# Supplementary material
Source: PubMed Central journal article supplement (PMC7615671)
Supplement: EMS194148-supplement-Supplementary_Materials.pdf [file EMS194148-supplement-Supplementary_Materials.pdf]

643 **Figure S1** Related to Figure 1. (A) Targeting strategy for introducing the mKO2 reporter at the  
644 *Hoxb5* locus (*Hoxb5* mKO2). (B) Representative flow cytometry gating of BM cells to isolate LK,  
645 LSK, HSC, MPP, HPC-1 and HPC-2 populations. (C) Representative histograms from WT and  
646 *Hoxb5* mKO2 mice showing mKO2 expression in CD150<sup>-</sup> and CD150<sup>+</sup> fractions. (D) *Hoxb5*

647 expression for cell types gated in B is shown by bar graph with mean % of Hoxb5<sup>+</sup> cells  $\pm$ SEM,  
648 and representative contour plots with outliers. mKO2<sup>+</sup> cells were measured after comparison to  
649 wild-type control mice (top row), used as fluorescence minus one (FMO) and for logical exclusion  
650 of autofluorescence. Results are from 15 Hoxb5 mKO2 mice at 8-12 weeks old. (E) Percentage of  
651 CD45.2<sup>+</sup> cells in the BM HSC compartment of primary recipient mice 16 weeks after  
652 transplantation of Hoxb5<sup>+</sup> or Hoxb5<sup>-</sup> HSCs, see also Figure E1B-C \*  $P \leq 0.05$ , unpaired, two-tailed  
653 Student's t-test. (F) Representative flow cytometry gates used for isolation of HSPC  
654 subpopulations and Tom<sup>+</sup> cells from mouse BM. Tom labelling (red) is shown in each population  
655 compared to control cells (blue). FACS plots correspond to mouse analysed 3 months after label  
656 induction. Relevant to Figure 1B-E. (G) Fractions of Tom<sup>+</sup> cells in the HSPC populations at each  
657 analysed time point. All data represent mean  $\pm$ SEM; \* $P < 0.05$ , \*\* $P < 0.01$ , \*\*\* $P < 0.001$  and \*\*\*\* $P$   
658  $< 0.0001$  (one-way ANOVA with post hoc Tukey's multiple comparisons test against all groups).  
659 (H) Fractions of Tom<sup>+</sup> cells in the BM, thymus, spleen and lymph nodes analyzed at the indicated  
660 time-points after label induction. Shown as mean with error bars denoting SEM of 4-32 animals.

661 **Figure S2** Related to Figure 2. (A) UMAP projection of the integrated HSPC scRNA-Seq  
662 landscape (all Tom<sup>+</sup> and Tom<sup>-</sup> combined) with log-normalized expression for chosen marker genes  
663 in red. (B) Projection from A with inferred cell cycle phases. (C) Projection from A showing the  
664 HSC-score, metric correlated with the highest HSC repopulation potential. (D) Projection from A  
665 showing inferred diffusion pseudotime values for each cell. (E) Projection from A color-coded by  
666 scRNA-Seq technology used, SS2 - Smart-Seq2, 10x - 10x Genomics 3' Kit. (F) UMAP projection  
667 of the integrated scRNA-Seq landscape (all Tom<sup>+</sup> and Tom<sup>-</sup> cells combined) prior to filtering out  
668 outlier/aberrant clusters with color-coded cluster information. After filtering cluster were  
669 renumbered in consecutive order. (G) Projection from F with color-coded manual annotation.

670 Abbreviations: B prog - B cell progenitor, Bas - basophils, Bas/MC prog - Basophil and Mast Cell  
671 progenitors, DC prog - dendritic cell progenitors, Eos - eosinophils, Ery prog - erythroid  
672 progenitors, HSC - hematopoietic stem cells, Hi-Mito - cluster characterized by high mitochondrial  
673 gene expression (potentially dying cells), ILC - innate lymphoid cells, Ifn-act prog - progenitors  
674 with strongly activated Interferon signature, Int prog - intermediate progenitors, Ly prog -  
675 lymphoid progenitors, Meg prog - megakaryocyte progenitors, Mono/DC prog - monocyte and



676 dendritic cells progenitors, Myo C1 - myeloid cells with high expression of complement genes,  
677 Neu prog - neutrophil progenitors, pDC - plasmacytoid dendritic cells

678 **Figure S3** Related to Figure 2. (A) UMAP projection of the integrated HSPC landscape (grey)  
679 with embedded immunophenotypic sub-populations (blue) from Nestorowa et al.<sup>7</sup> (B) Fraction of  
680 cells in each immunophenotypic population from A assigned to the HSPC landscape clusters. (C)  
681 UMAP projection of the integrated HSPC landscape (grey) with embedded cells from Weinreb et  
682 al.<sup>11</sup> split by their progeny fate.

683 **Figure S4** Related to Figure 2. (A) Projection from A comparing the relative abundance between  
684 labelled and unlabelled cells within each time-point. Each cluster is color-coded according to its  
685 log<sub>2</sub>-transformed ratio between Tom<sup>+</sup> and Tom<sup>-</sup> cell numbers (average of all replicates per time-  
686 point). Red indicates enrichment, white the expected value and blue depletion. For reference the  
687 cluster boundaries are visualized in the bottom right panel. (B) UMAP projection of the integrated  
688 scRNA-Seq landscape (all Tom<sup>+</sup> and Tom<sup>-</sup> combined) in grey with Tom<sup>-</sup> cells harvested at 269  
689 days in blue.

690 **Figure S5** Related to Figure 3. (A) Best discrete model fit (with 95% confidence intervals) for  
691 number of Tom<sup>+</sup> cells in cluster 0. (B) Best discrete model fit (with 95% confidence intervals) for  
692 cluster 0 size. (C) Best discrete model fit for sub-cluster sizes within cluster 0. Error bars indicate  
693 pooled standard error of the mean. (D) Total number of cells per mouse in the indicated populations  
694 normalized to the first time-point. Based on flow cytometry data from Barile et al.<sup>22</sup>. Error bars  
695 indicate pooled standard error of the mean. (E) UMAP projection of the isolated cluster 0 from the  
696 HSPC landscape, colour-coded by subclusters. (F) Violin plots of HSCscore or Procr/Ly6a  
697 expression grouped per subcluster from E. (G) Relative observed size of subclusters from E  
698 compared with the model best fit and bounds for cluster 0a. (H,I) Observed labelling frequency in  
699 subclusters from E: 8 -with highest HSC-score and HSC marker expression and 12 – with  
700 intermediate HSC-score but highest Ly6a expression. Data compared with the best fit and bounds  
701 for cluster 0a from the HSPC discrete dynamics model.

702 **Figure S6** Related to Figure 3. (A) UMAP projection of the integrated landscape color-coded by  
703 log-normalized expression of indicated JAK/STAT target genes<sup>72</sup>. (B,C) Relative cluster size  
704 (normalized to cluster 0, based on Tom<sup>-</sup> cells) with the best fit for the main model (only one phase)

705 and bi-phasic model, which permits a change in proliferation and differentiation rates after day 27.  
706 Error bars indicate pooled standard error of the mean. (D) Proliferation rates per cluster for each  
707 phase of the bi-phasic model. Phase I includes the first four time-points and phase II the remaining  
708 ones. Error bars indicate 95% confidence interval. (E) Differentiation rates per transition for each  
709 phase of the bi-phasic model. Phase I includes the first four time-points and phase II the remaining  
710 ones. Error bars indicate 95% confidence interval. (F) Graph abstraction view of the dynamics  
711 model. Size of the nodes is proportional to square roots of relative cluster size, node color is  
712 proportional to net proliferation rate, arrows indicate differentiation directions, arrow thickness is  
713 proportional to cell differentiation rate (log-scale). (G) Scatter plot showing relation of cluster  
714 connectivity (estimated by PAGA) to differentiation rates. Only clusters 0-12 and differentiation  
715 rates greater than  $10^{-12}$  are shown. Please note that in the case of the transitions between clusters 4  
716 and 8 two differentiation rates are plotted (each direction). Blue line indicates linear model fit with  
717 shaded 95% confidence interval. (H) Related to Figure 3F, the average time required for a single  
718 cell to accumulate in the corresponding cluster when initiated in cluster 0 (journey time).

719 **Figure S7** Related to Figure 5. (A) HSPC dynamics discrete model prediction of labelled cells  
720 relative to cluster 0 based on the initial labelling from the Pdzk1ip1-Tom *in vivo* mouse model  
721 data<sup>43</sup>. Please note that this dataset contains a limited number of cells, in particular clusters 14, 17,  
722 18, 19 contain less than 10 cells across all time-points. (B) Predicted relative cluster size (red line  
723 with 95% confidence interval) based on day 3 data from Dong et al.<sup>44</sup>. Observed data shown in  
724 blue (please note that this dataset contains a limited number of cells). Error bars indicate  
725 propagated standard error of the mean.

## 726 **Supplementary tables legends**

727 **Table S1. Details of the manual annotation of the integrated HSPC landscape.** Table contains  
728 the manual annotation for each cluster, indication whether the cluster was filtered out and lists of  
729 key marker genes used in the annotation process.

730 **Table S2. Discrete model input data.** Tables of observed cell numbers per cluster for Tom<sup>+</sup> and  
731 Tom<sup>-</sup> populations with the following columns: biosample\_id - a unique sample and mouse  
732 identifier, cluster numbers, total\_cells\_flow - total number of cells captured in the Lin<sup>-</sup>, (Sca1 OR

733 cKit)<sup>+</sup> flow cytometry gates, total\_cells\_sc - total number of cells observed in single-cell data,  
734 total\_cells\_sc\_filtered - total number of cells observed in single-cell data for filtered clusters,  
735 time\_days - timepoint.

736 **Table S3. Discrete model parameters.** Tables containing estimates for the main discrete model  
737 and bi-phasic model parameters. Transition column indicates the direction of specific  
738 differentiation rates between clusters, start/stop columns indicate pre-defined maximum/minimum  
739 values for the parameter, upper and lower bounds correspond to 95% intervals.

740 **Table S4. Continuous model parameters.** Tables containing continuous model parameter  
741 estimates per cell, cellid correspond to unique cell identifier matching the deposited scRNA-Seq  
742 data.

743 **Table S5. Dynamically expressed genes per trajectory.** Tables containing differential  
744 expression statistics for genes with dynamic expression around the pseudotime ranges indicated in  
745 Figures 4 and E9,E10 corresponding to changes in differentiation rates or net proliferation rates.  
746 logFC - log<sub>2</sub>(Fold Change) within the indicated range.

747 **Table S6. Number of cells from the Upadhaya et al.<sup>43</sup> data.** Observed in each cluster of the  
748 HSPC model present in this work.

749 **Table S7. Oligonucleotide sequences.** Table containing DNA sequences of the oligonucleotides  
750 used in this work.

751

## 752 **STAR Methods**

### 753 **Lead contact**

754 Further information and requests for resources and reagents should be directed to and will be  
755 fulfilled by the lead contact, Berthold Göttgens ([bg200@cam.ac.uk](mailto:bg200@cam.ac.uk))

### 756 **Materials availability**

757 Plasmids and mouse lines generated in this work are available upon request.

| cellid                            | dpt_pseudot | dpt_pseudot | diffusion  |
|-----------------------------------|-------------|-------------|------------|
| 9mo_SIGAE3_AAACGAACAATAGAGT-1-10x | 0.0239746   | 0.03528244  | 3.91E-05   |
| 9mo_SIGAE3_AAACGAAGTAACAGGC-1-10x | 0.0821011   | 0.24224426  | 0.0031253  |
| 9mo_SIGAE3_AAACGCTAGCGTTCAT-1-10x | 0.27788842  | 0.9393531   | 0.00075239 |
| 9mo_SIGAE3_AAAGAACGTAGAGACC-1-10x | 0.01826756  | 0.01496231  | 3.44E-05   |
| 9mo_SIGAE3_AAAGAACTCCTACTGC-1-10x | 0.26575866  | 0.89616466  | 0.00075974 |
| 9mo_SIGAE3_AAAGAACTCTAAACGC-1-10x | 0.15297356  | 0.4945886   | 0.0018617  |
| 9mo_SIGAE3_AAAGGATAGCGTGTCC-1-10x | 0.03415044  | 0.07151394  | 5.17E-05   |
| 9mo_SIGAE3_AAAGGATCAATAGTAG-1-10x | 0.04891016  | 0.12406655  | 0.00012523 |
| 9mo_SIGAE3_AAAGTCCCAATTGAAG-1-10x | 0.27094117  | 0.9146172   | 0.00075418 |
| 9mo_SIGAE3_AAAGTCCCAGGTTCGC-1-10x | 0.1664618   | 0.542614    | 0.0017206  |
| 9mo_SIGAE3_AAAGTGAGTACCCGCA-1-10x | 0.016837    | 0.00986872  | 3.38E-05   |
| 9mo_SIGAE3_AAATGGAAGATTTGCC-1-10x | 0.21674351  | 0.72164416  | 0.0010475  |
| 9mo_SIGAE3_AAATGGATCGACATCA-1-10x | 0.09087863  | 0.27349702  | 0.0043535  |
| 9mo_SIGAE3_AAATGGATCGTGCATA-1-10x | 0.27341676  | 0.9234316   | 0.0007526  |
| 9mo_SIGAE3_AACAAAGCAAAGCGTG-1-10x | 0.08116487  | 0.23891076  | 0.0029431  |
| 9mo_SIGAE3_AACAAAGCAGAGCGTA-1-10x | 0.25593346  | 0.8611816   | 0.00078825 |
| 9mo_SIGAE3_AACAACCGTACGAAAT-1-10x | 0.2751247   | 0.9295128   | 0.00075218 |
| 9mo_SIGAE3_AACAACCGTATGGTTC-1-10x | 0.11520898  | 0.36012623  | 0.002594   |
| 9mo_SIGAE3_AACAAGATCGATTCCC-1-10x | 0.16655847  | 0.54295826  | 0.0017206  |
| 9mo_SIGAE3_AACACACCACATCCCT-1-10x | 0.04881964  | 0.12374426  | 0.00012523 |
| 9mo_SIGAE3_AACACACCACTACTTT-1-10x | 0.25031078  | 0.8411618   | 0.00080923 |
| 9mo_SIGAE3_AACACACGTCCGTACG-1-10x | 0.23758152  | 0.7958388   | 0.00088935 |
| 9mo_SIGAE3_AACACACGTTCCTACT-1-10x | 0.29303214  | 0.99327296  | 0.00076488 |
| 9mo_SIGAE3_AACACACTCGAGAGAC-1-10x | 0.04374395  | 0.10567204  | 8.81E-05   |
| 9mo_SIGAE3_AACAGGGTCTATCACT-1-10x | 0.27348813  | 0.9236857   | 0.0007526  |
| 9mo_SIGAE3_AACCAACGTAGACGTG-1-10x | 0.29151526  | 0.98787206  | 0.00076269 |
| 9mo_SIGAE3_AACCAACTCAACACGT-1-10x | 0.11977831  | 0.37639555  | 0.0022788  |
| 9mo_SIGAE3_AACCACAGTCGCACAC-1-10x | 0.16573642  | 0.54003125  | 0.0017353  |
| 9mo_SIGAE3_AACCTTTAGTAGGAAG-1-10x | 0.0477895   | 0.1200764   | 0.00011598 |
| 9mo_SIGAE3_AACCTTTGTTCTCTAT-1-10x | 0.07313575  | 0.21032277  | 0.0015819  |
| 9mo_SIGAE3_AACGAAATCCGTGGGT-1-10x | 0.07569597  | 0.21943854  | 0.0020486  |
| 9mo_SIGAE3_AACGGGATCTTGATG-1-10x  | 0.25078905  | 0.8428647   | 0.00080923 |
| 9mo_SIGAE3_AACGTCATCCATGCAA-1-10x | 0.09549639  | 0.28993878  | 0.0043808  |
| 9mo_SIGAE3_AACGTCATCCGCAAAT-1-10x | 0.06574325  | 0.18400148  | 0.00072102 |
| 9mo_SIGAE3_AACTTCTCAAATGAGT-1-10x | 0.07622643  | 0.22132726  | 0.0020486  |
| 9mo_SIGAE3_AACTTCTGTGGCCTCA-1-10x | 0.28491795  | 0.96438205  | 0.00075605 |
| 9mo_SIGAE3_AAGAACACACACCAGC-1-10x | 0.05442309  | 0.14369558  | 0.00021164 |
| 9mo_SIGAE3_AAGACAACACGCCACA-1-10x | 0.28003293  | 0.94698876  | 0.00075303 |
| 9mo_SIGAE3_AAGACTCGTACACGTT-1-10x | 0.0460271   | 0.11380129  | 0.00010046 |
| 9mo_SIGAE3_AAGACTCGTATGCGGA-1-10x | 0.20606019  | 0.68360573  | 0.001143   |

|                                    |            |            |            |
|------------------------------------|------------|------------|------------|
| 9mo_SIGAE3_AAGATAGGTATGGAAT-1-10x  | 0.2921884  | 0.9902688  | 0.00076378 |
| 9mo_SIGAE3_AAGCCATAGGCGACAT-1-10x  | 0.14471239 | 0.46517438 | 0.0018716  |
| 9mo_SIGAE3_AAGCCATGTAGCTCGC-1-10x  | 0.04894915 | 0.12420535 | 0.00012523 |
| 9mo_SIGAE3_AAGCCATTCTCTCGCA-1-10x  | 0.15678832 | 0.5081712  | 0.0018385  |
| 9mo_SIGAE3_AAGCCATTCTTGGGCG-1-10x  | 0.1652584  | 0.53832924 | 0.0017353  |
| 9mo_SIGAE3_AAGCGAGAGCCTCAGC-1-10x  | 0.09647993 | 0.2934407  | 0.0043435  |
| 9mo_SIGAE3_AAGCGAGAGGGTGGGA-1-10x  | 0.04087767 | 0.09546653 | 7.40E-05   |
| 9mo_SIGAE3_AAGCGAGAGTTGCGCC-1-10x  | 0.04355994 | 0.10501687 | 8.29E-05   |
| 9mo_SIGAE3_AAGCGAGCATCTAGAC-1-10x  | 0.2013659  | 0.6668915  | 0.0011888  |
| 9mo_SIGAE3_AAGCGTTAGCACTAGG-1-10x  | 0.06164748 | 0.1694183  | 0.00047505 |
| 9mo_SIGAE3_AAGCGTTCATAATGCC-1-10x  | 0.04955438 | 0.12636031 | 0.00013566 |
| 9mo_SIGAE3_AAGCGTTTCTATACTC-1-10x  | 0.0463246  | 0.11486054 | 0.00010046 |
| 9mo_SIGAE3_AAGGAATAGTGAGTGC-1-10x  | 0.02627105 | 0.04345906 | 4.09E-05   |
| 9mo_SIGAE3_AAGGAATCACATCCCT-1-10x  | 0.04583291 | 0.11310988 | 0.00010046 |
| 9mo_SIGAE3_AAGGAATGTTGTTGAC-1-10x  | 0.20125854 | 0.6665093  | 0.0011888  |
| 9mo_SIGAE3_AAGGTAAGTATGGGAC-1-10x  | 0.2158179  | 0.71834844 | 0.001055   |
| 9mo_SIGAE3_AAGTCGTGTACAGCGA-1-10x  | 0.21011458 | 0.69804156 | 0.0011014  |
| 9mo_SIGAE3_AAGTGAAGTATTGCCA-1-10x  | 0.08166323 | 0.24068521 | 0.0031253  |
| 9mo_SIGAE3_AAGTGAAGTTATGTGC-1-10x  | 0.05655275 | 0.1512783  | 0.000257   |
| 9mo_SIGAE3_AAGTGAATCCAGTGG-1-10x   | 0.08664038 | 0.25840655 | 0.0039187  |
| 9mo_SIGAE3_AAGTTCGAGATCGCCC-1-10x  | 0.21378839 | 0.71112233 | 0.0010701  |
| 9mo_SIGAE3_AAGTTCGCACAGTCGC-1-10x  | 0.01549813 | 0.00510162 | 3.33E-05   |
| 9mo_SIGAE3_AAGTTCGGTAGAATAC-1-10x  | 0.05340835 | 0.14008254 | 0.00019264 |
| 9mo_SIGAE3_AAGTTCGGTGCCTGCA-1-10x  | 0.28844336 | 0.97693443 | 0.0007596  |
| 9mo_SIGAE3_AAGTTCGTCAACCTCC-1-10x  | 0.1348666  | 0.430118   | 0.0018953  |
| 9mo_SIGAE3_AAGTTCGTCCGACATA-1-10x  | 0.02866468 | 0.05198165 | 4.42E-05   |
| 9mo_SIGAE3_AAGTTCGTCCGTGTAA-1-10x  | 0.10336985 | 0.31797254 | 0.0038193  |
| 9mo_SIGAE3_AAGTTCGTCCGGTCATA-1-10x | 0.04686355 | 0.11677951 | 0.00010777 |
| 9mo_SIGAE3_AATAGAGTCACAACCA-1-10x  | 0.051871   | 0.13460876 | 0.00016076 |
| 9mo_SIGAE3_AATCGACCAGCAGGAT-1-10x  | 0.09345688 | 0.282677   | 0.0044154  |
| 9mo_SIGAE3_AATCGACGTATGCTAC-1-10x  | 0.08408529 | 0.24930906 | 0.0036353  |
| 9mo_SIGAE3_AATCGACTCACTCCGT-1-10x  | 0.08779808 | 0.2625286  | 0.0040384  |
| 9mo_SIGAE3_AATCGTGAGATTAGAC-1-10x  | 0.03914208 | 0.08928688 | 6.67E-05   |
| 9mo_SIGAE3_AATGACCAGCGTGCCT-1-10x  | 0.14756607 | 0.475335   | 0.0018716  |
| 9mo_SIGAE3_AATGACCCAGCGTACC-1-10x  | 0.08546911 | 0.25423622 | 0.0037839  |
| 9mo_SIGAE3_AATGACCGTGGAACCA-1-10x  | 0.08346821 | 0.2471119  | 0.0034742  |
| 9mo_SIGAE3_AATGCCAAGAGTCTTC-1-10x  | 0.04979711 | 0.12722458 | 0.00013566 |
| 9mo_SIGAE3_AATGCCAAGCGACCCT-1-10x  | 0.26909292 | 0.9080364  | 0.00075499 |
| 9mo_SIGAE3_AATGGAAAGAGTGGCT-1-10x  | 0.2803456  | 0.948102   | 0.00075303 |
| 9mo_SIGAE3_AATGGAAAGTCTGGAG-1-10x  | 0.02068625 | 0.02357415 | 3.62E-05   |
| 9mo_SIGAE3_AATGGAATCCGTTTCG-1-10x  | 0.02959559 | 0.05529622 | 4.55E-05   |

|                                   |            |            |            |
|-----------------------------------|------------|------------|------------|
| 9mo_SIGAE3_AATGGCTTCGCCAGTG-1-10x | 0.2552249  | 0.8586588  | 0.00078825 |
| 9mo_SIGAE3_AATTCCTGTTAGAGAT-1-10x | 0.04692037 | 0.1169818  | 0.00010777 |
| 9mo_SIGAE3_AATTCCTGTTTGGGTT-1-10x | 0.0485575  | 0.12281089 | 0.00012523 |
| 9mo_SIGAE3_AATTTCCCATGTCGTA-1-10x | 0.0229177  | 0.03151931 | 3.76E-05   |
| 9mo_SIGAE3_AATTTCTCCCATTTA-1-10x  | 0.09025966 | 0.27129313 | 0.0042999  |
| 9mo_SIGAE3_AATTTCTCGGAAACG-1-10x  | 0.02313613 | 0.03229703 | 3.83E-05   |
| 9mo_SIGAE3_ACAAAGACATCGATCA-1-10x | 0.18445086 | 0.60666484 | 0.0014112  |
| 9mo_SIGAE3_ACAAAGAGTCACCTTC-1-10x | 0.06288436 | 0.17382227 | 0.00052741 |
| 9mo_SIGAE3_ACAAGCTAGGAAAGTG-1-10x | 0.05906018 | 0.16020612 | 0.00034795 |
| 9mo_SIGAE3_ACAAGCTAGTAGTCCT-1-10x | 0.01872272 | 0.0165829  | 3.49E-05   |
| 9mo_SIGAE3_ACAAGCTGTTATCTGG-1-10x | 0.08700384 | 0.2597007  | 0.0040384  |
| 9mo_SIGAE3_ACAAGCTTCAGTCACA-1-10x | 0.07065665 | 0.20149584 | 0.0011935  |
| 9mo_SIGAE3_ACACAGTCATGGAAGC-1-10x | 0.15407296 | 0.49850306 | 0.0018575  |
| 9mo_SIGAE3_ACACAGTTCAATCCAG-1-10x | 0.09212771 | 0.27794442 | 0.0043903  |
| 9mo_SIGAE3_ACACCAAAGGTCACAG-1-10x | 0.13736273 | 0.4390056  | 0.0018842  |
| 9mo_SIGAE3_ACACCAACACCAGACC-1-10x | 0.21901087 | 0.7297172  | 0.0010326  |
| 9mo_SIGAE3_ACACGCGTCGCAGAGA-1-10x | 0.02102515 | 0.0247808  | 3.62E-05   |
| 9mo_SIGAE3_ACAGCCGAGTATGGAT-1-10x | 0.08041842 | 0.236253   | 0.0029431  |
| 9mo_SIGAE3_ACAGCCGTCATTCGGA-1-10x | 0.02007977 | 0.02141474 | 3.55E-05   |
| 9mo_SIGAE3_ACAGGGAAGGTGAGCT-1-10x | 0.0454519  | 0.11175327 | 9.39E-05   |
| 9mo_SIGAE3_ACAGGGACACAGCGCT-1-10x | 0.266138   | 0.89751524 | 0.00075974 |
| 9mo_SIGAE3_ACAGGGAGTCCAATCA-1-10x | 0.22871253 | 0.76426035 | 0.0009522  |
| 9mo_SIGAE3_ACATCCCTCCGAGTGC-1-10x | 0.03010229 | 0.05710033 | 4.55E-05   |
| 9mo_SIGAE3_ACATCCCTCTTTCCAA-1-10x | 0.04637336 | 0.11503418 | 0.00010046 |
| 9mo_SIGAE3_ACATCGAAGAAGTGTT-1-10x | 0.2391007  | 0.80124784 | 0.00087632 |
| 9mo_SIGAE3_ACATCGACAACCGATT-1-10x | 0.18445887 | 0.6066933  | 0.0014112  |
| 9mo_SIGAE3_ACATCGAGTGTCACAT-1-10x | 0.25848028 | 0.8702496  | 0.000778   |
| 9mo_SIGAE3_ACATGCATCAGTCCGG-1-10x | 0.02939004 | 0.05456434 | 4.42E-05   |
| 9mo_SIGAE3_ACATTTCCAAGTTCGT-1-10x | 0.2534609  | 0.852378   | 0.00079608 |
| 9mo_SIGAE3_ACATTTCTCGCACTCT-1-10x | 0.02621992 | 0.043277   | 4.09E-05   |
| 9mo_SIGAE3_ACATTTCTCGCAGAGA-1-10x | 0.06712104 | 0.18890713 | 0.00079936 |
| 9mo_SIGAE3_ACCAAACAGTGTAGTA-1-10x | 0.07407144 | 0.21365432 | 0.0017292  |
| 9mo_SIGAE3_ACCAAACCACGTACTA-1-10x | 0.2795877  | 0.94540346 | 0.00075303 |
| 9mo_SIGAE3_ACCAACACAAGGTCGA-1-10x | 0.02151983 | 0.02654213 | 3.69E-05   |
| 9mo_SIGAE3_ACCACAAAGCTGAAAT-1-10x | 0.0318445  | 0.06330357 | 4.83E-05   |
| 9mo_SIGAE3_ACCATTTCACTCAGAT-1-10x | 0.11682124 | 0.36586678 | 0.0025211  |
| 9mo_SIGAE3_ACCATTTTCAGCTAGT-1-10x | 0.09718362 | 0.2959462  | 0.0043435  |
| 9mo_SIGAE3_ACCCAAAGGAACGCT-1-10x  | 0.19916525 | 0.659056   | 0.0012085  |
| 9mo_SIGAE3_ACCCTCACAGGCATGA-1-10x | 0.18962032 | 0.62507087 | 0.0013244  |
| 9mo_SIGAE3_ACCCTCACAGGTAGTG-1-10x | 0.03360614 | 0.06957594 | 5.17E-05   |
| 9mo_SIGAE3_ACCCTCACATACTGTG-1-10x | 0.07493847 | 0.21674143 | 0.001885   |

|                                    |            |            |            |
|------------------------------------|------------|------------|------------|
| 9mo_SIGAE3_ACCCTCAGTTAATGAG-1-10x  | 0.04539672 | 0.11155678 | 9.39E-05   |
| 9mo_SIGAE3_ACCCTTGGTAATGCGG-1-10x  | 0.2680149  | 0.9041981  | 0.00075705 |
| 9mo_SIGAE3_ACCCTTGGTTGTCCCT-1-10x  | 0.05151095 | 0.13332678 | 0.00016076 |
| 9mo_SIGAE3_ACCGTTCAGGTCACTT-1-10x  | 0.2343396  | 0.78429574 | 0.00090964 |
| 9mo_SIGAE3_ACCGTTCGTGGCCACT-1-10x  | 0.26215085 | 0.8833189  | 0.00076727 |
| 9mo_SIGAE3_ACCGTTCGTGTACGCC-1-10x  | 0.04942897 | 0.1259138  | 0.00013566 |
| 9mo_SIGAE3_ACCTACCCAAGCCCAC-1-10x  | 0.21914455 | 0.73019314 | 0.0010326  |
| 9mo_SIGAE3_ACCTGAAGTCACAGTT-1-10x  | 0.06774544 | 0.19113036 | 0.00088537 |
| 9mo_SIGAE3_ACCTGAAGTTTGAAAG-1-10x  | 0.09160303 | 0.27607626 | 0.0043903  |
| 9mo_SIGAE3_ACCTGTCCAAGAGAGA-1-10x  | 0.07815205 | 0.2281835  | 0.0023954  |
| 9mo_SIGAE3_ACCTGTCCAGACTGCC-1-10x  | 0.25848278 | 0.87025857 | 0.000778   |
| 9mo_SIGAE3_ACGATCACAACATCGT-1-10x  | 0.19614893 | 0.64831626 | 0.00124    |
| 9mo_SIGAE3_ACGATCACAGCGTGCT-1-10x  | 0.11457418 | 0.35786602 | 0.0026715  |
| 9mo_SIGAE3_ACGATCATCAAAGCCT-1-10x  | 0.02846934 | 0.05128615 | 4.30E-05   |
| 9mo_SIGAE3_ACGATGTCACTACCGG-1-10x  | 0.02965669 | 0.05551375 | 4.55E-05   |
| 9mo_SIGAE3_ACGATGTTCTCTGACC-1-10x  | 0.03461601 | 0.07317164 | 5.37E-05   |
| 9mo_SIGAE3_ACGCACGCATCGCTGG-1-10x  | 0.07738633 | 0.22545713 | 0.0022191  |
| 9mo_SIGAE3_ACGCACGGTCCACATA-1-10x  | 0.05593397 | 0.14907512 | 0.000257   |
| 9mo_SIGAE3_ACGCACGTCTCGTCTG-1-10x  | 0.08785858 | 0.262744   | 0.0041422  |
| 9mo_SIGAE3_ACGCACGTCTCGTCTG-1-10x  | 0.09200046 | 0.27749133 | 0.0043903  |
| 9mo_SIGAE3_ACGGAAGCAGAGGGTT-1-10x  | 0.02395062 | 0.03519707 | 3.91E-05   |
| 9mo_SIGAE3_ACGGAAGCATGAAGCG-1-10x  | 0.04192773 | 0.09920532 | 7.82E-05   |
| 9mo_SIGAE3_ACGGAAGGTCGTACTA-1-10x  | 0.09748132 | 0.29700616 | 0.0042943  |
| 9mo_SIGAE3_ACGGGTCAGAAATTCG-1-10x  | 0.04791271 | 0.12051509 | 0.00011598 |
| 9mo_SIGAE3_ACGGGTCAGAATCCCT-1-10x  | 0.1126428  | 0.35098925 | 0.0028393  |
| 9mo_SIGAE3_ACGGGTCGTTCATCCC-1-10x  | 0.17461094 | 0.5716294  | 0.0015753  |
| 9mo_SIGAE3_ACGGGTCGTCTCTCTG-1-10x  | 0.0568326  | 0.15227474 | 0.00028394 |
| 9mo_SIGAE3_ACGGGTCGTGCAAGAC-1-10x  | 0.22354856 | 0.7458738  | 0.00099599 |
| 9mo_SIGAE3_ACGGTTCGCACCTTCGT-1-10x | 0.24095215 | 0.80784    | 0.00086374 |
| 9mo_SIGAE3_ACGGTTCGCATCGCCTT-1-10x | 0.08990166 | 0.27001846 | 0.0042999  |
| 9mo_SIGAE3_ACGGTTCGGTGCATGTT-1-10x | 0.05071135 | 0.13047975 | 0.00014746 |
| 9mo_SIGAE3_ACGGTTAGTGAACCGA-1-10x  | 0.12486482 | 0.39450625 | 0.0020803  |
| 9mo_SIGAE3_ACGGTTATCAGCAGAG-1-10x  | 0.04073499 | 0.09495851 | 7.01E-05   |
| 9mo_SIGAE3_ACGTAACAGCAGGCTA-1-10x  | 0.04859071 | 0.12292914 | 0.00012523 |
| 9mo_SIGAE3_ACGTACACATGGGAAC-1-10x  | 0.0779438  | 0.22744203 | 0.0023954  |
| 9mo_SIGAE3_ACGTAGTGTATCTCGA-1-10x  | 0.20084131 | 0.6650237  | 0.0011888  |
| 9mo_SIGAE3_ACGTCCTAGCACCGAA-1-10x  | 0.05441306 | 0.14365984 | 0.00021164 |
| 9mo_SIGAE3_ACGTCCTAGCCTCAAT-1-10x  | 0.08164526 | 0.24062122 | 0.0031253  |
| 9mo_SIGAE3_ACTACGAAGGGTACAC-1-10x  | 0.05376883 | 0.14136605 | 0.00019264 |
| 9mo_SIGAE3_ACTACGATCCGTCTTA-1-10x  | 0.27864257 | 0.9420383  | 0.00075266 |
| 9mo_SIGAE3_ACTATCTTCTGGGTCG-1-10x  | 0.03259799 | 0.06598638 | 5.00E-05   |

|                                    |            |            |            |
|------------------------------------|------------|------------|------------|
| 9mo_SIGAE3_ACTATGGAGCGAGTCA-1-10x  | 0.07475489 | 0.2160878  | 0.001885   |
| 9mo_SIGAE3_ACTATGGGTTACCCAA-1-10x  | 0.10609249 | 0.3276666  | 0.00352    |
| 9mo_SIGAE3_ACTATGGTCAGTCACA-1-10x  | 0.15278079 | 0.49390224 | 0.0018617  |
| 9mo_SIGAE3_ACTATTCAGACGGAAA-1-10x  | 0.0505148  | 0.12977995 | 0.00014746 |
| 9mo_SIGAE3_ACTCCCAGTAGAGTTA-1-10x  | 0.06370167 | 0.17673233 | 0.00058553 |
| 9mo_SIGAE3_ACTCTCGTCTAGACAC-1-10x  | 0.27258417 | 0.92046714 | 0.000753   |
| 9mo_SIGAE3_ACTGATGAGGCTGGAT-1-10x  | 0.02971187 | 0.05571024 | 4.55E-05   |
| 9mo_SIGAE3_ACTGATGGTTCGCTTAA-1-10x | 0.10151848 | 0.31138062 | 0.0040036  |
| 9mo_SIGAE3_ACTGATGGTTCATCTT-1-10x  | 0.04678034 | 0.11648325 | 0.00010777 |
| 9mo_SIGAE3_ACTGATGTCACITTTGT-1-10x | 0.23871599 | 0.79987806 | 0.00088278 |
| 9mo_SIGAE3_ACTGCAACACTTGAAC-1-10x  | 0.08725675 | 0.26060116 | 0.0040384  |
| 9mo_SIGAE3_ACTGTCCGTCAACCTA-1-10x  | 0.08483608 | 0.25198227 | 0.0036353  |
| 9mo_SIGAE3_ACTGTCCTCACTGTCC-1-10x  | 0.05287924 | 0.13819861 | 0.00017575 |
| 9mo_SIGAE3_ACTGTCCTCCGATGTA-1-10x  | 0.15018277 | 0.4846519  | 0.0018694  |
| 9mo_SIGAE3_ACTGTGACAAGAGGCT-1-10x  | 0.04626503 | 0.11464843 | 0.00010046 |
| 9mo_SIGAE3_ACTTAGGAGACGGTTG-1-10x  | 0.0189582  | 0.01742135 | 3.49E-05   |
| 9mo_SIGAE3_ACTTAGGCATAATCCG-1-10x  | 0.17989613 | 0.5904475  | 0.001475   |
| 9mo_SIGAE3_ACTTATCGTACAGTCT-1-10x  | 0.2572382  | 0.8658272  | 0.00078121 |
| 9mo_SIGAE3_ACTTTCGCGTACGAAAT-1-10x | 0.08394279 | 0.24880166 | 0.0034742  |
| 9mo_SIGAE3_ACTTTTCAGTGAATTAG-1-10x | 0.22786568 | 0.7612451  | 0.00095947 |
| 9mo_SIGAE3_ACTTTTCAGTTTGTGG-1-10x  | 0.05142565 | 0.13302307 | 0.00016076 |
| 9mo_SIGAE3_ACTTTTGCATGCAGCC-1-10x  | 0.06512009 | 0.18178266 | 0.00064991 |
| 9mo_SIGAE3_AGAAATGAGCTGAGCA-1-10x  | 0.03540606 | 0.07598465 | 5.58E-05   |
| 9mo_SIGAE3_AGAAATGCAATCTGCA-1-10x  | 0.22085361 | 0.73627836 | 0.0010179  |
| 9mo_SIGAE3_AGAAATGGTGGTAACG-1-10x  | 0.27066132 | 0.91362077 | 0.00075418 |
| 9mo_SIGAE3_AGAACCTAGTGCGACA-1-10x  | 0.05578822 | 0.14855619 | 0.000233   |
| 9mo_SIGAE3_AGAAGCGCACTAACCA-1-10x  | 0.03142917 | 0.06182475 | 4.68E-05   |
| 9mo_SIGAE3_AGAAGCGGTTAAGCAA-1-10x  | 0.0592898  | 0.1610237  | 0.00034795 |
| 9mo_SIGAE3_AGAAGTAGTCGTCATA-1-10x  | 0.24643485 | 0.8273614  | 0.00083459 |
| 9mo_SIGAE3_AGAAGTAGTTTCACTT-1-10x  | 0.08921944 | 0.26758942 | 0.0042295  |
| 9mo_SIGAE3_AGAAGTATCGGAACTT-1-10x  | 0.04061551 | 0.09453309 | 7.01E-05   |
| 9mo_SIGAE3_AGACAAACAGGTGTGA-1-10x  | 0.24399911 | 0.8186888  | 0.00084583 |
| 9mo_SIGAE3_AGACAGGTCGATTCCC-1-10x  | 0.16207702 | 0.52700186 | 0.001776   |
| 9mo_SIGAE3_AGACTCACATGGAATA-1-10x  | 0.05052109 | 0.12980233 | 0.00014746 |
| 9mo_SIGAE3_AGACTCATCGGTAAGG-1-10x  | 0.23876241 | 0.80004334 | 0.00088278 |
| 9mo_SIGAE3_AGAGAATCACAAAGCCC-1-10x | 0.08832461 | 0.26440334 | 0.0041422  |
| 9mo_SIGAE3_AGAGAATGTACGATCT-1-10x  | 0.08307459 | 0.24571042 | 0.0033032  |
| 9mo_SIGAE3_AGAGAGCCAAGAGCTG-1-10x  | 0.09045087 | 0.27197397 | 0.0042999  |
| 9mo_SIGAE3_AGAGAGCTCACATACG-1-10x  | 0.01659171 | 0.00899534 | 3.38E-05   |
| 9mo_SIGAE3_AGAGCAGTCATACAGC-1-10x  | 0.0776084  | 0.22624782 | 0.0023954  |
| 9mo_SIGAE3_AGAGCAGTCTGCACCT-1-10x  | 0.07844328 | 0.22922045 | 0.002576   |



|                                   |            |            |            |
|-----------------------------------|------------|------------|------------|
| 9mo_SIGAE3_AGAGCCCGTCCAAAGG-1-10x | 0.0394779  | 0.09048258 | 6.67E-05   |
| 9mo_SIGAE3_AGAGCCCTCTGGAAGG-1-10x | 0.0484746  | 0.12251571 | 0.00012523 |
| 9mo_SIGAE3_AGATCCATCTTCTGTA-1-10x | 0.17047626 | 0.55690765 | 0.0016421  |
| 9mo_SIGAE3_AGATCGTGTGCGAAAC-1-10x | 0.07365561 | 0.21217375 | 0.0015819  |
| 9mo_SIGAE3_AGATGAAAGAGACAAG-1-10x | 0.04724655 | 0.11814318 | 0.00010777 |
| 9mo_SIGAE3_AGATGAAGTATGGGAC-1-10x | 0.04010642 | 0.09272046 | 7.01E-05   |
| 9mo_SIGAE3_AGATGAAGTGCCTACG-1-10x | 0.07533167 | 0.21814142 | 0.001885   |
| 9mo_SIGAE3_AGATGAATCTCGCTTG-1-10x | 0.22139397 | 0.73820233 | 0.0010106  |
| 9mo_SIGAE3_AGCATCAAGTTTCGAC-1-10x | 0.08597919 | 0.25605237 | 0.0039187  |
| 9mo_SIGAE3_AGCATCACAAGGCTTT-1-10x | 0.10598341 | 0.32727823 | 0.00352    |
| 9mo_SIGAE3_AGCATCAGTGTTACAC-1-10x | 0.02305111 | 0.0319943  | 3.83E-05   |
| 9mo_SIGAE3_AGCCAATCAATACCCA-1-10x | 0.15848285 | 0.5142046  | 0.0018209  |
| 9mo_SIGAE3_AGCCAATGTACGTAGG-1-10x | 0.13984618 | 0.44784802 | 0.001875   |
| 9mo_SIGAE3_AGCCACGCACTACCGG-1-10x | 0.07082822 | 0.20210673 | 0.0011935  |
| 9mo_SIGAE3_AGCCAGCGTATCGATC-1-10x | 0.03607858 | 0.07837918 | 5.58E-05   |
| 9mo_SIGAE3_AGCCAGCGTTGCCATA-1-10x | 0.26817626 | 0.9047726  | 0.00075594 |
| 9mo_SIGAE3_AGCGATTGTGAGTGA-1-10x  | 0.09438239 | 0.2859723  | 0.0044051  |
| 9mo_SIGAE3_AGCGCCACAGCTACTA-1-10x | 0.09562314 | 0.29039007 | 0.0043808  |
| 9mo_SIGAE3_AGCGCTGCACGGAAGT-1-10x | 0.09420443 | 0.2853387  | 0.0044154  |
| 9mo_SIGAE3_AGCGTATTCGGCAGTC-1-10x | 0.0457272  | 0.11273348 | 0.00010046 |
| 9mo_SIGAE3_AGCTACACAGAGATTA-1-10x | 0.27014986 | 0.91179967 | 0.00075418 |
| 9mo_SIGAE3_AGCTACAGTGGAAGTC-1-10x | 0.07735276 | 0.22533762 | 0.0022191  |
| 9mo_SIGAE3_AGCTACATCGAGATGG-1-10x | 0.12354994 | 0.38982457 | 0.0021124  |
| 9mo_SIGAE3_AGCTACATCTACCCAC-1-10x | 0.2890874  | 0.9792276  | 0.0007606  |
| 9mo_SIGAE3_AGCTCAAAGGTGAGCT-1-10x | 0.21178333 | 0.70398325 | 0.0010934  |
| 9mo_SIGAE3_AGCTCAACAGCAAGAC-1-10x | 0.07400212 | 0.21340753 | 0.0017292  |
| 9mo_SIGAE3_AGCTCAAGTCCCGGTA-1-10x | 0.04836495 | 0.12212528 | 0.00012523 |
| 9mo_SIGAE3_AGGAAATAGCTCATAC-1-10x | 0.08269456 | 0.2443573  | 0.0033032  |
| 9mo_SIGAE3_AGGAAATCACTGCACG-1-10x | 0.18949814 | 0.6246359  | 0.0013244  |
| 9mo_SIGAE3_AGGAAATCATCAGTGT-1-10x | 0.03438849 | 0.07236154 | 5.37E-05   |
| 9mo_SIGAE3_AGGAAATGTCGAAACG-1-10x | 0.26998708 | 0.9112201  | 0.00075499 |
| 9mo_SIGAE3_AGGAATAAGATCCCAT-1-10x | 0.05334974 | 0.13987386 | 0.00019264 |
| 9mo_SIGAE3_AGGAATAAGGACTATA-1-10x | 0.05065945 | 0.13029498 | 0.00014746 |
| 9mo_SIGAE3_AGGAATACACGGCACT-1-10x | 0.10419683 | 0.32091704 | 0.0037215  |
| 9mo_SIGAE3_AGGACTTAGCACCTGC-1-10x | 0.27412578 | 0.92595613 | 0.00075233 |
| 9mo_SIGAE3_AGGACTTGCCAAATC-1-10x  | 0.07392442 | 0.21313088 | 0.0017292  |
| 9mo_SIGAE3_AGGAGGTAGAGCATCG-1-10x | 0.27148554 | 0.9165554  | 0.00075352 |
| 9mo_SIGAE3_AGGAGGTGTCTCTCTG-1-10x | 0.18137054 | 0.5956972  | 0.0014587  |
| 9mo_SIGAE3_AGGAGGTTCTGTCCCA-1-10x | 0.19219641 | 0.6342432  | 0.0012861  |
| 9mo_SIGAE3_AGGATAACATGACTCA-1-10x | 0.05105314 | 0.13169673 | 0.00014746 |
| 9mo_SIGAE3_AGGATAAGTGGATGAC-1-10x | 0.18744335 | 0.6173197  | 0.0013519  |

|                                    |            |            |            |
|------------------------------------|------------|------------|------------|
| 9mo_SIGAE3_AGGATCTAGACCAACG-1-10x  | 0.08601827 | 0.25619152 | 0.0039187  |
| 9mo_SIGAE3_AGGATCTAGAGCAAGA-1-10x  | 0.12927146 | 0.4101963  | 0.0019639  |
| 9mo_SIGAE3_AGGATCTAGAGTTGAT-1-10x  | 0.05014827 | 0.12847489 | 0.00013566 |
| 9mo_SIGAE3_AGGATCTCAATCCTAG-1-10x  | 0.03912642 | 0.08923111 | 6.67E-05   |
| 9mo_SIGAE3_AGGATCTTCGCCAGA-1-10x   | 0.05501543 | 0.14580461 | 0.000233   |
| 9mo_SIGAE3_AGGCATTAGCTCCACG-1-10x  | 0.06897301 | 0.19550118 | 0.00097948 |
| 9mo_SIGAE3_AGGCATTCAACCGCCA-1-10x  | 0.1556179  | 0.5040038  | 0.0018459  |
| 9mo_SIGAE3_AGGCATTGTAGCGATG-1-10x  | 0.04404073 | 0.10672872 | 8.81E-05   |
| 9mo_SIGAE3_AGGCATTTCGAGAACG-1-10x  | 0.07916765 | 0.23179959 | 0.002576   |
| 9mo_SIGAE3_AGGCATTCTTCGTGC-1-10x   | 0.0437923  | 0.10584419 | 8.81E-05   |
| 9mo_SIGAE3_AGGCTGCAGTCGAATA-1-10x  | 0.27640978 | 0.93408835 | 0.00075214 |
| 9mo_SIGAE3_AGGCTGCTCAAGCCGC-1-10x  | 0.04650253 | 0.11549407 | 0.00010777 |
| 9mo_SIGAE3_AGGGAGTTCTGTGTGA-1-10x  | 0.06685623 | 0.18796428 | 0.00079936 |
| 9mo_SIGAE3_AGGGCCTTCGAACGGA-1-10x  | 0.02713611 | 0.04653914 | 4.19E-05   |
| 9mo_SIGAE3_AGGGCCTTCTGCAGCG-1-10x  | 0.11411653 | 0.35623652 | 0.0026715  |
| 9mo_SIGAE3_AGGGCTCAGTTGCTCA-1-10x  | 0.20497888 | 0.6797557  | 0.0011518  |
| 9mo_SIGAE3_AGGGCTCAGTTGTAGA-1-10x  | 0.2727614  | 0.9210982  | 0.000753   |
| 9mo_SIGAE3_AGGGTCCCACGGTAGA-1-10x  | 0.20843285 | 0.6920537  | 0.0011177  |
| 9mo_SIGAE3_AGGGTCTCTTCTAAC-1-10x   | 0.27928373 | 0.9443212  | 0.00075266 |
| 9mo_SIGAE3_AGGGTTTCATACACCA-1-10x  | 0.19293797 | 0.6368835  | 0.0012861  |
| 9mo_SIGAE3_AGGGTTTGTGGTATGG-1-10x  | 0.08261835 | 0.24408595 | 0.0033032  |
| 9mo_SIGAE3_AGGTAGGAGCAACTTC-1-10x  | 0.10592878 | 0.3270837  | 0.00352    |
| 9mo_SIGAE3_AGGTAGGGTATACCTG-1-10x  | 0.05103285 | 0.13162449 | 0.00014746 |
| 9mo_SIGAE3_AGGTAGGGTCTACGTA-1-10x  | 0.08780888 | 0.26256704 | 0.0041422  |
| 9mo_SIGAE3_AGGTCATCACCTCTA-1-10x   | 0.08908185 | 0.26709953 | 0.0042295  |
| 9mo_SIGAE3_AGGTCATGTTGGGTT-1-10x   | 0.0613357  | 0.1683082  | 0.00042799 |
| 9mo_SIGAE3_AGGTCATTCCATGAGT-1-10x  | 0.22020094 | 0.7339545  | 0.0010253  |
| 9mo_SIGAE3_AGGTGTTTCATGTCGTA-1-10x | 0.27405238 | 0.92569476 | 0.00075233 |
| 9mo_SIGAE3_AGGTGTTCCGTTTCG-1-10x   | 0.06572141 | 0.1839237  | 0.00072102 |
| 9mo_SIGAE3_AGGTTACGTGATGTAA-1-10x  | 0.21032445 | 0.6987888  | 0.0011014  |
| 9mo_SIGAE3_AGGTTACTCTGGGCG-1-10x   | 0.28388613 | 0.96070826 | 0.00075531 |
| 9mo_SIGAE3_AGGTTGTCACCGTGCA-1-10x  | 0.02992667 | 0.05647504 | 4.55E-05   |
| 9mo_SIGAE3_AGGTTGTGTCTGTAAC-1-10x  | 0.11863726 | 0.37233278 | 0.0023898  |
| 9mo_SIGAE3_AGGTTGTGTGTCATGT-1-10x  | 0.0498456  | 0.12739722 | 0.00013566 |
| 9mo_SIGAE3_AGGTTGTTCCGTGACG-1-10x  | 0.01609311 | 0.00722005 | 3.33E-05   |
| 9mo_SIGAE3_AGTAACCCATGTGTCA-1-10x  | 0.10952223 | 0.33987835 | 0.0031181  |
| 9mo_SIGAE3_AGTAACCGTTAAACAG-1-10x  | 0.28192768 | 0.95373505 | 0.00075401 |
| 9mo_SIGAE3_AGTAACCTCCTTACCG-1-10x  | 0.22989954 | 0.76848674 | 0.00094498 |
| 9mo_SIGAE3_AGTACCAAGCACACCC-1-10x  | 0.08351772 | 0.24728818 | 0.0034742  |
| 9mo_SIGAE3_AGTACCAGTGCCGTTG-1-10x  | 0.02128557 | 0.02570804 | 3.69E-05   |
| 9mo_SIGAE3_AGTACCAGTGGTATGG-1-10x  | 0.03709269 | 0.08198994 | 6.07E-05   |

|                                   |            |            |            |
|-----------------------------------|------------|------------|------------|
| 9mo_SIGAE3_AGTACCATCTAGAACC-1-10x | 0.14480586 | 0.46550718 | 0.0018716  |
| 9mo_SIGAE3_AGTACTGCAACGGGTA-1-10x | 0.22559993 | 0.75317776 | 0.00098137 |
| 9mo_SIGAE3_AGTACTGTCGTCTCAC-1-10x | 0.0842083  | 0.24974702 | 0.0036353  |
| 9mo_SIGAE3_AGTACTGTCGTTAGAC-1-10x | 0.09655659 | 0.29371363 | 0.0043435  |
| 9mo_SIGAE3_AGTAGCTAGTCTTCGA-1-10x | 0.24713095 | 0.8298399  | 0.0008292  |
| 9mo_SIGAE3_AGTAGCTCAAATTGGA-1-10x | 0.08512978 | 0.25302798 | 0.0037839  |
| 9mo_SIGAE3_AGTAGTCAGCGAGGAG-1-10x | 0.04856084 | 0.12282278 | 0.00012523 |
| 9mo_SIGAE3_AGTAGTCAGGCTTAAA-1-10x | 0.24144296 | 0.8095876  | 0.00086374 |
| 9mo_SIGAE3_AGTAGTCAGTGGTTCT-1-10x | 0.2586565  | 0.8708771  | 0.000778   |
| 9mo_SIGAE3_AGTAGTCGTTGCGGCT-1-10x | 0.04574366 | 0.1127921  | 0.00010046 |
| 9mo_SIGAE3_AGTCAACAGCGCTGAA-1-10x | 0.12176979 | 0.3834863  | 0.0021873  |
| 9mo_SIGAE3_AGTCAACGTCTCACGG-1-10x | 0.10574687 | 0.32643598 | 0.00352    |
| 9mo_SIGAE3_AGTCAACTCCGTGCGA-1-10x | 0.04630815 | 0.11480197 | 0.00010046 |
| 9mo_SIGAE3_AGTCACATCATGCCGG-1-10x | 0.1544983  | 0.50001746 | 0.0018522  |
| 9mo_SIGAE3_AGTCACATCTCCAAC-1-10x  | 0.10864756 | 0.336764   | 0.0032165  |
| 9mo_SIGAE3_AGTCACATCTTAGTTC-1-10x | 0.1701269  | 0.55566376 | 0.0016584  |
| 9mo_SIGAE3_AGTCATGCAAGTATCC-1-10x | 0.08181033 | 0.24120896 | 0.0031253  |
| 9mo_SIGAE3_AGTCATGTCTCTGAGA-1-10x | 0.27563766 | 0.9313392  | 0.00075218 |
| 9mo_SIGAE3_AGTCTCCGTGTATTGC-1-10x | 0.26439962 | 0.8913257  | 0.00076135 |
| 9mo_SIGAE3_AGTCTCCGTTATGTGC-1-10x | 0.10953071 | 0.33990854 | 0.0031181  |
| 9mo_SIGAE3_AGTCTCCTCGCCGAAC-1-10x | 0.28490362 | 0.96433103 | 0.00075605 |
| 9mo_SIGAE3_AGTGATCGTGAGTGAC-1-10x | 0.07905085 | 0.23138371 | 0.002576   |
| 9mo_SIGAE3_AGTGCCGCACACTTAG-1-10x | 0.27159873 | 0.91695845 | 0.00075352 |
| 9mo_SIGAE3_AGTGCCGGTTGTGCCG-1-10x | 0.09378142 | 0.28383252 | 0.0044154  |
| 9mo_SIGAE3_AGTGTTGAGCAATTCC-1-10x | 0.20402214 | 0.67634916 | 0.0011608  |
| 9mo_SIGAE3_AGTGTTGCATTGCCGG-1-10x | 0.09269448 | 0.27996242 | 0.0044107  |
| 9mo_SIGAE3_AGTGTTGGTGAGTAAT-1-10x | 0.08412656 | 0.249456   | 0.0036353  |
| 9mo_SIGAE3_AGTTAGCAGACATCAA-1-10x | 0.06974494 | 0.19824964 | 0.0010821  |
| 9mo_SIGAE3_AGTTAGCGTCGCGTCA-1-10x | 0.13113128 | 0.41681826 | 0.001934   |
| 9mo_SIGAE3_AGTTAGCTCACATTGG-1-10x | 0.24678433 | 0.8286057  | 0.0008292  |
| 9mo_SIGAE3_AGTTAGCTCTCTATAC-1-10x | 0.24463296 | 0.8209457  | 0.00084583 |
| 9mo_SIGAE3_AGTTCCCAGCACGATG-1-10x | 0.03016095 | 0.05730921 | 4.55E-05   |
| 9mo_SIGAE3_AGTTCCCGTTCCACAA-1-10x | 0.06944557 | 0.19718374 | 0.0010821  |
| 9mo_SIGAE3_AGTTCCCTCTCCGAGG-1-10x | 0.26619694 | 0.8977251  | 0.00075974 |
| 9mo_SIGAE3_AGTTCGATCAAGCTGT-1-10x | 0.04876984 | 0.12356693 | 0.00012523 |
| 9mo_SIGAE3_AGTTCGATCCTCTCGA-1-10x | 0.19283478 | 0.6365161  | 0.0012861  |
| 9mo_SIGAE3_AGTTCGATCGCTTACC-1-10x | 0.019536   | 0.01947862 | 3.55E-05   |
| 9mo_SIGAE3_ATACCGAGTCTGATAC-1-10x | 0.07939992 | 0.2326266  | 0.0027593  |
| 9mo_SIGAE3_ATACCGATCTACGGTA-1-10x | 0.0952697  | 0.2891316  | 0.0044051  |
| 9mo_SIGAE3_ATACCTTGATACCCA-1-10x  | 0.05293767 | 0.13840666 | 0.00017575 |
| 9mo_SIGAE3_ATACCTTTCCGGACTG-1-10x | 0.07770664 | 0.22659759 | 0.0023954  |

|                                    |            |            |            |
|------------------------------------|------------|------------|------------|
| 9mo_SIGAE3_ATACTTCAGACTCATC-1-10x  | 0.03173032 | 0.062897   | 4.83E-05   |
| 9mo_SIGAE3_ATACTTCCAACGACTT-1-10x  | 0.08763775 | 0.2619577  | 0.0040384  |
| 9mo_SIGAE3_ATACTTCCAGTGGGTA-1-10x  | 0.05537166 | 0.14707302 | 0.000233   |
| 9mo_SIGAE3_ATAGAGAAGCTGAGTG-1-10x  | 0.02645112 | 0.04410018 | 4.09E-05   |
| 9mo_SIGAE3_ATAGAGATCCGGACGT-1-10x  | 0.02957913 | 0.0552376  | 4.55E-05   |
| 9mo_SIGAE3_ATAGGCTCAGGTTTAC-1-10x  | 0.27495936 | 0.9289241  | 0.00075218 |
| 9mo_SIGAE3_ATAGGCTCAGTATACC-1-10x  | 0.16321197 | 0.5310429  | 0.001763   |
| 9mo_SIGAE3_ATATCCTAGGCTAGCA-1-10x  | 0.2406652  | 0.8068183  | 0.00086997 |
| 9mo_SIGAE3_ATCACAGAGCGTCTGC-1-10x  | 0.22158046 | 0.7388663  | 0.0010106  |
| 9mo_SIGAE3_ATCACAGCAACAAAGT-1-10x  | 0.18129112 | 0.5954144  | 0.0014587  |
| 9mo_SIGAE3_ATCACAGCAGAATCGG-1-10x  | 0.07828451 | 0.22865513 | 0.0023954  |
| 9mo_SIGAE3_ATCACAGGTTGAGTCT-1-10x  | 0.02717315 | 0.04667101 | 4.19E-05   |
| 9mo_SIGAE3_ATCACAGTCGTTCTCG-1-10x  | 0.09095754 | 0.273778   | 0.0043535  |
| 9mo_SIGAE3_ATCACAGGTGGAACAC-1-10x  | 0.09242818 | 0.27901426 | 0.0043903  |
| 9mo_SIGAE3_ATCACGATCTGTGTGA-1-10x  | 0.2561137  | 0.8618234  | 0.00078463 |
| 9mo_SIGAE3_ATCAGGTTTATGCCGG-1-10x  | 0.21541907 | 0.7169284  | 0.0010625  |
| 9mo_SIGAE3_ATCAGGTTCCGGACT-1-10x   | 0.09968655 | 0.30485797 | 0.0041652  |
| 9mo_SIGAE3_ATCCACCCAAAGCAAT-1-10x  | 0.07884703 | 0.23065801 | 0.002576   |
| 9mo_SIGAE3_ATCCACCCAATAACCC-1-10x  | 0.07939165 | 0.23259716 | 0.0027593  |
| 9mo_SIGAE3_ATCCACCCACAGTATC-1-10x  | 0.24870858 | 0.8354571  | 0.00081888 |
| 9mo_SIGAE3_ATCCACCGTGACAACG-1-10x  | 0.08377945 | 0.24822012 | 0.0034742  |
| 9mo_SIGAE3_ATCCATTAGATGCTTC-1-10x  | 0.03447537 | 0.07267088 | 5.37E-05   |
| 9mo_SIGAE3_ATCCATTATGTTCTGA-1-10x  | 0.05137122 | 0.13282926 | 0.00016076 |
| 9mo_SIGAE3_ATCCATTGTCACCGAC-1-10x  | 0.04657669 | 0.11575811 | 0.00010777 |
| 9mo_SIGAE3_ATCCCTGAGCGGTAGT-1-10x  | 0.02012545 | 0.0215774  | 3.55E-05   |
| 9mo_SIGAE3_ATCCCTGTCTAGTGTG-1-10x  | 0.04742571 | 0.11878111 | 0.00011598 |
| 9mo_SIGAE3_ATCCGTCGTTCAATCG-1-10x  | 0.04004071 | 0.09248649 | 7.01E-05   |
| 9mo_SIGAE3_ATCCGTCGTTGCTCGG-1-10x  | 0.08280399 | 0.24474692 | 0.0033032  |
| 9mo_SIGAE3_ATCCTATAGACCTCAT-1-10x  | 0.12055969 | 0.3791777  | 0.0022788  |
| 9mo_SIGAE3_ATCCTATTCAATTTGTC-1-10x | 0.01583376 | 0.00629664 | 3.33E-05   |
| 9mo_SIGAE3_ATCGATGTCCTCTTTC-1-10x  | 0.01865081 | 0.01632687 | 3.49E-05   |
| 9mo_SIGAE3_ATCGATGTCCTGGTCT-1-10x  | 0.04935448 | 0.12564856 | 0.00013566 |
| 9mo_SIGAE3_ATCGATGTCGGTAACT-1-10x  | 0.08314337 | 0.2459553  | 0.0034742  |
| 9mo_SIGAE3_ATCGCCTAGACCAACG-1-10x  | 0.04270532 | 0.10197394 | 7.82E-05   |
| 9mo_SIGAE3_ATCGCCTAGTATGCAA-1-10x  | 0.04970213 | 0.12688638 | 0.00013566 |
| 9mo_SIGAE3_ATCGCCTCACAGTCAT-1-10x  | 0.18137631 | 0.5957177  | 0.0014587  |
| 9mo_SIGAE3_ATCGGATAGTCCGTCG-1-10x  | 0.06683075 | 0.18787354 | 0.00079936 |
| 9mo_SIGAE3_ATCGGATCAAGCGGAT-1-10x  | 0.1515403  | 0.4894854  | 0.0018676  |
| 9mo_SIGAE3_ATCGGATCCGTACGG-1-10x   | 0.17779322 | 0.58296    | 0.0015248  |
| 9mo_SIGAE3_ATCGGCGAGCACTCTA-1-10x  | 0.25205702 | 0.8473793  | 0.00080467 |
| 9mo_SIGAE3_ATCGGCGCAATACCTG-1-10x  | 0.19316857 | 0.63770455 | 0.0012741  |

|                                    |            |            |            |
|------------------------------------|------------|------------|------------|
| 9mo_SIGAE3_ATCGGCGGTTGGGTAG-1-10x  | 0.29068005 | 0.98489827 | 0.00076163 |
| 9mo_SIGAE3_ATCGTCCGTCAAGTCGC-1-10x | 0.28658158 | 0.9703055  | 0.00075773 |
| 9mo_SIGAE3_ATCGTGAGTGACAGCA-1-10x  | 0.02769947 | 0.048545   | 4.30E-05   |
| 9mo_SIGAE3_ATCGTGAGTGAAATT-1-10x   | 0.02396066 | 0.03523279 | 3.91E-05   |
| 9mo_SIGAE3_ATCGTGATCCATCAGA-1-10x  | 0.07483321 | 0.21636666 | 0.001885   |
| 9mo_SIGAE3_ATCTCTAAGTAGCCAG-1-10x  | 0.2758152  | 0.9319713  | 0.00075214 |
| 9mo_SIGAE3_ATCTCTATCAAGCCGC-1-10x  | 0.1807605  | 0.5935252  | 0.001475   |
| 9mo_SIGAE3_ATCTCTATCACCACAA-1-10x  | 0.10475937 | 0.32291996 | 0.0036214  |
| 9mo_SIGAE3_ATCTTCAAGCAAGCCA-1-10x  | 0.26378825 | 0.8891489  | 0.00076313 |
| 9mo_SIGAE3_ATCTTCAGTCAAGTTC-1-10x  | 0.1497485  | 0.48310566 | 0.0018705  |
| 9mo_SIGAE3_ATCTTCAGTTCGGCTG-1-10x  | 0.02436355 | 0.03666733 | 3.91E-05   |
| 9mo_SIGAE3_ATCTTCATCATCCTGC-1-10x  | 0.04854152 | 0.12275399 | 0.00012523 |
| 9mo_SIGAE3_ATCTTCATCTAGCCTC-1-10x  | 0.11785592 | 0.3695508  | 0.002453   |
| 9mo_SIGAE3_ATGAAAGGTCCGATCG-1-10x  | 0.04387829 | 0.10615035 | 8.81E-05   |
| 9mo_SIGAE3_ATGAGGGAGCATCAAA-1-10x  | 0.03189082 | 0.06346847 | 4.83E-05   |
| 9mo_SIGAE3_ATGAGGGAGGGTCACA-1-10x  | 0.04762071 | 0.11947539 | 0.00011598 |
| 9mo_SIGAE3_ATGAGGGGTCTCCCTA-1-10x  | 0.05456997 | 0.14421853 | 0.00021164 |
| 9mo_SIGAE3_ATGAGTCAGTGTGTTTC-1-10x | 0.20614399 | 0.6839041  | 0.001143   |
| 9mo_SIGAE3_ATGAGTCCACCCTAAA-1-10x  | 0.07539332 | 0.21836095 | 0.001885   |
| 9mo_SIGAE3_ATGAGTCGTCTTGCGG-1-10x  | 0.08784946 | 0.26271155 | 0.0041422  |
| 9mo_SIGAE3_ATGATCGGTTTGGGTT-1-10x  | 0.02429225 | 0.03641346 | 3.91E-05   |
| 9mo_SIGAE3_ATGCATGCAATTCGTG-1-10x  | 0.089833   | 0.26977402 | 0.0042999  |
| 9mo_SIGAE3_ATGCCTCGTAGGGAGG-1-10x  | 0.16670865 | 0.5434929  | 0.0017056  |
| 9mo_SIGAE3_ATGCCTCGTCACATTG-1-10x  | 0.0732631  | 0.21077621 | 0.0015819  |
| 9mo_SIGAE3_ATGCGATAGTAGCATA-1-10x  | 0.13622318 | 0.43494818 | 0.0018891  |
| 9mo_SIGAE3_ATGCGATCAACAGCTT-1-10x  | 0.145087   | 0.4665082  | 0.0018716  |
| 9mo_SIGAE3_ATGGAGGAGCGTCAAG-1-10x  | 0.27317256 | 0.9225621  | 0.0007526  |
| 9mo_SIGAE3_ATGGAGGGTCTGTCCT-1-10x  | 0.28378162 | 0.9603361  | 0.00075531 |
| 9mo_SIGAE3_ATGGATCAGACCTCAT-1-10x  | 0.02118095 | 0.02533553 | 3.69E-05   |
| 9mo_SIGAE3_ATGGATCAGATAGTCA-1-10x  | 0.04688477 | 0.11685506 | 0.00010777 |
| 9mo_SIGAE3_ATGGATCAGGTGCTAG-1-10x  | 0.2617146  | 0.8817656  | 0.00076727 |
| 9mo_SIGAE3_ATGGATCGTAGGTTTC-1-10x  | 0.05002564 | 0.12803826 | 0.00013566 |
| 9mo_SIGAE3_ATGGGAGAGTTCGGCAA-1-10x | 0.04829714 | 0.12188386 | 0.00011598 |
| 9mo_SIGAE3_ATGGGAGCACTGTCCT-1-10x  | 0.05664355 | 0.15160161 | 0.000257   |
| 9mo_SIGAE3_ATGGGAGCATCGCTCT-1-10x  | 0.04156643 | 0.0979189  | 7.40E-05   |
| 9mo_SIGAE3_ATGGGAGTCTCCCTAG-1-10x  | 0.09462313 | 0.28682947 | 0.0044051  |
| 9mo_SIGAE3_ATGGGTTTCATACCAA-1-10x  | 0.04286203 | 0.10253193 | 8.29E-05   |
| 9mo_SIGAE3_ATGGTTGAGGCCTTGC-1-10x  | 0.03101939 | 0.0603657  | 4.68E-05   |
| 9mo_SIGAE3_ATGTCCCTCGGAACTT-1-10x  | 0.07849246 | 0.22939555 | 0.002576   |
| 9mo_SIGAE3_ATGTCTTCAGACAATA-1-10x  | 0.04183396 | 0.09887146 | 7.82E-05   |
| 9mo_SIGAE3_ATGTCTTTCGCCTAT-1-10x   | 0.21125525 | 0.70210296 | 0.0010934  |

|                                     |            |            |            |
|-------------------------------------|------------|------------|------------|
| 9mo_SIGAE3_ATTACCTGTGTAGTGG-1-10x   | 0.02068299 | 0.02356254 | 3.62E-05   |
| 9mo_SIGAE3_ATTACTCAGGCAGCTA-1-10x   | 0.11708451 | 0.36680415 | 0.002453   |
| 9mo_SIGAE3_ATTACTCCACTATCCC-1-10x   | 0.04372731 | 0.10561278 | 8.81E-05   |
| 9mo_SIGAE3_ATTACTCCACTGGAAG-1-10x   | 0.04461154 | 0.10876113 | 9.39E-05   |
| 9mo_SIGAE3_ATTACTCTCCCAAGTA-1-10x   | 0.14414853 | 0.4631667  | 0.0018716  |
| 9mo_SIGAE3_ATTCACTAGGTCCTGC-1-10x   | 0.07751153 | 0.2259029  | 0.0023954  |
| 9mo_SIGAE3_ATTCACTAGTTGCCCG-1-10x   | 0.08162557 | 0.24055113 | 0.0031253  |
| 9mo_SIGAE3_ATTCACTTCCGTGCGA-1-10x   | 0.06040835 | 0.16500634 | 0.00038577 |
| 9mo_SIGAE3_ATTCAAGGTAACC-1-10x      | 0.25627938 | 0.8624132  | 0.00078463 |
| 9mo_SIGAE3_ATTCAAGGTCCGGTGT-1-10x   | 0.03102606 | 0.06038944 | 4.68E-05   |
| 9mo_SIGAE3_ATTCAATCCAAGTCCCG-1-10x  | 0.07318789 | 0.2105084  | 0.0015819  |
| 9mo_SIGAE3_ATTCAATCGTTCTCGTC-1-10x  | 0.29057744 | 0.98453295 | 0.00076163 |
| 9mo_SIGAE3_ATTCCATGTAAACCC-1-10x    | 0.11942763 | 0.37514693 | 0.0023317  |
| 9mo_SIGAE3_ATTCTAAGGTGCTTT-1-10x    | 0.02501523 | 0.03898766 | 4.00E-05   |
| 9mo_SIGAE3_ATTCTACAAGAGAGA-1-10x    | 0.0357381  | 0.07716686 | 5.58E-05   |
| 9mo_SIGAE3_ATTCTACACCAGACC-1-10x    | 0.09641762 | 0.29321882 | 0.0043435  |
| 9mo_SIGAE3_ATTCTCGTTTCATGGTAC-1-10x | 0.23085529 | 0.7718897  | 0.00093779 |
| 9mo_SIGAE3_ATTCTCGTTCCGTAATG-1-10x  | 0.12855464 | 0.40764403 | 0.0019821  |
| 9mo_SIGAE3_ATTCTACAGTGGCGAT-1-10x   | 0.08592421 | 0.2558566  | 0.0039187  |
| 9mo_SIGAE3_ATTCTACCACGTCTCT-1-10x   | 0.08544033 | 0.25413373 | 0.0037839  |
| 9mo_SIGAE3_ATTCTACGTAGCTGAG-1-10x   | 0.23938254 | 0.80225134 | 0.00087632 |
| 9mo_SIGAE3_ATTGGGTAGATACAGT-1-10x   | 0.2537476  | 0.8533988  | 0.00079608 |
| 9mo_SIGAE3_ATTTACCTCATGGAGG-1-10x   | 0.15961199 | 0.51822495 | 0.0018109  |
| 9mo_SIGAE3_ATTTCTGTCAGACTGT-1-10x   | 0.2504461  | 0.84164363 | 0.00080923 |
| 9mo_SIGAE3_CAAAGAAGTGGGTCAA-1-10x   | 0.20429683 | 0.6773272  | 0.0011518  |
| 9mo_SIGAE3_CAAAGAATCACTTGGA-1-10x   | 0.1117105  | 0.34766978 | 0.002929   |
| 9mo_SIGAE3_CAACAACAGATTGGGC-1-10x   | 0.08675269 | 0.25880644 | 0.0039187  |
| 9mo_SIGAE3_CAACAACGTGAGTTGG-1-10x   | 0.03123656 | 0.06113897 | 4.68E-05   |
| 9mo_SIGAE3_CAACAGTAGAAACCCG-1-10x   | 0.12190857 | 0.38398042 | 0.0021873  |
| 9mo_SIGAE3_CAACAGTGTCCGCCTA-1-10x   | 0.06675883 | 0.1876175  | 0.00079936 |
| 9mo_SIGAE3_CAACCAACACTGGATT-1-10x   | 0.02989667 | 0.05636821 | 4.55E-05   |
| 9mo_SIGAE3_CAACCTCCATGTTTCAG-1-10x  | 0.02284417 | 0.03125751 | 3.76E-05   |
| 9mo_SIGAE3_CAACCTCGTCCAGCAC-1-10x   | 0.0596322  | 0.16224284 | 0.00038577 |
| 9mo_SIGAE3_CAACGATAGGAAACGA-1-10x   | 0.05402768 | 0.1422877  | 0.00021164 |
| 9mo_SIGAE3_CAACGATAGTAGAGTT-1-10x   | 0.06972542 | 0.19818014 | 0.0010821  |
| 9mo_SIGAE3_CAACGATGTGACCTGC-1-10x   | 0.09830789 | 0.29994923 | 0.0042345  |
| 9mo_SIGAE3_CAACGATTCATACGAC-1-10x   | 0.08960135 | 0.2689492  | 0.0042295  |
| 9mo_SIGAE3_CAACGGCCATATGGCT-1-10x   | 0.25289783 | 0.8503731  | 0.00080028 |
| 9mo_SIGAE3_CAACGGCTCCATAAGC-1-10x   | 0.24683012 | 0.8287688  | 0.0008292  |
| 9mo_SIGAE3_CAAGACTCATTGAGCT-1-10x   | 0.2203636  | 0.7345336  | 0.0010179  |
| 9mo_SIGAE3_CAAGAGGGTCCTATAG-1-10x   | 0.04343729 | 0.10458016 | 8.29E-05   |

|                                     |            |            |            |
|-------------------------------------|------------|------------|------------|
| 9mo_SIGAE3_CAAGAGGGTGATACTC-1-10x   | 0.18527737 | 0.60960764 | 0.0013959  |
| 9mo_SIGAE3_CAAGCTAAGAGAGAAC-1-10x   | 0.19691269 | 0.65103567 | 0.0012292  |
| 9mo_SIGAE3_CAAGCTAAGCGACATG-1-10x   | 0.04610314 | 0.11407202 | 0.00010046 |
| 9mo_SIGAE3_CAAGCTATCCAAGCTA-1-10x   | 0.15593626 | 0.5051374  | 0.0018459  |
| 9mo_SIGAE3_CAAGGGACATCGAAGG-1-10x   | 0.03991871 | 0.09205211 | 7.01E-05   |
| 9mo_SIGAE3_CAATACGAGCACGTCC-1-10x   | 0.05013765 | 0.12843709 | 0.00013566 |
| 9mo_SIGAE3_CAATACGCAAAGGGTC-1-10x   | 0.21072698 | 0.700222   | 0.0011014  |
| 9mo_SIGAE3_CAATACGCAACCAATC-1-10x   | 0.29213774 | 0.99008846 | 0.00076378 |
| 9mo_SIGAE3_CAATACGTACCTACC-1-10x    | 0.14383358 | 0.4620453  | 0.0018716  |
| 9mo_SIGAE3_CAATCGATCGGAGTAG-1-10x   | 0.23536246 | 0.78793764 | 0.00090278 |
| 9mo_SIGAE3_CAATCGATCTATCCAT-1-10x   | 0.21800067 | 0.7261203  | 0.00104    |
| 9mo_SIGAE3_CAATGACCATGTACGT-1-10x   | 0.19961476 | 0.6606565  | 0.0011985  |
| 9mo_SIGAE3_CAATGACTCACAAGAA-1-10x   | 0.26468468 | 0.89234066 | 0.00076135 |
| 9mo_SIGAE3_CACAACAAGGCAGTCA-1-10x   | 0.1300784  | 0.41306946 | 0.001948   |
| 9mo_SIGAE3_CACAACACAACACTGGTT-1-10x | 0.26029766 | 0.8767205  | 0.00077221 |
| 9mo_SIGAE3_CACAACAGTTAAGTCC-1-10x   | 0.05918666 | 0.16065647 | 0.00034795 |
| 9mo_SIGAE3_CACAGATAGGCCATAG-1-10x   | 0.05074848 | 0.13061197 | 0.00014746 |
| 9mo_SIGAE3_CACAGATAGTTGGAGC-1-10x   | 0.29034665 | 0.9837112  | 0.00076163 |
| 9mo_SIGAE3_CACAGGCAGGTGAGCT-1-10x   | 0.04500177 | 0.11015057 | 9.39E-05   |
| 9mo_SIGAE3_CACAGGCCAAGCGCAA-1-10x   | 0.2900611  | 0.98269445 | 0.00076163 |
| 9mo_SIGAE3_CACAGGCCATAGTCAC-1-10x   | 0.10367366 | 0.31905425 | 0.0038193  |
| 9mo_SIGAE3_CACAGGCGTACGCTAT-1-10x   | 0.09589077 | 0.29134294 | 0.0043808  |
| 9mo_SIGAE3_CACATGAAGGAATCGC-1-10x   | 0.11146819 | 0.346807   | 0.002929   |
| 9mo_SIGAE3_CACATGATCGACACCG-1-10x   | 0.29003865 | 0.9826145  | 0.00076163 |
| 9mo_SIGAE3_CACCAAAGTTTCGTTTT-1-10x  | 0.08017898 | 0.23540047 | 0.0027593  |
| 9mo_SIGAE3_CACCGTTCAATGCAAA-1-10x   | 0.09614743 | 0.2922568  | 0.0043808  |
| 9mo_SIGAE3_CACCGTTCACACCAGC-1-10x   | 0.04200952 | 0.09949654 | 7.82E-05   |
| 9mo_SIGAE3_CACCGTTCAGTCCGTG-1-10x   | 0.1656862  | 0.5398525  | 0.0017353  |
| 9mo_SIGAE3_CACCGTTGTCAGTCCG-1-10x   | 0.16970445 | 0.55415964 | 0.0016584  |
| 9mo_SIGAE3_CACCGTTGTGAGAACC-1-10x   | 0.1802483  | 0.59170145 | 0.001475   |
| 9mo_SIGAE3_CACCGTTGTTCTCTCG-1-10x   | 0.1894254  | 0.62437683 | 0.0013244  |
| 9mo_SIGAE3_CACCGTTTCGCAGTTA-1-10x   | 0.10213165 | 0.31356388 | 0.0039137  |
| 9mo_SIGAE3_CACGAATGTTGCCATA-1-10x   | 0.05987514 | 0.16310783 | 0.00038577 |
| 9mo_SIGAE3_CACGAATTCTGTGTGA-1-10x   | 0.17139505 | 0.56017905 | 0.0016421  |
| 9mo_SIGAE3_CACGGGTAGAGGCGTT-1-10x   | 0.07519034 | 0.21763821 | 0.001885   |
| 9mo_SIGAE3_CACGGGTGTCCTATAG-1-10x   | 0.01855947 | 0.01600166 | 3.49E-05   |
| 9mo_SIGAE3_CACGTGGAGGTTTCATC-1-10x  | 0.17839718 | 0.5851104  | 0.0015081  |
| 9mo_SIGAE3_CACGTGGTCAAGCTTG-1-10x   | 0.04346758 | 0.10468802 | 8.29E-05   |
| 9mo_SIGAE3_CACGTGGTCTACTTCA-1-10x   | 0.01557062 | 0.00535973 | 3.33E-05   |
| 9mo_SIGAE3_CACGTTCGTAGTCCTA-1-10x   | 0.0937592  | 0.28375342 | 0.0044154  |
| 9mo_SIGAE3_CACTAAGGTTACGATC-1-10x   | 0.24967243 | 0.83888894 | 0.00081397 |

|                                   |            |            |            |
|-----------------------------------|------------|------------|------------|
| 9mo_SIGAE3_CACTGGGGTTCACGAT-1-10x | 0.21461368 | 0.7140608  | 0.0010625  |
| 9mo_SIGAE3_CACTGGGTCGCAGTGC-1-10x | 0.24827342 | 0.83390766 | 0.00082396 |
| 9mo_SIGAE3_CACTGTCCAACTCGT-1-10x  | 0.09688963 | 0.29489943 | 0.0043435  |
| 9mo_SIGAE3_CACTGTCTCGTGCGAC-1-10x | 0.08629546 | 0.25717846 | 0.0039187  |
| 9mo_SIGAE3_CACTTCGAGCGAGGAG-1-10x | 0.19908547 | 0.658772   | 0.0012085  |
| 9mo_SIGAE3_CAGAGCCTCAACTGAC-1-10x | 0.04328958 | 0.10405424 | 8.29E-05   |
| 9mo_SIGAE3_CAGATACAGTCCCAAT-1-10x | 0.03086315 | 0.05980941 | 4.68E-05   |
| 9mo_SIGAE3_CAGATACTCATTCATC-1-10x | 0.04455124 | 0.10854644 | 8.81E-05   |
| 9mo_SIGAE3_CAGATCAAGGTTGAGC-1-10x | 0.25117478 | 0.8442381  | 0.00080923 |
| 9mo_SIGAE3_CAGCAATCAATAACGA-1-10x | 0.12808892 | 0.4059858  | 0.0020026  |
| 9mo_SIGAE3_CAGCAATGTTGTGCAT-1-10x | 0.07096316 | 0.20258717 | 0.0013138  |
| 9mo_SIGAE3_CAGCACGAGACGAGCT-1-10x | 0.09385245 | 0.28408542 | 0.0044154  |
| 9mo_SIGAE3_CAGCACGGTTAGAGAT-1-10x | 0.04525552 | 0.11105406 | 9.39E-05   |
| 9mo_SIGAE3_CAGCAGCAGGATTCCT-1-10x | 0.1873157  | 0.6168652  | 0.0013662  |
| 9mo_SIGAE3_CAGCAGCGTCTCACGG-1-10x | 0.11191824 | 0.34840944 | 0.002929   |
| 9mo_SIGAE3_CAGCAGCGTTGTTTGG-1-10x | 0.11579507 | 0.36221305 | 0.002594   |
| 9mo_SIGAE3_CAGCCAGAGCATCAGG-1-10x | 0.1454216  | 0.46769953 | 0.0018716  |
| 9mo_SIGAE3_CAGCCAGGTACCCACG-1-10x | 0.03972398 | 0.09135877 | 6.67E-05   |
| 9mo_SIGAE3_CAGCCAGTCGGCCTTT-1-10x | 0.06387597 | 0.17735292 | 0.00058553 |
| 9mo_SIGAE3_CAGCGTGCACCATATG-1-10x | 0.09140958 | 0.2753875  | 0.0043535  |
| 9mo_SIGAE3_CAGGCCAAGTGAGCCA-1-10x | 0.17055102 | 0.55717385 | 0.0016421  |
| 9mo_SIGAE3_CAGGGCTCAAGAGTGC-1-10x | 0.04910767 | 0.12476978 | 0.00012523 |
| 9mo_SIGAE3_CAGGGCTCAGTTTCGA-1-10x | 0.08013459 | 0.23524243 | 0.0027593  |
| 9mo_SIGAE3_CAGGGCTTCAGCAATC-1-10x | 0.2487896  | 0.8357456  | 0.00081888 |
| 9mo_SIGAE3_CAGGTATAGCGGCTCT-1-10x | 0.28439325 | 0.96251386 | 0.00075605 |
| 9mo_SIGAE3_CAGGTATCACAATTCG-1-10x | 0.04301905 | 0.10309099 | 8.29E-05   |
| 9mo_SIGAE3_CAGGTATCACCATAAC-1-10x | 0.08101508 | 0.23837745 | 0.0029431  |
| 9mo_SIGAE3_CAGTGCGCAACAAAGT-1-10x | 0.04792668 | 0.12056482 | 0.00011598 |
| 9mo_SIGAE3_CAGTTAGAGAACAAGG-1-10x | 0.09561605 | 0.2903648  | 0.0043808  |
| 9mo_SIGAE3_CAGTTCCAGACGTCCC-1-10x | 0.04946596 | 0.12604551 | 0.00013566 |
| 9mo_SIGAE3_CATAAGCGTTAGGAGC-1-10x | 0.09870654 | 0.30136862 | 0.0042345  |
| 9mo_SIGAE3_CATACAGCAACACACT-1-10x | 0.20556764 | 0.681852   | 0.001143   |
| 9mo_SIGAE3_CATACCCACTCCGGA-1-10x  | 0.17290992 | 0.5655728  | 0.0016089  |
| 9mo_SIGAE3_CATACCCAGAACATA-1-10x  | 0.22070247 | 0.7357402  | 0.0010179  |
| 9mo_SIGAE3_CATACCCTCCCGTTGT-1-10x | 0.09519524 | 0.2888665  | 0.0044051  |
| 9mo_SIGAE3_CATACCCTCCGAGAAG-1-10x | 0.0539436  | 0.14198832 | 0.00019264 |
| 9mo_SIGAE3_CATACCCTCGTTGTTT-1-10x | 0.27259356 | 0.9205006  | 0.000753   |
| 9mo_SIGAE3_CATACCCTCTAGCATG-1-10x | 0.15349147 | 0.49643263 | 0.0018617  |
| 9mo_SIGAE3_CATACTTAGCAAGGAA-1-10x | 0.08870161 | 0.26574564 | 0.0041422  |
| 9mo_SIGAE3_CATACTTCAAGAATAC-1-10x | 0.23756477 | 0.7957791  | 0.00088935 |
| 9mo_SIGAE3_CATACTTCACAGACGA-1-10x | 0.13362715 | 0.4257049  | 0.0019115  |



|                                    |            |            |            |
|------------------------------------|------------|------------|------------|
| 9mo_SIGAE3_CATACTTTCATTGCCC-1-10x  | 0.11724263 | 0.36736715 | 0.002453   |
| 9mo_SIGAE3_CATAGACAGTGCGTCC-1-10x  | 0.22625737 | 0.7555186  | 0.00097406 |
| 9mo_SIGAE3_CATAGACCAGGGCTTC-1-10x  | 0.24879941 | 0.8357805  | 0.00081888 |
| 9mo_SIGAE3_CATAGACCATAAGCGG-1-10x  | 0.07445515 | 0.21502055 | 0.0017292  |
| 9mo_SIGAE3_CATCAAGAGTTACTCG-1-10x  | 0.2570311  | 0.86508983 | 0.00078121 |
| 9mo_SIGAE3_CATCCACCAGCGTGCT-1-10x  | 0.09652828 | 0.29361284 | 0.0043435  |
| 9mo_SIGAE3_CATCCACCATAACCCA-1-10x  | 0.25467885 | 0.8567145  | 0.00079207 |
| 9mo_SIGAE3_CATCCACGTAGACAGC-1-10x  | 0.01967413 | 0.01997044 | 3.55E-05   |
| 9mo_SIGAE3_CATCCACGTCCGGATC-1-10x  | 0.01873797 | 0.01663721 | 3.49E-05   |
| 9mo_SIGAE3_CATCCACTCCGAGAAG-1-10x  | 0.08050966 | 0.23657785 | 0.0029431  |
| 9mo_SIGAE3_CATCCCAAGCTCGCAC-1-10x  | 0.02034595 | 0.02236249 | 3.62E-05   |
| 9mo_SIGAE3_CATCCCAGTATGAAAC-1-10x  | 0.01643142 | 0.00842464 | 3.38E-05   |
| 9mo_SIGAE3_CATCCCAGTTCTGACA-1-10x  | 0.04944124 | 0.12595749 | 0.00013566 |
| 9mo_SIGAE3_CATCCGTAGGGAGGCA-1-10x  | 0.23926398 | 0.8018292  | 0.00087632 |
| 9mo_SIGAE3_CATCCGTCACTCCCTA-1-10x  | 0.15736115 | 0.51021075 | 0.0018302  |
| 9mo_SIGAE3_CATCCGTCACTTCAAG-1-10x  | 0.16526374 | 0.53834826 | 0.0017353  |
| 9mo_SIGAE3_CATCCGTGTCCCTGTT-1-10x  | 0.09786073 | 0.2983571  | 0.0042943  |
| 9mo_SIGAE3_CATCCGTGTGCTTCAA-1-10x  | 0.2552281  | 0.8586701  | 0.00078825 |
| 9mo_SIGAE3_CATCCGTTC AACCCGG-1-10x | 0.031726   | 0.06288164 | 4.83E-05   |
| 9mo_SIGAE3_CATCCGTTCATTGTT-1-10x   | 0.04941886 | 0.12587781 | 0.00013566 |
| 9mo_SIGAE3_CATCCGTTCGCAAGAG-1-10x  | 0.17331813 | 0.56702626 | 0.0015922  |
| 9mo_SIGAE3_CATCGCTCACCATTCC-1-10x  | 0.27842805 | 0.9412745  | 0.00075239 |
| 9mo_SIGAE3_CATCGCTTCTGACCCT-1-10x  | 0.18539418 | 0.61002356 | 0.0013959  |
| 9mo_SIGAE3_CATCGTTCGTATCGTTG-1-10x | 0.09645238 | 0.2933426  | 0.0043435  |
| 9mo_SIGAE3_CATCGTTCGTCTCGGGT-1-10x | 0.04865658 | 0.12316365 | 0.00012523 |
| 9mo_SIGAE3_CATGAGTCAGAAGTGC-1-10x  | 0.02212895 | 0.02871094 | 3.76E-05   |
| 9mo_SIGAE3_CATGAGTCATCGGAGA-1-10x  | 0.05357771 | 0.14068554 | 0.00019264 |
| 9mo_SIGAE3_CATGAGTTCGCATAGT-1-10x  | 0.03305306 | 0.06760668 | 5.00E-05   |
| 9mo_SIGAE3_CATGCAACAGTTTCGA-1-10x  | 0.08359982 | 0.24758053 | 0.0034742  |
| 9mo_SIGAE3_CATGCAATCATCAGTG-1-10x  | 0.23447254 | 0.7847691  | 0.00090964 |
| 9mo_SIGAE3_CATGCGGGTATGATCC-1-10x  | 0.05930148 | 0.1610653  | 0.00034795 |
| 9mo_SIGAE3_CATGCGGTCAGAGCGA-1-10x  | 0.28734022 | 0.97300667 | 0.00075864 |
| 9mo_SIGAE3_CATGCGGTCATCGTAG-1-10x  | 0.03724472 | 0.08253127 | 6.07E-05   |
| 9mo_SIGAE3_CATGCGGTCGAAGCCC-1-10x  | 0.2010091  | 0.6656211  | 0.0011888  |
| 9mo_SIGAE3_CATGCTCAGGAACGAA-1-10x  | 0.17823555 | 0.58453494 | 0.0015081  |
| 9mo_SIGAE3_CATGCTCCAATTCACG-1-10x  | 0.26466945 | 0.8922864  | 0.00076135 |
| 9mo_SIGAE3_CATGCTCCACCGTCTT-1-10x  | 0.06971123 | 0.19812962 | 0.0010821  |
| 9mo_SIGAE3_CATGCTCTCACCTTAT-1-10x  | 0.04896954 | 0.12427797 | 0.00012523 |
| 9mo_SIGAE3_CATGGATCAGGAACCA-1-10x  | 0.15547957 | 0.5035113  | 0.0018459  |
| 9mo_SIGAE3_CATGGATGTCACGCTG-1-10x  | 0.03594392 | 0.07789972 | 5.58E-05   |
| 9mo_SIGAE3_CATGGATTCGCTTACC-1-10x  | 0.26837608 | 0.9054841  | 0.00075594 |

|                                   |            |            |            |
|-----------------------------------|------------|------------|------------|
| 9mo_SIGAE3_CATGGTAGTCATGACT-1-10x | 0.06701309 | 0.1885228  | 0.00079936 |
| 9mo_SIGAE3_CATGGTATCCTGCTAC-1-10x | 0.07992712 | 0.23450373 | 0.0027593  |
| 9mo_SIGAE3_CATTCATCAGGAGGTT-1-10x | 0.05934841 | 0.16123237 | 0.00034795 |
| 9mo_SIGAE3_CATTCATGTCGATTCA-1-10x | 0.1046283  | 0.3224533  | 0.0037215  |
| 9mo_SIGAE3_CATTCATGTTCAAAGA-1-10x | 0.04940792 | 0.12583885 | 0.00013566 |
| 9mo_SIGAE3_CATTCCGAGATGAAGG-1-10x | 0.09400208 | 0.2846182  | 0.0044154  |
| 9mo_SIGAE3_CATTCCGGTTTCCCAC-1-10x | 0.23940477 | 0.8023305  | 0.00087632 |
| 9mo_SIGAE3_CATTCTAGTACAAGTA-1-10x | 0.25215542 | 0.84772974 | 0.00080467 |
| 9mo_SIGAE3_CATTCTAGTTATCCAG-1-10x | 0.05087776 | 0.13107228 | 0.00014746 |
| 9mo_SIGAE3_CATTGAGAGGTTAGTA-1-10x | 0.20601384 | 0.6834407  | 0.001143   |
| 9mo_SIGAE3_CATTGAGTCAAACCCA-1-10x | 0.01651283 | 0.00871449 | 3.38E-05   |
| 9mo_SIGAE3_CATTGAGTCAAGGCTT-1-10x | 0.27313042 | 0.9224121  | 0.0007526  |
| 9mo_SIGAE3_CATTGCCAGCACGTCC-1-10x | 0.26278374 | 0.88557225 | 0.00076511 |
| 9mo_SIGAE3_CATTGCCAGCATGCAG-1-10x | 0.1251307  | 0.39545295 | 0.0020803  |
| 9mo_SIGAE3_CATTGCCAGTTGCGCC-1-10x | 0.12796299 | 0.40553743 | 0.0020026  |
| 9mo_SIGAE3_CATTGCCGTATTCCGA-1-10x | 0.0998724  | 0.30551973 | 0.0041652  |
| 9mo_SIGAE3_CATTGCCGTCTACGTA-1-10x | 0.21275346 | 0.7074374  | 0.0010778  |
| 9mo_SIGAE3_CATTGCCGTCTCCTGT-1-10x | 0.25033677 | 0.84125435 | 0.00080923 |
| 9mo_SIGAE3_CATTGCCTCATCTGTT-1-10x | 0.04413193 | 0.10705345 | 8.81E-05   |
| 9mo_SIGAE3_CATTGTTCAAGCTACT-1-10x | 0.05846253 | 0.15807818 | 0.00031414 |
| 9mo_SIGAE3_CATTGTTCACCCAAGC-1-10x | 0.05411638 | 0.1426035  | 0.00021164 |
| 9mo_SIGAE3_CATTGTTCACGTGTGC-1-10x | 0.16813125 | 0.5485582  | 0.0016902  |
| 9mo_SIGAE3_CATTGTTCAGAGGCAT-1-10x | 0.16248651 | 0.52845985 | 0.001776   |
| 9mo_SIGAE3_CATTGTTCAGATCCTA-1-10x | 0.02322062 | 0.03259785 | 3.83E-05   |
| 9mo_SIGAE3_CATTGTTGTACAGTCT-1-10x | 0.03687238 | 0.08120553 | 5.82E-05   |
| 9mo_SIGAE3_CATTTCAAGGGCGAAG-1-10x | 0.05529213 | 0.14678982 | 0.000233   |
| 9mo_SIGAE3_CATTTCAGTACGTGTT-1-10x | 0.08885633 | 0.26629654 | 0.0042295  |
| 9mo_SIGAE3_CATTTCAGTCTCAGAT-1-10x | 0.04086735 | 0.09542979 | 7.40E-05   |
| 9mo_SIGAE3_CCAATTTCAGAACTTC-1-10x | 0.08236539 | 0.2431853  | 0.0033032  |
| 9mo_SIGAE3_CCAATTTGTCGTTGCG-1-10x | 0.06867459 | 0.19443862 | 0.00097948 |
| 9mo_SIGAE3_CCAATTTTCAGACCGC-1-10x | 0.04504992 | 0.11032199 | 9.39E-05   |
| 9mo_SIGAE3_CCAATTTTCTCGTCAC-1-10x | 0.04616376 | 0.11428788 | 0.00010046 |
| 9mo_SIGAE3_CCACAAACAAACTCTG-1-10x | 0.08499475 | 0.2525472  | 0.0037839  |
| 9mo_SIGAE3_CCACAAAGTGAAGCGT-1-10x | 0.06441656 | 0.17927773 | 0.00064991 |
| 9mo_SIGAE3_CCACCATAGCCTGGAA-1-10x | 0.05873158 | 0.15903611 | 0.00034795 |
| 9mo_SIGAE3_CCACCATAGCTATCCA-1-10x | 0.03023233 | 0.05756335 | 4.55E-05   |
| 9mo_SIGAE3_CCACCATAGTTCGGTT-1-10x | 0.0183016  | 0.01508351 | 3.49E-05   |
| 9mo_SIGAE3_CCACCATCTCGCGTT-1-10x  | 0.04697024 | 0.11715938 | 0.00010777 |
| 9mo_SIGAE3_CCACGAGAGGCTCTAT-1-10x | 0.04997125 | 0.1278446  | 0.00013566 |
| 9mo_SIGAE3_CCACGAGCATCTTTCA-1-10x | 0.01656512 | 0.00890068 | 3.38E-05   |
| 9mo_SIGAE3_CCACTTGCACTACAGT-1-10x | 0.06821153 | 0.19278987 | 0.00097948 |

|                                    |            |            |            |
|------------------------------------|------------|------------|------------|
| 9mo_SIGAE3_CCACTTGGTTACCGTA-1-10x  | 0.2850255  | 0.964765   | 0.00075605 |
| 9mo_SIGAE3_CCACTTGTCGCGTGCA-1-10x  | 0.08431505 | 0.2501271  | 0.0036353  |
| 9mo_SIGAE3_CCATAAGAGGTAGACC-1-10x  | 0.26070124 | 0.87815744 | 0.00076963 |
| 9mo_SIGAE3_CCATAAGAGGTATAGT-1-10x  | 0.08322683 | 0.24625248 | 0.0034742  |
| 9mo_SIGAE3_CCATAAGTCAATGCAC-1-10x  | 0.21753007 | 0.72444475 | 0.00104    |
| 9mo_SIGAE3_CCCAACTCAGACCTGC-1-10x  | 0.193399   | 0.638525   | 0.0012741  |
| 9mo_SIGAE3_CCCAACTCAGTGACCC-1-10x  | 0.2085213  | 0.6923686  | 0.0011177  |
| 9mo_SIGAE3_CCCAACTTCATGCTAG-1-10x  | 0.2549464  | 0.85766715 | 0.00079207 |
| 9mo_SIGAE3_CCCATTGCAGACCGCT-1-10x  | 0.0819469  | 0.24169521 | 0.0031253  |
| 9mo_SIGAE3_CCCATTGTCACCTACC-1-10x  | 0.04227145 | 0.10042913 | 7.82E-05   |
| 9mo_SIGAE3_CCCATTGTCGTGAGAG-1-10x  | 0.07560124 | 0.21910124 | 0.0020486  |
| 9mo_SIGAE3_CCCGAAGTCCATAGAC-1-10x  | 0.02399561 | 0.03535724 | 3.91E-05   |
| 9mo_SIGAE3_CCCGAATCGCAAGAG-1-10x   | 0.2703935  | 0.91266716 | 0.00075418 |
| 9mo_SIGAE3_CCCTAACAGACCAAGC-1-10x  | 0.0752035  | 0.21768509 | 0.001885   |
| 9mo_SIGAE3_CCCTAACAGGATGGCT-1-10x  | 0.28700876 | 0.9718265  | 0.00075864 |
| 9mo_SIGAE3_CCCTAACATGCGTGCA-1-10x  | 0.04426643 | 0.10753235 | 8.81E-05   |
| 9mo_SIGAE3_CCCTAACTCCCATAGA-1-10x  | 0.0168854  | 0.01004105 | 3.38E-05   |
| 9mo_SIGAE3_CCCTCTCAGGAATCGC-1-10x  | 0.10417863 | 0.32085222 | 0.0037215  |
| 9mo_SIGAE3_CCCTGATAGTGCTCGC-1-10x  | 0.1903461  | 0.6276551  | 0.0013113  |
| 9mo_SIGAE3_CCCTGATCAAGCAGGT-1-10x  | 0.27281737 | 0.9212975  | 0.000753   |
| 9mo_SIGAE3_CCCTGATTCTAGAGT-1-10x   | 0.04496273 | 0.11001155 | 9.39E-05   |
| 9mo_SIGAE3_CCCTTAGAGGCTCACC-1-10x  | 0.07896566 | 0.23108038 | 0.002576   |
| 9mo_SIGAE3_CCCTTAGAGGTACCTT-1-10x  | 0.18072265 | 0.5933904  | 0.001475   |
| 9mo_SIGAE3_CCCTTAGGTTGTGGCC-1-10x  | 0.08903635 | 0.2669375  | 0.0042295  |
| 9mo_SIGAE3_CCGAACGGTGAGTAAT-1-10x  | 0.19285634 | 0.63659286 | 0.0012861  |
| 9mo_SIGAE3_CCGATCTGTTGTCTAG-1-10x  | 0.21591148 | 0.71868163 | 0.001055   |
| 9mo_SIGAE3_CCGATCTGTTTCCCAC-1-10x  | 0.08804832 | 0.26341957 | 0.0041422  |
| 9mo_SIGAE3_CCGATCTTCATCGCCT-1-10x  | 0.26287934 | 0.8859127  | 0.00076511 |
| 9mo_SIGAE3_CCGATGGCATATCGGT-1-10x  | 0.05070591 | 0.1304604  | 0.00014746 |
| 9mo_SIGAE3_CCGATGGGTTGGGTAG-1-10x  | 0.20196196 | 0.66901386 | 0.0011792  |
| 9mo_SIGAE3_CCGCAAGAGGAGACCT-1-10x  | 0.0995084  | 0.30422366 | 0.0041652  |
| 9mo_SIGAE3_CCGCAAGCACGAAAGC-1-10x  | 0.01633088 | 0.00806666 | 3.33E-05   |
| 9mo_SIGAE3_CCGGACACAACCTCCCT-1-10x | 0.08387171 | 0.24854858 | 0.0034742  |
| 9mo_SIGAE3_CCGGGTAAGCCATGCC-1-10x  | 0.18805797 | 0.6195081  | 0.0013519  |
| 9mo_SIGAE3_CCGGGTACACGACAAG-1-10x  | 0.02255263 | 0.03021945 | 3.76E-05   |
| 9mo_SIGAE3_CCGGGTACATCATGAC-1-10x  | 0.25050947 | 0.84186924 | 0.00080923 |
| 9mo_SIGAE3_CCGGGTATCAGCCTTC-1-10x  | 0.2498805  | 0.83962977 | 0.00081397 |
| 9mo_SIGAE3_CCGGGTATCCTCTTTC-1-10x  | 0.09515667 | 0.28872916 | 0.0044051  |
| 9mo_SIGAE3_CCGGGTATCGCACGAC-1-10x  | 0.04795814 | 0.12067684 | 0.00011598 |
| 9mo_SIGAE3_CCGGGTATCTTGACAG-1-10x  | 0.25731224 | 0.8660908  | 0.00078121 |
| 9mo_SIGAE3_CCGGTAGAGTAGTCTC-1-10x  | 0.25155327 | 0.8455857  | 0.00080467 |

|                                   |            |            |            |
|-----------------------------------|------------|------------|------------|
| 9mo_SIGAE3_CCGGTAGCAACCGCTG-1-10x | 0.06691819 | 0.1881849  | 0.00079936 |
| 9mo_SIGAE3_CCGGTAGGTATCAGGG-1-10x | 0.26448846 | 0.89164203 | 0.00076135 |
| 9mo_SIGAE3_CCGGTGAGTAACTGCT-1-10x | 0.20525606 | 0.6807426  | 0.001143   |
| 9mo_SIGAE3_CCGGTGATCCATCGTC-1-10x | 0.04009453 | 0.09267811 | 7.01E-05   |
| 9mo_SIGAE3_CCGTAGGAGCGGTATG-1-10x | 0.04899245 | 0.12435955 | 0.00012523 |
| 9mo_SIGAE3_CCGTAGGTCCGTGTGG-1-10x | 0.16099593 | 0.5231526  | 0.0018     |
| 9mo_SIGAE3_CCGTAGGTCTGTAACG-1-10x | 0.03203874 | 0.06399516 | 4.83E-05   |
| 9mo_SIGAE3_CCGTGAGCAGTTTGGT-1-10x | 0.17727743 | 0.58112353 | 0.0015248  |
| 9mo_SIGAE3_CCGTTCACAACACTAC-1-10x | 0.20261908 | 0.6713535  | 0.0011699  |
| 9mo_SIGAE3_CCGTTCAGTGAAGAC-1-10x  | 0.02880859 | 0.05249406 | 4.42E-05   |
| 9mo_SIGAE3_CCGTTCATCACTGGTA-1-10x | 0.02898068 | 0.05310679 | 4.42E-05   |
| 9mo_SIGAE3_CCGTTCATCCCGAATA-1-10x | 0.0961305  | 0.2921965  | 0.0043808  |
| 9mo_SIGAE3_CCTAACCTCCATTGGA-1-10x | 0.11781001 | 0.36938733 | 0.002453   |
| 9mo_SIGAE3_CCTAAGAAGCGTGAGT-1-10x | 0.185687   | 0.61106616 | 0.0013809  |
| 9mo_SIGAE3_CCTAAGACAGTCAGTT-1-10x | 0.03274559 | 0.06651191 | 5.00E-05   |
| 9mo_SIGAE3_CCTAAGAGTGCTCTCT-1-10x | 0.16735066 | 0.5457789  | 0.0017056  |
| 9mo_SIGAE3_CCTACGTCAAGCTGCC-1-10x | 0.08596021 | 0.25598478 | 0.0039187  |
| 9mo_SIGAE3_CCTACGTCAATGAAG-1-10x  | 0.28000692 | 0.94689614 | 0.00075303 |
| 9mo_SIGAE3_CCTATCGGTGACAGGT-1-10x | 0.243614   | 0.81731766 | 0.00085167 |
| 9mo_SIGAE3_CCTATCGGTGGACTGA-1-10x | 0.0630858  | 0.17453952 | 0.00052741 |
| 9mo_SIGAE3_CCTCAACGTAGGTACG-1-10x | 0.02423354 | 0.03620441 | 3.91E-05   |
| 9mo_SIGAE3_CCTCACACATACTGTG-1-10x | 0.05102236 | 0.13158713 | 0.00014746 |
| 9mo_SIGAE3_CCTCACATCAGACAAA-1-10x | 0.05148938 | 0.13324995 | 0.00016076 |
| 9mo_SIGAE3_CCTCAGTCAATAGGAT-1-10x | 0.05192591 | 0.13480423 | 0.00016076 |
| 9mo_SIGAE3_CCTCAGTGTGGTCCCA-1-10x | 0.2096366  | 0.69633967 | 0.0011095  |
| 9mo_SIGAE3_CCTCAGTTCAGCCCAG-1-10x | 0.2705585  | 0.9132547  | 0.00075418 |
| 9mo_SIGAE3_CCTCAGTTCTTCCGTG-1-10x | 0.2172156  | 0.723325   | 0.0010475  |
| 9mo_SIGAE3_CCTCATGTGCACTCT-1-10x  | 0.07261796 | 0.20847917 | 0.0014433  |
| 9mo_SIGAE3_CCTCAAAGGTAGGCT-1-10x  | 0.02560285 | 0.04107989 | 4.00E-05   |
| 9mo_SIGAE3_CCTCCAACACTATGTG-1-10x | 0.18683201 | 0.615143   | 0.0013662  |
| 9mo_SIGAE3_CCTCTCCATTACCC-1-10x   | 0.2593623  | 0.87339014 | 0.00077499 |
| 9mo_SIGAE3_CCTCTCCTCGTTGTGA-1-10x | 0.25734764 | 0.86621684 | 0.00078121 |
| 9mo_SIGAE3_CCTGCATCAAGTAGTA-1-10x | 0.1298107  | 0.4121163  | 0.0019639  |
| 9mo_SIGAE3_CCTGCATCACGAAGAC-1-10x | 0.03901074 | 0.08881924 | 6.67E-05   |
| 9mo_SIGAE3_CCTGTTGTCAAGCTTG-1-10x | 0.240767   | 0.80718076 | 0.00086997 |
| 9mo_SIGAE3_CCTGTTGTCCGATCTC-1-10x | 0.08400326 | 0.24901697 | 0.0034742  |
| 9mo_SIGAE3_CCTGTTGTCTAGATCG-1-10x | 0.12325222 | 0.38876453 | 0.0021479  |
| 9mo_SIGAE3_CCTTCAGAGAGAGAAC-1-10x | 0.0758534  | 0.21999907 | 0.0020486  |
| 9mo_SIGAE3_CCTTCAGAGGAGGCAG-1-10x | 0.01883316 | 0.01697614 | 3.49E-05   |
| 9mo_SIGAE3_CCTTGTCGAAGTGGTG-1-10x | 0.01907358 | 0.01783217 | 3.49E-05   |
| 9mo_SIGAE3_CCTTGTCACCCGTAG-1-10x  | 0.09420302 | 0.28533363 | 0.0044154  |

|                                    |            |            |            |
|------------------------------------|------------|------------|------------|
| 9mo_SIGAE3_CCTTGTGCAGTATAACC-1-10x | 0.08718237 | 0.26033634 | 0.0040384  |
| 9mo_SIGAE3_CCTTGTGCATGCAGCC-1-10x  | 0.01678975 | 0.00970047 | 3.38E-05   |
| 9mo_SIGAE3_CCTTGTGTCCCATAGA-1-10x  | 0.09140892 | 0.27538514 | 0.0043535  |
| 9mo_SIGAE3_CCTTGTGTGCTGCGA-1-10x   | 0.04977085 | 0.12713107 | 0.00013566 |
| 9mo_SIGAE3_CCTTTGGAGGTAAACT-1-10x  | 0.05473416 | 0.14480314 | 0.00021164 |
| 9mo_SIGAE3_CCTTTGGCACTCAAGT-1-10x  | 0.0437495  | 0.1056918  | 8.81E-05   |
| 9mo_SIGAE3_CGAAGGATCAAGAAAC-1-10x  | 0.2609611  | 0.8790827  | 0.00076963 |
| 9mo_SIGAE3_CGAAGTTAGAATTCAG-1-10x  | 0.01576141 | 0.00603904 | 3.33E-05   |
| 9mo_SIGAE3_CGAAGTTGTGGCCTCA-1-10x  | 0.28328958 | 0.9585842  | 0.00075531 |
| 9mo_SIGAE3_CGAAGTTGTTTCTATC-1-10x  | 0.25237483 | 0.8485109  | 0.00080028 |
| 9mo_SIGAE3_CGAATTGAGGCTTTCA-1-10x  | 0.09330615 | 0.2821403  | 0.0044107  |
| 9mo_SIGAE3_CGAATTGCAAGAGAGA-1-10x  | 0.08126137 | 0.23925439 | 0.0031253  |
| 9mo_SIGAE3_CGACAGCAGGAGAGTA-1-10x  | 0.28702223 | 0.9718745  | 0.00075864 |
| 9mo_SIGAE3_CGACAGCTCAGCGCGT-1-10x  | 0.04982604 | 0.12732756 | 0.00013566 |
| 9mo_SIGAE3_CGAGGAAAGGTTCTAC-1-10x  | 0.08278274 | 0.24467127 | 0.0033032  |
| 9mo_SIGAE3_CGAGGAACAACCTAAC-1-10x  | 0.04806846 | 0.12106966 | 0.00011598 |
| 9mo_SIGAE3_CGAGGAAGTAGTAAGT-1-10x  | 0.0373444  | 0.08288617 | 6.07E-05   |
| 9mo_SIGAE3_CGAGGCTCACGCCAGT-1-10x  | 0.04712642 | 0.11771545 | 0.00010777 |
| 9mo_SIGAE3_CGAGGCTGTGTATCCA-1-10x  | 0.04273355 | 0.10207448 | 8.29E-05   |
| 9mo_SIGAE3_CGAGGCTGTTGAGAGC-1-10x  | 0.09189117 | 0.2771022  | 0.0043903  |
| 9mo_SIGAE3_CGAGGCTTCGCCACTT-1-10x  | 0.0433214  | 0.10416752 | 8.29E-05   |
| 9mo_SIGAE3_CGAGTGCAGTCGCTAT-1-10x  | 0.23734543 | 0.7949981  | 0.00088935 |
| 9mo_SIGAE3_CGAGTTACACTATCGA-1-10x  | 0.05994253 | 0.16334777 | 0.00038577 |
| 9mo_SIGAE3_CGAGTTACAGTTTAC-1-10x   | 0.08304818 | 0.24561638 | 0.0033032  |
| 9mo_SIGAE3_CGATCGGAGGGTCTTT-1-10x  | 0.08668224 | 0.2585556  | 0.0039187  |
| 9mo_SIGAE3_CGATCGGCACAGGATG-1-10x  | 0.14777437 | 0.47607666 | 0.0018716  |
| 9mo_SIGAE3_CGATCGGGTGCAGGAT-1-10x  | 0.03865808 | 0.08756357 | 6.36E-05   |
| 9mo_SIGAE3_CGATCGGGTTGACGGA-1-10x  | 0.2427347  | 0.8141869  | 0.00085764 |
| 9mo_SIGAE3_CGATGCGAGGTGGCTA-1-10x  | 0.15837507 | 0.5138209  | 0.0018209  |
| 9mo_SIGAE3_CGATGCGCATGGGTCC-1-10x  | 0.03105379 | 0.06048818 | 4.68E-05   |
| 9mo_SIGAE3_CGATGCGGTAGAGATT-1-10x  | 0.15864429 | 0.51477945 | 0.0018209  |
| 9mo_SIGAE3_CGATGCGGTCAATTC-1-10x   | 0.1020487  | 0.31326854 | 0.0039137  |
| 9mo_SIGAE3_CGATGCGTCACCTCA-1-10x   | 0.0164648  | 0.0085435  | 3.38E-05   |
| 9mo_SIGAE3_CGATGCGTCGGCCAAC-1-10x  | 0.07351115 | 0.21165942 | 0.0015819  |
| 9mo_SIGAE3_CGATGGCCAAATACGA-1-10x  | 0.04523021 | 0.11096394 | 9.39E-05   |
| 9mo_SIGAE3_CGATGGCTCAAGCGTT-1-10x  | 0.08641569 | 0.25760654 | 0.0039187  |
| 9mo_SIGAE3_CGCAGGTCATTGAAAG-1-10x  | 0.18135972 | 0.5956587  | 0.0014587  |
| 9mo_SIGAE3_CGCAGGTGTATGGAGC-1-10x  | 0.26550508 | 0.8952617  | 0.00075974 |
| 9mo_SIGAE3_CGCAGGTTCTCCACG-1-10x   | 0.22539243 | 0.75243896 | 0.00098137 |
| 9mo_SIGAE3_CGCATAAGTTTGGGAG-1-10x  | 0.08452503 | 0.25087476 | 0.0036353  |
| 9mo_SIGAE3_CGCCATTTCAAGTGG-1-10x   | 0.26716825 | 0.90118355 | 0.00075831 |

|                                    |            |            |            |
|------------------------------------|------------|------------|------------|
| 9mo_SIGAE3_CGCGTGAAGCCACAAG-1-10x  | 0.24208573 | 0.8118762  | 0.00085764 |
| 9mo_SIGAE3_CGCGTGACATTATGCG-1-10x  | 0.20158023 | 0.66765463 | 0.0011792  |
| 9mo_SIGAE3_CGCGTGAGTTTACGTG-1-10x  | 0.2333758  | 0.7808641  | 0.00092358 |
| 9mo_SIGAE3_CGGAACCGTTTACTGG-1-10x  | 0.01667506 | 0.00929212 | 3.38E-05   |
| 9mo_SIGAE3_CGGAACCTCCGGTAAT-1-10x  | 0.10390445 | 0.319876   | 0.0037215  |
| 9mo_SIGAE3_CGGAACCTCCGGTAGC-1-10x  | 0.03065717 | 0.059076   | 4.68E-05   |
| 9mo_SIGAE3_CGGACACCATCAGTCA-1-10x  | 0.19309515 | 0.6374432  | 0.0012741  |
| 9mo_SIGAE3_CGGACACGTGTAGGAC-1-10x  | 0.12212795 | 0.38476154 | 0.0021873  |
| 9mo_SIGAE3_CGGACACTCTCATTAC-1-10x  | 0.23333289 | 0.7807113  | 0.00092358 |
| 9mo_SIGAE3_CGGAGAACAACAAAGT-1-10x  | 0.24628134 | 0.82681483 | 0.00083459 |
| 9mo_SIGAE3_CGGAGAACAGAAGCGT-1-10x  | 0.27641258 | 0.93409836 | 0.00075214 |
| 9mo_SIGAE3_CGGCAGTAGCCAAGTG-1-10x  | 0.1710811  | 0.5590612  | 0.0016421  |
| 9mo_SIGAE3_CGGCAGTAGGTATTGA-1-10x  | 0.11266534 | 0.3510695  | 0.0028393  |
| 9mo_SIGAE3_CGGCAGTCAAGCTCTA-1-10x  | 0.27778366 | 0.93898016 | 0.00075239 |
| 9mo_SIGAE3_CGGCAGTTCCTTATGT-1-10x  | 0.05771323 | 0.15541025 | 0.00028394 |
| 9mo_SIGAE3_CGGCAGTTCCTTGCTA-1-10x  | 0.0750628  | 0.21718413 | 0.001885   |
| 9mo_SIGAE3_CGGGACTCATCGAACT-1-10x  | 0.26884118 | 0.9071401  | 0.00075594 |
| 9mo_SIGAE3_CGGGACTGTGCGTGGTC-1-10x | 0.0387657  | 0.08794678 | 6.36E-05   |
| 9mo_SIGAE3_CGGGACTGTGGCATCC-1-10x  | 0.0228111  | 0.03113975 | 3.76E-05   |
| 9mo_SIGAE3_CGGGACTGTGGTCTGC-1-10x  | 0.16764818 | 0.54683816 | 0.0016902  |
| 9mo_SIGAE3_CGGGCATAGACCAAGC-1-10x  | 0.04084407 | 0.09534689 | 7.40E-05   |
| 9mo_SIGAE3_CGGGCATCAGTACTAC-1-10x  | 0.08925859 | 0.2677288  | 0.0042295  |
| 9mo_SIGAE3_CGGGCATCATGAGTAA-1-10x  | 0.05617435 | 0.149931   | 0.000257   |
| 9mo_SIGAE3_CGGGCATTCGTGCATA-1-10x  | 0.20686519 | 0.686472   | 0.0011344  |
| 9mo_SIGAE3_CGGGTCAAGGACTATA-1-10x  | 0.16118321 | 0.5238194  | 0.0017883  |
| 9mo_SIGAE3_CGGGTCAAGGCCGCTT-1-10x  | 0.14509495 | 0.46653646 | 0.0018716  |
| 9mo_SIGAE3_CGGGTCACATTGAGCT-1-10x  | 0.26261744 | 0.8849802  | 0.00076511 |
| 9mo_SIGAE3_CGGGTCAGTAACACCT-1-10x  | 0.24750061 | 0.8311561  | 0.00082396 |
| 9mo_SIGAE3_CGGGTGTCAGTTTCGA-1-10x  | 0.01709912 | 0.010802   | 3.38E-05   |
| 9mo_SIGAE3_CGGGTGTTGTCGACG-1-10x   | 0.27677605 | 0.9353925  | 0.00075222 |
| 9mo_SIGAE3_CGGTCAGAGCGCTGCT-1-10x  | 0.03064968 | 0.05904935 | 4.68E-05   |
| 9mo_SIGAE3_CGGTCAGCAATCAAGA-1-10x  | 0.04164013 | 0.0981813  | 7.40E-05   |
| 9mo_SIGAE3_CGGTCAGCACAGACGA-1-10x  | 0.04553962 | 0.11206559 | 0.00010046 |
| 9mo_SIGAE3_CGGTCAGCATCTGGGC-1-10x  | 0.27750388 | 0.93798393 | 0.00075222 |
| 9mo_SIGAE3_CGTAAGTAGAGGATGA-1-10x  | 0.04018313 | 0.09299361 | 7.01E-05   |
| 9mo_SIGAE3_CGTAAGTCATATTCGG-1-10x  | 0.052476   | 0.13676286 | 0.00017575 |
| 9mo_SIGAE3_CGTAGTAAGGAAAGGT-1-10x  | 0.28891906 | 0.9786282  | 0.0007606  |
| 9mo_SIGAE3_CGTAGTAGTACTAAA-1-10x   | 0.07074042 | 0.20179409 | 0.0011935  |
| 9mo_SIGAE3_CGTAGTATCGGACCAC-1-10x  | 0.04865816 | 0.12316927 | 0.00012523 |
| 9mo_SIGAE3_CGTCAAATCTGAGATC-1-10x  | 0.11557489 | 0.3614291  | 0.002594   |
| 9mo_SIGAE3_CGTCCATAGAATCGAT-1-10x  | 0.09440383 | 0.28604865 | 0.0044051  |

|                                    |            |            |            |
|------------------------------------|------------|------------|------------|
| 9mo_SIGAE3_CGTCCATCACCTTGT-1-10x   | 0.03055342 | 0.05870659 | 4.68E-05   |
| 9mo_SIGAE3_CGTCCATCATGCGTGC-1-10x  | 0.11168797 | 0.34758955 | 0.002929   |
| 9mo_SIGAE3_CGTCCATGTTATCCAG-1-10x  | 0.06292534 | 0.17396818 | 0.00052741 |
| 9mo_SIGAE3_CGTCCATGTTGCCGAC-1-10x  | 0.11181811 | 0.3480529  | 0.002929   |
| 9mo_SIGAE3_CGTGAATTCCGCAGTG-1-10x  | 0.09282744 | 0.28043583 | 0.0044107  |
| 9mo_SIGAE3_CGTGAATTCTGAATCG-1-10x  | 0.0453473  | 0.11138083 | 9.39E-05   |
| 9mo_SIGAE3_CGTGATAAGTCTGGAG-1-10x  | 0.29043183 | 0.98401445 | 0.00076163 |
| 9mo_SIGAE3_CGTGATACAATGAAAC-1-10x  | 0.04473021 | 0.10918364 | 9.39E-05   |
| 9mo_SIGAE3_CGTGATAGTGGATCGA-1-10x  | 0.01791238 | 0.01369764 | 3.44E-05   |
| 9mo_SIGAE3_CGTGTCTAGAGCATCG-1-10x  | 0.04972424 | 0.1269651  | 0.00013566 |
| 9mo_SIGAE3_CGTTCTGAGGTCATT-1-10x   | 0.08735685 | 0.26095757 | 0.0040384  |
| 9mo_SIGAE3_CGTTCTGGTTCCTTGC-1-10x  | 0.08717951 | 0.26032615 | 0.0040384  |
| 9mo_SIGAE3_CGTTCTGTCCATTTAC-1-10x  | 0.07336447 | 0.21113716 | 0.0015819  |
| 9mo_SIGAE3_CGTTGGGGTTCAGTAC-1-10x  | 0.27050456 | 0.91306263 | 0.00075418 |
| 9mo_SIGAE3_CTAAGTGTGGGAAA-1-10x    | 0.03991497 | 0.0920388  | 7.01E-05   |
| 9mo_SIGAE3_CTAAGTGTCAAACGAGC-1-10x | 0.19453782 | 0.64257985 | 0.0012624  |
| 9mo_SIGAE3_CTAAGTGTCAAAGGCAC-1-10x | 0.21522684 | 0.716244   | 0.0010625  |
| 9mo_SIGAE3_CTAAGTGTGCAAGAC-1-10x   | 0.08622935 | 0.25694308 | 0.0039187  |
| 9mo_SIGAE3_CTAAGTGTCTAGAGCT-1-10x  | 0.02021184 | 0.02188497 | 3.62E-05   |
| 9mo_SIGAE3_CTAAGTGTCAAGTCCCG-1-10x | 0.25486594 | 0.8573806  | 0.00079207 |
| 9mo_SIGAE3_CTAAGTGTCAAGTCCCG-1-10x | 0.03527628 | 0.07552254 | 5.58E-05   |
| 9mo_SIGAE3_CTAAGTGTCAAGTCCCG-1-10x | 0.10703261 | 0.33101395 | 0.0034182  |
| 9mo_SIGAE3_CTAAGTGTCAAGTCCCG-1-10x | 0.05223635 | 0.1359096  | 0.00017575 |
| 9mo_SIGAE3_CTAAGTGTCAAGTCCCG-1-10x | 0.26218128 | 0.8834272  | 0.00076727 |
| 9mo_SIGAE3_CTAAGTGTCAAGTCCCG-1-10x | 0.29293433 | 0.9929247  | 0.00076488 |
| 9mo_SIGAE3_CTAAGTGTCAAGTCCCG-1-10x | 0.04489359 | 0.10976537 | 9.39E-05   |
| 9mo_SIGAE3_CTAAGTGTCAAGTCCCG-1-10x | 0.27168763 | 0.91727495 | 0.00075352 |
| 9mo_SIGAE3_CTAAGTGTCAAGTCCCG-1-10x | 0.275854   | 0.9321095  | 0.00075214 |
| 9mo_SIGAE3_CTAAGTGTCAAGTCCCG-1-10x | 0.05754897 | 0.15482539 | 0.00028394 |
| 9mo_SIGAE3_CTAAGTGTCAAGTCCCG-1-10x | 0.04948761 | 0.1261226  | 0.00013566 |
| 9mo_SIGAE3_CTAAGTGTCAAGTCCCG-1-10x | 0.15238446 | 0.4924911  | 0.0018651  |
| 9mo_SIGAE3_CTAAGTGTCAAGTCCCG-1-10x | 0.08302914 | 0.24554858 | 0.0033032  |
| 9mo_SIGAE3_CTAAGTGTCAAGTCCCG-1-10x | 0.06193529 | 0.17044307 | 0.00047505 |
| 9mo_SIGAE3_CTAAGTGTCAAGTCCCG-1-10x | 0.0809183  | 0.23803285 | 0.0029431  |
| 9mo_SIGAE3_CTAAGTGTCAAGTCCCG-1-10x | 0.26404604 | 0.8900668  | 0.00076313 |
| 9mo_SIGAE3_CTAAGTGTCAAGTCCCG-1-10x | 0.03753606 | 0.08356858 | 6.07E-05   |
| 9mo_SIGAE3_CTAAGTGTCAAGTCCCG-1-10x | 0.2850015  | 0.9646795  | 0.00075605 |
| 9mo_SIGAE3_CTAAGTGTCAAGTCCCG-1-10x | 0.07311978 | 0.21026592 | 0.0015819  |
| 9mo_SIGAE3_CTAAGTGTCAAGTCCCG-1-10x | 0.08334843 | 0.24668543 | 0.0034742  |
| 9mo_SIGAE3_CTAAGTGTCAAGTCCCG-1-10x | 0.02403465 | 0.03549624 | 3.91E-05   |
| 9mo_SIGAE3_CTAAGTGTCAAGTCCCG-1-10x | 0.0367413  | 0.08073882 | 5.82E-05   |

|                                   |            |            |            |
|-----------------------------------|------------|------------|------------|
| 9mo_SIGAE3_CTCAATTCAATACCTG-1-10x | 0.2655525  | 0.89543056 | 0.00075974 |
| 9mo_SIGAE3_CTCACTGGTCGTTGGC-1-10x | 0.04213064 | 0.09992779 | 7.82E-05   |
| 9mo_SIGAE3_CTCAACAACAGTGG-1-10x   | 0.0825563  | 0.24386503 | 0.0033032  |
| 9mo_SIGAE3_CTCAGAATCAAGCCCG-1-10x | 0.19521306 | 0.64498407 | 0.0012511  |
| 9mo_SIGAE3_CTCAGTCAGACATGCG-1-10x | 0.03233822 | 0.06506146 | 4.83E-05   |
| 9mo_SIGAE3_CTCAGTCCAAGAGGTC-1-10x | 0.08434462 | 0.2502324  | 0.0036353  |
| 9mo_SIGAE3_CTCAGTCGTGTGCTG-1-10x  | 0.10133403 | 0.3107239  | 0.0040036  |
| 9mo_SIGAE3_CTCAGTCTCGAACACT-1-10x | 0.07485095 | 0.2164298  | 0.001885   |
| 9mo_SIGAE3_CTCATGCCAATGGCCC-1-10x | 0.2637135  | 0.88888276 | 0.00076313 |
| 9mo_SIGAE3_CTCATGCCACTTGTCC-1-10x | 0.05315394 | 0.1391767  | 0.00019264 |
| 9mo_SIGAE3_CTCATGCGTACATTGC-1-10x | 0.0397328  | 0.09139016 | 6.67E-05   |
| 9mo_SIGAE3_CTCATGCGTGTCATGT-1-10x | 0.0860463  | 0.25629133 | 0.0039187  |
| 9mo_SIGAE3_CTCATTAGTGGGACAT-1-10x | 0.05809869 | 0.1567827  | 0.00031414 |
| 9mo_SIGAE3_CTCCAACAGCTGTGCC-1-10x | 0.07561094 | 0.2191358  | 0.0020486  |
| 9mo_SIGAE3_CTCCAACTCATTCACT-1-10x | 0.01650539 | 0.00868799 | 3.38E-05   |
| 9mo_SIGAE3_CTCCAACTCTGAATCG-1-10x | 0.25026748 | 0.8410076  | 0.00081397 |
| 9mo_SIGAE3_CTCCACAGTACTCCCT-1-10x | 0.08474489 | 0.25165758 | 0.0036353  |
| 9mo_SIGAE3_CTCCACAGTCAAGTTC-1-10x | 0.267099   | 0.90093696 | 0.00075831 |
| 9mo_SIGAE3_CTCCATGCAAGTGGCA-1-10x | 0.08003358 | 0.23488277 | 0.0027593  |
| 9mo_SIGAE3_CTCCATGCATCCCACT-1-10x | 0.11970842 | 0.37614667 | 0.0023317  |
| 9mo_SIGAE3_CTCCCAACACAACGTT-1-10x | 0.173572   | 0.5679302  | 0.0015922  |
| 9mo_SIGAE3_CTCCCAACAGAGGCTA-1-10x | 0.14772674 | 0.47590712 | 0.0018716  |
| 9mo_SIGAE3_CTCCCAATCACGACTA-1-10x | 0.2677788  | 0.90335745 | 0.00075705 |
| 9mo_SIGAE3_CTCCCAATCGCCATAA-1-10x | 0.10439753 | 0.3216316  | 0.0037215  |
| 9mo_SIGAE3_CTCCCTCAGACAACAT-1-10x | 0.02605757 | 0.04269895 | 4.09E-05   |
| 9mo_SIGAE3_CTCCCTCAGTATGAAC-1-10x | 0.08535134 | 0.25381687 | 0.0037839  |
| 9mo_SIGAE3_CTCCCTCGTATGAAGT-1-10x | 0.03139052 | 0.06168713 | 4.68E-05   |
| 9mo_SIGAE3_CTCCGATAGCAGCAGT-1-10x | 0.08245    | 0.24348652 | 0.0033032  |
| 9mo_SIGAE3_CTCCGATGTTGCTAGT-1-10x | 0.2938398  | 0.9961487  | 0.000766   |
| 9mo_SIGAE3_CTCCTCCAGAGGACTC-1-10x | 0.25654355 | 0.86335385 | 0.00078463 |
| 9mo_SIGAE3_CTCCTCCATGCGTGC-1-10x  | 0.02022935 | 0.02194733 | 3.62E-05   |
| 9mo_SIGAE3_CTCCTTTAGGAGTACC-1-10x | 0.01853586 | 0.01591759 | 3.49E-05   |
| 9mo_SIGAE3_CTCCTTTACGCGTGT-1-10x  | 0.10859797 | 0.3365875  | 0.0032165  |
| 9mo_SIGAE3_CTCCTTTGTAGCTTTG-1-10x | 0.02624652 | 0.04337171 | 4.09E-05   |
| 9mo_SIGAE3_CTCGAGGGTCTACGTA-1-10x | 0.02907993 | 0.05346017 | 4.42E-05   |
| 9mo_SIGAE3_CTCGAGGTCCCGAAAT-1-10x | 0.04633989 | 0.11491498 | 0.00010046 |
| 9mo_SIGAE3_CTCTCAGAGAACCCGA-1-10x | 0.22713506 | 0.7586437  | 0.00096676 |
| 9mo_SIGAE3_CTCTCAGCATCGGAAG-1-10x | 0.17280486 | 0.5651988  | 0.0016089  |
| 9mo_SIGAE3_CTCTCAGGTGTGAATA-1-10x | 0.03422722 | 0.07178732 | 5.17E-05   |
| 9mo_SIGAE3_CTCTGGTGTGGAATGC-1-10x | 0.08837459 | 0.26458126 | 0.0041422  |
| 9mo_SIGAE3_CTGAATGAGACGGAAA-1-10x | 0.12635855 | 0.39982477 | 0.0020256  |



|                                    |            |            |            |
|------------------------------------|------------|------------|------------|
| 9mo_SIGAE3_CTGAATGCATGGGCAA-1-10x  | 0.03269078 | 0.06631676 | 5.00E-05   |
| 9mo_SIGAE3_CTGAATGTCATGCGGC-1-10x  | 0.19660586 | 0.6499432  | 0.00124    |
| 9mo_SIGAE3_CTGAATGTCTTGCGAGA-1-10x | 0.2891855  | 0.9795768  | 0.0007606  |
| 9mo_SIGAE3_CTGAGCGGTCATAACC-1-10x  | 0.09020668 | 0.2711045  | 0.0042999  |
| 9mo_SIGAE3_CTGATCCAGGATACAT-1-10x  | 0.08000744 | 0.2347897  | 0.0027593  |
| 9mo_SIGAE3_CTGATCCCATAACGGG-1-10x  | 0.29125112 | 0.9869316  | 0.00076269 |
| 9mo_SIGAE3_CTGATCCCATTCTTCA-1-10x  | 0.04757221 | 0.11930272 | 0.00011598 |
| 9mo_SIGAE3_CTGCAGGCATCGAGCC-1-10x  | 0.04085063 | 0.09537026 | 7.40E-05   |
| 9mo_SIGAE3_CTGCAGGGTACGAAAT-1-10x  | 0.20104414 | 0.6657459  | 0.0011888  |
| 9mo_SIGAE3_CTGCATCAGTATAGGT-1-10x  | 0.05223973 | 0.13592163 | 0.00017575 |
| 9mo_SIGAE3_CTGCATCGTGTATCCA-1-10x  | 0.0295828  | 0.05525068 | 4.55E-05   |
| 9mo_SIGAE3_CTGCCATAGCCGATCC-1-10x  | 0.08122999 | 0.23914264 | 0.0031253  |
| 9mo_SIGAE3_CTGCTCAAGCTTCGTA-1-10x  | 0.05657436 | 0.15135525 | 0.000257   |
| 9mo_SIGAE3_CTGCTCAGTCATCGCG-1-10x  | 0.0752428  | 0.217825   | 0.001885   |
| 9mo_SIGAE3_CTGCTCAGTTGCGGAA-1-10x  | 0.16552961 | 0.5392949  | 0.0017353  |
| 9mo_SIGAE3_CTGCTCATCAACTTTC-1-10x  | 0.27440822 | 0.9269617  | 0.00075233 |
| 9mo_SIGAE3_CTGGACGGTCAAGCCC-1-10x  | 0.17712012 | 0.5805634  | 0.0015248  |
| 9mo_SIGAE3_CTGGCAGAGCGAATGC-1-10x  | 0.10057867 | 0.30803442 | 0.0040879  |
| 9mo_SIGAE3_CTGGCAGGTAAGTACT-1-10x  | 0.09537835 | 0.28951845 | 0.0043808  |
| 9mo_SIGAE3_CTGGCAGGTCTTGTA-1-10x   | 0.21945785 | 0.73130864 | 0.0010253  |
| 9mo_SIGAE3_CTGGCAGTCCATCAGA-1-10x  | 0.11988068 | 0.37676004 | 0.0022788  |
| 9mo_SIGAE3_CTGGCAGTCCTGGGAC-1-10x  | 0.27170062 | 0.9173212  | 0.00075352 |
| 9mo_SIGAE3_CTGGCAGTCGGCTGTG-1-10x  | 0.01583155 | 0.00628878 | 3.33E-05   |
| 9mo_SIGAE3_CTGGTCTGTGGTCTCG-1-10x  | 0.14406474 | 0.4628684  | 0.0018716  |
| 9mo_SIGAE3_CTGTAGAAGGTCGACA-1-10x  | 0.04376723 | 0.10575491 | 8.81E-05   |
| 9mo_SIGAE3_CTGTATTAGCAAATCA-1-10x  | 0.17334639 | 0.56712687 | 0.0015922  |
| 9mo_SIGAE3_CTGTATTAGGAAGTCTG-1-10x | 0.28480005 | 0.9639623  | 0.00075605 |
| 9mo_SIGAE3_CTGTATTAGTAGCAAT-1-10x  | 0.09302756 | 0.28114837 | 0.0044107  |
| 9mo_SIGAE3_CTGTTCGTAGCTAGAAT-1-10x | 0.25957093 | 0.87413293 | 0.00077499 |
| 9mo_SIGAE3_CTGTTCGTAGTCATGGG-1-10x | 0.19027007 | 0.62738436 | 0.0013113  |
| 9mo_SIGAE3_CTGTTCGTGTCTGTCCT-1-10x | 0.03329312 | 0.06846143 | 5.00E-05   |
| 9mo_SIGAE3_CTGTGAACAGAACCGA-1-10x  | 0.02566256 | 0.04129251 | 4.00E-05   |
| 9mo_SIGAE3_CTGTGAAGTCCGGTCA-1-10x  | 0.2888762  | 0.97847563 | 0.0007606  |
| 9mo_SIGAE3_CTTACCGGTATGAAAC-1-10x  | 0.25727868 | 0.8659713  | 0.00078121 |
| 9mo_SIGAE3_CTTACCGGTGGAAGTC-1-10x  | 0.09303597 | 0.2811783  | 0.0044107  |
| 9mo_SIGAE3_CTTACCGGTTCGGACC-1-10x  | 0.2168862  | 0.7221522  | 0.0010475  |
| 9mo_SIGAE3_CTTAGGAAGAGTCTTC-1-10x  | 0.04599973 | 0.11370385 | 0.00010046 |
| 9mo_SIGAE3_CTTAGGAAGTTGCTGT-1-10x  | 0.08570516 | 0.25507668 | 0.0037839  |
| 9mo_SIGAE3_CTTAGGAGTCTAGATC-1-10x  | 0.08603229 | 0.2562414  | 0.0039187  |
| 9mo_SIGAE3_CTTCAATAGGGTTGCA-1-10x  | 0.04199662 | 0.09945061 | 7.82E-05   |
| 9mo_SIGAE3_CTTCCGAGTTGGTAGG-1-10x  | 0.05548132 | 0.14746343 | 0.000233   |

|                                    |            |            |            |
|------------------------------------|------------|------------|------------|
| 9mo_SIGAE3_CTTCCGATCGTTGCCT-1-10x  | 0.08716091 | 0.26025993 | 0.0040384  |
| 9mo_SIGAE3_CTTCTTGTTGCTCAA-1-10x   | 0.23690075 | 0.79341483 | 0.00089602 |
| 9mo_SIGAE3_CTTCTTTCTCTATGT-1-10x   | 0.18472628 | 0.60764545 | 0.0013959  |
| 9mo_SIGAE3_CTTCTGGTAGAGTGACC-1-10x | 0.12917443 | 0.4098508  | 0.0019639  |
| 9mo_SIGAE3_CTTCTGGTAGCACACCC-1-10x | 0.2299822  | 0.76878107 | 0.00094498 |
| 9mo_SIGAE3_CTTCTGGTCATACAGGG-1-10x | 0.05179743 | 0.13434678 | 0.00016076 |
| 9mo_SIGAE3_CTTCTAACACACGGTC-1-10x  | 0.1577607  | 0.5116334  | 0.0018302  |
| 9mo_SIGAE3_CTTCTAACAGTGCGCT-1-10x  | 0.03420427 | 0.0717056  | 5.17E-05   |
| 9mo_SIGAE3_CTTCTAATCACGGGCT-1-10x  | 0.03973948 | 0.09141394 | 6.67E-05   |
| 9mo_SIGAE3_CTTCTAATCCTCATAT-1-10x  | 0.10239897 | 0.31451568 | 0.0039137  |
| 9mo_SIGAE3_CTTCTCTAGTATGGAT-1-10x  | 0.14930674 | 0.48153275 | 0.0018705  |
| 9mo_SIGAE3_CTTCTCTTCTTGATG-1-10x   | 0.29008773 | 0.9827893  | 0.00076163 |
| 9mo_SIGAE3_CTTGAGACATCATCTT-1-10x  | 0.01621346 | 0.00764858 | 3.33E-05   |
| 9mo_SIGAE3_CTTGAGATCGTTGCCT-1-10x  | 0.20837632 | 0.6918524  | 0.0011177  |
| 9mo_SIGAE3_CTTGAGATCTATCGGA-1-10x  | 0.049394   | 0.12578927 | 0.00013566 |
| 9mo_SIGAE3_CTTGATTTCTAACAG-1-10x   | 0.05386128 | 0.14169523 | 0.00019264 |
| 9mo_SIGAE3_CTTGATTTCTGCGAC-1-10x   | 0.04790206 | 0.12047716 | 0.00011598 |
| 9mo_SIGAE3_CTTTCGGAGCGATTCT-1-10x  | 0.07919589 | 0.23190013 | 0.002576   |
| 9mo_SIGAE3_CTTTCGGGTGACTATC-1-10x  | 0.20102893 | 0.66569173 | 0.0011888  |
| 9mo_SIGAE3_CTTTCGGGTGGCTGCT-1-10x  | 0.08619665 | 0.25682664 | 0.0039187  |
| 9mo_SIGAE3_CTTTCGGTCAAACCCA-1-10x  | 0.08038265 | 0.23612566 | 0.0029431  |
| 9mo_SIGAE3_GAAACCTAGGAAAGTG-1-10x  | 0.05439257 | 0.14358689 | 0.00021164 |
| 9mo_SIGAE3_GAAACCTCAAAGCAAT-1-10x  | 0.03081136 | 0.059625   | 4.68E-05   |
| 9mo_SIGAE3_GAAACCTCAGCCTATA-1-10x  | 0.09025589 | 0.27127975 | 0.0042999  |
| 9mo_SIGAE3_GAAACCTGTCTACAAC-1-10x  | 0.16882646 | 0.5510335  | 0.0016744  |
| 9mo_SIGAE3_GAAACCTCTTTTCAGT-1-10x  | 0.06711171 | 0.18887392 | 0.00079936 |
| 9mo_SIGAE3_GAACACTAGTAGACCG-1-10x  | 0.04266442 | 0.10182834 | 7.82E-05   |
| 9mo_SIGAE3_GAACACTTCTCAATCT-1-10x  | 0.06008231 | 0.16384546 | 0.00038577 |
| 9mo_SIGAE3_GAACGTTTCAGTGTATC-1-10x | 0.19631733 | 0.6489159  | 0.00124    |
| 9mo_SIGAE3_GAACGTTGTGGAAATT-1-10x  | 0.05910287 | 0.16035813 | 0.00034795 |
| 9mo_SIGAE3_GAAGAATCAACGACTT-1-10x  | 0.04482685 | 0.10952775 | 9.39E-05   |
| 9mo_SIGAE3_GAAGAATGTCCATCTC-1-10x  | 0.12686107 | 0.40161398 | 0.0020256  |
| 9mo_SIGAE3_GAAGAATGTGTTGATC-1-10x  | 0.04359946 | 0.10515756 | 8.29E-05   |
| 9mo_SIGAE3_GAAGCCCAGAACCCGA-1-10x  | 0.02093083 | 0.02444497 | 3.62E-05   |
| 9mo_SIGAE3_GAAGCCCGTGATAGAT-1-10x  | 0.10830808 | 0.33555532 | 0.0033168  |
| 9mo_SIGAE3_GAAGCGAAGTCCTGTA-1-10x  | 0.06629951 | 0.18598205 | 0.00079936 |
| 9mo_SIGAE3_GAAGCGACAAGTGATA-1-10x  | 0.03544527 | 0.07612423 | 5.58E-05   |
| 9mo_SIGAE3_GAAGGACGTGGTAATA-1-10x  | 0.23805216 | 0.7975145  | 0.00088935 |
| 9mo_SIGAE3_GAAGGGTAGAGGTGCT-1-10x  | 0.07936467 | 0.2325011  | 0.0027593  |
| 9mo_SIGAE3_GAAGTAATCATAGACC-1-10x  | 0.21434823 | 0.71311563 | 0.0010701  |
| 9mo_SIGAE3_GAATAGAGTCGCATGC-1-10x  | 0.01597002 | 0.0067818  | 3.33E-05   |

|                                   |            |            |            |
|-----------------------------------|------------|------------|------------|
| 9mo_SIGAE3_GAATAGATCACATACG-1-10x | 0.18167678 | 0.5967876  | 0.0014587  |
| 9mo_SIGAE3_GAATCACAGTATTCCG-1-10x | 0.08062881 | 0.23700212 | 0.0029431  |
| 9mo_SIGAE3_GACACGCCATGTGCCG-1-10x | 0.05183902 | 0.13449489 | 0.00016076 |
| 9mo_SIGAE3_GACACGCGTAGCTTTG-1-10x | 0.15045887 | 0.48563495 | 0.0018694  |
| 9mo_SIGAE3_GACATCAAGTCGGCCT-1-10x | 0.0798913  | 0.23437618 | 0.0027593  |
| 9mo_SIGAE3_GACATCAGTTACCTTT-1-10x | 0.27032685 | 0.91242987 | 0.00075418 |
| 9mo_SIGAE3_GACATCAGTTAGAAAC-1-10x | 0.05056414 | 0.1299556  | 0.00014746 |
| 9mo_SIGAE3_GACCAATCAGGCATTT-1-10x | 0.22799909 | 0.7617201  | 0.00095947 |
| 9mo_SIGAE3_GACCCAGAGCCTCGTG-1-10x | 0.14982979 | 0.48339507 | 0.0018694  |
| 9mo_SIGAE3_GACCCAGCATCGATCA-1-10x | 0.07527785 | 0.21794981 | 0.001885   |
| 9mo_SIGAE3_GACCCTTAGAGGCGTT-1-10x | 0.18575518 | 0.6113089  | 0.0013809  |
| 9mo_SIGAE3_GACCGTGAGTCAGGGT-1-10x | 0.05664777 | 0.15161663 | 0.000257   |
| 9mo_SIGAE3_GACCGTGCAGGGAATC-1-10x | 0.2803638  | 0.94816685 | 0.00075348 |
| 9mo_SIGAE3_GACCGTGGTATCGTAC-1-10x | 0.23558743 | 0.7887387  | 0.00090278 |
| 9mo_SIGAE3_GACCGTGGTTCACGAT-1-10x | 0.19937074 | 0.65978765 | 0.0012085  |
| 9mo_SIGAE3_GACCTTCAGGACAGTC-1-10x | 0.05426295 | 0.14312537 | 0.00021164 |
| 9mo_SIGAE3_GACCTTCAGTAAACAC-1-10x | 0.03471213 | 0.07351387 | 5.37E-05   |
| 9mo_SIGAE3_GACCTTCGTTACGGAG-1-10x | 0.08160373 | 0.24047334 | 0.0031253  |
| 9mo_SIGAE3_GACGCTGAGCATTGTC-1-10x | 0.04710695 | 0.11764614 | 0.00010777 |
| 9mo_SIGAE3_GACGCTGGTCCCGCAA-1-10x | 0.08641629 | 0.25760868 | 0.0039187  |
| 9mo_SIGAE3_GACGTTACAGCGTATT-1-10x | 0.26783043 | 0.90354127 | 0.00075705 |
| 9mo_SIGAE3_GACTCAATCGACGAGA-1-10x | 0.11052646 | 0.34345394 | 0.0030221  |
| 9mo_SIGAE3_GACTCTCTCACTCTTA-1-10x | 0.15112415 | 0.4880037  | 0.0018676  |
| 9mo_SIGAE3_GACTCTCTCGTCTACC-1-10x | 0.05997641 | 0.16346839 | 0.00038577 |
| 9mo_SIGAE3_GACTCTCTCTACCAGA-1-10x | 0.14968297 | 0.4828723  | 0.0018705  |
| 9mo_SIGAE3_GACTGATGTTGTGTAC-1-10x | 0.10120016 | 0.31024727 | 0.0040036  |
| 9mo_SIGAE3_GACTTCCGTGATGTAA-1-10x | 0.10076328 | 0.3086917  | 0.0040879  |
| 9mo_SIGAE3_GAGAAATCATGCGGTC-1-10x | 0.0190943  | 0.01790592 | 3.49E-05   |
| 9mo_SIGAE3_GAGAAATGTATCGGTT-1-10x | 0.08212384 | 0.24232523 | 0.0031253  |
| 9mo_SIGAE3_GAGACCCTCGGTGTAT-1-10x | 0.03759366 | 0.08377367 | 6.07E-05   |
| 9mo_SIGAE3_GAGACTTGTCAGGTAG-1-10x | 0.09302465 | 0.281138   | 0.0044107  |
| 9mo_SIGAE3_GAGAGGTCAGAAGCTG-1-10x | 0.24725974 | 0.8302984  | 0.0008292  |
| 9mo_SIGAE3_GAGAGGTCAGCACCCA-1-10x | 0.09109156 | 0.27425516 | 0.0043535  |
| 9mo_SIGAE3_GAGAGGTCATAATGCC-1-10x | 0.20077522 | 0.66478837 | 0.0011888  |
| 9mo_SIGAE3_GAGAGGTCATTCTCTA-1-10x | 0.06059148 | 0.16565838 | 0.00042799 |
| 9mo_SIGAE3_GAGAGGTGTGATACCT-1-10x | 0.12982513 | 0.41216767 | 0.0019639  |
| 9mo_SIGAE3_GAGATGGGTGACTCTA-1-10x | 0.24438412 | 0.8200597  | 0.00084583 |
| 9mo_SIGAE3_GAGCTGCCAAGGTCTT-1-10x | 0.10458109 | 0.3222852  | 0.0037215  |
| 9mo_SIGAE3_GAGCTGCTCACGAACT-1-10x | 0.1635835  | 0.53236574 | 0.001763   |
| 9mo_SIGAE3_GAGGCAAAGCCGTAAG-1-10x | 0.22495206 | 0.750871   | 0.00098137 |
| 9mo_SIGAE3_GAGGCAACAAAGGGTC-1-10x | 0.10214292 | 0.31360397 | 0.0039137  |

|                                    |            |            |            |
|------------------------------------|------------|------------|------------|
| 9mo_SIGAE3_GAGGCCTTCAGAATAG-1-10x  | 0.07024265 | 0.20002177 | 0.0011935  |
| 9mo_SIGAE3_GAGGGATCATGACGGA-1-10x  | 0.28545293 | 0.9662869  | 0.00075686 |
| 9mo_SIGAE3_GAGGGATGTGCGGTAA-1-10x  | 0.09587453 | 0.29128516 | 0.0043808  |
| 9mo_SIGAE3_GAGGGATTCAATCTCT-1-10x  | 0.05064116 | 0.13022985 | 0.00014746 |
| 9mo_SIGAE3_GAGGGATTCCACGTCT-1-10x  | 0.08829939 | 0.26431355 | 0.0041422  |
| 9mo_SIGAE3_GAGGGTAAGTAACGTA-1-10x  | 0.05134181 | 0.13272454 | 0.00016076 |
| 9mo_SIGAE3_GAGGGTACAGAGGCAT-1-10x  | 0.06454936 | 0.17975056 | 0.00064991 |
| 9mo_SIGAE3_GAGTCATAGCCTCAAT-1-10x  | 0.09118795 | 0.2745984  | 0.0043535  |
| 9mo_SIGAE3_GAGTCATCACTGAATC-1-10x  | 0.21378566 | 0.7111126  | 0.0010701  |
| 9mo_SIGAE3_GAGTCATCAGGCACAA-1-10x  | 0.08544148 | 0.2541378  | 0.0037839  |
| 9mo_SIGAE3_GAGTCATGTTGGCCTG-1-10x  | 0.28278327 | 0.95678145 | 0.00075462 |
| 9mo_SIGAE3_GAGTCTAGTGCAGGAT-1-10x  | 0.2466289  | 0.8280523  | 0.0008292  |
| 9mo_SIGAE3_GAGTCTATCCGTGTAA-1-10x  | 0.02581038 | 0.0418188  | 4.09E-05   |
| 9mo_SIGAE3_GAGTCTATCTAAGCCA-1-10x  | 0.01580905 | 0.00620865 | 3.33E-05   |
| 9mo_SIGAE3_GAGTGAGTCAATGTTCG-1-10x | 0.10442682 | 0.32173592 | 0.0037215  |
| 9mo_SIGAE3_GAGTGAGTCGGACTGC-1-10x  | 0.03804864 | 0.08539367 | 6.36E-05   |
| 9mo_SIGAE3_GAGTGTTTCCCTCGAT-1-10x  | 0.03237272 | 0.06518432 | 4.83E-05   |
| 9mo_SIGAE3_GAGTTACCAGATACCT-1-10x  | 0.24551158 | 0.82407403 | 0.00084014 |
| 9mo_SIGAE3_GAGTTGTCAAGTGGAC-1-10x  | 0.02095924 | 0.02454614 | 3.62E-05   |
| 9mo_SIGAE3_GAGTTGTCAGCAGTCC-1-10x  | 0.11849147 | 0.37181368 | 0.0023898  |
| 9mo_SIGAE3_GAGTTTGAGATTGCGG-1-10x  | 0.23737027 | 0.79508656 | 0.00088935 |
| 9mo_SIGAE3_GATAGAATCCACTAGA-1-10x  | 0.05393154 | 0.14194539 | 0.00019264 |
| 9mo_SIGAE3_GATAGCTAGAATCGAT-1-10x  | 0.0556314  | 0.14799781 | 0.000233   |
| 9mo_SIGAE3_GATAGCTAGAATTCAG-1-10x  | 0.15871106 | 0.5150172  | 0.0018209  |
| 9mo_SIGAE3_GATAGCTAGGAAGTCC-1-10x  | 0.09022647 | 0.271175   | 0.0042999  |
| 9mo_SIGAE3_GATAGCTATTAAGCC-1-10x   | 0.26013544 | 0.8761429  | 0.00077221 |
| 9mo_SIGAE3_GATCACATCACTCACC-1-10x  | 0.23622109 | 0.7909949  | 0.00089602 |
| 9mo_SIGAE3_GATCACATCCTAGCTC-1-10x  | 0.09493181 | 0.28792855 | 0.0044051  |
| 9mo_SIGAE3_GATCAGTAGCGGGTAT-1-10x  | 0.092543   | 0.2794231  | 0.0044107  |
| 9mo_SIGAE3_GATCAGTGTCAGCCA-1-10x   | 0.10351893 | 0.31850332 | 0.0038193  |
| 9mo_SIGAE3_GATCAGTTCAAACCTG-1-10x  | 0.24363439 | 0.8173902  | 0.00085167 |
| 9mo_SIGAE3_GATCAGTTCATCTACT-1-10x  | 0.02357948 | 0.0338756  | 3.83E-05   |
| 9mo_SIGAE3_GATCATGCAAGTGATA-1-10x  | 0.21270633 | 0.7072696  | 0.0010856  |
| 9mo_SIGAE3_GATCATGGTACCGTCG-1-10x  | 0.04205086 | 0.09964372 | 7.82E-05   |
| 9mo_SIGAE3_GATGAGGGTACGCTAT-1-10x  | 0.08419925 | 0.2497148  | 0.0036353  |
| 9mo_SIGAE3_GATGATCAGCTCCATA-1-10x  | 0.07388943 | 0.2130063  | 0.0017292  |
| 9mo_SIGAE3_GATGCTAAGAATACAC-1-10x  | 0.04746158 | 0.11890881 | 0.00011598 |
| 9mo_SIGAE3_GATGCTACACTAGTAC-1-10x  | 0.01625054 | 0.00778059 | 3.33E-05   |
| 9mo_SIGAE3_GATGGAGAGTCACGCC-1-10x  | 0.03163563 | 0.06255985 | 4.83E-05   |
| 9mo_SIGAE3_GATGGAGGTATAGGGC-1-10x  | 0.08734434 | 0.26091304 | 0.0040384  |
| 9mo_SIGAE3_GATGGAGGTGGGCTTC-1-10x  | 0.2608776  | 0.87878543 | 0.00076963 |

|                                     |            |            |            |
|-------------------------------------|------------|------------|------------|
| 9mo_SIGAE3_GATGGAGGTTTCGCTC-1-10x   | 0.07154878 | 0.20467228 | 0.0013138  |
| 9mo_SIGAE3_GATGTTGAGCGCCCAT-1-10x   | 0.05266078 | 0.1374208  | 0.00017575 |
| 9mo_SIGAE3_GATGTTGTCCATAAG-1-10x    | 0.05501516 | 0.14580366 | 0.000233   |
| 9mo_SIGAE3_GATTTCGATCCATTTCA-1-10x  | 0.15694413 | 0.50872594 | 0.0018385  |
| 9mo_SIGAE3_GATTTCGATCGGCCAAC-1-10x  | 0.03111289 | 0.06069863 | 4.68E-05   |
| 9mo_SIGAE3_GATTCTTAGAGCATCG-1-10x   | 0.14248805 | 0.4572545  | 0.0018718  |
| 9mo_SIGAE3_GATTCTTCAATGTGGG-1-10x   | 0.20082776 | 0.66497546 | 0.0011888  |
| 9mo_SIGAE3_GATTCTTTCTTGAGCA-1-10x   | 0.2588249  | 0.8714767  | 0.00077499 |
| 9mo_SIGAE3_GATTGGTAGACATACA-1-10x   | 0.03599985 | 0.07809885 | 5.58E-05   |
| 9mo_SIGAE3_GATTGGTTCATTCTTG-1-10x   | 0.08124851 | 0.23920856 | 0.0031253  |
| 9mo_SIGAE3_GATTTCTAGTGTAGTA-1-10x   | 0.26722988 | 0.90140295 | 0.00075705 |
| 9mo_SIGAE3_GCAACATAGACGAGCT-1-10x   | 0.28028744 | 0.947895   | 0.00075303 |
| 9mo_SIGAE3_GCAACATAGATGGTTCG-1-10x  | 0.07360524 | 0.21199441 | 0.0015819  |
| 9mo_SIGAE3_GCAACATAGTAATTGG-1-10x   | 0.04733174 | 0.1184465  | 0.00010777 |
| 9mo_SIGAE3_GCAACATAGTCACGAG-1-10x   | 0.03364106 | 0.06970029 | 5.17E-05   |
| 9mo_SIGAE3_GCAACATGTTTCGGTTCG-1-10x | 0.25761446 | 0.8671669  | 0.00078121 |
| 9mo_SIGAE3_GCAACATTCAAGCCTA-1-10x   | 0.02101811 | 0.02475573 | 3.62E-05   |
| 9mo_SIGAE3_GCAACCGGTCAGTTTG-1-10x   | 0.17237142 | 0.56365544 | 0.0016089  |
| 9mo_SIGAE3_GCACATAGTCTGATCA-1-10x   | 0.03486213 | 0.07404794 | 5.37E-05   |
| 9mo_SIGAE3_GCACGGTCAGAGGACT-1-10x   | 0.25394288 | 0.854094   | 0.00079608 |
| 9mo_SIGAE3_GCACGGTTCAAAGCCT-1-10x   | 0.01721806 | 0.01122551 | 3.38E-05   |
| 9mo_SIGAE3_GCACGGTTCGTGGTAT-1-10x   | 0.21554978 | 0.7173938  | 0.001055   |
| 9mo_SIGAE3_GCACGTGTCGACCATA-1-10x   | 0.02920072 | 0.05389025 | 4.42E-05   |
| 9mo_SIGAE3_GCACTAAAGTACCCTA-1-10x   | 0.15394029 | 0.4980307  | 0.0018575  |
| 9mo_SIGAE3_GCACTAATCGCGGACT-1-10x   | 0.16007076 | 0.5198585  | 0.0018109  |
| 9mo_SIGAE3_GCAGCTGAGAGTCACG-1-10x   | 0.12272555 | 0.3868893  | 0.0021479  |
| 9mo_SIGAE3_GCAGCTGGTGGAATT-1-10x    | 0.01719794 | 0.01115385 | 3.38E-05   |
| 9mo_SIGAE3_GCAGCTGGTTGGGAAC-1-10x   | 0.0171847  | 0.01110671 | 3.38E-05   |
| 9mo_SIGAE3_GCAGGCTCACCGTACG-1-10x   | 0.27390167 | 0.92515814 | 0.00075233 |
| 9mo_SIGAE3_GCAGGCTCAGAGATTA-1-10x   | 0.07708036 | 0.22436772 | 0.0022191  |
| 9mo_SIGAE3_GCAGGCTGTAGATTAG-1-10x   | 0.22773543 | 0.76078135 | 0.00096676 |
| 9mo_SIGAE3_GCAGTTAGTCTACAAC-1-10x   | 0.02029095 | 0.02216667 | 3.62E-05   |
| 9mo_SIGAE3_GCATCGGGTCCTCAGG-1-10x   | 0.08080178 | 0.23761797 | 0.0029431  |
| 9mo_SIGAE3_GCCAACGAGTGTAGTA-1-10x   | 0.09632589 | 0.29289222 | 0.0043435  |
| 9mo_SIGAE3_GCCAACGTCCAGCACG-1-10x   | 0.0575241  | 0.15473686 | 0.00028394 |
| 9mo_SIGAE3_GCCAACGTCTCGCCTA-1-10x   | 0.11838368 | 0.37142992 | 0.0023898  |
| 9mo_SIGAE3_GCCAGGTAGGAACGTC-1-10x   | 0.03355227 | 0.06938415 | 5.17E-05   |
| 9mo_SIGAE3_GCCATGGCAAGACTGG-1-10x   | 0.1412003  | 0.45266944 | 0.0018734  |
| 9mo_SIGAE3_GCCATGGCAGGCACAA-1-10x   | 0.01523608 | 0.00416858 | 3.27E-05   |
| 9mo_SIGAE3_GCCATGGGTTGCCAAT-1-10x   | 0.18048175 | 0.59253263 | 0.001475   |
| 9mo_SIGAE3_GCCATTCTCACCTTG-1-10x    | 0.05786047 | 0.1559345  | 0.00031414 |

|                                   |            |            |            |
|-----------------------------------|------------|------------|------------|
| 9mo_SIGAE3_GCCCAGAAGGGTCTTT-1-10x | 0.24936616 | 0.8377985  | 0.00081397 |
| 9mo_SIGAE3_GCCCAGACATCTAGAC-1-10x | 0.07429553 | 0.2144522  | 0.0017292  |
| 9mo_SIGAE3_GCCCAGATCACATCAG-1-10x | 0.07702437 | 0.22416838 | 0.0022191  |
| 9mo_SIGAE3_GCCCGAATCACGACTA-1-10x | 0.07359324 | 0.2119517  | 0.0015819  |
| 9mo_SIGAE3_GCCGATGAGGAAGTAG-1-10x | 0.18522921 | 0.60943615 | 0.0013959  |
| 9mo_SIGAE3_GCCGATGAGGACCCAA-1-10x | 0.03103439 | 0.06041911 | 4.68E-05   |
| 9mo_SIGAE3_GCCGATGTCCGCCTAT-1-10x | 0.05798535 | 0.15637913 | 0.00031414 |
| 9mo_SIGAE3_GCCGTGAAGTCTTCGA-1-10x | 0.03345924 | 0.06905291 | 5.17E-05   |
| 9mo_SIGAE3_GCCTGTTCACAAATGA-1-10x | 0.09919171 | 0.3030961  | 0.0041652  |
| 9mo_SIGAE3_GCCTGTTCCCGAAAT-1-10x  | 0.01791117 | 0.01369336 | 3.44E-05   |
| 9mo_SIGAE3_GCGATCGCATCGGAAG-1-10x | 0.03303768 | 0.06755191 | 5.00E-05   |
| 9mo_SIGAE3_GCGATCGGTCTTTCC-1-10x  | 0.08933019 | 0.26798373 | 0.0042295  |
| 9mo_SIGAE3_GCGGAAAAGAAGTCTA-1-10x | 0.08927236 | 0.26777783 | 0.0042295  |
| 9mo_SIGAE3_GCGGAAACAGCACAGA-1-10x | 0.26732248 | 0.9017327  | 0.00075705 |
| 9mo_SIGAE3_GCGGATCTCGAAGTGG-1-10x | 0.1015515  | 0.31149822 | 0.0040036  |
| 9mo_SIGAE3_GCGGATCTCTGCGGGT-1-10x | 0.12443235 | 0.39296642 | 0.0021124  |
| 9mo_SIGAE3_GCGTGCAAGGTAGGCT-1-10x | 0.04462561 | 0.10881122 | 9.39E-05   |
| 9mo_SIGAE3_GCGTGCAACACAAA-1-10x   | 0.06324282 | 0.17509857 | 0.00052741 |
| 9mo_SIGAE3_GCGTTTCAGCACGGAT-1-10x | 0.28237078 | 0.9553127  | 0.00075462 |
| 9mo_SIGAE3_GCGTTTCAGCCATTGT-1-10x | 0.03890131 | 0.08842961 | 6.36E-05   |
| 9mo_SIGAE3_GCGTTTCGTGTGTGGA-1-10x | 0.10505165 | 0.32396066 | 0.0036214  |
| 9mo_SIGAE3_GCTACAATCTCTGGTC-1-10x | 0.04514722 | 0.11066844 | 9.39E-05   |
| 9mo_SIGAE3_GCTCAAAGCAAATGT-1-10x  | 0.05172961 | 0.13410532 | 0.00016076 |
| 9mo_SIGAE3_GCTCAAACACTCCCTA-1-10x | 0.0652462  | 0.18223168 | 0.00064991 |
| 9mo_SIGAE3_GCTCAAAGTACGATGG-1-10x | 0.23076792 | 0.7715786  | 0.00093779 |
| 9mo_SIGAE3_GCTCAAATCCGGCTTT-1-10x | 0.26641238 | 0.8984922  | 0.00075831 |
| 9mo_SIGAE3_GCTGCAGAGACCATTC-1-10x | 0.09182881 | 0.27688017 | 0.0043903  |
| 9mo_SIGAE3_GCTGCAGCAGAGTCAG-1-10x | 0.29243076 | 0.9911317  | 0.00076378 |
| 9mo_SIGAE3_GCTGCAGGTAACGCGA-1-10x | 0.05326157 | 0.13955992 | 0.00019264 |
| 9mo_SIGAE3_GCTGCAGGTCCCGTGA-1-10x | 0.08492018 | 0.2522817  | 0.0036353  |
| 9mo_SIGAE3_GCTGCAGTCGCGGTAC-1-10x | 0.27577108 | 0.93181425 | 0.00075214 |
| 9mo_SIGAE3_GCTGGGTAGACTCAA-1-10x  | 0.22294949 | 0.7437408  | 0.0010033  |
| 9mo_SIGAE3_GCTGGGTGTATTCTCT-1-10x | 0.04577687 | 0.11291034 | 0.00010046 |
| 9mo_SIGAE3_GCTTCACAGATTCGAA-1-10x | 0.04558608 | 0.11223103 | 0.00010046 |
| 9mo_SIGAE3_GCTTCACGTATCCTCC-1-10x | 0.17115459 | 0.5593229  | 0.0016421  |
| 9mo_SIGAE3_GCTTCACGTATGGAAT-1-10x | 0.04156039 | 0.0978974  | 7.40E-05   |
| 9mo_SIGAE3_GCTTGGGCAGGGATAC-1-10x | 0.26162896 | 0.88146067 | 0.00076727 |
| 9mo_SIGAE3_GCTTTGAGCACCGAA-1-10x  | 0.26808634 | 0.90445244 | 0.00075705 |
| 9mo_SIGAE3_GCTTTGAGTGATAGT-1-10x  | 0.0469601  | 0.11712329 | 0.00010777 |
| 9mo_SIGAE3_GCTTTGTCGCAATGT-1-10x  | 0.0761806  | 0.22116409 | 0.0020486  |
| 9mo_SIGAE3_GGAACCCAGTTACCA-1-10x  | 0.03382457 | 0.07035369 | 5.17E-05   |

|                                    |            |            |            |
|------------------------------------|------------|------------|------------|
| 9mo_SIGAE3_GGAACCCTCGAGTCCG-1-10x  | 0.15941277 | 0.51751566 | 0.0018109  |
| 9mo_SIGAE3_GGAAGTGAGCAGCAGT-1-10x  | 0.08336085 | 0.24672966 | 0.0034742  |
| 9mo_SIGAE3_GGAAGTGGTTGCTAGT-1-10x  | 0.27476785 | 0.9282422  | 0.00075218 |
| 9mo_SIGAE3_GGAATCTCACATAACC-1-10x  | 0.25379413 | 0.85356444 | 0.00079608 |
| 9mo_SIGAE3_GGAATCTCAGCATGCC-1-10x  | 0.2596572  | 0.87444013 | 0.00077499 |
| 9mo_SIGAE3_GGAATCTGTCTGCATA-1-10x  | 0.08472277 | 0.2515788  | 0.0036353  |
| 9mo_SIGAE3_GGAATCTGTGCAACGA-1-10x  | 0.28033414 | 0.9480612  | 0.00075303 |
| 9mo_SIGAE3_GGAATCTTCCCAACTC-1-10x  | 0.04651757 | 0.11554761 | 0.00010777 |
| 9mo_SIGAE3_GGAATCTTCGTGGCGT-1-10x  | 0.261294   | 0.88026804 | 0.00076963 |
| 9mo_SIGAE3_GGAATGGAGATAGCAT-1-10x  | 0.2043686  | 0.6775828  | 0.0011518  |
| 9mo_SIGAE3_GGAATGGTCCGGCAAC-1-10x  | 0.04145972 | 0.09753896 | 7.40E-05   |
| 9mo_SIGAE3_GGAGAACAGGGCCAAT-1-10x  | 0.05014847 | 0.12847559 | 0.00013566 |
| 9mo_SIGAE3_GGAGAACTCCGCAGTG-1-10x  | 0.13216428 | 0.4204963  | 0.0019219  |
| 9mo_SIGAE3_GGAGATGAGCGGGTAT-1-10x  | 0.27695072 | 0.9360144  | 0.00075222 |
| 9mo_SIGAE3_GGAGATGCAGCGGTTC-1-10x  | 0.09648804 | 0.29346958 | 0.0043435  |
| 9mo_SIGAE3_GGAGATGCATGACGAG-1-10x  | 0.04089379 | 0.09552392 | 7.40E-05   |
| 9mo_SIGAE3_GGAGATGGTCCGAAAG-1-10x  | 0.2709796  | 0.91475403 | 0.00075352 |
| 9mo_SIGAE3_GGAGATGTCTTCCAGC-1-10x  | 0.01927097 | 0.01853497 | 3.55E-05   |
| 9mo_SIGAE3_GGAGCAACAAGCGCAA-1-10x  | 0.13613245 | 0.43462512 | 0.0018891  |
| 9mo_SIGAE3_GGAGCAAGTCTAGATC-1-10x  | 0.04042122 | 0.09384133 | 7.01E-05   |
| 9mo_SIGAE3_GGAGCAATCCTGTAGA-1-10x  | 0.23518145 | 0.7872932  | 0.00090964 |
| 9mo_SIGAE3_GGAGGATAGAGAGCAA-1-10x  | 0.04736831 | 0.11857671 | 0.00010777 |
| 9mo_SIGAE3_GGAGGATCATCCGAGC-1-10x  | 0.03110639 | 0.06067549 | 4.68E-05   |
| 9mo_SIGAE3_GGAGGATTCAAGGCTT-1-10x  | 0.23888183 | 0.80046856 | 0.00088278 |
| 9mo_SIGAE3_GGAGGATTCTTACGC-1-10x   | 0.2722854  | 0.9194034  | 0.000753   |
| 9mo_SIGAE3_GGAGGTAAGTTGTCTGT-1-10x | 0.0820163  | 0.24194232 | 0.0031253  |
| 9mo_SIGAE3_GGATCTAAGTGTAGAT-1-10x  | 0.19872233 | 0.657479   | 0.0012085  |
| 9mo_SIGAE3_GGATGTTTCAGAGCGA-1-10x  | 0.01731547 | 0.01157233 | 3.38E-05   |
| 9mo_SIGAE3_GGCACGTACGGGAGAG-1-10x  | 0.08954518 | 0.2687492  | 0.0042295  |
| 9mo_SIGAE3_GGCACGTTCGGCATT-1-10x   | 0.11660058 | 0.3650811  | 0.0025211  |
| 9mo_SIGAE3_GGCAGTCGTGGCAACA-1-10x  | 0.01757318 | 0.01248993 | 3.44E-05   |
| 9mo_SIGAE3_GGCTGTGTCCAATCTT-1-10x  | 0.2472768  | 0.83035916 | 0.0008292  |
| 9mo_SIGAE3_GGCTGTGTCTGTGCTC-1-10x  | 0.17581074 | 0.5759013  | 0.0015585  |
| 9mo_SIGAE3_GGCTTGTCCTAACAG-1-10x   | 0.26820266 | 0.9048666  | 0.00075594 |
| 9mo_SIGAE3_GGCTTGGTCTGGTGGC-1-10x  | 0.05074859 | 0.13061236 | 0.00014746 |
| 9mo_SIGAE3_GGCTTGGTCTTCCCAG-1-10x  | 0.14640768 | 0.4712105  | 0.0018717  |
| 9mo_SIGAE3_GGCTTTCAGATTAGTG-1-10x  | 0.2619326  | 0.88254184 | 0.00076727 |
| 9mo_SIGAE3_GGCTTTCCAAAGTATG-1-10x  | 0.08850497 | 0.26504552 | 0.0041422  |
| 9mo_SIGAE3_GGCTTTCGTCTCGGT-1-10x   | 0.07869795 | 0.2301272  | 0.002576   |
| 9mo_SIGAE3_GGCTTTCGTTTCGATG-1-10x  | 0.05361129 | 0.14080511 | 0.00019264 |
| 9mo_SIGAE3_GGGAAGTCAAATGATG-1-10x  | 0.09814325 | 0.29936302 | 0.0042345  |

|                                     |            |            |            |
|-------------------------------------|------------|------------|------------|
| 9mo_SIGAE3_GGGAAGTCAGGCGAAT-1-10x   | 0.28336433 | 0.9588503  | 0.00075531 |
| 9mo_SIGAE3_GGGACAAAGGAAGTAG-1-10x   | 0.04650715 | 0.11551053 | 0.00010777 |
| 9mo_SIGAE3_GGGACAACAAGAAACT-1-10x   | 0.1000196  | 0.30604383 | 0.0040879  |
| 9mo_SIGAE3_GGGACCTTCACAATGC-1-10x   | 0.07307918 | 0.21012135 | 0.0015819  |
| 9mo_SIGAE3_GGGACTCTCTCGGTAA-1-10x   | 0.03982993 | 0.09173602 | 6.67E-05   |
| 9mo_SIGAE3_GGGACTCTCTGCAGCG-1-10x   | 0.05327238 | 0.13959841 | 0.00019264 |
| 9mo_SIGAE3_GGGAGATAGTCCGTCG-1-10x   | 0.26907626 | 0.90797704 | 0.00075594 |
| 9mo_SIGAE3_GGGAGTACACTTCTCG-1-10x   | 0.09409405 | 0.28494567 | 0.0044154  |
| 9mo_SIGAE3_GGGAGTACATTGGATC-1-10x   | 0.01592046 | 0.00660534 | 3.33E-05   |
| 9mo_SIGAE3_GGGATCCCAACAAGTA-1-10x   | 0.04014278 | 0.09284992 | 7.01E-05   |
| 9mo_SIGAE3_GGGATCCGTTCAAGGG-1-10x   | 0.18762864 | 0.61797947 | 0.0013519  |
| 9mo_SIGAE3_GGGATCCTCAGTGCGC-1-10x   | 0.19870836 | 0.6574292  | 0.0012085  |
| 9mo_SIGAE3_GGGATGAAGTTCATGC-1-10x   | 0.11545856 | 0.36101487 | 0.002594   |
| 9mo_SIGAE3_GGGATGACATGGCCA-1-10x    | 0.09863275 | 0.30110592 | 0.0042345  |
| 9mo_SIGAE3_GGGATGAGTACGCTAT-1-10x   | 0.05376122 | 0.14133894 | 0.00019264 |
| 9mo_SIGAE3_GGGATGAGTATGAGCG-1-10x   | 0.09028933 | 0.27139878 | 0.0042999  |
| 9mo_SIGAE3_GGGATGATCTTGAACG-1-10x   | 0.11329897 | 0.35332558 | 0.0027534  |
| 9mo_SIGAE3_GGGATGATCTTTGCGC-1-10x   | 0.08179476 | 0.24115354 | 0.0031253  |
| 9mo_SIGAE3_GGGCCATAGAACGCGT-1-10x   | 0.25763935 | 0.86725545 | 0.00078121 |
| 9mo_SIGAE3_GGGCCATAGGGACTGT-1-10x   | 0.19793585 | 0.6546787  | 0.0012187  |
| 9mo_SIGAE3_GGGCCATTCAAGTGTG-1-10x   | 0.07665387 | 0.22284918 | 0.0022191  |
| 9mo_SIGAE3_GGGCTACGTTGACTGT-1-10x   | 0.01898271 | 0.01750861 | 3.49E-05   |
| 9mo_SIGAE3_GGGCTCAAGCAGGTCA-1-10x   | 0.01643427 | 0.00843477 | 3.38E-05   |
| 9mo_SIGAE3_GGGCTCACAAGAAGAACT-1-10x | 0.14197497 | 0.45542768 | 0.0018724  |
| 9mo_SIGAE3_GGGTAGACAGTAACAA-1-10x   | 0.01938183 | 0.01892968 | 3.55E-05   |
| 9mo_SIGAE3_GGGTATTAGCTCTATG-1-10x   | 0.27833804 | 0.940954   | 0.00075239 |
| 9mo_SIGAE3_GGGTATTCAAATCAGA-1-10x   | 0.25748253 | 0.86669713 | 0.00078121 |
| 9mo_SIGAE3_GGGTATTGACACCAGA-1-10x   | 0.03515118 | 0.07507714 | 5.37E-05   |
| 9mo_SIGAE3_GGGTATTGTCATTCCC-1-10x   | 0.03809985 | 0.08557599 | 6.36E-05   |
| 9mo_SIGAE3_GGGTATTTCCGCTTAC-1-10x   | 0.06245925 | 0.17230867 | 0.00052741 |
| 9mo_SIGAE3_GGGTATTTCTGCTTAT-1-10x   | 0.0615505  | 0.169073   | 0.00047505 |
| 9mo_SIGAE3_GGGTCACCAACCGGAA-1-10x   | 0.0432862  | 0.1040422  | 8.29E-05   |
| 9mo_SIGAE3_GGGTCTGCATGGTACT-1-10x   | 0.26971415 | 0.9102483  | 0.00075499 |
| 9mo_SIGAE3_GGGTCTGGTCATCTAG-1-10x   | 0.10394753 | 0.32002938 | 0.0037215  |
| 9mo_SIGAE3_GGGTCTGGTTGCTAGT-1-10x   | 0.11851653 | 0.3719029  | 0.0023898  |
| 9mo_SIGAE3_GGGTCTGTCAACACGT-1-10x   | 0.27939504 | 0.9447175  | 0.00075266 |
| 9mo_SIGAE3_GGGTGAACACCAGACC-1-10x   | 0.02126236 | 0.0256254  | 3.69E-05   |
| 9mo_SIGAE3_GGGTGAAGTCCCGGTA-1-10x   | 0.2520279  | 0.8472757  | 0.00080467 |
| 9mo_SIGAE3_GGGTGTCAGCAGCCTC-1-10x   | 0.08557667 | 0.25461918 | 0.0037839  |
| 9mo_SIGAE3_GGGTGTCAGGACAGTC-1-10x   | 0.25296012 | 0.8505949  | 0.00080028 |
| 9mo_SIGAE3_GGGTGTCAGGCTGAAC-1-10x   | 0.04858242 | 0.1228996  | 0.00012523 |



|                                    |            |            |            |
|------------------------------------|------------|------------|------------|
| 9mo_SIGAE3_GGGTGTCTGTGTTTG-1-10x   | 0.05025128 | 0.12884168 | 0.00014746 |
| 9mo_SIGAE3_GGGTTATAGCTGGTGA-1-10x  | 0.0277149  | 0.04859994 | 4.30E-05   |
| 9mo_SIGAE3_GGGTTATGTACCGGAA-1-10x  | 0.06257137 | 0.17270786 | 0.00052741 |
| 9mo_SIGAE3_GGGTTATTCGGAGATG-1-10x  | 0.27736342 | 0.93748385 | 0.00075222 |
| 9mo_SIGAE3_GGGTTTACTGCGCT-1-10x    | 0.05111048 | 0.13190089 | 0.00014746 |
| 9mo_SIGAE3_GGGTTTAGTATTCCTT-1-10x  | 0.03546391 | 0.0761906  | 5.58E-05   |
| 9mo_SIGAE3_GGGTTTAGTGTGTACT-1-10x  | 0.2720531  | 0.91857624 | 0.000753   |
| 9mo_SIGAE3_GGGTTTATCCGACGGT-1-10x  | 0.2438324  | 0.81809527 | 0.00084583 |
| 9mo_SIGAE3_GGTAAGTAGGGCGAGA-1-10x  | 0.08683848 | 0.2591119  | 0.0039187  |
| 9mo_SIGAE3_GGTAAGTGTACCCAA-1-10x   | 0.03074538 | 0.05939008 | 4.68E-05   |
| 9mo_SIGAE3_GGTAATCCAATTCCT-1-10x   | 0.05040842 | 0.12940118 | 0.00014746 |
| 9mo_SIGAE3_GGTAGAGTCATGCCGG-1-10x  | 0.25768828 | 0.86742973 | 0.00078121 |
| 9mo_SIGAE3_GGTCACGCAAATGCTC-1-10x  | 0.05243558 | 0.13661894 | 0.00017575 |
| 9mo_SIGAE3_GGTCACGCACTTGCGG-1-10x  | 0.27120125 | 0.9155432  | 0.00075352 |
| 9mo_SIGAE3_GGTCACGGTATGACAA-1-10x  | 0.01844245 | 0.01558501 | 3.49E-05   |
| 9mo_SIGAE3_GGTCACGGTCAGGTGA-1-10x  | 0.10809875 | 0.33481    | 0.0033168  |
| 9mo_SIGAE3_GGTCTGGAGCGTCAAG-1-10x  | 0.27126622 | 0.9157745  | 0.00075352 |
| 9mo_SIGAE3_GGTCTGGCATCGATAC-1-10x  | 0.03547473 | 0.07622913 | 5.58E-05   |
| 9mo_SIGAE3_GGTGATTGTGCTCGA-1-10x   | 0.05416047 | 0.1427605  | 0.00021164 |
| 9mo_SIGAE3_GGTGGCTAGTCAGCGA-1-10x  | 0.2100331  | 0.69775146 | 0.0011014  |
| 9mo_SIGAE3_GGTGGCTCAAAGGGTC-1-10x  | 0.02377519 | 0.03457245 | 3.83E-05   |
| 9mo_SIGAE3_GGTGGCTCAATGAACA-1-10x  | 0.08062267 | 0.23698023 | 0.0029431  |
| 9mo_SIGAE3_GGTGGCTGTCGTGATT-1-10x  | 0.05353094 | 0.14051902 | 0.00019264 |
| 9mo_SIGAE3_GGTGTGCGATGACCCG-1-10x  | 0.09105923 | 0.27414006 | 0.0043535  |
| 9mo_SIGAE3_GGTGTGCGTATCGCTA-1-10x  | 0.08230607 | 0.24297407 | 0.0033032  |
| 9mo_SIGAE3_GGTGTGCGTGGAACCA-1-10x  | 0.22662778 | 0.7568375  | 0.00097406 |
| 9mo_SIGAE3_GGTGTGCGTTGGTGTT-1-10x  | 0.09026253 | 0.2713034  | 0.0042999  |
| 9mo_SIGAE3_GGTGTGCGTCAAGGCTT-1-10x | 0.1922631  | 0.6344806  | 0.0012861  |
| 9mo_SIGAE3_GGTGTGCGTCCGAACG-1-10x  | 0.15261915 | 0.49332672 | 0.0018617  |
| 9mo_SIGAE3_GGTGTGCGTCTGGGTC-1-10x  | 0.2057982  | 0.68267286 | 0.001143   |
| 9mo_SIGAE3_GGTGTGCGTCTCATGCC-1-10x | 0.23147275 | 0.7740882  | 0.00093779 |
| 9mo_SIGAE3_GGTGTTACAGTGCCT-1-10x   | 0.10638402 | 0.3287046  | 0.00352    |
| 9mo_SIGAE3_GGTGTTACATGCAGCC-1-10x  | 0.02959147 | 0.05528153 | 4.55E-05   |
| 9mo_SIGAE3_GGTGTTACATGGGCAA-1-10x  | 0.08394185 | 0.24879833 | 0.0034742  |
| 9mo_SIGAE3_GGTGTTAGTTCAAACC-1-10x  | 0.25243288 | 0.84871763 | 0.00080028 |
| 9mo_SIGAE3_GGTGTTATCTGAACGT-1-10x  | 0.05585801 | 0.14880466 | 0.000233   |
| 9mo_SIGAE3_GGTAAACAGGAGCAA-1-10x   | 0.26947922 | 0.9094118  | 0.00075499 |
| 9mo_SIGAE3_GGTAAACAGGTAGATT-1-10x  | 0.21966298 | 0.73203903 | 0.0010253  |
| 9mo_SIGAE3_GGTAAACTCGGATAAA-1-10x  | 0.19141205 | 0.6314504  | 0.0012985  |
| 9mo_SIGAE3_GGTTCTCCACGTAGAG-1-10x  | 0.27113467 | 0.91530615 | 0.00075352 |
| 9mo_SIGAE3_GGTTCTCCATGACAGG-1-10x  | 0.04710751 | 0.11764813 | 0.00010777 |

|                                    |            |            |            |
|------------------------------------|------------|------------|------------|
| 9mo_SIGAE3_GGTTGTATCCTACTGC-1-10x  | 0.02680909 | 0.04537477 | 4.19E-05   |
| 9mo_SIGAE3_GTAACACAGCTCGTGC-1-10x  | 0.28218144 | 0.9546386  | 0.00075401 |
| 9mo_SIGAE3_GTAACACCAAGGTCTT-1-10x  | 0.03840314 | 0.08665585 | 6.36E-05   |
| 9mo_SIGAE3_GTAACACTCTAAACGC-1-10x  | 0.10442519 | 0.3217301  | 0.0037215  |
| 9mo_SIGAE3_GTAACCATCCCGTGTT-1-10x  | 0.11052053 | 0.3434328  | 0.0030221  |
| 9mo_SIGAE3_GTAACCATCGGAGTGA-1-10x  | 0.02073586 | 0.02375078 | 3.62E-05   |
| 9mo_SIGAE3_GTAAGTCAGCCGGAAT-1-10x  | 0.22503108 | 0.7511524  | 0.00098137 |
| 9mo_SIGAE3_GTAAGTCGTAGACAGC-1-10x  | 0.05060527 | 0.13010207 | 0.00014746 |
| 9mo_SIGAE3_GTAAGTCTCCTTATGT-1-10x  | 0.09343839 | 0.28261116 | 0.0044154  |
| 9mo_SIGAE3_GTAATCGCAACCTAAC-1-10x  | 0.2630342  | 0.88646406 | 0.00076511 |
| 9mo_SIGAE3_GTAATCGGTAGGACCA-1-10x  | 0.14476904 | 0.46537608 | 0.0018716  |
| 9mo_SIGAE3_GTAATGCGTACTGAGG-1-10x  | 0.14423881 | 0.4634882  | 0.0018716  |
| 9mo_SIGAE3_GTACAACAGGGATCGT-1-10x  | 0.12972902 | 0.41182545 | 0.0019639  |
| 9mo_SIGAE3_GTACAACGTGAGTCAG-1-10x  | 0.04499921 | 0.11014143 | 9.39E-05   |
| 9mo_SIGAE3_GTACAACGTGGCACTC-1-10x  | 0.23813424 | 0.7978067  | 0.00088278 |
| 9mo_SIGAE3_GTACAACCTCAGCGCGT-1-10x | 0.27099073 | 0.9147936  | 0.00075352 |
| 9mo_SIGAE3_GTACAGTAGCAGGCAT-1-10x  | 0.14319593 | 0.45977494 | 0.0018718  |
| 9mo_SIGAE3_GTACAGTAGGCGATAC-1-10x  | 0.16311955 | 0.5307138  | 0.001763   |
| 9mo_SIGAE3_GTACAGTGTGAGTCGC-1-10x  | 0.04364256 | 0.10531103 | 8.29E-05   |
| 9mo_SIGAE3_GTACAGTGTGCTCAA-1-10x   | 0.08739007 | 0.26107585 | 0.0040384  |
| 9mo_SIGAE3_GTAGAAACAGTAACCT-1-10x  | 0.11482281 | 0.3587513  | 0.0026715  |
| 9mo_SIGAE3_GTAGAGGCACAATGAA-1-10x  | 0.29012492 | 0.9829217  | 0.00076163 |
| 9mo_SIGAE3_GTAGAGGCATAGGCGA-1-10x  | 0.03209035 | 0.06417891 | 4.83E-05   |
| 9mo_SIGAE3_GTAGAGGGTAGTGCGA-1-10x  | 0.28128874 | 0.9514601  | 0.00075348 |
| 9mo_SIGAE3_GTAGATCTCTAACGGT-1-10x  | 0.23692143 | 0.79348844 | 0.00089602 |
| 9mo_SIGAE3_GTAGCTACAAAGTATG-1-10x  | 0.01537405 | 0.00465983 | 3.27E-05   |
| 9mo_SIGAE3_GTAGCTACAGGAATAT-1-10x  | 0.2302583  | 0.7697641  | 0.00094498 |
| 9mo_SIGAE3_GTAGCTAGTATCGAAA-1-10x  | 0.02499968 | 0.03893229 | 4.00E-05   |
| 9mo_SIGAE3_GTAGCTATCCAAGGGA-1-10x  | 0.04360584 | 0.10518029 | 8.29E-05   |
| 9mo_SIGAE3_GTAGGAGGTCTACAGT-1-10x  | 0.01706034 | 0.01066393 | 3.38E-05   |
| 9mo_SIGAE3_GTAGGAGTCTATACGG-1-10x  | 0.02092094 | 0.02440976 | 3.62E-05   |
| 9mo_SIGAE3_GTAGGTTGTGCCTTTC-1-10x  | 0.23341122 | 0.78099024 | 0.00091657 |
| 9mo_SIGAE3_GTAGTACAGTCGGGAT-1-10x  | 0.28499734 | 0.96466476 | 0.00075605 |
| 9mo_SIGAE3_GTAGTACCACTTTAGG-1-10x  | 0.07856816 | 0.22966509 | 0.002576   |
| 9mo_SIGAE3_GTATTGGAGTGACACG-1-10x  | 0.08507431 | 0.25283048 | 0.0037839  |
| 9mo_SIGAE3_GTATTGGCAAGGCGTA-1-10x  | 0.17704372 | 0.5802914  | 0.0015248  |
| 9mo_SIGAE3_GTATTGGCAAGTGGTG-1-10x  | 0.0309269  | 0.06003641 | 4.68E-05   |
| 9mo_SIGAE3_GTATTGGCAATTCACG-1-10x  | 0.0313417  | 0.06151332 | 4.68E-05   |
| 9mo_SIGAE3_GTATTTTCAGTCGTCTA-1-10x | 0.06696053 | 0.18833564 | 0.00079936 |
| 9mo_SIGAE3_GTATTTCCAACAGTGG-1-10x  | 0.09736536 | 0.29659328 | 0.0042943  |
| 9mo_SIGAE3_GTATTTTCGTATGGGAC-1-10x | 0.27134833 | 0.9160669  | 0.00075352 |

|                                   |            |            |            |
|-----------------------------------|------------|------------|------------|
| 9mo_SIGAE3_GTCAAACAGCGTTAGG-1-10x | 0.04167188 | 0.09829435 | 7.40E-05   |
| 9mo_SIGAE3_GTCAAGTAGGACAACC-1-10x | 0.06627057 | 0.185879   | 0.00079936 |
| 9mo_SIGAE3_GTCACGGAGAATCGTA-1-10x | 0.04428801 | 0.1076092  | 8.81E-05   |
| 9mo_SIGAE3_GTCACGGGTTCCCAAA-1-10x | 0.04658649 | 0.11579301 | 0.00010777 |
| 9mo_SIGAE3_GTCACGGTCGGTGAC-1-10x  | 0.06982734 | 0.19854304 | 0.0010821  |
| 9mo_SIGAE3_GTCACTCAGCGGGTTA-1-10x | 0.01751485 | 0.01228223 | 3.44E-05   |
| 9mo_SIGAE3_GTCACTCTCGTCCATC-1-10x | 0.25915772 | 0.8726617  | 0.00077499 |
| 9mo_SIGAE3_GTCAGCGAGATGGCGT-1-10x | 0.08606418 | 0.25635496 | 0.0039187  |
| 9mo_SIGAE3_GTCATCCGTTGTACGT-1-10x | 0.07795274 | 0.22747387 | 0.0023954  |
| 9mo_SIGAE3_GTCATGACATACTGAC-1-10x | 0.2850537  | 0.9648654  | 0.00075605 |
| 9mo_SIGAE3_GTCATGAGTACCCGAC-1-10x | 0.27690473 | 0.9358507  | 0.00075222 |
| 9mo_SIGAE3_GTCATGATCCTTGAAG-1-10x | 0.18289484 | 0.6011245  | 0.0014268  |
| 9mo_SIGAE3_GTCATGATCTGGCCAG-1-10x | 0.24085306 | 0.8074872  | 0.00086997 |
| 9mo_SIGAE3_GTCATTTGTGCGACAA-1-10x | 0.02604423 | 0.04265145 | 4.09E-05   |
| 9mo_SIGAE3_GTCATTTTCAAAGCCT-1-10x | 0.04844712 | 0.12241788 | 0.00012523 |
| 9mo_SIGAE3_GTCCACTAGGGCCAAT-1-10x | 0.10496064 | 0.32363662 | 0.0036214  |
| 9mo_SIGAE3_GTCCACTCAAAGCGTG-1-10x | 0.02693132 | 0.04580997 | 4.19E-05   |
| 9mo_SIGAE3_GTCCCATAGACGAAGA-1-10x | 0.137249   | 0.43860063 | 0.0018842  |
| 9mo_SIGAE3_GTCCCATAGGCTCTCG-1-10x | 0.09391092 | 0.28429362 | 0.0044154  |
| 9mo_SIGAE3_GTCCCATCATTGATG-1-10x  | 0.09833257 | 0.3000371  | 0.0042345  |
| 9mo_SIGAE3_GTCCCATGTCACAGTT-1-10x | 0.09359829 | 0.2831805  | 0.0044154  |
| 9mo_SIGAE3_GTCCCATGTGTCGCTG-1-10x | 0.02331105 | 0.03291985 | 3.83E-05   |
| 9mo_SIGAE3_GTCCTCACACAAGCTT-1-10x | 0.08237966 | 0.2432361  | 0.0033032  |
| 9mo_SIGAE3_GTCCTCATCCAATAG-1-10x  | 0.09224713 | 0.2783696  | 0.0043903  |
| 9mo_SIGAE3_GTCGAATGTGGTATGG-1-10x | 0.25538036 | 0.8592123  | 0.00078825 |
| 9mo_SIGAE3_GTCGAATTCTGCGAGC-1-10x | 0.17436935 | 0.5707692  | 0.0015753  |
| 9mo_SIGAE3_GTCGCGAAGATGGTCG-1-10x | 0.05621139 | 0.1500629  | 0.000257   |
| 9mo_SIGAE3_GTCGCGAGTGAGACCA-1-10x | 0.01843504 | 0.01555859 | 3.49E-05   |
| 9mo_SIGAE3_GTCGTAAAGTGTCATC-1-10x | 0.15304746 | 0.4948517  | 0.0018617  |
| 9mo_SIGAE3_GTCGTAATCGTACCTC-1-10x | 0.02599414 | 0.04247311 | 4.09E-05   |
| 9mo_SIGAE3_GTCTACCAGTAGGCCA-1-10x | 0.16106352 | 0.5233932  | 0.0018     |
| 9mo_SIGAE3_GTCTACCAGTCTGCGC-1-10x | 0.03218023 | 0.06449894 | 4.83E-05   |
| 9mo_SIGAE3_GTCTACCCAGCTACTA-1-10x | 0.08028486 | 0.23577748 | 0.0027593  |
| 9mo_SIGAE3_GTCTACCGTTAAGTCC-1-10x | 0.09803251 | 0.29896873 | 0.0042943  |
| 9mo_SIGAE3_GTCTACCTCCCAACTC-1-10x | 0.27598864 | 0.9325889  | 0.00075214 |
| 9mo_SIGAE3_GTCTACCTCGCATAGT-1-10x | 0.06829836 | 0.19309902 | 0.00097948 |
| 9mo_SIGAE3_GTCTAGAGTCTCGACG-1-10x | 0.23605843 | 0.7904157  | 0.00090278 |
| 9mo_SIGAE3_GTCTAGAGTTCAAGTC-1-10x | 0.11969665 | 0.37610477 | 0.0023317  |
| 9mo_SIGAE3_GTCTCACAGCTAGCCC-1-10x | 0.2545193  | 0.85614645 | 0.00079207 |
| 9mo_SIGAE3_GTCTCACACACGTGC-1-10x  | 0.0862785  | 0.25711808 | 0.0039187  |
| 9mo_SIGAE3_GTCTCACGTCAACATC-1-10x | 0.08363929 | 0.24772105 | 0.0034742  |

|                                   |            |            |            |
|-----------------------------------|------------|------------|------------|
| 9mo_SIGAE3_GTCTCACTCCCGAAAT-1-10x | 0.2547786  | 0.8570696  | 0.00079207 |
| 9mo_SIGAE3_GTCTGTCCAATCACGT-1-10x | 0.02532776 | 0.04010041 | 4.00E-05   |
| 9mo_SIGAE3_GTCTGTCTGTCCACG-1-10x  | 0.05962594 | 0.16222054 | 0.00038577 |
| 9mo_SIGAE3_GTCTTTACAGAAGCTG-1-10x | 0.13803102 | 0.44138506 | 0.0018802  |
| 9mo_SIGAE3_GTCTTTACATGCACTA-1-10x | 0.04181273 | 0.09879583 | 7.82E-05   |
| 9mo_SIGAE3_GTCTTTAGTATATGGA-1-10x | 0.12267337 | 0.38670352 | 0.0021479  |
| 9mo_SIGAE3_GTCTTTAGTTATAGAG-1-10x | 0.28562734 | 0.96690786 | 0.00075686 |
| 9mo_SIGAE3_GTCTTTATCAGTCCGG-1-10x | 0.09292059 | 0.2807675  | 0.0044107  |
| 9mo_SIGAE3_GTGACGCAGAGCCGAT-1-10x | 0.03899759 | 0.08877245 | 6.67E-05   |
| 9mo_SIGAE3_GTGACGCCACCATATG-1-10x | 0.24659598 | 0.8279351  | 0.0008292  |
| 9mo_SIGAE3_GTGACGCCAGCTAACT-1-10x | 0.27783528 | 0.9391639  | 0.00075239 |
| 9mo_SIGAE3_GTGACGCTCTACGCGG-1-10x | 0.1146041  | 0.35797256 | 0.0026715  |
| 9mo_SIGAE3_GTGAGCCGTCCTCCAT-1-10x | 0.05222079 | 0.13585418 | 0.00017575 |
| 9mo_SIGAE3_GTGAGCCTCTGAGAAA-1-10x | 0.07321603 | 0.21060862 | 0.0015819  |
| 9mo_SIGAE3_GTGAGGACAACGACAG-1-10x | 0.0766823  | 0.22295041 | 0.0022191  |
| 9mo_SIGAE3_GTGAGTTCATACAGGG-1-10x | 0.26251784 | 0.88462555 | 0.00076511 |
| 9mo_SIGAE3_GTGATGTAGGAGAGTA-1-10x | 0.2512252  | 0.84441763 | 0.00080923 |
| 9mo_SIGAE3_GTGATGTCACTGAGTT-1-10x | 0.13097557 | 0.41626388 | 0.001948   |
| 9mo_SIGAE3_GTGATGTTCCACGTGG-1-10x | 0.2478453  | 0.8323834  | 0.00082396 |
| 9mo_SIGAE3_GTGATGTTCTACGAA-1-10x  | 0.13101755 | 0.41641334 | 0.001934   |
| 9mo_SIGAE3_GTGCACGGTAATCAAG-1-10x | 0.02395182 | 0.03520135 | 3.91E-05   |
| 9mo_SIGAE3_GTGCACGTCGTCCTTG-1-10x | 0.18149273 | 0.5961323  | 0.0014587  |
| 9mo_SIGAE3_GTGCAGCTCAATCAGC-1-10x | 0.16519687 | 0.5381102  | 0.0017353  |
| 9mo_SIGAE3_GTGCGTGAGAAGCGAA-1-10x | 0.07200423 | 0.20629394 | 0.0014433  |
| 9mo_SIGAE3_GTGCGTGCACGCGGTT-1-10x | 0.0270542  | 0.04624749 | 4.19E-05   |
| 9mo_SIGAE3_GTGCGTGGTCGATTCA-1-10x | 0.04931983 | 0.12552519 | 0.00013566 |
| 9mo_SIGAE3_GTGCTGGAGCCTCCAG-1-10x | 0.0959869  | 0.29168525 | 0.0043808  |
| 9mo_SIGAE3_GTGCTGGCACAAGCTT-1-10x | 0.29297042 | 0.9930532  | 0.00076488 |
| 9mo_SIGAE3_GTGCTGGCAGCAGTAG-1-10x | 0.08242732 | 0.24340577 | 0.0033032  |
| 9mo_SIGAE3_GTGCTGGGTGATTAC-1-10x  | 0.05092329 | 0.13123438 | 0.00014746 |
| 9mo_SIGAE3_GTGCTTCCAAGTTGG-1-10x  | 0.27964264 | 0.94559914 | 0.00075303 |
| 9mo_SIGAE3_GTGCTTCCAGTGCTG-1-10x  | 0.05524504 | 0.14662215 | 0.000233   |
| 9mo_SIGAE3_GTGGAAGAGCCTTCTC-1-10x | 0.08414139 | 0.2495088  | 0.0036353  |
| 9mo_SIGAE3_GTGGAAGCACTTACAG-1-10x | 0.22288759 | 0.7435204  | 0.0010033  |
| 9mo_SIGAE3_GTGGAAGCAGTTGTTG-1-10x | 0.08900216 | 0.26681575 | 0.0042295  |
| 9mo_SIGAE3_GTGGAGACATGTTCAG-1-10x | 0.03580651 | 0.07741046 | 5.58E-05   |
| 9mo_SIGAE3_GTGCCGTAGTCGCGAA-1-10x | 0.03495298 | 0.07437141 | 5.37E-05   |
| 9mo_SIGAE3_GTGCCGTGTCTAGGTT-1-10x | 0.24226117 | 0.81250083 | 0.00085764 |
| 9mo_SIGAE3_GTGCCGTGTTCTCTCG-1-10x | 0.04921914 | 0.12516667 | 0.00012523 |
| 9mo_SIGAE3_GTGGAACAAGAGCTG-1-10x  | 0.07167648 | 0.20512697 | 0.0013138  |
| 9mo_SIGAE3_GTGGAATCCATAGAC-1-10x  | 0.03741779 | 0.08314749 | 6.07E-05   |

|                                    |            |            |            |
|------------------------------------|------------|------------|------------|
| 9mo_SIGAE3_GTGGTTAAGCTGAAAT-1-10x  | 0.04004843 | 0.09251399 | 7.01E-05   |
| 9mo_SIGAE3_GTGTAACAGACTACCT-1-10x  | 0.08593439 | 0.25589284 | 0.0039187  |
| 9mo_SIGAE3_GTGTCCTGTAACCTCG-1-10x  | 0.07460834 | 0.215566   | 0.0017292  |
| 9mo_SIGAE3_GTGTCCTGTGTAGCAG-1-10x  | 0.15484259 | 0.50124335 | 0.0018522  |
| 9mo_SIGAE3_GTGTCCTCCGAACGC-1-10x   | 0.019471   | 0.01924718 | 3.55E-05   |
| 9mo_SIGAE3_GTGTGGCAGGGCTAAC-1-10x  | 0.01877693 | 0.01677591 | 3.49E-05   |
| 9mo_SIGAE3_GTGTGGCAGTTAGAAC-1-10x  | 0.11101015 | 0.34517613 | 0.0030221  |
| 9mo_SIGAE3_GTGTTAGCAATGTGGG-1-10x  | 0.04855765 | 0.12281142 | 0.00012523 |
| 9mo_SIGAE3_GTGTTCCCATGCCGCA-1-10x  | 0.01701569 | 0.01050496 | 3.38E-05   |
| 9mo_SIGAE3_GTGTTCTCTTCCTAA-1-10x   | 0.03434742 | 0.0722153  | 5.37E-05   |
| 9mo_SIGAE3_GTTACAGAGTAGACCG-1-10x  | 0.04806868 | 0.12107042 | 0.00011598 |
| 9mo_SIGAE3_GTTACAGCAAGTGGCA-1-10x  | 0.25971726 | 0.87465394 | 0.00077221 |
| 9mo_SIGAE3_GTTACCCACAAACGG-1-10x   | 0.04743274 | 0.11880614 | 0.00011598 |
| 9mo_SIGAE3_GTTACGACATGAGATA-1-10x  | 0.07608128 | 0.22081044 | 0.0020486  |
| 9mo_SIGAE3_GTTACGAGTCAAAGCG-1-10x  | 0.29084113 | 0.9854718  | 0.00076269 |
| 9mo_SIGAE3_GTTAGACCAAGGCAAC-1-10x  | 0.06985455 | 0.19863993 | 0.0010821  |
| 9mo_SIGAE3_GTTAGACGTGCTACAT-1-10x  | 0.02646168 | 0.0441378  | 4.09E-05   |
| 9mo_SIGAE3_GTTAGACTCAGCGGAA-1-10x  | 0.02493617 | 0.03870615 | 4.00E-05   |
| 9mo_SIGAE3_GTTAGACTCTGCCTGT-1-10x  | 0.23770566 | 0.79628074 | 0.00088935 |
| 9mo_SIGAE3_GTTAGTGAGGTTACCT-1-10x  | 0.08564305 | 0.2548555  | 0.0037839  |
| 9mo_SIGAE3_GTTAGTGGTTGTGGCC-1-10x  | 0.10421663 | 0.32098752 | 0.0037215  |
| 9mo_SIGAE3_GTTCATTCACAGCCAC-1-10x  | 0.09220234 | 0.27821016 | 0.0043903  |
| 9mo_SIGAE3_GTTCATTTCACTTTGT-1-10x  | 0.11386084 | 0.35532615 | 0.0027534  |
| 9mo_SIGAE3_GTTCCGTTCTGGTTGA-1-10x  | 0.04839214 | 0.12222213 | 0.00012523 |
| 9mo_SIGAE3_GTTGCTCATACTGAC-1-10x   | 0.2613104  | 0.8803264  | 0.00076963 |
| 9mo_SIGAE3_GTTGCTTCTCCTGAC-1-10x   | 0.04689092 | 0.11687697 | 0.00010777 |
| 9mo_SIGAE3_GTTCTATCAGTCTCTC-1-10x  | 0.08449048 | 0.25075173 | 0.0036353  |
| 9mo_SIGAE3_GTTCTATTCTTTGATC-1-10x  | 0.01711723 | 0.01086649 | 3.38E-05   |
| 9mo_SIGAE3_GTTGAACAGGGTCACA-1-10x  | 0.04838752 | 0.12220567 | 0.00012523 |
| 9mo_SIGAE3_GTTGAACGTAGAGTTA-1-10x  | 0.01803109 | 0.01412033 | 3.44E-05   |
| 9mo_SIGAE3_GTTGAACGTGCGACTGC-1-10x | 0.26933327 | 0.90889215 | 0.00075499 |
| 9mo_SIGAE3_GTTGCGGAGGACTGGT-1-10x  | 0.09183762 | 0.27691156 | 0.0043903  |
| 9mo_SIGAE3_GTTGCGGAGTAGGGTC-1-10x  | 0.03129023 | 0.06133004 | 4.68E-05   |
| 9mo_SIGAE3_GTTGCGGAGTCTAACC-1-10x  | 0.26365682 | 0.88868093 | 0.00076313 |
| 9mo_SIGAE3_GTTGCGGCAGCGACAA-1-10x  | 0.2665087  | 0.8988352  | 0.00075831 |
| 9mo_SIGAE3_GTTGCGGGTTGCGGCT-1-10x  | 0.2933906  | 0.9945493  | 0.00076488 |
| 9mo_SIGAE3_GTTGTAGAGGTACAAT-1-10x  | 0.22759806 | 0.76029223 | 0.00096676 |
| 9mo_SIGAE3_GTTGTAGCAGATTAAG-1-10x  | 0.03016587 | 0.05732672 | 4.55E-05   |
| 9mo_SIGAE3_GTTGTCCAGGCTCTAT-1-10x  | 0.07435679 | 0.21467033 | 0.0017292  |
| 9mo_SIGAE3_GTTGTCCACCTGATA-1-10x   | 0.2213822  | 0.7381604  | 0.0010106  |
| 9mo_SIGAE3_GTTGTCCACTAGTAC-1-10x   | 0.0297829  | 0.05596313 | 4.55E-05   |

|                                   |            |            |            |
|-----------------------------------|------------|------------|------------|
| 9mo_SIGAE3_GTTGTCCGTTCCGTTC-1-10x | 0.2584999  | 0.8703195  | 0.000778   |
| 9mo_SIGAE3_GTTGTCTCTCGCTCA-1-10x  | 0.02647645 | 0.04419039 | 4.09E-05   |
| 9mo_SIGAE3_GTTGTGAGTGTCTTCC-1-10x | 0.07869455 | 0.2301151  | 0.002576   |
| 9mo_SIGAE3_GTTTACTGTTGCCATA-1-10x | 0.08089225 | 0.2379401  | 0.0029431  |
| 9mo_SIGAE3_GTTTGGAGTTCGGCGT-1-10x | 0.10931747 | 0.3391493  | 0.0032165  |
| 9mo_SIGAE3_GTTTGGATCATTTGGG-1-10x | 0.14114739 | 0.45248103 | 0.0018734  |
| 9mo_SIGAE3_TAACACGCAACTCGTA-1-10x | 0.08575329 | 0.25524804 | 0.0037839  |
| 9mo_SIGAE3_TAACACGCAGAGGCAT-1-10x | 0.05023389 | 0.12877975 | 0.00014746 |
| 9mo_SIGAE3_TAACACGTCACCGACG-1-10x | 0.04860132 | 0.12296692 | 0.00012523 |
| 9mo_SIGAE3_TAACCAGAGTAAAGCT-1-10x | 0.10500643 | 0.32379967 | 0.0036214  |
| 9mo_SIGAE3_TAACCAGCATTACCC-1-10x  | 0.05003038 | 0.12805514 | 0.00013566 |
| 9mo_SIGAE3_TAACTTCAGGCTTAAA-1-10x | 0.24939501 | 0.8379012  | 0.00081397 |
| 9mo_SIGAE3_TAACTTCTCCTGGTCT-1-10x | 0.04274929 | 0.1021305  | 8.29E-05   |
| 9mo_SIGAE3_TAAGCACCAGTGCGCT-1-10x | 0.22137053 | 0.7381188  | 0.0010106  |
| 9mo_SIGAE3_TAAGCCACATAGGTTC-1-10x | 0.08316223 | 0.24602248 | 0.0034742  |
| 9mo_SIGAE3_TAAGCCAGTAACGGTG-1-10x | 0.2556686  | 0.86023855 | 0.00078825 |
| 9mo_SIGAE3_TAAGCGTGTAGCGTTT-1-10x | 0.04352767 | 0.10490196 | 8.29E-05   |
| 9mo_SIGAE3_TAAGTCGAGTTAGAAC-1-10x | 0.0301568  | 0.05729443 | 4.55E-05   |
| 9mo_SIGAE3_TAAGTCGCAACTAC-1-10x   | 0.0506308  | 0.13019298 | 0.00014746 |
| 9mo_SIGAE3_TAAGTCGGTGGTCCGT-1-10x | 0.04926471 | 0.12532893 | 0.00012523 |
| 9mo_SIGAE3_TAAGTCGTCGGAGCAA-1-10x | 0.26712957 | 0.9010458  | 0.00075831 |
| 9mo_SIGAE3_TAACTCTCCCTCGTA-1-10x  | 0.250527   | 0.84193164 | 0.00080923 |
| 9mo_SIGAE3_TAAATCCAGATGCCGA-1-10x | 0.04374757 | 0.10568491 | 8.81E-05   |
| 9mo_SIGAE3_TAAATCCATTACCC-1-10x   | 0.04642991 | 0.11523552 | 0.00010046 |
| 9mo_SIGAE3_TACACCCAGAACTTC-1-10x  | 0.14263985 | 0.457795   | 0.0018718  |
| 9mo_SIGAE3_TACAGGTAGCATGCAG-1-10x | 0.21996243 | 0.73310524 | 0.0010253  |
| 9mo_SIGAE3_TACAGGTCATGGGTCC-1-10x | 0.03956996 | 0.09081037 | 6.67E-05   |
| 9mo_SIGAE3_TACATTAGTAGCCAG-1-10x  | 0.01683514 | 0.00986211 | 3.38E-05   |
| 9mo_SIGAE3_TACATTCCAATATCCG-1-10x | 0.22334418 | 0.7451461  | 0.00099599 |
| 9mo_SIGAE3_TACCCACGTGGCTTGC-1-10x | 0.24153681 | 0.80992174 | 0.00086374 |
| 9mo_SIGAE3_TACCCACTTTCACGC-1-10x  | 0.04636837 | 0.11501639 | 0.00010046 |
| 9mo_SIGAE3_TACCCGTGTCCTGGTG-1-10x | 0.19858699 | 0.6569971  | 0.0012187  |
| 9mo_SIGAE3_TACCGAAAGATCCTAC-1-10x | 0.05183391 | 0.13447668 | 0.00016076 |
| 9mo_SIGAE3_TACCGAACAGTGGGTA-1-10x | 0.13876721 | 0.44400632 | 0.0018772  |
| 9mo_SIGAE3_TACCGAAGTACCGGAA-1-10x | 0.17580022 | 0.57586384 | 0.0015585  |
| 9mo_SIGAE3_TACCGGGAGAGGCGTT-1-10x | 0.23159978 | 0.7745405  | 0.00093066 |
| 9mo_SIGAE3_TACCGGGTCCCTGGTT-1-10x | 0.02520648 | 0.03966862 | 4.00E-05   |
| 9mo_SIGAE3_TACCTCGGTATTTCT-1-10x  | 0.23120375 | 0.7731304  | 0.00093779 |
| 9mo_SIGAE3_TACCTGCCAAAGGCTG-1-10x | 0.2237333  | 0.7465316  | 0.00099599 |
| 9mo_SIGAE3_TACCTGCTCTCCTGAC-1-10x | 0.22825041 | 0.76261497 | 0.00095947 |
| 9mo_SIGAE3_TACGCTCAGATGACCG-1-10x | 0.09753217 | 0.2971872  | 0.0042943  |

|                                   |            |            |            |
|-----------------------------------|------------|------------|------------|
| 9mo_SIGAE3_TACGCTCGTACTCAG-1-10x  | 0.05769716 | 0.15535304 | 0.00028394 |
| 9mo_SIGAE3_TACGGTAAGATGGCAC-1-10x | 0.04552894 | 0.11202756 | 9.39E-05   |
| 9mo_SIGAE3_TACGTCTCTTCGTGC-1-10x  | 0.0460655  | 0.11393802 | 0.00010046 |
| 9mo_SIGAE3_TACTGCCACTTGAGT-1-10x  | 0.07625014 | 0.2214117  | 0.0020486  |
| 9mo_SIGAE3_TACTGCCGTAATGATG-1-10x | 0.22200365 | 0.7403731  | 0.0010106  |
| 9mo_SIGAE3_TACTGCCGATTGGCT-1-10x  | 0.16888252 | 0.5512331  | 0.0016744  |
| 9mo_SIGAE3_TACTGCCTCAATCCAG-1-10x | 0.25722647 | 0.8657854  | 0.00078121 |
| 9mo_SIGAE3_TACTTACTCGGTAAGG-1-10x | 0.04909068 | 0.12470928 | 0.00012523 |
| 9mo_SIGAE3_TACTTCACAAATACAG-1-10x | 0.10428929 | 0.32124624 | 0.0037215  |
| 9mo_SIGAE3_TACTTCAGTTAAGCAA-1-10x | 0.03516854 | 0.07513895 | 5.37E-05   |
| 9mo_SIGAE3_TACTTGTAGAATAACC-1-10x | 0.06841048 | 0.19349825 | 0.00097948 |
| 9mo_SIGAE3_TACTTGTCAAGTATCC-1-10x | 0.05367716 | 0.14103964 | 0.00019264 |
| 9mo_SIGAE3_TAGACCACATGGAACG-1-10x | 0.04655463 | 0.11567956 | 0.00010777 |
| 9mo_SIGAE3_TAGACTGCAGGCTCTG-1-10x | 0.2864706  | 0.9699103  | 0.00075773 |
| 9mo_SIGAE3_TAGAGTCCAACACACT-1-10x | 0.01848822 | 0.01574796 | 3.49E-05   |
| 9mo_SIGAE3_TAGAGTCCAAGATGGC-1-10x | 0.08845566 | 0.26486996 | 0.0041422  |
| 9mo_SIGAE3_TAGAGTCGTGGTCCGT-1-10x | 0.0750862  | 0.21726742 | 0.001885   |
| 9mo_SIGAE3_TAGATCGCATCGCCTT-1-10x | 0.08779033 | 0.262501   | 0.0040384  |
| 9mo_SIGAE3_TAGATCGGTCCCACGA-1-10x | 0.0466116  | 0.11588244 | 0.00010777 |
| 9mo_SIGAE3_TAGCACATCCGGTAGC-1-10x | 0.05042864 | 0.12947318 | 0.00014746 |
| 9mo_SIGAE3_TAGGAGGCACCACATA-1-10x | 0.17670037 | 0.57906884 | 0.0015416  |
| 9mo_SIGAE3_TAGGAGGTACCTCTG-1-10x  | 0.27934247 | 0.94453037 | 0.00075266 |
| 9mo_SIGAE3_TAGGAGGTCCGTAGTA-1-10x | 0.02619246 | 0.04317924 | 4.09E-05   |
| 9mo_SIGAE3_TAGGGTTAGGAACGTC-1-10x | 0.10155761 | 0.31151998 | 0.0040036  |
| 9mo_SIGAE3_TAGGGTTGTTGAGCTA-1-10x | 0.04551737 | 0.11198638 | 9.39E-05   |
| 9mo_SIGAE3_TAGGTACCAACACAGG-1-10x | 0.21452941 | 0.71376073 | 0.0010701  |
| 9mo_SIGAE3_TAGGTACCACGACAGA-1-10x | 0.22838145 | 0.76308155 | 0.00095947 |
| 9mo_SIGAE3_TAGGTACGTGCGTTTA-1-10x | 0.13257444 | 0.4219567  | 0.0019219  |
| 9mo_SIGAE3_TAGGTTGACTCAGAT-1-10x  | 0.15363851 | 0.4969562  | 0.0018575  |
| 9mo_SIGAE3_TAGGTTGACTTTAGG-1-10x  | 0.11842492 | 0.37157673 | 0.0023898  |
| 9mo_SIGAE3_TAGGTTGGTAGCTTGT-1-10x | 0.06450443 | 0.1795906  | 0.00064991 |
| 9mo_SIGAE3_TAGGTTGGTCTTGAGT-1-10x | 0.03329946 | 0.06848399 | 5.00E-05   |
| 9mo_SIGAE3_TAGTGCAAGCAATTAG-1-10x | 0.04857533 | 0.12287437 | 0.00012523 |
| 9mo_SIGAE3_TAGTGCAAGGAACGAA-1-10x | 0.06443645 | 0.17934856 | 0.00064991 |
| 9mo_SIGAE3_TAGTGCATCGGCATTA-1-10x | 0.24177521 | 0.8107706  | 0.00086374 |
| 9mo_SIGAE3_TATACCTAGGATTCCT-1-10x | 0.2364307  | 0.7917412  | 0.00089602 |
| 9mo_SIGAE3_TATACCTCATGGCTAT-1-10x | 0.04167937 | 0.09832101 | 7.40E-05   |
| 9mo_SIGAE3_TATACCTGTCTGCAAT-1-10x | 0.01707238 | 0.01070681 | 3.38E-05   |
| 9mo_SIGAE3_TATATCCCACAATGTC-1-10x | 0.05123129 | 0.13233104 | 0.00016076 |
| 9mo_SIGAE3_TATATCCCATCGATGT-1-10x | 0.12450913 | 0.3932398  | 0.0020803  |
| 9mo_SIGAE3_TATCAGGAGTTCCTG-1-10x  | 0.19905059 | 0.6586478  | 0.0012085  |

|                                    |            |            |            |
|------------------------------------|------------|------------|------------|
| 9mo_SIGAE3_TATCAGGGTGGAAATT-1-10x  | 0.01852112 | 0.01586512 | 3.49E-05   |
| 9mo_SIGAE3_TATCAGGTCCGGGACT-1-10x  | 0.16417658 | 0.5344774  | 0.0017494  |
| 9mo_SIGAE3_TATCCTAGTCTTCTAT-1-10x  | 0.25543535 | 0.859408   | 0.00078825 |
| 9mo_SIGAE3_TATCCTATCGCCGTGA-1-10x  | 0.22260621 | 0.74251854 | 0.0010033  |
| 9mo_SIGAE3_TATCGCCAGACACACG-1-10x  | 0.07507893 | 0.21724154 | 0.001885   |
| 9mo_SIGAE3_TATCGCCAGAGTAAT-1-10x   | 0.04518102 | 0.11078879 | 9.39E-05   |
| 9mo_SIGAE3_TATCGCCGTATGTCAC-1-10x  | 0.23506112 | 0.78686476 | 0.00090964 |
| 9mo_SIGAE3_TATCTGTAGCCGAATG-1-10x  | 0.19272058 | 0.6361095  | 0.0012861  |
| 9mo_SIGAE3_TATCTTGAGACCTCAT-1-10x  | 0.04825924 | 0.12174892 | 0.00011598 |
| 9mo_SIGAE3_TATCTTGTCATGCTAG-1-10x  | 0.04949627 | 0.12615341 | 0.00013566 |
| 9mo_SIGAE3_TATCTTGTCATAGG-1-10x    | 0.20008379 | 0.6623265  | 0.0011985  |
| 9mo_SIGAE3_TATGTTTCAGGCTAGCA-1-10x | 0.20176287 | 0.6683049  | 0.0011792  |
| 9mo_SIGAE3_TATGTTTCAGGTACAAT-1-10x | 0.01892425 | 0.01730047 | 3.49E-05   |
| 9mo_SIGAE3_TATGTTTCGTTCTGACA-1-10x | 0.2623217  | 0.8839272  | 0.00076727 |
| 9mo_SIGAE3_TATTCCACAGGTTTCGC-1-10x | 0.2780572  | 0.93995404 | 0.00075239 |
| 9mo_SIGAE3_TATTCCATCGCGGACT-1-10x  | 0.1454612  | 0.46784055 | 0.0018716  |
| 9mo_SIGAE3_TATTGCTAGAGGATGA-1-10x  | 0.08104143 | 0.23847127 | 0.0029431  |
| 9mo_SIGAE3_TATTGCTCAAAGCAAT-1-10x  | 0.24993536 | 0.8398251  | 0.00081397 |
| 9mo_SIGAE3_TATTGCTCATAGAATG-1-10x  | 0.26244682 | 0.88437265 | 0.00076727 |
| 9mo_SIGAE3_TATTGGGAGAGATTCA-1-10x  | 0.08885332 | 0.2662858  | 0.0042295  |
| 9mo_SIGAE3_TATTGGGCAGGTTACT-1-10x  | 0.20076464 | 0.6647507  | 0.0011888  |
| 9mo_SIGAE3_TATTGGGGTTGTGCAT-1-10x  | 0.22477205 | 0.7502301  | 0.00098869 |
| 9mo_SIGAE3_TATTCGAGGTATTGA-1-10x   | 0.09182222 | 0.27685672 | 0.0043903  |
| 9mo_SIGAE3_TATTCGTCGCCGAGT-1-10x   | 0.09681332 | 0.29462773 | 0.0043435  |
| 9mo_SIGAE3_TATTCGTCTCATGGA-1-10x   | 0.02696146 | 0.0459173  | 4.19E-05   |
| 9mo_SIGAE3_TCAAGACCAGGGAATC-1-10x  | 0.2788729  | 0.94285846 | 0.00075266 |
| 9mo_SIGAE3_TCAAGACCATCTGGGC-1-10x  | 0.0265807  | 0.04456156 | 4.09E-05   |
| 9mo_SIGAE3_TCAAGACGTCAAGCA-1-10x   | 0.2600174  | 0.8757226  | 0.00077221 |
| 9mo_SIGAE3_TCAAGCAAGCTATCTG-1-10x  | 0.07587919 | 0.22009093 | 0.0020486  |
| 9mo_SIGAE3_TCAAGTGCACCAGGTC-1-10x  | 0.18320552 | 0.6022307  | 0.0014268  |
| 9mo_SIGAE3_TCAAGTGGTTAGGCC-1-10x   | 0.0229269  | 0.03155205 | 3.76E-05   |
| 9mo_SIGAE3_TCAAGTGGTTCACCGG-1-10x  | 0.03952722 | 0.09065818 | 6.67E-05   |
| 9mo_SIGAE3_TCAATCTAGTGATCGG-1-10x  | 0.14115296 | 0.45250088 | 0.0018734  |
| 9mo_SIGAE3_TCAATCTGTCTAGGCC-1-10x  | 0.21445382 | 0.7134916  | 0.0010701  |
| 9mo_SIGAE3_TCAATTCGTTCGAGTGA-1-10x | 0.07293035 | 0.20959145 | 0.0015819  |
| 9mo_SIGAE3_TCACAAGCAAGTTTGC-1-10x  | 0.08020677 | 0.23549944 | 0.0027593  |
| 9mo_SIGAE3_TCACAAGCATGACACT-1-10x  | 0.04720691 | 0.11800204 | 0.00010777 |
| 9mo_SIGAE3_TCACAAGTCATGGGAG-1-10x  | 0.01836162 | 0.01529718 | 3.49E-05   |
| 9mo_SIGAE3_TCACACCCACCTCAGG-1-10x  | 0.17253716 | 0.5642456  | 0.0016089  |
| 9mo_SIGAE3_TCACACCCAGAGCTAG-1-10x  | 0.03486842 | 0.07407036 | 5.37E-05   |
| 9mo_SIGAE3_TCACACCTCGAGAAAT-1-10x  | 0.05124449 | 0.13237801 | 0.00016076 |



|                                   |            |            |            |
|-----------------------------------|------------|------------|------------|
| 9mo_SIGAE3_TCACATTGTCTCAAGT-1-10x | 0.08761164 | 0.26186475 | 0.0040384  |
| 9mo_SIGAE3_TCACGCTCAAGTTCCA-1-10x | 0.07750067 | 0.22586426 | 0.0023954  |
| 9mo_SIGAE3_TCACGGGAGGGCAGTT-1-10x | 0.14207466 | 0.45578262 | 0.0018724  |
| 9mo_SIGAE3_TCACGGGGTAGATGTA-1-10x | 0.02409073 | 0.03569591 | 3.91E-05   |
| 9mo_SIGAE3_TCACGGGGTCAAGGCA-1-10x | 0.12518503 | 0.3956464  | 0.0020803  |
| 9mo_SIGAE3_TCACTATTCCGAAGGA-1-10x | 0.1751886  | 0.5736862  | 0.0015585  |
| 9mo_SIGAE3_TCACTCGAGCAGGCTA-1-10x | 0.02631309 | 0.04360872 | 4.09E-05   |
| 9mo_SIGAE3_TCACTCGAGCCTCCAG-1-10x | 0.05546657 | 0.14741093 | 0.000233   |
| 9mo_SIGAE3_TCACTCGAGCGACTTT-1-10x | 0.03027888 | 0.05772908 | 4.55E-05   |
| 9mo_SIGAE3_TCACTCGTCACTGTTT-1-10x | 0.04815007 | 0.1213602  | 0.00011598 |
| 9mo_SIGAE3_TCAGCAATCAAAGTGC-1-10x | 0.04456519 | 0.10859609 | 8.81E-05   |
| 9mo_SIGAE3_TCAGCCTAGGTGCCTC-1-10x | 0.05071653 | 0.13049822 | 0.00014746 |
| 9mo_SIGAE3_TCAGCCTCCTACTGC-1-10x  | 0.28064328 | 0.94916195 | 0.00075348 |
| 9mo_SIGAE3_TCAGCCTTCTCCTGAC-1-10x | 0.07383445 | 0.21281052 | 0.0017292  |
| 9mo_SIGAE3_TCAGGGCAGGTTCTAC-1-10x | 0.04045808 | 0.09397255 | 7.01E-05   |
| 9mo_SIGAE3_TCAGGGCGTGAGGCAT-1-10x | 0.28259006 | 0.95609355 | 0.00075462 |
| 9mo_SIGAE3_TCAGGGCTCTACTTCA-1-10x | 0.05735236 | 0.15412538 | 0.00028394 |
| 9mo_SIGAE3_TCAGGTACACAGTGTT-1-10x | 0.10043304 | 0.3075159  | 0.0040879  |
| 9mo_SIGAE3_TCAGTCCATTAAGCC-1-10x  | 0.07367785 | 0.21225296 | 0.0015819  |
| 9mo_SIGAE3_TCAGTCCCTGATGCTA-1-10x | 0.26018706 | 0.8763267  | 0.00077221 |
| 9mo_SIGAE3_TCAGTGAGTCGTGTTA-1-10x | 0.2931097  | 0.9935491  | 0.00076488 |
| 9mo_SIGAE3_TCATACTAGCCAGAGT-1-10x | 0.09024452 | 0.27123925 | 0.0042999  |
| 9mo_SIGAE3_TCATACTGTCTAGTGT-1-10x | 0.04694102 | 0.11705534 | 0.00010777 |
| 9mo_SIGAE3_TCATACTTCCGGGACT-1-10x | 0.21489589 | 0.7150656  | 0.0010625  |
| 9mo_SIGAE3_TCATATCCAAGAGAGA-1-10x | 0.27742642 | 0.9377082  | 0.00075222 |
| 9mo_SIGAE3_TCATCATGTAGGTGCA-1-10x | 0.12959594 | 0.4113516  | 0.0019639  |
| 9mo_SIGAE3_TCATCCGAGGTGCCAA-1-10x | 0.13042726 | 0.41431156 | 0.001948   |
| 9mo_SIGAE3_TCATCCGCAACCGGAA-1-10x | 0.24203981 | 0.8117127  | 0.00085764 |
| 9mo_SIGAE3_TCATCCGCAATAAGGT-1-10x | 0.04851575 | 0.12266222 | 0.00012523 |
| 9mo_SIGAE3_TCATCCGGTTACAGCT-1-10x | 0.08841822 | 0.26473662 | 0.0041422  |
| 9mo_SIGAE3_TCATGAGCACAGACGA-1-10x | 0.27754396 | 0.9381267  | 0.00075239 |
| 9mo_SIGAE3_TCATGAGCACCTGCGA-1-10x | 0.10181995 | 0.31245404 | 0.0040036  |
| 9mo_SIGAE3_TCATGAGCACGGCACT-1-10x | 0.15269645 | 0.49360192 | 0.0018617  |
| 9mo_SIGAE3_TCATGAGCACTCTCGT-1-10x | 0.10822973 | 0.33527637 | 0.0033168  |
| 9mo_SIGAE3_TCATGAGCAGACAAAT-1-10x | 0.29068357 | 0.9849108  | 0.00076163 |
| 9mo_SIGAE3_TCATGAGGTGTCGATT-1-10x | 0.04628595 | 0.11472295 | 0.00010046 |
| 9mo_SIGAE3_TCATGCCGTTGCTAGT-1-10x | 0.09226754 | 0.2784423  | 0.0043903  |
| 9mo_SIGAE3_TCATGGACACAGTATC-1-10x | 0.2509895  | 0.8435784  | 0.00080923 |
| 9mo_SIGAE3_TCATGGAGTCTTTCTA-1-10x | 0.12389626 | 0.39105767 | 0.0021124  |
| 9mo_SIGAE3_TCATGGATCTCTTGCG-1-10x | 0.05038594 | 0.12932113 | 0.00014746 |
| 9mo_SIGAE3_TCATGGATCTTCGGAA-1-10x | 0.26510143 | 0.8938245  | 0.00076135 |

|                                    |            |            |            |
|------------------------------------|------------|------------|------------|
| 9mo_SIGAE3_TCATGTTAGGAGAGTA-1-10x  | 0.2497006  | 0.83898926 | 0.00081397 |
| 9mo_SIGAE3_TCATTACTCAGTGATC-1-10x  | 0.04870011 | 0.12331865 | 0.00012523 |
| 9mo_SIGAE3_TCATTACTCTTTGCGC-1-10x  | 0.2568593  | 0.8644781  | 0.00078463 |
| 9mo_SIGAE3_TCATTACAAGCGCTC-1-10x   | 0.2934504  | 0.9947622  | 0.00076488 |
| 9mo_SIGAE3_TCATTCAAGTCTTAGTG-1-10x | 0.27699083 | 0.9361572  | 0.00075222 |
| 9mo_SIGAE3_TCATTGTTTCGCGTGCA-1-10x | 0.01969622 | 0.0200491  | 3.55E-05   |
| 9mo_SIGAE3_TCATTTGAGACCAACG-1-10x  | 0.01534331 | 0.00455038 | 3.27E-05   |
| 9mo_SIGAE3_TCATTTGAGAGTGTTA-1-10x  | 0.108183   | 0.33510998 | 0.0033168  |
| 9mo_SIGAE3_TCATTTGTCTCACCCA-1-10x  | 0.09693889 | 0.29507485 | 0.0043435  |
| 9mo_SIGAE3_TCCACCAAGCCATTCA-1-10x  | 0.03284058 | 0.06685013 | 5.00E-05   |
| 9mo_SIGAE3_TCCACGTTCTCGTTTA-1-10x  | 0.11556401 | 0.36139035 | 0.002594   |
| 9mo_SIGAE3_TCCAGAACAAGGACAC-1-10x  | 0.25823984 | 0.8693935  | 0.000778   |
| 9mo_SIGAE3_TCCATCGCAATTTCCCT-1-10x | 0.12054452 | 0.37912366 | 0.0022788  |
| 9mo_SIGAE3_TCCATCGCATGACTCA-1-10x  | 0.04306195 | 0.10324376 | 8.29E-05   |
| 9mo_SIGAE3_TCCATCGGTGACTCTA-1-10x  | 0.04075661 | 0.09503549 | 7.01E-05   |
| 9mo_SIGAE3_TCCATCGTCTGCTAGA-1-10x  | 0.07244231 | 0.20785375 | 0.0014433  |
| 9mo_SIGAE3_TCCATCGTCTGGCTGG-1-10x  | 0.01778101 | 0.01322991 | 3.44E-05   |
| 9mo_SIGAE3_TCCATGCCAACCGTGC-1-10x  | 0.12544024 | 0.39655507 | 0.0020515  |
| 9mo_SIGAE3_TCCCAGTCAGTGATC-1-10x   | 0.08567798 | 0.2549799  | 0.0037839  |
| 9mo_SIGAE3_TCCCAGTCATTGGCAT-1-10x  | 0.08822715 | 0.2640563  | 0.0041422  |
| 9mo_SIGAE3_TCCCATGAGAGCATAT-1-10x  | 0.07137154 | 0.20404123 | 0.0013138  |
| 9mo_SIGAE3_TCCCATGGTCAAGGCA-1-10x  | 0.03905908 | 0.08899137 | 6.67E-05   |
| 9mo_SIGAE3_TCCCATGTGAGATGG-1-10x   | 0.26857913 | 0.906207   | 0.00075594 |
| 9mo_SIGAE3_TCCCATGTGCGTCTAA-1-10x  | 0.14476407 | 0.46535835 | 0.0018716  |
| 9mo_SIGAE3_TCCGAAAAGCACAAAT-1-10x  | 0.161305   | 0.524253   | 0.0017883  |
| 9mo_SIGAE3_TCCGAAAAGGAACGAA-1-10x  | 0.1344002  | 0.4284574  | 0.0019027  |
| 9mo_SIGAE3_TCCGAAACACGAAGAC-1-10x  | 0.08090586 | 0.23798855 | 0.0029431  |
| 9mo_SIGAE3_TCCGAAAGTACCGGCT-1-10x  | 0.2771406  | 0.93669045 | 0.00075222 |
| 9mo_SIGAE3_TCCGAAATCCTACCGT-1-10x  | 0.08668061 | 0.25854978 | 0.0039187  |
| 9mo_SIGAE3_TCCGGGACAGTCAGTT-1-10x  | 0.03073829 | 0.05936486 | 4.68E-05   |
| 9mo_SIGAE3_TCCGGGACAGTCTTCC-1-10x  | 0.2450333  | 0.82237107 | 0.00084014 |
| 9mo_SIGAE3_TCCGGGATCATCGGGC-1-10x  | 0.02707261 | 0.04631304 | 4.19E-05   |
| 9mo_SIGAE3_TCCGTGTTCCGATTAC-1-10x  | 0.05530573 | 0.14683823 | 0.000233   |
| 9mo_SIGAE3_TCCTCGAAGACCCGCT-1-10x  | 0.26687986 | 0.9001567  | 0.00075831 |
| 9mo_SIGAE3_TCCTCGAGTGCGGCTT-1-10x  | 0.01670017 | 0.00938154 | 3.38E-05   |
| 9mo_SIGAE3_TCCTCTTAGCTGTGCC-1-10x  | 0.12467966 | 0.393847   | 0.0020803  |
| 9mo_SIGAE3_TCCTCTTTGCGGCTGA-1-10x  | 0.07901362 | 0.23125118 | 0.002576   |
| 9mo_SIGAE3_TCCTGCACAGAACTAA-1-10x  | 0.28276232 | 0.9567069  | 0.00075462 |
| 9mo_SIGAE3_TCCTTTGTCGTGATT-1-10x   | 0.25456983 | 0.85632634 | 0.00079207 |
| 9mo_SIGAE3_TCGAACACATTGACCA-1-10x  | 0.13852169 | 0.4431321  | 0.0018802  |
| 9mo_SIGAE3_TCGAACATCGTTGCCT-1-10x  | 0.08926968 | 0.2677683  | 0.0042295  |

|                                    |            |            |            |
|------------------------------------|------------|------------|------------|
| 9mo_SIGAE3_TCGAAGTCAACCGCTG-1-10x  | 0.02234504 | 0.02948034 | 3.76E-05   |
| 9mo_SIGAE3_TCGACCTAGTCAACAA-1-10x  | 0.04300705 | 0.10304827 | 8.29E-05   |
| 9mo_SIGAE3_TCGACCTTCTCCCATG-1-10x  | 0.09705068 | 0.29547286 | 0.0043435  |
| 9mo_SIGAE3_TCGACGGAGTCCTGCG-1-10x  | 0.23498769 | 0.78660333 | 0.00090964 |
| 9mo_SIGAE3_TCGACGGTCACCATCC-1-10x  | 0.06420298 | 0.17851727 | 0.00058553 |
| 9mo_SIGAE3_TCGATTTCACTTGACA-1-10x  | 0.06022051 | 0.16433753 | 0.00038577 |
| 9mo_SIGAE3_TCGATTTGTAGTTACC-1-10x  | 0.17449506 | 0.57121676 | 0.0015753  |
| 9mo_SIGAE3_TCGATTTTCTCAGAAC-1-10x  | 0.07335773 | 0.21111315 | 0.0015819  |
| 9mo_SIGAE3_TCGCACTAGAAAGCGA-1-10x  | 0.09443558 | 0.2861617  | 0.0044051  |
| 9mo_SIGAE3_TCGCAGGCATAGGTTTC-1-10x | 0.21403646 | 0.7120056  | 0.0010701  |
| 9mo_SIGAE3_TCGCAGGTCGACACTA-1-10x  | 0.14770547 | 0.47583133 | 0.0018716  |
| 9mo_SIGAE3_TCGCTCAAGGTAGTCG-1-10x  | 0.14507265 | 0.4664571  | 0.0018716  |
| 9mo_SIGAE3_TCGCTCATCCGGCAAC-1-10x  | 0.04697522 | 0.11717711 | 0.00010777 |
| 9mo_SIGAE3_TCGCTTGCATCCGAGC-1-10x  | 0.17295343 | 0.5657277  | 0.0016089  |
| 9mo_SIGAE3_TCGGATAAGCTGGCCT-1-10x  | 0.04424608 | 0.10745989 | 8.81E-05   |
| 9mo_SIGAE3_TCGGATAGTACTCAAC-1-10x  | 0.07185356 | 0.2057575  | 0.0014433  |
| 9mo_SIGAE3_TCGGGACAGCACACCC-1-10x  | 0.17242034 | 0.56382966 | 0.0016089  |
| 9mo_SIGAE3_TCGGGACAGCGACAGT-1-10x  | 0.18470524 | 0.6075705  | 0.0013959  |
| 9mo_SIGAE3_TCGGGACAGGGCCTCT-1-10x  | 0.19730304 | 0.6524255  | 0.0012292  |
| 9mo_SIGAE3_TCGGGACCACAGTGTT-1-10x  | 0.07668351 | 0.2229547  | 0.0022191  |
| 9mo_SIGAE3_TCGGGACGTCTCGACG-1-10x  | 0.2369705  | 0.7936632  | 0.00089602 |
| 9mo_SIGAE3_TCGGGACGTGCCACA-1-10x   | 0.10834709 | 0.3356942  | 0.0033168  |
| 9mo_SIGAE3_TCGGGACTCAGTGTGT-1-10x  | 0.23900284 | 0.8008994  | 0.00088278 |
| 9mo_SIGAE3_TCGGGCACAGCTGTTA-1-10x  | 0.02250904 | 0.03006426 | 3.76E-05   |
| 9mo_SIGAE3_TCGGGCAGTCCACACG-1-10x  | 0.05451158 | 0.14401066 | 0.00021164 |
| 9mo_SIGAE3_TCGGGCAGTTCCGCTT-1-10x  | 0.01649286 | 0.0086434  | 3.38E-05   |
| 9mo_SIGAE3_TCGGGCATCTGCTTTA-1-10x  | 0.08935798 | 0.26808268 | 0.0042295  |
| 9mo_SIGAE3_TCGGGTGTCCAAGAGG-1-10x  | 0.0958645  | 0.29124942 | 0.0043808  |
| 9mo_SIGAE3_TCGGTCTCAAGAATGT-1-10x  | 0.03600929 | 0.07813247 | 5.58E-05   |
| 9mo_SIGAE3_TCGTAGAAGGGTTTCT-1-10x  | 0.23041998 | 0.7703398  | 0.00094498 |
| 9mo_SIGAE3_TCGTAGATCCACGGGT-1-10x  | 0.2629176  | 0.8860489  | 0.00076511 |
| 9mo_SIGAE3_TCGTAGATCGCCGAAC-1-10x  | 0.22469448 | 0.74995387 | 0.00098869 |
| 9mo_SIGAE3_TCGTAGATCGTTCAGA-1-10x  | 0.04544244 | 0.11171959 | 9.39E-05   |
| 9mo_SIGAE3_TCGTCCAGTATCGAAA-1-10x  | 0.12021558 | 0.37795246 | 0.0022788  |
| 9mo_SIGAE3_TCGTCCATCGTTATCT-1-10x  | 0.15928309 | 0.5170539  | 0.0018109  |
| 9mo_SIGAE3_TCGTGCTCATACTTTC-1-10x  | 0.11578251 | 0.3621683  | 0.002594   |
| 9mo_SIGAE3_TCGTGCTGTTGGGATG-1-10x  | 0.01530345 | 0.00440846 | 3.27E-05   |
| 9mo_SIGAE3_TCGTGGGAGGATTCCCT-1-10x | 0.09947277 | 0.30409682 | 0.0041652  |
| 9mo_SIGAE3_TCGTGGGTCCCATGGG-1-10x  | 0.09192541 | 0.27722412 | 0.0043903  |
| 9mo_SIGAE3_TCTACATGTAGTCTTG-1-10x  | 0.2864237  | 0.96974343 | 0.00075773 |
| 9mo_SIGAE3_TCTACGGTAGACAGC-1-10x   | 0.08567741 | 0.25497785 | 0.0037839  |

|                                    |            |            |            |
|------------------------------------|------------|------------|------------|
| 9mo_SIGAE3_TCTACCGTCTCATTAC-1-10x  | 0.09131448 | 0.27504888 | 0.0043535  |
| 9mo_SIGAE3_TCTACCGTCTTGAACG-1-10x  | 0.05220575 | 0.13580063 | 0.00017575 |
| 9mo_SIGAE3_TCTATCATCGGCTCTT-1-10x  | 0.07930329 | 0.23228256 | 0.002576   |
| 9mo_SIGAE3_TCTCACGAGACTAAGT-1-10x  | 0.25916067 | 0.8726722  | 0.00077499 |
| 9mo_SIGAE3_TCTCACGGTATTAAGG-1-10x  | 0.04660816 | 0.11587019 | 0.00010777 |
| 9mo_SIGAE3_TCTCACGTCCAAACCA-1-10x  | 0.02600807 | 0.04252269 | 4.09E-05   |
| 9mo_SIGAE3_TCTCAGCAGTGATAAC-1-10x  | 0.26237112 | 0.8841032  | 0.00076727 |
| 9mo_SIGAE3_TCTCCGAGTGCCTTCT-1-10x  | 0.0896603  | 0.2691591  | 0.0042295  |
| 9mo_SIGAE3_TCTCCGATCACAAGAA-1-10x  | 0.02240334 | 0.0296879  | 3.76E-05   |
| 9mo_SIGAE3_TCTGCCATCGAGCCAC-1-10x  | 0.09405478 | 0.28480583 | 0.0044154  |
| 9mo_SIGAE3_TCTGGCTCATTAGCA-1-10x   | 0.04759197 | 0.11937306 | 0.00011598 |
| 9mo_SIGAE3_TCTGGCTGTAAGAACT-1-10x  | 0.24263345 | 0.8138263  | 0.00085764 |
| 9mo_SIGAE3_TCTGGCTCCCTTGTG-1-10x   | 0.15194348 | 0.49092096 | 0.0018651  |
| 9mo_SIGAE3_TCTGTGCGTCAAGGCA-1-10x  | 0.08899795 | 0.2668008  | 0.0042295  |
| 9mo_SIGAE3_TCTGTGCGTGGCAGAT-1-10x  | 0.17540012 | 0.5744393  | 0.0015585  |
| 9mo_SIGAE3_TCTGTGCGTCCCGTGTT-1-10x | 0.13361514 | 0.42566213 | 0.0019115  |
| 9mo_SIGAE3_TCTGTGCGTCTTATCT-1-10x  | 0.09770485 | 0.29780206 | 0.0042943  |
| 9mo_SIGAE3_TCTTAGTAGAAATTCG-1-10x  | 0.17628735 | 0.57759833 | 0.0015416  |
| 9mo_SIGAE3_TCTTAGTCATGACTTG-1-10x  | 0.05067983 | 0.13036755 | 0.00014746 |
| 9mo_SIGAE3_TCTTAGTGTCGTGCG-1-10x   | 0.17793418 | 0.58346194 | 0.0015248  |
| 9mo_SIGAE3_TCTTCCTGTACTCGCG-1-10x  | 0.08119138 | 0.23900515 | 0.0029431  |
| 9mo_SIGAE3_TCTTCCTGTGGACAGT-1-10x  | 0.03858125 | 0.08729003 | 6.36E-05   |
| 9mo_SIGAE3_TCTTGCGAGTTCTCTT-1-10x  | 0.23260202 | 0.778109   | 0.00092358 |
| 9mo_SIGAE3_TCTTGCGTCAACGAGG-1-10x  | 0.02918151 | 0.05382186 | 4.42E-05   |
| 9mo_SIGAE3_TCTTGCGTCGTGCTT-1-10x   | 0.29028037 | 0.9834752  | 0.00076163 |
| 9mo_SIGAE3_TCTTTGAAGAGATTCA-1-10x  | 0.14832604 | 0.4780409  | 0.0018713  |
| 9mo_SIGAE3_TCTTTGACAGCATACT-1-10x  | 0.02767947 | 0.04847379 | 4.19E-05   |
| 9mo_SIGAE3_TGAACGTGTACGTGAG-1-10x  | 0.10663098 | 0.3295839  | 0.0034182  |
| 9mo_SIGAE3_TGAATCGCACAAAGGTG-1-10x | 0.18516229 | 0.6091979  | 0.0013959  |
| 9mo_SIGAE3_TGAATGCCAATTGAGA-1-10x  | 0.04089889 | 0.09554207 | 7.40E-05   |
| 9mo_SIGAE3_TGAATGCCACTGGCGT-1-10x  | 0.05203461 | 0.13519128 | 0.00016076 |
| 9mo_SIGAE3_TGAATGCCAGCTCGGT-1-10x  | 0.26224735 | 0.88366246 | 0.00076727 |
| 9mo_SIGAE3_TGACAGTAGACGGATC-1-10x  | 0.2696967  | 0.91018623 | 0.00075499 |
| 9mo_SIGAE3_TGACAGTAGCCGCTTG-1-10x  | 0.25871864 | 0.87109834 | 0.000778   |
| 9mo_SIGAE3_TGACAGTTCGTGGTAT-1-10x  | 0.01504755 | 0.00349733 | 3.27E-05   |
| 9mo_SIGAE3_TGACCCTAGCGAGGAG-1-10x  | 0.27407417 | 0.9257723  | 0.00075233 |
| 9mo_SIGAE3_TGACCCTGTTCGGTTA-1-10x  | 0.24351409 | 0.8169619  | 0.00085167 |
| 9mo_SIGAE3_TGACGCGTCATGAGTC-1-10x  | 0.05128132 | 0.13250917 | 0.00016076 |
| 9mo_SIGAE3_TGACGCGTCATTCGGA-1-10x  | 0.1067318  | 0.32994288 | 0.0034182  |
| 9mo_SIGAE3_TGACGCGTCCAGCTCT-1-10x  | 0.02001265 | 0.02117576 | 3.55E-05   |
| 9mo_SIGAE3_TGACTCCAGCTAATGA-1-10x  | 0.05676446 | 0.15203212 | 0.000257   |

|                                    |            |            |            |
|------------------------------------|------------|------------|------------|
| 9mo_SIGAE3_TGACTCCTCCTGGGTG-1-10x  | 0.23508443 | 0.7869477  | 0.00090964 |
| 9mo_SIGAE3_TGACTCCTCGCAAGAG-1-10x  | 0.22732465 | 0.7593187  | 0.00096676 |
| 9mo_SIGAE3_TGAGACTAGTTCTACG-1-10x  | 0.06744894 | 0.19007464 | 0.00088537 |
| 9mo_SIGAE3_TGAGACTGTAGGGAGG-1-10x  | 0.0835015  | 0.24723043 | 0.0034742  |
| 9mo_SIGAE3_TGAGACTGTTCGTATGT-1-10x | 0.11292542 | 0.35199553 | 0.0028393  |
| 9mo_SIGAE3_TGAGCATGTAGAGTTA-1-10x  | 0.16132788 | 0.5243345  | 0.0017883  |
| 9mo_SIGAE3_TGAGCATTGAGGACAG-1-10x  | 0.27766868 | 0.93857074 | 0.00075239 |
| 9mo_SIGAE3_TGAGCGCAGTCGCCAC-1-10x  | 0.21463145 | 0.7141241  | 0.0010625  |
| 9mo_SIGAE3_TGAGCGCCACCCTCTA-1-10x  | 0.0913375  | 0.27513084 | 0.0043535  |
| 9mo_SIGAE3_TGAGGAGGTGCCTATA-1-10x  | 0.01943593 | 0.01912233 | 3.55E-05   |
| 9mo_SIGAE3_TGAGGGACATCCGCGA-1-10x  | 0.02229284 | 0.02929447 | 3.76E-05   |
| 9mo_SIGAE3_TGAGGTTACATACGT-1-10x   | 0.04400351 | 0.10659622 | 8.81E-05   |
| 9mo_SIGAE3_TGAGGTTTCTCTTGCG-1-10x  | 0.24541418 | 0.82372725 | 0.00084014 |
| 9mo_SIGAE3_TGAGTCAGTAGACGTG-1-10x  | 0.25014597 | 0.840575   | 0.00081397 |
| 9mo_SIGAE3_TGAGTCAGTGTTGCCG-1-10x  | 0.17839117 | 0.585089   | 0.0015081  |
| 9mo_SIGAE3_TGATCAGAGGGTGGGA-1-10x  | 0.05740215 | 0.15430264 | 0.00028394 |
| 9mo_SIGAE3_TGATCTTAGCGACTTT-1-10x  | 0.04533763 | 0.11134639 | 9.39E-05   |
| 9mo_SIGAE3_TGATCTTCAATATCCG-1-10x  | 0.06580707 | 0.18422872 | 0.00072102 |
| 9mo_SIGAE3_TGATCTTGTACAGCGA-1-10x  | 0.0494126  | 0.12585549 | 0.00013566 |
| 9mo_SIGAE3_TGATCTTGTACAGTAA-1-10x  | 0.11694975 | 0.36632434 | 0.002453   |
| 9mo_SIGAE3_TGATCTTGTAGTCTGT-1-10x  | 0.09051164 | 0.27219033 | 0.0042999  |
| 9mo_SIGAE3_TGATGCAAGAAGTGTT-1-10x  | 0.24352708 | 0.8170082  | 0.00085167 |
| 9mo_SIGAE3_TGATGCAAGTTGAATG-1-10x  | 0.04130875 | 0.0970014  | 7.40E-05   |
| 9mo_SIGAE3_TGATGCAGTAATACCC-1-10x  | 0.26870263 | 0.9066467  | 0.00075594 |
| 9mo_SIGAE3_TGATGCAGTCGCACGT-1-10x  | 0.06246889 | 0.17234296 | 0.00052741 |
| 9mo_SIGAE3_TGATGGTAGAGGGTAA-1-10x  | 0.20435727 | 0.6775424  | 0.0011518  |
| 9mo_SIGAE3_TGATGGTCAACTCGTA-1-10x  | 0.27808085 | 0.9400383  | 0.00075239 |
| 9mo_SIGAE3_TGATGGTTCAAACGTA-1-10x  | 0.04730973 | 0.11836815 | 0.00010777 |
| 9mo_SIGAE3_TGATTCTTCCAGCAAT-1-10x  | 0.23107669 | 0.772678   | 0.00093779 |
| 9mo_SIGAE3_TGATTCTTCTCCTGTG-1-10x  | 0.02031127 | 0.02223901 | 3.62E-05   |
| 9mo_SIGAE3_TGATTTCGTTTACTGG-1-10x  | 0.01926057 | 0.01849796 | 3.55E-05   |
| 9mo_SIGAE3_TGCACGGAGCAGTACG-1-10x  | 0.04975391 | 0.12707077 | 0.00013566 |
| 9mo_SIGAE3_TGCACGGGTAACGCG-1-10x   | 0.20390354 | 0.6759269  | 0.0011608  |
| 9mo_SIGAE3_TGCACGGTCGATGGAG-1-10x  | 0.1083236  | 0.33561054 | 0.0033168  |
| 9mo_SIGAE3_TGCAGATAGAGCCGTA-1-10x  | 0.04669469 | 0.11617828 | 0.00010777 |
| 9mo_SIGAE3_TGCAGATCATTCTTCA-1-10x  | 0.10290997 | 0.3163351  | 0.0038193  |
| 9mo_SIGAE3_TGCAGGCTCCCTAGGG-1-10x  | 0.27049804 | 0.9130394  | 0.00075418 |
| 9mo_SIGAE3_TGCATCCAGGCGTCCT-1-10x  | 0.2523803  | 0.8485305  | 0.00080028 |
| 9mo_SIGAE3_TGCATCCGTACAAAGT-1-10x  | 0.28138378 | 0.9517985  | 0.00075401 |
| 9mo_SIGAE3_TGCATGAAGTTCACTG-1-10x  | 0.277173   | 0.9368059  | 0.00075222 |
| 9mo_SIGAE3_TGCATGAGTATGCAA-1-10x   | 0.04542065 | 0.11164202 | 9.39E-05   |

|                                    |            |            |            |
|------------------------------------|------------|------------|------------|
| 9mo_SIGAE3_TGCATGAGTCGCAACC-1-10x  | 0.23909432 | 0.8012251  | 0.00087632 |
| 9mo_SIGAE3_TGCCGAGGTCCCAAAT-1-10x  | 0.03438762 | 0.07235844 | 5.37E-05   |
| 9mo_SIGAE3_TGCCGAGTCCATTGGA-1-10x  | 0.09220757 | 0.27822876 | 0.0043903  |
| 9mo_SIGAE3_TGCGACGAGTGGTGAC-1-10x  | 0.0350088  | 0.07457016 | 5.37E-05   |
| 9mo_SIGAE3_TGCGACGCAGTCTGGC-1-10x  | 0.08831389 | 0.26436514 | 0.0041422  |
| 9mo_SIGAE3_TGCGACGTCTGTGCAA-1-10x  | 0.08647819 | 0.25782907 | 0.0039187  |
| 9mo_SIGAE3_TGCGGCAAGGGTTGCA-1-10x  | 0.02007058 | 0.02138202 | 3.55E-05   |
| 9mo_SIGAE3_TGCGGCAGTGCTCTTC-1-10x  | 0.03281924 | 0.06677416 | 5.00E-05   |
| 9mo_SIGAE3_TGCGGGTAGCACTAGG-1-10x  | 0.02021989 | 0.02191363 | 3.62E-05   |
| 9mo_SIGAE3_TGCGGGTTCATGGCCG-1-10x  | 0.24725679 | 0.83028793 | 0.0008292  |
| 9mo_SIGAE3_TGCTCCAAGACGAGCT-1-10x  | 0.08185475 | 0.24136713 | 0.0031253  |
| 9mo_SIGAE3_TGCTCCATCTTGCTC-1-10x   | 0.240516   | 0.8062871  | 0.00086997 |
| 9mo_SIGAE3_TGCTCGTCAGACGATG-1-10x  | 0.07750659 | 0.2258853  | 0.0023954  |
| 9mo_SIGAE3_TGCTCGTGTTACGTAC-1-10x  | 0.09153802 | 0.2758448  | 0.0043535  |
| 9mo_SIGAE3_TGCTCGTTCCTGGTG-1-10x   | 0.23105608 | 0.77260464 | 0.00093779 |
| 9mo_SIGAE3_TGCTCGTTCGAATCG-1-10x   | 0.2413632  | 0.8093036  | 0.00086374 |
| 9mo_SIGAE3_TGCTTCGAGGACGGAG-1-10x  | 0.19790298 | 0.65456164 | 0.0012187  |
| 9mo_SIGAE3_TGCTTCGGTCAGGTGA-1-10x  | 0.23607263 | 0.79046625 | 0.00090278 |
| 9mo_SIGAE3_TGCTTGCCAGCTGGTC-1-10x  | 0.27152103 | 0.91668177 | 0.00075352 |
| 9mo_SIGAE3_TGCTTGCTCCTGTACC-1-10x  | 0.09253246 | 0.27938557 | 0.0044107  |
| 9mo_SIGAE3_TGGAAC TCATAACTCG-1-10x | 0.10086281 | 0.30904612 | 0.0040879  |
| 9mo_SIGAE3_TGGAAC TGTTGGTGTT-1-10x | 0.0863615  | 0.2574136  | 0.0039187  |
| 9mo_SIGAE3_TGGATCACAAGTGACG-1-10x  | 0.08933704 | 0.2680081  | 0.0042295  |
| 9mo_SIGAE3_TGGATCACACAATGCT-1-10x  | 0.24752158 | 0.83123076 | 0.00082396 |
| 9mo_SIGAE3_TGGATGTGTAGGCAGT-1-10x  | 0.06190499 | 0.1703352  | 0.00047505 |
| 9mo_SIGAE3_TGGCGTGTCAACTCTT-1-10x  | 0.29103452 | 0.9861604  | 0.00076269 |
| 9mo_SIGAE3_TGGGAAGCAACTCCAA-1-10x  | 0.17677395 | 0.57933086 | 0.0015416  |
| 9mo_SIGAE3_TGGGAGACAGACAAAT-1-10x  | 0.18059334 | 0.59292996 | 0.001475   |
| 9mo_SIGAE3_TGGGAGACAGCGTTGC-1-10x  | 0.08324674 | 0.24632335 | 0.0034742  |
| 9mo_SIGAE3_TGGGAGATCCTGCTAC-1-10x  | 0.07230091 | 0.2073503  | 0.0014433  |
| 9mo_SIGAE3_TGGGATTCACCCATC-1-10x   | 0.2518244  | 0.8465511  | 0.00080467 |
| 9mo_SIGAE3_TGGGATTCATAGCAC-1-10x   | 0.04915275 | 0.12493029 | 0.00012523 |
| 9mo_SIGAE3_TGGGCGTAGGCTTTCA-1-10x  | 0.1969843  | 0.65129066 | 0.0012292  |
| 9mo_SIGAE3_TGGGCGTCACAATGCT-1-10x  | 0.05159582 | 0.13362896 | 0.00016076 |
| 9mo_SIGAE3_TGGGCGTTCTGTGCGG-1-10x  | 0.04838326 | 0.12219049 | 0.00012523 |
| 9mo_SIGAE3_TGGGCTGGTGAGCAGT-1-10x  | 0.05107056 | 0.13175875 | 0.00014746 |
| 9mo_SIGAE3_TGGGCTGGTTGTTGTG-1-10x  | 0.03040663 | 0.05818396 | 4.55E-05   |
| 9mo_SIGAE3_TGGGCTGTCACTACTT-1-10x  | 0.2391208  | 0.8013194  | 0.00087632 |
| 9mo_SIGAE3_TGGTAGTGTAACAGTA-1-10x  | 0.04021942 | 0.09312281 | 7.01E-05   |
| 9mo_SIGAE3_TGGTGATAGACTTCGT-1-10x  | 0.10020014 | 0.30668664 | 0.0040879  |
| 9mo_SIGAE3_TGGTGATAGATCGGTG-1-10x  | 0.25154376 | 0.8455519  | 0.00080467 |

|                                    |            |            |            |
|------------------------------------|------------|------------|------------|
| 9mo_SIGAE3_TGGTGATGTAAGCAAT-1-10x  | 0.27072978 | 0.9138645  | 0.00075418 |
| 9mo_SIGAE3_TGGTTAGAGGCTCAAG-1-10x  | 0.08967473 | 0.2692105  | 0.0042295  |
| 9mo_SIGAE3_TGTAACGCACCTATCC-1-10x  | 0.04928168 | 0.12538937 | 0.00012523 |
| 9mo_SIGAE3_TGTAACGGTGGAACAC-1-10x  | 0.23438022 | 0.78444034 | 0.00090964 |
| 9mo_SIGAE3_TGTAAGCCACGAGAAC-1-10x  | 0.06032684 | 0.16471611 | 0.00038577 |
| 9mo_SIGAE3_TGTAAGCGTGCGGTAA-1-10x  | 0.08700436 | 0.2597025  | 0.0040384  |
| 9mo_SIGAE3_TGTAAGCTCCACACCT-1-10x  | 0.1065528  | 0.32930556 | 0.00352    |
| 9mo_SIGAE3_TGTACAGAGCATGCAG-1-10x  | 0.02578888 | 0.04174226 | 4.00E-05   |
| 9mo_SIGAE3_TGTACAGGTACGAAAT-1-10x  | 0.03571264 | 0.07707624 | 5.58E-05   |
| 9mo_SIGAE3_TGTACAGGTTGAGAGC-1-10x  | 0.10547663 | 0.3254738  | 0.0036214  |
| 9mo_SIGAE3_TGTAGACAGTCAGAGC-1-10x  | 0.01827665 | 0.01499467 | 3.44E-05   |
| 9mo_SIGAE3_TGTAGACCATAATCCG-1-10x  | 0.2617931  | 0.8820451  | 0.00076727 |
| 9mo_SIGAE3_TGTAGACTCGCATAGT-1-10x  | 0.09781312 | 0.29818755 | 0.0042943  |
| 9mo_SIGAE3_TGTCAGATCCTGCTAC-1-10x  | 0.0607279  | 0.16614412 | 0.00042799 |
| 9mo_SIGAE3_TGTCCACCACGTGTGC-1-10x  | 0.06863421 | 0.19429485 | 0.00097948 |
| 9mo_SIGAE3_TGTCCACGTCTCCTGT-1-10x  | 0.03796835 | 0.08510778 | 6.07E-05   |
| 9mo_SIGAE3_TGTCCACGTGCCAGT-1-10x   | 0.06111391 | 0.16751851 | 0.00042799 |
| 9mo_SIGAE3_TGTCCCATCATGGTAC-1-10x  | 0.16393326 | 0.53361106 | 0.0017494  |
| 9mo_SIGAE3_TGTCCCATCGTAGAGG-1-10x  | 0.08239001 | 0.24327295 | 0.0033032  |
| 9mo_SIGAE3_TGTCCTGAGTCACACT-1-10x  | 0.0477729  | 0.12001727 | 0.00011598 |
| 9mo_SIGAE3_TGTCCTGCAGGTGTGA-1-10x  | 0.0438113  | 0.10591183 | 8.81E-05   |
| 9mo_SIGAE3_TGTCCTGGTCCAACGC-1-10x  | 0.05124809 | 0.13239086 | 0.00016076 |
| 9mo_SIGAE3_TGTCCTGTCATGCCGG-1-10x  | 0.06374094 | 0.17687216 | 0.00058553 |
| 9mo_SIGAE3_TGTGAGTAGAAGCCTG-1-10x  | 0.02889975 | 0.05281864 | 4.42E-05   |
| 9mo_SIGAE3_TGTGAGTTCGTGGGTC-1-10x  | 0.23043106 | 0.77037925 | 0.00094498 |
| 9mo_SIGAE3_TGTGATGCAAGCGATG-1-10x  | 0.24239862 | 0.81299025 | 0.00085764 |
| 9mo_SIGAE3_TGTGATGCAATTGGTC-1-10x  | 0.29034033 | 0.9836887  | 0.00076163 |
| 9mo_SIGAE3_TGTGATGCACTGTGTA-1-10x  | 0.03009384 | 0.05707026 | 4.55E-05   |
| 9mo_SIGAE3_TGTGGCGAGGAGTACC-1-10x  | 0.01548079 | 0.00503989 | 3.33E-05   |
| 9mo_SIGAE3_TGTGGCGCATCTCAAG-1-10x  | 0.01746648 | 0.01211    | 3.44E-05   |
| 9mo_SIGAE3_TGTGGCGTCAGATTGC-1-10x  | 0.15944433 | 0.517628   | 0.0018109  |
| 9mo_SIGAE3_TGTGTGACAATTCCT-1-10x   | 0.07761791 | 0.22628166 | 0.0023954  |
| 9mo_SIGAE3_TGTTACTTCCTAACAG-1-10x  | 0.2733751  | 0.9232833  | 0.0007526  |
| 9mo_SIGAE3_TGTTTCATAGCACGATG-1-10x | 0.04137496 | 0.09723716 | 7.40E-05   |
| 9mo_SIGAE3_TGTTTCATCATGAGATA-1-10x | 0.11706702 | 0.36674187 | 0.002453   |
| 9mo_SIGAE3_TGTTTCATGTGTTAGCT-1-10x | 0.03417139 | 0.07158853 | 5.17E-05   |
| 9mo_SIGAE3_TGTTCCGAGCACTCGC-1-10x  | 0.02233159 | 0.02943243 | 3.76E-05   |
| 9mo_SIGAE3_TGTTCCGAGGTTGACG-1-10x  | 0.131377   | 0.41769314 | 0.001934   |
| 9mo_SIGAE3_TGTTCCGGTGCGGATA-1-10x  | 0.12621774 | 0.39932337 | 0.0020515  |
| 9mo_SIGAE3_TGTTCTAAGATCGCCC-1-10x  | 0.10608188 | 0.32762882 | 0.00352    |
| 9mo_SIGAE3_TGTTCTAAGGTAGCCA-1-10x  | 0.02111641 | 0.02510575 | 3.69E-05   |

|                                   |            |            |            |
|-----------------------------------|------------|------------|------------|
| 9mo_SIGAE3_TGTTGAGGTGGGTATG-1-10x | 0.20909189 | 0.6944002  | 0.0011095  |
| 9mo_SIGAE3_TGTTGAGTCCGATGCG-1-10x | 0.02193665 | 0.02802625 | 3.69E-05   |
| 9mo_SIGAE3_TGTTGGAAGTTCGCAT-1-10x | 0.28323478 | 0.95838904 | 0.00075531 |
| 9mo_SIGAE3_TGTTGGACAAATAGCA-1-10x | 0.17017962 | 0.55585146 | 0.0016584  |
| 9mo_SIGAE3_TGTTGGACAAGTACCT-1-10x | 0.09970369 | 0.30491903 | 0.0041652  |
| 9mo_SIGAE3_TGTTTGTAGTGGTTGG-1-10x | 0.16729826 | 0.54559225 | 0.0017056  |
| 9mo_SIGAE3_TGTTTGTCAAACCATC-1-10x | 0.08253106 | 0.24377514 | 0.0033032  |
| 9mo_SIGAE3_TGTTTGTGTCCAAAGG-1-10x | 0.0850293  | 0.25267023 | 0.0037839  |
| 9mo_SIGAE3_TGTTTGTTCCTCGTAT-1-10x | 0.20042236 | 0.663532   | 0.0011985  |
| 9mo_SIGAE3_TTAATCCAGCTGACTT-1-10x | 0.04432764 | 0.10775027 | 8.81E-05   |
| 9mo_SIGAE3_TTAATCCCAATCGAAA-1-10x | 0.19626485 | 0.648729   | 0.00124    |
| 9mo_SIGAE3_TTAATCCCATGGTACT-1-10x | 0.02981837 | 0.05608943 | 4.55E-05   |
| 9mo_SIGAE3_TTAATCCGTAACATAG-1-10x | 0.16825227 | 0.54898906 | 0.0016902  |
| 9mo_SIGAE3_TTACAGGCAGTCGGTC-1-10x | 0.03920123 | 0.08949751 | 6.67E-05   |
| 9mo_SIGAE3_TTACAGGCATACCGTA-1-10x | 0.02466208 | 0.03773025 | 3.91E-05   |
| 9mo_SIGAE3_TTACAGGGTGGTAATA-1-10x | 0.03126483 | 0.0612396  | 4.68E-05   |
| 9mo_SIGAE3_TTACCATGTATCCTCC-1-10x | 0.2220582  | 0.7405673  | 0.0010106  |
| 9mo_SIGAE3_TTACCATGTCTCCCTA-1-10x | 0.04498922 | 0.11010587 | 9.39E-05   |
| 9mo_SIGAE3_TTACCATCAAGCCCG-1-10x  | 0.04174548 | 0.09855641 | 7.40E-05   |
| 9mo_SIGAE3_TTACCGCTCATTGTTC-1-10x | 0.02355544 | 0.03379002 | 3.83E-05   |
| 9mo_SIGAE3_TTACGCCCAATTAGGA-1-10x | 0.10790268 | 0.33411184 | 0.0033168  |
| 9mo_SIGAE3_TTACGCCTCGCTTACC-1-10x | 0.0483364  | 0.12202364 | 0.00011598 |
| 9mo_SIGAE3_TTACGTTAGAGAGAAC-1-10x | 0.23508422 | 0.786947   | 0.00090964 |
| 9mo_SIGAE3_TTACGTTCAATCGTCA-1-10x | 0.01775798 | 0.01314792 | 3.44E-05   |
| 9mo_SIGAE3_TTACGTTCAATTGCAC-1-10x | 0.10632177 | 0.32848296 | 0.00352    |
| 9mo_SIGAE3_TTACGTTACATAACC-1-10x  | 0.11047915 | 0.3432855  | 0.0030221  |
| 9mo_SIGAE3_TTACTGTGTCGCTCGA-1-10x | 0.06842031 | 0.19353327 | 0.00097948 |
| 9mo_SIGAE3_TTACTGTTCCCGTGTT-1-10x | 0.08283404 | 0.24485391 | 0.0033032  |
| 9mo_SIGAE3_TTAGGCAGTATTTCTC-1-10x | 0.04630571 | 0.1147933  | 0.00010046 |
| 9mo_SIGAE3_TTAGGGTAGGTGCATG-1-10x | 0.10762194 | 0.33311227 | 0.0033168  |
| 9mo_SIGAE3_TTAGGGTGTTCGGTTC-1-10x | 0.23431495 | 0.784208   | 0.00091657 |
| 9mo_SIGAE3_TTAGTCTCAAAGGGCT-1-10x | 0.02013205 | 0.02160089 | 3.55E-05   |
| 9mo_SIGAE3_TTAGTCTTCGTCTCAC-1-10x | 0.08514876 | 0.25309557 | 0.0037839  |
| 9mo_SIGAE3_TTATTGCCAGACCAGA-1-10x | 0.08788216 | 0.26282796 | 0.0041422  |
| 9mo_SIGAE3_TTCAATCAGTACTGTC-1-10x | 0.08337634 | 0.2467848  | 0.0034742  |
| 9mo_SIGAE3_TTCAATCGTGGTCTAT-1-10x | 0.06785801 | 0.19153117 | 0.00088537 |
| 9mo_SIGAE3_TTCACCGAGCGTGAGT-1-10x | 0.14801747 | 0.47694224 | 0.0018713  |
| 9mo_SIGAE3_TTCACCGGTCTCGGAC-1-10x | 0.0483476  | 0.12206353 | 0.00011598 |
| 9mo_SIGAE3_TTCACGCAGATAACAC-1-10x | 0.03802154 | 0.08529717 | 6.36E-05   |
| 9mo_SIGAE3_TTCACGCAGTCACAGG-1-10x | 0.14418547 | 0.46329823 | 0.0018716  |
| 9mo_SIGAE3_TTCAGGAAGACTTCCA-1-10x | 0.01644946 | 0.00848886 | 3.38E-05   |



|                                   |            |            |            |
|-----------------------------------|------------|------------|------------|
| 9mo_SIGAE3_TTCAGGACACGTGTGC-1-10x | 0.03149623 | 0.06206353 | 4.83E-05   |
| 9mo_SIGAE3_TTCATGTAGGAGGGTG-1-10x | 0.2522684  | 0.848132   | 0.00080028 |
| 9mo_SIGAE3_TTCATGTAGGCTTCCG-1-10x | 0.04309213 | 0.10335121 | 8.29E-05   |
| 9mo_SIGAE3_TTCATTGTCCATTAC-1-10x  | 0.04715125 | 0.11780386 | 0.00010777 |
| 9mo_SIGAE3_TTCCAATCAGCAGGAT-1-10x | 0.07148918 | 0.20446008 | 0.0013138  |
| 9mo_SIGAE3_TTCCACGAGAGTGACC-1-10x | 0.03924732 | 0.0896616  | 6.67E-05   |
| 9mo_SIGAE3_TTCCGTGCAGGTCTCG-1-10x | 0.10371693 | 0.3192083  | 0.0038193  |
| 9mo_SIGAE3_TTCCGTGGTACAGTAA-1-10x | 0.08570376 | 0.2550717  | 0.0037839  |
| 9mo_SIGAE3_TTCCTAAAGACAGTCG-1-10x | 0.03075573 | 0.05942695 | 4.68E-05   |
| 9mo_SIGAE3_TTCCTCAGATCCGAG-1-10x  | 0.03940712 | 0.09023056 | 6.67E-05   |
| 9mo_SIGAE3_TTCCTTCGTGGCTCTG-1-10x | 0.19900201 | 0.6584748  | 0.0012085  |
| 9mo_SIGAE3_TTCCTTCGTTGCGTAT-1-10x | 0.22788127 | 0.76130056 | 0.00095947 |
| 9mo_SIGAE3_TTCGATTAGAGAGTGA-1-10x | 0.25100437 | 0.8436313  | 0.00080923 |
| 9mo_SIGAE3_TTCGATTAGTGTCCA-1-10x  | 0.0311144  | 0.060704   | 4.68E-05   |
| 9mo_SIGAE3_TTCGCTGGTCTCTCTG-1-10x | 0.11393227 | 0.35558048 | 0.0027534  |
| 9mo_SIGAE3_TTCGGTCCATTGTGCA-1-10x | 0.09339184 | 0.2824454  | 0.0044107  |
| 9mo_SIGAE3_TTCTAACAGGATACCG-1-10x | 0.02119704 | 0.02539282 | 3.69E-05   |
| 9mo_SIGAE3_TTCTAACGTCGTTGGC-1-10x | 0.01874521 | 0.01666298 | 3.49E-05   |
| 9mo_SIGAE3_TTCTAACGTGATAGTA-1-10x | 0.10108291 | 0.30982977 | 0.0040036  |
| 9mo_SIGAE3_TTCTAGTCAACAGCCC-1-10x | 0.18423884 | 0.6059099  | 0.0014112  |
| 9mo_SIGAE3_TTCTCTCCACACCTAA-1-10x | 0.04444008 | 0.10815062 | 8.81E-05   |
| 9mo_SIGAE3_TTCTCTCGTGTGGTCC-1-10x | 0.07607916 | 0.2208029  | 0.0020486  |
| 9mo_SIGAE3_TTCTCTCTCGTTGTAG-1-10x | 0.0969694  | 0.29518348 | 0.0043435  |
| 9mo_SIGAE3_TTCTGTACAAACTGCT-1-10x | 0.05311424 | 0.13903536 | 0.00019264 |
| 9mo_SIGAE3_TTCTTGAAGCCATATC-1-10x | 0.04386005 | 0.10608543 | 8.81E-05   |
| 9mo_SIGAE3_TTCTTGAAGTGCTCGC-1-10x | 0.15085666 | 0.48705128 | 0.0018676  |
| 9mo_SIGAE3_TTGAACGCAGAAGTGC-1-10x | 0.02923792 | 0.0540227  | 4.42E-05   |
| 9mo_SIGAE3_TTGAACGGTCACGCTG-1-10x | 0.01990179 | 0.02078104 | 3.55E-05   |
| 9mo_SIGAE3_TTGAACGTCTAGATCG-1-10x | 0.12297325 | 0.38777125 | 0.0021479  |
| 9mo_SIGAE3_TTGAGTGAGACCGTTT-1-10x | 0.0413627  | 0.09719349 | 7.40E-05   |
| 9mo_SIGAE3_TTGATGGGTCCAAATC-1-10x | 0.08723342 | 0.2605181  | 0.0040384  |
| 9mo_SIGAE3_TTGCATTAGACCTCAT-1-10x | 0.0419245  | 0.09919381 | 7.82E-05   |
| 9mo_SIGAE3_TTGCATTTGTTTCATT-1-10x | 0.04058194 | 0.09441356 | 7.01E-05   |
| 9mo_SIGAE3_TTGCCTGAGGCACTCC-1-10x | 0.05889757 | 0.15962714 | 0.00034795 |
| 9mo_SIGAE3_TTGCCTGAGTTCCTGA-1-10x | 0.25789386 | 0.8681617  | 0.000778   |
| 9mo_SIGAE3_TTGCCTGCACAATTCG-1-10x | 0.05614081 | 0.1498116  | 0.000257   |
| 9mo_SIGAE3_TTGCCTGCATTACCC-1-10x  | 0.03836478 | 0.08651928 | 6.36E-05   |
| 9mo_SIGAE3_TTGCCTCCACGGCTAC-1-10x | 0.2100017  | 0.69763964 | 0.0011014  |
| 9mo_SIGAE3_TTGCCTCTCCTTTAGT-1-10x | 0.17138013 | 0.56012595 | 0.0016421  |
| 9mo_SIGAE3_TTGCTGCCACGATTCA-1-10x | 0.24251491 | 0.81340426 | 0.00085764 |
| 9mo_SIGAE3_TTGATGCACGCTTAA-1-10x  | 0.15339254 | 0.4960804  | 0.0018617  |

|                                     |            |            |            |
|-------------------------------------|------------|------------|------------|
| 9mo_SIGAE3_TTGGATGTCATTCCTACT-1-10x | 0.05051797 | 0.12979123 | 0.00014746 |
| 9mo_SIGAE3_TTGGGATCAAAGACTA-1-10x   | 0.13840303 | 0.44270962 | 0.0018802  |
| 9mo_SIGAE3_TTGGGATCAACGTTAC-1-10x   | 0.04243543 | 0.10101299 | 7.82E-05   |
| 9mo_SIGAE3_TTGGGATCAGCTCGGT-1-10x   | 0.07365443 | 0.21216954 | 0.0015819  |
| 9mo_SIGAE3_TTGGGCGAGTCACTGT-1-10x   | 0.16449806 | 0.53562206 | 0.0017494  |
| 9mo_SIGAE3_TTGGGCGGTAGGCTCC-1-10x   | 0.03326267 | 0.06835299 | 5.00E-05   |
| 9mo_SIGAE3_TTGGGCGTCGCAATTG-1-10x   | 0.04574534 | 0.11279806 | 0.00010046 |
| 9mo_SIGAE3_TTGGGTACAGAGCTAG-1-10x   | 0.04617878 | 0.11434136 | 0.00010046 |
| 9mo_SIGAE3_TTGGGTAGTCGACGCT-1-10x   | 0.15562347 | 0.5040237  | 0.0018459  |
| 9mo_SIGAE3_TTGGTTTTAGGACTATA-1-10x  | 0.08306521 | 0.24567702 | 0.0033032  |
| 9mo_SIGAE3_TTGGTTTTTCATTGGTG-1-10x  | 0.07083947 | 0.20214675 | 0.0011935  |
| 9mo_SIGAE3_TTGGTTTTCTTCGTGC-1-10x   | 0.29195338 | 0.98943204 | 0.00076378 |
| 9mo_SIGAE3_TTGTGGACATAACAGA-1-10x   | 0.05118908 | 0.13218074 | 0.00016076 |
| 9mo_SIGAE3_TTGTGGATCAAGGTGG-1-10x   | 0.17499636 | 0.5730017  | 0.0015753  |
| 9mo_SIGAE3_TTGTGGATCGAGAAAT-1-10x   | 0.02186052 | 0.02775518 | 3.69E-05   |
| 9mo_SIGAE3_TTGTGTTGTAGCGTCC-1-10x   | 0.02102633 | 0.024785   | 3.62E-05   |
| 9mo_SIGAE3_TTGTGTTGTGCCACA-1-10x    | 0.26977614 | 0.910469   | 0.00075499 |
| 9mo_SIGAE3_TTGTTCAGTACCATC-1-10x    | 0.26488897 | 0.8930681  | 0.00076135 |
| 9mo_SIGAE3_TTGTTCAGTCGTGATT-1-10x   | 0.07832626 | 0.2288038  | 0.0023954  |
| 9mo_SIGAE3_TTGTGTGTCTGTTCAA-1-10x   | 0.01537264 | 0.0046548  | 3.27E-05   |
| 9mo_SIGAE3_TTGTGTGTGTACATC-1-10x    | 0.26628602 | 0.8980423  | 0.00075831 |
| 9mo_SIGAE3_TTGTGTGTGTTGAC-1-10x     | 0.22713368 | 0.75863874 | 0.00096676 |
| 9mo_SIGAE3_TTGTGTTCAACCTCC-1-10x    | 0.11093602 | 0.34491217 | 0.0030221  |
| 9mo_SIGAE3_TTGTGTTGAGAACAAGG-1-10x  | 0.16427529 | 0.53482884 | 0.0017494  |
| 9mo_SIGAE3_TTGTGTTGCACTAACCA-1-10x  | 0.11344638 | 0.35385042 | 0.0027534  |
| 9mo_SIGAE3_TTGTGTTGCAGCTCGGT-1-10x  | 0.17429377 | 0.5705001  | 0.0015753  |
| 9mo_SIGAE3_TTTACCAAGCTAGCCC-1-10x   | 0.02139958 | 0.02611397 | 3.69E-05   |
| 9mo_SIGAE3_TTTACCAAGTGTAGAT-1-10x   | 0.1509776  | 0.4874819  | 0.0018676  |
| 9mo_SIGAE3_TTTACCACAAGTGCTT-1-10x   | 0.05899498 | 0.15997398 | 0.00034795 |
| 9mo_SIGAE3_TTTACGTCACCTCAGG-1-10x   | 0.28763708 | 0.97406363 | 0.00075864 |
| 9mo_SIGAE3_TTTACGTCAGCAGGAT-1-10x   | 0.01533071 | 0.00450551 | 3.27E-05   |
| 9mo_SIGAE3_TTTACGTGTGCCTGCA-1-10x   | 0.24454185 | 0.8206213  | 0.00084583 |
| 9mo_SIGAE3_TTTACGTGTTATGACC-1-10x   | 0.05001819 | 0.12801175 | 0.00013566 |
| 9mo_SIGAE3_TTTACTGGTGGCTAGA-1-10x   | 0.07218082 | 0.20692271 | 0.0014433  |
| 9mo_SIGAE3_TTTACTGTGCAAGAG-1-10x    | 0.08988105 | 0.26994509 | 0.0042999  |
| 9mo_SIGAE3_TTTATGCAGACGCCAA-1-10x   | 0.27851737 | 0.9415925  | 0.00075266 |
| 9mo_SIGAE3_TTTATGCCAACGATTC-1-10x   | 0.08004554 | 0.23492537 | 0.0027593  |
| 9mo_SIGAE3_TTTCAGTGTTCCGGCT-1-10x   | 0.2560167  | 0.861478   | 0.00078463 |
| 9mo_SIGAE3_TTTCCTCCACGTAGTT-1-10x   | 0.05372141 | 0.14119719 | 0.00019264 |
| 9mo_SIGAE3_TTTCCTCGTTTCCATT-1-10x   | 0.13585362 | 0.43363234 | 0.0018891  |
| 9mo_SIGAE3_TTTCCTCTCACGGGCT-1-10x   | 0.08487418 | 0.2521179  | 0.0036353  |

|                                   |            |            |            |
|-----------------------------------|------------|------------|------------|
| 9mo_SIGAE3_TTTCGATGTAGCTTTG-1-10x | 0.0502095  | 0.1286929  | 0.00013566 |
| 9mo_SIGAE3_TTTGACTTCGAGAATA-1-10x | 0.27491078 | 0.9287511  | 0.00075218 |
| 9mo_SIGAE3_TTTGATCCAAGCGAAC-1-10x | 0.265802   | 0.8963189  | 0.00075974 |
| 9mo_SIGAE3_TTTGATCCAGATCCAT-1-10x | 0.20731711 | 0.6880811  | 0.001126   |
| 9mo_SIGAE3_TTTGATCGTTGCCATA-1-10x | 0.07928801 | 0.23222815 | 0.002576   |
| 9mo_SIGAE3_TTTGATCTCCCGATCT-1-10x | 0.07810109 | 0.22800207 | 0.0023954  |
| 9mo_SIGAE3_TTTGATCTCTTTCTAG-1-10x | 0.26628524 | 0.8980395  | 0.00075831 |
| 9mo_SIGAE3_TTTGGAGCAATCGTCA-1-10x | 0.07270935 | 0.20880456 | 0.0014433  |
| 9mo_SIGAE3_TTTGGAGTCGAAATCC-1-10x | 0.20927069 | 0.6950368  | 0.0011095  |
| 9mo_SIGAE3_TTTGGTTGTTTCGTTT-1-10x | 0.2357755  | 0.7894083  | 0.00090278 |
| 9mo_SIGAE3_TTTGTTGCACCAGTTA-1-10x | 0.13432066 | 0.4281742  | 0.0019027  |
| 9mo_SIGAE3_TTTGTTGGTCGTGATT-1-10x | 0.08195783 | 0.24173413 | 0.0031253  |
| 9mo_SIGAE3_TTTGTTGGTTGCTTGA-1-10x | 0.09165264 | 0.27625293 | 0.0043903  |
| 9mo_SIGAE3_AAACGCTTCTGCGGAC-1-10x | 0.0823952  | 0.24329144 | 0.0033032  |
| 9mo_SIGAE3_AAAGAACGTTTGTGG-1-10x  | 0.01657402 | 0.00893236 | 3.38E-05   |
| 9mo_SIGAE3_AAAGGATAGAGCCGAT-1-10x | 0.24658638 | 0.82790095 | 0.0008292  |
| 9mo_SIGAE3_AAAGGGCAGAGTGACC-1-10x | 0.18772078 | 0.6183075  | 0.0013519  |
| 9mo_SIGAE3_AAAGGTACACTTGGGC-1-10x | 0.12381686 | 0.39077494 | 0.0021124  |
| 9mo_SIGAE3_AAAGTCCCAGACACCC-1-10x | 0.17785169 | 0.5831682  | 0.0015248  |
| 9mo_SIGAE3_AAAGTCCGTTAGGGTG-1-10x | 0.02391367 | 0.0350655  | 3.83E-05   |
| 9mo_SIGAE3_AAAGTGACAGTCCCGA-1-10x | 0.02952794 | 0.05505535 | 4.42E-05   |
| 9mo_SIGAE3_AAAGTGATCCGAGTGC-1-10x | 0.09673667 | 0.29435483 | 0.0043435  |
| 9mo_SIGAE3_AAATGGACACGCACCA-1-10x | 0.02072509 | 0.02371244 | 3.62E-05   |
| 9mo_SIGAE3_AAATGGACACTTTAGG-1-10x | 0.03872408 | 0.08779858 | 6.36E-05   |
| 9mo_SIGAE3_AACAAAGAGAAATCCA-1-10x | 0.04651223 | 0.11552862 | 0.00010777 |
| 9mo_SIGAE3_AACAAAGAGTACAACA-1-10x | 0.28445035 | 0.9627172  | 0.00075605 |
| 9mo_SIGAE3_AACAAAGCAGTAGAAT-1-10x | 0.21633722 | 0.7201975  | 0.001055   |
| 9mo_SIGAE3_AACAACCGTGTAGGAC-1-10x | 0.07225183 | 0.20717555 | 0.0014433  |
| 9mo_SIGAE3_AACAAGATCGTGCTCT-1-10x | 0.04460658 | 0.10874347 | 9.39E-05   |
| 9mo_SIGAE3_AACACACCATACTGAC-1-10x | 0.07444334 | 0.2149785  | 0.0017292  |
| 9mo_SIGAE3_AACCACATCGAGAAAT-1-10x | 0.01744018 | 0.01201636 | 3.44E-05   |
| 9mo_SIGAE3_AACCATGAGCTTCTAG-1-10x | 0.275723   | 0.9316431  | 0.00075214 |
| 9mo_SIGAE3_AACCTTTCACGTCTCT-1-10x | 0.15159294 | 0.48967284 | 0.0018676  |
| 9mo_SIGAE3_AACGAAAAGTGATAGT-1-10x | 0.0322205  | 0.06464233 | 4.83E-05   |
| 9mo_SIGAE3_AACGAAACACCGTGCA-1-10x | 0.02356525 | 0.03382493 | 3.83E-05   |
| 9mo_SIGAE3_AACGAAACAGCTCATA-1-10x | 0.02691951 | 0.0457679  | 4.19E-05   |
| 9mo_SIGAE3_AACGGGACAAGGTCTT-1-10x | 0.05986138 | 0.16305883 | 0.00038577 |
| 9mo_SIGAE3_AAGATAGAGTAAGCAT-1-10x | 0.10694174 | 0.33069038 | 0.0034182  |
| 9mo_SIGAE3_AAGATAGCATTCTAT-1-10x  | 0.03984533 | 0.09179085 | 6.67E-05   |
| 9mo_SIGAE3_AAGCCATCATCATCTT-1-10x | 0.2816523  | 0.9527546  | 0.00075401 |
| 9mo_SIGAE3_AAGCGAGGTCTCCCTA-1-10x | 0.07376996 | 0.21258089 | 0.0017292  |

|                                    |            |            |            |
|------------------------------------|------------|------------|------------|
| 9mo_SIGAE3_AAGCGAGTCATCAGTG-1-10x  | 0.06451819 | 0.1796396  | 0.00064991 |
| 9mo_SIGAE3_AAGCGTTTCATTCGGA-1-10x  | 0.08891315 | 0.26649886 | 0.0042295  |
| 9mo_SIGAE3_AAGGAATAGGCCATAG-1-10x  | 0.05008232 | 0.12824008 | 0.00013566 |
| 9mo_SIGAE3_AAGGAATAGTGCACAG-1-10x  | 0.01997989 | 0.0210591  | 3.55E-05   |
| 9mo_SIGAE3_AAGGAATGTCTTCGAA-1-10x  | 0.06649571 | 0.18668063 | 0.00079936 |
| 9mo_SIGAE3_AAGGAATTCGGCTTCT-1-10x  | 0.08718993 | 0.26036325 | 0.0040384  |
| 9mo_SIGAE3_AAGTGAACATAACAGA-1-10x  | 0.06970181 | 0.1980961  | 0.0010821  |
| 9mo_SIGAE3_AAGTGAATCGGAGTAG-1-10x  | 0.06880109 | 0.19488904 | 0.00097948 |
| 9mo_SIGAE3_AAGTTCGCAGGTATGG-1-10x  | 0.07248001 | 0.20798798 | 0.0014433  |
| 9mo_SIGAE3_AATCGTGGTCATCACA-1-10x  | 0.05416924 | 0.14279172 | 0.00021164 |
| 9mo_SIGAE3_AATGAAGGTGTTACAC-1-10x  | 0.09536098 | 0.2894566  | 0.0043808  |
| 9mo_SIGAE3_AATGAAGTCCCGAGAC-1-10x  | 0.07288513 | 0.20943044 | 0.0015819  |
| 9mo_SIGAE3_AATGCCAAGCACTGGA-1-10x  | 0.04078632 | 0.09514125 | 7.01E-05   |
| 9mo_SIGAE3_AATGCCAAGGTTGTTC-1-10x  | 0.04819175 | 0.12150863 | 0.00011598 |
| 9mo_SIGAE3_AATGCCATCCTCTCGA-1-10x  | 0.07856617 | 0.22965801 | 0.002576   |
| 9mo_SIGAE3_AATGGAAAGAGTCAGC-1-10x  | 0.29350778 | 0.9949665  | 0.00076488 |
| 9mo_SIGAE3_AATGGAAACATGTCTAG-1-10x | 0.22477733 | 0.75024885 | 0.00098869 |
| 9mo_SIGAE3_AATTCCTCAATTCTCT-1-10x  | 0.0732121  | 0.21059462 | 0.0015819  |
| 9mo_SIGAE3_AATTCCTCATGATGCT-1-10x  | 0.24469829 | 0.82117826 | 0.00084014 |
| 9mo_SIGAE3_AATTCCTGTCCTTAAG-1-10x  | 0.19243811 | 0.63510376 | 0.0012861  |
| 9mo_SIGAE3_ACACAGTCAATGTCTG-1-10x  | 0.25636065 | 0.8627026  | 0.00078463 |
| 9mo_SIGAE3_ACAGAAACAGAAACCG-1-10x  | 0.26813856 | 0.90463835 | 0.00075705 |
| 9mo_SIGAE3_ACAGAAATCCGCACGA-1-10x  | 0.01784331 | 0.01345172 | 3.44E-05   |
| 9mo_SIGAE3_ACAGAAATCGTTAGTG-1-10x  | 0.08620993 | 0.25687394 | 0.0039187  |
| 9mo_SIGAE3_ACAGCCGCAGCGGATA-1-10x  | 0.02117537 | 0.02531568 | 3.69E-05   |
| 9mo_SIGAE3_ACATCCCAGTCTTGGT-1-10x  | 0.18997402 | 0.62633026 | 0.0013244  |
| 9mo_SIGAE3_ACATCGAGTCTAGGCC-1-10x  | 0.14003396 | 0.44851664 | 0.001875   |
| 9mo_SIGAE3_ACCAAACCATAACGGG-1-10x  | 0.02788011 | 0.04918818 | 4.30E-05   |
| 9mo_SIGAE3_ACCAACAGTCACAGTT-1-10x  | 0.08160697 | 0.2404849  | 0.0031253  |
| 9mo_SIGAE3_ACCAACATCAACTGAC-1-10x  | 0.02828742 | 0.0506384  | 4.30E-05   |
| 9mo_SIGAE3_ACCACAAGTCTCTCTG-1-10x  | 0.02077389 | 0.02388617 | 3.62E-05   |
| 9mo_SIGAE3_ACCACAATCGTAGGGA-1-10x  | 0.05667378 | 0.15170923 | 0.000257   |
| 9mo_SIGAE3_ACCCAAACAGGCTACC-1-10x  | 0.1360439  | 0.43430987 | 0.0018891  |
| 9mo_SIGAE3_ACCCAAAGTAAGGCTG-1-10x  | 0.02193801 | 0.02803107 | 3.69E-05   |
| 9mo_SIGAE3_ACCCAAATCCGCGATG-1-10x  | 0.23831156 | 0.7984381  | 0.00088278 |
| 9mo_SIGAE3_ACCCTCAAGCATCAGG-1-10x  | 0.24525698 | 0.8231675  | 0.00084014 |
| 9mo_SIGAE3_ACCCTCAAGCCTCTCT-1-10x  | 0.07237119 | 0.20760053 | 0.0014433  |
| 9mo_SIGAE3_ACCCTCAGTCTAACTG-1-10x  | 0.27784678 | 0.9392049  | 0.00075239 |
| 9mo_SIGAE3_ACCCTCATCTTGCAAG-1-10x  | 0.0233769  | 0.0331543  | 3.83E-05   |
| 9mo_SIGAE3_ACCCTTGAGATAACAC-1-10x  | 0.10256378 | 0.3151025  | 0.0039137  |
| 9mo_SIGAE3_ACCCTTGAGTGGACGT-1-10x  | 0.03757587 | 0.08371035 | 6.07E-05   |

|                                    |            |            |            |
|------------------------------------|------------|------------|------------|
| 9mo_SIGAE3_ACCTACCGTTTAGTCG-1-10x  | 0.0173626  | 0.01174014 | 3.44E-05   |
| 9mo_SIGAE3_ACCTGAAAGCGTCAGA-1-10x  | 0.23631227 | 0.79131955 | 0.00089602 |
| 9mo_SIGAE3_ACCTGAAGTAGGTCAG-1-10x  | 0.02560815 | 0.04109875 | 4.00E-05   |
| 9mo_SIGAE3_ACCTGTCTCAAACGTC-1-10x  | 0.03589769 | 0.0777351  | 5.58E-05   |
| 9mo_SIGAE3_ACGATCACATGTGCTA-1-10x  | 0.10514987 | 0.32431036 | 0.0036214  |
| 9mo_SIGAE3_ACGATGTTCGACCACG-1-10x  | 0.05088157 | 0.13108584 | 0.00014746 |
| 9mo_SIGAE3_ACGCACGCAATAACCC-1-10x  | 0.1017856  | 0.31233174 | 0.0040036  |
| 9mo_SIGAE3_ACGCACGGTTAAGCAA-1-10x  | 0.08132807 | 0.23949187 | 0.0031253  |
| 9mo_SIGAE3_ACGGGTCAGAATCGCG-1-10x  | 0.05078399 | 0.13073839 | 0.00014746 |
| 9mo_SIGAE3_ACGGTTCGCACGGCGTT-1-10x | 0.04110445 | 0.09627398 | 7.40E-05   |
| 9mo_SIGAE3_ACGGTTAAGACTTCGT-1-10x  | 0.0161869  | 0.00755402 | 3.33E-05   |
| 9mo_SIGAE3_ACGGTTACACAGAGCA-1-10x  | 0.11325459 | 0.35316756 | 0.0027534  |
| 9mo_SIGAE3_ACGTAACCACGCTGCA-1-10x  | 0.03844093 | 0.08679041 | 6.36E-05   |
| 9mo_SIGAE3_ACGTAACGTTGATGTC-1-10x  | 0.03768497 | 0.0840988  | 6.07E-05   |
| 9mo_SIGAE3_ACGTACAGTTACGGAG-1-10x  | 0.01733028 | 0.01162508 | 3.38E-05   |
| 9mo_SIGAE3_ACGTACATCAGACTA-1-10x   | 0.09562701 | 0.29040384 | 0.0043808  |
| 9mo_SIGAE3_ACTATCTAGTGGACGT-1-10x  | 0.06158615 | 0.16919993 | 0.00047505 |
| 9mo_SIGAE3_ACTATGGCAAACACGG-1-10x  | 0.27675846 | 0.93532985 | 0.00075222 |
| 9mo_SIGAE3_ACTATGGCATTACTCT-1-10x  | 0.14681679 | 0.47266716 | 0.0018717  |
| 9mo_SIGAE3_ACTATGGTCATCACCC-1-10x  | 0.26617995 | 0.89766467 | 0.00075974 |
| 9mo_SIGAE3_ACTATTCCAGCTGTCG-1-10x  | 0.12352366 | 0.38973102 | 0.0021124  |
| 9mo_SIGAE3_ACTCCATCACCATAG-1-10x   | 0.12429522 | 0.3924782  | 0.0021124  |
| 9mo_SIGAE3_ACTCTCGGTGCCGAAA-1-10x  | 0.06418624 | 0.17845766 | 0.00058553 |
| 9mo_SIGAE3_ACTCTCGGTGGATTTC-1-10x  | 0.08179355 | 0.24114923 | 0.0031253  |
| 9mo_SIGAE3_ACTGCAAGTCGTATTG-1-10x  | 0.05210142 | 0.13542917 | 0.00016076 |
| 9mo_SIGAE3_ACTGTCCCAACTCATG-1-10x  | 0.03510856 | 0.07492536 | 5.37E-05   |
| 9mo_SIGAE3_ACTGTCCCACTTCCTG-1-10x  | 0.08852848 | 0.26512924 | 0.0041422  |
| 9mo_SIGAE3_ACTGTCCGTTGCCTAA-1-10x  | 0.0623793  | 0.17202398 | 0.00047505 |
| 9mo_SIGAE3_ACTGTGAAGACGCTCC-1-10x  | 0.02012891 | 0.02158972 | 3.55E-05   |
| 9mo_SIGAE3_ACTGTGAAGATTAGTG-1-10x  | 0.21983725 | 0.7326595  | 0.0010253  |
| 9mo_SIGAE3_ACTTATCGTACCAATC-1-10x  | 0.01742713 | 0.0119699  | 3.44E-05   |
| 9mo_SIGAE3_ACTTATCGTGATACCT-1-10x  | 0.03630507 | 0.0791856  | 5.82E-05   |
| 9mo_SIGAE3_ACTTCCGAGATCACCT-1-10x  | 0.05512502 | 0.14619483 | 0.000233   |
| 9mo_SIGAE3_ACTTTGTCATTAAAGG-1-10x  | 0.13252242 | 0.42177147 | 0.0019219  |
| 9mo_SIGAE3_ACTTTGTGTATCACCA-1-10x  | 0.01824551 | 0.01488378 | 3.44E-05   |
| 9mo_SIGAE3_ACTTTGTGTGTTTGCA-1-10x  | 0.03009261 | 0.05706587 | 4.55E-05   |
| 9mo_SIGAE3_AGAAATGGTTAGGCTT-1-10x  | 0.02920199 | 0.05389477 | 4.42E-05   |
| 9mo_SIGAE3_AGAACCTGTACTGAGG-1-10x  | 0.08894573 | 0.26661485 | 0.0042295  |
| 9mo_SIGAE3_AGAACCTTCGCTGTTC-1-10x  | 0.01533072 | 0.00450556 | 3.27E-05   |
| 9mo_SIGAE3_AGAAGCGCATAACTCG-1-10x  | 0.08738168 | 0.26104596 | 0.0040384  |
| 9mo_SIGAE3_AGACAAAGTGCCAAGA-1-10x  | 0.11588903 | 0.36254758 | 0.002594   |

|                                   |            |            |            |
|-----------------------------------|------------|------------|------------|
| 9mo_SIGAE3_AGACACTAGTAGGATT-1-10x | 0.0948909  | 0.28778288 | 0.0044051  |
| 9mo_SIGAE3_AGACAGGTCTCGTGAA-1-10x | 0.07850055 | 0.22942434 | 0.002576   |
| 9mo_SIGAE3_AGACCCGAGCTTAAGA-1-10x | 0.11663484 | 0.36520308 | 0.0025211  |
| 9mo_SIGAE3_AGACTCAGTTATAGCC-1-10x | 0.02766648 | 0.04842753 | 4.19E-05   |
| 9mo_SIGAE3_AGAGAATGTGCACGCT-1-10x | 0.04787121 | 0.12036732 | 0.00011598 |
| 9mo_SIGAE3_AGAGAATGTGGTCTGC-1-10x | 0.02534925 | 0.04017693 | 4.00E-05   |
| 9mo_SIGAE3_AGAGCAGCACGATAGG-1-10x | 0.02386632 | 0.03489691 | 3.83E-05   |
| 9mo_SIGAE3_AGATAGAAGTGATAAC-1-10x | 0.02911532 | 0.0535862  | 4.42E-05   |
| 9mo_SIGAE3_AGATAGATCCCGATCT-1-10x | 0.10422425 | 0.32101467 | 0.0037215  |
| 9mo_SIGAE3_AGATCGTAGCGTTGTT-1-10x | 0.14292528 | 0.45881128 | 0.0018718  |
| 9mo_SIGAE3_AGCATCATCCCTTG-1-10x   | 0.02268411 | 0.0306876  | 3.76E-05   |
| 9mo_SIGAE3_AGCATCATCGAGCACC-1-10x | 0.19326724 | 0.6380559  | 0.0012741  |
| 9mo_SIGAE3_AGCCAATCAGTGGCTC-1-10x | 0.10573478 | 0.32639298 | 0.00352    |
| 9mo_SIGAE3_AGCCACGAGCATGATA-1-10x | 0.04691493 | 0.11696244 | 0.00010777 |
| 9mo_SIGAE3_AGCGATTCGATTGGT-1-10x  | 0.04436167 | 0.10787147 | 8.81E-05   |
| 9mo_SIGAE3_AGCGCCAAGAGATTCA-1-10x | 0.02047529 | 0.02282301 | 3.62E-05   |
| 9mo_SIGAE3_AGCGCCAAGCTGGTGA-1-10x | 0.0401011  | 0.09270153 | 7.01E-05   |
| 9mo_SIGAE3_AGCGCCAAGTTGCC-1-10x   | 0.02407081 | 0.03562499 | 3.91E-05   |
| 9mo_SIGAE3_AGCGCCACAAGATTGA-1-10x | 0.2307539  | 0.7715287  | 0.00093779 |
| 9mo_SIGAE3_AGCGTATAGGATACGC-1-10x | 0.28771952 | 0.9743572  | 0.00075864 |
| 9mo_SIGAE3_AGCTACACAGCGACAA-1-10x | 0.04297628 | 0.1029387  | 8.29E-05   |
| 9mo_SIGAE3_AGCTCAAGTGATTAGA-1-10x | 0.27002826 | 0.9113667  | 0.00075499 |
| 9mo_SIGAE3_AGGAAATCAAGCGTT-1-10x  | 0.041457   | 0.09752925 | 7.40E-05   |
| 9mo_SIGAE3_AGGACGATCCTACGGG-1-10x | 0.09164424 | 0.27622303 | 0.0043903  |
| 9mo_SIGAE3_AGGACGATCGATACGT-1-10x | 0.1408494  | 0.45142    | 0.0018734  |
| 9mo_SIGAE3_AGGACGATCTCCCTAG-1-10x | 0.01857639 | 0.0160619  | 3.49E-05   |
| 9mo_SIGAE3_AGGACTTCACTCCTGT-1-10x | 0.01937943 | 0.01892115 | 3.55E-05   |
| 9mo_SIGAE3_AGGACTTTCGGTTAGT-1-10x | 0.15753567 | 0.5108322  | 0.0018302  |
| 9mo_SIGAE3_AGGATCTAGGGTTAGC-1-10x | 0.02572662 | 0.04152058 | 4.00E-05   |
| 9mo_SIGAE3_AGGATCTTCACTCCGT-1-10x | 0.02028102 | 0.02213132 | 3.62E-05   |
| 9mo_SIGAE3_AGGATCTTCGTGCGAC-1-10x | 0.02765105 | 0.04837259 | 4.19E-05   |
| 9mo_SIGAE3_AGGCATTAGTCGAGGT-1-10x | 0.02020888 | 0.02187445 | 3.62E-05   |
| 9mo_SIGAE3_AGGCATTGTGGCTACC-1-10x | 0.04834626 | 0.12205874 | 0.00011598 |
| 9mo_SIGAE3_AGGCATTTCAGGAACG-1-10x | 0.04908717 | 0.1246968  | 0.00012523 |
| 9mo_SIGAE3_AGGCTGCGTATCGAAA-1-10x | 0.02815166 | 0.05015505 | 4.30E-05   |
| 9mo_SIGAE3_AGGCTGCTCAGTAGGG-1-10x | 0.05214434 | 0.13558199 | 0.00017575 |
| 9mo_SIGAE3_AGGCTGCTCCTGGCTT-1-10x | 0.05773429 | 0.15548523 | 0.00028394 |
| 9mo_SIGAE3_AGGGCCTCAAGGATGC-1-10x | 0.04668962 | 0.1161602  | 0.00010777 |
| 9mo_SIGAE3_AGGGCCTCAGGGACTA-1-10x | 0.05000344 | 0.12795922 | 0.00013566 |
| 9mo_SIGAE3_AGGGCTCTCTGGACCG-1-10x | 0.14887656 | 0.4800011  | 0.0018705  |
| 9mo_SIGAE3_AGGGTGAAGTCCCGAC-1-10x | 0.12151462 | 0.38257775 | 0.0022308  |

|                                    |            |            |            |
|------------------------------------|------------|------------|------------|
| 9mo_SIGAE3_AGGGTGATCATTGCC-1-10x   | 0.04298277 | 0.10296182 | 8.29E-05   |
| 9mo_SIGAE3_AGGTAGGAGACAGCGT-1-10x  | 0.14766935 | 0.47570273 | 0.0018716  |
| 9mo_SIGAE3_AGGTCTACAGTCAACT-1-10x  | 0.04125657 | 0.09681562 | 7.40E-05   |
| 9mo_SIGAE3_AGGTGTTGTCCTTGTC-1-10x  | 0.19070232 | 0.6289234  | 0.0013113  |
| 9mo_SIGAE3_AGGTGTTTCGCAGTGC-1-10x  | 0.26034564 | 0.8768913  | 0.00077221 |
| 9mo_SIGAE3_AGGTTGTGTACCCACG-1-10x  | 0.09118703 | 0.27459508 | 0.0043535  |
| 9mo_SIGAE3_AGTAACCTCAGCAATC-1-10x  | 0.06669212 | 0.18737997 | 0.00079936 |
| 9mo_SIGAE3_AGTACCACAATTTCTC-1-10x  | 0.04250692 | 0.10126755 | 7.82E-05   |
| 9mo_SIGAE3_AGTACCAGTCCTACGG-1-10x  | 0.01520269 | 0.0040497  | 3.27E-05   |
| 9mo_SIGAE3_AGTAAGTGTGCTTGTGT-1-10x | 0.05395322 | 0.14202258 | 0.00019264 |
| 9mo_SIGAE3_AGTAAGTGTGCTTGTGT-1-10x | 0.01647147 | 0.00856725 | 3.38E-05   |
| 9mo_SIGAE3_AGTAAGTGTGCTTGTGT-1-10x | 0.02431626 | 0.03649895 | 3.91E-05   |
| 9mo_SIGAE3_AGTAAGTGTGCTTGTGT-1-10x | 0.02840224 | 0.05104725 | 4.30E-05   |
| 9mo_SIGAE3_AGTAAGTGTGCTTGTGT-1-10x | 0.15226822 | 0.4920772  | 0.0018651  |
| 9mo_SIGAE3_AGTAAGTGTGCTTGTGT-1-10x | 0.16980037 | 0.5545011  | 0.0016584  |
| 9mo_SIGAE3_AGTAAGTGTGCTTGTGT-1-10x | 0.02387426 | 0.03492517 | 3.83E-05   |
| 9mo_SIGAE3_AGTAAGTGTGCTTGTGT-1-10x | 0.0214267  | 0.02621053 | 3.69E-05   |
| 9mo_SIGAE3_AGTAAGTGTGCTTGTGT-1-10x | 0.161849   | 0.52619    | 0.0017883  |
| 9mo_SIGAE3_AGTAAGTGTGCTTGTGT-1-10x | 0.27268773 | 0.92083585 | 0.000753   |
| 9mo_SIGAE3_AGTAAGTGTGCTTGTGT-1-10x | 0.09358819 | 0.28314453 | 0.0044154  |
| 9mo_SIGAE3_AGTAAGTGTGCTTGTGT-1-10x | 0.04595536 | 0.11354586 | 0.00010046 |
| 9mo_SIGAE3_AGTAAGTGTGCTTGTGT-1-10x | 0.05111434 | 0.13191463 | 0.00014746 |
| 9mo_SIGAE3_AGTAAGTGTGCTTGTGT-1-10x | 0.03802644 | 0.08531461 | 6.36E-05   |
| 9mo_SIGAE3_AGTAAGTGTGCTTGTGT-1-10x | 0.04387844 | 0.10615088 | 8.81E-05   |
| 9mo_SIGAE3_AGTAAGTGTGCTTGTGT-1-10x | 0.02402121 | 0.03544841 | 3.91E-05   |
| 9mo_SIGAE3_AGTAAGTGTGCTTGTGT-1-10x | 0.02315471 | 0.03236318 | 3.83E-05   |
| 9mo_SIGAE3_AGTAAGTGTGCTTGTGT-1-10x | 0.02374799 | 0.03447558 | 3.83E-05   |
| 9mo_SIGAE3_AGTAAGTGTGCTTGTGT-1-10x | 0.25843585 | 0.87009144 | 0.000778   |
| 9mo_SIGAE3_AGTAAGTGTGCTTGTGT-1-10x | 0.02038391 | 0.02249765 | 3.62E-05   |
| 9mo_SIGAE3_AGTAAGTGTGCTTGTGT-1-10x | 0.02016565 | 0.02172051 | 3.55E-05   |
| 9mo_SIGAE3_AGTAAGTGTGCTTGTGT-1-10x | 0.28308195 | 0.9578449  | 0.00075462 |
| 9mo_SIGAE3_AGTAAGTGTGCTTGTGT-1-10x | 0.2921233  | 0.99003696 | 0.00076378 |
| 9mo_SIGAE3_AGTAAGTGTGCTTGTGT-1-10x | 0.14651626 | 0.47159714 | 0.0018717  |
| 9mo_SIGAE3_AGTAAGTGTGCTTGTGT-1-10x | 0.03080865 | 0.05961535 | 4.68E-05   |
| 9mo_SIGAE3_AGTAAGTGTGCTTGTGT-1-10x | 0.26870713 | 0.90666276 | 0.00075594 |
| 9mo_SIGAE3_AGTAAGTGTGCTTGTGT-1-10x | 0.0426413  | 0.10174602 | 7.82E-05   |
| 9mo_SIGAE3_AGTAAGTGTGCTTGTGT-1-10x | 0.04391345 | 0.10627557 | 8.81E-05   |
| 9mo_SIGAE3_AGTAAGTGTGCTTGTGT-1-10x | 0.09297761 | 0.28097054 | 0.0044107  |
| 9mo_SIGAE3_AGTAAGTGTGCTTGTGT-1-10x | 0.19004908 | 0.6265975  | 0.0013244  |
| 9mo_SIGAE3_AGTAAGTGTGCTTGTGT-1-10x | 0.02667165 | 0.0448854  | 4.09E-05   |
| 9mo_SIGAE3_AGTAAGTGTGCTTGTGT-1-10x | 0.17349076 | 0.56764096 | 0.0015922  |

|                                     |            |            |            |
|-------------------------------------|------------|------------|------------|
| 9mo_SIGAE3_ATCGGCGAGGCCCACT-1-10x   | 0.05686478 | 0.15238932 | 0.00028394 |
| 9mo_SIGAE3_ATCGTAGCAGCACACC-1-10x   | 0.07788128 | 0.2272194  | 0.0023954  |
| 9mo_SIGAE3_ATCGTAGTCCTCAGAA-1-10x   | 0.07038236 | 0.2005192  | 0.0011935  |
| 9mo_SIGAE3_ATCGTCCGTAGCTGCC-1-10x   | 0.08792723 | 0.26298845 | 0.0041422  |
| 9mo_SIGAE3_ATCTCTACACCTATCC-1-10x   | 0.28839067 | 0.9767468  | 0.0007596  |
| 9mo_SIGAE3_ATCTCTAGTCGTGGTC-1-10x   | 0.0387937  | 0.08804646 | 6.36E-05   |
| 9mo_SIGAE3_ATCTTCACAAACGAGC-1-10x   | 0.08138162 | 0.23968253 | 0.0031253  |
| 9mo_SIGAE3_ATCTTCATCGGCCAAC-1-10x   | 0.20984611 | 0.6970857  | 0.0011095  |
| 9mo_SIGAE3_ATCTTCATCGTTAGAC-1-10x   | 0.01727532 | 0.01142939 | 3.38E-05   |
| 9mo_SIGAE3_ATGAAAGAGTATGAAC-1-10x   | 0.18295258 | 0.60133016 | 0.0014268  |
| 9mo_SIGAE3_ATGAAAGCATGGATCT-1-10x   | 0.10300608 | 0.3166773  | 0.0038193  |
| 9mo_SIGAE3_ATGAAAGGTCTTGCTC-1-10x   | 0.2727683  | 0.92112267 | 0.000753   |
| 9mo_SIGAE3_ATGACCAGTCTTGTC-1-10x    | 0.02107381 | 0.02495406 | 3.62E-05   |
| 9mo_SIGAE3_ATGACCAGTTGCTGAT-1-10x   | 0.02125809 | 0.02561019 | 3.69E-05   |
| 9mo_SIGAE3_ATGAGGGAGCCTGACC-1-10x   | 0.09337732 | 0.2823937  | 0.0044107  |
| 9mo_SIGAE3_ATGAGGGGTAGAGGAA-1-10x   | 0.0201212  | 0.02156225 | 3.55E-05   |
| 9mo_SIGAE3_ATGAGTCGTTGAGTCT-1-10x   | 0.0239215  | 0.03509338 | 3.83E-05   |
| 9mo_SIGAE3_ATGATCGGTTCCCACT-1-10x   | 0.04363338 | 0.10527835 | 8.29E-05   |
| 9mo_SIGAE3_ATGCCTCTACGGTA-1-10x     | 0.24859673 | 0.83505887 | 0.00081888 |
| 9mo_SIGAE3_ATGGAGGCAAAGGTTA-1-10x   | 0.15151913 | 0.48941007 | 0.0018676  |
| 9mo_SIGAE3_ATGGATCGTTGACTGT-1-10x   | 0.07323038 | 0.2106597  | 0.0015819  |
| 9mo_SIGAE3_ATGGGTTGTAAGTCT-1-10x    | 0.10440247 | 0.32164922 | 0.0037215  |
| 9mo_SIGAE3_ATGGGTTGTGTAATC-1-10x    | 0.01804688 | 0.01417654 | 3.44E-05   |
| 9mo_SIGAE3_ATGTCCCTCTCCGATC-1-10x   | 0.07479716 | 0.21623829 | 0.001885   |
| 9mo_SIGAE3_ATTACCTCAGTCTACA-1-10x   | 0.28333738 | 0.9587544  | 0.00075531 |
| 9mo_SIGAE3_ATTACTCGTCACTGAT-1-10x   | 0.04607767 | 0.11398136 | 0.00010046 |
| 9mo_SIGAE3_ATTCAGGCAGGTACGA-1-10x   | 0.01517592 | 0.00395436 | 3.27E-05   |
| 9mo_SIGAE3_ATTCAGGGTACGAAAT-1-10x   | 0.0519423  | 0.13486262 | 0.00016076 |
| 9mo_SIGAE3_ATTCATCAGTTGGCT-1-10x    | 0.01709466 | 0.01078611 | 3.38E-05   |
| 9mo_SIGAE3_ATTCATCGTTGTGGCC-1-10x   | 0.1394007  | 0.44626188 | 0.0018772  |
| 9mo_SIGAE3_ATTCCATCACCAGACC-1-10x   | 0.01667293 | 0.00928454 | 3.38E-05   |
| 9mo_SIGAE3_ATTCGTTGTCAACCTA-1-10x   | 0.04517611 | 0.1107713  | 9.39E-05   |
| 9mo_SIGAE3_ATTCTACGTCTCGGGT-1-10x   | 0.19640166 | 0.6492161  | 0.00124    |
| 9mo_SIGAE3_ATTGTTCCATCATTTTC-1-10x  | 0.14540364 | 0.4676356  | 0.0018716  |
| 9mo_SIGAE3_ATTTCACGTTGGCTAT-1-10x   | 0.06095024 | 0.16693574 | 0.00042799 |
| 9mo_SIGAE3_ATTTCTGGTCTGGTG-1-10x    | 0.02495929 | 0.03878848 | 4.00E-05   |
| 9mo_SIGAE3_CAAAGAACAACCTTGAGT-1-10x | 0.03323804 | 0.06826529 | 5.00E-05   |
| 9mo_SIGAE3_CAACAACCAGCTGTTCG-1-10x  | 0.04582807 | 0.11309262 | 0.00010046 |
| 9mo_SIGAE3_CAACAACCTCGATTCCC-1-10x  | 0.24957159 | 0.8385299  | 0.00081397 |
| 9mo_SIGAE3_CAACAGTCATCGCCTT-1-10x   | 0.04780982 | 0.12014874 | 0.00011598 |
| 9mo_SIGAE3_CAACCAACATGTGTCA-1-10x   | 0.07769721 | 0.22656403 | 0.0023954  |



|                                    |            |            |            |
|------------------------------------|------------|------------|------------|
| 9mo_SIGAE3_CAACCAAGTTGTTGTG-1-10x  | 0.03715109 | 0.08219788 | 6.07E-05   |
| 9mo_SIGAE3_CAACCTCAGTATGAGT-1-10x  | 0.02825034 | 0.0505064  | 4.30E-05   |
| 9mo_SIGAE3_CAACCTCCATTCTTCA-1-10x  | 0.2555047  | 0.85965496 | 0.00078825 |
| 9mo_SIGAE3_CAACGGCGTTTCCCAC-1-10x  | 0.0817411  | 0.24096248 | 0.0031253  |
| 9mo_SIGAE3_CAACGGCTCTGTTTCAT-1-10x | 0.0175429  | 0.01238212 | 3.44E-05   |
| 9mo_SIGAE3_CAAGACTTCGCGCTGA-1-10x  | 0.02478806 | 0.0381788  | 3.91E-05   |
| 9mo_SIGAE3_CAAGCTACATTCTCTA-1-10x  | 0.19977173 | 0.6612154  | 0.0011985  |
| 9mo_SIGAE3_CAAGGGAGTCACTCAA-1-10x  | 0.26286763 | 0.885871   | 0.00076511 |
| 9mo_SIGAE3_CAATCGAGTAACTAAG-1-10x  | 0.18059972 | 0.59295267 | 0.001475   |
| 9mo_SIGAE3_CAATGACGTCTTGTCC-1-10x  | 0.01624513 | 0.00776135 | 3.33E-05   |
| 9mo_SIGAE3_CACAACAGTTTACGTG-1-10x  | 0.07043078 | 0.20069161 | 0.0011935  |
| 9mo_SIGAE3_CACACAAAGTAGGATT-1-10x  | 0.04933979 | 0.12559626 | 0.00013566 |
| 9mo_SIGAE3_CACACAACAAGGGTCA-1-10x  | 0.02664885 | 0.04480422 | 4.09E-05   |
| 9mo_SIGAE3_CACACAAGTACTGCCG-1-10x  | 0.23546913 | 0.7883175  | 0.00090278 |
| 9mo_SIGAE3_CACAGATCAAGGGTCA-1-10x  | 0.26640806 | 0.89847684 | 0.00075831 |
| 9mo_SIGAE3_CACAGGCCAGTTAGAA-1-10x  | 0.03483145 | 0.07393871 | 5.37E-05   |
| 9mo_SIGAE3_CACAGGCGTATTCTCT-1-10x  | 0.1676858  | 0.54697216 | 0.0016902  |
| 9mo_SIGAE3_CACATGAAGTAGGTTA-1-10x  | 0.10112321 | 0.3099733  | 0.0040036  |
| 9mo_SIGAE3_CACCAAACACGAGAAC-1-10x  | 0.03902393 | 0.08886622 | 6.67E-05   |
| 9mo_SIGAE3_CACCAAAGTTTGTGGT-1-10x  | 0.02492845 | 0.03867865 | 4.00E-05   |
| 9mo_SIGAE3_CACCGTTAGTGACAG-1-10x   | 0.08913359 | 0.26728374 | 0.0042295  |
| 9mo_SIGAE3_CACGTGGAGCCTGGAA-1-10x  | 0.16690658 | 0.5441977  | 0.0017056  |
| 9mo_SIGAE3_CACGTGGGTCATCCCT-1-10x  | 0.11804481 | 0.37022334 | 0.0023898  |
| 9mo_SIGAE3_CACTGAATCTGTCCCA-1-10x  | 0.28758052 | 0.9738623  | 0.00075864 |
| 9mo_SIGAE3_CACTGGGCATGTTACG-1-10x  | 0.02072585 | 0.02371514 | 3.62E-05   |
| 9mo_SIGAE3_CACTGGGGTATTCCGA-1-10x  | 0.03274069 | 0.06649449 | 5.00E-05   |
| 9mo_SIGAE3_CACTGTCAGGTGCCTC-1-10x  | 0.2792981  | 0.94437236 | 0.00075266 |
| 9mo_SIGAE3_CACTGTCTCCACAAGT-1-10x  | 0.05967737 | 0.16240366 | 0.00038577 |
| 9mo_SIGAE3_CACTTCGGTTGCTCCT-1-10x  | 0.08060388 | 0.23691335 | 0.0029431  |
| 9mo_SIGAE3_CAGATCATCGCTTACC-1-10x  | 0.03857128 | 0.08725452 | 6.36E-05   |
| 9mo_SIGAE3_CAGATCATCTCGTGGG-1-10x  | 0.05563786 | 0.14802082 | 0.000233   |
| 9mo_SIGAE3_CAGATTGAGTATGGCG-1-10x  | 0.28411433 | 0.96152073 | 0.00075531 |
| 9mo_SIGAE3_CAGATTGGTTGCAACT-1-10x  | 0.20619969 | 0.6841024  | 0.0011344  |
| 9mo_SIGAE3_CAGCACGCATAGAATG-1-10x  | 0.21988791 | 0.73283994 | 0.0010253  |
| 9mo_SIGAE3_CAGCAGCAGGGCCCTT-1-10x  | 0.02514737 | 0.03945813 | 4.00E-05   |
| 9mo_SIGAE3_CAGCAGCCAAGTGGTG-1-10x  | 0.02630559 | 0.04358202 | 4.09E-05   |
| 9mo_SIGAE3_CAGCGTGTCCAAACCA-1-10x  | 0.05654883 | 0.15126437 | 0.000257   |
| 9mo_SIGAE3_CAGGCCAAGACTTGTC-1-10x  | 0.06371386 | 0.17677572 | 0.00058553 |
| 9mo_SIGAE3_CAGGGCTACTAACGT-1-10x   | 0.1436494  | 0.46138954 | 0.0018716  |
| 9mo_SIGAE3_CAGGTATAGACTTCGT-1-10x  | 0.17201254 | 0.56237763 | 0.0016256  |
| 9mo_SIGAE3_CAGTGCGTCACGGGCT-1-10x  | 0.07961454 | 0.23339075 | 0.0027593  |

|                                    |            |            |            |
|------------------------------------|------------|------------|------------|
| 9mo_SIGAE3_CAGTTAGAGCAGCAGT-1-10x  | 0.2626807  | 0.88520545 | 0.00076511 |
| 9mo_SIGAE3_CAGTTCCAGGTTTCATC-1-10x | 0.05145879 | 0.13314106 | 0.00016076 |
| 9mo_SIGAE3_CAGTTCCGTTCCACGG-1-10x  | 0.09853964 | 0.30077437 | 0.0042345  |
| 9mo_SIGAE3_CAGTTCCTCTCCGAAA-1-10x  | 0.01751466 | 0.01228156 | 3.44E-05   |
| 9mo_SIGAE3_CATACAGAGGGTCTTT-1-10x  | 0.23995693 | 0.8042965  | 0.00087632 |
| 9mo_SIGAE3_CATACAGAGTCCCGAC-1-10x  | 0.10604417 | 0.32749453 | 0.00352    |
| 9mo_SIGAE3_CATACAGTCAGACATC-1-10x  | 0.03164676 | 0.0625995  | 4.83E-05   |
| 9mo_SIGAE3_CATACCCCAGCTAACT-1-10x  | 0.01617792 | 0.00752206 | 3.33E-05   |
| 9mo_SIGAE3_CATACCCTCATTCGGA-1-10x  | 0.08009592 | 0.23510475 | 0.0027593  |
| 9mo_SIGAE3_CATACTTTCCACCTGT-1-10x  | 0.09317874 | 0.28168666 | 0.0044107  |
| 9mo_SIGAE3_CATCCACTCCACAAGT-1-10x  | 0.18685141 | 0.6152121  | 0.0013662  |
| 9mo_SIGAE3_CATCCCAGTCGAGATG-1-10x  | 0.01862821 | 0.0162464  | 3.49E-05   |
| 9mo_SIGAE3_CATCGGGGTTAATCGC-1-10x  | 0.0194168  | 0.01905421 | 3.55E-05   |
| 9mo_SIGAE3_CATCGTCAGCACCGTC-1-10x  | 0.02360464 | 0.0339652  | 3.83E-05   |
| 9mo_SIGAE3_CATCGTCCACCAACAT-1-10x  | 0.01864373 | 0.01630165 | 3.49E-05   |
| 9mo_SIGAE3_CATGAGTCACAAGCCC-1-10x  | 0.1516271  | 0.48979446 | 0.0018676  |
| 9mo_SIGAE3_CATGCAAGTCGTTATG-1-10x  | 0.2752794  | 0.9300636  | 0.00075218 |
| 9mo_SIGAE3_CATGCAATCTATCGTT-1-10x  | 0.09082506 | 0.27330628 | 0.0043535  |
| 9mo_SIGAE3_CATGCCTCAAGTGGTG-1-10x  | 0.27829713 | 0.94080836 | 0.00075239 |
| 9mo_SIGAE3_CATGCTCTCAGCTTGA-1-10x  | 0.05525016 | 0.14664038 | 0.000233   |
| 9mo_SIGAE3_CATGGTAGTATCATGC-1-10x  | 0.25776067 | 0.86768746 | 0.00078121 |
| 9mo_SIGAE3_CATGGTAGTTAGCGGA-1-10x  | 0.07851338 | 0.22947003 | 0.002576   |
| 9mo_SIGAE3_CATGGTAGTTCGCTT-1-10x   | 0.04389904 | 0.10622426 | 8.81E-05   |
| 9mo_SIGAE3_CATGGTATCAGTGTGT-1-10x  | 0.04398332 | 0.10652433 | 8.81E-05   |
| 9mo_SIGAE3_CATTCATCACGCGCTA-1-10x  | 0.10316964 | 0.3172597  | 0.0038193  |
| 9mo_SIGAE3_CATTCTACATCAGCAT-1-10x  | 0.06948161 | 0.19731206 | 0.0010821  |
| 9mo_SIGAE3_CATTCTAGTGGTTTTGT-1-10x | 0.12683725 | 0.4015292  | 0.0020256  |
| 9mo_SIGAE3_CATTGAGTCATGCAGT-1-10x  | 0.09043069 | 0.2719021  | 0.0042999  |
| 9mo_SIGAE3_CATTGAGTCCCAATAG-1-10x  | 0.02432153 | 0.0365177  | 3.91E-05   |
| 9mo_SIGAE3_CATTGCCGTCAACACT-1-10x  | 0.14540742 | 0.46764907 | 0.0018716  |
| 9mo_SIGAE3_CCAAGCGAGCAAGTGC-1-10x  | 0.04159218 | 0.09801059 | 7.40E-05   |
| 9mo_SIGAE3_CCAAGCGGTGTTCCAA-1-10x  | 0.03352043 | 0.06927076 | 5.17E-05   |
| 9mo_SIGAE3_CCAAGCGTCATTTCCA-1-10x  | 0.15098798 | 0.48751888 | 0.0018676  |
| 9mo_SIGAE3_CCAAGCGTCGCCAGAC-1-10x  | 0.04910536 | 0.12476155 | 0.00012523 |
| 9mo_SIGAE3_CCAATTTCAAAGAGTT-1-10x  | 0.22020426 | 0.7339663  | 0.0010253  |
| 9mo_SIGAE3_CCACAAAGTAAGGCCA-1-10x  | 0.05591384 | 0.14900343 | 0.000257   |
| 9mo_SIGAE3_CCACAAAGTCAGCTTA-1-10x  | 0.03324031 | 0.0682734  | 5.00E-05   |
| 9mo_SIGAE3_CCACGTTAGCAGGCAT-1-10x  | 0.01651861 | 0.00873507 | 3.38E-05   |
| 9mo_SIGAE3_CCACGTTGTATACCCA-1-10x  | 0.08859781 | 0.26537606 | 0.0041422  |
| 9mo_SIGAE3_CCACGTTGTATTAAGG-1-10x  | 0.26385584 | 0.8893896  | 0.00076313 |
| 9mo_SIGAE3_CCACTTGAGGTAGCAC-1-10x  | 0.24829842 | 0.8339967  | 0.00082396 |

|                                    |            |            |            |
|------------------------------------|------------|------------|------------|
| 9mo_SIGAE3_CCACTTGGTCGCATGC-1-10x  | 0.01551799 | 0.00517233 | 3.33E-05   |
| 9mo_SIGAE3_CCATCACAGTTGCTGT-1-10x  | 0.02724898 | 0.04694102 | 4.19E-05   |
| 9mo_SIGAE3_CCATCACGTTTCTTAC-1-10x  | 0.25833708 | 0.8697398  | 0.000778   |
| 9mo_SIGAE3_CCCAAGTCCCTCAT-1-10x    | 0.08769459 | 0.2621601  | 0.0040384  |
| 9mo_SIGAE3_CCCAAGTGTATAGCC-1-10x   | 0.03621892 | 0.07887884 | 5.82E-05   |
| 9mo_SIGAE3_CCCTAACTCCCGAAAT-1-10x  | 0.03744154 | 0.08323206 | 6.07E-05   |
| 9mo_SIGAE3_CCCTCAAGTGTTTCATG-1-10x | 0.05099628 | 0.13149427 | 0.00014746 |
| 9mo_SIGAE3_CCCTCAATCGAGAAAT-1-10x  | 0.08903107 | 0.26691872 | 0.0042295  |
| 9mo_SIGAE3_CCCTGATTTCGTCTCAC-1-10x | 0.01957565 | 0.01961981 | 3.55E-05   |
| 9mo_SIGAE3_CCCTTAGAGACCAAAT-1-10x  | 0.2802904  | 0.9479055  | 0.00075303 |
| 9mo_SIGAE3_CCGAACGCACAGCCAC-1-10x  | 0.07941253 | 0.23267148 | 0.0027593  |
| 9mo_SIGAE3_CCGAACGCATGATCTG-1-10x  | 0.19471367 | 0.64320594 | 0.0012624  |
| 9mo_SIGAE3_CCGATGGGTGTGGACA-1-10x  | 0.0482679  | 0.12177976 | 0.00011598 |
| 9mo_SIGAE3_CCGATGGTCTGAATCG-1-10x  | 0.04851375 | 0.12265512 | 0.00012523 |
| 9mo_SIGAE3_CCGCAAGCATTAAAGG-1-10x  | 0.0284584  | 0.0512472  | 4.30E-05   |
| 9mo_SIGAE3_CCGCAAGGTTGTCCCT-1-10x  | 0.24392872 | 0.8184382  | 0.00084583 |
| 9mo_SIGAE3_CCGGACATCTTACGGA-1-10x  | 0.05064898 | 0.13025768 | 0.00014746 |
| 9mo_SIGAE3_CCGGGTAAGTAACGAT-1-10x  | 0.21917874 | 0.73031485 | 0.0010326  |
| 9mo_SIGAE3_CCGTGAGAGATCGCCC-1-10x  | 0.04479006 | 0.10939677 | 9.39E-05   |
| 9mo_SIGAE3_CCGTTCAAGAAATTGC-1-10x  | 0.09163932 | 0.27620548 | 0.0043903  |
| 9mo_SIGAE3_CCTACGTGTATTGACC-1-10x  | 0.03941947 | 0.09027454 | 6.67E-05   |
| 9mo_SIGAE3_CCTATCGTCCTACGAA-1-10x  | 0.04770415 | 0.11977249 | 0.00011598 |
| 9mo_SIGAE3_CCTATCGTCTACTTCA-1-10x  | 0.05812605 | 0.15688011 | 0.00031414 |
| 9mo_SIGAE3_CCTCAACGTGCGAACCC-1-10x | 0.08978295 | 0.26959583 | 0.0042999  |
| 9mo_SIGAE3_CCTCACACAGTGAGCA-1-10x  | 0.04752186 | 0.11912346 | 0.00011598 |
| 9mo_SIGAE3_CCTCACAGTCCAAGAG-1-10x  | 0.05521427 | 0.1465126  | 0.000233   |
| 9mo_SIGAE3_CCTCACATCAACTGAC-1-10x  | 0.02017853 | 0.02176637 | 3.62E-05   |
| 9mo_SIGAE3_CCTCAGTTCGATTTCT-1-10x  | 0.01689948 | 0.01009118 | 3.38E-05   |
| 9mo_SIGAE3_CCTCCAAGTGTCGGT-1-10x   | 0.01777941 | 0.01322423 | 3.44E-05   |
| 9mo_SIGAE3_CCTCCAAGTTTGACAC-1-10x  | 0.08489221 | 0.25218213 | 0.0036353  |
| 9mo_SIGAE3_CCTCCTCCAGGAATAT-1-10x  | 0.05215574 | 0.13562256 | 0.00017575 |
| 9mo_SIGAE3_CCTCTAGAGTGGCGAT-1-10x  | 0.22146308 | 0.7384484  | 0.0010106  |
| 9mo_SIGAE3_CCTCTAGGTGTCCATA-1-10x  | 0.20033538 | 0.6632223  | 0.0011985  |
| 9mo_SIGAE3_CCTCTAGTCTCGACGG-1-10x  | 0.041448   | 0.0974972  | 7.40E-05   |
| 9mo_SIGAE3_CCTCTAGTCTGCTTAT-1-10x  | 0.01784478 | 0.01345698 | 3.44E-05   |
| 9mo_SIGAE3_CCTCTCCAGTTCCAGT-1-10x  | 0.03026286 | 0.05767205 | 4.55E-05   |
| 9mo_SIGAE3_CCTCTCCGTGAGTAGC-1-10x  | 0.03832898 | 0.08639181 | 6.36E-05   |
| 9mo_SIGAE3_CCTCTCCTCACAAGAA-1-10x  | 0.22142956 | 0.738329   | 0.0010106  |
| 9mo_SIGAE3_CCTTCAGCACAGCCAC-1-10x  | 0.01931326 | 0.01868554 | 3.55E-05   |
| 9mo_SIGAE3_CCTTCAGGTTTGCCGG-1-10x  | 0.25060412 | 0.84220624 | 0.00080923 |
| 9mo_SIGAE3_CCTTCAGTCTATACTC-1-10x  | 0.19723156 | 0.652171   | 0.0012292  |

|                                    |            |            |            |
|------------------------------------|------------|------------|------------|
| 9mo_SIGAE3_CCTTGTGTCTGTTCAT-1-10x  | 0.01729426 | 0.01149681 | 3.38E-05   |
| 9mo_SIGAE3_CGAGGCTCAAAGGATT-1-10x  | 0.03225985 | 0.06478242 | 4.83E-05   |
| 9mo_SIGAE3_CGAGTGCCAATTCTTC-1-10x  | 0.05225293 | 0.13596863 | 0.00017575 |
| 9mo_SIGAE3_CGAGTGCCAGCTTTGA-1-10x  | 0.16979836 | 0.55449396 | 0.0016584  |
| 9mo_SIGAE3_CGAGTGCGTGCCTGAC-1-10x  | 0.23828171 | 0.7983318  | 0.00088278 |
| 9mo_SIGAE3_CGAGTTATCGAAGGAC-1-10x  | 0.04167086 | 0.09829071 | 7.40E-05   |
| 9mo_SIGAE3_CGATGCGAGACTCCGC-1-10x  | 0.03349747 | 0.06918903 | 5.17E-05   |
| 9mo_SIGAE3_CGATGCGGTATTCCCTT-1-10x | 0.07673023 | 0.22312106 | 0.0022191  |
| 9mo_SIGAE3_CGCATGGAGGGTTAAT-1-10x  | 0.01689624 | 0.01007964 | 3.38E-05   |
| 9mo_SIGAE3_CGCCATTTCATGCCGCA-1-10x | 0.07824861 | 0.2285273  | 0.0023954  |
| 9mo_SIGAE3_CGGAACCTCAGACAAA-1-10x  | 0.0641794  | 0.17843331 | 0.00058553 |
| 9mo_SIGAE3_CGGAATTTCAACTGAC-1-10x  | 0.01803984 | 0.01415149 | 3.44E-05   |
| 9mo_SIGAE3_CGGACACAGTCTTCGA-1-10x  | 0.27517542 | 0.9296934  | 0.00075218 |
| 9mo_SIGAE3_CGGACACGTGACACAG-1-10x  | 0.05053825 | 0.12986343 | 0.00014746 |
| 9mo_SIGAE3_CGGAGAAGTGACCGTC-1-10x  | 0.09169179 | 0.27639228 | 0.0043903  |
| 9mo_SIGAE3_CGGCAGTAGGGAACAA-1-10x  | 0.0238186  | 0.03472701 | 3.83E-05   |
| 9mo_SIGAE3_CGGCAGTGACACGTT-1-10x   | 0.2644427  | 0.89147913 | 0.00076135 |
| 9mo_SIGAE3_CGGCAGTGACAGCA-1-10x    | 0.03489351 | 0.07415967 | 5.37E-05   |
| 9mo_SIGAE3_CGGCAGTGAGTTTC-1-10x    | 0.1145024  | 0.35761043 | 0.0026715  |
| 9mo_SIGAE3_CGGGTCACAGATACTC-1-10x  | 0.09404615 | 0.2847751  | 0.0044154  |
| 9mo_SIGAE3_CGGGTCATCTCCGAGG-1-10x  | 0.08819463 | 0.26394054 | 0.0041422  |
| 9mo_SIGAE3_CGGGTGTAGACTTGTC-1-10x  | 0.04557082 | 0.1121767  | 0.00010046 |
| 9mo_SIGAE3_CGGGTGTAGTCCCTAA-1-10x  | 0.01949437 | 0.0193304  | 3.55E-05   |
| 9mo_SIGAE3_CGGGTGTGTGTTACAC-1-10x  | 0.02537042 | 0.04025233 | 4.00E-05   |
| 9mo_SIGAE3_CGTCAAAGATGACCG-1-10x   | 0.15672772 | 0.50795543 | 0.0018385  |
| 9mo_SIGAE3_CGTCAAATCCTATTGT-1-10x  | 0.03487936 | 0.07410932 | 5.37E-05   |
| 9mo_SIGAE3_CGTCAAATCTACGCA-1-10x   | 0.10344268 | 0.31823182 | 0.0038193  |
| 9mo_SIGAE3_CGTGAATGTACGAGCA-1-10x  | 0.22604907 | 0.75477695 | 0.00097406 |
| 9mo_SIGAE3_CGTGATAAGGTTGCCC-1-10x  | 0.04149911 | 0.0976792  | 7.40E-05   |
| 9mo_SIGAE3_CGTGATACAAGTGACG-1-10x  | 0.20302622 | 0.67280316 | 0.0011699  |
| 9mo_SIGAE3_CGTGATAGTTAGAAGT-1-10x  | 0.04613788 | 0.11419574 | 0.00010046 |
| 9mo_SIGAE3_CGTGCTTAGCACACCC-1-10x  | 0.02626568 | 0.04343992 | 4.09E-05   |
| 9mo_SIGAE3_CGTTAGATCGCAAGAG-1-10x  | 0.05056679 | 0.12996505 | 0.00014746 |
| 9mo_SIGAE3_CGTTCTGCATCAACCA-1-10x  | 0.02046287 | 0.02277879 | 3.62E-05   |
| 9mo_SIGAE3_CGTTCTGTCAAACCTGC-1-10x | 0.04271376 | 0.102004   | 7.82E-05   |
| 9mo_SIGAE3_CGTTGGGCAAGTTCGT-1-10x  | 0.0367215  | 0.08066832 | 5.82E-05   |
| 9mo_SIGAE3_CGTTGGGCATCAGTGT-1-10x  | 0.04335215 | 0.10427701 | 8.29E-05   |
| 9mo_SIGAE3_CGTTGGGCATCGAACT-1-10x  | 0.02216866 | 0.02885233 | 3.76E-05   |
| 9mo_SIGAE3_CTAACCCAGACTTGTC-1-10x  | 0.10666547 | 0.32970673 | 0.0034182  |
| 9mo_SIGAE3_CTAACCCACTTGAGT-1-10x   | 0.01645049 | 0.00849253 | 3.38E-05   |
| 9mo_SIGAE3_CTACCTGAGATCGCCC-1-10x  | 0.12775816 | 0.40480813 | 0.0020026  |

|                                    |            |            |            |
|------------------------------------|------------|------------|------------|
| 9mo_SIGAE3_CTACCTGAGTCCCAGC-1-10x  | 0.07660899 | 0.2226894  | 0.0022191  |
| 9mo_SIGAE3_CTACCTGCACTCATAG-1-10x  | 0.14812268 | 0.47731686 | 0.0018713  |
| 9mo_SIGAE3_CTACCTGTCCCGAAAT-1-10x  | 0.281945   | 0.95379674 | 0.00075401 |
| 9mo_SIGAE3_CTACTATAGCACCAGA-1-10x  | 0.02235635 | 0.02952059 | 3.76E-05   |
| 9mo_SIGAE3_CTACTATGTTCGGTTA-1-10x  | 0.2579052  | 0.868202   | 0.000778   |
| 9mo_SIGAE3_CTAGACAGTGTCTTCC-1-10x  | 0.04830257 | 0.12190319 | 0.00011598 |
| 9mo_SIGAE3_CTAGGTAAGCCTGTGC-1-10x  | 0.01931519 | 0.01869243 | 3.55E-05   |
| 9mo_SIGAE3_CTAGGTAAGTTGTAGA-1-10x  | 0.02114149 | 0.02519503 | 3.69E-05   |
| 9mo_SIGAE3_CTATCCGAGAGTGAAG-1-10x  | 0.27691472 | 0.9358862  | 0.00075222 |
| 9mo_SIGAE3_CTATCCGAGCCTCTGG-1-10x  | 0.24884546 | 0.8359445  | 0.00081888 |
| 9mo_SIGAE3_CTATCCGCAGACCGCT-1-10x  | 0.09634049 | 0.29294422 | 0.0043435  |
| 9mo_SIGAE3_CTATCTATCTCGAGTA-1-10x  | 0.04634808 | 0.11494414 | 0.00010046 |
| 9mo_SIGAE3_CTCAACCTCTACGCAA-1-10x  | 0.07695059 | 0.22390567 | 0.0022191  |
| 9mo_SIGAE3_CTCAAGACACAGTCCG-1-10x  | 0.22469173 | 0.74994415 | 0.00098869 |
| 9mo_SIGAE3_CTCATCGCAGGTTTCGC-1-10x | 0.07724726 | 0.22496198 | 0.0022191  |
| 9mo_SIGAE3_CTCATGCAGGAATTAC-1-10x  | 0.04669542 | 0.11618087 | 0.00010777 |
| 9mo_SIGAE3_CTCATGCCATTTCATCT-1-10x | 0.02199937 | 0.02824957 | 3.69E-05   |
| 9mo_SIGAE3_CTCATGCGTTCCTAAG-1-10x  | 0.07581373 | 0.21985784 | 0.0020486  |
| 9mo_SIGAE3_CTCATTAAGTCTCCTC-1-10x  | 0.06673852 | 0.18754515 | 0.00079936 |
| 9mo_SIGAE3_CTCATTACATTAGGCT-1-10x  | 0.04949401 | 0.12614538 | 0.00013566 |
| 9mo_SIGAE3_CTCCAACCTCGCCAGTG-1-10x | 0.02091209 | 0.02437826 | 3.62E-05   |
| 9mo_SIGAE3_CTCCACAAGAAGTGTT-1-10x  | 0.04471812 | 0.10914063 | 9.39E-05   |
| 9mo_SIGAE3_CTCCCTCGTTAACAGA-1-10x  | 0.10026632 | 0.3069223  | 0.0040879  |
| 9mo_SIGAE3_CTCCGATGTACGGGAT-1-10x  | 0.02320472 | 0.03254125 | 3.83E-05   |
| 9mo_SIGAE3_CTCTCAGAGGAACGCT-1-10x  | 0.05741911 | 0.15436302 | 0.00028394 |
| 9mo_SIGAE3_CTCTCAGGTTAGAAGT-1-10x  | 0.20613797 | 0.68388265 | 0.001143   |
| 9mo_SIGAE3_CTCTCAGTCCCTCTTT-1-10x  | 0.04500133 | 0.110149   | 9.39E-05   |
| 9mo_SIGAE3_CTCTCGAGTCTATGAC-1-10x  | 0.097003   | 0.2953031  | 0.0043435  |
| 9mo_SIGAE3_CTGATCCTCTCAACCC-1-10x  | 0.04058426 | 0.09442184 | 7.01E-05   |
| 9mo_SIGAE3_CTGCATCAGCCGTCGT-1-10x  | 0.04455534 | 0.10856102 | 8.81E-05   |
| 9mo_SIGAE3_CTGCATCCAGCAGATG-1-10x  | 0.22759603 | 0.76028496 | 0.00096676 |
| 9mo_SIGAE3_CTGCCATAGGGCAAGG-1-10x  | 0.04278609 | 0.10226153 | 8.29E-05   |
| 9mo_SIGAE3_CTGCCATAGTATGAAC-1-10x  | 0.08151353 | 0.2401522  | 0.0031253  |
| 9mo_SIGAE3_CTGCCTATCACTGCTC-1-10x  | 0.20770547 | 0.6894638  | 0.001126   |
| 9mo_SIGAE3_CTGGACGAGCTCCCTT-1-10x  | 0.194015   | 0.64071834 | 0.0012624  |
| 9mo_SIGAE3_CTGGACGGTATCGTGT-1-10x  | 0.1193389  | 0.374831   | 0.0023317  |
| 9mo_SIGAE3_CTGGTCTCAAGTGGCA-1-10x  | 0.10358901 | 0.31875288 | 0.0038193  |
| 9mo_SIGAE3_CTGTACCAGTTGTCGT-1-10x  | 0.02731411 | 0.04717289 | 4.19E-05   |
| 9mo_SIGAE3_CTGTACCCAGAAGTTA-1-10x  | 0.12638886 | 0.39993268 | 0.0020256  |
| 9mo_SIGAE3_CTGTAGAGTGCCTCA-1-10x   | 0.03032041 | 0.05787695 | 4.55E-05   |
| 9mo_SIGAE3_CTGTGAACACGGTGCT-1-10x  | 0.25824088 | 0.8693972  | 0.000778   |

|                                   |            |            |            |
|-----------------------------------|------------|------------|------------|
| 9mo_SIGAE3_CTGTGAAGTTCACGAT-1-10x | 0.02904281 | 0.05332802 | 4.42E-05   |
| 9mo_SIGAE3_CTGTGAATCATCGCTC-1-10x | 0.12648705 | 0.40028226 | 0.0020256  |
| 9mo_SIGAE3_CTGTGGGAGAAATGGG-1-10x | 0.02812069 | 0.05004477 | 4.30E-05   |
| 9mo_SIGAE3_CTGTGGGGTACTAACC-1-10x | 0.09241401 | 0.2789638  | 0.0043903  |
| 9mo_SIGAE3_CTTAGGAGTGGTCCCA-1-10x | 0.0245554  | 0.03735039 | 3.91E-05   |
| 9mo_SIGAE3_CTTAGGATCCTGGGAC-1-10x | 0.01674029 | 0.00952439 | 3.38E-05   |
| 9mo_SIGAE3_CTTCAATAGTGGAAAG-1-10x | 0.02894538 | 0.05298112 | 4.42E-05   |
| 9mo_SIGAE3_CTTCCGAAGCACTCAT-1-10x | 0.0183958  | 0.0154189  | 3.49E-05   |
| 9mo_SIGAE3_CTTCCGAAGTGGTTGG-1-10x | 0.0859937  | 0.25610402 | 0.0039187  |
| 9mo_SIGAE3_CTTCCGACATGGGAAC-1-10x | 0.18501587 | 0.60867655 | 0.0013959  |
| 9mo_SIGAE3_CTTCTTAGGTTGGAC-1-10x  | 0.26994926 | 0.9110854  | 0.00075499 |
| 9mo_SIGAE3_CTTCTTTCTCCTGTG-1-10x  | 0.04038505 | 0.09371253 | 7.01E-05   |
| 9mo_SIGAE3_CTTCTAACAAGGACAC-1-10x | 0.24583544 | 0.82522714 | 0.00083459 |
| 9mo_SIGAE3_CTTCTCTAGGTTCACT-1-10x | 0.03958175 | 0.09085237 | 6.67E-05   |
| 9mo_SIGAE3_CTTGAGAGTCATCGGC-1-10x | 0.05215536 | 0.13562122 | 0.00017575 |
| 9mo_SIGAE3_CTTGATTAGAAAGCGA-1-10x | 0.02111095 | 0.0250863  | 3.69E-05   |
| 9mo_SIGAE3_CTTTCAAGTCGTCGGT-1-10x | 0.02853387 | 0.0515159  | 4.30E-05   |
| 9mo_SIGAE3_CTTTCAAGTTCTCCTG-1-10x | 0.04139449 | 0.09730671 | 7.40E-05   |
| 9mo_SIGAE3_CTTTCGGCAATCTGCA-1-10x | 0.04083071 | 0.09529934 | 7.01E-05   |
| 9mo_SIGAE3_GAAACCTCACTAACCA-1-10x | 0.23823948 | 0.7981814  | 0.00088278 |
| 9mo_SIGAE3_GAACACTTCAAAGAAC-1-10x | 0.07483281 | 0.21636523 | 0.001885   |
| 9mo_SIGAE3_GAAGCCCAGTATTGCC-1-10x | 0.04616994 | 0.11430988 | 0.00010046 |
| 9mo_SIGAE3_GAAGCCCATCGAGCC-1-10x  | 0.02781293 | 0.04894899 | 4.30E-05   |
| 9mo_SIGAE3_GAAGCGACACGGCGTT-1-10x | 0.08622473 | 0.2569266  | 0.0039187  |
| 9mo_SIGAE3_GAAGCGACATAATCGC-1-10x | 0.02472304 | 0.03794729 | 3.91E-05   |
| 9mo_SIGAE3_GAAGGACGTGCGAGTA-1-10x | 0.02137653 | 0.02603192 | 3.69E-05   |
| 9mo_SIGAE3_GAAGGACGTTAGAGAT-1-10x | 0.2693911  | 0.909098   | 0.00075499 |
| 9mo_SIGAE3_GAAGGGTGTGTGACCC-1-10x | 0.0914257  | 0.27544487 | 0.0043535  |
| 9mo_SIGAE3_GAAGGGTTCGAGTTGT-1-10x | 0.21537298 | 0.71676433 | 0.0010625  |
| 9mo_SIGAE3_GAAGTAACAGACTCTA-1-10x | 0.04108104 | 0.09619064 | 7.40E-05   |
| 9mo_SIGAE3_GAATAGAAGCACAAAT-1-10x | 0.27249554 | 0.92015153 | 0.000753   |
| 9mo_SIGAE3_GAATCACGTCCAAAGG-1-10x | 0.07472169 | 0.21596959 | 0.001885   |
| 9mo_SIGAE3_GAATCACGTCCCGTGA-1-10x | 0.09401187 | 0.28465307 | 0.0044154  |
| 9mo_SIGAE3_GAATCACGTTGTCTAG-1-10x | 0.08566193 | 0.25492272 | 0.0037839  |
| 9mo_SIGAE3_GAATCGTTCGGTAGGA-1-10x | 0.18622173 | 0.6129701  | 0.0013809  |
| 9mo_SIGAE3_GACACGCAGTATTCCG-1-10x | 0.03610478 | 0.07847246 | 5.58E-05   |
| 9mo_SIGAE3_GACACGCCAACTGTGT-1-10x | 0.05277131 | 0.13781433 | 0.00017575 |
| 9mo_SIGAE3_GACCCTTTCTCATTTG-1-10x | 0.01826946 | 0.01496907 | 3.44E-05   |
| 9mo_SIGAE3_GACCGTGGTGGAACCA-1-10x | 0.01903693 | 0.01770167 | 3.49E-05   |
| 9mo_SIGAE3_GACCGTGTCCACAGG-1-10x  | 0.0222253  | 0.02905398 | 3.76E-05   |
| 9mo_SIGAE3_GACCTTCGTATGTCTG-1-10x | 0.01840637 | 0.01545653 | 3.49E-05   |

|                                   |            |            |            |
|-----------------------------------|------------|------------|------------|
| 9mo_SIGAE3_GACTCAATCACCATAG-1-10x | 0.2273599  | 0.75944424 | 0.00096676 |
| 9mo_SIGAE3_GACTCTCCAGTAGAAT-1-10x | 0.22054061 | 0.73516387 | 0.0010179  |
| 9mo_SIGAE3_GACTCTCTTTCCGG-1-10x   | 0.02013813 | 0.02162255 | 3.55E-05   |
| 9mo_SIGAE3_GAGAAATAGAGCATCG-1-10x | 0.04654899 | 0.1156595  | 0.00010777 |
| 9mo_SIGAE3_GAGCCTGAGCAATTCC-1-10x | 0.2586343  | 0.87079805 | 0.000778   |
| 9mo_SIGAE3_GAGCCTGTCGCAACAT-1-10x | 0.04846642 | 0.12248658 | 0.00012523 |
| 9mo_SIGAE3_GAGCTGCCAACAGTGG-1-10x | 0.08778535 | 0.26248327 | 0.0040384  |
| 9mo_SIGAE3_GAGCTGCTCGCAATTG-1-10x | 0.09369929 | 0.2835401  | 0.0044154  |
| 9mo_SIGAE3_GAGCTGCTCTAGAGCT-1-10x | 0.03808706 | 0.08553046 | 6.36E-05   |
| 9mo_SIGAE3_GAGGCAAAGTGACCTT-1-10x | 0.27420518 | 0.9262388  | 0.00075233 |
| 9mo_SIGAE3_GAGGCAATCGGTTGTA-1-10x | 0.07945809 | 0.23283371 | 0.0027593  |
| 9mo_SIGAE3_GAGGCCTAGTCGTTAC-1-10x | 0.03848839 | 0.08695939 | 6.36E-05   |
| 9mo_SIGAE3_GAGGGATCACGTAGAG-1-10x | 0.09583429 | 0.29114187 | 0.0043808  |
| 9mo_SIGAE3_GAGTCATTCGAACCAT-1-10x | 0.20613365 | 0.6838673  | 0.001143   |
| 9mo_SIGAE3_GAGTGAGTCGGTAACT-1-10x | 0.03110619 | 0.06067478 | 4.68E-05   |
| 9mo_SIGAE3_GAGTGTTGTCGTAATC-1-10x | 0.09072385 | 0.2729459  | 0.0043535  |
| 9mo_SIGAE3_GAGTTACAGACGGTCA-1-10x | 0.08305091 | 0.24562609 | 0.0033032  |
| 9mo_SIGAE3_GAGTTACCACCGTCTT-1-10x | 0.17728853 | 0.58116305 | 0.0015248  |
| 9mo_SIGAE3_GAGTTACGTGACTGAG-1-10x | 0.04985486 | 0.1274302  | 0.00013566 |
| 9mo_SIGAE3_GATAGCTTCACTGCTC-1-10x | 0.10394621 | 0.32002467 | 0.0037215  |
| 9mo_SIGAE3_GATCAGTAGCCGGATA-1-10x | 0.08664023 | 0.25840604 | 0.0039187  |
| 9mo_SIGAE3_GATCCCTCAGGTGACA-1-10x | 0.01834277 | 0.01523006 | 3.49E-05   |
| 9mo_SIGAE3_GATGACTGTCACTCGG-1-10x | 0.04325803 | 0.1039419  | 8.29E-05   |
| 9mo_SIGAE3_GATGACTTCATTTCCA-1-10x | 0.03261684 | 0.06605351 | 5.00E-05   |
| 9mo_SIGAE3_GATGAGGCAGTCCCGA-1-10x | 0.09804151 | 0.29900074 | 0.0042943  |
| 9mo_SIGAE3_GATGAGGCAGTCGAGA-1-10x | 0.04151756 | 0.09774488 | 7.40E-05   |
| 9mo_SIGAE3_GATGGAGTCATGGAGG-1-10x | 0.01500463 | 0.0033445  | 3.27E-05   |
| 9mo_SIGAE3_GATGTTGAGCGTGCCT-1-10x | 0.25907806 | 0.87237805 | 0.00077499 |
| 9mo_SIGAE3_GATGTTGCATTCTCG-1-10x  | 0.02530832 | 0.04003121 | 4.00E-05   |
| 9mo_SIGAE3_GATTCTTCAACACAGG-1-10x | 0.01697743 | 0.01036872 | 3.38E-05   |
| 9mo_SIGAE3_GATTTCTCACCGAATT-1-10x | 0.09221115 | 0.27824152 | 0.0043903  |
| 9mo_SIGAE3_GCAACATAGGAGGCAG-1-10x | 0.02084096 | 0.024125   | 3.62E-05   |
| 9mo_SIGAE3_GCAACATCAATACCTG-1-10x | 0.03558037 | 0.07660529 | 5.58E-05   |
| 9mo_SIGAE3_GCAACCGAGAGCATAT-1-10x | 0.04137331 | 0.09723126 | 7.40E-05   |
| 9mo_SIGAE3_GCACATAAGGCTCTCG-1-10x | 0.04382169 | 0.10594883 | 8.81E-05   |
| 9mo_SIGAE3_GCACATATCGCAGTCG-1-10x | 0.0449581  | 0.10999507 | 9.39E-05   |
| 9mo_SIGAE3_GCACGGTGTGGACTAG-1-10x | 0.04741101 | 0.11872874 | 0.00010777 |
| 9mo_SIGAE3_GCACGTGCAACCGGAA-1-10x | 0.09677032 | 0.29447463 | 0.0043435  |
| 9mo_SIGAE3_GCAGCTGAGTCAGCGA-1-10x | 0.02283125 | 0.03121151 | 3.76E-05   |
| 9mo_SIGAE3_GCAGGCTTCCATGCAA-1-10x | 0.12441773 | 0.39291438 | 0.0021124  |
| 9mo_SIGAE3_GCAGTTATCTCTGCCA-1-10x | 0.02048004 | 0.02283992 | 3.62E-05   |

|                                    |            |            |            |
|------------------------------------|------------|------------|------------|
| 9mo_SIGAE3_GCATCTCCACAACGTT-1-10x  | 0.10269406 | 0.31556633 | 0.0039137  |
| 9mo_SIGAE3_GCATGATAGAGCATAT-1-10x  | 0.1533931  | 0.49608243 | 0.0018617  |
| 9mo_SIGAE3_GCATTAGCAGCTACCG-1-10x  | 0.08531202 | 0.25367686 | 0.0037839  |
| 9mo_SIGAE3_GCCAACGTCCATTTCGC-1-10x | 0.05175668 | 0.13420172 | 0.00016076 |
| 9mo_SIGAE3_GCCAGCAGTGCAATGG-1-10x  | 0.01751106 | 0.01226873 | 3.44E-05   |
| 9mo_SIGAE3_GCCAGGTAGCGTTCAT-1-10x  | 0.03520275 | 0.07526075 | 5.58E-05   |
| 9mo_SIGAE3_GCCAGTGGTGAGATCG-1-10x  | 0.031249   | 0.06118326 | 4.68E-05   |
| 9mo_SIGAE3_GCCCAGATCGAAGGAC-1-10x  | 0.25185397 | 0.8466564  | 0.00080467 |
| 9mo_SIGAE3_GCCGATGGTTAAGGGC-1-10x  | 0.04862857 | 0.12306393 | 0.00012523 |
| 9mo_SIGAE3_GCCTGTTGTCATCCGG-1-10x  | 0.21647187 | 0.72067696 | 0.001055   |
| 9mo_SIGAE3_GCGATCGTCCAATCCC-1-10x  | 0.08938237 | 0.26816955 | 0.0042295  |
| 9mo_SIGAE3_GCGTGCATCCTAGCGG-1-10x  | 0.07473028 | 0.21600015 | 0.001885   |
| 9mo_SIGAE3_GCGTGCATCGTGCGAC-1-10x  | 0.04040448 | 0.0937817  | 7.01E-05   |
| 9mo_SIGAE3_GCTACAAAGCCTGTGC-1-10x  | 0.23176952 | 0.7751449  | 0.00093066 |
| 9mo_SIGAE3_GCTACAATCAGCTTGA-1-10x  | 0.24065343 | 0.8067764  | 0.00086997 |
| 9mo_SIGAE3_GCTACCTGTTGGTAGG-1-10x  | 0.24747601 | 0.8310685  | 0.0008292  |
| 9mo_SIGAE3_GCTCAAACAGTAACGG-1-10x  | 0.12466761 | 0.39380407 | 0.0020803  |
| 9mo_SIGAE3_GCTGAATAGGTAGTCG-1-10x  | 0.01563346 | 0.00558347 | 3.33E-05   |
| 9mo_SIGAE3_GCTGAATCATCGGAAG-1-10x  | 0.0185269  | 0.01588568 | 3.49E-05   |
| 9mo_SIGAE3_GCTGCAGAGAGGATGA-1-10x  | 0.02609766 | 0.04284168 | 4.09E-05   |
| 9mo_SIGAE3_GCTGCAGAGAGGGTCT-1-10x  | 0.03615322 | 0.07864493 | 5.82E-05   |
| 9mo_SIGAE3_GCTGCAGAGCATAGGC-1-10x  | 0.26175427 | 0.88190687 | 0.00076727 |
| 9mo_SIGAE3_GCTGGGTTCTCACCCA-1-10x  | 0.01937299 | 0.01889823 | 3.55E-05   |
| 9mo_SIGAE3_GCTTTCGCATGGGTCC-1-10x  | 0.05402295 | 0.14227086 | 0.00021164 |
| 9mo_SIGAE3_GCTTTCGGTTCTGAGT-1-10x  | 0.04758627 | 0.11935277 | 0.00011598 |
| 9mo_SIGAE3_GGAACCCAGGGTCTC-1-10x   | 0.03474144 | 0.07361824 | 5.37E-05   |
| 9mo_SIGAE3_GGAAGTGTCTAGACAC-1-10x  | 0.26251647 | 0.88462067 | 0.00076511 |
| 9mo_SIGAE3_GGAATCTTCAGTCCGG-1-10x  | 0.2808935  | 0.95005286 | 0.00075348 |
| 9mo_SIGAE3_GGAATGGCACCAAATC-1-10x  | 0.03563738 | 0.07680827 | 5.58E-05   |
| 9mo_SIGAE3_GGACGTGAGAGCAGTC-1-10x  | 0.0650785  | 0.18163459 | 0.00064991 |
| 9mo_SIGAE3_GGACGTCCATGCTGCG-1-10x  | 0.11434688 | 0.3570567  | 0.0026715  |
| 9mo_SIGAE3_GGACGTCTCGAGTACT-1-10x  | 0.09253762 | 0.27940392 | 0.0044107  |
| 9mo_SIGAE3_GGACGTCTCTTAAGGC-1-10x  | 0.09458011 | 0.28667632 | 0.0044051  |
| 9mo_SIGAE3_GGAGAACCAAAGGTTA-1-10x  | 0.01778415 | 0.01324108 | 3.44E-05   |
| 9mo_SIGAE3_GGAGAACGTATCGATC-1-10x  | 0.02687606 | 0.04561321 | 4.19E-05   |
| 9mo_SIGAE3_GGAGAACTCTGTGCAA-1-10x  | 0.26125878 | 0.8801426  | 0.00076963 |
| 9mo_SIGAE3_GGAGATGGTAGTATAG-1-10x  | 0.0207978  | 0.02397132 | 3.62E-05   |
| 9mo_SIGAE3_GGAGATGTCGAGTGC-1-10x   | 0.0746451  | 0.21569686 | 0.0017292  |
| 9mo_SIGAE3_GGAGATGTCGCCTATC-1-10x  | 0.07081286 | 0.20205203 | 0.0011935  |
| 9mo_SIGAE3_GGATCTACAAGCACAG-1-10x  | 0.03508684 | 0.07484803 | 5.37E-05   |
| 9mo_SIGAE3_GGATCTATCGACCTAA-1-10x  | 0.15923545 | 0.51688427 | 0.0018109  |



|                                    |            |            |            |
|------------------------------------|------------|------------|------------|
| 9mo_SIGAE3_GGCGTCAGTCACTGAT-1-10x  | 0.01942735 | 0.01909176 | 3.55E-05   |
| 9mo_SIGAE3_GGCGTCAGTGCCAAT-1-10x   | 0.07919467 | 0.2318958  | 0.002576   |
| 9mo_SIGAE3_GGCTGTGGTAAGATCA-1-10x  | 0.08910953 | 0.26719806 | 0.0042295  |
| 9mo_SIGAE3_GGCTGTGGTTCCGCGA-1-10x  | 0.0343381  | 0.07218211 | 5.37E-05   |
| 9mo_SIGAE3_GGCTTGGAGTCAAGCG-1-10x  | 0.02944066 | 0.05474457 | 4.42E-05   |
| 9mo_SIGAE3_GGCTTGGCACTAGGCC-1-10x  | 0.01756046 | 0.01244464 | 3.44E-05   |
| 9mo_SIGAE3_GGGACTCGTTTCAGAC-1-10x  | 0.11946874 | 0.3752933  | 0.0023317  |
| 9mo_SIGAE3_GGGAGTATCTCGTCGT-1-10x  | 0.04258651 | 0.10155094 | 7.82E-05   |
| 9mo_SIGAE3_GGGATCCTCATCTGTT-1-10x  | 0.06080158 | 0.16640647 | 0.00042799 |
| 9mo_SIGAE3_GGGCGTTGTATGAAAC-1-10x  | 0.21922195 | 0.73046875 | 0.0010326  |
| 9mo_SIGAE3_GGGCGTTTCATACAGC-1-10x  | 0.18964389 | 0.6251548  | 0.0013244  |
| 9mo_SIGAE3_GGGCTACCATAACTCG-1-10x  | 0.01881674 | 0.01691767 | 3.49E-05   |
| 9mo_SIGAE3_GGGCTCATCACCTTAT-1-10x  | 0.01620457 | 0.00761694 | 3.33E-05   |
| 9mo_SIGAE3_GGGCTCATCAGACTA-1-10x   | 0.11618113 | 0.36358762 | 0.0025211  |
| 9mo_SIGAE3_GGGTCACCAGCCGTCA-1-10x  | 0.11208616 | 0.34900734 | 0.002929   |
| 9mo_SIGAE3_GGGTGAACACGGTAGA-1-10x  | 0.02942051 | 0.05467283 | 4.42E-05   |
| 9mo_SIGAE3_GGGTGTCTCTATGCC-1-10x   | 0.1489974  | 0.48043132 | 0.0018705  |
| 9mo_SIGAE3_GGTAAGTACGTCGAA-1-10x   | 0.03571795 | 0.07709514 | 5.58E-05   |
| 9mo_SIGAE3_GGTAAGTCACTTTAGG-1-10x  | 0.03434625 | 0.07221113 | 5.37E-05   |
| 9mo_SIGAE3_GGTAATCCAAAGACGC-1-10x  | 0.0266105  | 0.04466766 | 4.09E-05   |
| 9mo_SIGAE3_GGTAATCGTCGACGCT-1-10x  | 0.02557313 | 0.04097408 | 4.00E-05   |
| 9mo_SIGAE3_GGTCACGAGACGATAT-1-10x  | 0.27417856 | 0.92614406 | 0.00075233 |
| 9mo_SIGAE3_GGTCACGCATGGCCCA-1-10x  | 0.23364162 | 0.7818106  | 0.00091657 |
| 9mo_SIGAE3_GGTCTGGTCGGTCGAC-1-10x  | 0.06617406 | 0.18553539 | 0.00072102 |
| 9mo_SIGAE3_GGTCTGGTCTGAGAAA-1-10x  | 0.02166302 | 0.02705198 | 3.69E-05   |
| 9mo_SIGAE3_GGTGAAGAGGGAGGCA-1-10x  | 0.0211708  | 0.0252994  | 3.69E-05   |
| 9mo_SIGAE3_GGTGAAGTCAAGGAGC-1-10x  | 0.05611867 | 0.14973274 | 0.000257   |
| 9mo_SIGAE3_GGTGGCTAGACATAGT-1-10x  | 0.04779215 | 0.12008581 | 0.00011598 |
| 9mo_SIGAE3_GGTGGCTTCAGCCTCT-1-10x  | 0.23408805 | 0.7834001  | 0.00091657 |
| 9mo_SIGAE3_GGTGTCCGGTCACAGTT-1-10x | 0.04523853 | 0.11099353 | 9.39E-05   |
| 9mo_SIGAE3_GGTGTCCGGTGTTAACC-1-10x | 0.08365396 | 0.2477733  | 0.0034742  |
| 9mo_SIGAE3_GGTGTTAGTTAGAAAC-1-10x  | 0.02845878 | 0.05124855 | 4.30E-05   |
| 9mo_SIGAE3_GGTTAACCAGGCACTC-1-10x  | 0.11329886 | 0.3533252  | 0.0027534  |
| 9mo_SIGAE3_GGTTCTCCACCACATA-1-10x  | 0.08011712 | 0.23518023 | 0.0027593  |
| 9mo_SIGAE3_GGTTGTAAGTTCATCG-1-10x  | 0.02927552 | 0.0541566  | 4.42E-05   |
| 9mo_SIGAE3_GGTTGTATCAGTGTCA-1-10x  | 0.19651647 | 0.64962494 | 0.00124    |
| 9mo_SIGAE3_GTAATGCAGCCATTTG-1-10x  | 0.26268598 | 0.8852242  | 0.00076511 |
| 9mo_SIGAE3_GTACAGTAGGCTGGAT-1-10x  | 0.28161812 | 0.9526329  | 0.00075401 |
| 9mo_SIGAE3_GTACAGTGTCACTGAT-1-10x  | 0.09609109 | 0.2920562  | 0.0043808  |
| 9mo_SIGAE3_GTAGAGGAGGGTTAGC-1-10x  | 0.02986379 | 0.05625114 | 4.55E-05   |
| 9mo_SIGAE3_GTAGATCCAGCGCTTG-1-10x  | 0.23362571 | 0.7817539  | 0.00091657 |

|                                    |            |            |            |
|------------------------------------|------------|------------|------------|
| 9mo_SIGAE3_GTAGGAGTCGTACCTC-1-10x  | 0.09008431 | 0.2706688  | 0.0042999  |
| 9mo_SIGAE3_GTAGGAGTCTGGTGCG-1-10x  | 0.03375535 | 0.07010721 | 5.17E-05   |
| 9mo_SIGAE3_GTAGGTTGTCTTCAAG-1-10x  | 0.05005764 | 0.1281522  | 0.00013566 |
| 9mo_SIGAE3_GTAGTACCAGCAGGAT-1-10x  | 0.03182738 | 0.06324258 | 4.83E-05   |
| 9mo_SIGAE3_GTATTGGTCATTGGTG-1-10x  | 0.02403885 | 0.03551121 | 3.91E-05   |
| 9mo_SIGAE3_GTATTTTCGTACCGTGC-1-10x | 0.23847872 | 0.7990333  | 0.00088278 |
| 9mo_SIGAE3_GTATTTCTCCTAGAGT-1-10x  | 0.2479517  | 0.8327622  | 0.00082396 |
| 9mo_SIGAE3_GTCAAACAGGCTGTAG-1-10x  | 0.04323918 | 0.10387479 | 8.29E-05   |
| 9mo_SIGAE3_GTCAAGTTCGGTCCTA-1-10x  | 0.04914541 | 0.12490416 | 0.00012523 |
| 9mo_SIGAE3_GTCACGGAGACGTCCC-1-10x  | 0.05138156 | 0.13286607 | 0.00016076 |
| 9mo_SIGAE3_GTCACTCCATCGTGGC-1-10x  | 0.05251204 | 0.13689117 | 0.00017575 |
| 9mo_SIGAE3_GTCACTCGTACAGGTG-1-10x  | 0.25673532 | 0.8640367  | 0.00078463 |
| 9mo_SIGAE3_GTCACTCTCGTTGTTT-1-10x  | 0.04724126 | 0.11812436 | 0.00010777 |
| 9mo_SIGAE3_GTCAGCGCACGTTGGC-1-10x  | 0.03303521 | 0.06754312 | 5.00E-05   |
| 9mo_SIGAE3_GTCATTTAGGTACCTT-1-10x  | 0.01882448 | 0.01694522 | 3.49E-05   |
| 9mo_SIGAE3_GTCATTTGTGATCATC-1-10x  | 0.23982707 | 0.8038341  | 0.00087632 |
| 9mo_SIGAE3_GTCCCATGTTATCTTC-1-10x  | 0.01591085 | 0.00657113 | 3.33E-05   |
| 9mo_SIGAE3_GTCCTCATCAAACGTC-1-10x  | 0.02612737 | 0.04294748 | 4.09E-05   |
| 9mo_SIGAE3_GTCTAGAAGACCATT-1-10x   | 0.04495925 | 0.10999917 | 9.39E-05   |
| 9mo_SIGAE3_GTCTCACCAGCTCCTT-1-10x  | 0.01891104 | 0.01725342 | 3.49E-05   |
| 9mo_SIGAE3_GTCTCACGTCTCAGGC-1-10x  | 0.0881267  | 0.26369864 | 0.0041422  |
| 9mo_SIGAE3_GTCTGTCCACGCAGTC-1-10x  | 0.04612909 | 0.11416444 | 0.00010046 |
| 9mo_SIGAE3_GTCTGTCCACTGTTCC-1-10x  | 0.2642098  | 0.89064986 | 0.00076313 |
| 9mo_SIGAE3_GTCTTTACATCGGAGA-1-10x  | 0.04584308 | 0.11314607 | 0.00010046 |
| 9mo_SIGAE3_GTGACGCGTAACTTCG-1-10x  | 0.09140219 | 0.27536118 | 0.0043535  |
| 9mo_SIGAE3_GTGACGCTCAGCCTCT-1-10x  | 0.04151434 | 0.09773341 | 7.40E-05   |
| 9mo_SIGAE3_GTGAGCCGTCCGATCG-1-10x  | 0.04755596 | 0.11924487 | 0.00011598 |
| 9mo_SIGAE3_GTGAGCCTCAAGAATG-1-10x  | 0.28110653 | 0.9508114  | 0.00075348 |
| 9mo_SIGAE3_GTGATGTCAAGTCATC-1-10x  | 0.08330046 | 0.24651462 | 0.0034742  |
| 9mo_SIGAE3_GTGCTGGCATCATTGG-1-10x  | 0.08059505 | 0.23688193 | 0.0029431  |
| 9mo_SIGAE3_GTGCTTCGTACGACTT-1-10x  | 0.03250063 | 0.06563971 | 5.00E-05   |
| 9mo_SIGAE3_GTGGAAGAGCTCATAC-1-10x  | 0.04934755 | 0.12562391 | 0.00013566 |
| 9mo_SIGAE3_GTGCGTCATAACGGG-1-10x   | 0.22805971 | 0.76193595 | 0.00095947 |
| 9mo_SIGAE3_GTGCGTTCCTTATGT-1-10x   | 0.11075664 | 0.3442735  | 0.0030221  |
| 9mo_SIGAE3_GTGCGTTCCTTGCAAG-1-10x  | 0.29135454 | 0.9872998  | 0.00076269 |
| 9mo_SIGAE3_GTGGAACAGAACATA-1-10x   | 0.27931976 | 0.9444495  | 0.00075266 |
| 9mo_SIGAE3_GTGGAAGTTTCGCTC-1-10x   | 0.26092842 | 0.87896633 | 0.00076963 |
| 9mo_SIGAE3_GTGTTACACCATATG-1-10x   | 0.08052655 | 0.23663802 | 0.0029431  |
| 9mo_SIGAE3_GTGTTACAGCCATTA-1-10x   | 0.23111877 | 0.77282786 | 0.00093779 |
| 9mo_SIGAE3_GTGTCCTAGATAGTCA-1-10x  | 0.09002665 | 0.2704635  | 0.0042999  |
| 9mo_SIGAE3_GTGTCCTTCTCGTGAA-1-10x  | 0.09295607 | 0.28089386 | 0.0044107  |

|                                    |            |            |            |
|------------------------------------|------------|------------|------------|
| 9mo_SIGAE3_GTGTGATGTCCCGGTA-1-10x  | 0.02708317 | 0.04635064 | 4.19E-05   |
| 9mo_SIGAE3_GTGTTAGGTTACGTAC-1-10x  | 0.09304826 | 0.28122208 | 0.0044107  |
| 9mo_SIGAE3_GTGTTCCCATCGGAAG-1-10x  | 0.09279067 | 0.28030494 | 0.0044107  |
| 9mo_SIGAE3_GTTACAGAGGTGCTAG-1-10x  | 0.2502201  | 0.8408389  | 0.00081397 |
| 9mo_SIGAE3_GTTACAGGTGACATCT-1-10x  | 0.06788135 | 0.19161426 | 0.00088537 |
| 9mo_SIGAE3_GTTACCCCTCGTGCAGC-1-10x | 0.1722186  | 0.56311136 | 0.0016256  |
| 9mo_SIGAE3_GTTAGTGAGTGAGCCA-1-10x  | 0.06922906 | 0.19641283 | 0.0010821  |
| 9mo_SIGAE3_GTTAGTGCAAGCTCTA-1-10x  | 0.2107316  | 0.70023847 | 0.0011014  |
| 9mo_SIGAE3_GTTAGTGCACCGTCGA-1-10x  | 0.17529932 | 0.57408035 | 0.0015585  |
| 9mo_SIGAE3_GTTAGTGGTCCAGCCA-1-10x  | 0.06262965 | 0.17291535 | 0.00052741 |
| 9mo_SIGAE3_GTTAGTGCCTTCTAA-1-10x   | 0.24670029 | 0.8283065  | 0.0008292  |
| 9mo_SIGAE3_GTTATGGCAGGATTCT-1-10x  | 0.09169126 | 0.2763904  | 0.0043903  |
| 9mo_SIGAE3_GTTCATTAGTCAGGGT-1-10x  | 0.01582681 | 0.00627191 | 3.33E-05   |
| 9mo_SIGAE3_GTTTCGCTAGACGCTCC-1-10x | 0.02613313 | 0.04296796 | 4.09E-05   |
| 9mo_SIGAE3_GTTTCGCTTCATCGCAA-1-10x | 0.2440737  | 0.8189544  | 0.00084583 |
| 9mo_SIGAE3_GTTCTATGTGTTTACG-1-10x  | 0.02917433 | 0.0537963  | 4.42E-05   |
| 9mo_SIGAE3_GTTCTATGTTTGCAGT-1-10x  | 0.03572557 | 0.07712226 | 5.58E-05   |
| 9mo_SIGAE3_GTTGAACAGGCGATAC-1-10x  | 0.04983877 | 0.12737292 | 0.00013566 |
| 9mo_SIGAE3_GTTGCGGCAAGACGGT-1-10x  | 0.02560672 | 0.04109368 | 4.00E-05   |
| 9mo_SIGAE3_GTTGCTCAGATTAGCA-1-10x  | 0.0338852  | 0.07056956 | 5.17E-05   |
| 9mo_SIGAE3_GTTGTAGTCCGCATAA-1-10x  | 0.24311653 | 0.8155464  | 0.00085167 |
| 9mo_SIGAE3_GTTGTCTCTGTCAAAC-1-10x  | 0.08986422 | 0.26988515 | 0.0042999  |
| 9mo_SIGAE3_TAACCAGGTGTACATC-1-10x  | 0.19532982 | 0.6453998  | 0.0012511  |
| 9mo_SIGAE3_TAACGACGTACAAGCG-1-10x  | 0.05008591 | 0.12825285 | 0.00013566 |
| 9mo_SIGAE3_TAAGCACCAATTGCAC-1-10x  | 0.20721635 | 0.6877223  | 0.001126   |
| 9mo_SIGAE3_TAAGCCATCGTTAGTG-1-10x  | 0.07339933 | 0.21126126 | 0.0015819  |
| 9mo_SIGAE3_TAAGCGTCAAGTGCC-1-10x   | 0.24172878 | 0.8106052  | 0.00086374 |
| 9mo_SIGAE3_TAAGCGTTCAGACCCG-1-10x  | 0.01770458 | 0.01295776 | 3.44E-05   |
| 9mo_SIGAE3_TAAGTCGGTTCATCGA-1-10x  | 0.03955567 | 0.09075949 | 6.67E-05   |
| 9mo_SIGAE3_TAATCTCGTCTTTATC-1-10x  | 0.03230128 | 0.06492994 | 4.83E-05   |
| 9mo_SIGAE3_TAATCTCTCCATCACC-1-10x  | 0.01797468 | 0.01391948 | 3.44E-05   |
| 9mo_SIGAE3_TAATTCCAGAAGCGAA-1-10x  | 0.02185801 | 0.02774624 | 3.69E-05   |
| 9mo_SIGAE3_TAATTCCGTCCAACGA-1-10x  | 0.0176938  | 0.0129194  | 3.44E-05   |
| 9mo_SIGAE3_TACACCCCTCAGGAGAC-1-10x | 0.08703054 | 0.25979573 | 0.0040384  |
| 9mo_SIGAE3_TACAGGTCAAGGCTTT-1-10x  | 0.03009629 | 0.05707898 | 4.55E-05   |
| 9mo_SIGAE3_TACATTCCAACCTTGCA-1-10x | 0.23337321 | 0.7808549  | 0.00092358 |
| 9mo_SIGAE3_TACCGAAAGCACCGAA-1-10x  | 0.03632994 | 0.07927415 | 5.82E-05   |
| 9mo_SIGAE3_TACCGGGAGACGAGCT-1-10x  | 0.1070479  | 0.3310684  | 0.0034182  |
| 9mo_SIGAE3_TACCGGGTCCACAGGC-1-10x  | 0.20313773 | 0.6732002  | 0.0011699  |
| 9mo_SIGAE3_TACCGGGTCCGTAATG-1-10x  | 0.03262858 | 0.06609529 | 5.00E-05   |
| 9mo_SIGAE3_TACCTGCAGCTCTTCC-1-10x  | 0.01651851 | 0.00873473 | 3.38E-05   |

|                                    |            |            |            |
|------------------------------------|------------|------------|------------|
| 9mo_SIGAE3_TACGCTCGTGCATTAC-1-10x  | 0.26994258 | 0.91106164 | 0.00075499 |
| 9mo_SIGAE3_TACTGCCCAAACCTCGT-1-10x | 0.04286984 | 0.10255972 | 8.29E-05   |
| 9mo_SIGAE3_TACTTCATCCTTCTTC-1-10x  | 0.0413345  | 0.09709308 | 7.40E-05   |
| 9mo_SIGAE3_TAGACCATCACGAGGA-1-10x  | 0.259071   | 0.8723529  | 0.00077499 |
| 9mo_SIGAE3_TAGAGTCGTGGTAATA-1-10x  | 0.11917036 | 0.37423092 | 0.0023317  |
| 9mo_SIGAE3_TAGAGTCTCACCTGGG-1-10x  | 0.23210847 | 0.77635175 | 0.00093066 |
| 9mo_SIGAE3_TAGATCGCAAACCACT-1-10x  | 0.02711295 | 0.04645667 | 4.19E-05   |
| 9mo_SIGAE3_TAGCACACAGGACTAG-1-10x  | 0.21818893 | 0.7267906  | 0.00104    |
| 9mo_SIGAE3_TAGCACATCAAGAATG-1-10x  | 0.09024776 | 0.27125078 | 0.0042999  |
| 9mo_SIGAE3_TAGGAGGCATCCGAGC-1-10x  | 0.18916379 | 0.6234454  | 0.001338   |
| 9mo_SIGAE3_TAGGAGGGTTAGAGTA-1-10x  | 0.08576553 | 0.25529164 | 0.0037839  |
| 9mo_SIGAE3_TAGGTACAGCATTTGC-1-10x  | 0.04731296 | 0.11837964 | 0.00010777 |
| 9mo_SIGAE3_TAGGTTGGTAGAGGAA-1-10x  | 0.1252718  | 0.39595532 | 0.0020803  |
| 9mo_SIGAE3_TAGGTTGTCTAGACAC-1-10x  | 0.0220073  | 0.02827779 | 3.69E-05   |
| 9mo_SIGAE3_TATACCTGTGAATGAT-1-10x  | 0.0348815  | 0.07411692 | 5.37E-05   |
| 9mo_SIGAE3_TATCAGGCACAACGCC-1-10x  | 0.03528043 | 0.07553733 | 5.58E-05   |
| 9mo_SIGAE3_TATCCTAAGCATAGGC-1-10x  | 0.03944543 | 0.09036698 | 6.67E-05   |
| 9mo_SIGAE3_TATCGCCCAGGCCCTA-1-10x  | 0.24946919 | 0.8381653  | 0.00081397 |
| 9mo_SIGAE3_TATCGCCCAGGGCTTC-1-10x  | 0.02554257 | 0.04086527 | 4.00E-05   |
| 9mo_SIGAE3_TATCTGTCACTTGACA-1-10x  | 0.0896307  | 0.26905373 | 0.0042295  |
| 9mo_SIGAE3_TATCTTGGTTGCGTAT-1-10x  | 0.03407478 | 0.07124455 | 5.17E-05   |
| 9mo_SIGAE3_TATGTTTCGTTTCACAG-1-10x | 0.05970651 | 0.1625074  | 0.00038577 |
| 9mo_SIGAE3_TATGTTCTCTATCGCC-1-10x  | 0.02815817 | 0.05017821 | 4.30E-05   |
| 9mo_SIGAE3_TATTGCTAGACGCAGT-1-10x  | 0.03218818 | 0.06452724 | 4.83E-05   |
| 9mo_SIGAE3_TATTGCTCACCAGACC-1-10x  | 0.04548043 | 0.11185485 | 9.39E-05   |
| 9mo_SIGAE3_TATTGGGAGTCGGCCT-1-10x  | 0.04207439 | 0.0997275  | 7.82E-05   |
| 9mo_SIGAE3_TCAAGACCACAACATC-1-10x  | 0.01916369 | 0.01815301 | 3.49E-05   |
| 9mo_SIGAE3_TCAAGACGTAGAATGT-1-10x  | 0.202853   | 0.6721864  | 0.0011699  |
| 9mo_SIGAE3_TCAAGCAGTGCAACGA-1-10x  | 0.21799316 | 0.72609353 | 0.00104    |
| 9mo_SIGAE3_TCAATTCGTGCATTTG-1-10x  | 0.2237942  | 0.74674845 | 0.00099599 |
| 9mo_SIGAE3_TCACAAGGTAAGGAGA-1-10x  | 0.08411726 | 0.2494229  | 0.0036353  |
| 9mo_SIGAE3_TCACACCAGTAACGAT-1-10x  | 0.07767737 | 0.22649339 | 0.0023954  |
| 9mo_SIGAE3_TCACATTAGACTGGGT-1-10x  | 0.03563578 | 0.07680258 | 5.58E-05   |
| 9mo_SIGAE3_TCACATTCAAGGTCAG-1-10x  | 0.0179947  | 0.01399077 | 3.44E-05   |
| 9mo_SIGAE3_TCACATTAGCCACA-1-10x    | 0.0224173  | 0.02973761 | 3.76E-05   |
| 9mo_SIGAE3_TCACGCTTCGAGAACG-1-10x  | 0.0160956  | 0.00722892 | 3.33E-05   |
| 9mo_SIGAE3_TCACTATCAGGCTTGC-1-10x  | 0.06917661 | 0.1962261  | 0.0010821  |
| 9mo_SIGAE3_TCACTATGTCTCACGG-1-10x  | 0.03341053 | 0.06887949 | 5.17E-05   |
| 9mo_SIGAE3_TCACTCGAGTCCGTCG-1-10x  | 0.01924318 | 0.01843603 | 3.55E-05   |
| 9mo_SIGAE3_TCACTCGGTGTTACTG-1-10x  | 0.08936068 | 0.26809227 | 0.0042295  |
| 9mo_SIGAE3_TCAGCAACACGGGTAA-1-10x  | 0.07966043 | 0.23355415 | 0.0027593  |

|                                    |            |            |            |
|------------------------------------|------------|------------|------------|
| 9mo_SIGAE3_TCAGGGCGTTTACCAG-1-10x  | 0.09772876 | 0.2978872  | 0.0042943  |
| 9mo_SIGAE3_TCAGGTACATCGATCA-1-10x  | 0.01889801 | 0.01720704 | 3.49E-05   |
| 9mo_SIGAE3_TCAGTCCCCTCCTGT-1-10x   | 0.03997764 | 0.09226195 | 7.01E-05   |
| 9mo_SIGAE3_TCAGTGAGTCCCTCAT-1-10x  | 0.07224213 | 0.20714098 | 0.0014433  |
| 9mo_SIGAE3_TCAGTTTGTCCGACGT-1-10x  | 0.01501742 | 0.00339002 | 3.27E-05   |
| 9mo_SIGAE3_TCATATCAGCGCCCAT-1-10x  | 0.2332656  | 0.7804717  | 0.00092358 |
| 9mo_SIGAE3_TCATATCCACCAATA-1-10x   | 0.02288158 | 0.03139072 | 3.76E-05   |
| 9mo_SIGAE3_TCATCCGCACGGTGAA-1-10x  | 0.04172372 | 0.09847891 | 7.40E-05   |
| 9mo_SIGAE3_TCATGCCTCTGACAGT-1-10x  | 0.02931942 | 0.05431289 | 4.42E-05   |
| 9mo_SIGAE3_TCATGGAGTGGCAACA-1-10x  | 0.02694789 | 0.04586896 | 4.19E-05   |
| 9mo_SIGAE3_TCATTACGTGTGCTTA-1-10x  | 0.02517266 | 0.03954819 | 4.00E-05   |
| 9mo_SIGAE3_TCATTACGTTTGTCT-1-10x   | 0.04621899 | 0.11448451 | 0.00010046 |
| 9mo_SIGAE3_TCATTACTCGACGATT-1-10x  | 0.01688909 | 0.0100542  | 3.38E-05   |
| 9mo_SIGAE3_TCATTACATCGCCTT-1-10x   | 0.08614402 | 0.25663924 | 0.0039187  |
| 9mo_SIGAE3_TCCACCAAGGGTTGCA-1-10x  | 0.22791797 | 0.7614313  | 0.00095947 |
| 9mo_SIGAE3_TCCAGAACACGCGGTT-1-10x  | 0.02517211 | 0.03954624 | 4.00E-05   |
| 9mo_SIGAE3_TCCAGAATCTTCTAAC-1-10x  | 0.1300649  | 0.4130214  | 0.0019639  |
| 9mo_SIGAE3_TCCATGCGTAGACGTG-1-10x  | 0.05792686 | 0.15617089 | 0.00031414 |
| 9mo_SIGAE3_TCCATGCGTGACGCT-1-10x   | 0.08829731 | 0.26430613 | 0.0041422  |
| 9mo_SIGAE3_TCCCACACACTTTATC-1-10x  | 0.11274084 | 0.35133833 | 0.0028393  |
| 9mo_SIGAE3_TCCCACAGTAACAAGT-1-10x  | 0.04079352 | 0.0951669  | 7.01E-05   |
| 9mo_SIGAE3_TCCCAGTAGTTGGCTT-1-10x  | 0.19937402 | 0.65979934 | 0.0012085  |
| 9mo_SIGAE3_TCCCATGAGCCTCTCT-1-10x  | 0.05508838 | 0.14606436 | 0.000233   |
| 9mo_SIGAE3_TCCGAAAAGGTTTACC-1-10x  | 0.03729709 | 0.08271771 | 6.07E-05   |
| 9mo_SIGAE3_TCCGAAATCCAAGGGA-1-10x  | 0.01921203 | 0.01832512 | 3.49E-05   |
| 9mo_SIGAE3_TCCGGGAGTCATGGCC-1-10x  | 0.20460787 | 0.6784347  | 0.0011518  |
| 9mo_SIGAE3_TCCGGGAGTGTTTCGAT-1-10x | 0.06278373 | 0.17346399 | 0.00052741 |
| 9mo_SIGAE3_TCCGTGTTCCACAGGC-1-10x  | 0.21906987 | 0.72992724 | 0.0010326  |
| 9mo_SIGAE3_TCCTCCCAGGTAAGT-1-10x   | 0.0177596  | 0.01315369 | 3.44E-05   |
| 9mo_SIGAE3_TCCTCCCGTCTGCAAT-1-10x  | 0.09770773 | 0.2978123  | 0.0042943  |
| 9mo_SIGAE3_TCCTCGAAGGCCGCTT-1-10x  | 0.05120194 | 0.13222651 | 0.00016076 |
| 9mo_SIGAE3_TCCTCGATCGCCATAA-1-10x  | 0.08639884 | 0.25754654 | 0.0039187  |
| 9mo_SIGAE3_TCCTCTTAGGACAGCT-1-10x  | 0.06904152 | 0.1957451  | 0.0010821  |
| 9mo_SIGAE3_TCCTCTTTCAGTCACA-1-10x  | 0.27213648 | 0.91887313 | 0.000753   |
| 9mo_SIGAE3_TCCTCTTCTAAGCCA-1-10x   | 0.07435557 | 0.21466601 | 0.0017292  |
| 9mo_SIGAE3_TCCTTCTTCTATGCCC-1-10x  | 0.01987527 | 0.0206866  | 3.55E-05   |
| 9mo_SIGAE3_TCCTTTCAGGTCCTGC-1-10x  | 0.08180681 | 0.24119642 | 0.0031253  |
| 9mo_SIGAE3_TCGAACATCATTTCCA-1-10x  | 0.02423278 | 0.0362017  | 3.91E-05   |
| 9mo_SIGAE3_TCGAACATCATTTGTC-1-10x  | 0.04648193 | 0.11542073 | 0.00010777 |
| 9mo_SIGAE3_TCGAAGTTCAAGATAG-1-10x  | 0.04901414 | 0.12443676 | 0.00012523 |
| 9mo_SIGAE3_TCGACCTCAAATAAG-1-10x   | 0.09941138 | 0.30387825 | 0.0041652  |

|                                   |            |            |            |
|-----------------------------------|------------|------------|------------|
| 9mo_SIGAE3_TCGACCTGTAGCGCTC-1-10x | 0.06677438 | 0.18767287 | 0.00079936 |
| 9mo_SIGAE3_TCGACCTTCCTTACCG-1-10x | 0.04280468 | 0.10232772 | 8.29E-05   |
| 9mo_SIGAE3_TCGACGGTCTTCCACG-1-10x | 0.2596277  | 0.8743351  | 0.00077499 |
| 9mo_SIGAE3_TCGCTCACATAAGCGG-1-10x | 0.04420863 | 0.10732655 | 8.81E-05   |
| 9mo_SIGAE3_TCGCTCATCAATCAGC-1-10x | 0.07584964 | 0.21998568 | 0.0020486  |
| 9mo_SIGAE3_TCGCTTGGTGGGTATG-1-10x | 0.02141946 | 0.02618477 | 3.69E-05   |
| 9mo_SIGAE3_TCGCTTGTCAGCTGTA-1-10x | 0.05868907 | 0.15888475 | 0.00034795 |
| 9mo_SIGAE3_TCGGATAAGAGGGTAA-1-10x | 0.14709187 | 0.47364658 | 0.0018716  |
| 9mo_SIGAE3_TCGGATAAGCCACTCG-1-10x | 0.17767698 | 0.5825461  | 0.0015248  |
| 9mo_SIGAE3_TCGGGACAGACCATGG-1-10x | 0.0843874  | 0.25038472 | 0.0036353  |
| 9mo_SIGAE3_TCGGGCACACGTACTA-1-10x | 0.02108057 | 0.02497813 | 3.62E-05   |
| 9mo_SIGAE3_TCGGTCTGTCTAGATC-1-10x | 0.24738309 | 0.83073765 | 0.0008292  |
| 9mo_SIGAE3_TCGTAGAGTCCCGTGA-1-10x | 0.04604507 | 0.11386527 | 0.00010046 |
| 9mo_SIGAE3_TCGTAGATCACTGGGC-1-10x | 0.22067532 | 0.7356435  | 0.0010179  |
| 9mo_SIGAE3_TCGTGCTAGTTGTAGA-1-10x | 0.01636135 | 0.00817514 | 3.33E-05   |
| 9mo_SIGAE3_TCGTGGGAGTTTCGGT-1-10x | 0.0534777  | 0.14032947 | 0.00019264 |
| 9mo_SIGAE3_TCTACCGGTATGAAGT-1-10x | 0.19594474 | 0.64758927 | 0.00124    |
| 9mo_SIGAE3_TCTACCGTCTTCTAAC-1-10x | 0.04542577 | 0.11166024 | 9.39E-05   |
| 9mo_SIGAE3_TCTATACAGTCGTTAC-1-10x | 0.16383713 | 0.5332688  | 0.001763   |
| 9mo_SIGAE3_TCTATACGTCATGGCC-1-10x | 0.11483031 | 0.35877797 | 0.0026715  |
| 9mo_SIGAE3_TCTATCAAGGCCTGAA-1-10x | 0.07650087 | 0.22230442 | 0.0020486  |
| 9mo_SIGAE3_TCTCACGCATTAGGCT-1-10x | 0.06654791 | 0.18686649 | 0.00079936 |
| 9mo_SIGAE3_TCTGCCAGTTTGTCT-1-10x  | 0.19293997 | 0.63689065 | 0.0012861  |
| 9mo_SIGAE3_TCTGGCTCACGCGTT-1-10x  | 0.14342038 | 0.46057412 | 0.0018716  |
| 9mo_SIGAE3_TCTTAGTCATGTGCCG-1-10x | 0.22306873 | 0.74416536 | 0.00099599 |
| 9mo_SIGAE3_TGAATCGGTGGGTTGA-1-10x | 0.05459968 | 0.14432433 | 0.00021164 |
| 9mo_SIGAE3_TGAATCGTCAAAGACA-1-10x | 0.02437828 | 0.03671975 | 3.91E-05   |
| 9mo_SIGAE3_TGACGCGCAGTAGGAC-1-10x | 0.11992861 | 0.3769307  | 0.0022788  |
| 9mo_SIGAE3_TGACTCCAGAAGGGAT-1-10x | 0.09691086 | 0.294975   | 0.0043435  |
| 9mo_SIGAE3_TGACTCCCAATCGAAA-1-10x | 0.17930132 | 0.5883297  | 0.0014915  |
| 9mo_SIGAE3_TGAGACTTCAGTCATG-1-10x | 0.02790543 | 0.04927834 | 4.30E-05   |
| 9mo_SIGAE3_TGAGGAGTCCACGGAC-1-10x | 0.03190144 | 0.0635063  | 4.83E-05   |
| 9mo_SIGAE3_TGAGGAGTCCTTTAGT-1-10x | 0.08423661 | 0.24984783 | 0.0036353  |
| 9mo_SIGAE3_TGAGGAGTCGTTCTCG-1-10x | 0.04496427 | 0.11001702 | 9.39E-05   |
| 9mo_SIGAE3_TGAGGAGTCTCTATAC-1-10x | 0.04760322 | 0.11941313 | 0.00011598 |
| 9mo_SIGAE3_TGAGGGAAGGTACCTT-1-10x | 0.1515655  | 0.48957518 | 0.0018676  |
| 9mo_SIGAE3_TGAGGGACACGACGTC-1-10x | 0.10058976 | 0.3080739  | 0.0040879  |
| 9mo_SIGAE3_TGAGTCACACCAATTG-1-10x | 0.24268484 | 0.8140093  | 0.00085764 |
| 9mo_SIGAE3_TGATCAGGTGCCCTTT-1-10x | 0.05356393 | 0.1406365  | 0.00019264 |
| 9mo_SIGAE3_TGATCTTACCAGCGT-1-10x  | 0.04375617 | 0.10571554 | 8.81E-05   |
| 9mo_SIGAE3_TGATCTTGTTTAGACC-1-10x | 0.02738878 | 0.04743877 | 4.19E-05   |

|                                    |            |            |            |
|------------------------------------|------------|------------|------------|
| 9mo_SIGAE3_TGATTCTAGCGTCAGA-1-10x  | 0.05452284 | 0.14405073 | 0.00021164 |
| 9mo_SIGAE3_TGATTCTGTCTTCTAT-1-10x  | 0.08255675 | 0.24386664 | 0.0033032  |
| 9mo_SIGAE3_TGCACGGTCAGTCATG-1-10x  | 0.13713615 | 0.43819883 | 0.0018842  |
| 9mo_SIGAE3_TGCACGGTCCGTGTAA-1-10x  | 0.0406508  | 0.09465875 | 7.01E-05   |
| 9mo_SIGAE3_TGCAGATTCACAGAGG-1-10x  | 0.05142342 | 0.13301513 | 0.00016076 |
| 9mo_SIGAE3_TGCAGGCGTAGTCGGA-1-10x  | 0.08766573 | 0.26205736 | 0.0040384  |
| 9mo_SIGAE3_TGCAGGCGTTTAGAGA-1-10x  | 0.05438342 | 0.14355431 | 0.00021164 |
| 9mo_SIGAE3_TGCAGGCTCTCTCTAA-1-10x  | 0.05635453 | 0.15057252 | 0.000257   |
| 9mo_SIGAE3_TGCAGTATCTGTCCCA-1-10x  | 0.08604214 | 0.25627652 | 0.0039187  |
| 9mo_SIGAE3_TGCATGAAGGGAACAA-1-10x  | 0.02888848 | 0.05277853 | 4.42E-05   |
| 9mo_SIGAE3_TGCATGAGTATCAGGG-1-10x  | 0.04200621 | 0.09948473 | 7.82E-05   |
| 9mo_SIGAE3_TGCCGAGTCCCGTGAG-1-10x  | 0.0839771  | 0.24892385 | 0.0034742  |
| 9mo_SIGAE3_TGCGACGGTAACAAGT-1-10x  | 0.11626974 | 0.3639031  | 0.0025211  |
| 9mo_SIGAE3_TGCGATACATCCGAGC-1-10x  | 0.02429113 | 0.03640945 | 3.91E-05   |
| 9mo_SIGAE3_TGCGGGTAGGGATCGT-1-10x  | 0.2565948  | 0.86353636 | 0.00078463 |
| 9mo_SIGAE3_TGCGGGTCACGTACTA-1-10x  | 0.03174161 | 0.0629372  | 4.83E-05   |
| 9mo_SIGAE3_TGCGGGTGTCGTATTG-1-10x  | 0.03723902 | 0.08251096 | 6.07E-05   |
| 9mo_SIGAE3_TGCTCCAGTAACCAGG-1-10x  | 0.28642175 | 0.9697364  | 0.00075773 |
| 9mo_SIGAE3_TGCTCGTCAAAGTGTA-1-10x  | 0.0899512  | 0.27019486 | 0.0042999  |
| 9mo_SIGAE3_TGGAAGTAAAGTCC-1-10x    | 0.01832014 | 0.0151495  | 3.49E-05   |
| 9mo_SIGAE3_TGGATGTAGATTTGCC-1-10x  | 0.02283179 | 0.03121344 | 3.76E-05   |
| 9mo_SIGAE3_TGGATGTTACATACAGC-1-10x | 0.01637576 | 0.00822646 | 3.33E-05   |
| 9mo_SIGAE3_TGGCGTGAGATCCGAG-1-10x  | 0.05078938 | 0.1307576  | 0.00014746 |
| 9mo_SIGAE3_TGGGAAGTCACTGAAC-1-10x  | 0.02197987 | 0.02818013 | 3.69E-05   |
| 9mo_SIGAE3_TGGGATTCACGGTGCT-1-10x  | 0.05747533 | 0.15456319 | 0.00028394 |
| 9mo_SIGAE3_TGGGCGTAGGCAGTCA-1-10x  | 0.060713   | 0.16609105 | 0.00042799 |
| 9mo_SIGAE3_TGGGCTGCAGCTACCG-1-10x  | 0.09986381 | 0.30548915 | 0.0041652  |
| 9mo_SIGAE3_TGGGTTAAGGTAAAGG-1-10x  | 0.03621525 | 0.07886577 | 5.82E-05   |
| 9mo_SIGAE3_TGGGTTATCAAAGACA-1-10x  | 0.04065403 | 0.09467025 | 7.01E-05   |
| 9mo_SIGAE3_TGGGTTATCCTATGGA-1-10x  | 0.12625496 | 0.39945593 | 0.0020515  |
| 9mo_SIGAE3_TGGTACAAGGAACGCT-1-10x  | 0.02472024 | 0.03793733 | 3.91E-05   |
| 9mo_SIGAE3_TGGTACACATCCTCAC-1-10x  | 0.09403614 | 0.28473946 | 0.0044154  |
| 9mo_SIGAE3_TGGTACAGTACTCCCT-1-10x  | 0.04361531 | 0.10521402 | 8.29E-05   |
| 9mo_SIGAE3_TGGTAGTCACAACGAG-1-10x  | 0.05119238 | 0.13219249 | 0.00016076 |
| 9mo_SIGAE3_TGGTAGTCACCTCAGG-1-10x  | 0.26131094 | 0.8803283  | 0.00076963 |
| 9mo_SIGAE3_TGGTGATAGGAGGTTTC-1-10x | 0.06135057 | 0.16836114 | 0.00042799 |
| 9mo_SIGAE3_TGGTTAGAGACTAAGT-1-10x  | 0.01584849 | 0.00634909 | 3.33E-05   |
| 9mo_SIGAE3_TGTAAGCCAATAGAGT-1-10x  | 0.04342792 | 0.10454681 | 8.29E-05   |
| 9mo_SIGAE3_TGTAAGCGTCATCCCT-1-10x  | 0.19119553 | 0.6306795  | 0.0012985  |
| 9mo_SIGAE3_TGTACAGCAGGGATAC-1-10x  | 0.04523795 | 0.11099149 | 9.39E-05   |
| 9mo_SIGAE3_TGTACAGGTAAGTAGT-1-10x  | 0.0868196  | 0.25904468 | 0.0039187  |

|                                    |            |            |            |
|------------------------------------|------------|------------|------------|
| 9mo_SIGAE3_TGTCCCAAGGACTAAT-1-10x  | 0.08240128 | 0.24331307 | 0.0033032  |
| 9mo_SIGAE3_TGTCCCACATGTCGTA-1-10x  | 0.02917436 | 0.05379641 | 4.42E-05   |
| 9mo_SIGAE3_TGTCCAGTCTCTCCA-1-10x   | 0.08575738 | 0.2552626  | 0.0037839  |
| 9mo_SIGAE3_TGTCCTGAGCCTCCAG-1-10x  | 0.09275126 | 0.2801646  | 0.0044107  |
| 9mo_SIGAE3_TGTCCTGGTTCTCAGA-1-10x  | 0.03030086 | 0.05780734 | 4.55E-05   |
| 9mo_SIGAE3_TGTCCTGGTTGCTTGA-1-10x  | 0.0940382  | 0.2847468  | 0.0044154  |
| 9mo_SIGAE3_TGTCCTGGTTGTGTTG-1-10x  | 0.03620482 | 0.07882866 | 5.82E-05   |
| 9mo_SIGAE3_TGTCCTGTCTAACACG-1-10x  | 0.20984909 | 0.6970963  | 0.0011095  |
| 9mo_SIGAE3_TGTGAGTGTGCATCTA-1-10x  | 0.09343467 | 0.2825979  | 0.0044107  |
| 9mo_SIGAE3_TGTGATGCAAGGGTCA-1-10x  | 0.04534108 | 0.11135868 | 9.39E-05   |
| 9mo_SIGAE3_TGTGCGGAGCTGCGAA-1-10x  | 0.01661058 | 0.00906254 | 3.38E-05   |
| 9mo_SIGAE3_TGTGCGGTCCCTCAAC-1-10x  | 0.06876636 | 0.19476536 | 0.00097948 |
| 9mo_SIGAE3_TGTGGCGAGTATGAGT-1-10x  | 0.17146136 | 0.56041515 | 0.0016256  |
| 9mo_SIGAE3_TGTGGCGAGTGCACAG-1-10x  | 0.03530172 | 0.07561314 | 5.58E-05   |
| 9mo_SIGAE3_TGTGGCGTCGAGAGAC-1-10x  | 0.08572231 | 0.2551377  | 0.0037839  |
| 9mo_SIGAE3_TGTGTGAGTACAGCGA-1-10x  | 0.02951903 | 0.05502363 | 4.42E-05   |
| 9mo_SIGAE3_TGTTACTGTTTCCATT-1-10x  | 0.04489653 | 0.10977586 | 9.39E-05   |
| 9mo_SIGAE3_TGTTTCATCACCCAACG-1-10x | 0.20433764 | 0.67747253 | 0.0011518  |
| 9mo_SIGAE3_TGTTCCGAGCATTTGC-1-10x  | 0.01646962 | 0.00856065 | 3.38E-05   |
| 9mo_SIGAE3_TGTTGAGAGTCGTTAC-1-10x  | 0.05106781 | 0.13174896 | 0.00014746 |
| 9mo_SIGAE3_TGTTGAGTCTTCGATT-1-10x  | 0.04659632 | 0.11582802 | 0.00010777 |
| 9mo_SIGAE3_TGTTGGAAGACTCTAC-1-10x  | 0.04949757 | 0.12615804 | 0.00013566 |
| 9mo_SIGAE3_TGTTGGACATCGCTGG-1-10x  | 0.08166253 | 0.2406827  | 0.0031253  |
| 9mo_SIGAE3_TGTTGGATCCTCTCTT-1-10x  | 0.26356634 | 0.8883588  | 0.00076313 |
| 9mo_SIGAE3_TGTTTGTAGTATGAGT-1-10x  | 0.24173576 | 0.8106301  | 0.00086374 |
| 9mo_SIGAE3_TGTTTGTCAAAGCTCT-1-10x  | 0.05053825 | 0.12986343 | 0.00014746 |
| 9mo_SIGAE3_TGTTTGTCAAGTACCT-1-10x  | 0.02457453 | 0.03741851 | 3.91E-05   |
| 9mo_SIGAE3_TGTTTGTGTGAAGCA-1-10x   | 0.27824566 | 0.9406251  | 0.00075239 |
| 9mo_SIGAE3_TTACAGGTCAACCGAT-1-10x  | 0.27461955 | 0.92771417 | 0.00075233 |
| 9mo_SIGAE3_TTACCATCAGGCCTGT-1-10x  | 0.01790739 | 0.01367991 | 3.44E-05   |
| 9mo_SIGAE3_TTACGCCAGTAGGAAG-1-10x  | 0.11499111 | 0.35935053 | 0.0026715  |
| 9mo_SIGAE3_TTAGGCATCTCTGCCA-1-10x  | 0.28378287 | 0.96034056 | 0.00075531 |
| 9mo_SIGAE3_TTAGGCATCTTACTGT-1-10x  | 0.19254078 | 0.6354693  | 0.0012861  |
| 9mo_SIGAE3_TTAGGGTGTACACAC-1-10x   | 0.05783296 | 0.15583655 | 0.00031414 |
| 9mo_SIGAE3_TTCACGCCATGACGAG-1-10x  | 0.12972972 | 0.41182795 | 0.0019639  |
| 9mo_SIGAE3_TTCACGCTCACTAGT-1-10x   | 0.22622068 | 0.755388   | 0.00097406 |
| 9mo_SIGAE3_TTCACGCTCCATTGTT-1-10x  | 0.19294074 | 0.6368934  | 0.0012861  |
| 9mo_SIGAE3_TTCATTGAGTGATAGT-1-10x  | 0.04979715 | 0.1272247  | 0.00013566 |
| 9mo_SIGAE3_TTCATTGCAAATAAGC-1-10x  | 0.07904108 | 0.23134893 | 0.002576   |
| 9mo_SIGAE3_TTCATTGCACAGTGAG-1-10x  | 0.2014668  | 0.66725075 | 0.0011792  |
| 9mo_SIGAE3_TTCATTGTCTGAATGC-1-10x  | 0.01688012 | 0.01002224 | 3.38E-05   |



|                                    |            |            |            |
|------------------------------------|------------|------------|------------|
| 9mo_SIGAE3_TTCCAATGTCTTGCTC-1-10x  | 0.20370373 | 0.6752155  | 0.0011608  |
| 9mo_SIGAE3_TTCCAATGTGAGATTA-1-10x  | 0.03724363 | 0.08252738 | 6.07E-05   |
| 9mo_SIGAE3_TTCCACGAGAATGTTG-1-10x  | 0.03952371 | 0.09064569 | 6.67E-05   |
| 9mo_SIGAE3_TTCCACGTCTGAGGCC-1-10x  | 0.05479417 | 0.14501683 | 0.00021164 |
| 9mo_SIGAE3_TTCCGGTTCGCGTCGA-1-10x  | 0.09336002 | 0.28233212 | 0.0044107  |
| 9mo_SIGAE3_TTCCTCTAGCCTCAAT-1-10x  | 0.04030011 | 0.09341011 | 7.01E-05   |
| 9mo_SIGAE3_TTCGCTGCAGGCGAAT-1-10x  | 0.08876141 | 0.26595858 | 0.0042295  |
| 9mo_SIGAE3_TTCGCTGGTAGGAGGG-1-10x  | 0.1305204  | 0.4146432  | 0.001948   |
| 9mo_SIGAE3_TTCGGTCCAAGACTGG-1-10x  | 0.21450496 | 0.71367365 | 0.0010701  |
| 9mo_SIGAE3_TTCTAACAGTGCACCC-1-10x  | 0.04215544 | 0.10001607 | 7.82E-05   |
| 9mo_SIGAE3_TTCTCTCCAGTTTCGC-1-10x  | 0.2687296  | 0.90674275 | 0.00075594 |
| 9mo_SIGAE3_TTCTGTACATTCATCT-1-10x  | 0.2320697  | 0.7762137  | 0.00093066 |
| 9mo_SIGAE3_TTCTTCCGTTTTCCAAG-1-10x | 0.04086834 | 0.09543332 | 7.40E-05   |
| 9mo_SIGAE3_TTCTTGAGTCAGCGTC-1-10x  | 0.18889995 | 0.62250596 | 0.001338   |
| 9mo_SIGAE3_TTGAACGGTCCGACGT-1-10x  | 0.04686537 | 0.116786   | 0.00010777 |
| 9mo_SIGAE3_TTGACCCAGGATGGCT-1-10x  | 0.21283892 | 0.7077417  | 0.0010778  |
| 9mo_SIGAE3_TTGACCTCTCCTGTG-1-10x   | 0.25421986 | 0.85508025 | 0.00079207 |
| 9mo_SIGAE3_TTGAGTGAGCGAAACC-1-10x  | 0.02357089 | 0.03384503 | 3.83E-05   |
| 9mo_SIGAE3_TTGAGTGGTTCTCGCT-1-10x  | 0.07709057 | 0.22440407 | 0.0022191  |
| 9mo_SIGAE3_TTGCAATTCCTGTTAT-1-10x  | 0.02359779 | 0.03394078 | 3.83E-05   |
| 9mo_SIGAE3_TTGCAATTCCTGGAAC-1-10x  | 0.05508892 | 0.14606626 | 0.000233   |
| 9mo_SIGAE3_TTGCGTCCAGATAAAC-1-10x  | 0.0746612  | 0.21575418 | 0.001885   |
| 9mo_SIGAE3_TTGCTGCAGGGCCTCT-1-10x  | 0.04832432 | 0.12198065 | 0.00011598 |
| 9mo_SIGAE3_TTGCGCGTCTGCTAGA-1-10x  | 0.05033679 | 0.12914613 | 0.00014746 |
| 9mo_SIGAE3_TTGTTTTAGGTGCGAT-1-10x  | 0.03069838 | 0.05922275 | 4.68E-05   |
| 9mo_SIGAE3_TTGTTGGAAGTGCACAG-1-10x | 0.06916753 | 0.19619374 | 0.0010821  |
| 9mo_SIGAE3_TTGTTACAACGATCT-1-10x   | 0.16119297 | 0.52385414 | 0.0017883  |
| 9mo_SIGAE3_TTGTTTGTCTTACCG-1-10x   | 0.10163046 | 0.31177938 | 0.0040036  |
| 9mo_SIGAE3_TTGTTTGTCTGACTA-1-10x   | 0.1711163  | 0.5591866  | 0.0016421  |
| 9mo_SIGAE3_TTTACTGGTCGGCACT-1-10x  | 0.26792115 | 0.90386426 | 0.00075705 |
| 9mo_SIGAE3_TTTATGCAGTTTCGAC-1-10x  | 0.04892077 | 0.12410434 | 0.00012523 |
| 9mo_SIGAE3_TTTCACAGTGTTTCATG-1-10x | 0.21229039 | 0.7057886  | 0.0010856  |
| 9mo_SIGAE3_TTTCACATCCTGTTAT-1-10x  | 0.07450792 | 0.21520846 | 0.0017292  |
| 9mo_SIGAE3_TTTCATGCATAATGAG-1-10x  | 0.04234435 | 0.1006887  | 7.82E-05   |
| 9mo_SIGAE3_TTTCATGGTCCAAATC-1-10x  | 0.02760669 | 0.04821466 | 4.19E-05   |
| 9mo_SIGAE3_TTTCATGTCACTGAAC-1-10x  | 0.05015108 | 0.12848489 | 0.00013566 |
| 9mo_SIGAE3_TTTCATGTCCATTCG-1-10x   | 0.12329556 | 0.38891885 | 0.0021479  |
| 9mo_SIGAE3_TTTCCTCAGCAAGTCG-1-10x  | 0.06686912 | 0.18801017 | 0.00079936 |
| 9mo_SIGAE3_TTTCCTCTCCAACGG-1-10x   | 0.29332146 | 0.9943031  | 0.00076488 |
| 9mo_SIGAE3_TTTCGATGTTATGTCG-1-10x  | 0.03077644 | 0.05950068 | 4.68E-05   |
| 9mo_SIGAE3_TTGGAGCAAAGAACT-1-10x   | 0.0411197  | 0.09632828 | 7.40E-05   |

|                                     |            |            |            |
|-------------------------------------|------------|------------|------------|
| 9mo_SIGAE3_TTTGTTGTCGCATTAG-1-10x   | 0.04998832 | 0.12790537 | 0.00013566 |
| 9mo_SIGAF3_AAACCCATCTTCCACG-1-10x   | 0.11582408 | 0.36231634 | 0.002594   |
| 9mo_SIGAF3_AAACGCTGTAAGATAC-1-10x   | 0.04983782 | 0.12736951 | 0.00013566 |
| 9mo_SIGAF3_AAAGAACAGCTGTTCA-1-10x   | 0.03325894 | 0.06833971 | 5.00E-05   |
| 9mo_SIGAF3_AAAGAACGTCTACAGT-1-10x   | 0.04149469 | 0.09766346 | 7.40E-05   |
| 9mo_SIGAF3_AAAGAACTCATAGGCT-1-10x   | 0.10625825 | 0.32825682 | 0.00352    |
| 9mo_SIGAF3_AAAGGATCAGGTGGAT-1-10x   | 0.24485543 | 0.8217378  | 0.00084014 |
| 9mo_SIGAF3_AAAGGATCAGTGCGCT-1-10x   | 0.04786848 | 0.1203576  | 0.00011598 |
| 9mo_SIGAF3_AAAGGGCGTCATGCAT-1-10x   | 0.09337469 | 0.28238437 | 0.0044107  |
| 9mo_SIGAF3_AAAGGTAAGACTACCT-1-10x   | 0.01925678 | 0.01848446 | 3.55E-05   |
| 9mo_SIGAF3_AAAGGTACAGGCCCTA-1-10x   | 0.06729698 | 0.18953359 | 0.00088537 |
| 9mo_SIGAF3_AAAGTCCAGCGCCGTT-1-10x   | 0.14286253 | 0.45858786 | 0.0018718  |
| 9mo_SIGAF3_AAAGTCCAGGCCCGTT-1-10x   | 0.01705988 | 0.01066229 | 3.38E-05   |
| 9mo_SIGAF3_AAAGTCCTCAACCCGG-1-10x   | 0.04259181 | 0.1015698  | 7.82E-05   |
| 9mo_SIGAF3_AAAGTCCTCGACCATA-1-10x   | 0.0406944  | 0.094814   | 7.01E-05   |
| 9mo_SIGAF3_AAAGTGACAACACTACGT-1-10x | 0.02827299 | 0.05058703 | 4.30E-05   |
| 9mo_SIGAF3_AAAGTGATCCATTCGC-1-10x   | 0.23216008 | 0.77653545 | 0.00093066 |
| 9mo_SIGAF3_AAATGGAGTAGCGCTC-1-10x   | 0.02229491 | 0.02930182 | 3.76E-05   |
| 9mo_SIGAF3_AACAAAGCATAAGATG-1-10x   | 0.01909682 | 0.0179149  | 3.49E-05   |
| 9mo_SIGAF3_AACAAAGGTTCAAGCGC-1-10x  | 0.04618569 | 0.11436596 | 0.00010046 |
| 9mo_SIGAF3_AACAAAGTCAGGACGA-1-10x   | 0.2055317  | 0.681724   | 0.001143   |
| 9mo_SIGAF3_AACACACCAGACCAGA-1-10x   | 0.02248753 | 0.02998768 | 3.76E-05   |
| 9mo_SIGAF3_AACACACGTGCCGTAC-1-10x   | 0.27796847 | 0.93963814 | 0.00075239 |
| 9mo_SIGAF3_AACAGGGAGTTCTCTT-1-10x   | 0.1174829  | 0.36822262 | 0.002453   |
| 9mo_SIGAF3_AACAGGGGTCGTAATC-1-10x   | 0.28473157 | 0.9637185  | 0.00075605 |
| 9mo_SIGAF3_AACCAACCAACAAGTA-1-10x   | 0.2634869  | 0.8880759  | 0.00076313 |
| 9mo_SIGAF3_AACCAACTCGTGGCTG-1-10x   | 0.08956777 | 0.26882967 | 0.0042295  |
| 9mo_SIGAF3_AACCACAAGGCAGTCA-1-10x   | 0.13038482 | 0.41416046 | 0.001948   |
| 9mo_SIGAF3_AACCACATCAGTCCGG-1-10x   | 0.01975919 | 0.02027329 | 3.55E-05   |
| 9mo_SIGAF3_AACCATGCAATCTAGC-1-10x   | 0.04830663 | 0.12191764 | 0.00011598 |
| 9mo_SIGAF3_AACCATGCAGTACTAC-1-10x   | 0.01605066 | 0.00706892 | 3.33E-05   |
| 9mo_SIGAF3_AACCATGGTTGAGAGC-1-10x   | 0.07443558 | 0.21495089 | 0.0017292  |
| 9mo_SIGAF3_AACCATGTCCTAAACG-1-10x   | 0.10013963 | 0.3064712  | 0.0040879  |
| 9mo_SIGAF3_AACCATGTCGCTGTTC-1-10x   | 0.04857112 | 0.12285938 | 0.00012523 |
| 9mo_SIGAF3_AACCTGAAGACATAAC-1-10x   | 0.04357147 | 0.10505793 | 8.29E-05   |
| 9mo_SIGAF3_AACCTGAGTTGCTCAA-1-10x   | 0.10692548 | 0.3306325  | 0.0034182  |
| 9mo_SIGAF3_AACCTTTCAGTAGAAT-1-10x   | 0.28190267 | 0.95364606 | 0.00075401 |
| 9mo_SIGAF3_AACGAAAAGCGGGTAT-1-10x   | 0.04867512 | 0.12322968 | 0.00012523 |
| 9mo_SIGAF3_AACGAAACAAGAGATT-1-10x   | 0.06274445 | 0.17332411 | 0.00052741 |
| 9mo_SIGAF3_AACGAAAGTCAAGGCA-1-10x   | 0.04749167 | 0.11901595 | 0.00011598 |
| 9mo_SIGAF3_AACGAAAGTGGTCAAG-1-10x   | 0.02772114 | 0.04862216 | 4.30E-05   |

|                                   |            |            |            |
|-----------------------------------|------------|------------|------------|
| 9mo_SIGAF3_AACGAAATCTTGATG-1-10x  | 0.2583431  | 0.8697612  | 0.000778   |
| 9mo_SIGAF3_AACGGGACAGTAAAG-1-10x  | 0.01778772 | 0.01325378 | 3.44E-05   |
| 9mo_SIGAF3_AACGTCACACGCTATA-1-10x | 0.19315775 | 0.63766605 | 0.0012741  |
| 9mo_SIGAF3_AACGTCACAGATCCTA-1-10x | 0.01794385 | 0.0138097  | 3.44E-05   |
| 9mo_SIGAF3_AACGTCATCCTACCAC-1-10x | 0.09504702 | 0.28833875 | 0.0044051  |
| 9mo_SIGAF3_AACGTCATCGGTCTGG-1-10x | 0.24992853 | 0.8398008  | 0.00081397 |
| 9mo_SIGAF3_AACTTCTGTAGTCTGT-1-10x | 0.04930821 | 0.12548383 | 0.00013566 |
| 9mo_SIGAF3_AACTTCTGTCTACTGA-1-10x | 0.04500014 | 0.11014474 | 9.39E-05   |
| 9mo_SIGAF3_AACTTCTTCTCTGCA-1-10x  | 0.04849832 | 0.12260018 | 0.00012523 |
| 9mo_SIGAF3_AAGAACAGTGTGAATA-1-10x | 0.2752808  | 0.9300686  | 0.00075218 |
| 9mo_SIGAF3_AAGACAATCAGCTGAT-1-10x | 0.01856019 | 0.01600422 | 3.49E-05   |
| 9mo_SIGAF3_AAGACTCAGTGGTTGG-1-10x | 0.17858621 | 0.5857835  | 0.0015081  |
| 9mo_SIGAF3_AAGATAGCACAAATGA-1-10x | 0.24040501 | 0.8058919  | 0.00086997 |
| 9mo_SIGAF3_AAGATAGGTGGCTGCT-1-10x | 0.03913139 | 0.08924884 | 6.67E-05   |
| 9mo_SIGAF3_AAGCATCTCACTTCTA-1-10x | 0.02974867 | 0.05584126 | 4.55E-05   |
| 9mo_SIGAF3_AAGCGAGAGAACAGGA-1-10x | 0.04266302 | 0.10182333 | 7.82E-05   |
| 9mo_SIGAF3_AAGGAATAGATCCGAG-1-10x | 0.0844081  | 0.25045845 | 0.0036353  |
| 9mo_SIGAF3_AAGGAATAGTGCAGCA-1-10x | 0.1536462  | 0.4969836  | 0.0018575  |
| 9mo_SIGAF3_AAGGAATCAGAATTCC-1-10x | 0.01922649 | 0.01837659 | 3.49E-05   |
| 9mo_SIGAF3_AAGGAATGTGGGTCAA-1-10x | 0.2219117  | 0.74004567 | 0.0010106  |
| 9mo_SIGAF3_AAGGTAACACAACCGC-1-10x | 0.15360324 | 0.4968306  | 0.0018575  |
| 9mo_SIGAF3_AAGGTAATCGTGGTAT-1-10x | 0.04494214 | 0.10993823 | 9.39E-05   |
| 9mo_SIGAF3_AAGTACCAGTGGACGT-1-10x | 0.04481309 | 0.10947876 | 9.39E-05   |
| 9mo_SIGAF3_AAGTACCGTCTCAGGC-1-10x | 0.07489632 | 0.21659136 | 0.001885   |
| 9mo_SIGAF3_AAGTACCGTGCCACA-1-10x  | 0.26097977 | 0.8791492  | 0.00076963 |
| 9mo_SIGAF3_AAGTACCTCATTCGGA-1-10x | 0.10467    | 0.32260177 | 0.0037215  |
| 9mo_SIGAF3_AAGTACCTCTGAACGT-1-10x | 0.09361198 | 0.28322923 | 0.0044154  |
| 9mo_SIGAF3_AAGTCGTCACTGGCCA-1-10x | 0.09585767 | 0.2912251  | 0.0043808  |
| 9mo_SIGAF3_AAGTCGTTCTGGCCGA-1-10x | 0.10545043 | 0.32538053 | 0.0036214  |
| 9mo_SIGAF3_AAGTGAAAGGGCCAAT-1-10x | 0.10432127 | 0.3213601  | 0.0037215  |
| 9mo_SIGAF3_AAGTGAAGTTGGACTT-1-10x | 0.09475409 | 0.28729576 | 0.0044051  |
| 9mo_SIGAF3_AAGTGAATCTTCCCGA-1-10x | 0.08940879 | 0.2682636  | 0.0042295  |
| 9mo_SIGAF3_AAGTTCGAGACTGAGC-1-10x | 0.05143282 | 0.1330486  | 0.00016076 |
| 9mo_SIGAF3_AAGTTCGGTACATTGC-1-10x | 0.01668934 | 0.00934298 | 3.38E-05   |
| 9mo_SIGAF3_AAGTTCGGTTGCCAAT-1-10x | 0.13144669 | 0.4179413  | 0.001934   |
| 9mo_SIGAF3_AAGTTCGTCACTCACC-1-10x | 0.25811526 | 0.86895    | 0.000778   |
| 9mo_SIGAF3_AATAGAGGTTTCTTAC-1-10x | 0.0831656  | 0.24603446 | 0.0034742  |
| 9mo_SIGAF3_AATCACGTCTCCTACG-1-10x | 0.04054968 | 0.09429872 | 7.01E-05   |
| 9mo_SIGAF3_AATCGACCATCTTTCA-1-10x | 0.12180079 | 0.38359666 | 0.0021873  |
| 9mo_SIGAF3_AATCGACGTTTGAACC-1-10x | 0.0270848  | 0.04635643 | 4.19E-05   |
| 9mo_SIGAF3_AATCGTGTCCAACACA-1-10x | 0.01730748 | 0.01154389 | 3.38E-05   |

|                             |            |            |            |
|-----------------------------|------------|------------|------------|
| 9mo_SIGAF3_AATGAAGAGGTA     | 0.1919572  | 0.6333915  | 0.0012985  |
| 9mo_SIGAF3_AATGAAGAGTCTAGCT | 0.06196464 | 0.17054756 | 0.00047505 |
| 9mo_SIGAF3_AATGAAGCAGAATTCC | 0.11751931 | 0.3683523  | 0.002453   |
| 9mo_SIGAF3_AATGAAGTCGGTCGGT | 0.03663335 | 0.08035444 | 5.82E-05   |
| 9mo_SIGAF3_AATGCCAAGGGTAGCT | 0.10361627 | 0.31884992 | 0.0038193  |
| 9mo_SIGAF3_AATGGAAGTGAGATTA | 0.02161689 | 0.0268877  | 3.69E-05   |
| 9mo_SIGAF3_AATGGCTAGCAAATCA | 0.1972035  | 0.6520711  | 0.0012292  |
| 9mo_SIGAF3_AATTCCTAGCGCCCAT | 0.04906718 | 0.12462561 | 0.00012523 |
| 9mo_SIGAF3_AATTCCTAACCTATG  | 0.04571996 | 0.11270771 | 0.00010046 |
| 9mo_SIGAF3_AATTCCTACCAGTAT  | 0.04489905 | 0.10978481 | 9.39E-05   |
| 9mo_SIGAF3_AATTCCTACTGGCGT  | 0.07701673 | 0.22414118 | 0.0022191  |
| 9mo_SIGAF3_AATTTCCAATGGCAG  | 0.25049493 | 0.84181744 | 0.00080923 |
| 9mo_SIGAF3_AATTTCCAGCAGAAC  | 0.03171113 | 0.06282868 | 4.83E-05   |
| 9mo_SIGAF3_AATTTCTCCATCACC  | 0.08312413 | 0.2458868  | 0.0034742  |
| 9mo_SIGAF3_ACAAAGAGTCCCTGAG | 0.2651055  | 0.89383894 | 0.00076135 |
| 9mo_SIGAF3_ACAAAGAGTTTCACTT | 0.0155313  | 0.00521974 | 3.33E-05   |
| 9mo_SIGAF3_ACAAAGATCGACCACG | 0.08113194 | 0.2387935  | 0.0029431  |
| 9mo_SIGAF3_ACAACCAAGGCATCAG | 0.03236458 | 0.06515531 | 4.83E-05   |
| 9mo_SIGAF3_ACACAGTCATAAGATG | 0.0768076  | 0.22339654 | 0.0022191  |
| 9mo_SIGAF3_ACACCAAAGCGACTGA | 0.01879712 | 0.01684781 | 3.49E-05   |
| 9mo_SIGAF3_ACACCAACAGAGGTTG | 0.06604534 | 0.18507706 | 0.00072102 |
| 9mo_SIGAF3_ACACGCGAGCTTTGTG | 0.04686717 | 0.11679238 | 0.00010777 |
| 9mo_SIGAF3_ACACTGAGTGTTGATC | 0.12255834 | 0.38629395 | 0.0021479  |
| 9mo_SIGAF3_ACACTGATCGACCAAT | 0.053081   | 0.13891698 | 0.00019264 |
| 9mo_SIGAF3_ACAGAAATCGGTCACG | 0.05615708 | 0.1498695  | 0.000257   |
| 9mo_SIGAF3_ACAGCCGGTGCCTACG | 0.01573153 | 0.00593266 | 3.33E-05   |
| 9mo_SIGAF3_ACAGCCGTCTGTGCAA | 0.01702666 | 0.01054402 | 3.38E-05   |
| 9mo_SIGAF3_ACAGGGACACTTCAGA | 0.01587201 | 0.00643283 | 3.33E-05   |
| 9mo_SIGAF3_ACAGGGATCCAAAGGG | 0.14454076 | 0.46456325 | 0.0018716  |
| 9mo_SIGAF3_ACATCGAAGCGATTCT | 0.0223448  | 0.02947947 | 3.76E-05   |
| 9mo_SIGAF3_ACATCGAGTTCTATCT | 0.06830595 | 0.19312605 | 0.00097948 |
| 9mo_SIGAF3_ACATTTGTCATCAGT  | 0.23542239 | 0.7881511  | 0.00090278 |
| 9mo_SIGAF3_ACCAAACTCCCAAGTA | 0.21392423 | 0.71160597 | 0.0010701  |
| 9mo_SIGAF3_ACCAACAAGCCTCGTG | 0.07908364 | 0.23150049 | 0.002576   |
| 9mo_SIGAF3_ACCAACACAAAGGGCT | 0.11444638 | 0.35741097 | 0.0026715  |
| 9mo_SIGAF3_ACCACAACAATGGCCC | 0.06655074 | 0.18687657 | 0.00079936 |
| 9mo_SIGAF3_ACCACAAGTGGACTGA | 0.09165923 | 0.27627638 | 0.0043903  |
| 9mo_SIGAF3_ACCACAAGTTAGCGGA | 0.1884126  | 0.62077075 | 0.001338   |
| 9mo_SIGAF3_ACCATTTAGAAGCTCG | 0.2335169  | 0.7813665  | 0.00091657 |
| 9mo_SIGAF3_ACCATTTTCAATCCAG | 0.18744376 | 0.6173212  | 0.0013519  |
| 9mo_SIGAF3_ACCCAAAGTGACATC  | 0.03854175 | 0.08714939 | 6.36E-05   |

|                                    |            |            |            |
|------------------------------------|------------|------------|------------|
| 9mo_SIGAF3_ACCCAAAGTGTCGGT-1-10x   | 0.06844885 | 0.19363487 | 0.00097948 |
| 9mo_SIGAF3_ACCCAAATCGACCCAG-1-10x  | 0.07887213 | 0.23074737 | 0.002576   |
| 9mo_SIGAF3_ACCCTCACATGACAGG-1-10x  | 0.26202783 | 0.88288087 | 0.00076727 |
| 9mo_SIGAF3_ACCCTTGAGGCATTTC-1-10x  | 0.08485402 | 0.25204614 | 0.0036353  |
| 9mo_SIGAF3_ACCCTTGGTAGCGCCT-1-10x  | 0.23086818 | 0.7719356  | 0.00093779 |
| 9mo_SIGAF3_ACCCTTGGTCTGAAGCA-1-10x | 0.03677477 | 0.08085799 | 5.82E-05   |
| 9mo_SIGAF3_ACCTACCAGCACGTCC-1-10x  | 0.21086918 | 0.70072836 | 0.0010934  |
| 9mo_SIGAF3_ACCTACCTCCTAGAGT-1-10x  | 0.1833561  | 0.6027669  | 0.0014268  |
| 9mo_SIGAF3_ACCTGAAAGTAAACTG-1-10x  | 0.01766207 | 0.01280643 | 3.44E-05   |
| 9mo_SIGAF3_ACCTGAACACAGCCTG-1-10x  | 0.25164914 | 0.8459271  | 0.00080467 |
| 9mo_SIGAF3_ACCTGAAGTTTACGAC-1-10x  | 0.2590977  | 0.87244797 | 0.00077499 |
| 9mo_SIGAF3_ACCTGTCAGAAGAACG-1-10x  | 0.02690208 | 0.04570586 | 4.19E-05   |
| 9mo_SIGAF3_ACCTGTCCAAGTTCCA-1-10x  | 0.07593543 | 0.22029115 | 0.0020486  |
| 9mo_SIGAF3_ACCTGTTCGTCACATC-1-10x  | 0.04689216 | 0.11688136 | 0.00010777 |
| 9mo_SIGAF3_ACCTGTTCGTTACGTAC-1-10x | 0.03133444 | 0.06148746 | 4.68E-05   |
| 9mo_SIGAF3_ACGATCAAGTGCAGGT-1-10x  | 0.18070608 | 0.5933314  | 0.001475   |
| 9mo_SIGAF3_ACGATGTAGCACTGGA-1-10x  | 0.09816236 | 0.29943106 | 0.0042345  |
| 9mo_SIGAF3_ACGATGTAGTGCAAAT-1-10x  | 0.05275073 | 0.13774107 | 0.00017575 |
| 9mo_SIGAF3_ACGCACGGTACGAGCA-1-10x  | 0.03139116 | 0.0616894  | 4.68E-05   |
| 9mo_SIGAF3_ACGCACGGTATGCTAC-1-10x  | 0.02063065 | 0.02337619 | 3.62E-05   |
| 9mo_SIGAF3_ACGCACGGTTTGTGG-1-10x   | 0.26964346 | 0.90999657 | 0.00075499 |
| 9mo_SIGAF3_ACGCACGTCCGCGGAT-1-10x  | 0.13102192 | 0.41642886 | 0.001934   |
| 9mo_SIGAF3_ACGGAAGAGACGGTCA-1-10x  | 0.24094532 | 0.80781573 | 0.00086374 |
| 9mo_SIGAF3_ACGGAAGAGGAATGTT-1-10x  | 0.03408278 | 0.07127304 | 5.17E-05   |
| 9mo_SIGAF3_ACGGGTCCAAGTATC-1-10x   | 0.03674744 | 0.08076068 | 5.82E-05   |
| 9mo_SIGAF3_ACGGGTTCGTGTGAGCA-1-10x | 0.06120994 | 0.16786045 | 0.00042799 |
| 9mo_SIGAF3_ACGGGTCTCAACACCA-1-10x  | 0.23415294 | 0.78363115 | 0.00091657 |
| 9mo_SIGAF3_ACGGGTCTCACAGTGT-1-10x  | 0.0513333  | 0.13269424 | 0.00016076 |
| 9mo_SIGAF3_ACGGTTCGAGAAGTGT-1-10x  | 0.15979083 | 0.5188618  | 0.0018109  |
| 9mo_SIGAF3_ACGGTTCGCACAGACGA-1-10x | 0.02814847 | 0.05014367 | 4.30E-05   |
| 9mo_SIGAF3_ACGGTTAAGTACGTT-1-10x   | 0.24716556 | 0.8299631  | 0.0008292  |
| 9mo_SIGAF3_ACGGTTAAGTAGGAAG-1-10x  | 0.11474074 | 0.3584591  | 0.0026715  |
| 9mo_SIGAF3_ACGTAACGTGCCTTCT-1-10x  | 0.27738702 | 0.9375679  | 0.00075222 |
| 9mo_SIGAF3_ACGTACACAATTTCT-1-10x   | 0.02989896 | 0.05637636 | 4.55E-05   |
| 9mo_SIGAF3_ACGTAGTAGCCTCGTG-1-10x  | 0.02069615 | 0.02360938 | 3.62E-05   |
| 9mo_SIGAF3_ACGTAGTAGGAATTAC-1-10x  | 0.02507008 | 0.03918293 | 4.00E-05   |
| 9mo_SIGAF3_ACGTAGTAGTCTCCTC-1-10x  | 0.05513585 | 0.14623336 | 0.000233   |
| 9mo_SIGAF3_ACGTAGTCAATAGTGA-1-10x  | 0.08185215 | 0.24135788 | 0.0031253  |
| 9mo_SIGAF3_ACGTAGTTCGCCACTT-1-10x  | 0.22650355 | 0.75639516 | 0.00097406 |
| 9mo_SIGAF3_ACGTCCTGTGGATACG-1-10x  | 0.23580867 | 0.78952646 | 0.00090278 |
| 9mo_SIGAF3_ACGTTCAGGTGCCAA-1-10x   | 0.27230847 | 0.9194855  | 0.000753   |

|                                    |            |            |            |
|------------------------------------|------------|------------|------------|
| 9mo_SIGAF3_ACGTTCCTCTCTGAGA-1-10x  | 0.07209553 | 0.20661902 | 0.0014433  |
| 9mo_SIGAF3_ACTACGAAGGCTAACG-1-10x  | 0.16709185 | 0.5448573  | 0.0017056  |
| 9mo_SIGAF3_ACTATCTGTACAAACA-1-10x  | 0.25009608 | 0.84039736 | 0.00081397 |
| 9mo_SIGAF3_ACTATCTGTTTACGTG-1-10x  | 0.03605503 | 0.0782953  | 5.58E-05   |
| 9mo_SIGAF3_ACTATTCCAGCCTCGTG-1-10x | 0.02443236 | 0.03691232 | 3.91E-05   |
| 9mo_SIGAF3_ACTATTCCAGTTGTTG-1-10x  | 0.05256704 | 0.13708702 | 0.00017575 |
| 9mo_SIGAF3_ACTCCAGTAAGTCAA-1-10x   | 0.04482586 | 0.10952424 | 9.39E-05   |
| 9mo_SIGAF3_ACTGATGGTACCGTGC-1-10x  | 0.17289104 | 0.56550556 | 0.0016089  |
| 9mo_SIGAF3_ACTGCAAGTCTGCATA-1-10x  | 0.0836305  | 0.24768974 | 0.0034742  |
| 9mo_SIGAF3_ACTGCAATCATCACTT-1-10x  | 0.05100128 | 0.13151206 | 0.00014746 |
| 9mo_SIGAF3_ACTGTGAAGGGACAGG-1-10x  | 0.02289713 | 0.03144607 | 3.76E-05   |
| 9mo_SIGAF3_ACTGTGAAGTTGCCCG-1-10x  | 0.14083393 | 0.45136493 | 0.0018734  |
| 9mo_SIGAF3_ACTGTGATCTCGCTCA-1-10x  | 0.09781268 | 0.29818597 | 0.0042943  |
| 9mo_SIGAF3_ACTTAGGAGTACTCGT-1-10x  | 0.04757734 | 0.11932099 | 0.00011598 |
| 9mo_SIGAF3_ACTTAGGGTTACGTAC-1-10x  | 0.04626546 | 0.11465    | 0.00010046 |
| 9mo_SIGAF3_ACTTATCAGTTTGCTG-1-10x  | 0.12260555 | 0.38646203 | 0.0021479  |
| 9mo_SIGAF3_ACTTATCCACTCCGGA-1-10x  | 0.16705172 | 0.54471445 | 0.0017056  |
| 9mo_SIGAF3_ACTTATCGTCTTTATC-1-10x  | 0.0849574  | 0.25241423 | 0.0036353  |
| 9mo_SIGAF3_ACTTATCTCACCGGTG-1-10x  | 0.1513394  | 0.4887701  | 0.0018676  |
| 9mo_SIGAF3_ACTTCGCAGGCATCTT-1-10x  | 0.18306103 | 0.6017163  | 0.0014268  |
| 9mo_SIGAF3_ACTTCGCGTTAAACAG-1-10x  | 0.24040179 | 0.8058804  | 0.00086997 |
| 9mo_SIGAF3_ACTTTTACAACCTGGT-1-10x  | 0.19867496 | 0.6573103  | 0.0012085  |
| 9mo_SIGAF3_ACTTTTACAGCAGACA-1-10x  | 0.09029699 | 0.27142608 | 0.0042999  |
| 9mo_SIGAF3_ACTTTTGTTGAGCTGC-1-10x  | 0.13701473 | 0.43776652 | 0.0018842  |
| 9mo_SIGAF3_ACTTTGTTCTGGCTGG-1-10x  | 0.23692149 | 0.7934887  | 0.00089602 |
| 9mo_SIGAF3_AGAAATGTCAAACGAA-1-10x  | 0.08574992 | 0.25523606 | 0.0037839  |
| 9mo_SIGAF3_AGAACAACAAGCGATG-1-10x  | 0.13068624 | 0.41523367 | 0.001948   |
| 9mo_SIGAF3_AGAACCTAGTGGGAAA-1-10x  | 0.07440201 | 0.21483135 | 0.0017292  |
| 9mo_SIGAF3_AGAACCTCAAAGGATT-1-10x  | 0.23756278 | 0.795772   | 0.00088935 |
| 9mo_SIGAF3_AGAACCTTCGACCCAG-1-10x  | 0.01545892 | 0.00496202 | 3.27E-05   |
| 9mo_SIGAF3_AGAACCTTCGTTATCT-1-10x  | 0.21901666 | 0.72973776 | 0.0010326  |
| 9mo_SIGAF3_AGAACCTTCTCATTAC-1-10x  | 0.0630004  | 0.17423542 | 0.00052741 |
| 9mo_SIGAF3_AGAACCTTCTCCAAC-1-10x   | 0.2687999  | 0.9069931  | 0.00075594 |
| 9mo_SIGAF3_AGAAGCGCATCTGGGC-1-10x  | 0.06201954 | 0.17074305 | 0.00047505 |
| 9mo_SIGAF3_AGAAGCGGTGTCTTAG-1-10x  | 0.04352344 | 0.10488688 | 8.29E-05   |
| 9mo_SIGAF3_AGAAGTAGTCGAACGA-1-10x  | 0.01845096 | 0.01561528 | 3.49E-05   |
| 9mo_SIGAF3_AGAAGTAGTCGCATCG-1-10x  | 0.07159632 | 0.20484158 | 0.0013138  |
| 9mo_SIGAF3_AGAAGTAGTGACGTCC-1-10x  | 0.0304584  | 0.05836828 | 4.55E-05   |
| 9mo_SIGAF3_AGAAGTAGTGGATGAC-1-10x  | 0.24322821 | 0.815944   | 0.00085167 |
| 9mo_SIGAF3_AGAAGTAGTTGGTACT-1-10x  | 0.04364213 | 0.10530949 | 8.29E-05   |
| 9mo_SIGAF3_AGACAAATCCAGTGCG-1-10x  | 0.18802907 | 0.61940515 | 0.0013519  |

|                                    |            |            |            |
|------------------------------------|------------|------------|------------|
| 9mo_SIGAF3_AGACCCGAGCTGACTT-1-10x  | 0.20051429 | 0.6638593  | 0.0011985  |
| 9mo_SIGAF3_AGACCCGTCGGTAGAG-1-10x  | 0.04003574 | 0.09246881 | 7.01E-05   |
| 9mo_SIGAF3_AGACTCACACTGTTCC-1-10x  | 0.2656326  | 0.8957158  | 0.00075974 |
| 9mo_SIGAF3_AGACTCAGTTGCGGAA-1-10x  | 0.01727852 | 0.01144077 | 3.38E-05   |
| 9mo_SIGAF3_AGAGAATAGTAGTCTC-1-10x  | 0.12324993 | 0.38875636 | 0.0021479  |
| 9mo_SIGAF3_AGAGAATGTCTTGGA-1-10x   | 0.08052018 | 0.23661532 | 0.0029431  |
| 9mo_SIGAF3_AGAGAATTCAACTACG-1-10x  | 0.04363324 | 0.10527786 | 8.29E-05   |
| 9mo_SIGAF3_AGAGAATTCATCCGT-1-10x   | 0.0914472  | 0.27552143 | 0.0043535  |
| 9mo_SIGAF3_AGAGAGCAGTTAACAG-1-10x  | 0.09163188 | 0.27617902 | 0.0043903  |
| 9mo_SIGAF3_AGAGCAGCAAAGACTA-1-10x  | 0.2480113  | 0.83297443 | 0.00082396 |
| 9mo_SIGAF3_AGAGCCCAGTTTCAGC-1-10x  | 0.02889057 | 0.05278596 | 4.42E-05   |
| 9mo_SIGAF3_AGAGCCCTCGCTCATC-1-10x  | 0.08031286 | 0.23587717 | 0.0029431  |
| 9mo_SIGAF3_AGATAGATCGCCGTGA-1-10x  | 0.08358602 | 0.24753137 | 0.0034742  |
| 9mo_SIGAF3_AGATCCACAGAATCGG-1-10x  | 0.04353365 | 0.10492327 | 8.29E-05   |
| 9mo_SIGAF3_AGATCGTAGAGCAGAA-1-10x  | 0.26959398 | 0.90982044 | 0.00075499 |
| 9mo_SIGAF3_AGATCGTTCAAACGTC-1-10x  | 0.01712754 | 0.01090319 | 3.38E-05   |
| 9mo_SIGAF3_AGATCGTTCCACACCT-1-10x  | 0.09470483 | 0.28712037 | 0.0044051  |
| 9mo_SIGAF3_AGATCGTTCGTGAGAG-1-10x  | 0.0425286  | 0.10134473 | 7.82E-05   |
| 9mo_SIGAF3_AGATGAAGTGATTGC-1-10x   | 0.08258668 | 0.24397321 | 0.0033032  |
| 9mo_SIGAF3_AGATGCTAGTGATTCC-1-10x  | 0.27712676 | 0.9366412  | 0.00075222 |
| 9mo_SIGAF3_AGATGCTCACCAGTTA-1-10x  | 0.24331519 | 0.8162537  | 0.00085167 |
| 9mo_SIGAF3_AGATGCTGTCCAAGAG-1-10x  | 0.01685109 | 0.00991888 | 3.38E-05   |
| 9mo_SIGAF3_AGCATCAAGCGTACAG-1-10x  | 0.21561679 | 0.7176324  | 0.001055   |
| 9mo_SIGAF3_AGCCAATAGTGCCAGA-1-10x  | 0.2370663  | 0.79400426 | 0.00089602 |
| 9mo_SIGAF3_AGCCAATGTTGACGGA-1-10x  | 0.28123513 | 0.9512692  | 0.00075348 |
| 9mo_SIGAF3_AGCCACGGTGGACTGA-1-10x  | 0.14468597 | 0.4650803  | 0.0018716  |
| 9mo_SIGAF3_AGCCACGGTTCATCGA-1-10x  | 0.1077116  | 0.3334315  | 0.0033168  |
| 9mo_SIGAF3_AGCGATTGTACCTAGT-1-10x  | 0.21564099 | 0.7177186  | 0.001055   |
| 9mo_SIGAF3_AGCGATTTGACGCGT-1-10x   | 0.27017483 | 0.9118886  | 0.00075418 |
| 9mo_SIGAF3_AGCGATTTCGTAATGC-1-10x  | 0.02958951 | 0.05527455 | 4.55E-05   |
| 9mo_SIGAF3_AGCGATTTCTGAGTCA-1-10x  | 0.13156769 | 0.4183721  | 0.001934   |
| 9mo_SIGAF3_AGCGCCAAGAGACAAG-1-10x  | 0.08250181 | 0.243671   | 0.0033032  |
| 9mo_SIGAF3_AGCGCCAGTGAGTAAT-1-10x  | 0.11006074 | 0.3417957  | 0.0031181  |
| 9mo_SIGAF3_AGCGCCAGTGATACTC-1-10x  | 0.08280806 | 0.24476144 | 0.0033032  |
| 9mo_SIGAF3_AGCGCCAGTTCGCGA-1-10x   | 0.15886602 | 0.5155689  | 0.0018209  |
| 9mo_SIGAF3_AGCGCCATCAGTCATG-1-10x  | 0.09861265 | 0.30103433 | 0.0042345  |
| 9mo_SIGAF3_AGCGCTGAGCACTCGC-1-10x  | 0.0512084  | 0.13224953 | 0.00016076 |
| 9mo_SIGAF3_AGCGCTGCAGATTTTCG-1-10x | 0.19383052 | 0.6400615  | 0.0012741  |
| 9mo_SIGAF3_AGCGCTGTCCGACTG-1-10x   | 0.0213806  | 0.02604639 | 3.69E-05   |
| 9mo_SIGAF3_AGCGTATAGCTATCCA-1-10x  | 0.01636869 | 0.00820128 | 3.33E-05   |
| 9mo_SIGAF3_AGCGTATGTATGGAGC-1-10x  | 0.06002583 | 0.16364436 | 0.00038577 |

|                                   |            |            |            |
|-----------------------------------|------------|------------|------------|
| 9mo_SIGAF3_AGCGTATGTTGACTGT-1-10x | 0.25840625 | 0.86998606 | 0.000778   |
| 9mo_SIGAF3_AGCGTATTCCGACAGC-1-10x | 0.0430935  | 0.10335608 | 8.29E-05   |
| 9mo_SIGAF3_AGCGTCGCACCACATA-1-10x | 0.14214735 | 0.45604143 | 0.0018724  |
| 9mo_SIGAF3_AGCTCAACAGACACAG-1-10x | 0.17632458 | 0.57773083 | 0.0015416  |
| 9mo_SIGAF3_AGCTCAAGTGGCTACC-1-10x | 0.07384367 | 0.21284336 | 0.0017292  |
| 9mo_SIGAF3_AGCTCAAGTTTAGTCG-1-10x | 0.02592522 | 0.04222772 | 4.09E-05   |
| 9mo_SIGAF3_AGCTTCCTCGGTAAC-1-10x  | 0.11438616 | 0.35719657 | 0.0026715  |
| 9mo_SIGAF3_AGGAAATAGGTTAAAC-1-10x | 0.26129225 | 0.8802618  | 0.00076963 |
| 9mo_SIGAF3_AGGAAATCACCCTGG-1-10x  | 0.23192845 | 0.77571076 | 0.00093066 |
| 9mo_SIGAF3_AGGAAATTCATTTGT-1-10x  | 0.1226074  | 0.38646865 | 0.0021479  |
| 9mo_SIGAF3_AGGAAATCTATCGCC-1-10x  | 0.09299448 | 0.2810306  | 0.0044107  |
| 9mo_SIGAF3_AGGACTTGTCCTAAA-1-10x  | 0.1430223  | 0.45915672 | 0.0018718  |
| 9mo_SIGAF3_AGGACTTGTTCAATCG-1-10x | 0.09268868 | 0.27994177 | 0.0044107  |
| 9mo_SIGAF3_AGGATAAAGCCTAACT-1-10x | 0.08863196 | 0.26549765 | 0.0041422  |
| 9mo_SIGAF3_AGGATAACACGGCACT-1-10x | 0.06611472 | 0.18532412 | 0.00072102 |
| 9mo_SIGAF3_AGGATCTAGGACTAAT-1-10x | 0.23624004 | 0.79106236 | 0.00089602 |
| 9mo_SIGAF3_AGGATCTCAAGGCTTT-1-10x | 0.03697701 | 0.08157808 | 5.82E-05   |
| 9mo_SIGAF3_AGGATCTCACGTATAC-1-10x | 0.02506115 | 0.03915115 | 4.00E-05   |
| 9mo_SIGAF3_AGGATCTGTGTCTTGA-1-10x | 0.05150089 | 0.13329098 | 0.00016076 |
| 9mo_SIGAF3_AGGATCTCCCGAAAT-1-10x  | 0.28970844 | 0.9814388  | 0.0007606  |
| 9mo_SIGAF3_AGGCATTCACGCGCTA-1-10x | 0.01732898 | 0.01162045 | 3.38E-05   |
| 9mo_SIGAF3_AGGCCACGTGCCCTTT-1-10x | 0.22597331 | 0.75450724 | 0.00097406 |
| 9mo_SIGAF3_AGGCCACTCCTATTGT-1-10x | 0.04321646 | 0.10379387 | 8.29E-05   |
| 9mo_SIGAF3_AGGCTGCGTCCAGCCA-1-10x | 0.22578572 | 0.7538393  | 0.00098137 |
| 9mo_SIGAF3_AGGCTGCTCATCGCAA-1-10x | 0.04277013 | 0.10220471 | 8.29E-05   |
| 9mo_SIGAF3_AGGGAGTAGGGTAGCT-1-10x | 0.08198725 | 0.24183892 | 0.0031253  |
| 9mo_SIGAF3_AGGGAGTCACAGAGAC-1-10x | 0.17405128 | 0.5696367  | 0.0015922  |
| 9mo_SIGAF3_AGGGAGTCAGACGATG-1-10x | 0.04865925 | 0.12317316 | 0.00012523 |
| 9mo_SIGAF3_AGGGAGTGTGAGTCAG-1-10x | 0.02078459 | 0.02392427 | 3.62E-05   |
| 9mo_SIGAF3_AGGGCCTCACAATTCG-1-10x | 0.06316191 | 0.1748105  | 0.00052741 |
| 9mo_SIGAF3_AGGGCCTTCATTTGGG-1-10x | 0.28128722 | 0.9514547  | 0.00075348 |
| 9mo_SIGAF3_AGGGCTCGTAGTCGTT-1-10x | 0.25904417 | 0.8722574  | 0.00077499 |
| 9mo_SIGAF3_AGGGCTCTCGAGAATA-1-10x | 0.02207249 | 0.02850991 | 3.76E-05   |
| 9mo_SIGAF3_AGGGTCCAGGATTCAA-1-10x | 0.01528155 | 0.00433049 | 3.27E-05   |
| 9mo_SIGAF3_AGGGTCCAGGTAGCCA-1-10x | 0.03129476 | 0.06134618 | 4.68E-05   |
| 9mo_SIGAF3_AGGGTCCAGTATAGGT-1-10x | 0.04165497 | 0.09823414 | 7.40E-05   |
| 9mo_SIGAF3_AGGGTCCGTCACAATC-1-10x | 0.01852628 | 0.01588348 | 3.49E-05   |
| 9mo_SIGAF3_AGGGTGAAGCTGTACT-1-10x | 0.27537778 | 0.9304139  | 0.00075218 |
| 9mo_SIGAF3_AGGGTGAGTGTCATGT-1-10x | 0.21568708 | 0.7178827  | 0.001055   |
| 9mo_SIGAF3_AGGTAGGAGTGTCATC-1-10x | 0.21899098 | 0.7296464  | 0.0010326  |
| 9mo_SIGAF3_AGGTAGGCAATTCTTC-1-10x | 0.02653007 | 0.0443813  | 4.09E-05   |



|                                     |            |            |            |
|-------------------------------------|------------|------------|------------|
| 9mo_SIGAF3_AGGTAGGGTACCTTCC-1-10x   | 0.06659402 | 0.18703067 | 0.00079936 |
| 9mo_SIGAF3_AGGTAGGTCATTACGG-1-10x   | 0.24620792 | 0.8265534  | 0.00083459 |
| 9mo_SIGAF3_AGGTAGGTCTCCACTG-1-10x   | 0.28216964 | 0.9545966  | 0.00075401 |
| 9mo_SIGAF3_AGGTCATTCTACTATC-1-10x   | 0.08475777 | 0.25170344 | 0.0036353  |
| 9mo_SIGAF3_AGGTCATTCTTGGAAC-1-10x   | 0.23246525 | 0.77762204 | 0.00092358 |
| 9mo_SIGAF3_AGGTCTACAGCGCTTG-1-10x   | 0.05597836 | 0.14923318 | 0.000257   |
| 9mo_SIGAF3_AGGTCTAGTTGTGTTG-1-10x   | 0.26642138 | 0.8985243  | 0.00075831 |
| 9mo_SIGAF3_AGGTCTATCTTAGGAC-1-10x   | 0.05499514 | 0.14573237 | 0.000233   |
| 9mo_SIGAF3_AGGTGTTAGCTTGTGT-1-10x   | 0.01676482 | 0.00961173 | 3.38E-05   |
| 9mo_SIGAF3_AGGTGTTACCCCTTGT-1-10x   | 0.0475768  | 0.11931906 | 0.00011598 |
| 9mo_SIGAF3_AGGTGTTCACTGCTTC-1-10x   | 0.19738473 | 0.6527164  | 0.0012292  |
| 9mo_SIGAF3_AGGTTACAGCTGACCC-1-10x   | 0.08364768 | 0.24775094 | 0.0034742  |
| 9mo_SIGAF3_AGGTTGTCAACGGCTC-1-10x   | 0.17515026 | 0.5735496  | 0.0015753  |
| 9mo_SIGAF3_AGGTTGTGTACAACGG-1-10x   | 0.02082147 | 0.0240556  | 3.62E-05   |
| 9mo_SIGAF3_AGGTTGTGTATGTCAC-1-10x   | 0.23427807 | 0.7840767  | 0.00091657 |
| 9mo_SIGAF3_AGGTTGTGTCACGCTG-1-10x   | 0.01922305 | 0.01836436 | 3.49E-05   |
| 9mo_SIGAF3_AGTAACCAGCAAGGAA-1-10x   | 0.08401232 | 0.24904925 | 0.0034742  |
| 9mo_SIGAF3_AGTAACCGTTTGAACC-1-10x   | 0.02429758 | 0.03643243 | 3.91E-05   |
| 9mo_SIGAF3_AGTAAGTGGTAGCACGA-1-10x  | 0.0844443  | 0.2505873  | 0.0036353  |
| 9mo_SIGAF3_AGTAAGTGGTGAACC-1-10x    | 0.08363236 | 0.24769637 | 0.0034742  |
| 9mo_SIGAF3_AGTAAGTGTCTAATTCC-1-10x  | 0.14724511 | 0.47419223 | 0.0018716  |
| 9mo_SIGAF3_AGTAAGTCTCATATCTGG-1-10x | 0.0242656  | 0.03631857 | 3.91E-05   |
| 9mo_SIGAF3_AGTAAGTCTGTCAGCTTA-1-10x | 0.16505091 | 0.5375905  | 0.0017353  |
| 9mo_SIGAF3_AGTAAGTCTCTCATAGG-1-10x  | 0.1082084  | 0.33520037 | 0.0033168  |
| 9mo_SIGAF3_AGTCATGTCTTACCGC-1-10x   | 0.01937719 | 0.01891318 | 3.55E-05   |
| 9mo_SIGAF3_AGTCATCCCAAATTGGA-1-10x  | 0.10718663 | 0.33156234 | 0.0034182  |
| 9mo_SIGAF3_AGTCATCTGTGACGCCT-1-10x  | 0.05384382 | 0.14163306 | 0.00019264 |
| 9mo_SIGAF3_AGTCATCGTTCGAGTCCG-1-10x | 0.28201908 | 0.9540605  | 0.00075401 |
| 9mo_SIGAF3_AGTCATGGTACCGGAA-1-10x   | 0.26498193 | 0.893399   | 0.00076135 |
| 9mo_SIGAF3_AGTCATCCGTTCTCGTC-1-10x  | 0.02993251 | 0.05649583 | 4.55E-05   |
| 9mo_SIGAF3_AGTCATCCCTCGGAGTGA-1-10x | 0.03247654 | 0.06555396 | 5.00E-05   |
| 9mo_SIGAF3_AGTCATCGAAGATCCAAA-1-10x | 0.22062114 | 0.7354506  | 0.0010179  |
| 9mo_SIGAF3_AGTCATCGAAGTGCAAAT-1-10x | 0.03820956 | 0.08596662 | 6.36E-05   |
| 9mo_SIGAF3_ATACCGATCAAATAGG-1-10x   | 0.08918302 | 0.26745972 | 0.0042295  |
| 9mo_SIGAF3_ATACCTTGTAGAGATT-1-10x   | 0.04451587 | 0.10842049 | 8.81E-05   |
| 9mo_SIGAF3_ATACCTTGTGACAACG-1-10x   | 0.04331801 | 0.10415547 | 8.29E-05   |
| 9mo_SIGAF3_ATACTTCAGGATCATA-1-10x   | 0.03883302 | 0.08818645 | 6.36E-05   |
| 9mo_SIGAF3_ATACTTCCAAGATGGC-1-10x   | 0.08148859 | 0.24006341 | 0.0031253  |
| 9mo_SIGAF3_ATAGACCTCATGGCCG-1-10x   | 0.01717974 | 0.01108905 | 3.38E-05   |
| 9mo_SIGAF3_ATAGAGACATCCGAAT-1-10x   | 0.05079483 | 0.130777   | 0.00014746 |
| 9mo_SIGAF3_ATAGGCTCAGTCTCTC-1-10x   | 0.2535738  | 0.8527799  | 0.00079608 |

|                                    |            |            |            |
|------------------------------------|------------|------------|------------|
| 9mo_SIGAF3_ATAGGCTTCTGAATCG-1-10x  | 0.05020415 | 0.12867387 | 0.00013566 |
| 9mo_SIGAF3_ATATCCTTCCGTGTCT-1-10x  | 0.07777936 | 0.22685653 | 0.0023954  |
| 9mo_SIGAF3_ATCACAGAGCTGACCC-1-10x  | 0.10157144 | 0.3115692  | 0.0040036  |
| 9mo_SIGAF3_ATCACGACACAATCTG-1-10x  | 0.24994613 | 0.8398635  | 0.00081397 |
| 9mo_SIGAF3_ATCACGAGTCCTCATC-1-10x  | 0.10002598 | 0.30606654 | 0.0040879  |
| 9mo_SIGAF3_ATCACTTGTCCGGTCA-1-10x  | 0.26974106 | 0.9103441  | 0.00075499 |
| 9mo_SIGAF3_ATCAGGTCAATGGCAG-1-10x  | 0.0844407  | 0.2505745  | 0.0036353  |
| 9mo_SIGAF3_ATCAGGTTCAAGCTGT-1-10x  | 0.19425677 | 0.64157915 | 0.0012624  |
| 9mo_SIGAF3_ATCATTACAGAGTTCCG-1-10x | 0.01555817 | 0.00531538 | 3.33E-05   |
| 9mo_SIGAF3_ATCCACCCATTGCTTT-1-10x  | 0.01601651 | 0.00694732 | 3.33E-05   |
| 9mo_SIGAF3_ATCCATTAGGGATGTC-1-10x  | 0.01850921 | 0.01582269 | 3.49E-05   |
| 9mo_SIGAF3_ATCCATTTCCGGTCTAA-1-10x | 0.09026603 | 0.27131584 | 0.0042999  |
| 9mo_SIGAF3_ATCCCTGAGAGCAAGA-1-10x  | 0.03978698 | 0.09158308 | 6.67E-05   |
| 9mo_SIGAF3_ATCCCTGAGCTTCTAG-1-10x  | 0.16207324 | 0.5269884  | 0.001776   |
| 9mo_SIGAF3_ATCCGTCGTTTGGAGG-1-10x  | 0.09387658 | 0.28417134 | 0.0044154  |
| 9mo_SIGAF3_ATCCGTCCTCAAGCTTG-1-10x | 0.09155055 | 0.27588943 | 0.0043535  |
| 9mo_SIGAF3_ATCCGTCCTCCACTG-1-10x   | 0.07971981 | 0.23376559 | 0.0027593  |
| 9mo_SIGAF3_ATCCTATAGAGATTCA-1-10x  | 0.08632222 | 0.25727373 | 0.0039187  |
| 9mo_SIGAF3_ATCCTATAGCAGCGAT-1-10x  | 0.28246054 | 0.9556324  | 0.00075462 |
| 9mo_SIGAF3_ATCCTATAGGTGCAGT-1-10x  | 0.25182977 | 0.84657025 | 0.00080467 |
| 9mo_SIGAF3_ATCCTATTCGTTCCCA-1-10x  | 0.0489549  | 0.12422586 | 0.00012523 |
| 9mo_SIGAF3_ATCGATGGTCACTCTC-1-10x  | 0.08017907 | 0.23540078 | 0.0027593  |
| 9mo_SIGAF3_ATCGATGGTGCCTAAT-1-10x  | 0.04193169 | 0.09921941 | 7.82E-05   |
| 9mo_SIGAF3_ATCGATGTCCTTGAAG-1-10x  | 0.03485674 | 0.07402876 | 5.37E-05   |
| 9mo_SIGAF3_ATCGCCTAGGGATCGT-1-10x  | 0.04814903 | 0.1213565  | 0.00011598 |
| 9mo_SIGAF3_ATCGCCTCAGGTCCGT-1-10x  | 0.11600477 | 0.36295968 | 0.0025211  |
| 9mo_SIGAF3_ATCGCCTCATTGCCTC-1-10x  | 0.02678709 | 0.04529642 | 4.19E-05   |
| 9mo_SIGAF3_ATCGCCTGTGAAGCA-1-10x   | 0.03896253 | 0.08864759 | 6.67E-05   |
| 9mo_SIGAF3_ATCGGATTCGGAATTC-1-10x  | 0.01703905 | 0.01058813 | 3.38E-05   |
| 9mo_SIGAF3_ATCGGCGGTGTCCACG-1-10x  | 0.10198757 | 0.31305087 | 0.0039137  |
| 9mo_SIGAF3_ATCGTAGGTCAGGCAA-1-10x  | 0.22833154 | 0.7629038  | 0.00095947 |
| 9mo_SIGAF3_ATCGTCCAGCCTGAGA-1-10x  | 0.28488985 | 0.96428204 | 0.00075605 |
| 9mo_SIGAF3_ATCGTGACACTGGACC-1-10x  | 0.03428983 | 0.07201025 | 5.37E-05   |
| 9mo_SIGAF3_ATCGTGACATACGCAT-1-10x  | 0.05038594 | 0.12932111 | 0.00014746 |
| 9mo_SIGAF3_ATCGTGAGTTATAGAG-1-10x  | 0.08634321 | 0.25734845 | 0.0039187  |
| 9mo_SIGAF3_ATCTCTAAGCACCGTC-1-10x  | 0.2439483  | 0.8185079  | 0.00084583 |
| 9mo_SIGAF3_ATGAAAGTCGTTACCC-1-10x  | 0.0186282  | 0.01624635 | 3.49E-05   |
| 9mo_SIGAF3_ATGACCACACCTCTGT-1-10x  | 0.10959854 | 0.34015003 | 0.0031181  |
| 9mo_SIGAF3_ATGAGGGTACTCCCT-1-10x   | 0.25168207 | 0.84604436 | 0.00080467 |
| 9mo_SIGAF3_ATGAGTCTCCATTTGT-1-10x  | 0.24730249 | 0.83045065 | 0.0008292  |
| 9mo_SIGAF3_ATGAGTCTCGCACTCT-1-10x  | 0.01586881 | 0.00642143 | 3.33E-05   |

|                                   |            |            |            |
|-----------------------------------|------------|------------|------------|
| 9mo_SIGAF3_ATGATCGCACGCGTGT-1-10x | 0.01734699 | 0.01168457 | 3.38E-05   |
| 9mo_SIGAF3_ATGGAGGGTGCAATAA-1-10x | 0.016289   | 0.00791756 | 3.33E-05   |
| 9mo_SIGAF3_ATGGAGGGTGGAGAAA-1-10x | 0.04656628 | 0.11572105 | 0.00010777 |
| 9mo_SIGAF3_ATGGATCAGCACTCAT-1-10x | 0.26365346 | 0.88866895 | 0.00076313 |
| 9mo_SIGAF3_ATGGATCCAATAAGGT-1-10x | 0.04794587 | 0.12063315 | 0.00011598 |
| 9mo_SIGAF3_ATGGATCGTGGGTATG-1-10x | 0.02370565 | 0.03432484 | 3.83E-05   |
| 9mo_SIGAF3_ATGGATCGTTAGGCC-1-10x  | 0.05266777 | 0.13744569 | 0.00017575 |
| 9mo_SIGAF3_ATGGGAGAGATGCGAC-1-10x | 0.2711608  | 0.9153992  | 0.00075352 |
| 9mo_SIGAF3_ATGGGAGTCACTTGA-1-10x  | 0.07428466 | 0.21441351 | 0.0017292  |
| 9mo_SIGAF3_ATGGTTGAGCTGAAGC-1-10x | 0.06046415 | 0.16520502 | 0.00038577 |
| 9mo_SIGAF3_ATGGTTGCAAGCGCTC-1-10x | 0.07765615 | 0.22641784 | 0.0023954  |
| 9mo_SIGAF3_ATGGTTGTCGGAAGGT-1-10x | 0.05142666 | 0.13302667 | 0.00016076 |
| 9mo_SIGAF3_ATGTCCCGTCATCCCT-1-10x | 0.09663524 | 0.29399365 | 0.0043435  |
| 9mo_SIGAF3_ATGTCCCGTTCGGTTC-1-10x | 0.020405   | 0.02257273 | 3.62E-05   |
| 9mo_SIGAF3_ATTACCTCATCAGCGC-1-10x | 0.03875096 | 0.0878943  | 6.36E-05   |
| 9mo_SIGAF3_ATTACCTGTGTGAATA-1-10x | 0.03461776 | 0.07317787 | 5.37E-05   |
| 9mo_SIGAF3_ATTACTCCATATGAAG-1-10x | 0.28211123 | 0.9543886  | 0.00075401 |
| 9mo_SIGAF3_ATTATCCAGCAACTTC-1-10x | 0.27816498 | 0.94033784 | 0.00075239 |
| 9mo_SIGAF3_ATTATCCTCGAGATAA-1-10x | 0.06973121 | 0.19820075 | 0.0010821  |
| 9mo_SIGAF3_ATTCACTAGAAGAGCA-1-10x | 0.1662817  | 0.54197276 | 0.0017206  |
| 9mo_SIGAF3_ATTCATCGTCCACATA-1-10x | 0.27205265 | 0.91857463 | 0.000753   |
| 9mo_SIGAF3_ATTCCATTCTTTGAT-1-10x  | 0.02112092 | 0.02512178 | 3.69E-05   |
| 9mo_SIGAF3_ATTCCATTCTGGAAGG-1-10x | 0.20818612 | 0.6911752  | 0.0011177  |
| 9mo_SIGAF3_ATTCCCGCACAGAGCA-1-10x | 0.05402551 | 0.14227995 | 0.00021164 |
| 9mo_SIGAF3_ATTCCCGTAACAAGT-1-10x  | 0.02371493 | 0.03435788 | 3.83E-05   |
| 9mo_SIGAF3_ATTCCCGTTCAGGC-1-10x   | 0.04825544 | 0.1217354  | 0.00011598 |
| 9mo_SIGAF3_ATTCGTTAGCTGAGCA-1-10x | 0.2678767  | 0.903706   | 0.00075705 |
| 9mo_SIGAF3_ATTCGTTACCGTCTGA-1-10x | 0.22467433 | 0.74988216 | 0.00098869 |
| 9mo_SIGAF3_ATTCTACAGGAGAGGC-1-10x | 0.015112   | 0.00372677 | 3.27E-05   |
| 9mo_SIGAF3_ATTCTACTCGCAATGT-1-10x | 0.04778459 | 0.1200589  | 0.00011598 |
| 9mo_SIGAF3_ATTCTTGGTCCAAAGG-1-10x | 0.19679922 | 0.65063167 | 0.0012292  |
| 9mo_SIGAF3_ATTGGGTTCCGTAGGC-1-10x | 0.1440663  | 0.46287397 | 0.0018716  |
| 9mo_SIGAF3_ATTGTTCCAAAGCTAA-1-10x | 0.02889702 | 0.05280891 | 4.42E-05   |
| 9mo_SIGAF3_ATTGTTCTCGTACCTC-1-10x | 0.13828544 | 0.44229096 | 0.0018802  |
| 9mo_SIGAF3_ATTTACCAGAAGCGGG-1-10x | 0.03675096 | 0.0807732  | 5.82E-05   |
| 9mo_SIGAF3_ATTTACCAGTTCTACG-1-10x | 0.10290645 | 0.3163226  | 0.0038193  |
| 9mo_SIGAF3_ATTTACCAAGTACCT-1-10x  | 0.07330766 | 0.21093485 | 0.0015819  |
| 9mo_SIGAF3_ATTTCACTCTAGATCG-1-10x | 0.07905193 | 0.23138756 | 0.002576   |
| 9mo_SIGAF3_ATTTCTGGTACCTAGT-1-10x | 0.14349893 | 0.4608538  | 0.0018716  |
| 9mo_SIGAF3_ATTTCTGGTCTAACTG-1-10x | 0.10359642 | 0.31877923 | 0.0038193  |
| 9mo_SIGAF3_ATTTCTGTCTCGGGAC-1-10x | 0.13927019 | 0.44579718 | 0.0018772  |

|                                   |            |            |            |
|-----------------------------------|------------|------------|------------|
| 9mo_SIGAF3_CAAAGAAAGGCCACCT-1-10x | 0.23745975 | 0.79540515 | 0.00088935 |
| 9mo_SIGAF3_CAAAGAACACTGCTTC-1-10x | 0.09806923 | 0.29909945 | 0.0042943  |
| 9mo_SIGAF3_CAACAACAGAACAGGA-1-10x | 0.02014749 | 0.02165586 | 3.55E-05   |
| 9mo_SIGAF3_CAACAACAGTAATTGG-1-10x | 0.18083501 | 0.5937904  | 0.0014587  |
| 9mo_SIGAF3_CAACAACCAAGTCCAT-1-10x | 0.03452728 | 0.0728557  | 5.37E-05   |
| 9mo_SIGAF3_CAACAGTAGTGGCAGT-1-10x | 0.17791036 | 0.58337706 | 0.0015248  |
| 9mo_SIGAF3_CAACAGTCAACTAGAA-1-10x | 0.06912632 | 0.19604702 | 0.0010821  |
| 9mo_SIGAF3_CAACAGTCAAGCGATG-1-10x | 0.11292721 | 0.3520019  | 0.0028393  |
| 9mo_SIGAF3_CAACAGTTCCTAGCCT-1-10x | 0.12909986 | 0.4095853  | 0.0019821  |
| 9mo_SIGAF3_CAACCAAAGACTCTTG-1-10x | 0.05878415 | 0.15922329 | 0.00034795 |
| 9mo_SIGAF3_CAACCAAAGATAGCTA-1-10x | 0.0476694  | 0.11964878 | 0.00011598 |
| 9mo_SIGAF3_CAACCAAAGGATCACG-1-10x | 0.05309093 | 0.13895237 | 0.00019264 |
| 9mo_SIGAF3_CAACCAATCTACGCAA-1-10x | 0.08079185 | 0.23758261 | 0.0029431  |
| 9mo_SIGAF3_CAACCTCCAAGTACCT-1-10x | 0.19147262 | 0.63166606 | 0.0012985  |
| 9mo_SIGAF3_CAACCTCTCTAGGAAA-1-10x | 0.18426943 | 0.60601884 | 0.0014112  |
| 9mo_SIGAF3_CAACGGCGTGGACTAG-1-10x | 0.17661028 | 0.5787481  | 0.0015416  |
| 9mo_SIGAF3_CAAGACTCAATGGCAG-1-10x | 0.12553911 | 0.3969071  | 0.0020515  |
| 9mo_SIGAF3_CAAGAGGGTAACTGCT-1-10x | 0.0676349  | 0.19073676 | 0.00088537 |
| 9mo_SIGAF3_CAAGCTAAGTGTAGTA-1-10x | 0.26427764 | 0.8908914  | 0.00076313 |
| 9mo_SIGAF3_CAAGCTAGTTCATCTT-1-10x | 0.2760162  | 0.93268704 | 0.00075214 |
| 9mo_SIGAF3_CAAGCTATCAGACATC-1-10x | 0.21334475 | 0.70954275 | 0.0010778  |
| 9mo_SIGAF3_CAAGGGACATGCGTGC-1-10x | 0.25941953 | 0.87359387 | 0.00077499 |
| 9mo_SIGAF3_CAAGGGAGTCTAGGCC-1-10x | 0.19458649 | 0.6427531  | 0.0012624  |
| 9mo_SIGAF3_CAATACGCACCTTCGT-1-10x | 0.04003811 | 0.09247724 | 7.01E-05   |
| 9mo_SIGAF3_CAATCGAGTATGGTAA-1-10x | 0.02376037 | 0.03451966 | 3.83E-05   |
| 9mo_SIGAF3_CAATCGATCCACTTTA-1-10x | 0.07554248 | 0.21889204 | 0.001885   |
| 9mo_SIGAF3_CAATGACCAGGAATAT-1-10x | 0.08388513 | 0.24859636 | 0.0034742  |
| 9mo_SIGAF3_CAATGACGTTGCAAGG-1-10x | 0.11884014 | 0.37305513 | 0.0023317  |
| 9mo_SIGAF3_CAATGACTCTAACGCA-1-10x | 0.24508724 | 0.8225632  | 0.00084014 |
| 9mo_SIGAF3_CACAACAAGATTTGCC-1-10x | 0.26940486 | 0.9091471  | 0.00075499 |
| 9mo_SIGAF3_CACAACAAGTGCAGGT-1-10x | 0.05321243 | 0.13938497 | 0.00019264 |
| 9mo_SIGAF3_CACACAAAGCAGTAAT-1-10x | 0.03762654 | 0.08389073 | 6.07E-05   |
| 9mo_SIGAF3_CACACAAAGGGAGGCA-1-10x | 0.15651003 | 0.50718033 | 0.0018385  |
| 9mo_SIGAF3_CACACAAAGTATTCCG-1-10x | 0.05451988 | 0.14404021 | 0.00021164 |
| 9mo_SIGAF3_CACACAAAGTCCCGGT-1-10x | 0.23834993 | 0.7985747  | 0.00088278 |
| 9mo_SIGAF3_CACACAAGTTGGAGAC-1-10x | 0.21841389 | 0.7275916  | 0.0010326  |
| 9mo_SIGAF3_CACACAATCGCCGAGT-1-10x | 0.03145894 | 0.06193076 | 4.83E-05   |
| 9mo_SIGAF3_CACAGATAGATTGAGT-1-10x | 0.08918516 | 0.26746738 | 0.0042295  |
| 9mo_SIGAF3_CACAGATGTGTTACAC-1-10x | 0.10901876 | 0.3380857  | 0.0032165  |
| 9mo_SIGAF3_CACCAAAGGGCAATC-1-10x  | 0.25220445 | 0.84790426 | 0.00080028 |
| 9mo_SIGAF3_CACCAAAGTTTCGTAG-1-10x | 0.1316416  | 0.41863525 | 0.001934   |

|                                    |            |            |            |
|------------------------------------|------------|------------|------------|
| 9mo_SIGAF3_CACGAATCAAAGCTAA-1-10x  | 0.0185489  | 0.01596403 | 3.49E-05   |
| 9mo_SIGAF3_CACGAATGTAGCTGAG-1-10x  | 0.09424631 | 0.2854878  | 0.0044154  |
| 9mo_SIGAF3_CACGAATGTCCAAAGG-1-10x  | 0.01678545 | 0.00968516 | 3.38E-05   |
| 9mo_SIGAF3_CACGAATGTGTGAGCA-1-10x  | 0.19701377 | 0.65139556 | 0.0012292  |
| 9mo_SIGAF3_CACGAATCCGCAGTG-1-10x   | 0.28440043 | 0.96253943 | 0.00075605 |
| 9mo_SIGAF3_CACGGGTAGTCATGAA-1-10x  | 0.08532717 | 0.25373083 | 0.0037839  |
| 9mo_SIGAF3_CACGGGTCAAGAGGTC-1-10x  | 0.27361032 | 0.9241208  | 0.0007526  |
| 9mo_SIGAF3_CACGTGGAGTGAGCCA-1-10x  | 0.09120406 | 0.27465573 | 0.0043535  |
| 9mo_SIGAF3_CACGTGGTCGATGGAG-1-10x  | 0.04675658 | 0.11639863 | 0.00010777 |
| 9mo_SIGAF3_CACGTTCCAGAGTCAGC-1-10x | 0.15240026 | 0.49254733 | 0.0018651  |
| 9mo_SIGAF3_CACGTTCCAGCAGTAAT-1-10x | 0.14868985 | 0.4793363  | 0.0018713  |
| 9mo_SIGAF3_CACGTTCTCGGACCAC-1-10x  | 0.23602305 | 0.79028976 | 0.00090278 |
| 9mo_SIGAF3_CACTGAAAGGGCTAAC-1-10x  | 0.05179955 | 0.13435434 | 0.00016076 |
| 9mo_SIGAF3_CACTGAATCCTAGCGG-1-10x  | 0.21314128 | 0.70881826 | 0.0010778  |
| 9mo_SIGAF3_CACTGAATCTAAGCGT-1-10x  | 0.14905548 | 0.48063812 | 0.0018705  |
| 9mo_SIGAF3_CACTGGGAGAGATTCA-1-10x  | 0.03592804 | 0.07784316 | 5.58E-05   |
| 9mo_SIGAF3_CACTGGGAGTCGAATA-1-10x  | 0.06428095 | 0.17879489 | 0.00058553 |
| 9mo_SIGAF3_CACTGGGGTTCCGTTC-1-10x  | 0.0861013  | 0.25648713 | 0.0039187  |
| 9mo_SIGAF3_CACTGTCCACCCTCTA-1-10x  | 0.07867349 | 0.23004012 | 0.002576   |
| 9mo_SIGAF3_CACTTCGAGAAGGGAT-1-10x  | 0.01796498 | 0.01388495 | 3.44E-05   |
| 9mo_SIGAF3_CACTTCGTCGTGGCTG-1-10x  | 0.03294    | 0.06720414 | 5.00E-05   |
| 9mo_SIGAF3_CAGAGCCAGTTACGTC-1-10x  | 0.08067261 | 0.23715807 | 0.0029431  |
| 9mo_SIGAF3_CAGAGCCTCGGTCTGG-1-10x  | 0.20881176 | 0.6934028  | 0.0011177  |
| 9mo_SIGAF3_CAGATACGTGGCAACA-1-10x  | 0.1295397  | 0.41115138 | 0.0019639  |
| 9mo_SIGAF3_CAGATACGTTAGGAGC-1-10x  | 0.04841685 | 0.1223101  | 0.00012523 |
| 9mo_SIGAF3_CAGATCACAAACCGTAT-1-10x | 0.22465634 | 0.7498181  | 0.00098869 |
| 9mo_SIGAF3_CAGATCACACAGCGCT-1-10x  | 0.07556143 | 0.21895953 | 0.001885   |
| 9mo_SIGAF3_CAGATCACACTTTATC-1-10x  | 0.09752978 | 0.29717872 | 0.0042943  |
| 9mo_SIGAF3_CAGATTGCATTGAGGG-1-10x  | 0.04682842 | 0.11665442 | 0.00010777 |
| 9mo_SIGAF3_CAGATTGTCGTGTCAA-1-10x  | 0.03234188 | 0.06507448 | 4.83E-05   |
| 9mo_SIGAF3_CAGCAATCACACATA-1-10x   | 0.07233648 | 0.20747694 | 0.0014433  |
| 9mo_SIGAF3_CAGCACGAGCGGTAGT-1-10x  | 0.0839121  | 0.2486924  | 0.0034742  |
| 9mo_SIGAF3_CAGCACGCAAGAGCTG-1-10x  | 0.09486698 | 0.28769773 | 0.0044051  |
| 9mo_SIGAF3_CAGCACGCACTCCTGT-1-10x  | 0.26592457 | 0.89675534 | 0.00075974 |
| 9mo_SIGAF3_CAGCACGCAGTCAACT-1-10x  | 0.04666606 | 0.11607634 | 0.00010777 |
| 9mo_SIGAF3_CAGCACGTCAATCCA-1-10x   | 0.16155057 | 0.52512735 | 0.0017883  |
| 9mo_SIGAF3_CAGCAGCTCAATCGGT-1-10x  | 0.03731198 | 0.08277075 | 6.07E-05   |
| 9mo_SIGAF3_CAGCCAGAGACAACAT-1-10x  | 0.09973765 | 0.30503994 | 0.0041652  |
| 9mo_SIGAF3_CAGCCAGGTGGACTGA-1-10x  | 0.0566318  | 0.15155976 | 0.000257   |
| 9mo_SIGAF3_CAGCGTGAGTAGACCG-1-10x  | 0.21533662 | 0.71663487 | 0.0010625  |
| 9mo_SIGAF3_CAGCGTGCAATTTCTC-1-10x  | 0.08754339 | 0.26162177 | 0.0040384  |

|                                   |            |            |            |
|-----------------------------------|------------|------------|------------|
| 9mo_SIGAF3_CAGCGTGGTTAAAGTG-1-10x | 0.01586469 | 0.00640676 | 3.33E-05   |
| 9mo_SIGAF3_CAGGTATGTACTCCGG-1-10x | 0.18020684 | 0.5915538  | 0.001475   |
| 9mo_SIGAF3_CAGTGCGAGCTCAGAG-1-10x | 0.03712563 | 0.08210723 | 6.07E-05   |
| 9mo_SIGAF3_CAGTGCGCAGCGATTT-1-10x | 0.08964511 | 0.26910502 | 0.0042295  |
| 9mo_SIGAF3_CAGTTAGAGCACAAAT-1-10x | 0.1678916  | 0.5477049  | 0.0016902  |
| 9mo_SIGAF3_CAGTTAGCAGCTGAAG-1-10x | 0.19110708 | 0.63036454 | 0.0013113  |
| 9mo_SIGAF3_CAGTTAGGTAGCTGAG-1-10x | 0.28624725 | 0.96911514 | 0.00075773 |
| 9mo_SIGAF3_CAGTTCCCAAATAAGC-1-10x | 0.05380033 | 0.1414782  | 0.00019264 |
| 9mo_SIGAF3_CAGTTCTCCGGTTCT-1-10x  | 0.2018334  | 0.66855603 | 0.0011792  |
| 9mo_SIGAF3_CAGTTCTCTGTGCTC-1-10x  | 0.05006997 | 0.1281961  | 0.00013566 |
| 9mo_SIGAF3_CATAAGCTCCTACTGC-1-10x | 0.11856373 | 0.372071   | 0.0023898  |
| 9mo_SIGAF3_CATACCCAACACACT-1-10x  | 0.0456929  | 0.11261135 | 0.00010046 |
| 9mo_SIGAF3_CATACCCCACGATTCA-1-10x | 0.2754538  | 0.93068457 | 0.00075218 |
| 9mo_SIGAF3_CATACCTCCTTCTGG-1-10x  | 0.18547857 | 0.610324   | 0.0013959  |
| 9mo_SIGAF3_CATACTTAGCTTCTAG-1-10x | 0.22415225 | 0.7480233  | 0.00098869 |
| 9mo_SIGAF3_CATACTTCAGTGACCC-1-10x | 0.11928387 | 0.37463507 | 0.0023317  |
| 9mo_SIGAF3_CATACTTGTGATTGGG-1-10x | 0.08387309 | 0.24855351 | 0.0034742  |
| 9mo_SIGAF3_CATAGACAGAATCCCT-1-10x | 0.28131846 | 0.9515659  | 0.00075401 |
| 9mo_SIGAF3_CATAGACAGGATTTGA-1-10x | 0.21784726 | 0.7255741  | 0.00104    |
| 9mo_SIGAF3_CATAGACCAACATACC-1-10x | 0.24074572 | 0.807105   | 0.00086997 |
| 9mo_SIGAF3_CATAGACGTAAGGGA-1-10x  | 0.2740182  | 0.92557305 | 0.00075233 |
| 9mo_SIGAF3_CATAGACTCGTGGAAG-1-10x | 0.03492254 | 0.07426304 | 5.37E-05   |
| 9mo_SIGAF3_CATCAAGCAACAGCTT-1-10x | 0.27051347 | 0.91309434 | 0.00075418 |
| 9mo_SIGAF3_CATCAAGCAGATCACT-1-10x | 0.0708349  | 0.2021305  | 0.0011935  |
| 9mo_SIGAF3_CATCCACGTTGATGTC-1-10x | 0.0999403  | 0.3057615  | 0.0041652  |
| 9mo_SIGAF3_CATCCGTCACGGCACT-1-10x | 0.02209747 | 0.02859883 | 3.76E-05   |
| 9mo_SIGAF3_CATCGCTGTGGTTTAC-1-10x | 0.12686884 | 0.40164167 | 0.0020256  |
| 9mo_SIGAF3_CATCGCTCCTGATAG-1-10x  | 0.08857019 | 0.2652777  | 0.0041422  |
| 9mo_SIGAF3_CATCGGGCACCGTGGT-1-10x | 0.02589419 | 0.04211723 | 4.09E-05   |
| 9mo_SIGAF3_CATCGGGTTCGCACAC-1-10x | 0.03144566 | 0.06188348 | 4.83E-05   |
| 9mo_SIGAF3_CATCGGGTCGCATGAT-1-10x | 0.23805478 | 0.7975238  | 0.00088935 |
| 9mo_SIGAF3_CATGAGTGTCCGGA-1-10x   | 0.04608107 | 0.11399345 | 0.00010046 |
| 9mo_SIGAF3_CATGCAAAGGATGCGT-1-10x | 0.04669895 | 0.11619343 | 0.00010777 |
| 9mo_SIGAF3_CATGCAACAAGACGAC-1-10x | 0.02881238 | 0.05250755 | 4.42E-05   |
| 9mo_SIGAF3_CATGCAATCCTCGATC-1-10x | 0.21862072 | 0.728328   | 0.0010326  |
| 9mo_SIGAF3_CATGCCTCAGTATACC-1-10x | 0.21786717 | 0.72564495 | 0.00104    |
| 9mo_SIGAF3_CATGCCTCCAATCCC-1-10x  | 0.01714079 | 0.01095038 | 3.38E-05   |
| 9mo_SIGAF3_CATGCCTTCTACGGGC-1-10x | 0.23832299 | 0.7984788  | 0.00088278 |
| 9mo_SIGAF3_CATGCTCAGGGCTAAC-1-10x | 0.14126952 | 0.45291588 | 0.0018734  |
| 9mo_SIGAF3_CATGCTCCATTGCTGA-1-10x | 0.0879489  | 0.26306558 | 0.0041422  |
| 9mo_SIGAF3_CATGGATGTAGTCGGA-1-10x | 0.05273054 | 0.13766918 | 0.00017575 |

|                                    |            |            |            |
|------------------------------------|------------|------------|------------|
| 9mo_SIGAF3_CATTCATGTCTCACAA-1-10x  | 0.28116256 | 0.9510108  | 0.00075348 |
| 9mo_SIGAF3_CATTCATGTGACAGGT-1-10x  | 0.20817612 | 0.6911396  | 0.0011177  |
| 9mo_SIGAF3_CATTCATTCCATGCAA-1-10x  | 0.08350139 | 0.24723005 | 0.0034742  |
| 9mo_SIGAF3_CATTCCGGTATCGTTG-1-10x  | 0.23090675 | 0.772073   | 0.00093779 |
| 9mo_SIGAF3_CATTCTACATCGTGCG-1-10x  | 0.05033465 | 0.12913851 | 0.00014746 |
| 9mo_SIGAF3_CATTGAGGTTGCTAGT-1-10x  | 0.2683581  | 0.90542006 | 0.00075594 |
| 9mo_SIGAF3_CATTGCCAGACATAAC-1-10x  | 0.05671205 | 0.1518455  | 0.000257   |
| 9mo_SIGAF3_CATTGCCAGGAACCA-1-10x   | 0.07042801 | 0.20068176 | 0.0011935  |
| 9mo_SIGAF3_CATTGCCGTCGCTGCA-1-10x  | 0.02460798 | 0.03753762 | 3.91E-05   |
| 9mo_SIGAF3_CATTGCCTCCGGCAGT-1-10x  | 0.19485173 | 0.64369756 | 0.0012624  |
| 9mo_SIGAF3_CATTGTTAGACGTGCGA-1-10x | 0.02383084 | 0.03477059 | 3.83E-05   |
| 9mo_SIGAF3_CATTGTTAGATTCGAA-1-10x  | 0.03365029 | 0.06973313 | 5.17E-05   |
| 9mo_SIGAF3_CATTGTTGTCAACCAT-1-10x  | 0.11651371 | 0.36477178 | 0.0025211  |
| 9mo_SIGAF3_CATTGTTGTGACACGA-1-10x  | 0.02950112 | 0.05495986 | 4.42E-05   |
| 9mo_SIGAF3_CATTTCAAGCCGATAG-1-10x  | 0.11186411 | 0.3482167  | 0.002929   |
| 9mo_SIGAF3_CATTTCAGTGCGGATA-1-10x  | 0.277624   | 0.9384117  | 0.00075239 |
| 9mo_SIGAF3_CATTTCATCACTGTTT-1-10x  | 0.20180018 | 0.6684378  | 0.0011792  |
| 9mo_SIGAF3_CCAAGCGGTGTGTGTT-1-10x  | 0.16668235 | 0.5433993  | 0.0017206  |
| 9mo_SIGAF3_CCAATTTGTGATACAA-1-10x  | 0.0215831  | 0.02676741 | 3.69E-05   |
| 9mo_SIGAF3_CCACAAACACAGTCCG-1-10x  | 0.04653386 | 0.11560565 | 0.00010777 |
| 9mo_SIGAF3_CCACGAGCATGCTGCG-1-10x  | 0.05450724 | 0.1439952  | 0.00021164 |
| 9mo_SIGAF3_CCACGAGGTACACGTT-1-10x  | 0.09088385 | 0.2735156  | 0.0043535  |
| 9mo_SIGAF3_CCACGTTAGACCAAGC-1-10x  | 0.08089525 | 0.23795079 | 0.0029431  |
| 9mo_SIGAF3_CCACGTTTCACTCGAA-1-10x  | 0.2811094  | 0.9508215  | 0.00075348 |
| 9mo_SIGAF3_CCACTTGAGATAGCAT-1-10x  | 0.28626445 | 0.96917635 | 0.00075773 |
| 9mo_SIGAF3_CCACTTGAGCTATCCA-1-10x  | 0.03375036 | 0.07008943 | 5.17E-05   |
| 9mo_SIGAF3_CCATAAGGTCCGGTCA-1-10x  | 0.18487549 | 0.6081767  | 0.0013959  |
| 9mo_SIGAF3_CCATAAGTCTACGCAA-1-10x  | 0.17442133 | 0.57095426 | 0.0015753  |
| 9mo_SIGAF3_CCATCACTCTCCGAAA-1-10x  | 0.02228463 | 0.02926525 | 3.76E-05   |
| 9mo_SIGAF3_CCCAAGTGTCTACTGA-1-10x  | 0.02569802 | 0.04141876 | 4.00E-05   |
| 9mo_SIGAF3_CCCAAGTCAATCCGA-1-10x   | 0.08105241 | 0.23851036 | 0.0029431  |
| 9mo_SIGAF3_CCCATTGGTGATTAGA-1-10x  | 0.02712015 | 0.04648231 | 4.19E-05   |
| 9mo_SIGAF3_CCCATTGGTGCGTTTA-1-10x  | 0.24542007 | 0.82374823 | 0.00084014 |
| 9mo_SIGAF3_CCCGAAGCATTGAGCT-1-10x  | 0.18420343 | 0.6057838  | 0.0014112  |
| 9mo_SIGAF3_CCCGAAGTCCATAGAC-1-10x  | 0.0159315  | 0.00664463 | 3.33E-05   |
| 9mo_SIGAF3_CCCGAAGTCTGGGCGT-1-10x  | 0.03708234 | 0.0819531  | 6.07E-05   |
| 9mo_SIGAF3_CCCGAAAGTTGCCCG-1-10x   | 0.17682984 | 0.5795299  | 0.0015416  |
| 9mo_SIGAF3_CCCGAAACAGGGTTGA-1-10x  | 0.10788427 | 0.3340463  | 0.0033168  |
| 9mo_SIGAF3_CCCGAAACATTGCTTT-1-10x  | 0.27258304 | 0.9204631  | 0.000753   |
| 9mo_SIGAF3_CCCGAAAGTACTCGCG-1-10x  | 0.19176303 | 0.6327001  | 0.0012985  |
| 9mo_SIGAF3_CCCGAAAGTGGTCTCG-1-10x  | 0.04974688 | 0.12704572 | 0.00013566 |

|                                    |            |            |            |
|------------------------------------|------------|------------|------------|
| 9mo_SIGAF3_CCCTAACCAGCACCCA-1-10x  | 0.02377327 | 0.03456559 | 3.83E-05   |
| 9mo_SIGAF3_CCCTAACTCCGGCTTT-1-10x  | 0.23588835 | 0.7898101  | 0.00090278 |
| 9mo_SIGAF3_CCCTCAACAATACGAA-1-10x  | 0.22696957 | 0.75805444 | 0.00096676 |
| 9mo_SIGAF3_CCCTCAACACAACGAG-1-10x  | 0.0339226  | 0.07070271 | 5.17E-05   |
| 9mo_SIGAF3_CCCTCAAGTGCCTCA-1-10x   | 0.04695042 | 0.1170888  | 0.00010777 |
| 9mo_SIGAF3_CCCTCTCAGAAAGCGA-1-10x  | 0.24791399 | 0.8326279  | 0.00082396 |
| 9mo_SIGAF3_CCCTCTCAGCTGAGTG-1-10x  | 0.24636818 | 0.827124   | 0.00083459 |
| 9mo_SIGAF3_CCCTCTCCAACTAAG-1-10x   | 0.18659905 | 0.61431354 | 0.0013662  |
| 9mo_SIGAF3_CCCTCTCTCTCAATCT-1-10x  | 0.09021333 | 0.27112818 | 0.0042999  |
| 9mo_SIGAF3_CCCTGATCAATGGGTG-1-10x  | 0.01797929 | 0.01393591 | 3.44E-05   |
| 9mo_SIGAF3_CCCTTAGCAGGACTAG-1-10x  | 0.2719423  | 0.91818166 | 0.000753   |
| 9mo_SIGAF3_CCCTTAGCAGTCGGAA-1-10x  | 0.04273239 | 0.10207033 | 8.29E-05   |
| 9mo_SIGAF3_CCCTTAGGTGATGAAT-1-10x  | 0.09638435 | 0.29310036 | 0.0043435  |
| 9mo_SIGAF3_CCCTTAGTCCACAGCG-1-10x  | 0.1937093  | 0.6396299  | 0.0012741  |
| 9mo_SIGAF3_CCCTTAGTCGCTGTCT-1-10x  | 0.14325246 | 0.45997623 | 0.0018716  |
| 9mo_SIGAF3_CCGAACGGTCTTCATT-1-10x  | 0.10301372 | 0.3167045  | 0.0038193  |
| 9mo_SIGAF3_CCGATCTTCGAGAATA-1-10x  | 0.02116158 | 0.02526658 | 3.69E-05   |
| 9mo_SIGAF3_CCGCAAGGTGCCTAG-1-10x   | 0.09978605 | 0.30521226 | 0.0041652  |
| 9mo_SIGAF3_CCGCAAGGTTGCATTG-1-10x  | 0.21741752 | 0.72404397 | 0.0010475  |
| 9mo_SIGAF3_CCGCAAGTCGCCAACG-1-10x  | 0.19830187 | 0.6559819  | 0.0012187  |
| 9mo_SIGAF3_CCGCAAGTCTGCTTTA-1-10x  | 0.16370967 | 0.5328149  | 0.001763   |
| 9mo_SIGAF3_CCGCAAGTCTTGGTGA-1-10x  | 0.0206072  | 0.02329268 | 3.62E-05   |
| 9mo_SIGAF3_CCGGGTAAGCAGGGAG-1-10x  | 0.07753097 | 0.22597213 | 0.0023954  |
| 9mo_SIGAF3_CCGGGTAAGCGATGGT-1-10x  | 0.04981534 | 0.12728949 | 0.00013566 |
| 9mo_SIGAF3_CCGGGTAGTCTTCAAG-1-10x  | 0.04277005 | 0.10220444 | 8.29E-05   |
| 9mo_SIGAF3_CCGGTAGCACACCTTC-1-10x  | 0.03228673 | 0.06487812 | 4.83E-05   |
| 9mo_SIGAF3_CCGGTAGGTGAACTAA-1-10x  | 0.09854897 | 0.3008076  | 0.0042345  |
| 9mo_SIGAF3_CCGGTAGGTTTCCATT-1-10x  | 0.24638775 | 0.8271937  | 0.00083459 |
| 9mo_SIGAF3_CCGGTGAGTATGGTTC-1-10x  | 0.0345716  | 0.07301349 | 5.37E-05   |
| 9mo_SIGAF3_CCGGTGAGTCGAATGG-1-10x  | 0.03893317 | 0.08854307 | 6.36E-05   |
| 9mo_SIGAF3_CCGTAGGAGCGATGAC-1-10x  | 0.04128905 | 0.09693126 | 7.40E-05   |
| 9mo_SIGAF3_CCGTGAGCAGCGCGTT-1-10x  | 0.04844246 | 0.12240128 | 0.00012523 |
| 9mo_SIGAF3_CCGTTCAAGCCTCTCT-1-10x  | 0.04507767 | 0.11042082 | 9.39E-05   |
| 9mo_SIGAF3_CCTAACCAGCGTACAG-1-10x  | 0.11123045 | 0.34596053 | 0.0030221  |
| 9mo_SIGAF3_CCTAACCGTCATCTAG-1-10x  | 0.01649112 | 0.00863718 | 3.38E-05   |
| 9mo_SIGAF3_CCTAAGACACCCAATA-1-10x  | 0.0218952  | 0.02787866 | 3.69E-05   |
| 9mo_SIGAF3_CCTAAGAGTACGTGAG-1-10x  | 0.28628847 | 0.9692619  | 0.00075773 |
| 9mo_SIGAF3_CCTAAGAGTAGACACG-1-10x  | 0.11513551 | 0.35986465 | 0.002594   |
| 9mo_SIGAF3_CCTAAGATCATACGAC-1-10x  | 0.10113996 | 0.31003293 | 0.0040036  |
| 9mo_SIGAF3_CCTACGTTTCGACACTA-1-10x | 0.03438796 | 0.07235964 | 5.37E-05   |
| 9mo_SIGAF3_CCTATCGAGCCAAGCA-1-10x  | 0.03642926 | 0.07962777 | 5.82E-05   |



|                                     |            |            |            |
|-------------------------------------|------------|------------|------------|
| 9mo_SIGAF3_CCTCACAGTCTAGGCC-1-10x   | 0.06791078 | 0.19171906 | 0.00088537 |
| 9mo_SIGAF3_CCTCACAGTTATCTGG-1-10x   | 0.0357709  | 0.07728365 | 5.58E-05   |
| 9mo_SIGAF3_CCTCAGTTCAATCTCT-1-10x   | 0.01652885 | 0.00877154 | 3.38E-05   |
| 9mo_SIGAF3_CCTCAGTTCACCATCC-1-10x   | 0.2448232  | 0.821623   | 0.00084014 |
| 9mo_SIGAF3_CCTCAGTTCGGAGTAG-1-10x   | 0.0190819  | 0.01786179 | 3.49E-05   |
| 9mo_SIGAF3_CCTCAGTTCGTCGCTT-1-10x   | 0.05289311 | 0.13824801 | 0.00017575 |
| 9mo_SIGAF3_CCTCATGAGGGTGGGA-1-10x   | 0.01897875 | 0.01749452 | 3.49E-05   |
| 9mo_SIGAF3_CCTCCAACAACACTGCCG-1-10x | 0.04407391 | 0.10684688 | 8.81E-05   |
| 9mo_SIGAF3_CCTCCAACAGCTCTGG-1-10x   | 0.2121242  | 0.7051969  | 0.0010856  |
| 9mo_SIGAF3_CCTCCAACATGGCCCA-1-10x   | 0.20068297 | 0.6644599  | 0.0011888  |
| 9mo_SIGAF3_CCTCCAACATTTCGATG-1-10x  | 0.0903156  | 0.27149233 | 0.0042999  |
| 9mo_SIGAF3_CCTCCAAGTTCAGTAC-1-10x   | 0.05625699 | 0.15022524 | 0.000257   |
| 9mo_SIGAF3_CCTCCTCCACAGCATT-1-10x   | 0.18665425 | 0.6145101  | 0.0013662  |
| 9mo_SIGAF3_CCTCCTCCAGGATGAC-1-10x   | 0.0587591  | 0.15913413 | 0.00034795 |
| 9mo_SIGAF3_CCTCTAGGTACGTTCA-1-10x   | 0.08951296 | 0.2686345  | 0.0042295  |
| 9mo_SIGAF3_CCTCTAGGTTGTTGCA-1-10x   | 0.26807812 | 0.9044232  | 0.00075705 |
| 9mo_SIGAF3_CCTCTCCCAGGAGGAG-1-10x   | 0.06017001 | 0.16415773 | 0.00038577 |
| 9mo_SIGAF3_CCTGCATCAGTTCACA-1-10x   | 0.02638072 | 0.04384952 | 4.09E-05   |
| 9mo_SIGAF3_CCTGCATTCCGTGTCT-1-10x   | 0.2883223  | 0.9765034  | 0.0007596  |
| 9mo_SIGAF3_CCTGCATTCCGCCGAGT-1-10x  | 0.1512766  | 0.48854652 | 0.0018676  |
| 9mo_SIGAF3_CCTGTTGAGGTTAGTA-1-10x   | 0.11804709 | 0.37023145 | 0.0023898  |
| 9mo_SIGAF3_CCTGTTGAGTGCGCTC-1-10x   | 0.09728779 | 0.2963171  | 0.0042943  |
| 9mo_SIGAF3_CCTGTTGCAGGCCTGT-1-10x   | 0.01951904 | 0.01941823 | 3.55E-05   |
| 9mo_SIGAF3_CCTGTTGGTGACTCGC-1-10x   | 0.096642   | 0.29401773 | 0.0043435  |
| 9mo_SIGAF3_CCTGTTGTCAAGTGGG-1-10x   | 0.03045109 | 0.05834227 | 4.55E-05   |
| 9mo_SIGAF3_CCTTCAGTCGTCAACA-1-10x   | 0.21928087 | 0.7306785  | 0.0010326  |
| 9mo_SIGAF3_CCTTCAGTCTAACACG-1-10x   | 0.11870954 | 0.37259015 | 0.0023898  |
| 9mo_SIGAF3_CCTTGTGCAAGTATCC-1-10x   | 0.08295149 | 0.24527213 | 0.0033032  |
| 9mo_SIGAF3_CCTTGTGCAGTACTAC-1-10x   | 0.07687396 | 0.22363283 | 0.0022191  |
| 9mo_SIGAF3_CCTTGTGTCATTGGTG-1-10x   | 0.04783795 | 0.12024891 | 0.00011598 |
| 9mo_SIGAF3_CCTTGTGTCCATTTGT-1-10x   | 0.11433592 | 0.35701767 | 0.0026715  |
| 9mo_SIGAF3_CCTTTGGTCCGCATTA-1-10x   | 0.04669471 | 0.11617835 | 0.00010777 |
| 9mo_SIGAF3_CGAAGTTGTGCGACTTA-1-10x  | 0.09135017 | 0.27517596 | 0.0043535  |
| 9mo_SIGAF3_CGAAGTTTCCTATGGA-1-10x   | 0.08295821 | 0.24529605 | 0.0033032  |
| 9mo_SIGAF3_CGAAGTTTCGCGAAGA-1-10x   | 0.03678431 | 0.08089194 | 5.82E-05   |
| 9mo_SIGAF3_CGAAGTTTCTAACGGT-1-10x   | 0.02272386 | 0.03082912 | 3.76E-05   |
| 9mo_SIGAF3_CGAATTGCATCGGATT-1-10x   | 0.09391611 | 0.2843121  | 0.0044154  |
| 9mo_SIGAF3_CGACAGCGTTCTAACG-1-10x   | 0.0834074  | 0.2468954  | 0.0034742  |
| 9mo_SIGAF3_CGACAGCTCGTGACGC-1-10x   | 0.03917498 | 0.08940404 | 6.67E-05   |
| 9mo_SIGAF3_CGAGAAGGTCTGATCA-1-10x   | 0.04915561 | 0.12494047 | 0.00012523 |
| 9mo_SIGAF3_CGAGAAGGTGATCGTT-1-10x   | 0.03553781 | 0.07645373 | 5.58E-05   |

|                                    |            |            |            |
|------------------------------------|------------|------------|------------|
| 9mo_SIGAF3_CGAGAAGTCAGGCGAA-1-10x  | 0.01633864 | 0.00809429 | 3.33E-05   |
| 9mo_SIGAF3_CGAGAAGTCTAGCCAA-1-10x  | 0.24814615 | 0.83345455 | 0.00082396 |
| 9mo_SIGAF3_CGAGGAACATTGTAGC-1-10x  | 0.08201919 | 0.24195261 | 0.0031253  |
| 9mo_SIGAF3_CGAGGAATCATCGTAG-1-10x  | 0.25906482 | 0.87233096 | 0.00077499 |
| 9mo_SIGAF3_CGAGGAATCGGAATGG-1-10x  | 0.19578476 | 0.6470196  | 0.0012511  |
| 9mo_SIGAF3_CGAGGCTGTTCAAAGA-1-10x  | 0.16213642 | 0.52721334 | 0.001776   |
| 9mo_SIGAF3_CGAGTGCCAACGCCCA-1-10x  | 0.21607432 | 0.71926147 | 0.001055   |
| 9mo_SIGAF3_CGAGTGCCACTACCGG-1-10x  | 0.02998501 | 0.05668275 | 4.55E-05   |
| 9mo_SIGAF3_CGAGTGCTCGTTAGT-1-10x   | 0.13784263 | 0.4407143  | 0.0018802  |
| 9mo_SIGAF3_CGAGTTAAGGAGGGTG-1-10x  | 0.07364424 | 0.21213329 | 0.0015819  |
| 9mo_SIGAF3_CGAGTTAGTGGAGGTT-1-10x  | 0.05037221 | 0.12927222 | 0.00014746 |
| 9mo_SIGAF3_CGCAGGTAGATACATG-1-10x  | 0.09605192 | 0.29191676 | 0.0043808  |
| 9mo_SIGAF3_CGCAGGTCAACGATTC-1-10x  | 0.10950273 | 0.3398089  | 0.0031181  |
| 9mo_SIGAF3_CGCATAACAAACCATC-1-10x  | 0.0274327  | 0.04759514 | 4.19E-05   |
| 9mo_SIGAF3_CGCATAATCCCTCGAT-1-10x  | 0.02364987 | 0.03412624 | 3.83E-05   |
| 9mo_SIGAF3_CGCATGGAGCTTTGTG-1-10x  | 0.02139178 | 0.02608622 | 3.69E-05   |
| 9mo_SIGAF3_CGCATGGCACAGAGCA-1-10x  | 0.14975557 | 0.4831308  | 0.0018705  |
| 9mo_SIGAF3_CGCCAGAAGAACCCGA-1-10x  | 0.11104196 | 0.34528938 | 0.0030221  |
| 9mo_SIGAF3_CGCCAGAAGCGAAACC-1-10x  | 0.11291207 | 0.35194802 | 0.0028393  |
| 9mo_SIGAF3_CGCCAGACATCATTTTC-1-10x | 0.01543581 | 0.00487973 | 3.27E-05   |
| 9mo_SIGAF3_CGCCAGAGTTCAGCGC-1-10x  | 0.24275367 | 0.8142544  | 0.00085764 |
| 9mo_SIGAF3_CGGAACCAGGCCACT-1-10x   | 0.04154591 | 0.09784582 | 7.40E-05   |
| 9mo_SIGAF3_CGGAACCGTAGTTAGA-1-10x  | 0.03310844 | 0.06780385 | 5.00E-05   |
| 9mo_SIGAF3_CGGAACCTCCATCTCG-1-10x  | 0.17284873 | 0.56535494 | 0.0016089  |
| 9mo_SIGAF3_CGGAACCTCGATACTG-1-10x  | 0.01828655 | 0.01502992 | 3.44E-05   |
| 9mo_SIGAF3_CGGACACCACCAGCCA-1-10x  | 0.05233766 | 0.13627031 | 0.00017575 |
| 9mo_SIGAF3_CGGACACCAGGAGGTT-1-10x  | 0.04611405 | 0.11411088 | 0.00010046 |
| 9mo_SIGAF3_CGGACACCAGGCGTTC-1-10x  | 0.2283563  | 0.76299196 | 0.00095947 |
| 9mo_SIGAF3_CGGACACTCGGAAGGT-1-10x  | 0.01981982 | 0.02048917 | 3.55E-05   |
| 9mo_SIGAF3_CGGACACTCTTAGCTT-1-10x  | 0.24610546 | 0.82618856 | 0.00083459 |
| 9mo_SIGAF3_CGGCAGTGTGGATCT-1-10x   | 0.02156922 | 0.026718   | 3.69E-05   |
| 9mo_SIGAF3_CGGCAGTTCAAGCTGT-1-10x  | 0.11296412 | 0.35213333 | 0.0028393  |
| 9mo_SIGAF3_CGGGACTGTACCCGCA-1-10x  | 0.1605211  | 0.5214619  | 0.0018     |
| 9mo_SIGAF3_CGGGACTTCTCCCTAG-1-10x  | 0.01667333 | 0.00928597 | 3.38E-05   |
| 9mo_SIGAF3_CGGGCATCATGAATAG-1-10x  | 0.25809667 | 0.8688838  | 0.000778   |
| 9mo_SIGAF3_CGGGTCAAGGGTCACA-1-10x  | 0.01776628 | 0.01317746 | 3.44E-05   |
| 9mo_SIGAF3_CGGGTCAAGGGTCACA-1-10x  | 0.282677   | 0.9564031  | 0.00075462 |
| 9mo_SIGAF3_CGGGTGTCAGAGGGTT-1-10x  | 0.10395387 | 0.32005197 | 0.0037215  |
| 9mo_SIGAF3_CGGTCAGGTAGAGTTA-1-10x  | 0.23776875 | 0.7965054  | 0.00088935 |
| 9mo_SIGAF3_CGTAAGTAGAGAGGGC-1-10x  | 0.28218865 | 0.9546643  | 0.00075401 |
| 9mo_SIGAF3_CGTAAGTTCAAATAGG-1-10x  | 0.1073723  | 0.33222342 | 0.0034182  |

|                                    |            |            |            |
|------------------------------------|------------|------------|------------|
| 9mo_SIGAF3_CGTAAGTTCCGGCAGT-1-10x  | 0.02046864 | 0.02279934 | 3.62E-05   |
| 9mo_SIGAF3_CGTAAGTTCTGAGCAT-1-10x  | 0.06754232 | 0.19040714 | 0.00088537 |
| 9mo_SIGAF3_CGTAATGGTTACGCCG-1-10x  | 0.07923482 | 0.23203874 | 0.002576   |
| 9mo_SIGAF3_CGTCAAAGGGCGCTTC-1-10x  | 0.21523309 | 0.7162662  | 0.0010625  |
| 9mo_SIGAF3_CGTCAAAGGGATCTG-1-10x   | 0.14939632 | 0.48185167 | 0.0018705  |
| 9mo_SIGAF3_CGTCAAAGTTCAAGGG-1-10x  | 0.19554365 | 0.64616114 | 0.0012511  |
| 9mo_SIGAF3_CGTCAAATCTTTCAGT-1-10x  | 0.27370405 | 0.9244545  | 0.0007526  |
| 9mo_SIGAF3_CGTCCATCAGCGGATA-1-10x  | 0.04641791 | 0.1151928  | 0.00010046 |
| 9mo_SIGAF3_CGTCCATTCAAGTGTC-1-10x  | 0.1782366  | 0.5845387  | 0.0015081  |
| 9mo_SIGAF3_CGTCCATTCTTCACAT-1-10x  | 0.09258337 | 0.2795668  | 0.0044107  |
| 9mo_SIGAF3_CGTGAATAGAGGATGA-1-10x  | 0.27341384 | 0.9234212  | 0.0007526  |
| 9mo_SIGAF3_CGTGAATAGTTCTACG-1-10x  | 0.01864762 | 0.01631553 | 3.49E-05   |
| 9mo_SIGAF3_CGTGAATTCGAAGTGG-1-10x  | 0.2695321  | 0.90960014 | 0.00075499 |
| 9mo_SIGAF3_CGTGAATTCTCGGGAC-1-10x  | 0.01584072 | 0.00632143 | 3.33E-05   |
| 9mo_SIGAF3_CGTGATAGTGCAACAG-1-10x  | 0.25789717 | 0.8681735  | 0.000778   |
| 9mo_SIGAF3_CGTGCTTCAATTAGGA-1-10x  | 0.09323917 | 0.28190184 | 0.0044107  |
| 9mo_SIGAF3_CGTGCTTGTGACGCCT-1-10x  | 0.02469928 | 0.0378627  | 3.91E-05   |
| 9mo_SIGAF3_CGTGCTTTCAAATGCC-1-10x  | 0.02917528 | 0.05379969 | 4.42E-05   |
| 9mo_SIGAF3_CGTGCTTTCCTTCTAA-1-10x  | 0.03893816 | 0.08856081 | 6.36E-05   |
| 9mo_SIGAF3_CGTGTCTCACTCCACT-1-10x  | 0.25791782 | 0.868247   | 0.000778   |
| 9mo_SIGAF3_CGTGTCTTCGTACACA-1-10x  | 0.01926436 | 0.01851144 | 3.55E-05   |
| 9mo_SIGAF3_CGTTAGAAGAGGTGCT-1-10x  | 0.05398048 | 0.14211963 | 0.00019264 |
| 9mo_SIGAF3_CGTTAGACATTGAGGG-1-10x  | 0.01862099 | 0.01622067 | 3.49E-05   |
| 9mo_SIGAF3_CGTTCTGAGCATCAGG-1-10x  | 0.02965653 | 0.0555132  | 4.55E-05   |
| 9mo_SIGAF3_CGTTGGGCAGTCGGAA-1-10x  | 0.25939694 | 0.87351346 | 0.00077499 |
| 9mo_SIGAF3_CGTTGGGGTGCCTGCT-1-10x  | 0.25700197 | 0.86498606 | 0.00078121 |
| 9mo_SIGAF3_CGTTGGGTCGGAACCTT-1-10x | 0.1395913  | 0.44694054 | 0.001875   |
| 9mo_SIGAF3_CTAACCCAGAAACCG-1-10x   | 0.04311397 | 0.10342898 | 8.29E-05   |
| 9mo_SIGAF3_CTAACCCGTGCGACAA-1-10x  | 0.11707484 | 0.36676973 | 0.002453   |
| 9mo_SIGAF3_CTAACCCGTTCTAAG-1-10x   | 0.24947453 | 0.8381843  | 0.00081397 |
| 9mo_SIGAF3_CTAAGTTAGGGTTAAT-1-10x  | 0.04370256 | 0.10552466 | 8.81E-05   |
| 9mo_SIGAF3_CTAAGTTCAATGAACA-1-10x  | 0.11011949 | 0.34200493 | 0.0031181  |
| 9mo_SIGAF3_CTAAGTTGTCTGGTGTC-1-10x | 0.02537487 | 0.04026815 | 4.00E-05   |
| 9mo_SIGAF3_CTAAGTTTCTGCAGCG-1-10x  | 0.15531345 | 0.50291985 | 0.0018522  |
| 9mo_SIGAF3_CTAAGTGAGACTCATC-1-10x  | 0.01670381 | 0.00939451 | 3.38E-05   |
| 9mo_SIGAF3_CTAAGTGAGTCCCAAT-1-10x  | 0.04296741 | 0.10290712 | 8.29E-05   |
| 9mo_SIGAF3_CTAAGTGGTTACGTAC-1-10x  | 0.09912005 | 0.30284095 | 0.0041652  |
| 9mo_SIGAF3_CTACAGAAGCTCGACC-1-10x  | 0.02348135 | 0.03352619 | 3.83E-05   |
| 9mo_SIGAF3_CTACATTAGTATGGCG-1-10x  | 0.01764952 | 0.01276174 | 3.44E-05   |
| 9mo_SIGAF3_CTACATTCAAGGCCTC-1-10x  | 0.11189064 | 0.34831116 | 0.002929   |
| 9mo_SIGAF3_CTACATTGTAACAGTA-1-10x  | 0.07899497 | 0.23118478 | 0.002576   |

|                                      |            |            |            |
|--------------------------------------|------------|------------|------------|
| 9mo_SIGAF3_CTACCCAAGTCCGCGT-1-10x    | 0.0378341  | 0.08462979 | 6.07E-05   |
| 9mo_SIGAF3_CTACGGGTCCGCTGTT-1-10x    | 0.08440822 | 0.25045887 | 0.0036353  |
| 9mo_SIGAF3_CTAGACAAGTCATGAA-1-10x    | 0.01986009 | 0.02063258 | 3.55E-05   |
| 9mo_SIGAF3_CTAGGTACATCCTTGC-1-10x    | 0.11251548 | 0.35053593 | 0.0028393  |
| 9mo_SIGAF3_CTAGGTATCACGATCA-1-10x    | 0.04765185 | 0.11958628 | 0.00011598 |
| 9mo_SIGAF3_CTAGGTATCATCCCGT-1-10x    | 0.03644645 | 0.07968898 | 5.82E-05   |
| 9mo_SIGAF3_CTAGGTATCCAAGTGA-1-10x    | 0.05332059 | 0.13977009 | 0.00019264 |
| 9mo_SIGAF3_CTATAGGAGGTGCCTC-1-10x    | 0.01984836 | 0.02059078 | 3.55E-05   |
| 9mo_SIGAF3_CTATAGGCAAGCTACT-1-10x    | 0.0826693  | 0.24426737 | 0.0033032  |
| 9mo_SIGAF3_CTATAGGTCCACAAGT-1-10x    | 0.06892104 | 0.19531614 | 0.00097948 |
| 9mo_SIGAF3_CTATAGGTCCCGAGAC-1-10x    | 0.0176176  | 0.01264809 | 3.44E-05   |
| 9mo_SIGAF3_CTATCCGAGTATGACA-1-10x    | 0.06788783 | 0.19163732 | 0.00088537 |
| 9mo_SIGAF3_CTATCTACACAGCTGC-1-10x    | 0.2828734  | 0.95710236 | 0.00075462 |
| 9mo_SIGAF3_CTATCTACATGGGCAA-1-10x    | 0.22599848 | 0.7545968  | 0.00097406 |
| 9mo_SIGAF3_CTCAACCAGTTTGTGCG-1-10x   | 0.0406119  | 0.09452026 | 7.01E-05   |
| 9mo_SIGAF3_CTCAACCCACGATAGG-1-10x    | 0.02407841 | 0.03565207 | 3.91E-05   |
| 9mo_SIGAF3_CTCAACCCATAGGCGA-1-10x    | 0.07328738 | 0.21086264 | 0.0015819  |
| 9mo_SIGAF3_CTCAATTAGTATCCTG-1-10x    | 0.24883501 | 0.8359073  | 0.00081888 |
| 9mo_SIGAF3_CTCAATTTCCATTGTT-1-10x    | 0.08573675 | 0.25518915 | 0.0037839  |
| 9mo_SIGAF3_CTCAGTACTGAGTGCCT-1-10x   | 0.07181764 | 0.20562957 | 0.0013138  |
| 9mo_SIGAF3_CTCAGTACTGCAATCAAGA-1-10x | 0.05320674 | 0.1393647  | 0.00019264 |
| 9mo_SIGAF3_CTCAGTACTGCATGGTACT-1-10x | 0.08912493 | 0.26725292 | 0.0042295  |
| 9mo_SIGAF3_CTCAGAAGTCCGCAGT-1-10x    | 0.08354691 | 0.24739212 | 0.0034742  |
| 9mo_SIGAF3_CTCAGAATCTGACCCT-1-10x    | 0.28804016 | 0.97549886 | 0.0007596  |
| 9mo_SIGAF3_CTCAGGGTCCGAGATT-1-10x    | 0.01761848 | 0.01265122 | 3.44E-05   |
| 9mo_SIGAF3_CTCAGGGTCTCGTCAC-1-10x    | 0.05091025 | 0.13118795 | 0.00014746 |
| 9mo_SIGAF3_CTCAGTCTCGCCTAG-1-10x     | 0.02575142 | 0.04160887 | 4.00E-05   |
| 9mo_SIGAF3_CTCAGTCTCCGAACGC-1-10x    | 0.04429564 | 0.10763634 | 8.81E-05   |
| 9mo_SIGAF3_CTCATCGAGCACTGGA-1-10x    | 0.26961157 | 0.9098831  | 0.00075499 |
| 9mo_SIGAF3_CTCATCGCACTTCATT-1-10x    | 0.10065013 | 0.30828887 | 0.0040879  |
| 9mo_SIGAF3_CTCATCGCAGGCTATT-1-10x    | 0.02659692 | 0.04461934 | 4.09E-05   |
| 9mo_SIGAF3_CTCATCGGTGCGAACA-1-10x    | 0.02427712 | 0.03635956 | 3.91E-05   |
| 9mo_SIGAF3_CTCATCGTCTACACAG-1-10x    | 0.01724162 | 0.01130937 | 3.38E-05   |
| 9mo_SIGAF3_CTCATGCCATAGATCC-1-10x    | 0.19788285 | 0.65448993 | 0.0012187  |
| 9mo_SIGAF3_CTCATGCCATTGCCTC-1-10x    | 0.08434103 | 0.25021964 | 0.0036353  |
| 9mo_SIGAF3_CTCATGCGTCCCACGA-1-10x    | 0.1109348  | 0.34490785 | 0.0030221  |
| 9mo_SIGAF3_CTCATTACAAGCAATA-1-10x    | 0.08433847 | 0.25021052 | 0.0036353  |
| 9mo_SIGAF3_CTCATTAGTAGAGGAA-1-10x    | 0.01561367 | 0.00551299 | 3.33E-05   |
| 9mo_SIGAF3_CTCCACACAGCACACC-1-10x    | 0.12127791 | 0.38173494 | 0.0022308  |
| 9mo_SIGAF3_CTCCATGGTGCACAAG-1-10x    | 0.08574146 | 0.25520593 | 0.0037839  |
| 9mo_SIGAF3_CTCCCAAAGAACGCGT-1-10x    | 0.11060217 | 0.3437235  | 0.0030221  |

|                                      |            |            |            |
|--------------------------------------|------------|------------|------------|
| 9mo_SIGAF3_CTCCCTCCAAGTCCCG-1-10x    | 0.02011987 | 0.02155753 | 3.55E-05   |
| 9mo_SIGAF3_CTCCCTCCAGTCATA-1-10x     | 0.02524823 | 0.03981725 | 4.00E-05   |
| 9mo_SIGAF3_CTCCCTCCAGCTCGGT-1-10x    | 0.23748854 | 0.79550767 | 0.00088935 |
| 9mo_SIGAF3_CTCCGATAGCACAAAT-1-10x    | 0.02344671 | 0.03340288 | 3.83E-05   |
| 9mo_SIGAF3_CTCCGATAGGCTGTAG-1-10x    | 0.09844523 | 0.30043823 | 0.0042345  |
| 9mo_SIGAF3_CTCCGATTCAGCAATC-1-10x    | 0.04610851 | 0.11409116 | 0.00010046 |
| 9mo_SIGAF3_CTCCGATTCGCCAGA-1-10x     | 0.10289075 | 0.3162667  | 0.0038193  |
| 9mo_SIGAF3 CTCCTCCAGCGCTGCT-1-10x    | 0.21865927 | 0.72846526 | 0.0010326  |
| 9mo_SIGAF3 CTCCTCCTCGTTCCCA-1-10x    | 0.06215331 | 0.17121932 | 0.00047505 |
| 9mo_SIGAF3 CTCCTTTCAAGTCCCG-1-10x    | 0.08985756 | 0.26986146 | 0.0042999  |
| 9mo_SIGAF3 CTCGAGGAGTCACTGT-1-10x    | 0.02201348 | 0.0282998  | 3.69E-05   |
| 9mo_SIGAF3 CTCGAGGCACGTACAT-1-10x    | 0.05582824 | 0.14869866 | 0.000233   |
| 9mo_SIGAF3 CTCGAGGCAGCGCTTG-1-10x    | 0.20299734 | 0.67270035 | 0.0011699  |
| 9mo_SIGAF3 CTCGAGGCATCAACCA-1-10x    | 0.02907833 | 0.05345449 | 4.42E-05   |
| 9mo_SIGAF3 CTCGAGGCATCACCAA-1-10x    | 0.04956275 | 0.12639011 | 0.00013566 |
| 9mo_SIGAF3 CTCTCAGAGCGATCGA-1-10x    | 0.17717609 | 0.5807627  | 0.0015248  |
| 9mo_SIGAF3 CTCTCAGCATGTACGT-1-10x    | 0.02855762 | 0.05160049 | 4.30E-05   |
| 9mo_SIGAF3 CTCTCAGTCTCCGCAT-1-10x    | 0.03388657 | 0.07057442 | 5.17E-05   |
| 9mo_SIGAF3 CTCTCGAAGTGCCCGT-1-10x    | 0.0357579  | 0.07723738 | 5.58E-05   |
| 9mo_SIGAF3 CTCTCGAGTAACAGGC-1-10x    | 0.03095891 | 0.06015037 | 4.68E-05   |
| 9mo_SIGAF3 CTCTCGAGTTCTTGTT-1-10x    | 0.19922122 | 0.6592553  | 0.0012085  |
| 9mo_SIGAF3 CTCTCGATCCTGTTAT-1-10x    | 0.04224885 | 0.10034866 | 7.82E-05   |
| 9mo_SIGAF3 CTGAGCGAGCGTTCCG-1-10x    | 0.15766133 | 0.5112796  | 0.0018302  |
| 9mo_SIGAF3 CTGAGGCCATGATCTG-1-10x    | 0.25208575 | 0.84748167 | 0.00080467 |
| 9mo_SIGAF3 CTGATCCATTAAGCC-1-10x     | 0.03362717 | 0.06965083 | 5.17E-05   |
| 9mo_SIGAF3 CTGCAGGAGTAACAGT-1-10x    | 0.1775206  | 0.58198935 | 0.0015248  |
| 9mo_SIGAF3 CTGCAGGCACTGTCCT-1-10x    | 0.05281492 | 0.13796961 | 0.00017575 |
| 9mo_SIGAF3 CTGCAGGCAGCGTACC-1-10x    | 0.08850718 | 0.26505336 | 0.0041422  |
| 9mo_SIGAF3 CTGCATCGTCAGCTTA-1-10x    | 0.24156278 | 0.8100142  | 0.00086374 |
| 9mo_SIGAF3 CTGCATCGTTGCATAC-1-10x    | 0.0196697  | 0.01995465 | 3.55E-05   |
| 9mo_SIGAF3 CTGCGAGGTATGAGGC-1-10x    | 0.17802176 | 0.58377373 | 0.0015081  |
| 9mo_SIGAF3 CTGCGAGGTGTCTCCT-1-10x    | 0.05023426 | 0.12878107 | 0.00014746 |
| 9mo_SIGAF3 CTGCGAGTCTCGTCGT-1-10x    | 0.27797452 | 0.9396597  | 0.00075239 |
| 9mo_SIGAF3 CTGGACGGTGACTGTT-1-10x    | 0.04573323 | 0.11275496 | 0.00010046 |
| 9mo_SIGAF3 CTGGACGGTGCTGCAC-1-10x    | 0.14563306 | 0.46845245 | 0.0018716  |
| 9mo_SIGAF3 CTGGCAGCACCCAGCCA-1-10x   | 0.04517989 | 0.11078477 | 9.39E-05   |
| 9mo_SIGAF3 CTGGCAGGTAACGTTC-1-10x    | 0.25039947 | 0.8414776  | 0.00080923 |
| 9mo_SIGAF3 CTGGCAGGTAACACTCAAC-1-10x | 0.0870305  | 0.2597956  | 0.0040384  |
| 9mo_SIGAF3 CTGGTCTAGTCCGCCA-1-10x    | 0.09477298 | 0.28736302 | 0.0044051  |
| 9mo_SIGAF3 CTGTACCGTAATACCC-1-10x    | 0.04176801 | 0.09863663 | 7.40E-05   |
| 9mo_SIGAF3 CTGTACCTCGCAATTG-1-10x    | 0.06848589 | 0.19376674 | 0.00097948 |

|                                    |            |            |            |
|------------------------------------|------------|------------|------------|
| 9mo_SIGAF3_CTGTATTTCTTCTGGC-1-10x  | 0.06750154 | 0.19026193 | 0.00088537 |
| 9mo_SIGAF3_CTGTCTGTCAACACT-1-10x   | 0.0319395  | 0.06364179 | 4.83E-05   |
| 9mo_SIGAF3_CTGTCTGTACGACC-1-10x    | 0.26150492 | 0.881019   | 0.00076963 |
| 9mo_SIGAF3_CTGTGAAGTTTGACAC-1-10x  | 0.0200397  | 0.02127208 | 3.55E-05   |
| 9mo_SIGAF3_CTGTGGGAGTAGATCA-1-10x  | 0.03831342 | 0.0863364  | 6.36E-05   |
| 9mo_SIGAF3_CTGTGGGCACCTATC-1-10x   | 0.08943166 | 0.26834503 | 0.0042295  |
| 9mo_SIGAF3_CTGTGGGCATCTCAAG-1-10x  | 0.11518236 | 0.3600315  | 0.002594   |
| 9mo_SIGAF3_CTGTGGGGTGCAGATG-1-10x  | 0.01961567 | 0.01976229 | 3.55E-05   |
| 9mo_SIGAF3_CTGTGGGTCTAGGGTAG-1-10x | 0.01795678 | 0.01385575 | 3.44E-05   |
| 9mo_SIGAF3_CTGTGGGTCTACCTTA-1-10x  | 0.17186293 | 0.56184494 | 0.0016256  |
| 9mo_SIGAF3_CTTAGGAAGTCCCAAT-1-10x  | 0.02786334 | 0.04912846 | 4.30E-05   |
| 9mo_SIGAF3_CTTAGGAGTGTGACCC-1-10x  | 0.05497387 | 0.14565665 | 0.000233   |
| 9mo_SIGAF3_CTTCAATTCAAGCCCG-1-10x  | 0.07538749 | 0.2183402  | 0.001885   |
| 9mo_SIGAF3_CTTCTTCAATGGCCC-1-10x   | 0.14719023 | 0.47399682 | 0.0018716  |
| 9mo_SIGAF3_CTTCTTTCCATCACC-1-10x   | 0.03324214 | 0.06827989 | 5.00E-05   |
| 9mo_SIGAF3_CTTCTCGGTATTGCTTT-1-10x | 0.20400399 | 0.67628455 | 0.0011608  |
| 9mo_SIGAF3_CTTCTAAAGTGCAACG-1-10x  | 0.030362   | 0.05802505 | 4.55E-05   |
| 9mo_SIGAF3_CTTCTAAAGTTCGGTT-1-10x  | 0.2520246  | 0.8472639  | 0.00080467 |
| 9mo_SIGAF3_CTTCTAACATAGGTTT-1-10x  | 0.15365511 | 0.4970153  | 0.0018575  |
| 9mo_SIGAF3_CTTCTAAGTGATACTC-1-10x  | 0.16434924 | 0.5350922  | 0.0017494  |
| 9mo_SIGAF3_CTTGAGAAGCATGCGA-1-10x  | 0.0294657  | 0.05483374 | 4.42E-05   |
| 9mo_SIGAF3_CTTGAGATCATTGAGC-1-10x  | 0.1787824  | 0.58648205 | 0.0015081  |
| 9mo_SIGAF3_CTTGATTCATAACGT-1-10x   | 0.01849088 | 0.01575745 | 3.49E-05   |
| 9mo_SIGAF3_CTTGATTCATCATTTT-1-10x  | 0.05641046 | 0.15077169 | 0.000257   |
| 9mo_SIGAF3_CTTTCGGAGCCTTTCC-1-10x  | 0.0846545  | 0.25133574 | 0.0036353  |
| 9mo_SIGAF3_GAAACCTTCACTGGGC-1-10x  | 0.02999997 | 0.05673601 | 4.55E-05   |
| 9mo_SIGAF3_GAAACCTTCCGGCAGT-1-10x  | 0.16631399 | 0.54208773 | 0.0017206  |
| 9mo_SIGAF3_GAAATGAAGCTGACCC-1-10x  | 0.09379181 | 0.2838695  | 0.0044154  |
| 9mo_SIGAF3_GAAATGAGTTCGCGTG-1-10x  | 0.10198475 | 0.31304082 | 0.0039137  |
| 9mo_SIGAF3_GAAATGATCAACCTCC-1-10x  | 0.01984925 | 0.02059396 | 3.55E-05   |
| 9mo_SIGAF3_GAACACTTCACAGAGG-1-10x  | 0.09425784 | 0.28552884 | 0.0044154  |
| 9mo_SIGAF3_GAACGTTGTGCCCGTA-1-10x  | 0.14505972 | 0.46641105 | 0.0018716  |
| 9mo_SIGAF3_GAACGTTGTTAGAAGT-1-10x  | 0.23212664 | 0.7764164  | 0.00093066 |
| 9mo_SIGAF3_GAACGTTTCATCACCC-1-10x  | 0.23094535 | 0.77221036 | 0.00093779 |
| 9mo_SIGAF3_GAACTGTCAACCCTCT-1-10x  | 0.09467015 | 0.28699687 | 0.0044051  |
| 9mo_SIGAF3_GAACTGTGTTACGAT-1-10x   | 0.04221323 | 0.10022185 | 7.82E-05   |
| 9mo_SIGAF3_GAACTGTTCACTGTCC-1-10x  | 0.24943325 | 0.8380373  | 0.00081397 |
| 9mo_SIGAF3_GAAGCCCAGGCGAACT-1-10x  | 0.02374489 | 0.03446455 | 3.83E-05   |
| 9mo_SIGAF3_GAAGCCCGTTCAAGGG-1-10x  | 0.07382742 | 0.21278548 | 0.0017292  |
| 9mo_SIGAF3_GAAGCCCTCTACGCGG-1-10x  | 0.0909224  | 0.27365288 | 0.0043535  |
| 9mo_SIGAF3_GAAGCGACAGTAACAA-1-10x  | 0.01882584 | 0.01695005 | 3.49E-05   |

|                                    |            |            |            |
|------------------------------------|------------|------------|------------|
| 9mo_SIGAF3_GAAGCGATCAGCCTCT-1-10x  | 0.23683214 | 0.7931706  | 0.00089602 |
| 9mo_SIGAF3_GAAGGGTAGGCACAAC-1-10x  | 0.02069311 | 0.02359857 | 3.62E-05   |
| 9mo_SIGAF3_GAAGGGTCCGCACGA-1-10x   | 0.25085905 | 0.84311396 | 0.00080923 |
| 9mo_SIGAF3_GAAGTAAGTAGGCAAC-1-10x  | 0.03064342 | 0.05902707 | 4.68E-05   |
| 9mo_SIGAF3_GAAGTAAGTGCCCTTT-1-10x  | 0.01796527 | 0.01388598 | 3.44E-05   |
| 9mo_SIGAF3_GAAGTAATCAGTGTGT-1-10x  | 0.03752459 | 0.08352773 | 6.07E-05   |
| 9mo_SIGAF3_GAAGTAATCCGTCCT-1-10x   | 0.11149392 | 0.34689865 | 0.002929   |
| 9mo_SIGAF3_GAATAGAAGACGATAT-1-10x  | 0.22130264 | 0.73787713 | 0.0010106  |
| 9mo_SIGAF3_GAATAGACAATGAACA-1-10x  | 0.26736423 | 0.90188134 | 0.00075705 |
| 9mo_SIGAF3_GAATAGAGTCCAGCGT-1-10x  | 0.09687432 | 0.29484493 | 0.0043435  |
| 9mo_SIGAF3_GAATCACAGATCGGTG-1-10x  | 0.22708118 | 0.7584518  | 0.00096676 |
| 9mo_SIGAF3_GAATCACCACACGGAA-1-10x  | 0.11160779 | 0.34730408 | 0.002929   |
| 9mo_SIGAF3_GAATCACTCTGCGGGT-1-10x  | 0.01976479 | 0.02029325 | 3.55E-05   |
| 9mo_SIGAF3_GAATCGTCAAGGTCTT-1-10x  | 0.12908235 | 0.40952298 | 0.0019821  |
| 9mo_SIGAF3_GAATCGTTCAGTCCGG-1-10x  | 0.05148181 | 0.13322301 | 0.00016076 |
| 9mo_SIGAF3_GACACGCCATGTGACT-1-10x  | 0.05009432 | 0.1282828  | 0.00013566 |
| 9mo_SIGAF3_GACACGCTCGCATGAT-1-10x  | 0.0956366  | 0.29043797 | 0.0043808  |
| 9mo_SIGAF3_GACAGCCCAAGTACCT-1-10x  | 0.02057882 | 0.02319162 | 3.62E-05   |
| 9mo_SIGAF3_GACAGCCCATAGGTTC-1-10x  | 0.08708841 | 0.2600018  | 0.0040384  |
| 9mo_SIGAF3_GACAGCCGTTGTTA-1-10x    | 0.03326866 | 0.06837434 | 5.00E-05   |
| 9mo_SIGAF3_GACAGCCTCTTGATTC-1-10x  | 0.23622622 | 0.7910131  | 0.00089602 |
| 9mo_SIGAF3_GACATCAGTCTTGTA-1-10x   | 0.08831736 | 0.26437753 | 0.0041422  |
| 9mo_SIGAF3_GACCAATAGATCACCT-1-10x  | 0.12316962 | 0.3884704  | 0.0021479  |
| 9mo_SIGAF3_GACCAATCACTAGAGG-1-10x  | 0.2901236  | 0.9829171  | 0.00076163 |
| 9mo_SIGAF3_GACCAATCATCTCCA-1-10x   | 0.02483775 | 0.03835572 | 3.91E-05   |
| 9mo_SIGAF3_GACCAATGTAACATCC-1-10x  | 0.23288728 | 0.77912474 | 0.00092358 |
| 9mo_SIGAF3_GACCAATCCACAAGT-1-10x   | 0.2213246  | 0.7379553  | 0.0010106  |
| 9mo_SIGAF3_GACCCAGAGGTGATAT-1-10x  | 0.02116438 | 0.02527655 | 3.69E-05   |
| 9mo_SIGAF3_GACCCAGCAGCCGGTT-1-10x  | 0.03911664 | 0.08919631 | 6.67E-05   |
| 9mo_SIGAF3_GACCCAGGTATCGTTG-1-10x  | 0.12709878 | 0.4024604  | 0.0020256  |
| 9mo_SIGAF3_GACCCCTTAGCATTTGC-1-10x | 0.04576363 | 0.1128632  | 0.00010046 |
| 9mo_SIGAF3_GACCCTTTCGTTTATT-1-10x  | 0.22156739 | 0.7388198  | 0.0010106  |
| 9mo_SIGAF3_GACCGTGGTACGACTT-1-10x  | 0.09360597 | 0.28320783 | 0.0044154  |
| 9mo_SIGAF3_GACCGTGGTTCGGTGTC-1-10x | 0.04560394 | 0.11229461 | 0.00010046 |
| 9mo_SIGAF3_GACCGTGGTTACCTGA-1-10x  | 0.087873   | 0.26279533 | 0.0041422  |
| 9mo_SIGAF3_GACCGTGGTTTGATCG-1-10x  | 0.01670519 | 0.00939942 | 3.38E-05   |
| 9mo_SIGAF3_GACCTTCAGTAATACG-1-10x  | 0.09631171 | 0.29284173 | 0.0043435  |
| 9mo_SIGAF3_GACCTTCTCCATGATG-1-10x  | 0.25377473 | 0.85349536 | 0.00079608 |
| 9mo_SIGAF3_GACTATGAGGGTCAAC-1-10x  | 0.18709287 | 0.6160718  | 0.0013662  |
| 9mo_SIGAF3_GACTATGCATTCTGTT-1-10x  | 0.03288629 | 0.0670129  | 5.00E-05   |
| 9mo_SIGAF3_GACTATGGTTCGCTGCA-1-10x | 0.06292221 | 0.17395703 | 0.00052741 |

|                                    |            |            |            |
|------------------------------------|------------|------------|------------|
| 9mo_SIGAF3_GACTCAACATGACGTT-1-10x  | 0.03018773 | 0.05740454 | 4.55E-05   |
| 9mo_SIGAF3_GACTCTCGTATCCCAA-1-10x  | 0.01704621 | 0.01061362 | 3.38E-05   |
| 9mo_SIGAF3_GACTGATTCCAATCTT-1-10x  | 0.2705098  | 0.9130813  | 0.00075418 |
| 9mo_SIGAF3_GACTTCCAGCTGCCAC-1-10x  | 0.09546799 | 0.28983763 | 0.0043808  |
| 9mo_SIGAF3_GACTTCCAGGAACATT-1-10x  | 0.08591557 | 0.25582585 | 0.0037839  |
| 9mo_SIGAF3_GACTTCTCGGACAAG-1-10x   | 0.04587501 | 0.11325976 | 0.00010046 |
| 9mo_SIGAF3_GAGAAATGTATGTCCA-1-10x  | 0.05293723 | 0.13840511 | 0.00017575 |
| 9mo_SIGAF3_GAGAAATCCCGAGTG-1-10x   | 0.20844027 | 0.69208014 | 0.0011177  |
| 9mo_SIGAF3_GAGACCCAGAGAGGGC-1-10x  | 0.05409168 | 0.14251557 | 0.00021164 |
| 9mo_SIGAF3_GAGACCCGTAGACACG-1-10x  | 0.01823239 | 0.01483706 | 3.44E-05   |
| 9mo_SIGAF3_GAGACTTCACACGGTC-1-10x  | 0.01652499 | 0.0087578  | 3.38E-05   |
| 9mo_SIGAF3_GAGAGGTAGCGCAATG-1-10x  | 0.06534806 | 0.18259437 | 0.00072102 |
| 9mo_SIGAF3_GAGAGGTGTGACACGA-1-10x  | 0.07548811 | 0.21869846 | 0.001885   |
| 9mo_SIGAF3_GAGATGGCAGAGGAAA-1-10x  | 0.04943575 | 0.12593795 | 0.00013566 |
| 9mo_SIGAF3_GAGATGGCAGGAGGAG-1-10x  | 0.02370455 | 0.03432093 | 3.83E-05   |
| 9mo_SIGAF3_GAGATGGTCGTTCTGC-1-10x  | 0.0530993  | 0.13898218 | 0.00019264 |
| 9mo_SIGAF3_GAGCCTGGTAGAATAC-1-10x  | 0.28505102 | 0.96485585 | 0.00075605 |
| 9mo_SIGAF3_GAGCCTGGTGTAGCAG-1-10x  | 0.09134785 | 0.2751677  | 0.0043535  |
| 9mo_SIGAF3_GAGCTGCGTTGGTAGG-1-10x  | 0.15922332 | 0.5168411  | 0.0018109  |
| 9mo_SIGAF3_GAGCTGCTCATTGTTC-1-10x  | 0.04806239 | 0.12104802 | 0.00011598 |
| 9mo_SIGAF3_GAGGCCTAGCCTGCCA-1-10x  | 0.27239937 | 0.9198091  | 0.000753   |
| 9mo_SIGAF3_GAGGCCTTCTTCTAAC-1-10x  | 0.17991138 | 0.5905018  | 0.001475   |
| 9mo_SIGAF3_GAGGGATAGGCCGCTT-1-10x  | 0.02471341 | 0.037913   | 3.91E-05   |
| 9mo_SIGAF3_GAGGGTACAAGTTTGC-1-10x  | 0.17244846 | 0.56392974 | 0.0016089  |
| 9mo_SIGAF3_GAGTCATCAGCTGAGA-1-10x  | 0.04911133 | 0.12478283 | 0.00012523 |
| 9mo_SIGAF3_GAGTCATGTATGACAA-1-10x  | 0.05693602 | 0.15264297 | 0.00028394 |
| 9mo_SIGAF3_GAGTCTAAGGGTCTTT-1-10x  | 0.22458358 | 0.74955904 | 0.00098869 |
| 9mo_SIGAF3_GAGTCTACAAACCGGA-1-10x  | 0.0495467  | 0.12633298 | 0.00013566 |
| 9mo_SIGAF3_GAGTCTACATAACGGG-1-10x  | 0.2672835  | 0.90159386 | 0.00075705 |
| 9mo_SIGAF3_GAGTCTAGTTTGTGG-1-10x   | 0.09154515 | 0.2758702  | 0.0043535  |
| 9mo_SIGAF3_GAGTCTATCTGTGTGA-1-10x  | 0.02176638 | 0.02741999 | 3.69E-05   |
| 9mo_SIGAF3_GAGTGAGTCGCCATAA-1-10x  | 0.08982015 | 0.26972827 | 0.0042999  |
| 9mo_SIGAF3_GAGTGTTAGCGACTGA-1-10x  | 0.02322251 | 0.03260459 | 3.83E-05   |
| 9mo_SIGAF3_GAGTGTTTCAGCTCGGT-1-10x | 0.02250912 | 0.03006454 | 3.76E-05   |
| 9mo_SIGAF3_GAGTTGTCATGACTTG-1-10x  | 0.03942531 | 0.09029535 | 6.67E-05   |
| 9mo_SIGAF3_GAGTTTGGTTAAGGA-1-10x   | 0.04801595 | 0.12088267 | 0.00011598 |
| 9mo_SIGAF3_GATAGAAAGGTCACAG-1-10x  | 0.08489986 | 0.25220934 | 0.0036353  |
| 9mo_SIGAF3_GATAGAACACAATGCT-1-10x  | 0.03337837 | 0.06876498 | 5.17E-05   |
| 9mo_SIGAF3_GATAGAACAGTCGGAA-1-10x  | 0.04772186 | 0.11983556 | 0.00011598 |
| 9mo_SIGAF3_GATAGAAGTACACGTT-1-10x  | 0.07653934 | 0.22244139 | 0.0022191  |
| 9mo_SIGAF3_GATAGCTCATGTGCTA-1-10x  | 0.27128285 | 0.9158337  | 0.00075352 |



|                                    |            |            |            |
|------------------------------------|------------|------------|------------|
| 9mo_SIGAF3_GATAGCTGTAGGAGTC-1-10x  | 0.2778479  | 0.9392088  | 0.00075239 |
| 9mo_SIGAF3_GATAGCTGTCTGCCTT-1-10x  | 0.28234988 | 0.95523834 | 0.00075462 |
| 9mo_SIGAF3_GATAGCTTCAACAAGAA-1-10x | 0.03510064 | 0.07489719 | 5.37E-05   |
| 9mo_SIGAF3_GATAGCTTCGAACACT-1-10x  | 0.01652179 | 0.0087464  | 3.38E-05   |
| 9mo_SIGAF3_GATCACAAGTTTGCTG-1-10x  | 0.09746987 | 0.2969654  | 0.0042943  |
| 9mo_SIGAF3_GATCAGTCACAGCGCT-1-10x  | 0.02059938 | 0.02326485 | 3.62E-05   |
| 9mo_SIGAF3_GATCAGTGTTGTTGCA-1-10x  | 0.18925543 | 0.62377167 | 0.0013244  |
| 9mo_SIGAF3_GATCATGAGTCTCCTC-1-10x  | 0.09513563 | 0.28865424 | 0.0044051  |
| 9mo_SIGAF3_GATCATGCAATGAAAC-1-10x  | 0.15375392 | 0.4973671  | 0.0018575  |
| 9mo_SIGAF3_GATCATGGTGTCCCTT-1-10x  | 0.11754878 | 0.3684572  | 0.002453   |
| 9mo_SIGAF3_GATCATGGTTGAGTCT-1-10x  | 0.01752874 | 0.01233169 | 3.44E-05   |
| 9mo_SIGAF3_GATCGTATCTGACCCT-1-10x  | 0.02620058 | 0.04320812 | 4.09E-05   |
| 9mo_SIGAF3_GATGACTAGACGAAGA-1-10x  | 0.08500558 | 0.25258577 | 0.0037839  |
| 9mo_SIGAF3_GATGACTAGTAGGATT-1-10x  | 0.1997692  | 0.6612064  | 0.0011985  |
| 9mo_SIGAF3_GATGACTCAAATTGCC-1-10x  | 0.03179585 | 0.06313034 | 4.83E-05   |
| 9mo_SIGAF3_GATGACTCAACACACT-1-10x  | 0.05526098 | 0.1466789  | 0.000233   |
| 9mo_SIGAF3_GATGACTTCCAACCAA-1-10x  | 0.01834956 | 0.01525426 | 3.49E-05   |
| 9mo_SIGAF3_GATGAGGAGAGTCAGC-1-10x  | 0.09573437 | 0.2907861  | 0.0043808  |
| 9mo_SIGAF3_GATGAGGCAATACGCT-1-10x  | 0.28323567 | 0.95839226 | 0.00075531 |
| 9mo_SIGAF3_GATGAGGTCTCTCTT-1-10x   | 0.25302267 | 0.8508176  | 0.00080028 |
| 9mo_SIGAF3_GATGAGGTGCGATTAG-1-10x  | 0.03482576 | 0.07391844 | 5.37E-05   |
| 9mo_SIGAF3_GATGAGGTGCGTTGTA-1-10x  | 0.0473012  | 0.11833779 | 0.00010777 |
| 9mo_SIGAF3_GATGCTAAGATCGCCC-1-10x  | 0.13624996 | 0.43504354 | 0.0018891  |
| 9mo_SIGAF3_GATGCTAAGATGCAGC-1-10x  | 0.13660905 | 0.4363221  | 0.0018891  |
| 9mo_SIGAF3_GATGCTAAGTGCACCTT-1-10x | 0.01519696 | 0.00402929 | 3.27E-05   |
| 9mo_SIGAF3_GATGGAGCAAGAATAC-1-10x  | 0.04293041 | 0.10277541 | 8.29E-05   |
| 9mo_SIGAF3_GATGGAGGTAGGGTAC-1-10x  | 0.0837553  | 0.2481341  | 0.0034742  |
| 9mo_SIGAF3_GATGTTGCAAAGCTAA-1-10x  | 0.0815341  | 0.24022542 | 0.0031253  |
| 9mo_SIGAF3_GATTTCGAGTTGCGAAG-1-10x | 0.10960919 | 0.34018794 | 0.0031181  |
| 9mo_SIGAF3_GATTCTTGTCGGTGAA-1-10x  | 0.07751641 | 0.2259203  | 0.0023954  |
| 9mo_SIGAF3_GCAACATAGATGGCGT-1-10x  | 0.034797   | 0.07381606 | 5.37E-05   |
| 9mo_SIGAF3_GCAACATGTATCGGTT-1-10x  | 0.13914195 | 0.44534057 | 0.0018772  |
| 9mo_SIGAF3_GCAACATGTCTACTGA-1-10x  | 0.03830875 | 0.08631977 | 6.36E-05   |
| 9mo_SIGAF3_GCAACATGTGTCCTAA-1-10x  | 0.22557494 | 0.75308883 | 0.00098137 |
| 9mo_SIGAF3_GCAACATTCCGAGCTG-1-10x  | 0.0826105  | 0.24405798 | 0.0033032  |
| 9mo_SIGAF3_GCAACATTCTAGGCCG-1-10x  | 0.25480184 | 0.8571524  | 0.00079207 |
| 9mo_SIGAF3_GCAACCGAGAGTCACG-1-10x  | 0.06534349 | 0.18257812 | 0.00072102 |
| 9mo_SIGAF3_GCACGGTAGAAACACT-1-10x  | 0.2836067  | 0.95971334 | 0.00075531 |
| 9mo_SIGAF3_GCACGGTAGACCATAA-1-10x  | 0.03604289 | 0.0782521  | 5.58E-05   |
| 9mo_SIGAF3_GCACGTGAGTGAGTGC-1-10x  | 0.03203018 | 0.06396467 | 4.83E-05   |
| 9mo_SIGAF3_GCACTAAGTCTTCTAT-1-10x  | 0.04638474 | 0.11507469 | 0.00010046 |

|                                    |            |            |            |
|------------------------------------|------------|------------|------------|
| 9mo_SIGAF3_GCAGCTGCAAATCCCA-1-10x  | 0.2194872  | 0.7314132  | 0.0010253  |
| 9mo_SIGAF3_GCAGCTGTCCGTGTAA-1-10x  | 0.2728718  | 0.9214912  | 0.0007526  |
| 9mo_SIGAF3_GCAGGCTGTCTCTCTG-1-10x  | 0.03816303 | 0.08580092 | 6.36E-05   |
| 9mo_SIGAF3_GCAGGCTTCGAAACAA-1-10x  | 0.05297147 | 0.138527   | 0.00017575 |
| 9mo_SIGAF3_GCAGGCTTCGCTGTCT-1-10x  | 0.23501474 | 0.7866996  | 0.00090964 |
| 9mo_SIGAF3_GCAGTTAAGACGAAGA-1-10x  | 0.25092953 | 0.8433649  | 0.00080923 |
| 9mo_SIGAF3_GCAGTTAGTAGTTACC-1-10x  | 0.20468941 | 0.678725   | 0.0011518  |
| 9mo_SIGAF3_GCAGTTAGTCTCGACG-1-10x  | 0.01954181 | 0.01949932 | 3.55E-05   |
| 9mo_SIGAF3_GCAGTTATCTGTCTCG-1-10x  | 0.20199126 | 0.66911817 | 0.0011792  |
| 9mo_SIGAF3_GCATCGGGTCGTCGGT-1-10x  | 0.02982707 | 0.05612039 | 4.55E-05   |
| 9mo_SIGAF3_GCATGATAGATGCTGG-1-10x  | 0.27277043 | 0.92113036 | 0.000753   |
| 9mo_SIGAF3_GCATGATTCTCTCAA-1-10x   | 0.01626977 | 0.00784906 | 3.33E-05   |
| 9mo_SIGAF3_GCATTAGCAAGCCCAC-1-10x  | 0.2680625  | 0.90436757 | 0.00075705 |
| 9mo_SIGAF3_GCATTAGGTGAAACG-1-10x   | 0.27927247 | 0.9442811  | 0.00075266 |
| 9mo_SIGAF3_GCCAACGCAGCTGTAT-1-10x  | 0.07992812 | 0.23450729 | 0.0027593  |
| 9mo_SIGAF3_GCCAACGTCTGCGAGC-1-10x  | 0.21668379 | 0.7214315  | 0.0010475  |
| 9mo_SIGAF3_GCCAGGTGTAGTTACC-1-10x  | 0.03073838 | 0.05936518 | 4.68E-05   |
| 9mo_SIGAF3_GCCAGGTGTCCAACGC-1-10x  | 0.15599345 | 0.505341   | 0.0018459  |
| 9mo_SIGAF3_GCCAGGTTCCCGTTGT-1-10x  | 0.0840671  | 0.24924429 | 0.0036353  |
| 9mo_SIGAF3_GCCAGGTTGATTCCC-1-10x   | 0.08641927 | 0.2576193  | 0.0039187  |
| 9mo_SIGAF3_GCCAGTGGTTCACCGG-1-10x  | 0.05242521 | 0.13658203 | 0.00017575 |
| 9mo_SIGAF3_GCCAGTGTCTACGGG-1-10x   | 0.02294707 | 0.03162386 | 3.76E-05   |
| 9mo_SIGAF3_GCCATTGTCGAAGGCA-1-10x  | 0.16005628 | 0.51980686 | 0.0018109  |
| 9mo_SIGAF3_GCCATTGTTAAGCAA-1-10x   | 0.03582701 | 0.07748345 | 5.58E-05   |
| 9mo_SIGAF3_GCCATTCTCGGAATTC-1-10x  | 0.02666959 | 0.04487807 | 4.09E-05   |
| 9mo_SIGAF3_GCCGTGACACAATGAA-1-10x  | 0.1024782  | 0.31479776 | 0.0039137  |
| 9mo_SIGAF3_GCCGTGAGTCGTCATA-1-10x  | 0.04727926 | 0.11825966 | 0.00010777 |
| 9mo_SIGAF3_GCCGTGATCGGAGTGA-1-10x  | 0.03530666 | 0.07563072 | 5.58E-05   |
| 9mo_SIGAF3_GCCTGTTTCATCTTAGG-1-10x | 0.02841452 | 0.05109097 | 4.30E-05   |
| 9mo_SIGAF3_GCCTGTTGTGATTCTG-1-10x  | 0.25382963 | 0.8536908  | 0.00079608 |
| 9mo_SIGAF3_GCGAGAAAGCTGTTCA-1-10x  | 0.2857474  | 0.9673354  | 0.00075686 |
| 9mo_SIGAF3_GCGAGAACAAGCAATA-1-10x  | 0.0193356  | 0.01876508 | 3.55E-05   |
| 9mo_SIGAF3_GCGGAAAAGCATTGTC-1-10x  | 0.09434053 | 0.2858233  | 0.0044154  |
| 9mo_SIGAF3_GCGGAAACAGATACCT-1-10x  | 0.02686621 | 0.04557813 | 4.19E-05   |
| 9mo_SIGAF3_GCGGATCGTGGCTGCT-1-10x  | 0.22604565 | 0.7547648  | 0.00097406 |
| 9mo_SIGAF3_GCGGATCTCGCTCCTA-1-10x  | 0.2628429  | 0.8857829  | 0.00076511 |
| 9mo_SIGAF3_GCGTGCAAGAGACCT-1-10x   | 0.0856759  | 0.25497246 | 0.0037839  |
| 9mo_SIGAF3_GCGTGCACAACGACTT-1-10x  | 0.0504407  | 0.12951608 | 0.00014746 |
| 9mo_SIGAF3_GCGTGCAGTGTTGAGG-1-10x  | 0.24610028 | 0.82617015 | 0.00083459 |
| 9mo_SIGAF3_GCGTTTCAGCACGTCC-1-10x  | 0.04515534 | 0.11069735 | 9.39E-05   |
| 9mo_SIGAF3_GCGTTTCCATTCTGTT-1-10x  | 0.03104186 | 0.06044572 | 4.68E-05   |

|                                    |            |            |            |
|------------------------------------|------------|------------|------------|
| 9mo_SIGAF3_GCGTTTCTCTAGATCG-1-10x  | 0.2777218  | 0.93875986 | 0.00075239 |
| 9mo_SIGAF3_GCTACAAAGCGACCCT-1-10x  | 0.21840201 | 0.7275493  | 0.0010326  |
| 9mo_SIGAF3_GCTACAAAGTCCGGTGT-1-10x | 0.13849938 | 0.44305268 | 0.0018802  |
| 9mo_SIGAF3_GCTACCTAGACCGCCT-1-10x  | 0.27864563 | 0.9420492  | 0.00075266 |
| 9mo_SIGAF3_GCTACCTAGCGACTTT-1-10x  | 0.05389693 | 0.14182217 | 0.00019264 |
| 9mo_SIGAF3_GCTCAAATCCGTACGG-1-10x  | 0.08308397 | 0.2457438  | 0.0033032  |
| 9mo_SIGAF3_GCTGCAGAGGGTTTCT-1-10x  | 0.02303454 | 0.03193532 | 3.83E-05   |
| 9mo_SIGAF3_GCTGCAGTCTTCGGTC-1-10x  | 0.11722136 | 0.36729142 | 0.002453   |
| 9mo_SIGAF3_GCTGGGTGTCCGGTCA-1-10x  | 0.04841575 | 0.12230619 | 0.00012523 |
| 9mo_SIGAF3_GCTGGGTTACCCGGTG-1-10x  | 0.01555803 | 0.00531489 | 3.33E-05   |
| 9mo_SIGAF3_GCTGGGTTCGAACTCA-1-10x  | 0.04222956 | 0.10027999 | 7.82E-05   |
| 9mo_SIGAF3_GCTGGGTTGTAACCA-1-10x   | 0.23969342 | 0.80335826 | 0.00087632 |
| 9mo_SIGAF3_GCTTCACAGCGCATCC-1-10x  | 0.05178309 | 0.13429572 | 0.00016076 |
| 9mo_SIGAF3_GCTTCACGTACGCTTA-1-10x  | 0.17727566 | 0.5811172  | 0.0015248  |
| 9mo_SIGAF3_GCTTGGGGTTCGCAGTC-1-10x | 0.03513381 | 0.07501528 | 5.37E-05   |
| 9mo_SIGAF3_GCTTTGAGGCCTTGC-1-10x   | 0.16608979 | 0.54128945 | 0.0017206  |
| 9mo_SIGAF3_GCTTTGAGTTGGCTT-1-10x   | 0.0677195  | 0.19103798 | 0.00088537 |
| 9mo_SIGAF3_GCTTTGCACTACGGC-1-10x   | 0.20159349 | 0.66770184 | 0.0011792  |
| 9mo_SIGAF3_GCTTTGTAACCTTTC-1-10x   | 0.25335693 | 0.85200775 | 0.00079608 |
| 9mo_SIGAF3_GGAACCCTCCGTGTGG-1-10x  | 0.09155972 | 0.2759221  | 0.0043903  |
| 9mo_SIGAF3_GGAACCCTCTCGCTCA-1-10x  | 0.26609498 | 0.8973621  | 0.00075974 |
| 9mo_SIGAF3_GGAAGTGAGGTTGCC-1-10x   | 0.141403   | 0.45339116 | 0.0018724  |
| 9mo_SIGAF3_GGAATCTAGTGGTTGG-1-10x  | 0.01683113 | 0.00984782 | 3.38E-05   |
| 9mo_SIGAF3_GGAATCTTCGCAATGT-1-10x  | 0.05132227 | 0.13265496 | 0.00016076 |
| 9mo_SIGAF3_GGAATGGAGCTAGCCC-1-10x  | 0.20779242 | 0.6897734  | 0.001126   |
| 9mo_SIGAF3_GGAATGGCATAATCGC-1-10x  | 0.21268293 | 0.7071863  | 0.0010856  |
| 9mo_SIGAF3_GGAATGGGTGCAACGA-1-10x  | 0.02047521 | 0.02282272 | 3.62E-05   |
| 9mo_SIGAF3_GGAGAACGTCATCCCT-1-10x  | 0.02828408 | 0.05062651 | 4.30E-05   |
| 9mo_SIGAF3_GGAGATGCAGTGTATC-1-10x  | 0.05314822 | 0.13915634 | 0.00019264 |
| 9mo_SIGAF3_GGAGATGTCAGACCGC-1-10x  | 0.07234545 | 0.20750888 | 0.0014433  |
| 9mo_SIGAF3_GGAGCAAGTTGCTCGG-1-10x  | 0.15248112 | 0.49283525 | 0.0018651  |
| 9mo_SIGAF3_GGAGGATAGGATTCT-1-10x   | 0.04724276 | 0.11812972 | 0.00010777 |
| 9mo_SIGAF3_GGAGGATGTATGCGTT-1-10x  | 0.04815633 | 0.12138248 | 0.00011598 |
| 9mo_SIGAF3_GGAGGATGTCGAAAC-1-10x   | 0.18977569 | 0.6256241  | 0.0013244  |
| 9mo_SIGAF3_GGAGGATGTCTCACA-1-10x   | 0.09368596 | 0.28349262 | 0.0044154  |
| 9mo_SIGAF3_GGAGGATTCGTGCTCT-1-10x  | 0.19374837 | 0.63976896 | 0.0012741  |
| 9mo_SIGAF3_GGAGGTAGTGTGAGCA-1-10x  | 0.03947791 | 0.09048263 | 6.67E-05   |
| 9mo_SIGAF3_GGAGGTATCTTCCTAA-1-10x  | 0.15797773 | 0.5124061  | 0.0018302  |
| 9mo_SIGAF3_GGATCTACAACAAGTA-1-10x  | 0.21243739 | 0.706312   | 0.0010856  |
| 9mo_SIGAF3_GGATCTAGTACCATAC-1-10x  | 0.0815056  | 0.24012397 | 0.0031253  |
| 9mo_SIGAF3_GGATCTATCTATCCAT-1-10x  | 0.05579465 | 0.14857906 | 0.000233   |

|                                    |            |            |            |
|------------------------------------|------------|------------|------------|
| 9mo_SIGAF3_GGATGTTGTATAGGAT-1-10x  | 0.02944565 | 0.05476236 | 4.42E-05   |
| 9mo_SIGAF3_GGCACGTACGGTGAA-1-10x   | 0.09083173 | 0.27333003 | 0.0043535  |
| 9mo_SIGAF3_GGCACGTGTCGAGTTT-1-10x  | 0.11528184 | 0.36038566 | 0.002594   |
| 9mo_SIGAF3_GGCACGTTCCATGAGT-1-10x  | 0.02176653 | 0.02742053 | 3.69E-05   |
| 9mo_SIGAF3_GGCAGTCAGTTGAAGT-1-10x  | 0.03487621 | 0.07409807 | 5.37E-05   |
| 9mo_SIGAF3_GGCAGTCCACAGACGA-1-10x  | 0.28081205 | 0.9497629  | 0.00075348 |
| 9mo_SIGAF3_GGCAGTCTCCACATAG-1-10x  | 0.27088732 | 0.91442543 | 0.00075418 |
| 9mo_SIGAF3_GGCGTCACAAGAGTAT-1-10x  | 0.04374237 | 0.1056664  | 8.81E-05   |
| 9mo_SIGAF3_GGCGTCACACGGATCC-1-10x  | 0.19094113 | 0.6297737  | 0.0013113  |
| 9mo_SIGAF3_GGCTGTGAGCGGTAAC-1-10x  | 0.02414913 | 0.03590387 | 3.91E-05   |
| 9mo_SIGAF3_GGCTGTGGTCTAACGT-1-10x  | 0.0188403  | 0.01700154 | 3.49E-05   |
| 9mo_SIGAF3_GGCTTTCAGCCATGCC-1-10x  | 0.08038291 | 0.23612656 | 0.0029431  |
| 9mo_SIGAF3_GGGAAGTAGAGAGCAA-1-10x  | 0.021796   | 0.02752545 | 3.69E-05   |
| 9mo_SIGAF3_GGGAAGTTCCCGAGTG-1-10x  | 0.0667878  | 0.18772064 | 0.00079936 |
| 9mo_SIGAF3_GGGACAAAGTGCCTCG-1-10x  | 0.16425762 | 0.5347659  | 0.0017494  |
| 9mo_SIGAF3_GGGACAACAACATACC-1-10x  | 0.03460587 | 0.07313553 | 5.37E-05   |
| 9mo_SIGAF3_GGGACAATCATCGCCT-1-10x  | 0.01889492 | 0.01719602 | 3.49E-05   |
| 9mo_SIGAF3_GGGACAATCTGAGATC-1-10x  | 0.17332081 | 0.56703585 | 0.0015922  |
| 9mo_SIGAF3_GGGACCTGTACGTTCA-1-10x  | 0.08317096 | 0.24605353 | 0.0034742  |
| 9mo_SIGAF3_GGGACTCAGAGCATCG-1-10x  | 0.17644933 | 0.578175   | 0.0015416  |
| 9mo_SIGAF3_GGGACTCAGGCGATAC-1-10x  | 0.2156505  | 0.71775246 | 0.001055   |
| 9mo_SIGAF3_GGGACTCCAGCCTATA-1-10x  | 0.232398   | 0.7773826  | 0.00093066 |
| 9mo_SIGAF3_GGGACTCGTAGACACG-1-10x  | 0.04457205 | 0.10862053 | 8.81E-05   |
| 9mo_SIGAF3_GGGATCCAGAGCACTG-1-10x  | 0.28000584 | 0.9468923  | 0.00075303 |
| 9mo_SIGAF3_GGGATCCAGCATAGGC-1-10x  | 0.25581408 | 0.8607565  | 0.00078825 |
| 9mo_SIGAF3_GGGATCCCAATAGGGC-1-10x  | 0.1728274  | 0.56527895 | 0.0016089  |
| 9mo_SIGAF3_GGGATGACAGTAACGG-1-10x  | 0.04349583 | 0.10478861 | 8.29E-05   |
| 9mo_SIGAF3_GGGCCATAGCATCAGG-1-10x  | 0.0448418  | 0.10958096 | 9.39E-05   |
| 9mo_SIGAF3_GGGCCATAGTCAACAA-1-10x  | 0.04586014 | 0.11320683 | 0.00010046 |
| 9mo_SIGAF3_GGGCGTTCAACCTATG-1-10x  | 0.11138932 | 0.3465262  | 0.002929   |
| 9mo_SIGAF3_GGGCGTTCAGGAGACT-1-10x  | 0.05166991 | 0.13389274 | 0.00016076 |
| 9mo_SIGAF3_GGGCGTTGTACTCGCG-1-10x  | 0.22804248 | 0.7618746  | 0.00095947 |
| 9mo_SIGAF3_GGGCGTTTTCTTACTGT-1-10x | 0.03084624 | 0.05974921 | 4.68E-05   |
| 9mo_SIGAF3_GGGCTACAGAGCATT-1-10x   | 0.0967539  | 0.29441616 | 0.0043435  |
| 9mo_SIGAF3_GGGCTACAGTCGAGGT-1-10x  | 0.03034063 | 0.05794897 | 4.55E-05   |
| 9mo_SIGAF3_GGGCTACCAACCACAT-1-10x  | 0.0987827  | 0.30163977 | 0.0042345  |
| 9mo_SIGAF3_GGGCTACGTCTTGCTC-1-10x  | 0.19859767 | 0.6570351  | 0.0012187  |
| 9mo_SIGAF3_GGGCTACGTCTTGTA-1-10x   | 0.0214329  | 0.0262326  | 3.69E-05   |
| 9mo_SIGAF3_GGGCTCACACGCAGTC-1-10x  | 0.13004896 | 0.4129646  | 0.0019639  |
| 9mo_SIGAF3_GGGCTCATCGAGAGCA-1-10x  | 0.11015052 | 0.3421154  | 0.0031181  |
| 9mo_SIGAF3_GGGCTCATCGTTCTAT-1-10x  | 0.2682366  | 0.90498745 | 0.00075594 |

|                                    |            |            |            |
|------------------------------------|------------|------------|------------|
| 9mo_SIGAF3_GGGTATTCACGCAGTC-1-10x  | 0.12373436 | 0.39048123 | 0.0021124  |
| 9mo_SIGAF3_GGGTATTCATGGGAAC-1-10x  | 0.05020892 | 0.12869084 | 0.00013566 |
| 9mo_SIGAF3_GGGTCACCAACCGTGC-1-10x  | 0.23879494 | 0.80015916 | 0.00088278 |
| 9mo_SIGAF3_GGGTGAACAGTTGAAA-1-10x  | 0.04232318 | 0.10061331 | 7.82E-05   |
| 9mo_SIGAF3_GGGTGAACATTCACAG-1-10x  | 0.285185   | 0.9653329  | 0.00075686 |
| 9mo_SIGAF3_GGGTGAAGTTTGGAGG-1-10x  | 0.09725759 | 0.29620957 | 0.0042943  |
| 9mo_SIGAF3_GGGTGAATCACGAACT-1-10x  | 0.06115346 | 0.16765933 | 0.00042799 |
| 9mo_SIGAF3_GGTAACTAGCCACTCG-1-10x  | 0.02245391 | 0.02986797 | 3.76E-05   |
| 9mo_SIGAF3_GGTAACTAGGAGAGTA-1-10x  | 0.13916405 | 0.44541925 | 0.0018772  |
| 9mo_SIGAF3_GGTAACTCAACAGAGC-1-10x  | 0.0505489  | 0.12990136 | 0.00014746 |
| 9mo_SIGAF3_GGTAACTGTCTCCCTA-1-10x  | 0.05245542 | 0.13668959 | 0.00017575 |
| 9mo_SIGAF3_GGTAATCCAGCGTACC-1-10x  | 0.02189484 | 0.02787736 | 3.69E-05   |
| 9mo_SIGAF3_GGTAGAGTCGCTGTTC-1-10x  | 0.2510179  | 0.84367955 | 0.00080923 |
| 9mo_SIGAF3_GGTCACGTCTCATAGG-1-10x  | 0.20829415 | 0.69155985 | 0.0011177  |
| 9mo_SIGAF3_GGTCTGGAGGTGCGAT-1-10x  | 0.05857982 | 0.15849577 | 0.00031414 |
| 9mo_SIGAF3_GGTCTGGTCCATCGTC-1-10x  | 0.15386328 | 0.4977565  | 0.0018575  |
| 9mo_SIGAF3_GGTGAAGAGGAATCGC-1-10x  | 0.0291683  | 0.05377484 | 4.42E-05   |
| 9mo_SIGAF3_GGTGAAGCAAGAGCTG-1-10x  | 0.19935276 | 0.65972364 | 0.0012085  |
| 9mo_SIGAF3_GGTGATTCATCGGGC-1-10x   | 0.03308528 | 0.06772141 | 5.00E-05   |
| 9mo_SIGAF3_GGTGATTTCCGCGGAT-1-10x  | 0.04624121 | 0.11456364 | 0.00010046 |
| 9mo_SIGAF3_GGTGGCTTCGCTGATA-1-10x  | 0.23724619 | 0.7946448  | 0.00088935 |
| 9mo_SIGAF3_GGTGTCGAGTTCGCAT-1-10x  | 0.05083788 | 0.13093029 | 0.00014746 |
| 9mo_SIGAF3_GGTGTCGGTTGCCATA-1-10x  | 0.0165872  | 0.00897929 | 3.38E-05   |
| 9mo_SIGAF3_GGTGTCGTCAACACCA-1-10x  | 0.2674964  | 0.9023519  | 0.00075705 |
| 9mo_SIGAF3_GGTGTTAAGATGAAGG-1-10x  | 0.03522742 | 0.07534857 | 5.58E-05   |
| 9mo_SIGAF3_GGTTCTCAGTGCCTCG-1-10x  | 0.04325091 | 0.10391654 | 8.29E-05   |
| 9mo_SIGAF3_GGTTGTACAACCGACC-1-10x  | 0.08778655 | 0.26248753 | 0.0040384  |
| 9mo_SIGAF3_GGTTGTAGTGCTGATT-1-10x  | 0.01969296 | 0.0200375  | 3.55E-05   |
| 9mo_SIGAF3_GGTTGTAGTTCTTCAT-1-10x  | 0.25495765 | 0.85770714 | 0.00079207 |
| 9mo_SIGAF3_GGTTGTATCAACCTTT-1-10x  | 0.09478402 | 0.28740233 | 0.0044051  |
| 9mo_SIGAF3_GTAACACGTTCAACGT-1-10x  | 0.13491386 | 0.4302863  | 0.0018953  |
| 9mo_SIGAF3_GTAAGTCAGGTAAGAG-1-10x  | 0.08603401 | 0.25624755 | 0.0039187  |
| 9mo_SIGAF3_GTAAGTCCATCGAGCC-1-10x  | 0.24336143 | 0.81641835 | 0.00085167 |
| 9mo_SIGAF3_GTAATCGAGCGGGTTA-1-10x  | 0.21356454 | 0.7103253  | 0.0010778  |
| 9mo_SIGAF3_GTAATCGTCAACGAGG-1-10x  | 0.08669028 | 0.25858423 | 0.0039187  |
| 9mo_SIGAF3_GTAATGCAGGAGAATG-1-10x  | 0.06819999 | 0.1927488  | 0.00097948 |
| 9mo_SIGAF3_GTAATGCCACCCTAAA-1-10x  | 0.09581271 | 0.291065   | 0.0043808  |
| 9mo_SIGAF3_GTAATGCGTCCTACGG-1-10x  | 0.0362686  | 0.07905574 | 5.82E-05   |
| 9mo_SIGAF3_GTACAACGTCTGGAA-1-10x   | 0.26092193 | 0.8789432  | 0.00076963 |
| 9mo_SIGAF3_GTACAACCTCATAACAG-1-10x | 0.08652903 | 0.2580101  | 0.0039187  |
| 9mo_SIGAF3_GTACAGTCACTGTCCT-1-10x  | 0.09280108 | 0.28034198 | 0.0044107  |

|                                    |            |            |            |
|------------------------------------|------------|------------|------------|
| 9mo_SIGAF3_GTAGAGGCAAGCAATA-1-10x  | 0.10255897 | 0.31508535 | 0.0039137  |
| 9mo_SIGAF3_GTAGAGGCATTCAGCA-1-10x  | 0.1860958  | 0.6125217  | 0.0013809  |
| 9mo_SIGAF3_GTAGAGGGTTTGTGG-1-10x   | 0.05492482 | 0.145482   | 0.00021164 |
| 9mo_SIGAF3_GTAGATCTCCCGTTCA-1-10x  | 0.09274357 | 0.2801372  | 0.0044107  |
| 9mo_SIGAF3_GTAGATCTCGCTACAA-1-10x  | 0.06900847 | 0.19562742 | 0.00097948 |
| 9mo_SIGAF3_GTAGCTACAACATCGT-1-10x  | 0.12014072 | 0.3776859  | 0.0022788  |
| 9mo_SIGAF3_GTAGCTACAAGCACCC-1-10x  | 0.14722307 | 0.47411376 | 0.0018716  |
| 9mo_SIGAF3_GTAGCTACATAATGCC-1-10x  | 0.11560797 | 0.36154687 | 0.002594   |
| 9mo_SIGAF3_GTAGGAGAGCTCGTGC-1-10x  | 0.02373516 | 0.0344299  | 3.83E-05   |
| 9mo_SIGAF3_GTAGGAGGTTCCCACT-1-10x  | 0.04791411 | 0.12052007 | 0.00011598 |
| 9mo_SIGAF3_GTATTGGAGGGAGTTC-1-10x  | 0.03856129 | 0.08721894 | 6.36E-05   |
| 9mo_SIGAF3_GTATTGGCACATATGC-1-10x  | 0.22067726 | 0.7356504  | 0.0010179  |
| 9mo_SIGAF3_GTATTGGGTGCGTTC-1-10x   | 0.16752474 | 0.54639864 | 0.0017056  |
| 9mo_SIGAF3_GTATTTTCAGCCAGAGT-1-10x | 0.15835543 | 0.513751   | 0.0018209  |
| 9mo_SIGAF3_GTATTTTCAGGAGTCTG-1-10x | 0.08092889 | 0.23807056 | 0.0029431  |
| 9mo_SIGAF3_GTCAAACAGCCGGAAT-1-10x  | 0.01636464 | 0.00818688 | 3.33E-05   |
| 9mo_SIGAF3_GTCAAACCAACGCATT-1-10x  | 0.11801614 | 0.37012124 | 0.0023898  |
| 9mo_SIGAF3_GTCAAACGTAGCGTCC-1-10x  | 0.11899294 | 0.3735992  | 0.0023317  |
| 9mo_SIGAF3_GTCAAACCTTACTGT-1-10x   | 0.0501843  | 0.12860319 | 0.00013566 |
| 9mo_SIGAF3_GTCAAGTAGAGAGCAA-1-10x  | 0.07628757 | 0.22154495 | 0.0020486  |
| 9mo_SIGAF3_GTCAAGTTCACATCAG-1-10x  | 0.01593216 | 0.00664701 | 3.33E-05   |
| 9mo_SIGAF3_GTCAAGTTCGTGGGTC-1-10x  | 0.24441336 | 0.8201638  | 0.00084583 |
| 9mo_SIGAF3_GTCACGGCAACGTATC-1-10x  | 0.08828031 | 0.26424557 | 0.0041422  |
| 9mo_SIGAF3_GTCACGGGTCTGTGAT-1-10x  | 0.07447057 | 0.21507543 | 0.0017292  |
| 9mo_SIGAF3_GTCACTCTCGGTCACG-1-10x  | 0.24746767 | 0.8310388  | 0.0008292  |
| 9mo_SIGAF3_GTCAGCGCACGTATAC-1-10x  | 0.26100132 | 0.8792259  | 0.00076963 |
| 9mo_SIGAF3_GTCATGACAGAATCGG-1-10x  | 0.03796111 | 0.085082   | 6.07E-05   |
| 9mo_SIGAF3_GTCATGATCTTAGCTT-1-10x  | 0.10981296 | 0.3409135  | 0.0031181  |
| 9mo_SIGAF3_GTCCACTAGGGTACAC-1-10x  | 0.02560129 | 0.04107435 | 4.00E-05   |
| 9mo_SIGAF3_GTCCACTCATGTGGTT-1-10x  | 0.02380953 | 0.03469471 | 3.83E-05   |
| 9mo_SIGAF3_GTCCACTCATTGACAC-1-10x  | 0.01959863 | 0.01970163 | 3.55E-05   |
| 9mo_SIGAF3_GTCCACTGTTCTTGCC-1-10x  | 0.2082777  | 0.69150126 | 0.0011177  |
| 9mo_SIGAF3_GTCCACTTCTCCTACG-1-10x  | 0.09057957 | 0.2724322  | 0.0042999  |
| 9mo_SIGAF3_GTCCCATAGCCTATCA-1-10x  | 0.24541391 | 0.8237263  | 0.00084014 |
| 9mo_SIGAF3_GTCCCATCATCAACCA-1-10x  | 0.01807217 | 0.01426659 | 3.44E-05   |
| 9mo_SIGAF3_GTCCCATGTACCTGTA-1-10x  | 0.05004319 | 0.12810075 | 0.00013566 |
| 9mo_SIGAF3_GTCCCATGTCCCTCAT-1-10x  | 0.2046109  | 0.67844546 | 0.0011518  |
| 9mo_SIGAF3_GTCCTCAAGACTACGG-1-10x  | 0.05548657 | 0.14748214 | 0.000233   |
| 9mo_SIGAF3_GTCCTCATCAGTGTGT-1-10x  | 0.04358366 | 0.10510131 | 8.29E-05   |
| 9mo_SIGAF3_GTCGAATGTGTTAAAG-1-10x  | 0.01599666 | 0.00687665 | 3.33E-05   |
| 9mo_SIGAF3_GTCGAATGTTGCATAC-1-10x  | 0.08000314 | 0.2347744  | 0.0027593  |

|                                    |            |            |            |
|------------------------------------|------------|------------|------------|
| 9mo_SIGAF3_GTCGTAAGTAGTGGCA-1-10x  | 0.03157588 | 0.06234712 | 4.83E-05   |
| 9mo_SIGAF3_GTCGTTCAGTAAGGGA-1-10x  | 0.1450486  | 0.46637148 | 0.0018716  |
| 9mo_SIGAF3_GTCTACCCACTGAGGA-1-10x  | 0.2813121  | 0.95154333 | 0.00075401 |
| 9mo_SIGAF3_GTCTACCTCTGTAAGC-1-10x  | 0.27479154 | 0.92832655 | 0.00075218 |
| 9mo_SIGAF3_GTCTAGAGTGGAACAC-1-10x  | 0.08673883 | 0.2587571  | 0.0039187  |
| 9mo_SIGAF3_GTCTGTCGTAECTCGAT-1-10x | 0.07531932 | 0.21809746 | 0.001885   |
| 9mo_SIGAF3_GTCTTTAAGTTCCTGA-1-10x  | 0.03130623 | 0.06138703 | 4.68E-05   |
| 9mo_SIGAF3_GTCTTTATCCTACAAG-1-10x  | 0.25616887 | 0.8620198  | 0.00078463 |
| 9mo_SIGAF3_GTGAGCCTCTGCGTCT-1-10x  | 0.11034545 | 0.34280944 | 0.0031181  |
| 9mo_SIGAF3_GTGAGCCTCTTCCCAG-1-10x  | 0.02857348 | 0.05165693 | 4.30E-05   |
| 9mo_SIGAF3_GTGAGGAAGTAGTGGC-1-10x  | 0.17247757 | 0.56403345 | 0.0016089  |
| 9mo_SIGAF3_GTGATGTAGACGTCGA-1-10x  | 0.27381298 | 0.92484236 | 0.00075233 |
| 9mo_SIGAF3_GTGCACGAGACATAGT-1-10x  | 0.07477714 | 0.21616702 | 0.001885   |
| 9mo_SIGAF3_GTGCACGCATTACGGT-1-10x  | 0.04754195 | 0.11919496 | 0.00011598 |
| 9mo_SIGAF3_GTGCAGCAGACCTCCG-1-10x  | 0.24463467 | 0.82095176 | 0.00084583 |
| 9mo_SIGAF3_GTGCAGCGTTCACGAT-1-10x  | 0.26192427 | 0.8825121  | 0.00076727 |
| 9mo_SIGAF3_GTGCAGCTCGTTGTGA-1-10x  | 0.05768756 | 0.15531883 | 0.00028394 |
| 9mo_SIGAF3_GTGCGTGAGAATCCCT-1-10x  | 0.20102426 | 0.6656751  | 0.0011888  |
| 9mo_SIGAF3_GTGCTGGAGACCCTTA-1-10x  | 0.07590368 | 0.22017811 | 0.0020486  |
| 9mo_SIGAF3_GTGCTGGAGGCCATAG-1-10x  | 0.10440048 | 0.32164213 | 0.0037215  |
| 9mo_SIGAF3_GTGCTGGGTAGTCGGA-1-10x  | 0.08926567 | 0.267754   | 0.0042295  |
| 9mo_SIGAF3_GTGCTTCAGACCAAAT-1-10x  | 0.04040895 | 0.09379763 | 7.01E-05   |
| 9mo_SIGAF3_GTGCTTCATCTGCGG-1-10x   | 0.01557887 | 0.00538908 | 3.33E-05   |
| 9mo_SIGAF3_GTGCTTCGTTACCTTT-1-10x  | 0.08802427 | 0.26333395 | 0.0041422  |
| 9mo_SIGAF3_GTGGAGAAGGTCGTGA-1-10x  | 0.1246503  | 0.39374247 | 0.0020803  |
| 9mo_SIGAF3_GTGGAGAAGTGCCCGT-1-10x  | 0.03468351 | 0.07341196 | 5.37E-05   |
| 9mo_SIGAF3_GTGGAGAGTCGGAACA-1-10x  | 0.19555646 | 0.6462068  | 0.0012511  |
| 9mo_SIGAF3_GTGCGTCACTGGACC-1-10x   | 0.01628358 | 0.00789826 | 3.33E-05   |
| 9mo_SIGAF3_GTGCGTCACTGACAT-1-10x   | 0.01552584 | 0.00520027 | 3.33E-05   |
| 9mo_SIGAF3_GTGGAAGCTGGCCT-1-10x    | 0.08222836 | 0.24269736 | 0.0033032  |
| 9mo_SIGAF3_GTGGAAGTAGCTTTG-1-10x   | 0.02234099 | 0.0294659  | 3.76E-05   |
| 9mo_SIGAF3_GTGGAAGTCTCACGG-1-10x   | 0.20733035 | 0.6881282  | 0.001126   |
| 9mo_SIGAF3_GTGGAAGTTCACGAT-1-10x   | 0.24594533 | 0.82561845 | 0.00083459 |
| 9mo_SIGAF3_GTGTTATCTTGTGCC-1-10x   | 0.04598864 | 0.11366434 | 0.00010046 |
| 9mo_SIGAF3_GTGTAACAGAAGTCAT-1-10x  | 0.23741469 | 0.79524475 | 0.00088935 |
| 9mo_SIGAF3_GTGTAACCAAATACGA-1-10x  | 0.0157886  | 0.00613585 | 3.33E-05   |
| 9mo_SIGAF3_GTGTAACGTTGAATCC-1-10x  | 0.24164146 | 0.81029433 | 0.00086374 |
| 9mo_SIGAF3_GTGCCTAGAGTCACG-1-10x   | 0.10681486 | 0.33023864 | 0.0034182  |
| 9mo_SIGAF3_GTGCCTGTTGAGCC-1-10x    | 0.04898461 | 0.12433162 | 0.00012523 |
| 9mo_SIGAF3_GTGTGATAGAAGAACG-1-10x  | 0.26954287 | 0.90963846 | 0.00075499 |
| 9mo_SIGAF3_GTGTGATAGGGTAGCT-1-10x  | 0.03171914 | 0.0628572  | 4.83E-05   |

|                                    |            |            |            |
|------------------------------------|------------|------------|------------|
| 9mo_SIGAF3_GTGTGATCAGACTCTA-1-10x  | 0.03731268 | 0.08277325 | 6.07E-05   |
| 9mo_SIGAF3_GTGTGATCAGTGTATC-1-10x  | 0.04913454 | 0.12486547 | 0.00012523 |
| 9mo_SIGAF3_GTGTGATGTAACAAGT-1-10x  | 0.08883827 | 0.26623225 | 0.0042295  |
| 9mo_SIGAF3_GTGTGATGTAACATGA-1-10x  | 0.02013428 | 0.02160883 | 3.55E-05   |
| 9mo_SIGAF3_GTGTGGCTCAAGCCAT-1-10x  | 0.02509839 | 0.03928373 | 4.00E-05   |
| 9mo_SIGAF3_GTGTTAGCAACCGCCA-1-10x  | 0.11663706 | 0.36521098 | 0.0025211  |
| 9mo_SIGAF3_GTGTTAGGTGACTCTA-1-10x  | 0.05550326 | 0.14754155 | 0.000233   |
| 9mo_SIGAF3_GTGTTCGTCAACGCC-1-10x   | 0.23191674 | 0.77566904 | 0.00093066 |
| 9mo_SIGAF3_GTGTTCCTCCCAGCGA-1-10x  | 0.0899162  | 0.27007025 | 0.0042999  |
| 9mo_SIGAF3_GTTACAGAGATCGGTG-1-10x  | 0.09704235 | 0.2954432  | 0.0043435  |
| 9mo_SIGAF3_GTTACAGAGCACCCAC-1-10x  | 0.25452903 | 0.856181   | 0.00079207 |
| 9mo_SIGAF3_GTTACAGCATCTAGAC-1-10x  | 0.19726464 | 0.6522888  | 0.0012292  |
| 9mo_SIGAF3_GTTACAGTCGGACTTA-1-10x  | 0.18039152 | 0.59221137 | 0.001475   |
| 9mo_SIGAF3_GTTACCCAGATCCCAT-1-10x  | 0.06122533 | 0.16791521 | 0.00042799 |
| 9mo_SIGAF3_GTTACCCAGTAGACAT-1-10x  | 0.07068807 | 0.2016077  | 0.0011935  |
| 9mo_SIGAF3_GTTACGAAGGTTCCAT-1-10x  | 0.25475574 | 0.85698825 | 0.00079207 |
| 9mo_SIGAF3_GTTACGAGTATGAGGC-1-10x  | 0.02360074 | 0.03395129 | 3.83E-05   |
| 9mo_SIGAF3_GTTACGATCTACAGGT-1-10x  | 0.06192777 | 0.1704163  | 0.00047505 |
| 9mo_SIGAF3_GTTAGTGGTGGACCAA-1-10x  | 0.11123326 | 0.3459705  | 0.0030221  |
| 9mo_SIGAF3_GTTAGTGGTTCGAACT-1-10x  | 0.08105158 | 0.2385074  | 0.0029431  |
| 9mo_SIGAF3_GTTAGTGGTTGTCATG-1-10x  | 0.05549459 | 0.14751069 | 0.000233   |
| 9mo_SIGAF3_GTTCCGTAGTCATAGA-1-10x  | 0.0339094  | 0.0706557  | 5.17E-05   |
| 9mo_SIGAF3_GTTCCGTCACAGTCGC-1-10x  | 0.08444025 | 0.25057292 | 0.0036353  |
| 9mo_SIGAF3_GTTCCGTGTTTGGCTA-1-10x  | 0.27103472 | 0.91495025 | 0.00075352 |
| 9mo_SIGAF3_GTTTCGCTCAGGGAATC-1-10x | 0.0487286  | 0.1234201  | 0.00012523 |
| 9mo_SIGAF3_GTTTCGCTTCGCATTAG-1-10x | 0.0436395  | 0.10530014 | 8.29E-05   |
| 9mo_SIGAF3_GTTCTATAGAATCGTA-1-10x  | 0.08240673 | 0.24333248 | 0.0033032  |
| 9mo_SIGAF3_GTTCTATCAACAAGAT-1-10x  | 0.08269838 | 0.2443709  | 0.0033032  |
| 9mo_SIGAF3_GTTGAACAGTCATCCA-1-10x  | 0.05104505 | 0.1316679  | 0.00014746 |
| 9mo_SIGAF3_GTTGAACCAAGTATAG-1-10x  | 0.01888321 | 0.01715435 | 3.49E-05   |
| 9mo_SIGAF3_GTTGAACTCGTGACTA-1-10x  | 0.2124015  | 0.7061842  | 0.0010856  |
| 9mo_SIGAF3_GTTGCTCGTTATGGTC-1-10x  | 0.14598924 | 0.46972063 | 0.0018716  |
| 9mo_SIGAF3_GTTGCTCGTTGGCTAT-1-10x  | 0.03252085 | 0.06571174 | 5.00E-05   |
| 9mo_SIGAF3_GTTGTAGAGCAAGCCA-1-10x  | 0.03546518 | 0.07619512 | 5.58E-05   |
| 9mo_SIGAF3_GTTGTAGGTCACTCAA-1-10x  | 0.03621595 | 0.07886827 | 5.82E-05   |
| 9mo_SIGAF3_GTTGTAGGTGGTTTAC-1-10x  | 0.08420436 | 0.24973302 | 0.0036353  |
| 9mo_SIGAF3_GTTGTCCAGGACGAT-1-10x   | 0.01870839 | 0.01653187 | 3.49E-05   |
| 9mo_SIGAF3_GTTGTCCGTTAAGACA-1-10x  | 0.04478971 | 0.10939552 | 9.39E-05   |
| 9mo_SIGAF3_GTTGTGACACGGTGTC-1-10x  | 0.09405261 | 0.2847981  | 0.0044154  |
| 9mo_SIGAF3_GTTGTGAGTGGTCCCA-1-10x  | 0.02745482 | 0.0476739  | 4.19E-05   |
| 9mo_SIGAF3_GTTTACTCACAGCCAC-1-10x  | 0.0169163  | 0.01015108 | 3.38E-05   |



|                                    |            |            |            |
|------------------------------------|------------|------------|------------|
| 9mo_SIGAF3_GTTTACTGTCTACGTA-1-10x  | 0.04527808 | 0.11113436 | 9.39E-05   |
| 9mo_SIGAF3_GTTTGGATCCGACAGC-1-10x  | 0.22180039 | 0.73964936 | 0.0010106  |
| 9mo_SIGAF3_TAACACGGTTCATCGA-1-10x  | 0.28749618 | 0.97356194 | 0.00075864 |
| 9mo_SIGAF3_TAACGACCACGGGTAA-1-10x  | 0.02458938 | 0.03747139 | 3.91E-05   |
| 9mo_SIGAF3_TAACTTCAGACGGATC-1-10x  | 0.04753907 | 0.11918473 | 0.00011598 |
| 9mo_SIGAF3_TAACTTCTCCTCTTTC-1-10x  | 0.27022132 | 0.9120541  | 0.00075418 |
| 9mo_SIGAF3_TAAGCACAGGTGATCG-1-10x  | 0.01926347 | 0.01850827 | 3.55E-05   |
| 9mo_SIGAF3_TAAGCACCAGGTCCGT-1-10x  | 0.19742742 | 0.6528684  | 0.0012292  |
| 9mo_SIGAF3_TAAGCCAAGGTCACTT-1-10x  | 0.01893317 | 0.01733222 | 3.49E-05   |
| 9mo_SIGAF3_TAAGCCAGTATGAGAT-1-10x  | 0.09697808 | 0.29521435 | 0.0043435  |
| 9mo_SIGAF3_TAAGCGTTCCTGCTG-1-10x   | 0.02033138 | 0.02231062 | 3.62E-05   |
| 9mo_SIGAF3_TAAGTCGTCCACTTTA-1-10x  | 0.10189126 | 0.31270793 | 0.0040036  |
| 9mo_SIGAF3_TAATCTCTCGTCTATC-1-10x  | 0.06069879 | 0.16604045 | 0.00042799 |
| 9mo_SIGAF3_TAATTCACCGTGGT-1-10x    | 0.23427539 | 0.7840671  | 0.00091657 |
| 9mo_SIGAF3_TAATTCCTCCATCTGC-1-10x  | 0.0171776  | 0.01108144 | 3.38E-05   |
| 9mo_SIGAF3_TACAACGAGCAGCAGT-1-10x  | 0.24750602 | 0.8311753  | 0.00082396 |
| 9mo_SIGAF3_TACATTCTCCGTGGGT-1-10x  | 0.05401525 | 0.14224343 | 0.00021164 |
| 9mo_SIGAF3_TACCCACGTTGCAACT-1-10x  | 0.27645928 | 0.9342646  | 0.00075214 |
| 9mo_SIGAF3_TACCCGTGTAATGCGG-1-10x  | 0.05027992 | 0.12894365 | 0.00014746 |
| 9mo_SIGAF3_TACCCGTGTCTCGGAC-1-10x  | 0.04915843 | 0.12495051 | 0.00012523 |
| 9mo_SIGAF3_TACCCGTTTCGCGATCG-1-10x | 0.12047563 | 0.37887836 | 0.0022788  |
| 9mo_SIGAF3_TACCGAACAGGCTTGC-1-10x  | 0.2280219  | 0.76180136 | 0.00095947 |
| 9mo_SIGAF3_TACCGAAGTTAGGCC-1-10x   | 0.01651219 | 0.00871223 | 3.38E-05   |
| 9mo_SIGAF3_TACCGGGAGCATCAAA-1-10x  | 0.26877987 | 0.9069218  | 0.00075594 |
| 9mo_SIGAF3_TACCGGGTCATGCGGC-1-10x  | 0.0380538  | 0.08541203 | 6.36E-05   |
| 9mo_SIGAF3_TACCGGGTCGCGTCTGA-1-10x | 0.24527097 | 0.82321733 | 0.00084014 |
| 9mo_SIGAF3_TACCTGCGTACAGAAT-1-10x  | 0.03499938 | 0.07453663 | 5.37E-05   |
| 9mo_SIGAF3_TACCTGCGTACCGGCT-1-10x  | 0.02355809 | 0.03379944 | 3.83E-05   |
| 9mo_SIGAF3_TACCTGCGTATGATCC-1-10x  | 0.07912739 | 0.23165625 | 0.002576   |
| 9mo_SIGAF3_TACCTGCTCCATAAG-1-10x   | 0.16928163 | 0.55265415 | 0.0016744  |
| 9mo_SIGAF3_TACGCTCGTCCAGAAG-1-10x  | 0.07427917 | 0.21439399 | 0.0017292  |
| 9mo_SIGAF3_TACGGTAGTTTGCAGT-1-10x  | 0.04366137 | 0.10537802 | 8.81E-05   |
| 9mo_SIGAF3_TACGTCCAGAGGGTAA-1-10x  | 0.04136987 | 0.09721902 | 7.40E-05   |
| 9mo_SIGAF3_TACGTCCAGCGGTAAC-1-10x  | 0.02120368 | 0.02541647 | 3.69E-05   |
| 9mo_SIGAF3_TACGTCCAGTACGCC-1-10x   | 0.04776161 | 0.11997709 | 0.00011598 |
| 9mo_SIGAF3_TACTTACGTGGAACAC-1-10x  | 0.1914889  | 0.63172406 | 0.0012985  |
| 9mo_SIGAF3_TACTTCAAGTTGGAGC-1-10x  | 0.03688006 | 0.08123288 | 5.82E-05   |
| 9mo_SIGAF3_TACTTCAGTAAGTAGT-1-10x  | 0.03999073 | 0.09230854 | 7.01E-05   |
| 9mo_SIGAF3_TACTTCAGTGACAGGT-1-10x  | 0.17913526 | 0.5877384  | 0.0014915  |
| 9mo_SIGAF3_TACTTCAGTTCGTTCC-1-10x  | 0.09293384 | 0.28081468 | 0.0044107  |
| 9mo_SIGAF3_TACTTCATCTCATTAC-1-10x  | 0.07952204 | 0.2330614  | 0.0027593  |

|                                    |            |            |            |
|------------------------------------|------------|------------|------------|
| 9mo_SIGAF3_TACTTGTAGAAGTATC-1-10x  | 0.02140789 | 0.02614355 | 3.69E-05   |
| 9mo_SIGAF3_TACTTGTAGTTACGAA-1-10x  | 0.21902198 | 0.7297567  | 0.0010326  |
| 9mo_SIGAF3_TAGACCAGTACCGGCT-1-10x  | 0.22898455 | 0.76522887 | 0.0009522  |
| 9mo_SIGAF3_TAGACCAGTGATACTC-1-10x  | 0.07776724 | 0.22681336 | 0.0023954  |
| 9mo_SIGAF3_TAGACTGCAGGCACTC-1-10x  | 0.07118499 | 0.20337702 | 0.0013138  |
| 9mo_SIGAF3_TAGACTGGTATGAGCG-1-10x  | 0.04653993 | 0.11562724 | 0.00010777 |
| 9mo_SIGAF3_TAGACTGGTTCGTAAC-1-10x  | 0.09306009 | 0.28126422 | 0.0044107  |
| 9mo_SIGAF3_TAGAGTCAGAGAGCAA-1-10x  | 0.01853281 | 0.01590673 | 3.49E-05   |
| 9mo_SIGAF3_TAGATCGAGCTTGTTG-1-10x  | 0.04710314 | 0.11763258 | 0.00010777 |
| 9mo_SIGAF3_TAGATCGCAGACTGCC-1-10x  | 0.24808306 | 0.8332299  | 0.00082396 |
| 9mo_SIGAF3_TAGATCGTCCAATCCC-1-10x  | 0.04058009 | 0.09440697 | 7.01E-05   |
| 9mo_SIGAF3_TAGCACAAGCGCTGCT-1-10x  | 0.07081858 | 0.2020724  | 0.0011935  |
| 9mo_SIGAF3_TAGGAGGCATTGAAGA-1-10x  | 0.23014386 | 0.76935667 | 0.00094498 |
| 9mo_SIGAF3_TAGGAGGTCGACATTG-1-10x  | 0.03414557 | 0.07149661 | 5.17E-05   |
| 9mo_SIGAF3_TAGGGTTCATCCAATG-1-10x  | 0.03535082 | 0.07578796 | 5.58E-05   |
| 9mo_SIGAF3_TAGGGTTGTCAGACGA-1-10x  | 0.03184915 | 0.06332011 | 4.83E-05   |
| 9mo_SIGAF3_TAGGGTTGTTCTCGCT-1-10x  | 0.11333764 | 0.35346326 | 0.0027534  |
| 9mo_SIGAF3_TAGGGTTTCAAGCTGT-1-10x  | 0.06069505 | 0.16602714 | 0.00042799 |
| 9mo_SIGAF3_TAGGGTTTCATGCCCT-1-10x  | 0.12768191 | 0.40453663 | 0.0020026  |
| 9mo_SIGAF3_TAGGGTTTCCCGTAAA-1-10x  | 0.01922925 | 0.01838644 | 3.49E-05   |
| 9mo_SIGAF3_TAGGTACTCGTGTGAT-1-10x  | 0.02716334 | 0.04663608 | 4.19E-05   |
| 9mo_SIGAF3_TAGTGCAGTCGAAGCA-1-10x  | 0.10539748 | 0.32519197 | 0.0036214  |
| 9mo_SIGAF3_TAGTGCAGTTTACTTC-1-10x  | 0.04225401 | 0.10036705 | 7.82E-05   |
| 9mo_SIGAF3_TATACCTGTATCGCAT-1-10x  | 0.05072279 | 0.13052051 | 0.00014746 |
| 9mo_SIGAF3_TATATCCAGGAGCAAAA-1-10x | 0.12341221 | 0.3893342  | 0.0021479  |
| 9mo_SIGAF3_TATATCCAGTTCCAGT-1-10x  | 0.04608779 | 0.1140174  | 0.00010046 |
| 9mo_SIGAF3_TATCCTAAGCTATCTG-1-10x  | 0.07288969 | 0.20944668 | 0.0015819  |
| 9mo_SIGAF3_TATCCTAAGTCTTCGA-1-10x  | 0.09244856 | 0.2790868  | 0.0043903  |
| 9mo_SIGAF3_TATCCTAAGTTGGCTT-1-10x  | 0.24336332 | 0.8164251  | 0.00085167 |
| 9mo_SIGAF3_TATCGCCAGCCTTGAT-1-10x  | 0.22405685 | 0.7476836  | 0.00098869 |
| 9mo_SIGAF3_TATCGCCCAACCACAT-1-10x  | 0.23232043 | 0.7771064  | 0.00093066 |
| 9mo_SIGAF3_TATCGCCAGAAACCG-1-10x   | 0.2646432  | 0.89219296 | 0.00076135 |
| 9mo_SIGAF3_TATCGCCATGTTACG-1-10x   | 0.01758364 | 0.01252717 | 3.44E-05   |
| 9mo_SIGAF3_TATCGCCTCTGGACTA-1-10x  | 0.0212578  | 0.02560917 | 3.69E-05   |
| 9mo_SIGAF3_TATCTTGGTGAGGCAT-1-10x  | 0.25364512 | 0.85303384 | 0.00079608 |
| 9mo_SIGAF3_TATGTTTCGTATCGCAT-1-10x | 0.21561097 | 0.7176117  | 0.001055   |
| 9mo_SIGAF3_TATTCCAGTAGCTCGC-1-10x  | 0.27591237 | 0.9323173  | 0.00075214 |
| 9mo_SIGAF3_TATTCCAGTGCATGAG-1-10x  | 0.03590574 | 0.07776377 | 5.58E-05   |
| 9mo_SIGAF3_TATTCCAGTGGGATTG-1-10x  | 0.13201407 | 0.41996145 | 0.0019219  |
| 9mo_SIGAF3_TATTGCTAGAGACAAG-1-10x  | 0.08545619 | 0.2541902  | 0.0037839  |
| 9mo_SIGAF3_TATTGGGCAATGAACA-1-10x  | 0.04566601 | 0.11251563 | 0.00010046 |

|                                    |            |            |            |
|------------------------------------|------------|------------|------------|
| 9mo_SIGAF3_TATTGGGGTCATGGCC-1-10x  | 0.02303433 | 0.03193457 | 3.83E-05   |
| 9mo_SIGAF3_TATTTGAGAGAGCCT-1-10x   | 0.07250733 | 0.20808525 | 0.0014433  |
| 9mo_SIGAF3_TCAAGACCACCTATCC-1-10x  | 0.04829754 | 0.12188527 | 0.00011598 |
| 9mo_SIGAF3_TCAAGACGTACGTGAG-1-10x  | 0.05007801 | 0.12822473 | 0.00013566 |
| 9mo_SIGAF3_TCAAGCAAGCTGCCTG-1-10x  | 0.14438881 | 0.46402225 | 0.0018716  |
| 9mo_SIGAF3_TCAAGTGAGAGAAGGT-1-10x  | 0.02713576 | 0.04653787 | 4.19E-05   |
| 9mo_SIGAF3_TCAAGTGAGATTCGAA-1-10x  | 0.01785177 | 0.01348186 | 3.44E-05   |
| 9mo_SIGAF3_TCAAGTGCACCAGCTG-1-10x  | 0.04168604 | 0.09834475 | 7.40E-05   |
| 9mo_SIGAF3_TCAAGTGCATCTTAGG-1-10x  | 0.01910261 | 0.01793551 | 3.49E-05   |
| 9mo_SIGAF3_TCACAAGCAGGATCTT-1-10x  | 0.20975217 | 0.6967512  | 0.0011095  |
| 9mo_SIGAF3_TCACATTCACCGGTCA-1-10x  | 0.08875136 | 0.26592278 | 0.0042295  |
| 9mo_SIGAF3_TCACGCTAGGCTAAAT-1-10x  | 0.2813994  | 0.9518541  | 0.00075401 |
| 9mo_SIGAF3_TCACGCTCACCCAACG-1-10x  | 0.04805632 | 0.12102643 | 0.00011598 |
| 9mo_SIGAF3_TCACGCTCACTCGATA-1-10x  | 0.08877072 | 0.26599172 | 0.0042295  |
| 9mo_SIGAF3_TCACGGGGTCCTTAAG-1-10x  | 0.07328776 | 0.210864   | 0.0015819  |
| 9mo_SIGAF3_TCACTCGAGTGAACAT-1-10x  | 0.18457511 | 0.6071072  | 0.0013959  |
| 9mo_SIGAF3_TCACTCGCAGCACCCA-1-10x  | 0.01660337 | 0.00903686 | 3.38E-05   |
| 9mo_SIGAF3_TCAGCAACAGAGTTCT-1-10x  | 0.01544605 | 0.0049162  | 3.27E-05   |
| 9mo_SIGAF3_TCAGCCTTCCGCAAAT-1-10x  | 0.09591992 | 0.29144675 | 0.0043808  |
| 9mo_SIGAF3_TCAGCCTTCTCACAT-1-10x   | 0.03317048 | 0.06802478 | 5.00E-05   |
| 9mo_SIGAF3_TCAGGGCGTTCAGTAC-1-10x  | 0.0894779  | 0.26850966 | 0.0042295  |
| 9mo_SIGAF3_TCAGGTACACCGTGGT-1-10x  | 0.25633147 | 0.8625987  | 0.00078463 |
| 9mo_SIGAF3_TCAGGTAGTCCACGCA-1-10x  | 0.0181082  | 0.01439489 | 3.44E-05   |
| 9mo_SIGAF3_TCAGGTAGTCGCGTCA-1-10x  | 0.02153053 | 0.02658022 | 3.69E-05   |
| 9mo_SIGAF3_TCAGTCCAGAATTGCA-1-10x  | 0.04506747 | 0.11038448 | 9.39E-05   |
| 9mo_SIGAF3_TCAGTCCAGGATGCGT-1-10x  | 0.04738521 | 0.11863689 | 0.00010777 |
| 9mo_SIGAF3_TCAGTCCGTTTCGTAAC-1-10x | 0.08423743 | 0.24985076 | 0.0036353  |
| 9mo_SIGAF3_TCAGTCCCTCACTGAAC-1-10x | 0.01532607 | 0.004489   | 3.27E-05   |
| 9mo_SIGAF3_TCAGTCCCTCTAAGG-1-10x   | 0.09440021 | 0.28603578 | 0.0044051  |
| 9mo_SIGAF3_TCAGTGATCCTGTACC-1-10x  | 0.02327736 | 0.03279988 | 3.83E-05   |
| 9mo_SIGAF3_TCAGTTTAGATAACGT-1-10x  | 0.01925619 | 0.01848234 | 3.55E-05   |
| 9mo_SIGAF3_TCAGTTTCACCCTGAG-1-10x  | 0.0483322  | 0.1220087  | 0.00011598 |
| 9mo_SIGAF3_TCATACTAGCCGAACA-1-10x  | 0.24750884 | 0.8311854  | 0.00082396 |
| 9mo_SIGAF3_TCATACTCATCGGTTA-1-10x  | 0.1424662  | 0.45717672 | 0.0018718  |
| 9mo_SIGAF3_TCATACTGTAGTCCTA-1-10x  | 0.08132146 | 0.23946834 | 0.0031253  |
| 9mo_SIGAF3_TCATACTTCGTGGCGT-1-10x  | 0.11952986 | 0.3755109  | 0.0023317  |
| 9mo_SIGAF3_TCATATCAGGTTTCATC-1-10x | 0.0357047  | 0.07704795 | 5.58E-05   |
| 9mo_SIGAF3_TCATATCTCAAACCTG-1-10x  | 0.13823582 | 0.4421143  | 0.0018802  |
| 9mo_SIGAF3_TCATATCTCCTAGCTC-1-10x  | 0.07558252 | 0.2190346  | 0.001885   |
| 9mo_SIGAF3_TCATCATAGCTTTCTT-1-10x  | 0.11253338 | 0.35059965 | 0.0028393  |
| 9mo_SIGAF3_TCATCCGAGTTCTACG-1-10x  | 0.01675118 | 0.00956316 | 3.38E-05   |

|                                    |            |            |            |
|------------------------------------|------------|------------|------------|
| 9mo_SIGAF3_TCATCCGGTACGCTAT-1-10x  | 0.07842923 | 0.22917041 | 0.002576   |
| 9mo_SIGAF3_TCATGAGAGCTCTTCC-1-10x  | 0.0688041  | 0.19489975 | 0.00097948 |
| 9mo_SIGAF3_TCATGAGGTTGCAAGG-1-10x  | 0.0930678  | 0.28129166 | 0.0044107  |
| 9mo_SIGAF3_TCATGAGTCCAAGTAG-1-10x  | 0.25669622 | 0.86389744 | 0.00078463 |
| 9mo_SIGAF3_TCATGCCAGGAACTCG-1-10x  | 0.04732839 | 0.1184346  | 0.00010777 |
| 9mo_SIGAF3_TCATGCCAGTGGACTG-1-10x  | 0.2620258  | 0.88287365 | 0.00076727 |
| 9mo_SIGAF3_TCATGCCGTAGGACTG-1-10x  | 0.04416548 | 0.10717292 | 8.81E-05   |
| 9mo_SIGAF3_TCATGCCTCGTTGTTT-1-10x  | 0.09623436 | 0.29256633 | 0.0043808  |
| 9mo_SIGAF3_TCATGGACAGCCTTCT-1-10x  | 0.0190072  | 0.01759579 | 3.49E-05   |
| 9mo_SIGAF3_TCATGTTCAAACCATC-1-10x  | 0.08440376 | 0.25044298 | 0.0036353  |
| 9mo_SIGAF3_TCATTACAGATGTAGT-1-10x  | 0.2317558  | 0.775096   | 0.00093066 |
| 9mo_SIGAF3_TCATTACCATAGGCGA-1-10x  | 0.16351911 | 0.53213644 | 0.001763   |
| 9mo_SIGAF3_TCATTATCACAGTGT-1-10x   | 0.10385326 | 0.3196937  | 0.0037215  |
| 9mo_SIGAF3_TCATTGTGTAGAGGAA-1-10x  | 0.07185059 | 0.2057469  | 0.0014433  |
| 9mo_SIGAF3_TCATTGTTCTAGGCAT-1-10x  | 0.05318197 | 0.13927649 | 0.00019264 |
| 9mo_SIGAF3_TCATTTGGTGCACATT-1-10x  | 0.07435192 | 0.214653   | 0.0017292  |
| 9mo_SIGAF3_TCCACCACAGTCTACA-1-10x  | 0.08289901 | 0.24508525 | 0.0033032  |
| 9mo_SIGAF3_TCCACGTAGTTGCCCG-1-10x  | 0.1083082  | 0.33555573 | 0.0033168  |
| 9mo_SIGAF3_TCCACGTGTCACTCGG-1-10x  | 0.19395015 | 0.64048743 | 0.0012624  |
| 9mo_SIGAF3_TCCACGTTTCATCGCTC-1-10x | 0.04160224 | 0.09804639 | 7.40E-05   |
| 9mo_SIGAF3_TCCAGAAAGACCATAA-1-10x  | 0.02968791 | 0.05562491 | 4.55E-05   |
| 9mo_SIGAF3_TCCAGAAAGGTGCCAA-1-10x  | 0.10792514 | 0.33419183 | 0.0033168  |
| 9mo_SIGAF3_TCCAGAACAGCTGAAG-1-10x  | 0.14159244 | 0.45406568 | 0.0018724  |
| 9mo_SIGAF3_TCCAGAATCGTGGCTG-1-10x  | 0.01704179 | 0.01059788 | 3.38E-05   |
| 9mo_SIGAF3_TCCAGAATCTCTAAGG-1-10x  | 0.02127238 | 0.02566106 | 3.69E-05   |
| 9mo_SIGAF3_TCCATCGAGAGGTTTA-1-10x  | 0.24628587 | 0.8268309  | 0.00083459 |
| 9mo_SIGAF3_TCCATCGTTCGATTGAC-1-10x | 0.05707201 | 0.15312715 | 0.00028394 |
| 9mo_SIGAF3_TCCATGCAGCCGATTT-1-10x  | 0.10563745 | 0.32604644 | 0.0036214  |
| 9mo_SIGAF3_TCCATGCAGCTCATAC-1-10x  | 0.04524231 | 0.11100703 | 9.39E-05   |
| 9mo_SIGAF3_TCCATGCTCTCTTGCG-1-10x  | 0.02284725 | 0.03126848 | 3.76E-05   |
| 9mo_SIGAF3_TCCCACAGTCGACTTA-1-10x  | 0.06121502 | 0.16787854 | 0.00042799 |
| 9mo_SIGAF3_TCCCACATCCTACCGT-1-10x  | 0.27095765 | 0.91467583 | 0.00075418 |
| 9mo_SIGAF3_TCCCATGAGCGACATG-1-10x  | 0.08633666 | 0.25732514 | 0.0039187  |
| 9mo_SIGAF3_TCCCATGTACCTCTG-1-10x   | 0.22639716 | 0.7560164  | 0.00097406 |
| 9mo_SIGAF3_TCCGAAACAGGGATAC-1-10x  | 0.01612942 | 0.00734934 | 3.33E-05   |
| 9mo_SIGAF3_TCCGATCGTGTGTGTT-1-10x  | 0.2094832  | 0.6957935  | 0.0011095  |
| 9mo_SIGAF3_TCCGGGAAGGGACAGG-1-10x  | 0.29136696 | 0.987344   | 0.00076269 |
| 9mo_SIGAF3_TCCGGGAAGTCTTCCC-1-10x  | 0.1861161  | 0.61259395 | 0.0013809  |
| 9mo_SIGAF3_TCCGTGTCAAGTGGCA-1-10x  | 0.17439845 | 0.5708728  | 0.0015753  |
| 9mo_SIGAF3_TCCGTGTATGCCGCA-1-10x   | 0.1568349  | 0.508337   | 0.0018385  |
| 9mo_SIGAF3_TCCGTGTGTTCTTGTT-1-10x  | 0.24518888 | 0.82292503 | 0.00084014 |

|                                    |            |            |            |
|------------------------------------|------------|------------|------------|
| 9mo_SIGAF3_TCCGTGTTCCACAAGT-1-10x  | 0.11438162 | 0.3571804  | 0.0026715  |
| 9mo_SIGAF3_TCCTAATAGAATTCAG-1-10x  | 0.04503155 | 0.11025658 | 9.39E-05   |
| 9mo_SIGAF3_TCCTCCCTCGTTCCCA-1-10x  | 0.07674799 | 0.2231843  | 0.0022191  |
| 9mo_SIGAF3_TCCTCGACAAGTGGGT-1-10x  | 0.02026559 | 0.02207635 | 3.62E-05   |
| 9mo_SIGAF3_TCCTCGATCGTAACCA-1-10x  | 0.08506911 | 0.252812   | 0.0037839  |
| 9mo_SIGAF3_TCCTCTTCAACTCCCT-1-10x  | 0.03174248 | 0.06294031 | 4.83E-05   |
| 9mo_SIGAF3_TCCTCTTCAATTCGTG-1-10x  | 0.02017724 | 0.02176178 | 3.62E-05   |
| 9mo_SIGAF3_TCCTGCAAGAATTGTG-1-10x  | 0.04668719 | 0.11615158 | 0.00010777 |
| 9mo_SIGAF3_TCCTGCAAGCTATCTG-1-10x  | 0.16880278 | 0.55094916 | 0.0016744  |
| 9mo_SIGAF3_TCCTTTCCATCCGATA-1-10x  | 0.04882613 | 0.12376735 | 0.00012523 |
| 9mo_SIGAF3_TCCTTTCGTTCCGCTT-1-10x  | 0.07846115 | 0.22928406 | 0.002576   |
| 9mo_SIGAF3_TCGAAGTAGCCTAGGA-1-10x  | 0.0197295  | 0.0201676  | 3.55E-05   |
| 9mo_SIGAF3_TCGACCTGTGTACGCC-1-10x  | 0.05094245 | 0.13130261 | 0.00014746 |
| 9mo_SIGAF3_TCGACCTTCACTTCTA-1-10x  | 0.09073543 | 0.27298716 | 0.0043535  |
| 9mo_SIGAF3_TCGACGGAGGTCCTG-1-10x   | 0.02797123 | 0.04951263 | 4.30E-05   |
| 9mo_SIGAF3_TCGACGGCAGTGAGCA-1-10x  | 0.04733543 | 0.11845964 | 0.00010777 |
| 9mo_SIGAF3_TCGATTTTCTTAATCC-1-10x  | 0.23204254 | 0.77611697 | 0.00093066 |
| 9mo_SIGAF3_TCGCACTCACACGTGC-1-10x  | 0.27169108 | 0.9172873  | 0.00075352 |
| 9mo_SIGAF3_TCGCAGGAGGGTCTTT-1-10x  | 0.01656575 | 0.00890294 | 3.38E-05   |
| 9mo_SIGAF3_TCGCAGGGTTAAGGAT-1-10x  | 0.03814907 | 0.08575125 | 6.36E-05   |
| 9mo_SIGAF3_TCGCAGGTCAAGCAG-1-10x   | 0.06078142 | 0.16633466 | 0.00042799 |
| 9mo_SIGAF3_TCGCAGGTCGATCCCT-1-10x  | 0.0810172  | 0.23838498 | 0.0029431  |
| 9mo_SIGAF3_TCGCTCAAGACCAACG-1-10x  | 0.26312375 | 0.88678294 | 0.00076511 |
| 9mo_SIGAF3_TCGCTCACACGTCATA-1-10x  | 0.04983896 | 0.12737359 | 0.00013566 |
| 9mo_SIGAF3_TCGCTCAGTATCCCAA-1-10x  | 0.0367115  | 0.08063272 | 5.82E-05   |
| 9mo_SIGAF3_TCGGATACAGAGTTCT-1-10x  | 0.09246779 | 0.27915528 | 0.0043903  |
| 9mo_SIGAF3_TCGGATATCAAGAGGC-1-10x  | 0.02593492 | 0.04226226 | 4.09E-05   |
| 9mo_SIGAF3_TCGGGTGCAGCTCTGG-1-10x  | 0.04382713 | 0.1059682  | 8.81E-05   |
| 9mo_SIGAF3_TCGGGTGGTTAAGAAC-1-10x  | 0.03514212 | 0.07504486 | 5.37E-05   |
| 9mo_SIGAF3_TCGTAGACAAGGCGTA-1-10x  | 0.02593291 | 0.0422551  | 4.09E-05   |
| 9mo_SIGAF3_TCGTAGATCGAATGCT-1-10x  | 0.12467568 | 0.39383283 | 0.0020803  |
| 9mo_SIGAF3_TCGTCCAAGCGTCAAG-1-10x  | 0.05314421 | 0.13914205 | 0.00019264 |
| 9mo_SIGAF3_TCGTCCATCGCACGAC-1-10x  | 0.03896681 | 0.08866282 | 6.67E-05   |
| 9mo_SIGAF3_TCGTGCTTCACTTTGT-1-10x  | 0.19216712 | 0.6341389  | 0.0012861  |
| 9mo_SIGAF3_TCGTGGGAGGGACTGT-1-10x  | 0.04354028 | 0.10494688 | 8.29E-05   |
| 9mo_SIGAF3_TCTAACTGTTGAGAGC-1-10x  | 0.12170654 | 0.38326108 | 0.0021873  |
| 9mo_SIGAF3_TCTACATGTTCTACC-1-10x   | 0.04286224 | 0.10253268 | 8.29E-05   |
| 9mo_SIGAF3_TCTATCAGTATCTTT-1-10x   | 0.26071075 | 0.8781913  | 0.00076963 |
| 9mo_SIGAF3_TCTCACGCACGTTCCGG-1-10x | 0.23669244 | 0.7926732  | 0.00089602 |
| 9mo_SIGAF3_TCTCACGGTGCGTTCGT-1-10x | 0.12439687 | 0.39284012 | 0.0021124  |
| 9mo_SIGAF3_TCTCAGCTCCAACCAA-1-10x  | 0.16922185 | 0.5524413  | 0.0016744  |

|                                   |            |            |            |
|-----------------------------------|------------|------------|------------|
| 9mo_SIGAF3_TCTCCGAAGCTAAACA-1-10x | 0.0313619  | 0.06158524 | 4.68E-05   |
| 9mo_SIGAF3_TCTCCGACAAATCAGA-1-10x | 0.1891294  | 0.62332296 | 0.001338   |
| 9mo_SIGAF3_TCTCTGGAGACGCCCT-1-10x | 0.02950319 | 0.0549672  | 4.42E-05   |
| 9mo_SIGAF3_TCTGCCACAGCCGTCA-1-10x | 0.04509651 | 0.11048789 | 9.39E-05   |
| 9mo_SIGAF3_TCTGCCAGTACACGCC-1-10x | 0.03313335 | 0.06789257 | 5.00E-05   |
| 9mo_SIGAF3_TCTGGCTTCGGAGTGA-1-10x | 0.04167601 | 0.09830906 | 7.40E-05   |
| 9mo_SIGAF3_TCTTAGTAGCCGATTT-1-10x | 0.04625015 | 0.11459547 | 0.00010046 |
| 9mo_SIGAF3_TCTTAGTCACTAAACC-1-10x | 0.04298519 | 0.10297044 | 8.29E-05   |
| 9mo_SIGAF3_TCTTCCTCATCTCGTC-1-10x | 0.04459529 | 0.10870329 | 9.39E-05   |
| 9mo_SIGAF3_TCTTGCGAGTATTAGG-1-10x | 0.09074044 | 0.273005   | 0.0043535  |
| 9mo_SIGAF3_TCTTGCGCAGCAGACA-1-10x | 0.17743613 | 0.5816886  | 0.0015248  |
| 9mo_SIGAF3_TCTTGCGTCAACCTCC-1-10x | 0.01894242 | 0.01736517 | 3.49E-05   |
| 9mo_SIGAF3_TCTTTGAAGGGCCTCT-1-10x | 0.26978433 | 0.9104982  | 0.00075499 |
| 9mo_SIGAF3_TCTTTGAAGGTCATTC-1-10x | 0.08872257 | 0.2658203  | 0.0041422  |
| 9mo_SIGAF3_TCTTTGACAAACTCGT-1-10x | 0.27163866 | 0.9171006  | 0.00075352 |
| 9mo_SIGAF3_TGAATCGGTTCAACGT-1-10x | 0.1502222  | 0.48479226 | 0.0018694  |
| 9mo_SIGAF3_TGAATGCAGCTAGAGC-1-10x | 0.04526176 | 0.11107625 | 9.39E-05   |
| 9mo_SIGAF3_TGACAGTGCAAGCCC-1-10x  | 0.17088619 | 0.55836725 | 0.0016421  |
| 9mo_SIGAF3_TGACCCTAGTAAAGCT-1-10x | 0.08523152 | 0.25339025 | 0.0037839  |
| 9mo_SIGAF3_TGACCCTCACGTCTCT-1-10x | 0.20799482 | 0.69049406 | 0.001126   |
| 9mo_SIGAF3_TGACCCTGTATGCGGA-1-10x | 0.2829494  | 0.9573729  | 0.00075462 |
| 9mo_SIGAF3_TGACCCTCATGTCAG-1-10x  | 0.04282136 | 0.1023871  | 8.29E-05   |
| 9mo_SIGAF3_TGACGCGCACGTGAGA-1-10x | 0.02175543 | 0.02738099 | 3.69E-05   |
| 9mo_SIGAF3_TGACGCGGTCACGACC-1-10x | 0.04599308 | 0.11368017 | 0.00010046 |
| 9mo_SIGAF3_TGACGCGGTCCAACGC-1-10x | 0.04874123 | 0.12346505 | 0.00012523 |
| 9mo_SIGAF3_TGACGCGGTCTGTGCG-1-10x | 0.26552963 | 0.89534914 | 0.00075974 |
| 9mo_SIGAF3_TGACGCGTCTATGCCC-1-10x | 0.1338598  | 0.42653325 | 0.0019027  |
| 9mo_SIGAF3_TGACTCCAGGATGCGT-1-10x | 0.0890091  | 0.2668405  | 0.0042295  |
| 9mo_SIGAF3_TGACTCCGTAGCGAGT-1-10x | 0.18732542 | 0.6168998  | 0.0013662  |
| 9mo_SIGAF3_TGACTCCGTCACTCTC-1-10x | 0.25669506 | 0.86389333 | 0.00078463 |
| 9mo_SIGAF3_TGACTCCGTGGTCCCA-1-10x | 0.14779322 | 0.47614378 | 0.0018716  |
| 9mo_SIGAF3_TGACTCCGTTGGTAGG-1-10x | 0.14699776 | 0.47331154 | 0.0018716  |
| 9mo_SIGAF3_TGACTCCTCTCATGGA-1-10x | 0.07119551 | 0.20341446 | 0.0013138  |
| 9mo_SIGAF3_TGAGACTGTAACAGTA-1-10x | 0.08388615 | 0.24859999 | 0.0034742  |
| 9mo_SIGAF3_TGAGACTGTGTATCCA-1-10x | 0.05860698 | 0.15859246 | 0.00031414 |
| 9mo_SIGAF3_TGAGCATAGCAGGGAG-1-10x | 0.22012632 | 0.7336888  | 0.0010253  |
| 9mo_SIGAF3_TGAGCATTCAAACGAA-1-10x | 0.2613534  | 0.8804795  | 0.00076963 |
| 9mo_SIGAF3_TGAGCGCCAACCTATG-1-10x | 0.02331724 | 0.03294187 | 3.83E-05   |
| 9mo_SIGAF3_TGAGGAGCAAAGCTCT-1-10x | 0.2873131  | 0.9729101  | 0.00075864 |
| 9mo_SIGAF3_TGAGGAGTCTGGTGCG-1-10x | 0.25147766 | 0.8453165  | 0.00080467 |
| 9mo_SIGAF3_TGAGGGAAGATAGTGT-1-10x | 0.03599677 | 0.07808787 | 5.58E-05   |

|                                   |            |            |            |
|-----------------------------------|------------|------------|------------|
| 9mo_SIGAF3_TGAGGTTAGCACGATG-1-10x | 0.15834692 | 0.51372063 | 0.0018209  |
| 9mo_SIGAF3_TGAGGTTGTATTGACC-1-10x | 0.01624288 | 0.00775333 | 3.33E-05   |
| 9mo_SIGAF3_TGAGTCACAGAGAGGG-1-10x | 0.04102226 | 0.09598136 | 7.40E-05   |
| 9mo_SIGAF3_TGAGTCATCCGGCTTT-1-10x | 0.14236744 | 0.45682508 | 0.0018718  |
| 9mo_SIGAF3_TGATCAGAGCACTGGA-1-10x | 0.07013221 | 0.19962855 | 0.0011935  |
| 9mo_SIGAF3_TGATCAGCAGTTGTTG-1-10x | 0.08442268 | 0.25051033 | 0.0036353  |
| 9mo_SIGAF3_TGATCAGCATGGCTAT-1-10x | 0.11514294 | 0.35989112 | 0.002594   |
| 9mo_SIGAF3_TGATCAGTCCGTGTGG-1-10x | 0.24819586 | 0.8336315  | 0.00082396 |
| 9mo_SIGAF3_TGATCTTAGAATCGCG-1-10x | 0.03517705 | 0.07516923 | 5.37E-05   |
| 9mo_SIGAF3_TGATTCTGTGTTGTA-1-10x  | 0.01892749 | 0.017312   | 3.49E-05   |
| 9mo_SIGAF3_TGATTCTTCTACTT-1-10x   | 0.07987884 | 0.23433183 | 0.0027593  |
| 9mo_SIGAF3_TGATTCAGAATGTTG-1-10x  | 0.17334743 | 0.56713057 | 0.0015922  |
| 9mo_SIGAF3_TGATTCAGGGATCGT-1-10x  | 0.13852933 | 0.44315934 | 0.0018772  |
| 9mo_SIGAF3_TGATTCGTTTACTTC-1-10x  | 0.01741647 | 0.01193195 | 3.44E-05   |
| 9mo_SIGAF3_TGCACGGAGAGATTCA-1-10x | 0.06501062 | 0.1813929  | 0.00064991 |
| 9mo_SIGAF3_TGCAGATAGCTAATGA-1-10x | 0.05673875 | 0.15194058 | 0.000257   |
| 9mo_SIGAF3_TGCAGATAGTAGGAAG-1-10x | 0.06246868 | 0.17234223 | 0.00052741 |
| 9mo_SIGAF3_TGCAGGCGTACTCGAT-1-10x | 0.03981217 | 0.09167276 | 6.67E-05   |
| 9mo_SIGAF3_TGCAGGCTCATGCAGT-1-10x | 0.03796842 | 0.08510802 | 6.07E-05   |
| 9mo_SIGAF3_TGCAGTACCCATATG-1-10x  | 0.01757342 | 0.01249076 | 3.44E-05   |
| 9mo_SIGAF3_TGCAGTACAGGAGACT-1-10x | 0.08666179 | 0.2584828  | 0.0039187  |
| 9mo_SIGAF3_TGCAGTATCGTTGTGA-1-10x | 0.1059645  | 0.3272109  | 0.00352    |
| 9mo_SIGAF3_TGCATCCTCGATCCAA-1-10x | 0.09263319 | 0.2797442  | 0.0044107  |
| 9mo_SIGAF3_TGCATCCTCTGGCCGA-1-10x | 0.02299144 | 0.03178186 | 3.83E-05   |
| 9mo_SIGAF3_TGCATGAAGCGAGGAG-1-10x | 0.04643007 | 0.11523608 | 0.00010046 |
| 9mo_SIGAF3_TGCATGATCGTTGTAG-1-10x | 0.21546659 | 0.7170976  | 0.0010625  |
| 9mo_SIGAF3_TGCATGATCTTACCAT-1-10x | 0.02348585 | 0.03354224 | 3.83E-05   |
| 9mo_SIGAF3_TGCCGAGAGCGCAATG-1-10x | 0.01720469 | 0.01117789 | 3.38E-05   |
| 9mo_SIGAF3_TGCCGAGAGGATTTCC-1-10x | 0.0485493  | 0.12278168 | 0.00012523 |
| 9mo_SIGAF3_TGCGGGTGTGGCTACC-1-10x | 0.04751913 | 0.11911371 | 0.00011598 |
| 9mo_SIGAF3_TGCGGGTGTACGTAC-1-10x  | 0.09216546 | 0.27807882 | 0.0043903  |
| 9mo_SIGAF3_TGCGGGTCTCAACCC-1-10x  | 0.06194344 | 0.1704721  | 0.00047505 |
| 9mo_SIGAF3_TGCTCCAAGCTTAGTC-1-10x | 0.08507168 | 0.25282112 | 0.0037839  |
| 9mo_SIGAF3_TGCTCCACAAGAGTGC-1-10x | 0.01978465 | 0.02036395 | 3.55E-05   |
| 9mo_SIGAF3_TGCTCCAGTCTACGTA-1-10x | 0.26470295 | 0.8924057  | 0.00076135 |
| 9mo_SIGAF3_TGCTCGTAGCGTCAGA-1-10x | 0.08730523 | 0.2607738  | 0.0040384  |
| 9mo_SIGAF3_TGCTCGTAGTTGCGAG-1-10x | 0.20875402 | 0.6931972  | 0.0011177  |
| 9mo_SIGAF3_TGCTCGTTCCATAGGT-1-10x | 0.11258661 | 0.3507892  | 0.0028393  |
| 9mo_SIGAF3_TGCTGAATCTCCGAAA-1-10x | 0.27937707 | 0.9446536  | 0.00075266 |
| 9mo_SIGAF3_TGCTTCGAGTATGAAC-1-10x | 0.02945929 | 0.0548109  | 4.42E-05   |
| 9mo_SIGAF3_TGGAAGTGTGGACTGA-1-10x | 0.08290821 | 0.24511799 | 0.0033032  |

|                                    |            |            |            |
|------------------------------------|------------|------------|------------|
| 9mo_SIGAF3_TGGAGAGAGAACCGCA-1-10x  | 0.20615318 | 0.68393683 | 0.001143   |
| 9mo_SIGAF3_TGGAGAGAGGTGCCTC-1-10x  | 0.22883177 | 0.76468486 | 0.0009522  |
| 9mo_SIGAF3_TGGAGAGTCGCCAGA-1-10x   | 0.26888674 | 0.9073023  | 0.00075594 |
| 9mo_SIGAF3_TGGATCAAGTGTGTC-1-10x   | 0.01566431 | 0.0056933  | 3.33E-05   |
| 9mo_SIGAF3_TGGATGTAGACCAGAC-1-10x  | 0.01802069 | 0.01408329 | 3.44E-05   |
| 9mo_SIGAF3_TGGATGTCAAGTGTATC-1-10x | 0.07009471 | 0.199495   | 0.0011935  |
| 9mo_SIGAF3_TGGGAAGAGCGATGAC-1-10x  | 0.24518976 | 0.8229282  | 0.00084014 |
| 9mo_SIGAF3_TGGGAGACAGGAGGTT-1-10x  | 0.04738079 | 0.11862117 | 0.00010777 |
| 9mo_SIGAF3_TGGGATTAGCTCCCTT-1-10x  | 0.02451133 | 0.0371935  | 3.91E-05   |
| 9mo_SIGAF3_TGGGATTAGTATAGGT-1-10x  | 0.12454738 | 0.393376   | 0.0020803  |
| 9mo_SIGAF3_TGGGATTCAACTGCCG-1-10x  | 0.05342175 | 0.14013027 | 0.00019264 |
| 9mo_SIGAF3_TGGGCGTCATCTTAGG-1-10x  | 0.04508822 | 0.11045836 | 9.39E-05   |
| 9mo_SIGAF3_TGGGCGTCTCCTGCA-1-10x   | 0.27524152 | 0.9299288  | 0.00075218 |
| 9mo_SIGAF3_TGGGCTGAGGTTACCT-1-10x  | 0.06263416 | 0.17293143 | 0.00052741 |
| 9mo_SIGAF3_TGGGCTGTCCACAAGT-1-10x  | 0.11226121 | 0.3496306  | 0.0028393  |
| 9mo_SIGAF3_TGGGTTACAGAGACTG-1-10x  | 0.29253137 | 0.99148995 | 0.00076378 |
| 9mo_SIGAF3_TGGGTTATCGTCACCT-1-10x  | 0.09243552 | 0.2790404  | 0.0043903  |
| 9mo_SIGAF3_TGGGTTATCTACTCAT-1-10x  | 0.25782764 | 0.8679259  | 0.000778   |
| 9mo_SIGAF3_TGGTACATCCTGCCAT-1-10x  | 0.01608994 | 0.0072088  | 3.33E-05   |
| 9mo_SIGAF3_TGGTAGTAGGTTTCATC-1-10x | 0.14240788 | 0.45696905 | 0.0018718  |
| 9mo_SIGAF3_TGGTAGTTCGTAGCCG-1-10x  | 0.1068159  | 0.33024237 | 0.0034182  |
| 9mo_SIGAF3_TGGTGATCATTAGGCT-1-10x  | 0.05068269 | 0.13037771 | 0.00014746 |
| 9mo_SIGAF3_TGGTGATGTGAATGAT-1-10x  | 0.10219359 | 0.31378442 | 0.0039137  |
| 9mo_SIGAF3_TGGTTAGCAGTGCGCT-1-10x  | 0.15909892 | 0.5163982  | 0.0018209  |
| 9mo_SIGAF3_TGTAACGTCTACGCGG-1-10x  | 0.23790209 | 0.79698014 | 0.00088935 |
| 9mo_SIGAF3_TGTAAGCAGGCGAACT-1-10x  | 0.10264021 | 0.3153746  | 0.0039137  |
| 9mo_SIGAF3_TGTAAGCGTATGAGCG-1-10x  | 0.11278754 | 0.3515046  | 0.0028393  |
| 9mo_SIGAF3_TGTACAGCAGGCATGA-1-10x  | 0.08572537 | 0.25514862 | 0.0037839  |
| 9mo_SIGAF3_TGTAGACGTCCATAGT-1-10x  | 0.25322944 | 0.8515538  | 0.00079608 |
| 9mo_SIGAF3_TGTCCACGTTTCGATG-1-10x  | 0.04286783 | 0.10255259 | 8.29E-05   |
| 9mo_SIGAF3_TGTCCACTCATTATCC-1-10x  | 0.01617781 | 0.00752166 | 3.33E-05   |
| 9mo_SIGAF3_TGTCCACTCGGCCAA-1-10x   | 0.08664385 | 0.2584189  | 0.0039187  |
| 9mo_SIGAF3_TGTCCACAGCGTATT-1-10x   | 0.02564319 | 0.04122353 | 4.00E-05   |
| 9mo_SIGAF3_TGTCCAGTAGGAGGG-1-10x   | 0.02261183 | 0.03043023 | 3.76E-05   |
| 9mo_SIGAF3_TGTCCCATCACTAGCA-1-10x  | 0.0846108  | 0.25118014 | 0.0036353  |
| 9mo_SIGAF3_TGTCCCATCGTAGAGG-1-10x  | 0.08634286 | 0.25734723 | 0.0039187  |
| 9mo_SIGAF3_TGTGAGTAGGATTCAA-1-10x  | 0.16068536 | 0.52204674 | 0.0018     |
| 9mo_SIGAF3_TGTGATGGTGTGATGT-1-10x  | 0.20029432 | 0.6630761  | 0.0011985  |
| 9mo_SIGAF3_TGTGCGGGTGTGACCC-1-10x  | 0.01524932 | 0.00421571 | 3.27E-05   |
| 9mo_SIGAF3_TGTGGCGAGGCCACCT-1-10x  | 0.04452507 | 0.10845323 | 8.81E-05   |
| 9mo_SIGAF3_TGTGGCGCATTGAGCT-1-10x  | 0.06209661 | 0.17101747 | 0.00047505 |



|                                     |            |            |            |
|-------------------------------------|------------|------------|------------|
| 9mo_SIGAF3_TGTGGCGTCCGTATGA-1-10x   | 0.19933183 | 0.65964913 | 0.0012085  |
| 9mo_SIGAF3_TGTGGCGTCTTTGCGC-1-10x   | 0.01864133 | 0.01629313 | 3.49E-05   |
| 9mo_SIGAF3_TGTGTGAGTTTGACAC-1-10x   | 0.2729529  | 0.92178005 | 0.0007526  |
| 9mo_SIGAF3_TGTTACTAGAGGCCAT-1-10x   | 0.17395578 | 0.56929666 | 0.0015922  |
| 9mo_SIGAF3_TGTTACTGTTCGGTCG-1-10x   | 0.04551367 | 0.11197319 | 9.39E-05   |
| 9mo_SIGAF3_TGTTACTTCATGCCAA-1-10x   | 0.04265614 | 0.10179883 | 7.82E-05   |
| 9mo_SIGAF3_TGTTTCATAGCTCAGAG-1-10x  | 0.07517035 | 0.21756706 | 0.001885   |
| 9mo_SIGAF3_TGTTCTAAGCGTACAG-1-10x   | 0.09433772 | 0.28581327 | 0.0044154  |
| 9mo_SIGAF3_TGTTCTACACGAAAGC-1-10x   | 0.23551664 | 0.78848666 | 0.00090278 |
| 9mo_SIGAF3_TGTTCTATCTGAGCAT-1-10x   | 0.14459835 | 0.46476832 | 0.0018716  |
| 9mo_SIGAF3_TGTTGAGCAGTCGAGA-1-10x   | 0.25074866 | 0.8427209  | 0.00080923 |
| 9mo_SIGAF3_TGTTGAGGTAAGTGC-1-10x    | 0.01880509 | 0.01687619 | 3.49E-05   |
| 9mo_SIGAF3_TGTTGGAGTAGTCGTT-1-10x   | 0.09352833 | 0.2829314  | 0.0044154  |
| 9mo_SIGAF3_TGTTGGAGTGGCTGAA-1-10x   | 0.13728558 | 0.4387309  | 0.0018842  |
| 9mo_SIGAF3_TGTTGGATCGTTCTGC-1-10x   | 0.03072828 | 0.05932922 | 4.68E-05   |
| 9mo_SIGAF3_TGTTTGTCATGCCGCA-1-10x   | 0.04857849 | 0.12288562 | 0.00012523 |
| 9mo_SIGAF3_TGTTTGTCGCTCCGA-1-10x    | 0.2666386  | 0.8992977  | 0.00075831 |
| 9mo_SIGAF3_TGTTTGTTTCAGTGGGA-1-10x  | 0.01928526 | 0.01858585 | 3.55E-05   |
| 9mo_SIGAF3_TTACAGGTCCAACCAA-1-10x   | 0.01893114 | 0.017325   | 3.49E-05   |
| 9mo_SIGAF3_TTACAGGTCTCTGCCA-1-10x   | 0.12323494 | 0.38870302 | 0.0021479  |
| 9mo_SIGAF3_TTACGCCAAGCGAAC-1-10x    | 0.07196054 | 0.20613839 | 0.0014433  |
| 9mo_SIGAF3_TTACGCCGTGATGAAT-1-10x   | 0.03388805 | 0.07057969 | 5.17E-05   |
| 9mo_SIGAF3_TTACGTTAGAGCGACT-1-10x   | 0.08502359 | 0.2526499  | 0.0037839  |
| 9mo_SIGAF3_TTACGTTAGTCATACC-1-10x   | 0.04858202 | 0.12289819 | 0.00012523 |
| 9mo_SIGAF3_TTACGTTTCATTTCAGGT-1-10x | 0.2933496  | 0.9944033  | 0.00076488 |
| 9mo_SIGAF3_TTACTGTCAACACAGG-1-10x   | 0.05554635 | 0.14769499 | 0.000233   |
| 9mo_SIGAF3_TTAGGGTTCAGCTTTCC-1-10x  | 0.18702036 | 0.6158136  | 0.0013662  |
| 9mo_SIGAF3_TTAGTCTAGCGCCCAT-1-10x   | 0.06987454 | 0.1987111  | 0.0010821  |
| 9mo_SIGAF3_TTAGTCTCAGTTGGTT-1-10x   | 0.0691883  | 0.19626771 | 0.0010821  |
| 9mo_SIGAF3_TTAGTCTTCTTTCAGT-1-10x   | 0.18578526 | 0.61141604 | 0.0013809  |
| 9mo_SIGAF3_TTATTGCAGTAAGCAT-1-10x   | 0.08668695 | 0.2585724  | 0.0039187  |
| 9mo_SIGAF3_TTATTGCCACTGGACC-1-10x   | 0.14605276 | 0.46994683 | 0.0018717  |
| 9mo_SIGAF3_TTATTGCGTTTGTGGT-1-10x   | 0.14816889 | 0.4774814  | 0.0018713  |
| 9mo_SIGAF3_TTCAATCAGGTTTCAGG-1-10x  | 0.2332525  | 0.7804251  | 0.00092358 |
| 9mo_SIGAF3_TTCAATCGTATACAGA-1-10x   | 0.2471845  | 0.83003056 | 0.0008292  |
| 9mo_SIGAF3_TTCAATCGTGCATTAC-1-10x   | 0.04383896 | 0.10601033 | 8.81E-05   |
| 9mo_SIGAF3_TTCAATCTCTAGCCAA-1-10x   | 0.02408981 | 0.03569264 | 3.91E-05   |
| 9mo_SIGAF3_TTCAACGAGCAGCGAT-1-10x   | 0.02591175 | 0.04217976 | 4.09E-05   |
| 9mo_SIGAF3_TTCAACGGTCTGCGCA-1-10x   | 0.05090464 | 0.13116798 | 0.00014746 |
| 9mo_SIGAF3_TTCAACGCTCGACAAG-1-10x   | 0.26449427 | 0.8916627  | 0.00076135 |
| 9mo_SIGAF3_TTCAACGCTCTAAGCGT-1-10x  | 0.1239442  | 0.39122838 | 0.0021124  |

|                                    |            |            |            |
|------------------------------------|------------|------------|------------|
| 9mo_SIGAF3_TTCAGGAGTCCATAGT-1-10x  | 0.18012358 | 0.59125733 | 0.001475   |
| 9mo_SIGAF3_TTCATGTTCCGCTGTT-1-10x  | 0.08626981 | 0.25708714 | 0.0039187  |
| 9mo_SIGAF3_TTCATTGAGTGGGAAGA-1-10x | 0.23048991 | 0.77058876 | 0.00094498 |
| 9mo_SIGAF3_TTCATTGTGAGCTGC-1-10x   | 0.0412813  | 0.09690367 | 7.40E-05   |
| 9mo_SIGAF3_TTCCAATAGCCTCCAG-1-10x  | 0.05545139 | 0.14735685 | 0.000233   |
| 9mo_SIGAF3_TTCCAATGTGTAGCAG-1-10x  | 0.22247729 | 0.74205947 | 0.0010033  |
| 9mo_SIGAF3_TTCCAATTCCGTATGA-1-10x  | 0.01748574 | 0.01217857 | 3.44E-05   |
| 9mo_SIGAF3_TTCCACGCACGGCACT-1-10x  | 0.11586165 | 0.3624501  | 0.002594   |
| 9mo_SIGAF3_TTCCACGGTCGTACAGC-1-10x | 0.05951505 | 0.1618257  | 0.00034795 |
| 9mo_SIGAF3_TTCCACGTGAGAGAC-1-10x   | 0.10897461 | 0.3379285  | 0.0032165  |
| 9mo_SIGAF3_TTCCGGTAGCAATTCC-1-10x  | 0.04917366 | 0.12500475 | 0.00012523 |
| 9mo_SIGAF3_TTCCGGTAGCTAATGA-1-10x  | 0.03549701 | 0.07630847 | 5.58E-05   |
| 9mo_SIGAF3_TTCCGGTCAATTGAAG-1-10x  | 0.04329749 | 0.10408239 | 8.29E-05   |
| 9mo_SIGAF3_TTCCTAACATCATCTT-1-10x  | 0.02575821 | 0.04163306 | 4.00E-05   |
| 9mo_SIGAF3_TTCCTAACATCGCTGG-1-10x  | 0.0746914  | 0.21586174 | 0.001885   |
| 9mo_SIGAF3_TTCCTCTCACGTCATA-1-10x  | 0.24457486 | 0.8207388  | 0.00084583 |
| 9mo_SIGAF3_TTCCTCTTCCATTTCA-1-10x  | 0.20935325 | 0.6953308  | 0.0011095  |
| 9mo_SIGAF3_TTCCTTCAGAATAGTC-1-10x  | 0.20606884 | 0.68363655 | 0.001143   |
| 9mo_SIGAF3_TTCCTTCGTACAAGCG-1-10x  | 0.04267631 | 0.10187066 | 7.82E-05   |
| 9mo_SIGAF3_TTCCTTCGTTGCATGT-1-10x  | 0.01812589 | 0.01445788 | 3.44E-05   |
| 9mo_SIGAF3_TTCGATTAGTTAGAAC-1-10x  | 0.1279992  | 0.40566635 | 0.0020026  |
| 9mo_SIGAF3_TTCGATTTCCGGAGTAG-1-10x | 0.01579688 | 0.00616533 | 3.33E-05   |
| 9mo_SIGAF3_TTCGGTCAGTTGTAGA-1-10x  | 0.09372903 | 0.28364602 | 0.0044154  |
| 9mo_SIGAF3_TTCGGTCCACTTGTGA-1-10x  | 0.22825962 | 0.76264775 | 0.00095947 |
| 9mo_SIGAF3_TTCGGTCTCCTACCAC-1-10x  | 0.04672347 | 0.11628074 | 0.00010777 |
| 9mo_SIGAF3_TTCTAACTCTGCGGGT-1-10x  | 0.1652282  | 0.5382217  | 0.0017353  |
| 9mo_SIGAF3_TTCTAGTTCCGGAATGG-1-10x | 0.08345678 | 0.2470712  | 0.0034742  |
| 9mo_SIGAF3_TTCTCTCCATCCCACT-1-10x  | 0.07918424 | 0.23185867 | 0.002576   |
| 9mo_SIGAF3_TTCTGTAAAGGACTAAT-1-10x | 0.03010305 | 0.05710305 | 4.55E-05   |
| 9mo_SIGAF3_TTCTGTACAATGTCTG-1-10x  | 0.10157847 | 0.31159425 | 0.0040036  |
| 9mo_SIGAF3_TTCTGTACAGAACTTC-1-10x  | 0.03380244 | 0.07027486 | 5.17E-05   |
| 9mo_SIGAF3_TTCTTCCCACCCTATC-1-10x  | 0.01607135 | 0.0071426  | 3.33E-05   |
| 9mo_SIGAF3_TTCTTCCGTTGATCGT-1-10x  | 0.14155461 | 0.45393094 | 0.0018724  |
| 9mo_SIGAF3_TTCTTGAGTTCTCACC-1-10x  | 0.26744038 | 0.9021525  | 0.00075705 |
| 9mo_SIGAF3_TTGAACGAGAACCCGA-1-10x  | 0.05458953 | 0.14428818 | 0.00021164 |
| 9mo_SIGAF3_TTGAACGGTCCCAAAT-1-10x  | 0.23728348 | 0.7947776  | 0.00088935 |
| 9mo_SIGAF3_TTGAACGTCCTCTTTC-1-10x  | 0.20749463 | 0.68871313 | 0.001126   |
| 9mo_SIGAF3_TTGACCCAGCCATTA-1-10x   | 0.21616043 | 0.7195681  | 0.001055   |
| 9mo_SIGAF3_TTGAGTGTCTGATGGT-1-10x  | 0.16758043 | 0.54659694 | 0.0017056  |
| 9mo_SIGAF3_TTGATGGCACCAACAT-1-10x  | 0.08988877 | 0.26997256 | 0.0042999  |
| 9mo_SIGAF3_TTGATGGCATGAGGGT-1-10x  | 0.21377136 | 0.71106166 | 0.0010701  |

|                                    |            |            |            |
|------------------------------------|------------|------------|------------|
| 9mo_SIGAF3_TTGCATTCAGCTACCG-1-10x  | 0.04847144 | 0.12250448 | 0.00012523 |
| 9mo_SIGAF3_TTGCATTCATGACGGA-1-10x  | 0.04402086 | 0.10665798 | 8.81E-05   |
| 9mo_SIGAF3_TTGCATTGTGTGGACA-1-10x  | 0.16340306 | 0.53172326 | 0.001763   |
| 9mo_SIGAF3_TTGCATTTGAGTCCG-1-10x   | 0.14548898 | 0.46793944 | 0.0018716  |
| 9mo_SIGAF3_TTGCCTGAGGAGAGGC-1-10x  | 0.0328467  | 0.06687193 | 5.00E-05   |
| 9mo_SIGAF3_TTGCCTGCAGCCAGT-1-10x   | 0.2581283  | 0.8689964  | 0.000778   |
| 9mo_SIGAF3_TTGCCTGCGTTTACTGG-1-10x | 0.17450793 | 0.5712626  | 0.0015753  |
| 9mo_SIGAF3_TTGGATGAGATGCTAA-1-10x  | 0.02606706 | 0.04273272 | 4.09E-05   |
| 9mo_SIGAF3_TTGGATGCAATTGCGT-1-10x  | 0.03417338 | 0.07159562 | 5.17E-05   |
| 9mo_SIGAF3_TTGGGCGAGAGGGTCT-1-10x  | 0.24828888 | 0.83396274 | 0.00082396 |
| 9mo_SIGAF3_TTGGGTAAGGAGCAAA-1-10x  | 0.04366539 | 0.10539232 | 8.81E-05   |
| 9mo_SIGAF3_TTGGGTAAGTAGAATC-1-10x  | 0.14640671 | 0.47120705 | 0.0018717  |
| 9mo_SIGAF3_TTGGGTAGTAGGCTGA-1-10x  | 0.17381838 | 0.5688074  | 0.0015922  |
| 9mo_SIGAF3_TTGGGTAGTAGTCCGA-1-10x  | 0.05399638 | 0.14217626 | 0.00021164 |
| 9mo_SIGAF3_TTGGGTATCGGCATTA-1-10x  | 0.02405191 | 0.03555772 | 3.91E-05   |
| 9mo_SIGAF3_TTGGTTTAGCGTCTGC-1-10x  | 0.0518625  | 0.13457848 | 0.00016076 |
| 9mo_SIGAF3_TTGTGGAAGTATGGAT-1-10x  | 0.08995875 | 0.27022174 | 0.0042999  |
| 9mo_SIGAF3_TTGTGGACAGGATGAC-1-10x  | 0.24746977 | 0.8310463  | 0.0008292  |
| 9mo_SIGAF3_TTGTGGATCCAATGCA-1-10x  | 0.10787849 | 0.33402574 | 0.0033168  |
| 9mo_SIGAF3_TTGTTC AAGATGACAT-1-10x | 0.17193182 | 0.5620902  | 0.0016256  |
| 9mo_SIGAF3_TTGTTC AAGCTGCCTG-1-10x | 0.02263946 | 0.03052863 | 3.76E-05   |
| 9mo_SIGAF3_TTGTTC AAGTCAGCCC-1-10x | 0.03918747 | 0.0894485  | 6.67E-05   |
| 9mo_SIGAF3_TTGTTC ACACGGAAGT-1-10x | 0.02880925 | 0.05249641 | 4.42E-05   |
| 9mo_SIGAF3_TTGTTC AGTAAGCAAT-1-10x | 0.15945509 | 0.51766634 | 0.0018109  |
| 9mo_SIGAF3_TTGTTC ATCATGGTAC-1-10x | 0.04473301 | 0.10919362 | 9.39E-05   |
| 9mo_SIGAF3_TTGTTC GGTAGCTTAC-1-10x | 0.11605805 | 0.3631494  | 0.0025211  |
| 9mo_SIGAF3_TTTACCAAGCCACAAG-1-10x  | 0.27059606 | 0.9133884  | 0.00075418 |
| 9mo_SIGAF3_TTTACCACAATAGGAT-1-10x  | 0.25016996 | 0.8406604  | 0.00081397 |
| 9mo_SIGAF3_TTTACCACACCAGACC-1-10x  | 0.08056117 | 0.23676127 | 0.0029431  |
| 9mo_SIGAF3_TTTACGTCAGAGTGAC-1-10x  | 0.06164425 | 0.16940682 | 0.00047505 |
| 9mo_SIGAF3_TTTATGCCAAGCACCC-1-10x  | 0.22055164 | 0.73520315 | 0.0010179  |
| 9mo_SIGAF3_TTTATGCCAGGTAGTG-1-10x  | 0.04955228 | 0.12635286 | 0.00013566 |
| 9mo_SIGAF3_TTTATGCGTTGCGTAT-1-10x  | 0.01572094 | 0.00589496 | 3.33E-05   |
| 9mo_SIGAF3_TTTATGCTCACGATCA-1-10x  | 0.24930124 | 0.83756727 | 0.00081888 |
| 9mo_SIGAF3_TTTCAGTAGACTCTTG-1-10x  | 0.07608315 | 0.2208171  | 0.0020486  |
| 9mo_SIGAF3_TTTCAGTAGTGAGGTC-1-10x  | 0.02356161 | 0.03381198 | 3.83E-05   |
| 9mo_SIGAF3_TTTCATGGTCCCTGTT-1-10x  | 0.02039805 | 0.02254801 | 3.62E-05   |
| 9mo_SIGAF3_TTTCATGGTCTGGTC-1-10x   | 0.20323743 | 0.6735552  | 0.0011699  |
| 9mo_SIGAF3_TTTCCTCGTCTGAAT-1-10x   | 0.17850006 | 0.58547676 | 0.0015081  |
| 9mo_SIGAF3_TTTCCTCGTCTGGGT-1-10x   | 0.02309379 | 0.03214627 | 3.83E-05   |
| 9mo_SIGAF3_TTGTACTGTCTTGCTC-1-10x  | 0.03529401 | 0.07558568 | 5.58E-05   |

|                                    |            |            |            |
|------------------------------------|------------|------------|------------|
| 9mo_SIGAF3_TTTGACTGTGTTAACC-1-10x  | 0.01706042 | 0.01066423 | 3.38E-05   |
| 9mo_SIGAF3_TTTGATCAGACCCGCT-1-10x  | 0.04063562 | 0.09460472 | 7.01E-05   |
| 9mo_SIGAF3_TTTGATCAGACTGTTC-1-10x  | 0.17676473 | 0.579298   | 0.0015416  |
| 9mo_SIGAF3_TTTGGAGAGGCTAACG-1-10x  | 0.06243964 | 0.17223883 | 0.00047505 |
| 9mo_SIGAF3_TTTGGAGCACAGCTTA-1-10x  | 0.04208115 | 0.09975158 | 7.82E-05   |
| 9mo_SIGAF3_TTTGGAGGTTTGTGG-1-10x   | 0.19806738 | 0.655147   | 0.0012187  |
| 9mo_SIGAF3_TTTGGAGTCGACGCGT-1-10x  | 0.0281712  | 0.05022461 | 4.30E-05   |
| 9mo_SIGAF3_TTTGGTTCAACTGATC-1-10x  | 0.05050929 | 0.12976032 | 0.00014746 |
| 9mo_SIGAF3_TTTGTTGAGAAGCTCG-1-10x  | 0.06969375 | 0.1980674  | 0.0010821  |
| 9mo_SIGAF3_AAAGGATAGCTTAAGA-1-10x  | 0.06051957 | 0.16540235 | 0.00038577 |
| 9mo_SIGAF3_AAAGGATGTGATCGTT-1-10x  | 0.02347094 | 0.03348913 | 3.83E-05   |
| 9mo_SIGAF3_AAAGGGCAGTTCCTGA-1-10x  | 0.28425053 | 0.9620057  | 0.00075605 |
| 9mo_SIGAF3_AAAGTCCGTTAATCGC-1-10x  | 0.0272191  | 0.04683461 | 4.19E-05   |
| 9mo_SIGAF3_AAAGTGAGTGCCACA-1-10x   | 0.01768397 | 0.01288441 | 3.44E-05   |
| 9mo_SIGAF3_AAATGGACAATAGGAT-1-10x  | 0.01698266 | 0.01038734 | 3.38E-05   |
| 9mo_SIGAF3_AACAAAGCAAGTCATC-1-10x  | 0.08954956 | 0.26876482 | 0.0042295  |
| 9mo_SIGAF3_AACAAGATCGGCATCG-1-10x  | 0.12795208 | 0.4054986  | 0.0020026  |
| 9mo_SIGAF3_AACACACTCCGACGGT-1-10x  | 0.07630754 | 0.22161604 | 0.0020486  |
| 9mo_SIGAF3_AACAGGGTCCCGAGTG-1-10x  | 0.03313878 | 0.06791189 | 5.00E-05   |
| 9mo_SIGAF3_AACCAACAGGTCTACT-1-10x  | 0.27923146 | 0.94413507 | 0.00075266 |
| 9mo_SIGAF3_AACCACAAGTAGCCAG-1-10x  | 0.10217691 | 0.313725   | 0.0039137  |
| 9mo_SIGAF3_AACCACACAGACTCTA-1-10x  | 0.07345925 | 0.2114746  | 0.0015819  |
| 9mo_SIGAF3_AACCTTTTCACAGTGT-1-10x  | 0.22269312 | 0.74282795 | 0.0010033  |
| 9mo_SIGAF3_AACGGGATCATTCGTT-1-10x  | 0.14366224 | 0.4614353  | 0.0018716  |
| 9mo_SIGAF3_AACGTCAAGTCAGGCAA-1-10x | 0.19038941 | 0.6278093  | 0.0013113  |
| 9mo_SIGAF3_AACTTCTGTATCGCGC-1-10x  | 0.07957548 | 0.23325169 | 0.0027593  |
| 9mo_SIGAF3_AACTTCTGTCTTCAAG-1-10x  | 0.01802781 | 0.01410867 | 3.44E-05   |
| 9mo_SIGAF3_AACTTCTTCTACAAG-1-10x   | 0.25150695 | 0.84542084 | 0.00080467 |
| 9mo_SIGAF3_AAGACAACAACCTCCCT-1-10x | 0.25310162 | 0.8510987  | 0.00080028 |
| 9mo_SIGAF3_AAGACAACACTTGGGC-1-10x  | 0.22533132 | 0.7522214  | 0.00098137 |
| 9mo_SIGAF3_AAGACAAGTTCGGCGT-1-10x  | 0.01552538 | 0.00519865 | 3.33E-05   |
| 9mo_SIGAF3_AAGATAGCAGAACTAA-1-10x  | 0.1504438  | 0.4855813  | 0.0018694  |
| 9mo_SIGAF3_AAGATAGTCAACTTTC-1-10x  | 0.04428545 | 0.10760006 | 8.81E-05   |
| 9mo_SIGAF3_AAGCGAGCAGTTCTAG-1-10x  | 0.15556942 | 0.50383127 | 0.0018459  |
| 9mo_SIGAF3_AAGGAATCACACCAGC-1-10x  | 0.02725442 | 0.04696037 | 4.19E-05   |
| 9mo_SIGAF3_AAGGTAACACATTCTT-1-10x  | 0.03174122 | 0.06293582 | 4.83E-05   |
| 9mo_SIGAF3_AAGTCGTAGAAGATCT-1-10x  | 0.02099288 | 0.02466591 | 3.62E-05   |
| 9mo_SIGAF3_AAGTGAACACTAGGTT-1-10x  | 0.08280662 | 0.24475628 | 0.0033032  |
| 9mo_SIGAF3_AAGTGAAGTTGTACGT-1-10x  | 0.01925883 | 0.01849176 | 3.55E-05   |
| 9mo_SIGAF3_AATCACGTCTAGAGCT-1-10x  | 0.0528226  | 0.13799694 | 0.00017575 |
| 9mo_SIGAF3_AATCGACCAGTGACCC-1-10x  | 0.12764901 | 0.40441948 | 0.0020026  |

|                                    |            |            |            |
|------------------------------------|------------|------------|------------|
| 9mo_SIGAF3_AATCGTGCAGATCACT-1-10x  | 0.11860038 | 0.37220144 | 0.0023898  |
| 9mo_SIGAF3_AATGAAGCAACCCGCA-1-10x  | 0.02376677 | 0.03454247 | 3.83E-05   |
| 9mo_SIGAF3_AATGCCATCCGTCCTA-1-10x  | 0.0523792  | 0.13641821 | 0.00017575 |
| 9mo_SIGAF3_AATGGAATCAACTGAC-1-10x  | 0.09383141 | 0.2840105  | 0.0044154  |
| 9mo_SIGAF3_AATGGCTGTTGGTACT-1-10x  | 0.08424223 | 0.24986783 | 0.0036353  |
| 9mo_SIGAF3_AATTCTGTTCTTAGG-1-10x   | 0.04723406 | 0.11809871 | 0.00010777 |
| 9mo_SIGAF3_AATTTCCCATGGAACG-1-10x  | 0.03240513 | 0.06529971 | 5.00E-05   |
| 9mo_SIGAF3_ACAAAGAAGGCACAAC-1-10x  | 0.08098738 | 0.2382788  | 0.0029431  |
| 9mo_SIGAF3_ACAAAGACAGGTTACT-1-10x  | 0.04195683 | 0.09930894 | 7.82E-05   |
| 9mo_SIGAF3_ACAAAGATCATGAGAA-1-10x  | 0.09307343 | 0.2813117  | 0.0044107  |
| 9mo_SIGAF3_ACAACCAGTTGACTAC-1-10x  | 0.01745295 | 0.01206183 | 3.44E-05   |
| 9mo_SIGAF3_ACACAGTTCGGCAGTC-1-10x  | 0.24036229 | 0.80573976 | 0.00086997 |
| 9mo_SIGAF3_ACACGCGCACCGCTAG-1-10x  | 0.08433066 | 0.25018272 | 0.0036353  |
| 9mo_SIGAF3_ACAGAAAAGAAGCTGC-1-10x  | 0.2843872  | 0.96249235 | 0.00075605 |
| 9mo_SIGAF3_ACAGAAAGTAACCCGC-1-10x  | 0.07967839 | 0.23361811 | 0.0027593  |
| 9mo_SIGAF3_ACAGAAATCGTAGTCA-1-10x  | 0.14807837 | 0.47715908 | 0.0018713  |
| 9mo_SIGAF3_ACAGCCGAGCAAGCCA-1-10x  | 0.04234077 | 0.10067595 | 7.82E-05   |
| 9mo_SIGAF3_ACAGCCGGTCCAACGC-1-10x  | 0.08354446 | 0.24738342 | 0.0034742  |
| 9mo_SIGAF3_ACATCCCCAACTAGA-1-10x   | 0.07416327 | 0.21398129 | 0.0017292  |
| 9mo_SIGAF3_ACATCGAAGAATTTGG-1-10x  | 0.24761386 | 0.8315593  | 0.00082396 |
| 9mo_SIGAF3_ACATGCAAGGCTCACC-1-10x  | 0.10002438 | 0.30606085 | 0.0040879  |
| 9mo_SIGAF3_ACCAAACTCTGCTCTG-1-10x  | 0.04763009 | 0.1195088  | 0.00011598 |
| 9mo_SIGAF3_ACCAACATCCACCTCA-1-10x  | 0.06217395 | 0.17129283 | 0.00047505 |
| 9mo_SIGAF3_ACCATTTAGCAACTTC-1-10x  | 0.04674914 | 0.11637213 | 0.00010777 |
| 9mo_SIGAF3_ACCCAAAAGCGTTCCG-1-10x  | 0.02378782 | 0.0346174  | 3.83E-05   |
| 9mo_SIGAF3_ACCCAAATCGTAATG-1-10x   | 0.04805485 | 0.12102118 | 0.00011598 |
| 9mo_SIGAF3_ACCCTTGTCATTGGA-1-10x   | 0.08623886 | 0.25697693 | 0.0039187  |
| 9mo_SIGAF3_ACCGTTTCAGGTGCATG-1-10x | 0.04189684 | 0.09909534 | 7.82E-05   |
| 9mo_SIGAF3_ACCTACCAGTCGTCTA-1-10x  | 0.13114148 | 0.4168546  | 0.001934   |
| 9mo_SIGAF3_ACCTACCGTTAGAGTA-1-10x  | 0.01593228 | 0.00664742 | 3.33E-05   |
| 9mo_SIGAF3_ACCTGAACACTAACGT-1-10x  | 0.02624594 | 0.04336963 | 4.09E-05   |
| 9mo_SIGAF3_ACCTGAAGTCGTGTTA-1-10x  | 0.05830889 | 0.15753111 | 0.00031414 |
| 9mo_SIGAF3_ACCTGTCTCGCAGATT-1-10x  | 0.08929983 | 0.26787564 | 0.0042295  |
| 9mo_SIGAF3_ACGATCAGTCATCCGG-1-10x  | 0.05448206 | 0.14390552 | 0.00021164 |
| 9mo_SIGAF3_ACGATGTCACGAGAAC-1-10x  | 0.02772473 | 0.04863493 | 4.30E-05   |
| 9mo_SIGAF3_ACGATGTGTCCCGCAA-1-10x  | 0.2473334  | 0.83056074 | 0.0008292  |
| 9mo_SIGAF3_ACGGGTCAGAGTCTGG-1-10x  | 0.05540367 | 0.14718695 | 0.000233   |
| 9mo_SIGAF3_ACGGGTCTCTGCGGCA-1-10x  | 0.02179725 | 0.02752988 | 3.69E-05   |
| 9mo_SIGAF3_ACGGTTACAAAGTATG-1-10x  | 0.08214138 | 0.24238767 | 0.0031253  |
| 9mo_SIGAF3_ACGTAACGTACGCGTC-1-10x  | 0.02786247 | 0.04912537 | 4.30E-05   |
| 9mo_SIGAF3_ACGTAACTCGACGATT-1-10x  | 0.12552284 | 0.39684916 | 0.0020515  |

|                                    |            |            |            |
|------------------------------------|------------|------------|------------|
| 9mo_SIGAF3_ACGTACACAACCCTCT-1-10x  | 0.24572612 | 0.8248379  | 0.00083459 |
| 9mo_SIGAF3_ACGTCCTGTACCGTCG-1-10x  | 0.10611995 | 0.32776436 | 0.00352    |
| 9mo_SIGAF3_ACGTTCCACTCTCGT-1-10x   | 0.07578179 | 0.21974409 | 0.0020486  |
| 9mo_SIGAF3_ACTACGAGTCGGAAAC-1-10x  | 0.02055753 | 0.02311583 | 3.62E-05   |
| 9mo_SIGAF3_ACTATCTCAGTTCCAA-1-10x  | 0.02711154 | 0.04645165 | 4.19E-05   |
| 9mo_SIGAF3_ACTGATGGTTTGGCTA-1-10x  | 0.0724108  | 0.20774156 | 0.0014433  |
| 9mo_SIGAF3_ACTGCAAAGAGTCAAT-1-10x  | 0.0362192  | 0.07887985 | 5.82E-05   |
| 9mo_SIGAF3_ACTGCAACAGCAAGAC-1-10x  | 0.02645957 | 0.04413027 | 4.09E-05   |
| 9mo_SIGAF3_ACTGCAATCAGACCCG-1-10x  | 0.04456176 | 0.10858387 | 8.81E-05   |
| 9mo_SIGAF3_ACTGTCCAGTTACTCG-1-10x  | 0.26727578 | 0.9015664  | 0.00075705 |
| 9mo_SIGAF3_ACTGTCCCACATGACT-1-10x  | 0.15171473 | 0.4901065  | 0.0018651  |
| 9mo_SIGAF3_ACTGTGAGTCACTACA-1-10x  | 0.23553991 | 0.7885695  | 0.00090278 |
| 9mo_SIGAF3_ACTTCCGGTGTCAATTG-1-10x | 0.27376923 | 0.9246866  | 0.0007526  |
| 9mo_SIGAF3_ACTTCGCCACTGCATA-1-10x  | 0.1164593  | 0.36457807 | 0.0025211  |
| 9mo_SIGAF3_ACTTCGCTCTGTCCGT-1-10x  | 0.03277601 | 0.06662023 | 5.00E-05   |
| 9mo_SIGAF3_ACTTTCATCGCGTGAC-1-10x  | 0.19267212 | 0.635937   | 0.0012861  |
| 9mo_SIGAF3_AGAAATGAGCAATAAC-1-10x  | 0.0370941  | 0.08199497 | 6.07E-05   |
| 9mo_SIGAF3_AGAAGCGCACACTTAG-1-10x  | 0.01730837 | 0.01154704 | 3.38E-05   |
| 9mo_SIGAF3_AGAAGCGGTTGCGGAA-1-10x  | 0.05934798 | 0.16123083 | 0.00034795 |
| 9mo_SIGAF3_AGAAGCGTCAAACGAA-1-10x  | 0.2262892  | 0.755632   | 0.00097406 |
| 9mo_SIGAF3_AGAAGTATCAGCGCGT-1-10x  | 0.08760797 | 0.2618517  | 0.0040384  |
| 9mo_SIGAF3_AGAAGTATCGTTGCCT-1-10x  | 0.22983372 | 0.7682524  | 0.00094498 |
| 9mo_SIGAF3_AGACAAAAGACGTCCC-1-10x  | 0.03760567 | 0.08381645 | 6.07E-05   |
| 9mo_SIGAF3_AGACAAAAGGATACGC-1-10x  | 0.17495032 | 0.5728377  | 0.0015753  |
| 9mo_SIGAF3_AGACAAACAGCCGTTG-1-10x  | 0.01866343 | 0.0163718  | 3.49E-05   |
| 9mo_SIGAF3_AGACACTCAGCGTGAA-1-10x  | 0.01601397 | 0.00693828 | 3.33E-05   |
| 9mo_SIGAF3_AGACAGGCATGAGAAT-1-10x  | 0.19146295 | 0.6316317  | 0.0012985  |
| 9mo_SIGAF3_AGACAGGTCCACTGGG-1-10x  | 0.01502541 | 0.00341846 | 3.27E-05   |
| 9mo_SIGAF3_AGACCATCACGGCTAC-1-10x  | 0.09395609 | 0.28445446 | 0.0044154  |
| 9mo_SIGAF3_AGACCCGAGGAAGTCC-1-10x  | 0.02633561 | 0.04368893 | 4.09E-05   |
| 9mo_SIGAF3_AGACCCGGTTTCGACA-1-10x  | 0.02566255 | 0.04129247 | 4.00E-05   |
| 9mo_SIGAF3_AGAGCCCCACCAAATC-1-10x  | 0.28079423 | 0.9496994  | 0.00075348 |
| 9mo_SIGAF3_AGATCCACAGCTGGTC-1-10x  | 0.10215792 | 0.3136574  | 0.0039137  |
| 9mo_SIGAF3_AGATGAAGTTGTTTGG-1-10x  | 0.04706492 | 0.1174965  | 0.00010777 |
| 9mo_SIGAF3_AGATGCTAGTGATAAC-1-10x  | 0.02088091 | 0.02426723 | 3.62E-05   |
| 9mo_SIGAF3_AGCATCAGTAAGAACT-1-10x  | 0.08793621 | 0.2630204  | 0.0041422  |
| 9mo_SIGAF3_AGCCAATAGTAGGGTC-1-10x  | 0.2622605  | 0.88370925 | 0.00076727 |
| 9mo_SIGAF3_AGCCAATGTCCGGTGT-1-10x  | 0.25376734 | 0.853469   | 0.00079608 |
| 9mo_SIGAF3_AGCCAATGTTCCAGGC-1-10x  | 0.0380737  | 0.08548287 | 6.36E-05   |
| 9mo_SIGAF3_AGCGATTGTCATAGTC-1-10x  | 0.04372635 | 0.10560937 | 8.81E-05   |
| 9mo_SIGAF3_AGCGCCAGTATAGCTC-1-10x  | 0.0711313  | 0.20318586 | 0.0013138  |

|                                    |            |            |            |
|------------------------------------|------------|------------|------------|
| 9mo_SIGAF3_AGC GCCAGTCGTCGGT-1-10x | 0.09111567 | 0.27434102 | 0.0043535  |
| 9mo_SIGAF3_AGC GTATAGAGTCTGG-1-10x | 0.09305958 | 0.28126237 | 0.0044107  |
| 9mo_SIGAF3_AGC GTATGTAGAGTTA-1-10x | 0.05257731 | 0.13712358 | 0.00017575 |
| 9mo_SIGAF3_AGCTCAAAGACATCAA-1-10x  | 0.0215895  | 0.02679018 | 3.69E-05   |
| 9mo_SIGAF3_AGCTCAATCCAGTGTA-1-10x  | 0.24246116 | 0.81321293 | 0.00085764 |
| 9mo_SIGAF3_AGCTCAATCCGCAACG-1-10x  | 0.04696271 | 0.11713257 | 0.00010777 |
| 9mo_SIGAF3_AGCTTCCCATCTAGAC-1-10x  | 0.04869242 | 0.12329126 | 0.00012523 |
| 9mo_SIGAF3_AGCTTCCGTCCAGCCA-1-10x  | 0.02172375 | 0.02726819 | 3.69E-05   |
| 9mo_SIGAF3_AGGAAATCATCTGTTT-1-10x  | 0.01576129 | 0.0060386  | 3.33E-05   |
| 9mo_SIGAF3_AGGAAATGTACGGTTT-1-10x  | 0.13279216 | 0.4227319  | 0.0019219  |
| 9mo_SIGAF3_AGGAATAAGCGAGTAC-1-10x  | 0.04535389 | 0.11140429 | 9.39E-05   |
| 9mo_SIGAF3_AGGACGAGTGCCTAAT-1-10x  | 0.06987585 | 0.19871578 | 0.0010821  |
| 9mo_SIGAF3_AGGACTTCATCATTGG-1-10x  | 0.20241404 | 0.6706234  | 0.0011699  |
| 9mo_SIGAF3_AGGATAATCCAGCCTT-1-10x  | 0.04075924 | 0.09504484 | 7.01E-05   |
| 9mo_SIGAF3_AGGATCTCAAATTGCC-1-10x  | 0.08512509 | 0.2530113  | 0.0037839  |
| 9mo_SIGAF3_AGGATCTTCAGTCCGG-1-10x  | 0.08650444 | 0.25792256 | 0.0039187  |
| 9mo_SIGAF3_AGGATCTTCATATGGC-1-10x  | 0.08260703 | 0.24404564 | 0.0033032  |
| 9mo_SIGAF3_AGGCATTAGGTCTGGA-1-10x  | 0.09232115 | 0.27863318 | 0.0043903  |
| 9mo_SIGAF3_AGGCATTAGTGCATC-1-10x   | 0.2381024  | 0.7976934  | 0.00088278 |
| 9mo_SIGAF3_AGGCCACGTAATACCC-1-10x  | 0.02358752 | 0.03390424 | 3.83E-05   |
| 9mo_SIGAF3_AGGGAGTAGTATGAAC-1-10x  | 0.04945226 | 0.12599672 | 0.00013566 |
| 9mo_SIGAF3_AGGGCCTGTAATTGGA-1-10x  | 0.11684264 | 0.36594296 | 0.0025211  |
| 9mo_SIGAF3_AGGGCCTTCATCACCC-1-10x  | 0.07388071 | 0.21297523 | 0.0017292  |
| 9mo_SIGAF3_AGGGTCCAGTACAGCG-1-10x  | 0.09540097 | 0.28959903 | 0.0043808  |
| 9mo_SIGAF3_AGGGTCCGTTGCACGC-1-10x  | 0.04765741 | 0.11960607 | 0.00011598 |
| 9mo_SIGAF3_AGGGTTTGTGGCAACA-1-10x  | 0.08426259 | 0.24994032 | 0.0036353  |
| 9mo_SIGAF3_AGGTAGGCAGAGGAAA-1-10x  | 0.15354097 | 0.49660888 | 0.0018617  |
| 9mo_SIGAF3_AGGTAGGTCCCTAGC-1-10x   | 0.01832756 | 0.01517592 | 3.49E-05   |
| 9mo_SIGAF3_AGGTAGGTCCGGCTGGT-1-10x | 0.03404301 | 0.07113145 | 5.17E-05   |
| 9mo_SIGAF3_AGGTCATGTTCGTATGT-1-10x | 0.23119792 | 0.7731097  | 0.00093779 |
| 9mo_SIGAF3_AGGTCATGTGGTACAG-1-10x  | 0.05865281 | 0.15875567 | 0.00031414 |
| 9mo_SIGAF3_AGGTTACAGGTAGTAT-1-10x  | 0.08179921 | 0.24116936 | 0.0031253  |
| 9mo_SIGAF3_AGGTTACCAAATAAG-1-10x   | 0.1460736  | 0.47002098 | 0.0018717  |
| 9mo_SIGAF3_AGGTTACTCTGGAGAG-1-10x  | 0.01665578 | 0.00922348 | 3.38E-05   |
| 9mo_SIGAF3_AGTAACCAGAATACAC-1-10x  | 0.0281265  | 0.05006545 | 4.30E-05   |
| 9mo_SIGAF3_AGTAACCGTATTCCGA-1-10x  | 0.0246503  | 0.0376883  | 3.91E-05   |
| 9mo_SIGAF3_AGTACCACAAGCACCC-1-10x  | 0.07875902 | 0.23034465 | 0.002576   |
| 9mo_SIGAF3_AGTCACAGTATGCGGA-1-10x  | 0.04436543 | 0.10788482 | 8.81E-05   |
| 9mo_SIGAF3_AGTCATGAGATCGGTG-1-10x  | 0.2756289  | 0.93130803 | 0.00075218 |
| 9mo_SIGAF3_AGTCATGGTGAGTTGG-1-10x  | 0.14430849 | 0.46373627 | 0.0018716  |
| 9mo_SIGAF3_AGTCATGTCACCTTAT-1-10x  | 0.0325284  | 0.0657386  | 5.00E-05   |

|                                    |            |            |            |
|------------------------------------|------------|------------|------------|
| 9mo_SIGAF3_AGTGATCCAATCGAAA-1-10x  | 0.16404808 | 0.5340198  | 0.0017494  |
| 9mo_SIGAF3_AGTGCCGAGTATAGGT-1-10x  | 0.15673406 | 0.507978   | 0.0018385  |
| 9mo_SIGAF3_AGTGCCGCACACCGAC-1-10x  | 0.07676936 | 0.22326039 | 0.0022191  |
| 9mo_SIGAF3_AGTGTTGAGTTTCGAC-1-10x  | 0.08211444 | 0.24229178 | 0.0031253  |
| 9mo_SIGAF3_AGTGTTGGTCTCGACG-1-10x  | 0.0386903  | 0.08767831 | 6.36E-05   |
| 9mo_SIGAF3_AGTGTTGTCAAGTAAG-1-10x  | 0.12541798 | 0.39647582 | 0.0020515  |
| 9mo_SIGAF3_AGTTCGAAGCAGAAAG-1-10x  | 0.08340239 | 0.24687755 | 0.0034742  |
| 9mo_SIGAF3_ATACCGACACTTCCTG-1-10x  | 0.06137693 | 0.16845502 | 0.00042799 |
| 9mo_SIGAF3_ATAGACCGTCAGTTTG-1-10x  | 0.03388631 | 0.07057352 | 5.17E-05   |
| 9mo_SIGAF3_ATAGACCTCCAAGCG-1-10x   | 0.09624506 | 0.29260442 | 0.0043808  |
| 9mo_SIGAF3_ATAGAGAGTGCTAGCC-1-10x  | 0.21679391 | 0.7218236  | 0.0010475  |
| 9mo_SIGAF3_ATAGGCTTCGAGAATA-1-10x  | 0.02299864 | 0.0318075  | 3.83E-05   |
| 9mo_SIGAF3_ATCACAGGTATGGAAT-1-10x  | 0.10272799 | 0.31568715 | 0.0039137  |
| 9mo_SIGAF3_ATCACAGGTGATAGGAC-1-10x | 0.27710307 | 0.9365569  | 0.00075222 |
| 9mo_SIGAF3_ATCACAGTCATAGACC-1-10x  | 0.04626346 | 0.11464286 | 0.00010046 |
| 9mo_SIGAF3_ATCACTTGTACCGGAA-1-10x  | 0.0935189  | 0.2828978  | 0.0044154  |
| 9mo_SIGAF3_ATCAGGTGTGATACCT-1-10x  | 0.09765846 | 0.29763687 | 0.0042943  |
| 9mo_SIGAF3_ATCCATTAGACTCCGC-1-10x  | 0.10036676 | 0.30727988 | 0.0040879  |
| 9mo_SIGAF3_ATCCGTCTCGTGAGAG-1-10x  | 0.18265493 | 0.60027033 | 0.0014427  |
| 9mo_SIGAF3_ATCCTATTCGTGCAGC-1-10x  | 0.02285069 | 0.03128073 | 3.76E-05   |
| 9mo_SIGAF3_ATCGATGGTCCCTAAA-1-10x  | 0.03225734 | 0.06477349 | 4.83E-05   |
| 9mo_SIGAF3_ATCGCCTAGGGTTTCT-1-10x  | 0.01891958 | 0.01728385 | 3.49E-05   |
| 9mo_SIGAF3_ATCGGATCACACCTTC-1-10x  | 0.14641675 | 0.47124282 | 0.0018717  |
| 9mo_SIGAF3_ATCGGCGGTGTAGGAC-1-10x  | 0.13973075 | 0.44743705 | 0.001875   |
| 9mo_SIGAF3_ATCGTAGAGCACTCCG-1-10x  | 0.25397843 | 0.8542206  | 0.00079608 |
| 9mo_SIGAF3_ATCGTAGGTGGTTTAC-1-10x  | 0.09013377 | 0.27084494 | 0.0042999  |
| 9mo_SIGAF3_ATCGTCTCACCGCTT-1-10x   | 0.27918547 | 0.94397134 | 0.00075266 |
| 9mo_SIGAF3_ATCGTGAGTTGCATTG-1-10x  | 0.2499593  | 0.8399104  | 0.00081397 |
| 9mo_SIGAF3_ATCTTCAAGCTATCCA-1-10x  | 0.21669053 | 0.7214555  | 0.0010475  |
| 9mo_SIGAF3_ATGAGGGGTTCTGTGCG-1-10x | 0.01559866 | 0.00545954 | 3.33E-05   |
| 9mo_SIGAF3_ATGAGTCAGAAAGCGA-1-10x  | 0.09713232 | 0.29576355 | 0.0043435  |
| 9mo_SIGAF3_ATGGAGGAGCCAAGGT-1-10x  | 0.08311118 | 0.2458407  | 0.0034742  |
| 9mo_SIGAF3_ATGGATCTCGAGAGCA-1-10x  | 0.04783062 | 0.12022279 | 0.00011598 |
| 9mo_SIGAF3_ATGGGAGGTAGCGTAG-1-10x  | 0.08790554 | 0.26291123 | 0.0041422  |
| 9mo_SIGAF3_ATGGGTTAGGTTGTTC-1-10x  | 0.19879803 | 0.6577485  | 0.0012085  |
| 9mo_SIGAF3_ATGGTTGGTTTGTGGT-1-10x  | 0.02624386 | 0.04336225 | 4.09E-05   |
| 9mo_SIGAF3_ATGTCCCAGAATTCC-1-10x   | 0.10652261 | 0.32919806 | 0.00352    |
| 9mo_SIGAF3_ATGTCTTTCGAACACT-1-10x  | 0.18759571 | 0.61786216 | 0.0013519  |
| 9mo_SIGAF3_ATTACTCGTATGGAAT-1-10x  | 0.01897839 | 0.01749322 | 3.49E-05   |
| 9mo_SIGAF3_ATTACTCTCCGCTTAC-1-10x  | 0.01566037 | 0.00567929 | 3.33E-05   |
| 9mo_SIGAF3_ATTACTCTCGGCTGAC-1-10x  | 0.06835231 | 0.19329114 | 0.00097948 |



|                                    |            |            |            |
|------------------------------------|------------|------------|------------|
| 9mo_SIGAF3_ATTCAGGCACTACTTT-1-10x  | 0.01611552 | 0.00729986 | 3.33E-05   |
| 9mo_SIGAF3_ATTCAGGGTCGGAACA-1-10x  | 0.1385902  | 0.44337606 | 0.0018772  |
| 9mo_SIGAF3_ATTCATCGTATTCTCT-1-10x  | 0.03909366 | 0.08911448 | 6.67E-05   |
| 9mo_SIGAF3_ATTCTATCTTACCAT-1-10x   | 0.0555554  | 0.14772722 | 0.000233   |
| 9mo_SIGAF3_ATTCTTGAGCTTCATG-1-10x  | 0.02085386 | 0.02417092 | 3.62E-05   |
| 9mo_SIGAF3_ATTCTTGCACTACTGG-1-10x  | 0.17214881 | 0.5628629  | 0.0016256  |
| 9mo_SIGAF3_ATTCTTGTCGGTCTGG-1-10x  | 0.01785172 | 0.01348168 | 3.44E-05   |
| 9mo_SIGAF3_ATTGGGTAGGCCACCT-1-10x  | 0.08786777 | 0.26277673 | 0.0041422  |
| 9mo_SIGAF3_ATTGGGTGTTCCGCTT-1-10x  | 0.01788418 | 0.01359726 | 3.44E-05   |
| 9mo_SIGAF3_ATTGTTCCACCAGCTG-1-10x  | 0.07948297 | 0.23292232 | 0.0027593  |
| 9mo_SIGAF3_CAACTCGTATCGGTT-1-10x   | 0.18260902 | 0.6001069  | 0.0014427  |
| 9mo_SIGAF3_CAACTCGTGCCTACG-1-10x   | 0.02924028 | 0.0540311  | 4.42E-05   |
| 9mo_SIGAF3_CAATTTCCAATGCAAA-1-10x  | 0.07093184 | 0.20247565 | 0.0013138  |
| 9mo_SIGAF3_CAATTTTCGTCAGGTC-1-10x  | 0.0189832  | 0.01751034 | 3.49E-05   |
| 9mo_SIGAF3_CAATTTTCGTTATTCCT-1-10x | 0.086727   | 0.25871497 | 0.0039187  |
| 9mo_SIGAF3_CAATTTTCGTTCCGCTT-1-10x | 0.03606197 | 0.07832003 | 5.58E-05   |
| 9mo_SIGAF3_CACACAACATGGCTAT-1-10x  | 0.05459715 | 0.14431532 | 0.00021164 |
| 9mo_SIGAF3_CACCGTTAGGCCCAAA-1-10x  | 0.2306124  | 0.7710249  | 0.00093779 |
| 9mo_SIGAF3_CACGAATGTGTTTCGTA-1-10x | 0.15539043 | 0.503194   | 0.0018522  |
| 9mo_SIGAF3_CACGAATTCTTGGAAC-1-10x  | 0.01560898 | 0.00549629 | 3.33E-05   |
| 9mo_SIGAF3_CACTAAGAGGATTTGA-1-10x  | 0.03721731 | 0.08243367 | 6.07E-05   |
| 9mo_SIGAF3_CACTAAGCAAGAGGTC-1-10x  | 0.03198234 | 0.06379435 | 4.83E-05   |
| 9mo_SIGAF3_CACTGAAAGCCAAGCA-1-10x  | 0.08520616 | 0.25329995 | 0.0037839  |
| 9mo_SIGAF3_CACTGTCCAGAGGAAA-1-10x  | 0.04491407 | 0.10983831 | 9.39E-05   |
| 9mo_SIGAF3_CAGATACCACGCCACA-1-10x  | 0.08305388 | 0.24563667 | 0.0033032  |
| 9mo_SIGAF3_CAGATCAAGAGAGGTA-1-10x  | 0.04746338 | 0.11891521 | 0.00011598 |
| 9mo_SIGAF3_CAGATCAAGTACGAGC-1-10x  | 0.04273395 | 0.10207589 | 8.29E-05   |
| 9mo_SIGAF3_CAGATTGGTTGTGGCC-1-10x  | 0.01607772 | 0.00716526 | 3.33E-05   |
| 9mo_SIGAF3_CAGCAATAGATGGTAT-1-10x  | 0.07616337 | 0.22110273 | 0.0020486  |
| 9mo_SIGAF3_CAGCCAGAGAATTCAG-1-10x  | 0.08445242 | 0.25061622 | 0.0036353  |
| 9mo_SIGAF3_CAGCCAGCAAACCATC-1-10x  | 0.25072765 | 0.8426461  | 0.00080923 |
| 9mo_SIGAF3_CAGGCCACAGAGGCTA-1-10x  | 0.28044018 | 0.94843876 | 0.00075348 |
| 9mo_SIGAF3_CAGGCCATCTGATTCT-1-10x  | 0.02451289 | 0.03719903 | 3.91E-05   |
| 9mo_SIGAF3_CAGGGCTCATTAGGCT-1-10x  | 0.08595666 | 0.25597212 | 0.0039187  |
| 9mo_SIGAF3_CAGGTATCACTTGGGC-1-10x  | 0.15124676 | 0.48844025 | 0.0018676  |
| 9mo_SIGAF3_CAGTTAGGTCTCTCTG-1-10x  | 0.03925037 | 0.08967245 | 6.67E-05   |
| 9mo_SIGAF3_CAGTTAGGTGAGACCA-1-10x  | 0.02045067 | 0.02273534 | 3.62E-05   |
| 9mo_SIGAF3_CAGTTAGTCTCCGAAA-1-10x  | 0.02950118 | 0.05496006 | 4.42E-05   |
| 9mo_SIGAF3_CATAAGCAGATGTTAG-1-10x  | 0.12287643 | 0.38742653 | 0.0021479  |
| 9mo_SIGAF3_CATACAGTCCCTCGAT-1-10x  | 0.08355581 | 0.24742381 | 0.0034742  |
| 9mo_SIGAF3_CATACTTAGAACTAC-1-10x   | 0.26246879 | 0.8844509  | 0.00076727 |

|                                    |            |            |            |
|------------------------------------|------------|------------|------------|
| 9mo_SIGAF3_CATACTTAGGATCATA-1-10x  | 0.03894584 | 0.08858815 | 6.36E-05   |
| 9mo_SIGAF3_CATACTTCAACGTA-1-10x    | 0.08668584 | 0.2585684  | 0.0039187  |
| 9mo_SIGAF3_CATAGACAGGCCAAA-1-10x   | 0.08340415 | 0.24688381 | 0.0034742  |
| 9mo_SIGAF3_CATAGACCAGAAGTGC-1-10x  | 0.11892562 | 0.37335947 | 0.0023317  |
| 9mo_SIGAF3_CATCCACAGTTTCTTC-1-10x  | 0.09914279 | 0.30292192 | 0.0041652  |
| 9mo_SIGAF3_CATCCACCAGTCGCAC-1-10x  | 0.07961265 | 0.23338403 | 0.0027593  |
| 9mo_SIGAF3_CATGAGTACTAACGT-1-10x   | 0.06089459 | 0.1667376  | 0.00042799 |
| 9mo_SIGAF3_CATGAGTGTCCCGCAA-1-10x  | 0.08306325 | 0.24567002 | 0.0033032  |
| 9mo_SIGAF3_CATGCAAAGGTCCGAA-1-10x  | 0.06216689 | 0.17126769 | 0.00047505 |
| 9mo_SIGAF3_CATGCCTAGAACGTGC-1-10x  | 0.05115546 | 0.13206102 | 0.00014746 |
| 9mo_SIGAF3_CATGCCTTCGTAACAC-1-10x  | 0.04653869 | 0.11562282 | 0.00010777 |
| 9mo_SIGAF3_CATGCGGTCGTTTACT-1-10x  | 0.13915248 | 0.4453781  | 0.0018772  |
| 9mo_SIGAF3_CATGGTAAGCCGAACA-1-10x  | 0.28105053 | 0.95061195 | 0.00075348 |
| 9mo_SIGAF3_CATGGTACAGTCTGGC-1-10x  | 0.03998534 | 0.09228934 | 7.01E-05   |
| 9mo_SIGAF3_CATTCAATCAATGCAC-1-10x  | 0.01786196 | 0.01351812 | 3.44E-05   |
| 9mo_SIGAF3_CATTCCGAGGCATCGA-1-10x  | 0.09247819 | 0.27919233 | 0.0043903  |
| 9mo_SIGAF3_CATTCCGCACGGCACT-1-10x  | 0.252726   | 0.84976125 | 0.00080028 |
| 9mo_SIGAF3_CATTGTTCAAGTAGAAT-1-10x | 0.01731179 | 0.01155922 | 3.38E-05   |
| 9mo_SIGAF3_CATTGTTTCTGGAGAG-1-10x  | 0.04898522 | 0.1243338  | 0.00012523 |
| 9mo_SIGAF3_CATTTCAAGTCTCAGAT-1-10x | 0.09469622 | 0.28708974 | 0.0044051  |
| 9mo_SIGAF3_CCACACTTCACAATGC-1-10x  | 0.09010507 | 0.27074274 | 0.0042999  |
| 9mo_SIGAF3_CCACGAGGTATTAAGG-1-10x  | 0.09229951 | 0.27855614 | 0.0043903  |
| 9mo_SIGAF3_CCACGAGTCGCCACTT-1-10x  | 0.03973819 | 0.09140938 | 6.67E-05   |
| 9mo_SIGAF3_CCACGTTACGCACCA-1-10x   | 0.01663014 | 0.00913219 | 3.38E-05   |
| 9mo_SIGAF3_CCACGTTACGCGTGT-1-10x   | 0.22464946 | 0.7497936  | 0.00098869 |
| 9mo_SIGAF3_CCACGTTTCACTTTGT-1-10x  | 0.08907581 | 0.267078   | 0.0042295  |
| 9mo_SIGAF3_CCACTTGAGTCGGGAT-1-10x  | 0.03900075 | 0.08878369 | 6.67E-05   |
| 9mo_SIGAF3_CCAACTAGCAGGTCA-1-10x   | 0.2391255  | 0.80133617 | 0.00087632 |
| 9mo_SIGAF3_CCCTCTCCACAAACGG-1-10x  | 0.01599345 | 0.00686524 | 3.33E-05   |
| 9mo_SIGAF3_CCCTTAGGTCACTCAA-1-10x  | 0.1516662  | 0.48993367 | 0.0018676  |
| 9mo_SIGAF3_CCGAACGAGGTA-1-10x      | 0.2934434  | 0.9947373  | 0.00076488 |
| 9mo_SIGAF3_CCGAACGAGGTGCCAA-1-10x  | 0.01929033 | 0.0186039  | 3.55E-05   |
| 9mo_SIGAF3_CCGCAAGAGGAGCTGT-1-10x  | 0.04120836 | 0.09664397 | 7.40E-05   |
| 9mo_SIGAF3_CCGGACACATTGAAGA-1-10x  | 0.03521796 | 0.07531488 | 5.58E-05   |
| 9mo_SIGAF3_CCGGACAGTTGCTGAT-1-10x  | 0.16327645 | 0.5312725  | 0.001763   |
| 9mo_SIGAF3_CCGGACAGTTTGGGTT-1-10x  | 0.23448142 | 0.7848007  | 0.00090964 |
| 9mo_SIGAF3_CCGGTAGCACCTATCC-1-10x  | 0.2489888  | 0.83645487 | 0.00081888 |
| 9mo_SIGAF3_CCGGTGACAAACGTGG-1-10x  | 0.02287782 | 0.03137733 | 3.76E-05   |
| 9mo_SIGAF3_CCTAACCAATCGCGC-1-10x   | 0.0878041  | 0.26255003 | 0.0041422  |
| 9mo_SIGAF3_CCTACGTAGGTACATA-1-10x  | 0.10815283 | 0.33500254 | 0.0033168  |
| 9mo_SIGAF3_CCTACGTAGTGAATAC-1-10x  | 0.01691893 | 0.01016042 | 3.38E-05   |

|                                    |            |            |            |
|------------------------------------|------------|------------|------------|
| 9mo_SIGAF3_CCTCAACGTGGTAATA-1-10x  | 0.09748666 | 0.2970252  | 0.0042943  |
| 9mo_SIGAF3_CCTCAGTCAGTTTGGT-1-10x  | 0.08505326 | 0.25275552 | 0.0037839  |
| 9mo_SIGAF3_CCTCATGCACCTGTCT-1-10x  | 0.16549155 | 0.5391594  | 0.0017353  |
| 9mo_SIGAF3_CCTCTAGGTGAGTTGG-1-10x  | 0.10423499 | 0.32105288 | 0.0037215  |
| 9mo_SIGAF3_CCTCTCCCACGCTGCA-1-10x  | 0.09683689 | 0.29471165 | 0.0043435  |
| 9mo_SIGAF3_CCTGCATGTCCGGACT-1-10x  | 0.07554196 | 0.21889018 | 0.001885   |
| 9mo_SIGAF3_CCTTCAGGTGGTATGG-1-10x  | 0.02105632 | 0.02489178 | 3.62E-05   |
| 9mo_SIGAF3_CCTTGTGAGCGAGGAG-1-10x  | 0.04927098 | 0.12535127 | 0.00012523 |
| 9mo_SIGAF3_CCTTTGGGTAGGCTGA-1-10x  | 0.04134108 | 0.09711652 | 7.40E-05   |
| 9mo_SIGAF3_CGAAGTTTCTATTGTC-1-10x  | 0.02114405 | 0.02520416 | 3.69E-05   |
| 9mo_SIGAF3_CGAATTGGTGGCTGCT-1-10x  | 0.04860251 | 0.12297115 | 0.00012523 |
| 9mo_SIGAF3_CGAGAAGTCTGTCGCT-1-10x  | 0.0819675  | 0.24176858 | 0.0031253  |
| 9mo_SIGAF3_CGAGGCTAGTAGAGTT-1-10x  | 0.09306598 | 0.28128517 | 0.0044107  |
| 9mo_SIGAF3_CGATCGGCAACCGTGC-1-10x  | 0.02362321 | 0.03403131 | 3.83E-05   |
| 9mo_SIGAF3_CGATCGGTCGGCATAT-1-10x  | 0.0330514  | 0.06760077 | 5.00E-05   |
| 9mo_SIGAF3_CGATGCGGTAACACGG-1-10x  | 0.19000219 | 0.6264306  | 0.0013244  |
| 9mo_SIGAF3_CGCAGGTGTTTGAAA-1-10x   | 0.0286109  | 0.05179017 | 4.30E-05   |
| 9mo_SIGAF3_CGCAGGTTCTTGGGCG-1-10x  | 0.25910315 | 0.8724674  | 0.00077499 |
| 9mo_SIGAF3_CGCATAAGTCTAATCG-1-10x  | 0.10643116 | 0.32887244 | 0.00352    |
| 9mo_SIGAF3_CGCATGGAGGATTTGA-1-10x  | 0.09115169 | 0.2744693  | 0.0043535  |
| 9mo_SIGAF3_CGCATGGGTACCATAC-1-10x  | 0.06456024 | 0.17978929 | 0.00064991 |
| 9mo_SIGAF3_CGCATGGGTGTATACC-1-10x  | 0.03135648 | 0.06156595 | 4.68E-05   |
| 9mo_SIGAF3_CGGAATTGTGGTCCGT-1-10x  | 0.13509604 | 0.43093497 | 0.0018953  |
| 9mo_SIGAF3_CGGACACAGCTGAAAT-1-10x  | 0.18403931 | 0.60519946 | 0.0014112  |
| 9mo_SIGAF3_CGGAGAACAGTTAAAG-1-10x  | 0.02025934 | 0.0220541  | 3.62E-05   |
| 9mo_SIGAF3_CGGGCATAGAGATCGC-1-10x  | 0.21266381 | 0.7071182  | 0.0010856  |
| 9mo_SIGAF3_CGGGCATAGGTTGGTG-1-10x  | 0.02201766 | 0.02831466 | 3.69E-05   |
| 9mo_SIGAF3_CGGGTCATCCTTCTTC-1-10x  | 0.03594264 | 0.07789516 | 5.58E-05   |
| 9mo_SIGAF3_CGGGTCATCGACACCG-1-10x  | 0.0253375  | 0.04013509 | 4.00E-05   |
| 9mo_SIGAF3_CGGTCAGGTACGCGTC-1-10x  | 0.22658457 | 0.75668365 | 0.00097406 |
| 9mo_SIGAF3_CGTAATGCACTCAAGT-1-10x  | 0.1309019  | 0.41600156 | 0.001948   |
| 9mo_SIGAF3_CGTAATnatCGTCACCT-1-10x | 0.18510121 | 0.6089804  | 0.0013959  |
| 9mo_SIGAF3_CGTCCATAGGTCCGAA-1-10x  | 0.02617931 | 0.04313241 | 4.09E-05   |
| 9mo_SIGAF3_CGTGAATAGACCATTC-1-10x  | 0.0222856  | 0.02926869 | 3.76E-05   |
| 9mo_SIGAF3_CGTGAATTCGCTGATA-1-10x  | 0.24370557 | 0.8176437  | 0.00085167 |
| 9mo_SIGAF3_CGTGCTTAGTATCCTG-1-10x  | 0.01859678 | 0.0161345  | 3.49E-05   |
| 9mo_SIGAF3_CGTGTCTTCAAGCGTT-1-10x  | 0.09641746 | 0.29321826 | 0.0043435  |
| 9mo_SIGAF3_CGTTAGAGTTTATGCG-1-10x  | 0.01588474 | 0.00647817 | 3.33E-05   |
| 9mo_SIGAF3_CTAACCCAGCTTTGA-1-10x   | 0.02710091 | 0.0464138  | 4.19E-05   |
| 9mo_SIGAF3_CTAACCTCAGTAGGG-1-10x   | 0.26465783 | 0.89224505 | 0.00076135 |
| 9mo_SIGAF3_CTAACCTTCCTCTCTT-1-10x  | 0.02632538 | 0.04365249 | 4.09E-05   |

|                                    |            |            |            |
|------------------------------------|------------|------------|------------|
| 9mo_SIGAF3_CTACCCACACATGACT-1-10x  | 0.05151538 | 0.13334255 | 0.00016076 |
| 9mo_SIGAF3_CTACCTGTCACGTAGT-1-10x  | 0.04170669 | 0.09841829 | 7.40E-05   |
| 9mo_SIGAF3_CTACTATTCAACCCGG-1-10x  | 0.2458473  | 0.8252694  | 0.00083459 |
| 9mo_SIGAF3_CTACTATTCAGACCTA-1-10x  | 0.23359329 | 0.78163844 | 0.00091657 |
| 9mo_SIGAF3_CTAGACAGTAAGATTG-1-10x  | 0.08079288 | 0.2375863  | 0.0029431  |
| 9mo_SIGAF3_CTAGACATCGCGTAGC-1-10x  | 0.06339016 | 0.1756232  | 0.00058553 |
| 9mo_SIGAF3_CTAGGTAAGATGGTAT-1-10x  | 0.03345137 | 0.06902487 | 5.17E-05   |
| 9mo_SIGAF3_CTAGGTATCTGCGGGT-1-10x  | 0.17090924 | 0.5584493  | 0.0016421  |
| 9mo_SIGAF3_CTATAGGCAATAACGA-1-10x  | 0.01859595 | 0.01613152 | 3.49E-05   |
| 9mo_SIGAF3_CTATCCGAGAGAGCAA-1-10x  | 0.01923954 | 0.01842306 | 3.55E-05   |
| 9mo_SIGAF3_CTATCCGGTTCGATTCA-1-10x | 0.25225794 | 0.84809476 | 0.00080028 |
| 9mo_SIGAF3_CTATCTAAGAGGCCAT-1-10x  | 0.0180691  | 0.01425566 | 3.44E-05   |
| 9mo_SIGAF3_CTCAACCAGCGACAGT-1-10x  | 0.08555441 | 0.25453994 | 0.0037839  |
| 9mo_SIGAF3_CTCAACCAGTTCCAGT-1-10x  | 0.03919781 | 0.08948533 | 6.67E-05   |
| 9mo_SIGAF3_CTCAACCGTGAGATTA-1-10x  | 0.08891358 | 0.26650038 | 0.0042295  |
| 9mo_SIGAF3_CTCAAGACATAACCCA-1-10x  | 0.24943276 | 0.8380356  | 0.00081397 |
| 9mo_SIGAF3_CTCAAGAGTCTCACGG-1-10x  | 0.25106275 | 0.8438392  | 0.00080923 |
| 9mo_SIGAF3_CTCAATTCATGAGATA-1-10x  | 0.01600092 | 0.00689183 | 3.33E-05   |
| 9mo_SIGAF3_CTCAGAAAGGATTTGA-1-10x  | 0.17852785 | 0.5855757  | 0.0015081  |
| 9mo_SIGAF3_CTCAGAAATCTAGTCAG-1-10x | 0.1268575  | 0.4016013  | 0.0020256  |
| 9mo_SIGAF3_CTCAGGGAGCACCGAA-1-10x  | 0.0221313  | 0.0287193  | 3.76E-05   |
| 9mo_SIGAF3_CTCAGTCCAATTCTTC-1-10x  | 0.26466206 | 0.89226013 | 0.00076135 |
| 9mo_SIGAF3_CTCATTACAGCATTGT-1-10x  | 0.02329196 | 0.03285186 | 3.83E-05   |
| 9mo_SIGAF3_CTCATTATCGAGAGAC-1-10x  | 0.09954684 | 0.30436057 | 0.0041652  |
| 9mo_SIGAF3_CTCCATGCACACAGCC-1-10x  | 0.13239773 | 0.4213275  | 0.0019219  |
| 9mo_SIGAF3_CTCCATGTCACTGATG-1-10x  | 0.11403236 | 0.35593683 | 0.0027534  |
| 9mo_SIGAF3_CTCCCTCGTAATGATG-1-10x  | 0.04895931 | 0.12424155 | 0.00012523 |
| 9mo_SIGAF3_CTCCTCCAGTGTGGA-1-10x   | 0.24134375 | 0.8092343  | 0.00086374 |
| 9mo_SIGAF3_CTCCTTTGTATCAGCT-1-10x  | 0.21389472 | 0.71150094 | 0.0010701  |
| 9mo_SIGAF3_CTCTCAGAGACTTCCA-1-10x  | 0.08680178 | 0.25898123 | 0.0039187  |
| 9mo_SIGAF3_CTCTCAGAGCAGCCCT-1-10x  | 0.08028406 | 0.2357746  | 0.0027593  |
| 9mo_SIGAF3_CTCTCAGAGGTGCGCT-1-10x  | 0.11555883 | 0.3613719  | 0.002594   |
| 9mo_SIGAF3_CTCTGGTCATATGCGT-1-10x  | 0.26115376 | 0.87976867 | 0.00076963 |
| 9mo_SIGAF3_CTGAATGAGCTGCGAA-1-10x  | 0.06705511 | 0.18867241 | 0.00079936 |
| 9mo_SIGAF3_CTGAATGCACTTACAG-1-10x  | 0.05165909 | 0.13385424 | 0.00016076 |
| 9mo_SIGAF3_CTGATCCGTTAGCTAC-1-10x  | 0.14475176 | 0.46531454 | 0.0018716  |
| 9mo_SIGAF3_CTGCAGGGTTAAGAAC-1-10x  | 0.1964781  | 0.6494883  | 0.00124    |
| 9mo_SIGAF3_CTGCAGGTCATTCTTG-1-10x  | 0.0403298  | 0.09351581 | 7.01E-05   |
| 9mo_SIGAF3_CTGCATCAGCATCCCG-1-10x  | 0.04192679 | 0.09920197 | 7.82E-05   |
| 9mo_SIGAF3_CTGCATCGTCGTGGAA-1-10x  | 0.03339559 | 0.06882625 | 5.17E-05   |
| 9mo_SIGAF3_CTGCCTAAGTAGAATC-1-10x  | 0.22942954 | 0.7668133  | 0.0009522  |

|                                    |            |            |            |
|------------------------------------|------------|------------|------------|
| 9mo_SIGAF3_CTGCTCATCGCTCATC-1-10x  | 0.2462061  | 0.8265469  | 0.00083459 |
| 9mo_SIGAF3_CTGGACGTCTGAGATC-1-10x  | 0.22518452 | 0.7516987  | 0.00098137 |
| 9mo_SIGAF3_CTGGCAGTCGTTTCAGA-1-10x | 0.0804408  | 0.23633268 | 0.0029431  |
| 9mo_SIGAF3_CTGTACCTCGCGTTTC-1-10x  | 0.03666459 | 0.0804657  | 5.82E-05   |
| 9mo_SIGAF3_CTGTAGAAGGATACGC-1-10x  | 0.02991716 | 0.05644118 | 4.55E-05   |
| 9mo_SIGAF3_CTGTAGAAGGCCATAG-1-10x  | 0.0239103  | 0.0350535  | 3.83E-05   |
| 9mo_SIGAF3_CTGTATTAGCGCCGTT-1-10x  | 0.0220956  | 0.02859218 | 3.76E-05   |
| 9mo_SIGAF3_CTGTTCGTAGCCATTGT-1-10x | 0.08095105 | 0.23814946 | 0.0029431  |
| 9mo_SIGAF3_CTGTGAATCATCGGGC-1-10x  | 0.01751116 | 0.01226909 | 3.44E-05   |
| 9mo_SIGAF3_CTGTGGGCACCTCTAC-1-10x  | 0.09103213 | 0.27404356 | 0.0043535  |
| 9mo_SIGAF3_CTTACCGAGTGCACCTT-1-10x | 0.03110782 | 0.06068056 | 4.68E-05   |
| 9mo_SIGAF3_CTTCCGACACACGGAA-1-10x  | 0.03921346 | 0.08954104 | 6.67E-05   |
| 9mo_SIGAF3_CTTCTTAGCTTGTGT-1-10x   | 0.09449514 | 0.28637376 | 0.0044051  |
| 9mo_SIGAF3_CTTCCGGTAGTCACTGT-1-10x | 0.18248315 | 0.5996587  | 0.0014427  |
| 9mo_SIGAF3_CTTCTAAGTCGGATTT-1-10x  | 0.20691614 | 0.6866534  | 0.0011344  |
| 9mo_SIGAF3_CTTCTCTCAGAGCGTA-1-10x  | 0.14625987 | 0.47068426 | 0.0018717  |
| 9mo_SIGAF3_CTTGATTCAAATCGGG-1-10x  | 0.08662991 | 0.25836927 | 0.0039187  |
| 9mo_SIGAF3_CTTTCGGAGTTAACAG-1-10x  | 0.13021846 | 0.41356814 | 0.001948   |
| 9mo_SIGAF3_GAAACCTAGAAGAACG-1-10x  | 0.01529235 | 0.00436894 | 3.27E-05   |
| 9mo_SIGAF3_GAACACTTCCAACCGG-1-10x  | 0.03530318 | 0.07561833 | 5.58E-05   |
| 9mo_SIGAF3_GAACTGTGTGTGTGGA-1-10x  | 0.0514451  | 0.13309233 | 0.00016076 |
| 9mo_SIGAF3_GAAGAATCAGGCTATT-1-10x  | 0.04511333 | 0.11054777 | 9.39E-05   |
| 9mo_SIGAF3_GAAGAATGTATCTCGA-1-10x  | 0.12013001 | 0.3776478  | 0.0022788  |
| 9mo_SIGAF3_GAAGAATTCTACCAGA-1-10x  | 0.02091656 | 0.02439418 | 3.62E-05   |
| 9mo_SIGAF3_GAAGCGAGTGTCATA-1-10x   | 0.08980413 | 0.2696712  | 0.0042999  |
| 9mo_SIGAF3_GAAGGGTAGCGTCAAG-1-10x  | 0.28112555 | 0.95087904 | 0.00075348 |
| 9mo_SIGAF3_GAAGTAAAGGTGATCG-1-10x  | 0.0207718  | 0.02387875 | 3.62E-05   |
| 9mo_SIGAF3_GAATAGAAGGATGAGA-1-10x  | 0.02900076 | 0.05317831 | 4.42E-05   |
| 9mo_SIGAF3_GAATAGATCTACTGCC-1-10x  | 0.01628271 | 0.00789516 | 3.33E-05   |
| 9mo_SIGAF3_GAATCACGTAATCAGA-1-10x  | 0.05377484 | 0.14138743 | 0.00019264 |
| 9mo_SIGAF3_GAATCACGTGACCGTC-1-10x  | 0.01646979 | 0.00856124 | 3.38E-05   |
| 9mo_SIGAF3_GAATCGTGTGAGTAGC-1-10x  | 0.03295995 | 0.06727517 | 5.00E-05   |
| 9mo_SIGAF3_GACACGCGTTTAAGGA-1-10x  | 0.15406138 | 0.4984618  | 0.0018575  |
| 9mo_SIGAF3_GACAGCCAGCTAGCCC-1-10x  | 0.02601788 | 0.04255761 | 4.09E-05   |
| 9mo_SIGAF3_GACATCATCAGTGTGT-1-10x  | 0.08574187 | 0.2552074  | 0.0037839  |
| 9mo_SIGAF3_GACCCAGTCTGAGGCC-1-10x  | 0.07196635 | 0.20615909 | 0.0014433  |
| 9mo_SIGAF3_GACCCCTCACGCGTGT-1-10x  | 0.01550668 | 0.00513206 | 3.33E-05   |
| 9mo_SIGAF3_GACCGTGAGAACTTCC-1-10x  | 0.08355343 | 0.24741536 | 0.0034742  |
| 9mo_SIGAF3_GACCGTGGTATGTCAC-1-10x  | 0.05225124 | 0.13596259 | 0.00017575 |
| 9mo_SIGAF3_GACCTTCCAACCAACT-1-10x  | 0.04325178 | 0.10391966 | 8.29E-05   |
| 9mo_SIGAF3_GACCTTCCAGGAAGTC-1-10x  | 0.0453344  | 0.11133491 | 9.39E-05   |

|                                    |            |            |            |
|------------------------------------|------------|------------|------------|
| 9mo_SIGAF3_GACGTTATCTGCGAGC-1-10x  | 0.04664261 | 0.11599284 | 0.00010777 |
| 9mo_SIGAF3_GACTATGAGACAGTCG-1-10x  | 0.03358204 | 0.06949012 | 5.17E-05   |
| 9mo_SIGAF3_GACTCTCGTCGGTAAG-1-10x  | 0.08733414 | 0.26087672 | 0.0040384  |
| 9mo_SIGAF3_GACTCTCTCGTTCTAT-1-10x  | 0.0418037  | 0.09876368 | 7.82E-05   |
| 9mo_SIGAF3_GACTTCCTCAGCGCAC-1-10x  | 0.02499318 | 0.03890913 | 4.00E-05   |
| 9mo_SIGAF3_GACTTCCTCTATCCAT-1-10x  | 0.14684384 | 0.47276348 | 0.0018717  |
| 9mo_SIGAF3_GAGACCCAGGGCCCTT-1-10x  | 0.28513744 | 0.9651636  | 0.00075686 |
| 9mo_SIGAF3_GAGACCCTCCTGGCTT-1-10x  | 0.20593382 | 0.6831558  | 0.001143   |
| 9mo_SIGAF3_GAGACTTTCCAAGTAG-1-10x  | 0.20058899 | 0.66412526 | 0.0011888  |
| 9mo_SIGAF3_GAGCCTGCATATAGCC-1-10x  | 0.21034858 | 0.6988747  | 0.0011014  |
| 9mo_SIGAF3_GAGGCAAAGCCGCACT-1-10x  | 0.02350904 | 0.03362481 | 3.83E-05   |
| 9mo_SIGAF3_GAGGCAACACGGGCTT-1-10x  | 0.09593726 | 0.2915085  | 0.0043808  |
| 9mo_SIGAF3_GAGGCAAGTAGGTAGC-1-10x  | 0.01850755 | 0.01581678 | 3.49E-05   |
| 9mo_SIGAF3_GAGGCAATCTCATTTG-1-10x  | 0.01618244 | 0.00753813 | 3.33E-05   |
| 9mo_SIGAF3_GAGGCCTTCGCGCTGA-1-10x  | 0.2937991  | 0.9960038  | 0.000766   |
| 9mo_SIGAF3_GAGGGATCAAATTGCC-1-10x  | 0.29061002 | 0.9846489  | 0.00076163 |
| 9mo_SIGAF3_GAGGGATGTAGCACAG-1-10x  | 0.08037655 | 0.23610394 | 0.0029431  |
| 9mo_SIGAF3_GAGGGTAGTGTTGCCG-1-10x  | 0.14058787 | 0.45048884 | 0.0018734  |
| 9mo_SIGAF3_GAGTGAGTCACTTTGT-1-10x  | 0.03891166 | 0.08846647 | 6.36E-05   |
| 9mo_SIGAF3_GAGTTACAGGACCCAA-1-10x  | 0.0828871  | 0.24504285 | 0.0033032  |
| 9mo_SIGAF3_GAGTTTGCACATCATG-1-10x  | 0.01579467 | 0.00615746 | 3.33E-05   |
| 9mo_SIGAF3_GAGTTTGGTGCCAAGA-1-10x  | 0.02676824 | 0.0452293  | 4.19E-05   |
| 9mo_SIGAF3_GAGTTTGGTTAGGAGC-1-10x  | 0.06068115 | 0.16597766 | 0.00042799 |
| 9mo_SIGAF3_GATAGAATCGCTATTT-1-10x  | 0.08802383 | 0.26333237 | 0.0041422  |
| 9mo_SIGAF3_GATCATGAGGTGCGAT-1-10x  | 0.04268622 | 0.10190596 | 7.82E-05   |
| 9mo_SIGAF3_GATCATGGTACGACTT-1-10x  | 0.23376189 | 0.7822388  | 0.00091657 |
| 9mo_SIGAF3_GATCCCTCAGTTTGGT-1-10x  | 0.22767885 | 0.7605799  | 0.00096676 |
| 9mo_SIGAF3_GATCCCTCCGCACTT-1-10x   | 0.0553383  | 0.14695422 | 0.000233   |
| 9mo_SIGAF3_GATCGTAAGCCATTTG-1-10x  | 0.1878244  | 0.6186764  | 0.0013519  |
| 9mo_SIGAF3_GATCGTACAAAGGGTC-1-10x  | 0.0332901  | 0.06845068 | 5.00E-05   |
| 9mo_SIGAF3_GATCGTACATGGCACC-1-10x  | 0.18398425 | 0.6050034  | 0.0014112  |
| 9mo_SIGAF3_GATGACTCACTTGACA-1-10x  | 0.15446487 | 0.4998985  | 0.0018575  |
| 9mo_SIGAF3_GATGATCGTGATGGCA-1-10x  | 0.16244939 | 0.52832764 | 0.001776   |
| 9mo_SIGAF3_GATGATCGTTATCCAG-1-10x  | 0.28940418 | 0.9803555  | 0.0007606  |
| 9mo_SIGAF3_GATGCTAAGCATGGGT-1-10x  | 0.06502105 | 0.18143006 | 0.00064991 |
| 9mo_SIGAF3_GATGGAGAGGGATCAC-1-10x  | 0.08865933 | 0.2655951  | 0.0041422  |
| 9mo_SIGAF3_GATTTCGACACCGTGAC-1-10x | 0.01802187 | 0.01408751 | 3.44E-05   |
| 9mo_SIGAF3_GATTTCTCAGCCCACA-1-10x  | 0.05387216 | 0.14173396 | 0.00019264 |
| 9mo_SIGAF3_GCAACCGTCTCAGAAC-1-10x  | 0.07769989 | 0.22657359 | 0.0023954  |
| 9mo_SIGAF3_GCACATAAGATGCCGA-1-10x  | 0.08658072 | 0.25819415 | 0.0039187  |
| 9mo_SIGAF3_GCACGTGAGGTCGACA-1-10x  | 0.23340543 | 0.78096956 | 0.00091657 |

|                                    |            |            |            |
|------------------------------------|------------|------------|------------|
| 9mo_SIGAF3_GCACGTGCATAGATGA-1-10x  | 0.24234149 | 0.8127868  | 0.00085764 |
| 9mo_SIGAF3_GCACGTGTCAGCGGAA-1-10x  | 0.09535044 | 0.2894191  | 0.0043808  |
| 9mo_SIGAF3_GCAGCTGGTTAATGAG-1-10x  | 0.06720877 | 0.18921953 | 0.00088537 |
| 9mo_SIGAF3_GCAGGCTAGCTAGAGC-1-10x  | 0.01681629 | 0.00979498 | 3.38E-05   |
| 9mo_SIGAF3_GCAGTTAGTCATTCCC-1-10x  | 0.02525611 | 0.0398453  | 4.00E-05   |
| 9mo_SIGAF3_GCATCTCCACGGCTAC-1-10x  | 0.04971253 | 0.12692343 | 0.00013566 |
| 9mo_SIGAF3_GCATGATGTTCCAAAC-1-10x  | 0.21608198 | 0.7192887  | 0.001055   |
| 9mo_SIGAF3_GCCAACGCATTGAGGG-1-10x  | 0.08324246 | 0.24630813 | 0.0034742  |
| 9mo_SIGAF3_GCCAGGTTGATACAC-1-10x   | 0.03162473 | 0.06252106 | 4.83E-05   |
| 9mo_SIGAF3_GCCATGGAGAGGCGGA-1-10x  | 0.01928598 | 0.01858841 | 3.55E-05   |
| 9mo_SIGAF3_GCCATGGGTAAGCCG-1-10x   | 0.04707537 | 0.11753369 | 0.00010777 |
| 9mo_SIGAF3_GCCATGGGTAGACTGG-1-10x  | 0.04404475 | 0.10674306 | 8.81E-05   |
| 9mo_SIGAF3_GCCATTCTCGAACCTA-1-10x  | 0.044593   | 0.1086951  | 9.39E-05   |
| 9mo_SIGAF3_GCCGATGAGGACAAGA-1-10x  | 0.03701665 | 0.08171919 | 5.82E-05   |
| 9mo_SIGAF3_GCCGATGTCGCATTGA-1-10x  | 0.07053198 | 0.20105194 | 0.0011935  |
| 9mo_SIGAF3_GCCGATGTCTTCGCTG-1-10x  | 0.23305152 | 0.7797095  | 0.00092358 |
| 9mo_SIGAF3_GCCTGTTGTGACAGGT-1-10x  | 0.09127336 | 0.27490246 | 0.0043535  |
| 9mo_SIGAF3_GCCTGTTTCCATTTCGC-1-10x | 0.14836253 | 0.47817084 | 0.0018713  |
| 9mo_SIGAF3_GCGAGAAAGACCAACG-1-10x  | 0.2639336  | 0.88966644 | 0.00076313 |
| 9mo_SIGAF3_GCGAGAACAACGACAG-1-10x  | 0.01852008 | 0.0158614  | 3.49E-05   |
| 9mo_SIGAF3_GCGGAAAGTACACGCC-1-10x  | 0.0552609  | 0.14667861 | 0.000233   |
| 9mo_SIGAF3_GCGGATCTCGAGCTGC-1-10x  | 0.24155582 | 0.8099894  | 0.00086374 |
| 9mo_SIGAF3_GCGTGCAGTCGATTAC-1-10x  | 0.02748026 | 0.0477645  | 4.19E-05   |
| 9mo_SIGAF3_GCGTTTCCATGAGTAA-1-10x  | 0.24496098 | 0.82211363 | 0.00084014 |
| 9mo_SIGAF3_GCGTTTCTGTCCCTT-1-10x   | 0.08398783 | 0.24896204 | 0.0034742  |
| 9mo_SIGAF3_GCTACAAGTAGCTTGT-1-10x  | 0.0168139  | 0.00978646 | 3.38E-05   |
| 9mo_SIGAF3_GCTCAAACACGTCATA-1-10x  | 0.08403683 | 0.24913651 | 0.0034742  |
| 9mo_SIGAF3_GCTCAAAGTGTGACT-1-10x   | 0.0279998  | 0.04961435 | 4.30E-05   |
| 9mo_SIGAF3_GCTCAAATCACATTGG-1-10x  | 0.01518818 | 0.00399802 | 3.27E-05   |
| 9mo_SIGAF3_GCTCAAATCTCCAATT-1-10x  | 0.02607329 | 0.04275493 | 4.09E-05   |
| 9mo_SIGAF3_GCTGAATCAGGCCCTA-1-10x  | 0.08790761 | 0.26291856 | 0.0041422  |
| 9mo_SIGAF3_GCTGAATGTTGCGTTA-1-10x  | 0.0465862  | 0.11579199 | 0.00010777 |
| 9mo_SIGAF3_GCTTCACTCGGACTTA-1-10x  | 0.06871875 | 0.19459584 | 0.00097948 |
| 9mo_SIGAF3_GCTTTCGCATGTTACG-1-10x  | 0.02480488 | 0.03823869 | 3.91E-05   |
| 9mo_SIGAF3_GGAACCCAGATTGGGC-1-10x  | 0.01590768 | 0.00655982 | 3.33E-05   |
| 9mo_SIGAF3_GGAAGTGAGAATTGTG-1-10x  | 0.03702278 | 0.08174105 | 5.82E-05   |
| 9mo_SIGAF3_GGAAGTGGTACAAACA-1-10x  | 0.02719673 | 0.04675498 | 4.19E-05   |
| 9mo_SIGAF3_GGAATCTTCTGCACCT-1-10x  | 0.08197222 | 0.24178538 | 0.0031253  |
| 9mo_SIGAF3_GGACGTCGTGGGCTCT-1-10x  | 0.07989377 | 0.23438497 | 0.0027593  |
| 9mo_SIGAF3_GGAGATGCAGTAACGG-1-10x  | 0.01782704 | 0.0133938  | 3.44E-05   |
| 9mo_SIGAF3_GGAGATGGTCGCGTCA-1-10x  | 0.0449928  | 0.11011863 | 9.39E-05   |

|                                    |            |            |            |
|------------------------------------|------------|------------|------------|
| 9mo_SIGAF3_GGAGCAAGTGTGTA-1-10x    | 0.15617009 | 0.50596994 | 0.0018459  |
| 9mo_SIGAF3_GGAGGATAGATAGCAT-1-10x  | 0.2587466  | 0.8711979  | 0.000778   |
| 9mo_SIGAF3_GGAGGATTCAAACTGC-1-10x  | 0.0510494  | 0.13168341 | 0.00014746 |
| 9mo_SIGAF3_GGAGGTATCATTACGG-1-10x  | 0.08509765 | 0.2529136  | 0.0037839  |
| 9mo_SIGAF3_GGCAGTCAGCAGCACA-1-10x  | 0.23974462 | 0.8035405  | 0.00087632 |
| 9mo_SIGAF3_GGCTGTGAGCCTCTCT-1-10x  | 0.05535799 | 0.14702432 | 0.000233   |
| 9mo_SIGAF3_GGCTTTCAGGAATTAC-1-10x  | 0.04680812 | 0.11658215 | 0.00010777 |
| 9mo_SIGAF3_GGCTTTCGTGGCCTA-1-10x   | 0.18678153 | 0.61496323 | 0.0013662  |
| 9mo_SIGAF3_GGGACAAAGCATCGAG-1-10x  | 0.04420799 | 0.10732429 | 8.81E-05   |
| 9mo_SIGAF3_GGGACAATCCAGTGTA-1-10x  | 0.03339171 | 0.06881245 | 5.17E-05   |
| 9mo_SIGAF3_GGGAGATGTTTCGGCCA-1-10x | 0.11306509 | 0.35249284 | 0.0028393  |
| 9mo_SIGAF3_GGGATGAGTTCAATCG-1-10x  | 0.01742218 | 0.01195229 | 3.44E-05   |
| 9mo_SIGAF3_GGGCCATAGAGGCGGA-1-10x  | 0.04801546 | 0.12088092 | 0.00011598 |
| 9mo_SIGAF3_GGGCCATCACATTGTG-1-10x  | 0.02024863 | 0.02201598 | 3.62E-05   |
| 9mo_SIGAF3_GGGCCATGTGCGTCA-1-10x   | 0.15786827 | 0.51201636 | 0.0018302  |
| 9mo_SIGAF3_GGGCGTTTCTCGACGG-1-10x  | 0.04579169 | 0.1129631  | 0.00010046 |
| 9mo_SIGAF3_GGGTAGAAGGGTTTCT-1-10x  | 0.04388335 | 0.10616838 | 8.81E-05   |
| 9mo_SIGAF3_GGGTAGAGTGGCCACT-1-10x  | 0.04440018 | 0.10800856 | 8.81E-05   |
| 9mo_SIGAF3_GGGTCACGTACGTGC-1-10x   | 0.11815988 | 0.37063304 | 0.0023898  |
| 9mo_SIGAF3_GGGTCACTCCATTTCG-1-10x  | 0.07953542 | 0.23310904 | 0.0027593  |
| 9mo_SIGAF3_GGGTCTGTGACATTG-1-10x   | 0.06172545 | 0.16969593 | 0.00047505 |
| 9mo_SIGAF3_GGGTGAATCAGCTGAT-1-10x  | 0.05220941 | 0.13581367 | 0.00017575 |
| 9mo_SIGAF3_GGGTGAATCCACAGGC-1-10x  | 0.22243887 | 0.74192274 | 0.0010033  |
| 9mo_SIGAF3_GGGTGTCCAGGTGTTT-1-10x  | 0.0568838  | 0.15245701 | 0.00028394 |
| 9mo_SIGAF3_GGGTTTAGTTGCTCAA-1-10x  | 0.24385273 | 0.8181677  | 0.00084583 |
| 9mo_SIGAF3_GGTAATCGTAGCTGCC-1-10x  | 0.06646141 | 0.18655853 | 0.00079936 |
| 9mo_SIGAF3_GGTCACGAGCTGAAGC-1-10x  | 0.02459229 | 0.03748175 | 3.91E-05   |
| 9mo_SIGAF3_GGTCACGAGGAACATT-1-10x  | 0.01699345 | 0.01042578 | 3.38E-05   |
| 9mo_SIGAF3_GGTCACGTCCACTTTA-1-10x  | 0.07908096 | 0.23149094 | 0.002576   |
| 9mo_SIGAF3_GGTCACGTCTTCTGTA-1-10x  | 0.03989868 | 0.09198079 | 7.01E-05   |
| 9mo_SIGAF3_GGTGGCTCATCGGCCA-1-10x  | 0.05144693 | 0.13309883 | 0.00016076 |
| 9mo_SIGAF3_GGTTAACCATACACCA-1-10x  | 0.01648412 | 0.00861226 | 3.38E-05   |
| 9mo_SIGAF3_GGTTAACTCCATCAGA-1-10x  | 0.13596979 | 0.43404597 | 0.0018891  |
| 9mo_SIGAF3_GGTTCTCAGCGAGTCA-1-10x  | 0.06170011 | 0.16960572 | 0.00047505 |
| 9mo_SIGAF3_GGTTCTCAGTCGGCCT-1-10x  | 0.04784112 | 0.1202602  | 0.00011598 |
| 9mo_SIGAF3_GGTTGTAGTCCTCATC-1-10x  | 0.0215346  | 0.02659473 | 3.69E-05   |
| 9mo_SIGAF3_GTAACCACAACCGTAT-1-10x  | 0.04404621 | 0.10674825 | 8.81E-05   |
| 9mo_SIGAF3_GTAATCGCAAGTTGGG-1-10x  | 0.2515919  | 0.8457233  | 0.00080467 |
| 9mo_SIGAF3_GTAATCGCATGTGACT-1-10x  | 0.04780879 | 0.12014507 | 0.00011598 |
| 9mo_SIGAF3_GTAATGCTCAGGAAAT-1-10x  | 0.10764747 | 0.33320317 | 0.0033168  |
| 9mo_SIGAF3_GTAATGCTCTAACGCA-1-10x  | 0.08810778 | 0.26363128 | 0.0041422  |



|                                    |            |            |            |
|------------------------------------|------------|------------|------------|
| 9mo_SIGAF3_GTAGAGGAGTGGAAGA-1-10x  | 0.12926294 | 0.41016597 | 0.0019639  |
| 9mo_SIGAF3_GTAGCTAAGTCAGGGT-1-10x  | 0.14874215 | 0.4795225  | 0.0018713  |
| 9mo_SIGAF3_GTAGGAGAGTAGGGTC-1-10x  | 0.24886484 | 0.8360135  | 0.00081888 |
| 9mo_SIGAF3_GTATTGGAGAGTTGAT-1-10x  | 0.01960159 | 0.01971215 | 3.55E-05   |
| 9mo_SIGAF3_GTATTTCTCACCTCAC-1-10x  | 0.0289821  | 0.05311186 | 4.42E-05   |
| 9mo_SIGAF3_GTCAAACCTCAAGTCGT-1-10x | 0.08696431 | 0.25955993 | 0.0040384  |
| 9mo_SIGAF3_GTCAAGTTCGCTAGCG-1-10x  | 0.26453567 | 0.8918101  | 0.00076135 |
| 9mo_SIGAF3_GTCACTCTCCTTATGT-1-10x  | 0.09150618 | 0.27573144 | 0.0043535  |
| 9mo_SIGAF3_GTCATGACAAAGACTA-1-10x  | 0.04010453 | 0.09271374 | 7.01E-05   |
| 9mo_SIGAF3_GTCATGACAGCGACCT-1-10x  | 0.03768022 | 0.08408187 | 6.07E-05   |
| 9mo_SIGAF3_GTCATGACAGCTGTTA-1-10x  | 0.02496732 | 0.03881704 | 4.00E-05   |
| 9mo_SIGAF3_GTCATTTCAAAGCG-1-10x    | 0.03324671 | 0.06829619 | 5.00E-05   |
| 9mo_SIGAF3_GTCCACTGTAGTTAGA-1-10x  | 0.05018101 | 0.12859148 | 0.00013566 |
| 9mo_SIGAF3_GTCCCATAGGGACTGT-1-10x  | 0.01919752 | 0.01827345 | 3.49E-05   |
| 9mo_SIGAF3_GTCCCATAGTAAGCAT-1-10x  | 0.08296492 | 0.24531993 | 0.0033032  |
| 9mo_SIGAF3_GTCCTCAGTATCCTCC-1-10x  | 0.04304577 | 0.10318615 | 8.29E-05   |
| 9mo_SIGAF3_GTCGCGAGTAGCACGA-1-10x  | 0.27311724 | 0.9223652  | 0.0007526  |
| 9mo_SIGAF3_GTCGCGATCCGATAAC-1-10x  | 0.27602166 | 0.9327065  | 0.00075214 |
| 9mo_SIGAF3_GTCTACCCACTGAATC-1-10x  | 0.05840528 | 0.15787432 | 0.00031414 |
| 9mo_SIGAF3_GTCTAGATCGTGGGTC-1-10x  | 0.01936283 | 0.01886204 | 3.55E-05   |
| 9mo_SIGAF3_GTCTCACTCGAGAATA-1-10x  | 0.03283753 | 0.06683926 | 5.00E-05   |
| 9mo_SIGAF3_GTCTGTCAGCGCAATG-1-10x  | 0.08609711 | 0.2564722  | 0.0039187  |
| 9mo_SIGAF3_GTCTTTATCACTCGAA-1-10x  | 0.02907172 | 0.05343093 | 4.42E-05   |
| 9mo_SIGAF3_GTCTTTATCAGCTGTA-1-10x  | 0.1275067  | 0.4039128  | 0.0020026  |
| 9mo_SIGAF3_GTGAGCCGTGTAAACA-1-10x  | 0.08433197 | 0.25018737 | 0.0036353  |
| 9mo_SIGAF3_GTGAGGAGTAACCCTA-1-10x  | 0.04820091 | 0.12154124 | 0.00011598 |
| 9mo_SIGAF3_GTGAGGAGTTGCGGCT-1-10x  | 0.03663363 | 0.08035545 | 5.82E-05   |
| 9mo_SIGAF3_GTGAGGATCTGTGCTC-1-10x  | 0.04987838 | 0.12751393 | 0.00013566 |
| 9mo_SIGAF3_GTGAGTTTCGCAATGT-1-10x  | 0.03456305 | 0.07298305 | 5.37E-05   |
| 9mo_SIGAF3_GTGATGTCATGCGGTC-1-10x  | 0.01718016 | 0.01109055 | 3.38E-05   |
| 9mo_SIGAF3_GTGATGTGTGGGACAT-1-10x  | 0.02556207 | 0.04093468 | 4.00E-05   |
| 9mo_SIGAF3_GTGGAAGGTCCCGCAA-1-10x  | 0.22310925 | 0.7443096  | 0.00099599 |
| 9mo_SIGAF3_GTGGAAGGCGGATAC-1-10x   | 0.1252528  | 0.39588767 | 0.0020803  |
| 9mo_SIGAF3_GTGGAAGTGGTCCGT-1-10x   | 0.2423369  | 0.8127705  | 0.00085764 |
| 9mo_SIGAF3_GTGTCCTGTCCTCAGG-1-10x  | 0.15432434 | 0.4993981  | 0.0018575  |
| 9mo_SIGAF3_GTTACCCGTGGACTGA-1-10x  | 0.01692706 | 0.01018938 | 3.38E-05   |
| 9mo_SIGAF3_GTTACGATCTGGACCG-1-10x  | 0.18137312 | 0.5957064  | 0.0014587  |
| 9mo_SIGAF3_GTTAGACGTTGCAAGG-1-10x  | 0.22528806 | 0.7520674  | 0.00098137 |
| 9mo_SIGAF3_GTTCCGTTCCGTGCGA-1-10x  | 0.21940398 | 0.7311169  | 0.0010253  |
| 9mo_SIGAF3_GTTGCTAGGACTATA-1-10x   | 0.07214204 | 0.20678464 | 0.0014433  |
| 9mo_SIGAF3_GTTGCTCACATATGC-1-10x   | 0.18343846 | 0.6030601  | 0.0014268  |

|                                    |            |            |            |
|------------------------------------|------------|------------|------------|
| 9mo_SIGAF3_GTTCTATTCGTAGCCG-1-10x  | 0.14791565 | 0.4765797  | 0.0018716  |
| 9mo_SIGAF3_GTTGCTCAGGAACGTC-1-10x  | 0.04408297 | 0.10687913 | 8.81E-05   |
| 9mo_SIGAF3_GTTGTAGAGGTGCTGA-1-10x  | 0.02069208 | 0.02359491 | 3.62E-05   |
| 9mo_SIGAF3_GTTGTCCAGTGGATAT-1-10x  | 0.04749531 | 0.1190289  | 0.00011598 |
| 9mo_SIGAF3_GTTGTGACAGGGCTTC-1-10x  | 0.04443465 | 0.1081313  | 8.81E-05   |
| 9mo_SIGAF3_TAACACGGTAAGCGGT-1-10x  | 0.06060423 | 0.16570379 | 0.00042799 |
| 9mo_SIGAF3_TAACCAGAGGCAGGTT-1-10x  | 0.19855803 | 0.65689397 | 0.0012187  |
| 9mo_SIGAF3_TAACCAGAGGGACAGG-1-10x  | 0.04189688 | 0.09909547 | 7.82E-05   |
| 9mo_SIGAF3_TAACCAGCAAAGGCGT-1-10x  | 0.2557456  | 0.8605127  | 0.00078825 |
| 9mo_SIGAF3_TAACCAGTCGAACTCA-1-10x  | 0.03920712 | 0.08951847 | 6.67E-05   |
| 9mo_SIGAF3_TAACGACCAATGTTGC-1-10x  | 0.04110276 | 0.09626796 | 7.40E-05   |
| 9mo_SIGAF3_TAACGACCATTGAAGA-1-10x  | 0.09416366 | 0.2851935  | 0.0044154  |
| 9mo_SIGAF3_TAACTTCAGAGTAACT-1-10x  | 0.03338624 | 0.06879298 | 5.17E-05   |
| 9mo_SIGAF3_TAACTTCTCAGCAAT-1-10x   | 0.03587107 | 0.07764033 | 5.58E-05   |
| 9mo_SIGAF3_TAAGCACAGGAGGGTG-1-10x  | 0.01833925 | 0.01521754 | 3.49E-05   |
| 9mo_SIGAF3_TAAGCACGTAAGGGA-1-10x   | 0.27451965 | 0.9273585  | 0.00075233 |
| 9mo_SIGAF3_TAATCTCTCTGCGAGC-1-10x  | 0.04125507 | 0.09681029 | 7.40E-05   |
| 9mo_SIGAF3_TACACCCGTGTCCTAA-1-10x  | 0.094483   | 0.28633052 | 0.0044051  |
| 9mo_SIGAF3_TACACCCTCGTAGCCG-1-10x  | 0.26810944 | 0.9045347  | 0.00075705 |
| 9mo_SIGAF3_TACAGGTAGCATATGA-1-10x  | 0.17591503 | 0.57627267 | 0.0015585  |
| 9mo_SIGAF3_TACCCACGTACGTAGG-1-10x  | 0.01807705 | 0.01428396 | 3.44E-05   |
| 9mo_SIGAF3_TACCCGTAGCGTATGG-1-10x  | 0.08105752 | 0.23852855 | 0.0029431  |
| 9mo_SIGAF3_TACCGAAAGAGTGAAG-1-10x  | 0.08260569 | 0.24404088 | 0.0033032  |
| 9mo_SIGAF3_TACGCTCGTAGATCGG-1-10x  | 0.17563209 | 0.5752652  | 0.0015585  |
| 9mo_SIGAF3_TACGGTAAGACCGTTT-1-10x  | 0.03524273 | 0.07540309 | 5.58E-05   |
| 9mo_SIGAF3_TACGGTAGTTATGACC-1-10x  | 0.08580335 | 0.25542626 | 0.0037839  |
| 9mo_SIGAF3_TACGTCCAGTAGGAAG-1-10x  | 0.03601559 | 0.0781549  | 5.58E-05   |
| 9mo_SIGAF3_TACGTCCCTCCTTATCA-1-10x | 0.12650156 | 0.40033394 | 0.0020256  |
| 9mo_SIGAF3_TACTGCCAGGGCCTCT-1-10x  | 0.03812415 | 0.0856625  | 6.36E-05   |
| 9mo_SIGAF3_TACTTCAGTATACGGG-1-10x  | 0.0862551  | 0.25703478 | 0.0039187  |
| 9mo_SIGAF3_TACTTCAGTCCTACGG-1-10x  | 0.07980155 | 0.23405662 | 0.0027593  |
| 9mo_SIGAF3_TACTTGTCACAGTGTT-1-10x  | 0.01649998 | 0.00866875 | 3.38E-05   |
| 9mo_SIGAF3_TAGGAGGCAACATCGT-1-10x  | 0.12289797 | 0.3875032  | 0.0021479  |
| 9mo_SIGAF3_TAGGAGGTCTTACGTT-1-10x  | 0.07808754 | 0.2279538  | 0.0023954  |
| 9mo_SIGAF3_TAGGGTTAGTTTGAGA-1-10x  | 0.24035084 | 0.80569905 | 0.00086997 |
| 9mo_SIGAF3_TAGTGACATCTACCTTA-1-10x | 0.21095005 | 0.70101625 | 0.0010934  |
| 9mo_SIGAF3_TATCAGGAGAGCGACT-1-10x  | 0.23718481 | 0.7944262  | 0.00088935 |
| 9mo_SIGAF3_TATCAGGGTACGGCAA-1-10x  | 0.24009016 | 0.8047709  | 0.00086997 |
| 9mo_SIGAF3_TATCTTGAGTAGATCA-1-10x  | 0.04299114 | 0.10299164 | 8.29E-05   |
| 9mo_SIGAF3_TATCTTGTCGGAATGG-1-10x  | 0.07038052 | 0.20051268 | 0.0011935  |
| 9mo_SIGAF3_TATGTTCTCAGGACGA-1-10x  | 0.24514863 | 0.82278174 | 0.00084014 |

|                                      |            |            |            |
|--------------------------------------|------------|------------|------------|
| 9mo_SIGAF3_TATTGCTTCGCTGTTC-1-10x    | 0.01504431 | 0.00348579 | 3.27E-05   |
| 9mo_SIGAF3_TCAAGCAGTCCCGGTA-1-10x    | 0.01845804 | 0.01564051 | 3.49E-05   |
| 9mo_SIGAF3_TCAATCTCAAGGGCAT-1-10x    | 0.21923868 | 0.7305283  | 0.0010326  |
| 9mo_SIGAF3_TCAATTCCATCGGATT-1-10x    | 0.01820446 | 0.01473763 | 3.44E-05   |
| 9mo_SIGAF3_TCAATTCGTTCTAAGC-1-10x    | 0.0191886  | 0.01824168 | 3.49E-05   |
| 9mo_SIGAF3_TCACAAGTCCTGGGAC-1-10x    | 0.09533697 | 0.2893711  | 0.0043808  |
| 9mo_SIGAF3_TCACACCTCCAGTTCC-1-10x    | 0.01561314 | 0.00551111 | 3.33E-05   |
| 9mo_SIGAF3_TCACATTAGGTAGTCG-1-10x    | 0.03188481 | 0.06344709 | 4.83E-05   |
| 9mo_SIGAF3_TCACGCTGTGCTCGTG-1-10x    | 0.02037644 | 0.02247105 | 3.62E-05   |
| 9mo_SIGAF3_TCACGGGGTTGTTGCA-1-10x    | 0.04731646 | 0.1183921  | 0.00010777 |
| 9mo_SIGAF3_TCACTATAGCGAAACC-1-10x    | 0.28390115 | 0.9607617  | 0.00075531 |
| 9mo_SIGAF3_TCAGCCTGTGGCTAGA-1-10x    | 0.04764197 | 0.1195511  | 0.00011598 |
| 9mo_SIGAF3_TCAGGGCAGCTTCATG-1-10x    | 0.01718259 | 0.0110992  | 3.38E-05   |
| 9mo_SIGAF3_TCAGGGCGTTCTCACC-1-10x    | 0.09723053 | 0.29611322 | 0.0042943  |
| 9mo_SIGAF3_TCAGGTAAGACATCCT-1-10x    | 0.13542263 | 0.4320978  | 0.0018953  |
| 9mo_SIGAF3_TCAGGTACAATCACGT-1-10x    | 0.1993864  | 0.65984344 | 0.0012085  |
| 9mo_SIGAF3_TCAGGTACATTCACAG-1-10x    | 0.05007243 | 0.12820487 | 0.00013566 |
| 9mo_SIGAF3_TCAGTCCCAAGTCCCG-1-10x    | 0.02076543 | 0.02385605 | 3.62E-05   |
| 9mo_SIGAF3_TCAGTTTAGGCAGGGA-1-10x    | 0.01885237 | 0.01704454 | 3.49E-05   |
| 9mo_SIGAF3_TCATACTAGTCCCAAT-1-10x    | 0.02026462 | 0.0220729  | 3.62E-05   |
| 9mo_SIGAF3_TCATCCGAGGTACAGC-1-10x    | 0.0448266  | 0.10952687 | 9.39E-05   |
| 9mo_SIGAF3_TCATGAGTCCGGCTTT-1-10x    | 0.01899896 | 0.01756647 | 3.49E-05   |
| 9mo_SIGAF3_TCATGGATCGTCCTCA-1-10x    | 0.03670176 | 0.08059802 | 5.82E-05   |
| 9mo_SIGAF3_TCATGTTTCGACGACC-1-10x    | 0.02279532 | 0.03108358 | 3.76E-05   |
| 9mo_SIGAF3_TCATGTTTCTCATTGT-1-10x    | 0.07253675 | 0.20819001 | 0.0014433  |
| 9mo_SIGAF3_TCATTGTAGGATACAT-1-10x    | 0.183055   | 0.60169476 | 0.0014268  |
| 9mo_SIGAF3_TCATTGTTCTCAGAAC-1-10x    | 0.07098723 | 0.20267285 | 0.0013138  |
| 9mo_SIGAF3_TCCAGAACACTCTCGT-1-10x    | 0.0156696  | 0.00571214 | 3.33E-05   |
| 9mo_SIGAF3_TCCAGAATCTTCTAAC-1-10x    | 0.04658662 | 0.11579347 | 0.00010777 |
| 9mo_SIGAF3_TCCATCGAGAATAACC-1-10x    | 0.06912381 | 0.1960381  | 0.0010821  |
| 9mo_SIGAF3_TCCCAGTGTATCAGCT-1-10x    | 0.06147266 | 0.16879587 | 0.00042799 |
| 9mo_SIGAF3_TCCCAGTGTTACCCTC-1-10x    | 0.04194616 | 0.09927094 | 7.82E-05   |
| 9mo_SIGAF3_TCCCATGTCCGGGACT-1-10x    | 0.03232171 | 0.0650027  | 4.83E-05   |
| 9mo_SIGAF3_TCCCATGTCTCCTACG-1-10x    | 0.07445248 | 0.21501106 | 0.0017292  |
| 9mo_SIGAF3_TCCGAAATCTCAACGA-1-10x    | 0.11334945 | 0.35350528 | 0.0027534  |
| 9mo_SIGAF3_TCCGATCTCCGGACTG-1-10x    | 0.20840478 | 0.6919537  | 0.0011177  |
| 9mo_SIGAF3_TCCGATCTCTCATTAC-1-10x    | 0.0172987  | 0.01151261 | 3.38E-05   |
| 9mo_SIGAF3_TCCTAATAGGACTGGT-1-10x    | 0.06304741 | 0.17440282 | 0.00052741 |
| 9mo_SIGAF3_TCCTCGAGTGTGTACTION-1-10x | 0.07265527 | 0.208612   | 0.0014433  |
| 9mo_SIGAF3_TCCTCTTAGCCGGAAT-1-10x    | 0.08595295 | 0.2559589  | 0.0039187  |
| 9mo_SIGAF3_TCCTTCTTCGAGTACT-1-10x    | 0.04031326 | 0.09345691 | 7.01E-05   |

|                                   |            |            |            |
|-----------------------------------|------------|------------|------------|
| 9mo_SIGAF3_TCGAACACACGTCGTG-1-10x | 0.09817382 | 0.29947186 | 0.0042345  |
| 9mo_SIGAF3_TCGAAGTGTGTGTCGC-1-10x | 0.04698717 | 0.11721966 | 0.00010777 |
| 9mo_SIGAF3_TCGAAGTGTTCGGTTA-1-10x | 0.01810258 | 0.01437486 | 3.44E-05   |
| 9mo_SIGAF3_TCGACCTAGCCGTAAG-1-10x | 0.06874315 | 0.19468276 | 0.00097948 |
| 9mo_SIGAF3_TCGACGGAGTATTCCG-1-10x | 0.04564614 | 0.11244486 | 0.00010046 |
| 9mo_SIGAF3_TCGACGGGTAGGAGGG-1-10x | 0.02097547 | 0.02460393 | 3.62E-05   |
| 9mo_SIGAF3_TCGACGGTCGGTGTTA-1-10x | 0.06737249 | 0.18980245 | 0.00088537 |
| 9mo_SIGAF3_TCGCACTAGACTAAGT-1-10x | 0.05015934 | 0.12851429 | 0.00013566 |
| 9mo_SIGAF3_TCGCAGGTCGGCTGAC-1-10x | 0.110501   | 0.34336329 | 0.0030221  |
| 9mo_SIGAF3_TCGGATACAACCGCCA-1-10x | 0.055898   | 0.14894706 | 0.000257   |
| 9mo_SIGAF3_TCGGGACAGCGTTAGG-1-10x | 0.20598355 | 0.68333286 | 0.001143   |
| 9mo_SIGAF3_TCGGGACCACACCGCA-1-10x | 0.05266175 | 0.13742423 | 0.00017575 |
| 9mo_SIGAF3_TCTAACTCATTCAGGT-1-10x | 0.28424037 | 0.9619695  | 0.00075605 |
| 9mo_SIGAF3_TCTACATAGCACGATG-1-10x | 0.04898655 | 0.12433854 | 0.00012523 |
| 9mo_SIGAF3_TCTATACGTTTCCAAG-1-10x | 0.0690111  | 0.19563678 | 0.00097948 |
| 9mo_SIGAF3_TCTCACGAGTGATGGC-1-10x | 0.05322398 | 0.13942607 | 0.00019264 |
| 9mo_SIGAF3_TCTCAGCAGCTCATAC-1-10x | 0.03502536 | 0.07462913 | 5.37E-05   |
| 9mo_SIGAF3_TCTCTGGCACTGTGTA-1-10x | 0.09620233 | 0.29245228 | 0.0043808  |
| 9mo_SIGAF3_TCTGGCTCATGGGATG-1-10x | 0.16353427 | 0.53219044 | 0.001763   |
| 9mo_SIGAF3_TCTTAGTCAGTCAGAG-1-10x | 0.20556861 | 0.68185544 | 0.001143   |
| 9mo_SIGAF3_TCTTCCTAGCAAGTCG-1-10x | 0.05392484 | 0.14192152 | 0.00019264 |
| 9mo_SIGAF3_TCTTTGAAGCTCGGCT-1-10x | 0.19107363 | 0.63024545 | 0.0013113  |
| 9mo_SIGAF3_TCTTTGACAGCAGGAT-1-10x | 0.19133641 | 0.6311811  | 0.0012985  |
| 9mo_SIGAF3_TGAATCGAGACTGGGT-1-10x | 0.05547797 | 0.1474515  | 0.000233   |
| 9mo_SIGAF3_TGAATCGGTACGTAGG-1-10x | 0.21688597 | 0.7221514  | 0.0010475  |
| 9mo_SIGAF3_TGAATCGGTCTGTAGT-1-10x | 0.04974784 | 0.12704916 | 0.00013566 |
| 9mo_SIGAF3_TGAATGCAGACAGCGT-1-10x | 0.27846375 | 0.9414016  | 0.00075239 |
| 9mo_SIGAF3_TGACCCTAGCCGCTTG-1-10x | 0.24652454 | 0.82768077 | 0.00083459 |
| 9mo_SIGAF3_TGACGCGTCCGAGCTG-1-10x | 0.20521295 | 0.6805891  | 0.0011518  |
| 9mo_SIGAF3_TGAGCGCTCTGGCCAG-1-10x | 0.04253589 | 0.10137069 | 7.82E-05   |
| 9mo_SIGAF3_TGAGGAGGTCGAAACG-1-10x | 0.07599985 | 0.22052051 | 0.0020486  |
| 9mo_SIGAF3_TGAGGTTGTCTCACGG-1-10x | 0.01529566 | 0.00438072 | 3.27E-05   |
| 9mo_SIGAF3_TGATCAGAGTGAGGCT-1-10x | 0.04992772 | 0.12768961 | 0.00013566 |
| 9mo_SIGAF3_TGATGCAGTTAAAGTG-1-10x | 0.29284972 | 0.99262345 | 0.00076488 |
| 9mo_SIGAF3_TGATGGTGTGGCACTC-1-10x | 0.17609243 | 0.5769043  | 0.0015585  |
| 9mo_SIGAF3_TGATGGTGTTTACTGG-1-10x | 0.04953333 | 0.12628539 | 0.00013566 |
| 9mo_SIGAF3_TGATTTCGTCATTCCC-1-10x | 0.07521194 | 0.21771514 | 0.001885   |
| 9mo_SIGAF3_TGCATCCCATACCATG-1-10x | 0.11481812 | 0.35873458 | 0.0026715  |
| 9mo_SIGAF3_TGCATCCTCATCACAG-1-10x | 0.03856228 | 0.0872225  | 6.36E-05   |
| 9mo_SIGAF3_TGCCGAGAGCCAAGGT-1-10x | 0.02392307 | 0.03509897 | 3.83E-05   |
| 9mo_SIGAF3_TGCGACGCATCACCAA-1-10x | 0.22971503 | 0.7678298  | 0.00094498 |

|                                    |            |            |            |
|------------------------------------|------------|------------|------------|
| 9mo_SIGAF3_TGCGACGGTCCGCTT-1-10x   | 0.04288442 | 0.10261166 | 8.29E-05   |
| 9mo_SIGAF3_TGCGACGTCAACACGT-1-10x  | 0.11104    | 0.34528244 | 0.0030221  |
| 9mo_SIGAF3_TGCGGCAAGCTCGACC-1-10x  | 0.01531738 | 0.00445804 | 3.27E-05   |
| 9mo_SIGAF3_TGCGGCAGTATGTGTC-1-10x  | 0.05405394 | 0.1423812  | 0.00021164 |
| 9mo_SIGAF3_TGCGGGTCAAACGAGC-1-10x  | 0.20245574 | 0.67077196 | 0.0011699  |
| 9mo_SIGAF3_TGCGGGTCAAGGGTCA-1-10x  | 0.04313859 | 0.10351665 | 8.29E-05   |
| 9mo_SIGAF3_TGCTCGTCAGAGTTCT-1-10x  | 0.0166695  | 0.00927232 | 3.38E-05   |
| 9mo_SIGAF3_TGCTTCGGTCTGTCCT-1-10x  | 0.0423133  | 0.10057815 | 7.82E-05   |
| 9mo_SIGAF3_TGGAAGTGTGAATTGA-1-10x  | 0.01520577 | 0.00406065 | 3.27E-05   |
| 9mo_SIGAF3_TGGAGAGTCTGCACCT-1-10x  | 0.26438603 | 0.8912773  | 0.00076313 |
| 9mo_SIGAF3_TGGAGGAAGATAGTCA-1-10x  | 0.25930503 | 0.87318623 | 0.00077499 |
| 9mo_SIGAF3_TGGAGGACAATAGTCC-1-10x  | 0.01942817 | 0.01909469 | 3.55E-05   |
| 9mo_SIGAF3_TGGATCACAGACGCTC-1-10x  | 0.02141451 | 0.02616713 | 3.69E-05   |
| 9mo_SIGAF3_TGGATGTAGACATAGT-1-10x  | 0.04726901 | 0.11822315 | 0.00010777 |
| 9mo_SIGAF3_TGGGATTCATAACCACA-1-10x | 0.1894552  | 0.624483   | 0.0013244  |
| 9mo_SIGAF3_TGGGCGTCAATCGCCG-1-10x  | 0.09312244 | 0.28148618 | 0.0044107  |
| 9mo_SIGAF3_TGGGTTAGTCAGTCTA-1-10x  | 0.03479184 | 0.07379769 | 5.37E-05   |
| 9mo_SIGAF3_TGGTAGTGTGGCTGCT-1-10x  | 0.04272442 | 0.10204195 | 8.29E-05   |
| 9mo_SIGAF3_TGGTGATTCATTACCT-1-10x  | 0.01676579 | 0.00961518 | 3.38E-05   |
| 9mo_SIGAF3_TGTACAGCAAACACGG-1-10x  | 0.11742416 | 0.3680135  | 0.002453   |
| 9mo_SIGAF3_TGTCAGAAGCATCTTG-1-10x  | 0.04136455 | 0.09720007 | 7.40E-05   |
| 9mo_SIGAF3_TGTCAGAGTCCTCCTA-1-10x  | 0.0644692  | 0.17946514 | 0.00064991 |
| 9mo_SIGAF3_TGTCAGATCCTCACCA-1-10x  | 0.01971531 | 0.02011705 | 3.55E-05   |
| 9mo_SIGAF3_TGTCAGATCTCGGTAA-1-10x  | 0.04273784 | 0.10208973 | 8.29E-05   |
| 9mo_SIGAF3_TGTCCACATCCTGTC-1-10x   | 0.02808778 | 0.0499276  | 4.30E-05   |
| 9mo_SIGAF3_TGTCCAGTACCGCGT-1-10x   | 0.07992186 | 0.234485   | 0.0027593  |
| 9mo_SIGAF3_TGTGATGAGATGAATC-1-10x  | 0.02167158 | 0.02708245 | 3.69E-05   |
| 9mo_SIGAF3_TGTGCGGAGAATGTTG-1-10x  | 0.03410684 | 0.07135872 | 5.17E-05   |
| 9mo_SIGAF3_TGTGCGGAGCCGTTGC-1-10x  | 0.0272214  | 0.0468428  | 4.19E-05   |
| 9mo_SIGAF3_TGTGCGGGTAACAGGC-1-10x  | 0.02281618 | 0.03115783 | 3.76E-05   |
| 9mo_SIGAF3_TGTGGCGCAGCGTATT-1-10x  | 0.02162815 | 0.02692781 | 3.69E-05   |
| 9mo_SIGAF3_TGTGTGAGTTCTTCAT-1-10x  | 0.01827445 | 0.01498681 | 3.44E-05   |
| 9mo_SIGAF3_TGTTTCATGTAGAGCTG-1-10x | 0.11311657 | 0.35267612 | 0.0028393  |
| 9mo_SIGAF3_TGTTCCGAGCAGCCCT-1-10x  | 0.01524274 | 0.00419228 | 3.27E-05   |
| 9mo_SIGAF3_TGTTGAGCATGTGACT-1-10x  | 0.28462014 | 0.9633217  | 0.00075605 |
| 9mo_SIGAF3_TGTTGAGTCGTAACAC-1-10x  | 0.25790417 | 0.8681984  | 0.000778   |
| 9mo_SIGAF3_TGTTGGAAGCAGAAAG-1-10x  | 0.07490511 | 0.21662264 | 0.001885   |
| 9mo_SIGAF3_TGTTTGTACATGAAA-1-10x   | 0.27366072 | 0.92430025 | 0.0007526  |
| 9mo_SIGAF3_TGTTTGTGTGGTCAAG-1-10x  | 0.24258775 | 0.8136636  | 0.00085764 |
| 9mo_SIGAF3_TTACCATAGGAAAGAC-1-10x  | 0.22446631 | 0.7491415  | 0.00098869 |
| 9mo_SIGAF3_TTACCGCAGAGCCGAT-1-10x  | 0.04080643 | 0.09521288 | 7.01E-05   |

|                                     |            |            |            |
|-------------------------------------|------------|------------|------------|
| 9mo_SIGAF3_TTACGCCCAAGTACCT-1-10x   | 0.07162784 | 0.2049538  | 0.0013138  |
| 9mo_SIGAF3_TTACGCCCATGGTGGA-1-10x   | 0.26964813 | 0.91001326 | 0.00075499 |
| 9mo_SIGAF3_TTACGTTGTAATACCC-1-10x   | 0.08150488 | 0.24012141 | 0.0031253  |
| 9mo_SIGAF3_TTACTGTAGTACCATC-1-10x   | 0.14461018 | 0.46481046 | 0.0018716  |
| 9mo_SIGAF3_TTACTGTCACTCCGAG-1-10x   | 0.26872846 | 0.90673876 | 0.00075594 |
| 9mo_SIGAF3_TTACTGTCATGGCCCA-1-10x   | 0.09430344 | 0.2856912  | 0.0044154  |
| 9mo_SIGAF3_TTAGTCTAGGGATCGT-1-10x   | 0.0917016  | 0.27642724 | 0.0043903  |
| 9mo_SIGAF3_TTAGTCTCATGTTTTCAG-1-10x | 0.01952157 | 0.01942726 | 3.55E-05   |
| 9mo_SIGAF3_TTAGTCTGTGCCAGT-1-10x    | 0.08199206 | 0.24185602 | 0.0031253  |
| 9mo_SIGAF3_TTCACCGTCATTACCT-1-10x   | 0.09971221 | 0.30494934 | 0.0041652  |
| 9mo_SIGAF3_TTCAGGATCCCAGTGG-1-10x   | 0.10609377 | 0.32767117 | 0.00352    |
| 9mo_SIGAF3_TTCATGTAGGCTAGCA-1-10x   | 0.03235355 | 0.06511606 | 4.83E-05   |
| 9mo_SIGAF3_TTCATTGTCGTTTATT-1-10x   | 0.10408258 | 0.32051024 | 0.0037215  |
| 9mo_SIGAF3_TTCCGTGCAAGCTGCC-1-10x   | 0.1042454  | 0.32108998 | 0.0037215  |
| 9mo_SIGAF3_TTCCTAATCGGACTGC-1-10x   | 0.01797435 | 0.01391831 | 3.44E-05   |
| 9mo_SIGAF3_TTCCTTCCAAGCGATG-1-10x   | 0.07474951 | 0.21606863 | 0.001885   |
| 9mo_SIGAF3_TTCGATTCAAGCAATA-1-10x   | 0.02124833 | 0.02557544 | 3.69E-05   |
| 9mo_SIGAF3_TTCGATTGTACGGGAT-1-10x   | 0.0218285  | 0.02764118 | 3.69E-05   |
| 9mo_SIGAF3_TTCGCTGCACGAGGAT-1-10x   | 0.07178922 | 0.2055284  | 0.0013138  |
| 9mo_SIGAF3_TTCTAACCACGAAGAC-1-10x   | 0.08044449 | 0.23634584 | 0.0029431  |
| 9mo_SIGAF3_TTCTAACCAGGTGGAT-1-10x   | 0.01666509 | 0.00925663 | 3.38E-05   |
| 9mo_SIGAF3_TTCTAGTAGCCGGAAT-1-10x   | 0.02150833 | 0.02650117 | 3.69E-05   |
| 9mo_SIGAF3_TTCTCTCTCAGTGGGA-1-10x   | 0.02352595 | 0.033685   | 3.83E-05   |
| 9mo_SIGAF3_TTCTCTCTCGGAACTT-1-10x   | 0.02421108 | 0.03612446 | 3.91E-05   |
| 9mo_SIGAF3_TTCTGTAAGGACTTCT-1-10x   | 0.10376791 | 0.31938985 | 0.0038193  |
| 9mo_SIGAF3_TTGACCCCACTCATAG-1-10x   | 0.17766595 | 0.58250684 | 0.0015248  |
| 9mo_SIGAF3_TTGAGTGCAGAGGCTA-1-10x   | 0.08163382 | 0.2405805  | 0.0031253  |
| 9mo_SIGAF3_TTGCAATTGTAACCCGC-1-10x  | 0.04940442 | 0.12582639 | 0.00013566 |
| 9mo_SIGAF3_TTGCAATTGTCCTATAG-1-10x  | 0.01880379 | 0.01687157 | 3.49E-05   |
| 9mo_SIGAF3_TTGCAATTGTTTACACG-1-10x  | 0.04430027 | 0.10765284 | 8.81E-05   |
| 9mo_SIGAF3_TTGCTGAGGCGCTTC-1-10x    | 0.04648062 | 0.11541607 | 0.00010777 |
| 9mo_SIGAF3_TTGCGTCTCGTTGTTT-1-10x   | 0.03635132 | 0.07935026 | 5.82E-05   |
| 9mo_SIGAF3_TTGCGTCTCTATCGGA-1-10x   | 0.2746155  | 0.92769974 | 0.00075233 |
| 9mo_SIGAF3_TTGATGACACATTACG-1-10x   | 0.1334803  | 0.425182   | 0.0019115  |
| 9mo_SIGAF3_TTGATGTCTTTTCGAT-1-10x   | 0.18368174 | 0.60392636 | 0.0014112  |
| 9mo_SIGAF3_TTGGATCATCGGCCA-1-10x    | 0.05088826 | 0.13110967 | 0.00014746 |
| 9mo_SIGAF3_TTGGTTTCATCATTTT-1-10x   | 0.27533644 | 0.93026674 | 0.00075218 |
| 9mo_SIGAF3_TTGTTTCAGTCATAGTC-1-10x  | 0.03958705 | 0.09087122 | 6.67E-05   |
| 9mo_SIGAF3_TTGTTGTTCTTGAACG-1-10x   | 0.01599477 | 0.00686991 | 3.33E-05   |
| 9mo_SIGAF3_TTGTTTGCCTGGACC-1-10x    | 0.07264421 | 0.20857263 | 0.0014433  |
| 9mo_SIGAF3_TTGACTAGATCACCT-1-10x    | 0.14289477 | 0.45870268 | 0.0018718  |

|                                    |            |            |            |
|------------------------------------|------------|------------|------------|
| 9mo_SIGAF3_TTTGGTTGTGCCTGCA-1-10x  | 0.02070006 | 0.02362332 | 3.62E-05   |
| 5mo_SIGAE9_AAACCCAGTAACCAGG-1-10x  | 0.10284851 | 0.31611627 | 0.0038193  |
| 5mo_SIGAE9_AAACCCATCCTTGAAG-1-10x  | 0.1319379  | 0.41969028 | 0.001934   |
| 5mo_SIGAE9_AAACGAACAAGTGACG-1-10x  | 0.04905926 | 0.12459744 | 0.00012523 |
| 5mo_SIGAE9_AAACGAAGTTAACAGA-1-10x  | 0.06491742 | 0.18106107 | 0.00064991 |
| 5mo_SIGAE9_AAACGCTAGGGCAGTT-1-10x  | 0.08692053 | 0.25940403 | 0.0040384  |
| 5mo_SIGAE9_AAAGAACCAAACCTCTG-1-10x | 0.15206869 | 0.49136677 | 0.0018651  |
| 5mo_SIGAE9_AAAGAACTCACCTGT-1-10x   | 0.02500892 | 0.03896518 | 4.00E-05   |
| 5mo_SIGAE9_AAAGGATGTGCTGGTC-1-10x  | 0.09744957 | 0.29689312 | 0.0042943  |
| 5mo_SIGAE9_AAAGGATGTCTAACGT-1-10x  | 0.04983322 | 0.12735313 | 0.00013566 |
| 5mo_SIGAE9_AAAGGATTCGACGCGT-1-10x  | 0.18682104 | 0.61510396 | 0.0013662  |
| 5mo_SIGAE9_AAAGGGCGTCACTTAG-1-10x  | 0.03932184 | 0.08992692 | 6.67E-05   |
| 5mo_SIGAE9_AAAGGTATCTTTGGAG-1-10x  | 0.19191    | 0.6332234  | 0.0012985  |
| 5mo_SIGAE9_AAAGTCCCAAGCGAAC-1-10x  | 0.01745828 | 0.01208081 | 3.44E-05   |
| 5mo_SIGAE9_AAAGTCCCACCTCTGT-1-10x  | 0.17254752 | 0.5642825  | 0.0016089  |
| 5mo_SIGAE9_AAAGTCCCTCGGTAAGG-1-10x | 0.27518415 | 0.9297245  | 0.00075218 |
| 5mo_SIGAE9_AAATGGATCGCGTGAC-1-10x  | 0.03667074 | 0.08048757 | 5.82E-05   |
| 5mo_SIGAE9_AACAACCTCTACTGAG-1-10x  | 0.05364239 | 0.14091586 | 0.00019264 |
| 5mo_SIGAE9_AACACACCATGACGGA-1-10x  | 0.20097096 | 0.6654853  | 0.0011888  |
| 5mo_SIGAE9_AACACACGTCATTGCA-1-10x  | 0.08798496 | 0.263194   | 0.0041422  |
| 5mo_SIGAE9_AACAGGGAGTAGCATA-1-10x  | 0.15869255 | 0.5149513  | 0.0018209  |
| 5mo_SIGAE9_AACAGGGGTGCGGATA-1-10x  | 0.0414539  | 0.09751823 | 7.40E-05   |
| 5mo_SIGAE9_AACCAACAGGAAGTAG-1-10x  | 0.26925418 | 0.9086106  | 0.00075499 |
| 5mo_SIGAE9_AACCAACCAGGCGAAT-1-10x  | 0.15149702 | 0.48933133 | 0.0018676  |
| 5mo_SIGAE9_AACCATGCACGGTGCT-1-10x  | 0.05881944 | 0.15934896 | 0.00034795 |
| 5mo_SIGAE9_AACCCAACACACCAGC-1-10x  | 0.01986665 | 0.02065592 | 3.55E-05   |
| 5mo_SIGAE9_AACCCAACACAGAAGC-1-10x  | 0.03569527 | 0.07701436 | 5.58E-05   |
| 5mo_SIGAE9_AACCCAAGTGCCGGTT-1-10x  | 0.04117981 | 0.09654232 | 7.40E-05   |
| 5mo_SIGAE9_AACCCAATCTCATTAC-1-10x  | 0.08577509 | 0.25532568 | 0.0037839  |
| 5mo_SIGAE9_AACCTGAAGACCATGG-1-10x  | 0.16502868 | 0.53751135 | 0.0017353  |
| 5mo_SIGAE9_AACGAAATCTAAACGC-1-10x  | 0.05030398 | 0.1290293  | 0.00014746 |
| 5mo_SIGAE9_AACGAAATCTCCTGTG-1-10x  | 0.0322956  | 0.06490973 | 4.83E-05   |
| 5mo_SIGAE9_AACGGGAAGGTGAGCT-1-10x  | 0.11138462 | 0.34650946 | 0.002929   |
| 5mo_SIGAE9_AACGGGACACTAACCA-1-10x  | 0.05886189 | 0.1595001  | 0.00034795 |
| 5mo_SIGAE9_AACGTCAAGCAGGTCA-1-10x  | 0.03415131 | 0.07151704 | 5.17E-05   |
| 5mo_SIGAE9_AACTTCTCAAAGGCAC-1-10x  | 0.06840804 | 0.19348958 | 0.00097948 |
| 5mo_SIGAE9_AAGACAACACACGGAA-1-10x  | 0.0211711  | 0.02530048 | 3.69E-05   |
| 5mo_SIGAE9_AAGACAACATGTGACT-1-10x  | 0.08048466 | 0.23648885 | 0.0029431  |
| 5mo_SIGAE9_AAGATAGAGCATGTTC-1-10x  | 0.03357064 | 0.06944954 | 5.17E-05   |
| 5mo_SIGAE9_AAGCGAGTCATTTGGG-1-10x  | 0.2422052  | 0.8123016  | 0.00085764 |
| 5mo_SIGAE9_AAGCGTTCAAGAATGT-1-10x  | 0.2674326  | 0.90212476 | 0.00075705 |

|                                    |            |            |            |
|------------------------------------|------------|------------|------------|
| 5mo_SIGAE9_AAGCGTTGTACATACC-1-10x  | 0.17865938 | 0.586044   | 0.0015081  |
| 5mo_SIGAE9_AAGCGTTGTACTAGT-1-10x   | 0.10400341 | 0.32022834 | 0.0037215  |
| 5mo_SIGAE9_AAGGAATCACGACGCT-1-10x  | 0.04633774 | 0.11490733 | 0.00010046 |
| 5mo_SIGAE9_AAGGTAACAACCAACT-1-10x  | 0.08338513 | 0.24681608 | 0.0034742  |
| 5mo_SIGAE9_AAGGTAACACATGGTT-1-10x  | 0.02653616 | 0.04440297 | 4.09E-05   |
| 5mo_SIGAE9_AAGTACCGTGGCCTCA-1-10x  | 0.0417689  | 0.09863979 | 7.40E-05   |
| 5mo_SIGAE9_AAGTACCTCACTGTCC-1-10x  | 0.05619462 | 0.15000317 | 0.000257   |
| 5mo_SIGAE9_AAGTCGTAGACCATGG-1-10x  | 0.19612843 | 0.6482433  | 0.00124    |
| 5mo_SIGAE9_AAGTCGTAGAGAAGGT-1-10x  | 0.02030261 | 0.02220818 | 3.62E-05   |
| 5mo_SIGAE9_AAGTTCGGTAAGTTAG-1-10x  | 0.03195473 | 0.06369604 | 4.83E-05   |
| 5mo_SIGAE9_AAGTTCGGTGC GGTA-1-10x  | 0.0331952  | 0.06811278 | 5.00E-05   |
| 5mo_SIGAE9_AATCACGCACTGTGAT-1-10x  | 0.05575709 | 0.14844535 | 0.000233   |
| 5mo_SIGAE9_AATCGTGAGGTACCTT-1-10x  | 0.02811685 | 0.0500311  | 4.30E-05   |
| 5mo_SIGAE9_AATGAAGAGTACTCGT-1-10x  | 0.1292233  | 0.41002482 | 0.0019639  |
| 5mo_SIGAE9_AATGGAATCCTGCCAT-1-10x  | 0.06042311 | 0.16505888 | 0.00038577 |
| 5mo_SIGAE9_AATGGAATCGATACTG-1-10x  | 0.23443687 | 0.7846421  | 0.00090964 |
| 5mo_SIGAE9_AATGGCTCATGGCCCA-1-10x  | 0.08798225 | 0.26318434 | 0.0041422  |
| 5mo_SIGAE9_AATTCCTCAAGGTCTT-1-10x  | 0.0641063  | 0.17817305 | 0.00058553 |
| 5mo_SIGAE9_ACAAAGAAGGAAGTGA-1-10x  | 0.05923205 | 0.16081806 | 0.00034795 |
| 5mo_SIGAE9_ACAAAGACAAATTAGG-1-10x  | 0.04298998 | 0.1029875  | 8.29E-05   |
| 5mo_SIGAE9_ACAACCAAGACATAGT-1-10x  | 0.24722712 | 0.8301823  | 0.0008292  |
| 5mo_SIGAE9_ACAAGCTAGGAGATAG-1-10x  | 0.04888443 | 0.12397494 | 0.00012523 |
| 5mo_SIGAE9_ACAAGCTCAGCATCTA-1-10x  | 0.06365157 | 0.17655395 | 0.00058553 |
| 5mo_SIGAE9_ACAAGCTTCCTCAGGG-1-10x  | 0.13646884 | 0.43582287 | 0.0018891  |
| 5mo_SIGAE9_ACAAGCTTCGGCAGTC-1-10x  | 0.03335708 | 0.06868917 | 5.17E-05   |
| 5mo_SIGAE9_ACACAGTAGATGGCAC-1-10x  | 0.18015394 | 0.59136546 | 0.001475   |
| 5mo_SIGAE9_ACACAGTCAACAGATA-1-10x  | 0.03407532 | 0.07124648 | 5.17E-05   |
| 5mo_SIGAE9_ACACCAACAACCGATT-1-10x  | 0.103724   | 0.31923348 | 0.0038193  |
| 5mo_SIGAE9_ACACCAATCTGCTTTA-1-10x  | 0.01593941 | 0.00667281 | 3.33E-05   |
| 5mo_SIGAE9_ACACGCGCAAGTGGGT-1-10x  | 0.05160007 | 0.13364409 | 0.00016076 |
| 5mo_SIGAE9_ACACGCGGTGGGCTTC-1-10x  | 0.04504215 | 0.11029432 | 9.39E-05   |
| 5mo_SIGAE9_ACAGAAAAGTCATCCA-1-10x  | 0.13596787 | 0.43403912 | 0.0018891  |
| 5mo_SIGAE9_ACAGAAACAGCACCCA-1-10x  | 0.07134155 | 0.20393446 | 0.0013138  |
| 5mo_SIGAE9_ACAGGGAAGCATTTTCG-1-10x | 0.10670034 | 0.32983088 | 0.0034182  |
| 5mo_SIGAE9_ACAGGGACAGACACAG-1-10x  | 0.08537976 | 0.25391808 | 0.0037839  |
| 5mo_SIGAE9_ACAGGGACAGGAATCG-1-10x  | 0.0567457  | 0.15196534 | 0.000257   |
| 5mo_SIGAE9_ACATCCCATCGGCCA-1-10x   | 0.02132067 | 0.02583301 | 3.69E-05   |
| 5mo_SIGAE9_ACATCCCGTGCCTGCA-1-10x  | 0.10652825 | 0.32921815 | 0.00352    |
| 5mo_SIGAE9_ACATCCCTCGAAACAA-1-10x  | 0.02676283 | 0.04521005 | 4.19E-05   |
| 5mo_SIGAE9_ACATGCAGTCAACGCC-1-10x  | 0.188172   | 0.61991405 | 0.0013519  |
| 5mo_SIGAE9_ACATTTTCAGCTTCATG-1-10x | 0.10074952 | 0.30864272 | 0.0040879  |



|                                   |            |            |            |
|-----------------------------------|------------|------------|------------|
| 5mo_SIGAE9_ACCAACATCTGGTGGC-1-10x | 0.26005307 | 0.8758496  | 0.00077221 |
| 5mo_SIGAE9_ACCATTTGTCATCGCG-1-10x | 0.04708608 | 0.11757182 | 0.00010777 |
| 5mo_SIGAE9_ACCCAAACATTGTAGC-1-10x | 0.09143571 | 0.27548054 | 0.0043535  |
| 5mo_SIGAE9_ACCCTCACAAAGGCTG-1-10x | 0.04331532 | 0.10414588 | 8.29E-05   |
| 5mo_SIGAE9_ACCCTCATCGAAGGAC-1-10x | 0.02932661 | 0.05433851 | 4.42E-05   |
| 5mo_SIGAE9_ACCCTCATCTATCCAT-1-10x | 0.09178065 | 0.2767087  | 0.0043903  |
| 5mo_SIGAE9_ACCGTTCGTCAACT-1-10x   | 0.04346455 | 0.10467723 | 8.29E-05   |
| 5mo_SIGAE9_ACCGTTCGTGCACGCT-1-10x | 0.04469437 | 0.10905604 | 9.39E-05   |
| 5mo_SIGAE9_ACCTACCCAAGAATGT-1-10x | 0.24208188 | 0.81186247 | 0.00085764 |
| 5mo_SIGAE9_ACCTACCGTAGGCAGT-1-10x | 0.11528563 | 0.36039916 | 0.002594   |
| 5mo_SIGAE9_ACGATCAGTCTTCCGT-1-10x | 0.07930137 | 0.23227571 | 0.002576   |
| 5mo_SIGAE9_ACGATCAGTGATTAGA-1-10x | 0.02548737 | 0.04066871 | 4.00E-05   |
| 5mo_SIGAE9_ACGATCATCACCATGA-1-10x | 0.04877194 | 0.12357441 | 0.00012523 |
| 5mo_SIGAE9_ACGATCATCGGAAACG-1-10x | 0.08381318 | 0.2483402  | 0.0034742  |
| 5mo_SIGAE9_ACGATGTAGGCCACTC-1-10x | 0.15637235 | 0.50669014 | 0.0018385  |
| 5mo_SIGAE9_ACGATGTCAAGGTCTT-1-10x | 0.0286477  | 0.05192123 | 4.42E-05   |
| 5mo_SIGAE9_ACGATGTGTGAAGCTG-1-10x | 0.03474078 | 0.07361589 | 5.37E-05   |
| 5mo_SIGAE9_ACGGAAGGTGACTCGC-1-10x | 0.02153137 | 0.02658322 | 3.69E-05   |
| 5mo_SIGAE9_ACGGTCGTCAATCCAG-1-10x | 0.01866675 | 0.01638361 | 3.49E-05   |
| 5mo_SIGAE9_ACGGTTAGTAGACAGC-1-10x | 0.11893727 | 0.373401   | 0.0023317  |
| 5mo_SIGAE9_ACGGTTATCTTTCCGG-1-10x | 0.0888995  | 0.26645026 | 0.0042295  |
| 5mo_SIGAE9_ACGTACAGTTTGGCTA-1-10x | 0.06245046 | 0.17227736 | 0.00052741 |
| 5mo_SIGAE9_ACGTCCTAGGAGAGGC-1-10x | 0.19514053 | 0.6447258  | 0.0012511  |
| 5mo_SIGAE9_ACGTCCTCAGTCAGT-1-10x  | 0.1789505  | 0.58708054 | 0.0014915  |
| 5mo_SIGAE9_ACGTCCTCCTTGGAA-1-10x  | 0.24673872 | 0.82844335 | 0.0008292  |
| 5mo_SIGAE9_ACGTTCCCATATCTCT-1-10x | 0.04474425 | 0.10923363 | 9.39E-05   |
| 5mo_SIGAE9_ACGTTCCTCTATCCAT-1-10x | 0.02572402 | 0.04151134 | 4.00E-05   |
| 5mo_SIGAE9_ACTATGGAGGCTGGAT-1-10x | 0.10180383 | 0.31239665 | 0.0040036  |
| 5mo_SIGAE9_ACTATGGTCGGTTCAA-1-10x | 0.07849705 | 0.22941187 | 0.002576   |
| 5mo_SIGAE9_ACTATTCAGGTCGTCC-1-10x | 0.10797443 | 0.33436733 | 0.0033168  |
| 5mo_SIGAE9_ACTCCACAGAAGTGC-1-10x  | 0.01882565 | 0.01694937 | 3.49E-05   |
| 5mo_SIGAE9_ACTCCACATCAGCAT-1-10x  | 0.080656   | 0.23709892 | 0.0029431  |
| 5mo_SIGAE9_ACTCCAGTTTCTTAC-1-10x  | 0.08338225 | 0.24680585 | 0.0034742  |
| 5mo_SIGAE9_ACTCTCGGTTGGAGGT-1-10x | 0.17179191 | 0.5615921  | 0.0016256  |
| 5mo_SIGAE9_ACTGATGAGCGGTAGT-1-10x | 0.02401368 | 0.03542159 | 3.91E-05   |
| 5mo_SIGAE9_ACTGATGCACGTCGTG-1-10x | 0.0263288  | 0.04366468 | 4.09E-05   |
| 5mo_SIGAE9_ACTGATGCAGCTTTGA-1-10x | 0.11190635 | 0.3483671  | 0.002929   |
| 5mo_SIGAE9_ACTGATGTCACCCATC-1-10x | 0.02068971 | 0.02358644 | 3.62E-05   |
| 5mo_SIGAE9_ACTGATGTCAGTCCGG-1-10x | 0.08696982 | 0.25957954 | 0.0040384  |
| 5mo_SIGAE9_ACTGCAACTGATTG-1-10x   | 0.01954997 | 0.01952835 | 3.55E-05   |
| 5mo_SIGAE9_ACTGCAAGTGCCACG-1-10x  | 0.10642932 | 0.3288659  | 0.00352    |

|                                    |            |            |            |
|------------------------------------|------------|------------|------------|
| 5mo_SIGAE9_ACTGTCCAGTCTTGGT-1-10x  | 0.26202258 | 0.88286215 | 0.00076727 |
| 5mo_SIGAE9_ACTGTCCCAGCTGAGA-1-10x  | 0.10143639 | 0.31108838 | 0.0040036  |
| 5mo_SIGAE9_ACTGTCCCTCACTCTTA-1-10x | 0.04440916 | 0.10804055 | 8.81E-05   |
| 5mo_SIGAE9_ACTTATCGTTGCGTAT-1-10x  | 0.04818649 | 0.12148988 | 0.00011598 |
| 5mo_SIGAE9_ACTTTCGCTCGGTAAC-1-10x  | 0.10802472 | 0.33454642 | 0.0033168  |
| 5mo_SIGAE9_ACTTTCAGTGCAGATG-1-10x  | 0.16646965 | 0.54264194 | 0.0017206  |
| 5mo_SIGAE9_AGAAATGTCGCCAACG-1-10x  | 0.25906745 | 0.87234026 | 0.00077499 |
| 5mo_SIGAE9_AGAACCTGTACCATAC-1-10x  | 0.2520932  | 0.8475082  | 0.00080467 |
| 5mo_SIGAE9_AGAAGCGAGCAAGCCA-1-10x  | 0.22636373 | 0.75589734 | 0.00097406 |
| 5mo_SIGAE9_AGAAGCGTCACAAGAA-1-10x  | 0.2640124  | 0.889947   | 0.00076313 |
| 5mo_SIGAE9_AGAAGCGTCTAGTGAC-1-10x  | 0.27270487 | 0.9208969  | 0.000753   |
| 5mo_SIGAE9_AGAAGTAAGTTGGCTT-1-10x  | 0.06245341 | 0.17228787 | 0.00052741 |
| 5mo_SIGAE9_AGAAGTACAAAGACTA-1-10x  | 0.2631331  | 0.88681626 | 0.00076511 |
| 5mo_SIGAE9_AGAAGTATCTACGGTA-1-10x  | 0.12065264 | 0.3795086  | 0.0022788  |
| 5mo_SIGAE9_AGACACTCACTTGACA-1-10x  | 0.2815294  | 0.952317   | 0.00075401 |
| 5mo_SIGAE9_AGACACTCATGCCGCA-1-10x  | 0.0289456  | 0.05298188 | 4.42E-05   |
| 5mo_SIGAE9_AGACACTCATTAGGAA-1-10x  | 0.28365895 | 0.95989937 | 0.00075531 |
| 5mo_SIGAE9_AGACTCACAAGTATCC-1-10x  | 0.0420318  | 0.09957584 | 7.82E-05   |
| 5mo_SIGAE9_AGACTCACAATCGTCA-1-10x  | 0.03997461 | 0.09225115 | 7.01E-05   |
| 5mo_SIGAE9_AGACTCAGTACGAGCA-1-10x  | 0.07140669 | 0.2041664  | 0.0013138  |
| 5mo_SIGAE9_AGACTCAGTCCTGTTC-1-10x  | 0.04320225 | 0.1037433  | 8.29E-05   |
| 5mo_SIGAE9_AGAGAATCAATCTGCA-1-10x  | 0.09461097 | 0.2867862  | 0.0044051  |
| 5mo_SIGAE9_AGAGCCCGTGTTCCTT-1-10x  | 0.04309165 | 0.10334949 | 8.29E-05   |
| 5mo_SIGAE9_AGAGCCCTCAAGTGGG-1-10x  | 0.0856433  | 0.2548564  | 0.0037839  |
| 5mo_SIGAE9_AGATAGACAGTTCTAG-1-10x  | 0.07257982 | 0.20834337 | 0.0014433  |
| 5mo_SIGAE9_AGATAGAGTTGGCCTG-1-10x  | 0.08909509 | 0.26714668 | 0.0042295  |
| 5mo_SIGAE9_AGATAGATCGAACCAT-1-10x  | 0.27931526 | 0.94443345 | 0.00075266 |
| 5mo_SIGAE9_AGATCGTAGAGAGGGC-1-10x  | 0.02284469 | 0.03125936 | 3.76E-05   |
| 5mo_SIGAE9_AGATGAAGTAACCCTA-1-10x  | 0.10230851 | 0.3141936  | 0.0039137  |
| 5mo_SIGAE9_AGATGAATCGTCAGAT-1-10x  | 0.04738391 | 0.11863228 | 0.00010777 |
| 5mo_SIGAE9_AGATGCTGTACCTAGT-1-10x  | 0.09847806 | 0.30055514 | 0.0042345  |
| 5mo_SIGAE9_AGCATCATCTAAGCCA-1-10x  | 0.0169892  | 0.01041062 | 3.38E-05   |
| 5mo_SIGAE9_AGCCAATGTGTGAATA-1-10x  | 0.20987968 | 0.6972052  | 0.0011095  |
| 5mo_SIGAE9_AGCCACGCACAGTGTT-1-10x  | 0.04369073 | 0.10548253 | 8.81E-05   |
| 5mo_SIGAE9_AGCCACGCAGATTTTCG-1-10x | 0.03830408 | 0.08630315 | 6.36E-05   |
| 5mo_SIGAE9_AGCGATTGTCTTGAAC-1-10x  | 0.12301521 | 0.38792065 | 0.0021479  |
| 5mo_SIGAE9_AGCGATTGTGCCCTTT-1-10x  | 0.20230924 | 0.6702503  | 0.0011792  |
| 5mo_SIGAE9_AGCGATTGTTTCGTTT-1-10x  | 0.27893478 | 0.94307876 | 0.00075266 |
| 5mo_SIGAE9_AGCGATTTCTGCCTCA-1-10x  | 0.09001003 | 0.27040434 | 0.0042999  |
| 5mo_SIGAE9_AGCGCCACATGAGGGT-1-10x  | 0.04255441 | 0.10143663 | 7.82E-05   |
| 5mo_SIGAE9_AGCGCTGCACCCCTTAC-1-10x | 0.04638298 | 0.11506841 | 0.00010046 |

|                                    |            |            |            |
|------------------------------------|------------|------------|------------|
| 5mo_SIGAE9_AGCGTATAGAAGCTCG-1-10x  | 0.087478   | 0.26138893 | 0.0040384  |
| 5mo_SIGAE9_AGCGTCGCACATCCCT-1-10x  | 0.09289409 | 0.28067318 | 0.0044107  |
| 5mo_SIGAE9_AGCGTCGGTCTTGAAC-1-10x  | 0.04396194 | 0.10644821 | 8.81E-05   |
| 5mo_SIGAE9_AGCTACACAGAACATA-1-10x  | 0.04530411 | 0.11122704 | 9.39E-05   |
| 5mo_SIGAE9_AGCTTCCAGACAGCGT-1-10x  | 0.24660459 | 0.82796574 | 0.0008292  |
| 5mo_SIGAE9_AGCTTCCAGAGAGCGG-1-10x  | 0.07992837 | 0.23450816 | 0.0027593  |
| 5mo_SIGAE9_AGCTTCCCAAGACGGT-1-10x  | 0.01588873 | 0.00649237 | 3.33E-05   |
| 5mo_SIGAE9_AGGAAATAGCATGGGT-1-10x  | 0.28129953 | 0.95149857 | 0.00075348 |
| 5mo_SIGAE9_AGGAAATCATGAATAG-1-10x  | 0.03962754 | 0.09101539 | 6.67E-05   |
| 5mo_SIGAE9_AGGAAATTCACTGATG-1-10x  | 0.08048184 | 0.23647884 | 0.0029431  |
| 5mo_SIGAE9_AGGAATAGTACCGCGT-1-10x  | 0.04713276 | 0.11773804 | 0.00010777 |
| 5mo_SIGAE9_AGGAATATCGTGAATA-1-10x  | 0.05445534 | 0.14381039 | 0.00021164 |
| 5mo_SIGAE9_AGGAGGTAGCTGTTCA-1-10x  | 0.23123293 | 0.7732343  | 0.00093779 |
| 5mo_SIGAE9_AGGAGGTAGGGCGAAG-1-10x  | 0.09559091 | 0.2902753  | 0.0043808  |
| 5mo_SIGAE9_AGGAGGTTCCCATTTA-1-10x  | 0.13913514 | 0.4453163  | 0.0018772  |
| 5mo_SIGAE9_AGGATCTGTCCTCCTA-1-10x  | 0.02249298 | 0.03000708 | 3.76E-05   |
| 5mo_SIGAE9_AGGCATTAGAGCCATG-1-10x  | 0.22602604 | 0.754695   | 0.00097406 |
| 5mo_SIGAE9_AGGGAGTCAGAAGTTA-1-10x  | 0.05398737 | 0.14214417 | 0.00021164 |
| 5mo_SIGAE9_AGGGAGTGTCGAACA-1-10x   | 0.04724774 | 0.11814742 | 0.00010777 |
| 5mo_SIGAE9_AGGGAGTGTTATCG-1-10x    | 0.03530331 | 0.07561879 | 5.58E-05   |
| 5mo_SIGAE9_AGGGCCTTCTATGTGG-1-10x  | 0.02255838 | 0.03023993 | 3.76E-05   |
| 5mo_SIGAE9_AGGGCTCAGACTGAGC-1-10x  | 0.03617571 | 0.07872502 | 5.82E-05   |
| 5mo_SIGAE9_AGGGCTCGTGGTTTAC-1-10x  | 0.0199971  | 0.02112039 | 3.55E-05   |
| 5mo_SIGAE9_AGGGTCCCACAGTCCG-1-10x  | 0.05769226 | 0.15533559 | 0.00028394 |
| 5mo_SIGAE9_AGGGTGACATCAGTCA-1-10x  | 0.09793229 | 0.29861188 | 0.0042943  |
| 5mo_SIGAE9_AGGGTGACATGCAGGA-1-10x  | 0.27182603 | 0.91776776 | 0.00075352 |
| 5mo_SIGAE9_AGGGTGATCCATCTCG-1-10x  | 0.01989507 | 0.02075712 | 3.55E-05   |
| 5mo_SIGAE9_AGGGTGATCCGTCAA-1-10x   | 0.07650762 | 0.22232845 | 0.0020486  |
| 5mo_SIGAE9_AGGTAGGGTTGCATCA-1-10x  | 0.14700764 | 0.4733467  | 0.0018716  |
| 5mo_SIGAE9_AGGTAGGTCTACCGT-1-10x   | 0.08757648 | 0.26173958 | 0.0040384  |
| 5mo_SIGAE9_AGGTCATTCCCGAACG-1-10x  | 0.09003271 | 0.2704851  | 0.0042999  |
| 5mo_SIGAE9_AGGTCATTCCCGAGAC-1-10x  | 0.10655917 | 0.3293282  | 0.00352    |
| 5mo_SIGAE9_AGGTCTACATTTCGATG-1-10x | 0.05102558 | 0.13159858 | 0.00014746 |
| 5mo_SIGAE9_AGGTTACCAGTATTCG-1-10x  | 0.04694908 | 0.11708404 | 0.00010777 |
| 5mo_SIGAE9_AGGTTACGTTGTGCAT-1-10x  | 0.26809055 | 0.9044674  | 0.00075705 |
| 5mo_SIGAE9_AGGTTACTCCCTCTAG-1-10x  | 0.12175687 | 0.3834403  | 0.0021873  |
| 5mo_SIGAE9_AGGTTGTCACAATGAA-1-10x  | 0.04113652 | 0.09638818 | 7.40E-05   |
| 5mo_SIGAE9_AGTACCAAGGATTCAA-1-10x  | 0.25066194 | 0.8424121  | 0.00080923 |
| 5mo_SIGAE9_AGTACCATCTAACGCA-1-10x  | 0.24060461 | 0.8066026  | 0.00086997 |
| 5mo_SIGAE9_AGTAGCTTCTCTCAA-1-10x   | 0.18603097 | 0.61229086 | 0.0013809  |
| 5mo_SIGAE9_AGTAGTCCAGTTAGGG-1-10x  | 0.05193437 | 0.13483436 | 0.00016076 |

|                                    |            |            |            |
|------------------------------------|------------|------------|------------|
| 5mo_SIGAE9_AGTCAACTCCTTCTGG-1-10x  | 0.25180945 | 0.8464979  | 0.00080467 |
| 5mo_SIGAE9_AGTCACAAGGTAGGCT-1-10x  | 0.11494776 | 0.35919616 | 0.0026715  |
| 5mo_SIGAE9_AGTCATGAGAACTGAT-1-10x  | 0.19388661 | 0.6402612  | 0.0012741  |
| 5mo_SIGAE9_AGTCTCCTCACGAGGA-1-10x  | 0.04297263 | 0.10292573 | 8.29E-05   |
| 5mo_SIGAE9_AGTGACTAGTCTAGCT-1-10x  | 0.17359567 | 0.56801444 | 0.0015922  |
| 5mo_SIGAE9_AGTGACTAGTTTGGCT-1-10x  | 0.10197176 | 0.31299457 | 0.0039137  |
| 5mo_SIGAE9_AGTGCCGCAACCGATT-1-10x  | 0.04407982 | 0.10686791 | 8.81E-05   |
| 5mo_SIGAE9_AGTGTTGTCAATCTCT-1-10x  | 0.03374328 | 0.07006424 | 5.17E-05   |
| 5mo_SIGAE9_AGTGTTGTCATTTGCT-1-10x  | 0.02762148 | 0.04826731 | 4.19E-05   |
| 5mo_SIGAE9_AGTTCCCGTGGTTCTA-1-10x  | 0.09847566 | 0.30054656 | 0.0042345  |
| 5mo_SIGAE9_AGTTTCGACACAATCTG-1-10x | 0.29086834 | 0.9855687  | 0.00076269 |
| 5mo_SIGAE9_ATACTTCCAGCTTTCC-1-10x  | 0.0685771  | 0.1940915  | 0.00097948 |
| 5mo_SIGAE9_ATAGACCAGGTGGGTT-1-10x  | 0.02125442 | 0.02559712 | 3.69E-05   |
| 5mo_SIGAE9_ATAGACCCAGCTAACT-1-10x  | 0.08339152 | 0.24683885 | 0.0034742  |
| 5mo_SIGAE9_ATAGACCGTCTCGGGT-1-10x  | 0.28382647 | 0.9604958  | 0.00075531 |
| 5mo_SIGAE9_ATAGGCTGTCACCGCA-1-10x  | 0.10017325 | 0.3065909  | 0.0040879  |
| 5mo_SIGAE9_ATAGGCTGTCGCGTT-1-10x   | 0.19672425 | 0.65036476 | 0.00124    |
| 5mo_SIGAE9_ATATCCTAGATTCGCT-1-10x  | 0.08678623 | 0.25892586 | 0.0039187  |
| 5mo_SIGAE9_ATATCCTTCGGAGTGA-1-10x  | 0.08551796 | 0.25441012 | 0.0037839  |
| 5mo_SIGAE9_ATCACAGGTGCACGCT-1-10x  | 0.04281183 | 0.10235319 | 8.29E-05   |
| 5mo_SIGAE9_ATCACAGGTTCAAACC-1-10x  | 0.04895758 | 0.12423537 | 0.00012523 |
| 5mo_SIGAE9_ATCACGATCAGCGTCG-1-10x  | 0.0915549  | 0.27590492 | 0.0043535  |
| 5mo_SIGAE9_ATCACTTTCAGCACCG-1-10x  | 0.07967621 | 0.23361035 | 0.0027593  |
| 5mo_SIGAE9_ATCAGGTCAAGACCTT-1-10x  | 0.10758287 | 0.33297315 | 0.0033168  |
| 5mo_SIGAE9_ATCATTCTCTCCAATT-1-10x  | 0.02378283 | 0.03459965 | 3.83E-05   |
| 5mo_SIGAE9_ATCCATTTACGAGGA-1-10x   | 0.08836702 | 0.26455435 | 0.0041422  |
| 5mo_SIGAE9_ATCCGTCAGTCAATCC-1-10x  | 0.09470803 | 0.28713176 | 0.0044051  |
| 5mo_SIGAE9_ATCCGCTCCGCCTAT-1-10x   | 0.04579665 | 0.11298075 | 0.00010046 |
| 5mo_SIGAE9_ATCGATGCAAACCTCGT-1-10x | 0.26520717 | 0.89420104 | 0.00076135 |
| 5mo_SIGAE9_ATCGATGGTGGAACCA-1-10x  | 0.18980478 | 0.62572765 | 0.0013244  |
| 5mo_SIGAE9_ATCGCCTCAAGAGGCT-1-10x  | 0.05263265 | 0.13732061 | 0.00017575 |
| 5mo_SIGAE9_ATCGGATGTAAGTCAA-1-10x  | 0.2156005  | 0.7175744  | 0.001055   |
| 5mo_SIGAE9_ATCGGCGGTGCCTAAT-1-10x  | 0.08144153 | 0.23989584 | 0.0031253  |
| 5mo_SIGAE9_ATCGTCCCAGTCAACT-1-10x  | 0.0610206  | 0.16718628 | 0.00042799 |
| 5mo_SIGAE9_ATCGTGAGTCCATACA-1-10x  | 0.19866374 | 0.6572704  | 0.0012085  |
| 5mo_SIGAE9_ATGAAAGGTACTCCCT-1-10x  | 0.18198678 | 0.59789133 | 0.0014427  |
| 5mo_SIGAE9_ATGACCACAGTAGAGC-1-10x  | 0.19656244 | 0.6497886  | 0.00124    |
| 5mo_SIGAE9_ATGAGGGAGCCTCAGC-1-10x  | 0.10390315 | 0.31987134 | 0.0037215  |
| 5mo_SIGAE9_ATGAGGGTCACCGACG-1-10x  | 0.06144278 | 0.16868946 | 0.00042799 |
| 5mo_SIGAE9_ATGAGTCCAACCGACC-1-10x  | 0.01683164 | 0.00984964 | 3.38E-05   |
| 5mo_SIGAE9_ATGAGTCGTACAAAGT-1-10x  | 0.17100033 | 0.55877364 | 0.0016421  |

|                                    |            |            |            |
|------------------------------------|------------|------------|------------|
| 5mo_SIGAE9_ATGATCGCAGTTGTCA-1-10x  | 0.02653932 | 0.04441425 | 4.09E-05   |
| 5mo_SIGAE9_ATGATCGGTAAGTTAG-1-10x  | 0.21889499 | 0.72930455 | 0.0010326  |
| 5mo_SIGAE9_ATGCATGTCTGACCCT-1-10x  | 0.05055257 | 0.12991442 | 0.00014746 |
| 5mo_SIGAE9_ATGCCTCTCTCCACG-1-10x   | 0.01514084 | 0.00382947 | 3.27E-05   |
| 5mo_SIGAE9_ATGGAGGAGAGCAGTC-1-10x  | 0.02174739 | 0.02735237 | 3.69E-05   |
| 5mo_SIGAE9_ATGGAGGAGCCTATCA-1-10x  | 0.07386389 | 0.21291533 | 0.0017292  |
| 5mo_SIGAE9_ATGGAGGAGTTAGTAG-1-10x  | 0.08454398 | 0.25094223 | 0.0036353  |
| 5mo_SIGAE9_ATGGATCGTGAGGCAT-1-10x  | 0.04781826 | 0.12017877 | 0.00011598 |
| 5mo_SIGAE9_ATGGGAGAGAATCGAT-1-10x  | 0.18897869 | 0.62278634 | 0.001338   |
| 5mo_SIGAE9_ATGGGAGGTAACCAGG-1-10x  | 0.12600057 | 0.39855015 | 0.0020515  |
| 5mo_SIGAE9_ATGGGTTAGCCTGTTCG-1-10x | 0.0375108  | 0.08347865 | 6.07E-05   |
| 5mo_SIGAE9_ATGGGTTTCATCGACA-1-10x  | 0.24770196 | 0.831873   | 0.00082396 |
| 5mo_SIGAE9_ATGGTTGAGAGATCGC-1-10x  | 0.09191142 | 0.27717432 | 0.0043903  |
| 5mo_SIGAE9_ATGGTTGCACCCTTGT-1-10x  | 0.02683082 | 0.04545215 | 4.19E-05   |
| 5mo_SIGAE9_ATGGTTGGTCTACGAT-1-10x  | 0.02759822 | 0.04818448 | 4.19E-05   |
| 5mo_SIGAE9_ATGTCCCGTTGCCAAT-1-10x  | 0.03701723 | 0.08172128 | 5.82E-05   |
| 5mo_SIGAE9_ATGTCCCTCGTCAAAC-1-10x  | 0.03430885 | 0.07207798 | 5.37E-05   |
| 5mo_SIGAE9_ATTACCTAGCGGACAT-1-10x  | 0.06933387 | 0.19678602 | 0.0010821  |
| 5mo_SIGAE9_ATTACTCGTAGCACAG-1-10x  | 0.01626483 | 0.0078315  | 3.33E-05   |
| 5mo_SIGAE9_ATTACTCGTTATAGCC-1-10x  | 0.05522451 | 0.14654905 | 0.000233   |
| 5mo_SIGAE9_ATTCAGGGTTGGGAAC-1-10x  | 0.04852039 | 0.12267876 | 0.00012523 |
| 5mo_SIGAE9_ATTCAGGTCTGATGGT-1-10x  | 0.11341091 | 0.35372415 | 0.0027534  |
| 5mo_SIGAE9_ATTCATCAGCCTTCTC-1-10x  | 0.01938487 | 0.01894052 | 3.55E-05   |
| 5mo_SIGAE9_ATTCATCAGGCTCTAT-1-10x  | 0.15317546 | 0.49530748 | 0.0018617  |
| 5mo_SIGAE9_ATTCATCGTGTACGCC-1-10x  | 0.16557053 | 0.53944063 | 0.0017353  |
| 5mo_SIGAE9_ATTCCATAGTATCCTG-1-10x  | 0.24302042 | 0.81520414 | 0.00085167 |
| 5mo_SIGAE9_ATTCCATCATCAGTGT-1-10x  | 0.08743078 | 0.26122078 | 0.0040384  |
| 5mo_SIGAE9_ATTCCCGCAGTTTCGA-1-10x  | 0.08475019 | 0.25167644 | 0.0036353  |
| 5mo_SIGAE9_ATTCCCGGTAGATTAG-1-10x  | 0.03723637 | 0.08250152 | 6.07E-05   |
| 5mo_SIGAE9_ATTCTAGTCGTACGC-1-10x   | 0.09273429 | 0.2801042  | 0.0044107  |
| 5mo_SIGAE9_ATTCTATCTCTGAGA-1-10x   | 0.08943253 | 0.26834813 | 0.0042295  |
| 5mo_SIGAE9_ATTCGTTCAAGAC-1-10x     | 0.11107244 | 0.34539795 | 0.0030221  |
| 5mo_SIGAE9_ATTCTACGTACTGACT-1-10x  | 0.10434376 | 0.3214402  | 0.0037215  |
| 5mo_SIGAE9_ATTCTTGCAAGATCCT-1-10x  | 0.08116954 | 0.2389274  | 0.0029431  |
| 5mo_SIGAE9_ATTCTTGCAATAATGCC-1-10x | 0.07130419 | 0.20380142 | 0.0013138  |
| 5mo_SIGAE9_ATTCTTGGTACAAGCG-1-10x  | 0.14946182 | 0.4820849  | 0.0018705  |
| 5mo_SIGAE9_ATTGGGTCAAGACGAC-1-10x  | 0.22346221 | 0.74556637 | 0.00099599 |
| 5mo_SIGAE9_ATTGGGTTACCCCTTG-1-10x  | 0.042514   | 0.10129275 | 7.82E-05   |
| 5mo_SIGAE9_ATTTACCGTACGCTTA-1-10x  | 0.11916062 | 0.37419623 | 0.0023317  |
| 5mo_SIGAE9_ATTTCACTCAAGAGTA-1-10x  | 0.19754472 | 0.65328604 | 0.0012292  |
| 5mo_SIGAE9_ATTTCTGCAATGCAAA-1-10x  | 0.24143866 | 0.8095722  | 0.00086374 |

|                                    |            |            |            |
|------------------------------------|------------|------------|------------|
| 5mo_SIGAE9_CAACAACCAATGAGCG-1-10x  | 0.08067397 | 0.2371629  | 0.0029431  |
| 5mo_SIGAE9_CAACAACCTAACGGT-1-10x   | 0.23151128 | 0.7742254  | 0.00093779 |
| 5mo_SIGAE9_CAACCAAGTAGTCTTG-1-10x  | 0.09586516 | 0.29125178 | 0.0043808  |
| 5mo_SIGAE9_CAACCTCTCACAGAGG-1-10x  | 0.12548897 | 0.39672858 | 0.0020515  |
| 5mo_SIGAE9_CAACGATCAAAGACTA-1-10x  | 0.09382346 | 0.2839822  | 0.0044154  |
| 5mo_SIGAE9_CAACGATGTTACCGTA-1-10x  | 0.03839091 | 0.08661231 | 6.36E-05   |
| 5mo_SIGAE9_CAACGGCAGGTACAGC-1-10x  | 0.22795929 | 0.7615784  | 0.00095947 |
| 5mo_SIGAE9_CAACGGCGTTCAAGG-1-10x   | 0.08513382 | 0.25304237 | 0.0037839  |
| 5mo_SIGAE9_CAAGAGGAGAGGCTGT-1-10x  | 0.04755272 | 0.11923333 | 0.00011598 |
| 5mo_SIGAE9_CAATACGGTTAACCTG-1-10x  | 0.18921584 | 0.6236307  | 0.001338   |
| 5mo_SIGAE9_CAATACGTCTCCGAAA-1-10x  | 0.01902457 | 0.01765766 | 3.49E-05   |
| 5mo_SIGAE9_CAATCGACACATCCCT-1-10x  | 0.28073618 | 0.9494927  | 0.00075348 |
| 5mo_SIGAE9_CAATTTCCAGGTGTGAC-1-10x | 0.09033517 | 0.271562   | 0.0042999  |
| 5mo_SIGAE9_CAATTTCCATCGATGT-1-10x  | 0.05000254 | 0.12795602 | 0.00013566 |
| 5mo_SIGAE9_CAATTTTCGTCCTCCTA-1-10x | 0.06352294 | 0.17609595 | 0.00058553 |
| 5mo_SIGAE9_CACAACAGTAGCACAG-1-10x  | 0.01720304 | 0.01117203 | 3.38E-05   |
| 5mo_SIGAE9_CACACAATCCTTCACG-1-10x  | 0.19201648 | 0.6336025  | 0.0012985  |
| 5mo_SIGAE9_CACAGATGTGCAGGAT-1-10x  | 0.07799406 | 0.22762099 | 0.0023954  |
| 5mo_SIGAE9_CACAGGCAGAGAACCC-1-10x  | 0.01817943 | 0.0146485  | 3.44E-05   |
| 5mo_SIGAE9_CACAGGCTCGGTCTGG-1-10x  | 0.04550552 | 0.11194417 | 9.39E-05   |
| 5mo_SIGAE9_CACCAAAAGATGCTTC-1-10x  | 0.27995986 | 0.9467286  | 0.00075303 |
| 5mo_SIGAE9_CACCGTTAGGATGGCT-1-10x  | 0.04338552 | 0.10439582 | 8.29E-05   |
| 5mo_SIGAE9_CACGAATGTTGGCCGT-1-10x  | 0.02961392 | 0.05536147 | 4.55E-05   |
| 5mo_SIGAE9_CACGAATTCATAGGT-1-10x   | 0.04705972 | 0.11747798 | 0.00010777 |
| 5mo_SIGAE9_CACGAATTCGCCAACG-1-10x  | 0.06799223 | 0.19200905 | 0.00088537 |
| 5mo_SIGAE9_CACGGGTTCAGAGTGG-1-10x  | 0.23110802 | 0.7727896  | 0.00093779 |
| 5mo_SIGAE9_CACGTGGTCTGAGGCC-1-10x  | 0.11614467 | 0.36345783 | 0.0025211  |
| 5mo_SIGAE9_CACGTTCAGAGTATAC-1-10x  | 0.03242055 | 0.06535459 | 5.00E-05   |
| 5mo_SIGAE9_CACTAAGCAACCGACC-1-10x  | 0.01675603 | 0.00958043 | 3.38E-05   |
| 5mo_SIGAE9_CACTAAGGTATCTTCT-1-10x  | 0.06965869 | 0.19794255 | 0.0010821  |
| 5mo_SIGAE9_CACTGAAAGATAACGT-1-10x  | 0.03072139 | 0.05930467 | 4.68E-05   |
| 5mo_SIGAE9_CACTGAATCGCCAGA-1-10x   | 0.0163147  | 0.00800906 | 3.33E-05   |
| 5mo_SIGAE9_CACTGGGGTGCACGCT-1-10x  | 0.10594367 | 0.32713673 | 0.00352    |
| 5mo_SIGAE9_CACTGTCCAAGTGATA-1-10x  | 0.23138125 | 0.7737624  | 0.00093779 |
| 5mo_SIGAE9_CACTGTCTGTTGCCG-1-10x   | 0.26487127 | 0.893005   | 0.00076135 |
| 5mo_SIGAE9_CACTGTCTCCACGTAA-1-10x  | 0.09878348 | 0.30164257 | 0.0042345  |
| 5mo_SIGAE9_CAGATACTCCATTTCA-1-10x  | 0.02203966 | 0.02839301 | 3.69E-05   |
| 5mo_SIGAE9_CAGATCACAGGTCAGA-1-10x  | 0.04879353 | 0.12365126 | 0.00012523 |
| 5mo_SIGAE9_CAGATTGAGGGATCTG-1-10x  | 0.13810346 | 0.44164297 | 0.0018802  |
| 5mo_SIGAE9_CAGCAATCATACATCG-1-10x  | 0.03689869 | 0.0812992  | 5.82E-05   |
| 5mo_SIGAE9_CAGCAATCATATTCGG-1-10x  | 0.08966255 | 0.26916713 | 0.0042295  |

|                                    |            |            |            |
|------------------------------------|------------|------------|------------|
| 5mo_SIGAE9_CAGCAGCCAGAACGCA-1-10x  | 0.08225355 | 0.24278705 | 0.0033032  |
| 5mo_SIGAE9_CAGCGTGCATGAAAGT-1-10x  | 0.04386328 | 0.10609691 | 8.81E-05   |
| 5mo_SIGAE9_CAGCGTGTCCGTAGGC-1-10x  | 0.04765169 | 0.11958572 | 0.00011598 |
| 5mo_SIGAE9_CAGCGTGTCCGTAGGC-1-10x  | 0.25222176 | 0.84796596 | 0.00080028 |
| 5mo_SIGAE9_CAGGCCAGTTCACGAT-1-10x  | 0.11589437 | 0.36256662 | 0.002594   |
| 5mo_SIGAE9_CAGGGCTGTAGTAAGT-1-10x  | 0.05360695 | 0.14078967 | 0.00019264 |
| 5mo_SIGAE9_CAGTGCGAGACGACTG-1-10x  | 0.05180829 | 0.13438547 | 0.00016076 |
| 5mo_SIGAE9_CAGTTAGCAACCCGCA-1-10x  | 0.21093257 | 0.700954   | 0.0010934  |
| 5mo_SIGAE9_CATACCCAGACTCGAG-1-10x  | 0.09225416 | 0.27839467 | 0.0043903  |
| 5mo_SIGAE9_CATACCCAGGGCAGGA-1-10x  | 0.08275661 | 0.24457823 | 0.0033032  |
| 5mo_SIGAE9_CATACTTGTGTCATCA-1-10x  | 0.23171797 | 0.77496135 | 0.00093066 |
| 5mo_SIGAE9_CATAGACAGCCATTCA-1-10x  | 0.05443909 | 0.14375255 | 0.00021164 |
| 5mo_SIGAE9_CATCAAGAGGTAGGCT-1-10x  | 0.09414426 | 0.28512445 | 0.0044154  |
| 5mo_SIGAE9_CATCCACAGCCTCACG-1-10x  | 0.19693257 | 0.6511065  | 0.0012292  |
| 5mo_SIGAE9_CATCCACCACGTACAT-1-10x  | 0.01887072 | 0.01710988 | 3.49E-05   |
| 5mo_SIGAE9_CATCCACTCTCCTGTG-1-10x  | 0.04535231 | 0.11139868 | 9.39E-05   |
| 5mo_SIGAE9_CATCCACAATTGAAG-1-10x   | 0.04960819 | 0.1265519  | 0.00013566 |
| 5mo_SIGAE9_CATCCCATCTGGAGAG-1-10x  | 0.0287165  | 0.05216617 | 4.42E-05   |
| 5mo_SIGAE9_CATCGCTCAGCAGATG-1-10x  | 0.11692572 | 0.36623877 | 0.002453   |
| 5mo_SIGAE9_CATCGCTGTCTTGTCC-1-10x  | 0.05225203 | 0.13596542 | 0.00017575 |
| 5mo_SIGAE9_CATCGTCAGCGTGAGT-1-10x  | 0.24603218 | 0.8259277  | 0.00083459 |
| 5mo_SIGAE9_CATCGTCGTAAGGTCG-1-10x  | 0.09086096 | 0.27343413 | 0.0043535  |
| 5mo_SIGAE9_CATGCAACAACGATTC-1-10x  | 0.02289054 | 0.03142262 | 3.76E-05   |
| 5mo_SIGAE9_CATGCAAGTGGTCCCA-1-10x  | 0.26885182 | 0.9071779  | 0.00075594 |
| 5mo_SIGAE9_CATGCCTGTGTGTGGA-1-10x  | 0.2669876  | 0.9005403  | 0.00075831 |
| 5mo_SIGAE9_CATGCGGAGAGGATGA-1-10x  | 0.08647924 | 0.2578328  | 0.0039187  |
| 5mo_SIGAE9_CATGCGGGTCCGACGT-1-10x  | 0.03273379 | 0.06646992 | 5.00E-05   |
| 5mo_SIGAE9_CATGCGGGTGTGTGGA-1-10x  | 0.22840458 | 0.76316386 | 0.00095947 |
| 5mo_SIGAE9_CATGCGGTCACTGCTC-1-10x  | 0.17993596 | 0.59058934 | 0.001475   |
| 5mo_SIGAE9_CATGGATCACGACAGA-1-10x  | 0.03885298 | 0.08825752 | 6.36E-05   |
| 5mo_SIGAE9_CATGGATGTCCTCCTA-1-10x  | 0.12839136 | 0.40706265 | 0.0019821  |
| 5mo_SIGAE9_CATGGATTCACCTACGA-1-10x | 0.26222634 | 0.88358766 | 0.00076727 |
| 5mo_SIGAE9_CATGGTAAGACTAAGT-1-10x  | 0.14849931 | 0.47865784 | 0.0018713  |
| 5mo_SIGAE9_CATGGTAGTATCGCGC-1-10x  | 0.01920707 | 0.01830745 | 3.49E-05   |
| 5mo_SIGAE9_CATGGTATCGGATAAA-1-10x  | 0.0271211  | 0.04648567 | 4.19E-05   |
| 5mo_SIGAE9_CATTATCATATCTCT-1-10x   | 0.04611154 | 0.11410195 | 0.00010046 |
| 5mo_SIGAE9_CATTCCGAGGGAGGTG-1-10x  | 0.01899441 | 0.01755028 | 3.49E-05   |
| 5mo_SIGAE9_CATTCCGTACCTACC-1-10x   | 0.04494197 | 0.10993765 | 9.39E-05   |
| 5mo_SIGAE9_CATTCTAAGTGCTACT-1-10x  | 0.0520408  | 0.13521332 | 0.00016076 |
| 5mo_SIGAE9_CATTCTACAATTCTTC-1-10x  | 0.25299603 | 0.85072273 | 0.00080028 |
| 5mo_SIGAE9_CATTGAGAGAGAGTTT-1-10x  | 0.04665501 | 0.11603698 | 0.00010777 |

|                                    |            |            |            |
|------------------------------------|------------|------------|------------|
| 5mo_SIGAE9_CATTGAGTCCGATTAG-1-10x  | 0.03474481 | 0.07363024 | 5.37E-05   |
| 5mo_SIGAE9_CATTTCAAGAGACAAG-1-10x  | 0.04315781 | 0.10358506 | 8.29E-05   |
| 5mo_SIGAE9_CATTTTCATCGCCAGAC-1-10x | 0.07638554 | 0.2218938  | 0.0020486  |
| 5mo_SIGAE9_CCAATTTTCATGACT-1-10x   | 0.05306561 | 0.13886222 | 0.00019264 |
| 5mo_SIGAE9_CCAATTTGTTAAGACA-1-10x  | 0.11966946 | 0.37600797 | 0.0023317  |
| 5mo_SIGAE9_CCACAAAAGAAGCGAA-1-10x  | 0.28748658 | 0.9735278  | 0.00075864 |
| 5mo_SIGAE9_CCACAAAGTATTCCTT-1-10x  | 0.05916088 | 0.16056469 | 0.00034795 |
| 5mo_SIGAE9_CCACACTAGGTAAACT-1-10x  | 0.09769111 | 0.29775316 | 0.0042943  |
| 5mo_SIGAE9_CCACCATCATTACTCT-1-10x  | 0.1973101  | 0.6524507  | 0.0012292  |
| 5mo_SIGAE9_CCACGAGGTAACGGTG-1-10x  | 0.02281507 | 0.03115389 | 3.76E-05   |
| 5mo_SIGAE9_CCACGTTAGGGTAGCT-1-10x  | 0.0443637  | 0.1078787  | 8.81E-05   |
| 5mo_SIGAE9_CCACTTGGTCAAGTTC-1-10x  | 0.06314892 | 0.17476423 | 0.00052741 |
| 5mo_SIGAE9_CCATAAGTCGCTGACG-1-10x  | 0.05359944 | 0.14076294 | 0.00019264 |
| 5mo_SIGAE9_CCCAAGTGTGG-1-10x       | 0.112275   | 0.34967968 | 0.0028393  |
| 5mo_SIGAE9_CCCAAGTGTGG-1-10x       | 0.23365158 | 0.78184605 | 0.00091657 |
| 5mo_SIGAE9_CCCAAGTGTGG-1-10x       | 0.04659205 | 0.1158128  | 0.00010777 |
| 5mo_SIGAE9_CCCATTGCAAATGATG-1-10x  | 0.02117113 | 0.02530057 | 3.69E-05   |
| 5mo_SIGAE9_CCCATTGGTTAACAGA-1-10x  | 0.2033592  | 0.67398876 | 0.0011608  |
| 5mo_SIGAE9_CCCATTGTCATTCAT-1-10x   | 0.08336125 | 0.24673109 | 0.0034742  |
| 5mo_SIGAE9_CCCGAAGAGATTGACA-1-10x  | 0.04461131 | 0.10876032 | 9.39E-05   |
| 5mo_SIGAE9_CCCGAAGAGCTGAGCA-1-10x  | 0.05344353 | 0.1402078  | 0.00019264 |
| 5mo_SIGAE9_CCCGAACAATGAGCG-1-10x   | 0.01571665 | 0.00587967 | 3.33E-05   |
| 5mo_SIGAE9_CCCGAAGTTGGATCT-1-10x   | 0.23319726 | 0.7802284  | 0.00092358 |
| 5mo_SIGAE9_CCCGAATCTACTATC-1-10x   | 0.07196757 | 0.2061634  | 0.0014433  |
| 5mo_SIGAE9_CCCTAACCATGCACTA-1-10x  | 0.04206182 | 0.09968273 | 7.82E-05   |
| 5mo_SIGAE9_CCCTCAAAGTTCGCAT-1-10x  | 0.20855431 | 0.69248617 | 0.0011177  |
| 5mo_SIGAE9_CCCTCAACACAACGTT-1-10x  | 0.0262237  | 0.04329047 | 4.09E-05   |
| 5mo_SIGAE9_CCCTCTCAGGTGCCAA-1-10x  | 0.27200735 | 0.91841334 | 0.000753   |
| 5mo_SIGAE9_CCCTCTCGTAGATTGA-1-10x  | 0.14098841 | 0.45191497 | 0.0018734  |
| 5mo_SIGAE9_CCCTCTCGTCCCTGTT-1-10x  | 0.0840683  | 0.24924855 | 0.0036353  |
| 5mo_SIGAE9_CCCTCTCGCTGATA-1-10x    | 0.04740563 | 0.11870962 | 0.00010777 |
| 5mo_SIGAE9_CCCTGATCACTGCGAC-1-10x  | 0.04150587 | 0.09770326 | 7.40E-05   |
| 5mo_SIGAE9_CCCTTAGAGGGTATAT-1-10x  | 0.272294   | 0.919434   | 0.000753   |
| 5mo_SIGAE9_CCCTTAGTCTGAGCAT-1-10x  | 0.07003464 | 0.19928114 | 0.0011935  |
| 5mo_SIGAE9_CCGAACGTCTCTCAAT-1-10x  | 0.01781874 | 0.01336426 | 3.44E-05   |
| 5mo_SIGAE9_CCGATCTCATAAGCAA-1-10x  | 0.14283931 | 0.45850518 | 0.0018718  |
| 5mo_SIGAE9_CCGCAAGCATGTGGCC-1-10x  | 0.09297795 | 0.28097174 | 0.0044107  |
| 5mo_SIGAE9_CCGGACAAGATAGGGA-1-10x  | 0.01531122 | 0.00443613 | 3.27E-05   |
| 5mo_SIGAE9_CCGGACAAGCCGTTGC-1-10x  | 0.04121678 | 0.09667393 | 7.40E-05   |
| 5mo_SIGAE9_CCGGACACAATTTCTC-1-10x  | 0.06041459 | 0.16502854 | 0.00038577 |
| 5mo_SIGAE9_CCGGACAGTGTAATG-1-10x   | 0.05706904 | 0.15311657 | 0.00028394 |



|                                     |            |            |            |
|-------------------------------------|------------|------------|------------|
| 5mo_SIGAE9_CCGGGTATCCCATGGG-1-10x   | 0.04835862 | 0.12210275 | 0.00012523 |
| 5mo_SIGAE9_CCGGTGAAGACCCTTA-1-10x   | 0.11629411 | 0.3639899  | 0.0025211  |
| 5mo_SIGAE9_CCGGTGATCACCGGTG-1-10x   | 0.11008934 | 0.34189755 | 0.0031181  |
| 5mo_SIGAE9_CCGTAGGTCCGGACGT-1-10x   | 0.08071161 | 0.23729692 | 0.0029431  |
| 5mo_SIGAE9_CCGTGAGAGTTACGTC-1-10x   | 0.0520882  | 0.13538209 | 0.00016076 |
| 5mo_SIGAE9_CCGTTCAAGATGGCAC-1-10x   | 0.09364982 | 0.28336397 | 0.0044154  |
| 5mo_SIGAE9_CCGTTCAAGTACTCGT-1-10x   | 0.05152335 | 0.1333709  | 0.00016076 |
| 5mo_SIGAE9_CCTAACCCAGTACTAC-1-10x   | 0.04554739 | 0.11209325 | 0.00010046 |
| 5mo_SIGAE9_CCTAACCGTTCCTAAG-1-10x   | 0.19160642 | 0.6321425  | 0.0012985  |
| 5mo_SIGAE9_CCTAAGAAGACCATGG-1-10x   | 0.24940637 | 0.8379416  | 0.00081397 |
| 5mo_SIGAE9_CCTACGTAGGTCTGGA-1-10x   | 0.05773151 | 0.15547533 | 0.00028394 |
| 5mo_SIGAE9_CCTATCGAGCGCTGCT-1-10x   | 0.259888   | 0.87526184 | 0.00077221 |
| 5mo_SIGAE9_CCTCAACAGGGCCCTT-1-10x   | 0.056677   | 0.15172069 | 0.000257   |
| 5mo_SIGAE9_CCTCAACGTTGTTGTG-1-10x   | 0.08855791 | 0.265234   | 0.0041422  |
| 5mo_SIGAE9_CCTCACACACGGTAGA-1-10x   | 0.19670475 | 0.65029526 | 0.00124    |
| 5mo_SIGAE9_CCTCACAGTAGCACAG-1-10x   | 0.08435639 | 0.2502743  | 0.0036353  |
| 5mo_SIGAE9_CCTCACATCACTGGTA-1-10x   | 0.08819388 | 0.26393786 | 0.0041422  |
| 5mo_SIGAE9_CCTCAGTAGAGATGCC-1-10x   | 0.01879931 | 0.0168556  | 3.49E-05   |
| 5mo_SIGAE9_CCTCAGTGTCTCTCTG-1-10x   | 0.27665502 | 0.93496156 | 0.00075222 |
| 5mo_SIGAE9_CCTCATGCACACAGCC-1-10x   | 0.02604133 | 0.0426411  | 4.09E-05   |
| 5mo_SIGAE9_CCTCCAACAACCTCGAT-1-10x  | 0.06828842 | 0.19306363 | 0.00097948 |
| 5mo_SIGAE9_CCTCCAACACGTAACCT-1-10x  | 0.13105994 | 0.41656426 | 0.001934   |
| 5mo_SIGAE9_CCTCCTCGTAAGGAGA-1-10x   | 0.20819049 | 0.6911907  | 0.0011177  |
| 5mo_SIGAE9_CCTCCTCGTGTTCCTCAA-1-10x | 0.17027435 | 0.55618876 | 0.0016584  |
| 5mo_SIGAE9_CCTCTCCTCCATACAG-1-10x   | 0.06290603 | 0.17389944 | 0.00052741 |
| 5mo_SIGAE9_CCTGCATCAGTTTCAG-1-10x   | 0.23795311 | 0.7971618  | 0.00088935 |
| 5mo_SIGAE9_CCTGCATCATGAATCC-1-10x   | 0.10389957 | 0.3198586  | 0.0037215  |
| 5mo_SIGAE9_CCTTTGGAGTCCGCGT-1-10x   | 0.27604866 | 0.9328026  | 0.00075214 |
| 5mo_SIGAE9_CGAAGTTAGGCACAAC-1-10x   | 0.2168097  | 0.72187984 | 0.0010475  |
| 5mo_SIGAE9_CGAAGTTGTTACACAC-1-10x   | 0.08918634 | 0.26747155 | 0.0042295  |
| 5mo_SIGAE9_CGAAGTTTCATCGCTC-1-10x   | 0.02953398 | 0.05507685 | 4.42E-05   |
| 5mo_SIGAE9_CGAATTGAGGCCCACT-1-10x   | 0.0965829  | 0.29380733 | 0.0043435  |
| 5mo_SIGAE9_CGACAGCGTAGATCGG-1-10x   | 0.159072   | 0.5163023  | 0.0018209  |
| 5mo_SIGAE9_CGACAGCGTGAATGAT-1-10x   | 0.02889566 | 0.05280407 | 4.42E-05   |
| 5mo_SIGAE9_CGACAGCGTTGGGCCT-1-10x   | 0.2248958  | 0.75067073 | 0.00098869 |
| 5mo_SIGAE9_CGAGAAGCAAAGAGTT-1-10x   | 0.25312024 | 0.851165   | 0.00080028 |
| 5mo_SIGAE9_CGAGGAAAGCTAGATA-1-10x   | 0.10768998 | 0.33335453 | 0.0033168  |
| 5mo_SIGAE9_CGAGTGCAGTTTAGGA-1-10x   | 0.15309295 | 0.4950137  | 0.0018617  |
| 5mo_SIGAE9_CGATGCGTCCTTATAC-1-10x   | 0.0488156  | 0.12372988 | 0.00012523 |
| 5mo_SIGAE9_CGCAGGTAGACACACG-1-10x   | 0.03340276 | 0.06885178 | 5.17E-05   |
| 5mo_SIGAE9_CGCAGGTAGATACTGA-1-10x   | 0.03158832 | 0.06239143 | 4.83E-05   |

|                                   |            |            |            |
|-----------------------------------|------------|------------|------------|
| 5mo_SIGAE9_CGCAGGTGTCCCGCAA-1-10x | 0.04517748 | 0.11077619 | 9.39E-05   |
| 5mo_SIGAE9_CGCATAAAGCGAGTCA-1-10x | 0.231236   | 0.7732452  | 0.00093779 |
| 5mo_SIGAE9_CGCCATTCAAAGCAAT-1-10x | 0.02106272 | 0.02491459 | 3.62E-05   |
| 5mo_SIGAE9_CGCCATTTCAAGTATC-1-10x | 0.25471628 | 0.85684776 | 0.00079207 |
| 5mo_SIGAE9_CGCGTGATCAAATGCC-1-10x | 0.22088756 | 0.7363992  | 0.0010179  |
| 5mo_SIGAE9_CGGAATTAGGGTGGGA-1-10x | 0.25591525 | 0.86111677 | 0.00078825 |
| 5mo_SIGAE9_CGGAATTGTTCTCCA-1-10x  | 0.06359071 | 0.17633727 | 0.00058553 |
| 5mo_SIGAE9_CGGACACGTGGGCTTC-1-10x | 0.23970076 | 0.8033844  | 0.00087632 |
| 5mo_SIGAE9_CGGAGAAGTCACCTTC-1-10x | 0.28741825 | 0.9732845  | 0.00075864 |
| 5mo_SIGAE9_CGGCAGTGTGTAATG-1-10x  | 0.08194175 | 0.24167688 | 0.0031253  |
| 5mo_SIGAE9_CGGCAGTTCGCTCTA-1-10x  | 0.02391529 | 0.03507128 | 3.83E-05   |
| 5mo_SIGAE9_CGGGACTAGCACTCAT-1-10x | 0.09839369 | 0.30025473 | 0.0042345  |
| 5mo_SIGAE9_CGGGACTCAAGCGCTC-1-10x | 0.2820266  | 0.95408726 | 0.00075401 |
| 5mo_SIGAE9_CGGGACTCAGCACACC-1-10x | 0.29202965 | 0.9897036  | 0.00076378 |
| 5mo_SIGAE9_CGGGCATAGACCAACG-1-10x | 0.10252193 | 0.31495348 | 0.0039137  |
| 5mo_SIGAE9_CGGGCATTCACCTTGT-1-10x | 0.04964913 | 0.12669769 | 0.00013566 |
| 5mo_SIGAE9_CGGGTCACAGCGTTTA-1-10x | 0.24573278 | 0.82486165 | 0.00083459 |
| 5mo_SIGAE9_CGGGTCATCCCAGTGG-1-10x | 0.02284382 | 0.03125624 | 3.76E-05   |
| 5mo_SIGAE9_CGGGTGTAGGGTCTTT-1-10x | 0.27490902 | 0.92874485 | 0.00075218 |
| 5mo_SIGAE9_CGGTCAGTCAAGGCTT-1-10x | 0.07822166 | 0.22843137 | 0.0023954  |
| 5mo_SIGAE9_CGTAAGTAGTCAGAGC-1-10x | 0.0211715  | 0.0253019  | 3.69E-05   |
| 5mo_SIGAE9_CGTAAGTGTAGAATGT-1-10x | 0.05367762 | 0.1410413  | 0.00019264 |
| 5mo_SIGAE9_CGTAAGTTCGCTCTCA-1-10x | 0.11932391 | 0.37477762 | 0.0023317  |
| 5mo_SIGAE9_CGTAATGTCAACTACG-1-10x | 0.27913117 | 0.94377804 | 0.00075266 |
| 5mo_SIGAE9_CGTCCATGTCATCACA-1-10x | 0.04697784 | 0.11718644 | 0.00010777 |
| 5mo_SIGAE9_CGTGCTTGTGTCGATT-1-10x | 0.06684879 | 0.18793777 | 0.00079936 |
| 5mo_SIGAE9_CGTGCTTTCTGCTCTG-1-10x | 0.2330692  | 0.7797724  | 0.00092358 |
| 5mo_SIGAE9_CGTTAGAGTCGGCTAC-1-10x | 0.02729496 | 0.04710473 | 4.19E-05   |
| 5mo_SIGAE9_CGTTAGATCTCCGAGG-1-10x | 0.26301134 | 0.88638264 | 0.00076511 |
| 5mo_SIGAE9_CGTTCTGTACACCGG-1-10x  | 0.21892    | 0.72939366 | 0.0010326  |
| 5mo_SIGAE9_CTAACCCAGTCAGAG-1-10x  | 0.07497339 | 0.21686576 | 0.001885   |
| 5mo_SIGAE9_CTAACCCATAGGCGA-1-10x  | 0.06627757 | 0.18590394 | 0.00079936 |
| 5mo_SIGAE9_CTAACCCGTTGGGTTT-1-10x | 0.0434561  | 0.10464715 | 8.29E-05   |
| 5mo_SIGAE9_CTAACCTCATTACTCT-1-10x | 0.03449847 | 0.07275312 | 5.37E-05   |
| 5mo_SIGAE9_CTAACCTGTACGTGAG-1-10x | 0.08973562 | 0.2694273  | 0.0042999  |
| 5mo_SIGAE9_CTAACCTTCAGTGTCA-1-10x | 0.27413315 | 0.92598236 | 0.00075233 |
| 5mo_SIGAE9_CTAAGTGTCTCCAGC-1-10x  | 0.01606605 | 0.00712372 | 3.33E-05   |
| 5mo_SIGAE9_CTACAGAAGTCGAATA-1-10x | 0.05692852 | 0.15261626 | 0.00028394 |
| 5mo_SIGAE9_CTACATTCATTCACAG-1-10x | 0.26605842 | 0.89723194 | 0.00075974 |
| 5mo_SIGAE9_CTACATTGTAGGAGGG-1-10x | 0.2444338  | 0.82023656 | 0.00084583 |
| 5mo_SIGAE9_CTACATTTCTGAGTCA-1-10x | 0.02250961 | 0.03006628 | 3.76E-05   |

|                                    |            |            |            |
|------------------------------------|------------|------------|------------|
| 5mo_SIGAE9_CTACCCATCTCCGCAT-1-10x  | 0.21251298 | 0.7065812  | 0.0010856  |
| 5mo_SIGAE9_CTACGGGAGAGGCTGT-1-10x  | 0.02239202 | 0.02964759 | 3.76E-05   |
| 5mo_SIGAE9_CTACTATCATGATGCT-1-10x  | 0.27451015 | 0.92732465 | 0.00075233 |
| 5mo_SIGAE9_CTACTATGTGTGGACA-1-10x  | 0.0577431  | 0.1555166  | 0.00028394 |
| 5mo_SIGAE9_CTAGACAAGCAGCCCT-1-10x  | 0.02575348 | 0.04161621 | 4.00E-05   |
| 5mo_SIGAE9_CTATAGGAGCTCCGAC-1-10x  | 0.02309133 | 0.03213754 | 3.83E-05   |
| 5mo_SIGAE9_CTATCTACATCATTTTC-1-10x | 0.03034491 | 0.0579642  | 4.55E-05   |
| 5mo_SIGAE9_CTATCTAGTAACATCC-1-10x  | 0.10296237 | 0.31652167 | 0.0038193  |
| 5mo_SIGAE9_CTCAAGAAGACCAACG-1-10x  | 0.02031317 | 0.02224578 | 3.62E-05   |
| 5mo_SIGAE9_CTCACTGCAGTTCACA-1-10x  | 0.16623421 | 0.54180366 | 0.0017206  |
| 5mo_SIGAE9_CTCAGAAAGACTCAAA-1-10x  | 0.091199   | 0.27463773 | 0.0043535  |
| 5mo_SIGAE9_CTCAGAAAGTGGTCAAG-1-10x | 0.02774918 | 0.04872199 | 4.30E-05   |
| 5mo_SIGAE9_CTCAGAAAGTTAGAAGT-1-10x | 0.05598295 | 0.14924952 | 0.000257   |
| 5mo_SIGAE9_CTCAGGGCACAAACGG-1-10x  | 0.02799901 | 0.04961152 | 4.30E-05   |
| 5mo_SIGAE9_CTCAGGGGTGCGGGTT-1-10x  | 0.16025709 | 0.5205219  | 0.0018     |
| 5mo_SIGAE9_CTCAGGGTCCGGTAGC-1-10x  | 0.0530196  | 0.13869838 | 0.00017575 |
| 5mo_SIGAE9_CTCAGTCGTCTGTAAC-1-10x  | 0.07610738 | 0.2209034  | 0.0020486  |
| 5mo_SIGAE9_CTCATGCTCCGCGGAT-1-10x  | 0.02443094 | 0.03690727 | 3.91E-05   |
| 5mo_SIGAE9_CTCATGCTCGCTAAAC-1-10x  | 0.02640479 | 0.04393524 | 4.09E-05   |
| 5mo_SIGAE9_CTCATTAGTTTCAAAG-1-10x  | 0.08802785 | 0.2633467  | 0.0041422  |
| 5mo_SIGAE9_CTCATTATCCCGAATA-1-10x  | 0.08105972 | 0.2385364  | 0.0029431  |
| 5mo_SIGAE9_CTCCACAGTTGCAACT-1-10x  | 0.14451188 | 0.46446043 | 0.0018716  |
| 5mo_SIGAE9_CTCCACATCTTGGTGA-1-10x  | 0.25422668 | 0.85510457 | 0.00079207 |
| 5mo_SIGAE9_CTCCATGCACGTTGGC-1-10x  | 0.09322589 | 0.28185454 | 0.0044107  |
| 5mo_SIGAE9_CTCCATGGTGTAGCAG-1-10x  | 0.01693544 | 0.01021921 | 3.38E-05   |
| 5mo_SIGAE9_CTCCCAATCAACGAGG-1-10x  | 0.21524496 | 0.7163085  | 0.0010625  |
| 5mo_SIGAE9_CTCCTCCCACTCTGCT-1-10x  | 0.17209455 | 0.5626697  | 0.0016256  |
| 5mo_SIGAE9_CTCCTTTTCCAGCCTT-1-10x  | 0.26061386 | 0.87784636 | 0.00077221 |
| 5mo_SIGAE9_CTCTCAGGTAGAATAC-1-10x  | 0.18646361 | 0.6138313  | 0.0013662  |
| 5mo_SIGAE9_CTCTCGAGTAAGGCTG-1-10x  | 0.04984499 | 0.12739505 | 0.00013566 |
| 5mo_SIGAE9_CTCTGGTAGCCTATTG-1-10x  | 0.10434294 | 0.32143724 | 0.0037215  |
| 5mo_SIGAE9_CTGAGCGTCCAGTACA-1-10x  | 0.21799009 | 0.7260826  | 0.00104    |
| 5mo_SIGAE9_CTGATCCCAAGGAGTC-1-10x  | 0.27717236 | 0.9368036  | 0.00075222 |
| 5mo_SIGAE9_CTGATCCCAATACCTG-1-10x  | 0.06235046 | 0.1719213  | 0.00047505 |
| 5mo_SIGAE9_CTGATCCTCTGTCCGT-1-10x  | 0.02709543 | 0.04639427 | 4.19E-05   |
| 5mo_SIGAE9_CTGCCTATCTGTAACG-1-10x  | 0.0328304  | 0.0668139  | 5.00E-05   |
| 5mo_SIGAE9_CTGCGAGTCCTACTGC-1-10x  | 0.21791422 | 0.7258125  | 0.00104    |
| 5mo_SIGAE9_CTGCTCACAATTGTGC-1-10x  | 0.27859798 | 0.9418796  | 0.00075266 |
| 5mo_SIGAE9_CTGCTCAGTCCAGGTC-1-10x  | 0.02832868 | 0.05078531 | 4.30E-05   |
| 5mo_SIGAE9_CTGGCAGTCTCGGCTT-1-10x  | 0.27326035 | 0.92287475 | 0.0007526  |
| 5mo_SIGAE9_CTGGTCTGTAAGCAAT-1-10x  | 0.04912696 | 0.12483849 | 0.00012523 |

|                                    |            |            |            |
|------------------------------------|------------|------------|------------|
| 5mo_SIGAE9_CTGTACCCATAATCGC-1-10x  | 0.28762665 | 0.9740265  | 0.00075864 |
| 5mo_SIGAE9_CTGTACCTCGGTAGAG-1-10x  | 0.18036681 | 0.5921234  | 0.001475   |
| 5mo_SIGAE9_CTGTACCTCTTGGTGA-1-10x  | 0.0414662  | 0.097562   | 7.40E-05   |
| 5mo_SIGAE9_CTGTATTAGCAACAGC-1-10x  | 0.02637127 | 0.0438159  | 4.09E-05   |
| 5mo_SIGAE9_CTGTGAAAGCTAAACA-1-10x  | 0.22561567 | 0.7532338  | 0.00098137 |
| 5mo_SIGAE9_CTGTGAAAGTCGAAAT-1-10x  | 0.0481596  | 0.12139416 | 0.00011598 |
| 5mo_SIGAE9_CTGTGGGAGAGGGTAA-1-10x  | 0.05008159 | 0.12823747 | 0.00013566 |
| 5mo_SIGAE9_CTGTGGGCAATTGCAC-1-10x  | 0.18514986 | 0.6091536  | 0.0013959  |
| 5mo_SIGAE9_CTTAGGACACAGCTTA-1-10x  | 0.06084671 | 0.16656715 | 0.00042799 |
| 5mo_SIGAE9_CTTAGGACAGTAGAGC-1-10x  | 0.03741831 | 0.08314932 | 6.07E-05   |
| 5mo_SIGAE9_CTTAGGAGTCAACCTA-1-10x  | 0.21439582 | 0.7132851  | 0.0010701  |
| 5mo_SIGAE9_CTTCCGAGTATGTCCA-1-10x  | 0.04798648 | 0.12077775 | 0.00011598 |
| 5mo_SIGAE9_CTTCTTAGCCTATCA-1-10x   | 0.02433246 | 0.03655661 | 3.91E-05   |
| 5mo_SIGAE9_CTTCCGGTAGTAACCTC-1-10x | 0.01811981 | 0.01443623 | 3.44E-05   |
| 5mo_SIGAE9_CTTCCGGTCACTGCATA-1-10x | 0.01577987 | 0.00610477 | 3.33E-05   |
| 5mo_SIGAE9_CTTCCGGTCAGAGAATT-1-10x | 0.06000325 | 0.16356397 | 0.00038577 |
| 5mo_SIGAE9_CTTCCGGTCAGTCAGTT-1-10x | 0.08620103 | 0.25684223 | 0.0039187  |
| 5mo_SIGAE9_CTTCTAAAGAAGTGTT-1-10x  | 0.08642841 | 0.25765184 | 0.0039187  |
| 5mo_SIGAE9_CTTCTAATCCGATCGG-1-10x  | 0.17739733 | 0.5815504  | 0.0015248  |
| 5mo_SIGAE9_CTTCTAATCCGTTGAA-1-10x  | 0.03193931 | 0.06364112 | 4.83E-05   |
| 5mo_SIGAE9_CTTCTCTCAAATTAGG-1-10x  | 0.0406264  | 0.09457187 | 7.01E-05   |
| 5mo_SIGAE9_CTTCTCTCACTCCCTA-1-10x  | 0.04084342 | 0.09534458 | 7.40E-05   |
| 5mo_SIGAE9_CTTGAGATCGTAACTG-1-10x  | 0.22669226 | 0.7570671  | 0.00097406 |
| 5mo_SIGAE9_CTTGATTAGCCAGACA-1-10x  | 0.25766304 | 0.86733985 | 0.00078121 |
| 5mo_SIGAE9_CTTTCAATCACTTGTT-1-10x  | 0.02048029 | 0.02284081 | 3.62E-05   |
| 5mo_SIGAE9_CTTTCGGAGCGTTGTT-1-10x  | 0.03480861 | 0.0738574  | 5.37E-05   |
| 5mo_SIGAE9_CTTTCGGGTGGATACG-1-10x  | 0.04194054 | 0.09925092 | 7.82E-05   |
| 5mo_SIGAE9_GAACACTAGTGGCCTC-1-10x  | 0.0260518  | 0.0426784  | 4.09E-05   |
| 5mo_SIGAE9_GAACACTCAATAAGGT-1-10x  | 0.28216118 | 0.9545665  | 0.00075401 |
| 5mo_SIGAE9_GAACGTTGTATGAGCG-1-10x  | 0.06146393 | 0.16876476 | 0.00042799 |
| 5mo_SIGAE9_GAACGTTGTGGATCAG-1-10x  | 0.0853015  | 0.2536394  | 0.0037839  |
| 5mo_SIGAE9_GAACTGTTCCCAAGCG-1-10x  | 0.13806063 | 0.4414905  | 0.0018802  |
| 5mo_SIGAE9_GAAGAATCACGCCAGT-1-10x  | 0.02220135 | 0.02896871 | 3.76E-05   |
| 5mo_SIGAE9_GAAGAATGTGTGACCC-1-10x  | 0.2698785  | 0.9108335  | 0.00075499 |
| 5mo_SIGAE9_GAAGCCGTATTTTCGG-1-10x  | 0.18466562 | 0.6074295  | 0.0013959  |
| 5mo_SIGAE9_GAAGCGAAGTCACACT-1-10x  | 0.05457451 | 0.14423472 | 0.00021164 |
| 5mo_SIGAE9_GAAGCGAAGTCTACCA-1-10x  | 0.05928195 | 0.16099575 | 0.00034795 |
| 5mo_SIGAE9_GAAGCGAAGTTACTCG-1-10x  | 0.09176658 | 0.27665862 | 0.0043903  |
| 5mo_SIGAE9_GAAGCGATCACCTACC-1-10x  | 0.09009634 | 0.27071166 | 0.0042999  |
| 5mo_SIGAE9_GAAGGACAGAGCTGCA-1-10x  | 0.14634489 | 0.47098693 | 0.0018717  |
| 5mo_SIGAE9_GAAGGACAGTTACTCG-1-10x  | 0.11314757 | 0.3527865  | 0.0028393  |

|                                    |            |            |            |
|------------------------------------|------------|------------|------------|
| 5mo_SIGAE9_GAAGTAACAAGGCTTT-1-10x  | 0.23693402 | 0.79353327 | 0.00089602 |
| 5mo_SIGAE9_GAAGTAATCGACATTG-1-10x  | 0.08299175 | 0.24541545 | 0.0033032  |
| 5mo_SIGAE9_GAATCACCAGCCATTA-1-10x  | 0.08731026 | 0.2607917  | 0.0040384  |
| 5mo_SIGAE9_GAATCGTGTGGCCTG-1-10x   | 0.03220872 | 0.06460039 | 4.83E-05   |
| 5mo_SIGAE9_GAATCGTTCACAATGC-1-10x  | 0.01650549 | 0.00868836 | 3.38E-05   |
| 5mo_SIGAE9_GAATCGTTCAGCTGTA-1-10x  | 0.02668656 | 0.04493849 | 4.09E-05   |
| 5mo_SIGAE9_GACACGCTCGGACCAC-1-10x  | 0.04600668 | 0.1137286  | 0.00010046 |
| 5mo_SIGAE9_GACAGCCAGACCAGAC-1-10x  | 0.27856535 | 0.94176334 | 0.00075266 |
| 5mo_SIGAE9_GACAGCCAGCAGCGAT-1-10x  | 0.2664858  | 0.89875364 | 0.00075831 |
| 5mo_SIGAE9_GACAGCCCACCTTGT-1-10x   | 0.08075957 | 0.23746769 | 0.0029431  |
| 5mo_SIGAE9_GACATCATCGATCCCT-1-10x  | 0.03479183 | 0.07379765 | 5.37E-05   |
| 5mo_SIGAE9_GACCAATCAGCTGGTC-1-10x  | 0.02286875 | 0.031345   | 3.76E-05   |
| 5mo_SIGAE9_GACCAATCATGGAACG-1-10x  | 0.01656527 | 0.00890122 | 3.38E-05   |
| 5mo_SIGAE9_GACCAATTCATCGACA-1-10x  | 0.05866575 | 0.15880175 | 0.00031414 |
| 5mo_SIGAE9_GACCAATTCGCGTCGA-1-10x  | 0.01544544 | 0.00491401 | 3.27E-05   |
| 5mo_SIGAE9_GACCCAGGTGCCTTTC-1-10x  | 0.25153962 | 0.8455371  | 0.00080467 |
| 5mo_SIGAE9_GACCTTGTGCAACAG-1-10x   | 0.08808991 | 0.2635677  | 0.0041422  |
| 5mo_SIGAE9_GACCCTTCTTGCTC-1-10x    | 0.26173204 | 0.88182765 | 0.00076727 |
| 5mo_SIGAE9_GACCGTGCACGACGCT-1-10x  | 0.05213672 | 0.13555487 | 0.00017575 |
| 5mo_SIGAE9_GACCTTCGTACTGCCG-1-10x  | 0.06614287 | 0.18542431 | 0.00072102 |
| 5mo_SIGAE9_GACCTTCTCCAACCAA-1-10x  | 0.08540326 | 0.25400177 | 0.0037839  |
| 5mo_SIGAE9_GACGCTGGTAAGATTG-1-10x  | 0.05159891 | 0.13363995 | 0.00016076 |
| 5mo_SIGAE9_GACGTTATCTGTCCGT-1-10x  | 0.06698188 | 0.18841167 | 0.00079936 |
| 5mo_SIGAE9_GACTCAAAGGGACAGG-1-10x  | 0.27390674 | 0.9251762  | 0.00075233 |
| 5mo_SIGAE9_GACTGATCAGACGCTC-1-10x  | 0.04157749 | 0.09795826 | 7.40E-05   |
| 5mo_SIGAE9_GACTTCCGTCGATTAC-1-10x  | 0.27216154 | 0.91896236 | 0.000753   |
| 5mo_SIGAE9_GAGACTTCAAGTTTGC-1-10x  | 0.03442456 | 0.07248997 | 5.37E-05   |
| 5mo_SIGAE9_GAGACTTGTACTGGGA-1-10x  | 0.09683412 | 0.29470178 | 0.0043435  |
| 5mo_SIGAE9_GAGACTTGTGGAAA-1-10x    | 0.01691967 | 0.01016307 | 3.38E-05   |
| 5mo_SIGAE9_GAGAGGTCACCTGCCGA-1-10x | 0.01567257 | 0.00572273 | 3.33E-05   |
| 5mo_SIGAE9_GAGAGGTCAGCGCGTT-1-10x  | 0.03943516 | 0.09033042 | 6.67E-05   |
| 5mo_SIGAE9_GAGAGGTGTCGTGATT-1-10x  | 0.02571388 | 0.04147523 | 4.00E-05   |
| 5mo_SIGAE9_GAGCCTGAGGCCTTCG-1-10x  | 0.01509695 | 0.00367321 | 3.27E-05   |
| 5mo_SIGAE9_GAGGGTAGTGCTGCAC-1-10x  | 0.01994485 | 0.02093437 | 3.55E-05   |
| 5mo_SIGAE9_GAGGGTATCGCCTTTG-1-10x  | 0.07092555 | 0.20245326 | 0.0013138  |
| 5mo_SIGAE9_GAGTCATCATGTTCGA-1-10x  | 0.04650749 | 0.11551174 | 0.00010777 |
| 5mo_SIGAE9_GAGTCTACAATCGAAA-1-10x  | 0.1785763  | 0.5857482  | 0.0015081  |
| 5mo_SIGAE9_GAGTCTAGTGACTGAG-1-10x  | 0.07353528 | 0.2117453  | 0.0015819  |
| 5mo_SIGAE9_GAGTCTAGTTTATGCG-1-10x  | 0.04939309 | 0.12578604 | 0.00013566 |
| 5mo_SIGAE9_GAGTGAGAGTCCCAAT-1-10x  | 0.10105985 | 0.3097477  | 0.0040036  |
| 5mo_SIGAE9_GAGTGAGTCCCGAAAT-1-10x  | 0.16992877 | 0.55495834 | 0.0016584  |

|                                   |            |            |            |
|-----------------------------------|------------|------------|------------|
| 5mo_SIGAE9_GAGTGTTAGAGTGGCT-1-10x | 0.03544667 | 0.07612921 | 5.58E-05   |
| 5mo_SIGAE9_GAGTGTTAGTTGCCCG-1-10x | 0.06051501 | 0.1653861  | 0.00038577 |
| 5mo_SIGAE9_GAGTTGTGTTGCATGT-1-10x | 0.04086176 | 0.09540988 | 7.40E-05   |
| 5mo_SIGAE9_GAGTTTGGTAGTAAGT-1-10x | 0.25196186 | 0.84704053 | 0.00080467 |
| 5mo_SIGAE9_GAGTTTGGTGGCCTCA-1-10x | 0.10643029 | 0.32886934 | 0.00352    |
| 5mo_SIGAE9_GAGTTTGTCTTTGAAG-1-10x | 0.0197094  | 0.02009601 | 3.55E-05   |
| 5mo_SIGAE9_GAGTTTGTCTTTGATC-1-10x | 0.01813783 | 0.01450039 | 3.44E-05   |
| 5mo_SIGAE9_GATAGCTCAATCGTCA-1-10x | 0.02501723 | 0.03899478 | 4.00E-05   |
| 5mo_SIGAE9_GATCATGGTAGACACG-1-10x | 0.04915105 | 0.12492425 | 0.00012523 |
| 5mo_SIGAE9_GATCCCTCAACAGAGC-1-10x | 0.10311903 | 0.31707948 | 0.0038193  |
| 5mo_SIGAE9_GATCGTAAGTAAATGC-1-10x | 0.03036509 | 0.05803606 | 4.55E-05   |
| 5mo_SIGAE9_GATCGTACAGGTCAAG-1-10x | 0.22858061 | 0.7637906  | 0.00095947 |
| 5mo_SIGAE9_GATCGTAGTGCCTATA-1-10x | 0.19413248 | 0.6411366  | 0.0012624  |
| 5mo_SIGAE9_GATCGTAGTTACGCCG-1-10x | 0.09839275 | 0.30025136 | 0.0042345  |
| 5mo_SIGAE9_GATGATCGTCCTACGG-1-10x | 0.08675243 | 0.2588055  | 0.0039187  |
| 5mo_SIGAE9_GATGTTGCACATGAAA-1-10x | 0.09257253 | 0.2795282  | 0.0044107  |
| 5mo_SIGAE9_GATGTTGCAGCAGTGA-1-10x | 0.02251658 | 0.03009111 | 3.76E-05   |
| 5mo_SIGAE9_GATTGGTCACTGAGGA-1-10x | 0.24281767 | 0.8144823  | 0.00085167 |
| 5mo_SIGAE9_GCAACATCAGCTCATA-1-10x | 0.0453989  | 0.11156455 | 9.39E-05   |
| 5mo_SIGAE9_GCAACATGTTGGATCT-1-10x | 0.03036328 | 0.0580296  | 4.55E-05   |
| 5mo_SIGAE9_GCAACATGTTGGTAGG-1-10x | 0.08248519 | 0.24361184 | 0.0033032  |
| 5mo_SIGAE9_GCACATAAGTCACTGT-1-10x | 0.02718637 | 0.04671809 | 4.19E-05   |
| 5mo_SIGAE9_GCACATAAGTTGGGAC-1-10x | 0.28837454 | 0.9766894  | 0.0007596  |
| 5mo_SIGAE9_GCACATAGTGAGATTA-1-10x | 0.10944901 | 0.3396176  | 0.0031181  |
| 5mo_SIGAE9_GCACGGTCACCAAAGG-1-10x | 0.04871737 | 0.1233801  | 0.00012523 |
| 5mo_SIGAE9_GCACGTGAGGTCTACT-1-10x | 0.09197621 | 0.277405   | 0.0043903  |
| 5mo_SIGAE9_GCACGTGCAATTGAAG-1-10x | 0.08853199 | 0.2651417  | 0.0041422  |
| 5mo_SIGAE9_GCACTAATCACTGGGC-1-10x | 0.05004781 | 0.1281172  | 0.00013566 |
| 5mo_SIGAE9_GCACTAATCTGACCCT-1-10x | 0.23849513 | 0.7990917  | 0.00088278 |
| 5mo_SIGAE9_GCAGCCAAGAACAAGG-1-10x | 0.01654096 | 0.00881467 | 3.38E-05   |
| 5mo_SIGAE9_GCAGCCAAGAGCAAGA-1-10x | 0.044252   | 0.10748097 | 8.81E-05   |
| 5mo_SIGAE9_GCAGCCACAAATCAGA-1-10x | 0.0810658  | 0.23855802 | 0.0029431  |
| 5mo_SIGAE9_GCAGCCACACAGTATC-1-10x | 0.05759157 | 0.15497707 | 0.00028394 |
| 5mo_SIGAE9_GCAGCTGCACCCTATC-1-10x | 0.17845558 | 0.5853184  | 0.0015081  |
| 5mo_SIGAE9_GCAGCTGTCCACCTGT-1-10x | 0.24920791 | 0.837235   | 0.00081888 |
| 5mo_SIGAE9_GCAGGCTAGAACTTCC-1-10x | 0.2622098  | 0.88352877 | 0.00076727 |
| 5mo_SIGAE9_GCAGGCTAGCATGATA-1-10x | 0.06167128 | 0.16950305 | 0.00047505 |
| 5mo_SIGAE9_GCAGTTAAGCGACCCT-1-10x | 0.0950869  | 0.28848076 | 0.0044051  |
| 5mo_SIGAE9_GCAGTTAGTCCTGAAT-1-10x | 0.21904753 | 0.7298477  | 0.0010326  |
| 5mo_SIGAE9_GCAGTTATCCGTGTAA-1-10x | 0.03728267 | 0.08266638 | 6.07E-05   |
| 5mo_SIGAE9_GCAGTTATCGCCAATA-1-10x | 0.0434314  | 0.1045592  | 8.29E-05   |

|                                     |            |            |            |
|-------------------------------------|------------|------------|------------|
| 5mo_SIGAE9_GCATCGGCACAAATCC-1-10x   | 0.01856739 | 0.01602984 | 3.49E-05   |
| 5mo_SIGAE9_GCATCGGCATCATCCC-1-10x   | 0.26926407 | 0.9086458  | 0.00075499 |
| 5mo_SIGAE9_GCATCGGGTTGGATCT-1-10x   | 0.12490676 | 0.3946556  | 0.0020803  |
| 5mo_SIGAE9_GCATCGGGTTGTCAGT-1-10x   | 0.2928558  | 0.9926451  | 0.00076488 |
| 5mo_SIGAE9_GCATCTCCAACTAGA-1-10x    | 0.03571051 | 0.07706864 | 5.58E-05   |
| 5mo_SIGAE9_GCATCTCGTAAGTCAA-1-10x   | 0.0391291  | 0.08924069 | 6.67E-05   |
| 5mo_SIGAE9_GCATGATAGGTTGAGC-1-10x   | 0.20833267 | 0.691697   | 0.0011177  |
| 5mo_SIGAE9_GCATGATCAAATCAGA-1-10x   | 0.18451303 | 0.6068862  | 0.0014112  |
| 5mo_SIGAE9_GCATTAGCAAGAGTAT-1-10x   | 0.27585927 | 0.93212825 | 0.00075214 |
| 5mo_SIGAE9_GCCAACGGTCATCAGT-1-10x   | 0.12487259 | 0.39453393 | 0.0020803  |
| 5mo_SIGAE9_GCCAGCACACAACGTT-1-10x   | 0.18906341 | 0.623088   | 0.001338   |
| 5mo_SIGAE9_GCCAGCATCGGAAGGT-1-10x   | 0.08787395 | 0.26279873 | 0.0041422  |
| 5mo_SIGAE9_GCCAGTGCACGGTGCT-1-10x   | 0.04317143 | 0.10363355 | 8.29E-05   |
| 5mo_SIGAE9_GCCAGTGGTCCTGTCT-1-10x   | 0.10318808 | 0.31732532 | 0.0038193  |
| 5mo_SIGAE9_GCCATGGAGACTCTAC-1-10x   | 0.03477915 | 0.07375251 | 5.37E-05   |
| 5mo_SIGAE9_GCCATGGCAGCGCTTG-1-10x   | 0.07999735 | 0.23475379 | 0.0027593  |
| 5mo_SIGAE9_GCCATGGCATGCTGCG-1-10x   | 0.03097965 | 0.06022421 | 4.68E-05   |
| 5mo_SIGAE9_GCCATTCCAAGTCCCG-1-10x   | 0.07524955 | 0.21784906 | 0.001885   |
| 5mo_SIGAE9_GCCAGACAGTTCCAA-1-10x    | 0.14913656 | 0.4809268  | 0.0018705  |
| 5mo_SIGAE9_GCCAGAGTCACTTAG-1-10x    | 0.0207646  | 0.0238531  | 3.62E-05   |
| 5mo_SIGAE9_GCCCGAAAGGTCGACA-1-10x   | 0.02593717 | 0.04227027 | 4.09E-05   |
| 5mo_SIGAE9_GCCGATGGTGCATGAG-1-10x   | 0.12470904 | 0.3939516  | 0.0020803  |
| 5mo_SIGAE9_GCCGTGAGTCCAGCAC-1-10x   | 0.24744412 | 0.83095497 | 0.0008292  |
| 5mo_SIGAE9_GCCTGTTAGCGTCAGA-1-10x   | 0.2785927  | 0.9418608  | 0.00075266 |
| 5mo_SIGAE9_GCCTGTTCATCCTCAC-1-10x   | 0.01943696 | 0.01912599 | 3.55E-05   |
| 5mo_SIGAE9_GCGAGAAGTGCCGTTG-1-10x   | 0.2558871  | 0.8610165  | 0.00078825 |
| 5mo_SIGAE9_GCGGAAAGTTCCTTGC-1-10x   | 0.23425397 | 0.78399086 | 0.00091657 |
| 5mo_SIGAE9_GCGTGCAGTGGAATGC-1-10x   | 0.03716245 | 0.08223833 | 6.07E-05   |
| 5mo_SIGAE9_GCGTTTCGTCCGTACC-1-10x   | 0.07139257 | 0.20411612 | 0.0013138  |
| 5mo_SIGAE9_GCTACCTAGGTAGGCT-1-10x   | 0.05410959 | 0.14257935 | 0.00021164 |
| 5mo_SIGAE9_GCTGAATGTAGCACGA-1-10x   | 0.07230428 | 0.20736228 | 0.0014433  |
| 5mo_SIGAE9_GCTGAATGTTTGGAGG-1-10x   | 0.07372169 | 0.21240905 | 0.0017292  |
| 5mo_SIGAE9_GCTGCAGGTGTCTTGA-1-10x   | 0.25152358 | 0.84548    | 0.00080467 |
| 5mo_SIGAE9_GCTGGGTAGGCAGGGA-1-10x   | 0.12223039 | 0.38512626 | 0.0021873  |
| 5mo_SIGAE9_GCTGGGTTGTTGCCT-1-10x    | 0.1779875  | 0.5836518  | 0.0015081  |
| 5mo_SIGAE9_GCTTGGGAGACGCATG-1-10x   | 0.07965785 | 0.23354498 | 0.0027593  |
| 5mo_SIGAE9_GCTTGGGAGTTCTCTT-1-10x   | 0.11052448 | 0.3434469  | 0.0030221  |
| 5mo_SIGAE9_GCTTGGGCAGTCTTCC-1-10x   | 0.07590861 | 0.22019565 | 0.0020486  |
| 5mo_SIGAE9_GCTTGGGCATAATCCG-1-10x   | 0.04240562 | 0.10090686 | 7.82E-05   |
| 5mo_SIGAE9_GCTTGGGGTCCCTAAA-1-10x   | 0.0482732  | 0.12179863 | 0.00011598 |
| 5mo_SIGAE9_GCTTGGGTCCAACACTAG-1-10x | 0.06502169 | 0.18143234 | 0.00064991 |

|                                   |            |            |            |
|-----------------------------------|------------|------------|------------|
| 5mo_SIGAE9_GCTTGGGTCGTAGTCA-1-10x | 0.27055672 | 0.9132483  | 0.00075418 |
| 5mo_SIGAE9_GCTTTGAGCCTTTGA-1-10x  | 0.269354   | 0.90896595 | 0.00075499 |
| 5mo_SIGAE9_GCTTTGCAAATCGGG-1-10x  | 0.07312327 | 0.21027833 | 0.0015819  |
| 5mo_SIGAE9_GGAACCCCAAGTTTGC-1-10x | 0.08931356 | 0.26792452 | 0.0042295  |
| 5mo_SIGAE9_GGAACCCGTCAGTAGT-1-10x | 0.03258098 | 0.06592581 | 5.00E-05   |
| 5mo_SIGAE9_GGAACCCCTCACCTTG-1-10x | 0.03482401 | 0.07391221 | 5.37E-05   |
| 5mo_SIGAE9_GGAAGTGAGGCTCTCG-1-10x | 0.01608161 | 0.00717913 | 3.33E-05   |
| 5mo_SIGAE9_GGAATCTAGTGCACAG-1-10x | 0.26184002 | 0.8822121  | 0.00076727 |
| 5mo_SIGAE9_GGAATCTAGTTCCTGA-1-10x | 0.11271555 | 0.3512483  | 0.0028393  |
| 5mo_SIGAE9_GGAATGGAGGCATCAG-1-10x | 0.07834948 | 0.22888646 | 0.0023954  |
| 5mo_SIGAE9_GGAATGGGTACTCGCG-1-10x | 0.21879703 | 0.7289558  | 0.0010326  |
| 5mo_SIGAE9_GGAGAACAGAATAGTC-1-10x | 0.05006103 | 0.12816426 | 0.00013566 |
| 5mo_SIGAE9_GGAGAACAGTCTGTAC-1-10x | 0.08281414 | 0.24478306 | 0.0033032  |
| 5mo_SIGAE9_GGAGATGAGAAAGCGA-1-10x | 0.04969541 | 0.12686245 | 0.00013566 |
| 5mo_SIGAE9_GGAGATGGTCCGCGA-1-10x  | 0.29162577 | 0.9882655  | 0.00076269 |
| 5mo_SIGAE9_GGAGCAAAGGATACAT-1-10x | 0.07376395 | 0.2125595  | 0.0017292  |
| 5mo_SIGAE9_GGAGCAAGTCTAGTGT-1-10x | 0.04752702 | 0.11914182 | 0.00011598 |
| 5mo_SIGAE9_GGAGGATGTATGATCC-1-10x | 0.2285362  | 0.76363254 | 0.00095947 |
| 5mo_SIGAE9_GGAGGTAAGCGGTATG-1-10x | 0.20920748 | 0.69481176 | 0.0011095  |
| 5mo_SIGAE9_GGATCTACAGGCTACC-1-10x | 0.01823717 | 0.01485409 | 3.44E-05   |
| 5mo_SIGAE9_GGATCTAGTCGATTAC-1-10x | 0.2654061  | 0.8949093  | 0.00075974 |
| 5mo_SIGAE9_GGATGTTAGCATTTGC-1-10x | 0.0356187  | 0.07674176 | 5.58E-05   |
| 5mo_SIGAE9_GGATGTTAGTAATCCC-1-10x | 0.23202915 | 0.77606934 | 0.00093066 |
| 5mo_SIGAE9_GGATGTTGTACTTGTG-1-10x | 0.02147905 | 0.02639693 | 3.69E-05   |
| 5mo_SIGAE9_GGATGTTGCCTGTTC-1-10x  | 0.19857845 | 0.6569667  | 0.0012187  |
| 5mo_SIGAE9_GGCACGTTGCTAATG-1-10x  | 0.05805712 | 0.15663467 | 0.00031414 |
| 5mo_SIGAE9_GGCGTCAGTCCTGTCT-1-10x | 0.10891754 | 0.3377253  | 0.0032165  |
| 5mo_SIGAE9_GGCGTCAGTTCATCGA-1-10x | 0.02117259 | 0.02530577 | 3.69E-05   |
| 5mo_SIGAE9_GGCTGTGGTCGTCAGC-1-10x | 0.08477005 | 0.2517472  | 0.0036353  |
| 5mo_SIGAE9_GGCTTGAGTCATAGA-1-10x  | 0.02091768 | 0.02439814 | 3.62E-05   |
| 5mo_SIGAE9_GGCTTGGGTGGCAACA-1-10x | 0.2690483  | 0.9078775  | 0.00075594 |
| 5mo_SIGAE9_GGCTTTCAGTACGAGC-1-10x | 0.17306198 | 0.56611425 | 0.0016089  |
| 5mo_SIGAE9_GGCTTTCAGAACGCA-1-10x  | 0.28443688 | 0.9626692  | 0.00075605 |
| 5mo_SIGAE9_GGCTTTCGTGTCCACG-1-10x | 0.05463592 | 0.14445338 | 0.00021164 |
| 5mo_SIGAE9_GGCTTTCCTGGGTG-1-10x   | 0.01686353 | 0.00996319 | 3.38E-05   |
| 5mo_SIGAE9_GGGAAGTGTGGTCCGT-1-10x | 0.02308117 | 0.03210134 | 3.83E-05   |
| 5mo_SIGAE9_GGGACCTAGCCATTTG-1-10x | 0.0198083  | 0.02044815 | 3.55E-05   |
| 5mo_SIGAE9_GGGACCTCCATAAG-1-10x   | 0.09185526 | 0.27697435 | 0.0043903  |
| 5mo_SIGAE9_GGGACTCCACAGCTGC-1-10x | 0.12577045 | 0.3977308  | 0.0020515  |
| 5mo_SIGAE9_GGGAGATAGCGAGGAG-1-10x | 0.08981381 | 0.26970568 | 0.0042999  |
| 5mo_SIGAE9_GGGAGATAGTAACGAT-1-10x | 0.04873471 | 0.12344183 | 0.00012523 |



|                                    |            |            |            |
|------------------------------------|------------|------------|------------|
| 5mo_SIGAE9_GGGAGATAGTGCTCGC-1-10x  | 0.01788419 | 0.01359727 | 3.44E-05   |
| 5mo_SIGAE9_GGGAGATCACAATGTC-1-10x  | 0.1202661  | 0.37813234 | 0.0022788  |
| 5mo_SIGAE9_GGGAGTAAGGAACAT-1-10x   | 0.25851744 | 0.87038195 | 0.000778   |
| 5mo_SIGAE9_GGGATCCGTTACCTTT-1-10x  | 0.10644536 | 0.32892302 | 0.00352    |
| 5mo_SIGAE9_GGGATGACAACTAAG-1-10x   | 0.07726134 | 0.2250121  | 0.0022191  |
| 5mo_SIGAE9_GGGCCATTCGGATTAC-1-10x  | 0.21394186 | 0.7116687  | 0.0010701  |
| 5mo_SIGAE9_GGGCGTTCATGCTGCG-1-10x  | 0.16386148 | 0.5333555  | 0.001763   |
| 5mo_SIGAE9_GGGCTACTCGTCGGGT-1-10x  | 0.05446819 | 0.14385614 | 0.00021164 |
| 5mo_SIGAE9_GGGTAGATCGGTTCAA-1-10x  | 0.04754695 | 0.11921279 | 0.00011598 |
| 5mo_SIGAE9_GGGTATTCACAAGTGG-1-10x  | 0.10376427 | 0.31937686 | 0.0038193  |
| 5mo_SIGAE9_GGGTCACAGCATACTC-1-10x  | 0.03157739 | 0.06235251 | 4.83E-05   |
| 5mo_SIGAE9_GGGTCACCAAGCACAG-1-10x  | 0.25578728 | 0.86066115 | 0.00078825 |
| 5mo_SIGAE9_GGGTCACCATATAGCC-1-10x  | 0.0175297  | 0.01233511 | 3.44E-05   |
| 5mo_SIGAE9_GGGTCTGTCCATTTAC-1-10x  | 0.04547676 | 0.11184177 | 9.39E-05   |
| 5mo_SIGAE9_GGGTCTGTCCGAGTGA-1-10x  | 0.21938244 | 0.7310401  | 0.0010253  |
| 5mo_SIGAE9_GGGTGAAAGCGTCCG-1-10x   | 0.08710602 | 0.26006448 | 0.0040384  |
| 5mo_SIGAE9_GGGTGAAGTCAGCTTA-1-10x  | 0.04113177 | 0.09637127 | 7.40E-05   |
| 5mo_SIGAE9_GGGTGAATCTGAATGC-1-10x  | 0.10009901 | 0.30632654 | 0.0040879  |
| 5mo_SIGAE9_GGGTTATCAAGTGGTG-1-10x  | 0.07365535 | 0.21217284 | 0.0015819  |
| 5mo_SIGAE9_GGGTTATCACACAGAG-1-10x  | 0.0976694  | 0.29767585 | 0.0042943  |
| 5mo_SIGAE9_GGTAAGTAGAAGCTCG-1-10x  | 0.24174571 | 0.8106655  | 0.00086374 |
| 5mo_SIGAE9_GGTAAGTCAACGCATT-1-10x  | 0.01744648 | 0.01203881 | 3.44E-05   |
| 5mo_SIGAE9_GGTCACGGTAGCTCGC-1-10x  | 0.1051472  | 0.32430086 | 0.0036214  |
| 5mo_SIGAE9_GGTCACGGTGTCCCTT-1-10x  | 0.01756344 | 0.01245525 | 3.44E-05   |
| 5mo_SIGAE9_GGTCACGTCTGTAAAG-1-10x  | 0.04703618 | 0.11739417 | 0.00010777 |
| 5mo_SIGAE9_GGTCTGGAGCTCGACC-1-10x  | 0.02017685 | 0.02176041 | 3.62E-05   |
| 5mo_SIGAE9_GGTCTGGAGTAGCTCT-1-10x  | 0.14415582 | 0.46319267 | 0.0018716  |
| 5mo_SIGAE9_GGTGAAGTCTTACAG-1-10x   | 0.01568078 | 0.00575195 | 3.33E-05   |
| 5mo_SIGAE9_GGTGAAGTCTGGAAGG-1-10x  | 0.26924482 | 0.90857726 | 0.00075499 |
| 5mo_SIGAE9_GGTGTCCGTGTTTCAT-1-10x  | 0.05558812 | 0.1478437  | 0.000233   |
| 5mo_SIGAE9_GGTGTCTGCTGCCAT-1-10x   | 0.10815475 | 0.33500937 | 0.0033168  |
| 5mo_SIGAE9_GGTTAACGTTGTTGTG-1-10x  | 0.04748951 | 0.11900827 | 0.00011598 |
| 5mo_SIGAE9_GGTTCTCTACGGGC-1-10x    | 0.11963929 | 0.37590054 | 0.0023317  |
| 5mo_SIGAE9_GGTTGTAGTCTGTGTA-1-10x  | 0.23690067 | 0.79341453 | 0.00089602 |
| 5mo_SIGAE9_GTAACACCACAGGATG-1-10x  | 0.27424502 | 0.9263807  | 0.00075233 |
| 5mo_SIGAE9_GTAATCGGTCTGCATA-1-10x  | 0.01717469 | 0.01107109 | 3.38E-05   |
| 5mo_SIGAE9_GTAATGCAGTGCCGAA-1-10x  | 0.25442603 | 0.85581434 | 0.00079207 |
| 5mo_SIGAE9_GTAATGCGTGCATCTA-1-10x  | 0.16843252 | 0.5496308  | 0.0016902  |
| 5mo_SIGAE9_GTACAACAGAATCGTA-1-10x  | 0.03160689 | 0.06245755 | 4.83E-05   |
| 5mo_SIGAE9_GTACAACAGTCACGCC-1-10x  | 0.18298705 | 0.6014528  | 0.0014268  |
| 5mo_SIGAE9_GTACAGTTCTGGGTTCG-1-10x | 0.06653219 | 0.18681051 | 0.00079936 |

|                                      |            |            |            |
|--------------------------------------|------------|------------|------------|
| 5mo_SIGAE9_GTAGATCAGATCACCT-1-10x    | 0.09471065 | 0.28714108 | 0.0044051  |
| 5mo_SIGAE9_GTAGATCTCGCCGAAC-1-10x    | 0.2788802  | 0.94288445 | 0.00075266 |
| 5mo_SIGAE9_GTAGATCTCTGCTTAT-1-10x    | 0.07592375 | 0.22024956 | 0.0020486  |
| 5mo_SIGAE9_GTAGCTAAGCGATCGA-1-10x    | 0.01683975 | 0.00987851 | 3.38E-05   |
| 5mo_SIGAE9_GTAGCTAAGCTGTACTION-1-10x | 0.07918387 | 0.23185734 | 0.002576   |
| 5mo_SIGAE9_GTAGCTACAAGGTCGA-1-10x    | 0.01529604 | 0.00438206 | 3.27E-05   |
| 5mo_SIGAE9_GTAGGAGGTGGCTTGC-1-10x    | 0.08063585 | 0.23702717 | 0.0029431  |
| 5mo_SIGAE9_GTAGGTTAGGGAGTTC-1-10x    | 0.167371   | 0.5458513  | 0.0017056  |
| 5mo_SIGAE9_GTAGGTTGTGAACGGT-1-10x    | 0.13915113 | 0.44537327 | 0.0018772  |
| 5mo_SIGAE9_GTAGTACAGCACTGGA-1-10x    | 0.04688167 | 0.11684401 | 0.00010777 |
| 5mo_SIGAE9_GTAGTACAGTGCCTC-1-10x     | 0.02539642 | 0.0403449  | 4.00E-05   |
| 5mo_SIGAE9_GTAGTACGTATCATGC-1-10x    | 0.0675834  | 0.1905534  | 0.00088537 |
| 5mo_SIGAE9_GTAGTACTCATGGGAG-1-10x    | 0.19059978 | 0.62855834 | 0.0013113  |
| 5mo_SIGAE9_GTAGTACTCCTCTCGA-1-10x    | 0.23486441 | 0.78616434 | 0.00090964 |
| 5mo_SIGAE9_GTATTGGCAGGACATG-1-10x    | 0.04040483 | 0.09378298 | 7.01E-05   |
| 5mo_SIGAE9_GTATTTTCAGATTCGAA-1-10x   | 0.07512246 | 0.21739654 | 0.001885   |
| 5mo_SIGAE9_GTCAAACAGTAAGCAT-1-10x    | 0.02640758 | 0.04394518 | 4.09E-05   |
| 5mo_SIGAE9_GTCAAACCATCGAACT-1-10x    | 0.06020933 | 0.1642977  | 0.00038577 |
| 5mo_SIGAE9_GTCAAGTCAGGAAGTC-1-10x    | 0.01811495 | 0.01441891 | 3.44E-05   |
| 5mo_SIGAE9_GTCACTCGTTGAAGTA-1-10x    | 0.07939655 | 0.2326146  | 0.0027593  |
| 5mo_SIGAE9_GTCAGCGAGCACTAGG-1-10x    | 0.08099471 | 0.23830491 | 0.0029431  |
| 5mo_SIGAE9_GTCAGCGAGCGCTTCG-1-10x    | 0.09392558 | 0.2843458  | 0.0044154  |
| 5mo_SIGAE9_GTCAGCGTCATCGACA-1-10x    | 0.11886139 | 0.3731308  | 0.0023317  |
| 5mo_SIGAE9_GTCAGCGTCCCTCATG-1-10x    | 0.01970348 | 0.02007495 | 3.55E-05   |
| 5mo_SIGAE9_GTCAGCGTCTCGGGAC-1-10x    | 0.25389376 | 0.85391915 | 0.00079608 |
| 5mo_SIGAE9_GTCATCCAGGTTCCGC-1-10x    | 0.28572756 | 0.9672647  | 0.00075686 |
| 5mo_SIGAE9_GTCATGAGTAAGGTCG-1-10x    | 0.21242057 | 0.7062521  | 0.0010856  |
| 5mo_SIGAE9_GTCATTTTCACACGCCA-1-10x   | 0.03778376 | 0.08445055 | 6.07E-05   |
| 5mo_SIGAE9_GTCATTTGTGCTGCA-1-10x     | 0.02703356 | 0.04617398 | 4.19E-05   |
| 5mo_SIGAE9_GTCCACTCATCGAAGG-1-10x    | 0.07550262 | 0.2187501  | 0.001885   |
| 5mo_SIGAE9_GTCCACTTCTCCACG-1-10x     | 0.0209161  | 0.02439254 | 3.62E-05   |
| 5mo_SIGAE9_GTCCTCACACTCCTTG-1-10x    | 0.04291746 | 0.10272928 | 8.29E-05   |
| 5mo_SIGAE9_GTCCTCAGTTTAGTCG-1-10x    | 0.13988191 | 0.44797525 | 0.001875   |
| 5mo_SIGAE9_GTCGAATTCTGAATGC-1-10x    | 0.23026687 | 0.76979464 | 0.00094498 |
| 5mo_SIGAE9_GTCGCGACTGCATA-1-10x      | 0.0595962  | 0.16211464 | 0.00034795 |
| 5mo_SIGAE9_GTCGCGACAGTTTCGA-1-10x    | 0.08287868 | 0.24501286 | 0.0033032  |
| 5mo_SIGAE9_GTCGTAATCAAAGGAT-1-10x    | 0.07229463 | 0.20732793 | 0.0014433  |
| 5mo_SIGAE9_GTCGTTCTGTTCTC-1-10x      | 0.14547062 | 0.46787408 | 0.0018716  |
| 5mo_SIGAE9_GTCGTTCTCTGGGAGA-1-10x    | 0.0843744  | 0.25033844 | 0.0036353  |
| 5mo_SIGAE9_GTCTACCGTACTCGAT-1-10x    | 0.08680411 | 0.25898954 | 0.0039187  |
| 5mo_SIGAE9_GTCTGTCTCTCCGAGG-1-10x    | 0.01686719 | 0.0099762  | 3.38E-05   |

|                                    |            |            |            |
|------------------------------------|------------|------------|------------|
| 5mo_SIGAE9_GTCTTTAAGCTGGCCT-1-10x  | 0.20478882 | 0.67907894 | 0.0011518  |
| 5mo_SIGAE9_GTCTTTAGTAGAATAC-1-10x  | 0.22319424 | 0.7446122  | 0.00099599 |
| 5mo_SIGAE9_GTGAGTTAGGGACAGG-1-10x  | 0.0285308  | 0.051505   | 4.30E-05   |
| 5mo_SIGAE9_GTGCACGGTGTATTTCG-1-10x | 0.26364604 | 0.88864255 | 0.00076313 |
| 5mo_SIGAE9_GTGCACGTCTGGAAGG-1-10x  | 0.21573241 | 0.7180441  | 0.001055   |
| 5mo_SIGAE9_GTGCAGCTCCCATTTA-1-10x  | 0.05184621 | 0.13452049 | 0.00016076 |
| 5mo_SIGAE9_GTGCGTGAGTCATGAA-1-10x  | 0.22763991 | 0.76044124 | 0.00096676 |
| 5mo_SIGAE9_GTGCTGGGTCGTGGTC-1-10x  | 0.01592145 | 0.00660886 | 3.33E-05   |
| 5mo_SIGAE9_GTGCTGGGTGGTAATA-1-10x  | 0.0160464  | 0.00705374 | 3.33E-05   |
| 5mo_SIGAE9_GTGCTCCAGCACCCA-1-10x   | 0.07883719 | 0.23062296 | 0.002576   |
| 5mo_SIGAE9_GTGCTTCGTGGATGAC-1-10x  | 0.27526468 | 0.9300112  | 0.00075218 |
| 5mo_SIGAE9_GTGGAGAAGGGACAGG-1-10x  | 0.05569855 | 0.1482369  | 0.000233   |
| 5mo_SIGAE9_GTGGAGAGTATCTTCT-1-10x  | 0.04136925 | 0.09721683 | 7.40E-05   |
| 5mo_SIGAE9_GTGGGAAAGCACGATG-1-10x  | 0.20517099 | 0.6804397  | 0.0011518  |
| 5mo_SIGAE9_GTGTA ACTCTAACGCA-1-10x | 0.02041239 | 0.02259904 | 3.62E-05   |
| 5mo_SIGAE9_GTGTA ACTCTCGGTAA-1-10x | 0.09310361 | 0.28141916 | 0.0044107  |
| 5mo_SIGAE9_GTGTCTGTACAGAAT-1-10x   | 0.17052534 | 0.5570824  | 0.0016421  |
| 5mo_SIGAE9_GTGTGGCCACTATCCC-1-10x  | 0.01853663 | 0.01592031 | 3.49E-05   |
| 5mo_SIGAE9_GTGTTAGCAGAGTCAG-1-10x  | 0.1782914  | 0.5847338  | 0.0015081  |
| 5mo_SIGAE9_GTGTTAGCAGCTAACT-1-10x  | 0.08062165 | 0.23697662 | 0.0029431  |
| 5mo_SIGAE9_GTGTTAGGTCGGTGTC-1-10x  | 0.1083042  | 0.3355415  | 0.0033168  |
| 5mo_SIGAE9_GTGTTCCCAAATCAAG-1-10x  | 0.07703536 | 0.2242075  | 0.0022191  |
| 5mo_SIGAE9_GTGTTCCCACTGCGTG-1-10x  | 0.05558469 | 0.14783148 | 0.000233   |
| 5mo_SIGAE9_GTGTTCCCTCCGCACTT-1-10x | 0.14165436 | 0.45428613 | 0.0018724  |
| 5mo_SIGAE9_GTTACAGTCGAGAGCA-1-10x  | 0.24249946 | 0.81334925 | 0.00085764 |
| 5mo_SIGAE9_GTTACAGTCTACGCAA-1-10x  | 0.02375792 | 0.03451094 | 3.83E-05   |
| 5mo_SIGAE9_GTTACCCAGAGCATAT-1-10x  | 0.03250878 | 0.06566875 | 5.00E-05   |
| 5mo_SIGAE9_GTTACCCGTATTTCT-1-10x   | 0.09541105 | 0.28963488 | 0.0043808  |
| 5mo_SIGAE9_GTTACCCGTCCGCTAC-1-10x  | 0.13394354 | 0.42683145 | 0.0019027  |
| 5mo_SIGAE9_GTTACGACATAATCGC-1-10x  | 0.04213556 | 0.09994528 | 7.82E-05   |
| 5mo_SIGAE9_GTTACGAGTCAGTTTG-1-10x  | 0.10110016 | 0.30989122 | 0.0040036  |
| 5mo_SIGAE9_GTTAGACAGACCACGA-1-10x  | 0.22418049 | 0.7481238  | 0.00098869 |
| 5mo_SIGAE9_GTTATGGAGAGACAAG-1-10x  | 0.23277031 | 0.7787082  | 0.00092358 |
| 5mo_SIGAE9_GTTATGGTCCGTGGCA-1-10x  | 0.01744339 | 0.0120278  | 3.44E-05   |
| 5mo_SIGAE9_GTTATGGTCGTTGTGA-1-10x  | 0.23168409 | 0.7748407  | 0.00093066 |
| 5mo_SIGAE9_GTTCATTGTCCGAAAG-1-10x  | 0.04178045 | 0.0986809  | 7.82E-05   |
| 5mo_SIGAE9_GTTCGCTTCAGTGATC-1-10x  | 0.26743132 | 0.9021202  | 0.00075705 |
| 5mo_SIGAE9_GTTGCGGAGACTACCT-1-10x  | 0.136052   | 0.4343387  | 0.0018891  |
| 5mo_SIGAE9_GTTGCGGGTGCGGCTT-1-10x  | 0.2733784  | 0.923295   | 0.0007526  |
| 5mo_SIGAE9_GTTGTAGCATCCGATA-1-10x  | 0.28723416 | 0.972629   | 0.00075864 |
| 5mo_SIGAE9_GTTGTAGTCATTGTGG-1-10x  | 0.02046408 | 0.0227831  | 3.62E-05   |

|                                    |            |            |            |
|------------------------------------|------------|------------|------------|
| 5mo_SIGAE9_GTTGTCCAGACGCATG-1-10x  | 0.04484799 | 0.10960303 | 9.39E-05   |
| 5mo_SIGAE9_GTTGTCCGTACGTA-1-10x    | 0.16735424 | 0.54579157 | 0.0017056  |
| 5mo_SIGAE9_GTTGTGACAAGGCTTT-1-10x  | 0.02874808 | 0.05227863 | 4.42E-05   |
| 5mo_SIGAE9_GTTTACTAGTCGTCTA-1-10x  | 0.06824338 | 0.19290328 | 0.00097948 |
| 5mo_SIGAE9_GTTTACTTCATTCTTG-1-10x  | 0.03179727 | 0.06313539 | 4.83E-05   |
| 5mo_SIGAE9_GTTTACTTCCTGGGTG-1-10x  | 0.08524033 | 0.2534216  | 0.0037839  |
| 5mo_SIGAE9_GTTTACTTCGACCATA-1-10x  | 0.0419394  | 0.09924687 | 7.82E-05   |
| 5mo_SIGAE9_GTTTACTTCTGGGATT-1-10x  | 0.10609008 | 0.32765803 | 0.00352    |
| 5mo_SIGAE9_GTTTGGATCATAACAGC-1-10x | 0.27309012 | 0.9222686  | 0.0007526  |
| 5mo_SIGAE9_TAACACGAGAAGTATC-1-10x  | 0.01547685 | 0.00502584 | 3.33E-05   |
| 5mo_SIGAE9_TAACACGTCCTTCTAA-1-10x  | 0.2565855  | 0.8635032  | 0.00078463 |
| 5mo_SIGAE9_TAAGCACAGAGTCTTC-1-10x  | 0.01715935 | 0.01101645 | 3.38E-05   |
| 5mo_SIGAE9_TAAGCACAGACAAG-1-10x    | 0.25425652 | 0.8552108  | 0.00079207 |
| 5mo_SIGAE9_TAAGCCATCATGGATC-1-10x  | 0.03153931 | 0.06221691 | 4.83E-05   |
| 5mo_SIGAE9_TAAGCGTCACGCGCTA-1-10x  | 0.02964182 | 0.05546082 | 4.55E-05   |
| 5mo_SIGAE9_TAAGCGTCTTAGCTT-1-10x   | 0.04501646 | 0.11020288 | 9.39E-05   |
| 5mo_SIGAE9_TAAGTCGAGCATCTTG-1-10x  | 0.04654641 | 0.1156503  | 0.00010777 |
| 5mo_SIGAE9_TAAGTCGCACTCTAGA-1-10x  | 0.22302704 | 0.7440169  | 0.0010033  |
| 5mo_SIGAE9_TAATTCCAGTACGAGC-1-10x  | 0.06372074 | 0.17680024 | 0.00058553 |
| 5mo_SIGAE9_TACAACGGTAATACCC-1-10x  | 0.04571987 | 0.11270737 | 0.00010046 |
| 5mo_SIGAE9_TACACCCAGGTCATAA-1-10x  | 0.20924038 | 0.69492894 | 0.0011095  |
| 5mo_SIGAE9_TACAGGTAGCGACAGT-1-10x  | 0.04399149 | 0.10655342 | 8.81E-05   |
| 5mo_SIGAE9_TACATTCCATCGCTGG-1-10x  | 0.05278164 | 0.1378511  | 0.00017575 |
| 5mo_SIGAE9_TACATTCTCATGAAAG-1-10x  | 0.07141987 | 0.20421332 | 0.0013138  |
| 5mo_SIGAE9_TACCCGTAGCGGACAT-1-10x  | 0.02086298 | 0.02420338 | 3.62E-05   |
| 5mo_SIGAE9_TACCCGTAGTGTTCCA-1-10x  | 0.01698238 | 0.01038636 | 3.38E-05   |
| 5mo_SIGAE9_TACCGAACATAGACTC-1-10x  | 0.0504024  | 0.12937973 | 0.00014746 |
| 5mo_SIGAE9_TACCGAACATTGAAGA-1-10x  | 0.05726503 | 0.15381442 | 0.00028394 |
| 5mo_SIGAE9_TACCGGGAGGTAGATT-1-10x  | 0.04314378 | 0.10353512 | 8.29E-05   |
| 5mo_SIGAE9_TACCGGGCAACCGTAT-1-10x  | 0.03866207 | 0.08757778 | 6.36E-05   |
| 5mo_SIGAE9_TACCGGGCATTCTCTA-1-10x  | 0.28102815 | 0.95053226 | 0.00075348 |
| 5mo_SIGAE9_TACCGGGGTTGCATGT-1-10x  | 0.21952839 | 0.7315598  | 0.0010253  |
| 5mo_SIGAE9_TACCGGGTCTGTAGA-1-10x   | 0.02821342 | 0.05037495 | 4.30E-05   |
| 5mo_SIGAE9_TACCTCGAGCCGTAAG-1-10x  | 0.06730582 | 0.18956506 | 0.00088537 |
| 5mo_SIGAE9_TACCTGCAGTCGCGAA-1-10x  | 0.0892445  | 0.26767865 | 0.0042295  |
| 5mo_SIGAE9_TACCTGCTCAGCGGAA-1-10x  | 0.04944835 | 0.12598278 | 0.00013566 |
| 5mo_SIGAE9_TACGTCCAGACCATGG-1-10x  | 0.08937933 | 0.26815867 | 0.0042295  |
| 5mo_SIGAE9_TACGTCCAGAGCTTTC-1-10x  | 0.08879314 | 0.26607156 | 0.0042295  |
| 5mo_SIGAE9_TACGTCCATCTGTTT-1-10x   | 0.07736177 | 0.22536969 | 0.0022191  |
| 5mo_SIGAE9_TACTGCCGTTGCATCA-1-10x  | 0.02803717 | 0.04974739 | 4.30E-05   |
| 5mo_SIGAE9_TACTTCAGTGAATTAG-1-10x  | 0.18957284 | 0.62490183 | 0.0013244  |

|                                    |            |            |            |
|------------------------------------|------------|------------|------------|
| 5mo_SIGAE9_TAGACCAGTTCTTGCC-1-10x  | 0.22727776 | 0.75915176 | 0.00096676 |
| 5mo_SIGAE9_TAGACCATCATTTGTC-1-10x  | 0.09039336 | 0.27176923 | 0.0042999  |
| 5mo_SIGAE9_TAGACTGTCACTTCTA-1-10x  | 0.0500718  | 0.12820262 | 0.00013566 |
| 5mo_SIGAE9_TAGAGTCCAGAGTGAC-1-10x  | 0.2664188  | 0.8985151  | 0.00075831 |
| 5mo_SIGAE9_TAGAGTCCATCCCACT-1-10x  | 0.07236014 | 0.2075612  | 0.0014433  |
| 5mo_SIGAE9_TAGATCGAGATGAATC-1-10x  | 0.05028632 | 0.12896644 | 0.00014746 |
| 5mo_SIGAE9_TAGCACACAACAGCTT-1-10x  | 0.02846461 | 0.05126932 | 4.30E-05   |
| 5mo_SIGAE9_TAGCACATCCGACGGT-1-10x  | 0.08454256 | 0.25093716 | 0.0036353  |
| 5mo_SIGAE9_TAGGGTTAGTCTCGTA-1-10x  | 0.08621392 | 0.25688815 | 0.0039187  |
| 5mo_SIGAE9_TAGGGTTAGTGAGGTC-1-10x  | 0.04845967 | 0.12246255 | 0.00012523 |
| 5mo_SIGAE9_TAGGGTTGTTTCGATG-1-10x  | 0.01930344 | 0.0186506  | 3.55E-05   |
| 5mo_SIGAE9_TAGGGTTTCCTTCTTC-1-10x  | 0.08291958 | 0.24515848 | 0.0033032  |
| 5mo_SIGAE9_TAGGGTTTCGCATTAG-1-10x  | 0.02403524 | 0.03549836 | 3.91E-05   |
| 5mo_SIGAE9_TAGGTACAGGGCGAGA-1-10x  | 0.03410499 | 0.07135212 | 5.17E-05   |
| 5mo_SIGAE9_TAGGTACCATCATTGG-1-10x  | 0.05828808 | 0.15745701 | 0.00031414 |
| 5mo_SIGAE9_TATACCTCAGTGTATC-1-10x  | 0.1820696  | 0.59818625 | 0.0014427  |
| 5mo_SIGAE9_TATATCCGTGAGCCAA-1-10x  | 0.19478717 | 0.64346766 | 0.0012624  |
| 5mo_SIGAE9_TATATCCGTGAGGAAA-1-10x  | 0.21899611 | 0.7296646  | 0.0010326  |
| 5mo_SIGAE9_TATATCCGTTCTCTCG-1-10x  | 0.03249169 | 0.06560789 | 5.00E-05   |
| 5mo_SIGAE9_TATCCTAAGACCAAAT-1-10x  | 0.10371931 | 0.3192168  | 0.0038193  |
| 5mo_SIGAE9_TATCCTAAGAGCTGAC-1-10x  | 0.04433669 | 0.10778252 | 8.81E-05   |
| 5mo_SIGAE9_TATCCTAAGAGGTATT-1-10x  | 0.15395083 | 0.4980682  | 0.0018575  |
| 5mo_SIGAE9_TATCCTACACAGCTGC-1-10x  | 0.2491584  | 0.8370587  | 0.00081888 |
| 5mo_SIGAE9_TATCCTACACCTTCCA-1-10x  | 0.26795197 | 0.903974   | 0.00075705 |
| 5mo_SIGAE9_TATCGCCGTATTGAGA-1-10x  | 0.13693953 | 0.43749875 | 0.0018842  |
| 5mo_SIGAE9_TATCGCCGTTGTTGAC-1-10x  | 0.22061305 | 0.7354218  | 0.0010179  |
| 5mo_SIGAE9_TATCTGTAGCGAGGAG-1-10x  | 0.2591034  | 0.87246823 | 0.00077499 |
| 5mo_SIGAE9_TATCTGTAGGGACTGT-1-10x  | 0.09410833 | 0.2849965  | 0.0044154  |
| 5mo_SIGAE9_TATCTGTTCCCAGGAC-1-10x  | 0.04574943 | 0.11281265 | 0.00010046 |
| 5mo_SIGAE9_TATCTTGCAGGGAATC-1-10x  | 0.12597062 | 0.3984435  | 0.0020515  |
| 5mo_SIGAE9_TATGTTTCAGCTAAACA-1-10x | 0.2177501  | 0.72522813 | 0.00104    |
| 5mo_SIGAE9_TATGTTTCGTGAGCTCC-1-10x | 0.13223913 | 0.4207628  | 0.0019219  |
| 5mo_SIGAE9_TATGTTTCGTTCTAACG-1-10x | 0.01565056 | 0.00564436 | 3.33E-05   |
| 5mo_SIGAE9_TATGTTCTCACGGTCG-1-10x  | 0.2631738  | 0.8869611  | 0.00076511 |
| 5mo_SIGAE9_TATGTTCTCGGTCATA-1-10x  | 0.20019084 | 0.6627077  | 0.0011985  |
| 5mo_SIGAE9_TATTCCAAGGAACGTC-1-10x  | 0.26732293 | 0.90173423 | 0.00075705 |
| 5mo_SIGAE9_TATTCCAAGTCACGAG-1-10x  | 0.07795589 | 0.22748506 | 0.0023954  |
| 5mo_SIGAE9_TATTCCAGTTGGTACT-1-10x  | 0.15210034 | 0.49147946 | 0.0018651  |
| 5mo_SIGAE9_TATTGCTTCTCCGAAA-1-10x  | 0.25321493 | 0.8515021  | 0.00079608 |
| 5mo_SIGAE9_TATTGGGAGGTGGTTG-1-10x  | 0.04445359 | 0.10819875 | 8.81E-05   |
| 5mo_SIGAE9_TATTCGAGAGTCAGC-1-10x   | 0.28198656 | 0.95394474 | 0.00075401 |

|                                    |            |            |            |
|------------------------------------|------------|------------|------------|
| 5mo_SIGAE9_TCAAGACGTCTGCATA-1-10x  | 0.06416998 | 0.17839979 | 0.00058553 |
| 5mo_SIGAE9_TCAAGTGGTAACACGG-1-10x  | 0.08517607 | 0.2531928  | 0.0037839  |
| 5mo_SIGAE9_TCAAGTGGTCCACGG-1-10x   | 0.2717976  | 0.9176665  | 0.00075352 |
| 5mo_SIGAE9_TCAAGTGTGAGAATA-1-10x   | 0.24774542 | 0.83202773 | 0.00082396 |
| 5mo_SIGAE9_TCAAGTGTCTCATGCC-1-10x  | 0.03021379 | 0.05749733 | 4.55E-05   |
| 5mo_SIGAE9_TCACAAGGTCTTTCAT-1-10x  | 0.26178375 | 0.8820118  | 0.00076727 |
| 5mo_SIGAE9_TCACAAGGTGGCTCTG-1-10x  | 0.08406812 | 0.24924792 | 0.0036353  |
| 5mo_SIGAE9_TCACATTAGGGACAGG-1-10x  | 0.05065162 | 0.1302671  | 0.00014746 |
| 5mo_SIGAE9_TCACATTCACACGGTC-1-10x  | 0.02425961 | 0.03629723 | 3.91E-05   |
| 5mo_SIGAE9_TCACGGGAGATGTTGA-1-10x  | 0.25692138 | 0.8646991  | 0.00078121 |
| 5mo_SIGAE9_TCACGGGGTGTGCTG-1-10x   | 0.10791653 | 0.33416116 | 0.0033168  |
| 5mo_SIGAE9_TCACTATTCTAGACCA-1-10x  | 0.01729762 | 0.01150878 | 3.38E-05   |
| 5mo_SIGAE9_TCAGCCTAGGTGCTTT-1-10x  | 0.27812704 | 0.9402028  | 0.00075239 |
| 5mo_SIGAE9_TCAGCCTGTTATCTTC-1-10x  | 0.03627108 | 0.07906459 | 5.82E-05   |
| 5mo_SIGAE9_TCAGGTAAGCGGCTCT-1-10x  | 0.04102077 | 0.09597604 | 7.40E-05   |
| 5mo_SIGAE9_TCAGGTACATGAATCC-1-10x  | 0.2678339  | 0.90355355 | 0.00075705 |
| 5mo_SIGAE9_TCAGGTACATTCAGGT-1-10x  | 0.2421738  | 0.81218976 | 0.00085764 |
| 5mo_SIGAE9_TCAGGTATCCTAGCGG-1-10x  | 0.2778953  | 0.93937767 | 0.00075239 |
| 5mo_SIGAE9_TCAGTCCGTCCAGCCA-1-10x  | 0.02776332 | 0.04877234 | 4.30E-05   |
| 5mo_SIGAE9_TCAGTCCGTTACCCAA-1-10x  | 0.217404   | 0.7239958  | 0.0010475  |
| 5mo_SIGAE9_TCAGTCCCTCGTGGGTC-1-10x | 0.09508918 | 0.28848886 | 0.0044051  |
| 5mo_SIGAE9_TCAGTGACAAAGCTAA-1-10x  | 0.03970714 | 0.0912988  | 6.67E-05   |
| 5mo_SIGAE9_TCAGTTTAGAGTACCG-1-10x  | 0.01870927 | 0.01653501 | 3.49E-05   |
| 5mo_SIGAE9_TCATACTGTTGGACTT-1-10x  | 0.03797814 | 0.08514264 | 6.07E-05   |
| 5mo_SIGAE9_TCATGAGGTTGGATCT-1-10x  | 0.04659914 | 0.11583807 | 0.00010777 |
| 5mo_SIGAE9_TCATGCCTCCGTTGAA-1-10x  | 0.2911774  | 0.98666906 | 0.00076269 |
| 5mo_SIGAE9_TCATGGAAGGAGGCAG-1-10x  | 0.19542089 | 0.64572406 | 0.0012511  |
| 5mo_SIGAE9_TCATGGACATACAGCT-1-10x  | 0.2480641  | 0.8331624  | 0.00082396 |
| 5mo_SIGAE9_TCATGGAGTCCTCATC-1-10x  | 0.059994   | 0.16353102 | 0.00038577 |
| 5mo_SIGAE9_TCATGGAGTCGCGGTT-1-10x  | 0.04214317 | 0.0999724  | 7.82E-05   |
| 5mo_SIGAE9_TCATTACGTATGTCAC-1-10x  | 0.2759306  | 0.9323823  | 0.00075214 |
| 5mo_SIGAE9_TCATTAGTTAGGGTG-1-10x   | 0.04478604 | 0.10938246 | 9.39E-05   |
| 5mo_SIGAE9_TCATTGTCATGTCTAG-1-10x  | 0.26936087 | 0.90899044 | 0.00075499 |
| 5mo_SIGAE9_TCATTGTTGACGAGA-1-10x   | 0.03376561 | 0.07014376 | 5.17E-05   |
| 5mo_SIGAE9_TCATTTGCAGGCTCTG-1-10x  | 0.02857885 | 0.05167608 | 4.30E-05   |
| 5mo_SIGAE9_TCCACCAAGGAGTCTG-1-10x  | 0.26492667 | 0.8932023  | 0.00076135 |
| 5mo_SIGAE9_TCCACCAAGTCCCGAC-1-10x  | 0.10876885 | 0.3371959  | 0.0032165  |
| 5mo_SIGAE9_TCCACCACACATACGT-1-10x  | 0.05617382 | 0.14992914 | 0.000257   |
| 5mo_SIGAE9_TCCAGAATCATAGAGA-1-10x  | 0.08915769 | 0.26736954 | 0.0042295  |
| 5mo_SIGAE9_TCCATCGCAGAGAAAG-1-10x  | 0.16499966 | 0.537408   | 0.0017353  |
| 5mo_SIGAE9_TCCATGCGTCATTGCA-1-10x  | 0.13791357 | 0.44096687 | 0.0018802  |

|                                   |            |            |            |
|-----------------------------------|------------|------------|------------|
| 5mo_SIGAE9_TCCCACAAGTTGGCTT-1-10x | 0.06514925 | 0.1818865  | 0.00064991 |
| 5mo_SIGAE9_TCCCAGTAGATCACCT-1-10x | 0.24103436 | 0.8081327  | 0.00086374 |
| 5mo_SIGAE9_TCCCAGTGTGACACGA-1-10x | 0.25681663 | 0.8643261  | 0.00078463 |
| 5mo_SIGAE9_TCCCATGAGCGGTAAC-1-10x | 0.05093578 | 0.13127887 | 0.00014746 |
| 5mo_SIGAE9_TCCCATGAGCTTAGTC-1-10x | 0.04943122 | 0.1259218  | 0.00013566 |
| 5mo_SIGAE9_TCCCATGAGGACAAGA-1-10x | 0.07758728 | 0.22617264 | 0.0023954  |
| 5mo_SIGAE9_TCCGAAACATGTCGTA-1-10x | 0.04488001 | 0.10971703 | 9.39E-05   |
| 5mo_SIGAE9_TCCGAAATCTAGGAAA-1-10x | 0.27124554 | 0.9157009  | 0.00075352 |
| 5mo_SIGAE9_TCCGATCAGAAGCGAA-1-10x | 0.04083644 | 0.09531973 | 7.40E-05   |
| 5mo_SIGAE9_TCCGGGACAGACGATG-1-10x | 0.12014873 | 0.37771443 | 0.0022788  |
| 5mo_SIGAE9_TCCTAATCCCAGCGA-1-10x  | 0.03714275 | 0.08216821 | 6.07E-05   |
| 5mo_SIGAE9_TCCTCGACATGTACGT-1-10x | 0.1480658  | 0.47711435 | 0.0018713  |
| 5mo_SIGAE9_TCCTCTTTCGAGTCG-1-10x  | 0.13161515 | 0.4185411  | 0.001934   |
| 5mo_SIGAE9_TCCTCTTCTCTTCAA-1-10x  | 0.06204193 | 0.17082277 | 0.00047505 |
| 5mo_SIGAE9_TCCTGCAGTCGACGCT-1-10x | 0.09435367 | 0.28587005 | 0.0044154  |
| 5mo_SIGAE9_TCCTGCAGTTGTCAGT-1-10x | 0.09183502 | 0.27690226 | 0.0043903  |
| 5mo_SIGAE9_TCCTTCTAGCTACGTT-1-10x | 0.04677718 | 0.11647198 | 0.00010777 |
| 5mo_SIGAE9_TCCTTCTCACCGGTCA-1-10x | 0.05132205 | 0.13265418 | 0.00016076 |
| 5mo_SIGAE9_TCCTTCTGTTAAGAAC-1-10x | 0.01868313 | 0.01644193 | 3.49E-05   |
| 5mo_SIGAE9_TCCTTCTTCGGCTGTG-1-10x | 0.03624493 | 0.07897146 | 5.82E-05   |
| 5mo_SIGAE9_TCCTTTCAGGGCTTCC-1-10x | 0.05140256 | 0.13294086 | 0.00016076 |
| 5mo_SIGAE9_TCCTTTCAGGTTATAG-1-10x | 0.04558998 | 0.11224492 | 0.00010046 |
| 5mo_SIGAE9_TCCTTTCGTAACATAG-1-10x | 0.10590471 | 0.326998   | 0.00352    |
| 5mo_SIGAE9_TCGAACACAGTGGTGA-1-10x | 0.05086047 | 0.1310107  | 0.00014746 |
| 5mo_SIGAE9_TCGAACAGTACAGTAA-1-10x | 0.04528763 | 0.11116839 | 9.39E-05   |
| 5mo_SIGAE9_TCGAACAGTCCTTTCG-1-10x | 0.07670088 | 0.22301657 | 0.0022191  |
| 5mo_SIGAE9_TCGAACAGTGAGCCAA-1-10x | 0.02164251 | 0.02697893 | 3.69E-05   |
| 5mo_SIGAE9_TCGAAGTTCTTCGTAT-1-10x | 0.0157406  | 0.00596496 | 3.33E-05   |
| 5mo_SIGAE9_TCGACCTCAACAAAGT-1-10x | 0.24495517 | 0.8220929  | 0.00084014 |
| 5mo_SIGAE9_TCGACCTCAGACACAG-1-10x | 0.02047519 | 0.02282266 | 3.62E-05   |
| 5mo_SIGAE9_TCGACCTTCGTAGGAG-1-10x | 0.1710142  | 0.55882305 | 0.0016421  |
| 5mo_SIGAE9_TCGATTTAGCGTCTCG-1-10x | 0.05177251 | 0.13425806 | 0.00016076 |
| 5mo_SIGAE9_TCGCTCAAGAGCAACC-1-10x | 0.15078759 | 0.48680538 | 0.0018676  |
| 5mo_SIGAE9_TCGCTCAAGATGGCAC-1-10x | 0.07585458 | 0.22000328 | 0.0020486  |
| 5mo_SIGAE9_TCGCTCAAGGAGATAG-1-10x | 0.15941331 | 0.51751757 | 0.0018109  |
| 5mo_SIGAE9_TCGGGACCACCATTC-1-10x  | 0.01511309 | 0.00373065 | 3.27E-05   |
| 5mo_SIGAE9_TCGGGACTCAAGAAAC-1-10x | 0.28563878 | 0.9669486  | 0.00075686 |
| 5mo_SIGAE9_TCGGGTGAGGTGCGAT-1-10x | 0.0182444  | 0.01487984 | 3.44E-05   |
| 5mo_SIGAE9_TCGGTCTAGGAGATAG-1-10x | 0.04750245 | 0.11905433 | 0.00011598 |
| 5mo_SIGAE9_TCGGTCTCAACCCTAA-1-10x | 0.03444145 | 0.0725501  | 5.37E-05   |
| 5mo_SIGAE9_TCGTAGACATAAGCAA-1-10x | 0.02918764 | 0.05384367 | 4.42E-05   |

|                                   |            |            |            |
|-----------------------------------|------------|------------|------------|
| 5mo_SIGAE9_TCGTAGATCAAGTTGC-1-10x | 0.2320146  | 0.7760175  | 0.00093066 |
| 5mo_SIGAE9_TCGTAGATCAGCAGAG-1-10x | 0.04125381 | 0.0968058  | 7.40E-05   |
| 5mo_SIGAE9_TCGTGCTAGTTTGAGA-1-10x | 0.01968938 | 0.02002472 | 3.55E-05   |
| 5mo_SIGAE9_TCGTGCTGTGTGTGTT-1-10x | 0.05055516 | 0.12992363 | 0.00014746 |
| 5mo_SIGAE9_TCGTGCTTCAGAGTTC-1-10x | 0.2319362  | 0.77573836 | 0.00093066 |
| 5mo_SIGAE9_TCTAACTAGGTCACAG-1-10x | 0.01817615 | 0.01463681 | 3.44E-05   |
| 5mo_SIGAE9_TCTAACTCAACTAC-1-10x   | 0.01651597 | 0.00872569 | 3.38E-05   |
| 5mo_SIGAE9_TCTAACTGTTCTCACC-1-10x | 0.23808974 | 0.7976483  | 0.00088935 |
| 5mo_SIGAE9_TCTAACTTCTGGGAGA-1-10x | 0.23330188 | 0.7806009  | 0.00092358 |
| 5mo_SIGAE9_TCTACCGCAGTTTGGT-1-10x | 0.02192695 | 0.02799171 | 3.69E-05   |
| 5mo_SIGAE9_TCTACCGGTCATAGTC-1-10x | 0.2702889  | 0.9122948  | 0.00075418 |
| 5mo_SIGAE9_TCTACCGTCATGGGAG-1-10x | 0.02584608 | 0.04194592 | 4.09E-05   |
| 5mo_SIGAE9_TCTATCAAGAGAAGGT-1-10x | 0.2892868  | 0.9799375  | 0.0007606  |
| 5mo_SIGAE9_TCTATCAGTCGGCCTA-1-10x | 0.01539699 | 0.0047415  | 3.27E-05   |
| 5mo_SIGAE9_TCTATCATCTACGGTA-1-10x | 0.01714994 | 0.01098297 | 3.38E-05   |
| 5mo_SIGAE9_TCTCACGCACACCGAC-1-10x | 0.04537069 | 0.11146411 | 9.39E-05   |
| 5mo_SIGAE9_TCTCACGCACTAGAGG-1-10x | 0.10669211 | 0.32980156 | 0.0034182  |
| 5mo_SIGAE9_TCTCACGGTGGTCTGC-1-10x | 0.04563707 | 0.11241258 | 0.00010046 |
| 5mo_SIGAE9_TCTCAGCAGTATGGAT-1-10x | 0.02183054 | 0.02764841 | 3.69E-05   |
| 5mo_SIGAE9_TCTCAGCAGTCGCCAC-1-10x | 0.25944915 | 0.87369937 | 0.00077499 |
| 5mo_SIGAE9_TCTCTGGGTGGGCTTC-1-10x | 0.01841553 | 0.01548915 | 3.49E-05   |
| 5mo_SIGAE9_TCTGCCAAGGGCAGGA-1-10x | 0.16330393 | 0.5313703  | 0.001763   |
| 5mo_SIGAE9_TCTGTCTCAATCCAG-1-10x  | 0.22129056 | 0.7378341  | 0.0010106  |
| 5mo_SIGAE9_TCTTAGTGTAAGATAC-1-10x | 0.09299474 | 0.2810315  | 0.0044107  |
| 5mo_SIGAE9_TCTTCCTAGTAGTCAA-1-10x | 0.04493916 | 0.10992765 | 9.39E-05   |
| 5mo_SIGAE9_TCTTGCGAGGAATTAC-1-10x | 0.15703943 | 0.5090653  | 0.0018385  |
| 5mo_SIGAE9_TCTTGCGAGTGGTGAC-1-10x | 0.25678176 | 0.86420196 | 0.00078463 |
| 5mo_SIGAE9_TCTTGCGGTAGACACG-1-10x | 0.12983657 | 0.4122084  | 0.0019639  |
| 5mo_SIGAE9_TCTTGCGGTTTGAACC-1-10x | 0.26406553 | 0.8901362  | 0.00076313 |
| 5mo_SIGAE9_TCTTTGAAGCGCTTCG-1-10x | 0.17124216 | 0.5596347  | 0.0016421  |
| 5mo_SIGAE9_TCTTTGACATGACACT-1-10x | 0.27052885 | 0.9131491  | 0.00075418 |
| 5mo_SIGAE9_TGAACGTAGCGCTGCT-1-10x | 0.22390966 | 0.74715954 | 0.00099599 |
| 5mo_SIGAE9_TGAACGTCACGTCGTG-1-10x | 0.26507643 | 0.8937355  | 0.00076135 |
| 5mo_SIGAE9_TGAACGTCAGCAATTC-1-10x | 0.23798066 | 0.7972599  | 0.00088935 |
| 5mo_SIGAE9_TGAACGTTCCGTACGG-1-10x | 0.04027661 | 0.09332643 | 7.01E-05   |
| 5mo_SIGAE9_TGAATCGTCCTCACCA-1-10x | 0.05364386 | 0.1409211  | 0.00019264 |
| 5mo_SIGAE9_TGAATGCTCAACCCGG-1-10x | 0.01636103 | 0.008174   | 3.33E-05   |
| 5mo_SIGAE9_TGAATGCTCTGTGCC-1-10x  | 0.23233318 | 0.7771518  | 0.00093066 |
| 5mo_SIGAE9_TGACAGTAGTGGTTCT-1-10x | 0.04004837 | 0.09251378 | 7.01E-05   |
| 5mo_SIGAE9_TGACAGTCAAAGACTA-1-10x | 0.05184555 | 0.13451813 | 0.00016076 |
| 5mo_SIGAE9_TGACAGTCACTTACAG-1-10x | 0.07169203 | 0.20518234 | 0.0013138  |



|                                    |            |            |            |
|------------------------------------|------------|------------|------------|
| 5mo_SIGAE9_TGACAGTCAGTTCCAA-1-10x  | 0.03919308 | 0.08946846 | 6.67E-05   |
| 5mo_SIGAE9_TGACCCTTCGCTGTTC-1-10x  | 0.26601282 | 0.8970696  | 0.00075974 |
| 5mo_SIGAE9_TGAGCGCGTATGATCC-1-10x  | 0.06891072 | 0.19527937 | 0.00097948 |
| 5mo_SIGAE9_TGAGCGCTCCGACATA-1-10x  | 0.04312838 | 0.10348029 | 8.29E-05   |
| 5mo_SIGAE9_TGAGGAGGTTCTTGCC-1-10x  | 0.06546826 | 0.18302235 | 0.00072102 |
| 5mo_SIGAE9_TGAGTCACAAGAGGCT-1-10x  | 0.18465945 | 0.6074075  | 0.0013959  |
| 5mo_SIGAE9_TGAGTCAGTGAGCAGT-1-10x  | 0.04211684 | 0.09987865 | 7.82E-05   |
| 5mo_SIGAE9_TGATGCAGTGACCTGC-1-10x  | 0.11215387 | 0.3492484  | 0.002929   |
| 5mo_SIGAE9_TGATGGTCACGGCTAC-1-10x  | 0.02955085 | 0.05513692 | 4.42E-05   |
| 5mo_SIGAE9_TGATGGTTCGAGAAAT-1-10x  | 0.0386517  | 0.08754087 | 6.36E-05   |
| 5mo_SIGAE9_TGATTCTAGCTCAGAG-1-10x  | 0.1641683  | 0.5344479  | 0.0017494  |
| 5mo_SIGAE9_TGATTCTAGTGGCAGT-1-10x  | 0.23361857 | 0.7817285  | 0.00091657 |
| 5mo_SIGAE9_TGATTTTCGTGCATTAC-1-10x | 0.04484176 | 0.10958085 | 9.39E-05   |
| 5mo_SIGAE9_TGCAGATCACCTGCGA-1-10x  | 0.04580921 | 0.11302547 | 0.00010046 |
| 5mo_SIGAE9_TGCAGATTCAAAGACA-1-10x  | 0.05476752 | 0.14492191 | 0.00021164 |
| 5mo_SIGAE9_TGCAGATTCGAAACAA-1-10x  | 0.09133184 | 0.2751107  | 0.0043535  |
| 5mo_SIGAE9_TGCAGGCGTGCGTGCT-1-10x  | 0.043721   | 0.10559032 | 8.81E-05   |
| 5mo_SIGAE9_TGCATCCAGAATTTGG-1-10x  | 0.16366932 | 0.5326713  | 0.001763   |
| 5mo_SIGAE9_TGCATCCCAATACAGA-1-10x  | 0.03975873 | 0.0914825  | 6.67E-05   |
| 5mo_SIGAE9_TGCATCCGTGCAATGG-1-10x  | 0.27059588 | 0.9133877  | 0.00075418 |
| 5mo_SIGAE9_TGCATCCTCCGAGGCT-1-10x  | 0.02000032 | 0.02113186 | 3.55E-05   |
| 5mo_SIGAE9_TGCATGAGTACGGTTT-1-10x  | 0.28209049 | 0.95431477 | 0.00075401 |
| 5mo_SIGAE9_TGCCGAGGTGGACTAG-1-10x  | 0.14291213 | 0.4587645  | 0.0018718  |
| 5mo_SIGAE9_TGCGATAGTAGCGCTC-1-10x  | 0.10992201 | 0.34130177 | 0.0031181  |
| 5mo_SIGAE9_TGCGATATCGCCCAGA-1-10x  | 0.06035919 | 0.16483131 | 0.00038577 |
| 5mo_SIGAE9_TGCGATATCTAAACGC-1-10x  | 0.24564202 | 0.82453847 | 0.00083459 |
| 5mo_SIGAE9_TGCGGCATCATCCTGC-1-10x  | 0.0169846  | 0.01039426 | 3.38E-05   |
| 5mo_SIGAE9_TGCGGCATCTACGCGG-1-10x  | 0.25536698 | 0.8591646  | 0.00078825 |
| 5mo_SIGAE9_TGCGGGTAGAGGCTGT-1-10x  | 0.24303164 | 0.8152441  | 0.00085167 |
| 5mo_SIGAE9_TGCGGGTAGTAAACGT-1-10x  | 0.03737022 | 0.08297809 | 6.07E-05   |
| 5mo_SIGAE9_TGCGGGTTCACCCCTA-1-10x  | 0.03583236 | 0.07750251 | 5.58E-05   |
| 5mo_SIGAE9_TGCTCGTAGCATCAGG-1-10x  | 0.04442499 | 0.10809689 | 8.81E-05   |
| 5mo_SIGAE9_TGCTGAAAGGCCTAGA-1-10x  | 0.02863482 | 0.05187534 | 4.42E-05   |
| 5mo_SIGAE9_TGCTTCGCAGAAATCA-1-10x  | 0.02116813 | 0.02528988 | 3.69E-05   |
| 5mo_SIGAE9_TGCTTGCAGCCACCGT-1-10x  | 0.06790833 | 0.19171034 | 0.00088537 |
| 5mo_SIGAE9_TGCTTGCAGTGATGGC-1-10x  | 0.03832916 | 0.08639245 | 6.36E-05   |
| 5mo_SIGAE9_TGCTTGCGTACAGAAT-1-10x  | 0.23932822 | 0.8020579  | 0.00087632 |
| 5mo_SIGAE9_TGGAAGTAGGTTACAA-1-10x  | 0.02230331 | 0.02933176 | 3.76E-05   |
| 5mo_SIGAE9_TGGAGAGCACACGTGC-1-10x  | 0.04470018 | 0.10907673 | 9.39E-05   |
| 5mo_SIGAE9_TGGAGAGTCCTTCTGG-1-10x  | 0.03104114 | 0.06044315 | 4.68E-05   |
| 5mo_SIGAE9_TGGAGGACAATCGAAA-1-10x  | 0.28192434 | 0.9537232  | 0.00075401 |

|                                    |            |            |            |
|------------------------------------|------------|------------|------------|
| 5mo_SIGAE9_TGGATGTAGAGTATAC-1-10x  | 0.18965213 | 0.6251842  | 0.0013244  |
| 5mo_SIGAE9_TGGCGTGCATAAGATG-1-10x  | 0.05404702 | 0.14235654 | 0.00021164 |
| 5mo_SIGAE9_TGGGAGATCATTTGCT-1-10x  | 0.04880982 | 0.12370926 | 0.00012523 |
| 5mo_SIGAE9_TGGGAGATCCCAAGCG-1-10x  | 0.25662705 | 0.86365116 | 0.00078463 |
| 5mo_SIGAE9_TGGGATTAGGACGCTA-1-10x  | 0.15518281 | 0.5024547  | 0.0018522  |
| 5mo_SIGAE9_TGGGATTCAAGAGATT-1-10x  | 0.0884878  | 0.2649844  | 0.0041422  |
| 5mo_SIGAE9_TGGGCGTTCGAAATCC-1-10x  | 0.02347256 | 0.03349492 | 3.83E-05   |
| 5mo_SIGAE9_TGGGCGTTCGACGACC-1-10x  | 0.02244348 | 0.02983083 | 3.76E-05   |
| 5mo_SIGAE9_TGGGCTGCAGTGGTGA-1-10x  | 0.11587498 | 0.36249757 | 0.002594   |
| 5mo_SIGAE9_TGGGTTATCGCACTCT-1-10x  | 0.10252982 | 0.31498158 | 0.0039137  |
| 5mo_SIGAE9_TGGGTTATCTCAATCT-1-10x  | 0.02506382 | 0.03916065 | 4.00E-05   |
| 5mo_SIGAE9_TGGTACAAGATCGACG-1-10x  | 0.04844829 | 0.12242204 | 0.00012523 |
| 5mo_SIGAE9_TGGTGATCACTTCCTG-1-10x  | 0.09236331 | 0.2787833  | 0.0043903  |
| 5mo_SIGAE9_TGGTTAGAGAGATGCC-1-10x  | 0.0269178  | 0.04576184 | 4.19E-05   |
| 5mo_SIGAE9_TGTAACGAGAACTCCT-1-10x  | 0.02195204 | 0.02808103 | 3.69E-05   |
| 5mo_SIGAE9_TGTAAGCGTCCACGCA-1-10x  | 0.03346521 | 0.06907415 | 5.17E-05   |
| 5mo_SIGAE9_TGTAAGCGTCTACGAT-1-10x  | 0.12271259 | 0.38684317 | 0.0021479  |
| 5mo_SIGAE9_TGTACAGAGAATCGAT-1-10x  | 0.09578166 | 0.29095447 | 0.0043808  |
| 5mo_SIGAE9_TGTAGACAGTATGCAA-1-10x  | 0.04294911 | 0.10284198 | 8.29E-05   |
| 5mo_SIGAE9_TGTCAGACAGACAAGC-1-10x  | 0.22183368 | 0.7397679  | 0.0010106  |
| 5mo_SIGAE9_TGTCCACGTTGTGTAC-1-10x  | 0.2795615  | 0.9453102  | 0.00075303 |
| 5mo_SIGAE9_TGTCCACAATCGTCA-1-10x   | 0.27287024 | 0.9214857  | 0.0007526  |
| 5mo_SIGAE9_TGTGAGTGTGCGCATCG-1-10x | 0.01897613 | 0.01748519 | 3.49E-05   |
| 5mo_SIGAE9_TGTGATGCAATACCCA-1-10x  | 0.06865168 | 0.19435704 | 0.00097948 |
| 5mo_SIGAE9_TGTGATGGTATAGGAT-1-10x  | 0.02772692 | 0.04864275 | 4.30E-05   |
| 5mo_SIGAE9_TGTGTGACAACGCATT-1-10x  | 0.25900528 | 0.87211895 | 0.00077499 |
| 5mo_SIGAE9_TGTTACTCAGGTGTGA-1-10x  | 0.10269123 | 0.3155563  | 0.0039137  |
| 5mo_SIGAE9_TGTTACTTCTATTGTC-1-10x  | 0.0373008  | 0.08273093 | 6.07E-05   |
| 5mo_SIGAE9_TGTTTCATGTACCCGCA-1-10x | 0.0923832  | 0.2788541  | 0.0043903  |
| 5mo_SIGAE9_TGTTCCGAGCGGGTTA-1-10x  | 0.08195994 | 0.24174166 | 0.0031253  |
| 5mo_SIGAE9_TGTTCCGTCGCGATG-1-10x   | 0.02655929 | 0.04448535 | 4.09E-05   |
| 5mo_SIGAE9_TGTTCTATCCATCTAT-1-10x  | 0.14671516 | 0.47230533 | 0.0018717  |
| 5mo_SIGAE9_TGTTCTATCTGGAGAG-1-10x  | 0.02358052 | 0.03387931 | 3.83E-05   |
| 5mo_SIGAE9_TGTTCTATCTTACGGA-1-10x  | 0.20124276 | 0.66645306 | 0.0011888  |
| 5mo_SIGAE9_TGTTGAGAGTGCACAG-1-10x  | 0.04954922 | 0.12634192 | 0.00013566 |
| 5mo_SIGAE9_TGTTGAGGTAAGTTGA-1-10x  | 0.08827401 | 0.26422316 | 0.0041422  |
| 5mo_SIGAE9_TGTTGGAGTCCGCACT-1-10x  | 0.0919177  | 0.27719668 | 0.0043903  |
| 5mo_SIGAE9_TGTTGGATCAACGTGT-1-10x  | 0.03494604 | 0.07434673 | 5.37E-05   |
| 5mo_SIGAE9_TGTTTGTCATTGAAGA-1-10x  | 0.05078584 | 0.130745   | 0.00014746 |
| 5mo_SIGAE9_TTACAGGAGCATCAGG-1-10x  | 0.07835007 | 0.22888856 | 0.0023954  |
| 5mo_SIGAE9_TTACAGGAGGGTAGCT-1-10x  | 0.02524716 | 0.03981343 | 4.00E-05   |

|                                   |            |            |            |
|-----------------------------------|------------|------------|------------|
| 5mo_SIGAE9_TTACAGGTCATTCCTA-1-10x | 0.2702061  | 0.9119999  | 0.00075418 |
| 5mo_SIGAE9_TTACAGGTCTCGCAGG-1-10x | 0.08503833 | 0.25270241 | 0.0037839  |
| 5mo_SIGAE9_TTACCATAGACGCCAA-1-10x | 0.23012963 | 0.769306   | 0.00094498 |
| 5mo_SIGAE9_TTACGTTTCCAAGAGG-1-10x | 0.20166424 | 0.6679538  | 0.0011792  |
| 5mo_SIGAE9_TTAGGGTCATGAAAGT-1-10x | 0.06895409 | 0.1954338  | 0.00097948 |
| 5mo_SIGAE9_TTATTGCAGGCTCACC-1-10x | 0.03725439 | 0.0825657  | 6.07E-05   |
| 5mo_SIGAE9_TTCAATCGTTAGGACG-1-10x | 0.04459561 | 0.10870441 | 9.39E-05   |
| 5mo_SIGAE9_TTCACCGCAAAGCACG-1-10x | 0.23563732 | 0.78891635 | 0.00090278 |
| 5mo_SIGAE9_TTCACGCTCTAAACGC-1-10x | 0.05484154 | 0.1451855  | 0.00021164 |
| 5mo_SIGAE9_TTCAGGATCTGCCTCA-1-10x | 0.16101713 | 0.52322805 | 0.0018     |
| 5mo_SIGAE9_TTCATGTAGGCAGCTA-1-10x | 0.26507437 | 0.8937282  | 0.00076135 |
| 5mo_SIGAE9_TTCATGTTCTAGCCAA-1-10x | 0.06811852 | 0.19245872 | 0.00097948 |
| 5mo_SIGAE9_TTCCAATAGTTCCTGA-1-10x | 0.06181063 | 0.16999921 | 0.00047505 |
| 5mo_SIGAE9_TTCCACGCATGGGTTT-1-10x | 0.2106436  | 0.6999252  | 0.0011014  |
| 5mo_SIGAE9_TTCCACGGTCAAACGG-1-10x | 0.212775   | 0.7075141  | 0.0010778  |
| 5mo_SIGAE9_TTCCACGTCCCAAGCG-1-10x | 0.2604059  | 0.8771059  | 0.00077221 |
| 5mo_SIGAE9_TTCCGGTAGACTCAAA-1-10x | 0.28741556 | 0.97327495 | 0.00075864 |
| 5mo_SIGAE9_TTCCGGTCAGACTCTA-1-10x | 0.2698298  | 0.91066015 | 0.00075499 |
| 5mo_SIGAE9_TTCCGGTCATAATCCG-1-10x | 0.28522164 | 0.96546334 | 0.00075686 |
| 5mo_SIGAE9_TTCCGGTTCATCCAG-1-10x  | 0.09274311 | 0.28013557 | 0.0044107  |
| 5mo_SIGAE9_TTCCGTGAGCTGAGTG-1-10x | 0.04760701 | 0.11942663 | 0.00011598 |
| 5mo_SIGAE9_TTCCGTGGTACACGCC-1-10x | 0.20043832 | 0.6635888  | 0.0011985  |
| 5mo_SIGAE9_TTCCGTGCCGGTAAT-1-10x  | 0.22515048 | 0.7515775  | 0.00098137 |
| 5mo_SIGAE9_TTCGATTGTTGCGGAA-1-10x | 0.2527728  | 0.84992796 | 0.00080028 |
| 5mo_SIGAE9_TTCGCTGCAAATCGTC-1-10x | 0.07772531 | 0.2266641  | 0.0023954  |
| 5mo_SIGAE9_TTCGGTCGTCATGACT-1-10x | 0.03853298 | 0.08711818 | 6.36E-05   |
| 5mo_SIGAE9_TTCTAACAGGATAATC-1-10x | 0.13255511 | 0.42188787 | 0.0019219  |
| 5mo_SIGAE9_TTCTAACAGCCACA-1-10x   | 0.26692086 | 0.9003027  | 0.00075831 |
| 5mo_SIGAE9_TTCTAGTAGTCTGGAG-1-10x | 0.07560519 | 0.21911532 | 0.0020486  |
| 5mo_SIGAE9_TTCTAGTTCAAAGCCT-1-10x | 0.03195378 | 0.06369266 | 4.83E-05   |
| 5mo_SIGAE9_TTCTGTAGTAGCTGTT-1-10x | 0.03263518 | 0.06611881 | 5.00E-05   |
| 5mo_SIGAE9_TTCTTCCGTGACACAG-1-10x | 0.08160915 | 0.24049266 | 0.0031253  |
| 5mo_SIGAE9_TTCTTCTCTCCGAAA-1-10x  | 0.278698   | 0.94223565 | 0.00075266 |
| 5mo_SIGAE9_TTCTTGATCGCCTTGT-1-10x | 0.21917811 | 0.73031265 | 0.0010326  |
| 5mo_SIGAE9_TTGAGTGAGACTTAAG-1-10x | 0.03968819 | 0.09123135 | 6.67E-05   |
| 5mo_SIGAE9_TTGATGGCACTACCGG-1-10x | 0.08778223 | 0.26247218 | 0.0040384  |
| 5mo_SIGAE9_TTGATGGCATCAACCA-1-10x | 0.06901073 | 0.19563545 | 0.00097948 |
| 5mo_SIGAE9_TTGATGGGTGGTTTGT-1-10x | 0.27560282 | 0.93121517 | 0.00075218 |
| 5mo_SIGAE9_TTGCTGTCCGCACGA-1-10x  | 0.23840736 | 0.7987792  | 0.00088278 |
| 5mo_SIGAE9_TTGCGTCAGCGTGAGT-1-10x | 0.02056337 | 0.02313661 | 3.62E-05   |
| 5mo_SIGAE9_TTGATGAGCAGCACA-1-10x  | 0.18703675 | 0.61587197 | 0.0013662  |

|                                    |            |            |            |
|------------------------------------|------------|------------|------------|
| 5mo_SIGAE9_TTGGATGCATGTGACT-1-10x  | 0.08966813 | 0.269187   | 0.0042295  |
| 5mo_SIGAE9_TTGGATGTCCATAGA-1-10x   | 0.04885003 | 0.12385245 | 0.00012523 |
| 5mo_SIGAE9_TTGGATGTCTGCTCTG-1-10x  | 0.04515018 | 0.11067896 | 9.39E-05   |
| 5mo_SIGAE9_TTGGGATGTGCCCTTT-1-10x  | 0.13042195 | 0.41429266 | 0.001948   |
| 5mo_SIGAE9_TTGGGCGTCTAGTACG-1-10x  | 0.1126617  | 0.35105658 | 0.0028393  |
| 5mo_SIGAE9_TTGGGCGTCTCAAAGC-1-10x  | 0.17950295 | 0.58904755 | 0.0014915  |
| 5mo_SIGAE9_TTGGTTTAGCACGTCC-1-10x  | 0.18917717 | 0.623493   | 0.001338   |
| 5mo_SIGAE9_TTGGTTTCACTCTCGT-1-10x  | 0.02227876 | 0.02924434 | 3.76E-05   |
| 5mo_SIGAE9_TTGGTTTTCGTAGTCA-1-10x  | 0.02021583 | 0.02189919 | 3.62E-05   |
| 5mo_SIGAE9_TTGTGGATCTGTTGGA-1-10x  | 0.0835584  | 0.24743302 | 0.0034742  |
| 5mo_SIGAE9_TTGTGTTAGGACATCG-1-10x  | 0.15721957 | 0.5097067  | 0.0018385  |
| 5mo_SIGAE9_TTGTGTTACGAAGAC-1-10x   | 0.02498576 | 0.03888274 | 4.00E-05   |
| 5mo_SIGAE9_TTGTTCACATCTAGAC-1-10x  | 0.08227833 | 0.24287528 | 0.0033032  |
| 5mo_SIGAE9_TTGTGTGTCAGTCGGAA-1-10x | 0.04085362 | 0.09538089 | 7.40E-05   |
| 5mo_SIGAE9_TTGTGTTGAGGTAGACC-1-10x | 0.08869673 | 0.2657283  | 0.0041422  |
| 5mo_SIGAE9_TTGTGTTGCATGAAAGT-1-10x | 0.2466909  | 0.82827306 | 0.0008292  |
| 5mo_SIGAE9_TTGTGTTGCTACTCCGT-1-10x | 0.03245745 | 0.06548597 | 5.00E-05   |
| 5mo_SIGAE9_TTTACCACAGATACTC-1-10x  | 0.18433762 | 0.6062616  | 0.0014112  |
| 5mo_SIGAE9_TTTACCATCTACTATC-1-10x  | 0.04519905 | 0.11085298 | 9.39E-05   |
| 5mo_SIGAE9_TTTACGTAGCTTAGTC-1-10x  | 0.07388504 | 0.21299064 | 0.0017292  |
| 5mo_SIGAE9_TTTAGTCTCACTCGAA-1-10x  | 0.03089385 | 0.05991871 | 4.68E-05   |
| 5mo_SIGAE9_TTTATGCCAAAGGAGA-1-10x  | 0.08402586 | 0.24909745 | 0.0034742  |
| 5mo_SIGAE9_TTTATGCGTTGTCCCT-1-10x  | 0.10251693 | 0.31493565 | 0.0039137  |
| 5mo_SIGAE9_TTTATGCTCAGGTGTT-1-10x  | 0.15800275 | 0.5124952  | 0.0018302  |
| 5mo_SIGAE9_TTTCACATCAGGGATG-1-10x  | 0.03438461 | 0.07234773 | 5.37E-05   |
| 5mo_SIGAE9_TTTCAGTTCCAACCGG-1-10x  | 0.05800983 | 0.15646629 | 0.00031414 |
| 5mo_SIGAE9_TTTCCTCAGTTCTACG-1-10x  | 0.0458808  | 0.11328036 | 0.00010046 |
| 5mo_SIGAE9_TTTCCTCTCGGATTAC-1-10x  | 0.17825438 | 0.584602   | 0.0015081  |
| 5mo_SIGAE9_TTTCGATCACCCCTGAG-1-10x | 0.23440206 | 0.7845181  | 0.00090964 |
| 5mo_SIGAE9_TTTGACTAGGTTGACG-1-10x  | 0.04305371 | 0.10321441 | 8.29E-05   |
| 5mo_SIGAE9_TTTGATCTCGACACCG-1-10x  | 0.16588612 | 0.5405643  | 0.0017206  |
| 5mo_SIGAE9_TTTGGAGCAAGGATGC-1-10x  | 0.13786744 | 0.44080263 | 0.0018802  |
| 5mo_SIGAE9_TTTGGTTAGCTTGTTG-1-10x  | 0.03966215 | 0.0911386  | 6.67E-05   |
| 5mo_SIGAE9_TTTGGTTCACGCGTCA-1-10x  | 0.02478409 | 0.03816466 | 3.91E-05   |
| 5mo_SIGAE9_TTTGGTTCATAGCTGT-1-10x  | 0.26288575 | 0.8859355  | 0.00076511 |
| 5mo_SIGAE9_AACACACTCGGACGTC-1-10x  | 0.01639605 | 0.00829869 | 3.33E-05   |
| 5mo_SIGAE9_AAGATAGAGAAGTGTT-1-10x  | 0.03495675 | 0.07438485 | 5.37E-05   |
| 5mo_SIGAE9_AAGCGTTTCAAGTTGC-1-10x  | 0.158309   | 0.5135856  | 0.0018209  |
| 5mo_SIGAE9_AATGGAATCATTGCTT-1-10x  | 0.15626569 | 0.50631034 | 0.0018459  |
| 5mo_SIGAE9_ACAAGCTTCGACGCTG-1-10x  | 0.02828445 | 0.05062785 | 4.30E-05   |
| 5mo_SIGAE9_ACCCTCATCACTGCTC-1-10x  | 0.01612185 | 0.00732239 | 3.33E-05   |

|                                    |            |            |            |
|------------------------------------|------------|------------|------------|
| 5mo_SIGAE9_AGGAATATCCACGTCT-1-10x  | 0.02395118 | 0.03519907 | 3.91E-05   |
| 5mo_SIGAE9_AGGGAGTTCATTCCCTA-1-10x | 0.2551037  | 0.8582272  | 0.00078825 |
| 5mo_SIGAE9_AGGTCTAAGCTACGTT-1-10x  | 0.07842203 | 0.22914477 | 0.002576   |
| 5mo_SIGAE9_ATCGATGCATTGTAGC-1-10x  | 0.08660706 | 0.25828794 | 0.0039187  |
| 5mo_SIGAE9_ATGACCAGTCGAGCAA-1-10x  | 0.03312929 | 0.06787809 | 5.00E-05   |
| 5mo_SIGAE9_ATTACTCAGACGCCAA-1-10x  | 0.13469501 | 0.42950708 | 0.0019027  |
| 5mo_SIGAE9_ATTTCTGGTTCTTGTT-1-10x  | 0.02936276 | 0.05446721 | 4.42E-05   |
| 5mo_SIGAE9_CACTGAAAGGTAGATT-1-10x  | 0.0405229  | 0.09420335 | 7.01E-05   |
| 5mo_SIGAE9_CAGGGCTAGCACTCGC-1-10x  | 0.10275399 | 0.31577975 | 0.0039137  |
| 5mo_SIGAE9_CATTCCGAGGTCATAA-1-10x  | 0.21446796 | 0.7135419  | 0.0010701  |
| 5mo_SIGAE9_CCACACTCATGCACTA-1-10x  | 0.12908296 | 0.40952516 | 0.0019821  |
| 5mo_SIGAE9_CCACGAGGTCTGAAGCA-1-10x | 0.22875233 | 0.76440203 | 0.0009522  |
| 5mo_SIGAE9_CCGATGGTCTGAAGAAT-1-10x | 0.08558144 | 0.25463617 | 0.0037839  |
| 5mo_SIGAE9_CCTTGTGTCCACGGTCG-1-10x | 0.05538305 | 0.14711356 | 0.000233   |
| 5mo_SIGAE9_CGACAGCAGTAGTCTC-1-10x  | 0.09481344 | 0.2875071  | 0.0044051  |
| 5mo_SIGAE9_CGCGTGAGTACTCGCG-1-10x  | 0.01619707 | 0.00759022 | 3.33E-05   |
| 5mo_SIGAE9_CGTAGTATCCACTGAA-1-10x  | 0.08427514 | 0.24998502 | 0.0036353  |
| 5mo_SIGAE9_CTACTATTCCACTTCG-1-10x  | 0.02169127 | 0.02715255 | 3.69E-05   |
| 5mo_SIGAE9_CTCCCAAAGACCAGCA-1-10x  | 0.03527022 | 0.07550098 | 5.58E-05   |
| 5mo_SIGAE9_CTCGAGGCAACTGCCG-1-10x  | 0.02420905 | 0.0361172  | 3.91E-05   |
| 5mo_SIGAE9_CTGAGGCGTATGCAA-1-10x   | 0.23161003 | 0.774577   | 0.00093066 |
| 5mo_SIGAE9_CTTCTAAAGAGGGTAA-1-10x  | 0.16078426 | 0.5223989  | 0.0018     |
| 5mo_SIGAE9_GAACGTTTCTACTCAT-1-10x  | 0.20474865 | 0.67893595 | 0.0011518  |
| 5mo_SIGAE9_GAGGCAAGTTAGAAGT-1-10x  | 0.08653375 | 0.2580269  | 0.0039187  |
| 5mo_SIGAE9_GATAGAACAACGCATT-1-10x  | 0.01727268 | 0.01141999 | 3.38E-05   |
| 5mo_SIGAE9_GATCACAAGAAGAGCA-1-10x  | 0.09894442 | 0.3022156  | 0.0042345  |
| 5mo_SIGAE9_GATCGTAAGGTCCAGA-1-10x  | 0.01993594 | 0.02090263 | 3.55E-05   |
| 5mo_SIGAE9_GATTGGTAGAGGCCAT-1-10x  | 0.26951736 | 0.9095476  | 0.00075499 |
| 5mo_SIGAE9_GCCAACGAGCAGATAT-1-10x  | 0.26058903 | 0.87775797 | 0.00077221 |
| 5mo_SIGAE9_GCCGATGGTCCCTCCTA-1-10x | 0.27683488 | 0.93560195 | 0.00075222 |
| 5mo_SIGAE9_GCCGTGATCGATTCCC-1-10x  | 0.10577897 | 0.3265503  | 0.00352    |
| 5mo_SIGAE9_GCTGCAGTCATGAAAG-1-10x  | 0.04705112 | 0.11744737 | 0.00010777 |
| 5mo_SIGAE9_GGAATGGTCTGAACGGA-1-10x | 0.06643581 | 0.18646738 | 0.00079936 |
| 5mo_SIGAE9_GGGAAGTAGTGTAGTA-1-10x  | 0.27935246 | 0.9445659  | 0.00075266 |
| 5mo_SIGAE9_GGTGAAGTCGACGATT-1-10x  | 0.05070902 | 0.13047147 | 0.00014746 |
| 5mo_SIGAE9_GTAATCGTCCTGGCTT-1-10x  | 0.02953612 | 0.05508448 | 4.42E-05   |
| 5mo_SIGAE9_GTATTTCCAACAGATA-1-10x  | 0.24923225 | 0.83732164 | 0.00081888 |
| 5mo_SIGAE9_GTCGTTCTTTGGAAA-1-10x   | 0.01791393 | 0.01370316 | 3.44E-05   |
| 5mo_SIGAE9_GTGTCCTGTTTACGAC-1-10x  | 0.09573858 | 0.29080105 | 0.0043808  |
| 5mo_SIGAE9_TACCGGGTCGGCTATA-1-10x  | 0.08103143 | 0.23843564 | 0.0029431  |
| 5mo_SIGAE9_TAGACCACAGCATGCC-1-10x  | 0.28291512 | 0.9572509  | 0.00075462 |

|                                    |            |            |            |
|------------------------------------|------------|------------|------------|
| 5mo_SIGAE9_TAGCACAGTCTTAGTG-1-10x  | 0.08984431 | 0.26981428 | 0.0042999  |
| 5mo_SIGAE9_TCACGGGTCTGGGCAC-1-10x  | 0.21928164 | 0.73068124 | 0.0010326  |
| 5mo_SIGAE9_TCATGTTAGATGCAGC-1-10x  | 0.01553952 | 0.00524899 | 3.33E-05   |
| 5mo_SIGAE9_TCATTTGCATTGCTGA-1-10x  | 0.06332596 | 0.17539462 | 0.00052741 |
| 5mo_SIGAE9_TCGATTTCAAAACGG-1-10x   | 0.28184384 | 0.95343655 | 0.00075401 |
| 5mo_SIGAE9_TCGGATAGTGGTTTAC-1-10x  | 0.05782355 | 0.15580305 | 0.00031414 |
| 5mo_SIGAE9_TCGGGCATCTCTCCGA-1-10x  | 0.03392495 | 0.07071108 | 5.17E-05   |
| 5mo_SIGAE9_TGCGGCAGTGGCCACT-1-10x  | 0.09504239 | 0.28832224 | 0.0044051  |
| 5mo_SIGAE9_TGTGTGACATCCTATT-1-10x  | 0.25811374 | 0.8689446  | 0.000778   |
| 5mo_SIGAE9_TTACTGTTGCACTCT-1-10x   | 0.03142515 | 0.06181045 | 4.68E-05   |
| 5mo_SIGAE9_TTCATGTGTTGCAACT-1-10x  | 0.08273578 | 0.24450408 | 0.0033032  |
| 5mo_SIGAD9_AAACGCTGTGGATCAG-1-10x  | 0.18407524 | 0.60532737 | 0.0014112  |
| 5mo_SIGAD9_AAAGGATTCGTCTACC-1-10x  | 0.05081395 | 0.13084508 | 0.00014746 |
| 5mo_SIGAD9_AAAGGTATCGTTACCC-1-10x  | 0.28104237 | 0.9505829  | 0.00075348 |
| 5mo_SIGAD9_AAAGTGACAATAGGAT-1-10x  | 0.22069062 | 0.735698   | 0.0010179  |
| 5mo_SIGAD9_AAAGTGATCTAGGCAT-1-10x  | 0.09245107 | 0.27909574 | 0.0043903  |
| 5mo_SIGAD9_AACAAAGGTTGTAAAG-1-10x  | 0.18885566 | 0.6223483  | 0.001338   |
| 5mo_SIGAD9_AACAACCTCAGTCACA-1-10x  | 0.13380706 | 0.4263455  | 0.0019115  |
| 5mo_SIGAD9_AACCATGCAAATGCGG-1-10x  | 0.04530487 | 0.11122977 | 9.39E-05   |
| 5mo_SIGAD9_AACCTTTAGAGTTGCG-1-10x  | 0.02024473 | 0.0220021  | 3.62E-05   |
| 5mo_SIGAD9_AACCTTTAGTTACGTC-1-10x  | 0.07698195 | 0.22401732 | 0.0022191  |
| 5mo_SIGAD9_AACCTTTCAACACGTT-1-10x  | 0.09048697 | 0.27210248 | 0.0042999  |
| 5mo_SIGAD9_AACCTTTGTGGAAATT-1-10x  | 0.25139746 | 0.84503096 | 0.00080467 |
| 5mo_SIGAD9_AACGTCAAGGAGAGGC-1-10x  | 0.2775079  | 0.9379983  | 0.00075222 |
| 5mo_SIGAD9_AACTTCTTCTGGGCCA-1-10x  | 0.02611673 | 0.04290958 | 4.09E-05   |
| 5mo_SIGAD9_AAGAACACATGACTTG-1-10x  | 0.03071491 | 0.0592816  | 4.68E-05   |
| 5mo_SIGAD9_AAGAACATCATAGGCT-1-10x  | 0.2096295  | 0.69631445 | 0.0011095  |
| 5mo_SIGAD9_AAGCATCAGGAGACCT-1-10x  | 0.07154667 | 0.20466478 | 0.0013138  |
| 5mo_SIGAD9_AAGCATCGTCATCAGT-1-10x  | 0.28158644 | 0.9525201  | 0.00075401 |
| 5mo_SIGAD9_AAGCATCGTGGCACTC-1-10x  | 0.08614467 | 0.25664157 | 0.0039187  |
| 5mo_SIGAD9_AAGCATCGTTCGTA-1-10x    | 0.11777873 | 0.36927593 | 0.002453   |
| 5mo_SIGAD9_AAGCCATCAGTATGAA-1-10x  | 0.06610018 | 0.18527234 | 0.00072102 |
| 5mo_SIGAD9_AAGGAATTCAGCCCG-1-10x   | 0.24962614 | 0.83872414 | 0.00081397 |
| 5mo_SIGAD9_AAGTTCGTGACTGACTA-1-10x | 0.27259377 | 0.9205013  | 0.000753   |
| 5mo_SIGAD9_AATCGACCACAAGGTG-1-10x  | 0.03903156 | 0.08889337 | 6.67E-05   |
| 5mo_SIGAD9_AATCGACCAGGACAGT-1-10x  | 0.22823168 | 0.76254827 | 0.00095947 |
| 5mo_SIGAD9_AATGCCACAGTCCCGA-1-10x  | 0.04671374 | 0.11624609 | 0.00010777 |
| 5mo_SIGAD9_ACACGCGCAAACCACT-1-10x  | 0.03159708 | 0.0624226  | 4.83E-05   |
| 5mo_SIGAD9_ACAGAAAAGACTGGGT-1-10x  | 0.08451718 | 0.2508468  | 0.0036353  |
| 5mo_SIGAD9_ACCAAACGTACTTCCC-1-10x  | 0.26542506 | 0.8949768  | 0.00075974 |
| 5mo_SIGAD9_ACCAAACGTATCAAGA-1-10x  | 0.22793035 | 0.7614754  | 0.00095947 |

|                                     |            |            |            |
|-------------------------------------|------------|------------|------------|
| 5mo_SIGAD9_ACCCAAACACCAATTG-1-10x   | 0.03916546 | 0.08937015 | 6.67E-05   |
| 5mo_SIGAD9_ACCGTTCAGTTCCGGC-1-10x   | 0.18794255 | 0.6190971  | 0.0013519  |
| 5mo_SIGAD9_ACCTGAAAGCATTTCG-1-10x   | 0.27744332 | 0.93776834 | 0.00075222 |
| 5mo_SIGAD9_ACCTGAAAGCGGTAGT-1-10x   | 0.09141871 | 0.27541998 | 0.0043535  |
| 5mo_SIGAD9_ACGCACGAGGGCAACT-1-10x   | 0.07460164 | 0.21554212 | 0.0017292  |
| 5mo_SIGAD9_ACGGAAGCACTTGGCG-1-10x   | 0.08810601 | 0.263625   | 0.0041422  |
| 5mo_SIGAD9_ACGGAAGTCCACGTCT-1-10x   | 0.0862147  | 0.2568909  | 0.0039187  |
| 5mo_SIGAD9_ACGGGTCCAGTGAGCA-1-10x   | 0.04267727 | 0.10187406 | 7.82E-05   |
| 5mo_SIGAD9_ACGTTCCAGTGACCC-1-10x    | 0.14687383 | 0.47287026 | 0.0018717  |
| 5mo_SIGAD9_ACTCTCGAGCTCCACG-1-10x   | 0.02569975 | 0.04142491 | 4.00E-05   |
| 5mo_SIGAD9_ACTGATGAGTATGCAA-1-10x   | 0.2694305  | 0.90923834 | 0.00075499 |
| 5mo_SIGAD9_ACTGCAAGTCAGTCGC-1-10x   | 0.03412314 | 0.07141674 | 5.17E-05   |
| 5mo_SIGAD9_ACTGCAATCAGAGTTC-1-10x   | 0.02707609 | 0.04632543 | 4.19E-05   |
| 5mo_SIGAD9_ACTGCAATCGGAACTT-1-10x   | 0.05743539 | 0.154421   | 0.00028394 |
| 5mo_SIGAD9_ACTTAGGCACGTCCGGT-1-10x  | 0.05171704 | 0.13406056 | 0.00016076 |
| 5mo_SIGAD9_ACTTATCCATTGAAAG-1-10x   | 0.1957168  | 0.64677763 | 0.0012511  |
| 5mo_SIGAD9_ACTTCCGTCGCGCAA-1-10x    | 0.1380416  | 0.44142273 | 0.0018802  |
| 5mo_SIGAD9_AGAAGCGAGATGAACT-1-10x   | 0.05559233 | 0.1478587  | 0.000233   |
| 5mo_SIGAD9_AGACAGGGTCGTCATA-1-10x   | 0.19243625 | 0.63509715 | 0.0012861  |
| 5mo_SIGAD9_AGACAGGGTTGATGTC-1-10x   | 0.07801421 | 0.22769272 | 0.0023954  |
| 5mo_SIGAD9_AGACCCGGTAGTGTGG-1-10x   | 0.09994556 | 0.3057802  | 0.0041652  |
| 5mo_SIGAD9_AGAGCAGAGGATAATC-1-10x   | 0.09150837 | 0.27573925 | 0.0043535  |
| 5mo_SIGAD9_AGATAGACATGCCGAC-1-10x   | 0.09884986 | 0.3018789  | 0.0042345  |
| 5mo_SIGAD9_AGATGCTAGGGATGTC-1-10x   | 0.04619797 | 0.11440969 | 0.00010046 |
| 5mo_SIGAD9_AGATGCTGTTGTGTTG-1-10x   | 0.28753614 | 0.9737043  | 0.00075864 |
| 5mo_SIGAD9_AGATGCTTCAAACGTC-1-10x   | 0.05596643 | 0.1491907  | 0.000257   |
| 5mo_SIGAD9_AGCATCACAGTGTACT-1-10x   | 0.05067345 | 0.13034481 | 0.00014746 |
| 5mo_SIGAD9_AGCCAATCACCTGAG-1-10x    | 0.04869559 | 0.12330255 | 0.00012523 |
| 5mo_SIGAD9_AGCCAGCAGGCATGCA-1-10x   | 0.27520508 | 0.92979896 | 0.00075218 |
| 5mo_SIGAD9_AGCGCTGGTCGTATTG-1-10x   | 0.28686762 | 0.97132397 | 0.00075773 |
| 5mo_SIGAD9_AGCTACACATCATTTTC-1-10x  | 0.03429338 | 0.07202289 | 5.37E-05   |
| 5mo_SIGAD9_AGCTACATCAGTGCGC-1-10x   | 0.21537063 | 0.7167559  | 0.0010625  |
| 5mo_SIGAD9_AGCTCAATCGAATGCT-1-10x   | 0.03706255 | 0.08188264 | 5.82E-05   |
| 5mo_SIGAD9_AGGAAATTCCTCTGCA-1-10x   | 0.01621624 | 0.00765848 | 3.33E-05   |
| 5mo_SIGAD9_AGGACGACAGCTTCCT-1-10x   | 0.19364636 | 0.6394058  | 0.0012741  |
| 5mo_SIGAD9_AGGACTTGTAGGCTGA-1-10x   | 0.05159277 | 0.1336181  | 0.00016076 |
| 5mo_SIGAD9_AGGCCACCATCTGCGG-1-10x   | 0.2430339  | 0.8152522  | 0.00085167 |
| 5mo_SIGAD9_AGGGAGTGTACCTTCC-1-10x   | 0.03899879 | 0.08877672 | 6.67E-05   |
| 5mo_SIGAD9_AGGGCTCCAGGTAGTG-1-10x   | 0.02080788 | 0.02400722 | 3.62E-05   |
| 5mo_SIGAD9_AGGTTGTTACAATGC-1-10x    | 0.0171475  | 0.01097428 | 3.38E-05   |
| 5mo_SIGAD9_AGTACTIONCAGGCCCTA-1-10x | 0.0790255  | 0.23129345 | 0.002576   |

|                                    |            |            |            |
|------------------------------------|------------|------------|------------|
| 5mo_SIGAD9_AGTCACGTATCGTGT-1-10x   | 0.12894513 | 0.40903437 | 0.0019821  |
| 5mo_SIGAD9_AGTCATGTCTCTCTTC-1-10x  | 0.15045789 | 0.48563147 | 0.0018694  |
| 5mo_SIGAD9_AGTCTCCCACCTCGTT-1-10x  | 0.14343178 | 0.4606147  | 0.0018716  |
| 5mo_SIGAD9_AGTGACTGTACTION-1-10x   | 0.17423327 | 0.57028466 | 0.0015753  |
| 5mo_SIGAD9_AGTGTTGTCAGACCCG-1-10x  | 0.05105742 | 0.13171196 | 0.00014746 |
| 5mo_SIGAD9_AGTGTTGTCCATGAGT-1-10x  | 0.09121713 | 0.27470228 | 0.0043535  |
| 5mo_SIGAD9_AGTTAGCAGGCAGCTA-1-10x  | 0.2770773  | 0.9364651  | 0.00075222 |
| 5mo_SIGAD9_AGTTAGCGTTCCATTT-1-10x  | 0.28196612 | 0.95387197 | 0.00075401 |
| 5mo_SIGAD9_AGTTAGCTCCCTATTA-1-10x  | 0.16117698 | 0.5237972  | 0.0017883  |
| 5mo_SIGAD9_AGTTCCTAGCGAGT-1-10x    | 0.02248872 | 0.02999191 | 3.76E-05   |
| 5mo_SIGAD9_ATACTTCTCAGCTAGT-1-10x  | 0.02810741 | 0.0499975  | 4.30E-05   |
| 5mo_SIGAD9_ATACTTCTCTGAATCG-1-10x  | 0.08156905 | 0.24034989 | 0.0031253  |
| 5mo_SIGAD9_ATAGACCTCGTGGCTG-1-10x  | 0.06270263 | 0.1731752  | 0.00052741 |
| 5mo_SIGAD9_ATAGAGACATCTAGAC-1-10x  | 0.04955732 | 0.1263708  | 0.00013566 |
| 5mo_SIGAD9_ATAGGCTTCAAACGAA-1-10x  | 0.09556174 | 0.2901714  | 0.0043808  |
| 5mo_SIGAD9_ATATCCTAGAGGATCC-1-10x  | 0.05390155 | 0.1418386  | 0.00019264 |
| 5mo_SIGAD9_ATCAGGTGTTTCAAAG-1-10x  | 0.24498764 | 0.8222085  | 0.00084014 |
| 5mo_SIGAD9_ATCCATTCAGCAAGAC-1-10x  | 0.06050085 | 0.16533567 | 0.00038577 |
| 5mo_SIGAD9_ATCCATTGTCCGAACA-1-10x  | 0.09904133 | 0.30256066 | 0.0042345  |
| 5mo_SIGAD9_ATCCCTGAGCAATTCC-1-10x  | 0.13863751 | 0.4435445  | 0.0018772  |
| 5mo_SIGAD9_ATCGATGCAATTGGTC-1-10x  | 0.06646331 | 0.18656527 | 0.00079936 |
| 5mo_SIGAD9_ATCGATGCATCGATCA-1-10x  | 0.01709724 | 0.01079533 | 3.38E-05   |
| 5mo_SIGAD9_ATCGATGGTGCGACAA-1-10x  | 0.09492687 | 0.28791097 | 0.0044051  |
| 5mo_SIGAD9_ATCGGCGGTCGACTGC-1-10x  | 0.21301389 | 0.70836467 | 0.0010778  |
| 5mo_SIGAD9_ATCGTCCAGCGAGGAG-1-10x  | 0.08339039 | 0.24683481 | 0.0034742  |
| 5mo_SIGAD9_ATCGTCCCAGGCGTTC-1-10x  | 0.05884462 | 0.15943861 | 0.00034795 |
| 5mo_SIGAD9_ATCTTCAAGCTCATAC-1-10x  | 0.25916156 | 0.87267536 | 0.00077499 |
| 5mo_SIGAD9_ATGAAAGGTGTTCAAGT-1-10x | 0.0522746  | 0.1360458  | 0.00017575 |
| 5mo_SIGAD9_ATGACCATCCGACGGT-1-10x  | 0.11857694 | 0.37211803 | 0.0023898  |
| 5mo_SIGAD9_ATGATCGAGTGTACAA-1-10x  | 0.05568661 | 0.14819437 | 0.000233   |
| 5mo_SIGAD9_ATGATCGGTAATGCGG-1-10x  | 0.05283336 | 0.13803527 | 0.00017575 |
| 5mo_SIGAD9_ATGGAGGCAGGCATGA-1-10x  | 0.09902605 | 0.30250627 | 0.0042345  |
| 5mo_SIGAD9_ATGGAGGTCATCAGTG-1-10x  | 0.11763538 | 0.36876556 | 0.002453   |
| 5mo_SIGAD9_ATGGATCAGGTACAGC-1-10x  | 0.13953702 | 0.44674724 | 0.001875   |
| 5mo_SIGAD9_ATGTCCCCAGACCTAT-1-10x  | 0.02450201 | 0.03716032 | 3.91E-05   |
| 5mo_SIGAD9_ATGTCCCTCAACGCTA-1-10x  | 0.03041123 | 0.05820033 | 4.55E-05   |
| 5mo_SIGAD9_ATGTCTTTCGGAAGGT-1-10x  | 0.283261   | 0.95848244 | 0.00075531 |
| 5mo_SIGAD9_ATTACCTACTAGGCC-1-10x   | 0.19603474 | 0.6479097  | 0.00124    |
| 5mo_SIGAD9_ATTACCTCACCTTAT-1-10x   | 0.01959739 | 0.01969719 | 3.55E-05   |
| 5mo_SIGAD9_ATTACTCTCCATTTCA-1-10x  | 0.23633562 | 0.79140264 | 0.00089602 |
| 5mo_SIGAD9_ATTATCCTCATTTGGG-1-10x  | 0.01778704 | 0.01325136 | 3.44E-05   |



|                                    |            |            |            |
|------------------------------------|------------|------------|------------|
| 5mo_SIGAD9_ATTCATCAGCGCATCC-1-10x  | 0.07197956 | 0.20620611 | 0.0014433  |
| 5mo_SIGAD9_ATTCCCGTCTTCGATT-1-10x  | 0.05768064 | 0.15529421 | 0.00028394 |
| 5mo_SIGAD9_ATTCTACAGCAGTCC-1-10x   | 0.2656749  | 0.89586633 | 0.00075974 |
| 5mo_SIGAD9_ATTCGTTAGGGCTGAT-1-10x  | 0.12794717 | 0.4054811  | 0.0020026  |
| 5mo_SIGAD9_ATTCTTGTCTACGCAA-1-10x  | 0.28247356 | 0.95567876 | 0.00075462 |
| 5mo_SIGAD9_ATTGTTCAGCCTCTGG-1-10x  | 0.2791749  | 0.94393367 | 0.00075266 |
| 5mo_SIGAD9_ATTTCACTCTTCCACG-1-10x  | 0.04605668 | 0.11390661 | 0.00010046 |
| 5mo_SIGAD9_CAACCAACACACACGC-1-10x  | 0.26588324 | 0.8966082  | 0.00075974 |
| 5mo_SIGAD9_CAACCAACACCGGTCA-1-10x  | 0.05529436 | 0.14679775 | 0.000233   |
| 5mo_SIGAD9_CAACGATGTACTAAGA-1-10x  | 0.1290766  | 0.40950248 | 0.0019821  |
| 5mo_SIGAD9_CAACGATTCATGGTAC-1-10x  | 0.24408726 | 0.8190027  | 0.00084583 |
| 5mo_SIGAD9_CAAGGGATCCTAACAG-1-10x  | 0.01620912 | 0.00763314 | 3.33E-05   |
| 5mo_SIGAD9_CAATCGAGTGGCTGAA-1-10x  | 0.03510675 | 0.07491891 | 5.37E-05   |
| 5mo_SIGAD9_CAATGACCAGAGAATT-1-10x  | 0.27862066 | 0.94196033 | 0.00075266 |
| 5mo_SIGAD9_CAATTTCCATTGCAAC-1-10x  | 0.23952317 | 0.8027521  | 0.00087632 |
| 5mo_SIGAD9_CAATTTCTCGCTGATA-1-10x  | 0.09655431 | 0.29370552 | 0.0043435  |
| 5mo_SIGAD9_CACCAAATCTCTTAAC-1-10x  | 0.03858064 | 0.08728785 | 6.36E-05   |
| 5mo_SIGAD9_CACGTTCCAGGTTTCAT-1-10x | 0.04090989 | 0.09558125 | 7.40E-05   |
| 5mo_SIGAD9_CACTAAGAGAACGCGT-1-10x  | 0.03110683 | 0.06067705 | 4.68E-05   |
| 5mo_SIGAD9_CACTAAGAGGTTGAGC-1-10x  | 0.02797519 | 0.04952669 | 4.30E-05   |
| 5mo_SIGAD9_CACTGGGGTAGTGATA-1-10x  | 0.04064403 | 0.09463465 | 7.01E-05   |
| 5mo_SIGAD9_CAGATACCATTGCTGA-1-10x  | 0.10565122 | 0.32609546 | 0.00352    |
| 5mo_SIGAD9_CAGATCAAGAAGTCTA-1-10x  | 0.08614647 | 0.25664794 | 0.0039187  |
| 5mo_SIGAD9_CAGATCAAGCCGGATA-1-10x  | 0.02124347 | 0.02555813 | 3.69E-05   |
| 5mo_SIGAD9_CAGATTGAGGCACGAT-1-10x  | 0.1148838  | 0.35896844 | 0.0026715  |
| 5mo_SIGAD9_CAGATTGCAACTGCCG-1-10x  | 0.05012322 | 0.1283857  | 0.00013566 |
| 5mo_SIGAD9_CAGCAATCACGACTAT-1-10x  | 0.09494258 | 0.28796688 | 0.0044051  |
| 5mo_SIGAD9_CAGCAGCAGGATGGCT-1-10x  | 0.04368589 | 0.10546532 | 8.81E-05   |
| 5mo_SIGAD9_CAGCGTGGTTGGTACT-1-10x  | 0.06857546 | 0.19408566 | 0.00097948 |
| 5mo_SIGAD9_CAGCGTGTCTGTTCTAT-1-10x | 0.04306445 | 0.10325265 | 8.29E-05   |
| 5mo_SIGAD9_CAGGGCTAGTGGTTCT-1-10x  | 0.27406108 | 0.92572576 | 0.00075233 |
| 5mo_SIGAD9_CAGGTATAGCACTCTA-1-10x  | 0.10341648 | 0.31813857 | 0.0038193  |
| 5mo_SIGAD9_CAGTTCCGTCATGGCC-1-10x  | 0.2513423  | 0.84483457 | 0.00080467 |
| 5mo_SIGAD9_CAGTTCTCCAAGTGA-1-10x   | 0.26495662 | 0.89330894 | 0.00076135 |
| 5mo_SIGAD9_CATAAGCCAGCGGTTC-1-10x  | 0.03974522 | 0.09143438 | 6.67E-05   |
| 5mo_SIGAD9_CATACCCGTTACCCTC-1-10x  | 0.22672005 | 0.757166   | 0.00097406 |
| 5mo_SIGAD9_CATCGGGAGAGAGCAA-1-10x  | 0.10979354 | 0.34084436 | 0.0031181  |
| 5mo_SIGAD9_CATCGGGCAGAGTTGG-1-10x  | 0.13399835 | 0.42702657 | 0.0019027  |
| 5mo_SIGAD9_CATCGGGGTGCAATGG-1-10x  | 0.08058371 | 0.23684154 | 0.0029431  |
| 5mo_SIGAD9_CATCGTCTCAAGTTC-1-10x   | 0.02587246 | 0.04203984 | 4.09E-05   |
| 5mo_SIGAD9_CATGCGGAGCCACAAG-1-10x  | 0.26597625 | 0.89693934 | 0.00075974 |

|                                     |            |            |            |
|-------------------------------------|------------|------------|------------|
| 5mo_SIGAD9_CATGCGGCAATTGCGT-1-10x   | 0.16326259 | 0.5312231  | 0.001763   |
| 5mo_SIGAD9_CATTGAGCACGCTGCA-1-10x   | 0.19710065 | 0.6517049  | 0.0012292  |
| 5mo_SIGAD9_CATTGAGGTGGGATTG-1-10x   | 0.07494561 | 0.21676686 | 0.001885   |
| 5mo_SIGAD9_CATTGCCAGCCTTTCC-1-10x   | 0.13420229 | 0.4277527  | 0.0019027  |
| 5mo_SIGAD9_CATTGCCAGTGCCTC-1-10x    | 0.07255016 | 0.20823774 | 0.0014433  |
| 5mo_SIGAD9_CATTGCCGTAACCTCG-1-10x   | 0.18116419 | 0.5949625  | 0.0014587  |
| 5mo_SIGAD9_CATTTCAAGGCATCAG-1-10x   | 0.2303844  | 0.77021307 | 0.00094498 |
| 5mo_SIGAD9_CATTTCAAGTTAGTAG-1-10x   | 0.01579603 | 0.00616231 | 3.33E-05   |
| 5mo_SIGAD9_CATTTCAAGTGGCATCC-1-10x  | 0.04847067 | 0.1225017  | 0.00012523 |
| 5mo_SIGAD9_CCACAAATCTCGCTCA-1-10x   | 0.2092424  | 0.69493616 | 0.0011095  |
| 5mo_SIGAD9_CCACCATAGCACTCCG-1-10x   | 0.27560058 | 0.9312072  | 0.00075218 |
| 5mo_SIGAD9_CCACGTTAGACATAGT-1-10x   | 0.0820534  | 0.24207443 | 0.0031253  |
| 5mo_SIGAD9_CCACGTTTCCGAACG-1-10x    | 0.2509475  | 0.8434289  | 0.00080923 |
| 5mo_SIGAD9_CCACGTTTCGTTAGAC-1-10x   | 0.17388642 | 0.56904966 | 0.0015922  |
| 5mo_SIGAD9_CCATAAGCAAACACCT-1-10x   | 0.24052748 | 0.80632794 | 0.00086997 |
| 5mo_SIGAD9_CCATCACCATGGTGGA-1-10x   | 0.09556105 | 0.29016897 | 0.0043808  |
| 5mo_SIGAD9_CCCAAGTACTCCATA-1-10x    | 0.20115033 | 0.666124   | 0.0011888  |
| 5mo_SIGAD9_CCCAAGTCAAGACGAC-1-10x   | 0.27287903 | 0.921517   | 0.0007526  |
| 5mo_SIGAD9_CCCTGATCAGAACATA-1-10x   | 0.1223419  | 0.38552332 | 0.0021873  |
| 5mo_SIGAD9_CCCTGATGTCCTACGG-1-10x   | 0.25139794 | 0.8450327  | 0.00080467 |
| 5mo_SIGAD9_CCGATCTGTTTCTTAC-1-10x   | 0.02296851 | 0.0317002  | 3.76E-05   |
| 5mo_SIGAD9_CCGATGGTCGCCAACG-1-10x   | 0.2705419  | 0.91319555 | 0.00075418 |
| 5mo_SIGAD9_CCGGACAAGCGGATCA-1-10x   | 0.08217373 | 0.24250285 | 0.0033032  |
| 5mo_SIGAD9_CCGGACACAAGTAGTA-1-10x   | 0.10620722 | 0.3280751  | 0.00352    |
| 5mo_SIGAD9_CCGGGTAAGTTAGTAG-1-10x   | 0.26949903 | 0.90948236 | 0.00075499 |
| 5mo_SIGAD9_CCGTTCACAGCCTACG-1-10x   | 0.11425396 | 0.35672587 | 0.0026715  |
| 5mo_SIGAD9_CCTAACCTCAAGGACG-1-10x   | 0.07719871 | 0.22478913 | 0.0022191  |
| 5mo_SIGAD9_CCTACGTAGACTCATC-1-10x   | 0.23953687 | 0.80280083 | 0.00087632 |
| 5mo_SIGAD9_CCTACGTACAGAGGTA-1-10x   | 0.04288553 | 0.10261559 | 8.29E-05   |
| 5mo_SIGAD9_CCTACGTGTCGATTAC-1-10x   | 0.10708322 | 0.33119416 | 0.0034182  |
| 5mo_SIGAD9_CCTACGTTCGTTGTGA-1-10x   | 0.04426503 | 0.10752738 | 8.81E-05   |
| 5mo_SIGAD9_CCTATCGGTCAATGGG-1-10x   | 0.18347062 | 0.6031746  | 0.0014268  |
| 5mo_SIGAD9_CCTATCGTCAAAGGTA-1-10x   | 0.27454546 | 0.9274504  | 0.00075233 |
| 5mo_SIGAD9_CCTCAACCAATCAGCT-1-10x   | 0.05124446 | 0.13237794 | 0.00016076 |
| 5mo_SIGAD9_CCTCAGTCAGGTTTTCAT-1-10x | 0.23678525 | 0.79300356 | 0.00089602 |
| 5mo_SIGAD9_CCTCAGTGTCTCGTC-1-10x    | 0.01837211 | 0.01533456 | 3.49E-05   |
| 5mo_SIGAD9_CCTCATGAGTGGTGGT-1-10x   | 0.23987113 | 0.803991   | 0.00087632 |
| 5mo_SIGAD9_CCTCATGGTATTGAGA-1-10x   | 0.04081834 | 0.09525527 | 7.01E-05   |
| 5mo_SIGAD9_CCTCAAAGTGAAGTAGC-1-10x  | 0.15098365 | 0.48750344 | 0.0018676  |
| 5mo_SIGAD9_CCTCCTCGTCATCCCT-1-10x   | 0.02040465 | 0.02257148 | 3.62E-05   |
| 5mo_SIGAD9_CCTCCTCGTTCAAAGA-1-10x   | 0.0865945  | 0.2582432  | 0.0039187  |

|                                     |            |            |            |
|-------------------------------------|------------|------------|------------|
| 5mo_SIGAD9_CCTGCATCAGCACAAG-1-10x   | 0.05004115 | 0.1280935  | 0.00013566 |
| 5mo_SIGAD9_CCTGCATGTGGGTATG-1-10x   | 0.26621908 | 0.89780396 | 0.00075974 |
| 5mo_SIGAD9_CCTTCAGCAGTGCCT-1-10x    | 0.06808115 | 0.19232565 | 0.00097948 |
| 5mo_SIGAD9_CGAAGTTCATAGCTGT-1-10x   | 0.07387319 | 0.21294847 | 0.0017292  |
| 5mo_SIGAD9_CGAGGCTAGAGACAAG-1-10x   | 0.29041785 | 0.9839647  | 0.00076163 |
| 5mo_SIGAD9_CGAGTGCTCTGGGCAC-1-10x   | 0.2032294  | 0.6735266  | 0.0011699  |
| 5mo_SIGAD9_CGAGTTACTATGTG-1-10x     | 0.08273205 | 0.24449079 | 0.0033032  |
| 5mo_SIGAD9_CGATCGGCACTCTAGA-1-10x   | 0.08884318 | 0.26624972 | 0.0042295  |
| 5mo_SIGAD9_CGATGCGGTGTCATGT-1-10x   | 0.01503874 | 0.00346593 | 3.27E-05   |
| 5mo_SIGAD9_CGCAGGTAGTATGACA-1-10x   | 0.08419202 | 0.24968906 | 0.0036353  |
| 5mo_SIGAD9_CGCAGGTGTCGCTTGG-1-10x   | 0.2834862  | 0.95928425 | 0.00075531 |
| 5mo_SIGAD9_CGCATAACAGGTGACA-1-10x   | 0.27079934 | 0.91411215 | 0.00075418 |
| 5mo_SIGAD9_CGCGTGACAACACTGCTA-1-10x | 0.1694932  | 0.55340743 | 0.0016744  |
| 5mo_SIGAD9_CGCGTGACATCCAATG-1-10x   | 0.03243118 | 0.06539246 | 5.00E-05   |
| 5mo_SIGAD9_CGCGTGATCTTCCCGA-1-10x   | 0.0386472  | 0.08752484 | 6.36E-05   |
| 5mo_SIGAD9_CGGAACCAGGAGAGTA-1-10x   | 0.02851924 | 0.05146383 | 4.30E-05   |
| 5mo_SIGAD9_CGGAATTGTCGTATGT-1-10x   | 0.03148286 | 0.06201591 | 4.83E-05   |
| 5mo_SIGAD9_CGGACACAGCGTATGG-1-10x   | 0.03630689 | 0.07919209 | 5.82E-05   |
| 5mo_SIGAD9_CGGGACTCAGCATGCC-1-10x   | 0.0464544  | 0.11532272 | 0.00010046 |
| 5mo_SIGAD9_CGGGCATGTTAATGAG-1-10x   | 0.21998481 | 0.73318493 | 0.0010253  |
| 5mo_SIGAD9_CGGGCATTCCGTGTGG-1-10x   | 0.0725849  | 0.20836145 | 0.0014433  |
| 5mo_SIGAD9_CGGTCAGTCACGGGCT-1-10x   | 0.24098477 | 0.80795616 | 0.00086374 |
| 5mo_SIGAD9_CGTAAGTGCTTAGTG-1-10x    | 0.07181967 | 0.20563681 | 0.0013138  |
| 5mo_SIGAD9_CGTAAGTTCGAACGGA-1-10x   | 0.0364283  | 0.07962436 | 5.82E-05   |
| 5mo_SIGAD9_CGTAATGTCGGTGTTA-1-10x   | 0.0991411  | 0.3029159  | 0.0041652  |
| 5mo_SIGAD9_CGTCAAAGCTGTTAC-1-10x    | 0.18067813 | 0.59323186 | 0.001475   |
| 5mo_SIGAD9_CGTGATAAGTCTAGAA-1-10x   | 0.12279394 | 0.3871328  | 0.0021479  |
| 5mo_SIGAD9_CGTGATACAGAGGTTG-1-10x   | 0.03603266 | 0.07821567 | 5.58E-05   |
| 5mo_SIGAD9_CGTGTCTGTTCAAACC-1-10x   | 0.08811905 | 0.2636714  | 0.0041422  |
| 5mo_SIGAD9_CGTGTCTTCTAAGTG-1-10x    | 0.05451808 | 0.14403377 | 0.00021164 |
| 5mo_SIGAD9_CGTTAGAGTCATTCCC-1-10x   | 0.04820258 | 0.12154719 | 0.00011598 |
| 5mo_SIGAD9_CGTTCTGGTAATACCC-1-10x   | 0.15481356 | 0.50114    | 0.0018522  |
| 5mo_SIGAD9_CTACAGAAGAGAGGGC-1-10x   | 0.04347508 | 0.10471471 | 8.29E-05   |
| 5mo_SIGAD9_CTACATTTCCCGAGTG-1-10x   | 0.09059304 | 0.27248016 | 0.0042999  |
| 5mo_SIGAD9_CTACCCAAGGATGTTA-1-10x   | 0.1006036  | 0.3081232  | 0.0040879  |
| 5mo_SIGAD9_CTACGGGGTTCACCGG-1-10x   | 0.10957445 | 0.3400643  | 0.0031181  |
| 5mo_SIGAD9_CTACTATGTCTACAAC-1-10x   | 0.04994059 | 0.12773542 | 0.00013566 |
| 5mo_SIGAD9_CTAGGTACAGAGATGC-1-10x   | 0.22625808 | 0.7555212  | 0.00097406 |
| 5mo_SIGAD9_CTAGGTATCGGTCTGG-1-10x   | 0.0394947  | 0.09054241 | 6.67E-05   |
| 5mo_SIGAD9_CTATAGGTCATTCACT-1-10x   | 0.04292538 | 0.1027575  | 8.29E-05   |
| 5mo_SIGAD9_CTCAAGAAGTAAGACT-1-10x   | 0.0999663  | 0.30585405 | 0.0041652  |

|                                    |            |            |            |
|------------------------------------|------------|------------|------------|
| 5mo_SIGAD9_CTCAAGAGTCAAAGTA-1-10x  | 0.1937618  | 0.63981676 | 0.0012741  |
| 5mo_SIGAD9_CTCACTGCATCGGAAG-1-10x  | 0.11030493 | 0.34266517 | 0.0031181  |
| 5mo_SIGAD9_CTCAAGTCAAGCGCT-1-10x   | 0.08612298 | 0.25656432 | 0.0039187  |
| 5mo_SIGAD9_CTCCATGCAATTTCTC-1-10x  | 0.2125569  | 0.7067375  | 0.0010856  |
| 5mo_SIGAD9_CTCCATGCAGCTCATA-1-10x  | 0.03143564 | 0.0618478  | 4.68E-05   |
| 5mo_SIGAD9_CTCCCTCGTGGAACAC-1-10x  | 0.02621951 | 0.04327552 | 4.09E-05   |
| 5mo_SIGAD9_CTCCGATAGCAGGTCA-1-10x  | 0.01796684 | 0.01389157 | 3.44E-05   |
| 5mo_SIGAD9_CTCTCCCATCCGTGG-1-10x   | 0.04942056 | 0.12588385 | 0.00013566 |
| 5mo_SIGAD9_CTGCAGGTGAGTCCG-1-10x   | 0.06591486 | 0.1846125  | 0.00072102 |
| 5mo_SIGAD9_CTCTCAGAGAAGCGCT-1-10x  | 0.08700527 | 0.25970578 | 0.0040384  |
| 5mo_SIGAD9_CTCTCGAAGAATACAC-1-10x  | 0.02349421 | 0.03357198 | 3.83E-05   |
| 5mo_SIGAD9_CTCTCGACATGGAATA-1-10x  | 0.231333   | 0.7735906  | 0.00093779 |
| 5mo_SIGAD9_CTCTCGATCCACGTAA-1-10x  | 0.15673713 | 0.5079889  | 0.0018385  |
| 5mo_SIGAD9_CTGAATGAGCCTGAGA-1-10x  | 0.0943711  | 0.28593212 | 0.0044154  |
| 5mo_SIGAD9_CTGAGCGCACATACTG-1-10x  | 0.0953136  | 0.28928792 | 0.0044051  |
| 5mo_SIGAD9_CTGAGGCCACATTGTG-1-10x  | 0.27156025 | 0.9168214  | 0.00075352 |
| 5mo_SIGAD9_CTGCATCGTCGCACGT-1-10x  | 0.10585412 | 0.3268179  | 0.00352    |
| 5mo_SIGAD9_CTGCGAGCACTGGACC-1-10x  | 0.02049228 | 0.02288351 | 3.62E-05   |
| 5mo_SIGAD9_CTGCGAGGTAACCTCG-1-10x  | 0.08839399 | 0.26465037 | 0.0041422  |
| 5mo_SIGAD9_CTGCGAGTCGACCCAG-1-10x  | 0.01767878 | 0.01286592 | 3.44E-05   |
| 5mo_SIGAD9_CTGCTCATCAAGAAAC-1-10x  | 0.2481256  | 0.83338135 | 0.00082396 |
| 5mo_SIGAD9_CTGGACGAGTATCCTG-1-10x  | 0.10560922 | 0.3259459  | 0.0036214  |
| 5mo_SIGAD9_CTGGACGCAATCCAGT-1-10x  | 0.09225807 | 0.27840856 | 0.0043903  |
| 5mo_SIGAD9_CTGGCAGGTGCAACAG-1-10x  | 0.08412922 | 0.24946548 | 0.0036353  |
| 5mo_SIGAD9_CTGTACCGTTCTCAGA-1-10x  | 0.09683146 | 0.2946923  | 0.0043435  |
| 5mo_SIGAD9_CTTAGGAGTCACTCAA-1-10x  | 0.04327223 | 0.10399246 | 8.29E-05   |
| 5mo_SIGAD9_CTTAGGAGTTTGCCGG-1-10x  | 0.09289932 | 0.28069177 | 0.0044107  |
| 5mo_SIGAD9_CTTAGGATCTCGACCT-1-10x  | 0.2692911  | 0.908742   | 0.00075499 |
| 5mo_SIGAD9_CTTCAATGTATCGGTT-1-10x  | 0.0498152  | 0.127289   | 0.00013566 |
| 5mo_SIGAD9_CTTGCGTACGCCAGT-1-10x   | 0.23186165 | 0.77547294 | 0.00093066 |
| 5mo_SIGAD9_GAAACCTGTTGCTCGG-1-10x  | 0.2937175  | 0.99571323 | 0.000766   |
| 5mo_SIGAD9_GAAATGAGTGGCTACC-1-10x  | 0.26520517 | 0.8941939  | 0.00076135 |
| 5mo_SIGAD9_GAACGTTCAAGTGGTG-1-10x  | 0.2297638  | 0.76800346 | 0.00094498 |
| 5mo_SIGAD9_GAAGCCCCACCTTCGT-1-10x  | 0.03146669 | 0.06195833 | 4.83E-05   |
| 5mo_SIGAD9_GAAGCGACATTACTCT-1-10x  | 0.04455343 | 0.10855422 | 8.81E-05   |
| 5mo_SIGAD9_GAAGCGAGTGACAACG-1-10x  | 0.08632483 | 0.25728303 | 0.0039187  |
| 5mo_SIGAD9_GAAGGGTAGCTCATAAC-1-10x | 0.28730416 | 0.9728783  | 0.00075864 |
| 5mo_SIGAD9_GAATCACAGTGGACTG-1-10x  | 0.170628   | 0.5574479  | 0.0016421  |
| 5mo_SIGAD9_GAATCACCAGGCAATG-1-10x  | 0.14459486 | 0.46475592 | 0.0018716  |
| 5mo_SIGAD9_GAATCGTAGGAAGAAC-1-10x  | 0.28836703 | 0.9766627  | 0.0007596  |
| 5mo_SIGAD9_GAATCGTGTGGAACAC-1-10x  | 0.23999204 | 0.8044215  | 0.00086997 |

|                                    |            |            |            |
|------------------------------------|------------|------------|------------|
| 5mo_SIGAD9_GACAGCCAGCTAGTTC-1-10x  | 0.2315255  | 0.774276   | 0.00093066 |
| 5mo_SIGAD9_GACCTTCTCATGAAAG-1-10x  | 0.26275158 | 0.8854578  | 0.00076511 |
| 5mo_SIGAD9_GACGTTACACTTGACA-1-10x  | 0.05115351 | 0.13205409 | 0.00014746 |
| 5mo_SIGAD9_GACGTTATCATACAGC-1-10x  | 0.05562043 | 0.14795876 | 0.000233   |
| 5mo_SIGAD9_GACGTTATCGGCTGAC-1-10x  | 0.1600898  | 0.51992625 | 0.0018109  |
| 5mo_SIGAD9_GACTCAAAGCACTAGG-1-10x  | 0.0186499  | 0.01632361 | 3.49E-05   |
| 5mo_SIGAD9_GACTCTCCACCACATA-1-10x  | 0.2753527  | 0.93032455 | 0.00075218 |
| 5mo_SIGAD9_GACTGATAGTCATCGT-1-10x  | 0.13156068 | 0.41834718 | 0.001934   |
| 5mo_SIGAD9_GAGACTTAGCTAGCCC-1-10x  | 0.05111577 | 0.13191971 | 0.00014746 |
| 5mo_SIGAD9_GAGAGGTGTGTGATGG-1-10x  | 0.01771532 | 0.01299603 | 3.44E-05   |
| 5mo_SIGAD9_GAGATGGCACGGTCTG-1-10x  | 0.18404715 | 0.60522735 | 0.0014112  |
| 5mo_SIGAD9_GAGATGGCAGCGACAA-1-10x  | 0.06018044 | 0.16419484 | 0.00038577 |
| 5mo_SIGAD9_GAGTCTAGTAGTTACC-1-10x  | 0.2364646  | 0.7918619  | 0.00089602 |
| 5mo_SIGAD9_GAGTCTATCGCAGTGC-1-10x  | 0.05359389 | 0.14074318 | 0.00019264 |
| 5mo_SIGAD9_GAGTGTCTGTGCGG-1-10x    | 0.0657728  | 0.1841067  | 0.00072102 |
| 5mo_SIGAD9_GAGTTACTCGAGTCTA-1-10x  | 0.0253045  | 0.04001762 | 4.00E-05   |
| 5mo_SIGAD9_GAGTTGTAGTGAATAC-1-10x  | 0.06339295 | 0.17563312 | 0.00058553 |
| 5mo_SIGAD9_GAGTTGTACCTGCGA-1-10x   | 0.03888182 | 0.08836021 | 6.36E-05   |
| 5mo_SIGAD9_GAGTTGTTGAGTACT-1-10x   | 0.2186455  | 0.72841626 | 0.0010326  |
| 5mo_SIGAD9_GAGTTTGCATAGGCCGA-1-10x | 0.01604077 | 0.0070337  | 3.33E-05   |
| 5mo_SIGAD9_GATAGAAAGTCGGCCT-1-10x  | 0.24150781 | 0.80981845 | 0.00086374 |
| 5mo_SIGAD9_GATAGAACAAGTCCCG-1-10x  | 0.04000426 | 0.09235672 | 7.01E-05   |
| 5mo_SIGAD9_GATCACAGTTAAAGTG-1-10x  | 0.04757179 | 0.11930122 | 0.00011598 |
| 5mo_SIGAD9_GATCCCTCAGGTTTCAT-1-10x | 0.14557725 | 0.46825373 | 0.0018716  |
| 5mo_SIGAD9_GATCCCTGTA CTGCGC-1-10x | 0.06957416 | 0.19764157 | 0.0010821  |
| 5mo_SIGAD9_GATCGTATCCTAAACG-1-10x  | 0.0446756  | 0.10898923 | 9.39E-05   |
| 5mo_SIGAD9_GATGACTAGGCACTAG-1-10x  | 0.1818304  | 0.59733456 | 0.0014427  |
| 5mo_SIGAD9_GATGCTAAGTAATCCC-1-10x  | 0.04828627 | 0.12184515 | 0.00011598 |
| 5mo_SIGAD9_GATGCTAAGTGGTCAG-1-10x  | 0.15255983 | 0.4931155  | 0.0018651  |
| 5mo_SIGAD9_GATGCTAGTCACAGTT-1-10x  | 0.07938765 | 0.23258291 | 0.0027593  |
| 5mo_SIGAD9_GATTGGTGTCCAGTTA-1-10x  | 0.05195631 | 0.13491249 | 0.00016076 |
| 5mo_SIGAD9_GATTTCTGTGGCTTAT-1-10x  | 0.2767026  | 0.935131   | 0.00075222 |
| 5mo_SIGAD9_GCAACCGTCTCAAAGC-1-10x  | 0.12617841 | 0.39918336 | 0.0020515  |
| 5mo_SIGAD9_GCACGGTGTGACTCTA-1-10x  | 0.2340257  | 0.7831781  | 0.00091657 |
| 5mo_SIGAD9_GCACTAACACGGTCTG-1-10x  | 0.13662545 | 0.4363805  | 0.0018891  |
| 5mo_SIGAD9_GCACTAAGTTCTCTAT-1-10x  | 0.27046952 | 0.9129378  | 0.00075418 |
| 5mo_SIGAD9_GCAGCCAGTACGAGTG-1-10x  | 0.08491156 | 0.252251   | 0.0036353  |
| 5mo_SIGAD9_GCAGCCAGTCTTCTAT-1-10x  | 0.0897522  | 0.2694863  | 0.0042999  |
| 5mo_SIGAD9_GCAGCCATCCTTATGT-1-10x  | 0.05123118 | 0.13233064 | 0.00016076 |
| 5mo_SIGAD9_GCAGGCTGTTCTATCT-1-10x  | 0.20978957 | 0.69688433 | 0.0011095  |
| 5mo_SIGAD9_GCAGTTATCGCCTTTG-1-10x  | 0.04307975 | 0.10330714 | 8.29E-05   |

|                                    |            |            |            |
|------------------------------------|------------|------------|------------|
| 5mo_SIGAD9_GCATCGGAGGTTGAGC-1-10x  | 0.2693453  | 0.90893507 | 0.00075499 |
| 5mo_SIGAD9_GCATCGGCAGCAGTGA-1-10x  | 0.09311494 | 0.2814595  | 0.0044107  |
| 5mo_SIGAD9_GCATCTCCACTCCCTA-1-10x  | 0.0430363  | 0.10315244 | 8.29E-05   |
| 5mo_SIGAD9_GCATGATAGTTTCGGT-1-10x  | 0.05305811 | 0.13883552 | 0.00019264 |
| 5mo_SIGAD9_GCATTAGAGAGTGAAG-1-10x  | 0.08599626 | 0.25611314 | 0.0039187  |
| 5mo_SIGAD9_GCCAGTGAGACTCTTG-1-10x  | 0.27657294 | 0.9346693  | 0.00075214 |
| 5mo_SIGAD9_GCCATGGAGGATCATA-1-10x  | 0.01523192 | 0.00415376 | 3.27E-05   |
| 5mo_SIGAD9_GCCATGGGTGTATACC-1-10x  | 0.01652024 | 0.00874089 | 3.38E-05   |
| 5mo_SIGAD9_GCCATCCACCAATTG-1-10x   | 0.15526393 | 0.50274354 | 0.0018522  |
| 5mo_SIGAD9_GCCGTGACACGTTCGGT-1-10x | 0.08378524 | 0.24824072 | 0.0034742  |
| 5mo_SIGAD9_GCCGTGAGTCGATTCA-1-10x  | 0.15709345 | 0.5092576  | 0.0018385  |
| 5mo_SIGAD9_GCGGATCAGATGGCAC-1-10x  | 0.2708264  | 0.91420853 | 0.00075418 |
| 5mo_SIGAD9_GCGTGCAGTGCCTGCA-1-10x  | 0.24148253 | 0.80972844 | 0.00086374 |
| 5mo_SIGAD9_GCTACCTGTAGCGTAG-1-10x  | 0.02204901 | 0.02842631 | 3.69E-05   |
| 5mo_SIGAD9_GCTGAATTCGAGAATA-1-10x  | 0.08929448 | 0.2678566  | 0.0042295  |
| 5mo_SIGAD9_GCTTGGGGTCACGACC-1-10x  | 0.25492847 | 0.85760325 | 0.00079207 |
| 5mo_SIGAD9_GCTTTCGAGCTGAGTG-1-10x  | 0.01583977 | 0.00631803 | 3.33E-05   |
| 5mo_SIGAD9_GGAAGTGTCGAATCCA-1-10x  | 0.24980974 | 0.8393778  | 0.00081397 |
| 5mo_SIGAD9_GGACGTCAGATGAAGG-1-10x  | 0.0179833  | 0.01395017 | 3.44E-05   |
| 5mo_SIGAD9_GGAGAACGTGACTCGC-1-10x  | 0.01504186 | 0.00347704 | 3.27E-05   |
| 5mo_SIGAD9_GGAGGATCACGCTTAA-1-10x  | 0.05787671 | 0.15599231 | 0.00031414 |
| 5mo_SIGAD9_GGAGGATTCTGCGGGT-1-10x  | 0.03122754 | 0.06110685 | 4.68E-05   |
| 5mo_SIGAD9_GGCGTCACAACCACGC-1-10x  | 0.02200632 | 0.02827431 | 3.69E-05   |
| 5mo_SIGAD9_GGGAAGTCAGCATTGT-1-10x  | 0.04355888 | 0.1050131  | 8.29E-05   |
| 5mo_SIGAD9_GGGAAGTGTAAGGCTG-1-10x  | 0.16883743 | 0.55107254 | 0.0016744  |
| 5mo_SIGAD9_GGGACAAAGTTGTAGA-1-10x  | 0.03402685 | 0.07107389 | 5.17E-05   |
| 5mo_SIGAD9_GGGACTCTCTGCAGCG-1-10x  | 0.08763927 | 0.26196316 | 0.0040384  |
| 5mo_SIGAD9_GGGTATTCAGAATGTA-1-10x  | 0.05098673 | 0.13146026 | 0.00014746 |
| 5mo_SIGAD9_GGGTCACCAAGAGTTA-1-10x  | 0.14143936 | 0.45352063 | 0.0018724  |
| 5mo_SIGAD9_GGGTCACTCCGACAGC-1-10x  | 0.06115542 | 0.1676663  | 0.00042799 |
| 5mo_SIGAD9_GGGTCTGAGCGATTCT-1-10x  | 0.05047882 | 0.12965184 | 0.00014746 |
| 5mo_SIGAD9_GGGTCTGAGGGTTAGC-1-10x  | 0.03737439 | 0.08299295 | 6.07E-05   |
| 5mo_SIGAD9_GGGTGAAGTAGCGCCT-1-10x  | 0.09580992 | 0.29105508 | 0.0043808  |
| 5mo_SIGAD9_GGGTGTCTAGTGCGA-1-10x   | 0.05160638 | 0.13366656 | 0.00016076 |
| 5mo_SIGAD9_GGGTTATAGTTTGAGA-1-10x  | 0.19474736 | 0.6433259  | 0.0012624  |
| 5mo_SIGAD9_GGTCACGAGGATTTAG-1-10x  | 0.09333281 | 0.28223523 | 0.0044107  |
| 5mo_SIGAD9_GGTGTTCGGTCAAGGCA-1-10x | 0.01557268 | 0.00536706 | 3.33E-05   |
| 5mo_SIGAD9_GGTGTTCGGTCGTTTCC-1-10x | 0.12551239 | 0.39681196 | 0.0020515  |
| 5mo_SIGAD9_GGTTAACACAAATAG-1-10x   | 0.2469427  | 0.82916963 | 0.0008292  |
| 5mo_SIGAD9_GGTTAACTCATACGAC-1-10x  | 0.07981518 | 0.23410514 | 0.0027593  |
| 5mo_SIGAD9_GTAACACAGCTTTGTG-1-10x  | 0.03428061 | 0.07197744 | 5.37E-05   |

|                                   |            |            |            |
|-----------------------------------|------------|------------|------------|
| 5mo_SIGAD9_GTAACCAAGCGAGTCA-1-10x | 0.17215665 | 0.56289077 | 0.0016256  |
| 5mo_SIGAD9_GTAAGTCCAGCTTCGG-1-10x | 0.04420707 | 0.10732099 | 8.81E-05   |
| 5mo_SIGAD9_GTAAGTCTCCTTGACC-1-10x | 0.2668034  | 0.8998845  | 0.00075831 |
| 5mo_SIGAD9_GTAATGCTCTGGTGCG-1-10x | 0.25503525 | 0.85798347 | 0.00078825 |
| 5mo_SIGAD9_GTACAGTAGAGTCAAT-1-10x | 0.01626913 | 0.00784681 | 3.33E-05   |
| 5mo_SIGAD9_GTAGGTTAGTATTCCG-1-10x | 0.21992598 | 0.7329755  | 0.0010253  |
| 5mo_SIGAD9_GTATTGGCAGTCCCGA-1-10x | 0.10694457 | 0.33070046 | 0.0034182  |
| 5mo_SIGAD9_GTCAGCGAGTCTAGCT-1-10x | 0.07639952 | 0.22194356 | 0.0020486  |
| 5mo_SIGAD9_GTCAGCGTCGAGTCTA-1-10x | 0.22830865 | 0.7628223  | 0.00095947 |
| 5mo_SIGAD9_GTCAGCGTCGGTGAAG-1-10x | 0.02492232 | 0.03865683 | 4.00E-05   |
| 5mo_SIGAD9_GTCATCCCAACAACAA-1-10x | 0.07922046 | 0.23198763 | 0.002576   |
| 5mo_SIGAD9_GTCATCCTCTCACCCA-1-10x | 0.04654927 | 0.11566049 | 0.00010777 |
| 5mo_SIGAD9_GTCATGACACCGCTGA-1-10x | 0.08124176 | 0.23918453 | 0.0031253  |
| 5mo_SIGAD9_GTCATTTAGCAAACAT-1-10x | 0.02031979 | 0.02226934 | 3.62E-05   |
| 5mo_SIGAD9_GTCATTTAGCAGAAAG-1-10x | 0.2702442  | 0.9121356  | 0.00075418 |
| 5mo_SIGAD9_GTCCACTAGCTCCATA-1-10x | 0.0618622  | 0.17018284 | 0.00047505 |
| 5mo_SIGAD9_GTCGCGAAGCACGATG-1-10x | 0.10537536 | 0.32511324 | 0.0036214  |
| 5mo_SIGAD9_GTCGTTCAGGTAGTAT-1-10x | 0.20383991 | 0.67570037 | 0.0011608  |
| 5mo_SIGAD9_GTCGTTCTGTGTCC-1-10x   | 0.2704424  | 0.91284126 | 0.00075418 |
| 5mo_SIGAD9_GTCTAGAAGTAGGATT-1-10x | 0.1306167  | 0.41498604 | 0.001948   |
| 5mo_SIGAD9_GTCTAGACACGCGCAT-1-10x | 0.03746222 | 0.08330568 | 6.07E-05   |
| 5mo_SIGAD9_GTCTAGAGTGCCACG-1-10x  | 0.02025669 | 0.02204468 | 3.62E-05   |
| 5mo_SIGAD9_GTCTAGATCCCTTGGT-1-10x | 0.09880289 | 0.3017117  | 0.0042345  |
| 5mo_SIGAD9_GTCTGTCAGAATACAC-1-10x | 0.23147708 | 0.77410364 | 0.00093779 |
| 5mo_SIGAD9_GTCTGTCGTTCTACC-1-10x  | 0.03723661 | 0.08250238 | 6.07E-05   |
| 5mo_SIGAD9_GTGAGGAAGCCTCTGG-1-10x | 0.08529241 | 0.25360703 | 0.0037839  |
| 5mo_SIGAD9_GTGAGGACAACAACAA-1-10x | 0.18710616 | 0.61611915 | 0.0013662  |
| 5mo_SIGAD9_GTGCAGCTCCAGCTCT-1-10x | 0.0216185  | 0.02689346 | 3.69E-05   |
| 5mo_SIGAD9_GTGCGTGGTGTGTGTT-1-10x | 0.02694035 | 0.0458421  | 4.19E-05   |
| 5mo_SIGAD9_GTGCTTCAGCCTCTTC-1-10x | 0.2252171  | 0.7518147  | 0.00098137 |
| 5mo_SIGAD9_GTGGAAGGTCAACCTA-1-10x | 0.10884148 | 0.3374545  | 0.0032165  |
| 5mo_SIGAD9_GTGGAAGTCCATCACC-1-10x | 0.07848145 | 0.22935635 | 0.002576   |
| 5mo_SIGAD9_GTGGAGAGTGTCTTGA-1-10x | 0.08871687 | 0.2658     | 0.0041422  |
| 5mo_SIGAD9_GTGGGAAGTATGAGGC-1-10x | 0.08988106 | 0.2699451  | 0.0042999  |
| 5mo_SIGAD9_GTGTAACAGTGGATTA-1-10x | 0.04420462 | 0.10731228 | 8.81E-05   |
| 5mo_SIGAD9_GTGTCCTGTTGCACT-1-10x  | 0.05903876 | 0.16012986 | 0.00034795 |
| 5mo_SIGAD9_GTGTTAGAGTAGCAAT-1-10x | 0.25213632 | 0.84766173 | 0.00080467 |
| 5mo_SIGAD9_GTGTTAGGTGCGAACA-1-10x | 0.16490287 | 0.53706336 | 0.0017353  |
| 5mo_SIGAD9_GTTACAGAGTTAGTGA-1-10x | 0.28232333 | 0.9551438  | 0.00075462 |
| 5mo_SIGAD9_GTTATGGAGGTAAACT-1-10x | 0.08820211 | 0.26396716 | 0.0041422  |
| 5mo_SIGAD9_GTTCATTTCTTTCGAT-1-10x | 0.03645576 | 0.07972214 | 5.82E-05   |

|                                    |            |            |            |
|------------------------------------|------------|------------|------------|
| 5mo_SIGAD9_GTTGCTCAGGTCCAGA-1-10x  | 0.02321151 | 0.03256543 | 3.83E-05   |
| 5mo_SIGAD9_GTTGCTCCACAAGCAG-1-10x  | 0.10691365 | 0.33059037 | 0.0034182  |
| 5mo_SIGAD9_GTTTACTCAGCAAGAC-1-10x  | 0.03361687 | 0.06961417 | 5.17E-05   |
| 5mo_SIGAD9_TAACACGAGGCATGGT-1-10x  | 0.02773461 | 0.04867011 | 4.30E-05   |
| 5mo_SIGAD9_TAAGTCGCAAGCGAAC-1-10x  | 0.04803201 | 0.12093987 | 0.00011598 |
| 5mo_SIGAD9_TAAGTCGTCAAGTGTC-1-10x  | 0.07565376 | 0.21928826 | 0.0020486  |
| 5mo_SIGAD9_TACAACGTCTCGCTTG-1-10x  | 0.07906903 | 0.23144846 | 0.002576   |
| 5mo_SIGAD9_TACAGGTTCAAGTCGT-1-10x  | 0.06604686 | 0.18508248 | 0.00072102 |
| 5mo_SIGAD9_TACATTCAGCCTTCTC-1-10x  | 0.03201289 | 0.06390311 | 4.83E-05   |
| 5mo_SIGAD9_TACATTCAGTCTTGGT-1-10x  | 0.2645791  | 0.89196473 | 0.00076135 |
| 5mo_SIGAD9_TACCTGCAGCTTCATG-1-10x  | 0.03205114 | 0.0640393  | 4.83E-05   |
| 5mo_SIGAD9_TACCTGCAGGGAACAA-1-10x  | 0.08752432 | 0.26155385 | 0.0040384  |
| 5mo_SIGAD9_TACCTGCAGTGATAGT-1-10x  | 0.01544492 | 0.00491217 | 3.27E-05   |
| 5mo_SIGAD9_TACGCTCTGTGCGTC-1-10x   | 0.03122648 | 0.06110308 | 4.68E-05   |
| 5mo_SIGAD9_TACGGGCAGGCACAAC-1-10x  | 0.08885502 | 0.2662919  | 0.0042295  |
| 5mo_SIGAD9_TACGGTATCGACTCCT-1-10x  | 0.27833506 | 0.9409434  | 0.00075239 |
| 5mo_SIGAD9_TACGTCCAGTGGACGT-1-10x  | 0.2714577  | 0.9164563  | 0.00075352 |
| 5mo_SIGAD9_TACGTCCCACCAGCCA-1-10x  | 0.02439626 | 0.03678378 | 3.91E-05   |
| 5mo_SIGAD9_TACGTCTCGTCGACG-1-10x   | 0.19240418 | 0.63498294 | 0.0012861  |
| 5mo_SIGAD9_TACTTACAGTTGGACG-1-10x  | 0.0339129  | 0.07066818 | 5.17E-05   |
| 5mo_SIGAD9_TAGACCAGTAGGTACG-1-10x  | 0.16764063 | 0.5468113  | 0.0017056  |
| 5mo_SIGAD9_TAGATCGCATCCTTCG-1-10x  | 0.07982469 | 0.23413903 | 0.0027593  |
| 5mo_SIGAD9_TAGCACAGTTTACCTT-1-10x  | 0.1579433  | 0.5122835  | 0.0018302  |
| 5mo_SIGAD9_TAGGGTTTTCGCTACAA-1-10x | 0.02148209 | 0.02640777 | 3.69E-05   |
| 5mo_SIGAD9_TAGGTTGCAGTTGAAA-1-10x  | 0.23883358 | 0.8002967  | 0.00088278 |
| 5mo_SIGAD9_TATCAGGAGCGTCAAG-1-10x  | 0.02088549 | 0.02428353 | 3.62E-05   |
| 5mo_SIGAD9_TATCGCCAGTGCCGAA-1-10x  | 0.20332101 | 0.67385274 | 0.0011699  |
| 5mo_SIGAD9_TATCTTGCAGCGTTGC-1-10x  | 0.04760178 | 0.119408   | 0.00011598 |
| 5mo_SIGAD9_TATTGGGAGCTGAAAT-1-10x  | 0.29130083 | 0.9871086  | 0.00076269 |
| 5mo_SIGAD9_TATTGGGAGCTTCGTA-1-10x  | 0.23962416 | 0.8031116  | 0.00087632 |
| 5mo_SIGAD9_TATTGGGAGTAAACTG-1-10x  | 0.04195212 | 0.09929214 | 7.82E-05   |
| 5mo_SIGAD9_TATTTCCGGTAAGTTGA-1-10x | 0.05628213 | 0.15031476 | 0.000257   |
| 5mo_SIGAD9_TCAAGACTCTACCAGA-1-10x  | 0.1959527  | 0.6476176  | 0.00124    |
| 5mo_SIGAD9_TCAATCTAGCAGCCTC-1-10x  | 0.05542327 | 0.14725675 | 0.000233   |
| 5mo_SIGAD9_TCAATTCAGGAGGGTG-1-10x  | 0.05724116 | 0.15372944 | 0.00028394 |
| 5mo_SIGAD9_TCACATTAGGTCCTGC-1-10x  | 0.01684365 | 0.00989241 | 3.38E-05   |
| 5mo_SIGAD9_TCACGGGTCCTTCAGC-1-10x  | 0.22469063 | 0.7499402  | 0.00098869 |
| 5mo_SIGAD9_TCACTATCATGCCGGT-1-10x  | 0.04301817 | 0.10308788 | 8.29E-05   |
| 5mo_SIGAD9_TCACTCGTCACTGCTC-1-10x  | 0.04612007 | 0.11413232 | 0.00010046 |
| 5mo_SIGAD9_TCACTCGTCCGCAACG-1-10x  | 0.03915951 | 0.08934894 | 6.67E-05   |
| 5mo_SIGAD9_TCACTCGTCTGTGCTC-1-10x  | 0.01877581 | 0.01677192 | 3.49E-05   |



|                                    |            |            |            |
|------------------------------------|------------|------------|------------|
| 5mo_SIGAD9_TCAGGTAGTCCTGGGT-1-10x  | 0.03877236 | 0.08797049 | 6.36E-05   |
| 5mo_SIGAD9_TCAGTCCAGACTTAAG-1-10x  | 0.0474679  | 0.1189313  | 0.00011598 |
| 5mo_SIGAD9_TCAGTCCGTCCGGTGT-1-10x  | 0.13424365 | 0.4279     | 0.0019027  |
| 5mo_SIGAD9_TCATACTAGGCCACTC-1-10x  | 0.09010971 | 0.27075922 | 0.0042999  |
| 5mo_SIGAD9_TCATGCCCAAGCCTGC-1-10x  | 0.2780609  | 0.93996733 | 0.00075239 |
| 5mo_SIGAD9_TCATGGACAGTGTACT-1-10x  | 0.07067269 | 0.20155296 | 0.0011935  |
| 5mo_SIGAD9_TCATGGACATAGATGA-1-10x  | 0.11212932 | 0.349161   | 0.002929   |
| 5mo_SIGAD9_TCATTACGTAGTCGGA-1-10x  | 0.20141876 | 0.66707975 | 0.0011888  |
| 5mo_SIGAD9_TCATTCATCGGTCAGC-1-10x  | 0.08515962 | 0.25313422 | 0.0037839  |
| 5mo_SIGAD9_TCATTGTAGATTAGCA-1-10x  | 0.23443079 | 0.78462046 | 0.00090964 |
| 5mo_SIGAD9_TCATTGTCAACAGAGC-1-10x  | 0.08862319 | 0.26546642 | 0.0041422  |
| 5mo_SIGAD9_TCATTTGAGCGGTATG-1-10x  | 0.25581145 | 0.86074716 | 0.00078825 |
| 5mo_SIGAD9_TCCACCATCTGGTCAA-1-10x  | 0.02413941 | 0.03586926 | 3.91E-05   |
| 5mo_SIGAD9_TCCACGTTCTACCAC-1-10x   | 0.27495265 | 0.9289002  | 0.00075218 |
| 5mo_SIGAD9_TCCCAGTTCCCGATCT-1-10x  | 0.27569798 | 0.93155396 | 0.00075214 |
| 5mo_SIGAD9_TCCGAAAGTGGACCTC-1-10x  | 0.0535559  | 0.14060788 | 0.00019264 |
| 5mo_SIGAD9_TCCTCCCGTGATACAA-1-10x  | 0.04125825 | 0.09682158 | 7.40E-05   |
| 5mo_SIGAD9_TCCTCGAGTTCTTCAT-1-10x  | 0.03225099 | 0.06475087 | 4.83E-05   |
| 5mo_SIGAD9_TCCTTCTCATCGCTAA-1-10x  | 0.02083137 | 0.02409085 | 3.62E-05   |
| 5mo_SIGAD9_TCGAAGTAGCGCACAA-1-10x  | 0.02461004 | 0.03754494 | 3.91E-05   |
| 5mo_SIGAD9_TCGACCTGTTAGCTAC-1-10x  | 0.23302402 | 0.7796116  | 0.00092358 |
| 5mo_SIGAD9_TCGCACTAGAACTCA-1-10x   | 0.1641559  | 0.53440374 | 0.0017494  |
| 5mo_SIGAD9_TCGCTTGACAGAGTGAC-1-10x | 0.12346799 | 0.3895328  | 0.0021479  |
| 5mo_SIGAD9_TCGCTTGTCAGCTTCC-1-10x  | 0.02290348 | 0.03146866 | 3.76E-05   |
| 5mo_SIGAD9_TCGGGACCACCGGCTA-1-10x  | 0.08790542 | 0.26291078 | 0.0041422  |
| 5mo_SIGAD9_TCTATCACATAGGAGC-1-10x  | 0.08990461 | 0.270029   | 0.0042999  |
| 5mo_SIGAD9_TCTCAGCCACTTTAGG-1-10x  | 0.0360367  | 0.07823005 | 5.58E-05   |
| 5mo_SIGAD9_TCTCAGCTCCTCTCGA-1-10x  | 0.04281947 | 0.10238039 | 8.29E-05   |
| 5mo_SIGAD9_TCTGCCATCTGCAGCG-1-10x  | 0.08812693 | 0.26369947 | 0.0041422  |
| 5mo_SIGAD9_TCTGGCTAGAGTAACT-1-10x  | 0.13354671 | 0.4254185  | 0.0019115  |
| 5mo_SIGAD9_TCTGTGAGAGTAACT-1-10x   | 0.01859746 | 0.01613692 | 3.49E-05   |
| 5mo_SIGAD9_TCTGTGCGTTGGGCCT-1-10x  | 0.01863951 | 0.01628663 | 3.49E-05   |
| 5mo_SIGAD9_TCTTAGTAGAGATCGC-1-10x  | 0.15332375 | 0.49583548 | 0.0018617  |
| 5mo_SIGAD9_TCTTAGTGTTCTCTAT-1-10x  | 0.14192232 | 0.45524022 | 0.0018724  |
| 5mo_SIGAD9_TCTTGCGAGGCTCACC-1-10x  | 0.21414906 | 0.71240646 | 0.0010701  |
| 5mo_SIGAD9_TCTTTGAAGGATGAGA-1-10x  | 0.23494427 | 0.7864487  | 0.00090964 |
| 5mo_SIGAD9_TGAACGTTGACGATT-1-10x   | 0.06480461 | 0.18065941 | 0.00064991 |
| 5mo_SIGAD9_TGAATGCGTTAACAGA-1-10x  | 0.11529852 | 0.36044508 | 0.002594   |
| 5mo_SIGAD9_TGAATGCTCGGCTGGT-1-10x  | 0.05958469 | 0.16207367 | 0.00034795 |
| 5mo_SIGAD9_TGACCCTTCTGACGCG-1-10x  | 0.028672   | 0.05200773 | 4.42E-05   |
| 5mo_SIGAD9_TGACGCGGTAGACACG-1-10x  | 0.08389004 | 0.24861385 | 0.0034742  |

|                                    |            |            |            |
|------------------------------------|------------|------------|------------|
| 5mo_SIGAD9_TGACTCCCAAGTGGGT-1-10x  | 0.01793772 | 0.01378789 | 3.44E-05   |
| 5mo_SIGAD9_TGAGGGAAGAACGCGT-1-10x  | 0.01895777 | 0.0174198  | 3.49E-05   |
| 5mo_SIGAD9_TGAGGGATCGCTTTAT-1-10x  | 0.08221054 | 0.24263394 | 0.0033032  |
| 5mo_SIGAD9_TGAGGTTGTCGCCACA-1-10x  | 0.05390197 | 0.14184012 | 0.00019264 |
| 5mo_SIGAD9_TGAGTCACAGGAGGTT-1-10x  | 0.04076822 | 0.09507683 | 7.01E-05   |
| 5mo_SIGAD9_TGATGGTTCAGCGGAA-1-10x  | 0.07328928 | 0.2108694  | 0.0015819  |
| 5mo_SIGAD9_TGCACGGGTCTCACC-1-10x   | 0.12905563 | 0.40942785 | 0.0019821  |
| 5mo_SIGAD9_TGCAGATCAAGCGAAC-1-10x  | 0.02209783 | 0.02860012 | 3.76E-05   |
| 5mo_SIGAD9_TGCAGATGTCATCACA-1-10x  | 0.07927361 | 0.23217687 | 0.002576   |
| 5mo_SIGAD9_TGCAGATGTTAATGAG-1-10x  | 0.20806345 | 0.69073844 | 0.0011177  |
| 5mo_SIGAD9_TGCAGGCGTAGCACAG-1-10x  | 0.01514689 | 0.00385102 | 3.27E-05   |
| 5mo_SIGAD9_TGCATCCCACCAGCTG-1-10x  | 0.04367158 | 0.10541435 | 8.81E-05   |
| 5mo_SIGAD9_TGCATCCTCTACCCA-1-10x   | 0.04328295 | 0.10403062 | 8.29E-05   |
| 5mo_SIGAD9_TGCGGGTGTAACGCGA-1-10x  | 0.02943221 | 0.05471449 | 4.42E-05   |
| 5mo_SIGAD9_TGCGGGTTCATTACTC-1-10x  | 0.25955272 | 0.8740681  | 0.00077499 |
| 5mo_SIGAD9_TGCTCCAAGGCTATCT-1-10x  | 0.2472508  | 0.8302666  | 0.0008292  |
| 5mo_SIGAD9_TGCTCGTTCCTCTTTC-1-10x  | 0.11719359 | 0.36719254 | 0.002453   |
| 5mo_SIGAD9_TGGAGAGTCTTGAACG-1-10x  | 0.22670883 | 0.7571261  | 0.00097406 |
| 5mo_SIGAD9_TGGAGGACAGGATCTT-1-10x  | 0.10969511 | 0.3404939  | 0.0031181  |
| 5mo_SIGAD9_TGGATGTAGCCTGCCA-1-10x  | 0.02067742 | 0.0235427  | 3.62E-05   |
| 5mo_SIGAD9_TGGATGTTCGGTCTAA-1-10x  | 0.16458221 | 0.53592163 | 0.0017494  |
| 5mo_SIGAD9_TGGGAAGAGTCAGCCC-1-10x  | 0.08584895 | 0.25558865 | 0.0037839  |
| 5mo_SIGAD9_TGGGATTAGAGCCGAT-1-10x  | 0.06360984 | 0.17640537 | 0.00058553 |
| 5mo_SIGAD9_TGGGATTTACCGGGT-1-10x   | 0.12394048 | 0.3912151  | 0.0021124  |
| 5mo_SIGAD9_TGGGCGTAGAGAACCC-1-10x  | 0.14828916 | 0.4779096  | 0.0018713  |
| 5mo_SIGAD9_TGGGCGTAGAGCCAT-1-10x   | 0.03363098 | 0.0696644  | 5.17E-05   |
| 5mo_SIGAD9_TGGGCGTTCATCGTAG-1-10x  | 0.03319057 | 0.06809628 | 5.00E-05   |
| 5mo_SIGAD9_TGGGTTAAGGGAGATA-1-10x  | 0.03489998 | 0.07418272 | 5.37E-05   |
| 5mo_SIGAD9_TGGGTTATCCGTAATG-1-10x  | 0.02584221 | 0.04193215 | 4.09E-05   |
| 5mo_SIGAD9_TGGGTTATCGATTTCT-1-10x  | 0.08103933 | 0.23846379 | 0.0029431  |
| 5mo_SIGAD9_TGGTAGTTCCCAGGCA-1-10x  | 0.01823034 | 0.01482975 | 3.44E-05   |
| 5mo_SIGAD9_TGGTGATGTGCCTATA-1-10x  | 0.04053681 | 0.0942529  | 7.01E-05   |
| 5mo_SIGAD9_TGGTGATTCTGTAGA-1-10x   | 0.17665447 | 0.57890546 | 0.0015416  |
| 5mo_SIGAD9_TGGTTAGCAAATACAG-1-10x  | 0.28574196 | 0.967316   | 0.00075686 |
| 5mo_SIGAD9_TGTAACGAGGTAAGAG-1-10x  | 0.09167943 | 0.27634832 | 0.0043903  |
| 5mo_SIGAD9_TGTAAGCTCAAGGACG-1-10x  | 0.06521511 | 0.18212101 | 0.00064991 |
| 5mo_SIGAD9_TGTACAGAGCCAAGCA-1-10x  | 0.04362509 | 0.10524885 | 8.29E-05   |
| 5mo_SIGAD9_TGTGCGGGTGAICTCGC-1-10x | 0.06929749 | 0.19665647 | 0.0010821  |
| 5mo_SIGAD9_TGTGGCGAGCAACAAT-1-10x  | 0.25361484 | 0.8529261  | 0.00079608 |
| 5mo_SIGAD9_TGTGGCGCAATCCTTT-1-10x  | 0.15899521 | 0.51602894 | 0.0018209  |
| 5mo_SIGAD9_TGTGTGAAGCCTATCA-1-10x  | 0.02272194 | 0.0308223  | 3.76E-05   |

|                                    |            |            |            |
|------------------------------------|------------|------------|------------|
| 5mo_SIGAD9_TGTTACTAGACGTCCC-1-10x  | 0.07426282 | 0.21433575 | 0.0017292  |
| 5mo_SIGAD9_TGTTTCATAGAAGCTGC-1-10x | 0.25589988 | 0.861062   | 0.00078825 |
| 5mo_SIGAD9_TGTTCCGTCAGAGCGA-1-10x  | 0.09738048 | 0.29664713 | 0.0042943  |
| 5mo_SIGAD9_TGTTGAGAGGCTTAAA-1-10x  | 0.05007027 | 0.12819718 | 0.00013566 |
| 5mo_SIGAD9_TGTTTGTCAGGTGGAT-1-10x  | 0.14288206 | 0.4586574  | 0.0018718  |
| 5mo_SIGAD9_TGTTTGTCAGGTGGAT-1-10x  | 0.11605217 | 0.36312845 | 0.0025211  |
| 5mo_SIGAD9_TTACAGGGTCCAGTTA-1-10x  | 0.20937748 | 0.6954171  | 0.0011095  |
| 5mo_SIGAD9_TTACCGCTCATGAGGG-1-10x  | 0.07657147 | 0.22255579 | 0.0022191  |
| 5mo_SIGAD9_TTACGTTCACTGTATC-1-10x  | 0.02718688 | 0.04671989 | 4.19E-05   |
| 5mo_SIGAD9_TTACCGTCACTGTCC-1-10x   | 0.15422042 | 0.4990281  | 0.0018575  |
| 5mo_SIGAD9_TTCATTGAGGAAAGAC-1-10x  | 0.06021658 | 0.16432354 | 0.00038577 |
| 5mo_SIGAD9_TTCCAATTCTCCTAA-1-10x   | 0.06809016 | 0.19235775 | 0.00097948 |
| 5mo_SIGAD9_TTCCGGTAGGTGAGAA-1-10x  | 0.04370672 | 0.10553949 | 8.81E-05   |
| 5mo_SIGAD9_TTCCTTCGTGGATGAC-1-10x  | 0.01635101 | 0.00813832 | 3.33E-05   |
| 5mo_SIGAD9_TTCGATTGTAAGATAC-1-10x  | 0.06554173 | 0.18328395 | 0.00072102 |
| 5mo_SIGAD9_TTCGCTGAGCATCCTA-1-10x  | 0.11266899 | 0.3510825  | 0.0028393  |
| 5mo_SIGAD9_TTCTCTCTTTGAGCA-1-10x   | 0.09504084 | 0.28831676 | 0.0044051  |
| 5mo_SIGAD9_TTCTTCCTCATGACAC-1-10x  | 0.04606507 | 0.1139365  | 0.00010046 |
| 5mo_SIGAD9_TTCTTGAAGCATACTC-1-10x  | 0.10655271 | 0.32930523 | 0.00352    |
| 5mo_SIGAD9_TTCTTGACAATGACCT-1-10x  | 0.26347    | 0.88801575 | 0.00076313 |
| 5mo_SIGAD9_TTGAGTGGTGCACGCT-1-10x  | 0.04204147 | 0.09961028 | 7.82E-05   |
| 5mo_SIGAD9_TTGCCTGAGAGTGAAG-1-10x  | 0.04317583 | 0.10364923 | 8.29E-05   |
| 5mo_SIGAD9_TTGCCTGAGAGTGAAG-1-10x  | 0.02118275 | 0.02534195 | 3.69E-05   |
| 5mo_SIGAD9_TTGCTGCGTGTCCGGT-1-10x  | 0.08389974 | 0.2486484  | 0.0034742  |
| 5mo_SIGAD9_TTGGGATTCGCCTATC-1-10x  | 0.25963667 | 0.874367   | 0.00077499 |
| 5mo_SIGAD9_TTGGGTACACGCAAAG-1-10x  | 0.03010634 | 0.05711477 | 4.55E-05   |
| 5mo_SIGAD9_TTGTGTTACAGCGCT-1-10x   | 0.03912234 | 0.08921661 | 6.67E-05   |
| 5mo_SIGAD9_TTGTGTTGTGTCCGGT-1-10x  | 0.04960277 | 0.12653261 | 0.00013566 |
| 5mo_SIGAD9_TTGTTCAGTCGATGCC-1-10x  | 0.05668652 | 0.15175462 | 0.000257   |
| 5mo_SIGAD9_TTGTGTTAGGTTGACG-1-10x  | 0.04126008 | 0.09682811 | 7.40E-05   |
| 5mo_SIGAD9_TTGTGTTACAGCATTG-1-10x  | 0.07864918 | 0.22995356 | 0.002576   |
| 5mo_SIGAD9_TTGTGTTGAGGGAGGTG-1-10x | 0.18031602 | 0.59194255 | 0.001475   |
| 5mo_SIGAD9_TTTACTGTCCCTAGGG-1-10x  | 0.06922099 | 0.1963841  | 0.0010821  |
| 5mo_SIGAD9_TTTAGTCAGCCGCTTG-1-10x  | 0.20583476 | 0.6828031  | 0.001143   |
| 5mo_SIGAD9_TTTCAGTCACTGGCGT-1-10x  | 0.04451909 | 0.10843196 | 8.81E-05   |
| 5mo_SIGAD9_TTTGACTGTTACCCTC-1-10x  | 0.02843851 | 0.05117637 | 4.30E-05   |
| 5mo_SIGAD9_TTTGACTTCACACCCT-1-10x  | 0.04895953 | 0.12424234 | 0.00012523 |
| 5mo_SIGAD9_TTTGACTTCACGATCA-1-10x  | 0.22216465 | 0.7409463  | 0.0010033  |
| 5mo_SIGAD9_TTTGATCAGGACATCG-1-10x  | 0.02350769 | 0.03362    | 3.83E-05   |
| 5mo_SIGAD9_TTTGGTTCACTAGTGG-1-10x  | 0.03690964 | 0.08133818 | 5.82E-05   |
| 5mo_SIGAD9_AAACCCACAAATGAGT-1-10x  | 0.02033008 | 0.02230598 | 3.62E-05   |

|                                   |            |            |            |
|-----------------------------------|------------|------------|------------|
| 5mo_SIGAD9_AAACGAACATACCACA-1-10x | 0.01770403 | 0.01295582 | 3.44E-05   |
| 5mo_SIGAD9_AAAGAACGTGTGCCTG-1-10x | 0.02118977 | 0.02536693 | 3.69E-05   |
| 5mo_SIGAD9_AAAGGATAGCCTTTCC-1-10x | 0.01808776 | 0.01432209 | 3.44E-05   |
| 5mo_SIGAD9_AAAGGGCAGTAATCCC-1-10x | 0.08949364 | 0.2685657  | 0.0042295  |
| 5mo_SIGAD9_AAAGGTACAAATTGCC-1-10x | 0.04324865 | 0.10390852 | 8.29E-05   |
| 5mo_SIGAD9_AAATGGAAGTGCAAAT-1-10x | 0.1610272  | 0.5232639  | 0.0018     |
| 5mo_SIGAD9_AACAAAGCATTGTAGC-1-10x | 0.24577193 | 0.82500106 | 0.00083459 |
| 5mo_SIGAD9_AACAAAGGTGTGCCTG-1-10x | 0.01673226 | 0.00949579 | 3.38E-05   |
| 5mo_SIGAD9_AACAACCAGAACGTGC-1-10x | 0.09054005 | 0.2722915  | 0.0042999  |
| 5mo_SIGAD9_AACAACCCACGGATCC-1-10x | 0.02023837 | 0.02197945 | 3.62E-05   |
| 5mo_SIGAD9_AACAACCCATCCAACA-1-10x | 0.18779612 | 0.61857575 | 0.0013519  |
| 5mo_SIGAD9_AACACACAGTTTCGAC-1-10x | 0.0379196  | 0.08493418 | 6.07E-05   |
| 5mo_SIGAD9_AACCAACCAACCTATG-1-10x | 0.0163544  | 0.00815042 | 3.33E-05   |
| 5mo_SIGAD9_AACGGGAAGTTGTCAC-1-10x | 0.01538269 | 0.00469059 | 3.27E-05   |
| 5mo_SIGAD9_AACGTCACAAAGAGTT-1-10x | 0.2852751  | 0.9656537  | 0.00075686 |
| 5mo_SIGAD9_AAGACTCAGTGCTAGG-1-10x | 0.15700333 | 0.50893676 | 0.0018385  |
| 5mo_SIGAD9_AAGATAGAGACTGAGC-1-10x | 0.04465465 | 0.10891464 | 9.39E-05   |
| 5mo_SIGAD9_AAGATAGAGGATTTAG-1-10x | 0.0417272  | 0.09849132 | 7.40E-05   |
| 5mo_SIGAD9_AAGATAGTCTGGCCAG-1-10x | 0.03349916 | 0.06919503 | 5.17E-05   |
| 5mo_SIGAD9_AAGCGTTAGGCAATGC-1-10x | 0.03292761 | 0.06716001 | 5.00E-05   |
| 5mo_SIGAD9_AATCGACCACACCAGC-1-10x | 0.05622395 | 0.1501076  | 0.000257   |
| 5mo_SIGAD9_AATGCCAAGAAGTATC-1-10x | 0.24664296 | 0.8281024  | 0.0008292  |
| 5mo_SIGAD9_AATGCCAGTGATACAA-1-10x | 0.12659563 | 0.4006689  | 0.0020256  |
| 5mo_SIGAD9_AATGGCTAGATCGCTT-1-10x | 0.0434316  | 0.10455988 | 8.29E-05   |
| 5mo_SIGAD9_AATGGCTCAGTCACGC-1-10x | 0.06295555 | 0.17407575 | 0.00052741 |
| 5mo_SIGAD9_ACAACCAGTCGCACGT-1-10x | 0.046568   | 0.11572717 | 0.00010777 |
| 5mo_SIGAD9_ACAAGCTTCATCGGGC-1-10x | 0.02203805 | 0.02838727 | 3.69E-05   |
| 5mo_SIGAD9_ACACAGTTCCTCTAG-1-10x  | 0.05413945 | 0.14268567 | 0.00021164 |
| 5mo_SIGAD9_ACACCAAGTAGACTGG-1-10x | 0.2248227  | 0.75041044 | 0.00098869 |
| 5mo_SIGAD9_ACACCAATCGTTACCC-1-10x | 0.02002251 | 0.02121088 | 3.55E-05   |
| 5mo_SIGAD9_ACACGCGAGGACAGCT-1-10x | 0.2880454  | 0.9755175  | 0.0007596  |
| 5mo_SIGAD9_ACACGCGGTTCTCACC-1-10x | 0.05801358 | 0.15647964 | 0.00031414 |
| 5mo_SIGAD9_ACAGCCGAGGATGAGA-1-10x | 0.10850632 | 0.33626115 | 0.0032165  |
| 5mo_SIGAD9_ACATCCCAGAGCAACC-1-10x | 0.12354697 | 0.38981402 | 0.0021124  |
| 5mo_SIGAD9_ACCAAACAGACGGAAA-1-10x | 0.06807694 | 0.19231066 | 0.00097948 |
| 5mo_SIGAD9_ACCAACACATGCCGAC-1-10x | 0.01513359 | 0.00380365 | 3.27E-05   |
| 5mo_SIGAD9_ACCACAACACTCCCTA-1-10x | 0.05150319 | 0.13329916 | 0.00016076 |
| 5mo_SIGAD9_ACCACAAGTTCCTTGC-1-10x | 0.20034795 | 0.6632671  | 0.0011985  |
| 5mo_SIGAD9_ACCATTTGTGCGGTT-1-10x  | 0.04878156 | 0.12360864 | 0.00012523 |
| 5mo_SIGAD9_ACCATTTGTCTTAGTG-1-10x | 0.09314372 | 0.28156197 | 0.0044107  |
| 5mo_SIGAD9_ACCCAAAGGAGAGGC-1-10x  | 0.28012055 | 0.94730073 | 0.00075303 |

|                                   |            |            |            |
|-----------------------------------|------------|------------|------------|
| 5mo_SIGAD9_ACCCTCAAGCGTGTCC-1-10x | 0.05021022 | 0.12869547 | 0.00013566 |
| 5mo_SIGAD9_ACCCTCACACAAATAG-1-10x | 0.16373536 | 0.5329064  | 0.001763   |
| 5mo_SIGAD9_ACCGTTCTCTGGAAGG-1-10x | 0.2772648  | 0.9371327  | 0.00075222 |
| 5mo_SIGAD9_ACCTACCTCCAACCGG-1-10x | 0.09044146 | 0.27194047 | 0.0042999  |
| 5mo_SIGAD9_ACGATCAGTACCCAGC-1-10x | 0.03049379 | 0.05849429 | 4.55E-05   |
| 5mo_SIGAD9_ACGCACGCAGCATCTA-1-10x | 0.24141037 | 0.80947155 | 0.00086374 |
| 5mo_SIGAD9_ACGCACGCAGCTTTGA-1-10x | 0.04535953 | 0.11142439 | 9.39E-05   |
| 5mo_SIGAD9_ACGGGTCAGTGAGTTA-1-10x | 0.02861809 | 0.05181578 | 4.30E-05   |
| 5mo_SIGAD9_ACGGGTCGTAAGGCTG-1-10x | 0.10186251 | 0.3126056  | 0.0040036  |
| 5mo_SIGAD9_ACGTAACCAACTTCTT-1-10x | 0.15506005 | 0.5020176  | 0.0018522  |
| 5mo_SIGAD9_ACTATGGGTAGGATAT-1-10x | 0.08322514 | 0.24624644 | 0.0034742  |
| 5mo_SIGAD9_ACTGATGCACACGGTC-1-10x | 0.25313097 | 0.8512032  | 0.00079608 |
| 5mo_SIGAD9_ACTTAGGAGCGCTGCT-1-10x | 0.03675918 | 0.08080249 | 5.82E-05   |
| 5mo_SIGAD9_ACTTATCAGTAGTCAA-1-10x | 0.06144593 | 0.16870067 | 0.00042799 |
| 5mo_SIGAD9_ACTTATCGTAAGACCG-1-10x | 0.2672531  | 0.9014856  | 0.00075705 |
| 5mo_SIGAD9_ACTTATCGTCAGCGTC-1-10x | 0.07427296 | 0.21437186 | 0.0017292  |
| 5mo_SIGAD9_AGAAATGGTATCAGGG-1-10x | 0.09444476 | 0.28619438 | 0.0044051  |
| 5mo_SIGAD9_AGAAGCGAGATACGAT-1-10x | 0.01690079 | 0.01009585 | 3.38E-05   |
| 5mo_SIGAD9_AGAAGTACAATAGTAG-1-10x | 0.01526017 | 0.00425435 | 3.27E-05   |
| 5mo_SIGAD9_AGACCATAGCTAGAGC-1-10x | 0.27916497 | 0.9438983  | 0.00075266 |
| 5mo_SIGAD9_AGACCATGTCAGACGA-1-10x | 0.01507297 | 0.00358781 | 3.27E-05   |
| 5mo_SIGAD9_AGATAGAGTTTCAGAC-1-10x | 0.2621366  | 0.8832682  | 0.00076727 |
| 5mo_SIGAD9_AGATCGTAGCATGCAG-1-10x | 0.03061064 | 0.05891033 | 4.68E-05   |
| 5mo_SIGAD9_AGATCGTGTTGGCTA-1-10x  | 0.27078354 | 0.91405594 | 0.00075418 |
| 5mo_SIGAD9_AGCCACGCAGCACCCA-1-10x | 0.05981021 | 0.16287662 | 0.00038577 |
| 5mo_SIGAD9_AGCGCCATCCTTATAC-1-10x | 0.25968355 | 0.87453395 | 0.00077499 |
| 5mo_SIGAD9_AGCGTATGTCCCAAAT-1-10x | 0.03781748 | 0.0845706  | 6.07E-05   |
| 5mo_SIGAD9_AGGAAATAGACCAAGC-1-10x | 0.03006561 | 0.05696975 | 4.55E-05   |
| 5mo_SIGAD9_AGGAAATAGTAAGCAT-1-10x | 0.05048013 | 0.1296565  | 0.00014746 |
| 5mo_SIGAD9_AGGACGAAGACCAAGC-1-10x | 0.03101118 | 0.06033649 | 4.68E-05   |
| 5mo_SIGAD9_AGGACTTGTCGATTCA-1-10x | 0.265539   | 0.89538246 | 0.00075974 |
| 5mo_SIGAD9_AGGATAAGTGTCTCCT-1-10x | 0.05138661 | 0.13288404 | 0.00016076 |
| 5mo_SIGAD9_AGGGTTTTCCCTCAAC-1-10x | 0.22394925 | 0.7473005  | 0.00099599 |
| 5mo_SIGAD9_AGGTTGTTCAAAGCCT-1-10x | 0.01756146 | 0.0124482  | 3.44E-05   |
| 5mo_SIGAD9_AGTAACCCACGTAGAG-1-10x | 0.03644157 | 0.07967162 | 5.82E-05   |
| 5mo_SIGAD9_AGTAGCTGTTGGAGAC-1-10x | 0.04532631 | 0.11130609 | 9.39E-05   |
| 5mo_SIGAD9_AGTAGTCCATGTGGTT-1-10x | 0.02694925 | 0.04587381 | 4.19E-05   |
| 5mo_SIGAD9_AGTCACAGTCCGACGT-1-10x | 0.1644346  | 0.5353961  | 0.0017494  |
| 5mo_SIGAD9_AGTGCCGCAAGCGAAC-1-10x | 0.08857164 | 0.26528287 | 0.0041422  |
| 5mo_SIGAD9_AGTGCCGGTGCCAGT-1-10x  | 0.24569558 | 0.8247292  | 0.00083459 |
| 5mo_SIGAD9_AGTGTTGAGCGTCTGC-1-10x | 0.06482849 | 0.18074444 | 0.00064991 |

|                                   |            |            |            |
|-----------------------------------|------------|------------|------------|
| 5mo_SIGAD9_AGTTAGCCAATTAGGA-1-10x | 0.17021622 | 0.55598176 | 0.0016584  |
| 5mo_SIGAD9_AGTTCCCGTTGGGTTT-1-10x | 0.08127685 | 0.23930949 | 0.0031253  |
| 5mo_SIGAD9_ATACCGACAGACGCTC-1-10x | 0.04745536 | 0.11888667 | 0.00011598 |
| 5mo_SIGAD9_ATACCTTAGGTAAGTT-1-10x | 0.06071541 | 0.16609964 | 0.00042799 |
| 5mo_SIGAD9_ATACCTTGACTTGTG-1-10x  | 0.02351691 | 0.03365283 | 3.83E-05   |
| 5mo_SIGAD9_ATCACGATCTCGCGTT-1-10x | 0.19598167 | 0.64772075 | 0.00124    |
| 5mo_SIGAD9_ATCCACCCACTTGAAC-1-10x | 0.03498363 | 0.07448056 | 5.37E-05   |
| 5mo_SIGAD9_ATCCATTCACTACTTT-1-10x | 0.02014545 | 0.02164861 | 3.55E-05   |
| 5mo_SIGAD9_ATCCATTTCGCTGACG-1-10x | 0.0382593  | 0.08614372 | 6.36E-05   |
| 5mo_SIGAD9_ATCCCTGAGACCTTTG-1-10x | 0.2539466  | 0.8541073  | 0.00079608 |
| 5mo_SIGAD9_ATCGATGTCCTAAGTG-1-10x | 0.08742075 | 0.2611851  | 0.0040384  |
| 5mo_SIGAD9_ATCGTGACATGCCGGT-1-10x | 0.0761124  | 0.22092128 | 0.0020486  |
| 5mo_SIGAD9_ATCTCTATCCGATCTC-1-10x | 0.06900309 | 0.19560827 | 0.00097948 |
| 5mo_SIGAD9_ATGACCAGTTTACTGG-1-10x | 0.24743052 | 0.8309065  | 0.0008292  |
| 5mo_SIGAD9_ATGAGGGCATGACTCA-1-10x | 0.02624426 | 0.04336368 | 4.09E-05   |
| 5mo_SIGAD9_ATGCATGAGTCTTCGA-1-10x | 0.03427893 | 0.07197142 | 5.37E-05   |
| 5mo_SIGAD9_ATGCATGTCTGGGATT-1-10x | 0.04351394 | 0.10485308 | 8.29E-05   |
| 5mo_SIGAD9_ATGCCTCGTAGCACAG-1-10x | 0.01770545 | 0.01296087 | 3.44E-05   |
| 5mo_SIGAD9_ATGGGAGAGAGGTCAC-1-10x | 0.02963881 | 0.05545009 | 4.55E-05   |
| 5mo_SIGAD9_ATGTCTTAGGGACCAT-1-10x | 0.04282834 | 0.10241197 | 8.29E-05   |
| 5mo_SIGAD9_ATGTCTTCAGACCTGC-1-10x | 0.0219079  | 0.02792389 | 3.69E-05   |
| 5mo_SIGAD9_ATTATCCAGGTTATC-1-10x  | 0.1982607  | 0.65583533 | 0.0012187  |
| 5mo_SIGAD9_ATTATCCGTTAGAAGT-1-10x | 0.2677093  | 0.90311    | 0.00075705 |
| 5mo_SIGAD9_ATTCCATGTAACGCGA-1-10x | 0.07942    | 0.2326981  | 0.0027593  |
| 5mo_SIGAD9_ATTCCCGTCTTCGTGC-1-10x | 0.05017648 | 0.12857535 | 0.00013566 |
| 5mo_SIGAD9_ATTCTACCAGTAGATA-1-10x | 0.08680812 | 0.2590038  | 0.0039187  |
| 5mo_SIGAD9_ATTTACCAGCATTTGC-1-10x | 0.09556785 | 0.2901932  | 0.0043808  |
| 5mo_SIGAD9_ATTTACCGTACAGCGA-1-10x | 0.02407805 | 0.03565078 | 3.91E-05   |
| 5mo_SIGAD9_ATTTCACTCTCAGGCG-1-10x | 0.04862883 | 0.12306485 | 0.00012523 |
| 5mo_SIGAD9_ATTTCTGCACAGCTTA-1-10x | 0.09038241 | 0.27173018 | 0.0042999  |
| 5mo_SIGAD9_CAAGACTAGAGCATTA-1-10x | 0.04471503 | 0.10912961 | 9.39E-05   |
| 5mo_SIGAD9_CAAGAGGAGCTTACGT-1-10x | 0.2327756  | 0.77872705 | 0.00092358 |
| 5mo_SIGAD9_CAAGAGGTCGGTCATA-1-10x | 0.25705677 | 0.8651812  | 0.00078121 |
| 5mo_SIGAD9_CAAGCTACAGCTTTCC-1-10x | 0.22144112 | 0.7383702  | 0.0010106  |
| 5mo_SIGAD9_CACACAAGTACACGCC-1-10x | 0.02899115 | 0.05314409 | 4.42E-05   |
| 5mo_SIGAD9_CACAGATCAATGACCT-1-10x | 0.2536633  | 0.8530986  | 0.00079608 |
| 5mo_SIGAD9_CACTGAAGTCCAGGTC-1-10x | 0.01602145 | 0.00696491 | 3.33E-05   |
| 5mo_SIGAD9_CACTGAAGTGGTCCCA-1-10x | 0.04577794 | 0.11291415 | 0.00010046 |
| 5mo_SIGAD9_CACTGTCTCGAGTGAG-1-10x | 0.026468   | 0.0441603  | 4.09E-05   |
| 5mo_SIGAD9_CAGATTGGTCTAACGT-1-10x | 0.26075295 | 0.87834156 | 0.00076963 |
| 5mo_SIGAD9_CAGCCAGAGAGTCGAC-1-10x | 0.08280569 | 0.244753   | 0.0033032  |

|                                    |            |            |            |
|------------------------------------|------------|------------|------------|
| 5mo_SIGAD9_CAGCCAGAGTGTTGAA-1-10x  | 0.290422   | 0.98397946 | 0.00076163 |
| 5mo_SIGAD9_CAGGCCAGTATCAGGG-1-10x  | 0.01831539 | 0.0151326  | 3.49E-05   |
| 5mo_SIGAD9_CAGGCCAGTGACGTCC-1-10x  | 0.01721582 | 0.01121753 | 3.38E-05   |
| 5mo_SIGAD9_CAGGGCTGTTATTCTC-1-10x  | 0.08202171 | 0.2419616  | 0.0031253  |
| 5mo_SIGAD9_CAGTTAGAGAAACACT-1-10x  | 0.04091393 | 0.09559561 | 7.40E-05   |
| 5mo_SIGAD9_CAGTTAGAGAGGGTAA-1-10x  | 0.08618847 | 0.25679752 | 0.0039187  |
| 5mo_SIGAD9_CAGTTCCAGAGCAACC-1-10x  | 0.06989627 | 0.19878848 | 0.0010821  |
| 5mo_SIGAD9_CATAAGCAGCTGGCTC-1-10x  | 0.03020033 | 0.05744941 | 4.55E-05   |
| 5mo_SIGAD9_CATAAGCAGGTATAGT-1-10x  | 0.11164202 | 0.34742594 | 0.002929   |
| 5mo_SIGAD9_CATACAGAGCAGAAAG-1-10x  | 0.0467144  | 0.11624844 | 0.00010777 |
| 5mo_SIGAD9_CATAGACAGATGAACT-1-10x  | 0.02259169 | 0.03035853 | 3.76E-05   |
| 5mo_SIGAD9_CATCGGGCAGCGTATT-1-10x  | 0.02846944 | 0.05128651 | 4.30E-05   |
| 5mo_SIGAD9_CATGCGGCAAACACCT-1-10x  | 0.06702472 | 0.18856418 | 0.00079936 |
| 5mo_SIGAD9_CATGCGGTCCGTATGA-1-10x  | 0.05048874 | 0.12968715 | 0.00014746 |
| 5mo_SIGAD9_CATGCTCAGCCGATCC-1-10x  | 0.09028373 | 0.27137884 | 0.0042999  |
| 5mo_SIGAD9_CATGCTCAGGACAGCT-1-10x  | 0.08351199 | 0.24726778 | 0.0034742  |
| 5mo_SIGAD9_CATGGATCACAGAGCA-1-10x  | 0.03483686 | 0.07395796 | 5.37E-05   |
| 5mo_SIGAD9_CATGGATGTATACGGG-1-10x  | 0.21468782 | 0.7143248  | 0.0010625  |
| 5mo_SIGAD9_CATGGATGTTCAGCTA-1-10x  | 0.02399863 | 0.03536801 | 3.91E-05   |
| 5mo_SIGAD9_CATTCATGTAGTGCGA-1-10x  | 0.02982084 | 0.05609821 | 4.55E-05   |
| 5mo_SIGAD9_CATTCCGTCTCATGCC-1-10x  | 0.06638112 | 0.18627264 | 0.00079936 |
| 5mo_SIGAD9_CATTCTACAAGAGAGA-1-10x  | 0.07988262 | 0.23434527 | 0.0027593  |
| 5mo_SIGAD9_CATTCTACACATTGTG-1-10x  | 0.26658243 | 0.8990977  | 0.00075831 |
| 5mo_SIGAD9_CATTGCCGTACTGAGG-1-10x  | 0.02900608 | 0.05319723 | 4.42E-05   |
| 5mo_SIGAD9_CATTGTTAGGAGTACC-1-10x  | 0.08988248 | 0.26995018 | 0.0042999  |
| 5mo_SIGAD9_CATTTCCATCCATCGTC-1-10x | 0.2397861  | 0.8036882  | 0.00087632 |
| 5mo_SIGAD9_CCAATTTAGCTGAGCA-1-10x  | 0.08718108 | 0.26033172 | 0.0040384  |
| 5mo_SIGAD9_CCACACTAGAAATTCG-1-10x  | 0.13372692 | 0.42606017 | 0.0019115  |
| 5mo_SIGAD9_CCACGTTCCATCCGGCA-1-10x | 0.1037768  | 0.3194215  | 0.0037215  |
| 5mo_SIGAD9_CCATCACCACATGAAA-1-10x  | 0.2701127  | 0.91166735 | 0.00075418 |
| 5mo_SIGAD9_CCCAACTTCACCGGTG-1-10x  | 0.11836194 | 0.37135246 | 0.0023898  |
| 5mo_SIGAD9_CCCGGAACACCAGCTG-1-10x  | 0.0433499  | 0.10426902 | 8.29E-05   |
| 5mo_SIGAD9_CCCTCAAAGTCCGCGT-1-10x  | 0.2322015  | 0.776683   | 0.00093066 |
| 5mo_SIGAD9_CCCTCAACAAGATTGA-1-10x  | 0.04321311 | 0.10378198 | 8.29E-05   |
| 5mo_SIGAD9_CCCTCAACAGGTATGG-1-10x  | 0.01560194 | 0.00547125 | 3.33E-05   |
| 5mo_SIGAD9_CCCTCAATCAGCGGAA-1-10x  | 0.12234986 | 0.38555163 | 0.0021873  |
| 5mo_SIGAD9_CCCTCAATCTAAGCGT-1-10x  | 0.2712005  | 0.9155406  | 0.00075352 |
| 5mo_SIGAD9_CCCTCTCTCGAGCCAC-1-10x  | 0.04780431 | 0.12012912 | 0.00011598 |
| 5mo_SIGAD9_CCCTGATAGGTTGTTC-1-10x  | 0.26201195 | 0.8828243  | 0.00076727 |
| 5mo_SIGAD9_CCCTGATCAAGGTCAG-1-10x  | 0.25562677 | 0.8600896  | 0.00078825 |
| 5mo_SIGAD9_CCCTTAGTCTGCGTCT-1-10x  | 0.26455772 | 0.8918886  | 0.00076135 |

|                                    |            |            |            |
|------------------------------------|------------|------------|------------|
| 5mo_SIGAD9_CCGATCTGTCCGGATC-1-10x  | 0.04005057 | 0.09252161 | 7.01E-05   |
| 5mo_SIGAD9_CCGATCTTCCGCAAAT-1-10x  | 0.02369242 | 0.03427774 | 3.83E-05   |
| 5mo_SIGAD9_CCGCAAGTCGGCTATA-1-10x  | 0.02810693 | 0.04999579 | 4.30E-05   |
| 5mo_SIGAD9_CCGGACACATGACGGA-1-10x  | 0.05105573 | 0.13170594 | 0.00014746 |
| 5mo_SIGAD9_CCGGGTAGTCTGTGCG-1-10x  | 0.03125415 | 0.06120159 | 4.68E-05   |
| 5mo_SIGAD9_CCGGGTATCCGAGCTG-1-10x  | 0.02407201 | 0.03562928 | 3.91E-05   |
| 5mo_SIGAD9_CCGGTAGAGCGAGAAA-1-10x  | 0.0202087  | 0.02187381 | 3.62E-05   |
| 5mo_SIGAD9_CCGTAGGAGCAAGGAA-1-10x  | 0.2602204  | 0.8764455  | 0.00077221 |
| 5mo_SIGAD9_CCGTGAGTCTTCGGAA-1-10x  | 0.07864403 | 0.22993521 | 0.002576   |
| 5mo_SIGAD9_CCGTTCAAGTAGGTTA-1-10x  | 0.01621469 | 0.00765295 | 3.33E-05   |
| 5mo_SIGAD9_CCGTTCAGTTGAGAGC-1-10x  | 0.07144748 | 0.20431164 | 0.0013138  |
| 5mo_SIGAD9_CCTAAGATCCAAGTGA-1-10x  | 0.2700694  | 0.91151315 | 0.00075418 |
| 5mo_SIGAD9_CCTCACACAAGTTCGCA-1-10x | 0.2778501  | 0.9392167  | 0.00075239 |
| 5mo_SIGAD9_CCTCACACAATGGGTG-1-10x  | 0.16244143 | 0.52829933 | 0.001776   |
| 5mo_SIGAD9_CCTCACAGTGGTTTAC-1-10x  | 0.03218311 | 0.06450918 | 4.83E-05   |
| 5mo_SIGAD9_CCTCACATCACCGGTG-1-10x  | 0.04614079 | 0.11420609 | 0.00010046 |
| 5mo_SIGAD9_CCTCATGAGCATGGGT-1-10x  | 0.26368582 | 0.88878417 | 0.00076313 |
| 5mo_SIGAD9_CCTCCTCAAATAAGC-1-10x   | 0.2303029  | 0.7699229  | 0.00094498 |
| 5mo_SIGAD9_CCTCTCCACTTCTCG-1-10x   | 0.16865048 | 0.5504069  | 0.0016744  |
| 5mo_SIGAD9_CCTCTCCTCGATAACC-1-10x  | 0.09432921 | 0.28578296 | 0.0044154  |
| 5mo_SIGAD9_CCTGTTGGTCACTACA-1-10x  | 0.03277128 | 0.06660339 | 5.00E-05   |
| 5mo_SIGAD9_CCTTCAGAGCGACTGA-1-10x  | 0.25780767 | 0.8678548  | 0.00078121 |
| 5mo_SIGAD9_CCTTTGGAGAGAGCAA-1-10x  | 0.20562717 | 0.68206394 | 0.001143   |
| 5mo_SIGAD9_CGAAGGATCTTCCAGC-1-10x  | 0.0473857  | 0.11863863 | 0.00010777 |
| 5mo_SIGAD9_CGAGAAGTCACTTATC-1-10x  | 0.09107892 | 0.27421018 | 0.0043535  |
| 5mo_SIGAD9_CGAGGAACATTGACCA-1-10x  | 0.02763841 | 0.04832759 | 4.19E-05   |
| 5mo_SIGAD9_CGAGGCTTCTACGGGC-1-10x  | 0.01827482 | 0.01498815 | 3.44E-05   |
| 5mo_SIGAD9_CGCAGGTCACGTGAGA-1-10x  | 0.03681259 | 0.08099265 | 5.82E-05   |
| 5mo_SIGAD9_CGCATAAAGGTTAAAC-1-10x  | 0.03429688 | 0.07203536 | 5.37E-05   |
| 5mo_SIGAD9_CGCGTGACACCTCGTT-1-10x  | 0.08496144 | 0.2524286  | 0.0036353  |
| 5mo_SIGAD9_CGCGTGATCAGTCAGT-1-10x  | 0.01768105 | 0.01287399 | 3.44E-05   |
| 5mo_SIGAD9_CGGAACCAGAATGTTG-1-10x  | 0.02143181 | 0.02622875 | 3.69E-05   |
| 5mo_SIGAD9_CGGAATTGTTGGACTT-1-10x  | 0.02483691 | 0.03835272 | 3.91E-05   |
| 5mo_SIGAD9_CGGAATTTGTACACA-1-10x   | 0.11996389 | 0.3770563  | 0.0022788  |
| 5mo_SIGAD9_CGGGACTAGCCGTAAG-1-10x  | 0.01513031 | 0.00379198 | 3.27E-05   |
| 5mo_SIGAD9_CGGGACTAGCTGCGAA-1-10x  | 0.0444428  | 0.10816031 | 8.81E-05   |
| 5mo_SIGAD9_CGGGACTTCGCCAGTG-1-10x  | 0.25830096 | 0.86961114 | 0.000778   |
| 5mo_SIGAD9_CGGGCATTCACTCCGT-1-10x  | 0.02650342 | 0.04428642 | 4.09E-05   |
| 5mo_SIGAD9_CGGGTCACAGCAGTTT-1-10x  | 0.03153682 | 0.06220805 | 4.83E-05   |
| 5mo_SIGAD9_CGGTCAGGTTGCATTG-1-10x  | 0.15229467 | 0.49217138 | 0.0018651  |
| 5mo_SIGAD9_CGTCCATAGAAATCCA-1-10x  | 0.2746946  | 0.9279814  | 0.00075233 |



|                                    |            |            |            |
|------------------------------------|------------|------------|------------|
| 5mo_SIGAD9_CGTGAATCAAAGGCAC-1-10x  | 0.09896403 | 0.30228543 | 0.0042345  |
| 5mo_SIGAD9_CGTGTCTTCGATCCAA-1-10x  | 0.03889476 | 0.0884063  | 6.36E-05   |
| 5mo_SIGAD9_CGTTAGACATCCGAAT-1-10x  | 0.2687257  | 0.90672886 | 0.00075594 |
| 5mo_SIGAD9_CGTTGGGTCATTTGCT-1-10x  | 0.0543811  | 0.14354606 | 0.00021164 |
| 5mo_SIGAD9_CTAACCCAGTAGTGCG-1-10x  | 0.08301915 | 0.245513   | 0.0033032  |
| 5mo_SIGAD9_CTAAGTGGTCTCAGGC-1-10x  | 0.20253105 | 0.6710401  | 0.0011699  |
| 5mo_SIGAD9_CTACATTGTCAGACGA-1-10x  | 0.12855496 | 0.40764514 | 0.0019821  |
| 5mo_SIGAD9_CTACCTGGTCAGCGTC-1-10x  | 0.13174015 | 0.41898617 | 0.001934   |
| 5mo_SIGAD9_CTACCTGGTCGTTATG-1-10x  | 0.02426548 | 0.03631812 | 3.91E-05   |
| 5mo_SIGAD9_CTACTATCCGCGAGT-1-10x   | 0.04116579 | 0.09649239 | 7.40E-05   |
| 5mo_SIGAD9_CTACTATTCGTGGACC-1-10x  | 0.01891975 | 0.01728445 | 3.49E-05   |
| 5mo_SIGAD9_CTAGACACATTGTAGC-1-10x  | 0.27799445 | 0.9397307  | 0.00075239 |
| 5mo_SIGAD9_CTATCTAGTGATACTC-1-10x  | 0.28063244 | 0.9491233  | 0.00075348 |
| 5mo_SIGAD9_CTCACTGGTACCTATG-1-10x  | 0.03119218 | 0.06098094 | 4.68E-05   |
| 5mo_SIGAD9 CTCAGAATCGGACCAC-1-10x  | 0.25462404 | 0.85651934 | 0.00079207 |
| 5mo_SIGAD9 CTCATCGGTAGTGATA-1-10x  | 0.2521229  | 0.847614   | 0.00080467 |
| 5mo_SIGAD9 CTCATCGGTCTAGGCC-1-10x  | 0.14406687 | 0.46287596 | 0.0018716  |
| 5mo_SIGAD9 CTCCACAAGCGCCTAC-1-10x  | 0.01974493 | 0.02022254 | 3.55E-05   |
| 5mo_SIGAD9 CTCCACAGTTAACCTG-1-10x  | 0.02435557 | 0.03663889 | 3.91E-05   |
| 5mo_SIGAD9 CTCCACATCGCCACTT-1-10x  | 0.05063554 | 0.13020985 | 0.00014746 |
| 5mo_SIGAD9 CTCCCTCGTGA CTATC-1-10x | 0.04505564 | 0.11034238 | 9.39E-05   |
| 5mo_SIGAD9 CTCCTCCAAAGCTAA-1-10x   | 0.02216376 | 0.02883487 | 3.76E-05   |
| 5mo_SIGAD9 CTCTCAGAGCTAAATG-1-10x  | 0.09477036 | 0.2873537  | 0.0044051  |
| 5mo_SIGAD9 CTCTGGTCAGATCCTA-1-10x  | 0.0216343  | 0.02694971 | 3.69E-05   |
| 5mo_SIGAD9 CTGAATGTCCTTACCG-1-10x  | 0.1181819  | 0.37071145 | 0.0023898  |
| 5mo_SIGAD9 CTGAGGCAGTTGCTGT-1-10x  | 0.22773804 | 0.7607906  | 0.00096676 |
| 5mo_SIGAD9 CTGAGGCCATTACCCC-1-10x  | 0.02345148 | 0.03341986 | 3.83E-05   |
| 5mo_SIGAD9 CTGAGGCGTATGCGGA-1-10x  | 0.23011646 | 0.7692591  | 0.00094498 |
| 5mo_SIGAD9 CTGATCCAGACCCTTA-1-10x  | 0.27530378 | 0.93015045 | 0.00075218 |
| 5mo_SIGAD9 CTGATCCAGTCGAAAT-1-10x  | 0.2343686  | 0.78439903 | 0.00090964 |
| 5mo_SIGAD9 CTGATCCTCTTAAC-1-10x    | 0.01507629 | 0.00359965 | 3.27E-05   |
| 5mo_SIGAD9 CTGCCTACAGGTTTAC-1-10x  | 0.02398839 | 0.03533154 | 3.91E-05   |
| 5mo_SIGAD9 CTGCCTAGTATGAAAC-1-10x  | 0.02887314 | 0.05272391 | 4.42E-05   |
| 5mo_SIGAD9 CTGGTCTGTTAACAGA-1-10x  | 0.04959027 | 0.12648812 | 0.00013566 |
| 5mo_SIGAD9 CTGGTCTGTTTCAGAC-1-10x  | 0.25189134 | 0.8467895  | 0.00080467 |
| 5mo_SIGAD9 CTGTGGGAGCGGGTTA-1-10x  | 0.04156999 | 0.09793155 | 7.40E-05   |
| 5mo_SIGAD9 CTTAGGATCCCGTGTT-1-10x  | 0.26300377 | 0.8863557  | 0.00076511 |
| 5mo_SIGAD9 CTTAGGATCTCCAATT-1-10x  | 0.13649319 | 0.43590957 | 0.0018891  |
| 5mo_SIGAD9 CTTCAATCCACTTCG-1-10x   | 0.24320346 | 0.8158559  | 0.00085167 |
| 5mo_SIGAD9 CTTCCGAGTCTGTAAC-1-10x  | 0.05037774 | 0.12929194 | 0.00014746 |
| 5mo_SIGAD9 CTTCCGGTCCGTTGGG-1-10x  | 0.07614585 | 0.22104037 | 0.0020486  |

|                                   |            |            |            |
|-----------------------------------|------------|------------|------------|
| 5mo_SIGAD9_CTTGAGAGTGGTATGG-1-10x | 0.09299804 | 0.28104326 | 0.0044107  |
| 5mo_SIGAD9_CTTTCAAAGTCTCTGA-1-10x | 0.08582526 | 0.25550428 | 0.0037839  |
| 5mo_SIGAD9_GAACGTTGTGTTGATC-1-10x | 0.04547146 | 0.11182291 | 9.39E-05   |
| 5mo_SIGAD9_GAAGCCCTCTATACTC-1-10x | 0.06417987 | 0.17843498 | 0.00058553 |
| 5mo_SIGAD9_GAAGCGATCAATCTCT-1-10x | 0.1618727  | 0.5262743  | 0.0017883  |
| 5mo_SIGAD9_GAAGCGATCTGTGCGG-1-10x | 0.09629431 | 0.2927798  | 0.0043435  |
| 5mo_SIGAD9_GAAGTAAAGTACTCGT-1-10x | 0.03894386 | 0.08858114 | 6.36E-05   |
| 5mo_SIGAD9_GAATCACCACAGTACT-1-10x | 0.26572192 | 0.8960338  | 0.00075974 |
| 5mo_SIGAD9_GAATCGTGAACATGA-1-10x  | 0.09863608 | 0.30111775 | 0.0042345  |
| 5mo_SIGAD9_GACAGCCAGCACCTGC-1-10x | 0.04337085 | 0.10434359 | 8.29E-05   |
| 5mo_SIGAD9_GACATCAGTGGCATCC-1-10x | 0.03452318 | 0.07284111 | 5.37E-05   |
| 5mo_SIGAD9_GACCCAGCATGGAGAC-1-10x | 0.19618775 | 0.6484545  | 0.00124    |
| 5mo_SIGAD9_GACCCTTTCACCTCAC-1-10x | 0.07881354 | 0.23053876 | 0.002576   |
| 5mo_SIGAD9_GACCTTCGTGTACAGG-1-10x | 0.19438149 | 0.64202327 | 0.0012624  |
| 5mo_SIGAD9_GACGTTAAGCGCATCC-1-10x | 0.02934653 | 0.05440943 | 4.42E-05   |
| 5mo_SIGAD9_GACTATGTCATTGTGG-1-10x | 0.08999322 | 0.2703445  | 0.0042999  |
| 5mo_SIGAD9_GAGAGGTGTTGGACCC-1-10x | 0.02801981 | 0.04968558 | 4.30E-05   |
| 5mo_SIGAD9_GAGATGGGTCATTCCC-1-10x | 0.02308435 | 0.03211268 | 3.83E-05   |
| 5mo_SIGAD9_GAGCTGCCATGGAAGC-1-10x | 0.04435259 | 0.10783912 | 8.81E-05   |
| 5mo_SIGAD9_GAGGCAACAAAGTGTA-1-10x | 0.04530698 | 0.11123729 | 9.39E-05   |
| 5mo_SIGAD9_GAGGCCTAGTGAACAT-1-10x | 0.02508543 | 0.03923759 | 4.00E-05   |
| 5mo_SIGAD9_GAGTCTAGTCATACCA-1-10x | 0.2228702  | 0.74345845 | 0.0010033  |
| 5mo_SIGAD9_GAGTGTTGTGCATTAC-1-10x | 0.01729976 | 0.01151641 | 3.38E-05   |
| 5mo_SIGAD9_GATAGAAGTTGTGTAC-1-10x | 0.15135314 | 0.48881903 | 0.0018676  |
| 5mo_SIGAD9_GATAGCTGTATAGCTC-1-10x | 0.03895826 | 0.08863238 | 6.67E-05   |
| 5mo_SIGAD9_GATCATGAGAGGGTAA-1-10x | 0.18362233 | 0.6037148  | 0.0014112  |
| 5mo_SIGAD9_GATCCCTTCTCAATCT-1-10x | 0.04935148 | 0.12563787 | 0.00013566 |
| 5mo_SIGAD9_GATCGTATCCGTCAA-1-10x  | 0.08882493 | 0.26618472 | 0.0042295  |
| 5mo_SIGAD9_GATGACTAGTAAACGT-1-10x | 0.27546686 | 0.93073106 | 0.00075218 |
| 5mo_SIGAD9_GATGAGGCAAAGACGC-1-10x | 0.02676557 | 0.0452198  | 4.19E-05   |
| 5mo_SIGAD9_GATGCTAGTCTTCATT-1-10x | 0.2884117  | 0.9768217  | 0.0007596  |
| 5mo_SIGAD9_GATTCGAGTTCTCACC-1-10x | 0.01878036 | 0.01678814 | 3.49E-05   |
| 5mo_SIGAD9_GATTCTTAGAGCCGAT-1-10x | 0.03727643 | 0.08264416 | 6.07E-05   |
| 5mo_SIGAD9_GATTCTTAGCTTTGTG-1-10x | 0.24561337 | 0.8244365  | 0.00083459 |
| 5mo_SIGAD9_GCAACATTCCCATAGA-1-10x | 0.23662157 | 0.7924208  | 0.00089602 |
| 5mo_SIGAD9_GCAACCGCACGCTGCA-1-10x | 0.01579009 | 0.00614116 | 3.33E-05   |
| 5mo_SIGAD9_GCAACCGTCGCCTCTA-1-10x | 0.07125355 | 0.2036211  | 0.0013138  |
| 5mo_SIGAD9_GCACGTGTCTGAATGC-1-10x | 0.18251404 | 0.5997687  | 0.0014427  |
| 5mo_SIGAD9_GCAGCCAGTGTGTCCG-1-10x | 0.02082598 | 0.02407167 | 3.62E-05   |
| 5mo_SIGAD9_GCAGTTACATAAGATG-1-10x | 0.08676769 | 0.25885984 | 0.0039187  |
| 5mo_SIGAD9_GCCAGCAAGATACATG-1-10x | 0.07654442 | 0.22245948 | 0.0022191  |

|                                     |            |            |            |
|-------------------------------------|------------|------------|------------|
| 5mo_SIGAD9_GCCAGGTTCTTCGAC-1-10x    | 0.0264738  | 0.04418095 | 4.09E-05   |
| 5mo_SIGAD9_GCCAGTGTCCGTGTAA-1-10x   | 0.03375681 | 0.0701124  | 5.17E-05   |
| 5mo_SIGAD9_GCCAGTGTGAGCCTG-1-10x    | 0.05516336 | 0.14633134 | 0.000233   |
| 5mo_SIGAD9_GCCATGGGTCCTGTCT-1-10x   | 0.01832318 | 0.01516034 | 3.49E-05   |
| 5mo_SIGAD9_GCCATTCAGCGATGAC-1-10x   | 0.20902    | 0.69414425 | 0.0011095  |
| 5mo_SIGAD9_GCCATTCAGCGTCAAG-1-10x   | 0.03929844 | 0.08984361 | 6.67E-05   |
| 5mo_SIGAD9_GCCATTCGTGCGATCG-1-10x   | 0.16769278 | 0.54699695 | 0.0016902  |
| 5mo_SIGAD9_GCCATTCGTGTGAATA-1-10x   | 0.04340939 | 0.10448082 | 8.29E-05   |
| 5mo_SIGAD9_GCTACAACATCTGTTT-1-10x   | 0.03597197 | 0.07799957 | 5.58E-05   |
| 5mo_SIGAD9_GCTGGGTGTCCTACTACA-1-10x | 0.01698252 | 0.01038684 | 3.38E-05   |
| 5mo_SIGAD9_GCTTTCGGTAGAGTTA-1-10x   | 0.21367128 | 0.71070534 | 0.0010701  |
| 5mo_SIGAD9_GGAACCCAGTAGGAAG-1-10x   | 0.03699019 | 0.08162499 | 5.82E-05   |
| 5mo_SIGAD9_GGAATCTCACAGTGTT-1-10x   | 0.05454654 | 0.14413512 | 0.00021164 |
| 5mo_SIGAD9_GGAATGGAGTTGCGAG-1-10x   | 0.09900087 | 0.3024166  | 0.0042345  |
| 5mo_SIGAD9_GGACGTCAGGTCATAA-1-10x   | 0.26725128 | 0.9014792  | 0.00075705 |
| 5mo_SIGAD9_GGAGAACGTACTGGGA-1-10x   | 0.03754791 | 0.08361079 | 6.07E-05   |
| 5mo_SIGAD9_GGAGAACGTAGCGCCT-1-10x   | 0.08658332 | 0.25820342 | 0.0039187  |
| 5mo_SIGAD9_GGAGCAAGTGGCGCTT-1-10x   | 0.05075949 | 0.13065119 | 0.00014746 |
| 5mo_SIGAD9_GGATGTTCAATGAAAC-1-10x   | 0.01504819 | 0.00349958 | 3.27E-05   |
| 5mo_SIGAD9_GGATGTTGTGAAATT-1-10x    | 0.11862409 | 0.3722859  | 0.0023898  |
| 5mo_SIGAD9_GGCAGTCTCCATTCGC-1-10x   | 0.02940964 | 0.05463413 | 4.42E-05   |
| 5mo_SIGAD9_GGCGTCAAGTATTGCC-1-10x   | 0.03287543 | 0.06697421 | 5.00E-05   |
| 5mo_SIGAD9_GGCGTCAGTGGACCAA-1-10x   | 0.0349409  | 0.07432841 | 5.37E-05   |
| 5mo_SIGAD9_GGCTGTGTCGGACGTC-1-10x   | 0.28699705 | 0.9717848  | 0.00075864 |
| 5mo_SIGAD9_GGCTTGGAGAGTCCGA-1-10x   | 0.04734653 | 0.11849916 | 0.00010777 |
| 5mo_SIGAD9_GGGACCTAGAGTCTTC-1-10x   | 0.03264957 | 0.06617005 | 5.00E-05   |
| 5mo_SIGAD9_GGGACTCGTATTGAGA-1-10x   | 0.03688901 | 0.08126473 | 5.82E-05   |
| 5mo_SIGAD9_GGGAGATGTGGAACAC-1-10x   | 0.06099768 | 0.16710469 | 0.00042799 |
| 5mo_SIGAD9_GGGATCCCAGTTGAAA-1-10x   | 0.02331673 | 0.03294006 | 3.83E-05   |
| 5mo_SIGAD9_GGGCGTTAGAGCAGAA-1-10x   | 0.03892883 | 0.08852761 | 6.36E-05   |
| 5mo_SIGAD9_GGGCGTTCAGCAGACA-1-10x   | 0.23702237 | 0.79384786 | 0.00089602 |
| 5mo_SIGAD9_GGGCTACGTGAGAGGG-1-10x   | 0.23808745 | 0.7976401  | 0.00088935 |
| 5mo_SIGAD9_GGGTAGACAAATGATG-1-10x   | 0.04735467 | 0.11852817 | 0.00010777 |
| 5mo_SIGAD9_GGGTCTGGTATAGCTC-1-10x   | 0.04787969 | 0.12039749 | 0.00011598 |
| 5mo_SIGAD9_GGGTGTGTCGTTCTGCG-1-10x  | 0.04616658 | 0.11429793 | 0.00010046 |
| 5mo_SIGAD9_GGGTTATCAGCTGAAG-1-10x   | 0.25654557 | 0.86336106 | 0.00078463 |
| 5mo_SIGAD9_GGTAGAGAGCTCGCAC-1-10x   | 0.03842773 | 0.08674343 | 6.36E-05   |
| 5mo_SIGAD9_GGTGTGCGAGATTAGTG-1-10x  | 0.2434464  | 0.81672084 | 0.00085167 |
| 5mo_SIGAD9_GGTTGTAAGACTAAGT-1-10x   | 0.02971607 | 0.0557252  | 4.55E-05   |
| 5mo_SIGAD9_GGTTGTAAGGTTCCGC-1-10x   | 0.08044232 | 0.2363381  | 0.0029431  |
| 5mo_SIGAD9_GTAACACAGGTTAGTA-1-10x   | 0.06171123 | 0.1696453  | 0.00047505 |

|                                    |            |            |            |
|------------------------------------|------------|------------|------------|
| 5mo_SIGAD9_GTAAGTCCACTTGAGT-1-10x  | 0.13358653 | 0.42556027 | 0.0019115  |
| 5mo_SIGAD9_GTAAGTCGTAATAAGA-1-10x  | 0.27648595 | 0.9343596  | 0.00075214 |
| 5mo_SIGAD9_GTAATCGGTGTACAGG-1-10x  | 0.03195394 | 0.06369322 | 4.83E-05   |
| 5mo_SIGAD9_GTAATCGGTAGAGAT-1-10x   | 0.24644439 | 0.8273954  | 0.00083459 |
| 5mo_SIGAD9_GTACAACTCATACGGT-1-10x  | 0.08356457 | 0.24745499 | 0.0034742  |
| 5mo_SIGAD9_GTAGATCAGCACGATG-1-10x  | 0.0862596  | 0.25705075 | 0.0039187  |
| 5mo_SIGAD9_GTAGATCGTTGTGTAC-1-10x  | 0.04821023 | 0.12157442 | 0.00011598 |
| 5mo_SIGAD9_GTAGTACTCTGGGTTCG-1-10x | 0.03294289 | 0.06721441 | 5.00E-05   |
| 5mo_SIGAD9_GTCAAGTAGACATCAA-1-10x  | 0.0171949  | 0.01114304 | 3.38E-05   |
| 5mo_SIGAD9_GTCACTCCACACTGGC-1-10x  | 0.24016057 | 0.8050216  | 0.00086997 |
| 5mo_SIGAD9_GTCACTCTCCAACCAA-1-10x  | 0.03071121 | 0.0592684  | 4.68E-05   |
| 5mo_SIGAD9_GTCATGAAGTATGGAT-1-10x  | 0.041624   | 0.09812388 | 7.40E-05   |
| 5mo_SIGAD9_GTCATTTGTGGGTTGA-1-10x  | 0.03257126 | 0.06589121 | 5.00E-05   |
| 5mo_SIGAD9_GTCCACTCACATCCCT-1-10x  | 0.11836449 | 0.37136158 | 0.0023898  |
| 5mo_SIGAD9_GTCGTTTCGTTAGTCGT-1-10x | 0.02566158 | 0.04128901 | 4.00E-05   |
| 5mo_SIGAD9_GTCTCACTCCAGTACA-1-10x  | 0.05354297 | 0.14056188 | 0.00019264 |
| 5mo_SIGAD9_GTCTCACTCTGCACCT-1-10x  | 0.02144045 | 0.02625949 | 3.69E-05   |
| 5mo_SIGAD9_GTCTGTCGTCAAAGTA-1-10x  | 0.08923186 | 0.26763362 | 0.0042295  |
| 5mo_SIGAD9_GTCTTTAAGGTTGTTC-1-10x  | 0.04347326 | 0.10470825 | 8.29E-05   |
| 5mo_SIGAD9_GTGACGCGTGTATTGC-1-10x  | 0.03658668 | 0.0801883  | 5.82E-05   |
| 5mo_SIGAD9_GTGAGGACATGATGCT-1-10x  | 0.04447291 | 0.10826752 | 8.81E-05   |
| 5mo_SIGAD9_GTGATGTTTCGCTGCCA-1-10x | 0.0178238  | 0.01338227 | 3.44E-05   |
| 5mo_SIGAD9_GTGATGTTCTAGCAAC-1-10x  | 0.03193902 | 0.0636401  | 4.83E-05   |
| 5mo_SIGAD9_GTGGAGAAGTTTCGGT-1-10x  | 0.08488734 | 0.25216478 | 0.0036353  |
| 5mo_SIGAD9_GTGTCCTGTCGCAACC-1-10x  | 0.05567839 | 0.14816512 | 0.000233   |
| 5mo_SIGAD9_GTTACCCCAGTATTCG-1-10x  | 0.03213023 | 0.06432089 | 4.83E-05   |
| 5mo_SIGAD9_GTTAGACTCCATTGTT-1-10x  | 0.26885262 | 0.9071808  | 0.00075594 |
| 5mo_SIGAD9_GTTAGTGCAAATCGGG-1-10x  | 0.04233325 | 0.10064919 | 7.82E-05   |
| 5mo_SIGAD9_GTTAGTGTCGAGTTGT-1-10x  | 0.05536648 | 0.14705455 | 0.000233   |
| 5mo_SIGAD9_GTTCCGTTCAAGTGTC-1-10x  | 0.02477624 | 0.03813672 | 3.91E-05   |
| 5mo_SIGAD9_GTTGAACTCCTACGAA-1-10x  | 0.09406036 | 0.2848257  | 0.0044154  |
| 5mo_SIGAD9_GTTGCGGAGCGGGTAT-1-10x  | 0.13144454 | 0.41793364 | 0.001934   |
| 5mo_SIGAD9_GTTGCGGGTTAGAAAC-1-10x  | 0.1044746  | 0.32190606 | 0.0037215  |
| 5mo_SIGAD9_GTTGTAGCAGCAGAAC-1-10x  | 0.03106614 | 0.06053215 | 4.68E-05   |
| 5mo_SIGAD9_GTTGTCCCAATAGGAT-1-10x  | 0.06960348 | 0.19774598 | 0.0010821  |
| 5mo_SIGAD9_GTTTACTAGCAGTCTT-1-10x  | 0.24269904 | 0.8140599  | 0.00085764 |
| 5mo_SIGAD9_TAACCAGCATGTCAGT-1-10x  | 0.22938675 | 0.7666609  | 0.0009522  |
| 5mo_SIGAD9_TAAGCCAGTACCCGAC-1-10x  | 0.03119941 | 0.06100667 | 4.68E-05   |
| 5mo_SIGAD9_TAAGCCAGTGTTTAC-1-10x   | 0.06001453 | 0.16360413 | 0.00038577 |
| 5mo_SIGAD9_TAAGTCGAGTGGAATT-1-10x  | 0.03343776 | 0.06897642 | 5.17E-05   |
| 5mo_SIGAD9_TACATTCTCACCTGT-1-10x   | 0.08412777 | 0.2494603  | 0.0036353  |

|                                    |            |            |            |
|------------------------------------|------------|------------|------------|
| 5mo_SIGAD9_TACGGGCCACTTGGGC-1-10x  | 0.0423377  | 0.10066502 | 7.82E-05   |
| 5mo_SIGAD9_TACGGGCCAGACCTGC-1-10x  | 0.03847099 | 0.08689745 | 6.36E-05   |
| 5mo_SIGAD9_TACGGGCTCTAGTACG-1-10x  | 0.17391272 | 0.5691433  | 0.0015922  |
| 5mo_SIGAD9_TACTTACAGGCCTGAA-1-10x  | 0.02624087 | 0.04335159 | 4.09E-05   |
| 5mo_SIGAD9_TAGACCACAGACCTAT-1-10x  | 0.03825232 | 0.08611888 | 6.36E-05   |
| 5mo_SIGAD9_TAGACTGCATCTCGTC-1-10x  | 0.08764509 | 0.26198387 | 0.0040384  |
| 5mo_SIGAD9_TAGACTGGTACAGCGA-1-10x  | 0.04706391 | 0.11749289 | 0.00010777 |
| 5mo_SIGAD9_TAGAGTCTCGATGCAT-1-10x  | 0.08220174 | 0.2426026  | 0.0033032  |
| 5mo_SIGAD9_TAGGAGGTCTCCACTG-1-10x  | 0.02254163 | 0.03018029 | 3.76E-05   |
| 5mo_SIGAD9_TAGGGTTGTCCCTGAG-1-10x  | 0.13652639 | 0.43602777 | 0.0018891  |
| 5mo_SIGAD9_TAGGTACAGTCCCTAA-1-10x  | 0.02061688 | 0.02332713 | 3.62E-05   |
| 5mo_SIGAD9_TAGGTTGTACAATGC-1-10x   | 0.0202242  | 0.02192901 | 3.62E-05   |
| 5mo_SIGAD9_TAGGTTGTCCCTTGTC-1-10x  | 0.23046276 | 0.7704921  | 0.00094498 |
| 5mo_SIGAD9_TAGTGCAAGGTAGATT-1-10x  | 0.01725844 | 0.01136929 | 3.38E-05   |
| 5mo_SIGAD9_TATACCTAGATGCTAA-1-10x  | 0.04341553 | 0.10450268 | 8.29E-05   |
| 5mo_SIGAD9_TATACCTCCGTGGGT-1-10x   | 0.21227838 | 0.7057459  | 0.0010856  |
| 5mo_SIGAD9_TATATCCAGTACCGGA-1-10x  | 0.26635486 | 0.8982874  | 0.00075831 |
| 5mo_SIGAD9_TATATCCTCCGTGGCA-1-10x  | 0.26963896 | 0.9099806  | 0.00075499 |
| 5mo_SIGAD9_TATCTTGCAGTGTATC-1-10x  | 0.08085287 | 0.2377999  | 0.0029431  |
| 5mo_SIGAD9_TATGTTCTAGCACAG-1-10x   | 0.04054339 | 0.09427631 | 7.01E-05   |
| 5mo_SIGAD9_TATTCCAAGATAGCAT-1-10x  | 0.02247829 | 0.02995478 | 3.76E-05   |
| 5mo_SIGAD9_TATTTGAGAGCCCAA-1-10x   | 0.02119775 | 0.02539535 | 3.69E-05   |
| 5mo_SIGAD9_TATTTGAGTCAGCGA-1-10x   | 0.04399927 | 0.10658113 | 8.81E-05   |
| 5mo_SIGAD9_TATTTGGTGC GGCTT-1-10x  | 0.26690912 | 0.90026087 | 0.00075831 |
| 5mo_SIGAD9_TCACAAGCAAAGGAGA-1-10x  | 0.03808393 | 0.08551931 | 6.36E-05   |
| 5mo_SIGAD9_TCACAAGCAATTGTGC-1-10x  | 0.02319028 | 0.03248984 | 3.83E-05   |
| 5mo_SIGAD9_TCACAAGCATCATTTTC-1-10x | 0.02137093 | 0.02601199 | 3.69E-05   |
| 5mo_SIGAD9_TCACACCGTTGGGACA-1-10x  | 0.07995338 | 0.23459722 | 0.0027593  |
| 5mo_SIGAD9_TCACATTAGCCGTTGC-1-10x  | 0.02598498 | 0.04244047 | 4.09E-05   |
| 5mo_SIGAD9_TCACGCTAGTAATTGG-1-10x  | 0.14820725 | 0.47761795 | 0.0018713  |
| 5mo_SIGAD9_TCACTCGAGCATGATA-1-10x  | 0.25957566 | 0.8741498  | 0.00077499 |
| 5mo_SIGAD9_TCAGCAAGTAAGAACT-1-10x  | 0.22366793 | 0.74629885 | 0.00099599 |
| 5mo_SIGAD9_TCAGGTATCAAGAATG-1-10x  | 0.01997204 | 0.02103116 | 3.55E-05   |
| 5mo_SIGAD9_TCAGTCCGTCTGTGAT-1-10x  | 0.02105429 | 0.02488455 | 3.62E-05   |
| 5mo_SIGAD9_TCAGTGAGTGGTACAG-1-10x  | 0.02114688 | 0.02521423 | 3.69E-05   |
| 5mo_SIGAD9_TCAGTTTAGGAATGTT-1-10x  | 0.2716746  | 0.9172286  | 0.00075352 |
| 5mo_SIGAD9_TCATATCGTACGTTCA-1-10x  | 0.11913207 | 0.37409458 | 0.0023317  |
| 5mo_SIGAD9_TCATCATTCCAAAGGG-1-10x  | 0.01514142 | 0.00383154 | 3.27E-05   |
| 5mo_SIGAD9_TCATGAGCATAGAAAC-1-10x  | 0.2565264  | 0.8632928  | 0.00078463 |
| 5mo_SIGAD9_TCATGCCCAATGTTGC-1-10x  | 0.03687324 | 0.0812086  | 5.82E-05   |
| 5mo_SIGAD9_TCATGCCGTACCTAGT-1-10x  | 0.27096418 | 0.9146991  | 0.00075418 |

|                                    |            |            |            |
|------------------------------------|------------|------------|------------|
| 5mo_SIGAD9_TCATTACGTTTCCATT-1-10x  | 0.09255428 | 0.27946323 | 0.0044107  |
| 5mo_SIGAD9_TCATTCAGTTCCTTGC-1-10x  | 0.05299577 | 0.13861354 | 0.00017575 |
| 5mo_SIGAD9_TCATTGTGTGAGGAAA-1-10x  | 0.07349925 | 0.21161702 | 0.0015819  |
| 5mo_SIGAD9_TCATTTGGTCGAATTC-1-10x  | 0.20777349 | 0.689706   | 0.001126   |
| 5mo_SIGAD9_TCCACCATCGACATAC-1-10x  | 0.25561562 | 0.8600499  | 0.00078825 |
| 5mo_SIGAD9_TCCACGTAGCTCTGTA-1-10x  | 0.02794895 | 0.0494333  | 4.30E-05   |
| 5mo_SIGAD9_TCCGATCAGGTTACCT-1-10x  | 0.01773963 | 0.01308257 | 3.44E-05   |
| 5mo_SIGAD9_TCCGATCCACGCACCA-1-10x  | 0.22514176 | 0.75154644 | 0.00098137 |
| 5mo_SIGAD9_TCCGATCCATAGGCCGA-1-10x | 0.01732763 | 0.01161564 | 3.38E-05   |
| 5mo_SIGAD9_TCCTCGAGTCATGGCC-1-10x  | 0.04054892 | 0.09429599 | 7.01E-05   |
| 5mo_SIGAD9_TCCTGCATCACGGACC-1-10x  | 0.08956406 | 0.26881644 | 0.0042295  |
| 5mo_SIGAD9_TCGAACAAGTCCCAAT-1-10x  | 0.13782617 | 0.4406557  | 0.0018802  |
| 5mo_SIGAD9_TCGACGGTCCGAAATC-1-10x  | 0.01661592 | 0.00908156 | 3.38E-05   |
| 5mo_SIGAD9_TCGGGCAGTACAGAAT-1-10x  | 0.06608988 | 0.18523565 | 0.00072102 |
| 5mo_SIGAD9_TCGGGCATCGTCAAAC-1-10x  | 0.11657806 | 0.3650009  | 0.0025211  |
| 5mo_SIGAD9_TCGGTCTAGCGACCCT-1-10x  | 0.2550165  | 0.8579167  | 0.00078825 |
| 5mo_SIGAD9_TCGTGCTAGAGATGCC-1-10x  | 0.18555236 | 0.61058676 | 0.0013809  |
| 5mo_SIGAD9_TCGTGGGCAGTGTGCC-1-10x  | 0.16127725 | 0.5241542  | 0.0017883  |
| 5mo_SIGAD9_TCTACATCATTACAGGT-1-10x | 0.24403168 | 0.8188048  | 0.00084583 |
| 5mo_SIGAD9_TCTACATTCGTGCGAC-1-10x  | 0.24708118 | 0.8296627  | 0.0008292  |
| 5mo_SIGAD9_TCTCACGCAGCTATTG-1-10x  | 0.13373846 | 0.42610124 | 0.0019115  |
| 5mo_SIGAD9_TCTCTGGTCTTACGTT-1-10x  | 0.1534639  | 0.4963345  | 0.0018617  |
| 5mo_SIGAD9_TCTGCCAGTAACATCC-1-10x  | 0.04271348 | 0.10200302 | 7.82E-05   |
| 5mo_SIGAD9_TCTTGCGTCTTACGTT-1-10x  | 0.04954001 | 0.12630916 | 0.00013566 |
| 5mo_SIGAD9_TGAATCGTCAGAGCGA-1-10x  | 0.24454631 | 0.82063717 | 0.00084583 |
| 5mo_SIGAD9_TGACAGTGTGAGTGA-1-10x   | 0.24649656 | 0.8275811  | 0.00083459 |
| 5mo_SIGAD9_TGAGACTAGAAGCTCG-1-10x  | 0.26338863 | 0.88772607 | 0.00076511 |
| 5mo_SIGAD9_TGAGCATTCTGGTTGA-1-10x  | 0.25079367 | 0.84288114 | 0.00080923 |
| 5mo_SIGAD9_TGAGGAGTCGTAACAC-1-10x  | 0.08455012 | 0.2509641  | 0.0036353  |
| 5mo_SIGAD9_TGATCTTTCGGTCGAC-1-10x  | 0.08781742 | 0.26259747 | 0.0041422  |
| 5mo_SIGAD9_TGATTTCCAGACAATA-1-10x  | 0.02150266 | 0.02648101 | 3.69E-05   |
| 5mo_SIGAD9_TGCAGATCAGCGCTTG-1-10x  | 0.02700718 | 0.04608005 | 4.19E-05   |
| 5mo_SIGAD9_TGCATGAGTACGATTC-1-10x  | 0.05267929 | 0.13748671 | 0.00017575 |
| 5mo_SIGAD9_TGCATGAGTGGCAGAT-1-10x  | 0.26399508 | 0.8898853  | 0.00076313 |
| 5mo_SIGAD9_TGCCGAGCAGTCGGTC-1-10x  | 0.04664253 | 0.11599255 | 0.00010777 |
| 5mo_SIGAD9_TGCTCGTGTACGACC-1-10x   | 0.01642218 | 0.00839172 | 3.38E-05   |
| 5mo_SIGAD9_TGCTCGTGTACATCTAG-1-10x | 0.2850511  | 0.9648562  | 0.00075605 |
| 5mo_SIGAD9_TGCTCGTTCCTGTTGC-1-10x  | 0.04093365 | 0.09566587 | 7.40E-05   |
| 5mo_SIGAD9_TGGAGGACAATTTCTC-1-10x  | 0.28083575 | 0.9498472  | 0.00075348 |
| 5mo_SIGAD9_TGGAGGAGTCGCATGC-1-10x  | 0.02735576 | 0.04732122 | 4.19E-05   |
| 5mo_SIGAD9_TGGATCATCATGCGGC-1-10x  | 0.0481254  | 0.12127236 | 0.00011598 |

|                                    |            |            |            |
|------------------------------------|------------|------------|------------|
| 5mo_SIGAD9_TGGATCATCCGACATA-1-10x  | 0.02135934 | 0.0259707  | 3.69E-05   |
| 5mo_SIGAD9_TGGCGTGAGATTGACA-1-10x  | 0.25944734 | 0.87369287 | 0.00077499 |
| 5mo_SIGAD9_TGGCGTGAGCGCCTTG-1-10x  | 0.2927543  | 0.9922837  | 0.00076488 |
| 5mo_SIGAD9_TGGGAAGGTGCCGGTT-1-10x  | 0.12496919 | 0.39487788 | 0.0020803  |
| 5mo_SIGAD9_TGGGAGATCTATGCCC-1-10x  | 0.0974047  | 0.29673338 | 0.0042943  |
| 5mo_SIGAD9_TGGGCGTAGAGCTTTC-1-10x  | 0.2738357  | 0.92492324 | 0.00075233 |
| 5mo_SIGAD9_TGGGCTGTGAAGGAC-1-10x   | 0.02906615 | 0.05341112 | 4.42E-05   |
| 5mo_SIGAD9_TGGGTTACACACAGCC-1-10x  | 0.03269015 | 0.06631452 | 5.00E-05   |
| 5mo_SIGAD9_TGGGTTATCTCTCTTC-1-10x  | 0.04718667 | 0.11792997 | 0.00010777 |
| 5mo_SIGAD9_TGGTAGTTCGACTCCT-1-10x  | 0.12115081 | 0.3812824  | 0.0022308  |
| 5mo_SIGAD9_TGGTAGTTCTCGTTTA-1-10x  | 0.02817088 | 0.05022346 | 4.30E-05   |
| 5mo_SIGAD9_TGTAAGCGTACTCAG-1-10x   | 0.02498101 | 0.03886582 | 4.00E-05   |
| 5mo_SIGAD9_TGTGAGTGTGAATGAT-1-10x  | 0.03420925 | 0.07172333 | 5.17E-05   |
| 5mo_SIGAD9_TGTGGCGCAACTAC-1-10x    | 0.2752608  | 0.9299974  | 0.00075218 |
| 5mo_SIGAD9_TGTTCAATCGCCGAGT-1-10x  | 0.07027648 | 0.20014223 | 0.0011935  |
| 5mo_SIGAD9_TGTTCTAGTTTGTCT-1-10x   | 0.25968054 | 0.8745232  | 0.00077499 |
| 5mo_SIGAD9_TGTTGAGCAATGCAA-1-10x   | 0.23340353 | 0.7809628  | 0.00091657 |
| 5mo_SIGAD9_TGTTGAGCACACCGAC-1-10x  | 0.02078059 | 0.02391003 | 3.62E-05   |
| 5mo_SIGAD9_TGTTTGTAGAACCCGA-1-10x  | 0.08226462 | 0.24282648 | 0.0033032  |
| 5mo_SIGAD9_TGTTTGTGTTACCCAA-1-10x  | 0.019477   | 0.01926854 | 3.55E-05   |
| 5mo_SIGAD9_TTACAGGTGCGATTGA-1-10x  | 0.02532312 | 0.0400839  | 4.00E-05   |
| 5mo_SIGAD9_TTACAGGTCTGCCTCA-1-10x  | 0.01986516 | 0.0206506  | 3.55E-05   |
| 5mo_SIGAD9_TTACCATTCTGTGTGA-1-10x  | 0.29016867 | 0.98307747 | 0.00076163 |
| 5mo_SIGAD9_TTACCGCAGTAGCTCT-1-10x  | 0.03974852 | 0.09144615 | 6.67E-05   |
| 5mo_SIGAD9_TTAGGCAGTGGCTACC-1-10x  | 0.04106141 | 0.09612074 | 7.40E-05   |
| 5mo_SIGAD9_TTCAATCTCGAGAATA-1-10x  | 0.03727494 | 0.08263885 | 6.07E-05   |
| 5mo_SIGAD9_TTCAGGAGTTGTGCAT-1-10x  | 0.2782602  | 0.94067687 | 0.00075239 |
| 5mo_SIGAD9_TTCATGTTCTTTGAT-1-10x   | 0.18357478 | 0.6035455  | 0.0014268  |
| 5mo_SIGAD9_TTCCAATAGGGCGAAG-1-10x  | 0.03244983 | 0.06545886 | 5.00E-05   |
| 5mo_SIGAD9_TTCCAATTCTCAGGCG-1-10x  | 0.0302271  | 0.05754475 | 4.55E-05   |
| 5mo_SIGAD9_TTCCACGAGACGGAAA-1-10x  | 0.1122303  | 0.34952053 | 0.0028393  |
| 5mo_SIGAD9_TTCGATTCAGCGACAA-1-10x  | 0.11235283 | 0.3499568  | 0.0028393  |
| 5mo_SIGAD9_TTCTAACGTATCCTCC-1-10x  | 0.11676402 | 0.36566305 | 0.0025211  |
| 5mo_SIGAD9_TTCTCTCTACCATGA-1-10x   | 0.120436   | 0.37873727 | 0.0022788  |
| 5mo_SIGAD9_TTCTTGAAGTTACGTC-1-10x  | 0.02683435 | 0.04546469 | 4.19E-05   |
| 5mo_SIGAD9_TTGAACGGTCAACGCC-1-10x  | 0.06393316 | 0.17755656 | 0.00058553 |
| 5mo_SIGAD9_TTGATGGAGCACGATG-1-10x  | 0.04571834 | 0.11270195 | 0.00010046 |
| 5mo_SIGAD9_TTGCGTCCAACCTCCCT-1-10x | 0.03263294 | 0.06611081 | 5.00E-05   |
| 5mo_SIGAD9_TTGTTTTTCGTCCTCA-1-10x  | 0.0470359  | 0.11739317 | 0.00010777 |
| 5mo_SIGAD9_TTGTGGACAGCACCCA-1-10x  | 0.01765991 | 0.01279873 | 3.44E-05   |
| 5mo_SIGAD9_TTGTTTCATCTTCCCAG-1-10x | 0.09744886 | 0.29689062 | 0.0042943  |

|                                           |            |            |            |
|-------------------------------------------|------------|------------|------------|
| 5mo_SIGAD9_TTGTTTGGTGCGTGCT-1-10x         | 0.18508023 | 0.60890573 | 0.0013959  |
| 5mo_SIGAD9_TTGTTTGTCACTCACC-1-10x         | 0.02774484 | 0.04870654 | 4.30E-05   |
| 5mo_SIGAD9_TTGTTTGTGACACCCG-1-10x         | 0.04724092 | 0.11812314 | 0.00010777 |
| 5mo_SIGAD9_TTTACCAAGTCTTACAG-1-10x        | 0.0428659  | 0.10254569 | 8.29E-05   |
| 5mo_SIGAD9_TTTACGTGTTTACGTG-1-10x         | 0.02731254 | 0.04716731 | 4.19E-05   |
| 5mo_SIGAD9_TTTAGTCGTTGCCATA-1-10x         | 0.09200751 | 0.27751645 | 0.0043903  |
| 5mo_SIGAD9_TTTTCATGCAACTTGCA-1-10x        | 0.03814437 | 0.08573449 | 6.36E-05   |
| 5mo_SIGAD9_TTTGACTCAAACACCT-1-10x         | 0.01798612 | 0.01396023 | 3.44E-05   |
| 5mo_SIGAD9_TTTGGAGCAGAGTCTT-1-10x         | 0.02591706 | 0.04219867 | 4.09E-05   |
| 7dr2_7dold_SITTB4_AAGTCGTAGTAGGCCA-1-10x  | 0.0978439  | 0.29829717 | 0.0042943  |
| 7dr2_7dold_SITTB4_ACACAGTAGCGATGCA-1-10x  | 0.06281952 | 0.1735914  | 0.00052741 |
| 7dr2_7dold_SITTB4_ACCACAAGTCGTTCAA-1-10x  | 0.09130327 | 0.27500898 | 0.0043535  |
| 7dr2_7dold_SITTB4_ACCCTCATCTTTCCAA-1-10x  | 0.0200148  | 0.02118341 | 3.55E-05   |
| 7dr2_7dold_SITTB4_ACTTTCAGTGTTCCAA-1-10x  | 0.129733   | 0.4118396  | 0.0019639  |
| 7dr2_7dold_SITTB4_ACTTTGTAGGTGCCAA-1-10x  | 0.10736686 | 0.33220404 | 0.0034182  |
| 7dr2_7dold_SITTB4_AGAGCAGTCGGACCAC-1-10x  | 0.07613144 | 0.22098906 | 0.0020486  |
| 7dr2_7dold_SITTB4_AGCGTATGTTACCCTC-1-10x  | 0.06517369 | 0.18197352 | 0.00064991 |
| 7dr2_7dold_SITTB4_AGGATCTGTGCGAACA-1-10x  | 0.08821792 | 0.26402345 | 0.0041422  |
| 7dr2_7dold_SITTB4_AGGGTTTTCTTCGACC-1-10x  | 0.04340462 | 0.10446385 | 8.29E-05   |
| 7dr2_7dold_SITTB4_AGGTAGGCACAGTCCG-1-10x  | 0.04624859 | 0.11458991 | 0.00010046 |
| 7dr2_7dold_SITTB4_AGGTGTTGTTAAGTCC-1-10x  | 0.04253417 | 0.10136455 | 7.82E-05   |
| 7dr2_7dold_SITTB4_ATGTCTTGTCGCGTA-1-10x   | 0.02599525 | 0.04247705 | 4.09E-05   |
| 7dr2_7dold_SITTB4_ATTTACCAGACGACGT-1-10x  | 0.04308007 | 0.10330827 | 8.29E-05   |
| 7dr2_7dold_SITTB4_CAGATACCAAATCAGA-1-10x  | 0.06321803 | 0.17501031 | 0.00052741 |
| 7dr2_7dold_SITTB4_CAGCACGAGGCCTTCG-1-10x  | 0.04993946 | 0.12773141 | 0.00013566 |
| 7dr2_7dold_SITTB4_CAGGCCAAGATGGCAC-1-10x  | 0.08695398 | 0.25952312 | 0.0040384  |
| 7dr2_7dold_SITTB4_CATCGTCAGGGTGAGG-1-10x  | 0.28367156 | 0.95994425 | 0.00075531 |
| 7dr2_7dold_SITTB4_CATTCCGTCAGCCTTC-1-10x  | 0.03806352 | 0.08544664 | 6.36E-05   |
| 7dr2_7dold_SITTB4_CCATCACGTACTTCCC-1-10x  | 0.0398627  | 0.09185267 | 6.67E-05   |
| 7dr2_7dold_SITTB4_CCGGTGAGTTGATCGT-1-10x  | 0.02951072 | 0.05499402 | 4.42E-05   |
| 7dr2_7dold_SITTB4_CTAGACATCGAGTCTA-1-10x  | 0.08875337 | 0.26592997 | 0.0042295  |
| 7dr2_7dold_SITTB4_CTATAGGCACAGTGAG-1-10x  | 0.1283648  | 0.4069681  | 0.0019821  |
| 7dr2_7dold_SITTB4_CTCATCGCATGACGAG-1-10x  | 0.06042632 | 0.16507033 | 0.00038577 |
| 7dr2_7dold_SITTB4_CTGAATGTCAGAGCGA-1-10x  | 0.0355145  | 0.07637074 | 5.58E-05   |
| 7dr2_7dold_SITTB4_GACGCTGCAGACAAAT-1-10x  | 0.01748751 | 0.0121849  | 3.44E-05   |
| 7dr2_7dold_SITTB4_GAGTTTGGTGTCTTCC-1-10x  | 0.04569246 | 0.11260977 | 0.00010046 |
| 7dr2_7dold_SITTB4_GGATGTTAGGTCACAG-1-10x  | 0.07935689 | 0.2324734  | 0.0027593  |
| 7dr2_7dold_SITTB4_GGTGATTTCTCCGATC-1-10x  | 0.09174814 | 0.27659294 | 0.0043903  |
| 7dr2_7dold_SITTB4_GTATTTTCGTATTCCTT-1-10x | 0.08239966 | 0.24330729 | 0.0033032  |
| 7dr2_7dold_SITTB4_GTCCTCACAGTCACGC-1-10x  | 0.08189463 | 0.24150911 | 0.0031253  |
| 7dr2_7dold_SITTB4_GTGTTAGGTAGAGACC-1-10x  | 0.06538189 | 0.18271483 | 0.00072102 |



|                                          |            |            |            |
|------------------------------------------|------------|------------|------------|
| 7dr2_7dold_SITTB4_GTTACAGGTAACGATA-1-10x | 0.10603636 | 0.32746676 | 0.00352    |
| 7dr2_7dold_SITTB4_TCGCACTTCACTGGTA-1-10x | 0.1192621  | 0.37455755 | 0.0023317  |
| 7dr2_7dold_SITTB4_TGAGACTTCAGAGTTC-1-10x | 0.06655549 | 0.1868935  | 0.00079936 |
| 7dr2_7dold_SITTB4_TGATTCTCATATGGCT-1-10x | 0.08584923 | 0.25558963 | 0.0037839  |
| 7dr2_7dold_SITTB4_TGCATCCGTCCTCATC-1-10x | 0.05376688 | 0.14135912 | 0.00019264 |
| 7dr2_7dold_SITTB4_TGCTCGTGTTATTCTC-1-10x | 0.03236422 | 0.06515405 | 4.83E-05   |
| 7dr2_7dold_SITTB4_TTACTGTGTTGTCTAG-1-10x | 0.019049   | 0.01774464 | 3.49E-05   |
| 7dr2_7dold_SITTB4_TTGACCCCAACTACGT-1-10x | 0.08398908 | 0.24896652 | 0.0034742  |
| 3d7d_SITTB7_AAGAACAAGGTAACATA-1-10x      | 0.01965796 | 0.01991286 | 3.55E-05   |
| 3d7d_SITTB7_ACCTGTCAGCTAGTTC-1-10x       | 0.01881146 | 0.01689888 | 3.49E-05   |
| 3d7d_SITTB7_ACTATTTCGTTTGAACC-1-10x      | 0.10255671 | 0.31507733 | 0.0039137  |
| 3d7d_SITTB7_AGGTAGGGTGTACAGG-1-10x       | 0.01941629 | 0.01905239 | 3.55E-05   |
| 3d7d_SITTB7_AGGTCATCAGGACGAT-1-10x       | 0.01763472 | 0.01270905 | 3.44E-05   |
| 3d7d_SITTB7_AGTAGCTAGTATTCCG-1-10x       | 0.0255105  | 0.04075108 | 4.00E-05   |
| 3d7d_SITTB7_CAATACGGTTCGCGAG-1-10x       | 0.02237859 | 0.02959979 | 3.76E-05   |
| 3d7d_SITTB7_CAGGGCTCATAGGAGC-1-10x       | 0.02749915 | 0.04783173 | 4.19E-05   |
| 3d7d_SITTB7_CATACTTCACCCTTGT-1-10x       | 0.02172548 | 0.02727435 | 3.69E-05   |
| 3d7d_SITTB7_CATCCGTTCCCTATTA-1-10x       | 0.03281395 | 0.06675531 | 5.00E-05   |
| 3d7d_SITTB7_CCAATTTTCAGTAACAA-1-10x      | 0.02418705 | 0.03603886 | 3.91E-05   |
| 3d7d_SITTB7_CCGTAGGCAAACAACTAAG-1-10x    | 0.01738485 | 0.01181938 | 3.44E-05   |
| 3d7d_SITTB7_CCTGCATAGGTCCAGA-1-10x       | 0.01866713 | 0.01638496 | 3.49E-05   |
| 3d7d_SITTB7_CGGAGAACATCCCCTACT-1-10x     | 0.02034347 | 0.02235365 | 3.62E-05   |
| 3d7d_SITTB7_CTGCATCTCCGTACGG-1-10x       | 0.12225569 | 0.38521636 | 0.0021873  |
| 3d7d_SITTB7_GATCCCTAGTGCCGAA-1-10x       | 0.09652285 | 0.29359353 | 0.0043435  |
| 3d7d_SITTB7_GATGGAGTCCAACACTAG-1-10x     | 0.04376155 | 0.1057347  | 8.81E-05   |
| 3d7d_SITTB7_GCGGAAATCTGTTCAT-1-10x       | 0.02633952 | 0.04370285 | 4.09E-05   |
| 3d7d_SITTB7_GCGTTTCGTGGTCTGC-1-10x       | 0.01985556 | 0.02061645 | 3.55E-05   |
| 3d7d_SITTB7_TATTCCATCTTTCTAG-1-10x       | 0.01671747 | 0.00944312 | 3.38E-05   |
| 3d7d_SITTB7_TCAAGACAGGGCCAAT-1-10x       | 0.02057575 | 0.02318068 | 3.62E-05   |
| 3d7d_SITTB7_TCAGGTAAGTCTAGAA-1-10x       | 0.01608859 | 0.00720399 | 3.33E-05   |
| 3d7d_SITTB7_TCATCCGAGATGAATC-1-10x       | 0.02040172 | 0.02256105 | 3.62E-05   |
| 3d7d_SITTB7_TCGTGGGTCTTACTGT-1-10x       | 0.01767434 | 0.0128501  | 3.44E-05   |
| 3d7d_SITTB7_TGAGCGCAGGTACTGG-1-10x       | 0.08357159 | 0.24748    | 0.0034742  |
| 3d7d_SITTB7_TGGAGGACACGTACAT-1-10x       | 0.03320723 | 0.06815559 | 5.00E-05   |
| 3d7d_SITTB7_TTAATCCAGGTAGGCT-1-10x       | 0.02593487 | 0.04226206 | 4.09E-05   |
| 3d7d_SITTB7_TTCGATTTCCGTGTAA-1-10x       | 0.05442075 | 0.14368725 | 0.00021164 |
| 3d7d_SITTB7_TTTCCTCGTAACCAGG-1-10x       | 0.01812187 | 0.01444356 | 3.44E-05   |
| 2w4w_SITTC4_AAACGAAGTGA CTCTA-1-10x      | 0.01763498 | 0.01270996 | 3.44E-05   |
| 2w4w_SITTC4_AAAGAACAGCCTAGGA-1-10x       | 0.06303241 | 0.17434941 | 0.00052741 |
| 2w4w_SITTC4_AAAGGATGTCTCATC-1-10x        | 0.02536443 | 0.04023098 | 4.00E-05   |
| 2w4w_SITTC4_AAAGTGAAGGGAGAAT-1-10x       | 0.04604926 | 0.11388019 | 0.00010046 |

|                                    |            |            |            |
|------------------------------------|------------|------------|------------|
| 2w4w_SITTC4_AAATGGATCACGTAGT-1-10x | 0.05256591 | 0.13708301 | 0.00017575 |
| 2w4w_SITTC4_AACAAAGGTTCTGAGT-1-10x | 0.03872148 | 0.08778931 | 6.36E-05   |
| 2w4w_SITTC4_AACAACCGTTCTCCTG-1-10x | 0.01691846 | 0.01015877 | 3.38E-05   |
| 2w4w_SITTC4_AACACACCAGTTGGTT-1-10x | 0.2486671  | 0.83530945 | 0.00081888 |
| 2w4w_SITTC4_AACACACGTGTCCAAT-1-10x | 0.08795287 | 0.26307973 | 0.0041422  |
| 2w4w_SITTC4_AACCAACTCAGAATAG-1-10x | 0.05008085 | 0.12823483 | 0.00013566 |
| 2w4w_SITTC4_AACCAACTCCGGCAAC-1-10x | 0.22937453 | 0.7666174  | 0.0009522  |
| 2w4w_SITTC4_AACCACAAGTCACACT-1-10x | 0.03992602 | 0.09207815 | 7.01E-05   |
| 2w4w_SITTC4_AACCATGCACAGCCAC-1-10x | 0.03327389 | 0.06839295 | 5.00E-05   |
| 2w4w_SITTC4_AACCCAATCAGCATTG-1-10x | 0.04069511 | 0.09481653 | 7.01E-05   |
| 2w4w_SITTC4_AACCTTTGTAGCACGA-1-10x | 0.02317821 | 0.03244686 | 3.83E-05   |
| 2w4w_SITTC4_AAGAACACAAGTCATC-1-10x | 0.16994104 | 0.555002   | 0.0016584  |
| 2w4w_SITTC4_AAGACAAAGTCTCTGA-1-10x | 0.02570136 | 0.04143065 | 4.00E-05   |
| 2w4w_SITTC4_AAGACTCTCACCTCTG-1-10x | 0.08507905 | 0.25284737 | 0.0037839  |
| 2w4w_SITTC4_AAGATAGCACAAATAG-1-10x | 0.02352229 | 0.03367196 | 3.83E-05   |
| 2w4w_SITTC4_AAGCCATGTCTCTCAC-1-10x | 0.01666104 | 0.00924221 | 3.38E-05   |
| 2w4w_SITTC4_AAGCGAGAGCAGATAT-1-10x | 0.04426771 | 0.1075369  | 8.81E-05   |
| 2w4w_SITTC4_AAGGAATGTGTCTAAC-1-10x | 0.11900074 | 0.37362698 | 0.0023317  |
| 2w4w_SITTC4_AAGTGAATCAGTCACA-1-10x | 0.04403888 | 0.10672215 | 8.81E-05   |
| 2w4w_SITTC4_AATCGACAGAGGGTGG-1-10x | 0.04639459 | 0.11510977 | 0.00010046 |
| 2w4w_SITTC4_AATCGACCAGGCGAAT-1-10x | 0.1036519  | 0.3189768  | 0.0038193  |
| 2w4w_SITTC4_AATGGAAAGACGCCCT-1-10x | 0.03513629 | 0.07502411 | 5.37E-05   |
| 2w4w_SITTC4_AATGGAATCTAGAGCT-1-10x | 0.17354909 | 0.5678486  | 0.0015922  |
| 2w4w_SITTC4_AATTCTGTACTGCGC-1-10x  | 0.03538193 | 0.07589873 | 5.58E-05   |
| 2w4w_SITTC4_ACAAAGAAGCTGAGTG-1-10x | 0.23721425 | 0.79453105 | 0.00088935 |
| 2w4w_SITTC4_ACACCAAAGGTACCTT-1-10x | 0.05712133 | 0.15330276 | 0.00028394 |
| 2w4w_SITTC4_ACACCAACATGACTGT-1-10x | 0.05431854 | 0.14332332 | 0.00021164 |
| 2w4w_SITTC4_ACAGAAAAGATCCTAC-1-10x | 0.24843068 | 0.83446765 | 0.00081888 |
| 2w4w_SITTC4_ACATCGATCAAAGCCT-1-10x | 0.10229866 | 0.31415853 | 0.0039137  |
| 2w4w_SITTC4_ACCAAACTCGTGGGTC-1-10x | 0.18495314 | 0.6084532  | 0.0013959  |
| 2w4w_SITTC4_ACCTGTCTCATTCCA-1-10x  | 0.16232829 | 0.52789646 | 0.001776   |
| 2w4w_SITTC4_ACGATCAAGCGATGGT-1-10x | 0.01679036 | 0.00970264 | 3.38E-05   |
| 2w4w_SITTC4_ACGCACGAGTCGCTAT-1-10x | 0.15257119 | 0.49315593 | 0.0018651  |
| 2w4w_SITTC4_ACGGGTCAGACTTCGT-1-10x | 0.02293184 | 0.03156967 | 3.76E-05   |
| 2w4w_SITTC4_ACTACGAGTATGAAGT-1-10x | 0.05766653 | 0.15524398 | 0.00028394 |
| 2w4w_SITTC4_ACTATGGGTACGACAG-1-10x | 0.03929566 | 0.0898337  | 6.67E-05   |
| 2w4w_SITTC4_ACTATGGGTGGTCTTA-1-10x | 0.04824803 | 0.12170902 | 0.00011598 |
| 2w4w_SITTC4_ACTATTCCAACGCATT-1-10x | 0.04132907 | 0.09707375 | 7.40E-05   |
| 2w4w_SITTC4_ACTATTCTCATGGAGG-1-10x | 0.08033777 | 0.23596585 | 0.0029431  |
| 2w4w_SITTC4_ACTCTCGGTCGTAATC-1-10x | 0.017022   | 0.01052743 | 3.38E-05   |
| 2w4w_SITTC4_ACTTCCGTCATGAAAG-1-10x | 0.04597902 | 0.11363011 | 0.00010046 |

|                                    |            |            |            |
|------------------------------------|------------|------------|------------|
| 2w4w_SITTC4_AGAAATGCACAGTCAT-1-10x | 0.04952167 | 0.12624387 | 0.00013566 |
| 2w4w_SITTC4_AGAACCTAGGTAAAGG-1-10x | 0.01968497 | 0.02000905 | 3.55E-05   |
| 2w4w_SITTC4_AGAAGCGTCTACCACC-1-10x | 0.05440104 | 0.14361706 | 0.00021164 |
| 2w4w_SITTC4_AGATAGATCAGCCTCT-1-10x | 0.01802933 | 0.01411405 | 3.44E-05   |
| 2w4w_SITTC4_AGATCCAGTGCTTCAA-1-10x | 0.07594327 | 0.22031906 | 0.0020486  |
| 2w4w_SITTC4_AGATCGTTCTGGAGAG-1-10x | 0.05090325 | 0.13116302 | 0.00014746 |
| 2w4w_SITTC4_AGCATCATCGAAATCC-1-10x | 0.10265201 | 0.31541663 | 0.0039137  |
| 2w4w_SITTC4_AGCCACGCAGTGGTGA-1-10x | 0.09810785 | 0.29923695 | 0.0042943  |
| 2w4w_SITTC4_AGCGTATTCGTTTCA-1-10x  | 0.04335971 | 0.10430393 | 8.29E-05   |
| 2w4w_SITTC4_AGCTCAAAGAAATGGG-1-10x | 0.02417783 | 0.03600603 | 3.91E-05   |
| 2w4w_SITTC4_AGCTTCCAGGATATAC-1-10x | 0.07905721 | 0.23140636 | 0.002576   |
| 2w4w_SITTC4_AGGACTTAGGGAGTTC-1-10x | 0.03044679 | 0.05832693 | 4.55E-05   |
| 2w4w_SITTC4_AGGATAAAGGCAGGTT-1-10x | 0.25233158 | 0.84835696 | 0.00080028 |
| 2w4w_SITTC4_AGGGCTCAGCAGCACA-1-10x | 0.02875072 | 0.05228802 | 4.42E-05   |
| 2w4w_SITTC4_AGGGTGACAAATTGGA-1-10x | 0.01613046 | 0.00735306 | 3.33E-05   |
| 2w4w_SITTC4_AGGTCTACAGACCCGT-1-10x | 0.0903034  | 0.27144888 | 0.0042999  |
| 2w4w_SITTC4_AGGTTACCAGTCTGGC-1-10x | 0.04445685 | 0.10821034 | 8.81E-05   |
| 2w4w_SITTC4_AGTACCAAGTAGGGTC-1-10x | 0.07293626 | 0.20961247 | 0.0015819  |
| 2w4w_SITTC4_AGTACTGTCTAACGCA-1-10x | 0.0294882  | 0.05491385 | 4.42E-05   |
| 2w4w_SITTC4_AGTAGCTCACGGTGTC-1-10x | 0.0402458  | 0.09321673 | 7.01E-05   |
| 2w4w_SITTC4_AGTCACACAAAGACTA-1-10x | 0.04669146 | 0.11616676 | 0.00010777 |
| 2w4w_SITTC4_AGTCATGGTGCGTAA-1-10x  | 0.01506997 | 0.00357713 | 3.27E-05   |
| 2w4w_SITTC4_AGTCTCCAGGTCGAGT-1-10x | 0.02029982 | 0.02219825 | 3.62E-05   |
| 2w4w_SITTC4_AGTGATCGTCTCACAA-1-10x | 0.04296647 | 0.10290381 | 8.29E-05   |
| 2w4w_SITTC4_AGTGTTGCATGTGACT-1-10x | 0.07524246 | 0.2178238  | 0.001885   |
| 2w4w_SITTC4_AGTTCCAGCTAGCCC-1-10x  | 0.02394079 | 0.03516204 | 3.91E-05   |
| 2w4w_SITTC4_AGTTCCCGTGTGTTTG-1-10x | 0.04357303 | 0.10506347 | 8.29E-05   |
| 2w4w_SITTC4_ATACCTTCAATTCGTG-1-10x | 0.05220339 | 0.13579224 | 0.00017575 |
| 2w4w_SITTC4_ATACTTCGTAGATCGG-1-10x | 0.04564218 | 0.11243077 | 0.00010046 |
| 2w4w_SITTC4_ATACTTCTCCGAAGGA-1-10x | 0.04580118 | 0.1129969  | 0.00010046 |
| 2w4w_SITTC4_ATAGACCGTGGTCAAG-1-10x | 0.05906849 | 0.16023572 | 0.00034795 |
| 2w4w_SITTC4_ATAGAGAAGCGGTATG-1-10x | 0.04636896 | 0.1150185  | 0.00010046 |
| 2w4w_SITTC4_ATCACAGGTCATGGCC-1-10x | 0.07464923 | 0.21571158 | 0.0017292  |
| 2w4w_SITTC4_ATCACAGGTGTTTACG-1-10x | 0.08690454 | 0.2593471  | 0.0040384  |
| 2w4w_SITTC4_ATCACGATCTCATAGG-1-10x | 0.08691672 | 0.25939047 | 0.0040384  |
| 2w4w_SITTC4_ATCATTCAGATTGAGT-1-10x | 0.25070143 | 0.8425527  | 0.00080923 |
| 2w4w_SITTC4_ATCCACCAAGTTTGC-1-10x  | 0.04258417 | 0.10154259 | 7.82E-05   |
| 2w4w_SITTC4_ATCGGATAGCGAGAAA-1-10x | 0.1641037  | 0.5342179  | 0.0017494  |
| 2w4w_SITTC4_ATCGGCGGTATGGAAT-1-10x | 0.05050668 | 0.12975103 | 0.00014746 |
| 2w4w_SITTC4_ATCGTGATCGTTGTGA-1-10x | 0.02702578 | 0.0461463  | 4.19E-05   |
| 2w4w_SITTC4_ATGAGGGAGACCTCCG-1-10x | 0.02252993 | 0.03013865 | 3.76E-05   |

|                                    |            |            |            |
|------------------------------------|------------|------------|------------|
| 2w4w_SITTC4_ATGAGTCAGCTCCATA-1-10x | 0.07264043 | 0.20855919 | 0.0014433  |
| 2w4w_SITTC4_ATGCATGTCTCCGAGG-1-10x | 0.20233208 | 0.67033166 | 0.0011792  |
| 2w4w_SITTC4_ATGGGAGGTTTAGTCG-1-10x | 0.04853363 | 0.1227259  | 0.00012523 |
| 2w4w_SITTC4_ATGGGTTTCGTAAGT-1-10x  | 0.08352748 | 0.24732296 | 0.0034742  |
| 2w4w_SITTC4_ATGTCCCCACGTA-1-10x    | 0.03301035 | 0.06745462 | 5.00E-05   |
| 2w4w_SITTC4_ATTATCCGTAGGACTG-1-10x | 0.11784898 | 0.36952606 | 0.002453   |
| 2w4w_SITTC4_ATTCCTAAGAAACT-1-10x   | 0.2800752  | 0.9471392  | 0.00075303 |
| 2w4w_SITTC4_ATTCCTAGTTCGTGCG-1-10x | 0.04458014 | 0.10864931 | 8.81E-05   |
| 2w4w_SITTC4_ATTGGGTCATTGACAC-1-10x | 0.04789767 | 0.12046153 | 0.00011598 |
| 2w4w_SITTC4_ATTGGGTGTATCCTTT-1-10x | 0.05465341 | 0.14451563 | 0.00021164 |
| 2w4w_SITTC4_ATTGGGTTCTGATAG-1-10x  | 0.03782397 | 0.08459371 | 6.07E-05   |
| 2w4w_SITTC4_ATTGTTCTCGCTCATC-1-10x | 0.24922448 | 0.837294   | 0.00081888 |
| 2w4w_SITTC4_ATTTACCATAACTCG-1-10x  | 0.04533862 | 0.11134993 | 9.39E-05   |
| 2w4w_SITTC4_ATTTCTGCATGCAGGA-1-10x | 0.04214341 | 0.09997325 | 7.82E-05   |
| 2w4w_SITTC4_CAACAACAGTCTGCGC-1-10x | 0.21351723 | 0.71015686 | 0.0010778  |
| 2w4w_SITTC4_CAACGGCGTGGGCTTC-1-10x | 0.01964226 | 0.01985697 | 3.55E-05   |
| 2w4w_SITTC4_CAAGCTAGTTAACAGA-1-10x | 0.10069288 | 0.30844107 | 0.0040879  |
| 2w4w_SITTC4_CAATGACCACCTATCC-1-10x | 0.25980845 | 0.87497866 | 0.00077221 |
| 2w4w_SITTC4_CAATGACGTGACGCT-1-10x  | 0.17903812 | 0.5873925  | 0.0014915  |
| 2w4w_SITTC4_CAATTTAGCTAAATG-1-10x  | 0.02645461 | 0.04411262 | 4.09E-05   |
| 2w4w_SITTC4_CACAGGCCAAAGGCGT-1-10x | 0.28208733 | 0.9543035  | 0.00075401 |
| 2w4w_SITTC4_CACCAAAGTAAGCGGT-1-10x | 0.02568153 | 0.04136004 | 4.00E-05   |
| 2w4w_SITTC4_CACCGTTTCTAGGCCG-1-10x | 0.04309532 | 0.10336258 | 8.29E-05   |
| 2w4w_SITTC4_CAGCACGGTTATGTCG-1-10x | 0.1922053  | 0.6342748  | 0.0012861  |
| 2w4w_SITTC4_CAGGCCACACGTA-1-10x    | 0.04083847 | 0.09532694 | 7.40E-05   |
| 2w4w_SITTC4_CATAAGCGTAAGGCTG-1-10x | 0.08686994 | 0.2592239  | 0.0040384  |
| 2w4w_SITTC4_CATACAGAGTTTCGGT-1-10x | 0.09435171 | 0.28586307 | 0.0044154  |
| 2w4w_SITTC4_CATACTTGTCTGTCCT-1-10x | 0.03165175 | 0.06261726 | 4.83E-05   |
| 2w4w_SITTC4_CATCAAGAGAGAAGGT-1-10x | 0.04138487 | 0.09727245 | 7.40E-05   |
| 2w4w_SITTC4_CATCAAGAGAGCTTTC-1-10x | 0.02433547 | 0.03656735 | 3.91E-05   |
| 2w4w_SITTC4_CATCCGTAGGGTTAGC-1-10x | 0.05918531 | 0.16065164 | 0.00034795 |
| 2w4w_SITTC4_CATCGCTCAGGACATG-1-10x | 0.01866112 | 0.01636357 | 3.49E-05   |
| 2w4w_SITTC4_CATGCCTCATTCTCCG-1-10x | 0.01840769 | 0.01546124 | 3.49E-05   |
| 2w4w_SITTC4_CATGCTCCAGCCATTA-1-10x | 0.09327158 | 0.2820172  | 0.0044107  |
| 2w4w_SITTC4_CATTCATAGGAGGCAG-1-10x | 0.04508325 | 0.11044066 | 9.39E-05   |
| 2w4w_SITTC4_CATTCCGAGATTAGCA-1-10x | 0.24526566 | 0.82319844 | 0.00084014 |
| 2w4w_SITTC4_CATTGAGTCTACACAG-1-10x | 0.05200277 | 0.13507792 | 0.00016076 |
| 2w4w_SITTC4_CCACAAAAGGCAGTCA-1-10x | 0.07507488 | 0.21722713 | 0.001885   |
| 2w4w_SITTC4_CCACAAAGTCGAATGG-1-10x | 0.01791288 | 0.01369943 | 3.44E-05   |
| 2w4w_SITTC4_CCACGTTGTGTATTGC-1-10x | 0.01960852 | 0.01973684 | 3.55E-05   |
| 2w4w_SITTC4_CCATAAGGTCTGTCC-1-10x  | 0.11233058 | 0.34987757 | 0.0028393  |

|                                        |            |            |            |
|----------------------------------------|------------|------------|------------|
| 2w4w_SITTC4_CCCTAACTCGGTTAGT-1-10x     | 0.02100188 | 0.02469795 | 3.62E-05   |
| 2w4w_SITTC4_CCCTTAGTCTATGCCC-1-10x     | 0.08981738 | 0.26971838 | 0.0042999  |
| 2w4w_SITTC4_CCGAACGAGCAAGTCG-1-10x     | 0.03890298 | 0.08843558 | 6.36E-05   |
| 2w4w_SITTC4_CCGGGTAGTCATTCCC-1-10x     | 0.08687431 | 0.2592395  | 0.0040384  |
| 2w4w_SITTC4_CCGGTAGTCGCCTTGT-1-10x     | 0.09766886 | 0.2976739  | 0.0042943  |
| 2w4w_SITTC4_CCGTGAGAGCCACCGT-1-10x     | 0.24785583 | 0.8324208  | 0.00082396 |
| 2w4w_SITTC4_CCGTGAGCACACGTGC-1-10x     | 0.08221486 | 0.24264932 | 0.0033032  |
| 2w4w_SITTC4_CCGTGAGCACCGGTCA-1-10x     | 0.1103456  | 0.34280998 | 0.0031181  |
| 2w4w_SITTC4_CCTAAGATCCGATTAG-1-10x     | 0.06572878 | 0.18394993 | 0.00072102 |
| 2w4w_SITTC4_CCTATCGTCGTCTCAC-1-10x     | 0.17968585 | 0.5896988  | 0.0014915  |
| 2w4w_SITTC4_CCTCCAAGTAGCTTAC-1-10x     | 0.03163884 | 0.0625713  | 4.83E-05   |
| 2w4w_SITTC4_CCTCCTCCAGTATACC-1-10x     | 0.04504159 | 0.11029233 | 9.39E-05   |
| 2w4w_SITTC4_CGAAGGATCACTGTCC-1-10x     | 0.03709802 | 0.08200894 | 6.07E-05   |
| 2w4w_SITTC4_CGAGTTAAGACCAAGC-1-10x     | 0.18866718 | 0.6216772  | 0.001338   |
| 2w4w_SITTC4_CGCATAAAGGCACTAG-1-10x     | 0.22874321 | 0.76436955 | 0.0009522  |
| 2w4w_SITTC4_CGCATGGTCGAAATCC-1-10x     | 0.20056415 | 0.66403687 | 0.0011888  |
| 2w4w_SITTC4_CGCCAGAGTTGTTGTG-1-10x     | 0.02185808 | 0.02774649 | 3.69E-05   |
| 2w4w_SITTC4_CGGAATTCAGAACCT-1-10x      | 0.04487463 | 0.10969788 | 9.39E-05   |
| 2w4w_SITTC4_CGAGAGAACAACACTGCGTG-1-10x | 0.03047748 | 0.05843623 | 4.55E-05   |
| 2w4w_SITTC4_CGGCAGTCATACCATG-1-10x     | 0.08377812 | 0.24821536 | 0.0034742  |
| 2w4w_SITTC4_CGGGTCATCCGACGGT-1-10x     | 0.23273398 | 0.7785789  | 0.00092358 |
| 2w4w_SITTC4_CGGGTGTGTGCAACGA-1-10x     | 0.03600953 | 0.07813331 | 5.58E-05   |
| 2w4w_SITTC4_CGGTCAGTTTTCCAAG-1-10x     | 0.1361799  | 0.43479407 | 0.0018891  |
| 2w4w_SITTC4_CGTAAGTAGGGCAGAG-1-10x     | 0.04434068 | 0.10779671 | 8.81E-05   |
| 2w4w_SITTC4_CGTCAAACAAAGGATT-1-10x     | 0.02695113 | 0.04588052 | 4.19E-05   |
| 2w4w_SITTC4_CGTGATATCTCTCGCA-1-10x     | 0.09746254 | 0.29693928 | 0.0042943  |
| 2w4w_SITTC4_CGTGTCTGTTGTTGCA-1-10x     | 0.07743175 | 0.22561885 | 0.0022191  |
| 2w4w_SITTC4_CGTTAGAGTCGAGCAA-1-10x     | 0.02005894 | 0.02134058 | 3.55E-05   |
| 2w4w_SITTC4_CGTTCTGCAGTCAGCC-1-10x     | 0.18816014 | 0.61987185 | 0.0013519  |
| 2w4w_SITTC4_CTAACITTCGTGGGTC-1-10x     | 0.2521095  | 0.8475662  | 0.00080467 |
| 2w4w_SITTC4_CTAAGTGTCGAGTGA-1-10x      | 0.02058833 | 0.02322547 | 3.62E-05   |
| 2w4w_SITTC4_CTACAGAGTCTACGTA-1-10x     | 0.0851603  | 0.25313666 | 0.0037839  |
| 2w4w_SITTC4_CTACAGATCGATTCCC-1-10x     | 0.05716535 | 0.1534595  | 0.00028394 |
| 2w4w_SITTC4_CTACCTGTCCAGTGTA-1-10x     | 0.2896724  | 0.9813105  | 0.0007606  |
| 2w4w_SITTC4_CTACGGGCAGACAAGC-1-10x     | 0.09252572 | 0.27936155 | 0.0044107  |
| 2w4w_SITTC4_CTAATATAGTAATACG-1-10x     | 0.12864444 | 0.40796375 | 0.0019821  |
| 2w4w_SITTC4_CTATAGGTCTAGTCAG-1-10x     | 0.10863462 | 0.33671796 | 0.0032165  |
| 2w4w_SITTC4_CTATCCGTCACCGACG-1-10x     | 0.10921121 | 0.33877096 | 0.0032165  |
| 2w4w_SITTC4_CTATCTACACGGCTAC-1-10x     | 0.02314742 | 0.03233723 | 3.83E-05   |
| 2w4w_SITTC4_CTCAAGAAGGTGAGCT-1-10x     | 0.0528691  | 0.13816252 | 0.00017575 |
| 2w4w_SITTC4_CTCAAGATCTCCAAGA-1-10x     | 0.09223199 | 0.27831572 | 0.0043903  |

|                                     |            |            |            |
|-------------------------------------|------------|------------|------------|
| 2w4w_SITTC4_CTCAGAAAGGAAAGGT-1-10x  | 0.01935923 | 0.01884924 | 3.55E-05   |
| 2w4w_SITTC4_CTCATGCCATTGGCAT-1-10x  | 0.0345787  | 0.07303879 | 5.37E-05   |
| 2w4w_SITTC4_CTCATTAAGTCAAGCG-1-10x  | 0.02599921 | 0.04249114 | 4.09E-05   |
| 2w4w_SITTC4_CTCATTAGTAGCGCTC-1-10x  | 0.2307303  | 0.7714447  | 0.00093779 |
| 2w4w_SITTC4_CTCCAACCAGCTGTGC-1-10x  | 0.0353369  | 0.0757384  | 5.58E-05   |
| 2w4w_SITTC4_CTCCACACACACCAGC-1-10x  | 0.02207635 | 0.02852364 | 3.76E-05   |
| 2w4w_SITTC4_CTCCACACAGAACCGA-1-10x  | 0.05321654 | 0.13939959 | 0.00019264 |
| 2w4w_SITTC4_CTCCACAGTTAGGGTG-1-10x  | 0.10752279 | 0.33275926 | 0.0034182  |
| 2w4w_SITTC4_CTCTCAGAGGGAGGTG-1-10x  | 0.01671205 | 0.00942382 | 3.38E-05   |
| 2w4w_SITTC4_CTCTCAGGTGATAGAT-1-10x  | 0.02894344 | 0.05297422 | 4.42E-05   |
| 2w4w_SITTC4_CTGAATGTCCCGTGTT-1-10x  | 0.05569155 | 0.14821199 | 0.000233   |
| 2w4w_SITTC4_CTGAGCGGTACAGAAT-1-10x  | 0.09444098 | 0.2861809  | 0.0044051  |
| 2w4w_SITTC4_CTGCAGGCAGAGTCTT-1-10x  | 0.09289187 | 0.28066525 | 0.0044107  |
| 2w4w_SITTC4_CTGCATCCAAGAGGCT-1-10x  | 0.04311355 | 0.10342747 | 8.29E-05   |
| 2w4w_SITTC4_CTGCCTAAGCGAATGC-1-10x  | 0.13109997 | 0.41670677 | 0.001934   |
| 2w4w_SITTC4_CTGCGAGAGATACATG-1-10x  | 0.04240808 | 0.10091562 | 7.82E-05   |
| 2w4w_SITTC4_CTGTGGCAGAGGGTT-1-10x   | 0.22640549 | 0.756046   | 0.00097406 |
| 2w4w_SITTC4_CTTAGGAAGGTCGAGT-1-10x  | 0.0234416  | 0.03338467 | 3.83E-05   |
| 2w4w_SITTC4_CTTCCGGTTCATGTCAG-1-10x | 0.05529752 | 0.146809   | 0.000233   |
| 2w4w_SITTC4_CTTGAGATCGCCTTGT-1-10x  | 0.0627408  | 0.17331113 | 0.00052741 |
| 2w4w_SITTC4_CTTTCAACAACCCGCA-1-10x  | 0.01911823 | 0.01799113 | 3.49E-05   |
| 2w4w_SITTC4_GAAACCTGTGTGTGTT-1-10x  | 0.19887099 | 0.6580083  | 0.0012085  |
| 2w4w_SITTC4_GAAATGAAGAGCTGAC-1-10x  | 0.03846034 | 0.08685952 | 6.36E-05   |
| 2w4w_SITTC4_GAAATGAAGTAGCAAT-1-10x  | 0.0681768  | 0.19266622 | 0.00097948 |
| 2w4w_SITTC4_GAAGAATCATCATTGG-1-10x  | 0.01527021 | 0.00429009 | 3.27E-05   |
| 2w4w_SITTC4_GAATAGAAGAGGCCAT-1-10x  | 0.07651664 | 0.22236058 | 0.0020486  |
| 2w4w_SITTC4_GAATCGTAGAGGCGTT-1-10x  | 0.05661782 | 0.15151    | 0.000257   |
| 2w4w_SITTC4_GACACGCAGGTTGGTG-1-10x  | 0.01642511 | 0.00840215 | 3.38E-05   |
| 2w4w_SITTC4_GACATCACAAGGACAC-1-10x  | 0.04946793 | 0.12605251 | 0.00013566 |
| 2w4w_SITTC4_GACGCTGAGAGAAGGT-1-10x  | 0.14508885 | 0.46651477 | 0.0018716  |
| 2w4w_SITTC4_GAGACTTCAATGTCTG-1-10x  | 0.04538589 | 0.11151825 | 9.39E-05   |
| 2w4w_SITTC4_GAGCCTGAGGTACCTT-1-10x  | 0.05632904 | 0.15048179 | 0.000257   |
| 2w4w_SITTC4_GAGGCAAAGGACAGTC-1-10x  | 0.02102381 | 0.02477602 | 3.62E-05   |
| 2w4w_SITTC4_GAGTGTTAGCGCCTTG-1-10x  | 0.03669119 | 0.08056038 | 5.82E-05   |
| 2w4w_SITTC4_GATAGAAGTTGTAGCT-1-10x  | 0.02702429 | 0.046141   | 4.19E-05   |
| 2w4w_SITTC4_GATCATGAGTCAATCC-1-10x  | 0.05383411 | 0.14159846 | 0.00019264 |
| 2w4w_SITTC4_GATCCCTCAACTGTGT-1-10x  | 0.04900801 | 0.12441494 | 0.00012523 |
| 2w4w_SITTC4_GATGAGGAGGTTGCC-1-10x   | 0.07634888 | 0.22176325 | 0.0020486  |
| 2w4w_SITTC4_GATGCTATCCAAACCA-1-10x  | 0.07105889 | 0.20292804 | 0.0013138  |
| 2w4w_SITTC4_GATGCTATCCTAAGTG-1-10x  | 0.20988275 | 0.6972161  | 0.0011095  |
| 2w4w_SITTC4_GCAACCGAGGAACGAA-1-10x  | 0.04962613 | 0.12661579 | 0.00013566 |

|                                    |            |            |            |
|------------------------------------|------------|------------|------------|
| 2w4w_SITTC4_GCAGCCAGTCGTTATG-1-10x | 0.08210479 | 0.24225739 | 0.0031253  |
| 2w4w_SITTC4_GCATTAGTCGGATTAC-1-10x | 0.05568695 | 0.1481956  | 0.000233   |
| 2w4w_SITTC4_GCCAACGAGTGAACAT-1-10x | 0.03638692 | 0.07947702 | 5.82E-05   |
| 2w4w_SITTC4_GCCAGTGTGAGGCAA-1-10x  | 0.0180119  | 0.014052   | 3.44E-05   |
| 2w4w_SITTC4_GCCCAGAAGAAATGGG-1-10x | 0.03606654 | 0.0783363  | 5.58E-05   |
| 2w4w_SITTC4_GCCGATGCACCTGAAT-1-10x | 0.07606886 | 0.22076625 | 0.0020486  |
| 2w4w_SITTC4_GCCGATGGTTTGTGGT-1-10x | 0.0458812  | 0.11328182 | 0.00010046 |
| 2w4w_SITTC4_GCGGATCCAAGCAATA-1-10x | 0.04963255 | 0.12663867 | 0.00013566 |
| 2w4w_SITTC4_GCGGATCCAGAAGTTA-1-10x | 0.2911836  | 0.9866911  | 0.00076269 |
| 2w4w_SITTC4_GCTACCTAGCGAAACC-1-10x | 0.0272381  | 0.04690227 | 4.19E-05   |
| 2w4w_SITTC4_GCTCAAATCGCACTCT-1-10x | 0.02903031 | 0.0532835  | 4.42E-05   |
| 2w4w_SITTC4_GGAACCCGTTGCGAAG-1-10x | 0.0333088  | 0.06851725 | 5.00E-05   |
| 2w4w_SITTC4_GGAGGATAGGAACTCG-1-10x | 0.04412933 | 0.10704421 | 8.81E-05   |
| 2w4w_SITTC4_GGATGTTGTATCACGT-1-10x | 0.12677701 | 0.4013147  | 0.0020256  |
| 2w4w_SITTC4_GGCAGTCAGATGGCGT-1-10x | 0.04234118 | 0.10067741 | 7.82E-05   |
| 2w4w_SITTC4_GGCAGTCGTCATCACA-1-10x | 0.08353812 | 0.24736081 | 0.0034742  |
| 2w4w_SITTC4_GGCGTCAAGGCGATAC-1-10x | 0.14228033 | 0.4565149  | 0.0018724  |
| 2w4w_SITTC4_GGCTTGGTCGCGATCG-1-10x | 0.06058863 | 0.16564824 | 0.00042799 |
| 2w4w_SITTC4_GGGAAGTAGTCATCGT-1-10x | 0.12867272 | 0.40806445 | 0.0019821  |
| 2w4w_SITTC4_GGGAAGTCATGACTGT-1-10x | 0.18327798 | 0.6024887  | 0.0014268  |
| 2w4w_SITTC4_GGGAAGTGTCCGAAGA-1-10x | 0.07464786 | 0.2157067  | 0.0017292  |
| 2w4w_SITTC4_GGGATCCCAACGCATT-1-10x | 0.10938935 | 0.3394052  | 0.0032165  |
| 2w4w_SITTC4_GGGCCATCAGATAAAC-1-10x | 0.08471867 | 0.2515642  | 0.0036353  |
| 2w4w_SITTC4_GGGCTCATCTCTTGCG-1-10x | 0.05286662 | 0.1381537  | 0.00017575 |
| 2w4w_SITTC4_GGGTTTAAGGAAGTAG-1-10x | 0.11457793 | 0.35787937 | 0.0026715  |
| 2w4w_SITTC4_GGTAGAGCAACGGGTA-1-10x | 0.05543218 | 0.14728847 | 0.000233   |
| 2w4w_SITTC4_GGTCACGAGGCGTCCT-1-10x | 0.03369457 | 0.06989081 | 5.17E-05   |
| 2w4w_SITTC4_GGTCTGGTCGCAAGAG-1-10x | 0.01664959 | 0.00920144 | 3.38E-05   |
| 2w4w_SITTC4_GTAACCAAGAAGATCT-1-10x | 0.03231635 | 0.06498359 | 4.83E-05   |
| 2w4w_SITTC4_GTAATCGGTCTTCATT-1-10x | 0.28199214 | 0.9539646  | 0.00075401 |
| 2w4w_SITTC4_GTAATGCCAATTCACG-1-10x | 0.13586643 | 0.43367797 | 0.0018891  |
| 2w4w_SITTC4_GTAGAGGCAGAAGTGC-1-10x | 0.049836   | 0.12736303 | 0.00013566 |
| 2w4w_SITTC4_GTAGGAGCACGGGCTT-1-10x | 0.2551297  | 0.85831976 | 0.00078825 |
| 2w4w_SITTC4_GTAGTTTTCCGCACGA-1-10x | 0.03741    | 0.08311974 | 6.07E-05   |
| 2w4w_SITTC4_GTAGTACGTTCTACC-1-10x  | 0.04566118 | 0.11249841 | 0.00010046 |
| 2w4w_SITTC4_GTCACTCGTATACAGA-1-10x | 0.07908356 | 0.2315002  | 0.002576   |
| 2w4w_SITTC4_GTCATTTAGGGCAAGG-1-10x | 0.03162273 | 0.06251393 | 4.83E-05   |
| 2w4w_SITTC4_GTCCCATAGTTCCGGC-1-10x | 0.0160609  | 0.00710538 | 3.33E-05   |
| 2w4w_SITTC4_GTCGCGAGTCAAGCCC-1-10x | 0.15815075 | 0.5130222  | 0.0018302  |
| 2w4w_SITTC4_GTCGTAAAGCGTGGT-1-10x  | 0.04711329 | 0.11766871 | 0.00010777 |
| 2w4w_SITTC4_GTCGTAATCCGCGATG-1-10x | 0.03551297 | 0.07636528 | 5.58E-05   |

|                                     |            |            |            |
|-------------------------------------|------------|------------|------------|
| 2w4w_SITTC4_GTCGTTCTGTTATGTCG-1-10x | 0.02646372 | 0.04414504 | 4.09E-05   |
| 2w4w_SITTC4_GTCTACCTCGTGCAGC-1-10x  | 0.2616763  | 0.8816292  | 0.00076727 |
| 2w4w_SITTC4_GTCTAGAAGATCCCAT-1-10x  | 0.1778457  | 0.58314687 | 0.0015248  |
| 2w4w_SITTC4_GTGAGCCGTCATATGC-1-10x  | 0.29351833 | 0.9950041  | 0.000766   |
| 2w4w_SITTC4_GTGAGGATCAGCCCAG-1-10x  | 0.04095514 | 0.09574236 | 7.40E-05   |
| 2w4w_SITTC4_GTGAGGATCGCAGATT-1-10x  | 0.07875151 | 0.23031792 | 0.002576   |
| 2w4w_SITTC4_GTGATGTCAGTCCCGA-1-10x  | 0.11057347 | 0.3436213  | 0.0030221  |
| 2w4w_SITTC4_GTGCAGCAGACCCGCT-1-10x  | 0.1941444  | 0.6411791  | 0.0012624  |
| 2w4w_SITTC4_GTGCAGCAGCCTCTGG-1-10x  | 0.09503461 | 0.28829458 | 0.0044051  |
| 2w4w_SITTC4_GTGCAGCCAGAACCGA-1-10x  | 0.02877535 | 0.0523757  | 4.42E-05   |
| 2w4w_SITTC4_GTGCTTCAGTCGGCAA-1-10x  | 0.0436621  | 0.10538061 | 8.81E-05   |
| 2w4w_SITTC4_GTGCTTCTCAAGTCGT-1-10x  | 0.02162989 | 0.02693402 | 3.69E-05   |
| 2w4w_SITTC4_GTGGAAGTCCAAACCA-1-10x  | 0.05237852 | 0.1364158  | 0.00017575 |
| 2w4w_SITTC4_GTGAGAGTGGTAACG-1-10x   | 0.03080779 | 0.05961229 | 4.68E-05   |
| 2w4w_SITTC4_GTGTAACGTATGGTTC-1-10x  | 0.01555362 | 0.00529921 | 3.33E-05   |
| 2w4w_SITTC4_GTGTTAGGTTCCGGTAT-1-10x | 0.21935153 | 0.7309301  | 0.0010253  |
| 2w4w_SITTC4_GTTACCCGTAACAAGT-1-10x  | 0.03635186 | 0.07935218 | 5.82E-05   |
| 2w4w_SITTC4_GTTGAACAGTTGGCTT-1-10x  | 0.05424115 | 0.14304778 | 0.00021164 |
| 2w4w_SITTC4_GTTGTCCAGCCTCACG-1-10x  | 0.05022493 | 0.12874787 | 0.00013566 |
| 2w4w_SITTC4_GTTGTCTCTACTTCA-1-10x   | 0.2583056  | 0.8696277  | 0.000778   |
| 2w4w_SITTC4_GTTTACTGTACTCA-1-10x    | 0.02652824 | 0.04437478 | 4.09E-05   |
| 2w4w_SITTC4_TAACACGTCCACATAG-1-10x  | 0.13521053 | 0.4313426  | 0.0018953  |
| 2w4w_SITTC4_TAACCAGAGCACACAG-1-10x  | 0.10247508 | 0.31478664 | 0.0039137  |
| 2w4w_SITTC4_TAAGCCATCGCATAGT-1-10x  | 0.02419631 | 0.03607184 | 3.91E-05   |
| 2w4w_SITTC4_TAAGTCGAGGCCTTGC-1-10x  | 0.16431907 | 0.5349847  | 0.0017494  |
| 2w4w_SITTC4_TAACTCTCGTCCCTGAG-1-10x | 0.0667615  | 0.187627   | 0.00079936 |
| 2w4w_SITTC4_TACCTGCGTCCAGCGT-1-10x  | 0.24819888 | 0.8336423  | 0.00082396 |
| 2w4w_SITTC4_TACGGGCAGACAAGCC-1-10x  | 0.03280703 | 0.06673066 | 5.00E-05   |
| 2w4w_SITTC4_TACGGGCTCCGATGTA-1-10x  | 0.2726735  | 0.9207851  | 0.000753   |
| 2w4w_SITTC4_TACGGTAAGCGCCAT-1-10x   | 0.01856207 | 0.0160109  | 3.49E-05   |
| 2w4w_SITTC4_TACGGTACTACTAGAGG-1-10x | 0.09455049 | 0.28657085 | 0.0044051  |
| 2w4w_SITTC4_TACGTCCCATTACGGT-1-10x  | 0.119296   | 0.37467825 | 0.0023317  |
| 2w4w_SITTC4_TACTGCCTCTTAGGAC-1-10x  | 0.02937719 | 0.05451858 | 4.42E-05   |
| 2w4w_SITTC4_TACTTACGTGGAAGCA-1-10x  | 0.04110682 | 0.09628243 | 7.40E-05   |
| 2w4w_SITTC4_TACTTACTCGGCATAT-1-10x  | 0.04310065 | 0.10338154 | 8.29E-05   |
| 2w4w_SITTC4_TACTTCATCGCAGAGA-1-10x  | 0.03852047 | 0.08707364 | 6.36E-05   |
| 2w4w_SITTC4_TAGGGTTCAGGAACCA-1-10x  | 0.05956543 | 0.16200508 | 0.00034795 |
| 2w4w_SITTC4_TAGGGTTGTTAGAAAC-1-10x  | 0.03890387 | 0.08843872 | 6.36E-05   |
| 2w4w_SITTC4_TAGTGCAAGTCACTAC-1-10x  | 0.05060437 | 0.13009885 | 0.00014746 |
| 2w4w_SITTC4_TATCTGTCATAGATGA-1-10x  | 0.04625936 | 0.11462826 | 0.00010046 |
| 2w4w_SITTC4_TATCTTGACAGCTTA-1-10x   | 0.02155213 | 0.02665716 | 3.69E-05   |



|                                     |            |            |            |
|-------------------------------------|------------|------------|------------|
| 2w4w_SITTC4_TATTGCTAGCGATGAC-1-10x  | 0.23096636 | 0.77228516 | 0.00093779 |
| 2w4w_SITTC4_TATTTTCGTGAGTCTA-1-10x  | 0.12514517 | 0.39550444 | 0.0020803  |
| 2w4w_SITTC4_TCAAGACGTCTAGTGT-1-10x  | 0.06246446 | 0.1723272  | 0.00052741 |
| 2w4w_SITTC4_TCAAGTGTCTCGGGAC-1-10x  | 0.05473863 | 0.14481907 | 0.00021164 |
| 2w4w_SITTC4_TCACATTTTCATGGAGG-1-10x | 0.10278826 | 0.31590176 | 0.0039137  |
| 2w4w_SITTC4_TCACGCTCAGGTTCCGC-1-10x | 0.07644739 | 0.22211401 | 0.0020486  |
| 2w4w_SITTC4_TCACGGGGTACCTAAC-1-10x  | 0.02889332 | 0.05279574 | 4.42E-05   |
| 2w4w_SITTC4_TCATCATGTGTTTCATG-1-10x | 0.03789716 | 0.08485428 | 6.07E-05   |
| 2w4w_SITTC4_TCATCATTCTAGGAAA-1-10x  | 0.03916173 | 0.08935685 | 6.67E-05   |
| 2w4w_SITTC4_TCATCCGTCTTAGTTC-1-10x  | 0.17814909 | 0.5842271  | 0.0015081  |
| 2w4w_SITTC4_TCATGAGTCTCTTAAC-1-10x  | 0.03661635 | 0.08029393 | 5.82E-05   |
| 2w4w_SITTC4_TCATGCCAGTCAGCGA-1-10x  | 0.09634643 | 0.29296535 | 0.0043435  |
| 2w4w_SITTC4_TCATTGTAGGGACAGG-1-10x  | 0.03161129 | 0.06247321 | 4.83E-05   |
| 2w4w_SITTC4_TCCACGTGTACTGACT-1-10x  | 0.09439904 | 0.28603157 | 0.0044051  |
| 2w4w_SITTC4_TCCATCGAGGCTGAAC-1-10x  | 0.03063987 | 0.0590144  | 4.68E-05   |
| 2w4w_SITTC4_TCCATGCCAAACTAAG-1-10x  | 0.05072648 | 0.13053362 | 0.00014746 |
| 2w4w_SITTC4_TCCCAGTCACAGTACT-1-10x  | 0.0896706  | 0.26919577 | 0.0042295  |
| 2w4w_SITTC4_TCCGAAACACCAAAGG-1-10x  | 0.03289044 | 0.06702765 | 5.00E-05   |
| 2w4w_SITTC4_TCCGGGAGTGCACATT-1-10x  | 0.03324196 | 0.06827926 | 5.00E-05   |
| 2w4w_SITTC4_TCCTTCTGTATGTCTG-1-10x  | 0.0524822  | 0.13678494 | 0.00017575 |
| 2w4w_SITTC4_TCGAAGTTCCACCCTA-1-10x  | 0.25264904 | 0.84948725 | 0.00080028 |
| 2w4w_SITTC4_TCGATTTTCGGTAACT-1-10x  | 0.10094209 | 0.3093284  | 0.0040879  |
| 2w4w_SITTC4_TCGCTCAAGCATACTC-1-10x  | 0.10939494 | 0.33942512 | 0.0032165  |
| 2w4w_SITTC4_TCGGATAAGTAGATCA-1-10x  | 0.0291024  | 0.05354019 | 4.42E-05   |
| 2w4w_SITTC4_TCGGGTGAGTTGGGAC-1-10x  | 0.09987591 | 0.30553222 | 0.0041652  |
| 2w4w_SITTC4_TCGGTCTAGTGGCGAT-1-10x  | 0.03898694 | 0.08873449 | 6.67E-05   |
| 2w4w_SITTC4_TCGTAGACAAGGTCTT-1-10x  | 0.0248901  | 0.03854211 | 4.00E-05   |
| 2w4w_SITTC4_TCGTGCTTCACCTACC-1-10x  | 0.1341451  | 0.42754906 | 0.0019027  |
| 2w4w_SITTC4_TCTAACTCATACACCA-1-10x  | 0.12446049 | 0.3930666  | 0.0020803  |
| 2w4w_SITTC4_TCTACATGTGCCACA-1-10x   | 0.04883432 | 0.12379653 | 0.00012523 |
| 2w4w_SITTC4_TCTCACGTCCATCACC-1-10x  | 0.01770698 | 0.01296633 | 3.44E-05   |
| 2w4w_SITTC4_TCTCCGAAGAAGTCAT-1-10x  | 0.1085368  | 0.33636966 | 0.0032165  |
| 2w4w_SITTC4_TCTGGCTTCTACCAC-1-10x   | 0.05930517 | 0.16107842 | 0.00034795 |
| 2w4w_SITTC4_TCTGTGAGCGAATGC-1-10x   | 0.05840966 | 0.15788992 | 0.00031414 |
| 2w4w_SITTC4_TGAATGCAGCGACCCT-1-10x  | 0.02817274 | 0.05023009 | 4.30E-05   |
| 2w4w_SITTC4_TGAGACTAGCGATTCT-1-10x  | 0.2853461  | 0.9659065  | 0.00075686 |
| 2w4w_SITTC4_TGAGCATAGCACTCAT-1-10x  | 0.26711956 | 0.90101016 | 0.00075831 |
| 2w4w_SITTC4_TGAGCATTCTAGTCA-1-10x   | 0.14729157 | 0.47435763 | 0.0018716  |
| 2w4w_SITTC4_TGAGCGCAGGCCGCTT-1-10x  | 0.14075483 | 0.45108333 | 0.0018734  |
| 2w4w_SITTC4_TGAGCGCTCACTTATC-1-10x  | 0.03242645 | 0.06537561 | 5.00E-05   |
| 2w4w_SITTC4_TGAGGGATCCATAGGT-1-10x  | 0.15505224 | 0.50198984 | 0.0018522  |

|                                     |            |            |            |
|-------------------------------------|------------|------------|------------|
| 2w4w_SITTC4_TGAGGTTACCTGAAT-1-10x   | 0.13761628 | 0.43990836 | 0.0018802  |
| 2w4w_SITTC4_TGAGTCAAGCGTGAGT-1-10x  | 0.01825976 | 0.01493452 | 3.44E-05   |
| 2w4w_SITTC4_TGATGGTTCCGTGGGT-1-10x  | 0.08168109 | 0.2407488  | 0.0031253  |
| 2w4w_SITTC4_TGATTCTCACCTCGTT-1-10x  | 0.03579499 | 0.07736941 | 5.58E-05   |
| 2w4w_SITTC4_TGATTCTCAGCAAGAC-1-10x  | 0.05059576 | 0.13006821 | 0.00014746 |
| 2w4w_SITTC4_TGCACGGCAGTGCCTG-1-10x  | 0.24932592 | 0.8376551  | 0.00081888 |
| 2w4w_SITTC4_TGCATGAAGTAAGCAT-1-10x  | 0.11451829 | 0.357667   | 0.0026715  |
| 2w4w_SITTC4_TGCGACGGTCCAGCAC-1-10x  | 0.01965187 | 0.0198912  | 3.55E-05   |
| 2w4w_SITTC4_TGCGGGTAGAATAGTC-1-10x  | 0.09724607 | 0.29616854 | 0.0042943  |
| 2w4w_SITTC4_TGCTGAAGTTAAGACA-1-10x  | 0.01582912 | 0.00628012 | 3.33E-05   |
| 2w4w_SITTC4_TGCTGAAGTTGCCTAA-1-10x  | 0.20068146 | 0.6644546  | 0.0011888  |
| 2w4w_SITTC4_TGCTTCGTCTCTAAT-1-10x   | 0.26254645 | 0.8847274  | 0.00076511 |
| 2w4w_SITTC4_TGCTTGCCATCAGTCA-1-10x  | 0.04647945 | 0.11541191 | 0.00010777 |
| 2w4w_SITTC4_TGGAATTCGTGAGAG-1-10x   | 0.03268017 | 0.066279   | 5.00E-05   |
| 2w4w_SITTC4_TGGAGGACAGACGCTC-1-10x  | 0.09271667 | 0.28004146 | 0.0044107  |
| 2w4w_SITTC4_TGGATGTCACCCAACG-1-10x  | 0.08360774 | 0.24760872 | 0.0034742  |
| 2w4w_SITTC4_TGGGAAGCAGTTGAAA-1-10x  | 0.01950866 | 0.01938127 | 3.55E-05   |
| 2w4w_SITTC4_TGGGATTGTTCAAGTC-1-10x  | 0.09309242 | 0.2813793  | 0.0044107  |
| 2w4w_SITTC4_TGGGTTACACATATGC-1-10x  | 0.08867373 | 0.2656464  | 0.0041422  |
| 2w4w_SITTC4_TGGGTTATCAATCGGT-1-10x  | 0.06720706 | 0.18921342 | 0.00088537 |
| 2w4w_SITTC4_TGTCAGAGTACGGATG-1-10x  | 0.04016107 | 0.09291504 | 7.01E-05   |
| 2w4w_SITTC4_TGTCCCAGTGCGTTTA-1-10x  | 0.23626453 | 0.79114956 | 0.00089602 |
| 2w4w_SITTC4_TGTCCTGAGCGTCGAA-1-10x  | 0.02220654 | 0.02898718 | 3.76E-05   |
| 2w4w_SITTC4_TGTGCGGAGTCAAGCG-1-10x  | 0.02815577 | 0.05016968 | 4.30E-05   |
| 2w4w_SITTC4_TGTTCTATCCTTGAAG-1-10x  | 0.04084692 | 0.09535705 | 7.40E-05   |
| 2w4w_SITTC4_TGTTGAGGTCTAGTGT-1-10x  | 0.03495665 | 0.07438449 | 5.37E-05   |
| 2w4w_SITTC4_TGTTTGTCTGAATCG-1-10x   | 0.01531028 | 0.00443276 | 3.27E-05   |
| 2w4w_SITTC4_TGTTTGTCTTCCCAG-1-10x   | 0.10063569 | 0.30823746 | 0.0040879  |
| 2w4w_SITTC4_TTACCATAGTTCCATG-1-10x  | 0.08001711 | 0.23482414 | 0.0027593  |
| 2w4w_SITTC4_TTACCATCAGAGAGGG-1-10x  | 0.02837469 | 0.05094913 | 4.30E-05   |
| 2w4w_SITTC4_TTACCCGGTCTGAAT-1-10x   | 0.08453458 | 0.25090876 | 0.0036353  |
| 2w4w_SITTC4_TTCAGGAGTAAGCGGT-1-10x  | 0.24505118 | 0.8224348  | 0.00084014 |
| 2w4w_SITTC4_TTCATTGGTTCGTTGCG-1-10x | 0.27588606 | 0.9322236  | 0.00075214 |
| 2w4w_SITTC4_TTCCGTGCAGCCGTCA-1-10x  | 0.26698065 | 0.90051556 | 0.00075831 |
| 2w4w_SITTC4_TTCTCTGTACGACAG-1-10x   | 0.04694706 | 0.11707684 | 0.00010777 |
| 2w4w_SITTC4_TTCGCTGGTCGATGCC-1-10x  | 0.10632859 | 0.32850724 | 0.00352    |
| 2w4w_SITTC4_TTCGGTCAGGACACTG-1-10x  | 0.08107384 | 0.23858665 | 0.0029431  |
| 2w4w_SITTC4_TTCGGTCGTCAAATCC-1-10x  | 0.04625733 | 0.11462101 | 0.00010046 |
| 2w4w_SITTC4_TTCTAACTCGGCCAAC-1-10x  | 0.08425175 | 0.24990173 | 0.0036353  |
| 2w4w_SITTC4_TTCTAGTAGTTGGCGA-1-10x  | 0.03492429 | 0.07426927 | 5.37E-05   |
| 2w4w_SITTC4_TTCTAGTGTGACTCGC-1-10x  | 0.08890618 | 0.266474   | 0.0042295  |

|                                    |            |            |            |
|------------------------------------|------------|------------|------------|
| 2w4w_SITTC4_TTCTCTCTCCGTTTCG-1-10x | 0.07782778 | 0.22702894 | 0.0023954  |
| 2w4w_SITTC4_TTCTGTAAGTCACTCA-1-10x | 0.02249578 | 0.03001704 | 3.76E-05   |
| 2w4w_SITTC4_TTCTTGAGTCCACAGC-1-10x | 0.08728638 | 0.26070666 | 0.0040384  |
| 2w4w_SITTC4_TTGAACGAGCCGTCGT-1-10x | 0.01671417 | 0.00943138 | 3.38E-05   |
| 2w4w_SITTC4_TTGACCCTCGAGTCTA-1-10x | 0.04870045 | 0.12331986 | 0.00012523 |
| 2w4w_SITTC4_TTGACCCTCGCGTAGC-1-10x | 0.01741201 | 0.01191608 | 3.44E-05   |
| 2w4w_SITTC4_TTGAGTGAGCCGAATG-1-10x | 0.01684471 | 0.00989618 | 3.38E-05   |
| 2w4w_SITTC4_TTGATGGCAAAGGCGT-1-10x | 0.02295855 | 0.03166474 | 3.76E-05   |
| 2w4w_SITTC4_TTGATGGCAACCACAT-1-10x | 0.0165842  | 0.00896861 | 3.38E-05   |
| 2w4w_SITTC4_TTGATGGTCACCTCTG-1-10x | 0.03853269 | 0.08711711 | 6.36E-05   |
| 2w4w_SITTC4_TTGCATTAGCTCGAAG-1-10x | 0.04530848 | 0.11124262 | 9.39E-05   |
| 2w4w_SITTC4_TTGCATTAGACAAAT-1-10x  | 0.08729468 | 0.2607362  | 0.0040384  |
| 2w4w_SITTC4_TTGCCTCAGTAGTCTC-1-10x | 0.03550377 | 0.07633252 | 5.58E-05   |
| 2w4w_SITTC4_TTGCCTCAGTAGTGC-1-10x  | 0.01675926 | 0.00959193 | 3.38E-05   |
| 2w4w_SITTC4_TTGGATGGTTCTTGCC-1-10x | 0.0251479  | 0.03946002 | 4.00E-05   |
| 2w4w_SITTC4_TTGGGATCAGCGTTTA-1-10x | 0.25767323 | 0.86737615 | 0.00078121 |
| 2w4w_SITTC4_TTGGGCGAGATTTGCC-1-10x | 0.13740094 | 0.43914166 | 0.0018842  |
| 2w4w_SITTC4_TTGGGTAAGTCAGGGT-1-10x | 0.02326953 | 0.03277201 | 3.83E-05   |
| 2w4w_SITTC4_TTGTGTTAGGATACAT-1-10x | 0.02862304 | 0.0518334  | 4.30E-05   |
| 2w4w_SITTC4_TTGTGTTCAATCAAGA-1-10x | 0.10049396 | 0.30773282 | 0.0040879  |
| 2w4w_SITTC4_TTGTGTTCAAATAGG-1-10x  | 0.02652025 | 0.04434635 | 4.09E-05   |
| 2w4w_SITTC4_TTGTGTTGACACAGCC-1-10x | 0.17584802 | 0.57603407 | 0.0015585  |
| 2w4w_SITTC4_TTGTGTTGCTAATTCC-1-10x | 0.07511948 | 0.21738593 | 0.001885   |
| 2w4w_SITTC4_TTTACCACAATTGAGA-1-10x | 0.04117441 | 0.09652308 | 7.40E-05   |
| 2w4w_SITTC4_TTTCACAGTTTCTTAC-1-10x | 0.02553564 | 0.04084057 | 4.00E-05   |
| 2w4w_SITTC4_TTTCAGTCATCCGAAT-1-10x | 0.23908646 | 0.8011972  | 0.00087632 |
| 2w4w_SITTC4_TTTCATGAGGATTCT-1-10x  | 0.10691667 | 0.33060113 | 0.0034182  |
| 2w4w_SITTC4_TTTCCTCCAGCGTACC-1-10x | 0.09313524 | 0.28153178 | 0.0044107  |
| 2w4w_SITTC4_TTTGATCGTTGCATGT-1-10x | 0.28284    | 0.9569835  | 0.00075462 |
| 2w4w_SITTC4_TTTGGAGTCCCATTTA-1-10x | 0.02995446 | 0.05657397 | 4.55E-05   |
| 2w4w_SITTC4_TTTGTTGCAACCAACT-1-10x | 0.18735567 | 0.6170075  | 0.0013662  |
| 2w4w_SITTC4_AAACCCAAGACTCCGC-1-10x | 0.04555025 | 0.11210343 | 0.00010046 |
| 2w4w_SITTC4_AAACGTTTCGTCAAAC-1-10x | 0.04445689 | 0.10821048 | 8.81E-05   |
| 2w4w_SITTC4_AAAGGTAAGCTGTTCA-1-10x | 0.08076721 | 0.23749489 | 0.0029431  |
| 2w4w_SITTC4_AACCACAGTAGAGTTA-1-10x | 0.08471482 | 0.25155053 | 0.0036353  |
| 2w4w_SITTC4_AATAGAGCAAATACGA-1-10x | 0.04313473 | 0.10350288 | 8.29E-05   |
| 2w4w_SITTC4_AATCACGCAGAGTCAG-1-10x | 0.01797227 | 0.0139109  | 3.44E-05   |
| 2w4w_SITTC4_ACAACCATCCATATGG-1-10x | 0.05723084 | 0.15369269 | 0.00028394 |
| 2w4w_SITTC4_ACACCAAAGGCCATAG-1-10x | 0.19447547 | 0.6423579  | 0.0012624  |
| 2w4w_SITTC4_ACATTTGTTACCTTT-1-10x  | 0.0432316  | 0.10384779 | 8.29E-05   |
| 2w4w_SITTC4_ACTTCGCTCCGTAATG-1-10x | 0.04120992 | 0.09664953 | 7.40E-05   |

|                                    |            |            |            |
|------------------------------------|------------|------------|------------|
| 2w4w_SITTC4_AGCTCAACAATCCAGT-1-10x | 0.03049211 | 0.05848829 | 4.55E-05   |
| 2w4w_SITTC4_AGGACGACAGTCCCGA-1-10x | 0.01544479 | 0.00491171 | 3.27E-05   |
| 2w4w_SITTC4_AGTGATCAGCCTCTGG-1-10x | 0.04551552 | 0.11197978 | 9.39E-05   |
| 2w4w_SITTC4_ATACTTCTCTCGTCAC-1-10x | 0.15441862 | 0.4997338  | 0.0018575  |
| 2w4w_SITTC4_ATCCCTGGTTCAATCG-1-10x | 0.04793564 | 0.12059671 | 0.00011598 |
| 2w4w_SITTC4_ATCCGTCAGAAAGCGA-1-10x | 0.17057289 | 0.55725175 | 0.0016421  |
| 2w4w_SITTC4_ATCCTATCAAGTAGTA-1-10x | 0.01707882 | 0.01072973 | 3.38E-05   |
| 2w4w_SITTC4_ATGCGATCAATAGGAT-1-10x | 0.29068196 | 0.98490506 | 0.00076163 |
| 2w4w_SITTC4_ATGGGAGTCCTGTTGC-1-10x | 0.02880811 | 0.05249236 | 4.42E-05   |
| 2w4w_SITTC4_ATTTCTGTCTCGCAT-1-10x  | 0.01542187 | 0.00483011 | 3.27E-05   |
| 2w4w_SITTC4_CAACAACCACTATCCC-1-10x | 0.21842626 | 0.7276356  | 0.0010326  |
| 2w4w_SITTC4_CAATGACTCCATCTGC-1-10x | 0.08541545 | 0.25404513 | 0.0037839  |
| 2w4w_SITTC4_CACTTCGGTACTCCGG-1-10x | 0.19964972 | 0.66078097 | 0.0011985  |
| 2w4w_SITTC4_CAGGCCACATGCCATA-1-10x | 0.07740568 | 0.22552605 | 0.0022191  |
| 2w4w_SITTC4_CATCCACAGGGACCAT-1-10x | 0.0601229  | 0.16398999 | 0.00038577 |
| 2w4w_SITTC4_CATCGCTAGCGGTATG-1-10x | 0.04272933 | 0.10205945 | 8.29E-05   |
| 2w4w_SITTC4_CCCAACCTCCACGGAC-1-10x | 0.04752306 | 0.11912773 | 0.00011598 |
| 2w4w_SITTC4_CCGGGTAAGCCAGACA-1-10x | 0.07919522 | 0.23189774 | 0.002576   |
| 2w4w_SITTC4_CGCAGGTAGATAGTGT-1-10x | 0.02476407 | 0.03809338 | 3.91E-05   |
| 2w4w_SITTC4_CGGGTGTCATAGAGGC-1-10x | 0.21133251 | 0.7023781  | 0.0010934  |
| 2w4w_SITTC4_CGGGTGTGTGCGGCTT-1-10x | 0.25360575 | 0.8528937  | 0.00079608 |
| 2w4w_SITTC4_CGTGCTTCTCCACA-1-10x   | 0.04681623 | 0.11661102 | 0.00010777 |
| 2w4w_SITTC4_CTCAAGATCTGGGAGA-1-10x | 0.09248418 | 0.27921367 | 0.0043903  |
| 2w4w_SITTC4 CTCAGGGCAGTTAGAA-1-10x | 0.02942949 | 0.0547048  | 4.42E-05   |
| 2w4w_SITTC4 CTGGCAGCATTGGCAT-1-10x | 0.08576249 | 0.2552808  | 0.0037839  |
| 2w4w_SITTC4_GAACTGTAGACTTGTC-1-10x | 0.21632744 | 0.7201627  | 0.001055   |
| 2w4w_SITTC4_GAAGAATCAGGTAGTG-1-10x | 0.02618347 | 0.04314722 | 4.09E-05   |
| 2w4w_SITTC4_GAAGTAAAGCATCAGG-1-10x | 0.03693882 | 0.08144208 | 5.82E-05   |
| 2w4w_SITTC4_GAATCGTAGCCAGACA-1-10x | 0.0422391  | 0.10031395 | 7.82E-05   |
| 2w4w_SITTC4_GACACGCTCGTGGGTC-1-10x | 0.01566776 | 0.00570558 | 3.33E-05   |
| 2w4w_SITTC4_GACTATGGTCGTTCAA-1-10x | 0.02035521 | 0.02239544 | 3.62E-05   |
| 2w4w_SITTC4_GATGATCTCTTGGTCC-1-10x | 0.28492016 | 0.9643899  | 0.00075605 |
| 2w4w_SITTC4_GCCAGGTAGTAACCTC-1-10x | 0.02172816 | 0.02728391 | 3.69E-05   |
| 2w4w_SITTC4_GCCAGGTTGATACTG-1-10x  | 0.01767916 | 0.01286728 | 3.44E-05   |
| 2w4w_SITTC4_GCCCAGAGTCGAGATG-1-10x | 0.15511547 | 0.50221497 | 0.0018522  |
| 2w4w_SITTC4_GCGAGAACAGTGGTGA-1-10x | 0.02681877 | 0.04540921 | 4.19E-05   |
| 2w4w_SITTC4_GGATGTTGTACAAGCG-1-10x | 0.04233966 | 0.10067201 | 7.82E-05   |
| 2w4w_SITTC4_GGATGTTTCATCTATC-1-10x | 0.02402956 | 0.03547813 | 3.91E-05   |
| 2w4w_SITTC4_GGCTGTGGTTGTGGAG-1-10x | 0.04187503 | 0.09901767 | 7.82E-05   |
| 2w4w_SITTC4_GGGATGACAACCGATT-1-10x | 0.02316544 | 0.03240139 | 3.83E-05   |
| 2w4w_SITTC4_GTAGCTATCTTACCGC-1-10x | 0.01529704 | 0.00438564 | 3.27E-05   |

|                                     |            |            |            |
|-------------------------------------|------------|------------|------------|
| 2w4w_SITTC4_GTAGTACAGCCTCACG-1-10x  | 0.01621438 | 0.00765185 | 3.33E-05   |
| 2w4w_SITTC4_GTGAGTTAGCCAAGCA-1-10x  | 0.05470775 | 0.1447091  | 0.00021164 |
| 2w4w_SITTC4_GTGTTAGTCATTTGCT-1-10x  | 0.04577429 | 0.11290114 | 0.00010046 |
| 2w4w_SITTC4_GTTGCGGAGCAAATCA-1-10x  | 0.04670056 | 0.11619916 | 0.00010777 |
| 2w4w_SITTC4_GTTGCGGCAAGCGATG-1-10x  | 0.04538786 | 0.11152527 | 9.39E-05   |
| 2w4w_SITTC4_GTTTACTCAGATTTTCG-1-10x | 0.08556091 | 0.25456306 | 0.0037839  |
| 2w4w_SITTC4_TCAAGCACACCCGTAG-1-10x  | 0.02064555 | 0.02342922 | 3.62E-05   |
| 2w4w_SITTC4_TCATACTGTACCCACG-1-10x  | 0.03701979 | 0.0817304  | 5.82E-05   |
| 2w4w_SITTC4_TGAGGAGAGCGACTGA-1-10x  | 0.0459503  | 0.11352784 | 0.00010046 |
| 2w4w_SITTC4_TGGATGTTCTTAGCAG-1-10x  | 0.04249474 | 0.10122419 | 7.82E-05   |
| 2w4w_SITTC4_TGGGTTATCGTTAGAC-1-10x  | 0.07058354 | 0.20123552 | 0.0011935  |
| 2w4w_SITTC4_TTACTGTTTCATGGTAC-1-10x | 0.08746065 | 0.26132715 | 0.0040384  |
| 2w4w_SITTC4_TTAGGCATCACCGACG-1-10x  | 0.2635214  | 0.8881988  | 0.00076313 |
| 2w4w_SITTC4_TTCCTAAGTCACGTGC-1-10x  | 0.03155014 | 0.06225547 | 4.83E-05   |
| 2w4w_SITTC4_TTCTAACGTTGATGTC-1-10x  | 0.01739463 | 0.01185417 | 3.44E-05   |
| 2w4w_SITTC4_TTCTGTAGTCTGTGTA-1-10x  | 0.0294762  | 0.05487112 | 4.42E-05   |
| 2w4w_SITTD4_AAACGAAAGTAAGGGA-1-10x  | 0.02852002 | 0.05146661 | 4.30E-05   |
| 2w4w_SITTD4_AAAGGATTCTTCTGGC-1-10x  | 0.12886116 | 0.4087354  | 0.0019821  |
| 2w4w_SITTD4_AACCTGAAGACTTCCA-1-10x  | 0.04219926 | 0.1001721  | 7.82E-05   |
| 2w4w_SITTD4_AAGACAAAGCCAGTAG-1-10x  | 0.04589585 | 0.11333398 | 0.00010046 |
| 2w4w_SITTD4_AAGCATCTCTACGCAA-1-10x  | 0.11159473 | 0.34725755 | 0.002929   |
| 2w4w_SITTD4_AAGGTAAGAATCGCG-1-10x   | 0.05100358 | 0.13152024 | 0.00014746 |
| 2w4w_SITTD4_AAGTTCGGTCTTGCGG-1-10x  | 0.01808443 | 0.01431025 | 3.44E-05   |
| 2w4w_SITTD4_AAGTTCGTCCTTGGA-1-10x   | 0.23397146 | 0.782985   | 0.00091657 |
| 2w4w_SITTD4_AATGACCCATCAGCTA-1-10x  | 0.04478665 | 0.10938463 | 9.39E-05   |
| 2w4w_SITTD4_AATGCCAAGGCGCTTC-1-10x  | 0.27338025 | 0.92330164 | 0.0007526  |
| 2w4w_SITTD4_ACACTGATCGCCAGAC-1-10x  | 0.02682835 | 0.04544333 | 4.19E-05   |
| 2w4w_SITTD4_ACAGCCGCAGGTGTGA-1-10x  | 0.01783239 | 0.01341283 | 3.44E-05   |
| 2w4w_SITTD4_ACAGCCGTCAGTGTGT-1-10x  | 0.08725138 | 0.26058206 | 0.0040384  |
| 2w4w_SITTD4_ACATGCAGTCCCGCAA-1-10x  | 0.02288009 | 0.03138539 | 3.76E-05   |
| 2w4w_SITTD4_ACGGTTACTGCGCCA-1-10x   | 0.0742695  | 0.21435952 | 0.0017292  |
| 2w4w_SITTD4_ACGTAACGTGCGTCGT-1-10x  | 0.06932891 | 0.19676837 | 0.0010821  |
| 2w4w_SITTD4_ACTATTCCATAGATCC-1-10x  | 0.09037298 | 0.27169663 | 0.0042999  |
| 2w4w_SITTD4_ACTGTGATCAAGTCGT-1-10x  | 0.23868865 | 0.7997807  | 0.00088278 |
| 2w4w_SITTD4_AGAAATGAGACGTCTGA-1-10x | 0.03912113 | 0.08921229 | 6.67E-05   |
| 2w4w_SITTD4_AGACTCAGTCCACTTC-1-10x  | 0.04077205 | 0.09509046 | 7.01E-05   |
| 2w4w_SITTD4_AGAGCAGCACCAGACC-1-10x  | 0.0380789  | 0.0855014  | 6.36E-05   |
| 2w4w_SITTD4_AGCCAATCAGACTGCC-1-10x  | 0.2719675  | 0.9182715  | 0.000753   |
| 2w4w_SITTD4_AGCCAGCCAGTGACCC-1-10x  | 0.0723394  | 0.20748734 | 0.0014433  |
| 2w4w_SITTD4_AGAAATAGTTGGAAT-1-10x   | 0.11603007 | 0.36304978 | 0.0025211  |
| 2w4w_SITTD4_AGGATAACACCGGAAA-1-10x  | 0.03118367 | 0.06095064 | 4.68E-05   |

|                                    |            |            |            |
|------------------------------------|------------|------------|------------|
| 2w4w_SITTD4_AGGATAAGTGATACTC-1-10x | 0.16523458 | 0.5382444  | 0.0017353  |
| 2w4w_SITTD4_AGGATAATCATTTACC-1-10x | 0.02909448 | 0.053512   | 4.42E-05   |
| 2w4w_SITTD4_AGGATCTCACTTTATC-1-10x | 0.27937827 | 0.9446578  | 0.00075266 |
| 2w4w_SITTD4_AGGGCTCAGAGAGTTT-1-10x | 0.04808341 | 0.12112288 | 0.00011598 |
| 2w4w_SITTD4_AGGGTCCCATGTCAGT-1-10x | 0.04304071 | 0.10316813 | 8.29E-05   |
| 2w4w_SITTD4_AGGGTCCGTACGATGG-1-10x | 0.05994952 | 0.16337265 | 0.00038577 |
| 2w4w_SITTD4_AGGGTGACAGCCGGTT-1-10x | 0.04237195 | 0.10078697 | 7.82E-05   |
| 2w4w_SITTD4_AGGTCATGTCGGTAAG-1-10x | 0.05545646 | 0.14737491 | 0.000233   |
| 2w4w_SITTD4_AGTAGCTTCCGGCTTT-1-10x | 0.26201138 | 0.8828223  | 0.00076727 |
| 2w4w_SITTD4_AGTCACATCAGGAAGC-1-10x | 0.13217457 | 0.4205329  | 0.0019219  |
| 2w4w_SITTD4_AGTCTCCTCTCGACCT-1-10x | 0.03472864 | 0.07357267 | 5.37E-05   |
| 2w4w_SITTD4_AGTGCCGAGCGGATCA-1-10x | 0.03968762 | 0.09122932 | 6.67E-05   |
| 2w4w_SITTD4_AGTTAGCCACTTCAGA-1-10x | 0.04170583 | 0.09841523 | 7.40E-05   |
| 2w4w_SITTD4_AGTTAGCGTGACTION-1-10x | 0.22724527 | 0.7590361  | 0.00096676 |
| 2w4w_SITTD4_ATCCATTAGGTCATCT-1-10x | 0.26957455 | 0.9097513  | 0.00075499 |
| 2w4w_SITTD4_ATGCCTCTCTCGTAT-1-10x  | 0.09769771 | 0.29777664 | 0.0042943  |
| 2w4w_SITTD4_ATTCCCGCACCAGACC-1-10x | 0.15922615 | 0.5168512  | 0.0018109  |
| 2w4w_SITTD4_ATTCCTAAGTGGCAGT-1-10x | 0.06839634 | 0.1934479  | 0.00097948 |
| 2w4w_SITTD4_ATTGGGTCACCTGTCC-1-10x | 0.03865958 | 0.08756894 | 6.36E-05   |
| 2w4w_SITTD4_ATTTCACTCGGACTGC-1-10x | 0.05880209 | 0.15928717 | 0.00034795 |
| 2w4w_SITTD4_CAACAGTCAGAAATCA-1-10x | 0.03784565 | 0.08467091 | 6.07E-05   |
| 2w4w_SITTD4_CAATCGATCGACACCG-1-10x | 0.28130352 | 0.95151275 | 0.00075401 |
| 2w4w_SITTD4_CAATGACAGCTCCGAC-1-10x | 0.08523847 | 0.25341502 | 0.0037839  |
| 2w4w_SITTD4_CAATGACTCTTACTGT-1-10x | 0.03923132 | 0.08960465 | 6.67E-05   |
| 2w4w_SITTD4_CACTGAAAGGGATCAC-1-10x | 0.04567563 | 0.11254987 | 0.00010046 |
| 2w4w_SITTD4_CAGAGCCGTGCCTTCT-1-10x | 0.0472477  | 0.11814728 | 0.00010777 |
| 2w4w_SITTD4_CAGCAGCAGTGACCTT-1-10x | 0.02543199 | 0.04047156 | 4.00E-05   |
| 2w4w_SITTD4_CAGTTAGTCTTCTGGC-1-10x | 0.01550712 | 0.00513364 | 3.33E-05   |
| 2w4w_SITTD4_CATACAGCAGGTTCCG-1-10x | 0.04986584 | 0.12746929 | 0.00013566 |
| 2w4w_SITTD4_CATCAAGTCAGCTGAT-1-10x | 0.13925572 | 0.44574565 | 0.0018772  |
| 2w4w_SITTD4_CATGAGTTCTTGCAAG-1-10x | 0.10639145 | 0.32873106 | 0.00352    |
| 2w4w_SITTD4_CATGGATTCCGTCACT-1-10x | 0.25487864 | 0.85742587 | 0.00079207 |
| 2w4w_SITTD4_CCAAGCGCAAGTGATA-1-10x | 0.0954114  | 0.28963614 | 0.0043808  |
| 2w4w_SITTD4_CCACCATGTGTGACCC-1-10x | 0.03019019 | 0.05741329 | 4.55E-05   |
| 2w4w_SITTD4_CCGGACATCTGCTAGA-1-10x | 0.02226932 | 0.02921072 | 3.76E-05   |
| 2w4w_SITTD4_CCGGTGATCATCTGTT-1-10x | 0.03879724 | 0.08805909 | 6.36E-05   |
| 2w4w_SITTD4_CCTAAGAAGTATAACG-1-10x | 0.062676   | 0.17308038 | 0.00052741 |
| 2w4w_SITTD4_CCTAAGACAAGTAAA-1-10x  | 0.05048271 | 0.12966567 | 0.00014746 |
| 2w4w_SITTD4_CCTCTCCAGGCAGGTT-1-10x | 0.01930548 | 0.01865786 | 3.55E-05   |
| 2w4w_SITTD4_CCTCTCCAGATACTC-1-10x  | 0.04635523 | 0.1149696  | 0.00010046 |
| 2w4w_SITTD4_CGAAGGAAGAGGCTGT-1-10x | 0.05741249 | 0.15433945 | 0.00028394 |

|                                     |            |            |            |
|-------------------------------------|------------|------------|------------|
| 2w4w_SITTD4_CGATCGGCACTCAGAT-1-10x  | 0.05363873 | 0.14090282 | 0.00019264 |
| 2w4w_SITTD4_CGCATAACACAAATCC-1-10x  | 0.03569787 | 0.07702365 | 5.58E-05   |
| 2w4w_SITTD4_CGGAACCTCGGCATCG-1-10x  | 0.0749955  | 0.21694447 | 0.001885   |
| 2w4w_SITTD4_CGGACACCAATACCTG-1-10x  | 0.2921384  | 0.9900908  | 0.00076378 |
| 2w4w_SITTD4_CGTAAGTAGAACTGAT-1-10x  | 0.03656976 | 0.08012805 | 5.82E-05   |
| 2w4w_SITTD4_CGTAAGTCAGCACACC-1-10x  | 0.03872104 | 0.08778776 | 6.36E-05   |
| 2w4w_SITTD4_CGTCAAACATACGCAT-1-10x  | 0.209512   | 0.695896   | 0.0011095  |
| 2w4w_SITTD4_CGTCAAAGTATTCTCT-1-10x  | 0.04218113 | 0.10010756 | 7.82E-05   |
| 2w4w_SITTD4_CGTCCATTCGATCCAA-1-10x  | 0.0170438  | 0.01060504 | 3.38E-05   |
| 2w4w_SITTD4_CGTGATAGTCGGTAAG-1-10x  | 0.04626187 | 0.11463718 | 0.00010046 |
| 2w4w_SITTD4_CGTTGGGTCCTACAAG-1-10x  | 0.04235419 | 0.10072375 | 7.82E-05   |
| 2w4w_SITTD4_CTAGACATCTAGGCAT-1-10x  | 0.14240456 | 0.45695722 | 0.0018718  |
| 2w4w_SITTD4_CTAGGTACAACCGTAT-1-10x  | 0.08850152 | 0.26503322 | 0.0041422  |
| 2w4w_SITTD4_CTCAACCTCTGCGGCA-1-10x  | 0.1485321  | 0.47877458 | 0.0018713  |
| 2w4w_SITTD4_CTCCAACCTCACCATAG-1-10x | 0.08096825 | 0.23821072 | 0.0029431  |
| 2w4w_SITTD4_CTCCCAACATCTCCCA-1-10x  | 0.03707321 | 0.08192058 | 5.82E-05   |
| 2w4w_SITTD4 CTCCTCCGTGCCCGTA-1-10x  | 0.03091873 | 0.06000729 | 4.68E-05   |
| 2w4w_SITTD4 CTCCTTTGTCTAACGT-1-10x  | 0.08973278 | 0.26941717 | 0.0042999  |
| 2w4w_SITTD4 CTCTCAGAGACCAAGC-1-10x  | 0.04186626 | 0.09898645 | 7.82E-05   |
| 2w4w_SITTD4 CTGCATCCACGTCCGGT-1-10x | 0.01729638 | 0.01150437 | 3.38E-05   |
| 2w4w_SITTD4 CTGTATTTCCAAGCCG-1-10x  | 0.05198217 | 0.13500457 | 0.00016076 |
| 2w4w_SITTD4 CTGTGGGTCCGCGAGT-1-10x  | 0.19071968 | 0.6289852  | 0.0013113  |
| 2w4w_SITTD4 CTTCTAAAGTAGCTCT-1-10x  | 0.01607663 | 0.00716139 | 3.33E-05   |
| 2w4w_SITTD4 CTTGATTCAAAGGCTG-1-10x  | 0.2364548  | 0.791827   | 0.00089602 |
| 2w4w_SITTD4_GAACTGTTCTCGGCTT-1-10x  | 0.0469888  | 0.11722546 | 0.00010777 |
| 2w4w_SITTD4_GACAGCCAGTCAATCC-1-10x  | 0.09621029 | 0.29248062 | 0.0043808  |
| 2w4w_SITTD4_GACGCTGAGACATAAC-1-10x  | 0.02947546 | 0.05486849 | 4.42E-05   |
| 2w4w_SITTD4_GACTCTCTCCATAGGT-1-10x  | 0.14171423 | 0.4544993  | 0.0018724  |
| 2w4w_SITTD4_GAGGCAACAATGTTGC-1-10x  | 0.02179731 | 0.0275301  | 3.69E-05   |
| 2w4w_SITTD4_GATTCTTTCTTAAGGC-1-10x  | 0.01677019 | 0.00963084 | 3.38E-05   |
| 2w4w_SITTD4_GCAGCTGCACGGCCAT-1-10x  | 0.18938054 | 0.62421715 | 0.0013244  |
| 2w4w_SITTD4_GCCATGGAGCGAGGAG-1-10x  | 0.03557022 | 0.07656915 | 5.58E-05   |
| 2w4w_SITTD4_GCCGTGATCCACGGAC-1-10x  | 0.09032023 | 0.2715088  | 0.0042999  |
| 2w4w_SITTD4_GCGGAAAGTAACCCTA-1-10x  | 0.07270934 | 0.20880452 | 0.0014433  |
| 2w4w_SITTD4_GCGTTTCGTAATAAGA-1-10x  | 0.05328729 | 0.13965152 | 0.00019264 |
| 2w4w_SITTD4_GGAAGTGTCCCTCGATC-1-10x | 0.2788903  | 0.9429204  | 0.00075266 |
| 2w4w_SITTD4_GGAATCTGTACCCACG-1-10x  | 0.2864048  | 0.969676   | 0.00075773 |
| 2w4w_SITTD4_GGAGGTATCCTGGGAC-1-10x  | 0.19490035 | 0.64387065 | 0.0012511  |
| 2w4w_SITTD4_GGCTTTCTGTTCGAT-1-10x   | 0.22647947 | 0.75630945 | 0.00097406 |
| 2w4w_SITTD4_GGGAAGTAGTGGTGGT-1-10x  | 0.0917866  | 0.27672988 | 0.0043903  |
| 2w4w_SITTD4_GGGACCTCCGATGTA-1-10x   | 0.08077304 | 0.23751566 | 0.0029431  |

|                                     |            |            |            |
|-------------------------------------|------------|------------|------------|
| 2w4w_SITTD4_GGGAGATCATGAGTAA-1-10x  | 0.26770085 | 0.90307987 | 0.00075705 |
| 2w4w_SITTD4_GGGTAGATCTAGACCA-1-10x  | 0.09439561 | 0.28601936 | 0.0044051  |
| 2w4w_SITTD4_GGTAACCTCAGAATGTA-1-10x | 0.04951178 | 0.12620863 | 0.00013566 |
| 2w4w_SITTD4_GGTAGAGAGAATTGCA-1-10x  | 0.06543184 | 0.18289268 | 0.00072102 |
| 2w4w_SITTD4_GGTCACGTCAAGCTGT-1-10x  | 0.08945467 | 0.26842695 | 0.0042295  |
| 2w4w_SITTD4_GGTGGCTAGGTTCCGC-1-10x  | 0.25930664 | 0.87319195 | 0.00077499 |
| 2w4w_SITTD4_GGTGTCGAGACCAGAC-1-10x  | 0.27522114 | 0.9298562  | 0.00075218 |
| 2w4w_SITTD4_GGTAACTCGTCTGATCA-1-10x | 0.05675386 | 0.15199436 | 0.000257   |
| 2w4w_SITTD4_GGTAACTCGATTTCT-1-10x   | 0.07502445 | 0.21704756 | 0.001885   |
| 2w4w_SITTD4_GTAAGTCCAATAGTCC-1-10x  | 0.09448299 | 0.2863305  | 0.0044051  |
| 2w4w_SITTD4_GTAGGTTGACGCTGAA-1-10x  | 0.02437555 | 0.03671002 | 3.91E-05   |
| 2w4w_SITTD4_GTAGGTTGTGACTAAA-1-10x  | 0.0906942  | 0.27284035 | 0.0043535  |
| 2w4w_SITTD4_GTATTGGGTCTCTCAC-1-10x  | 0.18175064 | 0.59705055 | 0.0014427  |
| 2w4w_SITTD4_GTCAAACAGACGAAGA-1-10x  | 0.09147498 | 0.27562034 | 0.0043535  |
| 2w4w_SITTD4_GTCCTCAAGTCAGGGT-1-10x  | 0.04583418 | 0.11311438 | 0.00010046 |
| 2w4w_SITTD4_GTCGCGAGTAAGCTCT-1-10x  | 0.04917764 | 0.12501894 | 0.00012523 |
| 2w4w_SITTD4_GTCGCGAGTACAGTAA-1-10x  | 0.1058202  | 0.3266971  | 0.00352    |
| 2w4w_SITTD4_GTCTAGACAGACGATG-1-10x  | 0.05948087 | 0.161704   | 0.00034795 |
| 2w4w_SITTD4_GTCCTTAGTTACCTTT-1-10x  | 0.04404265 | 0.10673557 | 8.81E-05   |
| 2w4w_SITTD4_GTGTTAGCATTGCAAC-1-10x  | 0.27264243 | 0.92067456 | 0.000753   |
| 2w4w_SITTD4_GTTTGGACACCTCTGT-1-10x  | 0.02339139 | 0.03320592 | 3.83E-05   |
| 2w4w_SITTD4_TACAGGTGTACCTAGT-1-10x  | 0.05112353 | 0.13194734 | 0.00014746 |
| 2w4w_SITTD4_TACCCACCAGCGTAGA-1-10x  | 0.25350347 | 0.8525295  | 0.00079608 |
| 2w4w_SITTD4_TACGGTACAATACAGA-1-10x  | 0.03580252 | 0.07739625 | 5.58E-05   |
| 2w4w_SITTD4_TAGGGTTAGCGTCTGC-1-10x  | 0.01776192 | 0.01316195 | 3.44E-05   |
| 2w4w_SITTD4_TAGGGTTCAGCTTTCC-1-10x  | 0.02056138 | 0.02312952 | 3.62E-05   |
| 2w4w_SITTD4_TAGGTTGGTTGCCGCA-1-10x  | 0.03969782 | 0.09126563 | 6.67E-05   |
| 2w4w_SITTD4_TATACCTAGACGCATG-1-10x  | 0.05441071 | 0.14365149 | 0.00021164 |
| 2w4w_SITTD4_TATACCTTCAAACCTG-1-10x  | 0.0894411  | 0.26837865 | 0.0042295  |
| 2w4w_SITTD4_TATCGCCCAAGTTCGT-1-10x  | 0.01944001 | 0.01913684 | 3.55E-05   |
| 2w4w_SITTD4_TATCGCCGTAGGACCA-1-10x  | 0.08381975 | 0.24836358 | 0.0034742  |
| 2w4w_SITTD4_TATCGCCGTGTTGCCG-1-10x  | 0.06241575 | 0.17215377 | 0.00047505 |
| 2w4w_SITTD4_TCACTATGTTCTACC-1-10x   | 0.27499104 | 0.92903686 | 0.00075218 |
| 2w4w_SITTD4_TCAGGTAGTCGATGCC-1-10x  | 0.2895946  | 0.98103344 | 0.0007606  |
| 2w4w_SITTD4_TCATACTCACATGACT-1-10x  | 0.04143445 | 0.09744896 | 7.40E-05   |
| 2w4w_SITTD4_TCATACTGTCAGGTAG-1-10x  | 0.10535802 | 0.3250515  | 0.0036214  |
| 2w4w_SITTD4_TCATACTGTTCTTGTT-1-10x  | 0.2691194  | 0.9081307  | 0.00075499 |
| 2w4w_SITTD4_TCATGGACACTTACAG-1-10x  | 0.04212985 | 0.09992497 | 7.82E-05   |
| 2w4w_SITTD4_TCCAGAATCAGTCACA-1-10x  | 0.08255705 | 0.2438677  | 0.0033032  |
| 2w4w_SITTD4_TCCATGCAGCAAGTGC-1-10x  | 0.02517638 | 0.03956144 | 4.00E-05   |
| 2w4w_SITTD4_TCCCAGTGTGTTTACG-1-10x  | 0.26182666 | 0.8821646  | 0.00076727 |



|                                    |            |            |            |
|------------------------------------|------------|------------|------------|
| 2w4w_SITTD4_TCCGATCGTTAAGGAT-1-10x | 0.04474339 | 0.10923057 | 9.39E-05   |
| 2w4w_SITTD4_TCCGGGATCCGCATAA-1-10x | 0.02763807 | 0.04832638 | 4.19E-05   |
| 2w4w_SITTD4_TCGCACTAGTGTTGTC-1-10x | 0.08863971 | 0.26552528 | 0.0041422  |
| 2w4w_SITTD4_TCGCTTGCAGTTTCAG-1-10x | 0.06362633 | 0.17646411 | 0.00058553 |
| 2w4w_SITTD4_TCGTGGGGTAGCTTGT-1-10x | 0.02967892 | 0.05559291 | 4.55E-05   |
| 2w4w_SITTD4_TCTAACTGTGGAGAAA-1-10x | 0.04382813 | 0.10597178 | 8.81E-05   |
| 2w4w_SITTD4_TCTACCGGTCGAGTTT-1-10x | 0.09651192 | 0.2935546  | 0.0043435  |
| 2w4w_SITTD4_TCTTAGTCATATGGCT-1-10x | 0.09013606 | 0.27085307 | 0.0042999  |
| 2w4w_SITTD4_TCTTGCGCAAGCCAC-1-10x  | 0.23454817 | 0.78503835 | 0.00090964 |
| 2w4w_SITTD4_TCTTGCGTCCGCAAT-1-10x  | 0.0460916  | 0.11403094 | 0.00010046 |
| 2w4w_SITTD4_TGAATCGGTCCTTAAG-1-10x | 0.02741225 | 0.04752234 | 4.19E-05   |
| 2w4w_SITTD4_TGACCCTAGGTACAGC-1-10x | 0.07662653 | 0.22275186 | 0.0022191  |
| 2w4w_SITTD4_TGACCCTTCATTCTTG-1-10x | 0.04003754 | 0.09247522 | 7.01E-05   |
| 2w4w_SITTD4_TGAGGAGTCATCTGTT-1-10x | 0.02153759 | 0.02660538 | 3.69E-05   |
| 2w4w_SITTD4_TGATCTTCACTCGATA-1-10x | 0.03044581 | 0.05832344 | 4.55E-05   |
| 2w4w_SITTD4_TGATCTTTCCCATACC-1-10x | 0.09678961 | 0.29454333 | 0.0043435  |
| 2w4w_SITTD4_TGATGCATCTAGTGTG-1-10x | 0.04777414 | 0.1200217  | 0.00011598 |
| 2w4w_SITTD4_TGATTTGTTGCTTGA-1-10x  | 0.01526308 | 0.0042647  | 3.27E-05   |
| 2w4w_SITTD4_TGCAGGCTCGATCCCT-1-10x | 0.02670182 | 0.04499283 | 4.09E-05   |
| 2w4w_SITTD4_TGCGGCAGTAACGCGA-1-10x | 0.18049958 | 0.5925961  | 0.001475   |
| 2w4w_SITTD4_TGCTCGTAGCCTCCAG-1-10x | 0.0914617  | 0.27557305 | 0.0043535  |
| 2w4w_SITTD4_TGGATGTCAGGACTTT-1-10x | 0.04286145 | 0.10252985 | 8.29E-05   |
| 2w4w_SITTD4_TGGGAGATCAAGAGGC-1-10x | 0.06769574 | 0.1909534  | 0.00088537 |
| 2w4w_SITTD4_TGGGTTATCGCCTTTG-1-10x | 0.08380126 | 0.24829774 | 0.0034742  |
| 2w4w_SITTD4_TGGTAGTGTCGTCTCT-1-10x | 0.02193428 | 0.02801779 | 3.69E-05   |
| 2w4w_SITTD4_TGGTGATGTAATTAGG-1-10x | 0.23251638 | 0.7778041  | 0.00092358 |
| 2w4w_SITTD4_TGGTGATGTGTCATGT-1-10x | 0.07643389 | 0.22206594 | 0.0020486  |
| 2w4w_SITTD4_TGTAGACAGAGGGTGG-1-10x | 0.19205084 | 0.63372487 | 0.0012985  |
| 2w4w_SITTD4_TGTGGCGCACAGTCCG-1-10x | 0.143146   | 0.45959714 | 0.0018718  |
| 2w4w_SITTD4_TGTTCTAGTTCTAACG-1-10x | 0.04844084 | 0.1223955  | 0.00012523 |
| 2w4w_SITTD4_TGTTTGTTGCTGAT-1-10x   | 0.22345942 | 0.7455564  | 0.00099599 |
| 2w4w_SITTD4_TTACAGGCACCGCTGA-1-10x | 0.24917907 | 0.8371323  | 0.00081888 |
| 2w4w_SITTD4_TTCAGGAGTACAGTCT-1-10x | 0.02270638 | 0.0307669  | 3.76E-05   |
| 2w4w_SITTD4_TTCCAATTCGTGCTCT-1-10x | 0.02239343 | 0.02965262 | 3.76E-05   |
| 2w4w_SITTD4_TTGAACGCATGGACAG-1-10x | 0.0475044  | 0.11906129 | 0.00011598 |
| 2w4w_SITTD4_TTGACCCCAGGTTTAC-1-10x | 0.08254683 | 0.2438313  | 0.0033032  |
| 2w4w_SITTD4_TTGACCCTCGAAGCAG-1-10x | 0.02918314 | 0.05382768 | 4.42E-05   |
| 2w4w_SITTD4_TTGCGTCCATCCCACT-1-10x | 0.08532387 | 0.25371906 | 0.0037839  |
| 2w4w_SITTD4_TTGGATGCAGAATCGG-1-10x | 0.06475156 | 0.18047051 | 0.00064991 |
| 2w4w_SITTD4_TTTACGTGTTAGGAGC-1-10x | 0.02126938 | 0.02565041 | 3.69E-05   |
| 2w4w_SITTD4_AAACCCACATATGGCT-1-10x | 0.03238274 | 0.06521998 | 5.00E-05   |

|                                    |            |            |            |
|------------------------------------|------------|------------|------------|
| 2w4w_SITTD4_AAACGCTCATGGCCAC-1-10x | 0.02255825 | 0.03023946 | 3.76E-05   |
| 2w4w_SITTD4_AAAGAACTCTCAAAGC-1-10x | 0.06055335 | 0.16552262 | 0.00038577 |
| 2w4w_SITTD4_AAAGGGCTCTACGCGG-1-10x | 0.08327084 | 0.24640918 | 0.0034742  |
| 2w4w_SITTD4_AAAGTCCCACCGAATT-1-10x | 0.01793704 | 0.01378545 | 3.44E-05   |
| 2w4w_SITTD4_AAAGTCCCAGCTAACT-1-10x | 0.1006849  | 0.30841267 | 0.0040879  |
| 2w4w_SITTD4_AAATGGAGTATTAAGG-1-10x | 0.04809709 | 0.12117157 | 0.00011598 |
| 2w4w_SITTD4_AACAAAGAGACAAGCC-1-10x | 0.04330299 | 0.10410197 | 8.29E-05   |
| 2w4w_SITTD4_AACAACCAGAGTCTTC-1-10x | 0.02275464 | 0.03093871 | 3.76E-05   |
| 2w4w_SITTD4_AACACACGTGCCTTTC-1-10x | 0.01568852 | 0.00577951 | 3.33E-05   |
| 2w4w_SITTD4_AACACACTCTCTGAGA-1-10x | 0.05204365 | 0.1352235  | 0.00016076 |
| 2w4w_SITTD4_AACAGGGCATAATCGC-1-10x | 0.05375785 | 0.14132695 | 0.00019264 |
| 2w4w_SITTD4_AACAGGGTCAGTCTTT-1-10x | 0.17091398 | 0.5584662  | 0.0016421  |
| 2w4w_SITTD4_AACCAACCACAGTCAT-1-10x | 0.12351961 | 0.3897166  | 0.0021124  |
| 2w4w_SITTD4_AACCATGTCTGAGAGG-1-10x | 0.03693702 | 0.08143569 | 5.82E-05   |
| 2w4w_SITTD4_AACCATGTCTCGTCGT-1-10x | 0.0247994  | 0.03821917 | 3.91E-05   |
| 2w4w_SITTD4_AACCTGACATCGTTCC-1-10x | 0.13866718 | 0.44365016 | 0.0018772  |
| 2w4w_SITTD4_AACGGGAGTGATTAGA-1-10x | 0.1058346  | 0.3267484  | 0.00352    |
| 2w4w_SITTD4_AAGCGTTAGGATTCAA-1-10x | 0.2648462  | 0.8929158  | 0.00076135 |
| 2w4w_SITTD4_AAGGAATTCATGGGAG-1-10x | 0.02319838 | 0.03251867 | 3.83E-05   |
| 2w4w_SITTD4_AAGGTAACAAGGCAAC-1-10x | 0.04193069 | 0.09921587 | 7.82E-05   |
| 2w4w_SITTD4_AAGGTAATCCGCCTAT-1-10x | 0.03370075 | 0.06991279 | 5.17E-05   |
| 2w4w_SITTD4_AAGGTAATCGTGGACC-1-10x | 0.06693817 | 0.18825603 | 0.00079936 |
| 2w4w_SITTD4_AATAGAGCAGAACTCT-1-10x | 0.25244534 | 0.848762   | 0.00080028 |
| 2w4w_SITTD4_AATCACGGTGGGATTG-1-10x | 0.13297473 | 0.42338192 | 0.0019115  |
| 2w4w_SITTD4_AATCGTGTGAGCAATC-1-10x | 0.03115237 | 0.0608392  | 4.68E-05   |
| 2w4w_SITTD4_AATGACCAGCACTCCG-1-10x | 0.0400217  | 0.09241881 | 7.01E-05   |
| 2w4w_SITTD4_AATTCCTGTGTCATTG-1-10x | 0.0320441  | 0.06401424 | 4.83E-05   |
| 2w4w_SITTD4_ACAGAAATCACGGGAA-1-10x | 0.04232859 | 0.10063259 | 7.82E-05   |
| 2w4w_SITTD4_ACAGAAATCGTGTTC-1-10x  | 0.11638596 | 0.36431694 | 0.0025211  |
| 2w4w_SITTD4_ACAGGGACAGTCGTTA-1-10x | 0.26083615 | 0.87863785 | 0.00076963 |
| 2w4w_SITTD4_ACATGCACAGTATGAA-1-10x | 0.12201884 | 0.38437304 | 0.0021873  |
| 2w4w_SITTD4_ACATTCGTCCTACAA-1-10x  | 0.09975649 | 0.30510703 | 0.0041652  |
| 2w4w_SITTD4_ACCAAACAGATCCTAC-1-10x | 0.2483849  | 0.8343046  | 0.00082396 |
| 2w4w_SITTD4_ACCAAACTCCGATGTA-1-10x | 0.02227821 | 0.02924236 | 3.76E-05   |
| 2w4w_SITTD4_ACCCTTGGTCCTCATC-1-10x | 0.06570495 | 0.1838651  | 0.00072102 |
| 2w4w_SITTD4_ACCTGAAAGTCTACCA-1-10x | 0.29173005 | 0.98863685 | 0.00076378 |
| 2w4w_SITTD4_ACGGTCGAGTGTTGAA-1-10x | 0.03093852 | 0.06007776 | 4.68E-05   |
| 2w4w_SITTD4_ACGGTCGAGAGAAAG-1-10x  | 0.01803391 | 0.01413038 | 3.44E-05   |
| 2w4w_SITTD4_ACGGTCGTCCGCATAA-1-10x | 0.02002361 | 0.02121478 | 3.55E-05   |
| 2w4w_SITTD4_ACGTAGTCAAGCTACT-1-10x | 0.01940133 | 0.01899913 | 3.55E-05   |
| 2w4w_SITTD4_ACGTAGTTCTATCGTT-1-10x | 0.2145957  | 0.71399677 | 0.0010701  |

|                                    |            |            |            |
|------------------------------------|------------|------------|------------|
| 2w4w_SITTD4_ACGTTCCAGTGACAA-1-10x  | 0.05118997 | 0.13218392 | 0.00016076 |
| 2w4w_SITTD4_ACTATCTAGCGTCAAG-1-10x | 0.19053175 | 0.62831604 | 0.0013113  |
| 2w4w_SITTD4_ACTATGGCATGGGATG-1-10x | 0.25264302 | 0.84946585 | 0.00080028 |
| 2w4w_SITTD4_ACTATTCCATACAGGG-1-10x | 0.09391081 | 0.28429323 | 0.0044154  |
| 2w4w_SITTD4_ACTTAGGGTGAGCTCC-1-10x | 0.02509891 | 0.0392856  | 4.00E-05   |
| 2w4w_SITTD4_ACTTTCACAAACTCTG-1-10x | 0.18920052 | 0.62357616 | 0.001338   |
| 2w4w_SITTD4_AGACCATCATCCTTCG-1-10x | 0.05623443 | 0.1501449  | 0.000257   |
| 2w4w_SITTD4_AGACTCACAAGTTTGC-1-10x | 0.03510601 | 0.0749163  | 5.37E-05   |
| 2w4w_SITTD4_AGACTCATCGTTGTTT-1-10x | 0.2890219  | 0.97899437 | 0.0007606  |
| 2w4w_SITTD4_AGAGAATTCGCCAGTG-1-10x | 0.02934596 | 0.0544074  | 4.42E-05   |
| 2w4w_SITTD4_AGAGCAGTCTCAGAAC-1-10x | 0.02833158 | 0.05079566 | 4.30E-05   |
| 2w4w_SITTD4_AGATAGATCGTTGTTT-1-10x | 0.11584438 | 0.3623886  | 0.002594   |
| 2w4w_SITTD4_AGATGCTGTACAAGCG-1-10x | 0.01651243 | 0.00871309 | 3.38E-05   |
| 2w4w_SITTD4_AGCCACGCACGCGGTT-1-10x | 0.04641448 | 0.11518058 | 0.00010046 |
| 2w4w_SITTD4_AGCCACGTCACAATGC-1-10x | 0.01614395 | 0.00740108 | 3.33E-05   |
| 2w4w_SITTD4_AGCCAGCGTACCGCGT-1-10x | 0.01654281 | 0.00882124 | 3.38E-05   |
| 2w4w_SITTD4_AGCCAGCTCCATTTAC-1-10x | 0.05137674 | 0.13284892 | 0.00016076 |
| 2w4w_SITTD4_AGCTCAATCCGACAGC-1-10x | 0.256388   | 0.8628     | 0.00078463 |
| 2w4w_SITTD4_AGGAAATGTAACCCGC-1-10x | 0.13457215 | 0.4290696  | 0.0019027  |
| 2w4w_SITTD4_AGGACGATCCTCCACA-1-10x | 0.2726964  | 0.9208667  | 0.000753   |
| 2w4w_SITTD4_AGGAGGTCACCTGTCT-1-10x | 0.25372303 | 0.85331124 | 0.00079608 |
| 2w4w_SITTD4_AGGATAATCGTGCATA-1-10x | 0.04102876 | 0.09600448 | 7.40E-05   |
| 2w4w_SITTD4_AGGATCTGTAACAAGT-1-10x | 0.10504595 | 0.32394037 | 0.0036214  |
| 2w4w_SITTD4_AGGCCACGTGAAAGTT-1-10x | 0.16543365 | 0.53895324 | 0.0017353  |
| 2w4w_SITTD4_AGGGAGTAGCCTTCTC-1-10x | 0.01579121 | 0.00614515 | 3.33E-05   |
| 2w4w_SITTD4_AGGGAGTGTGACACGA-1-10x | 0.09016023 | 0.2709391  | 0.0042999  |
| 2w4w_SITTD4_AGGGAGTTCCACACCT-1-10x | 0.12113966 | 0.3812427  | 0.0022308  |
| 2w4w_SITTD4_AGGGCTCAGCATGTTC-1-10x | 0.02999296 | 0.05671107 | 4.55E-05   |
| 2w4w_SITTD4_AGGGTTTCACATTACG-1-10x | 0.0534814  | 0.14034264 | 0.00019264 |
| 2w4w_SITTD4_AGGTAGGGTGCCAGT-1-10x  | 0.10051736 | 0.30781612 | 0.0040879  |
| 2w4w_SITTD4_AGGTAGGTCCACGTGG-1-10x | 0.04289788 | 0.10265958 | 8.29E-05   |
| 2w4w_SITTD4_AGGTCATCATCCCGTT-1-10x | 0.07015119 | 0.19969611 | 0.0011935  |
| 2w4w_SITTD4_AGGTCTACAGCGAACA-1-10x | 0.03315468 | 0.06796851 | 5.00E-05   |
| 2w4w_SITTD4_AGGTCTACATATGAAG-1-10x | 0.21938117 | 0.73103565 | 0.0010253  |
| 2w4w_SITTD4_AGGTTACTCACCTCGT-1-10x | 0.10139026 | 0.3109241  | 0.0040036  |
| 2w4w_SITTD4_AGTAGTCTCCATGAGT-1-10x | 0.03915405 | 0.08932952 | 6.67E-05   |
| 2w4w_SITTD4_AGTGCCGTCAACCGAT-1-10x | 0.02063979 | 0.02340873 | 3.62E-05   |
| 2w4w_SITTD4_AGTGCCGTCACTACTT-1-10x | 0.262829   | 0.8857335  | 0.00076511 |
| 2w4w_SITTD4_AGTGCCGTGCCCAGA-1-10x  | 0.08772996 | 0.26228607 | 0.0040384  |
| 2w4w_SITTD4_AGTTCCAGTCGAAAT-1-10x  | 0.01605213 | 0.00707416 | 3.33E-05   |
| 2w4w_SITTD4_ATACCTTCATCTAGAC-1-10x | 0.06597029 | 0.18480986 | 0.00072102 |

|                                     |            |            |            |
|-------------------------------------|------------|------------|------------|
| 2w4w_SITTD4_ATAGAGACAGAGTGTG-1-10x  | 0.01748535 | 0.0121772  | 3.44E-05   |
| 2w4w_SITTD4_ATAGGCTAGATGGTCG-1-10x  | 0.09163757 | 0.27619928 | 0.0043903  |
| 2w4w_SITTD4_ATAGGCTGTAGGTAGC-1-10x  | 0.11262854 | 0.3509385  | 0.0028393  |
| 2w4w_SITTD4_ATCACGATCAGGGATG-1-10x  | 0.01870191 | 0.0165088  | 3.49E-05   |
| 2w4w_SITTD4_ATCAGGTCATTGACTG-1-10x  | 0.22006509 | 0.73347074 | 0.0010253  |
| 2w4w_SITTD4_ATCAGGTTCTGCTAGA-1-10x  | 0.28898662 | 0.9788687  | 0.0007606  |
| 2w4w_SITTD4_ATCCATTTCCATAGGT-1-10x  | 0.12337137 | 0.38918877 | 0.0021479  |
| 2w4w_SITTD4_ATCGCCTAGAAGTCTA-1-10x  | 0.14572206 | 0.46876934 | 0.0018716  |
| 2w4w_SITTD4_ATCGGATAGCAGGTCA-1-10x  | 0.01958933 | 0.01966852 | 3.55E-05   |
| 2w4w_SITTD4_ATCGTAGGTTGACTAC-1-10x  | 0.2821785  | 0.9546281  | 0.00075401 |
| 2w4w_SITTD4_ATCTTCATCCAATGCA-1-10x  | 0.25452942 | 0.85618246 | 0.00079207 |
| 2w4w_SITTD4_ATCTTCATCGAGTCCG-1-10x  | 0.05876243 | 0.15914597 | 0.00034795 |
| 2w4w_SITTD4_ATGCATGTGCGCCAA-1-10x   | 0.07830653 | 0.22873352 | 0.0023954  |
| 2w4w_SITTD4_ATGGAGGAGGGTCAAC-1-10x  | 0.21563414 | 0.71769416 | 0.001055   |
| 2w4w_SITTD4_ATGGGAGAGCATCCCG-1-10x  | 0.06572085 | 0.18392171 | 0.00072102 |
| 2w4w_SITTD4_ATGGGAGTCTTTCAGT-1-10x  | 0.05141085 | 0.13297035 | 0.00016076 |
| 2w4w_SITTD4_ATGGGTTTCTGGAAGG-1-10x  | 0.06121058 | 0.16786271 | 0.00042799 |
| 2w4w_SITTD4_ATGGTTGAGGCCTTGC-1-10x  | 0.04735992 | 0.11854686 | 0.00010777 |
| 2w4w_SITTD4_ATGGTTGCAGCACAAG-1-10x  | 0.25727    | 0.86594045 | 0.00078121 |
| 2w4w_SITTD4_ATGGTTGTCCATTTGT-1-10x  | 0.04027609 | 0.09332457 | 7.01E-05   |
| 2w4w_SITTD4_ATGTCCCAGTTCGGTA-1-10x  | 0.01568562 | 0.00576919 | 3.33E-05   |
| 2w4w_SITTD4_ATTACCTTCCAAGTAG-1-10x  | 0.04245209 | 0.10107232 | 7.82E-05   |
| 2w4w_SITTD4_ATTACAGTCTTTACAC-1-10x  | 0.11666243 | 0.3653013  | 0.0025211  |
| 2w4w_SITTD4_ATTACATCGTGACACAG-1-10x | 0.02033879 | 0.02233699 | 3.62E-05   |
| 2w4w_SITTD4_ATTCCCGTCACACGAT-1-10x  | 0.04761213 | 0.11944486 | 0.00011598 |
| 2w4w_SITTD4_ATTCTACAGGCTACC-1-10x   | 0.04743267 | 0.11880589 | 0.00011598 |
| 2w4w_SITTD4_ATTCTACGTCGAACAG-1-10x  | 0.01529238 | 0.00436905 | 3.27E-05   |
| 2w4w_SITTD4_ATTCTTGAGCAGATAT-1-10x  | 0.02301624 | 0.03187017 | 3.83E-05   |
| 2w4w_SITTD4_ATTGTTCAGGGTGAGG-1-10x  | 0.23909822 | 0.801239   | 0.00087632 |
| 2w4w_SITTD4_ATTGTTCGTAAGGGA-1-10x   | 0.04455921 | 0.10857479 | 8.81E-05   |
| 2w4w_SITTD4_ATTTCACTCCATAGAC-1-10x  | 0.02285026 | 0.03127919 | 3.76E-05   |
| 2w4w_SITTD4_ATTTCTGTCCATTACCT-1-10x | 0.14008282 | 0.4486906  | 0.001875   |
| 2w4w_SITTD4_ATTTCTGTCCACAGCG-1-10x  | 0.02032074 | 0.02227271 | 3.62E-05   |
| 2w4w_SITTD4_CAAAGAAAGTGAGTTA-1-10x  | 0.24734542 | 0.8306035  | 0.0008292  |
| 2w4w_SITTD4_CAACAGTCAGAGAGGG-1-10x  | 0.02863996 | 0.05189366 | 4.42E-05   |
| 2w4w_SITTD4_CAACCTCAGTACCCTA-1-10x  | 0.01616094 | 0.00746158 | 3.33E-05   |
| 2w4w_SITTD4_CAACGGCAGAAAGTCT-1-10x  | 0.01902309 | 0.0176524  | 3.49E-05   |
| 2w4w_SITTD4_CAAGACTGTCGCTCGA-1-10x  | 0.15349151 | 0.4964328  | 0.0018617  |
| 2w4w_SITTD4_CAAGACTTCAGGAACG-1-10x  | 0.15947995 | 0.51775485 | 0.0018109  |
| 2w4w_SITTD4_CAAGAGGCAGGAATAT-1-10x  | 0.04866344 | 0.12318808 | 0.00012523 |
| 2w4w_SITTD4_CAAGCTAGTCTGTCCT-1-10x  | 0.02231293 | 0.02936599 | 3.76E-05   |

|                                    |            |            |            |
|------------------------------------|------------|------------|------------|
| 2w4w_SITTD4_CAAGGGAGTATGCTAC-1-10x | 0.04712826 | 0.11772201 | 0.00010777 |
| 2w4w_SITTD4_CAATACGGTTCGAACT-1-10x | 0.01650509 | 0.00868694 | 3.38E-05   |
| 2w4w_SITTD4_CAATTTTGTATGAGGC-1-10x | 0.02306406 | 0.03204044 | 3.83E-05   |
| 2w4w_SITTD4_CACAACAGTTCGGCCA-1-10x | 0.04497258 | 0.11004662 | 9.39E-05   |
| 2w4w_SITTD4_CACACAACATGAAGCG-1-10x | 0.19007626 | 0.6266943  | 0.0013244  |
| 2w4w_SITTD4_CACAGGCCACCTGAAT-1-10x | 0.11269627 | 0.35117963 | 0.0028393  |
| 2w4w_SITTD4_CACGAATGTTGGTACT-1-10x | 0.25529376 | 0.8589039  | 0.00078825 |
| 2w4w_SITTD4_CAGCAATAGCTCGCAC-1-10x | 0.04853239 | 0.12272146 | 0.00012523 |
| 2w4w_SITTD4_CAGCACGGTTCGAGT-1-10x  | 0.04400273 | 0.10659342 | 8.81E-05   |
| 2w4w_SITTD4_CAGCCAGCACACACTA-1-10x | 0.0172445  | 0.01131965 | 3.38E-05   |
| 2w4w_SITTD4_CAGCCAGCACGACGCT-1-10x | 0.03384555 | 0.07042838 | 5.17E-05   |
| 2w4w_SITTD4_CAGCCAGGTCACCTAG-1-10x | 0.04711549 | 0.11767655 | 0.00010777 |
| 2w4w_SITTD4_CAGGCCAGTCTACAGT-1-10x | 0.04502092 | 0.11021874 | 9.39E-05   |
| 2w4w_SITTD4_CAGGTATAGGGATGTC-1-10x | 0.08883548 | 0.2662223  | 0.0042295  |
| 2w4w_SITTD4_CAGTTCCCATACAGAA-1-10x | 0.11075508 | 0.34426793 | 0.0030221  |
| 2w4w_SITTD4_CATAAGCGTTTATGCG-1-10x | 0.21480072 | 0.71472675 | 0.0010625  |
| 2w4w_SITTD4_CATACCCACAATGAA-1-10x  | 0.01647287 | 0.00857222 | 3.38E-05   |
| 2w4w_SITTD4_CATACCCGTCATCTAG-1-10x | 0.02243954 | 0.0298168  | 3.76E-05   |
| 2w4w_SITTD4_CATCCACTCCGCACTT-1-10x | 0.07613458 | 0.22100022 | 0.0020486  |
| 2w4w_SITTD4_CATCGTCCAGAGGTAC-1-10x | 0.22552705 | 0.7529183  | 0.00098137 |
| 2w4w_SITTD4_CATGCAAGTATGCTTG-1-10x | 0.02349217 | 0.03356475 | 3.83E-05   |
| 2w4w_SITTD4_CATGCCTGTCCGTACG-1-10x | 0.18066306 | 0.5931782  | 0.001475   |
| 2w4w_SITTD4_CATGCGGGTTGAATCC-1-10x | 0.09091222 | 0.27361664 | 0.0043535  |
| 2w4w_SITTD4_CATGGTATCGAGTCTA-1-10x | 0.04327446 | 0.1040004  | 8.29E-05   |
| 2w4w_SITTD4_CCACCATCAGCTGCCA-1-10x | 0.05308875 | 0.13894461 | 0.00019264 |
| 2w4w_SITTD4_CCACGAGCAGGAAGTC-1-10x | 0.08629722 | 0.2571847  | 0.0039187  |
| 2w4w_SITTD4_CCACGAGGTAGTGATA-1-10x | 0.08056386 | 0.23677085 | 0.0029431  |
| 2w4w_SITTD4_CCACGTTTCATATGGC-1-10x | 0.20515776 | 0.68039256 | 0.0011518  |
| 2w4w_SITTD4_CCATAAGCACAGCTGC-1-10x | 0.04293817 | 0.10280304 | 8.29E-05   |
| 2w4w_SITTD4_CCCGAAGTCGGACTGC-1-10x | 0.16376634 | 0.53301674 | 0.001763   |
| 2w4w_SITTD4_CCCGAAGTCGGTTCAA-1-10x | 0.0483636  | 0.12212049 | 0.00012523 |
| 2w4w_SITTD4_CCCTCTCCAGTAACGG-1-10x | 0.09008713 | 0.27067885 | 0.0042999  |
| 2w4w_SITTD4_CCCTGATTCTGTTGGA-1-10x | 0.17835093 | 0.58494574 | 0.0015081  |
| 2w4w_SITTD4_CCCTTAGAGGTAGTAT-1-10x | 0.24412243 | 0.8191279  | 0.00084583 |
| 2w4w_SITTD4_CCCTTAGTCAACGTGT-1-10x | 0.07859489 | 0.22976024 | 0.002576   |
| 2w4w_SITTD4_CCCTTAGTCTAGCCAA-1-10x | 0.06287029 | 0.17377219 | 0.00052741 |
| 2w4w_SITTD4_CCCTTAGTCTATCGCC-1-10x | 0.17569771 | 0.5754989  | 0.0015585  |
| 2w4w_SITTD4_CCGATCTTCCAGGAC-1-10x  | 0.09942544 | 0.3039283  | 0.0041652  |
| 2w4w_SITTD4_CCGATGGAGTCGCCAC-1-10x | 0.08711592 | 0.26009974 | 0.0040384  |
| 2w4w_SITTD4_CCGATGGTCATGTCTT-1-10x | 0.02703969 | 0.04619581 | 4.19E-05   |
| 2w4w_SITTD4_CCGGGTAAGATGACAT-1-10x | 0.01713747 | 0.01093856 | 3.38E-05   |

|                                     |            |            |            |
|-------------------------------------|------------|------------|------------|
| 2w4w_SITTD4_CCGGGTACAAATCAGA-1-10x  | 0.05077981 | 0.13072352 | 0.00014746 |
| 2w4w_SITTD4_CCGGGTAGTATGCAAA-1-10x  | 0.20225887 | 0.67007095 | 0.0011792  |
| 2w4w_SITTD4_CCGGTAGCAGCTACTA-1-10x  | 0.02734356 | 0.04727776 | 4.19E-05   |
| 2w4w_SITTD4_CCGTAGGCACCAACAT-1-10x  | 0.04359293 | 0.10513432 | 8.29E-05   |
| 2w4w_SITTD4_CCTATCGCACGTCATA-1-10x  | 0.24283558 | 0.81454605 | 0.00085167 |
| 2w4w_SITTD4_CCTCACACATAACCCA-1-10x  | 0.01703314 | 0.01056709 | 3.38E-05   |
| 2w4w_SITTD4_CCTCCTCCACACCTGG-1-10x  | 0.07376432 | 0.21256082 | 0.0017292  |
| 2w4w_SITTD4_CCTCTCCGTAAGGTCG-1-10x  | 0.05293021 | 0.13838011 | 0.00017575 |
| 2w4w_SITTD4_CCTGTTGAGCGTCCG-1-10x   | 0.05730333 | 0.15395078 | 0.00028394 |
| 2w4w_SITTD4_CCTGTTGGTGAACCGA-1-10x  | 0.11310142 | 0.3526222  | 0.0028393  |
| 2w4w_SITTD4_CGAAGGACACGGTGCT-1-10x  | 0.02199664 | 0.02823983 | 3.69E-05   |
| 2w4w_SITTD4_CGACAGCAGGAGGCAG-1-10x  | 0.2605139  | 0.87749046 | 0.00077221 |
| 2w4w_SITTD4_CGAGAAGGTGGCTACC-1-10x  | 0.02162811 | 0.02692766 | 3.69E-05   |
| 2w4w_SITTD4_CGAGTGCCAACGTTAC-1-10x  | 0.0261938  | 0.043184   | 4.09E-05   |
| 2w4w_SITTD4_CGAGTTAAGGGCAGTT-1-10x  | 0.0345358  | 0.07288604 | 5.37E-05   |
| 2w4w_SITTD4_CGATGGCAGAGGCTGT-1-10x  | 0.28325063 | 0.9584455  | 0.00075531 |
| 2w4w_SITTD4_CGCAGGTGTGTCTTAG-1-10x  | 0.03304227 | 0.06756825 | 5.00E-05   |
| 2w4w_SITTD4_CGCAGGTTCAAACCTGC-1-10x | 0.03596139 | 0.0779619  | 5.58E-05   |
| 2w4w_SITTD4_CGCAGGTTCGAAGGAC-1-10x  | 0.08610568 | 0.25650275 | 0.0039187  |
| 2w4w_SITTD4_CGCATAAGTGAGCCAA-1-10x  | 0.08357844 | 0.24750438 | 0.0034742  |
| 2w4w_SITTD4_CGCGTGAGTTGGGTTT-1-10x  | 0.0651473  | 0.18187958 | 0.00064991 |
| 2w4w_SITTD4_CGGAACCTCGGCTTGG-1-10x  | 0.13642192 | 0.4356558  | 0.0018891  |
| 2w4w_SITTD4_CGGACACAGATTGAGT-1-10x  | 0.01705978 | 0.01066192 | 3.38E-05   |
| 2w4w_SITTD4_CGGACACTCCTACCAC-1-10x  | 0.02773718 | 0.04867927 | 4.30E-05   |
| 2w4w_SITTD4_CGGGTCAAGATACTGA-1-10x  | 0.07382149 | 0.21276437 | 0.0017292  |
| 2w4w_SITTD4_CGGGTCACATATCTCT-1-10x  | 0.01623861 | 0.00773812 | 3.33E-05   |
| 2w4w_SITTD4_CGGTCAGGTGAACGGT-1-10x  | 0.04362259 | 0.10523995 | 8.29E-05   |
| 2w4w_SITTD4_CGTCCATAGAATCTAG-1-10x  | 0.03617644 | 0.0787276  | 5.82E-05   |
| 2w4w_SITTD4_CGTGCTTCATTCTCTA-1-10x  | 0.02956553 | 0.0551892  | 4.55E-05   |
| 2w4w_SITTD4_CGTGCTTCTCATGGA-1-10x   | 0.07978579 | 0.23400049 | 0.0027593  |
| 2w4w_SITTD4_CGTTAGACAGAGATTA-1-10x  | 0.17781375 | 0.58303314 | 0.0015248  |
| 2w4w_SITTD4_CGTTAGATCTAGATCG-1-10x  | 0.02302643 | 0.03190643 | 3.83E-05   |
| 2w4w_SITTD4_CGTTCTGGTGCATTAC-1-10x  | 0.03990638 | 0.09200821 | 7.01E-05   |
| 2w4w_SITTD4_CGTTGGGTCTGCTGAA-1-10x  | 0.04393956 | 0.10636853 | 8.81E-05   |
| 2w4w_SITTD4_CTAACCCGTAGTGTGG-1-10x  | 0.15702465 | 0.50901264 | 0.0018385  |
| 2w4w_SITTD4_CTACATTGTAGTCGTT-1-10x  | 0.03765966 | 0.08400869 | 6.07E-05   |
| 2w4w_SITTD4_CTAGACAAGCAACTTC-1-10x  | 0.01615434 | 0.00743808 | 3.33E-05   |
| 2w4w_SITTD4_CTAGACAAGCTGAAGC-1-10x  | 0.25191656 | 0.84687924 | 0.00080467 |
| 2w4w_SITTD4_CTAGACAATGGCCC-1-10x    | 0.03420416 | 0.07170522 | 5.17E-05   |
| 2w4w_SITTD4_CTATCTAGTGCTCGTG-1-10x  | 0.02543968 | 0.04049891 | 4.00E-05   |
| 2w4w_SITTD4_CTATCTAGTGCTCGTG-1-10x  | 0.08001423 | 0.23481387 | 0.0027593  |

|                                      |            |            |            |
|--------------------------------------|------------|------------|------------|
| 2w4w_SITTD4_CTATCTATCGAAGCCC-1-10x   | 0.16909495 | 0.55198944 | 0.0016744  |
| 2w4w_SITTD4_CTCAGTCCAAGTGCAG-1-10x   | 0.04958766 | 0.1264788  | 0.00013566 |
| 2w4w_SITTD4_CTCAGTCTCAGACTGT-1-10x   | 0.26529452 | 0.89451206 | 0.00076135 |
| 2w4w_SITTD4_CTCATTAGTCTACGTA-1-10x   | 0.04268333 | 0.10189567 | 7.82E-05   |
| 2w4w_SITTD4_CTCCAACCAGGCATGA-1-10x   | 0.02261336 | 0.03043569 | 3.76E-05   |
| 2w4w_SITTD4_CTCCACAGTCTAACTG-1-10x   | 0.02096905 | 0.02458106 | 3.62E-05   |
| 2w4w_SITTD4_CTCCTTTAGCTGTGCC-1-10x   | 0.1051742  | 0.324397   | 0.0036214  |
| 2w4w_SITTD4_CTCCTTTGTAACAAGT-1-10x   | 0.15863605 | 0.5147501  | 0.0018209  |
| 2w4w_SITTD4_CTGAATGGTTGGACCC-1-10x   | 0.17298453 | 0.56583846 | 0.0016089  |
| 2w4w_SITTD4_CTGAGGCGTCCAAAGG-1-10x   | 0.02256759 | 0.03027271 | 3.76E-05   |
| 2w4w_SITTD4_CTGCATCTCACTGCTC-1-10x   | 0.22123711 | 0.7376438  | 0.0010106  |
| 2w4w_SITTD4_CTGGACGTCTGGGCCA-1-10x   | 0.02498822 | 0.03889147 | 4.00E-05   |
| 2w4w_SITTD4_CTGGTCTGTGTCCAAT-1-10x   | 0.03860384 | 0.08737045 | 6.36E-05   |
| 2w4w_SITTD4_CTGTCTGTTCCATAAGGA-1-10x | 0.04165684 | 0.09824079 | 7.40E-05   |
| 2w4w_SITTD4_CTGTCTGTTCCGAGATT-1-10x  | 0.02052211 | 0.02298972 | 3.62E-05   |
| 2w4w_SITTD4_CTTCAATAGATTACCC-1-10x   | 0.0189948  | 0.01755168 | 3.49E-05   |
| 2w4w_SITTD4_CTTCAATGTACACGCC-1-10x   | 0.26463798 | 0.89217436 | 0.00076135 |
| 2w4w_SITTD4_CTTCCGACAGGCTCTG-1-10x   | 0.02096134 | 0.02455362 | 3.62E-05   |
| 2w4w_SITTD4_CTTCTTAGACATATG-1-10x    | 0.14969765 | 0.48292458 | 0.0018705  |
| 2w4w_SITTD4_CTTCTAAAGTCTGTAG-1-10x   | 0.06276405 | 0.1733939  | 0.00052741 |
| 2w4w_SITTD4_CTTCTAATCCGGGACT-1-10x   | 0.08385088 | 0.24847442 | 0.0034742  |
| 2w4w_SITTD4_GAAATGACATTGACCA-1-10x   | 0.1326729  | 0.42230728 | 0.0019219  |
| 2w4w_SITTD4_GAATAGACACCTGCAG-1-10x   | 0.20628701 | 0.6844133  | 0.0011344  |
| 2w4w_SITTD4_GAATCACCAGGATGAC-1-10x   | 0.22519445 | 0.7517341  | 0.00098137 |
| 2w4w_SITTD4_GAATCACGTCTGTAGT-1-10x   | 0.02365646 | 0.03414969 | 3.83E-05   |
| 2w4w_SITTD4_GAATCGTAGTTGGACG-1-10x   | 0.24572434 | 0.82483155 | 0.00083459 |
| 2w4w_SITTD4_GACAGCCAGATTGTGA-1-10x   | 0.10456496 | 0.32222778 | 0.0037215  |
| 2w4w_SITTD4_GACCAATCATGATCTG-1-10x   | 0.10651557 | 0.329173   | 0.00352    |
| 2w4w_SITTD4_GACCCAGTCTATGGCC-1-10x   | 0.07229129 | 0.20731604 | 0.0014433  |
| 2w4w_SITTD4_GACGCTGTCACCTTG-1-10x    | 0.09714307 | 0.29580182 | 0.0043435  |
| 2w4w_SITTD4_GACGTTATCAGGCGAA-1-10x   | 0.09048777 | 0.27210537 | 0.0042999  |
| 2w4w_SITTD4_GACTCTCCATGAGAAT-1-10x   | 0.02885175 | 0.05264773 | 4.42E-05   |
| 2w4w_SITTD4_GACTCTCTCGAGTCTA-1-10x   | 0.07218724 | 0.20694555 | 0.0014433  |
| 2w4w_SITTD4_GAGACTTAGCCTATCA-1-10x   | 0.02179839 | 0.02753397 | 3.69E-05   |
| 2w4w_SITTD4_GAGAGGTGTAGGACCA-1-10x   | 0.03842848 | 0.0867461  | 6.36E-05   |
| 2w4w_SITTD4_GAGAGGTGTCTCTCAC-1-10x   | 0.01649779 | 0.00866096 | 3.38E-05   |
| 2w4w_SITTD4_GAGCCTGAGATTCGAA-1-10x   | 0.02544478 | 0.04051707 | 4.00E-05   |
| 2w4w_SITTD4_GAGTCATAGAGGCGTT-1-10x   | 0.01581493 | 0.00622958 | 3.33E-05   |
| 2w4w_SITTD4_GAGTCATAGCACCAGA-1-10x   | 0.01526265 | 0.00426319 | 3.27E-05   |
| 2w4w_SITTD4_GAGTTACGTGTCTAAC-1-10x   | 0.03470389 | 0.07348453 | 5.37E-05   |
| 2w4w_SITTD4_GAGTTGTTCCGGTTCAA-1-10x  | 0.0344174  | 0.07246448 | 5.37E-05   |

|                                     |            |            |            |
|-------------------------------------|------------|------------|------------|
| 2w4w_SITTD4_GATAGAACACCTGAAT-1-10x  | 0.18741204 | 0.61720824 | 0.0013519  |
| 2w4w_SITTD4_GATCAGTGTGTCCAAT-1-10x  | 0.03139663 | 0.0617089  | 4.68E-05   |
| 2w4w_SITTD4_GATCCCTAGCCTGAAG-1-10x  | 0.21069472 | 0.70010716 | 0.0011014  |
| 2w4w_SITTD4_GATCGTAGTATCATGC-1-10x  | 0.0267291  | 0.04508997 | 4.09E-05   |
| 2w4w_SITTD4_GATGACTTCGTAGTCA-1-10x  | 0.02975914 | 0.05587854 | 4.55E-05   |
| 2w4w_SITTD4_GATGTTGTCCCACAGG-1-10x  | 0.02339218 | 0.03320872 | 3.83E-05   |
| 2w4w_SITTD4_GATTTCTGTAGGAGTC-1-10x  | 0.23459706 | 0.78521246 | 0.00090964 |
| 2w4w_SITTD4_GATTTCTTCGTTAGAC-1-10x  | 0.0437175  | 0.10557785 | 8.81E-05   |
| 2w4w_SITTD4_GCAACCGCATCACGGC-1-10x  | 0.04299594 | 0.10300871 | 8.29E-05   |
| 2w4w_SITTD4_GCACGTGAGGTTCCAGG-1-10x | 0.05951883 | 0.16183917 | 0.00034795 |
| 2w4w_SITTD4_GCACGTGGTCCCTGAG-1-10x  | 0.08495478 | 0.25240493 | 0.0036353  |
| 2w4w_SITTD4_GACTAAGTTTACCAG-1-10x   | 0.08741458 | 0.26116312 | 0.0040384  |
| 2w4w_SITTD4_GCAGCCACATCAGTCA-1-10x  | 0.08715736 | 0.2602473  | 0.0040384  |
| 2w4w_SITTD4_GCAGCTGCATCTCGTC-1-10x  | 0.2716851  | 0.91726595 | 0.00075352 |
| 2w4w_SITTD4_GCATCGGGTGTTCGATT-1-10x | 0.03980124 | 0.09163387 | 6.67E-05   |
| 2w4w_SITTD4_GCATGATCAACCGCTG-1-10x  | 0.14697418 | 0.47322756 | 0.0018717  |
| 2w4w_SITTD4_GCATGATGTCTATAG-1-10x   | 0.02338403 | 0.03317968 | 3.83E-05   |
| 2w4w_SITTD4_GCCATGGTCCCGTTGT-1-10x  | 0.0285071  | 0.05142061 | 4.30E-05   |
| 2w4w_SITTD4_GCCATGGTCTAGGCCG-1-10x  | 0.0408234  | 0.0952733  | 7.01E-05   |
| 2w4w_SITTD4_GCCATTCCATCGTGGC-1-10x  | 0.15771852 | 0.5114832  | 0.0018302  |
| 2w4w_SITTD4_GCCGTGAAGTTGCTCA-1-10x  | 0.02497572 | 0.03884697 | 4.00E-05   |
| 2w4w_SITTD4_GCTACCTGTAGAGTTA-1-10x  | 0.28662163 | 0.9704481  | 0.00075773 |
| 2w4w_SITTD4_GCTACCTCCGACAGC-1-10x   | 0.04874227 | 0.12346875 | 0.00012523 |
| 2w4w_SITTD4_GCTGAATCATTGCTGA-1-10x  | 0.03068656 | 0.05918066 | 4.68E-05   |
| 2w4w_SITTD4_GCTGAATTCACCTCGT-1-10x  | 0.03476307 | 0.07369524 | 5.37E-05   |
| 2w4w_SITTD4_GCTTCACGTTAATGAG-1-10x  | 0.26883087 | 0.90710336 | 0.00075594 |
| 2w4w_SITTD4_GGAATCTAGAATAGTC-1-10x  | 0.07219143 | 0.20696048 | 0.0014433  |
| 2w4w_SITTD4_GGAATCTTCATTACTC-1-10x  | 0.03991107 | 0.09202489 | 7.01E-05   |
| 2w4w_SITTD4_GGAGAACCAAGGGCAT-1-10x  | 0.20192264 | 0.6688738  | 0.0011792  |
| 2w4w_SITTD4_GGAGCAATCTGTCCA-1-10x   | 0.01532186 | 0.004474   | 3.27E-05   |
| 2w4w_SITTD4_GGAGGATGTGCTGATT-1-10x  | 0.01959634 | 0.01969345 | 3.55E-05   |
| 2w4w_SITTD4_GGATCTAAGAAGAGCA-1-10x  | 0.06589566 | 0.18454415 | 0.00072102 |
| 2w4w_SITTD4_GGATGTTCCAGTTCCG-1-10x  | 0.02601238 | 0.04253804 | 4.09E-05   |
| 2w4w_SITTD4_GGCAGTCGTACCACGC-1-10x  | 0.02570991 | 0.04146109 | 4.00E-05   |
| 2w4w_SITTD4_GGCAGTCTCATAAGGA-1-10x  | 0.02317712 | 0.03244298 | 3.83E-05   |
| 2w4w_SITTD4_GGCTGTGGTCCAGAAG-1-10x  | 0.05186438 | 0.13458517 | 0.00016076 |
| 2w4w_SITTD4_GGCTTGGCACTGGCGT-1-10x  | 0.05787017 | 0.15596904 | 0.00031414 |
| 2w4w_SITTD4_GGCTTGGTCACTCACC-1-10x  | 0.04160368 | 0.09805151 | 7.40E-05   |
| 2w4w_SITTD4_GGCTTTCTCCATTTA-1-10x   | 0.02655559 | 0.04447218 | 4.09E-05   |
| 2w4w_SITTD4_GGGACTCCAGAACTCT-1-10x  | 0.02752024 | 0.04790684 | 4.19E-05   |
| 2w4w_SITTD4_GGGATCCAGGCTAAAT-1-10x  | 0.02034681 | 0.02236554 | 3.62E-05   |



|                                      |            |            |            |
|--------------------------------------|------------|------------|------------|
| 2w4w_SITTD4_GGGATCCCACAAATGA-1-10x   | 0.07670212 | 0.22302097 | 0.0022191  |
| 2w4w_SITTD4_GGGCCATGTATGAAGT-1-10x   | 0.2030878  | 0.67302245 | 0.0011699  |
| 2w4w_SITTD4_GGGCCATGTCTCAAGT-1-10x   | 0.08253549 | 0.24379092 | 0.0033032  |
| 2w4w_SITTD4_GGGCTCATCTTTCTAG-1-10x   | 0.09287427 | 0.28060257 | 0.0044107  |
| 2w4w_SITTD4_GGGTCACGTACTIONAAC-1-10x | 0.03007302 | 0.05699614 | 4.55E-05   |
| 2w4w_SITTD4_GGGTCTGTCTCTGGTC-1-10x   | 0.08468705 | 0.25145164 | 0.0036353  |
| 2w4w_SITTD4_GGGTTATAGTCTTCCC-1-10x   | 0.07997906 | 0.23468864 | 0.0027593  |
| 2w4w_SITTD4_GGGTTTATCTTCGGTC-1-10x   | 0.01828977 | 0.01504135 | 3.44E-05   |
| 2w4w_SITTD4_GGTAACCTCCGTGTGG-1-10x   | 0.06108268 | 0.16740733 | 0.00042799 |
| 2w4w_SITTD4_GGTCACGGTATGCAAA-1-10x   | 0.02984616 | 0.05618839 | 4.55E-05   |
| 2w4w_SITTD4_GGTGATTAGTCACGCC-1-10x   | 0.04694224 | 0.11705968 | 0.00010777 |
| 2w4w_SITTD4_GGTGTCGTCGATCCAA-1-10x   | 0.13378002 | 0.4262492  | 0.0019115  |
| 2w4w_SITTD4_GGTTAACAGCGAGTCA-1-10x   | 0.28195956 | 0.9538486  | 0.00075401 |
| 2w4w_SITTD4_GTAACACAGCTTACGT-1-10x   | 0.09225916 | 0.27841246 | 0.0043903  |
| 2w4w_SITTD4_GTAACACGTATAGGAT-1-10x   | 0.1082847  | 0.33547205 | 0.0033168  |
| 2w4w_SITTD4_GTAACACGTCTTGAAC-1-10x   | 0.01746397 | 0.01210107 | 3.44E-05   |
| 2w4w_SITTD4_GTAAGTCGTGTATCG-1-10x    | 0.06925356 | 0.1965001  | 0.0010821  |
| 2w4w_SITTD4_GTACAGTCATGACGGA-1-10x   | 0.25781736 | 0.8678893  | 0.00078121 |
| 2w4w_SITTD4_GTAGAAACAGGCTATT-1-10x   | 0.12893488 | 0.40899786 | 0.0019821  |
| 2w4w_SITTD4_GTAGAAATCCCTCATG-1-10x   | 0.26700655 | 0.90060776 | 0.00075831 |
| 2w4w_SITTD4_GTAGATCAGGGATGTC-1-10x   | 0.01811524 | 0.01441995 | 3.44E-05   |
| 2w4w_SITTD4_GTAGATCCAGTTCCAA-1-10x   | 0.02567811 | 0.04134787 | 4.00E-05   |
| 2w4w_SITTD4_GTAGTACCACACCTGG-1-10x   | 0.09873965 | 0.3014865  | 0.0042345  |
| 2w4w_SITTD4_GTAGTACTCCTTCTGG-1-10x   | 0.25480416 | 0.8571607  | 0.00079207 |
| 2w4w_SITTD4_GTATTGGCAGCGTGCT-1-10x   | 0.15085976 | 0.48706234 | 0.0018676  |
| 2w4w_SITTD4_GTATTTCAGGGCTGAT-1-10x   | 0.02350414 | 0.03360735 | 3.83E-05   |
| 2w4w_SITTD4_GTATTTCAGTTAGTGA-1-10x   | 0.04431351 | 0.10769998 | 8.81E-05   |
| 2w4w_SITTD4_GTCAAGTAGATAACGT-1-10x   | 0.1044674  | 0.3218804  | 0.0037215  |
| 2w4w_SITTD4_GTCACTCAGAGCTTTC-1-10x   | 0.07376124 | 0.21254985 | 0.0017292  |
| 2w4w_SITTD4_GTCACTCCAGAGGCAT-1-10x   | 0.02535012 | 0.04018003 | 4.00E-05   |
| 2w4w_SITTD4_GTCAGCGGTACCTATG-1-10x   | 0.02985131 | 0.0562067  | 4.55E-05   |
| 2w4w_SITTD4_GTCATGAAGCATTGTC-1-10x   | 0.04592375 | 0.1134333  | 0.00010046 |
| 2w4w_SITTD4_GTCCCATTCGCACGAC-1-10x   | 0.11022687 | 0.34238723 | 0.0031181  |
| 2w4w_SITTD4_GTCGCGATCTGGGCGT-1-10x   | 0.22640815 | 0.75605553 | 0.00097406 |
| 2w4w_SITTD4_GTCTACCAGCGATCGA-1-10x   | 0.04784163 | 0.120262   | 0.00011598 |
| 2w4w_SITTD4_GTGATGTTACAGCGAA-1-10x   | 0.06381831 | 0.17714763 | 0.00058553 |
| 2w4w_SITTD4_GTGGAAGGTGGCTACC-1-10x   | 0.02314233 | 0.03231913 | 3.83E-05   |
| 2w4w_SITTD4_GTGGAAGGTTCTAACG-1-10x   | 0.05236433 | 0.13636528 | 0.00017575 |
| 2w4w_SITTD4_GTGGAGAGTATACCCA-1-10x   | 0.02697118 | 0.04595188 | 4.19E-05   |
| 2w4w_SITTD4_GTGGCGTTCTCGCCTA-1-10x   | 0.24829413 | 0.83398145 | 0.00082396 |
| 2w4w_SITTD4_GTGTAACCACCCTGTT-1-10x   | 0.02629251 | 0.04353545 | 4.09E-05   |

|                                     |            |            |            |
|-------------------------------------|------------|------------|------------|
| 2w4w_SITTD4_GTGTCCTTCGACGTCG-1-10x  | 0.15045029 | 0.4856044  | 0.0018694  |
| 2w4w_SITTD4_GTGTGGCGTCGACTTA-1-10x  | 0.01640333 | 0.00832461 | 3.33E-05   |
| 2w4w_SITTD4_GTTACAGAGGTACATA-1-10x  | 0.09197734 | 0.27740905 | 0.0043903  |
| 2w4w_SITTD4_GTTACAGGTTATTCCT-1-10x  | 0.03229288 | 0.06490004 | 4.83E-05   |
| 2w4w_SITTD4_GTTACCCTCAGGACGA-1-10x  | 0.1687973  | 0.55092967 | 0.0016744  |
| 2w4w_SITTD4_GTTACGAAGCTGACAG-1-10x  | 0.15705365 | 0.50911593 | 0.0018385  |
| 2w4w_SITTD4_GTTATGGCATTAGGAA-1-10x  | 0.03196058 | 0.06371685 | 4.83E-05   |
| 2w4w_SITTD4_GTTCATTAGTCTCGTA-1-10x  | 0.11613788 | 0.36343363 | 0.0025211  |
| 2w4w_SITTD4_GTTCCGTAGTACCATC-1-10x  | 0.01855615 | 0.01598983 | 3.49E-05   |
| 2w4w_SITTD4_GTTCTATTCCAAGCAT-1-10x  | 0.06916991 | 0.19620223 | 0.0010821  |
| 2w4w_SITTD4_GTTGAACGTGGGTTGA-1-10x  | 0.03105403 | 0.06048903 | 4.68E-05   |
| 2w4w_SITTD4_GTTGTAGAGTGATTCC-1-10x  | 0.04766499 | 0.11963308 | 0.00011598 |
| 2w4w_SITTD4_GTTGTGACAAGACGGT-1-10x  | 0.02727233 | 0.04702414 | 4.19E-05   |
| 2w4w_SITTD4_TAACACGTCAGTCCGG-1-10x  | 0.01903756 | 0.01770392 | 3.49E-05   |
| 2w4w_SITTD4_TAACGACTCATGGAGG-1-10x  | 0.05629587 | 0.15036367 | 0.000257   |
| 2w4w_SITTD4_TAAGCCAAGCGAATGC-1-10x  | 0.0867561  | 0.2588186  | 0.0039187  |
| 2w4w_SITTD4_TAACTCTCACGATCA-1-10x   | 0.10419339 | 0.3209048  | 0.0037215  |
| 2w4w_SITTD4_TACAACGCACTATCCC-1-10x  | 0.02697726 | 0.04597355 | 4.19E-05   |
| 2w4w_SITTD4_TACCCACTCTAGTACG-1-10x  | 0.25900927 | 0.87213314 | 0.00077499 |
| 2w4w_SITTD4_TACCTCGCAATCAGCT-1-10x  | 0.03278638 | 0.06665716 | 5.00E-05   |
| 2w4w_SITTD4_TACCTCGGTGGTCTCG-1-10x  | 0.21717334 | 0.7231746  | 0.0010475  |
| 2w4w_SITTD4_TACGGGCAGCAGTACG-1-10x  | 0.22724399 | 0.75903153 | 0.00096676 |
| 2w4w_SITTD4_TACTTCAAGTGAGCCA-1-10x  | 0.03506196 | 0.07475944 | 5.37E-05   |
| 2w4w_SITTD4_TACTTGTCAGTCTACA-1-10x  | 0.02785692 | 0.0491056  | 4.30E-05   |
| 2w4w_SITTD4_TAGACCATCACTGGTA-1-10x  | 0.03822871 | 0.08603478 | 6.36E-05   |
| 2w4w_SITTD4_TAGGTAATCATGAGGG-1-10x  | 0.1013054  | 0.31062195 | 0.0040036  |
| 2w4w_SITTD4_TAGGTTGAGAATCGAT-1-10x  | 0.05610449 | 0.14968225 | 0.000257   |
| 2w4w_SITTD4_TATCCTAAGGTAGCCA-1-10x  | 0.24153808 | 0.8099262  | 0.00086374 |
| 2w4w_SITTD4_TATCCTACAATGCTCA-1-10x  | 0.25890622 | 0.8717662  | 0.00077499 |
| 2w4w_SITTD4_TATCCTACACGTCTCT-1-10x  | 0.02441199 | 0.03683977 | 3.91E-05   |
| 2w4w_SITTD4_TATGTTCCATACTGTG-1-10x  | 0.26359737 | 0.8884693  | 0.00076313 |
| 2w4w_SITTD4_TATTTTCGAGGACATG-1-10x  | 0.04183409 | 0.09887189 | 7.82E-05   |
| 2w4w_SITTD4_TCAAGCATCCCTTCCC-1-10x  | 0.17141844 | 0.5602624  | 0.0016256  |
| 2w4w_SITTD4_TCAATTCGTAAGTGTG-1-10x  | 0.2467685  | 0.8285494  | 0.0008292  |
| 2w4w_SITTD4_TCACACCAGGAACATT-1-10x  | 0.23593292 | 0.78996885 | 0.00090278 |
| 2w4w_SITTD4_TCACGCTCACTCATAG-1-10x  | 0.12903604 | 0.40935805 | 0.0019821  |
| 2w4w_SITTD4_TCACGGGCAGACCTAT-1-10x  | 0.07225503 | 0.20718694 | 0.0014433  |
| 2w4w_SITTD4_TCACTATTCAATTATCC-1-10x | 0.04763141 | 0.11951351 | 0.00011598 |
| 2w4w_SITTD4_TCAGGGCAGGTTAAAC-1-10x  | 0.05644918 | 0.15090953 | 0.000257   |
| 2w4w_SITTD4_TCAGGGCCAACCGTGC-1-10x  | 0.03806479 | 0.08545114 | 6.36E-05   |
| 2w4w_SITTD4_TCATACTTCAAGGTGG-1-10x  | 0.01500581 | 0.00334868 | 3.27E-05   |

|                                     |            |            |            |
|-------------------------------------|------------|------------|------------|
| 2w4w_SITTD4_TCATCATAGTAACGTA-1-10x  | 0.01832331 | 0.0151608  | 3.49E-05   |
| 2w4w_SITTD4_TCATCCGGTCGGAACA-1-10x  | 0.18563786 | 0.61089116 | 0.0013809  |
| 2w4w_SITTD4_TCATGCCTCTTAGCAG-1-10x  | 0.02781814 | 0.04896751 | 4.30E-05   |
| 2w4w_SITTD4_TCATTACCAACCAGAG-1-10x  | 0.24466325 | 0.82105356 | 0.00084583 |
| 2w4w_SITTD4_TCATTGTGTCCGGACT-1-10x  | 0.01958785 | 0.01966325 | 3.55E-05   |
| 2w4w_SITTD4_TCATTTGAGGGACTGT-1-10x  | 0.09442864 | 0.28613696 | 0.0044051  |
| 2w4w_SITTD4_TCATTTGAGTAAACAC-1-10x  | 0.10330941 | 0.31775734 | 0.0038193  |
| 2w4w_SITTD4_TCCAGAAAGTGACACG-1-10x  | 0.04661906 | 0.115909   | 0.00010777 |
| 2w4w_SITTD4_TCCGAAACACGCTGTG-1-10x  | 0.02065584 | 0.02346586 | 3.62E-05   |
| 2w4w_SITTD4_TCCGAAACATGATAGA-1-10x  | 0.26181668 | 0.882129   | 0.00076727 |
| 2w4w_SITTD4_TCCTCGAAGGCGTTGA-1-10x  | 0.23757541 | 0.795817   | 0.00088935 |
| 2w4w_SITTD4_TCCTCGAGTAGCTAAA-1-10x  | 0.0153011  | 0.00440007 | 3.27E-05   |
| 2w4w_SITTD4_TCCTCTTCAGAAACCG-1-10x  | 0.01507182 | 0.00358371 | 3.27E-05   |
| 2w4w_SITTD4_TCGAACATCCGAGCTG-1-10x  | 0.04663158 | 0.11595356 | 0.00010777 |
| 2w4w_SITTD4_TCGAAGTCACACAGCC-1-10x  | 0.19185881 | 0.63304114 | 0.0012985  |
| 2w4w_SITTD4_TCGAAGTTCATCTCTA-1-10x  | 0.2909701  | 0.985931   | 0.00076269 |
| 2w4w_SITTD4_TCGAAGTTCATTGTGG-1-10x  | 0.01772073 | 0.01301526 | 3.44E-05   |
| 2w4w_SITTD4_TCGACGGCAGGCTCTG-1-10x  | 0.02782903 | 0.0490063  | 4.30E-05   |
| 2w4w_SITTD4_TCGACGGGTTTCGATTG-1-10x | 0.2778673  | 0.9392779  | 0.00075239 |
| 2w4w_SITTD4_TCGATTTTCAGAGGTAC-1-10x | 0.02382368 | 0.0347451  | 3.83E-05   |
| 2w4w_SITTD4_TCGCACTCACCAGTAT-1-10x  | 0.09220986 | 0.27823693 | 0.0043903  |
| 2w4w_SITTD4_TCGGGCAAGGAATTAC-1-10x  | 0.09434059 | 0.2858235  | 0.0044154  |
| 2w4w_SITTD4_TCGTAGATCCTTGAAG-1-10x  | 0.03626589 | 0.07904609 | 5.82E-05   |
| 2w4w_SITTD4_TCGTAGATCTGGGAGA-1-10x  | 0.02931731 | 0.05430538 | 4.42E-05   |
| 2w4w_SITTD4_TCGTCCAGTGAATGTA-1-10x  | 0.01575655 | 0.00602174 | 3.33E-05   |
| 2w4w_SITTD4_TCTACATTCTGGCTT-1-10x   | 0.17770813 | 0.58265704 | 0.0015248  |
| 2w4w_SITTD4_TCTACATTCTGTTAT-1-10x   | 0.02170538 | 0.0272028  | 3.69E-05   |
| 2w4w_SITTD4_TCTATACTCATTACGG-1-10x  | 0.22909346 | 0.76561666 | 0.0009522  |
| 2w4w_SITTD4_TCTCACGAGTCTGCAT-1-10x  | 0.08291829 | 0.24515392 | 0.0033032  |
| 2w4w_SITTD4_TCTCTGGAGCTGTTAC-1-10x  | 0.05232997 | 0.13624293 | 0.00017575 |
| 2w4w_SITTD4_TCTTGCGAGTATAGGT-1-10x  | 0.01866213 | 0.01636716 | 3.49E-05   |
| 2w4w_SITTD4_TGAACGTCACGGTGCT-1-10x  | 0.26023477 | 0.8764966  | 0.00077221 |
| 2w4w_SITTD4_TGAATGCTCTTCCCGA-1-10x  | 0.14941768 | 0.48192775 | 0.0018705  |
| 2w4w_SITTD4_TGAGCGCCAGCTGAAG-1-10x  | 0.04413155 | 0.10705211 | 8.81E-05   |
| 2w4w_SITTD4_TGAGTCAGTCTGGGT-1-10x   | 0.13864759 | 0.4435804  | 0.0018772  |
| 2w4w_SITTD4_TGATGCAGTGCTGATT-1-10x  | 0.26766944 | 0.90296805 | 0.00075705 |
| 2w4w_SITTD4_TGATTCTAGGGAGTGG-1-10x  | 0.02049175 | 0.0228816  | 3.62E-05   |
| 2w4w_SITTD4_TGCAGATAGAGCATAT-1-10x  | 0.04080569 | 0.09521023 | 7.01E-05   |
| 2w4w_SITTD4_TGCAGGCGTCCGAAGA-1-10x  | 0.23726866 | 0.79472476 | 0.00088935 |
| 2w4w_SITTD4_TGCAGTAGTATTCTCT-1-10x  | 0.09629568 | 0.29278463 | 0.0043435  |
| 2w4w_SITTD4_TGCATCCAGGATCACG-1-10x  | 0.17687033 | 0.579674   | 0.0015416  |

|                                     |            |            |            |
|-------------------------------------|------------|------------|------------|
| 2w4w_SITTD4_TGCATGAAGATGGCAC-1-10x  | 0.04241832 | 0.10095207 | 7.82E-05   |
| 2w4w_SITTD4_TGCGATACAGAACTAA-1-10x  | 0.09539761 | 0.28958702 | 0.0043808  |
| 2w4w_SITTD4_TGCGGCATCTTCACGC-1-10x  | 0.0344184  | 0.07246802 | 5.37E-05   |
| 2w4w_SITTD4_TGCGGGTAGTTCAACC-1-10x  | 0.04447138 | 0.1082621  | 8.81E-05   |
| 2w4w_SITTD4_TGCTCCACAGCTGGTC-1-10x  | 0.2635383  | 0.88825893 | 0.00076313 |
| 2w4w_SITTD4_TGCTCCATCTCTGACC-1-10x  | 0.03999922 | 0.09233878 | 7.01E-05   |
| 2w4w_SITTD4_TGCTCGTTCGAGATAA-1-10x  | 0.0218431  | 0.02769316 | 3.69E-05   |
| 2w4w_SITTD4_TGCTGAACAATACGCT-1-10x  | 0.03521615 | 0.07530846 | 5.58E-05   |
| 2w4w_SITTD4_TGCTGAAGTGATGTAA-1-10x  | 0.23585245 | 0.7896823  | 0.00090278 |
| 2w4w_SITTD4_TGGAAGTAGGGTTTCT-1-10x  | 0.21351568 | 0.7101513  | 0.0010778  |
| 2w4w_SITTD4_TGGAGAGAGGTCTTTG-1-10x  | 0.02182875 | 0.02764207 | 3.69E-05   |
| 2w4w_SITTD4_TGGCGTGAGACAGTCG-1-10x  | 0.10701408 | 0.33094794 | 0.0034182  |
| 2w4w_SITTD4_TGGGAAGGTGACTGAG-1-10x  | 0.04148061 | 0.09761332 | 7.40E-05   |
| 2w4w_SITTD4_TGGGAGATCTGGCCAG-1-10x  | 0.18084086 | 0.5938113  | 0.0014587  |
| 2w4w_SITTD4_TGGGCGTCACCCTGAG-1-10x  | 0.03758464 | 0.08374156 | 6.07E-05   |
| 2w4w_SITTD4_TGGTTAGAGCGAGAAA-1-10x  | 0.06462798 | 0.18003051 | 0.00064991 |
| 2w4w_SITTD4_TGTAAGCCAGGCAATG-1-10x  | 0.08867772 | 0.26566058 | 0.0041422  |
| 2w4w_SITTD4_TGTACAGAGATGCTGG-1-10x  | 0.2506471  | 0.8423593  | 0.00080923 |
| 2w4w_SITTD4_TGTTCAATCACGACTA-1-10x  | 0.13264029 | 0.42219114 | 0.0019219  |
| 2w4w_SITTD4_TGTTGAGCAACCTAAC-1-10x  | 0.12447768 | 0.39312783 | 0.0020803  |
| 2w4w_SITTD4_TTAATCCGTCTGTGCG-1-10x  | 0.10035849 | 0.30725047 | 0.0040879  |
| 2w4w_SITTD4_TTACAGGCACACGGTC-1-10x  | 0.04200951 | 0.09949651 | 7.82E-05   |
| 2w4w_SITTD4_TTACCGCCAAGAATAC-1-10x  | 0.02656395 | 0.04450194 | 4.09E-05   |
| 2w4w_SITTD4_TTACCGCTCTCGCTCA-1-10x  | 0.02614795 | 0.04302074 | 4.09E-05   |
| 2w4w_SITTD4_TTACGCCTCGCAGATT-1-10x  | 0.19424215 | 0.6415271  | 0.0012624  |
| 2w4w_SITTD4_TTACGTTTCATCTGTTT-1-10x | 0.08778586 | 0.2624851  | 0.0040384  |
| 2w4w_SITTD4_TTACTGTGTACATTG-1-10x   | 0.02828604 | 0.05063352 | 4.30E-05   |
| 2w4w_SITTD4_TTAGTCTGTACGTTCA-1-10x  | 0.04706296 | 0.11748951 | 0.00010777 |
| 2w4w_SITTD4_TTCACGCAGTATGTAG-1-10x  | 0.08328803 | 0.24647038 | 0.0034742  |
| 2w4w_SITTD4_TTCACGCGTAGCGCTC-1-10x  | 0.10068215 | 0.30840287 | 0.0040879  |
| 2w4w_SITTD4_TTCAGGAAGAAGCTGC-1-10x  | 0.04995838 | 0.12779878 | 0.00013566 |
| 2w4w_SITTD4_TTCATGTAGTAACGTA-1-10x  | 0.24028029 | 0.8054478  | 0.00086997 |
| 2w4w_SITTD4_TTCATGTCAATGTTGC-1-10x  | 0.03943818 | 0.09034117 | 6.67E-05   |
| 2w4w_SITTD4_TTCATGTTCTGAGCAT-1-10x  | 0.04040731 | 0.09379178 | 7.01E-05   |
| 2w4w_SITTD4_TTCCACGTCCGTAATG-1-10x  | 0.0475554  | 0.11924286 | 0.00011598 |
| 2w4w_SITTD4_TTCCGGTAGGAGGCAG-1-10x  | 0.10504595 | 0.32394037 | 0.0036214  |
| 2w4w_SITTD4_TTCCTTCGTTCTCACC-1-10x  | 0.09045748 | 0.2719975  | 0.0042999  |
| 2w4w_SITTD4_TTCGGTCTCACCGCTT-1-10x  | 0.01639129 | 0.00828174 | 3.33E-05   |
| 2w4w_SITTD4_TTCTAGTGTTCAGTG-1-10x   | 0.22923657 | 0.7661262  | 0.0009522  |
| 2w4w_SITTD4_TTCTCTCGTGTTCACT-1-10x  | 0.04536568 | 0.11144629 | 9.39E-05   |
| 2w4w_SITTD4_TTCTGTAAGATAGTCA-1-10x  | 0.11666921 | 0.36532545 | 0.0025211  |

|                                     |            |            |            |
|-------------------------------------|------------|------------|------------|
| 2w4w_SITTD4_TTCTTGACATGGAAGC-1-10x  | 0.03769547 | 0.08413618 | 6.07E-05   |
| 2w4w_SITTD4_TTGATGGGTTGTACGT-1-10x  | 0.23009272 | 0.7691746  | 0.00094498 |
| 2w4w_SITTD4_TTGGGCGAGACAACTA-1-10x  | 0.04981826 | 0.12729988 | 0.00013566 |
| 2w4w_SITTD4_TTGGGCGGTTGTAGCT-1-10x  | 0.06083338 | 0.16651966 | 0.00042799 |
| 2w4w_SITTD4_TTGGGTACATGGTGGA-1-10x  | 0.26294702 | 0.8861537  | 0.00076511 |
| 2w4w_SITTD4_TTGTTTGAGGAATCGC-1-10x  | 0.16316983 | 0.53089285 | 0.001763   |
| 2w4w_SITTD4_TTTACTGGTGCTATTG-1-10x  | 0.05746697 | 0.15453343 | 0.00028394 |
| 2w4w_SITTD4_TTTAGTCCAGGACTAG-1-10x  | 0.08105719 | 0.23852739 | 0.0029431  |
| 2w4w_SITTD4_TTTATGCTCTCTGCTG-1-10x  | 0.04257513 | 0.10151039 | 7.82E-05   |
| 2w4w_SITTD4_TTTCACAGTCAAGTTC-1-10x  | 0.21982373 | 0.7326114  | 0.0010253  |
| 2w4w_SITTD4_TTTCAGTGTCATGACT-1-10x  | 0.0488345  | 0.12379714 | 0.00012523 |
| 2w4w_SITTD4_TTTGGTTAGACCAGCA-1-10x  | 0.04148683 | 0.09763547 | 7.40E-05   |
| 2w4w_SITTE4_AAAGTCCAGATCCCGC-1-10x  | 0.26472923 | 0.8924993  | 0.00076135 |
| 2w4w_SITTE4_AACACACGTGGCTTAT-1-10x  | 0.08118642 | 0.2389875  | 0.0029431  |
| 2w4w_SITTE4_AACCAACTCGAAGCCC-1-10x  | 0.06266182 | 0.17302991 | 0.00052741 |
| 2w4w_SITTE4_AACGGGAAGAGAGGTA-1-10x  | 0.05421328 | 0.14294852 | 0.00021164 |
| 2w4w_SITTE4_AACGTCAGTGTGGTCC-1-10x  | 0.15170878 | 0.4900853  | 0.0018651  |
| 2w4w_SITTE4_AAGCATCGTAGACGGT-1-10x  | 0.141201   | 0.45267195 | 0.0018734  |
| 2w4w_SITTE4_AAGCATCTCTAGTTCT-1-10x  | 0.0313735  | 0.06162653 | 4.68E-05   |
| 2w4w_SITTE4_AAGTACCTCGTCAACA-1-10x  | 0.0500186  | 0.1280132  | 0.00013566 |
| 2w4w_SITTE4_ACAAGTCTCTCGTGAA-1-10x  | 0.03038392 | 0.05810311 | 4.55E-05   |
| 2w4w_SITTE4_ACAGAAAGTTAAGACA-1-10x  | 0.09031159 | 0.27147806 | 0.0042999  |
| 2w4w_SITTE4_ACCAAACTCGTGTCAA-1-10x  | 0.03594213 | 0.07789332 | 5.58E-05   |
| 2w4w_SITTE4_ACGTTCCAGGCATTTTC-1-10x | 0.02226101 | 0.02918115 | 3.76E-05   |
| 2w4w_SITTE4_ACTATCTAGACTTCAC-1-10x  | 0.03420302 | 0.07170117 | 5.17E-05   |
| 2w4w_SITTE4_ACTATCTGTTTGGAAA-1-10x  | 0.04386265 | 0.10609467 | 8.81E-05   |
| 2w4w_SITTE4_ACTATGGCAACAACAA-1-10x  | 0.26382908 | 0.88929427 | 0.00076313 |
| 2w4w_SITTE4_AGAACAATCTCGCGTT-1-10x  | 0.2199975  | 0.7332301  | 0.0010253  |
| 2w4w_SITTE4_AGAGCAGAGCACCCAC-1-10x  | 0.20105784 | 0.6657947  | 0.0011888  |
| 2w4w_SITTE4_AGAGCAGAGCCTCCAG-1-10x  | 0.07608505 | 0.2208239  | 0.0020486  |
| 2w4w_SITTE4_AGCGCTGTCCCAACTC-1-10x  | 0.26651114 | 0.8988439  | 0.00075831 |
| 2w4w_SITTE4_AGCGTCGAGATGACCG-1-10x  | 0.12967102 | 0.41161895 | 0.0019639  |
| 2w4w_SITTE4_AGGCCACAGTAGATCA-1-10x  | 0.01501344 | 0.00337586 | 3.27E-05   |
| 2w4w_SITTE4_AGGGAGTGTCCAGAAG-1-10x  | 0.05345751 | 0.14025757 | 0.00019264 |
| 2w4w_SITTE4_AGGGCTCCACGTATAC-1-10x  | 0.10334139 | 0.31787118 | 0.0038193  |
| 2w4w_SITTE4_AGTACTGCATGGATCT-1-10x  | 0.05087501 | 0.1310625  | 0.00014746 |
| 2w4w_SITTE4_AGTGATCGTTTGTGG-1-10x   | 0.0513216  | 0.1326526  | 0.00016076 |
| 2w4w_SITTE4_ATACTTCCAACGCATT-1-10x  | 0.12519693 | 0.39568877 | 0.0020803  |
| 2w4w_SITTE4_ATAGACCCAAAGGATT-1-10x  | 0.02667696 | 0.04490429 | 4.09E-05   |
| 2w4w_SITTE4_ATAGACCGTTTGAACC-1-10x  | 0.04488684 | 0.10974135 | 9.39E-05   |
| 2w4w_SITTE4_ATAGAGATCTGCCTGT-1-10x  | 0.12218448 | 0.3849628  | 0.0021873  |

|                                    |            |            |            |
|------------------------------------|------------|------------|------------|
| 2w4w_SITTE4_ATATCCTAGCAGAAAG-1-10x | 0.13643727 | 0.43571046 | 0.0018891  |
| 2w4w_SITTE4_ATATCCTAGCGACTAG-1-10x | 0.09612174 | 0.29216534 | 0.0043808  |
| 2w4w_SITTE4_ATGATCGTCATTCCGA-1-10x | 0.07731819 | 0.22521453 | 0.0022191  |
| 2w4w_SITTE4_ATGGGTTAGAACTCA-1-10x  | 0.08382908 | 0.24839681 | 0.0034742  |
| 2w4w_SITTE4_ATGGGTTGTCGTA-1-10x    | 0.03744001 | 0.08322661 | 6.07E-05   |
| 2w4w_SITTE4_CAAAGAACACTAACCA-1-10x | 0.03967932 | 0.09119974 | 6.67E-05   |
| 2w4w_SITTE4_CACTGAAAGAGAGCGG-1-10x | 0.16587716 | 0.5405324  | 0.0017206  |
| 2w4w_SITTE4_CATACTTTCACCTTAT-1-10x | 0.08085121 | 0.23779398 | 0.0029431  |
| 2w4w_SITTE4_CATGCGCAAAGGAGA-1-10x  | 0.04030656 | 0.09343308 | 7.01E-05   |
| 2w4w_SITTE4_CATGCTCTACAACCA-1-10x  | 0.07751091 | 0.2259007  | 0.0023954  |
| 2w4w_SITTE4_CATTGTTACCCAACG-1-10x  | 0.02028815 | 0.0221567  | 3.62E-05   |
| 2w4w_SITTE4_CCAAGCGGTCGTTATG-1-10x | 0.04892524 | 0.12412025 | 0.00012523 |
| 2w4w_SITTE4_CCAATTTTCTTCGATT-1-10x | 0.01720371 | 0.01117442 | 3.38E-05   |
| 2w4w_SITTE4_CCCAAGTCTCTCG-1-10x    | 0.03945965 | 0.09041759 | 6.67E-05   |
| 2w4w_SITTE4_CCCTCAACAGTTCACA-1-10x | 0.07169773 | 0.20520265 | 0.0013138  |
| 2w4w_SITTE4_CCGGTAGTCTCCACG-1-10x  | 0.04829057 | 0.12186047 | 0.00011598 |
| 2w4w_SITTE4_CCGTTCAGTCTATGAC-1-10x | 0.03488328 | 0.07412326 | 5.37E-05   |
| 2w4w_SITTE4_CCTAAGATCTGTAAGC-1-10x | 0.05541747 | 0.1472361  | 0.000233   |
| 2w4w_SITTE4_CCTCAACAGATGTTGA-1-10x | 0.20963684 | 0.69634056 | 0.0011095  |
| 2w4w_SITTE4_CCTCTAGGTTCCGCGA-1-10x | 0.04757366 | 0.11930789 | 0.00011598 |
| 2w4w_SITTE4_CGACAGCTCTGGTGGC-1-10x | 0.0486018  | 0.12296861 | 0.00012523 |
| 2w4w_SITTE4_CGATGCGTCAGTCTTT-1-10x | 0.09775084 | 0.2979658  | 0.0042943  |
| 2w4w_SITTE4_CGCCATTAGAGAGGGC-1-10x | 0.04982382 | 0.1273197  | 0.00013566 |
| 2w4w_SITTE4_CTATCTACAGGGAATC-1-10x | 0.0916397  | 0.27620685 | 0.0043903  |
| 2w4w_SITTE4_CTCTCGATCATACAGC-1-10x | 0.03883229 | 0.08818388 | 6.36E-05   |
| 2w4w_SITTE4_CTGAGCGCACCTATCC-1-10x | 0.05765109 | 0.15518901 | 0.00028394 |
| 2w4w_SITTE4_CTGCATCGTTCGGCTG-1-10x | 0.0168098  | 0.00977187 | 3.38E-05   |
| 2w4w_SITTE4_CTGCCTAAGTGCCTCG-1-10x | 0.03861019 | 0.08739309 | 6.36E-05   |
| 2w4w_SITTE4_CTTCCGTAGAGCATCG-1-10x | 0.14897263 | 0.48034313 | 0.0018705  |
| 2w4w_SITTE4_CTTCCGTTCTGTCAGA-1-10x | 0.26714763 | 0.9011101  | 0.00075831 |
| 2w4w_SITTE4_CTTCTAATCGATTTCT-1-10x | 0.07699865 | 0.2240768  | 0.0022191  |
| 2w4w_SITTE4_CTTCTAATCTAGCATG-1-10x | 0.04056137 | 0.09434033 | 7.01E-05   |
| 2w4w_SITTE4_GAACTGTTCCATAAGC-1-10x | 0.10965899 | 0.3403653  | 0.0031181  |
| 2w4w_SITTE4_GAGCTGCTCCCATGGG-1-10x | 0.10175726 | 0.31223083 | 0.0040036  |
| 2w4w_SITTE4_GAGTCATTCTGTGCAA-1-10x | 0.12665536 | 0.40088153 | 0.0020256  |
| 2w4w_SITTE4_GATAGAATCCATACTT-1-10x | 0.07002932 | 0.1992622  | 0.0011935  |
| 2w4w_SITTE4_GATAGCTCATTAGGAA-1-10x | 0.03639383 | 0.07950161 | 5.82E-05   |
| 2w4w_SITTE4_GCAACCGTCCACGGG-1-10x  | 0.05902974 | 0.16009772 | 0.00034795 |
| 2w4w_SITTE4_GCAGTTATCCAAGCAT-1-10x | 0.22578087 | 0.753822   | 0.00098137 |
| 2w4w_SITTE4_GCGATCGGTGGCAGAT-1-10x | 0.09632516 | 0.29288962 | 0.0043435  |
| 2w4w_SITTE4_GCTTTCGGTATGGAAT-1-10x | 0.01678394 | 0.00967979 | 3.38E-05   |

|                                     |            |            |            |
|-------------------------------------|------------|------------|------------|
| 2w4w_SITTE4_GGAGATGTCATTCTCA-1-10x  | 0.01762796 | 0.01268498 | 3.44E-05   |
| 2w4w_SITTE4_GGCTTGGGTCGAACGA-1-10x  | 0.04268525 | 0.10190249 | 7.82E-05   |
| 2w4w_SITTE4_GGCTTTTCGTTAGCTAC-1-10x | 0.04733355 | 0.11845296 | 0.00010777 |
| 2w4w_SITTE4_GGGATCCTCACAAGGG-1-10x  | 0.12490331 | 0.3946433  | 0.0020803  |
| 2w4w_SITTE4_GGGTGAATCCAAGCAT-1-10x  | 0.21906377 | 0.72990555 | 0.0010326  |
| 2w4w_SITTE4_GGGTTTAAGCGCTGCT-1-10x  | 0.08112469 | 0.2387677  | 0.0029431  |
| 2w4w_SITTE4_GGTAGAGTCCACCTCA-1-10x  | 0.01956672 | 0.01958799 | 3.55E-05   |
| 2w4w_SITTE4_GTCAGCGCACCTTCCA-1-10x  | 0.20398833 | 0.67622876 | 0.0011608  |
| 2w4w_SITTE4_GTCCACTCACACACGC-1-10x  | 0.01935719 | 0.01884197 | 3.55E-05   |
| 2w4w_SITTE4_GTCGAATTCTTCCCAG-1-10x  | 0.01654069 | 0.0088137  | 3.38E-05   |
| 2w4w_SITTE4_GTCTAGAGTATCGTTG-1-10x  | 0.03572254 | 0.07711147 | 5.58E-05   |
| 2w4w_SITTE4_GTGACGCGTACCGCGT-1-10x  | 0.02255501 | 0.03022795 | 3.76E-05   |
| 2w4w_SITTE4_GTTACCCGTGGGCTTC-1-10x  | 0.02552286 | 0.04079508 | 4.00E-05   |
| 2w4w_SITTE4_GTTCCGTGTCTCCTGT-1-10x  | 0.02204293 | 0.02840465 | 3.69E-05   |
| 2w4w_SITTE4_GTTCTATTCCAAGCG-1-10x   | 0.03806942 | 0.08546765 | 6.36E-05   |
| 2w4w_SITTE4_GTTGTCCGTCTACTA-1-10x   | 0.04850492 | 0.12262365 | 0.00012523 |
| 2w4w_SITTE4_TAGAGTCCAAGACCGA-1-10x  | 0.17012979 | 0.5556741  | 0.0016584  |
| 2w4w_SITTE4_TATCAGGGTCTGTGTA-1-10x  | 0.16172905 | 0.52576286 | 0.0017883  |
| 2w4w_SITTE4_TATCCTAAGTCATGCT-1-10x  | 0.07962821 | 0.23343943 | 0.0027593  |
| 2w4w_SITTE4_TATCGCCAGGCGCTCT-1-10x  | 0.12756415 | 0.40411735 | 0.0020026  |
| 2w4w_SITTE4_TATTTTCGTCGAGAAGC-1-10x | 0.08195498 | 0.24172398 | 0.0031253  |
| 2w4w_SITTE4_TCAAGTGCATCGCTAA-1-10x  | 0.08032744 | 0.23592909 | 0.0029431  |
| 2w4w_SITTE4_TCACATTTTCGGTGCAC-1-10x | 0.08167759 | 0.24073632 | 0.0031253  |
| 2w4w_SITTE4_TCATATCCATCTAGAC-1-10x  | 0.26088703 | 0.878819   | 0.00076963 |
| 2w4w_SITTE4_TCATCATCAATCGAAA-1-10x  | 0.09542645 | 0.28968972 | 0.0043808  |
| 2w4w_SITTE4_TCATCCGGTTCGTTGCG-1-10x | 0.09796307 | 0.29872146 | 0.0042943  |
| 2w4w_SITTE4_TCATTTGGTTCCACGG-1-10x  | 0.06275442 | 0.1733596  | 0.00052741 |
| 2w4w_SITTE4_TCCCATGCAATAACCC-1-10x  | 0.03177014 | 0.0630388  | 4.83E-05   |
| 2w4w_SITTE4_TCGGGACGTATGCGTT-1-10x  | 0.04079169 | 0.09516038 | 7.01E-05   |
| 2w4w_SITTE4_TGAGCGCGTGTAACGG-1-10x  | 0.03554051 | 0.07646336 | 5.58E-05   |
| 2w4w_SITTE4_TGATTCTTCAGAGTTC-1-10x  | 0.03050391 | 0.05853033 | 4.68E-05   |
| 2w4w_SITTE4_TGATTTCTCGAAGCCC-1-10x  | 0.04734584 | 0.11849673 | 0.00010777 |
| 2w4w_SITTE4_TGCATCCTCGAGTCCG-1-10x  | 0.04482502 | 0.10952123 | 9.39E-05   |
| 2w4w_SITTE4_TGCGGGTGTAGATGTA-1-10x  | 0.2514763  | 0.84531164 | 0.00080467 |
| 2w4w_SITTE4_TGCTTGCAGTCTCTGA-1-10x  | 0.04753688 | 0.11917694 | 0.00011598 |
| 2w4w_SITTE4_TGGAGGAGTAACGATA-1-10x  | 0.04308174 | 0.10331422 | 8.29E-05   |
| 2w4w_SITTE4_TGGTGATGTAGTTCCA-1-10x  | 0.03809045 | 0.08554253 | 6.36E-05   |
| 2w4w_SITTE4_TGTGATGCAGCCCACA-1-10x  | 0.07415454 | 0.21395022 | 0.0017292  |
| 2w4w_SITTE4_TGTTACTAGCTTACGT-1-10x  | 0.09602394 | 0.2918171  | 0.0043808  |
| 2w4w_SITTE4_TGTTTGTAGCATATGA-1-10x  | 0.04006931 | 0.09258834 | 7.01E-05   |
| 2w4w_SITTE4_TTAATCCTCCTGGTCT-1-10x  | 0.08664613 | 0.25842705 | 0.0039187  |

|                                     |            |            |            |
|-------------------------------------|------------|------------|------------|
| 2w4w_SITTE4_TTCCACGAGAGCCTGA-1-10x  | 0.20253538 | 0.6710555  | 0.0011699  |
| 2w4w_SITTE4_TTCCTTCGTTCAATCG-1-10x  | 0.0819955  | 0.24186827 | 0.0031253  |
| 2w4w_SITTE4_TTCTTCCAGTTAGTAG-1-10x  | 0.12424602 | 0.392303   | 0.0021124  |
| 2w4w_SITTE4_TTCTTCCTCTTGCCT-1-10x   | 0.08403692 | 0.24913685 | 0.0034742  |
| 2w4w_SITTE4_TTGCCTGGTCAGTCGC-1-10x  | 0.05455973 | 0.1441821  | 0.00021164 |
| 2w4w_SITTE4_TTGGGCGGTCTGAATGG-1-10x | 0.08769986 | 0.26217887 | 0.0040384  |
| 2w4w_SITTE4_TTGGGTACAGTCTGGC-1-10x  | 0.2874001  | 0.9732199  | 0.00075864 |
| 2w4w_SITTE4_AAATGGAAGATGAATC-1-10x  | 0.08788035 | 0.26282153 | 0.0041422  |
| 2w4w_SITTE4_AAGATAGCAATGCTCA-1-10x  | 0.01647118 | 0.00856619 | 3.38E-05   |
| 2w4w_SITTE4_AATGACCTCCGGACGT-1-10x  | 0.01579752 | 0.0061676  | 3.33E-05   |
| 2w4w_SITTE4_ACACTGAAGGCGATAC-1-10x  | 0.01828442 | 0.01502233 | 3.44E-05   |
| 2w4w_SITTE4_ACAGAAACAGCATACT-1-10x  | 0.035061   | 0.07475603 | 5.37E-05   |
| 2w4w_SITTE4_ACATGCATCACTCCGT-1-10x  | 0.06899915 | 0.19559424 | 0.00097948 |
| 2w4w_SITTE4_ACGGTCGTCTAGGCAT-1-10x  | 0.0242037  | 0.03609815 | 3.91E-05   |
| 2w4w_SITTE4_ACTATGGGTCCAGCGT-1-10x  | 0.01522257 | 0.00412048 | 3.27E-05   |
| 2w4w_SITTE4_AGCCACGAGTGGTTGG-1-10x  | 0.02664157 | 0.04477831 | 4.09E-05   |
| 2w4w_SITTE4_AGCCACGCACTTTATC-1-10x  | 0.04047994 | 0.09405039 | 7.01E-05   |
| 2w4w_SITTE4_ATTTCACGTACGCTAT-1-10x  | 0.03320209 | 0.06813732 | 5.00E-05   |
| 2w4w_SITTE4_CACTGTCGTGACTATC-1-10x  | 0.04776983 | 0.12000635 | 0.00011598 |
| 2w4w_SITTE4_CAGATTGCACACTGGC-1-10x  | 0.27143997 | 0.91639316 | 0.00075352 |
| 2w4w_SITTE4_CAGCGTGGTACTTGTG-1-10x  | 0.01822212 | 0.01480051 | 3.44E-05   |
| 2w4w_SITTE4_CATGCTCAGCCTTGAT-1-10x  | 0.02085711 | 0.02418249 | 3.62E-05   |
| 2w4w_SITTE4_CCCAACTCAACTGTGT-1-10x  | 0.01918443 | 0.01822684 | 3.49E-05   |
| 2w4w_SITTE4_CCTCCTCAGTGAGGCT-1-10x  | 0.2256415  | 0.7533258  | 0.00098137 |
| 2w4w_SITTE4_CGAGTGCCATACAGAA-1-10x  | 0.24772315 | 0.8319484  | 0.00082396 |
| 2w4w_SITTE4_CGAGTGCTCTGGGCCA-1-10x  | 0.17444795 | 0.57104903 | 0.0015753  |
| 2w4w_SITTE4_CGGGACTGTCGCCACA-1-10x  | 0.16992195 | 0.554934   | 0.0016584  |
| 2w4w_SITTE4_CTCTCAGCACGTTGGC-1-10x  | 0.12936808 | 0.4105403  | 0.0019639  |
| 2w4w_SITTE4_CTGATCCCAAGGCAAC-1-10x  | 0.01841512 | 0.0154877  | 3.49E-05   |
| 2w4w_SITTE4_GCCGTGAGTAAGCAAT-1-10x  | 0.01715552 | 0.01100284 | 3.38E-05   |
| 2w4w_SITTE4_GGAAGTGTGCTTAGAC-1-10x  | 0.08496656 | 0.25244683 | 0.0036353  |
| 2w4w_SITTE4_GGCGTCAGTTGATCGT-1-10x  | 0.0511875  | 0.1321751  | 0.00016076 |
| 2w4w_SITTE4_GTAGATCCATCGAACT-1-10x  | 0.15959282 | 0.5181567  | 0.0018109  |
| 2w4w_SITTE4_GTAGGAGTCGTAATGC-1-10x  | 0.04048021 | 0.09405135 | 7.01E-05   |
| 2w4w_SITTE4_GTCATTTGTCGATTCA-1-10x  | 0.02712151 | 0.04648715 | 4.19E-05   |
| 2w4w_SITTE4_GTCCTCAAGAGGTATT-1-10x  | 0.08527105 | 0.25353098 | 0.0037839  |
| 2w4w_SITTE4_GTGAGCCTCGTAACCA-1-10x  | 0.02372311 | 0.034387   | 3.83E-05   |
| 2w4w_SITTE4_GTGTTCCAGGAACTAT-1-10x  | 0.03166653 | 0.06266987 | 4.83E-05   |
| 2w4w_SITTE4_TATCCTACAGCGAACA-1-10x  | 0.05672262 | 0.15188316 | 0.000257   |
| 2w4w_SITTE4_TCATTACAGACATGCG-1-10x  | 0.16940781 | 0.55310345 | 0.0016744  |
| 2w4w_SITTE4_TCATTGTCAACTTGGT-1-10x  | 0.08004271 | 0.23491526 | 0.0027593  |



|                                      |            |            |            |
|--------------------------------------|------------|------------|------------|
| 2w4w_SITTE4_TCGAACAGTACCCACG-1-10x   | 0.14662674 | 0.4719905  | 0.0018717  |
| 2w4w_SITTE4_TCGGATAAGTTACGGG-1-10x   | 0.17884056 | 0.5866891  | 0.0015081  |
| 2w4w_SITTE4_TGAGGAGTCGAACGCC-1-10x   | 0.04421714 | 0.10735686 | 8.81E-05   |
| 2w4w_SITTE4_TGATGCATCAAAGGAT-1-10x   | 0.11322724 | 0.35307017 | 0.0027534  |
| 2w4w_SITTE4_TGTGAGTAGAGGGTAA-1-10x   | 0.0972282  | 0.29610494 | 0.0042943  |
| 2w4w_SITTE4_TTGATGGTCCTGTAAG-1-10x   | 0.03987807 | 0.09190741 | 6.67E-05   |
| 7w11w_SITTC3_AAACGCTGTTGCTAGT-1-10x  | 0.03075548 | 0.05942604 | 4.68E-05   |
| 7w11w_SITTC3_AAAGAACAGAAATTCG-1-10x  | 0.04671577 | 0.11625334 | 0.00010777 |
| 7w11w_SITTC3_AAAGAACCATGGCTGC-1-10x  | 0.13433155 | 0.42821297 | 0.0019027  |
| 7w11w_SITTC3_AAAGGGCTCTCATTGT-1-10x  | 0.2656462  | 0.8957642  | 0.00075974 |
| 7w11w_SITTC3_AAAGGTAGTCCACACG-1-10x  | 0.08625652 | 0.25703982 | 0.0039187  |
| 7w11w_SITTC3_AAAGTCCAGATCGCCC-1-10x  | 0.28824377 | 0.97622377 | 0.0007596  |
| 7w11w_SITTC3_AAAGTCCCAGTCAGAG-1-10x  | 0.03123963 | 0.06114987 | 4.68E-05   |
| 7w11w_SITTC3_AAAGTCCGTCACAGAG-1-10x  | 0.08443261 | 0.25054568 | 0.0036353  |
| 7w11w_SITTC3_AAAGTCCGTGGATCGA-1-10x  | 0.02893003 | 0.05292646 | 4.42E-05   |
| 7w11w_SITTC3_AAAGTGAGTTGCCAAT-1-10x  | 0.1827804  | 0.60071707 | 0.0014268  |
| 7w11w_SITTC3_AAAGTGATCTTCGGTC-1-10x  | 0.2181756  | 0.72674316 | 0.00104    |
| 7w11w_SITTC3_AAATGGAGTAGTCTTG-1-10x  | 0.04740914 | 0.11872211 | 0.00010777 |
| 7w11w_SITTC3_AAATGGATCAAGGACG-1-10x  | 0.1660725  | 0.54122794 | 0.0017206  |
| 7w11w_SITTC3_AACAAGATCGACATAC-1-10x  | 0.03366275 | 0.0697775  | 5.17E-05   |
| 7w11w_SITTC3_AACAGGGAGGCCCGTT-1-10x  | 0.04495609 | 0.10998792 | 9.39E-05   |
| 7w11w_SITTC3_AACAGGGTCTCCACA-1-10x   | 0.05315724 | 0.13918845 | 0.00019264 |
| 7w11w_SITTC3_AACCAACGTGCGCTCA-1-10x  | 0.07910035 | 0.23155996 | 0.002576   |
| 7w11w_SITTC3_AACCACACACGCTGAC-1-10x  | 0.03637978 | 0.0794516  | 5.82E-05   |
| 7w11w_SITTC3_AACCATGAGGGATCGT-1-10x  | 0.01564921 | 0.00563956 | 3.33E-05   |
| 7w11w_SITTC3_AACCTTTAGCCAGAGT-1-10x  | 0.08132839 | 0.23949298 | 0.0031253  |
| 7w11w_SITTC3_AACGAAACACATGTTG-1-10x  | 0.05422478 | 0.14298947 | 0.00021164 |
| 7w11w_SITTC3_AACGGGAAGTTGTAGA-1-10x  | 0.02050935 | 0.02294428 | 3.62E-05   |
| 7w11w_SITTC3_AACGTCAGTCGTATTG-1-10x  | 0.09302257 | 0.2811306  | 0.0044107  |
| 7w11w_SITTC3_AACTTCTGTTCTGTTCC-1-10x | 0.04980439 | 0.1272505  | 0.00013566 |
| 7w11w_SITTC3_AAGAACAGTAGCGCTC-1-10x  | 0.25106984 | 0.8438645  | 0.00080923 |
| 7w11w_SITTC3_AAGAACATCCTAGCGG-1-10x  | 0.08574273 | 0.25521046 | 0.0037839  |
| 7w11w_SITTC3_AAGACAATCGTCAAAC-1-10x  | 0.08048479 | 0.23648931 | 0.0029431  |
| 7w11w_SITTC3_AAGATAGTCCACGTAA-1-10x  | 0.02394929 | 0.03519232 | 3.91E-05   |
| 7w11w_SITTC3_AAGCATCAGTTCAACC-1-10x  | 0.11568949 | 0.36183712 | 0.002594   |
| 7w11w_SITTC3_AAGCATCGTAGGTAGC-1-10x  | 0.17037757 | 0.5565563  | 0.0016584  |
| 7w11w_SITTC3_AAGCGTTCAAGAAACT-1-10x  | 0.01951001 | 0.01938609 | 3.55E-05   |
| 7w11w_SITTC3_AAGCGTTGTTGCATCA-1-10x  | 0.13942285 | 0.44634074 | 0.0018772  |
| 7w11w_SITTC3_AAGGTAACACACCTTC-1-10x  | 0.02717898 | 0.04669179 | 4.19E-05   |
| 7w11w_SITTC3_AAGTACCAGGCCACTC-1-10x  | 0.08145792 | 0.23995419 | 0.0031253  |
| 7w11w_SITTC3_AAGTCGTCCTGGATT-1-10x   | 0.21465786 | 0.7142181  | 0.0010625  |

|                                       |            |            |            |
|---------------------------------------|------------|------------|------------|
| 7w11w_SITTC3_AATAGAGAGCTTGTGT-1-10x   | 0.07360469 | 0.21199244 | 0.0015819  |
| 7w11w_SITTC3_AATCACGTCAGCATTG-1-10x   | 0.03456966 | 0.07300659 | 5.37E-05   |
| 7w11w_SITTC3_AATCACGTCTCCAATT-1-10x   | 0.05259196 | 0.13717575 | 0.00017575 |
| 7w11w_SITTC3_AATCGACGTTATAGCC-1-10x   | 0.28598967 | 0.968198   | 0.00075686 |
| 7w11w_SITTC3_AATCGTGAGGGTAGCT-1-10x   | 0.08232176 | 0.24302992 | 0.0033032  |
| 7w11w_SITTC3_AATCGTGAGTAGCATA-1-10x   | 0.05096321 | 0.13137653 | 0.00014746 |
| 7w11w_SITTC3_AATCGTGGTACACGCC-1-10x   | 0.24415675 | 0.8192501  | 0.00084583 |
| 7w11w_SITTC3_AATCGTGTCTCTGCTG-1-10x   | 0.02360693 | 0.03397333 | 3.83E-05   |
| 7w11w_SITTC3_AATGACCCACGGCTAC-1-10x   | 0.07847075 | 0.22931826 | 0.002576   |
| 7w11w_SITTC3_AATGCCAGTAACGCGA-1-10x   | 0.04130428 | 0.09698549 | 7.40E-05   |
| 7w11w_SITTC3_AATGGAAAGAAGGCTC-1-10x   | 0.25844327 | 0.87011784 | 0.000778   |
| 7w11w_SITTC3_AATGGCTAGGTCCCTG-1-10x   | 0.11239611 | 0.35011092 | 0.0028393  |
| 7w11w_SITTC3_AATTTCTCGGAGCAA-1-10x    | 0.24736549 | 0.83067495 | 0.0008292  |
| 7w11w_SITTC3_AATTTCTCTGCAGCG-1-10x    | 0.27819157 | 0.9404325  | 0.00075239 |
| 7w11w_SITTC3_ACAACCAAGCGATTCT-1-10x   | 0.12077977 | 0.37996128 | 0.0022308  |
| 7w11w_SITTC3_ACAACCACAGTCAGCC-1-10x   | 0.03060694 | 0.05889718 | 4.68E-05   |
| 7w11w_SITTC3_ACAACCACATATAGCC-1-10x   | 0.12502493 | 0.39507633 | 0.0020803  |
| 7w11w_SITTC3_ACAAGCTGTCGTCGGT-1-10x   | 0.0427403  | 0.1020985  | 8.29E-05   |
| 7w11w_SITTC3_ACACAGTGTCAACCAT-1-10x   | 0.13900575 | 0.44485563 | 0.0018772  |
| 7w11w_SITTC3_ACACAGTTCAGGAAAT-1-10x   | 0.03129038 | 0.06133057 | 4.68E-05   |
| 7w11w_SITTC3_ACACCAAAGCACACAG-1-10x   | 0.18964666 | 0.6251647  | 0.0013244  |
| 7w11w_SITTC3_ACACCAAAGCTTGTGT-1-10x   | 0.06709366 | 0.18880968 | 0.00079936 |
| 7w11w_SITTC3_ACACGCGCACAAACGG-1-10x   | 0.01806015 | 0.01422381 | 3.44E-05   |
| 7w11w_SITTC3_ACAGAAACACCAACAT-1-10x   | 0.04784368 | 0.12026928 | 0.00011598 |
| 7w11w_SITTC3_ACAGAAAGTCCCGCAA-1-10x   | 0.24048421 | 0.80617386 | 0.00086997 |
| 7w11w_SITTC3_ACAGAAAGTGTCCATA-1-10x   | 0.06558514 | 0.1834385  | 0.00072102 |
| 7w11w_SITTC3_ACAGCCGAGGTTTACC-1-10x   | 0.08494453 | 0.25236842 | 0.0036353  |
| 7w11w_SITTC3_ACAGGGATCCCAGCGA-1-10x   | 0.05590774 | 0.14898172 | 0.000257   |
| 7w11w_SITTC3_ACAGGGATCTGTGCTC-1-10x   | 0.29253602 | 0.9915065  | 0.00076378 |
| 7w11w_SITTC3_ACATCCCTCATCTCTA-1-10x   | 0.28013766 | 0.94736165 | 0.00075303 |
| 7w11w_SITTC3_ACATGCACATGGCACC-1-10x   | 0.09003886 | 0.27050698 | 0.0042999  |
| 7w11w_SITTC3_ACATTTCCAACGGCCT-1-10x   | 0.10513096 | 0.32424304 | 0.0036214  |
| 7w11w_SITTC3_ACCAAACCAAGAGGTC-1-10x   | 0.07805887 | 0.22785173 | 0.0023954  |
| 7w11w_SITTC3_ACCAAACGTTAGCTAC-1-10x   | 0.10084026 | 0.3089658  | 0.0040879  |
| 7w11w_SITTC3_ACCAAACTCCATTGTT-1-10x   | 0.0545237  | 0.14405379 | 0.00021164 |
| 7w11w_SITTC3_ACCACAATCGCAGTGC-1-10x   | 0.08127871 | 0.23931612 | 0.0031253  |
| 7w11w_SITTC3_ACCCAAAGTGGTAACG-1-10x   | 0.02130091 | 0.02576266 | 3.69E-05   |
| 7w11w_SITTC3_ACCCTTGTGCTGTGGC-1-10x   | 0.02022046 | 0.02191565 | 3.62E-05   |
| 7w11w_SITTC3_ACCGTTACAGATAACAC-1-10x  | 0.27844337 | 0.94132906 | 0.00075239 |
| 7w11w_SITTC3_ACCTGAAAGCAAGTGC-1-10x   | 0.10024841 | 0.3068585  | 0.0040879  |
| 7w11w_SITTC3_ACCTGAACAACACTGTGT-1-10x | 0.03744753 | 0.08325336 | 6.07E-05   |

|                                     |            |            |            |
|-------------------------------------|------------|------------|------------|
| 7w11w_SITTC3_ACCTGAACAAGTCCAT-1-10x | 0.2609909  | 0.8791888  | 0.00076963 |
| 7w11w_SITTC3_ACCTGTCAGACCCGCT-1-10x | 0.09001321 | 0.27041563 | 0.0042999  |
| 7w11w_SITTC3_ACGATCATCAACCCGG-1-10x | 0.14223222 | 0.45634362 | 0.0018724  |
| 7w11w_SITTC3_ACGATGTAGTAGCAA-1-10x  | 0.24722336 | 0.8301689  | 0.0008292  |
| 7w11w_SITTC3_ACGCACGGTCAGTCGC-1-10x | 0.10727191 | 0.33186597 | 0.0034182  |
| 7w11w_SITTC3_ACGCACGTCGTTGTTT-1-10x | 0.03486136 | 0.0740452  | 5.37E-05   |
| 7w11w_SITTC3_ACGGTCGGTAGGGAGG-1-10x | 0.0401158  | 0.09275387 | 7.01E-05   |
| 7w11w_SITTC3_ACGGTTAAGCCTAACT-1-10x | 0.04950886 | 0.12619825 | 0.00013566 |
| 7w11w_SITTC3_ACGGTTACAACCGCTG-1-10x | 0.08357919 | 0.24750707 | 0.0034742  |
| 7w11w_SITTC3_ACGGTTATCCATTTGT-1-10x | 0.07317182 | 0.21045122 | 0.0015819  |
| 7w11w_SITTC3_ACGTAGTAGCAACAGC-1-10x | 0.08625045 | 0.25701818 | 0.0039187  |
| 7w11w_SITTC3_ACGTAGTGTACAGAAT-1-10x | 0.07221133 | 0.20703135 | 0.0014433  |
| 7w11w_SITTC3_ACGTAGTGTGTCCGGT-1-10x | 0.05396738 | 0.14207299 | 0.00019264 |
| 7w11w_SITTC3_ACGTAGTTCGTGGGTC-1-10x | 0.27615228 | 0.9331716  | 0.00075214 |
| 7w11w_SITTC3_ACGTCCTGTGGCATCC-1-10x | 0.261291   | 0.8802573  | 0.00076963 |
| 7w11w_SITTC3_ACGTCCTGTGTGTAAT-1-10x | 0.2595676  | 0.87412107 | 0.00077499 |
| 7w11w_SITTC3_ACGTTCCACGTAGAG-1-10x  | 0.24506037 | 0.8224675  | 0.00084014 |
| 7w11w_SITTC3_ACGTTCCGTGAAAGTT-1-10x | 0.03761722 | 0.08385755 | 6.07E-05   |
| 7w11w_SITTC3_ACTACGAAGATACATG-1-10x | 0.08359099 | 0.24754909 | 0.0034742  |
| 7w11w_SITTC3_ACTACGAAGCGTGAGT-1-10x | 0.05017754 | 0.1285791  | 0.00013566 |
| 7w11w_SITTC3_ACTATCTAGGCGAACT-1-10x | 0.07989555 | 0.2343913  | 0.0027593  |
| 7w11w_SITTC3_ACTATGGCACTGTTCC-1-10x | 0.03743367 | 0.08320401 | 6.07E-05   |
| 7w11w_SITTC3_ACTATTCCAGCCGTCA-1-10x | 0.18824302 | 0.62016696 | 0.0013519  |
| 7w11w_SITTC3_ACTCCAAGAGCCATG-1-10x  | 0.05326078 | 0.13955712 | 0.00019264 |
| 7w11w_SITTC3_ACTGTGACACTTCATT-1-10x | 0.22115383 | 0.73734725 | 0.0010179  |
| 7w11w_SITTC3_ACTGTGACATCTATCT-1-10x | 0.10655372 | 0.32930884 | 0.00352    |
| 7w11w_SITTC3_ACTTAGGCAGGTGGAT-1-10x | 0.02953706 | 0.05508782 | 4.42E-05   |
| 7w11w_SITTC3_ACTTATCGTCTCACAA-1-10x | 0.20831059 | 0.6916184  | 0.0011177  |
| 7w11w_SITTC3_ACTTCGCCATCAGCAT-1-10x | 0.06564919 | 0.18366656 | 0.00072102 |
| 7w11w_SITTC3_ACTTCGCGTACTGTTG-1-10x | 0.08671349 | 0.25866684 | 0.0039187  |
| 7w11w_SITTC3_ACTTCGCGTTGACTGT-1-10x | 0.04743223 | 0.11880431 | 0.00011598 |
| 7w11w_SITTC3_ACTTTCAAGGTAGCAC-1-10x | 0.09290174 | 0.2807004  | 0.0044107  |
| 7w11w_SITTC3_ACTTTGTCAAGTAAAG-1-10x | 0.04178338 | 0.09869134 | 7.82E-05   |
| 7w11w_SITTC3_ACTTTGTTCCGTACGG-1-10x | 0.01780648 | 0.0133206  | 3.44E-05   |
| 7w11w_SITTC3_AGAAATGCATGGGAAC-1-10x | 0.04300171 | 0.10302927 | 8.29E-05   |
| 7w11w_SITTC3_AGAACAACAAGTGACG-1-10x | 0.02041349 | 0.02260296 | 3.62E-05   |
| 7w11w_SITTC3_AGAACAACACCAGACC-1-10x | 0.04835879 | 0.12210339 | 0.00012523 |
| 7w11w_SITTC3_AGAACAAGTCACTTCC-1-10x | 0.04438512 | 0.10795496 | 8.81E-05   |
| 7w11w_SITTC3_AGAACAAGTCGCATTA-1-10x | 0.08913203 | 0.2672782  | 0.0042295  |
| 7w11w_SITTC3_AGAAGTATCCGGTAGC-1-10x | 0.12894176 | 0.4090224  | 0.0019821  |
| 7w11w_SITTC3_AGAAGTATCTCGCGTT-1-10x | 0.01754213 | 0.01237937 | 3.44E-05   |

|                                      |            |            |            |
|--------------------------------------|------------|------------|------------|
| 7w11w_SITTC3_AGACAAACACAGCTGC-1-10x  | 0.03760217 | 0.08380397 | 6.07E-05   |
| 7w11w_SITTC3_AGACACTAGGTCTTTG-1-10x  | 0.09390789 | 0.2842828  | 0.0044154  |
| 7w11w_SITTC3_AGACACTGTAGCTGCC-1-10x  | 0.1981646  | 0.65549314 | 0.0012187  |
| 7w11w_SITTC3_AGACACTTCCACTAGA-1-10x  | 0.02095439 | 0.02452887 | 3.62E-05   |
| 7w11w_SITTC3_AGACCATGTGAAAGTT-1-10x  | 0.03412754 | 0.07143241 | 5.17E-05   |
| 7w11w_SITTC3_AGACCCGAGCATAGGC-1-10x  | 0.2570666  | 0.8652162  | 0.00078121 |
| 7w11w_SITTC3_AGAGAATGTCCGCAGT-1-10x  | 0.23513617 | 0.78713197 | 0.00090964 |
| 7w11w_SITTC3_AGAGCCCAGCTGGAGT-1-10x  | 0.05067895 | 0.13036439 | 0.00014746 |
| 7w11w_SITTC3_AGAGCCCAGGGCAGAG-1-10x  | 0.03531503 | 0.07566052 | 5.58E-05   |
| 7w11w_SITTC3_AGAGCCCGTCCGTACC-1-10x  | 0.17195132 | 0.5621597  | 0.0016256  |
| 7w11w_SITTC3_AGATAGACACAAGCTT-1-10x  | 0.01674431 | 0.00953868 | 3.38E-05   |
| 7w11w_SITTC3_AGATCCAGTAGGTGCA-1-10x  | 0.02895744 | 0.05302404 | 4.42E-05   |
| 7w11w_SITTC3_AGATGCTCAATGGCAG-1-10x  | 0.08242053 | 0.2433816  | 0.0033032  |
| 7w11w_SITTC3_AGCCAATCACGCCAGT-1-10x  | 0.04308262 | 0.10331735 | 8.29E-05   |
| 7w11w_SITTC3_AGCCACGGTGAGTTTC-1-10x  | 0.10299347 | 0.31663242 | 0.0038193  |
| 7w11w_SITTC3_AGCCAGCAGTTCATGC-1-10x  | 0.15721044 | 0.5096742  | 0.0018385  |
| 7w11w_SITTC3_AGCGATTCATAGGAGC-1-10x  | 0.08354575 | 0.247388   | 0.0034742  |
| 7w11w_SITTC3_AGCGCCACACACGCCA-1-10x  | 0.1417736  | 0.45471066 | 0.0018724  |
| 7w11w_SITTC3_AGCGCCAGTGGACTGA-1-10x  | 0.08476847 | 0.25174153 | 0.0036353  |
| 7w11w_SITTC3_AGCGCCATCTAATTCC-1-10x  | 0.2826873  | 0.9564398  | 0.00075462 |
| 7w11w_SITTC3_AGCGTATTCTCGTGGG-1-10x  | 0.03255257 | 0.06582467 | 5.00E-05   |
| 7w11w_SITTC3_AGCGTCGGTACAGTCT-1-10x  | 0.11507334 | 0.35964328 | 0.002594   |
| 7w11w_SITTC3_AGCTTCCAGTGGATAT-1-10x  | 0.24028246 | 0.80545557 | 0.00086997 |
| 7w11w_SITTC3_AGCTTCCCATCTGTTT-1-10x  | 0.07569428 | 0.21943252 | 0.0020486  |
| 7w11w_SITTC3_AGCTTCCGTGCAACAG-1-10x  | 0.10087684 | 0.30909607 | 0.0040879  |
| 7w11w_SITTC3_AGCTTCCGTGGTCCGT-1-10x  | 0.0727597  | 0.20898384 | 0.0014433  |
| 7w11w_SITTC3_AGGAAATGTTAGAAAC-1-10x  | 0.04796659 | 0.12070693 | 0.00011598 |
| 7w11w_SITTC3_AGGACTTCAGCTTTGA-1-10x  | 0.03278767 | 0.06666175 | 5.00E-05   |
| 7w11w_SITTC3_AGGACTTTCAGACCCG-1-10x  | 0.08731265 | 0.2608002  | 0.0040384  |
| 7w11w_SITTC3_AGGATAAAGCAAGGAA-1-10x  | 0.115121   | 0.359813   | 0.002594   |
| 7w11w_SITTC3_AGGATAAAGTCGGGAT-1-10x  | 0.04769305 | 0.11973297 | 0.00011598 |
| 7w11w_SITTC3_AGGCATTAGAAGTATC-1-10x  | 0.02543424 | 0.04047953 | 4.00E-05   |
| 7w11w_SITTC3_AGGCATTAGGACTATA-1-10x  | 0.09330596 | 0.28213963 | 0.0044107  |
| 7w11w_SITTC3_AGGCTGCTCGCACGGT-1-10x  | 0.04569502 | 0.11261891 | 0.00010046 |
| 7w11w_SITTC3_AGGGAGTCACTCACTC-1-10x  | 0.2760257  | 0.9327209  | 0.00075214 |
| 7w11w_SITTC3_AGGGCCTCAACACAGG-1-10x  | 0.11604832 | 0.36311474 | 0.0025211  |
| 7w11w_SITTC3_AGGGCTCAGTATCTGC-1-10x  | 0.02529733 | 0.03999208 | 4.00E-05   |
| 7w11w_SITTC3_AGGGCTCCATCGGAGA-1-10x  | 0.10904174 | 0.33816752 | 0.0032165  |
| 7w11w_SITTC3_AGGGTCCAGTAGCTCT-1-10x  | 0.05740052 | 0.15429683 | 0.00028394 |
| 7w11w_SITTC3_AGGGTCCCTCCGGACT-1-10x  | 0.07679519 | 0.22335237 | 0.0022191  |
| 7w11w_SITTC3_AGGGTCCCTCCGGTAAT-1-10x | 0.03793042 | 0.08497272 | 6.07E-05   |

|                                      |            |            |            |
|--------------------------------------|------------|------------|------------|
| 7w11w_SITTC3_AGGGTGAAGCGTACT-1-10x   | 0.10443953 | 0.3217812  | 0.0037215  |
| 7w11w_SITTC3_AGGGTTTAGTGAGCCA-1-10x  | 0.01506682 | 0.00356594 | 3.27E-05   |
| 7w11w_SITTC3_AGGTCATAGCCTTGAT-1-10x  | 0.04983047 | 0.12734337 | 0.00013566 |
| 7w11w_SITTC3_AGGTCATCACTACAGT-1-10x  | 0.06281415 | 0.17357227 | 0.00052741 |
| 7w11w_SITTC3_AGGTCATGTACGGCAA-1-10x  | 0.04918244 | 0.125036   | 0.00012523 |
| 7w11w_SITTC3_AGGTCTAAGTCGAAGC-1-10x  | 0.05380439 | 0.14149266 | 0.00019264 |
| 7w11w_SITTC3_AGGTCTAGTTCTCGCT-1-10x  | 0.0966457  | 0.2940309  | 0.0043435  |
| 7w11w_SITTC3_AGGTGTTGTAGCCAGA-1-10x  | 0.04924721 | 0.12526664 | 0.00012523 |
| 7w11w_SITTC3_AGGTGTTTCAGACCCG-1-10x  | 0.04881554 | 0.12372964 | 0.00012523 |
| 7w11w_SITTC3_AGGTGTTTCGACCTAA-1-10x  | 0.28814313 | 0.9758654  | 0.0007596  |
| 7w11w_SITTC3_AGGTTACCACCTCTAC-1-10x  | 0.02911433 | 0.05358266 | 4.42E-05   |
| 7w11w_SITTC3_AGGTTACGTCAGGTGA-1-10x  | 0.05809533 | 0.15677074 | 0.00031414 |
| 7w11w_SITTC3_AGGTTGTGTTTGGAAA-1-10x  | 0.01887072 | 0.01710988 | 3.49E-05   |
| 7w11w_SITTC3_AGTACCACACGCGTA-1-10x   | 0.05195304 | 0.13490085 | 0.00016076 |
| 7w11w_SITTC3_AGTACCAGTCGCGTCA-1-10x  | 0.0299316  | 0.0564926  | 4.55E-05   |
| 7w11w_SITTC3_AGTACTGAGGAAAGGT-1-10x  | 0.03844024 | 0.08678795 | 6.36E-05   |
| 7w11w_SITTC3_AGTCAACGTTATCCAG-1-10x  | 0.16141388 | 0.5246407  | 0.0017883  |
| 7w11w_SITTC3_AGTCATGCAAGCTCTA-1-10x  | 0.21608508 | 0.71929973 | 0.001055   |
| 7w11w_SITTC3_AGTCATGGTGCCAAGA-1-10x  | 0.08214084 | 0.24238576 | 0.0031253  |
| 7w11w_SITTC3_AGTGACTCAAGTGGTG-1-10x  | 0.03610256 | 0.07846454 | 5.58E-05   |
| 7w11w_SITTC3_AGTGATCAGTACAGAT-1-10x  | 0.04994565 | 0.12775345 | 0.00013566 |
| 7w11w_SITTC3_AGTGATCGTCGTGATT-1-10x  | 0.02773171 | 0.04865977 | 4.30E-05   |
| 7w11w_SITTC3_AGTGATCTCCTCTGCA-1-10x  | 0.05104046 | 0.13165157 | 0.00014746 |
| 7w11w_SITTC3_AGTGATCTCGTAACCA-1-10x  | 0.10999331 | 0.34155563 | 0.0031181  |
| 7w11w_SITTC3_AGTGATCTCTGCTCTG-1-10x  | 0.08204369 | 0.24203986 | 0.0031253  |
| 7w11w_SITTC3_AGTGCCGAGCTACGTT-1-10x  | 0.04230107 | 0.1005346  | 7.82E-05   |
| 7w11w_SITTC3_AGTGCCGTCTCTGCA-1-10x   | 0.11449976 | 0.35760102 | 0.0026715  |
| 7w11w_SITTC3_AGTGTTGTCATGGAGG-1-10x  | 0.01838717 | 0.01538818 | 3.49E-05   |
| 7w11w_SITTC3_AGTTAGCAGCGCGTTC-1-10x  | 0.25671175 | 0.86395276 | 0.00078463 |
| 7w11w_SITTC3_AGTTAGCGTATTTCCGG-1-10x | 0.04645261 | 0.11531633 | 0.00010046 |
| 7w11w_SITTC3_AGTTAGCTCGCACGAC-1-10x  | 0.08942892 | 0.26833525 | 0.0042295  |
| 7w11w_SITTC3_AGTTGACACTGCGTG-1-10x   | 0.03656748 | 0.08011992 | 5.82E-05   |
| 7w11w_SITTC3_ATACCGAGTTCGGGTC-1-10x  | 0.26854092 | 0.90607095 | 0.00075594 |
| 7w11w_SITTC3_ATACTTCCAAGGCTTT-1-10x  | 0.18680425 | 0.6150442  | 0.0013662  |
| 7w11w_SITTC3_ATACTTCGTGGATCAG-1-10x  | 0.06229777 | 0.17173369 | 0.00047505 |
| 7w11w_SITTC3_ATACTTCTCTTTTCGAT-1-10x | 0.03172508 | 0.06287836 | 4.83E-05   |
| 7w11w_SITTC3_ATAGACCCATTGAAAG-1-10x  | 0.10426623 | 0.32116413 | 0.0037215  |
| 7w11w_SITTC3_ATAGAGACACCTCTAC-1-10x  | 0.27717003 | 0.9367953  | 0.00075222 |
| 7w11w_SITTC3_ATAGAGATCGCTTTAT-1-10x  | 0.269029   | 0.9078088  | 0.00075594 |
| 7w11w_SITTC3_ATATCCTAGCACTCTA-1-10x  | 0.14089888 | 0.45159623 | 0.0018734  |
| 7w11w_SITTC3_ATCACAGAGAAACCAT-1-10x  | 0.18960199 | 0.6250056  | 0.0013244  |

|                                      |            |            |            |
|--------------------------------------|------------|------------|------------|
| 7w11w_SITTC3_ATCACAGCATCCTCAC-1-10x  | 0.13092653 | 0.41608927 | 0.001948   |
| 7w11w_SITTC3_ATCACAGTCACGATAC-1-10x  | 0.04001806 | 0.09240584 | 7.01E-05   |
| 7w11w_SITTC3_ATCACAGTCGAGTGAG-1-10x  | 0.14005353 | 0.4485863  | 0.001875   |
| 7w11w_SITTC3_ATCACGACAAGGGCAT-1-10x  | 0.2711574  | 0.9153871  | 0.00075352 |
| 7w11w_SITTC3_ATCACGACACTGTGTA-1-10x  | 0.06929718 | 0.19665538 | 0.0010821  |
| 7w11w_SITTC3_ATCACGAGTCTTGGTA-1-10x  | 0.07801676 | 0.2277018  | 0.0023954  |
| 7w11w_SITTC3_ATCACGATCCAGCACG-1-10x  | 0.0203321  | 0.02231317 | 3.62E-05   |
| 7w11w_SITTC3_ATCACTTTCCAATGCA-1-10x  | 0.04449197 | 0.10833541 | 8.81E-05   |
| 7w11w_SITTC3_ATCACTTTCCGGCTCTT-1-10x | 0.08140685 | 0.23977235 | 0.0031253  |
| 7w11w_SITTC3_ATCATTCTCGTAGGGA-1-10x  | 0.04540321 | 0.11157991 | 9.39E-05   |
| 7w11w_SITTC3_ATCCATTACCAACAT-1-10x   | 0.09110852 | 0.27431554 | 0.0043535  |
| 7w11w_SITTC3_ATCCATTAGTGTGGA-1-10x   | 0.0563064  | 0.15040116 | 0.000257   |
| 7w11w_SITTC3_ATCCTATAGAGTCTTC-1-10x  | 0.08230792 | 0.24298066 | 0.0033032  |
| 7w11w_SITTC3_ATCGCCTAGAAGAACG-1-10x  | 0.01782899 | 0.01340074 | 3.44E-05   |
| 7w11w_SITTC3_ATCGCCTAGGTTACCT-1-10x  | 0.04496572 | 0.1100222  | 9.39E-05   |
| 7w11w_SITTC3_ATCGCCTTCTGTACC-1-10x   | 0.08815093 | 0.26378495 | 0.0041422  |
| 7w11w_SITTC3_ATCGGATGTAGCGATG-1-10x  | 0.08880983 | 0.26613095 | 0.0042295  |
| 7w11w_SITTC3_ATCGGATGTCCGGCAT-1-10x  | 0.0491378  | 0.12487706 | 0.00012523 |
| 7w11w_SITTC3_ATCGGATGTCCTCATC-1-10x  | 0.0165243  | 0.00875533 | 3.38E-05   |
| 7w11w_SITTC3_ATCGGCGAGACTTCGT-1-10x  | 0.02825217 | 0.0505129  | 4.30E-05   |
| 7w11w_SITTC3_ATCGTCTCCACTAGA-1-10x   | 0.07475544 | 0.21608974 | 0.001885   |
| 7w11w_SITTC3_ATCGTGACAGTCGGAA-1-10x  | 0.14883354 | 0.4798479  | 0.0018713  |
| 7w11w_SITTC3_ATCGTGAGTGTGGTCC-1-10x  | 0.08575286 | 0.25524652 | 0.0037839  |
| 7w11w_SITTC3_ATCGTGAGTTAAGGAT-1-10x  | 0.21453021 | 0.7137636  | 0.0010701  |
| 7w11w_SITTC3_ATGAAAGAGTAGTCAA-1-10x  | 0.04289293 | 0.10264196 | 8.29E-05   |
| 7w11w_SITTC3_ATGAAAGGTTAAACCC-1-10x  | 0.19397223 | 0.64056605 | 0.0012624  |
| 7w11w_SITTC3_ATGACCATCTCGGTAA-1-10x  | 0.05102965 | 0.13161308 | 0.00014746 |
| 7w11w_SITTC3_ATGAGGGAGAAGGATG-1-10x  | 0.02813717 | 0.05010343 | 4.30E-05   |
| 7w11w_SITTC3_ATGAGTCCACAATGCT-1-10x  | 0.05759293 | 0.15498193 | 0.00028394 |
| 7w11w_SITTC3_ATGCATGAGACAATA-1-10x   | 0.03372693 | 0.07000601 | 5.17E-05   |
| 7w11w_SITTC3_ATGGAGGAGCTCGCAC-1-10x  | 0.02752922 | 0.04793881 | 4.19E-05   |
| 7w11w_SITTC3_ATGGAGGGTTCGAGCC-1-10x  | 0.22052753 | 0.7351173  | 0.0010179  |
| 7w11w_SITTC3_ATGGAGGTCCGCAAT-1-10x   | 0.05568842 | 0.14820082 | 0.000233   |
| 7w11w_SITTC3_ATGGATCAGTCCGCGT-1-10x  | 0.25891763 | 0.87180686 | 0.00077499 |
| 7w11w_SITTC3_ATGGATCCAAGCTGTT-1-10x  | 0.11207473 | 0.34896663 | 0.002929   |
| 7w11w_SITTC3_ATGGATCGTCAATTC-1-10x   | 0.09910578 | 0.3027901  | 0.0041652  |
| 7w11w_SITTC3_ATGGATCGTGTCATTG-1-10x  | 0.1536195  | 0.4968885  | 0.0018575  |
| 7w11w_SITTC3_ATGGGAGAGGCGTTAG-1-10x  | 0.10176196 | 0.31224757 | 0.0040036  |
| 7w11w_SITTC3_ATGGGTTAGCTTACGT-1-10x  | 0.04489414 | 0.10976734 | 9.39E-05   |
| 7w11w_SITTC3_ATGGGTTTCTAGCCAA-1-10x  | 0.26579252 | 0.8962852  | 0.00075974 |
| 7w11w_SITTC3_ATGTCCCGTGAGCCAA-1-10x  | 0.08205991 | 0.24209759 | 0.0031253  |

|                                      |            |            |            |
|--------------------------------------|------------|------------|------------|
| 7w11w_SITTC3_ATTACCTCACTGAGTT-1-10x  | 0.08763336 | 0.26194212 | 0.0040384  |
| 7w11w_SITTC3_ATTACCTCAGTTGTCA-1-10x  | 0.04655505 | 0.11568108 | 0.00010777 |
| 7w11w_SITTC3_ATTACCTTCTCTGGTC-1-10x  | 0.02502739 | 0.03903095 | 4.00E-05   |
| 7w11w_SITTC3_ATTACTCGTTGTGTAC-1-10x  | 0.1699554  | 0.5550531  | 0.0016584  |
| 7w11w_SITTC3_ATTCACTCACTGCACG-1-10x  | 0.01905436 | 0.01776373 | 3.49E-05   |
| 7w11w_SITTC3_ATTCACTGTAGTAAGT-1-10x  | 0.26676202 | 0.8997371  | 0.00075831 |
| 7w11w_SITTC3_ATTCAAGGTCATGGCC-1-10x  | 0.10146591 | 0.31119347 | 0.0040036  |
| 7w11w_SITTC3_ATTCAAGTCCCGTAAA-1-10x  | 0.02822099 | 0.05040187 | 4.30E-05   |
| 7w11w_SITTC3_ATTCAATCAGGGTTAGC-1-10x | 0.0869535  | 0.25952142 | 0.0040384  |
| 7w11w_SITTC3_ATTCTATCGTGCAGC-1-10x   | 0.08001369 | 0.23481193 | 0.0027593  |
| 7w11w_SITTC3_ATTCTACTCGACGTCG-1-10x  | 0.2675082  | 0.90239394 | 0.00075705 |
| 7w11w_SITTC3_ATTCTTGGTAGATGTA-1-10x  | 0.02630438 | 0.04357771 | 4.09E-05   |
| 7w11w_SITTC3_ATTGGGTCATGCGTGC-1-10x  | 0.06037896 | 0.1649017  | 0.00038577 |
| 7w11w_SITTC3_ATTGTTGTTGCATAC-1-10x   | 0.2826282  | 0.9562293  | 0.00075462 |
| 7w11w_SITTC3_ATTTACCGTACCGTCG-1-10x  | 0.08822826 | 0.2640603  | 0.0041422  |
| 7w11w_SITTC3_ATTTCTGTCCTGCTAC-1-10x  | 0.26399738 | 0.8898935  | 0.00076313 |
| 7w11w_SITTC3_CAAAGAACAAGAGGTC-1-10x  | 0.01720424 | 0.01117631 | 3.38E-05   |
| 7w11w_SITTC3_CAACAACCTCGCAGTGC-1-10x | 0.15710689 | 0.5093055  | 0.0018385  |
| 7w11w_SITTC3_CAACAGTCATGACCCG-1-10x  | 0.16793835 | 0.54787135 | 0.0016902  |
| 7w11w_SITTC3_CAACAGTGTGAGTCAG-1-10x  | 0.03362528 | 0.06964408 | 5.17E-05   |
| 7w11w_SITTC3_CAACCAAGTGCAGGAT-1-10x  | 0.28703886 | 0.97193366 | 0.00075864 |
| 7w11w_SITTC3_CAACCTCGTTATTCCT-1-10x  | 0.05038205 | 0.12930728 | 0.00014746 |
| 7w11w_SITTC3_CAACGATGTACCGCGT-1-10x  | 0.04835869 | 0.12210303 | 0.00012523 |
| 7w11w_SITTC3_CAAGACTGTCTCGGAC-1-10x  | 0.17410883 | 0.5698416  | 0.0015922  |
| 7w11w_SITTC3_CAAGAGGAGATTGGGC-1-10x  | 0.07172875 | 0.2053131  | 0.0013138  |
| 7w11w_SITTC3_CAAGAGGCACGGTCTG-1-10x  | 0.23652524 | 0.7920778  | 0.00089602 |
| 7w11w_SITTC3_CAAGCTATCCGGACTG-1-10x  | 0.23716024 | 0.79433876 | 0.00088935 |
| 7w11w_SITTC3_CAATCGAGTTCACGAT-1-10x  | 0.2602731  | 0.87663305 | 0.00077221 |
| 7w11w_SITTC3_CACACAATCAGTGTTG-1-10x  | 0.15564772 | 0.50411004 | 0.0018459  |
| 7w11w_SITTC3_CACAGATCAACTCGTA-1-10x  | 0.07577574 | 0.21972255 | 0.0020486  |
| 7w11w_SITTC3_CACAGATTCACGGAGA-1-10x  | 0.09045085 | 0.27197388 | 0.0042999  |
| 7w11w_SITTC3_CACAGGCCACACTTAG-1-10x  | 0.12473625 | 0.39404848 | 0.0020803  |
| 7w11w_SITTC3_CACAGGCGTCTGATCA-1-10x  | 0.20722078 | 0.68773806 | 0.001126   |
| 7w11w_SITTC3_CACCAAAAGCGAGTAC-1-10x  | 0.01634773 | 0.00812664 | 3.33E-05   |
| 7w11w_SITTC3_CACCGTTCAGTAGATA-1-10x  | 0.23608954 | 0.7905265  | 0.00090278 |
| 7w11w_SITTC3_CACCGTTGTAGCTTGT-1-10x  | 0.07369029 | 0.21229723 | 0.0015819  |
| 7w11w_SITTC3_CACCGTTGTGCCCGTA-1-10x  | 0.03904019 | 0.0889241  | 6.67E-05   |
| 7w11w_SITTC3_CACCGTTGTGCTGCAC-1-10x  | 0.23078395 | 0.7716357  | 0.00093779 |
| 7w11w_SITTC3_CACCGTTTCTGCGGAC-1-10x  | 0.01942848 | 0.01909581 | 3.55E-05   |
| 7w11w_SITTC3_CACGAATGTGTCTAAC-1-10x  | 0.07874031 | 0.23027802 | 0.002576   |
| 7w11w_SITTC3_CACGGGTAGCACTGGA-1-10x  | 0.03429405 | 0.07202529 | 5.37E-05   |

|                                     |            |            |            |
|-------------------------------------|------------|------------|------------|
| 7w11w_SITTC3_CACGTGGGTCTACTGA-1-10x | 0.0197647  | 0.02029292 | 3.55E-05   |
| 7w11w_SITTC3_CACGTGGGTTCTCTCG-1-10x | 0.02584888 | 0.04195589 | 4.09E-05   |
| 7w11w_SITTC3_CACGTGGTCCATTGCC-1-10x | 0.01564254 | 0.0056158  | 3.33E-05   |
| 7w11w_SITTC3_CAGTTTCTCCGCTTAC-1-10x | 0.11274846 | 0.35136545 | 0.0028393  |
| 7w11w_SITTC3_CACTGTCAGGCACAAC-1-10x | 0.03802197 | 0.0852987  | 6.36E-05   |
| 7w11w_SITTC3_CACTGTCTCAGTGTCA-1-10x | 0.03836963 | 0.08653656 | 6.36E-05   |
| 7w11w_SITTC3_CACTTCGTCTCGACGG-1-10x | 0.0447039  | 0.10908997 | 9.39E-05   |
| 7w11w_SITTC3_CAGATACCACGGTGAA-1-10x | 0.084937   | 0.2523416  | 0.0036353  |
| 7w11w_SITTC3_CAGATACGTCCCTGAG-1-10x | 0.19523004 | 0.6450445  | 0.0012511  |
| 7w11w_SITTC3_CAGATCATCAACGCTA-1-10x | 0.07697686 | 0.2239992  | 0.0022191  |
| 7w11w_SITTC3_CAGATTGGTACTCAAC-1-10x | 0.18529843 | 0.6096826  | 0.0013959  |
| 7w11w_SITTC3_CAGCAATCAGAGATTA-1-10x | 0.02832387 | 0.05076819 | 4.30E-05   |
| 7w11w_SITTC3_CAGCAATGTCTACGTA-1-10x | 0.0431185  | 0.10344508 | 8.29E-05   |
| 7w11w_SITTC3_CAGCAATTCGGTACAG-1-10x | 0.06924172 | 0.19645791 | 0.0010821  |
| 7w11w_SITTC3_CAGCACGGTACAGGTG-1-10x | 0.10199036 | 0.31306082 | 0.0039137  |
| 7w11w_SITTC3_CAGCAGCGTCCGTACG-1-10x | 0.10077747 | 0.30874225 | 0.0040879  |
| 7w11w_SITTC3_CAGCCAGAGCCAAGGT-1-10x | 0.11519942 | 0.3600922  | 0.002594   |
| 7w11w_SITTC3_CAGCGTGGTCCAGAAG-1-10x | 0.0608834  | 0.16669776 | 0.00042799 |
| 7w11w_SITTC3_CAGGCCAGTACGCGTC-1-10x | 0.04176749 | 0.09863478 | 7.40E-05   |
| 7w11w_SITTC3_CAGGGCTTCTTACCAT-1-10x | 0.10446235 | 0.32186243 | 0.0037215  |
| 7w11w_SITTC3_CAGGTATCACGACCTG-1-10x | 0.08508868 | 0.25288165 | 0.0037839  |
| 7w11w_SITTC3_CAGTTAGTCATGGAGG-1-10x | 0.25941056 | 0.8735619  | 0.00077499 |
| 7w11w_SITTC3_CAGTTAGTCTTGGTCC-1-10x | 0.26503643 | 0.89359313 | 0.00076135 |
| 7w11w_SITTC3_CAGTTCCGTTTACTTC-1-10x | 0.06905855 | 0.19580574 | 0.0010821  |
| 7w11w_SITTC3_CAGTTCCGTTTCAGAC-1-10x | 0.05103893 | 0.13164614 | 0.00014746 |
| 7w11w_SITTC3_CATAAGCGTGCCTAG-1-10x  | 0.09763809 | 0.29756436 | 0.0042943  |
| 7w11w_SITTC3_CATACAGCAAGTGATA-1-10x | 0.02829749 | 0.05067426 | 4.30E-05   |
| 7w11w_SITTC3_CATACAGCATCCTCAC-1-10x | 0.08165405 | 0.24065252 | 0.0031253  |
| 7w11w_SITTC3_CATACTTAGAGAGTGA-1-10x | 0.2197501  | 0.7323493  | 0.0010253  |
| 7w11w_SITTC3_CATACTTAGCCTCGTG-1-10x | 0.13048227 | 0.41450745 | 0.001948   |
| 7w11w_SITTC3_CATACTTCATAGTCAC-1-10x | 0.12047856 | 0.37888882 | 0.0022788  |
| 7w11w_SITTC3_CATCCGTTCTGGCCAG-1-10x | 0.04629728 | 0.11476328 | 0.00010046 |
| 7w11w_SITTC3_CATCGCTGTGACAACG-1-10x | 0.01753234 | 0.0123445  | 3.44E-05   |
| 7w11w_SITTC3_CATCGCTGTGCAACAG-1-10x | 0.03678059 | 0.0808787  | 5.82E-05   |
| 7w11w_SITTC3_CATCGTCAGACGAAGA-1-10x | 0.0912898  | 0.27496102 | 0.0043535  |
| 7w11w_SITTC3_CATGAGTCATCTCGTC-1-10x | 0.07596766 | 0.22040592 | 0.0020486  |
| 7w11w_SITTC3_CATGCCTAGAAGTATC-1-10x | 0.01990952 | 0.02080854 | 3.55E-05   |
| 7w11w_SITTC3_CATGGTATCGAAGAAT-1-10x | 0.09255848 | 0.2794782  | 0.0044107  |
| 7w11w_SITTC3_CATTCATAGAACAAGG-1-10x | 0.1892042  | 0.6235893  | 0.001338   |
| 7w11w_SITTC3_CATTCATTCCGGTTCT-1-10x | 0.09113318 | 0.27440336 | 0.0043535  |
| 7w11w_SITTC3_CATTCCGTCCATATGG-1-10x | 0.21358003 | 0.71038043 | 0.0010778  |



|                                      |            |            |            |
|--------------------------------------|------------|------------|------------|
| 7w11w_SITTC3_CATTGAGGTGTTTCTT-1-10x  | 0.01889965 | 0.01721289 | 3.49E-05   |
| 7w11w_SITTC3_CATTGAGTCTTGGAAC-1-10x  | 0.03276488 | 0.0665806  | 5.00E-05   |
| 7w11w_SITTC3_CATTGCCAGCTAAACA-1-10x  | 0.02802521 | 0.0497048  | 4.30E-05   |
| 7w11w_SITTC3_CATTGTTAGGTAAAGG-1-10x  | 0.05315099 | 0.13916622 | 0.00019264 |
| 7w11w_SITTC3_CATTGTTTCATGCCGGT-1-10x | 0.2368506  | 0.7932363  | 0.00089602 |
| 7w11w_SITTC3_CATTCATCCGCTAGG-1-10x   | 0.04875961 | 0.12353049 | 0.00012523 |
| 7w11w_SITTC3_CCACAAACAATCTCTT-1-10x  | 0.03001986 | 0.05680684 | 4.55E-05   |
| 7w11w_SITTC3_CCACCATCACAATGTC-1-10x  | 0.01697099 | 0.01034579 | 3.38E-05   |
| 7w11w_SITTC3_CCACCATCAGAGTGAC-1-10x  | 0.0699725  | 0.19905989 | 0.0011935  |
| 7w11w_SITTC3_CCACCATCAGCCGGTT-1-10x  | 0.03371389 | 0.06995959 | 5.17E-05   |
| 7w11w_SITTC3_CCACCATCATCAACCA-1-10x  | 0.04433753 | 0.10778551 | 8.81E-05   |
| 7w11w_SITTC3_CCACGTTTCGGACTGC-1-10x  | 0.07950734 | 0.23300909 | 0.0027593  |
| 7w11w_SITTC3_CCACGTTTCTTGACAGA-1-10x | 0.01971644 | 0.02012108 | 3.55E-05   |
| 7w11w_SITTC3_CCATAAGGTCCTGTTC-1-10x  | 0.01713389 | 0.01092582 | 3.38E-05   |
| 7w11w_SITTC3_CCATCACAGTCCCTAA-1-10x  | 0.06201055 | 0.17071103 | 0.00047505 |
| 7w11w_SITTC3_CCATCACAGTGGTGAC-1-10x  | 0.09743951 | 0.2968573  | 0.0042943  |
| 7w11w_SITTC3_CCCATTGAGGTGCGAT-1-10x  | 0.2542083  | 0.85503906 | 0.00079207 |
| 7w11w_SITTC3_CCCGAAGGTGGGTATG-1-10x  | 0.04795663 | 0.12067145 | 0.00011598 |
| 7w11w_SITTC3_CCCTAACCACGTA ACT-1-10x | 0.0303195  | 0.05787373 | 4.55E-05   |
| 7w11w_SITTC3_CCCTAACTCCTTTAGT-1-10x  | 0.07389116 | 0.21301246 | 0.0017292  |
| 7w11w_SITTC3_CCCTCAAGTCTACTGA-1-10x  | 0.21167825 | 0.70360905 | 0.0010934  |
| 7w11w_SITTC3_CCGATCTAGCGCCTCA-1-10x  | 0.2061767  | 0.6840206  | 0.0011344  |
| 7w11w_SITTC3_CCGATCTGTATAGCTC-1-10x  | 0.03618376 | 0.07875367 | 5.82E-05   |
| 7w11w_SITTC3_CCGATGGCATCCGGTG-1-10x  | 0.0290031  | 0.05318661 | 4.42E-05   |
| 7w11w_SITTC3_CCGATGGCATTCTAT-1-10x   | 0.07584524 | 0.21997003 | 0.0020486  |
| 7w11w_SITTC3_CCGCAAGTCTGTTGGA-1-10x  | 0.18160717 | 0.59653974 | 0.0014587  |
| 7w11w_SITTC3_CCGGACAAGACATGCG-1-10x  | 0.01992983 | 0.02088086 | 3.55E-05   |
| 7w11w_SITTC3_CCGGGTAAGGACAGTC-1-10x  | 0.09177452 | 0.27668688 | 0.0043903  |
| 7w11w_SITTC3_CCGGGTACAAGCTACT-1-10x  | 0.0937172  | 0.28360385 | 0.0044154  |
| 7w11w_SITTC3_CCGGGTAGTGCCACA-1-10x   | 0.26625022 | 0.8979148  | 0.00075974 |
| 7w11w_SITTC3_CCGGTAGAGTCTCCTC-1-10x  | 0.0833839  | 0.2468117  | 0.0034742  |
| 7w11w_SITTC3_CCGGTAGCAGAAAGTTA-1-10x | 0.04677089 | 0.11644959 | 0.00010777 |
| 7w11w_SITTC3_CCGGTAGCAGGTCAGA-1-10x  | 0.08895776 | 0.26665768 | 0.0042295  |
| 7w11w_SITTC3_CCGGTAGGTCATGGCC-1-10x  | 0.08279758 | 0.24472411 | 0.0033032  |
| 7w11w_SITTC3_CCGGTAGTCACTGTCC-1-10x  | 0.08331453 | 0.24656473 | 0.0034742  |
| 7w11w_SITTC3_CCGGTGAGTGCAATGG-1-10x  | 0.10234863 | 0.31433645 | 0.0039137  |
| 7w11w_SITTC3_CCGTAGGCAGGCTTGC-1-10x  | 0.02616546 | 0.0430831  | 4.09E-05   |
| 7w11w_SITTC3_CCGTAGGGTACCGGAA-1-10x  | 0.18957548 | 0.62491125 | 0.0013244  |
| 7w11w_SITTC3_CCGTGAGCAAGACCGA-1-10x  | 0.06544545 | 0.18294112 | 0.00072102 |
| 7w11w_SITTC3_CCGTGAGTCGTTGCT-1-10x   | 0.01539316 | 0.00472786 | 3.27E-05   |
| 7w11w_SITTC3_CCGTTCATCGCGGTAC-1-10x  | 0.07516067 | 0.21753258 | 0.001885   |

|                                     |            |            |            |
|-------------------------------------|------------|------------|------------|
| 7w11w_SITTC3_CCGTTCATCTAGTTCT-1-10x | 0.23306409 | 0.7797542  | 0.00092358 |
| 7w11w_SITTC3_CCTAACCTCTATCGTT-1-10x | 0.26426563 | 0.89084864 | 0.00076313 |
| 7w11w_SITTC3_CCTAAGAAGTATAGGT-1-10x | 0.17124745 | 0.5596535  | 0.0016421  |
| 7w11w_SITTC3_CCTAAGATCGTTAGAC-1-10x | 0.0744994  | 0.2151781  | 0.0017292  |
| 7w11w_SITTC3_CCTACGTAGAGTGTTA-1-10x | 0.02932883 | 0.05434639 | 4.42E-05   |
| 7w11w_SITTC3_CCTACGTAGATGAATC-1-10x | 0.0378022  | 0.0845162  | 6.07E-05   |
| 7w11w_SITTC3_CCTACGTGTCTGTCAA-1-10x | 0.04179788 | 0.09874299 | 7.82E-05   |
| 7w11w_SITTC3_CCTATCGCAACACGTT-1-10x | 0.25716937 | 0.8655821  | 0.00078121 |
| 7w11w_SITTC3_CCTATCGCACCTAAA-1-10x  | 0.02103444 | 0.02481389 | 3.62E-05   |
| 7w11w_SITTC3_CCTATCGCATCCTTGC-1-10x | 0.08194836 | 0.24170044 | 0.0031253  |
| 7w11w_SITTC3_CCTATCGTCAAAGACA-1-10x | 0.26355022 | 0.8883014  | 0.00076313 |
| 7w11w_SITTC3_CCTCACAAGGTAGCAC-1-10x | 0.02345648 | 0.03343765 | 3.83E-05   |
| 7w11w_SITTC3_CCTCACAGTACAAGCG-1-10x | 0.03713914 | 0.08215534 | 6.07E-05   |
| 7w11w_SITTC3_CCTCACAGTGTAAATG-1-10x | 0.05483225 | 0.14515239 | 0.00021164 |
| 7w11w_SITTC3_CCTCAGTCAGTCAGCC-1-10x | 0.03460688 | 0.07313912 | 5.37E-05   |
| 7w11w_SITTC3_CCTCCAACACACCTAA-1-10x | 0.11226524 | 0.34964496 | 0.0028393  |
| 7w11w_SITTC3_CCTCCAAGTGCACATT-1-10x | 0.04378406 | 0.10581487 | 8.81E-05   |
| 7w11w_SITTC3_CCTCCTCCATTCGGGC-1-10x | 0.0388166  | 0.08812801 | 6.36E-05   |
| 7w11w_SITTC3_CCTCCTCTCGGATAAA-1-10x | 0.0403351  | 0.09353469 | 7.01E-05   |
| 7w11w_SITTC3_CCTCTAGCAATGAAAC-1-10x | 0.03831381 | 0.08633779 | 6.36E-05   |
| 7w11w_SITTC3_CCTCTAGCACAGCCAC-1-10x | 0.02946151 | 0.0548188  | 4.42E-05   |
| 7w11w_SITTC3_CCTCTCCTCTGAGA-1-10x   | 0.19904925 | 0.658643   | 0.0012085  |
| 7w11w_SITTC3_CCTGCATAGATTAGCA-1-10x | 0.05483967 | 0.14517882 | 0.00021164 |
| 7w11w_SITTC3_CCTGCATAGCACGTCC-1-10x | 0.02657784 | 0.04455139 | 4.09E-05   |
| 7w11w_SITTC3_CCTGCATTCCCATTCG-1-10x | 0.05352962 | 0.14051433 | 0.00019264 |
| 7w11w_SITTC3_CCTTCAGCACCTGTT-1-10x  | 0.15771064 | 0.5114552  | 0.0018302  |
| 7w11w_SITTC3_CCTTCAGTCTCCGAGG-1-10x | 0.0346472  | 0.07328268 | 5.37E-05   |
| 7w11w_SITTC3_CCTTTGGCAAAGACTA-1-10x | 0.10278467 | 0.31588897 | 0.0039137  |
| 7w11w_SITTC3_CCTTTGGCACCTTCCA-1-10x | 0.21117687 | 0.7018239  | 0.0010934  |
| 7w11w_SITTC3_CGAAGGAGTGCCTATA-1-10x | 0.08129104 | 0.23936002 | 0.0031253  |
| 7w11w_SITTC3_CGAAGTTGTACGTAGG-1-10x | 0.03724803 | 0.08254303 | 6.07E-05   |
| 7w11w_SITTC3_CGAAGTTGTCATACCA-1-10x | 0.03715658 | 0.08221744 | 6.07E-05   |
| 7w11w_SITTC3_CGAAGTTTCGCGTGAC-1-10x | 0.1303709  | 0.4141109  | 0.001948   |
| 7w11w_SITTC3_CGACAGCAGATAGTGT-1-10x | 0.02597016 | 0.04238771 | 4.09E-05   |
| 7w11w_SITTC3_CGACAGCGTTCCTTGC-1-10x | 0.03337315 | 0.06874637 | 5.17E-05   |
| 7w11w_SITTC3_CGAGAAGTCCGAAATC-1-10x | 0.04110221 | 0.09626601 | 7.40E-05   |
| 7w11w_SITTC3_CGAGGAATCACGGGCT-1-10x | 0.01729735 | 0.01150781 | 3.38E-05   |
| 7w11w_SITTC3_CGAGTGCAGCGTACT-1-10x  | 0.02438705 | 0.036751   | 3.91E-05   |
| 7w11w_SITTC3_CGAGTGTCTTTCGACC-1-10x | 0.04266843 | 0.10184259 | 7.82E-05   |
| 7w11w_SITTC3_CGAGTTAGTGTTATCG-1-10x | 0.25775456 | 0.8676657  | 0.00078121 |
| 7w11w_SITTC3_CGATCGGAGCGGTAGT-1-10x | 0.09450498 | 0.28640878 | 0.0044051  |

|                                      |            |            |            |
|--------------------------------------|------------|------------|------------|
| 7w11w_SITTC3_CGATCGGAGTTGCTGT-1-10x  | 0.20932232 | 0.69522065 | 0.0011095  |
| 7w11w_SITTC3_CGATCGGTCGTAGTGT-1-10x  | 0.02803562 | 0.04974188 | 4.30E-05   |
| 7w11w_SITTC3_CGATGCGCATATCTCT-1-10x  | 0.02879841 | 0.05245781 | 4.42E-05   |
| 7w11w_SITTC3_CGCAGGTGTGGATACG-1-10x  | 0.06002046 | 0.16362523 | 0.00038577 |
| 7w11w_SITTC3_CGCATAACAACCTTGGT-1-10x | 0.04489832 | 0.10978221 | 9.39E-05   |
| 7w11w_SITTC3_CGCATAAGTCTTAGTG-1-10x  | 0.0440272  | 0.10668057 | 8.81E-05   |
| 7w11w_SITTC3_CGCATAATCATCACAG-1-10x  | 0.04854505 | 0.12276655 | 0.00012523 |
| 7w11w_SITTC3_CGCATGGCAAGCAGGT-1-10x  | 0.07764958 | 0.22639443 | 0.0023954  |
| 7w11w_SITTC3_CGCATGGCACTCTCGT-1-10x  | 0.10692797 | 0.33064136 | 0.0034182  |
| 7w11w_SITTC3_CGCATGGGTCCGATCG-1-10x  | 0.02366096 | 0.03416571 | 3.83E-05   |
| 7w11w_SITTC3_CGCATGGTCAAGAGTA-1-10x  | 0.02069289 | 0.0235978  | 3.62E-05   |
| 7w11w_SITTC3_CGCCAGATCTGTGTGA-1-10x  | 0.10203087 | 0.31320503 | 0.0039137  |
| 7w11w_SITTC3_CGCCATTACAGCTTA-1-10x   | 0.01709979 | 0.01080439 | 3.38E-05   |
| 7w11w_SITTC3_CGCCATTGTAAGATCA-1-10x  | 0.04375949 | 0.10572738 | 8.81E-05   |
| 7w11w_SITTC3_CGCCATTTCTAGTGAC-1-10x  | 0.04584444 | 0.11315092 | 0.00010046 |
| 7w11w_SITTC3_CGCGTGACAGCGTATT-1-10x  | 0.06338257 | 0.17559618 | 0.00058553 |
| 7w11w_SITTC3_CGGAATTAGTGCTCAT-1-10x  | 0.07171783 | 0.20527421 | 0.0013138  |
| 7w11w_SITTC3_CGGAATTCACATCATG-1-10x  | 0.02431893 | 0.03650844 | 3.91E-05   |
| 7w11w_SITTC3_CGGAGAACATCGAAGG-1-10x  | 0.10241889 | 0.3145866  | 0.0039137  |
| 7w11w_SITTC3_CGGAGAATCAACCCGG-1-10x  | 0.25495204 | 0.85768723 | 0.00079207 |
| 7w11w_SITTC3_CGGCAGTGTAACATGA-1-10x  | 0.01989896 | 0.02077097 | 3.55E-05   |
| 7w11w_SITTC3_CGGGACTAGGCCTTCG-1-10x  | 0.09779056 | 0.29810724 | 0.0042943  |
| 7w11w_SITTC3_CGGGTCACATCCGAGC-1-10x  | 0.1039355  | 0.31998652 | 0.0037215  |
| 7w11w_SITTC3_CGGGTCATCGTAGAGG-1-10x  | 0.1076467  | 0.33320045 | 0.0033168  |
| 7w11w_SITTC3_CGGTCAGGTCAAACG-1-10x   | 0.03270085 | 0.06635263 | 5.00E-05   |
| 7w11w_SITTC3_CGGTCAGGTTGCGGCT-1-10x  | 0.04266439 | 0.10182823 | 7.82E-05   |
| 7w11w_SITTC3_CGTAAGTAGGAGAGGC-1-10x  | 0.18136556 | 0.59567946 | 0.0014587  |
| 7w11w_SITTC3_CGTAAGTCATAACAGT-1-10x  | 0.07923391 | 0.2320355  | 0.002576   |
| 7w11w_SITTC3_CGTAGTACAATGGCCC-1-10x  | 0.09383372 | 0.28401873 | 0.0044154  |
| 7w11w_SITTC3_CGTAGTATCGTGCTCT-1-10x  | 0.12152165 | 0.38260278 | 0.0022308  |
| 7w11w_SITTC3_CGTAAAAGATTACCC-1-10x   | 0.28250986 | 0.955808   | 0.00075462 |
| 7w11w_SITTC3_CGTGAATGTCAGTTTG-1-10x  | 0.04091388 | 0.09559547 | 7.40E-05   |
| 7w11w_SITTC3_CGTGATAGTATGGAAT-1-10x  | 0.04765282 | 0.11958972 | 0.00011598 |
| 7w11w_SITTC3_CGTGCTTCATCCGTGG-1-10x  | 0.08591086 | 0.2558091  | 0.0037839  |
| 7w11w_SITTC3_CGTGCTTGTCCTCTC-1-10x   | 0.03649557 | 0.07986388 | 5.82E-05   |
| 7w11w_SITTC3_CGTGCTTGTTCCAAT-1-10x   | 0.08133305 | 0.23950958 | 0.0031253  |
| 7w11w_SITTC3_CGTGCTTTCCGTACGG-1-10x  | 0.07055499 | 0.20113389 | 0.0011935  |
| 7w11w_SITTC3_CGTGTCTCAGGTAGTG-1-10x  | 0.2723878  | 0.919768   | 0.000753   |
| 7w11w_SITTC3_CGTTAGAAGGAAGTAG-1-10x  | 0.07759354 | 0.22619489 | 0.0023954  |
| 7w11w_SITTC3_CGTTAGAGTACGGGAT-1-10x  | 0.09775485 | 0.2979801  | 0.0042943  |
| 7w11w_SITTC3_CTAACCCGTATCCCTC-1-10x  | 0.04417436 | 0.10720451 | 8.81E-05   |

|                                      |            |            |            |
|--------------------------------------|------------|------------|------------|
| 7w11w_SITTC3_CTAACCCGTCCATAGT-1-10x  | 0.12835886 | 0.40694693 | 0.0019821  |
| 7w11w_SITTC3_CTAACCCTCTGGGCAC-1-10x  | 0.08285958 | 0.24494487 | 0.0033032  |
| 7w11w_SITTC3_CTAACCTTAGGTGCTTT-1-10x | 0.04647955 | 0.11541224 | 0.00010777 |
| 7w11w_SITTC3_CTAACCTTCCGATCGG-1-10x  | 0.09272545 | 0.2800727  | 0.0044107  |
| 7w11w_SITTC3_CTACAGAAGGCCTTCG-1-10x  | 0.07015559 | 0.1997118  | 0.0011935  |
| 7w11w_SITTC3_CTACAGAAGTGATGGC-1-10x  | 0.08266022 | 0.24423504 | 0.0033032  |
| 7w11w_SITTC3_CTACAGAGTACAGAAT-1-10x  | 0.06199304 | 0.1706487  | 0.00047505 |
| 7w11w_SITTC3_CTACAGAGTTGATCGT-1-10x  | 0.19285788 | 0.63659835 | 0.0012861  |
| 7w11w_SITTC3_CTACCCAAGGCACTAG-1-10x  | 0.27966934 | 0.9456942  | 0.00075303 |
| 7w11w_SITTC3_CTACCCAGTCATCGCG-1-10x  | 0.02131195 | 0.02580196 | 3.69E-05   |
| 7w11w_SITTC3_CTACCCATCTACCCAC-1-10x  | 0.20367666 | 0.67511904 | 0.0011608  |
| 7w11w_SITTC3_CTACGGGGTTTGAAAG-1-10x  | 0.02838468 | 0.05098471 | 4.30E-05   |
| 7w11w_SITTC3_CTACTATAGATAGTCA-1-10x  | 0.21022724 | 0.6984427  | 0.0011014  |
| 7w11w_SITTC3_CTACTATAGGCGTCCT-1-10x  | 0.0727015  | 0.20877661 | 0.0014433  |
| 7w11w_SITTC3_CTAGGTAAGGATCACG-1-10x  | 0.01956251 | 0.019573   | 3.55E-05   |
| 7w11w_SITTC3_CTATCCGCAGAGGACT-1-10x  | 0.06347852 | 0.17593782 | 0.00058553 |
| 7w11w_SITTC3_CTCAACCAGAAATTGC-1-10x  | 0.19239858 | 0.634963   | 0.0012861  |
| 7w11w_SITTC3_CTCAACCCAGGTGACA-1-10x  | 0.06829917 | 0.19310194 | 0.00097948 |
| 7w11w_SITTC3_CTCAACCGTAGACAGC-1-10x  | 0.03730923 | 0.08276094 | 6.07E-05   |
| 7w11w_SITTC3_CTCAACCTCAAAGAAC-1-10x  | 0.27259016 | 0.9204885  | 0.000753   |
| 7w11w_SITTC3_CTCAAGACACTCTAGA-1-10x  | 0.04506605 | 0.11037944 | 9.39E-05   |
| 7w11w_SITTC3_CTCAATTTCGTGTGAT-1-10x  | 0.08943223 | 0.26834705 | 0.0042295  |
| 7w11w_SITTC3_CTCACTGAGCTCGGCT-1-10x  | 0.18519384 | 0.6093102  | 0.0013959  |
| 7w11w_SITTC3_CTCACTGCAGAGGTTG-1-10x  | 0.04903219 | 0.12450102 | 0.00012523 |
| 7w11w_SITTC3_CTCAGAAAGATTGGGC-1-10x  | 0.09122221 | 0.27472037 | 0.0043535  |
| 7w11w_SITTC3_CTCAGAAGTGAGTAAT-1-10x  | 0.0728978  | 0.20947555 | 0.0015819  |
| 7w11w_SITTC3_CTCAGAAGTTACGATC-1-10x  | 0.16871053 | 0.55062073 | 0.0016744  |
| 7w11w_SITTC3_CTCAGTCTCTCACCCA-1-10x  | 0.26144624 | 0.8808101  | 0.00076963 |
| 7w11w_SITTC3_CTCATGCAGGATACAT-1-10x  | 0.05408844 | 0.14250405 | 0.00021164 |
| 7w11w_SITTC3_CTCATTAAGCATTTCG-1-10x  | 0.0518414  | 0.13450335 | 0.00016076 |
| 7w11w_SITTC3_CTCATTATCAATCGGT-1-10x  | 0.07401648 | 0.21345866 | 0.0017292  |
| 7w11w_SITTC3_CTCCAACAGGTAAACT-1-10x  | 0.06815583 | 0.19259158 | 0.00097948 |
| 7w11w_SITTC3_CTCCAACAGTCAACAA-1-10x  | 0.08487704 | 0.2521281  | 0.0036353  |
| 7w11w_SITTC3_CTCCACATCGTGGGAA-1-10x  | 0.0280321  | 0.04972933 | 4.30E-05   |
| 7w11w_SITTC3_CTCCATGTCATGAGTC-1-10x  | 0.08651855 | 0.25797278 | 0.0039187  |
| 7w11w_SITTC3_CTCCCAAAGTCACACT-1-10x  | 0.03351136 | 0.06923846 | 5.17E-05   |
| 7w11w_SITTC3_CTCCCAAACAAAGCTAA-1-10x | 0.02063876 | 0.02340503 | 3.62E-05   |
| 7w11w_SITTC3_CTCCCAATCAGACAAA-1-10x  | 0.09206874 | 0.27773446 | 0.0043903  |
| 7w11w_SITTC3_CTCCCTCTCTAGGA-1-10x    | 0.05846739 | 0.15809546 | 0.00031414 |
| 7w11w_SITTC3_CTCCGATAGAAGGTAG-1-10x  | 0.1794545  | 0.5888751  | 0.0014915  |
| 7w11w_SITTC3_CTCCGATAGCAATAAC-1-10x  | 0.26402044 | 0.8899756  | 0.00076313 |

|                                      |            |            |            |
|--------------------------------------|------------|------------|------------|
| 7w11w_SITTC3_CTCCTCCAGCATCCTA-1-10x  | 0.27428818 | 0.9265343  | 0.00075233 |
| 7w11w_SITTC3_CTCCTCCGTCACCTCC-1-10x  | 0.08327808 | 0.24643493 | 0.0034742  |
| 7w11w_SITTC3_CTCCTTTACAGTGTT-1-10x   | 0.08540103 | 0.2539938  | 0.0037839  |
| 7w11w_SITTC3_CTCCTTTGTATGGTTC-1-10x  | 0.04274615 | 0.10211934 | 8.29E-05   |
| 7w11w_SITTC3_CTCCTTTGTGGCATCC-1-10x  | 0.12696981 | 0.4020012  | 0.0020256  |
| 7w11w_SITTC3_CTCTCGAGTAATGATG-1-10x  | 0.03264231 | 0.06614417 | 5.00E-05   |
| 7w11w_SITTC3_CTCTCGAGTCTACATG-1-10x  | 0.02435317 | 0.03663034 | 3.91E-05   |
| 7w11w_SITTC3_CTCTGGTAGTTCGGTT-1-10x  | 0.05778969 | 0.15568249 | 0.00031414 |
| 7w11w_SITTC3_CTCTGGTCAAGAGCTG-1-10x  | 0.04817388 | 0.12144499 | 0.00011598 |
| 7w11w_SITTC3_CTCTGGTGTGAATAAC-1-10x  | 0.05084052 | 0.13093966 | 0.00014746 |
| 7w11w_SITTC3_CTGAGCGGTCCCCTGA-1-10x  | 0.01559719 | 0.00545434 | 3.33E-05   |
| 7w11w_SITTC3_CTGATCCGTGGCTTGC-1-10x  | 0.2085415  | 0.6924405  | 0.0011177  |
| 7w11w_SITTC3_CTGCAGGCAATCCTTT-1-10x  | 0.0154455  | 0.00491423 | 3.27E-05   |
| 7w11w_SITTC3_CTGCCATGTCTACATG-1-10x  | 0.2471811  | 0.83001846 | 0.0008292  |
| 7w11w_SITTC3_CTGCCTACAGGTAGTG-1-10x  | 0.10147723 | 0.3112338  | 0.0040036  |
| 7w11w_SITTC3_CTGCCTAGTCCGATCG-1-10x  | 0.15709263 | 0.5092547  | 0.0018385  |
| 7w11w_SITTC3_CTGCCTATCCGCTGTT-1-10x  | 0.27048787 | 0.9130032  | 0.00075418 |
| 7w11w_SITTC3_CTGCTCAAGTAAGAGG-1-10x  | 0.02095324 | 0.02452477 | 3.62E-05   |
| 7w11w_SITTC3_CTGGACGGTCTCTCTG-1-10x  | 0.09141159 | 0.27539465 | 0.0043535  |
| 7w11w_SITTC3_CTGGCAGGTCATCGCG-1-10x  | 0.1637578  | 0.53298634 | 0.001763   |
| 7w11w_SITTC3_CTGGTCTAGGTTGTTC-1-10x  | 0.14809081 | 0.47720337 | 0.0018713  |
| 7w11w_SITTC3_CTGGTCTTCGTTTACT-1-10x  | 0.06625179 | 0.18581213 | 0.00079936 |
| 7w11w_SITTC3_CTGTACCAGGCATGGT-1-10x  | 0.09415467 | 0.2851615  | 0.0044154  |
| 7w11w_SITTC3_CTGTACCTCCGCACGA-1-10x  | 0.15931147 | 0.517155   | 0.0018109  |
| 7w11w_SITTC3_CTGTATTCAACAACAA-1-10x  | 0.08020761 | 0.2355024  | 0.0027593  |
| 7w11w_SITTC3_CTGTGAATCATGAGTC-1-10x  | 0.05651893 | 0.1511579  | 0.000257   |
| 7w11w_SITTC3_CTGTGGGAGAGGGCGA-1-10x  | 0.05777988 | 0.15564756 | 0.00031414 |
| 7w11w_SITTC3_CTTACCGTCATGCCCT-1-10x  | 0.02260592 | 0.03040919 | 3.76E-05   |
| 7w11w_SITTC3_CTTACCGTCCGTGGTG-1-10x  | 0.18262176 | 0.60015225 | 0.0014427  |
| 7w11w_SITTC3_CTTAGGATCCATTGTT-1-10x  | 0.04443286 | 0.10812492 | 8.81E-05   |
| 7w11w_SITTC3_CTTCAATCAACAGATA-1-10x  | 0.09888595 | 0.3020074  | 0.0042345  |
| 7w11w_SITTC3_CTTCCGAGTAACGATA-1-10x  | 0.05605565 | 0.14950836 | 0.000257   |
| 7w11w_SITTC3_CTTCTTGTGAATAAC-1-10x   | 0.2587528  | 0.87121993 | 0.000778   |
| 7w11w_SITTC3_CTTCTTGTGTTGAACC-1-10x  | 0.07611883 | 0.22094415 | 0.0020486  |
| 7w11w_SITTC3_CTTGCGTCAGGAACCA-1-10x  | 0.05389277 | 0.14180735 | 0.00019264 |
| 7w11w_SITTC3_CTTGCGTCATAAGCGG-1-10x  | 0.04462498 | 0.10880897 | 9.39E-05   |
| 7w11w_SITTC3_CTTGCGGTGTAAGTTAG-1-10x | 0.06546722 | 0.18301867 | 0.00072102 |
| 7w11w_SITTC3_CTTGCGTTCGACGTCG-1-10x  | 0.1778104  | 0.58302116 | 0.0015248  |
| 7w11w_SITTC3_CTTCTCTCAGGTGACA-1-10x  | 0.19978702 | 0.66126984 | 0.0011985  |
| 7w11w_SITTC3_CTTCTCTGTCGGAAAC-1-10x  | 0.02941888 | 0.05466701 | 4.42E-05   |
| 7w11w_SITTC3_CTTGAGAAGTCTGGTT-1-10x  | 0.03923716 | 0.08962543 | 6.67E-05   |

|                                     |            |            |            |
|-------------------------------------|------------|------------|------------|
| 7w11w_SITTC3_CTTTCAACATAGCTGT-1-10x | 0.04508125 | 0.11043354 | 9.39E-05   |
| 7w11w_SITTC3_CTTTCAATCCGCATAA-1-10x | 0.04212602 | 0.09991132 | 7.82E-05   |
| 7w11w_SITTC3_GAAACCTTCGGCAGTC-1-10x | 0.07593155 | 0.22027734 | 0.0020486  |
| 7w11w_SITTC3_GAAACTAGGTCCGAA-1-10x  | 0.27670956 | 0.93515575 | 0.00075222 |
| 7w11w_SITTC3_GAACTGTCATTGTACG-1-10x | 0.0745862  | 0.21548715 | 0.0017292  |
| 7w11w_SITTC3_GAACTGTTCTTCGTAT-1-10x | 0.07963394 | 0.23345983 | 0.0027593  |
| 7w11w_SITTC3_GAAGAATCATCGTGCC-1-10x | 0.22569393 | 0.75351244 | 0.00098137 |
| 7w11w_SITTC3_GAAGCCCAGGTTAGTA-1-10x | 0.27954513 | 0.94525194 | 0.00075303 |
| 7w11w_SITTC3_GAAGCGATCAGTCACA-1-10x | 0.1506578  | 0.48634326 | 0.0018694  |
| 7w11w_SITTC3_GAATCACAGGTACCTT-1-10x | 0.02242872 | 0.02977828 | 3.76E-05   |
| 7w11w_SITTC3_GAATCACTCAATCTCT-1-10x | 0.20074274 | 0.66467273 | 0.0011888  |
| 7w11w_SITTC3_GACACGCCAAGTACCT-1-10x | 0.19510102 | 0.6445852  | 0.0012511  |
| 7w11w_SITTC3_GACATCAAGGTTAGTA-1-10x | 0.13312724 | 0.42392495 | 0.0019115  |
| 7w11w_SITTC3_GACATCACATCGATGT-1-10x | 0.03021364 | 0.05749679 | 4.55E-05   |
| 7w11w_SITTC3_GACATCATCGTGTTCC-1-10x | 0.2761319  | 0.933099   | 0.00075214 |
| 7w11w_SITTC3_GACCAATAGGGAACAA-1-10x | 0.01505466 | 0.00352264 | 3.27E-05   |
| 7w11w_SITTC3_GACCAATGTTGCATCA-1-10x | 0.2596975  | 0.8745836  | 0.00077221 |
| 7w11w_SITTC3_GACCGTGGTTGTGGAG-1-10x | 0.2110913  | 0.7015192  | 0.0010934  |
| 7w11w_SITTC3_GACCTTCCACAGTCAT-1-10x | 0.05120679 | 0.1322438  | 0.00016076 |
| 7w11w_SITTC3_GACGCTGAGGTGCCAA-1-10x | 0.10541052 | 0.3252384  | 0.0036214  |
| 7w11w_SITTC3_GACGTTACAATCGCCG-1-10x | 0.08234829 | 0.24312438 | 0.0033032  |
| 7w11w_SITTC3_GACTATGAGAGCCGAT-1-10x | 0.02725541 | 0.04696392 | 4.19E-05   |
| 7w11w_SITTC3_GACTATGTCCAGCACG-1-10x | 0.04378488 | 0.10581778 | 8.81E-05   |
| 7w11w_SITTC3_GACTCAATCTAGAACC-1-10x | 0.19446523 | 0.6423214  | 0.0012624  |
| 7w11w_SITTC3_GACTCTCAGCCATGCC-1-10x | 0.03337029 | 0.06873618 | 5.17E-05   |
| 7w11w_SITTC3_GACTCTCAGTAGGCCA-1-10x | 0.10603026 | 0.32744503 | 0.00352    |
| 7w11w_SITTC3_GACTCTCTCTCCGAAA-1-10x | 0.04231432 | 0.10058179 | 7.82E-05   |
| 7w11w_SITTC3_GAGAAATAGACTGTTC-1-10x | 0.13578124 | 0.43337464 | 0.0018891  |
| 7w11w_SITTC3_GAGAAATTCACCGACG-1-10x | 0.07727518 | 0.22506139 | 0.0022191  |
| 7w11w_SITTC3_GAGACCCAGGCCGCTT-1-10x | 0.04091091 | 0.09558487 | 7.40E-05   |
| 7w11w_SITTC3_GAGACCCCATCGTCCT-1-10x | 0.2724527  | 0.91999906 | 0.000753   |
| 7w11w_SITTC3_GAGACTTGTCGATGCC-1-10x | 0.02909318 | 0.05350736 | 4.42E-05   |
| 7w11w_SITTC3_GAGAGGTCAATTTCTC-1-10x | 0.1915768  | 0.632037   | 0.0012985  |
| 7w11w_SITTC3_GAGATGGCAGACCGCT-1-10x | 0.05713915 | 0.15336621 | 0.00028394 |
| 7w11w_SITTC3_GAGATGGTCTGGGTGC-1-10x | 0.09745759 | 0.29692167 | 0.0042943  |
| 7w11w_SITTC3_GAGCCTGAGAGTGTGC-1-10x | 0.09264672 | 0.27979237 | 0.0044107  |
| 7w11w_SITTC3_GAGCCTGTCGGCATAT-1-10x | 0.17617333 | 0.5771923  | 0.0015416  |
| 7w11w_SITTC3_GAGCTGCAGAAGGTAG-1-10x | 0.04136339 | 0.09719594 | 7.40E-05   |
| 7w11w_SITTC3_GAGCTGCAGTTGAAAC-1-10x | 0.04781574 | 0.12016982 | 0.00011598 |
| 7w11w_SITTC3_GAGGCAAAGGTAAACT-1-10x | 0.22558548 | 0.7531263  | 0.00098137 |
| 7w11w_SITTC3_GAGGCCTAGTTACGGG-1-10x | 0.21632415 | 0.720151   | 0.001055   |

|                                      |            |            |            |
|--------------------------------------|------------|------------|------------|
| 7w11w_SITTC3_GAGGCCTCAATCCTTT-1-10x  | 0.04230902 | 0.10056292 | 7.82E-05   |
| 7w11w_SITTC3_GAGGCCTCCGAGATT-1-10x   | 0.05744183 | 0.1544439  | 0.00028394 |
| 7w11w_SITTC3_GAGGGATGTGTAAACA-1-10x  | 0.04546356 | 0.11179478 | 9.39E-05   |
| 7w11w_SITTC3_GAGGGTAGTACCTGTA-1-10x  | 0.25918886 | 0.8727726  | 0.00077499 |
| 7w11w_SITTC3_GAGTCATGTACCTAAC-1-10x  | 0.22374398 | 0.7465696  | 0.00099599 |
| 7w11w_SITTC3_GAGTCTAAGCACACCC-1-10x  | 0.15242223 | 0.4926256  | 0.0018651  |
| 7w11w_SITTC3_GAGTCTAAGGATCATA-1-10x  | 0.16105983 | 0.52338004 | 0.0018     |
| 7w11w_SITTC3_GAGTCTAAGGTATCTC-1-10x  | 0.06504564 | 0.1815176  | 0.00064991 |
| 7w11w_SITTC3_GAGTCTATCGCCTTGT-1-10x  | 0.08240687 | 0.24333297 | 0.0033032  |
| 7w11w_SITTC3_GAGTGAGTCGCTGCGA-1-10x  | 0.05704658 | 0.15303662 | 0.00028394 |
| 7w11w_SITTC3_GAGTGTTTCGAAACAA-1-10x  | 0.05026133 | 0.12887746 | 0.00014746 |
| 7w11w_SITTC3_GAGTGTTTCGTACCT-1-10x   | 0.03384621 | 0.07043071 | 5.17E-05   |
| 7w11w_SITTC3_GAGTTACCAATCCTTT-1-10x  | 0.12432555 | 0.39258617 | 0.0021124  |
| 7w11w_SITTC3_GAGTTACGTGGCGTAA-1-10x  | 0.01749072 | 0.01219631 | 3.44E-05   |
| 7w11w_SITTC3_GAGTTGTGTCCGGATC-1-10x  | 0.17506325 | 0.57323986 | 0.0015753  |
| 7w11w_SITTC3_GAGTTTGCAACCCTCT-1-10x  | 0.2604757  | 0.8773544  | 0.00077221 |
| 7w11w_SITTC3_GAGTTTGACAGTTACCA-1-10x | 0.26267394 | 0.88518137 | 0.00076511 |
| 7w11w_SITTC3_GAGTTTGTCTCTCTTC-1-10x  | 0.09706534 | 0.29552507 | 0.0043435  |
| 7w11w_SITTC3_GATAGCTGTCTGTCCT-1-10x  | 0.03467184 | 0.07337041 | 5.37E-05   |
| 7w11w_SITTC3_GATAGCTTCGCATTGA-1-10x  | 0.05123594 | 0.13234758 | 0.00016076 |
| 7w11w_SITTC3_GATCAGTAGCCGCTTG-1-10x  | 0.15622935 | 0.50618094 | 0.0018459  |
| 7w11w_SITTC3_GATCATGAGGTACAGC-1-10x  | 0.03485531 | 0.07402366 | 5.37E-05   |
| 7w11w_SITTC3_GATCATGGTATCAAGA-1-10x  | 0.2566252  | 0.8636446  | 0.00078463 |
| 7w11w_SITTC3_GATCATGTCATGAGAA-1-10x  | 0.22889744 | 0.7649187  | 0.0009522  |
| 7w11w_SITTC3_GATCCCTCACGGGCT-1-10x   | 0.03325011 | 0.06830829 | 5.00E-05   |
| 7w11w_SITTC3_GATCGTAGTCACCGAC-1-10x  | 0.01514114 | 0.00383053 | 3.27E-05   |
| 7w11w_SITTC3_GATGAGGGTTCAACGT-1-10x  | 0.08984088 | 0.26980206 | 0.0042999  |
| 7w11w_SITTC3_GATGATCGTGGATACG-1-10x  | 0.01525709 | 0.0042434  | 3.27E-05   |
| 7w11w_SITTC3_GATGCTACATTGTCGA-1-10x  | 0.02991226 | 0.05642372 | 4.55E-05   |
| 7w11w_SITTC3_GATGGAGAGACGATAT-1-10x  | 0.07446875 | 0.215069   | 0.0017292  |
| 7w11w_SITTC3_GATGGAGTCTCCTACG-1-10x  | 0.12266242 | 0.3866645  | 0.0021479  |
| 7w11w_SITTC3_GATGTTGGTTTCGTAG-1-10x  | 0.05364117 | 0.1409115  | 0.00019264 |
| 7w11w_SITTC3_GATTTCGAGTCAGGAGT-1-10x | 0.05218342 | 0.13572112 | 0.00017575 |
| 7w11w_SITTC3_GATTCTTAGCAGGCTA-1-10x  | 0.08572098 | 0.255133   | 0.0037839  |
| 7w11w_SITTC3_GATTCTTCACGGCGTT-1-10x  | 0.02063618 | 0.02339588 | 3.62E-05   |
| 7w11w_SITTC3_GATTCTTGTTATCTTC-1-10x  | 0.0661879  | 0.18558465 | 0.00072102 |
| 7w11w_SITTC3_GATTGGTCATGAATAG-1-10x  | 0.26563403 | 0.8957209  | 0.00075974 |
| 7w11w_SITTC3_GCAACATAGGTTCACT-1-10x  | 0.12464066 | 0.39370814 | 0.0020803  |
| 7w11w_SITTC3_GCAACGGTGAGACCA-1-10x   | 0.02250503 | 0.03004997 | 3.76E-05   |
| 7w11w_SITTC3_GCACATAGTAGACAAT-1-10x  | 0.07836949 | 0.22895771 | 0.0023954  |
| 7w11w_SITTC3_GCACATATCGCAGATT-1-10x  | 0.05594542 | 0.1491159  | 0.000257   |

|                                      |            |            |            |
|--------------------------------------|------------|------------|------------|
| 7w11w_SITTC3_GCACGGTGTCAACCAT-1-10x  | 0.2857019  | 0.96717334 | 0.00075686 |
| 7w11w_SITTC3_GCACGGTGTTAGGCTT-1-10x  | 0.11251857 | 0.35054693 | 0.0028393  |
| 7w11w_SITTC3_GCACGTGTCGTTGCCT-1-10x  | 0.03925099 | 0.08967465 | 6.67E-05   |
| 7w11w_SITTC3_GCACGTGTCTCAATCT-1-10x  | 0.02144598 | 0.0262792  | 3.69E-05   |
| 7w11w_SITTC3_GCACTAAGTGTTGTA-1-10x   | 0.05497951 | 0.14567673 | 0.000233   |
| 7w11w_SITTC3_GCAGCCACAAAGGCGT-1-10x  | 0.01507421 | 0.00359222 | 3.27E-05   |
| 7w11w_SITTC3_GCAGCCACAACCTCATG-1-10x | 0.01641823 | 0.00837769 | 3.38E-05   |
| 7w11w_SITTC3_GCAGCCATCTAGTTCT-1-10x  | 0.18255982 | 0.59993166 | 0.0014427  |
| 7w11w_SITTC3_GCAGCTGAGCCATTTG-1-10x  | 0.04834043 | 0.12203798 | 0.00011598 |
| 7w11w_SITTC3_GCAGCTGAGCTACAAA-1-10x  | 0.0555732  | 0.14779058 | 0.000233   |
| 7w11w_SITTC3_GCAGCTGTCGGTGTAT-1-10x  | 0.05129018 | 0.13254073 | 0.00016076 |
| 7w11w_SITTC3_GCATCTCAGACTTGTC-1-10x  | 0.09240785 | 0.27894187 | 0.0043903  |
| 7w11w_SITTC3_GCATCTCGTATGCTTG-1-10x  | 0.0254785  | 0.04063714 | 4.00E-05   |
| 7w11w_SITTC3_GCATGATCACGCTATA-1-10x  | 0.09570991 | 0.290699   | 0.0043808  |
| 7w11w_SITTC3_GCATGATCATAGGAGC-1-10x  | 0.02035143 | 0.02238201 | 3.62E-05   |
| 7w11w_SITTC3_GCATTAGCACGACTAT-1-10x  | 0.0778936  | 0.22726329 | 0.0023954  |
| 7w11w_SITTC3_GCATTAGGTAACGATA-1-10x  | 0.14348812 | 0.4608153  | 0.0018716  |
| 7w11w_SITTC3_GCCAACGAGGGCATGT-1-10x  | 0.20895639 | 0.69391775 | 0.0011177  |
| 7w11w_SITTC3_GCCAACGAGGGTATAT-1-10x  | 0.19782785 | 0.65429413 | 0.0012187  |
| 7w11w_SITTC3_GCCAACGGTCTCGCGA-1-10x  | 0.0226136  | 0.03043653 | 3.76E-05   |
| 7w11w_SITTC3_GCCAGCAGTATTCCGA-1-10x  | 0.0831434  | 0.24595541 | 0.0034742  |
| 7w11w_SITTC3_GCCAGCATCGACGCGT-1-10x  | 0.04978962 | 0.12719789 | 0.00013566 |
| 7w11w_SITTC3_GCCCGAAAGATGGCAC-1-10x  | 0.25333986 | 0.85194695 | 0.00079608 |
| 7w11w_SITTC3_GCCGATGCATGTGTCA-1-10x  | 0.20764291 | 0.6892411  | 0.001126   |
| 7w11w_SITTC3_GCCGATGGTTCGGTCG-1-10x  | 0.04313008 | 0.10348634 | 8.29E-05   |
| 7w11w_SITTC3_GCCTGTTAGCTAATCC-1-10x  | 0.09029341 | 0.27141333 | 0.0042999  |
| 7w11w_SITTC3_GCCTGTTTCACCGCTT-1-10x  | 0.07976    | 0.23390868 | 0.0027593  |
| 7w11w_SITTC3_GCGATCGTCCCGAGGT-1-10x  | 0.29093516 | 0.9858066  | 0.00076269 |
| 7w11w_SITTC3_GCGTGACATGAGATA-1-10x   | 0.05294908 | 0.1384473  | 0.00017575 |
| 7w11w_SITTC3_GCGTGACAGTCACTCTC-1-10x | 0.02776338 | 0.04877256 | 4.30E-05   |
| 7w11w_SITTC3_GCTACCTAGTCTCCTC-1-10x  | 0.26849335 | 0.9059016  | 0.00075594 |
| 7w11w_SITTC3_GCTCAAAAGCAAGGAA-1-10x  | 0.03131849 | 0.06143066 | 4.68E-05   |
| 7w11w_SITTC3_GCTCAAAGTGGACTGA-1-10x  | 0.07934935 | 0.23244655 | 0.0027593  |
| 7w11w_SITTC3_GCTCAAATCCTTCTGG-1-10x  | 0.04769518 | 0.11974057 | 0.00011598 |
| 7w11w_SITTC3_GCTGCAGCAGCTGGTC-1-10x  | 0.04124983 | 0.09679163 | 7.40E-05   |
| 7w11w_SITTC3_GCTGCAGGTCCATACA-1-10x  | 0.144388   | 0.4640194  | 0.0018716  |
| 7w11w_SITTC3_GCTTGGGCACGTAGAG-1-10x  | 0.09522107 | 0.28895843 | 0.0044051  |
| 7w11w_SITTC3_GCTTTCGCAGTAGATA-1-10x  | 0.08373392 | 0.248058   | 0.0034742  |
| 7w11w_SITTC3_GGAACCCAGGCAGTCA-1-10x  | 0.24927036 | 0.83745736 | 0.00081888 |
| 7w11w_SITTC3_GGAAGTGCAGTTAGGG-1-10x  | 0.05457677 | 0.14424276 | 0.00021164 |
| 7w11w_SITTC3_GGAAGTGTCCGAAGGA-1-10x  | 0.04967477 | 0.12678897 | 0.00013566 |



|                                      |            |            |            |
|--------------------------------------|------------|------------|------------|
| 7w11w_SITTC3_GGAATGGGTCACAGAG-1-10x  | 0.09925515 | 0.30332196 | 0.0041652  |
| 7w11w_SITTC3_GGACGTCAGCATTTTCG-1-10x | 0.04252736 | 0.10134032 | 7.82E-05   |
| 7w11w_SITTC3_GGAGAACGTAGGAGGG-1-10x  | 0.06530294 | 0.18243372 | 0.00072102 |
| 7w11w_SITTC3_GGAGCAACATAGAATG-1-10x  | 0.04334159 | 0.10423941 | 8.29E-05   |
| 7w11w_SITTC3_GGAGGATCAAGACGGT-1-10x  | 0.02456292 | 0.03737719 | 3.91E-05   |
| 7w11w_SITTC3_GGAGGTACACGTACAT-1-10x  | 0.11063701 | 0.34384754 | 0.0030221  |
| 7w11w_SITTC3_GGATCTAAGATCCTAC-1-10x  | 0.23488127 | 0.78622437 | 0.00090964 |
| 7w11w_SITTC3_GGATCTACAAGACAAT-1-10x  | 0.2800682  | 0.9471143  | 0.00075303 |
| 7w11w_SITTC3_GGATGTTAGCACCCAC-1-10x  | 0.18482694 | 0.60800385 | 0.0013959  |
| 7w11w_SITTC3_GGATGTTTCGTCTACC-1-10x  | 0.1454712  | 0.46787614 | 0.0018716  |
| 7w11w_SITTC3_GGCACGTCAGCTGGTC-1-10x  | 0.03756246 | 0.08366258 | 6.07E-05   |
| 7w11w_SITTC3_GGCAGTCCATGTGCTA-1-10x  | 0.03267647 | 0.0662658  | 5.00E-05   |
| 7w11w_SITTC3_GGCGTCAAGGAGACCT-1-10x  | 0.05427613 | 0.14317231 | 0.00021164 |
| 7w11w_SITTC3_GGCGTCAAGTTCACTG-1-10x  | 0.0500552  | 0.12814349 | 0.00013566 |
| 7w11w_SITTC3_GGCTTGGAGATTGTGA-1-10x  | 0.01820783 | 0.01474961 | 3.44E-05   |
| 7w11w_SITTC3_GGCTTGGCACTGTGAT-1-10x  | 0.05086993 | 0.13104439 | 0.00014746 |
| 7w11w_SITTC3_GGGACAAGTAGCGCTC-1-10x  | 0.26740593 | 0.9020298  | 0.00075705 |
| 7w11w_SITTC3_GGGACAATCTGTGCGG-1-10x  | 0.02973601 | 0.05579618 | 4.55E-05   |
| 7w11w_SITTC3_GGGACTCGTTGTTGAC-1-10x  | 0.04253605 | 0.10137125 | 7.82E-05   |
| 7w11w_SITTC3_GGGACTCTCTACCACC-1-10x  | 0.01977295 | 0.02032229 | 3.55E-05   |
| 7w11w_SITTC3_GGGAGATTCCGCGGAT-1-10x  | 0.09719808 | 0.2959977  | 0.0042943  |
| 7w11w_SITTC3_GGGAGTATCAAGAGGC-1-10x  | 0.08121634 | 0.23909402 | 0.0029431  |
| 7w11w_SITTC3_GGGATCCAGTGAGTTA-1-10x  | 0.03549156 | 0.07628906 | 5.58E-05   |
| 7w11w_SITTC3_GGGATCCAGTTGGACG-1-10x  | 0.03043779 | 0.05829489 | 4.55E-05   |
| 7w11w_SITTC3_GGGCCATGTACTGTTG-1-10x  | 0.04001455 | 0.09239337 | 7.01E-05   |
| 7w11w_SITTC3_GGGCGTTTCCTGCTAC-1-10x  | 0.19354156 | 0.6390326  | 0.0012741  |
| 7w11w_SITTC3_GGGCTACAGCCGCACT-1-10x  | 0.06936284 | 0.19688918 | 0.0010821  |
| 7w11w_SITTC3_GGGCTCAAGCATACTC-1-10x  | 0.10309616 | 0.31699803 | 0.0038193  |
| 7w11w_SITTC3_GGGTAGATCGACGCTG-1-10x  | 0.07939006 | 0.23259148 | 0.0027593  |
| 7w11w_SITTC3_GGGTATTTCCACTAGA-1-10x  | 0.2739347  | 0.92527574 | 0.00075233 |
| 7w11w_SITTC3_GGGTCACAGGAGTCTG-1-10x  | 0.02444166 | 0.03694541 | 3.91E-05   |
| 7w11w_SITTC3_GGGTCTGTCAAGTGTCA-1-10x | 0.15086916 | 0.4870958  | 0.0018676  |
| 7w11w_SITTC3_GGGTCTGTCTCAAAGC-1-10x  | 0.05097701 | 0.13142565 | 0.00014746 |
| 7w11w_SITTC3_GGGTCTGTCTGGACCG-1-10x  | 0.05533972 | 0.14695926 | 0.000233   |
| 7w11w_SITTC3_GGGTGAACAGGATTCT-1-10x  | 0.08228736 | 0.24290746 | 0.0033032  |
| 7w11w_SITTC3_GGGTGAATCACCTTAT-1-10x  | 0.05309195 | 0.138956   | 0.00019264 |
| 7w11w_SITTC3_GGGTGTCCACACCTAA-1-10x  | 0.2621768  | 0.8834113  | 0.00076727 |
| 7w11w_SITTC3_GGGTGTCTGCGCGTTG-1-10x  | 0.2165825  | 0.7210709  | 0.0010475  |
| 7w11w_SITTC3_GGGTGTCTCTATTCGT-1-10x  | 0.04061283 | 0.09452356 | 7.01E-05   |
| 7w11w_SITTC3_GGGTTATAGACCAAAT-1-10x  | 0.03107246 | 0.06055469 | 4.68E-05   |
| 7w11w_SITTC3_GGGTTATGTCGTGCCA-1-10x  | 0.28388813 | 0.96071535 | 0.00075531 |

|                                        |            |            |            |
|----------------------------------------|------------|------------|------------|
| 7w11w_SITTC3_GGTAATCCATGGCGCT-1-10x    | 0.25512862 | 0.85831594 | 0.00078825 |
| 7w11w_SITTC3_GGTCACGCATCATGAC-1-10x    | 0.06521936 | 0.18213613 | 0.00064991 |
| 7w11w_SITTC3_GGTCTGGCAAGGGCAT-1-10x    | 0.15243848 | 0.4926834  | 0.0018651  |
| 7w11w_SITTC3_GGTGAAGAGGACAACC-1-10x    | 0.03955098 | 0.0907428  | 6.67E-05   |
| 7w11w_SITTC3_GGTGATTAGCAATTCC-1-10x    | 0.07432519 | 0.21455783 | 0.0017292  |
| 7w11w_SITTC3_GGTGATTCATAGACC-1-10x     | 0.27031738 | 0.91239613 | 0.00075418 |
| 7w11w_SITTC3_GGTGGCTGTGAGATTA-1-10x    | 0.27136233 | 0.9161167  | 0.00075352 |
| 7w11w_SITTC3_GGTGTGAGTCTGGAG-1-10x     | 0.28627017 | 0.96919674 | 0.00075773 |
| 7w11w_SITTC3_GGTGTGCTCACGGGCT-1-10x    | 0.024146   | 0.03589271 | 3.91E-05   |
| 7w11w_SITTC3_GGTGTGCTCTTCACAT-1-10x    | 0.02494409 | 0.03873436 | 4.00E-05   |
| 7w11w_SITTC3_GGTAACTCACGTCCT-1-10x     | 0.21244107 | 0.7063251  | 0.0010856  |
| 7w11w_SITTC3_GGTAACTCAGGAACG-1-10x     | 0.01805285 | 0.01419781 | 3.44E-05   |
| 7w11w_SITTC3_GGTTCTCCAATACGAA-1-10x    | 0.02046594 | 0.02278972 | 3.62E-05   |
| 7w11w_SITTC3_GTAATCGGTCCCTAAA-1-10x    | 0.27087554 | 0.9143835  | 0.00075418 |
| 7w11w_SITTC3_GTAATCGGTGCGGCTT-1-10x    | 0.10162259 | 0.31175134 | 0.0040036  |
| 7w11w_SITTC3_GTAATGCTCGAGTTGT-1-10x    | 0.28317538 | 0.95817757 | 0.00075462 |
| 7w11w_SITTC3_GTACAACAGCGTGAAC-1-10x    | 0.04889984 | 0.1240298  | 0.00012523 |
| 7w11w_SITTC3_GTACAACGTGTGTACTION-1-10x | 0.04731458 | 0.11838543 | 0.00010777 |
| 7w11w_SITTC3_GTACAGTAGGTAGACC-1-10x    | 0.04178395 | 0.09869337 | 7.82E-05   |
| 7w11w_SITTC3_GTACAGTAGGTGCTAG-1-10x    | 0.08452989 | 0.25089207 | 0.0036353  |
| 7w11w_SITTC3_GTAGAAACAAGAGGTC-1-10x    | 0.13396138 | 0.42689493 | 0.0019027  |
| 7w11w_SITTC3_GTAGAGGGTCACCACG-1-10x    | 0.08586656 | 0.25565135 | 0.0037839  |
| 7w11w_SITTC3_GTAGAGGGTCCGGTCA-1-10x    | 0.16243827 | 0.52828807 | 0.001776   |
| 7w11w_SITTC3_GTAGAGGTCTCGGTCT-1-10x    | 0.24717359 | 0.8299917  | 0.0008292  |
| 7w11w_SITTC3_GTAGATCGTGTTGAGG-1-10x    | 0.24484485 | 0.82170016 | 0.00084014 |
| 7w11w_SITTC3_GTAGCTACAGTTGAAA-1-10x    | 0.02129165 | 0.02572969 | 3.69E-05   |
| 7w11w_SITTC3_GTAGCTAGTCTTCATT-1-10x    | 0.11997763 | 0.37710524 | 0.0022788  |
| 7w11w_SITTC3_GTAGGAGCATTGCCTC-1-10x    | 0.01811907 | 0.0144336  | 3.44E-05   |
| 7w11w_SITTC3_GTAGGAGGTTGAGGCC-1-10x    | 0.09543261 | 0.28971165 | 0.0043808  |
| 7w11w_SITTC3_GTAGGTTAGTAGGTTA-1-10x    | 0.0534475  | 0.14022194 | 0.00019264 |
| 7w11w_SITTC3_GTAGGTTGTGCCCGTA-1-10x    | 0.03022599 | 0.05754079 | 4.55E-05   |
| 7w11w_SITTC3_GTAGGTTGTGGATCGA-1-10x    | 0.28829524 | 0.97640705 | 0.0007596  |
| 7w11w_SITTC3_GTAGTACAGCTAATGA-1-10x    | 0.08112753 | 0.23877783 | 0.0029431  |
| 7w11w_SITTC3_GTAGTACTCATCGCTC-1-10x    | 0.03977802 | 0.09155119 | 6.67E-05   |
| 7w11w_SITTC3_GTAGTACTCATGAAAG-1-10x    | 0.02028155 | 0.02213318 | 3.62E-05   |
| 7w11w_SITTC3_GTATTGGTCAATCCAG-1-10x    | 0.05210647 | 0.13544714 | 0.00016076 |
| 7w11w_SITTC3_GTATTTAGATTAGCA-1-10x     | 0.09232429 | 0.27864435 | 0.0043903  |
| 7w11w_SITTC3_GTATTTAGCCTCAGC-1-10x     | 0.06082756 | 0.16649896 | 0.00042799 |
| 7w11w_SITTC3_GTCAAACAGGAGGCAG-1-10x    | 0.2810891  | 0.9507493  | 0.00075348 |
| 7w11w_SITTC3_GTCAAGTTCACCATGA-1-10x    | 0.1960913  | 0.64811105 | 0.00124    |
| 7w11w_SITTC3_GTCACTCAGCTGAAGC-1-10x    | 0.02914732 | 0.05370013 | 4.42E-05   |

|                                      |            |            |            |
|--------------------------------------|------------|------------|------------|
| 7w11w_SITTC3_GTCACTCAGGAAAGAC-1-10x  | 0.17725046 | 0.5810275  | 0.0015248  |
| 7w11w_SITTC3_GTCAGCGTCTCGTGGG-1-10x  | 0.02030806 | 0.02222757 | 3.62E-05   |
| 7w11w_SITTC3_GTCAGCGTCTTCCACG-1-10x  | 0.0229853  | 0.03176002 | 3.76E-05   |
| 7w11w_SITTC3_GTCATCCCAGTCGGTC-1-10x  | 0.01786109 | 0.01351502 | 3.44E-05   |
| 7w11w_SITTC3_GTCATCCTCCTTGGA-1-10x   | 0.02846436 | 0.05126842 | 4.30E-05   |
| 7w11w_SITTC3_GTCCCATCAATCCAGT-1-10x  | 0.05504785 | 0.14592005 | 0.000233   |
| 7w11w_SITTC3_GTCCCATCAGCCTACG-1-10x  | 0.03102129 | 0.06037246 | 4.68E-05   |
| 7w11w_SITTC3_GTCGAATCATCGATCA-1-10x  | 0.04361238 | 0.10520358 | 8.29E-05   |
| 7w11w_SITTC3_GTCGAATTCGTCTACC-1-10x  | 0.1041434  | 0.3207268  | 0.0037215  |
| 7w11w_SITTC3_GTCGCGAAGAGTTCGG-1-10x  | 0.0406262  | 0.09457117 | 7.01E-05   |
| 7w11w_SITTC3_GTCGCGATCAGTGATC-1-10x  | 0.13250968 | 0.4217261  | 0.0019219  |
| 7w11w_SITTC3_GTCGTAAGTGAGCCAA-1-10x  | 0.03120986 | 0.06104388 | 4.68E-05   |
| 7w11w_SITTC3_GTCGTTTCGTATCGAGG-1-10x | 0.06972745 | 0.19818738 | 0.0010821  |
| 7w11w_SITTC3_GTCTACCAGTAGGTTA-1-10x  | 0.03246    | 0.06549506 | 5.00E-05   |
| 7w11w_SITTC3_GTCTAGAAGGCTGAAC-1-10x  | 0.20008762 | 0.66234016 | 0.0011985  |
| 7w11w_SITTC3_GTCTCACGTAACATGA-1-10x  | 0.27624705 | 0.933509   | 0.00075214 |
| 7w11w_SITTC3_GTCTGTCCACTTGAAC-1-10x  | 0.03424903 | 0.07186499 | 5.17E-05   |
| 7w11w_SITTC3_GTCTGTTCGTAGGTTTC-1-10x | 0.04872253 | 0.12339848 | 0.00012523 |
| 7w11w_SITTC3_GTGAGCCAGAACTGT-1-10x   | 0.15259607 | 0.49324453 | 0.0018651  |
| 7w11w_SITTC3_GTGAGCCCAAAGGCGT-1-10x  | 0.06977174 | 0.19834507 | 0.0010821  |
| 7w11w_SITTC3_GTGAGCCCAGTTGGTT-1-10x  | 0.04198809 | 0.09942024 | 7.82E-05   |
| 7w11w_SITTC3_GTGAGCCGTCGCATGC-1-10x  | 0.09898294 | 0.30235276 | 0.0042345  |
| 7w11w_SITTC3_GTGAGTTCAGCGTATT-1-10x  | 0.13363972 | 0.4257497  | 0.0019115  |
| 7w11w_SITTC3_GTGAGTTGTTAATCGC-1-10x  | 0.10978237 | 0.34080458 | 0.0031181  |
| 7w11w_SITTC3_GTGATGTTTCGACATAC-1-10x | 0.02238397 | 0.02961893 | 3.76E-05   |
| 7w11w_SITTC3_GTGACAGCAAACAGGC-1-10x  | 0.05767231 | 0.15526456 | 0.00028394 |
| 7w11w_SITTC3_GTGACAGCAGGGTCACA-1-10x | 0.05919945 | 0.16070198 | 0.00034795 |
| 7w11w_SITTC3_GTGACAGCAGGTTTGAA-1-10x | 0.02527816 | 0.03992383 | 4.00E-05   |
| 7w11w_SITTC3_GTGACAGCGTCGCTGCA-1-10x | 0.01605615 | 0.00708846 | 3.33E-05   |
| 7w11w_SITTC3_GTGCTGGAGTGCAAAT-1-10x  | 0.21777767 | 0.7253263  | 0.00104    |
| 7w11w_SITTC3_GTGCTGGGTCTACAGT-1-10x  | 0.01771611 | 0.01299884 | 3.44E-05   |
| 7w11w_SITTC3_GTGCTTCCAGGTATGG-1-10x  | 0.03158207 | 0.06236914 | 4.83E-05   |
| 7w11w_SITTC3_GTGCTTCCATCCTCAC-1-10x  | 0.03303374 | 0.06753789 | 5.00E-05   |
| 7w11w_SITTC3_GTGCTTCGTTCGTTGCG-1-10x | 0.1129269  | 0.3520008  | 0.0028393  |
| 7w11w_SITTC3_GTGCTTCTCCTTCAGC-1-10x  | 0.18827021 | 0.62026376 | 0.0013519  |
| 7w11w_SITTC3_GTGGAAGCAAGGTTGG-1-10x  | 0.10554692 | 0.3257241  | 0.0036214  |
| 7w11w_SITTC3_GTGCGTAGTGTTGG-1-10x    | 0.01742276 | 0.01195436 | 3.44E-05   |
| 7w11w_SITTC3_GTGCGTCACCATATG-1-10x   | 0.25342217 | 0.85224    | 0.00079608 |
| 7w11w_SITTC3_GTGGAACAAGCAATA-1-10x   | 0.05568635 | 0.14819346 | 0.000233   |
| 7w11w_SITTC3_GTGGAACAGTATGAA-1-10x   | 0.02370236 | 0.03431311 | 3.83E-05   |
| 7w11w_SITTC3_GTGTAACCAGGTGTTT-1-10x  | 0.04619425 | 0.11439644 | 0.00010046 |

|                                      |            |            |            |
|--------------------------------------|------------|------------|------------|
| 7w11w_SITTC3_GTGTGATCAACCGGAA-1-10x  | 0.21829891 | 0.7271822  | 0.00104    |
| 7w11w_SITTC3_GTGTGATGTCTACTGA-1-10x  | 0.02024248 | 0.02199406 | 3.62E-05   |
| 7w11w_SITTC3_GTGTGATTCAGCACCG-1-10x  | 0.10203923 | 0.31323478 | 0.0039137  |
| 7w11w_SITTC3_GTGTTAGCACTCCGGA-1-10x  | 0.1269545  | 0.40194663 | 0.0020256  |
| 7w11w_SITTC3_GTGTTAGCAGAATTCC-1-10x  | 0.17319305 | 0.56658095 | 0.0016089  |
| 7w11w_SITTC3_GTTACAGTCTGGTCAA-1-10x  | 0.15682447 | 0.5082999  | 0.0018385  |
| 7w11w_SITTC3_GTTAGACCACTGTCCT-1-10x  | 0.2776891  | 0.93864346 | 0.00075239 |
| 7w11w_SITTC3_GTTAGTGAGAACTAC-1-10x   | 0.05040546 | 0.12939064 | 0.00014746 |
| 7w11w_SITTC3_GTTATGGCAATAGTAG-1-10x  | 0.04878188 | 0.12360981 | 0.00012523 |
| 7w11w_SITTC3_GTTATGGGTCCGGTGC-1-10x  | 0.13240957 | 0.42136967 | 0.0019219  |
| 7w11w_SITTC3_GTTATGGTCAAGTAAG-1-10x  | 0.06030939 | 0.16465397 | 0.00038577 |
| 7w11w_SITTC3_GTTATGGTCACGAGGA-1-10x  | 0.03425086 | 0.07187151 | 5.17E-05   |
| 7w11w_SITTC3_GTTCATTAGAAGTCCG-1-10x  | 0.028028   | 0.04971474 | 4.30E-05   |
| 7w11w_SITTC3_GTTCATTTCTGCGATA-1-10x  | 0.05513376 | 0.14622594 | 0.000233   |
| 7w11w_SITTC3_GTTCCGTGTGCGTGCT-1-10x  | 0.20474346 | 0.67891747 | 0.0011518  |
| 7w11w_SITTC3_GTTCCGCTCAGGAAGC-1-10x  | 0.2644417  | 0.8914755  | 0.00076135 |
| 7w11w_SITTC3_GTTCCGCTTCTCACGC-1-10x  | 0.25702617 | 0.8650722  | 0.00078121 |
| 7w11w_SITTC3_GTTCTATTCTCCATAT-1-10x  | 0.285113   | 0.96507657 | 0.00075686 |
| 7w11w_SITTC3_GTTGAACAGCCATTTG-1-10x  | 0.05502442 | 0.1458366  | 0.000233   |
| 7w11w_SITTC3_GTTGCTCGTATAATGG-1-10x  | 0.1988199  | 0.6578264  | 0.0012085  |
| 7w11w_SITTC3_GTTGTCCCACCAGCGT-1-10x  | 0.1264608  | 0.40018883 | 0.0020256  |
| 7w11w_SITTC3_GTTGTGAGTAGGAAAG-1-10x  | 0.08517081 | 0.25317407 | 0.0037839  |
| 7w11w_SITTC3_GTTTACTCATCGATCA-1-10x  | 0.04107527 | 0.09617011 | 7.40E-05   |
| 7w11w_SITTC3_GTTTACTTCTCCACA-1-10x   | 0.08132289 | 0.2394734  | 0.0031253  |
| 7w11w_SITTC3_GTTTGGACATGCGTGC-1-10x  | 0.12506689 | 0.39522576 | 0.0020803  |
| 7w11w_SITTC3_GTTTGGAGTTCCTACC-1-10x  | 0.10852925 | 0.33634278 | 0.0032165  |
| 7w11w_SITTC3_TAACCAGCAACTTGGT-1-10x  | 0.2846818  | 0.9635412  | 0.00075605 |
| 7w11w_SITTC3_TAACCAGGTCACAGTT-1-10x  | 0.14507231 | 0.46645588 | 0.0018716  |
| 7w11w_SITTC3_TAAGCACTCGAACCTA-1-10x  | 0.03048755 | 0.05847208 | 4.55E-05   |
| 7w11w_SITTC3_TAAGCGTCAGGGAATC-1-10x  | 0.15288585 | 0.49427631 | 0.0018617  |
| 7w11w_SITTC3_TAAGTCGAGGGTAGCT-1-10x  | 0.08558754 | 0.25465786 | 0.0037839  |
| 7w11w_SITTC3_TAAGTCGCATGTAACC-1-10x  | 0.2514956  | 0.8453804  | 0.00080467 |
| 7w11w_SITTC3_TAAGTCGTCCGATAGT-1-10x  | 0.05438203 | 0.14354937 | 0.00021164 |
| 7w11w_SITTC3_TAATCTCAGCTAGAAT-1-10x  | 0.04856074 | 0.12282243 | 0.00012523 |
| 7w11w_SITTC3_TAATCTCCAGCTCCGGT-1-10x | 0.04641364 | 0.11517757 | 0.00010046 |
| 7w11w_SITTC3_TAATCCCAGCATTGT-1-10x   | 0.12621884 | 0.3993273  | 0.0020515  |
| 7w11w_SITTC3_TACAACGGTTGCTGAT-1-10x  | 0.16832288 | 0.54924047 | 0.0016902  |
| 7w11w_SITTC3_TACACCCAGACCTTTG-1-10x  | 0.02944422 | 0.05475726 | 4.42E-05   |
| 7w11w_SITTC3_TACAGGTAGCTGACAG-1-10x  | 0.02433077 | 0.03655058 | 3.91E-05   |
| 7w11w_SITTC3_TACAGGTAGTCAGGGT-1-10x  | 0.02965941 | 0.05552345 | 4.55E-05   |
| 7w11w_SITTC3_TACAGGTCAACTACGT-1-10x  | 0.25213408 | 0.84765375 | 0.00080467 |

|                                      |            |            |            |
|--------------------------------------|------------|------------|------------|
| 7w11w_SITTC3_TACAGGTGTGGTTTAC-1-10x  | 0.27679828 | 0.93547165 | 0.00075222 |
| 7w11w_SITTC3_TACCCACGTCCGAAAG-1-10x  | 0.02016488 | 0.02171779 | 3.55E-05   |
| 7w11w_SITTC3_TACCCACTCCTACGGG-1-10x  | 0.25903246 | 0.8722157  | 0.00077499 |
| 7w11w_SITTC3_TACCGAATCGCATGAT-1-10x  | 0.19600834 | 0.6478157  | 0.00124    |
| 7w11w_SITTC3_TACCGGTCCCATGGG-1-10x   | 0.02261534 | 0.03044274 | 3.76E-05   |
| 7w11w_SITTC3_TACCTCGGTTTACCTT-1-10x  | 0.0771266  | 0.22453237 | 0.0022191  |
| 7w11w_SITTC3_TACGCTCAGAAGCTGC-1-10x  | 0.06805851 | 0.19224504 | 0.00088537 |
| 7w11w_SITTC3_TACGCTCAGTTCTCTT-1-10x  | 0.10678696 | 0.33013928 | 0.0034182  |
| 7w11w_SITTC3_TACGCTCGTCCGGCAT-1-10x  | 0.04009293 | 0.09267245 | 7.01E-05   |
| 7w11w_SITTC3_TACGCTCGTGAGAGGG-1-10x  | 0.09005532 | 0.27056557 | 0.0042999  |
| 7w11w_SITTC3_TACGTCCAGGAGAGTA-1-10x  | 0.09633091 | 0.2929101  | 0.0043435  |
| 7w11w_SITTC3_TACGTCCCAACCCGCA-1-10x  | 0.11383501 | 0.35523415 | 0.0027534  |
| 7w11w_SITTC3_TACGTCCGTGCCGAAA-1-10x  | 0.18868789 | 0.62175095 | 0.001338   |
| 7w11w_SITTC3_TACTGCCGTGCCTTCT-1-10x  | 0.03619004 | 0.07877603 | 5.82E-05   |
| 7w11w_SITTC3_TACTTACGTGCTAGCC-1-10x  | 0.220072   | 0.73349535 | 0.0010253  |
| 7w11w_SITTC3_TACTTACGTGGCGTAA-1-10x  | 0.28453365 | 0.96301377 | 0.00075605 |
| 7w11w_SITTC3_TACTTCATCCGGCAGT-1-10x  | 0.07777679 | 0.22684738 | 0.0023954  |
| 7w11w_SITTC3_TACTTGTGTAAGTCT-1-10x   | 0.01889769 | 0.01720589 | 3.49E-05   |
| 7w11w_SITTC3_TAGACCAGTGTAACA-1-10x   | 0.25666833 | 0.86379814 | 0.00078463 |
| 7w11w_SITTC3_TAGACTGTCTCCGAAA-1-10x  | 0.25674418 | 0.86406815 | 0.00078463 |
| 7w11w_SITTC3_TAGAGTCAGTTACGAA-1-10x  | 0.03667863 | 0.08051568 | 5.82E-05   |
| 7w11w_SITTC3_TAGAGTCGTTCTAAG-1-10x   | 0.18338616 | 0.6028739  | 0.0014268  |
| 7w11w_SITTC3_TAGAGTCTCATAACGGT-1-10x | 0.259693   | 0.87456757 | 0.00077499 |
| 7w11w_SITTC3_TAGATCGGTCAGACTT-1-10x  | 0.27231342 | 0.9195031  | 0.000753   |
| 7w11w_SITTC3_TAGATCGGTGTCTTCC-1-10x  | 0.16658935 | 0.5430682  | 0.0017206  |
| 7w11w_SITTC3_TAGACAAGGCCACCT-1-10x   | 0.09741525 | 0.29677093 | 0.0042943  |
| 7w11w_SITTC3_TAGCACAGTAAGCAAT-1-10x  | 0.08453286 | 0.25090265 | 0.0036353  |
| 7w11w_SITTC3_TAGCACAGTTAGAAGT-1-10x  | 0.02128221 | 0.02569609 | 3.69E-05   |
| 7w11w_SITTC3_TAGGTACGTTTCGCTC-1-10x  | 0.13412647 | 0.42748275 | 0.0019027  |
| 7w11w_SITTC3_TAGGTTGCACAGACGA-1-10x  | 0.24975106 | 0.8391689  | 0.00081397 |
| 7w11w_SITTC3_TAGGTTGGTGAGTAGC-1-10x  | 0.27335116 | 0.92319804 | 0.0007526  |
| 7w11w_SITTC3_TATACCTAGTGCCTCG-1-10x  | 0.01552638 | 0.00520222 | 3.33E-05   |
| 7w11w_SITTC3_TATACCTAGTTAACGA-1-10x  | 0.03723064 | 0.08248115 | 6.07E-05   |
| 7w11w_SITTC3_TATACCTGTTATCTGG-1-10x  | 0.23582853 | 0.78959715 | 0.00090278 |
| 7w11w_SITTC3_TATACCTGTTGCGGAA-1-10x  | 0.06009114 | 0.16387689 | 0.00038577 |
| 7w11w_SITTC3_TATACCTTCCGTCCTA-1-10x  | 0.23052548 | 0.7707154  | 0.00094498 |
| 7w11w_SITTC3_TATATCCAGAGTCAAT-1-10x  | 0.05104223 | 0.13165785 | 0.00014746 |
| 7w11w_SITTC3_TATATCCAGTCCCGA-1-10x   | 0.04001139 | 0.0923821  | 7.01E-05   |
| 7w11w_SITTC3_TATCAGGCAACGGTAG-1-10x  | 0.23428781 | 0.7841114  | 0.00091657 |
| 7w11w_SITTC3_TATCAGGTCTGGGTCG-1-10x  | 0.04805279 | 0.12101385 | 0.00011598 |
| 7w11w_SITTC3_TATCCTAGTCGAACAG-1-10x  | 0.06924198 | 0.19645883 | 0.0010821  |

|                                     |            |            |            |
|-------------------------------------|------------|------------|------------|
| 7w11w_SITTC3_TATCCTAGTTCTCGTC-1-10x | 0.16561836 | 0.5396109  | 0.0017353  |
| 7w11w_SITTC3_TATCCTATCGCCATAA-1-10x | 0.04274288 | 0.1021077  | 8.29E-05   |
| 7w11w_SITTC3_TATCCTATCGGCATCG-1-10x | 0.0866235  | 0.25834644 | 0.0039187  |
| 7w11w_SITTC3_TATCTGTCAACGATCT-1-10x | 0.25477883 | 0.8570705  | 0.00079207 |
| 7w11w_SITTC3_TATGTTCCACAGCATT-1-10x | 0.043784   | 0.10581463 | 8.81E-05   |
| 7w11w_SITTC3_TATTCCAAGATACCAA-1-10x | 0.07348637 | 0.21157119 | 0.0015819  |
| 7w11w_SITTC3_TATTCCATCACCTTGC-1-10x | 0.28299245 | 0.95752627 | 0.00075462 |
| 7w11w_SITTC3_TATTGCTTCTGACGCG-1-10x | 0.11542866 | 0.36090842 | 0.002594   |
| 7w11w_SITTC3_TATTGGGTCGGCTTCT-1-10x | 0.07649592 | 0.2222868  | 0.0020486  |
| 7w11w_SITTC3_TATTCGTAACGCGA-1-10x   | 0.02721096 | 0.04680563 | 4.19E-05   |
| 7w11w_SITTC3_TATTCGGTACGGGAT-1-10x  | 0.20021434 | 0.6627914  | 0.0011985  |
| 7w11w_SITTC3_TATTCGGTAGCCAGA-1-10x  | 0.02852045 | 0.05146812 | 4.30E-05   |
| 7w11w_SITTC3_TATTCGGTTCAGCGC-1-10x  | 0.06854115 | 0.19396353 | 0.00097948 |
| 7w11w_SITTC3_TATTCGGTTTCTTAC-1-10x  | 0.13118254 | 0.41700077 | 0.001934   |
| 7w11w_SITTC3_TCAAGACTCCCTGTTG-1-10x | 0.03117836 | 0.06093172 | 4.68E-05   |
| 7w11w_SITTC3_TCAAGTGAGCGACTGA-1-10x | 0.09633487 | 0.2929242  | 0.0043435  |
| 7w11w_SITTC3_TCAATCTAGCATGGGT-1-10x | 0.2727615  | 0.92109853 | 0.000753   |
| 7w11w_SITTC3_TCAATCTAGTTGCCTA-1-10x | 0.04117083 | 0.09651034 | 7.40E-05   |
| 7w11w_SITTC3_TCAATCTAGTAACAA-1-10x  | 0.03983121 | 0.09174058 | 6.67E-05   |
| 7w11w_SITTC3_TCACAAGGTCGTTGCG-1-10x | 0.12965906 | 0.41157636 | 0.0019639  |
| 7w11w_SITTC3_TCACAAGTCCGCGGAT-1-10x | 0.01878734 | 0.01681298 | 3.49E-05   |
| 7w11w_SITTC3_TCACATTAGGTGCTTT-1-10x | 0.10339655 | 0.3180676  | 0.0038193  |
| 7w11w_SITTC3_TCACGGGAGGACGCAT-1-10x | 0.05965525 | 0.16232488 | 0.00038577 |
| 7w11w_SITTC3_TCACTATTCGGCTTCT-1-10x | 0.07380221 | 0.21269573 | 0.0017292  |
| 7w11w_SITTC3_TCACTCGAGTCCCGGT-1-10x | 0.12018076 | 0.37782845 | 0.0022788  |
| 7w11w_SITTC3_TCAGCCTCAGTGTGGA-1-10x | 0.16711262 | 0.5449313  | 0.0017056  |
| 7w11w_SITTC3_TCAGGGCTCTTAATCC-1-10x | 0.0839752  | 0.24891706 | 0.0034742  |
| 7w11w_SITTC3_TCAGTCCAGCTCCCTT-1-10x | 0.22964236 | 0.76757103 | 0.00094498 |
| 7w11w_SITTC3_TCAGTCCATAGACC-1-10x   | 0.08243026 | 0.24341625 | 0.0033032  |
| 7w11w_SITTC3_TCAGTTTTCTAAGGAA-1-10x | 0.02422594 | 0.03617736 | 3.91E-05   |
| 7w11w_SITTC3_TCATACTAGCCTCTGG-1-10x | 0.09232473 | 0.27864593 | 0.0043903  |
| 7w11w_SITTC3_TCATACTCAGTAGGAC-1-10x | 0.18325041 | 0.6023906  | 0.0014268  |
| 7w11w_SITTC3_TCATACTTCGCTGCGA-1-10x | 0.06187541 | 0.17022987 | 0.00047505 |
| 7w11w_SITTC3_TCATCATCAGCAGATG-1-10x | 0.04556153 | 0.11214362 | 0.00010046 |
| 7w11w_SITTC3_TCATCATTCACGAACT-1-10x | 0.26970282 | 0.910208   | 0.00075499 |
| 7w11w_SITTC3_TCATCCGAGACCCTTA-1-10x | 0.13831379 | 0.44239187 | 0.0018802  |
| 7w11w_SITTC3_TCATGAGCATACCAA-1-10x  | 0.07249405 | 0.20803799 | 0.0014433  |
| 7w11w_SITTC3_TCATGAGGTCACGACC-1-10x | 0.0449742  | 0.11005238 | 9.39E-05   |
| 7w11w_SITTC3_TCATGAGTCATCCCGT-1-10x | 0.07981698 | 0.23411156 | 0.0027593  |
| 7w11w_SITTC3_TCATGAGTCTGCACCT-1-10x | 0.01754119 | 0.012376   | 3.44E-05   |
| 7w11w_SITTC3_TCATGCCAGTATAACG-1-10x | 0.09079484 | 0.2731987  | 0.0043535  |

|                                       |            |            |            |
|---------------------------------------|------------|------------|------------|
| 7w11w_SITTC3_TCATGGAAGGAACGTC-1-10x   | 0.09627625 | 0.29271546 | 0.0043435  |
| 7w11w_SITTC3_TCATGTTTCACCTCTG-1-10x   | 0.03053206 | 0.05863057 | 4.68E-05   |
| 7w11w_SITTC3_TCATTACAAGCGCTC-1-10x    | 0.08779278 | 0.2625097  | 0.0040384  |
| 7w11w_SITTC3_TCATTACAGTCGCAC-1-10x    | 0.10528205 | 0.324781   | 0.0036214  |
| 7w11w_SITTC3_TCATTTGGTGTGCGTG-1-10x   | 0.05505258 | 0.14593689 | 0.000233   |
| 7w11w_SITTC3_TCATTTGTCATTATCC-1-10x   | 0.02201625 | 0.02830966 | 3.69E-05   |
| 7w11w_SITTC3_TCCACGTCATGGACAG-1-10x   | 0.02279737 | 0.03109086 | 3.76E-05   |
| 7w11w_SITTC3_TCCACGTGTGATTAGA-1-10x   | 0.03355398 | 0.06939023 | 5.17E-05   |
| 7w11w_SITTC3_TCCATCGAGCTTAGTC-1-10x   | 0.02375284 | 0.03449285 | 3.83E-05   |
| 7w11w_SITTC3_TCCATCGTCCTCACGT-1-10x   | 0.03386752 | 0.0705066  | 5.17E-05   |
| 7w11w_SITTC3_TCCACATCATTGTTC-1-10x    | 0.05179722 | 0.13434604 | 0.00016076 |
| 7w11w_SITTC3_TCCCATGAGAGTACCG-1-10x   | 0.11297379 | 0.35216776 | 0.0028393  |
| 7w11w_SITTC3_TCCGAAACAACACTGGTT-1-10x | 0.09568742 | 0.29061893 | 0.0043808  |
| 7w11w_SITTC3_TCCGGGAAGTACGAGC-1-10x   | 0.07757449 | 0.22612709 | 0.0023954  |
| 7w11w_SITTC3_TCCTAATGTCATGCAT-1-10x   | 0.20866863 | 0.6928932  | 0.0011177  |
| 7w11w_SITTC3_TCCTCGACATTAGGCT-1-10x   | 0.015628   | 0.00556402 | 3.33E-05   |
| 7w11w_SITTC3_TCCTTCTGTCTGTAGT-1-10x   | 0.0332033  | 0.06814163 | 5.00E-05   |
| 7w11w_SITTC3_TCCTTCTCGTGTGAT-1-10x    | 0.08553568 | 0.25447324 | 0.0037839  |
| 7w11w_SITTC3_TCCTTTCAGACTGAGC-1-10x   | 0.26506203 | 0.89368427 | 0.00076135 |
| 7w11w_SITTC3_TCCTTTCGTGTCATCA-1-10x   | 0.04073183 | 0.09494724 | 7.01E-05   |
| 7w11w_SITTC3_TCCTTTCGTGATGG-1-10x     | 0.21007706 | 0.697908   | 0.0011014  |
| 7w11w_SITTC3_TCCTTTCACCTGGG-1-10x     | 0.24253486 | 0.8134753  | 0.00085764 |
| 7w11w_SITTC3_TCGAACAGTTCCCAAA-1-10x   | 0.099282   | 0.3034176  | 0.0041652  |
| 7w11w_SITTC3_TCGAAGTGTCTGGGT-1-10x    | 0.1126719  | 0.35109285 | 0.0028393  |
| 7w11w_SITTC3_TCGAAGTCACTGTTT-1-10x    | 0.23007573 | 0.7691141  | 0.00094498 |
| 7w11w_SITTC3_TCGACGGAGTGACACG-1-10x   | 0.27173424 | 0.9174409  | 0.00075352 |
| 7w11w_SITTC3_TCGACGGGTTTCAGAC-1-10x   | 0.16390173 | 0.53349876 | 0.0017494  |
| 7w11w_SITTC3_TCGATTTAGACCTCCG-1-10x   | 0.0999862  | 0.30592492 | 0.0041652  |
| 7w11w_SITTC3_TCGATTTGTGATTCTG-1-10x   | 0.08184913 | 0.2413471  | 0.0031253  |
| 7w11w_SITTC3_TCGCACTTCTTAGCCC-1-10x   | 0.10471776 | 0.32277182 | 0.0036214  |
| 7w11w_SITTC3_TCGCTTGGTATAGCTC-1-10x   | 0.23612373 | 0.7906482  | 0.00090278 |
| 7w11w_SITTC3_TCGGGACCATGTCTAG-1-10x   | 0.02424711 | 0.03625271 | 3.91E-05   |
| 7w11w_SITTC3_TCGGGCACAGAATGTA-1-10x   | 0.08153625 | 0.24023308 | 0.0031253  |
| 7w11w_SITTC3_TCGGGCACATGATCTG-1-10x   | 0.01696927 | 0.01033966 | 3.38E-05   |
| 7w11w_SITTC3_TCGGGCATCCCATACC-1-10x   | 0.256136   | 0.8619027  | 0.00078463 |
| 7w11w_SITTC3_TCGGGTGCAACAAGAT-1-10x   | 0.02836207 | 0.05090422 | 4.30E-05   |
| 7w11w_SITTC3_TCGGGTGCAAGGCGTA-1-10x   | 0.04164942 | 0.09821437 | 7.40E-05   |
| 7w11w_SITTC3_TCGGGTGACCTGAAT-1-10x    | 0.19887982 | 0.65803975 | 0.0012085  |
| 7w11w_SITTC3_TCGGTCTTCCCTCTTT-1-10x   | 0.05004543 | 0.12810872 | 0.00013566 |
| 7w11w_SITTC3_TCGTAGAAGAGTTGTA-1-10x   | 0.04246635 | 0.1011231  | 7.82E-05   |
| 7w11w_SITTC3_TCTAACTACAACGCC-1-10x    | 0.01589892 | 0.00652865 | 3.33E-05   |

|                                      |            |            |            |
|--------------------------------------|------------|------------|------------|
| 7w11w_SITTC3_TCTACCGGTCGAGTTT-1-10x  | 0.02236465 | 0.02955014 | 3.76E-05   |
| 7w11w_SITTC3_TCTACCGTTGTTGCA-1-10x   | 0.06805314 | 0.19222593 | 0.00088537 |
| 7w11w_SITTC3_TCTACCGTCAGTCATG-1-10x  | 0.03017259 | 0.05735064 | 4.55E-05   |
| 7w11w_SITTC3_TCTATACCAACGAGGT-1-10x  | 0.2493438  | 0.83771884 | 0.00081888 |
| 7w11w_SITTC3_TCTATCAAGCAGCAGT-1-10x  | 0.06310839 | 0.17461994 | 0.00052741 |
| 7w11w_SITTC3_TCTCACGCATGGTACT-1-10x  | 0.04623942 | 0.11455728 | 0.00010046 |
| 7w11w_SITTC3_TCTCTGGTCGTTAGTG-1-10x  | 0.01962202 | 0.0197849  | 3.55E-05   |
| 7w11w_SITTC3_TCTGCCATCGAACTCA-1-10x  | 0.28539318 | 0.96607417 | 0.00075686 |
| 7w11w_SITTC3_TCTGGCTAGGTACCTT-1-10x  | 0.26309165 | 0.8866686  | 0.00076511 |
| 7w11w_SITTC3_TCTGGCTGTTGAGCC-1-10x   | 0.28362754 | 0.9597875  | 0.00075531 |
| 7w11w_SITTC3_TCTGTCGGTTCACCGG-1-10x  | 0.10009603 | 0.30631593 | 0.0040879  |
| 7w11w_SITTC3_TCTTGCGCACTCATAG-1-10x  | 0.03086506 | 0.0598162  | 4.68E-05   |
| 7w11w_SITTC3_TGAACGTCACTGAATC-1-10x  | 0.26699457 | 0.9005651  | 0.00075831 |
| 7w11w_SITTC3_TGAACGTCATCGATAC-1-10x  | 0.04606669 | 0.11394225 | 0.00010046 |
| 7w11w_SITTC3_TGAACGTTGCGATGAT-1-10x  | 0.01669267 | 0.00935483 | 3.38E-05   |
| 7w11w_SITTC3_TGAATCGGTAGATCCT-1-10x  | 0.02283193 | 0.03121392 | 3.76E-05   |
| 7w11w_SITTC3_TGAATGCAGAAGTCTA-1-10x  | 0.06829926 | 0.19310227 | 0.00097948 |
| 7w11w_SITTC3_TGAATGCCAACTAAG-1-10x   | 0.04794402 | 0.12062658 | 0.00011598 |
| 7w11w_SITTC3_TGACAGTGTAACATAG-1-10x  | 0.08141486 | 0.23980087 | 0.0031253  |
| 7w11w_SITTC3_TGACGCGAGTCATGAA-1-10x  | 0.04687737 | 0.11682871 | 0.00010777 |
| 7w11w_SITTC3_TGACGCGGTAAGGCTG-1-10x  | 0.08782419 | 0.26262155 | 0.0041422  |
| 7w11w_SITTC3_TGACGCGGTATCGCGC-1-10x  | 0.04269737 | 0.10194564 | 7.82E-05   |
| 7w11w_SITTC3_TGACTCCCATGGGTTT-1-10x  | 0.21214536 | 0.70527226 | 0.0010856  |
| 7w11w_SITTC3_TGAGACTAGCCTGAGA-1-10x  | 0.06830312 | 0.19311601 | 0.00097948 |
| 7w11w_SITTC3_TGAGACTCAATGAACA-1-10x  | 0.25982442 | 0.8750355  | 0.00077221 |
| 7w11w_SITTC3_TGAGACTGTAGTGCGA-1-10x  | 0.04166696 | 0.09827681 | 7.40E-05   |
| 7w11w_SITTC3_TGAGCATAGGTCTACT-1-10x  | 0.01722076 | 0.01123513 | 3.38E-05   |
| 7w11w_SITTC3_TGAGCATGTATAGGAT-1-10x  | 0.22631812 | 0.7557349  | 0.00097406 |
| 7w11w_SITTC3_TGAGCGCCAGGTGTTT-1-10x  | 0.28052086 | 0.94872606 | 0.00075348 |
| 7w11w_SITTC3_TGAGCGCTCTACCACC-1-10x  | 0.01682176 | 0.00981446 | 3.38E-05   |
| 7w11w_SITTC3_TGAGGGAAGGGCATGT-1-10x  | 0.02138729 | 0.02607022 | 3.69E-05   |
| 7w11w_SITTC3_TGAGGTTCAATTTCCG-1-10x  | 0.23350644 | 0.7813293  | 0.00091657 |
| 7w11w_SITTC3_TGATGCAGTTTGAACC-1-10x  | 0.04840629 | 0.1222725  | 0.00012523 |
| 7w11w_SITTC3_TGATGCATCCAGTGTA-1-10x  | 0.05603406 | 0.1494315  | 0.000257   |
| 7w11w_SITTC3_TGATGGTGTGGCCTCA-1-10x  | 0.13882904 | 0.44422644 | 0.0018772  |
| 7w11w_SITTC3_TGATGGTGTTCGTGA-1-10x   | 0.08912262 | 0.2672447  | 0.0042295  |
| 7w11w_SITTC3_TGATGGTCTTCCCAG-1-10x   | 0.04325125 | 0.10391778 | 8.29E-05   |
| 7w11w_SITTC3_TGATTCTAGTAGTCTC-1-10x  | 0.04887834 | 0.12395325 | 0.00012523 |
| 7w11w_SITTC3_TGATTTCCAGATGCTAA-1-10x | 0.22187334 | 0.7399091  | 0.0010106  |
| 7w11w_SITTC3_TGATTTCCAGCAGATG-1-10x  | 0.2823081  | 0.95508957 | 0.00075462 |
| 7w11w_SITTC3_TGCACGGTCTCGCTCA-1-10x  | 0.18220782 | 0.5986784  | 0.0014427  |



|                                      |            |            |            |
|--------------------------------------|------------|------------|------------|
| 7w11w_SITTC3_TGCAGATTCAGACAAA-1-10x  | 0.08130155 | 0.23939742 | 0.0031253  |
| 7w11w_SITTC3_TGCAGGCGTCACTCAA-1-10x  | 0.07878932 | 0.23045252 | 0.002576   |
| 7w11w_SITTC3_TGCATCCTCGTTATCT-1-10x  | 0.02344623 | 0.03340117 | 3.83E-05   |
| 7w11w_SITTC3_TGCATGAAGCCGTTAT-1-10x  | 0.04207749 | 0.09973852 | 7.82E-05   |
| 7w11w_SITTC3_TGCGGGTTCATTACGG-1-10x  | 0.04207599 | 0.09973319 | 7.82E-05   |
| 7w11w_SITTC3_TGCTCCACAGAGTAAT-1-10x  | 0.09110405 | 0.27429962 | 0.0043535  |
| 7w11w_SITTC3_TGCTCCAGTCTGGTTA-1-10x  | 0.09112157 | 0.27436203 | 0.0043535  |
| 7w11w_SITTC3_TGCTCCAGTCTGTGGC-1-10x  | 0.16150121 | 0.52495164 | 0.0017883  |
| 7w11w_SITTC3_TGCTGAAAGACCTCCG-1-10x  | 0.04059934 | 0.09447552 | 7.01E-05   |
| 7w11w_SITTC3_TGCTGAAAGATGAATC-1-10x  | 0.09484507 | 0.2876197  | 0.0044051  |
| 7w11w_SITTC3_TGCTGAATCTACCACC-1-10x  | 0.01792357 | 0.01373751 | 3.44E-05   |
| 7w11w_SITTC3_TGCTTCGAGCCGTCGT-1-10x  | 0.04839224 | 0.12222248 | 0.00012523 |
| 7w11w_SITTC3_TGCTTCGCACTGGACC-1-10x  | 0.04180971 | 0.09878509 | 7.82E-05   |
| 7w11w_SITTC3_TGCTTCGTCCAAGGGA-1-10x  | 0.03641255 | 0.07956829 | 5.82E-05   |
| 7w11w_SITTC3_TGGAGAGGTGCTCTTC-1-10x  | 0.03657134 | 0.08013365 | 5.82E-05   |
| 7w11w_SITTC3_TGGCGTGAGACCTCAT-1-10x  | 0.06987841 | 0.19872487 | 0.0010821  |
| 7w11w_SITTC3_TGGGAAGGTCTGATAC-1-10x  | 0.09250147 | 0.2792752  | 0.0044107  |
| 7w11w_SITTC3_TGGGATTGTGTGTCCG-1-10x  | 0.03778013 | 0.08443759 | 6.07E-05   |
| 7w11w_SITTC3_TGGGCGTAGTACAGAT-1-10x  | 0.09448824 | 0.2863492  | 0.0044051  |
| 7w11w_SITTC3_TGGGCGTCAAGACGGT-1-10x  | 0.04400558 | 0.1066036  | 8.81E-05   |
| 7w11w_SITTC3_TGGGCGTGTGTTTCGAT-1-10x | 0.22630478 | 0.7556875  | 0.00097406 |
| 7w11w_SITTC3_TGGGCTGGTACTGAG-1-10x   | 0.26798987 | 0.90410894 | 0.00075705 |
| 7w11w_SITTC3_TGGGTTAAGAAAGTCT-1-10x  | 0.01602837 | 0.00698958 | 3.33E-05   |
| 7w11w_SITTC3_TGGGTTAAGGTGAGAA-1-10x  | 0.11134359 | 0.34636334 | 0.002929   |
| 7w11w_SITTC3_TGGGTTAGTAATGCGG-1-10x  | 0.04648851 | 0.11544414 | 0.00010777 |
| 7w11w_SITTC3_TGGTAGTTCTTAGGAC-1-10x  | 0.02898682 | 0.05312865 | 4.42E-05   |
| 7w11w_SITTC3_TGGTGATGTAGTAAGT-1-10x  | 0.08614128 | 0.2566295  | 0.0039187  |
| 7w11w_SITTC3_TGGTTAGCATCAGCTA-1-10x  | 0.06691383 | 0.18816936 | 0.00079936 |
| 7w11w_SITTC3_TGTAACGGTTCGCGTCA-1-10x | 0.02007318 | 0.02139127 | 3.55E-05   |
| 7w11w_SITTC3_TGTAAGCAGACTCTTG-1-10x  | 0.29134822 | 0.9872773  | 0.00076269 |
| 7w11w_SITTC3_TGTAAGCAGAGCCGAT-1-10x  | 0.04929979 | 0.12545383 | 0.00013566 |
| 7w11w_SITTC3_TGTACAGGTTATGTGC-1-10x  | 0.02739102 | 0.04744674 | 4.19E-05   |
| 7w11w_SITTC3_TGTAGACCAGATACCT-1-10x  | 0.10760699 | 0.33305904 | 0.0033168  |
| 7w11w_SITTC3_TGTAGACGTTACAGCGC-1-10x | 0.03185551 | 0.06334274 | 4.83E-05   |
| 7w11w_SITTC3_TGTCAGATCAGAGCGA-1-10x  | 0.01798601 | 0.01395984 | 3.44E-05   |
| 7w11w_SITTC3_TGTCCACAGCTGACCC-1-10x  | 0.03716127 | 0.08223413 | 6.07E-05   |
| 7w11w_SITTC3_TGTCCACCAACCGCCA-1-10x  | 0.15446801 | 0.49990967 | 0.0018575  |
| 7w11w_SITTC3_TGTCCAAGTGGCCTC-1-10x   | 0.22629894 | 0.7556667  | 0.00097406 |
| 7w11w_SITTC3_TGTCCACAAGGATGC-1-10x   | 0.07932358 | 0.23235478 | 0.002576   |
| 7w11w_SITTC3_TGTCCACATCAGTGT-1-10x   | 0.08713803 | 0.26017848 | 0.0040384  |
| 7w11w_SITTC3_TGTCCAGTCATAAAG-1-10x   | 0.03645536 | 0.07972072 | 5.82E-05   |

|                                      |            |            |            |
|--------------------------------------|------------|------------|------------|
| 7w11w_SITTC3_TGTGAGTAGAATACAC-1-10x  | 0.27966347 | 0.9456733  | 0.00075303 |
| 7w11w_SITTC3_TGTGATGGTCCACATA-1-10x  | 0.01910682 | 0.0179505  | 3.49E-05   |
| 7w11w_SITTC3_TGTGATGTCCCAGGAC-1-10x  | 0.16618249 | 0.54161954 | 0.0017206  |
| 7w11w_SITTC3_TGTGCGGGTCGCATGC-1-10x  | 0.03464683 | 0.07328136 | 5.37E-05   |
| 7w11w_SITTC3_TGTGTGAGTGCACAAG-1-10x  | 0.09596682 | 0.29161376 | 0.0043808  |
| 7w11w_SITTC3_TGTTTCATCAAAGACTA-1-10x | 0.03865923 | 0.08756769 | 6.36E-05   |
| 7w11w_SITTC3_TGTTCTAAGAGTACCG-1-10x  | 0.2659603  | 0.8968826  | 0.00075974 |
| 7w11w_SITTC3_TGTTCTAGTACTGCGC-1-10x  | 0.04271008 | 0.10199092 | 7.82E-05   |
| 7w11w_SITTC3_TGTTGAGGTGGCTTAT-1-10x  | 0.01870575 | 0.01652248 | 3.49E-05   |
| 7w11w_SITTC3_TGTTTGTAGAGTTGTA-1-10x  | 0.2825247  | 0.9558608  | 0.00075462 |
| 7w11w_SITTC3_TTAATCCGTGTAGCAG-1-10x  | 0.01879538 | 0.0168416  | 3.49E-05   |
| 7w11w_SITTC3_TTACCATAGACATACA-1-10x  | 0.05797764 | 0.15635167 | 0.00031414 |
| 7w11w_SITTC3_TTACCATTCTGTTAT-1-10x   | 0.0210804  | 0.02497752 | 3.62E-05   |
| 7w11w_SITTC3_TTACCGCAGACTTAAG-1-10x  | 0.07475106 | 0.21607414 | 0.001885   |
| 7w11w_SITTC3_TTACCGCAGGGAGGAC-1-10x  | 0.02046763 | 0.02279572 | 3.62E-05   |
| 7w11w_SITTC3_TTACGTTGTTATGTCG-1-10x  | 0.12654914 | 0.40050337 | 0.0020256  |
| 7w11w_SITTC3_TTACTGTAGCTTGTGT-1-10x  | 0.04308021 | 0.10330878 | 8.29E-05   |
| 7w11w_SITTC3_TTACTGTCAAGTACCT-1-10x  | 0.05628805 | 0.15033583 | 0.000257   |
| 7w11w_SITTC3_TTACTGTTACCTACC-1-10x   | 0.21816641 | 0.72671044 | 0.00104    |
| 7w11w_SITTC3_TTACTGTTTCATATGGC-1-10x | 0.14629804 | 0.47082013 | 0.0018717  |
| 7w11w_SITTC3_TTAGGCATCAAACCCA-1-10x  | 0.10305429 | 0.31684896 | 0.0038193  |
| 7w11w_SITTC3_TTAGGCATCAAAGACA-1-10x  | 0.2771489  | 0.9367201  | 0.00075222 |
| 7w11w_SITTC3_TTAGTCTAGTACCATC-1-10x  | 0.09386902 | 0.28414443 | 0.0044154  |
| 7w11w_SITTC3_TTAGTCTAGTCCGCCA-1-10x  | 0.29171643 | 0.98858833 | 0.00076378 |
| 7w11w_SITTC3_TTAGTCTCACCCAACG-1-10x  | 0.08491778 | 0.25227314 | 0.0036353  |
| 7w11w_SITTC3_TTAGTCTGTATCGCTA-1-10x  | 0.05426086 | 0.14311795 | 0.00021164 |
| 7w11w_SITTC3_TTATTGCAGCTCGACC-1-10x  | 0.15111451 | 0.48796937 | 0.0018676  |
| 7w11w_SITTC3_TTATTGCCATAGCACT-1-10x  | 0.03465958 | 0.07332674 | 5.37E-05   |
| 7w11w_SITTC3_TTATTGCTCCTATTGT-1-10x  | 0.14253044 | 0.45740545 | 0.0018718  |
| 7w11w_SITTC3_TTCACCGCACACCGCA-1-10x  | 0.07849284 | 0.22939691 | 0.002576   |
| 7w11w_SITTC3_TTCACCGGTACCGGAA-1-10x  | 0.07650727 | 0.22232722 | 0.0020486  |
| 7w11w_SITTC3_TTCACCGGTCTGTGATT-1-10x | 0.0483664  | 0.12213047 | 0.00012523 |
| 7w11w_SITTC3_TTCACCGTCTAGGCCG-1-10x  | 0.04272733 | 0.10205232 | 8.29E-05   |
| 7w11w_SITTC3_TTCAGGAAGAGTCGAC-1-10x  | 0.05600347 | 0.14932257 | 0.000257   |
| 7w11w_SITTC3_TTCAGGACATCAGTGT-1-10x  | 0.2494947  | 0.8382561  | 0.00081397 |
| 7w11w_SITTC3_TTCAGGAGTCATCGGC-1-10x  | 0.0918693  | 0.27702436 | 0.0043903  |
| 7w11w_SITTC3_TTCAGGAGTGGGCTTC-1-10x  | 0.02117252 | 0.02530552 | 3.69E-05   |
| 7w11w_SITTC3_TTCATGTAGCTACGTT-1-10x  | 0.08393029 | 0.24875717 | 0.0034742  |
| 7w11w_SITTC3_TTCATTGTCAGAACCT-1-10x  | 0.10881688 | 0.33736694 | 0.0032165  |
| 7w11w_SITTC3_TTCCAATAGAGTATAC-1-10x  | 0.07329371 | 0.2108852  | 0.0015819  |
| 7w11w_SITTC3_TTCCAATAGGCATCGA-1-10x  | 0.12798999 | 0.40563357 | 0.0020026  |

|                                      |            |            |            |
|--------------------------------------|------------|------------|------------|
| 7w11w_SITTC3_TTCCACGCAGGCAATG-1-10x  | 0.05096748 | 0.13139173 | 0.00014746 |
| 7w11w_SITTC3_TTCCGGTAGAATCTAG-1-10x  | 0.04395069 | 0.10640815 | 8.81E-05   |
| 7w11w_SITTC3_TTCCGGTCAGTAACGG-1-10x  | 0.02012323 | 0.0215695  | 3.55E-05   |
| 7w11w_SITTC3_TTCCGGTGTGAGACGT-1-10x  | 0.06482364 | 0.18072717 | 0.00064991 |
| 7w11w_SITTC3_TTCCGTGTCACGAACT-1-10x  | 0.02828395 | 0.05062608 | 4.30E-05   |
| 7w11w_SITTC3_TTCTCTCACAGTGTT-1-10x   | 0.1450169  | 0.46625856 | 0.0018716  |
| 7w11w_SITTC3_TTCTTCCAGCTCTGG-1-10x   | 0.03426736 | 0.07193023 | 5.37E-05   |
| 7w11w_SITTC3_TTCGATTGTTCCGGGTC-1-10x | 0.02511517 | 0.03934349 | 4.00E-05   |
| 7w11w_SITTC3_TTCGATTTCTATGCCC-1-10x  | 0.03765816 | 0.08400334 | 6.07E-05   |
| 7w11w_SITTC3_TTCGGTCTGTTGATC-1-10x   | 0.05640427 | 0.15074964 | 0.000257   |
| 7w11w_SITTC3_TTCTAGTCATTGACCA-1-10x  | 0.0757997  | 0.21980786 | 0.0020486  |
| 7w11w_SITTC3_TTCTGTAAGAGTGACC-1-10x  | 0.03479747 | 0.07381772 | 5.37E-05   |
| 7w11w_SITTC3_TTCTTCCAGGCGATAC-1-10x  | 0.01526051 | 0.00425556 | 3.27E-05   |
| 7w11w_SITTC3_TTCTTCCAATAGTCC-1-10x   | 0.04011234 | 0.09274153 | 7.01E-05   |
| 7w11w_SITTC3_TTCTTCTCTAGACCA-1-10x   | 0.0924608  | 0.27913043 | 0.0043903  |
| 7w11w_SITTC3_TTCTTGACACGTCTCT-1-10x  | 0.0174948  | 0.01221083 | 3.44E-05   |
| 7w11w_SITTC3_TTGAACGCAACGATCT-1-10x  | 0.27837315 | 0.941079   | 0.00075239 |
| 7w11w_SITTC3_TTGAACGTCATGGTAC-1-10x  | 0.08403475 | 0.2491291  | 0.0034742  |
| 7w11w_SITTC3_TTGACCCAGAATAGTC-1-10x  | 0.22064243 | 0.73552644 | 0.0010179  |
| 7w11w_SITTC3_TTGAGTGCATTGACCA-1-10x  | 0.03506091 | 0.0747557  | 5.37E-05   |
| 7w11w_SITTC3_TTGAGTGTCATCACTT-1-10x  | 0.02711231 | 0.04645439 | 4.19E-05   |
| 7w11w_SITTC3_TTGAGTGTCGTTCCA-1-10x   | 0.11923743 | 0.37446973 | 0.0023317  |
| 7w11w_SITTC3_TTGCAATTCAGGACGAT-1-10x | 0.04973552 | 0.1270053  | 0.00013566 |
| 7w11w_SITTC3_TTGCAATGTTGGGACA-1-10x  | 0.0532984  | 0.13969107 | 0.00019264 |
| 7w11w_SITTC3_TTGCCTGCAGGTTTCAT-1-10x | 0.12749256 | 0.40386245 | 0.0020026  |
| 7w11w_SITTC3_TTGCCTGCAGGTTTCAT-1-10x | 0.17453001 | 0.5713412  | 0.0015753  |
| 7w11w_SITTC3_TTGCCTGCAGGTTTCAT-1-10x | 0.01709668 | 0.01079331 | 3.38E-05   |
| 7w11w_SITTC3_TTGCCTGCAGGTTTCAT-1-10x | 0.04373523 | 0.10564097 | 8.81E-05   |
| 7w11w_SITTC3_TTGCCTGCAGGTTTCAT-1-10x | 0.05823185 | 0.15725681 | 0.00031414 |
| 7w11w_SITTC3_TTGCCTGCAGGTTTCAT-1-10x | 0.02643861 | 0.04405567 | 4.09E-05   |
| 7w11w_SITTC3_TTGCCTGCAGGTTTCAT-1-10x | 0.24127533 | 0.8089907  | 0.00086374 |
| 7w11w_SITTC3_TTGCCTGCAGGTTTCAT-1-10x | 0.10997038 | 0.34147397 | 0.0031181  |
| 7w11w_SITTC3_TTGCCTGCAGGTTTCAT-1-10x | 0.14351343 | 0.4609054  | 0.0018716  |
| 7w11w_SITTC3_TTGCCTGCAGGTTTCAT-1-10x | 0.27081722 | 0.9141758  | 0.00075418 |
| 7w11w_SITTC3_TTGCCTGCAGGTTTCAT-1-10x | 0.11776299 | 0.3692199  | 0.002453   |
| 7w11w_SITTC3_TTGCCTGCAGGTTTCAT-1-10x | 0.02489527 | 0.03856053 | 4.00E-05   |
| 7w11w_SITTC3_TTGCCTGCAGGTTTCAT-1-10x | 0.04565064 | 0.11246087 | 0.00010046 |
| 7w11w_SITTC3_TTGCCTGCAGGTTTCAT-1-10x | 0.09490602 | 0.2878367  | 0.0044051  |
| 7w11w_SITTC3_TTGCCTGCAGGTTTCAT-1-10x | 0.02253615 | 0.03016077 | 3.76E-05   |
| 7w11w_SITTC3_TTGCCTGCAGGTTTCAT-1-10x | 0.07618512 | 0.22118019 | 0.0020486  |
| 7w11w_SITTC3_TTGCCTGCAGGTTTCAT-1-10x | 0.11688278 | 0.3660859  | 0.0025211  |

|                                      |            |            |            |
|--------------------------------------|------------|------------|------------|
| 7w11w_SITTC3_TTGTGGAGTAGCCCTG-1-10x  | 0.0844454  | 0.25059125 | 0.0036353  |
| 7w11w_SITTC3_TTGTGTTACGCGGTCT-1-10x  | 0.0491028  | 0.12475244 | 0.00012523 |
| 7w11w_SITTC3_TTGTGTTGTGAATGG-1-10x   | 0.02521413 | 0.03969584 | 4.00E-05   |
| 7w11w_SITTC3_TTGTTCACACAATGAA-1-10x  | 0.11038043 | 0.342934   | 0.0030221  |
| 7w11w_SITTC3_TTGTGGTGGCGCTCA-1-10x   | 0.07855062 | 0.22960263 | 0.002576   |
| 7w11w_SITTC3_TTTACCATCACCTTAT-1-10x  | 0.06834126 | 0.1932518  | 0.00097948 |
| 7w11w_SITTC3_TTTACTGAGCCTTGA-1-10x   | 0.05496585 | 0.14562808 | 0.000233   |
| 7w11w_SITTC3_TTTAGTCAGGAAGTGA-1-10x  | 0.10876458 | 0.3371807  | 0.0032165  |
| 7w11w_SITTC3_TTTATGCCACAGGATG-1-10x  | 0.02045433 | 0.02274839 | 3.62E-05   |
| 7w11w_SITTC3_TTTATGCCATTGGCAT-1-10x  | 0.0415957  | 0.09802311 | 7.40E-05   |
| 7w11w_SITTC3_TTTATGCGTCCTGGGT-1-10x  | 0.06361239 | 0.17641445 | 0.00058553 |
| 7w11w_SITTC3_TTTCACACAAACTGCT-1-10x  | 0.0249379  | 0.0387123  | 4.00E-05   |
| 7w11w_SITTC3_TTTCACACATATCTGG-1-10x  | 0.04202246 | 0.09954261 | 7.82E-05   |
| 7w11w_SITTC3_TTTCATGGTGCCGTTG-1-10x  | 0.10042225 | 0.30747747 | 0.0040879  |
| 7w11w_SITTC3_TTTCGATAGAGCATTGA-1-10x | 0.04398638 | 0.10653523 | 8.81E-05   |
| 7w11w_SITTC3_TTTCGATAGTTATGGA-1-10x  | 0.26435155 | 0.8911545  | 0.00076313 |
| 7w11w_SITTC3_TTTCGATGTTGGTGTT-1-10x  | 0.040643   | 0.09463097 | 7.01E-05   |
| 7w11w_SITTC3_TTTGACTAGAGTGTGC-1-10x  | 0.08351596 | 0.24728192 | 0.0034742  |
| 7w11w_SITTC3_TTTGACTAGGGATCTG-1-10x  | 0.08953926 | 0.26872814 | 0.0042295  |
| 7w11w_SITTC3_TTTGACTGTCTAACGT-1-10x  | 0.07703283 | 0.2241985  | 0.0022191  |
| 7w11w_SITTC3_TTTGACTTCCATTGCG-1-10x  | 0.12085578 | 0.38023192 | 0.0022308  |
| 7w11w_SITTC3_TTTGATCAGCCTCTCT-1-10x  | 0.05425036 | 0.14308056 | 0.00021164 |
| 7w11w_SITTC3_TTTGATCCACGTATAC-1-10x  | 0.12210845 | 0.38469207 | 0.0021873  |
| 7w11w_SITTC3_TTTGGAGCATGAGGGT-1-10x  | 0.2844145  | 0.9625895  | 0.00075605 |
| 7w11w_SITTC3_TTTGTTGCCTGGGAC-1-10x   | 0.20329337 | 0.67375433 | 0.0011699  |
| 7w11w_SITTC3_AAACGCTGTGCGTAAG-1-10x  | 0.26016852 | 0.8762607  | 0.00077221 |
| 7w11w_SITTC3_AAAGAACCCTTGGGC-1-10x   | 0.12479622 | 0.39426202 | 0.0020803  |
| 7w11w_SITTC3_AAAGAACGTTATCCAG-1-10x  | 0.04009816 | 0.09269107 | 7.01E-05   |
| 7w11w_SITTC3_AAAGGATCACTGCGTG-1-10x  | 0.2723166  | 0.9195145  | 0.000753   |
| 7w11w_SITTC3_AAAGGATGTGACGTCC-1-10x  | 0.01775766 | 0.01314676 | 3.44E-05   |
| 7w11w_SITTC3_AAAGGTAGTCCGGATC-1-10x  | 0.04785419 | 0.12030673 | 0.00011598 |
| 7w11w_SITTC3_AAAGTCCAGCGGACAT-1-10x  | 0.02985675 | 0.05622608 | 4.55E-05   |
| 7w11w_SITTC3_AACAAAGGTTGCGTTCG-1-10x | 0.04584971 | 0.1131697  | 0.00010046 |
| 7w11w_SITTC3_AACACACCACACACTA-1-10x  | 0.02019263 | 0.02181659 | 3.62E-05   |
| 7w11w_SITTC3_AACAGGGAGAAGTCAT-1-10x  | 0.03389628 | 0.07060901 | 5.17E-05   |
| 7w11w_SITTC3_AACCAACTCGTCTCAC-1-10x  | 0.05172106 | 0.13407487 | 0.00016076 |
| 7w11w_SITTC3_AACCATGGTTAAAGTG-1-10x  | 0.01940286 | 0.01900456 | 3.55E-05   |
| 7w11w_SITTC3_AACCCAAAGCAGTAAT-1-10x  | 0.09573657 | 0.29079393 | 0.0043808  |
| 7w11w_SITTC3_AACGGGACAGCCTATA-1-10x  | 0.02003929 | 0.02127061 | 3.55E-05   |
| 7w11w_SITTC3_AACGTCATCAGGGATG-1-10x  | 0.24342528 | 0.8166457  | 0.00085167 |
| 7w11w_SITTC3_AACTTCTCAGCAGACA-1-10x  | 0.1298125  | 0.41212267 | 0.0019639  |

|                                      |            |            |            |
|--------------------------------------|------------|------------|------------|
| 7w11w_SITTC3_AACTTCTCAGCTGTTA-1-10x  | 0.05892355 | 0.15971965 | 0.00034795 |
| 7w11w_SITTC3_AACTTCTCATGGGAAC-1-10x  | 0.08524446 | 0.25343633 | 0.0037839  |
| 7w11w_SITTC3_AACTTCTGTAAGGCTG-1-10x  | 0.1228364  | 0.387284   | 0.0021479  |
| 7w11w_SITTC3_AAGACAAAGTTCATGC-1-10x  | 0.07461711 | 0.21559721 | 0.0017292  |
| 7w11w_SITTC3_AAGATAGAGGTGCAGT-1-10x  | 0.02037375 | 0.02246146 | 3.62E-05   |
| 7w11w_SITTC3_AAGCGTTCAATTTCCGG-1-10x | 0.04411062 | 0.10697759 | 8.81E-05   |
| 7w11w_SITTC3_AAGTACCAGACGCCCT-1-10x  | 0.02970171 | 0.05567406 | 4.55E-05   |
| 7w11w_SITTC3_AAGTGAAGTGTAACGG-1-10x  | 0.2329688  | 0.779415   | 0.00092358 |
| 7w11w_SITTC3_AATCACGTCAGGTGTT-1-10x  | 0.02728159 | 0.04705711 | 4.19E-05   |
| 7w11w_SITTC3_AATCACGTCGACCACG-1-10x  | 0.07303317 | 0.20995753 | 0.0015819  |
| 7w11w_SITTC3_AATCGTGTCACCGACG-1-10x  | 0.09233166 | 0.27867058 | 0.0043903  |
| 7w11w_SITTC3_AATGAAGAGGTGATAT-1-10x  | 0.17342895 | 0.56742084 | 0.0015922  |
| 7w11w_SITTC3_AATGACCAGGAGAATG-1-10x  | 0.0290017  | 0.05318165 | 4.42E-05   |
| 7w11w_SITTC3_AATGACCGTCAGCTTA-1-10x  | 0.24968381 | 0.8389295  | 0.00081397 |
| 7w11w_SITTC3_AATGGCTAGCAGAAAG-1-10x  | 0.02489957 | 0.03857583 | 4.00E-05   |
| 7w11w_SITTC3_ACAAAGACAAACGTGG-1-10x  | 0.04200743 | 0.09948909 | 7.82E-05   |
| 7w11w_SITTC3_ACAAAGACAAGTGGA-1-10x   | 0.06337928 | 0.17558447 | 0.00052741 |
| 7w11w_SITTC3_ACAACCACAAGTATCC-1-10x  | 0.14349177 | 0.4608283  | 0.0018716  |
| 7w11w_SITTC3_ACAACCATCCGAAATC-1-10x  | 0.03192182 | 0.06357885 | 4.83E-05   |
| 7w11w_SITTC3_ACAAGCTGTACCGCGT-1-10x  | 0.02318903 | 0.03248539 | 3.83E-05   |
| 7w11w_SITTC3_ACAAGCTGTGTATACC-1-10x  | 0.04643047 | 0.1152375  | 0.00010046 |
| 7w11w_SITTC3_ACAAGCTTCATTCATC-1-10x  | 0.17610423 | 0.5769463  | 0.0015416  |
| 7w11w_SITTC3_ACACCAAAGTTACGGG-1-10x  | 0.26186976 | 0.882318   | 0.00076727 |
| 7w11w_SITTC3_ACACCAAGTATCTCGA-1-10x  | 0.02154593 | 0.02663507 | 3.69E-05   |
| 7w11w_SITTC3_ACACTGAAGAGATCGC-1-10x  | 0.08886771 | 0.26633707 | 0.0042295  |
| 7w11w_SITTC3_ACAGGGAGTTATGTGC-1-10x  | 0.04401685 | 0.10664371 | 8.81E-05   |
| 7w11w_SITTC3_ACATCGACATCATTGG-1-10x  | 0.11303247 | 0.3523767  | 0.0028393  |
| 7w11w_SITTC3_ACATGCACAAGGCTTT-1-10x  | 0.17926818 | 0.58821166 | 0.0014915  |
| 7w11w_SITTC3_ACATGCACAGCACACC-1-10x  | 0.02318164 | 0.03245906 | 3.83E-05   |
| 7w11w_SITTC3_ACATGCATCACCTTG-1-10x   | 0.07041396 | 0.20063171 | 0.0011935  |
| 7w11w_SITTC3_ACATTTCCAAGTCCCG-1-10x  | 0.23364022 | 0.7818056  | 0.00091657 |
| 7w11w_SITTC3_ACATTTCGTACAAGTA-1-10x  | 0.07169671 | 0.20519903 | 0.0013138  |
| 7w11w_SITTC3_ACCAAACAGGGTACGT-1-10x  | 0.02695404 | 0.04589086 | 4.19E-05   |
| 7w11w_SITTC3_ACCAACAAGGTTCCAT-1-10x  | 0.01858943 | 0.01610831 | 3.49E-05   |
| 7w11w_SITTC3_ACCATTTGTGAATTAG-1-10x  | 0.22250247 | 0.7421492  | 0.0010033  |
| 7w11w_SITTC3_ACCCTCATGGGAAC-1-10x    | 0.14627326 | 0.47073188 | 0.0018717  |
| 7w11w_SITTC3_ACCCTCATCCATTGCC-1-10x  | 0.01842155 | 0.01551057 | 3.49E-05   |
| 7w11w_SITTC3_ACCCTTGCATAGAGGC-1-10x  | 0.01599293 | 0.00686337 | 3.33E-05   |
| 7w11w_SITTC3_ACCCTTGGTAGCTTGT-1-10x  | 0.23792145 | 0.79704905 | 0.00088935 |
| 7w11w_SITTC3_ACCTACCTCCCGAGTG-1-10x  | 0.08700208 | 0.25969443 | 0.0040384  |
| 7w11w_SITTC3_ACCTGTCCAAGTGCAG-1-10x  | 0.26123476 | 0.8800571  | 0.00076963 |

|                                      |            |            |            |
|--------------------------------------|------------|------------|------------|
| 7w11w_SITTC3_ACGATCAAGAGATCGC-1-10x  | 0.07545528 | 0.21858156 | 0.001885   |
| 7w11w_SITTC3_ACGCACGCACTCGATA-1-10x  | 0.02946918 | 0.05484613 | 4.42E-05   |
| 7w11w_SITTC3_ACGGTCGAGCTACGTT-1-10x  | 0.07732982 | 0.22525594 | 0.0022191  |
| 7w11w_SITTC3_ACGGTCGCAGTCTCTC-1-10x  | 0.03482169 | 0.07390395 | 5.37E-05   |
| 7w11w_SITTC3_ACGGTTATCAGCGCAC-1-10x  | 0.05374901 | 0.1412955  | 0.00019264 |
| 7w11w_SITTC3_ACGTACACACCCTGAG-1-10x  | 0.02342025 | 0.03330867 | 3.83E-05   |
| 7w11w_SITTC3_ACGTACACATTCACCC-1-10x  | 0.15478769 | 0.50104785 | 0.0018522  |
| 7w11w_SITTC3_ACGTAGTAGTATGCAA-1-10x  | 0.08321887 | 0.24622414 | 0.0034742  |
| 7w11w_SITTC3_ACGTCCTTCGTTCCCA-1-10x  | 0.02343795 | 0.03337169 | 3.83E-05   |
| 7w11w_SITTC3_ACGTTCAGGACTAAT-1-10x   | 0.27355587 | 0.92392695 | 0.0007526  |
| 7w11w_SITTC3_ACGTTCAGCTTCCT-1-10x    | 0.07749806 | 0.22585498 | 0.0023954  |
| 7w11w_SITTC3_ACTACGAAGCTTCTAG-1-10x  | 0.08093017 | 0.23807514 | 0.0029431  |
| 7w11w_SITTC3_ACTATGGGTCACCGAC-1-10x  | 0.04194563 | 0.09926903 | 7.82E-05   |
| 7w11w_SITTC3_ACTATTGTTGTGTAC-1-10x   | 0.08296872 | 0.24533346 | 0.0033032  |
| 7w11w_SITTC3_ACTCTCGTCACCATCC-1-10x  | 0.03643848 | 0.07966062 | 5.82E-05   |
| 7w11w_SITTC3_ACTCTCGTCATTCACT-1-10x  | 0.05483342 | 0.14515656 | 0.00021164 |
| 7w11w_SITTC3_ACTGATGAGGAACTAT-1-10x  | 0.01826569 | 0.01495563 | 3.44E-05   |
| 7w11w_SITTC3_ACTGATGGTTGCCGCA-1-10x  | 0.23358494 | 0.78160876 | 0.00091657 |
| 7w11w_SITTC3_ACTGTCCAGTCTGTAC-1-10x  | 0.25476068 | 0.8570059  | 0.00079207 |
| 7w11w_SITTC3_ACTGTCCAGCGGTCT-1-10x   | 0.0200894  | 0.02144903 | 3.55E-05   |
| 7w11w_SITTC3_ACTGTCTCCCGTTCA-1-10x   | 0.02487932 | 0.03850374 | 4.00E-05   |
| 7w11w_SITTC3_ACTGTCTCTGCTTAT-1-10x   | 0.20727614 | 0.6879352  | 0.001126   |
| 7w11w_SITTC3_ACTGTGACATTCTGTT-1-10x  | 0.04931326 | 0.12550181 | 0.00013566 |
| 7w11w_SITTC3_ACTGTGAGTTCTCTAT-1-10x  | 0.02807192 | 0.04987111 | 4.30E-05   |
| 7w11w_SITTC3_ACTTAGGAGATAACAC-1-10x  | 0.05387099 | 0.1417298  | 0.00019264 |
| 7w11w_SITTC3_ACTTATCGTAGTCGGA-1-10x  | 0.08730976 | 0.26078993 | 0.0040384  |
| 7w11w_SITTC3_ACTTCGCAGTCAAGCG-1-10x  | 0.04365156 | 0.10534309 | 8.29E-05   |
| 7w11w_SITTC3_AGAACCTTCACGGGT-1-10x   | 0.05100714 | 0.13153295 | 0.00014746 |
| 7w11w_SITTC3_AGAAGCGGTCCGAAGA-1-10x  | 0.2686543  | 0.90647465 | 0.00075594 |
| 7w11w_SITTC3_AGACAAACACACCAGC-1-10x  | 0.03189571 | 0.06348588 | 4.83E-05   |
| 7w11w_SITTC3_AGACAAATCGACCCAG-1-10x  | 0.04002456 | 0.09242901 | 7.01E-05   |
| 7w11w_SITTC3_AGACACTAGAAGTAT-1-10x   | 0.04000794 | 0.09236981 | 7.01E-05   |
| 7w11w_SITTC3_AGACACTTCTCGCCTA-1-10x  | 0.02358944 | 0.03391106 | 3.83E-05   |
| 7w11w_SITTC3_AGACAGGGTTCGGGTC-1-10x  | 0.0317186  | 0.06285528 | 4.83E-05   |
| 7w11w_SITTC3_AGACCCGCAGGTACGA-1-10x  | 0.08891019 | 0.2664883  | 0.0042295  |
| 7w11w_SITTC3_AGACCCGTCCGGTAGAG-1-10x | 0.283203   | 0.9582759  | 0.00075531 |
| 7w11w_SITTC3_AGACTCAGTTCTCACC-1-10x  | 0.01702945 | 0.01055395 | 3.38E-05   |
| 7w11w_SITTC3_AGAGAATAGACTCATC-1-10x  | 0.05514002 | 0.14624822 | 0.000233   |
| 7w11w_SITTC3_AGAGAATTCGGTGTTA-1-10x  | 0.05516496 | 0.14633702 | 0.000233   |
| 7w11w_SITTC3_AGAGAGCCAAGACGGT-1-10x  | 0.15319675 | 0.4953833  | 0.0018617  |
| 7w11w_SITTC3_AGAGCCCTCTGCATAG-1-10x  | 0.0494998  | 0.126166   | 0.00013566 |

|                                       |            |            |            |
|---------------------------------------|------------|------------|------------|
| 7w11w_SITTC3_AGATAGACATTAGGCT-1-10x   | 0.01874221 | 0.01665231 | 3.49E-05   |
| 7w11w_SITTC3_AGATCGTCAAGCGAAC-1-10x   | 0.1409609  | 0.45181704 | 0.0018734  |
| 7w11w_SITTC3_AGATGCTAGGAACTCG-1-10x   | 0.04992608 | 0.12768379 | 0.00013566 |
| 7w11w_SITTC3_AGATGCTGTAGGGTAC-1-10x   | 0.20876862 | 0.6932492  | 0.0011177  |
| 7w11w_SITTC3_AGCATCACATAATCCG-1-10x   | 0.24842976 | 0.8344644  | 0.00081888 |
| 7w11w_SITTC3_AGCATCAGTCCTCATC-1-10x   | 0.01543573 | 0.00487945 | 3.27E-05   |
| 7w11w_SITTC3_AGCCAATCAGACCTGC-1-10x   | 0.08222509 | 0.24268574 | 0.0033032  |
| 7w11w_SITTC3_AGCCACGAGAGGGTGG-1-10x   | 0.02649554 | 0.04425835 | 4.09E-05   |
| 7w11w_SITTC3_AGCCACGCACAGTCAT-1-10x   | 0.09074308 | 0.2730144  | 0.0043535  |
| 7w11w_SITTC3_AGCCAGCCACGTCATA-1-10x   | 0.08098117 | 0.2382567  | 0.0029431  |
| 7w11w_SITTC3_AGCCAGCGTGACACAG-1-10x   | 0.0351439  | 0.0750512  | 5.37E-05   |
| 7w11w_SITTC3_AGCGCCACAGGCTTGC-1-10x   | 0.26914486 | 0.90822136 | 0.00075499 |
| 7w11w_SITTC3_AGCGTCGGTATTTCCGG-1-10x  | 0.02545755 | 0.04056256 | 4.00E-05   |
| 7w11w_SITTC3_AGCTTCCGTCCTCCAT-1-10x   | 0.01808504 | 0.01431241 | 3.44E-05   |
| 7w11w_SITTC3_AGGACGAAGAGTTGCG-1-10x   | 0.04715015 | 0.11779996 | 0.00010777 |
| 7w11w_SITTC3_AGGACGAGTGTTACTG-1-10x   | 0.01862674 | 0.01624115 | 3.49E-05   |
| 7w11w_SITTC3_AGGAGGTTCCGCATAT-1-10x   | 0.04037662 | 0.09368251 | 7.01E-05   |
| 7w11w_SITTC3_AGGATAAAGCCATGCC-1-10x   | 0.17323759 | 0.5667395  | 0.0016089  |
| 7w11w_SITTC3_AGGATCTAGATTGCGG-1-10x   | 0.23605564 | 0.7904058  | 0.00090278 |
| 7w11w_SITTC3_AGGATCTAGTCACACT-1-10x   | 0.14122732 | 0.45276564 | 0.0018734  |
| 7w11w_SITTC3_AGGCCACAGTGATAGT-1-10x   | 0.01691818 | 0.01015778 | 3.38E-05   |
| 7w11w_SITTC3_AGGCTGCAGCCAGTAG-1-10x   | 0.20762655 | 0.6891828  | 0.001126   |
| 7w11w_SITTC3_AGGGAGTAGGAAAGGT-1-10x   | 0.20231484 | 0.67027026 | 0.0011792  |
| 7w11w_SITTC3_AGGGCCTTCAAGAAAC-1-10x   | 0.11156823 | 0.3471632  | 0.002929   |
| 7w11w_SITTC3_AGGGCTCCAAGAGGCT-1-10x   | 0.03966209 | 0.09113841 | 6.67E-05   |
| 7w11w_SITTC3_AGGGCTCGTAACATCC-1-10x   | 0.01815414 | 0.01455847 | 3.44E-05   |
| 7w11w_SITTC3_AGGGTCCAGTCCCAGC-1-10x   | 0.03629023 | 0.07913274 | 5.82E-05   |
| 7w11w_SITTC3_AGGGTGAAGCTAGTTC-1-10x   | 0.21420343 | 0.7126001  | 0.0010701  |
| 7w11w_SITTC3_AGGTAGGCAACCACGC-1-10x   | 0.01786094 | 0.0135145  | 3.44E-05   |
| 7w11w_SITTC3_AGGTAGGGTTTATGCG-1-10x   | 0.15392238 | 0.49796692 | 0.0018575  |
| 7w11w_SITTC3_AGGTCTAGTGCCCAT-1-10x    | 0.03084271 | 0.05973665 | 4.68E-05   |
| 7w11w_SITTC3_AGGTCTAGTTGGTAGG-1-10x   | 0.1667261  | 0.5435551  | 0.0017056  |
| 7w11w_SITTC3_AGGTTACCATCCGGCA-1-10x   | 0.07131381 | 0.2038357  | 0.0013138  |
| 7w11w_SITTC3_AGGTTGTTCTCTAGGA-1-10x   | 0.03625312 | 0.07900064 | 5.82E-05   |
| 7w11w_SITTC3_AGTAACCCACATATGC-1-10x   | 0.01874557 | 0.01666426 | 3.49E-05   |
| 7w11w_SITTC3_AGTACCAAGGTGCAGT-1-10x   | 0.03939966 | 0.09020401 | 6.67E-05   |
| 7w11w_SITTC3_AGTACTIONCATGTAACC-1-10x | 0.05273255 | 0.13767634 | 0.00017575 |
| 7w11w_SITTC3_AGTAGCTGTGTTTACG-1-10x   | 0.02765918 | 0.04840153 | 4.19E-05   |
| 7w11w_SITTC3_AGTAGCTTCTCACGAA-1-10x   | 0.11557724 | 0.36143744 | 0.002594   |
| 7w11w_SITTC3_AGTCTCCTCTGCCTGT-1-10x   | 0.03181076 | 0.06318343 | 4.83E-05   |
| 7w11w_SITTC3_AGTGCCGCAACGGCCT-1-10x   | 0.02208326 | 0.02854825 | 3.76E-05   |

|                                      |            |            |            |
|--------------------------------------|------------|------------|------------|
| 7w11w_SITTC3_AGTGCCGGTCCAAGAG-1-10x  | 0.18311742 | 0.601917   | 0.0014268  |
| 7w11w_SITTC3_AGTTAGCCATGGTGGA-1-10x  | 0.02223061 | 0.0290729  | 3.76E-05   |
| 7w11w_SITTC3_AGTTCGAAGCGGATCA-1-10x  | 0.03021525 | 0.05750253 | 4.55E-05   |
| 7w11w_SITTC3_AGTTCGAAGTCTGCGC-1-10x  | 0.04495978 | 0.11000104 | 9.39E-05   |
| 7w11w_SITTC3_ATACCTTAGGAAGTAG-1-10x  | 0.18119334 | 0.59506625 | 0.0014587  |
| 7w11w_SITTC3_ATACCTTTCATCGACA-1-10x  | 0.04816096 | 0.12139899 | 0.00011598 |
| 7w11w_SITTC3_ATACTTCAGGATACCG-1-10x  | 0.11063176 | 0.3438289  | 0.0030221  |
| 7w11w_SITTC3_ATAGAGAAGATCGCCC-1-10x  | 0.04770787 | 0.11978573 | 0.00011598 |
| 7w11w_SITTC3_ATAGGCTCAATTTCTC-1-10x  | 0.03809021 | 0.08554167 | 6.36E-05   |
| 7w11w_SITTC3_ATCACTTCAAACCATC-1-10x  | 0.04594522 | 0.11350977 | 0.00010046 |
| 7w11w_SITTC3_ATCAGGTGTGTGGACA-1-10x  | 0.02897135 | 0.05307359 | 4.42E-05   |
| 7w11w_SITTC3_ATCATTCCAACAGAGC-1-10x  | 0.04359209 | 0.10513133 | 8.29E-05   |
| 7w11w_SITTC3_ATCATTCCATCCCCT-1-10x   | 0.194063   | 0.6408892  | 0.0012624  |
| 7w11w_SITTC3_ATCATTTCGTCGCGTT-1-10x  | 0.0667592  | 0.18761879 | 0.00079936 |
| 7w11w_SITTC3_ATCATTTCGTTGAGCC-1-10x  | 0.05413256 | 0.14266112 | 0.00021164 |
| 7w11w_SITTC3_ATCCATTATAACAGA-1-10x   | 0.04541726 | 0.11162992 | 9.39E-05   |
| 7w11w_SITTC3_ATCCATTTCTATACTC-1-10x  | 0.1574131  | 0.5103957  | 0.0018302  |
| 7w11w_SITTC3_ATCCCTGTCTTGGTCC-1-10x  | 0.04983825 | 0.12737103 | 0.00013566 |
| 7w11w_SITTC3_ATCCGTCGTCGAAGTTC-1-10x | 0.02674632 | 0.04515127 | 4.19E-05   |
| 7w11w_SITTC3_ATCCTATCAATGTCAC-1-10x  | 0.08766479 | 0.26205403 | 0.0040384  |
| 7w11w_SITTC3_ATCCTATTCAAACCCA-1-10x  | 0.08729602 | 0.26074097 | 0.0040384  |
| 7w11w_SITTC3_ATCCTATTCCATTGGA-1-10x  | 0.05346157 | 0.14027204 | 0.00019264 |
| 7w11w_SITTC3_ATCGATGAGCATTGAA-1-10x  | 0.0501236  | 0.12838705 | 0.00013566 |
| 7w11w_SITTC3_ATCGGATAGCGTGCT-1-10x   | 0.07378791 | 0.2126448  | 0.0017292  |
| 7w11w_SITTC3_ATCGTGACAATAGTCC-1-10x  | 0.12296334 | 0.38773596 | 0.0021479  |
| 7w11w_SITTC3_ATCTTCACAGAAGCGT-1-10x  | 0.1541734  | 0.49886072 | 0.0018575  |
| 7w11w_SITTC3_ATCTTCAGTTGACGGA-1-10x  | 0.05800945 | 0.15646495 | 0.00031414 |
| 7w11w_SITTC3_ATGAAAGAGGCGACAT-1-10x  | 0.19799839 | 0.6549014  | 0.0012187  |
| 7w11w_SITTC3_ATGACCATCCGTGGCA-1-10x  | 0.02101217 | 0.02473458 | 3.62E-05   |
| 7w11w_SITTC3_ATGCATGGTATCAAGA-1-10x  | 0.03639238 | 0.07949648 | 5.82E-05   |
| 7w11w_SITTC3_ATGCCCTCAGCGTTAGG-1-10x | 0.1807148  | 0.59336245 | 0.001475   |
| 7w11w_SITTC3_ATGCGATCACGGGTAA-1-10x  | 0.02266369 | 0.03061489 | 3.76E-05   |
| 7w11w_SITTC3_ATGGAGGCAAAGAACT-1-10x  | 0.0173669  | 0.01175544 | 3.44E-05   |
| 7w11w_SITTC3_ATGGATCGTGCTGTCG-1-10x  | 0.04756461 | 0.11927566 | 0.00011598 |
| 7w11w_SITTC3_ATGGGTTTCATATTCGG-1-10x | 0.08580779 | 0.25544208 | 0.0037839  |
| 7w11w_SITTC3_ATGTCCCAGGGTGAGG-1-10x  | 0.0214279  | 0.02621482 | 3.69E-05   |
| 7w11w_SITTC3_ATGTCCCGTCTCACAA-1-10x  | 0.12729026 | 0.40314215 | 0.0020026  |
| 7w11w_SITTC3_ATGTCCCTCCTCTTTC-1-10x  | 0.14001895 | 0.4484632  | 0.001875   |
| 7w11w_SITTC3_ATTACCTAGTGGTTCT-1-10x  | 0.02321793 | 0.03258829 | 3.83E-05   |
| 7w11w_SITTC3_ATTACCTGTCCGGACT-1-10x  | 0.17646568 | 0.57823324 | 0.0015416  |
| 7w11w_SITTC3_ATTACCTTCAGGACGA-1-10x  | 0.14830934 | 0.47798145 | 0.0018713  |



|                                      |            |            |            |
|--------------------------------------|------------|------------|------------|
| 7w11w_SITTC3_ATTATCCAGGCGCTTC-1-10x  | 0.0877886  | 0.26249486 | 0.0040384  |
| 7w11w_SITTC3_ATTCAGGCAAGGTCAG-1-10x  | 0.08448187 | 0.2507211  | 0.0036353  |
| 7w11w_SITTC3_ATTCAGGCACGGGTA-1-10x   | 0.04450763 | 0.10839114 | 8.81E-05   |
| 7w11w_SITTC3_ATTCAGGGTTCAAAGA-1-10x  | 0.02867478 | 0.05201761 | 4.42E-05   |
| 7w11w_SITTC3_ATTCCCGAGCACACCC-1-10x  | 0.04135465 | 0.09716482 | 7.40E-05   |
| 7w11w_SITTC3_ATTCTACCATGTTCTGA-1-10x | 0.01601904 | 0.00695633 | 3.33E-05   |
| 7w11w_SITTC3_ATTCTTGAGCCAACCC-1-10x  | 0.10354827 | 0.3186078  | 0.0038193  |
| 7w11w_SITTC3_ATTCTTGGTCACTGAT-1-10x  | 0.26916364 | 0.9082882  | 0.00075499 |
| 7w11w_SITTC3_ATTGGGTGTACAGTT-1-10x   | 0.19287221 | 0.63664937 | 0.0012861  |
| 7w11w_SITTC3_ATTTACCGTGTGTGGA-1-10x  | 0.04827917 | 0.12181989 | 0.00011598 |
| 7w11w_SITTC3_ATTTACCTCAAACCTG-1-10x  | 0.07184465 | 0.20572574 | 0.0014433  |
| 7w11w_SITTC3_ATTTACAGTAGGTTA-1-10x   | 0.04889533 | 0.12401373 | 0.00012523 |
| 7w11w_SITTC3_CAACAACCACACCTGG-1-10x  | 0.03015178 | 0.05727656 | 4.55E-05   |
| 7w11w_SITTC3_CAACAACCTCAGATGCT-1-10x | 0.21645577 | 0.7206196  | 0.001055   |
| 7w11w_SITTC3_CAACAGTGTCTCTCT-1-10x   | 0.02141728 | 0.026177   | 3.69E-05   |
| 7w11w_SITTC3_CAACGATTCGAAGCCC-1-10x  | 0.22486785 | 0.7505712  | 0.00098869 |
| 7w11w_SITTC3_CAACGGCCATTACGGT-1-10x  | 0.14981645 | 0.4833476  | 0.0018694  |
| 7w11w_SITTC3_CAACGGCGTCTCTCTG-1-10x  | 0.04635721 | 0.11497667 | 0.00010046 |
| 7w11w_SITTC3_CAAGAGGGTAAGCGGT-1-10x  | 0.06594652 | 0.18472522 | 0.00072102 |
| 7w11w_SITTC3_CAAGAGGGTGATACAA-1-10x  | 0.09522903 | 0.2889868  | 0.0044051  |
| 7w11w_SITTC3_CAAGCTATCACGATCA-1-10x  | 0.25643212 | 0.86295706 | 0.00078463 |
| 7w11w_SITTC3_CAAGGGACAATGGCAG-1-10x  | 0.12544529 | 0.39657307 | 0.0020515  |
| 7w11w_SITTC3_CAAGGGACACACGCCA-1-10x  | 0.04756124 | 0.11926367 | 0.00011598 |
| 7w11w_SITTC3_CAATACGTCGTGTCAA-1-10x  | 0.01864823 | 0.01631767 | 3.49E-05   |
| 7w11w_SITTC3_CAATCGAGTACCATAC-1-10x  | 0.01542735 | 0.00484961 | 3.27E-05   |
| 7w11w_SITTC3_CAATGACAGTATGGCG-1-10x  | 0.0915757  | 0.27597895 | 0.0043903  |
| 7w11w_SITTC3_CAATGACGTTAGTTCTG-1-10x | 0.04345903 | 0.10465758 | 8.29E-05   |
| 7w11w_SITTC3_CACAGATAGAGCTGAC-1-10x  | 0.04166896 | 0.09828395 | 7.40E-05   |
| 7w11w_SITTC3_CACGTGGAGAATTGTG-1-10x  | 0.0263366  | 0.04369243 | 4.09E-05   |
| 7w11w_SITTC3_CACGTGGAGCGCCTCA-1-10x  | 0.04996707 | 0.12782973 | 0.00013566 |
| 7w11w_SITTC3_CACGTGGCAACAGTGG-1-10x  | 0.04915542 | 0.12493981 | 0.00012523 |
| 7w11w_SITTC3_CACGTTCCAGCTTTGA-1-10x  | 0.09560191 | 0.29031447 | 0.0043808  |
| 7w11w_SITTC3_CACGTTCTCCTACCGT-1-10x  | 0.02026183 | 0.02206297 | 3.62E-05   |
| 7w11w_SITTC3_CACTAAGTCCTGGTCT-1-10x  | 0.14500302 | 0.46620917 | 0.0018716  |
| 7w11w_SITTC3_CACTGAAAGTCATCCA-1-10x  | 0.17520225 | 0.57373476 | 0.0015585  |
| 7w11w_SITTC3_CACTGAAGTAGTGCGA-1-10x  | 0.06700368 | 0.18848926 | 0.00079936 |
| 7w11w_SITTC3_CACTGGGAGGTACCTT-1-10x  | 0.02579484 | 0.04176347 | 4.00E-05   |
| 7w11w_SITTC3_CAGAGCCAGCTCACTA-1-10x  | 0.03266016 | 0.06620776 | 5.00E-05   |
| 7w11w_SITTC3_CAGATACTCCGAGGCT-1-10x  | 0.16895178 | 0.5514797  | 0.0016744  |
| 7w11w_SITTC3_CAGATACTCTCAGAAC-1-10x  | 0.04365163 | 0.10534331 | 8.29E-05   |
| 7w11w_SITTC3_CAGATTGCACGTAGAG-1-10x  | 0.2643978  | 0.8913192  | 0.00076135 |

|                                      |            |            |            |
|--------------------------------------|------------|------------|------------|
| 7w11w_SITTC3_CAGCAATCAGAGCCCT-1-10x  | 0.23315234 | 0.78006846 | 0.00092358 |
| 7w11w_SITTC3_CAGCAATGTGATACAA-1-10x  | 0.21133508 | 0.7023872  | 0.0010934  |
| 7w11w_SITTC3_CAGCAATTCGACGAGA-1-10x  | 0.01909478 | 0.01790763 | 3.49E-05   |
| 7w11w_SITTC3_CAGGGCTCAGGTTCCG-1-10x  | 0.20611085 | 0.6837861  | 0.001143   |
| 7w11w_SITTC3_CAGGTATGTTAAGTCC-1-10x  | 0.01698377 | 0.01039132 | 3.38E-05   |
| 7w11w_SITTC3_CAGTGCGAGTGAGTTA-1-10x  | 0.2243632  | 0.74877435 | 0.00098869 |
| 7w11w_SITTC3_CAGTGCGTCAACACGT-1-10x  | 0.1832736  | 0.60247314 | 0.0014268  |
| 7w11w_SITTC3_CAGTTAGAGGTCACAG-1-10x  | 0.15847403 | 0.5141732  | 0.0018209  |
| 7w11w_SITTC3_CATAAGCAGACCAACG-1-10x  | 0.10759357 | 0.33301127 | 0.0033168  |
| 7w11w_SITTC3_CATAAGCAGTTACTCG-1-10x  | 0.04489017 | 0.10975318 | 9.39E-05   |
| 7w11w_SITTC3_CATAAGCCAGACCTGC-1-10x  | 0.0224782  | 0.02995443 | 3.76E-05   |
| 7w11w_SITTC3_CATACAGAGGTTGGTG-1-10x  | 0.04096889 | 0.09579132 | 7.40E-05   |
| 7w11w_SITTC3_CATACTTAGAGTCTGG-1-10x  | 0.01596313 | 0.00675727 | 3.33E-05   |
| 7w11w_SITTC3_CATCCCATCTGCGGCA-1-10x  | 0.09895217 | 0.30224317 | 0.0042345  |
| 7w11w_SITTC3_CATCCGTCAGGGCTTC-1-10x  | 0.02798161 | 0.04954957 | 4.30E-05   |
| 7w11w_SITTC3_CATCGCTCAAGGTCTT-1-10x  | 0.03018014 | 0.05737754 | 4.55E-05   |
| 7w11w_SITTC3_CATCGCTCATGTTACAG-1-10x | 0.02866142 | 0.05197006 | 4.42E-05   |
| 7w11w_SITTC3_CATCGGGCACGGTGAA-1-10x  | 0.1499209  | 0.48371947 | 0.0018694  |
| 7w11w_SITTC3_CATCGGGTCAAGTCGT-1-10x  | 0.20935348 | 0.69533163 | 0.0011095  |
| 7w11w_SITTC3_CATCGTTCGTCGAATTC-1-10x | 0.024668   | 0.03775133 | 3.91E-05   |
| 7w11w_SITTC3_CATGAGTAGCCATTCA-1-10x  | 0.02340726 | 0.03326241 | 3.83E-05   |
| 7w11w_SITTC3_CATGCCTAGGCCTGAA-1-10x  | 0.04244041 | 0.10103074 | 7.82E-05   |
| 7w11w_SITTC3_CATGCCTCAACGCTA-1-10x   | 0.09257051 | 0.27952105 | 0.0044107  |
| 7w11w_SITTC3_CATGCGGGTGGTCTTA-1-10x  | 0.02166004 | 0.02704135 | 3.69E-05   |
| 7w11w_SITTC3_CATGCTCTCTGAGGTT-1-10x  | 0.01609371 | 0.00722222 | 3.33E-05   |
| 7w11w_SITTC3_CATGGATGTCTGGTTA-1-10x  | 0.03959854 | 0.09091213 | 6.67E-05   |
| 7w11w_SITTC3_CATGGTAGTTATCTGG-1-10x  | 0.06692761 | 0.18821844 | 0.00079936 |
| 7w11w_SITTC3_CATTCATAGAGCATCG-1-10x  | 0.05925513 | 0.16090025 | 0.00034795 |
| 7w11w_SITTC3_CATTCATCATTGTACG-1-10x  | 0.12142085 | 0.38224384 | 0.0022308  |
| 7w11w_SITTC3_CATTCCGAGGAACATT-1-10x  | 0.14009699 | 0.44874105 | 0.001875   |
| 7w11w_SITTC3_CATTCTAGTTATCTTC-1-10x  | 0.08074145 | 0.23740317 | 0.0029431  |
| 7w11w_SITTC3_CATTGAGTCATAGAGA-1-10x  | 0.01625346 | 0.00779099 | 3.33E-05   |
| 7w11w_SITTC3_CATTGCCAGCGACATG-1-10x  | 0.23094824 | 0.7722207  | 0.00093779 |
| 7w11w_SITTC3_CATTGTTAGATTAGCA-1-10x  | 0.07755886 | 0.22607143 | 0.0023954  |
| 7w11w_SITTC3_CATTTAGTGTGTCGC-1-10x   | 0.17316255 | 0.5664723  | 0.0016089  |
| 7w11w_SITTC3_CCAAGCGGTAACGTTC-1-10x  | 0.05137545 | 0.13284433 | 0.00016076 |
| 7w11w_SITTC3_CCAAGCGTCTGCTAGA-1-10x  | 0.09152106 | 0.27578443 | 0.0043535  |
| 7w11w_SITTC3_CCAATGACAATCGTCA-1-10x  | 0.01822493 | 0.01481052 | 3.44E-05   |
| 7w11w_SITTC3_CCACAAACAGTCTGGC-1-10x  | 0.09628832 | 0.29275844 | 0.0043435  |
| 7w11w_SITTC3_CCACAAAGTAGAGATT-1-10x  | 0.06121163 | 0.16786647 | 0.00042799 |
| 7w11w_SITTC3_CCACACTAGAAACACT-1-10x  | 0.1083952  | 0.3358655  | 0.0033168  |

|                                     |            |            |            |
|-------------------------------------|------------|------------|------------|
| 7w11w_SITTC3_CCACACTCAATGAAAC-1-10x | 0.04166301 | 0.09826277 | 7.40E-05   |
| 7w11w_SITTC3_CCACACTCAGCACGAA-1-10x | 0.0556151  | 0.14793977 | 0.000233   |
| 7w11w_SITTC3_CCACACTGTAGCTTTG-1-10x | 0.06614535 | 0.18543318 | 0.00072102 |
| 7w11w_SITTC3_CCACCATGTCTGTAAC-1-10x | 0.02847839 | 0.05131836 | 4.30E-05   |
| 7w11w_SITTC3_CCACTTGAGTAGAATC-1-10x | 0.11542269 | 0.36088717 | 0.002594   |
| 7w11w_SITTC3_CCACTTGACACCTTC-1-10x  | 0.09335424 | 0.28231153 | 0.0044107  |
| 7w11w_SITTC3_CCACTTGGTCGACTGC-1-10x | 0.03653527 | 0.08000524 | 5.82E-05   |
| 7w11w_SITTC3_CCAACTTCATCTCTA-1-10x  | 0.27618074 | 0.9332729  | 0.00075214 |
| 7w11w_SITTC3_CCCATTGTCTGGGCG-1-10x  | 0.02699093 | 0.0460222  | 4.19E-05   |
| 7w11w_SITTC3_CCCGAAGGTAGAGGAA-1-10x | 0.01646097 | 0.00852985 | 3.38E-05   |
| 7w11w_SITTC3_CCCGGAACAGCGAGTA-1-10x | 0.05232637 | 0.1362301  | 0.00017575 |
| 7w11w_SITTC3_CCCTCAAAGCCTCTTC-1-10x | 0.21923994 | 0.73053277 | 0.0010326  |
| 7w11w_SITTC3_CCCTCAACAGATCACT-1-10x | 0.04829726 | 0.12188429 | 0.00011598 |
| 7w11w_SITTC3_CCCTGATCATAACCA-1-10x  | 0.03900087 | 0.0887841  | 6.67E-05   |
| 7w11w_SITTC3_CCGATGGGTTGCATCA-1-10x | 0.11746321 | 0.36815253 | 0.002453   |
| 7w11w_SITTC3_CCGCAAGAGACGTCGA-1-10x | 0.0516542  | 0.1338368  | 0.00016076 |
| 7w11w_SITTC3_CCGGTGACAGCGACAA-1-10x | 0.26884666 | 0.90715957 | 0.00075594 |
| 7w11w_SITTC3_CCGGTGAGTCCTTAAG-1-10x | 0.01827966 | 0.01500539 | 3.44E-05   |
| 7w11w_SITTC3_CCGTAGGAGCACCTGC-1-10x | 0.04331241 | 0.10413553 | 8.29E-05   |
| 7w11w_SITTC3_CCGTGAGTCGTGCATA-1-10x | 0.05419439 | 0.14288129 | 0.00021164 |
| 7w11w_SITTC3_CCGTTCAAGGGTTTCT-1-10x | 0.05224724 | 0.13594836 | 0.00017575 |
| 7w11w_SITTC3_CCGTTCAGTGCAACAG-1-10x | 0.08481889 | 0.25192106 | 0.0036353  |
| 7w11w_SITTC3_CCTACGTTACCCGGT-1-10x  | 0.10297397 | 0.31656298 | 0.0038193  |
| 7w11w_SITTC3_CCTCAACCATACCAGT-1-10x | 0.08319549 | 0.24614087 | 0.0034742  |
| 7w11w_SITTC3_CCTCACAAGAGCTGCA-1-10x | 0.09936389 | 0.30370915 | 0.0041652  |
| 7w11w_SITTC3_CCTCACACAAGAGTTA-1-10x | 0.08502356 | 0.25264978 | 0.0037839  |
| 7w11w_SITTC3_CCTCAAAGACTCTTG-1-10x  | 0.01540772 | 0.0047797  | 3.27E-05   |
| 7w11w_SITTC3_CCTCCAAGTCCTCCAT-1-10x | 0.01615769 | 0.00745002 | 3.33E-05   |
| 7w11w_SITTC3_CCTCCTCGTAAGTTAG-1-10x | 0.02452725 | 0.03725018 | 3.91E-05   |
| 7w11w_SITTC3_CCTCTAGAGGGACAGG-1-10x | 0.09922504 | 0.30321476 | 0.0041652  |
| 7w11w_SITTC3_CCTCTCCCACGGCACT-1-10x | 0.01787373 | 0.01356006 | 3.44E-05   |
| 7w11w_SITTC3_CCTGCATTCCATGCAA-1-10x | 0.13938268 | 0.4461977  | 0.0018772  |
| 7w11w_SITTC3_CCTGTTGCATCAACCA-1-10x | 0.023006   | 0.03183371 | 3.83E-05   |
| 7w11w_SITTC3_CCTTCAGCAACCAACT-1-10x | 0.01624824 | 0.0077724  | 3.33E-05   |
| 7w11w_SITTC3_CCTTCAGTCTGCCTCA-1-10x | 0.18210126 | 0.59829897 | 0.0014427  |
| 7w11w_SITTC3_CCTTTGGCACATCCCT-1-10x | 0.18224245 | 0.5988017  | 0.0014427  |
| 7w11w_SITTC3_CGAAGTTCAGTTTCGA-1-10x | 0.08292639 | 0.24518272 | 0.0033032  |
| 7w11w_SITTC3_CGAAGTTCCTGTTAT-1-10x  | 0.08059002 | 0.23686399 | 0.0029431  |
| 7w11w_SITTC3_CGAGAAGAGCAGGTCA-1-10x | 0.05090337 | 0.13116346 | 0.00014746 |
| 7w11w_SITTC3_CGAGGAACAGGTTACT-1-10x | 0.06427895 | 0.17878778 | 0.00058553 |
| 7w11w_SITTC3_CGAGGAACATACCACA-1-10x | 0.19959623 | 0.6605905  | 0.0011985  |

|                                      |            |            |            |
|--------------------------------------|------------|------------|------------|
| 7w11w_SITTC3_CGAGGCTAGATTCGCT-1-10x  | 0.2638202  | 0.8892627  | 0.00076313 |
| 7w11w_SITTC3_CGAGTGCCTACTCTC-1-10x   | 0.01623915 | 0.00774005 | 3.33E-05   |
| 7w11w_SITTC3_CGATGCGCAATTTCT-1-10x   | 0.02056323 | 0.02313613 | 3.62E-05   |
| 7w11w_SITTC3_CGATGCGCACCTCTAC-1-10x  | 0.05328083 | 0.1396285  | 0.00019264 |
| 7w11w_SITTC3_CGCAGGTGTCCATAGT-1-10x  | 0.04534313 | 0.11136599 | 9.39E-05   |
| 7w11w_SITTC3_CGCAGGTGTGTCATGT-1-10x  | 0.25958604 | 0.87418675 | 0.00077499 |
| 7w11w_SITTC3_CGCATGGAGTGGATAT-1-10x  | 0.04834401 | 0.12205074 | 0.00011598 |
| 7w11w_SITTC3_CGCGTGAAGCCTGTTCG-1-10x | 0.16595675 | 0.5408158  | 0.0017206  |
| 7w11w_SITTC3_CGCGTGATCCGGTTCT-1-10x  | 0.05210597 | 0.13544536 | 0.00016076 |
| 7w11w_SITTC3_CGGAACCCACCTCTAC-1-10x  | 0.03680762 | 0.08097493 | 5.82E-05   |
| 7w11w_SITTC3_CGGAATTGTAAGACCG-1-10x  | 0.02798783 | 0.04957171 | 4.30E-05   |
| 7w11w_SITTC3_CGGAGAAGTGCCCAGT-1-10x  | 0.02574658 | 0.04159164 | 4.00E-05   |
| 7w11w_SITTC3_CGGCAGTTCTCATGGA-1-10x  | 0.28927824 | 0.97990704 | 0.0007606  |
| 7w11w_SITTC3_CGGGACTAGGAAGTCC-1-10x  | 0.03258344 | 0.06593458 | 5.00E-05   |
| 7w11w_SITTC3_CGGGACTCAACACACT-1-10x  | 0.27052358 | 0.9131303  | 0.00075418 |
| 7w11w_SITTC3_CGGTCAGTCATTCTA-1-10x   | 0.02886035 | 0.05267836 | 4.42E-05   |
| 7w11w_SITTC3_CGTCAAAGTCACTTAG-1-10x  | 0.05821196 | 0.15718599 | 0.00031414 |
| 7w11w_SITTC3_CGTCAAAGTCTGACTGC-1-10x | 0.03456884 | 0.07300367 | 5.37E-05   |
| 7w11w_SITTC3_CGTGAATCATCTAGAC-1-10x  | 0.01617543 | 0.00751316 | 3.33E-05   |
| 7w11w_SITTC3_CGTGATAGTACGTGAG-1-10x  | 0.01851089 | 0.01582866 | 3.49E-05   |
| 7w11w_SITTC3_CGTGATAGTTCGATGCC-1-10x | 0.23553288 | 0.7885445  | 0.00090278 |
| 7w11w_SITTC3_CGTGCTTAGCCTGTTCG-1-10x | 0.28741962 | 0.9732894  | 0.00075864 |
| 7w11w_SITTC3_CGTTGGGTCCAGCTCT-1-10x  | 0.20669238 | 0.6858567  | 0.0011344  |
| 7w11w_SITTC3_CTAACCTCAAGCAATA-1-10x  | 0.06810256 | 0.1924019  | 0.00097948 |
| 7w11w_SITTC3_CTAACCTCATGTGCTA-1-10x  | 0.19185244 | 0.63301843 | 0.0012985  |
| 7w11w_SITTC3_CTAAGTGTCTCGCAGG-1-10x  | 0.02825537 | 0.05052431 | 4.30E-05   |
| 7w11w_SITTC3_CTACAGAAGCCTTGAT-1-10x  | 0.08226327 | 0.24282168 | 0.0033032  |
| 7w11w_SITTC3_CTACAGAAGTATTCCG-1-10x  | 0.03318698 | 0.06808351 | 5.00E-05   |
| 7w11w_SITTC3_CTACCTGAGATGGTAT-1-10x  | 0.18771657 | 0.6182925  | 0.0013519  |
| 7w11w_SITTC3_CTACCTGGTGGATCAG-1-10x  | 0.05193987 | 0.13485396 | 0.00016076 |
| 7w11w_SITTC3_CTACGGGCAGGCTCTG-1-10x  | 0.27342665 | 0.9234668  | 0.0007526  |
| 7w11w_SITTC3_CTAATGTGGATCGA-1-10x    | 0.03563767 | 0.07680928 | 5.58E-05   |
| 7w11w_SITTC3_CTAATTCGAGTTGT-1-10x    | 0.0805546  | 0.23673788 | 0.0029431  |
| 7w11w_SITTC3_CTATAGGTCTCTCCGA-1-10x  | 0.03028164 | 0.05773891 | 4.55E-05   |
| 7w11w_SITTC3_CTATCTATCATCTCTA-1-10x  | 0.02148961 | 0.02643454 | 3.69E-05   |
| 7w11w_SITTC3_CTCAAGATCTGCCCTA-1-10x  | 0.02802942 | 0.04971981 | 4.30E-05   |
| 7w11w_SITTC3_CTCAATTGTTCCCACT-1-10x  | 0.04861149 | 0.12300313 | 0.00012523 |
| 7w11w_SITTC3_CTCAGAATCATTGTGG-1-10x  | 0.03291313 | 0.06710845 | 5.00E-05   |
| 7w11w_SITTC3_CTCAGTCCAACAGAGC-1-10x  | 0.22012144 | 0.7336714  | 0.0010253  |
| 7w11w_SITTC3_CTCAGTCGTAGTCACT-1-10x  | 0.23996939 | 0.80434084 | 0.00087632 |
| 7w11w_SITTC3_CTCATCGGTAGTCCTA-1-10x  | 0.04969116 | 0.12684731 | 0.00013566 |

|                                      |            |            |            |
|--------------------------------------|------------|------------|------------|
| 7w11w_SITTC3_CTCATTATCATTTGTC-1-10x  | 0.14567395 | 0.46859804 | 0.0018716  |
| 7w11w_SITTC3_CTCCACAAGGAACGAA-1-10x  | 0.08872478 | 0.26582813 | 0.0041422  |
| 7w11w_SITTC3_CTCCACACACCAGACC-1-10x  | 0.05438653 | 0.1435654  | 0.00021164 |
| 7w11w_SITTC3_CTCCACAGTATGGGAC-1-10x  | 0.04359473 | 0.10514072 | 8.29E-05   |
| 7w11w_SITTC3_CTCCACATCCCGAATA-1-10x  | 0.08053578 | 0.23667087 | 0.0029431  |
| 7w11w_SITTC3_CTCCATGAGAGTCAAT-1-10x  | 0.01620917 | 0.00763332 | 3.33E-05   |
| 7w11w_SITTC3_CTCCATGGTTTACCAG-1-10x  | 0.08612696 | 0.2565785  | 0.0039187  |
| 7w11w_SITTC3_CTCCATGTCCACTGAA-1-10x  | 0.01637541 | 0.00822522 | 3.33E-05   |
| 7w11w_SITTC3_CTCCCAAAGATACCAA-1-10x  | 0.02094667 | 0.02450139 | 3.62E-05   |
| 7w11w_SITTC3_CTCCCAAGTGATAGAT-1-10x  | 0.01623531 | 0.00772637 | 3.33E-05   |
| 7w11w_SITTC3_CTCCCTCGTTGGAGAC-1-10x  | 0.02110359 | 0.02506008 | 3.62E-05   |
| 7w11w_SITTC3_CTCCGATTCTGTACAG-1-10x  | 0.10240687 | 0.3145438  | 0.0039137  |
| 7w11w_SITTC3_CTCCTTTAGCAAATCA-1-10x  | 0.02160783 | 0.02685547 | 3.69E-05   |
| 7w11w_SITTC3_CTCCTTTTCGTGGTAT-1-10x  | 0.01976189 | 0.02028291 | 3.55E-05   |
| 7w11w_SITTC3_CTCTCAGAGGTGCGAT-1-10x  | 0.09130544 | 0.27501667 | 0.0043535  |
| 7w11w_SITTC3_CTCTCAGGTTGTGTAC-1-10x  | 0.03432611 | 0.07213944 | 5.37E-05   |
| 7w11w_SITTC3_CTCTGGTAGCATACTC-1-10x  | 0.11134008 | 0.34635085 | 0.002929   |
| 7w11w_SITTC3_CTGAATGCAAGAATGT-1-10x  | 0.08771744 | 0.26224145 | 0.0040384  |
| 7w11w_SITTC3_CTGCCATAGCGTTCAT-1-10x  | 0.1634708  | 0.5319645  | 0.001763   |
| 7w11w_SITTC3_CTGCCTAGTATCGTGT-1-10x  | 0.03933081 | 0.08995886 | 6.67E-05   |
| 7w11w_SITTC3_CTGCCTAGTGCTCCGA-1-10x  | 0.13134505 | 0.41757938 | 0.001934   |
| 7w11w_SITTC3_CTGCTCAAGGGCCAAT-1-10x  | 0.1673159  | 0.5456551  | 0.0017056  |
| 7w11w_SITTC3_CTGGCAGCAAGTGCTT-1-10x  | 0.2901839  | 0.9831317  | 0.00076163 |
| 7w11w_SITTC3_CTGGTCTCACGTCTCT-1-10x  | 0.26048625 | 0.877392   | 0.00077221 |
| 7w11w_SITTC3_CTGGTCTTCTGATGGT-1-10x  | 0.03324763 | 0.06829944 | 5.00E-05   |
| 7w11w_SITTC3_CTGTACCCAGGTAGTG-1-10x  | 0.09248441 | 0.27921447 | 0.0043903  |
| 7w11w_SITTC3_CTGTGAATCACTTCTA-1-10x  | 0.04858637 | 0.12291369 | 0.00012523 |
| 7w11w_SITTC3_CTGTGGGCAGTGGTGA-1-10x  | 0.06047244 | 0.16523452 | 0.00038577 |
| 7w11w_SITTC3_CTGTGGGTCGGAACCTT-1-10x | 0.03500862 | 0.07456954 | 5.37E-05   |
| 7w11w_SITTC3_CTTAGGACAAGCGGAT-1-10x  | 0.0277131  | 0.04859351 | 4.30E-05   |
| 7w11w_SITTC3_CTTCAATTCTATTTTCG-1-10x | 0.05111742 | 0.13192561 | 0.00014746 |
| 7w11w_SITTC3_CTTCTAACAATGATG-1-10x   | 0.03994116 | 0.09213205 | 7.01E-05   |
| 7w11w_SITTC3_CTTCTAAGTCATCGGC-1-10x  | 0.09181402 | 0.2768275  | 0.0043903  |
| 7w11w_SITTC3_CTTCTCTGCTTAAG-1-10x    | 0.01767207 | 0.01284202 | 3.44E-05   |
| 7w11w_SITTC3_CTTGAGAGTCGGAACA-1-10x  | 0.02532408 | 0.04008734 | 4.00E-05   |
| 7w11w_SITTC3_CTTTCAAAGGCACCAA-1-10x  | 0.09022717 | 0.27117747 | 0.0042999  |
| 7w11w_SITTC3_CTTTCAATCGACATAC-1-10x  | 0.24308777 | 0.815444   | 0.00085167 |
| 7w11w_SITTC3_CTTTCGGGTAGAGACC-1-10x  | 0.13885257 | 0.44431022 | 0.0018772  |
| 7w11w_SITTC3_CTTTCGGTCGCAACAT-1-10x  | 0.01822844 | 0.01482301 | 3.44E-05   |
| 7w11w_SITTC3_GAAATGATCGAATGCT-1-10x  | 0.0395081  | 0.09059013 | 6.67E-05   |
| 7w11w_SITTC3_GAAGAATTCTCCGTG-1-10x   | 0.03774078 | 0.08429751 | 6.07E-05   |

|                                     |            |            |            |
|-------------------------------------|------------|------------|------------|
| 7w11w_SITTC3_GAAGCGAAGCGCCCAT-1-10x | 0.05413964 | 0.14268635 | 0.00021164 |
| 7w11w_SITTC3_GAAGTAACATGGCCCA-1-10x | 0.08731764 | 0.26081797 | 0.0040384  |
| 7w11w_SITTC3_GAAGTAATCTTTGCTA-1-10x | 0.2575512  | 0.8669416  | 0.00078121 |
| 7w11w_SITTC3_GAATAGAGTTAAGTCC-1-10x | 0.01913991 | 0.01806832 | 3.49E-05   |
| 7w11w_SITTC3_GAATCACGTGGTTTAC-1-10x | 0.04399674 | 0.10657211 | 8.81E-05   |
| 7w11w_SITTC3_GACACGCCATTAGGCT-1-10x | 0.15597983 | 0.50529253 | 0.0018459  |
| 7w11w_SITTC3_GACAGCCGTTGCTTGA-1-10x | 0.05792777 | 0.15617412 | 0.00031414 |
| 7w11w_SITTC3_GACCAATCACAAATCC-1-10x | 0.23118742 | 0.7730723  | 0.00093779 |
| 7w11w_SITTC3_GACCCTTAGGAAAGTG-1-10x | 0.24723062 | 0.8301948  | 0.0008292  |
| 7w11w_SITTC3_GACCCTTGATCCCAA-1-10x  | 0.03910438 | 0.08915266 | 6.67E-05   |
| 7w11w_SITTC3_GACCTTCTCACATTGG-1-10x | 0.13409224 | 0.4273609  | 0.0019027  |
| 7w11w_SITTC3_GACGCTGCACTGCATA-1-10x | 0.01514216 | 0.00383416 | 3.27E-05   |
| 7w11w_SITTC3_GACGTTACACAAATCC-1-10x | 0.03393712 | 0.07075441 | 5.17E-05   |
| 7w11w_SITTC3_GACGTTATCTTAGTTC-1-10x | 0.07751727 | 0.22592334 | 0.0023954  |
| 7w11w_SITTC3_GACTATGCACTGTCCG-1-10x | 0.08379789 | 0.24828577 | 0.0034742  |
| 7w11w_SITTC3_GACTATGCAGGGAATC-1-10x | 0.21597177 | 0.7188963  | 0.001055   |
| 7w11w_SITTC3_GACTCAAAGAGGATCC-1-10x | 0.01716006 | 0.01101899 | 3.38E-05   |
| 7w11w_SITTC3_GACTCAATCGTAACCA-1-10x | 0.05355135 | 0.14059171 | 0.00019264 |
| 7w11w_SITTC3_GACTCTCAGCGCGTTC-1-10x | 0.05845224 | 0.15804154 | 0.00031414 |
| 7w11w_SITTC3_GACTGATAGCGGATCA-1-10x | 0.09091979 | 0.27364355 | 0.0043535  |
| 7w11w_SITTC3_GAGAAATCAACTCATG-1-10x | 0.04329552 | 0.10407538 | 8.29E-05   |
| 7w11w_SITTC3_GAGAAATTCACGGACC-1-10x | 0.04892185 | 0.12410815 | 0.00012523 |
| 7w11w_SITTC3_GAGACCCGTCATCCGG-1-10x | 0.29179746 | 0.9888769  | 0.00076378 |
| 7w11w_SITTC3_GAGACTTTCTCAACGA-1-10x | 0.02032964 | 0.02230442 | 3.62E-05   |
| 7w11w_SITTC3_GAGCCTGTCACCTTGC-1-10x | 0.04100685 | 0.09592648 | 7.40E-05   |
| 7w11w_SITTC3_GAGGCAACAAGATGGC-1-10x | 0.05871864 | 0.15899007 | 0.00034795 |
| 7w11w_SITTC3_GAGGGATAGAGAATCT-1-10x | 0.04961154 | 0.12656383 | 0.00013566 |
| 7w11w_SITTC3_GAGGGATCAGTGTGCC-1-10x | 0.13989389 | 0.4480179  | 0.001875   |
| 7w11w_SITTC3_GAGTCATCAAGGGTCA-1-10x | 0.11385226 | 0.3552956  | 0.0027534  |
| 7w11w_SITTC3_GAGTCTAAGCGTATAA-1-10x | 0.02249837 | 0.03002627 | 3.76E-05   |
| 7w11w_SITTC3_GAGTCTACATAGTCAC-1-10x | 0.04475442 | 0.10926984 | 9.39E-05   |
| 7w11w_SITTC3_GAGTTGTAGATAGCTA-1-10x | 0.2814039  | 0.95187014 | 0.00075401 |
| 7w11w_SITTC3_GAGTTGTAGGTTGCC-1-10x  | 0.1070134  | 0.33094552 | 0.0034182  |
| 7w11w_SITTC3_GAGTTGTTCTCAACGA-1-10x | 0.05882964 | 0.15938526 | 0.00034795 |
| 7w11w_SITTC3_GAGTTTGTGATGGAG-1-10x  | 0.04928085 | 0.12538639 | 0.00012523 |
| 7w11w_SITTC3_GATAGCTAGCGGATCA-1-10x | 0.018485   | 0.01573648 | 3.49E-05   |
| 7w11w_SITTC3_GATCACACACACAGCC-1-10x | 0.1765485  | 0.5785281  | 0.0015416  |
| 7w11w_SITTC3_GATCAGTAGTTAGTAG-1-10x | 0.21354479 | 0.71025497 | 0.0010778  |
| 7w11w_SITTC3_GATCAGTGTGCGCTCA-1-10x | 0.03270132 | 0.06635429 | 5.00E-05   |
| 7w11w_SITTC3_GATCAGTTCTGATTCT-1-10x | 0.0430392  | 0.10316276 | 8.29E-05   |
| 7w11w_SITTC3_GATCATGAGATTCGCT-1-10x | 0.14226629 | 0.45646492 | 0.0018724  |

|                                      |            |            |            |
|--------------------------------------|------------|------------|------------|
| 7w11w_SITTC3_GATCATGAGCGCAATG-1-10x  | 0.05595099 | 0.14913571 | 0.000257   |
| 7w11w_SITTC3_GATGCTAGTGCGTAA-1-10x   | 0.04828649 | 0.12184595 | 0.00011598 |
| 7w11w_SITTC3_GATGCTATCATTGCTT-1-10x  | 0.05251482 | 0.1369011  | 0.00017575 |
| 7w11w_SITTC3_GATGGAGAGAAATCCA-1-10x  | 0.02027123 | 0.02209643 | 3.62E-05   |
| 7w11w_SITTC3_GATTTCGACAGTGGTGA-1-10x | 0.09856986 | 0.30088195 | 0.0042345  |
| 7w11w_SITTC3_GATTGGTGTCTGTTAG-1-10x  | 0.04753737 | 0.11917868 | 0.00011598 |
| 7w11w_SITTC3_GATTGGTTCGTTAGAC-1-10x  | 0.04506233 | 0.1103662  | 9.39E-05   |
| 7w11w_SITTC3_GATTTCTCACTACCCT-1-10x  | 0.15185736 | 0.49061432 | 0.0018651  |
| 7w11w_SITTC3_GATTTCTGTGCAACGA-1-10x  | 0.23844075 | 0.7988981  | 0.00088278 |
| 7w11w_SITTC3_GCACGTGCACGGGCTT-1-10x  | 0.20302476 | 0.672798   | 0.0011699  |
| 7w11w_SITTC3_GCACTAACATCTATCT-1-10x  | 0.22213177 | 0.7408293  | 0.0010033  |
| 7w11w_SITTC3_GCACTAATCATTTGTC-1-10x  | 0.26181808 | 0.882134   | 0.00076727 |
| 7w11w_SITTC3_GCAGCCAAGGAACGCT-1-10x  | 0.26522484 | 0.8942639  | 0.00076135 |
| 7w11w_SITTC3_GCAGGCTCATCGATGT-1-10x  | 0.10330832 | 0.31775346 | 0.0038193  |
| 7w11w_SITTC3_GCAGGCTGTAGTAAGT-1-10x  | 0.09892163 | 0.30213445 | 0.0042345  |
| 7w11w_SITTC3_GCATCGGTGACATCA-1-10x   | 0.22378299 | 0.7467085  | 0.00099599 |
| 7w11w_SITTC3_GCATCGGTCTCTAGGA-1-10x  | 0.0306426  | 0.05902413 | 4.68E-05   |
| 7w11w_SITTC3_GCATGATCACCCAACG-1-10x  | 0.02087935 | 0.02426167 | 3.62E-05   |
| 7w11w_SITTC3_GCATTAGCAAGTCCCG-1-10x  | 0.057432   | 0.15440893 | 0.00028394 |
| 7w11w_SITTC3_GCATTAGCATTGAAGA-1-10x  | 0.17859873 | 0.58582807 | 0.0015081  |
| 7w11w_SITTC3_GCCAGCACACAGAGAC-1-10x  | 0.01972367 | 0.02014684 | 3.55E-05   |
| 7w11w_SITTC3_GCCAGCACATTACGGT-1-10x  | 0.07893413 | 0.23096815 | 0.002576   |
| 7w11w_SITTC3_GCCAGCAGTTCTGACA-1-10x  | 0.03316961 | 0.06802166 | 5.00E-05   |
| 7w11w_SITTC3_GCCAGTGAGGTAGTCG-1-10x  | 0.0312574  | 0.06121315 | 4.68E-05   |
| 7w11w_SITTC3_GCCAGTGCAGACCGCT-1-10x  | 0.01588904 | 0.00649347 | 3.33E-05   |
| 7w11w_SITTC3_GCCATGGCAGAGTTGG-1-10x  | 0.04656776 | 0.11572634 | 0.00010777 |
| 7w11w_SITTC3_GCCATTCCATGGCGCT-1-10x  | 0.03110591 | 0.06067376 | 4.68E-05   |
| 7w11w_SITTC3_GCCCGAAAGACGAGCT-1-10x  | 0.08461589 | 0.25119826 | 0.0036353  |
| 7w11w_SITTC3_GCCCGAACAGTGCAGCT-1-10x | 0.0169672  | 0.01033229 | 3.38E-05   |
| 7w11w_SITTC3_GCCGATGCAAGCGCTC-1-10x  | 0.12208226 | 0.38459885 | 0.0021873  |
| 7w11w_SITTC3_GCCGATGTCACGATCA-1-10x  | 0.07104128 | 0.20286532 | 0.0013138  |
| 7w11w_SITTC3_GCGATCGAGGCTAACG-1-10x  | 0.08457739 | 0.2510612  | 0.0036353  |
| 7w11w_SITTC3_GCGATCGCACGTACTA-1-10x  | 0.06355975 | 0.17622702 | 0.00058553 |
| 7w11w_SITTC3_GCGATCGCAGAGAATT-1-10x  | 0.05633317 | 0.15049647 | 0.000257   |
| 7w11w_SITTC3_GCGGAAAAGCATCTTG-1-10x  | 0.07824673 | 0.22852062 | 0.0023954  |
| 7w11w_SITTC3_GCGGAAACATAGGAGC-1-10x  | 0.02646878 | 0.04416306 | 4.09E-05   |
| 7w11w_SITTC3_GCGGAAACATGAGTAA-1-10x  | 0.04305102 | 0.10320485 | 8.29E-05   |
| 7w11w_SITTC3_GCGTGCATCGAGAACG-1-10x  | 0.03458884 | 0.0730749  | 5.37E-05   |
| 7w11w_SITTC3_GCGTGCATCGTCTCAC-1-10x  | 0.02895747 | 0.05302417 | 4.42E-05   |
| 7w11w_SITTC3_GCGTTTCAGAAACCCG-1-10x  | 0.01768984 | 0.0129053  | 3.44E-05   |
| 7w11w_SITTC3_GCGTTTCAGCCTAACT-1-10x  | 0.04411335 | 0.10698731 | 8.81E-05   |

|                                     |            |            |            |
|-------------------------------------|------------|------------|------------|
| 7w11w_SITTC3_GCTCAAAAGAGAACCC-1-10x | 0.08074736 | 0.23742421 | 0.0029431  |
| 7w11w_SITTC3_GCTCAAACAAGATGTA-1-10x | 0.0196148  | 0.0197592  | 3.55E-05   |
| 7w11w_SITTC3_GCTGAATCCATTGTT-1-10x  | 0.1235644  | 0.38987607 | 0.0021124  |
| 7w11w_SITTC3_GCTGCAGAGATGCTAA-1-10x | 0.0398031  | 0.09164049 | 6.67E-05   |
| 7w11w_SITTC3_GCTGGGTGTTATCCAG-1-10x | 0.09052566 | 0.27224025 | 0.0042999  |
| 7w11w_SITTC3_GGAACCCAGGGCAGAG-1-10x | 0.14594093 | 0.46954864 | 0.0018716  |
| 7w11w_SITTC3_GGAAGTGTCTGTCTCG-1-10x | 0.04216325 | 0.10004388 | 7.82E-05   |
| 7w11w_SITTC3_GGAATCTCAGCGGTCT-1-10x | 0.03667186 | 0.08049157 | 5.82E-05   |
| 7w11w_SITTC3_GGAATGGAGATGGTAT-1-10x | 0.02453675 | 0.03728401 | 3.91E-05   |
| 7w11w_SITTC3_GGAATGGTCCACAGCG-1-10x | 0.10688952 | 0.33050448 | 0.0034182  |
| 7w11w_SITTC3_GGAGCAATCGTGCAGC-1-10x | 0.09325802 | 0.28196895 | 0.0044107  |
| 7w11w_SITTC3_GGATCTAGTTCTTCAT-1-10x | 0.03218659 | 0.06452157 | 4.83E-05   |
| 7w11w_SITTC3_GGATGTTAGACGCCAA-1-10x | 0.04626025 | 0.11463143 | 0.00010046 |
| 7w11w_SITTC3_GGATGTTACACAGCC-1-10x  | 0.10515553 | 0.3243305  | 0.0036214  |
| 7w11w_SITTC3_GGATGTTTCTCGTCAC-1-10x | 0.05584195 | 0.14874749 | 0.000233   |
| 7w11w_SITTC3_GGCTGTGTCTGATAG-1-10x  | 0.14002757 | 0.44849387 | 0.001875   |
| 7w11w_SITTC3_GGCTTGGAAGGTCAG-1-10x  | 0.23286216 | 0.7790353  | 0.00092358 |
| 7w11w_SITTC3_GGGACAAAGACGCAGT-1-10x | 0.08293525 | 0.2452143  | 0.0033032  |
| 7w11w_SITTC3_GGGAGATTCTTGGATG-1-10x | 0.15898973 | 0.5160094  | 0.0018209  |
| 7w11w_SITTC3_GGGAGTATCCCGTGAG-1-10x | 0.02813365 | 0.05009091 | 4.30E-05   |
| 7w11w_SITTC3_GGGATGATCGCCTTG-1-10x  | 0.02027214 | 0.02209968 | 3.62E-05   |
| 7w11w_SITTC3_GGGCCATAGGAGAGTA-1-10x | 0.23639254 | 0.79160535 | 0.00089602 |
| 7w11w_SITTC3_GGGCGTTTCTAGACAC-1-10x | 0.03992627 | 0.09207902 | 7.01E-05   |
| 7w11w_SITTC3_GGGCTACAGATGGCAC-1-10x | 0.16306882 | 0.53053313 | 0.001763   |
| 7w11w_SITTC3_GGGTAGAAGTCGCCAC-1-10x | 0.15034796 | 0.48524007 | 0.0018694  |
| 7w11w_SITTC3_GGGTATTCATAGAGGC-1-10x | 0.16703343 | 0.54464936 | 0.0017056  |
| 7w11w_SITTC3_GGGTATTGTTGGACCC-1-10x | 0.05288899 | 0.13823335 | 0.00017575 |
| 7w11w_SITTC3_GGGTCTGAGATTCGAA-1-10x | 0.03552637 | 0.076413   | 5.58E-05   |
| 7w11w_SITTC3_GGGTCTGCATGAGGGT-1-10x | 0.24594712 | 0.8256248  | 0.00083459 |
| 7w11w_SITTC3_GGGTCTGGTGCCTTCT-1-10x | 0.10891407 | 0.33771297 | 0.0032165  |
| 7w11w_SITTC3_GGGTGAAAGCACCGTC-1-10x | 0.17899281 | 0.5872312  | 0.0014915  |
| 7w11w_SITTC3_GGGTTATAGCGCCCAT-1-10x | 0.21810763 | 0.7265011  | 0.00104    |
| 7w11w_SITTC3_GGGTTATCCCGAGGT-1-10x  | 0.16064025 | 0.52188617 | 0.0018     |
| 7w11w_SITTC3_GGGTTTACAAATCGGG-1-10x | 0.10385849 | 0.31971234 | 0.0037215  |
| 7w11w_SITTC3_GGTAAGTGTCTGTTAG-1-10x | 0.05048676 | 0.1296801  | 0.00014746 |
| 7w11w_SITTC3_GGTCTGGAGGTCTGGA-1-10x | 0.04305085 | 0.10320424 | 8.29E-05   |
| 7w11w_SITTC3_GGTCTGGCAGTAACCT-1-10x | 0.10313538 | 0.3171377  | 0.0038193  |
| 7w11w_SITTC3_GGTCTGGTCTCTGCTG-1-10x | 0.1031606  | 0.31722748 | 0.0038193  |
| 7w11w_SITTC3_GGTGATTGTGCATGCC-1-10x | 0.02413325 | 0.03584732 | 3.91E-05   |
| 7w11w_SITTC3_GGTGATTGTTGTGGAG-1-10x | 0.24703754 | 0.8295073  | 0.0008292  |
| 7w11w_SITTC3_GGTGTCGCAGAGGTTG-1-10x | 0.04794542 | 0.12063155 | 0.00011598 |



|                                      |            |            |            |
|--------------------------------------|------------|------------|------------|
| 7w11w_SITTC3_GGTGTCGGTAGGAAAG-1-10x  | 0.18241608 | 0.5994199  | 0.0014427  |
| 7w11w_SITTC3_GGTGTAAAGCGTTGTT-1-10x  | 0.03279717 | 0.06669557 | 5.00E-05   |
| 7w11w_SITTC3_GGTGTAAAGGCGATAC-1-10x  | 0.02431702 | 0.03650165 | 3.91E-05   |
| 7w11w_SITTC3_GGTGTTATCTGAGGCC-1-10x  | 0.0766708  | 0.22290948 | 0.0022191  |
| 7w11w_SITTC3_GGTTAACCATGAAGCG-1-10x  | 0.09479219 | 0.28743142 | 0.0044051  |
| 7w11w_SITTC3_GGTTCTCCATCAACCA-1-10x  | 0.03906674 | 0.08901865 | 6.67E-05   |
| 7w11w_SITTC3_GTAACCACATGGAGAC-1-10x  | 0.24977437 | 0.8392519  | 0.00081397 |
| 7w11w_SITTC3_GTAACCATCAGCCCAG-1-10x  | 0.25328067 | 0.8517362  | 0.00079608 |
| 7w11w_SITTC3_GTAACCATCTGCTTTA-1-10x  | 0.09664949 | 0.2940444  | 0.0043435  |
| 7w11w_SITTC3_GTAATCGAGGGACAGG-1-10x  | 0.04771762 | 0.11982045 | 0.00011598 |
| 7w11w_SITTC3_GTAATGCCAATCGCGC-1-10x  | 0.08964729 | 0.2691128  | 0.0042295  |
| 7w11w_SITTC3_GTACAACAGATCACTC-1-10x  | 0.02019691 | 0.02183181 | 3.62E-05   |
| 7w11w_SITTC3_GTACAACCTCCCTCGAT-1-10x | 0.01867721 | 0.01642085 | 3.49E-05   |
| 7w11w_SITTC3_GTACAGTTCCAAGCCG-1-10x  | 0.04813585 | 0.12130957 | 0.00011598 |
| 7w11w_SITTC3_GTAGATCAGCACGTCC-1-10x  | 0.16722564 | 0.54533374 | 0.0017056  |
| 7w11w_SITTC3_GTAGATCTCAGGGTAG-1-10x  | 0.11060527 | 0.34373453 | 0.0030221  |
| 7w11w_SITTC3_GTAGCTAGTACACGCC-1-10x  | 0.02061578 | 0.02332324 | 3.62E-05   |
| 7w11w_SITTC3_GTAGGAGCAAATGATG-1-10x  | 0.08025564 | 0.23567344 | 0.0027593  |
| 7w11w_SITTC3_GTAGGAGCATGCAGGA-1-10x  | 0.01712814 | 0.01090535 | 3.38E-05   |
| 7w11w_SITTC3_GTAGGTTTCTCGCCTA-1-10x  | 0.1769949  | 0.5801176  | 0.0015416  |
| 7w11w_SITTC3_GTATTGGAGGGCAGTT-1-10x  | 0.19719167 | 0.652029   | 0.0012292  |
| 7w11w_SITTC3_GTATTGGCAAGGTTGG-1-10x  | 0.25434485 | 0.85552526 | 0.00079207 |
| 7w11w_SITTC3_GTCAAGTAGTCTTCGA-1-10x  | 0.08004095 | 0.234909   | 0.0027593  |
| 7w11w_SITTC3_GTCAAGTCACATTCGA-1-10x  | 0.01989555 | 0.02075882 | 3.55E-05   |
| 7w11w_SITTC3_GTCACGGGTCTAGGTT-1-10x  | 0.12793146 | 0.40542516 | 0.0020026  |
| 7w11w_SITTC3_GTCACTCTCTTCTCAA-1-10x  | 0.04866877 | 0.12320707 | 0.00012523 |
| 7w11w_SITTC3_GTCAGCGCAACTTGGT-1-10x  | 0.02422423 | 0.03617125 | 3.91E-05   |
| 7w11w_SITTC3_GTCAGCGTCCGTAGGC-1-10x  | 0.03678363 | 0.08088954 | 5.82E-05   |
| 7w11w_SITTC3_GTCATCCTCCTCGCAT-1-10x  | 0.01675148 | 0.00956421 | 3.38E-05   |
| 7w11w_SITTC3_GTCATGATCTGCTGAA-1-10x  | 0.21227486 | 0.70573336 | 0.0010856  |
| 7w11w_SITTC3_GTCCACTCAGAGATGC-1-10x  | 0.0191742  | 0.01819043 | 3.49E-05   |
| 7w11w_SITTC3_GTCGAATCATGAATCC-1-10x  | 0.04518582 | 0.11080589 | 9.39E-05   |
| 7w11w_SITTC3_GTCGCGATCCAAGCTA-1-10x  | 0.01901716 | 0.01763126 | 3.49E-05   |
| 7w11w_SITTC3_GTCGTAAAGGCGTCCT-1-10x  | 0.02935967 | 0.05445621 | 4.42E-05   |
| 7w11w_SITTC3_GTCTACCCAGGTCTCG-1-10x  | 0.05877374 | 0.15918624 | 0.00034795 |
| 7w11w_SITTC3_GTCTCACGTATCGTGT-1-10x  | 0.02685287 | 0.04553064 | 4.19E-05   |
| 7w11w_SITTC3_GTCTGTCTCATGTCAG-1-10x  | 0.0504976  | 0.12971869 | 0.00014746 |
| 7w11w_SITTC3_GTGAGCCAGTAACGTA-1-10x  | 0.05355531 | 0.14060582 | 0.00019264 |
| 7w11w_SITTC3_GTGATGTTCCGAGTGC-1-10x  | 0.04257302 | 0.10150288 | 7.82E-05   |
| 7w11w_SITTC3_GTGCAGCTCCTGGTCT-1-10x  | 0.03368854 | 0.06986934 | 5.17E-05   |
| 7w11w_SITTC3_GTGCGTGTCCGTGGCA-1-10x  | 0.08471827 | 0.2515628  | 0.0036353  |

|                                      |            |            |            |
|--------------------------------------|------------|------------|------------|
| 7w11w_SITTC3_GTGCGTGTCTCGACGG-1-10x  | 0.27166018 | 0.9171772  | 0.00075352 |
| 7w11w_SITTC3_GTGCTGGAGTGTAGTA-1-10x  | 0.05466609 | 0.1445608  | 0.00021164 |
| 7w11w_SITTC3_GTGCTTCGTCGCCTAG-1-10x  | 0.27143118 | 0.91636187 | 0.00075352 |
| 7w11w_SITTC3_GTGCTTCTCAGGAAGC-1-10x  | 0.04670597 | 0.11621842 | 0.00010777 |
| 7w11w_SITTC3_GTGGAAGTCTCGTGAA-1-10x  | 0.15009837 | 0.48435137 | 0.0018694  |
| 7w11w_SITTC3_GTGGAGACAGCTTTGA-1-10x  | 0.21984422 | 0.7326844  | 0.0010253  |
| 7w11w_SITTC3_GTGGGAACACAAATCC-1-10x  | 0.02988493 | 0.05632642 | 4.55E-05   |
| 7w11w_SITTC3_GTGTCTGTCTCATCTAG-1-10x | 0.0430277  | 0.1031218  | 8.29E-05   |
| 7w11w_SITTC3_GTGTGATAGACCATT-1-10x   | 0.09273294 | 0.28009936 | 0.0044107  |
| 7w11w_SITTC3_GTGTGATGTATGTCAC-1-10x  | 0.27852044 | 0.9416035  | 0.00075266 |
| 7w11w_SITTC3_GTGTTAGCAATAGAGT-1-10x  | 0.01526107 | 0.00425757 | 3.27E-05   |
| 7w11w_SITTC3_GTGTTAGGTAGCACGA-1-10x  | 0.14878576 | 0.47967777 | 0.0018713  |
| 7w11w_SITTC3_GTGTTAGTCGACTCCT-1-10x  | 0.15445955 | 0.49987954 | 0.0018575  |
| 7w11w_SITTC3_GTGTTCTCACGATCA-1-10x   | 0.05677782 | 0.15207969 | 0.000257   |
| 7w11w_SITTC3_GTTACAGAGTGACCTT-1-10x  | 0.01974997 | 0.02024046 | 3.55E-05   |
| 7w11w_SITTC3_GTTAGACGTCCTGGGT-1-10x  | 0.03911412 | 0.08918733 | 6.67E-05   |
| 7w11w_SITTC3_GTTAGACTCAACCTTT-1-10x  | 0.06312967 | 0.17469572 | 0.00052741 |
| 7w11w_SITTC3_GTTAGACTCTGAACGT-1-10x  | 0.16768454 | 0.5469676  | 0.0016902  |
| 7w11w_SITTC3_GTTAGTGGTCGCTCGA-1-10x  | 0.0777831  | 0.22686985 | 0.0023954  |
| 7w11w_SITTC3_GTTATGGGTTCCATTT-1-10x  | 0.02525903 | 0.03985572 | 4.00E-05   |
| 7w11w_SITTC3_GTTCATTAGGATGTTA-1-10x  | 0.04546291 | 0.11179245 | 9.39E-05   |
| 7w11w_SITTC3_GTTTCGCTGTAAACAG-1-10x  | 0.21738014 | 0.72391087 | 0.0010475  |
| 7w11w_SITTC3_GTTCTATTCTAGATCG-1-10x  | 0.21217512 | 0.7053782  | 0.0010856  |
| 7w11w_SITTC3_GTTGCGGCAATCACGT-1-10x  | 0.25251606 | 0.8490138  | 0.00080028 |
| 7w11w_SITTC3_GTTGCGGCACAAGCAG-1-10x  | 0.01940325 | 0.01900595 | 3.55E-05   |
| 7w11w_SITTC3_GTTGCGGTCTTTGCGC-1-10x  | 0.04138804 | 0.09728372 | 7.40E-05   |
| 7w11w_SITTC3_GTTGCTCAGTTCACTG-1-10x  | 0.07915062 | 0.23173894 | 0.002576   |
| 7w11w_SITTC3_GTTGCTCCAAGCGATG-1-10x  | 0.14982344 | 0.48337248 | 0.0018694  |
| 7w11w_SITTC3_GTTGTGACAGGCATTT-1-10x  | 0.24263924 | 0.813847   | 0.00085764 |
| 7w11w_SITTC3_GTTGTGAGTGAGTTGG-1-10x  | 0.01861606 | 0.01620313 | 3.49E-05   |
| 7w11w_SITTC3_GTTGTGATCTTCTGGC-1-10x  | 0.06198091 | 0.1706055  | 0.00047505 |
| 7w11w_SITTC3_GTTTGGAGTTCGTACA-1-10x  | 0.01685182 | 0.0099215  | 3.38E-05   |
| 7w11w_SITTC3_TAACCAGTCGACATAC-1-10x  | 0.06301617 | 0.17429158 | 0.00052741 |
| 7w11w_SITTC3_TAACGACGTGGCGTAA-1-10x  | 0.2242999  | 0.748549   | 0.00098869 |
| 7w11w_SITTC3_TAAGCCAAGTATAACG-1-10x  | 0.22641584 | 0.7560829  | 0.00097406 |
| 7w11w_SITTC3_TAAGCCACAGCTTTGA-1-10x  | 0.01581096 | 0.00621547 | 3.33E-05   |
| 7w11w_SITTC3_TAAGTCGTCCTAACAG-1-10x  | 0.03451137 | 0.07279903 | 5.37E-05   |
| 7w11w_SITTC3_TAATTCCGTACAAGTA-1-10x  | 0.13384345 | 0.42647505 | 0.0019027  |
| 7w11w_SITTC3_TACACCCAATTCGTG-1-10x   | 0.04737866 | 0.11861359 | 0.00010777 |
| 7w11w_SITTC3_TACACCCAGAGTGAC-1-10x   | 0.08781847 | 0.2626012  | 0.0041422  |
| 7w11w_SITTC3_TACACCCGTCAGACTT-1-10x  | 0.07084122 | 0.20215301 | 0.0011935  |

|                                      |            |            |            |
|--------------------------------------|------------|------------|------------|
| 7w11w_SITTC3_TACAGGTAGGATGCGT-1-10x  | 0.0154206  | 0.00482559 | 3.27E-05   |
| 7w11w_SITTC3_TACAGGTCAACGCATT-1-10x  | 0.02903101 | 0.05328599 | 4.42E-05   |
| 7w11w_SITTC3_TACCCACAGATGAAGG-1-10x  | 0.04538894 | 0.11152908 | 9.39E-05   |
| 7w11w_SITTC3_TACCCACAGGAAGTCC-1-10x  | 0.03597635 | 0.07801516 | 5.58E-05   |
| 7w11w_SITTC3_TACCCACAGTGAGTGC-1-10x  | 0.08894694 | 0.26661915 | 0.0042295  |
| 7w11w_SITTC3_TACCCGTCAGGACGAT-1-10x  | 0.10212715 | 0.31354785 | 0.0039137  |
| 7w11w_SITTC3_TACCCGTGTCTACGAT-1-10x  | 0.12146315 | 0.3823945  | 0.0022308  |
| 7w11w_SITTC3_TACCGGGTCGCCAATA-1-10x  | 0.04948229 | 0.12610362 | 0.00013566 |
| 7w11w_SITTC3_TACCTCGAGGTACATA-1-10x  | 0.03432757 | 0.07214463 | 5.37E-05   |
| 7w11w_SITTC3_TACCTCGAGTTGCCCG-1-10x  | 0.2674046  | 0.902025   | 0.00075705 |
| 7w11w_SITTC3_TACCTCGGTACACGTT-1-10x  | 0.0306232  | 0.05895504 | 4.68E-05   |
| 7w11w_SITTC3_TACCTGCAGGCTCAC-1-10x   | 0.02827631 | 0.05059886 | 4.30E-05   |
| 7w11w_SITTC3_TACCTGCTCCAAGCTA-1-10x  | 0.08497776 | 0.25248674 | 0.0036353  |
| 7w11w_SITTC3_TACGCTCAGACGAGCT-1-10x  | 0.16449742 | 0.53561974 | 0.0017494  |
| 7w11w_SITTC3_TACGGGCCAGCCGGTT-1-10x  | 0.01676623 | 0.00961673 | 3.38E-05   |
| 7w11w_SITTC3_TACGGTAAGGAGTACC-1-10x  | 0.02997782 | 0.05665715 | 4.55E-05   |
| 7w11w_SITTC3_TACTTACAGACCATGG-1-10x  | 0.03016646 | 0.05732881 | 4.55E-05   |
| 7w11w_SITTC3_TAGACCACACCATATG-1-10x  | 0.0415744  | 0.09794727 | 7.40E-05   |
| 7w11w_SITTC3_TAGCACAAGACTCATC-1-10x  | 0.02384441 | 0.0348189  | 3.83E-05   |
| 7w11w_SITTC3_TAGGGTTTCCCTTG-1-10x    | 0.21684135 | 0.7219925  | 0.0010475  |
| 7w11w_SITTC3_TAGGGTTTCTAGGCAT-1-10x  | 0.19346054 | 0.6387442  | 0.0012741  |
| 7w11w_SITTC3_TAGTGCACAGTCACGC-1-10x  | 0.02207512 | 0.02851925 | 3.76E-05   |
| 7w11w_SITTC3_TAGTGCATCGCATTGA-1-10x  | 0.1298148  | 0.4121309  | 0.0019639  |
| 7w11w_SITTC3_TATACCTAGCCGATCC-1-10x  | 0.07634492 | 0.22174917 | 0.0020486  |
| 7w11w_SITTC3_TATACCTGTACGATTC-1-10x  | 0.02002461 | 0.02121835 | 3.55E-05   |
| 7w11w_SITTC3_TATCAGGAGACCGTTT-1-10x  | 0.03198829 | 0.06381553 | 4.83E-05   |
| 7w11w_SITTC3_TATCGCCAGTCCCGA-1-10x   | 0.01886247 | 0.01708048 | 3.49E-05   |
| 7w11w_SITTC3_TATCGCCGTTTGCCGG-1-10x  | 0.02038851 | 0.02251403 | 3.62E-05   |
| 7w11w_SITTC3_TATCTGTCTGCGG-1-10x     | 0.07767083 | 0.2264701  | 0.0023954  |
| 7w11w_SITTC3_TATGTTTCAGAGCTGCA-1-10x | 0.02255513 | 0.03022837 | 3.76E-05   |
| 7w11w_SITTC3_TATGTTCTCGCCAGTG-1-10x  | 0.14094672 | 0.45176652 | 0.0018734  |
| 7w11w_SITTC3_TATTGGGAGATTAGCA-1-10x  | 0.0354319  | 0.07607663 | 5.58E-05   |
| 7w11w_SITTC3_TATTGGGCAATACGAA-1-10x  | 0.01965201 | 0.01989169 | 3.55E-05   |
| 7w11w_SITTC3_TCAAGACCAAAGTCT-1-10x   | 0.01540755 | 0.00477912 | 3.27E-05   |
| 7w11w_SITTC3_TCAATTCAGCTGTGCC-1-10x  | 0.04496294 | 0.11001229 | 9.39E-05   |
| 7w11w_SITTC3_TCACACCCACCTCAGG-1-10x  | 0.09172752 | 0.27651954 | 0.0043903  |
| 7w11w_SITTC3_TCACACCGTCCAAAGG-1-10x  | 0.04223546 | 0.10030101 | 7.82E-05   |
| 7w11w_SITTC3_TCACATTCACCAACAT-1-10x  | 0.01888217 | 0.01715065 | 3.49E-05   |
| 7w11w_SITTC3_TCACGGGGTGCTAGCC-1-10x  | 0.07278357 | 0.20906883 | 0.0015819  |
| 7w11w_SITTC3_TCACGGGGTGCGTAA-1-10x   | 0.09301911 | 0.2811183  | 0.0044107  |
| 7w11w_SITTC3_TCAGCCTCACGTGTGC-1-10x  | 0.08989278 | 0.26998687 | 0.0042999  |

|                                      |            |            |            |
|--------------------------------------|------------|------------|------------|
| 7w11w_SITTC3_TCAGTCCAGAATGTTG-1-10x  | 0.21444139 | 0.71344733 | 0.0010701  |
| 7w11w_SITTC3_TCAGTGAAGGACCCAA-1-10x  | 0.04553658 | 0.11205478 | 0.00010046 |
| 7w11w_SITTC3_TCAGTTTGTACCGTGC-1-10x  | 0.26063374 | 0.8779171  | 0.00077221 |
| 7w11w_SITTC3_TCATACTTCGGAGATG-1-10x  | 0.04512826 | 0.11060095 | 9.39E-05   |
| 7w11w_SITTC3_TCATATCTCGTGAGAG-1-10x  | 0.04990359 | 0.12760368 | 0.00013566 |
| 7w11w_SITTC3_TCATGCCTCGGCCTTT-1-10x  | 0.04993486 | 0.12771504 | 0.00013566 |
| 7w11w_SITTC3_TCATGGAGTGTCCCTT-1-10x  | 0.07972062 | 0.23376848 | 0.0027593  |
| 7w11w_SITTC3_TCATTACTCGCTTGCT-1-10x  | 0.20206386 | 0.6693766  | 0.0011792  |
| 7w11w_SITTC3_TCCACCAAGTGTTGAA-1-10x  | 0.01786556 | 0.01353096 | 3.44E-05   |
| 7w11w_SITTC3_TCCACCATCATTCGGA-1-10x  | 0.02698157 | 0.0459889  | 4.19E-05   |
| 7w11w_SITTC3_TCCACGTCAAGCCAC-1-10x   | 0.08117661 | 0.23895258 | 0.0029431  |
| 7w11w_SITTC3_TCCACGTGTTGACGGA-1-10x  | 0.03950169 | 0.09056729 | 6.67E-05   |
| 7w11w_SITTC3_TCCAGAATCATCAGTG-1-10x  | 0.14029033 | 0.44942945 | 0.001875   |
| 7w11w_SITTC3_TCCATGCGTGGAGAAA-1-10x  | 0.02230961 | 0.02935418 | 3.76E-05   |
| 7w11w_SITTC3_TCCGAAAAGACTTCAC-1-10x  | 0.02231734 | 0.02938168 | 3.76E-05   |
| 7w11w_SITTC3_TCCGAAAAGGCTAACG-1-10x  | 0.02177056 | 0.02743488 | 3.69E-05   |
| 7w11w_SITTC3_TCCGATCAGGTGGCTA-1-10x  | 0.03911359 | 0.08918545 | 6.67E-05   |
| 7w11w_SITTC3_TCCGATCTCGATAACC-1-10x  | 0.02268026 | 0.03067391 | 3.76E-05   |
| 7w11w_SITTC3_TCCGGGACATGCCGCA-1-10x  | 0.27926233 | 0.94424504 | 0.00075266 |
| 7w11w_SITTC3_TCCGTGTGTACCCACG-1-10x  | 0.05462167 | 0.14440264 | 0.00021164 |
| 7w11w_SITTC3_TCCTCCCCAGTATACC-1-10x  | 0.03838144 | 0.08657859 | 6.36E-05   |
| 7w11w_SITTC3_TCCTCGAGTAAGGCTG-1-10x  | 0.03333836 | 0.06862249 | 5.17E-05   |
| 7w11w_SITTC3_TCCTTCTCATAATGCC-1-10x  | 0.28245774 | 0.9556224  | 0.00075462 |
| 7w11w_SITTC3_TCCTTCTTCGAGCCTG-1-10x  | 0.01866641 | 0.0163824  | 3.49E-05   |
| 7w11w_SITTC3_TCGAACACACTTCCTG-1-10x  | 0.04482757 | 0.10953032 | 9.39E-05   |
| 7w11w_SITTC3_TCGAAGTGTTAGCTAC-1-10x  | 0.0421416  | 0.09996679 | 7.82E-05   |
| 7w11w_SITTC3_TCGACGGAGAATACAC-1-10x  | 0.25427842 | 0.85528874 | 0.00079207 |
| 7w11w_SITTC3_TCGACGGAGAGGCCAT-1-10x  | 0.15312946 | 0.49514368 | 0.0018617  |
| 7w11w_SITTC3_TCGACGGCAAGCGCAA-1-10x  | 0.23440455 | 0.784527   | 0.00090964 |
| 7w11w_SITTC3_TCGACGGGTGCATACT-1-10x  | 0.03015666 | 0.05729392 | 4.55E-05   |
| 7w11w_SITTC3_TCGATTTAGGTA ACTA-1-10x | 0.0529106  | 0.13831028 | 0.00017575 |
| 7w11w_SITTC3_TCGCACTTCGCTTTAT-1-10x  | 0.01598817 | 0.00684642 | 3.33E-05   |
| 7w11w_SITTC3_TCGCAGGTCTGACTCCT-1-10x | 0.03060635 | 0.05889508 | 4.68E-05   |
| 7w11w_SITTC3_TCGCTTGCAAAGCTCT-1-10x  | 0.08408418 | 0.24930508 | 0.0036353  |
| 7w11w_SITTC3_TCGGATAAGTGCTACT-1-10x  | 0.03920424 | 0.08950823 | 6.67E-05   |
| 7w11w_SITTC3_TCGGATAGTCTAATCG-1-10x  | 0.20914856 | 0.694602   | 0.0011095  |
| 7w11w_SITTC3_TCGGGCAAGCTCACTA-1-10x  | 0.29171625 | 0.9885877  | 0.00076378 |
| 7w11w_SITTC3_TCGGGCAGTCCACTTC-1-10x  | 0.05306767 | 0.13886955 | 0.00019264 |
| 7w11w_SITTC3_TCGGGTGTCCATTTAC-1-10x  | 0.0263164  | 0.0436205  | 4.09E-05   |
| 7w11w_SITTC3_TCGGTCTTCGTGGCTG-1-10x  | 0.03860908 | 0.08738912 | 6.36E-05   |
| 7w11w_SITTC3_TCGTGCTGTGCTGTCG-1-10x  | 0.0233412  | 0.03302719 | 3.83E-05   |

|                                      |            |            |            |
|--------------------------------------|------------|------------|------------|
| 7w11w_SITTC3_TCTACATAGAATCTAG-1-10x  | 0.02647225 | 0.04417543 | 4.09E-05   |
| 7w11w_SITTC3_TCTCCGATCTGCGATA-1-10x  | 0.0218845  | 0.02784057 | 3.69E-05   |
| 7w11w_SITTC3_TCTGTGAGAAATTGC-1-10x   | 0.20173156 | 0.66819346 | 0.0011792  |
| 7w11w_SITTC3_TCTTGCCTCGGCAGTC-1-10x  | 0.20660593 | 0.68554884 | 0.0011344  |
| 7w11w_SITTC3_TGAACGTGTTCTTGC-1-10x   | 0.235605   | 0.78880125 | 0.00090278 |
| 7w11w_SITTC3_TGAACGTTCACCTTGTT-1-10x | 0.0425708  | 0.10149499 | 7.82E-05   |
| 7w11w_SITTC3_TGAATGCAGGACGCAT-1-10x  | 0.02436498 | 0.0366724  | 3.91E-05   |
| 7w11w_SITTC3_TGACAGTGTCCACATA-1-10x  | 0.01909608 | 0.01791226 | 3.49E-05   |
| 7w11w_SITTC3_TGACGCGAGGTCTACT-1-10x  | 0.24964543 | 0.8387928  | 0.00081397 |
| 7w11w_SITTC3_TGACGCGTCCATCTGC-1-10x  | 0.14930414 | 0.48152348 | 0.0018705  |
| 7w11w_SITTC3_TGACTCCAGTCATAGA-1-10x  | 0.2319406  | 0.775754   | 0.00093066 |
| 7w11w_SITTC3_TGAGACTGTACTCGTA-1-10x  | 0.07956831 | 0.23322617 | 0.0027593  |
| 7w11w_SITTC3_TGAGACTTCACCTTGTT-1-10x | 0.07291315 | 0.20953019 | 0.0015819  |
| 7w11w_SITTC3_TGAGGAGTCCTGCCAT-1-10x  | 0.01875243 | 0.01668869 | 3.49E-05   |
| 7w11w_SITTC3_TGAGTCATCACTTCTA-1-10x  | 0.0811171  | 0.2387407  | 0.0029431  |
| 7w11w_SITTC3_TGATGGTAGATGCTAA-1-10x  | 0.03499299 | 0.07451389 | 5.37E-05   |
| 7w11w_SITTC3_TGCACGGCAAAGAACT-1-10x  | 0.01676525 | 0.00961327 | 3.38E-05   |
| 7w11w_SITTC3_TGCAGGCAGAGTGGCT-1-10x  | 0.04088648 | 0.09549791 | 7.40E-05   |
| 7w11w_SITTC3_TGCAGTAAGTGGATTA-1-10x  | 0.02109743 | 0.02503817 | 3.62E-05   |
| 7w11w_SITTC3_TGCAGTATCTCAGTCC-1-10x  | 0.01591724 | 0.00659386 | 3.33E-05   |
| 7w11w_SITTC3_TGCATCCTCACCGGTG-1-10x  | 0.17364137 | 0.56817716 | 0.0015922  |
| 7w11w_SITTC3_TGCCGAGAGGATCATA-1-10x  | 0.10446477 | 0.32187104 | 0.0037215  |
| 7w11w_SITTC3_TGCGATAAGGGATGTC-1-10x  | 0.02224226 | 0.02911437 | 3.76E-05   |
| 7w11w_SITTC3_TGCGGCAAGAGAGGGC-1-10x  | 0.21682157 | 0.72192204 | 0.0010475  |
| 7w11w_SITTC3_TGCGGGTCAAGCGGAT-1-10x  | 0.03572907 | 0.07713471 | 5.58E-05   |
| 7w11w_SITTC3_TGCTCCAAGCTAGCCC-1-10x  | 0.0234216  | 0.03331346 | 3.83E-05   |
| 7w11w_SITTC3_TGCTCCATCGATTTCT-1-10x  | 0.2820179  | 0.95405626 | 0.00075401 |
| 7w11w_SITTC3_TGCTGAACACAACCGC-1-10x  | 0.18928938 | 0.62389255 | 0.0013244  |
| 7w11w_SITTC3_TGCTTCGAGTCGTTAC-1-10x  | 0.1198246  | 0.37656033 | 0.0022788  |
| 7w11w_SITTC3_TGGCGTGAGATGATTG-1-10x  | 0.04803065 | 0.12093501 | 0.00011598 |
| 7w11w_SITTC3_TGGGCGTCAACGTT-1-10x    | 0.12332647 | 0.3890289  | 0.0021479  |
| 7w11w_SITTC3_TGGGCGTCCCGTTGT-1-10x   | 0.01595443 | 0.00672629 | 3.33E-05   |
| 7w11w_SITTC3_TGGGCTGAGTAAACAC-1-10x  | 0.02406748 | 0.03561315 | 3.91E-05   |
| 7w11w_SITTC3_TGGGCTGCACTGGACC-1-10x  | 0.23086438 | 0.77192205 | 0.00093779 |
| 7w11w_SITTC3_TGGGCTGCAGCTTTCC-1-10x  | 0.2213415  | 0.7380155  | 0.0010106  |
| 7w11w_SITTC3_TGGGCTGGTATCGTAC-1-10x  | 0.03568539 | 0.07697919 | 5.58E-05   |
| 7w11w_SITTC3_TGGGTTATCTACGCGG-1-10x  | 0.21756658 | 0.7245747  | 0.00104    |
| 7w11w_SITTC3_TGGTACATCCGGTTCT-1-10x  | 0.2155773  | 0.7174918  | 0.001055   |
| 7w11w_SITTC3_TGGTTAGGTGACAACG-1-10x  | 0.02616274 | 0.04307339 | 4.09E-05   |
| 7w11w_SITTC3_TGTAAGCCAGCAGTGA-1-10x  | 0.08623803 | 0.25697398 | 0.0039187  |
| 7w11w_SITTC3_TGTAAGCTCCCGAGTG-1-10x  | 0.04703395 | 0.11738621 | 0.00010777 |

|                                       |            |            |            |
|---------------------------------------|------------|------------|------------|
| 7w11w_SITTC3_TGTACAGCACACTGGC-1-10x   | 0.02852361 | 0.05147937 | 4.30E-05   |
| 7w11w_SITTC3_TGTACAGCATCTATCT-1-10x   | 0.01625682 | 0.00780298 | 3.33E-05   |
| 7w11w_SITTC3_TGTACAGTCTCTATGT-1-10x   | 0.04572735 | 0.11273401 | 0.00010046 |
| 7w11w_SITTC3_TGTCAGAAGAGCAAGA-1-10x   | 0.03078615 | 0.05953525 | 4.68E-05   |
| 7w11w_SITTC3_TGTCAGAGTAGGACTG-1-10x   | 0.1861522  | 0.6127225  | 0.0013809  |
| 7w11w_SITTC3_TGTCCCAAGTATGTAG-1-10x   | 0.05617334 | 0.1499274  | 0.000257   |
| 7w11w_SITTC3_TGTGCGGAGGGCGAAG-1-10x   | 0.07804082 | 0.22778748 | 0.0023954  |
| 7w11w_SITTC3_TGTGCGGGTGCTCCGA-1-10x   | 0.05173874 | 0.13413781 | 0.00016076 |
| 7w11w_SITTC3_TGTTTCATCAAATCGTC-1-10x  | 0.2535494  | 0.852693   | 0.00079608 |
| 7w11w_SITTC3_TGTTTCATCAGCGGTTTC-1-10x | 0.05297754 | 0.13854863 | 0.00017575 |
| 7w11w_SITTC3_TGTTGGACAACGACAG-1-10x   | 0.02912391 | 0.05361677 | 4.42E-05   |
| 7w11w_SITTC3_TGTTGGACATAGGTAA-1-10x   | 0.22101957 | 0.7368692  | 0.0010179  |
| 7w11w_SITTC3_TGTTGGAGTCAAGTTC-1-10x   | 0.23455136 | 0.78504974 | 0.00090964 |
| 7w11w_SITTC3_TGTTGGAGTCGTTGGC-1-10x   | 0.01855082 | 0.01597085 | 3.49E-05   |
| 7w11w_SITTC3_TTAATCCAGGATTTCC-1-10x   | 0.02644857 | 0.0440911  | 4.09E-05   |
| 7w11w_SITTC3_TTAATCCCATCACCAA-1-10x   | 0.1138254  | 0.35519993 | 0.0027534  |
| 7w11w_SITTC3_TTAATCCGTTCTCCA-1-10x    | 0.16745846 | 0.54616266 | 0.0017056  |
| 7w11w_SITTC3_TTACAGGGTGGACTGA-1-10x   | 0.03161107 | 0.0624724  | 4.83E-05   |
| 7w11w_SITTC3_TTACCGCGTTGACTAC-1-10x   | 0.04677327 | 0.11645804 | 0.00010777 |
| 7w11w_SITTC3_TTACGTTAGTCATGGG-1-10x   | 0.2607671  | 0.878392   | 0.00076963 |
| 7w11w_SITTC3_TTACGTTGTCCCGGTA-1-10x   | 0.08416548 | 0.24959458 | 0.0036353  |
| 7w11w_SITTC3_TTACGTTGTCTACAA-1-10x    | 0.15687601 | 0.5084834  | 0.0018385  |
| 7w11w_SITTC3_TTACGTTTCAGTGTTG-1-10x   | 0.02748314 | 0.04777475 | 4.19E-05   |
| 7w11w_SITTC3_TTACGTTTCGGATACT-1-10x   | 0.06023638 | 0.16439404 | 0.00038577 |
| 7w11w_SITTC3_TTATTGCGTCACAGAG-1-10x   | 0.03720266 | 0.08238152 | 6.07E-05   |
| 7w11w_SITTC3_TTCAATCAGGTCTGGA-1-10x   | 0.03782119 | 0.08458381 | 6.07E-05   |
| 7w11w_SITTC3_TTCAATCCATCGTCCT-1-10x   | 0.21383196 | 0.7112774  | 0.0010701  |
| 7w11w_SITTC3_TTCAATCTCCCATTCG-1-10x   | 0.2593511  | 0.87335026 | 0.00077499 |
| 7w11w_SITTC3_TTCAATCTCGGTATGT-1-10x   | 0.02011182 | 0.02152884 | 3.55E-05   |
| 7w11w_SITTC3_TTCAATCTCGTTGTTT-1-10x   | 0.17432745 | 0.57062    | 0.0015753  |
| 7w11w_SITTC3_TTACCGAGAAGCCTG-1-10x    | 0.18791209 | 0.6189887  | 0.0013519  |
| 7w11w_SITTC3_TTACAGGAAGACATAGT-1-10x  | 0.23469272 | 0.78555304 | 0.00090964 |
| 7w11w_SITTC3_TTACAGGATCATGTCAG-1-10x  | 0.03947016 | 0.09045501 | 6.67E-05   |
| 7w11w_SITTC3_TTACAGGATCGCCATAA-1-10x  | 0.2790549  | 0.9435065  | 0.00075266 |
| 7w11w_SITTC3_TTCATGTTCCCTTTGG-1-10x   | 0.08216462 | 0.24247041 | 0.0031253  |
| 7w11w_SITTC3_TTCATTGAGCGCCTAC-1-10x   | 0.10223458 | 0.31393036 | 0.0039137  |
| 7w11w_SITTC3_TTCCAATTCCGCGAGT-1-10x   | 0.04431872 | 0.10771854 | 8.81E-05   |
| 7w11w_SITTC3_TTCCACGGTCATCAGT-1-10x   | 0.08052369 | 0.23662782 | 0.0029431  |
| 7w11w_SITTC3_TTCCACGGTCCAGGTC-1-10x   | 0.07695661 | 0.2239271  | 0.0022191  |
| 7w11w_SITTC3_TTCCGTGTCGCTACGG-1-10x   | 0.04338748 | 0.10440281 | 8.29E-05   |
| 7w11w_SITTC3_TTCCGTGTCGCTCCTA-1-10x   | 0.28840557 | 0.9767999  | 0.0007596  |

|                                     |            |            |            |
|-------------------------------------|------------|------------|------------|
| 7w11w_SITTC3_TTCCTAAAGTTGCATC-1-10x | 0.01565801 | 0.00567087 | 3.33E-05   |
| 7w11w_SITTC3_TTCCTCTTCATCGGGC-1-10x | 0.01830737 | 0.01510403 | 3.49E-05   |
| 7w11w_SITTC3_TTCCTCTTCTGATTCT-1-10x | 0.02897731 | 0.05309479 | 4.42E-05   |
| 7w11w_SITTC3_TTCCTTCCATGGTGGA-1-10x | 0.2242416  | 0.7483414  | 0.00098869 |
| 7w11w_SITTC3_TTCCTTCTCAACACCA-1-10x | 0.01632362 | 0.00804081 | 3.33E-05   |
| 7w11w_SITTC3_TTCCTTCTCATCAGTG-1-10x | 0.26887614 | 0.90726453 | 0.00075594 |
| 7w11w_SITTC3_TTCGATTGTCGTTTCC-1-10x | 0.07332233 | 0.2109871  | 0.0015819  |
| 7w11w_SITTC3_TTCGCTGGTACTGACT-1-10x | 0.04763254 | 0.11951754 | 0.00011598 |
| 7w11w_SITTC3_TTCGCTGTGAGAGAC-1-10x  | 0.04557625 | 0.11219603 | 0.00010046 |
| 7w11w_SITTC3_TTCGGTCCACTTCAGA-1-10x | 0.07661191 | 0.22269978 | 0.0022191  |
| 7w11w_SITTC3_TTCTTCTCTGACGCG-1-10x  | 0.0548133  | 0.14508492 | 0.00021164 |
| 7w11w_SITTC3_TTGAACGGTAGAATAC-1-10x | 0.04284935 | 0.1024868  | 8.29E-05   |
| 7w11w_SITTC3_TTGAACGGTGACTGAG-1-10x | 0.10686798 | 0.33042777 | 0.0034182  |
| 7w11w_SITTC3_TTGACCTCGAATCCA-1-10x  | 0.0995817  | 0.30448467 | 0.0041652  |
| 7w11w_SITTC3_TTGGGATGTCCCTGTT-1-10x | 0.02822826 | 0.05042777 | 4.30E-05   |
| 7w11w_SITTC3_TTGGGCGAGATCCTAC-1-10x | 0.1181981  | 0.3707691  | 0.0023898  |
| 7w11w_SITTC3_TTGGGCGGTACGTTCA-1-10x | 0.02589785 | 0.04213027 | 4.09E-05   |
| 7w11w_SITTC3_TTGGGTACATGGATCT-1-10x | 0.03811842 | 0.08564211 | 6.36E-05   |
| 7w11w_SITTC3_TTGGGTATCCGATTAG-1-10x | 0.23186432 | 0.7754824  | 0.00093066 |
| 7w11w_SITTC3_TTGTTCAAGAATAACC-1-10x | 0.04447321 | 0.1082686  | 8.81E-05   |
| 7w11w_SITTC3_TTTACCAAGGACAAGA-1-10x | 0.04386866 | 0.10611608 | 8.81E-05   |
| 7w11w_SITTC3_TTTACGTATCAGCGC-1-10x  | 0.01538928 | 0.00471406 | 3.27E-05   |
| 7w11w_SITTC3_TTTACTGTCCGGACGT-1-10x | 0.12236002 | 0.38558784 | 0.0021873  |
| 7w11w_SITTC3_TTTAGTCTCGAGCCTG-1-10x | 0.0365434  | 0.08003418 | 5.82E-05   |
| 7w11w_SITTC3_TTTCACAGTCTCAAGT-1-10x | 0.02901831 | 0.05324078 | 4.42E-05   |
| 7w11w_SITTC3_TTTCAGTGTAAGTTGA-1-10x | 0.0284299  | 0.05114574 | 4.30E-05   |
| 7w11w_SITTC3_TTTCAGTTCCTGGGTG-1-10x | 0.08886009 | 0.26630992 | 0.0042295  |
| 7w11w_SITTC3_TTTCGATTCTGGGCGT-1-10x | 0.07015164 | 0.19969773 | 0.0011935  |
| 7w11w_SITTC3_TTTGATCGTGGCAACA-1-10x | 0.02213804 | 0.02874329 | 3.76E-05   |
| 7w11w_SITTC3_TTTGGAGAGCTCGTGC-1-10x | 0.07037377 | 0.20048864 | 0.0011935  |
| 7w11w_SITTC3_TTTGTTGTCCGAGATT-1-10x | 0.12033983 | 0.37839484 | 0.0022788  |
| 7w11w_SITTD3_AAACCCACATCCTAAG-1-10x | 0.02775265 | 0.04873435 | 4.30E-05   |
| 7w11w_SITTD3_AAAGAACGTAATGTGA-1-10x | 0.2575785  | 0.8670388  | 0.00078121 |
| 7w11w_SITTD3_AAAGGATCACCTAGG-1-10x  | 0.02306068 | 0.03202839 | 3.83E-05   |
| 7w11w_SITTD3_AAAGGGCGTGCTTCAA-1-10x | 0.03274909 | 0.06652439 | 5.00E-05   |
| 7w11w_SITTD3_AAAGGTACAATAGGAT-1-10x | 0.02939019 | 0.05456486 | 4.42E-05   |
| 7w11w_SITTD3_AAAGGTACAATAGTGA-1-10x | 0.04800458 | 0.1208422  | 0.00011598 |
| 7w11w_SITTD3_AAAGGTAGTGGCTACC-1-10x | 0.1068596  | 0.3303979  | 0.0034182  |
| 7w11w_SITTD3_AAAGTCTCTTAGGAC-1-10x  | 0.06400605 | 0.17781611 | 0.00058553 |
| 7w11w_SITTD3_AAAGTGATCTCCAAGA-1-10x | 0.04116279 | 0.09648171 | 7.40E-05   |
| 7w11w_SITTD3_AACCAACTCGATACAC-1-10x | 0.04904616 | 0.12455078 | 0.00012523 |

|                                     |            |            |            |
|-------------------------------------|------------|------------|------------|
| 7w11w_SITTD3_AACCATGGTGCCCACA-1-10x | 0.25087085 | 0.843156   | 0.00080923 |
| 7w11w_SITTD3_AACCATGGTTCGTGCG-1-10x | 0.0899815  | 0.27030277 | 0.0042999  |
| 7w11w_SITTD3_AACCCAACAAATCAGA-1-10x | 0.0375226  | 0.08352067 | 6.07E-05   |
| 7w11w_SITTD3_AACCCAACACTGGATT-1-10x | 0.16221187 | 0.527482   | 0.001776   |
| 7w11w_SITTD3_AACCTGACAGTAACGG-1-10x | 0.03057085 | 0.05876868 | 4.68E-05   |
| 7w11w_SITTD3_AACCTGATCTTCGTAT-1-10x | 0.23114467 | 0.7729201  | 0.00093779 |
| 7w11w_SITTD3_AACGTCAAGGACTGGT-1-10x | 0.04532178 | 0.11128996 | 9.39E-05   |
| 7w11w_SITTD3_AACTTCTGTAATTAGG-1-10x | 0.15494156 | 0.50159574 | 0.0018522  |
| 7w11w_SITTD3_AAGAACAGTAAGGAGA-1-10x | 0.25319105 | 0.8514171  | 0.00079608 |
| 7w11w_SITTD3_AAGACTCTCATTCTTG-1-10x | 0.22360827 | 0.7460864  | 0.00099599 |
| 7w11w_SITTD3_AAGCCATGTGCACGCT-1-10x | 0.13839166 | 0.44266915 | 0.0018802  |
| 7w11w_SITTD3_AAGCGTTTCTTTGATC-1-10x | 0.04964569 | 0.12668543 | 0.00013566 |
| 7w11w_SITTD3_AAGGAATAGCATACTC-1-10x | 0.13077725 | 0.41555774 | 0.001948   |
| 7w11w_SITTD3_AAGTACCTCTATGTGG-1-10x | 0.01681423 | 0.00978764 | 3.38E-05   |
| 7w11w_SITTD3_AATCGACCACAGTGAG-1-10x | 0.14008985 | 0.44871563 | 0.001875   |
| 7w11w_SITTD3_AATGACCTCCTTATGT-1-10x | 0.09083847 | 0.27335402 | 0.0043535  |
| 7w11w_SITTD3_AATTCCTGTAATACCC-1-10x | 0.06813174 | 0.19250578 | 0.00097948 |
| 7w11w_SITTD3_AATTTCCAAGTCATC-1-10x  | 0.18355027 | 0.6034582  | 0.0014268  |
| 7w11w_SITTD3_ACAACCAAGTGTGAGG-1-10x | 0.15066004 | 0.48635122 | 0.0018694  |
| 7w11w_SITTD3_ACACCAAAGTCTGGTT-1-10x | 0.04467867 | 0.10900015 | 9.39E-05   |
| 7w11w_SITTD3_ACACCAAAGTTGTAGA-1-10x | 0.24584556 | 0.8252632  | 0.00083459 |
| 7w11w_SITTD3_ACACGCGGTCTTGCGG-1-10x | 0.01556876 | 0.0053531  | 3.33E-05   |
| 7w11w_SITTD3_ACACGCGTCATCCCGT-1-10x | 0.20604691 | 0.68355846 | 0.001143   |
| 7w11w_SITTD3_ACAGGGAAGCCTCAAT-1-10x | 0.07928708 | 0.23222484 | 0.002576   |
| 7w11w_SITTD3_ACATCCCTCGATGCAT-1-10x | 0.07682556 | 0.2234605  | 0.0022191  |
| 7w11w_SITTD3_ACATCGACAACCAGAG-1-10x | 0.279806   | 0.9461807  | 0.00075303 |
| 7w11w_SITTD3_ACATGCAGTCGCTTAA-1-10x | 0.259943   | 0.87545776 | 0.00077221 |
| 7w11w_SITTD3_ACATTTCCAAGTATCC-1-10x | 0.04480825 | 0.10946151 | 9.39E-05   |
| 7w11w_SITTD3_ACATTTCTCTCGAGTA-1-10x | 0.03063748 | 0.05900588 | 4.68E-05   |
| 7w11w_SITTD3_ACCATTTCAAATGCGG-1-10x | 0.06118957 | 0.16778791 | 0.00042799 |
| 7w11w_SITTD3_ACCATTTCAAGGCTTT-1-10x | 0.04643202 | 0.115243   | 0.00010046 |
| 7w11w_SITTD3_ACCCAAATCTATGCCC-1-10x | 0.17330524 | 0.56698036 | 0.0015922  |
| 7w11w_SITTD3_ACCCTCACAGTTGGTT-1-10x | 0.01660018 | 0.00902553 | 3.38E-05   |
| 7w11w_SITTD3_ACCCTTGGTACCGTCG-1-10x | 0.05488692 | 0.14534706 | 0.00021164 |
| 7w11w_SITTD3_ACCGTTCTCGCAGTTA-1-10x | 0.04158803 | 0.09799579 | 7.40E-05   |
| 7w11w_SITTD3_ACGGAAGCACCGTGAC-1-10x | 0.06485292 | 0.18083143 | 0.00064991 |
| 7w11w_SITTD3_ACGGGTCTCAGCAGAG-1-10x | 0.03133001 | 0.0614717  | 4.68E-05   |
| 7w11w_SITTD3_ACGGTTACAACATCGT-1-10x | 0.0949994  | 0.28816918 | 0.0044051  |
| 7w11w_SITTD3_ACGTTCCAGGGACTGT-1-10x | 0.29155147 | 0.988001   | 0.00076269 |
| 7w11w_SITTD3_ACGTTCCAGCAGTAG-1-10x  | 0.21675804 | 0.7216959  | 0.0010475  |
| 7w11w_SITTD3_ACGTTCCGTTGCGTG-1-10x  | 0.08257929 | 0.24394687 | 0.0033032  |



|                                      |            |            |            |
|--------------------------------------|------------|------------|------------|
| 7w11w_SITTD3_ACTACGAAGGTACAAT-1-10x  | 0.21671179 | 0.7215312  | 0.0010475  |
| 7w11w_SITTD3_ACTATCTCACAGCCTG-1-10x  | 0.07590736 | 0.22019123 | 0.0020486  |
| 7w11w_SITTD3_ACTATCTTCATACAGC-1-10x  | 0.25254804 | 0.84912765 | 0.00080028 |
| 7w11w_SITTD3_ACTATGGCAAAGGCGT-1-10x  | 0.05565033 | 0.14806521 | 0.000233   |
| 7w11w_SITTD3_ACTCTCGTCCCTTGGT-1-10x  | 0.03355216 | 0.06938376 | 5.17E-05   |
| 7w11w_SITTD3_ACTGCAACACACGGTC-1-10x  | 0.25493795 | 0.85763705 | 0.00079207 |
| 7w11w_SITTD3_ACTGTCCGTGACGCCT-1-10x  | 0.02237586 | 0.02959006 | 3.76E-05   |
| 7w11w_SITTD3_ACTTATCTCCCTAGGG-1-10x  | 0.04931982 | 0.12552518 | 0.00013566 |
| 7w11w_SITTD3_ACTTCCGCACACACGC-1-10x  | 0.01624547 | 0.00776257 | 3.33E-05   |
| 7w11w_SITTD3_ACTTTCAAGACCATAA-1-10x  | 0.03104173 | 0.06044525 | 4.68E-05   |
| 7w11w_SITTD3_AGAACAATCGAGAAAT-1-10x  | 0.15822284 | 0.51327884 | 0.0018302  |
| 7w11w_SITTD3_AGACAAACAGCTGTTA-1-10x  | 0.15528773 | 0.5028283  | 0.0018522  |
| 7w11w_SITTD3_AGACACTAGACTTAAG-1-10x  | 0.2511429  | 0.84412456 | 0.00080923 |
| 7w11w_SITTD3_AGAGAATCAGGTGGAT-1-10x  | 0.23973387 | 0.80350226 | 0.00087632 |
| 7w11w_SITTD3_AGATAGAAGACAAGCC-1-10x  | 0.08340279 | 0.24687898 | 0.0034742  |
| 7w11w_SITTD3_AGATAGAGTATGAGGC-1-10x  | 0.16804759 | 0.5482603  | 0.0016902  |
| 7w11w_SITTD3_AGATAGAGTCCAAGAG-1-10x  | 0.02340813 | 0.0332655  | 3.83E-05   |
| 7w11w_SITTD3_AGATAGAGTCTGTGTA-1-10x  | 0.08785182 | 0.26271993 | 0.0041422  |
| 7w11w_SITTD3_AGATCGTGTGACGCCT-1-10x  | 0.25367793 | 0.85315067 | 0.00079608 |
| 7w11w_SITTD3_AGATGAAGTAGTCGTT-1-10x  | 0.21138492 | 0.70256466 | 0.0010934  |
| 7w11w_SITTD3_AGATGAAGTATGCTAC-1-10x  | 0.05281025 | 0.13795298 | 0.00017575 |
| 7w11w_SITTD3_AGCATCAGTCGTTCAA-1-10x  | 0.19538839 | 0.64560837 | 0.0012511  |
| 7w11w_SITTD3_AGCCAATCCCGAGAC-1-10x   | 0.23146947 | 0.7740765  | 0.00093779 |
| 7w11w_SITTD3_AGCGATTACTAGTAC-1-10x   | 0.0238628  | 0.03488438 | 3.83E-05   |
| 7w11w_SITTD3_AGCGCCATCAACTGGT-1-10x  | 0.25331536 | 0.85185975 | 0.00079608 |
| 7w11w_SITTD3_AGCGTATAGTGCTACT-1-10x  | 0.19808778 | 0.6552196  | 0.0012187  |
| 7w11w_SITTD3_AGCGTATAGTTCACTG-1-10x  | 0.26372397 | 0.88892    | 0.00076313 |
| 7w11w_SITTD3_AGCGTATGTCCTCAGG-1-10x  | 0.02527856 | 0.03992524 | 4.00E-05   |
| 7w11w_SITTD3_AGCGTATTCTAACGCA-1-10x  | 0.08297632 | 0.24536052 | 0.0033032  |
| 7w11w_SITTD3_AGCTTCCCAGTCAGCC-1-10x  | 0.0403687  | 0.09365432 | 7.01E-05   |
| 7w11w_SITTD3_AGGAATAGTCTTGCTC-1-10x  | 0.07708385 | 0.22438015 | 0.0022191  |
| 7w11w_SITTD3_AGGAATAGTTGTGCCG-1-10x  | 0.07638243 | 0.2218827  | 0.0020486  |
| 7w11w_SITTD3_AGGACGAAGCAAACAT-1-10x  | 0.0379059  | 0.08488543 | 6.07E-05   |
| 7w11w_SITTD3_AGGACGAGTTCGGTTA-1-10x  | 0.01625803 | 0.00780726 | 3.33E-05   |
| 7w11w_SITTD3_AGGACTTAGCGGCTCT-1-10x  | 0.0339505  | 0.07080207 | 5.17E-05   |
| 7w11w_SITTD3_AGGATAAAGATTACCC-1-10x  | 0.10241646 | 0.31457794 | 0.0039137  |
| 7w11w_SITTD3_AGGATCTGTGCGAGTA-1-10x  | 0.26677087 | 0.89976865 | 0.00075831 |
| 7w11w_SITTD3_AGGCATTGTAACATAAG-1-10x | 0.08666581 | 0.2584971  | 0.0039187  |
| 7w11w_SITTD3_AGGCCACCATGTCGTA-1-10x  | 0.04510034 | 0.11050152 | 9.39E-05   |
| 7w11w_SITTD3_AGGCCACGTTATGTGC-1-10x  | 0.04839875 | 0.12224565 | 0.00012523 |
| 7w11w_SITTD3_AGGGAGTAGTTTCGAC-1-10x  | 0.04157934 | 0.09796485 | 7.40E-05   |

|                                      |            |            |            |
|--------------------------------------|------------|------------|------------|
| 7w11w_SITTD3_AGGGCCTTCCCTCTCC-1-10x  | 0.06271036 | 0.17320274 | 0.00052741 |
| 7w11w_SITTD3_AGGGCTCGTCGACTGC-1-10x  | 0.02256188 | 0.0302524  | 3.76E-05   |
| 7w11w_SITTD3_AGGGTCTCCCTCGTA-1-10x   | 0.25640061 | 0.8628449  | 0.00078463 |
| 7w11w_SITTD3_AGGGTCTCTCATTAC-1-10x   | 0.16782959 | 0.5474841  | 0.0016902  |
| 7w11w_SITTD3_AGGGTGAGTGCCTTCT-1-10x  | 0.03678241 | 0.0808852  | 5.82E-05   |
| 7w11w_SITTD3_AGGTCATAGCACCTGC-1-10x  | 0.20567454 | 0.6822326  | 0.001143   |
| 7w11w_SITTD3_AGTACTGAGTTCACTG-1-10x  | 0.212982   | 0.7082511  | 0.0010778  |
| 7w11w_SITTD3_AGTACTGCAGTGAGCA-1-10x  | 0.20850614 | 0.6923146  | 0.0011177  |
| 7w11w_SITTD3_AGTAGCTGTGACTCTA-1-10x  | 0.2201054  | 0.73361427 | 0.0010253  |
| 7w11w_SITTD3_AGTAGTCTCTTTGCTA-1-10x  | 0.1847894  | 0.6078702  | 0.0013959  |
| 7w11w_SITTD3_AGTCAACCAACGACAG-1-10x  | 0.274772   | 0.9282569  | 0.00075218 |
| 7w11w_SITTD3_AGTGACTAGGTCGTAG-1-10x  | 0.18497512 | 0.6085315  | 0.0013959  |
| 7w11w_SITTD3_AGTGATCAGGATACAT-1-10x  | 0.19523495 | 0.645062   | 0.0012511  |
| 7w11w_SITTD3_AGTGCCGAGTGTTGAA-1-10x  | 0.03255384 | 0.0658292  | 5.00E-05   |
| 7w11w_SITTD3_AGTGCCGCAGCTGTAT-1-10x  | 0.27296358 | 0.9218181  | 0.0007526  |
| 7w11w_SITTD3_AGTTAGCAGCGAGAAA-1-10x  | 0.26640758 | 0.8984751  | 0.00075831 |
| 7w11w_SITTD3_AGTTAGCCAAAGCAAT-1-10x  | 0.20950903 | 0.6958855  | 0.0011095  |
| 7w11w_SITTD3_AGTTAGCTCACTGTCC-1-10x  | 0.05454666 | 0.14413553 | 0.00021164 |
| 7w11w_SITTD3_AGTTCCCAGCCGTCGT-1-10x  | 0.03911197 | 0.08917967 | 6.67E-05   |
| 7w11w_SITTD3_ATACCTTGTCTTTGCTA-1-10x | 0.04905845 | 0.12459453 | 0.00012523 |
| 7w11w_SITTD3_ATACCTTGTCTTTGCC-1-10x  | 0.07664209 | 0.22280724 | 0.0022191  |
| 7w11w_SITTD3_ATAGACCAGTTCACTG-1-10x  | 0.03652278 | 0.07996075 | 5.82E-05   |
| 7w11w_SITTD3_ATAGAGATCTCGCGTT-1-10x  | 0.0364711  | 0.07977673 | 5.82E-05   |
| 7w11w_SITTD3_ATAGGCTTCGCTCTAC-1-10x  | 0.08315113 | 0.24598294 | 0.0034742  |
| 7w11w_SITTD3_ATCACGAAGAAGCCTG-1-10x  | 0.0572334  | 0.1537018  | 0.00028394 |
| 7w11w_SITTD3_ATCAGGTGTAACGATA-1-10x  | 0.18436517 | 0.6063597  | 0.0014112  |
| 7w11w_SITTD3_ATCATTCCAGATCACT-1-10x  | 0.18179365 | 0.5972037  | 0.0014427  |
| 7w11w_SITTD3_ATCCGTCAGCTAGTTC-1-10x  | 0.04133998 | 0.09711261 | 7.40E-05   |
| 7w11w_SITTD3_ATCGGCGAGTCTGGTT-1-10x  | 0.20004775 | 0.6621982  | 0.0011985  |
| 7w11w_SITTD3_ATCGTAGCAACAAAGT-1-10x  | 0.20122781 | 0.66639984 | 0.0011888  |
| 7w11w_SITTD3_ATCTCTACAGAGTTCT-1-10x  | 0.27665544 | 0.93496305 | 0.00075222 |
| 7w11w_SITTD3_ATCTTCACACCGTGGT-1-10x  | 0.02489995 | 0.0385772  | 4.00E-05   |
| 7w11w_SITTD3_ATCTTCATCCGGACTG-1-10x  | 0.04061607 | 0.09453511 | 7.01E-05   |
| 7w11w_SITTD3_ATGAAAGTCAATCGGT-1-10x  | 0.05271309 | 0.13760705 | 0.00017575 |
| 7w11w_SITTD3_ATGACCAAGTTAGTAG-1-10x  | 0.05449171 | 0.1439399  | 0.00021164 |
| 7w11w_SITTD3_ATGACCACAGATAAAC-1-10x  | 0.05380723 | 0.14150277 | 0.00019264 |
| 7w11w_SITTD3_ATGACCAGTTCTCGCT-1-10x  | 0.03870709 | 0.0877381  | 6.36E-05   |
| 7w11w_SITTD3_ATGAGTCTCAAGCCCG-1-10x  | 0.03711363 | 0.08206452 | 6.07E-05   |
| 7w11w_SITTD3_ATGATCGCACCTTAC-1-10x   | 0.10191382 | 0.31278828 | 0.0039137  |
| 7w11w_SITTD3_ATGCATGCATGAATAG-1-10x  | 0.25411928 | 0.85472214 | 0.00079207 |
| 7w11w_SITTD3_ATGCATGTCGAGATAA-1-10x  | 0.22159716 | 0.73892576 | 0.0010106  |

|                                     |            |            |            |
|-------------------------------------|------------|------------|------------|
| 7w11w_SITTD3_ATGCCTCGTTGATGTC-1-10x | 0.24656713 | 0.8278324  | 0.0008292  |
| 7w11w_SITTD3_ATGCGATAGGACGCTA-1-10x | 0.03284904 | 0.06688025 | 5.00E-05   |
| 7w11w_SITTD3_ATGCGATCAGTGAGCA-1-10x | 0.22663325 | 0.756857   | 0.00097406 |
| 7w11w_SITTD3_ATGCGATTCTCTTAAC-1-10x | 0.2788912  | 0.9429236  | 0.00075266 |
| 7w11w_SITTD3_ATGGAGGAGTGGACGT-1-10x | 0.02554322 | 0.04086759 | 4.00E-05   |
| 7w11w_SITTD3_ATGGTTGCAAGGGCAT-1-10x | 0.04728755 | 0.11828917 | 0.00010777 |
| 7w11w_SITTD3_ATGTCTTAGTAAAGCT-1-10x | 0.10658927 | 0.3294354  | 0.0034182  |
| 7w11w_SITTD3_ATGTCTTCATGCTGCG-1-10x | 0.09521397 | 0.28893316 | 0.0044051  |
| 7w11w_SITTD3_ATGTCTTCCATTGGA-1-10x  | 0.04221027 | 0.10021131 | 7.82E-05   |
| 7w11w_SITTD3_ATTACTCCAAAGACGC-1-10x | 0.0777399  | 0.22671604 | 0.0023954  |
| 7w11w_SITTD3_ATTATCCAGGCGATAC-1-10x | 0.065621   | 0.18356618 | 0.00072102 |
| 7w11w_SITTD3_ATTCCATTCAGGCGAA-1-10x | 0.10041222 | 0.30744177 | 0.0040879  |
| 7w11w_SITTD3_ATTCCCGTCGTTGTAG-1-10x | 0.15843259 | 0.5140257  | 0.0018209  |
| 7w11w_SITTD3_ATTGGGTTCTAAACG-1-10x  | 0.0167638  | 0.0096081  | 3.38E-05   |
| 7w11w_SITTD3_ATTGTTCTCCAAGTAG-1-10x | 0.26978695 | 0.9105075  | 0.00075499 |
| 7w11w_SITTD3_ATTTACCGTTCGGTAT-1-10x | 0.04923492 | 0.12522288 | 0.00012523 |
| 7w11w_SITTD3_ATTTACCTCCTTCTGG-1-10x | 0.24451865 | 0.8205387  | 0.00084583 |
| 7w11w_SITTD3_ATTTCACGTGATTCAC-1-10x | 0.23062149 | 0.77105725 | 0.00093779 |
| 7w11w_SITTD3_ATTTCTGGTTCAAGGG-1-10x | 0.09123492 | 0.2747656  | 0.0043535  |
| 7w11w_SITTD3_CAAAGAAAGTATGAGT-1-10x | 0.04146216 | 0.09754764 | 7.40E-05   |
| 7w11w_SITTD3_CAACGATAGGTAAGGA-1-10x | 0.02909205 | 0.05350335 | 4.42E-05   |
| 7w11w_SITTD3_CAACGATTCTGGTGCG-1-10x | 0.10682916 | 0.33028954 | 0.0034182  |
| 7w11w_SITTD3_CAAGAGGCACCCTTGT-1-10x | 0.08398221 | 0.24894202 | 0.0034742  |
| 7w11w_SITTD3_CAATACGAGTATGCAA-1-10x | 0.01965432 | 0.0198999  | 3.55E-05   |
| 7w11w_SITTD3_CACACAAGTCTTCGAA-1-10x | 0.05106836 | 0.13175093 | 0.00014746 |
| 7w11w_SITTD3_CACGAATAGGAGACCT-1-10x | 0.06310306 | 0.17460096 | 0.00052741 |
| 7w11w_SITTD3_CACGGGTCAATTCGTG-1-10x | 0.03038652 | 0.05811237 | 4.55E-05   |
| 7w11w_SITTD3_CACGTGGAGCATTTCG-1-10x | 0.04344348 | 0.10460219 | 8.29E-05   |
| 7w11w_SITTD3_CACTGAATCATTTGTC-1-10x | 0.0179058  | 0.01367422 | 3.44E-05   |
| 7w11w_SITTD3_CACTTCGTCTCGTCAC-1-10x | 0.23919886 | 0.80159736 | 0.00087632 |
| 7w11w_SITTD3_CAGAGCCAGGATAATC-1-10x | 0.01957362 | 0.01961258 | 3.55E-05   |
| 7w11w_SITTD3_CAGAGCCCAAACACGG-1-10x | 0.18613958 | 0.6126776  | 0.0013809  |
| 7w11w_SITTD3_CAGAGCCTCATTGCTT-1-10x | 0.22773708 | 0.7607872  | 0.00096676 |
| 7w11w_SITTD3_CAGCACGAGCATGATA-1-10x | 0.03068501 | 0.05917515 | 4.68E-05   |
| 7w11w_SITTD3_CAGCACGAGTTGCATC-1-10x | 0.12947904 | 0.41093537 | 0.0019639  |
| 7w11w_SITTD3_CAGCCAGGTGCCCGTA-1-10x | 0.05490363 | 0.14540656 | 0.00021164 |
| 7w11w_SITTD3_CAGCGTGCAGAACTAA-1-10x | 0.2321105  | 0.77635896 | 0.00093066 |
| 7w11w_SITTD3_CAGGCCAAGTCGCTAT-1-10x | 0.05457295 | 0.14422916 | 0.00021164 |
| 7w11w_SITTD3_CAGGCCACACGGTGTC-1-10x | 0.21134183 | 0.70241123 | 0.0010934  |
| 7w11w_SITTD3_CAGGCCAGTGCCTTCT-1-10x | 0.26657274 | 0.8990632  | 0.00075831 |
| 7w11w_SITTD3_CAGTGCGCACACGTGC-1-10x | 0.12642667 | 0.4000673  | 0.0020256  |

|                                      |            |            |            |
|--------------------------------------|------------|------------|------------|
| 7w11w_SITTD3_CAGTGCGTCTACGGTA-1-10x  | 0.19652402 | 0.6496518  | 0.00124    |
| 7w11w_SITTD3_CAGTTCCAGTGGCTC-1-10x   | 0.06261759 | 0.17287241 | 0.00052741 |
| 7w11w_SITTD3_CATAAGCCAAGCTACT-1-10x  | 0.28179184 | 0.9532514  | 0.00075401 |
| 7w11w_SITTD3_CATACAGAGTAGTGCG-1-10x  | 0.04232389 | 0.10061584 | 7.82E-05   |
| 7w11w_SITTD3_CATACCCAGAGTGTG-1-10x   | 0.1710735  | 0.55903417 | 0.0016421  |
| 7w11w_SITTD3_CATACCTCTGCGATA-1-10x   | 0.20512107 | 0.68026197 | 0.0011518  |
| 7w11w_SITTD3_CATAGACGTACGGATG-1-10x  | 0.10224009 | 0.31394997 | 0.0039137  |
| 7w11w_SITTD3_CATCAAGCATATACCG-1-10x  | 0.13643672 | 0.4357085  | 0.0018891  |
| 7w11w_SITTD3_CATGCCTTCGATTGAC-1-10x  | 0.13219108 | 0.4205917  | 0.0019219  |
| 7w11w_SITTD3_CATGCGGAGGCCTTGC-1-10x  | 0.05380458 | 0.14149334 | 0.00019264 |
| 7w11w_SITTD3_CATGCTCCAGATCCAT-1-10x  | 0.09348718 | 0.28278488 | 0.0044154  |
| 7w11w_SITTD3_CATGCTCTCGGCATCG-1-10x  | 0.09919    | 0.30309    | 0.0041652  |
| 7w11w_SITTD3_CATTCAATCAATCGCAT-1-10x | 0.10949142 | 0.33976862 | 0.0031181  |
| 7w11w_SITTD3_CATTCCGCACTAAACC-1-10x  | 0.05402509 | 0.14227846 | 0.00021164 |
| 7w11w_SITTD3_CATTGCCTCATTTGTC-1-10x  | 0.04671646 | 0.11625577 | 0.00010777 |
| 7w11w_SITTD3_CATTGTTGTACTAGCT-1-10x  | 0.08904833 | 0.26698017 | 0.0042295  |
| 7w11w_SITTD3_CCACAAACATCCGATA-1-10x  | 0.19296868 | 0.6369929  | 0.0012861  |
| 7w11w_SITTD3_CCACGAGCAGCTGTAT-1-10x  | 0.19450565 | 0.6424653  | 0.0012624  |
| 7w11w_SITTD3_CCCATTGGTCTTTCAT-1-10x  | 0.01723103 | 0.0112717  | 3.38E-05   |
| 7w11w_SITTD3_CCCATTGTCAGCATTG-1-10x  | 0.01654716 | 0.00883672 | 3.38E-05   |
| 7w11w_SITTD3_CCCGAAGAGGTCGAGT-1-10x  | 0.24637796 | 0.8271588  | 0.00083459 |
| 7w11w_SITTD3_CCCTCAACATCCTTGC-1-10x  | 0.08565976 | 0.254915   | 0.0037839  |
| 7w11w_SITTD3_CCCTTAGGTCCACGCA-1-10x  | 0.01665427 | 0.0092181  | 3.38E-05   |
| 7w11w_SITTD3_CCGAACGCATTGTAGC-1-10x  | 0.02334556 | 0.03304271 | 3.83E-05   |
| 7w11w_SITTD3_CCGCAAGTCCAGGACC-1-10x  | 0.05574292 | 0.1483949  | 0.000233   |
| 7w11w_SITTD3_CCGGACAAGGTCCTG-1-10x   | 0.10735964 | 0.33217835 | 0.0034182  |
| 7w11w_SITTD3_CCGGACAGTGCGGTAA-1-10x  | 0.23979993 | 0.80373746 | 0.00087632 |
| 7w11w_SITTD3_CCGGTAGAGGCCATAG-1-10x  | 0.27983773 | 0.9462937  | 0.00075303 |
| 7w11w_SITTD3_CCGTAGGCAAACACCT-1-10x  | 0.03217251 | 0.06447145 | 4.83E-05   |
| 7w11w_SITTD3_CCGTGAGGTTAAGGAT-1-10x  | 0.03060237 | 0.05888089 | 4.68E-05   |
| 7w11w_SITTD3_CCTAAGACATACTGAC-1-10x  | 0.17338626 | 0.56726885 | 0.0015922  |
| 7w11w_SITTD3_CCTCACATCTTGGTGA-1-10x  | 0.01783305 | 0.0134152  | 3.44E-05   |
| 7w11w_SITTD3_CCTCCAAGTTTAGTCG-1-10x  | 0.17131123 | 0.5598806  | 0.0016421  |
| 7w11w_SITTD3_CCTCTCCAGATTGCGG-1-10x  | 0.28124237 | 0.951295   | 0.00075348 |
| 7w11w_SITTD3_CCTTCAGCATCTCGTC-1-10x  | 0.12229714 | 0.38536394 | 0.0021873  |
| 7w11w_SITTD3_CCTTTGGCATGGGATG-1-10x  | 0.04379499 | 0.10585377 | 8.81E-05   |
| 7w11w_SITTD3_CGAAGGAAGGGATCGT-1-10x  | 0.07860997 | 0.22981393 | 0.002576   |
| 7w11w_SITTD3_CGAAGTTTCGACCAAT-1-10x  | 0.04488724 | 0.10974276 | 9.39E-05   |
| 7w11w_SITTD3_CGAATTGGTGCCTGCA-1-10x  | 0.09543161 | 0.2897081  | 0.0043808  |
| 7w11w_SITTD3_CGACAGCGTTCGGTTC-1-10x  | 0.0607029  | 0.16605508 | 0.00042799 |
| 7w11w_SITTD3_CGAGAAGAGTCCCAAT-1-10x  | 0.0368236  | 0.08103184 | 5.82E-05   |

|                                     |            |            |            |
|-------------------------------------|------------|------------|------------|
| 7w11w_SITTD3_CGAGAAGGTATCGTGT-1-10x | 0.02073057 | 0.02373193 | 3.62E-05   |
| 7w11w_SITTD3_CGAGGAAAGTTTGGCT-1-10x | 0.04354136 | 0.10495073 | 8.29E-05   |
| 7w11w_SITTD3_CGAGGCTCACGACAAG-1-10x | 0.08349565 | 0.24720961 | 0.0034742  |
| 7w11w_SITTD3_CGATGCGCATGTCAGT-1-10x | 0.09342448 | 0.28256163 | 0.0044107  |
| 7w11w_SITTD3_CGATGGCCATCAGTCA-1-10x | 0.20475912 | 0.6789732  | 0.0011518  |
| 7w11w_SITTD3_CGCGTGACACACACGC-1-10x | 0.11740711 | 0.36795276 | 0.002453   |
| 7w11w_SITTD3_CGGAACCCAGGTGTGA-1-10x | 0.14000154 | 0.44840118 | 0.001875   |
| 7w11w_SITTD3_CGGACACAGAGGTCGT-1-10x | 0.07708043 | 0.22436796 | 0.0022191  |
| 7w11w_SITTD3_CGGAGAATCTGGGCAC-1-10x | 0.22326005 | 0.7448465  | 0.00099599 |
| 7w11w_SITTD3_CGGGTCACACTCCCTA-1-10x | 0.26307958 | 0.88662565 | 0.00076511 |
| 7w11w_SITTD3_CGGGTCATCTTTGCTA-1-10x | 0.0174581  | 0.01208017 | 3.44E-05   |
| 7w11w_SITTD3_CGGGTGTAGCTCGTGC-1-10x | 0.1157857  | 0.3621797  | 0.002594   |
| 7w11w_SITTD3_CGGGTGTGCTACTTAG-1-10x | 0.08739296 | 0.26108617 | 0.0040384  |
| 7w11w_SITTD3_CGTAATGTCAAAGGAT-1-10x | 0.02178338 | 0.0274805  | 3.69E-05   |
| 7w11w_SITTD3_CGTCAAAGCGCCATC-1-10x  | 0.0715236  | 0.20458265 | 0.0013138  |
| 7w11w_SITTD3_CGTGAATAGATTTGCC-1-10x | 0.09768713 | 0.29773897 | 0.0042943  |
| 7w11w_SITTD3_CGTGAATCAAACCCA-1-10x  | 0.2537492  | 0.8534044  | 0.00079608 |
| 7w11w_SITTD3_CGTTAGATCTCGACGG-1-10x | 0.02951411 | 0.0550061  | 4.42E-05   |
| 7w11w_SITTD3_CGTTGGGCACGCGCAT-1-10x | 0.123459   | 0.38950077 | 0.0021479  |
| 7w11w_SITTD3_CTACATTGTTCAAGGG-1-10x | 0.1802804  | 0.5918157  | 0.001475   |
| 7w11w_SITTD3_CTACGGGCACATTGTG-1-10x | 0.04707809 | 0.11754339 | 0.00010777 |
| 7w11w_SITTD3_CTATCCGAGCCTTTGA-1-10x | 0.0863975  | 0.25754178 | 0.0039187  |
| 7w11w_SITTD3_CTATCCGCAATTGGTC-1-10x | 0.04044082 | 0.0939111  | 7.01E-05   |
| 7w11w_SITTD3_CTCAACCAGGCATCTT-1-10x | 0.03683851 | 0.08108493 | 5.82E-05   |
| 7w11w_SITTD3 CTCATCGGTACGTGTT-1-10x | 0.09094191 | 0.27372235 | 0.0043535  |
| 7w11w_SITTD3 CTCATCGGTCATAACC-1-10x | 0.14750464 | 0.4751163  | 0.0018716  |
| 7w11w_SITTD3 CTCATTAAGCACTAGG-1-10x | 0.12283786 | 0.38728917 | 0.0021479  |
| 7w11w_SITTD3 CTCATTAGTGCATCTA-1-10x | 0.02197295 | 0.02815549 | 3.69E-05   |
| 7w11w_SITTD3 CTCCCAATCTGCAGCG-1-10x | 0.04848348 | 0.12254732 | 0.00012523 |
| 7w11w_SITTD3 CTCCCTCAGCATTTGC-1-10x | 0.07669648 | 0.2230009  | 0.0022191  |
| 7w11w_SITTD3 CTCCGATGTAGACGTG-1-10x | 0.05276059 | 0.13777618 | 0.00017575 |
| 7w11w_SITTD3 CTCGAGGCATCTTCGC-1-10x | 0.27157423 | 0.9168712  | 0.00075352 |
| 7w11w_SITTD3 CTCTCAGCACCTCTA-1-10x  | 0.13176724 | 0.41908264 | 0.001934   |
| 7w11w_SITTD3 CTCTCAGCATAGATCC-1-10x | 0.03792043 | 0.08493716 | 6.07E-05   |
| 7w11w_SITTD3 CTCTGGTCCCTGGTT-1-10x  | 0.09876799 | 0.3015874  | 0.0042345  |
| 7w11w_SITTD3 CTGAGGCAGCTGAGCA-1-10x | 0.04479615 | 0.10941843 | 9.39E-05   |
| 7w11w_SITTD3 CTGATCCAGTAATCCC-1-10x | 0.2215108  | 0.73861825 | 0.0010106  |
| 7w11w_SITTD3 CTGCAGGGTTAGCGGA-1-10x | 0.24277914 | 0.81434506 | 0.00085764 |
| 7w11w_SITTD3 CTGCCTATCCGAGATT-1-10x | 0.17558143 | 0.5750848  | 0.0015585  |
| 7w11w_SITTD3 CTGCCTATCGAACGGA-1-10x | 0.03455334 | 0.07294849 | 5.37E-05   |
| 7w11w_SITTD3 CTGCGAGTCTCTCAA-1-10x  | 0.2140329  | 0.7119929  | 0.0010701  |

|                                      |            |            |            |
|--------------------------------------|------------|------------|------------|
| 7w11w_SITTD3_CTGCTCAGTTAAGCAA-1-10x  | 0.23487405 | 0.7861987  | 0.00090964 |
| 7w11w_SITTD3_CTGGCAGGTTTGTGGT-1-10x  | 0.02895067 | 0.05299996 | 4.42E-05   |
| 7w11w_SITTD3_CTGTACCAGAGAATCT-1-10x  | 0.05536384 | 0.14704514 | 0.000233   |
| 7w11w_SITTD3_CTGTACCACAAGTGG-1-10x   | 0.01990394 | 0.02078868 | 3.55E-05   |
| 7w11w_SITTD3_CTGTCTGTGTTTCGAT-1-10x  | 0.21658123 | 0.7210663  | 0.0010475  |
| 7w11w_SITTD3_CTGTCTTCTGCGTCT-1-10x   | 0.2003452  | 0.6632573  | 0.0011985  |
| 7w11w_SITTD3_CTGTGAAAGTAGGGTC-1-10x  | 0.17422503 | 0.57025534 | 0.0015753  |
| 7w11w_SITTD3_CTTACCGTCTGTCGA-1-10x   | 0.26259997 | 0.884918   | 0.00076511 |
| 7w11w_SITTD3_CTTAGGAAGAAGGATG-1-10x  | 0.05960293 | 0.16213861 | 0.00034795 |
| 7w11w_SITTD3_CTTAGGAGTGCTGTCG-1-10x  | 0.20319828 | 0.6734158  | 0.0011699  |
| 7w11w_SITTD3_CTTCCGACAGCGTTGC-1-10x  | 0.04267431 | 0.10186356 | 7.82E-05   |
| 7w11w_SITTD3_CTTCTTCAAGGGTCA-1-10x   | 0.04819092 | 0.12150566 | 0.00011598 |
| 7w11w_SITTD3_CTTTCAAAGTCCTGCG-1-10x  | 0.08132185 | 0.2394697  | 0.0031253  |
| 7w11w_SITTD3_CTTTCAAGTACGCTTA-1-10x  | 0.13816376 | 0.4418577  | 0.0018802  |
| 7w11w_SITTD3_CTTTCGGCACGGCGTT-1-10x  | 0.02805582 | 0.0498138  | 4.30E-05   |
| 7w11w_SITTD3_GAAGCGAAGTACGAGC-1-10x  | 0.09406105 | 0.2848282  | 0.0044154  |
| 7w11w_SITTD3_GAAGCGAGTTTAGACC-1-10x  | 0.26834294 | 0.90536606 | 0.00075594 |
| 7w11w_SITTD3_GAAGCGATCCTCTCTT-1-10x  | 0.06088359 | 0.16669844 | 0.00042799 |
| 7w11w_SITTD3_GAAGTAACACGGCTAC-1-10x  | 0.2481284  | 0.83339137 | 0.00082396 |
| 7w11w_SITTD3_GAATAGACAGATTCGT-1-10x  | 0.21182804 | 0.7041424  | 0.0010856  |
| 7w11w_SITTD3_GAATCGTCAACATACC-1-10x  | 0.22853386 | 0.7636242  | 0.00095947 |
| 7w11w_SITTD3_GACATCAGTTGTCCCT-1-10x  | 0.14416108 | 0.4632114  | 0.0018716  |
| 7w11w_SITTD3_GACCAATGTTGTGCAT-1-10x  | 0.01621767 | 0.00766356 | 3.33E-05   |
| 7w11w_SITTD3_GACCCCTAGTCATCCA-1-10x  | 0.03136835 | 0.0616082  | 4.68E-05   |
| 7w11w_SITTD3_GACCGTGGTTAGTCGT-1-10x  | 0.08032276 | 0.2359124  | 0.0029431  |
| 7w11w_SITTD3_GACCTCCAATCCTAG-1-10x   | 0.04450708 | 0.10838918 | 8.81E-05   |
| 7w11w_SITTD3_GACGTTAGTCATAAAG-1-10x  | 0.04927434 | 0.12536322 | 0.00012523 |
| 7w11w_SITTD3_GACTATGAGGAACATT-1-10x  | 0.04562603 | 0.11237325 | 0.00010046 |
| 7w11w_SITTD3_GACTATGCAGCACGAA-1-10x  | 0.03125522 | 0.06120538 | 4.68E-05   |
| 7w11w_SITTD3_GACTGATAGGGAGTGG-1-10x  | 0.2177666  | 0.7252869  | 0.00104    |
| 7w11w_SITTD3_GAGAAATCAACGTAAA-1-10x  | 0.28363225 | 0.9598043  | 0.00075531 |
| 7w11w_SITTD3_GAGACCCTACCATAG-1-10x   | 0.07351773 | 0.21168284 | 0.0015819  |
| 7w11w_SITTD3_GAGACTTGTATGCTTG-1-10x  | 0.27625373 | 0.9335328  | 0.00075214 |
| 7w11w_SITTD3_GAGACTTTCCATAAGC-1-10x  | 0.18937209 | 0.62418705 | 0.0013244  |
| 7w11w_SITTD3_GAGAGGTTTCGTAGAGG-1-10x | 0.23780358 | 0.79662937 | 0.00088935 |
| 7w11w_SITTD3_GAGGCAAGTGTACATC-1-10x  | 0.13075945 | 0.41549432 | 0.001948   |
| 7w11w_SITTD3_GAGGGATGTTGTGTTG-1-10x  | 0.15488657 | 0.50139993 | 0.0018522  |
| 7w11w_SITTD3_GAGGGATTCCCAACTC-1-10x  | 0.28112605 | 0.9508809  | 0.00075348 |
| 7w11w_SITTD3_GAGGGATTCCAGCGA-1-10x   | 0.04527135 | 0.11111104 | 9.39E-05   |
| 7w11w_SITTD3_GAGGGTAAGATTAGAC-1-10x  | 0.25428033 | 0.85529554 | 0.00079207 |
| 7w11w_SITTD3_GAGTGTTTCAGTTTGGT-1-10x | 0.2694847  | 0.90943134 | 0.00075499 |

|                                      |            |            |            |
|--------------------------------------|------------|------------|------------|
| 7w11w_SITTD3_GAGTTTGCAGAATTCC-1-10x  | 0.0233788  | 0.03316107 | 3.83E-05   |
| 7w11w_SITTD3_GAGTTTGTCTGTGCTC-1-10x  | 0.0492051  | 0.1251167  | 0.00012523 |
| 7w11w_SITTD3_GATAGCTGTGCGTTG-1-10x   | 0.02252109 | 0.03010715 | 3.76E-05   |
| 7w11w_SITTD3_GATCAGTTCGAACTCA-1-10x  | 0.03441145 | 0.07244327 | 5.37E-05   |
| 7w11w_SITTD3_GATGACTCACTTCCTG-1-10x  | 0.05110558 | 0.13188343 | 0.00014746 |
| 7w11w_SITTD3_GATGAGGAGTTCATGC-1-10x  | 0.04473919 | 0.10921563 | 9.39E-05   |
| 7w11w_SITTD3_GATGAGGGTCGTCGGT-1-10x  | 0.1564078  | 0.5068163  | 0.0018385  |
| 7w11w_SITTD3_GATGCTACAGAGATTA-1-10x  | 0.17529847 | 0.57407737 | 0.0015585  |
| 7w11w_SITTD3_GATGGAGTCACTCACC-1-10x  | 0.02586045 | 0.04199709 | 4.09E-05   |
| 7w11w_SITTD3_GATTTCGAGTGATTGGG-1-10x | 0.04517963 | 0.11078385 | 9.39E-05   |
| 7w11w_SITTD3_GATTCTTGTCATGGCC-1-10x  | 0.1334187  | 0.4249627  | 0.0019115  |
| 7w11w_SITTD3_GATTGGTGTGAGTTT-1-10x   | 0.2710299  | 0.914933   | 0.00075352 |
| 7w11w_SITTD3_GATTTCTTCATAGAGA-1-10x  | 0.10318521 | 0.3173151  | 0.0038193  |
| 7w11w_SITTD3_GCAACATCAATACCCA-1-10x  | 0.01610294 | 0.00725508 | 3.33E-05   |
| 7w11w_SITTD3_GCAACCGGTAGCTTGT-1-10x  | 0.01515227 | 0.00387016 | 3.27E-05   |
| 7w11w_SITTD3_GCACATAAGAACTAC-1-10x   | 0.03171964 | 0.062859   | 4.83E-05   |
| 7w11w_SITTD3_GCACGTGAGTAAGGGA-1-10x  | 0.2501788  | 0.8406919  | 0.00081397 |
| 7w11w_SITTD3_GCATCGGAGAATTCAG-1-10x  | 0.29063657 | 0.9847435  | 0.00076163 |
| 7w11w_SITTD3_GCATTAGAGCCGTTAT-1-10x  | 0.21267854 | 0.7071706  | 0.0010856  |
| 7w11w_SITTD3_GCCAGGTTGTTAGAC-1-10x   | 0.12965702 | 0.4115691  | 0.0019639  |
| 7w11w_SITTD3_GCCAGTGGTACTCGC-1-10x   | 0.19452295 | 0.6425269  | 0.0012624  |
| 7w11w_SITTD3_GCCATTCTGACGTCG-1-10x   | 0.28358018 | 0.9596189  | 0.00075531 |
| 7w11w_SITTD3_GCCGAGAAGACATCCT-1-10x  | 0.2840396  | 0.9612546  | 0.00075531 |
| 7w11w_SITTD3_GCCTGTTGTACCTATG-1-10x  | 0.01633867 | 0.0080944  | 3.33E-05   |
| 7w11w_SITTD3_GCGGATCGTGACGCCT-1-10x  | 0.11134508 | 0.34636867 | 0.002929   |
| 7w11w_SITTD3_GCTACAAGTATTTCCG-1-10x  | 0.04129734 | 0.09696079 | 7.40E-05   |
| 7w11w_SITTD3_GCTTTGTC AACACGT-1-10x  | 0.01525005 | 0.00421831 | 3.27E-05   |
| 7w11w_SITTD3_GGAATCTGTACTTCCC-1-10x  | 0.07380626 | 0.21271017 | 0.0017292  |
| 7w11w_SITTD3_GGAGAACTCCGAAATC-1-10x  | 0.15205169 | 0.49130625 | 0.0018651  |
| 7w11w_SITTD3_GGAGATGTCTACCTTA-1-10x  | 0.24979413 | 0.8393222  | 0.00081397 |
| 7w11w_SITTD3_GGAGGTAAGCACGATG-1-10x  | 0.05261104 | 0.13724369 | 0.00017575 |
| 7w11w_SITTD3_GGATGTTTCCCGGTAG-1-10x  | 0.21148606 | 0.7029247  | 0.0010934  |
| 7w11w_SITTD3_GGATGTTTCTCTTTC-1-10x   | 0.08890993 | 0.2664874  | 0.0042295  |
| 7w11w_SITTD3_GGATGTTTCGCCGAAC-1-10x  | 0.20907095 | 0.6943257  | 0.0011095  |
| 7w11w_SITTD3_GGCACGTTCCCGTTGT-1-10x  | 0.0819296  | 0.24163364 | 0.0031253  |
| 7w11w_SITTD3_GGCAGTCGTTAGCGGA-1-10x  | 0.0323323  | 0.06504039 | 4.83E-05   |
| 7w11w_SITTD3_GGGACAACAACCACGC-1-10x  | 0.22260271 | 0.7425061  | 0.0010033  |
| 7w11w_SITTD3_GGGACAACAGCTTCGG-1-10x  | 0.230657   | 0.77118367 | 0.00093779 |
| 7w11w_SITTD3_GGGAGTAGTAGTGGCA-1-10x  | 0.04042191 | 0.09384377 | 7.01E-05   |
| 7w11w_SITTD3_GGGAGTATCAACTACG-1-10x  | 0.04688828 | 0.11686757 | 0.00010777 |
| 7w11w_SITTD3_GGGAGTATCAGCTGAT-1-10x  | 0.13666734 | 0.43652964 | 0.0018842  |

|                                      |            |            |            |
|--------------------------------------|------------|------------|------------|
| 7w11w_SITTD3_GGGATCCAGTCATGGG-1-10x  | 0.10253432 | 0.3149976  | 0.0039137  |
| 7w11w_SITTD3_GGGCCATAGCTGCGAA-1-10x  | 0.2654131  | 0.89493424 | 0.00075974 |
| 7w11w_SITTD3_GGGCCATCATCGTGCG-1-10x  | 0.13739738 | 0.43912897 | 0.0018842  |
| 7w11w_SITTD3_GGGCGTTTCTCTCAA-1-10x   | 0.07916908 | 0.23180468 | 0.002576   |
| 7w11w_SITTD3_GGGCGTTTCTTGCGC-1-10x   | 0.04623424 | 0.11453882 | 0.00010046 |
| 7w11w_SITTD3_GGGCTACTCGTAGCCG-1-10x  | 0.23980744 | 0.8037642  | 0.00087632 |
| 7w11w_SITTD3_GGGTATTAGCGACAGT-1-10x  | 0.031855   | 0.06334095 | 4.83E-05   |
| 7w11w_SITTD3_GGGTCACAGAAATCCA-1-10x  | 0.21972018 | 0.7322427  | 0.0010253  |
| 7w11w_SITTD3_GGGTGTCAGAAAGCGA-1-10x  | 0.26801395 | 0.9041947  | 0.00075705 |
| 7w11w_SITTD3_GGGTTATCAGCTGAAG-1-10x  | 0.2819809  | 0.9539246  | 0.00075401 |
| 7w11w_SITTD3_GGTAATCCATAACCCA-1-10x  | 0.01735699 | 0.01172015 | 3.44E-05   |
| 7w11w_SITTD3_GGTCACGAGTCTACCA-1-10x  | 0.23862809 | 0.7995651  | 0.00088278 |
| 7w11w_SITTD3_GGTCTGGTCTCTATGT-1-10x  | 0.11296029 | 0.3521197  | 0.0028393  |
| 7w11w_SITTD3_GGTGATTCATAGAGGC-1-10x  | 0.04829089 | 0.12186161 | 0.00011598 |
| 7w11w_SITTD3_GGTGGCTAGATTAGAC-1-10x  | 0.27782595 | 0.9391307  | 0.00075239 |
| 7w11w_SITTD3_GGTGTGCGAGTACCGGA-1-10x | 0.01602126 | 0.00696426 | 3.33E-05   |
| 7w11w_SITTD3_GGTGTGCGTCAGCGCAC-1-10x | 0.2247882  | 0.7502876  | 0.00098869 |
| 7w11w_SITTD3_GGTTAACAGCATACTC-1-10x  | 0.01962569 | 0.01979798 | 3.55E-05   |
| 7w11w_SITTD3_GTAACCACATGACAGG-1-10x  | 0.15480807 | 0.50112045 | 0.0018522  |
| 7w11w_SITTD3_GTAAGTCGTAGGTAGC-1-10x  | 0.02575252 | 0.0416128  | 4.00E-05   |
| 7w11w_SITTD3_GTACAACCATGCCGCA-1-10x  | 0.07975088 | 0.23387621 | 0.0027593  |
| 7w11w_SITTD3_GTAGAGGTCGCTCTCA-1-10x  | 0.2706061  | 0.91342413 | 0.00075418 |
| 7w11w_SITTD3_GTAGGAGTCATTACCT-1-10x  | 0.08624015 | 0.25698152 | 0.0039187  |
| 7w11w_SITTD3_GTAGGTTTCAGCGTACC-1-10x | 0.08350194 | 0.24723202 | 0.0034742  |
| 7w11w_SITTD3_GTAGGTTTCATACAGC-1-10x  | 0.11371464 | 0.35480556 | 0.0027534  |
| 7w11w_SITTD3_GTATTGGTCCAAGCTA-1-10x  | 0.24940768 | 0.8379463  | 0.00081397 |
| 7w11w_SITTD3_GTATTTCCAGACGCTC-1-10x  | 0.10267075 | 0.31548336 | 0.0039137  |
| 7w11w_SITTD3_GTCAGCGAGCATATGA-1-10x  | 0.1732985  | 0.56695634 | 0.0015922  |
| 7w11w_SITTD3_GTCAGCGAGGGCTAAC-1-10x  | 0.01517889 | 0.00396494 | 3.27E-05   |
| 7w11w_SITTD3_GTCAGCGTCAAGATAG-1-10x  | 0.14682095 | 0.47268197 | 0.0018717  |
| 7w11w_SITTD3_GTCATCCGTTTATGCG-1-10x  | 0.2645157  | 0.891739   | 0.00076135 |
| 7w11w_SITTD3_GTCATGAGTCGTTTCC-1-10x  | 0.26454726 | 0.89185137 | 0.00076135 |
| 7w11w_SITTD3_GTCGCGATCCCAGGAC-1-10x  | 0.12642834 | 0.40007323 | 0.0020256  |
| 7w11w_SITTD3_GTCGTAAAGTTGTAGA-1-10x  | 0.06934574 | 0.19682829 | 0.0010821  |
| 7w11w_SITTD3_GTCGTTCCAGTCGGTC-1-10x  | 0.01698409 | 0.01039244 | 3.38E-05   |
| 7w11w_SITTD3_GTGAGGAAGTGGTTGG-1-10x  | 0.09468019 | 0.28703263 | 0.0044051  |
| 7w11w_SITTD3_GTGAGGACAAGGCAAC-1-10x  | 0.25629398 | 0.86246526 | 0.00078463 |
| 7w11w_SITTD3_GTGAGGATCCGTGTCT-1-10x  | 0.0278837  | 0.04920097 | 4.30E-05   |
| 7w11w_SITTD3_GTGAGGATCGTTCTAT-1-10x  | 0.01927074 | 0.01853414 | 3.55E-05   |
| 7w11w_SITTD3_GTGCGTGAGCGATGGT-1-10x  | 0.02093813 | 0.02447096 | 3.62E-05   |
| 7w11w_SITTD3_GTGCTGGCATTACAG-1-10x   | 0.02961678 | 0.05537165 | 4.55E-05   |



|                                     |            |            |            |
|-------------------------------------|------------|------------|------------|
| 7w11w_SITTD3_GTGCTGGTCTATACGG-1-10x | 0.24976178 | 0.83920705 | 0.00081397 |
| 7w11w_SITTD3_GTGCTTCCAGAACCGA-1-10x | 0.02079667 | 0.02396729 | 3.62E-05   |
| 7w11w_SITTD3_GTGGAGACAGCGGATA-1-10x | 0.21270508 | 0.70726514 | 0.0010856  |
| 7w11w_SITTD3_GTGGAGAGTGTATTGC-1-10x | 0.0492328  | 0.1252153  | 0.00012523 |
| 7w11w_SITTD3_GTGCGTCAGAGGAAA-1-10x  | 0.10107187 | 0.3097905  | 0.0040036  |
| 7w11w_SITTD3_GTGGAAGCGACTTT-1-10x   | 0.04276911 | 0.10220107 | 8.29E-05   |
| 7w11w_SITTD3_GTGGAACATCCGATA-1-10x  | 0.01732213 | 0.01159606 | 3.38E-05   |
| 7w11w_SITTD3_GTGTAACGTGATAGTA-1-10x | 0.03306378 | 0.06764486 | 5.00E-05   |
| 7w11w_SITTD3_GTGTGATGTGATCGTT-1-10x | 0.04861007 | 0.12299807 | 0.00012523 |
| 7w11w_SITTD3_GTGTGATTCTAGCAAC-1-10x | 0.1793562  | 0.58852506 | 0.0014915  |
| 7w11w_SITTD3_GTGTTCCAGAGAGAAC-1-10x | 0.05175779 | 0.13420567 | 0.00016076 |
| 7w11w_SITTD3_GTGTTCCGTGGCTAGA-1-10x | 0.1267225  | 0.4011206  | 0.0020256  |
| 7w11w_SITTD3_GTTACAGCATGGAACG-1-10x | 0.2503139  | 0.84117293 | 0.00080923 |
| 7w11w_SITTD3_GTTACGAAGGCTAACG-1-10x | 0.25817466 | 0.8691615  | 0.000778   |
| 7w11w_SITTD3_GTTACGAGTTAAGCAA-1-10x | 0.26606128 | 0.8972421  | 0.00075974 |
| 7w11w_SITTD3_GTTAGACAGACGTCCC-1-10x | 0.11878456 | 0.37285724 | 0.0023898  |
| 7w11w_SITTD3_GTTAGACCAACACGTT-1-10x | 0.0188191  | 0.01692607 | 3.49E-05   |
| 7w11w_SITTD3_GTTAGACCAACGGGTA-1-10x | 0.1822515  | 0.5988339  | 0.0014427  |
| 7w11w_SITTD3_GTTAGTGGTTTCGACA-1-10x | 0.01922407 | 0.01836799 | 3.49E-05   |
| 7w11w_SITTD3_GTTCCGTGTGAATAAC-1-10x | 0.07350423 | 0.21163477 | 0.0015819  |
| 7w11w_SITTD3_GTTCTATAGTAATTGG-1-10x | 0.01581683 | 0.00623637 | 3.33E-05   |
| 7w11w_SITTD3_GTTGAACCACGTACAT-1-10x | 0.02352898 | 0.03369579 | 3.83E-05   |
| 7w11w_SITTD3_GTTGAACGTCTCTCCA-1-10x | 0.28215426 | 0.95454186 | 0.00075401 |
| 7w11w_SITTD3_GTTGTGAAGCGGTAGT-1-10x | 0.25893074 | 0.87185353 | 0.00077499 |
| 7w11w_SITTD3_TAACACGCACTAGTAC-1-10x | 0.05041488 | 0.12942417 | 0.00014746 |
| 7w11w_SITTD3_TACAACGCACATAACC-1-10x | 0.22291394 | 0.7436142  | 0.0010033  |
| 7w11w_SITTD3_TACAGGTGTGATTCTG-1-10x | 0.10564793 | 0.32608372 | 0.0036214  |
| 7w11w_SITTD3_TACATTCGTAGGCAGT-1-10x | 0.21813418 | 0.7265957  | 0.00104    |
| 7w11w_SITTD3_TACCCGTAGTATTAGG-1-10x | 0.01779463 | 0.01327841 | 3.44E-05   |
| 7w11w_SITTD3_TACCGGGCATATCTCT-1-10x | 0.08804996 | 0.26342544 | 0.0041422  |
| 7w11w_SITTD3_TACCGGGGTACGTGTT-1-10x | 0.03572501 | 0.07712025 | 5.58E-05   |
| 7w11w_SITTD3_TACGCTCCAAACACGG-1-10x | 0.07379173 | 0.2126584  | 0.0017292  |
| 7w11w_SITTD3_TACGCTCGTTCCTC-1-10x   | 0.02997642 | 0.05665217 | 4.55E-05   |
| 7w11w_SITTD3_TACGGGCCAATTCTTC-1-10x | 0.07558694 | 0.21905033 | 0.001885   |
| 7w11w_SITTD3_TACGGGCCAGGAGGAG-1-10x | 0.20634913 | 0.6846345  | 0.0011344  |
| 7w11w_SITTD3_TACGGTAAGTAGTCAA-1-10x | 0.03533732 | 0.07573988 | 5.58E-05   |
| 7w11w_SITTD3_TACGTCCAGGATGCGT-1-10x | 0.03457434 | 0.07302325 | 5.37E-05   |
| 7w11w_SITTD3_TACTGCCTCAGCATTG-1-10x | 0.13631007 | 0.43525755 | 0.0018891  |
| 7w11w_SITTD3_TACTTACCAGGCAATG-1-10x | 0.08953098 | 0.26869866 | 0.0042295  |
| 7w11w_SITTD3_TAGAGTCTCAGGAGAC-1-10x | 0.10094456 | 0.3093372  | 0.0040879  |
| 7w11w_SITTD3_TAGATCGTCTCTGAGA-1-10x | 0.17493132 | 0.57277006 | 0.0015753  |

|                                     |            |            |            |
|-------------------------------------|------------|------------|------------|
| 7w11w_SITTD3_TAGGAGGGTAGTGCGA-1-10x | 0.26461458 | 0.8920911  | 0.00076135 |
| 7w11w_SITTD3_TAGGGTTAGAAACCCG-1-10x | 0.08280057 | 0.24473475 | 0.0033032  |
| 7w11w_SITTD3_TAGGGTTGTGATTAGA-1-10x | 0.04624951 | 0.11459319 | 0.00010046 |
| 7w11w_SITTD3_TAGGTACGTTGCTTGA-1-10x | 0.25408652 | 0.8546055  | 0.00079207 |
| 7w11w_SITTD3_TATACCTAGTCCCAGC-1-10x | 0.26803723 | 0.90427756 | 0.00075705 |
| 7w11w_SITTD3_TATATCCAGGCGAACT-1-10x | 0.27581063 | 0.9319551  | 0.00075214 |
| 7w11w_SITTD3_TATATCCCACAAATAG-1-10x | 0.0293208  | 0.05431782 | 4.42E-05   |
| 7w11w_SITTD3_TATCAGGAGACTACCT-1-10x | 0.28578818 | 0.96748054 | 0.00075686 |
| 7w11w_SITTD3_TATCAGGCACGGCTAC-1-10x | 0.04004039 | 0.09248537 | 7.01E-05   |
| 7w11w_SITTD3_TATCCTAAGAAATCCA-1-10x | 0.07035476 | 0.20042095 | 0.0011935  |
| 7w11w_SITTD3_TATCGCCAGGGTAATT-1-10x | 0.04169672 | 0.09838281 | 7.40E-05   |
| 7w11w_SITTD3_TATCGCCCACGCACCA-1-10x | 0.29145613 | 0.98766154 | 0.00076269 |
| 7w11w_SITTD3_TATCTGTAGCTCCACG-1-10x | 0.09745218 | 0.29690242 | 0.0042943  |
| 7w11w_SITTD3_TATCTTGGTTCTTGTT-1-10x | 0.04115931 | 0.09646932 | 7.40E-05   |
| 7w11w_SITTD3_TATGTTCTCTCTTCAA-1-10x | 0.04106966 | 0.09615013 | 7.40E-05   |
| 7w11w_SITTD3_TATTGCTTCAACACGT-1-10x | 0.04529275 | 0.11118661 | 9.39E-05   |
| 7w11w_SITTD3_TATTGCTTCCGTAATG-1-10x | 0.07217674 | 0.20690818 | 0.0014433  |
| 7w11w_SITTD3_TATTGGGCATAGCTGT-1-10x | 0.24445014 | 0.82029474 | 0.00084583 |
| 7w11w_SITTD3_TCACAAGGTTGACTAC-1-10x | 0.20688112 | 0.6865287  | 0.0011344  |
| 7w11w_SITTD3_TCACGCTTCAGGACAG-1-10x | 0.03579643 | 0.07737455 | 5.58E-05   |
| 7w11w_SITTD3_TCACTATAGCGTATAA-1-10x | 0.0524933  | 0.13682447 | 0.00017575 |
| 7w11w_SITTD3_TCACTATTCCAGTGTA-1-10x | 0.02093396 | 0.0244561  | 3.62E-05   |
| 7w11w_SITTD3_TCAGGTAAGTTGAAAC-1-10x | 0.02323311 | 0.03264233 | 3.83E-05   |
| 7w11w_SITTD3_TCAGGTAGTACCACGC-1-10x | 0.19381915 | 0.640021   | 0.0012741  |
| 7w11w_SITTD3_TCAGTCCAGTTGCGAG-1-10x | 0.01983996 | 0.02056089 | 3.55E-05   |
| 7w11w_SITTD3_TCAGTTTCATGAGTAA-1-10x | 0.13147984 | 0.41805935 | 0.001934   |
| 7w11w_SITTD3_TCATCATGTCACTTAG-1-10x | 0.18296757 | 0.6013835  | 0.0014268  |
| 7w11w_SITTD3_TCATGTTCAGACACAG-1-10x | 0.04891334 | 0.12407786 | 0.00012523 |
| 7w11w_SITTD3_TCATTACTCGTGGAAG-1-10x | 0.04635173 | 0.11495714 | 0.00010046 |
| 7w11w_SITTD3_TCATTGTCAAACGAGC-1-10x | 0.03779776 | 0.08450038 | 6.07E-05   |
| 7w11w_SITTD3_TCATTGTCAAGATTGA-1-10x | 0.0960221  | 0.29181057 | 0.0043808  |
| 7w11w_SITTD3_TCATTGTGTAACGTTC-1-10x | 0.25897244 | 0.872002   | 0.00077499 |
| 7w11w_SITTD3_TCATTTGTCACGAGGA-1-10x | 0.05531459 | 0.14686981 | 0.000233   |
| 7w11w_SITTD3_TCCATCGTCCTGCCAT-1-10x | 0.09020232 | 0.27108902 | 0.0042999  |
| 7w11w_SITTD3_TCCATGCAGTCGCCCA-1-10x | 0.25582224 | 0.8607856  | 0.00078825 |
| 7w11w_SITTD3_TCCCAGTAGTTGAAGT-1-10x | 0.26732332 | 0.90173566 | 0.00075705 |
| 7w11w_SITTD3_TCCCAGTCCCATAACC-1-10x | 0.02047243 | 0.02281282 | 3.62E-05   |
| 7w11w_SITTD3_TCCGAAAAGTCTCCTC-1-10x | 0.20986563 | 0.6971552  | 0.0011095  |
| 7w11w_SITTD3_TCCTCCCCAGGTCCGT-1-10x | 0.03036458 | 0.05803422 | 4.55E-05   |
| 7w11w_SITTD3_TCCTCGAGTTATCTTC-1-10x | 0.0633359  | 0.17543001 | 0.00052741 |
| 7w11w_SITTD3_TCCTCTTAGCGCTTCG-1-10x | 0.17360185 | 0.56803644 | 0.0015922  |

|                                     |            |            |            |
|-------------------------------------|------------|------------|------------|
| 7w11w_SITTD3_TCCTGCATCTCGCTTG-1-10x | 0.01923841 | 0.01841906 | 3.55E-05   |
| 7w11w_SITTD3_TCCTTCTAGCACTCAT-1-10x | 0.04337194 | 0.10434748 | 8.29E-05   |
| 7w11w_SITTD3_TCGAAGTTCTAAGCCA-1-10x | 0.0558238  | 0.14868286 | 0.000233   |
| 7w11w_SITTD3_TCGACCTAGCACCGAA-1-10x | 0.26972887 | 0.91030073 | 0.00075499 |
| 7w11w_SITTD3_TCGATTTAGCTTCTAG-1-10x | 0.22189678 | 0.73999256 | 0.0010106  |
| 7w11w_SITTD3_TCGCACTTCCGTCCTA-1-10x | 0.07339221 | 0.21123593 | 0.0015819  |
| 7w11w_SITTD3_TCGGGACAGGATCACG-1-10x | 0.04032546 | 0.09350038 | 7.01E-05   |
| 7w11w_SITTD3_TCGGGACCAACAGCTT-1-10x | 0.02739955 | 0.04747712 | 4.19E-05   |
| 7w11w_SITTD3_TCGTCCAGTGTACGCC-1-10x | 0.02261203 | 0.03043095 | 3.76E-05   |
| 7w11w_SITTD3_TCGTCCATCATCGCCT-1-10x | 0.10082538 | 0.30891284 | 0.0040879  |
| 7w11w_SITTD3_TCGTCCATCATGGAGG-1-10x | 0.04915185 | 0.12492707 | 0.00012523 |
| 7w11w_SITTD3_TCGTGCTCATGAAGGC-1-10x | 0.08294762 | 0.24525833 | 0.0033032  |
| 7w11w_SITTD3_TCTAACTCAATTGTGC-1-10x | 0.03664063 | 0.08038037 | 5.82E-05   |
| 7w11w_SITTD3_TCTAACTGTGCCGTAC-1-10x | 0.264722   | 0.8924735  | 0.00076135 |
| 7w11w_SITTD3_TCTACATAGCGTCTGC-1-10x | 0.14913556 | 0.48092324 | 0.0018705  |
| 7w11w_SITTD3_TCTATACCATGGTGGA-1-10x | 0.27393937 | 0.9252924  | 0.00075233 |
| 7w11w_SITTD3_TCTCAGCACTACTTT-1-10x  | 0.21604635 | 0.71916187 | 0.001055   |
| 7w11w_SITTD3_TCTCAGCAGATGCTGG-1-10x | 0.05829602 | 0.15748529 | 0.00031414 |
| 7w11w_SITTD3_TCTCAGCCAACCCGCA-1-10x | 0.08151636 | 0.24016225 | 0.0031253  |
| 7w11w_SITTD3_TCTGCCAGTCCTTGTC-1-10x | 0.02973547 | 0.05579426 | 4.55E-05   |
| 7w11w_SITTD3_TCTGCCAGTGAGTGAC-1-10x | 0.02106917 | 0.02493754 | 3.62E-05   |
| 7w11w_SITTD3_TCTTAGTAGGTTGAGG-1-10x | 0.14672847 | 0.4723527  | 0.0018717  |
| 7w11w_SITTD3_TCTTAGTCATGGCACC-1-10x | 0.01707819 | 0.01072749 | 3.38E-05   |
| 7w11w_SITTD3_TCTTCCTTCCGTTGGG-1-10x | 0.01949556 | 0.01933462 | 3.55E-05   |
| 7w11w_SITTD3_TCTTCCTTCGTCCTCA-1-10x | 0.08163375 | 0.24058023 | 0.0031253  |
| 7w11w_SITTD3_TCTTGCGAGTGGAAGA-1-10x | 0.08211891 | 0.24230766 | 0.0031253  |
| 7w11w_SITTD3_TCTTTGAAGGAGTACC-1-10x | 0.09176785 | 0.27666312 | 0.0043903  |
| 7w11w_SITTD3_TGAATGCAGCCAGTAG-1-10x | 0.03792007 | 0.08493588 | 6.07E-05   |
| 7w11w_SITTD3_TGAATGCTCACGATAC-1-10x | 0.01575927 | 0.00603143 | 3.33E-05   |
| 7w11w_SITTD3_TGAGCATGTTTACTTC-1-10x | 0.03817548 | 0.08584525 | 6.36E-05   |
| 7w11w_SITTD3_TGAGGAGAGCTACTAC-1-10x | 0.02438488 | 0.03674327 | 3.91E-05   |
| 7w11w_SITTD3_TGATCAGGTCGATGCC-1-10x | 0.04973656 | 0.12700897 | 0.00013566 |
| 7w11w_SITTD3_TGATCAGTCACTCTTA-1-10x | 0.04176356 | 0.09862077 | 7.40E-05   |
| 7w11w_SITTD3_TGATCAGTCATGGTAC-1-10x | 0.01690422 | 0.01010808 | 3.38E-05   |
| 7w11w_SITTD3_TGATGCAGTCCTCCTA-1-10x | 0.02442912 | 0.03690079 | 3.91E-05   |
| 7w11w_SITTD3_TGCACGGAGGATTTCC-1-10x | 0.06392059 | 0.17751181 | 0.00058553 |
| 7w11w_SITTD3_TGCAGGCAGCACGTCC-1-10x | 0.20844516 | 0.69209754 | 0.0011177  |
| 7w11w_SITTD3_TGCAGGCGTTGGAGAC-1-10x | 0.06673389 | 0.18752868 | 0.00079936 |
| 7w11w_SITTD3_TGCAGGCTCTTTCAGT-1-10x | 0.08127097 | 0.23928855 | 0.0031253  |
| 7w11w_SITTD3_TGCGGCAAGAGGCGTT-1-10x | 0.03044571 | 0.05832309 | 4.55E-05   |
| 7w11w_SITTD3_TGCGGCACAAATGAGT-1-10x | 0.0995919  | 0.304521   | 0.0041652  |

|                                     |            |            |            |
|-------------------------------------|------------|------------|------------|
| 7w11w_SITTD3_TGCTGAAAGAAGAGCA-1-10x | 0.02793294 | 0.04937629 | 4.30E-05   |
| 7w11w_SITTD3_TGCTGAATCAAGTTGC-1-10x | 0.20997994 | 0.69756216 | 0.0011014  |
| 7w11w_SITTD3_TGCTGAATCCGTGTCT-1-10x | 0.01971919 | 0.02013087 | 3.55E-05   |
| 7w11w_SITTD3_TGGAGAGAGGGCGAGA-1-10x | 0.01721033 | 0.01119799 | 3.38E-05   |
| 7w11w_SITTD3_TGGCGTGCATGTTTGG-1-10x | 0.199125   | 0.6589127  | 0.0012085  |
| 7w11w_SITTD3_TGGCGTGGTTGGGTAG-1-10x | 0.07971656 | 0.233754   | 0.0027593  |
| 7w11w_SITTD3_TGGGCGTCACTGGCCA-1-10x | 0.02285212 | 0.0312858  | 3.76E-05   |
| 7w11w_SITTD3_TGGTACAGTACCACGC-1-10x | 0.28175715 | 0.9531279  | 0.00075401 |
| 7w11w_SITTD3_TGGTACAGTGACATT-1-10x  | 0.05482737 | 0.14513502 | 0.00021164 |
| 7w11w_SITTD3_TGGTACATCGTGTGAT-1-10x | 0.27831054 | 0.9408561  | 0.00075239 |
| 7w11w_SITTD3_TGGTAGTGTATCGTAC-1-10x | 0.08482052 | 0.25192684 | 0.0036353  |
| 7w11w_SITTD3_TGGTAGTTCAATCCGA-1-10x | 0.01887837 | 0.01713709 | 3.49E-05   |
| 7w11w_SITTD3_TGGTGATAGTGACCTT-1-10x | 0.12847209 | 0.4073501  | 0.0019821  |
| 7w11w_SITTD3_TGGTGATTCGCTAGCG-1-10x | 0.04010936 | 0.09273094 | 7.01E-05   |
| 7w11w_SITTD3_TGGTTAGAGGTAGACC-1-10x | 0.25724366 | 0.86584663 | 0.00078121 |
| 7w11w_SITTD3_TGTACAGCAACGCCCA-1-10x | 0.25975513 | 0.8747888  | 0.00077221 |
| 7w11w_SITTD3_TGTACAGTCTCTGCTG-1-10x | 0.01864137 | 0.01629327 | 3.49E-05   |
| 7w11w_SITTD3_TGTCCCAAGCATATGA-1-10x | 0.10089786 | 0.30917093 | 0.0040879  |
| 7w11w_SITTD3_TGTGAGTAGAACCCGA-1-10x | 0.0162122  | 0.00764409 | 3.33E-05   |
| 7w11w_SITTD3_TGTGCGGAGTAAGCAT-1-10x | 0.26655155 | 0.89898777 | 0.00075831 |
| 7w11w_SITTD3_TGTGCGGGTGCCTAA-1-10x  | 0.08942194 | 0.2683104  | 0.0042295  |
| 7w11w_SITTD3_TGTTACTAGATAGCTA-1-10x | 0.28154078 | 0.95235753 | 0.00075401 |
| 7w11w_SITTD3_TGTTACTGTGGACTAG-1-10x | 0.02779317 | 0.04887863 | 4.30E-05   |
| 7w11w_SITTD3_TGTTCTAAGGTAGGCT-1-10x | 0.06073203 | 0.16615881 | 0.00042799 |
| 7w11w_SITTD3_TGTTGAGCACTACCGG-1-10x | 0.02820574 | 0.05034759 | 4.30E-05   |
| 7w11w_SITTD3_TTAATCCAGCGAGTAC-1-10x | 0.26040834 | 0.8771146  | 0.00077221 |
| 7w11w_SITTD3_TTACCGTCCACGGGT-1-10x  | 0.04466092 | 0.10893696 | 9.39E-05   |
| 7w11w_SITTD3_TTACTGTTGCTAGCG-1-10x  | 0.14144698 | 0.45354775 | 0.0018724  |
| 7w11w_SITTD3_TTCATTGGTCTTTATC-1-10x | 0.05236926 | 0.13638283 | 0.00017575 |
| 7w11w_SITTD3_TTCACGAGAAGTCCG-1-10x  | 0.23936163 | 0.8021769  | 0.00087632 |
| 7w11w_SITTD3_TTCCTAAAGGGAGGTG-1-10x | 0.09244029 | 0.27905738 | 0.0043903  |
| 7w11w_SITTD3_TTCCTCTAGTAACGTA-1-10x | 0.19489887 | 0.6438654  | 0.0012511  |
| 7w11w_SITTD3_TTCGATTCATCTTTCA-1-10x | 0.24680723 | 0.82868725 | 0.0008292  |
| 7w11w_SITTD3_TTCGGTCTCGCCAGTG-1-10x | 0.20694453 | 0.68675447 | 0.0011344  |
| 7w11w_SITTD3_TTCTCTCCACTTCAAG-1-10x | 0.26103944 | 0.8793616  | 0.00076963 |
| 7w11w_SITTD3_TTCTCTCTCGTGAA-1-10x   | 0.08426393 | 0.2499451  | 0.0036353  |
| 7w11w_SITTD3_TTGACCCAGGACAGCT-1-10x | 0.04911259 | 0.12478732 | 0.00012523 |
| 7w11w_SITTD3_TTGCAATTCTGTCGTC-1-10x | 0.17262696 | 0.5645653  | 0.0016089  |
| 7w11w_SITTD3_TTGCGTCAACCGTAT-1-10x  | 0.0473216  | 0.11841041 | 0.00010777 |
| 7w11w_SITTD3_TTGCGTCCATCGAGCC-1-10x | 0.04266485 | 0.10182986 | 7.82E-05   |
| 7w11w_SITTD3_TTGGATGCAAGATCCT-1-10x | 0.13189068 | 0.41952214 | 0.001934   |

|                                      |            |            |            |
|--------------------------------------|------------|------------|------------|
| 7w11w_SITTD3_TTGGATGCACTGGCCA-1-10x  | 0.04830613 | 0.12191586 | 0.00011598 |
| 7w11w_SITTD3_TTGGATGGTTCCATTT-1-10x  | 0.03305328 | 0.06760745 | 5.00E-05   |
| 7w11w_SITTD3_TTGGGCGGTACCCAGC-1-10x  | 0.0431223  | 0.10345864 | 8.29E-05   |
| 7w11w_SITTD3_TTGGTTTCAAGTACCT-1-10x  | 0.16280797 | 0.52960443 | 0.001776   |
| 7w11w_SITTD3_TTGGTTTCACATTACG-1-10x  | 0.10593821 | 0.3271173  | 0.00352    |
| 7w11w_SITTD3_TTGTTCAGTTGTTGAC-1-10x  | 0.23383552 | 0.7825009  | 0.00091657 |
| 7w11w_SITTD3_TTGTTCGACAAGCCC-1-10x   | 0.12045295 | 0.37879762 | 0.0022788  |
| 7w11w_SITTD3_TTTAGTCAGTAAGAGG-1-10x  | 0.04167721 | 0.09831332 | 7.40E-05   |
| 7w11w_SITTD3_TTTCACAAGCTTAGTC-1-10x  | 0.27869892 | 0.942239   | 0.00075266 |
| 7w11w_SITTD3_TTTCACATCCAGCACG-1-10x  | 0.05654546 | 0.15125236 | 0.000257   |
| 7w11w_SITTD3_TTTCATGGTGGAGAAA-1-10x  | 0.04440299 | 0.10801857 | 8.81E-05   |
| 7w11w_SITTD3_TTTCCTCCACCTGCGA-1-10x  | 0.05155345 | 0.1334781  | 0.00016076 |
| 7w11w_SITTD3_TTTCCTCTCAATCGGT-1-10x  | 0.26083842 | 0.8786459  | 0.00076963 |
| 7w11w_SITTD3_TTTCGATAGAGAACCC-1-10x  | 0.26160896 | 0.88138944 | 0.00076727 |
| 7w11w_SITTD3_TTTGATCAGAGCAGCT-1-10x  | 0.03777051 | 0.08440334 | 6.07E-05   |
| 7w11w_SITTD3_TTTGATCAGTGTTCCA-1-10x  | 0.2562956  | 0.862471   | 0.00078463 |
| 7w11w_SITTD3_TTTGGAGAGTAGCATA-1-10x  | 0.01858475 | 0.01609164 | 3.49E-05   |
| 7w11w_SITTD3_TTTGGTTGTGCGCAGTC-1-10x | 0.09659791 | 0.29386076 | 0.0043435  |
| 7w11w_SITTD3_TTTGTTGCAGTGCGCT-1-10x  | 0.01677869 | 0.00966109 | 3.38E-05   |
| 7w11w_SITTD3_AACCTTTCATCGAACT-1-10x  | 0.22266085 | 0.7427131  | 0.0010033  |
| 7w11w_SITTD3_AACTTCTAGCGGTAGT-1-10x  | 0.13430767 | 0.4281279  | 0.0019027  |
| 7w11w_SITTD3_AATGAAGAGGCTGGAT-1-10x  | 0.23760499 | 0.79592234 | 0.00088935 |
| 7w11w_SITTD3_ACAACCATCCCGAATA-1-10x  | 0.08552774 | 0.25444496 | 0.0037839  |
| 7w11w_SITTD3_ACCACAAAGAGAGAAC-1-10x  | 0.28551304 | 0.96650094 | 0.00075686 |
| 7w11w_SITTD3_ACCTGAAAGATGCTTC-1-10x  | 0.09263502 | 0.27975073 | 0.0044107  |
| 7w11w_SITTD3_ACGGAAGTCCTCGCAT-1-10x  | 0.16877365 | 0.55084544 | 0.0016744  |
| 7w11w_SITTD3_ACTCCCATCAAATAGG-1-10x  | 0.08091305 | 0.23801416 | 0.0029431  |
| 7w11w_SITTD3_AGAACCTGTTATTCCT-1-10x  | 0.02233843 | 0.02945678 | 3.76E-05   |
| 7w11w_SITTD3_AGACTCAAGCCTGTCG-1-10x  | 0.10505725 | 0.3239806  | 0.0036214  |
| 7w11w_SITTD3_AGCGATTCGTCAAAC-1-10x   | 0.03537916 | 0.07588886 | 5.58E-05   |
| 7w11w_SITTD3_AGCTCAATCTGGGCGT-1-10x  | 0.24830528 | 0.83402115 | 0.00082396 |
| 7w11w_SITTD3_AGGAAATAGGCTTAAA-1-10x  | 0.04583957 | 0.11313357 | 0.00010046 |
| 7w11w_SITTD3_AGGGCCTCAGGTGAGT-1-10x  | 0.01793789 | 0.01378848 | 3.44E-05   |
| 7w11w_SITTD3_AGGGTCCCAAGTTTGC-1-10x  | 0.04992994 | 0.1276975  | 0.00013566 |
| 7w11w_SITTD3_AGTAACCAGGGAACAA-1-10x  | 0.23247132 | 0.7776437  | 0.00092358 |
| 7w11w_SITTD3_AGTCATGGTCGAACAG-1-10x  | 0.22090256 | 0.73645264 | 0.0010179  |
| 7w11w_SITTD3_AGTGACTGTAAGGTCG-1-10x  | 0.03368614 | 0.06986079 | 5.17E-05   |
| 7w11w_SITTD3_ATAGAGACAAATACAG-1-10x  | 0.20243537 | 0.6706994  | 0.0011699  |
| 7w11w_SITTD3_ATCCCTGTCTATTGTC-1-10x  | 0.14640188 | 0.4711899  | 0.0018717  |
| 7w11w_SITTD3_ATCGTCTCGATACTG-1-10x   | 0.11115488 | 0.34569144 | 0.0030221  |
| 7w11w_SITTD3_ATCTTCATCGCATGAT-1-10x  | 0.02758309 | 0.04813062 | 4.19E-05   |

|                                     |            |            |            |
|-------------------------------------|------------|------------|------------|
| 7w11w_SITTD3_ATGCATGTCTTGCC-1-10x   | 0.25162357 | 0.84583604 | 0.00080467 |
| 7w11w_SITTD3_ATGCCTCCTTATCA-1-10x   | 0.02714755 | 0.04657985 | 4.19E-05   |
| 7w11w_SITTD3_ATGGATCGTCCTGGTG-1-10x | 0.24364285 | 0.81742036 | 0.00085167 |
| 7w11w_SITTD3_ATGGGTTAGTATGAAC-1-10x | 0.10528062 | 0.3247759  | 0.0036214  |
| 7w11w_SITTD3_ATTACCTCAGGTCCGT-1-10x | 0.2884231  | 0.97686225 | 0.0007596  |
| 7w11w_SITTD3_ATTACTCCACACGGTC-1-10x | 0.02213917 | 0.02874733 | 3.76E-05   |
| 7w11w_SITTD3_ATTATCCGTAATTAGG-1-10x | 0.13398543 | 0.42698058 | 0.0019027  |
| 7w11w_SITTD3_CAAAGAACAAGTGCAG-1-10x | 0.25218424 | 0.8478323  | 0.00080028 |
| 7w11w_SITTD3_CAACAACCATAGAGGC-1-10x | 0.04061666 | 0.0945372  | 7.01E-05   |
| 7w11w_SITTD3_CACATGACACTGTTCC-1-10x | 0.22880143 | 0.76457685 | 0.0009522  |
| 7w11w_SITTD3_CACGGGTCAAGCGCTC-1-10x | 0.2160751  | 0.7192642  | 0.001055   |
| 7w11w_SITTD3_CACTTCGTCCATCACC-1-10x | 0.14440103 | 0.46406576 | 0.0018716  |
| 7w11w_SITTD3_CAGGTATTCATTACCT-1-10x | 0.04241665 | 0.10094614 | 7.82E-05   |
| 7w11w_SITTD3_CATAAGCAGGCAGGTT-1-10x | 0.08022063 | 0.23554878 | 0.0027593  |
| 7w11w_SITTD3_CATAGACGTCGCATGC-1-10x | 0.14364095 | 0.46135947 | 0.0018716  |
| 7w11w_SITTD3_CATCCACCACCTCAGG-1-10x | 0.08301256 | 0.24548955 | 0.0033032  |
| 7w11w_SITTD3_CATGAGTGTGCTAGCC-1-10x | 0.12067903 | 0.37960258 | 0.0022308  |
| 7w11w_SITTD3_CATGAGTGTGGCGTAA-1-10x | 0.11122334 | 0.34593523 | 0.0030221  |
| 7w11w_SITTD3_CATTCATCCTTCTGG-1-10x  | 0.08499913 | 0.25256282 | 0.0037839  |
| 7w11w_SITTD3_CCCATTGCATGACGGA-1-10x | 0.2394701  | 0.8025631  | 0.00087632 |
| 7w11w_SITTD3_CCTACGTTCCATCGTC-1-10x | 0.10054287 | 0.30790693 | 0.0040879  |
| 7w11w_SITTD3_CCTCACAAGTGTTAC-1-10x  | 0.19506079 | 0.6444419  | 0.0012511  |
| 7w11w_SITTD3_CCTCCAACAACCTCAA-1-10x | 0.01566571 | 0.00569831 | 3.33E-05   |
| 7w11w_SITTD3_CCTCCTCAGGGCCCTT-1-10x | 0.08473128 | 0.25160912 | 0.0036353  |
| 7w11w_SITTD3_CGCCATTCACCTTATC-1-10x | 0.01531059 | 0.00443386 | 3.27E-05   |
| 7w11w_SITTD3_CGGAGAATCAACTGAC-1-10x | 0.22203839 | 0.74049675 | 0.0010106  |
| 7w11w_SITTD3_CGGGTGTTGTTGCT-1-10x   | 0.11306119 | 0.35247895 | 0.0028393  |
| 7w11w_SITTD3_CGTAGTAGTTTGACAC-1-10x | 0.24251252 | 0.8133958  | 0.00085764 |
| 7w11w_SITTD3_CGTGCTTTCACCTTGT-1-10x | 0.02888253 | 0.05275732 | 4.42E-05   |
| 7w11w_SITTD3_CTACAGATCAAATGAG-1-10x | 0.01766159 | 0.0128047  | 3.44E-05   |
| 7w11w_SITTD3_CTACGGGGTGAATTGA-1-10x | 0.04812996 | 0.12128861 | 0.00011598 |
| 7w11w_SITTD3 CTCATCGCACAACCGC-1-10x | 0.07476068 | 0.2161084  | 0.001885   |
| 7w11w_SITTD3 CTCATGCAGTAGACCG-1-10x | 0.04180874 | 0.09878163 | 7.82E-05   |
| 7w11w_SITTD3 CTGAGCGTCCTAGAGT-1-10x | 0.2575051  | 0.8667774  | 0.00078121 |
| 7w11w_SITTD3 CTGCATCGTGTGATT-1-10x  | 0.08994695 | 0.27017972 | 0.0042999  |
| 7w11w_SITTD3 CTGGACGTCGTGGTAT-1-10x | 0.02607962 | 0.04277746 | 4.09E-05   |
| 7w11w_SITTD3 CTGTACCTCTTCGACC-1-10x | 0.02157136 | 0.02672559 | 3.69E-05   |
| 7w11w_SITTD3 CTTAGGACAGGCATGA-1-10x | 0.05026887 | 0.12890431 | 0.00014746 |
| 7w11w_SITTD3 CTTAGGAGTGTCCAAT-1-10x | 0.08876368 | 0.26596665 | 0.0042295  |
| 7w11w_SITTD3_GAACACTGTCTTACTT-1-10x | 0.03318928 | 0.06809169 | 5.00E-05   |
| 7w11w_SITTD3_GAAGAATTCACAGAGG-1-10x | 0.11409653 | 0.35616532 | 0.0027534  |

|                                     |            |            |            |
|-------------------------------------|------------|------------|------------|
| 7w11w_SITTD3_GAAGTAAGTCCTCAGG-1-10x | 0.04723672 | 0.11810818 | 0.00010777 |
| 7w11w_SITTD3_GAATCACTCAGCGCGT-1-10x | 0.01680017 | 0.0097376  | 3.38E-05   |
| 7w11w_SITTD3_GACCCTTTCCTGGGTG-1-10x | 0.26437527 | 0.891239   | 0.00076313 |
| 7w11w_SITTD3_GACGTTACTACTTTT-1-10x  | 0.14558917 | 0.4682962  | 0.0018716  |
| 7w11w_SITTD3_GAGGCCTAGTTGAAAC-1-10x | 0.01552888 | 0.00521111 | 3.33E-05   |
| 7w11w_SITTD3_GAGGGTAAGCGGGTAT-1-10x | 0.28911638 | 0.9793308  | 0.0007606  |
| 7w11w_SITTD3_GATCGTACATCCGTGG-1-10x | 0.2170422  | 0.7227076  | 0.0010475  |
| 7w11w_SITTD3_GATGATCGTCAGGAGT-1-10x | 0.01928855 | 0.01859757 | 3.55E-05   |
| 7w11w_SITTD3_GATGCTAGTGATATAG-1-10x | 0.15417267 | 0.4988581  | 0.0018575  |
| 7w11w_SITTD3_GCACGGTAGAATACAC-1-10x | 0.2650271  | 0.8935599  | 0.00076135 |
| 7w11w_SITTD3_GCAGTTAAGCGATGAC-1-10x | 0.2733436  | 0.9231711  | 0.0007526  |
| 7w11w_SITTD3_GCTGGGTAGGTCCCGT-1-10x | 0.2761002  | 0.9329861  | 0.00075214 |
| 7w11w_SITTD3_GGAGGTATCCGAGTGC-1-10x | 0.18084764 | 0.5938354  | 0.0014587  |
| 7w11w_SITTD3_GGCGTCAGTGACATC-1-10x  | 0.27603474 | 0.932753   | 0.00075214 |
| 7w11w_SITTD3_GGTGGCTCATTGAGGG-1-10x | 0.27069116 | 0.913727   | 0.00075418 |
| 7w11w_SITTD3_GGTGTGCGAGTCTGGC-1-10x | 0.20663698 | 0.6856594  | 0.0011344  |
| 7w11w_SITTD3_GTCCTCACATTAGCA-1-10x  | 0.05299058 | 0.13859504 | 0.00017575 |
| 7w11w_SITTD3_GTGGTTAAGGATCGT-1-10x  | 0.0510648  | 0.13173826 | 0.00014746 |
| 7w11w_SITTD3_GTTACCCGTCCAGGTC-1-10x | 0.11160388 | 0.34729013 | 0.002929   |
| 7w11w_SITTD3_GTTAGACAGGTGAGAA-1-10x | 0.09386371 | 0.28412554 | 0.0044154  |
| 7w11w_SITTD3_TAACTTCGTGAGCAGT-1-10x | 0.04310271 | 0.10338888 | 8.29E-05   |
| 7w11w_SITTD3_TACGGGCGTCGCTCGA-1-10x | 0.03588321 | 0.07768355 | 5.58E-05   |
| 7w11w_SITTD3_TATCTTGCAAGATGGC-1-10x | 0.08628362 | 0.2571363  | 0.0039187  |
| 7w11w_SITTD3_TATTCCACATGACGAG-1-10x | 0.01779252 | 0.01327088 | 3.44E-05   |
| 7w11w_SITTD3_TATTTGCTCTGGGCCA-1-10x | 0.18431027 | 0.6061642  | 0.0014112  |
| 7w11w_SITTD3_TCAATCTAGCGGTAGT-1-10x | 0.16846326 | 0.5497403  | 0.0016902  |
| 7w11w_SITTD3_TCACTCGTCGGTCACG-1-10x | 0.23397073 | 0.78298235 | 0.00091657 |
| 7w11w_SITTD3_TCAGCAACACAGTATC-1-10x | 0.02777451 | 0.04881218 | 4.30E-05   |
| 7w11w_SITTD3_TCAGTGACACAAACGG-1-10x | 0.080672   | 0.23715588 | 0.0029431  |
| 7w11w_SITTD3_TCATGAGGTTGAGGAC-1-10x | 0.02030077 | 0.02220161 | 3.62E-05   |
| 7w11w_SITTD3_TCCTCCCAGTCTAACC-1-10x | 0.28244397 | 0.9555734  | 0.00075462 |
| 7w11w_SITTD3_TCCTGCATCCCTCTTT-1-10x | 0.03348636 | 0.06914947 | 5.17E-05   |
| 7w11w_SITTD3_TCGCAGGCAATCAGCT-1-10x | 0.11193622 | 0.34847346 | 0.002929   |
| 7w11w_SITTD3_TCGCAGGTCTGACAGT-1-10x | 0.06758968 | 0.19057575 | 0.00088537 |
| 7w11w_SITTD3_TCGCTCACACAAACGG-1-10x | 0.23871472 | 0.7998736  | 0.00088278 |
| 7w11w_SITTD3_TCGGGACCAGGTGAGT-1-10x | 0.02201457 | 0.02830367 | 3.69E-05   |
| 7w11w_SITTD3_TCGGGCAAGTCGTTAC-1-10x | 0.21405919 | 0.7120865  | 0.0010701  |
| 7w11w_SITTD3_TCGTGCTGTGAGAGGG-1-10x | 0.0160146  | 0.00694053 | 3.33E-05   |
| 7w11w_SITTD3_TCTCACGAGCGTGAAC-1-10x | 0.20517078 | 0.68043894 | 0.0011518  |
| 7w11w_SITTD3_TGAATCGGTCTAATCG-1-10x | 0.21494384 | 0.71523637 | 0.0010625  |
| 7w11w_SITTD3_TGAGCATTCTGCGTCT-1-10x | 0.06210996 | 0.17106497 | 0.00047505 |

|                                      |            |            |            |
|--------------------------------------|------------|------------|------------|
| 7w11w_SITTD3_TGAGGGATCACAAGAA-1-10x  | 0.04702188 | 0.11734325 | 0.00010777 |
| 7w11w_SITTD3_TGAGGTTAGGCTGAAC-1-10x  | 0.12353574 | 0.38977402 | 0.0021124  |
| 7w11w_SITTD3_TGAGTCACAATGTTGC-1-10x  | 0.02485204 | 0.03840659 | 3.91E-05   |
| 7w11w_SITTD3_TGATGCAAGGCAGGTT-1-10x  | 0.05473433 | 0.14480376 | 0.00021164 |
| 7w11w_SITTD3_TGATTCTAGTACGAGC-1-10x  | 0.01830824 | 0.01510712 | 3.49E-05   |
| 7w11w_SITTD3_TGATTTTCGTATGATCC-1-10x | 0.25067788 | 0.8424689  | 0.00080923 |
| 7w11w_SITTD3_TGCATCCAGCCTTCTC-1-10x  | 0.07503855 | 0.21709777 | 0.001885   |
| 7w11w_SITTD3_TGCGATAGTTCACGAT-1-10x  | 0.20741355 | 0.68842447 | 0.001126   |
| 7w11w_SITTD3_TGCGGGTGTCCCACGA-1-10x  | 0.10629131 | 0.3283745  | 0.00352    |
| 7w11w_SITTD3_TGCTGAAGTAATGCTC-1-10x  | 0.01609068 | 0.00721142 | 3.33E-05   |
| 7w11w_SITTD3_TGGAGGATCCCGAGAC-1-10x  | 0.03542085 | 0.07603728 | 5.58E-05   |
| 7w11w_SITTD3_TGGGCGTGTCTATGAC-1-10x  | 0.01540264 | 0.00476163 | 3.27E-05   |
| 7w11w_SITTD3_TGTCCTGAGGTGGGTT-1-10x  | 0.02026443 | 0.02207224 | 3.62E-05   |
| 7w11w_SITTD3_TGTGTGACAAGGACAC-1-10x  | 0.04859277 | 0.12293645 | 0.00012523 |
| 7w11w_SITTD3_TTCAATCTCACTCGAA-1-10x  | 0.04119214 | 0.09658623 | 7.40E-05   |
| 7w11w_SITTD3_TTCATGTTCTCTGAGA-1-10x  | 0.22900507 | 0.76530194 | 0.0009522  |
| 7w11w_SITTD3_TTCCTAATCAGAACCT-1-10x  | 0.2511892  | 0.8442895  | 0.00080923 |
| 7w11w_SITTD3_TTGAACGGTTTCGCTC-1-10x  | 0.2801212  | 0.94730306 | 0.00075303 |
| 7w11w_SITTD3_TTGGGTAGTCTTACAG-1-10x  | 0.01955273 | 0.01953819 | 3.55E-05   |
| 7w11w_SITTD3_TTTACTGAGAATCGCG-1-10x  | 0.281752   | 0.95310956 | 0.00075401 |
| 7w11w_SITTD3_TTTGATCCATACTGAC-1-10x  | 0.01567531 | 0.00573246 | 3.33E-05   |
| 7w11w_SITTF3_AAACGAATCCCATAAG-1-10x  | 0.01508359 | 0.00362563 | 3.27E-05   |
| 7w11w_SITTF3_AAAGAACTCGTTGTGA-1-10x  | 0.01598789 | 0.00684542 | 3.33E-05   |
| 7w11w_SITTF3_AAAGTCCGTGGGAGAG-1-10x  | 0.24228865 | 0.81259865 | 0.00085764 |
| 7w11w_SITTF3_AACAACCTCTCGGTCT-1-10x  | 0.11933605 | 0.37482086 | 0.0023317  |
| 7w11w_SITTF3_AACAGGGAGTATTAGG-1-10x  | 0.01699724 | 0.01043927 | 3.38E-05   |
| 7w11w_SITTF3_AACCAACCAAAGGCTG-1-10x  | 0.09396447 | 0.2844843  | 0.0044154  |
| 7w11w_SITTF3_AACCCAACATCGGCCA-1-10x  | 0.24362312 | 0.8173501  | 0.00085167 |
| 7w11w_SITTF3_AACGAAACAGTTTGGT-1-10x  | 0.27594608 | 0.93243736 | 0.00075214 |
| 7w11w_SITTF3_AACGGGAGTCGGCCTA-1-10x  | 0.04796856 | 0.12071392 | 0.00011598 |
| 7w11w_SITTF3_AACGGGATCTACTGAG-1-10x  | 0.19508186 | 0.64451694 | 0.0012511  |
| 7w11w_SITTF3_AACGTCAAGTTGTAC-1-10x   | 0.14206275 | 0.4557402  | 0.0018724  |
| 7w11w_SITTF3_AAGCATCTCGGATAAAA-1-10x | 0.26225257 | 0.88368106 | 0.00076727 |
| 7w11w_SITTF3_AAGCGAGTCATTCATC-1-10x  | 0.01867459 | 0.01641152 | 3.49E-05   |
| 7w11w_SITTF3_AAGGTAAGTAATCAAG-1-10x  | 0.050749   | 0.13061383 | 0.00014746 |
| 7w11w_SITTF3_AAGTACCTCTGTGCAA-1-10x  | 0.06559528 | 0.18347463 | 0.00072102 |
| 7w11w_SITTF3_AAGTGAACAGACCAGA-1-10x  | 0.2400213  | 0.8045257  | 0.00086997 |
| 7w11w_SITTF3_AAGTGAAGTCTACACA-1-10x  | 0.04936834 | 0.12569791 | 0.00013566 |
| 7w11w_SITTF3_AATGAAGCACTTGTCC-1-10x  | 0.07932298 | 0.23235264 | 0.002576   |
| 7w11w_SITTF3_AATGAAGGTCAAGCGA-1-10x  | 0.04092228 | 0.09562537 | 7.40E-05   |
| 7w11w_SITTF3_AATGGAATCATCAGTG-1-10x  | 0.08199891 | 0.24188043 | 0.0031253  |



|                                       |            |            |            |
|---------------------------------------|------------|------------|------------|
| 7w11w_SITTF3_AATGGCTCATGTGACT-1-10x   | 0.07062376 | 0.20137872 | 0.0011935  |
| 7w11w_SITTF3_AATGGCTCCGTGGCA-1-10x    | 0.02878382 | 0.05240587 | 4.42E-05   |
| 7w11w_SITTF3_ACATCCCAGGCATGCA-1-10x   | 0.16071787 | 0.52216256 | 0.0018     |
| 7w11w_SITTF3_ACCAAACTCTAAACGC-1-10x   | 0.07709174 | 0.22440824 | 0.0022191  |
| 7w11w_SITTF3_ACCGTTCCATTGAAGA-1-10x   | 0.18650436 | 0.6139764  | 0.0013662  |
| 7w11w_SITTF3_ACCGTTCTCGCTGATA-1-10x   | 0.02665906 | 0.04484056 | 4.09E-05   |
| 7w11w_SITTF3_ACCTACCGTGCTCGTG-1-10x   | 0.02879555 | 0.05244764 | 4.42E-05   |
| 7w11w_SITTF3_ACGATGTCAATTCCT-1-10x    | 0.26059276 | 0.8777712  | 0.00077221 |
| 7w11w_SITTF3_ACGGGTCGTACGCTG-1-10x    | 0.03872919 | 0.08781677 | 6.36E-05   |
| 7w11w_SITTF3_ACGTACAAGAGCCTGA-1-10x   | 0.01928414 | 0.01858188 | 3.55E-05   |
| 7w11w_SITTF3_ACGTACACAACCTGGT-1-10x   | 0.2727602  | 0.92109394 | 0.000753   |
| 7w11w_SITTF3_ACGTCCTAGGCTAACG-1-10x   | 0.04011384 | 0.09274687 | 7.01E-05   |
| 7w11w_SITTF3_ACGTCCTGTCTATGAC-1-10x   | 0.02748757 | 0.04779052 | 4.19E-05   |
| 7w11w_SITTF3_ACTGTCCAGTACCATC-1-10x   | 0.04728141 | 0.11826731 | 0.00010777 |
| 7w11w_SITTF3_AGAAATGTGGAAGCAG-1-10x   | 0.01866349 | 0.01637202 | 3.49E-05   |
| 7w11w_SITTF3_AGAACAATCCTGCCAT-1-10x   | 0.02617143 | 0.04310434 | 4.09E-05   |
| 7w11w_SITTF3_AGAAGTATCGATGCTA-1-10x   | 0.02336793 | 0.03312238 | 3.83E-05   |
| 7w11w_SITTF3_AGAGCCCTCGAAGAAT-1-10x   | 0.2664299  | 0.8985546  | 0.00075831 |
| 7w11w_SITTF3_AGATGAATCCATTGCC-1-10x   | 0.07854677 | 0.22958893 | 0.002576   |
| 7w11w_SITTF3_AGCCAATAGTTGAATG-1-10x   | 0.01573115 | 0.0059313  | 3.33E-05   |
| 7w11w_SITTF3_AGCCAATGTTACGATC-1-10x   | 0.17229527 | 0.56338435 | 0.0016256  |
| 7w11w_SITTF3_AGCCAATTCTGCGGAC-1-10x   | 0.19013043 | 0.62688714 | 0.0013244  |
| 7w11w_SITTF3_AGCCAGCCATGCTGCG-1-10x   | 0.21704786 | 0.7227278  | 0.0010475  |
| 7w11w_SITTF3_AGCGATTCTCGCCTA-1-10x    | 0.2682945  | 0.9051936  | 0.00075594 |
| 7w11w_SITTF3_AGCGCCAAGAGTCGAC-1-10x   | 0.08122143 | 0.23911217 | 0.0029431  |
| 7w11w_SITTF3_AGCGCCAAGCCTTTCC-1-10x   | 0.05696204 | 0.15273559 | 0.00028394 |
| 7w11w_SITTF3_AGCGCCACAGGTCTCG-1-10x   | 0.01787285 | 0.01355692 | 3.44E-05   |
| 7w11w_SITTF3_AGCGCTGTCGCATAGT-1-10x   | 0.23109117 | 0.7727296  | 0.00093779 |
| 7w11w_SITTF3_AGCTACAAGCGCCTTG-1-10x   | 0.05742581 | 0.1543869  | 0.00028394 |
| 7w11w_SITTF3_AGCTCAAAGGGTACAC-1-10x   | 0.15303883 | 0.494821   | 0.0018617  |
| 7w11w_SITTF3_AGCTCAATCGATCCCT-1-10x   | 0.07912262 | 0.23163925 | 0.002576   |
| 7w11w_SITTF3_AGGAATATCCCAATAG-1-10x   | 0.08532958 | 0.2537394  | 0.0037839  |
| 7w11w_SITTF3_AGGACGAGTGGCTGCT-1-10x   | 0.11901122 | 0.3736643  | 0.0023317  |
| 7w11w_SITTF3_AGGACTTGTCTTGAAC-1-10x   | 0.04110614 | 0.09628    | 7.40E-05   |
| 7w11w_SITTF3_AGGACTTGTACGATC-1-10x    | 0.05717439 | 0.15349168 | 0.00028394 |
| 7w11w_SITTF3_AGGCTGCCAAGACGAC-1-10x   | 0.02322165 | 0.03260154 | 3.83E-05   |
| 7w11w_SITTF3_AGGGCCTGTTGTGGCC-1-10x   | 0.2495033  | 0.83828676 | 0.00081397 |
| 7w11w_SITTF3_AGGGCTCAGACGAGCT-1-10x   | 0.21427855 | 0.71286756 | 0.0010701  |
| 7w11w_SITTF3_AGGTTACGTTTCGTTCC-1-10x  | 0.07806671 | 0.22787964 | 0.0023954  |
| 7w11w_SITTF3_AGTAACCAGATACCAA-1-10x   | 0.21527374 | 0.71641093 | 0.0010625  |
| 7w11w_SITTF3_AGTAAGTGCAGGTTTCAT-1-10x | 0.04738331 | 0.11863014 | 0.00010777 |

|                                       |            |            |            |
|---------------------------------------|------------|------------|------------|
| 7w11w_SITTF3_AGTTCGAAGACATCAA-1-10x   | 0.09940127 | 0.30384222 | 0.0041652  |
| 7w11w_SITTF3_AGTTCGAGTGGTACAG-1-10x   | 0.04597315 | 0.1136092  | 0.00010046 |
| 7w11w_SITTF3_ATACTTCAGGGTGA AAA-1-10x | 0.08405042 | 0.24918492 | 0.0036353  |
| 7w11w_SITTF3_ATCACAGGTTAGGGTG-1-10x   | 0.11562118 | 0.3615939  | 0.002594   |
| 7w11w_SITTF3_ATCACGATCGTAACTG-1-10x   | 0.26058125 | 0.87773025 | 0.00077221 |
| 7w11w_SITTF3_ATCCATTAGCATGGGT-1-10x   | 0.03206996 | 0.06410629 | 4.83E-05   |
| 7w11w_SITTF3_ATCCTATAGCCGCTTG-1-10x   | 0.07709653 | 0.2244253  | 0.0022191  |
| 7w11w_SITTF3_ATCGCCTGTTGCCATA-1-10x   | 0.04745745 | 0.11889411 | 0.00011598 |
| 7w11w_SITTF3_ATCGTAGAGATTGTGA-1-10x   | 0.07394874 | 0.21321747 | 0.0017292  |
| 7w11w_SITTF3_ATGAAAGAGTAGGCCA-1-10x   | 0.0499298  | 0.127697   | 0.00013566 |
| 7w11w_SITTF3_ATGAAAGGTTCGTATTG-1-10x  | 0.06262066 | 0.17288336 | 0.00052741 |
| 7w11w_SITTF3_ATGCATGAGCTCGAAG-1-10x   | 0.01807536 | 0.01427797 | 3.44E-05   |
| 7w11w_SITTF3_ATGCCTCGTGTGTCCG-1-10x   | 0.02811617 | 0.05002866 | 4.30E-05   |
| 7w11w_SITTF3_ATGGAGGCAGCTGAGA-1-10x   | 0.02305517 | 0.03200877 | 3.83E-05   |
| 7w11w_SITTF3_ATGGTTGCAGAGGTAC-1-10x   | 0.07904318 | 0.23135641 | 0.002576   |
| 7w11w_SITTF3_ATGTCTTGTGGTATGG-1-10x   | 0.12226194 | 0.38523862 | 0.0021873  |
| 7w11w_SITTF3_ATTACTCCAGCATGCC-1-10x   | 0.27185297 | 0.91786367 | 0.00075352 |
| 7w11w_SITTF3_ATTATCCGTGGGACAT-1-10x   | 0.05102801 | 0.13160726 | 0.00014746 |
| 7w11w_SITTF3_ATTCATCAGAGAGTTT-1-10x   | 0.09312513 | 0.28149578 | 0.0044107  |
| 7w11w_SITTF3_ATTCCCGTAACCAGG-1-10x    | 0.13625851 | 0.43507397 | 0.0018891  |
| 7w11w_SITTF3_ATTCTACAGATAGGGA-1-10x   | 0.02349662 | 0.03358056 | 3.83E-05   |
| 7w11w_SITTF3_ATTCTTGCAAATGAAC-1-10x   | 0.04463063 | 0.10882911 | 9.39E-05   |
| 7w11w_SITTF3_ATTCTTGCATGTAACC-1-10x   | 0.04658363 | 0.11578285 | 0.00010777 |
| 7w11w_SITTF3_ATTTACCGTTCAGCGC-1-10x   | 0.02456309 | 0.0373778  | 3.91E-05   |
| 7w11w_SITTF3_ATTTCTGTCTGCGGCA-1-10x   | 0.0967694  | 0.29447135 | 0.0043435  |
| 7w11w_SITTF3_CAACAGTAGGCAGCTA-1-10x   | 0.2606231  | 0.87787926 | 0.00077221 |
| 7w11w_SITTF3_CAACAGTGTCCAAAC-1-10x    | 0.27342942 | 0.9234767  | 0.0007526  |
| 7w11w_SITTF3_CAACCAAGTTAGAGTA-1-10x   | 0.01688874 | 0.01005295 | 3.38E-05   |
| 7w11w_SITTF3_CAAGACTCAACAGCCC-1-10x   | 0.28100064 | 0.9504343  | 0.00075348 |
| 7w11w_SITTF3_CAATCGATCGCCAGTG-1-10x   | 0.06718941 | 0.18915059 | 0.00088537 |
| 7w11w_SITTF3_CACGGGTTCGATTTCT-1-10x   | 0.16051197 | 0.5214294  | 0.0018     |
| 7w11w_SITTF3_CACGTTCTCGGTATGT-1-10x   | 0.02005251 | 0.02131767 | 3.55E-05   |
| 7w11w_SITTF3_CACTAAGGTGTTTGCA-1-10x   | 0.02056248 | 0.02313343 | 3.62E-05   |
| 7w11w_SITTF3_CACTGTTCGTGTACAT-1-10x   | 0.22716399 | 0.7587467  | 0.00096676 |
| 7w11w_SITTF3_CAGATACTCAGAATAG-1-10x   | 0.1061204  | 0.32776597 | 0.00352    |
| 7w11w_SITTF3_CAGCAATCAAACGGCA-1-10x   | 0.12193824 | 0.38408607 | 0.0021873  |
| 7w11w_SITTF3_CAGCACGAGTTTCGGT-1-10x   | 0.08297315 | 0.24534924 | 0.0033032  |
| 7w11w_SITTF3_CAGCAGCGTCCGGCAT-1-10x   | 0.05746676 | 0.15453269 | 0.00028394 |
| 7w11w_SITTF3_CAGGCCAGTAGTGTGG-1-10x   | 0.11184584 | 0.34815165 | 0.002929   |
| 7w11w_SITTF3_CAGGGCTGTGTACGCC-1-10x   | 0.05485677 | 0.14523971 | 0.00021164 |
| 7w11w_SITTF3_CAGGTATAGTAAATGC-1-10x   | 0.03772909 | 0.08425589 | 6.07E-05   |

|                                     |            |            |            |
|-------------------------------------|------------|------------|------------|
| 7w11w_SITTF3_CAGGTATTCAAGTGGG-1-10x | 0.17940725 | 0.58870685 | 0.0014915  |
| 7w11w_SITTF3_CAGGTATTCCTCACCA-1-10x | 0.06755677 | 0.19045858 | 0.00088537 |
| 7w11w_SITTF3_CATAGACGTCCTCCTA-1-10x | 0.01953498 | 0.01947498 | 3.55E-05   |
| 7w11w_SITTF3_CATCAAGCATCCTATT-1-10x | 0.25328577 | 0.85175437 | 0.00079608 |
| 7w11w_SITTF3_CATCAAGGTGGCGTAA-1-10x | 0.02480838 | 0.03825115 | 3.91E-05   |
| 7w11w_SITTF3_CATCCCAGTTCAGCGC-1-10x | 0.09274012 | 0.28012493 | 0.0044107  |
| 7w11w_SITTF3_CATGCCTAGTGATTCC-1-10x | 0.07443441 | 0.2149467  | 0.0017292  |
| 7w11w_SITTF3_CATGCTCCACCCTGAG-1-10x | 0.016697   | 0.00937024 | 3.38E-05   |
| 7w11w_SITTF3_CATGGATTCCATTGTT-1-10x | 0.04851946 | 0.12267543 | 0.00012523 |
| 7w11w_SITTF3_CATTCATAGAAGCTCG-1-10x | 0.02575197 | 0.04161086 | 4.00E-05   |
| 7w11w_SITTF3_CATTCATCATCGCTGG-1-10x | 0.05139525 | 0.1329148  | 0.00016076 |
| 7w11w_SITTF3_CATTCCGCAGAGCCCT-1-10x | 0.08241456 | 0.24336036 | 0.0033032  |
| 7w11w_SITTF3_CATTCCGCATACCACA-1-10x | 0.10042048 | 0.30747116 | 0.0040879  |
| 7w11w_SITTF3_CATTCTAGTTTGTGGT-1-10x | 0.10075155 | 0.30864996 | 0.0040879  |
| 7w11w_SITTF3_CCACACTAGTTCATG-1-10x  | 0.02526133 | 0.0398639  | 4.00E-05   |
| 7w11w_SITTF3_CCACCATGTTTGCAGT-1-10x | 0.26460525 | 0.8920579  | 0.00076135 |
| 7w11w_SITTF3_CCACGAGTCATGCTAG-1-10x | 0.11556567 | 0.36139625 | 0.002594   |
| 7w11w_SITTF3_CCCAAGTACCATGG-1-10x   | 0.04827203 | 0.12179446 | 0.00011598 |
| 7w11w_SITTF3_CCCTAACCATCGAAGG-1-10x | 0.04514681 | 0.11066698 | 9.39E-05   |
| 7w11w_SITTF3_CCCTAACTCGTAGCCG-1-10x | 0.02899337 | 0.05315199 | 4.42E-05   |
| 7w11w_SITTF3_CCCTCAAGTTGTAAAG-1-10x | 0.28913727 | 0.97940516 | 0.0007606  |
| 7w11w_SITTF3_CCCTCTCGTGGTTTAC-1-10x | 0.0459318  | 0.11346198 | 0.00010046 |
| 7w11w_SITTF3_CCCTGATGTCACGTGC-1-10x | 0.23931198 | 0.8020001  | 0.00087632 |
| 7w11w_SITTF3_CCGATCTCAATTCGTG-1-10x | 0.09528578 | 0.28918886 | 0.0044051  |
| 7w11w_SITTF3_CCGATCTTCCGAGCTG-1-10x | 0.2572523  | 0.8658774  | 0.00078121 |
| 7w11w_SITTF3_CCGATCTTCGGCCTT-1-10x  | 0.03781692 | 0.08456861 | 6.07E-05   |
| 7w11w_SITTF3_CCGGACACAGAGGCAT-1-10x | 0.0411968  | 0.09660282 | 7.40E-05   |
| 7w11w_SITTF3_CCGGGTAAGCCTCTGG-1-10x | 0.05791584 | 0.15613165 | 0.00031414 |
| 7w11w_SITTF3_CCGGGTAAGTGATAAC-1-10x | 0.08005661 | 0.23496476 | 0.0027593  |
| 7w11w_SITTF3_CCGTGAGCAAATGGCG-1-10x | 0.04548586 | 0.11187419 | 9.39E-05   |
| 7w11w_SITTF3_CCTATCGAGGACAGTC-1-10x | 0.13753869 | 0.4396321  | 0.0018842  |
| 7w11w_SITTF3_CCTCCAAGTAGTCTTG-1-10x | 0.07557076 | 0.21899274 | 0.001885   |
| 7w11w_SITTF3_CCTGTTGAGTGGTCAG-1-10x | 0.01748172 | 0.01216428 | 3.44E-05   |
| 7w11w_SITTF3_CCTGTTGTCGCTTGAA-1-10x | 0.1256249  | 0.39721254 | 0.0020515  |
| 7w11w_SITTF3_CGAAGGAGTGTCTTCC-1-10x | 0.10715313 | 0.33144307 | 0.0034182  |
| 7w11w_SITTF3_CGAGAAGTCTCGTCGT-1-10x | 0.22408567 | 0.7477862  | 0.00098869 |
| 7w11w_SITTF3_CGAGGCTTCAGTCTTT-1-10x | 0.03349318 | 0.06917375 | 5.17E-05   |
| 7w11w_SITTF3_CGATGCGAGTCACTAC-1-10x | 0.17787823 | 0.5832627  | 0.0015248  |
| 7w11w_SITTF3_CGGACACAGCTCGACC-1-10x | 0.01705392 | 0.01064108 | 3.38E-05   |
| 7w11w_SITTF3_CGGACACCAGAGTCTT-1-10x | 0.06558037 | 0.18342152 | 0.00072102 |
| 7w11w_SITTF3_CGGGACTAGCACCGTC-1-10x | 0.07824901 | 0.22852872 | 0.0023954  |

|                                      |            |            |            |
|--------------------------------------|------------|------------|------------|
| 7w11w_SITTF3_CGGGACTGTCGGTGTC-1-10x  | 0.28843817 | 0.97691596 | 0.0007596  |
| 7w11w_SITTF3_CGGGTCACATGGGATG-1-10x  | 0.19490078 | 0.6438722  | 0.0012511  |
| 7w11w_SITTF3_CGTAGTAAGGTCACAG-1-10x  | 0.01946094 | 0.01921137 | 3.55E-05   |
| 7w11w_SITTF3_CGTAGTAGTCCGGTGT-1-10x  | 0.02741695 | 0.04753907 | 4.19E-05   |
| 7w11w_SITTF3_CGTGCTTGTGTTTCAGT-1-10x | 0.04884383 | 0.12383036 | 0.00012523 |
| 7w11w_SITTF3_CGTGTCTTCTCCAAGA-1-10x  | 0.08868904 | 0.2657009  | 0.0041422  |
| 7w11w_SITTF3_CGTTGGGAGGAAAGTG-1-10x  | 0.03638082 | 0.07945529 | 5.82E-05   |
| 7w11w_SITTF3_CTACCTGAGTCAGCCC-1-10x  | 0.29388124 | 0.9962962  | 0.000766   |
| 7w11w_SITTF3_CTAGTATAGCAAACAT-1-10x  | 0.01678987 | 0.00970092 | 3.38E-05   |
| 7w11w_SITTF3_CTAGACAGTCCTTAAG-1-10x  | 0.07447366 | 0.21508645 | 0.0017292  |
| 7w11w_SITTF3_CTATCTACAATTCACG-1-10x  | 0.10460895 | 0.3223844  | 0.0037215  |
| 7w11w_SITTF3_CTCAACCGTTTGGAAA-1-10x  | 0.0424499  | 0.10106453 | 7.82E-05   |
| 7w11w_SITTF3_CTCAGTGCATTAAGCC-1-10x  | 0.01518747 | 0.0039955  | 3.27E-05   |
| 7w11w_SITTF3_CTCAGTGGTCGTTATG-1-10x  | 0.04632809 | 0.11487298 | 0.00010046 |
| 7w11w_SITTF3_CTCAGGGTCTTCGTAT-1-10x  | 0.08453368 | 0.25090557 | 0.0036353  |
| 7w11w_SITTF3_CTCAGTCAGCTATCCA-1-10x  | 0.04095511 | 0.09574225 | 7.40E-05   |
| 7w11w_SITTF3_CTCATCGGTGTCTTCC-1-10x  | 0.267171   | 0.9011933  | 0.00075831 |
| 7w11w_SITTF3_CTCCACAGTGCATGTT-1-10x  | 0.037623   | 0.08387813 | 6.07E-05   |
| 7w11w_SITTF3_CTCCTTTCACTGTGAT-1-10x  | 0.26434633 | 0.891136   | 0.00076313 |
| 7w11w_SITTF3_CTCCTTTGTGCGAATGG-1-10x | 0.1157816  | 0.36216506 | 0.002594   |
| 7w11w_SITTF3_CTCGAGGCAGATACTC-1-10x  | 0.26247978 | 0.88449    | 0.00076727 |
| 7w11w_SITTF3_CTCGAGGGTCTGTTAG-1-10x  | 0.02759709 | 0.04818048 | 4.19E-05   |
| 7w11w_SITTF3_CTCTCAGTCTGCATGA-1-10x  | 0.02004043 | 0.02127465 | 3.55E-05   |
| 7w11w_SITTF3_CTGAGCGCAACAACAA-1-10x  | 0.07488736 | 0.21655944 | 0.001885   |
| 7w11w_SITTF3_CTGCATCGTTCACGAT-1-10x  | 0.05204586 | 0.13523136 | 0.00016076 |
| 7w11w_SITTF3_CTGCATCTCGAGATGG-1-10x  | 0.03073706 | 0.05936046 | 4.68E-05   |
| 7w11w_SITTF3_CTGCCTAAGGGAGTTC-1-10x  | 0.02892391 | 0.05290465 | 4.42E-05   |
| 7w11w_SITTF3_CTGCGAGTCATAAGGA-1-10x  | 0.08862478 | 0.26547208 | 0.0041422  |
| 7w11w_SITTF3_CTGTACCCACGTTCCG-1-10x  | 0.04981836 | 0.12730023 | 0.00013566 |
| 7w11w_SITTF3_CTGTAGAAGTCTACCA-1-10x  | 0.02343047 | 0.03334503 | 3.83E-05   |
| 7w11w_SITTF3_CTGTAGACAGGTCAAG-1-10x  | 0.04383772 | 0.10600591 | 8.81E-05   |
| 7w11w_SITTF3_CTGTATTCATGAATCC-1-10x  | 0.07889779 | 0.23083875 | 0.002576   |
| 7w11w_SITTF3_CTTCTTTCCGCTGTT-1-10x   | 0.26889718 | 0.90733945 | 0.00075594 |
| 7w11w_SITTF3_CTTTCGGCAGCAGACA-1-10x  | 0.13369323 | 0.42594022 | 0.0019115  |
| 7w11w_SITTF3_GAAACCTAGTGGACGT-1-10x  | 0.02510713 | 0.03931488 | 4.00E-05   |
| 7w11w_SITTF3_GAACACTTCTCTGCCA-1-10x  | 0.23732445 | 0.7949234  | 0.00088935 |
| 7w11w_SITTF3_GAAGCGATCTGCTAGA-1-10x  | 0.08180402 | 0.2411865  | 0.0031253  |
| 7w11w_SITTF3_GAAGGACAGCTCACTA-1-10x  | 0.01712601 | 0.01089776 | 3.38E-05   |
| 7w11w_SITTF3_GAATCACCAGAAGTTA-1-10x  | 0.1560962  | 0.5057069  | 0.0018459  |
| 7w11w_SITTF3_GAATCACTCCATTGTT-1-10x  | 0.08204877 | 0.24205795 | 0.0031253  |
| 7w11w_SITTF3_GACACGCAGACAGCTG-1-10x  | 0.09456221 | 0.28661257 | 0.0044051  |

|                                      |            |            |            |
|--------------------------------------|------------|------------|------------|
| 7w11w_SITTF3_GACACGCCAAAGCGTG-1-10x  | 0.25985354 | 0.8751392  | 0.00077221 |
| 7w11w_SITTF3_GACCAATCAAATCAGA-1-10x  | 0.07009982 | 0.1995132  | 0.0011935  |
| 7w11w_SITTF3_GACCCAGTCAGGTAAA-1-10x  | 0.18385589 | 0.6045464  | 0.0014112  |
| 7w11w_SITTF3_GACCCTTTCCGCATAA-1-10x  | 0.02407058 | 0.03562419 | 3.91E-05   |
| 7w11w_SITTF3_GACCGTGGTCGCCACA-1-10x  | 0.07371738 | 0.21239369 | 0.0017292  |
| 7w11w_SITTF3_GACTATGAGAGAATCT-1-10x  | 0.18039364 | 0.5922189  | 0.001475   |
| 7w11w_SITTF3_GACTCAATCGCTAAAC-1-10x  | 0.2562693  | 0.8623774  | 0.00078463 |
| 7w11w_SITTF3_GAGACTTTCGCTTACC-1-10x  | 0.22404042 | 0.7476251  | 0.00098869 |
| 7w11w_SITTF3_GAGATGGCAGTCAACT-1-10x  | 0.2855982  | 0.9668041  | 0.00075686 |
| 7w11w_SITTF3_GAGCCTGAGAGTTGTA-1-10x  | 0.06098077 | 0.16704446 | 0.00042799 |
| 7w11w_SITTF3_GAGGCAAGTCTGCCTT-1-10x  | 0.08411469 | 0.24941374 | 0.0036353  |
| 7w11w_SITTF3_GAGGCCTAGAATCTAG-1-10x  | 0.01835803 | 0.0152844  | 3.49E-05   |
| 7w11w_SITTF3_GAGGGATTTCATCCTAT-1-10x | 0.01587464 | 0.0064422  | 3.33E-05   |
| 7w11w_SITTF3_GAGTTACGTGTAGCAG-1-10x  | 0.10577109 | 0.32652223 | 0.00352    |
| 7w11w_SITTF3_GATAGAACAGAACCGA-1-10x  | 0.17709392 | 0.58047014 | 0.0015248  |
| 7w11w_SITTF3_GATAGAATCCGCTACT-1-10x  | 0.17763318 | 0.5823902  | 0.0015248  |
| 7w11w_SITTF3_GATAGCTAGCGTGAGT-1-10x  | 0.04662863 | 0.11594307 | 0.00010777 |
| 7w11w_SITTF3_GATCAGTAGCAATTCC-1-10x  | 0.06065578 | 0.16588733 | 0.00042799 |
| 7w11w_SITTF3_GATCATGAGTCATGCT-1-10x  | 0.01758613 | 0.01253601 | 3.44E-05   |
| 7w11w_SITTF3_GATCGTACACTCCTTG-1-10x  | 0.22701974 | 0.7582331  | 0.00096676 |
| 7w11w_SITTF3_GATGACTTCGACCATA-1-10x  | 0.25549912 | 0.8596351  | 0.00078825 |
| 7w11w_SITTF3_GATTTCTAGTGCAGGT-1-10x  | 0.02069984 | 0.02362252 | 3.62E-05   |
| 7w11w_SITTF3_GCACATACTGTGT-1-10x     | 0.1915799  | 0.632048   | 0.0012985  |
| 7w11w_SITTF3_GCACGGTGTGCTCGA-1-10x   | 0.03628638 | 0.07911904 | 5.82E-05   |
| 7w11w_SITTF3_GCATCGGTCGGCTCTT-1-10x  | 0.0155289  | 0.00521119 | 3.33E-05   |
| 7w11w_SITTF3_GCCAACGTCAGAGTTC-1-10x  | 0.01602339 | 0.00697184 | 3.33E-05   |
| 7w11w_SITTF3_GCCTGTTGTGTGCTG-1-10x   | 0.02076754 | 0.02386357 | 3.62E-05   |
| 7w11w_SITTF3_GCCTGTTGTGTGGA-1-10x    | 0.02342514 | 0.03332606 | 3.83E-05   |
| 7w11w_SITTF3_GCCTGTTTCTGACAGT-1-10x  | 0.27257442 | 0.92043245 | 0.000753   |
| 7w11w_SITTF3_GCGATCGCAGTCTCTC-1-10x  | 0.20960389 | 0.6962232  | 0.0011095  |
| 7w11w_SITTF3_GCGTGCACAACGTAAA-1-10x  | 0.26948375 | 0.90942794 | 0.00075499 |
| 7w11w_SITTF3_GCGTGCACATACCATG-1-10x  | 0.03865023 | 0.08753564 | 6.36E-05   |
| 7w11w_SITTF3_GCGTGCAGTGTGTTGCA-1-10x | 0.16379397 | 0.5331151  | 0.001763   |
| 7w11w_SITTF3_GCGTTTCTCGCCAGA-1-10x   | 0.16700363 | 0.5445432  | 0.0017056  |
| 7w11w_SITTF3_GCTACCTTCCGTAGGC-1-10x  | 0.07330091 | 0.21091084 | 0.0015819  |
| 7w11w_SITTF3_GCTGGTTCTTTGCTA-1-10x   | 0.24431077 | 0.8197985  | 0.00084583 |
| 7w11w_SITTF3_GCTTCACTCACGACTA-1-10x  | 0.14012659 | 0.44884643 | 0.001875   |
| 7w11w_SITTF3_GCTTGGGAGCTACAAA-1-10x  | 0.04588283 | 0.11328761 | 0.00010046 |
| 7w11w_SITTF3_GGAACCCAGCGGATA-1-10x   | 0.09313164 | 0.28151897 | 0.0044107  |
| 7w11w_SITTF3_GGAATCTAGCGCACAA-1-10x  | 0.04681172 | 0.11659496 | 0.00010777 |
| 7w11w_SITTF3_GGAATGGAGACAAGCC-1-10x  | 0.03115174 | 0.06083693 | 4.68E-05   |

|                                      |            |            |            |
|--------------------------------------|------------|------------|------------|
| 7w11w_SITTF3_GGAGAACCACTCCACT-1-10x  | 0.09906624 | 0.30264935 | 0.0042345  |
| 7w11w_SITTF3_GGCAGTCAGGATACGC-1-10x  | 0.12574421 | 0.39763737 | 0.0020515  |
| 7w11w_SITTF3_GGCGTCACATTGACTG-1-10x  | 0.08038856 | 0.2361467  | 0.0029431  |
| 7w11w_SITTF3_GGCGTCAGTGCAGTGA-1-10x  | 0.01904479 | 0.01772963 | 3.49E-05   |
| 7w11w_SITTF3_GGCTGTGCAGCATTGT-1-10x  | 0.29069498 | 0.98495144 | 0.00076269 |
| 7w11w_SITTF3_GGGAAGTCATGCAGGA-1-10x  | 0.04570136 | 0.11264148 | 0.00010046 |
| 7w11w_SITTF3_GGGACCTGTAGCTTGT-1-10x  | 0.01856101 | 0.01600712 | 3.49E-05   |
| 7w11w_SITTF3_GGGAGTACACGTA ACT-1-10x | 0.04497833 | 0.11006711 | 9.39E-05   |
| 7w11w_SITTF3_GGGATGAAGGCTCAAG-1-10x  | 0.19433826 | 0.6418693  | 0.0012624  |
| 7w11w_SITTF3_GGGTATTGTTGCCAAT-1-10x  | 0.10998705 | 0.34153336 | 0.0031181  |
| 7w11w_SITTF3_GGTGAAGTCCCGTGAG-1-10x  | 0.04991023 | 0.12762734 | 0.00013566 |
| 7w11w_SITTF3_GGTGATTCCTATTA-1-10x    | 0.27161008 | 0.91699886 | 0.00075352 |
| 7w11w_SITTF3_GGTGTCGCAGATCACT-1-10x  | 0.248917   | 0.83619916 | 0.00081888 |
| 7w11w_SITTF3_GGTGTCGTATCGGGC-1-10x   | 0.13528359 | 0.43160272 | 0.0018953  |
| 7w11w_SITTF3_GGTGTCGTCAATCCA-1-10x   | 0.09322172 | 0.28183967 | 0.0044107  |
| 7w11w_SITTF3_GTAACCATCGAGTCTA-1-10x  | 0.24458516 | 0.8207755  | 0.00084583 |
| 7w11w_SITTF3_GTAATCGTCTCGAGTA-1-10x  | 0.03547958 | 0.07624642 | 5.58E-05   |
| 7w11w_SITTF3_GTACAGTCAGACACCC-1-10x  | 0.26274478 | 0.8854336  | 0.00076511 |
| 7w11w_SITTF3_GTAGATCCAAATCGGG-1-10x  | 0.03136844 | 0.06160852 | 4.68E-05   |
| 7w11w_SITTF3_GTAGATCTCCATTTA-1-10x   | 0.02515045 | 0.03946909 | 4.00E-05   |
| 7w11w_SITTF3_GTAGGAGCAGGTGGAT-1-10x  | 0.04629089 | 0.11474052 | 0.00010046 |
| 7w11w_SITTF3_GTAGGAGTCCAGCCTT-1-10x  | 0.04159398 | 0.09801697 | 7.40E-05   |
| 7w11w_SITTF3_GTAGGTTTCTGAATGC-1-10x  | 0.10712113 | 0.33132914 | 0.0034182  |
| 7w11w_SITTF3_GTAGTACTCTGGTGGC-1-10x  | 0.20599738 | 0.6833821  | 0.001143   |
| 7w11w_SITTF3_GTCACTCAGACGTCCC-1-10x  | 0.0435187  | 0.10487003 | 8.29E-05   |
| 7w11w_SITTF3_GTCATGATCCCTCTCC-1-10x  | 0.26247567 | 0.8844754  | 0.00076727 |
| 7w11w_SITTF3_GTCATTTAGTGCAAAT-1-10x  | 0.27518827 | 0.9297391  | 0.00075218 |
| 7w11w_SITTF3_GTCCACTAGAGGATGA-1-10x  | 0.18410254 | 0.6054246  | 0.0014112  |
| 7w11w_SITTF3_GTCTACCAGACGGATC-1-10x  | 0.02338656 | 0.03318871 | 3.83E-05   |
| 7w11w_SITTF3_GTCTACCAGCGGTTC-1-10x   | 0.16340682 | 0.5317366  | 0.001763   |
| 7w11w_SITTF3_GTGAGTTCCTACCGG-1-10x   | 0.04878421 | 0.1236181  | 0.00012523 |
| 7w11w_SITTF3_GTGAGCAGCTAGCCC-1-10x   | 0.02191088 | 0.02793447 | 3.69E-05   |
| 7w11w_SITTF3_GTGCGTGAGGCTGGAT-1-10x  | 0.20912331 | 0.6945121  | 0.0011095  |
| 7w11w_SITTF3_GTGGAAGAGGACGCTA-1-10x  | 0.03875902 | 0.087923   | 6.36E-05   |
| 7w11w_SITTF3_GTGCGTCACGGAAGT-1-10x   | 0.01852616 | 0.01588304 | 3.49E-05   |
| 7w11w_SITTF3_GTGCGTTCTCATAGG-1-10x   | 0.02706523 | 0.04628675 | 4.19E-05   |
| 7w11w_SITTF3_GTGGAACAACCAATC-1-10x   | 0.08534386 | 0.25379026 | 0.0037839  |
| 7w11w_SITTF3_GTGTTAGGTGGTACAG-1-10x  | 0.09155227 | 0.27589554 | 0.0043535  |
| 7w11w_SITTF3_GTTACCCTCTAGTACG-1-10x  | 0.04471665 | 0.10913536 | 9.39E-05   |
| 7w11w_SITTF3_GTTAGTGTATCCTGC-1-10x   | 0.11673851 | 0.3655722  | 0.0025211  |
| 7w11w_SITTF3_GTTATGGAGGTTGGTG-1-10x  | 0.06880678 | 0.1949093  | 0.00097948 |

|                                     |            |            |            |
|-------------------------------------|------------|------------|------------|
| 7w11w_SITTF3_GTTCCGTGTGGCCCAT-1-10x | 0.17907605 | 0.5875276  | 0.0014915  |
| 7w11w_SITTF3_GTTCTATTCAGTGTCC-1-10x | 0.03800948 | 0.08525421 | 6.07E-05   |
| 7w11w_SITTF3_GTTGAACAGTGTTCCA-1-10x | 0.1858694  | 0.61171556 | 0.0013809  |
| 7w11w_SITTF3_GTTGCTCGTCGGTGTC-1-10x | 0.1979858  | 0.6548565  | 0.0012187  |
| 7w11w_SITTF3_GTTGTGACATGGAATA-1-10x | 0.01850397 | 0.01580405 | 3.49E-05   |
| 7w11w_SITTF3_GTTTACTAGGGCATGT-1-10x | 0.02127562 | 0.0256726  | 3.69E-05   |
| 7w11w_SITTF3_GTTTGGAAGACGGTCA-1-10x | 0.25260732 | 0.8493387  | 0.00080028 |
| 7w11w_SITTF3_TAACCAGTCAGAGCAG-1-10x | 0.18114837 | 0.59490615 | 0.0014587  |
| 7w11w_SITTF3_TAACGACAGGCCATAG-1-10x | 0.04733481 | 0.11845744 | 0.00010777 |
| 7w11w_SITTF3_TAACGACTCAGCTGTA-1-10x | 0.08161736 | 0.24052186 | 0.0031253  |
| 7w11w_SITTF3_TAAGCACAGTGTTTAC-1-10x | 0.11626881 | 0.3638998  | 0.0025211  |
| 7w11w_SITTF3_TAAGCGTCAGCGACAA-1-10x | 0.17580634 | 0.57588565 | 0.0015585  |
| 7w11w_SITTF3_TAATCTCGTGTCCAAT-1-10x | 0.08621282 | 0.25688422 | 0.0039187  |
| 7w11w_SITTF3_TACAACGAGAGCTGAC-1-10x | 0.02548776 | 0.04067011 | 4.00E-05   |
| 7w11w_SITTF3_TACACCCTCTGGGAGA-1-10x | 0.26058573 | 0.87774616 | 0.00077221 |
| 7w11w_SITTF3_TACCGAACAGAGAGGG-1-10x | 0.2182483  | 0.72700197 | 0.00104    |
| 7w11w_SITTF3_TACCGAATCGCTATTT-1-10x | 0.13659483 | 0.43627146 | 0.0018891  |
| 7w11w_SITTF3_TACCGGGTCAAGCCTA-1-10x | 0.0418025  | 0.09875943 | 7.82E-05   |
| 7w11w_SITTF3_TACCTCGAGTGGCCTC-1-10x | 0.01625525 | 0.00779738 | 3.33E-05   |
| 7w11w_SITTF3_TACCTCGCACGATTCA-1-10x | 0.19259202 | 0.63565177 | 0.0012861  |
| 7w11w_SITTF3_TACCTCGTTCTAAGC-1-10x  | 0.16224532 | 0.52760106 | 0.001776   |
| 7w11w_SITTF3_TACGGGCAGTAATACG-1-10x | 0.06940805 | 0.19705015 | 0.0010821  |
| 7w11w_SITTF3_TACGGGCAGTTTCAGC-1-10x | 0.02012198 | 0.02156502 | 3.55E-05   |
| 7w11w_SITTF3_TACTGCCAGCCAACCC-1-10x | 0.02905482 | 0.05337078 | 4.42E-05   |
| 7w11w_SITTF3_TAGACCAAGATAACGT-1-10x | 0.05223573 | 0.1359074  | 0.00017575 |
| 7w11w_SITTF3_TAGGTACTCCTTCTTC-1-10x | 0.02947211 | 0.05485657 | 4.42E-05   |
| 7w11w_SITTF3_TAGTGCAAGTTCCTGA-1-10x | 0.01575112 | 0.0060024  | 3.33E-05   |
| 7w11w_SITTF3_TATCAGGAGCCGTTGC-1-10x | 0.037936   | 0.0849926  | 6.07E-05   |
| 7w11w_SITTF3_TATCAGGAGTACCGGA-1-10x | 0.08869124 | 0.2657087  | 0.0041422  |
| 7w11w_SITTF3_TCAAGCACACATGTTG-1-10x | 0.26537958 | 0.8948149  | 0.00075974 |
| 7w11w_SITTF3_TCAAGTGTCCTCGTA-1-10x  | 0.28609544 | 0.9685746  | 0.00075773 |
| 7w11w_SITTF3_TCACGGGCAGACCTAT-1-10x | 0.0406505  | 0.09465769 | 7.01E-05   |
| 7w11w_SITTF3_TCACTCGTCGGTCAGC-1-10x | 0.13089438 | 0.41597477 | 0.001948   |
| 7w11w_SITTF3_TCAGGGCAGAGAGCCT-1-10x | 0.14160505 | 0.45411056 | 0.0018724  |
| 7w11w_SITTF3_TCAGGGCTCACCATCC-1-10x | 0.04736979 | 0.11858198 | 0.00010777 |
| 7w11w_SITTF3_TCAGTCCCACTAACGT-1-10x | 0.04631486 | 0.11482588 | 0.00010046 |
| 7w11w_SITTF3_TCAGTGAAGAGTTGCG-1-10x | 0.01542843 | 0.00485345 | 3.27E-05   |
| 7w11w_SITTF3_TCATCATAGACGCTCC-1-10x | 0.01750697 | 0.01225417 | 3.44E-05   |
| 7w11w_SITTF3_TCATGAGAGACAGTCG-1-10x | 0.03992463 | 0.09207319 | 7.01E-05   |
| 7w11w_SITTF3_TCATGCCAGAGGGTGG-1-10x | 0.09821919 | 0.29963338 | 0.0042345  |
| 7w11w_SITTF3_TCCACCATCCGCGAGT-1-10x | 0.02184144 | 0.02768724 | 3.69E-05   |

|                                     |            |            |            |
|-------------------------------------|------------|------------|------------|
| 7w11w_SITTF3_TCCCACAGTACTGCCG-1-10x | 0.0447119  | 0.10911845 | 9.39E-05   |
| 7w11w_SITTF3_TCCCATGAGTGATCGG-1-10x | 0.03795071 | 0.08504497 | 6.07E-05   |
| 7w11w_SITTF3_TCCGATCGTCGGTGAA-1-10x | 0.16847017 | 0.54976493 | 0.0016902  |
| 7w11w_SITTF3_TCCTAATTCTGTGTGA-1-10x | 0.11542332 | 0.36088943 | 0.002594   |
| 7w11w_SITTF3_TCGAACAGTCTGTGGC-1-10x | 0.25313407 | 0.85121423 | 0.00079608 |
| 7w11w_SITTF3_TCGACGGCAGCTGTTA-1-10x | 0.28664002 | 0.9705136  | 0.00075773 |
| 7w11w_SITTF3_TCGCAGGGTACCTAGT-1-10x | 0.17279914 | 0.5651784  | 0.0016089  |
| 7w11w_SITTF3_TCGCAGGGTGGCTGCT-1-10x | 0.23030187 | 0.7699193  | 0.00094498 |
| 7w11w_SITTF3_TCGGATATCACTACGA-1-10x | 0.08376733 | 0.24817695 | 0.0034742  |
| 7w11w_SITTF3_TCGGGACAGCAAGCCA-1-10x | 0.13910344 | 0.44520348 | 0.0018772  |
| 7w11w_SITTF3_TCGGGCAGTCAATCTG-1-10x | 0.01933396 | 0.01875926 | 3.55E-05   |
| 7w11w_SITTF3_TCGGGCAGTCTTCTAT-1-10x | 0.17463873 | 0.57172835 | 0.0015753  |
| 7w11w_SITTF3_TCGGTCTGTGTAGCAG-1-10x | 0.04889861 | 0.12402541 | 0.00012523 |
| 7w11w_SITTF3_TCGTAGAGTCATGGCC-1-10x | 0.04426254 | 0.10751849 | 8.81E-05   |
| 7w11w_SITTF3_TCGTCCATCTTACACT-1-10x | 0.26486892 | 0.89299667 | 0.00076135 |
| 7w11w_SITTF3_TCTATCAGTCTGTGGC-1-10x | 0.27190426 | 0.9180463  | 0.00075352 |
| 7w11w_SITTF3_TCTCAGCAGTCAGCGA-1-10x | 0.04048768 | 0.09407795 | 7.01E-05   |
| 7w11w_SITTF3_TCTCAGCGTTCAGGTT-1-10x | 0.02569728 | 0.04141613 | 4.00E-05   |
| 7w11w_SITTF3_TGAATGCAGAGAGGTA-1-10x | 0.08389615 | 0.24863562 | 0.0034742  |
| 7w11w_SITTF3_TGACAGTAGTGATCGG-1-10x | 0.0537978  | 0.14146921 | 0.00019264 |
| 7w11w_SITTF3_TGACCCTTCATACGAC-1-10x | 0.05121307 | 0.13226618 | 0.00016076 |
| 7w11w_SITTF3_TGAGCGCTCCGCATAA-1-10x | 0.25985226 | 0.87513465 | 0.00077221 |
| 7w11w_SITTF3_TGAGGAGGTTGCCAAT-1-10x | 0.27016622 | 0.9118579  | 0.00075418 |
| 7w11w_SITTF3_TGCAGATAGTAGGATT-1-10x | 0.20969042 | 0.6965313  | 0.0011095  |
| 7w11w_SITTF3_TGCATCCGTGATAGAT-1-10x | 0.2521972  | 0.8478785  | 0.00080028 |
| 7w11w_SITTF3_TGCATCCGTTGTGGAG-1-10x | 0.04887424 | 0.12393865 | 0.00012523 |
| 7w11w_SITTF3_TGCCGAGCAGAGGGTT-1-10x | 0.22799891 | 0.76171947 | 0.00095947 |
| 7w11w_SITTF3_TGCCGAGGTGCGTCGT-1-10x | 0.02647675 | 0.04419146 | 4.09E-05   |
| 7w11w_SITTF3_TGCCGAGTCCTGATAG-1-10x | 0.0811099  | 0.23871507 | 0.0029431  |
| 7w11w_SITTF3_TGCATATCGGCTGGT-1-10x  | 0.045197   | 0.11084567 | 9.39E-05   |
| 7w11w_SITTF3_TGCTCGTAGGTGTGAC-1-10x | 0.15841751 | 0.513972   | 0.0018209  |
| 7w11w_SITTF3_TGCTTGCCACGTAGTT-1-10x | 0.10128345 | 0.31054384 | 0.0040036  |
| 7w11w_SITTF3_TGGAAGTGTGCTTAG-1-10x  | 0.04093279 | 0.09566279 | 7.40E-05   |
| 7w11w_SITTF3_TGGAGGACAAGGCGTA-1-10x | 0.15212455 | 0.49156567 | 0.0018651  |
| 7w11w_SITTF3_TGGATGTTGCGCTGA-1-10x  | 0.03594919 | 0.07791849 | 5.58E-05   |
| 7w11w_SITTF3_TGGGAAGAGGAGAGTA-1-10x | 0.01894072 | 0.01735912 | 3.49E-05   |
| 7w11w_SITTF3_TGGGCGTGTGATAACC-1-10x | 0.0565973  | 0.15143695 | 0.000257   |
| 7w11w_SITTF3_TGGGCTGTCTTAGCAG-1-10x | 0.03359115 | 0.06952257 | 5.17E-05   |
| 7w11w_SITTF3_TGGGTTACAAGCAATA-1-10x | 0.03973906 | 0.09141246 | 6.67E-05   |
| 7w11w_SITTF3_TGGGTTAGTGCCGTAC-1-10x | 0.04140541 | 0.09734557 | 7.40E-05   |
| 7w11w_SITTF3_TGGTACACAAACGGCA-1-10x | 0.01522513 | 0.00412957 | 3.27E-05   |



|                                      |            |            |            |
|--------------------------------------|------------|------------|------------|
| 7w11w_SITTF3_TGGTACATCATCTCTA-1-10x  | 0.08214954 | 0.24241674 | 0.0031253  |
| 7w11w_SITTF3_TGGTAGTAGGCATGGT-1-10x  | 0.01779032 | 0.01326305 | 3.44E-05   |
| 7w11w_SITTF3_TGGTAGTCAGCGTGCT-1-10x  | 0.04045216 | 0.09395149 | 7.01E-05   |
| 7w11w_SITTF3_TGTACAGTCTCGAGTA-1-10x  | 0.28059065 | 0.94897455 | 0.00075348 |
| 7w11w_SITTF3_TGTCAGAGTCCATCTC-1-10x  | 0.0272821  | 0.04705895 | 4.19E-05   |
| 7w11w_SITTF3_TGTGAGTAGTGTATC-1-10x   | 0.05146677 | 0.13316946 | 0.00016076 |
| 7w11w_SITTF3_TTACCGCGTGACACGA-1-10x  | 0.20050728 | 0.6638344  | 0.0011985  |
| 7w11w_SITTF3_TTACTGTTCTGGACCG-1-10x  | 0.23940411 | 0.80232817 | 0.00087632 |
| 7w11w_SITTF3_TTCAGGACAAGCGCAA-1-10x  | 0.27233994 | 0.91959757 | 0.000753   |
| 7w11w_SITTF3_TTCATTGCACTTGGGC-1-10x  | 0.09242896 | 0.27901703 | 0.0043903  |
| 7w11w_SITTF3_TTCCGGTTCGATTGAC-1-10x  | 0.10020459 | 0.3067025  | 0.0040879  |
| 7w11w_SITTF3_TTCCGTGCAAGTCATC-1-10x  | 0.1220163  | 0.384364   | 0.0021873  |
| 7w11w_SITTF3_TTCCTCTCCATGATG-1-10x   | 0.12052342 | 0.37904856 | 0.0022788  |
| 7w11w_SITTF3_TTCGATTAGTCCGCCA-1-10x  | 0.02624894 | 0.04338032 | 4.09E-05   |
| 7w11w_SITTF3_TTCTTCCAGCAGAAAG-1-10x  | 0.03831545 | 0.08634365 | 6.36E-05   |
| 7w11w_SITTF3_TTCTCCGTAAGTGTG-1-10x   | 0.20498395 | 0.67977375 | 0.0011518  |
| 7w11w_SITTF3_TTCTTGATCGTGGGAA-1-10x  | 0.03358177 | 0.06948918 | 5.17E-05   |
| 7w11w_SITTF3_TTGAACGAGACATCAA-1-10x  | 0.02147898 | 0.0263967  | 3.69E-05   |
| 7w11w_SITTF3_TTGATGGAGACGTCGA-1-10x  | 0.04632927 | 0.11487719 | 0.00010046 |
| 7w11w_SITTF3_TTGCGTCTCTATACGG-1-10x  | 0.02657327 | 0.04453512 | 4.09E-05   |
| 7w11w_SITTF3_TTGTGTTGTGTTATCG-1-10x  | 0.13733816 | 0.4389181  | 0.0018842  |
| 7w11w_SITTF3_TTTACGTGTCGGTGTC-1-10x  | 0.2669026  | 0.9002377  | 0.00075831 |
| 7w11w_SITTF3_TTTACTGAGCGCCTAC-1-10x  | 0.24474144 | 0.8213319  | 0.00084014 |
| 7w11w_SITTF3_TTTACTGGTTTGGCTA-1-10x  | 0.15937103 | 0.51736706 | 0.0018109  |
| 7w11w_SITTF3_TTTCAGTTCACGGAGA-1-10x  | 0.01596189 | 0.00675285 | 3.33E-05   |
| 7w11w_SITTF3_AAACGCTAGACATAGT-1-10x  | 0.03339061 | 0.06880855 | 5.17E-05   |
| 7w11w_SITTF3_AACAGGGAGGTTACAGG-1-10x | 0.05794444 | 0.15623347 | 0.00031414 |
| 7w11w_SITTF3_AACCATGGTTAGAAGT-1-10x  | 0.0534464  | 0.14021802 | 0.00019264 |
| 7w11w_SITTF3_AACGTCACAACTGATC-1-10x  | 0.02453263 | 0.03726934 | 3.91E-05   |
| 7w11w_SITTF3_AACTTCTGTGCCTGAC-1-10x  | 0.07355002 | 0.21179779 | 0.0015819  |
| 7w11w_SITTF3_AAGACAAAGAGTGTTA-1-10x  | 0.13447958 | 0.42874002 | 0.0019027  |
| 7w11w_SITTF3_AATGCCAGTTCTCCTG-1-10x  | 0.04680962 | 0.11658748 | 0.00010777 |
| 7w11w_SITTF3_AATGGCTCACCTAAAC-1-10x  | 0.05926742 | 0.16094403 | 0.00034795 |
| 7w11w_SITTF3_AATGGCTTCAGAACCT-1-10x  | 0.02368564 | 0.03425358 | 3.83E-05   |
| 7w11w_SITTF3_ACACCAAAGCCTCTTC-1-10x  | 0.01615879 | 0.00745392 | 3.33E-05   |
| 7w11w_SITTF3_ACACCGGGTAGCCAGA-1-10x  | 0.10439531 | 0.3216237  | 0.0037215  |
| 7w11w_SITTF3_ACAGCCGCAATTTCCGG-1-10x | 0.2326833  | 0.77839845 | 0.00092358 |
| 7w11w_SITTF3_ACCCTCAGTAACTGCT-1-10x  | 0.04061717 | 0.09453902 | 7.01E-05   |
| 7w11w_SITTF3_ACCGTTCTCTGGCTGG-1-10x  | 0.02934661 | 0.05440969 | 4.42E-05   |
| 7w11w_SITTF3_ACTTCCGGTAGCTTAC-1-10x  | 0.07033344 | 0.20034504 | 0.0011935  |
| 7w11w_SITTF3_ACTTCCGGTATGGTTC-1-10x  | 0.02129462 | 0.02574026 | 3.69E-05   |

|                                      |            |            |            |
|--------------------------------------|------------|------------|------------|
| 7w11w_SITTF3_ACTTCGCCAGTGTATC-1-10x  | 0.06017902 | 0.1641898  | 0.00038577 |
| 7w11w_SITTF3_AGAAATGTCTAGGCCG-1-10x  | 0.25015908 | 0.8406217  | 0.00081397 |
| 7w11w_SITTF3_AGATGCTGTACGACTT-1-10x  | 0.23560315 | 0.7887947  | 0.00090278 |
| 7w11w_SITTF3_AGCCAATGTAGCGAGT-1-10x  | 0.04358826 | 0.10511768 | 8.29E-05   |
| 7w11w_SITTF3_AGCGCTGCATAATGAG-1-10x  | 0.01530316 | 0.00440741 | 3.27E-05   |
| 7w11w_SITTF3_AGCTTCCCATGTCGTA-1-10x  | 0.05413076 | 0.14265472 | 0.00021164 |
| 7w11w_SITTF3_AGGAAATTCGCTGTTC-1-10x  | 0.02496309 | 0.038802   | 4.00E-05   |
| 7w11w_SITTF3_AGGCATTCACCTTGAGT-1-10x | 0.03219509 | 0.06455185 | 4.83E-05   |
| 7w11w_SITTF3_AGGGTGAAGAATCGTA-1-10x  | 0.11013047 | 0.342044   | 0.0031181  |
| 7w11w_SITTF3_AGGGTGACACTCTAGA-1-10x  | 0.1055156  | 0.32561257 | 0.0036214  |
| 7w11w_SITTF3_AGGTTGTAGGAGTCTG-1-10x  | 0.22181796 | 0.73971194 | 0.0010106  |
| 7w11w_SITTF3_AGTCAACGTGAGGCAT-1-10x  | 0.01531261 | 0.00444107 | 3.27E-05   |
| 7w11w_SITTF3_ATCCATTTGGAACGGA-1-10x  | 0.03082548 | 0.05967527 | 4.68E-05   |
| 7w11w_SITTF3_ATCGGATAGTTCTACG-1-10x  | 0.03707708 | 0.08193439 | 5.82E-05   |
| 7w11w_SITTF3_ATCGTGAAGACCTCAT-1-10x  | 0.01782798 | 0.01339713 | 3.44E-05   |
| 7w11w_SITTF3_ATGCCTCGTATCATGC-1-10x  | 0.0436869  | 0.10546893 | 8.81E-05   |
| 7w11w_SITTF3_ATTCACTCACGTAAC-1-10x   | 0.08740678 | 0.26113534 | 0.0040384  |
| 7w11w_SITTF3_ATTCAGGTCGATCCCT-1-10x  | 0.01799909 | 0.01400639 | 3.44E-05   |
| 7w11w_SITTF3_ATTCTAGTCTACAA-1-10x    | 0.04604383 | 0.11386085 | 0.00010046 |
| 7w11w_SITTF3_ATTGTTCCAGTATACC-1-10x  | 0.02419412 | 0.03606407 | 3.91E-05   |
| 7w11w_SITTF3_CAACAACAGTTTCGGT-1-10x  | 0.288813   | 0.97825056 | 0.0007596  |
| 7w11w_SITTF3_CAACGGCTCGCAAGAG-1-10x  | 0.04282407 | 0.10239677 | 8.29E-05   |
| 7w11w_SITTF3_CAAGACTTCGAGTTGT-1-10x  | 0.14890814 | 0.4801135  | 0.0018705  |
| 7w11w_SITTF3_CAAGAGGAGTGCACCTT-1-10x | 0.03335686 | 0.06868836 | 5.17E-05   |
| 7w11w_SITTF3_CACATGAAGTAGCATA-1-10x  | 0.19770166 | 0.65384483 | 0.0012292  |
| 7w11w_SITTF3_CACGGGTGTAGCTGCC-1-10x  | 0.26726833 | 0.90153986 | 0.00075705 |
| 7w11w_SITTF3_CAGCAATAGCCTTCTC-1-10x  | 0.05600171 | 0.14931631 | 0.000257   |
| 7w11w_SITTF3_CAGCACGAGCAGTACG-1-10x  | 0.03334935 | 0.06866164 | 5.17E-05   |
| 7w11w_SITTF3_CATTCATCATGTTCTGA-1-10x | 0.05159444 | 0.13362405 | 0.00016076 |
| 7w11w_SITTF3_CCACACTTCCGCATAA-1-10x  | 0.23957822 | 0.80294806 | 0.00087632 |
| 7w11w_SITTF3_CCCTTAGCATTACCC-1-10x   | 0.09964323 | 0.30470374 | 0.0041652  |
| 7w11w_SITTF3_CCGATGGCAGGCCCTA-1-10x  | 0.01775451 | 0.01313555 | 3.44E-05   |
| 7w11w_SITTF3_CCTTTGGGTA CTGCGC-1-10x | 0.25512093 | 0.8582885  | 0.00078825 |
| 7w11w_SITTF3_CGAATTGTCGTGGGAA-1-10x  | 0.27206406 | 0.9186153  | 0.000753   |
| 7w11w_SITTF3_CGGGTACAGGGTTGA-1-10x   | 0.22995605 | 0.7686879  | 0.00094498 |
| 7w11w_SITTF3_CGGGTGTGTT CAGCTA-1-10x | 0.04606936 | 0.11395175 | 0.00010046 |
| 7w11w_SITTF3_CGTAAGTTCCTCAGGG-1-10x  | 0.03723936 | 0.08251217 | 6.07E-05   |
| 7w11w_SITTF3_CGTCCATGTCTGTTAG-1-10x  | 0.06377438 | 0.17699122 | 0.00058553 |
| 7w11w_SITTF3_CGTGATAGTTGAAGTA-1-10x  | 0.04576602 | 0.11287168 | 0.00010046 |
| 7w11w_SITTF3_CGTGCTTGATTGGCT-1-10x   | 0.01952091 | 0.01942491 | 3.55E-05   |
| 7w11w_SITTF3_CGTTCTGCAAACCGGA-1-10x  | 0.05290079 | 0.13827536 | 0.00017575 |

|                                     |            |            |            |
|-------------------------------------|------------|------------|------------|
| 7w11w_SITTF3_CTACGGGAGAAATTGC-1-10x | 0.04577434 | 0.11290132 | 0.00010046 |
| 7w11w_SITTF3_CTCCAACGTGTTAAAG-1-10x | 0.04897391 | 0.12429353 | 0.00012523 |
| 7w11w_SITTF3_CTCCCTCTCGGCTGTG-1-10x | 0.06160355 | 0.1692619  | 0.00047505 |
| 7w11w_SITTF3_CTCGAGGGTTAGCTAC-1-10x | 0.01917582 | 0.01819618 | 3.49E-05   |
| 7w11w_SITTF3_CTGTCTAGCAGCCTC-1-10x  | 0.22365431 | 0.74625033 | 0.00099599 |
| 7w11w_SITTF3_CTTCCGAGTAATTGGA-1-10x | 0.0438378  | 0.10600618 | 8.81E-05   |
| 7w11w_SITTF3_CTTGAGAGTGATTCTG-1-10x | 0.0441348  | 0.10706367 | 8.81E-05   |
| 7w11w_SITTF3_CTTTCAAAGACCAGCA-1-10x | 0.05607821 | 0.1495887  | 0.000257   |
| 7w11w_SITTF3_GAACTGTCACGTCGGT-1-10x | 0.05880099 | 0.15928327 | 0.00034795 |
| 7w11w_SITTF3_GAAGAATGTAGCTTGT-1-10x | 0.07862155 | 0.22985518 | 0.002576   |
| 7w11w_SITTF3_GAAGCGATCTGAACGT-1-10x | 0.04957235 | 0.12642431 | 0.00013566 |
| 7w11w_SITTF3_GACCTTCAGTCTGGAG-1-10x | 0.25403255 | 0.85441333 | 0.00079608 |
| 7w11w_SITTF3_GAGAAATGTCCACATA-1-10x | 0.23982303 | 0.8038197  | 0.00087632 |
| 7w11w_SITTF3_GAGGCCTAGTGGTCAG-1-10x | 0.06099854 | 0.16710772 | 0.00042799 |
| 7w11w_SITTF3_GAGTCTATCGCCTATC-1-10x | 0.15889952 | 0.5156882  | 0.0018209  |
| 7w11w_SITTF3_GAGTTACCATTACGGT-1-10x | 0.01662024 | 0.00909692 | 3.38E-05   |
| 7w11w_SITTF3_GATGTTGAGGTAGATT-1-10x | 0.13524735 | 0.4314737  | 0.0018953  |
| 7w11w_SITTF3_GATGTTGAGTGCACCC-1-10x | 0.040424   | 0.09385122 | 7.01E-05   |
| 7w11w_SITTF3_GATTCTTGATACGGG-1-10x  | 0.11075683 | 0.3442742  | 0.0030221  |
| 7w11w_SITTF3_GCACTAAAGCGGGTAT-1-10x | 0.03774159 | 0.0843004  | 6.07E-05   |
| 7w11w_SITTF3_GCATCTCCAGAGAAAG-1-10x | 0.16463746 | 0.5361184  | 0.0017494  |
| 7w11w_SITTF3_GCATGATCATCAGCTA-1-10x | 0.02400469 | 0.03538957 | 3.91E-05   |
| 7w11w_SITTF3_GCATGATGTCACGCTG-1-10x | 0.15403093 | 0.49835342 | 0.0018575  |
| 7w11w_SITTF3_GCCCGAAGTCGCGTTG-1-10x | 0.04241898 | 0.10095443 | 7.82E-05   |
| 7w11w_SITTF3_GCCGATGCAAGTGCAG-1-10x | 0.09271254 | 0.28002676 | 0.0044107  |
| 7w11w_SITTF3_GCCTGTTAGATTGGGC-1-10x | 0.03313373 | 0.06789391 | 5.00E-05   |
| 7w11w_SITTF3_GCGTGCAGTTTACTTC-1-10x | 0.05832834 | 0.15760039 | 0.00031414 |
| 7w11w_SITTF3_GCTGAATAGTTCATCG-1-10x | 0.04098656 | 0.09585425 | 7.40E-05   |
| 7w11w_SITTF3_GCTTCACTCTGAGTCA-1-10x | 0.0530667  | 0.1388661  | 0.00019264 |
| 7w11w_SITTF3_GGAATGGCATAGCACT-1-10x | 0.02638319 | 0.04385831 | 4.09E-05   |
| 7w11w_SITTF3_GGAGGATAGCAATTAG-1-10x | 0.24161652 | 0.8102055  | 0.00086374 |
| 7w11w_SITTF3_GGGACAATCTTAGCAG-1-10x | 0.0610358  | 0.16724041 | 0.00042799 |
| 7w11w_SITTF3_GGGTCACGTTGCAACT-1-10x | 0.06836568 | 0.19333874 | 0.00097948 |
| 7w11w_SITTF3_GGTCTGGCAGAGATTA-1-10x | 0.04008738 | 0.09265266 | 7.01E-05   |
| 7w11w_SITTF3_GTAGAGGGTTGGGTAG-1-10x | 0.0150972  | 0.0036741  | 3.27E-05   |
| 7w11w_SITTF3_GTAGTACAGGACATCG-1-10x | 0.04015238 | 0.09288409 | 7.01E-05   |
| 7w11w_SITTF3_GTCCCATGTGGGACAT-1-10x | 0.05004614 | 0.12811126 | 0.00013566 |
| 7w11w_SITTF3_GTCTCACGTCTGTCAA-1-10x | 0.05145319 | 0.13312112 | 0.00016076 |
| 7w11w_SITTF3_GTGAGCCCAACTTGGT-1-10x | 0.04001745 | 0.09240367 | 7.01E-05   |
| 7w11w_SITTF3_GTGGAAGAGCTGGCCT-1-10x | 0.09140224 | 0.27536136 | 0.0043535  |
| 7w11w_SITTF3_GTGCGTCACCAATTG-1-10x  | 0.26031548 | 0.87678397 | 0.00077221 |

|                                      |            |            |            |
|--------------------------------------|------------|------------|------------|
| 7w11w_SITTF3_GTGTGGCGTTAAGGGC-1-10x  | 0.02781872 | 0.04896959 | 4.30E-05   |
| 7w11w_SITTF3_GTTAGACTCCTCAGGG-1-10x  | 0.18434618 | 0.6062921  | 0.0014112  |
| 7w11w_SITTF3_GTTATGGTCCTGTTAT-1-10x  | 0.01970989 | 0.02009775 | 3.55E-05   |
| 7w11w_SITTF3_GTTCTATTCGGACGTC-1-10x  | 0.0216648  | 0.02705829 | 3.69E-05   |
| 7w11w_SITTF3_GTTGTAGAGTGTTCCA-1-10x  | 0.04642848 | 0.1152304  | 0.00010046 |
| 7w11w_SITTF3_TAATCTCAGGTTCCAGG-1-10x | 0.15639319 | 0.5067643  | 0.0018385  |
| 7w11w_SITTF3_TAATCTCTCGGAGCAA-1-10x  | 0.04068528 | 0.09478153 | 7.01E-05   |
| 7w11w_SITTF3_TACAGGTGTCCTCCAT-1-10x  | 0.1445704  | 0.46466878 | 0.0018716  |
| 7w11w_SITTF3_TACCTCGAGACGGATC-1-10x  | 0.0539204  | 0.14190573 | 0.00019264 |
| 7w11w_SITTF3_TACGGTAGTGTCCGTG-1-10x  | 0.11301673 | 0.35232064 | 0.0028393  |
| 7w11w_SITTF3_TACTGCCGTAGGGTAC-1-10x  | 0.01714094 | 0.01095092 | 3.38E-05   |
| 7w11w_SITTF3_TACTGCCTCGTAGGAG-1-10x  | 0.27966797 | 0.9456893  | 0.00075303 |
| 7w11w_SITTF3_TACTTGTCATAATCGC-1-10x  | 0.20459047 | 0.67837274 | 0.0011518  |
| 7w11w_SITTF3_TAGGAGGAGAATCTAG-1-10x  | 0.04683405 | 0.11667446 | 0.00010777 |
| 7w11w_SITTF3_TATATCCCAGCGGTCT-1-10x  | 0.22498736 | 0.7509967  | 0.00098137 |
| 7w11w_SITTF3_TATTCCAAGGATGCGT-1-10x  | 0.04808631 | 0.1211332  | 0.00011598 |
| 7w11w_SITTF3_TCAATCTAGTGACCTT-1-10x  | 0.02613951 | 0.0429907  | 4.09E-05   |
| 7w11w_SITTF3_TCACAAGAGGACACTG-1-10x  | 0.02248712 | 0.0299862  | 3.76E-05   |
| 7w11w_SITTF3_TCACACCAGTAAACAC-1-10x  | 0.02848142 | 0.05132917 | 4.30E-05   |
| 7w11w_SITTF3_TCACGCTGTATTCCTT-1-10x  | 0.09020007 | 0.27108097 | 0.0042999  |
| 7w11w_SITTF3_TCACGCTTCACGAGGA-1-10x  | 0.01712432 | 0.01089174 | 3.38E-05   |
| 7w11w_SITTF3_TCATATCTCGCATAGT-1-10x  | 0.12660928 | 0.4007175  | 0.0020256  |
| 7w11w_SITTF3_TCCACATCTGAATCG-1-10x   | 0.03412776 | 0.07143319 | 5.17E-05   |
| 7w11w_SITTF3_TCCGATCAGAGGGCGA-1-10x  | 0.01742837 | 0.0119743  | 3.44E-05   |
| 7w11w_SITTF3_TCCGATCTCGAGAAGC-1-10x  | 0.04199313 | 0.09943816 | 7.82E-05   |
| 7w11w_SITTF3_TCCTAATGTAGTGATA-1-10x  | 0.13917933 | 0.4454737  | 0.0018772  |
| 7w11w_SITTF3_TCCTCGAAGGAATCGC-1-10x  | 0.25937545 | 0.8734369  | 0.00077499 |
| 7w11w_SITTF3_TCCTGCAGTTAGAAAC-1-10x  | 0.0209863  | 0.02464248 | 3.62E-05   |
| 7w11w_SITTF3_TCGGATAAGGTCCCGT-1-10x  | 0.03716471 | 0.08224639 | 6.07E-05   |
| 7w11w_SITTF3_TGACAGTGTTCGTTT-1-10x   | 0.02739847 | 0.04747326 | 4.19E-05   |
| 7w11w_SITTF3_TGATGCATCTAGCCAA-1-10x  | 0.1056653  | 0.32614556 | 0.00352    |
| 7w11w_SITTF3_TGGAAGTAGTGAGTTA-1-10x  | 0.01815879 | 0.014575   | 3.44E-05   |
| 7w11w_SITTF3_TGGATGTCAGAAATCA-1-10x  | 0.05238806 | 0.13644975 | 0.00017575 |
| 7w11w_SITTF3_TGGCGTGGTAATTGGA-1-10x  | 0.09301836 | 0.28111562 | 0.0044107  |
| 7w11w_SITTF3_TGGGAGAGTCTTGCTC-1-10x  | 0.22086586 | 0.7363219  | 0.0010179  |
| 7w11w_SITTF3_TGGGAGAGTTGTGCCG-1-10x  | 0.22386275 | 0.74699247 | 0.00099599 |
| 7w11w_SITTF3_TGGTACAGTGAGATTA-1-10x  | 0.03967144 | 0.09117168 | 6.67E-05   |
| 7w11w_SITTF3_TGTCCACCATGTCAGT-1-10x  | 0.02941994 | 0.05467081 | 4.42E-05   |
| 7w11w_SITTF3_TGTGAGTGTGTGCCG-1-10x   | 0.11731625 | 0.3676293  | 0.002453   |
| 7w11w_SITTF3_TGTTGGAGTCGACGCT-1-10x  | 0.04184097 | 0.0988964  | 7.82E-05   |
| 7w11w_SITTF3_TGTTGGATCTACTTCA-1-10x  | 0.1576753  | 0.5113293  | 0.0018302  |

|                                     |            |            |            |
|-------------------------------------|------------|------------|------------|
| 7w11w_SITTF3_TTAGGGTCAGAACTTC-1-10x | 0.17373285 | 0.5685029  | 0.0015922  |
| 7w11w_SITTF3_TTCCGGTTCGATACGT-1-10x | 0.01734204 | 0.01166695 | 3.38E-05   |
| 7w11w_SITTF3_TTCTCCACATACTG-1-10x   | 0.09176445 | 0.27665102 | 0.0043903  |
| 7w11w_SITTF3_TTGAGTGAGGATATGT-1-10x | 0.06379359 | 0.1770596  | 0.00058553 |
| 7w11w_SITTF3_TTGCTGCTCACCTGGG-1-10x | 0.01915758 | 0.01813125 | 3.49E-05   |
| 7w11w_SITTF3_TTGGGATCCAACTAG-1-10x  | 0.07512599 | 0.21740909 | 0.001885   |
| 7w11w_SITTF3_TTGGGCGGTCCTGAAT-1-10x | 0.0262068  | 0.04323027 | 4.09E-05   |
| 7w11w_SITTF3_TTGGGTAGTACTCGAT-1-10x | 0.02014446 | 0.02164509 | 3.55E-05   |
| 7w11w_SITTF3_TTGTGGAGTAGCCAGA-1-10x | 0.0206937  | 0.02360065 | 3.62E-05   |
| 7w11w_SITTF3_TTGTGTTAGGTCCAGA-1-10x | 0.07436387 | 0.21469553 | 0.0017292  |
| 7w11w_SITTF3_TTTACTGTCCGACATA-1-10x | 0.09720413 | 0.29601923 | 0.0042943  |
| 7w11w_SITTF3_TTTACTGTCTGCACCT-1-10x | 0.01909252 | 0.01789958 | 3.49E-05   |
| 7w11w_SITTF3_TTTATGCAGGCTATCT-1-10x | 0.04267226 | 0.10185625 | 7.82E-05   |
| 7w11w_SITTF3_TTTCAGTTCCGGACTG-1-10x | 0.14478481 | 0.46543223 | 0.0018716  |
| 7w11w_SITTF3_TTTGACTAGTAGCAAT-1-10x | 0.05198601 | 0.13501826 | 0.00016076 |
| 16w_SITTD12_AAACCCACAGATCCAT-1-10x  | 0.14743541 | 0.4748698  | 0.0018716  |
| 16w_SITTD12_AAACGCTAGCCTGACC-1-10x  | 0.01818199 | 0.01465761 | 3.44E-05   |
| 16w_SITTD12_AAACGCTGTTAAGACA-1-10x  | 0.05185839 | 0.13456385 | 0.00016076 |
| 16w_SITTD12_AAAGAACCACATTCTT-1-10x  | 0.02025085 | 0.02202387 | 3.62E-05   |
| 16w_SITTD12_AAAGGATGTGCCTTCT-1-10x  | 0.22770937 | 0.76068854 | 0.00096676 |
| 16w_SITTD12_AAAGGATGTGTTGACT-1-10x  | 0.06968012 | 0.19801885 | 0.0010821  |
| 16w_SITTD12_AAATGGAAGCATTGTC-1-10x  | 0.18404284 | 0.60521203 | 0.0014112  |
| 16w_SITTD12_AAATGGAAGGATATGT-1-10x  | 0.21633428 | 0.72018707 | 0.001055   |
| 16w_SITTD12_AAATGGATCCTACGGG-1-10x  | 0.21651314 | 0.7208239  | 0.0010475  |
| 16w_SITTD12_AACAAAGAGTCGAAAT-1-10x  | 0.04917782 | 0.12501957 | 0.00012523 |
| 16w_SITTD12_AACAAAGCAAGTATCC-1-10x  | 0.27031368 | 0.91238296 | 0.00075418 |
| 16w_SITTD12_AACAAAGGTGGACCTC-1-10x  | 0.05351822 | 0.14047374 | 0.00019264 |
| 16w_SITTD12_AACAAGAAGACGCAGT-1-10x  | 0.02767142 | 0.04844513 | 4.19E-05   |
| 16w_SITTD12_AACAAGAAGAGTTCGG-1-10x  | 0.09179351 | 0.27675447 | 0.0043903  |
| 16w_SITTD12_AACAAGACAGTTCACA-1-10x  | 0.18972711 | 0.62545115 | 0.0013244  |
| 16w_SITTD12_AACAAGATCGAGTGGA-1-10x  | 0.19034602 | 0.6276548  | 0.0013113  |
| 16w_SITTD12_AACAAGATCTGCGGAC-1-10x  | 0.04299429 | 0.10300286 | 8.29E-05   |
| 16w_SITTD12_AACACACAGTGTTGAA-1-10x  | 0.25623152 | 0.8622428  | 0.00078463 |
| 16w_SITTD12_AACCAACCAGTAGTTC-1-10x  | 0.26267308 | 0.88517827 | 0.00076511 |
| 16w_SITTD12_AACCAACGTCGCTCGA-1-10x  | 0.02274901 | 0.03091868 | 3.76E-05   |
| 16w_SITTD12_AACCCAACACAGTGAG-1-10x  | 0.09953203 | 0.30430782 | 0.0041652  |
| 16w_SITTD12_AACCTTTAGCCGGAAT-1-10x  | 0.23480733 | 0.7859611  | 0.00090964 |
| 16w_SITTD12_AACCTTTTCTTCTGTA-1-10x  | 0.08393015 | 0.24875668 | 0.0034742  |
| 16w_SITTD12_AACGAAAAGCACTCGC-1-10x  | 0.01723379 | 0.01128151 | 3.38E-05   |
| 16w_SITTD12_AACGAAACACACTGGC-1-10x  | 0.2668137  | 0.8999211  | 0.00075831 |
| 16w_SITTD12_AAGACTCTCAACCTCC-1-10x  | 0.03526826 | 0.07549398 | 5.58E-05   |

|                                     |            |            |            |
|-------------------------------------|------------|------------|------------|
| 16w_SITTD12_AAGATAGCACTCCGGA-1-10x  | 0.01731091 | 0.0115561  | 3.38E-05   |
| 16w_SITTD12_AAGATAGCAGCCGGTT-1-10x  | 0.2183308  | 0.72729576 | 0.00104    |
| 16w_SITTD12_AAGCATCTCACATCAG-1-10x  | 0.28993267 | 0.98223716 | 0.00076163 |
| 16w_SITTD12_AAGCCATGTATGCGTT-1-10x  | 0.1888595  | 0.62236196 | 0.001338   |
| 16w_SITTD12_AAGCGAGAGGAAGTAG-1-10x  | 0.07967908 | 0.23362055 | 0.0027593  |
| 16w_SITTD12_AAGGAATAGGGCAGGA-1-10x  | 0.05202463 | 0.13515577 | 0.00016076 |
| 16w_SITTD12_AAGGTAAAGGCAGGTT-1-10x  | 0.14760683 | 0.47548017 | 0.0018716  |
| 16w_SITTD12_AAGGTAAAGTGACACG-1-10x  | 0.2746324  | 0.92775995 | 0.00075233 |
| 16w_SITTD12_AAGGTAATCAGGACGA-1-10x  | 0.12367748 | 0.3902787  | 0.0021124  |
| 16w_SITTD12_AAGTACCAGCCTCTCT-1-10x  | 0.14527759 | 0.46718678 | 0.0018716  |
| 16w_SITTD12_AAGTACCGTTGACTGT-1-10x  | 0.08131059 | 0.23942961 | 0.0031253  |
| 16w_SITTD12_AAGTCGTAGTAAGACT-1-10x  | 0.23511602 | 0.7870602  | 0.00090964 |
| 16w_SITTD12_AAGTGAAAGCTGTTAC-1-10x  | 0.09417271 | 0.28522572 | 0.0044154  |
| 16w_SITTD12_AAGTGAACACTGGAAG-1-10x  | 0.02618613 | 0.04315667 | 4.09E-05   |
| 16w_SITTD12_AAGTTTCGAGGTTGACG-1-10x | 0.27536777 | 0.93037826 | 0.00075218 |
| 16w_SITTD12_AAGTTTCGAGTCCGTG-1-10x  | 0.13002892 | 0.41289327 | 0.0019639  |
| 16w_SITTD12_AATAGAGCAAGATGGC-1-10x  | 0.26462168 | 0.89211637 | 0.00076135 |
| 16w_SITTD12_AATAGAGGTTATCTTC-1-10x  | 0.048787   | 0.12362804 | 0.00012523 |
| 16w_SITTD12_AATCGACCACCTTCGT-1-10x  | 0.047578   | 0.11932334 | 0.00011598 |
| 16w_SITTD12_AATCGACCAGCGCTTG-1-10x  | 0.02151389 | 0.026521   | 3.69E-05   |
| 16w_SITTD12_AATGAAGTTGCAACT-1-10x   | 0.03935059 | 0.09002931 | 6.67E-05   |
| 16w_SITTD12_AATGACCCAAAGGAGA-1-10x  | 0.06574758 | 0.1840169  | 0.00072102 |
| 16w_SITTD12_AATTTCCAGAAATCCA-1-10x  | 0.20380144 | 0.67556334 | 0.0011608  |
| 16w_SITTD12_AATTTCCGTAGGAGTC-1-10x  | 0.05938145 | 0.16135001 | 0.00034795 |
| 16w_SITTD12_AATTTCCGTTTGGAGG-1-10x  | 0.12934601 | 0.41046175 | 0.0019639  |
| 16w_SITTD12_ACAACCAGTTCCGGTG-1-10x  | 0.27454862 | 0.9274616  | 0.00075233 |
| 16w_SITTD12_ACAACCATCCAACACA-1-10x  | 0.2845982  | 0.9632436  | 0.00075605 |
| 16w_SITTD12_ACAAGCTAGCGAATGC-1-10x  | 0.05110012 | 0.13186398 | 0.00014746 |
| 16w_SITTD12_ACACCAACACCGTCTT-1-10x  | 0.01590571 | 0.00655282 | 3.33E-05   |
| 16w_SITTD12_ACACGCGTCAGTGCGC-1-10x  | 0.21774009 | 0.7251925  | 0.00104    |
| 16w_SITTD12_ACACTGATCTAGGAAA-1-10x  | 0.01552332 | 0.00519129 | 3.33E-05   |
| 16w_SITTD12_ACAGAAAAGGAAGTAG-1-10x  | 0.08679622 | 0.25896144 | 0.0039187  |
| 16w_SITTD12_ACAGAAAAGTCTCTGA-1-10x  | 0.24031179 | 0.80556    | 0.00086997 |
| 16w_SITTD12_ACAGAAAGTATGTGTC-1-10x  | 0.04052836 | 0.09422281 | 7.01E-05   |
| 16w_SITTD12_ACAGAAAGTTCTTAGG-1-10x  | 0.04499646 | 0.11013167 | 9.39E-05   |
| 16w_SITTD12_ACAGCCGCACTGTTCC-1-10x  | 0.16781399 | 0.54742855 | 0.0016902  |
| 16w_SITTD12_ACAGGGAAGCGTGCCT-1-10x  | 0.08833423 | 0.26443756 | 0.0041422  |
| 16w_SITTD12_ACAGGGAGTGACACAG-1-10x  | 0.01716562 | 0.01103878 | 3.38E-05   |
| 16w_SITTD12_ACATCCCCTCTGTTT-1-10x   | 0.0153064  | 0.00441897 | 3.27E-05   |
| 16w_SITTD12_ACATCCCTCGAGAGAC-1-10x  | 0.19087481 | 0.6295376  | 0.0013113  |
| 16w_SITTD12_ACATCGAAGTAATCCC-1-10x  | 0.04316798 | 0.10362126 | 8.29E-05   |

|                                    |            |            |            |
|------------------------------------|------------|------------|------------|
| 16w_SITTD12_ACCAAACAGCGACCCT-1-10x | 0.04251923 | 0.10131136 | 7.82E-05   |
| 16w_SITTD12_ACCAAACAGGGCCAAT-1-10x | 0.22920278 | 0.7660059  | 0.0009522  |
| 16w_SITTD12_ACCAAACCAAAGAGTT-1-10x | 0.10259364 | 0.3152088  | 0.0039137  |
| 16w_SITTD12_ACCAAACTCATCGACA-1-10x | 0.26865625 | 0.9064816  | 0.00075594 |
| 16w_SITTD12_ACCAAACTCGGCATAT-1-10x | 0.0399132  | 0.09203249 | 7.01E-05   |
| 16w_SITTD12_ACCAACAAGGGCAATC-1-10x | 0.2002635  | 0.6629664  | 0.0011985  |
| 16w_SITTD12_ACCAACACAACGACTT-1-10x | 0.04777642 | 0.1200298  | 0.00011598 |
| 16w_SITTD12_ACCCTTGTCATCGGGC-1-10x | 0.12971139 | 0.41176268 | 0.0019639  |
| 16w_SITTD12_ACCGTTCAGATAGTCA-1-10x | 0.22061902 | 0.73544306 | 0.0010179  |
| 16w_SITTD12_ACCGTTCTGTGCACAT-1-10x | 0.08969279 | 0.2692748  | 0.0042999  |
| 16w_SITTD12_ACCTGAAGTATTAAGG-1-10x | 0.04720159 | 0.11798312 | 0.00010777 |
| 16w_SITTD12_ACCTGTCAGCACTGGA-1-10x | 0.10477296 | 0.32296836 | 0.0036214  |
| 16w_SITTD12_ACGCACGCACGAAAGC-1-10x | 0.20238887 | 0.67053384 | 0.0011792  |
| 16w_SITTD12_ACGCACGTCGCCTAGG-1-10x | 0.0338966  | 0.07061015 | 5.17E-05   |
| 16w_SITTD12_ACGGAAGTCAGCAATC-1-10x | 0.09140042 | 0.27535486 | 0.0043535  |
| 16w_SITTD12_ACGGAAGTCCCGAATA-1-10x | 0.04556921 | 0.11217094 | 0.00010046 |
| 16w_SITTD12_ACGGGTCTCATGAAAG-1-10x | 0.27108347 | 0.9151238  | 0.00075352 |
| 16w_SITTD12_ACGGTGCAAGACGGT-1-10x  | 0.20505168 | 0.68001485 | 0.0011518  |
| 16w_SITTD12_ACGGTGTCAGTTCC-1-10x   | 0.22035667 | 0.73450893 | 0.0010179  |
| 16w_SITTD12_ACGGTTACACTTTATC-1-10x | 0.18389449 | 0.6046838  | 0.0014112  |
| 16w_SITTD12_ACGGTTAGTGTCCAA-1-10x  | 0.26803523 | 0.90427047 | 0.00075705 |
| 16w_SITTD12_ACGGTTATCTCCGAAA-1-10x | 0.15999752 | 0.5195977  | 0.0018109  |
| 16w_SITTD12_ACGTAACGTTAAGGGC-1-10x | 0.2763625  | 0.9339201  | 0.00075214 |
| 16w_SITTD12_ACGTAGTCACCACATA-1-10x | 0.0914253  | 0.27544346 | 0.0043535  |
| 16w_SITTD12_ACGTCCTCATGGCTAT-1-10x | 0.06330348 | 0.17531456 | 0.00052741 |
| 16w_SITTD12_ACGTTCCCATAGAGGC-1-10x | 0.02309658 | 0.03215623 | 3.83E-05   |
| 16w_SITTD12_ACTACGAGTCCCTAAA-1-10x | 0.22013067 | 0.73370427 | 0.0010253  |
| 16w_SITTD12_ACTACGATCACGACTA-1-10x | 0.01902035 | 0.01764264 | 3.49E-05   |
| 16w_SITTD12_ACTACGATCTACGGGC-1-10x | 0.0237402  | 0.03444784 | 3.83E-05   |
| 16w_SITTD12_ACTATCTGTGGAGAAA-1-10x | 0.25138232 | 0.8449771  | 0.00080467 |
| 16w_SITTD12_ACTATGGCACATATGC-1-10x | 0.16428062 | 0.53484786 | 0.0017494  |
| 16w_SITTD12_ACTCCCAAGACGACGT-1-10x | 0.04779303 | 0.12008896 | 0.00011598 |
| 16w_SITTD12_ACTCTCGCATGGTGGA-1-10x | 0.06048495 | 0.16527908 | 0.00038577 |
| 16w_SITTD12_ACTCTCGCATGTTACG-1-10x | 0.09151933 | 0.27577826 | 0.0043535  |
| 16w_SITTD12_ACTGATGCAAACAGGC-1-10x | 0.10790426 | 0.33411747 | 0.0033168  |
| 16w_SITTD12_ACTGATGGTGCCACA-1-10x  | 0.24209867 | 0.81192225 | 0.00085764 |
| 16w_SITTD12_ACTGCAATCTGAGATC-1-10x | 0.09066878 | 0.27274984 | 0.0043535  |
| 16w_SITTD12_ACTGTGATCTCTGGTC-1-10x | 0.2900187  | 0.9825435  | 0.00076163 |
| 16w_SITTD12_ACTTATCCACTTTATC-1-10x | 0.04154292 | 0.09783517 | 7.40E-05   |
| 16w_SITTD12_ACTTATCGTAGTACGG-1-10x | 0.2723661  | 0.9196907  | 0.000753   |
| 16w_SITTD12_ACTTCGCAGTAGCTCT-1-10x | 0.2270255  | 0.7582536  | 0.00096676 |

|                                     |            |            |            |
|-------------------------------------|------------|------------|------------|
| 16w_SITTD12_ACTTCGCCACGGCTAC-1-10x  | 0.04500627 | 0.11016657 | 9.39E-05   |
| 16w_SITTD12_ACTTCGCCAGGAAGTC-1-10x  | 0.05052387 | 0.12981224 | 0.00014746 |
| 16w_SITTD12_ACTTCGCGTGCCTAAT-1-10x  | 0.28588846 | 0.96783763 | 0.00075686 |
| 16w_SITTD12_ACTTTCAAGTGACACG-1-10x  | 0.24510351 | 0.8226211  | 0.00084014 |
| 16w_SITTD12_ACTTTGTCAACGAGGT-1-10x  | 0.26699877 | 0.90058005 | 0.00075831 |
| 16w_SITTD12_AGAAATGAGCAATTCC-1-10x  | 0.14691222 | 0.47300693 | 0.0018717  |
| 16w_SITTD12_AGAAATGTCAAAGACA-1-10x  | 0.19279853 | 0.63638705 | 0.0012861  |
| 16w_SITTD12_AGAAATGTCTTGGCTC-1-10x  | 0.07973787 | 0.23382989 | 0.0027593  |
| 16w_SITTD12_AGAACAACAGCTTCGG-1-10x  | 0.02341967 | 0.03330659 | 3.83E-05   |
| 16w_SITTD12_AGAACCTCACACTTAG-1-10x  | 0.19894716 | 0.6582795  | 0.0012085  |
| 16w_SITTD12_AGAAGCGTCGGAGCAA-1-10x  | 0.10297583 | 0.3165696  | 0.0038193  |
| 16w_SITTD12_AGACAAACATCACCAA-1-10x  | 0.02109598 | 0.025033   | 3.62E-05   |
| 16w_SITTD12_AGACAAAGTAACACCT-1-10x  | 0.04702247 | 0.11734533 | 0.00010777 |
| 16w_SITTD12_AGACACTAGTCGAAGC-1-10x  | 0.08318281 | 0.24609575 | 0.0034742  |
| 16w_SITTD12_AGACAGGAGATTACCC-1-10x  | 0.09185469 | 0.27697232 | 0.0043903  |
| 16w_SITTD12_AGACAGGTCCGGTCAGC-1-10x | 0.08896647 | 0.26668867 | 0.0042295  |
| 16w_SITTD12_AGACCATAGACGGTCA-1-10x  | 0.0295652  | 0.05518799 | 4.55E-05   |
| 16w_SITTD12_AGACCATAGATGGTCG-1-10x  | 0.17432296 | 0.570604   | 0.0015753  |
| 16w_SITTD12_AGACTCACACAAGCTT-1-10x  | 0.26319727 | 0.88704467 | 0.00076511 |
| 16w_SITTD12_AGACTCATCTTGTTAC-1-10x  | 0.27693132 | 0.93594533 | 0.00075222 |
| 16w_SITTD12_AGAGAATAGCATCGAG-1-10x  | 0.089036   | 0.26693627 | 0.0042295  |
| 16w_SITTD12_AGAGAATCATCGAGCC-1-10x  | 0.09192112 | 0.27720886 | 0.0043903  |
| 16w_SITTD12_AGAGAATCATCTCGTC-1-10x  | 0.01961691 | 0.01976669 | 3.55E-05   |
| 16w_SITTD12_AGAGCAGCACCTGAAT-1-10x  | 0.09615959 | 0.2923001  | 0.0043808  |
| 16w_SITTD12_AGATCGTAGTAGTGCG-1-10x  | 0.03031013 | 0.05784036 | 4.55E-05   |
| 16w_SITTD12_AGATCGTTCGGATACT-1-10x  | 0.14162838 | 0.45419365 | 0.0018724  |
| 16w_SITTD12_AGATGAATCGTAGAGG-1-10x  | 0.0386188  | 0.08742373 | 6.36E-05   |
| 16w_SITTD12_AGCATCAAGAAGCGGG-1-10x  | 0.02069289 | 0.0235978  | 3.62E-05   |
| 16w_SITTD12_AGCATCATCACGGAGA-1-10x  | 0.09704743 | 0.2954613  | 0.0043435  |
| 16w_SITTD12_AGCCAATAGTGACCTT-1-10x  | 0.09188066 | 0.2770648  | 0.0043903  |
| 16w_SITTD12_AGCCACGCAGAAATTG-1-10x  | 0.04293558 | 0.10279381 | 8.29E-05   |
| 16w_SITTD12_AGCGATTCACATTACG-1-10x  | 0.09215237 | 0.27803224 | 0.0043903  |
| 16w_SITTD12_AGCGATTGTGGTATGG-1-10x  | 0.10590706 | 0.32700637 | 0.00352    |
| 16w_SITTD12_AGCGCCAAGATCGCTT-1-10x  | 0.08262296 | 0.24410237 | 0.0033032  |
| 16w_SITTD12_AGCGCCATCAAAGAAC-1-10x  | 0.07486123 | 0.21646641 | 0.001885   |
| 16w_SITTD12_AGCGTATTCTGTCTCG-1-10x  | 0.19583581 | 0.6472014  | 0.00124    |
| 16w_SITTD12_AGCTACAAGCGTCTCG-1-10x  | 0.10218889 | 0.31376767 | 0.0039137  |
| 16w_SITTD12_AGCTACAGTCAAGCGA-1-10x  | 0.04574532 | 0.11279801 | 0.00010046 |
| 16w_SITTD12_AGCTCAATCAACTTTC-1-10x  | 0.2544217  | 0.85579896 | 0.00079207 |
| 16w_SITTD12_AGGAAATGTCCTTGTC-1-10x  | 0.21424232 | 0.7127386  | 0.0010701  |
| 16w_SITTD12_AGGAAATTCTCCAATT-1-10x  | 0.04393203 | 0.1063417  | 8.81E-05   |



|                                    |            |            |            |
|------------------------------------|------------|------------|------------|
| 16w_SITTD12_AGGAATAAGCCATTGT-1-10x | 0.05015443 | 0.12849684 | 0.00013566 |
| 16w_SITTD12_AGGAATAGTGATAGTA-1-10x | 0.16245805 | 0.5283585  | 0.001776   |
| 16w_SITTD12_AGGAATAGTTCTCTAT-1-10x | 0.17095321 | 0.5586059  | 0.0016421  |
| 16w_SITTD12_AGGACTTCATAATGAG-1-10x | 0.05058291 | 0.13002244 | 0.00014746 |
| 16w_SITTD12_AGGATCTTCAATCTTC-1-10x | 0.07985666 | 0.23425283 | 0.0027593  |
| 16w_SITTD12_AGGCATTAGGTTAAAC-1-10x | 0.08641949 | 0.25762007 | 0.0039187  |
| 16w_SITTD12_AGGCATTCTGGCCTT-1-10x  | 0.23708226 | 0.7940611  | 0.00089602 |
| 16w_SITTD12_AGGCCACGTAGCGATG-1-10x | 0.2685062  | 0.9059473  | 0.00075594 |
| 16w_SITTD12_AGGCTGCGTACAGTAA-1-10x | 0.07118864 | 0.20339002 | 0.0013138  |
| 16w_SITTD12_AGGGAGTAGCCTCAAT-1-10x | 0.0750421  | 0.21711041 | 0.001885   |
| 16w_SITTD12_AGGGCTCGTACTCAAC-1-10x | 0.08384062 | 0.24843788 | 0.0034742  |
| 16w_SITTD12_AGGGCTCGTATGTCCA-1-10x | 0.06347746 | 0.17593402 | 0.00058553 |
| 16w_SITTD12_AGGGCTCTCGAGATGG-1-10x | 0.02353474 | 0.03371631 | 3.83E-05   |
| 16w_SITTD12_AGGGTGATCCCTGTTG-1-10x | 0.02407564 | 0.03564218 | 3.91E-05   |
| 16w_SITTD12_AGGGTTTCAACCACAT-1-10x | 0.07632763 | 0.2216876  | 0.0020486  |
| 16w_SITTD12_AGGTAGGTACCTCGT-1-10x  | 0.21748924 | 0.7242994  | 0.00104    |
| 16w_SITTD12_AGGTCATTCGGACCAC-1-10x | 0.20392147 | 0.6759907  | 0.0011608  |
| 16w_SITTD12_AGGTCTACACTAGTAC-1-10x | 0.02390748 | 0.03504347 | 3.83E-05   |
| 16w_SITTD12_AGGTCTACATCCGGTG-1-10x | 0.23999797 | 0.8044426  | 0.00086997 |
| 16w_SITTD12_AGGTCTAGTTAGAGAT-1-10x | 0.09909432 | 0.3027493  | 0.0041652  |
| 16w_SITTD12_AGGTGTTGTCTAGGCC-1-10x | 0.0851898  | 0.2532417  | 0.0037839  |
| 16w_SITTD12_AGGTTACCAAAGCACG-1-10x | 0.05188671 | 0.13466467 | 0.00016076 |
| 16w_SITTD12_AGTAACCAGCGAATGC-1-10x | 0.22415815 | 0.7480443  | 0.00098869 |
| 16w_SITTD12_AGTAACCTCTTGCAT-1-10x  | 0.22496831 | 0.7509289  | 0.00098137 |
| 16w_SITTD12_AGTAAGTTGAAGT-1-10x    | 0.0163082  | 0.0079859  | 3.33E-05   |
| 16w_SITTD12_AGTCAACAGCCAACCC-1-10x | 0.12149318 | 0.38250142 | 0.0022308  |
| 16w_SITTD12_AGTCAACGTGTGCCTG-1-10x | 0.08511727 | 0.25298345 | 0.0037839  |
| 16w_SITTD12_AGTCACATCTTGGTCC-1-10x | 0.06724978 | 0.18936552 | 0.00088537 |
| 16w_SITTD12_AGTCATGAGTGCTACT-1-10x | 0.15731892 | 0.5100604  | 0.0018302  |
| 16w_SITTD12_AGTCATGGTTCGGTTA-1-10x | 0.08690262 | 0.25934026 | 0.0040384  |
| 16w_SITTD12_AGTGACTGTAGGCAGT-1-10x | 0.26957533 | 0.90975404 | 0.00075499 |
| 16w_SITTD12_AGTGACTGTGCATGTT-1-10x | 0.08951018 | 0.2686246  | 0.0042295  |
| 16w_SITTD12_AGTTCCCAGGTCTCG-1-10x  | 0.27536267 | 0.9303601  | 0.00075218 |
| 16w_SITTD12_ATACCGACAAGATGTA-1-10x | 0.09198327 | 0.27743015 | 0.0043903  |
| 16w_SITTD12_ATACCTTCTAAGCGT-1-10x  | 0.12542343 | 0.39649522 | 0.0020515  |
| 16w_SITTD12_ATACTTCAGTTAGAAC-1-10x | 0.15256174 | 0.4931223  | 0.0018651  |
| 16w_SITTD12_ATACTTCGTCAGGCAA-1-10x | 0.02099326 | 0.02466725 | 3.62E-05   |
| 16w_SITTD12_ATAGACCAGAGCATCG-1-10x | 0.2656372  | 0.8957321  | 0.00075974 |
| 16w_SITTD12_ATAGACCTCGCTAAAC-1-10x | 0.18797433 | 0.6192103  | 0.0013519  |
| 16w_SITTD12_ATAGAGATCCTGTTAT-1-10x | 0.04928326 | 0.12539499 | 0.00012523 |
| 16w_SITTD12_ATATCCTAGCCTTCTC-1-10x | 0.08206932 | 0.24213108 | 0.0031253  |

|                                      |            |            |            |
|--------------------------------------|------------|------------|------------|
| 16w_SITTD12_ATATCCTGTCTTGCTC-1-10x   | 0.08683167 | 0.25908765 | 0.0039187  |
| 16w_SITTD12_ATATCCTGTTGTGCCG-1-10x   | 0.09697637 | 0.29520828 | 0.0043435  |
| 16w_SITTD12_ATCACAGAGGTCATTC-1-10x   | 0.16927835 | 0.55264246 | 0.0016744  |
| 16w_SITTD12_ATCACAGCACGCGCTA-1-10x   | 0.05358008 | 0.14069399 | 0.00019264 |
| 16w_SITTD12_ATCACAGTCTGAGCAT-1-10x   | 0.07147378 | 0.20440525 | 0.0013138  |
| 16w_SITTD12_ATCACGAAGCTATCCA-1-10x   | 0.08198227 | 0.24182117 | 0.0031253  |
| 16w_SITTD12_ATCACTTAGCACCCAC-1-10x   | 0.01920972 | 0.0183169  | 3.49E-05   |
| 16w_SITTD12_ATCACTTGTCTACGTA-1-10x   | 0.2090049  | 0.6940905  | 0.0011095  |
| 16w_SITTD12_ATCATTCTCCAAGTGA-1-10x   | 0.08017688 | 0.23539297 | 0.0027593  |
| 16w_SITTD12_ATCCATTAGCCTTCTC-1-10x   | 0.08353148 | 0.24733718 | 0.0034742  |
| 16w_SITTD12_ATCCATTGTGCAATGG-1-10x   | 0.2310769  | 0.77267873 | 0.00093779 |
| 16w_SITTD12_ATCCCTGAGTCATTGC-1-10x   | 0.01656442 | 0.0088982  | 3.38E-05   |
| 16w_SITTD12_ATCCGTCGTACCAGAG-1-10x   | 0.28165153 | 0.9527518  | 0.00075401 |
| 16w_SITTD12_ATCCTATAGGCGCTCT-1-10x   | 0.2764684  | 0.9342971  | 0.00075214 |
| 16w_SITTD12_ATCCTATGTAGCGTCC-1-10x   | 0.24280754 | 0.8144462  | 0.00085167 |
| 16w_SITTD12_ATCCTATTCGTAATGC-1-10x   | 0.05057303 | 0.12998725 | 0.00014746 |
| 16w_SITTD12_ATCGCCTCAGTCCCGA-1-10x   | 0.25517997 | 0.85849875 | 0.00078825 |
| 16w_SITTD12_ATCGCCTCATTCTCCG-1-10x   | 0.01877438 | 0.01676684 | 3.49E-05   |
| 16w_SITTD12_ATCGCCTTCGCTGTCT-1-10x   | 0.02984578 | 0.05618702 | 4.55E-05   |
| 16w_SITTD12_ATCGGATCAGATTCGT-1-10x   | 0.08526845 | 0.25352174 | 0.0037839  |
| 16w_SITTD12_ATCGTAGCATCGGAGA-1-10x   | 0.07122079 | 0.20350449 | 0.0013138  |
| 16w_SITTD12_ATCGTAGGTCGGCCTA-1-10x   | 0.05575936 | 0.1484534  | 0.000233   |
| 16w_SITTD12_ATCGTAGGTTGCGAAG-1-10x   | 0.16416515 | 0.5344367  | 0.0017494  |
| 16w_SITTD12_ATCGTCCCAGCGGTCT-1-10x   | 0.04691187 | 0.11695155 | 0.00010777 |
| 16w_SITTD12_ATCGTCCGTCTACATG-1-10x   | 0.17402233 | 0.5695336  | 0.0015922  |
| 16w_SITTD12_ATCGTGATCCATTGTT-1-10x   | 0.06890365 | 0.19525419 | 0.00097948 |
| 16w_SITTD12_ATCTCTAAGCATGCAG-1-10x   | 0.08973029 | 0.26940832 | 0.0042999  |
| 16w_SITTD12_ATCTCTAAGGTAAACT-1-10x   | 0.02440514 | 0.03681538 | 3.91E-05   |
| 16w_SITTD12_ATCTCTACAAGTGGTT-1-10x   | 0.26562175 | 0.89567715 | 0.00075974 |
| 16w_SITTD12_ATCTCTACACCTTCCA-1-10x   | 0.04063437 | 0.09460025 | 7.01E-05   |
| 16w_SITTD12_ATGACCAGTCTTGCTC-1-10x   | 0.24462129 | 0.82090414 | 0.00084583 |
| 16w_SITTD12_ATGAGGGAGGCCTGCT-1-10x   | 0.0734515  | 0.21144703 | 0.0015819  |
| 16w_SITTD12_ATGAGGGAGTCAGGGT-1-10x   | 0.2178437  | 0.7255614  | 0.00104    |
| 16w_SITTD12_ATGAGGGGTAATCAAG-1-10x   | 0.24092528 | 0.8077443  | 0.00086374 |
| 16w_SITTD12_ATGATCGAGCGAGGAG-1-10x   | 0.20938705 | 0.69545114 | 0.0011095  |
| 16w_SITTD12_ATGATCGGTCTCGCTCGA-1-10x | 0.03929462 | 0.08983    | 6.67E-05   |
| 16w_SITTD12_ATGCCTCAGAATGTTG-1-10x   | 0.2782143  | 0.9405135  | 0.00075239 |
| 16w_SITTD12_ATGCCTCTCAACTGGT-1-10x   | 0.0489389  | 0.12416887 | 0.00012523 |
| 16w_SITTD12_ATGGAGGAGGGATCTG-1-10x   | 0.05085881 | 0.1310048  | 0.00014746 |
| 16w_SITTD12_ATGGGTTAGTGCTACT-1-10x   | 0.16702938 | 0.54463494 | 0.0017056  |
| 16w_SITTD12_ATGGGTTGTAGCACGA-1-10x   | 0.07125826 | 0.2036379  | 0.0013138  |

|                                     |            |            |            |
|-------------------------------------|------------|------------|------------|
| 16w_SITTD12_ATGGGTTGTGAATTAG-1-10x  | 0.02210978 | 0.02864266 | 3.76E-05   |
| 16w_SITTD12_ATGGTTGCATCTAACG-1-10x  | 0.20842882 | 0.6920393  | 0.0011177  |
| 16w_SITTD12_ATGTCCCCACGACAGA-1-10x  | 0.21448174 | 0.71359104 | 0.0010701  |
| 16w_SITTD12_ATGTCTTAGTTATGGA-1-10x  | 0.034764   | 0.07369855 | 5.37E-05   |
| 16w_SITTD12_ATGTCTTCACTTTAGG-1-10x  | 0.2792566  | 0.94422466 | 0.00075266 |
| 16w_SITTD12_ATGTCTTCAGCGTACC-1-10x  | 0.23444846 | 0.78468335 | 0.00090964 |
| 16w_SITTD12_ATGTCTTCAGGTTCCGC-1-10x | 0.01880933 | 0.01689128 | 3.49E-05   |
| 16w_SITTD12_ATGTCTTTCTTACCAT-1-10x  | 0.07133099 | 0.20389684 | 0.0013138  |
| 16w_SITTD12_ATTACCTTCAGAGTTC-1-10x  | 0.0781448  | 0.2281577  | 0.0023954  |
| 16w_SITTD12_ATTACTCAGAAAGTCTA-1-10x | 0.04620742 | 0.11444334 | 0.00010046 |
| 16w_SITTD12_ATTACTCGTAATGCGG-1-10x  | 0.15528306 | 0.5028117  | 0.0018522  |
| 16w_SITTD12_ATTACTCTCTCCAGC-1-10x   | 0.23222679 | 0.776773   | 0.00093066 |
| 16w_SITTD12_ATTATCCAGGGACACT-1-10x  | 0.08500511 | 0.2525841  | 0.0037839  |
| 16w_SITTD12_ATTCAGGAGTAGGATT-1-10x  | 0.24770391 | 0.8318799  | 0.00082396 |
| 16w_SITTD12_ATTCATCAGTATGACA-1-10x  | 0.1322121  | 0.42066658 | 0.0019219  |
| 16w_SITTD12_ATTCATCCATCGGCCA-1-10x  | 0.01755517 | 0.01242581 | 3.44E-05   |
| 16w_SITTD12_ATTCCCAGGAATTAC-1-10x   | 0.02350076 | 0.0335953  | 3.83E-05   |
| 16w_SITTD12_ATTCCCGCAGCGGATA-1-10x  | 0.09509482 | 0.28850895 | 0.0044051  |
| 16w_SITTD12_ATTCCCGTCTGTGCAA-1-10x  | 0.04054783 | 0.09429212 | 7.01E-05   |
| 16w_SITTD12_ATTCCTACAATACAGA-1-10x  | 0.04485957 | 0.10964426 | 9.39E-05   |
| 16w_SITTD12_ATTCGTTCAAATACGA-1-10x  | 0.03972168 | 0.09135056 | 6.67E-05   |
| 16w_SITTD12_ATTCTACGTTGTCCCT-1-10x  | 0.27394894 | 0.92532647 | 0.00075233 |
| 16w_SITTD12_ATTCTACTCTCGCTTG-1-10x  | 0.04391617 | 0.10628522 | 8.81E-05   |
| 16w_SITTD12_ATTCTTGGTTTCGTAG-1-10x  | 0.08984179 | 0.2698053  | 0.0042999  |
| 16w_SITTD12_ATTCTTGCCTTCGAC-1-10x   | 0.04176124 | 0.09861251 | 7.40E-05   |
| 16w_SITTD12_ATTTACCGTGATTCTG-1-10x  | 0.08152194 | 0.24018213 | 0.0031253  |
| 16w_SITTD12_ATTTCACCAAGTCCCG-1-10x  | 0.02715951 | 0.04662243 | 4.19E-05   |
| 16w_SITTD12_ATTTCACCAGTCAGTT-1-10x  | 0.09886561 | 0.30193502 | 0.0042345  |
| 16w_SITTD12_ATTTCACGTACTION-1-10x   | 0.04867719 | 0.12323704 | 0.00012523 |
| 16w_SITTD12_ATTTCTGGTACGTTCA-1-10x  | 0.02866949 | 0.0519988  | 4.42E-05   |
| 16w_SITTD12_CAAAGAAAGTGATGGC-1-10x  | 0.25065246 | 0.8423784  | 0.00080923 |
| 16w_SITTD12_CAAAGAAGTACACGTT-1-10x  | 0.03972525 | 0.0913633  | 6.67E-05   |
| 16w_SITTD12_CAAAGAAGTACCTATG-1-10x  | 0.07002804 | 0.19925766 | 0.0011935  |
| 16w_SITTD12_CAACAGTAGACATCAA-1-10x  | 0.01962914 | 0.01981026 | 3.55E-05   |
| 16w_SITTD12_CAACCAAGTTCGGTAT-1-10x  | 0.08207492 | 0.24215104 | 0.0031253  |
| 16w_SITTD12_CAACCTCAGGGAGGTG-1-10x  | 0.10582115 | 0.32670048 | 0.00352    |
| 16w_SITTD12_CAACGATAGTTGCCCG-1-10x  | 0.02916738 | 0.05377155 | 4.42E-05   |
| 16w_SITTD12_CAACGATCAAGGCTTT-1-10x  | 0.01667965 | 0.00930847 | 3.38E-05   |
| 16w_SITTD12_CAAGAGGAGCGTTAGG-1-10x  | 0.2049865  | 0.6797828  | 0.0011518  |
| 16w_SITTD12_CAAGCTAAGGTCACCTT-1-10x | 0.10228284 | 0.31410217 | 0.0039137  |
| 16w_SITTD12_CAATTCAGACATATG-1-10x   | 0.04647521 | 0.11539679 | 0.00010777 |

|                                     |            |            |            |
|-------------------------------------|------------|------------|------------|
| 16w_SITTD12_CAATTTCTCAGATTGC-1-10x  | 0.16714907 | 0.54506105 | 0.0017056  |
| 16w_SITTD12_CAATTTCTCTACCACC-1-10x  | 0.07207362 | 0.206541   | 0.0014433  |
| 16w_SITTD12_CACACAACATGTGGCC-1-10x  | 0.04879879 | 0.12367    | 0.00012523 |
| 16w_SITTD12_CACAGATCAAAGACTA-1-10x  | 0.09388864 | 0.2842143  | 0.0044154  |
| 16w_SITTD12_CACAGGCCACAGTGTT-1-10x  | 0.104557   | 0.32219943 | 0.0037215  |
| 16w_SITTD12_CACATGATCCGATCGG-1-10x  | 0.16372532 | 0.53287065 | 0.001763   |
| 16w_SITTD12_CACATGATCCGCAACG-1-10x  | 0.08604063 | 0.25627112 | 0.0039187  |
| 16w_SITTD12_CACCAAATCACCTGTC-1-10x  | 0.23361857 | 0.7817285  | 0.00091657 |
| 16w_SITTD12_CACCGTTAGAAGCTGC-1-10x  | 0.2549259  | 0.85759413 | 0.00079207 |
| 16w_SITTD12_CACGAATAGAGTCGAC-1-10x  | 0.0703949  | 0.20056385 | 0.0011935  |
| 16w_SITTD12_CACGAATAGCACTAGG-1-10x  | 0.07364249 | 0.21212703 | 0.0015819  |
| 16w_SITTD12_CACGAATGTGTCTTAG-1-10x  | 0.10993797 | 0.34135857 | 0.0031181  |
| 16w_SITTD12_CACGGGTAGCACTGGA-1-10x  | 0.0398526  | 0.09181673 | 6.67E-05   |
| 16w_SITTD12_CACGTGGTCGGCTCTT-1-10x  | 0.0984809  | 0.30056524 | 0.0042345  |
| 16w_SITTD12_CACTAAGAGCGGGTAT-1-10x  | 0.02301889 | 0.0318796  | 3.83E-05   |
| 16w_SITTD12_CACTAAGTCACGGGCT-1-10x  | 0.16987266 | 0.5547585  | 0.0016584  |
| 16w_SITTD12_CACTGAAAGCGATCGA-1-10x  | 0.2886602  | 0.9777065  | 0.0007596  |
| 16w_SITTD12_CACTGAACAGACATCT-1-10x  | 0.02688408 | 0.04564176 | 4.19E-05   |
| 16w_SITTD12_CACTGTCGTATTCCCTT-1-10x | 0.23844716 | 0.79892087 | 0.00088278 |
| 16w_SITTD12_CACTGTCGTGAGCGAT-1-10x  | 0.2175745  | 0.72460294 | 0.00104    |
| 16w_SITTD12_CACTTCGCACTACACA-1-10x  | 0.07380012 | 0.21268828 | 0.0017292  |
| 16w_SITTD12_CAGAGCCAGCTGCCAC-1-10x  | 0.04425249 | 0.10748272 | 8.81E-05   |
| 16w_SITTD12_CAGATACAGATTGGGC-1-10x  | 0.27223417 | 0.9192209  | 0.000753   |
| 16w_SITTD12_CAGATACTCGGTCCGGT-1-10x | 0.29216453 | 0.99018383 | 0.00076378 |
| 16w_SITTD12_CAGATCAAGCTTACGT-1-10x  | 0.06399208 | 0.17776634 | 0.00058553 |
| 16w_SITTD12_CAGATCATCCATAGAC-1-10x  | 0.28993025 | 0.9822286  | 0.00076163 |
| 16w_SITTD12_CAGATCATCGTTCCTG-1-10x  | 0.05108063 | 0.13179459 | 0.00014746 |
| 16w_SITTD12_CAGATTGTCATGCGGC-1-10x  | 0.04685096 | 0.11673469 | 0.00010777 |
| 16w_SITTD12_CAGCAATTCACCTACC-1-10x  | 0.01575107 | 0.00600221 | 3.33E-05   |
| 16w_SITTD12_CAGCACGCAGGTATGG-1-10x  | 0.23782375 | 0.79670125 | 0.00088935 |
| 16w_SITTD12_CAGCCAGCACGCCACA-1-10x  | 0.08586985 | 0.25566304 | 0.0037839  |
| 16w_SITTD12_CAGCCAGTCTGCGATA-1-10x  | 0.09105542 | 0.27412647 | 0.0043535  |
| 16w_SITTD12_CAGCGTGAGGGACAGG-1-10x  | 0.06076635 | 0.16628101 | 0.00042799 |
| 16w_SITTD12_CAGCGTGAGTGGTTAA-1-10x  | 0.2833396  | 0.9587622  | 0.00075531 |
| 16w_SITTD12_CAGCGTGTCTTTGAT-1-10x   | 0.08929053 | 0.26784253 | 0.0042295  |
| 16w_SITTD12_CAGGGCTAGCACTCTA-1-10x  | 0.1629328  | 0.53004885 | 0.001776   |
| 16w_SITTD12_CAGGGCTAGGTGCCTC-1-10x  | 0.24261251 | 0.8137518  | 0.00085764 |
| 16w_SITTD12_CAGTTAGAGAGCCCAA-1-10x  | 0.07714043 | 0.2245816  | 0.0022191  |
| 16w_SITTD12_CAGTTAGAGGCCCGTT-1-10x  | 0.2088806  | 0.6936479  | 0.0011177  |
| 16w_SITTD12_CAGTTAGAGTGGAAGA-1-10x  | 0.25386158 | 0.8538046  | 0.00079608 |
| 16w_SITTD12_CAGTTCCCACTGGCGT-1-10x  | 0.02354609 | 0.0337567  | 3.83E-05   |

|                                     |            |            |            |
|-------------------------------------|------------|------------|------------|
| 16w_SITTD12_CATAAGCCAAAGCTAA-1-10x  | 0.1148936  | 0.35900334 | 0.0026715  |
| 16w_SITTD12_CATACAGCATTACACAG-1-10x | 0.08001015 | 0.23479934 | 0.0027593  |
| 16w_SITTD12_CATACAGGTA CTCCC-1-10x  | 0.19910282 | 0.65883374 | 0.0012085  |
| 16w_SITTD12_CATACCCGTAGCGCTC-1-10x  | 0.03570441 | 0.07704692 | 5.58E-05   |
| 16w_SITTD12_CATCAAGCACCAAATC-1-10x  | 0.04156194 | 0.0979029  | 7.40E-05   |
| 16w_SITTD12_CATCAAGCATAATGCC-1-10x  | 0.08969835 | 0.2692946  | 0.0042999  |
| 16w_SITTD12_CATCCACAGACCTCAT-1-10x  | 0.23435736 | 0.784359   | 0.00090964 |
| 16w_SITTD12_CATCCACCACCAAAGG-1-10x  | 0.28143626 | 0.95198536 | 0.00075401 |
| 16w_SITTD12_CATCCGTACAGACCAAG-1-10x | 0.27768037 | 0.93861234 | 0.00075239 |
| 16w_SITTD12_CATCCGTTACCTACC-1-10x   | 0.02623447 | 0.04332878 | 4.09E-05   |
| 16w_SITTD12_CATCGTCCACAGTCGC-1-10x  | 0.08000643 | 0.2347861  | 0.0027593  |
| 16w_SITTD12_CATCGTCCATCGGATT-1-10x  | 0.21407406 | 0.7121394  | 0.0010701  |
| 16w_SITTD12_CATGAGTAGAAGTGTT-1-10x  | 0.2351863  | 0.7873104  | 0.00090964 |
| 16w_SITTD12_CATGAGTTCCAATGCA-1-10x  | 0.26197204 | 0.8826822  | 0.00076727 |
| 16w_SITTD12_CATGAGTTCCGACGGT-1-10x  | 0.20976269 | 0.69678867 | 0.0011095  |
| 16w_SITTD12_CATGCAATCGAGAGAC-1-10x  | 0.01588199 | 0.00646835 | 3.33E-05   |
| 16w_SITTD12_CATGCGGCATATAGCC-1-10x  | 0.03040942 | 0.05819388 | 4.55E-05   |
| 16w_SITTD12_CATGGATCATGACTTG-1-10x  | 0.28925863 | 0.97983724 | 0.0007606  |
| 16w_SITTD12_CATGGATCATTGATG-1-10x   | 0.04699165 | 0.1172356  | 0.00010777 |
| 16w_SITTD12_CATGGATGTCCTACAA-1-10x  | 0.232779   | 0.77873915 | 0.00092358 |
| 16w_SITTD12_CATGGATTCATAGGCT-1-10x  | 0.05984096 | 0.16298611 | 0.00038577 |
| 16w_SITTD12_CATGGTAAGTAGAGTT-1-10x  | 0.05679395 | 0.1521371  | 0.000257   |
| 16w_SITTD12_CATTCATAGGCACAAC-1-10x  | 0.03215859 | 0.06442189 | 4.83E-05   |
| 16w_SITTD12_CATTCATCACCTCAGG-1-10x  | 0.05046928 | 0.12961785 | 0.00014746 |
| 16w_SITTD12_CATTGAGGTCGCGTTG-1-10x  | 0.0186154  | 0.01620079 | 3.49E-05   |
| 16w_SITTD12_CATTGCCAACACTAC-1-10x   | 0.09988062 | 0.305549   | 0.0041652  |
| 16w_SITTD12_CATTGCCTCTACCAC-1-10x   | 0.28276527 | 0.9567174  | 0.00075462 |
| 16w_SITTD12_CCACAAAGTTCAGTAC-1-10x  | 0.01747431 | 0.01213789 | 3.44E-05   |
| 16w_SITTD12_CCACAAATCGTTTACT-1-10x  | 0.13248311 | 0.42163152 | 0.0019219  |
| 16w_SITTD12_CCACACTTCCATCAGA-1-10x  | 0.08213314 | 0.24235836 | 0.0031253  |
| 16w_SITTD12_CCACCATCACAAGCCC-1-10x  | 0.08753039 | 0.26157546 | 0.0040384  |
| 16w_SITTD12_CCACCATCACTCCACT-1-10x  | 0.24979776 | 0.8393352  | 0.00081397 |
| 16w_SITTD12_CCACCATCATCGGCCA-1-10x  | 0.06559058 | 0.18345787 | 0.00072102 |
| 16w_SITTD12_CCACGAGGTTGTGTTG-1-10x  | 0.09254781 | 0.27944022 | 0.0044107  |
| 16w_SITTD12_CCACGTTCAATGCAAA-1-10x  | 0.01510395 | 0.00369812 | 3.27E-05   |
| 16w_SITTD12_CCACGTTCAGAACTTC-1-10x  | 0.287602   | 0.97393876 | 0.00075864 |
| 16w_SITTD12_CCATCACCATGCAGGA-1-10x  | 0.08734696 | 0.26092237 | 0.0040384  |
| 16w_SITTD12_CCATCACTCCCTCTCC-1-10x  | 0.03947726 | 0.09048031 | 6.67E-05   |
| 16w_SITTD12_CCCAAGTAGTCGCGAA-1-10x  | 0.1175552  | 0.36848006 | 0.002453   |
| 16w_SITTD12_CCCATTGCAAAGGCAC-1-10x  | 0.10835451 | 0.33572063 | 0.0033168  |
| 16w_SITTD12_CCCGGAAGTAAGATTG-1-10x  | 0.04094472 | 0.09570526 | 7.40E-05   |

|                                    |            |            |            |
|------------------------------------|------------|------------|------------|
| 16w_SITTD12_CCCGGAAGTCCGGCAT-1-10x | 0.2349819  | 0.78658265 | 0.00090964 |
| 16w_SITTD12_CCCGGAATCAGGTAAA-1-10x | 0.12618217 | 0.39919674 | 0.0020515  |
| 16w_SITTD12_CCCTAACTCCGCTGTT-1-10x | 0.27694744 | 0.93600273 | 0.00075222 |
| 16w_SITTD12_CCCTCAAGTTTCTATC-1-10x | 0.03386244 | 0.07048851 | 5.17E-05   |
| 16w_SITTD12_CCCTCTCGTTCTTGCC-1-10x | 0.08261294 | 0.24406669 | 0.0033032  |
| 16w_SITTD12_CCCTCTCGTTGCATGT-1-10x | 0.19894606 | 0.65827554 | 0.0012085  |
| 16w_SITTD12_CCCTGATGTATCCTCC-1-10x | 0.17475286 | 0.5721347  | 0.0015753  |
| 16w_SITTD12_CCCTGATGTGACGTCC-1-10x | 0.04587654 | 0.11326522 | 0.00010046 |
| 16w_SITTD12_CCGAACGAGGCGACAT-1-10x | 0.19141757 | 0.6314701  | 0.0012985  |
| 16w_SITTD12_CCGAACGAGTGGACGT-1-10x | 0.06650865 | 0.18672672 | 0.00079936 |
| 16w_SITTD12_CCGAACGTTGAGGAC-1-10x  | 0.07620423 | 0.22124824 | 0.0020486  |
| 16w_SITTD12_CCGATCTGTGTTATCG-1-10x | 0.09222245 | 0.27828175 | 0.0043903  |
| 16w_SITTD12_CCGATCTTCTTCAGC-1-10x  | 0.0828421  | 0.24488264 | 0.0033032  |
| 16w_SITTD12_CCGATCTTCTGTCGCT-1-10x | 0.26055118 | 0.8776232  | 0.00077221 |
| 16w_SITTD12_CCGATGGCAGCGCTTG-1-10x | 0.28762355 | 0.9740155  | 0.00075864 |
| 16w_SITTD12_CCGGGTAAGTCACGAG-1-10x | 0.04794083 | 0.1206152  | 0.00011598 |
| 16w_SITTD12_CCGGGTACAGGTCCGT-1-10x | 0.04849175 | 0.1225768  | 0.00012523 |
| 16w_SITTD12_CCGGGTACAGTCGGAA-1-10x | 0.19016889 | 0.6270241  | 0.0013244  |
| 16w_SITTD12_CCGGGTATCCAAGTAG-1-10x | 0.07515744 | 0.21752109 | 0.001885   |
| 16w_SITTD12_CCGGTAGAGCTCACTA-1-10x | 0.17510018 | 0.5733713  | 0.0015753  |
| 16w_SITTD12_CCGGTAGCACCTGTT-1-10x  | 0.26341116 | 0.88780624 | 0.00076511 |
| 16w_SITTD12_CCGGTAGTCCCGTTCA-1-10x | 0.11247856 | 0.35040447 | 0.0028393  |
| 16w_SITTD12_CCGGTAGTCGAGAGCA-1-10x | 0.08762027 | 0.26189548 | 0.0040384  |
| 16w_SITTD12_CCGGTAGTCTTGTTAC-1-10x | 0.23716933 | 0.7943711  | 0.00088935 |
| 16w_SITTD12_CCGGTGAGTCATCGCG-1-10x | 0.27189118 | 0.9179997  | 0.00075352 |
| 16w_SITTD12_CCGTAGGAGCGACCCT-1-10x | 0.29308465 | 0.99345994 | 0.00076488 |
| 16w_SITTD12_CCGTAGGGTTAAGCAA-1-10x | 0.09099591 | 0.2739146  | 0.0043535  |
| 16w_SITTD12_CCGTGAGGTCCTTTGC-1-10x | 0.04703307 | 0.11738309 | 0.00010777 |
| 16w_SITTD12_CCGTGAGTCAACTTTC-1-10x | 0.04188946 | 0.09906904 | 7.82E-05   |
| 16w_SITTD12_CCTAACCTCTCACCCA-1-10x | 0.03721387 | 0.08242142 | 6.07E-05   |
| 16w_SITTD12_CCTAAGACAGCGCGTT-1-10x | 0.05222288 | 0.13586164 | 0.00017575 |
| 16w_SITTD12_CCTAAGATCTACTTCA-1-10x | 0.11260234 | 0.3508452  | 0.0028393  |
| 16w_SITTD12_CCTAAGATCTCATTAC-1-10x | 0.08515409 | 0.25311455 | 0.0037839  |
| 16w_SITTD12_CCTACGTAGTTGTCGT-1-10x | 0.04078738 | 0.09514504 | 7.01E-05   |
| 16w_SITTD12_CCTATCGGTTTGAAAG-1-10x | 0.06172393 | 0.16969052 | 0.00047505 |
| 16w_SITTD12_CCTCAACAGGCCCAA-1-10x  | 0.25988698 | 0.87525827 | 0.00077221 |
| 16w_SITTD12_CCTCAGTGTGTTGACT-1-10x | 0.11021379 | 0.34234068 | 0.0031181  |
| 16w_SITTD12_CCTCCAAGTCGTGTTA-1-10x | 0.27751115 | 0.93800986 | 0.00075222 |
| 16w_SITTD12_CCTCCTCCACTAGAGG-1-10x | 0.03494017 | 0.07432582 | 5.37E-05   |
| 16w_SITTD12_CCTCTAGCATTAGGCT-1-10x | 0.16259511 | 0.5288465  | 0.001776   |
| 16w_SITTD12_CCTGCATAGAAAGTCT-1-10x | 0.08494071 | 0.2523548  | 0.0036353  |

|                                     |            |            |            |
|-------------------------------------|------------|------------|------------|
| 16w_SITTD12_CCTGCATAGGTAGACC-1-10x  | 0.09761549 | 0.2974839  | 0.0042943  |
| 16w_SITTD12_CCTGCATTCTGTTAT-1-10x   | 0.24985202 | 0.8395284  | 0.00081397 |
| 16w_SITTD12_CCTTCAGGTCAACATC-1-10x  | 0.22920078 | 0.7659988  | 0.0009522  |
| 16w_SITTD12_CCTTTGGAGGGTACGT-1-10x  | 0.26603281 | 0.89714074 | 0.00075974 |
| 16w_SITTD12_CGAAGGACAGGTCCCA-1-10x  | 0.04816026 | 0.12139649 | 0.00011598 |
| 16w_SITTD12_CGAAGTTAGACCTGGA-1-10x  | 0.1494682  | 0.4821076  | 0.0018705  |
| 16w_SITTD12_CGAAGTTAGTGCACAG-1-10x  | 0.12141354 | 0.38221782 | 0.0022308  |
| 16w_SITTD12_CGAAGTTTCTTACTGT-1-10x  | 0.2387112  | 0.799861   | 0.00088278 |
| 16w_SITTD12_CGACAGCAGTCATGAA-1-10x  | 0.06441348 | 0.17926677 | 0.00064991 |
| 16w_SITTD12_CGACAGCGTTCTGAGT-1-10x  | 0.11416592 | 0.3564124  | 0.0026715  |
| 16w_SITTD12_CGAGTTAAGTGATTCC-1-10x  | 0.1028771  | 0.31621805 | 0.0038193  |
| 16w_SITTD12_CGATCGGCAGGTGTTT-1-10x  | 0.01502857 | 0.00342972 | 3.27E-05   |
| 16w_SITTD12_CGATCGGCATGCGGTC-1-10x  | 0.11055816 | 0.3435668  | 0.0030221  |
| 16w_SITTD12_CGATGCGCATGGGTCC-1-10x  | 0.04328188 | 0.1040268  | 8.29E-05   |
| 16w_SITTD12_CGATGGCCATGACTGT-1-10x  | 0.04955873 | 0.1263758  | 0.00013566 |
| 16w_SITTD12_CGCAGGTCAGCGCGTT-1-10x  | 0.06894735 | 0.1954098  | 0.00097948 |
| 16w_SITTD12_CGCATGGAGCTGGAGT-1-10x  | 0.04232033 | 0.10060317 | 7.82E-05   |
| 16w_SITTD12_CGCATGGGTGGCTTAT-1-10x  | 0.03790382 | 0.08487803 | 6.07E-05   |
| 16w_SITTD12_CGCCAGAGTTGATGTC-1-10x  | 0.1170269  | 0.36659902 | 0.002453   |
| 16w_SITTD12_CGCCAGATCCCTTTGG-1-10x  | 0.28778937 | 0.9746059  | 0.00075864 |
| 16w_SITTD12_CGGACACTCGCGTTTC-1-10x  | 0.09924856 | 0.3032985  | 0.0041652  |
| 16w_SITTD12_CGGAGAAGTTGACTAC-1-10x  | 0.03491942 | 0.07425193 | 5.37E-05   |
| 16w_SITTD12_CGGAGAAGTTGGCCTG-1-10x  | 0.22792584 | 0.7614593  | 0.00095947 |
| 16w_SITTD12_CGGCAGTCATGAAAGT-1-10x  | 0.08729267 | 0.26072907 | 0.0040384  |
| 16w_SITTD12_CGGGCATAGACCAAAT-1-10x  | 0.04035858 | 0.09361828 | 7.01E-05   |
| 16w_SITTD12_CGGGTCAAGAGTCTGG-1-10x  | 0.01787809 | 0.01357557 | 3.44E-05   |
| 16w_SITTD12_CGGGTCAAGTGAACAT-1-10x  | 0.01660166 | 0.00903078 | 3.38E-05   |
| 16w_SITTD12_CGTAAGTCAGTGTACT-1-10x  | 0.04269797 | 0.10194778 | 7.82E-05   |
| 16w_SITTD12_CGTAATGTCGTGGCGT-1-10x  | 0.05610064 | 0.14966854 | 0.000257   |
| 16w_SITTD12_CGTAGTATCTTGCAAG-1-10x  | 0.08320824 | 0.24618629 | 0.0034742  |
| 16w_SITTD12_CGTCAAAGGGCAAGG-1-10x   | 0.03398465 | 0.07092365 | 5.17E-05   |
| 16w_SITTD12_CGTCCATAGTGGACTG-1-10x  | 0.27216908 | 0.9189892  | 0.000753   |
| 16w_SITTD12_CGTGAATAGGCTAACG-1-10x  | 0.09163754 | 0.27619913 | 0.0043903  |
| 16w_SITTD12_CGTGCTTCATACTGAC-1-10x  | 0.1419969  | 0.45550576 | 0.0018724  |
| 16w_SITTD12_CGTGCTTGTTGATTGC-1-10x  | 0.28837857 | 0.97670376 | 0.0007596  |
| 16w_SITTD12_CGTTCTGGTACTCGTA-1-10x  | 0.07315403 | 0.21038787 | 0.0015819  |
| 16w_SITTD12_CGTTCTGGTGGTAATA-1-10x  | 0.21204393 | 0.70491105 | 0.0010856  |
| 16w_SITTD12_CTAACCCGTTTCCAAG-1-10x  | 0.29396558 | 0.9965965  | 0.000766   |
| 16w_SITTD12_CTAACCTTAGGGCCAAT-1-10x | 0.01700516 | 0.01046748 | 3.38E-05   |
| 16w_SITTD12_CTACAGAGTGTGCTTA-1-10x  | 0.14958756 | 0.4825326  | 0.0018705  |
| 16w_SITTD12_CTACATTCAGTATTCG-1-10x  | 0.08434166 | 0.25022188 | 0.0036353  |

|                                        |            |             |            |
|----------------------------------------|------------|-------------|------------|
| 16w_SITTD12_CTACATTCATCGTTCC-1-10x     | 0.09868142 | 0.3012792   | 0.0042345  |
| 16w_SITTD12_CTACATTTTCAGGTGTT-1-10x    | 0.10139035 | 0.31092444  | 0.0040036  |
| 16w_SITTD12_CTACCCACAAGAGTTA-1-10x     | 0.22853953 | 0.76364434  | 0.00095947 |
| 16w_SITTD12_CTACGGGGTTGGCCTG-1-10x     | 0.02654916 | 0.044444926 | 4.09E-05   |
| 16w_SITTD12_CTA CTATAGACGAAGA-1-10x    | 0.04371477 | 0.10556813  | 8.81E-05   |
| 16w_SITTD12_CTA CTATCAGCCGTCA-1-10x    | 0.06836914 | 0.19335105  | 0.00097948 |
| 16w_SITTD12_CTA CTATTCGGTTTCG-1-10x    | 0.06620845 | 0.18565784  | 0.00079936 |
| 16w_SITTD12_CTAGGTACACAGTACT-1-10x     | 0.03558931 | 0.07663711  | 5.58E-05   |
| 16w_SITTD12_CTATCTAAGCCTTTGA-1-10x     | 0.08665788 | 0.25846887  | 0.0039187  |
| 16w_SITTD12_CTATCTAGTCAACCTA-1-10x     | 0.23977797 | 0.80365926  | 0.00087632 |
| 16w_SITTD12_CTATCTAGTGTGTGTT-1-10x     | 0.0306587  | 0.05908145  | 4.68E-05   |
| 16w_SITTD12_CTATCTATCGACATCA-1-10x     | 0.09297546 | 0.28096288  | 0.0044107  |
| 16w_SITTD12_CTCAATTGTAATGTGA-1-10x     | 0.04919042 | 0.12506442  | 0.00012523 |
| 16w_SITTD12_CTCAATTGTCATCGCG-1-10x     | 0.2465881  | 0.827907    | 0.0008292  |
| 16w_SITTD12_CTCAATTGTTTAGACC-1-10x     | 0.07574998 | 0.21963084  | 0.0020486  |
| 16w_SITTD12_CTA CTGCAGCACACC-1-10x     | 0.22587739 | 0.7541657   | 0.00098137 |
| 16w_SITTD12_CTA CTGCATTAAAGG-1-10x     | 0.03167956 | 0.06271626  | 4.83E-05   |
| 16w_SITTD12_CTA CAGGGAGGATTCAA-1-10x   | 0.08273783 | 0.24451138  | 0.0033032  |
| 16w_SITTD12_CTA CAGGGCAGTCTCTC-1-10x   | 0.09318987 | 0.2817263   | 0.0044107  |
| 16w_SITTD12_CTA CAGGGTCGTGCACG-1-10x   | 0.06651978 | 0.18676634  | 0.00079936 |
| 16w_SITTD12_CTA CATCGAGTCGAGGT-1-10x   | 0.10470024 | 0.32270944  | 0.0037215  |
| 16w_SITTD12_CTA CATCGGTCAAACGG-1-10x   | 0.19083357 | 0.6293907   | 0.0013113  |
| 16w_SITTD12_CTA CATCGTCGGTAACT-1-10x   | 0.18157381 | 0.59642094  | 0.0014587  |
| 16w_SITTD12_CTA CATGCGTCGCAACC-1-10x   | 0.15327008 | 0.4956444   | 0.0018617  |
| 16w_SITTD12_CTA CATTATCTTTGCTA-1-10x   | 0.25869784 | 0.87102425  | 0.000778   |
| 16w_SITTD12_CTA CCACAGTAATGATG-1-10x   | 0.21197668 | 0.7046716   | 0.0010856  |
| 16w_SITTD12_CTA CCATGAGCGGGTTA-1-10x   | 0.03199431 | 0.06383695  | 4.83E-05   |
| 16w_SITTD12_CTA CCAAAGGGTACGT-1-10x    | 0.07152421 | 0.20458482  | 0.0013138  |
| 16w_SITTD12_CTA CCTCAGTAGAATC-1-10x    | 0.08163853 | 0.24059726  | 0.0031253  |
| 16w_SITTD12_CTA CCATGTCGGAACA-1-10x    | 0.08031409 | 0.23588155  | 0.0029431  |
| 16w_SITTD12_CTA CCTCCGTGTTACG-1-10x    | 0.05527866 | 0.14674185  | 0.000233   |
| 16w_SITTD12_CTA CCTCCTCCGTCACT-1-10x   | 0.10284953 | 0.3161199   | 0.0038193  |
| 16w_SITTD12_CTA CTCTCAGCAATTGGTC-1-10x | 0.26025856 | 0.87658125  | 0.00077221 |
| 16w_SITTD12_CTA CTCTCAGGTTGCATTG-1-10x | 0.10153188 | 0.31142837  | 0.0040036  |
| 16w_SITTD12_CTA CTCTGAAGCCTCATA-1-10x  | 0.0917225  | 0.27650166  | 0.0043903  |
| 16w_SITTD12_CTA CTCTGGTTCATCTATC-1-10x | 0.27827367 | 0.94072485  | 0.00075239 |
| 16w_SITTD12_CTA CTCTGGTCCAACCAA-1-10x  | 0.08794911 | 0.26306635  | 0.0041422  |
| 16w_SITTD12_CTA GAATGCAACCCTAA-1-10x   | 0.115318   | 0.36051443  | 0.002594   |
| 16w_SITTD12_CTA GAATGCAACCCTCT-1-10x   | 0.17373864 | 0.5685235   | 0.0015922  |
| 16w_SITTD12_CTA GATCCAGAGAGCCT-1-10x   | 0.08214385 | 0.24239647  | 0.0031253  |
| 16w_SITTD12_CTA GATCCCAATTGCGT-1-10x   | 0.07651819 | 0.22236608  | 0.0020486  |



|                                    |            |            |            |
|------------------------------------|------------|------------|------------|
| 16w_SITTD12_CTGCATCAGTTGGGAC-1-10x | 0.25965482 | 0.87443167 | 0.00077499 |
| 16w_SITTD12_CTGCCATGTTGGGTTT-1-10x | 0.21198408 | 0.704698   | 0.0010856  |
| 16w_SITTD12_CTGCCATTCGGTAGAG-1-10x | 0.29072613 | 0.9850623  | 0.00076269 |
| 16w_SITTD12_CTGCGAGGTCGGTGAA-1-10x | 0.0470739  | 0.11752847 | 0.00010777 |
| 16w_SITTD12_CTGCTCAAGGTTCCGC-1-10x | 0.06429765 | 0.17885433 | 0.00058553 |
| 16w_SITTD12_CTGCTCAGTAACCCGC-1-10x | 0.0154368  | 0.00488324 | 3.27E-05   |
| 16w_SITTD12_CTGGCAGAGAAAGTCT-1-10x | 0.08602753 | 0.25622448 | 0.0039187  |
| 16w_SITTD12_CTGTAGAAGCGTGAAC-1-10x | 0.14864926 | 0.47919175 | 0.0018713  |
| 16w_SITTD12_CTGTAGACACCCTAAA-1-10x | 0.04680055 | 0.11655518 | 0.00010777 |
| 16w_SITTD12_CTGTATTTCTACTT-1-10x   | 0.03932145 | 0.08992554 | 6.67E-05   |
| 16w_SITTD12_CTGTGAAAGGCTGAAC-1-10x | 0.19766301 | 0.6537072  | 0.0012292  |
| 16w_SITTD12_CTGTGAAGTACTCAAC-1-10x | 0.26944417 | 0.90928704 | 0.00075499 |
| 16w_SITTD12_CTGTGGGGTCAGACTT-1-10x | 0.2166504  | 0.7213126  | 0.0010475  |
| 16w_SITTD12_CTTACCGCAAGATGTA-1-10x | 0.02880916 | 0.0524961  | 4.42E-05   |
| 16w_SITTD12_CTTACCGCACTCATAG-1-10x | 0.10206251 | 0.3133177  | 0.0039137  |
| 16w_SITTD12_CTTCAATTCTGAACG-1-10x  | 0.14639305 | 0.47115842 | 0.0018717  |
| 16w_SITTD12_CTTCCGACATTACGGT-1-10x | 0.04644243 | 0.11528009 | 0.00010046 |
| 16w_SITTD12_CTTCCGAGTACAGTAA-1-10x | 0.01886468 | 0.01708837 | 3.49E-05   |
| 16w_SITTD12_CTTCTTGTCAGCC-1-10x    | 0.10540168 | 0.32520694 | 0.0036214  |
| 16w_SITTD12_CTTGATTGTCACCACG-1-10x | 0.23416728 | 0.78368217 | 0.00091657 |
| 16w_SITTD12_CTTTCAATCATCTGTT-1-10x | 0.04745508 | 0.11888567 | 0.00011598 |
| 16w_SITTD12_CTTTCGGAGGTCACAG-1-10x | 0.22806942 | 0.7619705  | 0.00095947 |
| 16w_SITTD12_GAACACTTCAAGGAGC-1-10x | 0.08787375 | 0.262798   | 0.0041422  |
| 16w_SITTD12_GAACTGTCACAAAGTA-1-10x | 0.0712048  | 0.20344754 | 0.0013138  |
| 16w_SITTD12_GAAGAATAGGCAGGTT-1-10x | 0.15502648 | 0.5018981  | 0.0018522  |
| 16w_SITTD12_GAAGAATCAGCTGAAG-1-10x | 0.04306174 | 0.10324299 | 8.29E-05   |
| 16w_SITTD12_GAAGAATCAGCTTTCC-1-10x | 0.04589915 | 0.11334571 | 0.00010046 |
| 16w_SITTD12_GAAGCCCATAACAGA-1-10x  | 0.02683282 | 0.04545924 | 4.19E-05   |
| 16w_SITTD12_GAAGCGAAGATTGCGG-1-10x | 0.24368379 | 0.8175661  | 0.00085167 |
| 16w_SITTD12_GAAGGACAGTGGCGAT-1-10x | 0.02239587 | 0.02966131 | 3.76E-05   |
| 16w_SITTD12_GAAGGACCAAGTTGGG-1-10x | 0.19769591 | 0.6538244  | 0.0012292  |
| 16w_SITTD12_GAAGGACTCACGATAC-1-10x | 0.01752769 | 0.01232796 | 3.44E-05   |
| 16w_SITTD12_GAAGGGTTCCGACGGT-1-10x | 0.02815152 | 0.05015454 | 4.30E-05   |
| 16w_SITTD12_GAAGGGTTGATTGGT-1-10x  | 0.01569532 | 0.0058037  | 3.33E-05   |
| 16w_SITTD12_GAATCACCAAAGCAAT-1-10x | 0.1026729  | 0.315491   | 0.0039137  |
| 16w_SITTD12_GACACGCAGAGAGCAA-1-10x | 0.01970126 | 0.02006702 | 3.55E-05   |
| 16w_SITTD12_GACACGCGTTACCTTT-1-10x | 0.01802133 | 0.01408558 | 3.44E-05   |
| 16w_SITTD12_GACCCAGCAAGGCGTA-1-10x | 0.04963112 | 0.12663355 | 0.00013566 |
| 16w_SITTD12_GACCCAGGTCTACGAT-1-10x | 0.02628719 | 0.04351651 | 4.09E-05   |
| 16w_SITTD12_GACCCAGGTGCATGTT-1-10x | 0.10938157 | 0.33937752 | 0.0032165  |
| 16w_SITTD12_GACCCAGTCTGGGAGA-1-10x | 0.16937312 | 0.5529799  | 0.0016744  |

|                                     |            |            |            |
|-------------------------------------|------------|------------|------------|
| 16w_SITTD12_GACCGTGTCCGGAATTC-1-10x | 0.07981505 | 0.2341047  | 0.0027593  |
| 16w_SITTD12_GACCTTCAGGCATGCA-1-10x  | 0.16286631 | 0.5298121  | 0.001776   |
| 16w_SITTD12_GACGCTGCAATATCCG-1-10x  | 0.25486115 | 0.8573636  | 0.00079207 |
| 16w_SITTD12_GACGTTAAGCTGAAAT-1-10x  | 0.05608566 | 0.14961523 | 0.000257   |
| 16w_SITTD12_GACTATGCATTCTTCA-1-10x  | 0.12766548 | 0.4044781  | 0.0020026  |
| 16w_SITTD12_GACTCTCAGCTCACTA-1-10x  | 0.10400258 | 0.3202254  | 0.0037215  |
| 16w_SITTD12_GACTGATTCGCTGTTC-1-10x  | 0.04328928 | 0.10405316 | 8.29E-05   |
| 16w_SITTD12_GACTTCCAGCTAGATA-1-10x  | 0.04765153 | 0.11958513 | 0.00011598 |
| 16w_SITTD12_GACTTCCGTAGAGATT-1-10x  | 0.18712257 | 0.61617756 | 0.0013662  |
| 16w_SITTD12_GACTTCCTCTGCGGAC-1-10x  | 0.27319336 | 0.92263615 | 0.0007526  |
| 16w_SITTD12_GAGAAATGTCCTGTTC-1-10x  | 0.17776817 | 0.58287084 | 0.0015248  |
| 16w_SITTD12_GAGACCCAGTGACCCC-1-10x  | 0.22909799 | 0.7656328  | 0.0009522  |
| 16w_SITTD12_GAGACTTAGACCAGAC-1-10x  | 0.09494826 | 0.2879871  | 0.0044051  |
| 16w_SITTD12_GAGACTTAGCTCGAAG-1-10x  | 0.18517219 | 0.60923314 | 0.0013959  |
| 16w_SITTD12_GAGAGGTCATATCGGT-1-10x  | 0.02889387 | 0.05279771 | 4.42E-05   |
| 16w_SITTD12_GAGAGGTTCCGTTTCG-1-10x  | 0.04778094 | 0.12004589 | 0.00011598 |
| 16w_SITTD12_GAGCTGCAGACCAAAT-1-10x  | 0.25645515 | 0.8630391  | 0.00078463 |
| 16w_SITTD12_GAGCTGCCAAAGGTTA-1-10x  | 0.2567134  | 0.86395854 | 0.00078463 |
| 16w_SITTD12_GAGCTGCTCGCCTTGT-1-10x  | 0.08192916 | 0.24163207 | 0.0031253  |
| 16w_SITTD12_GAGGCAAAGAAGCTCG-1-10x  | 0.22033894 | 0.7344458  | 0.0010179  |
| 16w_SITTD12_GAGGGATCACGTAGTT-1-10x  | 0.04676324 | 0.11642236 | 0.00010777 |
| 16w_SITTD12_GAGGGTAGTGCCCGTA-1-10x  | 0.0892866  | 0.26782852 | 0.0042295  |
| 16w_SITTD12_GAGGGTAGTGTTGATC-1-10x  | 0.02047139 | 0.02280912 | 3.62E-05   |
| 16w_SITTD12_GAGGGTATCCAGTGCG-1-10x  | 0.0500956  | 0.12828737 | 0.00013566 |
| 16w_SITTD12_GAGGGTATCCGTCCTA-1-10x  | 0.21233967 | 0.7059641  | 0.0010856  |
| 16w_SITTD12_GAGTCATAGGCACTAG-1-10x  | 0.04401901 | 0.1066514  | 8.81E-05   |
| 16w_SITTD12_GAGTGAGTCAGATTGC-1-10x  | 0.07907834 | 0.2314816  | 0.002576   |
| 16w_SITTD12_GAGTGTTTCTGCTGAA-1-10x  | 0.09021884 | 0.2711478  | 0.0042999  |
| 16w_SITTD12_GAGTTACAGTTGAGC-1-10x   | 0.04392406 | 0.10631334 | 8.81E-05   |
| 16w_SITTD12_GAGTTACAGTATGATG-1-10x  | 0.08464295 | 0.2512946  | 0.0036353  |
| 16w_SITTD12_GAGTTACCACGGTGTC-1-10x  | 0.03878481 | 0.0880148  | 6.36E-05   |
| 16w_SITTD12_GAGTTACGTTCCGCGA-1-10x  | 0.07661445 | 0.22270885 | 0.0022191  |
| 16w_SITTD12_GAGTTGTCACGTTGGC-1-10x  | 0.11428546 | 0.35683802 | 0.0026715  |
| 16w_SITTD12_GAGTTGTGTCGTATTG-1-10x  | 0.14138173 | 0.4533154  | 0.0018724  |
| 16w_SITTD12_GAGTTTGTCCAACCGG-1-10x  | 0.25350043 | 0.8525187  | 0.00079608 |
| 16w_SITTD12_GATAGAAAGGATGTTA-1-10x  | 0.2679708  | 0.90404105 | 0.00075705 |
| 16w_SITTD12_GATAGAACACATCATG-1-10x  | 0.04786623 | 0.12034957 | 0.00011598 |
| 16w_SITTD12_GATCACAAGCTACTGT-1-10x  | 0.09586659 | 0.29125687 | 0.0043808  |
| 16w_SITTD12_GATCAGTAGGAGACCT-1-10x  | 0.04004374 | 0.09249728 | 7.01E-05   |
| 16w_SITTD12_GATCATGGTGTTACTG-1-10x  | 0.03162408 | 0.06251874 | 4.83E-05   |
| 16w_SITTD12_GATCCCTCAACCAACT-1-10x  | 0.04696751 | 0.11714964 | 0.00010777 |

|                                     |            |            |            |
|-------------------------------------|------------|------------|------------|
| 16w_SITTD12_GATCGTAAGGGAGAAT-1-10x  | 0.25364596 | 0.8530368  | 0.00079608 |
| 16w_SITTD12_GATCGTAAGGTGTGAC-1-10x  | 0.0682461  | 0.19291298 | 0.00097948 |
| 16w_SITTD12_GATGAGGCACTTGGGC-1-10x  | 0.03665223 | 0.08042166 | 5.82E-05   |
| 16w_SITTD12_GATGATCAGGGTACAC-1-10x  | 0.14468342 | 0.46507123 | 0.0018716  |
| 16w_SITTD12_GATGATCGTATGAAAC-1-10x  | 0.26904875 | 0.9078791  | 0.00075594 |
| 16w_SITTD12_GATGCTACACGAGAAC-1-10x  | 0.03309504 | 0.06775615 | 5.00E-05   |
| 16w_SITTD12_GATGCTACAGGCTTGC-1-10x  | 0.02222276 | 0.02904494 | 3.76E-05   |
| 16w_SITTD12_GATGGAGCAGCAAGAC-1-10x  | 0.09792882 | 0.2985995  | 0.0042943  |
| 16w_SITTD12_GATGGAGCATCATTTTC-1-10x | 0.0168918  | 0.01006383 | 3.38E-05   |
| 16w_SITTD12_GATGGAGTCAAGCTTG-1-10x  | 0.1584886  | 0.5142251  | 0.0018209  |
| 16w_SITTD12_GATTCGAGTCGGTACC-1-10x  | 0.04022768 | 0.09315222 | 7.01E-05   |
| 16w_SITTD12_GATTCGATCTTTCAGT-1-10x  | 0.07567477 | 0.21936306 | 0.0020486  |
| 16w_SITTD12_GATTCTTAGAGCTTTC-1-10x  | 0.03258542 | 0.06594162 | 5.00E-05   |
| 16w_SITTD12_GATTCTTCACGGTCTG-1-10x  | 0.06493849 | 0.18113607 | 0.00064991 |
| 16w_SITTD12_GATTGGTAGACGCATG-1-10x  | 0.04290666 | 0.10269084 | 8.29E-05   |
| 16w_SITTD12_GCAACCGAGCATTGTC-1-10x  | 0.01645313 | 0.00850194 | 3.38E-05   |
| 16w_SITTD12_GCAACCGTCCGCGGT-1-10x   | 0.0520164  | 0.13512644 | 0.00016076 |
| 16w_SITTD12_GCACATAAGCAGGGAG-1-10x  | 0.01577139 | 0.00607458 | 3.33E-05   |
| 16w_SITTD12_GCACATACATGGGTCC-1-10x  | 0.05736154 | 0.15415806 | 0.00028394 |
| 16w_SITTD12_GCACATAGTCCAACGC-1-10x  | 0.05380178 | 0.14148338 | 0.00019264 |
| 16w_SITTD12_GCACGGTTCGGCATAT-1-10x  | 0.24602394 | 0.82589835 | 0.00083459 |
| 16w_SITTD12_GCACGTGAGGAGTACC-1-10x  | 0.0426113  | 0.10163918 | 7.82E-05   |
| 16w_SITTD12_GCACTAACATTCAGCA-1-10x  | 0.03322638 | 0.06822379 | 5.00E-05   |
| 16w_SITTD12_GCACTAATCGATACTG-1-10x  | 0.08427171 | 0.24997282 | 0.0036353  |
| 16w_SITTD12_GCAGGCTGTCATCACA-1-10x  | 0.06937318 | 0.196926   | 0.0010821  |
| 16w_SITTD12_GCAGTTACATAATCGC-1-10x  | 0.03387597 | 0.07053668 | 5.17E-05   |
| 16w_SITTD12_GCAGTTAGTCCACTTC-1-10x  | 0.24437164 | 0.82001525 | 0.00084583 |
| 16w_SITTD12_GCATCTCAGGGCAGAG-1-10x  | 0.02614221 | 0.04300031 | 4.09E-05   |
| 16w_SITTD12_GCATGATCACTGTTC-1-10x   | 0.08669522 | 0.2586018  | 0.0039187  |
| 16w_SITTD12_GCATGATCACTTCTCG-1-10x  | 0.07360627 | 0.21199808 | 0.0015819  |
| 16w_SITTD12_GCCAACGAGGTGCTAG-1-10x  | 0.06992528 | 0.19889176 | 0.0010821  |
| 16w_SITTD12_GCCAACGAGTGCAAAT-1-10x  | 0.23013484 | 0.76932454 | 0.00094498 |
| 16w_SITTD12_GCCAACGTCCCATACC-1-10x  | 0.19892326 | 0.6581944  | 0.0012085  |
| 16w_SITTD12_GCCAGCATCACCGGGT-1-10x  | 0.16315867 | 0.5308531  | 0.001763   |
| 16w_SITTD12_GCCATTCAGAAGCCAC-1-10x  | 0.04914041 | 0.12488634 | 0.00012523 |
| 16w_SITTD12_GCCATTCGTAATAACC-1-10x  | 0.27474725 | 0.9281689  | 0.00075218 |
| 16w_SITTD12_GCCATTCGTAGCGTCC-1-10x  | 0.04847222 | 0.12250725 | 0.00012523 |
| 16w_SITTD12_GCCCGAAAGCATTTTCG-1-10x | 0.14481124 | 0.46552634 | 0.0018716  |
| 16w_SITTD12_GCCCGAATCCATAGAC-1-10x  | 0.04413346 | 0.1070589  | 8.81E-05   |
| 16w_SITTD12_GCCGATGAGCCGATAG-1-10x  | 0.10368161 | 0.31908256 | 0.0038193  |
| 16w_SITTD12_GCCGATGCAGTTCCAA-1-10x  | 0.11101101 | 0.3451792  | 0.0030221  |

|                                     |            |            |            |
|-------------------------------------|------------|------------|------------|
| 16w_SITTD12_GCCGTGAAGCGATGAC-1-10x  | 0.23091945 | 0.77211815 | 0.00093779 |
| 16w_SITTD12_GCCGTGACAGGTATGG-1-10x  | 0.06274147 | 0.17331351 | 0.00052741 |
| 16w_SITTD12_GCCGTGATCGTGGACC-1-10x  | 0.14691903 | 0.4730312  | 0.0018717  |
| 16w_SITTD12_GCGAGAACAACACAGG-1-10x  | 0.2728928  | 0.921566   | 0.0007526  |
| 16w_SITTD12_GCGATCGCACGCTGTG-1-10x  | 0.03724592 | 0.08253554 | 6.07E-05   |
| 16w_SITTD12_GCGATCGCACTTACAG-1-10x  | 0.0475152  | 0.11909973 | 0.00011598 |
| 16w_SITTD12_GCGGAAAGTATGTCAC-1-10x  | 0.05550512 | 0.14754818 | 0.000233   |
| 16w_SITTD12_GCGGATCCAAATTGCC-1-10x  | 0.03471451 | 0.07352234 | 5.37E-05   |
| 16w_SITTD12_GCGGATCCACCAGCGT-1-10x  | 0.03761828 | 0.08386134 | 6.07E-05   |
| 16w_SITTD12_GCTCAAATCTTCGATT-1-10x  | 0.11354123 | 0.35418814 | 0.0027534  |
| 16w_SITTD12_GCTGCAGTCCATAGAC-1-10x  | 0.27761877 | 0.938393   | 0.00075239 |
| 16w_SITTD12_GCTTCACTCAAGATAG-1-10x  | 0.05347461 | 0.14031847 | 0.00019264 |
| 16w_SITTD12_GCTTCACTCGTTACCC-1-10x  | 0.08165309 | 0.2406491  | 0.0031253  |
| 16w_SITTD12_GCTTCACTCTACCACC-1-10x  | 0.07224634 | 0.20715597 | 0.0014433  |
| 16w_SITTD12_GCTTGGGGTGCCAAGA-1-10x  | 0.22890896 | 0.7649597  | 0.0009522  |
| 16w_SITTD12_GCTTTCGTCTATCGGA-1-10x  | 0.04652158 | 0.1155619  | 0.00010777 |
| 16w_SITTD12_GGAACCCAGGCTAACG-1-10x  | 0.03491474 | 0.07423527 | 5.37E-05   |
| 16w_SITTD12_GGAAGTGCAAGTGTCT-1-10x  | 0.05325859 | 0.13954931 | 0.00019264 |
| 16w_SITTD12_GGAAGTGTGATGGATC-1-10x  | 0.1974775  | 0.6530467  | 0.0012292  |
| 16w_SITTD12_GGAATGGAGCCATCCG-1-10x  | 0.05893825 | 0.159772   | 0.00034795 |
| 16w_SITTD12_GGAATGGTTCGACGCTG-1-10x | 0.01993699 | 0.02090638 | 3.55E-05   |
| 16w_SITTD12_GGACGTCCAAAGAGTT-1-10x  | 0.259415   | 0.8735778  | 0.00077499 |
| 16w_SITTD12_GGAGATGGTTCAGTAC-1-10x  | 0.06162427 | 0.16933568 | 0.00047505 |
| 16w_SITTD12_GGAGATGTCCAGCAAT-1-10x  | 0.04248346 | 0.10118403 | 7.82E-05   |
| 16w_SITTD12_GGAGGATAGTACAACA-1-10x  | 0.209852   | 0.6971066  | 0.0011095  |
| 16w_SITTD12_GGAGGATGTCATCCGG-1-10x  | 0.08800408 | 0.26326206 | 0.0041422  |
| 16w_SITTD12_GGAGGATGTGATATAG-1-10x  | 0.04766008 | 0.11961558 | 0.00011598 |
| 16w_SITTD12_GGATCTACAATACGCT-1-10x  | 0.19538365 | 0.6455915  | 0.0012511  |
| 16w_SITTD12_GGATGTTAGCCAAGGT-1-10x  | 0.10883839 | 0.3374435  | 0.0032165  |
| 16w_SITTD12_GGATGTTCCACCTGG-1-10x   | 0.02985719 | 0.05622765 | 4.55E-05   |
| 16w_SITTD12_GGATGTTGTGCCACA-1-10x   | 0.03454216 | 0.07290869 | 5.37E-05   |
| 16w_SITTD12_GGATGTTGTGTTAACC-1-10x  | 0.10023125 | 0.30679742 | 0.0040879  |
| 16w_SITTD12_GGCACGTCAACAACAA-1-10x  | 0.05308814 | 0.13894242 | 0.00019264 |
| 16w_SITTD12_GGCACGTGTACAGAGC-1-10x  | 0.2287246  | 0.7643033  | 0.0009522  |
| 16w_SITTD12_GGCAGTCGTGAACCGA-1-10x  | 0.16653563 | 0.5428769  | 0.0017206  |
| 16w_SITTD12_GGCTTTCAGGCCGCTT-1-10x  | 0.03271317 | 0.06639648 | 5.00E-05   |
| 16w_SITTD12_GGGAAGTCAGGTCAGA-1-10x  | 0.03776688 | 0.08439042 | 6.07E-05   |
| 16w_SITTD12_GGGAAGTCATGTTCGA-1-10x  | 0.23896046 | 0.8007485  | 0.00088278 |
| 16w_SITTD12_GGGACTCCAAGCGATG-1-10x  | 0.17743428 | 0.58168197 | 0.0015248  |
| 16w_SITTD12_GGGAGTATCTAGTCAG-1-10x  | 0.02316146 | 0.03238722 | 3.83E-05   |
| 16w_SITTD12_GGGATCCAGTAGTCTC-1-10x  | 0.17965841 | 0.5896011  | 0.0014915  |

|                                     |            |            |            |
|-------------------------------------|------------|------------|------------|
| 16w_SITTD12_GGGATCCTCCTACGGG-1-10x  | 0.04848725 | 0.12256074 | 0.00012523 |
| 16w_SITTD12_GGGATCCTCTGGAAGG-1-10x  | 0.24259591 | 0.8136927  | 0.00085764 |
| 16w_SITTD12_GGGATGACAATTGCTG-1-10x  | 0.0720586  | 0.20648752 | 0.0014433  |
| 16w_SITTD12_GGGATGAGTAACATCC-1-10x  | 0.05114397 | 0.13202012 | 0.00014746 |
| 16w_SITTD12_GGGCCATCAGCTATTG-1-10x  | 0.08357132 | 0.24747905 | 0.0034742  |
| 16w_SITTD12_GGGCCATGTCCTGGGT-1-10x  | 0.2588544  | 0.8715817  | 0.00077499 |
| 16w_SITTD12_GGGCGTTAGTGGATTA-1-10x  | 0.25524527 | 0.85873127 | 0.00078825 |
| 16w_SITTD12_GGGCGTTGTCACAGAG-1-10x  | 0.089734   | 0.26942152 | 0.0042999  |
| 16w_SITTD12_GGGCGTTTCACAACCA-1-10x  | 0.05667324 | 0.15170734 | 0.000257   |
| 16w_SITTD12_GGGCTCACAGGGTCTC-1-10x  | 0.20378886 | 0.6755186  | 0.0011608  |
| 16w_SITTD12_GGGCTCACAGTTGTTG-1-10x  | 0.10783656 | 0.33387643 | 0.0033168  |
| 16w_SITTD12_GGGCTCATCCATAGAC-1-10x  | 0.08319335 | 0.24613325 | 0.0034742  |
| 16w_SITTD12_GGGTAGAAGTGAGTGC-1-10x  | 0.15761323 | 0.51110834 | 0.0018302  |
| 16w_SITTD12_GGGTATTCAGAACTAA-1-10x  | 0.06216689 | 0.17126767 | 0.00047505 |
| 16w_SITTD12_GGGTCACGTTGCGCCA-1-10x  | 0.2599023  | 0.8753128  | 0.00077221 |
| 16w_SITTD12_GGGTCACGTTGCGGAA-1-10x  | 0.2909676  | 0.98592216 | 0.00076269 |
| 16w_SITTD12_GGGTCTGAGCAGCCTC-1-10x  | 0.26962295 | 0.9099236  | 0.00075499 |
| 16w_SITTD12_GGGTGAAAGAGTGTTA-1-10x  | 0.03990513 | 0.09200376 | 7.01E-05   |
| 16w_SITTD12_GGGTGAACACTGCATA-1-10x  | 0.0879858  | 0.26319697 | 0.0041422  |
| 16w_SITTD12_GGGTTATGTTGTCTAG-1-10x  | 0.16607812 | 0.5412479  | 0.0017206  |
| 16w_SITTD12_GGTAAC TAGCAAATGT-1-10x | 0.04508323 | 0.1104406  | 9.39E-05   |
| 16w_SITTD12_GGTAATCAGGACAGTC-1-10x  | 0.24526738 | 0.8232046  | 0.00084014 |
| 16w_SITTD12_GGTAGAGCAGCGTTGC-1-10x  | 0.08845267 | 0.2648593  | 0.0041422  |
| 16w_SITTD12_GGTACGATTCCGA-1-10x     | 0.27014324 | 0.9117761  | 0.00075418 |
| 16w_SITTD12_GGTCTGGCATCCGATA-1-10x  | 0.19262539 | 0.63577056 | 0.0012861  |
| 16w_SITTD12_GGTCTGGGTCGTATTG-1-10x  | 0.25914645 | 0.8726216  | 0.00077499 |
| 16w_SITTD12_GGTGAAGCAGCAAGAC-1-10x  | 0.03651637 | 0.07993794 | 5.82E-05   |
| 16w_SITTD12_GGTGAAGGTATCGCTA-1-10x  | 0.08779533 | 0.2625188  | 0.0040384  |
| 16w_SITTD12_GGTGTCGAGTACTCGT-1-10x  | 0.07831914 | 0.22877844 | 0.0023954  |
| 16w_SITTD12_GGTGTCGTCATACGAC-1-10x  | 0.05100084 | 0.13151051 | 0.00014746 |
| 16w_SITTD12_GGTGTTACACAACGCC-1-10x  | 0.03769413 | 0.08413142 | 6.07E-05   |
| 16w_SITTD12_GGTTAACAGCGTGCCT-1-10x  | 0.03269633 | 0.06633654 | 5.00E-05   |
| 16w_SITTD12_GGTTAACAGGCCTGAA-1-10x  | 0.2761109  | 0.93302417 | 0.00075214 |
| 16w_SITTD12_GGTTCTCAGTGAGTGC-1-10x  | 0.04479468 | 0.10941321 | 9.39E-05   |
| 16w_SITTD12_GGTTCTCAGTTGCGAG-1-10x  | 0.03135278 | 0.06155277 | 4.68E-05   |
| 16w_SITTD12_GGTTCTCTCGGAAACG-1-10x  | 0.02518751 | 0.03960107 | 4.00E-05   |
| 16w_SITTD12_GGTTGTACAAACCATC-1-10x  | 0.05004926 | 0.12812236 | 0.00013566 |
| 16w_SITTD12_GTAACCAAGAATTGTG-1-10x  | 0.02819686 | 0.05031599 | 4.30E-05   |
| 16w_SITTD12_GTAACCAGTTGTGGAG-1-10x  | 0.13408598 | 0.4273386  | 0.0019027  |
| 16w_SITTD12_GTAATCGAGATAGCAT-1-10x  | 0.11194167 | 0.34849286 | 0.002929   |
| 16w_SITTD12_GTAATCGTCATGCGGC-1-10x  | 0.05262947 | 0.1373093  | 0.00017575 |

|                                      |            |            |            |
|--------------------------------------|------------|------------|------------|
| 16w_SITTD12_GTACAACCACAACGAG-1-10x   | 0.0837216  | 0.24801412 | 0.0034742  |
| 16w_SITTD12_GTACAACGTACCCGCA-1-10x   | 0.07149006 | 0.20446321 | 0.0013138  |
| 16w_SITTD12_GTACAGTGTAGCGCCT-1-10x   | 0.24008437 | 0.8047502  | 0.00086997 |
| 16w_SITTD12_GTACAGTGTCGTATTG-1-10x   | 0.04086909 | 0.095436   | 7.40E-05   |
| 16w_SITTD12_GTACAGTGTGGGTCAA-1-10x   | 0.08443254 | 0.25054544 | 0.0036353  |
| 16w_SITTD12_GTACAGTTCAGTCTTT-1-10x   | 0.2819891  | 0.95395374 | 0.00075401 |
| 16w_SITTD12_GTACAGTTCATTGCTT-1-10x   | 0.03970624 | 0.0912956  | 6.67E-05   |
| 16w_SITTD12_GTAGAAAGTTCTTCAT-1-10x   | 0.25279304 | 0.85       | 0.00080028 |
| 16w_SITTD12_GTAGAGGTCAAGAGTA-1-10x   | 0.2660727  | 0.8972827  | 0.00075974 |
| 16w_SITTD12_GTAGATCCACTCCCTA-1-10x   | 0.10125209 | 0.31043217 | 0.0040036  |
| 16w_SITTD12_GTAGATCTCTTTCCGG-1-10x   | 0.0224539  | 0.02986791 | 3.76E-05   |
| 16w_SITTD12_GTAGCTACAAATGAGT-1-10x   | 0.09423866 | 0.28546056 | 0.0044154  |
| 16w_SITTD12_GTAGCTACAACGTATC-1-10x   | 0.08277047 | 0.24462757 | 0.0033032  |
| 16w_SITTD12_GTAGGAGTTAGCGGA-1-10x    | 0.19489294 | 0.6438443  | 0.0012511  |
| 16w_SITTD12_GTAGGAGTCTGTAACG-1-10x   | 0.02322198 | 0.03260271 | 3.83E-05   |
| 16w_SITTD12_GTAGTACCAGTAGAAT-1-10x   | 0.23455967 | 0.7850793  | 0.00090964 |
| 16w_SITTD12_GTATTCGTCGTGTTA-1-10x    | 0.17851935 | 0.5855454  | 0.0015081  |
| 16w_SITTD12_GTCACGGCAGAAATTG-1-10x   | 0.2709386  | 0.91460806 | 0.00075418 |
| 16w_SITTD12_GTCAGCGGTTGCCGCA-1-10x   | 0.09022152 | 0.27115738 | 0.0042999  |
| 16w_SITTD12_GTCATCCGTGCTCTCT-1-10x   | 0.08390105 | 0.24865305 | 0.0034742  |
| 16w_SITTD12_GTCATTTCAAGCCAC-1-10x    | 0.27260986 | 0.92055863 | 0.000753   |
| 16w_SITTD12_GTCCACTAGCGCTGCT-1-10x   | 0.1477148  | 0.47586456 | 0.0018716  |
| 16w_SITTD12_GTCCACTGTACTGCGC-1-10x   | 0.2746974  | 0.92799133 | 0.00075233 |
| 16w_SITTD12_GTCCTCAGTAAGAACT-1-10x   | 0.15448797 | 0.49998072 | 0.0018575  |
| 16w_SITTD12_GTCGTAAGATCGGTG-1-10x    | 0.06824838 | 0.19292107 | 0.00097948 |
| 16w_SITTD12_GTCGTAACAGAGGCAT-1-10x   | 0.2441328  | 0.8191649  | 0.00084583 |
| 16w_SITTD12_GTCGTAATCCCGAGTG-1-10x   | 0.09102216 | 0.2740081  | 0.0043535  |
| 16w_SITTD12_GTCGTTGTCGTAGATCCT-1-10x | 0.10006232 | 0.3061959  | 0.0040879  |
| 16w_SITTD12_GTCTCACTCCGTAATG-1-10x   | 0.04442023 | 0.10807997 | 8.81E-05   |
| 16w_SITTD12_GTCTCACTCTAGCAAC-1-10x   | 0.02174534 | 0.02734506 | 3.69E-05   |
| 16w_SITTD12_GTCTGTCGTGCCAAGA-1-10x   | 0.05071033 | 0.13047613 | 0.00014746 |
| 16w_SITTD12_GTGACGCAGTGACACG-1-10x   | 0.21326104 | 0.70924467 | 0.0010778  |
| 16w_SITTD12_GTGACGCTCGAGCCTG-1-10x   | 0.20661467 | 0.68558    | 0.0011344  |
| 16w_SITTD12_GTGAGCCAGCAACTTC-1-10x   | 0.02211094 | 0.02864682 | 3.76E-05   |
| 16w_SITTD12_GTGAGCCCACCCTGTT-1-10x   | 0.21278174 | 0.7075381  | 0.0010778  |
| 16w_SITTD12_GTGAGGATCACCTGT-1-10x    | 0.09715892 | 0.29585823 | 0.0043435  |
| 16w_SITTD12_GTGAGGATCGACCAAT-1-10x   | 0.09804716 | 0.2990209  | 0.0042943  |
| 16w_SITTD12_GTGATGTGTCGCTGCA-1-10x   | 0.03414385 | 0.0714905  | 5.17E-05   |
| 16w_SITTD12_GTGATGTTCACTT-1-10x      | 0.27046132 | 0.9129086  | 0.00075418 |
| 16w_SITTD12_GTGATGTTCCAGTGTA-1-10x   | 0.06548166 | 0.18307008 | 0.00072102 |
| 16w_SITTD12_GTGATGTTGACGCTG-1-10x    | 0.10996518 | 0.3414555  | 0.0031181  |

|                                     |            |            |            |
|-------------------------------------|------------|------------|------------|
| 16w_SITTD12_GTGCAGCAGAACCCGA-1-10x  | 0.1470017  | 0.47332555 | 0.0018716  |
| 16w_SITTD12_GTGCAGCAGAGCAAGA-1-10x  | 0.04250495 | 0.10126054 | 7.82E-05   |
| 16w_SITTD12_GTGCAGCCAGCGACAA-1-10x  | 0.13794373 | 0.44107428 | 0.0018802  |
| 16w_SITTD12_GTGCTTCCACCTGAAT-1-10x  | 0.25165483 | 0.8459474  | 0.00080467 |
| 16w_SITTD12_GTGGAAGTCCGCACTT-1-10x  | 0.02626792 | 0.04344789 | 4.09E-05   |
| 16w_SITTD12_GTGGAGACAAATGGTA-1-10x  | 0.07043213 | 0.20069641 | 0.0011935  |
| 16w_SITTD12_GTGGGAAAGAACAGGA-1-10x  | 0.16999167 | 0.5551823  | 0.0016584  |
| 16w_SITTD12_GTGTCCTCAAAGGTTA-1-10x  | 0.24478883 | 0.82150066 | 0.00084014 |
| 16w_SITTD12_GTGTCCTTCGAAACAA-1-10x  | 0.2209114  | 0.73648405 | 0.0010179  |
| 16w_SITTD12_GTGTGGCTCACAACCA-1-10x  | 0.2052526  | 0.6807303  | 0.001143   |
| 16w_SITTD12_GTGTTAGTCCCCTGAG-1-10x  | 0.0512724  | 0.1324774  | 0.00016076 |
| 16w_SITTD12_GTGTTCCGTAGCTAAA-1-10x  | 0.2910029  | 0.9860478  | 0.00076269 |
| 16w_SITTD12_GTTACAGCAAGGTCGA-1-10x  | 0.27528957 | 0.9300998  | 0.00075218 |
| 16w_SITTD12_GTTACCCAGATACGAT-1-10x  | 0.16450958 | 0.53566307 | 0.0017494  |
| 16w_SITTD12_GTTACCCAGGTTTGAA-1-10x  | 0.04066425 | 0.09470663 | 7.01E-05   |
| 16w_SITTD12_GTTACGAGTTGCTCGG-1-10x  | 0.03712954 | 0.08212117 | 6.07E-05   |
| 16w_SITTD12_GTTAGTGAGCGCCTTG-1-10x  | 0.15104303 | 0.48771486 | 0.0018676  |
| 16w_SITTD12_GTTAGTGTCGCGTGAC-1-10x  | 0.01963486 | 0.01983061 | 3.55E-05   |
| 16w_SITTD12_GTTCATTTCAAAGCCT-1-10x  | 0.08925823 | 0.26772752 | 0.0042295  |
| 16w_SITTD12_GTTCTATAGCATCAGG-1-10x  | 0.04584656 | 0.11315846 | 0.00010046 |
| 16w_SITTD12_GTTCTATCAACTAGAA-1-10x  | 0.0162997  | 0.00795563 | 3.33E-05   |
| 16w_SITTD12_GTTGCGGAGAAGGGAT-1-10x  | 0.2608341  | 0.8786305  | 0.00076963 |
| 16w_SITTD12_GTTGCGGAGGCACTAG-1-10x  | 0.0296441  | 0.05546893 | 4.55E-05   |
| 16w_SITTD12_GTTGTGACAACTCGTA-1-10x  | 0.08404752 | 0.24917457 | 0.0036353  |
| 16w_SITTD12_GTTTGGAAAGTTAGTGA-1-10x | 0.2776238  | 0.93841094 | 0.00075239 |
| 16w_SITTD12_GTTTGGACATCTGCGG-1-10x  | 0.17379083 | 0.5687093  | 0.0015922  |
| 16w_SITTD12_TAACACGTCACTTGGA-1-10x  | 0.06688733 | 0.188075   | 0.00079936 |
| 16w_SITTD12_TAACACGTGCATGCATG-1-10x | 0.2875924  | 0.9739046  | 0.00075864 |
| 16w_SITTD12_TAACACGTCCCTATTA-1-10x  | 0.03587426 | 0.07765169 | 5.58E-05   |
| 16w_SITTD12_TAACCAGTCACCTGGG-1-10x  | 0.0882263  | 0.2640533  | 0.0041422  |
| 16w_SITTD12_TAACGACCAAAGGCGT-1-10x  | 0.14898413 | 0.48038408 | 0.0018705  |
| 16w_SITTD12_TAACGACGTGCATGGCC-1-10x | 0.23964433 | 0.8031835  | 0.00087632 |
| 16w_SITTD12_TAAGCCAAGCGCCTTG-1-10x  | 0.09715617 | 0.29584846 | 0.0043435  |
| 16w_SITTD12_TAAGCCAAGGCGAACT-1-10x  | 0.1653592  | 0.5386882  | 0.0017353  |
| 16w_SITTD12_TAAGCCACATTAAGCC-1-10x  | 0.26685205 | 0.9000577  | 0.00075831 |
| 16w_SITTD12_TAAGCGTAGGCCACTC-1-10x  | 0.06827651 | 0.19302125 | 0.00097948 |
| 16w_SITTD12_TAAGCGTGTCAAGCGA-1-10x  | 0.01723999 | 0.01130359 | 3.38E-05   |
| 16w_SITTD12_TAAGCGTTCCTGGTCT-1-10x  | 0.262365   | 0.8840814  | 0.00076727 |
| 16w_SITTD12_TAAGTCGCAAGCGAAC-1-10x  | 0.2469978  | 0.8293658  | 0.0008292  |
| 16w_SITTD12_TAAGTCGCACTTGAGT-1-10x  | 0.08509746 | 0.25291294 | 0.0037839  |
| 16w_SITTD12_TAAGTCGGTTGGACTT-1-10x  | 0.07187506 | 0.20583403 | 0.0014433  |

|                                     |            |            |            |
|-------------------------------------|------------|------------|------------|
| 16w_SITTD12_TAATCTCCACCTGTCT-1-10x  | 0.02332398 | 0.03296588 | 3.83E-05   |
| 16w_SITTD12_TAATTCCGTAATCAAG-1-10x  | 0.10969657 | 0.34049907 | 0.0031181  |
| 16w_SITTD12_TAATTCCCTCTATTGTC-1-10x | 0.02024588 | 0.02200619 | 3.62E-05   |
| 16w_SITTD12_TACAACGAGACATATG-1-10x  | 0.09115616 | 0.27448517 | 0.0043535  |
| 16w_SITTD12_TACACCCAGGCAATGC-1-10x  | 0.2827271  | 0.9565814  | 0.00075462 |
| 16w_SITTD12_TACAGGTCACAAGGTG-1-10x  | 0.05407609 | 0.14246006 | 0.00021164 |
| 16w_SITTD12_TACAGGTCAGAAACCG-1-10x  | 0.05301043 | 0.13866572 | 0.00017575 |
| 16w_SITTD12_TACAGGTCAGTAGAGC-1-10x  | 0.0245302  | 0.03726069 | 3.91E-05   |
| 16w_SITTD12_TACAGGTTCAATTGAGC-1-10x | 0.13569374 | 0.4330631  | 0.0018953  |
| 16w_SITTD12_TACATTCAGTATGATG-1-10x  | 0.0469108  | 0.11694774 | 0.00010777 |
| 16w_SITTD12_TACATTCGTCGATTCA-1-10x  | 0.08243678 | 0.24343945 | 0.0033032  |
| 16w_SITTD12_TACATTCTCGTCGATA-1-10x  | 0.24964759 | 0.8388005  | 0.00081397 |
| 16w_SITTD12_TACCCACAGGATTCAA-1-10x  | 0.01751341 | 0.01227711 | 3.44E-05   |
| 16w_SITTD12_TACCCGTCAAGACGGT-1-10x  | 0.2462341  | 0.8266466  | 0.00083459 |
| 16w_SITTD12_TACCGGGTCTGGGCAC-1-10x  | 0.01930728 | 0.01866425 | 3.55E-05   |
| 16w_SITTD12_TACCTCGAGAGAACC-1-10x   | 0.24929123 | 0.8375316  | 0.00081888 |
| 16w_SITTD12_TACCTGCGTTGCATAC-1-10x  | 0.04101201 | 0.09594486 | 7.40E-05   |
| 16w_SITTD12_TACGGGCGTACAGTCT-1-10x  | 0.02341219 | 0.03327995 | 3.83E-05   |
| 16w_SITTD12_TACGGTAGTCTACAAC-1-10x  | 0.04376294 | 0.10573965 | 8.81E-05   |
| 16w_SITTD12_TACGTCCTCGACTCCT-1-10x  | 0.21203241 | 0.70487005 | 0.0010856  |
| 16w_SITTD12_TACTGCCAGCCTCTCT-1-10x  | 0.2538012  | 0.8535896  | 0.00079608 |
| 16w_SITTD12_TACTGCCGTGACCGTC-1-10x  | 0.25167352 | 0.8460139  | 0.00080467 |
| 16w_SITTD12_TACTGCCTCGCTCATC-1-10x  | 0.22730894 | 0.7592628  | 0.00096676 |
| 16w_SITTD12_TACTGCCTCGTTCTCG-1-10x  | 0.03459948 | 0.07311276 | 5.37E-05   |
| 16w_SITTD12_TACTTCATCACCTGGG-1-10x  | 0.0945375  | 0.2865246  | 0.0044051  |
| 16w_SITTD12_TACTTGTTCCGAGATG-1-10x  | 0.08280515 | 0.24475107 | 0.0033032  |
| 16w_SITTD12_TAGACCAAGGAACGAA-1-10x  | 0.17009531 | 0.5555513  | 0.0016584  |
| 16w_SITTD12_TAGACCACACCGTGGT-1-10x  | 0.20541482 | 0.68130785 | 0.001143   |
| 16w_SITTD12_TAGACCAGTATCTTCT-1-10x  | 0.08936998 | 0.26812539 | 0.0042295  |
| 16w_SITTD12_TAGACTGCACGTTCCGG-1-10x | 0.16845532 | 0.549712   | 0.0016902  |
| 16w_SITTD12_TAGACTGGTAGCGATG-1-10x  | 0.28061044 | 0.949045   | 0.00075348 |
| 16w_SITTD12_TAGACTGGTCCTGAAT-1-10x  | 0.28795126 | 0.9751823  | 0.0007596  |
| 16w_SITTD12_TAGAGTCAGCATCGAG-1-10x  | 0.18563356 | 0.61087584 | 0.0013809  |
| 16w_SITTD12_TAGCACAGTTTCGACA-1-10x  | 0.04727389 | 0.11824054 | 0.00010777 |
| 16w_SITTD12_TAGCACATCATCACAG-1-10x  | 0.04250506 | 0.10126093 | 7.82E-05   |
| 16w_SITTD12_TAGGAGGAGCCTGTCG-1-10x  | 0.14185347 | 0.45499507 | 0.0018724  |
| 16w_SITTD12_TAGGAGGCATCAGCGC-1-10x  | 0.02629901 | 0.04355861 | 4.09E-05   |
| 16w_SITTD12_TAGGGTTAGCTCTGTA-1-10x  | 0.25250512 | 0.8489748  | 0.00080028 |
| 16w_SITTD12_TAGGTAATCATAGCAC-1-10x  | 0.02596368 | 0.04236465 | 4.09E-05   |
| 16w_SITTD12_TAGGTTGGTCGATGCC-1-10x  | 0.01640608 | 0.00833441 | 3.33E-05   |
| 16w_SITTD12_TAGTGCAGTTGCGGAA-1-10x  | 0.27671024 | 0.9351582  | 0.00075222 |



|                                     |            |            |            |
|-------------------------------------|------------|------------|------------|
| 16w_SITTD12_TAGTGCATCAGACCTA-1-10x  | 0.20830409 | 0.69159526 | 0.0011177  |
| 16w_SITTD12_TATACCTCATTGGCAT-1-10x  | 0.22333433 | 0.74511105 | 0.00099599 |
| 16w_SITTD12_TATACCTTCAGTGTGT-1-10x  | 0.02587188 | 0.04203779 | 4.09E-05   |
| 16w_SITTD12_TATATCCAGACCATAA-1-10x  | 0.21479042 | 0.7146901  | 0.0010625  |
| 16w_SITTD12_TATATCCAGCCGCACT-1-10x  | 0.01972518 | 0.0201522  | 3.55E-05   |
| 16w_SITTD12_TATATCCGTTTCTTAC-1-10x  | 0.2155477  | 0.71738636 | 0.0010625  |
| 16w_SITTD12_TATCAGGAGTTATAG-1-10x   | 0.10508297 | 0.32407215 | 0.0036214  |
| 16w_SITTD12_TATCCTACAAACCATC-1-10x  | 0.03477237 | 0.07372835 | 5.37E-05   |
| 16w_SITTD12_TATCGCCAGAGATTCA-1-10x  | 0.27448785 | 0.92724526 | 0.00075233 |
| 16w_SITTD12_TATCGCCCAACGCCCA-1-10x  | 0.04735901 | 0.1185436  | 0.00010777 |
| 16w_SITTD12_TATCGCCCATCAGCAT-1-10x  | 0.07036959 | 0.20047376 | 0.0011935  |
| 16w_SITTD12_TATCGCCCATCGTGCG-1-10x  | 0.25420246 | 0.85501826 | 0.00079207 |
| 16w_SITTD12_TATCTGTAGCAACAAT-1-10x  | 0.25914034 | 0.87259984 | 0.00077499 |
| 16w_SITTD12_TATCTTGCACAAAGTA-1-10x  | 0.03813685 | 0.08570773 | 6.36E-05   |
| 16w_SITTD12_TATCTTGTACATACG-1-10x   | 0.02230256 | 0.02932906 | 3.76E-05   |
| 16w_SITTD12_TATCTTGTGAGGAACG-1-10x  | 0.01651908 | 0.00873676 | 3.38E-05   |
| 16w_SITTD12_TATGTTCAGGATACAT-1-10x  | 0.10658404 | 0.3294168  | 0.00352    |
| 16w_SITTD12_TATGTTCAGGGCATGT-1-10x  | 0.09076798 | 0.27310306 | 0.0043535  |
| 16w_SITTD12_TATTCAGTCGCGTCA-1-10x   | 0.03587562 | 0.07765653 | 5.58E-05   |
| 16w_SITTD12_TATTTCCGGTAGCTTAC-1-10x | 0.1066166  | 0.3295327  | 0.0034182  |
| 16w_SITTD12_TATTTCCGGTCTCTCG-1-10x  | 0.23048528 | 0.77057225 | 0.00094498 |
| 16w_SITTD12_TATTTCCGTCCGCGAGT-1-10x | 0.1661558  | 0.54152447 | 0.0017206  |
| 16w_SITTD12_TCAAGCAAGCGACTTT-1-10x  | 0.28113464 | 0.9509114  | 0.00075348 |
| 16w_SITTD12_TCAAGCAAGTCAGAGC-1-10x  | 0.20183757 | 0.66857094 | 0.0011792  |
| 16w_SITTD12_TCAAGCAGTCAGTCCG-1-10x  | 0.22779326 | 0.7609872  | 0.00095947 |
| 16w_SITTD12_TCAAGCATCTAGCAAC-1-10x  | 0.06405312 | 0.17798369 | 0.00058553 |
| 16w_SITTD12_TCAAGTGGTATGAGGC-1-10x  | 0.26799372 | 0.90412265 | 0.00075705 |
| 16w_SITTD12_TCACAAGGTCTACAGT-1-10x  | 0.054415   | 0.14366677 | 0.00021164 |
| 16w_SITTD12_TCACACCGTCGTCATA-1-10x  | 0.23654963 | 0.7921647  | 0.00089602 |
| 16w_SITTD12_TCACACCTCGCGTCGA-1-10x  | 0.07256364 | 0.20828575 | 0.0014433  |
| 16w_SITTD12_TCACATTAGCGTGTTT-1-10x  | 0.07460786 | 0.21556427 | 0.0017292  |
| 16w_SITTD12_TCACATTCAAATAGCA-1-10x  | 0.07964341 | 0.23349357 | 0.0027593  |
| 16w_SITTD12_TCACATTGATGCTTG-1-10x   | 0.07271007 | 0.20880714 | 0.0014433  |
| 16w_SITTD12_TCACATTGTATGCTTG-1-10x  | 0.14300047 | 0.459079   | 0.0018718  |
| 16w_SITTD12_TCACGCTAGCAGTCTT-1-10x  | 0.08657984 | 0.25819102 | 0.0039187  |
| 16w_SITTD12_TCACGCTCACATATCG-1-10x  | 0.11447853 | 0.35752544 | 0.0026715  |
| 16w_SITTD12_TCACGCTTCTACTGC-1-10x   | 0.13446982 | 0.42870528 | 0.0019027  |
| 16w_SITTD12_TCACGCTTCTCTCTT-1-10x   | 0.02071775 | 0.02368628 | 3.62E-05   |
| 16w_SITTD12_TCACGGGAGCCAGAGT-1-10x  | 0.01690573 | 0.01011342 | 3.38E-05   |
| 16w_SITTD12_TCACGGGGTAGATGTA-1-10x  | 0.18757379 | 0.61778414 | 0.0013519  |
| 16w_SITTD12_TCACGGGGTCTGAAT-1-10x   | 0.21792802 | 0.72586167 | 0.00104    |

|                                    |            |            |            |
|------------------------------------|------------|------------|------------|
| 16w_SITTD12_TCACTATCAGATCCAT-1-10x | 0.0228668  | 0.03133807 | 3.76E-05   |
| 16w_SITTD12_TCACTATTCCGTATGA-1-10x | 0.06134753 | 0.16835034 | 0.00042799 |
| 16w_SITTD12_TCACTCGAGCTAAATG-1-10x | 0.01719154 | 0.01113109 | 3.38E-05   |
| 16w_SITTD12_TCAGCAAAGTATGTAG-1-10x | 0.2692934  | 0.9087502  | 0.00075499 |
| 16w_SITTD12_TCAGCAACACAACGTT-1-10x | 0.03808248 | 0.08551416 | 6.36E-05   |
| 16w_SITTD12_TCAGCAAGTGTTGAGG-1-10x | 0.26666155 | 0.89937943 | 0.00075831 |
| 16w_SITTD12_TCAGCCTGTCAGGTAG-1-10x | 0.17841975 | 0.58519083 | 0.0015081  |
| 16w_SITTD12_TCAGCCTTCCCAGTGG-1-10x | 0.2701993  | 0.9119757  | 0.00075418 |
| 16w_SITTD12_TCAGGGCTCAAGTGGG-1-10x | 0.0869195  | 0.25940037 | 0.0040384  |
| 16w_SITTD12_TCAGGGCTCCGTGGGT-1-10x | 0.18067665 | 0.5932266  | 0.001475   |
| 16w_SITTD12_TCAGGTAAGGGCCCTT-1-10x | 0.17551303 | 0.5748413  | 0.0015585  |
| 16w_SITTD12_TCATACTAGCATATGA-1-10x | 0.10282685 | 0.31603914 | 0.0039137  |
| 16w_SITTD12_TCATGAGAGATGCTGG-1-10x | 0.051      | 0.13150753 | 0.00014746 |
| 16w_SITTD12_TCATGCCGTGCTCCGA-1-10x | 0.08516227 | 0.25314367 | 0.0037839  |
| 16w_SITTD12_TCATGTTGTGGGCTCT-1-10x | 0.07663845 | 0.22279426 | 0.0022191  |
| 16w_SITTD12_TCATTACAGATGCTAA-1-10x | 0.16419402 | 0.53453946 | 0.0017494  |
| 16w_SITTD12_TCATTCAAGAGAGAAC-1-10x | 0.04077514 | 0.09510148 | 7.01E-05   |
| 16w_SITTD12_TCATTTGTCTCGGTAA-1-10x | 0.1316517  | 0.41867125 | 0.001934   |
| 16w_SITTD12_TCCACGTCAACATACC-1-10x | 0.2399765  | 0.8043662  | 0.00086997 |
| 16w_SITTD12_TCCAGAATCTAACGCA-1-10x | 0.27347413 | 0.92363584 | 0.0007526  |
| 16w_SITTD12_TCCGATCAGCGTACT-1-10x  | 0.2757282  | 0.93166155 | 0.00075214 |
| 16w_SITTD12_TCCGATCAGTGATAGT-1-10x | 0.02418912 | 0.03604624 | 3.91E-05   |
| 16w_SITTD12_TCCGGGATCGTGTGAT-1-10x | 0.09102926 | 0.27403334 | 0.0043535  |
| 16w_SITTD12_TCCTAATAGCCTGAAG-1-10x | 0.09940874 | 0.30386883 | 0.0041652  |
| 16w_SITTD12_TCCTAATCAAGTATCC-1-10x | 0.24078546 | 0.8072465  | 0.00086997 |
| 16w_SITTD12_TCCTAATCAGAGGTTG-1-10x | 0.26592895 | 0.89677095 | 0.00075974 |
| 16w_SITTD12_TCCTGCAAGACGGATC-1-10x | 0.1008251  | 0.30891186 | 0.0040879  |
| 16w_SITTD12_TCCTGCAAGTTAGTA-1-10x  | 0.03704352 | 0.08181488 | 5.82E-05   |
| 16w_SITTD12_TCCTTCTAGTCTGTAC-1-10x | 0.2837311  | 0.96015626 | 0.00075531 |
| 16w_SITTD12_TCCTTCTCATCAGCAT-1-10x | 0.26895335 | 0.9075395  | 0.00075594 |
| 16w_SITTD12_TCGAACAGTTGTGGAG-1-10x | 0.01989023 | 0.02073988 | 3.55E-05   |
| 16w_SITTD12_TCGACCTCATCCGATA-1-10x | 0.26936394 | 0.90900135 | 0.00075499 |
| 16w_SITTD12_TCGACCTTCACTCTTA-1-10x | 0.04633687 | 0.11490426 | 0.00010046 |
| 16w_SITTD12_TCGACCTTCCATAAG-1-10x  | 0.10220983 | 0.31384224 | 0.0039137  |
| 16w_SITTD12_TCGACGGCATTGAAGA-1-10x | 0.05021684 | 0.12871905 | 0.00013566 |
| 16w_SITTD12_TCGACGGGTAGATTAG-1-10x | 0.02875185 | 0.05229202 | 4.42E-05   |
| 16w_SITTD12_TCGCACTGTCCGAAAG-1-10x | 0.2791914  | 0.9439925  | 0.00075266 |
| 16w_SITTD12_TCGCTACAAGACGAC-1-10x  | 0.08435527 | 0.25027034 | 0.0036353  |
| 16w_SITTD12_TCGGGACCAAGTCGTT-1-10x | 0.28014946 | 0.94740367 | 0.00075303 |
| 16w_SITTD12_TCGGGCAAGATGACAT-1-10x | 0.21416742 | 0.71247184 | 0.0010701  |
| 16w_SITTD12_TCGGGCACAACGATTC-1-10x | 0.22116305 | 0.7373801  | 0.0010179  |

|                                    |            |            |            |
|------------------------------------|------------|------------|------------|
| 16w_SITTD12_TCGGGCAGTCTAGATC-1-10x | 0.02258307 | 0.03032785 | 3.76E-05   |
| 16w_SITTD12_TCGGGTGAGATTGGGC-1-10x | 0.24384975 | 0.8181571  | 0.00084583 |
| 16w_SITTD12_TCGGGTGGTGTAAATG-1-10x | 0.08454555 | 0.25094783 | 0.0036353  |
| 16w_SITTD12_TCGGTCTAGACTCTTG-1-10x | 0.07420889 | 0.21414372 | 0.0017292  |
| 16w_SITTD12_TCGGTCTCAAGAGGCT-1-10x | 0.09825356 | 0.29975578 | 0.0042345  |
| 16w_SITTD12_TCGTAGACATGAAGGC-1-10x | 0.01881253 | 0.01690269 | 3.49E-05   |
| 16w_SITTD12_TCGTAGAGTAATACCC-1-10x | 0.08514073 | 0.253067   | 0.0037839  |
| 16w_SITTD12_TCGTCCAGTGCACAAG-1-10x | 0.09108771 | 0.27424148 | 0.0043535  |
| 16w_SITTD12_TCGTGGGCAACTCATG-1-10x | 0.22516577 | 0.7516319  | 0.00098137 |
| 16w_SITTD12_TCTACATTCATCCCGT-1-10x | 0.25212938 | 0.847637   | 0.00080467 |
| 16w_SITTD12_TCTACCGAGGCGTTAG-1-10x | 0.04122207 | 0.09669278 | 7.40E-05   |
| 16w_SITTD12_TCTACCGAGGTCCAGA-1-10x | 0.04752775 | 0.11914443 | 0.00011598 |
| 16w_SITTD12_TCTATCACATATGCGT-1-10x | 0.10558299 | 0.3258525  | 0.0036214  |
| 16w_SITTD12_TCTCAGCGTCCCGGTA-1-10x | 0.261659   | 0.8815676  | 0.00076727 |
| 16w_SITTD12_TCTCCGAAGGATCATA-1-10x | 0.28830838 | 0.97645384 | 0.0007596  |
| 16w_SITTD12_TCTCCGAAGTTTCTTC-1-10x | 0.25285012 | 0.8502032  | 0.00080028 |
| 16w_SITTD12_TCTCTGGCAAATAAG-1-10x  | 0.1888699  | 0.622399   | 0.001338   |
| 16w_SITTD12_TCTCTGGCAGTGTGCC-1-10x | 0.04811062 | 0.12121975 | 0.00011598 |
| 16w_SITTD12_TCTCTGGTCATTGCGA-1-10x | 0.06410433 | 0.17816605 | 0.00058553 |
| 16w_SITTD12_TCTGTGGTGTACAGG-1-10x  | 0.01852091 | 0.01586434 | 3.49E-05   |
| 16w_SITTD12_TCTTAGTTCGATACGT-1-10x | 0.08454601 | 0.25094944 | 0.0036353  |
| 16w_SITTD12_TCTTCTAGATGAAGG-1-10x  | 0.04675671 | 0.11639909 | 0.00010777 |
| 16w_SITTD12_TCTTCTAGCAGTACG-1-10x  | 0.13436338 | 0.4283263  | 0.0019027  |
| 16w_SITTD12_TCTTCTTCATTCTTG-1-10x  | 0.1597943  | 0.5188741  | 0.0018109  |
| 16w_SITTD12_TCTTGCGAGCGACTTT-1-10x | 0.02722896 | 0.04686973 | 4.19E-05   |
| 16w_SITTD12_TCTTGCGAGTTGTCGT-1-10x | 0.01921548 | 0.01833741 | 3.49E-05   |
| 16w_SITTD12_TCTTGCGGTCAATGGG-1-10x | 0.04535481 | 0.11140759 | 9.39E-05   |
| 16w_SITTD12_TCTTTGAAGACTTGTC-1-10x | 0.02201165 | 0.0282933  | 3.69E-05   |
| 16w_SITTD12_TCTTTGAGTTCCTAGA-1-10x | 0.01871917 | 0.01657026 | 3.49E-05   |
| 16w_SITTD12_TCTTTGATCCGCACTT-1-10x | 0.0794382  | 0.23276287 | 0.0027593  |
| 16w_SITTD12_TGAACGTCAACCGCTG-1-10x | 0.0952063  | 0.28890586 | 0.0044051  |
| 16w_SITTD12_TGAACGTGTTCAGTAC-1-10x | 0.02627972 | 0.0434899  | 4.09E-05   |
| 16w_SITTD12_TGAACGTTCATAAGGA-1-10x | 0.03627092 | 0.079064   | 5.82E-05   |
| 16w_SITTD12_TGAATCGTCCCTCAGC-1-10x | 0.07710727 | 0.22446352 | 0.0022191  |
| 16w_SITTD12_TGAATGCTCTCGCTCA-1-10x | 0.27091816 | 0.9145352  | 0.00075418 |
| 16w_SITTD12_TGACAGTAGAGTTAT-1-10x  | 0.17035073 | 0.55646074 | 0.0016584  |
| 16w_SITTD12_TGACAGTGTAGCTTGT-1-10x | 0.03967321 | 0.09117801 | 6.67E-05   |
| 16w_SITTD12_TGACAGTCCCAACTC-1-10x  | 0.17344688 | 0.5674847  | 0.0015922  |
| 16w_SITTD12_TGACCCTCAGCACCCA-1-10x | 0.01554706 | 0.00527584 | 3.33E-05   |
| 16w_SITTD12_TGAGACTAGAGTCTGG-1-10x | 0.04422939 | 0.10740046 | 8.81E-05   |
| 16w_SITTD12_TGAGCATGTATGGTTC-1-10x | 0.2035305  | 0.6745987  | 0.0011608  |

|                                    |            |            |            |
|------------------------------------|------------|------------|------------|
| 16w_SITTD12_TGAGCGCAGTGGTTAA-1-10x | 0.04417161 | 0.10719475 | 8.81E-05   |
| 16w_SITTD12_TGAGCGCGTGGCTTGC-1-10x | 0.0459154  | 0.11340356 | 0.00010046 |
| 16w_SITTD12_TGAGCGCGTGGGTCAA-1-10x | 0.08869953 | 0.26573825 | 0.0041422  |
| 16w_SITTD12_TGAGGGAAGCTTTCTT-1-10x | 0.08818808 | 0.26391718 | 0.0041422  |
| 16w_SITTD12_TGAGGTTGTCGTCATA-1-10x | 0.04638066 | 0.11506016 | 0.00010046 |
| 16w_SITTD12_TGAGGTTTCACAACCA-1-10x | 0.0423735  | 0.10079248 | 7.82E-05   |
| 16w_SITTD12_TGAGTCACACGAGGTA-1-10x | 0.08821928 | 0.26402828 | 0.0041422  |
| 16w_SITTD12_TGAGTCAGTTGGGCCT-1-10x | 0.03411797 | 0.07139834 | 5.17E-05   |
| 16w_SITTD12_TGATCAGTCAGAGCAG-1-10x | 0.0198695  | 0.02066608 | 3.55E-05   |
| 16w_SITTD12_TGCACGGAGTCGGCAA-1-10x | 0.09116828 | 0.27452832 | 0.0043535  |
| 16w_SITTD12_TGCAGTAAGCCTCCAG-1-10x | 0.21272434 | 0.70733374 | 0.0010856  |
| 16w_SITTD12_TGCAGTACAGTCACGC-1-10x | 0.21263821 | 0.7070271  | 0.0010856  |
| 16w_SITTD12_TGCAGTATCTCGCTCA-1-10x | 0.04617162 | 0.11431586 | 0.00010046 |
| 16w_SITTD12_TGCATCCGTAGTACGG-1-10x | 0.05192743 | 0.13480966 | 0.00016076 |
| 16w_SITTD12_TGCATGACATCCGTGG-1-10x | 0.04192488 | 0.09919518 | 7.82E-05   |
| 16w_SITTD12_TGCATGAGTCCAGCGT-1-10x | 0.11358652 | 0.3543494  | 0.0027534  |
| 16w_SITTD12_TGCATGAGTGGGACAT-1-10x | 0.02739903 | 0.04747526 | 4.19E-05   |
| 16w_SITTD12_TGCGACGCACTACAGT-1-10x | 0.04476042 | 0.10929121 | 9.39E-05   |
| 16w_SITTD12_TGCGACGTCGGTAAGG-1-10x | 0.1032467  | 0.31753406 | 0.0038193  |
| 16w_SITTD12_TGCGATAAGACCATAA-1-10x | 0.155672   | 0.50419647 | 0.0018459  |
| 16w_SITTD12_TGCGATAAGTTTCGAC-1-10x | 0.01852361 | 0.01587397 | 3.49E-05   |
| 16w_SITTD12_TGCGATACAGCGTTGC-1-10x | 0.263698   | 0.8888276  | 0.00076313 |
| 16w_SITTD12_TGCGATAGTGTGGACA-1-10x | 0.01680014 | 0.00973746 | 3.38E-05   |
| 16w_SITTD12_TGCGGCAAGAGGACTC-1-10x | 0.22022213 | 0.7340299  | 0.0010253  |
| 16w_SITTD12_TGCGGCAGTTAGCGGA-1-10x | 0.23738152 | 0.7951266  | 0.00088935 |
| 16w_SITTD12_TGCGGCATCAATCTCT-1-10x | 0.27262923 | 0.9206276  | 0.000753   |
| 16w_SITTD12_TGCGGCATCTATTGTC-1-10x | 0.04691258 | 0.11695407 | 0.00010777 |
| 16w_SITTD12_TGCGGGTGTCTGCGCA-1-10x | 0.09854994 | 0.30081105 | 0.0042345  |
| 16w_SITTD12_TGCGGGTTCATGCAGT-1-10x | 0.08991489 | 0.27006558 | 0.0042999  |
| 16w_SITTD12_TGCGGGTTCGCTAGCG-1-10x | 0.08407187 | 0.24926126 | 0.0036353  |
| 16w_SITTD12_TGCGGGTTCGGCTTCT-1-10x | 0.19964854 | 0.6607768  | 0.0011985  |
| 16w_SITTD12_TGGAAGTAGCACCTGC-1-10x | 0.03516613 | 0.07513034 | 5.37E-05   |
| 16w_SITTD12_TGGAGAGCAGTAACGG-1-10x | 0.02494434 | 0.03873523 | 4.00E-05   |
| 16w_SITTD12_TGGAGGAGTACTCGAT-1-10x | 0.04892314 | 0.12411274 | 0.00012523 |
| 16w_SITTD12_TGGATGTAGCTCGACC-1-10x | 0.29178908 | 0.988847   | 0.00076378 |
| 16w_SITTD12_TGGCGTGTGAGTCCG-1-10x  | 0.03315181 | 0.0679583  | 5.00E-05   |
| 16w_SITTD12_TGGGAAGAGTCTCCTC-1-10x | 0.05764696 | 0.1551743  | 0.00028394 |
| 16w_SITTD12_TGGGAAGCAGTTGTTG-1-10x | 0.18697028 | 0.61563534 | 0.0013662  |
| 16w_SITTD12_TGGGAAGTCTGAGAGG-1-10x | 0.1775443  | 0.5820737  | 0.0015248  |
| 16w_SITTD12_TGGGATTAGGTCGTAG-1-10x | 0.11863483 | 0.3723241  | 0.0023898  |
| 16w_SITTD12_TGGGATTGTGGATGAC-1-10x | 0.26284644 | 0.88579553 | 0.00076511 |

|                                     |            |            |            |
|-------------------------------------|------------|------------|------------|
| 16w_SITTD12_TGGGATTGTTGCATGT-1-10x  | 0.14174311 | 0.45460212 | 0.0018724  |
| 16w_SITTD12_TGGGTTAGTTCCGCAG-1-10x  | 0.1689299  | 0.5514018  | 0.0016744  |
| 16w_SITTD12_TGGTACACACAGCCAC-1-10x  | 0.03799168 | 0.08519083 | 6.07E-05   |
| 16w_SITTD12_TGGTACACATAATCGC-1-10x  | 0.02364324 | 0.03410262 | 3.83E-05   |
| 16w_SITTD12_TGGTAGTAGCTTCGTA-1-10x  | 0.25232324 | 0.8483273  | 0.00080028 |
| 16w_SITTD12_TGGTAGTAGGTACAGC-1-10x  | 0.11098397 | 0.3450829  | 0.0030221  |
| 16w_SITTD12_TGGTAGTCAAGCTGTT-1-10x  | 0.11057436 | 0.34362447 | 0.0030221  |
| 16w_SITTD12_TGGTAGTTCGTTGCCT-1-10x  | 0.01759905 | 0.01258204 | 3.44E-05   |
| 16w_SITTD12_TGTAACGCATGACTGT-1-10x  | 0.08514529 | 0.2530832  | 0.0037839  |
| 16w_SITTD12_TGTAACGTCTGGGCG-1-10x   | 0.07352152 | 0.21169631 | 0.0015819  |
| 16w_SITTD12_TGTAAGCCAACTTGGT-1-10x  | 0.04372159 | 0.10559242 | 8.81E-05   |
| 16w_SITTD12_TGTAAGCGTCGAACAG-1-10x  | 0.02576151 | 0.0416448  | 4.00E-05   |
| 16w_SITTD12_TGTAAGCTCGCTATTT-1-10x  | 0.04101863 | 0.09596843 | 7.40E-05   |
| 16w_SITTD12_TGTAAGCTCGCTCTAC-1-10x  | 0.08995145 | 0.27019575 | 0.0042999  |
| 16w_SITTD12_TGTACAGAGCAATTCC-1-10x  | 0.1594572  | 0.51767385 | 0.0018109  |
| 16w_SITTD12_TGTACAGCAATGAAAC-1-10x  | 0.06369112 | 0.17669477 | 0.00058553 |
| 16w_SITTD12_TGTACAGCACCGGTCA-1-10x  | 0.03478312 | 0.07376662 | 5.37E-05   |
| 16w_SITTD12_TGTACAGTCGATTTCT-1-10x  | 0.09656324 | 0.2937373  | 0.0043435  |
| 16w_SITTD12_TGTAGACGTAACCAGG-1-10x  | 0.05847615 | 0.15812667 | 0.00031414 |
| 16w_SITTD12_TGTCCCATCCAATGCA-1-10x  | 0.03856189 | 0.08722111 | 6.36E-05   |
| 16w_SITTD12_TGTCCTGTCCTCTTTC-1-10x  | 0.18943843 | 0.62442327 | 0.0013244  |
| 16w_SITTD12_TGTCCTGTCGAATGCT-1-10x  | 0.04571422 | 0.11268728 | 0.00010046 |
| 16w_SITTD12_TGTGAGTAGGATGGCT-1-10x  | 0.16499399 | 0.5373878  | 0.0017353  |
| 16w_SITTD12_TGTGAGTTCAGCTTGA-1-10x  | 0.04767383 | 0.11966453 | 0.00011598 |
| 16w_SITTD12_TGTGATGAGGAGACCT-1-10x  | 0.09559268 | 0.2902816  | 0.0043808  |
| 16w_SITTD12_TGTGATGAGGGTGAGG-1-10x  | 0.02535621 | 0.04020172 | 4.00E-05   |
| 16w_SITTD12_TGTGATGGTACAACGG-1-10x  | 0.06019738 | 0.16425516 | 0.00038577 |
| 16w_SITTD12_TGTGATGGTGGTCTAT-1-10x  | 0.0523717  | 0.13639149 | 0.00017575 |
| 16w_SITTD12_TGTGCGGTCTGAAGAAT-1-10x | 0.2913883  | 0.98742    | 0.00076269 |
| 16w_SITTD12_TGTGCGGTCTGAGGCC-1-10x  | 0.08747125 | 0.2613649  | 0.0040384  |
| 16w_SITTD12_TGTTACTCATTCGATG-1-10x  | 0.14452484 | 0.4645066  | 0.0018716  |
| 16w_SITTD12_TGTTGAGCAATCGCCG-1-10x  | 0.0194881  | 0.01930808 | 3.55E-05   |
| 16w_SITTD12_TGTTGAGCAGTATGAA-1-10x  | 0.14318737 | 0.45974448 | 0.0018718  |
| 16w_SITTD12_TGTTGAGGTTTCCAC-1-10x   | 0.086115   | 0.25653592 | 0.0039187  |
| 16w_SITTD12_TGTTGAGTCTTCGACC-1-10x  | 0.04392617 | 0.10632085 | 8.81E-05   |
| 16w_SITTD12_TGTTGGAAGTCGGGAT-1-10x  | 0.11198966 | 0.34866375 | 0.002929   |
| 16w_SITTD12_TGTTGGATCACCATCC-1-10x  | 0.04159327 | 0.09801446 | 7.40E-05   |
| 16w_SITTD12_TTAATCCCAGCCGGTT-1-10x  | 0.25520265 | 0.8585795  | 0.00078825 |
| 16w_SITTD12_TTACCGCGTGCCTATA-1-10x  | 0.06457024 | 0.17982492 | 0.00064991 |
| 16w_SITTD12_TTACGCCAGCTGACCC-1-10x  | 0.0165613  | 0.00888709 | 3.38E-05   |
| 16w_SITTD12_TTACGCCGTGGATCGA-1-10x  | 0.02266064 | 0.03060402 | 3.76E-05   |

|                                     |            |            |            |
|-------------------------------------|------------|------------|------------|
| 16w_SITTD12_TTACGTTAGACTCGAG-1-10x  | 0.01657816 | 0.00894712 | 3.38E-05   |
| 16w_SITTD12_TTACGTTGTCCAGCCA-1-10x  | 0.09706113 | 0.29551005 | 0.0043435  |
| 16w_SITTD12_TTAGGCAGTATCCCAA-1-10x  | 0.02039328 | 0.022531   | 3.62E-05   |
| 16w_SITTD12_TTAGGCAGTATGTCAC-1-10x  | 0.03228057 | 0.06485621 | 4.83E-05   |
| 16w_SITTD12_TTAGGCAGTCGATTTG-1-10x  | 0.11487736 | 0.3589455  | 0.0026715  |
| 16w_SITTD12_TTAGGGTAGGATTTCC-1-10x  | 0.08861893 | 0.26545125 | 0.0041422  |
| 16w_SITTD12_TTAGGGTCAGGTCCGT-1-10x  | 0.03859934 | 0.08735442 | 6.36E-05   |
| 16w_SITTD12_TTATTGCCAGTAGATA-1-10x  | 0.0415803  | 0.09796828 | 7.40E-05   |
| 16w_SITTD12_TTCAATCTCGAGAACG-1-10x  | 0.26634362 | 0.8982474  | 0.00075831 |
| 16w_SITTD12_TTCACCGAGCCTAGGA-1-10x  | 0.03853883 | 0.08713899 | 6.36E-05   |
| 16w_SITTD12_TTCACCGGTCCCGGTA-1-10x  | 0.10749745 | 0.33266902 | 0.0034182  |
| 16w_SITTD12_TTCACCGTCTGAGATC-1-10x  | 0.2639631  | 0.88977146 | 0.00076313 |
| 16w_SITTD12_TTCAGGAGTATCAGGG-1-10x  | 0.06367033 | 0.17662075 | 0.00058553 |
| 16w_SITTD12_TTCATTGGTACTGAGG-1-10x  | 0.18481308 | 0.6079545  | 0.0013959  |
| 16w_SITTD12_TTCATTGTCAGAACCT-1-10x  | 0.08863349 | 0.2655031  | 0.0041422  |
| 16w_SITTD12_TTCCAATCATTGAGCT-1-10x  | 0.01544312 | 0.00490574 | 3.27E-05   |
| 16w_SITTD12_TTCCACGCAACTCCCT-1-10x  | 0.04759883 | 0.11939751 | 0.00011598 |
| 16w_SITTD12_TTCCGGTAGGAGACCT-1-10x  | 0.11753544 | 0.3684097  | 0.002453   |
| 16w_SITTD12_TTCCGGGTACGGTTT-1-10x   | 0.07622241 | 0.22131297 | 0.0020486  |
| 16w_SITTD12_TTCCTCTTCATTCGGA-1-10x  | 0.24290317 | 0.81478673 | 0.00085167 |
| 16w_SITTD12_TTCCTCTTCCTTGACC-1-10x  | 0.19083545 | 0.6293974  | 0.0013113  |
| 16w_SITTD12_TTCGATTCACTTCTCG-1-10x  | 0.08991222 | 0.2700561  | 0.0042999  |
| 16w_SITTD12_TTCGATTTACCTTGC-1-10x   | 0.26666394 | 0.8993879  | 0.00075831 |
| 16w_SITTD12_TTCGCTGGTGCCTTCT-1-10x  | 0.21741076 | 0.7240199  | 0.0010475  |
| 16w_SITTD12_TTCGCTGGTGTGCCTG-1-10x  | 0.20087707 | 0.665151   | 0.0011888  |
| 16w_SITTD12_TTCGCTGTCATAGAGA-1-10x  | 0.12421744 | 0.39220124 | 0.0021124  |
| 16w_SITTD12_TTCGGTCGTCAGCGTC-1-10x  | 0.03862548 | 0.08744752 | 6.36E-05   |
| 16w_SITTD12_TTCGGTCGTCAGCCA-1-10x   | 0.01958392 | 0.01964923 | 3.55E-05   |
| 16w_SITTD12_TTCGGTCGTGGCCTCA-1-10x  | 0.13071515 | 0.4153366  | 0.001948   |
| 16w_SITTD12_TTCTAGTCATACTTTC-1-10x  | 0.01852868 | 0.01589201 | 3.49E-05   |
| 16w_SITTD12_TTCTAGTTCAGTGGGA-1-10x  | 0.08873352 | 0.26585925 | 0.0041422  |
| 16w_SITTD12_TTCTCTCAGATCACCT-1-10x  | 0.07964896 | 0.23351331 | 0.0027593  |
| 16w_SITTD12_TTCTTGAAGGTTAGTA-1-10x  | 0.04081636 | 0.09524825 | 7.01E-05   |
| 16w_SITTD12_TTCTTGACAAATGGCG-1-10x  | 0.09100349 | 0.27394158 | 0.0043535  |
| 16w_SITTD12_TTGAACGGTGTGAGCA-1-10x  | 0.03313227 | 0.0678887  | 5.00E-05   |
| 16w_SITTD12_TTGAACGTCTCTCGAC-1-10x  | 0.04282562 | 0.10240228 | 8.29E-05   |
| 16w_SITTD12_TTGACCCACAACGTT-1-10x   | 0.28069428 | 0.9493435  | 0.00075348 |
| 16w_SITTD12_TTGAGTGAGTCTGCAT-1-10x  | 0.04488487 | 0.10973433 | 9.39E-05   |
| 16w_SITTD12_TTGATGGAGGTCCCTG-1-10x  | 0.05227046 | 0.13603103 | 0.00017575 |
| 16w_SITTD12_TTGCATTGTTCCGGTAT-1-10x | 0.22030744 | 0.73433363 | 0.0010179  |
| 16w_SITTD12_TTGCATTTCTACGAA-1-10x   | 0.20725276 | 0.6878519  | 0.001126   |

|                                    |            |            |            |
|------------------------------------|------------|------------|------------|
| 16w_SITTD12_TTGCTGCAGGCACCAA-1-10x | 0.09402054 | 0.2846839  | 0.0044154  |
| 16w_SITTD12_TTGCTGCCAGACCGCT-1-10x | 0.26098877 | 0.87918127 | 0.00076963 |
| 16w_SITTD12_TTGCTGCTCGCTGTCT-1-10x | 0.04434324 | 0.10780583 | 8.81E-05   |
| 16w_SITTD12_TTGGATGTCACGGACC-1-10x | 0.04360859 | 0.10519009 | 8.29E-05   |
| 16w_SITTD12_TTGGATGTCGGCTGGT-1-10x | 0.01807754 | 0.01428571 | 3.44E-05   |
| 16w_SITTD12_TTGGATGTCTAGTGAC-1-10x | 0.04670944 | 0.11623079 | 0.00010777 |
| 16w_SITTD12_TTGGGATCAATCGCAT-1-10x | 0.02506118 | 0.03915126 | 4.00E-05   |
| 16w_SITTD12_TTGGTTTCACAAAGCG-1-10x | 0.14112553 | 0.45240322 | 0.0018734  |
| 16w_SITTD12_TTGTGGAGTCTCCCTA-1-10x | 0.21347012 | 0.7099891  | 0.0010778  |
| 16w_SITTD12_TTGTGGATCATTACCT-1-10x | 0.11831529 | 0.37118638 | 0.0023898  |
| 16w_SITTD12_TTGTGTTCAACCGTGC-1-10x | 0.03421059 | 0.07172813 | 5.17E-05   |
| 16w_SITTD12_TTGTTCAGTCCAGGTC-1-10x | 0.07135394 | 0.20397855 | 0.0013138  |
| 16w_SITTD12_TTGTGTAGTGCAGGT-1-10x  | 0.05831469 | 0.15755175 | 0.00031414 |
| 16w_SITTD12_TTGTTTGTCGGCGATC-1-10x | 0.0154991  | 0.00510507 | 3.33E-05   |
| 16w_SITTD12_TTTACCAAGAGGTCAC-1-10x | 0.08970057 | 0.2693025  | 0.0042999  |
| 16w_SITTD12_TTTACCAAGCAGGTCA-1-10x | 0.02932273 | 0.05432468 | 4.42E-05   |
| 16w_SITTD12_TTTACCAGTCCACAGC-1-10x | 0.02385074 | 0.03484142 | 3.83E-05   |
| 16w_SITTD12_TTTACCATCGCCAGTG-1-10x | 0.09915692 | 0.30297223 | 0.0041652  |
| 16w_SITTD12_TTTAGTCAGGTGCTTT-1-10x | 0.08898793 | 0.26676512 | 0.0042295  |
| 16w_SITTD12_TTTATGCGTTCTCCTG-1-10x | 0.07860542 | 0.22979775 | 0.002576   |
| 16w_SITTD12_TTTATGCTCCGAGGCT-1-10x | 0.07857776 | 0.22969928 | 0.002576   |
| 16w_SITTD12_TTTCACACACTTCAAG-1-10x | 0.12453067 | 0.3933165  | 0.0020803  |
| 16w_SITTD12_TTTCACAGTGCCGGTT-1-10x | 0.23667148 | 0.7925985  | 0.00089602 |
| 16w_SITTD12_TTTCGATAGTAACGTA-1-10x | 0.03139776 | 0.06171292 | 4.68E-05   |
| 16w_SITTD12_TTTGACTAGTGGTCAG-1-10x | 0.09079325 | 0.273193   | 0.0043535  |
| 16w_SITTD12_TTTGATCTCTCTATGT-1-10x | 0.18382227 | 0.6044267  | 0.0014112  |
| 16w_SITTD12_TTTGGAGAGACATCCT-1-10x | 0.03340836 | 0.06887174 | 5.17E-05   |
| 16w_SITTD12_TTTGGAGGTTAAGACA-1-10x | 0.25986308 | 0.87517315 | 0.00077221 |
| 16w_SITTD12_TTTGGTTAGCTACAAA-1-10x | 0.24279207 | 0.81439114 | 0.00085167 |
| 16w_SITTD12_TTTGTTGAGACGCATG-1-10x | 0.03200993 | 0.06389256 | 4.83E-05   |
| 16w_SITTD12_TTTGTTGCAGCATTGT-1-10x | 0.06181505 | 0.17001493 | 0.00047505 |
| 16w_SITTD12_TTTGTTGTCTGCTGAA-1-10x | 0.02296378 | 0.03168336 | 3.76E-05   |
| 16w_SITTD12_AAACCCATCTCACGAA-1-10x | 0.04685594 | 0.11675242 | 0.00010777 |
| 16w_SITTD12_AAACGAAGTCCGGATC-1-10x | 0.01970311 | 0.02007364 | 3.55E-05   |
| 16w_SITTD12_AAACGCTAGGTAGATT-1-10x | 0.09552284 | 0.29003295 | 0.0043808  |
| 16w_SITTD12_AAACGCTTCGTAACCA-1-10x | 0.03877376 | 0.08797546 | 6.36E-05   |
| 16w_SITTD12_AAAGGGCAGCAACAGC-1-10x | 0.09479448 | 0.28743958 | 0.0044051  |
| 16w_SITTD12_AAAGGGCAGGATACCG-1-10x | 0.24751396 | 0.83120364 | 0.00082396 |
| 16w_SITTD12_AAAGGTACAGATCACT-1-10x | 0.03638851 | 0.07948269 | 5.82E-05   |
| 16w_SITTD12_AAAGGTAGTCCAAATC-1-10x | 0.02085429 | 0.02417246 | 3.62E-05   |
| 16w_SITTD12_AAATGGAAGGGTATAT-1-10x | 0.24951573 | 0.838331   | 0.00081397 |

|                                    |            |            |            |
|------------------------------------|------------|------------|------------|
| 16w_SITTD12_AAATGGATCAAGGAGC-1-10x | 0.18777262 | 0.61849207 | 0.0013519  |
| 16w_SITTD12_AACAAAGGTAACATCC-1-10x | 0.06304309 | 0.17438743 | 0.00052741 |
| 16w_SITTD12_AACAAAGGTAGGACCA-1-10x | 0.09404057 | 0.28475523 | 0.0044154  |
| 16w_SITTD12_AACAACCAGGCTGGAT-1-10x | 0.02942558 | 0.05469089 | 4.42E-05   |
| 16w_SITTD12_AACAACCCAAGTATCC-1-10x | 0.13153695 | 0.41826266 | 0.001934   |
| 16w_SITTD12_AACAACCTCGAGTCTA-1-10x | 0.24280785 | 0.8144473  | 0.00085167 |
| 16w_SITTD12_AACACACAGTGCACCC-1-10x | 0.08460173 | 0.25114787 | 0.0036353  |
| 16w_SITTD12_AACAGGGAGCGCCTTG-1-10x | 0.2645747  | 0.8919491  | 0.00076135 |
| 16w_SITTD12_AACAGGGTCCCTGGTT-1-10x | 0.14814976 | 0.47741327 | 0.0018713  |
| 16w_SITTD12_AACCAACTCGACATAC-1-10x | 0.08556843 | 0.25458983 | 0.0037839  |
| 16w_SITTD12_AACCAACTCGACATTG-1-10x | 0.06493634 | 0.18112843 | 0.00064991 |
| 16w_SITTD12_AACCTGAAGGGAGTGG-1-10x | 0.24852835 | 0.8348154  | 0.00081888 |
| 16w_SITTD12_AACCTTTCAGGATTCT-1-10x | 0.01805717 | 0.0142132  | 3.44E-05   |
| 16w_SITTD12_AACGGGATCGGTGAAG-1-10x | 0.09809613 | 0.29919523 | 0.0042943  |
| 16w_SITTD12_AAGAACAGTCCTGTTC-1-10x | 0.26591834 | 0.89673316 | 0.00075974 |
| 16w_SITTD12_AAGAACATCGCTAAAC-1-10x | 0.23725761 | 0.7946855  | 0.00088935 |
| 16w_SITTD12_AAGACAATCAGCCTTC-1-10x | 0.26144814 | 0.8808169  | 0.00076963 |
| 16w_SITTD12_AAGATAGCAGTGCCTG-1-10x | 0.0611869  | 0.16777839 | 0.00042799 |
| 16w_SITTD12_AAGATAGGTCCGGATC-1-10x | 0.05101044 | 0.1315447  | 0.00014746 |
| 16w_SITTD12_AAGATAGTCATCACAG-1-10x | 0.21148784 | 0.7029311  | 0.0010934  |
| 16w_SITTD12_AAGCATCTCCTCGCAT-1-10x | 0.04487874 | 0.10971252 | 9.39E-05   |
| 16w_SITTD12_AAGCGAGCAATGTGGG-1-10x | 0.22144167 | 0.73837215 | 0.0010106  |
| 16w_SITTD12_AAGCGAGGTAGGACTG-1-10x | 0.2424596  | 0.8132073  | 0.00085764 |
| 16w_SITTD12_AAGCGAGGTGGATACG-1-10x | 0.01769537 | 0.01292499 | 3.44E-05   |
| 16w_SITTD12_AAGCGTTAGAGAGGTA-1-10x | 0.02038512 | 0.02250197 | 3.62E-05   |
| 16w_SITTD12_AAGCGTTCAATTTCTC-1-10x | 0.28032467 | 0.9480275  | 0.00075303 |
| 16w_SITTD12_AAGCGTTTCGGACGTC-1-10x | 0.27193728 | 0.91816384 | 0.000753   |
| 16w_SITTD12_AAGCGTTTCTGCGGGT-1-10x | 0.05518616 | 0.14641249 | 0.000233   |
| 16w_SITTD12_AAGGAATTCGTATGA-1-10x  | 0.05213308 | 0.13554189 | 0.00017575 |
| 16w_SITTD12_AAGGTAAGTTAACCTG-1-10x | 0.04268615 | 0.10190571 | 7.82E-05   |
| 16w_SITTD12_AAGGTAATCGTAGTGT-1-10x | 0.2319223  | 0.7756888  | 0.00093066 |
| 16w_SITTD12_AAGTACCAGTGGTGGT-1-10x | 0.1531148  | 0.4950915  | 0.0018617  |
| 16w_SITTD12_AATCACGCATGACTCA-1-10x | 0.09036858 | 0.27168098 | 0.0042999  |
| 16w_SITTD12_AATCACGTCCACTTTA-1-10x | 0.04917982 | 0.12502667 | 0.00012523 |
| 16w_SITTD12_AATCGTGAGAGACAAG-1-10x | 0.24776584 | 0.83210045 | 0.00082396 |
| 16w_SITTD12_AATGAAGAGGGCTTCC-1-10x | 0.27309844 | 0.9222982  | 0.0007526  |
| 16w_SITTD12_AATGAAGTCTACTATC-1-10x | 0.23167282 | 0.7748006  | 0.00093066 |
| 16w_SITTD12_AATGAAGTCTTCCAGC-1-10x | 0.07088547 | 0.20231053 | 0.0011935  |
| 16w_SITTD12_AATGACCCAGGGATAC-1-10x | 0.20032255 | 0.66317666 | 0.0011985  |
| 16w_SITTD12_AATGACCCATCTCCCA-1-10x | 0.02696237 | 0.04592052 | 4.19E-05   |
| 16w_SITTD12_AATGGAAAGTACCGGA-1-10x | 0.04837387 | 0.12215705 | 0.00012523 |



|                                     |            |            |            |
|-------------------------------------|------------|------------|------------|
| 16w_SITTD12_AATTCCTTCTCGTGGG-1-10x  | 0.09850761 | 0.30066034 | 0.0042345  |
| 16w_SITTD12_ACAAAGACACTAGTAC-1-10x  | 0.19865826 | 0.6572508  | 0.0012085  |
| 16w_SITTD12_ACAACCATCCGAGATT-1-10x  | 0.21474774 | 0.7145381  | 0.0010625  |
| 16w_SITTD12_ACAAGCTGTGGATACG-1-10x  | 0.02359388 | 0.03392686 | 3.83E-05   |
| 16w_SITTD12_ACACCAAAGCCTCATA-1-10x  | 0.08455483 | 0.25098085 | 0.0036353  |
| 16w_SITTD12_ACACGCGGTCTTTCAT-1-10x  | 0.1486732  | 0.479277   | 0.0018713  |
| 16w_SITTD12_ACACTGACACTCACTC-1-10x  | 0.19957128 | 0.6605017  | 0.0012085  |
| 16w_SITTD12_ACACTGACAGAGCCCT-1-10x  | 0.03016835 | 0.05733554 | 4.55E-05   |
| 16w_SITTD12_ACAGAAATCCCTCAAC-1-10x  | 0.03677305 | 0.08085187 | 5.82E-05   |
| 16w_SITTD12_ACATTTTCAGAGGACTC-1-10x | 0.12981376 | 0.41212717 | 0.0019639  |
| 16w_SITTD12_ACATTTCCACAACCGC-1-10x  | 0.0245347  | 0.03727669 | 3.91E-05   |
| 16w_SITTD12_ACCAAACAGGCTCTAT-1-10x  | 0.27450296 | 0.9272991  | 0.00075233 |
| 16w_SITTD12_ACCAAACTCGTAGTCA-1-10x  | 0.23486796 | 0.786177   | 0.00090964 |
| 16w_SITTD12_ACCAACACAATGTCTG-1-10x  | 0.07416367 | 0.21398272 | 0.0017292  |
| 16w_SITTD12_ACCAACAGTGGCAGAT-1-10x  | 0.06034557 | 0.16478279 | 0.00038577 |
| 16w_SITTD12_ACCACAAAGTATCCTG-1-10x  | 0.04968411 | 0.12682223 | 0.00013566 |
| 16w_SITTD12_ACCACAATCGGCATCG-1-10x  | 0.03151333 | 0.06212442 | 4.83E-05   |
| 16w_SITTD12_ACCCAAACAAGTCCCG-1-10x  | 0.12999427 | 0.4127699  | 0.0019639  |
| 16w_SITTD12_ACCCAAAGTCGTGGAA-1-10x  | 0.0496727  | 0.1267816  | 0.00013566 |
| 16w_SITTD12_ACCCTCAAGTAGCAAT-1-10x  | 0.11183845 | 0.3481253  | 0.002929   |
| 16w_SITTD12_ACCCTCACATCGAAGG-1-10x  | 0.03652358 | 0.0799636  | 5.82E-05   |
| 16w_SITTD12_ACCCTCAGTGAATTAG-1-10x  | 0.03700291 | 0.0816703  | 5.82E-05   |
| 16w_SITTD12_ACCCTTGAGGAGTACC-1-10x  | 0.08571426 | 0.25510907 | 0.0037839  |
| 16w_SITTD12_ACCCTTGTCCTCAGAA-1-10x  | 0.27830422 | 0.9408336  | 0.00075239 |
| 16w_SITTD12_ACGATGTAGCTGCCTG-1-10x  | 0.0810167  | 0.23838323 | 0.0029431  |
| 16w_SITTD12_ACGATGTTGAGAATA-1-10x   | 0.03564533 | 0.07683656 | 5.58E-05   |
| 16w_SITTD12_ACGCACGCAAGATGGC-1-10x  | 0.02094928 | 0.02451065 | 3.62E-05   |
| 16w_SITTD12_ACGGAAGTCGATTGGT-1-10x  | 0.076221   | 0.22130792 | 0.0020486  |
| 16w_SITTD12_ACGGGTCAGCTATCCA-1-10x  | 0.06497642 | 0.18127115 | 0.00064991 |
| 16w_SITTD12_ACGGGTCAGGGAGGCA-1-10x  | 0.02058817 | 0.02322492 | 3.62E-05   |
| 16w_SITTD12_ACGGTCGTCCATTGGA-1-10x  | 0.07571258 | 0.2194977  | 0.0020486  |
| 16w_SITTD12_ACGTACAAGCATACTC-1-10x  | 0.04131446 | 0.09702174 | 7.40E-05   |
| 16w_SITTD12_ACGTACATCCGCTGTT-1-10x  | 0.11604512 | 0.36310336 | 0.0025211  |
| 16w_SITTD12_ACGTTCCCATCCTTCG-1-10x  | 0.02599545 | 0.04247775 | 4.09E-05   |
| 16w_SITTD12_ACGTTCCGTATCACCA-1-10x  | 0.10255791 | 0.31508157 | 0.0039137  |
| 16w_SITTD12_ACTATCTTCCGAGTGC-1-10x  | 0.02457698 | 0.03742724 | 3.91E-05   |
| 16w_SITTD12_ACTATGGGTGTATCCA-1-10x  | 0.01776114 | 0.01315917 | 3.44E-05   |
| 16w_SITTD12_ACTATTCAGAAGCTCG-1-10x  | 0.13357069 | 0.42550388 | 0.0019115  |
| 16w_SITTD12_ACTATTCCACATCATG-1-10x  | 0.08358416 | 0.24752475 | 0.0034742  |
| 16w_SITTD12_ACTATTCTCGCCAGAC-1-10x  | 0.18149741 | 0.5961489  | 0.0014587  |
| 16w_SITTD12_ACTCCCACAATTGCCA-1-10x  | 0.19402573 | 0.64075655 | 0.0012624  |

|                                    |            |            |            |
|------------------------------------|------------|------------|------------|
| 16w_SITTD12_ACTCCCACAGTATGAA-1-10x | 0.12607378 | 0.3988108  | 0.0020515  |
| 16w_SITTD12_ACTCCCACATAACGGG-1-10x | 0.04850074 | 0.12260877 | 0.00012523 |
| 16w_SITTD12_ACTCCCAGTGACACAG-1-10x | 0.06307248 | 0.17449209 | 0.00052741 |
| 16w_SITTD12_ACTCTCGTCACAAGGG-1-10x | 0.09480441 | 0.28747493 | 0.0044051  |
| 16w_SITTD12_ACTGATGGTAGAGTTA-1-10x | 0.09663653 | 0.29399827 | 0.0043435  |
| 16w_SITTD12_ACTTATCTCTGTGCGG-1-10x | 0.28266352 | 0.9563551  | 0.00075462 |
| 16w_SITTD12_ACTTTCAAGCATTTGC-1-10x | 0.07720374 | 0.22480704 | 0.0022191  |
| 16w_SITTD12_ACTTTGTCAGCGGTCT-1-10x | 0.1022808  | 0.31409493 | 0.0039137  |
| 16w_SITTD12_AGAAATGAGAAGTCTA-1-10x | 0.12158382 | 0.38282412 | 0.0022308  |
| 16w_SITTD12_AGAAATGCAAAGTGTA-1-10x | 0.10533737 | 0.32497796 | 0.0036214  |
| 16w_SITTD12_AGAAATGTCCGTACGG-1-10x | 0.21185173 | 0.70422673 | 0.0010856  |
| 16w_SITTD12_AGAAATGTCTGCCTCA-1-10x | 0.07891858 | 0.23091277 | 0.002576   |
| 16w_SITTD12_AGAAGCGAGTCTTGGT-1-10x | 0.19813788 | 0.655398   | 0.0012187  |
| 16w_SITTD12_AGAAGCGACTAACCA-1-10x  | 0.163685   | 0.53272706 | 0.001763   |
| 16w_SITTD12_AGAAGCGTCGAGAGCA-1-10x | 0.03958818 | 0.09087526 | 6.67E-05   |
| 16w_SITTD12_AGACCATCAACATACC-1-10x | 0.01874281 | 0.01665444 | 3.49E-05   |
| 16w_SITTD12_AGACCATCAGCTTTCC-1-10x | 0.09007382 | 0.27063146 | 0.0042999  |
| 16w_SITTD12_AGAGAATAGGCGTCCT-1-10x | 0.02640428 | 0.04393343 | 4.09E-05   |
| 16w_SITTD12_AGAGAGCTCAGCCCAG-1-10x | 0.02306458 | 0.03204229 | 3.83E-05   |
| 16w_SITTD12_AGATAGATCACTCACC-1-10x | 0.01923019 | 0.01838978 | 3.49E-05   |
| 16w_SITTD12_AGATCCACAGTTCCAA-1-10x | 0.25710645 | 0.86535805 | 0.00078121 |
| 16w_SITTD12_AGATCGTTCGAAGTGG-1-10x | 0.1979059  | 0.654572   | 0.0012187  |
| 16w_SITTD12_AGATGCTAGACGCAGT-1-10x | 0.21090971 | 0.70087266 | 0.0010934  |
| 16w_SITTD12_AGATGCTAGCATGCGA-1-10x | 0.28567392 | 0.96707374 | 0.00075686 |
| 16w_SITTD12_AGATGCTCACGCGGTT-1-10x | 0.02866433 | 0.05198043 | 4.42E-05   |
| 16w_SITTD12_AGCATCACAGCGTGCT-1-10x | 0.02281121 | 0.03114014 | 3.76E-05   |
| 16w_SITTD12_AGCATCATCTCCGTGT-1-10x | 0.21963869 | 0.73195255 | 0.0010253  |
| 16w_SITTD12_AGCCAATTCTAGACAC-1-10x | 0.16263264 | 0.52898014 | 0.001776   |
| 16w_SITTD12_AGCCACGGTGAGGCAT-1-10x | 0.25126183 | 0.84454805 | 0.00080467 |
| 16w_SITTD12_AGCGATTCACCGGTG-1-10x  | 0.07927766 | 0.23219131 | 0.002576   |
| 16w_SITTD12_AGCGCCACAGCTCATA-1-10x | 0.26093197 | 0.87897897 | 0.00076963 |
| 16w_SITTD12_AGCGCTGAGCAGCCCT-1-10x | 0.07042432 | 0.2006686  | 0.0011935  |
| 16w_SITTD12_AGCTACACAGCTCATA-1-10x | 0.06279216 | 0.173494   | 0.00052741 |
| 16w_SITTD12_AGCTACAGTAGGGTAC-1-10x | 0.18667711 | 0.6145915  | 0.0013662  |
| 16w_SITTD12_AGCTACATCTGATTCT-1-10x | 0.23411399 | 0.78349245 | 0.00091657 |
| 16w_SITTD12_AGCTCAAAGACGACTG-1-10x | 0.10311644 | 0.31707025 | 0.0038193  |
| 16w_SITTD12_AGCTCAAAGACGCCAA-1-10x | 0.02660053 | 0.04463219 | 4.09E-05   |
| 16w_SITTD12_AGCTCAAAGTTAGAAC-1-10x | 0.11689869 | 0.3661425  | 0.0025211  |
| 16w_SITTD12_AGCTCAAGTCAAAGCG-1-10x | 0.0229815  | 0.03174647 | 3.76E-05   |
| 16w_SITTD12_AGCTTCCAGACTCATC-1-10x | 0.1528503  | 0.49414974 | 0.0018617  |
| 16w_SITTD12_AGCTTCCCATCCGATA-1-10x | 0.0248     | 0.03822132 | 3.91E-05   |

|                                      |            |            |            |
|--------------------------------------|------------|------------|------------|
| 16w_SITTD12_AGGAAATAGTGGCGAT-1-10x   | 0.04915327 | 0.12493213 | 0.00012523 |
| 16w_SITTD12_AGGATAAGTTTCAGAC-1-10x   | 0.09086468 | 0.27344736 | 0.0043535  |
| 16w_SITTD12_AGGATCTGTACCTATG-1-10x   | 0.11553647 | 0.3612923  | 0.002594   |
| 16w_SITTD12_AGGCCACAGATTAGTG-1-10x   | 0.01693387 | 0.01021364 | 3.38E-05   |
| 16w_SITTD12_AGGCCACAGCACTGGA-1-10x   | 0.2605189  | 0.8775083  | 0.00077221 |
| 16w_SITTD12_AGGCCACCAAAGAACT-1-10x   | 0.03718841 | 0.08233079 | 6.07E-05   |
| 16w_SITTD12_AGGCTGCAGCACACCC-1-10x   | 0.04822445 | 0.12162504 | 0.00011598 |
| 16w_SITTD12_AGGGAGTGTTGCCGCA-1-10x   | 0.07216036 | 0.20684987 | 0.0014433  |
| 16w_SITTD12_AGGGCTCGTGTGGTCC-1-10x   | 0.07382021 | 0.21275982 | 0.0017292  |
| 16w_SITTD12_AGGGTCCAGTTTGTCTG-1-10x  | 0.21417013 | 0.7124815  | 0.0010701  |
| 16w_SITTD12_AGGGTCCGTCCCTCAT-1-10x   | 0.24601047 | 0.82585037 | 0.00083459 |
| 16w_SITTD12_AGGGTTTTCGTAGAGG-1-10x   | 0.23730081 | 0.79483926 | 0.00088935 |
| 16w_SITTD12_AGGTCATCACAAGCTT-1-10x   | 0.19514267 | 0.6447334  | 0.0012511  |
| 16w_SITTD12_AGGTCATTCAACGCTA-1-10x   | 0.26672876 | 0.8996187  | 0.00075831 |
| 16w_SITTD12_AGGTCATTCCACAAGT-1-10x   | 0.01575701 | 0.00602338 | 3.33E-05   |
| 16w_SITTD12_AGGTTACTCGGTGCGAC-1-10x  | 0.03318894 | 0.06809047 | 5.00E-05   |
| 16w_SITTD12_AGTACTGCAACATCGT-1-10x   | 0.21492465 | 0.715168   | 0.0010625  |
| 16w_SITTD12_AGTAGCTTCGTTCTGC-1-10x   | 0.0284388  | 0.05117741 | 4.30E-05   |
| 16w_SITTD12_AGTCATGGTCGTGATT-1-10x   | 0.04814135 | 0.12132917 | 0.00011598 |
| 16w_SITTD12_AGTGATCCAACACTACGT-1-10x | 0.18070996 | 0.59334517 | 0.001475   |
| 16w_SITTD12_AGTGATCCATGTGCGTA-1-10x  | 0.19397242 | 0.64056677 | 0.0012624  |
| 16w_SITTD12_AGTGTTGAGAGCATAT-1-10x   | 0.2763484  | 0.9338699  | 0.00075214 |
| 16w_SITTD12_AGTGTTGTGCGCCAA-1-10x    | 0.07750053 | 0.22586375 | 0.0023954  |
| 16w_SITTD12_AGTGTTGTCTGTGCGG-1-10x   | 0.1614038  | 0.5246048  | 0.0017883  |
| 16w_SITTD12_AGTTCCAGCTGTTAC-1-10x    | 0.02808539 | 0.04991906 | 4.30E-05   |
| 16w_SITTD12_AGTTCCCTCCGCTTAC-1-10x   | 0.23155384 | 0.7743769  | 0.00093066 |
| 16w_SITTD12_AGTTCGAAGTCACTCA-1-10x   | 0.04788711 | 0.12042394 | 0.00011598 |
| 16w_SITTD12_AGTTGACAAATGGAT-1-10x    | 0.28787208 | 0.97490036 | 0.00075864 |
| 16w_SITTD12_AGTTGACAAACGTATC-1-10x   | 0.05983039 | 0.16294849 | 0.00038577 |
| 16w_SITTD12_ATACCGATCACCTTG-1-10x    | 0.21851744 | 0.7279603  | 0.0010326  |
| 16w_SITTD12_ATACTTCTCCGCATAA-1-10x   | 0.09151022 | 0.27574584 | 0.0043535  |
| 16w_SITTD12_ATAGACCGTATTTCCGG-1-10x  | 0.13181737 | 0.41926113 | 0.001934   |
| 16w_SITTD12_ATAGACCGTCCAGCCA-1-10x   | 0.20506655 | 0.68006784 | 0.0011518  |
| 16w_SITTD12_ATAGACCTCAGCAATC-1-10x   | 0.24291593 | 0.81483215 | 0.00085167 |
| 16w_SITTD12_ATAGAGATCCGCTAGG-1-10x   | 0.07988796 | 0.23436427 | 0.0027593  |
| 16w_SITTD12_ATAGGCTCACACGCCA-1-10x   | 0.01748798 | 0.01218658 | 3.44E-05   |
| 16w_SITTD12_ATCACAGCATCAACCA-1-10x   | 0.22342093 | 0.7454194  | 0.00099599 |
| 16w_SITTD12_ATCACAGCATGATAGA-1-10x   | 0.0161698  | 0.00749311 | 3.33E-05   |
| 16w_SITTD12_ATCACAGGTGCGGCTT-1-10x   | 0.03901725 | 0.08884244 | 6.67E-05   |
| 16w_SITTD12_ATCACGACAGTCGGTC-1-10x   | 0.04042684 | 0.09386131 | 7.01E-05   |
| 16w_SITTD12_ATCACTTAGATTGAGT-1-10x   | 0.20239058 | 0.6705399  | 0.0011792  |

|                                    |            |            |            |
|------------------------------------|------------|------------|------------|
| 16w_SITTD12_ATCACTTCAAAGCACG-1-10x | 0.02373205 | 0.03441883 | 3.83E-05   |
| 16w_SITTD12_ATCACTTTCGTGGCGT-1-10x | 0.05343448 | 0.14017558 | 0.00019264 |
| 16w_SITTD12_ATCATTCCAAGTTGGG-1-10x | 0.10986719 | 0.3411066  | 0.0031181  |
| 16w_SITTD12_ATCCCTGAGGACATCG-1-10x | 0.03458042 | 0.07304493 | 5.37E-05   |
| 16w_SITTD12_ATCCGTCCACAAGGTG-1-10x | 0.11472074 | 0.35838786 | 0.0026715  |
| 16w_SITTD12_ATCCTATCAGCCTTCT-1-10x | 0.21600787 | 0.7190249  | 0.001055   |
| 16w_SITTD12_ATCGATGAGGCGTTGA-1-10x | 0.04849273 | 0.12258025 | 0.00012523 |
| 16w_SITTD12_ATCGATGCAGAGTGTG-1-10x | 0.25744483 | 0.8665629  | 0.00078121 |
| 16w_SITTD12_ATCGATGTCGAGAAGC-1-10x | 0.2628656  | 0.8858638  | 0.00076511 |
| 16w_SITTD12_ATCGCCTTCCGACGGT-1-10x | 0.07603524 | 0.22064653 | 0.0020486  |
| 16w_SITTD12_ATCGCCTTCGTACCTC-1-10x | 0.01696806 | 0.01033536 | 3.38E-05   |
| 16w_SITTD12_ATCGGATAGTTATGGA-1-10x | 0.04966999 | 0.12677194 | 0.00013566 |
| 16w_SITTD12_ATCGGATTCTACTGC-1-10x  | 0.03221989 | 0.06464014 | 4.83E-05   |
| 16w_SITTD12_ATCGTAGCAAAGGCTG-1-10x | 0.2707791  | 0.9140401  | 0.00075418 |
| 16w_SITTD12_ATCGTAGGTTCCGCTT-1-10x | 0.06742536 | 0.1899907  | 0.00088537 |
| 16w_SITTD12_ATCGTAGGTTGCTCCT-1-10x | 0.21429598 | 0.7129296  | 0.0010701  |
| 16w_SITTD12_ATCGTCCGTTCCCAA-1-10x  | 0.18560955 | 0.6107904  | 0.0013809  |
| 16w_SITTD12_ATCGTGAGTGAGATTA-1-10x | 0.08341113 | 0.24690866 | 0.0034742  |
| 16w_SITTD12_ATCTCTAAGGTTGAGC-1-10x | 0.05100395 | 0.13152157 | 0.00014746 |
| 16w_SITTD12_ATCTCTACAAAGTATG-1-10x | 0.0697643  | 0.19831859 | 0.0010821  |
| 16w_SITTD12_ATCTCTACAATGAGCG-1-10x | 0.02339023 | 0.03320178 | 3.83E-05   |
| 16w_SITTD12_ATCTCTAGTAACATGA-1-10x | 0.09266081 | 0.27984253 | 0.0044107  |
| 16w_SITTD12_ATCTTCAGTATGGAGC-1-10x | 0.03842641 | 0.08673874 | 6.36E-05   |
| 16w_SITTD12_ATGAAAGAGAGCAACC-1-10x | 0.04924185 | 0.12524755 | 0.00012523 |
| 16w_SITTD12_ATGACCAAGGTACATA-1-10x | 0.23791987 | 0.79704344 | 0.00088935 |
| 16w_SITTD12_ATGAGGGTCTATTCGT-1-10x | 0.13994035 | 0.44818333 | 0.001875   |
| 16w_SITTD12_ATGAGTCCAGGTACGA-1-10x | 0.08434679 | 0.25024012 | 0.0036353  |
| 16w_SITTD12_ATGAGTCTCGGTCATA-1-10x | 0.09973729 | 0.30503866 | 0.0041652  |
| 16w_SITTD12_ATGCATGAGTGTACAA-1-10x | 0.05583306 | 0.14871581 | 0.000233   |
| 16w_SITTD12_ATGCATGGTTAGAAAC-1-10x | 0.08049634 | 0.23653045 | 0.0029431  |
| 16w_SITTD12_ATGCCTCCACGCGTGT-1-10x | 0.04324431 | 0.10389305 | 8.29E-05   |
| 16w_SITTD12_ATGGAGGAGATACATG-1-10x | 0.21882132 | 0.72904223 | 0.0010326  |
| 16w_SITTD12_ATGGAGGCATCGGTTA-1-10x | 0.18136697 | 0.59568447 | 0.0014587  |
| 16w_SITTD12_ATGGATCTCCTCAGGG-1-10x | 0.02907495 | 0.05344246 | 4.42E-05   |
| 16w_SITTD12_ATGGGAGCACGGTAGA-1-10x | 0.2751253  | 0.92951494 | 0.00075218 |
| 16w_SITTD12_ATGGGAGGTCGTGGTC-1-10x | 0.191925   | 0.6332768  | 0.0012985  |
| 16w_SITTD12_ATGGGAGTCTCTGCTG-1-10x | 0.04541852 | 0.1116344  | 9.39E-05   |
| 16w_SITTD12_ATGGGTTGTATCGCGC-1-10x | 0.18761796 | 0.6179414  | 0.0013519  |
| 16w_SITTD12_ATGGGTTTCAACGCTA-1-10x | 0.06081418 | 0.1664513  | 0.00042799 |
| 16w_SITTD12_ATGGGTTTCGATCCAA-1-10x | 0.05188489 | 0.1346582  | 0.00016076 |
| 16w_SITTD12_ATGGTTGGTCCATACA-1-10x | 0.04375396 | 0.10570767 | 8.81E-05   |

|                                    |            |            |            |
|------------------------------------|------------|------------|------------|
| 16w_SITTD12_ATGTCCCATATACCG-1-10x  | 0.27367273 | 0.924343   | 0.0007526  |
| 16w_SITTD12_ATGTCCCGTAAGCGGT-1-10x | 0.04853749 | 0.12273964 | 0.00012523 |
| 16w_SITTD12_ATGTCCCTCCCTCTTT-1-10x | 0.11935369 | 0.37488365 | 0.0023317  |
| 16w_SITTD12_ATGTCCCTCTCCAAGA-1-10x | 0.14212944 | 0.45597765 | 0.0018724  |
| 16w_SITTD12_ATGTCTTAGAAGTCCG-1-10x | 0.03566081 | 0.07689168 | 5.58E-05   |
| 16w_SITTD12_ATTACCTGTTCTCCCA-1-10x | 0.04736367 | 0.11856019 | 0.00010777 |
| 16w_SITTD12_ATTATCCAGCCGATCC-1-10x | 0.0938593  | 0.28410983 | 0.0044154  |
| 16w_SITTD12_ATTCACTAGGCTAACG-1-10x | 0.24962988 | 0.8387374  | 0.00081397 |
| 16w_SITTD12_ATTCACTGTTGAGCC-1-10x  | 0.04947877 | 0.12609112 | 0.00013566 |
| 16w_SITTD12_ATTCACTTCAGTCAGT-1-10x | 0.13084747 | 0.41580775 | 0.001948   |
| 16w_SITTD12_ATTCAGGCATTCCTCG-1-10x | 0.2724282  | 0.91991186 | 0.000753   |
| 16w_SITTD12_ATTCATCAGGTGAGCT-1-10x | 0.01934382 | 0.01879437 | 3.55E-05   |
| 16w_SITTD12_ATTCATCGTCAGGTAG-1-10x | 0.21775354 | 0.7252404  | 0.00104    |
| 16w_SITTD12_ATTCCATCATAACCA-1-10x  | 0.24547847 | 0.82395613 | 0.00084014 |
| 16w_SITTD12_ATTCCCGTCTGTGTGA-1-10x | 0.01802952 | 0.01411473 | 3.44E-05   |
| 16w_SITTD12_ATTCGTTTCAGGTGTT-1-10x | 0.17426485 | 0.5703971  | 0.0015753  |
| 16w_SITTD12_ATTCGTTTCCGATCTC-1-10x | 0.09746171 | 0.29693633 | 0.0042943  |
| 16w_SITTD12_ATTCTTGAGAATCTAG-1-10x | 0.03891063 | 0.08846279 | 6.36E-05   |
| 16w_SITTD12_ATTGGGTAGAGAGGTA-1-10x | 0.11942995 | 0.37515518 | 0.0023317  |
| 16w_SITTD12_ATTGTTCCACGAGGAT-1-10x | 0.05123612 | 0.13234821 | 0.00016076 |
| 16w_SITTD12_ATTTACCGTCCTTTCG-1-10x | 0.13532427 | 0.4317476  | 0.0018953  |
| 16w_SITTD12_ATTTCTGGTTGATCGT-1-10x | 0.09642936 | 0.29326063 | 0.0043435  |
| 16w_SITTD12_CAAAGAACAAAGCACG-1-10x | 0.16535182 | 0.5386619  | 0.0017353  |
| 16w_SITTD12_CAACAACCTCTGCA-1-10x   | 0.10459022 | 0.32231772 | 0.0037215  |
| 16w_SITTD12_CAACAACCTGCAGATT-1-10x | 0.07568819 | 0.21941085 | 0.0020486  |
| 16w_SITTD12_CAACAACCTGTGCGTC-1-10x | 0.02405245 | 0.03555961 | 3.91E-05   |
| 16w_SITTD12_CAACCAAAGGCCAAA-1-10x  | 0.17581686 | 0.5759231  | 0.0015585  |
| 16w_SITTD12_CAACCAATCCAACACA-1-10x | 0.20567934 | 0.6822497  | 0.001143   |
| 16w_SITTD12_CAACCAATCCTATTGT-1-10x | 0.20443952 | 0.6778353  | 0.0011518  |
| 16w_SITTD12_CAACCTCTCTCTCAA-1-10x  | 0.1701953  | 0.5559073  | 0.0016584  |
| 16w_SITTD12_CAACGATCACCTTCGT-1-10x | 0.05418494 | 0.14284763 | 0.00021164 |
| 16w_SITTD12_CAACGGCTCCACTAGA-1-10x | 0.08402497 | 0.24909429 | 0.0034742  |
| 16w_SITTD12_CAAGACTAGTGCGACA-1-10x | 0.03915631 | 0.08933756 | 6.67E-05   |
| 16w_SITTD12_CAAGACTCACGACGAA-1-10x | 0.0977275  | 0.2978827  | 0.0042943  |
| 16w_SITTD12_CAAGCTAAGTGCAGGT-1-10x | 0.11185978 | 0.34820127 | 0.002929   |
| 16w_SITTD12_CAAGCTAGTCGTGATT-1-10x | 0.20597284 | 0.6832947  | 0.001143   |
| 16w_SITTD12_CAAGGGACAAACCGGA-1-10x | 0.02974136 | 0.05581522 | 4.55E-05   |
| 16w_SITTD12_CAATACGTCGGTAGGA-1-10x | 0.06522865 | 0.18216921 | 0.00064991 |
| 16w_SITTD12_CAATCGACAGTCGTTA-1-10x | 0.08346497 | 0.24710037 | 0.0034742  |
| 16w_SITTD12_CAATGACAGTAAATGC-1-10x | 0.03790081 | 0.08486728 | 6.07E-05   |
| 16w_SITTD12_CAATTTCTCAGCACCG-1-10x | 0.18070008 | 0.59331    | 0.001475   |

|                                     |            |            |            |
|-------------------------------------|------------|------------|------------|
| 16w_SITTD12_CACACAAAGAATTGTG-1-10x  | 0.09389331 | 0.28423092 | 0.0044154  |
| 16w_SITTD12_CACACAAAGTCTAGCT-1-10x  | 0.18160295 | 0.5965247  | 0.0014587  |
| 16w_SITTD12_CACACAATCCCTGGTT-1-10x  | 0.01519867 | 0.00403537 | 3.27E-05   |
| 16w_SITTD12_CACAGATAGTTGCTCA-1-10x  | 0.14944667 | 0.48203096 | 0.0018705  |
| 16w_SITTD12_CACAGGCGTGGATTC-1-10x   | 0.09778145 | 0.2980748  | 0.0042943  |
| 16w_SITTD12_CACATGACAGTCACGC-1-10x  | 0.06523281 | 0.18218404 | 0.00064991 |
| 16w_SITTD12_CACGAATCAGCCCAGT-1-10x  | 0.07605267 | 0.2207086  | 0.0020486  |
| 16w_SITTD12_CACGTGGCAGCCTATA-1-10x  | 0.23063913 | 0.7711201  | 0.00093779 |
| 16w_SITTD12_CACGTGGTCTAACGCA-1-10x  | 0.28781056 | 0.9746813  | 0.00075864 |
| 16w_SITTD12_CACGTTCAGAGCTTTC-1-10x  | 0.27973402 | 0.94592446 | 0.00075303 |
| 16w_SITTD12_CACGTTCGTGGATCGA-1-10x  | 0.17825407 | 0.58460087 | 0.0015081  |
| 16w_SITTD12_CACTAAGGTAAGCTCT-1-10x  | 0.25687772 | 0.8645437  | 0.00078463 |
| 16w_SITTD12_CACTGGGCACAGCTGC-1-10x  | 0.08649017 | 0.25787172 | 0.0039187  |
| 16w_SITTD12_CACTGGGTCAAGCTTG-1-10x  | 0.08726036 | 0.260614   | 0.0040384  |
| 16w_SITTD12_CACTGTCAGCTATCCA-1-10x  | 0.08027638 | 0.23574726 | 0.0027593  |
| 16w_SITTD12_CACTGTCTCGAACGCC-1-10x  | 0.08425158 | 0.24990112 | 0.0036353  |
| 16w_SITTD12_CACTTCGAGCAACTCT-1-10x  | 0.07629375 | 0.22156698 | 0.0020486  |
| 16w_SITTD12_CAGAGCCCAGAACTTC-1-10x  | 0.27681753 | 0.9355402  | 0.00075222 |
| 16w_SITTD12_CAGAGCCGTATCGAGG-1-10x  | 0.02985394 | 0.05621608 | 4.55E-05   |
| 16w_SITTD12_CAGATACGTCCGGATC-1-10x  | 0.12768804 | 0.40455845 | 0.0020026  |
| 16w_SITTD12_CAGATACTCTGCTGAA-1-10x  | 0.04051343 | 0.09416962 | 7.01E-05   |
| 16w_SITTD12_CAGATTGAGCGCCTTG-1-10x  | 0.27426055 | 0.92643595 | 0.00075233 |
| 16w_SITTD12_CAGATTGCACCAGACC-1-10x  | 0.05081328 | 0.13084267 | 0.00014746 |
| 16w_SITTD12_CAGCAATCAAACCTCTG-1-10x | 0.01565004 | 0.00564251 | 3.33E-05   |
| 16w_SITTD12_CAGCAATGTCTCGCGA-1-10x  | 0.24464394 | 0.8209848  | 0.00084583 |
| 16w_SITTD12_CAGCCAGGTACAGAAT-1-10x  | 0.24921015 | 0.83724296 | 0.00081888 |
| 16w_SITTD12_CAGCCAGGTACATACC-1-10x  | 0.0476558  | 0.11960036 | 0.00011598 |
| 16w_SITTD12_CAGCCAGGTGATGGCA-1-10x  | 0.04625987 | 0.11463009 | 0.00010046 |
| 16w_SITTD12_CAGCGTGCATGCAGGA-1-10x  | 0.01612868 | 0.00734672 | 3.33E-05   |
| 16w_SITTD12_CAGGCCAAGTGCTAGG-1-10x  | 0.06167262 | 0.16950783 | 0.00047505 |
| 16w_SITTD12_CAGGGCTAGAAGCCAC-1-10x  | 0.2550022  | 0.8578658  | 0.00078825 |
| 16w_SITTD12_CAGGGCTAGGCACTAG-1-10x  | 0.07797965 | 0.22756968 | 0.0023954  |
| 16w_SITTD12_CATACAGTCCGTGTCT-1-10x  | 0.1337678  | 0.4262057  | 0.0019115  |
| 16w_SITTD12_CATACTTGTAATTAGG-1-10x  | 0.08502085 | 0.25264013 | 0.0037839  |
| 16w_SITTD12_CATAGACAGGTGATAT-1-10x  | 0.27229092 | 0.919423   | 0.000753   |
| 16w_SITTD12_CATCAAGTCATAGGCT-1-10x  | 0.17857924 | 0.5857587  | 0.0015081  |
| 16w_SITTD12_CATCGGGTCCGAATGG-1-10x  | 0.04937648 | 0.12572691 | 0.00013566 |
| 16w_SITTD12_CATCGGGTCCGCAAAT-1-10x  | 0.03289118 | 0.0670303  | 5.00E-05   |
| 16w_SITTD12_CATCGTCTCGTAACAC-1-10x  | 0.15483315 | 0.50120974 | 0.0018522  |
| 16w_SITTD12_CATGCAATCGTAGTCA-1-10x  | 0.07394018 | 0.21318698 | 0.0017292  |
| 16w_SITTD12_CATGCCTTCTTTGATC-1-10x  | 0.08674053 | 0.25876316 | 0.0039187  |

|                                     |            |            |            |
|-------------------------------------|------------|------------|------------|
| 16w_SITTD12_CATGCGGCAACTCGAT-1-10x  | 0.064427   | 0.17931493 | 0.00064991 |
| 16w_SITTD12_CATGCTCAGTGGAAG-1-10x   | 0.01903987 | 0.01771212 | 3.49E-05   |
| 16w_SITTD12_CATGCTCCACTGGCCA-1-10x  | 0.04494921 | 0.10996343 | 9.39E-05   |
| 16w_SITTD12_CATGGATAGGATTCCT-1-10x  | 0.09177529 | 0.27668962 | 0.0043903  |
| 16w_SITTD12_CATTCATAGAGCCATG-1-10x  | 0.21754399 | 0.7244943  | 0.00104    |
| 16w_SITTD12_CATTCATAGGACGCAT-1-10x  | 0.2753703  | 0.93038726 | 0.00075218 |
| 16w_SITTD12_CATTCTACAAGACCGA-1-10x  | 0.02554988 | 0.04089128 | 4.00E-05   |
| 16w_SITTD12_CATTGAGAGCTCTTCC-1-10x  | 0.04977111 | 0.12713198 | 0.00013566 |
| 16w_SITTD12_CATTGCCGTATCGTAC-1-10x  | 0.04936976 | 0.12570299 | 0.00013566 |
| 16w_SITTD12_CATTGCCGTGGCACTC-1-10x  | 0.17637204 | 0.5778998  | 0.0015416  |
| 16w_SITTD12_CATTGTTGTTAATGAG-1-10x  | 0.01677628 | 0.00965253 | 3.38E-05   |
| 16w_SITTD12_CATTTTCATCTCCATAT-1-10x | 0.03763873 | 0.08393416 | 6.07E-05   |
| 16w_SITTD12_CCAAGCGGTATGGTAA-1-10x  | 0.0719408  | 0.20606811 | 0.0014433  |
| 16w_SITTD12_CCAAGCGTCGTCAACA-1-10x  | 0.04754337 | 0.11920003 | 0.00011598 |
| 16w_SITTD12_CCAATGAGTTACTCAG-1-10x  | 0.23677348 | 0.79296166 | 0.00089602 |
| 16w_SITTD12_CCAATTTCAATGTTGC-1-10x  | 0.02186262 | 0.02776264 | 3.69E-05   |
| 16w_SITTD12_CCACAAAAGTGTTCATC-1-10x | 0.08268441 | 0.24432117 | 0.0033032  |
| 16w_SITTD12_CCACAAATCGGCTGTG-1-10x  | 0.07438009 | 0.2147533  | 0.0017292  |
| 16w_SITTD12_CCACCATAGTATCCTG-1-10x  | 0.08784463 | 0.26269433 | 0.0041422  |
| 16w_SITTD12_CCACCATGTACCGCGT-1-10x  | 0.05811045 | 0.15682456 | 0.00031414 |
| 16w_SITTD12_CCACCATGTCTGATAC-1-10x  | 0.08230527 | 0.24297121 | 0.0033032  |
| 16w_SITTD12_CCACGTTTCATGGAGAC-1-10x | 0.191421   | 0.6314823  | 0.0012985  |
| 16w_SITTD12_CCATCACAGGCAGGGA-1-10x  | 0.18894099 | 0.6226521  | 0.001338   |
| 16w_SITTD12_CCATCACAGTGCCTG-1-10x   | 0.25648627 | 0.8631499  | 0.00078463 |
| 16w_SITTD12_CCATCACGTACCTGTA-1-10x  | 0.08109023 | 0.238645   | 0.0029431  |
| 16w_SITTD12_CCCATTGCACTTGTCC-1-10x  | 0.1115223  | 0.34699968 | 0.002929   |
| 16w_SITTD12_CCCATTGCAGTCAGAG-1-10x  | 0.16069077 | 0.522066   | 0.0018     |
| 16w_SITTD12_CCCGAAGCAGGCCTGT-1-10x  | 0.16422409 | 0.5346466  | 0.0017494  |
| 16w_SITTD12_CCCGAAGTCGCGTGAC-1-10x  | 0.04075082 | 0.09501486 | 7.01E-05   |
| 16w_SITTD12_CCCGAAAGCATGTTC-1-10x   | 0.17740749 | 0.5815866  | 0.0015248  |
| 16w_SITTD12_CCCTAACTCCCGATCT-1-10x  | 0.07503509 | 0.21708545 | 0.001885   |
| 16w_SITTD12_CCCTCAAAGGAGTCTG-1-10x  | 0.21836832 | 0.72742933 | 0.0010326  |
| 16w_SITTD12_CCCTCTCCACAAGTTC-1-10x  | 0.05840321 | 0.15786695 | 0.00031414 |
| 16w_SITTD12_CCCTCTCGTCATCACA-1-10x  | 0.26019433 | 0.8763526  | 0.00077221 |
| 16w_SITTD12_CCCTCTCTCCCATACC-1-10x  | 0.08275309 | 0.24456568 | 0.0033032  |
| 16w_SITTD12_CCGAACGAGTATAGAC-1-10x  | 0.25200737 | 0.84720254 | 0.00080467 |
| 16w_SITTD12_CCGAACGCATGTTCTGA-1-10x | 0.05125353 | 0.13241023 | 0.00016076 |
| 16w_SITTD12_CCGATCTCATCTTCGC-1-10x  | 0.08771461 | 0.2622314  | 0.0040384  |
| 16w_SITTD12_CCGCAAGAGAGCCCAA-1-10x  | 0.17931056 | 0.5883626  | 0.0014915  |
| 16w_SITTD12_CCGCAAGCACGAGAAC-1-10x  | 0.03742763 | 0.08318252 | 6.07E-05   |
| 16w_SITTD12_CCGCAAGTCTTCTGGC-1-10x  | 0.23221096 | 0.77671665 | 0.00093066 |

|                                     |            |            |            |
|-------------------------------------|------------|------------|------------|
| 16w_SITTD12_CCGGACACACCCTATC-1-10x  | 0.29387295 | 0.9962667  | 0.000766   |
| 16w_SITTD12_CCGGGTAAGTCGAATA-1-10x  | 0.04625243 | 0.1146036  | 0.00010046 |
| 16w_SITTD12_CCGGGTACATTCCTAT-1-10x  | 0.19441968 | 0.6421592  | 0.0012624  |
| 16w_SITTD12_CCGGGTATCCGGTAAT-1-10x  | 0.17302965 | 0.5659991  | 0.0016089  |
| 16w_SITTD12_CCGTAGGAGTTGTAGA-1-10x  | 0.04943262 | 0.12592681 | 0.00013566 |
| 16w_SITTD12_CCGTAGGCACCCTAGG-1-10x  | 0.14366877 | 0.4614585  | 0.0018716  |
| 16w_SITTD12_CCGTAGGGTCTGTCT-1-10x   | 0.25829268 | 0.8695817  | 0.000778   |
| 16w_SITTD12_CCGTGAGGTGTTTACG-1-10x  | 0.01888277 | 0.01715278 | 3.49E-05   |
| 16w_SITTD12_CCGTTCACAAGAAATC-1-10x  | 0.14215878 | 0.45608214 | 0.0018724  |
| 16w_SITTD12_CCTAACCAGTAGGAAG-1-10x  | 0.12375605 | 0.39055845 | 0.0021124  |
| 16w_SITTD12_CCTAACCTCTCGGCTT-1-10x  | 0.03430904 | 0.07207867 | 5.37E-05   |
| 16w_SITTD12_CCTACGTGTACGTTCA-1-10x  | 0.11269865 | 0.35118812 | 0.0028393  |
| 16w_SITTD12_CCTCAACAGAGTGGCT-1-10x  | 0.04716739 | 0.11786135 | 0.00010777 |
| 16w_SITTD12_CCTCACAAGCCAACCC-1-10x  | 0.01590233 | 0.0065408  | 3.33E-05   |
| 16w_SITTD12_CCTCAGTGTAATCAAG-1-10x  | 0.20179982 | 0.6684365  | 0.0011792  |
| 16w_SITTD12_CCTCATGAGCCTAGGA-1-10x  | 0.29267463 | 0.99200004 | 0.00076488 |
| 16w_SITTD12_CCTCATGCACCAGGTC-1-10x  | 0.02293368 | 0.03157619 | 3.76E-05   |
| 16w_SITTD12_CCTCATGTCTTACGGA-1-10x  | 0.03385774 | 0.07047179 | 5.17E-05   |
| 16w_SITTD12_CCTCCTCAGCTAAGTA-1-10x  | 0.26559532 | 0.89558303 | 0.00075974 |
| 16w_SITTD12_CCTCCTCGTCGGCTAC-1-10x  | 0.1078387  | 0.33388406 | 0.0033168  |
| 16w_SITTD12_CCTCTCCAGAAGCCTG-1-10x  | 0.19937806 | 0.6598137  | 0.0012085  |
| 16w_SITTD12_CCTCTCCGTGAACGGT-1-10x  | 0.05833109 | 0.15761016 | 0.00031414 |
| 16w_SITTD12_CCTCTCCTATAAGGA-1-10x   | 0.24574162 | 0.8248931  | 0.00083459 |
| 16w_SITTD12_CCTCTCCTCATCTGTT-1-10x  | 0.03269169 | 0.06632001 | 5.00E-05   |
| 16w_SITTD12_CCTCTCCTCGCCTATC-1-10x  | 0.09739424 | 0.29669613 | 0.0042943  |
| 16w_SITTD12_CCTGCATTCTTCCACG-1-10x  | 0.12280634 | 0.38717696 | 0.0021479  |
| 16w_SITTD12_CCTGTTGTCTGGGCGT-1-10x  | 0.02965546 | 0.05550937 | 4.55E-05   |
| 16w_SITTD12_CCTTCAGAGCTCGTGC-1-10x  | 0.04446413 | 0.10823626 | 8.81E-05   |
| 16w_SITTD12_CCTTGTTGTCCATTGGA-1-10x | 0.04505798 | 0.11035068 | 9.39E-05   |
| 16w_SITTD12_CCTTTGGGTCCGTTTC-1-10x  | 0.12060241 | 0.37932977 | 0.0022788  |
| 16w_SITTD12_CCTTTGGTCAACAATGC-1-10x | 0.28976643 | 0.9816453  | 0.00076163 |
| 16w_SITTD12_CGAAGTTCAAGAGTGC-1-10x  | 0.24720468 | 0.8301024  | 0.0008292  |
| 16w_SITTD12_CGACAGCAGGCTTCCG-1-10x  | 0.27227697 | 0.91937333 | 0.000753   |
| 16w_SITTD12_CGACAGCCAAACCGGA-1-10x  | 0.08054141 | 0.23669092 | 0.0029431  |
| 16w_SITTD12_CGAGTGCAAGTACCATC-1-10x | 0.02355992 | 0.03380596 | 3.83E-05   |
| 16w_SITTD12_CGAGTGCCACCTGCTT-1-10x  | 0.0377176  | 0.08421496 | 6.07E-05   |
| 16w_SITTD12_CGAGTTATCACCTCGT-1-10x  | 0.07675946 | 0.22322513 | 0.0022191  |
| 16w_SITTD12_CGATCGGTCTACGGTA-1-10x  | 0.0604401  | 0.1651194  | 0.00038577 |
| 16w_SITTD12_CGATGCGAGCCGTAAG-1-10x  | 0.12927258 | 0.41020027 | 0.0019639  |
| 16w_SITTD12_CGATGCGTCTTTCGAC-1-10x  | 0.08933087 | 0.26798615 | 0.0042295  |
| 16w_SITTD12_CGATGGCAGCTTCTAG-1-10x  | 0.17856942 | 0.5857237  | 0.0015081  |



|                                     |            |            |            |
|-------------------------------------|------------|------------|------------|
| 16w_SITTD12_CGATGGCGTGTTGAGG-1-10x  | 0.25276697 | 0.84990716 | 0.00080028 |
| 16w_SITTD12_CGCAGGTCACACACGC-1-10x  | 0.03930448 | 0.08986511 | 6.67E-05   |
| 16w_SITTD12_CGCATAAAGGAACGTC-1-10x  | 0.01904107 | 0.01771641 | 3.49E-05   |
| 16w_SITTD12_CGCATAATCAACGCTA-1-10x  | 0.200465   | 0.66368383 | 0.0011985  |
| 16w_SITTD12_CGCCAGAAGAGCAGCT-1-10x  | 0.02009058 | 0.02145322 | 3.55E-05   |
| 16w_SITTD12_CGCGTGACAGTAGATA-1-10x  | 0.04833197 | 0.12200787 | 0.00011598 |
| 16w_SITTD12_CGGAACCCAATAGAGT-1-10x  | 0.08831664 | 0.26437497 | 0.0041422  |
| 16w_SITTD12_CGGAATTGTCAAAGCG-1-10x  | 0.06968361 | 0.19803129 | 0.0010821  |
| 16w_SITTD12_CGGACACCAGAACATA-1-10x  | 0.04891357 | 0.12407868 | 0.00012523 |
| 16w_SITTD12_CGGAGAACAGAGGGTT-1-10x  | 0.05236732 | 0.13637589 | 0.00017575 |
| 16w_SITTD12_CGGAGAAGTAGAGACC-1-10x  | 0.07879444 | 0.23047078 | 0.002576   |
| 16w_SITTD12_CGGCAGTCACAGCTGC-1-10x  | 0.03299046 | 0.0673838  | 5.00E-05   |
| 16w_SITTD12_CGGCAGTTCTCCGTG-1-10x   | 0.1393781  | 0.44618142 | 0.0018772  |
| 16w_SITTD12_CGGGTCAAGTGTCATC-1-10x  | 0.22526298 | 0.7519781  | 0.00098137 |
| 16w_SITTD12_CGGGTTCATCGAAATCC-1-10x | 0.04724008 | 0.11812013 | 0.00010777 |
| 16w_SITTD12_CGGGTGTTCTACGCAA-1-10x  | 0.042003   | 0.09947332 | 7.82E-05   |
| 16w_SITTD12_CGGTCAGGTCGAATTC-1-10x  | 0.2663409  | 0.89823776 | 0.00075831 |
| 16w_SITTD12_CGTAAGTGTCGTTATG-1-10x  | 0.274164   | 0.92609215 | 0.00075233 |
| 16w_SITTD12_CGTAGTAAGCGTCAGA-1-10x  | 0.03117049 | 0.0609037  | 4.68E-05   |
| 16w_SITTD12_CGTCAAACAGATGCGA-1-10x  | 0.10464437 | 0.3225105  | 0.0037215  |
| 16w_SITTD12_CGTCAAAGTGTCTCCT-1-10x  | 0.2510794  | 0.84389853 | 0.00080923 |
| 16w_SITTD12_CGTCAAATCAAAGCCT-1-10x  | 0.19311827 | 0.6375255  | 0.0012741  |
| 16w_SITTD12_CGTCCATGTGAATGAT-1-10x  | 0.02558483 | 0.04101573 | 4.00E-05   |
| 16w_SITTD12_CGTGATATCGTTCCCA-1-10x  | 0.0979768  | 0.29877037 | 0.0042943  |
| 16w_SITTD12_CGTTAGATCTAGAACC-1-10x  | 0.0172699  | 0.01141009 | 3.38E-05   |
| 16w_SITTD12_CGTTCTGAGACAACAT-1-10x  | 0.06647158 | 0.18659474 | 0.00079936 |
| 16w_SITTD12_CGTTCTGCATGCAGGA-1-10x  | 0.16821894 | 0.5488704  | 0.0016902  |
| 16w_SITTD12_CGTTCTGGTGCATCTA-1-10x  | 0.14511804 | 0.46661872 | 0.0018716  |
| 16w_SITTD12_CGTTGGGAGGCAGTCA-1-10x  | 0.04874102 | 0.1234643  | 0.00012523 |
| 16w_SITTD12_CGTTGGCAACAAGAT-1-10x   | 0.04875261 | 0.12350558 | 0.00012523 |
| 16w_SITTD12_CTAACCCGTCAGCAC-1-10x   | 0.08807942 | 0.26353034 | 0.0041422  |
| 16w_SITTD12_CTAACCCTCCCGTAAA-1-10x  | 0.05164059 | 0.13378838 | 0.00016076 |
| 16w_SITTD12_CTAACCTCAGTACTAC-1-10x  | 0.25861305 | 0.87072235 | 0.000778   |
| 16w_SITTD12_CTAACCTGTTCCGGTG-1-10x  | 0.16264246 | 0.5290151  | 0.001776   |
| 16w_SITTD12_CTAAGTGAGCATTGTC-1-10x  | 0.18948632 | 0.6245938  | 0.0013244  |
| 16w_SITTD12_CTAAGTGAGTTGCCTA-1-10x  | 0.0991654  | 0.3030024  | 0.0041652  |
| 16w_SITTD12_CTAAGTGCAAGGTTGG-1-10x  | 0.27143186 | 0.9163643  | 0.00075352 |
| 16w_SITTD12_CTAAGTGCAGTCGCTG-1-10x  | 0.10448784 | 0.32195318 | 0.0037215  |
| 16w_SITTD12_CTACAGATCACTACTT-1-10x  | 0.10612587 | 0.32778546 | 0.00352    |
| 16w_SITTD12_CTACAGATCTGTGCTC-1-10x  | 0.08796347 | 0.26311746 | 0.0041422  |
| 16w_SITTD12_CTACATTCATCCTAAG-1-10x  | 0.0612714  | 0.16807926 | 0.00042799 |

|                                     |            |            |            |
|-------------------------------------|------------|------------|------------|
| 16w_SITTD12_CTACCCACAATAACCC-1-10x  | 0.08132245 | 0.23947187 | 0.0031253  |
| 16w_SITTD12_CTAATATCACATTCTGA-1-10x | 0.10901345 | 0.33806682 | 0.0032165  |
| 16w_SITTD12_CTAATATCACCAACAT-1-10x  | 0.12640685 | 0.39999673 | 0.0020256  |
| 16w_SITTD12_CTAGGTATCGAAGGAC-1-10x  | 0.12038562 | 0.37855792 | 0.0022788  |
| 16w_SITTD12_CTATAGGAGGGAGGTG-1-10x  | 0.01681345 | 0.00978486 | 3.38E-05   |
| 16w_SITTD12_CTATCTATCCTTCGAC-1-10x  | 0.01724254 | 0.01131266 | 3.38E-05   |
| 16w_SITTD12_CTCAACCCAAGTAAA-1-10x   | 0.09126462 | 0.27487135 | 0.0043535  |
| 16w_SITTD12_CTCAATTAGAAGGCTC-1-10x  | 0.09993989 | 0.30576003 | 0.0041652  |
| 16w_SITTD12_CTCAATTGTTGCTCCT-1-10x  | 0.03533388 | 0.07572762 | 5.58E-05   |
| 16w_SITTD12_CCACTGCAGCTGGTC-1-10x   | 0.07392321 | 0.21312656 | 0.0017292  |
| 16w_SITTD12_CCACTGCAGGTCCGT-1-10x   | 0.2687045  | 0.9066534  | 0.00075594 |
| 16w_SITTD12_CCACTGTCTGAGTCA-1-10x   | 0.04694606 | 0.11707328 | 0.00010777 |
| 16w_SITTD12_CCAAGGTGCTCTTTG-1-10x   | 0.19901736 | 0.65852946 | 0.0012085  |
| 16w_SITTD12_CCAAGTCTCTGCGATA-1-10x  | 0.2873393  | 0.9730034  | 0.00075864 |
| 16w_SITTD12_CCAATTAGTGTAGTGG-1-10x  | 0.0437581  | 0.10572243 | 8.81E-05   |
| 16w_SITTD12_CCAATTAGTTGCTGAT-1-10x  | 0.10220524 | 0.31382588 | 0.0039137  |
| 16w_SITTD12_CCAACAGCTTAAGA-1-10x    | 0.25872052 | 0.871105   | 0.000778   |
| 16w_SITTD12_CCAATGCAACCGTGC-1-10x   | 0.02104048 | 0.02483537 | 3.62E-05   |
| 16w_SITTD12_CCAATGCAAGATGGC-1-10x   | 0.05083077 | 0.13090497 | 0.00014746 |
| 16w_SITTD12_CCAACAAAGACGTCCC-1-10x  | 0.05073772 | 0.13057366 | 0.00014746 |
| 16w_SITTD12_CCAACACGACTAT-1-10x     | 0.04214818 | 0.09999025 | 7.82E-05   |
| 16w_SITTD12_CCAACATCACAGT-1-10x     | 0.05519466 | 0.14644279 | 0.000233   |
| 16w_SITTD12_CCACTCGTAGTATAG-1-10x   | 0.15305856 | 0.49489126 | 0.0018617  |
| 16w_SITTD12_CCACTCGGTGAAG-1-10x     | 0.03731124 | 0.0827681  | 6.07E-05   |
| 16w_SITTD12_CCAAGGTCCTGGCTT-1-10x   | 0.09016164 | 0.27094418 | 0.0042999  |
| 16w_SITTD12_CCACTCAGGTATCACCA-1-10x | 0.05532555 | 0.14690882 | 0.000233   |
| 16w_SITTD12_CCACTCGAAGGGCTAAC-1-10x | 0.13523947 | 0.43144563 | 0.0018953  |
| 16w_SITTD12_CCACTCGATCAACCTTT-1-10x | 0.05727741 | 0.1538585  | 0.00028394 |
| 16w_SITTD12_CCACTCGATCATTACGG-1-10x | 0.07791808 | 0.22735043 | 0.0023954  |
| 16w_SITTD12_CCACTGGTGTCTCGAA-1-10x  | 0.02475585 | 0.03806412 | 3.91E-05   |
| 16w_SITTD12_CCAATGAGGCATGGT-1-10x   | 0.08569501 | 0.25504056 | 0.0037839  |
| 16w_SITTD12_CCAATGAGGTATTGA-1-10x   | 0.08195007 | 0.2417065  | 0.0031253  |
| 16w_SITTD12_CCAATGAGTGCGTCC-1-10x   | 0.16554764 | 0.5393591  | 0.0017353  |
| 16w_SITTD12_CCAAGGCGTGGCGTAA-1-10x  | 0.0421931  | 0.10015016 | 7.82E-05   |
| 16w_SITTD12_CCAAGGCTCCCTGGTT-1-10x  | 0.17865491 | 0.5860281  | 0.0015081  |
| 16w_SITTD12_CCAATCCAGGCACTAG-1-10x  | 0.29026565 | 0.98342276 | 0.00076163 |
| 16w_SITTD12_CCAATCCAGTCTCTC-1-10x   | 0.25784427 | 0.8679851  | 0.000778   |
| 16w_SITTD12_CCAATCCGTCAAATCC-1-10x  | 0.05506532 | 0.14598227 | 0.000233   |
| 16w_SITTD12_CCAATCCTCTATTCTG-1-10x  | 0.08490604 | 0.25223136 | 0.0036353  |
| 16w_SITTD12_CCAATCATAGTAGTGG-1-10x  | 0.21963856 | 0.7319521  | 0.0010253  |
| 16w_SITTD12_CCAATCATCAGAAGCTG-1-10x | 0.04583041 | 0.11310095 | 0.00010046 |

|                                     |            |            |            |
|-------------------------------------|------------|------------|------------|
| 16w_SITTD12_CTGCTCAGTGCCCTTT-1-10x  | 0.0281215  | 0.05004766 | 4.30E-05   |
| 16w_SITTD12_CTGCTCATCTATTGTC-1-10x  | 0.05900535 | 0.1600109  | 0.00034795 |
| 16w_SITTD12_CTGGACGCAGCGGTTTC-1-10x | 0.16187924 | 0.5262976  | 0.0017883  |
| 16w_SITTD12_CTGGCAGGTATTAAGG-1-10x  | 0.07709196 | 0.224409   | 0.0022191  |
| 16w_SITTD12_CTGTAGAGTAGACAAT-1-10x  | 0.04594247 | 0.11349996 | 0.00010046 |
| 16w_SITTD12_CTGTCGTC AACGATTC-1-10x | 0.19939142 | 0.6598613  | 0.0012085  |
| 16w_SITTD12_CTGTCGTCAGGTGAGT-1-10x  | 0.20038183 | 0.6633877  | 0.0011985  |
| 16w_SITTD12_CTGTGAATCGCTCCTA-1-10x  | 0.05052803 | 0.12982704 | 0.00014746 |
| 16w_SITTD12_CTTACCGAGTGAGCCA-1-10x  | 0.21536654 | 0.7167414  | 0.0010625  |
| 16w_SITTD12_CTTACCGGTACGTTCA-1-10x  | 0.10473083 | 0.32281837 | 0.0036214  |
| 16w_SITTD12_CTTCAATCAAAGACGC-1-10x  | 0.04917834 | 0.12502143 | 0.00012523 |
| 16w_SITTD12_CTTCAATCCATCGTC-1-10x   | 0.0392763  | 0.0897648  | 6.67E-05   |
| 16w_SITTD12_CTTCAATCCTTCGAT-1-10x   | 0.02408765 | 0.03568496 | 3.91E-05   |
| 16w_SITTD12_CTTCCGAAGGCCTTCG-1-10x  | 0.18840174 | 0.6207321  | 0.001338   |
| 16w_SITTD12_CTTCCGAAGTACTGTC-1-10x  | 0.1019613  | 0.31295732 | 0.0039137  |
| 16w_SITTD12_CTTCTTCAGAGACTG-1-10x   | 0.03866889 | 0.08760208 | 6.36E-05   |
| 16w_SITTD12_CTTCCGGTAGGTGCTGA-1-10x | 0.0566284  | 0.15154766 | 0.000257   |
| 16w_SITTD12_CTTCCGGTCACTGTTCC-1-10x | 0.2545343  | 0.85619986 | 0.00079207 |
| 16w_SITTD12_CTTCTAACACTCAAGT-1-10x  | 0.05298584 | 0.13857818 | 0.00017575 |
| 16w_SITTD12_CTTCTAAGTCGTCAGC-1-10x  | 0.0252036  | 0.03965834 | 4.00E-05   |
| 16w_SITTD12_CTTCTCTAGTATGATG-1-10x  | 0.04753914 | 0.11918498 | 0.00011598 |
| 16w_SITTD12_CTTGAGACAGCATCTA-1-10x  | 0.24471746 | 0.82124656 | 0.00084014 |
| 16w_SITTD12_CTTGAGATCCACTAGA-1-10x  | 0.05678234 | 0.15209578 | 0.000257   |
| 16w_SITTD12_CTTTCAAGTTTCGGCG-1-10x  | 0.09859949 | 0.30098748 | 0.0042345  |
| 16w_SITTD12_CTTTCGGAGAGGTCGT-1-10x  | 0.05356727 | 0.1406484  | 0.00019264 |
| 16w_SITTD12_GAAACCTAGGCTCACC-1-10x  | 0.05946927 | 0.1616627  | 0.00034795 |
| 16w_SITTD12_GAAATGACAACCCTAA-1-10x  | 0.27999267 | 0.9468454  | 0.00075303 |
| 16w_SITTD12_GAACACTCACATATGC-1-10x  | 0.2673285  | 0.9017541  | 0.00075705 |
| 16w_SITTD12_GAACACTGTACTGCCG-1-10x  | 0.10809209 | 0.33478624 | 0.0033168  |
| 16w_SITTD12_GAACACTTCGACGCGT-1-10x  | 0.20577711 | 0.6825978  | 0.001143   |
| 16w_SITTD12_GAACGTTAGATGAACT-1-10x  | 0.04752496 | 0.11913446 | 0.00011598 |
| 16w_SITTD12_GAACGTTCAAATAGCA-1-10x  | 0.01811102 | 0.01440493 | 3.44E-05   |
| 16w_SITTD12_GAACGTTTCATGCGGTC-1-10x | 0.25830394 | 0.86962175 | 0.000778   |
| 16w_SITTD12_GAACTGTTCAAGGAGC-1-10x  | 0.21138643 | 0.70257    | 0.0010934  |
| 16w_SITTD12_GAAGAATCAGGTTTAC-1-10x  | 0.20238425 | 0.6705174  | 0.0011792  |
| 16w_SITTD12_GAAGAATTCGCTTTAT-1-10x  | 0.22602542 | 0.75469273 | 0.00097406 |
| 16w_SITTD12_GAAGAATTCGAGTA-1-10x    | 0.04491688 | 0.10984832 | 9.39E-05   |
| 16w_SITTD12_GAAGCGATCCACAGGC-1-10x  | 0.03168722 | 0.06274355 | 4.83E-05   |
| 16w_SITTD12_GAAGGACTCATGAGAA-1-10x  | 0.2773863  | 0.9375653  | 0.00075222 |
| 16w_SITTD12_GAATAGAAGCCGCACT-1-10x  | 0.1296988  | 0.41171786 | 0.0019639  |
| 16w_SITTD12_GAATCACAGGCCTTGC-1-10x  | 0.110815   | 0.34448132 | 0.0030221  |

|                                    |            |            |            |
|------------------------------------|------------|------------|------------|
| 16w_SITTD12_GAATCACAGTCGGCCT-1-10x | 0.10937458 | 0.3393526  | 0.0032165  |
| 16w_SITTD12_GAATCACCACGGTAGA-1-10x | 0.18483399 | 0.60802895 | 0.0013959  |
| 16w_SITTD12_GAATCACCATACCATG-1-10x | 0.06365129 | 0.17655295 | 0.00058553 |
| 16w_SITTD12_GAATCGTCATCCTTCG-1-10x | 0.02095215 | 0.0245209  | 3.62E-05   |
| 16w_SITTD12_GAATCGTTCGGTCAAA-1-10x | 0.12776513 | 0.40483296 | 0.0020026  |
| 16w_SITTD12_GAATCGTTCGCTACAA-1-10x | 0.27519146 | 0.9297505  | 0.00075218 |
| 16w_SITTD12_GACACGCGTGCCAAGA-1-10x | 0.09665717 | 0.29407176 | 0.0043435  |
| 16w_SITTD12_GACAGCCCACCTGCTT-1-10x | 0.08562382 | 0.25478703 | 0.0037839  |
| 16w_SITTD12_GACATCATCGGAATTC-1-10x | 0.02612826 | 0.04295065 | 4.09E-05   |
| 16w_SITTD12_GACCAATCAAGCTGTT-1-10x | 0.03270004 | 0.06634974 | 5.00E-05   |
| 16w_SITTD12_GACCCAGCAAATTAGG-1-10x | 0.12312821 | 0.38832298 | 0.0021479  |
| 16w_SITTD12_GACCCAGGTGGATACG-1-10x | 0.08414935 | 0.24953716 | 0.0036353  |
| 16w_SITTD12_GACCCAGTCGGCACTG-1-10x | 0.07375184 | 0.21251641 | 0.0017292  |
| 16w_SITTD12_GACCGTGGTATGGTTC-1-10x | 0.09306571 | 0.2812842  | 0.0044107  |
| 16w_SITTD12_GACCGTGTCTGGACTA-1-10x | 0.0637406  | 0.17687094 | 0.00058553 |
| 16w_SITTD12_GACCTTCAGACCCGCT-1-10x | 0.25595722 | 0.8612662  | 0.00078463 |
| 16w_SITTD12_GACCTTCCAAGATTGA-1-10x | 0.02647476 | 0.04418438 | 4.09E-05   |
| 16w_SITTD12_GACGCTGGTATGCGTT-1-10x | 0.0844624  | 0.25065175 | 0.0036353  |
| 16w_SITTD12_GACTATGCATCGGAAG-1-10x | 0.05008751 | 0.12825854 | 0.00013566 |
| 16w_SITTD12_GACTATGGTGCGCTCA-1-10x | 0.02740812 | 0.04750764 | 4.19E-05   |
| 16w_SITTD12_GACTCTCTCCAGCAAT-1-10x | 0.27793878 | 0.93953246 | 0.00075239 |
| 16w_SITTD12_GACTTCCCACGTCTCT-1-10x | 0.03387872 | 0.07054647 | 5.17E-05   |
| 16w_SITTD12_GAGAAATCAACTCCAA-1-10x | 0.28499407 | 0.9646531  | 0.00075605 |
| 16w_SITTD12_GAGAAATGTCCTTTGC-1-10x | 0.14142478 | 0.45346868 | 0.0018724  |
| 16w_SITTD12_GAGACCCGTCAAGTTC-1-10x | 0.24536908 | 0.8235667  | 0.00084014 |
| 16w_SITTD12_GAGAGGTGTCAGTCTA-1-10x | 0.05274843 | 0.13773288 | 0.00017575 |
| 16w_SITTD12_GAGATGGAGACTCTTG-1-10x | 0.22316438 | 0.74450594 | 0.00099599 |
| 16w_SITTD12_GAGATGGGTAGTGATA-1-10x | 0.24355526 | 0.8171085  | 0.00085167 |
| 16w_SITTD12_GAGCCTGTCCCTCGAT-1-10x | 0.08450797 | 0.250814   | 0.0036353  |
| 16w_SITTD12_GAGCTGCCAATGTTGC-1-10x | 0.03466327 | 0.0733399  | 5.37E-05   |
| 16w_SITTD12_GAGGCAAGTAGGACTG-1-10x | 0.21028616 | 0.69865245 | 0.0011014  |
| 16w_SITTD12_GAGGCCTAGTCAACAA-1-10x | 0.0154081  | 0.00478106 | 3.27E-05   |
| 16w_SITTD12_GAGGGTAAGTCGCGAA-1-10x | 0.03830447 | 0.08630456 | 6.36E-05   |
| 16w_SITTD12_GAGGGTACAACACAAA-1-10x | 0.07103768 | 0.2028525  | 0.0013138  |
| 16w_SITTD12_GAGTCTAGTACTAAA-1-10x  | 0.26000005 | 0.87566084 | 0.00077221 |
| 16w_SITTD12_GAGTCTATCTAAACGC-1-10x | 0.02798577 | 0.0495644  | 4.30E-05   |
| 16w_SITTD12_GAGTGAGTCCCAAGTA-1-10x | 0.22440375 | 0.7489188  | 0.00098869 |
| 16w_SITTD12_GAGTGTTGTAGGCTGA-1-10x | 0.26624757 | 0.8979054  | 0.00075974 |
| 16w_SITTD12_GAGTTGTGTGGTCTTA-1-10x | 0.19128732 | 0.6310063  | 0.0012985  |
| 16w_SITTD12_GAGTTTGAGGCATCAG-1-10x | 0.01720772 | 0.01118867 | 3.38E-05   |
| 16w_SITTD12_GAGTTTGGTTTGGCTA-1-10x | 0.0465286  | 0.11558691 | 0.00010777 |

|                                    |            |            |            |
|------------------------------------|------------|------------|------------|
| 16w_SITTD12_GATCAGTAGGACTGGT-1-10x | 0.12235043 | 0.38555366 | 0.0021873  |
| 16w_SITTD12_GATCAGTGTCTAGATC-1-10x | 0.12233067 | 0.3854833  | 0.0021873  |
| 16w_SITTD12_GATCATGAGAAGTATC-1-10x | 0.06868862 | 0.1944886  | 0.00097948 |
| 16w_SITTD12_GATCCCTTCGTAACAC-1-10x | 0.09117889 | 0.2745661  | 0.0043535  |
| 16w_SITTD12_GATCGTACATGGAACG-1-10x | 0.1217721  | 0.38349453 | 0.0021873  |
| 16w_SITTD12_GATCGTATCACTTGGA-1-10x | 0.04625786 | 0.11462292 | 0.00010046 |
| 16w_SITTD12_GATCGTATCGAACCAT-1-10x | 0.03926045 | 0.08970835 | 6.67E-05   |
| 16w_SITTD12_GATGACTCACATTCGA-1-10x | 0.13238938 | 0.4212978  | 0.0019219  |
| 16w_SITTD12_GATGACTGTGTCGATT-1-10x | 0.14138825 | 0.45333862 | 0.0018724  |
| 16w_SITTD12_GATGATCGTCCACAGC-1-10x | 0.06176724 | 0.16984473 | 0.00047505 |
| 16w_SITTD12_GATGCTAGTCTAGGTT-1-10x | 0.13807558 | 0.4415437  | 0.0018802  |
| 16w_SITTD12_GATGCTATCGCTGACG-1-10x | 0.06596209 | 0.18478066 | 0.00072102 |
| 16w_SITTD12_GATGGAGCACATTACG-1-10x | 0.0380053  | 0.08523935 | 6.07E-05   |
| 16w_SITTD12_GATGGAGTCGCTGCGA-1-10x | 0.27098954 | 0.9147894  | 0.00075352 |
| 16w_SITTD12_GATGGAGTCTAGGCCG-1-10x | 0.29088405 | 0.9856246  | 0.00076269 |
| 16w_SITTD12_GATTCTTAGAAAGTCT-1-10x | 0.23746438 | 0.79542166 | 0.00088935 |
| 16w_SITTD12_GATTCTGTGGCTCTG-1-10x  | 0.09318092 | 0.2816944  | 0.0044107  |
| 16w_SITTD12_GATTGGTCAAGGTACG-1-10x | 0.08455648 | 0.25098675 | 0.0036353  |
| 16w_SITTD12_GATTGGTGTGTCCCTT-1-10x | 0.23898703 | 0.8008431  | 0.00088278 |
| 16w_SITTD12_GATTTCTTACCACAA-1-10x  | 0.02892165 | 0.05289663 | 4.42E-05   |
| 16w_SITTD12_GCAACATAGACTCTTG-1-10x | 0.0701098  | 0.19954875 | 0.0011935  |
| 16w_SITTD12_GCAACCGCACGCGTCA-1-10x | 0.07435775 | 0.21467374 | 0.0017292  |
| 16w_SITTD12_GCACATAGTAATGATG-1-10x | 0.05300143 | 0.13863368 | 0.00017575 |
| 16w_SITTD12_GCACGGTAGACGACGT-1-10x | 0.04995925 | 0.1278019  | 0.00013566 |
| 16w_SITTD12_GCACGGTGTACCAATC-1-10x | 0.01681096 | 0.00977602 | 3.38E-05   |
| 16w_SITTD12_GCACGTGCAAGTTCGT-1-10x | 0.2196996  | 0.73216945 | 0.0010253  |
| 16w_SITTD12_GCAGCTGCAGTCTTCC-1-10x | 0.11415664 | 0.35637936 | 0.0026715  |
| 16w_SITTD12_GCAGCTGCATGTGGTT-1-10x | 0.03778285 | 0.0844473  | 6.07E-05   |
| 16w_SITTD12_GCAGCTGTCGACTCT-1-10x  | 0.02562499 | 0.04115871 | 4.00E-05   |
| 16w_SITTD12_GCAGGCTAGATCACTC-1-10x | 0.23909256 | 0.80121887 | 0.00087632 |
| 16w_SITTD12_GCAGGCTGTAGCCCTG-1-10x | 0.03522301 | 0.07533288 | 5.58E-05   |
| 16w_SITTD12_GCAGGCTGTGTGAATA-1-10x | 0.04169289 | 0.09836916 | 7.40E-05   |
| 16w_SITTD12_GCAGTTATCCACGTA-1-10x  | 0.07010105 | 0.19951758 | 0.0011935  |
| 16w_SITTD12_GCATCGGGTCATCGCG-1-10x | 0.09660342 | 0.29388037 | 0.0043435  |
| 16w_SITTD12_GCATCGGGTTTCGTTT-1-10x | 0.02284751 | 0.0312694  | 3.76E-05   |
| 16w_SITTD12_GCATGATGTCAACGCC-1-10x | 0.02161321 | 0.02687461 | 3.69E-05   |
| 16w_SITTD12_GCATTAGAGCGCCATC-1-10x | 0.20125856 | 0.66650933 | 0.0011888  |
| 16w_SITTD12_GCATTAGGTGCACATT-1-10x | 0.23418163 | 0.7837333  | 0.00091657 |
| 16w_SITTD12_GCATTAGTCTGGCTT-1-10x  | 0.13218191 | 0.42055908 | 0.0019219  |
| 16w_SITTD12_GCCAGCAGTCTACAAC-1-10x | 0.117395   | 0.36790967 | 0.002453   |
| 16w_SITTD12_GCCAGCATCCTGCTAC-1-10x | 0.26899722 | 0.90769565 | 0.00075594 |

|                                     |            |            |            |
|-------------------------------------|------------|------------|------------|
| 16w_SITTD12_GCCAGGTCACCAGGTC-1-10x  | 0.2513446  | 0.84484273 | 0.00080467 |
| 16w_SITTD12_GCCAGGTCAGCCGGTT-1-10x  | 0.05215957 | 0.13563623 | 0.00017575 |
| 16w_SITTD12_GCCAGTGGTGAGGCAT-1-10x  | 0.04293568 | 0.10279418 | 8.29E-05   |
| 16w_SITTD12_GCCATGGAGGCGACAT-1-10x  | 0.25273666 | 0.8497992  | 0.00080028 |
| 16w_SITTD12_GCCATTCCAAAGGAGA-1-10x  | 0.14339499 | 0.46048373 | 0.0018716  |
| 16w_SITTD12_GCCATTCGTAGGTACG-1-10x  | 0.12998097 | 0.41272253 | 0.0019639  |
| 16w_SITTD12_GCCATTCGTCTCGCGA-1-10x  | 0.01835583 | 0.01527658 | 3.49E-05   |
| 16w_SITTD12_GCCATTCTCCATATGG-1-10x  | 0.07807335 | 0.2279033  | 0.0023954  |
| 16w_SITTD12_GCCCAGACACGCGCAT-1-10x  | 0.2490003  | 0.83649576 | 0.00081888 |
| 16w_SITTD12_GCCGATGCACCAAATC-1-10x  | 0.1318936  | 0.41953254 | 0.001934   |
| 16w_SITTD12_GCCGATGCAGTTACCA-1-10x  | 0.09250608 | 0.27929163 | 0.0044107  |
| 16w_SITTD12_GCCGATGGTACTAGCT-1-10x  | 0.04512108 | 0.11057537 | 9.39E-05   |
| 16w_SITTD12_GCCGTGATCGTAGCTA-1-10x  | 0.02840588 | 0.05106022 | 4.30E-05   |
| 16w_SITTD12_GCGAGAAAGCGCTTCG-1-10x  | 0.0977125  | 0.2978293  | 0.0042943  |
| 16w_SITTD12_GCGAGAATCTCTCGCA-1-10x  | 0.2708022  | 0.91412234 | 0.00075418 |
| 16w_SITTD12_GCGATCGTCATGGAGG-1-10x  | 0.2347541  | 0.7857716  | 0.00090964 |
| 16w_SITTD12_GCGGAAATCACATCAG-1-10x  | 0.04232763 | 0.10062918 | 7.82E-05   |
| 16w_SITTD12_GCGTGCAGTTGTTGCA-1-10x  | 0.2783844  | 0.9411191  | 0.00075239 |
| 16w_SITTD12_GCGTGCATCGATTTCT-1-10x  | 0.03278623 | 0.06665661 | 5.00E-05   |
| 16w_SITTD12_GCGTGCATCTGGTGGC-1-10x  | 0.2643667  | 0.89120847 | 0.00076313 |
| 16w_SITTD12_GCGTTTTCGTCTTCATT-1-10x | 0.1041531  | 0.32076135 | 0.0037215  |
| 16w_SITTD12_GCGTTTTCGTGAGCTCC-1-10x | 0.2905505  | 0.984437   | 0.00076163 |
| 16w_SITTD12_GCTACAACACAAGGTG-1-10x  | 0.09478537 | 0.28740713 | 0.0044051  |
| 16w_SITTD12_GCTACAACACTGATTG-1-10x  | 0.20827413 | 0.69148856 | 0.0011177  |
| 16w_SITTD12_GCTACAACATGACTCA-1-10x  | 0.18527503 | 0.6095993  | 0.0013959  |
| 16w_SITTD12_GCTACCTGTCGTACAT-1-10x  | 0.04916936 | 0.12498943 | 0.00012523 |
| 16w_SITTD12_GCTGAATCATGGACAG-1-10x  | 0.07284939 | 0.20930316 | 0.0015819  |
| 16w_SITTD12_GCTGCAGCACCGCTGA-1-10x  | 0.24986875 | 0.8395879  | 0.00081397 |
| 16w_SITTD12_GCTGCAGCAGACACAG-1-10x  | 0.17285928 | 0.5653925  | 0.0016089  |
| 16w_SITTD12_GCTGCAGCAGTAGATA-1-10x  | 0.07136466 | 0.20401675 | 0.0013138  |
| 16w_SITTD12_GCTGCAGGTTAATCGC-1-10x  | 0.13835496 | 0.44253847 | 0.0018802  |
| 16w_SITTD12_GCTTCACCAAGCGAGT-1-10x  | 0.03743155 | 0.08319649 | 6.07E-05   |
| 16w_SITTD12_GCTTTTCGAGATGATTG-1-10x | 0.08381674 | 0.24835289 | 0.0034742  |
| 16w_SITTD12_GCTTTTCGTCTACGGTA-1-10x | 0.18557696 | 0.6106743  | 0.0013809  |
| 16w_SITTD12_GGAACCCAGGCTTTCA-1-10x  | 0.01512349 | 0.0037677  | 3.27E-05   |
| 16w_SITTD12_GGAACCCGTATCCTTT-1-10x  | 0.24856536 | 0.83494717 | 0.00081888 |
| 16w_SITTD12_GGAACCCGTCGGCTAC-1-10x  | 0.2385174  | 0.799171   | 0.00088278 |
| 16w_SITTD12_GGAATCTGTATGTGTC-1-10x  | 0.25707763 | 0.8652555  | 0.00078121 |
| 16w_SITTD12_GGAATGGCACGAGAAC-1-10x  | 0.04324689 | 0.10390223 | 8.29E-05   |
| 16w_SITTD12_GGACGTCTCTAGTGTG-1-10x  | 0.2686081  | 0.90631014 | 0.00075594 |
| 16w_SITTD12_GGAGAACGTCACTCTC-1-10x  | 0.05415429 | 0.1427385  | 0.00021164 |

|                                     |            |            |            |
|-------------------------------------|------------|------------|------------|
| 16w_SITTD12_GGAGATGGTCGTTGGC-1-10x  | 0.06002465 | 0.16364017 | 0.00038577 |
| 16w_SITTD12_GGAGGTAGTCCAACGC-1-10x  | 0.24044004 | 0.8060166  | 0.00086997 |
| 16w_SITTD12_GGATCTAAGACGACTG-1-10x  | 0.12135428 | 0.38200685 | 0.0022308  |
| 16w_SITTD12_GGATCTAAGTTGAAAC-1-10x  | 0.27998698 | 0.94682515 | 0.00075303 |
| 16w_SITTD12_GGATGTTCAATACCCA-1-10x  | 0.28613257 | 0.9687068  | 0.00075773 |
| 16w_SITTD12_GGCACGTAGCACCTGC-1-10x  | 0.08695149 | 0.2595143  | 0.0040384  |
| 16w_SITTD12_GGCACGTCAAGGGCAT-1-10x  | 0.24359322 | 0.81724364 | 0.00085167 |
| 16w_SITTD12_GGCACGTTCTCGAGTA-1-10x  | 0.03118526 | 0.06095631 | 4.68E-05   |
| 16w_SITTD12_GGCAGTCCAGCACGAA-1-10x  | 0.03385244 | 0.07045292 | 5.17E-05   |
| 16w_SITTD12_GGCTGTGAGACTGAGC-1-10x  | 0.09030858 | 0.27146736 | 0.0042999  |
| 16w_SITTD12_GGCTGTGTCGCTAATG-1-10x  | 0.02831241 | 0.05072739 | 4.30E-05   |
| 16w_SITTD12_GGCTTGGAGTCCCTAA-1-10x  | 0.24933006 | 0.8376699  | 0.00081888 |
| 16w_SITTD12_GGCTTGGAGTGATCGG-1-10x  | 0.27797785 | 0.9396716  | 0.00075239 |
| 16w_SITTD12_GGCTTTCCAGGCTATT-1-10x  | 0.09148017 | 0.27563882 | 0.0043535  |
| 16w_SITTD12_GGGAAGTAGCATCAGG-1-10x  | 0.22025079 | 0.73413193 | 0.0010179  |
| 16w_SITTD12_GGGACAACAGGAGGTT-1-10x  | 0.04624104 | 0.11456304 | 0.00010046 |
| 16w_SITTD12_GGGACAAGTTAAAGTG-1-10x  | 0.11802949 | 0.3701688  | 0.0023898  |
| 16w_SITTD12_GGGACAATCGGAAACG-1-10x  | 0.0174495  | 0.01204957 | 3.44E-05   |
| 16w_SITTD12_GGGACCTAGGCTGTAG-1-10x  | 0.24047244 | 0.80613196 | 0.00086997 |
| 16w_SITTD12_GGGACTCAGACTCCGC-1-10x  | 0.01658999 | 0.00898922 | 3.38E-05   |
| 16w_SITTD12_GGGACTCAGCCACCGT-1-10x  | 0.24987999 | 0.8396279  | 0.00081397 |
| 16w_SITTD12_GGGAGTAAGACATAAC-1-10x  | 0.0980343  | 0.29897508 | 0.0042943  |
| 16w_SITTD12_GGGAGTATCTGGGTCG-1-10x  | 0.2704924  | 0.9130193  | 0.00075418 |
| 16w_SITTD12_GGGCCATAGTCCTGCG-1-10x  | 0.19746415 | 0.65299916 | 0.0012292  |
| 16w_SITTD12_GGGCCATGTAGGGTAC-1-10x  | 0.20972866 | 0.6966675  | 0.0011095  |
| 16w_SITTD12_GGGCGTTCAGTTGAAA-1-10x  | 0.10426631 | 0.3211644  | 0.0037215  |
| 16w_SITTD12_GGGCTACAGTTCACT-1-10x   | 0.29032773 | 0.98364383 | 0.00076163 |
| 16w_SITTD12_GGGCTACCATTCTAT-1-10x   | 0.16624516 | 0.5418427  | 0.0017206  |
| 16w_SITTD12_GGGTCACCAGGCCTGT-1-10x  | 0.2682561  | 0.90505683 | 0.00075594 |
| 16w_SITTD12_GGGTCTGTCCGACAAG-1-10x  | 0.04402939 | 0.10668837 | 8.81E-05   |
| 16w_SITTD12_GGGTTATCAAACCACT-1-10x  | 0.2576326  | 0.8672315  | 0.00078121 |
| 16w_SITTD12_GGGTTTAGTGTCGATT-1-10x  | 0.02944988 | 0.05477741 | 4.42E-05   |
| 16w_SITTD12_GGTAAGTACAAGTATC-1-10x  | 0.16873708 | 0.55071527 | 0.0016744  |
| 16w_SITTD12_GGTAAGTACAGGATCAC-1-10x | 0.01560945 | 0.00549797 | 3.33E-05   |
| 16w_SITTD12_GGTAATCGTTAAGGAT-1-10x  | 0.24323939 | 0.81598383 | 0.00085167 |
| 16w_SITTD12_GGTAGAGCACTATGTG-1-10x  | 0.10318616 | 0.3173185  | 0.0038193  |
| 16w_SITTD12_GGTACGCAAAGCGTG-1-10x   | 0.23548326 | 0.7883678  | 0.00090278 |
| 16w_SITTD12_GGTCTGGAGCGATGGT-1-10x  | 0.04355878 | 0.10501272 | 8.29E-05   |
| 16w_SITTD12_GGTGAAGGTACTCA-1-10x    | 0.01684269 | 0.00988899 | 3.38E-05   |
| 16w_SITTD12_GGTGATTAGATGTTGA-1-10x  | 0.01645935 | 0.00852409 | 3.38E-05   |
| 16w_SITTD12_GGTGGCTAGAATTCAG-1-10x  | 0.28995958 | 0.982333   | 0.00076163 |

|                                     |            |            |            |
|-------------------------------------|------------|------------|------------|
| 16w_SITTD12_GGTGTCGAGTGAGTGC-1-10x  | 0.04496802 | 0.11003039 | 9.39E-05   |
| 16w_SITTD12_GGTGTCGAGTTGCGAG-1-10x  | 0.24024317 | 0.8053157  | 0.00086997 |
| 16w_SITTD12_GGTGTCGTCTTGGTGA-1-10x  | 0.26151592 | 0.88105816 | 0.00076963 |
| 16w_SITTD12_GGTAACTCTGCCCTA-1-10x   | 0.0856062  | 0.2547243  | 0.0037839  |
| 16w_SITTD12_GGTTCTCTCGTACCTC-1-10x  | 0.06951346 | 0.19742547 | 0.0010821  |
| 16w_SITTD12_GGTTGTAAGTTGTAGA-1-10x  | 0.10817786 | 0.33509165 | 0.0033168  |
| 16w_SITTD12_GGTTGTATCGTTACCC-1-10x  | 0.26972395 | 0.9102832  | 0.00075499 |
| 16w_SITTD12_GTAACACGTATCATGC-1-10x  | 0.07211772 | 0.20669802 | 0.0014433  |
| 16w_SITTD12_GTAACACTCGCTCCTA-1-10x  | 0.23968324 | 0.803322   | 0.00087632 |
| 16w_SITTD12_GTAACCACACTGTGTA-1-10x  | 0.26384395 | 0.88934726 | 0.00076313 |
| 16w_SITTD12_GTAACCATCACTCGAA-1-10x  | 0.24309453 | 0.8154681  | 0.00085167 |
| 16w_SITTD12_GTAATCGCAACCCGCA-1-10x  | 0.2510378  | 0.8437504  | 0.00080923 |
| 16w_SITTD12_GTAATGCAGGTCACCC-1-10x  | 0.04022501 | 0.09314271 | 7.01E-05   |
| 16w_SITTD12_GTAATGCCAACCGTGC-1-10x  | 0.08368478 | 0.24788302 | 0.0034742  |
| 16w_SITTD12_GTAATGCCATACCAGT-1-10x  | 0.11420006 | 0.35653394 | 0.0026715  |
| 16w_SITTD12_GTACAGTAGACATCAA-1-10x  | 0.0522299  | 0.13588664 | 0.00017575 |
| 16w_SITTD12_GTACAGTCAGACTGCC-1-10x  | 0.26034677 | 0.87689537 | 0.00077221 |
| 16w_SITTD12_GTAGAAACAGCCTATA-1-10x  | 0.25048107 | 0.84176815 | 0.00080923 |
| 16w_SITTD12_GTAGAGGCACACCTTC-1-10x  | 0.10184299 | 0.3125361  | 0.0040036  |
| 16w_SITTD12_GTAGCTAAGAGAGGTA-1-10x  | 0.0160923  | 0.00721718 | 3.33E-05   |
| 16w_SITTD12_GTAGCTAGTGGGTATG-1-10x  | 0.05495877 | 0.14560287 | 0.000233   |
| 16w_SITTD12_GTAGTACCAGCACAAG-1-10x  | 0.28155893 | 0.95242214 | 0.00075401 |
| 16w_SITTD12_GTAGTACGTGGTCAAG-1-10x  | 0.03229133 | 0.06489453 | 4.83E-05   |
| 16w_SITTD12_GTATTGGAGCGGTATG-1-10x  | 0.01564834 | 0.00563645 | 3.33E-05   |
| 16w_SITTD12_GTATTGGCAGGTTTAC-1-10x  | 0.14307979 | 0.4593614  | 0.0018718  |
| 16w_SITTD12_GTATTGGGTCGCAGTC-1-10x  | 0.02349074 | 0.03355963 | 3.83E-05   |
| 16w_SITTD12_GTATTTAGGTAGGCT-1-10x   | 0.1367108  | 0.43668434 | 0.0018842  |
| 16w_SITTD12_GTCAAACCTCTCAGTCC-1-10x | 0.26130268 | 0.8802989  | 0.00076963 |
| 16w_SITTD12_GTCAAACCTTAGTTC-1-10x   | 0.037765   | 0.08438376 | 6.07E-05   |
| 16w_SITTD12_GTCACGGTCGTCTCAC-1-10x  | 0.19847691 | 0.6566051  | 0.0012187  |
| 16w_SITTD12_GTCACTCTCGGTGAC-1-10x   | 0.08269409 | 0.24435563 | 0.0033032  |
| 16w_SITTD12_GTCACTCTCGGTAGAG-1-10x  | 0.06079454 | 0.16638139 | 0.00042799 |
| 16w_SITTD12_GTCAGCGCAGCATACT-1-10x  | 0.08075571 | 0.23745395 | 0.0029431  |
| 16w_SITTD12_GTCAGCGGTGCCTATA-1-10x  | 0.24386126 | 0.818198   | 0.00084583 |
| 16w_SITTD12_GTCATCCCAGAGTCTT-1-10x  | 0.19805594 | 0.65510625 | 0.0012187  |
| 16w_SITTD12_GTCATGATCAACCCGG-1-10x  | 0.20971406 | 0.69661546 | 0.0011095  |
| 16w_SITTD12_GTCCACTAGTTAACAG-1-10x  | 0.0471668  | 0.11785924 | 0.00010777 |
| 16w_SITTD12_GTCCACTAGTTGTAAG-1-10x  | 0.08191936 | 0.24159716 | 0.0031253  |
| 16w_SITTD12_GTCCCATAGCGAACTG-1-10x  | 0.0852572  | 0.25348166 | 0.0037839  |
| 16w_SITTD12_GTCCCATGTGATTTG-1-10x   | 0.13715008 | 0.43824846 | 0.0018842  |
| 16w_SITTD12_GTCGAATCAAGTTCGT-1-10x  | 0.08039144 | 0.23615697 | 0.0029431  |



|                                     |            |            |            |
|-------------------------------------|------------|------------|------------|
| 16w_SITTD12_GTCGAATCAATAGGGC-1-10x  | 0.04038319 | 0.0937059  | 7.01E-05   |
| 16w_SITTD12_GTCGCGACAAAGGATT-1-10x  | 0.05541521 | 0.14722803 | 0.000233   |
| 16w_SITTD12_GTCGTTCTCGCTGATA-1-10x  | 0.06288284 | 0.17381686 | 0.00052741 |
| 16w_SITTD12_GTCTACCAGCGATCGA-1-10x  | 0.02159163 | 0.02679779 | 3.69E-05   |
| 16w_SITTD12_GTCTACCAGTACCGGA-1-10x  | 0.09536564 | 0.2894732  | 0.0043808  |
| 16w_SITTD12_GTCTAGAAGCACTCGC-1-10x  | 0.05946808 | 0.16165845 | 0.00034795 |
| 16w_SITTD12_GTCTAGAAGCTGAGTG-1-10x  | 0.02960689 | 0.05533645 | 4.55E-05   |
| 16w_SITTD12_GTCTAGAAGTGGAAAG-1-10x  | 0.10868422 | 0.33689457 | 0.0032165  |
| 16w_SITTD12_GTCTAGACACTAAACC-1-10x  | 0.06257981 | 0.17273791 | 0.00052741 |
| 16w_SITTD12_GTCTCACGTTGGGCCT-1-10x  | 0.17513257 | 0.5734867  | 0.0015753  |
| 16w_SITTD12_GTCTGTCTCATTTCCA-1-10x  | 0.12521428 | 0.39575052 | 0.0020803  |
| 16w_SITTD12_GTCTTTAAGTAGCTCT-1-10x  | 0.0482394  | 0.12167827 | 0.00011598 |
| 16w_SITTD12_GTGACGCAGTTGAAGT-1-10x  | 0.03862028 | 0.08742901 | 6.36E-05   |
| 16w_SITTD12_GTGACGCCATCCTAAG-1-10x  | 0.07964281 | 0.23349142 | 0.0027593  |
| 16w_SITTD12_GTGACGCGTGGACTAG-1-10x  | 0.05271131 | 0.1376007  | 0.00017575 |
| 16w_SITTD12_GTGATGTGTAGAAACT-1-10x  | 0.27837032 | 0.94106895 | 0.00075239 |
| 16w_SITTD12_GTGCACGTCACCGCTT-1-10x  | 0.14132914 | 0.45312816 | 0.0018734  |
| 16w_SITTD12_GTGCACGTCTGGCCAG-1-10x  | 0.11355626 | 0.35424167 | 0.0027534  |
| 16w_SITTD12_GTGCAGCTCGACATTG-1-10x  | 0.1819534  | 0.5977725  | 0.0014427  |
| 16w_SITTD12_GTGCGTGAGTAAGGGA-1-10x  | 0.265475   | 0.89515465 | 0.00075974 |
| 16w_SITTD12_GTGCGTGTTTCGGTCG-1-10x  | 0.02787214 | 0.04915981 | 4.30E-05   |
| 16w_SITTD12_GTGCTGGCAGTAACAA-1-10x  | 0.084914   | 0.2522597  | 0.0036353  |
| 16w_SITTD12_GTGCTTCGTCTGCCTT-1-10x  | 0.28551248 | 0.9664989  | 0.00075686 |
| 16w_SITTD12_GTGGAAGAGCCTTTGA-1-10x  | 0.1169714  | 0.36640143 | 0.002453   |
| 16w_SITTD12_GTGGAAGTTCAAACC-1-10x   | 0.13999799 | 0.44838855 | 0.001875   |
| 16w_SITTD12_GTGGAGACATGACGTT-1-10x  | 0.0990172  | 0.30247474 | 0.0042345  |
| 16w_SITTD12_GTGGCGTCAAGTCATC-1-10x  | 0.2683816  | 0.9055037  | 0.00075594 |
| 16w_SITTD12_GTGGGAATCCTACCAC-1-10x  | 0.09096725 | 0.27381253 | 0.0043535  |
| 16w_SITTD12_GTGGTTAAGACCTCCG-1-10x  | 0.02539126 | 0.04032653 | 4.00E-05   |
| 16w_SITTD12_GTGGTTAGTATCGTTG-1-10x  | 0.26320323 | 0.88706595 | 0.00076511 |
| 16w_SITTD12_GTGTAACAGTAGGCCA-1-10x  | 0.22398552 | 0.7474296  | 0.00099599 |
| 16w_SITTD12_GTGTAACGTTACGGAG-1-10x  | 0.0450244  | 0.11023112 | 9.39E-05   |
| 16w_SITTD12_GTGTGATCATGGGATG-1-10x  | 0.14418517 | 0.4632972  | 0.0018716  |
| 16w_SITTD12_GTGTGATTCAAGCCTA-1-10x  | 0.03332572 | 0.0685775  | 5.17E-05   |
| 16w_SITTD12_GTGTGATTCCTGAAG-1-10x   | 0.07302811 | 0.20993952 | 0.0015819  |
| 16w_SITTD12_GTGTGGCGTTTCGAGCC-1-10x | 0.09050298 | 0.2721595  | 0.0042999  |
| 16w_SITTD12_GTTACCCACGTCTCT-1-10x   | 0.01592156 | 0.00660924 | 3.33E-05   |
| 16w_SITTD12_GTTACCCTCGAGTGGA-1-10x  | 0.09791122 | 0.29853684 | 0.0042943  |
| 16w_SITTD12_GTTACCCTCTAGGCAT-1-10x  | 0.10373455 | 0.31927106 | 0.0038193  |
| 16w_SITTD12_GTTACGACACGACCTG-1-10x  | 0.07705379 | 0.22427313 | 0.0022191  |
| 16w_SITTD12_GTTACGATCGACGACC-1-10x  | 0.26633492 | 0.8982164  | 0.00075831 |

|                                     |            |            |            |
|-------------------------------------|------------|------------|------------|
| 16w_SITTD12_GTTAGACCACAGTATC-1-10x  | 0.0156579  | 0.00567048 | 3.33E-05   |
| 16w_SITTD12_GTTATGGAGTGTACCT-1-10x  | 0.19205636 | 0.6337445  | 0.0012985  |
| 16w_SITTD12_GTTATGGTCCTTCAGC-1-10x  | 0.11568985 | 0.3618384  | 0.002594   |
| 16w_SITTD12_GTTTCGCTCACGCGCAT-1-10x | 0.27109116 | 0.91515124 | 0.00075352 |
| 16w_SITTD12_GTTCTATAGACTTCAC-1-10x  | 0.04284924 | 0.10248639 | 8.29E-05   |
| 16w_SITTD12_GTTGAACAGGGCGACAT-1-10x | 0.12036482 | 0.37848383 | 0.0022788  |
| 16w_SITTD12_GTTGAACCATTGTAGC-1-10x  | 0.06262075 | 0.17288369 | 0.00052741 |
| 16w_SITTD12_GTTGCGGCATGGATCT-1-10x  | 0.02540646 | 0.04038065 | 4.00E-05   |
| 16w_SITTD12_GTTGTCCAGCTAATGA-1-10x  | 0.01625305 | 0.00778953 | 3.33E-05   |
| 16w_SITTD12_GTTTACTAGCCTTTGA-1-10x  | 0.04025318 | 0.093243   | 7.01E-05   |
| 16w_SITTD12_GTTTACTTCCGATGTA-1-10x  | 0.04402116 | 0.10665906 | 8.81E-05   |
| 16w_SITTD12_TAACCAGAGGTGCATG-1-10x  | 0.20891888 | 0.69378424 | 0.0011177  |
| 16w_SITTD12_TAACGACAGGGACTGT-1-10x  | 0.11404296 | 0.35597458 | 0.0027534  |
| 16w_SITTD12_TAACGACTCATCAGTG-1-10x  | 0.28102767 | 0.9505306  | 0.00075348 |
| 16w_SITTD12_TAAGCACGTATGGTTC-1-10x  | 0.08312539 | 0.24589129 | 0.0034742  |
| 16w_SITTD12_TAAGCACTCATTACGG-1-10x  | 0.09032114 | 0.27151206 | 0.0042999  |
| 16w_SITTD12_TAAGCGTGTCACTGAT-1-10x  | 0.04105068 | 0.09608255 | 7.40E-05   |
| 16w_SITTD12_TAATCTCATAACCCA-1-10x   | 0.06468769 | 0.1802431  | 0.00064991 |
| 16w_SITTD12_TAATCTCTCAATCAGC-1-10x  | 0.18667729 | 0.61459213 | 0.0013662  |
| 16w_SITTD12_TACACCCTCATCCCGT-1-10x  | 0.06334087 | 0.17544767 | 0.00052741 |
| 16w_SITTD12_TACATTCCACAGGATG-1-10x  | 0.02029396 | 0.02217736 | 3.62E-05   |
| 16w_SITTD12_TACCCACAGGTAAAGG-1-10x  | 0.20660187 | 0.6855344  | 0.0011344  |
| 16w_SITTD12_TACCCACCAATTGAGA-1-10x  | 0.01878894 | 0.01681867 | 3.49E-05   |
| 16w_SITTD12_TACCCACGTGAACCGA-1-10x  | 0.01816051 | 0.01458113 | 3.44E-05   |
| 16w_SITTD12_TACCCACGTGTCATTG-1-10x  | 0.0654233  | 0.18286225 | 0.00072102 |
| 16w_SITTD12_TACCCACTCCGACATA-1-10x  | 0.24940428 | 0.8379342  | 0.00081397 |
| 16w_SITTD12_TACCCACTCTCGAACA-1-10x  | 0.24388026 | 0.8182657  | 0.00084583 |
| 16w_SITTD12_TACCCGTTCTGCTTTA-1-10x  | 0.09465998 | 0.28696066 | 0.0044051  |
| 16w_SITTD12_TACCGAAAGGACAGTC-1-10x  | 0.08093745 | 0.23810105 | 0.0029431  |
| 16w_SITTD12_TACCGGGAGTGTACCT-1-10x  | 0.11317089 | 0.3528695  | 0.0027534  |
| 16w_SITTD12_TACCTCGAGGCTGTAG-1-10x  | 0.26965353 | 0.91003245 | 0.00075499 |
| 16w_SITTD12_TACCTCGTCAAGAAAC-1-10x  | 0.2527339  | 0.8497894  | 0.00080028 |
| 16w_SITTD12_TACCTCGTCATGGATC-1-10x  | 0.17982481 | 0.59019357 | 0.0014915  |
| 16w_SITTD12_TACGGGCTCCATACTT-1-10x  | 0.26874772 | 0.9068073  | 0.00075594 |
| 16w_SITTD12_TACGGTAGTCGCATGC-1-10x  | 0.13142413 | 0.41786095 | 0.001934   |
| 16w_SITTD12_TACGGTATCTTGCAAG-1-10x  | 0.02104209 | 0.02484111 | 3.62E-05   |
| 16w_SITTD12_TACTTACTCCAACACA-1-10x  | 0.05579598 | 0.1485838  | 0.000233   |
| 16w_SITTD12_TACTTCACAGTTTGGT-1-10x  | 0.04383783 | 0.10600629 | 8.81E-05   |
| 16w_SITTD12_TACTTCAGTCCAGCCA-1-10x  | 0.2593369  | 0.87329966 | 0.00077499 |
| 16w_SITTD12_TACTTGTTCTAGCCG-1-10x   | 0.0150968  | 0.00367267 | 3.27E-05   |
| 16w_SITTD12_TACTTGTTCTATTTG-1-10x   | 0.01903531 | 0.01769589 | 3.49E-05   |

|                                      |            |            |            |
|--------------------------------------|------------|------------|------------|
| 16w_SITTD12_TAGACCAAGCACCGAA-1-10x   | 0.04551815 | 0.11198913 | 9.39E-05   |
| 16w_SITTD12_TAGACCACAATTGCAC-1-10x   | 0.07649219 | 0.22227351 | 0.0020486  |
| 16w_SITTD12_TAGAGTCGTTGCATAC-1-10x   | 0.2053094  | 0.6809325  | 0.001143   |
| 16w_SITTD12_TAGATCGGTAACCAGG-1-10x   | 0.05891274 | 0.15968114 | 0.00034795 |
| 16w_SITTD12_TAGCACACAAGGCAAC-1-10x   | 0.25010738 | 0.8404376  | 0.00081397 |
| 16w_SITTD12_TAGCACAGTTCTGACA-1-10x   | 0.1653511  | 0.5386593  | 0.0017353  |
| 16w_SITTD12_TAGGTACAGAGTCGAC-1-10x   | 0.12163723 | 0.3830143  | 0.0021873  |
| 16w_SITTD12_TAGTGCAGTCTCTCCA-1-10x   | 0.27323335 | 0.9227786  | 0.0007526  |
| 16w_SITTD12_TATATCCTCAACTGGT-1-10x   | 0.27586043 | 0.93213236 | 0.00075214 |
| 16w_SITTD12_TATCCTACAGACACAG-1-10x   | 0.03156455 | 0.06230676 | 4.83E-05   |
| 16w_SITTD12_TATCCTAGTTGCCGAC-1-10x   | 0.10619141 | 0.3280188  | 0.00352    |
| 16w_SITTD12_TATCGCCTCGTAACCA-1-10x   | 0.2809204  | 0.9501486  | 0.00075348 |
| 16w_SITTD12_TATCGCCTCTGAGATC-1-10x   | 0.05020014 | 0.12865956 | 0.00013566 |
| 16w_SITTD12_TATCTTGTCGGTGACG-1-10x   | 0.03595473 | 0.07793821 | 5.58E-05   |
| 16w_SITTD12_TATGTTCCACGCCACA-1-10x   | 0.11320078 | 0.352976   | 0.0027534  |
| 16w_SITTD12_TATTCACACAGTATC-1-10x    | 0.13230157 | 0.42098513 | 0.0019219  |
| 16w_SITTD12_TATTGCTCAACTAC-1-10x     | 0.03321033 | 0.06816666 | 5.00E-05   |
| 16w_SITTD12_TATTCGCAATCGCCG-1-10x    | 0.27992308 | 0.94659764 | 0.00075303 |
| 16w_SITTD12_TCAAGCAAGTTGAAAC-1-10x   | 0.01722183 | 0.01123893 | 3.38E-05   |
| 16w_SITTD12_TCAAGTGCAGTCAGAG-1-10x   | 0.159077   | 0.51632017 | 0.0018209  |
| 16w_SITTD12_TCAATCTTCTCGATC-1-10x    | 0.08715049 | 0.26022282 | 0.0040384  |
| 16w_SITTD12_TCAATTCAGAGATGCC-1-10x   | 0.02596299 | 0.04236218 | 4.09E-05   |
| 16w_SITTD12_TCAATTCACGTCATA-1-10x    | 0.08670767 | 0.25864616 | 0.0039187  |
| 16w_SITTD12_TCACAAGCATTATCATCT-1-10x | 0.04880851 | 0.12370462 | 0.00012523 |
| 16w_SITTD12_TCACAAGGTACCCGCA-1-10x   | 0.28285357 | 0.9570318  | 0.00075462 |
| 16w_SITTD12_TCACAAGTCCATACTT-1-10x   | 0.05910851 | 0.16037819 | 0.00034795 |
| 16w_SITTD12_TCACACCAGTTATGGA-1-10x   | 0.05625797 | 0.15022872 | 0.000257   |
| 16w_SITTD12_TCACGCTCATGACTCA-1-10x   | 0.2759338  | 0.9323936  | 0.00075214 |
| 16w_SITTD12_TCACGGGGTACGGGAT-1-10x   | 0.05220268 | 0.13578969 | 0.00017575 |
| 16w_SITTD12_TCACGGGTATGTCTT-1-10x    | 0.09655382 | 0.29370376 | 0.0043435  |
| 16w_SITTD12_TCACTATCACACATA-1-10x    | 0.03908013 | 0.08906632 | 6.67E-05   |
| 16w_SITTD12_TCAGGGCAGGTAACCTA-1-10x  | 0.22935085 | 0.7665331  | 0.0009522  |
| 16w_SITTD12_TCAGGTAAGGAGTACC-1-10x   | 0.05075475 | 0.1306343  | 0.00014746 |
| 16w_SITTD12_TCAGTCCCACCTAGG-1-10x    | 0.02281361 | 0.03114869 | 3.76E-05   |
| 16w_SITTD12_TCAGTGACACCGTCGA-1-10x   | 0.08740222 | 0.2611191  | 0.0040384  |
| 16w_SITTD12_TCATACTTCCAACCTGA-1-10x  | 0.28914967 | 0.9794493  | 0.0007606  |
| 16w_SITTD12_TCATATCAGCTAATCC-1-10x   | 0.09697828 | 0.2952151  | 0.0043435  |
| 16w_SITTD12_TCATATCCACACCTGG-1-10x   | 0.07651094 | 0.22234027 | 0.0020486  |
| 16w_SITTD12_TCATCATGTCCGGATC-1-10x   | 0.08309508 | 0.24578337 | 0.0033032  |
| 16w_SITTD12_TCATCCGAGATAACAC-1-10x   | 0.06128333 | 0.16812174 | 0.00042799 |
| 16w_SITTD12_TCATCCGAGGACACTG-1-10x   | 0.13121079 | 0.41710135 | 0.001934   |

|                                    |            |            |            |
|------------------------------------|------------|------------|------------|
| 16w_SITTD12_TCATCCGCAAAGTAGA-1-10x | 0.13165471 | 0.41868195 | 0.001934   |
| 16w_SITTD12_TCATCCGGTGCGAACA-1-10x | 0.01803569 | 0.01413671 | 3.44E-05   |
| 16w_SITTD12_TCATGCCGTTTGTCT-1-10x  | 0.02202006 | 0.02832321 | 3.69E-05   |
| 16w_SITTD12_TCATGGAAGTTGGAC-1-10x  | 0.0162004  | 0.00760209 | 3.33E-05   |
| 16w_SITTD12_TCATGGAGTCAAGCGA-1-10x | 0.08046028 | 0.23640205 | 0.0029431  |
| 16w_SITTD12_TCATGGAGTGGACAGT-1-10x | 0.15111944 | 0.48798695 | 0.0018676  |
| 16w_SITTD12_TCATTACCACAGAAGC-1-10x | 0.04324269 | 0.10388729 | 8.29E-05   |
| 16w_SITTD12_TCATTACATATAGCC-1-10x  | 0.05620053 | 0.1500242  | 0.000257   |
| 16w_SITTD12_TCATTTGAGCAAACAT-1-10x | 0.0495384  | 0.12630342 | 0.00013566 |
| 16w_SITTD12_TCATTTGTGACACCCG-1-10x | 0.04614324 | 0.1142148  | 0.00010046 |
| 16w_SITTD12_TCCACCAGTATGAGGC-1-10x | 0.02552014 | 0.0407854  | 4.00E-05   |
| 16w_SITTD12_TCCACCATCTTACGC-1-10x  | 0.03474705 | 0.07363822 | 5.37E-05   |
| 16w_SITTD12_TCCAGAATCTCCGAAA-1-10x | 0.04073425 | 0.09495586 | 7.01E-05   |
| 16w_SITTD12_TCCATCGCAGCTTCC-1-10x  | 0.02244137 | 0.02982332 | 3.76E-05   |
| 16w_SITTD12_TCCATGCCACCCTAAA-1-10x | 0.1376725  | 0.44010854 | 0.0018802  |
| 16w_SITTD12_TCCCATGAGAGTCCGA-1-10x | 0.05597385 | 0.1492171  | 0.000257   |
| 16w_SITTD12_TCCGATCTCAGAATAG-1-10x | 0.25174507 | 0.84626865 | 0.00080467 |
| 16w_SITTD12_TCCGTGTCACGCGTCA-1-10x | 0.0948591  | 0.28766966 | 0.0044051  |
| 16w_SITTD12_TCCTCCCAGGTCACCT-1-10x | 0.10953611 | 0.33992776 | 0.0031181  |
| 16w_SITTD12_TCCTCCCAGCTACAT-1-10x  | 0.06852958 | 0.19392233 | 0.00097948 |
| 16w_SITTD12_TCCTCCCTCCGTCTA-1-10x  | 0.2128574  | 0.7078075  | 0.0010778  |
| 16w_SITTD12_TCCTCGATCATTTGTC-1-10x | 0.26237026 | 0.8841001  | 0.00076727 |
| 16w_SITTD12_TCCTCTTCGTTATCT-1-10x  | 0.02499446 | 0.03891371 | 4.00E-05   |
| 16w_SITTD12_TCCTGCATCTCAACCC-1-10x | 0.03056586 | 0.05875089 | 4.68E-05   |
| 16w_SITTD12_TCCTTCTCAAGTCATC-1-10x | 0.087838   | 0.26267073 | 0.0041422  |
| 16w_SITTD12_TCGAACAGTTTCACTT-1-10x | 0.04672527 | 0.11628716 | 0.00010777 |
| 16w_SITTD12_TCGAAGTCAAAGCTCT-1-10x | 0.10265891 | 0.3154412  | 0.0039137  |
| 16w_SITTD12_TCGAAGTACCAGCTG-1-10x  | 0.07207257 | 0.20653729 | 0.0014433  |
| 16w_SITTD12_TCGACCTGTCCACAGC-1-10x | 0.20607269 | 0.68365026 | 0.001143   |
| 16w_SITTD12_TCGATTTAGATCCGAG-1-10x | 0.08955527 | 0.26878515 | 0.0042295  |
| 16w_SITTD12_TCGCAGGAGCATCCCG-1-10x | 0.05422359 | 0.14298525 | 0.00021164 |
| 16w_SITTD12_TCGCAGGTCCGTGACG-1-10x | 0.28748474 | 0.97352123 | 0.00075864 |
| 16w_SITTD12_TCGCTCAAGCCTGCCA-1-10x | 0.03938323 | 0.09014552 | 6.67E-05   |
| 16w_SITTD12_TCGGGACTCTCTATAC-1-10x | 0.04048543 | 0.09406994 | 7.01E-05   |
| 16w_SITTD12_TCGGGCAGTCCAGGTC-1-10x | 0.15759614 | 0.5110475  | 0.0018302  |
| 16w_SITTD12_TCGGGCATCAGGCGAA-1-10x | 0.08016715 | 0.23535833 | 0.0027593  |
| 16w_SITTD12_TCGGGTGAGACTTAAG-1-10x | 0.03352158 | 0.06927487 | 5.17E-05   |
| 16w_SITTD12_TCGGGTGTTCTAACG-1-10x  | 0.24398138 | 0.8186257  | 0.00084583 |
| 16w_SITTD12_TCGGTCTAGTATCCTG-1-10x | 0.08831503 | 0.2643692  | 0.0041422  |
| 16w_SITTD12_TCGTAGAGTGGAAGTC-1-10x | 0.13662277 | 0.43637094 | 0.0018891  |
| 16w_SITTD12_TCGTAGATCTACTTCA-1-10x | 0.05121668 | 0.13227901 | 0.00016076 |

|                                     |            |            |            |
|-------------------------------------|------------|------------|------------|
| 16w_SITTD12_TCGTCCAGTATCTCGA-1-10x  | 0.12798975 | 0.40563273 | 0.0020026  |
| 16w_SITTD12_TCGTGGGCAGTGCCTG-1-10x  | 0.21212156 | 0.7051875  | 0.0010856  |
| 16w_SITTD12_TCGTGGGTCTCAAGTGG-1-10x | 0.10033362 | 0.30716193 | 0.0040879  |
| 16w_SITTD12_TCGTGGGTCTCCAAGA-1-10x  | 0.05736496 | 0.15417022 | 0.00028394 |
| 16w_SITTD12_TCTACATCAAAGGCGT-1-10x  | 0.05121326 | 0.13226683 | 0.00016076 |
| 16w_SITTD12_TCTACATCAACGGGTA-1-10x  | 0.24661428 | 0.82800025 | 0.0008292  |
| 16w_SITTD12_TCTACATCACAGTATC-1-10x  | 0.13037416 | 0.41412252 | 0.001948   |
| 16w_SITTD12_TCTACATGTCACAGTT-1-10x  | 0.16558506 | 0.5394923  | 0.0017353  |
| 16w_SITTD12_TCTACCGCAGCGTTGC-1-10x  | 0.05595886 | 0.14916375 | 0.000257   |
| 16w_SITTD12_TCTACCGTCTTGGTCC-1-10x  | 0.06604425 | 0.18507318 | 0.00072102 |
| 16w_SITTD12_TCTCAGCGTTCTCTAT-1-10x  | 0.08657163 | 0.25816175 | 0.0039187  |
| 16w_SITTD12_TCTCCGAAGTACTCGT-1-10x  | 0.14021854 | 0.44917384 | 0.001875   |
| 16w_SITTD12_TCTCCGAGTTTGCAGT-1-10x  | 0.12240063 | 0.3857324  | 0.0021873  |
| 16w_SITTD12_TCTCTGGAGCGCCGTT-1-10x  | 0.08693776 | 0.2594654  | 0.0040384  |
| 16w_SITTD12_TCTCTGGAGGAGACCT-1-10x  | 0.0984582  | 0.3004844  | 0.0042345  |
| 16w_SITTD12_TCTCTGGAGTCAACGAG-1-10x | 0.23973629 | 0.8035109  | 0.00087632 |
| 16w_SITTD12_TCTGCCAGTCAACCAT-1-10x  | 0.19633633 | 0.64898354 | 0.00124    |
| 16w_SITTD12_TCTGCCAGTTTACTTC-1-10x  | 0.07667083 | 0.22290958 | 0.0022191  |
| 16w_SITTD12_TCTGGCTCAATAGGGC-1-10x  | 0.14825018 | 0.4777708  | 0.0018713  |
| 16w_SITTD12_TCTGGCTCATTAAAGG-1-10x  | 0.2596308  | 0.87434614 | 0.00077499 |
| 16w_SITTD12_TCTGGCTTCACTCGAA-1-10x  | 0.27345344 | 0.9235622  | 0.0007526  |
| 16w_SITTD12_TCTGGCTTCGTGCAGC-1-10x  | 0.13144755 | 0.41794437 | 0.001934   |
| 16w_SITTD12_TCTTAGTGTAACACGG-1-10x  | 0.17698213 | 0.5800721  | 0.0015416  |
| 16w_SITTD12_TCTTAGTGTTGGCTA-1-10x   | 0.2191834  | 0.7303315  | 0.0010326  |
| 16w_SITTD12_TCTTCCTAGAAGCTCG-1-10x  | 0.24381441 | 0.8180312  | 0.00084583 |
| 16w_SITTD12_TCTTGCGGTTTGACAC-1-10x  | 0.262126   | 0.8832304  | 0.00076727 |
| 16w_SITTD12_TGAACGTGTAGCTTAC-1-10x  | 0.27082294 | 0.9141962  | 0.00075418 |
| 16w_SITTD12_TGAACGTTCGCGTGAC-1-10x  | 0.11209934 | 0.34905422 | 0.002929   |
| 16w_SITTD12_TGAATGCCATGGTACT-1-10x  | 0.18740529 | 0.61718416 | 0.0013519  |
| 16w_SITTD12_TGAATGCTCATAACAGC-1-10x | 0.1901395  | 0.62691945 | 0.0013244  |
| 16w_SITTD12_TGACAGTAGCAACAAT-1-10x  | 0.13236253 | 0.42120218 | 0.0019219  |
| 16w_SITTD12_TGACAGGTACCGCGT-1-10x   | 0.03010418 | 0.05710708 | 4.55E-05   |
| 16w_SITTD12_TGACCCTAGTCTCTGA-1-10x  | 0.02122977 | 0.02550936 | 3.69E-05   |
| 16w_SITTD12_TGACCCTTCGTGCATA-1-10x  | 0.12942617 | 0.41074714 | 0.0019639  |
| 16w_SITTD12_TGACCCTTCGTGTTCC-1-10x  | 0.03271453 | 0.06640133 | 5.00E-05   |
| 16w_SITTD12_TGACGCGAGGTCGACA-1-10x  | 0.04523069 | 0.11096564 | 9.39E-05   |
| 16w_SITTD12_TGACGCGAGTCGGCAA-1-10x  | 0.04820685 | 0.12156237 | 0.00011598 |
| 16w_SITTD12_TGACTCCCAAGAATGT-1-10x  | 0.16110049 | 0.5235249  | 0.0017883  |
| 16w_SITTD12_TGAGACTTCATTACTC-1-10x  | 0.08178733 | 0.24112706 | 0.0031253  |
| 16w_SITTD12_TGAGACTTCGGCTTCT-1-10x  | 0.17249614 | 0.56409955 | 0.0016089  |
| 16w_SITTD12_TGAGCATCAGAGATGC-1-10x  | 0.1323905  | 0.42130175 | 0.0019219  |

|                                    |            |            |            |
|------------------------------------|------------|------------|------------|
| 16w_SITTD12_TGAGGAGTCAGGAAAT-1-10x | 0.05665684 | 0.15164892 | 0.000257   |
| 16w_SITTD12_TGAGGTTAGTGTTAC-1-10x  | 0.11642269 | 0.3644477  | 0.0025211  |
| 16w_SITTD12_TGAGGTTTCTATTGTC-1-10x | 0.04700037 | 0.11726666 | 0.00010777 |
| 16w_SITTD12_TGATCAGCAAGGCTTT-1-10x | 0.28133658 | 0.9516304  | 0.00075401 |
| 16w_SITTD12_TGATGCACAACACGAG-1-10x | 0.11203061 | 0.34880954 | 0.002929   |
| 16w_SITTD12_TGATGGTCACGTGAGA-1-10x | 0.07227534 | 0.20725925 | 0.0014433  |
| 16w_SITTD12_TGATGGTGTTCAGA-1-10x   | 0.12815174 | 0.4062095  | 0.0020026  |
| 16w_SITTD12_TGATTCTAGAGGACTC-1-10x | 0.2431826  | 0.8157816  | 0.00085167 |
| 16w_SITTD12_TGATTCGTCGATCG-1-10x   | 0.06962896 | 0.19783671 | 0.0010821  |
| 16w_SITTD12_TGATTTCTCTCATGGA-1-10x | 0.10882901 | 0.3374101  | 0.0032165  |
| 16w_SITTD12_TGCAGATGTGAACGGT-1-10x | 0.26450837 | 0.8917129  | 0.00076135 |
| 16w_SITTD12_TGCAGGCTCGCTCATC-1-10x | 0.118178   | 0.3706976  | 0.0023898  |
| 16w_SITTD12_TGCAGTAGTACGAAAT-1-10x | 0.10848749 | 0.33619413 | 0.0032165  |
| 16w_SITTD12_TGCATGAAGGCTCTCG-1-10x | 0.2789092  | 0.9429877  | 0.00075266 |
| 16w_SITTD12_TGCATGATCCCATAGA-1-10x | 0.05138579 | 0.13288113 | 0.00016076 |
| 16w_SITTD12_TGCCGAGCATGGAACG-1-10x | 0.08667168 | 0.258518   | 0.0039187  |
| 16w_SITTD12_TGCGATACATACATCG-1-10x | 0.04510193 | 0.1105072  | 9.39E-05   |
| 16w_SITTD12_TGCGGCAAGGTCTACT-1-10x | 0.01554487 | 0.00526805 | 3.33E-05   |
| 16w_SITTD12_TGCTCCAAGGTGGGTT-1-10x | 0.15314902 | 0.49521336 | 0.0018617  |
| 16w_SITTD12_TGCTCCATCATGCCAA-1-10x | 0.11317385 | 0.3528801  | 0.0027534  |
| 16w_SITTD12_TGCTTCGAGTTGGAC-1-10x  | 0.24249098 | 0.8133191  | 0.00085764 |
| 16w_SITTD12_TGCTTCGGTACTGCCG-1-10x | 0.1631967  | 0.5309885  | 0.001763   |
| 16w_SITTD12_TGGATCATCGGCCCAA-1-10x | 0.21747905 | 0.7242631  | 0.00104    |
| 16w_SITTD12_TGGCGTGAGCGTGTCC-1-10x | 0.11301043 | 0.35229823 | 0.0028393  |
| 16w_SITTD12_TGGGAAGCAGCTAACT-1-10x | 0.0223439  | 0.02947626 | 3.76E-05   |
| 16w_SITTD12_TGGGAGATCAGTGGGA-1-10x | 0.04131521 | 0.09702442 | 7.40E-05   |
| 16w_SITTD12_TGGGAGATCGTTCCCA-1-10x | 0.25943968 | 0.87366563 | 0.00077499 |
| 16w_SITTD12_TGGGATTAGCATTGAA-1-10x | 0.08407537 | 0.24927373 | 0.0036353  |
| 16w_SITTD12_TGGGCGTTCGTAGAGG-1-10x | 0.01715479 | 0.01100022 | 3.38E-05   |
| 16w_SITTD12_TGGGCTGTGATACTG-1-10x  | 0.10713304 | 0.33137152 | 0.0034182  |
| 16w_SITTD12_TGGGTTAAGAGCAACC-1-10x | 0.1840605  | 0.6052749  | 0.0014112  |
| 16w_SITTD12_TGGGTTACAGGGAGAG-1-10x | 0.0501578  | 0.12850882 | 0.00013566 |
| 16w_SITTD12_TGGGTTATCTCGAGTA-1-10x | 0.20556244 | 0.6818335  | 0.001143   |
| 16w_SITTD12_TGGTACAGTTGCGGCT-1-10x | 0.26043862 | 0.8772224  | 0.00077221 |
| 16w_SITTD12_TGGTACATCTCCACTG-1-10x | 0.01919079 | 0.01824949 | 3.49E-05   |
| 16w_SITTD12_TGGTAGTTCCCGAGGT-1-10x | 0.258415   | 0.8700173  | 0.000778   |
| 16w_SITTD12_TGGTTAGCAATCGAAA-1-10x | 0.2849823  | 0.9646112  | 0.00075605 |
| 16w_SITTD12_TGTAACGAGCAGCAGT-1-10x | 0.18278782 | 0.6007435  | 0.0014268  |
| 16w_SITTD12_TGTAACGCAGACTCTA-1-10x | 0.03424566 | 0.07185299 | 5.17E-05   |
| 16w_SITTD12_TGTAACGGTCTTAGTG-1-10x | 0.1225163  | 0.38614428 | 0.0021873  |
| 16w_SITTD12_TGTAAGCGTCGCAGTC-1-10x | 0.24886143 | 0.83600134 | 0.00081888 |

|                                     |            |            |            |
|-------------------------------------|------------|------------|------------|
| 16w_SITTD12_TGTACAGTCCGATGCG-1-10x  | 0.04238866 | 0.10084647 | 7.82E-05   |
| 16w_SITTD12_TGTAGACAGAATAACC-1-10x  | 0.02232045 | 0.02939277 | 3.76E-05   |
| 16w_SITTD12_TGTCAGATCTATCCAT-1-10x  | 0.01985342 | 0.02060879 | 3.55E-05   |
| 16w_SITTD12_TGTCCACTCTATCGCC-1-10x  | 0.09523223 | 0.28899822 | 0.0044051  |
| 16w_SITTD12_TGTCCCAGTCATAGTC-1-10x  | 0.1919423  | 0.6333384  | 0.0012985  |
| 16w_SITTD12_TGTCCCATCTTGAGCA-1-10x  | 0.04733251 | 0.11844927 | 0.00010777 |
| 16w_SITTD12_TGTCCTGTCCATGCAA-1-10x  | 0.27054152 | 0.9131942  | 0.00075418 |
| 16w_SITTD12_TGTGATGGTCTTGCGG-1-10x  | 0.09973841 | 0.30504265 | 0.0041652  |
| 16w_SITTD12_TGTGATGGTGGCTTAT-1-10x  | 0.02915555 | 0.05372945 | 4.42E-05   |
| 16w_SITTD12_TGTGCGGAGGGAGTGG-1-10x  | 0.17424858 | 0.57033914 | 0.0015753  |
| 16w_SITTD12_TGTGCGGCACGGTCTG-1-10x  | 0.17346911 | 0.56756383 | 0.0015922  |
| 16w_SITTD12_TGTGCGGTCGTCCTCA-1-10x  | 0.1879677  | 0.6191867  | 0.0013519  |
| 16w_SITTD12_TGTGTGACAACTTGGT-1-10x  | 0.10309838 | 0.31700593 | 0.0038193  |
| 16w_SITTD12_TGTTACTCACGGTCTG-1-10x  | 0.07775725 | 0.22677779 | 0.0023954  |
| 16w_SITTD12_TGTTACTTCAAACGAA-1-10x  | 0.03757288 | 0.08369967 | 6.07E-05   |
| 16w_SITTD12_TGTTCACTCTCGATT-1-10x   | 0.0241065  | 0.03575209 | 3.91E-05   |
| 16w_SITTD12_TGTTCTATCCGACAGC-1-10x  | 0.04613448 | 0.11418361 | 0.00010046 |
| 16w_SITTD12_TGTTGAGAGGCACTAG-1-10x  | 0.11589012 | 0.36255148 | 0.002594   |
| 16w_SITTD12_TGTTGAGGTTGTCATG-1-10x  | 0.0989605  | 0.30227286 | 0.0042345  |
| 16w_SITTD12_TGTTGGAAGAGCACTG-1-10x  | 0.25384098 | 0.8537312  | 0.00079608 |
| 16w_SITTD12_TGTTGGAGTCCTTAAG-1-10x  | 0.01761842 | 0.01265101 | 3.44E-05   |
| 16w_SITTD12_TTAATCCAGTGACCTT-1-10x  | 0.24399215 | 0.8186641  | 0.00084583 |
| 16w_SITTD12_TTACAGGAGCTGAAAT-1-10x  | 0.22400612 | 0.7475029  | 0.00098869 |
| 16w_SITTD12_TTACAGGAGTGACCT-1-10x   | 0.229103   | 0.76565063 | 0.0009522  |
| 16w_SITTD12_TTACAGGCAGATCCAT-1-10x  | 0.09961662 | 0.304609   | 0.0041652  |
| 16w_SITTD12_TTACAGGGTCTAGGTT-1-10x  | 0.24108103 | 0.8082989  | 0.00086374 |
| 16w_SITTD12_TTACCATAGGTTCTTG-1-10x  | 0.23382957 | 0.78247976 | 0.00091657 |
| 16w_SITTD12_TTACCATTGTCAAAC-1-10x   | 0.27918753 | 0.94397867 | 0.00075266 |
| 16w_SITTD12_TTACGCCATTGACCA-1-10x   | 0.18656148 | 0.6141798  | 0.0013662  |
| 16w_SITTD12_TTACTGTAGATTGTGA-1-10x  | 0.26358578 | 0.888428   | 0.00076313 |
| 16w_SITTD12_TTAGGGTAGCTAGCCC-1-10x  | 0.04541765 | 0.11163131 | 9.39E-05   |
| 16w_SITTD12_TTAGGGTGTGCCTTTC-1-10x  | 0.06650224 | 0.18670389 | 0.00079936 |
| 16w_SITTD12_TTAGGGTTCATTGTTTC-1-10x | 0.19672751 | 0.6503764  | 0.00124    |
| 16w_SITTD12_TTAGTCTAGAGCCTGA-1-10x  | 0.03190542 | 0.06352048 | 4.83E-05   |
| 16w_SITTD12_TTAGTCTAGAGCTTTC-1-10x  | 0.2328159  | 0.7788706  | 0.00092358 |
| 16w_SITTD12_TTAGTCTAGCGAAACC-1-10x  | 0.02193721 | 0.02802823 | 3.69E-05   |
| 16w_SITTD12_TTCAATCTCACAACCA-1-10x  | 0.07347005 | 0.21151306 | 0.0015819  |
| 16w_SITTD12_TTCACGCAGGTAAGTT-1-10x  | 0.27196082 | 0.9182477  | 0.000753   |
| 16w_SITTD12_TTCACGCTCTGTGCAA-1-10x  | 0.27592862 | 0.9323752  | 0.00075214 |
| 16w_SITTD12_TTCAGGAGTTCAGTAC-1-10x  | 0.04564103 | 0.11242666 | 0.00010046 |
| 16w_SITTD12_TTCATGTGTCGTTGCG-1-10x  | 0.08158737 | 0.2404151  | 0.0031253  |

|                                     |            |            |            |
|-------------------------------------|------------|------------|------------|
| 16w_SITTD12_TTCATTGAGTAGACCG-1-10x  | 0.01953046 | 0.01945891 | 3.55E-05   |
| 16w_SITTD12_TTCATTGTCAGTGGGA-1-10x  | 0.02046517 | 0.02278698 | 3.62E-05   |
| 16w_SITTD12_TTCCAATAGGCTGAAC-1-10x  | 0.04754436 | 0.11920355 | 0.00011598 |
| 16w_SITTD12_TTCCACGTCGGCAGTC-1-10x  | 0.22774844 | 0.76082766 | 0.00096676 |
| 16w_SITTD12_TTCCGTGCAAGAACT-1-10x   | 0.01750091 | 0.01223261 | 3.44E-05   |
| 16w_SITTD12_TTCCTAAAGGCACCAA-1-10x  | 0.24992149 | 0.8397757  | 0.00081397 |
| 16w_SITTD12_TTCCTAAGTTTGTGGT-1-10x  | 0.22933973 | 0.7664935  | 0.0009522  |
| 16w_SITTD12_TTCCTCTTCTCGTAT-1-10x   | 0.0317882  | 0.06310311 | 4.83E-05   |
| 16w_SITTD12_TTCCTCCAACACAAA-1-10x   | 0.06521474 | 0.18211968 | 0.00064991 |
| 16w_SITTD12_TTCCTTCTCGCCAGAC-1-10x  | 0.22305816 | 0.74412775 | 0.0010033  |
| 16w_SITTD12_TTCGCTGCACAGTGTT-1-10x  | 0.04239939 | 0.10088467 | 7.82E-05   |
| 16w_SITTD12_TTCGCTGTCTATTTG-1-10x   | 0.10169518 | 0.3120098  | 0.0040036  |
| 16w_SITTD12_TTCGCTGTCTCCTGTG-1-10x  | 0.24413773 | 0.8191824  | 0.00084583 |
| 16w_SITTD12_TTCTAGTGTTTACTTC-1-10x  | 0.10067599 | 0.3083809  | 0.0040879  |
| 16w_SITTD12_TTCTAGTTCTCCGAGG-1-10x  | 0.11728042 | 0.36750168 | 0.002453   |
| 16w_SITTD12_TTCTCTCAAGGCTTT-1-10x   | 0.209788   | 0.69687873 | 0.0011095  |
| 16w_SITTD12_TTCTGTATCTGTGTGA-1-10x  | 0.04034431 | 0.09356746 | 7.01E-05   |
| 16w_SITTD12_TTCTTCCGTCTCCTGT-1-10x  | 0.07301083 | 0.20987797 | 0.0015819  |
| 16w_SITTD12_TTCTTGACAGTTCCAA-1-10x  | 0.05144718 | 0.13309973 | 0.00016076 |
| 16w_SITTD12_TTCTTGATCATGCCCT-1-10x  | 0.07709191 | 0.22440885 | 0.0022191  |
| 16w_SITTD12_TTGAACGAGAACTCCT-1-10x  | 0.27649334 | 0.9343859  | 0.00075214 |
| 16w_SITTD12_TTGAACGAGGTCCTGC-1-10x  | 0.03221021 | 0.06460568 | 4.83E-05   |
| 16w_SITTD12_TTGAGTGCAAGAGATT-1-10x  | 0.0397538  | 0.09146494 | 6.67E-05   |
| 16w_SITTD12_TTGAGTGGTCGTCTCT-1-10x  | 0.23616482 | 0.79079455 | 0.00090278 |
| 16w_SITTD12_TTGCGTCTCAGACCCG-1-10x  | 0.05760471 | 0.15502387 | 0.00028394 |
| 16w_SITTD12_TTGCTGCAGGAGTATT-1-10x  | 0.01520377 | 0.00405355 | 3.27E-05   |
| 16w_SITTD12_TTGCTGCAGTTGAAGT-1-10x  | 0.07496288 | 0.21682833 | 0.001885   |
| 16w_SITTD12_TTGGGTAAGATGAACT-1-10x  | 0.25712344 | 0.86541855 | 0.00078121 |
| 16w_SITTD12_TTGGTTTTCTTTGCAT-1-10x  | 0.09226626 | 0.27843773 | 0.0043903  |
| 16w_SITTD12_TTGTGTTGTGCCAGT-1-10x   | 0.26639393 | 0.89842653 | 0.00075831 |
| 16w_SITTD12_TTGTGTTGTTGGTACT-1-10x  | 0.02803314 | 0.04973305 | 4.30E-05   |
| 16w_SITTD12_TTGTTCATCCGTTTCG-1-10x  | 0.08044137 | 0.23633473 | 0.0029431  |
| 16w_SITTD12_TTGTGTGTCAGTCTACA-1-10x | 0.08302797 | 0.24554443 | 0.0033032  |
| 16w_SITTD12_TTGTGTGTCGCGGTT-1-10x   | 0.01707387 | 0.01071209 | 3.38E-05   |
| 16w_SITTD12_TTGTGTTCTCCGCAT-1-10x   | 0.18580851 | 0.6114988  | 0.0013809  |
| 16w_SITTD12_TTTACCAAGTATGGCG-1-10x  | 0.0151042  | 0.00369901 | 3.27E-05   |
| 16w_SITTD12_TTTACCACACGGCACT-1-10x  | 0.26194534 | 0.88258713 | 0.00076727 |
| 16w_SITTD12_TTTACCAGTTCCATTT-1-10x  | 0.02748628 | 0.04778593 | 4.19E-05   |
| 16w_SITTD12_TTTACCATCCCGGTAG-1-10x  | 0.07542837 | 0.21848573 | 0.001885   |
| 16w_SITTD12_TTTACGTCACGTACAT-1-10x  | 0.17835438 | 0.5849581  | 0.0015081  |
| 16w_SITTD12_TTTACGTCCTCCGAG-1-10x   | 0.19994321 | 0.661826   | 0.0011985  |



|                                    |            |            |            |
|------------------------------------|------------|------------|------------|
| 16w_SITTD12_TTTACGTGTTGCGGAA-1-10x | 0.2432551  | 0.81603974 | 0.00085167 |
| 16w_SITTD12_TTTACTGCATGGGAAC-1-10x | 0.19059737 | 0.6285497  | 0.0013113  |
| 16w_SITTD12_TTTACTGGTCCAGCCA-1-10x | 0.25794768 | 0.8683533  | 0.000778   |
| 16w_SITTD12_TTTAGTCGTAGGATAT-1-10x | 0.04831287 | 0.12193987 | 0.00011598 |
| 16w_SITTD12_TTTCATGAGGCAGCTA-1-10x | 0.2629141  | 0.8860364  | 0.00076511 |
| 16w_SITTD12_TTTCCTCGTCCGTACG-1-10x | 0.0871098  | 0.26007795 | 0.0040384  |
| 16w_SITTD12_TTTCGATAGATGAAGG-1-10x | 0.0166074  | 0.00905123 | 3.38E-05   |
| 16w_SITTD12_TTTCGATGTCTCCTGT-1-10x | 0.05022302 | 0.12874106 | 0.00013566 |
| 16w_SITTD12_TTTGACTGTTGTCCCT-1-10x | 0.01875979 | 0.01671489 | 3.49E-05   |
| 16w_SITTD12_TTTGGTTCAAGTGTCT-1-10x | 0.05359072 | 0.14073187 | 0.00019264 |
| 16w_SITTD12_TTTGTTGCATCACCAA-1-10x | 0.02955724 | 0.05515965 | 4.42E-05   |
| 16w_SITTE12_AAACCCACAGTATACC-1-10x | 0.24658686 | 0.8279026  | 0.0008292  |
| 16w_SITTE12_AAACCCACAGTTTCGA-1-10x | 0.03898839 | 0.08873968 | 6.67E-05   |
| 16w_SITTE12_AAACCCAGTCTACGTA-1-10x | 0.16557966 | 0.5394731  | 0.0017353  |
| 16w_SITTE12_AAACCCAGTCTGGTTA-1-10x | 0.04157868 | 0.09796251 | 7.40E-05   |
| 16w_SITTE12_AAACCCAGTTTCGGCG-1-10x | 0.24394435 | 0.81849384 | 0.00084583 |
| 16w_SITTE12_AAACGAAGTGGTAATA-1-10x | 0.01780622 | 0.01331965 | 3.44E-05   |
| 16w_SITTE12_AAACGCTTCGCGTCGA-1-10x | 0.06651648 | 0.1867546  | 0.00079936 |
| 16w_SITTE12_AAAGAACAGAATTCAG-1-10x | 0.08258775 | 0.243977   | 0.0033032  |
| 16w_SITTE12_AAAGAACCAGAGATGC-1-10x | 0.08745766 | 0.26131654 | 0.0040384  |
| 16w_SITTE12_AAAGAACCATTACTCT-1-10x | 0.05016498 | 0.12853438 | 0.00013566 |
| 16w_SITTE12_AAAGAACTCCCGGTAG-1-10x | 0.04494105 | 0.10993436 | 9.39E-05   |
| 16w_SITTE12_AAAGGTACATCCGTGG-1-10x | 0.0519145  | 0.13476364 | 0.00016076 |
| 16w_SITTE12_AAAGGTATCGATACAC-1-10x | 0.04606968 | 0.11395289 | 0.00010046 |
| 16w_SITTE12_AAAGTCCCAGCATCTA-1-10x | 0.20225517 | 0.67005783 | 0.0011792  |
| 16w_SITTE12_AAAGTGATCCCAGGCA-1-10x | 0.06784824 | 0.19149639 | 0.00088537 |
| 16w_SITTE12_AAATGGAAGATGATTG-1-10x | 0.10447242 | 0.32189828 | 0.0037215  |
| 16w_SITTE12_AAATGGATCCAAGTGA-1-10x | 0.24983145 | 0.8394551  | 0.00081397 |
| 16w_SITTE12_AAATGGATCGCCAGTG-1-10x | 0.06703053 | 0.1885849  | 0.00079936 |
| 16w_SITTE12_AAATGGATCGTAGAGG-1-10x | 0.04153335 | 0.09780111 | 7.40E-05   |
| 16w_SITTE12_AACAAAGAGTCATAGA-1-10x | 0.12305863 | 0.38807526 | 0.0021479  |
| 16w_SITTE12_AACAAAGGTTAAGGGC-1-10x | 0.20559183 | 0.6819381  | 0.001143   |
| 16w_SITTE12_AACAAGAAGGACGCTA-1-10x | 0.16531701 | 0.538538   | 0.0017353  |
| 16w_SITTE12_AACAAGATCTCCTGTG-1-10x | 0.164074   | 0.53411216 | 0.0017494  |
| 16w_SITTE12_AACACACAGCTAGTTC-1-10x | 0.14068678 | 0.450841   | 0.0018734  |
| 16w_SITTE12_AACACACGTACAGGTG-1-10x | 0.10446896 | 0.32188594 | 0.0037215  |
| 16w_SITTE12_AACACACGTGCAATGG-1-10x | 0.2810116  | 0.95047337 | 0.00075348 |
| 16w_SITTE12_AACAGGGGTGTAGCAG-1-10x | 0.03330264 | 0.0684953  | 5.00E-05   |
| 16w_SITTE12_AACAGGGGTTGAAGTA-1-10x | 0.04928403 | 0.12539771 | 0.00012523 |
| 16w_SITTE12_AACAGGGTACGATAC-1-10x  | 0.25054815 | 0.842007   | 0.00080923 |
| 16w_SITTE12_AACCACACATAGAATG-1-10x | 0.05027552 | 0.12892798 | 0.00014746 |

|                                    |            |            |            |
|------------------------------------|------------|------------|------------|
| 16w_SITTE12_AACCATGCATGCACTA-1-10x | 0.2453013  | 0.82332534 | 0.00084014 |
| 16w_SITTE12_AACCATGGTCTACATG-1-10x | 0.08628903 | 0.25715557 | 0.0039187  |
| 16w_SITTE12_AACCCAATCTTGGAAC-1-10x | 0.10244016 | 0.31466234 | 0.0039137  |
| 16w_SITTE12_AACCTGAGTACCGCGT-1-10x | 0.22670442 | 0.75711036 | 0.00097406 |
| 16w_SITTE12_AACCTTTAGCGTCAGA-1-10x | 0.19215794 | 0.6341062  | 0.0012861  |
| 16w_SITTE12_AACCTTTGTCTGTAAC-1-10x | 0.05823289 | 0.15726052 | 0.00031414 |
| 16w_SITTE12_AACCTTTTCCATCCGT-1-10x | 0.04481485 | 0.10948502 | 9.39E-05   |
| 16w_SITTE12_AACGAAAGTGTATTGC-1-10x | 0.17679514 | 0.5794063  | 0.0015416  |
| 16w_SITTE12_AACGGGAAGGCATCGA-1-10x | 0.24410573 | 0.81906843 | 0.00084583 |
| 16w_SITTE12_AACGTCAAGCTGTTCA-1-10x | 0.0507669  | 0.13067754 | 0.00014746 |
| 16w_SITTE12_AACGTCAGTAGTCTGT-1-10x | 0.22457573 | 0.7495311  | 0.00098869 |
| 16w_SITTE12_AACTTCTCAATCTCGA-1-10x | 0.05354895 | 0.14058316 | 0.00019264 |
| 16w_SITTE12_AACTTCTTCAGGGTAG-1-10x | 0.20083804 | 0.66501206 | 0.0011888  |
| 16w_SITTE12_AACTTCTTCGAGTTA-1-10x  | 0.01516947 | 0.0039314  | 3.27E-05   |
| 16w_SITTE12_AACTTCTTCGTGGACC-1-10x | 0.0225916  | 0.03035823 | 3.76E-05   |
| 16w_SITTE12_AAGACAAGTAGAATAC-1-10x | 0.1444112  | 0.464102   | 0.0018716  |
| 16w_SITTE12_AAGACTCAGCTAGAAT-1-10x | 0.13654803 | 0.4361048  | 0.0018891  |
| 16w_SITTE12_AAGACTCGTATGAAGT-1-10x | 0.08855497 | 0.26522353 | 0.0041422  |
| 16w_SITTE12_AAGACTCTCGTAGCCG-1-10x | 0.09194107 | 0.27727988 | 0.0043903  |
| 16w_SITTE12_AAGATAGCACGGTGTC-1-10x | 0.05873541 | 0.15904976 | 0.00034795 |
| 16w_SITTE12_AAGATAGTCAAAGAAC-1-10x | 0.01546748 | 0.00499247 | 3.27E-05   |
| 16w_SITTE12_AAGATAGTCTAGTGAC-1-10x | 0.01758988 | 0.01254938 | 3.44E-05   |
| 16w_SITTE12_AAGCATCAGGGATCGT-1-10x | 0.08565314 | 0.25489146 | 0.0037839  |
| 16w_SITTE12_AAGCCATAGGTTGACG-1-10x | 0.10761366 | 0.3330828  | 0.0033168  |
| 16w_SITTE12_AAGCGAGAGAATAACC-1-10x | 0.11548654 | 0.3611145  | 0.002594   |
| 16w_SITTE12_AAGCGAGTCTGTGTGA-1-10x | 0.03996229 | 0.09220729 | 7.01E-05   |
| 16w_SITTE12_AAGCGTTGTTGGGTAG-1-10x | 0.02424686 | 0.03625185 | 3.91E-05   |
| 16w_SITTE12_AAGCGTTTCAGCTTGA-1-10x | 0.07461434 | 0.21558735 | 0.0017292  |
| 16w_SITTE12_AAGCGTTTCCTCACGT-1-10x | 0.24799761 | 0.8329257  | 0.00082396 |
| 16w_SITTE12_AAGGAATTCCGTTTCG-1-10x | 0.1041571  | 0.32077557 | 0.0037215  |
| 16w_SITTE12_AAGGTAAGTATCTCTT-1-10x | 0.07509059 | 0.21728306 | 0.001885   |
| 16w_SITTE12_AAGTACCAGGAAAGAC-1-10x | 0.02701686 | 0.04611453 | 4.19E-05   |
| 16w_SITTE12_AAGTACCCAGGTGACA-1-10x | 0.08354131 | 0.2473722  | 0.0034742  |
| 16w_SITTE12_AAGTACCCATGGCACC-1-10x | 0.10420559 | 0.3209482  | 0.0037215  |
| 16w_SITTE12_AAGTCGTGTCGTGTTA-1-10x | 0.01901409 | 0.01762034 | 3.49E-05   |
| 16w_SITTE12_AAGTGAAAGGTGCCTC-1-10x | 0.08476491 | 0.25172883 | 0.0036353  |
| 16w_SITTE12_AAGTGAACAGGTGACA-1-10x | 0.01506353 | 0.00355421 | 3.27E-05   |
| 16w_SITTE12_AAGTGAATCGAACCTA-1-10x | 0.01955102 | 0.01953212 | 3.55E-05   |
| 16w_SITTE12_AATCACGCAGATAAAC-1-10x | 0.14563678 | 0.46846572 | 0.0018716  |
| 16w_SITTE12_AATCGACCAGTCTACA-1-10x | 0.0426111  | 0.1016385  | 7.82E-05   |
| 16w_SITTE12_AATCGACTCGGTGCAC-1-10x | 0.03898471 | 0.08872657 | 6.67E-05   |

|                                    |            |            |            |
|------------------------------------|------------|------------|------------|
| 16w_SITTE12_AATCGTGCACTACCCT-1-10x | 0.22364227 | 0.7462075  | 0.00099599 |
| 16w_SITTE12_AATCGTGCACTGGGTA-1-10x | 0.02452829 | 0.03725388 | 3.91E-05   |
| 16w_SITTE12_AATCGTGGTTAAGGAT-1-10x | 0.03328253 | 0.06842373 | 5.00E-05   |
| 16w_SITTE12_AATGAAGAGGTCCGAA-1-10x | 0.02421276 | 0.03613042 | 3.91E-05   |
| 16w_SITTE12_AATGAAGCATGCAGGA-1-10x | 0.27529576 | 0.9301219  | 0.00075218 |
| 16w_SITTE12_AATGAAGGTATATGGA-1-10x | 0.061831   | 0.17007175 | 0.00047505 |
| 16w_SITTE12_AATGAAGGTCCGGCAT-1-10x | 0.16768496 | 0.5469691  | 0.0016902  |
| 16w_SITTE12_AATGAAGTCGCGTTTC-1-10x | 0.1814596  | 0.5960143  | 0.0014587  |
| 16w_SITTE12_AATGACCTCAGGAACG-1-10x | 0.23557906 | 0.78870887 | 0.00090278 |
| 16w_SITTE12_AATGACCTCTAAGCCA-1-10x | 0.04362144 | 0.10523584 | 8.29E-05   |
| 16w_SITTE12_AATGCCATCTCTTGCG-1-10x | 0.08563905 | 0.2548413  | 0.0037839  |
| 16w_SITTE12_AATGGAAAGGGAGATA-1-10x | 0.01922477 | 0.01837046 | 3.49E-05   |
| 16w_SITTE12_AATGGAACATAGGAGC-1-10x | 0.20758551 | 0.6890367  | 0.001126   |
| 16w_SITTE12_AATGGCTTCACTAGCA-1-10x | 0.26819196 | 0.9048285  | 0.00075594 |
| 16w_SITTE12_AATGGCTTCTGGACTA-1-10x | 0.10431985 | 0.32135504 | 0.0037215  |
| 16w_SITTE12_AATTCCTAGAGTAACT-1-10x | 0.03203569 | 0.06398431 | 4.83E-05   |
| 16w_SITTE12_AATTCCTGTTGCGAAG-1-10x | 0.2544045  | 0.8557376  | 0.00079207 |
| 16w_SITTE12_AATTCCTCCACAGCG-1-10x  | 0.03683749 | 0.08108131 | 5.82E-05   |
| 16w_SITTE12_AATTCCTTCGATACGT-1-10x | 0.22261605 | 0.74255353 | 0.0010033  |
| 16w_SITTE12_ACAAAGACACAAACGG-1-10x | 0.19212455 | 0.6339873  | 0.0012861  |
| 16w_SITTE12_ACAAAGACACGAGGAT-1-10x | 0.1680715  | 0.5483454  | 0.0016902  |
| 16w_SITTE12_ACAAAGATCAGCGGAA-1-10x | 0.26763165 | 0.90283346 | 0.00075705 |
| 16w_SITTE12_ACAAGCTGTAGTAAGT-1-10x | 0.26880515 | 0.90701175 | 0.00075594 |
| 16w_SITTE12_ACACCAACACCTCTGT-1-10x | 0.06875841 | 0.19473706 | 0.00097948 |
| 16w_SITTE12_ACACCAAGTTGCATGT-1-10x | 0.28907537 | 0.97918475 | 0.0007606  |
| 16w_SITTE12_ACACTGACAAACCACT-1-10x | 0.04744243 | 0.11884061 | 0.00011598 |
| 16w_SITTE12_ACACTGAGTAGAATAC-1-10x | 0.05327202 | 0.13959712 | 0.00019264 |
| 16w_SITTE12_ACACTGAGTCTTGCGG-1-10x | 0.11613564 | 0.36342567 | 0.0025211  |
| 16w_SITTE12_ACAGAAAAGACATGCG-1-10x | 0.11575698 | 0.36207741 | 0.002594   |
| 16w_SITTE12_ACAGGGACAAGACGGT-1-10x | 0.04473606 | 0.10920449 | 9.39E-05   |
| 16w_SITTE12_ACAGGGATCATTGCGA-1-10x | 0.08228282 | 0.24289128 | 0.0033032  |
| 16w_SITTE12_ACATCCCAGACATCAA-1-10x | 0.11677952 | 0.36571822 | 0.0025211  |
| 16w_SITTE12_ACATCCCGTGACAGCA-1-10x | 0.1846653  | 0.6074284  | 0.0013959  |
| 16w_SITTE12_ACATCGAAGAGCTGCA-1-10x | 0.21089824 | 0.7008318  | 0.0010934  |
| 16w_SITTE12_ACATCGAAGGATCACG-1-10x | 0.04730252 | 0.11834248 | 0.00010777 |
| 16w_SITTE12_ACATCGAGTACAGAGC-1-10x | 0.13696086 | 0.43757474 | 0.0018842  |
| 16w_SITTE12_ACATGCATCTAGACAC-1-10x | 0.10054734 | 0.30792284 | 0.0040879  |
| 16w_SITTE12_ACATGCATCTGATTCT-1-10x | 0.20284124 | 0.67214453 | 0.0011699  |
| 16w_SITTE12_ACATGCATCTTTGCAT-1-10x | 0.04731109 | 0.11837301 | 0.00010777 |
| 16w_SITTE12_ACCAACACACGGAAGT-1-10x | 0.06179005 | 0.16992593 | 0.00047505 |
| 16w_SITTE12_ACCACAAAGTGATGGC-1-10x | 0.07723617 | 0.22492248 | 0.0022191  |

|                                     |            |            |            |
|-------------------------------------|------------|------------|------------|
| 16w_SITTE12_ACCACAACATCCCGTT-1-10x  | 0.25394574 | 0.8541042  | 0.00079608 |
| 16w_SITTE12_ACCACAAGTCGAATTC-1-10x  | 0.03711196 | 0.08205855 | 6.07E-05   |
| 16w_SITTE12_ACCATTTAGCACGATG-1-10x  | 0.04184459 | 0.09890928 | 7.82E-05   |
| 16w_SITTE12_ACCATTTAGGACTAAT-1-10x  | 0.11158192 | 0.34721196 | 0.002929   |
| 16w_SITTE12_ACCCAAACACTCATAG-1-10x  | 0.2776172  | 0.9383874  | 0.00075239 |
| 16w_SITTE12_ACCCAAAGTCAAGCCC-1-10x  | 0.19715732 | 0.6519067  | 0.0012292  |
| 16w_SITTE12_ACCCAAATCATGGCCG-1-10x  | 0.08854153 | 0.26517567 | 0.0041422  |
| 16w_SITTE12_ACCCTCACACCAGTTA-1-10x  | 0.27730295 | 0.93726856 | 0.00075222 |
| 16w_SITTE12_ACCCTTGGTGTTCATG-1-10x  | 0.02096375 | 0.02456218 | 3.62E-05   |
| 16w_SITTE12_ACCCTTGTCTTGCAGA-1-10x  | 0.2429488  | 0.81494915 | 0.00085167 |
| 16w_SITTE12_ACCGTTCCATTACGGT-1-10x  | 0.06827565 | 0.19301817 | 0.00097948 |
| 16w_SITTE12_ACCTACCCAGAGGGTT-1-10x  | 0.24434179 | 0.819909   | 0.00084583 |
| 16w_SITTE12_ACCTACCTCCCTATTA-1-10x  | 0.06935897 | 0.19687538 | 0.0010821  |
| 16w_SITTE12_ACCTGAACAGCTTTCC-1-10x  | 0.0166112  | 0.00906475 | 3.38E-05   |
| 16w_SITTE12_ACCTGAAGTTGTAGCT-1-10x  | 0.15980682 | 0.5189187  | 0.0018109  |
| 16w_SITTE12_ACCTGAATCCAAGTAG-1-10x  | 0.0395409  | 0.09070692 | 6.67E-05   |
| 16w_SITTE12_ACCTGTCAGAAGCTGC-1-10x  | 0.13815059 | 0.4418108  | 0.0018802  |
| 16w_SITTE12_ACCTGTCGTATGCTAC-1-10x  | 0.04023957 | 0.09319456 | 7.01E-05   |
| 16w_SITTE12_ACCTGTCTCCCTCGAT-1-10x  | 0.04742935 | 0.11879407 | 0.00011598 |
| 16w_SITTE12_ACGATCAAGTAGCAAT-1-10x  | 0.27359533 | 0.92406744 | 0.0007526  |
| 16w_SITTE12_ACGATGTCACTGCTTC-1-10x  | 0.11243697 | 0.35025638 | 0.0028393  |
| 16w_SITTE12_ACGATGTCAAGACCTGC-1-10x | 0.04601483 | 0.11375759 | 0.00010046 |
| 16w_SITTE12_ACGCACGAGAGATGCC-1-10x  | 0.08455811 | 0.25099257 | 0.0036353  |
| 16w_SITTE12_ACGCACGCAATCGTCA-1-10x  | 0.280731   | 0.9494742  | 0.00075348 |
| 16w_SITTE12_ACGCACGTCAAACCCA-1-10x  | 0.099318   | 0.30354574 | 0.0041652  |
| 16w_SITTE12_ACGGAAGTTCATCTT-1-10x   | 0.05597725 | 0.14922923 | 0.000257   |
| 16w_SITTE12_ACGGGTCCATCACAGT-1-10x  | 0.26979998 | 0.9105539  | 0.00075499 |
| 16w_SITTE12_ACGGTGCGAGCATCAGG-1-10x | 0.09208296 | 0.2777851  | 0.0043903  |
| 16w_SITTE12_ACGGTTAGTGCTCTCT-1-10x  | 0.02349389 | 0.03357086 | 3.83E-05   |
| 16w_SITTE12_ACGTAACCACCCAACG-1-10x  | 0.08379091 | 0.24826089 | 0.0034742  |
| 16w_SITTE12_ACGTAACCACCTATCC-1-10x  | 0.01785878 | 0.01350682 | 3.44E-05   |
| 16w_SITTE12_ACGTACAAGCCTTTGA-1-10x  | 0.09325446 | 0.2819563  | 0.0044107  |
| 16w_SITTE12_ACGTACATCAAACGAA-1-10x  | 0.02301719 | 0.03187355 | 3.83E-05   |
| 16w_SITTE12_ACGTACATCCGAGCTG-1-10x  | 0.05561674 | 0.14794563 | 0.000233   |
| 16w_SITTE12_ACGTAGTTCGCCAGTG-1-10x  | 0.11478229 | 0.358607   | 0.0026715  |
| 16w_SITTE12_ACGTCCTCAAGTCCAT-1-10x  | 0.26997223 | 0.9111672  | 0.00075499 |
| 16w_SITTE12_ACGTTCAGCCTAGGA-1-10x   | 0.20405775 | 0.676476   | 0.0011608  |
| 16w_SITTE12_ACGTTCCTACTCGATA-1-10x  | 0.26615158 | 0.89756364 | 0.00075974 |
| 16w_SITTE12_ACGTTCCTACTGTGAT-1-10x  | 0.08557705 | 0.25462052 | 0.0037839  |
| 16w_SITTE12_ACGTTCCTGTTATGACC-1-10x | 0.25968528 | 0.8745401  | 0.00077499 |
| 16w_SITTE12_ACGTTCCTCGAGCTGC-1-10x  | 0.25211525 | 0.8475867  | 0.00080467 |

|                                    |            |            |            |
|------------------------------------|------------|------------|------------|
| 16w_SITTE12_ACTATCTAGCGTGAA-1-10x  | 0.03962341 | 0.09100068 | 6.67E-05   |
| 16w_SITTE12_ACTATCTCACTATCCC-1-10x | 0.16442671 | 0.535368   | 0.0017494  |
| 16w_SITTE12_ACTATCTGTGTTATCG-1-10x | 0.04652705 | 0.1155814  | 0.00010777 |
| 16w_SITTE12_ACTATTCGTCAGTCTA-1-10x | 0.02881462 | 0.05251554 | 4.42E-05   |
| 16w_SITTE12_ACTATTCGTTTCGCTC-1-10x | 0.19522321 | 0.64502025 | 0.0012511  |
| 16w_SITTE12_ACTCCCAGTCAGACTT-1-10x | 0.08358415 | 0.24752471 | 0.0034742  |
| 16w_SITTE12_ACTCTCGAGGTGCTAG-1-10x | 0.17387764 | 0.5690184  | 0.0015922  |
| 16w_SITTE12_ACTCTCGAGTATTAGG-1-10x | 0.11100797 | 0.34516838 | 0.0030221  |
| 16w_SITTE12_ACTCTCGGTGGTCTAT-1-10x | 0.0976809  | 0.2977168  | 0.0042943  |
| 16w_SITTE12_ACTCTCGTCGTACCTC-1-10x | 0.03501033 | 0.07457564 | 5.37E-05   |
| 16w_SITTE12_ACTGATGCAGAGCGTA-1-10x | 0.22024474 | 0.7341104  | 0.0010253  |
| 16w_SITTE12_ACTGCAACAACCCGCA-1-10x | 0.17518945 | 0.57368916 | 0.0015585  |
| 16w_SITTE12_ACTGCAACAGATCCAT-1-10x | 0.04426416 | 0.10752425 | 8.81E-05   |
| 16w_SITTE12_ACTGCAACATTGCCGG-1-10x | 0.05522562 | 0.14655302 | 0.000233   |
| 16w_SITTE12_ACTGCAAGTACCTAGT-1-10x | 0.0833413  | 0.24666005 | 0.0034742  |
| 16w_SITTE12_ACTGTCCAGGATACGC-1-10x | 0.20065936 | 0.66437584 | 0.0011888  |
| 16w_SITTE12_ACTGTCCTCCTTATAC-1-10x | 0.02424467 | 0.03624402 | 3.91E-05   |
| 16w_SITTE12_ACTGTGAAGTATGATG-1-10x | 0.08760046 | 0.26182497 | 0.0040384  |
| 16w_SITTE12_ACTGTGACATCGCTGG-1-10x | 0.01812981 | 0.01447182 | 3.44E-05   |
| 16w_SITTE12_ACTTAGGAGCTCGACC-1-10x | 0.15762542 | 0.51115173 | 0.0018302  |
| 16w_SITTE12_ACTTAGGCAGACGATG-1-10x | 0.08164428 | 0.24061774 | 0.0031253  |
| 16w_SITTE12_ACTTATCTCGTCCTTG-1-10x | 0.07602733 | 0.22061835 | 0.0020486  |
| 16w_SITTE12_ACTTATCTCGTTCGCT-1-10x | 0.24722451 | 0.830173   | 0.0008292  |
| 16w_SITTE12_ACTTCCGAGGTACTGG-1-10x | 0.04868379 | 0.12326053 | 0.00012523 |
| 16w_SITTE12_ACTTCCGTCAAGGAC-1-10x  | 0.22796343 | 0.76159316 | 0.00095947 |
| 16w_SITTE12_ACTTCGCAGTATGTAG-1-10x | 0.09541121 | 0.28963548 | 0.0043808  |
| 16w_SITTE12_ACTTCGCCAATGTCAC-1-10x | 0.07903967 | 0.23134391 | 0.002576   |
| 16w_SITTE12_ACTTTGTCAAGCGAAC-1-10x | 0.19186808 | 0.63307416 | 0.0012985  |
| 16w_SITTE12_ACTTTGTGTTGGTAGG-1-10x | 0.08448115 | 0.25071853 | 0.0036353  |
| 16w_SITTE12_AGAAATGAGCCGTTGC-1-10x | 0.23075925 | 0.77154773 | 0.00093779 |
| 16w_SITTE12_AGAAATGCAATTGTGC-1-10x | 0.08664741 | 0.25843158 | 0.0039187  |
| 16w_SITTE12_AGAAATGCACAACGCC-1-10x | 0.16424711 | 0.5347285  | 0.0017494  |
| 16w_SITTE12_AGAACAAGTGATACAA-1-10x | 0.0514595  | 0.13314356 | 0.00016076 |
| 16w_SITTE12_AGAACCTGTCTCGACG-1-10x | 0.049785   | 0.12718146 | 0.00013566 |
| 16w_SITTE12_AGAACCTTCGAGTCCG-1-10x | 0.2741654  | 0.92609715 | 0.00075233 |
| 16w_SITTE12_AGAAGTAGTATTGACC-1-10x | 0.05932573 | 0.1611516  | 0.00034795 |
| 16w_SITTE12_AGAAGTATCCGGGACT-1-10x | 0.02206189 | 0.02847215 | 3.76E-05   |
| 16w_SITTE12_AGACAAAAGGGAGTTC-1-10x | 0.2844478  | 0.96270806 | 0.00075605 |
| 16w_SITTE12_AGACAAACATGGAACG-1-10x | 0.16574736 | 0.54007024 | 0.0017353  |
| 16w_SITTE12_AGACAAATCCGGTTCT-1-10x | 0.08026691 | 0.23571354 | 0.0027593  |
| 16w_SITTE12_AGACCATGTGAGTTGG-1-10x | 0.09094172 | 0.27372167 | 0.0043535  |

|                                     |            |            |            |
|-------------------------------------|------------|------------|------------|
| 16w_SITTE12_AGACCCGCACAGTCAT-1-10x  | 0.28908095 | 0.9792046  | 0.0007606  |
| 16w_SITTE12_AGACTCATCTCAGGG-1-10x   | 0.19625421 | 0.6486911  | 0.00124    |
| 16w_SITTE12_AGACTCATCTCATAGG-1-10x  | 0.19193065 | 0.6332969  | 0.0012985  |
| 16w_SITTE12_AGACTCATCTGTGCTC-1-10x  | 0.09117603 | 0.27455592 | 0.0043535  |
| 16w_SITTE12_AGAGAATAGACCATGG-1-10x  | 0.08275222 | 0.24456261 | 0.0033032  |
| 16w_SITTE12_AGAGAATGTACTCAAC-1-10x  | 0.07179294 | 0.20554164 | 0.0013138  |
| 16w_SITTE12_AGAGAGCAGTTGCGCC-1-10x  | 0.01873753 | 0.01663565 | 3.49E-05   |
| 16w_SITTE12_AGAGCAGGTGTTAGCT-1-10x  | 0.2829135  | 0.9572452  | 0.00075462 |
| 16w_SITTE12_AGAGCAGTCCTCTAGC-1-10x  | 0.09315767 | 0.28161165 | 0.0044107  |
| 16w_SITTE12_AGAGCCCAGCAGTAAT-1-10x  | 0.04614823 | 0.11423256 | 0.00010046 |
| 16w_SITTE12_AGAGCCCAGCCACCGT-1-10x  | 0.11566453 | 0.36174825 | 0.002594   |
| 16w_SITTE12_AGATAGACATCGTCCT-1-10x  | 0.08236049 | 0.24316783 | 0.0033032  |
| 16w_SITTE12_AGATAGAGTCCTACAA-1-10x  | 0.15166439 | 0.48992726 | 0.0018676  |
| 16w_SITTE12_AGATCCACACCCATAA-1-10x  | 0.04859775 | 0.1229542  | 0.00012523 |
| 16w_SITTE12_AGATCCATCTAATTCC-1-10x  | 0.03882461 | 0.08815654 | 6.36E-05   |
| 16w_SITTE12_AGATCGTAGGAACGAA-1-10x  | 0.17699914 | 0.58013266 | 0.0015416  |
| 16w_SITTE12_AGATCGTTCCAAGTGA-1-10x  | 0.02329109 | 0.03284879 | 3.83E-05   |
| 16w_SITTE12_AGATGAAGTACACGTT-1-10x  | 0.08234986 | 0.24312998 | 0.0033032  |
| 16w_SITTE12_AGATGCTCACCAAATC-1-10x  | 0.08491851 | 0.25227576 | 0.0036353  |
| 16w_SITTE12_AGATGCTTCTGATGGT-1-10x  | 0.12961803 | 0.41143027 | 0.0019639  |
| 16w_SITTE12_AGCATCAAGTATGACA-1-10x  | 0.22961238 | 0.7674643  | 0.0009522  |
| 16w_SITTE12_AGCCAATCAGAACTCT-1-10x  | 0.08372772 | 0.24803591 | 0.0034742  |
| 16w_SITTE12_AGCCAATGTTGTGTTG-1-10x  | 0.08146789 | 0.23998968 | 0.0031253  |
| 16w_SITTE12_AGCCAATTCTGGACCG-1-10x  | 0.12238435 | 0.38567445 | 0.0021873  |
| 16w_SITTE12_AGCCACGGTATTTCCGG-1-10x | 0.03506123 | 0.07475684 | 5.37E-05   |
| 16w_SITTE12_AGCCAGCTCCACGTA-1-10x   | 0.222683   | 0.74279195 | 0.0010033  |
| 16w_SITTE12_AGCGCCACAGAGGACT-1-10x  | 0.08174391 | 0.24097247 | 0.0031253  |
| 16w_SITTE12_AGCGCCATCCAGCACG-1-10x  | 0.05275671 | 0.13776235 | 0.00017575 |
| 16w_SITTE12_AGCGCTGAGATTGCGG-1-10x  | 0.2741965  | 0.9262079  | 0.00075233 |
| 16w_SITTE12_AGCGCTGAGGAATTAC-1-10x  | 0.08238788 | 0.24326536 | 0.0033032  |
| 16w_SITTE12_AGCGTATAGTAACCTC-1-10x  | 0.27852336 | 0.94161385 | 0.00075266 |
| 16w_SITTE12_AGCTACACAGTCGTTA-1-10x  | 0.09258516 | 0.2795732  | 0.0044107  |
| 16w_SITTE12_AGCTACAGTAGCTTAC-1-10x  | 0.16057363 | 0.52164894 | 0.0018     |
| 16w_SITTE12_AGCTACAGTAGGGTAC-1-10x  | 0.05185642 | 0.13455684 | 0.00016076 |
| 16w_SITTE12_AGCTCAACAGCGAACA-1-10x  | 0.02284178 | 0.03124899 | 3.76E-05   |
| 16w_SITTE12_AGCTCAAGTGGTCTAT-1-10x  | 0.18441993 | 0.6065547  | 0.0014112  |
| 16w_SITTE12_AGCTCAATCGTACACA-1-10x  | 0.01580697 | 0.00620127 | 3.33E-05   |
| 16w_SITTE12_AGCTTCCAGAGCGACT-1-10x  | 0.09519384 | 0.2888615  | 0.0044051  |
| 16w_SITTE12_AGCTTCCGTTCGAACT-1-10x  | 0.04874751 | 0.12348741 | 0.00012523 |
| 16w_SITTE12_AGCTTCCCTCACCTCTG-1-10x | 0.0455703  | 0.11217482 | 0.00010046 |
| 16w_SITTE12_AGGAAATAGAGGCCAT-1-10x  | 0.03622843 | 0.07891273 | 5.82E-05   |

|                                     |            |            |            |
|-------------------------------------|------------|------------|------------|
| 16w_SITTE12_AGGAATAAGAATCCCT-1-10x  | 0.06410264 | 0.17816    | 0.00058553 |
| 16w_SITTE12_AGGAATATCCGAACGC-1-10x  | 0.05200417 | 0.13508289 | 0.00016076 |
| 16w_SITTE12_AGGACGATCCACCCTA-1-10x  | 0.0216745  | 0.02709283 | 3.69E-05   |
| 16w_SITTE12_AGGAGGTAGTCGAAGC-1-10x  | 0.05145014 | 0.13311024 | 0.00016076 |
| 16w_SITTE12_AGGAGGTTCGTAACCA-1-10x  | 0.24403822 | 0.8188281  | 0.00084583 |
| 16w_SITTE12_AGGATAAAGTATGAAC-1-10x  | 0.04736964 | 0.11858147 | 0.00010777 |
| 16w_SITTE12_AGGATAAGTCTCACAA-1-10x  | 0.13988899 | 0.44800043 | 0.001875   |
| 16w_SITTE12_AGGATCTAGAAGTCAT-1-10x  | 0.12359196 | 0.3899742  | 0.0021124  |
| 16w_SITTE12_AGGATCTCAAATGATG-1-10x  | 0.02021164 | 0.02188426 | 3.62E-05   |
| 16w_SITTE12_AGGATCTCATGCTGCG-1-10x  | 0.11819173 | 0.37074643 | 0.0023898  |
| 16w_SITTE12_AGGATCTTCTGGCTGG-1-10x  | 0.0744764  | 0.2150962  | 0.0017292  |
| 16w_SITTE12_AGGCATTTCAGATCATC-1-10x | 0.24739987 | 0.8307974  | 0.0008292  |
| 16w_SITTE12_AGGCATTTCATGGG-1-10x    | 0.26235098 | 0.8840314  | 0.00076727 |
| 16w_SITTE12_AGGCCACAGTGTTTAC-1-10x  | 0.06010113 | 0.16391245 | 0.00038577 |
| 16w_SITTE12_AGGCTGCGTAGGTGCA-1-10x  | 0.0246158  | 0.03756548 | 3.91E-05   |
| 16w_SITTE12_AGGGAGTAGAGTGAAG-1-10x  | 0.02489753 | 0.03856857 | 4.00E-05   |
| 16w_SITTE12_AGGGAGTCACGAAGAC-1-10x  | 0.05542192 | 0.14725193 | 0.000233   |
| 16w_SITTE12_AGGGAGTCAGTACTAC-1-10x  | 0.24111544 | 0.8084214  | 0.00086374 |
| 16w_SITTE12_AGGGAGTTTCAACGCC-1-10x  | 0.28786093 | 0.97486067 | 0.00075864 |
| 16w_SITTE12_AGGGCCTCACACGGTC-1-10x  | 0.26819888 | 0.9048531  | 0.00075594 |
| 16w_SITTE12_AGGGCTCAGCGCCATC-1-10x  | 0.02732512 | 0.0472121  | 4.19E-05   |
| 16w_SITTE12_AGGGCTCTCACATTGG-1-10x  | 0.08513806 | 0.25305748 | 0.0037839  |
| 16w_SITTE12_AGGGTCCAGAAGCTGC-1-10x  | 0.02506399 | 0.03916127 | 4.00E-05   |
| 16w_SITTE12_AGGGTCCCATCATTTT-1-10x  | 0.07783424 | 0.22705193 | 0.0023954  |
| 16w_SITTE12_AGGGTGACAGGAGGAG-1-10x  | 0.26250193 | 0.88456887 | 0.00076727 |
| 16w_SITTE12_AGGGTGATCTCTTGCG-1-10x  | 0.25278416 | 0.8499684  | 0.00080028 |
| 16w_SITTE12_AGGGTTTAGACTCATC-1-10x  | 0.15590987 | 0.50504345 | 0.0018459  |
| 16w_SITTE12_AGGGTTTAGGCCTGCT-1-10x  | 0.03096221 | 0.06016211 | 4.68E-05   |
| 16w_SITTE12_AGGGTTTACCTGAAT-1-10x   | 0.22508058 | 0.75132865 | 0.00098137 |
| 16w_SITTE12_AGGGTTTTCGGAGATG-1-10x  | 0.254035   | 0.85442203 | 0.00079608 |
| 16w_SITTE12_AGGTCTATCGCCTCTA-1-10x  | 0.29201093 | 0.98963696 | 0.00076378 |
| 16w_SITTE12_AGGTCTATCTCATTGT-1-10x  | 0.1045491  | 0.32217127 | 0.0037215  |
| 16w_SITTE12_AGGTGTTAGCCAGACA-1-10x  | 0.06822046 | 0.19282168 | 0.00097948 |
| 16w_SITTE12_AGGTGTTAGGCAGCTA-1-10x  | 0.2760221  | 0.932708   | 0.00075214 |
| 16w_SITTE12_AGGTGTTTCATACAGCT-1-10x | 0.27462882 | 0.9277472  | 0.00075233 |
| 16w_SITTE12_AGGTGTTGTCCAGGTC-1-10x  | 0.04250081 | 0.10124577 | 7.82E-05   |
| 16w_SITTE12_AGGTGTTGTGCCGCA-1-10x   | 0.01731678 | 0.01157698 | 3.38E-05   |
| 16w_SITTE12_AGGTTGTGTGTTTCTT-1-10x  | 0.09575114 | 0.2908458  | 0.0043808  |
| 16w_SITTE12_AGTAACCGTGTCTAAC-1-10x  | 0.05189005 | 0.13467656 | 0.00016076 |
| 16w_SITTE12_AGTACCAAGCATCAGG-1-10x  | 0.07553455 | 0.21886382 | 0.001885   |
| 16w_SITTE12_AGTACCACAAGAGTGC-1-10x  | 0.027336   | 0.04725085 | 4.19E-05   |

|                                    |            |            |            |
|------------------------------------|------------|------------|------------|
| 16w_SITTE12_AGTACCATCCCGAATA-1-10x | 0.09085698 | 0.27341992 | 0.0043535  |
| 16w_SITTE12_AGTACTGAGGTGAGAA-1-10x | 0.04225629 | 0.10037516 | 7.82E-05   |
| 16w_SITTE12_AGTACTGGTCGGCCTA-1-10x | 0.1909304  | 0.62973547 | 0.0013113  |
| 16w_SITTE12_AGTAGCTAGAAGCTCG-1-10x | 0.15803625 | 0.5126145  | 0.0018302  |
| 16w_SITTE12_AGTAGTCGTACGTTCA-1-10x | 0.09473512 | 0.2872282  | 0.0044051  |
| 16w_SITTE12_AGTAGTCTCACGACTA-1-10x | 0.26511812 | 0.89388394 | 0.00076135 |
| 16w_SITTE12_AGTAGTCTCTTGTTAC-1-10x | 0.08220816 | 0.24262547 | 0.0033032  |
| 16w_SITTE12_AGTCAACAGCGGTAGT-1-10x | 0.01845856 | 0.01564235 | 3.49E-05   |
| 16w_SITTE12_AGTCAACTCAGCCTTC-1-10x | 0.03200634 | 0.06387979 | 4.83E-05   |
| 16w_SITTE12_AGTCAACTCCGGCTTT-1-10x | 0.03051069 | 0.05855446 | 4.68E-05   |
| 16w_SITTE12_AGTCATGAGCTCCACG-1-10x | 0.01982521 | 0.02050835 | 3.55E-05   |
| 16w_SITTE12_AGTCATGGTAAGATCA-1-10x | 0.03330094 | 0.06848928 | 5.00E-05   |
| 16w_SITTE12_AGTCATGTCCATTGTT-1-10x | 0.09649715 | 0.293502   | 0.0043435  |
| 16w_SITTE12_AGTCTCCTCGATGGAG-1-10x | 0.03872343 | 0.08779626 | 6.36E-05   |
| 16w_SITTE12_AGTGATCCAAACCACT-1-10x | 0.0385938  | 0.08733472 | 6.36E-05   |
| 16w_SITTE12_AGTGATCCACAGCTGC-1-10x | 0.04967801 | 0.1268005  | 0.00013566 |
| 16w_SITTE12_AGTGATCTCCATTCGC-1-10x | 0.2139154  | 0.7115745  | 0.0010701  |
| 16w_SITTE12_AGTGCCGCATGCCATA-1-10x | 0.04548097 | 0.11185679 | 9.39E-05   |
| 16w_SITTE12_AGTGCCGTCATAGGCT-1-10x | 0.0766259  | 0.22274959 | 0.0022191  |
| 16w_SITTE12_AGTGTTGAGAGTCTTC-1-10x | 0.14391373 | 0.4623307  | 0.0018716  |
| 16w_SITTE12_AGTGTTGCATGGACAG-1-10x | 0.1011227  | 0.30997145 | 0.0040036  |
| 16w_SITTE12_AGTTAGCTCTACACAG-1-10x | 0.25918433 | 0.8727564  | 0.00077499 |
| 16w_SITTE12_AGTTCCAGGAAAGAC-1-10x  | 0.23596334 | 0.79007715 | 0.00090278 |
| 16w_SITTE12_AGTTCCCTCAAAGAAC-1-10x | 0.29233012 | 0.9907734  | 0.00076378 |
| 16w_SITTE12_AGTTCGAAGCCATATC-1-10x | 0.25732028 | 0.86611944 | 0.00078121 |
| 16w_SITTE12_AGTTCGAAGTGAGGCT-1-10x | 0.10783147 | 0.3338583  | 0.0033168  |
| 16w_SITTE12_AGTTCGACATTACGGT-1-10x | 0.23774913 | 0.79643553 | 0.00088935 |
| 16w_SITTE12_AGTTCGAGTGTTAGCT-1-10x | 0.18872796 | 0.6218936  | 0.001338   |
| 16w_SITTE12_AGTTCGAGTTGTTTGG-1-10x | 0.09002437 | 0.2704554  | 0.0042999  |
| 16w_SITTE12_ATACCGACATATGAAG-1-10x | 0.12033946 | 0.37839353 | 0.0022788  |
| 16w_SITTE12_ATACCTCACACACTA-1-10x  | 0.05296069 | 0.13848862 | 0.00017575 |
| 16w_SITTE12_ATAGACCGTAGGAGGG-1-10x | 0.02229059 | 0.02928647 | 3.76E-05   |
| 16w_SITTE12_ATAGACCGTGGGCTTC-1-10x | 0.09856413 | 0.30086154 | 0.0042345  |
| 16w_SITTE12_ATAGACCTCCACTGGG-1-10x | 0.01640661 | 0.00833629 | 3.33E-05   |
| 16w_SITTE12_ATAGAGAGTTACCTTT-1-10x | 0.04787677 | 0.12038712 | 0.00011598 |
| 16w_SITTE12_ATAGGCTGTCACCTTC-1-10x | 0.23591419 | 0.78990215 | 0.00090278 |
| 16w_SITTE12_ATATCCTAGAGTGACC-1-10x | 0.0574929  | 0.15462577 | 0.00028394 |
| 16w_SITTE12_ATATCCTCAGTCTACA-1-10x | 0.043434   | 0.10456844 | 8.29E-05   |
| 16w_SITTE12_ATATCCTTCGAGCTGC-1-10x | 0.28804478 | 0.9755153  | 0.0007596  |
| 16w_SITTE12_ATCACAGCAATCGCCG-1-10x | 0.08088055 | 0.23789845 | 0.0029431  |
| 16w_SITTE12_ATCACGACACCAGTAT-1-10x | 0.05535743 | 0.14702234 | 0.000233   |



|                                    |            |            |            |
|------------------------------------|------------|------------|------------|
| 16w_SITTE12_ATCACGACAGTTAGGG-1-10x | 0.02403362 | 0.03549259 | 3.91E-05   |
| 16w_SITTE12_ATCACGAGTCGGAACA-1-10x | 0.02086724 | 0.02421855 | 3.62E-05   |
| 16w_SITTE12_ATCAGGTAGGGCGAGA-1-10x | 0.0343183  | 0.07211163 | 5.37E-05   |
| 16w_SITTE12_ATCAGGTCAAGCGGAT-1-10x | 0.08553771 | 0.25448045 | 0.0037839  |
| 16w_SITTE12_ATCAGGTCATTCTCTA-1-10x | 0.03391506 | 0.07067586 | 5.17E-05   |
| 16w_SITTE12_ATCAGGTGTGAGCAGT-1-10x | 0.03827797 | 0.08621018 | 6.36E-05   |
| 16w_SITTE12_ATCATTCCAGGCATGA-1-10x | 0.08706269 | 0.25991023 | 0.0040384  |
| 16w_SITTE12_ATCATTCTCACCTGTC-1-10x | 0.09688631 | 0.29488763 | 0.0043435  |
| 16w_SITTE12_ATCCACCCAGAGGTAC-1-10x | 0.17762914 | 0.5823758  | 0.0015248  |
| 16w_SITTE12_ATCCACCGTAATGATG-1-10x | 0.20676391 | 0.68611133 | 0.0011344  |
| 16w_SITTE12_ATCCATTAGTTCCTGA-1-10x | 0.2903228  | 0.9836263  | 0.00076163 |
| 16w_SITTE12_ATCCATTCACGGCGTT-1-10x | 0.07816085 | 0.22821482 | 0.0023954  |
| 16w_SITTE12_ATCCCTGGTAGGGAGG-1-10x | 0.25648236 | 0.863136   | 0.00078463 |
| 16w_SITTE12_ATCCCTGGTAGTCACT-1-10x | 0.10650262 | 0.3291269  | 0.00352    |
| 16w_SITTE12_ATCCCTGTCATTGCC-1-10x  | 0.2824714  | 0.955671   | 0.00075462 |
| 16w_SITTE12_ATCCGTCCAACTGCT-1-10x  | 0.24885187 | 0.8359673  | 0.00081888 |
| 16w_SITTE12_ATCCGTCCAACGTATC-1-10x | 0.08995178 | 0.27019694 | 0.0042999  |
| 16w_SITTE12_ATCCGTCTGTTTCGTA-1-10x | 0.06386706 | 0.17732123 | 0.00058553 |
| 16w_SITTE12_ATCGATGTCCGACGGT-1-10x | 0.24019341 | 0.80513847 | 0.00086997 |
| 16w_SITTE12_ATCGCCTGTGAGAGGG-1-10x | 0.01612246 | 0.00732455 | 3.33E-05   |
| 16w_SITTE12_ATCGGATAGCAGTAAT-1-10x | 0.08657982 | 0.25819093 | 0.0039187  |
| 16w_SITTE12_ATCGGCGCAACACACT-1-10x | 0.08780494 | 0.26255304 | 0.0041422  |
| 16w_SITTE12_ATCGGCGTCACGACTA-1-10x | 0.05038988 | 0.12933517 | 0.00014746 |
| 16w_SITTE12_ATCGGCGTCCCGATCT-1-10x | 0.21489194 | 0.71505153 | 0.0010625  |
| 16w_SITTE12_ATCGTAGAGGGCAAGG-1-10x | 0.22560115 | 0.7531821  | 0.00098137 |
| 16w_SITTE12_ATCGTAGAGTACGCC-1-10x  | 0.15759115 | 0.5110297  | 0.0018302  |
| 16w_SITTE12_ATCGTAGTCATCCTAT-1-10x | 0.23739725 | 0.79518265 | 0.00088935 |
| 16w_SITTE12_ATCGTAGTCTATACGG-1-10x | 0.2668641  | 0.9001005  | 0.00075831 |
| 16w_SITTE12_ATCGTCCCAAATTGCC-1-10x | 0.08250493 | 0.24368212 | 0.0033032  |
| 16w_SITTE12_ATCGTGAAGCCATCCG-1-10x | 0.21543325 | 0.7169789  | 0.0010625  |
| 16w_SITTE12_ATCGTGACAGACCCGT-1-10x | 0.04279725 | 0.10230127 | 8.29E-05   |
| 16w_SITTE12_ATCGTGATCATGGTAC-1-10x | 0.06516302 | 0.18193552 | 0.00064991 |
| 16w_SITTE12_ATCTCTAGTCACTTCC-1-10x | 0.23302895 | 0.7796291  | 0.00092358 |
| 16w_SITTE12_ATCTCTATCAGCTAGT-1-10x | 0.06444402 | 0.17937551 | 0.00064991 |
| 16w_SITTE12_ATCTTCACAAAGGCGT-1-10x | 0.2622902  | 0.88381505 | 0.00076727 |
| 16w_SITTE12_ATCTTCAGTCATCCGG-1-10x | 0.07444894 | 0.21499842 | 0.0017292  |
| 16w_SITTE12_ATCTTCATCACCTTGC-1-10x | 0.08533055 | 0.25374284 | 0.0037839  |
| 16w_SITTE12_ATGAAAGCAATCTGCA-1-10x | 0.10078866 | 0.3087821  | 0.0040879  |
| 16w_SITTE12_ATGACCACAGGTGTGA-1-10x | 0.03110275 | 0.06066251 | 4.68E-05   |
| 16w_SITTE12_ATGACCAGTTCCTACC-1-10x | 0.10897685 | 0.3379365  | 0.0032165  |
| 16w_SITTE12_ATGAGGGAGTCATGCT-1-10x | 0.14534037 | 0.4674103  | 0.0018716  |

|                                     |            |            |            |
|-------------------------------------|------------|------------|------------|
| 16w_SITTE12_ATGAGGGAGTCTTCGA-1-10x  | 0.02442802 | 0.03689685 | 3.91E-05   |
| 16w_SITTE12_ATGAGGGGTCCTTAAG-1-10x  | 0.01880876 | 0.01688926 | 3.49E-05   |
| 16w_SITTE12_ATGAGGGTCCAAACCA-1-10x  | 0.10183059 | 0.31249192 | 0.0040036  |
| 16w_SITTE12_ATGCCTCCAGCAGACA-1-10x  | 0.25375527 | 0.85342604 | 0.00079608 |
| 16w_SITTE12_ATGCCTCGTGGTTCTA-1-10x  | 0.16249569 | 0.5284925  | 0.001776   |
| 16w_SITTE12_ATGCGATAGGCCGCTT-1-10x  | 0.07310377 | 0.21020891 | 0.0015819  |
| 16w_SITTE12_ATGCGATAGTTTCGGT-1-10x  | 0.1458621  | 0.46926796 | 0.0018716  |
| 16w_SITTE12_ATGCGATCACTCACTC-1-10x  | 0.04380602 | 0.10589305 | 8.81E-05   |
| 16w_SITTE12_ATGGAGGGTCTAGGCC-1-10x  | 0.04355677 | 0.10500557 | 8.29E-05   |
| 16w_SITTE12_ATGGATCTCAAGAATG-1-10x  | 0.03097189 | 0.0601966  | 4.68E-05   |
| 16w_SITTE12_ATGGGAGAGAAGGTAG-1-10x  | 0.0999675  | 0.3058583  | 0.0041652  |
| 16w_SITTE12_ATGGGAGTCGTCAAAC-1-10x  | 0.05475555 | 0.14487933 | 0.00021164 |
| 16w_SITTE12_ATGGGTTCATAACGGG-1-10x  | 0.09274413 | 0.28013924 | 0.0044107  |
| 16w_SITTE12_ATGGTTGGTGGTCTAT-1-10x  | 0.06565352 | 0.18368198 | 0.00072102 |
| 16w_SITTE12_ATGGTTGGTGGTCTTA-1-10x  | 0.25814688 | 0.86906254 | 0.000778   |
| 16w_SITTE12_ATGTCCCGTGC GTGCT-1-10x | 0.09160996 | 0.27610096 | 0.0043903  |
| 16w_SITTE12_ATGTCCCTCGGCTTGG-1-10x  | 0.01856215 | 0.01601119 | 3.49E-05   |
| 16w_SITTE12_ATGTCTTTCTGGACTA-1-10x  | 0.24665003 | 0.8281275  | 0.0008292  |
| 16w_SITTE12_ATTACCTAGTTAGTGA-1-10x  | 0.20874922 | 0.69318014 | 0.0011177  |
| 16w_SITTE12_ATTACCTGTATCGTTG-1-10x  | 0.19393513 | 0.64043397 | 0.0012741  |
| 16w_SITTE12_ATTACCTGTTGAGAGC-1-10x  | 0.07701133 | 0.22412194 | 0.0022191  |
| 16w_SITTE12_ATTACTCAGTAAGCAT-1-10x  | 0.2282271  | 0.76253194 | 0.00095947 |
| 16w_SITTE12_ATTACTCAGTGCGACA-1-10x  | 0.19644128 | 0.6493572  | 0.00124    |
| 16w_SITTE12_ATTACTCCAAAGCTAA-1-10x  | 0.28109315 | 0.9507637  | 0.00075348 |
| 16w_SITTE12_ATTATCCCATGACTAC-1-10x  | 0.16312723 | 0.53074116 | 0.001763   |
| 16w_SITTE12_ATTATCCGTAGACACG-1-10x  | 0.1622822  | 0.5277324  | 0.001776   |
| 16w_SITTE12_ATTATCCGTGCAAACG-1-10x  | 0.06361161 | 0.17641169 | 0.00058553 |
| 16w_SITTE12_ATTATCCTCGCTCCTA-1-10x  | 0.02181009 | 0.02757562 | 3.69E-05   |
| 16w_SITTE12_ATTCACTAGTAGGATT-1-10x  | 0.28430164 | 0.96218765 | 0.00075605 |
| 16w_SITTE12_ATTCACTGTATCTCTT-1-10x  | 0.023996   | 0.03535862 | 3.91E-05   |
| 16w_SITTE12_ATTCACTTCCGATAGT-1-10x  | 0.1093962  | 0.3394296  | 0.0032165  |
| 16w_SITTE12_ATTCATCGTGACACGA-1-10x  | 0.08539032 | 0.25395566 | 0.0037839  |
| 16w_SITTE12_ATTCATCTCCAAAGGG-1-10x  | 0.03641019 | 0.07955987 | 5.82E-05   |
| 16w_SITTE12_ATTCCCAGGAATTAC-1-10x   | 0.09192412 | 0.27721953 | 0.0043903  |
| 16w_SITTE12_ATTCCCGGTGCGCTCA-1-10x  | 0.02664286 | 0.0447829  | 4.09E-05   |
| 16w_SITTE12_ATTCCCGGTGTATTTCG-1-10x | 0.11097846 | 0.3450633  | 0.0030221  |
| 16w_SITTE12_ATTCTAAGAACTCCT-1-10x   | 0.16781314 | 0.5474255  | 0.0016902  |
| 16w_SITTE12_ATTCGTTGTCGATTAC-1-10x  | 0.08955241 | 0.26877496 | 0.0042295  |
| 16w_SITTE12_ATTCGTTTCCTGCTAC-1-10x  | 0.12303993 | 0.38800868 | 0.0021479  |
| 16w_SITTE12_ATTCTACAGGCTTTCA-1-10x  | 0.03865985 | 0.08756987 | 6.36E-05   |
| 16w_SITTE12_ATTCTACGTCCAATCA-1-10x  | 0.19231197 | 0.63465464 | 0.0012861  |

|                                     |            |            |            |
|-------------------------------------|------------|------------|------------|
| 16w_SITTE12_ATTCTACGTGTCTCCT-1-10x  | 0.14243302 | 0.45705858 | 0.0018718  |
| 16w_SITTE12_ATTCTTGAGGCCACCT-1-10x  | 0.11234852 | 0.34994146 | 0.0028393  |
| 16w_SITTE12_ATTCTTGGTGCGTGCT-1-10x  | 0.05094677 | 0.13131799 | 0.00014746 |
| 16w_SITTE12_ATTGGGTGTAAGCGGT-1-10x  | 0.02645282 | 0.04410625 | 4.09E-05   |
| 16w_SITTE12_ATTTACCGTACAAAGT-1-10x  | 0.04341444 | 0.10449882 | 8.29E-05   |
| 16w_SITTE12_ATTTACCTCCAAGGGA-1-10x  | 0.08034371 | 0.235987   | 0.0029431  |
| 16w_SITTE12_ATTTACAGATCGCCC-1-10x   | 0.09331185 | 0.2821606  | 0.0044107  |
| 16w_SITTE12_ATTTACAGGGAGGCA-1-10x   | 0.02616976 | 0.0430984  | 4.09E-05   |
| 16w_SITTE12_ATTTCTGAGGTCTACT-1-10x  | 0.08070263 | 0.23726493 | 0.0029431  |
| 16w_SITTE12_ATTTCTGAGGTGGTTG-1-10x  | 0.21664129 | 0.7212802  | 0.0010475  |
| 16w_SITTE12_ATTTCTGCAAGAGGTC-1-10x  | 0.01705323 | 0.01063862 | 3.38E-05   |
| 16w_SITTE12_CAAAGAAAGACATATG-1-10x  | 0.22903855 | 0.76542115 | 0.0009522  |
| 16w_SITTE12_CAAAGAACACCGTGCA-1-10x  | 0.03564974 | 0.07685226 | 5.58E-05   |
| 16w_SITTE12_CAAAGAACAGCAAGAC-1-10x  | 0.04138199 | 0.09726218 | 7.40E-05   |
| 16w_SITTE12_CAACAACAGAGCCCAA-1-10x  | 0.26654816 | 0.8989757  | 0.00075831 |
| 16w_SITTE12_CAACAACAGGAGATAG-1-10x  | 0.10203922 | 0.31323478 | 0.0039137  |
| 16w_SITTE12_CAACAACGTCTAACTG-1-10x  | 0.01923254 | 0.01839813 | 3.55E-05   |
| 16w_SITTE12_CAACAGTTCGCCTTTG-1-10x  | 0.26647654 | 0.8987207  | 0.00075831 |
| 16w_SITTE12_CAACCAAAGACAGCGT-1-10x  | 0.05732865 | 0.15404093 | 0.00028394 |
| 16w_SITTE12_CAACCAAGTACGATTC-1-10x  | 0.02279771 | 0.03109207 | 3.76E-05   |
| 16w_SITTE12_CAACCTCAGGAGATAG-1-10x  | 0.2603758  | 0.8769987  | 0.00077221 |
| 16w_SITTE12_CAACCTCCATAGAGGC-1-10x  | 0.11274587 | 0.35135624 | 0.0028393  |
| 16w_SITTE12_CAACCTCCATATAGCC-1-10x  | 0.13005589 | 0.4129893  | 0.0019639  |
| 16w_SITTE12_CAACCTCGTAGACTGG-1-10x  | 0.270004   | 0.91128033 | 0.00075499 |
| 16w_SITTE12_CAACCTCGTATGTCTG-1-10x  | 0.19696444 | 0.65121996 | 0.0012292  |
| 16w_SITTE12_CAACCTCGTGCTGTGCG-1-10x | 0.10000166 | 0.30597994 | 0.0041652  |
| 16w_SITTE12_CAACGATCATATCTCT-1-10x  | 0.08953397 | 0.2687093  | 0.0042295  |
| 16w_SITTE12_CAACGATGTTGTTCC-1-10x   | 0.02232632 | 0.02941369 | 3.76E-05   |
| 16w_SITTE12_CAACGATTCATCGACA-1-10x  | 0.05515884 | 0.14631523 | 0.000233   |
| 16w_SITTE12_CAAGACTAGAGAGCCT-1-10x  | 0.24973443 | 0.83910966 | 0.00081397 |
| 16w_SITTE12_CAAGACTCATCCAATG-1-10x  | 0.02008864 | 0.02144633 | 3.55E-05   |
| 16w_SITTE12_CAAGACTTCGCTCTCA-1-10x  | 0.06074689 | 0.16621171 | 0.00042799 |
| 16w_SITTE12_CAAGACTTCGGCGATC-1-10x  | 0.02378493 | 0.03460711 | 3.83E-05   |
| 16w_SITTE12_CAAGAGGGTTTCTATC-1-10x  | 0.20264995 | 0.67146343 | 0.0011699  |
| 16w_SITTE12_CAAGGGAAGACAAGCC-1-10x  | 0.07154803 | 0.20466962 | 0.0013138  |
| 16w_SITTE12_CAAGGGACAACCTAAC-1-10x  | 0.01772078 | 0.01301547 | 3.44E-05   |
| 16w_SITTE12_CAAGGGACTGCATA-1-10x    | 0.08335421 | 0.24670602 | 0.0034742  |
| 16w_SITTE12_CAATACGTCAACGTGT-1-10x  | 0.24377495 | 0.8178907  | 0.00084583 |
| 16w_SITTE12_CAATCGAAGTCTTCGA-1-10x  | 0.12881243 | 0.40856192 | 0.0019821  |
| 16w_SITTE12_CAATGACGTTGCATTG-1-10x  | 0.08490972 | 0.25224444 | 0.0036353  |
| 16w_SITTE12_CAATGACTCGTCAAAC-1-10x  | 0.01893014 | 0.01732144 | 3.49E-05   |

|                                     |            |            |            |
|-------------------------------------|------------|------------|------------|
| 16w_SITTE12_CAATTTCCATACTTTC-1-10x  | 0.04369069 | 0.1054824  | 8.81E-05   |
| 16w_SITTE12_CAATTTCTGTGACACGA-1-10x | 0.05865358 | 0.15875842 | 0.00031414 |
| 16w_SITTE12_CACAACATCTCGACCT-1-10x  | 0.07200448 | 0.20629482 | 0.0014433  |
| 16w_SITTE12_CACCAAAGTGCTCTCT-1-10x  | 0.01717559 | 0.0110743  | 3.38E-05   |
| 16w_SITTE12_CACCAAAGTGTGTCGC-1-10x  | 0.07751367 | 0.22591051 | 0.0023954  |
| 16w_SITTE12_CACCAAATCACTGGGC-1-10x  | 0.03940629 | 0.0902276  | 6.67E-05   |
| 16w_SITTE12_CACCGTTAGCCAAGTG-1-10x  | 0.12753575 | 0.4040162  | 0.0020026  |
| 16w_SITTE12_CACGAATCAGGTCAAG-1-10x  | 0.07408627 | 0.21370715 | 0.0017292  |
| 16w_SITTE12_CACGGGTAGTAGACCG-1-10x  | 0.05386187 | 0.14169733 | 0.00019264 |
| 16w_SITTE12_CACGGGTAGTAGTCCT-1-10x  | 0.04325978 | 0.10394812 | 8.29E-05   |
| 16w_SITTE12_CACGGGTCAACTACGT-1-10x  | 0.2328246  | 0.7789015  | 0.00092358 |
| 16w_SITTE12_CACGTGGTCCGTCAA-1-10x   | 0.10691781 | 0.33060518 | 0.0034182  |
| 16w_SITTE12_CACGTTCCAACGCATT-1-10x  | 0.29251498 | 0.9914316  | 0.00076378 |
| 16w_SITTE12_CACGTTCTCGGTCGGT-1-10x  | 0.05987573 | 0.16310993 | 0.00038577 |
| 16w_SITTE12_CACTAAGAGACAGTCG-1-10x  | 0.10137754 | 0.3108788  | 0.0040036  |
| 16w_SITTE12_CACTAAGAGGTAGGCT-1-10x  | 0.04038547 | 0.09371403 | 7.01E-05   |
| 16w_SITTE12_CACTAAGCACGCGCAT-1-10x  | 0.05138584 | 0.13288131 | 0.00016076 |
| 16w_SITTE12_CACTGAAAGCGTCTCG-1-10x  | 0.02852166 | 0.05147243 | 4.30E-05   |
| 16w_SITTE12_CACTGAACACGCGTGT-1-10x  | 0.04420452 | 0.10731191 | 8.81E-05   |
| 16w_SITTE12_CACTGAACATGTACGT-1-10x  | 0.0516014  | 0.13364883 | 0.00016076 |
| 16w_SITTE12_CACTGAATCGACGATT-1-10x  | 0.04762546 | 0.1194923  | 0.00011598 |
| 16w_SITTE12_CACTGAATCGGCTTCT-1-10x  | 0.016223   | 0.00768255 | 3.33E-05   |
| 16w_SITTE12_CACTTCGGTTTGCAGT-1-10x  | 0.25533003 | 0.85903305 | 0.00078825 |
| 16w_SITTE12_CAGAGCCAGAAATTCG-1-10x  | 0.0582767  | 0.15741651 | 0.00031414 |
| 16w_SITTE12_CAGAGCCAGCGCCTAC-1-10x  | 0.05110074 | 0.1318662  | 0.00014746 |
| 16w_SITTE12_CAGATACCAACATCGT-1-10x  | 0.05377611 | 0.14139196 | 0.00019264 |
| 16w_SITTE12_CAGATACTCGAGTCTA-1-10x  | 0.0262529  | 0.04339442 | 4.09E-05   |
| 16w_SITTE12_CAGATCAAGTAATTGG-1-10x  | 0.253948   | 0.85411227 | 0.00079608 |
| 16w_SITTE12_CAGATCAGTTTACGAC-1-10x  | 0.02401255 | 0.03541755 | 3.91E-05   |
| 16w_SITTE12_CAGATCATCAACGTGT-1-10x  | 0.05461233 | 0.14436936 | 0.00021164 |
| 16w_SITTE12_CAGCAATTCAGCCTCT-1-10x  | 0.2819334  | 0.95375544 | 0.00075401 |
| 16w_SITTE12_CAGCACGAGCACGTCC-1-10x  | 0.25524977 | 0.8587473  | 0.00078825 |
| 16w_SITTE12_CAGCAGCAGCGTATGG-1-10x  | 0.15795274 | 0.5123172  | 0.0018302  |
| 16w_SITTE12_CAGCAGCGTGTTATCG-1-10x  | 0.10448004 | 0.3219254  | 0.0037215  |
| 16w_SITTE12_CAGCGTGAGCCTTCTC-1-10x  | 0.06313776 | 0.17472449 | 0.00052741 |
| 16w_SITTE12_CAGCGTGAGGCCCAA-1-10x   | 0.06304802 | 0.174405   | 0.00052741 |
| 16w_SITTE12_CAGCGTGAGTATAGAC-1-10x  | 0.07457607 | 0.21545108 | 0.0017292  |
| 16w_SITTE12_CAGCGTGGTCAGGTAG-1-10x  | 0.15822826 | 0.51329815 | 0.0018302  |
| 16w_SITTE12_CAGCGTGTCCGTACGG-1-10x  | 0.05122258 | 0.13230002 | 0.00016076 |
| 16w_SITTE12_CAGCGTGTGACCACG-1-10x   | 0.16551863 | 0.5392558  | 0.0017353  |
| 16w_SITTE12_CAGCGTGTCTAGAGCT-1-10x  | 0.02238659 | 0.02962828 | 3.76E-05   |

|                                     |            |            |            |
|-------------------------------------|------------|------------|------------|
| 16w_SITTE12_CAGGCCACATAACGGG-1-10x  | 0.282145   | 0.95450884 | 0.00075401 |
| 16w_SITTE12_CAGGCCAGTTCTCGCT-1-10x  | 0.16394778 | 0.53366274 | 0.0017494  |
| 16w_SITTE12_CAGGTATGTTGTATGC-1-10x  | 0.09849107 | 0.30060142 | 0.0042345  |
| 16w_SITTE12_CAGTTCCCATTGGGAG-1-10x  | 0.04769246 | 0.11973088 | 0.00011598 |
| 16w_SITTE12_CAGTTCCTCCATACTT-1-10x  | 0.24051934 | 0.806299   | 0.00086997 |
| 16w_SITTE12_CATAAGCGTTTGATCG-1-10x  | 0.0459008  | 0.11335158 | 0.00010046 |
| 16w_SITTE12_CATAAGCTCCACAGGC-1-10x  | 0.09112107 | 0.27436024 | 0.0043535  |
| 16w_SITTE12_CATAAGCTCGCTAAAC-1-10x  | 0.04549708 | 0.11191414 | 9.39E-05   |
| 16w_SITTE12_CATACAGCACCGTCTGA-1-10x | 0.23395002 | 0.7829086  | 0.00091657 |
| 16w_SITTE12_CATACAGCACGCGGTT-1-10x  | 0.07536902 | 0.21827443 | 0.001885   |
| 16w_SITTE12_CATACAGGTGCCGGTT-1-10x  | 0.2711472  | 0.91535074 | 0.00075352 |
| 16w_SITTE12_CATACAGTCACCACAA-1-10x  | 0.09197751 | 0.2774096  | 0.0043903  |
| 16w_SITTE12_CATACAGTCCGCAGTG-1-10x  | 0.23969568 | 0.8033663  | 0.00087632 |
| 16w_SITTE12_CATACCCGTGGAACAC-1-10x  | 0.05246029 | 0.13670695 | 0.00017575 |
| 16w_SITTE12_CATACTTAGTGGTGGT-1-10x  | 0.20853867 | 0.69243044 | 0.0011177  |
| 16w_SITTE12_CATAGACCAGCGGATA-1-10x  | 0.0696521  | 0.1979191  | 0.0010821  |
| 16w_SITTE12_CATAGACTCCGAGAAG-1-10x  | 0.22884634 | 0.7647368  | 0.0009522  |
| 16w_SITTE12_CATCAAGCATGACAAA-1-10x  | 0.27098966 | 0.9147898  | 0.00075352 |
| 16w_SITTE12_CATCAAGGTAACGTTT-1-10x  | 0.20378613 | 0.67550886 | 0.0011608  |
| 16w_SITTE12_CATCCACAGGAACATT-1-10x  | 0.2635319  | 0.8882361  | 0.00076313 |
| 16w_SITTE12_CATCCACTCACTACTT-1-10x  | 0.03952098 | 0.09063598 | 6.67E-05   |
| 16w_SITTE12_CATCCACTCTTGCA-1-10x    | 0.04969985 | 0.12687829 | 0.00013566 |
| 16w_SITTE12_CATCCCAAGTCCGTCTG-1-10x | 0.04979507 | 0.12721731 | 0.00013566 |
| 16w_SITTE12_CATCCACAAGGAGTC-1-10x   | 0.06750512 | 0.19027469 | 0.00088537 |
| 16w_SITTE12_CATCCATCGGCCTTT-1-10x   | 0.0490296  | 0.1244918  | 0.00012523 |
| 16w_SITTE12_CATCCGTAGATCCAAA-1-10x  | 0.14596364 | 0.4696295  | 0.0018716  |
| 16w_SITTE12_CATCCGTAGCCTCTTC-1-10x  | 0.13432507 | 0.4281899  | 0.0019027  |
| 16w_SITTE12_CATCCGTTCGAGAATA-1-10x  | 0.18866925 | 0.62168455 | 0.001338   |
| 16w_SITTE12_CATCGCTAGAGTCCGA-1-10x  | 0.19349599 | 0.63887036 | 0.0012741  |
| 16w_SITTE12_CATCGCTCACTGTCCG-1-10x  | 0.20751539 | 0.68878704 | 0.001126   |
| 16w_SITTE12_CATCGGGAGACCAAGC-1-10x  | 0.10670285 | 0.32983983 | 0.0034182  |
| 16w_SITTE12_CATCGTCAGAAGGATG-1-10x  | 0.25399563 | 0.85428184 | 0.00079608 |
| 16w_SITTE12_CATCGTCCACATTCTGA-1-10x | 0.20892599 | 0.69380957 | 0.0011177  |
| 16w_SITTE12_CATCGTCGTCTTGCTC-1-10x  | 0.0412787  | 0.09689441 | 7.40E-05   |
| 16w_SITTE12_CATCGTCGTCTTGTA-1-10x   | 0.03962263 | 0.09099791 | 6.67E-05   |
| 16w_SITTE12_CATGAGTAGTCAGCGA-1-10x  | 0.07872159 | 0.23021138 | 0.002576   |
| 16w_SITTE12_CATGAGTAGTGGAAG-1-10x   | 0.04997322 | 0.12785162 | 0.00013566 |
| 16w_SITTE12_CATGAGTCAAGCGAGT-1-10x  | 0.24477696 | 0.8214584  | 0.00084014 |
| 16w_SITTE12_CATGAGTCACAGGATG-1-10x  | 0.23639968 | 0.79163074 | 0.00089602 |
| 16w_SITTE12_CATGAGTCACCGTCTT-1-10x  | 0.08399445 | 0.2489856  | 0.0034742  |
| 16w_SITTE12_CATGAGTGTATCCCTC-1-10x  | 0.03158212 | 0.06236933 | 4.83E-05   |

|                                    |            |            |            |
|------------------------------------|------------|------------|------------|
| 16w_SITTE12_CATGAGTTCGAGAAAT-1-10x | 0.04950479 | 0.12618375 | 0.00013566 |
| 16w_SITTE12_CATGCAAGTTCTCCCA-1-10x | 0.2713004  | 0.91589624 | 0.00075352 |
| 16w_SITTE12_CATGCAATCGTGCATA-1-10x | 0.04623274 | 0.11453347 | 0.00010046 |
| 16w_SITTE12_CATGCCTCAGACCTAT-1-10x | 0.02855434 | 0.05158881 | 4.30E-05   |
| 16w_SITTE12_CATGCCTTCTACCTTA-1-10x | 0.0281641  | 0.05019935 | 4.30E-05   |
| 16w_SITTE12_CATGCGGAGCCAAGGT-1-10x | 0.13908038 | 0.44512135 | 0.0018772  |
| 16w_SITTE12_CATGCGGCAGTGTATC-1-10x | 0.14525218 | 0.46709633 | 0.0018716  |
| 16w_SITTE12_CATGCGGTCCCAACTC-1-10x | 0.02488548 | 0.03852565 | 4.00E-05   |
| 16w_SITTE12_CATGGATAGTAAATGC-1-10x | 0.04933391 | 0.12557532 | 0.00013566 |
| 16w_SITTE12_CATGGATCACGTGAGA-1-10x | 0.02676252 | 0.04520895 | 4.19E-05   |
| 16w_SITTE12_CATGGATGTCCTGTCT-1-10x | 0.01627858 | 0.00788043 | 3.33E-05   |
| 16w_SITTE12_CATGGATTCTCATAGG-1-10x | 0.04946934 | 0.12605755 | 0.00013566 |
| 16w_SITTE12_CATGGTACACTGGCGT-1-10x | 0.0272988  | 0.04711838 | 4.19E-05   |
| 16w_SITTE12_CATTGAGCAAGCAATA-1-10x | 0.25816235 | 0.8691176  | 0.000778   |
| 16w_SITTE12_CATTGAGGTTAGCGGA-1-10x | 0.08033063 | 0.23594044 | 0.0029431  |
| 16w_SITTE12_CATTGCCATTCTCTA-1-10x  | 0.20147298 | 0.6672728  | 0.0011792  |
| 16w_SITTE12_CATTGCCGTTCCAGGC-1-10x | 0.13376436 | 0.42619345 | 0.0019115  |
| 16w_SITTE12_CATTGCCTCATTCTA-1-10x  | 0.10070789 | 0.3084945  | 0.0040879  |
| 16w_SITTE12_CATTGTTCATAGACTC-1-10x | 0.01962617 | 0.01979968 | 3.55E-05   |
| 16w_SITTE12_CATTGTTGTTTATGCG-1-10x | 0.04451016 | 0.10840017 | 8.81E-05   |
| 16w_SITTE12_CATTTCAAGAGATGCC-1-10x | 0.08821864 | 0.26402602 | 0.0041422  |
| 16w_SITTE12_CATTTACATTAAGCC-1-10x  | 0.05468362 | 0.1446232  | 0.00021164 |
| 16w_SITTE12_CATTTATCTCGCTCA-1-10x  | 0.22199593 | 0.7403456  | 0.0010106  |
| 16w_SITTE12_CCAAGCGGTGACACGA-1-10x | 0.070641   | 0.2014401  | 0.0011935  |
| 16w_SITTE12_CCAAGCGGTTTGCCGG-1-10x | 0.04626267 | 0.11464007 | 0.00010046 |
| 16w_SITTE12_CCAATGACACCCAACG-1-10x | 0.08129508 | 0.2393744  | 0.0031253  |
| 16w_SITTE12_CCAATGAGTAGTTCCA-1-10x | 0.03451578 | 0.07281477 | 5.37E-05   |
| 16w_SITTE12_CCAATGAGTGCATGTT-1-10x | 0.23679668 | 0.79304427 | 0.00089602 |
| 16w_SITTE12_CCAATTTACACACTA-1-10x  | 0.09989051 | 0.3055842  | 0.0041652  |
| 16w_SITTE12_CCAATTTACGGCTAC-1-10x  | 0.0478632  | 0.12033881 | 0.00011598 |
| 16w_SITTE12_CCAATTTACTAAACC-1-10x  | 0.05309652 | 0.13897227 | 0.00019264 |
| 16w_SITTE12_CCAATTTGTTTGAACC-1-10x | 0.04837562 | 0.12216329 | 0.00012523 |
| 16w_SITTE12_CCAATTTTCTCGATC-1-10x  | 0.219669   | 0.7320605  | 0.0010253  |
| 16w_SITTE12_CCACCATGTGCGAACA-1-10x | 0.04848944 | 0.12256856 | 0.00012523 |
| 16w_SITTE12_CCACGTTGTATCAGGG-1-10x | 0.19189256 | 0.6331613  | 0.0012985  |
| 16w_SITTE12_CCACGTTGTCCACTTC-1-10x | 0.09185459 | 0.27697197 | 0.0043903  |
| 16w_SITTE12_CCACGTTGTCCATACA-1-10x | 0.18131596 | 0.59550285 | 0.0014587  |
| 16w_SITTE12_CCACGTTGTGTAATG-1-10x  | 0.04701106 | 0.11730471 | 0.00010777 |
| 16w_SITTE12_CCACGTTTCACTCCGT-1-10x | 0.04451888 | 0.1084312  | 8.81E-05   |
| 16w_SITTE12_CCACGTTTCCAGTACA-1-10x | 0.290405   | 0.98391896 | 0.00076163 |
| 16w_SITTE12_CCACTTGTCAGTCACA-1-10x | 0.02772725 | 0.04864391 | 4.30E-05   |

|                                     |            |            |            |
|-------------------------------------|------------|------------|------------|
| 16w_SITTE12_CCACTTGTCCACTTTA-1-10x  | 0.24158907 | 0.81010777 | 0.00086374 |
| 16w_SITTE12_CCATAAGCATGGAATA-1-10x  | 0.09434541 | 0.28584063 | 0.0044154  |
| 16w_SITTE12_CCATCACGTCTTACTT-1-10x  | 0.07183164 | 0.20567945 | 0.0013138  |
| 16w_SITTE12_CCCAAGTAGATTAGAC-1-10x  | 0.02207957 | 0.02853511 | 3.76E-05   |
| 16w_SITTE12_CCCAAGTGTACGAC-1-10x    | 0.07673084 | 0.22312324 | 0.0022191  |
| 16w_SITTE12_CCCATTGCAATTAGGA-1-10x  | 0.15183774 | 0.49054447 | 0.0018651  |
| 16w_SITTE12_CCCATTGGTGAGCGAT-1-10x  | 0.04710968 | 0.11765586 | 0.00010777 |
| 16w_SITTE12_CCCGAAGAGTGGACTG-1-10x  | 0.04141554 | 0.09738162 | 7.40E-05   |
| 16w_SITTE12_CCCGAAAGACCAAAT-1-10x   | 0.04232072 | 0.10060456 | 7.82E-05   |
| 16w_SITTE12_CCCGAAAGGCACTCC-1-10x   | 0.14350052 | 0.46085945 | 0.0018716  |
| 16w_SITTE12_CCCGGAACAATTGGTC-1-10x  | 0.0843456  | 0.2502359  | 0.0036353  |
| 16w_SITTE12_CCCGGAACACTACGGC-1-10x  | 0.16451976 | 0.5356993  | 0.0017494  |
| 16w_SITTE12_CCCGGAATCGGCATCG-1-10x  | 0.23934843 | 0.80212986 | 0.00087632 |
| 16w_SITTE12_CCCGGAATCTCGCCTA-1-10x  | 0.09567794 | 0.29058516 | 0.0043808  |
| 16w_SITTE12_CCCTAACCAACCCTAA-1-10x  | 0.07738573 | 0.22545502 | 0.0022191  |
| 16w_SITTE12_CCCTAACCACTTCCA-1-10x   | 0.0725159  | 0.20811576 | 0.0014433  |
| 16w_SITTE12_CCCTAACGTGACACGA-1-10x  | 0.07304506 | 0.20999987 | 0.0015819  |
| 16w_SITTE12_CCCTAACTCGTAGAGG-1-10x  | 0.07077142 | 0.20190448 | 0.0011935  |
| 16w_SITTE12_CCCTCAAAGACTTCAC-1-10x  | 0.19950992 | 0.6602832  | 0.0012085  |
| 16w_SITTE12_CCCTCTCTCCACCCTA-1-10x  | 0.08711051 | 0.2600805  | 0.0040384  |
| 16w_SITTE12_CCCTGATCAGTATGAA-1-10x  | 0.11346968 | 0.3539334  | 0.0027534  |
| 16w_SITTE12_CCCTGATTCCACTGGG-1-10x  | 0.03818082 | 0.08586428 | 6.36E-05   |
| 16w_SITTE12_CCCTTAGCACATGTTG-1-10x  | 0.08156701 | 0.24034262 | 0.0031253  |
| 16w_SITTE12_CCCTTAGGTATGGAAT-1-10x  | 0.01807527 | 0.01427764 | 3.44E-05   |
| 16w_SITTE12_CCCTTAGTCCGTGGTG-1-10x  | 0.23383333 | 0.7824932  | 0.00091657 |
| 16w_SITTE12_CCGAACGCAAATACGA-1-10x  | 0.04440753 | 0.10803475 | 8.81E-05   |
| 16w_SITTE12_CCGAACGCAATGGCCC-1-10x  | 0.03753196 | 0.08355399 | 6.07E-05   |
| 16w_SITTE12_CCGAACGTCGTCGGGT-1-10x  | 0.0455549  | 0.11211999 | 0.00010046 |
| 16w_SITTE12_CCGATCTTCTGGACTA-1-10x  | 0.04972513 | 0.12696826 | 0.00013566 |
| 16w_SITTE12_CCGATGGCAGCGGTCT-1-10x  | 0.23394555 | 0.7828927  | 0.00091657 |
| 16w_SITTE12_CCGATGGGTGGCGTAA-1-10x  | 0.04602566 | 0.11379615 | 0.00010046 |
| 16w_SITTE12_CCGCAAGGTCGGTACC-1-10x  | 0.02359075 | 0.03391573 | 3.83E-05   |
| 16w_SITTE12_CCGCAAGTCTTCTCAA-1-10x  | 0.20591496 | 0.68308866 | 0.001143   |
| 16w_SITTE12_CCGGACAAGCAGAAAG-1-10x  | 0.11438047 | 0.3571763  | 0.0026715  |
| 16w_SITTE12_CCGGACAAGTTTGGCT-1-10x  | 0.20728658 | 0.68797237 | 0.001126   |
| 16w_SITTE12_CCGGGTATCGGTGCAC-1-10x  | 0.02879571 | 0.05244819 | 4.42E-05   |
| 16w_SITTE12_CCGGTGAAGTCATTGC-1-10x  | 0.03571897 | 0.07709875 | 5.58E-05   |
| 16w_SITTE12_CCGGTGAGTAGAGCTG-1-10x  | 0.12499294 | 0.39496246 | 0.0020803  |
| 16w_SITTE12_CCGTGAGCAGGACGAT-1-10x  | 0.02188017 | 0.02782513 | 3.69E-05   |
| 16w_SITTE12_CCGTTCAGTAGTTACC-1-10x  | 0.18087843 | 0.593945   | 0.0014587  |
| 16w_SITTE12_CCGTTCAGTGTTTCATG-1-10x | 0.08714987 | 0.26022062 | 0.0040384  |

|                                    |            |            |            |
|------------------------------------|------------|------------|------------|
| 16w_SITTE12_CCTAACCAGTGCAACG-1-10x | 0.21195532 | 0.7045956  | 0.0010856  |
| 16w_SITTE12_CCTAACCCAAAGGTTA-1-10x | 0.20474508 | 0.67892325 | 0.0011518  |
| 16w_SITTE12_CCTAAGACACACACGC-1-10x | 0.24225417 | 0.8124759  | 0.00085764 |
| 16w_SITTE12_CCTAAGATCCCAGGCA-1-10x | 0.18384047 | 0.6044915  | 0.0014112  |
| 16w_SITTE12_CCTACGTAGTATGATG-1-10x | 0.2509563  | 0.8434602  | 0.00080923 |
| 16w_SITTE12_CCTACGTCATCCGTGG-1-10x | 0.256749   | 0.8640854  | 0.00078463 |
| 16w_SITTE12_CCTACGTGTAATCAAG-1-10x | 0.05392173 | 0.14191045 | 0.00019264 |
| 16w_SITTE12_CCTACGTGTCGCTTGG-1-10x | 0.09336337 | 0.28234404 | 0.0044107  |
| 16w_SITTE12_CCTATCGGTCTACTA-1-10x  | 0.03695739 | 0.08150823 | 5.82E-05   |
| 16w_SITTE12_CCTATCGTCCGAAATC-1-10x | 0.14677477 | 0.47251755 | 0.0018717  |
| 16w_SITTE12_CCTCAACGTTAGGGTG-1-10x | 0.08979429 | 0.26963618 | 0.0042999  |
| 16w_SITTE12_CCTCAACGTTGCTCCT-1-10x | 0.02001853 | 0.0211967  | 3.55E-05   |
| 16w_SITTE12_CCTCAGTGTACGACAG-1-10x | 0.2103289  | 0.6988047  | 0.0011014  |
| 16w_SITTE12_CCTCAGTGTGAACCGA-1-10x | 0.2582617  | 0.86947143 | 0.000778   |
| 16w_SITTE12_CCTCCAATCCCGTGTT-1-10x | 0.2196975  | 0.73216194 | 0.0010253  |
| 16w_SITTE12_CCTCCTCAGCACTAGG-1-10x | 0.04369425 | 0.1054951  | 8.81E-05   |
| 16w_SITTE12_CCTCCTCAGGAGGTT-1-10x  | 0.2387021  | 0.79982865 | 0.00088278 |
| 16w_SITTE12_CCTCTAGGTCCCTGTT-1-10x | 0.02253504 | 0.03015684 | 3.76E-05   |
| 16w_SITTE12_CCTCTAGGTTTGAAAG-1-10x | 0.0996277  | 0.30464846 | 0.0041652  |
| 16w_SITTE12_CCTCTCCACAAAGTA-1-10x  | 0.03101301 | 0.06034301 | 4.68E-05   |
| 16w_SITTE12_CCTGCATCAACGAGGT-1-10x | 0.26912975 | 0.90816754 | 0.00075499 |
| 16w_SITTE12_CCTTCAGGTTTGACAC-1-10x | 0.04680616 | 0.11657517 | 0.00010777 |
| 16w_SITTE12_CCTTGTGTACCATCC-1-10x  | 0.09404399 | 0.2847674  | 0.0044154  |
| 16w_SITTE12_CCTTTGGCAATACGAA-1-10x | 0.03900207 | 0.08878838 | 6.67E-05   |
| 16w_SITTE12_CGAAGGACAGAGGGTT-1-10x | 0.01721853 | 0.01122716 | 3.38E-05   |
| 16w_SITTE12_CGAAGGAGTCCTGTCT-1-10x | 0.26556963 | 0.89549154 | 0.00075974 |
| 16w_SITTE12_CGAAGGAGTTCACCGG-1-10x | 0.19955754 | 0.6604528  | 0.0012085  |
| 16w_SITTE12_CGAAGTTCAACACACT-1-10x | 0.02673132 | 0.04509786 | 4.09E-05   |
| 16w_SITTE12_CGAAGTTGTGATACTC-1-10x | 0.01673245 | 0.00949647 | 3.38E-05   |
| 16w_SITTE12_CGAAGTTTCATTCTTG-1-10x | 0.05061512 | 0.13013715 | 0.00014746 |
| 16w_SITTE12_CGAAGTTTCGTTGCCT-1-10x | 0.18985829 | 0.6259182  | 0.0013244  |
| 16w_SITTE12_CGAATTGGTGGCATCC-1-10x | 0.07717439 | 0.2247025  | 0.0022191  |
| 16w_SITTE12_CGAATTGGTTAATCGC-1-10x | 0.27713507 | 0.93667084 | 0.00075222 |
| 16w_SITTE12_CGACAGCTCTACGGGC-1-10x | 0.10197234 | 0.31299666 | 0.0039137  |
| 16w_SITTE12_CGAGAAGAGCTGAGTG-1-10x | 0.04640173 | 0.11513519 | 0.00010046 |
| 16w_SITTE12_CGAGAAGAGTTTGAGA-1-10x | 0.08267164 | 0.24427567 | 0.0033032  |
| 16w_SITTE12_CGAGAAGCATGTGTA-1-10x  | 0.176528   | 0.57845515 | 0.0015416  |
| 16w_SITTE12_CGAGGAAAGGTCCCGT-1-10x | 0.27093294 | 0.91458786 | 0.00075418 |
| 16w_SITTE12_CGAGGAAAGTGATGGC-1-10x | 0.11969555 | 0.37610087 | 0.0023317  |
| 16w_SITTE12_CGAGGCTAGTATGGCG-1-10x | 0.08345883 | 0.24707852 | 0.0034742  |
| 16w_SITTE12_CGAGTTACACGCCAGT-1-10x | 0.05018923 | 0.12862074 | 0.00013566 |



|                                     |            |            |            |
|-------------------------------------|------------|------------|------------|
| 16w_SITTE12_CGAGTTAGTACCAGAG-1-10x  | 0.2713335  | 0.916014   | 0.00075352 |
| 16w_SITTE12_CGATCGGCATGAAGGC-1-10x  | 0.04791832 | 0.12053505 | 0.00011598 |
| 16w_SITTE12_CGATGCGAGTGGACTG-1-10x  | 0.08039745 | 0.23617834 | 0.0029431  |
| 16w_SITTE12_CGATGGCAGACAACTA-1-10x  | 0.18103984 | 0.59451973 | 0.0014587  |
| 16w_SITTE12_CGATGGCCACCTCAGG-1-10x  | 0.05318783 | 0.13929738 | 0.00019264 |
| 16w_SITTE12_CGCAGGTAGTAGCCAG-1-10x  | 0.2700285  | 0.9113676  | 0.00075499 |
| 16w_SITTE12_CGCAGGTAGTGGCGAT-1-10x  | 0.27675036 | 0.935301   | 0.00075222 |
| 16w_SITTE12_CGCAGGTCACCGTCGA-1-10x  | 0.22413753 | 0.7479709  | 0.00098869 |
| 16w_SITTE12_CGCATAACATGAGGGT-1-10x  | 0.02111127 | 0.02508742 | 3.69E-05   |
| 16w_SITTE12_CGCCAGACAGTCAACT-1-10x  | 0.04384022 | 0.1060148  | 8.81E-05   |
| 16w_SITTE12_CGCCATTTCTGGCCGA-1-10x  | 0.04311333 | 0.1034267  | 8.29E-05   |
| 16w_SITTE12_CGCGTGATCATTACTC-1-10x  | 0.0159032  | 0.00654389 | 3.33E-05   |
| 16w_SITTE12_CGGAACCCAATCCTTT-1-10x  | 0.10000167 | 0.30598    | 0.0041652  |
| 16w_SITTE12_CGGAACCTCATTTCCA-1-10x  | 0.02301622 | 0.0318701  | 3.83E-05   |
| 16w_SITTE12_CGGAATTAGCATTTCG-1-10x  | 0.25396875 | 0.8541861  | 0.00079608 |
| 16w_SITTE12_CGGAATTGTTGAGAGC-1-10x  | 0.08697476 | 0.25959712 | 0.0040384  |
| 16w_SITTE12_CGGACACCAGGCGATA-1-10x  | 0.12190196 | 0.38395688 | 0.0021873  |
| 16w_SITTE12_CGGACACCATACTTTC-1-10x  | 0.03739319 | 0.08305989 | 6.07E-05   |
| 16w_SITTE12_CGGACACGTAAAGATTG-1-10x | 0.12878555 | 0.4084662  | 0.0019821  |
| 16w_SITTE12_CGGACACTCGTTGTTT-1-10x  | 0.23493592 | 0.786419   | 0.00090964 |
| 16w_SITTE12_CGGAGAACATGGCCAC-1-10x  | 0.06626341 | 0.18585351 | 0.00079936 |
| 16w_SITTE12_CGGAGAATCAGCAATC-1-10x  | 0.09291866 | 0.28076062 | 0.0044107  |
| 16w_SITTE12_CGGCAGTGTCTTGCGG-1-10x  | 0.23496546 | 0.7865241  | 0.00090964 |
| 16w_SITTE12_CGGGACTCAACCAACT-1-10x  | 0.18057044 | 0.5928484  | 0.001475   |
| 16w_SITTE12_CGGGCATAGCGTGAGT-1-10x  | 0.21138841 | 0.70257705 | 0.0010934  |
| 16w_SITTE12_CGGGCATCAACGTAAA-1-10x  | 0.09010565 | 0.27074477 | 0.0042999  |
| 16w_SITTE12_CGGGCATTCTAGAGT-1-10x   | 0.02496309 | 0.038802   | 4.00E-05   |
| 16w_SITTE12_CGGTCAGAGCACTCGC-1-10x  | 0.05699776 | 0.15286279 | 0.00028394 |
| 16w_SITTE12_CGGTCAGCAGTAGATA-1-10x  | 0.23489997 | 0.78629094 | 0.00090964 |
| 16w_SITTE12_CGGTCAGGTCGTCTCT-1-10x  | 0.07847326 | 0.2293272  | 0.002576   |
| 16w_SITTE12_CGGTCAGTCGTGACG-1-10x   | 0.01547297 | 0.00501204 | 3.27E-05   |
| 16w_SITTE12_CGTAATGCACACCGAC-1-10x  | 0.04204473 | 0.09962189 | 7.82E-05   |
| 16w_SITTE12_CGTAATGGTGCTGTCG-1-10x  | 0.22927226 | 0.7662533  | 0.0009522  |
| 16w_SITTE12_CGTAGTACAAACACCT-1-10x  | 0.12487018 | 0.39452535 | 0.0020803  |
| 16w_SITTE12_CGTAGTAGTAGCCAGA-1-10x  | 0.01644066 | 0.00845754 | 3.38E-05   |
| 16w_SITTE12_CGTCAAAGCGATGGT-1-10x   | 0.12003924 | 0.37732458 | 0.0022788  |
| 16w_SITTE12_CGTCCATCAGAGTAAT-1-10x  | 0.2838811  | 0.9606903  | 0.00075531 |
| 16w_SITTE12_CGTCCATGTTTCGACA-1-10x  | 0.2900962  | 0.98281944 | 0.00076163 |
| 16w_SITTE12_CGTGAATAGAATCGTA-1-10x  | 0.067082   | 0.18876813 | 0.00079936 |
| 16w_SITTE12_CGTGAATCAACAAAGT-1-10x  | 0.26022    | 0.876444   | 0.00077221 |
| 16w_SITTE12_CGTGCTTTCAGCTCTC-1-10x  | 0.0826602  | 0.24423495 | 0.0033032  |

|                                     |            |            |            |
|-------------------------------------|------------|------------|------------|
| 16w_SITTE12_CGTTAGACATATCTGG-1-10x  | 0.25896257 | 0.87196684 | 0.00077499 |
| 16w_SITTE12_CGTTCTGCAAGCACAG-1-10x  | 0.04647709 | 0.11540349 | 0.00010777 |
| 16w_SITTE12_CGTTCTGTCATTACTC-1-10x  | 0.03104784 | 0.06046701 | 4.68E-05   |
| 16w_SITTE12_CGTTGGGCACAATTCG-1-10x  | 0.01598479 | 0.00683438 | 3.33E-05   |
| 16w_SITTE12_CTAACCCAGGTACATA-1-10x  | 0.08460021 | 0.25114244 | 0.0036353  |
| 16w_SITTE12_CTAACCCTCCTAAGTG-1-10x  | 0.03718868 | 0.08233171 | 6.07E-05   |
| 16w_SITTE12_CTAACCTTAGGCTAAAT-1-10x | 0.12830643 | 0.40676028 | 0.0019821  |
| 16w_SITTE12_CTAAGTGTCGGCTTCT-1-10x  | 0.04240327 | 0.10089849 | 7.82E-05   |
| 16w_SITTE12_CTACAGACATGGAAGC-1-10x  | 0.17840034 | 0.5851217  | 0.0015081  |
| 16w_SITTE12_CTACAGATCGTACCTC-1-10x  | 0.08507883 | 0.25284657 | 0.0037839  |
| 16w_SITTE12_CTACATTAGCATTGTC-1-10x  | 0.1250077  | 0.395015   | 0.0020803  |
| 16w_SITTE12_CTACATTCAGCTCTGG-1-10x  | 0.08641476 | 0.25760323 | 0.0039187  |
| 16w_SITTE12_CTACATTGTGTTCAAGT-1-10x | 0.04198494 | 0.09940901 | 7.82E-05   |
| 16w_SITTE12_CTACATTTCTGCCCTA-1-10x  | 0.06393281 | 0.17755534 | 0.00058553 |
| 16w_SITTE12_CTACCCACACAAAGTA-1-10x  | 0.04504276 | 0.11029653 | 9.39E-05   |
| 16w_SITTE12_CTACCCAGTCTCAGGC-1-10x  | 0.19198474 | 0.6334895  | 0.0012985  |
| 16w_SITTE12_CTACCCATCAGTAGGG-1-10x  | 0.15222679 | 0.4919297  | 0.0018651  |
| 16w_SITTE12_CTACCTGGTACGAAAT-1-10x  | 0.2494905  | 0.83824116 | 0.00081397 |
| 16w_SITTE12_CTACGGGGTAAACAGA-1-10x  | 0.08814824 | 0.26377538 | 0.0041422  |
| 16w_SITTE12_CTACTATAGCGAGAAA-1-10x  | 0.27902138 | 0.9433871  | 0.00075266 |
| 16w_SITTE12_CTAGACACACAGGATG-1-10x  | 0.08467575 | 0.2514114  | 0.0036353  |
| 16w_SITTE12_CTAGACACACGCGTGT-1-10x  | 0.09088757 | 0.27352884 | 0.0043535  |
| 16w_SITTE12_CTAGACACATGAGAAT-1-10x  | 0.16891134 | 0.5513357  | 0.0016744  |
| 16w_SITTE12_CTAGACATCCTTCTTC-1-10x  | 0.0367986  | 0.08094285 | 5.82E-05   |
| 16w_SITTE12_CTAGGTATCCTCAGGG-1-10x  | 0.08691821 | 0.25939578 | 0.0040384  |
| 16w_SITTE12_CTAGGTATCGCTACAA-1-10x  | 0.09953696 | 0.30432534 | 0.0041652  |
| 16w_SITTE12_CTATAGGGTAACAAGT-1-10x  | 0.11708273 | 0.3667978  | 0.002453   |
| 16w_SITTE12_CTATAGGTCGATCCCT-1-10x  | 0.10950866 | 0.33983004 | 0.0031181  |
| 16w_SITTE12_CTATCCGAGATTGACA-1-10x  | 0.12929262 | 0.41027164 | 0.0019639  |
| 16w_SITTE12_CTATCCGGTATACCCA-1-10x  | 0.12112741 | 0.38119906 | 0.0022308  |
| 16w_SITTE12_CTATCTAGTGGTCTCG-1-10x  | 0.01824383 | 0.01487782 | 3.44E-05   |
| 16w_SITTE12_CTCAACCGTCTGCCTT-1-10x  | 0.11639658 | 0.36435476 | 0.0025211  |
| 16w_SITTE12_CTCAACCTCAGCTAGT-1-10x  | 0.14483677 | 0.4656172  | 0.0018716  |
| 16w_SITTE12_CTCAACCTCTGTGCAA-1-10x  | 0.05709933 | 0.15322442 | 0.00028394 |
| 16w_SITTE12_CTCAAGATCGGCTGAC-1-10x  | 0.27525878 | 0.9299902  | 0.00075218 |
| 16w_SITTE12_CTCAATTGTTGCGCGT-1-10x  | 0.04853138 | 0.1227179  | 0.00012523 |
| 16w_SITTE12 CTCAGAAAGAAATTGC-1-10x  | 0.16184509 | 0.52617604 | 0.0017883  |
| 16w_SITTE12 CTCAGAATCAAATAGG-1-10x  | 0.19799833 | 0.65490115 | 0.0012187  |
| 16w_SITTE12 CTCAGGGAGCTCATAC-1-10x  | 0.18672125 | 0.61474866 | 0.0013662  |
| 16w_SITTE12 CTCAGGGCAATGCAGG-1-10x  | 0.02055968 | 0.02312349 | 3.62E-05   |
| 16w_SITTE12 CTCAGGGGTTCTCTCG-1-10x  | 0.25490484 | 0.85751915 | 0.00079207 |

|                                    |            |            |            |
|------------------------------------|------------|------------|------------|
| 16w_SITTE12_CTCAGGGTCAAACGTC-1-10x | 0.0278654  | 0.0491358  | 4.30E-05   |
| 16w_SITTE12_CTCAGTCTCACCTGGG-1-10x | 0.05284103 | 0.13806258 | 0.00017575 |
| 16w_SITTE12_CTCATCGAGACCTGGA-1-10x | 0.07302158 | 0.20991628 | 0.0015819  |
| 16w_SITTE12_CTCATCGTCATGCATG-1-10x | 0.05503978 | 0.14589131 | 0.000233   |
| 16w_SITTE12_CTCATGCGTGAGAGGG-1-10x | 0.0258181  | 0.04184629 | 4.09E-05   |
| 16w_SITTE12_CTCATGCTCAAGTCGT-1-10x | 0.03699078 | 0.0816271  | 5.82E-05   |
| 16w_SITTE12_CTCATTACAGCGCTTG-1-10x | 0.01590131 | 0.00653715 | 3.33E-05   |
| 16w_SITTE12_CTCCAACCATTCTGTT-1-10x | 0.02251482 | 0.03008482 | 3.76E-05   |
| 16w_SITTE12_CTCCAACGTTGTTGTG-1-10x | 0.03604074 | 0.07824443 | 5.58E-05   |
| 16w_SITTE12_CTCCATGAGCAATAGT-1-10x | 0.18842556 | 0.6208169  | 0.001338   |
| 16w_SITTE12_CTCCATGAGGCTGGAT-1-10x | 0.02386035 | 0.03487563 | 3.83E-05   |
| 16w_SITTE12_CTCCAAAGGTCGAGT-1-10x  | 0.02264887 | 0.03056213 | 3.76E-05   |
| 16w_SITTE12_CTCCAAAGTTTGTGGT-1-10x | 0.27530783 | 0.9301649  | 0.00075218 |
| 16w_SITTE12_CTCCCTCAGTTCGCAT-1-10x | 0.20912063 | 0.69450253 | 0.0011095  |
| 16w_SITTE12_CTCCCTCGTCCATCTC-1-10x | 0.08277784 | 0.24465384 | 0.0033032  |
| 16w_SITTE12_CTCCGATAGGCTTAGG-1-10x | 0.0884735  | 0.26493347 | 0.0041422  |
| 16w_SITTE12_CTCCGATCACAATGCT-1-10x | 0.06070601 | 0.16606615 | 0.00042799 |
| 16w_SITTE12_CTCCGATGTAGCACGA-1-10x | 0.05403907 | 0.14232823 | 0.00021164 |
| 16w_SITTE12_CTCTCCAGATTAAG-1-10x   | 0.01604048 | 0.00703268 | 3.33E-05   |
| 16w_SITTE12_CTCTTTAGCATCCCG-1-10x  | 0.25965157 | 0.8744201  | 0.00077499 |
| 16w_SITTE12_CTCTTTGTGATTAGA-1-10x  | 0.24405761 | 0.8188971  | 0.00084583 |
| 16w_SITTE12_CTCGAGGCACACGGTC-1-10x | 0.19528127 | 0.64522696 | 0.0012511  |
| 16w_SITTE12_CTCGAGGGTAGCTGTT-1-10x | 0.04808945 | 0.12114438 | 0.00011598 |
| 16w_SITTE12_CTCTCAGAGGTTACCT-1-10x | 0.10619661 | 0.32803735 | 0.00352    |
| 16w_SITTE12_CTCTCAGCACATTACG-1-10x | 0.07925177 | 0.23209912 | 0.002576   |
| 16w_SITTE12_CTCTCAGGTGGCTGAA-1-10x | 0.03543054 | 0.0760718  | 5.58E-05   |
| 16w_SITTE12_CTCTCGACAGACGATG-1-10x | 0.11439505 | 0.35722822 | 0.0026715  |
| 16w_SITTE12_CTCTCGAGTTGGAGAC-1-10x | 0.04344786 | 0.10461781 | 8.29E-05   |
| 16w_SITTE12_CTCTCGATCGCCGATG-1-10x | 0.01522656 | 0.00413468 | 3.27E-05   |
| 16w_SITTE12_CTGAATGAGCATGTTC-1-10x | 0.23127002 | 0.7733664  | 0.00093779 |
| 16w_SITTE12_CTGAATGCAAAGTCTA-1-10x | 0.04170119 | 0.09839869 | 7.40E-05   |
| 16w_SITTE12_CTGAGGCTCCCGAGGT-1-10x | 0.05464824 | 0.14449722 | 0.00021164 |
| 16w_SITTE12_CTGATCCGTCTTGCTC-1-10x | 0.20114607 | 0.6661088  | 0.0011888  |
| 16w_SITTE12_CTGATCCGTTGTGCCG-1-10x | 0.19847272 | 0.6565902  | 0.0012187  |
| 16w_SITTE12_CTGATCCTCCTACAAG-1-10x | 0.19515896 | 0.6447914  | 0.0012511  |
| 16w_SITTE12_CTGCAGGAGAAGTCTA-1-10x | 0.03830244 | 0.08629732 | 6.36E-05   |
| 16w_SITTE12_CTGCAGGAGCACTGGA-1-10x | 0.25345573 | 0.85235953 | 0.00079608 |
| 16w_SITTE12_CTGCAGGAGGCTCTAT-1-10x | 0.10199762 | 0.31308666 | 0.0039137  |
| 16w_SITTE12_CTGCATCAGAGGATGA-1-10x | 0.24246866 | 0.8132396  | 0.00085764 |
| 16w_SITTE12_CTGCATCCATAGGTAA-1-10x | 0.0157743  | 0.00608495 | 3.33E-05   |
| 16w_SITTE12_CTGCATCCATCACAGT-1-10x | 0.09112769 | 0.2743838  | 0.0043535  |

|                                     |            |            |            |
|-------------------------------------|------------|------------|------------|
| 16w_SITTE12_CTGCATCTCATGGCCG-1-10x  | 0.02138179 | 0.02605064 | 3.69E-05   |
| 16w_SITTE12_CTGCCATCAGGTCAAG-1-10x  | 0.01526105 | 0.00425749 | 3.27E-05   |
| 16w_SITTE12_CTGCCATTCAAGGG-1-10x    | 0.1530808  | 0.49497047 | 0.0018617  |
| 16w_SITTE12_CTGCGAGAGATGGCGT-1-10x  | 0.20342918 | 0.6742379  | 0.0011608  |
| 16w_SITTE12_CTGCGAGAGCAGTCTT-1-10x  | 0.03738437 | 0.0830285  | 6.07E-05   |
| 16w_SITTE12_CTGCGAGAGCCTGAGA-1-10x  | 0.01626132 | 0.00781899 | 3.33E-05   |
| 16w_SITTE12_CTGCTCAGTACCGTTCG-1-10x | 0.20127296 | 0.6665606  | 0.0011888  |
| 16w_SITTE12_CTGCTCAGTTGGCCTG-1-10x  | 0.01732304 | 0.01159929 | 3.38E-05   |
| 16w_SITTE12_CTGGACGAGATAGTGT-1-10x  | 0.05147551 | 0.1332006  | 0.00016076 |
| 16w_SITTE12_CTGGACGCAGAAGTGC-1-10x  | 0.02775232 | 0.04873316 | 4.30E-05   |
| 16w_SITTE12_CTGGCAGAGATAGGGA-1-10x  | 0.02872217 | 0.05218636 | 4.42E-05   |
| 16w_SITTE12_CTGGTCTTCGCGGACT-1-10x  | 0.23379287 | 0.7823491  | 0.00091657 |
| 16w_SITTE12_CTGTACCAGGGTGAAA-1-10x  | 0.23532885 | 0.787818   | 0.00090278 |
| 16w_SITTE12_CTGTACCGTAACCCTA-1-10x  | 0.2615448  | 0.881161   | 0.00076963 |
| 16w_SITTE12_CTGTACCGTGCATGAG-1-10x  | 0.12299279 | 0.38784084 | 0.0021479  |
| 16w_SITTE12_CTGTAGAAGCCTCATA-1-10x  | 0.25385472 | 0.85378015 | 0.00079608 |
| 16w_SITTE12_CTGTAGAGTACTGCGC-1-10x  | 0.26184368 | 0.88222516 | 0.00076727 |
| 16w_SITTE12_CTGTAGAGTGACACGA-1-10x  | 0.09153842 | 0.27584624 | 0.0043535  |
| 16w_SITTE12_CTGTATTAGCCAAGTG-1-10x  | 0.0882724  | 0.26421744 | 0.0041422  |
| 16w_SITTE12_CTGTATTGTCGGCACT-1-10x  | 0.27438465 | 0.9268778  | 0.00075233 |
| 16w_SITTE12_CTGTATTTCTTACCGC-1-10x  | 0.05563163 | 0.14799862 | 0.000233   |
| 16w_SITTE12_CTGTGAATCATTTGCT-1-10x  | 0.24127989 | 0.8090069  | 0.00086374 |
| 16w_SITTE12_CTGTGGGCAACCGCTG-1-10x  | 0.25655112 | 0.8633808  | 0.00078463 |
| 16w_SITTE12_CTTACCGGTAATAAGA-1-10x  | 0.10303316 | 0.31677374 | 0.0038193  |
| 16w_SITTE12_CTTACCGTCCGTCAAA-1-10x  | 0.08900958 | 0.2668422  | 0.0042295  |
| 16w_SITTE12_CTTAGGAAGCCTCTTC-1-10x  | 0.14460093 | 0.4647775  | 0.0018716  |
| 16w_SITTE12_CTTAGGAAGGTACATA-1-10x  | 0.26396522 | 0.889779   | 0.00076313 |
| 16w_SITTE12_CTTAGGACAACCGTAT-1-10x  | 0.07785855 | 0.22713847 | 0.0023954  |
| 16w_SITTE12_CTTAGGACAGTCGTTA-1-10x  | 0.03740899 | 0.08311616 | 6.07E-05   |
| 16w_SITTE12_CTTCAATTCAGTCATG-1-10x  | 0.09826034 | 0.29977992 | 0.0042345  |
| 16w_SITTE12_CTTCCGATCCCTGGTT-1-10x  | 0.05504843 | 0.14592212 | 0.000233   |
| 16w_SITTE12_CTTCCTTTCATCTATC-1-10x  | 0.01874834 | 0.01667413 | 3.49E-05   |
| 16w_SITTE12_CTTCCGGTCAACAAGTA-1-10x | 0.04462781 | 0.10881907 | 9.39E-05   |
| 16w_SITTE12_CTTCCGGTCACATAACC-1-10x | 0.09622593 | 0.2925363  | 0.0043808  |
| 16w_SITTE12_CTTCTAAAGTGAACAT-1-10x  | 0.0314567  | 0.06192277 | 4.83E-05   |
| 16w_SITTE12_CTTCTAACACTCTCGT-1-10x  | 0.09995075 | 0.30579868 | 0.0041652  |
| 16w_SITTE12_CTTCTAATCTACTTCA-1-10x  | 0.04841781 | 0.12231351 | 0.00012523 |
| 16w_SITTE12_CTTGAGACAGAGTTGG-1-10x  | 0.02439806 | 0.03679018 | 3.91E-05   |
| 16w_SITTE12_CTTGATTAGTTGCTCA-1-10x  | 0.26716226 | 0.9011622  | 0.00075831 |
| 16w_SITTE12_CTTGATTTGAGCTGC-1-10x   | 0.09400989 | 0.284646   | 0.0044154  |
| 16w_SITTE12_CTTTCAATCGGCATCG-1-10x  | 0.09122293 | 0.2747229  | 0.0043535  |

|                                    |            |            |            |
|------------------------------------|------------|------------|------------|
| 16w_SITTE12_GAAACCTGTTGAGTCT-1-10x | 0.1377681  | 0.44044894 | 0.0018802  |
| 16w_SITTE12_GAAATGATCTGGAGAG-1-10x | 0.09596338 | 0.29160148 | 0.0043808  |
| 16w_SITTE12_GAACACTACTAACCA-1-10x  | 0.2063455  | 0.6846216  | 0.0011344  |
| 16w_SITTE12_GAACACTGTCGCCTAG-1-10x | 0.27866176 | 0.94210666 | 0.00075266 |
| 16w_SITTE12_GAACACTTCGCATTGA-1-10x | 0.02441464 | 0.03684924 | 3.91E-05   |
| 16w_SITTE12_GAACGTTTCAGTGGGA-1-10x | 0.10819368 | 0.33514798 | 0.0033168  |
| 16w_SITTE12_GAACTGTCAGGCCTGT-1-10x | 0.01902742 | 0.0176678  | 3.49E-05   |
| 16w_SITTE12_GAAGAATAGCGTTCAT-1-10x | 0.22605671 | 0.7548042  | 0.00097406 |
| 16w_SITTE12_GAAGCCCTCATGCCGG-1-10x | 0.14336784 | 0.46038705 | 0.0018716  |
| 16w_SITTE12_GAAGCGAAGAGGGTGG-1-10x | 0.23510838 | 0.787033   | 0.00090964 |
| 16w_SITTE12_GAAGCGAAGATTGATG-1-10x | 0.02092844 | 0.02443646 | 3.62E-05   |
| 16w_SITTE12_GAAGCGACACCCTAGG-1-10x | 0.26990783 | 0.9109379  | 0.00075499 |
| 16w_SITTE12_GAAGCGAGTCGTGTTA-1-10x | 0.23583303 | 0.7896132  | 0.00090278 |
| 16w_SITTE12_GAAGCGATCCCTTGGT-1-10x | 0.0242137  | 0.03613377 | 3.91E-05   |
| 16w_SITTE12_GAAGGACAGTAGCAAT-1-10x | 0.05385871 | 0.14168608 | 0.00019264 |
| 16w_SITTE12_GAAGGGTGTCTTCGAA-1-10x | 0.01613829 | 0.00738093 | 3.33E-05   |
| 16w_SITTE12_GAAGTAAAGACGACTG-1-10x | 0.08100047 | 0.23832542 | 0.0029431  |
| 16w_SITTE12_GAAGTAAAGGGAGTGG-1-10x | 0.0966117  | 0.29390985 | 0.0043435  |
| 16w_SITTE12_GAATCGTAGCTGTTCA-1-10x | 0.08491956 | 0.25227952 | 0.0036353  |
| 16w_SITTE12_GAATCGTCAAATCAGA-1-10x | 0.21635641 | 0.72026587 | 0.001055   |
| 16w_SITTE12_GAATCGTCCGACGGT-1-10x  | 0.08524392 | 0.2534344  | 0.0037839  |
| 16w_SITTE12_GACACGCCATAGAATG-1-10x | 0.04180132 | 0.0987552  | 7.82E-05   |
| 16w_SITTE12_GACAGCCTCTGTGCTC-1-10x | 0.1081015  | 0.33481976 | 0.0033168  |
| 16w_SITTE12_GACATCATACAATGC-1-10x  | 0.03117532 | 0.06092089 | 4.68E-05   |
| 16w_SITTE12_GACATCATCTACGCGG-1-10x | 0.17071515 | 0.5577583  | 0.0016421  |
| 16w_SITTE12_GACCAATGTTTGCAGT-1-10x | 0.15075316 | 0.48668277 | 0.0018676  |
| 16w_SITTE12_GACCAATTCGGACAAG-1-10x | 0.2452178  | 0.823028   | 0.00084014 |
| 16w_SITTE12_GACCCAGGTACCGTCG-1-10x | 0.05860966 | 0.15860203 | 0.00031414 |
| 16w_SITTE12_GACCGTGAGGTTACAA-1-10x | 0.0788755  | 0.2307594  | 0.002576   |
| 16w_SITTE12_GACCGTGCATGCGTGC-1-10x | 0.12873723 | 0.40829414 | 0.0019821  |
| 16w_SITTE12_GACCGTGGTTCAATCG-1-10x | 0.03257785 | 0.06591468 | 5.00E-05   |
| 16w_SITTE12_GACCGTGTCTGTGCGG-1-10x | 0.01740085 | 0.01187634 | 3.44E-05   |
| 16w_SITTE12_GACGCTGCATCGTGCG-1-10x | 0.1941089  | 0.64105266 | 0.0012624  |
| 16w_SITTE12_GACGTTAAGATCGCTT-1-10x | 0.2518136  | 0.8465126  | 0.00080467 |
| 16w_SITTE12_GACGTTAAGTACAGAT-1-10x | 0.03215746 | 0.06441784 | 4.83E-05   |
| 16w_SITTE12_GACGTTAGTTCGGCTG-1-10x | 0.06015269 | 0.16409604 | 0.00038577 |
| 16w_SITTE12_GACTATGGTTCAAAGA-1-10x | 0.2707215  | 0.913835   | 0.00075418 |
| 16w_SITTE12_GACTCAACAACGATC-1-10x  | 0.06242513 | 0.17218718 | 0.00047505 |
| 16w_SITTE12_GACTCAATCATCTATC-1-10x | 0.07982512 | 0.23414053 | 0.0027593  |
| 16w_SITTE12_GACTCTCAGCCGCTTG-1-10x | 0.03977972 | 0.09155722 | 6.67E-05   |
| 16w_SITTE12_GACTGATCATGTGACT-1-10x | 0.08002043 | 0.23483594 | 0.0027593  |

|                                    |            |            |            |
|------------------------------------|------------|------------|------------|
| 16w_SITTE12_GAGAAATCAGATACCT-1-10x | 0.23556986 | 0.78867614 | 0.00090278 |
| 16w_SITTE12_GAGACCCAGTCACGAG-1-10x | 0.09104746 | 0.27409816 | 0.0043535  |
| 16w_SITTE12_GAGACCCAGTGTAGAT-1-10x | 0.07894161 | 0.23099478 | 0.002576   |
| 16w_SITTE12_GAGACTTAGTGATGGC-1-10x | 0.22771649 | 0.7607139  | 0.00096676 |
| 16w_SITTE12_GAGACTTCAGAGATGC-1-10x | 0.08679498 | 0.25895703 | 0.0039187  |
| 16w_SITTE12_GAGACTTTCGGAACCT-1-10x | 0.09889225 | 0.30202985 | 0.0042345  |
| 16w_SITTE12_GAGAGGTCACTGCGAC-1-10x | 0.16262034 | 0.5289363  | 0.001776   |
| 16w_SITTE12_GAGCCTGCAAGAGTAT-1-10x | 0.21537527 | 0.7167725  | 0.0010625  |
| 16w_SITTE12_GAGCCTGCAGCACCCA-1-10x | 0.20748515 | 0.6886794  | 0.001126   |
| 16w_SITTE12_GAGCCTGTATGCCGG-1-10x  | 0.13147615 | 0.41804618 | 0.001934   |
| 16w_SITTE12_GAGCTGCTCTACTGCC-1-10x | 0.16792884 | 0.5478375  | 0.0016902  |
| 16w_SITTE12_GAGGCAAGTCCAGCGT-1-10x | 0.08154742 | 0.24027285 | 0.0031253  |
| 16w_SITTE12_GAGGCCTGTGATCGTT-1-10x | 0.12849179 | 0.40742025 | 0.0019821  |
| 16w_SITTE12_GAGGGTAAGATTGACA-1-10x | 0.11538733 | 0.36076126 | 0.002594   |
| 16w_SITTE12_GAGGGTAAGCGTATGG-1-10x | 0.09697974 | 0.2952203  | 0.0043435  |
| 16w_SITTE12_GAGGGTACAGATTCGT-1-10x | 0.0826893  | 0.24433857 | 0.0033032  |
| 16w_SITTE12_GAGGGTATCACTTGGA-1-10x | 0.08490196 | 0.25221682 | 0.0036353  |
| 16w_SITTE12_GAGGGTATCGCGCTGA-1-10x | 0.28769922 | 0.9742849  | 0.00075864 |
| 16w_SITTE12_GAGTCATGTTCGAACT-1-10x | 0.08044411 | 0.23634446 | 0.0029431  |
| 16w_SITTE12_GAGTCATTCATTACCT-1-10x | 0.02316586 | 0.0324029  | 3.83E-05   |
| 16w_SITTE12_GAGTCTAAGAGAGTGA-1-10x | 0.03272237 | 0.06642924 | 5.00E-05   |
| 16w_SITTE12_GAGTCTACAAGTAGAA-1-10x | 0.22342883 | 0.7454475  | 0.00099599 |
| 16w_SITTE12_GAGTCTACACTTCATT-1-10x | 0.09637728 | 0.29307517 | 0.0043435  |
| 16w_SITTE12_GAGTGAGCAAATTGGA-1-10x | 0.27832446 | 0.94090563 | 0.00075239 |
| 16w_SITTE12_GAGTGAGGTCAGTCCG-1-10x | 0.10586984 | 0.32687384 | 0.00352    |
| 16w_SITTE12_GAGTGTTTCAGGTAAA-1-10x | 0.23572588 | 0.78923166 | 0.00090278 |
| 16w_SITTE12_GAGTTACGTTCCACGG-1-10x | 0.054022   | 0.14226748 | 0.00021164 |
| 16w_SITTE12_GAGTTTGAGCGGATCA-1-10x | 0.1063745  | 0.3286707  | 0.00352    |
| 16w_SITTE12_GATAGAAAGGACAAGA-1-10x | 0.19578062 | 0.6470049  | 0.0012511  |
| 16w_SITTE12_GATAGAAAGTGGACGT-1-10x | 0.05324874 | 0.13951424 | 0.00019264 |
| 16w_SITTE12_GATCACACACCACTGG-1-10x | 0.1291416  | 0.40973392 | 0.0019639  |
| 16w_SITTE12_GATCACACAGGAATCG-1-10x | 0.2763829  | 0.9339926  | 0.00075214 |
| 16w_SITTE12_GATCACATCACACGAT-1-10x | 0.04289828 | 0.10266098 | 8.29E-05   |
| 16w_SITTE12_GATCAGTAGCATTGTC-1-10x | 0.07682619 | 0.22346272 | 0.0022191  |
| 16w_SITTE12_GATCATGAGCTACTGT-1-10x | 0.12292116 | 0.3875858  | 0.0021479  |
| 16w_SITTE12_GATCATGCACTACACA-1-10x | 0.04665658 | 0.11604256 | 0.00010777 |
| 16w_SITTE12_GATCATGTCCGCGATG-1-10x | 0.01810294 | 0.01437616 | 3.44E-05   |
| 16w_SITTE12_GATCCCTCAGCTTCCT-1-10x | 0.04830715 | 0.12191949 | 0.00011598 |
| 16w_SITTE12_GATCCCTGTACCAGAG-1-10x | 0.21820396 | 0.72684413 | 0.00104    |
| 16w_SITTE12_GATCCCTGTCACGACC-1-10x | 0.25522587 | 0.8586622  | 0.00078825 |
| 16w_SITTE12_GATCGTACAAAGCTAA-1-10x | 0.13603605 | 0.43428192 | 0.0018891  |

|                                     |            |            |            |
|-------------------------------------|------------|------------|------------|
| 16w_SITTE12_GATGAGGTCTTACACT-1-10x  | 0.01849993 | 0.01578964 | 3.49E-05   |
| 16w_SITTE12_GATGGAGCAACTCATG-1-10x  | 0.04584081 | 0.113138   | 0.00010046 |
| 16w_SITTE12_GATGGAGCATCGGATT-1-10x  | 0.09124571 | 0.27480403 | 0.0043535  |
| 16w_SITTE12_GATGTTGTCGGTTCGGT-1-10x | 0.077737   | 0.22670572 | 0.0023954  |
| 16w_SITTE12_GATTCGAAGTAAACAC-1-10x  | 0.15513986 | 0.5023018  | 0.0018522  |
| 16w_SITTE12_GATTCGAGTAGAGATT-1-10x  | 0.02740275 | 0.04748853 | 4.19E-05   |
| 16w_SITTE12_GATTCGATCAGCTAGT-1-10x  | 0.07419416 | 0.2140913  | 0.0017292  |
| 16w_SITTE12_GATTGGTTCTACGGGC-1-10x  | 0.06871057 | 0.19456673 | 0.00097948 |
| 16w_SITTE12_GATTTCTCAAGGTCGA-1-10x  | 0.14158604 | 0.45404285 | 0.0018724  |
| 16w_SITTE12_GCAACATGTACTAACC-1-10x  | 0.12085839 | 0.3802412  | 0.0022308  |
| 16w_SITTE12_GCAACCGGTAGCTGTT-1-10x  | 0.28454044 | 0.96303797 | 0.00075605 |
| 16w_SITTE12_GCACATATCCCTTTGG-1-10x  | 0.06098854 | 0.16707213 | 0.00042799 |
| 16w_SITTE12_GCACATATCTTGATG-1-10x   | 0.0514704  | 0.1331824  | 0.00016076 |
| 16w_SITTE12_GCACGTGCATCCCACT-1-10x  | 0.08191793 | 0.24159206 | 0.0031253  |
| 16w_SITTE12_GCACGTGGTCCGAAGA-1-10x  | 0.13957861 | 0.44689533 | 0.001875   |
| 16w_SITTE12_GCACTAAAGCTAAATG-1-10x  | 0.22327417 | 0.7448968  | 0.00099599 |
| 16w_SITTE12_GCACTAAGTTGGTACT-1-10x  | 0.0468891  | 0.11687049 | 0.00010777 |
| 16w_SITTE12_GCACTAATCTAGAACC-1-10x  | 0.03748015 | 0.08336953 | 6.07E-05   |
| 16w_SITTE12_GCAGCCAAGCGTCTCG-1-10x  | 0.14374389 | 0.46172598 | 0.0018716  |
| 16w_SITTE12_GCAGCCACACTAGGTT-1-10x  | 0.04957501 | 0.12643376 | 0.00013566 |
| 16w_SITTE12_GCAGCCAGTGTTGATC-1-10x  | 0.05308567 | 0.13893361 | 0.00019264 |
| 16w_SITTE12_GCAGCCAGTTATCTGG-1-10x  | 0.07658756 | 0.22261308 | 0.0022191  |
| 16w_SITTE12_GCAGCTGCACAACGTT-1-10x  | 0.20554368 | 0.6817667  | 0.001143   |
| 16w_SITTE12_GCAGCTGGTATGCTTG-1-10x  | 0.09945386 | 0.3040295  | 0.0041652  |
| 16w_SITTE12_GCAGCTGGTCCATACA-1-10x  | 0.02953687 | 0.05508713 | 4.42E-05   |
| 16w_SITTE12_GCAGGCTGTCTCGGGT-1-10x  | 0.0831851  | 0.24610388 | 0.0034742  |
| 16w_SITTE12_GCAGTTAAGTTGCGCC-1-10x  | 0.09129662 | 0.27498528 | 0.0043535  |
| 16w_SITTE12_GCAGTTAGTAACACGG-1-10x  | 0.01857313 | 0.01605029 | 3.49E-05   |
| 16w_SITTE12_GCAGTTATCTCTATGT-1-10x  | 0.07644646 | 0.22211069 | 0.0020486  |
| 16w_SITTE12_GCATCGGCAGGTTCCGC-1-10x | 0.20029229 | 0.6630689  | 0.0011985  |
| 16w_SITTE12_GCATCTCCAGACTGCC-1-10x  | 0.06097952 | 0.16703999 | 0.00042799 |
| 16w_SITTE12_GCATGATTCCCATTTA-1-10x  | 0.05684014 | 0.15230156 | 0.00028394 |
| 16w_SITTE12_GCATTAGCACGCTGTG-1-10x  | 0.24627922 | 0.82680726 | 0.00083459 |
| 16w_SITTE12_GCATTAGGTGACAGCA-1-10x  | 0.05339244 | 0.14002591 | 0.00019264 |
| 16w_SITTE12_GCATTAGGTTTAGAGA-1-10x  | 0.10257506 | 0.31514263 | 0.0039137  |
| 16w_SITTE12_GCCAACGGTGTCCACG-1-10x  | 0.09146253 | 0.27557603 | 0.0043535  |
| 16w_SITTE12_GCCAGCACAATAACCC-1-10x  | 0.01821306 | 0.01476823 | 3.44E-05   |
| 16w_SITTE12_GCCAGCACACTAGGTT-1-10x  | 0.24694647 | 0.82918304 | 0.0008292  |
| 16w_SITTE12_GCCAGCAGTATGGGAC-1-10x  | 0.04348218 | 0.10474002 | 8.29E-05   |
| 16w_SITTE12_GCCAGCAGTTGGTACT-1-10x  | 0.2595868  | 0.8741895  | 0.00077499 |
| 16w_SITTE12_GCCAGTGAGTATGACA-1-10x  | 0.04815909 | 0.12139234 | 0.00011598 |

|                                    |            |            |            |
|------------------------------------|------------|------------|------------|
| 16w_SITTE12_GCCAGTGCATGAAGCG-1-10x | 0.04903828 | 0.12452272 | 0.00012523 |
| 16w_SITTE12_GCCAGTGGTGACAACG-1-10x | 0.09697212 | 0.29519314 | 0.0043435  |
| 16w_SITTE12_GCCAGTGGTGACTATC-1-10x | 0.2545873  | 0.8563885  | 0.00079207 |
| 16w_SITTE12_GCCATGGGTTGGCTAT-1-10x | 0.20083816 | 0.6650125  | 0.0011888  |
| 16w_SITTE12_GCCATGGTCTCGGTCT-1-10x | 0.02360398 | 0.03396284 | 3.83E-05   |
| 16w_SITTE12_GCCCAGACACGACTA-1-10x  | 0.04131766 | 0.09703312 | 7.40E-05   |
| 16w_SITTE12_GCCCAGATCGTCTCAC-1-10x | 0.08526057 | 0.2534937  | 0.0037839  |
| 16w_SITTE12_GCCCGAACAGGACATG-1-10x | 0.01739755 | 0.01186458 | 3.44E-05   |
| 16w_SITTE12_GCCCGAAGTCAGTTTG-1-10x | 0.12186933 | 0.38384068 | 0.0021873  |
| 16w_SITTE12_GCCCGAATCGACCCAG-1-10x | 0.08254366 | 0.24382003 | 0.0033032  |
| 16w_SITTE12_GCCGATGAGTGGTTAA-1-10x | 0.2756821  | 0.9314974  | 0.00075214 |
| 16w_SITTE12_GCCTGTTAGCACTAAA-1-10x | 0.21997362 | 0.7331451  | 0.0010253  |
| 16w_SITTE12_GCCTGTTAGGGAGGTG-1-10x | 0.12937212 | 0.4105547  | 0.0019639  |
| 16w_SITTE12_GCGATCGAGATTGAGT-1-10x | 0.12734237 | 0.4033277  | 0.0020026  |
| 16w_SITTE12_GCGATCGGTCATCCCT-1-10x | 0.26789325 | 0.90376496 | 0.00075705 |
| 16w_SITTE12_GCGGAAACAATACAGA-1-10x | 0.22641441 | 0.75607777 | 0.00097406 |
| 16w_SITTE12_GCGGAAACAATCATT-1-10x  | 0.04414783 | 0.10711006 | 8.81E-05   |
| 16w_SITTE12_GCGGAAACATCGATGT-1-10x | 0.21068116 | 0.7000589  | 0.0011014  |
| 16w_SITTE12_GCGGATCAGTGCCTCG-1-10x | 0.25102153 | 0.8436925  | 0.00080923 |
| 16w_SITTE12_GCGGATCGTAGCCAGA-1-10x | 0.20403121 | 0.67638147 | 0.0011608  |
| 16w_SITTE12_GCGGATCTCGCCAGAC-1-10x | 0.09323884 | 0.28190064 | 0.0044107  |
| 16w_SITTE12_GCGGATCTCTCACTCG-1-10x | 0.25292233 | 0.85046035 | 0.00080028 |
| 16w_SITTE12_GCGTGCAAGTAGTCAA-1-10x | 0.2299087  | 0.76851934 | 0.00094498 |
| 16w_SITTE12_GCGTTTCCAGAACATA-1-10x | 0.21362244 | 0.7105314  | 0.0010778  |
| 16w_SITTE12_GCTACAAGTATCAAGA-1-10x | 0.04634347 | 0.11492773 | 0.00010046 |
| 16w_SITTE12_GCTACCTCAATTCACG-1-10x | 0.0930125  | 0.28109476 | 0.0044107  |
| 16w_SITTE12_GCTACCTCAGAATTCC-1-10x | 0.07687411 | 0.22363335 | 0.0022191  |
| 16w_SITTE12_GCTACCTCAGCGATTT-1-10x | 0.23821652 | 0.7980997  | 0.00088278 |
| 16w_SITTE12_GCTACCTCATTGCTGA-1-10x | 0.04525998 | 0.11106993 | 9.39E-05   |
| 16w_SITTE12_GCTCAAAGACGCATG-1-10x  | 0.05068943 | 0.13040173 | 0.00014746 |
| 16w_SITTE12_GCTCAAAGTACGAGTG-1-10x | 0.04436132 | 0.10787022 | 8.81E-05   |
| 16w_SITTE12_GCTCAAAGTAGCGCCT-1-10x | 0.26322058 | 0.8871277  | 0.00076511 |
| 16w_SITTE12_GCTCAAAGTTGAGAGC-1-10x | 0.2574343  | 0.8665254  | 0.00078121 |
| 16w_SITTE12_GCTGAATAGACGCCCT-1-10x | 0.08323569 | 0.24628401 | 0.0034742  |
| 16w_SITTE12_GCTGAATCAGTCAACT-1-10x | 0.27421385 | 0.92626965 | 0.00075233 |
| 16w_SITTE12_GCTGCAGAGCTGTACT-1-10x | 0.26683265 | 0.8999886  | 0.00075831 |
| 16w_SITTE12_GCTGGGTGTAGCGATG-1-10x | 0.26533675 | 0.8946624  | 0.00075974 |
| 16w_SITTE12_GCTTACCACCCAAGC-1-10x  | 0.03553784 | 0.07645385 | 5.58E-05   |
| 16w_SITTE12_GCTTCACTCATAAGGA-1-10x | 0.25890976 | 0.87177885 | 0.00077499 |
| 16w_SITTE12_GCTTGGGCACGACGCT-1-10x | 0.02477547 | 0.03813399 | 3.91E-05   |
| 16w_SITTE12_GCTTGGGCACGTCATA-1-10x | 0.24219708 | 0.81227267 | 0.00085764 |



|                                      |            |            |            |
|--------------------------------------|------------|------------|------------|
| 16w_SITTE12_GCTTGGGGTCCGATCG-1-10x   | 0.24984567 | 0.83950573 | 0.00081397 |
| 16w_SITTE12_GCTTTCGAGACTCTAC-1-10x   | 0.03267978 | 0.06627761 | 5.00E-05   |
| 16w_SITTE12_GCTTTCGGTCCGTGTCT-1-10x  | 0.07618048 | 0.22116366 | 0.0020486  |
| 16w_SITTE12_GGAACCCAGGAGGCAG-1-10x   | 0.25481153 | 0.8571869  | 0.00079207 |
| 16w_SITTE12_GGAACCCAGTTCGCAT-1-10x   | 0.24431694 | 0.81982046 | 0.00084583 |
| 16w_SITTE12_GGAATCTCAACAAGAT-1-10x   | 0.14456968 | 0.46466625 | 0.0018716  |
| 16w_SITTE12_GGAATCTTCAGTCCGG-1-10x   | 0.22358082 | 0.74598867 | 0.00099599 |
| 16w_SITTE12_GGAATGGGTTCGACGCT-1-10x  | 0.18877955 | 0.6220773  | 0.001338   |
| 16w_SITTE12_GGACGTCAAGTAAACAGT-1-10x | 0.2665855  | 0.8991086  | 0.00075831 |
| 16w_SITTE12_GGACGTCAAGTATGAAC-1-10x  | 0.04660146 | 0.11584631 | 0.00010777 |
| 16w_SITTE12_GGAGAACAGCGACCCT-1-10x   | 0.2576302  | 0.8672229  | 0.00078121 |
| 16w_SITTE12_GGAGAACGTGTAGCAG-1-10x   | 0.27676225 | 0.9353433  | 0.00075222 |
| 16w_SITTE12_GGAGATGAGTGCAAAT-1-10x   | 0.2685761  | 0.9061962  | 0.00075594 |
| 16w_SITTE12_GGAGATGTCTCTAGGA-1-10x   | 0.21503724 | 0.7155689  | 0.0010625  |
| 16w_SITTE12_GGAGATGTCTGCTGAA-1-10x   | 0.12036518 | 0.3784851  | 0.0022788  |
| 16w_SITTE12_GGAGCAACAAATGGTA-1-10x   | 0.1529393  | 0.49446663 | 0.0018617  |
| 16w_SITTE12_GGAGCAACAGTAGTTC-1-10x   | 0.11145686 | 0.34676665 | 0.002929   |
| 16w_SITTE12_GGAGCAAGTTCACCG-1-10x    | 0.24771509 | 0.8319197  | 0.00082396 |
| 16w_SITTE12_GGAGGATAGCCTTCTC-1-10x   | 0.04309473 | 0.10336046 | 8.29E-05   |
| 16w_SITTE12_GGAGGATAGGTGCGAT-1-10x   | 0.14650118 | 0.47154343 | 0.0018717  |
| 16w_SITTE12_GGAGGATGTCACAGTT-1-10x   | 0.03022567 | 0.05753963 | 4.55E-05   |
| 16w_SITTE12_GGAGGTAAGACGTCCC-1-10x   | 0.01847986 | 0.0157182  | 3.49E-05   |
| 16w_SITTE12_GGAGGTAGTTGCATGT-1-10x   | 0.23567401 | 0.78904694 | 0.00090278 |
| 16w_SITTE12_GGATCTATCCGCACTT-1-10x   | 0.04744245 | 0.11884071 | 0.00011598 |
| 16w_SITTE12_GGATGTTTCCTTCTAA-1-10x   | 0.0495826  | 0.12646082 | 0.00013566 |
| 16w_SITTE12_GGCACGTGTAACGTTTC-1-10x  | 0.12740436 | 0.40354842 | 0.0020026  |
| 16w_SITTE12_GGCACGTTCGATAGT-1-10x    | 0.02259596 | 0.03037374 | 3.76E-05   |
| 16w_SITTE12_GGCACGTTCGTGGCTG-1-10x   | 0.04416142 | 0.10715845 | 8.81E-05   |
| 16w_SITTE12_GGCAGTCAGCCGTTAT-1-10x   | 0.26465434 | 0.89223266 | 0.00076135 |
| 16w_SITTE12_GGCAGTCAGTACCCTA-1-10x   | 0.04458209 | 0.10865628 | 8.81E-05   |
| 16w_SITTE12_GGCGTCATCTCCAAGA-1-10x   | 0.11601274 | 0.36298805 | 0.0025211  |
| 16w_SITTE12_GGCTGTGCAGATCACT-1-10x   | 0.16993459 | 0.554979   | 0.0016584  |
| 16w_SITTE12_GGCTGTGGTGGAGGTT-1-10x   | 0.20546092 | 0.681472   | 0.001143   |
| 16w_SITTE12_GGCTTTCAGCAACTTC-1-10x   | 0.04869026 | 0.12328358 | 0.00012523 |
| 16w_SITTE12_GGCTTTCACCACTGG-1-10x    | 0.29048213 | 0.98419356 | 0.00076163 |
| 16w_SITTE12_GGCTTTCGTGATCATC-1-10x   | 0.03321917 | 0.06819814 | 5.00E-05   |
| 16w_SITTE12_GGCTTTCCTATCGCC-1-10x    | 0.2516459  | 0.84591556 | 0.00080467 |
| 16w_SITTE12_GGGAAGTCAGCATACT-1-10x   | 0.06837019 | 0.19335479 | 0.00097948 |
| 16w_SITTE12_GGGAAGTCTTGGCTC-1-10x    | 0.28934512 | 0.98014516 | 0.0007606  |
| 16w_SITTE12_GGGACAAGTACATTGC-1-10x   | 0.08032712 | 0.23592794 | 0.0029431  |
| 16w_SITTE12_GGGACAAGTTCAAAGA-1-10x   | 0.18578745 | 0.6114238  | 0.0013809  |

|                                    |            |            |            |
|------------------------------------|------------|------------|------------|
| 16w_SITTE12_GGGACAATCTCAATCT-1-10x | 0.08985407 | 0.26984903 | 0.0042999  |
| 16w_SITTE12_GGGACCTAGTTTCGAC-1-10x | 0.0480861  | 0.12113244 | 0.00011598 |
| 16w_SITTE12_GGGACTCAGAGGCCAT-1-10x | 0.02822818 | 0.0504275  | 4.30E-05   |
| 16w_SITTE12_GGGAGATAGCCAACCC-1-10x | 0.1719467  | 0.56214327 | 0.0016256  |
| 16w_SITTE12_GGGAGATGTCTCGGGT-1-10x | 0.01579092 | 0.00614411 | 3.33E-05   |
| 16w_SITTE12_GGGAGATGTGCCACA-1-10x  | 0.09202784 | 0.27758884 | 0.0043903  |
| 16w_SITTE12_GGGAGTAAGCTCGTGC-1-10x | 0.06713042 | 0.18894054 | 0.00079936 |
| 16w_SITTE12_GGGAGTATCGGATTAC-1-10x | 0.12279082 | 0.3871217  | 0.0021479  |
| 16w_SITTE12_GGGATCCAGTTCTCTT-1-10x | 0.28279763 | 0.9568326  | 0.00075462 |
| 16w_SITTE12_GGGATCCCACCAAATC-1-10x | 0.0578953  | 0.1560585  | 0.00031414 |
| 16w_SITTE12_GGGATCCGTACGCGTC-1-10x | 0.02670004 | 0.04498647 | 4.09E-05   |
| 16w_SITTE12_GGGATGACAACTCGAT-1-10x | 0.18726939 | 0.6167003  | 0.0013662  |
| 16w_SITTE12_GGGATGACTGTGTA-1-10x   | 0.0781989  | 0.2283503  | 0.0023954  |
| 16w_SITTE12_GGGATGATCCCGAATA-1-10x | 0.21694581 | 0.7223644  | 0.0010475  |
| 16w_SITTE12_GGGCCATTCCCTGGTT-1-10x | 0.06424113 | 0.17865312 | 0.00058553 |
| 16w_SITTE12_GGGCGTTAGAAGTATC-1-10x | 0.01683739 | 0.0098701  | 3.38E-05   |
| 16w_SITTE12_GGGCGTTAGGAGTACC-1-10x | 0.02389883 | 0.03501268 | 3.83E-05   |
| 16w_SITTE12_GGGCTACCACTTGACA-1-10x | 0.12848493 | 0.40739584 | 0.0019821  |
| 16w_SITTE12_GGGCTCAAGATGTTGA-1-10x | 0.02835672 | 0.05088516 | 4.30E-05   |
| 16w_SITTE12_GGGTAGAAGAAGAGCA-1-10x | 0.01832066 | 0.01515137 | 3.49E-05   |
| 16w_SITTE12_GGGTCACTCAACTACG-1-10x | 0.04252125 | 0.10131856 | 7.82E-05   |
| 16w_SITTE12_GGGTCTGAGCTCCGAC-1-10x | 0.15179133 | 0.49037924 | 0.0018651  |
| 16w_SITTE12_GGGTCTGGTCCACGCA-1-10x | 0.05964137 | 0.16227546 | 0.00038577 |
| 16w_SITTE12_GGGTCTGTCTTAGTTC-1-10x | 0.24957447 | 0.83854014 | 0.00081397 |
| 16w_SITTE12_GGGTGAACATTGTAGC-1-10x | 0.03846172 | 0.08686443 | 6.36E-05   |
| 16w_SITTE12_GGGTGTCCAGGAATCG-1-10x | 0.03142289 | 0.06180238 | 4.68E-05   |
| 16w_SITTE12_GGGTTATGTTGGGACA-1-10x | 0.21890165 | 0.7293283  | 0.0010326  |
| 16w_SITTE12_GGGTTATTCTGAGCAT-1-10x | 0.04783846 | 0.12025072 | 0.00011598 |
| 16w_SITTE12_GGGTTTAAGGTAAGAG-1-10x | 0.05200635 | 0.13509068 | 0.00016076 |
| 16w_SITTE12_GGGTTTAGTTCCACAA-1-10x | 0.1637452  | 0.53294146 | 0.001763   |
| 16w_SITTE12_GGTAAGTAGTAGACAT-1-10x | 0.12507747 | 0.39526343 | 0.0020803  |
| 16w_SITTE12_GGTAAGTACGATAGG-1-10x  | 0.26977947 | 0.9104809  | 0.00075499 |
| 16w_SITTE12_GGTAAGTACAGATTA-1-10x  | 0.13514273 | 0.4311012  | 0.0018953  |
| 16w_SITTE12_GGTAGAGTCTCTATGT-1-10x | 0.27912155 | 0.94374377 | 0.00075266 |
| 16w_SITTE12_GGTGAAGAGGGTTTCT-1-10x | 0.2427311  | 0.814174   | 0.00085764 |
| 16w_SITTE12_GGTGATTGTACCTATG-1-10x | 0.04943464 | 0.12593399 | 0.00013566 |
| 16w_SITTE12_GGTGATTGTGTTACAC-1-10x | 0.2939834  | 0.99666    | 0.000766   |
| 16w_SITTE12_GGTGGCTCAAATCGGG-1-10x | 0.2635973  | 0.88846904 | 0.00076313 |
| 16w_SITTE12_GGTGGCTCACATAACC-1-10x | 0.07180315 | 0.20557798 | 0.0013138  |
| 16w_SITTE12_GGTGTGAGGTCGTAG-1-10x  | 0.20145854 | 0.66722137 | 0.0011888  |
| 16w_SITTE12_GGTGTGTCCTCTAAT-1-10x  | 0.10359275 | 0.31876618 | 0.0038193  |

|                                     |            |            |            |
|-------------------------------------|------------|------------|------------|
| 16w_SITTE12_GGTGTTAAGTAGACAT-1-10x  | 0.27208602 | 0.9186935  | 0.000753   |
| 16w_SITTE12_GGTGTTAGTAGTCGTT-1-10x  | 0.04729655 | 0.11832121 | 0.00010777 |
| 16w_SITTE12_GGTGTTATCTATACTC-1-10x  | 0.04338837 | 0.10440598 | 8.29E-05   |
| 16w_SITTE12_GGTAAACCAGCTGTCTG-1-10x | 0.28317967 | 0.9581928  | 0.00075462 |
| 16w_SITTE12_GGTTCTCGTTTCGACA-1-10x  | 0.03456025 | 0.0729731  | 5.37E-05   |
| 16w_SITTE12_GGTTCTCTCCGTGTCT-1-10x  | 0.10763481 | 0.3331581  | 0.0033168  |
| 16w_SITTE12_GGTTGTACAACGACTT-1-10x  | 0.08522    | 0.25334924 | 0.0037839  |
| 16w_SITTE12_GTAACACTCCCTCATG-1-10x  | 0.0278092  | 0.04893569 | 4.30E-05   |
| 16w_SITTE12_GTAACACTCGCGTAGC-1-10x  | 0.11116364 | 0.34572265 | 0.0030221  |
| 16w_SITTE12_GTAACCAGTGTTCCAA-1-10x  | 0.24115925 | 0.80857736 | 0.00086374 |
| 16w_SITTE12_GTAAGTCAGCAACTCT-1-10x  | 0.04139084 | 0.0972937  | 7.40E-05   |
| 16w_SITTE12_GTAATGCAGTAGAGTT-1-10x  | 0.03709243 | 0.08198901 | 6.07E-05   |
| 16w_SITTE12_GTAATGCTCTGGGAGA-1-10x  | 0.0898859  | 0.26996237 | 0.0042999  |
| 16w_SITTE12_GTACAACAGTTGGCGA-1-10x  | 0.03595466 | 0.07793795 | 5.58E-05   |
| 16w_SITTE12_GTACAACGTGGCACTC-1-10x  | 0.08586626 | 0.25565025 | 0.0037839  |
| 16w_SITTE12_GTACAGTCAATACGCT-1-10x  | 0.07452212 | 0.21525902 | 0.0017292  |
| 16w_SITTE12_GTACAGTGTATGGAAT-1-10x  | 0.2562695  | 0.8623781  | 0.00078463 |
| 16w_SITTE12_GTAGAAAAGGGCGAGA-1-10x  | 0.01503647 | 0.00345786 | 3.27E-05   |
| 16w_SITTE12_GTAGAGGCACAACCGC-1-10x  | 0.2808877  | 0.9500322  | 0.00075348 |
| 16w_SITTE12_GTAGAGGGTCTGAATGG-1-10x | 0.27683714 | 0.93561    | 0.00075222 |
| 16w_SITTE12_GTAGATCCACGCTGAC-1-10x  | 0.0486159  | 0.1230188  | 0.00012523 |
| 16w_SITTE12_GTAGATCGTATGCTTG-1-10x  | 0.26282188 | 0.8857081  | 0.00076511 |
| 16w_SITTE12_GTAGCTACACTGGAAG-1-10x  | 0.16805102 | 0.5482725  | 0.0016902  |
| 16w_SITTE12_GTAGCTATCCGGCAAC-1-10x  | 0.18082114 | 0.59374106 | 0.0014587  |
| 16w_SITTE12_GTAGGAGAGCTGAAAT-1-10x  | 0.019908   | 0.02080315 | 3.55E-05   |
| 16w_SITTE12_GTAGGAGTCTTCTCAA-1-10x  | 0.02384601 | 0.03482461 | 3.83E-05   |
| 16w_SITTE12_GTAGTACTCACTACTT-1-10x  | 0.22135349 | 0.73805815 | 0.0010106  |
| 16w_SITTE12_GTATTGGTCATCCCGT-1-10x  | 0.09125934 | 0.27485254 | 0.0043535  |
| 16w_SITTE12_GTATTTCCAGACATCT-1-10x  | 0.07866745 | 0.23001863 | 0.002576   |
| 16w_SITTE12_GTATTTCTCGGCTGTG-1-10x  | 0.02404082 | 0.03551821 | 3.91E-05   |
| 16w_SITTE12_GTCAAACCAGACACCC-1-10x  | 0.09586702 | 0.2912584  | 0.0043808  |
| 16w_SITTE12_GTCAAACCAGCGTTTA-1-10x  | 0.15558124 | 0.5038733  | 0.0018459  |
| 16w_SITTE12_GTCAAACGTAACAGTA-1-10x  | 0.05634356 | 0.1505335  | 0.000257   |
| 16w_SITTE12_GTCAAGTAGGCTCTAT-1-10x  | 0.07346994 | 0.21151268 | 0.0015819  |
| 16w_SITTE12_GTCAAGTCAACACACT-1-10x  | 0.07776428 | 0.22680284 | 0.0023954  |
| 16w_SITTE12_GTCACGGCACGGTAGA-1-10x  | 0.1039944  | 0.32019627 | 0.0037215  |
| 16w_SITTE12_GTCACGGTCAGGAACG-1-10x  | 0.03194566 | 0.06366374 | 4.83E-05   |
| 16w_SITTE12_GTCAGCGGTTTCGATTG-1-10x | 0.01560914 | 0.00549687 | 3.33E-05   |
| 16w_SITTE12_GTCATCCCACCGTGGT-1-10x  | 0.19253995 | 0.63546634 | 0.0012861  |
| 16w_SITTE12_GTCATCCCATGGTACT-1-10x  | 0.05280498 | 0.13793422 | 0.00017575 |
| 16w_SITTE12_GTCATGAAGTACTCGT-1-10x  | 0.05752152 | 0.15472764 | 0.00028394 |

|                                    |            |            |            |
|------------------------------------|------------|------------|------------|
| 16w_SITTE12_GTCATGAGTGCATTAC-1-10x | 0.1399456  | 0.448202   | 0.001875   |
| 16w_SITTE12_GTCATGAGTTGGACCC-1-10x | 0.03128169 | 0.06129965 | 4.68E-05   |
| 16w_SITTE12_GTCATGATCAATCGGT-1-10x | 0.0513497  | 0.13275264 | 0.00016076 |
| 16w_SITTE12_GTCATTTTCAGAGTGG-1-10x | 0.01687199 | 0.00999329 | 3.38E-05   |
| 16w_SITTE12_GTCATTTTCCTCTCGA-1-10x | 0.06150817 | 0.16892229 | 0.00047505 |
| 16w_SITTE12_GTCATTTTCGCCACTT-1-10x | 0.05988499 | 0.16314289 | 0.00038577 |
| 16w_SITTE12_GTCCCATTCGGTAACT-1-10x | 0.0952943  | 0.28921923 | 0.0044051  |
| 16w_SITTE12_GTCCTCAAGGTCATCT-1-10x | 0.01987842 | 0.02069782 | 3.55E-05   |
| 16w_SITTE12_GTCCTCATCGCTGACG-1-10x | 0.02422002 | 0.03615626 | 3.91E-05   |
| 16w_SITTE12_GTCCTCATCTCGACCT-1-10x | 0.26348832 | 0.888081   | 0.00076313 |
| 16w_SITTE12_GTCGAATGTAACAGGC-1-10x | 0.05799078 | 0.15639849 | 0.00031414 |
| 16w_SITTE12_GTCGTAAAGGTATTGA-1-10x | 0.18680868 | 0.6150599  | 0.0013662  |
| 16w_SITTE12_GTCGTTCAACAACAG-1-10x  | 0.2312956  | 0.77345747 | 0.00093779 |
| 16w_SITTE12_GTCGTTCCAAGGGCAT-1-10x | 0.27818733 | 0.9404174  | 0.00075239 |
| 16w_SITTE12_GTCGTTCTGGACTAG-1-10x  | 0.22901474 | 0.76533633 | 0.0009522  |
| 16w_SITTE12_GTCTACCAGTCGAAGC-1-10x | 0.24165025 | 0.8103256  | 0.00086374 |
| 16w_SITTE12_GTCTACCGTGCTTATG-1-10x | 0.03543195 | 0.07607681 | 5.58E-05   |
| 16w_SITTE12_GTCTAGAAGATTAGAC-1-10x | 0.02223028 | 0.02907171 | 3.76E-05   |
| 16w_SITTE12_GTCTCACTCGAAGCAG-1-10x | 0.23430088 | 0.7841579  | 0.00091657 |
| 16w_SITTE12_GTCTCACTCGTGGCGT-1-10x | 0.01793604 | 0.0137819  | 3.44E-05   |
| 16w_SITTE12_GTCTGTCCAAGGATGC-1-10x | 0.19104962 | 0.63016    | 0.0013113  |
| 16w_SITTE12_GTCTTTAAGCAAATCA-1-10x | 0.1987075  | 0.6574262  | 0.0012085  |
| 16w_SITTE12_GTCTTTAAGTTAGAAC-1-10x | 0.0157142  | 0.00587095 | 3.33E-05   |
| 16w_SITTE12_GTCTTTACAAATGGTA-1-10x | 0.20637843 | 0.6847388  | 0.0011344  |
| 16w_SITTE12_GTCTTTAGTTTCAGAC-1-10x | 0.27657345 | 0.9346711  | 0.00075214 |
| 16w_SITTE12_GTCTTTATCAGCCTTC-1-10x | 0.02835152 | 0.05086664 | 4.30E-05   |
| 16w_SITTE12_GTGACGCAGACTGAGC-1-10x | 0.04838735 | 0.12220504 | 0.00012523 |
| 16w_SITTE12_GTGACGCAGTGGACTG-1-10x | 0.08774185 | 0.2623284  | 0.0040384  |
| 16w_SITTE12_GTGAGCCGTGGTTTAC-1-10x | 0.05117042 | 0.13211432 | 0.00016076 |
| 16w_SITTE12_GTGAGCCTCACTCACC-1-10x | 0.0747353  | 0.21601804 | 0.001885   |
| 16w_SITTE12_GTGAGCCTCTAGCAAC-1-10x | 0.02304469 | 0.03197146 | 3.83E-05   |
| 16w_SITTE12_GTGAGGAAGTCAGCCC-1-10x | 0.16644536 | 0.54255545 | 0.0017206  |
| 16w_SITTE12_GTGAGGACAAAGAACT-1-10x | 0.01898161 | 0.01750469 | 3.49E-05   |
| 16w_SITTE12_GTGAGGACAACCGCTG-1-10x | 0.1182889  | 0.37109244 | 0.0023898  |
| 16w_SITTE12_GTGAGGACAGCGACAA-1-10x | 0.28213188 | 0.9544622  | 0.00075401 |
| 16w_SITTE12_GTGAGGAGTGCTCTTC-1-10x | 0.05449404 | 0.14394818 | 0.00021164 |
| 16w_SITTE12_GTGAGTTCAAAGGCTG-1-10x | 0.16095327 | 0.52300066 | 0.0018     |
| 16w_SITTE12_GTGATGTCAATGACCT-1-10x | 0.03832182 | 0.08636633 | 6.36E-05   |
| 16w_SITTE12_GTGATGTTCAAACGTC-1-10x | 0.07947991 | 0.23291141 | 0.0027593  |
| 16w_SITTE12_GTGACAGTCCGAGAAG-1-10x | 0.01666472 | 0.00925532 | 3.38E-05   |
| 16w_SITTE12_GTGCTGGGTAGATGTA-1-10x | 0.05187856 | 0.13463566 | 0.00016076 |

|                                      |            |            |            |
|--------------------------------------|------------|------------|------------|
| 16w_SITTE12_GTGCTGGTCCCTTATAC-1-10x  | 0.02328612 | 0.03283109 | 3.83E-05   |
| 16w_SITTE12_GTGCTTCTCTAGCCAA-1-10x   | 0.08603151 | 0.25623867 | 0.0039187  |
| 16w_SITTE12_GTGGAAGTCACTGTCC-1-10x   | 0.26168156 | 0.88164794 | 0.00076727 |
| 16w_SITTE12_GTGGAAGTCAGGCGAA-1-10x   | 0.2313245  | 0.77356035 | 0.00093779 |
| 16w_SITTE12_GTGGAGAGTGTCTAAC-1-10x   | 0.04349027 | 0.10476881 | 8.29E-05   |
| 16w_SITTE12_GTGGCGTAGCAGATAT-1-10x   | 0.09877262 | 0.3016039  | 0.0042345  |
| 16w_SITTE12_GTGGCGTAGCGTCTCG-1-10x   | 0.04379271 | 0.10584564 | 8.81E-05   |
| 16w_SITTE12_GTGGCGTAGTCCGCCA-1-10x   | 0.03360756 | 0.069581   | 5.17E-05   |
| 16w_SITTE12_GTGGCGTGGAGAAA-1-10x     | 0.02738939 | 0.04744095 | 4.19E-05   |
| 16w_SITTE12_GTGGCGTTCATTACTC-1-10x   | 0.1822905  | 0.59897274 | 0.0014427  |
| 16w_SITTE12_GTGGCGTTCGAACGCC-1-10x   | 0.19361758 | 0.6393033  | 0.0012741  |
| 16w_SITTE12_GTGGGAAGTCAAGTTC-1-10x   | 0.03719195 | 0.08234337 | 6.07E-05   |
| 16w_SITTE12_GTGGTTACACGGTGCT-1-10x   | 0.16281018 | 0.52961224 | 0.001776   |
| 16w_SITTE12_GTGTAACCACGCCAGT-1-10x   | 0.04676077 | 0.11641354 | 0.00010777 |
| 16w_SITTE12_GTGTAACCATAACCCA-1-10x   | 0.12260125 | 0.3864467  | 0.0021479  |
| 16w_SITTE12_GTGTAACGTCAACCAT-1-10x   | 0.05060289 | 0.13009359 | 0.00014746 |
| 16w_SITTE12_GTGTGATCAGGATTCT-1-10x   | 0.28330758 | 0.95864826 | 0.00075531 |
| 16w_SITTE12_GTGTGATGTACGTTCA-1-10x   | 0.02803738 | 0.04974813 | 4.30E-05   |
| 16w_SITTE12_GTGTGATGTTAGAAGT-1-10x   | 0.04699971 | 0.1172643  | 0.00010777 |
| 16w_SITTE12_GTGTGATTCGCACTCT-1-10x   | 0.1642115  | 0.53460175 | 0.0017494  |
| 16w_SITTE12_GTGTTAGAGTTTGTGCG-1-10x  | 0.03039673 | 0.05814871 | 4.55E-05   |
| 16w_SITTE12_GTGTTAGCAAATACAG-1-10x   | 0.0445922  | 0.10869227 | 8.81E-05   |
| 16w_SITTE12_GTGTTCCGTGCTTGG-1-10x    | 0.09923809 | 0.30326122 | 0.0041652  |
| 16w_SITTE12_GTGTTCCGTGTTTCATG-1-10x  | 0.1671822  | 0.54517907 | 0.0017056  |
| 16w_SITTE12_GTTACCCAGCACGGAT-1-10x   | 0.0565479  | 0.15126105 | 0.000257   |
| 16w_SITTE12_GTTACCCTCATGCTAG-1-10x   | 0.08498035 | 0.25249594 | 0.0036353  |
| 16w_SITTE12_GTTACGAAGCGATGCA-1-10x   | 0.24406564 | 0.81892574 | 0.00084583 |
| 16w_SITTE12_GTTAGACAGATGGCAC-1-10x   | 0.04086555 | 0.09542337 | 7.40E-05   |
| 16w_SITTE12_GTTAGACGTATCGCGC-1-10x   | 0.05040143 | 0.12937629 | 0.00014746 |
| 16w_SITTE12_GTTAGACGTGAGAGGG-1-10x   | 0.13203666 | 0.4200419  | 0.0019219  |
| 16w_SITTE12_GTTAGACTCGGCTCTT-1-10x   | 0.24094635 | 0.80781937 | 0.00086374 |
| 16w_SITTE12_GTTAGTGAGAGATTCA-1-10x   | 0.16165353 | 0.525494   | 0.0017883  |
| 16w_SITTE12_GTTAGTGCATACAGAA-1-10x   | 0.03217042 | 0.064464   | 4.83E-05   |
| 16w_SITTE12_GTTAGTGTCTCACTCG-1-10x   | 0.0274631  | 0.04770338 | 4.19E-05   |
| 16w_SITTE12_GTTATGGCAAACACTAGA-1-10x | 0.04638227 | 0.11506588 | 0.00010046 |
| 16w_SITTE12_GTTATGGTCATTTCATC-1-10x  | 0.02318779 | 0.03248097 | 3.83E-05   |
| 16w_SITTE12_GTTCATTAGAGCCATG-1-10x   | 0.03792494 | 0.08495322 | 6.07E-05   |
| 16w_SITTE12_GTTCCGTGAGCTATAC-1-10x   | 0.10316051 | 0.31722715 | 0.0038193  |
| 16w_SITTE12_GTTCCGTTCACCTGTC-1-10x   | 0.18250658 | 0.5997421  | 0.0014427  |
| 16w_SITTE12_GTTCCGCTCAACGGTAG-1-10x  | 0.23925065 | 0.8017817  | 0.00087632 |
| 16w_SITTE12_GTTGAACAGTGGTGGT-1-10x   | 0.29343486 | 0.99470687 | 0.00076488 |

|                                      |            |            |            |
|--------------------------------------|------------|------------|------------|
| 16w_SITTE12_GTTGAACGTA CT CGCG-1-10x | 0.2331868  | 0.7801911  | 0.00092358 |
| 16w_SITTE12_GTTGAACTCAAGAATG-1-10x   | 0.04932385 | 0.12553953 | 0.00013566 |
| 16w_SITTE12_GTTGCGGAGACCATGG-1-10x   | 0.11304086 | 0.3524066  | 0.0028393  |
| 16w_SITTE12_GTTGCTCCACCCATAA-1-10x   | 0.04231672 | 0.10059034 | 7.82E-05   |
| 16w_SITTE12_GTTGCTCGTATCCCTC-1-10x   | 0.05582035 | 0.14867055 | 0.000233   |
| 16w_SITTE12_GTTGCTCTCATCTATC-1-10x   | 0.17379703 | 0.56873137 | 0.0015922  |
| 16w_SITTE12_GTTGCTCTCGACATAC-1-10x   | 0.02468263 | 0.0378034  | 3.91E-05   |
| 16w_SITTE12_GTTGTAGCAGCTATTG-1-10x   | 0.27948835 | 0.94504976 | 0.00075303 |
| 16w_SITTE12_GTTGTAGGTA CT CGAT-1-10x | 0.26999044 | 0.91123205 | 0.00075499 |
| 16w_SITTE12_GTTGTAGTCAAGAATG-1-10x   | 0.10972378 | 0.340596   | 0.0031181  |
| 16w_SITTE12_GTTGTCCAGTAACCTC-1-10x   | 0.03302744 | 0.06751545 | 5.00E-05   |
| 16w_SITTE12_GTTGTGACAATCTAGC-1-10x   | 0.086333   | 0.25731212 | 0.0039187  |
| 16w_SITTE12_GTTGTGAGTGTTAACCT-1-10x  | 0.0789226  | 0.23092708 | 0.002576   |
| 16w_SITTE12_GTTTACTAGTGAGTGC-1-10x   | 0.08752184 | 0.26154503 | 0.0040384  |
| 16w_SITTE12_GTTTACTGTATGGAGC-1-10x   | 0.19429405 | 0.6417119  | 0.0012624  |
| 16w_SITTE12_GTTTACTTCATCGCAA-1-10x   | 0.1185915  | 0.37216982 | 0.0023898  |
| 16w_SITTE12_GTTTACTTCCGTGGTG-1-10x   | 0.2012841  | 0.6666002  | 0.0011888  |
| 16w_SITTE12_GTTTACTTCGATACGT-1-10x   | 0.09122245 | 0.2747212  | 0.0043535  |
| 16w_SITTE12_GTTTGGAGTATCAAGA-1-10x   | 0.05375123 | 0.14130338 | 0.00019264 |
| 16w_SITTE12_GTTTGGATCAATCCAG-1-10x   | 0.28807    | 0.9756051  | 0.0007596  |
| 16w_SITTE12_TAACACGGTATCGTTG-1-10x   | 0.22300367 | 0.7439337  | 0.0010033  |
| 16w_SITTE12_TAACTTCCACCATAAC-1-10x   | 0.08027254 | 0.2357336  | 0.0027593  |
| 16w_SITTE12_TAAGCACCATCTAGAC-1-10x   | 0.02972669 | 0.05576299 | 4.55E-05   |
| 16w_SITTE12_TAAGCACCATGAGGG-1-10x    | 0.08429012 | 0.25003836 | 0.0036353  |
| 16w_SITTE12_TAAGCACGTCTGCCTT-1-10x   | 0.07439988 | 0.21482377 | 0.0017292  |
| 16w_SITTE12_TAAGCACGTTTGTTGG-1-10x   | 0.04438961 | 0.10797094 | 8.81E-05   |
| 16w_SITTE12_TAAGCCAAGGCTTAGG-1-10x   | 0.12975562 | 0.41192016 | 0.0019639  |
| 16w_SITTE12_TAAGCCATCGTTCAGA-1-10x   | 0.01738173 | 0.01180824 | 3.44E-05   |
| 16w_SITTE12_TAACTCTAGCAAGGAA-1-10x   | 0.04716946 | 0.11786871 | 0.00010777 |
| 16w_SITTE12_TAACTCTGTTGTGCC-1-10x    | 0.0360751  | 0.07836677 | 5.58E-05   |
| 16w_SITTE12_TAACTCCATTAAAGG-1-10x    | 0.0665901  | 0.18701671 | 0.00079936 |
| 16w_SITTE12_TAACTCCGTTTCACTT-1-10x   | 0.27823505 | 0.94058734 | 0.00075239 |
| 16w_SITTE12_TACACCCAGAGAGCCT-1-10x   | 0.17507294 | 0.5732743  | 0.0015753  |
| 16w_SITTE12_TACACCCCACGAGGTA-1-10x   | 0.14887603 | 0.47999915 | 0.0018705  |
| 16w_SITTE12_TACACCCGTCATCCCT-1-10x   | 0.0801556  | 0.23531722 | 0.0027593  |
| 16w_SITTE12_TACAGGTGTGTAGCAG-1-10x   | 0.23049343 | 0.7706013  | 0.00094498 |
| 16w_SITTE12_TACATTCAGGAAGTGA-1-10x   | 0.0373197  | 0.08279824 | 6.07E-05   |
| 16w_SITTE12_TACATTCGTCACTTAG-1-10x   | 0.04957619 | 0.12643796 | 0.00013566 |
| 16w_SITTE12_TACATTCGTGTCGGT-1-10x    | 0.0822023  | 0.2426046  | 0.0033032  |
| 16w_SITTE12_TACATTCTCATGCGGC-1-10x   | 0.27434808 | 0.9267476  | 0.00075233 |
| 16w_SITTE12_TACCCACAGCAACAAT-1-10x   | 0.26647037 | 0.8986987  | 0.00075831 |

|                                     |            |            |            |
|-------------------------------------|------------|------------|------------|
| 16w_SITTE12_TACCCACAGCATCTTG-1-10x  | 0.18835741 | 0.62057424 | 0.001338   |
| 16w_SITTE12_TACCCACGTTGTAGCT-1-10x  | 0.04002932 | 0.09244593 | 7.01E-05   |
| 16w_SITTE12_TACCCACTCAGAGTGG-1-10x  | 0.09974049 | 0.30505005 | 0.0041652  |
| 16w_SITTE12_TACCCGTAGGATTCCT-1-10x  | 0.02387453 | 0.03492612 | 3.83E-05   |
| 16w_SITTE12_TACCCGTTCTTCCTAA-1-10x  | 0.05082068 | 0.13086903 | 0.00014746 |
| 16w_SITTE12_TACCGAACAAACGGCA-1-10x  | 0.2845241  | 0.9629798  | 0.00075605 |
| 16w_SITTE12_TACCGAATCTCGAACA-1-10x  | 0.2532359  | 0.85157686 | 0.00079608 |
| 16w_SITTE12_TACCGGGGTGAGTCAG-1-10x  | 0.17480695 | 0.57232726 | 0.0015753  |
| 16w_SITTE12_TACCTCGCAGGATGAC-1-10x  | 0.04904003 | 0.12452894 | 0.00012523 |
| 16w_SITTE12_TACCTCGTCCGGGACT-1-10x  | 0.19408181 | 0.6409562  | 0.0012624  |
| 16w_SITTE12_TACGCTCAGTAACCTC-1-10x  | 0.07421273 | 0.2141574  | 0.0017292  |
| 16w_SITTE12_TACGCTCGTCCCACGA-1-10x  | 0.03555297 | 0.07650772 | 5.58E-05   |
| 16w_SITTE12_TACGGGCCAGCGCTTG-1-10x  | 0.09813868 | 0.29934672 | 0.0042345  |
| 16w_SITTE12_TACGGGCCAGGCGTTC-1-10x  | 0.06603295 | 0.18503298 | 0.00072102 |
| 16w_SITTE12_TACGGTACACGCGTCA-1-10x  | 0.07994916 | 0.2345822  | 0.0027593  |
| 16w_SITTE12_TACGGTACATGCCGAC-1-10x  | 0.01906445 | 0.01779963 | 3.49E-05   |
| 16w_SITTE12_TACGTCCCATCTTTCA-1-10x  | 0.20063613 | 0.66429317 | 0.0011888  |
| 16w_SITTE12_TACGTCCTCCTATTTG-1-10x  | 0.01743004 | 0.01198026 | 3.44E-05   |
| 16w_SITTE12_TACGTCCTCGTTCATT-1-10x  | 0.2680191  | 0.9042131  | 0.00075705 |
| 16w_SITTE12_TACTGCCAGGCTATT-1-10x   | 0.11608316 | 0.3632388  | 0.0025211  |
| 16w_SITTE12_TACTTACCAGACCAAG-1-10x  | 0.03809376 | 0.08555432 | 6.36E-05   |
| 16w_SITTE12_TACTTACGTACTGGGA-1-10x  | 0.10452809 | 0.3220965  | 0.0037215  |
| 16w_SITTE12_TACTTACGTAGGCTCC-1-10x  | 0.13094723 | 0.41616294 | 0.001948   |
| 16w_SITTE12_TACTTGTAGTCGAAAT-1-10x  | 0.04137301 | 0.09723023 | 7.40E-05   |
| 16w_SITTE12_TACTTGTGTATCGCGC-1-10x  | 0.04733531 | 0.11845923 | 0.00010777 |
| 16w_SITTE12_TACTTGTGTGGGTCAA-1-10x  | 0.25247285 | 0.8488599  | 0.00080028 |
| 16w_SITTE12_TACTTGTGTAAACAGA-1-10x  | 0.04802602 | 0.12091854 | 0.00011598 |
| 16w_SITTE12_TAGACCATCCATTTCGC-1-10x | 0.08984265 | 0.26980835 | 0.0042999  |
| 16w_SITTE12_TAGACTGAGCTTTCCC-1-10x  | 0.2385934  | 0.7994416  | 0.00088278 |
| 16w_SITTE12_TAGAGTCGTTGTGGCC-1-10x  | 0.02549704 | 0.04070317 | 4.00E-05   |
| 16w_SITTE12_TAGATCGAGACCATTTC-1-10x | 0.12708715 | 0.40241894 | 0.0020256  |
| 16w_SITTE12_TAGATCGGTAGCTAAA-1-10x  | 0.04987701 | 0.12750904 | 0.00013566 |
| 16w_SITTE12_TAGCACATCAGACTA-1-10x   | 0.15206446 | 0.49135172 | 0.0018651  |
| 16w_SITTE12_TAGGGTTGTAACCTTCG-1-10x | 0.13687627 | 0.43727353 | 0.0018842  |
| 16w_SITTE12_TAGGGTTGTTAAGGA-1-10x   | 0.05679091 | 0.1521263  | 0.000257   |
| 16w_SITTE12_TAGGTACAGCCTCAAT-1-10x  | 0.0306885  | 0.05918757 | 4.68E-05   |
| 16w_SITTE12_TAGGTTGTCCATTGTT-1-10x  | 0.10505677 | 0.32397887 | 0.0036214  |
| 16w_SITTE12_TAGGTTGTGATTCT-1-10x    | 0.08751676 | 0.26152694 | 0.0040384  |
| 16w_SITTE12_TAGTGCAAGTCAAGCG-1-10x  | 0.04821859 | 0.12160418 | 0.00011598 |
| 16w_SITTE12_TAGTGCAGTCGCTTAA-1-10x  | 0.24561147 | 0.82442975 | 0.00083459 |
| 16w_SITTE12_TATACCTGTACGATTC-1-10x  | 0.09619146 | 0.29241356 | 0.0043808  |

|                                     |            |            |            |
|-------------------------------------|------------|------------|------------|
| 16w_SITTE12_TATCAGGGTATAATGG-1-10x  | 0.26465884 | 0.8922487  | 0.00076135 |
| 16w_SITTE12_TATCAGGTCCACGTGG-1-10x  | 0.02898706 | 0.05312953 | 4.42E-05   |
| 16w_SITTE12_TATCCTATCCATTTGT-1-10x  | 0.08815153 | 0.26378706 | 0.0041422  |
| 16w_SITTE12_TATCGCCAGCGAATGC-1-10x  | 0.03148682 | 0.06203002 | 4.83E-05   |
| 16w_SITTE12_TATCGCCAGGGCAGAG-1-10x  | 0.03031752 | 0.05786668 | 4.55E-05   |
| 16w_SITTE12_TATCGCCTCTTCGTAT-1-10x  | 0.27729285 | 0.93723255 | 0.00075222 |
| 16w_SITTE12_TATCTGTGTAAGAACT-1-10x  | 0.06650349 | 0.18670833 | 0.00079936 |
| 16w_SITTE12_TATCTGTGTAGAATGT-1-10x  | 0.04051872 | 0.09418847 | 7.01E-05   |
| 16w_SITTE12_TATCTTGGTTACCTTT-1-10x  | 0.11384448 | 0.35526788 | 0.0027534  |
| 16w_SITTE12_TATGTTCAAGTTGTAGA-1-10x | 0.1314291  | 0.4178787  | 0.001934   |
| 16w_SITTE12_TATTCCACATCGAAGG-1-10x  | 0.07430776 | 0.21449575 | 0.0017292  |
| 16w_SITTE12_TATTGCTCACTTCAAG-1-10x  | 0.03716502 | 0.08224747 | 6.07E-05   |
| 16w_SITTE12_TATTGCTGTCCAAAGG-1-10x  | 0.26477322 | 0.8926559  | 0.00076135 |
| 16w_SITTE12_TATTGCTTCGTTACCC-1-10x  | 0.24938846 | 0.8378778  | 0.00081397 |
| 16w_SITTE12_TATTTGTCGTGGCGT-1-10x   | 0.09338529 | 0.28242207 | 0.0044107  |
| 16w_SITTE12_TCAAGACGTGTGAATA-1-10x  | 0.23847179 | 0.7990086  | 0.00088278 |
| 16w_SITTE12_TCAAGTGAGCATTGTC-1-10x  | 0.2737577  | 0.92464554 | 0.0007526  |
| 16w_SITTE12_TCAAGTGGTGCCGGTT-1-10x  | 0.08002194 | 0.23484133 | 0.0027593  |
| 16w_SITTE12_TCAAGTGGTGGCTAGA-1-10x  | 0.12531964 | 0.3961257  | 0.0020803  |
| 16w_SITTE12_TCAAGTGGTTTACGTG-1-10x  | 0.06768123 | 0.19090173 | 0.00088537 |
| 16w_SITTE12_TCAATCTCAAGTTCGT-1-10x  | 0.20728827 | 0.6879783  | 0.001126   |
| 16w_SITTE12_TCAATTCAGCGTCTGC-1-10x  | 0.24920586 | 0.8372277  | 0.00081888 |
| 16w_SITTE12_TCACACCAGGTAGCAC-1-10x  | 0.04703888 | 0.11740376 | 0.00010777 |
| 16w_SITTE12_TCACACCCAATGTCAC-1-10x  | 0.01579541 | 0.0061601  | 3.33E-05   |
| 16w_SITTE12_TCACACCTCGATACAC-1-10x  | 0.02704319 | 0.04620828 | 4.19E-05   |
| 16w_SITTE12_TCACACCTCTGAATGC-1-10x  | 0.08796324 | 0.26311666 | 0.0041422  |
| 16w_SITTE12_TCACATTTCTGTTATCT-1-10x | 0.24216348 | 0.812153   | 0.00085764 |
| 16w_SITTE12_TCACATTTCTCCGAAA-1-10x  | 0.16115868 | 0.52373207 | 0.0017883  |
| 16w_SITTE12_TCACGCTTCGGACCAC-1-10x  | 0.05252378 | 0.136933   | 0.00017575 |
| 16w_SITTE12_TCACGCTTCTCTCGAC-1-10x  | 0.02000761 | 0.0211578  | 3.55E-05   |
| 16w_SITTE12_TCACGGGAGTACTCGT-1-10x  | 0.09036657 | 0.27167383 | 0.0042999  |
| 16w_SITTE12_TCACGGGGTACTGCCG-1-10x  | 0.07293522 | 0.20960876 | 0.0015819  |
| 16w_SITTE12_TCACGGGGTCATCGGC-1-10x  | 0.097965   | 0.29872832 | 0.0042943  |
| 16w_SITTE12_TCACGGGTCCCGAAAT-1-10x  | 0.23710199 | 0.79413134 | 0.00089602 |
| 16w_SITTE12_TCACGGGTTCGTACCTC-1-10x | 0.08814408 | 0.26376054 | 0.0041422  |
| 16w_SITTE12_TCACTATCACGACCTG-1-10x  | 0.02495169 | 0.0387614  | 4.00E-05   |
| 16w_SITTE12_TCACTCGAGGTTGTTC-1-10x  | 0.04439375 | 0.10798568 | 8.81E-05   |
| 16w_SITTE12_TCACTCGTCTATACTC-1-10x  | 0.26046786 | 0.8773265  | 0.00077221 |
| 16w_SITTE12_TCAGCAAAGATGCTAA-1-10x  | 0.08157572 | 0.24037363 | 0.0031253  |
| 16w_SITTE12_TCAGCAACACACGTGC-1-10x  | 0.12405173 | 0.39161122 | 0.0021124  |
| 16w_SITTE12_TCAGCAACAGTTTCAG-1-10x  | 0.26276323 | 0.8854993  | 0.00076511 |



|                                     |            |            |            |
|-------------------------------------|------------|------------|------------|
| 16w_SITTE12_TCAGCAATCCGATGCG-1-10x  | 0.22597559 | 0.75451535 | 0.00097406 |
| 16w_SITTE12_TCAGCCTAGCAGCAGT-1-10x  | 0.05610872 | 0.14969732 | 0.000257   |
| 16w_SITTE12_TCAGCCTCAGCGTTGC-1-10x  | 0.0820305  | 0.24199288 | 0.0031253  |
| 16w_SITTE12_TCAGGGCAGGATAATC-1-10x  | 0.14838469 | 0.47824976 | 0.0018713  |
| 16w_SITTE12_TCAGGGCCACACGCCA-1-10x  | 0.14772967 | 0.4759175  | 0.0018716  |
| 16w_SITTE12_TCAGGGCCATCCAATG-1-10x  | 0.24301375 | 0.8151804  | 0.00085167 |
| 16w_SITTE12_TCAGGTAAGTTCACTG-1-10x  | 0.16034384 | 0.52083075 | 0.0018     |
| 16w_SITTE12_TCAGTCCCAGAAATTG-1-10x  | 0.2865778  | 0.97029203 | 0.00075773 |
| 16w_SITTE12_TCAGTGAAGGTTGTTTC-1-10x | 0.10071075 | 0.3085047  | 0.0040879  |
| 16w_SITTE12_TCAGTTTTTCATCAGTG-1-10x | 0.01823388 | 0.01484237 | 3.44E-05   |
| 16w_SITTE12_TCAGTTTTCTGTTAT-1-10x   | 0.25984472 | 0.87510777 | 0.00077221 |
| 16w_SITTE12_TCATATCAGCCTCACG-1-10x  | 0.08322191 | 0.24623494 | 0.0034742  |
| 16w_SITTE12_TCATATCAGCTTAGTC-1-10x  | 0.26319405 | 0.8870332  | 0.00076511 |
| 16w_SITTE12_TCATATCCACACCTTC-1-10x  | 0.08388472 | 0.24859491 | 0.0034742  |
| 16w_SITTE12_TCATATCCAGCACCCA-1-10x  | 0.05579351 | 0.148575   | 0.000233   |
| 16w_SITTE12_TCATATCGTCTCGCGA-1-10x  | 0.27515855 | 0.9296333  | 0.00075218 |
| 16w_SITTE12_TCATCCGAGCCAGACA-1-10x  | 0.15484542 | 0.5012534  | 0.0018522  |
| 16w_SITTE12_TCATCCGAGGTTGCC-1-10x   | 0.02167625 | 0.02709909 | 3.69E-05   |
| 16w_SITTE12_TCATCCGAGTGGTCAG-1-10x  | 0.15270214 | 0.49362218 | 0.0018617  |
| 16w_SITTE12_TCATGAGGTTGTCAAGT-1-10x | 0.16667071 | 0.54335785 | 0.0017206  |
| 16w_SITTE12_TCATGCCAGCTACTA-1-10x   | 0.22457857 | 0.7495412  | 0.00098869 |
| 16w_SITTE12_TCATGCCGTCATCCGG-1-10x  | 0.0762663  | 0.22146924 | 0.0020486  |
| 16w_SITTE12_TCATGGAAGGGCAAGG-1-10x  | 0.2567745  | 0.8641761  | 0.00078463 |
| 16w_SITTE12_TCATGGAGTCGATTTG-1-10x  | 0.09623655 | 0.2925741  | 0.0043808  |
| 16w_SITTE12_TCATGTTCAATTGTGC-1-10x  | 0.2195329  | 0.7315759  | 0.0010253  |
| 16w_SITTE12_TCATGTTGTAAGCTCT-1-10x  | 0.09616234 | 0.2923099  | 0.0043808  |
| 16w_SITTE12_TCATTACCACCACTGG-1-10x  | 0.05350021 | 0.14040962 | 0.00019264 |
| 16w_SITTE12_TCATTCAAGAGAGCGG-1-10x  | 0.06557125 | 0.18338905 | 0.00072102 |
| 16w_SITTE12_TCATTCAAGAGTGAAG-1-10x  | 0.01542311 | 0.00483451 | 3.27E-05   |
| 16w_SITTE12_TCATTATCTACGGTA-1-10x   | 0.08696902 | 0.25957668 | 0.0040384  |
| 16w_SITTE12_TCATTGTTCACTTACCT-1-10x | 0.28167096 | 0.952821   | 0.00075401 |
| 16w_SITTE12_TCATTGTTCCGTTGAA-1-10x  | 0.03821419 | 0.08598311 | 6.36E-05   |
| 16w_SITTE12_TCATTTGAGCTCGACC-1-10x  | 0.05472452 | 0.14476883 | 0.00021164 |
| 16w_SITTE12_TCATTTGAGGGTCAAC-1-10x  | 0.10505845 | 0.3239849  | 0.0036214  |
| 16w_SITTE12_TCATTTGCAGAGTCTT-1-10x  | 0.03293878 | 0.06719979 | 5.00E-05   |
| 16w_SITTE12_TCATTTGCAGCCGTT-1-10x   | 0.08349901 | 0.24722159 | 0.0034742  |
| 16w_SITTE12_TCATTTGTCTTCGCTG-1-10x  | 0.04411114 | 0.10697942 | 8.81E-05   |
| 16w_SITTE12_TCCACCAAGCATATGA-1-10x  | 0.20529559 | 0.68088335 | 0.001143   |
| 16w_SITTE12_TCCACGTCACAACCGC-1-10x  | 0.04496695 | 0.11002658 | 9.39E-05   |
| 16w_SITTE12_TCCACGTTCCGTCAAA-1-10x  | 0.04382668 | 0.10596662 | 8.81E-05   |
| 16w_SITTE12_TCCAGAAGTATTGACC-1-10x  | 0.04716121 | 0.11783934 | 0.00010777 |

|                                     |            |            |            |
|-------------------------------------|------------|------------|------------|
| 16w_SITTE12_TCCATCGAGGTAAGTT-1-10x  | 0.12548588 | 0.39671758 | 0.0020515  |
| 16w_SITTE12_TCCATCGAGTAGTGCG-1-10x  | 0.08055665 | 0.2367452  | 0.0029431  |
| 16w_SITTE12_TCCATGCTCTTCGTGC-1-10x  | 0.01906286 | 0.01779399 | 3.49E-05   |
| 16w_SITTE12_TCCACATCTGCGATA-1-10x   | 0.05067575 | 0.130353   | 0.00014746 |
| 16w_SITTE12_TCCCAGTCAATTCTTC-1-10x  | 0.12264431 | 0.38660005 | 0.0021479  |
| 16w_SITTE12_TCCCAGTTCGTTCTCG-1-10x  | 0.25634536 | 0.8626482  | 0.00078463 |
| 16w_SITTE12_TCCCATGTCCTAGCTC-1-10x  | 0.27296406 | 0.92181975 | 0.0007526  |
| 16w_SITTE12_TCCGATCAGGCGATAC-1-10x  | 0.10820015 | 0.335171   | 0.0033168  |
| 16w_SITTE12_TCCGATCTCAAGTGTC-1-10x  | 0.09360442 | 0.2832023  | 0.0044154  |
| 16w_SITTE12_TCCGTGTCAGTACTAC-1-10x  | 0.21218982 | 0.70543057 | 0.0010856  |
| 16w_SITTE12_TCCGTGTTTCATGCAGT-1-10x | 0.22282834 | 0.74330944 | 0.0010033  |
| 16w_SITTE12_TCCGTGTTCCAAGCTA-1-10x  | 0.13588263 | 0.43373564 | 0.0018891  |
| 16w_SITTE12_TCCTAATGTACGACAG-1-10x  | 0.21504873 | 0.7156098  | 0.0010625  |
| 16w_SITTE12_TCCTCCCAGCGCCTCA-1-10x  | 0.04322065 | 0.10380882 | 8.29E-05   |
| 16w_SITTE12_TCCTCCCACCGTGGT-1-10x   | 0.19831109 | 0.65601474 | 0.0012187  |
| 16w_SITTE12_TCCTCTTAGTTGTCAC-1-10x  | 0.07458323 | 0.2154766  | 0.0017292  |
| 16w_SITTE12_TCCTCTTGTGGACCC-1-10x   | 0.21460028 | 0.7140131  | 0.0010701  |
| 16w_SITTE12_TCCTGCAAGAAGCTGC-1-10x  | 0.08663753 | 0.25839642 | 0.0039187  |
| 16w_SITTE12_TCCTGCACAAATTAGG-1-10x  | 0.22563247 | 0.7532937  | 0.00098137 |
| 16w_SITTE12_TCCTGCAGTAGTCTTG-1-10x  | 0.24653316 | 0.8277114  | 0.00083459 |
| 16w_SITTE12_TCCTTCTAGAATCGCG-1-10x  | 0.23350997 | 0.78134185 | 0.00091657 |
| 16w_SITTE12_TCCTTCTAGAGCATCG-1-10x  | 0.24058628 | 0.80653733 | 0.00086997 |
| 16w_SITTE12_TCCTTTCAGGGAGGAC-1-10x  | 0.03967889 | 0.09119823 | 6.67E-05   |
| 16w_SITTE12_TCGAACAAGGTCCAGA-1-10x  | 0.03134429 | 0.06152253 | 4.68E-05   |
| 16w_SITTE12_TCGAACACATACGCAT-1-10x  | 0.04941857 | 0.12587674 | 0.00013566 |
| 16w_SITTE12_TCGAAGTAGGTAAACT-1-10x  | 0.18944012 | 0.6244293  | 0.0013244  |
| 16w_SITTE12_TCGACCTAGCTCTTCC-1-10x  | 0.09408762 | 0.28492275 | 0.0044154  |
| 16w_SITTE12_TCGACCTAGGGCTGAT-1-10x  | 0.12348161 | 0.3895813  | 0.0021479  |
| 16w_SITTE12_TCGACCTGTCTGCATA-1-10x  | 0.03549463 | 0.07629999 | 5.58E-05   |
| 16w_SITTE12_TCGACCTTCGGTGCAC-1-10x  | 0.26633865 | 0.89822966 | 0.00075831 |
| 16w_SITTE12_TCGACGGGTTGGGACA-1-10x  | 0.18469892 | 0.60754806 | 0.0013959  |
| 16w_SITTE12_TCGACGGGTTGGGTTT-1-10x  | 0.16715509 | 0.5450825  | 0.0017056  |
| 16w_SITTE12_TCGATTTAGATGCCGA-1-10x  | 0.02710653 | 0.04643381 | 4.19E-05   |
| 16w_SITTE12_TCGCTCAGTCAAAGTA-1-10x  | 0.0884891  | 0.26498902 | 0.0041422  |
| 16w_SITTE12_TCGCTCATCCTCAGGG-1-10x  | 0.06759303 | 0.19058768 | 0.00088537 |
| 16w_SITTE12_TCGCTCATCTAACGCA-1-10x  | 0.06210839 | 0.17105941 | 0.00047505 |
| 16w_SITTE12_TCGGGACCAATAGGGC-1-10x  | 0.0498222  | 0.12731391 | 0.00013566 |
| 16w_SITTE12_TCGGGACGTCATCCGG-1-10x  | 0.08708397 | 0.25998598 | 0.0040384  |
| 16w_SITTE12_TCGGGCACATTCTTCA-1-10x  | 0.04706774 | 0.11750652 | 0.00010777 |
| 16w_SITTE12_TCGGGCAGTAAGTTGA-1-10x  | 0.23712318 | 0.7942068  | 0.00089602 |
| 16w_SITTE12_TCGGGCAGTGTGGTCC-1-10x  | 0.09897067 | 0.3023091  | 0.0042345  |

|                                      |            |            |            |
|--------------------------------------|------------|------------|------------|
| 16w_SITTE12_TCGGGCATCCGCAAAT-1-10x   | 0.291172   | 0.9866499  | 0.00076269 |
| 16w_SITTE12_TCGGGTGGTCAGGAGT-1-10x   | 0.08135118 | 0.23957413 | 0.0031253  |
| 16w_SITTE12_TCGGTCTGTATTCTCT-1-10x   | 0.05891974 | 0.15970606 | 0.00034795 |
| 16w_SITTE12_TCGGTCTTCCATCTCG-1-10x   | 0.03018598 | 0.05739831 | 4.55E-05   |
| 16w_SITTE12_TCGTAGAAGAGTCTGG-1-10x   | 0.12025202 | 0.37808222 | 0.0022788  |
| 16w_SITTE12_TCGTAGACAATGGCCC-1-10x   | 0.14249831 | 0.45729107 | 0.0018718  |
| 16w_SITTE12_TCGTAGATCCAACACTAG-1-10x | 0.05408012 | 0.1424744  | 0.00021164 |
| 16w_SITTE12_TCGTCCACAACCGCTG-1-10x   | 0.0981165  | 0.29926777 | 0.0042943  |
| 16w_SITTE12_TCGTCCACATTGCAAC-1-10x   | 0.17770529 | 0.5826469  | 0.0015248  |
| 16w_SITTE12_TCGTCCATCGCCAACG-1-10x   | 0.2579464  | 0.8683488  | 0.000778   |
| 16w_SITTE12_TCGTGCTCAAAGGGCT-1-10x   | 0.10722673 | 0.33170512 | 0.0034182  |
| 16w_SITTE12_TCGTGCTCACGCAGTC-1-10x   | 0.15591542 | 0.50506324 | 0.0018459  |
| 16w_SITTE12_TCGTGCTCAGTTGAAA-1-10x   | 0.18200266 | 0.5979479  | 0.0014427  |
| 16w_SITTE12_TCGTGCTTCGTTGCT-1-10x    | 0.01852593 | 0.01588224 | 3.49E-05   |
| 16w_SITTE12_TCGTGGGAGAGTCTGG-1-10x   | 0.05532787 | 0.14691706 | 0.000233   |
| 16w_SITTE12_TCGTGGGAGTTACGTC-1-10x   | 0.05183993 | 0.1344981  | 0.00016076 |
| 16w_SITTE12_TCGTGGGCAGCGTTGC-1-10x   | 0.13199437 | 0.41989133 | 0.0019219  |
| 16w_SITTE12_TCTAACTCAAATGGCG-1-10x   | 0.08926345 | 0.2677461  | 0.0042295  |
| 16w_SITTE12_TCTAACTACTATCGA-1-10x    | 0.08065357 | 0.23709027 | 0.0029431  |
| 16w_SITTE12_TCTAACTGTGAACGGT-1-10x   | 0.26811197 | 0.9045437  | 0.00075705 |
| 16w_SITTE12_TCTAACTTCTCAACGA-1-10x   | 0.08316614 | 0.24603638 | 0.0034742  |
| 16w_SITTE12_TCTACATAGGCACGAT-1-10x   | 0.0525899  | 0.1371684  | 0.00017575 |
| 16w_SITTE12_TCTACATGTCATAAAG-1-10x   | 0.17727235 | 0.5811054  | 0.0015248  |
| 16w_SITTE12_TCTACATTCTGCATGA-1-10x   | 0.0850711  | 0.25281906 | 0.0037839  |
| 16w_SITTE12_TCTACCGAGGACTTCT-1-10x   | 0.24821974 | 0.8337166  | 0.00082396 |
| 16w_SITTE12_TCTACCGGTGGCTGCT-1-10x   | 0.07369155 | 0.21230175 | 0.0015819  |
| 16w_SITTE12_TCTCACGGTTTGAAAG-1-10x   | 0.02652319 | 0.04435679 | 4.09E-05   |
| 16w_SITTE12_TCTCAGCGTCTGTGTA-1-10x   | 0.11027822 | 0.34257007 | 0.0031181  |
| 16w_SITTE12_TCTCAGCTCACCTCAC-1-10x   | 0.01640596 | 0.00833399 | 3.33E-05   |
| 16w_SITTE12_TCTCAGCTCTGTCAGA-1-10x   | 0.08920215 | 0.26752785 | 0.0042295  |
| 16w_SITTE12_TCTGCCACAAAGAACT-1-10x   | 0.05500349 | 0.14576212 | 0.000233   |
| 16w_SITTE12_TCTGCCACATGGCTGC-1-10x   | 0.02164303 | 0.02698078 | 3.69E-05   |
| 16w_SITTE12_TCTGCCATCACACCCT-1-10x   | 0.16649742 | 0.5427409  | 0.0017206  |
| 16w_SITTE12_TCTGGCTCAGTCTTCC-1-10x   | 0.02320454 | 0.03254062 | 3.83E-05   |
| 16w_SITTE12_TCTGTGAGATGGGCT-1-10x    | 0.05562824 | 0.14798658 | 0.000233   |
| 16w_SITTE12_TCTTAGTCACACGGTC-1-10x   | 0.1478003  | 0.476169   | 0.0018716  |
| 16w_SITTE12_TCTTCTGTTCCGGTG-1-10x    | 0.05098547 | 0.13145576 | 0.00014746 |
| 16w_SITTE12_TCTTGCGAGCGTCTGC-1-10x   | 0.2490789  | 0.83677566 | 0.00081888 |
| 16w_SITTE12_TCTTGCGTCCGTGTAA-1-10x   | 0.02978507 | 0.05597084 | 4.55E-05   |
| 16w_SITTE12_TCTTTGACACAGTACT-1-10x   | 0.05201383 | 0.13511728 | 0.00016076 |
| 16w_SITTE12_TCTTTGACAGCTGAGA-1-10x   | 0.01727689 | 0.01143498 | 3.38E-05   |

|                                      |            |            |            |
|--------------------------------------|------------|------------|------------|
| 16w_SITTE12_TCTTTGACAGTGTGCC-1-10x   | 0.18133187 | 0.59555954 | 0.0014587  |
| 16w_SITTE12_TGAACGTTCTGTCAGA-1-10x   | 0.03466665 | 0.07335195 | 5.37E-05   |
| 16w_SITTE12_TGAATCGAGGACGGAG-1-10x   | 0.0991031  | 0.3027806  | 0.0041652  |
| 16w_SITTE12_TGAATCGAGGATACCG-1-10x   | 0.09274688 | 0.28014898 | 0.0044107  |
| 16w_SITTE12_TGAATCGGTTACTTGTG-1-10x  | 0.11415335 | 0.35636762 | 0.0026715  |
| 16w_SITTE12_TGAATCGGTTGTCATG-1-10x   | 0.05038288 | 0.12931024 | 0.00014746 |
| 16w_SITTE12_TGAATGCCAACAACAA-1-10x   | 0.09466827 | 0.2869902  | 0.0044051  |
| 16w_SITTE12_TGAATGCCAGCATACT-1-10x   | 0.06308443 | 0.17453463 | 0.00052741 |
| 16w_SITTE12_TGAATGCCATCTATT-1-10x    | 0.2729183  | 0.92165685 | 0.0007526  |
| 16w_SITTE12_TGACAGTAGTATGAAC-1-10x   | 0.14263013 | 0.4577604  | 0.0018718  |
| 16w_SITTE12_TGACAGTGTTCCCTACC-1-10x  | 0.08446363 | 0.25065613 | 0.0036353  |
| 16w_SITTE12_TGACCCTAGCCTAGGA-1-10x   | 0.0843915  | 0.25039932 | 0.0036353  |
| 16w_SITTE12_TGACGCGAGTTGCATC-1-10x   | 0.27236387 | 0.91968274 | 0.000753   |
| 16w_SITTE12_TGACTCCAGAGTACCG-1-10x   | 0.2866346  | 0.9704943  | 0.00075773 |
| 16w_SITTE12_TGACTCCCAGAAACCG-1-10x   | 0.23720069 | 0.79448277 | 0.00088935 |
| 16w_SITTE12_TGACTCCTCGTCAACA-1-10x   | 0.08798454 | 0.2631925  | 0.0041422  |
| 16w_SITTE12_TGACTCCTCTGATTCT-1-10x   | 0.21128334 | 0.702203   | 0.0010934  |
| 16w_SITTE12_TGAGACTCAAGACGGT-1-10x   | 0.2276544  | 0.7604928  | 0.00096676 |
| 16w_SITTE12_TGAGCGCAGGCCATAG-1-10x   | 0.08026297 | 0.23569953 | 0.0027593  |
| 16w_SITTE12_TGAGCGCAGTAACAGT-1-10x   | 0.02294845 | 0.03162881 | 3.76E-05   |
| 16w_SITTE12_TGAGCGCGTAGGCTCC-1-10x   | 0.10506903 | 0.32402256 | 0.0036214  |
| 16w_SITTE12_TGAGGAGAGTGTTTAC-1-10x   | 0.10104026 | 0.30967793 | 0.0040036  |
| 16w_SITTE12_TGAGGAGCAACTGATC-1-10x   | 0.04134623 | 0.09713487 | 7.40E-05   |
| 16w_SITTE12_TGAGGAGCAGACACCC-1-10x   | 0.23354384 | 0.78146243 | 0.00091657 |
| 16w_SITTE12_TGAGGAGTCAGTAGGG-1-10x   | 0.14492375 | 0.46592692 | 0.0018716  |
| 16w_SITTE12_TGAGGGAAGGTTTACC-1-10x   | 0.07616236 | 0.22109915 | 0.0020486  |
| 16w_SITTE12_TGAGGGAGTTGCATTG-1-10x   | 0.01552628 | 0.00520184 | 3.33E-05   |
| 16w_SITTE12_TGAGGGATCCCTCAAC-1-10x   | 0.04001552 | 0.09239682 | 7.01E-05   |
| 16w_SITTE12_TGAGGTTTCCAGGTGACA-1-10x | 0.08358803 | 0.24753852 | 0.0034742  |
| 16w_SITTE12_TGAGGTTTCCAGGTTTAC-1-10x | 0.27582043 | 0.93198997 | 0.00075214 |
| 16w_SITTE12_TGAGGTTTCCATCGCAA-1-10x  | 0.20863163 | 0.6927615  | 0.0011177  |
| 16w_SITTE12_TGAGTCAGTCATCGCG-1-10x   | 0.09255858 | 0.27947855 | 0.0044107  |
| 16w_SITTE12_TGAGTCATCACCATAG-1-10x   | 0.03454993 | 0.07293636 | 5.37E-05   |
| 16w_SITTE12_TGATCAGAGTGCAGGT-1-10x   | 0.25837678 | 0.8698811  | 0.000778   |
| 16w_SITTE12_TGATCAGCAGCCCACA-1-10x   | 0.08542222 | 0.25406924 | 0.0037839  |
| 16w_SITTE12_TGATCAGGTCCCACGA-1-10x   | 0.17844786 | 0.58529085 | 0.0015081  |
| 16w_SITTE12_TGATCTTGTGCACGCT-1-10x   | 0.10543358 | 0.32532054 | 0.0036214  |
| 16w_SITTE12_TGATGCACATTGCCTC-1-10x   | 0.05333066 | 0.13980594 | 0.00019264 |
| 16w_SITTE12_TGATGCATCGAAGGAC-1-10x   | 0.20115031 | 0.6661239  | 0.0011888  |
| 16w_SITTE12_TGATGGTGTATGTCCA-1-10x   | 0.06758156 | 0.19054684 | 0.00088537 |
| 16w_SITTE12_TGATGGTTCAACTGGT-1-10x   | 0.26004392 | 0.87581706 | 0.00077221 |

|                                     |            |            |            |
|-------------------------------------|------------|------------|------------|
| 16w_SITTE12_TGATTCTAGTAGCAAT-1-10x  | 0.09046266 | 0.27201593 | 0.0042999  |
| 16w_SITTE12_TGATTCTCCGTGGTG-1-10x   | 0.04462528 | 0.10881003 | 9.39E-05   |
| 16w_SITTE12_TGATTTCCACCGTCGA-1-10x  | 0.02944785 | 0.05477016 | 4.42E-05   |
| 16w_SITTE12_TGCACGGAGGTAGACC-1-10x  | 0.01633896 | 0.00809541 | 3.33E-05   |
| 16w_SITTE12_TGCAGATAGCTGTTAC-1-10x  | 0.09703223 | 0.29540718 | 0.0043435  |
| 16w_SITTE12_TGCAGATTCCAAGGGA-1-10x  | 0.08917421 | 0.26742837 | 0.0042295  |
| 16w_SITTE12_TGCAGTAAGTTGCCCG-1-10x  | 0.08308413 | 0.24574438 | 0.0033032  |
| 16w_SITTE12_TGCAGTAGTAATGAT-1-10x   | 0.2680536  | 0.9043358  | 0.00075705 |
| 16w_SITTE12_TGCATCCAGCAGTCTT-1-10x  | 0.07917296 | 0.2318185  | 0.002576   |
| 16w_SITTE12_TGCATCCCAAAGCACG-1-10x  | 0.04640105 | 0.11513276 | 0.00010046 |
| 16w_SITTE12_TGCATCCCACGTGAGA-1-10x  | 0.03280694 | 0.06673037 | 5.00E-05   |
| 16w_SITTE12_TGCATCCGTGTAAACA-1-10x  | 0.10543305 | 0.32531863 | 0.0036214  |
| 16w_SITTE12_TGCATGAAGAGTCTGG-1-10x  | 0.05001067 | 0.12798497 | 0.00013566 |
| 16w_SITTE12_TGCCGAGAGATCCGAG-1-10x  | 0.04434021 | 0.10779505 | 8.81E-05   |
| 16w_SITTE12_TGCCGAGTCGGCTGTG-1-10x  | 0.07375208 | 0.21251723 | 0.0017292  |
| 16w_SITTE12_TGCGACGAGAGAGCCT-1-10x  | 0.25382644 | 0.8536795  | 0.00079608 |
| 16w_SITTE12_TGCGACGAGGCCACTC-1-10x  | 0.0520165  | 0.1351268  | 0.00016076 |
| 16w_SITTE12_TGCGACGTCATTTGTC-1-10x  | 0.03520956 | 0.075285   | 5.58E-05   |
| 16w_SITTE12_TGCGATAAGCAGCACA-1-10x  | 0.25699812 | 0.86497235 | 0.00078121 |
| 16w_SITTE12_TGCGATACATGCCATA-1-10x  | 0.12811816 | 0.4060899  | 0.0020026  |
| 16w_SITTE12_TGCGGCAGTCAACCAT-1-10x  | 0.0846213  | 0.2512175  | 0.0036353  |
| 16w_SITTE12_TGCGGCAGTTCTCCTG-1-10x  | 0.04698187 | 0.11720078 | 0.00010777 |
| 16w_SITTE12_TGCGGCATCCAACACA-1-10x  | 0.13038214 | 0.4141509  | 0.001948   |
| 16w_SITTE12_TGCGGGTAGGCTGTAG-1-10x  | 0.09892338 | 0.30214068 | 0.0042345  |
| 16w_SITTE12_TGCGGGTCAGAACATA-1-10x  | 0.01553425 | 0.00523021 | 3.33E-05   |
| 16w_SITTE12_TGCGGGTGTTGCTCAA-1-10x  | 0.04757063 | 0.11929708 | 0.00011598 |
| 16w_SITTE12_TGCGGGTTCAGGGATG-1-10x  | 0.23690036 | 0.79341346 | 0.00089602 |
| 16w_SITTE12_TGCTCCAAGCGACTTT-1-10x  | 0.17945552 | 0.5888787  | 0.0014915  |
| 16w_SITTE12_TGCTCCACAAGCAATA-1-10x  | 0.05138648 | 0.13288361 | 0.00016076 |
| 16w_SITTE12_TGCTCCACATAACCACA-1-10x | 0.05144483 | 0.13309136 | 0.00016076 |
| 16w_SITTE12_TGCTCGTAGCTTTCCC-1-10x  | 0.12649487 | 0.40031013 | 0.0020256  |
| 16w_SITTE12_TGCTCGTAGGACGCTA-1-10x  | 0.17932929 | 0.5884293  | 0.0014915  |
| 16w_SITTE12_TGCTCGTCATGACAGG-1-10x  | 0.21892276 | 0.72940344 | 0.0010326  |
| 16w_SITTE12_TGCTCGTGTACTAACC-1-10x  | 0.27113372 | 0.91530275 | 0.00075352 |
| 16w_SITTE12_TGCTCGTTCATCGACA-1-10x  | 0.01527585 | 0.00431018 | 3.27E-05   |
| 16w_SITTE12_TGCTCGTTCGTTCTGC-1-10x  | 0.1572594  | 0.50984854 | 0.0018385  |
| 16w_SITTE12_TGCTGAACACAGCCAC-1-10x  | 0.01821281 | 0.01476735 | 3.44E-05   |
| 16w_SITTE12_TGCTGAACATCTGTTT-1-10x  | 0.08269735 | 0.24436726 | 0.0033032  |
| 16w_SITTE12_TGCTGAAGTCTACTGA-1-10x  | 0.14302337 | 0.45916054 | 0.0018718  |
| 16w_SITTE12_TGCTGAATCTCCGTGT-1-10x  | 0.04975038 | 0.12705821 | 0.00013566 |
| 16w_SITTE12_TGCTTCGAGGCCACTC-1-10x  | 0.04501231 | 0.1101881  | 9.39E-05   |

|                                     |            |            |            |
|-------------------------------------|------------|------------|------------|
| 16w_SITTE12_TGCTTCGAGGCCCACT-1-10x  | 0.20773862 | 0.6895819  | 0.001126   |
| 16w_SITTE12_TGCTTCGCAAGTCATC-1-10x  | 0.03602635 | 0.07819321 | 5.58E-05   |
| 16w_SITTE12_TGCTTGCGTGCTGCAC-1-10x  | 0.25540274 | 0.859292   | 0.00078825 |
| 16w_SITTE12_TGCTTGCTCTCATGGA-1-10x  | 0.28275064 | 0.9566653  | 0.00075462 |
| 16w_SITTE12_TGGAACACACGGGCTT-1-10x  | 0.04469427 | 0.10905568 | 9.39E-05   |
| 16w_SITTE12_TGGAACACAGAAGTTA-1-10x  | 0.2635555  | 0.88832015 | 0.00076313 |
| 16w_SITTE12_TGGAACACAGTCGTTA-1-10x  | 0.09739852 | 0.29671136 | 0.0042943  |
| 16w_SITTE12_TGGAACGTAAATGCGG-1-10x  | 0.08327086 | 0.24640925 | 0.0034742  |
| 16w_SITTE12_TGGAGGAAGCATTGAA-1-10x  | 0.04234876 | 0.1007044  | 7.82E-05   |
| 16w_SITTE12_TGGAGGAAGGTGAGAA-1-10x  | 0.19977784 | 0.6612372  | 0.0011985  |
| 16w_SITTE12_TGGATCATCACGATAC-1-10x  | 0.07795014 | 0.2274646  | 0.0023954  |
| 16w_SITTE12_TGGATGTAGCTCCACG-1-10x  | 0.28572997 | 0.9672733  | 0.00075686 |
| 16w_SITTE12_TGGATGTTCCGATCGG-1-10x  | 0.21919827 | 0.7303844  | 0.0010326  |
| 16w_SITTE12_TGGCGTGCATATTCGG-1-10x  | 0.01807502 | 0.01427675 | 3.44E-05   |
| 16w_SITTE12_TGGGAAGAGGGCAATC-1-10x  | 0.10496501 | 0.32365215 | 0.0036214  |
| 16w_SITTE12_TGGGAAGCATCCCGTT-1-10x  | 0.04813051 | 0.12129057 | 0.00011598 |
| 16w_SITTE12_TGGGAGAAGAACTTCC-1-10x  | 0.12244447 | 0.38588852 | 0.0021873  |
| 16w_SITTE12_TGGGAGACAAAGGGCT-1-10x  | 0.04922143 | 0.12517484 | 0.00012523 |
| 16w_SITTE12_TGGGAGAGTCTAATCG-1-10x  | 0.11362273 | 0.35447836 | 0.0027534  |
| 16w_SITTE12_TGGGAGATCTCCACTG-1-10x  | 0.01549681 | 0.00509693 | 3.33E-05   |
| 16w_SITTE12_TGGGATTTCAATGCGA-1-10x  | 0.04740536 | 0.11870865 | 0.00010777 |
| 16w_SITTE12_TGGGCGTCAGCAGACA-1-10x  | 0.25933218 | 0.87328285 | 0.00077499 |
| 16w_SITTE12_TGGGCTGGTACCTAGT-1-10x  | 0.09249474 | 0.27925125 | 0.0043903  |
| 16w_SITTE12_TGGGTTAAGTGCAGACA-1-10x | 0.08448962 | 0.2507487  | 0.0036353  |
| 16w_SITTE12_TGGGTTACATGGAACG-1-10x  | 0.037015   | 0.08171334 | 5.82E-05   |
| 16w_SITTE12_TGGGTTATCAGGACGA-1-10x  | 0.11949975 | 0.3754037  | 0.0023317  |
| 16w_SITTE12_TGGTACAAGTGTACAA-1-10x  | 0.1171288  | 0.36696187 | 0.002453   |
| 16w_SITTE12_TGGTACACATGGGAAC-1-10x  | 0.02192812 | 0.02799586 | 3.69E-05   |
| 16w_SITTE12_TGGTAGTCAAGACGAC-1-10x  | 0.16327731 | 0.5312755  | 0.001763   |
| 16w_SITTE12_TGGTATGTCCGTACG-1-10x   | 0.13822776 | 0.44208556 | 0.0018802  |
| 16w_SITTE12_TGGTTAGCACATACGT-1-10x  | 0.20952937 | 0.6959579  | 0.0011095  |
| 16w_SITTE12_TGGTTAGCATGTAACC-1-10x  | 0.08522245 | 0.25335795 | 0.0037839  |
| 16w_SITTE12_TGGTTAGTCCGACTG-1-10x   | 0.08450649 | 0.25080875 | 0.0036353  |
| 16w_SITTE12_TGTAACGGTCCGTTG-1-10x   | 0.01500548 | 0.00334751 | 3.27E-05   |
| 16w_SITTE12_TGTAACGGTCTACATG-1-10x  | 0.04204806 | 0.09963376 | 7.82E-05   |
| 16w_SITTE12_TGTAAGCAGGTTTCAGG-1-10x | 0.04115758 | 0.09646315 | 7.40E-05   |
| 16w_SITTE12_TGTACAGGTCGTAATA-1-10x  | 0.0806357  | 0.23702666 | 0.0029431  |
| 16w_SITTE12_TGTACAGGTCATACATG-1-10x | 0.05271764 | 0.13762325 | 0.00017575 |
| 16w_SITTE12_TGTACAGTCATTGCCC-1-10x  | 0.04866776 | 0.12320348 | 0.00012523 |
| 16w_SITTE12_TGTAGACAGTCTTGGT-1-10x  | 0.10178243 | 0.31232047 | 0.0040036  |
| 16w_SITTE12_TGTAGACCATCCCGTT-1-10x  | 0.08223877 | 0.24273445 | 0.0033032  |

|                                     |            |            |            |
|-------------------------------------|------------|------------|------------|
| 16w_SITTE12_TGTCCACAGACGCCCT-1-10x  | 0.2685793  | 0.9062076  | 0.00075594 |
| 16w_SITTE12_TGTCCACGTTCCGCAG-1-10x  | 0.18412618 | 0.6055088  | 0.0014112  |
| 16w_SITTE12_TGTCCACTCTGAATCG-1-10x  | 0.1038822  | 0.31979677 | 0.0037215  |
| 16w_SITTE12_TGTCCCAAGGAGAATG-1-10x  | 0.03078365 | 0.05952635 | 4.68E-05   |
| 16w_SITTE12_TGTCCCACAAAGTGTA-1-10x  | 0.24352287 | 0.8169932  | 0.00085167 |
| 16w_SITTE12_TGTCCTGCATAGAATG-1-10x  | 0.04299005 | 0.10298775 | 8.29E-05   |
| 16w_SITTE12_TGTCCTGTCGTGCGAC-1-10x  | 0.02385321 | 0.03485023 | 3.83E-05   |
| 16w_SITTE12_TGTGAGTAGCCATTGT-1-10x  | 0.04743617 | 0.11881836 | 0.00011598 |
| 16w_SITTE12_TGTGAGTAGTGGGAAA-1-10x  | 0.09142327 | 0.27543625 | 0.0043535  |
| 16w_SITTE12_TGTGAGTAGTGTTCATC-1-10x | 0.28087038 | 0.94997054 | 0.00075348 |
| 16w_SITTE12_TGTGAGTGTGACACAG-1-10x  | 0.20080662 | 0.6649002  | 0.0011888  |
| 16w_SITTE12_TGTGATGAGAGAGCGG-1-10x  | 0.08512095 | 0.25299653 | 0.0037839  |
| 16w_SITTE12_TGTGATGAGCTAATCC-1-10x  | 0.13119021 | 0.4170281  | 0.001934   |
| 16w_SITTE12_TGTGATGTCCGTAGTA-1-10x  | 0.22966869 | 0.7676648  | 0.00094498 |
| 16w_SITTE12_TGTGCGGAGCGTCTCG-1-10x  | 0.04817559 | 0.12145107 | 0.00011598 |
| 16w_SITTE12_TGTGCGGGTATGTCTG-1-10x  | 0.07097872 | 0.20264256 | 0.0013138  |
| 16w_SITTE12_TGTGGCGTCTTTCAA-1-10x   | 0.15853322 | 0.514384   | 0.0018209  |
| 16w_SITTE12_TGTGTGAGTATGCTAC-1-10x  | 0.01535704 | 0.00459926 | 3.27E-05   |
| 16w_SITTE12_TGTTACTAGCACCTGC-1-10x  | 0.23940384 | 0.8023272  | 0.00087632 |
| 16w_SITTE12_TGTTCTACTAGTCAG-1-10x   | 0.2580979  | 0.86888814 | 0.000778   |
| 16w_SITTE12_TGTTCTACAGCGTTGC-1-10x  | 0.24677351 | 0.8285672  | 0.0008292  |
| 16w_SITTE12_TGTTGAGAGCGCGTTC-1-10x  | 0.0944797  | 0.28631878 | 0.0044051  |
| 16w_SITTE12_TGTTGAGGTAGCCCTG-1-10x  | 0.21299656 | 0.708303   | 0.0010778  |
| 16w_SITTE12_TGTTGGACATGAGATA-1-10x  | 0.10026956 | 0.30693382 | 0.0040879  |
| 16w_SITTE12_TTAATCCCAATTGCCA-1-10x  | 0.03632492 | 0.07925627 | 5.82E-05   |
| 16w_SITTE12_TTAATCCGTGCGTTTA-1-10x  | 0.04749163 | 0.11901582 | 0.00011598 |
| 16w_SITTE12_TTAATCCTCTTAGTTC-1-10x  | 0.05280085 | 0.1379195  | 0.00017575 |
| 16w_SITTE12_TTACAGGGTCGTAATA-1-10x  | 0.06796257 | 0.19190346 | 0.00088537 |
| 16w_SITTE12_TTACAGGTCATGACAC-1-10x  | 0.06247666 | 0.17237064 | 0.00052741 |
| 16w_SITTE12_TTACAGGTCTGGCCTT-1-10x  | 0.25800866 | 0.86857045 | 0.000778   |
| 16w_SITTE12_TTACCATAGGGATCGT-1-10x  | 0.2664025  | 0.8984571  | 0.00075831 |
| 16w_SITTE12_TTACCGCGTAAGTCAA-1-10x  | 0.22357953 | 0.7459841  | 0.00099599 |
| 16w_SITTE12_TTACCGCGTACCGGAA-1-10x  | 0.24267025 | 0.8139574  | 0.00085764 |
| 16w_SITTE12_TTACCGCTCGTAGCCG-1-10x  | 0.02738539 | 0.0474267  | 4.19E-05   |
| 16w_SITTE12_TTACGCCCAACCCTAA-1-10x  | 0.11791511 | 0.36976153 | 0.0023898  |
| 16w_SITTE12_TTACGTTACGACGCT-1-10x   | 0.02033997 | 0.02234121 | 3.62E-05   |
| 16w_SITTE12_TTACGTTTCGTAAGT-1-10x   | 0.0434285  | 0.10454888 | 8.29E-05   |
| 16w_SITTE12_TTACTGTAGGTCATCT-1-10x  | 0.08860901 | 0.26541594 | 0.0041422  |
| 16w_SITTE12_TTACTGTAGTCGCCAC-1-10x  | 0.1241805  | 0.39206973 | 0.0021124  |
| 16w_SITTE12_TTACTGTCACGATTCA-1-10x  | 0.06935429 | 0.19685872 | 0.0010821  |
| 16w_SITTE12_TTAGGCATCGTTGTGA-1-10x  | 0.12956536 | 0.41124272 | 0.0019639  |

|                                    |            |            |            |
|------------------------------------|------------|------------|------------|
| 16w_SITTE12_TTAGGGTCATTGGATC-1-10x | 0.09477171 | 0.2873585  | 0.0044051  |
| 16w_SITTE12_TTAGTCTGTTACTG-1-10x   | 0.09383223 | 0.28401345 | 0.0044154  |
| 16w_SITTE12_TTATTGCGTCAGCGTC-1-10x | 0.0867866  | 0.25892717 | 0.0039187  |
| 16w_SITTE12_TTATTGCGTGAAAGTT-1-10x | 0.21915759 | 0.73023957 | 0.0010326  |
| 16w_SITTE12_TTCAATCCATCGCTGG-1-10x | 0.01501633 | 0.00338615 | 3.27E-05   |
| 16w_SITTE12_TTCAATCGTATCTTCT-1-10x | 0.02624825 | 0.04337788 | 4.09E-05   |
| 16w_SITTE12_TTCAATCGTCAGGTAG-1-10x | 0.19555722 | 0.6462095  | 0.0012511  |
| 16w_SITTE12_TTCACCGCAACTCGAT-1-10x | 0.17119876 | 0.55948013 | 0.0016421  |
| 16w_SITTE12_TTCACCGCACCCAACG-1-10x | 0.04037419 | 0.09367388 | 7.01E-05   |
| 16w_SITTE12_TTCACGCCAATCACGT-1-10x | 0.02103431 | 0.0248134  | 3.62E-05   |
| 16w_SITTE12_TTCACGCCACTCCGGA-1-10x | 0.08317818 | 0.24607924 | 0.0034742  |
| 16w_SITTE12_TTCACGCCATTCGGGC-1-10x | 0.14650635 | 0.47156185 | 0.0018717  |
| 16w_SITTE12_TTCACGCGTAGGAAAG-1-10x | 0.29092017 | 0.98575324 | 0.00076269 |
| 16w_SITTE12_TTCACGCTCTAGTGTG-1-10x | 0.1307382  | 0.41541868 | 0.001948   |
| 16w_SITTE12_TTCAGGAAGAGCCATG-1-10x | 0.08409642 | 0.2493487  | 0.0036353  |
| 16w_SITTE12_TTCATGTAGCTCATAC-1-10x | 0.26232898 | 0.8839531  | 0.00076727 |
| 16w_SITTE12_TTCATGTCAGATACCT-1-10x | 0.25048435 | 0.84177977 | 0.00080923 |
| 16w_SITTE12_TTCATGTGTGGCTGCT-1-10x | 0.05863253 | 0.15868346 | 0.00031414 |
| 16w_SITTE12_TTCATTGGTCTCCTGT-1-10x | 0.09606823 | 0.29197478 | 0.0043808  |
| 16w_SITTE12_TTCCAATGTTCAACGT-1-10x | 0.18537545 | 0.60995686 | 0.0013959  |
| 16w_SITTE12_TTCCGGTGTGACGTCC-1-10x | 0.05038687 | 0.12932445 | 0.00014746 |
| 16w_SITTE12_TTCCGTGCATACACCA-1-10x | 0.01684673 | 0.00990338 | 3.38E-05   |
| 16w_SITTE12_TTCCGTGCATGGCGCT-1-10x | 0.08187819 | 0.2414506  | 0.0031253  |
| 16w_SITTE12_TTCCGTGGTCAGCTTA-1-10x | 0.01996975 | 0.02102299 | 3.55E-05   |
| 16w_SITTE12_TTCCTAACACGTCGGT-1-10x | 0.19027834 | 0.6274138  | 0.0013113  |
| 16w_SITTE12_TTCCTAAGTGCCTCA-1-10x  | 0.26815572 | 0.90469944 | 0.00075594 |
| 16w_SITTE12_TTCCTTCTCGGATACT-1-10x | 0.01734429 | 0.01167493 | 3.38E-05   |
| 16w_SITTE12_TTCGATTCAAATACGA-1-10x | 0.26918653 | 0.90836966 | 0.00075499 |
| 16w_SITTE12_TTCGCTGGTTGGACCC-1-10x | 0.08148313 | 0.24004394 | 0.0031253  |
| 16w_SITTE12_TTCTAACAGAAATCCA-1-10x | 0.22319269 | 0.74460673 | 0.00099599 |
| 16w_SITTE12_TTCTAGTCAGCGTATT-1-10x | 0.05654407 | 0.15124741 | 0.000257   |
| 16w_SITTE12_TTCTGTAAGTTGCGAG-1-10x | 0.25824052 | 0.869396   | 0.000778   |
| 16w_SITTE12_TTCTTCCAGGTGCGAT-1-10x | 0.12044334 | 0.3787634  | 0.0022788  |
| 16w_SITTE12_TTCTTCCCATGCCATA-1-10x | 0.0449838  | 0.11008659 | 9.39E-05   |
| 16w_SITTE12_TTCTTCCGTTTCGTTT-1-10x | 0.01523016 | 0.00414749 | 3.27E-05   |
| 16w_SITTE12_TTGAACGAGGAGAATG-1-10x | 0.24730314 | 0.830453   | 0.0008292  |
| 16w_SITTE12_TTGACCCATAAGATG-1-10x  | 0.10027557 | 0.30695522 | 0.0040879  |
| 16w_SITTE12_TTGAGTGAGATGGGCT-1-10x | 0.15904528 | 0.51620716 | 0.0018209  |
| 16w_SITTE12_TTGAGTGGTTACCGTA-1-10x | 0.0832914  | 0.24648236 | 0.0034742  |
| 16w_SITTE12_TTGATGGTCGTAGCTA-1-10x | 0.19227932 | 0.6345384  | 0.0012861  |
| 16w_SITTE12_TTGCATTCATACAGAA-1-10x | 0.02482783 | 0.0383204  | 3.91E-05   |



|                                    |            |            |            |
|------------------------------------|------------|------------|------------|
| 16w_SITTE12_TTGCATTGTTCAAAGA-1-10x | 0.12605391 | 0.39874008 | 0.0020515  |
| 16w_SITTE12_TTGCCTGCAACTCGAT-1-10x | 0.2094384  | 0.695634   | 0.0011095  |
| 16w_SITTE12_TTGCCTGCAGTTAGGG-1-10x | 0.0348866  | 0.07413509 | 5.37E-05   |
| 16w_SITTE12_TTGCCTGTCAGACCGC-1-10x | 0.2804997  | 0.9486507  | 0.00075348 |
| 16w_SITTE12_TTGCGTCCACATGGTT-1-10x | 0.09372135 | 0.28361866 | 0.0044154  |
| 16w_SITTE12_TTGCTGCTCCCTCTAG-1-10x | 0.02182951 | 0.02764476 | 3.69E-05   |
| 16w_SITTE12_TTGGATGAGCAATAGT-1-10x | 0.26743743 | 0.9021419  | 0.00075705 |
| 16w_SITTE12_TTGGATGCAGGACTTT-1-10x | 0.23072696 | 0.77143276 | 0.00093779 |
| 16w_SITTE12_TTGGATGGTGCAACGA-1-10x | 0.13210936 | 0.42030075 | 0.0019219  |
| 16w_SITTE12_TTGGGATAGTTTGAGA-1-10x | 0.2361373  | 0.79069656 | 0.00090278 |
| 16w_SITTE12_TTGGGATTCACTTATC-1-10x | 0.16541065 | 0.53887135 | 0.0017353  |
| 16w_SITTE12_TTGGGTACTGAGGA-1-10x   | 0.03390663 | 0.07064585 | 5.17E-05   |
| 16w_SITTE12_TTGGGTAGTCCTCCTA-1-10x | 0.02599533 | 0.04247733 | 4.09E-05   |
| 16w_SITTE12_TTGGGTATCGCGGTAC-1-10x | 0.23235178 | 0.77721804 | 0.00093066 |
| 16w_SITTE12_TTGGTTTCAACTTGCA-1-10x | 0.08307191 | 0.24570087 | 0.0033032  |
| 16w_SITTE12_TTGGTTTGTACCCAGC-1-10x | 0.29277363 | 0.99235255 | 0.00076488 |
| 16w_SITTE12_TTGGTTTTCAATCCGA-1-10x | 0.05242977 | 0.13659826 | 0.00017575 |
| 16w_SITTE12_TTGTGGAGTAGATTGA-1-10x | 0.0970218  | 0.29537    | 0.0043435  |
| 16w_SITTE12_TTGTGTTGTTAACCTG-1-10x | 0.25684518 | 0.8644278  | 0.00078463 |
| 16w_SITTE12_TTGTTCATCGAGAACG-1-10x | 0.22038619 | 0.7346141  | 0.0010179  |
| 16w_SITTE12_TTGTGTGCACGGTGCT-1-10x | 0.16248533 | 0.5284556  | 0.001776   |
| 16w_SITTE12_TTGTGTGCAGGAATAT-1-10x | 0.0917166  | 0.27648067 | 0.0043903  |
| 16w_SITTE12_TTGTTTGCAAATGGTA-1-10x | 0.08338769 | 0.24682522 | 0.0034742  |
| 16w_SITTE12_TTGTTTGGTCAAGCGA-1-10x | 0.2415961  | 0.8101328  | 0.00086374 |
| 16w_SITTE12_TTGTTTGTCAGCTCTC-1-10x | 0.03761998 | 0.08386739 | 6.07E-05   |
| 16w_SITTE12_TTTACCACAGTCTTCC-1-10x | 0.03559484 | 0.07665678 | 5.58E-05   |
| 16w_SITTE12_TTTACCACATGTAACC-1-10x | 0.11788109 | 0.3696404  | 0.0023898  |
| 16w_SITTE12_TTTACCATCGTAACTG-1-10x | 0.27100003 | 0.91482675 | 0.00075352 |
| 16w_SITTE12_TTTACGTTACGGGCT-1-10x  | 0.10880668 | 0.33733058 | 0.0032165  |
| 16w_SITTE12_TTTACGTTCTCCTGTG-1-10x | 0.04466983 | 0.10896866 | 9.39E-05   |
| 16w_SITTE12_TTTACTGAGAGAGTTT-1-10x | 0.04516544 | 0.11073331 | 9.39E-05   |
| 16w_SITTE12_TTTACTGAGTATCCTG-1-10x | 0.25523415 | 0.8586917  | 0.00078825 |
| 16w_SITTE12_TTTACTGCACTCCTGT-1-10x | 0.22647287 | 0.7562859  | 0.00097406 |
| 16w_SITTE12_TTTAGTCAGAGCTTTC-1-10x | 0.02462159 | 0.03758609 | 3.91E-05   |
| 16w_SITTE12_TTTATGCAGTTGGAAT-1-10x | 0.02745801 | 0.04768528 | 4.19E-05   |
| 16w_SITTE12_TTTCACAAGATCCCGC-1-10x | 0.03943469 | 0.09032875 | 6.67E-05   |
| 16w_SITTE12_TTTCACACATCTCGTC-1-10x | 0.08642912 | 0.25765437 | 0.0039187  |
| 16w_SITTE12_TTTCACAGTGAATGAT-1-10x | 0.01902165 | 0.01764727 | 3.49E-05   |
| 16w_SITTE12_TTTCACAGTGGTCTTA-1-10x | 0.25040358 | 0.84149224 | 0.00080923 |
| 16w_SITTE12_TTTCAGTTCGCCATAA-1-10x | 0.12635835 | 0.39982402 | 0.0020256  |
| 16w_SITTE12_TTTCAGTTCTACTT-1-10x   | 0.09328038 | 0.28204852 | 0.0044107  |

|                                    |            |            |            |
|------------------------------------|------------|------------|------------|
| 16w_SITTE12_TTTCATGGTGACGTCC-1-10x | 0.04757456 | 0.11931109 | 0.00011598 |
| 16w_SITTE12_TTTCCTCTCAACCCGG-1-10x | 0.04840512 | 0.12226833 | 0.00012523 |
| 16w_SITTE12_TTTCGATCACTGCGAC-1-10x | 0.10549335 | 0.32553336 | 0.0036214  |
| 16w_SITTE12_TTTCGATGTGTCCATA-1-10x | 0.16752346 | 0.5463941  | 0.0017056  |
| 16w_SITTE12_TTTGACTAGTTGTACC-1-10x | 0.07358594 | 0.21192567 | 0.0015819  |
| 16w_SITTE12_TTTGATCCACCAGTAT-1-10x | 0.04937344 | 0.12571608 | 0.00013566 |
| 16w_SITTE12_TTTGATCTCTCGTCAC-1-10x | 0.03765216 | 0.08398197 | 6.07E-05   |
| 16w_SITTE12_TTTGGAGTCGCCGAGT-1-10x | 0.02098182 | 0.02462654 | 3.62E-05   |
| 16w_SITTE12_TTTGGTTGTGAGTTT-1-10x  | 0.20678978 | 0.6862035  | 0.0011344  |
| 16w_SITTE12_TTTGGTTGTTGAGTCT-1-10x | 0.07409167 | 0.21372636 | 0.0017292  |
| 16w_SITTE12_TTTGTTGCAACGACAG-1-10x | 0.02836942 | 0.05093039 | 4.30E-05   |
| 16w_SITTE12_TTTGTTGCAAGGTCTT-1-10x | 0.08629448 | 0.25717497 | 0.0039187  |
| 16w_SITTE12_TTTGTTGCAGCGTGAA-1-10x | 0.06961249 | 0.19777806 | 0.0010821  |
| 16w_SITTE12_TTTGTTGGTCAGACGA-1-10x | 0.08393125 | 0.2487606  | 0.0034742  |
| 16w_SITTE12_TTTGTTGGTACTATC-1-10x  | 0.17934701 | 0.58849233 | 0.0014915  |
| 16w_SITTE12_TTTGTTGTCAAGTCTG-1-10x | 0.18395852 | 0.6049118  | 0.0014112  |
| 16w_SITTE12_AAACCCAGTTCGAGCC-1-10x | 0.02261042 | 0.03042522 | 3.76E-05   |
| 16w_SITTE12_AAAGAACGTCTTCATT-1-10x | 0.07827587 | 0.22862439 | 0.0023954  |
| 16w_SITTE12_AAAGGGCTCCTTTGAT-1-10x | 0.02070492 | 0.02364062 | 3.62E-05   |
| 16w_SITTE12_AAAGTCCCAACAACAA-1-10x | 0.28089494 | 0.950058   | 0.00075348 |
| 16w_SITTE12_AAAGTCCGTCGTAATC-1-10x | 0.11623385 | 0.36377534 | 0.0025211  |
| 16w_SITTE12_AACAACCAGGTGTGAC-1-10x | 0.02303758 | 0.03194614 | 3.83E-05   |
| 16w_SITTE12_AACACACAGAACGTGC-1-10x | 0.09542538 | 0.28968593 | 0.0043808  |
| 16w_SITTE12_AACCACATCCTGCCAT-1-10x | 0.0714936  | 0.20447585 | 0.0013138  |
| 16w_SITTE12_AACGGGAGTGGCTTAT-1-10x | 0.26025254 | 0.87655985 | 0.00077221 |
| 16w_SITTE12_AACGTCACACTGGATT-1-10x | 0.02298494 | 0.03175873 | 3.76E-05   |
| 16w_SITTE12_AACGTCACATGAAGGC-1-10x | 0.04543395 | 0.11168937 | 9.39E-05   |
| 16w_SITTE12_AAGATAGTCGTAGCCG-1-10x | 0.07960033 | 0.23334019 | 0.0027593  |
| 16w_SITTE12_AAGCGTTAGCCTTTCC-1-10x | 0.04902948 | 0.12449138 | 0.00012523 |
| 16w_SITTE12_AATAGAGAGTACAGAT-1-10x | 0.1433046  | 0.46016186 | 0.0018716  |
| 16w_SITTE12_AATAGAGGTTACCCAA-1-10x | 0.03332941 | 0.06859062 | 5.17E-05   |
| 16w_SITTE12_AATGGCTTCGCTAAAC-1-10x | 0.12006888 | 0.3774301  | 0.0022788  |
| 16w_SITTE12_ACAAAGACAGTCCCGA-1-10x | 0.14734045 | 0.47453168 | 0.0018716  |
| 16w_SITTE12_ACAAGCTGTTAGCTAC-1-10x | 0.06383319 | 0.1772006  | 0.00058553 |
| 16w_SITTE12_ACACAGTGTGCCTAAT-1-10x | 0.08910414 | 0.26717886 | 0.0042295  |
| 16w_SITTE12_ACACCAAAGCCATGCC-1-10x | 0.0999199  | 0.30568886 | 0.0041652  |
| 16w_SITTE12_ACACCAAGTGCGAGTA-1-10x | 0.16669202 | 0.5434337  | 0.0017206  |
| 16w_SITTE12_ACACCAATCTCCAAC-1-10x  | 0.25815105 | 0.86907744 | 0.000778   |
| 16w_SITTE12_ACACGCGCAATAGTCC-1-10x | 0.14462355 | 0.46485806 | 0.0018716  |
| 16w_SITTE12_ACATCGACAAGAAACT-1-10x | 0.24467988 | 0.82111275 | 0.00084014 |
| 16w_SITTE12_ACATGCAGTCACAGAG-1-10x | 0.04959394 | 0.12650116 | 0.00013566 |

|                                     |            |            |            |
|-------------------------------------|------------|------------|------------|
| 16w_SITTE12_ACCCTCACAACGGTAG-1-10x  | 0.01861933 | 0.01621479 | 3.49E-05   |
| 16w_SITTE12_ACCCTCATCGTCGACG-1-10x  | 0.02800855 | 0.04964547 | 4.30E-05   |
| 16w_SITTE12_ACCGTTCTGTAAGGCTG-1-10x | 0.06435471 | 0.17905752 | 0.00064991 |
| 16w_SITTE12_ACCGTTCTGATCACGT-1-10x  | 0.03292869 | 0.06716385 | 5.00E-05   |
| 16w_SITTE12_ACGTAGTCACGCTGTG-1-10x  | 0.02085063 | 0.0241594  | 3.62E-05   |
| 16w_SITTE12_ACTATGGAGCGTCGAA-1-10x  | 0.03112425 | 0.06073906 | 4.68E-05   |
| 16w_SITTE12_ACTATCCAAGGCTTT-1-10x   | 0.26691553 | 0.9002837  | 0.00075831 |
| 16w_SITTE12_ACTGATGAGAAGCCAC-1-10x  | 0.08776777 | 0.26242065 | 0.0040384  |
| 16w_SITTE12_AGACACTCAAATGCGG-1-10x  | 0.03911794 | 0.08920092 | 6.67E-05   |
| 16w_SITTE12_AGAGCCCAGGTCGAGT-1-10x  | 0.08809061 | 0.26357016 | 0.0041422  |
| 16w_SITTE12_AGCTACACATCGAACT-1-10x  | 0.07672449 | 0.22310062 | 0.0022191  |
| 16w_SITTE12_AGCTCAAAGGAATCGC-1-10x  | 0.04207064 | 0.09971413 | 7.82E-05   |
| 16w_SITTE12_AGCTTCCTCGCTACGG-1-10x  | 0.15002926 | 0.4841053  | 0.0018694  |
| 16w_SITTE12_AGGAATATCGACCACG-1-10x  | 0.02981838 | 0.05608945 | 4.55E-05   |
| 16w_SITTE12_AGGACGAAGTCGTCTA-1-10x  | 0.09818502 | 0.29951173 | 0.0042345  |
| 16w_SITTE12_AGGATCTTCGGTCACG-1-10x  | 0.07647885 | 0.22222601 | 0.0020486  |
| 16w_SITTE12_AGGCTGCGTCGAACAG-1-10x  | 0.05665814 | 0.15165356 | 0.000257   |
| 16w_SITTE12_AGTACCAGTACAGTAA-1-10x  | 0.02810755 | 0.049998   | 4.30E-05   |
| 16w_SITTE12_AGTCTCCCACGCCAGT-1-10x  | 0.07730532 | 0.22516872 | 0.0022191  |
| 16w_SITTE12_AGTGCCGCACGTAGTT-1-10x  | 0.02331052 | 0.03291797 | 3.83E-05   |
| 16w_SITTE12_AGTTAGCAGCCATATC-1-10x  | 0.10036567 | 0.307276   | 0.0040879  |
| 16w_SITTE12_AGTTAGCCACTTACAG-1-10x  | 0.23335725 | 0.7807981  | 0.00092358 |
| 16w_SITTE12_AGTTGACAATATCCG-1-10x   | 0.01601479 | 0.00694122 | 3.33E-05   |
| 16w_SITTE12_ATACCGAAGGCCTAGA-1-10x  | 0.02378948 | 0.03462333 | 3.83E-05   |
| 16w_SITTE12_ATACCTTAGGAGAGTA-1-10x  | 0.06301259 | 0.17427886 | 0.00052741 |
| 16w_SITTE12_ATAGACCTCGGTGAAG-1-10x  | 0.08371317 | 0.24798413 | 0.0034742  |
| 16w_SITTE12_ATAGGCTAGGATTTGA-1-10x  | 0.01597963 | 0.006816   | 3.33E-05   |
| 16w_SITTE12_ATCAGGTAGGCGTTGA-1-10x  | 0.0300267  | 0.0568312  | 4.55E-05   |
| 16w_SITTE12_ATGAGTCGTTAACAGA-1-10x  | 0.0725389  | 0.20819765 | 0.0014433  |
| 16w_SITTE12_ATGCCTCCATGAGTAA-1-10x  | 0.07659403 | 0.2226361  | 0.0022191  |
| 16w_SITTE12_ATGCGATTCCGATCTC-1-10x  | 0.04079511 | 0.09517258 | 7.01E-05   |
| 16w_SITTE12_ATGTCTTAGCTACTAC-1-10x  | 0.13188155 | 0.41948962 | 0.001934   |
| 16w_SITTE12_ATGTCTTCCAATCCC-1-10x   | 0.14813453 | 0.47735903 | 0.0018713  |
| 16w_SITTE12_ATTACTCCATAGAGGC-1-10x  | 0.01634251 | 0.00810808 | 3.33E-05   |
| 16w_SITTE12_ATTCTTGAGGGAACAA-1-10x  | 0.01537969 | 0.00467992 | 3.27E-05   |
| 16w_SITTE12_ATTTCTGTCTCCAAGA-1-10x  | 0.1906944  | 0.6288952  | 0.0013113  |
| 16w_SITTE12_CAACGGCTCTAGACAC-1-10x  | 0.07450859 | 0.21521084 | 0.0017292  |
| 16w_SITTE12_CAAGAGGTCTAATTCC-1-10x  | 0.08704915 | 0.259862   | 0.0040384  |
| 16w_SITTE12_CAAGCTATCACACCCT-1-10x  | 0.0339215  | 0.07069878 | 5.17E-05   |
| 16w_SITTE12_CAATACGGTATGGAAT-1-10x  | 0.07212987 | 0.20674129 | 0.0014433  |
| 16w_SITTE12_CAATGACCAGAACATA-1-10x  | 0.10703139 | 0.3310096  | 0.0034182  |

|                                      |            |            |            |
|--------------------------------------|------------|------------|------------|
| 16w_SITTE12_CACAACAAGGCGAACT-1-10x   | 0.04560932 | 0.11231377 | 0.00010046 |
| 16w_SITTE12_CACAACACAAATTAGG-1-10x   | 0.01610449 | 0.00726058 | 3.33E-05   |
| 16w_SITTE12_CACAACATCGCACGAC-1-10x   | 0.02192041 | 0.0279684  | 3.69E-05   |
| 16w_SITTE12_CACACAAAGCTCTTCC-1-10x   | 0.03849703 | 0.08699018 | 6.36E-05   |
| 16w_SITTE12_CACACAATCGAGAGAC-1-10x   | 0.07717408 | 0.2247014  | 0.0022191  |
| 16w_SITTE12_CACGTTCCAATCTAGC-1-10x   | 0.01543838 | 0.00488888 | 3.27E-05   |
| 16w_SITTE12_CACTAAGCATCCGGCA-1-10x   | 0.2872296  | 0.9726128  | 0.00075864 |
| 16w_SITTE12_CAGATTGAGGTAAGAG-1-10x   | 0.0272818  | 0.04705786 | 4.19E-05   |
| 16w_SITTE12_CAGCAATTCTACTCAT-1-10x   | 0.07311476 | 0.21024804 | 0.0015819  |
| 16w_SITTE12_CAGCGTGCAGTCGGTC-1-10x   | 0.06581917 | 0.18427177 | 0.00072102 |
| 16w_SITTE12_CAGCGTGTCCCGTGTT-1-10x   | 0.26823345 | 0.9049762  | 0.00075594 |
| 16w_SITTE12_CAGTGCGCATAACCCA-1-10x   | 0.08999535 | 0.2703521  | 0.0042999  |
| 16w_SITTE12_CATAAGCCACATCATG-1-10x   | 0.06012315 | 0.16399089 | 0.00038577 |
| 16w_SITTE12_CATAGACCATAAGCGG-1-10x   | 0.01766166 | 0.01280494 | 3.44E-05   |
| 16w_SITTE12_CATCCGTAGTCGCGAA-1-10x   | 0.08126921 | 0.23928227 | 0.0031253  |
| 16w_SITTE12_CATCGGGCACGACAAG-1-10x   | 0.26611924 | 0.8974485  | 0.00075974 |
| 16w_SITTE12_CATCGTCGTAACGTTC-1-10x   | 0.06868701 | 0.19448283 | 0.00097948 |
| 16w_SITTE12_CCACACTGTAGAATAC-1-10x   | 0.07337727 | 0.2111827  | 0.0015819  |
| 16w_SITTE12_CCACCATAGCAACTTC-1-10x   | 0.19410978 | 0.6410558  | 0.0012624  |
| 16w_SITTE12_CCACGTTAGAACGCGT-1-10x   | 0.07449196 | 0.21515162 | 0.0017292  |
| 16w_SITTE12_CCACTTGTCACGGAGA-1-10x   | 0.11478974 | 0.35863352 | 0.0026715  |
| 16w_SITTE12_CCATAAGAGTGGAAGA-1-10x   | 0.07430013 | 0.21446858 | 0.0017292  |
| 16w_SITTE12_CCATCACCATACAGGG-1-10x   | 0.11511978 | 0.35980865 | 0.002594   |
| 16w_SITTE12_CCCGGAAGTGCTCTTC-1-10x   | 0.02614358 | 0.04300517 | 4.09E-05   |
| 16w_SITTE12_CCCTAACCAACAACAA-1-10x   | 0.19881509 | 0.65780926 | 0.0012085  |
| 16w_SITTE12_CCGAACGCACGACCTG-1-10x   | 0.01873205 | 0.01661612 | 3.49E-05   |
| 16w_SITTE12_CCGATCTGTGTGTGTT-1-10x   | 0.01620614 | 0.00762253 | 3.33E-05   |
| 16w_SITTE12_CCGCAAGCAACTCGAT-1-10x   | 0.2314494  | 0.77400506 | 0.00093779 |
| 16w_SITTE12_CCGCAAGTCATTCACT-1-10x   | 0.08061028 | 0.23693615 | 0.0029431  |
| 16w_SITTE12_CCGGGTACACTCCGGA-1-10x   | 0.13457899 | 0.42909396 | 0.0019027  |
| 16w_SITTE12_CCGGTGAAGTTGCTGT-1-10x   | 0.1176123  | 0.36868334 | 0.002453   |
| 16w_SITTE12_CCTAACCGTGCGGCTT-1-10x   | 0.0372699  | 0.0826209  | 6.07E-05   |
| 16w_SITTE12_CCTAACCTCTTGATTC-1-10x   | 0.01811579 | 0.0144219  | 3.44E-05   |
| 16w_SITTE12_CCTAAGAGTATGTCTG-1-10x   | 0.07687917 | 0.22365136 | 0.0022191  |
| 16w_SITTE12_CCTACGTTGCCTTGT-1-10x    | 0.01697696 | 0.01036704 | 3.38E-05   |
| 16w_SITTE12_CCTCAGTGACGCTTA-1-10x    | 0.07084199 | 0.20215575 | 0.0011935  |
| 16w_SITTE12_CCTGCATAGCAAGTCG-1-10x   | 0.01981575 | 0.02047468 | 3.55E-05   |
| 16w_SITTE12_CCTGTTGTCCAGTGG-1-10x    | 0.0387911  | 0.0880372  | 6.36E-05   |
| 16w_SITTE12_CGAGTTACAAGTACTGTA-1-10x | 0.0412379  | 0.09674915 | 7.40E-05   |
| 16w_SITTE12_CGATGCGAGAGGCTGT-1-10x   | 0.17855597 | 0.5856758  | 0.0015081  |
| 16w_SITTE12_CGCAGGTCAGGTTTAC-1-10x   | 0.04772288 | 0.11983917 | 0.00011598 |

|                                     |            |            |            |
|-------------------------------------|------------|------------|------------|
| 16w_SITTE12_CGGCAGTTCTACCCAC-1-10x  | 0.09296954 | 0.28094178 | 0.0044107  |
| 16w_SITTE12_CGGGTCAGTATCGATC-1-10x  | 0.17720239 | 0.5808563  | 0.0015248  |
| 16w_SITTE12_CGGGTGTTCAAGCGTT-1-10x  | 0.01625426 | 0.00779385 | 3.33E-05   |
| 16w_SITTE12_CGGTCAGTCTTCCAGC-1-10x  | 0.09563486 | 0.2904318  | 0.0043808  |
| 16w_SITTE12_CGTCCATAGTTGTAGA-1-10x  | 0.26054153 | 0.8775888  | 0.00077221 |
| 16w_SITTE12_CGTGTCTGTCCTCATC-1-10x  | 0.10259207 | 0.3152032  | 0.0039137  |
| 16w_SITTE12_CGTTAGACACGTCGTG-1-10x  | 0.1202933  | 0.37822917 | 0.0022788  |
| 16w_SITTE12_CTACCCAGTCGCCACA-1-10x  | 0.07889139 | 0.23081595 | 0.002576   |
| 16w_SITTE12_CTACGGGTCTTACACT-1-10x  | 0.03495591 | 0.07438187 | 5.37E-05   |
| 16w_SITTE12_CTATAGGTCTCTCTT-1-10x   | 0.04908343 | 0.12468349 | 0.00012523 |
| 16w_SITTE12_CTCAGTGGTCTCCTG-1-10x   | 0.01865061 | 0.01632614 | 3.49E-05   |
| 16w_SITTE12_CTCAGGGTCTCATTAC-1-10x  | 0.21476029 | 0.7145828  | 0.0010625  |
| 16w_SITTE12_CTCAGTCCATCTGCGG-1-10x  | 0.17189701 | 0.5619663  | 0.0016256  |
| 16w_SITTE12_CTCCAACAGCTGGTGA-1-10x  | 0.167644   | 0.54682326 | 0.0016902  |
| 16w_SITTE12_CTCCGATCATCGCTCT-1-10x  | 0.14706452 | 0.47354922 | 0.0018716  |
| 16w_SITTE12_CTCCTCCAGATACATG-1-10x  | 0.07514121 | 0.21746331 | 0.001885   |
| 16w_SITTE12_CTCCTCCGTGACCGTC-1-10x  | 0.03648771 | 0.07983588 | 5.82E-05   |
| 16w_SITTE12_CTCCTTTAGAGCACTG-1-10x  | 0.03547252 | 0.07622126 | 5.58E-05   |
| 16w_SITTE12_CTCTCAGCACCGTGAC-1-10x  | 0.0970621  | 0.2955135  | 0.0043435  |
| 16w_SITTE12_CTCTCAGGTGCGCTAG-1-10x  | 0.04266504 | 0.10183053 | 7.82E-05   |
| 16w_SITTE12_CTGAATGTCTTAGCCC-1-10x  | 0.22841857 | 0.7632137  | 0.00095947 |
| 16w_SITTE12_CTGAGCGGTGCTCGTG-1-10x  | 0.23119359 | 0.77309424 | 0.00093779 |
| 16w_SITTE12_CGTGATTCATTACAG-1-10x   | 0.08953483 | 0.26871234 | 0.0042295  |
| 16w_SITTE12_CTTAGGAGTTCGGACC-1-10x  | 0.04610629 | 0.11408325 | 0.00010046 |
| 16w_SITTE12_CTTCGGTAGAGATTCA-1-10x  | 0.09018736 | 0.2710357  | 0.0042999  |
| 16w_SITTE12_CTTCGGTCAATAGTGA-1-10x  | 0.03986522 | 0.09186165 | 6.67E-05   |
| 16w_SITTE12_CTTTCAAAGCGTGCTC-1-10x  | 0.04558963 | 0.11224368 | 0.00010046 |
| 16w_SITTE12_GAAGCCCAGTCTGGAG-1-10x  | 0.17122675 | 0.55957985 | 0.0016421  |
| 16w_SITTE12_GAAGCGAAGGGTAATT-1-10x  | 0.02905024 | 0.05335445 | 4.42E-05   |
| 16w_SITTE12_GAAGCGACACTGTTCC-1-10x  | 0.02880065 | 0.0524658  | 4.42E-05   |
| 16w_SITTE12_GAATCGTAGTTGTACC-1-10x  | 0.22795713 | 0.7615707  | 0.00095947 |
| 16w_SITTE12_GAATCGTTCGCGAGT-1-10x   | 0.08998491 | 0.2703149  | 0.0042999  |
| 16w_SITTE12_GACCCAGGTCTGGTTA-1-10x  | 0.08828131 | 0.26424918 | 0.0041422  |
| 16w_SITTE12_GACCCTTGTTCCGCTT-1-10x  | 0.25865448 | 0.8708699  | 0.000778   |
| 16w_SITTE12_GACTCTCAGCATGCGA-1-10x  | 0.07594356 | 0.22032009 | 0.0020486  |
| 16w_SITTE12_GAGACCCGTTTCGCTC-1-10x  | 0.07751986 | 0.22593258 | 0.0023954  |
| 16w_SITTE12_GAGACTTGTTGGTTTGT-1-10x | 0.04742307 | 0.11877171 | 0.00011598 |
| 16w_SITTE12_GAGATGGTCTCGACGG-1-10x  | 0.04705988 | 0.11747853 | 0.00010777 |
| 16w_SITTE12_GAGCCTGTACATTGG-1-10x   | 0.08792123 | 0.26296705 | 0.0041422  |
| 16w_SITTE12_GAGGGATTAGTGCGC-1-10x   | 0.04337692 | 0.1043652  | 8.29E-05   |
| 16w_SITTE12_GAGTTGTGTATTCCT-1-10x   | 0.05817822 | 0.15706587 | 0.00031414 |

|                                     |            |            |            |
|-------------------------------------|------------|------------|------------|
| 16w_SITTE12_GAGTTGTTCCAAGTGA-1-10x  | 0.03676574 | 0.08082583 | 5.82E-05   |
| 16w_SITTE12_GATGACTAGTTTGGCT-1-10x  | 0.05900307 | 0.16000278 | 0.00034795 |
| 16w_SITTE12_GCACATAAGATTGGGC-1-10x  | 0.01631232 | 0.00800058 | 3.33E-05   |
| 16w_SITTE12_GCACGGTTCAAGGTGG-1-10x  | 0.28676    | 0.97094077 | 0.00075773 |
| 16w_SITTE12_GCAGCTGGTAATGCTC-1-10x  | 0.07850515 | 0.22944073 | 0.002576   |
| 16w_SITTE12_GCATCTCTCCCTGTTG-1-10x  | 0.22644386 | 0.7561826  | 0.00097406 |
| 16w_SITTE12_GCATTAGGTATAGGGC-1-10x  | 0.14999075 | 0.4839682  | 0.0018694  |
| 16w_SITTE12_GCCAGCACATCGTTCC-1-10x  | 0.04442231 | 0.10808737 | 8.81E-05   |
| 16w_SITTE12_GCCGATGAGATCGACG-1-10x  | 0.01921633 | 0.01834043 | 3.49E-05   |
| 16w_SITTE12_GCGTTTCCACCAAAGG-1-10x  | 0.04973284 | 0.12699574 | 0.00013566 |
| 16w_SITTE12_GCTACCTGTAGGAGTC-1-10x  | 0.02485132 | 0.03840404 | 3.91E-05   |
| 16w_SITTE12_GCTCAAAGTGGACTAG-1-10x  | 0.09487563 | 0.2877285  | 0.0044051  |
| 16w_SITTE12_GCTCAAAGTGTTAGCT-1-10x  | 0.06022028 | 0.1643367  | 0.00038577 |
| 16w_SITTE12_GCTGCAGGTCTTCAAG-1-10x  | 0.09222809 | 0.2783018  | 0.0043903  |
| 16w_SITTE12_GCTTTCGTCTAATTCC-1-10x  | 0.04368456 | 0.10546057 | 8.81E-05   |
| 16w_SITTE12_GGCACGTTCACTACGA-1-10x  | 0.01510674 | 0.00370806 | 3.27E-05   |
| 16w_SITTE12_GGCTGTGTCCCGAGGT-1-10x  | 0.0530822  | 0.13892128 | 0.00019264 |
| 16w_SITTE12_GGCTTTCAGACGCCCT-1-10x  | 0.04788642 | 0.12042146 | 0.00011598 |
| 16w_SITTE12_GGGACAAAGCACCAGA-1-10x  | 0.04598033 | 0.11363475 | 0.00010046 |
| 16w_SITTE12_GGGCCATGTACAAGCG-1-10x  | 0.0355084  | 0.07634903 | 5.58E-05   |
| 16w_SITTE12_GGGTCACGTGTGTACT-1-10x  | 0.04478304 | 0.10937177 | 9.39E-05   |
| 16w_SITTE12_GGGTCTGTCTATC-1-10x     | 0.04756875 | 0.11929041 | 0.00011598 |
| 16w_SITTE12_GGGTGTCTCAACGTGT-1-10x  | 0.17914762 | 0.5877824  | 0.0014915  |
| 16w_SITTE12_GGGTTTATCGGAGATG-1-10x  | 0.07708409 | 0.224381   | 0.0022191  |
| 16w_SITTE12_GGTAAGTGTGGGATG-1-10x   | 0.11729065 | 0.36753812 | 0.002453   |
| 16w_SITTE12_GGTGTGCGAGACCTGGA-1-10x | 0.01686981 | 0.00998554 | 3.38E-05   |
| 16w_SITTE12_GGTTGTACATCTTAGG-1-10x  | 0.04490048 | 0.10978993 | 9.39E-05   |
| 16w_SITTE12_GTAGGTTTCATAGAGA-1-10x  | 0.18761635 | 0.61793566 | 0.0013519  |
| 16w_SITTE12_GTCACTCGTAGTTAGA-1-10x  | 0.13894467 | 0.44463816 | 0.0018772  |
| 16w_SITTE12_GTCATCCCAATACGAA-1-10x  | 0.14033481 | 0.44958782 | 0.001875   |
| 16w_SITTE12_GTCATCCTCCGTGGGT-1-10x  | 0.14794746 | 0.47669297 | 0.0018713  |
| 16w_SITTE12_GTCCTCACAATTTCTC-1-10x  | 0.09004056 | 0.27051303 | 0.0042999  |
| 16w_SITTE12_GTCGTAACACGGTCTG-1-10x  | 0.02930328 | 0.05425543 | 4.42E-05   |
| 16w_SITTE12_GTGAGCCCATAAGCAA-1-10x  | 0.05353706 | 0.14054084 | 0.00019264 |
| 16w_SITTE12_GTGAGCCGTCGCACAC-1-10x  | 0.0850735  | 0.2528276  | 0.0037839  |
| 16w_SITTE12_GTGAGTTTCTTCCACG-1-10x  | 0.08572043 | 0.25513104 | 0.0037839  |
| 16w_SITTE12_GTGGAAGGTGACACAG-1-10x  | 0.23613028 | 0.7906715  | 0.00090278 |
| 16w_SITTE12_GTGGAGAAGGGTACGT-1-10x  | 0.03500759 | 0.07456585 | 5.37E-05   |
| 16w_SITTE12_GTGTGGCGTACTCA-1-10x    | 0.20657626 | 0.6854432  | 0.0011344  |
| 16w_SITTE12_GTTATGGCAGGTCTCG-1-10x  | 0.21782036 | 0.7254783  | 0.00104    |
| 16w_SITTE12_GTTATGGTCCGACGGT-1-10x  | 0.19942321 | 0.6599745  | 0.0012085  |

|                                     |            |            |            |
|-------------------------------------|------------|------------|------------|
| 16w_SITTE12_GTTCGCTCATCCGGTG-1-10x  | 0.04664941 | 0.11601706 | 0.00010777 |
| 16w_SITTE12_GTTCGCTTCGAACCAT-1-10x  | 0.07889534 | 0.23083001 | 0.002576   |
| 16w_SITTE12_GTTGAACCAACTAGAA-1-10x  | 0.09620753 | 0.29247078 | 0.0043808  |
| 16w_SITTE12_GTTGCTCGTGGCCTCA-1-10x  | 0.11069155 | 0.34404173 | 0.0030221  |
| 16w_SITTE12_GTTGCTCTCTCTATAC-1-10x  | 0.03458347 | 0.07305577 | 5.37E-05   |
| 16w_SITTE12_GTTTACTCAGGCTACC-1-10x  | 0.12427038 | 0.39238974 | 0.0021124  |
| 16w_SITTE12_GTTTGGACAAGTGCTT-1-10x  | 0.07030647 | 0.20024899 | 0.0011935  |
| 16w_SITTE12_GTTTGGAGTGTTTCTT-1-10x  | 0.1656315  | 0.5396577  | 0.0017353  |
| 16w_SITTE12_TACACCCTCTAAGCGT-1-10x  | 0.04718813 | 0.1179352  | 0.00010777 |
| 16w_SITTE12_TACAGGTGTATCGGTT-1-10x  | 0.20479251 | 0.6790921  | 0.0011518  |
| 16w_SITTE12_TACAGGTTCTGCCTGT-1-10x  | 0.03538334 | 0.07590374 | 5.58E-05   |
| 16w_SITTE12_TACTTACGTATGTCTG-1-10x  | 0.08717658 | 0.26031575 | 0.0040384  |
| 16w_SITTE12_TAGACCACAACCCTAA-1-10x  | 0.0522347  | 0.13590372 | 0.00017575 |
| 16w_SITTE12_TAGGTTGCACGAAAGC-1-10x  | 0.05434392 | 0.14341366 | 0.00021164 |
| 16w_SITTE12_TATCGCCCATGGACAG-1-10x  | 0.24510124 | 0.822613   | 0.00084014 |
| 16w_SITTE12_TATGTTCTCCTACTGC-1-10x  | 0.01823537 | 0.01484767 | 3.44E-05   |
| 16w_SITTE12_TCAATCTTCGTGAGAG-1-10x  | 0.04933181 | 0.12556784 | 0.00013566 |
| 16w_SITTE12_TCACACCTCGAGCCTG-1-10x  | 0.03732947 | 0.082833   | 6.07E-05   |
| 16w_SITTE12_TCACTATAGGTCATAA-1-10x  | 0.24797061 | 0.83282954 | 0.00082396 |
| 16w_SITTE12_TCACTCGTCCATTCAT-1-10x  | 0.04622766 | 0.11451538 | 0.00010046 |
| 16w_SITTE12_TCAGCAAGTTCTCTCG-1-10x  | 0.08422501 | 0.24980652 | 0.0036353  |
| 16w_SITTE12_TCAGTTTAGATAGTGT-1-10x  | 0.08189347 | 0.24150498 | 0.0031253  |
| 16w_SITTE12_TCCACCAAGATGCTGG-1-10x  | 0.07845344 | 0.22925663 | 0.002576   |
| 16w_SITTE12_TCCACCAAGGAACGTC-1-10x  | 0.07730466 | 0.22516635 | 0.0022191  |
| 16w_SITTE12_TCCATCGGTATTAAGG-1-10x  | 0.03202847 | 0.06395859 | 4.83E-05   |
| 16w_SITTE12_TCCACATCTCAACCC-1-10x   | 0.04019949 | 0.09305182 | 7.01E-05   |
| 16w_SITTE12_TCCTAATGTCTGTCCT-1-10x  | 0.04844346 | 0.12240485 | 0.00012523 |
| 16w_SITTE12_TCGCACTAGAGAAGGT-1-10x  | 0.02427126 | 0.03633872 | 3.91E-05   |
| 16w_SITTE12_TCGCTTGCACCTTCGT-1-10x  | 0.0308598  | 0.0597975  | 4.68E-05   |
| 16w_SITTE12_TCGGGACAGGCATTTTC-1-10x | 0.03938709 | 0.09015924 | 6.67E-05   |
| 16w_SITTE12_TCGGGCATCGTAATGC-1-10x  | 0.07885425 | 0.23068371 | 0.002576   |
| 16w_SITTE12_TCGTAGAGTAGGAGGG-1-10x  | 0.23513743 | 0.7871365  | 0.00090964 |
| 16w_SITTE12_TCGTAGATCTACTATC-1-10x  | 0.13902462 | 0.4449228  | 0.0018772  |
| 16w_SITTE12_TCTCAGCTCTAGAACC-1-10x  | 0.09003181 | 0.27048188 | 0.0042999  |
| 16w_SITTE12_TCTGGCTTCCAACCTGA-1-10x | 0.09720583 | 0.29602528 | 0.0042943  |
| 16w_SITTE12_TGACGCGAGGCATGCA-1-10x  | 0.04342752 | 0.10454536 | 8.29E-05   |
| 16w_SITTE12_TGACTCCCAGATACCT-1-10x  | 0.02362831 | 0.03404946 | 3.83E-05   |
| 16w_SITTE12_TGAGCATGTCGGATTT-1-10x  | 0.03878734 | 0.08802383 | 6.36E-05   |
| 16w_SITTE12_TGAGCGCAGACCCTTA-1-10x  | 0.0435728  | 0.10506266 | 8.29E-05   |
| 16w_SITTE12_TGATGCATCACTCACC-1-10x  | 0.08163144 | 0.240572   | 0.0031253  |
| 16w_SITTE12_TGCACGGGTCGCGTCA-1-10x  | 0.03474089 | 0.07361626 | 5.37E-05   |

|                                     |            |            |            |
|-------------------------------------|------------|------------|------------|
| 16w_SITTE12_TGCAGATCAGCGTTGC-1-10x  | 0.07042016 | 0.2006538  | 0.0011935  |
| 16w_SITTE12_TGCATCCGTGCTTCAA-1-10x  | 0.05617556 | 0.1499353  | 0.000257   |
| 16w_SITTE12_TGCATGAGTAGAGGAA-1-10x  | 0.01971496 | 0.02011583 | 3.55E-05   |
| 16w_SITTE12_TGCTCCAGTGTGGCA-1-10x   | 0.03812311 | 0.08565881 | 6.36E-05   |
| 16w_SITTE12_TGCTCGTAGGTAATCA-1-10x  | 0.24048863 | 0.80618966 | 0.00086997 |
| 16w_SITTE12_TGGATCATCCATTCGC-1-10x  | 0.28329003 | 0.9585858  | 0.00075531 |
| 16w_SITTE12_TGGGTTATCATCTCTA-1-10x  | 0.26419014 | 0.8905798  | 0.00076313 |
| 16w_SITTE12_TGTCCTGTCCGAAATC-1-10x  | 0.09316886 | 0.2816515  | 0.0044107  |
| 16w_SITTE12_TGTGAGTGTGGTTGG-1-10x   | 0.23856263 | 0.799332   | 0.00088278 |
| 16w_SITTE12_TGTGGCGAGATTGATG-1-10x  | 0.03511571 | 0.07495082 | 5.37E-05   |
| 16w_SITTE12_TGTTTGTGTCTCACGG-1-10x  | 0.09488932 | 0.28777725 | 0.0044051  |
| 16w_SITTE12_TTAATCCGTGATAGTA-1-10x  | 0.1332794  | 0.42446673 | 0.0019115  |
| 16w_SITTE12_TTACGCCGTCTGTGGC-1-10x  | 0.08500793 | 0.25259414 | 0.0037839  |
| 16w_SITTE12_TTAGGGTAGCTCCACG-1-10x  | 0.26796424 | 0.9040177  | 0.00075705 |
| 16w_SITTE12_TTCACGCAGCACAAAT-1-10x  | 0.04799827 | 0.12081972 | 0.00011598 |
| 16w_SITTE12_TTCCAATCACACTA-1-10x    | 0.22716457 | 0.75874877 | 0.00096676 |
| 16w_SITTE12_TTCCTAAGTTGCCTAA-1-10x  | 0.07543761 | 0.21851863 | 0.001885   |
| 16w_SITTE12_TTCGATTAGTACTGTC-1-10x  | 0.02081814 | 0.02404375 | 3.62E-05   |
| 16w_SITTE12_TTCTAACCATCTATCT-1-10x  | 0.04278719 | 0.10226546 | 8.29E-05   |
| 16w_SITTE12_TTGCCTGTCTCTAGGA-1-10x  | 0.07875747 | 0.23033914 | 0.002576   |
| 16w_SITTE12_TTGTGGAGTGGTAACG-1-10x  | 0.01773248 | 0.01305711 | 3.44E-05   |
| 16w_SITTE12_TTGTTCAAGTATGTGTC-1-10x | 0.20903046 | 0.6941815  | 0.0011095  |
| 16w_SITTE12_TTGTTCAAGTGTGCCG-1-10x  | 0.04257309 | 0.10150313 | 7.82E-05   |
| 16w_SITTE12_TTTACCACAAGGCTTT-1-10x  | 0.05740693 | 0.15431966 | 0.00028394 |
| 16w_SITTE12_TTTACCATCCGTGGTG-1-10x  | 0.12922631 | 0.41003555 | 0.0019639  |
| 16w_SITTE12_TTTAGTCTCGGAAACG-1-10x  | 0.09330869 | 0.28214934 | 0.0044107  |
| 13-SS2                              | 0.11328566 | 0.3532782  | 0.0027534  |
| 14-SS2                              | 0.04097059 | 0.09579738 | 7.40E-05   |
| 15-SS2                              | 0.04070639 | 0.09485668 | 7.01E-05   |
| 24-SS2                              | 0.03444473 | 0.07256179 | 5.37E-05   |
| 28-SS2                              | 0.05013773 | 0.12843736 | 0.00013566 |
| 33-SS2                              | 0.02463893 | 0.03764781 | 3.91E-05   |
| 36-SS2                              | 0.0821088  | 0.24227169 | 0.0031253  |
| 39-SS2                              | 0.09057311 | 0.2724092  | 0.0042999  |
| 41-SS2                              | 0.02296131 | 0.03167457 | 3.76E-05   |
| 42-SS2                              | 0.02332793 | 0.03297994 | 3.83E-05   |
| 48-SS2                              | 0.04992604 | 0.12768361 | 0.00013566 |
| 53-SS2                              | 0.04936914 | 0.12570077 | 0.00013566 |
| 57-SS2                              | 0.0886472  | 0.26555192 | 0.0041422  |
| 59-SS2                              | 0.12501594 | 0.39504436 | 0.0020803  |
| 65-SS2                              | 0.01868896 | 0.01646272 | 3.49E-05   |



|         |            |            |            |
|---------|------------|------------|------------|
| 75-SS2  | 0.05892524 | 0.15972567 | 0.00034795 |
| 79-SS2  | 0.04734528 | 0.11849471 | 0.00010777 |
| 80-SS2  | 0.02398587 | 0.03532256 | 3.91E-05   |
| 83-SS2  | 0.04007044 | 0.09259237 | 7.01E-05   |
| 88-SS2  | 0.01606688 | 0.00712667 | 3.33E-05   |
| 89-SS2  | 0.03985917 | 0.0918401  | 6.67E-05   |
| 98-SS2  | 0.07674038 | 0.22315723 | 0.0022191  |
| 102-SS2 | 0.05018702 | 0.12861286 | 0.00013566 |
| 105-SS2 | 0.03750413 | 0.08345489 | 6.07E-05   |
| 109-SS2 | 0.07451491 | 0.21523333 | 0.0017292  |
| 110-SS2 | 0.07604596 | 0.22068469 | 0.0020486  |
| 113-SS2 | 0.04374666 | 0.10568168 | 8.81E-05   |
| 118-SS2 | 0.01623523 | 0.0077261  | 3.33E-05   |
| 119-SS2 | 0.06125361 | 0.16801591 | 0.00042799 |
| 124-SS2 | 0.04381068 | 0.10590965 | 8.81E-05   |
| 127-SS2 | 0.10839281 | 0.33585697 | 0.0033168  |
| 129-SS2 | 0.26665425 | 0.89935344 | 0.00075831 |
| 131-SS2 | 0.04058021 | 0.09440741 | 7.01E-05   |
| 134-SS2 | 0.04852686 | 0.12270178 | 0.00012523 |
| 138-SS2 | 0.02178037 | 0.02746979 | 3.69E-05   |
| 139-SS2 | 0.22181392 | 0.7396975  | 0.0010106  |
| 141-SS2 | 0.01515968 | 0.00389657 | 3.27E-05   |
| 154-SS2 | 0.17377898 | 0.5686672  | 0.0015922  |
| 156-SS2 | 0.08487684 | 0.2521274  | 0.0036353  |
| 160-SS2 | 0.04198012 | 0.09939184 | 7.82E-05   |
| 165-SS2 | 0.03225887 | 0.06477895 | 4.83E-05   |
| 168-SS2 | 0.04378649 | 0.10582349 | 8.81E-05   |
| 175-SS2 | 0.07960236 | 0.2333474  | 0.0027593  |
| 184-SS2 | 0.05903816 | 0.1601277  | 0.00034795 |
| 191-SS2 | 0.06831318 | 0.19315182 | 0.00097948 |
| 194-SS2 | 0.04049252 | 0.09409517 | 7.01E-05   |
| 196-SS2 | 0.02835845 | 0.0508913  | 4.30E-05   |
| 200-SS2 | 0.05746051 | 0.15451041 | 0.00028394 |
| 206-SS2 | 0.03798322 | 0.08516072 | 6.07E-05   |
| 207-SS2 | 0.0786902  | 0.23009962 | 0.002576   |
| 217-SS2 | 0.01609235 | 0.00721738 | 3.33E-05   |
| 219-SS2 | 0.04403526 | 0.10670926 | 8.81E-05   |
| 225-SS2 | 0.06376138 | 0.17694496 | 0.00058553 |
| 230-SS2 | 0.02167236 | 0.02708524 | 3.69E-05   |
| 236-SS2 | 0.04477745 | 0.10935184 | 9.39E-05   |
| 237-SS2 | 0.13615945 | 0.43472126 | 0.0018891  |

|         |            |            |            |
|---------|------------|------------|------------|
| 240-SS2 | 0.03053126 | 0.05862769 | 4.68E-05   |
| 244-SS2 | 0.28754616 | 0.9737399  | 0.00075864 |
| 245-SS2 | 0.29325593 | 0.99406976 | 0.00076488 |
| 246-SS2 | 0.03044413 | 0.05831748 | 4.55E-05   |
| 250-SS2 | 0.27449188 | 0.9272596  | 0.00075233 |
| 251-SS2 | 0.02158159 | 0.02676203 | 3.69E-05   |
| 252-SS2 | 0.09788487 | 0.29844305 | 0.0042943  |
| 260-SS2 | 0.04019217 | 0.09302579 | 7.01E-05   |
| 261-SS2 | 0.0510486  | 0.13168056 | 0.00014746 |
| 265-SS2 | 0.07376401 | 0.21255973 | 0.0017292  |
| 271-SS2 | 0.15207016 | 0.49137202 | 0.0018651  |
| 277-SS2 | 0.15694997 | 0.50874674 | 0.0018385  |
| 281-SS2 | 0.05119292 | 0.13219441 | 0.00016076 |
| 294-SS2 | 0.0719341  | 0.20604424 | 0.0014433  |
| 297-SS2 | 0.0647075  | 0.18031362 | 0.00064991 |
| 300-SS2 | 0.02510208 | 0.03929689 | 4.00E-05   |
| 307-SS2 | 0.02393907 | 0.03515594 | 3.91E-05   |
| 308-SS2 | 0.04483363 | 0.10955189 | 9.39E-05   |
| 311-SS2 | 0.03175477 | 0.06298408 | 4.83E-05   |
| 317-SS2 | 0.04644751 | 0.11529817 | 0.00010046 |
| 320-SS2 | 0.08977623 | 0.2695719  | 0.0042999  |
| 323-SS2 | 0.11171126 | 0.34767246 | 0.002929   |
| 325-SS2 | 0.07896418 | 0.23107514 | 0.002576   |
| 326-SS2 | 0.03716475 | 0.08224653 | 6.07E-05   |
| 333-SS2 | 0.06762514 | 0.190702   | 0.00088537 |
| 334-SS2 | 0.07566951 | 0.21934435 | 0.0020486  |
| 336-SS2 | 0.0259544  | 0.04233161 | 4.09E-05   |
| 337-SS2 | 0.11024839 | 0.34246388 | 0.0031181  |
| 338-SS2 | 0.04307633 | 0.10329495 | 8.29E-05   |
| 339-SS2 | 0.14870992 | 0.47940776 | 0.0018713  |
| 341-SS2 | 0.1478134  | 0.47621563 | 0.0018716  |
| 342-SS2 | 0.24257934 | 0.8136337  | 0.00085764 |
| 352-SS2 | 0.2579755  | 0.8684523  | 0.000778   |
| 362-SS2 | 0.04294428 | 0.10282479 | 8.29E-05   |
| 366-SS2 | 0.1150463  | 0.35954702 | 0.002594   |
| 374-SS2 | 0.03278487 | 0.06665177 | 5.00E-05   |
| 381-SS2 | 0.01666368 | 0.0092516  | 3.38E-05   |
| 386-SS2 | 0.0184237  | 0.01551822 | 3.49E-05   |
| 388-SS2 | 0.01852593 | 0.01588222 | 3.49E-05   |
| 395-SS2 | 0.03624576 | 0.07897441 | 5.82E-05   |
| 396-SS2 | 0.03277665 | 0.06662253 | 5.00E-05   |

|         |            |            |            |
|---------|------------|------------|------------|
| 397-SS2 | 0.04152428 | 0.09776883 | 7.40E-05   |
| 416-SS2 | 0.01871006 | 0.01653783 | 3.49E-05   |
| 422-SS2 | 0.04969814 | 0.12687217 | 0.00013566 |
| 423-SS2 | 0.05021035 | 0.12869592 | 0.00013566 |
| 428-SS2 | 0.2726151  | 0.9205773  | 0.000753   |
| 429-SS2 | 0.04601554 | 0.11376012 | 0.00010046 |
| 431-SS2 | 0.01528435 | 0.00434044 | 3.27E-05   |
| 432-SS2 | 0.02608169 | 0.04278481 | 4.09E-05   |
| 434-SS2 | 0.04726366 | 0.11820412 | 0.00010777 |
| 440-SS2 | 0.01501398 | 0.00337779 | 3.27E-05   |
| 441-SS2 | 0.03282804 | 0.06680547 | 5.00E-05   |
| 452-SS2 | 0.01577396 | 0.00608372 | 3.33E-05   |
| 453-SS2 | 0.04184916 | 0.09892555 | 7.82E-05   |
| 457-SS2 | 0.03048842 | 0.05847517 | 4.55E-05   |
| 462-SS2 | 0.03202691 | 0.06395304 | 4.83E-05   |
| 464-SS2 | 0.03392059 | 0.07069556 | 5.17E-05   |
| 465-SS2 | 0.03145355 | 0.06191157 | 4.83E-05   |
| 469-SS2 | 0.02569316 | 0.04140146 | 4.00E-05   |
| 470-SS2 | 0.03865165 | 0.08754069 | 6.36E-05   |
| 471-SS2 | 0.04634927 | 0.1149484  | 0.00010046 |
| 483-SS2 | 0.05055796 | 0.1299336  | 0.00014746 |
| 491-SS2 | 0.10022888 | 0.30678898 | 0.0040879  |
| 499-SS2 | 0.03134477 | 0.06152424 | 4.68E-05   |
| 507-SS2 | 0.07655947 | 0.22251306 | 0.0022191  |
| 511-SS2 | 0.02915403 | 0.05372402 | 4.42E-05   |
| 518-SS2 | 0.04175947 | 0.09860622 | 7.40E-05   |
| 530-SS2 | 0.02074753 | 0.02379233 | 3.62E-05   |
| 546-SS2 | 0.02400068 | 0.03537531 | 3.91E-05   |
| 550-SS2 | 0.01982887 | 0.02052141 | 3.55E-05   |
| 556-SS2 | 0.04632357 | 0.11485689 | 0.00010046 |
| 559-SS2 | 0.01818525 | 0.01466924 | 3.44E-05   |
| 560-SS2 | 0.04920363 | 0.12511145 | 0.00012523 |
| 562-SS2 | 0.04757603 | 0.11931632 | 0.00011598 |
| 567-SS2 | 0.01737948 | 0.01180025 | 3.44E-05   |
| 568-SS2 | 0.01761333 | 0.01263288 | 3.44E-05   |
| 572-SS2 | 0.02095358 | 0.02452597 | 3.62E-05   |
| 590-SS2 | 0.02273173 | 0.03085716 | 3.76E-05   |
| 593-SS2 | 0.01862374 | 0.01623048 | 3.49E-05   |
| 594-SS2 | 0.04325621 | 0.10393543 | 8.29E-05   |
| 598-SS2 | 0.01641755 | 0.00837525 | 3.38E-05   |
| 606-SS2 | 0.02083774 | 0.02411353 | 3.62E-05   |

|         |            |            |            |
|---------|------------|------------|------------|
| 611-SS2 | 0.02033665 | 0.02232939 | 3.62E-05   |
| 618-SS2 | 0.03354674 | 0.06936443 | 5.17E-05   |
| 620-SS2 | 0.06240973 | 0.17213231 | 0.00047505 |
| 628-SS2 | 0.02248754 | 0.0299877  | 3.76E-05   |
| 635-SS2 | 0.0317923  | 0.0631177  | 4.83E-05   |
| 637-SS2 | 0.03555368 | 0.07651025 | 5.58E-05   |
| 640-SS2 | 0.01823859 | 0.01485914 | 3.44E-05   |
| 641-SS2 | 0.04538544 | 0.11151663 | 9.39E-05   |
| 644-SS2 | 0.02023729 | 0.0219756  | 3.62E-05   |
| 651-SS2 | 0.0164805  | 0.0085994  | 3.38E-05   |
| 659-SS2 | 0.04517967 | 0.11078399 | 9.39E-05   |
| 666-SS2 | 0.03555965 | 0.07653152 | 5.58E-05   |
| 673-SS2 | 0.04293574 | 0.10279439 | 8.29E-05   |
| 679-SS2 | 0.03695643 | 0.08150478 | 5.82E-05   |
| 683-SS2 | 0.01676084 | 0.00959754 | 3.38E-05   |
| 689-SS2 | 0.01676072 | 0.00959712 | 3.38E-05   |
| 695-SS2 | 0.02101916 | 0.02475949 | 3.62E-05   |
| 717-SS2 | 0.04322038 | 0.10380785 | 8.29E-05   |
| 720-SS2 | 0.02614618 | 0.04301444 | 4.09E-05   |
| 721-SS2 | 0.0856685  | 0.25494614 | 0.0037839  |
| 725-SS2 | 0.01605676 | 0.00709063 | 3.33E-05   |
| 729-SS2 | 0.04491453 | 0.10983993 | 9.39E-05   |
| 736-SS2 | 0.05633837 | 0.15051499 | 0.000257   |
| 750-SS2 | 0.04832901 | 0.12199734 | 0.00011598 |
| 764-SS2 | 0.03668342 | 0.08053274 | 5.82E-05   |
| 773-SS2 | 0.02644295 | 0.04407112 | 4.09E-05   |
| 787-SS2 | 0.01695158 | 0.01027669 | 3.38E-05   |
| 789-SS2 | 0.03877824 | 0.08799143 | 6.36E-05   |
| 792-SS2 | 0.04881116 | 0.12371404 | 0.00012523 |
| 805-SS2 | 0.02875667 | 0.0523092  | 4.42E-05   |
| 807-SS2 | 0.01717971 | 0.01108895 | 3.38E-05   |
| 810-SS2 | 0.07635722 | 0.22179294 | 0.0020486  |
| 819-SS2 | 0.06990916 | 0.19883434 | 0.0010821  |
| 827-SS2 | 0.01548454 | 0.00505322 | 3.33E-05   |
| 831-SS2 | 0.0548952  | 0.14537653 | 0.00021164 |
| 842-SS2 | 0.07718301 | 0.2247332  | 0.0022191  |
| 844-SS2 | 0.02750131 | 0.04783943 | 4.19E-05   |
| 848-SS2 | 0.03549127 | 0.07628803 | 5.58E-05   |
| 852-SS2 | 0.04673858 | 0.11633454 | 0.00010777 |
| 854-SS2 | 0.04625616 | 0.11461686 | 0.00010046 |
| 855-SS2 | 0.18061158 | 0.5929949  | 0.001475   |

|          |            |            |            |
|----------|------------|------------|------------|
| 866-SS2  | 0.2535032  | 0.8525286  | 0.00079608 |
| 868-SS2  | 0.0838189  | 0.24836056 | 0.0034742  |
| 870-SS2  | 0.02151024 | 0.02650798 | 3.69E-05   |
| 879-SS2  | 0.03017609 | 0.05736311 | 4.55E-05   |
| 890-SS2  | 0.16408545 | 0.5341529  | 0.0017494  |
| 892-SS2  | 0.0411466  | 0.09642407 | 7.40E-05   |
| 893-SS2  | 0.26859093 | 0.90624905 | 0.00075594 |
| 896-SS2  | 0.25510883 | 0.8582455  | 0.00078825 |
| 897-SS2  | 0.04902544 | 0.124477   | 0.00012523 |
| 900-SS2  | 0.02260704 | 0.03041318 | 3.76E-05   |
| 903-SS2  | 0.03783943 | 0.08464876 | 6.07E-05   |
| 904-SS2  | 0.02292062 | 0.0315297  | 3.76E-05   |
| 907-SS2  | 0.01855496 | 0.0159856  | 3.49E-05   |
| 909-SS2  | 0.16020791 | 0.52034676 | 0.0018     |
| 910-SS2  | 0.01970691 | 0.02008717 | 3.55E-05   |
| 917-SS2  | 0.09201587 | 0.27754623 | 0.0043903  |
| 924-SS2  | 0.2768543  | 0.93567115 | 0.00075222 |
| 930-SS2  | 0.06793737 | 0.19181374 | 0.00088537 |
| 934-SS2  | 0.08331285 | 0.24655877 | 0.0034742  |
| 935-SS2  | 0.04730744 | 0.11835999 | 0.00010777 |
| 936-SS2  | 0.04535309 | 0.11140145 | 9.39E-05   |
| 937-SS2  | 0.03560482 | 0.07669233 | 5.58E-05   |
| 940-SS2  | 0.05027838 | 0.12893817 | 0.00014746 |
| 942-SS2  | 0.05124309 | 0.13237306 | 0.00016076 |
| 949-SS2  | 0.01624761 | 0.00777016 | 3.33E-05   |
| 951-SS2  | 0.12118953 | 0.38142022 | 0.0022308  |
| 953-SS2  | 0.04047484 | 0.09403224 | 7.01E-05   |
| 954-SS2  | 0.03384581 | 0.07042931 | 5.17E-05   |
| 957-SS2  | 0.04263451 | 0.10172182 | 7.82E-05   |
| 962-SS2  | 0.08798458 | 0.26319265 | 0.0041422  |
| 967-SS2  | 0.03894823 | 0.08859669 | 6.36E-05   |
| 974-SS2  | 0.02686259 | 0.04556524 | 4.19E-05   |
| 976-SS2  | 0.01629582 | 0.00794182 | 3.33E-05   |
| 983-SS2  | 0.04257742 | 0.10151855 | 7.82E-05   |
| 1004-SS2 | 0.0200805  | 0.02141733 | 3.55E-05   |
| 1007-SS2 | 0.03721218 | 0.08241541 | 6.07E-05   |
| 1011-SS2 | 0.04460446 | 0.10873593 | 9.39E-05   |
| 1012-SS2 | 0.0275787  | 0.048115   | 4.19E-05   |
| 1018-SS2 | 0.0839591  | 0.24885973 | 0.0034742  |
| 1022-SS2 | 0.02055798 | 0.02311743 | 3.62E-05   |
| 1023-SS2 | 0.04438414 | 0.10795146 | 8.81E-05   |

|          |            |            |            |
|----------|------------|------------|------------|
| 1031-SS2 | 0.04274539 | 0.10211662 | 8.29E-05   |
| 1043-SS2 | 0.04476008 | 0.10929002 | 9.39E-05   |
| 1052-SS2 | 0.03953459 | 0.09068443 | 6.67E-05   |
| 1055-SS2 | 0.01621787 | 0.0076643  | 3.33E-05   |
| 1056-SS2 | 0.0292033  | 0.05389944 | 4.42E-05   |
| 1060-SS2 | 0.0188514  | 0.01704108 | 3.49E-05   |
| 1064-SS2 | 0.044757   | 0.10927905 | 9.39E-05   |
| 1067-SS2 | 0.02603454 | 0.04261695 | 4.09E-05   |
| 1071-SS2 | 0.11228705 | 0.3497226  | 0.0028393  |
| 1079-SS2 | 0.02424106 | 0.03623118 | 3.91E-05   |
| 1080-SS2 | 0.01609856 | 0.00723946 | 3.33E-05   |
| 1083-SS2 | 0.04212715 | 0.09991536 | 7.82E-05   |
| 1087-SS2 | 0.0484251  | 0.12233949 | 0.00012523 |
| 1092-SS2 | 0.02587156 | 0.04203664 | 4.09E-05   |
| 1103-SS2 | 0.04348169 | 0.10473825 | 8.29E-05   |
| 1109-SS2 | 0.01552603 | 0.00520097 | 3.33E-05   |
| 1112-SS2 | 0.01564911 | 0.0056392  | 3.33E-05   |
| 1113-SS2 | 0.02114684 | 0.02521407 | 3.69E-05   |
| 1116-SS2 | 0.02199039 | 0.02821758 | 3.69E-05   |
| 1118-SS2 | 0.10847794 | 0.3361601  | 0.0032165  |
| 1122-SS2 | 0.03069465 | 0.05920947 | 4.68E-05   |
| 1124-SS2 | 0.01608531 | 0.0071923  | 3.33E-05   |
| 1135-SS2 | 0.04166711 | 0.09827735 | 7.40E-05   |
| 1140-SS2 | 0.02614418 | 0.04300733 | 4.09E-05   |
| 1143-SS2 | 0.04115    | 0.09643617 | 7.40E-05   |
| 1151-SS2 | 0.03153025 | 0.06218467 | 4.83E-05   |
| 1159-SS2 | 0.01900839 | 0.01760006 | 3.49E-05   |
| 1175-SS2 | 0.04009777 | 0.09268968 | 7.01E-05   |
| 1179-SS2 | 0.05179515 | 0.13433868 | 0.00016076 |
| 1181-SS2 | 0.01560402 | 0.00547865 | 3.33E-05   |
| 1187-SS2 | 0.01576745 | 0.00606054 | 3.33E-05   |
| 1188-SS2 | 0.01812432 | 0.01445227 | 3.44E-05   |
| 1193-SS2 | 0.05392638 | 0.14192702 | 0.00019264 |
| 1195-SS2 | 0.03771412 | 0.08420258 | 6.07E-05   |
| 1204-SS2 | 0.04737237 | 0.11859117 | 0.00010777 |
| 1205-SS2 | 0.0191373  | 0.01805905 | 3.49E-05   |
| 1215-SS2 | 0.0221111  | 0.02864739 | 3.76E-05   |
| 1223-SS2 | 0.01667172 | 0.00928025 | 3.38E-05   |
| 1227-SS2 | 0.02344243 | 0.03338762 | 3.83E-05   |
| 1233-SS2 | 0.0198754  | 0.02068706 | 3.55E-05   |
| 1240-SS2 | 0.02301141 | 0.03185295 | 3.83E-05   |

|          |            |            |           |
|----------|------------|------------|-----------|
| 1241-SS2 | 0.03765414 | 0.083989   | 6.07E-05  |
| 1243-SS2 | 0.02560086 | 0.04107282 | 4.00E-05  |
| 1244-SS2 | 0.03485631 | 0.07402721 | 5.37E-05  |
| 1246-SS2 | 0.01852834 | 0.0158908  | 3.49E-05  |
| 1250-SS2 | 0.04204536 | 0.09962414 | 7.82E-05  |
| 1256-SS2 | 0.04160262 | 0.09804776 | 7.40E-05  |
| 1259-SS2 | 0.02024341 | 0.02199737 | 3.62E-05  |
| 1276-SS2 | 0.01544121 | 0.00489896 | 3.27E-05  |
| 1279-SS2 | 0.02302526 | 0.03190228 | 3.83E-05  |
| 1285-SS2 | 0.1207611  | 0.3798948  | 0.0022308 |

| <b>diff_rate</b> | <b>net_proliferation</b> |
|------------------|--------------------------|
| 0.0084694        | 0.50845                  |
| 0.0092171        | -0.0058338               |
| 0.032389         | -1.0771                  |
| 0.00894          | 0.6398                   |
| 0.033642         | -0.95303                 |
| 0.083714         | 0.04663                  |
| 0.0078823        | 0.33401                  |
| 0.0072071        | 0.11821                  |
| 0.032743         | -1.0111                  |
| 0.092718         | 0.030934                 |
| 0.0090104        | 0.65886                  |
| 0.08799          | 0.040962                 |
| 0.012958         | 0.0021206                |
| 0.032474         | -1.0393                  |
| 0.0089841        | -0.0064176               |
| 0.038348         | -0.7654                  |
| 0.03239          | -1.0557                  |
| 0.041454         | 0.035337                 |
| 0.092718         | 0.030934                 |
| 0.0072071        | 0.11821                  |
| 0.042008         | -0.63085                 |
| 0.057264         | -0.31669                 |
| 0.034106         | -1.1486                  |
| 0.0073793        | 0.17468                  |
| 0.032474         | -1.0393                  |
| 0.033792         | -1.1419                  |
| 0.049567         | 0.040812                 |
| 0.09204          | 0.032017                 |
| 0.0072386        | 0.12857                  |
| 0.0077085        | -0.0060189               |
| 0.0080815        | -0.007536                |
| 0.042008         | -0.65431                 |
| 0.016066         | 0.0079609                |
| 0.007147         | 0.0078041                |
| 0.0080815        | -0.007536                |
| 0.032861         | -1.1149                  |
| 0.0070589        | 0.066311                 |
| 0.032462         | -1.0894                  |
| 0.007306         | 0.15072                  |
| 0.099669         | 0.06705                  |



|           |            |
|-----------|------------|
| 0.033948  | -1.1453    |
| 0.078448  | 0.050932   |
| 0.0072071 | 0.11821    |
| 0.086106  | 0.04308    |
| 0.09204   | 0.033125   |
| 0.016809  | 0.0092115  |
| 0.0075002 | 0.21378    |
| 0.0074182 | 0.17468    |
| 0.10264   | 0.061137   |
| 0.0070401 | 0.021497   |
| 0.0071773 | 0.10834    |
| 0.007306  | 0.15072    |
| 0.0083433 | 0.47199    |
| 0.007306  | 0.15072    |
| 0.10264   | 0.061137   |
| 0.08918   | 0.040962   |
| 0.095533  | 0.06518    |
| 0.0092171 | -0.0064176 |
| 0.0070309 | 0.052688   |
| 0.010731  | -0.0019027 |
| 0.091453  | 0.055137   |
| 0.0090816 | 0.67796    |
| 0.0070776 | 0.073782   |
| 0.033353  | -1.1312    |
| 0.070527  | 0.051118   |
| 0.0081619 | 0.41861    |
| 0.023303  | 0.018425   |
| 0.0072715 | 0.13941    |
| 0.007123  | 0.090103   |
| 0.014706  | 0.0055346  |
| 0.010048  | -0.0044341 |
| 0.011114  | -0.0009612 |
| 0.0075877 | 0.2418     |
| 0.080287  | 0.049748   |
| 0.010376  | -0.0036418 |
| 0.0097473 | -0.0051686 |
| 0.0071773 | 0.10834    |
| 0.032875  | -0.98966   |
| 0.032462  | -1.0894    |
| 0.0087331 | 0.58295    |
| 0.0081037 | 0.40122    |

|           |            |
|-----------|------------|
| 0.038348  | -0.7654    |
| 0.0072715 | 0.13941    |
| 0.0072071 | 0.11821    |
| 0.0085994 | 0.54547    |
| 0.012448  | 0.001053   |
| 0.0085339 | 0.52689    |
| 0.10347   | 0.024827   |
| 0.0070581 | 0.017584   |
| 0.0070159 | 0.035368   |
| 0.0088702 | 0.62079    |
| 0.0111114 | -0.0019027 |
| 0.0074333 | -0.0026829 |
| 0.084293  | 0.04497    |
| 0.013504  | 0.0032251  |
| 0.072398  | 0.051693   |
| 0.085509  | 0.020095   |
| 0.0087331 | 0.58295    |
| 0.0089841 | -0.006908  |
| 0.0088013 | 0.60183    |
| 0.0073419 | 0.15072    |
| 0.033642  | -0.95303   |
| 0.070056  | -0.10826   |
| 0.0081037 | 0.40122    |
| 0.007306  | 0.13941    |
| 0.05467   | -0.34019   |
| 0.10347   | 0.024827   |
| 0.036619  | -0.82536   |
| 0.0081619 | 0.41861    |
| 0.039695  | -0.72239   |
| 0.0083433 | 0.47199    |
| 0.0071894 | 0.0027978  |
| 0.007821  | -0.0067106 |
| 0.032462  | -1.0894    |
| 0.0086658 | 0.56416    |
| 0.0079906 | 0.36712    |
| 0.043079  | 0.037634   |
| 0.016809  | 0.010484   |
| 0.1035    | 0.057058   |
| 0.10485   | 0.033276   |
| 0.0078823 | 0.33401    |
| 0.0079451 | -0.0072122 |

|           |            |
|-----------|------------|
| 0.0073419 | 0.16248    |
| 0.033208  | -0.97806   |
| 0.007123  | 0.090103   |
| 0.061361  | -0.22652   |
| 0.034855  | -0.89503   |
| 0.0071773 | 0.10834    |
| 0.085509  | 0.020095   |
| 0.0072387 | 0.0027978  |
| 0.013504  | 0.0032251  |
| 0.0083953 | -0.0076979 |
| 0.036619  | -0.82536   |
| 0.10441   | 0.047424   |
| 0.039844  | 0.034143   |
| 0.0082213 | 0.43621    |
| 0.0081037 | 0.40122    |
| 0.00783   | 0.31787    |
| 0.0082313 | -0.0076979 |
| 0.0070309 | 0.052688   |
| 0.011527  | -0.0009612 |
| 0.013504  | 0.0032251  |
| 0.0084694 | 0.50845    |
| 0.0074585 | 0.20034    |
| 0.017596  | 0.010484   |
| 0.0072386 | 0.12857    |
| 0.03669   | 0.031675   |
| 0.098575  | 0.024065   |
| 0.007022  | 0.046511   |
| 0.07879   | -0.031991  |
| 0.052201  | -0.38803   |
| 0.012448  | 0.001053   |
| 0.0071491 | 0.098977   |
| 0.057178  | 0.045278   |
| 0.0075433 | 0.2276     |
| 0.0072071 | 0.11821    |
| 0.0083953 | -0.0076979 |
| 0.10264   | 0.061137   |
| 0.0070589 | 0.066311   |
| 0.0092171 | -0.0064176 |
| 0.0070776 | 0.073782   |
| 0.032418  | -1.0834    |
| 0.0079359 | 0.35043    |

|           |            |
|-----------|------------|
| 0.0079451 | -0.0072122 |
| 0.026825  | 0.022479   |
| 0.083714  | 0.04663    |
| 0.0071491 | 0.098977   |
| 0.0070818 | 0.014005   |
| 0.032544  | -1.0304    |
| 0.0081037 | 0.40122    |
| 0.021206  | 0.015736   |
| 0.0072715 | 0.13941    |
| 0.055952  | -0.34019   |
| 0.0111114 | -0.0019027 |
| 0.010048  | -0.0036418 |
| 0.007099  | 0.081709   |
| 0.082013  | 0.048674   |
| 0.007306  | 0.15072    |
| 0.0088702 | 0.62079    |
| 0.10183   | 0.022512   |
| 0.037156  | -0.80605   |
| 0.0097473 | -0.0044341 |
| 0.071533  | -0.09116   |
| 0.007123  | 0.090103   |
| 0.0071113 | 0.0078041  |
| 0.007779  | 0.30202    |
| 0.082903  | 0.0020229  |
| 0.032743  | -1.0111    |
| 0.0070433 | 0.052688   |
| 0.0080466 | 0.36712    |
| 0.0070159 | 0.035368   |
| 0.046637  | -0.53455   |
| 0.011972  | 2.49E-05   |
| 0.0075433 | 0.2276     |
| 0.048754  | -0.4856    |
| 0.090012  | 0.036534   |
| 0.0071491 | 0.098977   |
| 0.055952  | -0.34019   |
| 0.011527  | -0.0009612 |
| 0.0094709 | -0.0051686 |
| 0.012448  | 0.0021206  |
| 0.0090104 | 0.65886    |
| 0.0083953 | -0.0076979 |
| 0.0085746 | -0.0075602 |

|           |            |
|-----------|------------|
| 0.0075877 | 0.2418     |
| 0.0072071 | 0.11821    |
| 0.096059  | 0.027005   |
| 0.0077085 | -0.0067106 |
| 0.0072715 | 0.13941    |
| 0.0075433 | 0.2276     |
| 0.0079451 | -0.0072122 |
| 0.081558  | 0.0020229  |
| 0.010731  | -0.0027971 |
| 0.026825  | 0.022479   |
| 0.0085339 | 0.52689    |
| 0.087374  | 0.041005   |
| 0.074911  | 0.051821   |
| 0.0074333 | -0.0040171 |
| 0.007779  | 0.28647    |
| 0.03303   | -0.97806   |
| 0.015366  | 0.0067344  |
| 0.016066  | 0.0079609  |
| 0.014706  | 0.0067344  |
| 0.007306  | 0.15072    |
| 0.032743  | -1.0111    |
| 0.0082313 | -0.0076979 |
| 0.055719  | 0.044471   |
| 0.033494  | -1.1349    |
| 0.094574  | 0.061313   |
| 0.007821  | -0.0067106 |
| 0.0072071 | 0.11821    |
| 0.0094709 | -0.0058338 |
| 0.10485   | 0.03138    |
| 0.00783   | 0.31787    |
| 0.032875  | -1.0007    |
| 0.0070776 | 0.073782   |
| 0.0071491 | 0.098977   |
| 0.024427  | 0.019776   |
| 0.032423  | -1.0477    |
| 0.007821  | -0.0067106 |
| 0.032633  | -1.021     |
| 0.10228   | 0.022987   |
| 0.10494   | 0.037598   |
| 0.0071491 | 0.090103   |
| 0.10455   | 0.028193   |

|           |            |
|-----------|------------|
| 0.010731  | -0.0027971 |
| 0.063888  | 0.048637   |
| 0.0071773 | 0.098977   |
| 0.0075877 | 0.2418     |
| 0.0070433 | 0.059284   |
| 0.0072955 | -0.0011105 |
| 0.085489  | 0.044052   |
| 0.0073793 | 0.17468    |
| 0.0085746 | -0.0072929 |
| 0.0073793 | 0.17468    |
| 0.032373  | -1.0632    |
| 0.0072715 | 0.13941    |
| 0.0071894 | 0.0051576  |
| 0.0082818 | 0.45401    |
| 0.039844  | 0.034143   |
| 0.10036   | 0.06649    |
| 0.032544  | -1.0304    |
| 0.097321  | 0.06633    |
| 0.032418  | -1.0834    |
| 0.10494   | 0.039956   |
| 0.0094709 | -0.0058338 |
| 0.026825  | 0.022479   |
| 0.0071491 | 0.098977   |
| 0.011527  | -0.0009612 |
| 0.011972  | 2.49E-05   |
| 0.0070272 | 0.025758   |
| 0.084221  | 0.011497   |
| 0.032423  | -1.0477    |
| 0.007147  | 0.0078041  |
| 0.095533  | 0.063518   |
| 0.03276   | -1.1104    |
| 0.0081037 | 0.40122    |
| 0.046342  | 0.039792   |
| 0.0071773 | 0.10834    |
| 0.0090816 | 0.67796    |
| 0.032205  | 0.027815   |
| 0.032588  | -1.1005    |
| 0.068581  | -0.1449    |
| 0.0097473 | -0.0051686 |
| 0.0086658 | 0.56416    |
| 0.0076807 | 0.27125    |

|           |            |
|-----------|------------|
| 0.078448  | 0.050932   |
| 0.075932  | -0.059632  |
| 0.010048  | -0.0044341 |
| 0.016809  | 0.0092115  |
| 0.045635  | -0.5589    |
| 0.010376  | -0.0036418 |
| 0.0072071 | 0.11821    |
| 0.052201  | -0.41225   |
| 0.036619  | -0.82536   |
| 0.007306  | 0.15072    |
| 0.052701  | 0.042727   |
| 0.026825  | 0.022479   |
| 0.007306  | 0.15072    |
| 0.084884  | 0.04497    |
| 0.030791  | 0.026496   |
| 0.095403  | 0.027005   |
| 0.0092171 | -0.0064176 |
| 0.03239   | -1.0557    |
| 0.0339    | -0.92541   |
| 0.032205  | 0.027815   |
| 0.032861  | -1.1149    |
| 0.0085746 | -0.0075602 |
| 0.032633  | -1.021     |
| 0.014706  | 0.0055346  |
| 0.101     | 0.065585   |
| 0.014086  | 0.004364   |
| 0.010048  | -0.0044341 |
| 0.0073602 | -0.0011105 |
| 0.066276  | 0.049656   |
| 0.045635  | -0.5589    |
| 0.048754  | -0.4856    |
| 0.0081037 | 0.40122    |
| 0.0073602 | -0.0011105 |
| 0.033642  | -0.95303   |
| 0.0072071 | 0.11821    |
| 0.10494   | 0.039956   |
| 0.0088013 | 0.60183    |
| 0.0087704 | -0.0072929 |
| 0.015366  | 0.0079609  |
| 0.007099  | 0.073782   |
| 0.0083953 | -0.0076979 |

|           |            |
|-----------|------------|
| 0.0079906 | 0.36712    |
| 0.011114  | -0.0009612 |
| 0.0070433 | 0.059284   |
| 0.0083433 | 0.47199    |
| 0.0081037 | 0.40122    |
| 0.03239   | -1.0557    |
| 0.090686  | 0.035391   |
| 0.053419  | -0.38803   |
| 0.081558  | -0.008361  |
| 0.10228   | 0.022987   |
| 0.0083953 | -0.0075602 |
| 0.0082818 | 0.45401    |
| 0.012958  | 0.0021206  |
| 0.013504  | 0.004364   |
| 0.037733  | -0.78604   |
| 0.090335  | 0.046386   |
| 0.019306  | 0.013082   |
| 0.0085746 | -0.0075602 |
| 0.0087704 | -0.0072929 |
| 0.043745  | -0.6071    |
| 0.0097473 | -0.0051686 |
| 0.00783   | 0.31787    |
| 0.007123  | 0.090103   |
| 0.0072715 | 0.13941    |
| 0.0088013 | 0.60183    |
| 0.0072386 | 0.12857    |
| 0.0075433 | 0.2276     |
| 0.0094709 | -0.0058338 |
| 0.049567  | 0.041791   |
| 0.0090816 | 0.67796    |
| 0.0088702 | 0.62079    |
| 0.0071773 | 0.10834    |
| 0.0097473 | -0.0051686 |
| 0.0074585 | 0.1873     |
| 0.0071773 | 0.10834    |
| 0.10228   | 0.022987   |
| 0.0071894 | 0.0051576  |
| 0.082578  | 0.04737    |
| 0.1003    | 0.022572   |
| 0.041199  | -0.67741   |
| 0.10488   | 0.039956   |



|           |            |
|-----------|------------|
| 0.033641  | -1.1384    |
| 0.033092  | -1.1234    |
| 0.0082213 | 0.43621    |
| 0.0084694 | 0.50845    |
| 0.0079451 | -0.0072122 |
| 0.032373  | -1.0632    |
| 0.10183   | 0.022679   |
| 0.025601  | 0.021128   |
| 0.034187  | -0.92541   |
| 0.081445  | 0.048674   |
| 0.0084694 | 0.50845    |
| 0.0072071 | 0.11821    |
| 0.044711  | 0.038732   |
| 0.0073793 | 0.17468    |
| 0.0079906 | 0.36712    |
| 0.0072386 | 0.12857    |
| 0.0070589 | 0.066311   |
| 0.099669  | 0.06705    |
| 0.0079451 | -0.007536  |
| 0.011527  | -0.0009612 |
| 0.0084694 | 0.50845    |
| 0.012448  | 0.001053   |
| 0.093395  | 0.030934   |
| 0.0077085 | -0.0060189 |
| 0.071483  | 0.05136    |
| 0.078448  | 0.050932   |
| 0.032474  | -1.0393    |
| 0.03276   | -1.1104    |
| 0.0086658 | 0.56416    |
| 0.0072715 | 0.13941    |
| 0.034855  | -0.89503   |
| 0.0071773 | 0.10834    |
| 0.0072386 | 0.11821    |
| 0.0070309 | 0.052688   |
| 0.0075002 | 0.21378    |
| 0.015366  | 0.0067344  |
| 0.0074182 | 0.1873     |
| 0.0080466 | 0.38405    |
| 0.0085746 | -0.0075602 |
| 0.0074585 | 0.20034    |
| 0.094574  | 0.061313   |

|           |            |
|-----------|------------|
| 0.0087331 | 0.58295    |
| 0.044711  | 0.037634   |
| 0.0073793 | 0.17468    |
| 0.0073419 | 0.16248    |
| 0.077795  | 0.051216   |
| 0.0083953 | -0.0076979 |
| 0.0092171 | -0.0064176 |
| 0.0070192 | 0.030378   |
| 0.037733  | -0.78604   |
| 0.0080466 | 0.38405    |
| 0.0077085 | -0.0060189 |
| 0.033641  | -1.1384    |
| 0.047964  | 0.040812   |
| 0.0084058 | 0.49014    |
| 0.007779  | 0.30202    |
| 0.016809  | 0.0092115  |
| 0.067111  | -0.16433   |
| 0.062629  | 0.048056   |
| 0.010731  | -0.0027971 |
| 0.010376  | -0.0036418 |
| 0.05467   | -0.36399   |
| 0.039695  | -0.72239   |
| 0.088023  | 0.039917   |
| 0.042008  | -0.63085   |
| 0.10036   | 0.065585   |
| 0.035158  | 0.030407   |
| 0.010731  | -0.0019027 |
| 0.0080466 | 0.38405    |
| 0.052701  | 0.042727   |
| 0.0071894 | 0.0051576  |
| 0.0081037 | 0.40122    |
| 0.0085994 | 0.54547    |
| 0.0070192 | 0.030378   |
| 0.0070589 | 0.066311   |
| 0.0073602 | -0.0011105 |
| 0.018428  | 0.011775   |
| 0.011972  | 0.001053   |
| 0.040428  | -0.70012   |
| 0.045635  | -0.5589    |
| 0.082903  | 0.011497   |
| 0.0074182 | 0.1873     |

|           |            |
|-----------|------------|
| 0.1038    | 0.02577    |
| 0.10415   | 0.049934   |
| 0.007306  | 0.15072    |
| 0.085489  | 0.04308    |
| 0.0075433 | 0.2276     |
| 0.0071773 | 0.098977   |
| 0.095533  | 0.063518   |
| 0.033948  | -1.1453    |
| 0.077795  | 0.051216   |
| 0.059971  | -0.24839   |
| 0.086766  | 0.027849   |
| 0.10309   | 0.057058   |
| 0.0339    | -0.93955   |
| 0.065104  | 0.04917    |
| 0.035661  | -0.86174   |
| 0.0070159 | 0.035368   |
| 0.0071491 | 0.098977   |
| 0.033641  | -1.1384    |
| 0.0073419 | 0.16248    |
| 0.033641  | -1.1384    |
| 0.023303  | 0.019776   |
| 0.016066  | 0.0079609  |
| 0.035158  | 0.030407   |
| 0.033641  | -1.1384    |
| 0.0087704 | -0.006908  |
| 0.016066  | 0.0092115  |
| 0.0074585 | 0.20034    |
| 0.09204   | 0.032017   |
| 0.095403  | 0.027913   |
| 0.10183   | 0.022679   |
| 0.10485   | 0.03138    |
| 0.02223   | 0.017077   |
| 0.0070192 | 0.030378   |
| 0.096059  | 0.02616    |
| 0.0079451 | -0.0072122 |
| 0.0088702 | 0.62079    |
| 0.10083   | 0.022479   |
| 0.0074182 | 0.1873     |
| 0.0090816 | 0.67796    |
| 0.014706  | 0.0055346  |
| 0.042857  | -0.63085   |

|           |            |
|-----------|------------|
| 0.090335  | 0.0511     |
| 0.04467   | -0.5831    |
| 0.016809  | 0.0092115  |
| 0.010731  | -0.0027971 |
| 0.1035    | 0.057058   |
| 0.0074182 | 0.1873     |
| 0.0080466 | 0.38405    |
| 0.0073793 | 0.16248    |
| 0.042008  | -0.65431   |
| 0.061327  | 0.048056   |
| 0.0075153 | -0.0040171 |
| 0.014706  | 0.0055346  |
| 0.0073419 | 0.16248    |
| 0.10434   | 0.028193   |
| 0.035158  | 0.031675   |
| 0.041454  | 0.036502   |
| 0.079079  | 0.050932   |
| 0.0075877 | 0.2418     |
| 0.0070818 | 0.014005   |
| 0.012958  | 0.0032251  |
| 0.096059  | 0.027005   |
| 0.0072071 | 0.11821    |
| 0.0087704 | -0.006908  |
| 0.043745  | -0.6071    |
| 0.032861  | -1.1149    |
| 0.0074182 | 0.1873     |
| 0.0089841 | -0.0064176 |
| 0.0072386 | 0.12857    |
| 0.016066  | 0.0079609  |
| 0.0071773 | 0.10834    |
| 0.018428  | 0.011775   |
| 0.099669  | 0.06705    |
| 0.097342  | 0.024682   |
| 0.082903  | 0.0020229  |
| 0.015366  | 0.0079609  |
| 0.0070776 | 0.066311   |
| 0.032544  | -1.0304    |
| 0.083714  | 0.04583    |
| 0.011527  | 2.49E-05   |
| 0.057264  | -0.31669   |
| 0.068489  | 0.050826   |

|           |            |
|-----------|------------|
| 0.044711  | 0.037634   |
| 0.074476  | -0.074934  |
| 0.043745  | -0.6071    |
| 0.007821  | -0.0072122 |
| 0.037156  | -0.80605   |
| 0.016809  | 0.0092115  |
| 0.039002  | -0.74417   |
| 0.0088013 | 0.60183    |
| 0.0088702 | 0.62079    |
| 0.0089841 | -0.006908  |
| 0.0087331 | 0.58295    |
| 0.0090104 | 0.65886    |
| 0.0071773 | 0.10834    |
| 0.05467   | -0.36399   |
| 0.086735  | 0.042062   |
| 0.09204   | 0.032017   |
| 0.017596  | 0.011775   |
| 0.038348  | -0.7654    |
| 0.0079906 | 0.36712    |
| 0.0071773 | 0.10834    |
| 0.097966  | 0.024682   |
| 0.032389  | -1.0771    |
| 0.1038    | 0.02577    |
| 0.016809  | 0.0092115  |
| 0.0072071 | 0.11821    |
| 0.0085994 | 0.54547    |
| 0.0070776 | 0.073782   |
| 0.0079359 | 0.35043    |
| 0.0097473 | -0.0051686 |
| 0.061361  | -0.22652   |
| 0.0070159 | 0.035368   |
| 0.033219  | -1.1274    |
| 0.0076807 | 0.27125    |
| 0.10264   | 0.061137   |
| 0.10083   | 0.022572   |
| 0.0339    | -0.93955   |
| 0.0073602 | -0.0011105 |
| 0.0072071 | 0.11821    |
| 0.085489  | 0.044052   |
| 0.007779  | 0.30202    |
| 0.03303   | -0.98966   |

|           |            |
|-----------|------------|
| 0.0071894 | 0.0027978  |
| 0.0087704 | -0.0072929 |
| 0.0070159 | 0.035368   |
| 0.024427  | 0.021128   |
| 0.0071773 | 0.10834    |
| 0.014706  | 0.0055346  |
| 0.05467   | -0.36399   |
| 0.041199  | -0.67741   |
| 0.0071491 | 0.098977   |
| 0.099669  | 0.06705    |
| 0.0090104 | 0.65886    |
| 0.032474  | -1.0393    |
| 0.034505  | -0.91058   |
| 0.057178  | 0.04604    |
| 0.061327  | 0.048056   |
| 0.019306  | 0.014403   |
| 0.092533  | 0.05853    |
| 0.042008  | -0.63085   |
| 0.0073793 | 0.17468    |
| 0.0070169 | 0.040742   |
| 0.0070589 | 0.066311   |
| 0.094069  | 0.028875   |
| 0.090012  | 0.035391   |
| 0.0085339 | 0.52689    |
| 0.0077292 | 0.28647    |
| 0.0070433 | 0.059284   |
| 0.011972  | 2.49E-05   |
| 0.0075002 | 0.21378    |
| 0.0094709 | -0.0058338 |
| 0.0072955 | 0.00071242 |
| 0.0073419 | 0.16248    |
| 0.007306  | 0.15072    |
| 0.010376  | -0.0036418 |
| 0.0071113 | 0.010749   |
| 0.0070159 | 0.035368   |
| 0.0081037 | 0.40122    |
| 0.0088702 | 0.62079    |
| 0.0072715 | 0.13941    |
| 0.0071773 | 0.10834    |
| 0.0090104 | 0.65886    |
| 0.0072955 | 0.00071242 |

|           |            |
|-----------|------------|
| 0.032861  | -1.1149    |
| 0.010048  | -0.0044341 |
| 0.03524   | -0.86174   |
| 0.0097473 | -0.0051686 |
| 0.086766  | 0.034794   |
| 0.10488   | 0.042402   |
| 0.097321  | 0.06633    |
| 0.039002  | -0.74417   |
| 0.0092171 | -0.0058338 |
| 0.0074585 | 0.20034    |
| 0.0080815 | -0.007536  |
| 0.0084694 | 0.50845    |
| 0.032743  | -1.0111    |
| 0.0079451 | -0.0072122 |
| 0.033219  | -1.1274    |
| 0.0073793 | 0.17468    |
| 0.0090104 | 0.65886    |
| 0.024427  | 0.019776   |
| 0.10493   | 0.033276   |
| 0.032544  | -1.0304    |
| 0.0073419 | 0.16248    |
| 0.0085746 | -0.0075602 |
| 0.10183   | 0.022679   |
| 0.011972  | 2.49E-05   |
| 0.10494   | 0.039956   |
| 0.08918   | 0.040962   |
| 0.011527  | -0.0009612 |
| 0.034505  | -0.91058   |
| 0.0071491 | 0.098977   |
| 0.10215   | 0.062875   |
| 0.019306  | 0.013082   |
| 0.0090816 | 0.67796    |
| 0.0097473 | -0.0044341 |
| 0.10455   | 0.029687   |
| 0.0085994 | 0.54547    |
| 0.042008  | -0.65431   |
| 0.042857  | -0.63085   |
| 0.015366  | 0.0079609  |
| 0.0072386 | 0.12857    |
| 0.037156  | -0.80605   |
| 0.041199  | -0.67741   |

|           |            |
|-----------|------------|
| 0.0071894 | 0.0051576  |
| 0.0339    | -0.92541   |
| 0.099669  | 0.06649    |
| 0.0075433 | 0.2276     |
| 0.0072071 | 0.11821    |
| 0.08868   | 0.037674   |
| 0.0079906 | 0.36712    |
| 0.1003    | 0.022784   |
| 0.1016    | 0.062875   |
| 0.0081619 | 0.41861    |
| 0.0081619 | 0.41861    |
| 0.016066  | 0.0092115  |
| 0.044711  | 0.038732   |
| 0.10409   | 0.02577    |
| 0.0079359 | 0.35043    |
| 0.093395  | 0.029884   |
| 0.010731  | -0.0027971 |
| 0.032462  | -1.0894    |
| 0.049867  | -0.46109   |
| 0.0070581 | 0.017584   |
| 0.0084694 | 0.50845    |
| 0.0071491 | 0.098977   |
| 0.007123  | 0.090103   |
| 0.007123  | 0.090103   |
| 0.096449  | 0.06518    |
| 0.032743  | -1.0111    |
| 0.08799   | 0.034794   |
| 0.0076069 | -0.0060189 |
| 0.0084058 | 0.49014    |
| 0.10434   | 0.028193   |
| 0.03612   | -0.84394   |
| 0.037156  | -0.80605   |
| 0.063888  | 0.04917    |
| 0.0075877 | 0.2418     |
| 0.053419  | -0.38803   |
| 0.0097473 | -0.0044341 |
| 0.054226  | 0.044471   |
| 0.0080815 | -0.007536  |
| 0.0088702 | 0.62079    |
| 0.0088702 | 0.62079    |
| 0.014706  | 0.0067344  |



|           |            |
|-----------|------------|
| 0.011114  | -0.0019027 |
| 0.0090104 | 0.65886    |
| 0.012958  | 0.0032251  |
| 0.0071773 | 0.10834    |
| 0.0070589 | 0.066311   |
| 0.0073793 | 0.17468    |
| 0.03524   | -0.87876   |
| 0.0090816 | 0.67796    |
| 0.03276   | -1.1104    |
| 0.040428  | -0.70012   |
| 0.014086  | 0.0055346  |
| 0.0092171 | -0.0064176 |
| 0.033219  | -1.1274    |
| 0.0071773 | 0.10834    |
| 0.0094709 | -0.0058338 |
| 0.0072386 | 0.12857    |
| 0.0076807 | 0.27125    |
| 0.0072715 | 0.13941    |
| 0.0074182 | 0.1873     |
| 0.013504  | 0.0032251  |
| 0.0074182 | 0.1873     |
| 0.057264  | -0.31669   |
| 0.0070192 | 0.030378   |
| 0.0094709 | -0.0051686 |
| 0.010731  | -0.0019027 |
| 0.080287  | 0.049748   |
| 0.0076336 | 0.25635    |
| 0.051016  | -0.43662   |
| 0.087374  | 0.041005   |
| 0.0080466 | 0.38405    |
| 0.087374  | 0.041005   |
| 0.02223   | 0.017077   |
| 0.0090104 | 0.65886    |
| 0.0077085 | -0.0060189 |
| 0.0073419 | 0.16248    |
| 0.010731  | -0.0027971 |
| 0.10228   | 0.022987   |
| 0.033642  | -0.95303   |
| 0.075932  | -0.059632  |
| 0.010048  | -0.0044341 |
| 0.033412  | -0.96585   |

|           |            |
|-----------|------------|
| 0.051016  | -0.43662   |
| 0.10215   | 0.061137   |
| 0.064204  | -0.2052    |
| 0.0090104 | 0.65886    |
| 0.024427  | 0.019776   |
| 0.0080466 | 0.38405    |
| 0.10488   | 0.039956   |
| 0.052701  | 0.042727   |
| 0.064204  | -0.2052    |
| 0.046637  | -0.53455   |
| 0.032373  | -1.0632    |
| 0.096059  | 0.02616    |
| 0.03669   | 0.031675   |
| 0.032389  | -1.0771    |
| 0.007022  | 0.040742   |
| 0.0079451 | -0.0072122 |
| 0.03303   | -0.98966   |
| 0.0076336 | 0.25635    |
| 0.0085994 | 0.54547    |
| 0.094069  | 0.029884   |
| 0.0075002 | 0.21378    |
| 0.011972  | 2.49E-05   |
| 0.0070309 | 0.052688   |
| 0.098932  | 0.067232   |
| 0.089343  | 0.037674   |
| 0.078448  | 0.050932   |
| 0.034505  | -0.89503   |
| 0.04467   | -0.5589    |
| 0.0090104 | 0.65886    |
| 0.032373  | -1.0704    |
| 0.0080466 | 0.38405    |
| 0.0075002 | 0.21378    |
| 0.007306  | 0.15072    |
| 0.032373  | -1.0704    |
| 0.0075433 | 0.2276     |
| 0.007099  | 0.081709   |
| 0.033494  | -1.1349    |
| 0.0074333 | -0.0040171 |
| 0.0072071 | 0.11821    |
| 0.041454  | 0.035337   |
| 0.015366  | 0.0067344  |

|           |            |
|-----------|------------|
| 0.0080466 | 0.38405    |
| 0.035158  | 0.030407   |
| 0.0070581 | 0.017584   |
| 0.035158  | 0.030407   |
| 0.014086  | 0.004364   |
| 0.0073419 | 0.16248    |
| 0.033641  | -1.1384    |
| 0.0073419 | 0.16248    |
| 0.00894   | 0.6398     |
| 0.0071773 | 0.10834    |
| 0.011114  | -0.0019027 |
| 0.011114  | -0.0019027 |
| 0.0077085 | -0.0060189 |
| 0.032743  | -1.0111    |
| 0.0075433 | 0.2276     |
| 0.10477   | 0.044903   |
| 0.090335  | 0.046386   |
| 0.010731  | -0.0027971 |
| 0.0087331 | 0.58295    |
| 0.039002  | -0.74417   |
| 0.007779  | 0.30202    |
| 0.028099  | 0.023825   |
| 0.007099  | 0.081709   |
| 0.034855  | -0.89503   |
| 0.034106  | -1.1486    |
| 0.0073419 | 0.16248    |
| 0.032633  | -1.021     |
| 0.032373  | -1.0632    |
| 0.007022  | 0.046511   |
| 0.0071773 | 0.10834    |
| 0.083144  | 0.04663    |
| 0.0094709 | -0.0051686 |
| 0.0070401 | 0.021497   |
| 0.0089841 | -0.006908  |
| 0.034187  | -0.92541   |
| 0.0076807 | 0.27125    |
| 0.032861  | -1.1149    |
| 0.0077085 | -0.0060189 |
| 0.0097473 | -0.0051686 |
| 0.0084694 | 0.50845    |
| 0.0077292 | 0.28647    |

|           |            |
|-----------|------------|
| 0.033642  | -0.95303   |
| 0.0074585 | 0.20034    |
| 0.0094709 | -0.0058338 |
| 0.10462   | 0.044903   |
| 0.0079906 | 0.35043    |
| 0.010048  | -0.0044341 |
| 0.021206  | 0.015736   |
| 0.0079451 | -0.0072122 |
| 0.034187  | -0.92541   |
| 0.0070776 | 0.073782   |
| 0.0075877 | 0.2418     |
| 0.010731  | -0.0027971 |
| 0.0070169 | 0.040742   |
| 0.0080815 | -0.007536  |
| 0.0090104 | 0.65886    |
| 0.042857  | -0.63085   |
| 0.010048  | -0.0044341 |
| 0.033412  | -0.96585   |
| 0.0087704 | -0.0072929 |
| 0.047964  | 0.040812   |
| 0.097966  | 0.024682   |
| 0.080287  | 0.049748   |
| 0.033208  | -0.97806   |
| 0.024427  | 0.019776   |
| 0.0083433 | 0.47199    |
| 0.010376  | -0.0036418 |
| 0.0080466 | 0.36712    |
| 0.0094709 | -0.0058338 |
| 0.034268  | -1.1519    |
| 0.037733  | -0.78604   |
| 0.0087331 | 0.58295    |
| 0.0088702 | 0.62079    |
| 0.030791  | 0.026496   |
| 0.0083433 | 0.47199    |
| 0.0081619 | 0.41861    |
| 0.007306  | 0.15072    |
| 0.073008  | -0.09116   |
| 0.097342  | 0.024682   |
| 0.0078823 | 0.31787    |
| 0.011527  | -0.0009612 |
| 0.059983  | 0.046758   |

|           |            |
|-----------|------------|
| 0.0079359 | 0.35043    |
| 0.10441   | 0.049934   |
| 0.033494  | -1.1349    |
| 0.012448  | 0.001053   |
| 0.0087704 | -0.0072929 |
| 0.033792  | -1.1419    |
| 0.0072386 | 0.12857    |
| 0.0075002 | 0.21378    |
| 0.10264   | 0.061137   |
| 0.007099  | 0.081709   |
| 0.0081037 | 0.40122    |
| 0.0092171 | -0.0064176 |
| 0.0070309 | 0.052688   |
| 0.0079451 | -0.0072122 |
| 0.09204   | 0.032017   |
| 0.032423  | -1.0477    |
| 0.1003    | 0.022784   |
| 0.020232  | 0.014403   |
| 0.016066  | 0.0079609  |
| 0.084221  | 0.020095   |
| 0.049567  | 0.040812   |
| 0.032633  | -1.021     |
| 0.0090816 | 0.67796    |
| 0.077795  | 0.051216   |
| 0.0073793 | 0.17468    |
| 0.097966  | 0.024682   |
| 0.032861  | -1.1149    |
| 0.014086  | 0.004364   |
| 0.03612   | -0.84394   |
| 0.10493   | 0.033276   |
| 0.0079359 | 0.33401    |
| 0.0084058 | 0.49014    |
| 0.033494  | -1.1349    |
| 0.037156  | -0.80605   |
| 0.014086  | 0.004364   |
| 0.08799   | 0.034794   |
| 0.007306  | 0.15072    |
| 0.010376  | -0.0027971 |
| 0.010731  | -0.0027971 |
| 0.0074585 | 0.20034    |
| 0.0070433 | 0.059284   |

|           |            |
|-----------|------------|
| 0.011114  | -0.0019027 |
| 0.058604  | -0.29352   |
| 0.1038    | 0.024827   |
| 0.063888  | 0.048637   |
| 0.068581  | -0.1449    |
| 0.007123  | 0.090103   |
| 0.086735  | 0.042062   |
| 0.0078823 | 0.31787    |
| 0.0075877 | 0.2418     |
| 0.02223   | 0.017077   |
| 0.081445  | 0.04924    |
| 0.033641  | -1.1384    |
| 0.0090816 | 0.67796    |
| 0.097321  | 0.06633    |
| 0.0071773 | 0.10834    |
| 0.0070776 | 0.066311   |
| 0.0072386 | 0.12857    |
| 0.0085746 | -0.0072929 |
| 0.10264   | 0.061137   |
| 0.010731  | -0.0027971 |
| 0.0089841 | -0.006908  |
| 0.0070589 | 0.066311   |
| 0.0080466 | 0.38405    |
| 0.012448  | 0.001053   |
| 0.094739  | 0.028875   |
| 0.0071894 | 0.0027978  |
| 0.0074585 | 0.1873     |
| 0.0070192 | 0.030378   |
| 0.10441   | 0.049934   |
| 0.0070159 | 0.035368   |
| 0.0073419 | 0.16248    |
| 0.059983  | 0.046758   |
| 0.0074182 | 0.17468    |
| 0.0087331 | 0.58295    |
| 0.029421  | 0.026496   |
| 0.0071894 | 0.0051576  |
| 0.007779  | 0.30202    |
| 0.057264  | -0.31669   |
| 0.0087704 | -0.0072929 |
| 0.091453  | 0.0511     |
| 0.0090816 | 0.67796    |

|           |            |
|-----------|------------|
| 0.10228   | 0.022987   |
| 0.0089841 | -0.006908  |
| 0.007123  | 0.090103   |
| 0.082013  | 0.048051   |
| 0.0087704 | -0.0072929 |
| 0.032743  | -1.0111    |
| 0.0071491 | 0.098977   |
| 0.071533  | -0.10826   |
| 0.082013  | 0.048674   |
| 0.0079451 | -0.0072122 |
| 0.10409   | 0.02577    |
| 0.0070309 | 0.052688   |
| 0.032519  | -1.0894    |
| 0.059971  | -0.27073   |
| 0.1035    | 0.057058   |
| 0.0070589 | 0.066311   |
| 0.00783   | 0.31787    |
| 0.0092171 | -0.0064176 |
| 0.0072715 | 0.13941    |
| 0.010731  | -0.0027971 |
| 0.033208  | -0.97806   |
| 0.033662  | 0.029119   |
| 0.082578  | 0.048051   |
| 0.0070192 | 0.030378   |
| 0.081445  | 0.048674   |
| 0.021206  | 0.015736   |
| 0.020232  | 0.015736   |
| 0.0088702 | 0.62079    |
| 0.0092171 | -0.0058338 |
| 0.0076807 | 0.27125    |
| 0.014086  | 0.004364   |
| 0.045635  | -0.5589    |
| 0.012958  | 0.0021206  |
| 0.10264   | 0.059186   |
| 0.0070272 | 0.025758   |
| 0.063888  | 0.04917    |
| 0.048754  | -0.4856    |
| 0.024427  | 0.021128   |
| 0.090686  | 0.034253   |
| 0.075932  | -0.045303  |
| 0.02223   | 0.017077   |

|           |            |
|-----------|------------|
| 0.0074333 | -0.0026829 |
| 0.032972  | -1.1193    |
| 0.016066  | 0.0079609  |
| 0.0071491 | 0.098977   |
| 0.011527  | -0.0009612 |
| 0.007123  | 0.090103   |
| 0.0071113 | 0.010749   |
| 0.012958  | 0.0021206  |
| 0.091453  | 0.055137   |
| 0.010376  | -0.0036418 |
| 0.032668  | -1.1056    |
| 0.045635  | -0.53455   |
| 0.0083433 | 0.47199    |
| 0.0090816 | 0.67796    |
| 0.024427  | 0.021128   |
| 0.0076336 | 0.25635    |
| 0.0079906 | 0.35043    |
| 0.047677  | -0.5101    |
| 0.0087331 | 0.58295    |
| 0.046342  | 0.039792   |
| 0.057264  | -0.31669   |
| 0.0070776 | 0.066311   |
| 0.0070433 | 0.059284   |
| 0.087374  | 0.039917   |
| 0.012448  | 0.001053   |
| 0.035661  | -0.86174   |
| 0.058604  | -0.27073   |
| 0.015366  | 0.0067344  |
| 0.014086  | 0.004364   |
| 0.023303  | 0.019776   |
| 0.049867  | -0.46109   |
| 0.0085339 | 0.52689    |
| 0.093574  | 0.05853    |
| 0.0074585 | 0.20034    |
| 0.010048  | -0.0044341 |
| 0.007821  | -0.0067106 |
| 0.0072386 | 0.12857    |
| 0.0090816 | 0.67796    |
| 0.0079906 | 0.36712    |
| 0.011114  | -0.0019027 |
| 0.03524   | -0.87876   |



|           |            |
|-----------|------------|
| 0.0075153 | -0.0040171 |
| 0.007099  | 0.081709   |
| 0.0070433 | 0.059284   |
| 0.086106  | 0.042062   |
| 0.0080466 | 0.38405    |
| 0.077118  | 0.051619   |
| 0.10264   | 0.059186   |
| 0.03612   | -0.82536   |
| 0.007779  | 0.30202    |
| 0.0092171 | -0.0064176 |
| 0.033208  | -0.96585   |
| 0.032462  | -1.0894    |
| 0.0077085 | -0.0067106 |
| 0.0072715 | 0.12857    |
| 0.0078823 | 0.33401    |
| 0.037156  | -0.80605   |
| 0.0087331 | 0.58295    |
| 0.097342  | 0.025383   |
| 0.00783   | 0.31787    |
| 0.039695  | -0.72239   |
| 0.0090104 | 0.65886    |
| 0.08918   | 0.046386   |
| 0.0081619 | 0.41861    |
| 0.084293  | 0.04583    |
| 0.088023  | 0.038804   |
| 0.054226  | 0.043621   |
| 0.0090104 | 0.65886    |
| 0.0090104 | 0.65886    |
| 0.032423  | -1.0477    |
| 0.0082313 | -0.0076938 |
| 0.073008  | -0.09116   |
| 0.0087331 | 0.58295    |
| 0.0089841 | -0.006908  |
| 0.016809  | 0.0092115  |
| 0.007022  | 0.046511   |
| 0.046342  | 0.038732   |
| 0.0078823 | 0.33401    |
| 0.075678  | 0.051739   |
| 0.0091534 | 0.69708    |
| 0.10183   | 0.022679   |
| 0.0070169 | 0.040742   |

|           |            |
|-----------|------------|
| 0.042857  | -0.6071    |
| 0.007821  | -0.0067106 |
| 0.0082313 | -0.0076938 |
| 0.0077085 | -0.0067106 |
| 0.1038    | 0.02577    |
| 0.0080466 | 0.38405    |
| 0.0070169 | 0.040742   |
| 0.0078823 | 0.33401    |
| 0.019306  | 0.013082   |
| 0.00894   | 0.6398     |
| 0.0079359 | 0.35043    |
| 0.011972  | 2.49E-05   |
| 0.011972  | 2.49E-05   |
| 0.033208  | -0.97806   |
| 0.021206  | 0.015736   |
| 0.055719  | 0.045278   |
| 0.0073419 | 0.16248    |
| 0.0070581 | 0.014005   |
| 0.032668  | -1.1056    |
| 0.0076336 | 0.2418     |
| 0.025601  | 0.021128   |
| 0.0073419 | 0.16248    |
| 0.007123  | 0.090103   |
| 0.0071113 | 0.0078041  |
| 0.067111  | -0.1449    |
| 0.033412  | -0.96585   |
| 0.013504  | 0.0032251  |
| 0.033948  | -1.1453    |
| 0.0070776 | 0.073782   |
| 0.010048  | -0.0036418 |
| 0.032373  | -1.0632    |
| 0.080186  | -0.019688  |
| 0.007306  | 0.15072    |
| 0.007306  | 0.15072    |
| 0.096059  | 0.02616    |
| 0.0075002 | 0.21378    |
| 0.034855  | -0.87876   |
| 0.033208  | -0.97806   |
| 0.0072715 | 0.13941    |
| 0.0080815 | -0.007536  |
| 0.0078823 | 0.33401    |

|           |            |
|-----------|------------|
| 0.088023  | 0.039917   |
| 0.0097473 | -0.0051686 |
| 0.03239   | -1.0477    |
| 0.039695  | -0.72239   |
| 0.03612   | -0.84394   |
| 0.010048  | -0.0044341 |
| 0.032462  | -1.0894    |
| 0.0072715 | 0.13941    |
| 0.03524   | -0.87876   |
| 0.10036   | 0.065585   |
| 0.0075002 | 0.21378    |
| 0.0071773 | 0.098977   |
| 0.067404  | 0.050095   |
| 0.032373  | -1.0704    |
| 0.016809  | 0.0092115  |
| 0.0075002 | 0.21378    |
| 0.032633  | -1.0111    |
| 0.0088013 | 0.60183    |
| 0.071483  | 0.05136    |
| 0.0075433 | 0.2276     |
| 0.061361  | -0.24839   |
| 0.0072715 | 0.12857    |
| 0.0080466 | 0.38405    |
| 0.055952  | -0.34019   |
| 0.032544  | -1.0304    |
| 0.0092171 | -0.0058338 |
| 0.1035    | 0.054784   |
| 0.0090104 | 0.65886    |
| 0.011972  | 0.001053   |
| 0.043079  | 0.037634   |
| 0.00894   | 0.6398     |
| 0.045635  | -0.5589    |
| 0.099168  | 0.023109   |
| 0.03303   | -0.97806   |
| 0.0071491 | 0.098977   |
| 0.079691  | 0.050593   |
| 0.034855  | -0.89503   |
| 0.011527  | 2.49E-05   |
| 0.0085746 | -0.0075602 |
| 0.0070776 | 0.073782   |
| 0.018428  | 0.011775   |

|           |            |
|-----------|------------|
| 0.03276   | -1.1104    |
| 0.0072715 | 0.13941    |
| 0.020232  | 0.014403   |
| 0.0077085 | -0.0060189 |
| 0.0075877 | 0.2276     |
| 0.0070776 | 0.073782   |
| 0.03303   | -0.98966   |
| 0.014706  | 0.0055346  |
| 0.0090816 | 0.67796    |
| 0.0075433 | 0.2276     |
| 0.10455   | 0.028193   |
| 0.1035    | 0.054784   |
| 0.041454  | 0.035337   |
| 0.018428  | 0.011775   |
| 0.0070776 | 0.073782   |
| 0.012448  | 0.001053   |
| 0.038254  | 0.032921   |
| 0.0092171 | -0.0064176 |
| 0.037156  | -0.80605   |
| 0.10385   | 0.052398   |
| 0.0082313 | -0.0076938 |
| 0.0088702 | 0.62079    |
| 0.0090104 | 0.65886    |
| 0.076413  | 0.051619   |
| 0.0088013 | 0.60183    |
| 0.032389  | -1.0771    |
| 0.037156  | -0.80605   |
| 0.00783   | 0.30202    |
| 0.0076336 | 0.25635    |
| 0.0070581 | 0.017584   |
| 0.0070401 | 0.021497   |
| 0.0074182 | 0.1873     |
| 0.032875  | -1.0007    |
| 0.024427  | 0.019776   |
| 0.046342  | 0.039792   |
| 0.032418  | -1.0834    |
| 0.0086658 | 0.56416    |
| 0.041199  | -0.67741   |
| 0.010376  | -0.0036418 |
| 0.040428  | -0.70012   |
| 0.0072071 | 0.11821    |

|           |            |
|-----------|------------|
| 0.0071491 | 0.098977   |
| 0.0082213 | 0.43621    |
| 0.0070581 | 0.017584   |
| 0.032373  | -1.0704    |
| 0.0071491 | 0.090103   |
| 0.007779  | 0.30202    |
| 0.032544  | -1.0304    |
| 0.048754  | -0.46109   |
| 0.010731  | -0.0019027 |
| 0.0080466 | 0.38405    |
| 0.0071491 | 0.098977   |
| 0.037156  | -0.80605   |
| 0.007099  | 0.081709   |
| 0.032633  | -1.021     |
| 0.0088702 | 0.62079    |
| 0.029421  | 0.025165   |
| 0.032633  | -1.021     |
| 0.007779  | 0.30202    |
| 0.0070589 | 0.066311   |
| 0.095533  | 0.06518    |
| 0.0085339 | 0.52689    |
| 0.0089841 | -0.006908  |
| 0.0070776 | 0.073782   |
| 0.012958  | 0.0021206  |
| 0.0094709 | -0.0058338 |
| 0.074476  | -0.074934  |
| 0.012448  | 0.001053   |
| 0.10494   | 0.037598   |
| 0.083714  | 0.04663    |
| 0.099669  | 0.06705    |
| 0.067111  | -0.16433   |
| 0.026825  | 0.023825   |
| 0.0081037 | 0.40122    |
| 0.0097473 | -0.0044341 |
| 0.040428  | -0.70012   |
| 0.0070433 | 0.052688   |
| 0.032875  | -1.0007    |
| 0.084221  | 0.011497   |
| 0.10496   | 0.03536    |
| 0.032633  | -1.021     |
| 0.0072715 | 0.13941    |

|           |            |
|-----------|------------|
| 0.0082818 | 0.45401    |
| 0.032588  | -1.1005    |
| 0.0076336 | 0.25635    |
| 0.024427  | 0.021128   |
| 0.033662  | 0.029119   |
| 0.0087331 | 0.58295    |
| 0.075932  | -0.045303  |
| 0.0071491 | 0.098977   |
| 0.014706  | 0.0055346  |
| 0.034505  | -0.91058   |
| 0.078448  | 0.050932   |
| 0.078448  | 0.051216   |
| 0.063888  | 0.04917    |
| 0.0073419 | 0.16248    |
| 0.055952  | -0.31669   |
| 0.032633  | -1.0111    |
| 0.077118  | 0.051444   |
| 0.090686  | 0.035391   |
| 0.0074182 | 0.17468    |
| 0.011114  | -0.0019027 |
| 0.039844  | 0.035337   |
| 0.033641  | -1.1384    |
| 0.0079906 | 0.36712    |
| 0.032519  | -1.0951    |
| 0.058604  | -0.29352   |
| 0.0091534 | 0.69708    |
| 0.068581  | -0.1449    |
| 0.0084058 | 0.49014    |
| 0.0074182 | 0.17468    |
| 0.0090104 | 0.65886    |
| 0.0087331 | 0.58295    |
| 0.062773  | -0.2052    |
| 0.032861  | -1.1149    |
| 0.0085746 | -0.0075602 |
| 0.010376  | -0.0036418 |
| 0.1003    | 0.022784   |
| 0.0080466 | 0.38405    |
| 0.0080466 | 0.38405    |
| 0.0071894 | 0.0051576  |
| 0.017596  | 0.010484   |
| 0.032633  | -1.021     |

|           |            |
|-----------|------------|
| 0.0075002 | 0.21378    |
| 0.0071894 | 0.0051576  |
| 0.0073793 | 0.17468    |
| 0.0072715 | 0.13941    |
| 0.0073602 | -0.0026829 |
| 0.00894   | 0.6398     |
| 0.03612   | -0.84394   |
| 0.010731  | -0.0027971 |
| 0.0083953 | -0.0076979 |
| 0.032861  | -1.1149    |
| 0.032373  | -1.0704    |
| 0.10311   | 0.023443   |
| 0.053419  | -0.38803   |
| 0.0083433 | 0.47199    |
| 0.0072071 | 0.11821    |
| 0.025601  | 0.021128   |
| 0.0082818 | 0.45401    |
| 0.072398  | 0.051693   |
| 0.014706  | 0.0055346  |
| 0.018428  | 0.011775   |
| 0.014706  | 0.0055346  |
| 0.0085339 | 0.52689    |
| 0.0094709 | -0.0058338 |
| 0.013504  | 0.004364   |
| 0.038348  | -0.7654    |
| 0.098575  | 0.024065   |
| 0.0070309 | 0.052688   |
| 0.0088702 | 0.62079    |
| 0.083714  | 0.04663    |
| 0.0083433 | 0.47199    |
| 0.08868   | 0.037674   |
| 0.0079906 | 0.36712    |
| 0.0087704 | -0.006908  |
| 0.017596  | 0.011775   |
| 0.032373  | -1.0632    |
| 0.0072955 | 0.00071242 |
| 0.059971  | -0.27073   |
| 0.047964  | 0.040812   |
| 0.039002  | -0.74417   |
| 0.010731  | -0.0027971 |
| 0.0097473 | -0.0051686 |

|           |            |
|-----------|------------|
| 0.039002  | -0.74417   |
| 0.0084058 | 0.49014    |
| 0.0070192 | 0.030378   |
| 0.073273  | 0.051693   |
| 0.0074585 | 0.20034    |
| 0.054226  | 0.043621   |
| 0.032972  | -1.1193    |
| 0.014086  | 0.004364   |
| 0.0075877 | 0.2418     |
| 0.045635  | -0.53455   |
| 0.032389  | -1.0771    |
| 0.039844  | 0.034143   |
| 0.007099  | 0.081709   |
| 0.0077085 | -0.0060189 |
| 0.0082313 | -0.0076938 |
| 0.034505  | -0.89503   |
| 0.042008  | -0.65431   |
| 0.065104  | 0.049656   |
| 0.04467   | -0.5831    |
| 0.066276  | 0.049656   |
| 0.0084694 | 0.50845    |
| 0.10228   | 0.022987   |
| 0.09204   | 0.033125   |
| 0.0076069 | -0.0051251 |
| 0.0082818 | 0.45401    |
| 0.0071773 | 0.10834    |
| 0.016066  | 0.0092115  |
| 0.034106  | -1.1486    |
| 0.0094709 | -0.0058338 |
| 0.0071491 | 0.098977   |
| 0.032462  | -1.0894    |
| 0.0070433 | 0.059284   |
| 0.010048  | -0.0044341 |
| 0.080186  | -0.019688  |
| 0.011972  | 2.49E-05   |
| 0.007779  | 0.30202    |
| 0.00783   | 0.31787    |
| 0.051016  | -0.43662   |
| 0.0072071 | 0.10834    |
| 0.0075153 | -0.0051251 |
| 0.0076807 | 0.27125    |



|           |            |
|-----------|------------|
| 0.0075433 | 0.2276     |
| 0.010731  | -0.0027971 |
| 0.007821  | -0.0072122 |
| 0.084884  | 0.04497    |
| 0.0088013 | 0.60183    |
| 0.0088702 | 0.62079    |
| 0.033662  | 0.030407   |
| 0.0072071 | 0.11821    |
| 0.0090104 | 0.65886    |
| 0.00783   | 0.31787    |
| 0.0072386 | 0.12857    |
| 0.035661  | -0.84394   |
| 0.0072386 | 0.12857    |
| 0.0080815 | -0.007536  |
| 0.033792  | -1.1419    |
| 0.0073602 | -0.0026829 |
| 0.0083433 | 0.47199    |
| 0.0084058 | 0.49014    |
| 0.057264  | -0.31669   |
| 0.010376  | -0.0036418 |
| 0.024427  | 0.019776   |
| 0.013504  | 0.0032251  |
| 0.038254  | 0.034143   |
| 0.0072071 | 0.11821    |
| 0.03524   | -0.87876   |
| 0.0072715 | 0.13941    |
| 0.010048  | -0.0044341 |
| 0.0090104 | 0.65886    |
| 0.0072071 | 0.11821    |
| 0.00894   | 0.6398     |
| 0.032875  | -1.0007    |
| 0.013504  | 0.0032251  |
| 0.0080466 | 0.38405    |
| 0.034187  | -0.92541   |
| 0.033412  | -0.96585   |
| 0.034106  | -1.1486    |
| 0.073008  | -0.09116   |
| 0.0081037 | 0.40122    |
| 0.007821  | -0.0067106 |
| 0.081558  | 0.0020229  |
| 0.0081037 | 0.40122    |

|           |            |
|-----------|------------|
| 0.036619  | -0.82536   |
| 0.0083433 | 0.47199    |
| 0.0085746 | -0.0075602 |
| 0.0089841 | -0.006908  |
| 0.030791  | 0.027815   |
| 0.075678  | 0.051739   |
| 0.010376  | -0.0027971 |
| 0.0071491 | 0.098977   |
| 0.0072071 | 0.11821    |
| 0.025601  | 0.021128   |
| 0.0071773 | 0.10834    |
| 0.042857  | -0.6071    |
| 0.0074182 | 0.1873     |
| 0.081558  | 0.0020229  |
| 0.0097473 | -0.0051686 |
| 0.038348  | -0.7654    |
| 0.0074182 | 0.1873     |
| 0.0081037 | 0.40122    |
| 0.0071491 | 0.098977   |
| 0.0072071 | 0.10834    |
| 0.033412  | -0.96585   |
| 0.042008  | -0.65431   |
| 0.0073793 | 0.17468    |
| 0.007306  | 0.13941    |
| 0.077118  | 0.051619   |
| 0.084221  | 0.011497   |
| 0.0075877 | 0.2418     |
| 0.0090104 | 0.65886    |
| 0.07879   | -0.031991  |
| 0.052201  | -0.41225   |
| 0.007306  | 0.13941    |
| 0.10385   | 0.054784   |
| 0.007123  | 0.090103   |
| 0.07411   | 0.051783   |
| 0.099168  | 0.023109   |
| 0.065651  | -0.16433   |
| 0.0084058 | 0.49014    |
| 0.067111  | -0.16433   |
| 0.07879   | -0.031991  |
| 0.071533  | -0.10826   |
| 0.017596  | 0.010484   |

|           |            |
|-----------|------------|
| 0.007022  | 0.040742   |
| 0.0073419 | 0.15072    |
| 0.007306  | 0.15072    |
| 0.0080815 | -0.007536  |
| 0.081558  | -0.008361  |
| 0.094739  | 0.028875   |
| 0.037156  | -0.80605   |
| 0.0072071 | 0.11821    |
| 0.024427  | 0.019776   |
| 0.00783   | 0.30202    |
| 0.0072955 | 0.00071242 |
| 0.0070776 | 0.073782   |
| 0.0072715 | 0.13941    |
| 0.033092  | -1.1234    |
| 0.0088702 | 0.62079    |
| 0.011527  | -0.0009612 |
| 0.0079451 | -0.0072122 |
| 0.011114  | -0.0009612 |
| 0.0072715 | 0.13941    |
| 0.0071491 | 0.098977   |
| 0.099743  | 0.022784   |
| 0.032418  | -1.0834    |
| 0.0083433 | 0.47199    |
| 0.021206  | 0.015736   |
| 0.0073419 | 0.15072    |
| 0.091453  | 0.0511     |
| 0.071533  | -0.10826   |
| 0.067404  | 0.050485   |
| 0.084293  | 0.04583    |
| 0.046342  | 0.038732   |
| 0.0071113 | 0.010749   |
| 0.0079359 | 0.33401    |
| 0.0072071 | 0.11821    |
| 0.0071113 | 0.010749   |
| 0.052201  | -0.41225   |
| 0.058604  | -0.29352   |
| 0.0075002 | 0.21378    |
| 0.0090104 | 0.65886    |
| 0.007123  | 0.090103   |
| 0.057178  | 0.045278   |
| 0.1035    | 0.057058   |

|           |            |
|-----------|------------|
| 0.0088702 | 0.62079    |
| 0.091362  | 0.034253   |
| 0.038348  | -0.7654    |
| 0.080186  | -0.019688  |
| 0.0079451 | -0.0072122 |
| 0.0073419 | 0.16248    |
| 0.061361  | -0.24839   |
| 0.10494   | 0.039956   |
| 0.0072386 | 0.11821    |
| 0.0071773 | 0.10834    |
| 0.10309   | 0.059186   |
| 0.10215   | 0.061137   |
| 0.0088702 | 0.62079    |
| 0.034855  | -0.89503   |
| 0.032389  | -1.0771    |
| 0.079079  | 0.050932   |
| 0.0089841 | -0.0064176 |
| 0.042857  | -0.63085   |
| 0.034855  | -0.89503   |
| 0.011972  | 2.49E-05   |
| 0.10264   | 0.059186   |
| 0.077372  | -0.045303  |
| 0.013504  | 0.0032251  |
| 0.016809  | 0.0092115  |
| 0.0082818 | 0.45401    |
| 0.032418  | -1.0834    |
| 0.0083433 | 0.47199    |
| 0.035661  | -0.86174   |
| 0.0080815 | -0.007536  |
| 0.10311   | 0.024054   |
| 0.0085994 | 0.54547    |
| 0.0075877 | 0.2418     |
| 0.075678  | 0.051739   |
| 0.091453  | 0.0511     |
| 0.0077085 | -0.0060189 |
| 0.0087704 | -0.006908  |
| 0.0072715 | 0.13941    |
| 0.0088702 | 0.62079    |
| 0.097342  | 0.025383   |
| 0.00783   | 0.31787    |
| 0.007123  | 0.090103   |

|           |            |
|-----------|------------|
| 0.011114  | -0.0009612 |
| 0.0083953 | -0.0076979 |
| 0.076413  | 0.051619   |
| 0.0084694 | 0.50845    |
| 0.057178  | 0.04604    |
| 0.099168  | 0.023538   |
| 0.0083433 | 0.47199    |
| 0.0070433 | 0.059284   |
| 0.0081037 | 0.40122    |
| 0.0072386 | 0.12857    |
| 0.0073793 | 0.16248    |
| 0.0071491 | 0.098977   |
| 0.032519  | -1.0951    |
| 0.007821  | -0.0067106 |
| 0.0075433 | 0.2276     |
| 0.032668  | -1.1056    |
| 0.007022  | 0.046511   |
| 0.020232  | 0.014403   |
| 0.0077085 | -0.0067106 |
| 0.035661  | -0.86174   |
| 0.034106  | -1.1486    |
| 0.012448  | 0.001053   |
| 0.0072715 | 0.13941    |
| 0.090335  | 0.046386   |
| 0.032373  | -1.0704    |
| 0.063888  | 0.048637   |
| 0.065104  | 0.04917    |
| 0.051016  | -0.43662   |
| 0.0072071 | 0.11821    |
| 0.011527  | -0.0009612 |
| 0.032389  | -1.0704    |
| 0.021206  | 0.017077   |
| 0.083714  | 0.04663    |
| 0.029421  | 0.026496   |
| 0.033641  | -1.1384    |
| 0.007306  | 0.15072    |
| 0.013504  | 0.004364   |
| 0.042008  | -0.65431   |
| 0.055719  | 0.044471   |
| 0.0071491 | 0.098977   |
| 0.0339    | -0.93955   |

|           |            |
|-----------|------------|
| 0.042857  | -0.63085   |
| 0.0072071 | 0.11821    |
| 0.037733  | -0.78604   |
| 0.034106  | -1.1486    |
| 0.032373  | -1.0704    |
| 0.0088013 | 0.60183    |
| 0.0091534 | 0.69708    |
| 0.029421  | 0.026496   |
| 0.016809  | 0.010484   |
| 0.0079359 | 0.35043    |
| 0.041454  | 0.035337   |
| 0.036619  | -0.82536   |
| 0.049567  | 0.041791   |
| 0.0074182 | 0.1873     |
| 0.0075433 | 0.21378    |
| 0.0076069 | -0.0051251 |
| 0.00894   | 0.6398     |
| 0.0586    | 0.04604    |
| 0.010376  | -0.0036418 |
| 0.011527  | -0.0009612 |
| 0.0075153 | -0.0040171 |
| 0.0075877 | 0.2418     |
| 0.03303   | -0.98966   |
| 0.078448  | 0.050932   |
| 0.089343  | 0.037674   |
| 0.069529  | 0.051118   |
| 0.0089841 | -0.006908  |
| 0.032373  | -1.0704    |
| 0.010731  | -0.0019027 |
| 0.0080466 | 0.38405    |
| 0.047677  | -0.5101    |
| 0.0082818 | 0.45401    |
| 0.0070433 | 0.059284   |
| 0.033412  | -0.96585   |
| 0.0090104 | 0.65886    |
| 0.057178  | 0.045278   |
| 0.0085746 | -0.0075602 |
| 0.032668  | -1.1056    |
| 0.039002  | -0.74417   |
| 0.073273  | 0.051783   |
| 0.011972  | 2.49E-05   |

|           |            |
|-----------|------------|
| 0.0085994 | 0.54547    |
| 0.0074182 | 0.1873     |
| 0.016809  | 0.010484   |
| 0.061361  | -0.24839   |
| 0.0070818 | 0.010749   |
| 0.0070192 | 0.030378   |
| 0.098575  | 0.024065   |
| 0.0077085 | -0.0060189 |
| 0.015366  | 0.0067344  |
| 0.091453  | 0.0511     |
| 0.080287  | 0.049748   |
| 0.078448  | 0.050932   |
| 0.0072715 | 0.13941    |
| 0.097342  | 0.024682   |
| 0.0073793 | 0.17468    |
| 0.0076069 | -0.0051251 |
| 0.097342  | 0.025383   |
| 0.1038    | 0.024827   |
| 0.10415   | 0.052398   |
| 0.0082313 | -0.0076938 |
| 0.058604  | -0.29352   |
| 0.029421  | 0.026496   |
| 0.055952  | -0.34019   |
| 0.0085994 | 0.54547    |
| 0.0070589 | 0.066311   |
| 0.0090104 | 0.65886    |
| 0.011972  | 2.49E-05   |
| 0.016066  | 0.0079609  |
| 0.007779  | 0.30202    |
| 0.068581  | -0.1449    |
| 0.034505  | -0.91058   |
| 0.077372  | -0.045303  |
| 0.0073419 | 0.15072    |
| 0.049567  | 0.040812   |
| 0.088023  | 0.039917   |
| 0.041454  | 0.036502   |
| 0.0091534 | 0.69708    |
| 0.019306  | 0.013082   |
| 0.013504  | 0.0032251  |
| 0.033092  | -1.1234    |
| 0.010376  | -0.0036418 |

|           |            |
|-----------|------------|
| 0.012958  | 0.0032251  |
| 0.007099  | 0.081709   |
| 0.0085746 | -0.0072929 |
| 0.03612   | -0.84394   |
| 0.0072715 | 0.13941    |
| 0.0083433 | 0.47199    |
| 0.034855  | -0.89503   |
| 0.011972  | 0.001053   |
| 0.0085994 | 0.54547    |
| 0.014706  | 0.0055346  |
| 0.0072386 | 0.12857    |
| 0.051016  | -0.43662   |
| 0.083144  | 0.04737    |
| 0.011972  | 2.49E-05   |
| 0.099168  | 0.023538   |
| 0.068489  | 0.050826   |
| 0.017596  | 0.010484   |
| 0.099743  | 0.023109   |
| 0.0071491 | 0.098977   |
| 0.1003    | 0.022572   |
| 0.0089841 | -0.0064176 |
| 0.0076336 | 0.25635    |
| 0.064204  | -0.18445   |
| 0.0081619 | 0.41861    |
| 0.033641  | -1.1384    |
| 0.080871  | 0.049748   |
| 0.0082818 | 0.43621    |
| 0.028099  | 0.023825   |
| 0.1038    | 0.02577    |
| 0.0075002 | 0.21378    |
| 0.007123  | 0.081709   |
| 0.034855  | -0.89503   |
| 0.032875  | -1.0007    |
| 0.036619  | -0.82536   |
| 0.0091534 | 0.69708    |
| 0.032423  | -1.0477    |
| 0.049867  | -0.46109   |
| 0.007123  | 0.090103   |
| 0.028099  | 0.023825   |
| 0.0088013 | 0.60183    |
| 0.0070309 | 0.046511   |



|           |            |
|-----------|------------|
| 0.061361  | -0.24839   |
| 0.073008  | -0.09116   |
| 0.0072387 | 0.0027978  |
| 0.0097473 | -0.0051686 |
| 0.03669   | 0.032921   |
| 0.089343  | 0.037674   |
| 0.032389  | -1.0771    |
| 0.090335  | 0.0511     |
| 0.012958  | 0.0032251  |
| 0.0088013 | 0.60183    |
| 0.0085994 | 0.54547    |
| 0.0073793 | 0.17468    |
| 0.047677  | -0.5101    |
| 0.042857  | -0.63085   |
| 0.10083   | 0.022479   |
| 0.007022  | 0.046511   |
| 0.0073419 | 0.16248    |
| 0.007147  | 0.0078041  |
| 0.0071773 | 0.10834    |
| 0.044711  | 0.037634   |
| 0.012448  | 0.0021206  |
| 0.049867  | -0.46109   |
| 0.0075002 | 0.21378    |
| 0.03303   | -0.98966   |
| 0.0070581 | 0.017584   |
| 0.10036   | 0.065585   |
| 0.032389  | -1.0771    |
| 0.0072715 | 0.12857    |
| 0.067111  | -0.16433   |
| 0.0087331 | 0.58295    |
| 0.0088013 | 0.60183    |
| 0.0071773 | 0.10834    |
| 0.101     | 0.065585   |
| 0.029421  | 0.026496   |
| 0.0072715 | 0.13941    |
| 0.023303  | 0.018425   |
| 0.032743  | -1.0111    |
| 0.040428  | -0.70012   |
| 0.032588  | -1.1005    |
| 0.032373  | -1.0704    |
| 0.0073419 | 0.16248    |

|           |            |
|-----------|------------|
| 0.05467   | -0.34019   |
| 0.00783   | 0.31787    |
| 0.013504  | 0.0032251  |
| 0.00783   | 0.31787    |
| 0.011527  | -0.0009612 |
| 0.010731  | -0.0027971 |
| 0.0088013 | 0.60183    |
| 0.0079359 | 0.35043    |
| 0.0087331 | 0.58295    |
| 0.045635  | -0.5589    |
| 0.0092171 | -0.0064176 |
| 0.053419  | -0.38803   |
| 0.0083953 | -0.0076979 |
| 0.012958  | 0.0032251  |
| 0.067111  | -0.16433   |
| 0.052201  | -0.41225   |
| 0.10385   | 0.052398   |
| 0.059971  | -0.27073   |
| 0.032633  | -1.021     |
| 0.014086  | 0.004364   |
| 0.020232  | 0.015736   |
| 0.010731  | -0.0027971 |
| 0.011972  | 2.49E-05   |
| 0.04467   | -0.5589    |
| 0.0070401 | 0.021497   |
| 0.033792  | -1.1419    |
| 0.099743  | 0.022784   |
| 0.10183   | 0.022679   |
| 0.0097473 | -0.0051686 |
| 0.0076069 | -0.0051251 |
| 0.041199  | -0.67741   |
| 0.0072071 | 0.11821    |
| 0.10415   | 0.049934   |
| 0.007123  | 0.090103   |
| 0.0072071 | 0.11821    |
| 0.0071491 | 0.090103   |
| 0.0081037 | 0.40122    |
| 0.05467   | -0.34019   |
| 0.0075433 | 0.2276     |
| 0.020232  | 0.014403   |
| 0.041199  | -0.67741   |

|           |            |
|-----------|------------|
| 0.032743  | -1.0111    |
| 0.011972  | 0.001053   |
| 0.0072071 | 0.10834    |
| 0.061361  | -0.22652   |
| 0.0070192 | 0.030378   |
| 0.011114  | -0.0019027 |
| 0.026825  | 0.023825   |
| 0.0084058 | 0.47199    |
| 0.007779  | 0.30202    |
| 0.025601  | 0.022479   |
| 0.00894   | 0.6398     |
| 0.034855  | -0.89503   |
| 0.017596  | 0.010484   |
| 0.0070272 | 0.025758   |
| 0.0072955 | 0.00071242 |
| 0.0076807 | 0.25635    |
| 0.0070272 | 0.025758   |
| 0.091362  | 0.034253   |
| 0.0094709 | -0.0058338 |
| 0.0072386 | 0.12857    |
| 0.0073793 | 0.17468    |
| 0.007123  | 0.090103   |
| 0.0070818 | 0.014005   |
| 0.0081619 | 0.41861    |
| 0.068581  | -0.1449    |
| 0.051016  | -0.43662   |
| 0.033641  | -1.1384    |
| 0.0081037 | 0.40122    |
| 0.0090816 | 0.67796    |
| 0.00894   | 0.6398     |
| 0.088023  | 0.039917   |
| 0.0083953 | -0.0076979 |
| 0.032474  | -1.0393    |
| 0.0075002 | 0.21378    |
| 0.044711  | 0.037634   |
| 0.0078823 | 0.33401    |
| 0.0085994 | 0.54547    |
| 0.066276  | 0.049656   |
| 0.0586    | 0.046758   |
| 0.026825  | 0.022479   |
| 0.0086658 | 0.56416    |

|           |            |
|-----------|------------|
| 0.096449  | 0.06633    |
| 0.0086658 | 0.56416    |
| 0.03276   | -1.1104    |
| 0.095403  | 0.027005   |
| 0.019306  | 0.013082   |
| 0.093395  | 0.029884   |
| 0.0094709 | -0.0058338 |
| 0.010376  | -0.0036418 |
| 0.10309   | 0.059186   |
| 0.0073793 | 0.17468    |
| 0.10441   | 0.049934   |
| 0.0081037 | 0.40122    |
| 0.094069  | 0.028875   |
| 0.0075877 | 0.2418     |
| 0.0084694 | 0.50845    |
| 0.0080466 | 0.38405    |
| 0.081558  | -0.008361  |
| 0.0073419 | 0.16248    |
| 0.0075002 | 0.20034    |
| 0.0085339 | 0.52689    |
| 0.029421  | 0.025165   |
| 0.0072386 | 0.11821    |
| 0.061361  | -0.24839   |
| 0.00894   | 0.6398     |
| 0.026825  | 0.023825   |
| 0.033662  | 0.029119   |
| 0.0072955 | 0.00071242 |
| 0.0094709 | -0.0058338 |
| 0.007306  | 0.15072    |
| 0.029421  | 0.025165   |
| 0.062773  | -0.22652   |
| 0.0088013 | 0.60183    |
| 0.010376  | -0.0036418 |
| 0.011527  | -0.0009612 |
| 0.0097473 | -0.0051686 |
| 0.0072387 | 0.0027978  |
| 0.080871  | 0.049748   |
| 0.0072386 | 0.11821    |
| 0.0076336 | 0.25635    |
| 0.078448  | 0.051216   |
| 0.0090104 | 0.65886    |

|           |            |
|-----------|------------|
| 0.0079906 | 0.36712    |
| 0.040428  | -0.67741   |
| 0.0074182 | 0.1873     |
| 0.0072715 | 0.13941    |
| 0.0075153 | -0.0040171 |
| 0.0075877 | 0.2418     |
| 0.023303  | 0.019776   |
| 0.010376  | -0.0027971 |
| 0.0080466 | 0.38405    |
| 0.0075877 | 0.2418     |
| 0.1035    | 0.057058   |
| 0.071533  | -0.09116   |
| 0.042008  | -0.65431   |
| 0.0080466 | 0.38405    |
| 0.038254  | 0.034143   |
| 0.014086  | 0.0055346  |
| 0.0086658 | 0.56416    |
| 0.0088702 | 0.62079    |
| 0.021206  | 0.015736   |
| 0.10347   | 0.024827   |
| 0.0073793 | 0.17468    |
| 0.0080815 | -0.007536  |
| 0.016809  | 0.010484   |
| 0.0070776 | 0.073782   |
| 0.0073793 | 0.17468    |
| 0.082578  | 0.048051   |
| 0.0081619 | 0.41861    |
| 0.0088013 | 0.60183    |
| 0.054226  | 0.043621   |
| 0.0075002 | 0.21378    |
| 0.011114  | -0.0019027 |
| 0.0074585 | 0.20034    |
| 0.0075433 | 0.2276     |
| 0.0070159 | 0.035368   |
| 0.036619  | -0.80605   |
| 0.0070309 | 0.052688   |
| 0.0076336 | 0.25635    |
| 0.095533  | 0.06518    |
| 0.096059  | 0.02616    |
| 0.051016  | -0.43662   |
| 0.083714  | 0.04583    |

|           |            |
|-----------|------------|
| 0.0071491 | 0.098977   |
| 0.073273  | 0.051783   |
| 0.0074585 | 0.20034    |
| 0.0077085 | -0.0067106 |
| 0.091362  | 0.033125   |
| 0.0079359 | 0.33401    |
| 0.007306  | 0.15072    |
| 0.007306  | 0.15072    |
| 0.085489  | 0.044052   |
| 0.0094709 | -0.0051686 |
| 0.0074333 | -0.0040171 |
| 0.033948  | -1.1453    |
| 0.007123  | 0.090103   |
| 0.098575  | 0.023538   |
| 0.0086658 | 0.56416    |
| 0.0087331 | 0.58295    |
| 0.032875  | -1.0007    |
| 0.0339    | -0.93955   |
| 0.0083953 | -0.0075602 |
| 0.0091534 | 0.69708    |
| 0.033412  | -0.95303   |
| 0.073008  | -0.09116   |
| 0.033662  | 0.029119   |
| 0.091362  | 0.034253   |
| 0.038254  | 0.032921   |
| 0.098575  | 0.024065   |
| 0.0086658 | 0.56416    |
| 0.082578  | 0.048051   |
| 0.0070159 | 0.035368   |
| 0.033219  | -1.1274    |
| 0.0091534 | 0.69708    |
| 0.048754  | -0.4856    |
| 0.0071773 | 0.10834    |
| 0.0076069 | -0.0051251 |
| 0.012448  | 0.001053   |
| 0.032418  | -1.0771    |
| 0.0087704 | -0.0072929 |
| 0.037733  | -0.7654    |
| 0.0070776 | 0.073782   |
| 0.071483  | 0.05136    |
| 0.010048  | -0.0036418 |

|           |            |
|-----------|------------|
| 0.0071773 | 0.098977   |
| 0.03239   | -1.0557    |
| 0.033642  | -0.95303   |
| 0.098149  | 0.067232   |
| 0.0085746 | -0.0072929 |
| 0.0083953 | -0.0076979 |
| 0.033412  | -0.95303   |
| 0.0076069 | -0.0060189 |
| 0.096449  | 0.06518    |
| 0.059971  | -0.27073   |
| 0.069529  | 0.050826   |
| 0.0092171 | -0.0058338 |
| 0.013504  | 0.0032251  |
| 0.0094709 | -0.0058338 |
| 0.0090104 | 0.65886    |
| 0.045635  | -0.53455   |
| 0.10455   | 0.028193   |
| 0.055719  | 0.044471   |
| 0.1003    | 0.022572   |
| 0.0085339 | 0.50845    |
| 0.0081619 | 0.40122    |
| 0.016809  | 0.0092115  |
| 0.0087331 | 0.58295    |
| 0.0076336 | 0.25635    |
| 0.0072715 | 0.13941    |
| 0.032861  | -1.1149    |
| 0.08918   | 0.040962   |
| 0.0076069 | -0.0051251 |
| 0.0073419 | 0.16248    |
| 0.007821  | -0.0067106 |
| 0.00894   | 0.6398     |
| 0.032373  | -1.0557    |
| 0.082578  | 0.04737    |
| 0.0079906 | 0.36712    |
| 0.0085339 | 0.52689    |
| 0.0082818 | 0.45401    |
| 0.0070192 | 0.030378   |
| 0.028099  | 0.023825   |
| 0.0075877 | 0.2276     |
| 0.032588  | -1.1005    |
| 0.007821  | -0.0067106 |

|           |            |
|-----------|------------|
| 0.0071113 | 0.010749   |
| 0.011972  | 2.49E-05   |
| 0.0071773 | 0.10834    |
| 0.0088013 | 0.60183    |
| 0.0071894 | 0.0051576  |
| 0.011114  | -0.0019027 |
| 0.0073602 | -0.0011105 |
| 0.0072955 | 0.00071242 |
| 0.0076069 | -0.0051251 |
| 0.0070589 | 0.066311   |
| 0.016066  | 0.0079609  |
| 0.0077085 | -0.0060189 |
| 0.0075433 | 0.21378    |
| 0.0072386 | 0.12857    |
| 0.0085746 | -0.0075602 |
| 0.034106  | -1.1486    |
| 0.077372  | -0.045303  |
| 0.0077085 | -0.0060189 |
| 0.047677  | -0.4856    |
| 0.10494   | 0.039956   |
| 0.037733  | -0.78604   |
| 0.033208  | -0.97806   |
| 0.00894   | 0.6398     |
| 0.010731  | -0.0027971 |
| 0.0086658 | 0.56416    |
| 0.10485   | 0.033276   |
| 0.074911  | 0.051806   |
| 0.0082213 | 0.43621    |
| 0.0092171 | -0.0064176 |
| 0.0082213 | 0.43621    |
| 0.0087331 | 0.58295    |
| 0.0070309 | 0.046511   |
| 0.071483  | 0.05136    |
| 0.0086658 | 0.56416    |
| 0.055952  | -0.34019   |
| 0.047677  | -0.5101    |
| 0.0076069 | -0.0051251 |
| 0.032389  | -1.0771    |
| 0.0085339 | 0.52689    |
| 0.02223   | 0.018425   |
| 0.0076807 | 0.27125    |



|           |            |
|-----------|------------|
| 0.00894   | 0.6398     |
| 0.058604  | -0.27073   |
| 0.0084058 | 0.49014    |
| 0.007779  | 0.30202    |
| 0.025601  | 0.021128   |
| 0.0071491 | 0.098977   |
| 0.021206  | 0.017077   |
| 0.0092171 | -0.0064176 |
| 0.0071491 | 0.098977   |
| 0.0075002 | 0.21378    |
| 0.0090816 | 0.67796    |
| 0.038254  | 0.032921   |
| 0.0076336 | 0.25635    |
| 0.0076807 | 0.27125    |
| 0.0090104 | 0.65886    |
| 0.016066  | 0.0079609  |
| 0.0070401 | 0.021497   |
| 0.032373  | -1.0704    |
| 0.079691  | 0.050199   |
| 0.033642  | -0.95303   |
| 0.055719  | 0.044471   |
| 0.055719  | 0.045278   |
| 0.0070818 | 0.010749   |
| 0.0092171 | -0.0064176 |
| 0.007123  | 0.081709   |
| 0.00783   | 0.31787    |
| 0.011527  | 2.49E-05   |
| 0.0070401 | 0.017584   |
| 0.0088013 | 0.60183    |
| 0.084221  | 0.011497   |
| 0.00894   | 0.6398     |
| 0.0077292 | 0.28647    |
| 0.0070433 | 0.059284   |
| 0.067404  | 0.050485   |
| 0.00894   | 0.6398     |
| 0.0081037 | 0.40122    |
| 0.0081619 | 0.41861    |
| 0.011972  | 2.49E-05   |
| 0.0091534 | 0.69708    |
| 0.011114  | -0.0019027 |
| 0.041454  | 0.036502   |

|           |            |
|-----------|------------|
| 0.015366  | 0.0067344  |
| 0.0085746 | -0.0075602 |
| 0.043079  | 0.037634   |
| 0.0082818 | 0.43621    |
| 0.0072386 | 0.12857    |
| 0.0084058 | 0.49014    |
| 0.0085339 | 0.52689    |
| 0.0081619 | 0.41861    |
| 0.024427  | 0.019776   |
| 0.077118  | 0.051444   |
| 0.0085994 | 0.54547    |
| 0.10488   | 0.039956   |
| 0.026825  | 0.022479   |
| 0.0072715 | 0.13941    |
| 0.0073793 | 0.17468    |
| 0.0087331 | 0.58295    |
| 0.0075433 | 0.2276     |
| 0.0084694 | 0.50845    |
| 0.067111  | -0.1449    |
| 0.033219  | -1.1274    |
| 0.0074182 | 0.1873     |
| 0.032875  | -1.0007    |
| 0.0075002 | 0.21378    |
| 0.013504  | 0.0032251  |
| 0.075678  | 0.051806   |
| 0.0088702 | 0.62079    |
| 0.0088013 | 0.60183    |
| 0.086735  | 0.042062   |
| 0.0084058 | 0.49014    |
| 0.0087331 | 0.58295    |
| 0.0082818 | 0.43621    |
| 0.0087331 | 0.58295    |
| 0.0072386 | 0.11821    |
| 0.0072071 | 0.11821    |
| 0.0082213 | 0.43621    |
| 0.007099  | 0.081709   |
| 0.007022  | 0.040742   |
| 0.0072715 | 0.13941    |
| 0.0071773 | 0.10834    |
| 0.081445  | 0.04924    |
| 0.051147  | 0.042727   |

|           |           |
|-----------|-----------|
| 0.0074182 | 0.1873    |
| 0.080287  | 0.049748  |
| 0.0075002 | 0.21378   |
| 0.10493   | 0.03536   |
| 0.035661  | -0.86174  |
| 0.012958  | 0.0021206 |
| 0.0071894 | 0.0051576 |
| 0.0074585 | 0.20034   |
| 0.0091534 | 0.69708   |
| 0.0070776 | 0.066311  |
| 0.0090104 | 0.65886   |
| 0.0084694 | 0.50845   |
| 0.0082213 | 0.43621   |
| 0.083144  | 0.04663   |
| 0.095403  | 0.027913  |
| 0.0085339 | 0.52689   |
| 0.0086658 | 0.56416   |
| 0.089343  | 0.036534  |
| 0.032544  | -1.0304   |
| 0.014706  | 0.0055346 |
| 0.007306  | 0.15072   |
| 0.0071491 | 0.090103  |
| 0.0076336 | 0.25635   |
| 0.0073793 | 0.17468   |
| 0.0084694 | 0.50845   |
| 0.0085339 | 0.52689   |
| 0.0085339 | 0.52689   |
| 0.036619  | -0.82536  |
| 0.0087331 | 0.58295   |
| 0.0088013 | 0.58295   |
| 0.032668  | -1.1056   |
| 0.033948  | -1.1453   |
| 0.079691  | 0.050593  |
| 0.0080466 | 0.38405   |
| 0.03303   | -0.98966  |
| 0.0074585 | 0.1873    |
| 0.0073793 | 0.17468   |
| 0.014086  | 0.004364  |
| 0.10485   | 0.033276  |
| 0.0083433 | 0.47199   |
| 0.097966  | 0.024682  |

|           |            |
|-----------|------------|
| 0.007022  | 0.046511   |
| 0.0083953 | -0.0076979 |
| 0.0074333 | -0.0026829 |
| 0.011527  | -0.0009612 |
| 0.033353  | -1.1312    |
| 0.0076336 | 0.25635    |
| 0.0092171 | -0.0064176 |
| 0.096449  | 0.06518    |
| 0.0090104 | 0.65886    |
| 0.10311   | 0.023443   |
| 0.023303  | 0.018425   |
| 0.032544  | -1.0304    |
| 0.0087331 | 0.58295    |
| 0.0086658 | 0.56416    |
| 0.014086  | 0.0055346  |
| 0.0088013 | 0.60183    |
| 0.0085339 | 0.50845    |
| 0.0074182 | 0.17468    |
| 0.043745  | -0.6071    |
| 0.082578  | 0.04737    |
| 0.0077085 | -0.0060189 |
| 0.024427  | 0.019776   |
| 0.00894   | 0.6398     |
| 0.0079451 | -0.0072122 |
| 0.03276   | -1.1104    |
| 0.007306  | 0.15072    |
| 0.0091534 | 0.69708    |
| 0.007123  | 0.090103   |
| 0.0090104 | 0.65886    |
| 0.07411   | 0.051821   |
| 0.0090104 | 0.65886    |
| 0.0073419 | 0.16248    |
| 0.10441   | 0.049934   |
| 0.079079  | 0.050932   |
| 0.0070272 | 0.025758   |
| 0.0084058 | 0.49014    |
| 0.0079359 | 0.35043    |
| 0.007306  | 0.15072    |
| 0.042857  | -0.63085   |
| 0.0072386 | 0.12857    |
| 0.0083953 | -0.0076979 |

|           |            |
|-----------|------------|
| 0.0076807 | 0.27125    |
| 0.0082213 | 0.43621    |
| 0.038348  | -0.7654    |
| 0.0092171 | -0.0064176 |
| 0.00894   | 0.6398     |
| 0.0084694 | 0.50845    |
| 0.10309   | 0.057058   |
| 0.034505  | -0.91058   |
| 0.10183   | 0.022679   |
| 0.0090816 | 0.67796    |
| 0.0074333 | -0.0026829 |
| 0.0071773 | 0.10834    |
| 0.0083433 | 0.47199    |
| 0.059971  | -0.24839   |
| 0.033412  | -0.96585   |
| 0.00783   | 0.31787    |
| 0.094069  | 0.029884   |
| 0.021206  | 0.015736   |
| 0.0075877 | 0.2418     |
| 0.0084058 | 0.49014    |
| 0.011972  | 2.49E-05   |
| 0.093395  | 0.030934   |
| 0.046342  | 0.038732   |
| 0.033219  | -1.1274    |
| 0.0087331 | 0.58295    |
| 0.0079359 | 0.35043    |
| 0.032418  | -1.0834    |
| 0.0070192 | 0.030378   |
| 0.0089841 | -0.006908  |
| 0.0076336 | 0.25635    |
| 0.0070433 | 0.059284   |
| 0.03276   | -1.1104    |
| 0.098932  | 0.06705    |
| 0.084221  | 0.011497   |
| 0.0084058 | 0.49014    |
| 0.0083433 | 0.47199    |
| 0.0070309 | 0.052688   |
| 0.0070818 | 0.014005   |
| 0.077795  | 0.051444   |
| 0.096706  | 0.025383   |
| 0.0087704 | -0.0072929 |

|           |            |
|-----------|------------|
| 0.034505  | -0.91058   |
| 0.007123  | 0.090103   |
| 0.018428  | 0.011775   |
| 0.00894   | 0.6398     |
| 0.05467   | -0.36399   |
| 0.026825  | 0.022479   |
| 0.0079906 | 0.36712    |
| 0.0090816 | 0.67796    |
| 0.0087704 | -0.006908  |
| 0.014086  | 0.0055346  |
| 0.10434   | 0.028193   |
| 0.0088702 | 0.62079    |
| 0.0088013 | 0.60183    |
| 0.0085339 | 0.52689    |
| 0.0088702 | 0.62079    |
| 0.082578  | 0.04737    |
| 0.03239   | -1.0557    |
| 0.012958  | 0.0021206  |
| 0.032389  | -1.0771    |
| 0.0070433 | 0.059284   |
| 0.037156  | -0.80605   |
| 0.0085746 | -0.0075602 |
| 0.0073793 | 0.17468    |
| 0.0073793 | 0.17468    |
| 0.023303  | 0.018425   |
| 0.0073602 | -0.0011105 |
| 0.059983  | 0.046758   |
| 0.012448  | 0.0021206  |
| 0.0084694 | 0.50845    |
| 0.079079  | 0.050932   |
| 0.0075002 | 0.21378    |
| 0.0078823 | 0.33401    |
| 0.082578  | 0.048051   |
| 0.0072071 | 0.11821    |
| 0.084221  | 0.011497   |
| 0.0070309 | 0.052688   |
| 0.0079359 | 0.35043    |
| 0.0090104 | 0.65886    |
| 0.011527  | 2.49E-05   |
| 0.034187  | -0.92541   |
| 0.04467   | -0.5831    |

|           |            |
|-----------|------------|
| 0.0090816 | 0.67796    |
| 0.0082818 | 0.45401    |
| 0.036619  | -0.82536   |
| 0.0111114 | -0.0009612 |
| 0.0077292 | 0.28647    |
| 0.0076807 | 0.27125    |
| 0.0071491 | 0.098977   |
| 0.011972  | 2.49E-05   |
| 0.0088013 | 0.60183    |
| 0.032462  | -1.0894    |
| 0.0087704 | -0.0072929 |
| 0.10477   | 0.044903   |
| 0.0072386 | 0.11821    |
| 0.0072071 | 0.11821    |
| 0.0082213 | 0.43621    |
| 0.048754  | -0.4856    |
| 0.0071491 | 0.098977   |
| 0.085509  | 0.020095   |
| 0.0073419 | 0.16248    |
| 0.013504  | 0.0032251  |
| 0.0075877 | 0.2418     |
| 0.0072386 | 0.12857    |
| 0.0070169 | 0.040742   |
| 0.012448  | 0.001053   |
| 0.0072386 | 0.12857    |
| 0.0070433 | 0.059284   |
| 0.0087331 | 0.58295    |
| 0.0090104 | 0.65886    |
| 0.00894   | 0.6398     |
| 0.010048  | -0.0036418 |
| 0.007099  | 0.081709   |
| 0.081558  | -0.008361  |
| 0.10309   | 0.059186   |
| 0.0075002 | 0.21378    |
| 0.00894   | 0.6398     |
| 0.0081037 | 0.40122    |
| 0.0076336 | 0.25635    |
| 0.081558  | 0.0020229  |
| 0.0088013 | 0.60183    |
| 0.042008  | -0.65431   |
| 0.10415   | 0.052398   |

|           |            |
|-----------|------------|
| 0.0090104 | 0.65886    |
| 0.0079906 | 0.36712    |
| 0.007099  | 0.081709   |
| 0.095403  | 0.027913   |
| 0.055952  | -0.34019   |
| 0.0075002 | 0.21378    |
| 0.0078823 | 0.33401    |
| 0.0082313 | -0.0076938 |
| 0.0090104 | 0.65886    |
| 0.0083953 | -0.0075602 |
| 0.0070818 | 0.010749   |
| 0.00894   | 0.6398     |
| 0.03239   | -1.0557    |
| 0.0071491 | 0.098977   |
| 0.013504  | 0.0032251  |
| 0.0085339 | 0.52689    |
| 0.0339    | -0.92541   |
| 0.00783   | 0.31787    |
| 0.039844  | 0.034143   |
| 0.014706  | 0.0055346  |
| 0.011527  | -0.0009612 |
| 0.007306  | 0.15072    |
| 0.0088013 | 0.60183    |
| 0.0084058 | 0.49014    |
| 0.086106  | 0.04308    |
| 0.00783   | 0.31787    |
| 0.023303  | 0.018425   |
| 0.074476  | -0.059632  |
| 0.0075002 | 0.21378    |
| 0.1016    | 0.064369   |
| 0.007306  | 0.15072    |
| 0.0083433 | 0.47199    |
| 0.0071491 | 0.098977   |
| 0.0087331 | 0.58295    |
| 0.0074585 | 0.1873     |
| 0.0077292 | 0.28647    |
| 0.0074182 | 0.1873     |
| 0.0085994 | 0.54547    |
| 0.028099  | 0.023825   |
| 0.0090104 | 0.65886    |
| 0.061327  | 0.04743    |



|           |            |
|-----------|------------|
| 0.0082313 | -0.0076938 |
| 0.080871  | 0.049748   |
| 0.032588  | -1.1005    |
| 0.0085994 | 0.54547    |
| 0.036619  | -0.80605   |
| 0.0072386 | 0.11821    |
| 0.0088013 | 0.60183    |
| 0.0086658 | 0.56416    |
| 0.032373  | -1.0704    |
| 0.043745  | -0.6071    |
| 0.016809  | 0.0092115  |
| 0.007306  | 0.15072    |
| 0.0082313 | -0.0076938 |
| 0.077372  | -0.045303  |
| 0.0082313 | -0.0076938 |
| 0.0072715 | 0.13941    |
| 0.0086658 | 0.56416    |
| 0.0080815 | -0.007536  |
| 0.0071894 | 0.0051576  |
| 0.0071773 | 0.10834    |
| 0.0087331 | 0.58295    |
| 0.0073419 | 0.16248    |
| 0.020232  | 0.014403   |
| 0.0085339 | 0.52689    |
| 0.007022  | 0.046511   |
| 0.099669  | 0.06705    |
| 0.0073419 | 0.16248    |
| 0.016809  | 0.010484   |
| 0.0075433 | 0.2276     |
| 0.0073793 | 0.16248    |
| 0.073008  | -0.09116   |
| 0.0074182 | 0.1873     |
| 0.0092171 | -0.0064176 |
| 0.098149  | 0.067003   |
| 0.10477   | 0.042402   |
| 0.047964  | 0.039792   |
| 0.023303  | 0.019776   |
| 0.0082818 | 0.45401    |
| 0.059983  | 0.046758   |
| 0.0081037 | 0.40122    |
| 0.036619  | -0.82536   |

|           |            |
|-----------|------------|
| 0.0081619 | 0.41861    |
| 0.059983  | 0.046758   |
| 0.0082213 | 0.43621    |
| 0.013504  | 0.004364   |
| 0.0084694 | 0.50845    |
| 0.0090104 | 0.65886    |
| 0.0081619 | 0.41861    |
| 0.0088702 | 0.62079    |
| 0.010731  | -0.0027971 |
| 0.1038    | 0.02577    |
| 0.032875  | -1.0007    |
| 0.0075433 | 0.2276     |
| 0.046637  | -0.53455   |
| 0.0075877 | 0.2418     |
| 0.007099  | 0.081709   |
| 0.0086658 | 0.56416    |
| 0.0082213 | 0.43621    |
| 0.0075002 | 0.21378    |
| 0.0075433 | 0.21378    |
| 0.055952  | -0.31669   |
| 0.0079451 | -0.0072122 |
| 0.007306  | 0.15072    |
| 0.0082213 | 0.43621    |
| 0.010731  | -0.0027971 |
| 0.0084694 | 0.50845    |
| 0.0086658 | 0.56416    |
| 0.032875  | -1.0007    |
| 0.012958  | 0.0032251  |
| 0.090335  | 0.046386   |
| 0.0075002 | 0.21378    |
| 0.032544  | -1.0304    |
| 0.0079451 | -0.0072122 |
| 0.014706  | 0.0055346  |
| 0.010376  | -0.0036418 |
| 0.10409   | 0.026889   |
| 0.007779  | 0.28647    |
| 0.007099  | 0.081709   |
| 0.00894   | 0.6398     |
| 0.0088702 | 0.62079    |
| 0.0085994 | 0.54547    |
| 0.0088702 | 0.62079    |

|           |            |
|-----------|------------|
| 0.073008  | -0.09116   |
| 0.082903  | 0.0020229  |
| 0.0088013 | 0.60183    |
| 0.0072715 | 0.13941    |
| 0.036619  | -0.82536   |
| 0.0072071 | 0.11821    |
| 0.0111114 | -0.0009612 |
| 0.014706  | 0.0055346  |
| 0.0076336 | 0.25635    |
| 0.032423  | -1.0477    |
| 0.0087704 | -0.0072929 |
| 0.0076336 | 0.25635    |
| 0.016066  | 0.0079609  |
| 0.099669  | 0.06705    |
| 0.0080466 | 0.38405    |
| 0.012958  | 0.0021206  |
| 0.0094709 | -0.0051686 |
| 0.1003    | 0.022784   |
| 0.0071773 | 0.10834    |
| 0.024427  | 0.019776   |
| 0.010731  | -0.0019027 |
| 0.0088702 | 0.62079    |
| 0.0074182 | 0.1873     |
| 0.0079359 | 0.35043    |
| 0.017596  | 0.011775   |
| 0.0075002 | 0.21378    |
| 0.0091534 | 0.69708    |
| 0.03612   | -0.84394   |
| 0.0084058 | 0.49014    |
| 0.0090104 | 0.65886    |
| 0.013504  | 0.0032251  |
| 0.0087331 | 0.58295    |
| 0.007779  | 0.30202    |
| 0.0075002 | 0.21378    |
| 0.0073793 | 0.17468    |
| 0.0073419 | 0.16248    |
| 0.0072715 | 0.12857    |
| 0.016809  | 0.0092115  |
| 0.0085994 | 0.54547    |
| 0.055719  | 0.045278   |
| 0.0087331 | 0.58295    |

|           |            |
|-----------|------------|
| 0.02223   | 0.018425   |
| 0.083714  | 0.04583    |
| 0.010376  | -0.0036418 |
| 0.007123  | 0.090103   |
| 0.00894   | 0.6398     |
| 0.007779  | 0.30202    |
| 0.0080466 | 0.38405    |
| 0.041199  | -0.67741   |
| 0.0072071 | 0.11821    |
| 0.08918   | 0.040962   |
| 0.011972  | 2.49E-05   |
| 0.0079451 | -0.0072122 |
| 0.0075433 | 0.2276     |
| 0.065651  | -0.18445   |
| 0.053419  | -0.38803   |
| 0.045635  | -0.5589    |
| 0.057178  | 0.045278   |
| 0.0090816 | 0.67796    |
| 0.0088702 | 0.62079    |
| 0.0083433 | 0.47199    |
| 0.0077292 | 0.28647    |
| 0.034855  | -0.89503   |
| 0.0088013 | 0.60183    |
| 0.0070589 | 0.066311   |
| 0.0072386 | 0.12857    |
| 0.00783   | 0.31787    |
| 0.034505  | -0.89503   |
| 0.032519  | -1.0951    |
| 0.007779  | 0.30202    |
| 0.0071113 | 0.010749   |
| 0.039844  | 0.034143   |
| 0.014086  | 0.004364   |
| 0.015366  | 0.0067344  |
| 0.00894   | 0.6398     |
| 0.0082818 | 0.45401    |
| 0.03524   | -0.87876   |
| 0.0087331 | 0.58295    |
| 0.007821  | -0.0072122 |
| 0.0074333 | -0.0040171 |
| 0.00783   | 0.31787    |
| 0.088023  | 0.039917   |

|           |            |
|-----------|------------|
| 0.0088013 | 0.60183    |
| 0.0085746 | -0.0072929 |
| 0.011972  | 2.49E-05   |
| 0.00783   | 0.31787    |
| 0.0081619 | 0.41861    |
| 0.00894   | 0.6398     |
| 0.047964  | 0.040812   |
| 0.0074585 | 0.20034    |
| 0.0070272 | 0.025758   |
| 0.085509  | 0.020095   |
| 0.10485   | 0.033276   |
| 0.0088702 | 0.62079    |
| 0.0090816 | 0.67796    |
| 0.043079  | 0.036502   |
| 0.035158  | 0.031675   |
| 0.0081619 | 0.41861    |
| 0.081445  | 0.04924    |
| 0.007779  | 0.30202    |
| 0.00783   | 0.31787    |
| 0.0083433 | 0.47199    |
| 0.0084058 | 0.49014    |
| 0.032423  | -1.0477    |
| 0.062773  | -0.22652   |
| 0.007147  | 0.0051576  |
| 0.0086658 | 0.56416    |
| 0.0086658 | 0.56416    |
| 0.0070309 | 0.052688   |
| 0.0072386 | 0.12857    |
| 0.062773  | -0.22652   |
| 0.0073419 | 0.16248    |
| 0.0097473 | -0.0051686 |
| 0.0082213 | 0.43621    |
| 0.038254  | 0.032921   |
| 0.0087704 | -0.006908  |
| 0.0081619 | 0.41861    |
| 0.10441   | 0.049934   |
| 0.034505  | -0.91058   |
| 0.032588  | -1.1005    |
| 0.016066  | 0.0092115  |
| 0.0081037 | 0.40122    |
| 0.062773  | -0.22652   |

|           |            |
|-----------|------------|
| 0.012448  | 0.001053   |
| 0.0078823 | 0.33401    |
| 0.0071773 | 0.10834    |
| 0.0079906 | 0.36712    |
| 0.0084694 | 0.50845    |
| 0.055952  | -0.34019   |
| 0.04467   | -0.5831    |
| 0.0074182 | 0.1873     |
| 0.0072071 | 0.11821    |
| 0.007123  | 0.090103   |
| 0.007099  | 0.081709   |
| 0.037733  | -0.78604   |
| 0.0072715 | 0.13941    |
| 0.0079359 | 0.35043    |
| 0.0088702 | 0.62079    |
| 0.05467   | -0.36399   |
| 0.0090816 | 0.67796    |
| 0.0083433 | 0.47199    |
| 0.0073419 | 0.16248    |
| 0.0088702 | 0.62079    |
| 0.011527  | -0.0009612 |
| 0.007306  | 0.15072    |
| 0.034187  | -0.92541   |
| 0.007306  | 0.15072    |
| 0.012958  | 0.0032251  |
| 0.0075002 | 0.21378    |
| 0.0072386 | 0.12857    |
| 0.032519  | -1.0951    |
| 0.0097473 | -0.0051686 |
| 0.0089841 | -0.006908  |
| 0.0079359 | 0.35043    |
| 0.0071773 | 0.10834    |
| 0.071533  | -0.10826   |
| 0.033662  | 0.029119   |
| 0.033792  | -1.1419    |
| 0.032418  | -1.0834    |
| 0.03524   | -0.87876   |
| 0.0089841 | -0.006908  |
| 0.067111  | -0.16433   |
| 0.012448  | 0.001053   |
| 0.014086  | 0.004364   |

|           |            |
|-----------|------------|
| 0.0082818 | 0.45401    |
| 0.014086  | 0.004364   |
| 0.014086  | 0.004364   |
| 0.042857  | -0.63085   |
| 0.0072387 | 0.0027978  |
| 0.096706  | 0.025383   |
| 0.0073602 | -0.0011105 |
| 0.095533  | 0.063518   |
| 0.099168  | 0.023538   |
| 0.0070581 | 0.017584   |
| 0.045635  | -0.53455   |
| 0.013504  | 0.0032251  |
| 0.0090816 | 0.67796    |
| 0.0083433 | 0.47199    |
| 0.048754  | -0.4856    |
| 0.0081619 | 0.41861    |
| 0.007779  | 0.30202    |
| 0.0071773 | 0.10834    |
| 0.0084058 | 0.49014    |
| 0.0078823 | 0.33401    |
| 0.049867  | -0.46109   |
| 0.012448  | 0.001053   |
| 0.10462   | 0.047424   |
| 0.0071773 | 0.10834    |
| 0.098149  | 0.067232   |
| 0.0077085 | -0.0060189 |
| 0.052201  | -0.41225   |
| 0.00894   | 0.6398     |
| 0.0075877 | 0.2418     |
| 0.0079906 | 0.36712    |
| 0.00894   | 0.6398     |
| 0.0086658 | 0.56416    |
| 0.00894   | 0.6398     |
| 0.011114  | -0.0019027 |
| 0.0081037 | 0.40122    |
| 0.064204  | -0.2052    |
| 0.0077292 | 0.28647    |
| 0.028099  | 0.023825   |
| 0.1016    | 0.064369   |
| 0.0079359 | 0.35043    |
| 0.0090104 | 0.65886    |

|           |            |
|-----------|------------|
| 0.032875  | -1.0007    |
| 0.0074182 | 0.1873     |
| 0.0075002 | 0.21378    |
| 0.03612   | -0.84394   |
| 0.047964  | 0.039792   |
| 0.065651  | -0.18445   |
| 0.0082818 | 0.45401    |
| 0.086766  | 0.027849   |
| 0.012448  | 0.001053   |
| 0.10472   | 0.03138    |
| 0.010376  | -0.0027971 |
| 0.0072715 | 0.12857    |
| 0.057178  | 0.04604    |
| 0.0086658 | 0.56416    |
| 0.00783   | 0.31787    |
| 0.007779  | 0.30202    |
| 0.0075877 | 0.2418     |
| 0.042857  | -0.6071    |
| 0.0084058 | 0.49014    |
| 0.011972  | 0.001053   |
| 0.0078823 | 0.33401    |
| 0.0070192 | 0.030378   |
| 0.0082213 | 0.43621    |
| 0.0079906 | 0.36712    |
| 0.0073419 | 0.15072    |
| 0.0074585 | 0.20034    |
| 0.0088702 | 0.62079    |
| 0.1016    | 0.064369   |
| 0.086766  | 0.027849   |
| 0.07879   | -0.031991  |
| 0.010048  | -0.0044341 |
| 0.0083953 | -0.0076979 |
| 0.007779  | 0.30202    |
| 0.00894   | 0.6398     |
| 0.0085994 | 0.54547    |
| 0.0090816 | 0.67796    |
| 0.0073602 | -0.0011105 |
| 0.0078823 | 0.33401    |
| 0.0088013 | 0.60183    |
| 0.011972  | 2.49E-05   |
| 0.0087704 | -0.0072929 |



|           |            |
|-----------|------------|
| 0.017596  | 0.010484   |
| 0.0088702 | 0.62079    |
| 0.0075433 | 0.2276     |
| 0.0076069 | -0.0051251 |
| 0.0091534 | 0.69708    |
| 0.064204  | -0.2052    |
| 0.0085994 | 0.54547    |
| 0.0075002 | 0.20034    |
| 0.0081619 | 0.41861    |
| 0.0082818 | 0.45401    |
| 0.0084058 | 0.49014    |
| 0.007306  | 0.15072    |
| 0.0090104 | 0.65886    |
| 0.010731  | -0.0027971 |
| 0.071533  | -0.09116   |
| 0.0084058 | 0.49014    |
| 0.063888  | 0.04917    |
| 0.0070169 | 0.040742   |
| 0.011527  | -0.0009612 |
| 0.03669   | 0.031675   |
| 0.0075433 | 0.21378    |
| 0.1035    | 0.057058   |
| 0.0070433 | 0.059284   |
| 0.0076807 | 0.27125    |
| 0.0088702 | 0.62079    |
| 0.10036   | 0.06649    |
| 0.0070581 | 0.017584   |
| 0.085509  | 0.020095   |
| 0.00894   | 0.6398     |
| 0.017596  | 0.010484   |
| 0.007123  | 0.090103   |
| 0.010731  | -0.0027971 |
| 0.0073602 | -0.0011105 |
| 0.032544  | -1.0304    |
| 0.007821  | -0.0067106 |
| 0.0088013 | 0.60183    |
| 0.0092171 | -0.0064176 |
| 0.0084694 | 0.50845    |
| 0.0072715 | 0.13941    |
| 0.0072071 | 0.11821    |
| 0.019306  | 0.013082   |

|           |            |
|-----------|------------|
| 0.0071894 | 0.0051576  |
| 0.0074182 | 0.1873     |
| 0.03612   | -0.84394   |
| 0.0073793 | 0.17468    |
| 0.0080815 | -0.007536  |
| 0.0086658 | 0.56416    |
| 0.0070159 | 0.035368   |
| 0.080287  | 0.050199   |
| 0.1003    | 0.022572   |
| 0.010048  | -0.0044341 |
| 0.0087331 | 0.58295    |
| 0.045635  | -0.5589    |
| 0.007306  | 0.15072    |
| 0.082903  | 0.0020229  |
| 0.0090816 | 0.67796    |
| 0.0070776 | 0.073782   |
| 0.10441   | 0.047424   |
| 0.0073419 | 0.16248    |
| 0.090686  | 0.034253   |
| 0.039844  | 0.035337   |
| 0.0080815 | -0.0076938 |
| 0.0071894 | 0.0051576  |
| 0.10494   | 0.039956   |
| 0.077795  | 0.051444   |
| 0.07879   | -0.019688  |
| 0.0070589 | 0.066311   |
| 0.0084694 | 0.50845    |
| 0.049567  | 0.040812   |
| 0.016809  | 0.0092115  |
| 0.10134   | 0.022479   |
| 0.0082213 | 0.43621    |
| 0.0079906 | 0.36712    |
| 0.010048  | -0.0044341 |
| 0.0073419 | 0.16248    |
| 0.0072386 | 0.12857    |
| 0.082578  | 0.04737    |
| 0.020232  | 0.014403   |
| 0.051016  | -0.43662   |
| 0.0070776 | 0.073782   |
| 0.0073793 | 0.17468    |
| 0.0082818 | 0.45401    |

|           |            |
|-----------|------------|
| 0.0070589 | 0.066311   |
| 0.0094709 | -0.0058338 |
| 0.072398  | 0.051552   |
| 0.0075433 | 0.2276     |
| 0.007123  | 0.090103   |
| 0.011114  | -0.0009612 |
| 0.0070589 | 0.066311   |
| 0.0070309 | 0.052688   |
| 0.010731  | -0.0027971 |
| 0.0081619 | 0.41861    |
| 0.0074585 | 0.20034    |
| 0.0097473 | -0.0044341 |
| 0.043079  | 0.036502   |
| 0.0084694 | 0.50845    |
| 0.037733  | -0.78604   |
| 0.0079906 | 0.36712    |
| 0.0076807 | 0.27125    |
| 0.033092  | -1.1234    |
| 0.012448  | 0.001053   |
| 0.0088702 | 0.62079    |
| 0.0085994 | 0.54547    |
| 0.0090816 | 0.67796    |
| 0.0071491 | 0.098977   |
| 0.0086658 | 0.56416    |
| 0.007022  | 0.046511   |
| 0.0070272 | 0.025758   |
| 0.019306  | 0.014403   |
| 0.0077292 | 0.28647    |
| 0.0075433 | 0.2276     |
| 0.0586    | 0.046758   |
| 0.0084694 | 0.50845    |
| 0.014706  | 0.0055346  |
| 0.0074182 | 0.17468    |
| 0.007123  | 0.090103   |
| 0.03524   | -0.87876   |
| 0.0070272 | 0.021497   |
| 0.0090816 | 0.67796    |
| 0.0074182 | 0.1873     |
| 0.10496   | 0.03536    |
| 0.0073419 | 0.16248    |
| 0.010731  | -0.0019027 |

|           |            |
|-----------|------------|
| 0.0094709 | -0.0058338 |
| 0.0081619 | 0.41861    |
| 0.010376  | -0.0027971 |
| 0.014086  | 0.004364   |
| 0.0081037 | 0.40122    |
| 0.014706  | 0.0055346  |
| 0.0077292 | 0.28647    |
| 0.096449  | 0.06518    |
| 0.014086  | 0.0055346  |
| 0.0073419 | 0.16248    |
| 0.0090104 | 0.65886    |
| 0.0072955 | 0.00071242 |
| 0.096706  | 0.02616    |
| 0.007779  | 0.30202    |
| 0.010376  | -0.0027971 |
| 0.0081619 | 0.40122    |
| 0.0073419 | 0.16248    |
| 0.10036   | 0.065585   |
| 0.0090104 | 0.65886    |
| 0.0071491 | 0.090103   |
| 0.0072715 | 0.13941    |
| 0.0071773 | 0.10834    |
| 0.0092171 | -0.0064176 |
| 0.034187  | -0.92541   |
| 0.052201  | -0.41225   |
| 0.0071491 | 0.098977   |
| 0.0084694 | 0.50845    |
| 0.032389  | -1.0771    |
| 0.032423  | -1.0477    |
| 0.00894   | 0.6398     |
| 0.039844  | 0.035337   |
| 0.03276   | -1.1104    |
| 0.10494   | 0.039956   |
| 0.0070169 | 0.040742   |
| 0.063888  | 0.04917    |
| 0.074476  | -0.074934  |
| 0.10494   | 0.039956   |
| 0.0071773 | 0.10834    |
| 0.0085746 | -0.0075602 |
| 0.10215   | 0.061137   |
| 0.0090104 | 0.65886    |

|           |            |
|-----------|------------|
| 0.101     | 0.065585   |
| 0.0076807 | 0.27125    |
| 0.0075877 | 0.2418     |
| 0.0070589 | 0.059284   |
| 0.014086  | 0.0055346  |
| 0.0075433 | 0.2276     |
| 0.011972  | 2.49E-05   |
| 0.065104  | 0.04917    |
| 0.091453  | 0.0511     |
| 0.0074585 | 0.20034    |
| 0.03303   | -0.98966   |
| 0.065651  | -0.18445   |
| 0.0075002 | 0.21378    |
| 0.10472   | 0.03138    |
| 0.0072715 | 0.13941    |
| 0.092533  | 0.05853    |
| 0.039002  | -0.74417   |
| 0.0085339 | 0.52689    |
| 0.0082313 | -0.0076938 |
| 0.0085339 | 0.52689    |
| 0.0070433 | 0.059284   |
| 0.0079451 | -0.0072122 |
| 0.0072386 | 0.11821    |
| 0.0071491 | 0.098977   |
| 0.0080466 | 0.38405    |
| 0.0073602 | -0.0011105 |
| 0.089343  | 0.037674   |
| 0.021206  | 0.017077   |
| 0.096059  | 0.02616    |
| 0.033208  | -0.97806   |
| 0.0072071 | 0.11821    |
| 0.093574  | 0.05853    |
| 0.007821  | -0.0072122 |
| 0.0074585 | 0.20034    |
| 0.0082818 | 0.45401    |
| 0.0071773 | 0.098977   |
| 0.054226  | 0.044471   |
| 0.0071894 | 0.0051576  |
| 0.034106  | -1.1486    |
| 0.0080466 | 0.38405    |
| 0.0075002 | 0.21378    |

|           |            |
|-----------|------------|
| 0.0071773 | 0.10834    |
| 0.041454  | 0.036502   |
| 0.0071773 | 0.10834    |
| 0.0079359 | 0.35043    |
| 0.0075002 | 0.21378    |
| 0.026825  | 0.022479   |
| 0.047677  | -0.5101    |
| 0.0072386 | 0.12857    |
| 0.014086  | 0.0055346  |
| 0.0088013 | 0.60183    |
| 0.0072387 | 0.0027978  |
| 0.077118  | 0.051444   |
| 0.0090104 | 0.65886    |
| 0.0074585 | 0.20034    |
| 0.0075433 | 0.2276     |
| 0.0082213 | 0.43621    |
| 0.065651  | -0.18445   |
| 0.0085994 | 0.54547    |
| 0.0088702 | 0.62079    |
| 0.007306  | 0.15072    |
| 0.099669  | 0.06705    |
| 0.0085994 | 0.54547    |
| 0.032389  | -1.0771    |
| 0.044711  | 0.037634   |
| 0.032861  | -1.1149    |
| 0.034187  | -0.91058   |
| 0.011972  | 0.001053   |
| 0.065104  | 0.04917    |
| 0.0088013 | 0.60183    |
| 0.0072386 | 0.11821    |
| 0.0090816 | 0.67796    |
| 0.007821  | -0.0067106 |
| 0.020232  | 0.014403   |
| 0.0072071 | 0.11821    |
| 0.0074182 | 0.17468    |
| 0.028099  | 0.023825   |
| 0.032588  | -1.1005    |
| 0.0072071 | 0.11821    |
| 0.0070581 | 0.017584   |
| 0.0072386 | 0.12857    |
| 0.0082213 | 0.43621    |

|           |            |
|-----------|------------|
| 0.036619  | -0.82536   |
| 0.00894   | 0.6398     |
| 0.10488   | 0.039956   |
| 0.00894   | 0.6398     |
| 0.015366  | 0.0079609  |
| 0.042857  | -0.63085   |
| 0.0071773 | 0.10834    |
| 0.0073419 | 0.16248    |
| 0.0072071 | 0.11821    |
| 0.03239   | -1.0557    |
| 0.0088702 | 0.62079    |
| 0.10083   | 0.022479   |
| 0.053419  | -0.38803   |
| 0.0075877 | 0.2418     |
| 0.0081037 | 0.40122    |
| 0.0074585 | 0.1873     |
| 0.010048  | -0.0044341 |
| 0.084293  | 0.04583    |
| 0.0088702 | 0.60183    |
| 0.081558  | -0.008361  |
| 0.084293  | 0.04583    |
| 0.0073419 | 0.16248    |
| 0.0073419 | 0.16248    |
| 0.0079451 | -0.0072122 |
| 0.03524   | -0.87876   |
| 0.024427  | 0.021128   |
| 0.014706  | 0.0055346  |
| 0.016066  | 0.0079609  |
| 0.025601  | 0.022479   |
| 0.024427  | 0.019776   |
| 0.015366  | 0.0067344  |
| 0.011972  | 2.49E-05   |
| 0.007123  | 0.090103   |
| 0.0090104 | 0.65886    |
| 0.066276  | 0.049656   |
| 0.036619  | -0.82536   |
| 0.0097473 | -0.0051686 |
| 0.0075433 | 0.2276     |
| 0.052701  | 0.042727   |
| 0.0082818 | 0.45401    |
| 0.0090104 | 0.65886    |

|           |            |
|-----------|------------|
| 0.10496   | 0.037598   |
| 0.0070401 | 0.021497   |
| 0.044711  | 0.038732   |
| 0.0077292 | 0.28647    |
| 0.023303  | 0.019776   |
| 0.0086658 | 0.56416    |
| 0.10415   | 0.052398   |
| 0.0072071 | 0.11821    |
| 0.007306  | 0.15072    |
| 0.0073419 | 0.16248    |
| 0.0082313 | -0.0076938 |
| 0.042008  | -0.65431   |
| 0.0079906 | 0.36712    |
| 0.0097473 | -0.0051686 |
| 0.0339    | -0.93955   |
| 0.0090816 | 0.67796    |
| 0.0089841 | -0.0064176 |
| 0.0079906 | 0.35043    |
| 0.0082313 | -0.0076938 |
| 0.0088702 | 0.62079    |
| 0.007147  | 0.0051576  |
| 0.0072715 | 0.13941    |
| 0.054226  | 0.043621   |
| 0.0070776 | 0.073782   |
| 0.0070309 | 0.052688   |
| 0.0090816 | 0.67796    |
| 0.0090104 | 0.65886    |
| 0.0090816 | 0.67796    |
| 0.078448  | 0.051216   |
| 0.0085994 | 0.54547    |
| 0.0072955 | 0.00071242 |
| 0.059971  | -0.24839   |
| 0.091453  | 0.055137   |
| 0.0085746 | -0.0075602 |
| 0.039844  | 0.034143   |
| 0.0071894 | 0.0051576  |
| 0.013504  | 0.0032251  |
| 0.10472   | 0.029687   |
| 0.062773  | -0.2052    |
| 0.10455   | 0.028193   |
| 0.0076336 | 0.25635    |



|           |            |
|-----------|------------|
| 0.0072955 | 0.00071242 |
| 0.0085746 | -0.0075602 |
| 0.034855  | -0.89503   |
| 0.010048  | -0.0036418 |
| 0.067111  | -0.16433   |
| 0.0077292 | 0.28647    |
| 0.094574  | 0.063518   |
| 0.10311   | 0.024054   |
| 0.00894   | 0.6398     |
| 0.041199  | -0.67741   |
| 0.03612   | -0.84394   |
| 0.0082818 | 0.45401    |
| 0.0080815 | -0.007536  |
| 0.0072715 | 0.13941    |
| 0.0080466 | 0.38405    |
| 0.10183   | 0.022679   |
| 0.018428  | 0.011775   |
| 0.007099  | 0.081709   |
| 0.0080466 | 0.36712    |
| 0.0087331 | 0.58295    |
| 0.032875  | -1.0007    |
| 0.066276  | 0.049656   |
| 0.052201  | -0.38803   |
| 0.0078823 | 0.33401    |
| 0.0077292 | 0.28647    |
| 0.0070272 | 0.025758   |
| 0.062773  | -0.22652   |
| 0.007123  | 0.090103   |
| 0.088023  | 0.038804   |
| 0.0082213 | 0.43621    |
| 0.045635  | -0.5589    |
| 0.039844  | 0.035337   |
| 0.032373  | -1.0704    |
| 0.0081037 | 0.40122    |
| 0.0087331 | 0.58295    |
| 0.0084058 | 0.49014    |
| 0.0070433 | 0.059284   |
| 0.0092171 | -0.0064176 |
| 0.074476  | -0.074934  |
| 0.059971  | -0.27073   |
| 0.032544  | -1.0304    |

|           |            |
|-----------|------------|
| 0.0076069 | -0.0051251 |
| 0.093395  | 0.030934   |
| 0.042857  | -0.63085   |
| 0.007779  | 0.30202    |
| 0.0084694 | 0.50845    |
| 0.007099  | 0.081709   |
| 0.0073419 | 0.16248    |
| 0.097342  | 0.024682   |
| 0.0097473 | -0.0051686 |
| 0.0071491 | 0.098977   |
| 0.0085994 | 0.54547    |
| 0.075678  | 0.051806   |
| 0.017596  | 0.010484   |
| 0.0072386 | 0.12857    |
| 0.007306  | 0.15072    |
| 0.054226  | 0.043621   |
| 0.093395  | 0.030934   |
| 0.010048  | -0.0036418 |
| 0.082578  | 0.04737    |
| 0.10311   | 0.024054   |
| 0.053419  | -0.38803   |
| 0.1035    | 0.054784   |
| 0.012448  | 0.001053   |
| 0.072398  | 0.051552   |
| 0.058604  | -0.29352   |
| 0.010376  | -0.0027971 |
| 0.065104  | 0.049656   |
| 0.007821  | -0.0067106 |
| 0.057264  | -0.31669   |
| 0.0091534 | 0.69708    |
| 0.085509  | 0.020095   |
| 0.0070581 | 0.017584   |
| 0.03303   | -0.98966   |
| 0.0070401 | 0.021497   |
| 0.0074182 | 0.1873     |
| 0.0088702 | 0.62079    |
| 0.0075153 | -0.0040171 |
| 0.0081037 | 0.38405    |
| 0.049867  | -0.46109   |
| 0.0074182 | 0.17468    |
| 0.10455   | 0.029687   |

|           |            |
|-----------|------------|
| 0.10309   | 0.059186   |
| 0.0075433 | 0.2276     |
| 0.033642  | -0.95303   |
| 0.0090104 | 0.65886    |
| 0.054226  | 0.044471   |
| 0.0089841 | -0.006908  |
| 0.0074182 | 0.17468    |
| 0.012958  | 0.0032251  |
| 0.013504  | 0.0032251  |
| 0.04467   | -0.5831    |
| 0.0081619 | 0.41861    |
| 0.0089841 | -0.006908  |
| 0.0097473 | -0.0051686 |
| 0.0074182 | 0.1873     |
| 0.032875  | -1.0007    |
| 0.0090104 | 0.65886    |
| 0.015366  | 0.0067344  |
| 0.0074585 | 0.20034    |
| 0.0094709 | -0.0058338 |
| 0.032373  | -1.0704    |
| 0.049867  | -0.46109   |
| 0.0090104 | 0.65886    |
| 0.08918   | 0.046386   |
| 0.058604  | -0.29352   |
| 0.032519  | -1.0951    |
| 0.078448  | 0.050932   |
| 0.029421  | 0.025165   |
| 0.08918   | 0.046386   |
| 0.032743  | -1.0111    |
| 0.0081037 | 0.40122    |
| 0.066276  | 0.050095   |
| 0.0094709 | -0.0058338 |
| 0.032205  | 0.029119   |
| 0.0094709 | -0.0058338 |
| 0.087374  | 0.039917   |
| 0.018428  | 0.011775   |
| 0.007123  | 0.090103   |
| 0.10488   | 0.042402   |
| 0.0086658 | 0.56416    |
| 0.0090816 | 0.67796    |
| 0.0070192 | 0.030378   |

|           |            |
|-----------|------------|
| 0.036619  | -0.82536   |
| 0.0074182 | 0.1873     |
| 0.076413  | 0.051619   |
| 0.099743  | 0.023109   |
| 0.007821  | -0.0067106 |
| 0.0083433 | 0.47199    |
| 0.039844  | 0.034143   |
| 0.03524   | -0.87876   |
| 0.065651  | -0.18445   |
| 0.054226  | 0.043621   |
| 0.014086  | 0.004364   |
| 0.077118  | 0.051444   |
| 0.014086  | 0.004364   |
| 0.011527  | 2.49E-05   |
| 0.007147  | 0.0051576  |
| 0.058604  | -0.27073   |
| 0.0077292 | 0.28647    |
| 0.0084058 | 0.49014    |
| 0.007123  | 0.090103   |
| 0.033494  | -1.1349    |
| 0.0090104 | 0.65886    |
| 0.074476  | -0.059632  |
| 0.0074182 | 0.1873     |
| 0.075932  | -0.059632  |
| 0.0074182 | 0.1873     |
| 0.0092171 | -0.0058338 |
| 0.097966  | 0.024065   |
| 0.0072071 | 0.11821    |
| 0.0087331 | 0.58295    |
| 0.0070581 | 0.017584   |
| 0.032519  | -1.0951    |
| 0.03612   | -0.84394   |
| 0.0085994 | 0.54547    |
| 0.0091534 | 0.69708    |
| 0.0080466 | 0.38405    |
| 0.0075002 | 0.21378    |
| 0.0088702 | 0.62079    |
| 0.03239   | -1.0557    |
| 0.08918   | 0.046386   |
| 0.085509  | 0.020095   |
| 0.0083433 | 0.47199    |

|           |            |
|-----------|------------|
| 0.0071894 | 0.0051576  |
| 0.046637  | -0.53455   |
| 0.032588  | -1.1005    |
| 0.010048  | -0.0036418 |
| 0.064204  | -0.18445   |
| 0.0070309 | 0.052688   |
| 0.033412  | -0.96585   |
| 0.0070433 | 0.059284   |
| 0.0090104 | 0.65886    |
| 0.0072386 | 0.12857    |
| 0.10415   | 0.052398   |
| 0.0097473 | -0.0051686 |
| 0.098575  | 0.023538   |
| 0.0087331 | 0.58295    |
| 0.062773  | -0.22652   |
| 0.0088702 | 0.60183    |
| 0.0097473 | -0.0044341 |
| 0.0084694 | 0.50845    |
| 0.010048  | -0.0044341 |
| 0.0097473 | -0.0051686 |
| 0.080287  | 0.050199   |
| 0.0084694 | 0.50845    |
| 0.09204   | 0.033125   |
| 0.029421  | 0.026496   |
| 0.0088013 | 0.60183    |
| 0.028099  | 0.023825   |
| 0.0070776 | 0.073782   |
| 0.032588  | -1.1005    |
| 0.0339    | -0.93955   |
| 0.0081037 | 0.40122    |
| 0.0079359 | 0.35043    |
| 0.082903  | 0.0020229  |
| 0.0076336 | 0.25635    |
| 0.011972  | 2.49E-05   |
| 0.0073793 | 0.16248    |
| 0.0074182 | 0.1873     |
| 0.0076336 | 0.25635    |
| 0.0092171 | -0.0064176 |
| 0.0090104 | 0.65886    |
| 0.0071491 | 0.098977   |
| 0.039695  | -0.72239   |

|           |            |
|-----------|------------|
| 0.0071773 | 0.098977   |
| 0.0083953 | -0.0076979 |
| 0.021206  | 0.015736   |
| 0.042857  | -0.63085   |
| 0.020232  | 0.014403   |
| 0.032875  | -1.0007    |
| 0.010048  | -0.0044341 |
| 0.10477   | 0.042402   |
| 0.0090816 | 0.67796    |
| 0.0090816 | 0.67796    |
| 0.0088702 | 0.62079    |
| 0.012448  | 0.001053   |
| 0.0075877 | 0.2418     |
| 0.090012  | 0.036534   |
| 0.014706  | 0.0055346  |
| 0.012958  | 0.0032251  |
| 0.0087704 | -0.0072929 |
| 0.010731  | -0.0027971 |
| 0.032668  | -1.1056    |
| 0.041199  | -0.67741   |
| 0.0072071 | 0.11821    |
| 0.0087704 | -0.006908  |
| 0.0074585 | 0.20034    |
| 0.00783   | 0.31787    |
| 0.0072386 | 0.12857    |
| 0.043079  | 0.036502   |
| 0.0082818 | 0.45401    |
| 0.0075877 | 0.2418     |
| 0.0090104 | 0.65886    |
| 0.02223   | 0.017077   |
| 0.071533  | -0.10826   |
| 0.032861  | -1.1149    |
| 0.00783   | 0.31787    |
| 0.0071491 | 0.098977   |
| 0.010731  | -0.0027971 |
| 0.048754  | -0.4856    |
| 0.0088702 | 0.62079    |
| 0.032205  | 0.027815   |
| 0.041199  | -0.67741   |
| 0.045635  | -0.5589    |
| 0.0090816 | 0.67796    |

|           |            |
|-----------|------------|
| 0.0090104 | 0.6398     |
| 0.0090816 | 0.67796    |
| 0.0072715 | 0.13941    |
| 0.034187  | -0.92541   |
| 0.0072386 | 0.12857    |
| 0.0085339 | 0.52689    |
| 0.007099  | 0.081709   |
| 0.032633  | -1.021     |
| 0.007821  | -0.0067106 |
| 0.0070192 | 0.025758   |
| 0.0083953 | -0.0076979 |
| 0.007123  | 0.090103   |
| 0.016809  | 0.0092115  |
| 0.0087331 | 0.58295    |
| 0.0076336 | 0.25635    |
| 0.00783   | 0.31787    |
| 0.032588  | -1.1005    |
| 0.032389  | -1.0771    |
| 0.0073602 | -0.0011105 |
| 0.092718  | 0.030934   |
| 0.032544  | -1.0304    |
| 0.0086658 | 0.56416    |
| 0.097321  | 0.067003   |
| 0.0070589 | 0.066311   |
| 0.0085339 | 0.52689    |
| 0.0072386 | 0.11821    |
| 0.033208  | -0.97806   |
| 0.077372  | -0.045303  |
| 0.0091534 | 0.69708    |
| 0.0072386 | 0.12857    |
| 0.10415   | 0.049934   |
| 0.077795  | 0.051216   |
| 0.0081619 | 0.41861    |
| 0.073273  | 0.051783   |
| 0.0077292 | 0.28647    |
| 0.023303  | 0.018425   |
| 0.0077085 | -0.0060189 |
| 0.0085746 | -0.0075602 |
| 0.077795  | 0.051444   |
| 0.023303  | 0.019776   |
| 0.07411   | 0.051821   |

|           |            |
|-----------|------------|
| 0.057264  | -0.31669   |
| 0.017596  | 0.011775   |
| 0.0088013 | 0.60183    |
| 0.10228   | 0.022679   |
| 0.00783   | 0.31787    |
| 0.1003    | 0.022572   |
| 0.0073602 | -0.0011105 |
| 0.03669   | 0.032921   |
| 0.062629  | 0.048637   |
| 0.0070159 | 0.035368   |
| 0.0072386 | 0.12857    |
| 0.0070776 | 0.073782   |
| 0.0089841 | -0.006908  |
| 0.10496   | 0.037598   |
| 0.10347   | 0.024827   |
| 0.099743  | 0.022784   |
| 0.0586    | 0.04604    |
| 0.0072387 | 0.0027978  |
| 0.034187  | -0.92541   |
| 0.032373  | -1.0632    |
| 0.092533  | 0.055137   |
| 0.03612   | -0.84394   |
| 0.10477   | 0.044903   |
| 0.0075433 | 0.2276     |
| 0.0085339 | 0.52689    |
| 0.0079451 | -0.007536  |
| 0.0097473 | -0.0044341 |
| 0.047964  | 0.039792   |
| 0.047677  | -0.5101    |
| 0.032875  | -1.0007    |
| 0.0070776 | 0.073782   |
| 0.0076807 | 0.27125    |
| 0.086106  | 0.04308    |
| 0.0070589 | 0.066311   |
| 0.055952  | -0.34019   |
| 0.085509  | 0.027849   |
| 0.0079906 | 0.36712    |
| 0.011972  | 2.49E-05   |
| 0.030791  | 0.026496   |
| 0.040428  | -0.67741   |
| 0.066276  | 0.050095   |



|           |            |
|-----------|------------|
| 0.0088702 | 0.62079    |
| 0.014706  | 0.0067344  |
| 0.0090104 | 0.65886    |
| 0.10415   | 0.049934   |
| 0.032861  | -1.1149    |
| 0.010376  | -0.0036418 |
| 0.032474  | -1.0393    |
| 0.012958  | 0.0021206  |
| 0.0072715 | 0.13941    |
| 0.083144  | 0.04663    |
| 0.080871  | 0.04924    |
| 0.059971  | -0.27073   |
| 0.007123  | 0.090103   |
| 0.092533  | 0.055137   |
| 0.081445  | 0.04924    |
| 0.007779  | 0.30202    |
| 0.0070818 | 0.010749   |
| 0.010731  | -0.0027971 |
| 0.0085746 | -0.0075602 |
| 0.00894   | 0.6398     |
| 0.0079359 | 0.35043    |
| 0.0089841 | -0.006908  |
| 0.097321  | 0.06633    |
| 0.063888  | 0.048637   |
| 0.0072071 | 0.11821    |
| 0.077372  | -0.045303  |
| 0.0079451 | -0.007536  |
| 0.017596  | 0.010484   |
| 0.0072715 | 0.13941    |
| 0.0079906 | 0.35043    |
| 0.0076069 | -0.0051251 |
| 0.0097473 | -0.0044341 |
| 0.015366  | 0.0067344  |
| 0.033642  | -0.95303   |
| 0.0072715 | 0.13941    |
| 0.089343  | 0.036534   |
| 0.0076807 | 0.27125    |
| 0.019306  | 0.014403   |
| 0.0070309 | 0.052688   |
| 0.090335  | 0.046386   |
| 0.011114  | -0.0019027 |

|           |            |
|-----------|------------|
| 0.0090816 | 0.67796    |
| 0.10183   | 0.022512   |
| 0.0076807 | 0.27125    |
| 0.011972  | 0.001053   |
| 0.094069  | 0.029884   |
| 0.10493   | 0.03536    |
| 0.033092  | -1.1234    |
| 0.0070776 | 0.073782   |
| 0.10215   | 0.062875   |
| 0.0071773 | 0.10834    |
| 0.046342  | 0.039792   |
| 0.007306  | 0.15072    |
| 0.03239   | -1.0557    |
| 0.1038    | 0.02577    |
| 0.077372  | -0.031991  |
| 0.047964  | 0.039792   |
| 0.0097473 | -0.0044341 |
| 0.032588  | -1.0951    |
| 0.086766  | 0.027849   |
| 0.053419  | -0.38803   |
| 0.032423  | -1.0477    |
| 0.00783   | 0.31787    |
| 0.032743  | -1.0111    |
| 0.0074333 | -0.0040171 |
| 0.019306  | 0.014403   |
| 0.0085994 | 0.54547    |
| 0.059983  | 0.046758   |
| 0.011527  | 2.49E-05   |
| 0.0083433 | 0.47199    |
| 0.0079906 | 0.36712    |
| 0.057264  | -0.31669   |
| 0.007306  | 0.15072    |
| 0.0072715 | 0.13941    |
| 0.0081619 | 0.41861    |
| 0.085509  | 0.020095   |
| 0.086766  | 0.027849   |
| 0.0090104 | 0.65886    |
| 0.055952  | -0.34019   |
| 0.075678  | 0.051739   |
| 0.011527  | -0.0009612 |
| 0.007099  | 0.081709   |

|           |            |
|-----------|------------|
| 0.032519  | -1.0951    |
| 0.097321  | 0.067003   |
| 0.0097473 | -0.0051686 |
| 0.067111  | -0.16433   |
| 0.0071491 | 0.098977   |
| 0.03303   | -0.98966   |
| 0.0070309 | 0.046511   |
| 0.0074333 | -0.0026829 |
| 0.0084694 | 0.50845    |
| 0.10477   | 0.044903   |
| 0.0085339 | 0.52689    |
| 0.0078823 | 0.33401    |
| 0.043079  | 0.036502   |
| 0.0081619 | 0.41861    |
| 0.035158  | 0.030407   |
| 0.032389  | -1.0771    |
| 0.10215   | 0.062875   |
| 0.092718  | 0.030934   |
| 0.0086658 | 0.56416    |
| 0.0072715 | 0.13941    |
| 0.0070589 | 0.066311   |
| 0.012958  | 0.0021206  |
| 0.0089841 | -0.006908  |
| 0.032519  | -1.0951    |
| 0.033092  | -1.1234    |
| 0.0078823 | 0.33401    |
| 0.1038    | 0.024827   |
| 0.098575  | 0.024065   |
| 0.0085994 | 0.54547    |
| 0.0084058 | 0.49014    |
| 0.0089841 | -0.0064176 |
| 0.0082818 | 0.45401    |
| 0.047677  | -0.5101    |
| 0.10347   | 0.024827   |
| 0.0090816 | 0.67796    |
| 0.0076807 | 0.27125    |
| 0.099743  | 0.022784   |
| 0.029421  | 0.025165   |
| 0.032544  | -1.0304    |
| 0.10496   | 0.037598   |
| 0.0071773 | 0.10834    |

|           |            |
|-----------|------------|
| 0.0085339 | 0.52689    |
| 0.059971  | -0.27073   |
| 0.073008  | -0.074934  |
| 0.0078823 | 0.33401    |
| 0.0072715 | 0.13941    |
| 0.04467   | -0.5831    |
| 0.046637  | -0.53455   |
| 0.10434   | 0.026889   |
| 0.012448  | 0.001053   |
| 0.00894   | 0.6398     |
| 0.032544  | -1.021     |
| 0.0074182 | 0.1873     |
| 0.016809  | 0.0092115  |
| 0.10488   | 0.042402   |
| 0.077795  | 0.051444   |
| 0.023303  | 0.018425   |
| 0.0086658 | 0.56416    |
| 0.019306  | 0.014403   |
| 0.08799   | 0.034794   |
| 0.10385   | 0.054784   |
| 0.090686  | 0.034253   |
| 0.0087331 | 0.58295    |
| 0.0083953 | -0.0076979 |
| 0.0071773 | 0.10834    |
| 0.0074182 | 0.1873     |
| 0.0079906 | 0.36712    |
| 0.018428  | 0.011775   |
| 0.046637  | -0.53455   |
| 0.00783   | 0.31787    |
| 0.0076336 | 0.2418     |
| 0.0075002 | 0.21378    |
| 0.0072071 | 0.11821    |
| 0.0073419 | 0.16248    |
| 0.033662  | 0.030407   |
| 0.0090104 | 0.65886    |
| 0.0086658 | 0.56416    |
| 0.033092  | -1.1234    |
| 0.041454  | 0.035337   |
| 0.021206  | 0.015736   |
| 0.00783   | 0.31787    |
| 0.0077292 | 0.28647    |

|           |            |
|-----------|------------|
| 0.0072387 | 0.00071242 |
| 0.007779  | 0.30202    |
| 0.0090104 | 0.65886    |
| 0.047677  | -0.4856    |
| 0.0088702 | 0.62079    |
| 0.007099  | 0.081709   |
| 0.0088702 | 0.62079    |
| 0.0073793 | 0.17468    |
| 0.093574  | 0.05853    |
| 0.10264   | 0.059186   |
| 0.012448  | 0.001053   |
| 0.0070309 | 0.052688   |
| 0.10434   | 0.026889   |
| 0.0070159 | 0.035368   |
| 0.011972  | 0.001053   |
| 0.033208  | -0.97806   |
| 0.0070192 | 0.030378   |
| 0.0083433 | 0.47199    |
| 0.033353  | -1.1312    |
| 0.082578  | 0.04737    |
| 0.046342  | 0.038732   |
| 0.017596  | 0.010484   |
| 0.0088013 | 0.60183    |
| 0.016809  | 0.0092115  |
| 0.0081037 | 0.40122    |
| 0.085509  | 0.020095   |
| 0.046342  | 0.039792   |
| 0.0094709 | -0.0051686 |
| 0.0082313 | -0.0076938 |
| 0.0072386 | 0.12857    |
| 0.039844  | 0.034143   |
| 0.0072715 | 0.13941    |
| 0.012958  | 0.0032251  |
| 0.0094709 | -0.0051686 |
| 0.0077292 | 0.28647    |
| 0.0085994 | 0.54547    |
| 0.014706  | 0.0055346  |
| 0.0097473 | -0.0051686 |
| 0.0075877 | 0.2418     |
| 0.0072071 | 0.11821    |
| 0.007779  | 0.30202    |

|           |            |
|-----------|------------|
| 0.0090816 | 0.67796    |
| 0.04467   | -0.5831    |
| 0.0092171 | -0.0058338 |
| 0.03612   | -0.84394   |
| 0.10462   | 0.047424   |
| 0.090012  | 0.036534   |
| 0.08918   | 0.040962   |
| 0.0081037 | 0.40122    |
| 0.073273  | 0.051693   |
| 0.0077085 | -0.0067106 |
| 0.0071491 | 0.098977   |
| 0.016066  | 0.0092115  |
| 0.032205  | 0.027815   |
| 0.0082818 | 0.45401    |
| 0.0085339 | 0.52689    |
| 0.0086658 | 0.56416    |
| 0.081445  | 0.048674   |
| 0.033662  | 0.030407   |
| 0.03669   | 0.032921   |
| 0.0091534 | 0.69708    |
| 0.051016  | -0.43662   |
| 0.0075002 | 0.21378    |
| 0.0079359 | 0.35043    |
| 0.097342  | 0.024682   |
| 0.00894   | 0.62079    |
| 0.007099  | 0.081709   |
| 0.007306  | 0.15072    |
| 0.071533  | -0.10826   |
| 0.0088013 | 0.60183    |
| 0.046637  | -0.53455   |
| 0.0086658 | 0.56416    |
| 0.03669   | 0.032921   |
| 0.08868   | 0.038804   |
| 0.0090104 | 0.65886    |
| 0.036619  | -0.82536   |
| 0.00894   | 0.6398     |
| 0.032668  | -1.1056    |
| 0.024427  | 0.019776   |
| 0.057264  | -0.31669   |
| 0.032588  | -1.1005    |
| 0.028099  | 0.025165   |

|           |            |
|-----------|------------|
| 0.0087331 | 0.58295    |
| 0.0072387 | 0.0027978  |
| 0.0085746 | -0.0072929 |
| 0.090335  | 0.046386   |
| 0.081445  | 0.048674   |
| 0.10462   | 0.047424   |
| 0.032474  | -1.0393    |
| 0.007306  | 0.13941    |
| 0.10083   | 0.022572   |
| 0.014086  | 0.004364   |
| 0.032474  | -1.0393    |
| 0.0088702 | 0.62079    |
| 0.032875  | -1.0007    |
| 0.0090816 | 0.67796    |
| 0.036619  | -0.80605   |
| 0.014086  | 0.0055346  |
| 0.0084694 | 0.50845    |
| 0.0081619 | 0.41861    |
| 0.0076336 | 0.2418     |
| 0.036619  | -0.80605   |
| 0.0088013 | 0.60183    |
| 0.0070776 | 0.066311   |
| 0.0088702 | 0.62079    |
| 0.0081037 | 0.40122    |
| 0.03612   | -0.84394   |
| 0.037156  | -0.78604   |
| 0.074911  | 0.051821   |
| 0.0074182 | 0.1873     |
| 0.044711  | 0.037634   |
| 0.042857  | -0.6071    |
| 0.0073793 | 0.17468    |
| 0.032205  | 0.029119   |
| 0.0084058 | 0.49014    |
| 0.084884  | 0.044052   |
| 0.0090104 | 0.65886    |
| 0.0074182 | 0.1873     |
| 0.019306  | 0.013082   |
| 0.0085339 | 0.52689    |
| 0.00894   | 0.6398     |
| 0.035158  | 0.030407   |
| 0.0085746 | -0.0075602 |

|           |            |
|-----------|------------|
| 0.0076807 | 0.27125    |
| 0.010048  | -0.0044341 |
| 0.0088013 | 0.60183    |
| 0.03669   | 0.031675   |
| 0.0072386 | 0.12857    |
| 0.0077292 | 0.28647    |
| 0.0070776 | 0.073782   |
| 0.0088013 | 0.60183    |
| 0.0094709 | -0.0058338 |
| 0.0072955 | -0.0011105 |
| 0.00894   | 0.6398     |
| 0.0072387 | 0.0027978  |
| 0.032668  | -1.1056    |
| 0.074476  | -0.059632  |
| 0.0075433 | 0.2276     |
| 0.0084694 | 0.50845    |
| 0.0077085 | -0.0060189 |
| 0.043745  | -0.6071    |
| 0.010376  | -0.0027971 |
| 0.0075153 | -0.0051251 |
| 0.0070776 | 0.073782   |
| 0.011972  | 2.49E-05   |
| 0.0097473 | -0.0051686 |
| 0.033353  | -1.1312    |
| 0.00894   | 0.6398     |
| 0.0071491 | 0.098977   |
| 0.0084058 | 0.49014    |
| 0.0073793 | 0.17468    |
| 0.032875  | -1.0007    |
| 0.020232  | 0.014403   |
| 0.0083433 | 0.47199    |
| 0.0084694 | 0.50845    |
| 0.0090104 | 0.65886    |
| 0.10385   | 0.052398   |
| 0.010048  | -0.0044341 |
| 0.033662  | 0.029119   |
| 0.010048  | -0.0044341 |
| 0.0090816 | 0.67796    |
| 0.051147  | 0.042727   |
| 0.010376  | -0.0027971 |
| 0.033662  | 0.029119   |



|           |            |
|-----------|------------|
| 0.0088013 | 0.60183    |
| 0.0084058 | 0.49014    |
| 0.057264  | -0.31669   |
| 0.0085339 | 0.52689    |
| 0.018428  | 0.011775   |
| 0.007306  | 0.15072    |
| 0.023303  | 0.018425   |
| 0.085509  | 0.020095   |
| 0.0070401 | 0.021497   |
| 0.012448  | 0.001053   |
| 0.0086658 | 0.56416    |
| 0.0070433 | 0.052688   |
| 0.1016    | 0.064369   |
| 0.0081619 | 0.41861    |
| 0.0071773 | 0.10834    |
| 0.1003    | 0.022784   |
| 0.0082213 | 0.43621    |
| 0.0078823 | 0.33401    |
| 0.007779  | 0.30202    |
| 0.0080466 | 0.38405    |
| 0.1035    | 0.057058   |
| 0.0074585 | 0.20034    |
| 0.086735  | 0.042062   |
| 0.041199  | -0.67741   |
| 0.0078823 | 0.33401    |
| 0.1003    | 0.022572   |
| 0.007099  | 0.081709   |
| 0.011527  | 2.49E-05   |
| 0.052201  | -0.41225   |
| 0.0088013 | 0.60183    |
| 0.10083   | 0.022572   |
| 0.0071491 | 0.098977   |
| 0.032389  | -1.0771    |
| 0.007306  | 0.15072    |
| 0.079079  | 0.050593   |
| 0.0073419 | 0.16248    |
| 0.042008  | -0.63085   |
| 0.011114  | -0.0019027 |
| 0.015366  | 0.0067344  |
| 0.0075002 | 0.20034    |
| 0.0072955 | 0.00071242 |

|           |            |
|-----------|------------|
| 0.0072387 | 0.0027978  |
| 0.0079906 | 0.36712    |
| 0.03524   | -0.87876   |
| 0.0088013 | 0.60183    |
| 0.0076336 | 0.25635    |
| 0.011972  | 0.001053   |
| 0.041454  | 0.035337   |
| 0.0088013 | 0.60183    |
| 0.00894   | 0.6398     |
| 0.096706  | 0.025383   |
| 0.0082213 | 0.43621    |
| 0.0070433 | 0.059284   |
| 0.0079451 | -0.007536  |
| 0.080287  | 0.050199   |
| 0.0079359 | 0.35043    |
| 0.101     | 0.065585   |
| 0.0081037 | 0.40122    |
| 0.041199  | -0.67741   |
| 0.084293  | 0.04583    |
| 0.091362  | 0.033125   |
| 0.0081619 | 0.41861    |
| 0.10083   | 0.022479   |
| 0.0088702 | 0.62079    |
| 0.0070309 | 0.052688   |
| 0.010048  | -0.0044341 |
| 0.0081037 | 0.40122    |
| 0.092718  | 0.030934   |
| 0.014706  | 0.0055346  |
| 0.02223   | 0.017077   |
| 0.0088013 | 0.60183    |
| 0.014706  | 0.0067344  |
| 0.078448  | 0.050932   |
| 0.065651  | -0.18445   |
| 0.067111  | -0.16433   |
| 0.015366  | 0.0067344  |
| 0.0074585 | 0.20034    |
| 0.042857  | -0.6071    |
| 0.0085339 | 0.52689    |
| 0.007821  | -0.0067106 |
| 0.012958  | 0.0021206  |
| 0.0088702 | 0.62079    |

|           |            |
|-----------|------------|
| 0.058604  | -0.29352   |
| 0.0087331 | 0.58295    |
| 0.042008  | -0.65431   |
| 0.0080466 | 0.38405    |
| 0.00894   | 0.6398     |
| 0.0076807 | 0.27125    |
| 0.035158  | 0.030407   |
| 0.081558  | 0.0020229  |
| 0.033208  | -0.97806   |
| 0.016809  | 0.0092115  |
| 0.073008  | -0.09116   |
| 0.035158  | 0.030407   |
| 0.0088013 | 0.60183    |
| 0.062629  | 0.048637   |
| 0.007123  | 0.090103   |
| 0.0071773 | 0.10834    |
| 0.016066  | 0.0079609  |
| 0.0087331 | 0.58295    |
| 0.011114  | -0.0019027 |
| 0.0079359 | 0.33401    |
| 0.058604  | -0.27073   |
| 0.011527  | -0.0009612 |
| 0.054226  | 0.044471   |
| 0.033641  | -1.1384    |
| 0.0084694 | 0.49014    |
| 0.064204  | -0.2052    |
| 0.081558  | 0.0020229  |
| 0.0086658 | 0.56416    |
| 0.0075877 | 0.2418     |
| 0.059983  | 0.04743    |
| 0.007306  | 0.15072    |
| 0.081558  | -0.008361  |
| 0.014706  | 0.0055346  |
| 0.007306  | 0.15072    |
| 0.011527  | -0.0009612 |
| 0.0090104 | 0.65886    |
| 0.016809  | 0.0092115  |
| 0.039695  | -0.72239   |
| 0.10434   | 0.028193   |
| 0.0079359 | 0.35043    |
| 0.0070581 | 0.017584   |

|           |            |
|-----------|------------|
| 0.0081037 | 0.40122    |
| 0.0090104 | 0.65886    |
| 0.032743  | -1.0111    |
| 0.016066  | 0.0079609  |
| 0.010376  | -0.0027971 |
| 0.007306  | 0.15072    |
| 0.007099  | 0.073782   |
| 0.097321  | 0.06633    |
| 0.0070589 | 0.066311   |
| 0.00894   | 0.6398     |
| 0.0090104 | 0.65886    |
| 0.007147  | 0.0078041  |
| 0.0079451 | -0.007536  |
| 0.0071773 | 0.10834    |
| 0.0085339 | 0.52689    |
| 0.0070776 | 0.073782   |
| 0.032861  | -1.1149    |
| 0.012958  | 0.0032251  |
| 0.088023  | 0.039917   |
| 0.0072386 | 0.12857    |
| 0.032544  | -1.0304    |
| 0.10183   | 0.022512   |
| 0.0084694 | 0.50845    |
| 0.097342  | 0.025383   |
| 0.0072071 | 0.11821    |
| 0.007022  | 0.046511   |
| 0.077372  | -0.045303  |
| 0.0071773 | 0.10834    |
| 0.033208  | -0.96585   |
| 0.012958  | 0.0032251  |
| 0.0086658 | 0.56416    |
| 0.012448  | 0.001053   |
| 0.0085339 | 0.52689    |
| 0.0085994 | 0.54547    |
| 0.0075877 | 0.2418     |
| 0.0072386 | 0.12857    |
| 0.010048  | -0.0036418 |
| 0.0078823 | 0.33401    |
| 0.0072386 | 0.12857    |
| 0.0082313 | -0.0076938 |
| 0.032633  | -1.021     |

|           |            |
|-----------|------------|
| 0.032389  | -1.0771    |
| 0.032668  | -1.1056    |
| 0.00783   | 0.31787    |
| 0.0090104 | 0.65886    |
| 0.017596  | 0.010484   |
| 0.0087331 | 0.58295    |
| 0.10485   | 0.03138    |
| 0.015366  | 0.0079609  |
| 0.084293  | 0.04583    |
| 0.044711  | 0.038732   |
| 0.00894   | 0.6398     |
| 0.0083433 | 0.47199    |
| 0.010376  | -0.0036418 |
| 0.10309   | 0.057058   |
| 0.0079906 | 0.36712    |
| 0.0070433 | 0.059284   |
| 0.0088702 | 0.62079    |
| 0.016066  | 0.0079609  |
| 0.03276   | -1.1104    |
| 0.040428  | -0.70012   |
| 0.00783   | 0.31787    |
| 0.0072715 | 0.13941    |
| 0.071483  | 0.051552   |
| 0.071483  | 0.051552   |
| 0.0091534 | 0.69708    |
| 0.0074182 | 0.1873     |
| 0.0097473 | -0.0051686 |
| 0.0092171 | -0.0064176 |
| 0.032205  | 0.027815   |
| 0.0083953 | -0.0076979 |
| 0.00783   | 0.31787    |
| 0.07411   | 0.051821   |
| 0.0076336 | 0.25635    |
| 0.075932  | -0.059632  |
| 0.0094709 | -0.0058338 |
| 0.039002  | -0.74417   |
| 0.007147  | 0.0078041  |
| 0.03276   | -1.1104    |
| 0.007779  | 0.30202    |
| 0.0079906 | 0.36712    |
| 0.007306  | 0.13941    |

|           |            |
|-----------|------------|
| 0.084221  | 0.020095   |
| 0.032474  | -1.0304    |
| 0.0076336 | 0.25635    |
| 0.007099  | 0.073782   |
| 0.061361  | -0.24839   |
| 0.042008  | -0.65431   |
| 0.10036   | 0.06649    |
| 0.0088013 | 0.60183    |
| 0.10215   | 0.062875   |
| 0.0081037 | 0.40122    |
| 0.032544  | -1.0304    |
| 0.0090816 | 0.67796    |
| 0.033208  | -0.97806   |
| 0.032418  | -1.0834    |
| 0.0087704 | -0.0072929 |
| 0.08799   | 0.040962   |
| 0.0080466 | 0.38405    |
| 0.085489  | 0.04308    |
| 0.010048  | -0.0044341 |
| 0.010731  | -0.0027971 |
| 0.007099  | 0.081709   |
| 0.0085994 | 0.54547    |
| 0.088023  | 0.038804   |
| 0.007779  | 0.30202    |
| 0.0083433 | 0.47199    |
| 0.02223   | 0.017077   |
| 0.0072715 | 0.13941    |
| 0.007779  | 0.30202    |
| 0.0082213 | 0.43621    |
| 0.039695  | -0.72239   |
| 0.032972  | -1.1193    |
| 0.0088013 | 0.60183    |
| 0.014706  | 0.0067344  |
| 0.0082818 | 0.45401    |
| 0.074476  | -0.059632  |
| 0.034505  | -0.91058   |
| 0.010376  | -0.0036418 |
| 0.0071491 | 0.098977   |
| 0.046637  | -0.53455   |
| 0.0073419 | 0.16248    |
| 0.0080466 | 0.38405    |

|           |            |
|-----------|------------|
| 0.032389  | -1.0771    |
| 0.085509  | 0.027849   |
| 0.073273  | 0.051783   |
| 0.032418  | -1.0834    |
| 0.0070776 | 0.066311   |
| 0.0094709 | -0.0051686 |
| 0.0085339 | 0.52689    |
| 0.044711  | 0.037634   |
| 0.0072071 | 0.11821    |
| 0.0090816 | 0.67796    |
| 0.0074585 | 0.20034    |
| 0.05467   | -0.36399   |
| 0.007123  | 0.090103   |
| 0.1003    | 0.022784   |
| 0.00783   | 0.30202    |
| 0.092718  | 0.032017   |
| 0.0072387 | 0.0027978  |
| 0.10215   | 0.061137   |
| 0.039695  | -0.72239   |
| 0.013504  | 0.0032251  |
| 0.033642  | -0.95303   |
| 0.076413  | 0.051739   |
| 0.0090104 | 0.65886    |
| 0.007123  | 0.090103   |
| 0.098149  | 0.067003   |
| 0.093574  | 0.05853    |
| 0.0087331 | 0.58295    |
| 0.0082213 | 0.43621    |
| 0.0070776 | 0.073782   |
| 0.0076069 | -0.0051251 |
| 0.083144  | 0.04663    |
| 0.0072715 | 0.13941    |
| 0.0072386 | 0.12857    |
| 0.10485   | 0.033276   |
| 0.014706  | 0.0055346  |
| 0.10488   | 0.042402   |
| 0.0075877 | 0.2418     |
| 0.086735  | 0.041005   |
| 0.093574  | 0.05853    |
| 0.0092171 | -0.0064176 |
| 0.0070433 | 0.052688   |

|           |            |
|-----------|------------|
| 0.0081619 | 0.41861    |
| 0.012958  | 0.0021206  |
| 0.041454  | 0.035337   |
| 0.0086658 | 0.56416    |
| 0.00783   | 0.31787    |
| 0.032519  | -1.0951    |
| 0.032743  | -1.0111    |
| 0.0073793 | 0.17468    |
| 0.10493   | 0.03536    |
| 0.0084694 | 0.50845    |
| 0.0088702 | 0.62079    |
| 0.0089841 | -0.006908  |
| 0.0086658 | 0.56416    |
| 0.0071894 | 0.0051576  |
| 0.091362  | 0.034253   |
| 0.00783   | 0.31787    |
| 0.0088702 | 0.62079    |
| 0.097966  | 0.024682   |
| 0.0097473 | -0.0051686 |
| 0.099743  | 0.023109   |
| 0.08918   | 0.046386   |
| 0.065651  | -0.18445   |
| 0.0073793 | 0.16248    |
| 0.032462  | -1.0894    |
| 0.038348  | -0.7654    |
| 0.097342  | 0.024682   |
| 0.0074182 | 0.1873     |
| 0.0073419 | 0.16248    |
| 0.007306  | 0.15072    |
| 0.035158  | 0.030407   |
| 0.007123  | 0.090103   |
| 0.071533  | -0.10826   |
| 0.0080466 | 0.38405    |
| 0.016809  | 0.0092115  |
| 0.0081037 | 0.40122    |
| 0.018428  | 0.011775   |
| 0.10385   | 0.054784   |
| 0.0086658 | 0.56416    |
| 0.063888  | 0.04917    |
| 0.032205  | 0.029119   |
| 0.03303   | -0.97806   |



|           |            |
|-----------|------------|
| 0.055719  | 0.044471   |
| 0.0071773 | 0.098977   |
| 0.055952  | -0.34019   |
| 0.0074585 | 0.20034    |
| 0.032972  | -1.1193    |
| 0.017596  | 0.010484   |
| 0.0070272 | 0.025758   |
| 0.0085994 | 0.54547    |
| 0.07411   | 0.051821   |
| 0.0071491 | 0.098977   |
| 0.007099  | 0.081709   |
| 0.0086658 | 0.56416    |
| 0.042008  | -0.65431   |
| 0.097321  | 0.067003   |
| 0.0070169 | 0.035368   |
| 0.084293  | 0.04583    |
| 0.0081619 | 0.41861    |
| 0.1035    | 0.057058   |
| 0.0079359 | 0.35043    |
| 0.007306  | 0.15072    |
| 0.057264  | -0.29352   |
| 0.0071491 | 0.098977   |
| 0.0090104 | 0.65886    |
| 0.033208  | -0.97806   |
| 0.007779  | 0.30202    |
| 0.0074182 | 0.1873     |
| 0.011114  | -0.0009612 |
| 0.0088013 | 0.60183    |
| 0.039002  | -0.74417   |
| 0.015366  | 0.0067344  |
| 0.070527  | 0.051118   |
| 0.010731  | -0.0027971 |
| 0.049867  | -0.46109   |
| 0.092533  | 0.055137   |
| 0.010731  | -0.0019027 |
| 0.0072955 | 0.00071242 |
| 0.016066  | 0.0079609  |
| 0.0077292 | 0.28647    |
| 0.03524   | -0.87876   |
| 0.010731  | -0.0027971 |
| 0.014086  | 0.004364   |

|           |            |
|-----------|------------|
| 0.02223   | 0.018425   |
| 0.10409   | 0.026889   |
| 0.0070589 | 0.059284   |
| 0.014086  | 0.004364   |
| 0.0072955 | -0.0011105 |
| 0.049567  | 0.040812   |
| 0.080287  | 0.050199   |
| 0.041454  | 0.035337   |
| 0.0085339 | 0.52689    |
| 0.0072386 | 0.12857    |
| 0.0076336 | 0.25635    |
| 0.082903  | 0.0020229  |
| 0.093395  | 0.029884   |
| 0.087374  | 0.041005   |
| 0.0089841 | -0.006908  |
| 0.0090816 | 0.67796    |
| 0.046342  | 0.038732   |
| 0.047964  | 0.039792   |
| 0.0071773 | 0.098977   |
| 0.0080815 | -0.007536  |
| 0.0090816 | 0.67796    |
| 0.048754  | -0.4856    |
| 0.011527  | -0.0009612 |
| 0.007821  | -0.0072122 |
| 0.045635  | -0.5589    |
| 0.03524   | -0.87876   |
| 0.0076807 | 0.25635    |
| 0.032205  | 0.027815   |
| 0.0084058 | 0.49014    |
| 0.0085339 | 0.52689    |
| 0.0088013 | 0.60183    |
| 0.097321  | 0.067003   |
| 0.012448  | 0.0021206  |
| 0.047677  | -0.5101    |
| 0.00894   | 0.6398     |
| 0.0071773 | 0.10834    |
| 0.10036   | 0.06649    |
| 0.0070433 | 0.059284   |
| 0.0074182 | 0.17468    |
| 0.0090816 | 0.67796    |
| 0.0087704 | -0.0072929 |

|           |            |
|-----------|------------|
| 0.0079906 | 0.36712    |
| 0.078448  | 0.050932   |
| 0.032588  | -1.0951    |
| 0.03239   | -1.0557    |
| 0.010731  | -0.0019027 |
| 0.0079451 | -0.0072122 |
| 0.0080466 | 0.38405    |
| 0.037733  | -0.78604   |
| 0.032205  | 0.029119   |
| 0.0082213 | 0.43621    |
| 0.097342  | 0.025383   |
| 0.032423  | -1.0393    |
| 0.0079451 | -0.0072122 |
| 0.0072386 | 0.12857    |
| 0.048754  | -0.4856    |
| 0.034855  | -0.89503   |
| 0.007022  | 0.040742   |
| 0.10264   | 0.061137   |
| 0.0080815 | -0.007536  |
| 0.024427  | 0.019776   |
| 0.011972  | 2.49E-05   |
| 0.0075433 | 0.2276     |
| 0.0090816 | 0.67796    |
| 0.011527  | -0.0009612 |
| 0.057178  | 0.045278   |
| 0.00783   | 0.31787    |
| 0.10462   | 0.047424   |
| 0.0090816 | 0.67796    |
| 0.0090816 | 0.67796    |
| 0.0094709 | -0.0058338 |
| 0.0085994 | 0.54547    |
| 0.098149  | 0.067232   |
| 0.046637  | -0.53455   |
| 0.007306  | 0.15072    |
| 0.057264  | -0.31669   |
| 0.0090816 | 0.67796    |
| 0.052201  | -0.41225   |
| 0.028099  | 0.023825   |
| 0.0072071 | 0.11821    |
| 0.032875  | -1.0007    |
| 0.0079906 | 0.36712    |

|           |            |
|-----------|------------|
| 0.0076807 | 0.27125    |
| 0.0072071 | 0.11821    |
| 0.011972  | 2.49E-05   |
| 0.0088013 | 0.60183    |
| 0.0084058 | 0.49014    |
| 0.043079  | 0.037634   |
| 0.0070433 | 0.059284   |
| 0.065651  | -0.18445   |
| 0.012448  | 0.001053   |
| 0.016809  | 0.010484   |
| 0.039002  | -0.74417   |
| 0.10415   | 0.052398   |
| 0.10183   | 0.022679   |
| 0.0070272 | 0.025758   |
| 0.0074333 | -0.0026829 |
| 0.039002  | -0.74417   |
| 0.0085339 | 0.52689    |
| 0.0070401 | 0.021497   |
| 0.033662  | 0.030407   |
| 0.0089841 | -0.0064176 |
| 0.0070433 | 0.059284   |
| 0.0078823 | 0.33401    |
| 0.010048  | -0.0044341 |
| 0.032633  | -1.0111    |
| 0.0072071 | 0.11821    |
| 0.0074182 | 0.17468    |
| 0.0094709 | -0.0058338 |
| 0.0094709 | -0.0058338 |
| 0.0071491 | 0.098977   |
| 0.0088702 | 0.62079    |
| 0.093574  | 0.05853    |
| 0.079079  | 0.050593   |
| 0.0079359 | 0.35043    |
| 0.007779  | 0.30202    |
| 0.0077292 | 0.28647    |
| 0.010048  | -0.0044341 |
| 0.0088702 | 0.62079    |
| 0.0073419 | 0.16248    |
| 0.014706  | 0.0055346  |
| 0.0082818 | 0.45401    |
| 0.0090104 | 0.65886    |

|           |            |
|-----------|------------|
| 0.0073419 | 0.16248    |
| 0.081558  | -0.008361  |
| 0.033219  | -1.1274    |
| 0.0084694 | 0.50845    |
| 0.0072386 | 0.12857    |
| 0.032743  | -1.0111    |
| 0.0088013 | 0.60183    |
| 0.10415   | 0.052398   |
| 0.0088702 | 0.62079    |
| 0.016809  | 0.010484   |
| 0.0087331 | 0.58295    |
| 0.021206  | 0.017077   |
| 0.0070272 | 0.025758   |
| 0.062773  | -0.22652   |
| 0.0090104 | 0.65886    |
| 0.04467   | -0.5589    |
| 0.0070589 | 0.066311   |
| 0.032373  | -1.0632    |
| 0.0071491 | 0.098977   |
| 0.0072071 | 0.11821    |
| 0.049567  | 0.041791   |
| 0.071533  | -0.10826   |
| 0.0090104 | 0.65886    |
| 0.03303   | -0.98966   |
| 0.0076336 | 0.25635    |
| 0.047677  | -0.5101    |
| 0.00783   | 0.31787    |
| 0.0085339 | 0.52689    |
| 0.0085746 | -0.0075602 |
| 0.094739  | 0.027913   |
| 0.007821  | -0.0067106 |
| 0.0073793 | 0.17468    |
| 0.0075002 | 0.21378    |
| 0.0086658 | 0.56416    |
| 0.0072386 | 0.12857    |
| 0.10496   | 0.037598   |
| 0.0077292 | 0.28647    |
| 0.0075433 | 0.2276     |
| 0.10134   | 0.022479   |
| 0.014086  | 0.004364   |
| 0.0087704 | -0.0072929 |

|           |            |
|-----------|------------|
| 0.0086658 | 0.56416    |
| 0.085509  | 0.020095   |
| 0.070056  | -0.12619   |
| 0.0083953 | -0.0076979 |
| 0.0075153 | -0.0040171 |
| 0.0072715 | 0.13941    |
| 0.014086  | 0.004364   |
| 0.0088702 | 0.62079    |
| 0.0072715 | 0.13941    |
| 0.04467   | -0.5831    |
| 0.0075433 | 0.2276     |
| 0.0074333 | -0.0040171 |
| 0.068581  | -0.1449    |
| 0.0078823 | 0.33401    |
| 0.007779  | 0.30202    |
| 0.0079906 | 0.36712    |
| 0.038254  | 0.032921   |
| 0.0070272 | 0.025758   |
| 0.061327  | 0.04743    |
| 0.0088702 | 0.60183    |
| 0.0082818 | 0.45401    |
| 0.025601  | 0.022479   |
| 0.0074585 | 0.20034    |
| 0.0071491 | 0.098977   |
| 0.054226  | 0.044471   |
| 0.007306  | 0.15072    |
| 0.0077085 | -0.0060189 |
| 0.013504  | 0.004364   |
| 0.049867  | -0.46109   |
| 0.077372  | -0.031991  |
| 0.065651  | -0.18445   |
| 0.0339    | -0.93955   |
| 0.00894   | 0.6398     |
| 0.0086658 | 0.56416    |
| 0.039695  | -0.72239   |
| 0.08918   | 0.046386   |
| 0.032373  | -1.0632    |
| 0.007779  | 0.30202    |
| 0.067404  | 0.050095   |
| 0.010376  | -0.0036418 |
| 0.007306  | 0.15072    |

|           |            |
|-----------|------------|
| 0.0085339 | 0.52689    |
| 0.0076069 | -0.0051251 |
| 0.0072386 | 0.11821    |
| 0.0071773 | 0.10834    |
| 0.078448  | 0.051216   |
| 0.0082818 | 0.45401    |
| 0.00894   | 0.6398     |
| 0.0075002 | 0.20034    |
| 0.0088702 | 0.62079    |
| 0.096449  | 0.06518    |
| 0.011972  | 2.49E-05   |
| 0.032588  | -1.1005    |
| 0.0072386 | 0.12857    |
| 0.011972  | 2.49E-05   |
| 0.0077085 | -0.0060189 |
| 0.1038    | 0.024827   |
| 0.0090104 | 0.65886    |
| 0.0091534 | 0.69708    |
| 0.016066  | 0.0079609  |
| 0.0079359 | 0.35043    |
| 0.011972  | 0.001053   |
| 0.037733  | -0.78604   |
| 0.00894   | 0.6398     |
| 0.0086658 | 0.56416    |
| 0.0073419 | 0.16248    |
| 0.0072715 | 0.12857    |
| 0.010048  | -0.0044341 |
| 0.0091534 | 0.69708    |
| 0.015366  | 0.0067344  |
| 0.0085339 | 0.52689    |
| 0.0088013 | 0.60183    |
| 0.0072386 | 0.11821    |
| 0.04467   | -0.5589    |
| 0.077118  | 0.051619   |
| 0.0092171 | -0.0064176 |
| 0.047964  | 0.040812   |
| 0.007779  | 0.30202    |
| 0.073273  | 0.051783   |
| 0.0079451 | -0.007536  |
| 0.03669   | 0.031675   |
| 0.0090104 | 0.65886    |

|           |            |
|-----------|------------|
| 0.0085746 | -0.0075602 |
| 0.0072955 | 0.00071242 |
| 0.014086  | 0.004364   |
| 0.037733  | -0.78604   |
| 0.0072715 | 0.12857    |
| 0.034855  | -0.89503   |
| 0.0073793 | 0.17468    |
| 0.016066  | 0.0092115  |
| 0.0088702 | 0.62079    |
| 0.010048  | -0.0044341 |
| 0.065651  | -0.18445   |
| 0.090686  | 0.034253   |
| 0.024427  | 0.019776   |
| 0.0076069 | -0.0051251 |
| 0.0070776 | 0.073782   |
| 0.007821  | -0.0067106 |
| 0.0094709 | -0.0051686 |
| 0.029421  | 0.026496   |
| 0.10477   | 0.042402   |
| 0.0075002 | 0.21378    |
| 0.0081037 | 0.40122    |
| 0.029421  | 0.025165   |
| 0.076413  | 0.051739   |
| 0.0090104 | 0.65886    |
| 0.0086658 | 0.56416    |
| 0.046637  | -0.53455   |
| 0.007022  | 0.046511   |
| 0.025601  | 0.022479   |
| 0.0073419 | 0.16248    |
| 0.0085994 | 0.54547    |
| 0.0070272 | 0.025758   |
| 0.032743  | -1.0111    |
| 0.010731  | -0.0027971 |
| 0.074476  | -0.074934  |
| 0.0090816 | 0.67796    |
| 0.096449  | 0.06518    |
| 0.033792  | -1.1419    |
| 0.10409   | 0.026889   |
| 0.098575  | 0.024065   |
| 0.086106  | 0.042062   |
| 0.047677  | -0.5101    |



|           |            |
|-----------|------------|
| 0.039844  | 0.034143   |
| 0.0073419 | 0.16248    |
| 0.0082313 | -0.0076938 |
| 0.0087331 | 0.58295    |
| 0.010376  | -0.0036418 |
| 0.0079906 | 0.36712    |
| 0.0087331 | 0.58295    |
| 0.0072715 | 0.13941    |
| 0.094739  | 0.028875   |
| 0.0072071 | 0.11821    |
| 0.0085746 | -0.0075602 |
| 0.0088013 | 0.60183    |
| 0.0071491 | 0.098977   |
| 0.012958  | 0.0021206  |
| 0.0082213 | 0.43621    |
| 0.0072715 | 0.12857    |
| 0.065651  | -0.18445   |
| 0.032633  | -1.021     |
| 0.0090104 | 0.65886    |
| 0.0076336 | 0.25635    |
| 0.0070272 | 0.025758   |
| 0.0089841 | -0.0064176 |
| 0.034505  | -0.91058   |
| 0.0071773 | 0.10834    |
| 0.0077292 | 0.28647    |
| 0.013504  | 0.004364   |
| 0.0083433 | 0.47199    |
| 0.0073793 | 0.17468    |
| 0.00783   | 0.30202    |
| 0.0083433 | 0.47199    |
| 0.057178  | 0.045278   |
| 0.0070776 | 0.073782   |
| 0.0075877 | 0.2418     |
| 0.10494   | 0.037598   |
| 0.0074182 | 0.1873     |
| 0.052701  | 0.042727   |
| 0.0074182 | 0.1873     |
| 0.03524   | -0.86174   |
| 0.058604  | -0.29352   |
| 0.055719  | 0.045278   |
| 0.094739  | 0.027913   |

|           |            |
|-----------|------------|
| 0.0080466 | 0.38405    |
| 0.10472   | 0.03138    |
| 0.0081619 | 0.41861    |
| 0.0073419 | 0.16248    |
| 0.0079359 | 0.35043    |
| 0.0075002 | 0.21378    |
| 0.007306  | 0.15072    |
| 0.0074182 | 0.1873     |
| 0.0073419 | 0.16248    |
| 0.012958  | 0.0021206  |
| 0.1003    | 0.022572   |
| 0.0088702 | 0.62079    |
| 0.032875  | -1.0007    |
| 0.011527  | 2.49E-05   |
| 0.032633  | -1.021     |
| 0.082013  | 0.048674   |
| 0.0073419 | 0.16248    |
| 0.096059  | 0.02616    |
| 0.010376  | -0.0036418 |
| 0.098149  | 0.067003   |
| 0.032668  | -1.1056    |
| 0.0074182 | 0.1873     |
| 0.0086658 | 0.56416    |
| 0.007306  | 0.15072    |
| 0.0072071 | 0.11821    |
| 0.033642  | -0.95303   |
| 0.069529  | 0.050826   |
| 0.011972  | 2.49E-05   |
| 0.10434   | 0.028193   |
| 0.037733  | -0.78604   |
| 0.080287  | 0.049748   |
| 0.080287  | 0.050199   |
| 0.0075153 | -0.0040171 |
| 0.0097473 | -0.0044341 |
| 0.0070169 | 0.035368   |
| 0.084221  | 0.011497   |
| 0.03524   | -0.87876   |
| 0.0085339 | 0.52689    |
| 0.033219  | -1.1274    |
| 0.041199  | -0.67741   |
| 0.007779  | 0.30202    |

|           |            |
|-----------|------------|
| 0.087374  | 0.041005   |
| 0.0090816 | 0.67796    |
| 0.0075002 | 0.21378    |
| 0.077118  | 0.051619   |
| 0.0074333 | -0.0026829 |
| 0.010048  | -0.0044341 |
| 0.041454  | 0.035337   |
| 0.04467   | -0.5831    |
| 0.00783   | 0.30202    |
| 0.0088702 | 0.62079    |
| 0.0087704 | -0.0072929 |
| 0.097966  | 0.024682   |
| 0.07411   | 0.051783   |
| 0.00894   | 0.6398     |
| 0.0071113 | 0.010749   |
| 0.0070309 | 0.046511   |
| 0.0070581 | 0.017584   |
| 0.0075877 | 0.2418     |
| 0.0076807 | 0.25635    |
| 0.00894   | 0.6398     |
| 0.010731  | -0.0019027 |
| 0.026825  | 0.022479   |
| 0.014086  | 0.004364   |
| 0.0085339 | 0.52689    |
| 0.007306  | 0.13941    |
| 0.090335  | 0.046386   |
| 0.0085339 | 0.52689    |
| 0.0090104 | 0.65886    |
| 0.0072071 | 0.11821    |
| 0.0072386 | 0.12857    |
| 0.013504  | 0.0032251  |
| 0.0070401 | 0.021497   |
| 0.010376  | -0.0036418 |
| 0.0088013 | 0.60183    |
| 0.0339    | -0.93955   |
| 0.011114  | -0.0019027 |
| 0.097321  | 0.06633    |
| 0.03669   | 0.031675   |
| 0.032418  | -1.0834    |
| 0.0081619 | 0.41861    |
| 0.0094709 | -0.0051686 |

|           |            |
|-----------|------------|
| 0.099669  | 0.06705    |
| 0.070056  | -0.10826   |
| 0.03303   | -0.98966   |
| 0.0090816 | 0.67796    |
| 0.00894   | 0.6398     |
| 0.0074333 | -0.0026829 |
| 0.047677  | -0.5101    |
| 0.0072715 | 0.12857    |
| 0.0084694 | 0.50845    |
| 0.057178  | 0.045278   |
| 0.0070776 | 0.073782   |
| 0.0073419 | 0.16248    |
| 0.03239   | -1.0557    |
| 0.0070581 | 0.017584   |
| 0.03669   | 0.031675   |
| 0.033948  | -1.1453    |
| 0.013504  | 0.004364   |
| 0.036619  | -0.80605   |
| 0.0090816 | 0.67796    |
| 0.077118  | 0.051619   |
| 0.028099  | 0.023825   |
| 0.0071491 | 0.098977   |
| 0.02223   | 0.017077   |
| 0.087374  | 0.039917   |
| 0.057264  | -0.31669   |
| 0.02223   | 0.018425   |
| 0.03669   | 0.031675   |
| 0.010376  | -0.0027971 |
| 0.039695  | -0.70012   |
| 0.0074182 | 0.1873     |
| 0.0090816 | 0.67796    |
| 0.010731  | -0.0019027 |
| 0.0084058 | 0.49014    |
| 0.0085994 | 0.54547    |
| 0.010048  | -0.0044341 |
| 0.010731  | -0.0027971 |
| 0.08868   | 0.037674   |
| 0.10309   | 0.059186   |
| 0.0091534 | 0.69708    |
| 0.0073793 | 0.16248    |
| 0.0070401 | 0.021497   |

|           |            |
|-----------|------------|
| 0.1035    | 0.057058   |
| 0.0088702 | 0.62079    |
| 0.032474  | -1.0393    |
| 0.097966  | 0.024065   |
| 0.0073419 | 0.15072    |
| 0.0074585 | 0.1873     |
| 0.0079451 | -0.0072122 |
| 0.014706  | 0.0067344  |
| 0.059971  | -0.27073   |
| 0.078448  | 0.051216   |
| 0.042008  | -0.65431   |
| 0.0088702 | 0.62079    |
| 0.014706  | 0.0055346  |
| 0.072398  | 0.051693   |
| 0.0080466 | 0.38405    |
| 0.0072071 | 0.11821    |
| 0.033412  | -0.96585   |
| 0.0088013 | 0.60183    |
| 0.0088702 | 0.62079    |
| 0.054226  | 0.044471   |
| 0.0076069 | -0.0051251 |
| 0.0078823 | 0.33401    |
| 0.010376  | -0.0036418 |
| 0.0072071 | 0.11821    |
| 0.034106  | -1.1486    |
| 0.0070433 | 0.059284   |
| 0.10434   | 0.028193   |
| 0.0073602 | -0.0026829 |
| 0.0073602 | -0.0011105 |
| 0.10409   | 0.02577    |
| 0.010731  | -0.0019027 |
| 0.079691  | 0.050593   |
| 0.080871  | 0.049748   |
| 0.064204  | -0.2052    |
| 0.045635  | -0.5589    |
| 0.0073793 | 0.17468    |
| 0.0084694 | 0.50845    |
| 0.0083433 | 0.47199    |
| 0.0071491 | 0.098977   |
| 0.0339    | -0.93955   |
| 0.055719  | 0.044471   |

|           |            |
|-----------|------------|
| 0.10183   | 0.022512   |
| 0.010731  | -0.0027971 |
| 0.068581  | -0.1449    |
| 0.0075002 | 0.21378    |
| 0.0070433 | 0.059284   |
| 0.080186  | -0.019688  |
| 0.00894   | 0.6398     |
| 0.041454  | 0.036502   |
| 0.0070159 | 0.030378   |
| 0.030791  | 0.026496   |
| 0.0072071 | 0.11821    |
| 0.007779  | 0.30202    |
| 0.0074182 | 0.1873     |
| 0.0084058 | 0.49014    |
| 0.0079451 | -0.0072122 |
| 0.048754  | -0.4856    |
| 0.096449  | 0.06518    |
| 0.099669  | 0.06705    |
| 0.0074585 | 0.1873     |
| 0.00894   | 0.6398     |
| 0.061327  | 0.048056   |
| 0.0090816 | 0.67796    |
| 0.014706  | 0.0055346  |
| 0.071533  | -0.10826   |
| 0.0072715 | 0.13941    |
| 0.09204   | 0.033125   |
| 0.0097473 | -0.0051686 |
| 0.0085746 | -0.0072929 |
| 0.0081037 | 0.40122    |
| 0.021206  | 0.015736   |
| 0.0078823 | 0.33401    |
| 0.0090816 | 0.67796    |
| 0.076413  | 0.051739   |
| 0.033208  | -0.97806   |
| 0.0070589 | 0.066311   |
| 0.057264  | -0.29352   |
| 0.098149  | 0.067003   |
| 0.08918   | 0.040962   |
| 0.093395  | 0.029884   |
| 0.012448  | 0.001053   |
| 0.091453  | 0.055137   |

|           |           |
|-----------|-----------|
| 0.0072071 | 0.11821   |
| 0.0073793 | 0.17468   |
| 0.090686  | 0.034253  |
| 0.079079  | 0.050932  |
| 0.0079359 | 0.35043   |
| 0.036619  | -0.82536  |
| 0.098575  | 0.024065  |
| 0.0083433 | 0.47199   |
| 0.0078823 | 0.33401   |
| 0.04467   | -0.5831   |
| 0.0073793 | 0.17468   |
| 0.079691  | 0.050593  |
| 0.097966  | 0.024065  |
| 0.0070589 | 0.066311  |
| 0.0084694 | 0.50845   |
| 0.007123  | 0.090103  |
| 0.012448  | 0.001053  |
| 0.045635  | -0.5589   |
| 0.029421  | 0.025165  |
| 0.096706  | 0.025383  |
| 0.0085994 | 0.54547   |
| 0.0075877 | 0.2418    |
| 0.0081619 | 0.41861   |
| 0.088023  | 0.039917  |
| 0.0073419 | 0.16248   |
| 0.043079  | 0.036502  |
| 0.032743  | -1.0111   |
| 0.042857  | -0.63085  |
| 0.0089841 | -0.006908 |
| 0.0070401 | 0.021497  |
| 0.082903  | 0.0020229 |
| 0.0071773 | 0.10834   |
| 0.0090816 | 0.67796   |
| 0.043745  | -0.6071   |
| 0.0080815 | -0.007536 |
| 0.0085339 | 0.52689   |
| 0.0087331 | 0.58295   |
| 0.1016    | 0.064369  |
| 0.10083   | 0.022479  |
| 0.0085339 | 0.52689   |
| 0.007779  | 0.30202   |

|           |            |
|-----------|------------|
| 0.0090104 | 0.65886    |
| 0.0075433 | 0.2276     |
| 0.099743  | 0.022784   |
| 0.0070401 | 0.017584   |
| 0.0074585 | 0.20034    |
| 0.10385   | 0.054784   |
| 0.0082213 | 0.43621    |
| 0.0071491 | 0.098977   |
| 0.0073602 | -0.0011105 |
| 0.0070192 | 0.025758   |
| 0.0085339 | 0.52689    |
| 0.032861  | -1.1149    |
| 0.0082818 | 0.45401    |
| 0.00894   | 0.6398     |
| 0.0090104 | 0.65886    |
| 0.011972  | 0.001053   |
| 0.061327  | 0.048056   |
| 0.0080815 | -0.007536  |
| 0.0079359 | 0.35043    |
| 0.032418  | -1.0834    |
| 0.02223   | 0.017077   |
| 0.0077085 | -0.0060189 |
| 0.080186  | -0.019688  |
| 0.077795  | 0.051444   |
| 0.10493   | 0.033276   |
| 0.0087704 | -0.0072929 |
| 0.00894   | 0.6398     |
| 0.041199  | -0.67741   |
| 0.040428  | -0.70012   |
| 0.075932  | -0.059632  |
| 0.0090816 | 0.67796    |
| 0.082013  | 0.048051   |
| 0.0073793 | 0.17468    |
| 0.085489  | 0.044052   |
| 0.0082818 | 0.45401    |
| 0.0079906 | 0.36712    |
| 0.0087331 | 0.58295    |
| 0.0094709 | -0.0058338 |
| 0.0088013 | 0.60183    |
| 0.007099  | 0.081709   |
| 0.061327  | 0.04743    |



|           |            |
|-----------|------------|
| 0.046342  | 0.039792   |
| 0.0085339 | 0.52689    |
| 0.007099  | 0.081709   |
| 0.014706  | 0.0055346  |
| 0.010048  | -0.0044341 |
| 0.0072715 | 0.13941    |
| 0.0079359 | 0.35043    |
| 0.0089841 | -0.006908  |
| 0.0074585 | 0.20034    |
| 0.014086  | 0.004364   |
| 0.00894   | 0.6398     |
| 0.053419  | -0.38803   |
| 0.010048  | -0.0044341 |
| 0.032861  | -1.1149    |
| 0.0087704 | -0.0072929 |
| 0.080871  | 0.049748   |
| 0.0074585 | 0.20034    |
| 0.0097473 | -0.0051686 |
| 0.007821  | -0.0067106 |
| 0.04467   | -0.5589    |
| 0.020232  | 0.014403   |
| 0.0072386 | 0.12857    |
| 0.0070401 | 0.021497   |
| 0.0072715 | 0.13941    |
| 0.0085339 | 0.52689    |
| 0.0072386 | 0.12857    |
| 0.010731  | -0.0027971 |
| 0.0074585 | 0.20034    |
| 0.066276  | 0.049656   |
| 0.0090816 | 0.67796    |
| 0.0083433 | 0.47199    |
| 0.0070169 | 0.040742   |
| 0.011972  | 2.49E-05   |
| 0.0070589 | 0.066311   |
| 0.0082213 | 0.43621    |
| 0.045635  | -0.5589    |
| 0.0070433 | 0.059284   |
| 0.0086658 | 0.56416    |
| 0.0092171 | -0.0058338 |
| 0.0082213 | 0.43621    |
| 0.0586    | 0.04604    |

|           |            |
|-----------|------------|
| 0.046637  | -0.5101    |
| 0.026825  | 0.022479   |
| 0.0080815 | -0.007536  |
| 0.0087331 | 0.58295    |
| 0.0082818 | 0.45401    |
| 0.0076069 | -0.0051251 |
| 0.0077292 | 0.28647    |
| 0.0083433 | 0.47199    |
| 0.0073793 | 0.16248    |
| 0.033208  | -0.96585   |
| 0.083144  | 0.04737    |
| 0.059971  | -0.27073   |
| 0.032474  | -1.0393    |
| 0.043079  | 0.036502   |
| 0.0079359 | 0.35043    |
| 0.10494   | 0.039956   |
| 0.0076807 | 0.27125    |
| 0.0090104 | 0.65886    |
| 0.0070159 | 0.035368   |
| 0.074476  | -0.074934  |
| 0.0111114 | -0.0009612 |
| 0.068581  | -0.12619   |
| 0.0076807 | 0.27125    |
| 0.098575  | 0.023538   |
| 0.0088702 | 0.62079    |
| 0.0090816 | 0.67796    |
| 0.10496   | 0.03536    |
| 0.0091534 | 0.69708    |
| 0.014706  | 0.0055346  |
| 0.0083433 | 0.47199    |
| 0.0084058 | 0.49014    |
| 0.032519  | -1.0951    |
| 0.02223   | 0.017077   |
| 0.0072715 | 0.13941    |
| 0.0087331 | 0.58295    |
| 0.011527  | -0.0009612 |
| 0.034855  | -0.89503   |
| 0.039695  | -0.72239   |
| 0.0076336 | 0.25635    |
| 0.0073793 | 0.17468    |
| 0.0075153 | -0.0040171 |

|           |            |
|-----------|------------|
| 0.012958  | 0.0021206  |
| 0.014086  | 0.004364   |
| 0.007099  | 0.081709   |
| 0.0086658 | 0.56416    |
| 0.051016  | -0.43662   |
| 0.0072715 | 0.13941    |
| 0.0072071 | 0.11821    |
| 0.0086658 | 0.56416    |
| 0.0090816 | 0.67796    |
| 0.067404  | 0.050485   |
| 0.0073419 | 0.16248    |
| 0.0073602 | -0.0026829 |
| 0.1016    | 0.062875   |
| 0.0075433 | 0.21378    |
| 0.010376  | -0.0036418 |
| 0.010731  | -0.0027971 |
| 0.0094709 | -0.0058338 |
| 0.013504  | 0.004364   |
| 0.055952  | -0.31669   |
| 0.0085339 | 0.52689    |
| 0.0071773 | 0.10834    |
| 0.043079  | 0.037634   |
| 0.007821  | -0.0067106 |
| 0.016066  | 0.0079609  |
| 0.0072386 | 0.12857    |
| 0.010048  | -0.0044341 |
| 0.083714  | 0.04583    |
| 0.0088702 | 0.62079    |
| 0.0078823 | 0.33401    |
| 0.067111  | -0.16433   |
| 0.0070169 | 0.035368   |
| 0.0092171 | -0.0064176 |
| 0.079691  | 0.050593   |
| 0.0090104 | 0.65886    |
| 0.0082213 | 0.43621    |
| 0.0084694 | 0.50845    |
| 0.0085746 | -0.0075602 |
| 0.0073793 | 0.17468    |
| 0.03239   | -1.0557    |
| 0.078448  | 0.051216   |
| 0.0079359 | 0.35043    |

|           |            |
|-----------|------------|
| 0.091362  | 0.034253   |
| 0.086106  | 0.04308    |
| 0.0082313 | -0.0076938 |
| 0.0092171 | -0.0058338 |
| 0.0076336 | 0.25635    |
| 0.0586    | 0.04604    |
| 0.0097473 | -0.0051686 |
| 0.0070272 | 0.021497   |
| 0.0078823 | 0.33401    |
| 0.016066  | 0.0092115  |
| 0.08799   | 0.034794   |
| 0.0085339 | 0.52689    |
| 0.02223   | 0.018425   |
| 0.032373  | -1.0704    |
| 0.007306  | 0.15072    |
| 0.014706  | 0.0055346  |
| 0.017596  | 0.010484   |
| 0.020232  | 0.014403   |
| 0.10271   | 0.023443   |
| 0.0085994 | 0.54547    |
| 0.0079906 | 0.36712    |
| 0.0088702 | 0.62079    |
| 0.079691  | 0.050593   |
| 0.074911  | 0.051821   |
| 0.039695  | -0.72239   |
| 0.012448  | 0.001053   |
| 0.032418  | -1.0834    |
| 0.042857  | -0.63085   |
| 0.08799   | 0.040962   |
| 0.0090816 | 0.67796    |
| 0.016809  | 0.010484   |
| 0.0097473 | -0.0051686 |
| 0.0072386 | 0.12857    |
| 0.011527  | -0.0009612 |
| 0.1035    | 0.054784   |
| 0.0083433 | 0.47199    |
| 0.026825  | 0.023825   |
| 0.10455   | 0.028193   |
| 0.0088702 | 0.62079    |
| 0.0090816 | 0.67796    |
| 0.0072955 | 0.00071242 |

|           |            |
|-----------|------------|
| 0.0090816 | 0.67796    |
| 0.07411   | 0.051783   |
| 0.0075877 | 0.2418     |
| 0.0070433 | 0.059284   |
| 0.0087331 | 0.58295    |
| 0.096706  | 0.025383   |
| 0.00894   | 0.6398     |
| 0.011527  | -0.0009612 |
| 0.00894   | 0.6398     |
| 0.0087704 | -0.0072929 |
| 0.10271   | 0.023443   |
| 0.0081619 | 0.41861    |
| 0.0075153 | -0.0040171 |
| 0.0088702 | 0.62079    |
| 0.010731  | -0.0019027 |
| 0.007779  | 0.30202    |
| 0.0070589 | 0.066311   |
| 0.067111  | -0.1449    |
| 0.084884  | 0.044052   |
| 0.0090816 | 0.67796    |
| 0.0076807 | 0.27125    |
| 0.0079906 | 0.36712    |
| 0.010376  | -0.0036418 |
| 0.0073419 | 0.16248    |
| 0.0094709 | -0.0051686 |
| 0.0072386 | 0.12857    |
| 0.0074182 | 0.1873     |
| 0.0090816 | 0.67796    |
| 0.0080815 | -0.007536  |
| 0.010048  | -0.0044341 |
| 0.042008  | -0.65431   |
| 0.032519  | -1.0951    |
| 0.0084694 | 0.50845    |
| 0.010731  | -0.0027971 |
| 0.082578  | 0.04737    |
| 0.0075877 | 0.2418     |
| 0.0087331 | 0.58295    |
| 0.0081619 | 0.41861    |
| 0.054226  | 0.043621   |
| 0.0097473 | -0.0051686 |
| 0.034855  | -0.89503   |

|           |            |
|-----------|------------|
| 0.0076336 | 0.2418     |
| 0.010731  | -0.0019027 |
| 0.0097473 | -0.0051686 |
| 0.047964  | 0.039792   |
| 0.019306  | 0.013082   |
| 0.0087704 | -0.0072929 |
| 0.0070272 | 0.025758   |
| 0.0094709 | -0.0051686 |
| 0.0070401 | 0.021497   |
| 0.0071491 | 0.090103   |
| 0.0072715 | 0.13941    |
| 0.07411   | 0.051821   |
| 0.032519  | -1.0951    |
| 0.0075433 | 0.2276     |
| 0.00894   | 0.6398     |
| 0.013504  | 0.004364   |
| 0.040428  | -0.70012   |
| 0.0090104 | 0.65886    |
| 0.0072071 | 0.11821    |
| 0.015366  | 0.0067344  |
| 0.012448  | 0.001053   |
| 0.013504  | 0.004364   |
| 0.0075877 | 0.2418     |
| 0.0090104 | 0.65886    |
| 0.077372  | -0.045303  |
| 0.011972  | 2.49E-05   |
| 0.0075877 | 0.2418     |
| 0.05467   | -0.34019   |
| 0.0090816 | 0.67796    |
| 0.082578  | 0.04737    |
| 0.034106  | -1.1486    |
| 0.0088013 | 0.60183    |
| 0.0075002 | 0.21378    |
| 0.007779  | 0.30202    |
| 0.090686  | 0.035391   |
| 0.061361  | -0.22652   |
| 0.043745  | -0.6071    |
| 0.0085994 | 0.54547    |
| 0.011527  | -0.0009612 |
| 0.029421  | 0.025165   |
| 0.0090104 | 0.65886    |

|           |            |
|-----------|------------|
| 0.017596  | 0.010484   |
| 0.010376  | -0.0036418 |
| 0.09204   | 0.032017   |
| 0.024427  | 0.019776   |
| 0.016809  | 0.0092115  |
| 0.0079451 | -0.007536  |
| 0.0087331 | 0.58295    |
| 0.0072071 | 0.10834    |
| 0.0075002 | 0.21378    |
| 0.0086658 | 0.56416    |
| 0.0072071 | 0.11821    |
| 0.0092171 | -0.0058338 |
| 0.014086  | 0.004364   |
| 0.0085339 | 0.52689    |
| 0.0079359 | 0.35043    |
| 0.10485   | 0.033276   |
| 0.0082213 | 0.41861    |
| 0.03612   | -0.84394   |
| 0.026825  | 0.023825   |
| 0.012958  | 0.0021206  |
| 0.0071113 | 0.010749   |
| 0.0080466 | 0.38405    |
| 0.070527  | 0.051118   |
| 0.10347   | 0.024827   |
| 0.0087331 | 0.58295    |
| 0.093574  | 0.05853    |
| 0.0086658 | 0.56416    |
| 0.007779  | 0.30202    |
| 0.0084058 | 0.49014    |
| 0.074476  | -0.074934  |
| 0.065104  | 0.049656   |
| 0.1038    | 0.02577    |
| 0.0083433 | 0.47199    |
| 0.0085994 | 0.54547    |
| 0.049867  | -0.46109   |
| 0.0088702 | 0.62079    |
| 0.016809  | 0.0092115  |
| 0.0090816 | 0.67796    |
| 0.0082818 | 0.45401    |
| 0.0339    | -0.93955   |
| 0.0083433 | 0.47199    |

|           |            |
|-----------|------------|
| 0.007123  | 0.090103   |
| 0.0075002 | 0.20034    |
| 0.046637  | -0.53455   |
| 0.062773  | -0.2052    |
| 0.0089841 | -0.006908  |
| 0.0070818 | 0.014005   |
| 0.0078823 | 0.33401    |
| 0.096059  | 0.02616    |
| 0.0088702 | 0.62079    |
| 0.0088013 | 0.60183    |
| 0.040428  | -0.67741   |
| 0.00894   | 0.6398     |
| 0.010376  | -0.0036418 |
| 0.0075877 | 0.2418     |
| 0.011972  | 2.49E-05   |
| 0.042857  | -0.6071    |
| 0.042008  | -0.65431   |
| 0.0090816 | 0.67796    |
| 0.10083   | 0.022479   |
| 0.059983  | 0.046758   |
| 0.0085994 | 0.54547    |
| 0.0339    | -0.93955   |
| 0.0085339 | 0.52689    |
| 0.019306  | 0.013082   |
| 0.067404  | 0.050095   |
| 0.038254  | 0.034143   |
| 0.0072071 | 0.11821    |
| 0.052201  | -0.41225   |
| 0.091453  | 0.055137   |
| 0.010731  | -0.0019027 |
| 0.0087704 | -0.006908  |
| 0.041454  | 0.035337   |
| 0.03524   | -0.87876   |
| 0.0071894 | 0.0027978  |
| 0.007123  | 0.090103   |
| 0.078448  | 0.050932   |
| 0.10441   | 0.049934   |
| 0.0075433 | 0.2276     |
| 0.0074585 | 0.20034    |
| 0.0078823 | 0.33401    |
| 0.070056  | -0.12619   |



|           |            |
|-----------|------------|
| 0.046637  | -0.53455   |
| 0.075932  | -0.059632  |
| 0.0089841 | -0.006908  |
| 0.0077292 | 0.28647    |
| 0.0081037 | 0.40122    |
| 0.0085339 | 0.50845    |
| 0.0085994 | 0.54547    |
| 0.0089841 | -0.006908  |
| 0.00894   | 0.6398     |
| 0.012958  | 0.0021206  |
| 0.0080466 | 0.38405    |
| 0.0075877 | 0.2418     |
| 0.015366  | 0.0067344  |
| 0.10271   | 0.023443   |
| 0.098932  | 0.067232   |
| 0.079691  | 0.050593   |
| 0.010731  | -0.0019027 |
| 0.065104  | 0.04917    |
| 0.0091534 | 0.69708    |
| 0.007779  | 0.30202    |
| 0.007123  | 0.090103   |
| 0.0073419 | 0.16248    |
| 0.049567  | 0.040812   |
| 0.0087331 | 0.58295    |
| 0.012448  | 0.001053   |
| 0.032519  | -1.0951    |
| 0.0087331 | 0.58295    |
| 0.0081619 | 0.41861    |
| 0.0090816 | 0.67796    |
| 0.0070776 | 0.073782   |
| 0.0090104 | 0.65886    |
| 0.0079359 | 0.35043    |
| 0.084293  | 0.04497    |
| 0.0083433 | 0.47199    |
| 0.010376  | -0.0027971 |
| 0.0076069 | -0.0051251 |
| 0.0090816 | 0.67796    |
| 0.0097473 | -0.0051686 |
| 0.007099  | 0.081709   |
| 0.0074182 | 0.1873     |
| 0.0073419 | 0.16248    |

|           |            |
|-----------|------------|
| 0.0072715 | 0.13941    |
| 0.0078823 | 0.33401    |
| 0.011114  | -0.0019027 |
| 0.0074585 | 0.20034    |
| 0.0084058 | 0.49014    |
| 0.079691  | 0.050199   |
| 0.032972  | -1.1193    |
| 0.099669  | 0.06705    |
| 0.10264   | 0.059186   |
| 0.095533  | 0.063518   |
| 0.0085339 | 0.52689    |
| 0.016066  | 0.0079609  |
| 0.0088702 | 0.62079    |
| 0.0090816 | 0.67796    |
| 0.034268  | -1.1519    |
| 0.033641  | -1.1384    |
| 0.0089841 | -0.006908  |
| 0.075678  | 0.051806   |
| 0.0076336 | 0.2418     |
| 0.0094709 | -0.0051686 |
| 0.0090816 | 0.67796    |
| 0.0082818 | 0.45401    |
| 0.0070272 | 0.025758   |
| 0.011527  | -0.0009612 |
| 0.0074585 | 0.1873     |
| 0.062773  | -0.22652   |
| 0.073008  | -0.09116   |
| 0.0070433 | 0.059284   |
| 0.10455   | 0.029687   |
| 0.0079359 | 0.33401    |
| 0.10347   | 0.024827   |
| 0.084293  | 0.04497    |
| 0.090012  | 0.036534   |
| 0.033494  | -1.1349    |
| 0.0071113 | 0.010749   |
| 0.011527  | 2.49E-05   |
| 0.00894   | 0.6398     |
| 0.0070776 | 0.066311   |
| 0.0083953 | -0.0076979 |
| 0.010731  | -0.0027971 |
| 0.062773  | -0.2052    |

|           |            |
|-----------|------------|
| 0.051016  | -0.43662   |
| 0.016066  | 0.0079609  |
| 0.0072387 | 0.0027978  |
| 0.0090104 | 0.65886    |
| 0.0084058 | 0.49014    |
| 0.0071773 | 0.10834    |
| 0.08918   | 0.040962   |
| 0.0097473 | -0.0051686 |
| 0.0079906 | 0.36712    |
| 0.0088013 | 0.60183    |
| 0.0072715 | 0.13941    |
| 0.0073793 | 0.17468    |
| 0.0073419 | 0.16248    |
| 0.0077292 | 0.27125    |
| 0.0074333 | -0.0026829 |
| 0.064204  | -0.2052    |
| 0.012958  | 0.0021206  |
| 0.080871  | 0.049748   |
| 0.034187  | -0.92541   |
| 0.0088702 | 0.62079    |
| 0.0070433 | 0.059284   |
| 0.052201  | -0.41225   |
| 0.0082818 | 0.45401    |
| 0.047677  | -0.5101    |
| 0.0097473 | -0.0044341 |
| 0.0090104 | 0.65886    |
| 0.0097473 | -0.0044341 |
| 0.0082213 | 0.43621    |
| 0.0091534 | 0.69708    |
| 0.0083433 | 0.47199    |
| 0.011527  | -0.0009612 |
| 0.0072715 | 0.13941    |
| 0.0072955 | 0.00071242 |
| 0.0084694 | 0.50845    |
| 0.0090816 | 0.67796    |
| 0.0077292 | 0.27125    |
| 0.0082818 | 0.45401    |
| 0.0092171 | -0.0058338 |
| 0.0087704 | -0.0072929 |
| 0.00894   | 0.6398     |
| 0.0073419 | 0.16248    |

|           |            |
|-----------|------------|
| 0.085489  | 0.04308    |
| 0.036619  | -0.82536   |
| 0.0071491 | 0.090103   |
| 0.010376  | -0.0036418 |
| 0.05467   | -0.36399   |
| 0.0070433 | 0.059284   |
| 0.0072715 | 0.13941    |
| 0.10434   | 0.026889   |
| 0.0073793 | 0.17468    |
| 0.0078823 | 0.33401    |
| 0.03669   | 0.032921   |
| 0.00894   | 0.6398     |
| 0.0072386 | 0.12857    |
| 0.0087331 | 0.58295    |
| 0.086735  | 0.041005   |
| 0.007306  | 0.15072    |
| 0.0073793 | 0.17468    |
| 0.0073793 | 0.17468    |
| 0.046342  | 0.038732   |
| 0.0087704 | -0.0072929 |
| 0.0070401 | 0.021497   |
| 0.007099  | 0.081709   |
| 0.080186  | -0.019688  |
| 0.007022  | 0.046511   |
| 0.048754  | -0.46109   |
| 0.0071894 | 0.0051576  |
| 0.0084694 | 0.50845    |
| 0.0090104 | 0.65886    |
| 0.0085746 | -0.0075602 |
| 0.0075433 | 0.2276     |
| 0.007123  | 0.090103   |
| 0.0090104 | 0.65886    |
| 0.071483  | 0.05136    |
| 0.0070401 | 0.021497   |
| 0.0072386 | 0.12857    |
| 0.0086658 | 0.56416    |
| 0.0073793 | 0.17468    |
| 0.041199  | -0.67741   |
| 0.0072386 | 0.12857    |
| 0.029421  | 0.025165   |
| 0.011527  | -0.0009612 |

|           |            |
|-----------|------------|
| 0.063888  | 0.048637   |
| 0.080871  | 0.04924    |
| 0.043745  | -0.6071    |
| 0.0088013 | 0.60183    |
| 0.0081619 | 0.41861    |
| 0.011114  | -0.0019027 |
| 0.0339    | -0.93955   |
| 0.012958  | 0.0032251  |
| 0.0075433 | 0.2276     |
| 0.0076807 | 0.27125    |
| 0.0084058 | 0.49014    |
| 0.0079359 | 0.35043    |
| 0.0071773 | 0.098977   |
| 0.0088702 | 0.62079    |
| 0.0094709 | -0.0051686 |
| 0.0074182 | 0.1873     |
| 0.032474  | -1.0393    |
| 0.032373  | -1.0632    |
| 0.0070169 | 0.040742   |
| 0.0088013 | 0.60183    |
| 0.0079359 | 0.35043    |
| 0.010731  | -0.0027971 |
| 0.0081619 | 0.41861    |
| 0.061327  | 0.04743    |
| 0.010048  | -0.0044341 |
| 0.0072386 | 0.12857    |
| 0.0077292 | 0.28647    |
| 0.0071773 | 0.10834    |
| 0.00783   | 0.31787    |
| 0.0090104 | 0.65886    |
| 0.0084058 | 0.49014    |
| 0.07879   | -0.019688  |
| 0.057178  | 0.04604    |
| 0.051016  | -0.43662   |
| 0.084293  | 0.04497    |
| 0.0090104 | 0.65886    |
| 0.10228   | 0.022987   |
| 0.075932  | -0.059632  |
| 0.084221  | 0.020095   |
| 0.0076069 | -0.0051251 |
| 0.10311   | 0.024054   |

|           |            |
|-----------|------------|
| 0.080287  | 0.049748   |
| 0.0073793 | 0.17468    |
| 0.0087331 | 0.58295    |
| 0.0072386 | 0.12857    |
| 0.0073793 | 0.17468    |
| 0.0070272 | 0.025758   |
| 0.10385   | 0.054784   |
| 0.0074585 | 0.20034    |
| 0.038348  | -0.7654    |
| 0.0075877 | 0.2418     |
| 0.0075002 | 0.21378    |
| 0.014706  | 0.0067344  |
| 0.0078823 | 0.33401    |
| 0.007779  | 0.30202    |
| 0.0088702 | 0.62079    |
| 0.032423  | -1.0477    |
| 0.0075002 | 0.21378    |
| 0.015366  | 0.0067344  |
| 0.033208  | -0.97806   |
| 0.099168  | 0.023109   |
| 0.00894   | 0.6398     |
| 0.0089841 | -0.0064176 |
| 0.0094709 | -0.0058338 |
| 0.099168  | 0.023109   |
| 0.007779  | 0.30202    |
| 0.010376  | -0.0027971 |
| 0.007779  | 0.30202    |
| 0.059983  | 0.046758   |
| 0.0076336 | 0.25635    |
| 0.010731  | -0.0027971 |
| 0.0087704 | -0.0072929 |
| 0.0090104 | 0.65886    |
| 0.054226  | 0.043621   |
| 0.0083953 | -0.0076979 |
| 0.053419  | -0.38803   |
| 0.094574  | 0.063518   |
| 0.057264  | -0.29352   |
| 0.053419  | -0.36399   |
| 0.0074182 | 0.1873     |
| 0.0074333 | -0.0026829 |
| 0.047677  | -0.5101    |

|           |            |
|-----------|------------|
| 0.0091534 | 0.69708    |
| 0.0088702 | 0.62079    |
| 0.085509  | 0.020095   |
| 0.00894   | 0.6398     |
| 0.0088702 | 0.62079    |
| 0.016066  | 0.0079609  |
| 0.0090816 | 0.67796    |
| 0.0079906 | 0.36712    |
| 0.0087331 | 0.58295    |
| 0.0072715 | 0.12857    |
| 0.03276   | -1.1104    |
| 0.0072386 | 0.12857    |
| 0.0090104 | 0.65886    |
| 0.017596  | 0.010484   |
| 0.070527  | 0.05136    |
| 0.1035    | 0.057058   |
| 0.0071773 | 0.10834    |
| 0.0087331 | 0.58295    |
| 0.0088702 | 0.62079    |
| 0.0087331 | 0.58295    |
| 0.0073419 | 0.16248    |
| 0.0088702 | 0.62079    |
| 0.0077292 | 0.28647    |
| 0.0085994 | 0.54547    |
| 0.0076069 | -0.0051251 |
| 0.10311   | 0.024054   |
| 0.0075153 | -0.0040171 |
| 0.0090816 | 0.67796    |
| 0.0072715 | 0.13941    |
| 0.0073602 | -0.0011105 |
| 0.0070272 | 0.021497   |
| 0.0074585 | 0.20034    |
| 0.0079906 | 0.36712    |
| 0.007821  | -0.0072122 |
| 0.038254  | 0.032921   |
| 0.097321  | 0.06633    |
| 0.0090104 | 0.65886    |
| 0.0070581 | 0.017584   |
| 0.0076069 | -0.0060189 |
| 0.010731  | -0.0027971 |
| 0.0075433 | 0.2276     |

|           |            |
|-----------|------------|
| 0.018428  | 0.011775   |
| 0.0072715 | 0.13941    |
| 0.00894   | 0.6398     |
| 0.0072955 | 0.00071242 |
| 0.007306  | 0.15072    |
| 0.0087331 | 0.58295    |
| 0.0072387 | 0.0027978  |
| 0.0071773 | 0.098977   |
| 0.033662  | 0.029119   |
| 0.0070309 | 0.052688   |
| 0.099669  | 0.06705    |
| 0.007099  | 0.081709   |
| 0.032861  | -1.1149    |
| 0.0072071 | 0.11821    |
| 0.0072955 | -0.0011105 |
| 0.0070776 | 0.073782   |
| 0.00783   | 0.31787    |
| 0.016066  | 0.0092115  |
| 0.090686  | 0.034253   |
| 0.099669  | 0.06705    |
| 0.0070776 | 0.066311   |
| 0.10493   | 0.03536    |
| 0.10496   | 0.03536    |
| 0.0070433 | 0.059284   |
| 0.08799   | 0.034794   |
| 0.0071773 | 0.10834    |
| 0.032389  | -1.0771    |
| 0.046637  | -0.53455   |
| 0.10036   | 0.06649    |
| 0.0074585 | 0.20034    |
| 0.0080815 | -0.007536  |
| 0.0091534 | 0.69708    |
| 0.0071773 | 0.10834    |
| 0.034106  | -1.1486    |
| 0.099168  | 0.023109   |
| 0.0071773 | 0.10834    |
| 0.0079451 | -0.0072122 |
| 0.039844  | 0.035337   |
| 0.0076336 | 0.25635    |
| 0.0085339 | 0.50845    |
| 0.068581  | -0.12619   |



|           |            |
|-----------|------------|
| 0.0074182 | 0.1873     |
| 0.033662  | 0.030407   |
| 0.0091534 | 0.69708    |
| 0.0070589 | 0.066311   |
| 0.1016    | 0.062875   |
| 0.0074182 | 0.1873     |
| 0.0090104 | 0.65886    |
| 0.0074585 | 0.20034    |
| 0.0091534 | 0.69708    |
| 0.034187  | -0.92541   |
| 0.03612   | -0.84394   |
| 0.0088013 | 0.60183    |
| 0.0086658 | 0.56416    |
| 0.0072715 | 0.13941    |
| 0.10485   | 0.03138    |
| 0.014086  | 0.004364   |
| 0.00783   | 0.31787    |
| 0.0074182 | 0.1873     |
| 0.0090104 | 0.65886    |
| 0.044711  | 0.037634   |
| 0.0075002 | 0.21378    |
| 0.0071113 | 0.010749   |
| 0.0088013 | 0.60183    |
| 0.0074182 | 0.1873     |
| 0.0082213 | 0.43621    |
| 0.0087704 | -0.0072929 |
| 0.0086658 | 0.56416    |
| 0.0078823 | 0.33401    |
| 0.0082818 | 0.45401    |
| 0.0085994 | 0.54547    |
| 0.0086658 | 0.56416    |
| 0.00894   | 0.6398     |
| 0.03669   | 0.032921   |
| 0.0091534 | 0.69708    |
| 0.032861  | -1.1149    |
| 0.036619  | -0.80605   |
| 0.0079451 | -0.0072122 |
| 0.032474  | -1.0393    |
| 0.051016  | -0.43662   |
| 0.077372  | -0.045303  |
| 0.0075433 | 0.21378    |

|           |            |
|-----------|------------|
| 0.0075153 | -0.0040171 |
| 0.032875  | -1.0007    |
| 0.0092171 | -0.0064176 |
| 0.078448  | 0.051216   |
| 0.03303   | -0.98966   |
| 0.014706  | 0.0067344  |
| 0.013504  | 0.0032251  |
| 0.0088013 | 0.60183    |
| 0.0092171 | -0.0058338 |
| 0.019306  | 0.013082   |
| 0.026825  | 0.022479   |
| 0.0079906 | 0.35043    |
| 0.024427  | 0.019776   |
| 0.024427  | 0.019776   |
| 0.00894   | 0.6398     |
| 0.0079451 | -0.0072122 |
| 0.0086658 | 0.56416    |
| 0.0086658 | 0.56416    |
| 0.0075153 | -0.0051251 |
| 0.0089841 | -0.006908  |
| 0.0090104 | 0.65886    |
| 0.0086658 | 0.56416    |
| 0.0085339 | 0.52689    |
| 0.0084694 | 0.50845    |
| 0.023303  | 0.019776   |
| 0.1003    | 0.022572   |
| 0.0092171 | -0.0064176 |
| 0.0071773 | 0.10834    |
| 0.0088702 | 0.62079    |
| 0.0073793 | 0.17468    |
| 0.0072715 | 0.13941    |
| 0.0077292 | 0.28647    |
| 0.032423  | -1.0477    |
| 0.068489  | 0.050826   |
| 0.10347   | 0.024054   |
| 0.0071491 | 0.098977   |
| 0.03239   | -1.0557    |
| 0.0075877 | 0.2418     |
| 0.0090816 | 0.67796    |
| 0.0076069 | -0.0060189 |
| 0.077118  | 0.051444   |

|           |            |
|-----------|------------|
| 0.0087331 | 0.58295    |
| 0.023303  | 0.018425   |
| 0.066276  | 0.050095   |
| 0.0072071 | 0.11821    |
| 0.0071113 | 0.010749   |
| 0.011114  | -0.0019027 |
| 0.083144  | 0.04737    |
| 0.0084058 | 0.49014    |
| 0.017596  | 0.010484   |
| 0.0071773 | 0.10834    |
| 0.10434   | 0.028193   |
| 0.0075877 | 0.2418     |
| 0.10496   | 0.037598   |
| 0.00894   | 0.6398     |
| 0.097342  | 0.025383   |
| 0.03239   | -1.0557    |
| 0.0077292 | 0.28647    |
| 0.0070776 | 0.073782   |
| 0.10264   | 0.061137   |
| 0.011527  | -0.0009612 |
| 0.087374  | 0.041005   |
| 0.0075002 | 0.21378    |
| 0.032875  | -1.0007    |
| 0.082578  | 0.04737    |
| 0.0070159 | 0.035368   |
| 0.0088013 | 0.60183    |
| 0.007779  | 0.30202    |
| 0.0075002 | 0.21378    |
| 0.010376  | -0.0027971 |
| 0.09204   | 0.033125   |
| 0.0071491 | 0.098977   |
| 0.0079906 | 0.36712    |
| 0.035158  | 0.030407   |
| 0.0070159 | 0.035368   |
| 0.0078823 | 0.33401    |
| 0.0072955 | 0.00071242 |
| 0.0086658 | 0.56416    |
| 0.0089841 | -0.006908  |
| 0.0078823 | 0.33401    |
| 0.051016  | -0.43662   |
| 0.033208  | -0.97806   |

|           |            |
|-----------|------------|
| 0.10083   | 0.022479   |
| 0.024427  | 0.019776   |
| 0.007306  | 0.15072    |
| 0.0097473 | -0.0051686 |
| 0.0083433 | 0.47199    |
| 0.0075002 | 0.20034    |
| 0.0070309 | 0.052688   |
| 0.10441   | 0.047424   |
| 0.0087331 | 0.58295    |
| 0.0079906 | 0.36712    |
| 0.0079359 | 0.35043    |
| 0.0070433 | 0.052688   |
| 0.0082213 | 0.43621    |
| 0.063888  | 0.048637   |
| 0.0070192 | 0.025758   |
| 0.061361  | -0.22652   |
| 0.011527  | -0.0009612 |
| 0.0070818 | 0.014005   |
| 0.0070159 | 0.035368   |
| 0.0074182 | 0.1873     |
| 0.045635  | -0.5589    |
| 0.0072071 | 0.11821    |
| 0.0070818 | 0.014005   |
| 0.071483  | 0.051552   |
| 0.0078823 | 0.33401    |
| 0.10183   | 0.022512   |
| 0.0078823 | 0.33401    |
| 0.023303  | 0.019776   |
| 0.0090816 | 0.67796    |
| 0.007123  | 0.090103   |
| 0.0073419 | 0.16248    |
| 0.071483  | 0.05136    |
| 0.0075153 | -0.0040171 |
| 0.028099  | 0.023825   |
| 0.010376  | -0.0036418 |
| 0.0070309 | 0.046511   |
| 0.0086658 | 0.56416    |
| 0.026825  | 0.023825   |
| 0.0082818 | 0.45401    |
| 0.10455   | 0.029687   |
| 0.020232  | 0.015736   |

|           |            |
|-----------|------------|
| 0.035661  | -0.86174   |
| 0.0072715 | 0.13941    |
| 0.012958  | 0.0032251  |
| 0.0074182 | 0.1873     |
| 0.0081619 | 0.41861    |
| 0.013504  | 0.0032251  |
| 0.0074182 | 0.1873     |
| 0.0073419 | 0.16248    |
| 0.051016  | -0.43662   |
| 0.041454  | 0.035337   |
| 0.0085746 | -0.0072929 |
| 0.0084058 | 0.49014    |
| 0.0072071 | 0.11821    |
| 0.0097473 | -0.0044341 |
| 0.086106  | 0.04308    |
| 0.0081619 | 0.41861    |
| 0.00783   | 0.31787    |
| 0.0086658 | 0.56416    |
| 0.0088702 | 0.62079    |
| 0.047964  | 0.039792   |
| 0.011972  | 2.49E-05   |
| 0.0070581 | 0.017584   |
| 0.10462   | 0.044903   |
| 0.10134   | 0.022479   |
| 0.045635  | -0.5589    |
| 0.0073419 | 0.16248    |
| 0.0084058 | 0.49014    |
| 0.021206  | 0.017077   |
| 0.0085746 | -0.0075602 |
| 0.029421  | 0.025165   |
| 0.0088702 | 0.62079    |
| 0.0089841 | -0.006908  |
| 0.0097473 | -0.0051686 |
| 0.096706  | 0.02616    |
| 0.0084694 | 0.50845    |
| 0.0083433 | 0.47199    |
| 0.035158  | 0.031675   |
| 0.0087331 | 0.58295    |
| 0.011114  | -0.0019027 |
| 0.0088013 | 0.60183    |
| 0.026825  | 0.023825   |

|           |            |
|-----------|------------|
| 0.034855  | -0.89503   |
| 0.021206  | 0.015736   |
| 0.0073793 | 0.17468    |
| 0.0072386 | 0.12857    |
| 0.029421  | 0.025165   |
| 0.092718  | 0.030934   |
| 0.03612   | -0.84394   |
| 0.041199  | -0.67741   |
| 0.074476  | -0.074934  |
| 0.034187  | -0.92541   |
| 0.032544  | -1.0304    |
| 0.0070581 | 0.017584   |
| 0.034505  | -0.91058   |
| 0.049567  | 0.041791   |
| 0.032588  | -1.1005    |
| 0.0081619 | 0.41861    |
| 0.03276   | -1.1104    |
| 0.0074585 | 0.20034    |
| 0.0075433 | 0.2276     |
| 0.0075153 | -0.0040171 |
| 0.0074182 | 0.1873     |
| 0.015366  | 0.0067344  |
| 0.0074182 | 0.1873     |
| 0.010376  | -0.0036418 |
| 0.0076069 | -0.0060189 |
| 0.011972  | 2.49E-05   |
| 0.032418  | -1.0834    |
| 0.0085994 | 0.54547    |
| 0.02223   | 0.017077   |
| 0.0072715 | 0.12857    |
| 0.018428  | 0.011775   |
| 0.0090104 | 0.65886    |
| 0.096449  | 0.06518    |
| 0.0073793 | 0.17468    |
| 0.0076336 | 0.25635    |
| 0.054226  | 0.043621   |
| 0.10215   | 0.062875   |
| 0.032418  | -1.0834    |
| 0.012448  | 0.001053   |
| 0.0074585 | 0.20034    |
| 0.007306  | 0.13941    |

|           |            |
|-----------|------------|
| 0.011114  | -0.0019027 |
| 0.014086  | 0.004364   |
| 0.0073793 | 0.17468    |
| 0.0073419 | 0.16248    |
| 0.045635  | -0.53455   |
| 0.0087704 | -0.0072929 |
| 0.0090816 | 0.67796    |
| 0.032519  | -1.0951    |
| 0.0075877 | 0.2418     |
| 0.0089841 | -0.006908  |
| 0.0072715 | 0.13941    |
| 0.0070589 | 0.066311   |
| 0.067111  | -0.16433   |
| 0.016066  | 0.0079609  |
| 0.07411   | 0.051821   |
| 0.0085994 | 0.54547    |
| 0.074476  | -0.059632  |
| 0.0070589 | 0.066311   |
| 0.0072715 | 0.13941    |
| 0.007779  | 0.30202    |
| 0.0085994 | 0.54547    |
| 0.0077292 | 0.28647    |
| 0.0088013 | 0.60183    |
| 0.007022  | 0.040742   |
| 0.017596  | 0.011775   |
| 0.032633  | -1.021     |
| 0.0088013 | 0.60183    |
| 0.0080815 | -0.0076938 |
| 0.080287  | 0.050199   |
| 0.011114  | -0.0009612 |
| 0.012448  | 0.001053   |
| 0.026825  | 0.023825   |
| 0.0071491 | 0.098977   |
| 0.0072715 | 0.13941    |
| 0.033208  | -0.97806   |
| 0.052701  | 0.042727   |
| 0.0075002 | 0.21378    |
| 0.042008  | -0.65431   |
| 0.053419  | -0.38803   |
| 0.10409   | 0.026889   |
| 0.007123  | 0.090103   |

|           |            |
|-----------|------------|
| 0.041199  | -0.67741   |
| 0.039844  | 0.035337   |
| 0.10488   | 0.042402   |
| 0.0074182 | 0.1873     |
| 0.097966  | 0.024682   |
| 0.02223   | 0.017077   |
| 0.0073793 | 0.17468    |
| 0.0078823 | 0.33401    |
| 0.0082818 | 0.45401    |
| 0.018428  | 0.011775   |
| 0.033792  | -1.1419    |
| 0.0072955 | 0.00071242 |
| 0.0086658 | 0.56416    |
| 0.0097473 | -0.0051686 |
| 0.03276   | -1.1104    |
| 0.020232  | 0.014403   |
| 0.10441   | 0.049934   |
| 0.010731  | -0.0019027 |
| 0.010376  | -0.0036418 |
| 0.0074182 | 0.1873     |
| 0.0072071 | 0.11821    |
| 0.012958  | 0.0032251  |
| 0.0087704 | -0.0072929 |
| 0.029421  | 0.025165   |
| 0.0085339 | 0.52689    |
| 0.011527  | -0.0009612 |
| 0.015366  | 0.0067344  |
| 0.007306  | 0.15072    |
| 0.0339    | -0.93955   |
| 0.10485   | 0.033276   |
| 0.007099  | 0.081709   |
| 0.08918   | 0.046386   |
| 0.0092171 | -0.0064176 |
| 0.0070272 | 0.025758   |
| 0.1035    | 0.054784   |
| 0.10271   | 0.022987   |
| 0.10441   | 0.049934   |
| 0.024427  | 0.019776   |
| 0.0070272 | 0.021497   |
| 0.0090104 | 0.65886    |
| 0.096059  | 0.02616    |



|           |            |
|-----------|------------|
| 0.0083433 | 0.47199    |
| 0.085509  | 0.020095   |
| 0.0071491 | 0.098977   |
| 0.0091534 | 0.69708    |
| 0.0086658 | 0.56416    |
| 0.007821  | -0.0067106 |
| 0.010048  | -0.0044341 |
| 0.0072386 | 0.12857    |
| 0.10472   | 0.03138    |
| 0.0586    | 0.046758   |
| 0.0076807 | 0.27125    |
| 0.04467   | -0.5831    |
| 0.013504  | 0.0032251  |
| 0.0082818 | 0.45401    |
| 0.0082818 | 0.45401    |
| 0.0077292 | 0.27125    |
| 0.00783   | 0.31787    |
| 0.0073602 | -0.0011105 |
| 0.0090816 | 0.67796    |
| 0.0070433 | 0.059284   |
| 0.0072071 | 0.11821    |
| 0.038254  | 0.032921   |
| 0.0088013 | 0.60183    |
| 0.083714  | 0.04583    |
| 0.09204   | 0.032017   |
| 0.049867  | -0.46109   |
| 0.011114  | -0.0019027 |
| 0.010048  | -0.0036418 |
| 0.0076807 | 0.27125    |
| 0.014086  | 0.004364   |
| 0.011972  | 0.001053   |
| 0.033662  | 0.030407   |
| 0.024427  | 0.019776   |
| 0.0089841 | -0.0064176 |
| 0.0075153 | -0.0040171 |
| 0.081445  | 0.048674   |
| 0.07879   | -0.031991  |
| 0.0074585 | 0.20034    |
| 0.047964  | 0.039792   |
| 0.10415   | 0.052398   |
| 0.052201  | -0.41225   |

|           |            |
|-----------|------------|
| 0.0089841 | -0.006908  |
| 0.067111  | -0.16433   |
| 0.016066  | 0.0079609  |
| 0.0586    | 0.04604    |
| 0.014706  | 0.0055346  |
| 0.0076336 | 0.25635    |
| 0.071533  | -0.09116   |
| 0.010376  | -0.0036418 |
| 0.0072386 | 0.12857    |
| 0.10472   | 0.03138    |
| 0.0088702 | 0.62079    |
| 0.032519  | -1.0951    |
| 0.012448  | 0.001053   |
| 0.0071773 | 0.10834    |
| 0.0070818 | 0.014005   |
| 0.0090104 | 0.65886    |
| 0.10496   | 0.037598   |
| 0.0083953 | -0.0076979 |
| 0.00894   | 0.6398     |
| 0.0073419 | 0.15072    |
| 0.032462  | -1.0894    |
| 0.0074182 | 0.1873     |
| 0.0081037 | 0.40122    |
| 0.0072715 | 0.13941    |
| 0.0072387 | 0.00071242 |
| 0.067111  | -0.16433   |
| 0.043079  | 0.036502   |
| 0.0079359 | 0.35043    |
| 0.0090104 | 0.65886    |
| 0.0073602 | -0.0011105 |
| 0.0080466 | 0.38405    |
| 0.0090816 | 0.67796    |
| 0.026825  | 0.022479   |
| 0.067111  | -0.16433   |
| 0.0339    | -0.93955   |
| 0.018428  | 0.011775   |
| 0.0086658 | 0.54547    |
| 0.0072071 | 0.11821    |
| 0.073273  | 0.051693   |
| 0.0077292 | 0.28647    |
| 0.011972  | 0.001053   |

|           |            |
|-----------|------------|
| 0.0094709 | -0.0058338 |
| 0.0073793 | 0.17468    |
| 0.0072386 | 0.12857    |
| 0.040428  | -0.67741   |
| 0.041454  | 0.036502   |
| 0.0070776 | 0.073782   |
| 0.007123  | 0.090103   |
| 0.094574  | 0.063518   |
| 0.013504  | 0.004364   |
| 0.0094709 | -0.0058338 |
| 0.065651  | -0.16433   |
| 0.0070589 | 0.066311   |
| 0.014706  | 0.0067344  |
| 0.10415   | 0.049934   |
| 0.0088702 | 0.62079    |
| 0.0073419 | 0.16248    |
| 0.0071773 | 0.10834    |
| 0.0081619 | 0.41861    |
| 0.044711  | 0.037634   |
| 0.007099  | 0.081709   |
| 0.046637  | -0.53455   |
| 0.012958  | 0.0021206  |
| 0.0085994 | 0.54547    |
| 0.03303   | -0.98966   |
| 0.033412  | -0.96585   |
| 0.010731  | -0.0027971 |
| 0.0079359 | 0.35043    |
| 0.071533  | -0.10826   |
| 0.10183   | 0.022512   |
| 0.0076336 | 0.25635    |
| 0.062629  | 0.048056   |
| 0.034855  | -0.89503   |
| 0.080871  | 0.04924    |
| 0.0088702 | 0.62079    |
| 0.0082818 | 0.45401    |
| 0.007306  | 0.15072    |
| 0.0088702 | 0.62079    |
| 0.0073419 | 0.16248    |
| 0.007123  | 0.081709   |
| 0.040428  | -0.70012   |
| 0.0072715 | 0.13941    |

|           |            |
|-----------|------------|
| 0.00783   | 0.31787    |
| 0.0074182 | 0.1873     |
| 0.0080815 | -0.0076938 |
| 0.0070776 | 0.073782   |
| 0.047964  | 0.040812   |
| 0.033219  | -1.1274    |
| 0.0070159 | 0.035368   |
| 0.017596  | 0.010484   |
| 0.10415   | 0.052398   |
| 0.0085994 | 0.54547    |
| 0.0073793 | 0.17468    |
| 0.0070581 | 0.017584   |
| 0.0070776 | 0.073782   |
| 0.03669   | 0.031675   |
| 0.062773  | -0.22652   |
| 0.0072715 | 0.13941    |
| 0.0086658 | 0.56416    |
| 0.101     | 0.064369   |
| 0.0097473 | -0.0051686 |
| 0.0073419 | 0.16248    |
| 0.0070776 | 0.073782   |
| 0.0090816 | 0.67796    |
| 0.064204  | -0.2052    |
| 0.0076069 | -0.0051251 |
| 0.0074585 | 0.20034    |
| 0.097321  | 0.06633    |
| 0.0083433 | 0.47199    |
| 0.032544  | -1.0304    |
| 0.075678  | 0.051739   |
| 0.010048  | -0.0044341 |
| 0.0072715 | 0.12857    |
| 0.0075002 | 0.21378    |
| 0.032544  | -1.0304    |
| 0.0074333 | -0.0026829 |
| 0.00894   | 0.6398     |
| 0.077118  | 0.051444   |
| 0.014086  | 0.004364   |
| 0.0091534 | 0.69708    |
| 0.0075002 | 0.21378    |
| 0.0070192 | 0.025758   |
| 0.007022  | 0.046511   |

|           |            |
|-----------|------------|
| 0.0072071 | 0.11821    |
| 0.043079  | 0.036502   |
| 0.032205  | 0.029119   |
| 0.0089841 | -0.006908  |
| 0.007123  | 0.081709   |
| 0.014706  | 0.0055346  |
| 0.007123  | 0.090103   |
| 0.007306  | 0.15072    |
| 0.10496   | 0.037598   |
| 0.042857  | -0.6071    |
| 0.007022  | 0.040742   |
| 0.035661  | -0.86174   |
| 0.0070309 | 0.046511   |
| 0.011527  | 2.49E-05   |
| 0.10441   | 0.049934   |
| 0.010048  | -0.0044341 |
| 0.011527  | -0.0009612 |
| 0.0088702 | 0.62079    |
| 0.032373  | -1.0632    |
| 0.0083433 | 0.47199    |
| 0.0072955 | 0.00071242 |
| 0.066276  | 0.049656   |
| 0.097321  | 0.067003   |
| 0.095403  | 0.027005   |
| 0.0070581 | 0.017584   |
| 0.057264  | -0.31669   |
| 0.024427  | 0.019776   |
| 0.032373  | -1.0632    |
| 0.08799   | 0.034794   |
| 0.011972  | 2.49E-05   |
| 0.0081619 | 0.40122    |
| 0.016809  | 0.0092115  |
| 0.087374  | 0.039917   |
| 0.0081619 | 0.41861    |
| 0.077372  | -0.045303  |
| 0.040428  | -0.70012   |
| 0.029421  | 0.025165   |
| 0.083714  | 0.04583    |
| 0.0072071 | 0.11821    |
| 0.0078823 | 0.33401    |
| 0.0079906 | 0.36712    |

|           |            |
|-----------|------------|
| 0.0073419 | 0.16248    |
| 0.067111  | -0.16433   |
| 0.0087331 | 0.58295    |
| 0.039002  | -0.74417   |
| 0.082903  | 0.0020229  |
| 0.038348  | -0.7654    |
| 0.0070818 | 0.014005   |
| 0.05467   | -0.36399   |
| 0.033219  | -1.1274    |
| 0.0092171 | -0.0058338 |
| 0.0085339 | 0.50845    |
| 0.018428  | 0.011775   |
| 0.032588  | -1.1005    |
| 0.033948  | -1.1453    |
| 0.02223   | 0.017077   |
| 0.0071773 | 0.10834    |
| 0.046637  | -0.5101    |
| 0.0085994 | 0.54547    |
| 0.03239   | -1.0557    |
| 0.0083953 | -0.0075602 |
| 0.0086658 | 0.56416    |
| 0.0070776 | 0.073782   |
| 0.047964  | 0.039792   |
| 0.032418  | -1.0834    |
| 0.0072715 | 0.13941    |
| 0.0071894 | 0.0051576  |
| 0.064204  | -0.2052    |
| 0.0082818 | 0.45401    |
| 0.034505  | -0.91058   |
| 0.085509  | 0.020095   |
| 0.0079451 | -0.0072122 |
| 0.0071894 | 0.0051576  |
| 0.0074182 | 0.1873     |
| 0.00783   | 0.31787    |
| 0.012448  | 0.001053   |
| 0.032423  | -1.0477    |
| 0.0090816 | 0.67796    |
| 0.007022  | 0.046511   |
| 0.033642  | -0.95303   |
| 0.048754  | -0.4856    |
| 0.0085994 | 0.54547    |

|           |            |
|-----------|------------|
| 0.093574  | 0.05853    |
| 0.0085994 | 0.54547    |
| 0.032423  | -1.0477    |
| 0.007022  | 0.040742   |
| 0.0084058 | 0.49014    |
| 0.0085339 | 0.52689    |
| 0.0081037 | 0.40122    |
| 0.023303  | 0.018425   |
| 0.0087331 | 0.58295    |
| 0.092718  | 0.030934   |
| 0.012958  | 0.0021206  |
| 0.0082213 | 0.43621    |
| 0.0070309 | 0.052688   |
| 0.0082213 | 0.43621    |
| 0.08868   | 0.038804   |
| 0.007099  | 0.073782   |
| 0.0080815 | -0.007536  |
| 0.0084694 | 0.50845    |
| 0.0083433 | 0.47199    |
| 0.011527  | -0.0009612 |
| 0.0089841 | -0.0064176 |
| 0.078448  | 0.051216   |
| 0.039002  | -0.74417   |
| 0.014086  | 0.0055346  |
| 0.0090104 | 0.65886    |
| 0.090335  | 0.046386   |
| 0.096706  | 0.025383   |
| 0.035661  | -0.86174   |
| 0.10434   | 0.026889   |
| 0.0071773 | 0.10834    |
| 0.024427  | 0.019776   |
| 0.086766  | 0.027849   |
| 0.032373  | -1.0704    |
| 0.0070401 | 0.017584   |
| 0.0082818 | 0.45401    |
| 0.0079359 | 0.35043    |
| 0.086766  | 0.027849   |
| 0.032418  | -1.0834    |
| 0.0082213 | 0.43621    |
| 0.032474  | -1.0393    |
| 0.0072071 | 0.11821    |

|           |            |
|-----------|------------|
| 0.033219  | -1.1274    |
| 0.10183   | 0.022679   |
| 0.0075002 | 0.21378    |
| 0.0083433 | 0.47199    |
| 0.075932  | -0.059632  |
| 0.0072386 | 0.12857    |
| 0.0071773 | 0.10834    |
| 0.1038    | 0.02577    |
| 0.0070272 | 0.025758   |
| 0.0076807 | 0.27125    |
| 0.091453  | 0.0511     |
| 0.0072386 | 0.12857    |
| 0.0084694 | 0.50845    |
| 0.00894   | 0.6398     |
| 0.0090816 | 0.67796    |
| 0.0070192 | 0.030378   |
| 0.010731  | -0.0027971 |
| 0.010731  | -0.0027971 |
| 0.1003    | 0.022784   |
| 0.0079906 | 0.36712    |
| 0.0075433 | 0.2276     |
| 0.0075002 | 0.21378    |
| 0.074476  | -0.074934  |
| 0.037156  | -0.80605   |
| 0.0087331 | 0.58295    |
| 0.00783   | 0.31787    |
| 0.0074585 | 0.20034    |
| 0.0083433 | 0.47199    |
| 0.032588  | -1.1005    |
| 0.0070272 | 0.021497   |
| 0.010376  | -0.0036418 |
| 0.073273  | 0.051693   |
| 0.0085994 | 0.54547    |
| 0.032875  | -1.0007    |
| 0.1038    | 0.024827   |
| 0.0070589 | 0.066311   |
| 0.0070159 | 0.035368   |
| 0.013504  | 0.0032251  |
| 0.012448  | 0.001053   |
| 0.079691  | 0.050593   |
| 0.03669   | 0.032921   |



|           |            |
|-----------|------------|
| 0.058604  | -0.29352   |
| 0.0094709 | -0.0051686 |
| 0.011114  | -0.0019027 |
| 0.0079906 | 0.36712    |
| 0.0090104 | 0.65886    |
| 0.0083433 | 0.47199    |
| 0.007306  | 0.15072    |
| 0.032418  | -1.0834    |
| 0.033412  | -0.96585   |
| 0.0089841 | -0.006908  |
| 0.00783   | 0.31787    |
| 0.0085994 | 0.54547    |
| 0.0090104 | 0.65886    |
| 0.0070169 | 0.035368   |
| 0.0091534 | 0.69708    |
| 0.041199  | -0.67741   |
| 0.011527  | -0.0009612 |
| 0.034855  | -0.89503   |
| 0.007099  | 0.081709   |
| 0.007147  | 0.0051576  |
| 0.010376  | -0.0036418 |
| 0.007123  | 0.090103   |
| 0.0071894 | 0.0027978  |
| 0.032423  | -1.0477    |
| 0.0075002 | 0.21378    |
| 0.032544  | -1.0304    |
| 0.00783   | 0.31787    |
| 0.016809  | 0.0092115  |
| 0.0090104 | 0.65886    |
| 0.0090816 | 0.67796    |
| 0.0075877 | 0.2418     |
| 0.0084058 | 0.49014    |
| 0.0091534 | 0.69708    |
| 0.0088013 | 0.60183    |
| 0.0075153 | -0.0040171 |
| 0.0072715 | 0.13941    |
| 0.10083   | 0.022479   |
| 0.0077085 | -0.0067106 |
| 0.0071773 | 0.10834    |
| 0.021206  | 0.015736   |
| 0.095403  | 0.027913   |

|           |            |
|-----------|------------|
| 0.007779  | 0.30202    |
| 0.0070192 | 0.025758   |
| 0.0075002 | 0.21378    |
| 0.041199  | -0.67741   |
| 0.026825  | 0.023825   |
| 0.0088013 | 0.60183    |
| 0.00894   | 0.6398     |
| 0.0084058 | 0.49014    |
| 0.0072071 | 0.11821    |
| 0.023303  | 0.018425   |
| 0.0081037 | 0.40122    |
| 0.071533  | -0.10826   |
| 0.10477   | 0.042402   |
| 0.018428  | 0.011775   |
| 0.010731  | -0.0019027 |
| 0.014086  | 0.004364   |
| 0.0085994 | 0.54547    |
| 0.049867  | -0.43662   |
| 0.0073419 | 0.16248    |
| 0.0081037 | 0.40122    |
| 0.0094709 | -0.0058338 |
| 0.0082818 | 0.45401    |
| 0.033353  | -1.1312    |
| 0.032205  | 0.027815   |
| 0.0072071 | 0.11821    |
| 0.013504  | 0.0032251  |
| 0.011527  | 2.49E-05   |
| 0.0071773 | 0.10834    |
| 0.055952  | -0.34019   |
| 0.0090104 | 0.65886    |
| 0.0073793 | 0.17468    |
| 0.0089841 | -0.0064176 |
| 0.007022  | 0.046511   |
| 0.10083   | 0.022479   |
| 0.043745  | -0.6071    |
| 0.034855  | -0.89503   |
| 0.0070401 | 0.021497   |
| 0.015366  | 0.0079609  |
| 0.085509  | 0.020095   |
| 0.0076807 | 0.27125    |
| 0.0074182 | 0.1873     |

|           |            |
|-----------|------------|
| 0.0088702 | 0.62079    |
| 0.032875  | -1.0007    |
| 0.057178  | 0.045278   |
| 0.034106  | -1.1486    |
| 0.007779  | 0.30202    |
| 0.0075877 | 0.2418     |
| 0.097321  | 0.06633    |
| 0.10347   | 0.024827   |
| 0.032373  | -1.0632    |
| 0.057178  | 0.045278   |
| 0.10472   | 0.03138    |
| 0.011527  | -0.0009612 |
| 0.0074182 | 0.1873     |
| 0.023303  | 0.018425   |
| 0.00783   | 0.31787    |
| 0.0087704 | -0.0072929 |
| 0.0080466 | 0.38405    |
| 0.0079451 | -0.0072122 |
| 0.081445  | 0.04924    |
| 0.0087331 | 0.58295    |
| 0.0083433 | 0.47199    |
| 0.057178  | 0.045278   |
| 0.045635  | -0.5589    |
| 0.032418  | -1.0834    |
| 0.0088013 | 0.60183    |
| 0.038348  | -0.7654    |
| 0.062773  | -0.22652   |
| 0.0076807 | 0.27125    |
| 0.0075153 | -0.0040171 |
| 0.0070589 | 0.066311   |
| 0.0076069 | -0.0051251 |
| 0.007821  | -0.0067106 |
| 0.041199  | -0.67741   |
| 0.052701  | 0.043621   |
| 0.10083   | 0.022572   |
| 0.0087704 | -0.0072929 |
| 0.033662  | 0.029119   |
| 0.0080815 | -0.007536  |
| 0.0074585 | 0.20034    |
| 0.0072386 | 0.11821    |
| 0.0071113 | 0.010749   |

|           |            |
|-----------|------------|
| 0.032743  | -1.0111    |
| 0.032875  | -1.0007    |
| 0.0077085 | -0.0060189 |
| 0.011972  | 2.49E-05   |
| 0.0079359 | 0.35043    |
| 0.00783   | 0.31787    |
| 0.0090816 | 0.67796    |
| 0.034855  | -0.89503   |
| 0.03669   | 0.031675   |
| 0.0083953 | -0.0075602 |
| 0.085509  | 0.020095   |
| 0.0071773 | 0.10834    |
| 0.0094709 | -0.0058338 |
| 0.0071773 | 0.10834    |
| 0.033792  | -1.1419    |
| 0.007821  | -0.0067106 |
| 0.0072386 | 0.12857    |
| 0.071533  | -0.10826   |
| 0.096449  | 0.06633    |
| 0.00894   | 0.6398     |
| 0.033642  | -0.93955   |
| 0.007779  | 0.30202    |
| 0.065651  | -0.18445   |
| 0.0086658 | 0.56416    |
| 0.10385   | 0.054784   |
| 0.0070169 | 0.040742   |
| 0.030791  | 0.026496   |
| 0.0086658 | 0.56416    |
| 0.010048  | -0.0036418 |
| 0.0087331 | 0.58295    |
| 0.03303   | -0.98966   |
| 0.097342  | 0.024682   |
| 0.032861  | -1.1149    |
| 0.0070589 | 0.066311   |
| 0.0090104 | 0.65886    |
| 0.0085339 | 0.52689    |
| 0.0088013 | 0.60183    |
| 0.013504  | 0.0032251  |
| 0.0586    | 0.04604    |
| 0.012448  | 0.001053   |
| 0.0072071 | 0.11821    |

|           |            |
|-----------|------------|
| 0.00894   | 0.6398     |
| 0.049567  | 0.040812   |
| 0.036619  | -0.82536   |
| 0.026825  | 0.023825   |
| 0.0082313 | -0.0076979 |
| 0.091453  | 0.0511     |
| 0.090686  | 0.034253   |
| 0.0070589 | 0.066311   |
| 0.0072386 | 0.12857    |
| 0.023303  | 0.019776   |
| 0.0079906 | 0.36712    |
| 0.038348  | -0.7654    |
| 0.00894   | 0.6398     |
| 0.0073419 | 0.15072    |
| 0.084221  | 0.020095   |
| 0.011114  | -0.0019027 |
| 0.0075002 | 0.21378    |
| 0.020232  | 0.014403   |
| 0.0077085 | -0.0067106 |
| 0.017596  | 0.010484   |
| 0.052201  | -0.41225   |
| 0.00894   | 0.6398     |
| 0.025601  | 0.021128   |
| 0.00894   | 0.6398     |
| 0.0072715 | 0.13941    |
| 0.0087331 | 0.58295    |
| 0.077795  | 0.051216   |
| 0.0090816 | 0.67796    |
| 0.032875  | -1.0007    |
| 0.0070433 | 0.059284   |
| 0.029421  | 0.026496   |
| 0.0072386 | 0.12857    |
| 0.047964  | 0.040812   |
| 0.058604  | -0.29352   |
| 0.032423  | -1.0477    |
| 0.0090104 | 0.65886    |
| 0.039002  | -0.74417   |
| 0.094069  | 0.028875   |
| 0.0079906 | 0.36712    |
| 0.10311   | 0.023443   |
| 0.0071894 | 0.0051576  |

|           |            |
|-----------|------------|
| 0.015366  | 0.0067344  |
| 0.032418  | -1.0834    |
| 0.0080815 | -0.007536  |
| 0.0090104 | 0.65886    |
| 0.0085746 | -0.0072929 |
| 0.0091534 | 0.69708    |
| 0.0089841 | -0.006908  |
| 0.093395  | 0.029884   |
| 0.07411   | 0.051821   |
| 0.0072715 | 0.13941    |
| 0.0084058 | 0.49014    |
| 0.0072387 | 0.0027978  |
| 0.10493   | 0.03536    |
| 0.061361  | -0.24839   |
| 0.0075433 | 0.2276     |
| 0.0079451 | -0.0072122 |
| 0.0083433 | 0.47199    |
| 0.0070192 | 0.030378   |
| 0.00894   | 0.6398     |
| 0.0087704 | -0.0072929 |
| 0.0089841 | -0.006908  |
| 0.014706  | 0.0055346  |
| 0.047964  | 0.039792   |
| 0.0088013 | 0.60183    |
| 0.039695  | -0.72239   |
| 0.032972  | -1.1193    |
| 0.093574  | 0.05853    |
| 0.0076807 | 0.27125    |
| 0.0082818 | 0.45401    |
| 0.0079451 | -0.007536  |
| 0.0087331 | 0.58295    |
| 0.0074182 | 0.1873     |
| 0.074911  | 0.051821   |
| 0.068581  | -0.1449    |
| 0.0070159 | 0.030378   |
| 0.0094709 | -0.0051686 |
| 0.0076069 | -0.0051251 |
| 0.079079  | 0.050932   |
| 0.010048  | -0.0044341 |
| 0.010731  | -0.0019027 |
| 0.0090104 | 0.65886    |

|           |            |
|-----------|------------|
| 0.10036   | 0.06649    |
| 0.07879   | -0.019688  |
| 0.0082213 | 0.43621    |
| 0.034187  | -0.92541   |
| 0.08918   | 0.046386   |
| 0.007123  | 0.090103   |
| 0.073008  | -0.09116   |
| 0.0090816 | 0.67796    |
| 0.0090816 | 0.67796    |
| 0.0085746 | -0.0075602 |
| 0.03239   | -1.0557    |
| 0.0070433 | 0.059284   |
| 0.0075002 | 0.21378    |
| 0.10036   | 0.06649    |
| 0.0087331 | 0.58295    |
| 0.014086  | 0.004364   |
| 0.096059  | 0.027005   |
| 0.0088702 | 0.62079    |
| 0.10083   | 0.022572   |
| 0.0089841 | -0.006908  |
| 0.029421  | 0.026496   |
| 0.0082313 | -0.0076938 |
| 0.0070433 | 0.059284   |
| 0.076413  | 0.051739   |
| 0.051016  | -0.43662   |
| 0.0085339 | 0.52689    |
| 0.0079359 | 0.35043    |
| 0.016066  | 0.0079609  |
| 0.069529  | 0.050826   |
| 0.0074585 | 0.20034    |
| 0.021206  | 0.015736   |
| 0.077372  | -0.031991  |
| 0.064204  | -0.2052    |
| 0.00894   | 0.6398     |
| 0.065651  | -0.16433   |
| 0.0074585 | 0.20034    |
| 0.033208  | -0.97806   |
| 0.071483  | 0.05136    |
| 0.032474  | -1.0393    |
| 0.033219  | -1.1274    |
| 0.0087331 | 0.58295    |

|           |            |
|-----------|------------|
| 0.0073419 | 0.16248    |
| 0.093395  | 0.029884   |
| 0.0081619 | 0.41861    |
| 0.0072955 | 0.00071242 |
| 0.0079906 | 0.36712    |
| 0.010376  | -0.0036418 |
| 0.0074585 | 0.20034    |
| 0.026825  | 0.022479   |
| 0.032474  | -1.0393    |
| 0.0090816 | 0.67796    |
| 0.037733  | -0.78604   |
| 0.0090104 | 0.65886    |
| 0.039002  | -0.74417   |
| 0.0079906 | 0.36712    |
| 0.0081037 | 0.40122    |
| 0.0073419 | 0.16248    |
| 0.0072715 | 0.13941    |
| 0.080186  | -0.019688  |
| 0.0070818 | 0.014005   |
| 0.007306  | 0.15072    |
| 0.096449  | 0.06633    |
| 0.0073793 | 0.17468    |
| 0.007099  | 0.081709   |
| 0.0075153 | -0.0040171 |
| 0.0087331 | 0.58295    |
| 0.0090104 | 0.65886    |
| 0.0071491 | 0.098977   |
| 0.007022  | 0.046511   |
| 0.0074182 | 0.1873     |
| 0.0076336 | 0.25635    |
| 0.032519  | -1.0951    |
| 0.084221  | 0.020095   |
| 0.0082213 | 0.43621    |
| 0.0072387 | 0.0027978  |
| 0.011972  | 2.49E-05   |
| 0.0071773 | 0.10834    |
| 0.011972  | 2.49E-05   |
| 0.011972  | 2.49E-05   |
| 0.0082313 | -0.0076979 |
| 0.0082213 | 0.43621    |
| 0.10485   | 0.03138    |



|           |            |
|-----------|------------|
| 0.073008  | -0.09116   |
| 0.012448  | 0.0021206  |
| 0.0071773 | 0.10834    |
| 0.033412  | -0.96585   |
| 0.0076069 | -0.0051251 |
| 0.0071491 | 0.098977   |
| 0.0082213 | 0.43621    |
| 0.010048  | -0.0044341 |
| 0.010731  | -0.0027971 |
| 0.0072071 | 0.11821    |
| 0.0088013 | 0.60183    |
| 0.0094709 | -0.0051686 |
| 0.0084694 | 0.50845    |
| 0.0078823 | 0.33401    |
| 0.0070169 | 0.040742   |
| 0.10271   | 0.022987   |
| 0.10477   | 0.044903   |
| 0.085509  | 0.020095   |
| 0.0079359 | 0.35043    |
| 0.023303  | 0.019776   |
| 0.0073793 | 0.17468    |
| 0.084293  | 0.04583    |
| 0.043745  | -0.6071    |
| 0.033208  | -0.97806   |
| 0.072398  | 0.051552   |
| 0.082903  | 0.0020229  |
| 0.03612   | -0.84394   |
| 0.014706  | 0.0055346  |
| 0.007306  | 0.15072    |
| 0.0586    | 0.046758   |
| 0.086766  | 0.027849   |
| 0.067404  | 0.050095   |
| 0.0090816 | 0.67796    |
| 0.034505  | -0.91058   |
| 0.10309   | 0.059186   |
| 0.033208  | -0.97806   |
| 0.0083953 | -0.0076979 |
| 0.083144  | 0.04737    |
| 0.039695  | -0.70012   |
| 0.0073793 | 0.17468    |
| 0.032588  | -1.1005    |

|           |            |
|-----------|------------|
| 0.0070818 | 0.010749   |
| 0.010376  | -0.0036418 |
| 0.032633  | -1.021     |
| 0.04467   | -0.5831    |
| 0.0081037 | 0.40122    |
| 0.034855  | -0.89503   |
| 0.010048  | -0.0044341 |
| 0.0071491 | 0.098977   |
| 0.0084694 | 0.50845    |
| 0.037156  | -0.78604   |
| 0.029421  | 0.025165   |
| 0.0090104 | 0.65886    |
| 0.032389  | -1.0771    |
| 0.0077292 | 0.28647    |
| 0.0075002 | 0.21378    |
| 0.033208  | -0.97806   |
| 0.051016  | -0.43662   |
| 0.032389  | -1.0771    |
| 0.0082213 | 0.43621    |
| 0.08799   | 0.034794   |
| 0.015366  | 0.0079609  |
| 0.0075877 | 0.2418     |
| 0.0088702 | 0.62079    |
| 0.0076807 | 0.25635    |
| 0.0072715 | 0.13941    |
| 0.033792  | -1.1419    |
| 0.10462   | 0.047424   |
| 0.04467   | -0.5831    |
| 0.0070192 | 0.030378   |
| 0.0074585 | 0.20034    |
| 0.032373  | -1.0632    |
| 0.0073419 | 0.16248    |
| 0.032875  | -1.0007    |
| 0.0078823 | 0.33401    |
| 0.0082213 | 0.43621    |
| 0.0339    | -0.93955   |
| 0.030791  | 0.026496   |
| 0.0070309 | 0.052688   |
| 0.011972  | 2.49E-05   |
| 0.09204   | 0.033125   |
| 0.073273  | 0.051693   |

|           |            |
|-----------|------------|
| 0.0071113 | 0.0078041  |
| 0.052201  | -0.38803   |
| 0.037733  | -0.78604   |
| 0.0071491 | 0.098977   |
| 0.0071773 | 0.10834    |
| 0.0083953 | -0.0076979 |
| 0.0073419 | 0.16248    |
| 0.032633  | -1.021     |
| 0.0075002 | 0.21378    |
| 0.049567  | 0.040812   |
| 0.0076807 | 0.27125    |
| 0.080871  | 0.049748   |
| 0.066276  | 0.050095   |
| 0.0070401 | 0.021497   |
| 0.014706  | 0.0067344  |
| 0.013504  | 0.0032251  |
| 0.0072715 | 0.13941    |
| 0.007123  | 0.090103   |
| 0.0088702 | 0.62079    |
| 0.0077292 | 0.28647    |
| 0.007123  | 0.090103   |
| 0.007306  | 0.15072    |
| 0.026825  | 0.022479   |
| 0.0071491 | 0.098977   |
| 0.0073419 | 0.16248    |
| 0.0082313 | -0.0076938 |
| 0.0086658 | 0.56416    |
| 0.0090816 | 0.67796    |
| 0.047677  | -0.5101    |
| 0.0087331 | 0.58295    |
| 0.096059  | 0.02616    |
| 0.007123  | 0.090103   |
| 0.082578  | 0.048051   |
| 0.0080815 | -0.007536  |
| 0.088023  | 0.039917   |
| 0.0091534 | 0.69708    |
| 0.032972  | -1.1193    |
| 0.00894   | 0.6398     |
| 0.0072386 | 0.12857    |
| 0.00783   | 0.31787    |
| 0.0081619 | 0.41861    |

|           |            |
|-----------|------------|
| 0.065651  | -0.18445   |
| 0.0075002 | 0.21378    |
| 0.0088013 | 0.60183    |
| 0.0071491 | 0.098977   |
| 0.065651  | -0.18445   |
| 0.00894   | 0.6398     |
| 0.0090104 | 0.65886    |
| 0.057264  | -0.31669   |
| 0.064204  | -0.2052    |
| 0.0086658 | 0.56416    |
| 0.032743  | -1.0111    |
| 0.0083433 | 0.47199    |
| 0.033494  | -1.1349    |
| 0.0091534 | 0.69708    |
| 0.0090104 | 0.65886    |
| 0.0073419 | 0.16248    |
| 0.028099  | 0.023825   |
| 0.007306  | 0.15072    |
| 0.0086658 | 0.56416    |
| 0.03612   | -0.84394   |
| 0.0088702 | 0.62079    |
| 0.090686  | 0.035391   |
| 0.081558  | 0.0020229  |
| 0.014086  | 0.004364   |
| 0.0073419 | 0.16248    |
| 0.086106  | 0.042062   |
| 0.037733  | -0.78604   |
| 0.063888  | 0.04917    |
| 0.034187  | -0.92541   |
| 0.096059  | 0.02616    |
| 0.032743  | -1.0111    |
| 0.07879   | -0.031991  |
| 0.0339    | -0.93955   |
| 0.057264  | -0.31669   |
| 0.0075433 | 0.2276     |
| 0.0070776 | 0.073782   |
| 0.0090816 | 0.67796    |
| 0.065651  | -0.18445   |
| 0.0075433 | 0.2276     |
| 0.007123  | 0.090103   |
| 0.0075153 | -0.0051251 |

|           |            |
|-----------|------------|
| 0.0075877 | 0.2418     |
| 0.033642  | -0.95303   |
| 0.0072955 | -0.0011105 |
| 0.0074182 | 0.1873     |
| 0.007147  | 0.0078041  |
| 0.1038    | 0.024827   |
| 0.0074585 | 0.20034    |
| 0.035158  | 0.031675   |
| 0.0081619 | 0.40122    |
| 0.0076336 | 0.25635    |
| 0.091362  | 0.034253   |
| 0.062773  | -0.22652   |
| 0.0073419 | 0.16248    |
| 0.007306  | 0.15072    |
| 0.0070589 | 0.066311   |
| 0.012958  | 0.0032251  |
| 0.0073793 | 0.17468    |
| 0.090686  | 0.034253   |
| 0.0075877 | 0.2418     |
| 0.032743  | -1.0111    |
| 0.0088013 | 0.60183    |
| 0.032588  | -1.1005    |
| 0.077118  | 0.051444   |
| 0.032205  | 0.027815   |
| 0.0070192 | 0.030378   |
| 0.046637  | -0.5101    |
| 0.0090104 | 0.65886    |
| 0.038348  | -0.7654    |
| 0.049867  | -0.46109   |
| 0.0076807 | 0.27125    |
| 0.007779  | 0.30202    |
| 0.0073793 | 0.17468    |
| 0.0081619 | 0.41861    |
| 0.0086658 | 0.56416    |
| 0.0072387 | 0.00071242 |
| 0.0076336 | 0.25635    |
| 0.05467   | -0.36399   |
| 0.0085994 | 0.54547    |
| 0.0073419 | 0.16248    |
| 0.0080466 | 0.38405    |
| 0.032588  | -1.1005    |

|           |            |
|-----------|------------|
| 0.10485   | 0.033276   |
| 0.0070589 | 0.066311   |
| 0.0072071 | 0.11821    |
| 0.037733  | -0.78604   |
| 0.084884  | 0.044052   |
| 0.011527  | -0.0009612 |
| 0.0085339 | 0.52689    |
| 0.0085994 | 0.54547    |
| 0.041454  | 0.036502   |
| 0.02223   | 0.017077   |
| 0.0084058 | 0.49014    |
| 0.0072071 | 0.11821    |
| 0.013504  | 0.004364   |
| 0.0082818 | 0.45401    |
| 0.0086658 | 0.56416    |
| 0.0078823 | 0.33401    |
| 0.054226  | 0.043621   |
| 0.016066  | 0.0079609  |
| 0.0074182 | 0.1873     |
| 0.081558  | -0.008361  |
| 0.032462  | -1.0894    |
| 0.032474  | -1.0304    |
| 0.0088702 | 0.62079    |
| 0.0072955 | 0.00071242 |
| 0.0082213 | 0.43621    |
| 0.03612   | -0.84394   |
| 0.02223   | 0.018425   |
| 0.0076807 | 0.27125    |
| 0.013504  | 0.004364   |
| 0.0092171 | -0.0058338 |
| 0.0083433 | 0.47199    |
| 0.079691  | 0.050199   |
| 0.0085339 | 0.52689    |
| 0.10264   | 0.061137   |
| 0.0071773 | 0.10834    |
| 0.011527  | -0.0009612 |
| 0.013504  | 0.0032251  |
| 0.00783   | 0.31787    |
| 0.0071491 | 0.098977   |
| 0.0083953 | -0.0075602 |
| 0.0084058 | 0.49014    |

|           |            |
|-----------|------------|
| 0.032743  | -1.0111    |
| 0.010376  | -0.0036418 |
| 0.068581  | -0.1449    |
| 0.10215   | 0.061137   |
| 0.0072955 | -0.0011105 |
| 0.0076807 | 0.27125    |
| 0.0073419 | 0.16248    |
| 0.059971  | -0.27073   |
| 0.0070589 | 0.059284   |
| 0.08868   | 0.037674   |
| 0.0339    | -0.93955   |
| 0.0072955 | 0.00071242 |
| 0.0070401 | 0.021497   |
| 0.095533  | 0.063518   |
| 0.092533  | 0.05853    |
| 0.035661  | -0.86174   |
| 0.033219  | -1.1274    |
| 0.032875  | -1.0007    |
| 0.032972  | -1.1193    |
| 0.014086  | 0.004364   |
| 0.0072386 | 0.12857    |
| 0.10309   | 0.059186   |
| 0.075932  | -0.045303  |
| 0.040428  | -0.70012   |
| 0.0083953 | -0.0076979 |
| 0.0076336 | 0.25635    |
| 0.067404  | 0.050485   |
| 0.033412  | -0.96585   |
| 0.0080815 | -0.007536  |
| 0.0079906 | 0.36712    |
| 0.0079359 | 0.35043    |
| 0.0092171 | -0.0064176 |
| 0.032418  | -1.0834    |
| 0.085509  | 0.020095   |
| 0.0075877 | 0.2418     |
| 0.011114  | -0.0009612 |
| 0.0072955 | -0.0011105 |
| 0.03239   | -1.0557    |
| 0.055952  | -0.34019   |
| 0.0087331 | 0.58295    |
| 0.10434   | 0.028193   |

|           |            |
|-----------|------------|
| 0.011972  | 0.001053   |
| 0.0072071 | 0.11821    |
| 0.0073419 | 0.16248    |
| 0.065104  | 0.04917    |
| 0.03669   | 0.031675   |
| 0.10134   | 0.022512   |
| 0.10472   | 0.03138    |
| 0.0085994 | 0.54547    |
| 0.0087331 | 0.58295    |
| 0.0097473 | -0.0051686 |
| 0.086106  | 0.042062   |
| 0.0084058 | 0.49014    |
| 0.0094709 | -0.0058338 |
| 0.0075002 | 0.21378    |
| 0.011527  | 2.49E-05   |
| 0.045635  | -0.53455   |
| 0.0079359 | 0.35043    |
| 0.10347   | 0.024827   |
| 0.0073419 | 0.16248    |
| 0.007821  | -0.0067106 |
| 0.0080466 | 0.38405    |
| 0.0097473 | -0.0044341 |
| 0.02223   | 0.017077   |
| 0.086735  | 0.041005   |
| 0.00783   | 0.31787    |
| 0.0070169 | 0.040742   |
| 0.007306  | 0.15072    |
| 0.10083   | 0.022572   |
| 0.061361  | -0.22652   |
| 0.0074182 | 0.1873     |
| 0.092718  | 0.032017   |
| 0.073273  | 0.051693   |
| 0.0075877 | 0.2418     |
| 0.0084694 | 0.50845    |
| 0.034505  | -0.91058   |
| 0.0090816 | 0.67796    |
| 0.00783   | 0.31787    |
| 0.087374  | 0.041005   |
| 0.085489  | 0.04308    |
| 0.0082213 | 0.43621    |
| 0.0090816 | 0.67796    |



|           |            |
|-----------|------------|
| 0.0084694 | 0.50845    |
| 0.038348  | -0.74417   |
| 0.0085746 | -0.0075602 |
| 0.010731  | -0.0027971 |
| 0.0079359 | 0.35043    |
| 0.069529  | 0.051118   |
| 0.0081619 | 0.41861    |
| 0.0075433 | 0.2276     |
| 0.02223   | 0.018425   |
| 0.091453  | 0.0511     |
| 0.062629  | 0.048637   |
| 0.070056  | -0.10826   |
| 0.010376  | -0.0036418 |
| 0.0070433 | 0.059284   |
| 0.015366  | 0.0067344  |
| 0.0090816 | 0.67796    |
| 0.010048  | -0.0044341 |
| 0.0086658 | 0.56416    |
| 0.007779  | 0.30202    |
| 0.0084694 | 0.50845    |
| 0.065651  | -0.16433   |
| 0.08868   | 0.037674   |
| 0.10036   | 0.06649    |
| 0.010731  | -0.0027971 |
| 0.0090104 | 0.65886    |
| 0.018428  | 0.013082   |
| 0.0088013 | 0.60183    |
| 0.032875  | -1.0007    |
| 0.035661  | -0.86174   |
| 0.032373  | -1.0704    |
| 0.026825  | 0.022479   |
| 0.0072715 | 0.13941    |
| 0.0071894 | 0.0051576  |
| 0.032418  | -1.0834    |
| 0.0071491 | 0.098977   |
| 0.0081619 | 0.40122    |
| 0.043745  | -0.6071    |
| 0.00894   | 0.6398     |
| 0.016066  | 0.0079609  |
| 0.0089841 | -0.0064176 |
| 0.032668  | -1.1056    |

|           |            |
|-----------|------------|
| 0.012448  | 0.001053   |
| 0.085509  | 0.020095   |
| 0.0090816 | 0.67796    |
| 0.0070581 | 0.014005   |
| 0.032588  | -1.1005    |
| 0.0070169 | 0.040742   |
| 0.0078823 | 0.33401    |
| 0.015366  | 0.0067344  |
| 0.036619  | -0.82536   |
| 0.0080466 | 0.36712    |
| 0.0094709 | -0.0058338 |
| 0.10347   | 0.024827   |
| 0.0071491 | 0.098977   |
| 0.032519  | -1.0951    |
| 0.082903  | 0.0020229  |
| 0.013504  | 0.004364   |
| 0.10472   | 0.03138    |
| 0.068489  | 0.050826   |
| 0.0073419 | 0.16248    |
| 0.0087331 | 0.58295    |
| 0.0082313 | -0.0076938 |
| 0.012448  | 0.0021206  |
| 0.041199  | -0.67741   |
| 0.032373  | -1.0704    |
| 0.0083433 | 0.47199    |
| 0.0080466 | 0.38405    |
| 0.096449  | 0.06518    |
| 0.0075153 | -0.0040171 |
| 0.032588  | -1.1005    |
| 0.010731  | -0.0027971 |
| 0.044711  | 0.038732   |
| 0.007147  | 0.0051576  |
| 0.042857  | -0.63085   |
| 0.032544  | -1.0304    |
| 0.0075877 | 0.2418     |
| 0.071533  | -0.10826   |
| 0.0072715 | 0.13941    |
| 0.0079906 | 0.36712    |
| 0.010048  | -0.0044341 |
| 0.033642  | -0.93955   |
| 0.071533  | -0.09116   |

|           |            |
|-----------|------------|
| 0.0075877 | 0.2418     |
| 0.10455   | 0.029687   |
| 0.032373  | -1.0704    |
| 0.012958  | 0.0032251  |
| 0.007821  | -0.0072122 |
| 0.011527  | -0.0009612 |
| 0.010731  | -0.0027971 |
| 0.0074585 | 0.1873     |
| 0.079691  | 0.050199   |
| 0.0084058 | 0.49014    |
| 0.032875  | -1.0007    |
| 0.0078823 | 0.33401    |
| 0.0082818 | 0.45401    |
| 0.007022  | 0.046511   |
| 0.007123  | 0.090103   |
| 0.10462   | 0.047424   |
| 0.073273  | 0.051693   |
| 0.0070433 | 0.059284   |
| 0.10494   | 0.039956   |
| 0.0083953 | -0.0076979 |
| 0.019306  | 0.014403   |
| 0.012958  | 0.0032251  |
| 0.018428  | 0.013082   |
| 0.007306  | 0.15072    |
| 0.033219  | -1.1274    |
| 0.0070309 | 0.052688   |
| 0.0071491 | 0.098977   |
| 0.0072071 | 0.11821    |
| 0.03239   | -1.0557    |
| 0.033092  | -1.1234    |
| 0.00783   | 0.31787    |
| 0.090335  | 0.046386   |
| 0.0077292 | 0.27125    |
| 0.0090816 | 0.67796    |
| 0.10488   | 0.042402   |
| 0.007123  | 0.090103   |
| 0.049867  | -0.46109   |
| 0.0075877 | 0.2418     |
| 0.0087331 | 0.58295    |
| 0.0090104 | 0.65886    |
| 0.0085746 | -0.0075602 |

|           |            |
|-----------|------------|
| 0.062629  | 0.048637   |
| 0.082013  | 0.048051   |
| 0.077795  | 0.051444   |
| 0.098575  | 0.024065   |
| 0.0071491 | 0.090103   |
| 0.012958  | 0.0021206  |
| 0.032373  | -1.0704    |
| 0.032588  | -1.1005    |
| 0.089343  | 0.037674   |
| 0.0085994 | 0.54547    |
| 0.0082213 | 0.43621    |
| 0.0092171 | -0.0064176 |
| 0.0070581 | 0.017584   |
| 0.0071773 | 0.10834    |
| 0.016066  | 0.0079609  |
| 0.0070776 | 0.066311   |
| 0.047677  | -0.5101    |
| 0.0070192 | 0.025758   |
| 0.018428  | 0.013082   |
| 0.07411   | 0.051783   |
| 0.0071894 | 0.0051576  |
| 0.0090104 | 0.65886    |
| 0.015366  | 0.0067344  |
| 0.092533  | 0.055137   |
| 0.0097473 | -0.0051686 |
| 0.0070159 | 0.035368   |
| 0.03612   | -0.84394   |
| 0.007099  | 0.081709   |
| 0.046342  | 0.039792   |
| 0.0070433 | 0.059284   |
| 0.007099  | 0.081709   |
| 0.018428  | 0.013082   |
| 0.044711  | 0.038732   |
| 0.074911  | 0.051821   |
| 0.0084694 | 0.50845    |
| 0.0081037 | 0.40122    |
| 0.03276   | -1.1104    |
| 0.10441   | 0.047424   |
| 0.0088013 | 0.60183    |
| 0.058604  | -0.27073   |
| 0.00894   | 0.6398     |

|           |            |
|-----------|------------|
| 0.0076069 | -0.0051251 |
| 0.007022  | 0.040742   |
| 0.033642  | -0.95303   |
| 0.061327  | 0.048056   |
| 0.032668  | -1.1056    |
| 0.032418  | -1.0834    |
| 0.007306  | 0.15072    |
| 0.033642  | -0.95303   |
| 0.0070433 | 0.059284   |
| 0.062629  | 0.048637   |
| 0.048754  | -0.4856    |
| 0.0090816 | 0.67796    |
| 0.00783   | 0.31787    |
| 0.032418  | -1.0834    |
| 0.05467   | -0.36399   |
| 0.016809  | 0.0092115  |
| 0.0076336 | 0.25635    |
| 0.0075002 | 0.21378    |
| 0.0080466 | 0.38405    |
| 0.0082213 | 0.43621    |
| 0.0075433 | 0.2276     |
| 0.026825  | 0.022479   |
| 0.010731  | -0.0027971 |
| 0.0086658 | 0.56416    |
| 0.039844  | 0.035337   |
| 0.0071773 | 0.098977   |
| 0.015366  | 0.0067344  |
| 0.0073793 | 0.17468    |
| 0.0072955 | 0.00071242 |
| 0.0074182 | 0.1873     |
| 0.032423  | -1.0477    |
| 0.023303  | 0.018425   |
| 0.041199  | -0.65431   |
| 0.0339    | -0.93955   |
| 0.0075877 | 0.2418     |
| 0.074476  | -0.074934  |
| 0.032205  | 0.027815   |
| 0.069529  | 0.050826   |
| 0.0089841 | -0.006908  |
| 0.0083433 | 0.47199    |
| 0.033642  | -0.95303   |

|           |            |
|-----------|------------|
| 0.090686  | 0.035391   |
| 0.10415   | 0.052398   |
| 0.0079451 | -0.0072122 |
| 0.069529  | 0.050826   |
| 0.0076069 | -0.0051251 |
| 0.10228   | 0.022679   |
| 0.068581  | -0.1449    |
| 0.0090816 | 0.67796    |
| 0.0072071 | 0.11821    |
| 0.096449  | 0.06633    |
| 0.03239   | -1.0557    |
| 0.0092171 | -0.0058338 |
| 0.042008  | -0.65431   |
| 0.097966  | 0.024065   |
| 0.053419  | -0.38803   |
| 0.016066  | 0.0079609  |
| 0.10264   | 0.061137   |
| 0.032474  | -1.0304    |
| 0.052701  | 0.043621   |
| 0.041199  | -0.67741   |
| 0.0085994 | 0.52689    |
| 0.032743  | -1.0111    |
| 0.0094709 | -0.0058338 |
| 0.026825  | 0.022479   |
| 0.032875  | -1.0007    |
| 0.039844  | 0.034143   |
| 0.0082313 | -0.0076938 |
| 0.05467   | -0.36399   |
| 0.0074182 | 0.1873     |
| 0.028099  | 0.023825   |
| 0.0073793 | 0.17468    |
| 0.10311   | 0.024054   |
| 0.032423  | -1.0477    |
| 0.007123  | 0.090103   |
| 0.058604  | -0.29352   |
| 0.0088702 | 0.62079    |
| 0.05467   | -0.36399   |
| 0.0075433 | 0.21378    |
| 0.082578  | 0.048051   |
| 0.0087331 | 0.58295    |
| 0.010731  | -0.0027971 |

|           |            |
|-----------|------------|
| 0.0071773 | 0.10834    |
| 0.033642  | -0.95303   |
| 0.0072955 | 0.00071242 |
| 0.007821  | -0.0067106 |
| 0.033641  | -1.1384    |
| 0.1016    | 0.064369   |
| 0.0094709 | -0.0058338 |
| 0.011972  | 2.49E-05   |
| 0.0091534 | 0.69708    |
| 0.010048  | -0.0044341 |
| 0.03276   | -1.1104    |
| 0.032743  | -1.0111    |
| 0.094739  | 0.027913   |
| 0.0079359 | 0.35043    |
| 0.0076336 | 0.25635    |
| 0.0082213 | 0.43621    |
| 0.0079906 | 0.36712    |
| 0.0077292 | 0.28647    |
| 0.007306  | 0.13941    |
| 0.084221  | 0.011497   |
| 0.0076069 | -0.0060189 |
| 0.052201  | -0.38803   |
| 0.0075153 | -0.0051251 |
| 0.0077292 | 0.28647    |
| 0.019306  | 0.013082   |
| 0.10183   | 0.022679   |
| 0.054226  | 0.043621   |
| 0.007779  | 0.30202    |
| 0.011527  | -0.0009612 |
| 0.0070589 | 0.066311   |
| 0.0072386 | 0.12857    |
| 0.084884  | 0.04497    |
| 0.0074182 | 0.1873     |
| 0.012448  | 0.0021206  |
| 0.020232  | 0.014403   |
| 0.032205  | 0.027815   |
| 0.0071773 | 0.10834    |
| 0.074476  | -0.074934  |
| 0.0075877 | 0.2418     |
| 0.0074182 | 0.1873     |
| 0.019306  | 0.014403   |

|           |            |
|-----------|------------|
| 0.10488   | 0.042402   |
| 0.032205  | 0.029119   |
| 0.010731  | -0.0027971 |
| 0.093574  | 0.05853    |
| 0.0080466 | 0.36712    |
| 0.0083433 | 0.47199    |
| 0.00894   | 0.6398     |
| 0.0071773 | 0.10834    |
| 0.007147  | 0.0078041  |
| 0.011114  | -0.0019027 |
| 0.0085339 | 0.52689    |
| 0.067111  | -0.16433   |
| 0.086106  | 0.04308    |
| 0.014706  | 0.0067344  |
| 0.015366  | 0.0079609  |
| 0.032633  | -1.021     |
| 0.026825  | 0.022479   |
| 0.0087331 | 0.58295    |
| 0.011527  | -0.0009612 |
| 0.00894   | 0.6398     |
| 0.04467   | -0.5831    |
| 0.025601  | 0.022479   |
| 0.013504  | 0.004364   |
| 0.010048  | -0.0044341 |
| 0.016809  | 0.0092115  |
| 0.0074182 | 0.1873     |
| 0.014086  | 0.004364   |
| 0.032875  | -1.0007    |
| 0.0071773 | 0.10834    |
| 0.065651  | -0.18445   |
| 0.034268  | -1.1519    |
| 0.0339    | -0.93955   |
| 0.068581  | -0.12619   |
| 0.0079906 | 0.36712    |
| 0.0073793 | 0.16248    |
| 0.010731  | -0.0027971 |
| 0.033219  | -1.1274    |
| 0.096059  | 0.027005   |
| 0.078448  | 0.051216   |
| 0.033353  | -1.1312    |
| 0.053419  | -0.36399   |



|           |            |
|-----------|------------|
| 0.065651  | -0.16433   |
| 0.034505  | -0.91058   |
| 0.0071491 | 0.090103   |
| 0.0070433 | 0.059284   |
| 0.088023  | 0.038804   |
| 0.0088702 | 0.62079    |
| 0.03239   | -1.0557    |
| 0.066276  | 0.050095   |
| 0.0071491 | 0.090103   |
| 0.00894   | 0.6398     |
| 0.10347   | 0.024827   |
| 0.0070192 | 0.030378   |
| 0.058604  | -0.29352   |
| 0.0070776 | 0.073782   |
| 0.007147  | 0.0078041  |
| 0.0084058 | 0.49014    |
| 0.0070818 | 0.014005   |
| 0.0076336 | 0.2418     |
| 0.085509  | 0.020095   |
| 0.0090816 | 0.67796    |
| 0.052201  | -0.41225   |
| 0.0075433 | 0.2276     |
| 0.0072386 | 0.12857    |
| 0.079079  | 0.050932   |
| 0.0073602 | -0.0011105 |
| 0.0073419 | 0.16248    |
| 0.10271   | 0.022987   |
| 0.0072386 | 0.11821    |
| 0.083144  | 0.04663    |
| 0.0087704 | -0.0072929 |
| 0.007123  | 0.090103   |
| 0.032373  | -1.0704    |
| 0.0586    | 0.046758   |
| 0.062773  | -0.22652   |
| 0.071483  | 0.051552   |
| 0.032743  | -1.0111    |
| 0.010048  | -0.0036418 |
| 0.012448  | 0.001053   |
| 0.007123  | 0.090103   |
| 0.096449  | 0.06518    |
| 0.0074182 | 0.1873     |

|           |            |
|-----------|------------|
| 0.032875  | -1.0007    |
| 0.014086  | 0.004364   |
| 0.0074182 | 0.1873     |
| 0.0070776 | 0.073782   |
| 0.010731  | -0.0027971 |
| 0.032373  | -1.0632    |
| 0.0091534 | 0.69708    |
| 0.0090104 | 0.65886    |
| 0.084884  | 0.044052   |
| 0.0097473 | -0.0051686 |
| 0.086106  | 0.042062   |
| 0.032743  | -1.0111    |
| 0.052201  | -0.41225   |
| 0.0086658 | 0.54547    |
| 0.011972  | 2.49E-05   |
| 0.039002  | -0.74417   |
| 0.0090816 | 0.67796    |
| 0.042857  | -0.63085   |
| 0.00894   | 0.6398     |
| 0.0091534 | 0.69708    |
| 0.0070169 | 0.040742   |
| 0.0080466 | 0.38405    |
| 0.0086658 | 0.56416    |
| 0.0074182 | 0.17468    |
| 0.094739  | 0.028875   |
| 0.0078823 | 0.33401    |
| 0.011114  | -0.0009612 |
| 0.0071491 | 0.098977   |
| 0.076413  | 0.051739   |
| 0.0070272 | 0.025758   |
| 0.0071491 | 0.098977   |
| 0.0076807 | 0.27125    |
| 0.016066  | 0.0079609  |
| 0.007123  | 0.090103   |
| 0.10477   | 0.044903   |
| 0.014086  | 0.0055346  |
| 0.0090816 | 0.67796    |
| 0.0586    | 0.04604    |
| 0.045635  | -0.5589    |
| 0.0087704 | -0.0072929 |
| 0.00783   | 0.31787    |

|           |            |
|-----------|------------|
| 0.096706  | 0.025383   |
| 0.0073793 | 0.17468    |
| 0.033412  | -0.96585   |
| 0.038348  | -0.74417   |
| 0.0090816 | 0.67796    |
| 0.084221  | 0.011497   |
| 0.028099  | 0.023825   |
| 0.0080815 | -0.0076938 |
| 0.071533  | -0.10826   |
| 0.0084058 | 0.49014    |
| 0.0085746 | -0.0072929 |
| 0.0072715 | 0.13941    |
| 0.0092171 | -0.0064176 |
| 0.0087331 | 0.58295    |
| 0.032743  | -1.0111    |
| 0.0070401 | 0.021497   |
| 0.025601  | 0.022479   |
| 0.101     | 0.065585   |
| 0.032743  | -1.0111    |
| 0.065104  | 0.04917    |
| 0.0076807 | 0.27125    |
| 0.0087331 | 0.58295    |
| 0.018428  | 0.013082   |
| 0.067111  | -0.16433   |
| 0.0076807 | 0.27125    |
| 0.010376  | -0.0036418 |
| 0.10434   | 0.028193   |
| 0.0086658 | 0.56416    |
| 0.0082818 | 0.45401    |
| 0.075932  | -0.059632  |
| 0.030791  | 0.026496   |
| 0.0085746 | -0.0075602 |
| 0.011527  | 2.49E-05   |
| 0.012448  | 0.001053   |
| 0.0073793 | 0.17468    |
| 0.0070159 | 0.035368   |
| 0.041199  | -0.67741   |
| 0.09204   | 0.033125   |
| 0.032668  | -1.1056    |
| 0.011527  | -0.0009612 |
| 0.0077292 | 0.28647    |

|           |            |
|-----------|------------|
| 0.0085339 | 0.52689    |
| 0.028099  | 0.023825   |
| 0.0078823 | 0.33401    |
| 0.0082213 | 0.43621    |
| 0.0072386 | 0.12857    |
| 0.0080815 | -0.007536  |
| 0.0085746 | -0.0075602 |
| 0.007147  | 0.0051576  |
| 0.0079906 | 0.36712    |
| 0.0339    | -0.93955   |
| 0.0079906 | 0.36712    |
| 0.011114  | -0.0019027 |
| 0.0091534 | 0.69708    |
| 0.0080466 | 0.38405    |
| 0.011972  | 2.49E-05   |
| 0.032389  | -1.0771    |
| 0.032633  | -1.021     |
| 0.0084694 | 0.50845    |
| 0.10494   | 0.037598   |
| 0.0078823 | 0.33401    |
| 0.093395  | 0.029884   |
| 0.0087704 | -0.0072929 |
| 0.086735  | 0.041005   |
| 0.0086658 | 0.56416    |
| 0.055952  | -0.34019   |
| 0.0087331 | 0.58295    |
| 0.1016    | 0.064369   |
| 0.0072386 | 0.12857    |
| 0.033792  | -1.1419    |
| 0.05467   | -0.36399   |
| 0.0074585 | 0.20034    |
| 0.0070309 | 0.052688   |
| 0.10441   | 0.047424   |
| 0.0070433 | 0.059284   |
| 0.007022  | 0.046511   |
| 0.0090104 | 0.65886    |
| 0.077372  | -0.045303  |
| 0.0074182 | 0.1873     |
| 0.007306  | 0.15072    |
| 0.0075877 | 0.2418     |
| 0.0088702 | 0.62079    |

|           |            |
|-----------|------------|
| 0.0076336 | 0.25635    |
| 0.0072386 | 0.12857    |
| 0.069529  | 0.050826   |
| 0.012448  | 0.001053   |
| 0.032389  | -1.0771    |
| 0.0074333 | -0.0026829 |
| 0.035158  | 0.031675   |
| 0.10264   | 0.061137   |
| 0.010376  | -0.0036418 |
| 0.061361  | -0.22652   |
| 0.011527  | 2.49E-05   |
| 0.038348  | -0.7654    |
| 0.0084694 | 0.50845    |
| 0.03239   | -1.0557    |
| 0.032373  | -1.0557    |
| 0.0070776 | 0.073782   |
| 0.0075002 | 0.21378    |
| 0.0079906 | 0.36712    |
| 0.0087331 | 0.58295    |
| 0.0084694 | 0.50845    |
| 0.064204  | -0.2052    |
| 0.091362  | 0.034253   |
| 0.054226  | 0.044471   |
| 0.0085994 | 0.54547    |
| 0.011527  | -0.0009612 |
| 0.012448  | 0.001053   |
| 0.007779  | 0.30202    |
| 0.0074182 | 0.1873     |
| 0.011527  | -0.0009612 |
| 0.068489  | 0.050826   |
| 0.0088702 | 0.62079    |
| 0.0088702 | 0.62079    |
| 0.083714  | 0.04583    |
| 0.076413  | 0.051619   |
| 0.091453  | 0.0511     |
| 0.061361  | -0.24839   |
| 0.0071113 | 0.010749   |
| 0.041454  | 0.035337   |
| 0.0070159 | 0.030378   |
| 0.0081619 | 0.41861    |
| 0.0097473 | -0.0044341 |

|           |            |
|-----------|------------|
| 0.00894   | 0.6398     |
| 0.0088702 | 0.62079    |
| 0.0094709 | -0.0058338 |
| 0.0070776 | 0.066311   |
| 0.0075433 | 0.21378    |
| 0.0077085 | -0.0060189 |
| 0.062629  | 0.048637   |
| 0.0085994 | 0.54547    |
| 0.0085746 | -0.0072929 |
| 0.097321  | 0.067003   |
| 0.0091534 | 0.69708    |
| 0.0073793 | 0.17468    |
| 0.0074182 | 0.1873     |
| 0.0081619 | 0.41861    |
| 0.03612   | -0.84394   |
| 0.045635  | -0.5589    |
| 0.044711  | 0.037634   |
| 0.074476  | -0.074934  |
| 0.032205  | 0.027815   |
| 0.0087331 | 0.58295    |
| 0.091362  | 0.033125   |
| 0.010376  | -0.0027971 |
| 0.0070818 | 0.014005   |
| 0.055719  | 0.044471   |
| 0.080871  | 0.049748   |
| 0.0078823 | 0.33401    |
| 0.0079359 | 0.35043    |
| 0.00783   | 0.31787    |
| 0.0083433 | 0.47199    |
| 0.0089841 | -0.0064176 |
| 0.00894   | 0.6398     |
| 0.0075433 | 0.2276     |
| 0.099743  | 0.022784   |
| 0.032972  | -1.1193    |
| 0.013504  | 0.0032251  |
| 0.0071113 | 0.0078041  |
| 0.0074182 | 0.17468    |
| 0.0073602 | -0.0011105 |
| 0.039695  | -0.72239   |
| 0.087374  | 0.039917   |
| 0.0085994 | 0.54547    |

|           |            |
|-----------|------------|
| 0.007821  | -0.0067106 |
| 0.038348  | -0.7654    |
| 0.017596  | 0.010484   |
| 0.0071773 | 0.10834    |
| 0.077118  | 0.051444   |
| 0.043079  | 0.036502   |
| 0.096449  | 0.06518    |
| 0.0082313 | -0.0076938 |
| 0.0082818 | 0.45401    |
| 0.084293  | 0.04497    |
| 0.0070192 | 0.030378   |
| 0.0072955 | 0.00071242 |
| 0.0073793 | 0.17468    |
| 0.0090816 | 0.67796    |
| 0.007147  | 0.0078041  |
| 0.03669   | 0.031675   |
| 0.015366  | 0.0067344  |
| 0.007306  | 0.15072    |
| 0.026825  | 0.023825   |
| 0.034187  | -0.91058   |
| 0.0074585 | 0.20034    |
| 0.0074182 | 0.1873     |
| 0.0086658 | 0.56416    |
| 0.0097473 | -0.0044341 |
| 0.03612   | -0.84394   |
| 0.0081037 | 0.40122    |
| 0.0075877 | 0.2418     |
| 0.0071773 | 0.10834    |
| 0.0070309 | 0.046511   |
| 0.0075002 | 0.21378    |
| 0.0085746 | -0.0075602 |
| 0.10183   | 0.022679   |
| 0.0073602 | -0.0011105 |
| 0.099669  | 0.06705    |
| 0.0073793 | 0.16248    |
| 0.0082213 | 0.43621    |
| 0.0072071 | 0.11821    |
| 0.080186  | -0.008361  |
| 0.0085339 | 0.52689    |
| 0.0077292 | 0.28647    |
| 0.0087331 | 0.58295    |

|           |            |
|-----------|------------|
| 0.00894   | 0.6398     |
| 0.0086658 | 0.56416    |
| 0.00894   | 0.6398     |
| 0.011972  | 0.001053   |
| 0.0074182 | 0.1873     |
| 0.08868   | 0.037674   |
| 0.046637  | -0.53455   |
| 0.0090104 | 0.65886    |
| 0.012448  | 0.0021206  |
| 0.0087331 | 0.58295    |
| 0.10455   | 0.029687   |
| 0.0076807 | 0.27125    |
| 0.0090816 | 0.67796    |
| 0.0091534 | 0.69708    |
| 0.032972  | -1.1193    |
| 0.086106  | 0.042062   |
| 0.0073419 | 0.16248    |
| 0.0075002 | 0.20034    |
| 0.0078823 | 0.33401    |
| 0.0079359 | 0.35043    |
| 0.0070309 | 0.052688   |
| 0.045635  | -0.53455   |
| 0.059983  | 0.046758   |
| 0.0074182 | 0.1873     |
| 0.0070581 | 0.017584   |
| 0.0072715 | 0.13941    |
| 0.0086658 | 0.54547    |
| 0.0070589 | 0.066311   |
| 0.077372  | -0.045303  |
| 0.0088013 | 0.60183    |
| 0.033353  | -1.1312    |
| 0.0070169 | 0.040742   |
| 0.030791  | 0.026496   |
| 0.055719  | 0.044471   |
| 0.0072955 | 0.00071242 |
| 0.0091534 | 0.69708    |
| 0.007123  | 0.090103   |
| 0.10309   | 0.059186   |
| 0.0072071 | 0.11821    |
| 0.014086  | 0.004364   |
| 0.032462  | -1.0894    |



|           |            |
|-----------|------------|
| 0.0071773 | 0.098977   |
| 0.090686  | 0.034253   |
| 0.032373  | -1.0704    |
| 0.012448  | 0.0021206  |
| 0.0081037 | 0.38405    |
| 0.052201  | -0.41225   |
| 0.0073419 | 0.16248    |
| 0.0082213 | 0.41861    |
| 0.021206  | 0.017077   |
| 0.084884  | 0.044052   |
| 0.0097473 | -0.0051686 |
| 0.039695  | -0.70012   |
| 0.0077292 | 0.28647    |
| 0.0070272 | 0.021497   |
| 0.033208  | -0.96585   |
| 0.007821  | -0.0067106 |
| 0.015366  | 0.0067344  |
| 0.0090104 | 0.65886    |
| 0.0091534 | 0.69708    |
| 0.032418  | -1.0834    |
| 0.0091534 | 0.69708    |
| 0.034855  | -0.89503   |
| 0.0080466 | 0.38405    |
| 0.032743  | -1.0111    |
| 0.0070192 | 0.030378   |
| 0.03612   | -0.84394   |
| 0.0076807 | 0.27125    |
| 0.0081037 | 0.40122    |
| 0.0071491 | 0.098977   |
| 0.0080466 | 0.38405    |
| 0.033642  | -0.95303   |
| 0.007123  | 0.090103   |
| 0.07879   | -0.031991  |
| 0.00894   | 0.6398     |
| 0.0077292 | 0.28647    |
| 0.0073419 | 0.16248    |
| 0.0082818 | 0.45401    |
| 0.091362  | 0.033125   |
| 0.011527  | 2.49E-05   |
| 0.046637  | -0.5101    |
| 0.0071113 | 0.010749   |

|           |            |
|-----------|------------|
| 0.095403  | 0.027005   |
| 0.0092171 | -0.0064176 |
| 0.0072386 | 0.12857    |
| 0.0070272 | 0.025758   |
| 0.0085339 | 0.52689    |
| 0.10441   | 0.047424   |
| 0.00783   | 0.31787    |
| 0.0088013 | 0.60183    |
| 0.0076336 | 0.25635    |
| 0.039695  | -0.72239   |
| 0.011114  | -0.0019027 |
| 0.0080815 | -0.007536  |
| 0.0072955 | -0.0011105 |
| 0.045635  | -0.5589    |
| 0.0083433 | 0.47199    |
| 0.00783   | 0.31787    |
| 0.0074182 | 0.1873     |
| 0.00894   | 0.6398     |
| 0.0081037 | 0.40122    |
| 0.0074182 | 0.1873     |
| 0.0086658 | 0.56416    |
| 0.10385   | 0.054784   |
| 0.033208  | -0.97806   |
| 0.0087704 | -0.0072929 |
| 0.0071773 | 0.098977   |
| 0.010731  | -0.0019027 |
| 0.016066  | 0.0079609  |
| 0.0084694 | 0.50845    |
| 0.0072071 | 0.11821    |
| 0.012448  | 0.0021206  |
| 0.0073419 | 0.16248    |
| 0.064204  | -0.2052    |
| 0.037156  | -0.80605   |
| 0.081558  | -0.008361  |
| 0.0081619 | 0.41861    |
| 0.039695  | -0.72239   |
| 0.0090816 | 0.67796    |
| 0.007306  | 0.15072    |
| 0.0083433 | 0.47199    |
| 0.03524   | -0.87876   |
| 0.0094709 | -0.0058338 |

|           |            |
|-----------|------------|
| 0.033641  | -1.1384    |
| 0.0088702 | 0.62079    |
| 0.0090104 | 0.65886    |
| 0.0092171 | -0.0058338 |
| 0.0075002 | 0.21378    |
| 0.010731  | -0.0027971 |
| 0.0073602 | -0.0026829 |
| 0.0081037 | 0.40122    |
| 0.035158  | 0.030407   |
| 0.0072715 | 0.13941    |
| 0.0085994 | 0.54547    |
| 0.0082213 | 0.43621    |
| 0.0071894 | 0.0027978  |
| 0.0071491 | 0.098977   |
| 0.012448  | 0.001053   |
| 0.0097473 | -0.0051686 |
| 0.00783   | 0.31787    |
| 0.090335  | 0.0511     |
| 0.0084694 | 0.50845    |
| 0.0081037 | 0.40122    |
| 0.0071894 | 0.0051576  |
| 0.0087704 | -0.0072929 |
| 0.033412  | -0.96585   |
| 0.0081619 | 0.41861    |
| 0.012448  | 0.001053   |
| 0.05467   | -0.36399   |
| 0.011114  | -0.0019027 |
| 0.068489  | 0.050826   |
| 0.024427  | 0.019776   |
| 0.032743  | -1.0111    |
| 0.046342  | 0.038732   |
| 0.0074182 | 0.1873     |
| 0.065651  | -0.18445   |
| 0.0074182 | 0.1873     |
| 0.0090816 | 0.67796    |
| 0.052701  | 0.043621   |
| 0.032633  | -1.021     |
| 0.0072386 | 0.12857    |
| 0.034855  | -0.89503   |
| 0.038348  | -0.7654    |
| 0.0339    | -0.93955   |

|           |            |
|-----------|------------|
| 0.0075433 | 0.2276     |
| 0.0085339 | 0.52689    |
| 0.0082213 | 0.43621    |
| 0.0071491 | 0.090103   |
| 0.0080466 | 0.38405    |
| 0.0084694 | 0.50845    |
| 0.0087331 | 0.58295    |
| 0.035661  | -0.86174   |
| 0.0085746 | -0.0075602 |
| 0.0090816 | 0.67796    |
| 0.0075153 | -0.0040171 |
| 0.032743  | -1.0007    |
| 0.032389  | -1.0771    |
| 0.090012  | 0.036534   |
| 0.0079906 | 0.36712    |
| 0.007306  | 0.15072    |
| 0.034187  | -0.92541   |
| 0.068581  | -0.1449    |
| 0.094739  | 0.028875   |
| 0.014706  | 0.0067344  |
| 0.0079359 | 0.35043    |
| 0.037156  | -0.80605   |
| 0.099669  | 0.06705    |
| 0.0072715 | 0.12857    |
| 0.012958  | 0.0021206  |
| 0.0082818 | 0.45401    |
| 0.00894   | 0.6398     |
| 0.0077292 | 0.28647    |
| 0.00783   | 0.31787    |
| 0.010048  | -0.0036418 |
| 0.00894   | 0.6398     |
| 0.0086658 | 0.56416    |
| 0.0084694 | 0.49014    |
| 0.049567  | 0.040812   |
| 0.0091534 | 0.69708    |
| 0.0073793 | 0.17468    |
| 0.036619  | -0.82536   |
| 0.0083433 | 0.47199    |
| 0.0079906 | 0.36712    |
| 0.083144  | 0.04663    |
| 0.032423  | -1.0477    |

|           |            |
|-----------|------------|
| 0.018428  | 0.013082   |
| 0.0076336 | 0.2418     |
| 0.03303   | -0.98966   |
| 0.0070589 | 0.066311   |
| 0.0094709 | -0.0051686 |
| 0.1016    | 0.062875   |
| 0.062629  | 0.048056   |
| 0.066276  | 0.050095   |
| 0.0084694 | 0.50845    |
| 0.0075002 | 0.21378    |
| 0.0088702 | 0.62079    |
| 0.032389  | -1.0771    |
| 0.032519  | -1.0951    |
| 0.0080466 | 0.38405    |
| 0.039002  | -0.74417   |
| 0.041199  | -0.67741   |
| 0.077795  | 0.051216   |
| 0.0088013 | 0.60183    |
| 0.0084694 | 0.50845    |
| 0.0071491 | 0.098977   |
| 0.0073419 | 0.16248    |
| 0.0085994 | 0.54547    |
| 0.015366  | 0.0067344  |
| 0.0086658 | 0.56416    |
| 0.046342  | 0.038732   |
| 0.073008  | -0.09116   |
| 0.0085339 | 0.52689    |
| 0.068581  | -0.1449    |
| 0.03239   | -1.0557    |
| 0.061361  | -0.22652   |
| 0.0091534 | 0.69708    |
| 0.0084694 | 0.50845    |
| 0.0081619 | 0.41861    |
| 0.0071773 | 0.10834    |
| 0.041199  | -0.67741   |
| 0.0075002 | 0.21378    |
| 0.034505  | -0.91058   |
| 0.071483  | 0.051552   |
| 0.049867  | -0.46109   |
| 0.0071491 | 0.098977   |
| 0.0080815 | -0.007536  |

|           |            |
|-----------|------------|
| 0.014086  | 0.004364   |
| 0.010376  | -0.0027971 |
| 0.0073419 | 0.15072    |
| 0.0070818 | 0.010749   |
| 0.089343  | 0.036534   |
| 0.016809  | 0.0092115  |
| 0.0076336 | 0.2418     |
| 0.033642  | -0.95303   |
| 0.018428  | 0.011775   |
| 0.0074182 | 0.1873     |
| 0.00783   | 0.31787    |
| 0.10441   | 0.049934   |
| 0.0085746 | -0.0075602 |
| 0.10477   | 0.044903   |
| 0.0081619 | 0.41861    |
| 0.012448  | 0.001053   |
| 0.0082213 | 0.43621    |
| 0.0085339 | 0.52689    |
| 0.0073793 | 0.17468    |
| 0.0073419 | 0.16248    |
| 0.0084058 | 0.49014    |
| 0.080186  | -0.019688  |
| 0.0090104 | 0.65886    |
| 0.082578  | 0.04737    |
| 0.0075877 | 0.2418     |
| 0.10347   | 0.024054   |
| 0.0071773 | 0.10834    |
| 0.011972  | 2.49E-05   |
| 0.03239   | -1.0557    |
| 0.0082818 | 0.45401    |
| 0.033353  | -1.1312    |
| 0.0088702 | 0.62079    |
| 0.0076807 | 0.27125    |
| 0.046637  | -0.5101    |
| 0.058604  | -0.29352   |
| 0.0090816 | 0.67796    |
| 0.0075153 | -0.0040171 |
| 0.10271   | 0.023443   |
| 0.0087331 | 0.58295    |
| 0.010731  | -0.0019027 |
| 0.0082313 | -0.0076938 |

|           |            |
|-----------|------------|
| 0.0083433 | 0.47199    |
| 0.0078823 | 0.33401    |
| 0.0070433 | 0.059284   |
| 0.0088702 | 0.62079    |
| 0.096449  | 0.06633    |
| 0.0075877 | 0.2418     |
| 0.094069  | 0.029884   |
| 0.0074182 | 0.1873     |
| 0.007779  | 0.30202    |
| 0.0090104 | 0.65886    |
| 0.091453  | 0.055137   |
| 0.0077292 | 0.28647    |
| 0.0070589 | 0.066311   |
| 0.018428  | 0.013082   |
| 0.033208  | -0.96585   |
| 0.0076807 | 0.27125    |
| 0.010731  | -0.0027971 |
| 0.0071491 | 0.098977   |
| 0.0091534 | 0.69708    |
| 0.046342  | 0.039792   |
| 0.0081619 | 0.41861    |
| 0.0079359 | 0.35043    |
| 0.00783   | 0.31787    |
| 0.033219  | -1.1274    |
| 0.0072715 | 0.12857    |
| 0.0079359 | 0.35043    |
| 0.0077292 | 0.28647    |
| 0.0070272 | 0.025758   |
| 0.0085339 | 0.52689    |
| 0.0076336 | 0.2418     |
| 0.058604  | -0.29352   |
| 0.057264  | -0.31669   |
| 0.0072715 | 0.12857    |
| 0.0072386 | 0.12857    |
| 0.007306  | 0.15072    |
| 0.037733  | -0.78604   |
| 0.0076336 | 0.25635    |
| 0.049867  | -0.46109   |
| 0.0081037 | 0.40122    |
| 0.0089841 | -0.006908  |
| 0.0070401 | 0.021497   |

|           |            |
|-----------|------------|
| 0.068489  | 0.050826   |
| 0.032373  | -1.0632    |
| 0.0079906 | 0.36712    |
| 0.046637  | -0.53455   |
| 0.0097473 | -0.0051686 |
| 0.010731  | -0.0027971 |
| 0.0072386 | 0.12857    |
| 0.0079359 | 0.35043    |
| 0.0090104 | 0.65886    |
| 0.053419  | -0.38803   |
| 0.0080466 | 0.38405    |
| 0.0075002 | 0.21378    |
| 0.0079359 | 0.35043    |
| 0.046342  | 0.038732   |
| 0.0084058 | 0.49014    |
| 0.0070776 | 0.073782   |
| 0.0086658 | 0.56416    |
| 0.011972  | 2.49E-05   |
| 0.0074182 | 0.1873     |
| 0.0077292 | 0.28647    |
| 0.0073793 | 0.17468    |
| 0.00894   | 0.6398     |
| 0.0079906 | 0.36712    |
| 0.010048  | -0.0036418 |
| 0.0070433 | 0.059284   |
| 0.0079906 | 0.36712    |
| 0.03303   | -0.98966   |
| 0.0074585 | 0.20034    |
| 0.0070433 | 0.059284   |
| 0.0084694 | 0.50845    |
| 0.014706  | 0.0055346  |
| 0.066276  | 0.049656   |
| 0.024427  | 0.021128   |
| 0.0080466 | 0.38405    |
| 0.0073602 | -0.0011105 |
| 0.051016  | -0.43662   |
| 0.070056  | -0.12619   |
| 0.0080466 | 0.38405    |
| 0.0070192 | 0.030378   |
| 0.0078823 | 0.33401    |
| 0.010048  | -0.0044341 |



|           |            |
|-----------|------------|
| 0.0074585 | 0.20034    |
| 0.0076336 | 0.25635    |
| 0.097966  | 0.024065   |
| 0.0083433 | 0.47199    |
| 0.0076336 | 0.25635    |
| 0.011114  | -0.0009612 |
| 0.0072715 | 0.13941    |
| 0.0094709 | -0.0058338 |
| 0.0085994 | 0.54547    |
| 0.071483  | 0.051552   |
| 0.0087331 | 0.58295    |
| 0.0087331 | 0.58295    |
| 0.068581  | -0.1449    |
| 0.0090104 | 0.65886    |
| 0.0074182 | 0.1873     |
| 0.093574  | 0.05853    |
| 0.033412  | -0.95303   |
| 0.032875  | -1.0007    |
| 0.0089841 | -0.006908  |
| 0.0075433 | 0.2276     |
| 0.0085994 | 0.54547    |
| 0.0086658 | 0.56416    |
| 0.0073793 | 0.17468    |
| 0.033412  | -0.96585   |
| 0.0076336 | 0.25635    |
| 0.0085339 | 0.52689    |
| 0.0086658 | 0.56416    |
| 0.0087704 | -0.0072929 |
| 0.0083433 | 0.47199    |
| 0.080871  | 0.049748   |
| 0.03612   | -0.84394   |
| 0.07879   | -0.031991  |
| 0.0088013 | 0.60183    |
| 0.0087331 | 0.58295    |
| 0.0086658 | 0.56416    |
| 0.032633  | -1.021     |
| 0.047964  | 0.039792   |
| 0.0091534 | 0.69708    |
| 0.037733  | -0.78604   |
| 0.0077292 | 0.28647    |
| 0.032743  | -1.0111    |

|           |            |
|-----------|------------|
| 0.014086  | 0.004364   |
| 0.007099  | 0.073782   |
| 0.0077085 | -0.0060189 |
| 0.098149  | 0.067003   |
| 0.038348  | -0.7654    |
| 0.0082213 | 0.43621    |
| 0.00894   | 0.6398     |
| 0.075932  | -0.045303  |
| 0.0090104 | 0.65886    |
| 0.0075433 | 0.2276     |
| 0.011972  | 0.001053   |
| 0.073273  | 0.051693   |
| 0.0090104 | 0.65886    |
| 0.007147  | 0.0051576  |
| 0.043079  | 0.036502   |
| 0.038348  | -0.74417   |
| 0.10409   | 0.02577    |
| 0.089343  | 0.037674   |
| 0.048754  | -0.4856    |
| 0.045635  | -0.5589    |
| 0.068489  | 0.050826   |
| 0.083714  | 0.04583    |
| 0.0074585 | 0.1873     |
| 0.0071773 | 0.10834    |
| 0.048754  | -0.4856    |
| 0.046637  | -0.53455   |
| 0.034505  | -0.91058   |
| 0.042008  | -0.65431   |
| 0.010048  | -0.0044341 |
| 0.011527  | -0.0009612 |
| 0.0086658 | 0.56416    |
| 0.0082818 | 0.45401    |
| 0.007099  | 0.081709   |
| 0.034187  | -0.92541   |
| 0.0072715 | 0.13941    |
| 0.0090104 | 0.65886    |
| 0.032861  | -1.1149    |
| 0.0075002 | 0.21378    |
| 0.032519  | -1.0951    |
| 0.0082818 | 0.45401    |
| 0.0072386 | 0.12857    |

|           |            |
|-----------|------------|
| 0.0086658 | 0.56416    |
| 0.03612   | -0.84394   |
| 0.034106  | -1.1486    |
| 0.057178  | 0.045278   |
| 0.017596  | 0.010484   |
| 0.032423  | -1.0393    |
| 0.0081619 | 0.41861    |
| 0.0079359 | 0.35043    |
| 0.0072715 | 0.13941    |
| 0.051147  | 0.041791   |
| 0.0082213 | 0.43621    |
| 0.0084058 | 0.49014    |
| 0.0078823 | 0.31787    |
| 0.03239   | -1.0557    |
| 0.0074333 | -0.0026829 |
| 0.03612   | -0.84394   |
| 0.062773  | -0.2052    |
| 0.0087331 | 0.58295    |
| 0.0094709 | -0.0058338 |
| 0.0088013 | 0.60183    |
| 0.0084058 | 0.49014    |
| 0.0088013 | 0.60183    |
| 0.033641  | -1.1384    |
| 0.0075877 | 0.2418     |
| 0.0075002 | 0.21378    |
| 0.0076807 | 0.27125    |
| 0.032389  | -1.0771    |
| 0.10311   | 0.024054   |
| 0.0079359 | 0.35043    |
| 0.0081037 | 0.40122    |
| 0.03669   | 0.031675   |
| 0.03669   | 0.031675   |
| 0.043079  | 0.037634   |
| 0.049567  | 0.041791   |
| 0.0082818 | 0.45401    |
| 0.0070818 | 0.014005   |
| 0.007306  | 0.15072    |
| 0.0079359 | 0.35043    |
| 0.0072715 | 0.13941    |
| 0.00894   | 0.6398     |
| 0.017596  | 0.010484   |

|           |            |
|-----------|------------|
| 0.1038    | 0.02577    |
| 0.0082213 | 0.43621    |
| 0.0072715 | 0.13941    |
| 0.0074182 | 0.1873     |
| 0.0082818 | 0.45401    |
| 0.013504  | 0.0032251  |
| 0.0076336 | 0.25635    |
| 0.00894   | 0.6398     |
| 0.0083433 | 0.47199    |
| 0.017596  | 0.010484   |
| 0.0070581 | 0.017584   |
| 0.012958  | 0.0032251  |
| 0.0088013 | 0.60183    |
| 0.063888  | 0.04917    |
| 0.028099  | 0.025165   |
| 0.0080815 | -0.007536  |
| 0.0071113 | 0.0078041  |
| 0.011527  | -0.0009612 |
| 0.0074182 | 0.1873     |
| 0.007306  | 0.15072    |
| 0.0074585 | 0.20034    |
| 0.0083433 | 0.47199    |
| 0.0074182 | 0.1873     |
| 0.0070581 | 0.014005   |
| 0.0071773 | 0.10834    |
| 0.011114  | -0.0019027 |
| 0.03276   | -1.1104    |
| 0.0076336 | 0.25635    |
| 0.0075877 | 0.2276     |
| 0.0081619 | 0.41861    |
| 0.011972  | 2.49E-05   |
| 0.062629  | 0.048056   |
| 0.0070192 | 0.025758   |
| 0.007779  | 0.30202    |
| 0.00894   | 0.6398     |
| 0.007306  | 0.15072    |
| 0.0087704 | -0.0072929 |
| 0.013504  | 0.0032251  |
| 0.0094709 | -0.0058338 |
| 0.0092171 | -0.0064176 |
| 0.007147  | 0.0078041  |

|           |            |
|-----------|------------|
| 0.026825  | 0.022479   |
| 0.047964  | 0.039792   |
| 0.0071894 | 0.0051576  |
| 0.010376  | -0.0027971 |
| 0.0070776 | 0.073782   |
| 0.0079906 | 0.35043    |
| 0.0088702 | 0.62079    |
| 0.0097473 | -0.0044341 |
| 0.0088013 | 0.60183    |
| 0.0088702 | 0.62079    |
| 0.02223   | 0.018425   |
| 0.0088013 | 0.60183    |
| 0.00894   | 0.6398     |
| 0.0084058 | 0.49014    |
| 0.0085994 | 0.54547    |
| 0.0082818 | 0.45401    |
| 0.0086658 | 0.56416    |
| 0.0079359 | 0.35043    |
| 0.0084694 | 0.50845    |
| 0.00894   | 0.6398     |
| 0.0088702 | 0.62079    |
| 0.0087331 | 0.58295    |
| 0.052701  | 0.043621   |
| 0.016809  | 0.0092115  |
| 0.0073793 | 0.17468    |
| 0.0083433 | 0.47199    |
| 0.0088013 | 0.60183    |
| 0.0090104 | 0.65886    |
| 0.0087331 | 0.58295    |
| 0.0090816 | 0.67796    |
| 0.0087331 | 0.58295    |
| 0.00894   | 0.6398     |
| 0.0097473 | -0.0051686 |
| 0.0079359 | 0.35043    |
| 0.0083433 | 0.47199    |
| 0.0070589 | 0.066311   |
| 0.00894   | 0.6398     |
| 0.00894   | 0.6398     |
| 0.0070581 | 0.017584   |
| 0.0084058 | 0.49014    |
| 0.007306  | 0.15072    |

|           |            |
|-----------|------------|
| 0.007099  | 0.081709   |
| 0.0076336 | 0.25635    |
| 0.0090104 | 0.65886    |
| 0.043745  | -0.6071    |
| 0.011527  | -0.0009612 |
| 0.0071773 | 0.10834    |
| 0.070056  | -0.12619   |
| 0.0075433 | 0.2276     |
| 0.0079359 | 0.33401    |
| 0.0075433 | 0.2276     |
| 0.0085339 | 0.52689    |
| 0.095403  | 0.027005   |
| 0.0084058 | 0.49014    |
| 0.010376  | -0.0036418 |
| 0.0085339 | 0.52689    |
| 0.0090104 | 0.65886    |
| 0.0073793 | 0.17468    |
| 0.047964  | 0.039792   |
| 0.0073793 | 0.17468    |
| 0.007306  | 0.13941    |
| 0.023303  | 0.019776   |
| 0.00783   | 0.30202    |
| 0.097966  | 0.024682   |
| 0.007779  | 0.30202    |
| 0.057264  | -0.29352   |
| 0.007022  | 0.046511   |
| 0.0070589 | 0.066311   |
| 0.043745  | -0.5831    |
| 0.02223   | 0.017077   |
| 0.1038    | 0.02577    |
| 0.090012  | 0.036534   |
| 0.0090104 | 0.65886    |
| 0.083144  | 0.04663    |
| 0.0085994 | 0.54547    |
| 0.007022  | 0.040742   |
| 0.0075877 | 0.2418     |
| 0.0072386 | 0.11821    |
| 0.0075002 | 0.21378    |
| 0.0089841 | -0.006908  |
| 0.0090104 | 0.65886    |
| 0.007306  | 0.15072    |

|           |            |
|-----------|------------|
| 0.0071773 | 0.10834    |
| 0.0088013 | 0.60183    |
| 0.0070589 | 0.066311   |
| 0.00894   | 0.6398     |
| 0.0080815 | -0.007536  |
| 0.0071491 | 0.098977   |
| 0.02223   | 0.018425   |
| 0.017596  | 0.011775   |
| 0.0074182 | 0.1873     |
| 0.0084694 | 0.50845    |
| 0.0085746 | -0.0075602 |
| 0.0081037 | 0.40122    |
| 0.040428  | -0.70012   |
| 0.0081619 | 0.41861    |
| 0.0090816 | 0.67796    |
| 0.012448  | 0.001053   |
| 0.0073793 | 0.17468    |
| 0.0077085 | -0.0060189 |
| 0.0081619 | 0.41861    |
| 0.0075433 | 0.2276     |
| 0.0072715 | 0.13941    |
| 0.0091534 | 0.69708    |
| 0.0087331 | 0.58295    |
| 0.0074182 | 0.1873     |
| 0.0079451 | -0.0072122 |
| 0.0084694 | 0.50845    |
| 0.0074182 | 0.17468    |
| 0.007099  | 0.081709   |
| 0.007306  | 0.15072    |
| 0.007306  | 0.15072    |
| 0.0070159 | 0.035368   |
| 0.007306  | 0.13941    |
| 0.007821  | -0.0072122 |
| 0.011114  | -0.0019027 |
| 0.011114  | -0.0019027 |
| 0.042008  | -0.65431   |
| 0.0074585 | 0.20034    |
| 0.091362  | 0.034253   |
| 0.0071491 | 0.098977   |
| 0.0082818 | 0.45401    |
| 0.0085994 | 0.54547    |

|           |            |
|-----------|------------|
| 0.0076069 | -0.0060189 |
| 0.10215   | 0.062875   |
| 0.0072071 | 0.11821    |
| 0.0097473 | -0.0051686 |
| 0.0079359 | 0.35043    |
| 0.044711  | 0.038732   |
| 0.032462  | -1.0894    |
| 0.0073793 | 0.16248    |
| 0.0072386 | 0.12857    |
| 0.0070589 | 0.066311   |
| 0.0076807 | 0.27125    |
| 0.043745  | -0.6071    |
| 0.0073419 | 0.16248    |
| 0.0074585 | 0.20034    |
| 0.092533  | 0.055137   |
| 0.0088013 | 0.60183    |
| 0.020232  | 0.015736   |
| 0.035661  | -0.84394   |
| 0.10134   | 0.022479   |
| 0.0083433 | 0.47199    |
| 0.032588  | -1.1005    |
| 0.0084058 | 0.49014    |
| 0.0074182 | 0.1873     |
| 0.10494   | 0.037598   |
| 0.0075002 | 0.21378    |
| 0.011114  | -0.0019027 |
| 0.014706  | 0.0067344  |
| 0.0079906 | 0.36712    |
| 0.0075002 | 0.21378    |
| 0.0084694 | 0.50845    |
| 0.0070159 | 0.035368   |
| 0.0088702 | 0.62079    |
| 0.0088702 | 0.62079    |
| 0.014086  | 0.0055346  |
| 0.0073419 | 0.16248    |
| 0.047677  | -0.5101    |
| 0.007123  | 0.081709   |
| 0.0079451 | -0.0072122 |
| 0.00894   | 0.6398     |
| 0.0088013 | 0.60183    |
| 0.03669   | 0.031675   |



|           |            |
|-----------|------------|
| 0.0087331 | 0.58295    |
| 0.012448  | 0.001053   |
| 0.0076336 | 0.2418     |
| 0.0111114 | -0.0019027 |
| 0.017596  | 0.010484   |
| 0.04467   | -0.5831    |
| 0.0094709 | -0.0058338 |
| 0.032205  | 0.029119   |
| 0.007147  | 0.0078041  |
| 0.10134   | 0.022512   |
| 0.0079906 | 0.36712    |
| 0.0073419 | 0.16248    |
| 0.0076807 | 0.27125    |
| 0.10472   | 0.03138    |
| 0.070056  | -0.10826   |
| 0.10264   | 0.059186   |
| 0.0086658 | 0.56416    |
| 0.0073419 | 0.16248    |
| 0.0081037 | 0.38405    |
| 0.0097473 | -0.0051686 |
| 0.064204  | -0.2052    |
| 0.007779  | 0.30202    |
| 0.071483  | 0.05136    |
| 0.0073793 | 0.17468    |
| 0.0082818 | 0.45401    |
| 0.017596  | 0.010484   |
| 0.0082313 | -0.0076979 |
| 0.0088013 | 0.60183    |
| 0.10455   | 0.029687   |
| 0.041199  | -0.67741   |
| 0.0087331 | 0.58295    |
| 0.010376  | -0.0036418 |
| 0.007022  | 0.046511   |
| 0.033494  | -1.1349    |
| 0.014086  | 0.004364   |
| 0.062629  | 0.048056   |
| 0.030791  | 0.026496   |
| 0.030791  | 0.027815   |
| 0.0085339 | 0.52689    |
| 0.007099  | 0.081709   |
| 0.013504  | 0.0032251  |

|           |            |
|-----------|------------|
| 0.0088013 | 0.60183    |
| 0.00783   | 0.31787    |
| 0.0083433 | 0.47199    |
| 0.067111  | -0.1449    |
| 0.007779  | 0.30202    |
| 0.0085994 | 0.54547    |
| 0.0070776 | 0.073782   |
| 0.028099  | 0.025165   |
| 0.0090104 | 0.65886    |
| 0.0081619 | 0.41861    |
| 0.0070433 | 0.059284   |
| 0.015366  | 0.0067344  |
| 0.014086  | 0.004364   |
| 0.0074182 | 0.1873     |
| 0.066276  | 0.049656   |
| 0.0074585 | 0.20034    |
| 0.074476  | -0.074934  |
| 0.0085339 | 0.52689    |
| 0.0070433 | 0.059284   |
| 0.0070581 | 0.017584   |
| 0.0088702 | 0.62079    |
| 0.1035    | 0.054784   |
| 0.0076336 | 0.25635    |
| 0.0072955 | 0.00071242 |
| 0.0091534 | 0.69708    |
| 0.0080815 | -0.0076938 |
| 0.0070309 | 0.052688   |
| 0.0090104 | 0.65886    |
| 0.0071773 | 0.10834    |
| 0.078448  | 0.050932   |
| 0.0073419 | 0.16248    |
| 0.0070309 | 0.052688   |
| 0.0087331 | 0.58295    |
| 0.0077292 | 0.28647    |
| 0.0082818 | 0.45401    |
| 0.0070776 | 0.073782   |
| 0.0072071 | 0.11821    |
| 0.0080815 | -0.0076938 |
| 0.0075153 | -0.0040171 |
| 0.096449  | 0.06518    |
| 0.0071773 | 0.10834    |

|           |            |
|-----------|------------|
| 0.0092171 | -0.0058338 |
| 0.0070433 | 0.059284   |
| 0.0077292 | 0.28647    |
| 0.00894   | 0.6398     |
| 0.007779  | 0.30202    |
| 0.0080815 | -0.007536  |
| 0.007306  | 0.15072    |
| 0.0071773 | 0.10834    |
| 0.033792  | -1.1419    |
| 0.0082818 | 0.45401    |
| 0.0081619 | 0.41861    |
| 0.0079359 | 0.33401    |
| 0.0073793 | 0.17468    |
| 0.059983  | 0.046758   |
| 0.0074585 | 0.20034    |
| 0.0097473 | -0.0051686 |
| 0.076413  | 0.051619   |
| 0.0070272 | 0.025758   |
| 0.062629  | 0.048056   |
| 0.10311   | 0.024054   |
| 0.007821  | -0.0072122 |
| 0.030791  | 0.027815   |
| 0.010048  | -0.0044341 |
| 0.007099  | 0.081709   |
| 0.039844  | 0.034143   |
| 0.0070433 | 0.059284   |
| 0.0078823 | 0.33401    |
| 0.0090104 | 0.65886    |
| 0.0079906 | 0.36712    |
| 0.032588  | -1.1005    |
| 0.071483  | 0.05136    |
| 0.0071773 | 0.10834    |
| 0.038348  | -0.74417   |
| 0.0076807 | 0.27125    |
| 0.007306  | 0.15072    |
| 0.0085746 | -0.0075602 |
| 0.0079906 | 0.36712    |
| 0.0090816 | 0.67796    |
| 0.086735  | 0.041005   |
| 0.0072715 | 0.13941    |
| 0.007779  | 0.30202    |

|           |            |
|-----------|------------|
| 0.0083433 | 0.47199    |
| 0.034855  | -0.87876   |
| 0.1003    | 0.022572   |
| 0.034268  | -1.1519    |
| 0.0075002 | 0.21378    |
| 0.0085746 | -0.0075602 |
| 0.033662  | 0.029119   |
| 0.10477   | 0.042402   |
| 0.015366  | 0.0067344  |
| 0.0081619 | 0.41861    |
| 0.0073793 | 0.17468    |
| 0.0086658 | 0.56416    |
| 0.007099  | 0.081709   |
| 0.0080466 | 0.38405    |
| 0.0090816 | 0.67796    |
| 0.084221  | 0.020095   |
| 0.0077292 | 0.28647    |
| 0.0070589 | 0.066311   |
| 0.0071773 | 0.098977   |
| 0.036619  | -0.82536   |
| 0.0083433 | 0.47199    |
| 0.070527  | 0.051118   |
| 0.02223   | 0.017077   |
| 0.0084694 | 0.50845    |
| 0.091362  | 0.034253   |
| 0.0071894 | 0.0051576  |
| 0.04467   | -0.5831    |
| 0.0079359 | 0.35043    |
| 0.032544  | -1.0304    |
| 0.0088702 | 0.62079    |
| 0.015366  | 0.0067344  |
| 0.047964  | 0.039792   |
| 0.0081619 | 0.41861    |
| 0.0075002 | 0.21378    |
| 0.0074182 | 0.1873     |
| 0.0076336 | 0.25635    |
| 0.0070159 | 0.030378   |
| 0.0076336 | 0.2418     |
| 0.0071491 | 0.098977   |
| 0.007306  | 0.15072    |
| 0.0086658 | 0.56416    |

|           |            |
|-----------|------------|
| 0.067111  | -0.16433   |
| 0.057178  | 0.04604    |
| 0.0070581 | 0.017584   |
| 0.0070589 | 0.066311   |
| 0.02223   | 0.018425   |
| 0.0080815 | -0.0076938 |
| 0.0081619 | 0.41861    |
| 0.0076807 | 0.27125    |
| 0.0075877 | 0.2418     |
| 0.10083   | 0.022572   |
| 0.0077292 | 0.28647    |
| 0.016809  | 0.0092115  |
| 0.0079906 | 0.36712    |
| 0.015366  | 0.0067344  |
| 0.0080466 | 0.38405    |
| 0.0071491 | 0.098977   |
| 0.011972  | 0.001053   |
| 0.0079359 | 0.35043    |
| 0.0079359 | 0.35043    |
| 0.007099  | 0.081709   |
| 0.040428  | -0.70012   |
| 0.020232  | 0.015736   |
| 0.030791  | 0.027815   |
| 0.0081619 | 0.41861    |
| 0.019306  | 0.014403   |
| 0.0075877 | 0.2418     |
| 0.0084058 | 0.49014    |
| 0.069529  | 0.050826   |
| 0.057178  | 0.045278   |
| 0.0072071 | 0.11821    |
| 0.00894   | 0.6398     |
| 0.030791  | 0.026496   |
| 0.0070159 | 0.035368   |
| 0.0070169 | 0.040742   |
| 0.0082213 | 0.43621    |
| 0.032972  | -1.1193    |
| 0.033412  | -0.96585   |
| 0.080287  | 0.050199   |
| 0.075678  | 0.051806   |
| 0.0079359 | 0.35043    |
| 0.084884  | 0.044052   |

|           |            |
|-----------|------------|
| 0.073273  | 0.051693   |
| 0.00894   | 0.6398     |
| 0.0092171 | -0.0064176 |
| 0.007779  | 0.30202    |
| 0.0071491 | 0.098977   |
| 0.043745  | -0.6071    |
| 0.039844  | 0.034143   |
| 0.0088013 | 0.60183    |
| 0.017596  | 0.010484   |
| 0.0090816 | 0.67796    |
| 0.10264   | 0.059186   |
| 0.034505  | -0.89503   |
| 0.0072715 | 0.13941    |
| 0.0079359 | 0.35043    |
| 0.014086  | 0.004364   |
| 0.0097473 | -0.0051686 |
| 0.0088013 | 0.60183    |
| 0.014086  | 0.004364   |
| 0.011527  | 2.49E-05   |
| 0.0072387 | 0.0027978  |
| 0.0075433 | 0.2276     |
| 0.058604  | -0.27073   |
| 0.0085994 | 0.54547    |
| 0.0082213 | 0.43621    |
| 0.0075002 | 0.21378    |
| 0.00783   | 0.31787    |
| 0.0091534 | 0.69708    |
| 0.020232  | 0.014403   |
| 0.0087704 | -0.0072929 |
| 0.0082213 | 0.43621    |
| 0.010048  | -0.0044341 |
| 0.047677  | -0.5101    |
| 0.032373  | -1.0632    |
| 0.033412  | -0.96585   |
| 0.0072715 | 0.13941    |
| 0.026825  | 0.023825   |
| 0.0089841 | -0.0064176 |
| 0.007306  | 0.15072    |
| 0.010048  | -0.0044341 |
| 0.00783   | 0.31787    |
| 0.011972  | 2.49E-05   |

|           |            |
|-----------|------------|
| 0.0083953 | -0.0076979 |
| 0.0085994 | 0.54547    |
| 0.011114  | -0.0019027 |
| 0.0090104 | 0.65886    |
| 0.0072071 | 0.11821    |
| 0.00894   | 0.6398     |
| 0.0090104 | 0.65886    |
| 0.0085994 | 0.54547    |
| 0.0090104 | 0.65886    |
| 0.0076336 | 0.25635    |
| 0.0073419 | 0.16248    |
| 0.011114  | -0.0019027 |
| 0.007779  | 0.30202    |
| 0.0090104 | 0.65886    |
| 0.0084058 | 0.49014    |
| 0.037156  | -0.80605   |
| 0.072398  | 0.051693   |
| 0.0085339 | 0.52689    |
| 0.0082213 | 0.41861    |
| 0.020232  | 0.014403   |
| 0.0083433 | 0.47199    |
| 0.099168  | 0.023109   |
| 0.0079451 | -0.0072122 |
| 0.0075002 | 0.21378    |
| 0.0084058 | 0.49014    |
| 0.05467   | -0.34019   |
| 0.028099  | 0.023825   |
| 0.014086  | 0.004364   |
| 0.032668  | -1.1056    |
| 0.0081037 | 0.40122    |
| 0.10434   | 0.028193   |
| 0.007306  | 0.15072    |
| 0.0073793 | 0.17468    |
| 0.0089841 | -0.006908  |
| 0.010048  | -0.0044341 |
| 0.0074182 | 0.1873     |
| 0.00894   | 0.6398     |
| 0.007022  | 0.046511   |
| 0.10477   | 0.044903   |
| 0.0074182 | 0.1873     |
| 0.0075002 | 0.21378    |

|           |            |
|-----------|------------|
| 0.0081037 | 0.38405    |
| 0.0091534 | 0.69708    |
| 0.0073419 | 0.15072    |
| 0.084293  | 0.04497    |
| 0.0072386 | 0.12857    |
| 0.096059  | 0.027005   |
| 0.0090104 | 0.65886    |
| 0.033641  | -1.1384    |
| 0.0081619 | 0.41861    |
| 0.0091534 | 0.69708    |
| 0.085509  | 0.027849   |
| 0.010376  | -0.0036418 |
| 0.10309   | 0.057058   |
| 0.0082313 | -0.0076979 |
| 0.0070192 | 0.030378   |
| 0.0074182 | 0.1873     |
| 0.0072386 | 0.12857    |
| 0.0085746 | -0.0072929 |
| 0.0084694 | 0.50845    |
| 0.094574  | 0.061313   |
| 0.039695  | -0.72239   |
| 0.0072715 | 0.13941    |
| 0.013504  | 0.004364   |
| 0.0081619 | 0.41861    |
| 0.010376  | -0.0027971 |
| 0.08918   | 0.040962   |
| 0.0083433 | 0.47199    |
| 0.0077292 | 0.28647    |
| 0.0074585 | 0.20034    |
| 0.0090816 | 0.67796    |
| 0.0087331 | 0.58295    |
| 0.032861  | -1.1149    |
| 0.0086658 | 0.56416    |
| 0.00894   | 0.6398     |
| 0.084884  | 0.044052   |
| 0.0082818 | 0.45401    |
| 0.0074585 | 0.20034    |
| 0.0084694 | 0.50845    |
| 0.0074585 | 0.20034    |
| 0.0085339 | 0.52689    |
| 0.0091534 | 0.69708    |



|           |            |
|-----------|------------|
| 0.0090816 | 0.67796    |
| 0.0070589 | 0.066311   |
| 0.007306  | 0.15072    |
| 0.0072715 | 0.13941    |
| 0.0073419 | 0.16248    |
| 0.010376  | -0.0036418 |
| 0.0087331 | 0.58295    |
| 0.0077292 | 0.27125    |
| 0.007306  | 0.15072    |
| 0.0074585 | 0.20034    |
| 0.0074333 | -0.0026829 |
| 0.011114  | -0.0019027 |
| 0.034187  | -0.91058   |
| 0.0079906 | 0.36712    |
| 0.00894   | 0.6398     |
| 0.0081619 | 0.41861    |
| 0.0082213 | 0.43621    |
| 0.062629  | 0.048637   |
| 0.0074585 | 0.20034    |
| 0.007306  | 0.15072    |
| 0.035158  | 0.030407   |
| 0.0071491 | 0.098977   |
| 0.00894   | 0.6398     |
| 0.062773  | -0.22652   |
| 0.0073419 | 0.16248    |
| 0.032474  | -1.0393    |
| 0.0082818 | 0.45401    |
| 0.00894   | 0.6398     |
| 0.011114  | -0.0019027 |
| 0.0085994 | 0.54547    |
| 0.007821  | -0.0067106 |
| 0.0073602 | -0.0011105 |
| 0.012448  | 0.0021206  |
| 0.055952  | -0.34019   |
| 0.0075877 | 0.2418     |
| 0.0075433 | 0.21378    |
| 0.0076336 | 0.25635    |
| 0.032544  | -1.021     |
| 0.0076069 | -0.0051251 |
| 0.043079  | 0.036502   |
| 0.0080466 | 0.38405    |

|           |            |
|-----------|------------|
| 0.09204   | 0.033125   |
| 0.0081619 | 0.41861    |
| 0.032418  | -1.0834    |
| 0.0072386 | 0.12857    |
| 0.0074182 | 0.1873     |
| 0.0070192 | 0.030378   |
| 0.0074585 | 0.20034    |
| 0.0070433 | 0.059284   |
| 0.034855  | -0.89503   |
| 0.067404  | 0.050095   |
| 0.00783   | 0.31787    |
| 0.0075877 | 0.2418     |
| 0.0075002 | 0.20034    |
| 0.073008  | -0.09116   |
| 0.032875  | -1.0007    |
| 0.017596  | 0.010484   |
| 0.088023  | 0.039917   |
| 0.0072955 | 0.00071242 |
| 0.0076336 | 0.25635    |
| 0.0070159 | 0.035368   |
| 0.0076807 | 0.27125    |
| 0.032588  | -1.0951    |
| 0.010376  | -0.0036418 |
| 0.0075877 | 0.2418     |
| 0.007306  | 0.15072    |
| 0.0072715 | 0.13941    |
| 0.0084058 | 0.49014    |
| 0.0090816 | 0.67796    |
| 0.0071773 | 0.10834    |
| 0.07411   | 0.051821   |
| 0.026825  | 0.023825   |
| 0.039002  | -0.74417   |
| 0.016066  | 0.0079609  |
| 0.0081037 | 0.40122    |
| 0.0085994 | 0.54547    |
| 0.0076336 | 0.25635    |
| 0.0070581 | 0.017584   |
| 0.0071491 | 0.098977   |
| 0.0088013 | 0.60183    |
| 0.007306  | 0.15072    |
| 0.007022  | 0.046511   |

|           |            |
|-----------|------------|
| 0.0070776 | 0.073782   |
| 0.007779  | 0.30202    |
| 0.0079451 | -0.0072122 |
| 0.033948  | -1.1453    |
| 0.0077292 | 0.28647    |
| 0.0076336 | 0.25635    |
| 0.096449  | 0.06518    |
| 0.0074585 | 0.20034    |
| 0.0090104 | 0.65886    |
| 0.007306  | 0.15072    |
| 0.0074585 | 0.20034    |
| 0.077118  | 0.051619   |
| 0.011527  | 2.49E-05   |
| 0.080871  | 0.04924    |
| 0.0089841 | -0.006908  |
| 0.0077292 | 0.27125    |
| 0.0080466 | 0.38405    |
| 0.012448  | 0.001053   |
| 0.0074585 | 0.20034    |
| 0.0090104 | 0.65886    |
| 0.007123  | 0.090103   |
| 0.10493   | 0.03536    |
| 0.0090816 | 0.67796    |
| 0.058604  | -0.29352   |
| 0.0072715 | 0.13941    |
| 0.016066  | 0.0092115  |
| 0.0081619 | 0.41861    |
| 0.076413  | 0.051739   |
| 0.0086658 | 0.56416    |
| 0.0090104 | 0.65886    |
| 0.10485   | 0.03138    |
| 0.007779  | 0.30202    |
| 0.012448  | 0.001053   |
| 0.0076069 | -0.0060189 |
| 0.0070776 | 0.073782   |
| 0.032418  | -1.0834    |
| 0.033092  | -1.1234    |
| 0.10462   | 0.044903   |
| 0.074476  | -0.074934  |
| 0.013504  | 0.0032251  |
| 0.0089841 | -0.006908  |

|           |            |
|-----------|------------|
| 0.033208  | -0.97806   |
| 0.015366  | 0.0067344  |
| 0.0071773 | 0.10834    |
| 0.007147  | 0.0078041  |
| 0.011972  | 0.001053   |
| 0.03612   | -0.84394   |
| 0.03239   | -1.0557    |
| 0.0070309 | 0.046511   |
| 0.0079451 | -0.0072122 |
| 0.015366  | 0.0067344  |
| 0.0084694 | 0.50845    |
| 0.012958  | 0.0021206  |
| 0.10271   | 0.022987   |
| 0.012958  | 0.0032251  |
| 0.007306  | 0.15072    |
| 0.0072071 | 0.10834    |
| 0.026825  | 0.022479   |
| 0.0070159 | 0.030378   |
| 0.0073793 | 0.17468    |
| 0.032544  | -1.0304    |
| 0.0085339 | 0.52689    |
| 0.0071491 | 0.090103   |
| 0.039695  | -0.72239   |
| 0.007779  | 0.30202    |
| 0.00894   | 0.6398     |
| 0.0087331 | 0.58295    |
| 0.0075877 | 0.2418     |
| 0.0070589 | 0.066311   |
| 0.011972  | 0.001053   |
| 0.0088013 | 0.60183    |
| 0.0097473 | -0.0044341 |
| 0.0070401 | 0.017584   |
| 0.03239   | -1.0557    |
| 0.033494  | -1.1349    |
| 0.0075002 | 0.21378    |
| 0.025601  | 0.022479   |
| 0.032875  | -0.98966   |
| 0.0074585 | 0.20034    |
| 0.0094709 | -0.0058338 |
| 0.0084058 | 0.49014    |
| 0.034855  | -0.89503   |

|           |            |
|-----------|------------|
| 0.0073419 | 0.16248    |
| 0.0082818 | 0.45401    |
| 0.011527  | 2.49E-05   |
| 0.0070818 | 0.014005   |
| 0.0081037 | 0.40122    |
| 0.0073793 | 0.17468    |
| 0.016809  | 0.0092115  |
| 0.012448  | 0.001053   |
| 0.061361  | -0.24839   |
| 0.007306  | 0.15072    |
| 0.0082818 | 0.45401    |
| 0.0082313 | -0.0076938 |
| 0.0075433 | 0.2276     |
| 0.0086658 | 0.56416    |
| 0.0081037 | 0.40122    |
| 0.016809  | 0.0092115  |
| 0.0072386 | 0.12857    |
| 0.0091534 | 0.69708    |
| 0.0083433 | 0.47199    |
| 0.10183   | 0.022679   |
| 0.012958  | 0.0032251  |
| 0.0074182 | 0.1873     |
| 0.0072387 | 0.0027978  |
| 0.0097473 | -0.0051686 |
| 0.0086658 | 0.56416    |
| 0.064204  | -0.18445   |
| 0.0080815 | -0.0076938 |
| 0.10496   | 0.037598   |
| 0.077118  | 0.051444   |
| 0.0072071 | 0.11821    |
| 0.07879   | -0.031991  |
| 0.043745  | -0.6071    |
| 0.0085994 | 0.54547    |
| 0.0085994 | 0.54547    |
| 0.0072386 | 0.12857    |
| 0.0094709 | -0.0058338 |
| 0.0081619 | 0.41861    |
| 0.010376  | -0.0036418 |
| 0.0071113 | 0.010749   |
| 0.0086658 | 0.56416    |
| 0.0079359 | 0.35043    |

|           |            |
|-----------|------------|
| 0.0085994 | 0.54547    |
| 0.0070192 | 0.025758   |
| 0.0097473 | -0.0051686 |
| 0.00894   | 0.6398     |
| 0.020232  | 0.015736   |
| 0.0072386 | 0.12857    |
| 0.0074182 | 0.1873     |
| 0.0085994 | 0.54547    |
| 0.0090816 | 0.67796    |
| 0.007123  | 0.081709   |
| 0.0070776 | 0.073782   |
| 0.096059  | 0.02616    |
| 0.055719  | 0.044471   |
| 0.0077292 | 0.28647    |
| 0.0084694 | 0.50845    |
| 0.07411   | 0.051783   |
| 0.026825  | 0.022479   |
| 0.0339    | -0.93955   |
| 0.0085339 | 0.52689    |
| 0.0074585 | 0.20034    |
| 0.0078823 | 0.33401    |
| 0.0071894 | 0.0051576  |
| 0.040428  | -0.70012   |
| 0.068489  | 0.050485   |
| 0.0080466 | 0.38405    |
| 0.0075433 | 0.2276     |
| 0.0079906 | 0.36712    |
| 0.0074585 | 0.20034    |
| 0.043079  | 0.036502   |
| 0.03524   | -0.87876   |
| 0.052701  | 0.042727   |
| 0.019306  | 0.014403   |
| 0.04467   | -0.5831    |
| 0.0085994 | 0.54547    |
| 0.007147  | 0.0078041  |
| 0.033948  | -1.1453    |
| 0.0080466 | 0.38405    |
| 0.00894   | 0.6398     |
| 0.0088013 | 0.60183    |
| 0.0088013 | 0.60183    |
| 0.091453  | 0.0511     |

|           |            |
|-----------|------------|
| 0.007123  | 0.090103   |
| 0.10493   | 0.033276   |
| 0.040428  | -0.70012   |
| 0.014706  | 0.0055346  |
| 0.0084058 | 0.49014    |
| 0.10472   | 0.03138    |
| 0.0070309 | 0.052688   |
| 0.00783   | 0.31787    |
| 0.033494  | -1.1349    |
| 0.0081619 | 0.41861    |
| 0.0082213 | 0.43621    |
| 0.041454  | 0.036502   |
| 0.0090104 | 0.65886    |
| 0.007306  | 0.13941    |
| 0.0090816 | 0.67796    |
| 0.0090104 | 0.65886    |
| 0.007123  | 0.090103   |
| 0.037733  | -0.78604   |
| 0.069529  | 0.051118   |
| 0.032544  | -1.0304    |
| 0.039695  | -0.72239   |
| 0.0075002 | 0.21378    |
| 0.025601  | 0.021128   |
| 0.09204   | 0.032017   |
| 0.0090816 | 0.67796    |
| 0.012448  | 0.001053   |
| 0.051147  | 0.041791   |
| 0.0081037 | 0.40122    |
| 0.0070776 | 0.073782   |
| 0.020232  | 0.014403   |
| 0.0074182 | 0.1873     |
| 0.0074333 | -0.0026829 |
| 0.0079359 | 0.35043    |
| 0.084221  | 0.020095   |
| 0.021206  | 0.015736   |
| 0.0075877 | 0.2418     |
| 0.0087331 | 0.58295    |
| 0.034505  | -0.91058   |
| 0.011114  | -0.0009612 |
| 0.0090816 | 0.67796    |
| 0.007147  | 0.0078041  |

|           |            |
|-----------|------------|
| 0.00894   | 0.6398     |
| 0.013504  | 0.0032251  |
| 0.03669   | 0.031675   |
| 0.0088702 | 0.62079    |
| 0.084221  | 0.011497   |
| 0.033494  | -1.1349    |
| 0.054226  | 0.044471   |
| 0.079079  | 0.050593   |
| 0.0088013 | 0.60183    |
| 0.032588  | -1.1005    |
| 0.039002  | -0.74417   |
| 0.0070159 | 0.035368   |
| 0.0083953 | -0.0075602 |
| 0.08918   | 0.046386   |
| 0.007147  | 0.0078041  |
| 0.007123  | 0.090103   |
| 0.0070272 | 0.025758   |
| 0.0072715 | 0.12857    |
| 0.037156  | -0.80605   |
| 0.0075433 | 0.2276     |
| 0.0090816 | 0.67796    |
| 0.0074585 | 0.20034    |
| 0.043079  | 0.037634   |
| 0.0087331 | 0.58295    |
| 0.0072386 | 0.12857    |
| 0.0072386 | 0.12857    |
| 0.0091534 | 0.69708    |
| 0.0085339 | 0.52689    |
| 0.05467   | -0.34019   |
| 0.0073793 | 0.16248    |
| 0.0085994 | 0.54547    |
| 0.074911  | 0.051806   |
| 0.0087331 | 0.58295    |
| 0.045635  | -0.5589    |
| 0.0081619 | 0.41861    |
| 0.0090816 | 0.67796    |
| 0.0088702 | 0.62079    |
| 0.083714  | 0.04583    |
| 0.088023  | 0.039917   |
| 0.0072071 | 0.11821    |
| 0.0085994 | 0.54547    |



|           |            |
|-----------|------------|
| 0.0072715 | 0.13941    |
| 0.0090104 | 0.65886    |
| 0.0085339 | 0.52689    |
| 0.0073419 | 0.16248    |
| 0.10485   | 0.033276   |
| 0.03669   | 0.031675   |
| 0.038348  | -0.7654    |
| 0.0072071 | 0.11821    |
| 0.0073793 | 0.17468    |
| 0.0090104 | 0.65886    |
| 0.0078823 | 0.33401    |
| 0.0072715 | 0.13941    |
| 0.0073419 | 0.16248    |
| 0.011972  | 2.49E-05   |
| 0.033662  | 0.029119   |
| 0.090335  | 0.0511     |
| 0.0090104 | 0.65886    |
| 0.0085994 | 0.54547    |
| 0.0080815 | -0.007536  |
| 0.075932  | -0.059632  |
| 0.0085339 | 0.52689    |
| 0.10183   | 0.022679   |
| 0.012958  | 0.0021206  |
| 0.0074182 | 0.1873     |
| 0.0070776 | 0.073782   |
| 0.010731  | -0.0027971 |
| 0.0089841 | -0.006908  |
| 0.10036   | 0.06649    |
| 0.0074182 | 0.1873     |
| 0.090686  | 0.034253   |
| 0.0072071 | 0.11821    |
| 0.012448  | 0.001053   |
| 0.10083   | 0.022572   |
| 0.048754  | -0.4856    |
| 0.0085746 | -0.0075602 |
| 0.0070581 | 0.017584   |
| 0.099168  | 0.023109   |
| 0.019306  | 0.013082   |
| 0.011114  | -0.0019027 |
| 0.0082818 | 0.45401    |
| 0.0090104 | 0.65886    |

|           |            |
|-----------|------------|
| 0.0071491 | 0.098977   |
| 0.10215   | 0.062875   |
| 0.0082818 | 0.45401    |
| 0.0074182 | 0.17468    |
| 0.049867  | -0.43662   |
| 0.0090104 | 0.65886    |
| 0.007821  | -0.0067106 |
| 0.007099  | 0.073782   |
| 0.007022  | 0.046511   |
| 0.03669   | 0.032921   |
| 0.0086658 | 0.56416    |
| 0.035661  | -0.86174   |
| 0.0086658 | 0.56416    |
| 0.0083433 | 0.47199    |
| 0.00783   | 0.31787    |
| 0.03276   | -1.1104    |
| 0.0079359 | 0.35043    |
| 0.007779  | 0.30202    |
| 0.010731  | -0.0027971 |
| 0.0097473 | -0.0051686 |
| 0.0071113 | 0.0078041  |
| 0.071483  | 0.051552   |
| 0.0090104 | 0.65886    |
| 0.0082213 | 0.43621    |
| 0.007821  | -0.0067106 |
| 0.0090816 | 0.67796    |
| 0.0074182 | 0.17468    |
| 0.0077292 | 0.28647    |
| 0.0081037 | 0.40122    |
| 0.0087704 | -0.0072929 |
| 0.1003    | 0.022572   |
| 0.0085339 | 0.52689    |
| 0.0075433 | 0.2276     |
| 0.0073793 | 0.17468    |
| 0.086106  | 0.042062   |
| 0.0076807 | 0.27125    |
| 0.0090816 | 0.67796    |
| 0.041199  | -0.67741   |
| 0.0078823 | 0.31787    |
| 0.0084058 | 0.49014    |
| 0.0087704 | -0.0072929 |

|           |            |
|-----------|------------|
| 0.094739  | 0.027913   |
| 0.0071773 | 0.10834    |
| 0.0339    | -0.93955   |
| 0.0074585 | 0.1873     |
| 0.0085994 | 0.54547    |
| 0.0087331 | 0.58295    |
| 0.025601  | 0.021128   |
| 0.087374  | 0.041005   |
| 0.097342  | 0.024682   |
| 0.0085994 | 0.54547    |
| 0.081558  | 0.0020229  |
| 0.0084058 | 0.49014    |
| 0.0076336 | 0.25635    |
| 0.0075002 | 0.21378    |
| 0.0087331 | 0.58295    |
| 0.0088702 | 0.62079    |
| 0.0339    | -0.93955   |
| 0.0087331 | 0.58295    |
| 0.081445  | 0.048674   |
| 0.0070581 | 0.017584   |
| 0.0097473 | -0.0044341 |
| 0.067404  | 0.050485   |
| 0.098932  | 0.06705    |
| 0.075932  | -0.059632  |
| 0.0085339 | 0.52689    |
| 0.046637  | -0.5101    |
| 0.024427  | 0.021128   |
| 0.026825  | 0.023825   |
| 0.0076069 | -0.0051251 |
| 0.016809  | 0.010484   |
| 0.012448  | 0.0021206  |
| 0.0081619 | 0.41861    |
| 0.0076069 | -0.0051251 |
| 0.0086658 | 0.56416    |
| 0.0076336 | 0.25635    |
| 0.0090104 | 0.65886    |
| 0.0084058 | 0.49014    |
| 0.0090816 | 0.67796    |
| 0.0091534 | 0.69708    |
| 0.00783   | 0.31787    |
| 0.00783   | 0.31787    |

|           |            |
|-----------|------------|
| 0.10455   | 0.028193   |
| 0.0080466 | 0.36712    |
| 0.095533  | 0.063518   |
| 0.0083433 | 0.45401    |
| 0.0081037 | 0.40122    |
| 0.0085339 | 0.52689    |
| 0.061361  | -0.24839   |
| 0.0073793 | 0.17468    |
| 0.0074182 | 0.1873     |
| 0.0070159 | 0.030378   |
| 0.010048  | -0.0036418 |
| 0.011114  | -0.0019027 |
| 0.011114  | -0.0019027 |
| 0.032633  | -1.021     |
| 0.0075877 | 0.2418     |
| 0.079691  | 0.050199   |
| 0.0085339 | 0.52689    |
| 0.0082213 | 0.43621    |
| 0.0075433 | 0.21378    |
| 0.086735  | 0.042062   |
| 0.0084058 | 0.49014    |
| 0.033092  | -1.1234    |
| 0.0072071 | 0.11821    |
| 0.0080466 | 0.38405    |
| 0.00783   | 0.31787    |
| 0.03303   | -0.98966   |
| 0.0076069 | -0.0051251 |
| 0.0075433 | 0.2276     |
| 0.10215   | 0.062875   |
| 0.0091534 | 0.69708    |
| 0.0088013 | 0.60183    |
| 0.007147  | 0.0078041  |
| 0.0083433 | 0.47199    |
| 0.0084058 | 0.49014    |
| 0.0085339 | 0.52689    |
| 0.007123  | 0.090103   |
| 0.0070169 | 0.040742   |
| 0.0075002 | 0.21378    |
| 0.0083433 | 0.47199    |
| 0.0082818 | 0.45401    |
| 0.0087331 | 0.58295    |

|           |            |
|-----------|------------|
| 0.0082313 | -0.0076938 |
| 0.1016    | 0.064369   |
| 0.0094709 | -0.0058338 |
| 0.014086  | 0.004364   |
| 0.0081037 | 0.40122    |
| 0.010048  | -0.0044341 |
| 0.0087704 | -0.0072929 |
| 0.00894   | 0.62079    |
| 0.0070272 | 0.025758   |
| 0.0081037 | 0.40122    |
| 0.0072715 | 0.13941    |
| 0.068489  | 0.050826   |
| 0.032588  | -1.1005    |
| 0.013504  | 0.004364   |
| 0.029421  | 0.026496   |
| 0.00894   | 0.6398     |
| 0.0073602 | -0.0011105 |
| 0.037156  | -0.80605   |
| 0.062629  | 0.048637   |
| 0.033412  | -0.96585   |
| 0.00894   | 0.6398     |
| 0.0084058 | 0.49014    |
| 0.018428  | 0.011775   |
| 0.039002  | -0.74417   |
| 0.082578  | 0.048051   |
| 0.0085339 | 0.52689    |
| 0.0073793 | 0.17468    |
| 0.024427  | 0.021128   |
| 0.007821  | -0.0067106 |
| 0.0084058 | 0.49014    |
| 0.0081037 | 0.40122    |
| 0.007306  | 0.15072    |
| 0.032205  | 0.029119   |
| 0.074476  | -0.074934  |
| 0.0072386 | 0.12857    |
| 0.0070818 | 0.014005   |
| 0.0085339 | 0.52689    |
| 0.007099  | 0.081709   |
| 0.0082818 | 0.45401    |
| 0.04467   | -0.5831    |
| 0.0083433 | 0.47199    |

|           |            |
|-----------|------------|
| 0.082013  | 0.048051   |
| 0.0090816 | 0.67796    |
| 0.013504  | 0.0032251  |
| 0.0079906 | 0.36712    |
| 0.094739  | 0.028875   |
| 0.086106  | 0.042062   |
| 0.0079906 | 0.36712    |
| 0.043079  | 0.036502   |
| 0.0088702 | 0.62079    |
| 0.0073602 | -0.0011105 |
| 0.0080466 | 0.38405    |
| 0.0072386 | 0.12857    |
| 0.0082818 | 0.45401    |
| 0.0088702 | 0.62079    |
| 0.0070309 | 0.052688   |
| 0.010731  | -0.0019027 |
| 0.024427  | 0.019776   |
| 0.0082818 | 0.45401    |
| 0.03612   | -0.84394   |
| 0.0079359 | 0.35043    |
| 0.08799   | 0.034794   |
| 0.073008  | -0.09116   |
| 0.00783   | 0.31787    |
| 0.0082213 | 0.43621    |
| 0.0076336 | 0.25635    |
| 0.021206  | 0.015736   |
| 0.0070309 | 0.052688   |
| 0.052201  | -0.41225   |
| 0.03612   | -0.84394   |
| 0.0084694 | 0.50845    |
| 0.034187  | -0.92541   |
| 0.0074585 | 0.20034    |
| 0.096706  | 0.02616    |
| 0.045635  | -0.5589    |
| 0.059971  | -0.27073   |
| 0.062629  | 0.048637   |
| 0.0076069 | -0.0051251 |
| 0.0072386 | 0.12857    |
| 0.0070309 | 0.052688   |
| 0.0076336 | 0.25635    |
| 0.0091534 | 0.69708    |

|           |            |
|-----------|------------|
| 0.0088702 | 0.62079    |
| 0.10409   | 0.02577    |
| 0.0082213 | 0.43621    |
| 0.048754  | -0.4856    |
| 0.0088013 | 0.60183    |
| 0.015366  | 0.0067344  |
| 0.023303  | 0.018425   |
| 0.0072715 | 0.13941    |
| 0.0087331 | 0.58295    |
| 0.034855  | -0.89503   |
| 0.057264  | -0.31669   |
| 0.0091534 | 0.69708    |
| 0.0091534 | 0.69708    |
| 0.0072715 | 0.13941    |
| 0.10496   | 0.037598   |
| 0.033792  | -1.1419    |
| 0.00894   | 0.6398     |
| 0.0082213 | 0.43621    |
| 0.032389  | -1.0771    |
| 0.0085339 | 0.52689    |
| 0.013504  | 0.0032251  |
| 0.014706  | 0.0067344  |
| 0.0077292 | 0.28647    |
| 0.0081619 | 0.41861    |
| 0.0090816 | 0.67796    |
| 0.1003    | 0.022572   |
| 0.0086658 | 0.56416    |
| 0.070056  | -0.12619   |
| 0.0094709 | -0.0051686 |
| 0.007099  | 0.081709   |
| 0.0088702 | 0.62079    |
| 0.035661  | -0.86174   |
| 0.081445  | 0.048674   |
| 0.0073793 | 0.17468    |
| 0.07411   | 0.051783   |
| 0.033208  | -0.97806   |
| 0.0087331 | 0.58295    |
| 0.0075433 | 0.21378    |
| 0.057264  | -0.29352   |
| 0.016809  | 0.0092115  |
| 0.099743  | 0.022784   |

|           |            |
|-----------|------------|
| 0.0074585 | 0.20034    |
| 0.016066  | 0.0079609  |
| 0.00783   | 0.31787    |
| 0.0073793 | 0.17468    |
| 0.034187  | -0.91058   |
| 0.0075433 | 0.2276     |
| 0.0086658 | 0.56416    |
| 0.007779  | 0.30202    |
| 0.059971  | -0.27073   |
| 0.092533  | 0.055137   |
| 0.0086658 | 0.56416    |
| 0.028099  | 0.023825   |
| 0.0075002 | 0.21378    |
| 0.10228   | 0.022679   |
| 0.0076807 | 0.27125    |
| 0.0071113 | 0.010749   |
| 0.011527  | 2.49E-05   |
| 0.042008  | -0.65431   |
| 0.067404  | 0.050485   |
| 0.057178  | 0.045278   |
| 0.020232  | 0.014403   |
| 0.0074585 | 0.20034    |
| 0.0083433 | 0.47199    |
| 0.0083433 | 0.47199    |
| 0.10477   | 0.042402   |
| 0.011114  | -0.0009612 |
| 0.0082213 | 0.43621    |
| 0.0072715 | 0.13941    |
| 0.0097473 | -0.0051686 |
| 0.020232  | 0.015736   |
| 0.0071773 | 0.10834    |
| 0.053419  | -0.38803   |
| 0.0075877 | 0.2418     |
| 0.0075433 | 0.2276     |
| 0.0072386 | 0.12857    |
| 0.025601  | 0.021128   |
| 0.012448  | 0.0021206  |
| 0.0090816 | 0.67796    |
| 0.070056  | -0.12619   |
| 0.0073419 | 0.16248    |
| 0.043079  | 0.037634   |



|           |            |
|-----------|------------|
| 0.0076807 | 0.27125    |
| 0.068581  | -0.1449    |
| 0.0071773 | 0.10834    |
| 0.0070272 | 0.025758   |
| 0.034505  | -0.91058   |
| 0.090686  | 0.035391   |
| 0.007022  | 0.046511   |
| 0.0089841 | -0.0064176 |
| 0.0074585 | 0.20034    |
| 0.084221  | 0.011497   |
| 0.0072071 | 0.11821    |
| 0.0075002 | 0.21378    |
| 0.0339    | -0.93955   |
| 0.0089841 | -0.0064176 |
| 0.0070581 | 0.017584   |
| 0.0070589 | 0.066311   |
| 0.083144  | 0.04737    |
| 0.075678  | 0.051739   |
| 0.0080466 | 0.38405    |
| 0.0071773 | 0.10834    |
| 0.0081037 | 0.40122    |
| 0.012448  | 0.001053   |
| 0.007779  | 0.30202    |
| 0.0085994 | 0.54547    |
| 0.0078823 | 0.31787    |
| 0.0073793 | 0.17468    |
| 0.034187  | -0.92541   |
| 0.084221  | 0.011497   |
| 0.10264   | 0.061137   |
| 0.0080815 | -0.007536  |
| 0.033412  | -0.96585   |
| 0.063888  | 0.048637   |
| 0.0091534 | 0.69708    |
| 0.0070776 | 0.073782   |
| 0.023303  | 0.018425   |
| 0.0071491 | 0.098977   |
| 0.007123  | 0.090103   |
| 0.057178  | 0.04604    |
| 0.0083433 | 0.47199    |
| 0.0073419 | 0.16248    |
| 0.052701  | 0.042727   |

|           |            |
|-----------|------------|
| 0.071483  | 0.051552   |
| 0.016066  | 0.0092115  |
| 0.0082313 | -0.0076979 |
| 0.0097473 | -0.0044341 |
| 0.0076807 | 0.27125    |
| 0.0075877 | 0.2418     |
| 0.092718  | 0.032017   |
| 0.0089841 | -0.006908  |
| 0.0075433 | 0.2276     |
| 0.0083953 | -0.0076979 |
| 0.0087331 | 0.58295    |
| 0.0072071 | 0.11821    |
| 0.0090104 | 0.65886    |
| 0.0075877 | 0.2418     |
| 0.0075153 | -0.0051251 |
| 0.0072386 | 0.11821    |
| 0.00783   | 0.31787    |
| 0.0070433 | 0.059284   |
| 0.096449  | 0.06518    |
| 0.0072386 | 0.12857    |
| 0.0072071 | 0.11821    |
| 0.017596  | 0.010484   |
| 0.0071773 | 0.10834    |
| 0.013504  | 0.0032251  |
| 0.0076336 | 0.25635    |
| 0.007022  | 0.040742   |
| 0.0090104 | 0.65886    |
| 0.0076336 | 0.25635    |
| 0.081445  | 0.04924    |
| 0.033412  | -0.96585   |
| 0.0082313 | -0.0076938 |
| 0.0075433 | 0.2276     |
| 0.032205  | 0.027815   |
| 0.021206  | 0.017077   |
| 0.059983  | 0.046758   |
| 0.0074333 | -0.0026829 |
| 0.0077292 | 0.28647    |
| 0.0070159 | 0.035368   |
| 0.075932  | -0.059632  |
| 0.016809  | 0.0092115  |
| 0.0090104 | 0.65886    |

|           |            |
|-----------|------------|
| 0.00894   | 0.6398     |
| 0.0074585 | 0.1873     |
| 0.0072715 | 0.12857    |
| 0.057178  | 0.045278   |
| 0.085509  | 0.020095   |
| 0.0089841 | -0.0064176 |
| 0.0088013 | 0.60183    |
| 0.101     | 0.065585   |
| 0.0088013 | 0.60183    |
| 0.0090104 | 0.65886    |
| 0.007779  | 0.30202    |
| 0.0085994 | 0.54547    |
| 0.0084058 | 0.49014    |
| 0.0086658 | 0.54547    |
| 0.0076336 | 0.25635    |
| 0.0072071 | 0.11821    |
| 0.095403  | 0.027005   |
| 0.089343  | 0.036534   |
| 0.0087704 | -0.0072929 |
| 0.061327  | 0.04743    |
| 0.0092171 | -0.0058338 |
| 0.0089841 | -0.006908  |
| 0.0092171 | -0.0064176 |
| 0.03524   | -0.87876   |
| 0.016066  | 0.0079609  |
| 0.017596  | 0.011775   |
| 0.0070581 | 0.017584   |
| 0.0079906 | 0.36712    |
| 0.0075433 | 0.21378    |
| 0.007779  | 0.30202    |
| 0.0080466 | 0.38405    |
| 0.0072715 | 0.12857    |
| 0.0073419 | 0.16248    |
| 0.041199  | -0.67741   |
| 0.0072386 | 0.12857    |
| 0.0074182 | 0.1873     |
| 0.0076336 | 0.25635    |
| 0.007821  | -0.0067106 |
| 0.016066  | 0.0092115  |
| 0.0075433 | 0.2276     |
| 0.010731  | -0.0019027 |

|           |            |
|-----------|------------|
| 0.1016    | 0.062875   |
| 0.0092171 | -0.0058338 |
| 0.055719  | 0.045278   |
| 0.0097473 | -0.0044341 |
| 0.0070589 | 0.066311   |
| 0.011114  | -0.0009612 |
| 0.033219  | -1.1274    |
| 0.011527  | -0.0009612 |
| 0.0090104 | 0.65886    |
| 0.0090816 | 0.67796    |
| 0.00894   | 0.62079    |
| 0.00783   | 0.31787    |
| 0.0072955 | -0.0011105 |
| 0.0084694 | 0.50845    |
| 0.0091534 | 0.69708    |
| 0.0083433 | 0.47199    |
| 0.0075433 | 0.2276     |
| 0.0079359 | 0.35043    |
| 0.0072386 | 0.12857    |
| 0.032633  | -1.021     |
| 0.00894   | 0.6398     |
| 0.0087331 | 0.58295    |
| 0.0088702 | 0.62079    |
| 0.075932  | -0.059632  |
| 0.04467   | -0.5831    |
| 0.098575  | 0.024065   |
| 0.095403  | 0.027913   |
| 0.063888  | 0.048637   |
| 0.0088702 | 0.62079    |
| 0.0090104 | 0.65886    |
| 0.010048  | -0.0036418 |
| 0.007123  | 0.090103   |
| 0.088023  | 0.039917   |
| 0.0075433 | 0.2276     |
| 0.0082818 | 0.45401    |
| 0.010376  | -0.0036418 |
| 0.0085339 | 0.52689    |
| 0.0079906 | 0.36712    |
| 0.0070309 | 0.046511   |
| 0.094739  | 0.027913   |
| 0.0087704 | -0.0072929 |

|           |            |
|-----------|------------|
| 0.079691  | 0.050199   |
| 0.10083   | 0.022479   |
| 0.0073793 | 0.17468    |
| 0.038254  | 0.032921   |
| 0.017596  | 0.010484   |
| 0.0075877 | 0.2276     |
| 0.0080466 | 0.38405    |
| 0.0072715 | 0.13941    |
| 0.069529  | 0.050826   |
| 0.033642  | -0.95303   |
| 0.010731  | -0.0027971 |
| 0.033353  | -1.1312    |
| 0.0080466 | 0.38405    |
| 0.010048  | -0.0044341 |
| 0.0081619 | 0.41861    |
| 0.10311   | 0.023443   |
| 0.086766  | 0.027849   |
| 0.0072715 | 0.12857    |
| 0.092718  | 0.032017   |
| 0.0078823 | 0.33401    |
| 0.0073419 | 0.16248    |
| 0.0070776 | 0.073782   |
| 0.0085746 | -0.0075602 |
| 0.0077292 | 0.28647    |
| 0.0090816 | 0.67796    |
| 0.0092171 | -0.0064176 |
| 0.0070589 | 0.066311   |
| 0.0087331 | 0.58295    |
| 0.014086  | 0.004364   |
| 0.0071773 | 0.10834    |
| 0.042008  | -0.65431   |
| 0.010376  | -0.0027971 |
| 0.0089841 | -0.006908  |
| 0.0084694 | 0.50845    |
| 0.041454  | 0.036502   |
| 0.095403  | 0.027005   |
| 0.0088013 | 0.60183    |
| 0.07411   | 0.051821   |
| 0.0082818 | 0.45401    |
| 0.0092171 | -0.0064176 |
| 0.090335  | 0.0511     |

|           |            |
|-----------|------------|
| 0.0077085 | -0.0067106 |
| 0.00783   | 0.31787    |
| 0.007099  | 0.081709   |
| 0.032972  | -1.1193    |
| 0.0094709 | -0.0058338 |
| 0.0071491 | 0.098977   |
| 0.048754  | -0.4856    |
| 0.0085339 | 0.52689    |
| 0.0085746 | -0.0075602 |
| 0.0075002 | 0.21378    |
| 0.036619  | -0.82536   |
| 0.03669   | 0.031675   |
| 0.045635  | -0.5589    |
| 0.032389  | -1.0771    |
| 0.051147  | 0.041791   |
| 0.0080466 | 0.38405    |
| 0.057178  | 0.04604    |
| 0.0074182 | 0.1873     |
| 0.07411   | 0.051783   |
| 0.0080466 | 0.38405    |
| 0.10485   | 0.033276   |
| 0.0071894 | 0.0027978  |
| 0.00894   | 0.6398     |
| 0.0072386 | 0.12857    |
| 0.053419  | -0.38803   |
| 0.007147  | 0.0078041  |
| 0.010048  | -0.0036418 |
| 0.0070309 | 0.052688   |
| 0.033948  | -1.1453    |
| 0.032462  | -1.0894    |
| 0.012448  | 0.001053   |
| 0.025601  | 0.021128   |
| 0.0083953 | -0.0076979 |
| 0.020232  | 0.015736   |
| 0.0070589 | 0.066311   |
| 0.0092171 | -0.0064176 |
| 0.0086658 | 0.56416    |
| 0.0087331 | 0.58295    |
| 0.032389  | -1.0771    |
| 0.020232  | 0.014403   |
| 0.0076807 | 0.27125    |

|           |            |
|-----------|------------|
| 0.03524   | -0.87876   |
| 0.012448  | 0.001053   |
| 0.076413  | 0.051619   |
| 0.045635  | -0.5589    |
| 0.028099  | 0.025165   |
| 0.00783   | 0.31787    |
| 0.0075433 | 0.2276     |
| 0.0071773 | 0.10834    |
| 0.0097473 | -0.0051686 |
| 0.0077085 | -0.0060189 |
| 0.010731  | -0.0027971 |
| 0.0076069 | -0.0051251 |
| 0.0070776 | 0.066311   |
| 0.032373  | -1.0632    |
| 0.03524   | -0.87876   |
| 0.03612   | -0.84394   |
| 0.047677  | -0.5101    |
| 0.0076807 | 0.27125    |
| 0.0097473 | -0.0051686 |
| 0.0071773 | 0.098977   |
| 0.0087704 | -0.0072929 |
| 0.0076807 | 0.27125    |
| 0.10455   | 0.029687   |
| 0.0070776 | 0.073782   |
| 0.082903  | 0.0020229  |
| 0.026825  | 0.023825   |
| 0.0081619 | 0.40122    |
| 0.097321  | 0.067003   |
| 0.007147  | 0.0078041  |
| 0.010731  | -0.0019027 |
| 0.0072386 | 0.12857    |
| 0.014086  | 0.004364   |
| 0.0074585 | 0.20034    |
| 0.00894   | 0.6398     |
| 0.0074182 | 0.1873     |
| 0.0087331 | 0.58295    |
| 0.0072071 | 0.11821    |
| 0.0073793 | 0.17468    |
| 0.011972  | 2.49E-05   |
| 0.062629  | 0.048637   |
| 0.00894   | 0.6398     |

|           |            |
|-----------|------------|
| 0.0076807 | 0.27125    |
| 0.014706  | 0.0055346  |
| 0.10385   | 0.054784   |
| 0.0087331 | 0.58295    |
| 0.0078823 | 0.33401    |
| 0.037156  | -0.80605   |
| 0.061361  | -0.24839   |
| 0.0071491 | 0.098977   |
| 0.007779  | 0.30202    |
| 0.096706  | 0.025383   |
| 0.0090104 | 0.65886    |
| 0.0081619 | 0.41861    |
| 0.0094709 | -0.0058338 |
| 0.0074182 | 0.1873     |
| 0.023303  | 0.018425   |
| 0.086106  | 0.042062   |
| 0.0097473 | -0.0051686 |
| 0.076413  | 0.051739   |
| 0.010048  | -0.0036418 |
| 0.032668  | -1.1056    |
| 0.0079359 | 0.35043    |
| 0.041454  | 0.035337   |
| 0.053419  | -0.38803   |
| 0.0080815 | -0.007536  |
| 0.020232  | 0.015736   |
| 0.0076069 | -0.0060189 |
| 0.0072386 | 0.12857    |
| 0.0079359 | 0.35043    |
| 0.011114  | -0.0019027 |
| 0.041454  | 0.035337   |
| 0.0072386 | 0.12857    |
| 0.0084058 | 0.49014    |
| 0.014086  | 0.0055346  |
| 0.007306  | 0.15072    |
| 0.032373  | -1.0632    |
| 0.043079  | 0.036502   |
| 0.0084058 | 0.49014    |
| 0.030791  | 0.026496   |
| 0.007022  | 0.046511   |
| 0.0082313 | -0.0076938 |
| 0.0076807 | 0.27125    |



|           |            |
|-----------|------------|
| 0.024427  | 0.021128   |
| 0.0091534 | 0.69708    |
| 0.0071773 | 0.10834    |
| 0.0070581 | 0.017584   |
| 0.0072071 | 0.10834    |
| 0.0070776 | 0.073782   |
| 0.016809  | 0.0092115  |
| 0.0072071 | 0.10834    |
| 0.0072071 | 0.11821    |
| 0.033353  | -1.1312    |
| 0.0081619 | 0.41861    |
| 0.0070169 | 0.040742   |
| 0.0088702 | 0.62079    |
| 0.007123  | 0.090103   |
| 0.0081037 | 0.40122    |
| 0.0076336 | 0.25635    |
| 0.089343  | 0.037674   |
| 0.08918   | 0.040962   |
| 0.0092171 | -0.0058338 |
| 0.007779  | 0.28647    |
| 0.0071773 | 0.10834    |
| 0.0082213 | 0.43621    |
| 0.0071491 | 0.098977   |
| 0.032205  | 0.027815   |
| 0.0092171 | -0.0058338 |
| 0.0074585 | 0.20034    |
| 0.039844  | 0.034143   |
| 0.0088702 | 0.62079    |
| 0.037733  | -0.78604   |
| 0.007306  | 0.13941    |
| 0.011972  | 2.49E-05   |
| 0.0077292 | 0.28647    |
| 0.03303   | -0.98966   |
| 0.10434   | 0.028193   |
| 0.0070401 | 0.017584   |
| 0.0079906 | 0.36712    |
| 0.024427  | 0.019776   |
| 0.032373  | -1.0704    |
| 0.03303   | -0.98966   |
| 0.075678  | 0.051806   |
| 0.10485   | 0.033276   |

|           |            |
|-----------|------------|
| 0.065104  | 0.049656   |
| 0.0075433 | 0.2276     |
| 0.074911  | 0.051806   |
| 0.032633  | -1.021     |
| 0.0073602 | -0.0011105 |
| 0.0083953 | -0.0076979 |
| 0.0087331 | 0.58295    |
| 0.0073793 | 0.17468    |
| 0.0092171 | -0.0064176 |
| 0.0073419 | 0.16248    |
| 0.012958  | 0.0021206  |
| 0.0070309 | 0.052688   |
| 0.0094709 | -0.0058338 |
| 0.00894   | 0.6398     |
| 0.0073419 | 0.16248    |
| 0.011527  | -0.0009612 |
| 0.011972  | 2.49E-05   |
| 0.0072071 | 0.11821    |
| 0.0090104 | 0.65886    |
| 0.0082213 | 0.43621    |
| 0.0079451 | -0.0072122 |
| 0.080871  | 0.04924    |
| 0.010376  | -0.0027971 |
| 0.091453  | 0.0511     |
| 0.0074182 | 0.1873     |
| 0.10477   | 0.042402   |
| 0.0071491 | 0.098977   |
| 0.0082213 | 0.43621    |
| 0.007022  | 0.046511   |
| 0.0078823 | 0.33401    |
| 0.0082818 | 0.45401    |
| 0.082903  | 0.0020229  |
| 0.0070433 | 0.059284   |
| 0.03612   | -0.84394   |
| 0.035158  | 0.031675   |
| 0.019306  | 0.013082   |
| 0.084293  | 0.04583    |
| 0.021206  | 0.017077   |
| 0.0073419 | 0.16248    |
| 0.033642  | -0.95303   |
| 0.0092171 | -0.0058338 |

|           |            |
|-----------|------------|
| 0.011114  | -0.0009612 |
| 0.0072715 | 0.13941    |
| 0.0084058 | 0.49014    |
| 0.095403  | 0.027005   |
| 0.0088702 | 0.62079    |
| 0.033412  | -0.96585   |
| 0.021206  | 0.015736   |
| 0.0082213 | 0.43621    |
| 0.011114  | -0.0019027 |
| 0.0087704 | -0.0072929 |
| 0.033208  | -0.97806   |
| 0.0083433 | 0.47199    |
| 0.0070192 | 0.030378   |
| 0.032668  | -1.1056    |
| 0.011527  | -0.0009612 |
| 0.034187  | -0.92541   |
| 0.0090104 | 0.65886    |
| 0.086106  | 0.042062   |
| 0.094069  | 0.029884   |
| 0.0078823 | 0.33401    |
| 0.033219  | -1.1274    |
| 0.0071491 | 0.098977   |
| 0.0072071 | 0.11821    |
| 0.097966  | 0.024065   |
| 0.0075153 | -0.0051251 |
| 0.058604  | -0.29352   |
| 0.057264  | -0.29352   |
| 0.035661  | -0.86174   |
| 0.085489  | 0.044052   |
| 0.0080815 | -0.007536  |
| 0.012448  | 0.0021206  |
| 0.057178  | 0.045278   |
| 0.098149  | 0.067232   |
| 0.0090816 | 0.67796    |
| 0.059971  | -0.27073   |
| 0.0077085 | -0.0067106 |
| 0.0075877 | 0.2418     |
| 0.067111  | -0.1449    |
| 0.0088013 | 0.60183    |
| 0.0085746 | -0.0075602 |
| 0.00783   | 0.31787    |

|           |            |
|-----------|------------|
| 0.0088013 | 0.60183    |
| 0.0083433 | 0.47199    |
| 0.0090816 | 0.67796    |
| 0.03669   | 0.031675   |
| 0.0076336 | 0.25635    |
| 0.0076336 | 0.25635    |
| 0.0073419 | 0.16248    |
| 0.010048  | -0.0036418 |
| 0.10462   | 0.047424   |
| 0.0082313 | -0.0076938 |
| 0.1038    | 0.02577    |
| 0.0082213 | 0.43621    |
| 0.0074182 | 0.1873     |
| 0.0073602 | -0.0011105 |
| 0.02223   | 0.017077   |
| 0.020232  | 0.015736   |
| 0.041454  | 0.035337   |
| 0.0070272 | 0.025758   |
| 0.0075002 | 0.20034    |
| 0.024427  | 0.021128   |
| 0.010376  | -0.0036418 |
| 0.03612   | -0.84394   |
| 0.0339    | -0.93955   |
| 0.0073602 | -0.0011105 |
| 0.0071491 | 0.098977   |
| 0.017596  | 0.010484   |
| 0.0082213 | 0.43621    |
| 0.0092171 | -0.0064176 |
| 0.084221  | 0.011497   |
| 0.065104  | 0.04917    |
| 0.049567  | 0.041791   |
| 0.007306  | 0.15072    |
| 0.00894   | 0.6398     |
| 0.0077292 | 0.28647    |
| 0.012958  | 0.0021206  |
| 0.0080815 | -0.007536  |
| 0.0088013 | 0.60183    |
| 0.014086  | 0.004364   |
| 0.10472   | 0.03138    |
| 0.012958  | 0.0021206  |
| 0.092533  | 0.055137   |

|           |            |
|-----------|------------|
| 0.0088702 | 0.62079    |
| 0.0079359 | 0.35043    |
| 0.0082213 | 0.43621    |
| 0.0070776 | 0.073782   |
| 0.058604  | -0.29352   |
| 0.0072071 | 0.11821    |
| 0.0081037 | 0.40122    |
| 0.0090104 | 0.65886    |
| 0.0074333 | -0.0026829 |
| 0.0078823 | 0.33401    |
| 0.0073793 | 0.17468    |
| 0.0087704 | -0.0072929 |
| 0.0088013 | 0.60183    |
| 0.0090104 | 0.65886    |
| 0.0070401 | 0.021497   |
| 0.017596  | 0.010484   |
| 0.039002  | -0.74417   |
| 0.0072386 | 0.12857    |
| 0.0081037 | 0.40122    |
| 0.007821  | -0.0067106 |
| 0.094574  | 0.061313   |
| 0.098932  | 0.06705    |
| 0.0077292 | 0.28647    |
| 0.0081619 | 0.41861    |
| 0.0080815 | -0.007536  |
| 0.10228   | 0.022987   |
| 0.0088013 | 0.60183    |
| 0.013504  | 0.0032251  |
| 0.014706  | 0.0055346  |
| 0.033642  | -0.95303   |
| 0.0097473 | -0.0051686 |
| 0.0072715 | 0.13941    |
| 0.011972  | 2.49E-05   |
| 0.0094709 | -0.0058338 |
| 0.0097473 | -0.0051686 |
| 0.02223   | 0.017077   |
| 0.0083433 | 0.47199    |
| 0.10485   | 0.03138    |
| 0.007147  | 0.0078041  |
| 0.0091534 | 0.69708    |
| 0.0079451 | -0.0072122 |

|           |            |
|-----------|------------|
| 0.064204  | -0.2052    |
| 0.034187  | -0.92541   |
| 0.096059  | 0.02616    |
| 0.007821  | -0.0072122 |
| 0.0081619 | 0.41861    |
| 0.0076807 | 0.27125    |
| 0.0074585 | 0.20034    |
| 0.037156  | -0.80605   |
| 0.0087331 | 0.58295    |
| 0.0092171 | -0.0058338 |
| 0.034187  | -0.91058   |
| 0.0085339 | 0.52689    |
| 0.0076807 | 0.27125    |
| 0.0070589 | 0.059284   |
| 0.00783   | 0.31787    |
| 0.03669   | 0.031675   |
| 0.0073793 | 0.17468    |
| 0.0076336 | 0.25635    |
| 0.0075433 | 0.2276     |
| 0.0076336 | 0.25635    |
| 0.0081619 | 0.41861    |
| 0.1035    | 0.057058   |
| 0.0070589 | 0.059284   |
| 0.0083433 | 0.47199    |
| 0.0070776 | 0.073782   |
| 0.086735  | 0.042062   |
| 0.00783   | 0.31787    |
| 0.02223   | 0.018425   |
| 0.094574  | 0.061313   |
| 0.0092171 | -0.0064176 |
| 0.0076807 | 0.27125    |
| 0.0076807 | 0.27125    |
| 0.065104  | 0.04917    |
| 0.0083433 | 0.47199    |
| 0.0078823 | 0.33401    |
| 0.0075002 | 0.21378    |
| 0.0090104 | 0.65886    |
| 0.0084694 | 0.50845    |
| 0.0074585 | 0.1873     |
| 0.037156  | -0.80605   |
| 0.015366  | 0.0067344  |

|           |            |
|-----------|------------|
| 0.096449  | 0.06518    |
| 0.0082213 | 0.43621    |
| 0.0081619 | 0.41861    |
| 0.0070192 | 0.030378   |
| 0.0073419 | 0.16248    |
| 0.0073793 | 0.17468    |
| 0.0072071 | 0.11821    |
| 0.0083953 | -0.0076979 |
| 0.028099  | 0.023825   |
| 0.0085339 | 0.52689    |
| 0.0087331 | 0.58295    |
| 0.02223   | 0.017077   |
| 0.0090104 | 0.65886    |
| 0.0073793 | 0.17468    |
| 0.007306  | 0.15072    |
| 0.0070818 | 0.014005   |
| 0.0075153 | -0.0051251 |
| 0.0084694 | 0.50845    |
| 0.02223   | 0.017077   |
| 0.039002  | -0.74417   |
| 0.0088013 | 0.60183    |
| 0.017596  | 0.010484   |
| 0.024427  | 0.019776   |
| 0.029421  | 0.025165   |
| 0.0079359 | 0.35043    |
| 0.0074585 | 0.1873     |
| 0.10228   | 0.022987   |
| 0.0085746 | -0.0072929 |
| 0.014706  | 0.0055346  |
| 0.051147  | 0.042727   |
| 0.032668  | -1.1056    |
| 0.0075002 | 0.21378    |
| 0.0072386 | 0.12857    |
| 0.010376  | -0.0027971 |
| 0.0077292 | 0.28647    |
| 0.0092171 | -0.0064176 |
| 0.0074333 | -0.0026829 |
| 0.032544  | -1.0304    |
| 0.0083953 | -0.0076979 |
| 0.017596  | 0.010484   |
| 0.0073793 | 0.17468    |

|           |            |
|-----------|------------|
| 0.062629  | 0.048056   |
| 0.0094709 | -0.0058338 |
| 0.0072715 | 0.13941    |
| 0.014086  | 0.004364   |
| 0.0074333 | -0.0026829 |
| 0.0094709 | -0.0058338 |
| 0.0070401 | 0.021497   |
| 0.10494   | 0.039956   |
| 0.032462  | -1.0894    |
| 0.0086658 | 0.56416    |
| 0.101     | 0.065585   |
| 0.0082213 | 0.43621    |
| 0.095533  | 0.063518   |
| 0.0076069 | -0.0060189 |
| 0.0088013 | 0.60183    |
| 0.0070818 | 0.014005   |
| 0.10494   | 0.037598   |
| 0.0072955 | 0.00071242 |
| 0.0076807 | 0.27125    |
| 0.032544  | -1.0304    |
| 0.0073419 | 0.16248    |
| 0.011972  | 0.001053   |
| 0.1038    | 0.02577    |
| 0.0072071 | 0.11821    |
| 0.012958  | 0.0021206  |
| 0.0077085 | -0.0060189 |
| 0.094739  | 0.028875   |
| 0.03524   | -0.87876   |
| 0.0070589 | 0.066311   |
| 0.007123  | 0.090103   |
| 0.007821  | -0.0067106 |
| 0.0072955 | 0.00071242 |
| 0.010048  | -0.0036418 |
| 0.0082213 | 0.43621    |
| 0.010731  | -0.0027971 |
| 0.0078823 | 0.33401    |
| 0.0087331 | 0.58295    |
| 0.013504  | 0.0032251  |
| 0.0070169 | 0.040742   |
| 0.10134   | 0.022512   |
| 0.034187  | -0.92541   |



|           |            |
|-----------|------------|
| 0.032423  | -1.0477    |
| 0.0097473 | -0.0051686 |
| 0.010376  | -0.0036418 |
| 0.0074182 | 0.1873     |
| 0.059983  | 0.04743    |
| 0.0079359 | 0.35043    |
| 0.0084694 | 0.50845    |
| 0.0070169 | 0.040742   |
| 0.0072386 | 0.12857    |
| 0.0071491 | 0.098977   |
| 0.0090816 | 0.67796    |
| 0.097321  | 0.06633    |
| 0.0091534 | 0.69708    |
| 0.045635  | -0.5589    |
| 0.021206  | 0.015736   |
| 0.086106  | 0.042062   |
| 0.032743  | -1.0111    |
| 0.0087331 | 0.58295    |
| 0.012958  | 0.0032251  |
| 0.090686  | 0.034253   |
| 0.080871  | 0.049748   |
| 0.0071894 | 0.0051576  |
| 0.014706  | 0.0067344  |
| 0.088023  | 0.039917   |
| 0.0087704 | -0.006908  |
| 0.0070309 | 0.052688   |
| 0.0070169 | 0.040742   |
| 0.0085994 | 0.54547    |
| 0.10271   | 0.023443   |
| 0.0073793 | 0.17468    |
| 0.018428  | 0.013082   |
| 0.0070309 | 0.052688   |
| 0.036619  | -0.82536   |
| 0.0080815 | -0.007536  |
| 0.0070776 | 0.066311   |
| 0.0073419 | 0.16248    |
| 0.007147  | 0.0078041  |
| 0.1003    | 0.022572   |
| 0.10309   | 0.057058   |
| 0.0081619 | 0.41861    |
| 0.0075877 | 0.2418     |

|           |            |
|-----------|------------|
| 0.0073419 | 0.16248    |
| 0.0074585 | 0.20034    |
| 0.0080815 | -0.007536  |
| 0.032373  | -1.0704    |
| 0.007821  | -0.0072122 |
| 0.0087704 | -0.0072929 |
| 0.075932  | -0.059632  |
| 0.032462  | -1.0894    |
| 0.082013  | 0.048051   |
| 0.0085994 | 0.54547    |
| 0.10264   | 0.059186   |
| 0.10462   | 0.044903   |
| 0.068489  | 0.050485   |
| 0.0081037 | 0.40122    |
| 0.032373  | -1.0632    |
| 0.0091534 | 0.69708    |
| 0.035661  | -0.84394   |
| 0.094574  | 0.063518   |
| 0.007123  | 0.090103   |
| 0.025601  | 0.022479   |
| 0.0094709 | -0.0058338 |
| 0.0082818 | 0.45401    |
| 0.0073793 | 0.17468    |
| 0.10477   | 0.044903   |
| 0.0078823 | 0.33401    |
| 0.026825  | 0.022479   |
| 0.0074585 | 0.20034    |
| 0.071483  | 0.05136    |
| 0.0082313 | -0.0076979 |
| 0.0075002 | 0.21378    |
| 0.032544  | -1.0304    |
| 0.0081619 | 0.41861    |
| 0.10496   | 0.037598   |
| 0.007022  | 0.046511   |
| 0.017596  | 0.010484   |
| 0.014086  | 0.004364   |
| 0.099743  | 0.023109   |
| 0.0075002 | 0.21378    |
| 0.0072386 | 0.12857    |
| 0.075932  | -0.059632  |
| 0.08918   | 0.040962   |

|           |            |
|-----------|------------|
| 0.0074585 | 0.20034    |
| 0.007022  | 0.046511   |
| 0.0073419 | 0.15072    |
| 0.03612   | -0.84394   |
| 0.07879   | -0.031991  |
| 0.083144  | 0.04663    |
| 0.08868   | 0.037674   |
| 0.0071113 | 0.010749   |
| 0.0094709 | -0.0058338 |
| 0.007022  | 0.046511   |
| 0.0071491 | 0.098977   |
| 0.0078823 | 0.33401    |
| 0.055719  | 0.045278   |
| 0.00894   | 0.6398     |
| 0.098575  | 0.023538   |
| 0.035661  | -0.86174   |
| 0.034505  | -0.91058   |
| 0.016809  | 0.010484   |
| 0.00783   | 0.31787    |
| 0.007123  | 0.090103   |
| 0.085489  | 0.04308    |
| 0.00783   | 0.31787    |
| 0.037733  | -0.78604   |
| 0.070056  | -0.10826   |
| 0.0079359 | 0.35043    |
| 0.0091534 | 0.69708    |
| 0.012448  | 0.001053   |
| 0.0091534 | 0.69708    |
| 0.0081037 | 0.40122    |
| 0.007821  | -0.0072122 |
| 0.054226  | 0.043621   |
| 0.0070776 | 0.073782   |
| 0.007099  | 0.081709   |
| 0.010376  | -0.0027971 |
| 0.0087331 | 0.58295    |
| 0.007147  | 0.0051576  |
| 0.033642  | -0.95303   |
| 0.057178  | 0.045278   |
| 0.0085994 | 0.54547    |
| 0.0083953 | -0.0075602 |
| 0.0070309 | 0.052688   |

|           |            |
|-----------|------------|
| 0.032972  | -1.1193    |
| 0.03669   | 0.031675   |
| 0.0075877 | 0.2418     |
| 0.0086658 | 0.56416    |
| 0.0070433 | 0.059284   |
| 0.0091534 | 0.69708    |
| 0.0090104 | 0.65886    |
| 0.10271   | 0.023443   |
| 0.0072386 | 0.11821    |
| 0.0070433 | 0.059284   |
| 0.007123  | 0.090103   |
| 0.013504  | 0.004364   |
| 0.0084058 | 0.49014    |
| 0.016066  | 0.0079609  |
| 0.0087331 | 0.58295    |
| 0.0083953 | -0.0076979 |
| 0.077795  | 0.051444   |
| 0.097321  | 0.06633    |
| 0.10385   | 0.052398   |
| 0.0085994 | 0.54547    |
| 0.0097473 | -0.0051686 |
| 0.0071773 | 0.10834    |
| 0.039695  | -0.72239   |
| 0.098149  | 0.067003   |
| 0.0074182 | 0.1873     |
| 0.012448  | 0.001053   |
| 0.0087704 | -0.0072929 |
| 0.033792  | -1.1419    |
| 0.007099  | 0.073782   |
| 0.0082213 | 0.43621    |
| 0.03303   | -0.98966   |
| 0.0080466 | 0.38405    |
| 0.0087704 | -0.0072929 |
| 0.0072386 | 0.12857    |
| 0.0075002 | 0.21378    |
| 0.078448  | 0.051216   |
| 0.015366  | 0.0079609  |
| 0.0097473 | -0.0051686 |
| 0.043745  | -0.6071    |
| 0.0070589 | 0.066311   |
| 0.0071773 | 0.10834    |

|           |            |
|-----------|------------|
| 0.019306  | 0.013082   |
| 0.0074585 | 0.20034    |
| 0.007147  | 0.0078041  |
| 0.0074182 | 0.1873     |
| 0.0084694 | 0.50845    |
| 0.033662  | 0.029119   |
| 0.061361  | -0.24839   |
| 0.032462  | -1.0894    |
| 0.1038    | 0.024827   |
| 0.079079  | 0.050932   |
| 0.0076807 | 0.27125    |
| 0.0079359 | 0.35043    |
| 0.0070589 | 0.066311   |
| 0.0071773 | 0.10834    |
| 0.00894   | 0.6398     |
| 0.0071491 | 0.098977   |
| 0.033208  | -0.97806   |
| 0.0081037 | 0.40122    |
| 0.0074585 | 0.20034    |
| 0.0088013 | 0.60183    |
| 0.017596  | 0.010484   |
| 0.0089841 | -0.0064176 |
| 0.007779  | 0.30202    |
| 0.0081037 | 0.40122    |
| 0.0075433 | 0.2276     |
| 0.10488   | 0.042402   |
| 0.0073602 | -0.0011105 |
| 0.023303  | 0.018425   |
| 0.0087704 | -0.0072929 |
| 0.032423  | -1.0477    |
| 0.0084694 | 0.50845    |
| 0.082578  | 0.048051   |
| 0.0071491 | 0.098977   |
| 0.0070433 | 0.059284   |
| 0.0094709 | -0.0058338 |
| 0.0070776 | 0.073782   |
| 0.034855  | -0.89503   |
| 0.08799   | 0.040962   |
| 0.0075433 | 0.2276     |
| 0.0080466 | 0.38405    |
| 0.03276   | -1.1104    |

|           |            |
|-----------|------------|
| 0.038348  | -0.74417   |
| 0.0071113 | 0.0078041  |
| 0.083144  | 0.04663    |
| 0.0075877 | 0.2418     |
| 0.007821  | -0.0067106 |
| 0.032743  | -1.0111    |
| 0.032633  | -1.021     |
| 0.033092  | -1.1234    |
| 0.0084694 | 0.50845    |
| 0.0084058 | 0.49014    |
| 0.093574  | 0.05853    |
| 0.00894   | 0.6398     |
| 0.0087331 | 0.58295    |
| 0.032743  | -1.0111    |
| 0.021206  | 0.017077   |
| 0.032668  | -1.1056    |
| 0.0072071 | 0.11821    |
| 0.0072715 | 0.12857    |
| 0.0074585 | 0.20034    |
| 0.010048  | -0.0044341 |
| 0.069529  | 0.050826   |
| 0.010376  | -0.0027971 |
| 0.090012  | 0.036534   |
| 0.045635  | -0.5589    |
| 0.047677  | -0.5101    |
| 0.0086658 | 0.56416    |
| 0.049567  | 0.040812   |
| 0.00894   | 0.6398     |
| 0.016066  | 0.0079609  |
| 0.0070776 | 0.073782   |
| 0.0081037 | 0.40122    |
| 0.033353  | -1.1312    |
| 0.0089841 | -0.0064176 |
| 0.0075877 | 0.2418     |
| 0.0087331 | 0.58295    |
| 0.007123  | 0.081709   |
| 0.013504  | 0.004364   |
| 0.0070272 | 0.025758   |
| 0.032519  | -1.0951    |
| 0.10441   | 0.047424   |
| 0.0081619 | 0.41861    |

|           |            |
|-----------|------------|
| 0.1003    | 0.022784   |
| 0.0087331 | 0.58295    |
| 0.0085994 | 0.52689    |
| 0.00894   | 0.6398     |
| 0.0082213 | 0.43621    |
| 0.0070433 | 0.059284   |
| 0.0080466 | 0.38405    |
| 0.0074182 | 0.17468    |
| 0.024427  | 0.019776   |
| 0.0075433 | 0.2276     |
| 0.067404  | 0.050485   |
| 0.0080466 | 0.38405    |
| 0.0073602 | -0.0011105 |
| 0.0079359 | 0.35043    |
| 0.10309   | 0.059186   |
| 0.032373  | -1.0632    |
| 0.0078823 | 0.31787    |
| 0.0072071 | 0.11821    |
| 0.083144  | 0.04663    |
| 0.0073602 | -0.0026829 |
| 0.0074585 | 0.20034    |
| 0.018428  | 0.013082   |
| 0.068489  | 0.050826   |
| 0.032205  | 0.027815   |
| 0.0085994 | 0.54547    |
| 0.007022  | 0.040742   |
| 0.0070159 | 0.035368   |
| 0.0084058 | 0.49014    |
| 0.0090816 | 0.67796    |
| 0.086766  | 0.027849   |
| 0.00894   | 0.6398     |
| 0.0079906 | 0.36712    |
| 0.0079359 | 0.35043    |
| 0.03669   | 0.032921   |
| 0.10455   | 0.029687   |
| 0.025601  | 0.022479   |
| 0.00894   | 0.6398     |
| 0.039695  | -0.72239   |
| 0.0070433 | 0.059284   |
| 0.0085339 | 0.52689    |
| 0.007306  | 0.15072    |

|           |            |
|-----------|------------|
| 0.086766  | 0.027849   |
| 0.0087331 | 0.58295    |
| 0.02223   | 0.017077   |
| 0.059983  | 0.04743    |
| 0.097342  | 0.024682   |
| 0.086106  | 0.04308    |
| 0.032389  | -1.0771    |
| 0.0071491 | 0.098977   |
| 0.0072071 | 0.11821    |
| 0.067404  | 0.050095   |
| 0.0070192 | 0.030378   |
| 0.0078823 | 0.31787    |
| 0.0082213 | 0.43621    |
| 0.0070433 | 0.059284   |
| 0.10036   | 0.06649    |
| 0.0339    | -0.92541   |
| 0.037156  | -0.80605   |
| 0.032972  | -1.1193    |
| 0.0070433 | 0.059284   |
| 0.1035    | 0.054784   |
| 0.059983  | 0.046758   |
| 0.010376  | -0.0036418 |
| 0.0075002 | 0.21378    |
| 0.0092171 | -0.0064176 |
| 0.057178  | 0.04604    |
| 0.030791  | 0.026496   |
| 0.032861  | -1.1149    |
| 0.078448  | 0.050932   |
| 0.0081037 | 0.38405    |
| 0.083714  | 0.04663    |
| 0.010376  | -0.0036418 |
| 0.041199  | -0.67741   |
| 0.0070589 | 0.066311   |
| 0.0072071 | 0.11821    |
| 0.007306  | 0.13941    |
| 0.0586    | 0.046758   |
| 0.094069  | 0.028875   |
| 0.0081619 | 0.41861    |
| 0.0084694 | 0.50845    |
| 0.0081037 | 0.40122    |
| 0.041199  | -0.67741   |



|           |            |
|-----------|------------|
| 0.032373  | -1.0704    |
| 0.0088013 | 0.58295    |
| 0.03612   | -0.84394   |
| 0.10441   | 0.047424   |
| 0.0085994 | 0.54547    |
| 0.0082313 | -0.0076938 |
| 0.0072387 | 0.00071242 |
| 0.028099  | 0.023825   |
| 0.0075433 | 0.2276     |
| 0.012448  | 0.001053   |
| 0.016809  | 0.0092115  |
| 0.038254  | 0.034143   |
| 0.10472   | 0.03138    |
| 0.0077292 | 0.28647    |
| 0.084221  | 0.011497   |
| 0.032861  | -1.1149    |
| 0.0083953 | -0.0076979 |
| 0.0088702 | 0.62079    |
| 0.037733  | -0.78604   |
| 0.037733  | -0.78604   |
| 0.0077292 | 0.28647    |
| 0.10311   | 0.024054   |
| 0.03612   | -0.84394   |
| 0.032544  | -1.0304    |
| 0.092718  | 0.030934   |
| 0.017596  | 0.010484   |
| 0.010048  | -0.0044341 |
| 0.0086658 | 0.56416    |
| 0.069529  | 0.050826   |
| 0.042857  | -0.63085   |
| 0.032474  | -1.0393    |
| 0.0090816 | 0.67796    |
| 0.0076807 | 0.27125    |
| 0.059971  | -0.27073   |
| 0.0070192 | 0.030378   |
| 0.068581  | -0.1449    |
| 0.0071491 | 0.098977   |
| 0.0075433 | 0.2276     |
| 0.062773  | -0.22652   |
| 0.0072386 | 0.12857    |
| 0.0073602 | -0.0011105 |

|           |            |
|-----------|------------|
| 0.09204   | 0.032017   |
| 0.0074182 | 0.1873     |
| 0.010731  | -0.0019027 |
| 0.039002  | -0.74417   |
| 0.0073793 | 0.17468    |
| 0.0077085 | -0.0060189 |
| 0.032668  | -1.1056    |
| 0.041454  | 0.035337   |
| 0.0080815 | -0.0076938 |
| 0.0082818 | 0.45401    |
| 0.10309   | 0.059186   |
| 0.0082213 | 0.43621    |
| 0.0072955 | 0.00071242 |
| 0.066276  | 0.049656   |
| 0.0080466 | 0.38405    |
| 0.016809  | 0.0092115  |
| 0.032544  | -1.0304    |
| 0.0075002 | 0.21378    |
| 0.0075877 | 0.2276     |
| 0.063888  | 0.048637   |
| 0.0088702 | 0.62079    |
| 0.023303  | 0.018425   |
| 0.0070192 | 0.030378   |
| 0.007821  | -0.0067106 |
| 0.049567  | 0.040812   |
| 0.093395  | 0.030934   |
| 0.0097473 | -0.0044341 |
| 0.068581  | -0.12619   |
| 0.0094709 | -0.0058338 |
| 0.0084694 | 0.50845    |
| 0.013504  | 0.004364   |
| 0.10311   | 0.024054   |
| 0.0070401 | 0.021497   |
| 0.007306  | 0.15072    |
| 0.032875  | -1.0007    |
| 0.073273  | 0.051783   |
| 0.0076069 | -0.0051251 |
| 0.0073419 | 0.16248    |
| 0.0087704 | -0.0072929 |
| 0.00894   | 0.6398     |
| 0.012958  | 0.0021206  |

|           |            |
|-----------|------------|
| 0.016809  | 0.0092115  |
| 0.0080466 | 0.38405    |
| 0.011114  | -0.0009612 |
| 0.025601  | 0.021128   |
| 0.0070433 | 0.059284   |
| 0.0086658 | 0.56416    |
| 0.0085994 | 0.54547    |
| 0.0078823 | 0.33401    |
| 0.0085339 | 0.52689    |
| 0.0078823 | 0.33401    |
| 0.007123  | 0.090103   |
| 0.03669   | 0.032921   |
| 0.016066  | 0.0079609  |
| 0.0083953 | -0.0076979 |
| 0.097321  | 0.06633    |
| 0.0090816 | 0.67796    |
| 0.0079359 | 0.35043    |
| 0.010376  | -0.0036418 |
| 0.0339    | -0.93955   |
| 0.0075433 | 0.2276     |
| 0.095533  | 0.06518    |
| 0.051016  | -0.43662   |
| 0.019306  | 0.013082   |
| 0.03669   | 0.031675   |
| 0.068581  | -0.1449    |
| 0.032633  | -1.021     |
| 0.091362  | 0.034253   |
| 0.019306  | 0.014403   |
| 0.0092171 | -0.0064176 |
| 0.025601  | 0.021128   |
| 0.059971  | -0.27073   |
| 0.0084694 | 0.50845    |
| 0.0092171 | -0.0064176 |
| 0.0090104 | 0.65886    |
| 0.037733  | -0.78604   |
| 0.0082213 | 0.43621    |
| 0.0075002 | 0.21378    |
| 0.1035    | 0.054784   |
| 0.0071773 | 0.10834    |
| 0.0074585 | 0.20034    |
| 0.0090816 | 0.67796    |

|           |            |
|-----------|------------|
| 0.0085994 | 0.54547    |
| 0.0072387 | 0.00071242 |
| 0.0081037 | 0.40122    |
| 0.043745  | -0.6071    |
| 0.0070581 | 0.017584   |
| 0.007306  | 0.15072    |
| 0.0088013 | 0.60183    |
| 0.032972  | -1.1193    |
| 0.034505  | -0.91058   |
| 0.03276   | -1.1104    |
| 0.020232  | 0.014403   |
| 0.0080466 | 0.38405    |
| 0.033412  | -0.96585   |
| 0.007306  | 0.15072    |
| 0.0090104 | 0.65886    |
| 0.0085994 | 0.54547    |
| 0.0072955 | 0.00071242 |
| 0.0072386 | 0.12857    |
| 0.0092171 | -0.0064176 |
| 0.0072715 | 0.13941    |
| 0.011527  | -0.0009612 |
| 0.0074585 | 0.1873     |
| 0.093574  | 0.05853    |
| 0.0072955 | 0.00071242 |
| 0.035661  | -0.86174   |
| 0.0075002 | 0.21378    |
| 0.0090104 | 0.65886    |
| 0.074476  | -0.074934  |
| 0.032519  | -1.0951    |
| 0.0090104 | 0.65886    |
| 0.0086658 | 0.56416    |
| 0.062773  | -0.2052    |
| 0.0072071 | 0.11821    |
| 0.0070309 | 0.052688   |
| 0.07411   | 0.051783   |
| 0.011972  | 2.49E-05   |
| 0.0074182 | 0.1873     |
| 0.0072071 | 0.11821    |
| 0.081558  | -0.008361  |
| 0.032668  | -1.1056    |
| 0.10271   | 0.023443   |

|           |            |
|-----------|------------|
| 0.0092171 | -0.0064176 |
| 0.0085746 | -0.0075602 |
| 0.0085339 | 0.52689    |
| 0.0074585 | 0.20034    |
| 0.0074585 | 0.20034    |
| 0.012958  | 0.0021206  |
| 0.012958  | 0.0021206  |
| 0.089343  | 0.037674   |
| 0.0075433 | 0.2276     |
| 0.015366  | 0.0067344  |
| 0.00894   | 0.6398     |
| 0.0072071 | 0.11821    |
| 0.0074585 | 0.20034    |
| 0.0077292 | 0.28647    |
| 0.0077292 | 0.28647    |
| 0.0073602 | -0.0026829 |
| 0.014086  | 0.004364   |
| 0.0076807 | 0.27125    |
| 0.015366  | 0.0067344  |
| 0.0073793 | 0.17468    |
| 0.074476  | -0.074934  |
| 0.033208  | -0.97806   |
| 0.0090816 | 0.67796    |
| 0.035158  | 0.030407   |
| 0.0072715 | 0.13941    |
| 0.0081619 | 0.41861    |
| 0.010731  | -0.0027971 |
| 0.0071894 | 0.0051576  |
| 0.0088013 | 0.60183    |
| 0.033792  | -1.1419    |
| 0.0071773 | 0.10834    |
| 0.0082818 | 0.45401    |
| 0.029421  | 0.025165   |
| 0.0079906 | 0.36712    |
| 0.00894   | 0.6398     |
| 0.0076807 | 0.27125    |
| 0.084293  | 0.04497    |
| 0.074476  | -0.074934  |
| 0.0085746 | -0.0072929 |
| 0.011114  | -0.0019027 |
| 0.0077292 | 0.28647    |

|           |            |
|-----------|------------|
| 0.032462  | -1.0894    |
| 0.0088702 | 0.62079    |
| 0.092718  | 0.032017   |
| 0.00783   | 0.31787    |
| 0.016066  | 0.0079609  |
| 0.0076336 | 0.25635    |
| 0.033642  | -0.95303   |
| 0.0074585 | 0.1873     |
| 0.0088702 | 0.62079    |
| 0.032668  | -1.1056    |
| 0.0088702 | 0.62079    |
| 0.0070169 | 0.040742   |
| 0.0087331 | 0.58295    |
| 0.0079451 | -0.0072122 |
| 0.0087331 | 0.58295    |
| 0.059983  | 0.046758   |
| 0.0074182 | 0.1873     |
| 0.0070309 | 0.052688   |
| 0.086766  | 0.027849   |
| 0.079691  | 0.050593   |
| 0.023303  | 0.018425   |
| 0.032373  | -1.0704    |
| 0.014706  | 0.0055346  |
| 0.033948  | -1.1453    |
| 0.010048  | -0.0036418 |
| 0.0070589 | 0.066311   |
| 0.082578  | 0.048051   |
| 0.00783   | 0.31787    |
| 0.077118  | 0.051619   |
| 0.0085746 | -0.0075602 |
| 0.0080815 | -0.0076938 |
| 0.0072071 | 0.11821    |
| 0.0074182 | 0.1873     |
| 0.0070309 | 0.052688   |
| 0.042857  | -0.6071    |
| 0.013504  | 0.0032251  |
| 0.0086658 | 0.56416    |
| 0.0097473 | -0.0044341 |
| 0.030791  | 0.026496   |
| 0.0077085 | -0.0060189 |
| 0.061327  | 0.048056   |

|           |            |
|-----------|------------|
| 0.0071491 | 0.098977   |
| 0.0073793 | 0.17468    |
| 0.0088013 | 0.60183    |
| 0.0071113 | 0.010749   |
| 0.0082213 | 0.43621    |
| 0.078448  | 0.050932   |
| 0.00783   | 0.31787    |
| 0.0084058 | 0.49014    |
| 0.0076807 | 0.27125    |
| 0.0070309 | 0.052688   |
| 0.0080815 | -0.007536  |
| 0.00783   | 0.31787    |
| 0.0091534 | 0.69708    |
| 0.0075433 | 0.2276     |
| 0.013504  | 0.004364   |
| 0.00894   | 0.6398     |
| 0.032389  | -1.0771    |
| 0.0097473 | -0.0044341 |
| 0.082903  | 0.0020229  |
| 0.00783   | 0.31787    |
| 0.0082818 | 0.45401    |
| 0.047964  | 0.039792   |
| 0.0071773 | 0.10834    |
| 0.0070776 | 0.073782   |
| 0.061327  | 0.04743    |
| 0.098575  | 0.024065   |
| 0.0090104 | 0.65886    |
| 0.0073793 | 0.17468    |
| 0.0070169 | 0.040742   |
| 0.0083433 | 0.47199    |
| 0.052201  | -0.41225   |
| 0.032205  | 0.027815   |
| 0.077795  | 0.051444   |
| 0.032743  | -1.0111    |
| 0.044711  | 0.038732   |
| 0.0084058 | 0.49014    |
| 0.007306  | 0.15072    |
| 0.015366  | 0.0067344  |
| 0.0085994 | 0.54547    |
| 0.0080815 | -0.007536  |
| 0.043079  | 0.037634   |

|           |            |
|-----------|------------|
| 0.010048  | -0.0044341 |
| 0.0072071 | 0.11821    |
| 0.0084058 | 0.49014    |
| 0.033662  | 0.029119   |
| 0.0085746 | -0.0075602 |
| 0.0072955 | 0.00071242 |
| 0.0070433 | 0.059284   |
| 0.030791  | 0.026496   |
| 0.0087331 | 0.58295    |
| 0.0075002 | 0.21378    |
| 0.0070818 | 0.014005   |
| 0.0084058 | 0.49014    |
| 0.0074585 | 0.20034    |
| 0.020232  | 0.014403   |
| 0.0073793 | 0.17468    |
| 0.034187  | -0.92541   |
| 0.0075433 | 0.2276     |
| 0.0097473 | -0.0051686 |
| 0.011972  | 0.001053   |
| 0.0082313 | -0.0076938 |
| 0.051147  | 0.041791   |
| 0.0070589 | 0.066311   |
| 0.052701  | 0.042727   |
| 0.032861  | -1.1149    |
| 0.1016    | 0.064369   |
| 0.035661  | -0.86174   |
| 0.057178  | 0.045278   |
| 0.0075433 | 0.2276     |
| 0.032544  | -1.0304    |
| 0.00894   | 0.6398     |
| 0.0072386 | 0.12857    |
| 0.0081037 | 0.40122    |
| 0.007306  | 0.15072    |
| 0.0087331 | 0.58295    |
| 0.0078823 | 0.33401    |
| 0.007123  | 0.090103   |
| 0.0088013 | 0.60183    |
| 0.016066  | 0.0079609  |
| 0.0088013 | 0.60183    |
| 0.049867  | -0.46109   |
| 0.063888  | 0.04917    |



|           |            |
|-----------|------------|
| 0.0070159 | 0.035368   |
| 0.010376  | -0.0036418 |
| 0.054226  | 0.043621   |
| 0.007821  | -0.0072122 |
| 0.0087331 | 0.58295    |
| 0.0073793 | 0.17468    |
| 0.0081037 | 0.40122    |
| 0.064204  | -0.2052    |
| 0.0082818 | 0.45401    |
| 0.0077085 | -0.0060189 |
| 0.013504  | 0.004364   |
| 0.097966  | 0.024682   |
| 0.0081619 | 0.41861    |
| 0.042857  | -0.63085   |
| 0.0084058 | 0.49014    |
| 0.0074585 | 0.20034    |
| 0.0070581 | 0.014005   |
| 0.077795  | 0.051444   |
| 0.0079906 | 0.36712    |
| 0.0085339 | 0.52689    |
| 0.007306  | 0.13941    |
| 0.099743  | 0.023109   |
| 0.034855  | -0.89503   |
| 0.0086658 | 0.56416    |
| 0.011972  | 2.49E-05   |
| 0.0073793 | 0.17468    |
| 0.03669   | 0.032921   |
| 0.10134   | 0.022479   |
| 0.0085339 | 0.52689    |
| 0.0074333 | -0.0026829 |
| 0.062773  | -0.22652   |
| 0.0075153 | -0.0051251 |
| 0.0082818 | 0.45401    |
| 0.0088702 | 0.62079    |
| 0.080186  | -0.019688  |
| 0.079691  | 0.050593   |
| 0.0088702 | 0.62079    |
| 0.0090816 | 0.67796    |
| 0.057264  | -0.31669   |
| 0.011114  | -0.0019027 |
| 0.03524   | -0.87876   |

|           |            |
|-----------|------------|
| 0.0079451 | -0.007536  |
| 0.0081619 | 0.41861    |
| 0.0082313 | -0.0076979 |
| 0.00783   | 0.31787    |
| 0.0070776 | 0.073782   |
| 0.0085339 | 0.52689    |
| 0.084884  | 0.04497    |
| 0.0097473 | -0.0051686 |
| 0.0085339 | 0.52689    |
| 0.032474  | -1.0393    |
| 0.0083953 | -0.0076979 |
| 0.0089841 | -0.006908  |
| 0.0074585 | 0.20034    |
| 0.0094709 | -0.0051686 |
| 0.0077292 | 0.28647    |
| 0.0070589 | 0.059284   |
| 0.00894   | 0.6398     |
| 0.062773  | -0.2052    |
| 0.039002  | -0.74417   |
| 0.0088013 | 0.60183    |
| 0.0084058 | 0.49014    |
| 0.098149  | 0.067232   |
| 0.0071773 | 0.10834    |
| 0.0082213 | 0.43621    |
| 0.0070776 | 0.066311   |
| 0.011114  | -0.0019027 |
| 0.0074182 | 0.17468    |
| 0.0071491 | 0.098977   |
| 0.03303   | -0.98966   |
| 0.0079906 | 0.36712    |
| 0.0075433 | 0.2276     |
| 0.0075433 | 0.2276     |
| 0.0085339 | 0.52689    |
| 0.0079906 | 0.36712    |
| 0.011972  | 2.49E-05   |
| 0.03276   | -1.1056    |
| 0.0090104 | 0.65886    |
| 0.0070433 | 0.059284   |
| 0.0070433 | 0.059284   |
| 0.083714  | 0.04583    |
| 0.0071773 | 0.10834    |

|           |            |
|-----------|------------|
| 0.0088702 | 0.62079    |
| 0.075678  | 0.051739   |
| 0.0071773 | 0.10834    |
| 0.097321  | 0.06633    |
| 0.043745  | -0.5831    |
| 0.0091534 | 0.69708    |
| 0.0094709 | -0.0058338 |
| 0.0083433 | 0.47199    |
| 0.012958  | 0.0021206  |
| 0.0089841 | -0.006908  |
| 0.00783   | 0.30202    |
| 0.032875  | -0.98966   |
| 0.0084058 | 0.49014    |
| 0.00894   | 0.6398     |
| 0.0072715 | 0.13941    |
| 0.0088702 | 0.62079    |
| 0.0075433 | 0.2276     |
| 0.097342  | 0.024682   |
| 0.059971  | -0.27073   |
| 0.075678  | 0.051739   |
| 0.0090104 | 0.65886    |
| 0.098149  | 0.067003   |
| 0.10215   | 0.062875   |
| 0.035158  | 0.030407   |
| 0.0075877 | 0.2418     |
| 0.00894   | 0.6398     |
| 0.0077292 | 0.28647    |
| 0.091453  | 0.0511     |
| 0.00894   | 0.6398     |
| 0.084293  | 0.04583    |
| 0.0080466 | 0.38405    |
| 0.093395  | 0.030934   |
| 0.0075153 | -0.0040171 |
| 0.0077292 | 0.28647    |
| 0.0088702 | 0.62079    |
| 0.0075877 | 0.2418     |
| 0.007099  | 0.081709   |
| 0.0082818 | 0.43621    |
| 0.041454  | 0.035337   |
| 0.0079906 | 0.36712    |
| 0.0085994 | 0.54547    |

|           |            |
|-----------|------------|
| 0.10311   | 0.024054   |
| 0.0085994 | 0.54547    |
| 0.0081037 | 0.40122    |
| 0.0073419 | 0.16248    |
| 0.10228   | 0.022987   |
| 0.0072386 | 0.12857    |
| 0.033662  | 0.029119   |
| 0.0072386 | 0.12857    |
| 0.0076336 | 0.25635    |
| 0.007306  | 0.15072    |
| 0.0081619 | 0.41861    |
| 0.0074182 | 0.17468    |
| 0.10477   | 0.042402   |
| 0.0071894 | 0.0051576  |
| 0.0070589 | 0.066311   |
| 0.0073419 | 0.16248    |
| 0.086735  | 0.042062   |
| 0.0071773 | 0.10834    |
| 0.0082818 | 0.45401    |
| 0.011114  | -0.0009612 |
| 0.011114  | -0.0019027 |
| 0.0070776 | 0.073782   |
| 0.0071773 | 0.098977   |
| 0.007821  | -0.0067106 |
| 0.054226  | 0.043621   |
| 0.084293  | 0.04497    |
| 0.0070169 | 0.040742   |
| 0.10385   | 0.052398   |
| 0.0087331 | 0.58295    |
| 0.0077292 | 0.28647    |
| 0.10183   | 0.022679   |
| 0.0085994 | 0.54547    |
| 0.00894   | 0.6398     |
| 0.0072386 | 0.12857    |
| 0.010376  | -0.0027971 |
| 0.0086658 | 0.56416    |
| 0.061327  | 0.04743    |
| 0.074911  | 0.051806   |
| 0.0085339 | 0.52689    |
| 0.099743  | 0.023109   |
| 0.080871  | 0.049748   |

|           |            |
|-----------|------------|
| 0.011114  | -0.0009612 |
| 0.010048  | -0.0044341 |
| 0.0073793 | 0.16248    |
| 0.0081619 | 0.41861    |
| 0.0075002 | 0.21378    |
| 0.0090816 | 0.67796    |
| 0.023303  | 0.019776   |
| 0.032875  | -0.98966   |
| 0.10494   | 0.039956   |
| 0.0072386 | 0.11821    |
| 0.0076069 | -0.0051251 |
| 0.0072071 | 0.11821    |
| 0.0081037 | 0.40122    |
| 0.08918   | 0.040962   |
| 0.0086658 | 0.56416    |
| 0.077372  | -0.045303  |
| 0.082013  | 0.048674   |
| 0.007306  | 0.15072    |
| 0.007147  | 0.0078041  |
| 0.015366  | 0.0079609  |
| 0.037733  | -0.78604   |
| 0.0586    | 0.04604    |
| 0.0072386 | 0.12857    |
| 0.0088702 | 0.62079    |
| 0.0091534 | 0.69708    |
| 0.013504  | 0.0032251  |
| 0.0074182 | 0.1873     |
| 0.0075002 | 0.21378    |
| 0.0083433 | 0.47199    |
| 0.0071773 | 0.10834    |
| 0.0072071 | 0.11821    |
| 0.016066  | 0.0079609  |
| 0.0087331 | 0.58295    |
| 0.078448  | 0.050932   |
| 0.099168  | 0.023538   |
| 0.0071894 | 0.0027978  |
| 0.0084058 | 0.47199    |
| 0.0079359 | 0.35043    |
| 0.094739  | 0.028875   |
| 0.0074182 | 0.17468    |
| 0.0339    | -0.92541   |

|           |            |
|-----------|------------|
| 0.064204  | -0.2052    |
| 0.094574  | 0.061313   |
| 0.0088702 | 0.62079    |
| 0.099669  | 0.06705    |
| 0.0090104 | 0.65886    |
| 0.077372  | -0.045303  |
| 0.10311   | 0.024054   |
| 0.087374  | 0.041005   |
| 0.029421  | 0.025165   |
| 0.0073419 | 0.16248    |
| 0.0085994 | 0.54547    |
| 0.0075002 | 0.21378    |
| 0.0090816 | 0.67796    |
| 0.018428  | 0.013082   |
| 0.0082213 | 0.43621    |
| 0.0081037 | 0.40122    |
| 0.0081619 | 0.41861    |
| 0.082013  | 0.048674   |
| 0.096449  | 0.06518    |
| 0.0084694 | 0.50845    |
| 0.0085339 | 0.52689    |
| 0.0074585 | 0.20034    |
| 0.014086  | 0.004364   |
| 0.0086658 | 0.56416    |
| 0.0090816 | 0.67796    |
| 0.0075877 | 0.2418     |
| 0.0071894 | 0.0051576  |
| 0.0070159 | 0.035368   |
| 0.051147  | 0.042727   |
| 0.074911  | 0.051806   |
| 0.0089841 | -0.006908  |
| 0.0090816 | 0.67796    |
| 0.067111  | -0.16433   |
| 0.0083953 | -0.0076979 |
| 0.097342  | 0.024682   |
| 0.007123  | 0.090103   |
| 0.012958  | 0.0032251  |
| 0.00894   | 0.6398     |
| 0.016809  | 0.0092115  |
| 0.0070272 | 0.025758   |
| 0.029421  | 0.026496   |

|           |            |
|-----------|------------|
| 0.0075002 | 0.21378    |
| 0.0070433 | 0.059284   |
| 0.007147  | 0.0051576  |
| 0.0082213 | 0.43621    |
| 0.041454  | 0.035337   |
| 0.014086  | 0.0055346  |
| 0.0077292 | 0.28647    |
| 0.032373  | -1.0632    |
| 0.0082818 | 0.45401    |
| 0.0090104 | 0.65886    |
| 0.007099  | 0.081709   |
| 0.085509  | 0.020095   |
| 0.0072386 | 0.11821    |
| 0.0075877 | 0.2418     |
| 0.044711  | 0.037634   |
| 0.007123  | 0.090103   |
| 0.03303   | -0.98966   |
| 0.00894   | 0.6398     |
| 0.0074182 | 0.1873     |
| 0.0070589 | 0.066311   |
| 0.007099  | 0.081709   |
| 0.010048  | -0.0036418 |
| 0.023303  | 0.018425   |
| 0.0097473 | -0.0051686 |
| 0.019306  | 0.013082   |
| 0.010376  | -0.0036418 |
| 0.0091534 | 0.69708    |
| 0.0090816 | 0.67796    |
| 0.0084694 | 0.50845    |
| 0.019306  | 0.013082   |
| 0.00894   | 0.6398     |
| 0.07411   | 0.051821   |
| 0.0085339 | 0.52689    |
| 0.0090816 | 0.67796    |
| 0.10271   | 0.022987   |
| 0.10271   | 0.023443   |
| 0.0094709 | -0.0051686 |
| 0.0089841 | -0.006908  |
| 0.0071491 | 0.098977   |
| 0.0070818 | 0.010749   |
| 0.10309   | 0.057058   |

|           |            |
|-----------|------------|
| 0.034187  | -0.92541   |
| 0.0090816 | 0.67796    |
| 0.0087331 | 0.58295    |
| 0.0070776 | 0.073782   |
| 0.0073419 | 0.16248    |
| 0.03612   | -0.84394   |
| 0.0072386 | 0.11821    |
| 0.092718  | 0.032017   |
| 0.007123  | 0.081709   |
| 0.0077292 | 0.28647    |
| 0.0082213 | 0.43621    |
| 0.0084058 | 0.49014    |
| 0.033494  | -1.1349    |
| 0.0079359 | 0.35043    |
| 0.032743  | -1.0111    |
| 0.0081619 | 0.41861    |
| 0.0070169 | 0.040742   |
| 0.00783   | 0.31787    |
| 0.0090816 | 0.67796    |
| 0.0088702 | 0.62079    |
| 0.059971  | -0.27073   |
| 0.033219  | -1.1274    |
| 0.098932  | 0.067232   |
| 0.0072955 | 0.00071242 |
| 0.10496   | 0.037598   |
| 0.0082213 | 0.43621    |
| 0.0094709 | -0.0058338 |
| 0.0079359 | 0.35043    |
| 0.10455   | 0.028193   |
| 0.007123  | 0.090103   |
| 0.032474  | -1.0393    |
| 0.007779  | 0.30202    |
| 0.0089841 | -0.006908  |
| 0.0081037 | 0.40122    |
| 0.0086658 | 0.56416    |
| 0.0082213 | 0.43621    |
| 0.0072071 | 0.11821    |
| 0.0079359 | 0.35043    |
| 0.084221  | 0.011497   |
| 0.05467   | -0.36399   |
| 0.0071773 | 0.10834    |



|           |            |
|-----------|------------|
| 0.079079  | 0.050593   |
| 0.011527  | 2.49E-05   |
| 0.0070589 | 0.066311   |
| 0.0074182 | 0.17468    |
| 0.0089841 | -0.006908  |
| 0.0090816 | 0.67796    |
| 0.010731  | -0.0027971 |
| 0.0090816 | 0.67796    |
| 0.0087331 | 0.58295    |
| 0.0090816 | 0.67796    |
| 0.0087331 | 0.56416    |
| 0.02223   | 0.017077   |
| 0.0086658 | 0.56416    |
| 0.0088013 | 0.60183    |
| 0.012958  | 0.0032251  |
| 0.00783   | 0.31787    |
| 0.035158  | 0.030407   |
| 0.011114  | -0.0009612 |
| 0.090686  | 0.034253   |
| 0.0075877 | 0.2418     |
| 0.066276  | 0.049656   |
| 0.093395  | 0.029884   |
| 0.033641  | -1.1384    |
| 0.035661  | -0.86174   |
| 0.0079359 | 0.35043    |
| 0.013504  | 0.004364   |
| 0.0072071 | 0.11821    |
| 0.0070192 | 0.025758   |
| 0.00783   | 0.31787    |
| 0.0082213 | 0.43621    |
| 0.0071491 | 0.090103   |
| 0.0075433 | 0.2276     |
| 0.013504  | 0.0032251  |
| 0.00894   | 0.6398     |
| 0.0084058 | 0.49014    |
| 0.012448  | 0.001053   |
| 0.049867  | -0.46109   |
| 0.07411   | 0.051783   |
| 0.00894   | 0.6398     |
| 0.0075877 | 0.2418     |
| 0.0076807 | 0.27125    |

|           |            |
|-----------|------------|
| 0.0070589 | 0.066311   |
| 0.011114  | -0.0019027 |
| 0.037156  | -0.80605   |
| 0.0088702 | 0.62079    |
| 0.0073793 | 0.17468    |
| 0.085489  | 0.04308    |
| 0.0070169 | 0.040742   |
| 0.067111  | -0.16433   |
| 0.045635  | -0.5589    |
| 0.0075877 | 0.2418     |
| 0.069529  | 0.050826   |
| 0.0091534 | 0.69708    |
| 0.0078823 | 0.33401    |
| 0.0083953 | -0.0076979 |
| 0.0097473 | -0.0051686 |
| 0.08918   | 0.040962   |
| 0.0090104 | 0.65886    |
| 0.0070776 | 0.073782   |
| 0.0070169 | 0.040742   |
| 0.012958  | 0.0021206  |
| 0.0074182 | 0.1873     |
| 0.0072071 | 0.11821    |
| 0.033948  | -1.1453    |
| 0.0087331 | 0.58295    |
| 0.0075002 | 0.21378    |
| 0.0070159 | 0.035368   |
| 0.0071773 | 0.10834    |
| 0.074911  | 0.051821   |
| 0.038254  | 0.034143   |
| 0.0085994 | 0.54547    |
| 0.0073419 | 0.16248    |
| 0.032588  | -1.1005    |
| 0.028099  | 0.023825   |
| 0.0070159 | 0.035368   |
| 0.0072071 | 0.10834    |
| 0.0088702 | 0.62079    |
| 0.099743  | 0.022784   |
| 0.092533  | 0.055137   |
| 0.0079359 | 0.35043    |
| 0.0074182 | 0.1873     |
| 0.076413  | 0.051619   |

|           |            |
|-----------|------------|
| 0.0070309 | 0.052688   |
| 0.0072386 | 0.11821    |
| 0.007099  | 0.081709   |
| 0.0087331 | 0.58295    |
| 0.018428  | 0.011775   |
| 0.0072386 | 0.12857    |
| 0.0073419 | 0.16248    |
| 0.083144  | 0.04737    |
| 0.055952  | -0.34019   |
| 0.1016    | 0.064369   |
| 0.080186  | -0.008361  |
| 0.034855  | -0.89503   |
| 0.0339    | -0.93955   |
| 0.023303  | 0.018425   |
| 0.018428  | 0.013082   |
| 0.07879   | -0.031991  |
| 0.0080466 | 0.38405    |
| 0.0087331 | 0.58295    |
| 0.007022  | 0.046511   |
| 0.10083   | 0.022479   |
| 0.0088013 | 0.60183    |
| 0.0085746 | -0.0075602 |
| 0.0079359 | 0.35043    |
| 0.0080466 | 0.38405    |
| 0.0090816 | 0.67796    |
| 0.0072715 | 0.13941    |
| 0.0080466 | 0.38405    |
| 0.010048  | -0.0044341 |
| 0.0090104 | 0.65886    |
| 0.052701  | 0.042727   |
| 0.0075153 | -0.0040171 |
| 0.010048  | -0.0044341 |
| 0.0070818 | 0.014005   |
| 0.0070309 | 0.052688   |
| 0.0083953 | -0.0075602 |
| 0.0083433 | 0.47199    |
| 0.0074182 | 0.1873     |
| 0.00783   | 0.31787    |
| 0.0081619 | 0.41861    |
| 0.00894   | 0.6398     |
| 0.0073793 | 0.17468    |

|           |            |
|-----------|------------|
| 0.0089841 | -0.006908  |
| 0.0088013 | 0.60183    |
| 0.055719  | 0.044471   |
| 0.0075877 | 0.2418     |
| 0.012448  | 0.0021206  |
| 0.079079  | 0.050593   |
| 0.0074585 | 0.20034    |
| 0.0077292 | 0.28647    |
| 0.0084694 | 0.50845    |
| 0.028099  | 0.023825   |
| 0.014086  | 0.0055346  |
| 0.0079906 | 0.36712    |
| 0.007306  | 0.15072    |
| 0.025601  | 0.021128   |
| 0.0070433 | 0.052688   |
| 0.074911  | 0.051806   |
| 0.064204  | -0.2052    |
| 0.0094709 | -0.0051686 |
| 0.087374  | 0.039917   |
| 0.0082213 | 0.43621    |
| 0.0087331 | 0.58295    |
| 0.058604  | -0.27073   |
| 0.0075433 | 0.2276     |
| 0.090686  | 0.035391   |
| 0.082013  | 0.048051   |
| 0.093395  | 0.030934   |
| 0.007099  | 0.081709   |
| 0.007779  | 0.30202    |
| 0.046637  | -0.53455   |
| 0.030791  | 0.026496   |
| 0.10134   | 0.022479   |
| 0.086766  | 0.027849   |
| 0.08868   | 0.037674   |
| 0.024427  | 0.019776   |
| 0.0071491 | 0.098977   |
| 0.0074182 | 0.1873     |
| 0.023303  | 0.018425   |
| 0.023303  | 0.018425   |
| 0.0084694 | 0.50845    |
| 0.045635  | -0.5589    |
| 0.0072386 | 0.12857    |

|           |            |
|-----------|------------|
| 0.10271   | 0.023443   |
| 0.0079359 | 0.35043    |
| 0.0084694 | 0.50845    |
| 0.0082313 | -0.0076938 |
| 0.015366  | 0.0067344  |
| 0.0075877 | 0.2418     |
| 0.042857  | -0.63085   |
| 0.039695  | -0.72239   |
| 0.016809  | 0.0092115  |
| 0.0072386 | 0.12857    |
| 0.011972  | 0.001053   |
| 0.0087331 | 0.58295    |
| 0.0088702 | 0.62079    |
| 0.0072386 | 0.12857    |
| 0.093395  | 0.029884   |
| 0.033662  | 0.029119   |
| 0.0087331 | 0.58295    |
| 0.0087704 | -0.006908  |
| 0.0090104 | 0.65886    |
| 0.099743  | 0.022784   |
| 0.10415   | 0.052398   |
| 0.039002  | -0.74417   |
| 0.0087704 | -0.0072929 |
| 0.0088013 | 0.60183    |
| 0.061327  | 0.048056   |
| 0.0072071 | 0.11821    |
| 0.0084694 | 0.50845    |
| 0.0077292 | 0.28647    |
| 0.0090104 | 0.65886    |
| 0.093574  | 0.05853    |
| 0.0088702 | 0.62079    |
| 0.0073419 | 0.16248    |
| 0.0088702 | 0.62079    |
| 0.0081619 | 0.41861    |
| 0.0070159 | 0.035368   |
| 0.0082818 | 0.45401    |
| 0.0071491 | 0.098977   |
| 0.0070776 | 0.073782   |
| 0.0074585 | 0.20034    |
| 0.0078823 | 0.33401    |
| 0.010048  | -0.0044341 |

|           |            |
|-----------|------------|
| 0.032633  | -1.021     |
| 0.0070589 | 0.066311   |
| 0.032633  | -1.021     |
| 0.0072715 | 0.13941    |
| 0.082013  | 0.048674   |
| 0.084221  | 0.011497   |
| 0.0081037 | 0.40122    |
| 0.0074182 | 0.1873     |
| 0.014086  | 0.004364   |
| 0.032418  | -1.0771    |
| 0.0091534 | 0.69708    |
| 0.080871  | 0.04924    |
| 0.084293  | 0.04497    |
| 0.0070309 | 0.046511   |
| 0.0088013 | 0.60183    |
| 0.0075877 | 0.2418     |
| 0.0070581 | 0.017584   |
| 0.094069  | 0.029884   |
| 0.0083953 | -0.0076979 |
| 0.0084058 | 0.49014    |
| 0.0073419 | 0.15072    |
| 0.08799   | 0.034794   |
| 0.093574  | 0.05853    |
| 0.040428  | -0.70012   |
| 0.0088013 | 0.60183    |
| 0.0075002 | 0.21378    |
| 0.0085746 | -0.0072929 |
| 0.082013  | 0.048674   |
| 0.051016  | -0.43662   |
| 0.0088702 | 0.62079    |
| 0.0070401 | 0.021497   |
| 0.0090104 | 0.65886    |
| 0.0070581 | 0.017584   |
| 0.077372  | -0.045303  |
| 0.074476  | -0.074934  |
| 0.0090816 | 0.67796    |
| 0.00783   | 0.31787    |
| 0.069529  | 0.050826   |
| 0.0072715 | 0.12857    |
| 0.011527  | -0.0009612 |
| 0.0074333 | -0.0040171 |

|           |            |
|-----------|------------|
| 0.0091534 | 0.69708    |
| 0.0081619 | 0.41861    |
| 0.0073419 | 0.16248    |
| 0.007779  | 0.30202    |
| 0.011972  | 2.49E-05   |
| 0.02223   | 0.017077   |
| 0.051147  | 0.042727   |
| 0.0071773 | 0.10834    |
| 0.00783   | 0.31787    |
| 0.033208  | -0.97806   |
| 0.0080466 | 0.38405    |
| 0.0082213 | 0.43621    |
| 0.010048  | -0.0036418 |
| 0.091362  | 0.033125   |
| 0.0090104 | 0.65886    |
| 0.0081037 | 0.40122    |
| 0.0081037 | 0.40122    |
| 0.0075002 | 0.21378    |
| 0.0085339 | 0.52689    |
| 0.08799   | 0.034794   |
| 0.10488   | 0.042402   |
| 0.0085994 | 0.54547    |
| 0.063888  | 0.04917    |
| 0.0080815 | -0.0076938 |
| 0.0088013 | 0.60183    |
| 0.0079906 | 0.36712    |
| 0.0088702 | 0.62079    |
| 0.0087331 | 0.58295    |
| 0.0083953 | -0.0076979 |
| 0.0085994 | 0.54547    |
| 0.075678  | 0.051739   |
| 0.007779  | 0.30202    |
| 0.0088013 | 0.60183    |
| 0.0091534 | 0.69708    |
| 0.0073419 | 0.16248    |
| 0.013504  | 0.0032251  |
| 0.0074585 | 0.20034    |
| 0.0088702 | 0.62079    |
| 0.0077085 | -0.0060189 |
| 0.014086  | 0.004364   |
| 0.012448  | 0.001053   |

|           |            |
|-----------|------------|
| 0.091453  | 0.0511     |
| 0.007306  | 0.15072    |
| 0.035661  | -0.86174   |
| 0.0073419 | 0.16248    |
| 0.0071773 | 0.10834    |
| 0.0071773 | 0.10834    |
| 0.0087704 | -0.0072929 |
| 0.10215   | 0.062875   |
| 0.00894   | 0.6398     |
| 0.0082818 | 0.45401    |
| 0.0089841 | -0.0064176 |
| 0.0075877 | 0.2418     |
| 0.074911  | 0.051806   |
| 0.0085994 | 0.54547    |
| 0.0085994 | 0.54547    |
| 0.0086658 | 0.56416    |
| 0.0075877 | 0.2418     |
| 0.0085994 | 0.54547    |
| 0.032418  | -1.0834    |
| 0.0070589 | 0.066311   |
| 0.0076336 | 0.25635    |
| 0.0078823 | 0.33401    |
| 0.032668  | -1.1056    |
| 0.0088702 | 0.62079    |
| 0.0073419 | 0.16248    |
| 0.0074585 | 0.20034    |
| 0.039002  | -0.74417   |
| 0.083714  | 0.04583    |
| 0.061361  | -0.22652   |
| 0.0081037 | 0.40122    |
| 0.007099  | 0.081709   |
| 0.0090816 | 0.67796    |
| 0.0080466 | 0.38405    |
| 0.010048  | -0.0044341 |
| 0.0075877 | 0.2418     |
| 0.096449  | 0.06633    |
| 0.033948  | -1.1453    |
| 0.0070776 | 0.073782   |
| 0.0083433 | 0.47199    |
| 0.0076336 | 0.25635    |
| 0.0085339 | 0.52689    |



|           |            |
|-----------|------------|
| 0.0083433 | 0.47199    |
| 0.0086658 | 0.56416    |
| 0.10215   | 0.061137   |
| 0.098932  | 0.067232   |
| 0.059971  | -0.27073   |
| 0.0074585 | 0.20034    |
| 0.0084694 | 0.50845    |
| 0.0088702 | 0.62079    |
| 0.042857  | -0.63085   |
| 0.081445  | 0.04924    |
| 0.065651  | -0.18445   |
| 0.0087704 | -0.0072929 |
| 0.0077085 | -0.0060189 |
| 0.0088702 | 0.62079    |
| 0.0089841 | -0.0064176 |
| 0.00783   | 0.31787    |
| 0.0090104 | 0.65886    |
| 0.0075002 | 0.21378    |
| 0.0087331 | 0.56416    |
| 0.0090816 | 0.67796    |
| 0.097966  | 0.024682   |
| 0.024427  | 0.021128   |
| 0.0085994 | 0.54547    |
| 0.08799   | 0.034794   |
| 0.007779  | 0.30202    |
| 0.0085339 | 0.52689    |
| 0.032588  | -1.1005    |
| 0.10485   | 0.03138    |
| 0.049567  | 0.040812   |
| 0.0072386 | 0.12857    |
| 0.054226  | 0.044471   |
| 0.0090816 | 0.67796    |
| 0.0084694 | 0.50845    |
| 0.067111  | -0.16433   |
| 0.081558  | 0.0020229  |
| 0.007779  | 0.30202    |
| 0.086766  | 0.034794   |
| 0.08918   | 0.046386   |
| 0.0083433 | 0.47199    |
| 0.010731  | -0.0027971 |
| 0.0072715 | 0.13941    |

|           |            |
|-----------|------------|
| 0.0082213 | 0.43621    |
| 0.0090816 | 0.67796    |
| 0.007306  | 0.15072    |
| 0.0080466 | 0.38405    |
| 0.10409   | 0.026889   |
| 0.0070309 | 0.052688   |
| 0.0083953 | -0.0076979 |
| 0.007123  | 0.090103   |
| 0.039695  | -0.72239   |
| 0.007099  | 0.073782   |
| 0.0081619 | 0.41861    |
| 0.082903  | 0.0020229  |
| 0.061361  | -0.24839   |
| 0.0088702 | 0.62079    |
| 0.0083433 | 0.47199    |
| 0.038254  | 0.034143   |
| 0.093395  | 0.029884   |
| 0.0079906 | 0.36712    |
| 0.0072715 | 0.13941    |
| 0.03524   | -0.87876   |
| 0.010048  | -0.0044341 |
| 0.086106  | 0.042062   |
| 0.0082818 | 0.45401    |
| 0.0070192 | 0.030378   |
| 0.0076807 | 0.27125    |
| 0.0076807 | 0.27125    |
| 0.091453  | 0.055137   |
| 0.03612   | -0.84394   |
| 0.0088013 | 0.60183    |
| 0.098575  | 0.024065   |
| 0.10455   | 0.029687   |
| 0.061361  | -0.24839   |
| 0.0075877 | 0.2418     |
| 0.032418  | -1.0834    |
| 0.0092171 | -0.0058338 |
| 0.02223   | 0.017077   |
| 0.0073793 | 0.17468    |
| 0.0089841 | -0.006908  |
| 0.0082313 | -0.0076938 |
| 0.0074182 | 0.1873     |
| 0.033353  | -1.1312    |

|           |            |
|-----------|------------|
| 0.0090816 | 0.67796    |
| 0.0088702 | 0.62079    |
| 0.0081619 | 0.41861    |
| 0.077372  | -0.045303  |
| 0.0090816 | 0.67796    |
| 0.03303   | -0.98966   |
| 0.0077085 | -0.0060189 |
| 0.0072386 | 0.12857    |
| 0.007306  | 0.15072    |
| 0.0082313 | -0.0076938 |
| 0.0070589 | 0.059284   |
| 0.0074182 | 0.1873     |
| 0.028099  | 0.023825   |
| 0.019306  | 0.013082   |
| 0.0082213 | 0.43621    |
| 0.046342  | 0.038732   |
| 0.0083433 | 0.47199    |
| 0.0076336 | 0.25635    |
| 0.065651  | -0.18445   |
| 0.0073793 | 0.17468    |
| 0.0073793 | 0.17468    |
| 0.0091534 | 0.69708    |
| 0.052701  | 0.043621   |
| 0.0077292 | 0.28647    |
| 0.0081619 | 0.41861    |
| 0.0082213 | 0.43621    |
| 0.011972  | 2.49E-05   |
| 0.0074333 | -0.0026829 |
| 0.0085994 | 0.54547    |
| 0.0074333 | -0.0026829 |
| 0.049567  | 0.041791   |
| 0.0082213 | 0.43621    |
| 0.037156  | -0.80605   |
| 0.0085339 | 0.52689    |
| 0.0079359 | 0.35043    |
| 0.0081619 | 0.41861    |
| 0.0072386 | 0.12857    |
| 0.028099  | 0.023825   |
| 0.0070818 | 0.014005   |
| 0.0075002 | 0.21378    |
| 0.0072071 | 0.11821    |

|           |            |
|-----------|------------|
| 0.042008  | -0.65431   |
| 0.012448  | 0.001053   |
| 0.0076807 | 0.27125    |
| 0.090012  | 0.036534   |
| 0.0080466 | 0.38405    |
| 0.067111  | -0.16433   |
| 0.0073419 | 0.16248    |
| 0.084884  | 0.04497    |
| 0.039695  | -0.70012   |
| 0.07879   | -0.031991  |
| 0.073273  | 0.051783   |
| 0.0071773 | 0.10834    |
| 0.065104  | 0.049656   |
| 0.0090104 | 0.65886    |
| 0.074911  | 0.051806   |
| 0.012958  | 0.0021206  |
| 0.0072955 | 0.00071242 |
| 0.10311   | 0.024054   |
| 0.082013  | 0.048051   |
| 0.0073419 | 0.16248    |
| 0.046637  | -0.53455   |
| 0.0090816 | 0.67796    |
| 0.099669  | 0.06705    |
| 0.0085746 | -0.0072929 |
| 0.0082313 | -0.0076938 |
| 0.032462  | -1.0894    |
| 0.035661  | -0.86174   |
| 0.0073419 | 0.16248    |
| 0.0080466 | 0.38405    |
| 0.0070272 | 0.025758   |
| 0.007306  | 0.13941    |
| 0.097966  | 0.024682   |
| 0.0090104 | 0.65886    |
| 0.0070589 | 0.059284   |
| 0.0075002 | 0.21378    |
| 0.0071113 | 0.010749   |
| 0.0080466 | 0.38405    |
| 0.015366  | 0.0067344  |
| 0.033792  | -1.1419    |
| 0.08799   | 0.034794   |
| 0.0094709 | -0.0058338 |

|           |            |
|-----------|------------|
| 0.08799   | 0.040962   |
| 0.0080815 | -0.007536  |
| 0.040428  | -0.70012   |
| 0.0070433 | 0.059284   |
| 0.0078823 | 0.33401    |
| 0.039002  | -0.74417   |
| 0.0085994 | 0.54547    |
| 0.0071773 | 0.10834    |
| 0.0090816 | 0.67796    |
| 0.0080466 | 0.38405    |
| 0.086735  | 0.041005   |
| 0.084884  | 0.044052   |
| 0.042008  | -0.65431   |
| 0.05467   | -0.36399   |
| 0.0097473 | -0.0051686 |
| 0.094069  | 0.029884   |
| 0.0085339 | 0.52689    |
| 0.011527  | -0.0009612 |
| 0.039695  | -0.72239   |
| 0.094574  | 0.061313   |
| 0.007099  | 0.081709   |
| 0.10462   | 0.047424   |
| 0.067111  | -0.16433   |
| 0.0085339 | 0.52689    |
| 0.039695  | -0.72239   |
| 0.10385   | 0.054784   |
| 0.034187  | -0.92541   |
| 0.0084058 | 0.49014    |
| 0.0094709 | -0.0051686 |
| 0.0075433 | 0.2276     |
| 0.0082313 | -0.0076938 |
| 0.0080815 | -0.0076938 |
| 0.0076807 | 0.27125    |
| 0.0090816 | 0.67796    |
| 0.0078823 | 0.33401    |
| 0.02223   | 0.017077   |
| 0.033412  | -0.96585   |
| 0.010731  | -0.0019027 |
| 0.0073419 | 0.16248    |
| 0.0072071 | 0.11821    |
| 0.0075002 | 0.21378    |

|           |            |
|-----------|------------|
| 0.0070581 | 0.017584   |
| 0.0085994 | 0.54547    |
| 0.037733  | -0.78604   |
| 0.094069  | 0.029884   |
| 0.0077292 | 0.28647    |
| 0.099669  | 0.06705    |
| 0.092533  | 0.05853    |
| 0.097321  | 0.06633    |
| 0.084221  | 0.011497   |
| 0.1038    | 0.024827   |
| 0.03239   | -1.0477    |
| 0.1038    | 0.02577    |
| 0.10462   | 0.047424   |
| 0.0079359 | 0.35043    |
| 0.032474  | -1.0393    |
| 0.033412  | -0.96585   |
| 0.096449  | 0.06518    |
| 0.0070589 | 0.066311   |
| 0.0075877 | 0.2418     |
| 0.0072071 | 0.11821    |
| 0.0082313 | -0.0076938 |
| 0.0077292 | 0.28647    |
| 0.0077292 | 0.28647    |
| 0.0097473 | -0.0051686 |
| 0.007022  | 0.046511   |
| 0.10347   | 0.024827   |
| 0.10271   | 0.022987   |
| 0.0075002 | 0.21378    |
| 0.10309   | 0.059186   |
| 0.10264   | 0.061137   |
| 0.032373  | -1.0632    |
| 0.0084058 | 0.49014    |
| 0.0075433 | 0.2276     |
| 0.007099  | 0.081709   |
| 0.0070589 | 0.066311   |
| 0.0070776 | 0.073782   |
| 0.0076336 | 0.25635    |
| 0.0076807 | 0.27125    |
| 0.02223   | 0.017077   |
| 0.039002  | -0.72239   |
| 0.081558  | -0.008361  |

|           |            |
|-----------|------------|
| 0.045635  | -0.53455   |
| 0.0079359 | 0.35043    |
| 0.074476  | -0.074934  |
| 0.032418  | -1.0834    |
| 0.0084058 | 0.49014    |
| 0.0072715 | 0.13941    |
| 0.028099  | 0.023825   |
| 0.015366  | 0.0079609  |
| 0.0074585 | 0.20034    |
| 0.0083953 | -0.0076979 |
| 0.007147  | 0.0078041  |
| 0.020232  | 0.014403   |
| 0.087374  | 0.041005   |
| 0.0090104 | 0.65886    |
| 0.032875  | -1.0007    |
| 0.0072071 | 0.10834    |
| 0.048754  | -0.4856    |
| 0.067111  | -0.1449    |
| 0.012958  | 0.0021206  |
| 0.0075002 | 0.21378    |
| 0.0081619 | 0.41861    |
| 0.028099  | 0.023825   |
| 0.0097473 | -0.0044341 |
| 0.0088013 | 0.60183    |
| 0.0071491 | 0.090103   |
| 0.0070581 | 0.017584   |
| 0.0081037 | 0.40122    |
| 0.0074182 | 0.1873     |
| 0.00894   | 0.6398     |
| 0.05467   | -0.34019   |
| 0.0088013 | 0.60183    |
| 0.10409   | 0.026889   |
| 0.073008  | -0.09116   |
| 0.0080466 | 0.38405    |
| 0.063888  | 0.048637   |
| 0.0070589 | 0.059284   |
| 0.065651  | -0.18445   |
| 0.0070589 | 0.066311   |
| 0.094574  | 0.061313   |
| 0.033412  | -0.96585   |
| 0.059983  | 0.046758   |

|           |            |
|-----------|------------|
| 0.10441   | 0.049934   |
| 0.0070581 | 0.017584   |
| 0.032588  | -1.1005    |
| 0.0074585 | 0.20034    |
| 0.096059  | 0.02616    |
| 0.10036   | 0.06649    |
| 0.02223   | 0.017077   |
| 0.071483  | 0.051552   |
| 0.067404  | 0.050095   |
| 0.0070776 | 0.073782   |
| 0.014706  | 0.0055346  |
| 0.019306  | 0.013082   |
| 0.032205  | 0.027815   |
| 0.0070589 | 0.066311   |
| 0.0072715 | 0.13941    |
| 0.011972  | 2.49E-05   |
| 0.10494   | 0.039956   |
| 0.10477   | 0.044903   |
| 0.0090104 | 0.65886    |
| 0.0090104 | 0.65886    |
| 0.046637  | -0.53455   |
| 0.010376  | -0.0036418 |
| 0.0090104 | 0.65886    |
| 0.0085339 | 0.52689    |
| 0.0070433 | 0.052688   |
| 0.028099  | 0.025165   |
| 0.05467   | -0.36399   |
| 0.032462  | -1.0894    |
| 0.0079906 | 0.36712    |
| 0.0080466 | 0.38405    |
| 0.097966  | 0.024682   |
| 0.00894   | 0.6398     |
| 0.096059  | 0.02616    |
| 0.032519  | -1.0951    |
| 0.052701  | 0.043621   |
| 0.0073793 | 0.17468    |
| 0.0085746 | -0.0075602 |
| 0.0073419 | 0.16248    |
| 0.016066  | 0.0079609  |
| 0.0070272 | 0.025758   |
| 0.0077292 | 0.28647    |



|           |            |
|-----------|------------|
| 0.0087331 | 0.58295    |
| 0.0074182 | 0.1873     |
| 0.0097473 | -0.0051686 |
| 0.014086  | 0.0055346  |
| 0.10036   | 0.06649    |
| 0.044711  | 0.037634   |
| 0.074911  | 0.051806   |
| 0.0082313 | -0.0076938 |
| 0.07879   | -0.019688  |
| 0.034505  | -0.91058   |
| 0.00894   | 0.6398     |
| 0.041454  | 0.036502   |
| 0.011114  | -0.0019027 |
| 0.0086658 | 0.56416    |
| 0.0075153 | -0.0040171 |
| 0.017596  | 0.010484   |
| 0.039695  | -0.72239   |
| 0.0081619 | 0.41861    |
| 0.054226  | 0.044471   |
| 0.10183   | 0.022679   |
| 0.0072715 | 0.13941    |
| 0.010731  | -0.0027971 |
| 0.0075433 | 0.2276     |
| 0.0077292 | 0.28647    |
| 0.012958  | 0.0021206  |
| 0.080287  | 0.049748   |
| 0.054226  | 0.043621   |
| 0.0086658 | 0.56416    |
| 0.0072071 | 0.11821    |
| 0.0082313 | -0.0076938 |
| 0.007099  | 0.081709   |
| 0.032633  | -1.021     |
| 0.066276  | 0.050095   |
| 0.0076807 | 0.27125    |
| 0.018428  | 0.011775   |
| 0.0073419 | 0.16248    |
| 0.081558  | -0.008361  |
| 0.051016  | -0.43662   |
| 0.099168  | 0.023109   |
| 0.00783   | 0.31787    |
| 0.091453  | 0.0511     |

|           |            |
|-----------|------------|
| 0.061361  | -0.24839   |
| 0.0081619 | 0.41861    |
| 0.0070433 | 0.059284   |
| 0.0088013 | 0.60183    |
| 0.08799   | 0.040962   |
| 0.10309   | 0.059186   |
| 0.098575  | 0.024065   |
| 0.034505  | -0.89503   |
| 0.0070159 | 0.030378   |
| 0.1016    | 0.064369   |
| 0.0074585 | 0.1873     |
| 0.0072386 | 0.12857    |
| 0.0092171 | -0.0064176 |
| 0.073273  | 0.051783   |
| 0.0082213 | 0.43621    |
| 0.014706  | 0.0055346  |
| 0.03303   | -0.98966   |
| 0.0070272 | 0.025758   |
| 0.04467   | -0.5831    |
| 0.093574  | 0.061313   |
| 0.071533  | -0.10826   |
| 0.078448  | 0.051216   |
| 0.0090816 | 0.67796    |
| 0.0080466 | 0.38405    |
| 0.0089841 | -0.006908  |
| 0.0073793 | 0.16248    |
| 0.0072071 | 0.10834    |
| 0.007306  | 0.15072    |
| 0.0080466 | 0.38405    |
| 0.086766  | 0.027849   |
| 0.03276   | -1.1104    |
| 0.0077085 | -0.0067106 |
| 0.032373  | -1.0632    |
| 0.10485   | 0.03138    |
| 0.057264  | -0.31669   |
| 0.065104  | 0.049656   |
| 0.084884  | 0.04497    |
| 0.032519  | -1.0951    |
| 0.0073419 | 0.16248    |
| 0.039002  | -0.74417   |
| 0.032875  | -1.0007    |

|           |            |
|-----------|------------|
| 0.0085339 | 0.52689    |
| 0.0072071 | 0.10834    |
| 0.0085994 | 0.54547    |
| 0.00783   | 0.31787    |
| 0.0071491 | 0.090103   |
| 0.0073419 | 0.16248    |
| 0.086106  | 0.04308    |
| 0.099168  | 0.023538   |
| 0.0083433 | 0.47199    |
| 0.0073419 | 0.16248    |
| 0.068489  | 0.050485   |
| 0.032633  | -1.0111    |
| 0.023303  | 0.018425   |
| 0.0090816 | 0.67796    |
| 0.0091534 | 0.69708    |
| 0.0079906 | 0.36712    |
| 0.042857  | -0.63085   |
| 0.033641  | -1.1384    |
| 0.093574  | 0.05853    |
| 0.063888  | 0.048637   |
| 0.10477   | 0.044903   |
| 0.03276   | -1.1104    |
| 0.03276   | -1.1104    |
| 0.0090816 | 0.67796    |
| 0.035158  | 0.030407   |
| 0.0075002 | 0.21378    |
| 0.0091534 | 0.69708    |
| 0.007821  | -0.0067106 |
| 0.083144  | 0.04737    |
| 0.042857  | -0.63085   |
| 0.007099  | 0.081709   |
| 0.094574  | 0.061313   |
| 0.011972  | 2.49E-05   |
| 0.096449  | 0.06633    |
| 0.0092171 | -0.0064176 |
| 0.0079906 | 0.35043    |
| 0.080186  | -0.019688  |
| 0.067111  | -0.1449    |
| 0.0075433 | 0.2276     |
| 0.0072715 | 0.13941    |
| 0.072398  | 0.051552   |

|           |            |
|-----------|------------|
| 0.02223   | 0.017077   |
| 0.033642  | -0.93955   |
| 0.072398  | 0.051693   |
| 0.0085746 | -0.0072929 |
| 0.007306  | 0.15072    |
| 0.05467   | -0.36399   |
| 0.0079906 | 0.36712    |
| 0.084221  | 0.011497   |
| 0.033208  | -0.97806   |
| 0.032588  | -1.1005    |
| 0.00894   | 0.6398     |
| 0.055952  | -0.34019   |
| 0.03669   | 0.032921   |
| 0.0072386 | 0.11821    |
| 0.032389  | -1.0771    |
| 0.0090816 | 0.67796    |
| 0.077372  | -0.045303  |
| 0.0088013 | 0.60183    |
| 0.084884  | 0.04497    |
| 0.0084058 | 0.49014    |
| 0.0087704 | -0.0072929 |
| 0.032743  | -1.0111    |
| 0.010731  | -0.0027971 |
| 0.0097473 | -0.0051686 |
| 0.038254  | 0.032921   |
| 0.042857  | -0.6071    |
| 0.02223   | 0.018425   |
| 0.097966  | 0.024682   |
| 0.0091534 | 0.69708    |
| 0.079691  | 0.050199   |
| 0.0339    | -0.93955   |
| 0.0339    | -0.93955   |
| 0.059983  | 0.046758   |
| 0.0073602 | -0.0011105 |
| 0.0090104 | 0.65886    |
| 0.015366  | 0.0067344  |
| 0.037733  | -0.78604   |
| 0.0082213 | 0.43621    |
| 0.0088013 | 0.60183    |
| 0.0087331 | 0.58295    |
| 0.0081037 | 0.40122    |

|           |            |
|-----------|------------|
| 0.042857  | -0.63085   |
| 0.0087331 | 0.58295    |
| 0.093574  | 0.05853    |
| 0.0072071 | 0.10834    |
| 0.021206  | 0.015736   |
| 0.0074182 | 0.1873     |
| 0.0090104 | 0.65886    |
| 0.0079359 | 0.35043    |
| 0.0072071 | 0.11821    |
| 0.10134   | 0.022512   |
| 0.007123  | 0.090103   |
| 0.059983  | 0.046758   |
| 0.042008  | -0.63085   |
| 0.036619  | -0.82536   |
| 0.033642  | -0.95303   |
| 0.046342  | 0.039792   |
| 0.0088702 | 0.62079    |
| 0.10271   | 0.023443   |
| 0.0088702 | 0.60183    |
| 0.0077085 | -0.0060189 |
| 0.0090816 | 0.67796    |
| 0.0085339 | 0.52689    |
| 0.032588  | -1.1005    |
| 0.03612   | -0.84394   |
| 0.0071491 | 0.098977   |
| 0.080186  | -0.019688  |
| 0.025601  | 0.022479   |
| 0.086766  | 0.027849   |
| 0.00894   | 0.6398     |
| 0.011527  | -0.0009612 |
| 0.007779  | 0.30202    |
| 0.007821  | -0.0067106 |
| 0.0081037 | 0.40122    |
| 0.0079451 | -0.007536  |
| 0.098932  | 0.06705    |
| 0.007779  | 0.30202    |
| 0.00783   | 0.31787    |
| 0.071483  | 0.051552   |
| 0.011972  | 0.001053   |
| 0.020232  | 0.015736   |
| 0.098575  | 0.023538   |

|           |            |
|-----------|------------|
| 0.0339    | -0.93955   |
| 0.0094709 | -0.0058338 |
| 0.007306  | 0.15072    |
| 0.039002  | -0.72239   |
| 0.033208  | -0.97806   |
| 0.032373  | -1.0632    |
| 0.0081619 | 0.41861    |
| 0.032972  | -1.1193    |
| 0.0075433 | 0.2276     |
| 0.0074333 | -0.0026829 |
| 0.0075002 | 0.20034    |
| 0.033792  | -1.1419    |
| 0.017596  | 0.010484   |
| 0.0075002 | 0.21378    |
| 0.0075002 | 0.21378    |
| 0.0073419 | 0.16248    |
| 0.0076069 | -0.0051251 |
| 0.048754  | -0.4856    |
| 0.098932  | 0.067232   |
| 0.007779  | 0.30202    |
| 0.007099  | 0.081709   |
| 0.0087331 | 0.58295    |
| 0.0085339 | 0.52689    |
| 0.10488   | 0.042402   |
| 0.0088013 | 0.60183    |
| 0.066276  | 0.049656   |
| 0.10311   | 0.023443   |
| 0.0072071 | 0.11821    |
| 0.007306  | 0.15072    |
| 0.0076807 | 0.27125    |
| 0.016066  | 0.0092115  |
| 0.03612   | -0.84394   |
| 0.0070433 | 0.059284   |
| 0.012448  | 0.001053   |
| 0.038348  | -0.7654    |
| 0.033208  | -0.97806   |
| 0.0087331 | 0.58295    |
| 0.096449  | 0.06518    |
| 0.0081037 | 0.40122    |
| 0.0070581 | 0.014005   |
| 0.097966  | 0.024682   |

|           |            |
|-----------|------------|
| 0.0088013 | 0.60183    |
| 0.0074182 | 0.1873     |
| 0.0070433 | 0.052688   |
| 0.032875  | -1.0007    |
| 0.081558  | -0.008361  |
| 0.0077085 | -0.0060189 |
| 0.0075433 | 0.2276     |
| 0.0082818 | 0.45401    |
| 0.0085994 | 0.54547    |
| 0.020232  | 0.015736   |
| 0.0072071 | 0.11821    |
| 0.0094709 | -0.0051686 |
| 0.0077292 | 0.28647    |
| 0.0339    | -0.93955   |
| 0.081445  | 0.04924    |
| 0.032423  | -1.0477    |
| 0.08918   | 0.040962   |
| 0.0070169 | 0.040742   |
| 0.0092171 | -0.0064176 |
| 0.0081037 | 0.40122    |
| 0.0087331 | 0.58295    |
| 0.079691  | 0.050199   |
| 0.0090104 | 0.65886    |
| 0.0088013 | 0.60183    |
| 0.0092171 | -0.0064176 |
| 0.0092171 | -0.0058338 |
| 0.013504  | 0.0032251  |
| 0.0076807 | 0.27125    |
| 0.0090816 | 0.67796    |
| 0.0076336 | 0.25635    |
| 0.0084694 | 0.50845    |
| 0.0071773 | 0.10834    |
| 0.0075002 | 0.20034    |
| 0.0090104 | 0.65886    |
| 0.0084694 | 0.50845    |
| 0.0070818 | 0.014005   |
| 0.097321  | 0.06633    |
| 0.0071894 | 0.0051576  |
| 0.0092171 | -0.0064176 |
| 0.0081037 | 0.40122    |
| 0.019306  | 0.013082   |

|           |            |
|-----------|------------|
| 0.0082213 | 0.43621    |
| 0.095533  | 0.06518    |
| 0.0088013 | 0.60183    |
| 0.0090104 | 0.65886    |
| 0.1035    | 0.057058   |
| 0.0087704 | -0.0072929 |
| 0.0085994 | 0.54547    |
| 0.032588  | -1.1005    |
| 0.0070589 | 0.059284   |
| 0.032389  | -1.0771    |
| 0.010048  | -0.0036418 |
| 0.0088702 | 0.62079    |
| 0.062629  | 0.048056   |
| 0.0075433 | 0.2276     |
| 0.037156  | -0.80605   |
| 0.035661  | -0.84394   |
| 0.0088702 | 0.62079    |
| 0.020232  | 0.015736   |
| 0.0090816 | 0.67796    |
| 0.033412  | -0.96585   |
| 0.011972  | 2.49E-05   |
| 0.032588  | -1.1005    |
| 0.0082213 | 0.43621    |
| 0.0070272 | 0.025758   |
| 0.0082213 | 0.43621    |
| 0.035661  | -0.86174   |
| 0.0073419 | 0.16248    |
| 0.076413  | 0.051739   |
| 0.007099  | 0.081709   |
| 0.05467   | -0.36399   |
| 0.013504  | 0.004364   |
| 0.10462   | 0.044903   |
| 0.045635  | -0.5589    |
| 0.098932  | 0.067232   |
| 0.03524   | -0.87876   |
| 0.010048  | -0.0044341 |
| 0.0072071 | 0.11821    |
| 0.097342  | 0.025383   |
| 0.0072715 | 0.12857    |
| 0.0074585 | 0.1873     |
| 0.066276  | 0.050095   |



|           |            |
|-----------|------------|
| 0.0072386 | 0.11821    |
| 0.0079359 | 0.35043    |
| 0.0074182 | 0.1873     |
| 0.090012  | 0.035391   |
| 0.026825  | 0.022479   |
| 0.062773  | -0.22652   |
| 0.049567  | 0.041791   |
| 0.0075002 | 0.21378    |
| 0.032418  | -1.0834    |
| 0.0070309 | 0.052688   |
| 0.0073793 | 0.17468    |
| 0.007123  | 0.090103   |
| 0.03524   | -0.87876   |
| 0.034855  | -0.87876   |
| 0.0076807 | 0.27125    |
| 0.037733  | -0.78604   |
| 0.0088702 | 0.62079    |
| 0.016809  | 0.0092115  |
| 0.0090104 | 0.65886    |
| 0.080186  | -0.019688  |
| 0.069529  | 0.050826   |
| 0.057264  | -0.31669   |
| 0.010376  | -0.0036418 |
| 0.032972  | -1.1193    |
| 0.014086  | 0.004364   |
| 0.094739  | 0.028875   |
| 0.0089841 | -0.006908  |
| 0.0085994 | 0.54547    |
| 0.025601  | 0.021128   |
| 0.007779  | 0.30202    |
| 0.04467   | -0.5831    |
| 0.007306  | 0.15072    |
| 0.00894   | 0.6398     |
| 0.0071773 | 0.10834    |
| 0.064204  | -0.18445   |
| 0.082903  | 0.0020229  |
| 0.0078823 | 0.33401    |
| 0.1016    | 0.062875   |
| 0.079691  | 0.050593   |
| 0.033662  | 0.030407   |
| 0.0082818 | 0.45401    |

|           |            |
|-----------|------------|
| 0.041199  | -0.67741   |
| 0.0082818 | 0.45401    |
| 0.049867  | -0.46109   |
| 0.025601  | 0.021128   |
| 0.033353  | -1.1312    |
| 0.0085994 | 0.54547    |
| 0.069529  | 0.050826   |
| 0.040428  | -0.67741   |
| 0.0075433 | 0.2276     |
| 0.070056  | -0.10826   |
| 0.08918   | 0.040962   |
| 0.078448  | 0.051216   |
| 0.0074585 | 0.20034    |
| 0.0087704 | -0.006908  |
| 0.077795  | 0.051444   |
| 0.0094709 | -0.0051686 |
| 0.051147  | 0.041791   |
| 0.033662  | 0.030407   |
| 0.010376  | -0.0036418 |
| 0.05467   | -0.36399   |
| 0.020232  | 0.014403   |
| 0.10462   | 0.044903   |
| 0.0090816 | 0.67796    |
| 0.010048  | -0.0044341 |
| 0.0091534 | 0.69708    |
| 0.081558  | -0.008361  |
| 0.03669   | 0.032921   |
| 0.051016  | -0.43662   |
| 0.0081619 | 0.41861    |
| 0.00894   | 0.6398     |
| 0.0072386 | 0.12857    |
| 0.0079451 | -0.0072122 |
| 0.0074585 | 0.20034    |
| 0.037156  | -0.80605   |
| 0.012448  | 0.001053   |
| 0.0083433 | 0.47199    |
| 0.0086658 | 0.56416    |
| 0.0071491 | 0.098977   |
| 0.011972  | 2.49E-05   |
| 0.0079359 | 0.35043    |
| 0.038254  | 0.034143   |

|           |            |
|-----------|------------|
| 0.0072715 | 0.13941    |
| 0.0090104 | 0.65886    |
| 0.034187  | -0.92541   |
| 0.079079  | 0.050932   |
| 0.0090816 | 0.67796    |
| 0.033494  | -1.1349    |
| 0.08799   | 0.034794   |
| 0.0088013 | 0.60183    |
| 0.084293  | 0.04497    |
| 0.0339    | -0.93955   |
| 0.032474  | -1.0393    |
| 0.032373  | -1.0632    |
| 0.10228   | 0.022679   |
| 0.032373  | -1.0632    |
| 0.032743  | -1.0111    |
| 0.098932  | 0.067232   |
| 0.007099  | 0.073782   |
| 0.0071491 | 0.090103   |
| 0.035158  | 0.030407   |
| 0.014706  | 0.0055346  |
| 0.0074182 | 0.1873     |
| 0.007779  | 0.30202    |
| 0.010731  | -0.0027971 |
| 0.00894   | 0.6398     |
| 0.10347   | 0.024827   |
| 0.094069  | 0.028875   |
| 0.062773  | -0.22652   |
| 0.0082213 | 0.43621    |
| 0.0089841 | -0.006908  |
| 0.0087331 | 0.58295    |
| 0.032668  | -1.1056    |
| 0.0078823 | 0.33401    |
| 0.035158  | 0.031675   |
| 0.0072387 | 0.0027978  |
| 0.055952  | -0.34019   |
| 0.0086658 | 0.56416    |
| 0.091453  | 0.0511     |
| 0.0090816 | 0.67796    |
| 0.10036   | 0.06649    |
| 0.090335  | 0.046386   |
| 0.0070401 | 0.021497   |

|           |            |
|-----------|------------|
| 0.0072715 | 0.13941    |
| 0.055719  | 0.044471   |
| 0.0084694 | 0.49014    |
| 0.0070589 | 0.066311   |
| 0.0088702 | 0.62079    |
| 0.042008  | -0.65431   |
| 0.0079451 | -0.0072122 |
| 0.098149  | 0.067003   |
| 0.026825  | 0.023825   |
| 0.0090816 | 0.67796    |
| 0.007779  | 0.30202    |
| 0.0091534 | 0.69708    |
| 0.0087331 | 0.58295    |
| 0.0072071 | 0.11821    |
| 0.0075002 | 0.21378    |
| 0.070056  | -0.12619   |
| 0.042008  | -0.65431   |
| 0.032462  | -1.0894    |
| 0.0088013 | 0.60183    |
| 0.032588  | -1.1005    |
| 0.0090816 | 0.67796    |
| 0.0091534 | 0.69708    |
| 0.0090816 | 0.67796    |
| 0.051016  | -0.43662   |
| 0.047964  | 0.039792   |
| 0.0090104 | 0.65886    |
| 0.014706  | 0.0055346  |
| 0.049867  | -0.46109   |
| 0.032373  | -1.0632    |
| 0.0072386 | 0.12857    |
| 0.10462   | 0.044903   |
| 0.076413  | 0.051619   |
| 0.034855  | -0.89503   |
| 0.0088702 | 0.62079    |
| 0.0071491 | 0.098977   |
| 0.007147  | 0.0078041  |
| 0.053419  | -0.36399   |
| 0.0071773 | 0.10834    |
| 0.0085746 | -0.0072929 |
| 0.0075002 | 0.21378    |
| 0.0092171 | -0.0058338 |

|           |            |
|-----------|------------|
| 0.0074333 | -0.0026829 |
| 0.0081619 | 0.41861    |
| 0.08868   | 0.037674   |
| 0.0082313 | -0.0076938 |
| 0.10434   | 0.026889   |
| 0.0083433 | 0.47199    |
| 0.0081619 | 0.41861    |
| 0.035661  | -0.86174   |
| 0.0076336 | 0.25635    |
| 0.0088013 | 0.60183    |
| 0.032544  | -1.0304    |
| 0.0075433 | 0.2276     |
| 0.0082818 | 0.45401    |
| 0.0072715 | 0.13941    |
| 0.0088702 | 0.62079    |
| 0.0083433 | 0.47199    |
| 0.0085339 | 0.52689    |
| 0.033412  | -0.96585   |
| 0.0085746 | -0.0075602 |
| 0.0090816 | 0.67796    |
| 0.096706  | 0.025383   |
| 0.10485   | 0.033276   |
| 0.08799   | 0.034794   |
| 0.03303   | -0.98966   |
| 0.0089841 | -0.0064176 |
| 0.007022  | 0.046511   |
| 0.00894   | 0.6398     |
| 0.067111  | -0.16433   |
| 0.007022  | 0.046511   |
| 0.083714  | 0.04663    |
| 0.0085746 | -0.0075602 |
| 0.010376  | -0.0036418 |
| 0.047964  | 0.039792   |
| 0.0075002 | 0.21378    |
| 0.007022  | 0.046511   |
| 0.0085339 | 0.52689    |
| 0.042857  | -0.6071    |
| 0.091453  | 0.0511     |
| 0.0083953 | -0.0076979 |
| 0.090335  | 0.046386   |
| 0.0072715 | 0.12857    |

|           |            |
|-----------|------------|
| 0.019306  | 0.013082   |
| 0.007306  | 0.15072    |
| 0.010048  | -0.0044341 |
| 0.041454  | 0.035337   |
| 0.035661  | -0.86174   |
| 0.0079906 | 0.36712    |
| 0.0082313 | -0.0076938 |
| 0.0072386 | 0.12857    |
| 0.007821  | -0.0067106 |
| 0.0071773 | 0.10834    |
| 0.0070581 | 0.017584   |
| 0.00894   | 0.6398     |
| 0.0082213 | 0.43621    |
| 0.0085339 | 0.52689    |
| 0.0085746 | -0.0075602 |
| 0.052701  | 0.043621   |
| 0.032633  | -1.021     |
| 0.0071491 | 0.098977   |
| 0.014086  | 0.004364   |
| 0.071483  | 0.051552   |
| 0.0085339 | 0.52689    |
| 0.0073419 | 0.16248    |
| 0.0072715 | 0.13941    |
| 0.0084694 | 0.50845    |
| 0.016809  | 0.0092115  |
| 0.035661  | -0.86174   |
| 0.032474  | -1.0393    |
| 0.0090104 | 0.65886    |
| 0.032519  | -1.0951    |
| 0.0072387 | 0.0027978  |
| 0.08868   | 0.038804   |
| 0.0088013 | 0.60183    |
| 0.0087331 | 0.58295    |
| 0.073008  | -0.09116   |
| 0.026825  | 0.022479   |
| 0.052701  | 0.042727   |
| 0.0094709 | -0.0051686 |
| 0.007022  | 0.046511   |
| 0.035158  | 0.030407   |
| 0.0070589 | 0.059284   |
| 0.0076807 | 0.27125    |

|           |            |
|-----------|------------|
| 0.10134   | 0.022512   |
| 0.0072387 | 0.0027978  |
| 0.0088013 | 0.60183    |
| 0.039695  | -0.72239   |
| 0.0084694 | 0.50845    |
| 0.014086  | 0.004364   |
| 0.007821  | -0.0067106 |
| 0.0090104 | 0.65886    |
| 0.0072071 | 0.11821    |
| 0.0084058 | 0.49014    |
| 0.007123  | 0.090103   |
| 0.0094709 | -0.0058338 |
| 0.020232  | 0.014403   |
| 0.020232  | 0.015736   |
| 0.0084058 | 0.49014    |
| 0.0339    | -0.93955   |
| 0.041454  | 0.035337   |
| 0.0072386 | 0.11821    |
| 0.0073419 | 0.16248    |
| 0.0081619 | 0.41861    |
| 0.033494  | -1.1349    |
| 0.007306  | 0.15072    |
| 0.05467   | -0.36399   |
| 0.015366  | 0.0079609  |
| 0.037156  | -0.80605   |
| 0.0076807 | 0.27125    |
| 0.0075002 | 0.21378    |
| 0.0070169 | 0.040742   |
| 0.0087704 | -0.0072929 |
| 0.0073419 | 0.15072    |
| 0.072398  | 0.051693   |
| 0.0079451 | -0.007536  |
| 0.00894   | 0.6398     |
| 0.0586    | 0.04604    |
| 0.028099  | 0.023825   |
| 0.077372  | -0.031991  |
| 0.0078823 | 0.33401    |
| 0.1003    | 0.022572   |
| 0.0090104 | 0.65886    |
| 0.007147  | 0.0078041  |
| 0.0083953 | -0.0075602 |

|           |            |
|-----------|------------|
| 0.033353  | -1.1312    |
| 0.10462   | 0.044903   |
| 0.0088013 | 0.60183    |
| 0.0082818 | 0.45401    |
| 0.0072071 | 0.11821    |
| 0.011527  | 2.49E-05   |
| 0.0077292 | 0.28647    |
| 0.034268  | -1.1519    |
| 0.0090104 | 0.65886    |
| 0.007821  | -0.0072122 |
| 0.024427  | 0.021128   |
| 0.0074585 | 0.20034    |
| 0.0091534 | 0.69708    |
| 0.007306  | 0.15072    |
| 0.010048  | -0.0044341 |
| 0.0075002 | 0.21378    |
| 0.033412  | -0.96585   |
| 0.0076807 | 0.27125    |
| 0.034187  | -0.92541   |
| 0.041454  | 0.036502   |
| 0.034855  | -0.89503   |
| 0.0082818 | 0.45401    |
| 0.0088013 | 0.60183    |
| 0.0079451 | -0.0072122 |
| 0.007123  | 0.081709   |
| 0.0080466 | 0.38405    |
| 0.0081619 | 0.41861    |
| 0.011527  | 2.49E-05   |
| 0.0071773 | 0.10834    |
| 0.0085339 | 0.52689    |
| 0.0073793 | 0.17468    |
| 0.0085746 | -0.0075602 |
| 0.03303   | -0.98966   |
| 0.068489  | 0.050826   |
| 0.0084058 | 0.49014    |
| 0.057264  | -0.29352   |
| 0.0092171 | -0.0064176 |
| 0.0090104 | 0.65886    |
| 0.085489  | 0.04308    |
| 0.0092171 | -0.0058338 |
| 0.015366  | 0.0067344  |



|           |            |
|-----------|------------|
| 0.035661  | -0.86174   |
| 0.0074333 | -0.0026829 |
| 0.10347   | 0.024054   |
| 0.0084694 | 0.50845    |
| 0.007821  | -0.0067106 |
| 0.10183   | 0.022679   |
| 0.037733  | -0.78604   |
| 0.077372  | -0.031991  |
| 0.032972  | -1.1193    |
| 0.0070272 | 0.025758   |
| 0.010048  | -0.0044341 |
| 0.0088702 | 0.62079    |
| 0.0090816 | 0.67796    |
| 0.026825  | 0.022479   |
| 0.1003    | 0.022784   |
| 0.1003    | 0.022572   |
| 0.0072715 | 0.13941    |
| 0.0070272 | 0.025758   |
| 0.00894   | 0.6398     |
| 0.073008  | -0.074934  |
| 0.038348  | -0.7654    |
| 0.0087331 | 0.58295    |
| 0.10496   | 0.037598   |
| 0.0077292 | 0.28647    |
| 0.0090816 | 0.67796    |
| 0.0090816 | 0.67796    |
| 0.0087331 | 0.58295    |
| 0.0085339 | 0.52689    |
| 0.032544  | -1.0304    |
| 0.096449  | 0.06518    |
| 0.032875  | -1.0007    |
| 0.0076336 | 0.25635    |
| 0.090686  | 0.034253   |
| 0.093395  | 0.030934   |
| 0.0077085 | -0.0060189 |
| 0.048754  | -0.4856    |
| 0.074911  | 0.051806   |
| 0.007306  | 0.15072    |
| 0.014086  | 0.004364   |
| 0.0072715 | 0.13941    |
| 0.0080466 | 0.38405    |

|           |            |
|-----------|------------|
| 0.018428  | 0.013082   |
| 0.0586    | 0.04604    |
| 0.0089841 | -0.006908  |
| 0.0088702 | 0.62079    |
| 0.033792  | -1.1384    |
| 0.007306  | 0.15072    |
| 0.0088702 | 0.62079    |
| 0.0073419 | 0.16248    |
| 0.10477   | 0.044903   |
| 0.032205  | 0.027815   |
| 0.0071773 | 0.10834    |
| 0.032633  | -1.021     |
| 0.043745  | -0.6071    |
| 0.070527  | 0.051118   |
| 0.014086  | 0.0055346  |
| 0.048754  | -0.4856    |
| 0.007779  | 0.30202    |
| 0.034505  | -0.91058   |
| 0.0080466 | 0.38405    |
| 0.0084058 | 0.49014    |
| 0.007306  | 0.15072    |
| 0.0075002 | 0.21378    |
| 0.028099  | 0.023825   |
| 0.099669  | 0.06705    |
| 0.0074182 | 0.1873     |
| 0.034855  | -0.89503   |
| 0.03239   | -1.0557    |
| 0.10347   | 0.024827   |
| 0.0085339 | 0.52689    |
| 0.090686  | 0.034253   |
| 0.0072071 | 0.11821    |
| 0.0086658 | 0.56416    |
| 0.096449  | 0.06633    |
| 0.0076336 | 0.25635    |
| 0.0088702 | 0.62079    |
| 0.0082818 | 0.45401    |
| 0.010376  | -0.0036418 |
| 0.012958  | 0.0032251  |
| 0.0073419 | 0.16248    |
| 0.043079  | 0.037634   |
| 0.0072955 | 0.00071242 |

|           |            |
|-----------|------------|
| 0.10134   | 0.022479   |
| 0.0076807 | 0.25635    |
| 0.10409   | 0.026889   |
| 0.10385   | 0.052398   |
| 0.0088702 | 0.62079    |
| 0.0086658 | 0.56416    |
| 0.040428  | -0.70012   |
| 0.10228   | 0.022679   |
| 0.0072715 | 0.12857    |
| 0.0092171 | -0.0064176 |
| 0.043079  | 0.036502   |
| 0.099168  | 0.023109   |
| 0.010731  | -0.0027971 |
| 0.0084058 | 0.49014    |
| 0.035661  | -0.86174   |
| 0.086766  | 0.027849   |
| 0.071483  | 0.051552   |
| 0.0074585 | 0.20034    |
| 0.0090816 | 0.67796    |
| 0.10494   | 0.039956   |
| 0.090012  | 0.036534   |
| 0.0073602 | -0.0011105 |
| 0.0088013 | 0.60183    |
| 0.0081619 | 0.41861    |
| 0.007099  | 0.081709   |
| 0.0081619 | 0.41861    |
| 0.0090816 | 0.67796    |
| 0.0076807 | 0.27125    |
| 0.011527  | 2.49E-05   |
| 0.033642  | -0.93955   |
| 0.033092  | -1.1234    |
| 0.0075433 | 0.2276     |
| 0.065104  | 0.049656   |
| 0.076413  | 0.051739   |
| 0.0072715 | 0.12857    |
| 0.007306  | 0.15072    |
| 0.0091534 | 0.69708    |
| 0.00894   | 0.6398     |
| 0.0075433 | 0.2276     |
| 0.018428  | 0.011775   |
| 0.0086658 | 0.56416    |

|           |            |
|-----------|------------|
| 0.0073419 | 0.16248    |
| 0.0076807 | 0.25635    |
| 0.094069  | 0.028875   |
| 0.041454  | 0.035337   |
| 0.039695  | -0.70012   |
| 0.033092  | -1.1234    |
| 0.097342  | 0.024682   |
| 0.068581  | -0.1449    |
| 0.0097473 | -0.0051686 |
| 0.07411   | 0.051821   |
| 0.0088013 | 0.60183    |
| 0.098575  | 0.023538   |
| 0.0072071 | 0.11821    |
| 0.0073793 | 0.17468    |
| 0.0339    | -0.93955   |
| 0.032633  | -1.021     |
| 0.0075433 | 0.2276     |
| 0.0084058 | 0.49014    |
| 0.0097473 | -0.0044341 |
| 0.0070776 | 0.073782   |
| 0.007123  | 0.090103   |
| 0.035661  | -0.86174   |
| 0.032743  | -1.0111    |
| 0.096449  | 0.06518    |
| 0.040428  | -0.67741   |
| 0.0072071 | 0.11821    |
| 0.071533  | -0.10826   |
| 0.0083433 | 0.47199    |
| 0.0089841 | -0.0064176 |
| 0.0073419 | 0.16248    |
| 0.087374  | 0.041005   |
| 0.021206  | 0.015736   |
| 0.0075002 | 0.21378    |
| 0.083144  | 0.04737    |
| 0.007779  | 0.30202    |
| 0.0088702 | 0.62079    |
| 0.0070309 | 0.052688   |
| 0.0078823 | 0.33401    |
| 0.0075877 | 0.2418     |
| 0.0075002 | 0.21378    |
| 0.0091534 | 0.69708    |

|           |            |
|-----------|------------|
| 0.0092171 | -0.0058338 |
| 0.00894   | 0.6398     |
| 0.0075433 | 0.2276     |
| 0.032519  | -1.0951    |
| 0.0082818 | 0.45401    |
| 0.007123  | 0.090103   |
| 0.10309   | 0.059186   |
| 0.05467   | -0.36399   |
| 0.032544  | -1.0304    |
| 0.013504  | 0.004364   |
| 0.020232  | 0.014403   |
| 0.052701  | 0.042727   |
| 0.049567  | 0.041791   |
| 0.0083433 | 0.47199    |
| 0.0076336 | 0.25635    |
| 0.10036   | 0.06649    |
| 0.0078823 | 0.33401    |
| 0.0086658 | 0.56416    |
| 0.007306  | 0.15072    |
| 0.0083433 | 0.47199    |
| 0.072398  | 0.051693   |
| 0.033412  | -0.96585   |
| 0.047677  | -0.4856    |
| 0.088023  | 0.039917   |
| 0.0090816 | 0.67796    |
| 0.0078823 | 0.33401    |
| 0.0070169 | 0.040742   |
| 0.0070776 | 0.073782   |
| 0.0084694 | 0.50845    |
| 0.0077085 | -0.0067106 |
| 0.069529  | 0.051118   |
| 0.0072715 | 0.13941    |
| 0.0070159 | 0.035368   |
| 0.0085339 | 0.52689    |
| 0.0090816 | 0.67796    |
| 0.024427  | 0.019776   |
| 0.064204  | -0.2052    |
| 0.0075433 | 0.2276     |
| 0.0081619 | 0.41861    |
| 0.0074333 | -0.0026829 |
| 0.0086658 | 0.56416    |

|           |            |
|-----------|------------|
| 0.0070192 | 0.030378   |
| 0.042857  | -0.63085   |
| 0.059971  | -0.27073   |
| 0.0074182 | 0.17468    |
| 0.0091534 | 0.69708    |
| 0.0070589 | 0.066311   |
| 0.0084058 | 0.49014    |
| 0.0079906 | 0.36712    |
| 0.032205  | 0.029119   |
| 0.025601  | 0.022479   |
| 0.081558  | -0.008361  |
| 0.0091534 | 0.69708    |
| 0.0080466 | 0.38405    |
| 0.0077292 | 0.27125    |
| 0.00894   | 0.6398     |
| 0.0073793 | 0.17468    |
| 0.011114  | -0.0019027 |
| 0.00894   | 0.6398     |
| 0.007306  | 0.15072    |
| 0.0084694 | 0.50845    |
| 0.033353  | -1.1312    |
| 0.0074182 | 0.1873     |
| 0.081445  | 0.04924    |
| 0.0078823 | 0.33401    |
| 0.10415   | 0.052398   |
| 0.033208  | -0.96585   |
| 0.0070309 | 0.052688   |
| 0.0078823 | 0.33401    |
| 0.007123  | 0.090103   |
| 0.05467   | -0.36399   |
| 0.019306  | 0.013082   |
| 0.00894   | 0.6398     |
| 0.038348  | -0.74417   |
| 0.032544  | -1.0304    |
| 0.068581  | -0.1449    |
| 0.007306  | 0.15072    |
| 0.0076807 | 0.27125    |
| 0.0070818 | 0.014005   |
| 0.007306  | 0.15072    |
| 0.0088013 | 0.60183    |
| 0.007099  | 0.081709   |

|           |            |
|-----------|------------|
| 0.007306  | 0.15072    |
| 0.0072071 | 0.11821    |
| 0.0070401 | 0.021497   |
| 0.0088702 | 0.62079    |
| 0.07879   | -0.031991  |
| 0.0073793 | 0.17468    |
| 0.0073793 | 0.17468    |
| 0.0070309 | 0.052688   |
| 0.0070159 | 0.035368   |
| 0.0085746 | -0.0075602 |
| 0.0071773 | 0.10834    |
| 0.039695  | -0.72239   |
| 0.05467   | -0.36399   |
| 0.0070272 | 0.025758   |
| 0.087374  | 0.039917   |
| 0.0090104 | 0.65886    |
| 0.070527  | 0.051118   |
| 0.0075433 | 0.2276     |
| 0.033662  | 0.029119   |
| 0.0076807 | 0.27125    |
| 0.091362  | 0.033125   |
| 0.0084694 | 0.50845    |
| 0.084293  | 0.04497    |
| 0.0074585 | 0.20034    |
| 0.014086  | 0.004364   |
| 0.0079359 | 0.35043    |
| 0.0070169 | 0.040742   |
| 0.0075002 | 0.21378    |
| 0.0070776 | 0.073782   |
| 0.0083433 | 0.47199    |
| 0.052201  | -0.41225   |
| 0.0070272 | 0.025758   |
| 0.0072955 | 0.00071242 |
| 0.0075433 | 0.2276     |
| 0.0091534 | 0.69708    |
| 0.0075433 | 0.2276     |
| 0.0071773 | 0.10834    |
| 0.007123  | 0.090103   |
| 0.0075433 | 0.2276     |
| 0.012958  | 0.0032251  |
| 0.035661  | -0.86174   |

|           |           |
|-----------|-----------|
| 0.0082213 | 0.43621   |
| 0.10347   | 0.024827  |
| 0.0088013 | 0.60183   |
| 0.0086658 | 0.56416   |
| 0.007306  | 0.13941   |
| 0.086106  | 0.04308   |
| 0.0075433 | 0.2276    |
| 0.078448  | 0.051216  |
| 0.0070776 | 0.066311  |
| 0.03669   | 0.032921  |
| 0.0090104 | 0.65886   |
| 0.032462  | -1.0894   |
| 0.10036   | 0.06649   |
| 0.0072715 | 0.13941   |
| 0.075932  | -0.045303 |
| 0.0072386 | 0.12857   |
| 0.0083433 | 0.47199   |
| 0.0085994 | 0.54547   |
| 0.0082213 | 0.43621   |
| 0.012448  | 0.001053  |
| 0.0090104 | 0.65886   |
| 0.059983  | 0.046758  |
| 0.0078823 | 0.33401   |
| 0.00894   | 0.6398    |
| 0.0074585 | 0.20034   |
| 0.07411   | 0.051821  |
| 0.03612   | -0.84394  |
| 0.0087331 | 0.58295   |
| 0.0076807 | 0.27125   |
| 0.0082818 | 0.45401   |
| 0.026825  | 0.022479  |
| 0.00894   | 0.6398    |
| 0.007099  | 0.081709  |
| 0.014086  | 0.004364  |
| 0.082903  | 0.0020229 |
| 0.07879   | -0.031991 |
| 0.0075877 | 0.2418    |
| 0.0081619 | 0.41861   |
| 0.044711  | 0.037634  |
| 0.0074585 | 0.20034   |
| 0.086735  | 0.042062  |



|           |            |
|-----------|------------|
| 0.097966  | 0.024065   |
| 0.0090104 | 0.65886    |
| 0.013504  | 0.0032251  |
| 0.0070818 | 0.014005   |
| 0.0088702 | 0.62079    |
| 0.0079451 | -0.0072122 |
| 0.0083433 | 0.47199    |
| 0.0088013 | 0.60183    |
| 0.0087331 | 0.58295    |
| 0.007821  | -0.0067106 |
| 0.017596  | 0.010484   |
| 0.0088702 | 0.62079    |
| 0.0074585 | 0.1873     |
| 0.078448  | 0.050932   |
| 0.007123  | 0.081709   |
| 0.080287  | 0.050199   |
| 0.00894   | 0.6398     |
| 0.007123  | 0.090103   |
| 0.0087331 | 0.58295    |
| 0.073008  | -0.09116   |
| 0.0073602 | -0.0011105 |
| 0.10347   | 0.024827   |
| 0.08918   | 0.040962   |
| 0.08799   | 0.040962   |
| 0.0072071 | 0.10834    |
| 0.032743  | -1.0111    |
| 0.0070776 | 0.073782   |
| 0.0082818 | 0.43621    |
| 0.013504  | 0.0032251  |
| 0.10485   | 0.033276   |
| 0.10493   | 0.033276   |
| 0.0074182 | 0.1873     |
| 0.037733  | -0.78604   |
| 0.034505  | -0.91058   |
| 0.0085994 | 0.54547    |
| 0.019306  | 0.013082   |
| 0.061361  | -0.24839   |
| 0.0097473 | -0.0044341 |
| 0.0090104 | 0.65886    |
| 0.033412  | -0.96585   |
| 0.007779  | 0.30202    |

|           |            |
|-----------|------------|
| 0.0090104 | 0.65886    |
| 0.086766  | 0.027849   |
| 0.033641  | -1.1384    |
| 0.10472   | 0.03138    |
| 0.0087704 | -0.0072929 |
| 0.007123  | 0.081709   |
| 0.080287  | 0.049748   |
| 0.032423  | -1.0477    |
| 0.055719  | 0.044471   |
| 0.079079  | 0.050932   |
| 0.0092171 | -0.0064176 |
| 0.061361  | -0.24839   |
| 0.014706  | 0.0067344  |
| 0.0083433 | 0.47199    |
| 0.03239   | -1.0557    |
| 0.063888  | 0.04917    |
| 0.0339    | -0.93955   |
| 0.0072071 | 0.11821    |
| 0.0072386 | 0.12857    |
| 0.0086658 | 0.56416    |
| 0.0075877 | 0.2418     |
| 0.007147  | 0.0078041  |
| 0.101     | 0.065585   |
| 0.0070159 | 0.035368   |
| 0.063888  | 0.048637   |
| 0.032423  | -1.0477    |
| 0.032861  | -1.1149    |
| 0.0071491 | 0.090103   |
| 0.0090816 | 0.67796    |
| 0.086766  | 0.027849   |
| 0.0090816 | 0.67796    |
| 0.010731  | -0.0019027 |
| 0.053419  | -0.38803   |
| 0.0075433 | 0.2276     |
| 0.0073419 | 0.16248    |
| 0.094069  | 0.029884   |
| 0.011527  | -0.0009612 |
| 0.0090104 | 0.65886    |
| 0.0091534 | 0.69708    |
| 0.10493   | 0.03536    |
| 0.0074182 | 0.1873     |

|           |           |
|-----------|-----------|
| 0.0074585 | 0.20034   |
| 0.070056  | -0.12619  |
| 0.02223   | 0.018425  |
| 0.03303   | -0.98966  |
| 0.0075433 | 0.2276    |
| 0.10309   | 0.059186  |
| 0.0072386 | 0.12857   |
| 0.063888  | 0.04917   |
| 0.082903  | 0.0020229 |
| 0.012448  | 0.001053  |
| 0.0072715 | 0.13941   |
| 0.025601  | 0.021128  |
| 0.10215   | 0.062875  |
| 0.0078823 | 0.33401   |
| 0.012958  | 0.0032251 |
| 0.007306  | 0.15072   |
| 0.032633  | -1.021    |
| 0.10036   | 0.06649   |
| 0.082903  | 0.011497  |
| 0.10347   | 0.024054  |
| 0.033208  | -0.97806  |
| 0.088023  | 0.038804  |
| 0.032373  | -1.0632   |
| 0.012958  | 0.0032251 |
| 0.0070581 | 0.014005  |
| 0.0085339 | 0.52689   |
| 0.084221  | 0.011497  |
| 0.0088702 | 0.62079   |
| 0.0085339 | 0.52689   |
| 0.041199  | -0.65431  |
| 0.091362  | 0.034253  |
| 0.0072386 | 0.12857   |
| 0.0070192 | 0.025758  |
| 0.012958  | 0.0032251 |
| 0.029421  | 0.025165  |
| 0.051016  | -0.43662  |
| 0.012958  | 0.0021206 |
| 0.033641  | -1.1384   |
| 0.0075002 | 0.21378   |
| 0.032544  | -1.0304   |
| 0.073008  | -0.074934 |

|           |            |
|-----------|------------|
| 0.0073419 | 0.16248    |
| 0.0071491 | 0.098977   |
| 0.032972  | -1.1193    |
| 0.047677  | -0.5101    |
| 0.033412  | -0.96585   |
| 0.079691  | 0.050199   |
| 0.10494   | 0.039956   |
| 0.0087704 | -0.0072929 |
| 0.0085339 | 0.52689    |
| 0.1035    | 0.054784   |
| 0.023303  | 0.018425   |
| 0.0087331 | 0.56416    |
| 0.0072715 | 0.13941    |
| 0.0097473 | -0.0051686 |
| 0.013504  | 0.0032251  |
| 0.011972  | 2.49E-05   |
| 0.0081037 | 0.40122    |
| 0.098575  | 0.024065   |
| 0.034505  | -0.91058   |
| 0.032373  | -1.0704    |
| 0.011972  | 2.49E-05   |
| 0.013504  | 0.0032251  |
| 0.0088013 | 0.60183    |
| 0.016066  | 0.0092115  |
| 0.0081037 | 0.40122    |
| 0.076413  | 0.051739   |
| 0.0076336 | 0.25635    |
| 0.0087331 | 0.58295    |
| 0.016809  | 0.010484   |
| 0.013504  | 0.0032251  |
| 0.0074182 | 0.1873     |
| 0.013504  | 0.0032251  |
| 0.026825  | 0.022479   |
| 0.0094709 | -0.0058338 |
| 0.0079451 | -0.0072122 |
| 0.10441   | 0.047424   |
| 0.02223   | 0.017077   |
| 0.007306  | 0.15072    |
| 0.039002  | -0.74417   |
| 0.091453  | 0.0511     |
| 0.0073793 | 0.17468    |

|           |            |
|-----------|------------|
| 0.0071773 | 0.098977   |
| 0.090012  | 0.035391   |
| 0.096059  | 0.02616    |
| 0.0071491 | 0.098977   |
| 0.0087704 | -0.0072929 |
| 0.010731  | -0.0027971 |
| 0.058604  | -0.29352   |
| 0.03303   | -0.98966   |
| 0.0075153 | -0.0040171 |
| 0.0079451 | -0.0072122 |
| 0.0097473 | -0.0044341 |
| 0.0070818 | 0.014005   |
| 0.0085339 | 0.52689    |
| 0.0084694 | 0.50845    |
| 0.0080815 | -0.0076938 |
| 0.086766  | 0.034794   |
| 0.101     | 0.065585   |
| 0.0085339 | 0.50845    |
| 0.053419  | -0.36399   |
| 0.019306  | 0.013082   |
| 0.010376  | -0.0036418 |
| 0.007123  | 0.090103   |
| 0.077372  | -0.031991  |
| 0.075932  | -0.045303  |
| 0.0090816 | 0.67796    |
| 0.051147  | 0.042727   |
| 0.010376  | -0.0036418 |
| 0.0072387 | 0.0027978  |
| 0.086735  | 0.042062   |
| 0.011114  | -0.0019027 |
| 0.032875  | -1.0007    |
| 0.011972  | 0.001053   |
| 0.03239   | -1.0557    |
| 0.013504  | 0.0032251  |
| 0.0586    | 0.04604    |
| 0.083144  | 0.04663    |
| 0.0087331 | 0.58295    |
| 0.033642  | -0.95303   |
| 0.10455   | 0.029687   |
| 0.0072071 | 0.10834    |
| 0.0092171 | -0.0058338 |

|           |            |
|-----------|------------|
| 0.010731  | -0.0019027 |
| 0.016809  | 0.010484   |
| 0.094739  | 0.027913   |
| 0.0070776 | 0.073782   |
| 0.0075153 | -0.0040171 |
| 0.0092171 | -0.0058338 |
| 0.0088702 | 0.62079    |
| 0.096449  | 0.06633    |
| 0.0087704 | -0.006908  |
| 0.0097473 | -0.0051686 |
| 0.067111  | -0.16433   |
| 0.0090104 | 0.65886    |
| 0.032588  | -1.1005    |
| 0.032373  | -1.0632    |
| 0.049867  | -0.43662   |
| 0.0071491 | 0.098977   |
| 0.038348  | -0.7654    |
| 0.0088702 | 0.62079    |
| 0.0081037 | 0.40122    |
| 0.010376  | -0.0036418 |
| 0.0075153 | -0.0040171 |
| 0.0070433 | 0.052688   |
| 0.091362  | 0.034253   |
| 0.0072715 | 0.13941    |
| 0.097966  | 0.024065   |
| 0.0072955 | -0.0011105 |
| 0.012448  | 0.001053   |
| 0.0084694 | 0.50845    |
| 0.033642  | -0.95303   |
| 0.0075433 | 0.2276     |
| 0.048754  | -0.4856    |
| 0.0077085 | -0.0060189 |
| 0.086766  | 0.027849   |
| 0.052201  | -0.38803   |
| 0.096449  | 0.06518    |
| 0.0075877 | 0.2418     |
| 0.032389  | -1.0771    |
| 0.0072071 | 0.11821    |
| 0.0071491 | 0.098977   |
| 0.093395  | 0.030934   |
| 0.0075153 | -0.0040171 |

|           |            |
|-----------|------------|
| 0.0085994 | 0.54547    |
| 0.097321  | 0.06633    |
| 0.091453  | 0.0511     |
| 0.00783   | 0.31787    |
| 0.032418  | -1.0834    |
| 0.061361  | -0.22652   |
| 0.0088702 | 0.62079    |
| 0.0075153 | -0.0040171 |
| 0.0083953 | -0.0076979 |
| 0.007306  | 0.15072    |
| 0.084884  | 0.044052   |
| 0.065651  | -0.18445   |
| 0.010376  | -0.0036418 |
| 0.04467   | -0.5831    |
| 0.067404  | 0.050095   |
| 0.00894   | 0.6398     |
| 0.0085339 | 0.52689    |
| 0.015366  | 0.0079609  |
| 0.0075433 | 0.2276     |
| 0.0073419 | 0.16248    |
| 0.0075877 | 0.2418     |
| 0.032423  | -1.0477    |
| 0.0073793 | 0.17468    |
| 0.012448  | 0.001053   |
| 0.0075002 | 0.20034    |
| 0.0092171 | -0.0064176 |
| 0.0082818 | 0.45401    |
| 0.018428  | 0.013082   |
| 0.0072071 | 0.11821    |
| 0.0081619 | 0.41861    |
| 0.042008  | -0.65431   |
| 0.0075877 | 0.2418     |
| 0.0074333 | -0.0026829 |
| 0.0088013 | 0.60183    |
| 0.0092171 | -0.0058338 |
| 0.026825  | 0.022479   |
| 0.0081619 | 0.41861    |
| 0.0090104 | 0.65886    |
| 0.10036   | 0.06649    |
| 0.02223   | 0.017077   |
| 0.0072715 | 0.13941    |

|           |            |
|-----------|------------|
| 0.093395  | 0.029884   |
| 0.0076069 | -0.0051251 |
| 0.0072071 | 0.11821    |
| 0.014706  | 0.0055346  |
| 0.024427  | 0.021128   |
| 0.090686  | 0.034253   |
| 0.010731  | -0.0027971 |
| 0.062773  | -0.22652   |
| 0.039002  | -0.74417   |
| 0.0074333 | -0.0026829 |
| 0.0077085 | -0.0067106 |
| 0.032205  | 0.027815   |
| 0.0075877 | 0.2276     |
| 0.018428  | 0.011775   |
| 0.0085339 | 0.52689    |
| 0.095403  | 0.027913   |
| 0.033353  | -1.1312    |
| 0.0082818 | 0.45401    |
| 0.055952  | -0.34019   |
| 0.086766  | 0.034794   |
| 0.007821  | -0.0067106 |
| 0.0073793 | 0.17468    |
| 0.032544  | -1.0304    |
| 0.033948  | -1.1453    |
| 0.0070818 | 0.014005   |
| 0.033641  | -1.1384    |
| 0.0071491 | 0.090103   |
| 0.0072715 | 0.13941    |
| 0.0090816 | 0.67796    |
| 0.057264  | -0.31669   |
| 0.010376  | -0.0027971 |
| 0.012958  | 0.0021206  |
| 0.0070272 | 0.025758   |
| 0.03276   | -1.1104    |
| 0.011972  | 2.49E-05   |
| 0.090012  | 0.035391   |
| 0.051016  | -0.43662   |
| 0.0082313 | -0.0076938 |
| 0.097321  | 0.06633    |
| 0.039695  | -0.72239   |
| 0.0085339 | 0.52689    |



|           |            |
|-----------|------------|
| 0.039844  | 0.035337   |
| 0.0087704 | -0.0072929 |
| 0.1035    | 0.057058   |
| 0.007779  | 0.30202    |
| 0.0075002 | 0.21378    |
| 0.012448  | 0.001053   |
| 0.061361  | -0.22652   |
| 0.032588  | -1.1005    |
| 0.032389  | -1.0771    |
| 0.0083433 | 0.47199    |
| 0.0087704 | -0.0072929 |
| 0.091453  | 0.0511     |
| 0.061361  | -0.24839   |
| 0.034855  | -0.89503   |
| 0.096449  | 0.06518    |
| 0.0090816 | 0.67796    |
| 0.0081037 | 0.40122    |
| 0.033494  | -1.1349    |
| 0.0072715 | 0.13941    |
| 0.064204  | -0.2052    |
| 0.0070192 | 0.030378   |
| 0.0070309 | 0.046511   |
| 0.0079906 | 0.36712    |
| 0.0071491 | 0.098977   |
| 0.0088702 | 0.62079    |
| 0.019306  | 0.014403   |
| 0.032668  | -1.1056    |
| 0.00894   | 0.6398     |
| 0.067404  | 0.050095   |
| 0.0092171 | -0.0058338 |
| 0.011114  | -0.0019027 |
| 0.042857  | -0.63085   |
| 0.007147  | 0.0078041  |
| 0.014086  | 0.004364   |
| 0.0091534 | 0.69708    |
| 0.033219  | -1.1274    |
| 0.011114  | -0.0019027 |
| 0.0075877 | 0.2418     |
| 0.044711  | 0.038732   |
| 0.029421  | 0.026496   |
| 0.0075002 | 0.21378    |

|           |            |
|-----------|------------|
| 0.061361  | -0.24839   |
| 0.0586    | 0.046758   |
| 0.032373  | -1.0704    |
| 0.0078823 | 0.33401    |
| 0.0094709 | -0.0058338 |
| 0.1035    | 0.054784   |
| 0.098575  | 0.023538   |
| 0.007306  | 0.15072    |
| 0.10496   | 0.03536    |
| 0.0071894 | 0.0051576  |
| 0.0080815 | -0.007536  |
| 0.013504  | 0.0032251  |
| 0.0094709 | -0.0058338 |
| 0.035661  | -0.86174   |
| 0.033219  | -1.1274    |
| 0.0072386 | 0.12857    |
| 0.0072071 | 0.11821    |
| 0.10485   | 0.033276   |
| 0.0079451 | -0.0072122 |
| 0.098575  | 0.023538   |
| 0.034505  | -0.91058   |
| 0.03669   | 0.031675   |
| 0.011114  | -0.0009612 |
| 0.057264  | -0.29352   |
| 0.032633  | -1.021     |
| 0.034106  | -1.1486    |
| 0.012958  | 0.0021206  |
| 0.0072715 | 0.13941    |
| 0.0074585 | 0.20034    |
| 0.0076807 | 0.27125    |
| 0.007099  | 0.081709   |
| 0.03669   | 0.031675   |
| 0.010376  | -0.0036418 |
| 0.0075433 | 0.21378    |
| 0.0070401 | 0.021497   |
| 0.035661  | -0.86174   |
| 0.032205  | 0.029119   |
| 0.032373  | -1.0704    |
| 0.00783   | 0.31787    |
| 0.090012  | 0.035391   |
| 0.010048  | -0.0036418 |

|           |            |
|-----------|------------|
| 0.017596  | 0.010484   |
| 0.042857  | -0.63085   |
| 0.070056  | -0.12619   |
| 0.033642  | -0.95303   |
| 0.0072386 | 0.12857    |
| 0.081445  | 0.048674   |
| 0.051147  | 0.042727   |
| 0.055952  | -0.34019   |
| 0.0071113 | 0.010749   |
| 0.039844  | 0.034143   |
| 0.023303  | 0.018425   |
| 0.0091534 | 0.69708    |
| 0.033662  | 0.029119   |
| 0.0074182 | 0.1873     |
| 0.0071773 | 0.10834    |
| 0.0072955 | -0.0011105 |
| 0.0074585 | 0.20034    |
| 0.0076807 | 0.27125    |
| 0.044711  | 0.037634   |
| 0.033219  | -1.1274    |
| 0.019306  | 0.013082   |
| 0.00783   | 0.31787    |
| 0.071533  | -0.09116   |
| 0.011114  | -0.0019027 |
| 0.0075433 | 0.2276     |
| 0.00894   | 0.6398     |
| 0.0090104 | 0.65886    |
| 0.0074585 | 0.1873     |
| 0.0070309 | 0.052688   |
| 0.0097473 | -0.0051686 |
| 0.0078823 | 0.33401    |
| 0.032544  | -1.0304    |
| 0.013504  | 0.0032251  |
| 0.076413  | 0.051619   |
| 0.033353  | -1.1312    |
| 0.0077085 | -0.0060189 |
| 0.093574  | 0.061313   |
| 0.034268  | -1.1519    |
| 0.0090104 | 0.65886    |
| 0.081445  | 0.048674   |
| 0.010048  | -0.0044341 |

|           |            |
|-----------|------------|
| 0.018428  | 0.011775   |
| 0.021206  | 0.015736   |
| 0.071533  | -0.10826   |
| 0.0083433 | 0.47199    |
| 0.0073793 | 0.17468    |
| 0.0072955 | 0.00071242 |
| 0.0071894 | 0.0051576  |
| 0.007779  | 0.30202    |
| 0.010731  | -0.0019027 |
| 0.05467   | -0.36399   |
| 0.0080466 | 0.38405    |
| 0.014086  | 0.004364   |
| 0.0072071 | 0.10834    |
| 0.045635  | -0.53455   |
| 0.0080815 | -0.007536  |
| 0.075932  | -0.059632  |
| 0.0079906 | 0.36712    |
| 0.0094709 | -0.0058338 |
| 0.014086  | 0.0055346  |
| 0.0071894 | 0.0051576  |
| 0.024427  | 0.021128   |
| 0.10493   | 0.03536    |
| 0.10228   | 0.022987   |
| 0.083714  | 0.04583    |
| 0.036619  | -0.82536   |
| 0.093574  | 0.061313   |
| 0.0079906 | 0.36712    |
| 0.0075153 | -0.0040171 |
| 0.0092171 | -0.0064176 |
| 0.0089841 | -0.006908  |
| 0.0070433 | 0.059284   |
| 0.023303  | 0.018425   |
| 0.035661  | -0.86174   |
| 0.021206  | 0.015736   |
| 0.013504  | 0.0032251  |
| 0.032389  | -1.0771    |
| 0.011527  | -0.0009612 |
| 0.041454  | 0.035337   |
| 0.097966  | 0.024065   |
| 0.0092171 | -0.0058338 |
| 0.0080815 | -0.0076938 |

|           |            |
|-----------|------------|
| 0.03612   | -0.84394   |
| 0.093574  | 0.061313   |
| 0.033792  | -1.1419    |
| 0.0072715 | 0.13941    |
| 0.0070818 | 0.010749   |
| 0.0091534 | 0.69708    |
| 0.010731  | -0.0027971 |
| 0.080871  | 0.04924    |
| 0.0072715 | 0.13941    |
| 0.0075877 | 0.2418     |
| 0.10415   | 0.052398   |
| 0.032875  | -1.0007    |
| 0.08799   | 0.040962   |
| 0.0081619 | 0.41861    |
| 0.02223   | 0.017077   |
| 0.079691  | 0.050593   |
| 0.007306  | 0.13941    |
| 0.0088702 | 0.62079    |
| 0.025601  | 0.022479   |
| 0.062773  | -0.22652   |
| 0.0072386 | 0.12857    |
| 0.071533  | -0.10826   |
| 0.011527  | -0.0009612 |
| 0.0075153 | -0.0040171 |
| 0.084884  | 0.044052   |
| 0.0074182 | 0.1873     |
| 0.007306  | 0.15072    |
| 0.0082818 | 0.45401    |
| 0.049867  | -0.46109   |
| 0.0085994 | 0.54547    |
| 0.10415   | 0.052398   |
| 0.00894   | 0.6398     |
| 0.0082213 | 0.43621    |
| 0.0090816 | 0.67796    |
| 0.02223   | 0.018425   |
| 0.0088013 | 0.60183    |
| 0.00894   | 0.6398     |
| 0.0071773 | 0.10834    |
| 0.0083433 | 0.47199    |
| 0.030791  | 0.027815   |
| 0.094739  | 0.027913   |

|           |            |
|-----------|------------|
| 0.0087704 | -0.0072929 |
| 0.090012  | 0.035391   |
| 0.039002  | -0.74417   |
| 0.0070309 | 0.052688   |
| 0.061327  | 0.04743    |
| 0.024427  | 0.019776   |
| 0.0074182 | 0.1873     |
| 0.0072386 | 0.12857    |
| 0.10434   | 0.028193   |
| 0.032474  | -1.0393    |
| 0.1003    | 0.022572   |
| 0.070056  | -0.12619   |
| 0.015366  | 0.0067344  |
| 0.1038    | 0.02577    |
| 0.0081619 | 0.41861    |
| 0.0072386 | 0.12857    |
| 0.037733  | -0.78604   |
| 0.037733  | -0.78604   |
| 0.0092171 | -0.0064176 |
| 0.082903  | 0.011497   |
| 0.0072715 | 0.13941    |
| 0.011972  | 2.49E-05   |
| 0.0087331 | 0.58295    |
| 0.0071773 | 0.10834    |
| 0.093574  | 0.05853    |
| 0.0073793 | 0.17468    |
| 0.0085746 | -0.0075602 |
| 0.012448  | 0.001053   |
| 0.0073793 | 0.17468    |
| 0.010048  | -0.0044341 |
| 0.0076336 | 0.25635    |
| 0.0082313 | -0.0076938 |
| 0.039844  | 0.034143   |
| 0.076413  | 0.051739   |
| 0.039695  | -0.72239   |
| 0.033208  | -0.97806   |
| 0.0072386 | 0.12857    |
| 0.016066  | 0.0079609  |
| 0.0075433 | 0.2276     |
| 0.0079906 | 0.36712    |
| 0.0072715 | 0.13941    |

|           |            |
|-----------|------------|
| 0.039695  | -0.72239   |
| 0.0072955 | 0.00071242 |
| 0.0077292 | 0.28647    |
| 0.078448  | 0.050932   |
| 0.03303   | -0.98966   |
| 0.0079359 | 0.35043    |
| 0.0085994 | 0.54547    |
| 0.017596  | 0.011775   |
| 0.0090104 | 0.65886    |
| 0.087374  | 0.041005   |
| 0.0075433 | 0.2276     |
| 0.0080815 | -0.007536  |
| 0.0079359 | 0.35043    |
| 0.0071113 | 0.010749   |
| 0.0074182 | 0.1873     |
| 0.0090104 | 0.65886    |
| 0.007123  | 0.081709   |
| 0.0090816 | 0.67796    |
| 0.007022  | 0.046511   |
| 0.0070776 | 0.073782   |
| 0.046637  | -0.53455   |
| 0.0074585 | 0.20034    |
| 0.0079359 | 0.35043    |
| 0.010048  | -0.0044341 |
| 0.0073602 | -0.0011105 |
| 0.0078823 | 0.33401    |
| 0.048754  | -0.4856    |
| 0.0083433 | 0.47199    |
| 0.010731  | -0.0019027 |
| 0.0077085 | -0.0067106 |
| 0.0073602 | -0.0026829 |
| 0.068581  | -0.1449    |
| 0.1035    | 0.054784   |
| 0.090686  | 0.035391   |
| 0.0072071 | 0.11821    |
| 0.03239   | -1.0477    |
| 0.0072071 | 0.11821    |
| 0.078448  | 0.050932   |
| 0.0073793 | 0.17468    |
| 0.023303  | 0.019776   |
| 0.033662  | 0.030407   |

|           |            |
|-----------|------------|
| 0.067111  | -0.16433   |
| 0.0070581 | 0.017584   |
| 0.079691  | 0.050199   |
| 0.032474  | -1.0304    |
| 0.0076807 | 0.27125    |
| 0.0072386 | 0.12857    |
| 0.0070433 | 0.059284   |
| 0.00783   | 0.31787    |
| 0.0076807 | 0.27125    |
| 0.038254  | 0.032921   |
| 0.032389  | -1.0771    |
| 0.0070776 | 0.073782   |
| 0.0092171 | -0.0064176 |
| 0.0076069 | -0.0051251 |
| 0.070056  | -0.10826   |
| 0.0072715 | 0.13941    |
| 0.00783   | 0.31787    |
| 0.0070776 | 0.073782   |
| 0.10415   | 0.052398   |
| 0.0070159 | 0.035368   |
| 0.0088013 | 0.60183    |
| 0.03612   | -0.84394   |
| 0.0070401 | 0.021497   |
| 0.0074585 | 0.20034    |
| 0.096449  | 0.06518    |
| 0.011527  | -0.0009612 |
| 0.0072386 | 0.12857    |
| 0.10462   | 0.047424   |
| 0.030791  | 0.026496   |
| 0.0081037 | 0.40122    |
| 0.00783   | 0.31787    |
| 0.020232  | 0.014403   |
| 0.0070776 | 0.073782   |
| 0.070056  | -0.10826   |
| 0.092718  | 0.030934   |
| 0.0079359 | 0.35043    |
| 0.0076807 | 0.27125    |
| 0.055952  | -0.34019   |
| 0.1003    | 0.022572   |
| 0.0085339 | 0.52689    |
| 0.10134   | 0.022512   |



|           |            |
|-----------|------------|
| 0.0072071 | 0.11821    |
| 0.051016  | -0.43662   |
| 0.0076069 | -0.0051251 |
| 0.0071491 | 0.090103   |
| 0.0097473 | -0.0051686 |
| 0.03612   | -0.82536   |
| 0.038348  | -0.7654    |
| 0.012448  | 0.001053   |
| 0.0070309 | 0.046511   |
| 0.101     | 0.065585   |
| 0.029421  | 0.025165   |
| 0.0097473 | -0.0051686 |
| 0.086735  | 0.042062   |
| 0.0070401 | 0.021497   |
| 0.035661  | -0.86174   |
| 0.033792  | -1.1419    |
| 0.032875  | -1.0007    |
| 0.0075433 | 0.2276     |
| 0.011527  | -0.0009612 |
| 0.092718  | 0.032017   |
| 0.0073419 | 0.16248    |
| 0.047677  | -0.5101    |
| 0.011527  | -0.0009612 |
| 0.032743  | -1.0111    |
| 0.10494   | 0.039956   |
| 0.03612   | -0.84394   |
| 0.0077292 | 0.28647    |
| 0.011114  | -0.0009612 |
| 0.0083953 | -0.0075602 |
| 0.0071491 | 0.098977   |
| 0.0076807 | 0.27125    |
| 0.0079359 | 0.35043    |
| 0.032373  | -1.0632    |
| 0.0073419 | 0.16248    |
| 0.0080466 | 0.38405    |
| 0.0084058 | 0.49014    |
| 0.0071773 | 0.10834    |
| 0.0082213 | 0.43621    |
| 0.069529  | 0.050826   |
| 0.035158  | 0.031675   |
| 0.007099  | 0.081709   |

|           |            |
|-----------|------------|
| 0.0097473 | -0.0051686 |
| 0.0075153 | -0.0040171 |
| 0.053419  | -0.36399   |
| 0.0075002 | 0.21378    |
| 0.010048  | -0.0044341 |
| 0.032588  | -1.1005    |
| 0.0075877 | 0.2418     |
| 0.040428  | -0.70012   |
| 0.033642  | -0.95303   |
| 0.021206  | 0.015736   |
| 0.0085994 | 0.54547    |
| 0.014706  | 0.0067344  |
| 0.0094709 | -0.0058338 |
| 0.10462   | 0.044903   |
| 0.0085339 | 0.52689    |
| 0.061361  | -0.24839   |
| 0.10083   | 0.022479   |
| 0.032743  | -1.0111    |
| 0.012448  | 0.001053   |
| 0.0097473 | -0.0044341 |
| 0.032544  | -1.0304    |
| 0.080287  | 0.049748   |
| 0.032423  | -1.0477    |
| 0.084293  | 0.04497    |
| 0.0072955 | 0.00071242 |
| 0.048754  | -0.4856    |
| 0.012958  | 0.0021206  |
| 0.020232  | 0.014403   |
| 0.0073793 | 0.17468    |
| 0.0086658 | 0.56416    |
| 0.0071491 | 0.098977   |
| 0.092533  | 0.055137   |
| 0.098932  | 0.067232   |
| 0.0085994 | 0.54547    |
| 0.092533  | 0.05853    |
| 0.016809  | 0.010484   |
| 0.017596  | 0.011775   |
| 0.0078823 | 0.33401    |
| 0.032743  | -1.0111    |
| 0.007147  | 0.0078041  |
| 0.032205  | 0.027815   |

|           |            |
|-----------|------------|
| 0.080287  | 0.050199   |
| 0.0074585 | 0.20034    |
| 0.073273  | 0.051693   |
| 0.041199  | -0.67741   |
| 0.0083433 | 0.47199    |
| 0.0074333 | -0.0026829 |
| 0.095403  | 0.027005   |
| 0.047677  | -0.4856    |
| 0.082903  | 0.0020229  |
| 0.099669  | 0.06649    |
| 0.007123  | 0.090103   |
| 0.033792  | -1.1419    |
| 0.03239   | -1.0557    |
| 0.091362  | 0.033125   |
| 0.0075433 | 0.2276     |
| 0.0076807 | 0.27125    |
| 0.082578  | 0.048051   |
| 0.0088013 | 0.60183    |
| 0.011972  | 2.49E-05   |
| 0.007306  | 0.15072    |
| 0.0090816 | 0.67796    |
| 0.03524   | -0.87876   |
| 0.0081037 | 0.40122    |
| 0.010048  | -0.0044341 |
| 0.032389  | -1.0771    |
| 0.097966  | 0.024065   |
| 0.0071894 | 0.0051576  |
| 0.033219  | -1.1274    |
| 0.007779  | 0.30202    |
| 0.011527  | -0.0009612 |
| 0.081445  | 0.04924    |
| 0.05467   | -0.36399   |
| 0.016809  | 0.010484   |
| 0.09204   | 0.032017   |
| 0.033412  | -0.96585   |
| 0.0072955 | 0.00071242 |
| 0.0090104 | 0.65886    |
| 0.034855  | -0.89503   |
| 0.045635  | -0.5589    |
| 0.010376  | -0.0036418 |
| 0.0076069 | -0.0051251 |

|           |            |
|-----------|------------|
| 0.0085339 | 0.52689    |
| 0.032205  | 0.027815   |
| 0.0087331 | 0.58295    |
| 0.012958  | 0.0021206  |
| 0.032668  | -1.1056    |
| 0.0070589 | 0.066311   |
| 0.007099  | 0.073782   |
| 0.0084694 | 0.50845    |
| 0.070527  | 0.05136    |
| 0.0072715 | 0.13941    |
| 0.0094709 | -0.0058338 |
| 0.042857  | -0.63085   |
| 0.00894   | 0.6398     |
| 0.046637  | -0.53455   |
| 0.0088013 | 0.60183    |
| 0.043745  | -0.6071    |
| 0.0075002 | 0.21378    |
| 0.0085339 | 0.52689    |
| 0.0073793 | 0.17468    |
| 0.093574  | 0.061313   |
| 0.039695  | -0.72239   |
| 0.041199  | -0.67741   |
| 0.073008  | -0.09116   |
| 0.00783   | 0.31787    |
| 0.015366  | 0.0067344  |
| 0.0094709 | -0.0058338 |
| 0.095403  | 0.027005   |
| 0.099669  | 0.06649    |
| 0.011972  | 2.49E-05   |
| 0.094069  | 0.028875   |
| 0.032519  | -1.0951    |
| 0.033353  | -1.1312    |
| 0.10409   | 0.02577    |
| 0.0072715 | 0.13941    |
| 0.0074585 | 0.20034    |
| 0.076413  | 0.051739   |
| 0.0083433 | 0.47199    |
| 0.040428  | -0.70012   |
| 0.0083433 | 0.47199    |
| 0.0090816 | 0.67796    |
| 0.032373  | -1.0704    |

|           |            |
|-----------|------------|
| 0.097321  | 0.067003   |
| 0.07879   | -0.031991  |
| 0.0083433 | 0.47199    |
| 0.090335  | 0.0511     |
| 0.0088013 | 0.60183    |
| 0.090335  | 0.046386   |
| 0.025601  | 0.021128   |
| 0.00783   | 0.31787    |
| 0.032423  | -1.0477    |
| 0.0072715 | 0.12857    |
| 0.0074333 | -0.0026829 |
| 0.039002  | -0.74417   |
| 0.03612   | -0.84394   |
| 0.0076336 | 0.25635    |
| 0.0085994 | 0.54547    |
| 0.0090104 | 0.65886    |
| 0.026825  | 0.023825   |
| 0.012958  | 0.0021206  |
| 0.007779  | 0.30202    |
| 0.028099  | 0.023825   |
| 0.068581  | -0.1449    |
| 0.092718  | 0.032017   |
| 0.032519  | -1.0951    |
| 0.10215   | 0.062875   |
| 0.071533  | -0.09116   |
| 0.0070818 | 0.014005   |
| 0.033208  | -0.97806   |
| 0.0070589 | 0.066311   |
| 0.058604  | -0.29352   |
| 0.0076069 | -0.0051251 |
| 0.007821  | -0.0072122 |
| 0.0087704 | -0.0072929 |
| 0.0076069 | -0.0060189 |
| 0.077118  | 0.051444   |
| 0.010731  | -0.0027971 |
| 0.039844  | 0.034143   |
| 0.069529  | 0.051118   |
| 0.0087331 | 0.58295    |
| 0.0090104 | 0.65886    |
| 0.10455   | 0.028193   |
| 0.086766  | 0.027849   |

|           |            |
|-----------|------------|
| 0.0085994 | 0.54547    |
| 0.0070272 | 0.021497   |
| 0.0090104 | 0.65886    |
| 0.032875  | -1.0007    |
| 0.0076336 | 0.25635    |
| 0.033412  | -0.96585   |
| 0.10083   | 0.022479   |
| 0.032743  | -1.0111    |
| 0.011114  | -0.0019027 |
| 0.10183   | 0.022679   |
| 0.099168  | 0.023538   |
| 0.02223   | 0.018425   |
| 0.0071491 | 0.098977   |
| 0.010376  | -0.0036418 |
| 0.0082313 | -0.0076938 |
| 0.091362  | 0.034253   |
| 0.0075433 | 0.21378    |
| 0.066276  | 0.050095   |
| 0.053419  | -0.36399   |
| 0.032474  | -1.0393    |
| 0.032373  | -1.0632    |
| 0.0084694 | 0.50845    |
| 0.012958  | 0.0021206  |
| 0.019306  | 0.013082   |
| 0.053419  | -0.38803   |
| 0.033642  | -0.95303   |
| 0.020232  | 0.015736   |
| 0.0077292 | 0.27125    |
| 0.03276   | -1.1104    |
| 0.03303   | -0.98966   |
| 0.0088013 | 0.60183    |
| 0.032875  | -1.0007    |
| 0.007306  | 0.15072    |
| 0.02223   | 0.017077   |
| 0.0071773 | 0.098977   |
| 0.0081619 | 0.41861    |
| 0.032418  | -1.0834    |
| 0.010048  | -0.0044341 |
| 0.032462  | -1.0894    |
| 0.091453  | 0.0511     |
| 0.082903  | 0.0020229  |

|           |            |
|-----------|------------|
| 0.0085994 | 0.54547    |
| 0.048754  | -0.46109   |
| 0.010048  | -0.0044341 |
| 0.007821  | -0.0067106 |
| 0.018428  | 0.011775   |
| 0.0088702 | 0.62079    |
| 0.010376  | -0.0036418 |
| 0.012958  | 0.0021206  |
| 0.075932  | -0.045303  |
| 0.041199  | -0.67741   |
| 0.0075002 | 0.21378    |
| 0.0072386 | 0.12857    |
| 0.025601  | 0.022479   |
| 0.034855  | -0.87876   |
| 0.033353  | -1.1312    |
| 0.040428  | -0.70012   |
| 0.10472   | 0.03138    |
| 0.0072386 | 0.12857    |
| 0.0070818 | 0.014005   |
| 0.0088702 | 0.62079    |
| 0.010048  | -0.0044341 |
| 0.0072715 | 0.13941    |
| 0.069529  | 0.050826   |
| 0.088023  | 0.038804   |
| 0.0082818 | 0.45401    |
| 0.0088702 | 0.62079    |
| 0.0073419 | 0.16248    |
| 0.0086658 | 0.56416    |
| 0.0088702 | 0.62079    |
| 0.0087704 | -0.0072929 |
| 0.015366  | 0.0079609  |
| 0.0083433 | 0.47199    |
| 0.0077292 | 0.28647    |
| 0.0082313 | -0.0076938 |
| 0.032743  | -1.0111    |
| 0.095403  | 0.027005   |
| 0.0075877 | 0.2418     |
| 0.097966  | 0.024682   |
| 0.0090816 | 0.67796    |
| 0.0073793 | 0.17468    |
| 0.101     | 0.064369   |

|           |            |
|-----------|------------|
| 0.0073793 | 0.17468    |
| 0.007306  | 0.15072    |
| 0.011527  | 2.49E-05   |
| 0.011527  | -0.0009612 |
| 0.007306  | 0.13941    |
| 0.0074585 | 0.20034    |
| 0.011527  | -0.0009612 |
| 0.0078823 | 0.33401    |
| 0.0088013 | 0.60183    |
| 0.012958  | 0.0021206  |
| 0.093574  | 0.05853    |
| 0.093574  | 0.05853    |
| 0.007306  | 0.15072    |
| 0.007123  | 0.090103   |
| 0.0074585 | 0.20034    |
| 0.038254  | 0.032921   |
| 0.0082818 | 0.45401    |
| 0.0073419 | 0.16248    |
| 0.023303  | 0.018425   |
| 0.085489  | 0.044052   |
| 0.0088702 | 0.62079    |
| 0.034187  | -0.92541   |
| 0.0090104 | 0.65886    |
| 0.084221  | 0.011497   |
| 0.057264  | -0.31669   |
| 0.032544  | -1.0304    |
| 0.0072715 | 0.13941    |
| 0.018428  | 0.011775   |
| 0.012448  | 0.001053   |
| 0.010048  | -0.0044341 |
| 0.10309   | 0.057058   |
| 0.00783   | 0.30202    |
| 0.0084058 | 0.49014    |
| 0.0072071 | 0.11821    |
| 0.033948  | -1.1453    |
| 0.0079359 | 0.35043    |
| 0.007022  | 0.040742   |
| 0.10434   | 0.028193   |
| 0.1003    | 0.022572   |
| 0.046342  | 0.039792   |
| 0.034505  | -0.91058   |



|           |            |
|-----------|------------|
| 0.076413  | 0.051739   |
| 0.094739  | 0.028875   |
| 0.0076807 | 0.25635    |
| 0.0085339 | 0.52689    |
| 0.040428  | -0.67741   |
| 0.033662  | 0.030407   |
| 0.033662  | 0.029119   |
| 0.00894   | 0.6398     |
| 0.010376  | -0.0036418 |
| 0.0077085 | -0.0067106 |
| 0.0073793 | 0.17468    |
| 0.0084058 | 0.49014    |
| 0.0075002 | 0.21378    |
| 0.012448  | 0.001053   |
| 0.088023  | 0.039917   |
| 0.0070818 | 0.014005   |
| 0.00783   | 0.31787    |
| 0.016809  | 0.0092115  |
| 0.0070169 | 0.040742   |
| 0.0076336 | 0.25635    |
| 0.10485   | 0.03138    |
| 0.007306  | 0.15072    |
| 0.09204   | 0.033125   |
| 0.0072386 | 0.12857    |
| 0.016066  | 0.0079609  |
| 0.0084058 | 0.49014    |
| 0.0070192 | 0.030378   |
| 0.007099  | 0.081709   |
| 0.033792  | -1.1419    |
| 0.011114  | -0.0019027 |
| 0.078448  | 0.051216   |
| 0.0088013 | 0.60183    |
| 0.077118  | 0.051444   |
| 0.010731  | -0.0027971 |
| 0.0073793 | 0.17468    |
| 0.035158  | 0.031675   |
| 0.0075002 | 0.21378    |
| 0.038348  | -0.7654    |
| 0.0071113 | 0.010749   |
| 0.0090104 | 0.65886    |
| 0.0085994 | 0.54547    |

|           |            |
|-----------|------------|
| 0.0090104 | 0.65886    |
| 0.016809  | 0.010484   |
| 0.0087331 | 0.58295    |
| 0.0079906 | 0.36712    |
| 0.039844  | 0.035337   |
| 0.011527  | 2.49E-05   |
| 0.0076336 | 0.25635    |
| 0.0075002 | 0.21378    |
| 0.033412  | -0.95303   |
| 0.0076336 | 0.25635    |
| 0.028099  | 0.025165   |
| 0.034187  | -0.92541   |
| 0.0070818 | 0.014005   |
| 0.1038    | 0.024827   |
| 0.011527  | 2.49E-05   |
| 0.0091534 | 0.69708    |
| 0.0072386 | 0.12857    |
| 0.044711  | 0.038732   |
| 0.0080815 | -0.007536  |
| 0.049867  | -0.43662   |
| 0.10493   | 0.03536    |
| 0.012448  | 0.001053   |
| 0.033412  | -0.96585   |
| 0.08799   | 0.034794   |
| 0.10264   | 0.061137   |
| 0.055719  | 0.045278   |
| 0.0076336 | 0.25635    |
| 0.0088013 | 0.60183    |
| 0.065104  | 0.049656   |
| 0.0088702 | 0.62079    |
| 0.011527  | 2.49E-05   |
| 0.0087704 | -0.0072929 |
| 0.0075433 | 0.21378    |
| 0.012958  | 0.0021206  |
| 0.0079359 | 0.35043    |
| 0.0074182 | 0.1873     |
| 0.032519  | -1.0951    |
| 0.0073419 | 0.16248    |
| 0.007099  | 0.081709   |
| 0.082903  | 0.011497   |
| 0.098149  | 0.067232   |

|           |            |
|-----------|------------|
| 0.014706  | 0.0055346  |
| 0.03524   | -0.87876   |
| 0.0073793 | 0.17468    |
| 0.0074182 | 0.17468    |
| 0.00894   | 0.6398     |
| 0.0072715 | 0.13941    |
| 0.0084058 | 0.49014    |
| 0.075678  | 0.051739   |
| 0.092533  | 0.055137   |
| 0.046342  | 0.038732   |
| 0.0078823 | 0.31787    |
| 0.0075153 | -0.0040171 |
| 0.0070169 | 0.040742   |
| 0.0090816 | 0.67796    |
| 0.012448  | 0.001053   |
| 0.0081619 | 0.41861    |
| 0.0085339 | 0.52689    |
| 0.019306  | 0.013082   |
| 0.011972  | 2.49E-05   |
| 0.0085746 | -0.0075602 |
| 0.0085746 | -0.0075602 |
| 0.057178  | 0.045278   |
| 0.058604  | -0.29352   |
| 0.0080466 | 0.36712    |
| 0.012958  | 0.0021206  |
| 0.10347   | 0.024054   |
| 0.0078823 | 0.33401    |
| 0.035661  | -0.86174   |
| 0.049867  | -0.43662   |
| 0.0079906 | 0.36712    |
| 0.0070401 | 0.021497   |
| 0.0085994 | 0.52689    |
| 0.0072715 | 0.13941    |
| 0.0088013 | 0.60183    |
| 0.016066  | 0.0079609  |
| 0.0076336 | 0.25635    |
| 0.015366  | 0.0067344  |
| 0.04467   | -0.5589    |
| 0.0077292 | 0.28647    |
| 0.0087331 | 0.58295    |
| 0.042857  | -0.63085   |

|           |            |
|-----------|------------|
| 0.10455   | 0.029687   |
| 0.0070581 | 0.017584   |
| 0.014706  | 0.0055346  |
| 0.0081619 | 0.41861    |
| 0.066276  | 0.049656   |
| 0.049867  | -0.43662   |
| 0.010048  | -0.0044341 |
| 0.0339    | -0.93955   |
| 0.080871  | 0.049748   |
| 0.010376  | -0.0036418 |
| 0.0071113 | 0.010749   |
| 0.043745  | -0.5831    |
| 0.00894   | 0.6398     |
| 0.017596  | 0.011775   |
| 0.033642  | -0.95303   |
| 0.057264  | -0.29352   |
| 0.03524   | -0.87876   |
| 0.0070272 | 0.025758   |
| 0.0071491 | 0.098977   |
| 0.094574  | 0.061313   |
| 0.0073419 | 0.16248    |
| 0.081558  | -0.008361  |
| 0.051016  | -0.43662   |
| 0.00894   | 0.6398     |
| 0.0087331 | 0.58295    |
| 0.032462  | -1.0894    |
| 0.032544  | -1.021     |
| 0.0070433 | 0.059284   |
| 0.007099  | 0.081709   |
| 0.0074585 | 0.1873     |
| 0.065651  | -0.18445   |
| 0.083714  | 0.04583    |
| 0.012448  | 0.0021206  |
| 0.0072071 | 0.10834    |
| 0.04467   | -0.5831    |
| 0.032474  | -1.0393    |
| 0.065651  | -0.16433   |
| 0.0074333 | -0.0040171 |
| 0.10309   | 0.059186   |
| 0.0082818 | 0.45401    |
| 0.0072071 | 0.11821    |

|           |            |
|-----------|------------|
| 0.018428  | 0.011775   |
| 0.1035    | 0.054784   |
| 0.090335  | 0.0511     |
| 0.0085339 | 0.52689    |
| 0.010048  | -0.0044341 |
| 0.080871  | 0.04924    |
| 0.1035    | 0.057058   |
| 0.0081037 | 0.40122    |
| 0.0077292 | 0.28647    |
| 0.063888  | 0.04917    |
| 0.0084694 | 0.50845    |
| 0.032423  | -1.0477    |
| 0.061361  | -0.24839   |
| 0.007821  | -0.0067106 |
| 0.0070192 | 0.030378   |
| 0.0071773 | 0.10834    |
| 0.0079906 | 0.36712    |
| 0.063888  | 0.04917    |
| 0.0071773 | 0.10834    |
| 0.035158  | 0.030407   |
| 0.0077292 | 0.28647    |
| 0.0077292 | 0.28647    |
| 0.010376  | -0.0027971 |
| 0.032389  | -1.0771    |
| 0.0089841 | -0.0064176 |
| 0.007779  | 0.30202    |
| 0.0087331 | 0.58295    |
| 0.0080815 | -0.007536  |
| 0.0071113 | 0.010749   |
| 0.0087331 | 0.58295    |
| 0.0080815 | -0.007536  |
| 0.0075002 | 0.21378    |
| 0.043079  | 0.036502   |
| 0.0083433 | 0.47199    |
| 0.02223   | 0.018425   |
| 0.0084694 | 0.50845    |
| 0.00894   | 0.6398     |
| 0.068489  | 0.050826   |
| 0.0097473 | -0.0051686 |
| 0.10228   | 0.022987   |
| 0.10477   | 0.042402   |

|           |            |
|-----------|------------|
| 0.0586    | 0.046758   |
| 0.0072071 | 0.11821    |
| 0.0070581 | 0.017584   |
| 0.015366  | 0.0067344  |
| 0.016809  | 0.0092115  |
| 0.032668  | -1.1056    |
| 0.0082313 | -0.0076938 |
| 0.02223   | 0.017077   |
| 0.051147  | 0.042727   |
| 0.025601  | 0.021128   |
| 0.093574  | 0.061313   |
| 0.0085746 | -0.0075602 |
| 0.10385   | 0.054784   |
| 0.090686  | 0.034253   |
| 0.0075877 | 0.2418     |
| 0.0088702 | 0.62079    |
| 0.012448  | 0.001053   |
| 0.0083433 | 0.47199    |
| 0.0085339 | 0.52689    |
| 0.0088702 | 0.60183    |
| 0.037156  | -0.80605   |
| 0.10385   | 0.052398   |
| 0.094574  | 0.063518   |
| 0.032972  | -1.1193    |
| 0.0081619 | 0.41861    |
| 0.0085994 | 0.54547    |
| 0.084221  | 0.011497   |
| 0.090012  | 0.035391   |
| 0.041199  | -0.65431   |
| 0.0085746 | -0.0072929 |
| 0.03524   | -0.87876   |
| 0.0074333 | -0.0026829 |
| 0.0070581 | 0.017584   |
| 0.10434   | 0.026889   |
| 0.062773  | -0.22652   |
| 0.023303  | 0.018425   |
| 0.0083433 | 0.47199    |
| 0.043079  | 0.037634   |
| 0.0085994 | 0.52689    |
| 0.083714  | 0.04663    |
| 0.0084694 | 0.50845    |

|           |            |
|-----------|------------|
| 0.0072071 | 0.11821    |
| 0.012958  | 0.0021206  |
| 0.041454  | 0.035337   |
| 0.0090104 | 0.65886    |
| 0.035661  | -0.86174   |
| 0.0076807 | 0.27125    |
| 0.0072386 | 0.12857    |
| 0.0076069 | -0.0051251 |
| 0.007821  | -0.0067106 |
| 0.091453  | 0.0511     |
| 0.046637  | -0.53455   |
| 0.057264  | -0.29352   |
| 0.10462   | 0.044903   |
| 0.033412  | -0.96585   |
| 0.0090816 | 0.67796    |
| 0.0079359 | 0.35043    |
| 0.090335  | 0.046386   |
| 0.0082213 | 0.43621    |
| 0.0072386 | 0.12857    |
| 0.10183   | 0.022679   |
| 0.10477   | 0.042402   |
| 0.032373  | -1.0632    |
| 0.0083953 | -0.0076979 |
| 0.089343  | 0.037674   |
| 0.0082213 | 0.43621    |
| 0.065651  | -0.16433   |
| 0.0072386 | 0.12857    |
| 0.033219  | -1.1274    |
| 0.0070192 | 0.030378   |
| 0.085509  | 0.027849   |
| 0.012958  | 0.0032251  |
| 0.066276  | 0.050095   |
| 0.10036   | 0.06649    |
| 0.049867  | -0.43662   |
| 0.0087704 | -0.0072929 |
| 0.00894   | 0.6398     |
| 0.07879   | -0.031991  |
| 0.0090816 | 0.67796    |
| 0.0075877 | 0.2418     |
| 0.0075433 | 0.2276     |
| 0.10215   | 0.062875   |

|           |            |
|-----------|------------|
| 0.0085339 | 0.52689    |
| 0.0070776 | 0.073782   |
| 0.032205  | 0.027815   |
| 0.00783   | 0.31787    |
| 0.039844  | 0.035337   |
| 0.08918   | 0.040962   |
| 0.0072071 | 0.11821    |
| 0.037156  | -0.80605   |
| 0.034505  | -0.91058   |
| 0.0080815 | -0.007536  |
| 0.0090104 | 0.65886    |
| 0.0071773 | 0.10834    |
| 0.0079906 | 0.36712    |
| 0.032743  | -1.0111    |
| 0.0072387 | 0.0027978  |
| 0.091453  | 0.0511     |
| 0.10409   | 0.02577    |
| 0.0097473 | -0.0051686 |
| 0.0071491 | 0.098977   |
| 0.0073602 | -0.0011105 |
| 0.0085339 | 0.52689    |
| 0.014086  | 0.004364   |
| 0.0076336 | 0.25635    |
| 0.0072071 | 0.10834    |
| 0.057264  | -0.31669   |
| 0.074911  | 0.051821   |
| 0.010048  | -0.0044341 |
| 0.019306  | 0.014403   |
| 0.0070433 | 0.052688   |
| 0.0089841 | -0.006908  |
| 0.0074182 | 0.1873     |
| 0.085509  | 0.020095   |
| 0.10228   | 0.022987   |
| 0.0081619 | 0.41861    |
| 0.03239   | -1.0557    |
| 0.10496   | 0.037598   |
| 0.0073419 | 0.16248    |
| 0.10455   | 0.028193   |
| 0.0070272 | 0.025758   |
| 0.007123  | 0.090103   |
| 0.0073793 | 0.17468    |



|           |            |
|-----------|------------|
| 0.032474  | -1.0393    |
| 0.0072071 | 0.11821    |
| 0.047964  | 0.039792   |
| 0.076413  | 0.051619   |
| 0.007779  | 0.30202    |
| 0.0072715 | 0.12857    |
| 0.014706  | 0.0055346  |
| 0.042857  | -0.63085   |
| 0.0071773 | 0.10834    |
| 0.065104  | 0.049656   |
| 0.032544  | -1.0304    |
| 0.0088013 | 0.60183    |
| 0.086766  | 0.027849   |
| 0.047677  | -0.5101    |
| 0.00894   | 0.6398     |
| 0.098575  | 0.024065   |
| 0.017596  | 0.010484   |
| 0.0076336 | 0.2418     |
| 0.047964  | 0.040812   |
| 0.007123  | 0.090103   |
| 0.070527  | 0.05136    |
| 0.016809  | 0.0092115  |
| 0.09204   | 0.032017   |
| 0.024427  | 0.021128   |
| 0.0080815 | -0.007536  |
| 0.0084694 | 0.50845    |
| 0.099168  | 0.023109   |
| 0.099669  | 0.06705    |
| 0.10036   | 0.065585   |
| 0.095403  | 0.027005   |
| 0.0070589 | 0.066311   |
| 0.0097473 | -0.0044341 |
| 0.0075877 | 0.2418     |
| 0.017596  | 0.010484   |
| 0.035158  | 0.030407   |
| 0.099669  | 0.06705    |
| 0.0081037 | 0.40122    |
| 0.0071113 | 0.0078041  |
| 0.0097473 | -0.0051686 |
| 0.0076807 | 0.27125    |
| 0.10183   | 0.022679   |

|           |            |
|-----------|------------|
| 0.014706  | 0.0055346  |
| 0.10228   | 0.022987   |
| 0.0091534 | 0.69708    |
| 0.081445  | 0.048674   |
| 0.017596  | 0.010484   |
| 0.0071113 | 0.0078041  |
| 0.0080815 | -0.007536  |
| 0.067111  | -0.1449    |
| 0.033219  | -1.1274    |
| 0.032462  | -1.0894    |
| 0.10083   | 0.022572   |
| 0.037733  | -0.78604   |
| 0.010731  | -0.0027971 |
| 0.011114  | -0.0019027 |
| 0.0087704 | -0.006908  |
| 0.010048  | -0.0044341 |
| 0.0080815 | -0.007536  |
| 0.032373  | -1.0704    |
| 0.0081037 | 0.40122    |
| 0.061327  | 0.04743    |
| 0.0075433 | 0.2276     |
| 0.032423  | -1.0477    |
| 0.0071491 | 0.098977   |
| 0.0090816 | 0.67796    |
| 0.048754  | -0.4856    |
| 0.043745  | -0.6071    |
| 0.0072386 | 0.12857    |
| 0.007306  | 0.15072    |
| 0.0090816 | 0.67796    |
| 0.0070401 | 0.021497   |
| 0.038348  | -0.74417   |
| 0.0083953 | -0.0076979 |
| 0.068489  | 0.050826   |
| 0.010376  | -0.0036418 |
| 0.032544  | -1.0304    |
| 0.10083   | 0.022479   |
| 0.0071773 | 0.10834    |
| 0.0079359 | 0.35043    |
| 0.084884  | 0.04497    |
| 0.007821  | -0.0067106 |
| 0.010731  | -0.0019027 |

|           |            |
|-----------|------------|
| 0.0071113 | 0.010749   |
| 0.0088702 | 0.62079    |
| 0.0073419 | 0.16248    |
| 0.013504  | 0.0032251  |
| 0.086766  | 0.034794   |
| 0.03239   | -1.0557    |
| 0.0084058 | 0.49014    |
| 0.0071773 | 0.10834    |
| 0.0071773 | 0.10834    |
| 0.099743  | 0.023109   |
| 0.0090104 | 0.65886    |
| 0.0076807 | 0.27125    |
| 0.0076069 | -0.0051251 |
| 0.0072386 | 0.12857    |
| 0.058604  | -0.29352   |
| 0.0086658 | 0.56416    |
| 0.0094709 | -0.0058338 |
| 0.007821  | -0.0067106 |
| 0.011527  | -0.0009612 |
| 0.0070169 | 0.040742   |
| 0.0094709 | -0.0058338 |
| 0.10496   | 0.03536    |
| 0.10472   | 0.03138    |
| 0.037733  | -0.78604   |
| 0.0089841 | -0.0064176 |
| 0.035158  | 0.030407   |
| 0.08868   | 0.037674   |
| 0.091362  | 0.034253   |
| 0.0075433 | 0.21378    |
| 0.1003    | 0.022784   |
| 0.0079451 | -0.0072122 |
| 0.085509  | 0.027849   |
| 0.0070169 | 0.040742   |
| 0.035661  | -0.86174   |
| 0.0094709 | -0.0058338 |
| 0.041199  | -0.67741   |
| 0.007123  | 0.090103   |
| 0.011114  | -0.0009612 |
| 0.10134   | 0.022512   |
| 0.0076807 | 0.27125    |
| 0.065651  | -0.18445   |

|           |            |
|-----------|------------|
| 0.034268  | -1.1519    |
| 0.007306  | 0.15072    |
| 0.10477   | 0.044903   |
| 0.097342  | 0.024682   |
| 0.0071773 | 0.10834    |
| 0.077795  | 0.051444   |
| 0.036619  | -0.82536   |
| 0.0088702 | 0.62079    |
| 0.076413  | 0.051619   |
| 0.055719  | 0.044471   |
| 0.00783   | 0.31787    |
| 0.03669   | 0.031675   |
| 0.0072715 | 0.13941    |
| 0.0090816 | 0.67796    |
| 0.10215   | 0.062875   |
| 0.034106  | -1.1486    |
| 0.0085994 | 0.54547    |
| 0.0078823 | 0.33401    |
| 0.033642  | -0.95303   |
| 0.029421  | 0.025165   |
| 0.1035    | 0.057058   |
| 0.0070169 | 0.040742   |
| 0.046637  | -0.5101    |
| 0.0079359 | 0.35043    |
| 0.017596  | 0.010484   |
| 0.054226  | 0.043621   |
| 0.0081037 | 0.40122    |
| 0.0073793 | 0.17468    |
| 0.0073419 | 0.16248    |
| 0.049567  | 0.041791   |
| 0.033641  | -1.1349    |
| 0.045635  | -0.5589    |
| 0.032544  | -1.0304    |
| 0.0089841 | -0.006908  |
| 0.0085339 | 0.52689    |
| 0.0076807 | 0.27125    |
| 0.0082313 | -0.0076938 |
| 0.0070192 | 0.025758   |
| 0.063888  | 0.048637   |
| 0.011972  | 2.49E-05   |
| 0.10083   | 0.022479   |

|           |            |
|-----------|------------|
| 0.040428  | -0.70012   |
| 0.0075877 | 0.2418     |
| 0.0088702 | 0.62079    |
| 0.10309   | 0.059186   |
| 0.0088013 | 0.60183    |
| 0.0072386 | 0.11821    |
| 0.011527  | -0.0009612 |
| 0.0073602 | -0.0011105 |
| 0.0072071 | 0.11821    |
| 0.007099  | 0.081709   |
| 0.0085746 | -0.0075602 |
| 0.0079359 | 0.35043    |
| 0.07411   | 0.051821   |
| 0.075932  | -0.059632  |
| 0.0072715 | 0.13941    |
| 0.0074585 | 0.20034    |
| 0.033412  | -0.95303   |
| 0.032423  | -1.0477    |
| 0.0080466 | 0.38405    |
| 0.024427  | 0.021128   |
| 0.042008  | -0.65431   |
| 0.10488   | 0.039956   |
| 0.0084058 | 0.49014    |
| 0.017596  | 0.011775   |
| 0.0090104 | 0.65886    |
| 0.0071894 | 0.0051576  |
| 0.094069  | 0.028875   |
| 0.079079  | 0.050932   |
| 0.0072071 | 0.11821    |
| 0.0072071 | 0.11821    |
| 0.011527  | -0.0009612 |
| 0.007123  | 0.090103   |
| 0.036619  | -0.82536   |
| 0.090012  | 0.035391   |
| 0.10485   | 0.03138    |
| 0.019306  | 0.013082   |
| 0.032633  | -1.021     |
| 0.024427  | 0.021128   |
| 0.026825  | 0.022479   |
| 0.011527  | -0.0009612 |
| 0.0070272 | 0.025758   |

|           |            |
|-----------|------------|
| 0.0092171 | -0.0064176 |
| 0.030791  | 0.026496   |
| 0.059983  | 0.046758   |
| 0.049567  | 0.041791   |
| 0.0090104 | 0.65886    |
| 0.0090104 | 0.65886    |
| 0.012958  | 0.0021206  |
| 0.019306  | 0.014403   |
| 0.007779  | 0.30202    |
| 0.007821  | -0.0067106 |
| 0.03303   | -0.98966   |
| 0.0072715 | 0.13941    |
| 0.1035    | 0.057058   |
| 0.033219  | -1.1274    |
| 0.0073793 | 0.17468    |
| 0.02223   | 0.017077   |
| 0.036619  | -0.82536   |
| 0.0087331 | 0.58295    |
| 0.0071491 | 0.098977   |
| 0.0071491 | 0.098977   |
| 0.0074585 | 0.20034    |
| 0.0070433 | 0.059284   |
| 0.083714  | 0.04663    |
| 0.0076807 | 0.27125    |
| 0.012448  | 0.001053   |
| 0.0070433 | 0.059284   |
| 0.070527  | 0.051118   |
| 0.007022  | 0.046511   |
| 0.0083953 | -0.0076979 |
| 0.0084694 | 0.50845    |
| 0.010376  | -0.0027971 |
| 0.0092171 | -0.0058338 |
| 0.09204   | 0.032017   |
| 0.0074585 | 0.20034    |
| 0.10083   | 0.022479   |
| 0.033641  | -1.1384    |
| 0.036619  | -0.80605   |
| 0.0070433 | 0.059284   |
| 0.010048  | -0.0036418 |
| 0.084221  | 0.011497   |
| 0.007306  | 0.15072    |

|           |            |
|-----------|------------|
| 0.0082213 | 0.43621    |
| 0.0070159 | 0.035368   |
| 0.089343  | 0.036534   |
| 0.0082313 | -0.0076938 |
| 0.007306  | 0.15072    |
| 0.1035    | 0.057058   |
| 0.10309   | 0.059186   |
| 0.0071491 | 0.098977   |
| 0.090335  | 0.046386   |
| 0.025601  | 0.021128   |
| 0.0072071 | 0.10834    |
| 0.0075877 | 0.2418     |
| 0.0084694 | 0.50845    |
| 0.10472   | 0.029687   |
| 0.02223   | 0.017077   |
| 0.0076336 | 0.25635    |
| 0.0070309 | 0.052688   |
| 0.039002  | -0.74417   |
| 0.007099  | 0.073782   |
| 0.0084058 | 0.49014    |
| 0.0072386 | 0.12857    |
| 0.047677  | -0.4856    |
| 0.0070309 | 0.046511   |
| 0.018428  | 0.011775   |
| 0.0070776 | 0.073782   |
| 0.0070159 | 0.035368   |
| 0.032462  | -1.0894    |
| 0.033208  | -0.97806   |
| 0.029421  | 0.025165   |
| 0.099669  | 0.06705    |
| 0.0072386 | 0.12857    |
| 0.00894   | 0.6398     |
| 0.036619  | -0.82536   |
| 0.094574  | 0.061313   |
| 0.10215   | 0.062875   |
| 0.074476  | -0.059632  |
| 0.0073419 | 0.16248    |
| 0.0079906 | 0.36712    |
| 0.032373  | -1.0704    |
| 0.063888  | 0.04917    |
| 0.033662  | 0.029119   |

|           |            |
|-----------|------------|
| 0.030791  | 0.027815   |
| 0.1038    | 0.024827   |
| 0.0070818 | 0.014005   |
| 0.0087331 | 0.58295    |
| 0.061327  | 0.04743    |
| 0.03239   | -1.0557    |
| 0.016809  | 0.0092115  |
| 0.010376  | -0.0036418 |
| 0.0083433 | 0.47199    |
| 0.0079359 | 0.35043    |
| 0.054226  | 0.043621   |
| 0.010048  | -0.0044341 |
| 0.007821  | -0.0067106 |
| 0.014086  | 0.004364   |
| 0.0070818 | 0.014005   |
| 0.037733  | -0.7654    |
| 0.0083433 | 0.47199    |
| 0.010048  | -0.0044341 |
| 0.0071773 | 0.10834    |
| 0.0082818 | 0.45401    |
| 0.032389  | -1.0771    |
| 0.0078823 | 0.33401    |
| 0.032861  | -1.1149    |
| 0.076413  | 0.051739   |
| 0.047677  | -0.5101    |
| 0.007099  | 0.081709   |
| 0.07879   | -0.019688  |
| 0.049867  | -0.46109   |
| 0.010048  | -0.0044341 |
| 0.00783   | 0.31787    |
| 0.095533  | 0.063518   |
| 0.0091534 | 0.69708    |
| 0.0076336 | 0.25635    |
| 0.0075153 | -0.0040171 |
| 0.035661  | -0.86174   |
| 0.0082213 | 0.43621    |
| 0.077372  | -0.045303  |
| 0.033642  | -0.95303   |
| 0.10496   | 0.03536    |
| 0.0090104 | 0.65886    |
| 0.0072715 | 0.13941    |



|           |            |
|-----------|------------|
| 0.052701  | 0.043621   |
| 0.052701  | 0.043621   |
| 0.0072955 | 0.00071242 |
| 0.012958  | 0.0021206  |
| 0.052701  | 0.042727   |
| 0.007306  | 0.15072    |
| 0.0075877 | 0.2418     |
| 0.067404  | 0.050095   |
| 0.076413  | 0.051739   |
| 0.0070401 | 0.021497   |
| 0.073273  | 0.051693   |
| 0.007147  | 0.0078041  |
| 0.0076807 | 0.25635    |
| 0.032633  | -1.0111    |
| 0.033792  | -1.1419    |
| 0.057264  | -0.31669   |
| 0.014086  | 0.0055346  |
| 0.010048  | -0.0044341 |
| 0.055952  | -0.34019   |
| 0.0081619 | 0.41861    |
| 0.0074333 | -0.0026829 |
| 0.007821  | -0.0067106 |
| 0.007099  | 0.073782   |
| 0.0071773 | 0.10834    |
| 0.0090104 | 0.65886    |
| 0.084221  | 0.011497   |
| 0.039844  | 0.034143   |
| 0.0076807 | 0.27125    |
| 0.0084058 | 0.49014    |
| 0.05467   | -0.34019   |
| 0.007779  | 0.30202    |
| 0.0075002 | 0.20034    |
| 0.0074333 | -0.0026829 |
| 0.016809  | 0.0092115  |
| 0.0085994 | 0.54547    |
| 0.0086658 | 0.56416    |
| 0.10264   | 0.061137   |
| 0.062773  | -0.22652   |
| 0.067404  | 0.050095   |
| 0.044711  | 0.037634   |
| 0.03303   | -0.98966   |

|           |            |
|-----------|------------|
| 0.041199  | -0.65431   |
| 0.007099  | 0.081709   |
| 0.0074182 | 0.1873     |
| 0.040428  | -0.70012   |
| 0.077795  | 0.051444   |
| 0.063888  | 0.04917    |
| 0.0088702 | 0.62079    |
| 0.0083953 | -0.0076979 |
| 0.043745  | -0.6071    |
| 0.066276  | 0.050095   |
| 0.014086  | 0.004364   |
| 0.0073419 | 0.16248    |
| 0.0082213 | 0.43621    |
| 0.017596  | 0.010484   |
| 0.032743  | -1.0111    |
| 0.061361  | -0.24839   |
| 0.0074585 | 0.20034    |
| 0.032389  | -1.0771    |
| 0.0079359 | 0.35043    |
| 0.034187  | -0.92541   |
| 0.024427  | 0.019776   |
| 0.033641  | -1.1384    |
| 0.015366  | 0.0067344  |
| 0.097321  | 0.067003   |
| 0.1038    | 0.02577    |
| 0.0072071 | 0.11821    |
| 0.0077085 | -0.0060189 |
| 0.042857  | -0.63085   |
| 0.097342  | 0.024682   |
| 0.0075153 | -0.0040171 |
| 0.073273  | 0.051783   |
| 0.0076807 | 0.27125    |
| 0.0097473 | -0.0044341 |
| 0.10409   | 0.02577    |
| 0.0091534 | 0.69708    |
| 0.043745  | -0.5831    |
| 0.055952  | -0.34019   |
| 0.037156  | -0.80605   |
| 0.0074182 | 0.1873     |
| 0.03303   | -0.98966   |
| 0.0070589 | 0.066311   |

|           |            |
|-----------|------------|
| 0.0070192 | 0.030378   |
| 0.053419  | -0.38803   |
| 0.051147  | 0.042727   |
| 0.032462  | -1.0894    |
| 0.033092  | -1.1234    |
| 0.011114  | -0.0019027 |
| 0.049867  | -0.46109   |
| 0.0080466 | 0.38405    |
| 0.0078823 | 0.33401    |
| 0.012448  | 0.001053   |
| 0.0082213 | 0.43621    |
| 0.043745  | -0.6071    |
| 0.032389  | -1.0771    |
| 0.012958  | 0.0032251  |
| 0.082903  | 0.011497   |
| 0.007306  | 0.15072    |
| 0.046342  | 0.038732   |
| 0.00894   | 0.6398     |
| 0.053419  | -0.38803   |
| 0.0090104 | 0.65886    |
| 0.042857  | -0.63085   |
| 0.017596  | 0.011775   |
| 0.032743  | -1.0111    |
| 0.10415   | 0.052398   |
| 0.096449  | 0.06518    |
| 0.024427  | 0.019776   |
| 0.033641  | -1.1384    |
| 0.092718  | 0.030934   |
| 0.03303   | -0.98966   |
| 0.0073793 | 0.17468    |
| 0.037156  | -0.80605   |
| 0.0081619 | 0.41861    |
| 0.094739  | 0.028875   |
| 0.0090816 | 0.67796    |
| 0.049867  | -0.46109   |
| 0.023303  | 0.018425   |
| 0.059971  | -0.27073   |
| 0.0074182 | 0.17468    |
| 0.0090104 | 0.65886    |
| 0.0090104 | 0.65886    |
| 0.033641  | -1.1384    |

|           |            |
|-----------|------------|
| 0.0073419 | 0.16248    |
| 0.053419  | -0.38803   |
| 0.03524   | -0.87876   |
| 0.010376  | -0.0036418 |
| 0.0073602 | -0.0011105 |
| 0.029421  | 0.026496   |
| 0.032875  | -1.0007    |
| 0.0076069 | -0.0051251 |
| 0.05467   | -0.36399   |
| 0.034187  | -0.92541   |
| 0.049867  | -0.46109   |
| 0.042008  | -0.65431   |
| 0.0075433 | 0.2276     |
| 0.0097473 | -0.0051686 |
| 0.039844  | 0.034143   |
| 0.007099  | 0.081709   |
| 0.035661  | -0.86174   |
| 0.042008  | -0.65431   |
| 0.021206  | 0.017077   |
| 0.0090816 | 0.67796    |
| 0.0070433 | 0.059284   |
| 0.032588  | -1.1005    |
| 0.0079906 | 0.36712    |
| 0.0090816 | 0.67796    |
| 0.077118  | 0.051444   |
| 0.0085339 | 0.52689    |
| 0.072398  | 0.051552   |
| 0.03524   | -0.87876   |
| 0.0076807 | 0.27125    |
| 0.10385   | 0.054784   |
| 0.0094709 | -0.0058338 |
| 0.0070272 | 0.025758   |
| 0.0089841 | -0.006908  |
| 0.048754  | -0.46109   |
| 0.10385   | 0.054784   |
| 0.096449  | 0.06518    |
| 0.0072715 | 0.13941    |
| 0.0092171 | -0.0064176 |
| 0.010376  | -0.0036418 |
| 0.072398  | 0.051552   |
| 0.0089841 | -0.006908  |

|           |            |
|-----------|------------|
| 0.0075433 | 0.2276     |
| 0.0070433 | 0.059284   |
| 0.0070581 | 0.017584   |
| 0.0086658 | 0.56416    |
| 0.016066  | 0.0079609  |
| 0.0070159 | 0.035368   |
| 0.0081037 | 0.40122    |
| 0.030791  | 0.026496   |
| 0.0070581 | 0.017584   |
| 0.098575  | 0.023538   |
| 0.057178  | 0.04604    |
| 0.0072386 | 0.11821    |
| 0.0076336 | 0.25635    |
| 0.0087704 | -0.0072929 |
| 0.007099  | 0.081709   |
| 0.032389  | -1.0771    |
| 0.075678  | 0.051739   |
| 0.038254  | 0.032921   |
| 0.10271   | 0.022987   |
| 0.033642  | -0.95303   |
| 0.0082213 | 0.43621    |
| 0.010048  | -0.0036418 |
| 0.032972  | -1.1193    |
| 0.044711  | 0.037634   |
| 0.074911  | 0.051806   |
| 0.018428  | 0.013082   |
| 0.03303   | -0.98966   |
| 0.012958  | 0.0021206  |
| 0.0084058 | 0.49014    |
| 0.034505  | -0.91058   |
| 0.07879   | -0.031991  |
| 0.0073419 | 0.16248    |
| 0.078448  | 0.051216   |
| 0.0078823 | 0.33401    |
| 0.0077085 | -0.0060189 |
| 0.012448  | 0.0021206  |
| 0.0090816 | 0.67796    |
| 0.017596  | 0.011775   |
| 0.023303  | 0.019776   |
| 0.0082313 | -0.0076938 |
| 0.033412  | -0.95303   |

|           |            |
|-----------|------------|
| 0.0090816 | 0.67796    |
| 0.10496   | 0.037598   |
| 0.041454  | 0.036502   |
| 0.032633  | -1.021     |
| 0.0074182 | 0.1873     |
| 0.049567  | 0.041791   |
| 0.0070581 | 0.017584   |
| 0.0084058 | 0.49014    |
| 0.0090816 | 0.67796    |
| 0.0075433 | 0.2276     |
| 0.0073793 | 0.17468    |
| 0.097321  | 0.06633    |
| 0.038254  | 0.034143   |
| 0.032519  | -1.0951    |
| 0.0097473 | -0.0051686 |
| 0.012448  | 0.001053   |
| 0.0075002 | 0.21378    |
| 0.0071113 | 0.010749   |
| 0.10434   | 0.026889   |
| 0.0070581 | 0.014005   |
| 0.0087331 | 0.58295    |
| 0.098932  | 0.067232   |
| 0.0088702 | 0.62079    |
| 0.00894   | 0.6398     |
| 0.007147  | 0.0078041  |
| 0.042857  | -0.6071    |
| 0.048754  | -0.46109   |
| 0.015366  | 0.0067344  |
| 0.0089841 | -0.006908  |
| 0.038254  | 0.032921   |
| 0.032875  | -1.0007    |
| 0.040428  | -0.70012   |
| 0.10134   | 0.022512   |
| 0.03303   | -0.98966   |
| 0.066276  | 0.049656   |
| 0.0087331 | 0.58295    |
| 0.0070433 | 0.052688   |
| 0.0073793 | 0.17468    |
| 0.03612   | -0.84394   |
| 0.0091534 | 0.69708    |
| 0.0088702 | 0.62079    |

|           |            |
|-----------|------------|
| 0.0073419 | 0.15072    |
| 0.0080815 | -0.0076938 |
| 0.099669  | 0.06649    |
| 0.0070159 | 0.035368   |
| 0.042857  | -0.63085   |
| 0.09204   | 0.032017   |
| 0.052701  | 0.042727   |
| 0.032474  | -1.0393    |
| 0.032373  | -1.0632    |
| 0.0079906 | 0.36712    |
| 0.026825  | 0.022479   |
| 0.032519  | -1.0951    |
| 0.0071773 | 0.098977   |
| 0.007779  | 0.30202    |
| 0.038254  | 0.032921   |
| 0.067404  | 0.050095   |
| 0.0079359 | 0.35043    |
| 0.032462  | -1.0894    |
| 0.0090104 | 0.65886    |
| 0.087374  | 0.039917   |
| 0.011114  | -0.0019027 |
| 0.0083433 | 0.47199    |
| 0.010731  | -0.0019027 |
| 0.0072071 | 0.11821    |
| 0.032668  | -1.1056    |
| 0.0070159 | 0.035368   |
| 0.0070309 | 0.052688   |
| 0.032373  | -1.0632    |
| 0.007099  | 0.081709   |
| 0.016809  | 0.0092115  |
| 0.0075877 | 0.2418     |
| 0.070056  | -0.12619   |
| 0.0071491 | 0.098977   |
| 0.0085994 | 0.54547    |
| 0.011114  | -0.0019027 |
| 0.033494  | -1.1349    |
| 0.016809  | 0.010484   |
| 0.0080815 | -0.0076938 |
| 0.0094709 | -0.0051686 |
| 0.0070272 | 0.025758   |
| 0.066276  | 0.049656   |

|           |            |
|-----------|------------|
| 0.066276  | 0.050095   |
| 0.00894   | 0.6398     |
| 0.0086658 | 0.56416    |
| 0.0090816 | 0.67796    |
| 0.0089841 | -0.006908  |
| 0.082578  | 0.048051   |
| 0.0074182 | 0.1873     |
| 0.0070309 | 0.052688   |
| 0.0071773 | 0.10834    |
| 0.007306  | 0.15072    |
| 0.0084058 | 0.49014    |
| 0.00783   | 0.31787    |
| 0.0075433 | 0.2276     |
| 0.0085994 | 0.54547    |
| 0.073273  | 0.051693   |
| 0.0070309 | 0.052688   |
| 0.041199  | -0.67741   |
| 0.015366  | 0.0067344  |
| 0.032205  | 0.027815   |
| 0.0072955 | 0.00071242 |
| 0.092533  | 0.05853    |
| 0.034855  | -0.89503   |
| 0.0084058 | 0.49014    |
| 0.0080466 | 0.38405    |
| 0.011527  | -0.0009612 |
| 0.0072715 | 0.13941    |
| 0.02223   | 0.018425   |
| 0.0076069 | -0.0051251 |
| 0.099669  | 0.06705    |
| 0.011972  | 0.001053   |
| 0.0070589 | 0.066311   |
| 0.033219  | -1.1274    |
| 0.0075877 | 0.2418     |
| 0.0075433 | 0.2276     |
| 0.086735  | 0.042062   |
| 0.0087704 | -0.006908  |
| 0.0078823 | 0.33401    |
| 0.048754  | -0.4856    |
| 0.011527  | -0.0009612 |
| 0.071483  | 0.051552   |
| 0.007123  | 0.090103   |



|           |            |
|-----------|------------|
| 0.061327  | 0.048056   |
| 0.093574  | 0.05853    |
| 0.020232  | 0.014403   |
| 0.007022  | 0.046511   |
| 0.007123  | 0.090103   |
| 0.045635  | -0.53455   |
| 0.065104  | 0.04917    |
| 0.09204   | 0.032017   |
| 0.0070309 | 0.052688   |
| 0.007147  | 0.0051576  |
| 0.010731  | -0.0027971 |
| 0.074911  | 0.051806   |
| 0.052701  | 0.043621   |
| 0.011114  | -0.0019027 |
| 0.018428  | 0.011775   |
| 0.05467   | -0.36399   |
| 0.10441   | 0.049934   |
| 0.0082313 | -0.0076938 |
| 0.080871  | 0.049748   |
| 0.03612   | -0.84394   |
| 0.032474  | -1.0393    |
| 0.066276  | 0.049656   |
| 0.099743  | 0.022784   |
| 0.085509  | 0.020095   |
| 0.048754  | -0.46109   |
| 0.034855  | -0.89503   |
| 0.032743  | -1.0111    |
| 0.035158  | 0.031675   |
| 0.10455   | 0.028193   |
| 0.10485   | 0.033276   |
| 0.067404  | 0.050095   |
| 0.0081037 | 0.40122    |
| 0.0086658 | 0.56416    |
| 0.063888  | 0.048637   |
| 0.0079359 | 0.35043    |
| 0.0073419 | 0.16248    |
| 0.0072386 | 0.12857    |
| 0.089343  | 0.037674   |
| 0.0092171 | -0.0064176 |
| 0.097342  | 0.025383   |
| 0.067404  | 0.050095   |

|           |            |
|-----------|------------|
| 0.0070309 | 0.052688   |
| 0.043079  | 0.036502   |
| 0.0072715 | 0.13941    |
| 0.032588  | -1.0951    |
| 0.035158  | 0.031675   |
| 0.0076069 | -0.0051251 |
| 0.061327  | 0.048056   |
| 0.049867  | -0.46109   |
| 0.0073602 | -0.0011105 |
| 0.030791  | 0.026496   |
| 0.0339    | -0.93955   |
| 0.046342  | 0.038732   |
| 0.030791  | 0.026496   |
| 0.032418  | -1.0834    |
| 0.007123  | 0.090103   |
| 0.010731  | -0.0019027 |
| 0.0073419 | 0.16248    |
| 0.0090816 | 0.67796    |
| 0.083714  | 0.04583    |
| 0.038254  | 0.032921   |
| 0.051016  | -0.43662   |
| 0.090686  | 0.035391   |
| 0.086766  | 0.034794   |
| 0.03669   | 0.032921   |
| 0.0085994 | 0.54547    |
| 0.0075002 | 0.21378    |
| 0.03612   | -0.84394   |
| 0.010048  | -0.0044341 |
| 0.0090104 | 0.65886    |
| 0.028099  | 0.023825   |
| 0.10347   | 0.024827   |
| 0.0071773 | 0.098977   |
| 0.099669  | 0.06705    |
| 0.035661  | -0.86174   |
| 0.0088702 | 0.62079    |
| 0.036619  | -0.82536   |
| 0.032861  | -1.1149    |
| 0.10311   | 0.023443   |
| 0.0078823 | 0.31787    |
| 0.052701  | 0.043621   |
| 0.043745  | -0.6071    |

|           |            |
|-----------|------------|
| 0.0074585 | 0.20034    |
| 0.0085994 | 0.54547    |
| 0.0088013 | 0.60183    |
| 0.015366  | 0.0079609  |
| 0.10496   | 0.037598   |
| 0.0072715 | 0.12857    |
| 0.032743  | -1.0111    |
| 0.019306  | 0.014403   |
| 0.0081619 | 0.41861    |
| 0.098575  | 0.024065   |
| 0.097966  | 0.024682   |
| 0.10455   | 0.029687   |
| 0.023303  | 0.018425   |
| 0.0083953 | -0.0076979 |
| 0.0076807 | 0.27125    |
| 0.0084694 | 0.50845    |
| 0.007306  | 0.15072    |
| 0.041454  | 0.036502   |
| 0.018428  | 0.013082   |
| 0.039695  | -0.72239   |
| 0.00894   | 0.6398     |
| 0.048754  | -0.4856    |
| 0.077372  | -0.031991  |
| 0.070056  | -0.12619   |
| 0.019306  | 0.013082   |
| 0.052201  | -0.38803   |
| 0.062773  | -0.22652   |
| 0.032418  | -1.0834    |
| 0.10434   | 0.026889   |
| 0.034187  | -0.92541   |
| 0.0073419 | 0.16248    |
| 0.0071894 | 0.0051576  |
| 0.10441   | 0.049934   |
| 0.0079906 | 0.36712    |
| 0.064204  | -0.2052    |
| 0.0086658 | 0.56416    |
| 0.0077085 | -0.0060189 |
| 0.032544  | -1.021     |
| 0.032373  | -1.0632    |
| 0.007306  | 0.15072    |
| 0.0092171 | -0.0064176 |

|           |            |
|-----------|------------|
| 0.0088013 | 0.60183    |
| 0.0087331 | 0.58295    |
| 0.0072386 | 0.12857    |
| 0.073008  | -0.09116   |
| 0.00894   | 0.6398     |
| 0.042857  | -0.63085   |
| 0.070056  | -0.12619   |
| 0.0079906 | 0.36712    |
| 0.0071113 | 0.0078041  |
| 0.080186  | -0.019688  |
| 0.0074585 | 0.20034    |
| 0.021206  | 0.017077   |
| 0.048754  | -0.4856    |
| 0.020232  | 0.015736   |
| 0.044711  | 0.037634   |
| 0.096449  | 0.06518    |
| 0.0075433 | 0.2276     |
| 0.0077085 | -0.0060189 |
| 0.007123  | 0.090103   |
| 0.0082313 | -0.0076938 |
| 0.032373  | -1.0632    |
| 0.0079906 | 0.36712    |
| 0.0075877 | 0.2418     |
| 0.059971  | -0.27073   |
| 0.007022  | 0.040742   |
| 0.0091534 | 0.69708    |
| 0.0079451 | -0.0072122 |
| 0.037156  | -0.80605   |
| 0.013504  | 0.004364   |
| 0.033412  | -0.96585   |
| 0.0082213 | 0.43621    |
| 0.0089841 | -0.006908  |
| 0.0094709 | -0.0051686 |
| 0.0090104 | 0.65886    |
| 0.10409   | 0.02577    |
| 0.0091534 | 0.69708    |
| 0.034855  | -0.89503   |
| 0.0082818 | 0.45401    |
| 0.0079451 | -0.007536  |
| 0.10083   | 0.022572   |
| 0.10309   | 0.059186   |

|           |            |
|-----------|------------|
| 0.049867  | -0.46109   |
| 0.10493   | 0.03536    |
| 0.036619  | -0.82536   |
| 0.0072386 | 0.11821    |
| 0.034505  | -0.91058   |
| 0.011114  | -0.0019027 |
| 0.0090104 | 0.65886    |
| 0.0071773 | 0.098977   |
| 0.0088702 | 0.62079    |
| 0.0070776 | 0.073782   |
| 0.0081619 | 0.40122    |
| 0.045635  | -0.53455   |
| 0.0075877 | 0.2418     |
| 0.09204   | 0.032017   |
| 0.0075002 | 0.21378    |
| 0.048754  | -0.4856    |
| 0.00894   | 0.6398     |
| 0.0071894 | 0.0051576  |
| 0.0094709 | -0.0058338 |
| 0.011114  | -0.0019027 |
| 0.0071773 | 0.098977   |
| 0.0073419 | 0.16248    |
| 0.007123  | 0.090103   |
| 0.007306  | 0.15072    |
| 0.10215   | 0.062875   |
| 0.0072387 | 0.0027978  |
| 0.024427  | 0.021128   |
| 0.042857  | -0.63085   |
| 0.0071894 | 0.0027978  |
| 0.0075002 | 0.21378    |
| 0.054226  | 0.043621   |
| 0.099669  | 0.06705    |
| 0.09204   | 0.032017   |
| 0.091362  | 0.034253   |
| 0.075678  | 0.051806   |
| 0.024427  | 0.021128   |
| 0.032519  | -1.0951    |
| 0.0079359 | 0.33401    |
| 0.0072071 | 0.10834    |
| 0.042008  | -0.65431   |
| 0.0071491 | 0.098977   |

|           |            |
|-----------|------------|
| 0.047677  | -0.5101    |
| 0.010731  | -0.0027971 |
| 0.02223   | 0.017077   |
| 0.074476  | -0.074934  |
| 0.10494   | 0.037598   |
| 0.0070169 | 0.040742   |
| 0.0073419 | 0.16248    |
| 0.099743  | 0.022784   |
| 0.048754  | -0.4856    |
| 0.0071491 | 0.098977   |
| 0.077372  | -0.045303  |
| 0.0070776 | 0.073782   |
| 0.10264   | 0.061137   |
| 0.0091534 | 0.69708    |
| 0.0085994 | 0.54547    |
| 0.078448  | 0.051216   |
| 0.071483  | 0.051552   |
| 0.011527  | 2.49E-05   |
| 0.013504  | 0.0032251  |
| 0.0070159 | 0.035368   |
| 0.0091534 | 0.69708    |
| 0.00894   | 0.6398     |
| 0.010376  | -0.0036418 |
| 0.029421  | 0.025165   |
| 0.041454  | 0.035337   |
| 0.0075433 | 0.2276     |
| 0.0084694 | 0.50845    |
| 0.007821  | -0.0072122 |
| 0.04467   | -0.5831    |
| 0.024427  | 0.019776   |
| 0.0079451 | -0.0072122 |
| 0.0082818 | 0.45401    |
| 0.0097473 | -0.0051686 |
| 0.024427  | 0.019776   |
| 0.0088702 | 0.62079    |
| 0.010048  | -0.0036418 |
| 0.0091534 | 0.69708    |
| 0.0088013 | 0.60183    |
| 0.079079  | 0.050593   |
| 0.0074585 | 0.20034    |
| 0.0075877 | 0.2418     |

|           |            |
|-----------|------------|
| 0.07879   | -0.031991  |
| 0.0084694 | 0.50845    |
| 0.0079359 | 0.33401    |
| 0.0084694 | 0.50845    |
| 0.03239   | -1.0557    |
| 0.0070401 | 0.021497   |
| 0.094069  | 0.029884   |
| 0.10228   | 0.022987   |
| 0.059971  | -0.27073   |
| 0.0074182 | 0.17468    |
| 0.010376  | -0.0036418 |
| 0.0088702 | 0.60183    |
| 0.098149  | 0.067003   |
| 0.03303   | -0.97806   |
| 0.024427  | 0.019776   |
| 0.0079906 | 0.36712    |
| 0.039002  | -0.74417   |
| 0.0077292 | 0.28647    |
| 0.080186  | -0.019688  |
| 0.10494   | 0.037598   |
| 0.094069  | 0.028875   |
| 0.033208  | -0.97806   |
| 0.03303   | -0.98966   |
| 0.0072955 | 0.00071242 |
| 0.033494  | -1.1349    |
| 0.0072386 | 0.12857    |
| 0.0070776 | 0.073782   |
| 0.043079  | 0.036502   |
| 0.041454  | 0.036502   |
| 0.0073419 | 0.16248    |
| 0.0094709 | -0.0058338 |
| 0.043079  | 0.037634   |
| 0.1038    | 0.024827   |
| 0.094574  | 0.063518   |
| 0.0072715 | 0.12857    |
| 0.072398  | 0.051552   |
| 0.020232  | 0.014403   |
| 0.1016    | 0.064369   |
| 0.0072715 | 0.12857    |
| 0.0070401 | 0.021497   |
| 0.0082313 | -0.0076938 |

|           |            |
|-----------|------------|
| 0.039695  | -0.72239   |
| 0.0076807 | 0.27125    |
| 0.0074585 | 0.20034    |
| 0.035158  | 0.030407   |
| 0.032389  | -1.0771    |
| 0.10415   | 0.052398   |
| 0.011527  | 2.49E-05   |
| 0.032373  | -1.0704    |
| 0.0087331 | 0.58295    |
| 0.049867  | -0.43662   |
| 0.0072955 | 0.00071242 |
| 0.048754  | -0.4856    |
| 0.0073602 | -0.0011105 |
| 0.0090104 | 0.65886    |
| 0.088023  | 0.038804   |
| 0.0075877 | 0.2418     |
| 0.073273  | 0.051783   |
| 0.0075433 | 0.2276     |
| 0.0072386 | 0.12857    |
| 0.032474  | -1.0393    |
| 0.03669   | 0.031675   |
| 0.007306  | 0.15072    |
| 0.010048  | -0.0044341 |
| 0.032519  | -1.0951    |
| 0.019306  | 0.013082   |
| 0.0070309 | 0.052688   |
| 0.032875  | -1.0007    |
| 0.013504  | 0.0032251  |
| 0.0085339 | 0.52689    |
| 0.0097473 | -0.0051686 |
| 0.00894   | 0.6398     |
| 0.014086  | 0.0055346  |
| 0.0085339 | 0.52689    |
| 0.0070433 | 0.059284   |
| 0.039844  | 0.035337   |
| 0.032875  | -1.0007    |
| 0.101     | 0.065585   |
| 0.033642  | -0.95303   |
| 0.010376  | -0.0036418 |
| 0.03612   | -0.84394   |
| 0.041199  | -0.67741   |



|           |            |
|-----------|------------|
| 0.0075877 | 0.2418     |
| 0.091362  | 0.033125   |
| 0.0072715 | 0.13941    |
| 0.0081619 | 0.41861    |
| 0.10462   | 0.047424   |
| 0.0097473 | -0.0051686 |
| 0.097966  | 0.024065   |
| 0.033662  | 0.030407   |
| 0.017596  | 0.010484   |
| 0.00783   | 0.31787    |
| 0.084221  | 0.011497   |
| 0.099168  | 0.023538   |
| 0.0073793 | 0.17468    |
| 0.0070433 | 0.059284   |
| 0.0097473 | -0.0051686 |
| 0.10264   | 0.059186   |
| 0.0084694 | 0.50845    |
| 0.011114  | -0.0009612 |
| 0.00894   | 0.6398     |
| 0.086735  | 0.042062   |
| 0.0092171 | -0.0064176 |
| 0.0080815 | -0.007536  |
| 0.045635  | -0.5589    |
| 0.0072071 | 0.11821    |
| 0.071533  | -0.09116   |
| 0.016066  | 0.0079609  |
| 0.0085746 | -0.0075602 |
| 0.10496   | 0.037598   |
| 0.010048  | -0.0044341 |
| 0.067111  | -0.1449    |
| 0.010731  | -0.0019027 |
| 0.091362  | 0.034253   |
| 0.007123  | 0.090103   |
| 0.0071773 | 0.10834    |
| 0.032423  | -1.0477    |
| 0.0070159 | 0.035368   |
| 0.0085994 | 0.54547    |
| 0.032861  | -1.1149    |
| 0.09204   | 0.032017   |
| 0.0087704 | -0.006908  |
| 0.012958  | 0.0021206  |

|           |            |
|-----------|------------|
| 0.033494  | -1.1349    |
| 0.10441   | 0.049934   |
| 0.10496   | 0.037598   |
| 0.012958  | 0.0021206  |
| 0.0094709 | -0.0058338 |
| 0.0075153 | -0.0051251 |
| 0.0088702 | 0.62079    |
| 0.032668  | -1.1056    |
| 0.014086  | 0.004364   |
| 0.007306  | 0.15072    |
| 0.041454  | 0.036502   |
| 0.0094709 | -0.0058338 |
| 0.082578  | 0.04737    |
| 0.0072071 | 0.11821    |
| 0.0076336 | 0.25635    |
| 0.099743  | 0.022784   |
| 0.0085339 | 0.52689    |
| 0.0094709 | -0.0058338 |
| 0.010048  | -0.0036418 |
| 0.063888  | 0.048637   |
| 0.070056  | -0.12619   |
| 0.0097473 | -0.0051686 |
| 0.0092171 | -0.0064176 |
| 0.052701  | 0.043621   |
| 0.00783   | 0.31787    |
| 0.080186  | -0.019688  |
| 0.0092171 | -0.0064176 |
| 0.007099  | 0.081709   |
| 0.032423  | -1.0477    |
| 0.0094709 | -0.0058338 |
| 0.032418  | -1.0771    |
| 0.014086  | 0.004364   |
| 0.08868   | 0.038804   |
| 0.007123  | 0.090103   |
| 0.0085994 | 0.54547    |
| 0.10347   | 0.024827   |
| 0.0090816 | 0.67796    |
| 0.015366  | 0.0079609  |
| 0.0072071 | 0.11821    |
| 0.007306  | 0.15072    |
| 0.0077292 | 0.28647    |

|           |            |
|-----------|------------|
| 0.0070818 | 0.014005   |
| 0.007123  | 0.081709   |
| 0.0086658 | 0.56416    |
| 0.007123  | 0.090103   |
| 0.048754  | -0.4856    |
| 0.0072715 | 0.12857    |
| 0.074911  | 0.051821   |
| 0.055719  | 0.044471   |
| 0.0087331 | 0.58295    |
| 0.046342  | 0.038732   |
| 0.007821  | -0.0072122 |
| 0.045635  | -0.5589    |
| 0.034855  | -0.89503   |
| 0.0070192 | 0.030378   |
| 0.0084694 | 0.50845    |
| 0.0084058 | 0.49014    |
| 0.0070433 | 0.059284   |
| 0.052201  | -0.41225   |
| 0.033219  | -1.1274    |
| 0.03303   | -0.97806   |
| 0.0082818 | 0.45401    |
| 0.010376  | -0.0036418 |
| 0.0084058 | 0.49014    |
| 0.0083953 | -0.0076979 |
| 0.034855  | -0.89503   |
| 0.040428  | -0.70012   |
| 0.085489  | 0.04308    |
| 0.0080466 | 0.38405    |
| 0.075932  | -0.045303  |
| 0.039695  | -0.72239   |
| 0.033948  | -1.1453    |
| 0.024427  | 0.021128   |
| 0.0072955 | 0.00071242 |
| 0.032373  | -1.0632    |
| 0.032423  | -1.0477    |
| 0.0074585 | 0.20034    |
| 0.0090104 | 0.65886    |
| 0.016066  | 0.0079609  |
| 0.007123  | 0.090103   |
| 0.0079451 | -0.007536  |
| 0.0082818 | 0.45401    |

|           |            |
|-----------|------------|
| 0.012958  | 0.0021206  |
| 0.0074585 | 0.20034    |
| 0.10493   | 0.03536    |
| 0.086735  | 0.041005   |
| 0.015366  | 0.0067344  |
| 0.0339    | -0.93955   |
| 0.0094709 | -0.0058338 |
| 0.0088702 | 0.62079    |
| 0.0079906 | 0.36712    |
| 0.0080466 | 0.38405    |
| 0.0088013 | 0.60183    |
| 0.0079359 | 0.33401    |
| 0.016809  | 0.0092115  |
| 0.0076336 | 0.25635    |
| 0.0076336 | 0.25635    |
| 0.0071773 | 0.10834    |
| 0.091453  | 0.055137   |
| 0.0073419 | 0.15072    |
| 0.0082313 | -0.0076938 |
| 0.077795  | 0.051216   |
| 0.021206  | 0.015736   |
| 0.03612   | -0.84394   |
| 0.059971  | -0.27073   |
| 0.033948  | -1.1453    |
| 0.037156  | -0.80605   |
| 0.029421  | 0.025165   |
| 0.057264  | -0.31669   |
| 0.10472   | 0.03138    |
| 0.012448  | 0.001053   |
| 0.049567  | 0.041791   |
| 0.007099  | 0.073782   |
| 0.0085994 | 0.54547    |
| 0.018428  | 0.011775   |
| 0.0090816 | 0.67796    |
| 0.0072386 | 0.12857    |
| 0.059971  | -0.27073   |
| 0.007022  | 0.046511   |
| 0.0074182 | 0.1873     |
| 0.033353  | -1.1312    |
| 0.0089841 | -0.006908  |
| 0.0070433 | 0.059284   |

|           |            |
|-----------|------------|
| 0.0084694 | 0.50845    |
| 0.0087331 | 0.58295    |
| 0.00783   | 0.31787    |
| 0.010376  | -0.0036418 |
| 0.0078823 | 0.33401    |
| 0.0076336 | 0.25635    |
| 0.011114  | -0.0019027 |
| 0.016809  | 0.0092115  |
| 0.1003    | 0.022572   |
| 0.098932  | 0.067232   |
| 0.033641  | -1.1384    |
| 0.0083953 | -0.0076979 |
| 0.037733  | -0.78604   |
| 0.026825  | 0.023825   |
| 0.032668  | -1.1056    |
| 0.043745  | -0.6071    |
| 0.012448  | 0.001053   |
| 0.0070818 | 0.014005   |
| 0.053419  | -0.38803   |
| 0.0090816 | 0.67796    |
| 0.010731  | -0.0027971 |
| 0.011527  | -0.0009612 |
| 0.0071491 | 0.098977   |
| 0.090335  | 0.046386   |
| 0.075932  | -0.059632  |
| 0.086735  | 0.042062   |
| 0.057264  | -0.31669   |
| 0.033412  | -0.96585   |
| 0.0094709 | -0.0058338 |
| 0.090335  | 0.046386   |
| 0.0074182 | 0.1873     |
| 0.0071113 | 0.0078041  |
| 0.064204  | -0.2052    |
| 0.0071113 | 0.010749   |
| 0.034855  | -0.89503   |
| 0.007821  | -0.0067106 |
| 0.010376  | -0.0036418 |
| 0.020232  | 0.015736   |
| 0.0080466 | 0.38405    |
| 0.030791  | 0.026496   |
| 0.079079  | 0.050932   |

|           |            |
|-----------|------------|
| 0.0084694 | 0.50845    |
| 0.0088702 | 0.62079    |
| 0.021206  | 0.017077   |
| 0.039695  | -0.72239   |
| 0.090012  | 0.035391   |
| 0.0077085 | -0.0060189 |
| 0.079079  | 0.050593   |
| 0.0073793 | 0.17468    |
| 0.0074182 | 0.1873     |
| 0.0080466 | 0.38405    |
| 0.019306  | 0.014403   |
| 0.0070589 | 0.066311   |
| 0.014086  | 0.004364   |
| 0.007147  | 0.0078041  |
| 0.036619  | -0.82536   |
| 0.013504  | 0.0032251  |
| 0.0088702 | 0.62079    |
| 0.045635  | -0.53455   |
| 0.097321  | 0.06633    |
| 0.10488   | 0.042402   |
| 0.0082313 | -0.0076938 |
| 0.071533  | -0.10826   |
| 0.10441   | 0.049934   |
| 0.032519  | -1.0951    |
| 0.090686  | 0.035391   |
| 0.090012  | 0.036534   |
| 0.0070818 | 0.014005   |
| 0.0086658 | 0.56416    |
| 0.032861  | -1.1149    |
| 0.0084694 | 0.50845    |
| 0.030791  | 0.027815   |
| 0.010376  | -0.0036418 |
| 0.0077292 | 0.28647    |
| 0.013504  | 0.0032251  |
| 0.0083433 | 0.47199    |
| 0.033662  | 0.030407   |
| 0.094069  | 0.029884   |
| 0.011972  | 0.001053   |
| 0.054226  | 0.043621   |
| 0.0076336 | 0.25635    |
| 0.10494   | 0.037598   |

|           |            |
|-----------|------------|
| 0.077118  | 0.051619   |
| 0.03669   | 0.031675   |
| 0.0071491 | 0.098977   |
| 0.0083433 | 0.47199    |
| 0.0074182 | 0.1873     |
| 0.0089841 | -0.006908  |
| 0.014086  | 0.0055346  |
| 0.0083433 | 0.47199    |
| 0.0089841 | -0.006908  |
| 0.08799   | 0.040962   |
| 0.0090104 | 0.65886    |
| 0.070056  | -0.12619   |
| 0.007779  | 0.30202    |
| 0.0075002 | 0.21378    |
| 0.033412  | -0.96585   |
| 0.02223   | 0.017077   |
| 0.0088013 | 0.60183    |
| 0.033412  | -0.96585   |
| 0.007022  | 0.046511   |
| 0.0085994 | 0.54547    |
| 0.035661  | -0.86174   |
| 0.03669   | 0.031675   |
| 0.063888  | 0.04917    |
| 0.032875  | -1.0007    |
| 0.10415   | 0.049934   |
| 0.019306  | 0.014403   |
| 0.011972  | 0.001053   |
| 0.0085994 | 0.54547    |
| 0.0070433 | 0.059284   |
| 0.042857  | -0.63085   |
| 0.0088013 | 0.60183    |
| 0.0070272 | 0.025758   |
| 0.0085339 | 0.52689    |
| 0.1016    | 0.062875   |
| 0.0075153 | -0.0040171 |
| 0.00894   | 0.6398     |
| 0.0097473 | -0.0051686 |
| 0.048754  | -0.46109   |
| 0.062629  | 0.048637   |
| 0.010048  | -0.0036418 |
| 0.0088702 | 0.62079    |

|           |            |
|-----------|------------|
| 0.0073793 | 0.17468    |
| 0.0070169 | 0.035368   |
| 0.0076069 | -0.0051251 |
| 0.0090104 | 0.65886    |
| 0.0083953 | -0.0076979 |
| 0.0075877 | 0.2418     |
| 0.061327  | 0.04743    |
| 0.007821  | -0.0067106 |
| 0.0070776 | 0.066311   |
| 0.0074182 | 0.1873     |
| 0.064204  | -0.2052    |
| 0.028099  | 0.023825   |
| 0.033948  | -1.1453    |
| 0.0070192 | 0.030378   |
| 0.021206  | 0.015736   |
| 0.0075433 | 0.2276     |
| 0.007123  | 0.090103   |
| 0.0082213 | 0.43621    |
| 0.0073793 | 0.17468    |
| 0.007123  | 0.090103   |
| 0.0072386 | 0.12857    |
| 0.0090816 | 0.67796    |
| 0.038348  | -0.7654    |
| 0.0070169 | 0.040742   |
| 0.0071491 | 0.090103   |
| 0.0070776 | 0.073782   |
| 0.0083433 | 0.47199    |
| 0.039695  | -0.72239   |
| 0.0084694 | 0.50845    |
| 0.0070589 | 0.066311   |
| 0.032588  | -1.1005    |
| 0.038348  | -0.7654    |
| 0.086735  | 0.041005   |
| 0.024427  | 0.021128   |
| 0.0070581 | 0.017584   |
| 0.0070581 | 0.017584   |
| 0.007821  | -0.0072122 |
| 0.086735  | 0.041005   |
| 0.007123  | 0.090103   |
| 0.09204   | 0.032017   |
| 0.0085994 | 0.54547    |



|           |            |
|-----------|------------|
| 0.032588  | -1.1005    |
| 0.091362  | 0.034253   |
| 0.018428  | 0.011775   |
| 0.0072386 | 0.12857    |
| 0.053419  | -0.38803   |
| 0.007306  | 0.15072    |
| 0.012958  | 0.0021206  |
| 0.0073419 | 0.15072    |
| 0.062773  | -0.22652   |
| 0.0079451 | -0.0072122 |
| 0.032633  | -1.021     |
| 0.013504  | 0.0032251  |
| 0.05467   | -0.36399   |
| 0.007099  | 0.081709   |
| 0.097321  | 0.06633    |
| 0.0073602 | -0.0011105 |
| 0.070056  | -0.10826   |
| 0.032633  | -1.0111    |
| 0.101     | 0.065585   |
| 0.034187  | -0.91058   |
| 0.0075877 | 0.2418     |
| 0.0071773 | 0.10834    |
| 0.0071773 | 0.10834    |
| 0.0072387 | 0.0027978  |
| 0.0072071 | 0.11821    |
| 0.079079  | 0.050593   |
| 0.069529  | 0.050826   |
| 0.10472   | 0.03138    |
| 0.10488   | 0.042402   |
| 0.098149  | 0.067003   |
| 0.028099  | 0.023825   |
| 0.039695  | -0.72239   |
| 0.097321  | 0.06633    |
| 0.0075002 | 0.21378    |
| 0.0075877 | 0.2418     |
| 0.0085746 | -0.0075602 |
| 0.0071773 | 0.10834    |
| 0.047677  | -0.4856    |
| 0.058604  | -0.27073   |
| 0.0097473 | -0.0044341 |
| 0.0079906 | 0.36712    |

|           |            |
|-----------|------------|
| 0.0071773 | 0.10834    |
| 0.032633  | -1.021     |
| 0.007306  | 0.15072    |
| 0.0082213 | 0.43621    |
| 0.0082213 | 0.43621    |
| 0.07411   | 0.051821   |
| 0.079079  | 0.050932   |
| 0.0084058 | 0.49014    |
| 0.0071773 | 0.10834    |
| 0.0082818 | 0.45401    |
| 0.0090816 | 0.67796    |
| 0.0071773 | 0.10834    |
| 0.0082818 | 0.45401    |
| 0.036619  | -0.82536   |
| 0.0089841 | -0.006908  |
| 0.10215   | 0.061137   |
| 0.068489  | 0.050826   |
| 0.020232  | 0.015736   |
| 0.0088013 | 0.60183    |
| 0.0073793 | 0.16248    |
| 0.011527  | -0.0009612 |
| 0.0070589 | 0.066311   |
| 0.081558  | -0.008361  |
| 0.0074333 | -0.0026829 |
| 0.007306  | 0.15072    |
| 0.0092171 | -0.0064176 |
| 0.00783   | 0.31787    |
| 0.058604  | -0.29352   |
| 0.019306  | 0.014403   |
| 0.0072386 | 0.12857    |
| 0.0070776 | 0.073782   |
| 0.0072071 | 0.11821    |
| 0.084221  | 0.011497   |
| 0.0072071 | 0.11821    |
| 0.10496   | 0.037598   |
| 0.013504  | 0.0032251  |
| 0.10228   | 0.022987   |
| 0.0072715 | 0.13941    |
| 0.0073793 | 0.16248    |
| 0.033641  | -1.1384    |
| 0.0082213 | 0.43621    |

|           |            |
|-----------|------------|
| 0.052201  | -0.41225   |
| 0.014706  | 0.0067344  |
| 0.0075153 | -0.0051251 |
| 0.0085994 | 0.54547    |
| 0.0082313 | -0.0076938 |
| 0.083144  | 0.04737    |
| 0.0072715 | 0.13941    |
| 0.0075002 | 0.21378    |
| 0.0074585 | 0.20034    |
| 0.077795  | 0.051444   |
| 0.010048  | -0.0044341 |
| 0.091362  | 0.033125   |
| 0.05467   | -0.36399   |
| 0.016066  | 0.0079609  |
| 0.0082313 | -0.0076979 |
| 0.0076069 | -0.0051251 |
| 0.0077085 | -0.0060189 |
| 0.0074333 | -0.0040171 |
| 0.1035    | 0.057058   |
| 0.011114  | -0.0019027 |
| 0.038254  | 0.032921   |
| 0.0076336 | 0.25635    |
| 0.0092171 | -0.0064176 |
| 0.00894   | 0.6398     |
| 0.062773  | -0.22652   |
| 0.0073793 | 0.17468    |
| 0.0076807 | 0.27125    |
| 0.007306  | 0.15072    |
| 0.0071773 | 0.10834    |
| 0.062773  | -0.22652   |
| 0.007306  | 0.15072    |
| 0.0085339 | 0.52689    |
| 0.099669  | 0.06705    |
| 0.039844  | 0.034143   |
| 0.098149  | 0.067232   |
| 0.0081619 | 0.41861    |
| 0.007779  | 0.30202    |
| 0.057178  | 0.045278   |
| 0.0086658 | 0.56416    |
| 0.10228   | 0.022679   |
| 0.011114  | -0.0019027 |

|           |            |
|-----------|------------|
| 0.093574  | 0.061313   |
| 0.10036   | 0.06649    |
| 0.051016  | -0.43662   |
| 0.10347   | 0.024054   |
| 0.042008  | -0.65431   |
| 0.037733  | -0.78604   |
| 0.0070776 | 0.066311   |
| 0.014086  | 0.0055346  |
| 0.0077292 | 0.28647    |
| 0.079691  | 0.050199   |
| 0.012448  | 0.001053   |
| 0.0088013 | 0.60183    |
| 0.095533  | 0.063518   |
| 0.036619  | -0.82536   |
| 0.084221  | 0.011497   |
| 0.0073793 | 0.17468    |
| 0.055952  | -0.34019   |
| 0.0085994 | 0.54547    |
| 0.019306  | 0.013082   |
| 0.0080466 | 0.38405    |
| 0.032875  | -0.98966   |
| 0.0072715 | 0.13941    |
| 0.014706  | 0.0055346  |
| 0.0075877 | 0.2418     |
| 0.0090104 | 0.65886    |
| 0.033642  | -0.95303   |
| 0.1035    | 0.057058   |
| 0.0083433 | 0.45401    |
| 0.0090104 | 0.65886    |
| 0.0071491 | 0.098977   |
| 0.10485   | 0.033276   |
| 0.0082313 | -0.0076938 |
| 0.032373  | -1.0704    |
| 0.02223   | 0.017077   |
| 0.007306  | 0.13941    |
| 0.0094709 | -0.0058338 |
| 0.099743  | 0.022784   |
| 0.032743  | -1.0111    |
| 0.047964  | 0.040812   |
| 0.0097473 | -0.0051686 |
| 0.0071773 | 0.098977   |

|           |            |
|-----------|------------|
| 0.032633  | -1.021     |
| 0.0072386 | 0.12857    |
| 0.0089841 | -0.006908  |
| 0.10228   | 0.022679   |
| 0.0070776 | 0.073782   |
| 0.032875  | -1.0007    |
| 0.032373  | -1.0704    |
| 0.077372  | -0.031991  |
| 0.0086658 | 0.56416    |
| 0.0073793 | 0.17468    |
| 0.0074182 | 0.1873     |
| 0.0090816 | 0.67796    |
| 0.019306  | 0.014403   |
| 0.0085339 | 0.52689    |
| 0.039695  | -0.72239   |
| 0.011114  | -0.0019027 |
| 0.052701  | 0.042727   |
| 0.0076807 | 0.27125    |
| 0.062629  | 0.048637   |
| 0.061361  | -0.24839   |
| 0.0071894 | 0.0051576  |
| 0.014086  | 0.004364   |
| 0.061361  | -0.24839   |
| 0.10183   | 0.022679   |
| 0.094574  | 0.061313   |
| 0.012448  | 0.001053   |
| 0.0084058 | 0.49014    |
| 0.007022  | 0.046511   |
| 0.061361  | -0.24839   |
| 0.0085746 | -0.0075602 |
| 0.0091534 | 0.67796    |
| 0.0074585 | 0.20034    |
| 0.070056  | -0.12619   |
| 0.057178  | 0.045278   |
| 0.0090104 | 0.65886    |
| 0.049567  | 0.040812   |
| 0.03276   | -1.1104    |
| 0.033641  | -1.1384    |
| 0.0071894 | 0.0027978  |
| 0.035661  | -0.86174   |
| 0.0094709 | -0.0058338 |

|           |            |
|-----------|------------|
| 0.03612   | -0.84394   |
| 0.0072715 | 0.13941    |
| 0.0080466 | 0.38405    |
| 0.0090816 | 0.67796    |
| 0.010048  | -0.0044341 |
| 0.0076807 | 0.27125    |
| 0.062629  | 0.048056   |
| 0.0074585 | 0.20034    |
| 0.10083   | 0.022479   |
| 0.010376  | -0.0036418 |
| 0.057178  | 0.04604    |
| 0.010731  | -0.0027971 |
| 0.0074585 | 0.20034    |
| 0.0070818 | 0.014005   |
| 0.0073419 | 0.16248    |
| 0.10496   | 0.037598   |
| 0.083144  | 0.04663    |
| 0.042857  | -0.6071    |
| 0.011527  | -0.0009612 |
| 0.032418  | -1.0834    |
| 0.010048  | -0.0044341 |
| 0.012958  | 0.0021206  |
| 0.094739  | 0.028875   |
| 0.0077292 | 0.28647    |
| 0.011114  | -0.0019027 |
| 0.019306  | 0.013082   |
| 0.044711  | 0.037634   |
| 0.032205  | 0.027815   |
| 0.063888  | 0.048637   |
| 0.051147  | 0.041791   |
| 0.00894   | 0.6398     |
| 0.043079  | 0.036502   |
| 0.078448  | 0.050932   |
| 0.007022  | 0.046511   |
| 0.03239   | -1.0557    |
| 0.0072071 | 0.11821    |
| 0.089343  | 0.036534   |
| 0.10385   | 0.052398   |
| 0.10434   | 0.026889   |
| 0.0087331 | 0.58295    |
| 0.039002  | -0.74417   |

|           |            |
|-----------|------------|
| 0.0082213 | 0.43621    |
| 0.007099  | 0.081709   |
| 0.0077085 | -0.0060189 |
| 0.0070433 | 0.059284   |
| 0.0083433 | 0.47199    |
| 0.0077292 | 0.28647    |
| 0.0090816 | 0.67796    |
| 0.0085994 | 0.54547    |
| 0.007779  | 0.30202    |
| 0.10472   | 0.029687   |
| 0.0085339 | 0.52689    |
| 0.0085994 | 0.54547    |
| 0.03239   | -1.0557    |
| 0.096449  | 0.06633    |
| 0.0094709 | -0.0058338 |
| 0.011527  | -0.0009612 |
| 0.0070272 | 0.025758   |
| 0.0070589 | 0.066311   |
| 0.0090816 | 0.67796    |
| 0.03612   | -0.84394   |
| 0.048754  | -0.4856    |
| 0.10462   | 0.047424   |
| 0.0072386 | 0.12857    |
| 0.026825  | 0.022479   |
| 0.0085746 | -0.0072929 |
| 0.007779  | 0.30202    |
| 0.039844  | 0.034143   |
| 0.0074182 | 0.1873     |
| 0.0091534 | 0.69708    |
| 0.067111  | -0.16433   |
| 0.0075002 | 0.20034    |
| 0.0070589 | 0.066311   |
| 0.10264   | 0.061137   |
| 0.10385   | 0.054784   |
| 0.10462   | 0.044903   |
| 0.0076336 | 0.25635    |
| 0.039695  | -0.72239   |
| 0.02223   | 0.017077   |
| 0.051016  | -0.43662   |
| 0.0090816 | 0.67796    |
| 0.012958  | 0.0021206  |

|           |            |
|-----------|------------|
| 0.0086658 | 0.56416    |
| 0.0091534 | 0.69708    |
| 0.083714  | 0.04663    |
| 0.101     | 0.064369   |
| 0.0076807 | 0.27125    |
| 0.0090816 | 0.67796    |
| 0.10264   | 0.061137   |
| 0.0090104 | 0.65886    |
| 0.007123  | 0.090103   |
| 0.0082213 | 0.43621    |
| 0.0081619 | 0.41861    |
| 0.062773  | -0.22652   |
| 0.059971  | -0.24839   |
| 0.03524   | -0.87876   |
| 0.054226  | 0.043621   |
| 0.039695  | -0.72239   |
| 0.034855  | -0.89503   |
| 0.012958  | 0.0032251  |
| 0.011527  | -0.0009612 |
| 0.032423  | -1.0477    |
| 0.0070433 | 0.059284   |
| 0.052201  | -0.41225   |
| 0.037733  | -0.78604   |
| 0.023303  | 0.018425   |
| 0.011972  | 2.49E-05   |
| 0.078448  | 0.051216   |
| 0.034187  | -0.92541   |
| 0.0083953 | -0.0076979 |
| 0.0076807 | 0.27125    |
| 0.018428  | 0.011775   |
| 0.0070433 | 0.059284   |
| 0.0088702 | 0.62079    |
| 0.0073419 | 0.16248    |
| 0.016066  | 0.0092115  |
| 0.0079906 | 0.36712    |
| 0.019306  | 0.014403   |
| 0.0072071 | 0.11821    |
| 0.0084694 | 0.50845    |
| 0.033412  | -0.96585   |
| 0.014706  | 0.0055346  |
| 0.012958  | 0.0021206  |



|           |            |
|-----------|------------|
| 0.073273  | 0.051693   |
| 0.016066  | 0.0079609  |
| 0.098932  | 0.06705    |
| 0.032418  | -1.0834    |
| 0.0084694 | 0.50845    |
| 0.029421  | 0.026496   |
| 0.0088702 | 0.62079    |
| 0.074476  | -0.059632  |
| 0.077795  | 0.051444   |
| 0.061361  | -0.24839   |
| 0.0087331 | 0.58295    |
| 0.032875  | -1.0007    |
| 0.059971  | -0.27073   |
| 0.0084694 | 0.50845    |
| 0.0070776 | 0.066311   |
| 0.0090816 | 0.67796    |
| 0.0089841 | -0.006908  |
| 0.016809  | 0.0092115  |
| 0.010048  | -0.0036418 |
| 0.08918   | 0.040962   |
| 0.010376  | -0.0036418 |
| 0.0074585 | 0.20034    |
| 0.029421  | 0.025165   |
| 0.0080466 | 0.38405    |
| 0.096059  | 0.027005   |
| 0.082578  | 0.048051   |
| 0.047677  | -0.5101    |
| 0.0070169 | 0.035368   |
| 0.0085746 | -0.0075602 |
| 0.062629  | 0.048056   |
| 0.0079359 | 0.35043    |
| 0.00894   | 0.6398     |
| 0.10477   | 0.042402   |
| 0.041199  | -0.67741   |
| 0.0079906 | 0.36712    |
| 0.0070192 | 0.030378   |
| 0.032743  | -1.0111    |
| 0.0070401 | 0.017584   |
| 0.0087704 | -0.0072929 |
| 0.0075877 | 0.2418     |
| 0.0087704 | -0.0072929 |

|           |            |
|-----------|------------|
| 0.059971  | -0.27073   |
| 0.012958  | 0.0021206  |
| 0.0085746 | -0.0075602 |
| 0.073008  | -0.09116   |
| 0.010731  | -0.0019027 |
| 0.018428  | 0.013082   |
| 0.090012  | 0.035391   |
| 0.090335  | 0.046386   |
| 0.098149  | 0.067003   |
| 0.066276  | 0.049656   |
| 0.094069  | 0.029884   |
| 0.0092171 | -0.0064176 |
| 0.062629  | 0.048056   |
| 0.041454  | 0.035337   |
| 0.016809  | 0.010484   |
| 0.0094709 | -0.0058338 |
| 0.010048  | -0.0036418 |
| 0.033219  | -1.1274    |
| 0.0089841 | -0.006908  |
| 0.0085339 | 0.52689    |
| 0.0079359 | 0.35043    |
| 0.07879   | -0.031991  |
| 0.016809  | 0.0092115  |
| 0.032389  | -1.0771    |
| 0.026825  | 0.022479   |
| 0.059971  | -0.27073   |
| 0.0070589 | 0.066311   |
| 0.026825  | 0.023825   |
| 0.10462   | 0.047424   |
| 0.0070776 | 0.073782   |
| 0.063888  | 0.048637   |
| 0.032373  | -1.0632    |
| 0.0074182 | 0.1873     |
| 0.0082313 | -0.0076938 |
| 0.054226  | 0.043621   |
| 0.0072715 | 0.13941    |
| 0.00894   | 0.6398     |
| 0.0072386 | 0.11821    |
| 0.086766  | 0.027849   |
| 0.038348  | -0.7654    |
| 0.071483  | 0.05136    |

|           |            |
|-----------|------------|
| 0.0088702 | 0.62079    |
| 0.007306  | 0.15072    |
| 0.012958  | 0.0021206  |
| 0.0083953 | -0.0076979 |
| 0.084884  | 0.044052   |
| 0.0082818 | 0.45401    |
| 0.007821  | -0.0067106 |
| 0.0072955 | 0.00071242 |
| 0.076413  | 0.051739   |
| 0.051147  | 0.041791   |
| 0.032861  | -1.1149    |
| 0.0070272 | 0.025758   |
| 0.007123  | 0.090103   |
| 0.0092171 | -0.0064176 |
| 0.074911  | 0.051821   |
| 0.07879   | -0.019688  |
| 0.0072715 | 0.13941    |
| 0.0076807 | 0.27125    |
| 0.077795  | 0.051216   |
| 0.0071773 | 0.10834    |
| 0.0070776 | 0.073782   |
| 0.0082313 | -0.0076938 |
| 0.099669  | 0.06705    |
| 0.019306  | 0.013082   |
| 0.0081619 | 0.40122    |
| 0.0097473 | -0.0051686 |
| 0.012958  | 0.0021206  |
| 0.0088702 | 0.62079    |
| 0.0080815 | -0.0076938 |
| 0.10309   | 0.059186   |
| 0.0070272 | 0.025758   |
| 0.007022  | 0.046511   |
| 0.046637  | -0.53455   |
| 0.0070776 | 0.073782   |
| 0.02223   | 0.018425   |
| 0.012958  | 0.0032251  |
| 0.00894   | 0.6398     |
| 0.045635  | -0.5589    |
| 0.0074182 | 0.1873     |
| 0.03612   | -0.84394   |
| 0.0072386 | 0.12857    |

|           |            |
|-----------|------------|
| 0.0072071 | 0.11821    |
| 0.016809  | 0.010484   |
| 0.039002  | -0.74417   |
| 0.10264   | 0.061137   |
| 0.0085339 | 0.52689    |
| 0.0075002 | 0.21378    |
| 0.010376  | -0.0036418 |
| 0.00894   | 0.6398     |
| 0.052701  | 0.042727   |
| 0.0094709 | -0.0058338 |
| 0.032373  | -1.0557    |
| 0.084221  | 0.011497   |
| 0.063888  | 0.048637   |
| 0.061327  | 0.04743    |
| 0.033208  | -0.97806   |
| 0.074476  | -0.074934  |
| 0.0073793 | 0.17468    |
| 0.095533  | 0.063518   |
| 0.042008  | -0.65431   |
| 0.101     | 0.065585   |
| 0.014086  | 0.0055346  |
| 0.040428  | -0.70012   |
| 0.068581  | -0.1449    |
| 0.092533  | 0.055137   |
| 0.007306  | 0.15072    |
| 0.014086  | 0.004364   |
| 0.0082313 | -0.0076938 |
| 0.055952  | -0.31669   |
| 0.0073419 | 0.16248    |
| 0.0071491 | 0.098977   |
| 0.0073793 | 0.17468    |
| 0.034505  | -0.91058   |
| 0.037156  | -0.80605   |
| 0.0097473 | -0.0051686 |
| 0.032423  | -1.0477    |
| 0.033412  | -0.96585   |
| 0.033642  | -0.93955   |
| 0.007779  | 0.30202    |
| 0.03612   | -0.84394   |
| 0.0084694 | 0.50845    |
| 0.051016  | -0.43662   |

|           |            |
|-----------|------------|
| 0.042857  | -0.63085   |
| 0.0079359 | 0.35043    |
| 0.0080815 | -0.007536  |
| 0.039002  | -0.74417   |
| 0.048754  | -0.4856    |
| 0.078448  | 0.051216   |
| 0.07879   | -0.031991  |
| 0.10472   | 0.03138    |
| 0.033412  | -0.96585   |
| 0.0072715 | 0.13941    |
| 0.037156  | -0.80605   |
| 0.032373  | -1.0704    |
| 0.03303   | -0.98966   |
| 0.090335  | 0.046386   |
| 0.049567  | 0.041791   |
| 0.083714  | 0.04663    |
| 0.035158  | 0.030407   |
| 0.04467   | -0.5831    |
| 0.0074182 | 0.1873     |
| 0.079691  | 0.050593   |
| 0.0081037 | 0.40122    |
| 0.0088702 | 0.62079    |
| 0.059971  | -0.27073   |
| 0.0072386 | 0.12857    |
| 0.0071773 | 0.10834    |
| 0.061327  | 0.04743    |
| 0.0085994 | 0.54547    |
| 0.0073793 | 0.17468    |
| 0.0339    | -0.93955   |
| 0.0073793 | 0.16248    |
| 0.043079  | 0.036502   |
| 0.095403  | 0.027913   |
| 0.099669  | 0.06649    |
| 0.0072071 | 0.11821    |
| 0.033641  | -1.1384    |
| 0.0079359 | 0.35043    |
| 0.041199  | -0.67741   |
| 0.0072955 | 0.00071242 |
| 0.033494  | -1.1349    |
| 0.0089841 | -0.006908  |
| 0.10409   | 0.02577    |

|           |            |
|-----------|------------|
| 0.012448  | 0.001053   |
| 0.0072386 | 0.12857    |
| 0.0082213 | 0.43621    |
| 0.096706  | 0.025383   |
| 0.0090816 | 0.67796    |
| 0.013504  | 0.0032251  |
| 0.0071894 | 0.0027978  |
| 0.054226  | 0.043621   |
| 0.032668  | -1.1056    |
| 0.0070169 | 0.040742   |
| 0.0083433 | 0.47199    |
| 0.10434   | 0.028193   |
| 0.0083953 | -0.0075602 |
| 0.08799   | 0.034794   |
| 0.0070818 | 0.010749   |
| 0.0090104 | 0.65886    |
| 0.0085339 | 0.50845    |
| 0.062629  | 0.048056   |
| 0.0082213 | 0.43621    |
| 0.0088702 | 0.62079    |
| 0.0074585 | 0.20034    |
| 0.083144  | 0.04737    |
| 0.0070192 | 0.030378   |
| 0.042857  | -0.63085   |
| 0.0076336 | 0.25635    |
| 0.0080466 | 0.36712    |
| 0.085509  | 0.020095   |
| 0.0072386 | 0.12857    |
| 0.007123  | 0.081709   |
| 0.090686  | 0.034253   |
| 0.057178  | 0.04604    |
| 0.032875  | -1.0007    |
| 0.070527  | 0.051118   |
| 0.032418  | -1.0834    |
| 0.051016  | -0.43662   |
| 0.0071773 | 0.10834    |
| 0.034268  | -1.1519    |
| 0.034187  | -0.92541   |
| 0.0075153 | -0.0051251 |
| 0.10264   | 0.061137   |
| 0.023303  | 0.019776   |

|           |            |
|-----------|------------|
| 0.032544  | -1.0304    |
| 0.0072715 | 0.13941    |
| 0.0074182 | 0.1873     |
| 0.032668  | -1.1056    |
| 0.00783   | 0.31787    |
| 0.029421  | 0.025165   |
| 0.010376  | -0.0036418 |
| 0.0082213 | 0.43621    |
| 0.033662  | 0.030407   |
| 0.052201  | -0.41225   |
| 0.0075002 | 0.21378    |
| 0.0076807 | 0.27125    |
| 0.012448  | 0.001053   |
| 0.007779  | 0.30202    |
| 0.010376  | -0.0027971 |
| 0.007821  | -0.0072122 |
| 0.037733  | -0.78604   |
| 0.0091534 | 0.69708    |
| 0.032519  | -1.0951    |
| 0.032373  | -1.0704    |
| 0.0072071 | 0.11821    |
| 0.034505  | -0.91058   |
| 0.094069  | 0.029884   |
| 0.10228   | 0.022679   |
| 0.0088013 | 0.60183    |
| 0.0085339 | 0.52689    |
| 0.081558  | 0.0020229  |
| 0.012958  | 0.0021206  |
| 0.0085746 | -0.0075602 |
| 0.0084694 | 0.50845    |
| 0.016066  | 0.0079609  |
| 0.085489  | 0.044052   |
| 0.0070309 | 0.052688   |
| 0.0077085 | -0.0060189 |
| 0.0083953 | -0.0076979 |
| 0.024427  | 0.019776   |
| 0.0079906 | 0.36712    |
| 0.0090816 | 0.67796    |
| 0.10494   | 0.039956   |
| 0.007099  | 0.081709   |
| 0.007022  | 0.046511   |

|           |            |
|-----------|------------|
| 0.074911  | 0.051821   |
| 0.0080466 | 0.38405    |
| 0.007123  | 0.090103   |
| 0.0090104 | 0.65886    |
| 0.0070401 | 0.021497   |
| 0.0070192 | 0.030378   |
| 0.015366  | 0.0079609  |
| 0.0088013 | 0.60183    |
| 0.0084694 | 0.50845    |
| 0.034187  | -0.91058   |
| 0.0070169 | 0.040742   |
| 0.10434   | 0.028193   |
| 0.067111  | -0.16433   |
| 0.032389  | -1.0771    |
| 0.070056  | -0.12619   |
| 0.052201  | -0.41225   |
| 0.007779  | 0.30202    |
| 0.0085994 | 0.54547    |
| 0.062773  | -0.22652   |
| 0.00894   | 0.6398     |
| 0.10493   | 0.03536    |
| 0.1035    | 0.054784   |
| 0.0090816 | 0.67796    |
| 0.098932  | 0.06705    |
| 0.032373  | -1.0632    |
| 0.0082213 | 0.43621    |
| 0.0072071 | 0.11821    |
| 0.011114  | -0.0009612 |
| 0.007123  | 0.090103   |
| 0.0079451 | -0.0072122 |
| 0.0085339 | 0.52689    |
| 0.092718  | 0.030934   |
| 0.0088702 | 0.62079    |
| 0.046342  | 0.038732   |
| 0.032588  | -1.1005    |
| 0.0070589 | 0.066311   |
| 0.08868   | 0.037674   |
| 0.0076336 | 0.25635    |
| 0.0087704 | -0.0072929 |
| 0.0090104 | 0.65886    |
| 0.007123  | 0.090103   |



|           |            |
|-----------|------------|
| 0.0085339 | 0.52689    |
| 0.010731  | -0.0027971 |
| 0.034855  | -0.87876   |
| 0.067111  | -0.16433   |
| 0.0074182 | 0.1873     |
| 0.018428  | 0.011775   |
| 0.0073793 | 0.17468    |
| 0.0078823 | 0.33401    |
| 0.0082818 | 0.45401    |
| 0.10271   | 0.023443   |
| 0.10488   | 0.042402   |
| 0.0076807 | 0.27125    |
| 0.090012  | 0.035391   |
| 0.0072715 | 0.13941    |
| 0.054226  | 0.043621   |
| 0.0071491 | 0.098977   |
| 0.03276   | -1.1104    |
| 0.0082213 | 0.43621    |
| 0.0072715 | 0.13941    |
| 0.091362  | 0.034253   |
| 0.0081037 | 0.40122    |
| 0.0073793 | 0.16248    |
| 0.019306  | 0.013082   |
| 0.093395  | 0.029884   |
| 0.0070309 | 0.052688   |
| 0.010048  | -0.0036418 |
| 0.048754  | -0.4856    |
| 0.0075002 | 0.21378    |
| 0.0071491 | 0.098977   |
| 0.067404  | 0.050095   |
| 0.052201  | -0.38803   |
| 0.089343  | 0.036534   |
| 0.0079906 | 0.36712    |
| 0.0082818 | 0.45401    |
| 0.007306  | 0.13941    |
| 0.0085339 | 0.52689    |
| 0.0076807 | 0.27125    |
| 0.023303  | 0.018425   |
| 0.10271   | 0.023443   |
| 0.05467   | -0.36399   |
| 0.034106  | -1.1486    |

|           |            |
|-----------|------------|
| 0.064204  | -0.2052    |
| 0.0071773 | 0.10834    |
| 0.03669   | 0.032921   |
| 0.0074585 | 0.20034    |
| 0.0070433 | 0.052688   |
| 0.097966  | 0.024065   |
| 0.0084694 | 0.50845    |
| 0.032462  | -1.0894    |
| 0.032875  | -1.0007    |
| 0.032205  | 0.027815   |
| 0.0079359 | 0.35043    |
| 0.010731  | -0.0027971 |
| 0.0085746 | -0.0075602 |
| 0.011114  | -0.0019027 |
| 0.10477   | 0.044903   |
| 0.046342  | 0.039792   |
| 0.10264   | 0.061137   |
| 0.012958  | 0.0021206  |
| 0.0070776 | 0.073782   |
| 0.033353  | -1.1312    |
| 0.080186  | -0.019688  |
| 0.0087704 | -0.006908  |
| 0.0081037 | 0.40122    |
| 0.010048  | -0.0044341 |
| 0.007821  | -0.0067106 |
| 0.0073793 | 0.17468    |
| 0.063888  | 0.04917    |
| 0.00894   | 0.6398     |
| 0.0072715 | 0.13941    |
| 0.007779  | 0.28647    |
| 0.0071894 | 0.0051576  |
| 0.032389  | -1.0771    |
| 0.098575  | 0.023538   |
| 0.081445  | 0.04924    |
| 0.0087704 | -0.006908  |
| 0.068581  | -0.1449    |
| 0.0076807 | 0.27125    |
| 0.0071773 | 0.10834    |
| 0.0094709 | -0.0058338 |
| 0.032423  | -1.0477    |
| 0.033412  | -0.96585   |

|           |            |
|-----------|------------|
| 0.10472   | 0.029687   |
| 0.0075433 | 0.2276     |
| 0.019306  | 0.014403   |
| 0.0085339 | 0.52689    |
| 0.0071491 | 0.098977   |
| 0.032861  | -1.1149    |
| 0.039695  | -0.70012   |
| 0.098575  | 0.023538   |
| 0.0072071 | 0.11821    |
| 0.10477   | 0.042402   |
| 0.007821  | -0.0067106 |
| 0.007779  | 0.30202    |
| 0.018428  | 0.011775   |
| 0.007147  | 0.0051576  |
| 0.0087704 | -0.0072929 |
| 0.0088702 | 0.62079    |
| 0.10264   | 0.059186   |
| 0.00894   | 0.6398     |
| 0.033208  | -0.97806   |
| 0.043079  | 0.036502   |
| 0.0076336 | 0.25635    |
| 0.024427  | 0.021128   |
| 0.065104  | 0.049656   |
| 0.0075002 | 0.21378    |
| 0.0072715 | 0.12857    |
| 0.040428  | -0.70012   |
| 0.0072386 | 0.12857    |
| 0.012448  | 0.001053   |
| 0.055952  | -0.34019   |
| 0.0084058 | 0.49014    |
| 0.059983  | 0.04743    |
| 0.0071773 | 0.10834    |
| 0.083144  | 0.04737    |
| 0.072398  | 0.051552   |
| 0.0070309 | 0.046511   |
| 0.0080466 | 0.38405    |
| 0.025601  | 0.021128   |
| 0.011114  | -0.0019027 |
| 0.0072386 | 0.12857    |
| 0.046637  | -0.5101    |
| 0.016066  | 0.0092115  |

|           |            |
|-----------|------------|
| 0.0339    | -0.93955   |
| 0.0081619 | 0.41861    |
| 0.011527  | -0.0009612 |
| 0.0079906 | 0.36712    |
| 0.0081037 | 0.40122    |
| 0.032373  | -1.0704    |
| 0.0071894 | 0.0051576  |
| 0.0075433 | 0.2276     |
| 0.038254  | 0.034143   |
| 0.066276  | 0.049656   |
| 0.007821  | -0.0067106 |
| 0.0076807 | 0.27125    |
| 0.0339    | -0.93955   |
| 0.042857  | -0.6071    |
| 0.014086  | 0.0055346  |
| 0.055952  | -0.34019   |
| 0.032474  | -1.0393    |
| 0.0087704 | -0.0072929 |
| 0.057178  | 0.04604    |
| 0.0072387 | 0.0027978  |
| 0.098149  | 0.067232   |
| 0.043745  | -0.6071    |
| 0.0072715 | 0.13941    |
| 0.0090816 | 0.67796    |
| 0.0082818 | 0.45401    |
| 0.011527  | -0.0009612 |
| 0.051016  | -0.43662   |
| 0.089343  | 0.037674   |
| 0.007099  | 0.081709   |
| 0.0088013 | 0.60183    |
| 0.012448  | 0.001053   |
| 0.0077085 | -0.0060189 |
| 0.017596  | 0.011775   |
| 0.058604  | -0.29352   |
| 0.011527  | -0.0009612 |
| 0.0084058 | 0.49014    |
| 0.0073793 | 0.17468    |
| 0.035661  | -0.86174   |
| 0.0092171 | -0.0064176 |
| 0.055719  | 0.044471   |
| 0.034505  | -0.91058   |

|           |            |
|-----------|------------|
| 0.074476  | -0.059632  |
| 0.0070309 | 0.052688   |
| 0.0092171 | -0.0058338 |
| 0.080871  | 0.049748   |
| 0.080287  | 0.049748   |
| 0.049867  | -0.46109   |
| 0.08868   | 0.038804   |
| 0.033092  | -1.1234    |
| 0.020232  | 0.015736   |
| 0.00894   | 0.6398     |
| 0.035661  | -0.86174   |
| 0.0097473 | -0.0051686 |
| 0.034505  | -0.91058   |
| 0.0097473 | -0.0044341 |
| 0.0070433 | 0.052688   |
| 0.03239   | -1.0557    |
| 0.084884  | 0.04497    |
| 0.0086658 | 0.56416    |
| 0.083714  | 0.04663    |
| 0.092718  | 0.030934   |
| 0.077372  | -0.045303  |
| 0.0080815 | -0.007536  |
| 0.037733  | -0.78604   |
| 0.016066  | 0.0092115  |
| 0.084221  | 0.020095   |
| 0.016066  | 0.0092115  |
| 0.0070776 | 0.073782   |
| 0.007147  | 0.0078041  |
| 0.0091534 | 0.69708    |
| 0.011114  | -0.0019027 |
| 0.032588  | -1.1005    |
| 0.0076336 | 0.25635    |
| 0.0070589 | 0.066311   |
| 0.025601  | 0.021128   |
| 0.0079359 | 0.35043    |
| 0.0097473 | -0.0051686 |
| 0.0073793 | 0.17468    |
| 0.099669  | 0.06649    |
| 0.0073419 | 0.16248    |
| 0.0073793 | 0.17468    |
| 0.0072715 | 0.13941    |

|           |            |
|-----------|------------|
| 0.0586    | 0.04604    |
| 0.0089841 | -0.006908  |
| 0.0088702 | 0.62079    |
| 0.0071491 | 0.098977   |
| 0.054226  | 0.043621   |
| 0.037733  | -0.78604   |
| 0.032474  | -1.0393    |
| 0.029421  | 0.026496   |
| 0.014706  | 0.0055346  |
| 0.093574  | 0.05853    |
| 0.080186  | -0.019688  |
| 0.071483  | 0.05136    |
| 0.090335  | 0.046386   |
| 0.0074182 | 0.1873     |
| 0.10385   | 0.054784   |
| 0.007821  | -0.0072122 |
| 0.091453  | 0.0511     |
| 0.010731  | -0.0019027 |
| 0.075932  | -0.059632  |
| 0.046637  | -0.53455   |
| 0.062773  | -0.2052    |
| 0.053419  | -0.38803   |
| 0.0075877 | 0.2418     |
| 0.0080466 | 0.38405    |
| 0.0071773 | 0.10834    |
| 0.10485   | 0.03138    |
| 0.014706  | 0.0055346  |
| 0.054226  | 0.044471   |
| 0.007779  | 0.30202    |
| 0.033412  | -0.95303   |
| 0.1038    | 0.024827   |
| 0.093395  | 0.029884   |
| 0.0082818 | 0.45401    |
| 0.011527  | -0.0009612 |
| 0.0072387 | 0.0027978  |
| 0.0070401 | 0.021497   |
| 0.0071773 | 0.10834    |
| 0.011114  | -0.0019027 |
| 0.0072715 | 0.13941    |
| 0.058604  | -0.29352   |
| 0.018428  | 0.013082   |

|           |            |
|-----------|------------|
| 0.033792  | -1.1419    |
| 0.0092171 | -0.0064176 |
| 0.0070159 | 0.035368   |
| 0.0081037 | 0.40122    |
| 0.049567  | 0.040812   |
| 0.077118  | 0.051619   |
| 0.0070589 | 0.066311   |
| 0.017596  | 0.011775   |
| 0.1003    | 0.022572   |
| 0.036619  | -0.82536   |
| 0.028099  | 0.025165   |
| 0.085489  | 0.04308    |
| 0.10271   | 0.022987   |
| 0.0088702 | 0.62079    |
| 0.0070433 | 0.059284   |
| 0.007123  | 0.090103   |
| 0.067404  | 0.050095   |
| 0.011972  | 2.49E-05   |
| 0.0089841 | -0.006908  |
| 0.033208  | -0.97806   |
| 0.0097473 | -0.0051686 |
| 0.007099  | 0.081709   |
| 0.1003    | 0.022784   |
| 0.010376  | -0.0036418 |
| 0.04467   | -0.5831    |
| 0.0077085 | -0.0067106 |
| 0.0083433 | 0.47199    |
| 0.032205  | 0.029119   |
| 0.0090816 | 0.67796    |
| 0.011972  | 2.49E-05   |
| 0.0070433 | 0.059284   |
| 0.0086658 | 0.56416    |
| 0.092718  | 0.030934   |
| 0.0085339 | 0.52689    |
| 0.0070433 | 0.059284   |
| 0.080287  | 0.049748   |
| 0.0071491 | 0.098977   |
| 0.043745  | -0.6071    |
| 0.0081037 | 0.40122    |
| 0.007123  | 0.081709   |
| 0.0090104 | 0.65886    |

|           |            |
|-----------|------------|
| 0.10228   | 0.022987   |
| 0.00783   | 0.31787    |
| 0.019306  | 0.013082   |
| 0.014086  | 0.004364   |
| 0.039844  | 0.034143   |
| 0.0071491 | 0.098977   |
| 0.015366  | 0.0067344  |
| 0.0070581 | 0.017584   |
| 0.032474  | -1.0304    |
| 0.077118  | 0.051619   |
| 0.010048  | -0.0044341 |
| 0.010048  | -0.0044341 |
| 0.032544  | -1.0304    |
| 0.033092  | -1.1234    |
| 0.057264  | -0.29352   |
| 0.011527  | -0.0009612 |
| 0.094574  | 0.061313   |
| 0.073008  | -0.09116   |
| 0.0087704 | -0.006908  |
| 0.0085994 | 0.54547    |
| 0.025601  | 0.021128   |
| 0.021206  | 0.015736   |
| 0.0075002 | 0.21378    |
| 0.062773  | -0.2052    |
| 0.078448  | 0.050932   |
| 0.0080815 | -0.007536  |
| 0.0090816 | 0.67796    |
| 0.0075433 | 0.2276     |
| 0.0097473 | -0.0051686 |
| 0.032373  | -1.0632    |
| 0.097321  | 0.06633    |
| 0.014086  | 0.004364   |
| 0.00783   | 0.31787    |
| 0.036619  | -0.82536   |
| 0.010376  | -0.0036418 |
| 0.10083   | 0.022479   |
| 0.025601  | 0.022479   |
| 0.0070776 | 0.073782   |
| 0.10264   | 0.061137   |
| 0.0072387 | 0.0027978  |
| 0.035661  | -0.86174   |



|           |            |
|-----------|------------|
| 0.012448  | 0.0021206  |
| 0.0073419 | 0.16248    |
| 0.0081619 | 0.41861    |
| 0.0090816 | 0.67796    |
| 0.016809  | 0.010484   |
| 0.011972  | 2.49E-05   |
| 0.0094709 | -0.0051686 |
| 0.033208  | -0.97806   |
| 0.0085746 | -0.0072929 |
| 0.007306  | 0.13941    |
| 0.0079359 | 0.35043    |
| 0.025601  | 0.022479   |
| 0.0071773 | 0.10834    |
| 0.0073793 | 0.17468    |
| 0.007821  | -0.0067106 |
| 0.039695  | -0.72239   |
| 0.007123  | 0.081709   |
| 0.007779  | 0.30202    |
| 0.037156  | -0.78604   |
| 0.061327  | 0.048056   |
| 0.010048  | -0.0044341 |
| 0.0072715 | 0.13941    |
| 0.065104  | 0.04917    |
| 0.018428  | 0.013082   |
| 0.0090816 | 0.67796    |
| 0.0072386 | 0.12857    |
| 0.058604  | -0.29352   |
| 0.10134   | 0.022512   |
| 0.007123  | 0.090103   |
| 0.007123  | 0.090103   |
| 0.059983  | 0.046758   |
| 0.10134   | 0.022512   |
| 0.085509  | 0.020095   |
| 0.032633  | -1.021     |
| 0.0091534 | 0.69708    |
| 0.086106  | 0.042062   |
| 0.00894   | 0.6398     |
| 0.0094709 | -0.0058338 |
| 0.077118  | 0.051444   |
| 0.0071773 | 0.10834    |
| 0.0073419 | 0.16248    |

|           |            |
|-----------|------------|
| 0.098149  | 0.067003   |
| 0.007779  | 0.30202    |
| 0.038348  | -0.7654    |
| 0.032668  | -1.1056    |
| 0.0073419 | 0.16248    |
| 0.034187  | -0.91058   |
| 0.017596  | 0.010484   |
| 0.0097473 | -0.0051686 |
| 0.0074585 | 0.20034    |
| 0.10309   | 0.057058   |
| 0.0083953 | -0.0076979 |
| 0.032972  | -1.1193    |
| 0.085509  | 0.020095   |
| 0.00894   | 0.6398     |
| 0.025601  | 0.021128   |
| 0.0072386 | 0.12857    |
| 0.052701  | 0.043621   |
| 0.0072071 | 0.10834    |
| 0.038254  | 0.032921   |
| 0.0090816 | 0.67796    |
| 0.0072715 | 0.12857    |
| 0.03612   | -0.84394   |
| 0.013504  | 0.004364   |
| 0.010048  | -0.0044341 |
| 0.0077292 | 0.27125    |
| 0.047964  | 0.040812   |
| 0.044711  | 0.037634   |
| 0.0086658 | 0.56416    |
| 0.090686  | 0.035391   |
| 0.073273  | 0.051783   |
| 0.096449  | 0.06518    |
| 0.010376  | -0.0036418 |
| 0.010048  | -0.0044341 |
| 0.0091534 | 0.69708    |
| 0.0074585 | 0.20034    |
| 0.0075002 | 0.21378    |
| 0.0089841 | -0.006908  |
| 0.007099  | 0.081709   |
| 0.0072071 | 0.11821    |
| 0.021206  | 0.017077   |
| 0.0094709 | -0.0058338 |

|           |            |
|-----------|------------|
| 0.03303   | -0.98966   |
| 0.10347   | 0.024827   |
| 0.024427  | 0.019776   |
| 0.0080466 | 0.38405    |
| 0.049867  | -0.46109   |
| 0.0074182 | 0.1873     |
| 0.0085339 | 0.52689    |
| 0.0072386 | 0.12857    |
| 0.012958  | 0.0032251  |
| 0.032519  | -1.0951    |
| 0.10264   | 0.059186   |
| 0.010376  | -0.0036418 |
| 0.066276  | 0.049656   |
| 0.068581  | -0.12619   |
| 0.0072386 | 0.12857    |
| 0.0075153 | -0.0040171 |
| 0.087374  | 0.041005   |
| 0.0091534 | 0.69708    |
| 0.05467   | -0.36399   |
| 0.036619  | -0.82536   |
| 0.045635  | -0.5589    |
| 0.015366  | 0.0067344  |
| 0.092533  | 0.05853    |
| 0.020232  | 0.014403   |
| 0.0077292 | 0.28647    |
| 0.0072386 | 0.12857    |
| 0.007099  | 0.081709   |
| 0.0072387 | 0.00071242 |
| 0.0070581 | 0.017584   |
| 0.036619  | -0.82536   |
| 0.033412  | -0.96585   |
| 0.07879   | -0.031991  |
| 0.051016  | -0.43662   |
| 0.0082818 | 0.45401    |
| 0.046342  | 0.038732   |
| 0.0087331 | 0.58295    |
| 0.0074182 | 0.1873     |
| 0.011527  | 2.49E-05   |
| 0.055719  | 0.045278   |
| 0.0073602 | -0.0011105 |
| 0.063888  | 0.048637   |

|           |            |
|-----------|------------|
| 0.015366  | 0.0067344  |
| 0.014706  | 0.0055346  |
| 0.010731  | -0.0019027 |
| 0.085509  | 0.020095   |
| 0.0091534 | 0.69708    |
| 0.0083433 | 0.47199    |
| 0.10462   | 0.047424   |
| 0.096059  | 0.02616    |
| 0.0075433 | 0.2276     |
| 0.0087331 | 0.58295    |
| 0.0097473 | -0.0051686 |
| 0.079691  | 0.050593   |
| 0.033792  | -1.1419    |
| 0.065104  | 0.049656   |
| 0.010048  | -0.0044341 |
| 0.034855  | -0.89503   |
| 0.042008  | -0.65431   |
| 0.0070169 | 0.035368   |
| 0.016066  | 0.0092115  |
| 0.1038    | 0.02577    |
| 0.0071491 | 0.098977   |
| 0.0090104 | 0.65886    |
| 0.0092171 | -0.0064176 |
| 0.0088013 | 0.60183    |
| 0.10493   | 0.033276   |
| 0.03303   | -0.97806   |
| 0.0090104 | 0.65886    |
| 0.032875  | -1.0007    |
| 0.0092171 | -0.0064176 |
| 0.07879   | -0.019688  |
| 0.0070309 | 0.052688   |
| 0.036619  | -0.82536   |
| 0.049567  | 0.041791   |
| 0.0073419 | 0.16248    |
| 0.0091534 | 0.69708    |
| 0.045635  | -0.5589    |
| 0.020232  | 0.014403   |
| 0.087374  | 0.039917   |
| 0.0097473 | -0.0051686 |
| 0.10494   | 0.037598   |
| 0.0084694 | 0.50845    |

|           |            |
|-----------|------------|
| 0.0586    | 0.046758   |
| 0.096449  | 0.06518    |
| 0.00783   | 0.31787    |
| 0.032519  | -1.0951    |
| 0.014706  | 0.0055346  |
| 0.0086658 | 0.56416    |
| 0.033208  | -0.97806   |
| 0.067111  | -0.1449    |
| 0.067404  | 0.050095   |
| 0.059971  | -0.27073   |
| 0.09204   | 0.032017   |
| 0.0078823 | 0.33401    |
| 0.0083433 | 0.47199    |
| 0.065651  | -0.18445   |
| 0.0094709 | -0.0051686 |
| 0.034106  | -1.1486    |
| 0.007099  | 0.081709   |
| 0.016809  | 0.010484   |
| 0.037733  | -0.78604   |
| 0.082903  | 0.011497   |
| 0.090012  | 0.035391   |
| 0.013504  | 0.0032251  |
| 0.0097473 | -0.0051686 |
| 0.052201  | -0.41225   |
| 0.0076807 | 0.27125    |
| 0.007779  | 0.30202    |
| 0.046342  | 0.038732   |
| 0.032633  | -1.0111    |
| 0.030791  | 0.026496   |
| 0.0073419 | 0.16248    |
| 0.0073419 | 0.16248    |
| 0.038348  | -0.7654    |
| 0.074476  | -0.074934  |
| 0.0084694 | 0.50845    |
| 0.0082818 | 0.45401    |
| 0.0075877 | 0.2418     |
| 0.010731  | -0.0027971 |
| 0.0088702 | 0.62079    |
| 0.042008  | -0.63085   |
| 0.059983  | 0.046758   |
| 0.014086  | 0.0055346  |

|           |            |
|-----------|------------|
| 0.0072386 | 0.12857    |
| 0.0072071 | 0.11821    |
| 0.025601  | 0.022479   |
| 0.093395  | 0.029884   |
| 0.0077085 | -0.0067106 |
| 0.0071773 | 0.10834    |
| 0.0076807 | 0.27125    |
| 0.0087331 | 0.58295    |
| 0.098932  | 0.067232   |
| 0.007821  | -0.0067106 |
| 0.0082213 | 0.43621    |
| 0.010731  | -0.0027971 |
| 0.0073602 | -0.0011105 |
| 0.0097473 | -0.0044341 |
| 0.10134   | 0.022512   |
| 0.10347   | 0.024054   |
| 0.0085994 | 0.54547    |
| 0.0083953 | -0.0075602 |
| 0.0087331 | 0.58295    |
| 0.032519  | -1.0951    |
| 0.043079  | 0.036502   |
| 0.0085339 | 0.52689    |
| 0.016066  | 0.0079609  |
| 0.0075153 | -0.0040171 |
| 0.035661  | -0.86174   |
| 0.0085994 | 0.52689    |
| 0.0073419 | 0.15072    |
| 0.0087704 | -0.0072929 |
| 0.0072071 | 0.11821    |
| 0.077795  | 0.051444   |
| 0.0078823 | 0.33401    |
| 0.049567  | 0.040812   |
| 0.080287  | 0.050199   |
| 0.0070818 | 0.014005   |
| 0.011972  | 2.49E-05   |
| 0.019306  | 0.014403   |
| 0.092718  | 0.030934   |
| 0.036619  | -0.82536   |
| 0.078448  | 0.051216   |
| 0.047677  | -0.4856    |
| 0.0071773 | 0.10834    |

|           |            |
|-----------|------------|
| 0.0088702 | 0.62079    |
| 0.0082213 | 0.43621    |
| 0.0071113 | 0.010749   |
| 0.0079359 | 0.35043    |
| 0.0087331 | 0.58295    |
| 0.0080466 | 0.38405    |
| 0.033412  | -0.96585   |
| 0.011114  | -0.0009612 |
| 0.0075877 | 0.2418     |
| 0.011527  | -0.0009612 |
| 0.0082313 | -0.0076938 |
| 0.0074585 | 0.20034    |
| 0.082013  | 0.048674   |
| 0.0081037 | 0.40122    |
| 0.018428  | 0.011775   |
| 0.0080815 | -0.0076938 |
| 0.0070309 | 0.052688   |
| 0.0082213 | 0.43621    |
| 0.0082313 | -0.0076979 |
| 0.0085339 | 0.52689    |
| 0.020232  | 0.014403   |
| 0.064204  | -0.2052    |
| 0.0090816 | 0.67796    |
| 0.0085339 | 0.52689    |
| 0.0070581 | 0.017584   |
| 0.0097473 | -0.0051686 |
| 0.0090816 | 0.67796    |
| 0.0081037 | 0.40122    |
| 0.0076069 | -0.0051251 |
| 0.0082313 | -0.0076938 |
| 0.0075433 | 0.21378    |
| 0.066276  | 0.050095   |
| 0.080871  | 0.049748   |
| 0.0090816 | 0.67796    |
| 0.0091534 | 0.69708    |
| 0.10493   | 0.03536    |
| 0.007821  | -0.0072122 |
| 0.011114  | -0.0019027 |
| 0.0078823 | 0.33401    |
| 0.0076069 | -0.0051251 |
| 0.028099  | 0.023825   |

|           |            |
|-----------|------------|
| 0.007306  | 0.15072    |
| 0.0090816 | 0.67796    |
| 0.0086658 | 0.56416    |
| 0.0076336 | 0.25635    |
| 0.0082313 | -0.0076938 |
| 0.0091534 | 0.69708    |
| 0.033219  | -1.1274    |
| 0.0082818 | 0.45401    |
| 0.0077085 | -0.0060189 |
| 0.007147  | 0.0078041  |
| 0.03303   | -0.97806   |
| 0.012448  | 0.001053   |
| 0.0070192 | 0.030378   |
| 0.00894   | 0.6398     |
| 0.0092171 | -0.0064176 |
| 0.033642  | -0.95303   |
| 0.0072955 | 0.00071242 |
| 0.0077085 | -0.0060189 |
| 0.10477   | 0.042402   |
| 0.007821  | -0.0072122 |
| 0.039844  | 0.035337   |
| 0.007821  | -0.0067106 |
| 0.041454  | 0.035337   |
| 0.0083433 | 0.47199    |
| 0.1035    | 0.054784   |
| 0.0088702 | 0.62079    |
| 0.0090816 | 0.67796    |
| 0.067111  | -0.16433   |
| 0.0089841 | -0.006908  |
| 0.069529  | 0.051118   |
| 0.044711  | 0.038732   |
| 0.0076807 | 0.27125    |
| 0.00894   | 0.6398     |
| 0.0082313 | -0.0076938 |
| 0.0090104 | 0.65886    |
| 0.0074333 | -0.0040171 |
| 0.0088013 | 0.60183    |
| 0.0076336 | 0.25635    |
| 0.0075002 | 0.21378    |
| 0.10083   | 0.022479   |
| 0.0072386 | 0.12857    |



|           |            |
|-----------|------------|
| 0.014086  | 0.004364   |
| 0.1003    | 0.022784   |
| 0.0090816 | 0.67796    |
| 0.016066  | 0.0079609  |
| 0.035661  | -0.86174   |
| 0.02223   | 0.018425   |
| 0.049567  | 0.040812   |
| 0.0085746 | -0.0075602 |
| 0.00783   | 0.31787    |
| 0.0072071 | 0.11821    |
| 0.0088702 | 0.62079    |
| 0.090335  | 0.0511     |
| 0.096706  | 0.025383   |
| 0.094069  | 0.029884   |
| 0.080287  | 0.050199   |
| 0.0079451 | -0.0072122 |
| 0.0077292 | 0.28647    |
| 0.007779  | 0.30202    |
| 0.016809  | 0.010484   |
| 0.0074585 | 0.1873     |
| 0.071533  | -0.10826   |
| 0.067111  | -0.16433   |
| 0.011972  | 0.001053   |
| 0.007306  | 0.15072    |
| 0.012448  | 0.001053   |
| 0.0075877 | 0.2276     |
| 0.007306  | 0.15072    |
| 0.096059  | 0.02616    |
| 0.0081619 | 0.41861    |
| 0.0081619 | 0.41861    |
| 0.071533  | -0.09116   |
| 0.012448  | 0.001053   |
| 0.011527  | -0.0009612 |
| 0.036619  | -0.82536   |
| 0.0080815 | -0.007536  |
| 0.0083953 | -0.0076979 |
| 0.0072386 | 0.12857    |
| 0.0072715 | 0.13941    |
| 0.011527  | -0.0009612 |
| 0.0074182 | 0.1873     |
| 0.0070169 | 0.040742   |

|           |            |
|-----------|------------|
| 0.0077292 | 0.28647    |
| 0.0070159 | 0.035368   |
| 0.0090816 | 0.67796    |
| 0.033092  | -1.1234    |
| 0.0085746 | -0.0075602 |
| 0.074476  | -0.074934  |
| 0.082013  | 0.048674   |
| 0.0073793 | 0.17468    |
| 0.0088702 | 0.62079    |
| 0.0071773 | 0.10834    |
| 0.0084694 | 0.49014    |
| 0.015366  | 0.0067344  |
| 0.0070192 | 0.030378   |
| 0.013504  | 0.0032251  |
| 0.0073793 | 0.17468    |
| 0.0091534 | 0.69708    |
| 0.0070776 | 0.073782   |
| 0.0072386 | 0.12857    |
| 0.007306  | 0.15072    |
| 0.007779  | 0.30202    |
| 0.0073419 | 0.16248    |
| 0.0072386 | 0.12857    |
| 0.10134   | 0.022479   |
| 0.0082313 | -0.0076938 |
| 0.044711  | 0.037634   |
| 0.0090104 | 0.65886    |
| 0.0073419 | 0.16248    |
| 0.10455   | 0.028193   |
| 0.07411   | 0.051783   |
| 0.074911  | 0.051806   |
| 0.080871  | 0.049748   |
| 0.012448  | 0.001053   |
| 0.0081619 | 0.41861    |
| 0.0070776 | 0.073782   |
| 0.010376  | -0.0036418 |
| 0.010376  | -0.0027971 |
| 0.059971  | -0.27073   |
| 0.00783   | 0.31787    |
| 0.098932  | 0.067232   |
| 0.086766  | 0.027849   |
| 0.1035    | 0.057058   |

|           |            |
|-----------|------------|
| 0.0072715 | 0.13941    |
| 0.0085746 | -0.0075602 |
| 0.016066  | 0.0092115  |
| 0.033662  | 0.029119   |
| 0.00783   | 0.31787    |
| 0.055719  | 0.045278   |
| 0.0074333 | -0.0026829 |
| 0.09204   | 0.032017   |
| 0.0072715 | 0.13941    |
| 0.10036   | 0.06649    |
| 0.007779  | 0.30202    |
| 0.011114  | -0.0019027 |
| 0.007099  | 0.081709   |
| 0.0070589 | 0.066311   |
| 0.047677  | -0.5101    |
| 0.00894   | 0.6398     |
| 0.0071773 | 0.10834    |
| 0.0076807 | 0.27125    |
| 0.04467   | -0.5831    |
| 0.007306  | 0.15072    |
| 0.010048  | -0.0044341 |
| 0.0092171 | -0.0064176 |
| 0.0085746 | -0.0075602 |
| 0.0082313 | -0.0076979 |
| 0.0079906 | 0.36712    |
| 0.0075433 | 0.2276     |
| 0.0072071 | 0.11821    |
| 0.0084694 | 0.50845    |
| 0.0080466 | 0.38405    |
| 0.0075877 | 0.2418     |
| 0.0085746 | -0.0075602 |
| 0.061361  | -0.24839   |
| 0.07411   | 0.051783   |
| 0.012448  | 0.001053   |
| 0.017596  | 0.010484   |
| 0.0074182 | 0.1873     |
| 0.0085339 | 0.52689    |
| 0.0076336 | 0.25635    |
| 0.0074182 | 0.17468    |
| 0.0092171 | -0.0064176 |
| 0.00783   | 0.31787    |

|           |            |
|-----------|------------|
| 0.0074333 | -0.0026829 |
| 0.0070309 | 0.052688   |
| 0.0088013 | 0.60183    |
| 0.0076336 | 0.25635    |
| 0.053419  | -0.38803   |
| 0.03276   | -1.1104    |
| 0.034187  | -0.92541   |
| 0.014086  | 0.004364   |
| 0.055952  | -0.34019   |
| 0.00783   | 0.31787    |
| 0.015366  | 0.0067344  |
| 0.068489  | 0.050485   |
| 0.010376  | -0.0036418 |
| 0.033208  | -0.97806   |
| 0.0072386 | 0.12857    |
| 0.073008  | -0.09116   |
| 0.0079451 | -0.007536  |
| 0.0087331 | 0.58295    |
| 0.0074182 | 0.1873     |
| 0.0085746 | -0.0075602 |
| 0.00894   | 0.6398     |
| 0.096449  | 0.06633    |
| 0.0074585 | 0.20034    |
| 0.007022  | 0.046511   |
| 0.063888  | 0.048637   |
| 0.014086  | 0.0055346  |
| 0.038254  | 0.032921   |
| 0.0075002 | 0.21378    |
| 0.0075433 | 0.2276     |
| 0.00783   | 0.31787    |
| 0.0071773 | 0.098977   |
| 0.0084694 | 0.50845    |
| 0.0092171 | -0.0058338 |
| 0.012448  | 0.0021206  |
| 0.0085994 | 0.54547    |
| 0.0085339 | 0.52689    |
| 0.0071773 | 0.10834    |
| 0.0071773 | 0.10834    |
| 0.011527  | 2.49E-05   |
| 0.057178  | 0.04604    |
| 0.0088702 | 0.62079    |

|           |            |
|-----------|------------|
| 0.0070159 | 0.035368   |
| 0.0072715 | 0.12857    |
| 0.0084694 | 0.50845    |
| 0.0075433 | 0.2276     |
| 0.0090816 | 0.67796    |
| 0.0075877 | 0.2276     |
| 0.0082313 | -0.0076938 |
| 0.0071773 | 0.098977   |
| 0.0076807 | 0.27125    |
| 0.007821  | -0.0072122 |
| 0.0080815 | -0.007536  |
| 0.0073793 | 0.17468    |
| 0.0090816 | 0.67796    |
| 0.0070272 | 0.025758   |
| 0.0073793 | 0.17468    |
| 0.029421  | 0.026496   |
| 0.033412  | -0.96585   |
| 0.0075433 | 0.2276     |
| 0.0072071 | 0.11821    |
| 0.0086658 | 0.56416    |
| 0.081558  | -0.008361  |
| 0.0091534 | 0.69708    |
| 0.097966  | 0.024065   |
| 0.010048  | -0.0036418 |
| 0.0074585 | 0.20034    |
| 0.0079906 | 0.36712    |
| 0.0073793 | 0.17468    |
| 0.0087704 | -0.0072929 |
| 0.0070159 | 0.035368   |
| 0.0072955 | 0.00071242 |
| 0.0075433 | 0.2276     |
| 0.0082213 | 0.43621    |
| 0.007022  | 0.046511   |
| 0.0076807 | 0.25635    |
| 0.0085746 | -0.0075602 |
| 0.0090816 | 0.67796    |
| 0.0073793 | 0.17468    |
| 0.0070818 | 0.014005   |
| 0.0086658 | 0.56416    |
| 0.0073419 | 0.16248    |
| 0.071483  | 0.05136    |

|           |            |
|-----------|------------|
| 0.0080466 | 0.38405    |
| 0.033219  | -1.1274    |
| 0.034106  | -1.1486    |
| 0.0081037 | 0.40122    |
| 0.032423  | -1.0477    |
| 0.0086658 | 0.56416    |
| 0.017596  | 0.011775   |
| 0.0075433 | 0.2276     |
| 0.0071491 | 0.090103   |
| 0.007821  | -0.0067106 |
| 0.083144  | 0.04737    |
| 0.086106  | 0.042062   |
| 0.007123  | 0.090103   |
| 0.0076069 | -0.0051251 |
| 0.0071113 | 0.010749   |
| 0.0084058 | 0.49014    |
| 0.0084694 | 0.50845    |
| 0.0073419 | 0.16248    |
| 0.0079906 | 0.36712    |
| 0.007306  | 0.13941    |
| 0.012448  | 0.001053   |
| 0.035158  | 0.030407   |
| 0.0085746 | -0.0075602 |
| 0.0076807 | 0.27125    |
| 0.0072387 | 0.0027978  |
| 0.0080815 | -0.007536  |
| 0.0083433 | 0.47199    |
| 0.032205  | 0.029119   |
| 0.0074182 | 0.1873     |
| 0.080871  | 0.04924    |
| 0.080287  | 0.049748   |
| 0.051016  | -0.43662   |
| 0.036619  | -0.82536   |
| 0.0074182 | 0.1873     |
| 0.041454  | 0.035337   |
| 0.0079359 | 0.35043    |
| 0.0090104 | 0.65886    |
| 0.0088702 | 0.62079    |
| 0.0088702 | 0.62079    |
| 0.0077292 | 0.28647    |
| 0.0079359 | 0.35043    |

|           |            |
|-----------|------------|
| 0.0075002 | 0.21378    |
| 0.0088702 | 0.62079    |
| 0.0071773 | 0.10834    |
| 0.0071773 | 0.098977   |
| 0.032544  | -1.0304    |
| 0.007306  | 0.15072    |
| 0.0091534 | 0.69708    |
| 0.0083433 | 0.47199    |
| 0.0072715 | 0.13941    |
| 0.0091534 | 0.69708    |
| 0.0079359 | 0.35043    |
| 0.0090816 | 0.67796    |
| 0.0074585 | 0.20034    |
| 0.0081037 | 0.38405    |
| 0.0079906 | 0.36712    |
| 0.0078823 | 0.33401    |
| 0.0079906 | 0.36712    |
| 0.0084058 | 0.49014    |
| 0.0076336 | 0.25635    |
| 0.007306  | 0.15072    |
| 0.0071491 | 0.098977   |
| 0.020232  | 0.014403   |
| 0.0080466 | 0.38405    |
| 0.0082313 | -0.0076938 |
| 0.0081619 | 0.41861    |
| 0.0075002 | 0.20034    |
| 0.0087331 | 0.58295    |
| 0.0084694 | 0.50845    |
| 0.0088013 | 0.60183    |
| 0.007306  | 0.15072    |
| 0.00894   | 0.6398     |
| 0.0072071 | 0.10834    |
| 0.0072386 | 0.12857    |
| 0.00894   | 0.6398     |
| 0.00894   | 0.6398     |
| 0.0087331 | 0.58295    |
| 0.0085994 | 0.54547    |
| 0.0088702 | 0.62079    |
| 0.0074182 | 0.1873     |
| 0.0090104 | 0.65886    |
| 0.0087331 | 0.58295    |

|           |            |
|-----------|------------|
| 0.0087331 | 0.58295    |
| 0.0078823 | 0.33401    |
| 0.0070401 | 0.017584   |
| 0.0085994 | 0.54547    |
| 0.0079906 | 0.36712    |
| 0.007779  | 0.30202    |
| 0.00894   | 0.6398     |
| 0.0073419 | 0.16248    |
| 0.0087331 | 0.58295    |
| 0.0090104 | 0.65886    |
| 0.0073419 | 0.16248    |
| 0.007779  | 0.30202    |
| 0.0074182 | 0.1873     |
| 0.0077292 | 0.28647    |
| 0.0090104 | 0.65886    |
| 0.0090104 | 0.65886    |
| 0.0087331 | 0.58295    |
| 0.0074182 | 0.1873     |
| 0.0083433 | 0.47199    |
| 0.010376  | -0.0036418 |
| 0.0090816 | 0.67796    |
| 0.0073419 | 0.16248    |
| 0.0070309 | 0.052688   |
| 0.0072386 | 0.11821    |
| 0.0077292 | 0.28647    |
| 0.0083433 | 0.47199    |
| 0.0090104 | 0.65886    |
| 0.0076336 | 0.25635    |
| 0.0072071 | 0.11821    |
| 0.0081619 | 0.41861    |
| 0.0090104 | 0.65886    |
| 0.0080815 | -0.0076938 |
| 0.0073602 | -0.0026829 |
| 0.0090816 | 0.67796    |
| 0.0070589 | 0.059284   |
| 0.0082313 | -0.0076938 |
| 0.0082818 | 0.45401    |
| 0.007779  | 0.30202    |
| 0.0072715 | 0.13941    |
| 0.007306  | 0.15072    |
| 0.10183   | 0.022679   |



|           |            |
|-----------|------------|
| 0.039695  | -0.72239   |
| 0.0097473 | -0.0044341 |
| 0.0086658 | 0.56416    |
| 0.0081037 | 0.40122    |
| 0.091362  | 0.034253   |
| 0.0075002 | 0.21378    |
| 0.03303   | -0.98966   |
| 0.038348  | -0.74417   |
| 0.0072071 | 0.11821    |
| 0.0085994 | 0.54547    |
| 0.0076807 | 0.27125    |
| 0.0085994 | 0.54547    |
| 0.0088702 | 0.62079    |
| 0.08868   | 0.038804   |
| 0.0088013 | 0.60183    |
| 0.013504  | 0.0032251  |
| 0.032373  | -1.0704    |
| 0.0072387 | 0.00071242 |
| 0.0097473 | -0.0051686 |
| 0.0072715 | 0.12857    |
| 0.0073419 | 0.16248    |
| 0.007779  | 0.30202    |
| 0.0071491 | 0.098977   |
| 0.007123  | 0.090103   |
| 0.0090816 | 0.67796    |
| 0.051147  | 0.041791   |
| 0.0075433 | 0.2276     |
| 0.0078823 | 0.33401    |
| 0.0074585 | 0.1873     |
| 0.011527  | -0.0009612 |
| 0.0076336 | 0.2418     |
| 0.0082818 | 0.45401    |
| 0.0090816 | 0.67796    |
| 0.0074585 | 0.20034    |
| 0.0088013 | 0.60183    |
| 0.0076807 | 0.27125    |
| 0.0073419 | 0.16248    |
| 0.0082818 | 0.45401    |
| 0.0097473 | -0.0044341 |
| 0.0087331 | 0.58295    |
| 0.0073793 | 0.17468    |

|           |          |
|-----------|----------|
| 0.0074182 | 0.1873   |
| 0.0073419 | 0.16248  |
| 0.0075877 | 0.2418   |
| 0.0090816 | 0.67796  |
| 0.0081619 | 0.41861  |
| 0.0088702 | 0.62079  |
| 0.0073419 | 0.16248  |
| 0.0083433 | 0.47199  |
| 0.03669   | 0.031675 |
| 0.0084694 | 0.50845  |
| 0.0090816 | 0.67796  |
| 0.0074585 | 0.20034  |
| 0.0072071 | 0.11821  |
| 0.0083433 | 0.47199  |
| 0.0074182 | 0.1873   |
| 0.0090816 | 0.67796  |
| 0.0090816 | 0.67796  |
| 0.0086658 | 0.56416  |
| 0.0086658 | 0.56416  |
| 0.030791  | 0.026496 |
| 0.0080466 | 0.38405  |
| 0.0090816 | 0.67796  |
| 0.0075002 | 0.21378  |
| 0.0083433 | 0.47199  |
| 0.0075002 | 0.21378  |
| 0.0079906 | 0.36712  |
| 0.0088702 | 0.62079  |
| 0.0075433 | 0.2276   |
| 0.007123  | 0.090103 |
| 0.0090816 | 0.67796  |
| 0.0090816 | 0.67796  |
| 0.00894   | 0.6398   |
| 0.0070776 | 0.066311 |
| 0.0076807 | 0.27125  |
| 0.0072715 | 0.12857  |
| 0.0088702 | 0.62079  |
| 0.0085994 | 0.54547  |
| 0.0090104 | 0.65886  |
| 0.0085339 | 0.52689  |
| 0.0088013 | 0.60183  |
| 0.0085339 | 0.52689  |

|           |          |
|-----------|----------|
| 0.0076807 | 0.27125  |
| 0.0084058 | 0.49014  |
| 0.00783   | 0.31787  |
| 0.0088702 | 0.62079  |
| 0.0074585 | 0.20034  |
| 0.0075002 | 0.21378  |
| 0.0087331 | 0.58295  |
| 0.0091534 | 0.69708  |
| 0.0085339 | 0.52689  |
| 0.051147  | 0.041791 |

| cellid      | dpt_pseudot | dpt_pseudot | diffusion | diff_rate | net_proliferation |
|-------------|-------------|-------------|-----------|-----------|-------------------|
| 9mo_SIGAE3_ | 0.05983197  | 0.3504325   | 6.04E-05  | 0.0085136 | 0.077363          |
| 9mo_SIGAE3_ | 0.14918116  | 0.88957363  | 6.76E-05  | 0.023691  | -0.52143          |
| 9mo_SIGAE3_ | 0.05671287  | 0.3316115   | 5.98E-05  | 0.0075425 | 0.068678          |
| 9mo_SIGAE3_ | 0.0198481   | 0.10916609  | 3.42E-05  | 0.0045972 | 0.0032259         |
| 9mo_SIGAE3_ | 0.03584907  | 0.20571744  | 4.65E-05  | 0.0042637 | -0.068307         |
| 9mo_SIGAE3_ | 0.03773571  | 0.2171016   | 4.81E-05  | 0.0043756 | -0.05192          |
| 9mo_SIGAE3_ | 0.02900942  | 0.16444635  | 3.97E-05  | 0.0040686 | -0.10664          |
| 9mo_SIGAE3_ | 0.08566231  | 0.5062951   | 6.39E-05  | 0.019177  | 0.1043            |
| 9mo_SIGAE3_ | 0.02320711  | 0.12943469  | 3.58E-05  | 0.0042778 | -0.065623         |
| 9mo_SIGAE3_ | 0.08361795  | 0.49395925  | 6.37E-05  | 0.01841   | 0.12117           |
| 9mo_SIGAE3_ | 0.05800305  | 0.3393966   | 6.00E-05  | 0.0078516 | 0.073002          |
| 9mo_SIGAE3_ | 0.05249439  | 0.30615687  | 5.87E-05  | 0.0065755 | 0.057248          |
| 9mo_SIGAE3_ | 0.02273564  | 0.12658979  | 3.55E-05  | 0.0043197 | -0.056631         |
| 9mo_SIGAE3_ | 0.05774936  | 0.33786583  | 6.00E-05  | 0.0078516 | 0.071569          |
| 9mo_SIGAE3_ | 0.04211917  | 0.2435518   | 5.24E-05  | 0.0047963 | -0.00654          |
| 9mo_SIGAE3_ | 0.04711683  | 0.27370813  | 5.61E-05  | 0.0054936 | 0.032113          |
| 9mo_SIGAE3_ | 0.06233941  | 0.36556262  | 6.07E-05  | 0.0092324 | 0.085432          |
| 9mo_SIGAE3_ | 0.01306275  | 0.06822268  | 3.23E-05  | 0.0059016 | 0.25518           |
| 9mo_SIGAE3_ | 0.12875842  | 0.7663409   | 6.69E-05  | 0.023723  | -0.43195          |
| 9mo_SIGAE3_ | 0.01818825  | 0.09915043  | 3.36E-05  | 0.0048202 | 0.050123          |
| 9mo_SIGAE3_ | 0.06697149  | 0.39351296  | 6.14E-05  | 0.011039  | 0.10251           |
| 9mo_SIGAE3_ | 0.0246479   | 0.13812853  | 3.64E-05  | 0.0042065 | -0.080664         |
| 9mo_SIGAE3_ | 0.00816689  | 0.03868065  | 3.19E-05  | 0.0071994 | 0.45929           |
| 9mo_SIGAE3_ | 0.11776731  | 0.7000196   | 6.64E-05  | 0.024917  | -0.34876          |
| 9mo_SIGAE3_ | 0.05084928  | 0.2962301   | 5.81E-05  | 0.006215  | 0.051138          |
| 9mo_SIGAE3_ | 0.01972778  | 0.10844009  | 3.40E-05  | 0.0046667 | 0.0032259         |
| 9mo_SIGAE3_ | 0.02335591  | 0.1303326   | 3.58E-05  | 0.0042778 | -0.065623         |
| 9mo_SIGAE3_ | 0.02372377  | 0.13255227  | 3.61E-05  | 0.0042401 | -0.073623         |
| 9mo_SIGAE3_ | 0.09717822  | 0.57578313  | 6.51E-05  | 0.023799  | -0.065044         |
| 9mo_SIGAE3_ | 0.08283142  | 0.48921326  | 6.35E-05  | 0.017892  | 0.12434           |
| 9mo_SIGAE3_ | 0.05290697  | 0.3086464   | 5.87E-05  | 0.0065755 | 0.059084          |
| 9mo_SIGAE3_ | 0.030159    | 0.17138305  | 4.07E-05  | 0.0040668 | -0.10597          |
| 9mo_SIGAE3_ | 0.08143472  | 0.48078543  | 6.34E-05  | 0.017373  | 0.13148           |
| 9mo_SIGAE3_ | 0.08860171  | 0.5240317   | 6.42E-05  | 0.020663  | 0.074212          |
| 9mo_SIGAE3_ | 0.02356591  | 0.13159977  | 3.58E-05  | 0.0042778 | -0.065623         |
| 9mo_SIGAE3_ | 0.03623226  | 0.20802966  | 4.65E-05  | 0.0042637 | -0.068307         |
| 9mo_SIGAE3_ | 0.01904375  | 0.10431259  | 3.38E-05  | 0.004741  | 0.03364           |
| 9mo_SIGAE3_ | 0.01195028  | 0.06150996  | 3.22E-05  | 0.0061869 | 0.30353           |
| 9mo_SIGAE3_ | 0.04895606  | 0.28480622  | 5.70E-05  | 0.0057827 | 0.041222          |
| 9mo_SIGAE3_ | 0.10533112  | 0.6249785   | 6.57E-05  | 0.025482  | -0.19772          |
| 9mo_SIGAE3_ | 0.08216797  | 0.4852099   | 6.35E-05  | 0.017633  | 0.1271            |
| 9mo_SIGAE3_ | 0.10953952  | 0.6503723   | 6.60E-05  | 0.025611  | -0.2602           |

|             |            |            |          |           |           |
|-------------|------------|------------|----------|-----------|-----------|
| 9mo_SIGAE3_ | 0.0237586  | 0.13276246 | 3.61E-05 | 0.0042401 | -0.073623 |
| 9mo_SIGAE3_ | 0.02208717 | 0.12267685 | 3.52E-05 | 0.0043661 | -0.046619 |
| 9mo_SIGAE3_ | 0.05800273 | 0.3393947  | 6.00E-05 | 0.0078516 | 0.073002  |
| 9mo_SIGAE3_ | 0.02719589 | 0.15350334 | 3.84E-05 | 0.0040947 | -0.10271  |
| 9mo_SIGAE3_ | 0.07751834 | 0.45715368 | 6.29E-05 | 0.015562  | 0.13646   |
| 9mo_SIGAE3_ | 0.10077085 | 0.59746134 | 6.54E-05 | 0.024809  | -0.12375  |
| 9mo_SIGAE3_ | 0.03379102 | 0.19329903 | 4.43E-05 | 0.004153  | -0.087207 |
| 9mo_SIGAE3_ | 0.02786899 | 0.1575649  | 3.88E-05 | 0.0040827 | -0.10472  |
| 9mo_SIGAE3_ | 0.01537523 | 0.0821764  | 3.28E-05 | 0.0052924 | 0.1442    |
| 9mo_SIGAE3_ | 0.01802381 | 0.09815816 | 3.34E-05 | 0.0049043 | 0.067421  |
| 9mo_SIGAE3_ | 0.06008392 | 0.35195276 | 6.04E-05 | 0.0085136 | 0.07887   |
| 9mo_SIGAE3_ | 0.02293684 | 0.12780389 | 3.55E-05 | 0.0043197 | -0.056631 |
| 9mo_SIGAE3_ | 0.03147487 | 0.17932314 | 4.22E-05 | 0.0040866 | -0.10071  |
| 9mo_SIGAE3_ | 0.04857474 | 0.2825053  | 5.67E-05 | 0.0056831 | 0.041222  |
| 9mo_SIGAE3_ | 0.01827943 | 0.09970065 | 3.36E-05 | 0.0048202 | 0.050123  |
| 9mo_SIGAE3_ | 0.02615666 | 0.14723252 | 3.76E-05 | 0.0041286 | -0.096385 |
| 9mo_SIGAE3_ | 0.08831471 | 0.5222999  | 6.42E-05 | 0.020421  | 0.074212  |
| 9mo_SIGAE3_ | 0.01581736 | 0.08484426 | 3.28E-05 | 0.0052924 | 0.1442    |
| 9mo_SIGAE3_ | 0.02295217 | 0.12789635 | 3.55E-05 | 0.0043197 | -0.056631 |
| 9mo_SIGAE3_ | 0.01378336 | 0.07257089 | 3.25E-05 | 0.0056405 | 0.20898   |
| 9mo_SIGAE3_ | 0.03125379 | 0.17798911 | 4.16E-05 | 0.0040771 | -0.10299  |
| 9mo_SIGAE3_ | 0.0287945  | 0.16314954 | 3.97E-05 | 0.0040686 | -0.10664  |
| 9mo_SIGAE3_ | 0.01549813 | 0.082918   | 3.28E-05 | 0.0052924 | 0.1442    |
| 9mo_SIGAE3_ | 0.0664823  | 0.39056116 | 6.13E-05 | 0.010826  | 0.10013   |
| 9mo_SIGAE3_ | 0.10138084 | 0.6011421  | 6.54E-05 | 0.024923  | -0.13341  |
| 9mo_SIGAE3_ | 0.02866468 | 0.16236615 | 3.97E-05 | 0.0040686 | -0.10664  |
| 9mo_SIGAE3_ | 0.08313473 | 0.49104342 | 6.36E-05 | 0.018151  | 0.12434   |
| 9mo_SIGAE3_ | 0.00777365 | 0.03630777 | 3.19E-05 | 0.0073923 | 0.48652   |
| 9mo_SIGAE3_ | 0.01508313 | 0.08041388 | 3.27E-05 | 0.0054028 | 0.16515   |
| 9mo_SIGAE3_ | 0.0285126  | 0.16144852 | 3.93E-05 | 0.004074  | -0.10603  |
| 9mo_SIGAE3_ | 0.03788123 | 0.21797971 | 4.81E-05 | 0.0043756 | -0.05192  |
| 9mo_SIGAE3_ | 0.03649176 | 0.20959549 | 4.70E-05 | 0.0042982 | -0.062998 |
| 9mo_SIGAE3_ | 0.04976493 | 0.289687   | 5.76E-05 | 0.005992  | 0.046466  |
| 9mo_SIGAE3_ | 0.11758313 | 0.6989082  | 6.64E-05 | 0.024917  | -0.34876  |
| 9mo_SIGAE3_ | 0.02376612 | 0.13280779 | 3.61E-05 | 0.0042401 | -0.073623 |
| 9mo_SIGAE3_ | 0.07616768 | 0.44900364 | 6.26E-05 | 0.0148    | 0.1354    |
| 9mo_SIGAE3_ | 0.14140946 | 0.8426785  | 6.74E-05 | 0.023575  | -0.49999  |
| 9mo_SIGAE3_ | 0.01239419 | 0.06418857 | 3.23E-05 | 0.0060411 | 0.2791    |
| 9mo_SIGAE3_ | 0.02068625 | 0.11422362 | 3.44E-05 | 0.0045325 | -0.01065  |
| 9mo_SIGAE3_ | 0.06448903 | 0.3785336  | 6.10E-05 | 0.010005  | 0.093303  |
| 9mo_SIGAE3_ | 0.02342029 | 0.13072105 | 3.58E-05 | 0.0042778 | -0.065623 |
| 9mo_SIGAE3_ | 0.02959559 | 0.1679834  | 4.02E-05 | 0.0040662 | -0.10661  |
| 9mo_SIGAE3_ | 0.10852695 | 0.64426243 | 6.59E-05 | 0.025616  | -0.24573  |

|             |            |            |          |           |           |
|-------------|------------|------------|----------|-----------|-----------|
| 9mo_SIGAE3_ | 0.02295907 | 0.12793802 | 3.55E-05 | 0.0043197 | -0.056631 |
| 9mo_SIGAE3_ | 0.07419106 | 0.43707654 | 6.24E-05 | 0.014051  | 0.13074   |
| 9mo_SIGAE3_ | 0.1086826  | 0.6452016  | 6.59E-05 | 0.025616  | -0.25305  |
| 9mo_SIGAE3_ | 0.07688871 | 0.4533544  | 6.28E-05 | 0.015307  | 0.13605   |
| 9mo_SIGAE3_ | 0.13330668 | 0.7937856  | 6.71E-05 | 0.023556  | -0.45937  |
| 9mo_SIGAE3_ | 0.08091305 | 0.4776376  | 6.33E-05 | 0.017113  | 0.13314   |
| 9mo_SIGAE3_ | 0.01552766 | 0.08309618 | 3.28E-05 | 0.0052924 | 0.1442    |
| 9mo_SIGAE3_ | 0.01872272 | 0.10237546 | 3.38E-05 | 0.004741  | 0.03364   |
| 9mo_SIGAE3_ | 0.08732891 | 0.5163515  | 6.41E-05 | 0.01993   | 0.087329  |
| 9mo_SIGAE3_ | 0.05642485 | 0.3298736  | 5.98E-05 | 0.0075425 | 0.068678  |
| 9mo_SIGAE3_ | 0.0210323  | 0.1163117  | 3.47E-05 | 0.0044724 | -0.023601 |
| 9mo_SIGAE3_ | 0.01844763 | 0.10071556 | 3.36E-05 | 0.0048202 | 0.050123  |
| 9mo_SIGAE3_ | 0.01543655 | 0.08254641 | 3.28E-05 | 0.0052924 | 0.1442    |
| 9mo_SIGAE3_ | 0.09126836 | 0.5401225  | 6.45E-05 | 0.021597  | 0.036126  |
| 9mo_SIGAE3_ | 0.1262988  | 0.7514994  | 6.68E-05 | 0.023879  | -0.41325  |
| 9mo_SIGAE3_ | 0.07226115 | 0.42543125 | 6.21E-05 | 0.01308   | 0.12548   |
| 9mo_SIGAE3_ | 0.03780961 | 0.21754752 | 4.81E-05 | 0.0043756 | -0.05192  |
| 9mo_SIGAE3_ | 0.08401926 | 0.49638078 | 6.37E-05 | 0.01841   | 0.1176    |
| 9mo_SIGAE3_ | 0.02102515 | 0.11626854 | 3.47E-05 | 0.0044724 | -0.023601 |
| 9mo_SIGAE3_ | 0.0519328  | 0.30276814 | 5.85E-05 | 0.0064518 | 0.055318  |
| 9mo_SIGAE3_ | 0.02026872 | 0.11170421 | 3.42E-05 | 0.0045972 | -0.01065  |
| 9mo_SIGAE3_ | 0.01060908 | 0.05341705 | 3.21E-05 | 0.0064976 | 0.35381   |
| 9mo_SIGAE3_ | 0.10724077 | 0.6365015  | 6.58E-05 | 0.025586  | -0.23052  |
| 9mo_SIGAE3_ | 0.06763284 | 0.3975036  | 6.15E-05 | 0.011255  | 0.10492   |
| 9mo_SIGAE3_ | 0.05648885 | 0.33025977 | 5.98E-05 | 0.0075425 | 0.068678  |
| 9mo_SIGAE3_ | 0.05100444 | 0.29716635 | 5.81E-05 | 0.006215  | 0.051138  |
| 9mo_SIGAE3_ | 0.01769703 | 0.09618639 | 3.34E-05 | 0.0049043 | 0.067421  |
| 9mo_SIGAE3_ | 0.08302394 | 0.49037492 | 6.36E-05 | 0.018151  | 0.12434   |
| 9mo_SIGAE3_ | 0.11808402 | 0.70193064 | 6.65E-05 | 0.024847  | -0.35363  |
| 9mo_SIGAE3_ | 0.01754743 | 0.09528364 | 3.33E-05 | 0.0049935 | 0.067421  |
| 9mo_SIGAE3_ | 0.02370569 | 0.13244317 | 3.61E-05 | 0.0042401 | -0.073623 |
| 9mo_SIGAE3_ | 0.02621992 | 0.14761427 | 3.76E-05 | 0.0041286 | -0.096385 |
| 9mo_SIGAE3_ | 0.08746535 | 0.5171748  | 6.41E-05 | 0.020177  | 0.087329  |
| 9mo_SIGAE3_ | 0.02046794 | 0.1129063  | 3.44E-05 | 0.0045325 | -0.01065  |
| 9mo_SIGAE3_ | 0.02334776 | 0.13028339 | 3.58E-05 | 0.0042778 | -0.065623 |
| 9mo_SIGAE3_ | 0.11736453 | 0.6975892  | 6.64E-05 | 0.024917  | -0.34377  |
| 9mo_SIGAE3_ | 0.02478724 | 0.13896936 | 3.68E-05 | 0.0041768 | -0.086782 |
| 9mo_SIGAE3_ | 0.09086447 | 0.53768533 | 6.45E-05 | 0.021597  | 0.044278  |
| 9mo_SIGAE3_ | 0.02647003 | 0.14912346 | 3.80E-05 | 0.0041099 | -0.099939 |
| 9mo_SIGAE3_ | 0.09358683 | 0.5541124  | 6.48E-05 | 0.022676  | 0.0013661 |
| 9mo_SIGAE3_ | 0.01152163 | 0.05892343 | 3.22E-05 | 0.0061869 | 0.30353   |
| 9mo_SIGAE3_ | 0.02926114 | 0.16596527 | 4.02E-05 | 0.0040662 | -0.10661  |
| 9mo_SIGAE3_ | 0.01145284 | 0.05850833 | 3.21E-05 | 0.006339  | 0.30353   |

|             |            |            |          |           |           |
|-------------|------------|------------|----------|-----------|-----------|
| 9mo_SIGAE3_ | 0.01412117 | 0.07460927 | 3.25E-05 | 0.0056405 | 0.20898   |
| 9mo_SIGAE3_ | 0.08168332 | 0.4822855  | 6.34E-05 | 0.017373  | 0.12948   |
| 9mo_SIGAE3_ | 0.08960287 | 0.53007275 | 6.43E-05 | 0.020902  | 0.059815  |
| 9mo_SIGAE3_ | 0.02114978 | 0.11702059 | 3.47E-05 | 0.0044724 | -0.023601 |
| 9mo_SIGAE3_ | 0.11002978 | 0.6533306  | 6.60E-05 | 0.025599  | -0.26716  |
| 9mo_SIGAE3_ | 0.09581818 | 0.5675765  | 6.50E-05 | 0.023448  | -0.035993 |
| 9mo_SIGAE3_ | 0.061134   | 0.35828903 | 6.06E-05 | 0.008866  | 0.080421  |
| 9mo_SIGAE3_ | 0.08893079 | 0.5260174  | 6.42E-05 | 0.020663  | 0.067165  |
| 9mo_SIGAE3_ | 0.01677097 | 0.09059845 | 3.31E-05 | 0.0050879 | 0.10435   |
| 9mo_SIGAE3_ | 0.0251807  | 0.14134352 | 3.68E-05 | 0.0041768 | -0.086782 |
| 9mo_SIGAE3_ | 0.0851702  | 0.50332564 | 6.38E-05 | 0.018923  | 0.10916   |
| 9mo_SIGAE3_ | 0.03302254 | 0.18866193 | 4.32E-05 | 0.0041142 | -0.091175 |
| 9mo_SIGAE3_ | 0.00777953 | 0.03634325 | 3.19E-05 | 0.0073923 | 0.48652   |
| 9mo_SIGAE3_ | 0.11663844 | 0.6932079  | 6.64E-05 | 0.025054  | -0.33868  |
| 9mo_SIGAE3_ | 0.01784634 | 0.09708729 | 3.34E-05 | 0.0049043 | 0.067421  |
| 9mo_SIGAE3_ | 0.08038166 | 0.4744312  | 6.32E-05 | 0.016854  | 0.13446   |
| 9mo_SIGAE3_ | 0.04368777 | 0.2530169  | 5.38E-05 | 0.0050014 | 0.008455  |
| 9mo_SIGAE3_ | 0.01884964 | 0.10314131 | 3.38E-05 | 0.004741  | 0.03364   |
| 9mo_SIGAE3_ | 0.0528093  | 0.30805704 | 5.87E-05 | 0.0065755 | 0.057248  |
| 9mo_SIGAE3_ | 0.02395062 | 0.13392113 | 3.61E-05 | 0.0042401 | -0.073623 |
| 9mo_SIGAE3_ | 0.02931292 | 0.16627775 | 4.02E-05 | 0.0040662 | -0.10661  |
| 9mo_SIGAE3_ | 0.0110702  | 0.05619946 | 3.21E-05 | 0.006339  | 0.32844   |
| 9mo_SIGAE3_ | 0.05449978 | 0.31825754 | 5.92E-05 | 0.0069681 | 0.062513  |
| 9mo_SIGAE3_ | 0.0463679  | 0.26918906 | 5.54E-05 | 0.0053171 | 0.028707  |
| 9mo_SIGAE3_ | 0.08562511 | 0.50607055 | 6.39E-05 | 0.019177  | 0.1043    |
| 9mo_SIGAE3_ | 0.07593021 | 0.4475707  | 6.26E-05 | 0.0148    | 0.13453   |
| 9mo_SIGAE3_ | 0.11154094 | 0.66244906 | 6.61E-05 | 0.025525  | -0.28705  |
| 9mo_SIGAE3_ | 0.02604925 | 0.14658447 | 3.76E-05 | 0.0041286 | -0.096385 |
| 9mo_SIGAE3_ | 0.01975676 | 0.10861493 | 3.40E-05 | 0.0046667 | 0.0032259 |
| 9mo_SIGAE3_ | 0.06671277 | 0.39195183 | 6.13E-05 | 0.010826  | 0.10251   |
| 9mo_SIGAE3_ | 0.02059929 | 0.11369886 | 3.44E-05 | 0.0045325 | -0.01065  |
| 9mo_SIGAE3_ | 0.02478186 | 0.13893689 | 3.68E-05 | 0.0041768 | -0.086782 |
| 9mo_SIGAE3_ | 0.04090489 | 0.23622474 | 5.14E-05 | 0.0046741 | -0.017493 |
| 9mo_SIGAE3_ | 0.02691186 | 0.15178953 | 3.80E-05 | 0.0041099 | -0.10271  |
| 9mo_SIGAE3_ | 0.0186228  | 0.10177258 | 3.36E-05 | 0.0048202 | 0.03364   |
| 9mo_SIGAE3_ | 0.1205154  | 0.7166018  | 6.66E-05 | 0.024561  | -0.37215  |
| 9mo_SIGAE3_ | 0.01877217 | 0.10267384 | 3.38E-05 | 0.004741  | 0.03364   |
| 9mo_SIGAE3_ | 0.01772736 | 0.09636939 | 3.34E-05 | 0.0049043 | 0.067421  |
| 9mo_SIGAE3_ | 0.01416636 | 0.07488195 | 3.25E-05 | 0.0056405 | 0.20898   |
| 9mo_SIGAE3_ | 0.02166612 | 0.12013625 | 3.49E-05 | 0.0044169 | -0.0356   |
| 9mo_SIGAE3_ | 0.02478329 | 0.13894553 | 3.68E-05 | 0.0041768 | -0.086782 |
| 9mo_SIGAE3_ | 0.12650082 | 0.7527184  | 6.68E-05 | 0.023879  | -0.41707  |
| 9mo_SIGAE3_ | 0.10437322 | 0.61919844 | 6.56E-05 | 0.025367  | -0.18901  |

|             |            |            |          |           |           |
|-------------|------------|------------|----------|-----------|-----------|
| 9mo_SIGAE3_ | 0.02928584 | 0.16611433 | 4.02E-05 | 0.0040662 | -0.10661  |
| 9mo_SIGAE3_ | 0.0440984  | 0.25549468 | 5.38E-05 | 0.0050014 | 0.012967  |
| 9mo_SIGAE3_ | 0.0744963  | 0.43891838 | 6.24E-05 | 0.014051  | 0.13218   |
| 9mo_SIGAE3_ | 0.02212744 | 0.12291984 | 3.52E-05 | 0.0043661 | -0.046619 |
| 9mo_SIGAE3_ | 0.07585748 | 0.44713187 | 6.26E-05 | 0.0148    | 0.13453   |
| 9mo_SIGAE3_ | 0.02549481 | 0.14323889 | 3.72E-05 | 0.0041509 | -0.092011 |
| 9mo_SIGAE3_ | 0.01487867 | 0.0791801  | 3.27E-05 | 0.0054028 | 0.16515   |
| 9mo_SIGAE3_ | 0.04098793 | 0.23672582 | 5.14E-05 | 0.0046741 | -0.017493 |
| 9mo_SIGAE3_ | 0.08380278 | 0.4950745  | 6.37E-05 | 0.01841   | 0.1176    |
| 9mo_SIGAE3_ | 0.01113389 | 0.05658379 | 3.21E-05 | 0.006339  | 0.32844   |
| 9mo_SIGAE3_ | 0.02151606 | 0.11923072 | 3.49E-05 | 0.0044169 | -0.0356   |
| 9mo_SIGAE3_ | 0.01666386 | 0.0899521  | 3.31E-05 | 0.0050879 | 0.10435   |
| 9mo_SIGAE3_ | 0.05259359 | 0.3067554  | 5.87E-05 | 0.0065755 | 0.057248  |
| 9mo_SIGAE3_ | 0.01780821 | 0.09685721 | 3.34E-05 | 0.0049043 | 0.067421  |
| 9mo_SIGAE3_ | 0.0671353  | 0.39450145 | 6.14E-05 | 0.011039  | 0.10251   |
| 9mo_SIGAE3_ | 0.0758227  | 0.44692197 | 6.26E-05 | 0.0148    | 0.13453   |
| 9mo_SIGAE3_ | 0.05620431 | 0.32854283 | 5.97E-05 | 0.0073934 | 0.068678  |
| 9mo_SIGAE3_ | 0.02462884 | 0.13801351 | 3.64E-05 | 0.0042065 | -0.080664 |
| 9mo_SIGAE3_ | 0.0141927  | 0.07504089 | 3.25E-05 | 0.0056405 | 0.18676   |
| 9mo_SIGAE3_ | 0.08038666 | 0.47446135 | 6.32E-05 | 0.016854  | 0.13446   |
| 9mo_SIGAE3_ | 0.03142917 | 0.17904736 | 4.22E-05 | 0.0040866 | -0.10071  |
| 9mo_SIGAE3_ | 0.08787058 | 0.51962    | 6.41E-05 | 0.020177  | 0.080939  |
| 9mo_SIGAE3_ | 0.02135569 | 0.11826303 | 3.47E-05 | 0.0044724 | -0.023601 |
| 9mo_SIGAE3_ | 0.02452878 | 0.13740978 | 3.64E-05 | 0.0042065 | -0.080664 |
| 9mo_SIGAE3_ | 0.02099398 | 0.11608046 | 3.47E-05 | 0.0044724 | -0.023601 |
| 9mo_SIGAE3_ | 0.1021542  | 0.6058087  | 6.55E-05 | 0.025029  | -0.15246  |
| 9mo_SIGAE3_ | 0.09053282 | 0.5356842  | 6.44E-05 | 0.021369  | 0.044278  |
| 9mo_SIGAE3_ | 0.10444854 | 0.61965287 | 6.56E-05 | 0.025367  | -0.18901  |
| 9mo_SIGAE3_ | 0.09127972 | 0.54019105 | 6.45E-05 | 0.021822  | 0.036126  |
| 9mo_SIGAE3_ | 0.01659171 | 0.08951674 | 3.31E-05 | 0.0050879 | 0.10435   |
| 9mo_SIGAE3_ | 0.0257625  | 0.14485417 | 3.72E-05 | 0.0041509 | -0.092011 |
| 9mo_SIGAE3_ | 0.01872605 | 0.10239556 | 3.38E-05 | 0.004741  | 0.03364   |
| 9mo_SIGAE3_ | 0.10714606 | 0.63592994 | 6.58E-05 | 0.025586  | -0.23052  |
| 9mo_SIGAE3_ | 0.058597   | 0.34298056 | 6.02E-05 | 0.0081753 | 0.074438  |
| 9mo_SIGAE3_ | 0.06662478 | 0.39142093 | 6.13E-05 | 0.010826  | 0.10013   |
| 9mo_SIGAE3_ | 0.04423239 | 0.2563032  | 5.42E-05 | 0.0050757 | 0.012967  |
| 9mo_SIGAE3_ | 0.0860306  | 0.5085173  | 6.39E-05 | 0.01943   | 0.099025  |
| 9mo_SIGAE3_ | 0.11103632 | 0.65940416 | 6.61E-05 | 0.025556  | -0.28058  |
| 9mo_SIGAE3_ | 0.11295073 | 0.6709559  | 6.62E-05 | 0.025403  | -0.29951  |
| 9mo_SIGAE3_ | 0.02477916 | 0.13892062 | 3.68E-05 | 0.0041768 | -0.086782 |
| 9mo_SIGAE3_ | 0.09312683 | 0.5513367  | 6.47E-05 | 0.022469  | 0.010343  |
| 9mo_SIGAE3_ | 0.01486839 | 0.07911812 | 3.27E-05 | 0.0054028 | 0.16515   |
| 9mo_SIGAE3_ | 0.01165417 | 0.05972318 | 3.22E-05 | 0.0061869 | 0.30353   |



|             |            |            |          |           |            |
|-------------|------------|------------|----------|-----------|------------|
| 9mo_SIGAE3_ | 0.04718528 | 0.2741212  | 5.61E-05 | 0.0054936 | 0.032113   |
| 9mo_SIGAE3_ | 0.01139413 | 0.0581541  | 3.21E-05 | 0.006339  | 0.32844    |
| 9mo_SIGAE3_ | 0.02017617 | 0.11114574 | 3.42E-05 | 0.0045972 | 0.0032259  |
| 9mo_SIGAE3_ | 0.0580909  | 0.3399267  | 6.01E-05 | 0.0080116 | 0.073002   |
| 9mo_SIGAE3_ | 0.10616764 | 0.63002616 | 6.58E-05 | 0.025526  | -0.21453   |
| 9mo_SIGAE3_ | 0.080444   | 0.47480735 | 6.32E-05 | 0.016854  | 0.13446    |
| 9mo_SIGAE3_ | 0.0869392  | 0.51399994 | 6.41E-05 | 0.01993   | 0.093363   |
| 9mo_SIGAE3_ | 0.04581829 | 0.26587266 | 5.50E-05 | 0.0052335 | 0.025099   |
| 9mo_SIGAE3_ | 0.00498828 | 0.0195006  | 3.18E-05 | 0.0084677 | 0.62647    |
| 9mo_SIGAE3_ | 0.00930466 | 0.04554604 | 3.20E-05 | 0.0068348 | 0.4058     |
| 9mo_SIGAE3_ | 0.0499757  | 0.29095882 | 5.76E-05 | 0.005992  | 0.046466   |
| 9mo_SIGAE3_ | 0.030469   | 0.1732536  | 4.11E-05 | 0.0040705 | -0.10475   |
| 9mo_SIGAE3_ | 0.07504795 | 0.44224706 | 6.25E-05 | 0.014299  | 0.13345    |
| 9mo_SIGAE3_ | 0.04236098 | 0.24501094 | 5.24E-05 | 0.0047963 | -0.0013165 |
| 9mo_SIGAE3_ | 0.0654883  | 0.3845633  | 6.12E-05 | 0.01041   | 0.095509   |
| 9mo_SIGAE3_ | 0.04383348 | 0.2538961  | 5.38E-05 | 0.0050014 | 0.008455   |
| 9mo_SIGAE3_ | 0.0431546  | 0.2497997  | 5.33E-05 | 0.0049301 | 0.0036923  |
| 9mo_SIGAE3_ | 0.05978322 | 0.35013834 | 6.04E-05 | 0.0085136 | 0.077363   |
| 9mo_SIGAE3_ | 0.03251628 | 0.18560706 | 4.27E-05 | 0.004099  | -0.094772  |
| 9mo_SIGAE3_ | 0.09103917 | 0.5387395  | 6.45E-05 | 0.021597  | 0.036126   |
| 9mo_SIGAE3_ | 0.05499488 | 0.32124504 | 5.94E-05 | 0.0071062 | 0.064127   |
| 9mo_SIGAE3_ | 0.01799022 | 0.09795553 | 3.34E-05 | 0.0049043 | 0.067421   |
| 9mo_SIGAE3_ | 0.05750051 | 0.3363642  | 6.00E-05 | 0.0078516 | 0.071569   |
| 9mo_SIGAE3_ | 0.03481929 | 0.19950369 | 4.54E-05 | 0.0042028 | -0.078293  |
| 9mo_SIGAE3_ | 0.09758662 | 0.5782475  | 6.51E-05 | 0.023964  | -0.065044  |
| 9mo_SIGAE3_ | 0.0864213  | 0.5108749  | 6.40E-05 | 0.019681  | 0.099025   |
| 9mo_SIGAE3_ | 0.02263985 | 0.12601177 | 3.55E-05 | 0.0043197 | -0.056631  |
| 9mo_SIGAE3_ | 0.01225043 | 0.06332105 | 3.23E-05 | 0.0060411 | 0.2791     |
| 9mo_SIGAE3_ | 0.01896101 | 0.10381336 | 3.38E-05 | 0.004741  | 0.03364    |
| 9mo_SIGAE3_ | 0.07806348 | 0.46044308 | 6.29E-05 | 0.015819  | 0.13662    |
| 9mo_SIGAE3_ | 0.01235189 | 0.06393332 | 3.23E-05 | 0.0060411 | 0.2791     |
| 9mo_SIGAE3_ | 0.03586346 | 0.20580426 | 4.65E-05 | 0.0042637 | -0.068307  |
| 9mo_SIGAE3_ | 0.12050103 | 0.7165151  | 6.66E-05 | 0.024561  | -0.37215   |
| 9mo_SIGAE3_ | 0.05672514 | 0.3316856  | 5.98E-05 | 0.0075425 | 0.070131   |
| 9mo_SIGAE3_ | 0.01101638 | 0.05587471 | 3.21E-05 | 0.006339  | 0.32844    |
| 9mo_SIGAE3_ | 0.00598047 | 0.02548758 | 3.18E-05 | 0.008015  | 0.56984    |
| 9mo_SIGAE3_ | 0.07420499 | 0.43716058 | 6.24E-05 | 0.014051  | 0.13074    |
| 9mo_SIGAE3_ | 0.01577357 | 0.08458001 | 3.28E-05 | 0.0052924 | 0.1442     |
| 9mo_SIGAE3_ | 0.13740656 | 0.8185246  | 6.73E-05 | 0.02353   | -0.48301   |
| 9mo_SIGAE3_ | 0.0990651  | 0.58716875 | 6.53E-05 | 0.02442   | -0.094455  |
| 9mo_SIGAE3_ | 0.02418035 | 0.1353073  | 3.61E-05 | 0.0042401 | -0.080664  |
| 9mo_SIGAE3_ | 0.02204892 | 0.12244611 | 3.52E-05 | 0.0043661 | -0.046619  |
| 9mo_SIGAE3_ | 0.03896406 | 0.2245136  | 4.92E-05 | 0.0044639 | -0.040459  |

|             |            |            |          |           |           |
|-------------|------------|------------|----------|-----------|-----------|
| 9mo_SIGAE3_ | 0.02176011 | 0.12070335 | 3.49E-05 | 0.0044169 | -0.0356   |
| 9mo_SIGAE3_ | 0.05407755 | 0.31570977 | 5.91E-05 | 0.0068337 | 0.062513  |
| 9mo_SIGAE3_ | 0.03051387 | 0.17352435 | 4.11E-05 | 0.0040705 | -0.10475  |
| 9mo_SIGAE3_ | 0.02376952 | 0.13282833 | 3.61E-05 | 0.0042401 | -0.073623 |
| 9mo_SIGAE3_ | 0.07989827 | 0.47151434 | 6.32E-05 | 0.016594  | 0.13545   |
| 9mo_SIGAE3_ | 0.07386911 | 0.43513384 | 6.23E-05 | 0.013805  | 0.13074   |
| 9mo_SIGAE3_ | 0.11363255 | 0.67507005 | 6.62E-05 | 0.025353  | -0.31137  |
| 9mo_SIGAE3_ | 0.02215884 | 0.12310934 | 3.52E-05 | 0.0043661 | -0.046619 |
| 9mo_SIGAE3_ | 0.08393046 | 0.49584493 | 6.37E-05 | 0.01841   | 0.1176    |
| 9mo_SIGAE3_ | 0.09200715 | 0.54458046 | 6.46E-05 | 0.022042  | 0.027741  |
| 9mo_SIGAE3_ | 0.02479568 | 0.13902025 | 3.68E-05 | 0.0041768 | -0.086782 |
| 9mo_SIGAE3_ | 0.04696136 | 0.27277005 | 5.61E-05 | 0.0054936 | 0.032113  |
| 9mo_SIGAE3_ | 0.04550708 | 0.26399478 | 5.50E-05 | 0.0052335 | 0.021279  |
| 9mo_SIGAE3_ | 0.01602745 | 0.08611196 | 3.30E-05 | 0.0051875 | 0.12392   |
| 9mo_SIGAE3_ | 0.03624708 | 0.20811908 | 4.65E-05 | 0.0042637 | -0.068307 |
| 9mo_SIGAE3_ | 0.01609311 | 0.08650814 | 3.30E-05 | 0.0051875 | 0.12392   |
| 9mo_SIGAE3_ | 0.11290947 | 0.6707069  | 6.62E-05 | 0.025403  | -0.29951  |
| 9mo_SIGAE3_ | 0.00896087 | 0.04347159 | 3.19E-05 | 0.0070136 | 0.43237   |
| 9mo_SIGAE3_ | 0.08681137 | 0.5132286  | 6.40E-05 | 0.019681  | 0.093363  |
| 9mo_SIGAE3_ | 0.09150909 | 0.5415751  | 6.45E-05 | 0.021822  | 0.036126  |
| 9mo_SIGAE3_ | 0.04088743 | 0.23611939 | 5.14E-05 | 0.0046741 | -0.017493 |
| 9mo_SIGAE3_ | 0.07102441 | 0.41796866 | 6.20E-05 | 0.012608  | 0.11916   |
| 9mo_SIGAE3_ | 0.05276997 | 0.30781975 | 5.87E-05 | 0.0065755 | 0.057248  |
| 9mo_SIGAE3_ | 0.02271988 | 0.12649474 | 3.55E-05 | 0.0043197 | -0.056631 |
| 9mo_SIGAE3_ | 0.11653294 | 0.6925713  | 6.64E-05 | 0.025054  | -0.33868  |
| 9mo_SIGAE3_ | 0.02821556 | 0.15965612 | 3.93E-05 | 0.004074  | -0.10603  |
| 9mo_SIGAE3_ | 0.07828888 | 0.46180314 | 6.29E-05 | 0.015819  | 0.13651   |
| 9mo_SIGAE3_ | 0.13289477 | 0.79130006 | 6.71E-05 | 0.023556  | -0.45613  |
| 9mo_SIGAE3_ | 0.02342601 | 0.13075556 | 3.58E-05 | 0.0042778 | -0.065623 |
| 9mo_SIGAE3_ | 0.03598338 | 0.2065279  | 4.65E-05 | 0.0042637 | -0.068307 |
| 9mo_SIGAE3_ | 0.01119143 | 0.05693097 | 3.21E-05 | 0.006339  | 0.32844   |
| 9mo_SIGAE3_ | 0.11139542 | 0.661571   | 6.61E-05 | 0.025525  | -0.28058  |
| 9mo_SIGAE3_ | 0.01137121 | 0.05801577 | 3.21E-05 | 0.006339  | 0.32844   |
| 9mo_SIGAE3_ | 0.10030958 | 0.59467804 | 6.53E-05 | 0.024687  | -0.11403  |
| 9mo_SIGAE3_ | 0.10650818 | 0.632081   | 6.58E-05 | 0.02556   | -0.22263  |
| 9mo_SIGAE3_ | 0.11167478 | 0.6632567  | 6.61E-05 | 0.025525  | -0.28705  |
| 9mo_SIGAE3_ | 0.02560521 | 0.14390506 | 3.72E-05 | 0.0041509 | -0.092011 |
| 9mo_SIGAE3_ | 0.08338095 | 0.49252915 | 6.36E-05 | 0.018151  | 0.12117   |
| 9mo_SIGAE3_ | 0.00866154 | 0.04166536 | 3.19E-05 | 0.0071994 | 0.45929   |
| 9mo_SIGAE3_ | 0.05054522 | 0.2943954  | 5.78E-05 | 0.0061018 | 0.048868  |
| 9mo_SIGAE3_ | 0.11021809 | 0.6544669  | 6.60E-05 | 0.02558   | -0.26716  |
| 9mo_SIGAE3_ | 0.02106538 | 0.11651129 | 3.47E-05 | 0.0044724 | -0.023601 |
| 9mo_SIGAE3_ | 0.03004036 | 0.17066713 | 4.07E-05 | 0.0040668 | -0.10597  |

|             |            |            |          |           |           |
|-------------|------------|------------|----------|-----------|-----------|
| 9mo_SIGAE3_ | 0.01965522 | 0.10800225 | 3.40E-05 | 0.0046667 | 0.017998  |
| 9mo_SIGAE3_ | 0.04502339 | 0.26107615 | 5.46E-05 | 0.0051531 | 0.017239  |
| 9mo_SIGAE3_ | 0.10228889 | 0.6066214  | 6.55E-05 | 0.025029  | -0.15246  |
| 9mo_SIGAE3_ | 0.07985242 | 0.4712377  | 6.32E-05 | 0.016594  | 0.13545   |
| 9mo_SIGAE3_ | 0.03324506 | 0.1900046  | 4.37E-05 | 0.0041322 | -0.091175 |
| 9mo_SIGAE3_ | 0.04152601 | 0.2399726  | 5.19E-05 | 0.0047337 | -0.011944 |
| 9mo_SIGAE3_ | 0.0684052  | 0.40216413 | 6.16E-05 | 0.011474  | 0.10977   |
| 9mo_SIGAE3_ | 0.11056645 | 0.65656894 | 6.60E-05 | 0.02558   | -0.27396  |
| 9mo_SIGAE3_ | 0.10758386 | 0.63857174 | 6.59E-05 | 0.025604  | -0.23822  |
| 9mo_SIGAE3_ | 0.03038505 | 0.17274702 | 4.11E-05 | 0.0040705 | -0.10475  |
| 9mo_SIGAE3_ | 0.05080191 | 0.29594427 | 5.78E-05 | 0.0061018 | 0.051138  |
| 9mo_SIGAE3_ | 0.01882424 | 0.10298805 | 3.38E-05 | 0.004741  | 0.03364   |
| 9mo_SIGAE3_ | 0.02645112 | 0.14900933 | 3.80E-05 | 0.0041099 | -0.099939 |
| 9mo_SIGAE3_ | 0.05009026 | 0.2916501  | 5.76E-05 | 0.005992  | 0.046466  |
| 9mo_SIGAE3_ | 0.0926533  | 0.5484794  | 6.46E-05 | 0.022258  | 0.010343  |
| 9mo_SIGAE3_ | 0.09772475 | 0.57908094 | 6.51E-05 | 0.023964  | -0.074831 |
| 9mo_SIGAE3_ | 0.01824159 | 0.09947228 | 3.36E-05 | 0.0048202 | 0.050123  |
| 9mo_SIGAE3_ | 0.02774291 | 0.1568041  | 3.88E-05 | 0.0040827 | -0.10472  |
| 9mo_SIGAE3_ | 0.08141168 | 0.48064643 | 6.34E-05 | 0.017373  | 0.13148   |
| 9mo_SIGAE3_ | 0.01730393 | 0.09381438 | 3.33E-05 | 0.0049935 | 0.085504  |
| 9mo_SIGAE3_ | 0.07209963 | 0.42445663 | 6.21E-05 | 0.01308   | 0.12348   |
| 9mo_SIGAE3_ | 0.02493397 | 0.13985474 | 3.68E-05 | 0.0041768 | -0.086782 |
| 9mo_SIGAE3_ | 0.1302351  | 0.77525145 | 6.70E-05 | 0.02364   | -0.44263  |
| 9mo_SIGAE3_ | 0.01918853 | 0.10518622 | 3.38E-05 | 0.004741  | 0.017998  |
| 9mo_SIGAE3_ | 0.03362516 | 0.19229816 | 4.37E-05 | 0.0041322 | -0.087207 |
| 9mo_SIGAE3_ | 0.04953788 | 0.288317   | 5.73E-05 | 0.0058857 | 0.04392   |
| 9mo_SIGAE3_ | 0.04853886 | 0.2822888  | 5.67E-05 | 0.0056831 | 0.041222  |
| 9mo_SIGAE3_ | 0.01663179 | 0.0897586  | 3.31E-05 | 0.0050879 | 0.10435   |
| 9mo_SIGAE3_ | 0.02520705 | 0.14150253 | 3.68E-05 | 0.0041768 | -0.086782 |
| 9mo_SIGAE3_ | 0.13796116 | 0.82187116 | 6.73E-05 | 0.023534  | -0.48567  |
| 9mo_SIGAE3_ | 0.07745726 | 0.4567851  | 6.29E-05 | 0.015562  | 0.13646   |
| 9mo_SIGAE3_ | 0.04198354 | 0.2427334  | 5.24E-05 | 0.0047963 | -0.00654  |
| 9mo_SIGAE3_ | 0.09112328 | 0.53924704 | 6.45E-05 | 0.021597  | 0.036126  |
| 9mo_SIGAE3_ | 0.07047608 | 0.41465998 | 6.19E-05 | 0.012376  | 0.11689   |
| 9mo_SIGAE3_ | 0.020328   | 0.11206187 | 3.44E-05 | 0.0045325 | -0.01065  |
| 9mo_SIGAE3_ | 0.09822004 | 0.5820696  | 6.52E-05 | 0.024123  | -0.084641 |
| 9mo_SIGAE3_ | 0.14153334 | 0.84342605 | 6.74E-05 | 0.023575  | -0.49999  |
| 9mo_SIGAE3_ | 0.01583376 | 0.08494321 | 3.28E-05 | 0.0052924 | 0.1442    |
| 9mo_SIGAE3_ | 0.03050013 | 0.17344145 | 4.11E-05 | 0.0040705 | -0.10475  |
| 9mo_SIGAE3_ | 0.0880532  | 0.5207219  | 6.42E-05 | 0.020421  | 0.080939  |
| 9mo_SIGAE3_ | 0.13340664 | 0.7943888  | 6.71E-05 | 0.023546  | -0.45937  |
| 9mo_SIGAE3_ | 0.01123821 | 0.05721324 | 3.21E-05 | 0.006339  | 0.32844   |
| 9mo_SIGAE3_ | 0.01594665 | 0.08562438 | 3.30E-05 | 0.0051875 | 0.12392   |

|             |            |            |          |           |           |
|-------------|------------|------------|----------|-----------|-----------|
| 9mo_SIGAE3_ | 0.09308482 | 0.5510832  | 6.47E-05 | 0.022469  | 0.010343  |
| 9mo_SIGAE3_ | 0.02726364 | 0.15391214 | 3.84E-05 | 0.0040947 | -0.10271  |
| 9mo_SIGAE3_ | 0.10152522 | 0.6020133  | 6.54E-05 | 0.024923  | -0.14299  |
| 9mo_SIGAE3_ | 0.01504673 | 0.08019424 | 3.27E-05 | 0.0054028 | 0.16515   |
| 9mo_SIGAE3_ | 0.11676672 | 0.69398195 | 6.64E-05 | 0.024986  | -0.33868  |
| 9mo_SIGAE3_ | 0.0781403  | 0.46090662 | 6.29E-05 | 0.015819  | 0.13662   |
| 9mo_SIGAE3_ | 0.01965438 | 0.10799717 | 3.40E-05 | 0.0046667 | 0.017998  |
| 9mo_SIGAE3_ | 0.05561731 | 0.32500082 | 5.95E-05 | 0.007248  | 0.065685  |
| 9mo_SIGAE3_ | 0.02769947 | 0.15654203 | 3.88E-05 | 0.0040827 | -0.10472  |
| 9mo_SIGAE3_ | 0.0440505  | 0.25520563 | 5.38E-05 | 0.0050014 | 0.012967  |
| 9mo_SIGAE3_ | 0.12309463 | 0.7321651  | 6.67E-05 | 0.024217  | -0.39346  |
| 9mo_SIGAE3_ | 0.05057565 | 0.294579   | 5.78E-05 | 0.0061018 | 0.048868  |
| 9mo_SIGAE3_ | 0.02639978 | 0.1486996  | 3.76E-05 | 0.0041286 | -0.099939 |
| 9mo_SIGAE3_ | 0.06542651 | 0.38419044 | 6.12E-05 | 0.01041   | 0.095509  |
| 9mo_SIGAE3_ | 0.07695847 | 0.45377535 | 6.28E-05 | 0.015307  | 0.13605   |
| 9mo_SIGAE3_ | 0.01853034 | 0.10121461 | 3.36E-05 | 0.0048202 | 0.050123  |
| 9mo_SIGAE3_ | 0.03709643 | 0.21324417 | 4.76E-05 | 0.0043355 | -0.057524 |
| 9mo_SIGAE3_ | 0.0683467  | 0.40181112 | 6.16E-05 | 0.011474  | 0.10977   |
| 9mo_SIGAE3_ | 0.04400509 | 0.2549316  | 5.38E-05 | 0.0050014 | 0.008455  |
| 9mo_SIGAE3_ | 0.01608466 | 0.08645716 | 3.30E-05 | 0.0051875 | 0.12392   |
| 9mo_SIGAE3_ | 0.07742202 | 0.45657244 | 6.29E-05 | 0.015562  | 0.13646   |
| 9mo_SIGAE3_ | 0.06964456 | 0.4096425  | 6.17E-05 | 0.01192   | 0.11455   |
| 9mo_SIGAE3_ | 0.02436355 | 0.13641278 | 3.64E-05 | 0.0042065 | -0.080664 |
| 9mo_SIGAE3_ | 0.11287781 | 0.6705159  | 6.62E-05 | 0.025448  | -0.29951  |
| 9mo_SIGAE3_ | 0.03284284 | 0.18757758 | 4.32E-05 | 0.0041142 | -0.094772 |
| 9mo_SIGAE3_ | 0.10145623 | 0.601597   | 6.54E-05 | 0.024923  | -0.13341  |
| 9mo_SIGAE3_ | 0.06606109 | 0.38801953 | 6.13E-05 | 0.010616  | 0.097788  |
| 9mo_SIGAE3_ | 0.0180728  | 0.09845382 | 3.34E-05 | 0.0049043 | 0.050123  |
| 9mo_SIGAE3_ | 0.03189082 | 0.181833   | 4.22E-05 | 0.0040866 | -0.097962 |
| 9mo_SIGAE3_ | 0.01891398 | 0.10352959 | 3.38E-05 | 0.004741  | 0.03364   |
| 9mo_SIGAE3_ | 0.0795382  | 0.46934164 | 6.31E-05 | 0.016335  | 0.13545   |
| 9mo_SIGAE3_ | 0.07616171 | 0.44896764 | 6.26E-05 | 0.0148    | 0.1354    |
| 9mo_SIGAE3_ | 0.02429225 | 0.13598256 | 3.64E-05 | 0.0042065 | -0.080664 |
| 9mo_SIGAE3_ | 0.03851725 | 0.22181751 | 4.87E-05 | 0.0044183 | -0.040459 |
| 9mo_SIGAE3_ | 0.09166679 | 0.54252666 | 6.45E-05 | 0.021822  | 0.027741  |
| 9mo_SIGAE3_ | 0.1126891  | 0.6693772  | 6.62E-05 | 0.025448  | -0.29951  |
| 9mo_SIGAE3_ | 0.11904518 | 0.70773035 | 6.65E-05 | 0.024704  | -0.3584   |
| 9mo_SIGAE3_ | 0.02326853 | 0.12980534 | 3.58E-05 | 0.0042778 | -0.065623 |
| 9mo_SIGAE3_ | 0.13480094 | 0.8028021  | 6.72E-05 | 0.023533  | -0.46872  |
| 9mo_SIGAE3_ | 0.0870626  | 0.5147445  | 6.41E-05 | 0.01993   | 0.093363  |
| 9mo_SIGAE3_ | 0.07320398 | 0.4311204  | 6.23E-05 | 0.013561  | 0.12737   |
| 9mo_SIGAE3_ | 0.01062514 | 0.05351393 | 3.21E-05 | 0.0064976 | 0.35381   |
| 9mo_SIGAE3_ | 0.03515923 | 0.2015549  | 4.54E-05 | 0.0042028 | -0.078293 |

|             |            |            |          |           |           |
|-------------|------------|------------|----------|-----------|-----------|
| 9mo_SIGAE3_ | 0.03048205 | 0.17333236 | 4.11E-05 | 0.0040705 | -0.10475  |
| 9mo_SIGAE3_ | 0.11819844 | 0.7026211  | 6.65E-05 | 0.024847  | -0.35363  |
| 9mo_SIGAE3_ | 0.12397494 | 0.737477   | 6.67E-05 | 0.024092  | -0.39752  |
| 9mo_SIGAE3_ | 0.05156134 | 0.3005267  | 5.83E-05 | 0.0063316 | 0.053285  |
| 9mo_SIGAE3_ | 0.0086503  | 0.04159755 | 3.19E-05 | 0.0071994 | 0.45929   |
| 9mo_SIGAE3_ | 0.10919821 | 0.6483128  | 6.60E-05 | 0.025611  | -0.25305  |
| 9mo_SIGAE3_ | 0.03061206 | 0.17411683 | 4.11E-05 | 0.0040705 | -0.10475  |
| 9mo_SIGAE3_ | 0.09073576 | 0.5369087  | 6.45E-05 | 0.021597  | 0.044278  |
| 9mo_SIGAE3_ | 0.08966728 | 0.53046143 | 6.44E-05 | 0.021137  | 0.059815  |
| 9mo_SIGAE3_ | 0.02284654 | 0.12725896 | 3.55E-05 | 0.0043197 | -0.056631 |
| 9mo_SIGAE3_ | 0.0585472  | 0.34268007 | 6.01E-05 | 0.0080116 | 0.074438  |
| 9mo_SIGAE3_ | 0.10991658 | 0.65264755 | 6.60E-05 | 0.025599  | -0.26716  |
| 9mo_SIGAE3_ | 0.03179236 | 0.18123889 | 4.22E-05 | 0.0040866 | -0.10071  |
| 9mo_SIGAE3_ | 0.04891747 | 0.2845734  | 5.70E-05 | 0.0057827 | 0.041222  |
| 9mo_SIGAE3_ | 0.08291622 | 0.4897249  | 6.35E-05 | 0.017892  | 0.12434   |
| 9mo_SIGAE3_ | 0.01390237 | 0.07328906 | 3.25E-05 | 0.0056405 | 0.20898   |
| 9mo_SIGAE3_ | 0.07834084 | 0.4621167  | 6.29E-05 | 0.015819  | 0.13651   |
| 9mo_SIGAE3_ | 0.11962479 | 0.7112278  | 6.65E-05 | 0.024632  | -0.36308  |
| 9mo_SIGAE3_ | 0.01642522 | 0.08851212 | 3.30E-05 | 0.0051875 | 0.10435   |
| 9mo_SIGAE3_ | 0.1405473  | 0.8374762  | 6.74E-05 | 0.023558  | -0.49553  |
| 9mo_SIGAE3_ | 0.0861712  | 0.5093658  | 6.39E-05 | 0.01943   | 0.099025  |
| 9mo_SIGAE3_ | 0.02947142 | 0.16723414 | 4.02E-05 | 0.0040662 | -0.10661  |
| 9mo_SIGAE3_ | 0.08705588 | 0.51470405 | 6.41E-05 | 0.01993   | 0.093363  |
| 9mo_SIGAE3_ | 0.08154127 | 0.48142838 | 6.34E-05 | 0.017373  | 0.13148   |
| 9mo_SIGAE3_ | 0.01363193 | 0.0716572  | 3.24E-05 | 0.0057681 | 0.23179   |
| 9mo_SIGAE3_ | 0.02385113 | 0.13332076 | 3.61E-05 | 0.0042401 | -0.073623 |
| 9mo_SIGAE3_ | 0.01795575 | 0.09774754 | 3.34E-05 | 0.0049043 | 0.067421  |
| 9mo_SIGAE3_ | 0.00828909 | 0.03941801 | 3.19E-05 | 0.0071994 | 0.45929   |
| 9mo_SIGAE3_ | 0.01947018 | 0.10688573 | 3.40E-05 | 0.0046667 | 0.017998  |
| 9mo_SIGAE3_ | 0.02042409 | 0.11264173 | 3.44E-05 | 0.0045325 | -0.01065  |
| 9mo_SIGAE3_ | 0.09119693 | 0.5396915  | 6.45E-05 | 0.021597  | 0.036126  |
| 9mo_SIGAE3_ | 0.01500051 | 0.07991529 | 3.27E-05 | 0.0054028 | 0.16515   |
| 9mo_SIGAE3_ | 0.07568689 | 0.4461025  | 6.26E-05 | 0.014549  | 0.13453   |
| 9mo_SIGAE3_ | 0.09302755 | 0.5507376  | 6.47E-05 | 0.022469  | 0.010343  |
| 9mo_SIGAE3_ | 0.06203335 | 0.3637158  | 6.07E-05 | 0.0092324 | 0.083692  |
| 9mo_SIGAE3_ | 0.08731408 | 0.51626205 | 6.41E-05 | 0.01993   | 0.087329  |
| 9mo_SIGAE3_ | 0.0731322  | 0.43068728 | 6.23E-05 | 0.013561  | 0.12737   |
| 9mo_SIGAE3_ | 0.01628381 | 0.08765889 | 3.30E-05 | 0.0051875 | 0.12392   |
| 9mo_SIGAE3_ | 0.02500661 | 0.14029306 | 3.68E-05 | 0.0041768 | -0.086782 |
| 9mo_SIGAE3_ | 0.02914929 | 0.16529037 | 3.97E-05 | 0.0040686 | -0.10661  |
| 9mo_SIGAE3_ | 0.02009378 | 0.11064856 | 3.42E-05 | 0.0045972 | 0.0032259 |
| 9mo_SIGAE3_ | 0.03400249 | 0.19457503 | 4.43E-05 | 0.004153  | -0.087207 |
| 9mo_SIGAE3_ | 0.03226864 | 0.18411283 | 4.27E-05 | 0.004099  | -0.097962 |

|             |            |            |          |           |           |
|-------------|------------|------------|----------|-----------|-----------|
| 9mo_SIGAE3_ | 0.05173887 | 0.30159798 | 5.83E-05 | 0.0063316 | 0.053285  |
| 9mo_SIGAE3_ | 0.01953982 | 0.10730593 | 3.40E-05 | 0.0046667 | 0.017998  |
| 9mo_SIGAE3_ | 0.02284417 | 0.12724468 | 3.55E-05 | 0.0043197 | -0.056631 |
| 9mo_SIGAE3_ | 0.07663216 | 0.45180634 | 6.27E-05 | 0.015053  | 0.13605   |
| 9mo_SIGAE3_ | 0.01317349 | 0.06889093 | 3.24E-05 | 0.0057681 | 0.23179   |
| 9mo_SIGAE3_ | 0.02503265 | 0.14045015 | 3.68E-05 | 0.0041768 | -0.086782 |
| 9mo_SIGAE3_ | 0.03015134 | 0.1713368  | 4.07E-05 | 0.0040668 | -0.10597  |
| 9mo_SIGAE3_ | 0.02293078 | 0.1277673  | 3.55E-05 | 0.0043197 | -0.056631 |
| 9mo_SIGAE3_ | 0.03068756 | 0.17457241 | 4.11E-05 | 0.0040705 | -0.10475  |
| 9mo_SIGAE3_ | 0.02002744 | 0.11024828 | 3.42E-05 | 0.0045972 | 0.0032259 |
| 9mo_SIGAE3_ | 0.0214564  | 0.11887072 | 3.49E-05 | 0.0044169 | -0.0356   |
| 9mo_SIGAE3_ | 0.01956141 | 0.10743619 | 3.40E-05 | 0.0046667 | 0.017998  |
| 9mo_SIGAE3_ | 0.12111998 | 0.7202499  | 6.66E-05 | 0.02449   | -0.37656  |
| 9mo_SIGAE3_ | 0.0802932  | 0.4738974  | 6.32E-05 | 0.016854  | 0.13446   |
| 9mo_SIGAE3_ | 0.02592433 | 0.14583066 | 3.76E-05 | 0.0041286 | -0.096385 |
| 9mo_SIGAE3_ | 0.03362693 | 0.19230883 | 4.37E-05 | 0.0041322 | -0.087207 |
| 9mo_SIGAE3_ | 0.02705569 | 0.1526574  | 3.84E-05 | 0.0040947 | -0.10271  |
| 9mo_SIGAE3_ | 0.03811351 | 0.21938129 | 4.87E-05 | 0.0044183 | -0.04622  |
| 9mo_SIGAE3_ | 0.0924264  | 0.54711026 | 6.46E-05 | 0.022258  | 0.019141  |
| 9mo_SIGAE3_ | 0.09598722 | 0.56859654 | 6.50E-05 | 0.023448  | -0.045608 |
| 9mo_SIGAE3_ | 0.01716286 | 0.09296314 | 3.33E-05 | 0.0049935 | 0.085504  |
| 9mo_SIGAE3_ | 0.03185536 | 0.18161906 | 4.22E-05 | 0.0040866 | -0.10071  |
| 9mo_SIGAE3_ | 0.01781654 | 0.09690751 | 3.34E-05 | 0.0049043 | 0.067421  |
| 9mo_SIGAE3_ | 0.02993639 | 0.17003982 | 4.07E-05 | 0.0040668 | -0.10597  |
| 9mo_SIGAE3_ | 0.03066846 | 0.17445718 | 4.11E-05 | 0.0040705 | -0.10475  |
| 9mo_SIGAE3_ | 0.05023372 | 0.29251575 | 5.76E-05 | 0.005992  | 0.048868  |
| 9mo_SIGAE3_ | 0.02381681 | 0.13311367 | 3.61E-05 | 0.0042401 | -0.073623 |
| 9mo_SIGAE3_ | 0.01673991 | 0.090411   | 3.31E-05 | 0.0050879 | 0.10435   |
| 9mo_SIGAE3_ | 0.05328747 | 0.31094235 | 5.89E-05 | 0.0067028 | 0.059084  |
| 9mo_SIGAE3_ | 0.09972244 | 0.5911352  | 6.53E-05 | 0.024558  | -0.10426  |
| 9mo_SIGAE3_ | 0.01962271 | 0.10780612 | 3.40E-05 | 0.0046667 | 0.017998  |
| 9mo_SIGAE3_ | 0.02800348 | 0.15837643 | 3.88E-05 | 0.0040827 | -0.10603  |
| 9mo_SIGAE3_ | 0.01855947 | 0.10139044 | 3.36E-05 | 0.0048202 | 0.050123  |
| 9mo_SIGAE3_ | 0.0229185  | 0.1276932  | 3.55E-05 | 0.0043197 | -0.056631 |
| 9mo_SIGAE3_ | 0.1081634  | 0.64206874 | 6.59E-05 | 0.025614  | -0.24573  |
| 9mo_SIGAE3_ | 0.06941383 | 0.40825027 | 6.17E-05 | 0.01192   | 0.11218   |
| 9mo_SIGAE3_ | 0.0134843  | 0.07076638 | 3.24E-05 | 0.0057681 | 0.23179   |
| 9mo_SIGAE3_ | 0.02212282 | 0.12289199 | 3.52E-05 | 0.0043661 | -0.046619 |
| 9mo_SIGAE3_ | 0.09871993 | 0.585086   | 6.52E-05 | 0.024275  | -0.094455 |
| 9mo_SIGAE3_ | 0.02332686 | 0.13015729 | 3.58E-05 | 0.0042778 | -0.065623 |
| 9mo_SIGAE3_ | 0.12436736 | 0.7398449  | 6.67E-05 | 0.024092  | -0.40152  |
| 9mo_SIGAE3_ | 0.10205615 | 0.605217   | 6.55E-05 | 0.025029  | -0.15246  |
| 9mo_SIGAE3_ | 0.01959013 | 0.10760953 | 3.40E-05 | 0.0046667 | 0.017998  |

|             |            |            |          |           |           |
|-------------|------------|------------|----------|-----------|-----------|
| 9mo_SIGAE3_ | 0.02860043 | 0.16197847 | 3.93E-05 | 0.004074  | -0.10664  |
| 9mo_SIGAE3_ | 0.02986546 | 0.16961183 | 4.07E-05 | 0.0040668 | -0.10597  |
| 9mo_SIGAE3_ | 0.01413552 | 0.07469589 | 3.25E-05 | 0.0056405 | 0.20898   |
| 9mo_SIGAE3_ | 0.09312595 | 0.55133134 | 6.47E-05 | 0.022469  | 0.010343  |
| 9mo_SIGAE3_ | 0.08437551 | 0.49853042 | 6.37E-05 | 0.018667  | 0.1136    |
| 9mo_SIGAE3_ | 0.01646026 | 0.08872356 | 3.31E-05 | 0.0050879 | 0.10435   |
| 9mo_SIGAE3_ | 0.1218443  | 0.7246205  | 6.66E-05 | 0.02435   | -0.38089  |
| 9mo_SIGAE3_ | 0.10669183 | 0.63318914 | 6.58E-05 | 0.02556   | -0.22263  |
| 9mo_SIGAE3_ | 0.08207114 | 0.48462567 | 6.35E-05 | 0.017633  | 0.12948   |
| 9mo_SIGAE3_ | 0.05577114 | 0.32592902 | 5.95E-05 | 0.007248  | 0.067199  |
| 9mo_SIGAE3_ | 0.01217258 | 0.06285133 | 3.23E-05 | 0.0060411 | 0.2791    |
| 9mo_SIGAE3_ | 0.10808503 | 0.64159584 | 6.59E-05 | 0.025614  | -0.23822  |
| 9mo_SIGAE3_ | 0.01596196 | 0.08571679 | 3.30E-05 | 0.0051875 | 0.12392   |
| 9mo_SIGAE3_ | 0.0916621  | 0.54249835 | 6.45E-05 | 0.021822  | 0.027741  |
| 9mo_SIGAE3_ | 0.04348848 | 0.25181437 | 5.33E-05 | 0.0049301 | 0.008455  |
| 9mo_SIGAE3_ | 0.05608333 | 0.32781282 | 5.97E-05 | 0.0073934 | 0.067199  |
| 9mo_SIGAE3_ | 0.05500377 | 0.32129866 | 5.94E-05 | 0.0071062 | 0.064127  |
| 9mo_SIGAE3_ | 0.0532608  | 0.31078145 | 5.89E-05 | 0.0067028 | 0.059084  |
| 9mo_SIGAE3_ | 0.05035251 | 0.29323256 | 5.78E-05 | 0.0061018 | 0.048868  |
| 9mo_SIGAE3_ | 0.11321449 | 0.67254746 | 6.62E-05 | 0.025403  | -0.30551  |
| 9mo_SIGAE3_ | 0.08430558 | 0.4981085  | 6.37E-05 | 0.018667  | 0.1176    |
| 9mo_SIGAE3_ | 0.08010139 | 0.47274002 | 6.32E-05 | 0.016594  | 0.13446   |
| 9mo_SIGAE3_ | 0.1112236  | 0.66053426 | 6.61E-05 | 0.025556  | -0.28058  |
| 9mo_SIGAE3_ | 0.08137929 | 0.48045096 | 6.34E-05 | 0.017373  | 0.13148   |
| 9mo_SIGAE3_ | 0.12566537 | 0.7476772  | 6.68E-05 | 0.023927  | -0.40938  |
| 9mo_SIGAE3_ | 0.12296528 | 0.7313846  | 6.67E-05 | 0.024217  | -0.38934  |
| 9mo_SIGAE3_ | 0.13193823 | 0.78552824 | 6.71E-05 | 0.023582  | -0.45284  |
| 9mo_SIGAE3_ | 0.09473015 | 0.56101125 | 6.49E-05 | 0.023073  | -0.017059 |
| 9mo_SIGAE3_ | 0.05446559 | 0.31805125 | 5.92E-05 | 0.0069681 | 0.062513  |
| 9mo_SIGAE3_ | 0.02142237 | 0.11866541 | 3.47E-05 | 0.0044724 | -0.0356   |
| 9mo_SIGAE3_ | 0.06350967 | 0.37262407 | 6.09E-05 | 0.0096122 | 0.089169  |
| 9mo_SIGAE3_ | 0.01376863 | 0.07248205 | 3.25E-05 | 0.0056405 | 0.20898   |
| 9mo_SIGAE3_ | 0.04751745 | 0.27612552 | 5.64E-05 | 0.0055867 | 0.035328  |
| 9mo_SIGAE3_ | 0.11110996 | 0.6598485  | 6.61E-05 | 0.025556  | -0.28058  |
| 9mo_SIGAE3_ | 0.0802979  | 0.47392574 | 6.32E-05 | 0.016854  | 0.13446   |
| 9mo_SIGAE3_ | 0.07626987 | 0.44962022 | 6.26E-05 | 0.0148    | 0.1354    |
| 9mo_SIGAE3_ | 0.11642151 | 0.6918989  | 6.64E-05 | 0.025054  | -0.33868  |
| 9mo_SIGAE3_ | 0.03019344 | 0.17159085 | 4.07E-05 | 0.0040668 | -0.10597  |
| 9mo_SIGAE3_ | 0.07592151 | 0.4475182  | 6.26E-05 | 0.0148    | 0.13453   |
| 9mo_SIGAE3_ | 0.01931094 | 0.10592485 | 3.40E-05 | 0.0046667 | 0.017998  |
| 9mo_SIGAE3_ | 0.03968215 | 0.22884664 | 4.98E-05 | 0.0045122 | -0.028892 |
| 9mo_SIGAE3_ | 0.11263251 | 0.66903573 | 6.62E-05 | 0.025448  | -0.29951  |
| 9mo_SIGAE3_ | 0.12107402 | 0.7199726  | 6.66E-05 | 0.02449   | -0.37656  |

|             |            |            |          |           |            |
|-------------|------------|------------|----------|-----------|------------|
| 9mo_SIGAE3_ | 0.03062128 | 0.17417246 | 4.11E-05 | 0.0040705 | -0.10475   |
| 9mo_SIGAE3_ | 0.04621343 | 0.26825693 | 5.54E-05 | 0.0053171 | 0.025099   |
| 9mo_SIGAE3_ | 0.06002234 | 0.3515812  | 6.04E-05 | 0.0085136 | 0.077363   |
| 9mo_SIGAE3_ | 0.12756602 | 0.7591459  | 6.69E-05 | 0.023794  | -0.4246    |
| 9mo_SIGAE3_ | 0.01873797 | 0.10246751 | 3.38E-05 | 0.004741  | 0.03364    |
| 9mo_SIGAE3_ | 0.11778962 | 0.7001542  | 6.64E-05 | 0.024917  | -0.34876   |
| 9mo_SIGAE3_ | 0.08209758 | 0.48478517 | 6.35E-05 | 0.017633  | 0.12948    |
| 9mo_SIGAE3_ | 0.01643142 | 0.08854955 | 3.30E-05 | 0.0051875 | 0.10435    |
| 9mo_SIGAE3_ | 0.01655478 | 0.08929395 | 3.31E-05 | 0.0050879 | 0.10435    |
| 9mo_SIGAE3_ | 0.01584578 | 0.08501577 | 3.28E-05 | 0.0052924 | 0.12392    |
| 9mo_SIGAE3_ | 0.02312413 | 0.128934   | 3.58E-05 | 0.0042778 | -0.065623  |
| 9mo_SIGAE3_ | 0.07431063 | 0.43779802 | 6.24E-05 | 0.014051  | 0.13074    |
| 9mo_SIGAE3_ | 0.09011304 | 0.53315115 | 6.44E-05 | 0.021137  | 0.05218    |
| 9mo_SIGAE3_ | 0.06107344 | 0.3579236  | 6.06E-05 | 0.008866  | 0.080421   |
| 9mo_SIGAE3_ | 0.03187109 | 0.18171395 | 4.22E-05 | 0.0040866 | -0.097962  |
| 9mo_SIGAE3_ | 0.04722866 | 0.27438295 | 5.61E-05 | 0.0054936 | 0.032113   |
| 9mo_SIGAE3_ | 0.02519748 | 0.14144476 | 3.68E-05 | 0.0041768 | -0.086782  |
| 9mo_SIGAE3_ | 0.05318589 | 0.3103294  | 5.89E-05 | 0.0067028 | 0.059084   |
| 9mo_SIGAE3_ | 0.02396202 | 0.13398987 | 3.61E-05 | 0.0042401 | -0.073623  |
| 9mo_SIGAE3_ | 0.027898   | 0.15773998 | 3.88E-05 | 0.0040827 | -0.10472   |
| 9mo_SIGAE3_ | 0.03273651 | 0.18693599 | 4.32E-05 | 0.0041142 | -0.094772  |
| 9mo_SIGAE3_ | 0.02067404 | 0.11414989 | 3.44E-05 | 0.0045325 | -0.01065   |
| 9mo_SIGAE3_ | 0.06909379 | 0.40631914 | 6.16E-05 | 0.011695  | 0.11218    |
| 9mo_SIGAE3_ | 0.04547534 | 0.26380327 | 5.50E-05 | 0.0052335 | 0.021279   |
| 9mo_SIGAE3_ | 0.08973054 | 0.53084314 | 6.44E-05 | 0.021137  | 0.059815   |
| 9mo_SIGAE3_ | 0.02117028 | 0.11714426 | 3.47E-05 | 0.0044724 | -0.023601  |
| 9mo_SIGAE3_ | 0.10272916 | 0.609278   | 6.55E-05 | 0.025127  | -0.16182   |
| 9mo_SIGAE3_ | 0.09560888 | 0.5663136  | 6.49E-05 | 0.023263  | -0.035993  |
| 9mo_SIGAE3_ | 0.05131785 | 0.29905745 | 5.81E-05 | 0.006215  | 0.053285   |
| 9mo_SIGAE3_ | 0.02812198 | 0.1590915  | 3.93E-05 | 0.004074  | -0.10603   |
| 9mo_SIGAE3_ | 0.13366789 | 0.79596514 | 6.71E-05 | 0.023546  | -0.46255   |
| 9mo_SIGAE3_ | 0.02718667 | 0.15344773 | 3.84E-05 | 0.0040947 | -0.10271   |
| 9mo_SIGAE3_ | 0.01760886 | 0.09565431 | 3.34E-05 | 0.0049043 | 0.067421   |
| 9mo_SIGAE3_ | 0.11450224 | 0.6803179  | 6.63E-05 | 0.025299  | -0.3171    |
| 9mo_SIGAE3_ | 0.05801671 | 0.339479   | 6.01E-05 | 0.0080116 | 0.073002   |
| 9mo_SIGAE3_ | 0.04902354 | 0.28521338 | 5.70E-05 | 0.0057827 | 0.04392    |
| 9mo_SIGAE3_ | 0.09398182 | 0.5564957  | 6.48E-05 | 0.022676  | -0.0077738 |
| 9mo_SIGAE3_ | 0.02045052 | 0.11280119 | 3.44E-05 | 0.0045325 | -0.01065   |
| 9mo_SIGAE3_ | 0.13546969 | 0.8068374  | 6.72E-05 | 0.023529  | -0.47171   |
| 9mo_SIGAE3_ | 0.12864438 | 0.76565284 | 6.69E-05 | 0.023723  | -0.43195   |
| 9mo_SIGAE3_ | 0.12332172 | 0.7335354  | 6.67E-05 | 0.024217  | -0.39346   |
| 9mo_SIGAE3_ | 0.02329418 | 0.1299601  | 3.58E-05 | 0.0042778 | -0.065623  |
| 9mo_SIGAE3_ | 0.02417897 | 0.13529898 | 3.61E-05 | 0.0042401 | -0.080664  |



|             |            |            |          |           |           |
|-------------|------------|------------|----------|-----------|-----------|
| 9mo_SIGAE3_ | 0.0172659  | 0.09358486 | 3.33E-05 | 0.0049935 | 0.085504  |
| 9mo_SIGAE3_ | 0.01170514 | 0.06003077 | 3.22E-05 | 0.0061869 | 0.30353   |
| 9mo_SIGAE3_ | 0.1070592  | 0.6354059  | 6.58E-05 | 0.025586  | -0.23052  |
| 9mo_SIGAE3_ | 0.01297516 | 0.0676942  | 3.23E-05 | 0.0059016 | 0.25518   |
| 9mo_SIGAE3_ | 0.0780147  | 0.46014872 | 6.29E-05 | 0.015819  | 0.13662   |
| 9mo_SIGAE3_ | 0.01797804 | 0.09788198 | 3.34E-05 | 0.0049043 | 0.067421  |
| 9mo_SIGAE3_ | 0.03763303 | 0.21648203 | 4.81E-05 | 0.0043756 | -0.05192  |
| 9mo_SIGAE3_ | 0.01145816 | 0.05854048 | 3.22E-05 | 0.0061869 | 0.30353   |
| 9mo_SIGAE3_ | 0.00940025 | 0.04612282 | 3.20E-05 | 0.0068348 | 0.4058    |
| 9mo_SIGAE3_ | 0.02114659 | 0.11700135 | 3.47E-05 | 0.0044724 | -0.023601 |
| 9mo_SIGAE3_ | 0.01656512 | 0.0893563  | 3.31E-05 | 0.0050879 | 0.10435   |
| 9mo_SIGAE3_ | 0.03180429 | 0.18131086 | 4.22E-05 | 0.0040866 | -0.10071  |
| 9mo_SIGAE3_ | 0.025477   | 0.14313145 | 3.72E-05 | 0.0041509 | -0.092011 |
| 9mo_SIGAE3_ | 0.02326554 | 0.12978731 | 3.58E-05 | 0.0042778 | -0.065623 |
| 9mo_SIGAE3_ | 0.0849274  | 0.5018606  | 6.38E-05 | 0.018923  | 0.10916   |
| 9mo_SIGAE3_ | 0.05166919 | 0.3011775  | 5.83E-05 | 0.0063316 | 0.053285  |
| 9mo_SIGAE3_ | 0.00807425 | 0.03812161 | 3.19E-05 | 0.0073923 | 0.48652   |
| 9mo_SIGAE3_ | 0.01105337 | 0.05609794 | 3.21E-05 | 0.006339  | 0.32844   |
| 9mo_SIGAE3_ | 0.04548297 | 0.2638493  | 5.50E-05 | 0.0052335 | 0.021279  |
| 9mo_SIGAE3_ | 0.11041606 | 0.65566146 | 6.60E-05 | 0.02558   | -0.27396  |
| 9mo_SIGAE3_ | 0.01578154 | 0.08462811 | 3.28E-05 | 0.0052924 | 0.1442    |
| 9mo_SIGAE3_ | 0.04692476 | 0.27254915 | 5.57E-05 | 0.0054037 | 0.032113  |
| 9mo_SIGAE3_ | 0.02399561 | 0.13419259 | 3.61E-05 | 0.0042401 | -0.073623 |
| 9mo_SIGAE3_ | 0.0994193  | 0.58930606 | 6.53E-05 | 0.02442   | -0.10426  |
| 9mo_SIGAE3_ | 0.00959644 | 0.04730666 | 3.20E-05 | 0.0068348 | 0.4058    |
| 9mo_SIGAE3_ | 0.10262308 | 0.6086379  | 6.55E-05 | 0.025127  | -0.16182  |
| 9mo_SIGAE3_ | 0.05950169 | 0.34843954 | 6.03E-05 | 0.0083426 | 0.077363  |
| 9mo_SIGAE3_ | 0.0168854  | 0.09128892 | 3.31E-05 | 0.0050879 | 0.10435   |
| 9mo_SIGAE3_ | 0.02597762 | 0.14615221 | 3.76E-05 | 0.0041286 | -0.096385 |
| 9mo_SIGAE3_ | 0.08899841 | 0.5264254  | 6.42E-05 | 0.020663  | 0.067165  |
| 9mo_SIGAE3_ | 0.01694374 | 0.09164092 | 3.31E-05 | 0.0050879 | 0.10435   |
| 9mo_SIGAE3_ | 0.02362657 | 0.13196577 | 3.58E-05 | 0.0042778 | -0.073623 |
| 9mo_SIGAE3_ | 0.1052147  | 0.624276   | 6.57E-05 | 0.025482  | -0.19772  |
| 9mo_SIGAE3_ | 0.09481698 | 0.5615352  | 6.49E-05 | 0.023073  | -0.017059 |
| 9mo_SIGAE3_ | 0.02705016 | 0.15262404 | 3.84E-05 | 0.0040947 | -0.10271  |
| 9mo_SIGAE3_ | 0.05730183 | 0.33516535 | 5.99E-05 | 0.0076952 | 0.071569  |
| 9mo_SIGAE3_ | 0.05066106 | 0.29509437 | 5.78E-05 | 0.0061018 | 0.051138  |
| 9mo_SIGAE3_ | 0.03141751 | 0.17897703 | 4.22E-05 | 0.0040866 | -0.10071  |
| 9mo_SIGAE3_ | 0.04460269 | 0.2585376  | 5.42E-05 | 0.0050757 | 0.017239  |
| 9mo_SIGAE3_ | 0.01633088 | 0.08794288 | 3.30E-05 | 0.0051875 | 0.12392   |
| 9mo_SIGAE3_ | 0.07276407 | 0.42846593 | 6.22E-05 | 0.01332   | 0.12737   |
| 9mo_SIGAE3_ | 0.03625966 | 0.20819499 | 4.65E-05 | 0.0042637 | -0.068307 |
| 9mo_SIGAE3_ | 0.10124899 | 0.60034657 | 6.54E-05 | 0.024923  | -0.13341  |

|             |            |            |          |           |            |
|-------------|------------|------------|----------|-----------|------------|
| 9mo_SIGAE3_ | 0.09383862 | 0.55563164 | 6.48E-05 | 0.022676  | -0.0077738 |
| 9mo_SIGAE3_ | 0.05198836 | 0.30310342 | 5.85E-05 | 0.0064518 | 0.055318   |
| 9mo_SIGAE3_ | 0.10328262 | 0.6126176  | 6.56E-05 | 0.025216  | -0.17104   |
| 9mo_SIGAE3_ | 0.02255263 | 0.12548548 | 3.55E-05 | 0.0043197 | -0.056631  |
| 9mo_SIGAE3_ | 0.11148806 | 0.66213    | 6.61E-05 | 0.025525  | -0.28705   |
| 9mo_SIGAE3_ | 0.03991921 | 0.23027708 | 5.03E-05 | 0.0045634 | -0.028892  |
| 9mo_SIGAE3_ | 0.03203874 | 0.18272558 | 4.27E-05 | 0.004099  | -0.097962  |
| 9mo_SIGAE3_ | 0.03000317 | 0.17044277 | 4.07E-05 | 0.0040668 | -0.10597   |
| 9mo_SIGAE3_ | 0.03657083 | 0.21007264 | 4.70E-05 | 0.0042982 | -0.062998  |
| 9mo_SIGAE3_ | 0.0355148  | 0.20370045 | 4.59E-05 | 0.0042319 | -0.073417  |
| 9mo_SIGAE3_ | 0.09261541 | 0.54825073 | 6.46E-05 | 0.022258  | 0.019141   |
| 9mo_SIGAE3_ | 0.0282348  | 0.15977226 | 3.93E-05 | 0.004074  | -0.10603   |
| 9mo_SIGAE3_ | 0.11215787 | 0.6661717  | 6.61E-05 | 0.025489  | -0.29336   |
| 9mo_SIGAE3_ | 0.10558186 | 0.6264914  | 6.57E-05 | 0.025482  | -0.20623   |
| 9mo_SIGAE3_ | 0.0199396  | 0.10971823 | 3.42E-05 | 0.0045972 | 0.0032259  |
| 9mo_SIGAE3_ | 0.01958944 | 0.10760537 | 3.40E-05 | 0.0046667 | 0.017998   |
| 9mo_SIGAE3_ | 0.0878455  | 0.51946867 | 6.41E-05 | 0.020177  | 0.080939   |
| 9mo_SIGAE3_ | 0.06779113 | 0.39845875 | 6.15E-05 | 0.011255  | 0.10734    |
| 9mo_SIGAE3_ | 0.02264229 | 0.1260265  | 3.55E-05 | 0.0043197 | -0.056631  |
| 9mo_SIGAE3_ | 0.00491325 | 0.01904788 | 3.18E-05 | 0.0084677 | 0.62647    |
| 9mo_SIGAE3_ | 0.09555998 | 0.5660185  | 6.49E-05 | 0.023263  | -0.035993  |
| 9mo_SIGAE3_ | 0.0331276  | 0.18929587 | 4.37E-05 | 0.0041322 | -0.091175  |
| 9mo_SIGAE3_ | 0.13931514 | 0.8300412  | 6.73E-05 | 0.023544  | -0.49075   |
| 9mo_SIGAE3_ | 0.02804913 | 0.15865187 | 3.88E-05 | 0.0040827 | -0.10603   |
| 9mo_SIGAE3_ | 0.03447215 | 0.19740899 | 4.48E-05 | 0.0041765 | -0.082901  |
| 9mo_SIGAE3_ | 0.0296368  | 0.16823202 | 4.02E-05 | 0.0040662 | -0.10661   |
| 9mo_SIGAE3_ | 0.04698224 | 0.27289605 | 5.61E-05 | 0.0054936 | 0.032113   |
| 9mo_SIGAE3_ | 0.02560285 | 0.14389081 | 3.72E-05 | 0.0041509 | -0.092011  |
| 9mo_SIGAE3_ | 0.07208957 | 0.42439592 | 6.21E-05 | 0.01308   | 0.12348    |
| 9mo_SIGAE3_ | 0.04453902 | 0.25815344 | 5.42E-05 | 0.0050757 | 0.012967   |
| 9mo_SIGAE3_ | 0.02034908 | 0.1121891  | 3.44E-05 | 0.0045325 | -0.01065   |
| 9mo_SIGAE3_ | 0.11662968 | 0.693155   | 6.64E-05 | 0.025054  | -0.33868   |
| 9mo_SIGAE3_ | 0.05153312 | 0.30035645 | 5.83E-05 | 0.0063316 | 0.053285   |
| 9mo_SIGAE3_ | 0.10040216 | 0.5952367  | 6.53E-05 | 0.024687  | -0.12375   |
| 9mo_SIGAE3_ | 0.07408876 | 0.43645924 | 6.24E-05 | 0.014051  | 0.13074    |
| 9mo_SIGAE3_ | 0.08435562 | 0.4984104  | 6.37E-05 | 0.018667  | 0.1136     |
| 9mo_SIGAE3_ | 0.02013883 | 0.11092041 | 3.42E-05 | 0.0045972 | 0.0032259  |
| 9mo_SIGAE3_ | 0.02902336 | 0.16453047 | 3.97E-05 | 0.0040686 | -0.10664   |
| 9mo_SIGAE3_ | 0.08584471 | 0.5073957  | 6.39E-05 | 0.01943   | 0.1043     |
| 9mo_SIGAE3_ | 0.03478401 | 0.19929078 | 4.54E-05 | 0.0042028 | -0.078293  |
| 9mo_SIGAE3_ | 0.11156791 | 0.6626119  | 6.61E-05 | 0.025525  | -0.28705   |
| 9mo_SIGAE3_ | 0.04586463 | 0.2661523  | 5.54E-05 | 0.0053171 | 0.025099   |
| 9mo_SIGAE3_ | 0.02147021 | 0.1189541  | 3.49E-05 | 0.0044169 | -0.0356    |

|             |            |            |          |           |           |
|-------------|------------|------------|----------|-----------|-----------|
| 9mo_SIGAE3_ | 0.09243851 | 0.5471833  | 6.46E-05 | 0.022258  | 0.019141  |
| 9mo_SIGAE3_ | 0.08771488 | 0.51868045 | 6.41E-05 | 0.020177  | 0.080939  |
| 9mo_SIGAE3_ | 0.03696932 | 0.21247712 | 4.76E-05 | 0.0043355 | -0.057524 |
| 9mo_SIGAE3_ | 0.05108744 | 0.29766718 | 5.81E-05 | 0.006215  | 0.051138  |
| 9mo_SIGAE3_ | 0.02713844 | 0.15315673 | 3.84E-05 | 0.0040947 | -0.10271  |
| 9mo_SIGAE3_ | 0.04681614 | 0.27189377 | 5.57E-05 | 0.0054037 | 0.032113  |
| 9mo_SIGAE3_ | 0.03503256 | 0.20079054 | 4.54E-05 | 0.0042028 | -0.078293 |
| 9mo_SIGAE3_ | 0.10559721 | 0.62658405 | 6.57E-05 | 0.025482  | -0.20623  |
| 9mo_SIGAE3_ | 0.07642469 | 0.45055446 | 6.27E-05 | 0.015053  | 0.1354    |
| 9mo_SIGAE3_ | 0.02879185 | 0.16313353 | 3.97E-05 | 0.0040686 | -0.10664  |
| 9mo_SIGAE3_ | 0.02225089 | 0.12366479 | 3.52E-05 | 0.0043661 | -0.046619 |
| 9mo_SIGAE3_ | 0.01522589 | 0.08127526 | 3.27E-05 | 0.0054028 | 0.16515   |
| 9mo_SIGAE3_ | 0.04415232 | 0.25582    | 5.38E-05 | 0.0050014 | 0.012967  |
| 9mo_SIGAE3_ | 0.04432234 | 0.25684595 | 5.42E-05 | 0.0050757 | 0.012967  |
| 9mo_SIGAE3_ | 0.03826889 | 0.2203189  | 4.87E-05 | 0.0044183 | -0.04622  |
| 9mo_SIGAE3_ | 0.05301317 | 0.30928722 | 5.87E-05 | 0.0065755 | 0.059084  |
| 9mo_SIGAE3_ | 0.07807481 | 0.46051142 | 6.29E-05 | 0.015819  | 0.13662   |
| 9mo_SIGAE3_ | 0.08545347 | 0.5050349  | 6.39E-05 | 0.019177  | 0.1043    |
| 9mo_SIGAE3_ | 0.0398287  | 0.22973093 | 5.03E-05 | 0.0045634 | -0.028892 |
| 9mo_SIGAE3_ | 0.04943458 | 0.2876937  | 5.73E-05 | 0.0058857 | 0.04392   |
| 9mo_SIGAE3_ | 0.07636353 | 0.4501854  | 6.27E-05 | 0.015053  | 0.1354    |
| 9mo_SIGAE3_ | 0.05415843 | 0.31619784 | 5.92E-05 | 0.0069681 | 0.062513  |
| 9mo_SIGAE3_ | 0.11085381 | 0.6583029  | 6.61E-05 | 0.025556  | -0.27396  |
| 9mo_SIGAE3_ | 0.0694906  | 0.40871355 | 6.17E-05 | 0.01192   | 0.11455   |
| 9mo_SIGAE3_ | 0.05473543 | 0.3196795  | 5.94E-05 | 0.0071062 | 0.064127  |
| 9mo_SIGAE3_ | 0.02566329 | 0.1442555  | 3.72E-05 | 0.0041509 | -0.092011 |
| 9mo_SIGAE3_ | 0.10048121 | 0.5957137  | 6.53E-05 | 0.024687  | -0.12375  |
| 9mo_SIGAE3_ | 0.03022679 | 0.17179208 | 4.07E-05 | 0.0040668 | -0.10475  |
| 9mo_SIGAE3_ | 0.02254489 | 0.12543876 | 3.55E-05 | 0.0043197 | -0.056631 |
| 9mo_SIGAE3_ | 0.05156141 | 0.3005272  | 5.83E-05 | 0.0063316 | 0.053285  |
| 9mo_SIGAE3_ | 0.06462538 | 0.37935638 | 6.10E-05 | 0.010005  | 0.093303  |
| 9mo_SIGAE3_ | 0.08068208 | 0.47624397 | 6.32E-05 | 0.016854  | 0.13314   |
| 9mo_SIGAE3_ | 0.02930031 | 0.16620162 | 4.02E-05 | 0.0040662 | -0.10661  |
| 9mo_SIGAE3_ | 0.05435377 | 0.31737655 | 5.92E-05 | 0.0069681 | 0.062513  |
| 9mo_SIGAE3_ | 0.01857106 | 0.10146035 | 3.36E-05 | 0.0048202 | 0.050123  |
| 9mo_SIGAE3_ | 0.03091245 | 0.17592943 | 4.16E-05 | 0.0040771 | -0.10299  |
| 9mo_SIGAE3_ | 0.01608951 | 0.08648646 | 3.30E-05 | 0.0051875 | 0.12392   |
| 9mo_SIGAE3_ | 0.00640335 | 0.02803927 | 3.18E-05 | 0.008015  | 0.56984   |
| 9mo_SIGAE3_ | 0.1275913  | 0.75929844 | 6.69E-05 | 0.023794  | -0.4246   |
| 9mo_SIGAE3_ | 0.02634159 | 0.14834844 | 3.76E-05 | 0.0041286 | -0.099939 |
| 9mo_SIGAE3_ | 0.06990323 | 0.41120338 | 6.18E-05 | 0.012147  | 0.11455   |
| 9mo_SIGAE3_ | 0.07972682 | 0.4704798  | 6.32E-05 | 0.016594  | 0.13545   |
| 9mo_SIGAE3_ | 0.01907421 | 0.1044964  | 3.38E-05 | 0.004741  | 0.03364   |

|             |            |            |          |           |           |
|-------------|------------|------------|----------|-----------|-----------|
| 9mo_SIGAE3_ | 0.08147534 | 0.48103055 | 6.34E-05 | 0.017373  | 0.13148   |
| 9mo_SIGAE3_ | 0.02151346 | 0.11921507 | 3.49E-05 | 0.0044169 | -0.0356   |
| 9mo_SIGAE3_ | 0.02826135 | 0.15993243 | 3.93E-05 | 0.004074  | -0.10603  |
| 9mo_SIGAE3_ | 0.0192309  | 0.1054419  | 3.40E-05 | 0.0046667 | 0.017998  |
| 9mo_SIGAE3_ | 0.01060336 | 0.05338249 | 3.21E-05 | 0.0064976 | 0.35381   |
| 9mo_SIGAE3_ | 0.02859076 | 0.16192016 | 3.93E-05 | 0.004074  | -0.10664  |
| 9mo_SIGAE3_ | 0.0228111  | 0.12704514 | 3.55E-05 | 0.0043197 | -0.056631 |
| 9mo_SIGAE3_ | 0.01925728 | 0.10560107 | 3.40E-05 | 0.0046667 | 0.017998  |
| 9mo_SIGAE3_ | 0.07813892 | 0.46089825 | 6.29E-05 | 0.015819  | 0.13662   |
| 9mo_SIGAE3_ | 0.02766576 | 0.15633859 | 3.88E-05 | 0.0040827 | -0.10472  |
| 9mo_SIGAE3_ | 0.07112271 | 0.4185618  | 6.20E-05 | 0.012608  | 0.12136   |
| 9mo_SIGAE3_ | 0.01709912 | 0.0925785  | 3.33E-05 | 0.0049935 | 0.085504  |
| 9mo_SIGAE3_ | 0.0378229  | 0.21762775 | 4.81E-05 | 0.0043756 | -0.05192  |
| 9mo_SIGAE3_ | 0.03064968 | 0.17434387 | 4.11E-05 | 0.0040705 | -0.10475  |
| 9mo_SIGAE3_ | 0.02820334 | 0.15958244 | 3.93E-05 | 0.004074  | -0.10603  |
| 9mo_SIGAE3_ | 0.1212891  | 0.72127044 | 6.66E-05 | 0.024419  | -0.37656  |
| 9mo_SIGAE3_ | 0.0259109  | 0.1457496  | 3.76E-05 | 0.0041286 | -0.096385 |
| 9mo_SIGAE3_ | 0.07527429 | 0.44361284 | 6.26E-05 | 0.014549  | 0.13345   |
| 9mo_SIGAE3_ | 0.09317066 | 0.5516011  | 6.47E-05 | 0.022469  | 0.010343  |
| 9mo_SIGAE3_ | 0.03043129 | 0.17302606 | 4.11E-05 | 0.0040705 | -0.10475  |
| 9mo_SIGAE3_ | 0.0904332  | 0.53508306 | 6.44E-05 | 0.021369  | 0.044278  |
| 9mo_SIGAE3_ | 0.07497715 | 0.44181985 | 6.25E-05 | 0.014299  | 0.13345   |
| 9mo_SIGAE3_ | 0.03530176 | 0.20241491 | 4.59E-05 | 0.0042319 | -0.073417 |
| 9mo_SIGAE3_ | 0.08149479 | 0.4811479  | 6.34E-05 | 0.017373  | 0.13148   |
| 9mo_SIGAE3_ | 0.03055342 | 0.17376299 | 4.11E-05 | 0.0040705 | -0.10475  |
| 9mo_SIGAE3_ | 0.07758047 | 0.45752856 | 6.29E-05 | 0.015562  | 0.13646   |
| 9mo_SIGAE3_ | 0.11665908 | 0.69333243 | 6.64E-05 | 0.025054  | -0.33868  |
| 9mo_SIGAE3_ | 0.07646748 | 0.45081264 | 6.27E-05 | 0.015053  | 0.1354    |
| 9mo_SIGAE3_ | 0.06914088 | 0.40660328 | 6.17E-05 | 0.01192   | 0.11218   |
| 9mo_SIGAE3_ | 0.04833445 | 0.28105536 | 5.67E-05 | 0.0056831 | 0.038361  |
| 9mo_SIGAE3_ | 0.03557791 | 0.20408127 | 4.59E-05 | 0.0042319 | -0.073417 |
| 9mo_SIGAE3_ | 0.03535907 | 0.20276076 | 4.59E-05 | 0.0042319 | -0.073417 |
| 9mo_SIGAE3_ | 0.12258422 | 0.7290853  | 6.67E-05 | 0.024282  | -0.38934  |
| 9mo_SIGAE3_ | 0.13588564 | 0.8093473  | 6.72E-05 | 0.023527  | -0.47464  |
| 9mo_SIGAE3_ | 0.02290715 | 0.12762474 | 3.55E-05 | 0.0043197 | -0.056631 |
| 9mo_SIGAE3_ | 0.15815546 | 0.9437254  | 6.78E-05 | 0.023701  | -0.52688  |
| 9mo_SIGAE3_ | 0.01679678 | 0.09075416 | 3.31E-05 | 0.0050879 | 0.10435   |
| 9mo_SIGAE3_ | 0.01592534 | 0.08549581 | 3.30E-05 | 0.0051875 | 0.12392   |
| 9mo_SIGAE3_ | 0.07035575 | 0.41393393 | 6.19E-05 | 0.012376  | 0.11689   |
| 9mo_SIGAE3_ | 0.02879539 | 0.16315487 | 3.97E-05 | 0.0040686 | -0.10664  |
| 9mo_SIGAE3_ | 0.07236863 | 0.4260798  | 6.21E-05 | 0.01308   | 0.12548   |
| 9mo_SIGAE3_ | 0.08220801 | 0.48545152 | 6.35E-05 | 0.017633  | 0.1271    |
| 9mo_SIGAE3_ | 0.02931189 | 0.16627148 | 4.02E-05 | 0.0040662 | -0.10661  |

|             |            |            |          |           |            |
|-------------|------------|------------|----------|-----------|------------|
| 9mo_SIGAE3_ | 0.09506663 | 0.5630416  | 6.49E-05 | 0.023073  | -0.026471  |
| 9mo_SIGAE3_ | 0.02021184 | 0.11136094 | 3.42E-05 | 0.0045972 | 0.0032259  |
| 9mo_SIGAE3_ | 0.08782934 | 0.5193711  | 6.41E-05 | 0.020177  | 0.080939   |
| 9mo_SIGAE3_ | 0.02680543 | 0.1511473  | 3.80E-05 | 0.0041099 | -0.099939  |
| 9mo_SIGAE3_ | 0.0229261  | 0.12773909 | 3.55E-05 | 0.0043197 | -0.056631  |
| 9mo_SIGAE3_ | 0.02370665 | 0.13244894 | 3.61E-05 | 0.0042401 | -0.073623  |
| 9mo_SIGAE3_ | 0.01024514 | 0.05122099 | 3.20E-05 | 0.0066628 | 0.37961    |
| 9mo_SIGAE3_ | 0.08432203 | 0.49820772 | 6.37E-05 | 0.018667  | 0.1176     |
| 9mo_SIGAE3_ | 0.0772789  | 0.45570883 | 6.28E-05 | 0.015307  | 0.13646    |
| 9mo_SIGAE3_ | 0.04166206 | 0.24079357 | 5.19E-05 | 0.0047337 | -0.011944  |
| 9mo_SIGAE3_ | 0.09382088 | 0.55552465 | 6.48E-05 | 0.022676  | -0.0077738 |
| 9mo_SIGAE3_ | 0.08465148 | 0.5001956  | 6.38E-05 | 0.018923  | 0.1136     |
| 9mo_SIGAE3_ | 0.02682748 | 0.15128033 | 3.80E-05 | 0.0041099 | -0.099939  |
| 9mo_SIGAE3_ | 0.02344885 | 0.1308934  | 3.58E-05 | 0.0042778 | -0.065623  |
| 9mo_SIGAE3_ | 0.08172178 | 0.4825176  | 6.34E-05 | 0.017373  | 0.12948    |
| 9mo_SIGAE3_ | 0.05299854 | 0.30919895 | 5.87E-05 | 0.0065755 | 0.059084   |
| 9mo_SIGAE3_ | 0.01196343 | 0.0615893  | 3.22E-05 | 0.0061869 | 0.30353    |
| 9mo_SIGAE3_ | 0.02534967 | 0.1423631  | 3.72E-05 | 0.0041509 | -0.092011  |
| 9mo_SIGAE3_ | 0.02206616 | 0.12255006 | 3.52E-05 | 0.0043661 | -0.046619  |
| 9mo_SIGAE3_ | 0.10641426 | 0.63151425 | 6.58E-05 | 0.02556   | -0.21453   |
| 9mo_SIGAE3_ | 0.04837695 | 0.2813118  | 5.67E-05 | 0.0056831 | 0.038361   |
| 9mo_SIGAE3_ | 0.08267402 | 0.4882635  | 6.35E-05 | 0.017892  | 0.1271     |
| 9mo_SIGAE3_ | 0.1345275  | 0.80115217 | 6.72E-05 | 0.023533  | -0.46567   |
| 9mo_SIGAE3_ | 0.07606138 | 0.44836217 | 6.26E-05 | 0.0148    | 0.1354     |
| 9mo_SIGAE3_ | 0.12760055 | 0.7593543  | 6.69E-05 | 0.023794  | -0.4246    |
| 9mo_SIGAE3_ | 0.03174627 | 0.18096077 | 4.22E-05 | 0.0040866 | -0.10071   |
| 9mo_SIGAE3_ | 0.02403465 | 0.13442813 | 3.61E-05 | 0.0042401 | -0.073623  |
| 9mo_SIGAE3_ | 0.05207659 | 0.3036358  | 5.85E-05 | 0.0064518 | 0.055318   |
| 9mo_SIGAE3_ | 0.02066507 | 0.11409576 | 3.44E-05 | 0.0045325 | -0.01065   |
| 9mo_SIGAE3_ | 0.08002441 | 0.47227553 | 6.32E-05 | 0.016594  | 0.13446    |
| 9mo_SIGAE3_ | 0.05828638 | 0.34110624 | 6.01E-05 | 0.0080116 | 0.073002   |
| 9mo_SIGAE3_ | 0.0678778  | 0.39898172 | 6.15E-05 | 0.011255  | 0.10734    |
| 9mo_SIGAE3_ | 0.03250412 | 0.18553372 | 4.27E-05 | 0.004099  | -0.094772  |
| 9mo_SIGAE3_ | 0.01065905 | 0.05371855 | 3.21E-05 | 0.0064976 | 0.35381    |
| 9mo_SIGAE3_ | 0.1369513  | 0.81577754 | 6.73E-05 | 0.023528  | -0.48029   |
| 9mo_SIGAE3_ | 0.09450196 | 0.5596343  | 6.48E-05 | 0.022877  | -0.017059  |
| 9mo_SIGAE3_ | 0.02196539 | 0.12194206 | 3.49E-05 | 0.0044169 | -0.046619  |
| 9mo_SIGAE3_ | 0.02740999 | 0.15479529 | 3.84E-05 | 0.0040947 | -0.10271   |
| 9mo_SIGAE3_ | 0.04990896 | 0.2905561  | 5.76E-05 | 0.005992  | 0.046466   |
| 9mo_SIGAE3_ | 0.03190411 | 0.1819132  | 4.22E-05 | 0.0040866 | -0.097962  |
| 9mo_SIGAE3_ | 0.03306965 | 0.18894617 | 4.32E-05 | 0.0041142 | -0.091175  |
| 9mo_SIGAE3_ | 0.01509559 | 0.08048905 | 3.27E-05 | 0.0054028 | 0.16515    |
| 9mo_SIGAE3_ | 0.05296825 | 0.30901617 | 5.87E-05 | 0.0065755 | 0.059084   |

|             |            |            |          |           |            |
|-------------|------------|------------|----------|-----------|------------|
| 9mo_SIGAE3_ | 0.08208173 | 0.48468953 | 6.35E-05 | 0.017633  | 0.12948    |
| 9mo_SIGAE3_ | 0.08261372 | 0.48789963 | 6.35E-05 | 0.017892  | 0.1271     |
| 9mo_SIGAE3_ | 0.02196369 | 0.12193179 | 3.49E-05 | 0.0044169 | -0.046619  |
| 9mo_SIGAE3_ | 0.05907662 | 0.3458746  | 6.02E-05 | 0.0081753 | 0.075889   |
| 9mo_SIGAE3_ | 0.12209663 | 0.7261431  | 6.66E-05 | 0.02435   | -0.38515   |
| 9mo_SIGAE3_ | 0.01128702 | 0.05750776 | 3.21E-05 | 0.006339  | 0.32844    |
| 9mo_SIGAE3_ | 0.04981992 | 0.2900189  | 5.76E-05 | 0.005992  | 0.046466   |
| 9mo_SIGAE3_ | 0.08732127 | 0.5163054  | 6.41E-05 | 0.01993   | 0.087329   |
| 9mo_SIGAE3_ | 0.03209334 | 0.18305503 | 4.27E-05 | 0.004099  | -0.097962  |
| 9mo_SIGAE3_ | 0.02022935 | 0.11146663 | 3.42E-05 | 0.0045972 | 0.0032259  |
| 9mo_SIGAE3_ | 0.11997873 | 0.71336347 | 6.65E-05 | 0.024632  | -0.36766   |
| 9mo_SIGAE3_ | 0.01853586 | 0.10124795 | 3.36E-05 | 0.0048202 | 0.050123   |
| 9mo_SIGAE3_ | 0.03694597 | 0.21233623 | 4.70E-05 | 0.0042982 | -0.057524  |
| 9mo_SIGAE3_ | 0.11827412 | 0.70307773 | 6.65E-05 | 0.024847  | -0.35363   |
| 9mo_SIGAE3_ | 0.04542339 | 0.26348978 | 5.50E-05 | 0.0052335 | 0.021279   |
| 9mo_SIGAE3_ | 0.11592646 | 0.68891174 | 6.63E-05 | 0.025119  | -0.33347   |
| 9mo_SIGAE3_ | 0.05920186 | 0.34663036 | 6.03E-05 | 0.0083426 | 0.075889   |
| 9mo_SIGAE3_ | 0.02270433 | 0.12640089 | 3.55E-05 | 0.0043197 | -0.056631  |
| 9mo_SIGAE3_ | 0.07088623 | 0.41713485 | 6.20E-05 | 0.012608  | 0.11916    |
| 9mo_SIGAE3_ | 0.02371883 | 0.13252245 | 3.61E-05 | 0.0042401 | -0.073623  |
| 9mo_SIGAE3_ | 0.03485176 | 0.19969963 | 4.54E-05 | 0.0042028 | -0.078293  |
| 9mo_SIGAE3_ | 0.05238703 | 0.305509   | 5.85E-05 | 0.0064518 | 0.057248   |
| 9mo_SIGAE3_ | 0.08239912 | 0.48660472 | 6.35E-05 | 0.017633  | 0.1271     |
| 9mo_SIGAE3_ | 0.0502321  | 0.29250598 | 5.76E-05 | 0.005992  | 0.048868   |
| 9mo_SIGAE3_ | 0.09012055 | 0.5331965  | 6.44E-05 | 0.021137  | 0.05218    |
| 9mo_SIGAE3_ | 0.0357027  | 0.20483425 | 4.59E-05 | 0.0042319 | -0.073417  |
| 9mo_SIGAE3_ | 0.0734859  | 0.4328215  | 6.23E-05 | 0.013561  | 0.12913    |
| 9mo_SIGAE3_ | 0.11506305 | 0.6837018  | 6.63E-05 | 0.025242  | -0.32268   |
| 9mo_SIGAE3_ | 0.02267551 | 0.12622696 | 3.55E-05 | 0.0043197 | -0.056631  |
| 9mo_SIGAE3_ | 0.07981818 | 0.4710311  | 6.32E-05 | 0.016594  | 0.13545    |
| 9mo_SIGAE3_ | 0.01265995 | 0.06579216 | 3.23E-05 | 0.0059016 | 0.25518    |
| 9mo_SIGAE3_ | 0.1019844  | 0.6047841  | 6.55E-05 | 0.025029  | -0.14299   |
| 9mo_SIGAE3_ | 0.06655274 | 0.39098623 | 6.13E-05 | 0.010826  | 0.10013    |
| 9mo_SIGAE3_ | 0.10146701 | 0.60166204 | 6.54E-05 | 0.024923  | -0.13341   |
| 9mo_SIGAE3_ | 0.11022785 | 0.6545258  | 6.60E-05 | 0.02558   | -0.26716   |
| 9mo_SIGAE3_ | 0.09390166 | 0.5560121  | 6.48E-05 | 0.022676  | -0.0077738 |
| 9mo_SIGAE3_ | 0.09405694 | 0.5569491  | 6.48E-05 | 0.022877  | -0.0077738 |
| 9mo_SIGAE3_ | 0.03137177 | 0.17870101 | 4.16E-05 | 0.0040771 | -0.10071   |
| 9mo_SIGAE3_ | 0.07409556 | 0.43650025 | 6.24E-05 | 0.014051  | 0.13074    |
| 9mo_SIGAE3_ | 0.12045866 | 0.7162594  | 6.66E-05 | 0.024561  | -0.37215   |
| 9mo_SIGAE3_ | 0.09428056 | 0.5582984  | 6.48E-05 | 0.022877  | -0.0077738 |
| 9mo_SIGAE3_ | 0.14052    | 0.83731145 | 6.74E-05 | 0.023558  | -0.49553   |
| 9mo_SIGAE3_ | 0.00878099 | 0.04238613 | 3.19E-05 | 0.0070136 | 0.43237    |

|             |            |            |          |           |           |
|-------------|------------|------------|----------|-----------|-----------|
| 9mo_SIGAE3_ | 0.01813765 | 0.09884509 | 3.36E-05 | 0.0048202 | 0.050123  |
| 9mo_SIGAE3_ | 0.12834369 | 0.7638384  | 6.69E-05 | 0.023757  | -0.4283   |
| 9mo_SIGAE3_ | 0.04525007 | 0.262444   | 5.46E-05 | 0.0051531 | 0.021279  |
| 9mo_SIGAE3_ | 0.0472621  | 0.2745847  | 5.61E-05 | 0.0054936 | 0.032113  |
| 9mo_SIGAE3_ | 0.10863058 | 0.6448877  | 6.59E-05 | 0.025616  | -0.24573  |
| 9mo_SIGAE3_ | 0.05163712 | 0.300984   | 5.83E-05 | 0.0063316 | 0.053285  |
| 9mo_SIGAE3_ | 0.08262989 | 0.4879972  | 6.35E-05 | 0.017892  | 0.1271    |
| 9mo_SIGAE3_ | 0.07696503 | 0.45381495 | 6.28E-05 | 0.015307  | 0.13605   |
| 9mo_SIGAE3_ | 0.05205429 | 0.30350128 | 5.85E-05 | 0.0064518 | 0.055318  |
| 9mo_SIGAE3_ | 0.01560184 | 0.08354379 | 3.28E-05 | 0.0052924 | 0.1442    |
| 9mo_SIGAE3_ | 0.00530861 | 0.0214335  | 3.18E-05 | 0.0084677 | 0.62647   |
| 9mo_SIGAE3_ | 0.03770128 | 0.21689385 | 4.81E-05 | 0.0043756 | -0.05192  |
| 9mo_SIGAE3_ | 0.02444647 | 0.13691314 | 3.64E-05 | 0.0042065 | -0.080664 |
| 9mo_SIGAE3_ | 0.09353866 | 0.55382174 | 6.48E-05 | 0.022676  | 0.0013661 |
| 9mo_SIGAE3_ | 0.02611785 | 0.14699836 | 3.76E-05 | 0.0041286 | -0.096385 |
| 9mo_SIGAE3_ | 0.01621346 | 0.08723437 | 3.30E-05 | 0.0051875 | 0.12392   |
| 9mo_SIGAE3_ | 0.04621677 | 0.2682771  | 5.54E-05 | 0.0053171 | 0.025099  |
| 9mo_SIGAE3_ | 0.01098671 | 0.05569567 | 3.21E-05 | 0.006339  | 0.32844   |
| 9mo_SIGAE3_ | 0.09009577 | 0.533047   | 6.44E-05 | 0.021137  | 0.05218   |
| 9mo_SIGAE3_ | 0.02254916 | 0.12546457 | 3.55E-05 | 0.0043197 | -0.056631 |
| 9mo_SIGAE3_ | 0.01815243 | 0.09893428 | 3.36E-05 | 0.0048202 | 0.050123  |
| 9mo_SIGAE3_ | 0.03527544 | 0.20225613 | 4.54E-05 | 0.0042028 | -0.073417 |
| 9mo_SIGAE3_ | 0.090257   | 0.5340199  | 6.44E-05 | 0.021369  | 0.05218   |
| 9mo_SIGAE3_ | 0.09145659 | 0.54125834 | 6.45E-05 | 0.021822  | 0.036126  |
| 9mo_SIGAE3_ | 0.10010782 | 0.5934606  | 6.53E-05 | 0.024558  | -0.11403  |
| 9mo_SIGAE3_ | 0.09000926 | 0.53252494 | 6.44E-05 | 0.021137  | 0.05218   |
| 9mo_SIGAE3_ | 0.0184769  | 0.10089218 | 3.36E-05 | 0.0048202 | 0.050123  |
| 9mo_SIGAE3_ | 0.0463087  | 0.26883185 | 5.54E-05 | 0.0053171 | 0.028707  |
| 9mo_SIGAE3_ | 0.08034841 | 0.47423056 | 6.32E-05 | 0.016854  | 0.13446   |
| 9mo_SIGAE3_ | 0.08753783 | 0.51761216 | 6.41E-05 | 0.020177  | 0.087329  |
| 9mo_SIGAE3_ | 0.07564476 | 0.4458483  | 6.26E-05 | 0.014549  | 0.13453   |
| 9mo_SIGAE3_ | 0.08557019 | 0.5057392  | 6.39E-05 | 0.019177  | 0.1043    |
| 9mo_SIGAE3_ | 0.05726393 | 0.33493668 | 5.99E-05 | 0.0076952 | 0.070131  |
| 9mo_SIGAE3_ | 0.04698185 | 0.2728937  | 5.61E-05 | 0.0054936 | 0.032113  |
| 9mo_SIGAE3_ | 0.02093083 | 0.1156994  | 3.47E-05 | 0.0044724 | -0.023601 |
| 9mo_SIGAE3_ | 0.06197031 | 0.3633354  | 6.07E-05 | 0.0092324 | 0.083692  |
| 9mo_SIGAE3_ | 0.11996322 | 0.71326995 | 6.65E-05 | 0.024632  | -0.36766  |
| 9mo_SIGAE3_ | 0.1003962  | 0.5952007  | 6.53E-05 | 0.024687  | -0.12375  |
| 9mo_SIGAE3_ | 0.08685929 | 0.51351774 | 6.41E-05 | 0.01993   | 0.093363  |
| 9mo_SIGAE3_ | 0.01755847 | 0.0953503  | 3.34E-05 | 0.0049043 | 0.067421  |
| 9mo_SIGAE3_ | 0.0151333  | 0.08071661 | 3.27E-05 | 0.0054028 | 0.16515   |
| 9mo_SIGAE3_ | 0.1014245  | 0.60140556 | 6.54E-05 | 0.024923  | -0.13341  |
| 9mo_SIGAE3_ | 0.02526681 | 0.14186314 | 3.68E-05 | 0.0041768 | -0.092011 |

|             |            |            |          |           |            |
|-------------|------------|------------|----------|-----------|------------|
| 9mo_SIGAE3_ | 0.12327183 | 0.7332344  | 6.67E-05 | 0.024217  | -0.39346   |
| 9mo_SIGAE3_ | 0.02333819 | 0.13022564 | 3.58E-05 | 0.0042778 | -0.065623  |
| 9mo_SIGAE3_ | 0.06158523 | 0.3610118  | 6.07E-05 | 0.0090475 | 0.082025   |
| 9mo_SIGAE3_ | 0.13267314 | 0.78996277 | 6.71E-05 | 0.023568  | -0.45613   |
| 9mo_SIGAE3_ | 0.02295539 | 0.12791581 | 3.55E-05 | 0.0043197 | -0.056631  |
| 9mo_SIGAE3_ | 0.10101157 | 0.59891397 | 6.54E-05 | 0.024809  | -0.13341   |
| 9mo_SIGAE3_ | 0.04243352 | 0.2454486  | 5.24E-05 | 0.0047963 | -0.0013165 |
| 9mo_SIGAE3_ | 0.01363595 | 0.07168143 | 3.24E-05 | 0.0057681 | 0.20898    |
| 9mo_SIGAE3_ | 0.00838564 | 0.04000061 | 3.19E-05 | 0.0071994 | 0.45929    |
| 9mo_SIGAE3_ | 0.01832604 | 0.0999819  | 3.36E-05 | 0.0048202 | 0.050123   |
| 9mo_SIGAE3_ | 0.02854187 | 0.16162515 | 3.93E-05 | 0.004074  | -0.10603   |
| 9mo_SIGAE3_ | 0.03149628 | 0.17945231 | 4.22E-05 | 0.0040866 | -0.10071   |
| 9mo_SIGAE3_ | 0.11122023 | 0.6605139  | 6.61E-05 | 0.025556  | -0.28058   |
| 9mo_SIGAE3_ | 0.02469308 | 0.13840117 | 3.64E-05 | 0.0042065 | -0.086782  |
| 9mo_SIGAE3_ | 0.0301202  | 0.17114894 | 4.07E-05 | 0.0040668 | -0.10597   |
| 9mo_SIGAE3_ | 0.01489568 | 0.07928278 | 3.27E-05 | 0.0054028 | 0.16515    |
| 9mo_SIGAE3_ | 0.08178727 | 0.48291278 | 6.34E-05 | 0.017373  | 0.12948    |
| 9mo_SIGAE3_ | 0.01747652 | 0.09485581 | 3.33E-05 | 0.0049935 | 0.085504   |
| 9mo_SIGAE3_ | 0.01077988 | 0.05444763 | 3.21E-05 | 0.0064976 | 0.35381    |
| 9mo_SIGAE3_ | 0.0091417  | 0.04456272 | 3.19E-05 | 0.0070136 | 0.43237    |
| 9mo_SIGAE3_ | 0.09696814 | 0.57451546 | 6.51E-05 | 0.023799  | -0.055297  |
| 9mo_SIGAE3_ | 0.0207083  | 0.11435665 | 3.44E-05 | 0.0045325 | -0.01065   |
| 9mo_SIGAE3_ | 0.1390594  | 0.828498   | 6.73E-05 | 0.023544  | -0.49075   |
| 9mo_SIGAE3_ | 0.03270294 | 0.18673342 | 4.32E-05 | 0.0041142 | -0.094772  |
| 9mo_SIGAE3_ | 0.02345007 | 0.13090077 | 3.58E-05 | 0.0042778 | -0.065623  |
| 9mo_SIGAE3_ | 0.10926885 | 0.6487391  | 6.60E-05 | 0.025611  | -0.2602    |
| 9mo_SIGAE3_ | 0.01490244 | 0.07932355 | 3.27E-05 | 0.0054028 | 0.16515    |
| 9mo_SIGAE3_ | 0.1311954  | 0.7810459  | 6.70E-05 | 0.023599  | -0.44608   |
| 9mo_SIGAE3_ | 0.05659362 | 0.33089197 | 5.98E-05 | 0.0075425 | 0.068678   |
| 9mo_SIGAE3_ | 0.07825188 | 0.46157992 | 6.29E-05 | 0.015819  | 0.13662    |
| 9mo_SIGAE3_ | 0.01352848 | 0.07103294 | 3.24E-05 | 0.0057681 | 0.23179    |
| 9mo_SIGAE3_ | 0.07849458 | 0.46304435 | 6.29E-05 | 0.015819  | 0.13651    |
| 9mo_SIGAE3_ | 0.13025768 | 0.77538764 | 6.70E-05 | 0.02364   | -0.44263   |
| 9mo_SIGAE3_ | 0.02255474 | 0.12549822 | 3.55E-05 | 0.0043197 | -0.056631  |
| 9mo_SIGAE3_ | 0.07675228 | 0.4525312  | 6.27E-05 | 0.015053  | 0.13605    |
| 9mo_SIGAE3_ | 0.01124078 | 0.05722878 | 3.21E-05 | 0.006339  | 0.32844    |
| 9mo_SIGAE3_ | 0.01267895 | 0.06590682 | 3.23E-05 | 0.0059016 | 0.25518    |
| 9mo_SIGAE3_ | 0.01594103 | 0.08559049 | 3.30E-05 | 0.0051875 | 0.12392    |
| 9mo_SIGAE3_ | 0.02763566 | 0.15615699 | 3.88E-05 | 0.0040827 | -0.10472   |
| 9mo_SIGAE3_ | 0.03531665 | 0.20250477 | 4.59E-05 | 0.0042319 | -0.073417  |
| 9mo_SIGAE3_ | 0.08010326 | 0.47275126 | 6.32E-05 | 0.016594  | 0.13446    |
| 9mo_SIGAE3_ | 0.08196166 | 0.48396504 | 6.35E-05 | 0.017633  | 0.12948    |
| 9mo_SIGAE3_ | 0.02308675 | 0.12870847 | 3.55E-05 | 0.0043197 | -0.065623  |



|             |            |            |          |           |           |
|-------------|------------|------------|----------|-----------|-----------|
| 9mo_SIGAE3_ | 0.03495469 | 0.2003207  | 4.54E-05 | 0.0042028 | -0.078293 |
| 9mo_SIGAE3_ | 0.08828175 | 0.52210104 | 6.42E-05 | 0.020421  | 0.074212  |
| 9mo_SIGAE3_ | 0.08401839 | 0.49637556 | 6.37E-05 | 0.01841   | 0.1176    |
| 9mo_SIGAE3_ | 0.02511088 | 0.14092225 | 3.68E-05 | 0.0041768 | -0.086782 |
| 9mo_SIGAE3_ | 0.00616552 | 0.02660419 | 3.18E-05 | 0.008015  | 0.56984   |
| 9mo_SIGAE3_ | 0.06255259 | 0.36684898 | 6.08E-05 | 0.0094206 | 0.085432  |
| 9mo_SIGAE3_ | 0.08449387 | 0.49924463 | 6.37E-05 | 0.018667  | 0.1136    |
| 9mo_SIGAE3_ | 0.08728349 | 0.51607746 | 6.41E-05 | 0.01993   | 0.087329  |
| 9mo_SIGAE3_ | 0.02269156 | 0.1263238  | 3.55E-05 | 0.0043197 | -0.056631 |
| 9mo_SIGAE3_ | 0.02427824 | 0.135898   | 3.64E-05 | 0.0042065 | -0.080664 |
| 9mo_SIGAE3_ | 0.02603186 | 0.14647949 | 3.76E-05 | 0.0041286 | -0.096385 |
| 9mo_SIGAE3_ | 0.02808434 | 0.15886438 | 3.88E-05 | 0.0040827 | -0.10603  |
| 9mo_SIGAE3_ | 0.11191534 | 0.6647083  | 6.61E-05 | 0.025489  | -0.28705  |
| 9mo_SIGAE3_ | 0.03518909 | 0.20173505 | 4.54E-05 | 0.0042028 | -0.073417 |
| 9mo_SIGAE3_ | 0.02581038 | 0.14514306 | 3.72E-05 | 0.0041509 | -0.096385 |
| 9mo_SIGAE3_ | 0.01811114 | 0.09868515 | 3.36E-05 | 0.0048202 | 0.050123  |
| 9mo_SIGAE3_ | 0.0177973  | 0.09679137 | 3.34E-05 | 0.0049043 | 0.067421  |
| 9mo_SIGAE3_ | 0.07108077 | 0.41830873 | 6.20E-05 | 0.012608  | 0.11916   |
| 9mo_SIGAE3_ | 0.05325786 | 0.31076372 | 5.89E-05 | 0.0067028 | 0.059084  |
| 9mo_SIGAE3_ | 0.0306939  | 0.17461069 | 4.11E-05 | 0.0040705 | -0.10475  |
| 9mo_SIGAE3_ | 0.1321696  | 0.78692436 | 6.71E-05 | 0.023582  | -0.45284  |
| 9mo_SIGAE3_ | 0.04007033 | 0.23118892 | 5.03E-05 | 0.0045634 | -0.028892 |
| 9mo_SIGAE3_ | 0.02095924 | 0.11587086 | 3.47E-05 | 0.0044724 | -0.023601 |
| 9mo_SIGAE3_ | 0.09176473 | 0.54311764 | 6.45E-05 | 0.021822  | 0.027741  |
| 9mo_SIGAE3_ | 0.02132619 | 0.11808505 | 3.47E-05 | 0.0044724 | -0.023601 |
| 9mo_SIGAE3_ | 0.09994765 | 0.59249413 | 6.53E-05 | 0.024558  | -0.11403  |
| 9mo_SIGAE3_ | 0.12206276 | 0.72593874 | 6.66E-05 | 0.02435   | -0.38515  |
| 9mo_SIGAE3_ | 0.06320261 | 0.3707712  | 6.09E-05 | 0.0096122 | 0.087254  |
| 9mo_SIGAE3_ | 0.08795798 | 0.5201473  | 6.42E-05 | 0.020421  | 0.080939  |
| 9mo_SIGAE3_ | 0.12356915 | 0.73502845 | 6.67E-05 | 0.024153  | -0.39752  |
| 9mo_SIGAE3_ | 0.07071253 | 0.41608676 | 6.19E-05 | 0.012376  | 0.11916   |
| 9mo_SIGAE3_ | 0.02345455 | 0.13092774 | 3.58E-05 | 0.0042778 | -0.065623 |
| 9mo_SIGAE3_ | 0.12031199 | 0.7153744  | 6.66E-05 | 0.024561  | -0.37215  |
| 9mo_SIGAE3_ | 0.02828043 | 0.1600476  | 3.93E-05 | 0.004074  | -0.10603  |
| 9mo_SIGAE3_ | 0.02357948 | 0.1316816  | 3.58E-05 | 0.0042778 | -0.073623 |
| 9mo_SIGAE3_ | 0.01971637 | 0.10837126 | 3.40E-05 | 0.0046667 | 0.0032259 |
| 9mo_SIGAE3_ | 0.04710546 | 0.27363953 | 5.61E-05 | 0.0054936 | 0.032113  |
| 9mo_SIGAE3_ | 0.04656495 | 0.27037808 | 5.57E-05 | 0.0054037 | 0.028707  |
| 9mo_SIGAE3_ | 0.06829216 | 0.40148205 | 6.16E-05 | 0.011474  | 0.10734   |
| 9mo_SIGAE3_ | 0.01833401 | 0.10002998 | 3.36E-05 | 0.0048202 | 0.050123  |
| 9mo_SIGAE3_ | 0.08172503 | 0.4825372  | 6.34E-05 | 0.017373  | 0.12948   |
| 9mo_SIGAE3_ | 0.11373685 | 0.6756995  | 6.62E-05 | 0.025353  | -0.31137  |
| 9mo_SIGAE3_ | 0.02904812 | 0.16467991 | 3.97E-05 | 0.0040686 | -0.10664  |

|             |            |            |          |           |           |
|-------------|------------|------------|----------|-----------|-----------|
| 9mo_SIGAE3_ | 0.05632709 | 0.32928368 | 5.97E-05 | 0.0073934 | 0.068678  |
| 9mo_SIGAE3_ | 0.04430209 | 0.25672373 | 5.42E-05 | 0.0050757 | 0.012967  |
| 9mo_SIGAE3_ | 0.08600199 | 0.50834477 | 6.39E-05 | 0.01943   | 0.099025  |
| 9mo_SIGAE3_ | 0.02074388 | 0.11457133 | 3.44E-05 | 0.0045325 | -0.01065  |
| 9mo_SIGAE3_ | 0.02886427 | 0.16357052 | 3.97E-05 | 0.0040686 | -0.10664  |
| 9mo_SIGAE3_ | 0.02869496 | 0.16254888 | 3.97E-05 | 0.0040686 | -0.10664  |
| 9mo_SIGAE3_ | 0.01498887 | 0.07984511 | 3.27E-05 | 0.0054028 | 0.16515   |
| 9mo_SIGAE3_ | 0.06928315 | 0.40746176 | 6.17E-05 | 0.01192   | 0.11218   |
| 9mo_SIGAE3_ | 0.02793305 | 0.15795146 | 3.88E-05 | 0.0040827 | -0.10472  |
| 9mo_SIGAE3_ | 0.09626336 | 0.5702628  | 6.50E-05 | 0.023626  | -0.045608 |
| 9mo_SIGAE3_ | 0.0982018  | 0.5819595  | 6.52E-05 | 0.024123  | -0.084641 |
| 9mo_SIGAE3_ | 0.09166552 | 0.54251903 | 6.45E-05 | 0.021822  | 0.027741  |
| 9mo_SIGAE3_ | 0.02592246 | 0.14581937 | 3.76E-05 | 0.0041286 | -0.096385 |
| 9mo_SIGAE3_ | 0.05800151 | 0.3393873  | 6.00E-05 | 0.0078516 | 0.073002  |
| 9mo_SIGAE3_ | 0.06076456 | 0.3560598  | 6.05E-05 | 0.008688  | 0.080421  |
| 9mo_SIGAE3_ | 0.02101811 | 0.11622606 | 3.47E-05 | 0.0044724 | -0.023601 |
| 9mo_SIGAE3_ | 0.01212383 | 0.06255717 | 3.23E-05 | 0.0060411 | 0.2791    |
| 9mo_SIGAE3_ | 0.03381979 | 0.19347258 | 4.43E-05 | 0.004153  | -0.087207 |
| 9mo_SIGAE3_ | 0.12792692 | 0.7613236  | 6.69E-05 | 0.023757  | -0.4246   |
| 9mo_SIGAE3_ | 0.06358542 | 0.37308112 | 6.10E-05 | 0.0098069 | 0.089169  |
| 9mo_SIGAE3_ | 0.0651883  | 0.382753   | 6.11E-05 | 0.010206  | 0.095509  |
| 9mo_SIGAE3_ | 0.08995341 | 0.53218794 | 6.44E-05 | 0.021137  | 0.05218   |
| 9mo_SIGAE3_ | 0.01721806 | 0.09329624 | 3.33E-05 | 0.0049935 | 0.085504  |
| 9mo_SIGAE3_ | 0.08530995 | 0.50416887 | 6.39E-05 | 0.019177  | 0.10916   |
| 9mo_SIGAE3_ | 0.02920072 | 0.16560067 | 4.02E-05 | 0.0040662 | -0.10661  |
| 9mo_SIGAE3_ | 0.12048166 | 0.71639824 | 6.66E-05 | 0.024561  | -0.37215  |
| 9mo_SIGAE3_ | 0.16158883 | 0.9644427  | 6.79E-05 | 0.02368   | -0.52556  |
| 9mo_SIGAE3_ | 0.01392418 | 0.07342067 | 3.25E-05 | 0.0056405 | 0.20898   |
| 9mo_SIGAE3_ | 0.10529555 | 0.62476385 | 6.57E-05 | 0.025482  | -0.19772  |
| 9mo_SIGAE3_ | 0.01719794 | 0.09317479 | 3.33E-05 | 0.0049935 | 0.085504  |
| 9mo_SIGAE3_ | 0.02263098 | 0.12595828 | 3.55E-05 | 0.0043197 | -0.056631 |
| 9mo_SIGAE3_ | 0.05367302 | 0.3132688  | 5.91E-05 | 0.0068337 | 0.060836  |
| 9mo_SIGAE3_ | 0.02382629 | 0.13317087 | 3.61E-05 | 0.0042401 | -0.073623 |
| 9mo_SIGAE3_ | 0.0307437  | 0.17491119 | 4.11E-05 | 0.0040705 | -0.10475  |
| 9mo_SIGAE3_ | 0.11221541 | 0.6665189  | 6.61E-05 | 0.025489  | -0.29336  |
| 9mo_SIGAE3_ | 0.11262856 | 0.6690119  | 6.62E-05 | 0.025448  | -0.29951  |
| 9mo_SIGAE3_ | 0.04784925 | 0.2781276  | 5.64E-05 | 0.0055867 | 0.035328  |
| 9mo_SIGAE3_ | 0.01117605 | 0.05683814 | 3.21E-05 | 0.006339  | 0.32844   |
| 9mo_SIGAE3_ | 0.01866841 | 0.10204774 | 3.38E-05 | 0.004741  | 0.03364   |
| 9mo_SIGAE3_ | 0.05095183 | 0.2968489  | 5.81E-05 | 0.006215  | 0.051138  |
| 9mo_SIGAE3_ | 0.0216234  | 0.11987846 | 3.49E-05 | 0.0044169 | -0.0356   |
| 9mo_SIGAE3_ | 0.01523608 | 0.08133677 | 3.27E-05 | 0.0054028 | 0.16515   |
| 9mo_SIGAE3_ | 0.03299527 | 0.18849733 | 4.32E-05 | 0.0041142 | -0.091175 |

|             |            |            |          |           |           |
|-------------|------------|------------|----------|-----------|-----------|
| 9mo_SIGAE3_ | 0.08198652 | 0.48411506 | 6.35E-05 | 0.017633  | 0.12948   |
| 9mo_SIGAE3_ | 0.0680249  | 0.39986932 | 6.16E-05 | 0.011474  | 0.10734   |
| 9mo_SIGAE3_ | 0.0137296  | 0.07224653 | 3.25E-05 | 0.0056405 | 0.20898   |
| 9mo_SIGAE3_ | 0.02575773 | 0.14482538 | 3.72E-05 | 0.0041509 | -0.092011 |
| 9mo_SIGAE3_ | 0.02250357 | 0.12518948 | 3.52E-05 | 0.0043661 | -0.056631 |
| 9mo_SIGAE3_ | 0.02118596 | 0.11723888 | 3.47E-05 | 0.0044724 | -0.023601 |
| 9mo_SIGAE3_ | 0.02567434 | 0.1443222  | 3.72E-05 | 0.0041509 | -0.092011 |
| 9mo_SIGAE3_ | 0.12840392 | 0.7642019  | 6.69E-05 | 0.023757  | -0.4283   |
| 9mo_SIGAE3_ | 0.01933165 | 0.10604981 | 3.40E-05 | 0.0046667 | 0.017998  |
| 9mo_SIGAE3_ | 0.11052717 | 0.6563319  | 6.60E-05 | 0.02558   | -0.27396  |
| 9mo_SIGAE3_ | 0.01784053 | 0.09705225 | 3.34E-05 | 0.0049043 | 0.067421  |
| 9mo_SIGAE3_ | 0.01791117 | 0.09747852 | 3.34E-05 | 0.0049043 | 0.067421  |
| 9mo_SIGAE3_ | 0.11905    | 0.70775944 | 6.65E-05 | 0.024704  | -0.3584   |
| 9mo_SIGAE3_ | 0.08048032 | 0.47502652 | 6.32E-05 | 0.016854  | 0.13314   |
| 9mo_SIGAE3_ | 0.02938739 | 0.16672705 | 4.02E-05 | 0.0040662 | -0.10661  |
| 9mo_SIGAE3_ | 0.01851073 | 0.10109631 | 3.36E-05 | 0.0048202 | 0.050123  |
| 9mo_SIGAE3_ | 0.02254676 | 0.12545012 | 3.55E-05 | 0.0043197 | -0.056631 |
| 9mo_SIGAE3_ | 0.02392034 | 0.13373841 | 3.61E-05 | 0.0042401 | -0.073623 |
| 9mo_SIGAE3_ | 0.01907193 | 0.10448262 | 3.38E-05 | 0.004741  | 0.03364   |
| 9mo_SIGAE3_ | 0.11479107 | 0.6820607  | 6.63E-05 | 0.025242  | -0.32268  |
| 9mo_SIGAE3_ | 0.076365   | 0.4501943  | 6.27E-05 | 0.015053  | 0.1354    |
| 9mo_SIGAE3_ | 0.03676441 | 0.21124068 | 4.70E-05 | 0.0042982 | -0.062998 |
| 9mo_SIGAE3_ | 0.07997165 | 0.47195715 | 6.32E-05 | 0.016594  | 0.13446   |
| 9mo_SIGAE3_ | 0.04506793 | 0.2613449  | 5.46E-05 | 0.0051531 | 0.017239  |
| 9mo_SIGAE3_ | 0.09937187 | 0.58901983 | 6.53E-05 | 0.02442   | -0.10426  |
| 9mo_SIGAE3_ | 0.0138673  | 0.0730774  | 3.25E-05 | 0.0056405 | 0.20898   |
| 9mo_SIGAE3_ | 0.04889664 | 0.2844477  | 5.70E-05 | 0.0057827 | 0.041222  |
| 9mo_SIGAE3_ | 0.13601106 | 0.8101041  | 6.72E-05 | 0.023527  | -0.47464  |
| 9mo_SIGAE3_ | 0.02447763 | 0.13710114 | 3.64E-05 | 0.0042065 | -0.080664 |
| 9mo_SIGAE3_ | 0.01316544 | 0.06884233 | 3.24E-05 | 0.0057681 | 0.23179   |
| 9mo_SIGAE3_ | 0.01878656 | 0.1027607  | 3.38E-05 | 0.004741  | 0.03364   |
| 9mo_SIGAE3_ | 0.07632244 | 0.44993746 | 6.27E-05 | 0.015053  | 0.1354    |
| 9mo_SIGAE3_ | 0.01993093 | 0.10966592 | 3.42E-05 | 0.0045972 | 0.0032259 |
| 9mo_SIGAE3_ | 0.11436004 | 0.6794598  | 6.63E-05 | 0.025299  | -0.3171   |
| 9mo_SIGAE3_ | 0.03664186 | 0.2105012  | 4.70E-05 | 0.0042982 | -0.062998 |
| 9mo_SIGAE3_ | 0.07480758 | 0.44079664 | 6.25E-05 | 0.014299  | 0.13218   |
| 9mo_SIGAE3_ | 0.05415753 | 0.3161924  | 5.92E-05 | 0.0069681 | 0.062513  |
| 9mo_SIGAE3_ | 0.02762591 | 0.15609816 | 3.88E-05 | 0.0040827 | -0.10472  |
| 9mo_SIGAE3_ | 0.02226846 | 0.1237708  | 3.52E-05 | 0.0043661 | -0.046619 |
| 9mo_SIGAE3_ | 0.09261038 | 0.5482204  | 6.46E-05 | 0.022258  | 0.019141  |
| 9mo_SIGAE3_ | 0.01932899 | 0.10603374 | 3.40E-05 | 0.0046667 | 0.017998  |
| 9mo_SIGAE3_ | 0.01868142 | 0.10212629 | 3.38E-05 | 0.004741  | 0.03364   |
| 9mo_SIGAE3_ | 0.01230709 | 0.06366298 | 3.23E-05 | 0.0060411 | 0.2791    |

|             |            |            |          |           |           |
|-------------|------------|------------|----------|-----------|-----------|
| 9mo_SIGAE3_ | 0.01304717 | 0.06812866 | 3.23E-05 | 0.0059016 | 0.25518   |
| 9mo_SIGAE3_ | 0.02725575 | 0.15386458 | 3.84E-05 | 0.0040947 | -0.10271  |
| 9mo_SIGAE3_ | 0.04995523 | 0.2908353  | 5.76E-05 | 0.005992  | 0.046466  |
| 9mo_SIGAE3_ | 0.03562964 | 0.2043934  | 4.59E-05 | 0.0042319 | -0.073417 |
| 9mo_SIGAE3_ | 0.04714519 | 0.27387926 | 5.61E-05 | 0.0054936 | 0.032113  |
| 9mo_SIGAE3_ | 0.01505123 | 0.08022134 | 3.27E-05 | 0.0054028 | 0.16515   |
| 9mo_SIGAE3_ | 0.11542066 | 0.6858597  | 6.63E-05 | 0.025182  | -0.32814  |
| 9mo_SIGAE3_ | 0.04862024 | 0.2827799  | 5.70E-05 | 0.0057827 | 0.041222  |
| 9mo_SIGAE3_ | 0.01927097 | 0.10568366 | 3.40E-05 | 0.0046667 | 0.017998  |
| 9mo_SIGAE3_ | 0.03905723 | 0.22507581 | 4.92E-05 | 0.0044639 | -0.034672 |
| 9mo_SIGAE3_ | 0.01583128 | 0.08492826 | 3.28E-05 | 0.0052924 | 0.1442    |
| 9mo_SIGAE3_ | 0.02676631 | 0.15091124 | 3.80E-05 | 0.0041099 | -0.099939 |
| 9mo_SIGAE3_ | 0.01890181 | 0.10345615 | 3.38E-05 | 0.004741  | 0.03364   |
| 9mo_SIGAE3_ | 0.03811049 | 0.21936308 | 4.87E-05 | 0.0044183 | -0.04622  |
| 9mo_SIGAE3_ | 0.0725847  | 0.42738357 | 6.22E-05 | 0.01332   | 0.12548   |
| 9mo_SIGAE3_ | 0.02030814 | 0.11194208 | 3.42E-05 | 0.0045972 | -0.01065  |
| 9mo_SIGAE3_ | 0.07594902 | 0.44768423 | 6.26E-05 | 0.0148    | 0.13453   |
| 9mo_SIGAE3_ | 0.01484907 | 0.07900151 | 3.27E-05 | 0.0054028 | 0.16515   |
| 9mo_SIGAE3_ | 0.11063729 | 0.65699637 | 6.60E-05 | 0.02558   | -0.27396  |
| 9mo_SIGAE3_ | 0.09239894 | 0.54694456 | 6.46E-05 | 0.022258  | 0.019141  |
| 9mo_SIGAE3_ | 0.01757318 | 0.09543906 | 3.34E-05 | 0.0049043 | 0.067421  |
| 9mo_SIGAE3_ | 0.06902859 | 0.4059257  | 6.16E-05 | 0.011695  | 0.11218   |
| 9mo_SIGAE3_ | 0.06354109 | 0.37281367 | 6.09E-05 | 0.0096122 | 0.089169  |
| 9mo_SIGAE3_ | 0.02265555 | 0.12610655 | 3.55E-05 | 0.0043197 | -0.056631 |
| 9mo_SIGAE3_ | 0.0296914  | 0.16856152 | 4.02E-05 | 0.0040662 | -0.10597  |
| 9mo_SIGAE3_ | 0.00698784 | 0.03156615 | 3.18E-05 | 0.0078    | 0.54183   |
| 9mo_SIGAE3_ | 0.10282645 | 0.60986507 | 6.55E-05 | 0.025127  | -0.16182  |
| 9mo_SIGAE3_ | 0.03084339 | 0.17551273 | 4.11E-05 | 0.0040705 | -0.10299  |
| 9mo_SIGAE3_ | 0.08087609 | 0.4774146  | 6.33E-05 | 0.017113  | 0.13314   |
| 9mo_SIGAE3_ | 0.0790028  | 0.466111   | 6.30E-05 | 0.016077  | 0.13613   |
| 9mo_SIGAE3_ | 0.01852674 | 0.10119288 | 3.36E-05 | 0.0048202 | 0.050123  |
| 9mo_SIGAE3_ | 0.02859582 | 0.16195068 | 3.93E-05 | 0.004074  | -0.10664  |
| 9mo_SIGAE3_ | 0.01938441 | 0.1063682  | 3.40E-05 | 0.0046667 | 0.017998  |
| 9mo_SIGAE3_ | 0.12403178 | 0.73781997 | 6.67E-05 | 0.024092  | -0.39752  |
| 9mo_SIGAE3_ | 0.0186865  | 0.1021569  | 3.38E-05 | 0.004741  | 0.03364   |
| 9mo_SIGAE3_ | 0.1137194  | 0.67559415 | 6.62E-05 | 0.025353  | -0.31137  |
| 9mo_SIGAE3_ | 0.02762561 | 0.15609632 | 3.88E-05 | 0.0040827 | -0.10472  |
| 9mo_SIGAE3_ | 0.09766135 | 0.5786984  | 6.51E-05 | 0.023964  | -0.074831 |
| 9mo_SIGAE3_ | 0.09099341 | 0.5384634  | 6.45E-05 | 0.021597  | 0.036126  |
| 9mo_SIGAE3_ | 0.0106717  | 0.05379489 | 3.21E-05 | 0.0064976 | 0.35381   |
| 9mo_SIGAE3_ | 0.0822829  | 0.48590344 | 6.35E-05 | 0.017633  | 0.1271    |
| 9mo_SIGAE3_ | 0.03634669 | 0.20872012 | 4.65E-05 | 0.0042637 | -0.062998 |
| 9mo_SIGAE3_ | 0.08410011 | 0.49686867 | 6.37E-05 | 0.018667  | 0.1176    |

|             |            |            |          |           |           |
|-------------|------------|------------|----------|-----------|-----------|
| 9mo_SIGAE3_ | 0.02362675 | 0.13196687 | 3.58E-05 | 0.0042778 | -0.073623 |
| 9mo_SIGAE3_ | 0.01944629 | 0.10674153 | 3.40E-05 | 0.0046667 | 0.017998  |
| 9mo_SIGAE3_ | 0.05048261 | 0.29401758 | 5.78E-05 | 0.0061018 | 0.048868  |
| 9mo_SIGAE3_ | 0.01938183 | 0.10635258 | 3.40E-05 | 0.0046667 | 0.017998  |
| 9mo_SIGAE3_ | 0.01950119 | 0.10707282 | 3.40E-05 | 0.0046667 | 0.017998  |
| 9mo_SIGAE3_ | 0.01534504 | 0.08199421 | 3.28E-05 | 0.0052924 | 0.1442    |
| 9mo_SIGAE3_ | 0.02922715 | 0.16576016 | 4.02E-05 | 0.0040662 | -0.10661  |
| 9mo_SIGAE3_ | 0.02384656 | 0.13329323 | 3.61E-05 | 0.0042401 | -0.073623 |
| 9mo_SIGAE3_ | 0.0202207  | 0.11141441 | 3.42E-05 | 0.0045972 | 0.0032259 |
| 9mo_SIGAE3_ | 0.02126236 | 0.11769989 | 3.47E-05 | 0.0044724 | -0.023601 |
| 9mo_SIGAE3_ | 0.05588521 | 0.32661736 | 5.97E-05 | 0.0073934 | 0.067199  |
| 9mo_SIGAE3_ | 0.08037408 | 0.4743854  | 6.32E-05 | 0.016854  | 0.13446   |
| 9mo_SIGAE3_ | 0.0387025  | 0.22293532 | 4.92E-05 | 0.0044639 | -0.040459 |
| 9mo_SIGAE3_ | 0.12091287 | 0.7190002  | 6.66E-05 | 0.02449   | -0.37656  |
| 9mo_SIGAE3_ | 0.04663136 | 0.27077878 | 5.57E-05 | 0.0054037 | 0.028707  |
| 9mo_SIGAE3_ | 0.03546391 | 0.20339336 | 4.59E-05 | 0.0042319 | -0.073417 |
| 9mo_SIGAE3_ | 0.01894406 | 0.10371105 | 3.38E-05 | 0.004741  | 0.03364   |
| 9mo_SIGAE3_ | 0.02101058 | 0.11618064 | 3.47E-05 | 0.0044724 | -0.023601 |
| 9mo_SIGAE3_ | 0.02057528 | 0.11355396 | 3.44E-05 | 0.0045325 | -0.01065  |
| 9mo_SIGAE3_ | 0.07128654 | 0.41955036 | 6.20E-05 | 0.012608  | 0.12136   |
| 9mo_SIGAE3_ | 0.06157788 | 0.36096746 | 6.07E-05 | 0.0090475 | 0.082025  |
| 9mo_SIGAE3_ | 0.04902573 | 0.2852266  | 5.70E-05 | 0.0057827 | 0.04392   |
| 9mo_SIGAE3_ | 0.02402303 | 0.13435802 | 3.61E-05 | 0.0042401 | -0.073623 |
| 9mo_SIGAE3_ | 0.14320816 | 0.853532   | 6.75E-05 | 0.023603  | -0.50606  |
| 9mo_SIGAE3_ | 0.05709431 | 0.33391318 | 5.99E-05 | 0.0076952 | 0.070131  |
| 9mo_SIGAE3_ | 0.02206225 | 0.12252651 | 3.52E-05 | 0.0043661 | -0.046619 |
| 9mo_SIGAE3_ | 0.02232577 | 0.12411661 | 3.52E-05 | 0.0043661 | -0.046619 |
| 9mo_SIGAE3_ | 0.12131137 | 0.7214048  | 6.66E-05 | 0.024419  | -0.37656  |
| 9mo_SIGAE3_ | 0.10860905 | 0.6447578  | 6.59E-05 | 0.025616  | -0.24573  |
| 9mo_SIGAE3_ | 0.07796318 | 0.45983785 | 6.29E-05 | 0.015562  | 0.13662   |
| 9mo_SIGAE3_ | 0.06996059 | 0.41154948 | 6.18E-05 | 0.012147  | 0.11455   |
| 9mo_SIGAE3_ | 0.02159288 | 0.11969428 | 3.49E-05 | 0.0044169 | -0.0356   |
| 9mo_SIGAE3_ | 0.01672678 | 0.09033182 | 3.31E-05 | 0.0050879 | 0.10435   |
| 9mo_SIGAE3_ | 0.05788876 | 0.33870697 | 6.00E-05 | 0.0078516 | 0.073002  |
| 9mo_SIGAE3_ | 0.11016563 | 0.65415037 | 6.60E-05 | 0.02558   | -0.26716  |
| 9mo_SIGAE3_ | 0.01480266 | 0.07872146 | 3.27E-05 | 0.0054028 | 0.16515   |
| 9mo_SIGAE3_ | 0.0214476  | 0.11881763 | 3.49E-05 | 0.0044169 | -0.0356   |
| 9mo_SIGAE3_ | 0.06618595 | 0.38877296 | 6.13E-05 | 0.010616  | 0.10013   |
| 9mo_SIGAE3_ | 0.03789435 | 0.21805884 | 4.81E-05 | 0.0043756 | -0.05192  |
| 9mo_SIGAE3_ | 0.13289794 | 0.79131925 | 6.71E-05 | 0.023556  | -0.45613  |
| 9mo_SIGAE3_ | 0.02959147 | 0.16795848 | 4.02E-05 | 0.0040662 | -0.10661  |
| 9mo_SIGAE3_ | 0.01168525 | 0.05991075 | 3.22E-05 | 0.0061869 | 0.30353   |
| 9mo_SIGAE3_ | 0.07883289 | 0.46508574 | 6.30E-05 | 0.016077  | 0.13613   |

|             |            |            |          |           |           |
|-------------|------------|------------|----------|-----------|-----------|
| 9mo_SIGAE3_ | 0.11992004 | 0.71300936 | 6.65E-05 | 0.024632  | -0.36766  |
| 9mo_SIGAE3_ | 0.02370556 | 0.13244236 | 3.61E-05 | 0.0042401 | -0.073623 |
| 9mo_SIGAE3_ | 0.02911902 | 0.16510773 | 3.97E-05 | 0.0040686 | -0.10661  |
| 9mo_SIGAE3_ | 0.03140519 | 0.17890269 | 4.16E-05 | 0.0040771 | -0.10071  |
| 9mo_SIGAE3_ | 0.01804468 | 0.0982841  | 3.34E-05 | 0.0049043 | 0.067421  |
| 9mo_SIGAE3_ | 0.02680909 | 0.1511694  | 3.80E-05 | 0.0041099 | -0.099939 |
| 9mo_SIGAE3_ | 0.02511998 | 0.14097711 | 3.68E-05 | 0.0041768 | -0.086782 |
| 9mo_SIGAE3_ | 0.12469607 | 0.7418284  | 6.68E-05 | 0.024034  | -0.40548  |
| 9mo_SIGAE3_ | 0.08010747 | 0.4727767  | 6.32E-05 | 0.016594  | 0.13446   |
| 9mo_SIGAE3_ | 0.02073586 | 0.11452295 | 3.44E-05 | 0.0045325 | -0.01065  |
| 9mo_SIGAE3_ | 0.0536182  | 0.312938   | 5.91E-05 | 0.0068337 | 0.060836  |
| 9mo_SIGAE3_ | 0.03026811 | 0.17204142 | 4.07E-05 | 0.0040668 | -0.10475  |
| 9mo_SIGAE3_ | 0.01208856 | 0.06234432 | 3.23E-05 | 0.0060411 | 0.2791    |
| 9mo_SIGAE3_ | 0.01972846 | 0.10844423 | 3.40E-05 | 0.0046667 | 0.0032259 |
| 9mo_SIGAE3_ | 0.05018815 | 0.29224077 | 5.76E-05 | 0.005992  | 0.048868  |
| 9mo_SIGAE3_ | 0.0237032  | 0.13242815 | 3.61E-05 | 0.0042401 | -0.073623 |
| 9mo_SIGAE3_ | 0.02750726 | 0.15538222 | 3.84E-05 | 0.0040947 | -0.10472  |
| 9mo_SIGAE3_ | 0.12469087 | 0.741797   | 6.68E-05 | 0.024034  | -0.40548  |
| 9mo_SIGAE3_ | 0.04217154 | 0.24386781 | 5.24E-05 | 0.0047963 | -0.00654  |
| 9mo_SIGAE3_ | 0.03499928 | 0.20058973 | 4.54E-05 | 0.0042028 | -0.078293 |
| 9mo_SIGAE3_ | 0.02186296 | 0.12132397 | 3.49E-05 | 0.0044169 | -0.0356   |
| 9mo_SIGAE3_ | 0.01537405 | 0.08216929 | 3.28E-05 | 0.0052924 | 0.1442    |
| 9mo_SIGAE3_ | 0.0117306  | 0.06018437 | 3.22E-05 | 0.0061869 | 0.30353   |
| 9mo_SIGAE3_ | 0.02499968 | 0.14025125 | 3.68E-05 | 0.0041768 | -0.086782 |
| 9mo_SIGAE3_ | 0.10794379 | 0.64074355 | 6.59E-05 | 0.025614  | -0.23822  |
| 9mo_SIGAE3_ | 0.02457692 | 0.13770026 | 3.64E-05 | 0.0042065 | -0.080664 |
| 9mo_SIGAE3_ | 0.01546397 | 0.0827119  | 3.28E-05 | 0.0052924 | 0.1442    |
| 9mo_SIGAE3_ | 0.02092094 | 0.11563974 | 3.47E-05 | 0.0044724 | -0.023601 |
| 9mo_SIGAE3_ | 0.10175111 | 0.6033764  | 6.54E-05 | 0.024923  | -0.14299  |
| 9mo_SIGAE3_ | 0.0110156  | 0.05586999 | 3.21E-05 | 0.006339  | 0.32844   |
| 9mo_SIGAE3_ | 0.12456594 | 0.7410432  | 6.68E-05 | 0.024034  | -0.40152  |
| 9mo_SIGAE3_ | 0.01696856 | 0.09179073 | 3.31E-05 | 0.0050879 | 0.085504  |
| 9mo_SIGAE3_ | 0.02220732 | 0.12340187 | 3.52E-05 | 0.0043661 | -0.046619 |
| 9mo_SIGAE3_ | 0.09772717 | 0.57909554 | 6.51E-05 | 0.023964  | -0.074831 |
| 9mo_SIGAE3_ | 0.12249032 | 0.72851866 | 6.67E-05 | 0.024282  | -0.38934  |
| 9mo_SIGAE3_ | 0.02933925 | 0.16643661 | 4.02E-05 | 0.0040662 | -0.10661  |
| 9mo_SIGAE3_ | 0.01921949 | 0.10537305 | 3.40E-05 | 0.0046667 | 0.017998  |
| 9mo_SIGAE3_ | 0.10241395 | 0.607376   | 6.55E-05 | 0.025127  | -0.15246  |
| 9mo_SIGAE3_ | 0.08844203 | 0.52306813 | 6.42E-05 | 0.020421  | 0.074212  |
| 9mo_SIGAE3_ | 0.09847216 | 0.5835909  | 6.52E-05 | 0.024123  | -0.084641 |
| 9mo_SIGAE3_ | 0.10649669 | 0.63201165 | 6.58E-05 | 0.02556   | -0.22263  |
| 9mo_SIGAE3_ | 0.09484933 | 0.56173044 | 6.49E-05 | 0.023073  | -0.026471 |
| 9mo_SIGAE3_ | 0.08350111 | 0.4932542  | 6.36E-05 | 0.018151  | 0.12117   |

|             |            |            |          |           |           |
|-------------|------------|------------|----------|-----------|-----------|
| 9mo_SIGAE3_ | 0.0890309  | 0.52662146 | 6.42E-05 | 0.020663  | 0.067165  |
| 9mo_SIGAE3_ | 0.03016344 | 0.17140983 | 4.07E-05 | 0.0040668 | -0.10597  |
| 9mo_SIGAE3_ | 0.01395119 | 0.07358363 | 3.25E-05 | 0.0056405 | 0.20898   |
| 9mo_SIGAE3_ | 0.01621804 | 0.08726201 | 3.30E-05 | 0.0051875 | 0.12392   |
| 9mo_SIGAE3_ | 0.09212536 | 0.54529375 | 6.46E-05 | 0.022042  | 0.019141  |
| 9mo_SIGAE3_ | 0.03260091 | 0.18611775 | 4.32E-05 | 0.0041142 | -0.094772 |
| 9mo_SIGAE3_ | 0.02331105 | 0.13006191 | 3.58E-05 | 0.0042778 | -0.065623 |
| 9mo_SIGAE3_ | 0.02097494 | 0.11596557 | 3.47E-05 | 0.0044724 | -0.023601 |
| 9mo_SIGAE3_ | 0.03047853 | 0.1733111  | 4.11E-05 | 0.0040705 | -0.10475  |
| 9mo_SIGAE3_ | 0.03165489 | 0.18040937 | 4.22E-05 | 0.0040866 | -0.10071  |
| 9mo_SIGAE3_ | 0.02501861 | 0.14036547 | 3.68E-05 | 0.0041768 | -0.086782 |
| 9mo_SIGAE3_ | 0.01962243 | 0.10780437 | 3.40E-05 | 0.0046667 | 0.017998  |
| 9mo_SIGAE3_ | 0.03091816 | 0.17596386 | 4.16E-05 | 0.0040771 | -0.10299  |
| 9mo_SIGAE3_ | 0.12123051 | 0.72091687 | 6.66E-05 | 0.024419  | -0.37656  |
| 9mo_SIGAE3_ | 0.06336034 | 0.371723   | 6.09E-05 | 0.0096122 | 0.089169  |
| 9mo_SIGAE3_ | 0.0356235  | 0.20435631 | 4.59E-05 | 0.0042319 | -0.073417 |
| 9mo_SIGAE3_ | 0.006914   | 0.03112057 | 3.18E-05 | 0.0078    | 0.54183   |
| 9mo_SIGAE3_ | 0.09548954 | 0.5655935  | 6.49E-05 | 0.023263  | -0.035993 |
| 9mo_SIGAE3_ | 0.02599414 | 0.1462519  | 3.76E-05 | 0.0041286 | -0.096385 |
| 9mo_SIGAE3_ | 0.02956343 | 0.16778928 | 4.02E-05 | 0.0040662 | -0.10661  |
| 9mo_SIGAE3_ | 0.09733704 | 0.57674146 | 6.51E-05 | 0.023799  | -0.065044 |
| 9mo_SIGAE3_ | 0.03218023 | 0.18357934 | 4.27E-05 | 0.004099  | -0.097962 |
| 9mo_SIGAE3_ | 0.02084965 | 0.11520959 | 3.44E-05 | 0.0045325 | -0.023601 |
| 9mo_SIGAE3_ | 0.0087555  | 0.04223237 | 3.19E-05 | 0.0070136 | 0.43237   |
| 9mo_SIGAE3_ | 0.06342649 | 0.37212214 | 6.09E-05 | 0.0096122 | 0.089169  |
| 9mo_SIGAE3_ | 0.01489419 | 0.0792738  | 3.27E-05 | 0.0054028 | 0.16515   |
| 9mo_SIGAE3_ | 0.08338031 | 0.4925253  | 6.36E-05 | 0.018151  | 0.12117   |
| 9mo_SIGAE3_ | 0.08168622 | 0.48230302 | 6.34E-05 | 0.017373  | 0.12948   |
| 9mo_SIGAE3_ | 0.03590089 | 0.20603013 | 4.65E-05 | 0.0042637 | -0.068307 |
| 9mo_SIGAE3_ | 0.08788284 | 0.519694   | 6.41E-05 | 0.020177  | 0.080939  |
| 9mo_SIGAE3_ | 0.02532776 | 0.14223087 | 3.72E-05 | 0.0041509 | -0.092011 |
| 9mo_SIGAE3_ | 0.02388217 | 0.13350806 | 3.61E-05 | 0.0042401 | -0.073623 |
| 9mo_SIGAE3_ | 0.01129783 | 0.057573   | 3.21E-05 | 0.006339  | 0.32844   |
| 9mo_SIGAE3_ | 0.05240992 | 0.30564713 | 5.85E-05 | 0.0064518 | 0.057248  |
| 9mo_SIGAE3_ | 0.02104494 | 0.11638797 | 3.47E-05 | 0.0044724 | -0.023601 |
| 9mo_SIGAE3_ | 0.1024885  | 0.6078258  | 6.55E-05 | 0.025127  | -0.15246  |
| 9mo_SIGAE3_ | 0.13201669 | 0.7860017  | 6.71E-05 | 0.023582  | -0.45284  |
| 9mo_SIGAE3_ | 0.06614557 | 0.3885293  | 6.13E-05 | 0.010616  | 0.10013   |
| 9mo_SIGAE3_ | 0.12104075 | 0.71977186 | 6.66E-05 | 0.02449   | -0.37656  |
| 9mo_SIGAE3_ | 0.11758518 | 0.6989206  | 6.64E-05 | 0.024917  | -0.34876  |
| 9mo_SIGAE3_ | 0.06170352 | 0.36172557 | 6.07E-05 | 0.0090475 | 0.083692  |
| 9mo_SIGAE3_ | 0.02680077 | 0.15111914 | 3.80E-05 | 0.0041099 | -0.099939 |
| 9mo_SIGAE3_ | 0.03077974 | 0.17512867 | 4.11E-05 | 0.0040705 | -0.10299  |

|             |            |            |          |           |           |
|-------------|------------|------------|----------|-----------|-----------|
| 9mo_SIGAE3_ | 0.09161318 | 0.5422032  | 6.45E-05 | 0.021822  | 0.027741  |
| 9mo_SIGAE3_ | 0.12356412 | 0.73499805 | 6.67E-05 | 0.024153  | -0.39752  |
| 9mo_SIGAE3_ | 0.01912283 | 0.10478976 | 3.38E-05 | 0.004741  | 0.03364   |
| 9mo_SIGAE3_ | 0.0487728  | 0.28370047 | 5.70E-05 | 0.0057827 | 0.041222  |
| 9mo_SIGAE3_ | 0.02336956 | 0.13041493 | 3.58E-05 | 0.0042778 | -0.065623 |
| 9mo_SIGAE3_ | 0.10636358 | 0.6312084  | 6.58E-05 | 0.02556   | -0.21453  |
| 9mo_SIGAE3_ | 0.044062   | 0.25527504 | 5.38E-05 | 0.0050014 | 0.012967  |
| 9mo_SIGAE3_ | 0.01305165 | 0.0681557  | 3.23E-05 | 0.0059016 | 0.25518   |
| 9mo_SIGAE3_ | 0.08730142 | 0.5161856  | 6.41E-05 | 0.01993   | 0.087329  |
| 9mo_SIGAE3_ | 0.10197587 | 0.6047326  | 6.55E-05 | 0.025029  | -0.14299  |
| 9mo_SIGAE3_ | 0.07952505 | 0.46926233 | 6.31E-05 | 0.016335  | 0.13545   |
| 9mo_SIGAE3_ | 0.07232526 | 0.42581812 | 6.21E-05 | 0.01308   | 0.12548   |
| 9mo_SIGAE3_ | 0.12821743 | 0.7630766  | 6.69E-05 | 0.023757  | -0.4283   |
| 9mo_SIGAE3_ | 0.02040602 | 0.11253264 | 3.44E-05 | 0.0045325 | -0.01065  |
| 9mo_SIGAE3_ | 0.0619933  | 0.36347413 | 6.07E-05 | 0.0092324 | 0.083692  |
| 9mo_SIGAE3_ | 0.05513146 | 0.32206917 | 5.94E-05 | 0.0071062 | 0.065685  |
| 9mo_SIGAE3_ | 0.13160165 | 0.7834973  | 6.70E-05 | 0.023599  | -0.44949  |
| 9mo_SIGAE3_ | 0.01265326 | 0.06575181 | 3.23E-05 | 0.0059016 | 0.25518   |
| 9mo_SIGAE3_ | 0.07281282 | 0.42876008 | 6.22E-05 | 0.01332   | 0.12737   |
| 9mo_SIGAE3_ | 0.02236208 | 0.12433571 | 3.52E-05 | 0.0043661 | -0.046619 |
| 9mo_SIGAE3_ | 0.03039255 | 0.17279232 | 4.11E-05 | 0.0040705 | -0.10475  |
| 9mo_SIGAE3_ | 0.07645116 | 0.45071417 | 6.27E-05 | 0.015053  | 0.1354    |
| 9mo_SIGAE3_ | 0.10123275 | 0.6002486  | 6.54E-05 | 0.024809  | -0.13341  |
| 9mo_SIGAE3_ | 0.07294878 | 0.4295805  | 6.22E-05 | 0.01332   | 0.12737   |
| 9mo_SIGAE3_ | 0.08861278 | 0.52409846 | 6.42E-05 | 0.020663  | 0.074212  |
| 9mo_SIGAE3_ | 0.019471   | 0.10689066 | 3.40E-05 | 0.0046667 | 0.017998  |
| 9mo_SIGAE3_ | 0.01635578 | 0.08809312 | 3.30E-05 | 0.0051875 | 0.12392   |
| 9mo_SIGAE3_ | 0.06294093 | 0.36919224 | 6.08E-05 | 0.0094206 | 0.087254  |
| 9mo_SIGAE3_ | 0.02141192 | 0.11860237 | 3.47E-05 | 0.0044724 | -0.0356   |
| 9mo_SIGAE3_ | 0.09284713 | 0.54964894 | 6.46E-05 | 0.022258  | 0.010343  |
| 9mo_SIGAE3_ | 0.02007276 | 0.11052176 | 3.42E-05 | 0.0045972 | 0.0032259 |
| 9mo_SIGAE3_ | 0.01558983 | 0.08347132 | 3.28E-05 | 0.0052924 | 0.1442    |
| 9mo_SIGAE3_ | 0.02367917 | 0.13228317 | 3.61E-05 | 0.0042401 | -0.073623 |
| 9mo_SIGAE3_ | 0.08139638 | 0.48055407 | 6.34E-05 | 0.017373  | 0.13148   |
| 9mo_SIGAE3_ | 0.11397992 | 0.67716616 | 6.62E-05 | 0.025353  | -0.31137  |
| 9mo_SIGAE3_ | 0.08190273 | 0.48360944 | 6.35E-05 | 0.017633  | 0.12948   |
| 9mo_SIGAE3_ | 0.02646168 | 0.14907308 | 3.80E-05 | 0.0041099 | -0.099939 |
| 9mo_SIGAE3_ | 0.02493617 | 0.139868   | 3.68E-05 | 0.0041768 | -0.086782 |
| 9mo_SIGAE3_ | 0.07057297 | 0.41524467 | 6.19E-05 | 0.012376  | 0.11916   |
| 9mo_SIGAE3_ | 0.10286833 | 0.61011773 | 6.55E-05 | 0.025127  | -0.16182  |
| 9mo_SIGAE3_ | 0.0636524  | 0.3734853  | 6.10E-05 | 0.0098069 | 0.089169  |
| 9mo_SIGAE3_ | 0.08692893 | 0.51393795 | 6.41E-05 | 0.01993   | 0.093363  |
| 9mo_SIGAE3_ | 0.10530265 | 0.6248067  | 6.57E-05 | 0.025482  | -0.19772  |



|             |            |            |          |           |           |
|-------------|------------|------------|----------|-----------|-----------|
| 9mo_SIGAE3_ | 0.02693986 | 0.15195844 | 3.80E-05 | 0.0041099 | -0.10271  |
| 9mo_SIGAE3_ | 0.03955109 | 0.22805582 | 4.98E-05 | 0.0045122 | -0.034672 |
| 9mo_SIGAE3_ | 0.0986994  | 0.58496207 | 6.52E-05 | 0.024275  | -0.084641 |
| 9mo_SIGAE3_ | 0.03993771 | 0.23038866 | 5.03E-05 | 0.0045634 | -0.028892 |
| 9mo_SIGAE3_ | 0.0145124  | 0.07697002 | 3.26E-05 | 0.0055188 | 0.18676   |
| 9mo_SIGAE3_ | 0.01742352 | 0.09453596 | 3.33E-05 | 0.0049935 | 0.085504  |
| 9mo_SIGAE3_ | 0.01711723 | 0.09268779 | 3.33E-05 | 0.0049935 | 0.085504  |
| 9mo_SIGAE3_ | 0.07959513 | 0.46968517 | 6.31E-05 | 0.016335  | 0.13545   |
| 9mo_SIGAE3_ | 0.09210654 | 0.5451802  | 6.46E-05 | 0.022042  | 0.019141  |
| 9mo_SIGAE3_ | 0.0327795  | 0.18719536 | 4.32E-05 | 0.0041142 | -0.094772 |
| 9mo_SIGAE3_ | 0.02523797 | 0.14168908 | 3.68E-05 | 0.0041768 | -0.092011 |
| 9mo_SIGAE3_ | 0.0671402  | 0.39453098 | 6.14E-05 | 0.011039  | 0.10251   |
| 9mo_SIGAE3_ | 0.10319045 | 0.6120615  | 6.56E-05 | 0.025216  | -0.17104  |
| 9mo_SIGAE3_ | 0.02485262 | 0.13936386 | 3.68E-05 | 0.0041768 | -0.086782 |
| 9mo_SIGAE3_ | 0.0355347  | 0.20382048 | 4.59E-05 | 0.0042319 | -0.073417 |
| 9mo_SIGAE3_ | 0.04119144 | 0.23795378 | 5.14E-05 | 0.0046741 | -0.017493 |
| 9mo_SIGAE3_ | 0.0111097  | 0.05643783 | 3.21E-05 | 0.006339  | 0.32844   |
| 9mo_SIGAE3_ | 0.0598126  | 0.3503156  | 6.04E-05 | 0.0085136 | 0.077363  |
| 9mo_SIGAE3_ | 0.03005538 | 0.17075782 | 4.07E-05 | 0.0040668 | -0.10597  |
| 9mo_SIGAE3_ | 0.11009084 | 0.6536991  | 6.60E-05 | 0.025599  | -0.26716  |
| 9mo_SIGAE3_ | 0.03409049 | 0.195106   | 4.43E-05 | 0.004153  | -0.082901 |
| 9mo_SIGAE3_ | 0.01289371 | 0.06720266 | 3.23E-05 | 0.0059016 | 0.25518   |
| 9mo_SIGAE3_ | 0.0755939  | 0.44554138 | 6.26E-05 | 0.014549  | 0.13453   |
| 9mo_SIGAE3_ | 0.10110309 | 0.59946615 | 6.54E-05 | 0.024809  | -0.13341  |
| 9mo_SIGAE3_ | 0.04872342 | 0.28340247 | 5.70E-05 | 0.0057827 | 0.041222  |
| 9mo_SIGAE3_ | 0.09149389 | 0.54148334 | 6.45E-05 | 0.021822  | 0.036126  |
| 9mo_SIGAE3_ | 0.01442337 | 0.07643282 | 3.26E-05 | 0.0055188 | 0.18676   |
| 9mo_SIGAE3_ | 0.08830024 | 0.52221256 | 6.42E-05 | 0.020421  | 0.074212  |
| 9mo_SIGAE3_ | 0.0262441  | 0.14776017 | 3.76E-05 | 0.0041286 | -0.096385 |
| 9mo_SIGAE3_ | 0.04381153 | 0.25376368 | 5.38E-05 | 0.0050014 | 0.008455  |
| 9mo_SIGAE3_ | 0.02385588 | 0.13334945 | 3.61E-05 | 0.0042401 | -0.073623 |
| 9mo_SIGAE3_ | 0.01474339 | 0.07836381 | 3.26E-05 | 0.0055188 | 0.16515   |
| 9mo_SIGAE3_ | 0.01740272 | 0.09441046 | 3.33E-05 | 0.0049935 | 0.085504  |
| 9mo_SIGAE3_ | 0.02074751 | 0.11459322 | 3.44E-05 | 0.0045325 | -0.01065  |
| 9mo_SIGAE3_ | 0.08065219 | 0.4760636  | 6.32E-05 | 0.016854  | 0.13314   |
| 9mo_SIGAE3_ | 0.01400531 | 0.07391017 | 3.25E-05 | 0.0056405 | 0.20898   |
| 9mo_SIGAE3_ | 0.01476396 | 0.07848793 | 3.26E-05 | 0.0055188 | 0.16515   |
| 9mo_SIGAE3_ | 0.0311751  | 0.17751427 | 4.16E-05 | 0.0040771 | -0.10299  |
| 9mo_SIGAE3_ | 0.02085701 | 0.11525396 | 3.44E-05 | 0.0045325 | -0.023601 |
| 9mo_SIGAE3_ | 0.12494412 | 0.7433251  | 6.68E-05 | 0.024034  | -0.40548  |
| 9mo_SIGAE3_ | 0.01978076 | 0.10875978 | 3.42E-05 | 0.0045972 | 0.0032259 |
| 9mo_SIGAE3_ | 0.04902672 | 0.2852326  | 5.70E-05 | 0.0057827 | 0.04392   |
| 9mo_SIGAE3_ | 0.03014051 | 0.17127147 | 4.07E-05 | 0.0040668 | -0.10597  |

|             |            |            |          |           |           |
|-------------|------------|------------|----------|-----------|-----------|
| 9mo_SIGAE3_ | 0.02154261 | 0.11939095 | 3.49E-05 | 0.0044169 | -0.0356   |
| 9mo_SIGAE3_ | 0.00911228 | 0.04438521 | 3.19E-05 | 0.0070136 | 0.43237   |
| 9mo_SIGAE3_ | 0.0332646  | 0.19012254 | 4.37E-05 | 0.0041322 | -0.091175 |
| 9mo_SIGAE3_ | 0.06394522 | 0.37525222 | 6.10E-05 | 0.0098069 | 0.091185  |
| 9mo_SIGAE3_ | 0.11713464 | 0.696202   | 6.64E-05 | 0.024986  | -0.34377  |
| 9mo_SIGAE3_ | 0.0632386  | 0.3709884  | 6.09E-05 | 0.0096122 | 0.087254  |
| 9mo_SIGAE3_ | 0.01678383 | 0.09067603 | 3.31E-05 | 0.0050879 | 0.10435   |
| 9mo_SIGAE3_ | 0.05253207 | 0.30638424 | 5.87E-05 | 0.0065755 | 0.057248  |
| 9mo_SIGAE3_ | 0.08951253 | 0.52952766 | 6.43E-05 | 0.020902  | 0.059815  |
| 9mo_SIGAE3_ | 0.05018178 | 0.29220232 | 5.76E-05 | 0.005992  | 0.048868  |
| 9mo_SIGAE3_ | 0.0309222  | 0.1759883  | 4.16E-05 | 0.0040771 | -0.10299  |
| 9mo_SIGAE3_ | 0.01697509 | 0.09183011 | 3.31E-05 | 0.0050879 | 0.085504  |
| 9mo_SIGAE3_ | 0.08002722 | 0.47229248 | 6.32E-05 | 0.016594  | 0.13446   |
| 9mo_SIGAE3_ | 0.02557796 | 0.14374065 | 3.72E-05 | 0.0041509 | -0.092011 |
| 9mo_SIGAE3_ | 0.03310061 | 0.18913297 | 4.37E-05 | 0.0041322 | -0.091175 |
| 9mo_SIGAE3_ | 0.06338797 | 0.3718897  | 6.09E-05 | 0.0096122 | 0.089169  |
| 9mo_SIGAE3_ | 0.08512757 | 0.50306845 | 6.38E-05 | 0.018923  | 0.10916   |
| 9mo_SIGAE3_ | 0.01590724 | 0.08538662 | 3.30E-05 | 0.0051875 | 0.12392   |
| 9mo_SIGAE3_ | 0.04409674 | 0.25548467 | 5.38E-05 | 0.0050014 | 0.012967  |
| 9mo_SIGAE3_ | 0.04999176 | 0.29105574 | 5.76E-05 | 0.005992  | 0.046466  |
| 9mo_SIGAE3_ | 0.01764362 | 0.09586407 | 3.34E-05 | 0.0049043 | 0.067421  |
| 9mo_SIGAE3_ | 0.02060806 | 0.1137518  | 3.44E-05 | 0.0045325 | -0.01065  |
| 9mo_SIGAE3_ | 0.02128161 | 0.11781602 | 3.47E-05 | 0.0044724 | -0.023601 |
| 9mo_SIGAE3_ | 0.05116021 | 0.2981063  | 5.81E-05 | 0.006215  | 0.051138  |
| 9mo_SIGAE3_ | 0.04423747 | 0.25633386 | 5.42E-05 | 0.0050757 | 0.012967  |
| 9mo_SIGAE3_ | 0.01465126 | 0.07780788 | 3.26E-05 | 0.0055188 | 0.18676   |
| 9mo_SIGAE3_ | 0.12039482 | 0.71587425 | 6.66E-05 | 0.024561  | -0.37215  |
| 9mo_SIGAE3_ | 0.01309655 | 0.06842668 | 3.23E-05 | 0.0059016 | 0.23179   |
| 9mo_SIGAE3_ | 0.06561723 | 0.38534126 | 6.12E-05 | 0.01041   | 0.097788  |
| 9mo_SIGAE3_ | 0.10830359 | 0.64291465 | 6.59E-05 | 0.025614  | -0.24573  |
| 9mo_SIGAE3_ | 0.02299823 | 0.12817432 | 3.55E-05 | 0.0043197 | -0.056631 |
| 9mo_SIGAE3_ | 0.01479533 | 0.07867722 | 3.27E-05 | 0.0054028 | 0.16515   |
| 9mo_SIGAE3_ | 0.08927747 | 0.52810925 | 6.43E-05 | 0.020902  | 0.067165  |
| 9mo_SIGAE3_ | 0.04894708 | 0.28475204 | 5.70E-05 | 0.0057827 | 0.041222  |
| 9mo_SIGAE3_ | 0.08369817 | 0.4944433  | 6.37E-05 | 0.01841   | 0.12117   |
| 9mo_SIGAE3_ | 0.03799665 | 0.21867618 | 4.81E-05 | 0.0043756 | -0.04622  |
| 9mo_SIGAE3_ | 0.05945855 | 0.34817922 | 6.03E-05 | 0.0083426 | 0.075889  |
| 9mo_SIGAE3_ | 0.07005525 | 0.41212064 | 6.18E-05 | 0.012147  | 0.11689   |
| 9mo_SIGAE3_ | 0.0250051  | 0.14028396 | 3.68E-05 | 0.0041768 | -0.086782 |
| 9mo_SIGAE3_ | 0.08453851 | 0.499514   | 6.37E-05 | 0.018667  | 0.1136    |
| 9mo_SIGAE3_ | 0.14049472 | 0.83715886 | 6.74E-05 | 0.023558  | -0.49553  |
| 9mo_SIGAE3_ | 0.03329946 | 0.19033286 | 4.37E-05 | 0.0041322 | -0.091175 |
| 9mo_SIGAE3_ | 0.09545641 | 0.5653936  | 6.49E-05 | 0.023263  | -0.035993 |

|             |            |            |          |           |           |
|-------------|------------|------------|----------|-----------|-----------|
| 9mo_SIGAE3_ | 0.0256644  | 0.14426218 | 3.72E-05 | 0.0041509 | -0.092011 |
| 9mo_SIGAE3_ | 0.0228078  | 0.1270252  | 3.55E-05 | 0.0043197 | -0.056631 |
| 9mo_SIGAE3_ | 0.09891171 | 0.58624315 | 6.52E-05 | 0.024275  | -0.094455 |
| 9mo_SIGAE3_ | 0.02160288 | 0.11975466 | 3.49E-05 | 0.0044169 | -0.0356   |
| 9mo_SIGAE3_ | 0.04667372 | 0.2710344  | 5.57E-05 | 0.0054037 | 0.028707  |
| 9mo_SIGAE3_ | 0.03364501 | 0.19241796 | 4.43E-05 | 0.004153  | -0.087207 |
| 9mo_SIGAE3_ | 0.02212262 | 0.12289078 | 3.52E-05 | 0.0043661 | -0.046619 |
| 9mo_SIGAE3_ | 0.04135994 | 0.23897052 | 5.14E-05 | 0.0046741 | -0.011944 |
| 9mo_SIGAE3_ | 0.1309424  | 0.7795193  | 6.70E-05 | 0.023618  | -0.44608  |
| 9mo_SIGAE3_ | 0.01852112 | 0.10115902 | 3.36E-05 | 0.0048202 | 0.050123  |
| 9mo_SIGAE3_ | 0.01161259 | 0.0594723  | 3.22E-05 | 0.0061869 | 0.30353   |
| 9mo_SIGAE3_ | 0.08353923 | 0.49348423 | 6.37E-05 | 0.01841   | 0.12117   |
| 9mo_SIGAE3_ | 0.07821264 | 0.4613431  | 6.29E-05 | 0.015819  | 0.13662   |
| 9mo_SIGAE3_ | 0.11877283 | 0.706087   | 6.65E-05 | 0.024776  | -0.3584   |
| 9mo_SIGAE3_ | 0.02031132 | 0.11196123 | 3.42E-05 | 0.0045972 | -0.01065  |
| 9mo_SIGAE3_ | 0.00859445 | 0.04126054 | 3.19E-05 | 0.0071994 | 0.45929   |
| 9mo_SIGAE3_ | 0.08970077 | 0.5306635  | 6.44E-05 | 0.021137  | 0.059815  |
| 9mo_SIGAE3_ | 0.05011093 | 0.2917748  | 5.76E-05 | 0.005992  | 0.048868  |
| 9mo_SIGAE3_ | 0.01900368 | 0.10407083 | 3.38E-05 | 0.004741  | 0.03364   |
| 9mo_SIGAE3_ | 0.0944961  | 0.559599   | 6.48E-05 | 0.022877  | -0.017059 |
| 9mo_SIGAE3_ | 0.02630171 | 0.14810783 | 3.76E-05 | 0.0041286 | -0.096385 |
| 9mo_SIGAE3_ | 0.02307614 | 0.12864439 | 3.55E-05 | 0.0043197 | -0.065623 |
| 9mo_SIGAE3_ | 0.09964898 | 0.5906919  | 6.53E-05 | 0.024558  | -0.10426  |
| 9mo_SIGAE3_ | 0.0818263  | 0.48314828 | 6.34E-05 | 0.017373  | 0.12948   |
| 9mo_SIGAE3_ | 0.03220708 | 0.18374133 | 4.27E-05 | 0.004099  | -0.097962 |
| 9mo_SIGAE3_ | 0.01585909 | 0.08509607 | 3.28E-05 | 0.0052924 | 0.12392   |
| 9mo_SIGAE3_ | 0.0883867  | 0.5227343  | 6.42E-05 | 0.020421  | 0.074212  |
| 9mo_SIGAE3_ | 0.01276729 | 0.06643989 | 3.23E-05 | 0.0059016 | 0.25518   |
| 9mo_SIGAE3_ | 0.02570314 | 0.14449596 | 3.72E-05 | 0.0041509 | -0.092011 |
| 9mo_SIGAE3_ | 0.0784654  | 0.46286824 | 6.29E-05 | 0.015819  | 0.13651   |
| 9mo_SIGAE3_ | 0.0070724  | 0.03207637 | 3.19E-05 | 0.0075925 | 0.51404   |
| 9mo_SIGAE3_ | 0.02445075 | 0.13693891 | 3.64E-05 | 0.0042065 | -0.080664 |
| 9mo_SIGAE3_ | 0.01492822 | 0.07947909 | 3.27E-05 | 0.0054028 | 0.16515   |
| 9mo_SIGAE3_ | 0.02272344 | 0.1265162  | 3.55E-05 | 0.0043197 | -0.056631 |
| 9mo_SIGAE3_ | 0.02352682 | 0.13136385 | 3.58E-05 | 0.0042778 | -0.065623 |
| 9mo_SIGAE3_ | 0.10263978 | 0.60873866 | 6.55E-05 | 0.025127  | -0.16182  |
| 9mo_SIGAE3_ | 0.07802407 | 0.46020526 | 6.29E-05 | 0.015819  | 0.13662   |
| 9mo_SIGAE3_ | 0.01836162 | 0.10019655 | 3.36E-05 | 0.0048202 | 0.050123  |
| 9mo_SIGAE3_ | 0.01052365 | 0.05290153 | 3.21E-05 | 0.0064976 | 0.35381   |
| 9mo_SIGAE3_ | 0.13432238 | 0.79991436 | 6.71E-05 | 0.023539  | -0.46567  |
| 9mo_SIGAE3_ | 0.01800039 | 0.09801683 | 3.34E-05 | 0.0049043 | 0.067421  |
| 9mo_SIGAE3_ | 0.02351494 | 0.1312922  | 3.58E-05 | 0.0042778 | -0.065623 |
| 9mo_SIGAE3_ | 0.08893304 | 0.52603096 | 6.42E-05 | 0.020663  | 0.067165  |

|             |            |            |          |           |           |
|-------------|------------|------------|----------|-----------|-----------|
| 9mo_SIGAE3_ | 0.04346919 | 0.25169796 | 5.33E-05 | 0.0049301 | 0.008455  |
| 9mo_SIGAE3_ | 0.02454149 | 0.13748646 | 3.64E-05 | 0.0042065 | -0.080664 |
| 9mo_SIGAE3_ | 0.02409073 | 0.13476653 | 3.61E-05 | 0.0042401 | -0.073623 |
| 9mo_SIGAE3_ | 0.11005242 | 0.65346724 | 6.60E-05 | 0.025599  | -0.26716  |
| 9mo_SIGAE3_ | 0.02690416 | 0.15174305 | 3.80E-05 | 0.0041099 | -0.10271  |
| 9mo_SIGAE3_ | 0.00599597 | 0.02558109 | 3.18E-05 | 0.008015  | 0.56984   |
| 9mo_SIGAE3_ | 0.06932728 | 0.40772805 | 6.17E-05 | 0.01192   | 0.11218   |
| 9mo_SIGAE3_ | 0.01639251 | 0.0883148  | 3.30E-05 | 0.0051875 | 0.12392   |
| 9mo_SIGAE3_ | 0.11474127 | 0.6817602  | 6.63E-05 | 0.025242  | -0.32268  |
| 9mo_SIGAE3_ | 0.13112392 | 0.78061455 | 6.70E-05 | 0.023618  | -0.44608  |
| 9mo_SIGAE3_ | 0.02134833 | 0.11821862 | 3.47E-05 | 0.0044724 | -0.023601 |
| 9mo_SIGAE3_ | 0.02287225 | 0.1274141  | 3.55E-05 | 0.0043197 | -0.056631 |
| 9mo_SIGAE3_ | 0.08215611 | 0.4851384  | 6.35E-05 | 0.017633  | 0.1271    |
| 9mo_SIGAE3_ | 0.09098611 | 0.53841937 | 6.45E-05 | 0.021597  | 0.036126  |
| 9mo_SIGAE3_ | 0.04853397 | 0.28225932 | 5.67E-05 | 0.0056831 | 0.041222  |
| 9mo_SIGAE3_ | 0.05017142 | 0.29213983 | 5.76E-05 | 0.005992  | 0.048868  |
| 9mo_SIGAE3_ | 0.06710783 | 0.3943357  | 6.14E-05 | 0.011039  | 0.10251   |
| 9mo_SIGAE3_ | 0.10012317 | 0.59355325 | 6.53E-05 | 0.024558  | -0.11403  |
| 9mo_SIGAE3_ | 0.12460834 | 0.741299   | 6.68E-05 | 0.024034  | -0.40152  |
| 9mo_SIGAE3_ | 0.07057219 | 0.41523993 | 6.19E-05 | 0.012376  | 0.11916   |
| 9mo_SIGAE3_ | 0.08412584 | 0.4970239  | 6.37E-05 | 0.018667  | 0.1176    |
| 9mo_SIGAE3_ | 0.03805511 | 0.21902889 | 4.81E-05 | 0.0043756 | -0.04622  |
| 9mo_SIGAE3_ | 0.07773131 | 0.45843872 | 6.29E-05 | 0.015562  | 0.13662   |
| 9mo_SIGAE3_ | 0.02112525 | 0.11687259 | 3.47E-05 | 0.0044724 | -0.023601 |
| 9mo_SIGAE3_ | 0.0571737  | 0.33439222 | 5.99E-05 | 0.0076952 | 0.070131  |
| 9mo_SIGAE3_ | 0.07560384 | 0.44560134 | 6.26E-05 | 0.014549  | 0.13453   |
| 9mo_SIGAE3_ | 0.09832145 | 0.58268154 | 6.52E-05 | 0.024123  | -0.084641 |
| 9mo_SIGAE3_ | 0.09168064 | 0.5426102  | 6.45E-05 | 0.021822  | 0.027741  |
| 9mo_SIGAE3_ | 0.10697515 | 0.63489866 | 6.58E-05 | 0.025586  | -0.22263  |
| 9mo_SIGAE3_ | 0.01572906 | 0.08431148 | 3.28E-05 | 0.0052924 | 0.1442    |
| 9mo_SIGAE3_ | 0.01870614 | 0.10227545 | 3.38E-05 | 0.004741  | 0.03364   |
| 9mo_SIGAE3_ | 0.02238544 | 0.12447665 | 3.52E-05 | 0.0043661 | -0.046619 |
| 9mo_SIGAE3_ | 0.04841932 | 0.28156748 | 5.67E-05 | 0.0056831 | 0.038361  |
| 9mo_SIGAE3_ | 0.01481768 | 0.07881209 | 3.27E-05 | 0.0054028 | 0.16515   |
| 9mo_SIGAE3_ | 0.01433818 | 0.07591876 | 3.26E-05 | 0.0055188 | 0.18676   |
| 9mo_SIGAE3_ | 0.01969622 | 0.10824967 | 3.40E-05 | 0.0046667 | 0.017998  |
| 9mo_SIGAE3_ | 0.01866563 | 0.10203095 | 3.38E-05 | 0.004741  | 0.03364   |
| 9mo_SIGAE3_ | 0.09322003 | 0.5518991  | 6.47E-05 | 0.022469  | 0.0013661 |
| 9mo_SIGAE3_ | 0.08570125 | 0.50653005 | 6.39E-05 | 0.019177  | 0.1043    |
| 9mo_SIGAE3_ | 0.07437497 | 0.4381863  | 6.24E-05 | 0.014051  | 0.13074   |
| 9mo_SIGAE3_ | 0.01350321 | 0.0708805  | 3.24E-05 | 0.0057681 | 0.23179   |
| 9mo_SIGAE3_ | 0.06345982 | 0.37232327 | 6.09E-05 | 0.0096122 | 0.089169  |
| 9mo_SIGAE3_ | 0.08211625 | 0.48489782 | 6.35E-05 | 0.017633  | 0.12948   |

|             |            |            |          |           |           |
|-------------|------------|------------|----------|-----------|-----------|
| 9mo_SIGAE3_ | 0.13738672 | 0.818405   | 6.73E-05 | 0.02353   | -0.48301  |
| 9mo_SIGAE3_ | 0.02334314 | 0.13025549 | 3.58E-05 | 0.0042778 | -0.065623 |
| 9mo_SIGAE3_ | 0.01999322 | 0.11004177 | 3.42E-05 | 0.0045972 | 0.0032259 |
| 9mo_SIGAE3_ | 0.05639726 | 0.32970712 | 5.98E-05 | 0.0075425 | 0.068678  |
| 9mo_SIGAE3_ | 0.11250579 | 0.66827106 | 6.62E-05 | 0.025448  | -0.29336  |
| 9mo_SIGAE3_ | 0.08954652 | 0.52973276 | 6.43E-05 | 0.020902  | 0.059815  |
| 9mo_SIGAE3_ | 0.02845964 | 0.16112892 | 3.93E-05 | 0.004074  | -0.10603  |
| 9mo_SIGAE3_ | 0.01778101 | 0.09669311 | 3.34E-05 | 0.0049043 | 0.067421  |
| 9mo_SIGAE3_ | 0.01851735 | 0.10113623 | 3.36E-05 | 0.0048202 | 0.050123  |
| 9mo_SIGAE3_ | 0.09826511 | 0.58234155 | 6.52E-05 | 0.024123  | -0.084641 |
| 9mo_SIGAE3_ | 0.01150002 | 0.05879301 | 3.22E-05 | 0.0061869 | 0.30353   |
| 9mo_SIGAE3_ | 0.08102393 | 0.4783067  | 6.33E-05 | 0.017113  | 0.13314   |
| 9mo_SIGAE3_ | 0.09221571 | 0.5458389  | 6.46E-05 | 0.022042  | 0.019141  |
| 9mo_SIGAE3_ | 0.02320214 | 0.12940472 | 3.58E-05 | 0.0042778 | -0.065623 |
| 9mo_SIGAE3_ | 0.10112318 | 0.5995874  | 6.54E-05 | 0.024809  | -0.13341  |
| 9mo_SIGAE3_ | 0.01553391 | 0.08313388 | 3.28E-05 | 0.0052924 | 0.1442    |
| 9mo_SIGAE3_ | 0.03475855 | 0.19913718 | 4.54E-05 | 0.0042028 | -0.078293 |
| 9mo_SIGAE3_ | 0.10034279 | 0.59487844 | 6.53E-05 | 0.024687  | -0.11403  |
| 9mo_SIGAE3_ | 0.01981599 | 0.10897239 | 3.42E-05 | 0.0045972 | 0.0032259 |
| 9mo_SIGAE3_ | 0.05781283 | 0.3382488  | 6.00E-05 | 0.0078516 | 0.071569  |
| 9mo_SIGAE3_ | 0.03731203 | 0.21454507 | 4.76E-05 | 0.0043355 | -0.057524 |
| 9mo_SIGAE3_ | 0.09882554 | 0.5857232  | 6.52E-05 | 0.024275  | -0.094455 |
| 9mo_SIGAE3_ | 0.01993888 | 0.1097139  | 3.42E-05 | 0.0045972 | 0.0032259 |
| 9mo_SIGAE3_ | 0.07997393 | 0.4719709  | 6.32E-05 | 0.016594  | 0.13446   |
| 9mo_SIGAE3_ | 0.10257395 | 0.6083415  | 6.55E-05 | 0.025127  | -0.16182  |
| 9mo_SIGAE3_ | 0.13835348 | 0.8242385  | 6.73E-05 | 0.023534  | -0.48567  |
| 9mo_SIGAE3_ | 0.11500479 | 0.68335027 | 6.63E-05 | 0.025242  | -0.32268  |
| 9mo_SIGAE3_ | 0.02139648 | 0.11850915 | 3.47E-05 | 0.0044724 | -0.0356   |
| 9mo_SIGAE3_ | 0.01770406 | 0.09622878 | 3.34E-05 | 0.0049043 | 0.067421  |
| 9mo_SIGAE3_ | 0.05890458 | 0.34483656 | 6.02E-05 | 0.0081753 | 0.074438  |
| 9mo_SIGAE3_ | 0.02676025 | 0.1508747  | 3.80E-05 | 0.0041099 | -0.099939 |
| 9mo_SIGAE3_ | 0.0838868  | 0.49558148 | 6.37E-05 | 0.01841   | 0.1176    |
| 9mo_SIGAE3_ | 0.04880922 | 0.2839202  | 5.70E-05 | 0.0057827 | 0.041222  |
| 9mo_SIGAE3_ | 0.03961129 | 0.22841905 | 4.98E-05 | 0.0045122 | -0.028892 |
| 9mo_SIGAE3_ | 0.08266651 | 0.48821816 | 6.35E-05 | 0.017892  | 0.1271    |
| 9mo_SIGAE3_ | 0.0244426  | 0.13688976 | 3.64E-05 | 0.0042065 | -0.080664 |
| 9mo_SIGAE3_ | 0.08214221 | 0.48505452 | 6.35E-05 | 0.017633  | 0.1271    |
| 9mo_SIGAE3_ | 0.12646502 | 0.7525024  | 6.68E-05 | 0.023879  | -0.41707  |
| 9mo_SIGAE3_ | 0.10120901 | 0.6001053  | 6.54E-05 | 0.024809  | -0.13341  |
| 9mo_SIGAE3_ | 0.04389371 | 0.2542596  | 5.38E-05 | 0.0050014 | 0.008455  |
| 9mo_SIGAE3_ | 0.09595615 | 0.568409   | 6.50E-05 | 0.023448  | -0.045608 |
| 9mo_SIGAE3_ | 0.09910508 | 0.58741    | 6.53E-05 | 0.02442   | -0.094455 |
| 9mo_SIGAE3_ | 0.07208976 | 0.4243971  | 6.21E-05 | 0.01308   | 0.12348   |

|             |            |            |          |           |           |
|-------------|------------|------------|----------|-----------|-----------|
| 9mo_SIGAE3_ | 0.01493745 | 0.07953481 | 3.27E-05 | 0.0054028 | 0.16515   |
| 9mo_SIGAE3_ | 0.01915607 | 0.10499037 | 3.38E-05 | 0.004741  | 0.03364   |
| 9mo_SIGAE3_ | 0.01207032 | 0.0622343  | 3.23E-05 | 0.0060411 | 0.2791    |
| 9mo_SIGAE3_ | 0.01158992 | 0.05933548 | 3.22E-05 | 0.0061869 | 0.30353   |
| 9mo_SIGAE3_ | 0.01510294 | 0.08053341 | 3.27E-05 | 0.0054028 | 0.16515   |
| 9mo_SIGAE3_ | 0.01766566 | 0.0959971  | 3.34E-05 | 0.0049043 | 0.067421  |
| 9mo_SIGAE3_ | 0.0084023  | 0.0401011  | 3.19E-05 | 0.0071994 | 0.45929   |
| 9mo_SIGAE3_ | 0.0914005  | 0.54091984 | 6.45E-05 | 0.021822  | 0.036126  |
| 9mo_SIGAE3_ | 0.01185403 | 0.06092915 | 3.22E-05 | 0.0061869 | 0.30353   |
| 9mo_SIGAE3_ | 0.1400724  | 0.8346106  | 6.74E-05 | 0.023558  | -0.49317  |
| 9mo_SIGAE3_ | 0.10027125 | 0.5944467  | 6.53E-05 | 0.024687  | -0.11403  |
| 9mo_SIGAE3_ | 0.0103008  | 0.05155683 | 3.20E-05 | 0.0066628 | 0.37961   |
| 9mo_SIGAE3_ | 0.01649286 | 0.0889203  | 3.31E-05 | 0.0050879 | 0.10435   |
| 9mo_SIGAE3_ | 0.07064008 | 0.4156496  | 6.19E-05 | 0.012376  | 0.11916   |
| 9mo_SIGAE3_ | 0.1107522  | 0.65768975 | 6.61E-05 | 0.025556  | -0.27396  |
| 9mo_SIGAE3_ | 0.02192974 | 0.12172694 | 3.49E-05 | 0.0044169 | -0.046619 |
| 9mo_SIGAE3_ | 0.02682921 | 0.15129079 | 3.80E-05 | 0.0041099 | -0.099939 |
| 9mo_SIGAE3_ | 0.02170984 | 0.12040004 | 3.49E-05 | 0.0044169 | -0.0356   |
| 9mo_SIGAE3_ | 0.01474848 | 0.07839453 | 3.26E-05 | 0.0055188 | 0.16515   |
| 9mo_SIGAE3_ | 0.01811011 | 0.09867892 | 3.36E-05 | 0.0048202 | 0.050123  |
| 9mo_SIGAE3_ | 0.11226261 | 0.6668037  | 6.61E-05 | 0.025489  | -0.29336  |
| 9mo_SIGAE3_ | 0.07859066 | 0.46362412 | 6.30E-05 | 0.016077  | 0.13651   |
| 9mo_SIGAE3_ | 0.02714052 | 0.15316927 | 3.84E-05 | 0.0040947 | -0.10271  |
| 9mo_SIGAE3_ | 0.08121455 | 0.4794569  | 6.33E-05 | 0.017113  | 0.13148   |
| 9mo_SIGAE3_ | 0.0258495  | 0.14537911 | 3.72E-05 | 0.0041509 | -0.096385 |
| 9mo_SIGAE3_ | 0.13214582 | 0.78678083 | 6.71E-05 | 0.023582  | -0.45284  |
| 9mo_SIGAE3_ | 0.05853971 | 0.3426349  | 6.01E-05 | 0.0080116 | 0.074438  |
| 9mo_SIGAE3_ | 0.02559974 | 0.14387202 | 3.72E-05 | 0.0041509 | -0.092011 |
| 9mo_SIGAE3_ | 0.02261721 | 0.12587519 | 3.55E-05 | 0.0043197 | -0.056631 |
| 9mo_SIGAE3_ | 0.0178513  | 0.09711725 | 3.34E-05 | 0.0049043 | 0.067421  |
| 9mo_SIGAE3_ | 0.09081452 | 0.53738403 | 6.45E-05 | 0.021597  | 0.044278  |
| 9mo_SIGAE3_ | 0.03953676 | 0.22796929 | 4.98E-05 | 0.0045122 | -0.034672 |
| 9mo_SIGAE3_ | 0.01896603 | 0.10384359 | 3.38E-05 | 0.004741  | 0.03364   |
| 9mo_SIGAE3_ | 0.08706534 | 0.5147611  | 6.41E-05 | 0.01993   | 0.093363  |
| 9mo_SIGAE3_ | 0.02540747 | 0.1427119  | 3.72E-05 | 0.0041509 | -0.092011 |
| 9mo_SIGAE3_ | 0.01745215 | 0.09470873 | 3.33E-05 | 0.0049935 | 0.085504  |
| 9mo_SIGAE3_ | 0.04474608 | 0.2594028  | 5.46E-05 | 0.0051531 | 0.017239  |
| 9mo_SIGAE3_ | 0.08193208 | 0.48378652 | 6.35E-05 | 0.017633  | 0.12948   |
| 9mo_SIGAE3_ | 0.12339275 | 0.73396397 | 6.67E-05 | 0.024217  | -0.39346  |
| 9mo_SIGAE3_ | 0.08346162 | 0.49301594 | 6.36E-05 | 0.018151  | 0.12117   |
| 9mo_SIGAE3_ | 0.02240334 | 0.12458466 | 3.52E-05 | 0.0043661 | -0.046619 |
| 9mo_SIGAE3_ | 0.01611277 | 0.0866268  | 3.30E-05 | 0.0051875 | 0.12392   |
| 9mo_SIGAE3_ | 0.12467966 | 0.7417293  | 6.68E-05 | 0.024034  | -0.40548  |

|             |            |            |          |           |           |
|-------------|------------|------------|----------|-----------|-----------|
| 9mo_SIGAE3_ | 0.01240054 | 0.06422687 | 3.23E-05 | 0.0060411 | 0.2791    |
| 9mo_SIGAE3_ | 0.0539829  | 0.31513867 | 5.91E-05 | 0.0068337 | 0.062513  |
| 9mo_SIGAE3_ | 0.02611234 | 0.14696512 | 3.76E-05 | 0.0041286 | -0.096385 |
| 9mo_SIGAE3_ | 0.01763604 | 0.09581836 | 3.34E-05 | 0.0049043 | 0.067421  |
| 9mo_SIGAE3_ | 0.02234591 | 0.12423813 | 3.52E-05 | 0.0043661 | -0.046619 |
| 9mo_SIGAE3_ | 0.03159637 | 0.1800563  | 4.22E-05 | 0.0040866 | -0.10071  |
| 9mo_SIGAE3_ | 0.03440954 | 0.19703121 | 4.48E-05 | 0.0041765 | -0.082901 |
| 9mo_SIGAE3_ | 0.03242169 | 0.18503633 | 4.27E-05 | 0.004099  | -0.094772 |
| 9mo_SIGAE3_ | 0.05134143 | 0.29919976 | 5.81E-05 | 0.006215  | 0.053285  |
| 9mo_SIGAE3_ | 0.02858045 | 0.16185796 | 3.93E-05 | 0.004074  | -0.10664  |
| 9mo_SIGAE3_ | 0.01441255 | 0.07636748 | 3.26E-05 | 0.0055188 | 0.18676   |
| 9mo_SIGAE3_ | 0.02864681 | 0.16225837 | 3.97E-05 | 0.0040686 | -0.10664  |
| 9mo_SIGAE3_ | 0.02340231 | 0.13061252 | 3.58E-05 | 0.0042778 | -0.065623 |
| 9mo_SIGAE3_ | 0.026211   | 0.14756045 | 3.76E-05 | 0.0041286 | -0.096385 |
| 9mo_SIGAE3_ | 0.0730357  | 0.430105   | 6.23E-05 | 0.013561  | 0.12737   |
| 9mo_SIGAE3_ | 0.09613581 | 0.5694931  | 6.50E-05 | 0.023448  | -0.045608 |
| 9mo_SIGAE3_ | 0.07760976 | 0.4577053  | 6.29E-05 | 0.015562  | 0.13646   |
| 9mo_SIGAE3_ | 0.09861723 | 0.5844663  | 6.52E-05 | 0.024275  | -0.084641 |
| 9mo_SIGAE3_ | 0.02001265 | 0.11015904 | 3.42E-05 | 0.0045972 | 0.0032259 |
| 9mo_SIGAE3_ | 0.14365762 | 0.85624415 | 6.75E-05 | 0.023613  | -0.50792  |
| 9mo_SIGAE3_ | 0.07585087 | 0.447092   | 6.26E-05 | 0.0148    | 0.13453   |
| 9mo_SIGAE3_ | 0.05219881 | 0.3043733  | 5.85E-05 | 0.0064518 | 0.055318  |
| 9mo_SIGAE3_ | 0.01368547 | 0.07198022 | 3.25E-05 | 0.0056405 | 0.20898   |
| 9mo_SIGAE3_ | 0.09875272 | 0.5852838  | 6.52E-05 | 0.024275  | -0.094455 |
| 9mo_SIGAE3_ | 0.0117525  | 0.06031652 | 3.22E-05 | 0.0061869 | 0.30353   |
| 9mo_SIGAE3_ | 0.15793261 | 0.9423807  | 6.78E-05 | 0.023701  | -0.52688  |
| 9mo_SIGAE3_ | 0.086418   | 0.510855   | 6.40E-05 | 0.019681  | 0.099025  |
| 9mo_SIGAE3_ | 0.02976062 | 0.1689792  | 4.07E-05 | 0.0040668 | -0.10597  |
| 9mo_SIGAE3_ | 0.01943593 | 0.10667906 | 3.40E-05 | 0.0046667 | 0.017998  |
| 9mo_SIGAE3_ | 0.02229284 | 0.1239179  | 3.52E-05 | 0.0043661 | -0.046619 |
| 9mo_SIGAE3_ | 0.01964276 | 0.10792706 | 3.40E-05 | 0.0046667 | 0.017998  |
| 9mo_SIGAE3_ | 0.0222366  | 0.12357858 | 3.52E-05 | 0.0043661 | -0.046619 |
| 9mo_SIGAE3_ | 0.02271144 | 0.12644377 | 3.55E-05 | 0.0043197 | -0.056631 |
| 9mo_SIGAE3_ | 0.11104849 | 0.6594776  | 6.61E-05 | 0.025556  | -0.28058  |
| 9mo_SIGAE3_ | 0.10414624 | 0.6178288  | 6.56E-05 | 0.025367  | -0.18011  |
| 9mo_SIGAE3_ | 0.01630068 | 0.08776064 | 3.30E-05 | 0.0051875 | 0.12392   |
| 9mo_SIGAE3_ | 0.02800065 | 0.1583594  | 3.88E-05 | 0.0040827 | -0.10603  |
| 9mo_SIGAE3_ | 0.11899054 | 0.7074007  | 6.65E-05 | 0.024704  | -0.3584   |
| 9mo_SIGAE3_ | 0.08357263 | 0.4936858  | 6.37E-05 | 0.01841   | 0.12117   |
| 9mo_SIGAE3_ | 0.029666   | 0.16840826 | 4.02E-05 | 0.0040662 | -0.10597  |
| 9mo_SIGAE3_ | 0.09856526 | 0.58415264 | 6.52E-05 | 0.024275  | -0.084641 |
| 9mo_SIGAE3_ | 0.0349003  | 0.19999248 | 4.54E-05 | 0.0042028 | -0.078293 |
| 9mo_SIGAE3_ | 0.09313205 | 0.5513682  | 6.47E-05 | 0.022469  | 0.010343  |

|             |            |            |          |           |           |
|-------------|------------|------------|----------|-----------|-----------|
| 9mo_SIGAE3_ | 0.03478229 | 0.1992804  | 4.54E-05 | 0.0042028 | -0.078293 |
| 9mo_SIGAE3_ | 0.02723183 | 0.15372023 | 3.84E-05 | 0.0040947 | -0.10271  |
| 9mo_SIGAE3_ | 0.01345141 | 0.07056793 | 3.24E-05 | 0.0057681 | 0.23179   |
| 9mo_SIGAE3_ | 0.02031127 | 0.11196094 | 3.42E-05 | 0.0045972 | -0.01065  |
| 9mo_SIGAE3_ | 0.07721555 | 0.45532656 | 6.28E-05 | 0.015307  | 0.13646   |
| 9mo_SIGAE3_ | 0.01582042 | 0.0848627  | 3.28E-05 | 0.0052924 | 0.1442    |
| 9mo_SIGAE3_ | 0.01980367 | 0.10889803 | 3.42E-05 | 0.0045972 | 0.0032259 |
| 9mo_SIGAE3_ | 0.01001104 | 0.04980837 | 3.20E-05 | 0.0066628 | 0.37961   |
| 9mo_SIGAE3_ | 0.02113075 | 0.11690576 | 3.47E-05 | 0.0044724 | -0.023601 |
| 9mo_SIGAE3_ | 0.08548408 | 0.50521964 | 6.39E-05 | 0.019177  | 0.1043    |
| 9mo_SIGAE3_ | 0.01070895 | 0.05401963 | 3.21E-05 | 0.0064976 | 0.35381   |
| 9mo_SIGAE3_ | 0.01840238 | 0.10044249 | 3.36E-05 | 0.0048202 | 0.050123  |
| 9mo_SIGAE3_ | 0.01348071 | 0.07074472 | 3.24E-05 | 0.0057681 | 0.23179   |
| 9mo_SIGAE3_ | 0.02322311 | 0.12953123 | 3.58E-05 | 0.0042778 | -0.065623 |
| 9mo_SIGAE3_ | 0.02653493 | 0.14951508 | 3.80E-05 | 0.0041099 | -0.099939 |
| 9mo_SIGAE3_ | 0.05989917 | 0.35083795 | 6.04E-05 | 0.0085136 | 0.077363  |
| 9mo_SIGAE3_ | 0.05482804 | 0.3202383  | 5.94E-05 | 0.0071062 | 0.064127  |
| 9mo_SIGAE3_ | 0.01046945 | 0.0525745  | 3.21E-05 | 0.0064976 | 0.35381   |
| 9mo_SIGAE3_ | 0.02355658 | 0.13154344 | 3.58E-05 | 0.0042778 | -0.065623 |
| 9mo_SIGAE3_ | 0.11299444 | 0.67121965 | 6.62E-05 | 0.025403  | -0.29951  |
| 9mo_SIGAE3_ | 0.11800832 | 0.70147383 | 6.65E-05 | 0.024847  | -0.34876  |
| 9mo_SIGAE3_ | 0.11455179 | 0.68061686 | 6.63E-05 | 0.025242  | -0.3171   |
| 9mo_SIGAE3_ | 0.04526297 | 0.26252177 | 5.46E-05 | 0.0051531 | 0.021279  |
| 9mo_SIGAE3_ | 0.02639958 | 0.14869836 | 3.76E-05 | 0.0041286 | -0.099939 |
| 9mo_SIGAE3_ | 0.02688586 | 0.15163265 | 3.80E-05 | 0.0041099 | -0.099939 |
| 9mo_SIGAE3_ | 0.02007058 | 0.11050858 | 3.42E-05 | 0.0045972 | 0.0032259 |
| 9mo_SIGAE3_ | 0.06769864 | 0.39790064 | 6.15E-05 | 0.011255  | 0.10492   |
| 9mo_SIGAE3_ | 0.08505696 | 0.50264233 | 6.38E-05 | 0.018923  | 0.10916   |
| 9mo_SIGAE3_ | 0.12128018 | 0.72121656 | 6.66E-05 | 0.024419  | -0.37656  |
| 9mo_SIGAE3_ | 0.14324038 | 0.85372645 | 6.75E-05 | 0.023603  | -0.50606  |
| 9mo_SIGAE3_ | 0.02021989 | 0.11140951 | 3.42E-05 | 0.0045972 | 0.0032259 |
| 9mo_SIGAE3_ | 0.0793744  | 0.4683533  | 6.31E-05 | 0.016335  | 0.13545   |
| 9mo_SIGAE3_ | 0.01764866 | 0.09589449 | 3.34E-05 | 0.0049043 | 0.067421  |
| 9mo_SIGAE3_ | 0.02133825 | 0.11815779 | 3.47E-05 | 0.0044724 | -0.023601 |
| 9mo_SIGAE3_ | 0.07801405 | 0.4601448  | 6.29E-05 | 0.015819  | 0.13662   |
| 9mo_SIGAE3_ | 0.09437234 | 0.5588522  | 6.48E-05 | 0.022877  | -0.017059 |
| 9mo_SIGAE3_ | 0.00784793 | 0.03675598 | 3.19E-05 | 0.0073923 | 0.48652   |
| 9mo_SIGAE3_ | 0.07842501 | 0.46262455 | 6.29E-05 | 0.015819  | 0.13651   |
| 9mo_SIGAE3_ | 0.01413274 | 0.07467913 | 3.25E-05 | 0.0056405 | 0.20898   |
| 9mo_SIGAE3_ | 0.08200313 | 0.4842153  | 6.35E-05 | 0.017633  | 0.12948   |
| 9mo_SIGAE3_ | 0.01581675 | 0.08484056 | 3.28E-05 | 0.0052924 | 0.1442    |
| 9mo_SIGAE3_ | 0.06823733 | 0.4011512  | 6.16E-05 | 0.011474  | 0.10734   |
| 9mo_SIGAE3_ | 0.02547439 | 0.14311565 | 3.72E-05 | 0.0041509 | -0.092011 |



|             |            |            |          |           |           |
|-------------|------------|------------|----------|-----------|-----------|
| 9mo_SIGAE3_ | 0.02976617 | 0.16901265 | 4.07E-05 | 0.0040668 | -0.10597  |
| 9mo_SIGAE3_ | 0.03911843 | 0.22544506 | 4.92E-05 | 0.0044639 | -0.034672 |
| 9mo_SIGAE3_ | 0.11524173 | 0.68478    | 6.63E-05 | 0.025182  | -0.32268  |
| 9mo_SIGAE3_ | 0.02126639 | 0.11772424 | 3.47E-05 | 0.0044724 | -0.023601 |
| 9mo_SIGAE3_ | 0.06969302 | 0.40993494 | 6.18E-05 | 0.012147  | 0.11455   |
| 9mo_SIGAE3_ | 0.02373412 | 0.13261475 | 3.61E-05 | 0.0042401 | -0.073623 |
| 9mo_SIGAE3_ | 0.01973365 | 0.10847549 | 3.40E-05 | 0.0046667 | 0.0032259 |
| 9mo_SIGAE3_ | 0.07593891 | 0.44762322 | 6.26E-05 | 0.0148    | 0.13453   |
| 9mo_SIGAE3_ | 0.08775914 | 0.51894754 | 6.41E-05 | 0.020177  | 0.080939  |
| 9mo_SIGAE3_ | 0.06938675 | 0.4080869  | 6.17E-05 | 0.01192   | 0.11218   |
| 9mo_SIGAE3_ | 0.08635914 | 0.5104998  | 6.40E-05 | 0.019681  | 0.099025  |
| 9mo_SIGAE3_ | 0.0269848  | 0.15222964 | 3.84E-05 | 0.0040947 | -0.10271  |
| 9mo_SIGAE3_ | 0.07796245 | 0.45983344 | 6.29E-05 | 0.015562  | 0.13662   |
| 9mo_SIGAE3_ | 0.00638163 | 0.0279082  | 3.18E-05 | 0.008015  | 0.56984   |
| 9mo_SIGAE3_ | 0.06533546 | 0.38364103 | 6.12E-05 | 0.01041   | 0.095509  |
| 9mo_SIGAE3_ | 0.0811737  | 0.4792104  | 6.33E-05 | 0.017113  | 0.13148   |
| 9mo_SIGAE3_ | 0.01554925 | 0.08322645 | 3.28E-05 | 0.0052924 | 0.1442    |
| 9mo_SIGAE3_ | 0.05351279 | 0.31230196 | 5.89E-05 | 0.0067028 | 0.060836  |
| 9mo_SIGAE3_ | 0.023592   | 0.13175717 | 3.58E-05 | 0.0042778 | -0.073623 |
| 9mo_SIGAE3_ | 0.0600746  | 0.35189655 | 6.04E-05 | 0.0085136 | 0.07887   |
| 9mo_SIGAE3_ | 0.12204413 | 0.7258263  | 6.66E-05 | 0.02435   | -0.38515  |
| 9mo_SIGAE3_ | 0.05971715 | 0.3497396  | 6.04E-05 | 0.0085136 | 0.077363  |
| 9mo_SIGAE3_ | 0.08298137 | 0.49011806 | 6.36E-05 | 0.018151  | 0.12434   |
| 9mo_SIGAE3_ | 0.12986763 | 0.77303404 | 6.70E-05 | 0.023664  | -0.43912  |
| 9mo_SIGAE3_ | 0.01072018 | 0.0540874  | 3.21E-05 | 0.0064976 | 0.35381   |
| 9mo_SIGAE3_ | 0.01778783 | 0.09673428 | 3.34E-05 | 0.0049043 | 0.067421  |
| 9mo_SIGAE3_ | 0.04697608 | 0.27285886 | 5.61E-05 | 0.0054936 | 0.032113  |
| 9mo_SIGAE3_ | 0.02736364 | 0.1545156  | 3.84E-05 | 0.0040947 | -0.10271  |
| 9mo_SIGAE3_ | 0.0289567  | 0.16412824 | 3.97E-05 | 0.0040686 | -0.10664  |
| 9mo_SIGAE3_ | 0.04147148 | 0.23964359 | 5.19E-05 | 0.0047337 | -0.011944 |
| 9mo_SIGAE3_ | 0.04683015 | 0.2719783  | 5.57E-05 | 0.0054037 | 0.032113  |
| 9mo_SIGAE3_ | 0.02056005 | 0.11346211 | 3.44E-05 | 0.0045325 | -0.01065  |
| 9mo_SIGAE3_ | 0.10766318 | 0.63905036 | 6.59E-05 | 0.025604  | -0.23822  |
| 9mo_SIGAE3_ | 0.11866915 | 0.7054613  | 6.65E-05 | 0.024776  | -0.3584   |
| 9mo_SIGAE3_ | 0.04795965 | 0.2787938  | 5.64E-05 | 0.0055867 | 0.038361  |
| 9mo_SIGAE3_ | 0.01873703 | 0.1024618  | 3.38E-05 | 0.004741  | 0.03364   |
| 9mo_SIGAE3_ | 0.01827665 | 0.09968388 | 3.36E-05 | 0.0048202 | 0.050123  |
| 9mo_SIGAE3_ | 0.01929524 | 0.10583013 | 3.40E-05 | 0.0046667 | 0.017998  |
| 9mo_SIGAE3_ | 0.09710109 | 0.5753177  | 6.51E-05 | 0.023799  | -0.065044 |
| 9mo_SIGAE3_ | 0.04788195 | 0.27832496 | 5.64E-05 | 0.0055867 | 0.035328  |
| 9mo_SIGAE3_ | 0.08904222 | 0.52668977 | 6.42E-05 | 0.020663  | 0.067165  |
| 9mo_SIGAE3_ | 0.05287991 | 0.3084831  | 5.87E-05 | 0.0065755 | 0.059084  |
| 9mo_SIGAE3_ | 0.02535954 | 0.14242268 | 3.72E-05 | 0.0041509 | -0.092011 |

|             |            |            |          |           |            |
|-------------|------------|------------|----------|-----------|------------|
| 9mo_SIGAE3_ | 0.02043068 | 0.11268149 | 3.44E-05 | 0.0045325 | -0.01065   |
| 9mo_SIGAE3_ | 0.04603538 | 0.2671826  | 5.54E-05 | 0.0053171 | 0.025099   |
| 9mo_SIGAE3_ | 0.07585735 | 0.44713107 | 6.26E-05 | 0.0148    | 0.13453    |
| 9mo_SIGAE3_ | 0.02160266 | 0.11975331 | 3.49E-05 | 0.0044169 | -0.0356    |
| 9mo_SIGAE3_ | 0.09180574 | 0.5433651  | 6.45E-05 | 0.021822  | 0.027741   |
| 9mo_SIGAE3_ | 0.01736428 | 0.09417853 | 3.33E-05 | 0.0049935 | 0.085504   |
| 9mo_SIGAE3_ | 0.07929754 | 0.46788952 | 6.31E-05 | 0.016335  | 0.13613    |
| 9mo_SIGAE3_ | 0.03853841 | 0.22194517 | 4.87E-05 | 0.0044183 | -0.040459  |
| 9mo_SIGAE3_ | 0.1340726  | 0.79840726 | 6.71E-05 | 0.023539  | -0.46567   |
| 9mo_SIGAE3_ | 0.01212737 | 0.06257854 | 3.23E-05 | 0.0060411 | 0.2791     |
| 9mo_SIGAE3_ | 0.1164562  | 0.6921082  | 6.64E-05 | 0.025054  | -0.33868   |
| 9mo_SIGAE3_ | 0.01746648 | 0.09479518 | 3.33E-05 | 0.0049935 | 0.085504   |
| 9mo_SIGAE3_ | 0.08470311 | 0.5005072  | 6.38E-05 | 0.018923  | 0.1136     |
| 9mo_SIGAE3_ | 0.01723404 | 0.09339261 | 3.33E-05 | 0.0049935 | 0.085504   |
| 9mo_SIGAE3_ | 0.09428626 | 0.55833274 | 6.48E-05 | 0.022877  | -0.0077738 |
| 9mo_SIGAE3_ | 0.03254202 | 0.18576244 | 4.32E-05 | 0.0041142 | -0.094772  |
| 9mo_SIGAE3_ | 0.02332417 | 0.13014103 | 3.58E-05 | 0.0042778 | -0.065623  |
| 9mo_SIGAE3_ | 0.01748937 | 0.09493334 | 3.33E-05 | 0.0049935 | 0.085504   |
| 9mo_SIGAE3_ | 0.02233159 | 0.1241517  | 3.52E-05 | 0.0043661 | -0.046619  |
| 9mo_SIGAE3_ | 0.01676297 | 0.09055018 | 3.31E-05 | 0.0050879 | 0.10435    |
| 9mo_SIGAE3_ | 0.0591987  | 0.3466113  | 6.03E-05 | 0.0083426 | 0.075889   |
| 9mo_SIGAE3_ | 0.11237764 | 0.6674978  | 6.62E-05 | 0.025448  | -0.29336   |
| 9mo_SIGAE3_ | 0.08924301 | 0.52790135 | 6.43E-05 | 0.020902  | 0.067165   |
| 9mo_SIGAE3_ | 0.01884667 | 0.10312337 | 3.38E-05 | 0.004741  | 0.03364    |
| 9mo_SIGAE3_ | 0.11668144 | 0.6934674  | 6.64E-05 | 0.025054  | -0.33868   |
| 9mo_SIGAE3_ | 0.02269496 | 0.12634437 | 3.55E-05 | 0.0043197 | -0.056631  |
| 9mo_SIGAE3_ | 0.01154073 | 0.05903871 | 3.22E-05 | 0.0061869 | 0.30353    |
| 9mo_SIGAE3_ | 0.02574    | 0.14471838 | 3.72E-05 | 0.0041509 | -0.092011  |
| 9mo_SIGAE3_ | 0.00721893 | 0.03296058 | 3.19E-05 | 0.0075925 | 0.51404    |
| 9mo_SIGAE3_ | 0.018222   | 0.09935412 | 3.36E-05 | 0.0048202 | 0.050123   |
| 9mo_SIGAE3_ | 0.04619836 | 0.26816604 | 5.54E-05 | 0.0053171 | 0.025099   |
| 9mo_SIGAE3_ | 0.12719305 | 0.75689536 | 6.69E-05 | 0.023834  | -0.42086   |
| 9mo_SIGAE3_ | 0.01174185 | 0.06025228 | 3.22E-05 | 0.0061869 | 0.30353    |
| 9mo_SIGAE3_ | 0.03893225 | 0.22432165 | 4.92E-05 | 0.0044639 | -0.040459  |
| 9mo_SIGAE3_ | 0.10534328 | 0.62505186 | 6.57E-05 | 0.025482  | -0.20623   |
| 9mo_SIGAE3_ | 0.02366369 | 0.13218975 | 3.61E-05 | 0.0042401 | -0.073623  |
| 9mo_SIGAE3_ | 0.02132478 | 0.11807655 | 3.47E-05 | 0.0044724 | -0.023601  |
| 9mo_SIGAE3_ | 0.07408622 | 0.4364439  | 6.23E-05 | 0.013805  | 0.13074    |
| 9mo_SIGAE3_ | 0.07829263 | 0.4618258  | 6.29E-05 | 0.015819  | 0.13651    |
| 9mo_SIGAE3_ | 0.03607433 | 0.20707671 | 4.65E-05 | 0.0042637 | -0.068307  |
| 9mo_SIGAE3_ | 0.01465886 | 0.07785378 | 3.26E-05 | 0.0055188 | 0.18676    |
| 9mo_SIGAE3_ | 0.0567654  | 0.33192852 | 5.98E-05 | 0.0075425 | 0.070131   |
| 9mo_SIGAE3_ | 0.02077504 | 0.11475939 | 3.44E-05 | 0.0045325 | -0.01065   |

|             |            |            |          |           |           |
|-------------|------------|------------|----------|-----------|-----------|
| 9mo_SIGAE3_ | 0.01753259 | 0.09519412 | 3.33E-05 | 0.0049935 | 0.067421  |
| 9mo_SIGAE3_ | 0.10806581 | 0.64147985 | 6.59E-05 | 0.025614  | -0.23822  |
| 9mo_SIGAE3_ | 0.02013205 | 0.1108795  | 3.42E-05 | 0.0045972 | 0.0032259 |
| 9mo_SIGAE3_ | 0.02945005 | 0.1671052  | 4.02E-05 | 0.0040662 | -0.10661  |
| 9mo_SIGAE3_ | 0.01855764 | 0.10137938 | 3.36E-05 | 0.0048202 | 0.050123  |
| 9mo_SIGAE3_ | 0.02883726 | 0.16340755 | 3.97E-05 | 0.0040686 | -0.10664  |
| 9mo_SIGAE3_ | 0.01016949 | 0.05076449 | 3.20E-05 | 0.0066628 | 0.37961   |
| 9mo_SIGAE3_ | 0.07094096 | 0.41746515 | 6.20E-05 | 0.012608  | 0.11916   |
| 9mo_SIGAE3_ | 0.01557076 | 0.08335625 | 3.28E-05 | 0.0052924 | 0.1442    |
| 9mo_SIGAE3_ | 0.1042861  | 0.6186727  | 6.56E-05 | 0.025367  | -0.18901  |
| 9mo_SIGAE3_ | 0.01093502 | 0.05538375 | 3.21E-05 | 0.006339  | 0.32844   |
| 9mo_SIGAE3_ | 0.0277604  | 0.15690969 | 3.88E-05 | 0.0040827 | -0.10472  |
| 9mo_SIGAE3_ | 0.05128766 | 0.29887533 | 5.81E-05 | 0.006215  | 0.053285  |
| 9mo_SIGAE3_ | 0.09736928 | 0.576936   | 6.51E-05 | 0.023964  | -0.065044 |
| 9mo_SIGAE3_ | 0.12064838 | 0.71740425 | 6.66E-05 | 0.02449   | -0.37215  |
| 9mo_SIGAE3_ | 0.0605543  | 0.3547911  | 6.05E-05 | 0.008688  | 0.07887   |
| 9mo_SIGAE3_ | 0.02140384 | 0.11855357 | 3.47E-05 | 0.0044724 | -0.0356   |
| 9mo_SIGAE3_ | 0.04886374 | 0.28424916 | 5.70E-05 | 0.0057827 | 0.041222  |
| 9mo_SIGAE3_ | 0.02428349 | 0.13592964 | 3.64E-05 | 0.0042065 | -0.080664 |
| 9mo_SIGAE3_ | 0.0147551  | 0.07843446 | 3.26E-05 | 0.0055188 | 0.16515   |
| 9mo_SIGAE3_ | 0.05909776 | 0.3460022  | 6.02E-05 | 0.0081753 | 0.075889  |
| 9mo_SIGAE3_ | 0.01491176 | 0.07937981 | 3.27E-05 | 0.0054028 | 0.16515   |
| 9mo_SIGAE3_ | 0.02321608 | 0.12948886 | 3.58E-05 | 0.0042778 | -0.065623 |
| 9mo_SIGAE3_ | 0.06699368 | 0.39364687 | 6.14E-05 | 0.011039  | 0.10251   |
| 9mo_SIGAE3_ | 0.08631473 | 0.51023185 | 6.40E-05 | 0.019681  | 0.099025  |
| 9mo_SIGAE3_ | 0.0737883  | 0.43464625 | 6.23E-05 | 0.013805  | 0.12913   |
| 9mo_SIGAE3_ | 0.04759673 | 0.2766039  | 5.64E-05 | 0.0055867 | 0.035328  |
| 9mo_SIGAE3_ | 0.05990738 | 0.35088754 | 6.04E-05 | 0.0085136 | 0.077363  |
| 9mo_SIGAE3_ | 0.01759402 | 0.09556478 | 3.34E-05 | 0.0049043 | 0.067421  |
| 9mo_SIGAE3_ | 0.00792034 | 0.0371929  | 3.19E-05 | 0.0073923 | 0.48652   |
| 9mo_SIGAE3_ | 0.06550462 | 0.38466173 | 6.12E-05 | 0.01041   | 0.095509  |
| 9mo_SIGAE3_ | 0.03211179 | 0.18316638 | 4.27E-05 | 0.004099  | -0.097962 |
| 9mo_SIGAE3_ | 0.06499696 | 0.38159847 | 6.11E-05 | 0.010206  | 0.093303  |
| 9mo_SIGAE3_ | 0.09482789 | 0.56160104 | 6.49E-05 | 0.023073  | -0.017059 |
| 9mo_SIGAE3_ | 0.05931465 | 0.3473109  | 6.03E-05 | 0.0083426 | 0.075889  |
| 9mo_SIGAE3_ | 0.02113103 | 0.1169074  | 3.47E-05 | 0.0044724 | -0.023601 |
| 9mo_SIGAE3_ | 0.01565927 | 0.08389032 | 3.28E-05 | 0.0052924 | 0.1442    |
| 9mo_SIGAE3_ | 0.03747743 | 0.21554315 | 4.76E-05 | 0.0043355 | -0.05192  |
| 9mo_SIGAE3_ | 0.02507188 | 0.14068691 | 3.68E-05 | 0.0041768 | -0.086782 |
| 9mo_SIGAE3_ | 0.09358882 | 0.55412436 | 6.48E-05 | 0.022676  | 0.0013661 |
| 9mo_SIGAE3_ | 0.02021394 | 0.11137363 | 3.42E-05 | 0.0045972 | 0.0032259 |
| 9mo_SIGAE3_ | 0.08435867 | 0.49842882 | 6.37E-05 | 0.018667  | 0.1136    |
| 9mo_SIGAE3_ | 0.0789775  | 0.46595836 | 6.30E-05 | 0.016077  | 0.13613   |

|             |            |            |          |           |           |
|-------------|------------|------------|----------|-----------|-----------|
| 9mo_SIGAE3_ | 0.02462188 | 0.13797157 | 3.64E-05 | 0.0042065 | -0.080664 |
| 9mo_SIGAE3_ | 0.02679119 | 0.15106137 | 3.80E-05 | 0.0041099 | -0.099939 |
| 9mo_SIGAE3_ | 0.04526994 | 0.26256382 | 5.50E-05 | 0.0052335 | 0.021279  |
| 9mo_SIGAE3_ | 0.14184697 | 0.8453185  | 6.74E-05 | 0.023584  | -0.5021   |
| 9mo_SIGAE3_ | 0.09332804 | 0.5525508  | 6.47E-05 | 0.022469  | 0.0013661 |
| 9mo_SIGAE3_ | 0.1098545  | 0.65227294 | 6.60E-05 | 0.025599  | -0.26716  |
| 9mo_SIGAE3_ | 0.03854517 | 0.22198595 | 4.87E-05 | 0.0044183 | -0.040459 |
| 9mo_SIGAE3_ | 0.00329639 | 0.00929159 | 3.18E-05 | 0.0092049 | 0.71249   |
| 9mo_SIGAE3_ | 0.01338927 | 0.07019293 | 3.24E-05 | 0.0057681 | 0.23179   |
| 9mo_SIGAE3_ | 0.10294005 | 0.6105506  | 6.56E-05 | 0.025216  | -0.16182  |
| 9mo_SIGAE3_ | 0.01990179 | 0.1094901  | 3.42E-05 | 0.0045972 | 0.0032259 |
| 9mo_SIGAE3_ | 0.07998504 | 0.4720379  | 6.32E-05 | 0.016594  | 0.13446   |
| 9mo_SIGAE3_ | 0.08876579 | 0.5250218  | 6.42E-05 | 0.020663  | 0.067165  |
| 9mo_SIGAE3_ | 0.01061347 | 0.05344351 | 3.21E-05 | 0.0064976 | 0.35381   |
| 9mo_SIGAE3_ | 0.07598756 | 0.44791678 | 6.26E-05 | 0.0148    | 0.13453   |
| 9mo_SIGAE3_ | 0.01276694 | 0.06643775 | 3.23E-05 | 0.0059016 | 0.25518   |
| 9mo_SIGAE3_ | 0.02318104 | 0.12927738 | 3.58E-05 | 0.0042778 | -0.065623 |
| 9mo_SIGAE3_ | 0.02885336 | 0.16350466 | 3.97E-05 | 0.0040686 | -0.10664  |
| 9mo_SIGAE3_ | 0.03720735 | 0.21391344 | 4.76E-05 | 0.0043355 | -0.057524 |
| 9mo_SIGAE3_ | 0.06393627 | 0.37519822 | 6.10E-05 | 0.0098069 | 0.091185  |
| 9mo_SIGAE3_ | 0.01319    | 0.06899054 | 3.24E-05 | 0.0057681 | 0.23179   |
| 9mo_SIGAE3_ | 0.0836711  | 0.49427995 | 6.37E-05 | 0.01841   | 0.12117   |
| 9mo_SIGAE3_ | 0.01407806 | 0.07434915 | 3.25E-05 | 0.0056405 | 0.20898   |
| 9mo_SIGAE3_ | 0.00480621 | 0.01840198 | 3.18E-05 | 0.0084677 | 0.62647   |
| 9mo_SIGAE3_ | 0.08106153 | 0.47853357 | 6.33E-05 | 0.017113  | 0.13148   |
| 9mo_SIGAE3_ | 0.06628738 | 0.38938498 | 6.13E-05 | 0.010616  | 0.10013   |
| 9mo_SIGAE3_ | 0.04230023 | 0.24464434 | 5.24E-05 | 0.0047963 | -0.00654  |
| 9mo_SIGAE3_ | 0.04696243 | 0.2727765  | 5.61E-05 | 0.0054936 | 0.032113  |
| 9mo_SIGAE3_ | 0.0171626  | 0.09296159 | 3.33E-05 | 0.0049935 | 0.085504  |
| 9mo_SIGAE3_ | 0.03337766 | 0.1908047  | 4.37E-05 | 0.0041322 | -0.091175 |
| 9mo_SIGAE3_ | 0.12588048 | 0.7489752  | 6.68E-05 | 0.023927  | -0.41325  |
| 9mo_SIGAE3_ | 0.07503421 | 0.44216415 | 6.25E-05 | 0.014299  | 0.13345   |
| 9mo_SIGAE3_ | 0.00832326 | 0.03962415 | 3.19E-05 | 0.0071994 | 0.45929   |
| 9mo_SIGAE3_ | 0.02186052 | 0.12130926 | 3.49E-05 | 0.0044169 | -0.0356   |
| 9mo_SIGAE3_ | 0.0184679  | 0.10083785 | 3.36E-05 | 0.0048202 | 0.050123  |
| 9mo_SIGAE3_ | 0.01537264 | 0.08216076 | 3.28E-05 | 0.0052924 | 0.1442    |
| 9mo_SIGAE3_ | 0.0873541  | 0.5165035  | 6.41E-05 | 0.01993   | 0.087329  |
| 9mo_SIGAE3_ | 0.02035622 | 0.11223216 | 3.44E-05 | 0.0045325 | -0.01065  |
| 9mo_SIGAE3_ | 0.02363436 | 0.13201277 | 3.58E-05 | 0.0042778 | -0.073623 |
| 9mo_SIGAE3_ | 0.01037428 | 0.05200025 | 3.21E-05 | 0.0064976 | 0.35381   |
| 9mo_SIGAE3_ | 0.06143744 | 0.36012003 | 6.07E-05 | 0.0090475 | 0.082025  |
| 9mo_SIGAE3_ | 0.0217646  | 0.12073044 | 3.49E-05 | 0.0044169 | -0.0356   |
| 9mo_SIGAE3_ | 0.01553017 | 0.08311131 | 3.28E-05 | 0.0052924 | 0.1442    |

|             |            |            |          |           |           |
|-------------|------------|------------|----------|-----------|-----------|
| 9mo_SIGAE3_ | 0.00989396 | 0.04910191 | 3.20E-05 | 0.0066628 | 0.37961   |
| 9mo_SIGAE3_ | 0.04939313 | 0.28744352 | 5.73E-05 | 0.0058857 | 0.04392   |
| 9mo_SIGAE3_ | 0.01497599 | 0.07976734 | 3.27E-05 | 0.0054028 | 0.16515   |
| 9mo_SIGAE3_ | 0.03368924 | 0.19268483 | 4.43E-05 | 0.004153  | -0.087207 |
| 9mo_SIGAE3_ | 0.08468548 | 0.5004008  | 6.38E-05 | 0.018923  | 0.1136    |
| 9mo_SIGAE3_ | 0.10154324 | 0.60212207 | 6.54E-05 | 0.024923  | -0.14299  |
| 9mo_SIGAE3_ | 0.04998153 | 0.29099402 | 5.76E-05 | 0.005992  | 0.046466  |
| 9mo_SIGAE3_ | 0.06492598 | 0.38117015 | 6.11E-05 | 0.010206  | 0.093303  |
| 9mo_SIGAE3_ | 0.02201835 | 0.12226164 | 3.52E-05 | 0.0043661 | -0.046619 |
| 9mo_SIGAE3_ | 0.0562713  | 0.32894704 | 5.97E-05 | 0.0073934 | 0.068678  |
| 9mo_SIGAE3_ | 0.02302799 | 0.12835388 | 3.55E-05 | 0.0043197 | -0.065623 |
| 9mo_SIGAE3_ | 0.02637984 | 0.14857927 | 3.76E-05 | 0.0041286 | -0.099939 |
| 9mo_SIGAE3_ | 0.04690769 | 0.27244622 | 5.57E-05 | 0.0054037 | 0.032113  |
| 9mo_SIGAE3_ | 0.05407958 | 0.31572202 | 5.91E-05 | 0.0068337 | 0.062513  |
| 9mo_SIGAE3_ | 0.08836056 | 0.5225766  | 6.42E-05 | 0.020421  | 0.074212  |
| 9mo_SIGAE3_ | 0.04738579 | 0.2753311  | 5.61E-05 | 0.0054936 | 0.035328  |
| 9mo_SIGAE3_ | 0.07507759 | 0.44242597 | 6.25E-05 | 0.014299  | 0.13345   |
| 9mo_SIGAE3_ | 0.05883427 | 0.34441224 | 6.02E-05 | 0.0081753 | 0.074438  |
| 9mo_SIGAE3_ | 0.0177051  | 0.09623508 | 3.34E-05 | 0.0049043 | 0.067421  |
| 9mo_SIGAE3_ | 0.11527932 | 0.6850068  | 6.63E-05 | 0.025182  | -0.32814  |
| 9mo_SIGAE3_ | 0.03657562 | 0.2101015  | 4.70E-05 | 0.0042982 | -0.062998 |
| 9mo_SIGAE3_ | 0.10325404 | 0.61244524 | 6.56E-05 | 0.025216  | -0.17104  |
| 9mo_SIGAE3_ | 0.02221721 | 0.12346154 | 3.52E-05 | 0.0043661 | -0.046619 |
| 9mo_SIGAE3_ | 0.08283901 | 0.48925903 | 6.35E-05 | 0.017892  | 0.12434   |
| 9mo_SIGAE3_ | 0.05021657 | 0.2924123  | 5.76E-05 | 0.005992  | 0.048868  |
| 9mo_SIGAE3_ | 0.01950402 | 0.10708991 | 3.40E-05 | 0.0046667 | 0.017998  |
| 9mo_SIGAE3_ | 0.02722645 | 0.15368779 | 3.84E-05 | 0.0040947 | -0.10271  |
| 9mo_SIGAE3_ | 0.07210062 | 0.42446265 | 6.21E-05 | 0.01308   | 0.12348   |
| 9mo_SIGAE3_ | 0.01062856 | 0.05353457 | 3.21E-05 | 0.0064976 | 0.35381   |
| 9mo_SIGAE3_ | 0.11558835 | 0.6868715  | 6.63E-05 | 0.025182  | -0.32814  |
| 9mo_SIGAE3_ | 0.03825627 | 0.22024272 | 4.87E-05 | 0.0044183 | -0.04622  |
| 9mo_SIGAE3_ | 0.01657402 | 0.08941001 | 3.31E-05 | 0.0050879 | 0.10435   |
| 9mo_SIGAE3_ | 0.03152812 | 0.17964442 | 4.22E-05 | 0.0040866 | -0.10071  |
| 9mo_SIGAE3_ | 0.08111588 | 0.4788615  | 6.33E-05 | 0.017113  | 0.13148   |
| 9mo_SIGAE3_ | 0.01205138 | 0.06211999 | 3.23E-05 | 0.0060411 | 0.2791    |
| 9mo_SIGAE3_ | 0.10020686 | 0.5940582  | 6.53E-05 | 0.024687  | -0.11403  |
| 9mo_SIGAE3_ | 0.00888362 | 0.04300544 | 3.19E-05 | 0.0070136 | 0.43237   |
| 9mo_SIGAE3_ | 0.08708269 | 0.5148658  | 6.41E-05 | 0.01993   | 0.093363  |
| 9mo_SIGAE3_ | 0.01500175 | 0.07992277 | 3.27E-05 | 0.0054028 | 0.16515   |
| 9mo_SIGAE3_ | 0.02072509 | 0.11445797 | 3.44E-05 | 0.0045325 | -0.01065  |
| 9mo_SIGAE3_ | 0.02760476 | 0.15597053 | 3.88E-05 | 0.0040827 | -0.10472  |
| 9mo_SIGAE3_ | 0.07792385 | 0.4596005  | 6.29E-05 | 0.015562  | 0.13662   |
| 9mo_SIGAE3_ | 0.01987534 | 0.10933048 | 3.42E-05 | 0.0045972 | 0.0032259 |

|             |            |            |          |           |           |
|-------------|------------|------------|----------|-----------|-----------|
| 9mo_SIGAE3_ | 0.03114812 | 0.17735147 | 4.16E-05 | 0.0040771 | -0.10299  |
| 9mo_SIGAE3_ | 0.01744018 | 0.09463649 | 3.33E-05 | 0.0049935 | 0.085504  |
| 9mo_SIGAE3_ | 0.02219078 | 0.12330205 | 3.52E-05 | 0.0043661 | -0.046619 |
| 9mo_SIGAE3_ | 0.02690331 | 0.15173788 | 3.80E-05 | 0.0041099 | -0.10271  |
| 9mo_SIGAE3_ | 0.07493267 | 0.44155148 | 6.25E-05 | 0.014299  | 0.13218   |
| 9mo_SIGAE3_ | 0.11834589 | 0.7035108  | 6.65E-05 | 0.024847  | -0.35363  |
| 9mo_SIGAE3_ | 0.01107782 | 0.05624542 | 3.21E-05 | 0.006339  | 0.32844   |
| 9mo_SIGAE3_ | 0.06422381 | 0.37693325 | 6.10E-05 | 0.010005  | 0.091185  |
| 9mo_SIGAE3_ | 0.02691951 | 0.15183565 | 3.80E-05 | 0.0041099 | -0.10271  |
| 9mo_SIGAE3_ | 0.04774681 | 0.2775095  | 5.64E-05 | 0.0055867 | 0.035328  |
| 9mo_SIGAE3_ | 0.01269698 | 0.06601563 | 3.23E-05 | 0.0059016 | 0.25518   |
| 9mo_SIGAE3_ | 0.0115734  | 0.0592358  | 3.22E-05 | 0.0061869 | 0.30353   |
| 9mo_SIGAE3_ | 0.05493479 | 0.3208824  | 5.94E-05 | 0.0071062 | 0.064127  |
| 9mo_SIGAE3_ | 0.01440995 | 0.07635182 | 3.26E-05 | 0.0055188 | 0.18676   |
| 9mo_SIGAE3_ | 0.00978166 | 0.04842432 | 3.20E-05 | 0.0068348 | 0.37961   |
| 9mo_SIGAE3_ | 0.07770453 | 0.45827717 | 6.29E-05 | 0.015562  | 0.13646   |
| 9mo_SIGAE3_ | 0.01471457 | 0.07818991 | 3.26E-05 | 0.0055188 | 0.18676   |
| 9mo_SIGAE3_ | 0.0384259  | 0.22126631 | 4.87E-05 | 0.0044183 | -0.04622  |
| 9mo_SIGAE3_ | 0.02147586 | 0.11898819 | 3.49E-05 | 0.0044169 | -0.0356   |
| 9mo_SIGAE3_ | 0.04643796 | 0.2696118  | 5.57E-05 | 0.0054037 | 0.028707  |
| 9mo_SIGAE3_ | 0.01789653 | 0.09739019 | 3.34E-05 | 0.0049043 | 0.067421  |
| 9mo_SIGAE3_ | 0.02933393 | 0.16640449 | 4.02E-05 | 0.0040662 | -0.10661  |
| 9mo_SIGAE3_ | 0.01476198 | 0.078476   | 3.26E-05 | 0.0055188 | 0.16515   |
| 9mo_SIGAE3_ | 0.03735264 | 0.21479014 | 4.76E-05 | 0.0043355 | -0.057524 |
| 9mo_SIGAE3_ | 0.0349785  | 0.20046434 | 4.54E-05 | 0.0042028 | -0.078293 |
| 9mo_SIGAE3_ | 0.01681088 | 0.09083925 | 3.31E-05 | 0.0050879 | 0.10435   |
| 9mo_SIGAE3_ | 0.12768686 | 0.75987506 | 6.69E-05 | 0.023794  | -0.4246   |
| 9mo_SIGAE3_ | 0.01848897 | 0.10096501 | 3.36E-05 | 0.0048202 | 0.050123  |
| 9mo_SIGAE3_ | 0.14673653 | 0.87482256 | 6.76E-05 | 0.023666  | -0.51583  |
| 9mo_SIGAE3_ | 0.07653559 | 0.45122364 | 6.27E-05 | 0.015053  | 0.1354    |
| 9mo_SIGAE3_ | 0.02346474 | 0.13098927 | 3.58E-05 | 0.0042778 | -0.065623 |
| 9mo_SIGAE3_ | 0.01894984 | 0.10374595 | 3.38E-05 | 0.004741  | 0.03364   |
| 9mo_SIGAE3_ | 0.02717823 | 0.15339682 | 3.84E-05 | 0.0040947 | -0.10271  |
| 9mo_SIGAE3_ | 0.11310165 | 0.67186654 | 6.62E-05 | 0.025403  | -0.30551  |
| 9mo_SIGAE3_ | 0.04024006 | 0.23221312 | 5.03E-05 | 0.0045634 | -0.023154 |
| 9mo_SIGAE3_ | 0.04747785 | 0.27588657 | 5.61E-05 | 0.0054936 | 0.035328  |
| 9mo_SIGAE3_ | 0.01938243 | 0.10635624 | 3.40E-05 | 0.0046667 | 0.017998  |
| 9mo_SIGAE3_ | 0.08653297 | 0.51154876 | 6.40E-05 | 0.019681  | 0.099025  |
| 9mo_SIGAE3_ | 0.01556528 | 0.08332318 | 3.28E-05 | 0.0052924 | 0.1442    |
| 9mo_SIGAE3_ | 0.09237588 | 0.5468054  | 6.46E-05 | 0.022042  | 0.019141  |
| 9mo_SIGAE3_ | 0.02028252 | 0.11178742 | 3.42E-05 | 0.0045972 | -0.01065  |
| 9mo_SIGAE3_ | 0.00776092 | 0.03623099 | 3.19E-05 | 0.0073923 | 0.48652   |
| 9mo_SIGAE3_ | 0.1002399  | 0.5942576  | 6.53E-05 | 0.024687  | -0.11403  |

|             |            |            |          |           |           |
|-------------|------------|------------|----------|-----------|-----------|
| 9mo_SIGAE3_ | 0.12114301 | 0.7203888  | 6.66E-05 | 0.02449   | -0.37656  |
| 9mo_SIGAE3_ | 0.00959873 | 0.04732049 | 3.20E-05 | 0.0068348 | 0.4058    |
| 9mo_SIGAE3_ | 0.02061269 | 0.11377969 | 3.44E-05 | 0.0045325 | -0.01065  |
| 9mo_SIGAE3_ | 0.02747821 | 0.15520687 | 3.84E-05 | 0.0040947 | -0.10472  |
| 9mo_SIGAE3_ | 0.03841028 | 0.221172   | 4.87E-05 | 0.0044183 | -0.04622  |
| 9mo_SIGAE3_ | 0.11767174 | 0.6994429  | 6.64E-05 | 0.024917  | -0.34876  |
| 9mo_SIGAE3_ | 0.00982648 | 0.04869474 | 3.20E-05 | 0.0066628 | 0.37961   |
| 9mo_SIGAE3_ | 0.03715756 | 0.21361299 | 4.76E-05 | 0.0043355 | -0.057524 |
| 9mo_SIGAE3_ | 0.01714856 | 0.09287682 | 3.33E-05 | 0.0049935 | 0.085504  |
| 9mo_SIGAE3_ | 0.00893991 | 0.04334508 | 3.19E-05 | 0.0070136 | 0.43237   |
| 9mo_SIGAE3_ | 0.02518258 | 0.14135484 | 3.68E-05 | 0.0041768 | -0.086782 |
| 9mo_SIGAE3_ | 0.00707609 | 0.03209866 | 3.19E-05 | 0.0075925 | 0.51404   |
| 9mo_SIGAE3_ | 0.03061293 | 0.1741221  | 4.11E-05 | 0.0040705 | -0.10475  |
| 9mo_SIGAE3_ | 0.01438324 | 0.07619064 | 3.26E-05 | 0.0055188 | 0.18676   |
| 9mo_SIGAE3_ | 0.08728849 | 0.5161076  | 6.41E-05 | 0.01993   | 0.087329  |
| 9mo_SIGAE3_ | 0.01410799 | 0.07452977 | 3.25E-05 | 0.0056405 | 0.20898   |
| 9mo_SIGAE3_ | 0.02271354 | 0.12645647 | 3.55E-05 | 0.0043197 | -0.056631 |
| 9mo_SIGAE3_ | 0.06066968 | 0.35548732 | 6.05E-05 | 0.008688  | 0.080421  |
| 9mo_SIGAE3_ | 0.02193801 | 0.12177682 | 3.49E-05 | 0.0044169 | -0.046619 |
| 9mo_SIGAE3_ | 0.01057773 | 0.05322787 | 3.21E-05 | 0.0064976 | 0.35381   |
| 9mo_SIGAE3_ | 0.01362656 | 0.07162475 | 3.24E-05 | 0.0057681 | 0.23179   |
| 9mo_SIGAE3_ | 0.01858215 | 0.10152724 | 3.36E-05 | 0.0048202 | 0.050123  |
| 9mo_SIGAE3_ | 0.01702682 | 0.09214224 | 3.33E-05 | 0.0049935 | 0.085504  |
| 9mo_SIGAE3_ | 0.02072182 | 0.11443823 | 3.44E-05 | 0.0045325 | -0.01065  |
| 9mo_SIGAE3_ | 0.01489156 | 0.07925787 | 3.27E-05 | 0.0054028 | 0.16515   |
| 9mo_SIGAE3_ | 0.01282518 | 0.0667892  | 3.23E-05 | 0.0059016 | 0.25518   |
| 9mo_SIGAE3_ | 0.08691502 | 0.5138541  | 6.41E-05 | 0.01993   | 0.093363  |
| 9mo_SIGAE3_ | 0.01574398 | 0.08440146 | 3.28E-05 | 0.0052924 | 0.1442    |
| 9mo_SIGAE3_ | 0.09013254 | 0.5332688  | 6.44E-05 | 0.021137  | 0.05218   |
| 9mo_SIGAE3_ | 0.05707371 | 0.3337889  | 5.99E-05 | 0.0076952 | 0.070131  |
| 9mo_SIGAE3_ | 0.02677983 | 0.15099283 | 3.80E-05 | 0.0041099 | -0.099939 |
| 9mo_SIGAE3_ | 0.02029967 | 0.11189091 | 3.42E-05 | 0.0045972 | -0.01065  |
| 9mo_SIGAE3_ | 0.07575402 | 0.4465076  | 6.26E-05 | 0.0148    | 0.13453   |
| 9mo_SIGAE3_ | 0.06572624 | 0.385999   | 6.12E-05 | 0.01041   | 0.097788  |
| 9mo_SIGAE3_ | 0.01733028 | 0.09397338 | 3.33E-05 | 0.0049935 | 0.085504  |
| 9mo_SIGAE3_ | 0.131103   | 0.7804884  | 6.70E-05 | 0.023618  | -0.44608  |
| 9mo_SIGAE3_ | 0.02416934 | 0.13524088 | 3.61E-05 | 0.0042401 | -0.080664 |
| 9mo_SIGAE3_ | 0.02144709 | 0.1188146  | 3.49E-05 | 0.0044169 | -0.0356   |
| 9mo_SIGAE3_ | 0.01044527 | 0.05242856 | 3.21E-05 | 0.0064976 | 0.35381   |
| 9mo_SIGAE3_ | 0.0323979  | 0.18489277 | 4.27E-05 | 0.004099  | -0.097962 |
| 9mo_SIGAE3_ | 0.01593583 | 0.08555909 | 3.30E-05 | 0.0051875 | 0.12392   |
| 9mo_SIGAE3_ | 0.01278866 | 0.06656883 | 3.23E-05 | 0.0059016 | 0.25518   |
| 9mo_SIGAE3_ | 0.09746242 | 0.577498   | 6.51E-05 | 0.023964  | -0.065044 |

|             |            |            |          |           |            |
|-------------|------------|------------|----------|-----------|------------|
| 9mo_SIGAE3_ | 0.01360903 | 0.07151903 | 3.24E-05 | 0.0057681 | 0.23179    |
| 9mo_SIGAE3_ | 0.05525932 | 0.32284066 | 5.95E-05 | 0.007248  | 0.065685   |
| 9mo_SIGAE3_ | 0.09981325 | 0.59168315 | 6.53E-05 | 0.024558  | -0.11403   |
| 9mo_SIGAE3_ | 0.12708881 | 0.7562664  | 6.69E-05 | 0.023834  | -0.42086   |
| 9mo_SIGAE3_ | 0.02356162 | 0.13157386 | 3.58E-05 | 0.0042778 | -0.065623  |
| 9mo_SIGAE3_ | 0.05148514 | 0.30006695 | 5.83E-05 | 0.0063316 | 0.053285   |
| 9mo_SIGAE3_ | 0.01298053 | 0.06772655 | 3.23E-05 | 0.0059016 | 0.25518    |
| 9mo_SIGAE3_ | 0.02012891 | 0.11086058 | 3.42E-05 | 0.0045972 | 0.0032259  |
| 9mo_SIGAE3_ | 0.03292736 | 0.18808757 | 4.32E-05 | 0.0041142 | -0.094772  |
| 9mo_SIGAE3_ | 0.06633189 | 0.3896536  | 6.13E-05 | 0.010826  | 0.10013    |
| 9mo_SIGAE3_ | 0.09406994 | 0.55702746 | 6.48E-05 | 0.022877  | -0.0077738 |
| 9mo_SIGAE3_ | 0.01742713 | 0.09455776 | 3.33E-05 | 0.0049935 | 0.085504   |
| 9mo_SIGAE3_ | 0.08758766 | 0.5179128  | 6.41E-05 | 0.020177  | 0.087329   |
| 9mo_SIGAE3_ | 0.09593229 | 0.5682651  | 6.50E-05 | 0.023448  | -0.035993  |
| 9mo_SIGAE3_ | 0.07413079 | 0.43671283 | 6.24E-05 | 0.014051  | 0.13074    |
| 9mo_SIGAE3_ | 0.00983147 | 0.04872488 | 3.20E-05 | 0.0066628 | 0.37961    |
| 9mo_SIGAE3_ | 0.11675616 | 0.6939182  | 6.64E-05 | 0.025054  | -0.33868   |
| 9mo_SIGAE3_ | 0.02920199 | 0.16560833 | 4.02E-05 | 0.0040662 | -0.10661   |
| 9mo_SIGAE3_ | 0.03395366 | 0.19428037 | 4.43E-05 | 0.004153  | -0.087207  |
| 9mo_SIGAE3_ | 0.06199003 | 0.36345443 | 6.07E-05 | 0.0092324 | 0.083692   |
| 9mo_SIGAE3_ | 0.02854948 | 0.16167104 | 3.93E-05 | 0.004074  | -0.10603   |
| 9mo_SIGAE3_ | 0.03760344 | 0.2163035  | 4.81E-05 | 0.0043756 | -0.05192   |
| 9mo_SIGAE3_ | 0.01628527 | 0.08766764 | 3.30E-05 | 0.0051875 | 0.12392    |
| 9mo_SIGAE3_ | 0.01724519 | 0.09345993 | 3.33E-05 | 0.0049935 | 0.085504   |
| 9mo_SIGAE3_ | 0.02534925 | 0.14236054 | 3.72E-05 | 0.0041509 | -0.092011  |
| 9mo_SIGAE3_ | 0.01253087 | 0.06501331 | 3.23E-05 | 0.0060411 | 0.25518    |
| 9mo_SIGAE3_ | 0.01148235 | 0.05868643 | 3.22E-05 | 0.0061869 | 0.30353    |
| 9mo_SIGAE3_ | 0.04994887 | 0.29079697 | 5.76E-05 | 0.005992  | 0.046466   |
| 9mo_SIGAE3_ | 0.02028229 | 0.11178605 | 3.42E-05 | 0.0045972 | -0.01065   |
| 9mo_SIGAE3_ | 0.03575611 | 0.20515652 | 4.59E-05 | 0.0042319 | -0.068307  |
| 9mo_SIGAE3_ | 0.0102719  | 0.05138245 | 3.20E-05 | 0.0066628 | 0.37961    |
| 9mo_SIGAE3_ | 0.01785303 | 0.0971277  | 3.34E-05 | 0.0049043 | 0.067421   |
| 9mo_SIGAE3_ | 0.01123637 | 0.05720218 | 3.21E-05 | 0.006339  | 0.32844    |
| 9mo_SIGAE3_ | 0.02165435 | 0.12006518 | 3.49E-05 | 0.0044169 | -0.0356    |
| 9mo_SIGAE3_ | 0.02824744 | 0.15984854 | 3.93E-05 | 0.004074  | -0.10603   |
| 9mo_SIGAE3_ | 0.02047529 | 0.11295065 | 3.44E-05 | 0.0045325 | -0.01065   |
| 9mo_SIGAE3_ | 0.02407081 | 0.13464631 | 3.61E-05 | 0.0042401 | -0.073623  |
| 9mo_SIGAE3_ | 0.01534848 | 0.08201498 | 3.28E-05 | 0.0052924 | 0.1442     |
| 9mo_SIGAE3_ | 0.01500042 | 0.07991476 | 3.27E-05 | 0.0054028 | 0.16515    |
| 9mo_SIGAE3_ | 0.0162473  | 0.08743855 | 3.30E-05 | 0.0051875 | 0.12392    |
| 9mo_SIGAE3_ | 0.01667488 | 0.09001861 | 3.31E-05 | 0.0050879 | 0.10435    |
| 9mo_SIGAE3_ | 0.11130489 | 0.66102475 | 6.61E-05 | 0.025525  | -0.28058   |
| 9mo_SIGAE3_ | 0.02947586 | 0.16726093 | 4.02E-05 | 0.0040662 | -0.10661   |



|             |            |            |          |           |            |
|-------------|------------|------------|----------|-----------|------------|
| 9mo_SIGAE3_ | 0.10257298 | 0.6083356  | 6.55E-05 | 0.025127  | -0.16182   |
| 9mo_SIGAE3_ | 0.00803368 | 0.03787683 | 3.19E-05 | 0.0073923 | 0.48652    |
| 9mo_SIGAE3_ | 0.07201409 | 0.42394048 | 6.21E-05 | 0.01308   | 0.12348    |
| 9mo_SIGAE3_ | 0.09834086 | 0.5827986  | 6.52E-05 | 0.024123  | -0.084641  |
| 9mo_SIGAE3_ | 0.06858089 | 0.40322423 | 6.16E-05 | 0.011695  | 0.10977    |
| 9mo_SIGAE3_ | 0.02217247 | 0.12319159 | 3.52E-05 | 0.0043661 | -0.046619  |
| 9mo_SIGAE3_ | 0.02572662 | 0.14463764 | 3.72E-05 | 0.0041509 | -0.092011  |
| 9mo_SIGAE3_ | 0.01191577 | 0.06130171 | 3.22E-05 | 0.0061869 | 0.30353    |
| 9mo_SIGAE3_ | 0.02020888 | 0.11134311 | 3.42E-05 | 0.0045972 | 0.0032259  |
| 9mo_SIGAE3_ | 0.02179638 | 0.12092222 | 3.49E-05 | 0.0044169 | -0.0356    |
| 9mo_SIGAE3_ | 0.02189707 | 0.12152983 | 3.49E-05 | 0.0044169 | -0.0356    |
| 9mo_SIGAE3_ | 0.02211491 | 0.12284424 | 3.52E-05 | 0.0043661 | -0.046619  |
| 9mo_SIGAE3_ | 0.03365759 | 0.19249386 | 4.43E-05 | 0.004153  | -0.087207  |
| 9mo_SIGAE3_ | 0.01253806 | 0.06505667 | 3.23E-05 | 0.0060411 | 0.25518    |
| 9mo_SIGAE3_ | 0.01455151 | 0.07720599 | 3.26E-05 | 0.0055188 | 0.18676    |
| 9mo_SIGAE3_ | 0.01707414 | 0.09242778 | 3.33E-05 | 0.0049935 | 0.085504   |
| 9mo_SIGAE3_ | 0.07262439 | 0.42762312 | 6.22E-05 | 0.01332   | 0.12548    |
| 9mo_SIGAE3_ | 0.0253779  | 0.14253344 | 3.72E-05 | 0.0041509 | -0.092011  |
| 9mo_SIGAE3_ | 0.01162806 | 0.05956566 | 3.22E-05 | 0.0061869 | 0.30353    |
| 9mo_SIGAE3_ | 0.08888778 | 0.52575785 | 6.42E-05 | 0.020663  | 0.067165   |
| 9mo_SIGAE3_ | 0.13199559 | 0.78587437 | 6.71E-05 | 0.023582  | -0.45284   |
| 9mo_SIGAE3_ | 0.09856903 | 0.5841754  | 6.52E-05 | 0.024275  | -0.084641  |
| 9mo_SIGAE3_ | 0.04889403 | 0.28443196 | 5.70E-05 | 0.0057827 | 0.041222   |
| 9mo_SIGAE3_ | 0.07225765 | 0.42541018 | 6.21E-05 | 0.01308   | 0.12548    |
| 9mo_SIGAE3_ | 0.07908722 | 0.46662042 | 6.31E-05 | 0.016335  | 0.13613    |
| 9mo_SIGAE3_ | 0.02633182 | 0.14828947 | 3.76E-05 | 0.0041286 | -0.096385  |
| 9mo_SIGAE3_ | 0.01520269 | 0.0811353  | 3.27E-05 | 0.0054028 | 0.16515    |
| 9mo_SIGAE3_ | 0.01418494 | 0.07499411 | 3.25E-05 | 0.0056405 | 0.20898    |
| 9mo_SIGAE3_ | 0.01835946 | 0.10018352 | 3.36E-05 | 0.0048202 | 0.050123   |
| 9mo_SIGAE3_ | 0.02840224 | 0.16078262 | 3.93E-05 | 0.004074  | -0.10603   |
| 9mo_SIGAE3_ | 0.01110156 | 0.05638871 | 3.21E-05 | 0.006339  | 0.32844    |
| 9mo_SIGAE3_ | 0.0214267  | 0.11869152 | 3.47E-05 | 0.0044724 | -0.0356    |
| 9mo_SIGAE3_ | 0.03735499 | 0.2148043  | 4.76E-05 | 0.0043355 | -0.057524  |
| 9mo_SIGAE3_ | 0.05542908 | 0.32386506 | 5.95E-05 | 0.007248  | 0.065685   |
| 9mo_SIGAE3_ | 0.01846304 | 0.10080853 | 3.36E-05 | 0.0048202 | 0.050123   |
| 9mo_SIGAE3_ | 0.03954071 | 0.22799316 | 4.98E-05 | 0.0045122 | -0.034672  |
| 9mo_SIGAE3_ | 0.04284624 | 0.247939   | 5.29E-05 | 0.0048617 | -0.0013165 |
| 9mo_SIGAE3_ | 0.00984169 | 0.04878654 | 3.20E-05 | 0.0066628 | 0.37961    |
| 9mo_SIGAE3_ | 0.02860133 | 0.16198392 | 3.93E-05 | 0.004074  | -0.10664   |
| 9mo_SIGAE3_ | 0.07187252 | 0.42308623 | 6.21E-05 | 0.01308   | 0.12348    |
| 9mo_SIGAE3_ | 0.0241609  | 0.13518998 | 3.61E-05 | 0.0042401 | -0.080664  |
| 9mo_SIGAE3_ | 0.02347599 | 0.13105716 | 3.58E-05 | 0.0042778 | -0.065623  |
| 9mo_SIGAE3_ | 0.04470849 | 0.25917602 | 5.42E-05 | 0.0050757 | 0.017239   |

|             |            |            |          |           |            |
|-------------|------------|------------|----------|-----------|------------|
| 9mo_SIGAE3_ | 0.02547917 | 0.14314449 | 3.72E-05 | 0.0041509 | -0.092011  |
| 9mo_SIGAE3_ | 0.01287187 | 0.06707093 | 3.23E-05 | 0.0059016 | 0.25518    |
| 9mo_SIGAE3_ | 0.01403058 | 0.07406268 | 3.25E-05 | 0.0056405 | 0.20898    |
| 9mo_SIGAE3_ | 0.02402121 | 0.13434708 | 3.61E-05 | 0.0042401 | -0.073623  |
| 9mo_SIGAE3_ | 0.02273208 | 0.12656833 | 3.55E-05 | 0.0043197 | -0.056631  |
| 9mo_SIGAE3_ | 0.018473   | 0.10086864 | 3.36E-05 | 0.0048202 | 0.050123   |
| 9mo_SIGAE3_ | 0.11359949 | 0.67487055 | 6.62E-05 | 0.025353  | -0.30551   |
| 9mo_SIGAE3_ | 0.10708278 | 0.6355481  | 6.58E-05 | 0.025586  | -0.23052   |
| 9mo_SIGAE3_ | 0.01776872 | 0.09661893 | 3.34E-05 | 0.0049043 | 0.067421   |
| 9mo_SIGAE3_ | 0.01103398 | 0.05598094 | 3.21E-05 | 0.006339  | 0.32844    |
| 9mo_SIGAE3_ | 0.01375892 | 0.07242341 | 3.25E-05 | 0.0056405 | 0.20898    |
| 9mo_SIGAE3_ | 0.02071615 | 0.11440404 | 3.44E-05 | 0.0045325 | -0.01065   |
| 9mo_SIGAE3_ | 0.01316325 | 0.06882914 | 3.24E-05 | 0.0057681 | 0.23179    |
| 9mo_SIGAE3_ | 0.01355943 | 0.07121971 | 3.24E-05 | 0.0057681 | 0.23179    |
| 9mo_SIGAE3_ | 0.01087989 | 0.05505112 | 3.21E-05 | 0.0064976 | 0.32844    |
| 9mo_SIGAE3_ | 0.0197327  | 0.10846978 | 3.40E-05 | 0.0046667 | 0.0032259  |
| 9mo_SIGAE3_ | 0.02016565 | 0.11108224 | 3.42E-05 | 0.0045972 | 0.0032259  |
| 9mo_SIGAE3_ | 0.10364582 | 0.6148092  | 6.56E-05 | 0.025296  | -0.17104   |
| 9mo_SIGAE3_ | 0.0145775  | 0.07736284 | 3.26E-05 | 0.0055188 | 0.18676    |
| 9mo_SIGAE3_ | 0.02327209 | 0.12982678 | 3.58E-05 | 0.0042778 | -0.065623  |
| 9mo_SIGAE3_ | 0.02943224 | 0.1669977  | 4.02E-05 | 0.0040662 | -0.10661   |
| 9mo_SIGAE3_ | 0.03601624 | 0.20672618 | 4.65E-05 | 0.0042637 | -0.068307  |
| 9mo_SIGAE3_ | 0.12285786 | 0.73073643 | 6.67E-05 | 0.024282  | -0.38934   |
| 9mo_SIGAE3_ | 0.05070797 | 0.29537743 | 5.78E-05 | 0.0061018 | 0.051138   |
| 9mo_SIGAE3_ | 0.07986831 | 0.47133356 | 6.32E-05 | 0.016594  | 0.13545    |
| 9mo_SIGAE3_ | 0.09389544 | 0.5559745  | 6.48E-05 | 0.022676  | -0.0077738 |
| 9mo_SIGAE3_ | 0.03461201 | 0.19825293 | 4.48E-05 | 0.0041765 | -0.082901  |
| 9mo_SIGAE3_ | 0.02663957 | 0.15014648 | 3.80E-05 | 0.0041099 | -0.099939  |
| 9mo_SIGAE3_ | 0.01962484 | 0.10781894 | 3.40E-05 | 0.0046667 | 0.017998   |
| 9mo_SIGAE3_ | 0.03640428 | 0.20906763 | 4.70E-05 | 0.0042982 | -0.062998  |
| 9mo_SIGAE3_ | 0.01125319 | 0.05730363 | 3.21E-05 | 0.006339  | 0.32844    |
| 9mo_SIGAE3_ | 0.09081109 | 0.5373633  | 6.45E-05 | 0.021597  | 0.044278   |
| 9mo_SIGAE3_ | 0.01770744 | 0.09624919 | 3.34E-05 | 0.0049043 | 0.067421   |
| 9mo_SIGAE3_ | 0.01152594 | 0.05894942 | 3.22E-05 | 0.0061869 | 0.30353    |
| 9mo_SIGAE3_ | 0.0775885  | 0.457577   | 6.29E-05 | 0.015562  | 0.13646    |
| 9mo_SIGAE3_ | 0.09559406 | 0.56622416 | 6.49E-05 | 0.023263  | -0.035993  |
| 9mo_SIGAE3_ | 0.02991608 | 0.16991726 | 4.07E-05 | 0.0040668 | -0.10597   |
| 9mo_SIGAE3_ | 0.03183624 | 0.18150365 | 4.22E-05 | 0.0040866 | -0.10071   |
| 9mo_SIGAE3_ | 0.11014283 | 0.65401274 | 6.60E-05 | 0.02558   | -0.26716   |
| 9mo_SIGAE3_ | 0.02595454 | 0.14601296 | 3.76E-05 | 0.0041286 | -0.096385  |
| 9mo_SIGAE3_ | 0.06454474 | 0.37886974 | 6.10E-05 | 0.010005  | 0.093303   |
| 9mo_SIGAE3_ | 0.08272867 | 0.48859325 | 6.35E-05 | 0.017892  | 0.12434    |
| 9mo_SIGAE3_ | 0.10041472 | 0.5953125  | 6.53E-05 | 0.024687  | -0.12375   |

|             |            |            |          |           |           |
|-------------|------------|------------|----------|-----------|-----------|
| 9mo_SIGAE3_ | 0.00821311 | 0.03895954 | 3.19E-05 | 0.0071994 | 0.45929   |
| 9mo_SIGAE3_ | 0.03105687 | 0.17680086 | 4.16E-05 | 0.0040771 | -0.10299  |
| 9mo_SIGAE3_ | 0.03079696 | 0.17523256 | 4.11E-05 | 0.0040705 | -0.10299  |
| 9mo_SIGAE3_ | 0.01304571 | 0.06811989 | 3.23E-05 | 0.0059016 | 0.25518   |
| 9mo_SIGAE3_ | 0.01804688 | 0.09829737 | 3.34E-05 | 0.0049043 | 0.067421  |
| 9mo_SIGAE3_ | 0.08782337 | 0.5193351  | 6.41E-05 | 0.020177  | 0.080939  |
| 9mo_SIGAE3_ | 0.03288954 | 0.18785939 | 4.32E-05 | 0.0041142 | -0.094772 |
| 9mo_SIGAE3_ | 0.05120766 | 0.29839262 | 5.81E-05 | 0.006215  | 0.053285  |
| 9mo_SIGAE3_ | 0.03723314 | 0.21406907 | 4.76E-05 | 0.0043355 | -0.057524 |
| 9mo_SIGAE3_ | 0.05010614 | 0.29174593 | 5.76E-05 | 0.005992  | 0.048868  |
| 9mo_SIGAE3_ | 0.07625917 | 0.44955572 | 6.26E-05 | 0.0148    | 0.1354    |
| 9mo_SIGAE3_ | 0.00963016 | 0.04751014 | 3.20E-05 | 0.0068348 | 0.4058    |
| 9mo_SIGAE3_ | 0.04671705 | 0.27129585 | 5.57E-05 | 0.0054037 | 0.028707  |
| 9mo_SIGAE3_ | 0.01752681 | 0.09515926 | 3.33E-05 | 0.0049935 | 0.067421  |
| 9mo_SIGAE3_ | 0.00684056 | 0.03067745 | 3.18E-05 | 0.0078    | 0.54183   |
| 9mo_SIGAE3_ | 0.03943152 | 0.2273343  | 4.98E-05 | 0.0045122 | -0.034672 |
| 9mo_SIGAE3_ | 0.03087742 | 0.17571805 | 4.16E-05 | 0.0040771 | -0.10299  |
| 9mo_SIGAE3_ | 0.02550792 | 0.14331798 | 3.72E-05 | 0.0041509 | -0.092011 |
| 9mo_SIGAE3_ | 0.06025456 | 0.35298243 | 6.05E-05 | 0.008688  | 0.07887   |
| 9mo_SIGAE3_ | 0.04542831 | 0.2635195  | 5.50E-05 | 0.0052335 | 0.021279  |
| 9mo_SIGAE3_ | 0.05827355 | 0.3410288  | 6.01E-05 | 0.0080116 | 0.073002  |
| 9mo_SIGAE3_ | 0.01049263 | 0.05271438 | 3.21E-05 | 0.0064976 | 0.35381   |
| 9mo_SIGAE3_ | 0.01470647 | 0.07814108 | 3.26E-05 | 0.0055188 | 0.18676   |
| 9mo_SIGAE3_ | 0.01911796 | 0.10476041 | 3.38E-05 | 0.004741  | 0.03364   |
| 9mo_SIGAE3_ | 0.05125205 | 0.29866046 | 5.81E-05 | 0.006215  | 0.053285  |
| 9mo_SIGAE3_ | 0.02560494 | 0.14390339 | 3.72E-05 | 0.0041509 | -0.092011 |
| 9mo_SIGAE3_ | 0.01657467 | 0.08941394 | 3.31E-05 | 0.0050879 | 0.10435   |
| 9mo_SIGAE3_ | 0.08614802 | 0.5092259  | 6.39E-05 | 0.01943   | 0.099025  |
| 9mo_SIGAE3_ | 0.01210947 | 0.06247053 | 3.23E-05 | 0.0060411 | 0.2791    |
| 9mo_SIGAE3_ | 0.0177475  | 0.09649088 | 3.34E-05 | 0.0049043 | 0.067421  |
| 9mo_SIGAE3_ | 0.01637431 | 0.08820498 | 3.30E-05 | 0.0051875 | 0.12392   |
| 9mo_SIGAE3_ | 0.06630778 | 0.3895081  | 6.13E-05 | 0.010616  | 0.10013   |
| 9mo_SIGAE3_ | 0.01395698 | 0.07361857 | 3.25E-05 | 0.0056405 | 0.20898   |
| 9mo_SIGAE3_ | 0.01406226 | 0.07425385 | 3.25E-05 | 0.0056405 | 0.20898   |
| 9mo_SIGAE3_ | 0.01869573 | 0.10221262 | 3.38E-05 | 0.004741  | 0.03364   |
| 9mo_SIGAE3_ | 0.03569017 | 0.20475866 | 4.59E-05 | 0.0042319 | -0.073417 |
| 9mo_SIGAE3_ | 0.01435059 | 0.07599367 | 3.26E-05 | 0.0055188 | 0.18676   |
| 9mo_SIGAE3_ | 0.0291926  | 0.16555169 | 4.02E-05 | 0.0040662 | -0.10661  |
| 9mo_SIGAE3_ | 0.01684708 | 0.0910577  | 3.31E-05 | 0.0050879 | 0.10435   |
| 9mo_SIGAE3_ | 0.08294815 | 0.4899176  | 6.35E-05 | 0.017892  | 0.12434   |
| 9mo_SIGAE3_ | 0.0175429  | 0.09525634 | 3.33E-05 | 0.0049935 | 0.067421  |
| 9mo_SIGAE3_ | 0.01464337 | 0.0777603  | 3.26E-05 | 0.0055188 | 0.18676   |
| 9mo_SIGAE3_ | 0.02158899 | 0.11967081 | 3.49E-05 | 0.0044169 | -0.0356   |

|             |            |            |          |           |           |
|-------------|------------|------------|----------|-----------|-----------|
| 9mo_SIGAE3_ | 0.01380628 | 0.07270923 | 3.25E-05 | 0.0056405 | 0.20898   |
| 9mo_SIGAE3_ | 0.12813173 | 0.7625595  | 6.69E-05 | 0.023757  | -0.4283   |
| 9mo_SIGAE3_ | 0.00960726 | 0.04737195 | 3.20E-05 | 0.0068348 | 0.4058    |
| 9mo_SIGAE3_ | 0.1049246  | 0.6225255  | 6.57E-05 | 0.025429  | -0.19772  |
| 9mo_SIGAE3_ | 0.07668857 | 0.45214674 | 6.27E-05 | 0.015053  | 0.13605   |
| 9mo_SIGAE3_ | 0.13242635 | 0.7884736  | 6.71E-05 | 0.023568  | -0.45613  |
| 9mo_SIGAE3_ | 0.02178093 | 0.120829   | 3.49E-05 | 0.0044169 | -0.0356   |
| 9mo_SIGAE3_ | 0.02773882 | 0.15677945 | 3.88E-05 | 0.0040827 | -0.10472  |
| 9mo_SIGAE3_ | 0.01190014 | 0.06120742 | 3.22E-05 | 0.0061869 | 0.30353   |
| 9mo_SIGAE3_ | 0.02315885 | 0.12914349 | 3.58E-05 | 0.0042778 | -0.065623 |
| 9mo_SIGAE3_ | 0.08533864 | 0.504342   | 6.39E-05 | 0.019177  | 0.10916   |
| 9mo_SIGAE3_ | 0.01636263 | 0.0881345  | 3.30E-05 | 0.0051875 | 0.12392   |
| 9mo_SIGAE3_ | 0.09608863 | 0.56920844 | 6.50E-05 | 0.023448  | -0.045608 |
| 9mo_SIGAE3_ | 0.0926742  | 0.54860544 | 6.46E-05 | 0.022258  | 0.010343  |
| 9mo_SIGAE3_ | 0.08632375 | 0.5102863  | 6.40E-05 | 0.019681  | 0.099025  |
| 9mo_SIGAE3_ | 0.01778668 | 0.09672733 | 3.34E-05 | 0.0049043 | 0.067421  |
| 9mo_SIGAE3_ | 0.02096147 | 0.11588429 | 3.47E-05 | 0.0044724 | -0.023601 |
| 9mo_SIGAE3_ | 0.09519722 | 0.5638296  | 6.49E-05 | 0.023263  | -0.026471 |
| 9mo_SIGAE3_ | 0.00460779 | 0.01720467 | 3.18E-05 | 0.0087056 | 0.65503   |
| 9mo_SIGAE3_ | 0.05611523 | 0.3280053  | 5.97E-05 | 0.0073934 | 0.067199  |
| 9mo_SIGAE3_ | 0.07622134 | 0.4493274  | 6.26E-05 | 0.0148    | 0.1354    |
| 9mo_SIGAE3_ | 0.09295543 | 0.55030245 | 6.47E-05 | 0.022469  | 0.010343  |
| 9mo_SIGAE3_ | 0.01245996 | 0.06458538 | 3.23E-05 | 0.0060411 | 0.2791    |
| 9mo_SIGAE3_ | 0.01018173 | 0.05083837 | 3.20E-05 | 0.0066628 | 0.37961   |
| 9mo_SIGAE3_ | 0.01618697 | 0.08707455 | 3.30E-05 | 0.0051875 | 0.12392   |
| 9mo_SIGAE3_ | 0.01474457 | 0.07837096 | 3.26E-05 | 0.0055188 | 0.16515   |
| 9mo_SIGAE3_ | 0.01581787 | 0.08484734 | 3.28E-05 | 0.0052924 | 0.1442    |
| 9mo_SIGAE3_ | 0.02372641 | 0.1325682  | 3.61E-05 | 0.0042401 | -0.073623 |
| 9mo_SIGAE3_ | 0.0115488  | 0.05908738 | 3.22E-05 | 0.0061869 | 0.30353   |
| 9mo_SIGAE3_ | 0.01223195 | 0.06320959 | 3.23E-05 | 0.0060411 | 0.2791    |
| 9mo_SIGAE3_ | 0.09693187 | 0.5742966  | 6.51E-05 | 0.023799  | -0.055297 |
| 9mo_SIGAE3_ | 0.06069339 | 0.35563034 | 6.05E-05 | 0.008688  | 0.080421  |
| 9mo_SIGAE3_ | 0.08518705 | 0.5034273  | 6.39E-05 | 0.019177  | 0.10916   |
| 9mo_SIGAE3_ | 0.01568759 | 0.08406121 | 3.28E-05 | 0.0052924 | 0.1442    |
| 9mo_SIGAE3_ | 0.03064593 | 0.17432125 | 4.11E-05 | 0.0040705 | -0.10475  |
| 9mo_SIGAE3_ | 0.06383079 | 0.37456176 | 6.10E-05 | 0.0098069 | 0.089169  |
| 9mo_SIGAE3_ | 0.07689516 | 0.45339328 | 6.28E-05 | 0.015307  | 0.13605   |
| 9mo_SIGAE3_ | 0.02813827 | 0.15918975 | 3.93E-05 | 0.004074  | -0.10603  |
| 9mo_SIGAE3_ | 0.02525224 | 0.14177518 | 3.68E-05 | 0.0041768 | -0.092011 |
| 9mo_SIGAE3_ | 0.11530051 | 0.6851347  | 6.63E-05 | 0.025182  | -0.32814  |
| 9mo_SIGAE3_ | 0.01765294 | 0.09592033 | 3.34E-05 | 0.0049043 | 0.067421  |
| 9mo_SIGAE3_ | 0.03073734 | 0.17487279 | 4.11E-05 | 0.0040705 | -0.10475  |
| 9mo_SIGAE3_ | 0.04320634 | 0.2501119  | 5.33E-05 | 0.0049301 | 0.0036923 |

|             |            |            |          |           |           |
|-------------|------------|------------|----------|-----------|-----------|
| 9mo_SIGAE3_ | 0.01515077 | 0.08082199 | 3.27E-05 | 0.0054028 | 0.16515   |
| 9mo_SIGAE3_ | 0.05717497 | 0.33439988 | 5.99E-05 | 0.0076952 | 0.070131  |
| 9mo_SIGAE3_ | 0.0331146  | 0.1892174  | 4.37E-05 | 0.0041322 | -0.091175 |
| 9mo_SIGAE3_ | 0.01106801 | 0.05618628 | 3.21E-05 | 0.006339  | 0.32844   |
| 9mo_SIGAE3_ | 0.02080243 | 0.11492465 | 3.44E-05 | 0.0045325 | -0.01065  |
| 9mo_SIGAE3_ | 0.02360464 | 0.13183346 | 3.58E-05 | 0.0042778 | -0.073623 |
| 9mo_SIGAE3_ | 0.01864373 | 0.10189882 | 3.36E-05 | 0.0048202 | 0.03364   |
| 9mo_SIGAE3_ | 0.06881028 | 0.4046084  | 6.16E-05 | 0.011695  | 0.10977   |
| 9mo_SIGAE3_ | 0.06057952 | 0.35494325 | 6.05E-05 | 0.008688  | 0.07887   |
| 9mo_SIGAE3_ | 0.02204015 | 0.12239312 | 3.52E-05 | 0.0043661 | -0.046619 |
| 9mo_SIGAE3_ | 0.03042306 | 0.17297642 | 4.11E-05 | 0.0040705 | -0.10475  |
| 9mo_SIGAE3_ | 0.10983358 | 0.65214676 | 6.60E-05 | 0.025599  | -0.26716  |
| 9mo_SIGAE3_ | 0.00737423 | 0.03389763 | 3.19E-05 | 0.0075925 | 0.51404   |
| 9mo_SIGAE3_ | 0.10828663 | 0.6428123  | 6.59E-05 | 0.025614  | -0.24573  |
| 9mo_SIGAE3_ | 0.0243842  | 0.13653736 | 3.64E-05 | 0.0042065 | -0.080664 |
| 9mo_SIGAE3_ | 0.0608994  | 0.35687345 | 6.06E-05 | 0.008866  | 0.080421  |
| 9mo_SIGAE3_ | 0.02833892 | 0.1604005  | 3.93E-05 | 0.004074  | -0.10603  |
| 9mo_SIGAE3_ | 0.04508692 | 0.2614595  | 5.46E-05 | 0.0051531 | 0.017239  |
| 9mo_SIGAE3_ | 0.03385737 | 0.19369936 | 4.43E-05 | 0.004153  | -0.087207 |
| 9mo_SIGAE3_ | 0.06035991 | 0.35361812 | 6.05E-05 | 0.008688  | 0.07887   |
| 9mo_SIGAE3_ | 0.07533483 | 0.4439781  | 6.26E-05 | 0.014549  | 0.13345   |
| 9mo_SIGAE3_ | 0.00767595 | 0.03571827 | 3.19E-05 | 0.0073923 | 0.48652   |
| 9mo_SIGAE3_ | 0.03834133 | 0.220756   | 4.87E-05 | 0.0044183 | -0.04622  |
| 9mo_SIGAE3_ | 0.01546809 | 0.08273675 | 3.28E-05 | 0.0052924 | 0.1442    |
| 9mo_SIGAE3_ | 0.01727898 | 0.09366382 | 3.33E-05 | 0.0049935 | 0.085504  |
| 9mo_SIGAE3_ | 0.01267604 | 0.06588927 | 3.23E-05 | 0.0059016 | 0.25518   |
| 9mo_SIGAE3_ | 0.08373289 | 0.4946528  | 6.37E-05 | 0.01841   | 0.12117   |
| 9mo_SIGAE3_ | 0.04384329 | 0.2539553  | 5.38E-05 | 0.0050014 | 0.008455  |
| 9mo_SIGAE3_ | 0.06801276 | 0.3997961  | 6.16E-05 | 0.011474  | 0.10734   |
| 9mo_SIGAE3_ | 0.01651861 | 0.08907566 | 3.31E-05 | 0.0050879 | 0.10435   |
| 9mo_SIGAE3_ | 0.0103367  | 0.05177348 | 3.20E-05 | 0.0066628 | 0.35381   |
| 9mo_SIGAE3_ | 0.0846741  | 0.5003321  | 6.38E-05 | 0.018923  | 0.1136    |
| 9mo_SIGAE3_ | 0.0161056  | 0.08658356 | 3.30E-05 | 0.0051875 | 0.12392   |
| 9mo_SIGAE3_ | 0.02724898 | 0.15382373 | 3.84E-05 | 0.0040947 | -0.10271  |
| 9mo_SIGAE3_ | 0.08726654 | 0.5159752  | 6.41E-05 | 0.01993   | 0.087329  |
| 9mo_SIGAE3_ | 0.0642401  | 0.37703153 | 6.10E-05 | 0.010005  | 0.091185  |
| 9mo_SIGAE3_ | 0.03116406 | 0.17744769 | 4.16E-05 | 0.0040771 | -0.10299  |
| 9mo_SIGAE3_ | 0.0235233  | 0.13134263 | 3.58E-05 | 0.0042778 | -0.065623 |
| 9mo_SIGAE3_ | 0.10956651 | 0.6505352  | 6.60E-05 | 0.025599  | -0.2602   |
| 9mo_SIGAE3_ | 0.03786352 | 0.21787286 | 4.81E-05 | 0.0043756 | -0.05192  |
| 9mo_SIGAE3_ | 0.0077002  | 0.03586457 | 3.19E-05 | 0.0073923 | 0.48652   |
| 9mo_SIGAE3_ | 0.01114458 | 0.05664828 | 3.21E-05 | 0.006339  | 0.32844   |
| 9mo_SIGAE3_ | 0.0074894  | 0.03459256 | 3.19E-05 | 0.0075925 | 0.51404   |

|             |            |            |          |           |           |
|-------------|------------|------------|----------|-----------|-----------|
| 9mo_SIGAE3_ | 0.07851487 | 0.46316683 | 6.29E-05 | 0.015819  | 0.13651   |
| 9mo_SIGAE3_ | 0.13687707 | 0.8153297  | 6.73E-05 | 0.023528  | -0.48029  |
| 9mo_SIGAE3_ | 0.07375329 | 0.43443498 | 6.23E-05 | 0.013805  | 0.12913   |
| 9mo_SIGAE3_ | 0.05725776 | 0.33489946 | 5.99E-05 | 0.0076952 | 0.070131  |
| 9mo_SIGAE3_ | 0.08920916 | 0.5276971  | 6.43E-05 | 0.020902  | 0.067165  |
| 9mo_SIGAE3_ | 0.0096823  | 0.04782475 | 3.20E-05 | 0.0068348 | 0.4058    |
| 9mo_SIGAE3_ | 0.11120281 | 0.6604088  | 6.61E-05 | 0.025556  | -0.28058  |
| 9mo_SIGAE3_ | 0.01418528 | 0.07499614 | 3.25E-05 | 0.0056405 | 0.20898   |
| 9mo_SIGAE3_ | 0.09078229 | 0.53718954 | 6.45E-05 | 0.021597  | 0.044278  |
| 9mo_SIGAE3_ | 0.0779194  | 0.4595737  | 6.29E-05 | 0.015562  | 0.13662   |
| 9mo_SIGAE3_ | 0.02232278 | 0.12409854 | 3.52E-05 | 0.0043661 | -0.046619 |
| 9mo_SIGAE3_ | 0.09667277 | 0.57273316 | 6.50E-05 | 0.023626  | -0.055297 |
| 9mo_SIGAE3_ | 0.01310466 | 0.06847561 | 3.23E-05 | 0.0059016 | 0.23179   |
| 9mo_SIGAE3_ | 0.02708653 | 0.15284349 | 3.84E-05 | 0.0040947 | -0.10271  |
| 9mo_SIGAE3_ | 0.09977833 | 0.59147245 | 6.53E-05 | 0.024558  | -0.10426  |
| 9mo_SIGAE3_ | 0.02597434 | 0.1461324  | 3.76E-05 | 0.0041286 | -0.096385 |
| 9mo_SIGAE3_ | 0.08142515 | 0.48072767 | 6.34E-05 | 0.017373  | 0.13148   |
| 9mo_SIGAE3_ | 0.10237997 | 0.607171   | 6.55E-05 | 0.025127  | -0.15246  |
| 9mo_SIGAE3_ | 0.01777941 | 0.09668348 | 3.34E-05 | 0.0049043 | 0.067421  |
| 9mo_SIGAE3_ | 0.02889628 | 0.16376366 | 3.97E-05 | 0.0040686 | -0.10664  |
| 9mo_SIGAE3_ | 0.11107121 | 0.6596147  | 6.61E-05 | 0.025556  | -0.28058  |
| 9mo_SIGAE3_ | 0.01172235 | 0.06013459 | 3.22E-05 | 0.0061869 | 0.30353   |
| 9mo_SIGAE3_ | 0.13241565 | 0.78840905 | 6.71E-05 | 0.023568  | -0.45613  |
| 9mo_SIGAE3_ | 0.01784478 | 0.09707792 | 3.34E-05 | 0.0049043 | 0.067421  |
| 9mo_SIGAE3_ | 0.07589828 | 0.44737807 | 6.26E-05 | 0.0148    | 0.13453   |
| 9mo_SIGAE3_ | 0.00716658 | 0.03264467 | 3.19E-05 | 0.0075925 | 0.51404   |
| 9mo_SIGAE3_ | 0.03543593 | 0.20322451 | 4.59E-05 | 0.0042319 | -0.073417 |
| 9mo_SIGAE3_ | 0.01913646 | 0.10487202 | 3.38E-05 | 0.004741  | 0.03364   |
| 9mo_SIGAE3_ | 0.10970558 | 0.65137434 | 6.60E-05 | 0.025599  | -0.2602   |
| 9mo_SIGAE3_ | 0.07996839 | 0.47193745 | 6.32E-05 | 0.016594  | 0.13446   |
| 9mo_SIGAE3_ | 0.0507035  | 0.29535046 | 5.78E-05 | 0.0061018 | 0.051138  |
| 9mo_SIGAE3_ | 0.01729426 | 0.09375601 | 3.33E-05 | 0.0049935 | 0.085504  |
| 9mo_SIGAE3_ | 0.02746866 | 0.15514928 | 3.84E-05 | 0.0040947 | -0.10472  |
| 9mo_SIGAE3_ | 0.00834406 | 0.03974969 | 3.19E-05 | 0.0071994 | 0.45929   |
| 9mo_SIGAE3_ | 0.01333661 | 0.06987519 | 3.24E-05 | 0.0057681 | 0.23179   |
| 9mo_SIGAE3_ | 0.09938183 | 0.5890799  | 6.53E-05 | 0.02442   | -0.10426  |
| 9mo_SIGAE3_ | 0.01161461 | 0.0594845  | 3.22E-05 | 0.0061869 | 0.30353   |
| 9mo_SIGAE3_ | 0.11649518 | 0.6923434  | 6.64E-05 | 0.025054  | -0.33868  |
| 9mo_SIGAE3_ | 0.03323255 | 0.18992914 | 4.37E-05 | 0.0041322 | -0.091175 |
| 9mo_SIGAE3_ | 0.01203537 | 0.06202338 | 3.23E-05 | 0.0060411 | 0.2791    |
| 9mo_SIGAE3_ | 0.05234877 | 0.30527815 | 5.85E-05 | 0.0064518 | 0.057248  |
| 9mo_SIGAE3_ | 0.01689624 | 0.09135432 | 3.31E-05 | 0.0050879 | 0.10435   |
| 9mo_SIGAE3_ | 0.10148969 | 0.6017989  | 6.54E-05 | 0.024923  | -0.14299  |

|             |            |            |          |           |           |
|-------------|------------|------------|----------|-----------|-----------|
| 9mo_SIGAE3_ | 0.01492408 | 0.07945412 | 3.27E-05 | 0.0054028 | 0.16515   |
| 9mo_SIGAE3_ | 0.02006085 | 0.11044985 | 3.42E-05 | 0.0045972 | 0.0032259 |
| 9mo_SIGAE3_ | 0.03867476 | 0.22276792 | 4.92E-05 | 0.0044639 | -0.040459 |
| 9mo_SIGAE3_ | 0.1094863  | 0.65005124 | 6.60E-05 | 0.025611  | -0.2602   |
| 9mo_SIGAE3_ | 0.02609744 | 0.14687522 | 3.76E-05 | 0.0041286 | -0.096385 |
| 9mo_SIGAE3_ | 0.10988373 | 0.6524493  | 6.60E-05 | 0.025599  | -0.26716  |
| 9mo_SIGAE3_ | 0.0238186  | 0.1331245  | 3.61E-05 | 0.0042401 | -0.073623 |
| 9mo_SIGAE3_ | 0.01372389 | 0.07221206 | 3.25E-05 | 0.0056405 | 0.20898   |
| 9mo_SIGAE3_ | 0.0121969  | 0.06299805 | 3.23E-05 | 0.0060411 | 0.2791    |
| 9mo_SIGAE3_ | 0.10127981 | 0.60053253 | 6.54E-05 | 0.024923  | -0.13341  |
| 9mo_SIGAE3_ | 0.02781933 | 0.15726528 | 3.88E-05 | 0.0040827 | -0.10472  |
| 9mo_SIGAE3_ | 0.10955832 | 0.6504858  | 6.60E-05 | 0.025611  | -0.2602   |
| 9mo_SIGAE3_ | 0.02611161 | 0.14696075 | 3.76E-05 | 0.0041286 | -0.096385 |
| 9mo_SIGAE3_ | 0.08056736 | 0.4755517  | 6.32E-05 | 0.016854  | 0.13314   |
| 9mo_SIGAE3_ | 0.01956543 | 0.10746045 | 3.40E-05 | 0.0046667 | 0.017998  |
| 9mo_SIGAE3_ | 0.02087151 | 0.11534149 | 3.44E-05 | 0.0045325 | -0.023601 |
| 9mo_SIGAE3_ | 0.0248144  | 0.13913323 | 3.68E-05 | 0.0041768 | -0.086782 |
| 9mo_SIGAE3_ | 0.02252349 | 0.12530968 | 3.52E-05 | 0.0043661 | -0.056631 |
| 9mo_SIGAE3_ | 0.08267966 | 0.48829752 | 6.35E-05 | 0.017892  | 0.1271    |
| 9mo_SIGAE3_ | 0.10717613 | 0.63611144 | 6.58E-05 | 0.025586  | -0.23052  |
| 9mo_SIGAE3_ | 0.02223494 | 0.12356854 | 3.52E-05 | 0.0043661 | -0.046619 |
| 9mo_SIGAE3_ | 0.03478589 | 0.1993021  | 4.54E-05 | 0.0042028 | -0.078293 |
| 9mo_SIGAE3_ | 0.02121801 | 0.11743226 | 3.47E-05 | 0.0044724 | -0.023601 |
| 9mo_SIGAE3_ | 0.06863942 | 0.40357742 | 6.16E-05 | 0.011695  | 0.10977   |
| 9mo_SIGAE3_ | 0.02046287 | 0.11287571 | 3.44E-05 | 0.0045325 | -0.01065  |
| 9mo_SIGAE3_ | 0.01645049 | 0.08866461 | 3.31E-05 | 0.0050879 | 0.10435   |
| 9mo_SIGAE3_ | 0.02559848 | 0.14386444 | 3.72E-05 | 0.0041509 | -0.092011 |
| 9mo_SIGAE3_ | 0.03406683 | 0.19496326 | 4.43E-05 | 0.004153  | -0.087207 |
| 9mo_SIGAE3_ | 0.01165884 | 0.0597514  | 3.22E-05 | 0.0061869 | 0.30353   |
| 9mo_SIGAE3_ | 0.09179536 | 0.5433024  | 6.45E-05 | 0.021822  | 0.027741  |
| 9mo_SIGAE3_ | 0.04696484 | 0.27279106 | 5.61E-05 | 0.0054936 | 0.032113  |
| 9mo_SIGAE3_ | 0.02585994 | 0.14544211 | 3.72E-05 | 0.0041509 | -0.096385 |
| 9mo_SIGAE3_ | 0.02114149 | 0.11697055 | 3.47E-05 | 0.0044724 | -0.023601 |
| 9mo_SIGAE3_ | 0.07532903 | 0.44394314 | 6.26E-05 | 0.014549  | 0.13345   |
| 9mo_SIGAE3_ | 0.01145505 | 0.0585217  | 3.21E-05 | 0.006339  | 0.30353   |
| 9mo_SIGAE3_ | 0.07020094 | 0.41299975 | 6.18E-05 | 0.012147  | 0.11689   |
| 9mo_SIGAE3_ | 0.01922181 | 0.10538705 | 3.40E-05 | 0.0046667 | 0.017998  |
| 9mo_SIGAE3_ | 0.01387217 | 0.07310683 | 3.25E-05 | 0.0056405 | 0.20898   |
| 9mo_SIGAE3_ | 0.07832015 | 0.46199185 | 6.29E-05 | 0.015819  | 0.13651   |
| 9mo_SIGAE3_ | 0.01653117 | 0.08915144 | 3.31E-05 | 0.0050879 | 0.10435   |
| 9mo_SIGAE3_ | 0.1165187  | 0.6924854  | 6.64E-05 | 0.025054  | -0.33868  |
| 9mo_SIGAE3_ | 0.03451707 | 0.19768004 | 4.48E-05 | 0.0041765 | -0.082901 |
| 9mo_SIGAE3_ | 0.10320202 | 0.6121313  | 6.56E-05 | 0.025216  | -0.17104  |

|             |            |            |          |           |           |
|-------------|------------|------------|----------|-----------|-----------|
| 9mo_SIGAE3_ | 0.02947979 | 0.1672846  | 4.02E-05 | 0.0040662 | -0.10661  |
| 9mo_SIGAE3_ | 0.06137772 | 0.3597597  | 6.07E-05 | 0.0090475 | 0.082025  |
| 9mo_SIGAE3_ | 0.01945879 | 0.10681699 | 3.40E-05 | 0.0046667 | 0.017998  |
| 9mo_SIGAE3_ | 0.0878751  | 0.51964724 | 6.41E-05 | 0.020177  | 0.080939  |
| 9mo_SIGAE3_ | 0.00851003 | 0.04075114 | 3.19E-05 | 0.0071994 | 0.45929   |
| 9mo_SIGAE3_ | 0.05626622 | 0.3289164  | 5.97E-05 | 0.0073934 | 0.068678  |
| 9mo_SIGAE3_ | 0.01069692 | 0.05394703 | 3.21E-05 | 0.0064976 | 0.35381   |
| 9mo_SIGAE3_ | 0.12489259 | 0.7430142  | 6.68E-05 | 0.024034  | -0.40548  |
| 9mo_SIGAE3_ | 0.01307716 | 0.06830962 | 3.23E-05 | 0.0059016 | 0.25518   |
| 9mo_SIGAE3_ | 0.02053037 | 0.113283   | 3.44E-05 | 0.0045325 | -0.01065  |
| 9mo_SIGAE3_ | 0.02053904 | 0.11333531 | 3.44E-05 | 0.0045325 | -0.01065  |
| 9mo_SIGAE3_ | 0.04846266 | 0.28182903 | 5.67E-05 | 0.0056831 | 0.041222  |
| 9mo_SIGAE3_ | 0.05664285 | 0.331189   | 5.98E-05 | 0.0075425 | 0.068678  |
| 9mo_SIGAE3_ | 0.07397227 | 0.43575633 | 6.23E-05 | 0.013805  | 0.13074   |
| 9mo_SIGAE3_ | 0.02136849 | 0.11834029 | 3.47E-05 | 0.0044724 | -0.023601 |
| 9mo_SIGAE3_ | 0.01676505 | 0.09056273 | 3.31E-05 | 0.0050879 | 0.10435   |
| 9mo_SIGAE3_ | 0.02756921 | 0.15575603 | 3.88E-05 | 0.0040827 | -0.10472  |
| 9mo_SIGAE3_ | 0.01110668 | 0.05641957 | 3.21E-05 | 0.006339  | 0.32844   |
| 9mo_SIGAE3_ | 0.01507412 | 0.08035946 | 3.27E-05 | 0.0054028 | 0.16515   |
| 9mo_SIGAE3_ | 0.01452987 | 0.07707544 | 3.26E-05 | 0.0055188 | 0.18676   |
| 9mo_SIGAE3_ | 0.02731411 | 0.15421669 | 3.84E-05 | 0.0040947 | -0.10271  |
| 9mo_SIGAE3_ | 0.01307817 | 0.06831572 | 3.23E-05 | 0.0059016 | 0.25518   |
| 9mo_SIGAE3_ | 0.01526999 | 0.08154139 | 3.27E-05 | 0.0054028 | 0.16515   |
| 9mo_SIGAE3_ | 0.03206843 | 0.18290472 | 4.27E-05 | 0.004099  | -0.097962 |
| 9mo_SIGAE3_ | 0.09533107 | 0.5646373  | 6.49E-05 | 0.023263  | -0.026471 |
| 9mo_SIGAE3_ | 0.13178517 | 0.78460467 | 6.71E-05 | 0.023582  | -0.44949  |
| 9mo_SIGAE3_ | 0.01113549 | 0.05659344 | 3.21E-05 | 0.006339  | 0.32844   |
| 9mo_SIGAE3_ | 0.08440591 | 0.49871385 | 6.37E-05 | 0.018667  | 0.1136    |
| 9mo_SIGAE3_ | 0.071408   | 0.42028332 | 6.20E-05 | 0.012843  | 0.12136   |
| 9mo_SIGAE3_ | 0.0245554  | 0.1375704  | 3.64E-05 | 0.0042065 | -0.080664 |
| 9mo_SIGAE3_ | 0.08357129 | 0.4936777  | 6.37E-05 | 0.01841   | 0.12117   |
| 9mo_SIGAE3_ | 0.01674029 | 0.09041333 | 3.31E-05 | 0.0050879 | 0.10435   |
| 9mo_SIGAE3_ | 0.0183958  | 0.10040282 | 3.36E-05 | 0.0048202 | 0.050123  |
| 9mo_SIGAE3_ | 0.01739791 | 0.09438141 | 3.33E-05 | 0.0049935 | 0.085504  |
| 9mo_SIGAE3_ | 0.09705071 | 0.57501376 | 6.51E-05 | 0.023799  | -0.065044 |
| 9mo_SIGAE3_ | 0.02055367 | 0.11342359 | 3.44E-05 | 0.0045325 | -0.01065  |
| 9mo_SIGAE3_ | 0.03050718 | 0.17348397 | 4.11E-05 | 0.0040705 | -0.10475  |
| 9mo_SIGAE3_ | 0.02739827 | 0.15472457 | 3.84E-05 | 0.0040947 | -0.10271  |
| 9mo_SIGAE3_ | 0.10025378 | 0.59434134 | 6.53E-05 | 0.024687  | -0.11403  |
| 9mo_SIGAE3_ | 0.02759767 | 0.15592775 | 3.88E-05 | 0.0040827 | -0.10472  |
| 9mo_SIGAE3_ | 0.02111095 | 0.11678627 | 3.47E-05 | 0.0044724 | -0.023601 |
| 9mo_SIGAE3_ | 0.03238596 | 0.18482074 | 4.27E-05 | 0.004099  | -0.097962 |
| 9mo_SIGAE3_ | 0.0242876  | 0.13595451 | 3.64E-05 | 0.0042065 | -0.080664 |



|             |            |            |          |           |           |
|-------------|------------|------------|----------|-----------|-----------|
| 9mo_SIGAE3_ | 0.12363253 | 0.73541087 | 6.67E-05 | 0.024153  | -0.39752  |
| 9mo_SIGAE3_ | 0.0844295  | 0.4988562  | 6.37E-05 | 0.018667  | 0.1136    |
| 9mo_SIGAE3_ | 0.00968629 | 0.04784884 | 3.20E-05 | 0.0068348 | 0.4058    |
| 9mo_SIGAE3_ | 0.04479897 | 0.25972196 | 5.46E-05 | 0.0051531 | 0.017239  |
| 9mo_SIGAE3_ | 0.04112064 | 0.23752658 | 5.14E-05 | 0.0046741 | -0.017493 |
| 9mo_SIGAE3_ | 0.0333959  | 0.1909148  | 4.37E-05 | 0.0041322 | -0.091175 |
| 9mo_SIGAE3_ | 0.02397112 | 0.13404481 | 3.61E-05 | 0.0042401 | -0.073623 |
| 9mo_SIGAE3_ | 0.07693382 | 0.4536266  | 6.28E-05 | 0.015307  | 0.13605   |
| 9mo_SIGAE3_ | 0.02472304 | 0.13858196 | 3.64E-05 | 0.0042065 | -0.086782 |
| 9mo_SIGAE3_ | 0.02908691 | 0.16491392 | 3.97E-05 | 0.0040686 | -0.10664  |
| 9mo_SIGAE3_ | 0.03029571 | 0.17220798 | 4.07E-05 | 0.0040668 | -0.10475  |
| 9mo_SIGAE3_ | 0.01496623 | 0.07970849 | 3.27E-05 | 0.0054028 | 0.16515   |
| 9mo_SIGAE3_ | 0.01394012 | 0.07351685 | 3.25E-05 | 0.0056405 | 0.20898   |
| 9mo_SIGAE3_ | 0.01697092 | 0.09180497 | 3.31E-05 | 0.0050879 | 0.085504  |
| 9mo_SIGAE3_ | 0.06765284 | 0.39762428 | 6.15E-05 | 0.011255  | 0.10492   |
| 9mo_SIGAE3_ | 0.01099963 | 0.05577361 | 3.21E-05 | 0.006339  | 0.32844   |
| 9mo_SIGAE3_ | 0.03069592 | 0.17462286 | 4.11E-05 | 0.0040705 | -0.10475  |
| 9mo_SIGAE3_ | 0.00830225 | 0.03949742 | 3.19E-05 | 0.0071994 | 0.45929   |
| 9mo_SIGAE3_ | 0.03852699 | 0.22187626 | 4.87E-05 | 0.0044183 | -0.040459 |
| 9mo_SIGAE3_ | 0.01592126 | 0.08547118 | 3.30E-05 | 0.0051875 | 0.12392   |
| 9mo_SIGAE3_ | 0.01185163 | 0.06091467 | 3.22E-05 | 0.0061869 | 0.30353   |
| 9mo_SIGAE3_ | 0.03119004 | 0.17760445 | 4.16E-05 | 0.0040771 | -0.10299  |
| 9mo_SIGAE3_ | 0.00831639 | 0.03958272 | 3.19E-05 | 0.0071994 | 0.45929   |
| 9mo_SIGAE3_ | 0.01826946 | 0.0996405  | 3.36E-05 | 0.0048202 | 0.050123  |
| 9mo_SIGAE3_ | 0.01545859 | 0.08267938 | 3.28E-05 | 0.0052924 | 0.1442    |
| 9mo_SIGAE3_ | 0.01840637 | 0.10046659 | 3.36E-05 | 0.0048202 | 0.050123  |
| 9mo_SIGAE3_ | 0.0674897  | 0.39663988 | 6.15E-05 | 0.011255  | 0.10492   |
| 9mo_SIGAE3_ | 0.05806434 | 0.33976644 | 6.01E-05 | 0.0080116 | 0.073002  |
| 9mo_SIGAE3_ | 0.01940597 | 0.10649824 | 3.40E-05 | 0.0046667 | 0.017998  |
| 9mo_SIGAE3_ | 0.09441524 | 0.55911106 | 6.48E-05 | 0.022877  | -0.017059 |
| 9mo_SIGAE3_ | 0.01949734 | 0.10704962 | 3.40E-05 | 0.0046667 | 0.017998  |
| 9mo_SIGAE3_ | 0.06617943 | 0.3887336  | 6.13E-05 | 0.010616  | 0.10013   |
| 9mo_SIGAE3_ | 0.05761311 | 0.33704367 | 6.00E-05 | 0.0078516 | 0.071569  |
| 9mo_SIGAE3_ | 0.01501491 | 0.08000221 | 3.27E-05 | 0.0054028 | 0.16515   |
| 9mo_SIGAE3_ | 0.01414704 | 0.07476543 | 3.25E-05 | 0.0056405 | 0.20898   |
| 9mo_SIGAE3_ | 0.00860517 | 0.04132526 | 3.19E-05 | 0.0071994 | 0.45929   |
| 9mo_SIGAE3_ | 0.02040471 | 0.11252473 | 3.44E-05 | 0.0045325 | -0.01065  |
| 9mo_SIGAE3_ | 0.1132212  | 0.67258793 | 6.62E-05 | 0.025403  | -0.30551  |
| 9mo_SIGAE3_ | 0.10755263 | 0.63838327 | 6.59E-05 | 0.025604  | -0.23822  |
| 9mo_SIGAE3_ | 0.02050748 | 0.11314489 | 3.44E-05 | 0.0045325 | -0.01065  |
| 9mo_SIGAE3_ | 0.01049252 | 0.05271367 | 3.21E-05 | 0.0064976 | 0.35381   |
| 9mo_SIGAE3_ | 0.05942596 | 0.34798256 | 6.03E-05 | 0.0083426 | 0.075889  |
| 9mo_SIGAE3_ | 0.01311086 | 0.06851298 | 3.23E-05 | 0.0059016 | 0.23179   |

|             |            |            |          |           |           |
|-------------|------------|------------|----------|-----------|-----------|
| 9mo_SIGAE3_ | 0.02351925 | 0.1313182  | 3.58E-05 | 0.0042778 | -0.065623 |
| 9mo_SIGAE3_ | 0.03985758 | 0.22990516 | 5.03E-05 | 0.0045634 | -0.028892 |
| 9mo_SIGAE3_ | 0.02701358 | 0.15240331 | 3.84E-05 | 0.0040947 | -0.10271  |
| 9mo_SIGAE3_ | 0.09988576 | 0.5921207  | 6.53E-05 | 0.024558  | -0.11403  |
| 9mo_SIGAE3_ | 0.02845986 | 0.16113028 | 3.93E-05 | 0.004074  | -0.10603  |
| 9mo_SIGAE3_ | 0.03251341 | 0.1855898  | 4.27E-05 | 0.004099  | -0.094772 |
| 9mo_SIGAE3_ | 0.02114436 | 0.11698788 | 3.47E-05 | 0.0044724 | -0.023601 |
| 9mo_SIGAE3_ | 0.03180381 | 0.18130799 | 4.22E-05 | 0.0040866 | -0.10071  |
| 9mo_SIGAE3_ | 0.02618397 | 0.14739734 | 3.76E-05 | 0.0041286 | -0.096385 |
| 9mo_SIGAE3_ | 0.01940786 | 0.10650966 | 3.40E-05 | 0.0046667 | 0.017998  |
| 9mo_SIGAE3_ | 0.01431544 | 0.07578155 | 3.26E-05 | 0.0055188 | 0.18676   |
| 9mo_SIGAE3_ | 0.07052177 | 0.4149357  | 6.19E-05 | 0.012376  | 0.11689   |
| 9mo_SIGAE3_ | 0.09302353 | 0.55071336 | 6.47E-05 | 0.022469  | 0.010343  |
| 9mo_SIGAE3_ | 0.02232781 | 0.12412895 | 3.52E-05 | 0.0043661 | -0.046619 |
| 9mo_SIGAE3_ | 0.04685994 | 0.27215806 | 5.57E-05 | 0.0054037 | 0.032113  |
| 9mo_SIGAE3_ | 0.10518614 | 0.62410367 | 6.57E-05 | 0.025482  | -0.19772  |
| 9mo_SIGAE3_ | 0.03780949 | 0.21754679 | 4.81E-05 | 0.0043756 | -0.05192  |
| 9mo_SIGAE3_ | 0.02657368 | 0.1497489  | 3.80E-05 | 0.0041099 | -0.099939 |
| 9mo_SIGAE3_ | 0.08221031 | 0.4854654  | 6.35E-05 | 0.017633  | 0.1271    |
| 9mo_SIGAE3_ | 0.0714368  | 0.42045707 | 6.20E-05 | 0.012843  | 0.12136   |
| 9mo_SIGAE3_ | 0.02460772 | 0.1378861  | 3.64E-05 | 0.0042065 | -0.080664 |
| 9mo_SIGAE3_ | 0.01500463 | 0.07994019 | 3.27E-05 | 0.0054028 | 0.16515   |
| 9mo_SIGAE3_ | 0.0236455  | 0.13207999 | 3.58E-05 | 0.0042778 | -0.073623 |
| 9mo_SIGAE3_ | 0.11480283 | 0.68213165 | 6.63E-05 | 0.025242  | -0.32268  |
| 9mo_SIGAE3_ | 0.02752372 | 0.15548155 | 3.84E-05 | 0.0040947 | -0.10472  |
| 9mo_SIGAE3_ | 0.01697743 | 0.09184422 | 3.31E-05 | 0.0050879 | 0.085504  |
| 9mo_SIGAE3_ | 0.07435924 | 0.43809134 | 6.24E-05 | 0.014051  | 0.13074   |
| 9mo_SIGAE3_ | 0.01521904 | 0.08123396 | 3.27E-05 | 0.0054028 | 0.16515   |
| 9mo_SIGAE3_ | 0.02084096 | 0.11515714 | 3.44E-05 | 0.0045325 | -0.023601 |
| 9mo_SIGAE3_ | 0.01648371 | 0.08886508 | 3.31E-05 | 0.0050879 | 0.10435   |
| 9mo_SIGAE3_ | 0.02081813 | 0.11501937 | 3.44E-05 | 0.0045325 | -0.023601 |
| 9mo_SIGAE3_ | 0.08500861 | 0.50235057 | 6.38E-05 | 0.018923  | 0.10916   |
| 9mo_SIGAE3_ | 0.01320439 | 0.06907738 | 3.24E-05 | 0.0057681 | 0.23179   |
| 9mo_SIGAE3_ | 0.02887176 | 0.1636157  | 3.97E-05 | 0.0040686 | -0.10664  |
| 9mo_SIGAE3_ | 0.03323577 | 0.18994859 | 4.37E-05 | 0.0041322 | -0.091175 |
| 9mo_SIGAE3_ | 0.03888778 | 0.22405331 | 4.92E-05 | 0.0044639 | -0.040459 |
| 9mo_SIGAE3_ | 0.01070391 | 0.05398925 | 3.21E-05 | 0.0064976 | 0.35381   |
| 9mo_SIGAE3_ | 0.01672732 | 0.09033504 | 3.31E-05 | 0.0050879 | 0.10435   |
| 9mo_SIGAE3_ | 0.01982035 | 0.10899866 | 3.42E-05 | 0.0045972 | 0.0032259 |
| 9mo_SIGAE3_ | 0.07083656 | 0.41683516 | 6.20E-05 | 0.012608  | 0.11916   |
| 9mo_SIGAE3_ | 0.02119977 | 0.11732223 | 3.47E-05 | 0.0044724 | -0.023601 |
| 9mo_SIGAE3_ | 0.05596491 | 0.32709828 | 5.97E-05 | 0.0073934 | 0.067199  |
| 9mo_SIGAE3_ | 0.08724386 | 0.5158383  | 6.41E-05 | 0.01993   | 0.087329  |

|             |            |            |          |           |           |
|-------------|------------|------------|----------|-----------|-----------|
| 9mo_SIGAE3_ | 0.02738798 | 0.15466245 | 3.84E-05 | 0.0040947 | -0.10271  |
| 9mo_SIGAE3_ | 0.02185153 | 0.12125502 | 3.49E-05 | 0.0044169 | -0.0356   |
| 9mo_SIGAE3_ | 0.03742534 | 0.21522881 | 4.76E-05 | 0.0043355 | -0.05192  |
| 9mo_SIGAE3_ | 0.04691622 | 0.27249762 | 5.57E-05 | 0.0054037 | 0.032113  |
| 9mo_SIGAE3_ | 0.01511535 | 0.08060828 | 3.27E-05 | 0.0054028 | 0.16515   |
| 9mo_SIGAE3_ | 0.06693407 | 0.39328718 | 6.14E-05 | 0.011039  | 0.10251   |
| 9mo_SIGAE3_ | 0.01803155 | 0.09820491 | 3.34E-05 | 0.0049043 | 0.067421  |
| 9mo_SIGAE3_ | 0.01327171 | 0.06948357 | 3.24E-05 | 0.0057681 | 0.23179   |
| 9mo_SIGAE3_ | 0.0126807  | 0.06591739 | 3.23E-05 | 0.0059016 | 0.25518   |
| 9mo_SIGAE3_ | 0.01122525 | 0.05713504 | 3.21E-05 | 0.006339  | 0.32844   |
| 9mo_SIGAE3_ | 0.07545344 | 0.44469383 | 6.26E-05 | 0.014549  | 0.13345   |
| 9mo_SIGAE3_ | 0.03572926 | 0.20499448 | 4.59E-05 | 0.0042319 | -0.073417 |
| 9mo_SIGAE3_ | 0.02304465 | 0.12845443 | 3.55E-05 | 0.0043197 | -0.065623 |
| 9mo_SIGAE3_ | 0.01619507 | 0.08712339 | 3.30E-05 | 0.0051875 | 0.12392   |
| 9mo_SIGAE3_ | 0.01347899 | 0.07073432 | 3.24E-05 | 0.0057681 | 0.23179   |
| 9mo_SIGAE3_ | 0.03453226 | 0.19777168 | 4.48E-05 | 0.0041765 | -0.082901 |
| 9mo_SIGAE3_ | 0.05159682 | 0.30074084 | 5.83E-05 | 0.0063316 | 0.053285  |
| 9mo_SIGAE3_ | 0.09125616 | 0.54004884 | 6.45E-05 | 0.021597  | 0.036126  |
| 9mo_SIGAE3_ | 0.07994171 | 0.47177646 | 6.32E-05 | 0.016594  | 0.13446   |
| 9mo_SIGAE3_ | 0.11423219 | 0.67868835 | 6.63E-05 | 0.025299  | -0.3171   |
| 9mo_SIGAE3_ | 0.01737841 | 0.09426376 | 3.33E-05 | 0.0049935 | 0.085504  |
| 9mo_SIGAE3_ | 0.07384072 | 0.4349625  | 6.23E-05 | 0.013805  | 0.12913   |
| 9mo_SIGAE3_ | 0.05424428 | 0.31671584 | 5.92E-05 | 0.0069681 | 0.062513  |
| 9mo_SIGAE3_ | 0.01563346 | 0.08373459 | 3.28E-05 | 0.0052924 | 0.1442    |
| 9mo_SIGAE3_ | 0.09261796 | 0.5482661  | 6.46E-05 | 0.022258  | 0.019141  |
| 9mo_SIGAE3_ | 0.00822379 | 0.03902395 | 3.19E-05 | 0.0071994 | 0.45929   |
| 9mo_SIGAE3_ | 0.01856668 | 0.1014339  | 3.36E-05 | 0.0048202 | 0.050123  |
| 9mo_SIGAE3_ | 0.02010354 | 0.11070748 | 3.42E-05 | 0.0045972 | 0.0032259 |
| 9mo_SIGAE3_ | 0.02299736 | 0.12816907 | 3.55E-05 | 0.0043197 | -0.056631 |
| 9mo_SIGAE3_ | 0.05600506 | 0.32734057 | 5.97E-05 | 0.0073934 | 0.067199  |
| 9mo_SIGAE3_ | 0.11020232 | 0.65437174 | 6.60E-05 | 0.02558   | -0.26716  |
| 9mo_SIGAE3_ | 0.0465146  | 0.27007428 | 5.57E-05 | 0.0054037 | 0.028707  |
| 9mo_SIGAE3_ | 0.03842015 | 0.22123161 | 4.87E-05 | 0.0044183 | -0.04622  |
| 9mo_SIGAE3_ | 0.05421001 | 0.31650907 | 5.92E-05 | 0.0069681 | 0.062513  |
| 9mo_SIGAE3_ | 0.0207978  | 0.11489671 | 3.44E-05 | 0.0045325 | -0.01065  |
| 9mo_SIGAE3_ | 0.02085582 | 0.11524681 | 3.44E-05 | 0.0045325 | -0.023601 |
| 9mo_SIGAE3_ | 0.07283755 | 0.42890936 | 6.22E-05 | 0.01332   | 0.12737   |
| 9mo_SIGAE3_ | 0.03455718 | 0.19792205 | 4.48E-05 | 0.0041765 | -0.082901 |
| 9mo_SIGAE3_ | 0.03309273 | 0.18908542 | 4.37E-05 | 0.0041322 | -0.091175 |
| 9mo_SIGAE3_ | 0.03156447 | 0.17986381 | 4.22E-05 | 0.0040866 | -0.10071  |
| 9mo_SIGAE3_ | 0.09060346 | 0.5361104  | 6.44E-05 | 0.021369  | 0.044278  |
| 9mo_SIGAE3_ | 0.01414323 | 0.07474244 | 3.25E-05 | 0.0056405 | 0.20898   |
| 9mo_SIGAE3_ | 0.0626806  | 0.36762133 | 6.08E-05 | 0.0094206 | 0.085432  |

|             |            |            |          |           |           |
|-------------|------------|------------|----------|-----------|-----------|
| 9mo_SIGAE3_ | 0.05489461 | 0.32064    | 5.94E-05 | 0.0071062 | 0.064127  |
| 9mo_SIGAE3_ | 0.01072924 | 0.05414205 | 3.21E-05 | 0.0064976 | 0.35381   |
| 9mo_SIGAE3_ | 0.02654726 | 0.14958951 | 3.80E-05 | 0.0041099 | -0.099939 |
| 9mo_SIGAE3_ | 0.06402532 | 0.37573555 | 6.10E-05 | 0.0098069 | 0.091185  |
| 9mo_SIGAE3_ | 0.01751031 | 0.09505969 | 3.33E-05 | 0.0049935 | 0.067421  |
| 9mo_SIGAE3_ | 0.04162601 | 0.24057603 | 5.19E-05 | 0.0047337 | -0.011944 |
| 9mo_SIGAE3_ | 0.01756046 | 0.09536231 | 3.34E-05 | 0.0049043 | 0.067421  |
| 9mo_SIGAE3_ | 0.02224913 | 0.12365418 | 3.52E-05 | 0.0043661 | -0.046619 |
| 9mo_SIGAE3_ | 0.02752727 | 0.15550293 | 3.84E-05 | 0.0040947 | -0.10472  |
| 9mo_SIGAE3_ | 0.01554304 | 0.083189   | 3.28E-05 | 0.0052924 | 0.1442    |
| 9mo_SIGAE3_ | 0.01714074 | 0.09282965 | 3.33E-05 | 0.0049935 | 0.085504  |
| 9mo_SIGAE3_ | 0.01860203 | 0.10164719 | 3.36E-05 | 0.0048202 | 0.050123  |
| 9mo_SIGAE3_ | 0.0220588  | 0.1225057  | 3.52E-05 | 0.0043661 | -0.046619 |
| 9mo_SIGAE3_ | 0.04968291 | 0.2891921  | 5.73E-05 | 0.0058857 | 0.046466  |
| 9mo_SIGAE3_ | 0.04431283 | 0.25678855 | 5.42E-05 | 0.0050757 | 0.012967  |
| 9mo_SIGAE3_ | 0.01004964 | 0.05004128 | 3.20E-05 | 0.0066628 | 0.37961   |
| 9mo_SIGAE3_ | 0.08443172 | 0.49886963 | 6.37E-05 | 0.018667  | 0.1136    |
| 9mo_SIGAE3_ | 0.02606215 | 0.14666227 | 3.76E-05 | 0.0041286 | -0.096385 |
| 9mo_SIGAE3_ | 0.01357948 | 0.0713407  | 3.24E-05 | 0.0057681 | 0.23179   |
| 9mo_SIGAE3_ | 0.01120619 | 0.05702006 | 3.21E-05 | 0.006339  | 0.32844   |
| 9mo_SIGAE3_ | 0.02085766 | 0.11525792 | 3.44E-05 | 0.0045325 | -0.023601 |
| 9mo_SIGAE3_ | 0.01379662 | 0.07265091 | 3.25E-05 | 0.0056405 | 0.20898   |
| 9mo_SIGAE3_ | 0.08567703 | 0.5063839  | 6.39E-05 | 0.019177  | 0.1043    |
| 9mo_SIGAE3_ | 0.05605503 | 0.32764205 | 5.97E-05 | 0.0073934 | 0.067199  |
| 9mo_SIGAE3_ | 0.03227219 | 0.18413426 | 4.27E-05 | 0.004099  | -0.097962 |
| 9mo_SIGAE3_ | 0.0597309  | 0.34982258 | 6.04E-05 | 0.0085136 | 0.077363  |
| 9mo_SIGAE3_ | 0.06050472 | 0.3544919  | 6.05E-05 | 0.008688  | 0.07887   |
| 9mo_SIGAE3_ | 0.02115558 | 0.11705557 | 3.47E-05 | 0.0044724 | -0.023601 |
| 9mo_SIGAE3_ | 0.02942051 | 0.16692692 | 4.02E-05 | 0.0040662 | -0.10661  |
| 9mo_SIGAE3_ | 0.03586322 | 0.20580287 | 4.65E-05 | 0.0042637 | -0.068307 |
| 9mo_SIGAE3_ | 0.03479853 | 0.1993784  | 4.54E-05 | 0.0042028 | -0.078293 |
| 9mo_SIGAE3_ | 0.0817334  | 0.4825877  | 6.34E-05 | 0.017373  | 0.12948   |
| 9mo_SIGAE3_ | 0.02557313 | 0.14371149 | 3.72E-05 | 0.0041509 | -0.092011 |
| 9mo_SIGAE3_ | 0.01475259 | 0.07841932 | 3.26E-05 | 0.0055188 | 0.16515   |
| 9mo_SIGAE3_ | 0.03521285 | 0.20187844 | 4.54E-05 | 0.0042028 | -0.073417 |
| 9mo_SIGAE3_ | 0.0241088  | 0.13487555 | 3.61E-05 | 0.0042401 | -0.073623 |
| 9mo_SIGAE3_ | 0.00966895 | 0.04774419 | 3.20E-05 | 0.0068348 | 0.4058    |
| 9mo_SIGAE3_ | 0.00816447 | 0.038666   | 3.19E-05 | 0.0071994 | 0.45929   |
| 9mo_SIGAE3_ | 0.0859212  | 0.5078572  | 6.39E-05 | 0.01943   | 0.1043    |
| 9mo_SIGAE3_ | 0.01239339 | 0.06418374 | 3.23E-05 | 0.0060411 | 0.2791    |
| 9mo_SIGAE3_ | 0.0183591  | 0.10018133 | 3.36E-05 | 0.0048202 | 0.050123  |
| 9mo_SIGAE3_ | 0.10713358 | 0.63585466 | 6.58E-05 | 0.025586  | -0.23052  |
| 9mo_SIGAE3_ | 0.02845878 | 0.16112375 | 3.93E-05 | 0.004074  | -0.10603  |

|             |            |            |          |           |           |
|-------------|------------|------------|----------|-----------|-----------|
| 9mo_SIGAE3_ | 0.02484385 | 0.13931094 | 3.68E-05 | 0.0041768 | -0.086782 |
| 9mo_SIGAE3_ | 0.02400585 | 0.13425435 | 3.61E-05 | 0.0042401 | -0.073623 |
| 9mo_SIGAE3_ | 0.05512593 | 0.3220358  | 5.94E-05 | 0.0071062 | 0.065685  |
| 9mo_SIGAE3_ | 0.02049994 | 0.11309937 | 3.44E-05 | 0.0045325 | -0.01065  |
| 9mo_SIGAE3_ | 0.06139236 | 0.359848   | 6.07E-05 | 0.0090475 | 0.082025  |
| 9mo_SIGAE3_ | 0.12256796 | 0.72898716 | 6.67E-05 | 0.024282  | -0.38934  |
| 9mo_SIGAE3_ | 0.06789749 | 0.39910054 | 6.15E-05 | 0.011255  | 0.10734   |
| 9mo_SIGAE3_ | 0.00971914 | 0.04804706 | 3.20E-05 | 0.0068348 | 0.4058    |
| 9mo_SIGAE3_ | 0.08950448 | 0.5294791  | 6.43E-05 | 0.020902  | 0.059815  |
| 9mo_SIGAE3_ | 0.11863413 | 0.70525    | 6.65E-05 | 0.024776  | -0.3584   |
| 9mo_SIGAE3_ | 0.0417874  | 0.24154986 | 5.19E-05 | 0.0047337 | -0.011944 |
| 9mo_SIGAE3_ | 0.01644579 | 0.08863626 | 3.31E-05 | 0.0050879 | 0.10435   |
| 9mo_SIGAE3_ | 0.02403885 | 0.13445349 | 3.61E-05 | 0.0042401 | -0.073623 |
| 9mo_SIGAE3_ | 0.02553023 | 0.14345261 | 3.72E-05 | 0.0041509 | -0.092011 |
| 9mo_SIGAE3_ | 0.02247398 | 0.12501091 | 3.52E-05 | 0.0043661 | -0.056631 |
| 9mo_SIGAE3_ | 0.05926596 | 0.3470171  | 6.03E-05 | 0.0083426 | 0.075889  |
| 9mo_SIGAE3_ | 0.07035895 | 0.41395324 | 6.19E-05 | 0.012376  | 0.11689   |
| 9mo_SIGAE3_ | 0.01671135 | 0.09023868 | 3.31E-05 | 0.0050879 | 0.10435   |
| 9mo_SIGAE3_ | 0.07213555 | 0.42467338 | 6.21E-05 | 0.01308   | 0.12348   |
| 9mo_SIGAE3_ | 0.08455914 | 0.49963844 | 6.37E-05 | 0.018667  | 0.1136    |
| 9mo_SIGAE3_ | 0.07655842 | 0.4513614  | 6.27E-05 | 0.015053  | 0.1354    |
| 9mo_SIGAE3_ | 0.0213173  | 0.11803141 | 3.47E-05 | 0.0044724 | -0.023601 |
| 9mo_SIGAE3_ | 0.03352854 | 0.19171515 | 4.37E-05 | 0.0041322 | -0.087207 |
| 9mo_SIGAE3_ | 0.04768965 | 0.27716458 | 5.64E-05 | 0.0055867 | 0.035328  |
| 9mo_SIGAE3_ | 0.01882448 | 0.10298949 | 3.38E-05 | 0.004741  | 0.03364   |
| 9mo_SIGAE3_ | 0.01347323 | 0.07069959 | 3.24E-05 | 0.0057681 | 0.23179   |
| 9mo_SIGAE3_ | 0.01968141 | 0.1081603  | 3.40E-05 | 0.0046667 | 0.017998  |
| 9mo_SIGAE3_ | 0.02978433 | 0.16912225 | 4.07E-05 | 0.0040668 | -0.10597  |
| 9mo_SIGAE3_ | 0.03719251 | 0.21382391 | 4.76E-05 | 0.0043355 | -0.057524 |
| 9mo_SIGAE3_ | 0.04327792 | 0.25054383 | 5.33E-05 | 0.0049301 | 0.0036923 |
| 9mo_SIGAE3_ | 0.02573576 | 0.14469281 | 3.72E-05 | 0.0041509 | -0.092011 |
| 9mo_SIGAE3_ | 0.0329779  | 0.18839253 | 4.32E-05 | 0.0041142 | -0.091175 |
| 9mo_SIGAE3_ | 0.01545255 | 0.082643   | 3.28E-05 | 0.0052924 | 0.1442    |
| 9mo_SIGAE3_ | 0.06261629 | 0.3672333  | 6.08E-05 | 0.0094206 | 0.085432  |
| 9mo_SIGAE3_ | 0.01739622 | 0.09437124 | 3.33E-05 | 0.0049935 | 0.085504  |
| 9mo_SIGAE3_ | 0.09731311 | 0.5765971  | 6.51E-05 | 0.023799  | -0.065044 |
| 9mo_SIGAE3_ | 0.03817933 | 0.21977846 | 4.87E-05 | 0.0044183 | -0.04622  |
| 9mo_SIGAE3_ | 0.06219833 | 0.36471134 | 6.07E-05 | 0.0092324 | 0.083692  |
| 9mo_SIGAE3_ | 0.02360934 | 0.13186178 | 3.58E-05 | 0.0042778 | -0.073623 |
| 9mo_SIGAE3_ | 0.0359541  | 0.20635124 | 4.65E-05 | 0.0042637 | -0.068307 |
| 9mo_SIGAE3_ | 0.09092729 | 0.5380644  | 6.45E-05 | 0.021597  | 0.044278  |
| 9mo_SIGAE3_ | 0.02171212 | 0.1204138  | 3.49E-05 | 0.0044169 | -0.0356   |
| 9mo_SIGAE3_ | 0.01832158 | 0.09995495 | 3.36E-05 | 0.0048202 | 0.050123  |

|             |            |            |          |           |           |
|-------------|------------|------------|----------|-----------|-----------|
| 9mo_SIGAE3_ | 0.01182423 | 0.06074937 | 3.22E-05 | 0.0061869 | 0.30353   |
| 9mo_SIGAE3_ | 0.01818461 | 0.09912847 | 3.36E-05 | 0.0048202 | 0.050123  |
| 9mo_SIGAE3_ | 0.08503337 | 0.5025     | 6.38E-05 | 0.018923  | 0.10916   |
| 9mo_SIGAE3_ | 0.03247374 | 0.1853504  | 4.27E-05 | 0.004099  | -0.094772 |
| 9mo_SIGAE3_ | 0.02334269 | 0.1302528  | 3.58E-05 | 0.0042778 | -0.065623 |
| 9mo_SIGAE3_ | 0.0331092  | 0.1891848  | 4.37E-05 | 0.0041322 | -0.091175 |
| 9mo_SIGAE3_ | 0.11637325 | 0.6916077  | 6.64E-05 | 0.025054  | -0.33347  |
| 9mo_SIGAE3_ | 0.08206228 | 0.4845722  | 6.35E-05 | 0.017633  | 0.12948   |
| 9mo_SIGAE3_ | 0.12470535 | 0.7418844  | 6.68E-05 | 0.024034  | -0.40548  |
| 9mo_SIGAE3_ | 0.02370821 | 0.13245837 | 3.61E-05 | 0.0042401 | -0.073623 |
| 9mo_SIGAE3_ | 0.08875882 | 0.5249797  | 6.42E-05 | 0.020663  | 0.074212  |
| 9mo_SIGAE3_ | 0.07741776 | 0.45654675 | 6.29E-05 | 0.015562  | 0.13646   |
| 9mo_SIGAE3_ | 0.0148968  | 0.07928953 | 3.27E-05 | 0.0054028 | 0.16515   |
| 9mo_SIGAE3_ | 0.07175626 | 0.4223847  | 6.20E-05 | 0.012843  | 0.12348   |
| 9mo_SIGAE3_ | 0.07164095 | 0.42168894 | 6.20E-05 | 0.012843  | 0.12348   |
| 9mo_SIGAE3_ | 0.00766177 | 0.03563268 | 3.19E-05 | 0.0073923 | 0.48652   |
| 9mo_SIGAE3_ | 0.03521027 | 0.20186286 | 4.54E-05 | 0.0042028 | -0.073417 |
| 9mo_SIGAE3_ | 0.0181589  | 0.09897335 | 3.36E-05 | 0.0048202 | 0.050123  |
| 9mo_SIGAE3_ | 0.10833505 | 0.64310443 | 6.59E-05 | 0.025614  | -0.24573  |
| 9mo_SIGAE3_ | 0.00895751 | 0.04345129 | 3.19E-05 | 0.0070136 | 0.43237   |
| 9mo_SIGAE3_ | 0.10508271 | 0.62347955 | 6.57E-05 | 0.025429  | -0.19772  |
| 9mo_SIGAE3_ | 0.02917433 | 0.16544147 | 3.97E-05 | 0.0040686 | -0.10661  |
| 9mo_SIGAE3_ | 0.02531253 | 0.14213902 | 3.68E-05 | 0.0041768 | -0.092011 |
| 9mo_SIGAE3_ | 0.02489919 | 0.13964485 | 3.68E-05 | 0.0041768 | -0.086782 |
| 9mo_SIGAE3_ | 0.02560672 | 0.1439142  | 3.72E-05 | 0.0041509 | -0.092011 |
| 9mo_SIGAE3_ | 0.01285609 | 0.06697571 | 3.23E-05 | 0.0059016 | 0.25518   |
| 9mo_SIGAE3_ | 0.0682236  | 0.4010683  | 6.16E-05 | 0.011474  | 0.10734   |
| 9mo_SIGAE3_ | 0.02086621 | 0.11530951 | 3.44E-05 | 0.0045325 | -0.023601 |
| 9mo_SIGAE3_ | 0.01640071 | 0.08836424 | 3.30E-05 | 0.0051875 | 0.10435   |
| 9mo_SIGAE3_ | 0.0208202  | 0.11503189 | 3.44E-05 | 0.0045325 | -0.023601 |
| 9mo_SIGAE3_ | 0.01667436 | 0.09001549 | 3.31E-05 | 0.0050879 | 0.10435   |
| 9mo_SIGAE3_ | 0.07350068 | 0.4329107  | 6.23E-05 | 0.013561  | 0.12913   |
| 9mo_SIGAE3_ | 0.01630813 | 0.08780558 | 3.30E-05 | 0.0051875 | 0.12392   |
| 9mo_SIGAE3_ | 0.01345753 | 0.07060485 | 3.24E-05 | 0.0057681 | 0.23179   |
| 9mo_SIGAE3_ | 0.02335951 | 0.13035429 | 3.58E-05 | 0.0042778 | -0.065623 |
| 9mo_SIGAE3_ | 0.02578415 | 0.14498478 | 3.72E-05 | 0.0041509 | -0.092011 |
| 9mo_SIGAE3_ | 0.03449931 | 0.19757289 | 4.48E-05 | 0.0041765 | -0.082901 |
| 9mo_SIGAE3_ | 0.04943402 | 0.28769028 | 5.73E-05 | 0.0058857 | 0.04392   |
| 9mo_SIGAE3_ | 0.02012846 | 0.11085782 | 3.42E-05 | 0.0045972 | 0.0032259 |
| 9mo_SIGAE3_ | 0.01182207 | 0.06073631 | 3.22E-05 | 0.0061869 | 0.30353   |
| 9mo_SIGAE3_ | 0.12974893 | 0.77231777 | 6.70E-05 | 0.023664  | -0.43912  |
| 9mo_SIGAE3_ | 0.09629171 | 0.57043386 | 6.50E-05 | 0.023626  | -0.045608 |
| 9mo_SIGAE3_ | 0.03343728 | 0.19116448 | 4.37E-05 | 0.0041322 | -0.091175 |

|             |            |            |          |           |            |
|-------------|------------|------------|----------|-----------|------------|
| 9mo_SIGAE3_ | 0.01872036 | 0.10236123 | 3.38E-05 | 0.004741  | 0.03364    |
| 9mo_SIGAE3_ | 0.0138221  | 0.07280465 | 3.25E-05 | 0.0056405 | 0.20898    |
| 9mo_SIGAE3_ | 0.01408852 | 0.07441232 | 3.25E-05 | 0.0056405 | 0.20898    |
| 9mo_SIGAE3_ | 0.01797468 | 0.09786173 | 3.34E-05 | 0.0049043 | 0.067421   |
| 9mo_SIGAE3_ | 0.0176938  | 0.09616689 | 3.34E-05 | 0.0049043 | 0.067421   |
| 9mo_SIGAE3_ | 0.09385493 | 0.5557301  | 6.48E-05 | 0.022676  | -0.0077738 |
| 9mo_SIGAE3_ | 0.06902934 | 0.40593022 | 6.16E-05 | 0.011695  | 0.11218    |
| 9mo_SIGAE3_ | 0.03009629 | 0.17100465 | 4.07E-05 | 0.0040668 | -0.10597   |
| 9mo_SIGAE3_ | 0.01016225 | 0.05072083 | 3.20E-05 | 0.0066628 | 0.37961    |
| 9mo_SIGAE3_ | 0.053832   | 0.3142281  | 5.91E-05 | 0.0068337 | 0.060836   |
| 9mo_SIGAE3_ | 0.02371697 | 0.13251124 | 3.61E-05 | 0.0042401 | -0.073623  |
| 9mo_SIGAE3_ | 0.01061306 | 0.05344103 | 3.21E-05 | 0.0064976 | 0.35381    |
| 9mo_SIGAE3_ | 0.02117252 | 0.11715782 | 3.47E-05 | 0.0044724 | -0.023601  |
| 9mo_SIGAE3_ | 0.11706326 | 0.6957713  | 6.64E-05 | 0.024986  | -0.34377   |
| 9mo_SIGAE3_ | 0.01220117 | 0.06302384 | 3.23E-05 | 0.0060411 | 0.2791     |
| 9mo_SIGAE3_ | 0.05571676 | 0.32560092 | 5.95E-05 | 0.007248  | 0.067199   |
| 9mo_SIGAE3_ | 0.11018115 | 0.654244   | 6.60E-05 | 0.02558   | -0.26716   |
| 9mo_SIGAE3_ | 0.01888694 | 0.10336639 | 3.38E-05 | 0.004741  | 0.03364    |
| 9mo_SIGAE3_ | 0.01444968 | 0.07659157 | 3.26E-05 | 0.0055188 | 0.18676    |
| 9mo_SIGAE3_ | 0.0113109  | 0.05765189 | 3.21E-05 | 0.006339  | 0.32844    |
| 9mo_SIGAE3_ | 0.01858967 | 0.10157266 | 3.36E-05 | 0.0048202 | 0.050123   |
| 9mo_SIGAE3_ | 0.01423712 | 0.07530892 | 3.26E-05 | 0.0055188 | 0.18676    |
| 9mo_SIGAE3_ | 0.02659925 | 0.1499032  | 3.80E-05 | 0.0041099 | -0.099939  |
| 9mo_SIGAE3_ | 0.0909568  | 0.5382425  | 6.45E-05 | 0.021597  | 0.044278   |
| 9mo_SIGAE3_ | 0.01440152 | 0.07630095 | 3.26E-05 | 0.0055188 | 0.18676    |
| 9mo_SIGAE3_ | 0.02114258 | 0.11697711 | 3.47E-05 | 0.0044724 | -0.023601  |
| 9mo_SIGAE3_ | 0.06321465 | 0.37084386 | 6.09E-05 | 0.0096122 | 0.087254   |
| 9mo_SIGAE3_ | 0.01300636 | 0.06788246 | 3.23E-05 | 0.0059016 | 0.25518    |
| 9mo_SIGAE3_ | 0.01621197 | 0.08722538 | 3.30E-05 | 0.0051875 | 0.12392    |
| 9mo_SIGAE3_ | 0.02052646 | 0.11325942 | 3.44E-05 | 0.0045325 | -0.01065   |
| 9mo_SIGAE3_ | 0.04556016 | 0.26431504 | 5.50E-05 | 0.0052335 | 0.021279   |
| 9mo_SIGAE3_ | 0.01991137 | 0.10954789 | 3.42E-05 | 0.0045972 | 0.0032259  |
| 9mo_SIGAE3_ | 0.05060007 | 0.29472634 | 5.78E-05 | 0.0061018 | 0.048868   |
| 9mo_SIGAE3_ | 0.01415593 | 0.07481904 | 3.25E-05 | 0.0056405 | 0.20898    |
| 9mo_SIGAE3_ | 0.04403371 | 0.25510433 | 5.38E-05 | 0.0050014 | 0.012967   |
| 9mo_SIGAE3_ | 0.13197038 | 0.7857222  | 6.71E-05 | 0.023582  | -0.45284   |
| 9mo_SIGAE3_ | 0.00593959 | 0.02524089 | 3.18E-05 | 0.008015  | 0.56984    |
| 9mo_SIGAE3_ | 0.02054281 | 0.11335806 | 3.44E-05 | 0.0045325 | -0.01065   |
| 9mo_SIGAE3_ | 0.01261825 | 0.06554051 | 3.23E-05 | 0.0059016 | 0.25518    |
| 9mo_SIGAE3_ | 0.01302214 | 0.06797764 | 3.23E-05 | 0.0059016 | 0.25518    |
| 9mo_SIGAE3_ | 0.02554257 | 0.1435271  | 3.72E-05 | 0.0041509 | -0.092011  |
| 9mo_SIGAE3_ | 0.08369723 | 0.49443763 | 6.37E-05 | 0.01841   | 0.12117    |
| 9mo_SIGAE3_ | 0.00853223 | 0.04088513 | 3.19E-05 | 0.0071994 | 0.45929    |

|             |            |            |          |           |            |
|-------------|------------|------------|----------|-----------|------------|
| 9mo_SIGAE3_ | 0.02815817 | 0.15930983 | 3.93E-05 | 0.004074  | -0.10603   |
| 9mo_SIGAE3_ | 0.01134817 | 0.05787673 | 3.21E-05 | 0.006339  | 0.32844    |
| 9mo_SIGAE3_ | 0.02992259 | 0.1699565  | 4.07E-05 | 0.0040668 | -0.10597   |
| 9mo_SIGAE3_ | 0.01223022 | 0.06319913 | 3.23E-05 | 0.0060411 | 0.2791     |
| 9mo_SIGAE3_ | 0.06162    | 0.36122164 | 6.07E-05 | 0.0090475 | 0.082025   |
| 9mo_SIGAE3_ | 0.08491872 | 0.50180817 | 6.38E-05 | 0.018923  | 0.10916    |
| 9mo_SIGAE3_ | 0.0448109  | 0.25979397 | 5.46E-05 | 0.0051531 | 0.017239   |
| 9mo_SIGAE3_ | 0.05556783 | 0.32470226 | 5.95E-05 | 0.007248  | 0.065685   |
| 9mo_SIGAE3_ | 0.01338061 | 0.0701407  | 3.24E-05 | 0.0057681 | 0.23179    |
| 9mo_SIGAE3_ | 0.02350389 | 0.1312255  | 3.58E-05 | 0.0042778 | -0.065623  |
| 9mo_SIGAE3_ | 0.09388477 | 0.55591017 | 6.48E-05 | 0.022676  | -0.0077738 |
| 9mo_SIGAE3_ | 0.01186542 | 0.06099791 | 3.22E-05 | 0.0061869 | 0.30353    |
| 9mo_SIGAE3_ | 0.03609444 | 0.20719805 | 4.65E-05 | 0.0042637 | -0.068307  |
| 9mo_SIGAE3_ | 0.10534758 | 0.6250778  | 6.57E-05 | 0.025482  | -0.20623   |
| 9mo_SIGAE3_ | 0.0248113  | 0.13911454 | 3.68E-05 | 0.0041768 | -0.086782  |
| 9mo_SIGAE3_ | 0.0179947  | 0.09798255 | 3.34E-05 | 0.0049043 | 0.067421   |
| 9mo_SIGAE3_ | 0.0224173  | 0.12466889 | 3.52E-05 | 0.0043661 | -0.046619  |
| 9mo_SIGAE3_ | 0.01359868 | 0.07145653 | 3.24E-05 | 0.0057681 | 0.23179    |
| 9mo_SIGAE3_ | 0.02449773 | 0.13722244 | 3.64E-05 | 0.0042065 | -0.080664  |
| 9mo_SIGAE3_ | 0.0160956  | 0.08652316 | 3.30E-05 | 0.0051875 | 0.12392    |
| 9mo_SIGAE3_ | 0.04645501 | 0.26971465 | 5.57E-05 | 0.0054037 | 0.028707   |
| 9mo_SIGAE3_ | 0.01968431 | 0.10817779 | 3.40E-05 | 0.0046667 | 0.017998   |
| 9mo_SIGAE3_ | 0.02009542 | 0.11065845 | 3.42E-05 | 0.0045972 | 0.0032259  |
| 9mo_SIGAE3_ | 0.04314596 | 0.24974756 | 5.33E-05 | 0.0049301 | 0.0036923  |
| 9mo_SIGAE3_ | 0.00925509 | 0.0452469  | 3.20E-05 | 0.0068348 | 0.4058     |
| 9mo_SIGAE3_ | 0.05304608 | 0.3094858  | 5.89E-05 | 0.0067028 | 0.059084   |
| 9mo_SIGAE3_ | 0.07254949 | 0.4271711  | 6.22E-05 | 0.01332   | 0.12548    |
| 9mo_SIGAE3_ | 0.02014718 | 0.1109708  | 3.42E-05 | 0.0045972 | 0.0032259  |
| 9mo_SIGAE3_ | 0.02020975 | 0.11134835 | 3.42E-05 | 0.0045972 | 0.0032259  |
| 9mo_SIGAE3_ | 0.02540491 | 0.14269643 | 3.72E-05 | 0.0041509 | -0.092011  |
| 9mo_SIGAE3_ | 0.06797206 | 0.39955053 | 6.15E-05 | 0.011255  | 0.10734    |
| 9mo_SIGAE3_ | 0.01967797 | 0.10813958 | 3.40E-05 | 0.0046667 | 0.017998   |
| 9mo_SIGAE3_ | 0.02620747 | 0.14753912 | 3.76E-05 | 0.0041286 | -0.096385  |
| 9mo_SIGAE3_ | 0.02618665 | 0.14741349 | 3.76E-05 | 0.0041286 | -0.096385  |
| 9mo_SIGAE3_ | 0.10020115 | 0.59402376 | 6.53E-05 | 0.024687  | -0.11403   |
| 9mo_SIGAE3_ | 0.02608238 | 0.14678437 | 3.76E-05 | 0.0041286 | -0.096385  |
| 9mo_SIGAE3_ | 0.02931942 | 0.16631693 | 4.02E-05 | 0.0040662 | -0.10661   |
| 9mo_SIGAE3_ | 0.01447781 | 0.07676131 | 3.26E-05 | 0.0055188 | 0.18676    |
| 9mo_SIGAE3_ | 0.03388133 | 0.1938439  | 4.43E-05 | 0.004153  | -0.087207  |
| 9mo_SIGAE3_ | 0.09061687 | 0.53619134 | 6.44E-05 | 0.021369  | 0.044278   |
| 9mo_SIGAE3_ | 0.02462605 | 0.13799667 | 3.64E-05 | 0.0042065 | -0.080664  |
| 9mo_SIGAE3_ | 0.01688909 | 0.0913112  | 3.31E-05 | 0.0050879 | 0.10435    |
| 9mo_SIGAE3_ | 0.0112643  | 0.05737068 | 3.21E-05 | 0.006339  | 0.32844    |



|             |            |            |          |           |           |
|-------------|------------|------------|----------|-----------|-----------|
| 9mo_SIGAE3_ | 0.02033438 | 0.11210037 | 3.44E-05 | 0.0045325 | -0.01065  |
| 9mo_SIGAE3_ | 0.02765897 | 0.15629765 | 3.88E-05 | 0.0040827 | -0.10472  |
| 9mo_SIGAE3_ | 0.02517211 | 0.14129172 | 3.68E-05 | 0.0041768 | -0.086782 |
| 9mo_SIGAE3_ | 0.02442028 | 0.1367551  | 3.64E-05 | 0.0042065 | -0.080664 |
| 9mo_SIGAE3_ | 0.08393772 | 0.49588877 | 6.37E-05 | 0.01841   | 0.1176    |
| 9mo_SIGAE3_ | 0.08544539 | 0.50498617 | 6.39E-05 | 0.019177  | 0.10916   |
| 9mo_SIGAE3_ | 0.01875685 | 0.10258139 | 3.38E-05 | 0.004741  | 0.03364   |
| 9mo_SIGAE3_ | 0.11199005 | 0.6651591  | 6.61E-05 | 0.025489  | -0.29336  |
| 9mo_SIGAE3_ | 0.01212871 | 0.06258664 | 3.23E-05 | 0.0060411 | 0.2791    |
| 9mo_SIGAE3_ | 0.01226186 | 0.06339004 | 3.23E-05 | 0.0060411 | 0.2791    |
| 9mo_SIGAE3_ | 0.02978211 | 0.16910884 | 4.07E-05 | 0.0040668 | -0.10597  |
| 9mo_SIGAE3_ | 0.02852194 | 0.16150488 | 3.93E-05 | 0.004074  | -0.10603  |
| 9mo_SIGAE3_ | 0.01921203 | 0.10532802 | 3.38E-05 | 0.004741  | 0.017998  |
| 9mo_SIGAE3_ | 0.01962214 | 0.10780268 | 3.40E-05 | 0.0046667 | 0.017998  |
| 9mo_SIGAE3_ | 0.03193617 | 0.18210666 | 4.22E-05 | 0.0040866 | -0.097962 |
| 9mo_SIGAE3_ | 0.11927929 | 0.709143   | 6.65E-05 | 0.024704  | -0.36308  |
| 9mo_SIGAE3_ | 0.11700309 | 0.6954082  | 6.64E-05 | 0.024986  | -0.34377  |
| 9mo_SIGAE3_ | 0.10810048 | 0.64168906 | 6.59E-05 | 0.025614  | -0.24573  |
| 9mo_SIGAE3_ | 0.02491639 | 0.13974865 | 3.68E-05 | 0.0041768 | -0.086782 |
| 9mo_SIGAE3_ | 0.01506913 | 0.08032938 | 3.27E-05 | 0.0054028 | 0.16515   |
| 9mo_SIGAE3_ | 0.01731459 | 0.09387869 | 3.33E-05 | 0.0049935 | 0.085504  |
| 9mo_SIGAE3_ | 0.09080543 | 0.53732914 | 6.45E-05 | 0.021597  | 0.044278  |
| 9mo_SIGAE3_ | 0.06213734 | 0.36434332 | 6.07E-05 | 0.0092324 | 0.083692  |
| 9mo_SIGAE3_ | 0.03534792 | 0.20269345 | 4.59E-05 | 0.0042319 | -0.073417 |
| 9mo_SIGAE3_ | 0.0726845  | 0.4279858  | 6.22E-05 | 0.01332   | 0.12548   |
| 9mo_SIGAE3_ | 0.03132753 | 0.1784341  | 4.16E-05 | 0.0040771 | -0.10071  |
| 9mo_SIGAE3_ | 0.1022476  | 0.60637224 | 6.55E-05 | 0.025029  | -0.15246  |
| 9mo_SIGAE3_ | 0.01481577 | 0.0788006  | 3.27E-05 | 0.0054028 | 0.16515   |
| 9mo_SIGAE3_ | 0.08289231 | 0.4895807  | 6.35E-05 | 0.017892  | 0.12434   |
| 9mo_SIGAE3_ | 0.01763551 | 0.09581514 | 3.34E-05 | 0.0049043 | 0.067421  |
| 9mo_SIGAE3_ | 0.01222683 | 0.06317867 | 3.23E-05 | 0.0060411 | 0.2791    |
| 9mo_SIGAE3_ | 0.08793803 | 0.520027   | 6.41E-05 | 0.020177  | 0.080939  |
| 9mo_SIGAE3_ | 0.06449854 | 0.37859103 | 6.10E-05 | 0.010005  | 0.093303  |
| 9mo_SIGAE3_ | 0.03627638 | 0.2082959  | 4.65E-05 | 0.0042637 | -0.068307 |
| 9mo_SIGAE3_ | 0.09955774 | 0.5901414  | 6.53E-05 | 0.02442   | -0.10426  |
| 9mo_SIGAE3_ | 0.10285297 | 0.6100251  | 6.55E-05 | 0.025127  | -0.16182  |
| 9mo_SIGAE3_ | 0.02451306 | 0.13731495 | 3.64E-05 | 0.0042065 | -0.080664 |
| 9mo_SIGAE3_ | 0.01982486 | 0.10902591 | 3.42E-05 | 0.0045972 | 0.0032259 |
| 9mo_SIGAE3_ | 0.02709071 | 0.15286869 | 3.84E-05 | 0.0040947 | -0.10271  |
| 9mo_SIGAE3_ | 0.03882964 | 0.22370246 | 4.92E-05 | 0.0044639 | -0.040459 |
| 9mo_SIGAE3_ | 0.050444   | 0.29378462 | 5.78E-05 | 0.0061018 | 0.048868  |
| 9mo_SIGAE3_ | 0.06143751 | 0.36012045 | 6.07E-05 | 0.0090475 | 0.082025  |
| 9mo_SIGAE3_ | 0.09718137 | 0.5758021  | 6.51E-05 | 0.023799  | -0.065044 |

|             |            |            |          |           |           |
|-------------|------------|------------|----------|-----------|-----------|
| 9mo_SIGAE3_ | 0.01929275 | 0.10581511 | 3.40E-05 | 0.0046667 | 0.017998  |
| 9mo_SIGAE3_ | 0.0176546  | 0.09593032 | 3.34E-05 | 0.0049043 | 0.067421  |
| 9mo_SIGAE3_ | 0.10309964 | 0.61151356 | 6.56E-05 | 0.025216  | -0.16182  |
| 9mo_SIGAE3_ | 0.05738024 | 0.3356385  | 5.99E-05 | 0.0076952 | 0.071569  |
| 9mo_SIGAE3_ | 0.07616468 | 0.44898552 | 6.26E-05 | 0.0148    | 0.1354    |
| 9mo_SIGAE3_ | 0.03501264 | 0.20067035 | 4.54E-05 | 0.0042028 | -0.078293 |
| 9mo_SIGAE3_ | 0.04442657 | 0.2574749  | 5.42E-05 | 0.0050757 | 0.012967  |
| 9mo_SIGAE3_ | 0.01993408 | 0.10968497 | 3.42E-05 | 0.0045972 | 0.0032259 |
| 9mo_SIGAE3_ | 0.06941047 | 0.40822998 | 6.17E-05 | 0.01192   | 0.11218   |
| 9mo_SIGAE3_ | 0.11267915 | 0.6693171  | 6.62E-05 | 0.025448  | -0.29951  |
| 9mo_SIGAE3_ | 0.03319158 | 0.18968195 | 4.37E-05 | 0.0041322 | -0.091175 |
| 9mo_SIGAE3_ | 0.01767832 | 0.09607345 | 3.34E-05 | 0.0049043 | 0.067421  |
| 9mo_SIGAE3_ | 0.09225764 | 0.5460919  | 6.46E-05 | 0.022042  | 0.019141  |
| 9mo_SIGAE3_ | 0.08372774 | 0.49462172 | 6.37E-05 | 0.01841   | 0.12117   |
| 9mo_SIGAE3_ | 0.07807437 | 0.46050876 | 6.29E-05 | 0.015819  | 0.13662   |
| 9mo_SIGAE3_ | 0.08387179 | 0.49549094 | 6.37E-05 | 0.01841   | 0.1176    |
| 9mo_SIGAE3_ | 0.1422393  | 0.8476859  | 6.74E-05 | 0.023584  | -0.5021   |
| 9mo_SIGAE3_ | 0.0124336  | 0.06442636 | 3.23E-05 | 0.0060411 | 0.2791    |
| 9mo_SIGAE3_ | 0.02170769 | 0.12038707 | 3.49E-05 | 0.0044169 | -0.0356   |
| 9mo_SIGAE3_ | 0.11495325 | 0.6830393  | 6.63E-05 | 0.025242  | -0.32268  |
| 9mo_SIGAE3_ | 0.02925027 | 0.16589968 | 4.02E-05 | 0.0040662 | -0.10661  |
| 9mo_SIGAE3_ | 0.07699816 | 0.45401484 | 6.28E-05 | 0.015307  | 0.13605   |
| 9mo_SIGAE3_ | 0.01944606 | 0.10674018 | 3.40E-05 | 0.0046667 | 0.017998  |
| 9mo_SIGAE3_ | 0.02336073 | 0.13036166 | 3.58E-05 | 0.0042778 | -0.065623 |
| 9mo_SIGAE3_ | 0.03300171 | 0.18853624 | 4.32E-05 | 0.0041142 | -0.091175 |
| 9mo_SIGAE3_ | 0.0108337  | 0.05477243 | 3.21E-05 | 0.0064976 | 0.35381   |
| 9mo_SIGAE3_ | 0.01166934 | 0.05981473 | 3.22E-05 | 0.0061869 | 0.30353   |
| 9mo_SIGAE3_ | 0.04517382 | 0.26198384 | 5.46E-05 | 0.0051531 | 0.021279  |
| 9mo_SIGAE3_ | 0.0238492  | 0.13330914 | 3.61E-05 | 0.0042401 | -0.073623 |
| 9mo_SIGAE3_ | 0.02059194 | 0.11365455 | 3.44E-05 | 0.0045325 | -0.01065  |
| 9mo_SIGAE3_ | 0.04227109 | 0.24446848 | 5.24E-05 | 0.0047963 | -0.00654  |
| 9mo_SIGAE3_ | 0.01136426 | 0.05797383 | 3.21E-05 | 0.006339  | 0.32844   |
| 9mo_SIGAE3_ | 0.05619718 | 0.32849982 | 5.97E-05 | 0.0073934 | 0.068678  |
| 9mo_SIGAE3_ | 0.0501415  | 0.29195926 | 5.76E-05 | 0.005992  | 0.048868  |
| 9mo_SIGAE3_ | 0.03922785 | 0.22610533 | 4.98E-05 | 0.0045122 | -0.034672 |
| 9mo_SIGAE3_ | 0.02037791 | 0.11236303 | 3.44E-05 | 0.0045325 | -0.01065  |
| 9mo_SIGAE3_ | 0.08593007 | 0.5079108  | 6.39E-05 | 0.01943   | 0.1043    |
| 9mo_SIGAE3_ | 0.01353881 | 0.07109527 | 3.24E-05 | 0.0057681 | 0.23179   |
| 9mo_SIGAE3_ | 0.01243386 | 0.06442791 | 3.23E-05 | 0.0060411 | 0.2791    |
| 9mo_SIGAE3_ | 0.07143053 | 0.42041928 | 6.20E-05 | 0.012843  | 0.12136   |
| 9mo_SIGAE3_ | 0.12768488 | 0.7598631  | 6.69E-05 | 0.023794  | -0.4246   |
| 9mo_SIGAE3_ | 0.07940389 | 0.4685312  | 6.31E-05 | 0.016335  | 0.13545   |
| 9mo_SIGAE3_ | 0.00519105 | 0.02072414 | 3.18E-05 | 0.0084677 | 0.62647   |

|             |            |            |          |           |           |
|-------------|------------|------------|----------|-----------|-----------|
| 9mo_SIGAE3_ | 0.05867469 | 0.34344935 | 6.02E-05 | 0.0081753 | 0.074438  |
| 9mo_SIGAE3_ | 0.0447175  | 0.25923038 | 5.46E-05 | 0.0051531 | 0.017239  |
| 9mo_SIGAE3_ | 0.02668021 | 0.15039168 | 3.80E-05 | 0.0041099 | -0.099939 |
| 9mo_SIGAE3_ | 0.0238539  | 0.13333748 | 3.61E-05 | 0.0042401 | -0.073623 |
| 9mo_SIGAE3_ | 0.0852691  | 0.5039224  | 6.39E-05 | 0.019177  | 0.10916   |
| 9mo_SIGAE3_ | 0.04090022 | 0.23619653 | 5.14E-05 | 0.0046741 | -0.017493 |
| 9mo_SIGAE3_ | 0.04830116 | 0.28085455 | 5.67E-05 | 0.0056831 | 0.038361  |
| 9mo_SIGAE3_ | 0.01155965 | 0.05915284 | 3.22E-05 | 0.0061869 | 0.30353   |
| 9mo_SIGAE3_ | 0.0133307  | 0.06983951 | 3.24E-05 | 0.0057681 | 0.23179   |
| 9mo_SIGAE3_ | 0.01872685 | 0.10240037 | 3.38E-05 | 0.004741  | 0.03364   |
| 9mo_SIGAE3_ | 0.02738878 | 0.15466727 | 3.84E-05 | 0.0040947 | -0.10271  |
| 9mo_SIGAE3_ | 0.07608062 | 0.4484783  | 6.26E-05 | 0.0148    | 0.1354    |
| 9mo_SIGAE3_ | 0.03300822 | 0.18857549 | 4.32E-05 | 0.0041142 | -0.091175 |
| 9mo_SIGAE3_ | 0.10681522 | 0.63393366 | 6.58E-05 | 0.025586  | -0.22263  |
| 9mo_SIGAE3_ | 0.04938408 | 0.28738895 | 5.73E-05 | 0.0058857 | 0.04392   |
| 9mo_SIGAE3_ | 0.02283414 | 0.12718418 | 3.55E-05 | 0.0043197 | -0.056631 |
| 9mo_SIGAE3_ | 0.03702062 | 0.21278667 | 4.76E-05 | 0.0043355 | -0.057524 |
| 9mo_SIGAE3_ | 0.08840788 | 0.52286214 | 6.42E-05 | 0.020421  | 0.074212  |
| 9mo_SIGAE3_ | 0.00582592 | 0.02455497 | 3.18E-05 | 0.0082375 | 0.59807   |
| 9mo_SIGAE3_ | 0.02795921 | 0.15810934 | 3.88E-05 | 0.0040827 | -0.10472  |
| 9mo_SIGAE3_ | 0.02089218 | 0.11546619 | 3.47E-05 | 0.0044724 | -0.023601 |
| 9mo_SIGAE3_ | 0.01758835 | 0.09553056 | 3.34E-05 | 0.0049043 | 0.067421  |
| 9mo_SIGAE3_ | 0.02736242 | 0.15450822 | 3.84E-05 | 0.0040947 | -0.10271  |
| 9mo_SIGAE3_ | 0.03672074 | 0.21097718 | 4.70E-05 | 0.0042982 | -0.062998 |
| 9mo_SIGAE3_ | 0.07220234 | 0.4250764  | 6.21E-05 | 0.01308   | 0.12548   |
| 9mo_SIGAE3_ | 0.04691393 | 0.27248383 | 5.57E-05 | 0.0054037 | 0.032113  |
| 9mo_SIGAE3_ | 0.04416381 | 0.2558894  | 5.42E-05 | 0.0050757 | 0.012967  |
| 9mo_SIGAE3_ | 0.01886124 | 0.10321134 | 3.38E-05 | 0.004741  | 0.03364   |
| 9mo_SIGAE3_ | 0.02089205 | 0.1154654  | 3.47E-05 | 0.0044724 | -0.023601 |
| 9mo_SIGAE3_ | 0.01127877 | 0.057458   | 3.21E-05 | 0.006339  | 0.32844   |
| 9mo_SIGAE3_ | 0.01155468 | 0.05912286 | 3.22E-05 | 0.0061869 | 0.30353   |
| 9mo_SIGAE3_ | 0.02491209 | 0.13972269 | 3.68E-05 | 0.0041768 | -0.086782 |
| 9mo_SIGAE3_ | 0.01225899 | 0.06337272 | 3.23E-05 | 0.0060411 | 0.2791    |
| 9mo_SIGAE3_ | 0.02278232 | 0.12687147 | 3.55E-05 | 0.0043197 | -0.056631 |
| 9mo_SIGAE3_ | 0.08629405 | 0.51010704 | 6.40E-05 | 0.019681  | 0.099025  |
| 9mo_SIGAE3_ | 0.11220862 | 0.666478   | 6.61E-05 | 0.025489  | -0.29336  |
| 9mo_SIGAE3_ | 0.0214481  | 0.11882068 | 3.49E-05 | 0.0044169 | -0.0356   |
| 9mo_SIGAE3_ | 0.047825   | 0.27798134 | 5.64E-05 | 0.0055867 | 0.035328  |
| 9mo_SIGAE3_ | 0.02197987 | 0.12202944 | 3.49E-05 | 0.0044169 | -0.046619 |
| 9mo_SIGAE3_ | 0.06895286 | 0.40546873 | 6.16E-05 | 0.011695  | 0.11218   |
| 9mo_SIGAE3_ | 0.01547322 | 0.08276767 | 3.28E-05 | 0.0052924 | 0.1442    |
| 9mo_SIGAE3_ | 0.0218112  | 0.12101162 | 3.49E-05 | 0.0044169 | -0.0356   |
| 9mo_SIGAE3_ | 0.03205519 | 0.18282485 | 4.27E-05 | 0.004099  | -0.097962 |

|             |            |            |          |           |           |
|-------------|------------|------------|----------|-----------|-----------|
| 9mo_SIGAE3_ | 0.02368723 | 0.13233177 | 3.61E-05 | 0.0042401 | -0.073623 |
| 9mo_SIGAE3_ | 0.06175352 | 0.3620273  | 6.07E-05 | 0.0090475 | 0.083692  |
| 9mo_SIGAE3_ | 0.01947998 | 0.10694487 | 3.40E-05 | 0.0046667 | 0.017998  |
| 9mo_SIGAE3_ | 0.04105062 | 0.23710409 | 5.14E-05 | 0.0046741 | -0.017493 |
| 9mo_SIGAE3_ | 0.01584849 | 0.08503211 | 3.28E-05 | 0.0052924 | 0.12392   |
| 9mo_SIGAE3_ | 0.06566501 | 0.38562953 | 6.12E-05 | 0.01041   | 0.097788  |
| 9mo_SIGAE3_ | 0.04494365 | 0.26059496 | 5.46E-05 | 0.0051531 | 0.017239  |
| 9mo_SIGAE3_ | 0.0486153  | 0.28275007 | 5.70E-05 | 0.0057827 | 0.041222  |
| 9mo_SIGAE3_ | 0.07977449 | 0.47076747 | 6.32E-05 | 0.016594  | 0.13545   |
| 9mo_SIGAE3_ | 0.09171178 | 0.54279816 | 6.45E-05 | 0.021822  | 0.027741  |
| 9mo_SIGAE3_ | 0.03459331 | 0.19814011 | 4.48E-05 | 0.0041765 | -0.082901 |
| 9mo_SIGAE3_ | 0.0299635  | 0.17020337 | 4.07E-05 | 0.0040668 | -0.10597  |
| 9mo_SIGAE3_ | 0.00865263 | 0.0416116  | 3.19E-05 | 0.0071994 | 0.45929   |
| 9mo_SIGAE3_ | 0.05049959 | 0.29412004 | 5.78E-05 | 0.0061018 | 0.048868  |
| 9mo_SIGAE3_ | 0.02402332 | 0.13435979 | 3.61E-05 | 0.0042401 | -0.073623 |
| 9mo_SIGAE3_ | 0.01646962 | 0.08878006 | 3.31E-05 | 0.0050879 | 0.10435   |
| 9mo_SIGAE3_ | 0.12416861 | 0.7386457  | 6.67E-05 | 0.024092  | -0.40152  |
| 9mo_SIGAE3_ | 0.07207847 | 0.42432898 | 6.21E-05 | 0.01308   | 0.12348   |
| 9mo_SIGAE3_ | 0.0158234  | 0.08488073 | 3.28E-05 | 0.0052924 | 0.1442    |
| 9mo_SIGAE3_ | 0.02711165 | 0.15299506 | 3.84E-05 | 0.0040947 | -0.10271  |
| 9mo_SIGAE3_ | 0.01947526 | 0.10691635 | 3.40E-05 | 0.0046667 | 0.017998  |
| 9mo_SIGAE3_ | 0.03389775 | 0.193943   | 4.43E-05 | 0.004153  | -0.087207 |
| 9mo_SIGAE3_ | 0.01837602 | 0.10028343 | 3.36E-05 | 0.0048202 | 0.050123  |
| 9mo_SIGAE3_ | 0.05816035 | 0.3403458  | 6.01E-05 | 0.0080116 | 0.073002  |
| 9mo_SIGAE3_ | 0.02118574 | 0.11723755 | 3.47E-05 | 0.0044724 | -0.023601 |
| 9mo_SIGAE3_ | 0.02386928 | 0.13343029 | 3.61E-05 | 0.0042401 | -0.073623 |
| 9mo_SIGAE3_ | 0.01631369 | 0.08783919 | 3.30E-05 | 0.0051875 | 0.12392   |
| 9mo_SIGAE3_ | 0.02025081 | 0.11159609 | 3.42E-05 | 0.0045972 | 0.0032259 |
| 9mo_SIGAE3_ | 0.07660125 | 0.45161986 | 6.27E-05 | 0.015053  | 0.1354    |
| 9mo_SIGAE3_ | 0.09130716 | 0.5403566  | 6.45E-05 | 0.021822  | 0.036126  |
| 9mo_SIGAE3_ | 0.03473716 | 0.19900808 | 4.54E-05 | 0.0042028 | -0.078293 |
| 9mo_SIGAE3_ | 0.01586676 | 0.08514233 | 3.28E-05 | 0.0052924 | 0.12392   |
| 9mo_SIGAE3_ | 0.02317499 | 0.12924087 | 3.58E-05 | 0.0042778 | -0.065623 |
| 9mo_SIGAE3_ | 0.01621853 | 0.08726497 | 3.30E-05 | 0.0051875 | 0.12392   |
| 9mo_SIGAE3_ | 0.0695415  | 0.40902066 | 6.17E-05 | 0.01192   | 0.11455   |
| 9mo_SIGAE3_ | 0.02783382 | 0.1573527  | 3.88E-05 | 0.0040827 | -0.10472  |
| 9mo_SIGAE3_ | 0.02781384 | 0.1572321  | 3.88E-05 | 0.0040827 | -0.10472  |
| 9mo_SIGAE3_ | 0.01688012 | 0.09125704 | 3.31E-05 | 0.0050879 | 0.10435   |
| 9mo_SIGAE3_ | 0.08071167 | 0.4764225  | 6.32E-05 | 0.016854  | 0.13314   |
| 9mo_SIGAE3_ | 0.1005605  | 0.5961921  | 6.53E-05 | 0.024687  | -0.12375  |
| 9mo_SIGAE3_ | 0.08737376 | 0.5166221  | 6.41E-05 | 0.01993   | 0.087329  |
| 9mo_SIGAE3_ | 0.1068779  | 0.6343119  | 6.58E-05 | 0.025586  | -0.22263  |
| 9mo_SIGAE3_ | 0.08690968 | 0.51382184 | 6.41E-05 | 0.01993   | 0.093363  |

|             |            |            |          |           |            |
|-------------|------------|------------|----------|-----------|------------|
| 9mo_SIGAE3_ | 0.04079626 | 0.23556924 | 5.09E-05 | 0.0046173 | -0.017493  |
| 9mo_SIGAE3_ | 0.02056429 | 0.11348769 | 3.44E-05 | 0.0045325 | -0.01065   |
| 9mo_SIGAE3_ | 0.0577963  | 0.33814907 | 6.00E-05 | 0.0078516 | 0.071569   |
| 9mo_SIGAE3_ | 0.10832536 | 0.64304596 | 6.59E-05 | 0.025614  | -0.24573   |
| 9mo_SIGAE3_ | 0.05276553 | 0.30779296 | 5.87E-05 | 0.0065755 | 0.057248   |
| 9mo_SIGAE3_ | 0.05693045 | 0.33292446 | 5.99E-05 | 0.0076952 | 0.070131   |
| 9mo_SIGAE3_ | 0.02589853 | 0.14567499 | 3.76E-05 | 0.0041286 | -0.096385  |
| 9mo_SIGAE3_ | 0.07358122 | 0.4333967  | 6.23E-05 | 0.013805  | 0.12913    |
| 9mo_SIGAE3_ | 0.04870193 | 0.2832728  | 5.70E-05 | 0.0057827 | 0.041222   |
| 9mo_SIGAE3_ | 0.07216331 | 0.42484093 | 6.21E-05 | 0.01308   | 0.12348    |
| 9mo_SIGAE3_ | 0.03345217 | 0.19125433 | 4.37E-05 | 0.0041322 | -0.091175  |
| 9mo_SIGAE3_ | 0.11128637 | 0.66091305 | 6.61E-05 | 0.025525  | -0.28058   |
| 9mo_SIGAE3_ | 0.12195148 | 0.7252673  | 6.66E-05 | 0.02435   | -0.38515   |
| 9mo_SIGAE3_ | 0.06054397 | 0.3547288  | 6.05E-05 | 0.008688  | 0.07887    |
| 9mo_SIGAE3_ | 0.02357089 | 0.1316298  | 3.58E-05 | 0.0042778 | -0.065623  |
| 9mo_SIGAE3_ | 0.02146122 | 0.11889985 | 3.49E-05 | 0.0044169 | -0.0356    |
| 9mo_SIGAE3_ | 0.01761783 | 0.09570846 | 3.34E-05 | 0.0049043 | 0.067421   |
| 9mo_SIGAE3_ | 0.02359779 | 0.13179207 | 3.58E-05 | 0.0042778 | -0.073623  |
| 9mo_SIGAE3_ | 0.06807991 | 0.4002013  | 6.16E-05 | 0.011474  | 0.10734    |
| 9mo_SIGAE3_ | 0.0061781  | 0.02668007 | 3.18E-05 | 0.008015  | 0.56984    |
| 9mo_SIGAE3_ | 0.0281485  | 0.1592515  | 3.93E-05 | 0.004074  | -0.10603   |
| 9mo_SIGAE3_ | 0.00630125 | 0.02742316 | 3.18E-05 | 0.008015  | 0.56984    |
| 9mo_SIGAE3_ | 0.02248717 | 0.12509051 | 3.52E-05 | 0.0043661 | -0.056631  |
| 9mo_SIGAE3_ | 0.11487366 | 0.6825591  | 6.63E-05 | 0.025242  | -0.32268   |
| 9mo_SIGAE3_ | 0.02063531 | 0.11391625 | 3.44E-05 | 0.0045325 | -0.01065   |
| 9mo_SIGAE3_ | 0.01816129 | 0.09898774 | 3.36E-05 | 0.0048202 | 0.050123   |
| 9mo_SIGAE3_ | 0.07839257 | 0.46242884 | 6.29E-05 | 0.015819  | 0.13651    |
| 9mo_SIGAE3_ | 0.02846392 | 0.16115479 | 3.93E-05 | 0.004074  | -0.10603   |
| 9mo_SIGAE3_ | 0.02127721 | 0.11778951 | 3.47E-05 | 0.0044724 | -0.023601  |
| 9mo_SIGAE3_ | 0.09645739 | 0.57143354 | 6.50E-05 | 0.023626  | -0.045608  |
| 9mo_SIGAE3_ | 0.04286918 | 0.24807745 | 5.29E-05 | 0.0048617 | -0.0013165 |
| 9mo_SIGAE3_ | 0.0814141  | 0.480661   | 6.34E-05 | 0.017373  | 0.13148    |
| 9mo_SIGAE3_ | 0.01413921 | 0.07471818 | 3.25E-05 | 0.0056405 | 0.20898    |
| 9mo_SIGAE3_ | 0.08433946 | 0.49831292 | 6.37E-05 | 0.018667  | 0.1176     |
| 9mo_SIGAE3_ | 0.02038305 | 0.11239408 | 3.44E-05 | 0.0045325 | -0.01065   |
| 9mo_SIGAE3_ | 0.0765866  | 0.4515314  | 6.27E-05 | 0.015053  | 0.1354     |
| 9mo_SIGAE3_ | 0.05043864 | 0.29375228 | 5.78E-05 | 0.0061018 | 0.048868   |
| 9mo_SIGAF3_ | 0.0362229  | 0.20797317 | 4.65E-05 | 0.0042637 | -0.068307  |
| 9mo_SIGAF3_ | 0.0073736  | 0.03389387 | 3.19E-05 | 0.0075925 | 0.51404    |
| 9mo_SIGAF3_ | 0.04143623 | 0.23943086 | 5.19E-05 | 0.0047337 | -0.011944  |
| 9mo_SIGAF3_ | 0.10238814 | 0.6072203  | 6.55E-05 | 0.025127  | -0.15246   |
| 9mo_SIGAF3_ | 0.06103148 | 0.35767046 | 6.06E-05 | 0.008866  | 0.080421   |
| 9mo_SIGAF3_ | 0.02673468 | 0.15072039 | 3.80E-05 | 0.0041099 | -0.099939  |

|             |            |            |          |           |            |
|-------------|------------|------------|----------|-----------|------------|
| 9mo_SIGAF3_ | 0.02198666 | 0.12207039 | 3.49E-05 | 0.0044169 | -0.046619  |
| 9mo_SIGAF3_ | 0.10031304 | 0.5946989  | 6.53E-05 | 0.024687  | -0.11403   |
| 9mo_SIGAF3_ | 0.04218317 | 0.24393801 | 5.24E-05 | 0.0047963 | -0.00654   |
| 9mo_SIGAF3_ | 0.02319723 | 0.12937507 | 3.58E-05 | 0.0042778 | -0.065623  |
| 9mo_SIGAF3_ | 0.09386324 | 0.55578023 | 6.48E-05 | 0.022676  | -0.0077738 |
| 9mo_SIGAF3_ | 0.04632607 | 0.26893663 | 5.54E-05 | 0.0053171 | 0.028707   |
| 9mo_SIGAF3_ | 0.0580549  | 0.3397095  | 6.01E-05 | 0.0080116 | 0.073002   |
| 9mo_SIGAF3_ | 0.0181582  | 0.09896912 | 3.36E-05 | 0.0048202 | 0.050123   |
| 9mo_SIGAF3_ | 0.01310923 | 0.06850313 | 3.23E-05 | 0.0059016 | 0.23179    |
| 9mo_SIGAF3_ | 0.09464124 | 0.56047475 | 6.49E-05 | 0.023073  | -0.017059  |
| 9mo_SIGAF3_ | 0.10376583 | 0.6155334  | 6.56E-05 | 0.025296  | -0.18011   |
| 9mo_SIGAF3_ | 0.051613   | 0.30083844 | 5.83E-05 | 0.0063316 | 0.053285   |
| 9mo_SIGAF3_ | 0.09148327 | 0.5414193  | 6.45E-05 | 0.021822  | 0.036126   |
| 9mo_SIGAF3_ | 0.13193677 | 0.7855194  | 6.71E-05 | 0.023582  | -0.45284   |
| 9mo_SIGAF3_ | 0.01925678 | 0.10559806 | 3.40E-05 | 0.0046667 | 0.017998   |
| 9mo_SIGAF3_ | 0.1109907  | 0.6591289  | 6.61E-05 | 0.025556  | -0.28058   |
| 9mo_SIGAF3_ | 0.01705988 | 0.09234174 | 3.33E-05 | 0.0049935 | 0.085504   |
| 9mo_SIGAF3_ | 0.07218774 | 0.42498833 | 6.21E-05 | 0.01308   | 0.12348    |
| 9mo_SIGAF3_ | 0.04778495 | 0.27773967 | 5.64E-05 | 0.0055867 | 0.035328   |
| 9mo_SIGAF3_ | 0.06415748 | 0.376533   | 6.10E-05 | 0.010005  | 0.091185   |
| 9mo_SIGAF3_ | 0.02827299 | 0.16000268 | 3.93E-05 | 0.004074  | -0.10603   |
| 9mo_SIGAF3_ | 0.0500539  | 0.2914307  | 5.76E-05 | 0.005992  | 0.046466   |
| 9mo_SIGAF3_ | 0.02229491 | 0.12393037 | 3.52E-05 | 0.0043661 | -0.046619  |
| 9mo_SIGAF3_ | 0.06531404 | 0.38351178 | 6.12E-05 | 0.01041   | 0.095509   |
| 9mo_SIGAF3_ | 0.02355821 | 0.1315533  | 3.58E-05 | 0.0042778 | -0.065623  |
| 9mo_SIGAF3_ | 0.01371509 | 0.07215899 | 3.25E-05 | 0.0056405 | 0.20898    |
| 9mo_SIGAF3_ | 0.01897296 | 0.10388543 | 3.38E-05 | 0.004741  | 0.03364    |
| 9mo_SIGAF3_ | 0.04911389 | 0.28575855 | 5.70E-05 | 0.0057827 | 0.04392    |
| 9mo_SIGAF3_ | 0.11227664 | 0.66688836 | 6.61E-05 | 0.025489  | -0.29336   |
| 9mo_SIGAF3_ | 0.06207006 | 0.36393732 | 6.07E-05 | 0.0092324 | 0.083692   |
| 9mo_SIGAF3_ | 0.07670452 | 0.45224297 | 6.27E-05 | 0.015053  | 0.13605    |
| 9mo_SIGAF3_ | 0.0669478  | 0.39337006 | 6.14E-05 | 0.011039  | 0.10251    |
| 9mo_SIGAF3_ | 0.0190668  | 0.10445166 | 3.38E-05 | 0.004741  | 0.03364    |
| 9mo_SIGAF3_ | 0.09808749 | 0.58126974 | 6.52E-05 | 0.024123  | -0.074831  |
| 9mo_SIGAF3_ | 0.01952488 | 0.10721576 | 3.40E-05 | 0.0046667 | 0.017998   |
| 9mo_SIGAF3_ | 0.0724024  | 0.42628357 | 6.21E-05 | 0.01308   | 0.12548    |
| 9mo_SIGAF3_ | 0.02593652 | 0.14590423 | 3.76E-05 | 0.0041286 | -0.096385  |
| 9mo_SIGAF3_ | 0.10289936 | 0.610305   | 6.55E-05 | 0.025127  | -0.16182   |
| 9mo_SIGAF3_ | 0.09981711 | 0.5917064  | 6.53E-05 | 0.024558  | -0.11403   |
| 9mo_SIGAF3_ | 0.02867406 | 0.1624228  | 3.97E-05 | 0.0040686 | -0.10664   |
| 9mo_SIGAF3_ | 0.01602594 | 0.08610287 | 3.30E-05 | 0.0051875 | 0.12392    |
| 9mo_SIGAF3_ | 0.01192996 | 0.06138733 | 3.22E-05 | 0.0061869 | 0.30353    |
| 9mo_SIGAF3_ | 0.01623978 | 0.0873932  | 3.30E-05 | 0.0051875 | 0.12392    |

|             |            |            |          |           |           |
|-------------|------------|------------|----------|-----------|-----------|
| 9mo_SIGAF3_ | 0.02629042 | 0.14803968 | 3.76E-05 | 0.0041286 | -0.096385 |
| 9mo_SIGAF3_ | 0.03946801 | 0.22755447 | 4.98E-05 | 0.0045122 | -0.034672 |
| 9mo_SIGAF3_ | 0.02381243 | 0.13308728 | 3.61E-05 | 0.0042401 | -0.073623 |
| 9mo_SIGAF3_ | 0.01605066 | 0.086252   | 3.30E-05 | 0.0051875 | 0.12392   |
| 9mo_SIGAF3_ | 0.09669279 | 0.57285404 | 6.50E-05 | 0.023626  | -0.055297 |
| 9mo_SIGAF3_ | 0.10195889 | 0.6046301  | 6.55E-05 | 0.025029  | -0.14299  |
| 9mo_SIGAF3_ | 0.00362707 | 0.01128692 | 3.18E-05 | 0.0092049 | 0.71249   |
| 9mo_SIGAF3_ | 0.10816688 | 0.6420897  | 6.59E-05 | 0.025614  | -0.24573  |
| 9mo_SIGAF3_ | 0.03170571 | 0.18071605 | 4.22E-05 | 0.0040866 | -0.10071  |
| 9mo_SIGAF3_ | 0.11805906 | 0.7017801  | 6.65E-05 | 0.024847  | -0.35363  |
| 9mo_SIGAF3_ | 0.02395298 | 0.13393533 | 3.61E-05 | 0.0042401 | -0.073623 |
| 9mo_SIGAF3_ | 0.04142928 | 0.23938894 | 5.19E-05 | 0.0047337 | -0.011944 |
| 9mo_SIGAF3_ | 0.06643487 | 0.39027494 | 6.13E-05 | 0.010826  | 0.10013   |
| 9mo_SIGAF3_ | 0.01794385 | 0.0976757  | 3.34E-05 | 0.0049043 | 0.067421  |
| 9mo_SIGAF3_ | 0.10444526 | 0.61963314 | 6.56E-05 | 0.025367  | -0.18901  |
| 9mo_SIGAF3_ | 0.09023695 | 0.5338989  | 6.44E-05 | 0.021369  | 0.05218   |
| 9mo_SIGAF3_ | 0.02546924 | 0.14308462 | 3.72E-05 | 0.0041509 | -0.092011 |
| 9mo_SIGAF3_ | 0.02180917 | 0.1209994  | 3.49E-05 | 0.0044169 | -0.0356   |
| 9mo_SIGAF3_ | 0.05208544 | 0.3036892  | 5.85E-05 | 0.0064518 | 0.055318  |
| 9mo_SIGAF3_ | 0.02274938 | 0.12667271 | 3.55E-05 | 0.0043197 | -0.056631 |
| 9mo_SIGAF3_ | 0.04914547 | 0.28594914 | 5.70E-05 | 0.0057827 | 0.04392   |
| 9mo_SIGAF3_ | 0.01388103 | 0.0731603  | 3.25E-05 | 0.0056405 | 0.20898   |
| 9mo_SIGAF3_ | 0.01856019 | 0.10139476 | 3.36E-05 | 0.0048202 | 0.050123  |
| 9mo_SIGAF3_ | 0.05460827 | 0.31891218 | 5.92E-05 | 0.0069681 | 0.064127  |
| 9mo_SIGAF3_ | 0.08205465 | 0.48452613 | 6.35E-05 | 0.017633  | 0.12948   |
| 9mo_SIGAF3_ | 0.07622358 | 0.4493409  | 6.26E-05 | 0.0148    | 0.1354    |
| 9mo_SIGAF3_ | 0.04975765 | 0.2896431  | 5.76E-05 | 0.005992  | 0.046466  |
| 9mo_SIGAF3_ | 0.02005241 | 0.11039893 | 3.42E-05 | 0.0045972 | 0.0032259 |
| 9mo_SIGAF3_ | 0.02157246 | 0.11957105 | 3.49E-05 | 0.0044169 | -0.0356   |
| 9mo_SIGAF3_ | 0.01517588 | 0.08097352 | 3.27E-05 | 0.0054028 | 0.16515   |
| 9mo_SIGAF3_ | 0.09360132 | 0.5541998  | 6.48E-05 | 0.022676  | 0.0013661 |
| 9mo_SIGAF3_ | 0.15251613 | 0.9096972  | 6.77E-05 | 0.023709  | -0.52541  |
| 9mo_SIGAF3_ | 0.0206521  | 0.11401756 | 3.44E-05 | 0.0045325 | -0.01065  |
| 9mo_SIGAF3_ | 0.0705683  | 0.41521648 | 6.19E-05 | 0.012376  | 0.11916   |
| 9mo_SIGAF3_ | 0.09189068 | 0.5438776  | 6.46E-05 | 0.022042  | 0.027741  |
| 9mo_SIGAF3_ | 0.11704509 | 0.69566166 | 6.64E-05 | 0.024986  | -0.34377  |
| 9mo_SIGAF3_ | 0.03140367 | 0.17889352 | 4.16E-05 | 0.0040771 | -0.10071  |
| 9mo_SIGAF3_ | 0.05158036 | 0.3006415  | 5.83E-05 | 0.0063316 | 0.053285  |
| 9mo_SIGAF3_ | 0.01095795 | 0.05552212 | 3.21E-05 | 0.006339  | 0.32844   |
| 9mo_SIGAF3_ | 0.01902045 | 0.10417203 | 3.38E-05 | 0.004741  | 0.03364   |
| 9mo_SIGAF3_ | 0.09658472 | 0.5722019  | 6.50E-05 | 0.023626  | -0.055297 |
| 9mo_SIGAF3_ | 0.01121029 | 0.0570448  | 3.21E-05 | 0.006339  | 0.32844   |
| 9mo_SIGAF3_ | 0.12072505 | 0.7178669  | 6.66E-05 | 0.02449   | -0.37215  |

|             |            |            |          |           |           |
|-------------|------------|------------|----------|-----------|-----------|
| 9mo_SIGAF3_ | 0.05086191 | 0.2963063  | 5.81E-05 | 0.006215  | 0.051138  |
| 9mo_SIGAF3_ | 0.11727241 | 0.6970333  | 6.64E-05 | 0.024986  | -0.34377  |
| 9mo_SIGAF3_ | 0.0327175  | 0.1868213  | 4.32E-05 | 0.0041142 | -0.094772 |
| 9mo_SIGAF3_ | 0.04049785 | 0.23376866 | 5.09E-05 | 0.0046173 | -0.023154 |
| 9mo_SIGAF3_ | 0.02235859 | 0.12431467 | 3.52E-05 | 0.0043661 | -0.046619 |
| 9mo_SIGAF3_ | 0.09720618 | 0.5759518  | 6.51E-05 | 0.023799  | -0.065044 |
| 9mo_SIGAF3_ | 0.04865311 | 0.2829782  | 5.70E-05 | 0.0057827 | 0.041222  |
| 9mo_SIGAF3_ | 0.01668934 | 0.09010588 | 3.31E-05 | 0.0050879 | 0.10435   |
| 9mo_SIGAF3_ | 0.01419716 | 0.0750678  | 3.25E-05 | 0.0056405 | 0.18676   |
| 9mo_SIGAF3_ | 0.02042689 | 0.11265857 | 3.44E-05 | 0.0045325 | -0.01065  |
| 9mo_SIGAF3_ | 0.08643235 | 0.51094157 | 6.40E-05 | 0.019681  | 0.099025  |
| 9mo_SIGAF3_ | 0.02487855 | 0.13952033 | 3.68E-05 | 0.0041768 | -0.086782 |
| 9mo_SIGAF3_ | 0.07908426 | 0.46660256 | 6.31E-05 | 0.016335  | 0.13613   |
| 9mo_SIGAF3_ | 0.10320948 | 0.6121763  | 6.56E-05 | 0.025216  | -0.17104  |
| 9mo_SIGAF3_ | 0.0299392  | 0.17005679 | 4.07E-05 | 0.0040668 | -0.10597  |
| 9mo_SIGAF3_ | 0.04961443 | 0.2887789  | 5.73E-05 | 0.0058857 | 0.046466  |
| 9mo_SIGAF3_ | 0.07090251 | 0.41723314 | 6.20E-05 | 0.012608  | 0.11916   |
| 9mo_SIGAF3_ | 0.01376857 | 0.07248168 | 3.25E-05 | 0.0056405 | 0.20898   |
| 9mo_SIGAF3_ | 0.01965879 | 0.10802381 | 3.40E-05 | 0.0046667 | 0.017998  |
| 9mo_SIGAF3_ | 0.11776846 | 0.7000265  | 6.64E-05 | 0.024917  | -0.34876  |
| 9mo_SIGAF3_ | 0.06721202 | 0.39496437 | 6.14E-05 | 0.011039  | 0.10251   |
| 9mo_SIGAF3_ | 0.01730748 | 0.09383579 | 3.33E-05 | 0.0049935 | 0.085504  |
| 9mo_SIGAF3_ | 0.06868752 | 0.40386766 | 6.16E-05 | 0.011695  | 0.10977   |
| 9mo_SIGAF3_ | 0.02968272 | 0.16850913 | 4.02E-05 | 0.0040662 | -0.10597  |
| 9mo_SIGAF3_ | 0.01096075 | 0.05553905 | 3.21E-05 | 0.006339  | 0.32844   |
| 9mo_SIGAF3_ | 0.01657515 | 0.08941683 | 3.31E-05 | 0.0050879 | 0.10435   |
| 9mo_SIGAF3_ | 0.0803967  | 0.4745219  | 6.32E-05 | 0.016854  | 0.13446   |
| 9mo_SIGAF3_ | 0.08049145 | 0.4750937  | 6.32E-05 | 0.016854  | 0.13314   |
| 9mo_SIGAF3_ | 0.03091896 | 0.17596874 | 4.16E-05 | 0.0040771 | -0.10299  |
| 9mo_SIGAF3_ | 0.01880475 | 0.10287044 | 3.38E-05 | 0.004741  | 0.03364   |
| 9mo_SIGAF3_ | 0.02101523 | 0.11620866 | 3.47E-05 | 0.0044724 | -0.023601 |
| 9mo_SIGAF3_ | 0.14144857 | 0.8429145  | 6.74E-05 | 0.023575  | -0.49999  |
| 9mo_SIGAF3_ | 0.02376704 | 0.13281335 | 3.61E-05 | 0.0042401 | -0.073623 |
| 9mo_SIGAF3_ | 0.09343283 | 0.5531831  | 6.47E-05 | 0.022469  | 0.0013661 |
| 9mo_SIGAF3_ | 0.0141839  | 0.0749878  | 3.25E-05 | 0.0056405 | 0.20898   |
| 9mo_SIGAF3_ | 0.06963579 | 0.4095896  | 6.17E-05 | 0.01192   | 0.11455   |
| 9mo_SIGAF3_ | 0.02395762 | 0.13396336 | 3.61E-05 | 0.0042401 | -0.073623 |
| 9mo_SIGAF3_ | 0.01958979 | 0.10760745 | 3.40E-05 | 0.0046667 | 0.017998  |
| 9mo_SIGAF3_ | 0.09600832 | 0.56872386 | 6.50E-05 | 0.023448  | -0.045608 |
| 9mo_SIGAF3_ | 0.10309223 | 0.6114688  | 6.56E-05 | 0.025216  | -0.16182  |
| 9mo_SIGAF3_ | 0.01329985 | 0.06965335 | 3.24E-05 | 0.0057681 | 0.23179   |
| 9mo_SIGAF3_ | 0.02215192 | 0.1230676  | 3.52E-05 | 0.0043661 | -0.046619 |
| 9mo_SIGAF3_ | 0.06318726 | 0.3706786  | 6.09E-05 | 0.0096122 | 0.087254  |



|             |            |            |          |           |            |
|-------------|------------|------------|----------|-----------|------------|
| 9mo_SIGAF3_ | 0.09429833 | 0.55840564 | 6.48E-05 | 0.022877  | -0.017059  |
| 9mo_SIGAF3_ | 0.0793199  | 0.46802443 | 6.31E-05 | 0.016335  | 0.13613    |
| 9mo_SIGAF3_ | 0.04451637 | 0.25801677 | 5.42E-05 | 0.0050757 | 0.012967   |
| 9mo_SIGAF3_ | 0.10185958 | 0.60403085 | 6.55E-05 | 0.025029  | -0.14299   |
| 9mo_SIGAF3_ | 0.15310775 | 0.9132671  | 6.77E-05 | 0.02371   | -0.52582   |
| 9mo_SIGAF3_ | 0.04970989 | 0.28935495 | 5.76E-05 | 0.005992  | 0.046466   |
| 9mo_SIGAF3_ | 0.13159612 | 0.7834639  | 6.70E-05 | 0.023599  | -0.44949   |
| 9mo_SIGAF3_ | 0.02232686 | 0.12412319 | 3.52E-05 | 0.0043661 | -0.046619  |
| 9mo_SIGAF3_ | 0.11323268 | 0.67265725 | 6.62E-05 | 0.025403  | -0.30551   |
| 9mo_SIGAF3_ | 0.10808737 | 0.64160997 | 6.59E-05 | 0.025614  | -0.23822   |
| 9mo_SIGAF3_ | 0.03037651 | 0.17269555 | 4.11E-05 | 0.0040705 | -0.10475   |
| 9mo_SIGAF3_ | 0.01317105 | 0.06887621 | 3.24E-05 | 0.0057681 | 0.23179    |
| 9mo_SIGAF3_ | 0.0164652  | 0.08875342 | 3.31E-05 | 0.0050879 | 0.10435    |
| 9mo_SIGAF3_ | 0.01882187 | 0.10297373 | 3.38E-05 | 0.004741  | 0.03364    |
| 9mo_SIGAF3_ | 0.01573153 | 0.08432639 | 3.28E-05 | 0.0052924 | 0.1442     |
| 9mo_SIGAF3_ | 0.10394796 | 0.61663234 | 6.56E-05 | 0.025296  | -0.18011   |
| 9mo_SIGAF3_ | 0.01702666 | 0.0921413  | 3.33E-05 | 0.0049935 | 0.085504   |
| 9mo_SIGAF3_ | 0.01546315 | 0.08270694 | 3.28E-05 | 0.0052924 | 0.1442     |
| 9mo_SIGAF3_ | 0.1129432  | 0.6709104  | 6.62E-05 | 0.025403  | -0.29951   |
| 9mo_SIGAF3_ | 0.09194753 | 0.5442207  | 6.46E-05 | 0.022042  | 0.027741   |
| 9mo_SIGAF3_ | 0.01587201 | 0.08517401 | 3.28E-05 | 0.0052924 | 0.12392    |
| 9mo_SIGAF3_ | 0.04895035 | 0.2847718  | 5.70E-05 | 0.0057827 | 0.041222   |
| 9mo_SIGAF3_ | 0.04243414 | 0.24545239 | 5.24E-05 | 0.0047963 | -0.0013165 |
| 9mo_SIGAF3_ | 0.06017734 | 0.35251647 | 6.04E-05 | 0.0085136 | 0.07887    |
| 9mo_SIGAF3_ | 0.10461115 | 0.62063414 | 6.57E-05 | 0.025429  | -0.18901   |
| 9mo_SIGAF3_ | 0.04805252 | 0.2793542  | 5.67E-05 | 0.0056831 | 0.038361   |
| 9mo_SIGAF3_ | 0.0223448  | 0.12423143 | 3.52E-05 | 0.0043661 | -0.046619  |
| 9mo_SIGAF3_ | 0.04910497 | 0.28570476 | 5.70E-05 | 0.0057827 | 0.04392    |
| 9mo_SIGAF3_ | 0.03488763 | 0.19991602 | 4.54E-05 | 0.0042028 | -0.078293  |
| 9mo_SIGAF3_ | 0.10338172 | 0.6132156  | 6.56E-05 | 0.025216  | -0.17104   |
| 9mo_SIGAF3_ | 0.02823588 | 0.15977874 | 3.93E-05 | 0.004074  | -0.10603   |
| 9mo_SIGAF3_ | 0.0341044  | 0.19518998 | 4.43E-05 | 0.004153  | -0.082901  |
| 9mo_SIGAF3_ | 0.01038428 | 0.05206057 | 3.21E-05 | 0.0064976 | 0.35381    |
| 9mo_SIGAF3_ | 0.06935634 | 0.40790337 | 6.17E-05 | 0.01192   | 0.11218    |
| 9mo_SIGAF3_ | 0.02220321 | 0.12337704 | 3.52E-05 | 0.0043661 | -0.046619  |
| 9mo_SIGAF3_ | 0.01553566 | 0.08314447 | 3.28E-05 | 0.0052924 | 0.1442     |
| 9mo_SIGAF3_ | 0.03651432 | 0.20973165 | 4.70E-05 | 0.0042982 | -0.062998  |
| 9mo_SIGAF3_ | 0.02776396 | 0.15693116 | 3.88E-05 | 0.0040827 | -0.10472   |
| 9mo_SIGAF3_ | 0.08486095 | 0.5014596  | 6.38E-05 | 0.018923  | 0.1136     |
| 9mo_SIGAF3_ | 0.0668155  | 0.3925717  | 6.13E-05 | 0.010826  | 0.10251    |
| 9mo_SIGAF3_ | 0.04986294 | 0.29027843 | 5.76E-05 | 0.005992  | 0.046466   |
| 9mo_SIGAF3_ | 0.03184839 | 0.18157697 | 4.22E-05 | 0.0040866 | -0.10071   |
| 9mo_SIGAF3_ | 0.03025258 | 0.17194775 | 4.07E-05 | 0.0040668 | -0.10475   |

|             |            |            |          |           |           |
|-------------|------------|------------|----------|-----------|-----------|
| 9mo_SIGAF3_ | 0.0519916  | 0.30312294 | 5.85E-05 | 0.0064518 | 0.055318  |
| 9mo_SIGAF3_ | 0.0136217  | 0.07159544 | 3.24E-05 | 0.0057681 | 0.23179   |
| 9mo_SIGAF3_ | 0.11233942 | 0.6672672  | 6.62E-05 | 0.025448  | -0.29336  |
| 9mo_SIGAF3_ | 0.01840014 | 0.10042903 | 3.36E-05 | 0.0048202 | 0.050123  |
| 9mo_SIGAF3_ | 0.07695394 | 0.453748   | 6.28E-05 | 0.015307  | 0.13605   |
| 9mo_SIGAF3_ | 0.01766207 | 0.09597544 | 3.34E-05 | 0.0049043 | 0.067421  |
| 9mo_SIGAF3_ | 0.02228935 | 0.12389686 | 3.52E-05 | 0.0043661 | -0.046619 |
| 9mo_SIGAF3_ | 0.06746904 | 0.39651522 | 6.15E-05 | 0.011255  | 0.10492   |
| 9mo_SIGAF3_ | 0.02690208 | 0.1517305  | 3.80E-05 | 0.0041099 | -0.10271  |
| 9mo_SIGAF3_ | 0.01887261 | 0.10327994 | 3.38E-05 | 0.004741  | 0.03364   |
| 9mo_SIGAF3_ | 0.01021582 | 0.05104407 | 3.20E-05 | 0.0066628 | 0.37961   |
| 9mo_SIGAF3_ | 0.11136351 | 0.66137844 | 6.61E-05 | 0.025525  | -0.28058  |
| 9mo_SIGAF3_ | 0.02326644 | 0.1297927  | 3.58E-05 | 0.0042778 | -0.065623 |
| 9mo_SIGAF3_ | 0.10660199 | 0.63264704 | 6.58E-05 | 0.02556   | -0.22263  |
| 9mo_SIGAF3_ | 0.01830558 | 0.09985843 | 3.36E-05 | 0.0048202 | 0.050123  |
| 9mo_SIGAF3_ | 0.03096573 | 0.17625089 | 4.16E-05 | 0.0040771 | -0.10299  |
| 9mo_SIGAF3_ | 0.03570001 | 0.20481803 | 4.59E-05 | 0.0042319 | -0.073417 |
| 9mo_SIGAF3_ | 0.02063065 | 0.11388813 | 3.44E-05 | 0.0045325 | -0.01065  |
| 9mo_SIGAF3_ | 0.11403447 | 0.6774953  | 6.63E-05 | 0.025299  | -0.31137  |
| 9mo_SIGAF3_ | 0.02370655 | 0.13244839 | 3.61E-05 | 0.0042401 | -0.073623 |
| 9mo_SIGAF3_ | 0.10929511 | 0.6488975  | 6.60E-05 | 0.025611  | -0.2602   |
| 9mo_SIGAF3_ | 0.06295888 | 0.36930054 | 6.08E-05 | 0.0094206 | 0.087254  |
| 9mo_SIGAF3_ | 0.10030233 | 0.5946343  | 6.53E-05 | 0.024687  | -0.11403  |
| 9mo_SIGAF3_ | 0.09735413 | 0.5768446  | 6.51E-05 | 0.023799  | -0.065044 |
| 9mo_SIGAF3_ | 0.08441941 | 0.49879536 | 6.37E-05 | 0.018667  | 0.1136    |
| 9mo_SIGAF3_ | 0.03607835 | 0.20710097 | 4.65E-05 | 0.0042637 | -0.068307 |
| 9mo_SIGAF3_ | 0.02220891 | 0.12341143 | 3.52E-05 | 0.0043661 | -0.046619 |
| 9mo_SIGAF3_ | 0.04779106 | 0.2777765  | 5.64E-05 | 0.0055867 | 0.035328  |
| 9mo_SIGAF3_ | 0.01110431 | 0.05640531 | 3.21E-05 | 0.006339  | 0.32844   |
| 9mo_SIGAF3_ | 0.02440645 | 0.13667165 | 3.64E-05 | 0.0042065 | -0.080664 |
| 9mo_SIGAF3_ | 0.09233306 | 0.546547   | 6.46E-05 | 0.022042  | 0.019141  |
| 9mo_SIGAF3_ | 0.09592031 | 0.5681928  | 6.50E-05 | 0.023448  | -0.035993 |
| 9mo_SIGAF3_ | 0.1034504  | 0.61363006 | 6.56E-05 | 0.025216  | -0.17104  |
| 9mo_SIGAF3_ | 0.07983986 | 0.47116193 | 6.32E-05 | 0.016594  | 0.13545   |
| 9mo_SIGAF3_ | 0.08745977 | 0.5171411  | 6.41E-05 | 0.020177  | 0.087329  |
| 9mo_SIGAF3_ | 0.08077079 | 0.47677922 | 6.33E-05 | 0.017113  | 0.13314   |
| 9mo_SIGAF3_ | 0.10990309 | 0.6525662  | 6.60E-05 | 0.025599  | -0.26716  |
| 9mo_SIGAF3_ | 0.01547377 | 0.082771   | 3.28E-05 | 0.0052924 | 0.1442    |
| 9mo_SIGAF3_ | 0.01838807 | 0.10035615 | 3.36E-05 | 0.0048202 | 0.050123  |
| 9mo_SIGAF3_ | 0.02308708 | 0.12871043 | 3.55E-05 | 0.0043197 | -0.065623 |
| 9mo_SIGAF3_ | 0.00944921 | 0.04641826 | 3.20E-05 | 0.0068348 | 0.4058    |
| 9mo_SIGAF3_ | 0.01458525 | 0.07740962 | 3.26E-05 | 0.0055188 | 0.18676   |
| 9mo_SIGAF3_ | 0.03234612 | 0.1845803  | 4.27E-05 | 0.004099  | -0.097962 |

|             |            |            |          |           |           |
|-------------|------------|------------|----------|-----------|-----------|
| 9mo_SIGAF3_ | 0.03919127 | 0.22588459 | 4.98E-05 | 0.0045122 | -0.034672 |
| 9mo_SIGAF3_ | 0.14359193 | 0.8558477  | 6.75E-05 | 0.023613  | -0.50792  |
| 9mo_SIGAF3_ | 0.02143066 | 0.11871547 | 3.47E-05 | 0.0044724 | -0.0356   |
| 9mo_SIGAF3_ | 0.02659347 | 0.14986834 | 3.80E-05 | 0.0041099 | -0.099939 |
| 9mo_SIGAF3_ | 0.01918415 | 0.10515981 | 3.38E-05 | 0.004741  | 0.017998  |
| 9mo_SIGAF3_ | 0.04448206 | 0.2578097  | 5.42E-05 | 0.0050757 | 0.012967  |
| 9mo_SIGAF3_ | 0.02737067 | 0.154558   | 3.84E-05 | 0.0040947 | -0.10271  |
| 9mo_SIGAF3_ | 0.03806591 | 0.21909405 | 4.87E-05 | 0.0044183 | -0.04622  |
| 9mo_SIGAF3_ | 0.00913583 | 0.0445273  | 3.19E-05 | 0.0070136 | 0.43237   |
| 9mo_SIGAF3_ | 0.04454534 | 0.25819156 | 5.42E-05 | 0.0050757 | 0.012967  |
| 9mo_SIGAF3_ | 0.01992082 | 0.10960494 | 3.42E-05 | 0.0045972 | 0.0032259 |
| 9mo_SIGAF3_ | 0.0399669  | 0.2305648  | 5.03E-05 | 0.0045634 | -0.028892 |
| 9mo_SIGAF3_ | 0.12782142 | 0.760687   | 6.69E-05 | 0.023794  | -0.4246   |
| 9mo_SIGAF3_ | 0.02443236 | 0.13682799 | 3.64E-05 | 0.0042065 | -0.080664 |
| 9mo_SIGAF3_ | 0.05416257 | 0.3162228  | 5.92E-05 | 0.0069681 | 0.062513  |
| 9mo_SIGAF3_ | 0.02308117 | 0.12867475 | 3.55E-05 | 0.0043197 | -0.065623 |
| 9mo_SIGAF3_ | 0.14443724 | 0.8609484  | 6.75E-05 | 0.023623  | -0.50968  |
| 9mo_SIGAF3_ | 0.02878615 | 0.16309913 | 3.97E-05 | 0.0040686 | -0.10664  |
| 9mo_SIGAF3_ | 0.02329664 | 0.12997492 | 3.58E-05 | 0.0042778 | -0.065623 |
| 9mo_SIGAF3_ | 0.02102635 | 0.1162758  | 3.47E-05 | 0.0044724 | -0.023601 |
| 9mo_SIGAF3_ | 0.02003064 | 0.11026759 | 3.42E-05 | 0.0045972 | 0.0032259 |
| 9mo_SIGAF3_ | 0.07935762 | 0.46825206 | 6.31E-05 | 0.016335  | 0.13613   |
| 9mo_SIGAF3_ | 0.08532222 | 0.5042429  | 6.39E-05 | 0.019177  | 0.10916   |
| 9mo_SIGAF3_ | 0.1030955  | 0.6114886  | 6.56E-05 | 0.025216  | -0.16182  |
| 9mo_SIGAF3_ | 0.04449315 | 0.25787663 | 5.42E-05 | 0.0050757 | 0.012967  |
| 9mo_SIGAF3_ | 0.02089401 | 0.11547724 | 3.47E-05 | 0.0044724 | -0.023601 |
| 9mo_SIGAF3_ | 0.0133886  | 0.0701889  | 3.24E-05 | 0.0057681 | 0.23179   |
| 9mo_SIGAF3_ | 0.0514659  | 0.29995084 | 5.83E-05 | 0.0063316 | 0.053285  |
| 9mo_SIGAF3_ | 0.01460083 | 0.07750362 | 3.26E-05 | 0.0055188 | 0.18676   |
| 9mo_SIGAF3_ | 0.02285829 | 0.1273299  | 3.55E-05 | 0.0043197 | -0.056631 |
| 9mo_SIGAF3_ | 0.02289713 | 0.12756425 | 3.55E-05 | 0.0043197 | -0.056631 |
| 9mo_SIGAF3_ | 0.00658708 | 0.02914788 | 3.18E-05 | 0.0078    | 0.54183   |
| 9mo_SIGAF3_ | 0.05048581 | 0.2940369  | 5.78E-05 | 0.0061018 | 0.048868  |
| 9mo_SIGAF3_ | 0.08310016 | 0.49083486 | 6.36E-05 | 0.018151  | 0.12434   |
| 9mo_SIGAF3_ | 0.05323144 | 0.31060427 | 5.89E-05 | 0.0067028 | 0.059084  |
| 9mo_SIGAF3_ | 0.13676623 | 0.8146608  | 6.73E-05 | 0.023528  | -0.4775   |
| 9mo_SIGAF3_ | 0.06617853 | 0.3887282  | 6.13E-05 | 0.010616  | 0.10013   |
| 9mo_SIGAF3_ | 0.02070789 | 0.11435416 | 3.44E-05 | 0.0045325 | -0.01065  |
| 9mo_SIGAF3_ | 0.04039861 | 0.2331698  | 5.09E-05 | 0.0046173 | -0.023154 |
| 9mo_SIGAF3_ | 0.04553962 | 0.26419112 | 5.50E-05 | 0.0052335 | 0.021279  |
| 9mo_SIGAF3_ | 0.01655108 | 0.08927158 | 3.31E-05 | 0.0050879 | 0.10435   |
| 9mo_SIGAF3_ | 0.05833432 | 0.34139553 | 6.01E-05 | 0.0080116 | 0.073002  |
| 9mo_SIGAF3_ | 0.0233067  | 0.13003562 | 3.58E-05 | 0.0042778 | -0.065623 |

|             |            |            |          |           |           |
|-------------|------------|------------|----------|-----------|-----------|
| 9mo_SIGAF3_ | 0.01109583 | 0.05635413 | 3.21E-05 | 0.006339  | 0.32844   |
| 9mo_SIGAF3_ | 0.09545339 | 0.5653753  | 6.49E-05 | 0.023263  | -0.035993 |
| 9mo_SIGAF3_ | 0.09924909 | 0.58827895 | 6.53E-05 | 0.02442   | -0.094455 |
| 9mo_SIGAF3_ | 0.0458689  | 0.26617804 | 5.54E-05 | 0.0053171 | 0.025099  |
| 9mo_SIGAF3_ | 0.06540304 | 0.3840488  | 6.12E-05 | 0.01041   | 0.095509  |
| 9mo_SIGAF3_ | 0.0184764  | 0.10088917 | 3.36E-05 | 0.0048202 | 0.050123  |
| 9mo_SIGAF3_ | 0.1434144  | 0.85477644 | 6.75E-05 | 0.023613  | -0.50606  |
| 9mo_SIGAF3_ | 0.03053334 | 0.17364186 | 4.11E-05 | 0.0040705 | -0.10475  |
| 9mo_SIGAF3_ | 0.04653743 | 0.270212   | 5.57E-05 | 0.0054037 | 0.028707  |
| 9mo_SIGAF3_ | 0.08250959 | 0.48727128 | 6.35E-05 | 0.017892  | 0.1271    |
| 9mo_SIGAF3_ | 0.01289185 | 0.06719148 | 3.23E-05 | 0.0059016 | 0.25518   |
| 9mo_SIGAF3_ | 0.0232235  | 0.12953359 | 3.58E-05 | 0.0042778 | -0.065623 |
| 9mo_SIGAF3_ | 0.01324372 | 0.0693147  | 3.24E-05 | 0.0057681 | 0.23179   |
| 9mo_SIGAF3_ | 0.11506842 | 0.68373424 | 6.63E-05 | 0.025242  | -0.32268  |
| 9mo_SIGAF3_ | 0.07595706 | 0.44773275 | 6.26E-05 | 0.0148    | 0.13453   |
| 9mo_SIGAF3_ | 0.01917253 | 0.10508968 | 3.38E-05 | 0.004741  | 0.017998  |
| 9mo_SIGAF3_ | 0.02966687 | 0.16841346 | 4.02E-05 | 0.0040662 | -0.10597  |
| 9mo_SIGAF3_ | 0.02840495 | 0.16079897 | 3.93E-05 | 0.004074  | -0.10603  |
| 9mo_SIGAF3_ | 0.11650126 | 0.6923802  | 6.64E-05 | 0.025054  | -0.33868  |
| 9mo_SIGAF3_ | 0.12036053 | 0.7156673  | 6.66E-05 | 0.024561  | -0.37215  |
| 9mo_SIGAF3_ | 0.03966795 | 0.22876094 | 4.98E-05 | 0.0045122 | -0.028892 |
| 9mo_SIGAF3_ | 0.05159845 | 0.30075064 | 5.83E-05 | 0.0063316 | 0.053285  |
| 9mo_SIGAF3_ | 0.05287539 | 0.30845582 | 5.87E-05 | 0.0065755 | 0.059084  |
| 9mo_SIGAF3_ | 0.03226006 | 0.18406102 | 4.27E-05 | 0.004099  | -0.097962 |
| 9mo_SIGAF3_ | 0.05518585 | 0.32239738 | 5.94E-05 | 0.0071062 | 0.065685  |
| 9mo_SIGAF3_ | 0.03133898 | 0.17850313 | 4.16E-05 | 0.0040771 | -0.10071  |
| 9mo_SIGAF3_ | 0.04882015 | 0.28398615 | 5.70E-05 | 0.0057827 | 0.041222  |
| 9mo_SIGAF3_ | 0.06816415 | 0.4007096  | 6.16E-05 | 0.011474  | 0.10734   |
| 9mo_SIGAF3_ | 0.05926517 | 0.34701237 | 6.03E-05 | 0.0083426 | 0.075889  |
| 9mo_SIGAF3_ | 0.01287695 | 0.06710156 | 3.23E-05 | 0.0059016 | 0.25518   |
| 9mo_SIGAF3_ | 0.05897008 | 0.34523174 | 6.02E-05 | 0.0081753 | 0.075889  |
| 9mo_SIGAF3_ | 0.01263152 | 0.06562063 | 3.23E-05 | 0.0059016 | 0.25518   |
| 9mo_SIGAF3_ | 0.02626945 | 0.14791313 | 3.76E-05 | 0.0041286 | -0.096385 |
| 9mo_SIGAF3_ | 0.09288028 | 0.549849   | 6.46E-05 | 0.022258  | 0.010343  |
| 9mo_SIGAF3_ | 0.01711222 | 0.09265757 | 3.33E-05 | 0.0049935 | 0.085504  |
| 9mo_SIGAF3_ | 0.07976358 | 0.4707016  | 6.32E-05 | 0.016594  | 0.13545   |
| 9mo_SIGAF3_ | 0.01727852 | 0.09366103 | 3.33E-05 | 0.0049935 | 0.085504  |
| 9mo_SIGAF3_ | 0.06019074 | 0.35259733 | 6.04E-05 | 0.0085136 | 0.07887   |
| 9mo_SIGAF3_ | 0.02568982 | 0.14441562 | 3.72E-05 | 0.0041509 | -0.092011 |
| 9mo_SIGAF3_ | 0.02995832 | 0.17017213 | 4.07E-05 | 0.0040668 | -0.10597  |
| 9mo_SIGAF3_ | 0.09273833 | 0.54899246 | 6.46E-05 | 0.022258  | 0.010343  |
| 9mo_SIGAF3_ | 0.04999513 | 0.29107606 | 5.76E-05 | 0.005992  | 0.046466  |
| 9mo_SIGAF3_ | 0.08577663 | 0.5069849  | 6.39E-05 | 0.01943   | 0.1043    |

|             |            |            |          |           |            |
|-------------|------------|------------|----------|-----------|------------|
| 9mo_SIGAF3_ | 0.11090314 | 0.65860057 | 6.61E-05 | 0.025556  | -0.28058   |
| 9mo_SIGAF3_ | 0.03519175 | 0.2017511  | 4.54E-05 | 0.0042028 | -0.073417  |
| 9mo_SIGAF3_ | 0.09057487 | 0.5359379  | 6.44E-05 | 0.021369  | 0.044278   |
| 9mo_SIGAF3_ | 0.07173627 | 0.4222641  | 6.20E-05 | 0.012843  | 0.12348    |
| 9mo_SIGAF3_ | 0.08820143 | 0.52161634 | 6.42E-05 | 0.020421  | 0.080939   |
| 9mo_SIGAF3_ | 0.02551047 | 0.1433334  | 3.72E-05 | 0.0041509 | -0.092011  |
| 9mo_SIGAF3_ | 0.02357129 | 0.13163221 | 3.58E-05 | 0.0042778 | -0.065623  |
| 9mo_SIGAF3_ | 0.04284502 | 0.24793167 | 5.29E-05 | 0.0048617 | -0.0013165 |
| 9mo_SIGAF3_ | 0.13863717 | 0.82595026 | 6.73E-05 | 0.023538  | -0.48824   |
| 9mo_SIGAF3_ | 0.02170429 | 0.12036653 | 3.49E-05 | 0.0044169 | -0.0356    |
| 9mo_SIGAF3_ | 0.10401468 | 0.617035   | 6.56E-05 | 0.025296  | -0.18011   |
| 9mo_SIGAF3_ | 0.02829469 | 0.16013366 | 3.93E-05 | 0.004074  | -0.10603   |
| 9mo_SIGAF3_ | 0.02466897 | 0.13825569 | 3.64E-05 | 0.0042065 | -0.080664  |
| 9mo_SIGAF3_ | 0.07975388 | 0.47064307 | 6.32E-05 | 0.016594  | 0.13545    |
| 9mo_SIGAF3_ | 0.02421344 | 0.135507   | 3.64E-05 | 0.0042065 | -0.080664  |
| 9mo_SIGAF3_ | 0.03392263 | 0.19409312 | 4.43E-05 | 0.004153  | -0.087207  |
| 9mo_SIGAF3_ | 0.01887752 | 0.10330956 | 3.38E-05 | 0.004741  | 0.03364    |
| 9mo_SIGAF3_ | 0.08992568 | 0.5320206  | 6.44E-05 | 0.021137  | 0.05218    |
| 9mo_SIGAF3_ | 0.08755773 | 0.5177322  | 6.41E-05 | 0.020177  | 0.087329   |
| 9mo_SIGAF3_ | 0.0115695  | 0.05921231 | 3.22E-05 | 0.0061869 | 0.30353    |
| 9mo_SIGAF3_ | 0.10872637 | 0.64546573 | 6.59E-05 | 0.025616  | -0.25305   |
| 9mo_SIGAF3_ | 0.01438894 | 0.07622506 | 3.26E-05 | 0.0055188 | 0.18676    |
| 9mo_SIGAF3_ | 0.02618789 | 0.14742103 | 3.76E-05 | 0.0041286 | -0.096385  |
| 9mo_SIGAF3_ | 0.01313533 | 0.06866067 | 3.24E-05 | 0.0057681 | 0.23179    |
| 9mo_SIGAF3_ | 0.1081688  | 0.6421013  | 6.59E-05 | 0.025614  | -0.24573   |
| 9mo_SIGAF3_ | 0.05128332 | 0.2988491  | 5.81E-05 | 0.006215  | 0.053285   |
| 9mo_SIGAF3_ | 0.08542471 | 0.5048614  | 6.39E-05 | 0.019177  | 0.10916    |
| 9mo_SIGAF3_ | 0.06585786 | 0.38679323 | 6.13E-05 | 0.010616  | 0.097788   |
| 9mo_SIGAF3_ | 0.03666333 | 0.21063079 | 4.70E-05 | 0.0042982 | -0.062998  |
| 9mo_SIGAF3_ | 0.0213806  | 0.11841334 | 3.47E-05 | 0.0044724 | -0.0356    |
| 9mo_SIGAF3_ | 0.08500216 | 0.5023117  | 6.38E-05 | 0.018923  | 0.10916    |
| 9mo_SIGAF3_ | 0.0321901  | 0.18363889 | 4.27E-05 | 0.004099  | -0.097962  |
| 9mo_SIGAF3_ | 0.11349225 | 0.6742235  | 6.62E-05 | 0.025353  | -0.30551   |
| 9mo_SIGAF3_ | 0.08462655 | 0.5000452  | 6.38E-05 | 0.018923  | 0.1136     |
| 9mo_SIGAF3_ | 0.11815764 | 0.7023749  | 6.65E-05 | 0.024847  | -0.35363   |
| 9mo_SIGAF3_ | 0.04740072 | 0.27542114 | 5.61E-05 | 0.0054936 | 0.035328   |
| 9mo_SIGAF3_ | 0.08628272 | 0.5100387  | 6.40E-05 | 0.019681  | 0.099025   |
| 9mo_SIGAF3_ | 0.02233137 | 0.1241504  | 3.52E-05 | 0.0043661 | -0.046619  |
| 9mo_SIGAF3_ | 0.03080733 | 0.1752951  | 4.11E-05 | 0.0040705 | -0.10299   |
| 9mo_SIGAF3_ | 0.14074476 | 0.83866763 | 6.74E-05 | 0.023566  | -0.4978    |
| 9mo_SIGAF3_ | 0.0194854  | 0.10697756 | 3.40E-05 | 0.0046667 | 0.017998   |
| 9mo_SIGAF3_ | 0.03217466 | 0.18354572 | 4.27E-05 | 0.004099  | -0.097962  |
| 9mo_SIGAF3_ | 0.09926517 | 0.588376   | 6.53E-05 | 0.02442   | -0.10426   |

|             |            |            |          |           |           |
|-------------|------------|------------|----------|-----------|-----------|
| 9mo_SIGAF3_ | 0.08248238 | 0.48710713 | 6.35E-05 | 0.017892  | 0.1271    |
| 9mo_SIGAF3_ | 0.02832697 | 0.16032842 | 3.93E-05 | 0.004074  | -0.10603  |
| 9mo_SIGAF3_ | 0.02910835 | 0.16504332 | 3.97E-05 | 0.0040686 | -0.10661  |
| 9mo_SIGAF3_ | 0.02041846 | 0.11260774 | 3.44E-05 | 0.0045325 | -0.01065  |
| 9mo_SIGAF3_ | 0.01641574 | 0.08845493 | 3.30E-05 | 0.0051875 | 0.10435   |
| 9mo_SIGAF3_ | 0.03403597 | 0.19477703 | 4.43E-05 | 0.004153  | -0.087207 |
| 9mo_SIGAF3_ | 0.12434839 | 0.7397304  | 6.67E-05 | 0.024092  | -0.40152  |
| 9mo_SIGAF3_ | 0.01278954 | 0.06657413 | 3.23E-05 | 0.0059016 | 0.25518   |
| 9mo_SIGAF3_ | 0.08206107 | 0.48456487 | 6.35E-05 | 0.017633  | 0.12948   |
| 9mo_SIGAF3_ | 0.01868733 | 0.10216196 | 3.38E-05 | 0.004741  | 0.03364   |
| 9mo_SIGAF3_ | 0.13120443 | 0.7811004  | 6.70E-05 | 0.023599  | -0.44608  |
| 9mo_SIGAF3_ | 0.09524687 | 0.5641292  | 6.49E-05 | 0.023263  | -0.026471 |
| 9mo_SIGAF3_ | 0.01732898 | 0.09396554 | 3.33E-05 | 0.0049935 | 0.085504  |
| 9mo_SIGAF3_ | 0.01798659 | 0.09793359 | 3.34E-05 | 0.0049043 | 0.067421  |
| 9mo_SIGAF3_ | 0.01908757 | 0.10457698 | 3.38E-05 | 0.004741  | 0.03364   |
| 9mo_SIGAF3_ | 0.02527687 | 0.14192384 | 3.68E-05 | 0.0041768 | -0.092011 |
| 9mo_SIGAF3_ | 0.02601908 | 0.1464024  | 3.76E-05 | 0.0041286 | -0.096385 |
| 9mo_SIGAF3_ | 0.02307295 | 0.12862518 | 3.55E-05 | 0.0043197 | -0.065623 |
| 9mo_SIGAF3_ | 0.01647473 | 0.08881091 | 3.31E-05 | 0.0050879 | 0.10435   |
| 9mo_SIGAF3_ | 0.02699745 | 0.15230598 | 3.84E-05 | 0.0040947 | -0.10271  |
| 9mo_SIGAF3_ | 0.1199046  | 0.7129162  | 6.65E-05 | 0.024632  | -0.36766  |
| 9mo_SIGAF3_ | 0.01759421 | 0.09556592 | 3.34E-05 | 0.0049043 | 0.067421  |
| 9mo_SIGAF3_ | 0.07533041 | 0.4439515  | 6.26E-05 | 0.014549  | 0.13345   |
| 9mo_SIGAF3_ | 0.02078098 | 0.11479524 | 3.44E-05 | 0.0045325 | -0.01065  |
| 9mo_SIGAF3_ | 0.01852528 | 0.10118409 | 3.36E-05 | 0.0048202 | 0.050123  |
| 9mo_SIGAF3_ | 0.0299151  | 0.16991132 | 4.07E-05 | 0.0040668 | -0.10597  |
| 9mo_SIGAF3_ | 0.01156887 | 0.05920848 | 3.22E-05 | 0.0061869 | 0.30353   |
| 9mo_SIGAF3_ | 0.08874352 | 0.5248873  | 6.42E-05 | 0.020663  | 0.074212  |
| 9mo_SIGAF3_ | 0.02207249 | 0.1225883  | 3.52E-05 | 0.0043661 | -0.046619 |
| 9mo_SIGAF3_ | 0.01528155 | 0.08161116 | 3.27E-05 | 0.0054028 | 0.16515   |
| 9mo_SIGAF3_ | 0.0096137  | 0.04741078 | 3.20E-05 | 0.0068348 | 0.4058    |
| 9mo_SIGAF3_ | 0.07295849 | 0.4296391  | 6.22E-05 | 0.01332   | 0.12737   |
| 9mo_SIGAF3_ | 0.09963907 | 0.59063214 | 6.53E-05 | 0.024558  | -0.10426  |
| 9mo_SIGAF3_ | 0.03445196 | 0.19728716 | 4.48E-05 | 0.0041765 | -0.082901 |
| 9mo_SIGAF3_ | 0.1149004  | 0.68272036 | 6.63E-05 | 0.025242  | -0.32268  |
| 9mo_SIGAF3_ | 0.1062104  | 0.63028413 | 6.58E-05 | 0.025526  | -0.21453  |
| 9mo_SIGAF3_ | 0.01648521 | 0.08887415 | 3.31E-05 | 0.0050879 | 0.10435   |
| 9mo_SIGAF3_ | 0.06191674 | 0.36301216 | 6.07E-05 | 0.0092324 | 0.083692  |
| 9mo_SIGAF3_ | 0.02447673 | 0.13709569 | 3.64E-05 | 0.0042065 | -0.080664 |
| 9mo_SIGAF3_ | 0.0336497  | 0.19244625 | 4.43E-05 | 0.004153  | -0.087207 |
| 9mo_SIGAF3_ | 0.02224568 | 0.12363334 | 3.52E-05 | 0.0043661 | -0.046619 |
| 9mo_SIGAF3_ | 0.08762079 | 0.5181127  | 6.41E-05 | 0.020177  | 0.087329  |
| 9mo_SIGAF3_ | 0.08383307 | 0.4952573  | 6.37E-05 | 0.01841   | 0.1176    |

|             |            |            |          |           |            |
|-------------|------------|------------|----------|-----------|------------|
| 9mo_SIGAF3_ | 0.01181198 | 0.06067546 | 3.22E-05 | 0.0061869 | 0.30353    |
| 9mo_SIGAF3_ | 0.01676482 | 0.09056134 | 3.31E-05 | 0.0050879 | 0.10435    |
| 9mo_SIGAF3_ | 0.10230853 | 0.60673994 | 6.55E-05 | 0.025029  | -0.15246   |
| 9mo_SIGAF3_ | 0.02441048 | 0.13669592 | 3.64E-05 | 0.0042065 | -0.080664  |
| 9mo_SIGAF3_ | 0.02418594 | 0.13534106 | 3.61E-05 | 0.0042401 | -0.080664  |
| 9mo_SIGAF3_ | 0.01860243 | 0.10164962 | 3.36E-05 | 0.0048202 | 0.050123   |
| 9mo_SIGAF3_ | 0.00851364 | 0.04077297 | 3.19E-05 | 0.0071994 | 0.45929    |
| 9mo_SIGAF3_ | 0.02283008 | 0.12715966 | 3.55E-05 | 0.0043197 | -0.056631  |
| 9mo_SIGAF3_ | 0.0661696  | 0.3886743  | 6.13E-05 | 0.010616  | 0.10013    |
| 9mo_SIGAF3_ | 0.02861017 | 0.16203727 | 3.93E-05 | 0.004074  | -0.10664   |
| 9mo_SIGAF3_ | 0.07348882 | 0.43283913 | 6.23E-05 | 0.013561  | 0.12913    |
| 9mo_SIGAF3_ | 0.11496458 | 0.6831076  | 6.63E-05 | 0.025242  | -0.32268   |
| 9mo_SIGAF3_ | 0.0182497  | 0.0995212  | 3.36E-05 | 0.0048202 | 0.050123   |
| 9mo_SIGAF3_ | 0.02580317 | 0.14509957 | 3.72E-05 | 0.0041509 | -0.096385  |
| 9mo_SIGAF3_ | 0.10692586 | 0.6346013  | 6.58E-05 | 0.025586  | -0.22263   |
| 9mo_SIGAF3_ | 0.0242656  | 0.13582174 | 3.64E-05 | 0.0042065 | -0.080664  |
| 9mo_SIGAF3_ | 0.1070567  | 0.6353908  | 6.58E-05 | 0.025586  | -0.23052   |
| 9mo_SIGAF3_ | 0.01026859 | 0.05136245 | 3.20E-05 | 0.0066628 | 0.37961    |
| 9mo_SIGAF3_ | 0.08838175 | 0.5227044  | 6.42E-05 | 0.020421  | 0.074212   |
| 9mo_SIGAF3_ | 0.08103738 | 0.47838786 | 6.33E-05 | 0.017113  | 0.13148    |
| 9mo_SIGAF3_ | 0.08700822 | 0.5144164  | 6.41E-05 | 0.01993   | 0.093363   |
| 9mo_SIGAF3_ | 0.05286587 | 0.3083984  | 5.87E-05 | 0.0065755 | 0.059084   |
| 9mo_SIGAF3_ | 0.07377092 | 0.43454134 | 6.23E-05 | 0.013805  | 0.12913    |
| 9mo_SIGAF3_ | 0.04278093 | 0.24754494 | 5.29E-05 | 0.0048617 | -0.0013165 |
| 9mo_SIGAF3_ | 0.05258132 | 0.3066814  | 5.87E-05 | 0.0065755 | 0.057248   |
| 9mo_SIGAF3_ | 0.05533185 | 0.32327837 | 5.95E-05 | 0.007248  | 0.065685   |
| 9mo_SIGAF3_ | 0.11764885 | 0.69930476 | 6.64E-05 | 0.024917  | -0.34876   |
| 9mo_SIGAF3_ | 0.02742886 | 0.15490915 | 3.84E-05 | 0.0040947 | -0.10271   |
| 9mo_SIGAF3_ | 0.01937719 | 0.10632461 | 3.40E-05 | 0.0046667 | 0.017998   |
| 9mo_SIGAF3_ | 0.01892387 | 0.1035892  | 3.38E-05 | 0.004741  | 0.03364    |
| 9mo_SIGAF3_ | 0.02017639 | 0.11114707 | 3.42E-05 | 0.0045972 | 0.0032259  |
| 9mo_SIGAF3_ | 0.01282419 | 0.0667832  | 3.23E-05 | 0.0059016 | 0.25518    |
| 9mo_SIGAF3_ | 0.0291619  | 0.16536644 | 3.97E-05 | 0.0040686 | -0.10661   |
| 9mo_SIGAF3_ | 0.03871594 | 0.2230164  | 4.92E-05 | 0.0044639 | -0.040459  |
| 9mo_SIGAF3_ | 0.0992996  | 0.58858377 | 6.53E-05 | 0.02442   | -0.10426   |
| 9mo_SIGAF3_ | 0.05284716 | 0.30828547 | 5.87E-05 | 0.0065755 | 0.057248   |
| 9mo_SIGAF3_ | 0.10418131 | 0.6180404  | 6.56E-05 | 0.025367  | -0.18011   |
| 9mo_SIGAF3_ | 0.04787469 | 0.27828118 | 5.64E-05 | 0.0055867 | 0.035328   |
| 9mo_SIGAF3_ | 0.04785661 | 0.27817205 | 5.64E-05 | 0.0055867 | 0.035328   |
| 9mo_SIGAF3_ | 0.04812514 | 0.2797924  | 5.67E-05 | 0.0056831 | 0.038361   |
| 9mo_SIGAF3_ | 0.03820956 | 0.21996088 | 4.87E-05 | 0.0044183 | -0.04622   |
| 9mo_SIGAF3_ | 0.02374256 | 0.13266562 | 3.61E-05 | 0.0042401 | -0.073623  |
| 9mo_SIGAF3_ | 0.03553445 | 0.203819   | 4.59E-05 | 0.0042319 | -0.073417  |

|             |            |            |          |           |           |
|-------------|------------|------------|----------|-----------|-----------|
| 9mo_SIGAF3_ | 0.08382185 | 0.49518958 | 6.37E-05 | 0.01841   | 0.1176    |
| 9mo_SIGAF3_ | 0.02307224 | 0.12862088 | 3.55E-05 | 0.0043197 | -0.065623 |
| 9mo_SIGAF3_ | 0.00749977 | 0.03465517 | 3.19E-05 | 0.0075925 | 0.51404   |
| 9mo_SIGAF3_ | 0.01968807 | 0.10820047 | 3.40E-05 | 0.0046667 | 0.017998  |
| 9mo_SIGAF3_ | 0.03997295 | 0.23060136 | 5.03E-05 | 0.0045634 | -0.028892 |
| 9mo_SIGAF3_ | 0.04653558 | 0.27020085 | 5.57E-05 | 0.0054037 | 0.028707  |
| 9mo_SIGAF3_ | 0.03416697 | 0.19556753 | 4.43E-05 | 0.004153  | -0.082901 |
| 9mo_SIGAF3_ | 0.06612801 | 0.38842332 | 6.13E-05 | 0.010616  | 0.10013   |
| 9mo_SIGAF3_ | 0.06631988 | 0.3895811  | 6.13E-05 | 0.010616  | 0.10013   |
| 9mo_SIGAF3_ | 0.13222803 | 0.7872769  | 6.71E-05 | 0.023582  | -0.45284  |
| 9mo_SIGAF3_ | 0.02375671 | 0.13275103 | 3.61E-05 | 0.0042401 | -0.073623 |
| 9mo_SIGAF3_ | 0.15616986 | 0.9317441  | 6.78E-05 | 0.023708  | -0.527    |
| 9mo_SIGAF3_ | 0.06963156 | 0.4095641  | 6.17E-05 | 0.01192   | 0.11455   |
| 9mo_SIGAF3_ | 0.12558024 | 0.74716353 | 6.68E-05 | 0.023978  | -0.40938  |
| 9mo_SIGAF3_ | 0.01041231 | 0.05222967 | 3.21E-05 | 0.0064976 | 0.35381   |
| 9mo_SIGAF3_ | 0.12606871 | 0.75011104 | 6.68E-05 | 0.023927  | -0.41325  |
| 9mo_SIGAF3_ | 0.03085431 | 0.17557862 | 4.11E-05 | 0.0040705 | -0.10299  |
| 9mo_SIGAF3_ | 0.14959519 | 0.8920719  | 6.76E-05 | 0.023695  | -0.52228  |
| 9mo_SIGAF3_ | 0.09232929 | 0.5465243  | 6.46E-05 | 0.022042  | 0.019141  |
| 9mo_SIGAF3_ | 0.0770249  | 0.4541762  | 6.28E-05 | 0.015307  | 0.13605   |
| 9mo_SIGAF3_ | 0.05016938 | 0.29212752 | 5.76E-05 | 0.005992  | 0.048868  |
| 9mo_SIGAF3_ | 0.02608297 | 0.14678787 | 3.76E-05 | 0.0041286 | -0.096385 |
| 9mo_SIGAF3_ | 0.01850921 | 0.10108714 | 3.36E-05 | 0.0048202 | 0.050123  |
| 9mo_SIGAF3_ | 0.05733875 | 0.33538818 | 5.99E-05 | 0.0076952 | 0.071569  |
| 9mo_SIGAF3_ | 0.01692177 | 0.09150839 | 3.31E-05 | 0.0050879 | 0.10435   |
| 9mo_SIGAF3_ | 0.04388098 | 0.25418273 | 5.38E-05 | 0.0050014 | 0.008455  |
| 9mo_SIGAF3_ | 0.0140344  | 0.07408574 | 3.25E-05 | 0.0056405 | 0.20898   |
| 9mo_SIGAF3_ | 0.01324486 | 0.06932154 | 3.24E-05 | 0.0057681 | 0.23179   |
| 9mo_SIGAF3_ | 0.05562234 | 0.32503116 | 5.95E-05 | 0.007248  | 0.067199  |
| 9mo_SIGAF3_ | 0.03951095 | 0.2278136  | 4.98E-05 | 0.0045122 | -0.034672 |
| 9mo_SIGAF3_ | 0.10633101 | 0.6310119  | 6.58E-05 | 0.02556   | -0.21453  |
| 9mo_SIGAF3_ | 0.02339693 | 0.13058011 | 3.58E-05 | 0.0042778 | -0.065623 |
| 9mo_SIGAF3_ | 0.08442453 | 0.4988262  | 6.37E-05 | 0.018667  | 0.1136    |
| 9mo_SIGAF3_ | 0.01113399 | 0.05658437 | 3.21E-05 | 0.006339  | 0.32844   |
| 9mo_SIGAF3_ | 0.01605779 | 0.08629502 | 3.30E-05 | 0.0051875 | 0.12392   |
| 9mo_SIGAF3_ | 0.01481    | 0.07876576 | 3.27E-05 | 0.0054028 | 0.16515   |
| 9mo_SIGAF3_ | 0.12434607 | 0.7397165  | 6.67E-05 | 0.024092  | -0.40152  |
| 9mo_SIGAF3_ | 0.03485674 | 0.19972965 | 4.54E-05 | 0.0042028 | -0.078293 |
| 9mo_SIGAF3_ | 0.09298734 | 0.55049497 | 6.47E-05 | 0.022469  | 0.010343  |
| 9mo_SIGAF3_ | 0.01487057 | 0.07913127 | 3.27E-05 | 0.0054028 | 0.16515   |
| 9mo_SIGAF3_ | 0.01019136 | 0.05089646 | 3.20E-05 | 0.0066628 | 0.37961   |
| 9mo_SIGAF3_ | 0.0160692  | 0.08636391 | 3.30E-05 | 0.0051875 | 0.12392   |
| 9mo_SIGAF3_ | 0.11835121 | 0.7035429  | 6.65E-05 | 0.024847  | -0.35363  |



|             |            |            |          |           |           |
|-------------|------------|------------|----------|-----------|-----------|
| 9mo_SIGAF3_ | 0.00769329 | 0.03582288 | 3.19E-05 | 0.0073923 | 0.48652   |
| 9mo_SIGAF3_ | 0.02381257 | 0.13308808 | 3.61E-05 | 0.0042401 | -0.073623 |
| 9mo_SIGAF3_ | 0.09576596 | 0.5672614  | 6.50E-05 | 0.023448  | -0.035993 |
| 9mo_SIGAF3_ | 0.06621496 | 0.388948   | 6.13E-05 | 0.010616  | 0.10013   |
| 9mo_SIGAF3_ | 0.1044073  | 0.6194041  | 6.56E-05 | 0.025367  | -0.18901  |
| 9mo_SIGAF3_ | 0.04802774 | 0.27920464 | 5.64E-05 | 0.0055867 | 0.038361  |
| 9mo_SIGAF3_ | 0.07281861 | 0.428795   | 6.22E-05 | 0.01332   | 0.12737   |
| 9mo_SIGAF3_ | 0.06871352 | 0.40402457 | 6.16E-05 | 0.011695  | 0.10977   |
| 9mo_SIGAF3_ | 0.08591282 | 0.5078067  | 6.39E-05 | 0.01943   | 0.1043    |
| 9mo_SIGAF3_ | 0.01526713 | 0.08152414 | 3.27E-05 | 0.0054028 | 0.16515   |
| 9mo_SIGAF3_ | 0.0295183  | 0.16751698 | 4.02E-05 | 0.0040662 | -0.10661  |
| 9mo_SIGAF3_ | 0.01898256 | 0.10394338 | 3.38E-05 | 0.004741  | 0.03364   |
| 9mo_SIGAF3_ | 0.0186282  | 0.10180511 | 3.36E-05 | 0.0048202 | 0.03364   |
| 9mo_SIGAF3_ | 0.00915823 | 0.04466247 | 3.19E-05 | 0.0070136 | 0.43237   |
| 9mo_SIGAF3_ | 0.14074479 | 0.8386678  | 6.74E-05 | 0.023566  | -0.4978   |
| 9mo_SIGAF3_ | 0.09344329 | 0.5532462  | 6.47E-05 | 0.022469  | 0.0013661 |
| 9mo_SIGAF3_ | 0.01734699 | 0.0940742  | 3.33E-05 | 0.0049935 | 0.085504  |
| 9mo_SIGAF3_ | 0.08759154 | 0.5179362  | 6.41E-05 | 0.020177  | 0.087329  |
| 9mo_SIGAF3_ | 0.05668093 | 0.33141884 | 5.98E-05 | 0.0075425 | 0.068678  |
| 9mo_SIGAF3_ | 0.03057892 | 0.1739169  | 4.11E-05 | 0.0040705 | -0.10475  |
| 9mo_SIGAF3_ | 0.10022978 | 0.5941965  | 6.53E-05 | 0.024687  | -0.11403  |
| 9mo_SIGAF3_ | 0.01890246 | 0.10346004 | 3.38E-05 | 0.004741  | 0.03364   |
| 9mo_SIGAF3_ | 0.00800106 | 0.03768002 | 3.19E-05 | 0.0073923 | 0.48652   |
| 9mo_SIGAF3_ | 0.01922638 | 0.10541463 | 3.40E-05 | 0.0046667 | 0.017998  |
| 9mo_SIGAF3_ | 0.06957349 | 0.4092137  | 6.17E-05 | 0.01192   | 0.11455   |
| 9mo_SIGAF3_ | 0.0328551  | 0.18765154 | 4.32E-05 | 0.0041142 | -0.094772 |
| 9mo_SIGAF3_ | 0.11919575 | 0.70863897 | 6.65E-05 | 0.024704  | -0.36308  |
| 9mo_SIGAF3_ | 0.09373316 | 0.55499536 | 6.48E-05 | 0.022676  | 0.0013661 |
| 9mo_SIGAF3_ | 0.02376715 | 0.13281405 | 3.61E-05 | 0.0042401 | -0.073623 |
| 9mo_SIGAF3_ | 0.07934283 | 0.46816278 | 6.31E-05 | 0.016335  | 0.13613   |
| 9mo_SIGAF3_ | 0.10293551 | 0.61052316 | 6.56E-05 | 0.025216  | -0.16182  |
| 9mo_SIGAF3_ | 0.02108271 | 0.11661585 | 3.47E-05 | 0.0044724 | -0.023601 |
| 9mo_SIGAF3_ | 0.020683   | 0.11420395 | 3.44E-05 | 0.0045325 | -0.01065  |
| 9mo_SIGAF3_ | 0.08674754 | 0.51284343 | 6.40E-05 | 0.019681  | 0.093363  |
| 9mo_SIGAF3_ | 0.07781375 | 0.45893615 | 6.29E-05 | 0.015562  | 0.13662   |
| 9mo_SIGAF3_ | 0.09569862 | 0.5668551  | 6.49E-05 | 0.023263  | -0.035993 |
| 9mo_SIGAF3_ | 0.01552431 | 0.08307596 | 3.28E-05 | 0.0052924 | 0.1442    |
| 9mo_SIGAF3_ | 0.09112549 | 0.5392604  | 6.45E-05 | 0.021597  | 0.036126  |
| 9mo_SIGAF3_ | 0.07769846 | 0.4582405  | 6.29E-05 | 0.015562  | 0.13646   |
| 9mo_SIGAF3_ | 0.06937604 | 0.40802222 | 6.17E-05 | 0.01192   | 0.11218   |
| 9mo_SIGAF3_ | 0.02730762 | 0.15417756 | 3.84E-05 | 0.0040947 | -0.10271  |
| 9mo_SIGAF3_ | 0.020405   | 0.1125265  | 3.44E-05 | 0.0045325 | -0.01065  |
| 9mo_SIGAF3_ | 0.03066943 | 0.174463   | 4.11E-05 | 0.0040705 | -0.10475  |

|             |            |            |          |           |           |
|-------------|------------|------------|----------|-----------|-----------|
| 9mo_SIGAF3_ | 0.0187065  | 0.10227761 | 3.38E-05 | 0.004741  | 0.03364   |
| 9mo_SIGAF3_ | 0.09144051 | 0.54116124 | 6.45E-05 | 0.021822  | 0.036126  |
| 9mo_SIGAF3_ | 0.026003   | 0.14630534 | 3.76E-05 | 0.0041286 | -0.096385 |
| 9mo_SIGAF3_ | 0.01396404 | 0.07366119 | 3.25E-05 | 0.0056405 | 0.20898   |
| 9mo_SIGAF3_ | 0.03461776 | 0.19828764 | 4.48E-05 | 0.0041765 | -0.082901 |
| 9mo_SIGAF3_ | 0.09227597 | 0.5462025  | 6.46E-05 | 0.022042  | 0.019141  |
| 9mo_SIGAF3_ | 0.01767048 | 0.09602617 | 3.34E-05 | 0.0049043 | 0.067421  |
| 9mo_SIGAF3_ | 0.02280624 | 0.12701581 | 3.55E-05 | 0.0043197 | -0.056631 |
| 9mo_SIGAF3_ | 0.1265052  | 0.7527448  | 6.68E-05 | 0.023879  | -0.41707  |
| 9mo_SIGAF3_ | 0.04823306 | 0.28044358 | 5.67E-05 | 0.0056831 | 0.038361  |
| 9mo_SIGAF3_ | 0.12305558 | 0.7319295  | 6.67E-05 | 0.024217  | -0.39346  |
| 9mo_SIGAF3_ | 0.12055391 | 0.7168342  | 6.66E-05 | 0.024561  | -0.37215  |
| 9mo_SIGAF3_ | 0.01710164 | 0.09259373 | 3.33E-05 | 0.0049935 | 0.085504  |
| 9mo_SIGAF3_ | 0.07191055 | 0.42331573 | 6.21E-05 | 0.01308   | 0.12348   |
| 9mo_SIGAF3_ | 0.02138057 | 0.11841317 | 3.47E-05 | 0.0044724 | -0.0356   |
| 9mo_SIGAF3_ | 0.03077525 | 0.17510158 | 4.11E-05 | 0.0040705 | -0.10299  |
| 9mo_SIGAF3_ | 0.11437539 | 0.67955244 | 6.63E-05 | 0.025299  | -0.3171   |
| 9mo_SIGAF3_ | 0.09051315 | 0.5355655  | 6.44E-05 | 0.021369  | 0.044278  |
| 9mo_SIGAF3_ | 0.0166289  | 0.08974118 | 3.31E-05 | 0.0050879 | 0.10435   |
| 9mo_SIGAF3_ | 0.11694808 | 0.6950763  | 6.64E-05 | 0.024986  | -0.34377  |
| 9mo_SIGAF3_ | 0.02221602 | 0.12345439 | 3.52E-05 | 0.0043661 | -0.046619 |
| 9mo_SIGAF3_ | 0.03973405 | 0.22915982 | 5.03E-05 | 0.0045634 | -0.028892 |
| 9mo_SIGAF3_ | 0.01337275 | 0.07009324 | 3.24E-05 | 0.0057681 | 0.23179   |
| 9mo_SIGAF3_ | 0.015112   | 0.08058803 | 3.27E-05 | 0.0054028 | 0.16515   |
| 9mo_SIGAF3_ | 0.02537755 | 0.14253137 | 3.72E-05 | 0.0041509 | -0.092011 |
| 9mo_SIGAF3_ | 0.06159738 | 0.36108515 | 6.07E-05 | 0.0090475 | 0.082025  |
| 9mo_SIGAF3_ | 0.01865614 | 0.1019737  | 3.36E-05 | 0.0048202 | 0.03364   |
| 9mo_SIGAF3_ | 0.05646828 | 0.33013564 | 5.98E-05 | 0.0075425 | 0.068678  |
| 9mo_SIGAF3_ | 0.02136362 | 0.11831094 | 3.47E-05 | 0.0044724 | -0.023601 |
| 9mo_SIGAF3_ | 0.11019068 | 0.6543015  | 6.60E-05 | 0.02558   | -0.26716  |
| 9mo_SIGAF3_ | 0.09183788 | 0.5435591  | 6.46E-05 | 0.022042  | 0.027741  |
| 9mo_SIGAF3_ | 0.10818141 | 0.6421774  | 6.59E-05 | 0.025614  | -0.24573  |
| 9mo_SIGAF3_ | 0.01661063 | 0.08963095 | 3.31E-05 | 0.0050879 | 0.10435   |
| 9mo_SIGAF3_ | 0.04531888 | 0.26285917 | 5.50E-05 | 0.0052335 | 0.021279  |
| 9mo_SIGAF3_ | 0.0299     | 0.16982022 | 4.07E-05 | 0.0040668 | -0.10597  |
| 9mo_SIGAF3_ | 0.06452705 | 0.37876302 | 6.10E-05 | 0.010005  | 0.093303  |
| 9mo_SIGAF3_ | 0.05488036 | 0.32055402 | 5.94E-05 | 0.0071062 | 0.064127  |
| 9mo_SIGAF3_ | 0.11546929 | 0.6861532  | 6.63E-05 | 0.025182  | -0.32814  |
| 9mo_SIGAF3_ | 0.03003945 | 0.17066169 | 4.07E-05 | 0.0040668 | -0.10597  |
| 9mo_SIGAF3_ | 0.02127204 | 0.11775827 | 3.47E-05 | 0.0044724 | -0.023601 |
| 9mo_SIGAF3_ | 0.02103444 | 0.1163246  | 3.47E-05 | 0.0044724 | -0.023601 |
| 9mo_SIGAF3_ | 0.00931852 | 0.04562964 | 3.20E-05 | 0.0068348 | 0.4058    |
| 9mo_SIGAF3_ | 0.09190291 | 0.54395145 | 6.46E-05 | 0.022042  | 0.027741  |

|             |            |            |          |           |            |
|-------------|------------|------------|----------|-----------|------------|
| 9mo_SIGAF3_ | 0.01918446 | 0.10516163 | 3.38E-05 | 0.004741  | 0.017998   |
| 9mo_SIGAF3_ | 0.04744166 | 0.27566823 | 5.61E-05 | 0.0054936 | 0.035328   |
| 9mo_SIGAF3_ | 0.04289711 | 0.24824597 | 5.29E-05 | 0.0048617 | -0.0013165 |
| 9mo_SIGAF3_ | 0.02014749 | 0.11097266 | 3.42E-05 | 0.0045972 | 0.0032259  |
| 9mo_SIGAF3_ | 0.10437149 | 0.61918795 | 6.56E-05 | 0.025367  | -0.18901   |
| 9mo_SIGAF3_ | 0.01717186 | 0.09301743 | 3.33E-05 | 0.0049935 | 0.085504   |
| 9mo_SIGAF3_ | 0.05869613 | 0.3435787  | 6.02E-05 | 0.0081753 | 0.074438   |
| 9mo_SIGAF3_ | 0.0282566  | 0.1599038  | 3.93E-05 | 0.004074  | -0.10603   |
| 9mo_SIGAF3_ | 0.07997369 | 0.47196946 | 6.32E-05 | 0.016594  | 0.13446    |
| 9mo_SIGAF3_ | 0.0943038  | 0.55843866 | 6.48E-05 | 0.022877  | -0.017059  |
| 9mo_SIGAF3_ | 0.0200286  | 0.11025525 | 3.42E-05 | 0.0045972 | 0.0032259  |
| 9mo_SIGAF3_ | 0.10442215 | 0.61949366 | 6.56E-05 | 0.025367  | -0.18901   |
| 9mo_SIGAF3_ | 0.01817466 | 0.09906843 | 3.36E-05 | 0.0048202 | 0.050123   |
| 9mo_SIGAF3_ | 0.02117574 | 0.11717724 | 3.47E-05 | 0.0044724 | -0.023601  |
| 9mo_SIGAF3_ | 0.08257937 | 0.48769236 | 6.35E-05 | 0.017892  | 0.1271     |
| 9mo_SIGAF3_ | 0.09908918 | 0.58731407 | 6.53E-05 | 0.02442   | -0.094455  |
| 9mo_SIGAF3_ | 0.03141257 | 0.1789472  | 4.22E-05 | 0.0040866 | -0.10071   |
| 9mo_SIGAF3_ | 0.1127388  | 0.66967714 | 6.62E-05 | 0.025448  | -0.29951   |
| 9mo_SIGAF3_ | 0.08768105 | 0.5184763  | 6.41E-05 | 0.020177  | 0.080939   |
| 9mo_SIGAF3_ | 0.05039416 | 0.29348385 | 5.78E-05 | 0.0061018 | 0.048868   |
| 9mo_SIGAF3_ | 0.04972098 | 0.28942183 | 5.76E-05 | 0.005992  | 0.046466   |
| 9mo_SIGAF3_ | 0.07801107 | 0.46012685 | 6.29E-05 | 0.015819  | 0.13662    |
| 9mo_SIGAF3_ | 0.02118553 | 0.11723632 | 3.47E-05 | 0.0044724 | -0.023601  |
| 9mo_SIGAF3_ | 0.09797394 | 0.5805846  | 6.52E-05 | 0.024123  | -0.074831  |
| 9mo_SIGAF3_ | 0.04620832 | 0.26822615 | 5.54E-05 | 0.0053171 | 0.025099   |
| 9mo_SIGAF3_ | 0.02784753 | 0.15743542 | 3.88E-05 | 0.0040827 | -0.10472   |
| 9mo_SIGAF3_ | 0.08468408 | 0.5003924  | 6.38E-05 | 0.018923  | 0.1136     |
| 9mo_SIGAF3_ | 0.07639834 | 0.45039544 | 6.27E-05 | 0.015053  | 0.1354     |
| 9mo_SIGAF3_ | 0.08469361 | 0.5004499  | 6.38E-05 | 0.018923  | 0.1136     |
| 9mo_SIGAF3_ | 0.04153327 | 0.24001642 | 5.19E-05 | 0.0047337 | -0.011944  |
| 9mo_SIGAF3_ | 0.12338535 | 0.7339194  | 6.67E-05 | 0.024217  | -0.39346   |
| 9mo_SIGAF3_ | 0.02376037 | 0.13277312 | 3.61E-05 | 0.0042401 | -0.073623  |
| 9mo_SIGAF3_ | 0.01231291 | 0.06369811 | 3.23E-05 | 0.0060411 | 0.2791     |
| 9mo_SIGAF3_ | 0.06212275 | 0.36425528 | 6.07E-05 | 0.0092324 | 0.083692   |
| 9mo_SIGAF3_ | 0.01992276 | 0.10961663 | 3.42E-05 | 0.0045972 | 0.0032259  |
| 9mo_SIGAF3_ | 0.02594207 | 0.14593773 | 3.76E-05 | 0.0041286 | -0.096385  |
| 9mo_SIGAF3_ | 0.13168742 | 0.7840148  | 6.70E-05 | 0.023599  | -0.44949   |
| 9mo_SIGAF3_ | 0.07096338 | 0.41760042 | 6.20E-05 | 0.012608  | 0.11916    |
| 9mo_SIGAF3_ | 0.05441516 | 0.31774694 | 5.92E-05 | 0.0069681 | 0.062513   |
| 9mo_SIGAF3_ | 0.15829267 | 0.9445533  | 6.78E-05 | 0.023701  | -0.52688   |
| 9mo_SIGAF3_ | 0.10491227 | 0.62245107 | 6.57E-05 | 0.025429  | -0.19772   |
| 9mo_SIGAF3_ | 0.02153954 | 0.11937243 | 3.49E-05 | 0.0044169 | -0.0356    |
| 9mo_SIGAF3_ | 0.09489461 | 0.5620036  | 6.49E-05 | 0.023073  | -0.026471  |

|             |            |            |          |           |           |
|-------------|------------|------------|----------|-----------|-----------|
| 9mo_SIGAF3_ | 0.02490983 | 0.13970904 | 3.68E-05 | 0.0041768 | -0.086782 |
| 9mo_SIGAF3_ | 0.05822406 | 0.3407302  | 6.01E-05 | 0.0080116 | 0.073002  |
| 9mo_SIGAF3_ | 0.09735218 | 0.57683283 | 6.51E-05 | 0.023799  | -0.065044 |
| 9mo_SIGAF3_ | 0.08970093 | 0.5306645  | 6.44E-05 | 0.021137  | 0.059815  |
| 9mo_SIGAF3_ | 0.03413793 | 0.19539231 | 4.43E-05 | 0.004153  | -0.082901 |
| 9mo_SIGAF3_ | 0.02109124 | 0.11666731 | 3.47E-05 | 0.0044724 | -0.023601 |
| 9mo_SIGAF3_ | 0.10676977 | 0.6336594  | 6.58E-05 | 0.02556   | -0.22263  |
| 9mo_SIGAF3_ | 0.03231082 | 0.18436731 | 4.27E-05 | 0.004099  | -0.097962 |
| 9mo_SIGAF3_ | 0.0346142  | 0.19826615 | 4.48E-05 | 0.0041765 | -0.082901 |
| 9mo_SIGAF3_ | 0.01711027 | 0.09264582 | 3.33E-05 | 0.0049935 | 0.085504  |
| 9mo_SIGAF3_ | 0.02507062 | 0.14067931 | 3.68E-05 | 0.0041768 | -0.086782 |
| 9mo_SIGAF3_ | 0.0176945  | 0.09617112 | 3.34E-05 | 0.0049043 | 0.067421  |
| 9mo_SIGAF3_ | 0.04776234 | 0.27760324 | 5.64E-05 | 0.0055867 | 0.035328  |
| 9mo_SIGAF3_ | 0.0185489  | 0.10132664 | 3.36E-05 | 0.0048202 | 0.050123  |
| 9mo_SIGAF3_ | 0.04629709 | 0.26876175 | 5.54E-05 | 0.0053171 | 0.028707  |
| 9mo_SIGAF3_ | 0.02241067 | 0.12462888 | 3.52E-05 | 0.0043661 | -0.046619 |
| 9mo_SIGAF3_ | 0.01540639 | 0.08236443 | 3.28E-05 | 0.0052924 | 0.1442    |
| 9mo_SIGAF3_ | 0.02173371 | 0.12054408 | 3.49E-05 | 0.0044169 | -0.0356   |
| 9mo_SIGAF3_ | 0.14284308 | 0.8513291  | 6.75E-05 | 0.023603  | -0.50412  |
| 9mo_SIGAF3_ | 0.03384408 | 0.19361916 | 4.43E-05 | 0.004153  | -0.087207 |
| 9mo_SIGAF3_ | 0.02893639 | 0.16400571 | 3.97E-05 | 0.0040686 | -0.10664  |
| 9mo_SIGAF3_ | 0.08337771 | 0.49250963 | 6.36E-05 | 0.018151  | 0.12117   |
| 9mo_SIGAF3_ | 0.0240701  | 0.13464203 | 3.61E-05 | 0.0042401 | -0.073623 |
| 9mo_SIGAF3_ | 0.02513584 | 0.14107282 | 3.68E-05 | 0.0041768 | -0.086782 |
| 9mo_SIGAF3_ | 0.01382617 | 0.07282924 | 3.25E-05 | 0.0056405 | 0.20898   |
| 9mo_SIGAF3_ | 0.01034458 | 0.05182098 | 3.20E-05 | 0.0066628 | 0.35381   |
| 9mo_SIGAF3_ | 0.01007446 | 0.05019107 | 3.20E-05 | 0.0066628 | 0.37961   |
| 9mo_SIGAF3_ | 0.01796498 | 0.09780321 | 3.34E-05 | 0.0049043 | 0.067421  |
| 9mo_SIGAF3_ | 0.02212885 | 0.12292838 | 3.52E-05 | 0.0043661 | -0.046619 |
| 9mo_SIGAF3_ | 0.1068764  | 0.63430285 | 6.58E-05 | 0.025586  | -0.22263  |
| 9mo_SIGAF3_ | 0.08321997 | 0.49155778 | 6.36E-05 | 0.018151  | 0.12434   |
| 9mo_SIGAF3_ | 0.03012564 | 0.17118174 | 4.07E-05 | 0.0040668 | -0.10597  |
| 9mo_SIGAF3_ | 0.02204612 | 0.12242916 | 3.52E-05 | 0.0043661 | -0.046619 |
| 9mo_SIGAF3_ | 0.10317496 | 0.611968   | 6.56E-05 | 0.025216  | -0.17104  |
| 9mo_SIGAF3_ | 0.0181948  | 0.09918997 | 3.36E-05 | 0.0048202 | 0.050123  |
| 9mo_SIGAF3_ | 0.11321017 | 0.6725214  | 6.62E-05 | 0.025403  | -0.30551  |
| 9mo_SIGAF3_ | 0.02051137 | 0.11316838 | 3.44E-05 | 0.0045325 | -0.01065  |
| 9mo_SIGAF3_ | 0.11073887 | 0.65760934 | 6.61E-05 | 0.025556  | -0.27396  |
| 9mo_SIGAF3_ | 0.02929682 | 0.16618055 | 4.02E-05 | 0.0040662 | -0.10661  |
| 9mo_SIGAF3_ | 0.09180986 | 0.54339    | 6.45E-05 | 0.021822  | 0.027741  |
| 9mo_SIGAF3_ | 0.0530613  | 0.3095776  | 5.89E-05 | 0.0067028 | 0.059084  |
| 9mo_SIGAF3_ | 0.02032637 | 0.11205205 | 3.44E-05 | 0.0045325 | -0.01065  |
| 9mo_SIGAF3_ | 0.03086363 | 0.17563482 | 4.16E-05 | 0.0040771 | -0.10299  |

|             |            |            |          |           |            |
|-------------|------------|------------|----------|-----------|------------|
| 9mo_SIGAF3_ | 0.00673313 | 0.03002919 | 3.18E-05 | 0.0078    | 0.54183    |
| 9mo_SIGAF3_ | 0.01106024 | 0.05613938 | 3.21E-05 | 0.006339  | 0.32844    |
| 9mo_SIGAF3_ | 0.02056625 | 0.11349952 | 3.44E-05 | 0.0045325 | -0.01065   |
| 9mo_SIGAF3_ | 0.0356862  | 0.2047347  | 4.59E-05 | 0.0042319 | -0.073417  |
| 9mo_SIGAF3_ | 0.04309084 | 0.24941498 | 5.33E-05 | 0.0049301 | 0.0036923  |
| 9mo_SIGAF3_ | 0.01460082 | 0.07750357 | 3.26E-05 | 0.0055188 | 0.18676    |
| 9mo_SIGAF3_ | 0.02225269 | 0.12367562 | 3.52E-05 | 0.0043661 | -0.046619  |
| 9mo_SIGAF3_ | 0.02617308 | 0.14733166 | 3.76E-05 | 0.0041286 | -0.096385  |
| 9mo_SIGAF3_ | 0.01586469 | 0.08512983 | 3.28E-05 | 0.0052924 | 0.12392    |
| 9mo_SIGAF3_ | 0.0306066  | 0.1740839  | 4.11E-05 | 0.0040705 | -0.10475   |
| 9mo_SIGAF3_ | 0.03734848 | 0.21476501 | 4.76E-05 | 0.0043355 | -0.057524  |
| 9mo_SIGAF3_ | 0.08072858 | 0.4765245  | 6.32E-05 | 0.016854  | 0.13314    |
| 9mo_SIGAF3_ | 0.0627946  | 0.36830923 | 6.08E-05 | 0.0094206 | 0.085432   |
| 9mo_SIGAF3_ | 0.03375136 | 0.19305967 | 4.43E-05 | 0.004153  | -0.087207  |
| 9mo_SIGAF3_ | 0.09436438 | 0.55880415 | 6.48E-05 | 0.022877  | -0.017059  |
| 9mo_SIGAF3_ | 0.10649782 | 0.6320185  | 6.58E-05 | 0.02556   | -0.22263   |
| 9mo_SIGAF3_ | 0.01894732 | 0.10373075 | 3.38E-05 | 0.004741  | 0.03364    |
| 9mo_SIGAF3_ | 0.07642456 | 0.4505537  | 6.27E-05 | 0.015053  | 0.1354     |
| 9mo_SIGAF3_ | 0.07491043 | 0.44141725 | 6.25E-05 | 0.014299  | 0.13218    |
| 9mo_SIGAF3_ | 0.13358603 | 0.79547125 | 6.71E-05 | 0.023546  | -0.46255   |
| 9mo_SIGAF3_ | 0.02710583 | 0.15295994 | 3.84E-05 | 0.0040947 | -0.10271   |
| 9mo_SIGAF3_ | 0.01405782 | 0.07422707 | 3.25E-05 | 0.0056405 | 0.20898    |
| 9mo_SIGAF3_ | 0.08762278 | 0.5181247  | 6.41E-05 | 0.020177  | 0.087329   |
| 9mo_SIGAF3_ | 0.10634016 | 0.6310671  | 6.58E-05 | 0.02556   | -0.21453   |
| 9mo_SIGAF3_ | 0.03764176 | 0.21653473 | 4.81E-05 | 0.0043756 | -0.05192   |
| 9mo_SIGAF3_ | 0.01699829 | 0.0919701  | 3.31E-05 | 0.0050879 | 0.085504   |
| 9mo_SIGAF3_ | 0.08055726 | 0.47549075 | 6.32E-05 | 0.016854  | 0.13314    |
| 9mo_SIGAF3_ | 0.04258976 | 0.24639139 | 5.29E-05 | 0.0048617 | -0.0013165 |
| 9mo_SIGAF3_ | 0.04615243 | 0.26788887 | 5.54E-05 | 0.0053171 | 0.025099   |
| 9mo_SIGAF3_ | 0.03222856 | 0.18387094 | 4.27E-05 | 0.004099  | -0.097962  |
| 9mo_SIGAF3_ | 0.03039259 | 0.17279254 | 4.11E-05 | 0.0040705 | -0.10475   |
| 9mo_SIGAF3_ | 0.01937162 | 0.10629099 | 3.40E-05 | 0.0046667 | 0.017998   |
| 9mo_SIGAF3_ | 0.01946552 | 0.10685761 | 3.40E-05 | 0.0046667 | 0.017998   |
| 9mo_SIGAF3_ | 0.12736857 | 0.7579545  | 6.69E-05 | 0.023794  | -0.42086   |
| 9mo_SIGAF3_ | 0.02545022 | 0.14296986 | 3.72E-05 | 0.0041509 | -0.092011  |
| 9mo_SIGAF3_ | 0.02514808 | 0.14114667 | 3.68E-05 | 0.0041768 | -0.086782  |
| 9mo_SIGAF3_ | 0.06626486 | 0.38924912 | 6.13E-05 | 0.010616  | 0.10013    |
| 9mo_SIGAF3_ | 0.09781697 | 0.5796374  | 6.51E-05 | 0.023964  | -0.074831  |
| 9mo_SIGAF3_ | 0.02209747 | 0.122739   | 3.52E-05 | 0.0043661 | -0.046619  |
| 9mo_SIGAF3_ | 0.06774399 | 0.39817435 | 6.15E-05 | 0.011255  | 0.10492    |
| 9mo_SIGAF3_ | 0.01678294 | 0.09067068 | 3.31E-05 | 0.0050879 | 0.10435    |
| 9mo_SIGAF3_ | 0.09437176 | 0.5588487  | 6.48E-05 | 0.022877  | -0.017059  |
| 9mo_SIGAF3_ | 0.11508286 | 0.6838214  | 6.63E-05 | 0.025242  | -0.32268   |

|             |            |            |          |           |            |
|-------------|------------|------------|----------|-----------|------------|
| 9mo_SIGAF3_ | 0.02589419 | 0.1456488  | 3.76E-05 | 0.0041286 | -0.096385  |
| 9mo_SIGAF3_ | 0.0253442  | 0.14233008 | 3.72E-05 | 0.0041509 | -0.092011  |
| 9mo_SIGAF3_ | 0.12726232 | 0.7573134  | 6.69E-05 | 0.023834  | -0.42086   |
| 9mo_SIGAF3_ | 0.03350114 | 0.19154985 | 4.37E-05 | 0.0041322 | -0.091175  |
| 9mo_SIGAF3_ | 0.02087019 | 0.11533349 | 3.44E-05 | 0.0045325 | -0.023601  |
| 9mo_SIGAF3_ | 0.01952796 | 0.10723437 | 3.40E-05 | 0.0046667 | 0.017998   |
| 9mo_SIGAF3_ | 0.01155139 | 0.05910301 | 3.22E-05 | 0.0061869 | 0.30353    |
| 9mo_SIGAF3_ | 0.01989387 | 0.10944233 | 3.42E-05 | 0.0045972 | 0.0032259  |
| 9mo_SIGAF3_ | 0.02881238 | 0.16325742 | 3.97E-05 | 0.0040686 | -0.10664   |
| 9mo_SIGAF3_ | 0.04592801 | 0.26653472 | 5.54E-05 | 0.0053171 | 0.025099   |
| 9mo_SIGAF3_ | 0.03379382 | 0.19331588 | 4.43E-05 | 0.004153  | -0.087207  |
| 9mo_SIGAF3_ | 0.02199807 | 0.12213925 | 3.52E-05 | 0.0043661 | -0.046619  |
| 9mo_SIGAF3_ | 0.10000907 | 0.59286475 | 6.53E-05 | 0.024558  | -0.11403   |
| 9mo_SIGAF3_ | 0.10746835 | 0.6378747  | 6.59E-05 | 0.025604  | -0.23052   |
| 9mo_SIGAF3_ | 0.01341698 | 0.07036012 | 3.24E-05 | 0.0057681 | 0.23179    |
| 9mo_SIGAF3_ | 0.01714079 | 0.09282996 | 3.33E-05 | 0.0049935 | 0.085504   |
| 9mo_SIGAF3_ | 0.01544642 | 0.08260596 | 3.28E-05 | 0.0052924 | 0.1442     |
| 9mo_SIGAF3_ | 0.06892613 | 0.40530744 | 6.16E-05 | 0.011695  | 0.11218    |
| 9mo_SIGAF3_ | 0.11314423 | 0.6721235  | 6.62E-05 | 0.025403  | -0.30551   |
| 9mo_SIGAF3_ | 0.01675713 | 0.09051495 | 3.31E-05 | 0.0050879 | 0.10435    |
| 9mo_SIGAF3_ | 0.10869087 | 0.6452515  | 6.59E-05 | 0.025616  | -0.25305   |
| 9mo_SIGAF3_ | 0.03991664 | 0.23026156 | 5.03E-05 | 0.0045634 | -0.028892  |
| 9mo_SIGAF3_ | 0.1405482  | 0.83748156 | 6.74E-05 | 0.023558  | -0.49553   |
| 9mo_SIGAF3_ | 0.02622951 | 0.14767212 | 3.76E-05 | 0.0041286 | -0.096385  |
| 9mo_SIGAF3_ | 0.06710139 | 0.3942968  | 6.14E-05 | 0.011039  | 0.10251    |
| 9mo_SIGAF3_ | 0.11328045 | 0.67294544 | 6.62E-05 | 0.025403  | -0.30551   |
| 9mo_SIGAF3_ | 0.13357975 | 0.7954333  | 6.71E-05 | 0.023546  | -0.46255   |
| 9mo_SIGAF3_ | 0.08017422 | 0.47317943 | 6.32E-05 | 0.016594  | 0.13446    |
| 9mo_SIGAF3_ | 0.01938882 | 0.10639478 | 3.40E-05 | 0.0046667 | 0.017998   |
| 9mo_SIGAF3_ | 0.02236837 | 0.12437367 | 3.52E-05 | 0.0043661 | -0.046619  |
| 9mo_SIGAF3_ | 0.06304099 | 0.36979604 | 6.09E-05 | 0.0096122 | 0.087254   |
| 9mo_SIGAF3_ | 0.09396631 | 0.5564022  | 6.48E-05 | 0.022676  | -0.0077738 |
| 9mo_SIGAF3_ | 0.06844996 | 0.4024342  | 6.16E-05 | 0.011474  | 0.10977    |
| 9mo_SIGAF3_ | 0.0174718  | 0.09482729 | 3.33E-05 | 0.0049935 | 0.085504   |
| 9mo_SIGAF3_ | 0.11270332 | 0.66946304 | 6.62E-05 | 0.025448  | -0.29951   |
| 9mo_SIGAF3_ | 0.10388769 | 0.6162687  | 6.56E-05 | 0.025296  | -0.18011   |
| 9mo_SIGAF3_ | 0.02460798 | 0.13788769 | 3.64E-05 | 0.0042065 | -0.080664  |
| 9mo_SIGAF3_ | 0.01538686 | 0.08224658 | 3.28E-05 | 0.0052924 | 0.1442     |
| 9mo_SIGAF3_ | 0.0203395  | 0.11213124 | 3.44E-05 | 0.0045325 | -0.01065   |
| 9mo_SIGAF3_ | 0.02950112 | 0.16741335 | 4.02E-05 | 0.0040662 | -0.10661   |
| 9mo_SIGAF3_ | 0.0233252  | 0.13014728 | 3.58E-05 | 0.0042778 | -0.065623  |
| 9mo_SIGAF3_ | 0.01956758 | 0.10747344 | 3.40E-05 | 0.0046667 | 0.017998   |
| 9mo_SIGAF3_ | 0.07759517 | 0.45761725 | 6.29E-05 | 0.015562  | 0.13646    |

|             |            |            |          |           |           |
|-------------|------------|------------|----------|-----------|-----------|
| 9mo_SIGAF3_ | 0.07631742 | 0.44990718 | 6.27E-05 | 0.015053  | 0.1354    |
| 9mo_SIGAF3_ | 0.01627004 | 0.0875758  | 3.30E-05 | 0.0051875 | 0.12392   |
| 9mo_SIGAF3_ | 0.0297328  | 0.16881128 | 4.02E-05 | 0.0040662 | -0.10597  |
| 9mo_SIGAF3_ | 0.07235555 | 0.42600086 | 6.21E-05 | 0.01308   | 0.12548   |
| 9mo_SIGAF3_ | 0.06887548 | 0.40500185 | 6.16E-05 | 0.011695  | 0.11218   |
| 9mo_SIGAF3_ | 0.03003936 | 0.17066115 | 4.07E-05 | 0.0040668 | -0.10597  |
| 9mo_SIGAF3_ | 0.03171686 | 0.1807833  | 4.22E-05 | 0.0040866 | -0.10071  |
| 9mo_SIGAF3_ | 0.09923408 | 0.5881884  | 6.53E-05 | 0.02442   | -0.094455 |
| 9mo_SIGAF3_ | 0.04384245 | 0.25395024 | 5.38E-05 | 0.0050014 | 0.008455  |
| 9mo_SIGAF3_ | 0.01395793 | 0.0736243  | 3.25E-05 | 0.0056405 | 0.20898   |
| 9mo_SIGAF3_ | 0.01194363 | 0.06146985 | 3.22E-05 | 0.0061869 | 0.30353   |
| 9mo_SIGAF3_ | 0.02918755 | 0.1655212  | 3.97E-05 | 0.0040686 | -0.10661  |
| 9mo_SIGAF3_ | 0.01579113 | 0.08468597 | 3.28E-05 | 0.0052924 | 0.1442    |
| 9mo_SIGAF3_ | 0.13944364 | 0.83081657 | 6.73E-05 | 0.023544  | -0.49075  |
| 9mo_SIGAF3_ | 0.01463888 | 0.07773322 | 3.26E-05 | 0.0055188 | 0.18676   |
| 9mo_SIGAF3_ | 0.13191608 | 0.78539455 | 6.71E-05 | 0.023582  | -0.45284  |
| 9mo_SIGAF3_ | 0.06533915 | 0.38366327 | 6.12E-05 | 0.01041   | 0.095509  |
| 9mo_SIGAF3_ | 0.01904991 | 0.10434975 | 3.38E-05 | 0.004741  | 0.03364   |
| 9mo_SIGAF3_ | 0.08259051 | 0.4877596  | 6.35E-05 | 0.017892  | 0.1271    |
| 9mo_SIGAF3_ | 0.06201197 | 0.36358678 | 6.07E-05 | 0.0092324 | 0.083692  |
| 9mo_SIGAF3_ | 0.09697575 | 0.5745614  | 6.51E-05 | 0.023799  | -0.055297 |
| 9mo_SIGAF3_ | 0.02228463 | 0.1238684  | 3.52E-05 | 0.0043661 | -0.046619 |
| 9mo_SIGAF3_ | 0.0855617  | 0.505688   | 6.39E-05 | 0.019177  | 0.1043    |
| 9mo_SIGAF3_ | 0.03290829 | 0.18797255 | 4.32E-05 | 0.0041142 | -0.094772 |
| 9mo_SIGAF3_ | 0.09587196 | 0.5679011  | 6.50E-05 | 0.023448  | -0.035993 |
| 9mo_SIGAF3_ | 0.0718139  | 0.42273256 | 6.20E-05 | 0.012843  | 0.12348   |
| 9mo_SIGAF3_ | 0.02712015 | 0.15304635 | 3.84E-05 | 0.0040947 | -0.10271  |
| 9mo_SIGAF3_ | 0.05005767 | 0.29145348 | 5.76E-05 | 0.005992  | 0.046466  |
| 9mo_SIGAF3_ | 0.08765669 | 0.5183294  | 6.41E-05 | 0.020177  | 0.087329  |
| 9mo_SIGAF3_ | 0.07213338 | 0.4246603  | 6.21E-05 | 0.01308   | 0.12348   |
| 9mo_SIGAF3_ | 0.0159315  | 0.08553296 | 3.30E-05 | 0.0051875 | 0.12392   |
| 9mo_SIGAF3_ | 0.10721698 | 0.6363579  | 6.58E-05 | 0.025586  | -0.23052  |
| 9mo_SIGAF3_ | 0.01447752 | 0.07675957 | 3.26E-05 | 0.0055188 | 0.18676   |
| 9mo_SIGAF3_ | 0.13178596 | 0.78460944 | 6.71E-05 | 0.023582  | -0.44949  |
| 9mo_SIGAF3_ | 0.01058513 | 0.0532725  | 3.21E-05 | 0.0064976 | 0.35381   |
| 9mo_SIGAF3_ | 0.09099669 | 0.5384832  | 6.45E-05 | 0.021597  | 0.036126  |
| 9mo_SIGAF3_ | 0.02377327 | 0.13285093 | 3.61E-05 | 0.0042401 | -0.073623 |
| 9mo_SIGAF3_ | 0.07572398 | 0.44632632 | 6.26E-05 | 0.014549  | 0.13453   |
| 9mo_SIGAF3_ | 0.04121971 | 0.2381244  | 5.14E-05 | 0.0046741 | -0.017493 |
| 9mo_SIGAF3_ | 0.10246431 | 0.6076799  | 6.55E-05 | 0.025127  | -0.15246  |
| 9mo_SIGAF3_ | 0.03954632 | 0.22802702 | 4.98E-05 | 0.0045122 | -0.034672 |
| 9mo_SIGAF3_ | 0.01867826 | 0.10210718 | 3.38E-05 | 0.004741  | 0.03364   |
| 9mo_SIGAF3_ | 0.01118986 | 0.0569215  | 3.21E-05 | 0.006339  | 0.32844   |

|             |            |            |          |           |           |
|-------------|------------|------------|----------|-----------|-----------|
| 9mo_SIGAF3_ | 0.01597118 | 0.08577244 | 3.30E-05 | 0.0051875 | 0.12392   |
| 9mo_SIGAF3_ | 0.09572617 | 0.5670213  | 6.50E-05 | 0.023448  | -0.035993 |
| 9mo_SIGAF3_ | 0.01797929 | 0.09788958 | 3.34E-05 | 0.0049043 | 0.067421  |
| 9mo_SIGAF3_ | 0.02228628 | 0.12387834 | 3.52E-05 | 0.0043661 | -0.046619 |
| 9mo_SIGAF3_ | 0.09649362 | 0.5716522  | 6.50E-05 | 0.023626  | -0.045608 |
| 9mo_SIGAF3_ | 0.08386441 | 0.49544644 | 6.37E-05 | 0.01841   | 0.1176    |
| 9mo_SIGAF3_ | 0.05644475 | 0.3299937  | 5.98E-05 | 0.0075425 | 0.068678  |
| 9mo_SIGAF3_ | 0.03300426 | 0.18855162 | 4.32E-05 | 0.0041142 | -0.091175 |
| 9mo_SIGAF3_ | 0.02790145 | 0.15776075 | 3.88E-05 | 0.0040827 | -0.10472  |
| 9mo_SIGAF3_ | 0.14026502 | 0.8357728  | 6.74E-05 | 0.023558  | -0.49553  |
| 9mo_SIGAF3_ | 0.09271286 | 0.54883873 | 6.46E-05 | 0.022258  | 0.010343  |
| 9mo_SIGAF3_ | 0.10487951 | 0.6222535  | 6.57E-05 | 0.025429  | -0.19772  |
| 9mo_SIGAF3_ | 0.01548584 | 0.08284383 | 3.28E-05 | 0.0052924 | 0.1442    |
| 9mo_SIGAF3_ | 0.11083628 | 0.6581971  | 6.61E-05 | 0.025556  | -0.27396  |
| 9mo_SIGAF3_ | 0.01416221 | 0.07485692 | 3.25E-05 | 0.0056405 | 0.20898   |
| 9mo_SIGAF3_ | 0.01128434 | 0.05749162 | 3.21E-05 | 0.006339  | 0.32844   |
| 9mo_SIGAF3_ | 0.0163963  | 0.08833764 | 3.30E-05 | 0.0051875 | 0.12392   |
| 9mo_SIGAF3_ | 0.02185618 | 0.12128308 | 3.49E-05 | 0.0044169 | -0.0356   |
| 9mo_SIGAF3_ | 0.10406696 | 0.61735046 | 6.56E-05 | 0.025367  | -0.18011  |
| 9mo_SIGAF3_ | 0.00999309 | 0.04970005 | 3.20E-05 | 0.0066628 | 0.37961   |
| 9mo_SIGAF3_ | 0.02817085 | 0.15938637 | 3.93E-05 | 0.004074  | -0.10603  |
| 9mo_SIGAF3_ | 0.11570469 | 0.68757355 | 6.63E-05 | 0.025119  | -0.32814  |
| 9mo_SIGAF3_ | 0.06752876 | 0.39687562 | 6.15E-05 | 0.011255  | 0.10492   |
| 9mo_SIGAF3_ | 0.02121403 | 0.11740825 | 3.47E-05 | 0.0044724 | -0.023601 |
| 9mo_SIGAF3_ | 0.06420171 | 0.3767999  | 6.10E-05 | 0.010005  | 0.091185  |
| 9mo_SIGAF3_ | 0.097797   | 0.5795169  | 6.51E-05 | 0.023964  | -0.074831 |
| 9mo_SIGAF3_ | 0.09036788 | 0.5346889  | 6.44E-05 | 0.021369  | 0.05218   |
| 9mo_SIGAF3_ | 0.01879298 | 0.10279943 | 3.38E-05 | 0.004741  | 0.03364   |
| 9mo_SIGAF3_ | 0.0218952  | 0.12151852 | 3.49E-05 | 0.0044169 | -0.0356   |
| 9mo_SIGAF3_ | 0.01840956 | 0.10048583 | 3.36E-05 | 0.0048202 | 0.050123  |
| 9mo_SIGAF3_ | 0.03497269 | 0.2004293  | 4.54E-05 | 0.0042028 | -0.078293 |
| 9mo_SIGAF3_ | 0.02729515 | 0.1541023  | 3.84E-05 | 0.0040947 | -0.10271  |
| 9mo_SIGAF3_ | 0.02360224 | 0.13181897 | 3.58E-05 | 0.0042778 | -0.073623 |
| 9mo_SIGAF3_ | 0.02784223 | 0.15740345 | 3.88E-05 | 0.0040827 | -0.10472  |
| 9mo_SIGAF3_ | 0.01997984 | 0.10996105 | 3.42E-05 | 0.0045972 | 0.0032259 |
| 9mo_SIGAF3_ | 0.02260277 | 0.1257881  | 3.55E-05 | 0.0043197 | -0.056631 |
| 9mo_SIGAF3_ | 0.01725511 | 0.09351981 | 3.33E-05 | 0.0049935 | 0.085504  |
| 9mo_SIGAF3_ | 0.0325214  | 0.185638   | 4.32E-05 | 0.0041142 | -0.094772 |
| 9mo_SIGAF3_ | 0.08593467 | 0.5079385  | 6.39E-05 | 0.01943   | 0.1043    |
| 9mo_SIGAF3_ | 0.0298774  | 0.16968384 | 4.07E-05 | 0.0040668 | -0.10597  |
| 9mo_SIGAF3_ | 0.01737782 | 0.09426022 | 3.33E-05 | 0.0049935 | 0.085504  |
| 9mo_SIGAF3_ | 0.06869166 | 0.4038926  | 6.16E-05 | 0.011695  | 0.10977   |
| 9mo_SIGAF3_ | 0.01652885 | 0.08913745 | 3.31E-05 | 0.0050879 | 0.10435   |



|             |            |            |          |           |           |
|-------------|------------|------------|----------|-----------|-----------|
| 9mo_SIGAF3_ | 0.05741153 | 0.33582732 | 5.99E-05 | 0.0076952 | 0.071569  |
| 9mo_SIGAF3_ | 0.01897875 | 0.1039204  | 3.38E-05 | 0.004741  | 0.03364   |
| 9mo_SIGAF3_ | 0.13613947 | 0.8108789  | 6.72E-05 | 0.023527  | -0.47464  |
| 9mo_SIGAF3_ | 0.02089017 | 0.11545409 | 3.47E-05 | 0.0044724 | -0.023601 |
| 9mo_SIGAF3_ | 0.02579629 | 0.14505808 | 3.72E-05 | 0.0041509 | -0.096385 |
| 9mo_SIGAF3_ | 0.0316817  | 0.18057115 | 4.22E-05 | 0.0040866 | -0.10071  |
| 9mo_SIGAF3_ | 0.02826708 | 0.15996702 | 3.93E-05 | 0.004074  | -0.10603  |
| 9mo_SIGAF3_ | 0.09085061 | 0.5376017  | 6.45E-05 | 0.021597  | 0.044278  |
| 9mo_SIGAF3_ | 0.09279475 | 0.54933286 | 6.46E-05 | 0.022258  | 0.010343  |
| 9mo_SIGAF3_ | 0.08821812 | 0.521717   | 6.42E-05 | 0.020421  | 0.074212  |
| 9mo_SIGAF3_ | 0.05978502 | 0.35014918 | 6.04E-05 | 0.0085136 | 0.077363  |
| 9mo_SIGAF3_ | 0.0898058  | 0.53129727 | 6.44E-05 | 0.021137  | 0.059815  |
| 9mo_SIGAF3_ | 0.09119765 | 0.5396958  | 6.45E-05 | 0.021597  | 0.036126  |
| 9mo_SIGAF3_ | 0.01951904 | 0.10718051 | 3.40E-05 | 0.0046667 | 0.017998  |
| 9mo_SIGAF3_ | 0.03004574 | 0.17069963 | 4.07E-05 | 0.0040668 | -0.10597  |
| 9mo_SIGAF3_ | 0.08055002 | 0.47544706 | 6.32E-05 | 0.016854  | 0.13314   |
| 9mo_SIGAF3_ | 0.00856963 | 0.04111078 | 3.19E-05 | 0.0071994 | 0.45929   |
| 9mo_SIGAF3_ | 0.11057238 | 0.65660477 | 6.60E-05 | 0.02558   | -0.27396  |
| 9mo_SIGAF3_ | 0.07126088 | 0.41939557 | 6.20E-05 | 0.012608  | 0.12136   |
| 9mo_SIGAF3_ | 0.02320897 | 0.1294459  | 3.58E-05 | 0.0042778 | -0.065623 |
| 9mo_SIGAF3_ | 0.03137162 | 0.17870009 | 4.16E-05 | 0.0040771 | -0.10071  |
| 9mo_SIGAF3_ | 0.09777577 | 0.5793888  | 6.51E-05 | 0.023964  | -0.074831 |
| 9mo_SIGAF3_ | 0.1150169  | 0.6834234  | 6.63E-05 | 0.025242  | -0.32268  |
| 9mo_SIGAF3_ | 0.0839454  | 0.4959351  | 6.37E-05 | 0.01841   | 0.1176    |
| 9mo_SIGAF3_ | 0.02469073 | 0.13838702 | 3.64E-05 | 0.0042065 | -0.086782 |
| 9mo_SIGAF3_ | 0.07075886 | 0.4163663  | 6.19E-05 | 0.012376  | 0.11916   |
| 9mo_SIGAF3_ | 0.02352928 | 0.13137871 | 3.58E-05 | 0.0042778 | -0.065623 |
| 9mo_SIGAF3_ | 0.07724936 | 0.4555306  | 6.28E-05 | 0.015307  | 0.13646   |
| 9mo_SIGAF3_ | 0.00773811 | 0.03609333 | 3.19E-05 | 0.0073923 | 0.48652   |
| 9mo_SIGAF3_ | 0.01289341 | 0.06720089 | 3.23E-05 | 0.0059016 | 0.25518   |
| 9mo_SIGAF3_ | 0.05477667 | 0.31992832 | 5.94E-05 | 0.0071062 | 0.064127  |
| 9mo_SIGAF3_ | 0.02047567 | 0.11295295 | 3.44E-05 | 0.0045325 | -0.01065  |
| 9mo_SIGAF3_ | 0.01488621 | 0.07922561 | 3.27E-05 | 0.0054028 | 0.16515   |
| 9mo_SIGAF3_ | 0.09121703 | 0.53981274 | 6.45E-05 | 0.021597  | 0.036126  |
| 9mo_SIGAF3_ | 0.08895328 | 0.5261531  | 6.42E-05 | 0.020663  | 0.067165  |
| 9mo_SIGAF3_ | 0.1474386  | 0.8790589  | 6.76E-05 | 0.023673  | -0.51834  |
| 9mo_SIGAF3_ | 0.03649135 | 0.20959303 | 4.70E-05 | 0.0042982 | -0.062998 |
| 9mo_SIGAF3_ | 0.02322645 | 0.1295514  | 3.58E-05 | 0.0042778 | -0.065623 |
| 9mo_SIGAF3_ | 0.02217822 | 0.12322629 | 3.52E-05 | 0.0043661 | -0.046619 |
| 9mo_SIGAF3_ | 0.09225064 | 0.54604965 | 6.46E-05 | 0.022042  | 0.019141  |
| 9mo_SIGAF3_ | 0.03754914 | 0.21597585 | 4.81E-05 | 0.0043756 | -0.05192  |
| 9mo_SIGAF3_ | 0.01632406 | 0.08790176 | 3.30E-05 | 0.0051875 | 0.12392   |
| 9mo_SIGAF3_ | 0.09297735 | 0.55043465 | 6.47E-05 | 0.022469  | 0.010343  |

|             |            |            |          |           |           |
|-------------|------------|------------|----------|-----------|-----------|
| 9mo_SIGAF3_ | 0.06354116 | 0.37281406 | 6.09E-05 | 0.0096122 | 0.089169  |
| 9mo_SIGAF3_ | 0.01463401 | 0.07770384 | 3.26E-05 | 0.0055188 | 0.18676   |
| 9mo_SIGAF3_ | 0.01350696 | 0.07090309 | 3.24E-05 | 0.0057681 | 0.23179   |
| 9mo_SIGAF3_ | 0.04917625 | 0.28613487 | 5.73E-05 | 0.0058857 | 0.04392   |
| 9mo_SIGAF3_ | 0.02663962 | 0.15014675 | 3.80E-05 | 0.0041099 | -0.099939 |
| 9mo_SIGAF3_ | 0.06339611 | 0.37193882 | 6.09E-05 | 0.0096122 | 0.089169  |
| 9mo_SIGAF3_ | 0.04457032 | 0.25834227 | 5.42E-05 | 0.0050757 | 0.017239  |
| 9mo_SIGAF3_ | 0.02003221 | 0.11027703 | 3.42E-05 | 0.0045972 | 0.0032259 |
| 9mo_SIGAF3_ | 0.1079319  | 0.64067185 | 6.59E-05 | 0.025614  | -0.23822  |
| 9mo_SIGAF3_ | 0.03415998 | 0.19552532 | 4.43E-05 | 0.004153  | -0.082901 |
| 9mo_SIGAF3_ | 0.01868645 | 0.10215659 | 3.38E-05 | 0.004741  | 0.03364   |
| 9mo_SIGAF3_ | 0.02328662 | 0.12991445 | 3.58E-05 | 0.0042778 | -0.065623 |
| 9mo_SIGAF3_ | 0.1095404  | 0.65037763 | 6.60E-05 | 0.025611  | -0.2602   |
| 9mo_SIGAF3_ | 0.08304805 | 0.4905204  | 6.36E-05 | 0.018151  | 0.12434   |
| 9mo_SIGAF3_ | 0.04233238 | 0.24483833 | 5.24E-05 | 0.0047963 | -0.00654  |
| 9mo_SIGAF3_ | 0.01621996 | 0.08727361 | 3.30E-05 | 0.0051875 | 0.12392   |
| 9mo_SIGAF3_ | 0.03219951 | 0.18369567 | 4.27E-05 | 0.004099  | -0.097962 |
| 9mo_SIGAF3_ | 0.11719415 | 0.6965611  | 6.64E-05 | 0.024986  | -0.34377  |
| 9mo_SIGAF3_ | 0.01136232 | 0.05796215 | 3.21E-05 | 0.006339  | 0.32844   |
| 9mo_SIGAF3_ | 0.01007881 | 0.05021733 | 3.20E-05 | 0.0066628 | 0.37961   |
| 9mo_SIGAF3_ | 0.03511057 | 0.20126128 | 4.54E-05 | 0.0042028 | -0.078293 |
| 9mo_SIGAF3_ | 0.02393594 | 0.13383251 | 3.61E-05 | 0.0042401 | -0.073623 |
| 9mo_SIGAF3_ | 0.05431034 | 0.31711447 | 5.92E-05 | 0.0069681 | 0.062513  |
| 9mo_SIGAF3_ | 0.0204413  | 0.11274551 | 3.44E-05 | 0.0045325 | -0.01065  |
| 9mo_SIGAF3_ | 0.13177088 | 0.7845184  | 6.71E-05 | 0.023582  | -0.44949  |
| 9mo_SIGAF3_ | 0.02608419 | 0.14679526 | 3.76E-05 | 0.0041286 | -0.096385 |
| 9mo_SIGAF3_ | 0.02139178 | 0.11848085 | 3.47E-05 | 0.0044724 | -0.0356   |
| 9mo_SIGAF3_ | 0.01992446 | 0.10962688 | 3.42E-05 | 0.0045972 | 0.0032259 |
| 9mo_SIGAF3_ | 0.01992036 | 0.10960211 | 3.42E-05 | 0.0045972 | 0.0032259 |
| 9mo_SIGAF3_ | 0.09188301 | 0.54383135 | 6.46E-05 | 0.022042  | 0.027741  |
| 9mo_SIGAF3_ | 0.1598088  | 0.9537018  | 6.78E-05 | 0.023691  | -0.52638  |
| 9mo_SIGAF3_ | 0.12284069 | 0.73063284 | 6.67E-05 | 0.024282  | -0.38934  |
| 9mo_SIGAF3_ | 0.02679539 | 0.15108673 | 3.80E-05 | 0.0041099 | -0.099939 |
| 9mo_SIGAF3_ | 0.01828655 | 0.09974361 | 3.36E-05 | 0.0048202 | 0.050123  |
| 9mo_SIGAF3_ | 0.03168343 | 0.1805816  | 4.22E-05 | 0.0040866 | -0.10071  |
| 9mo_SIGAF3_ | 0.0444423  | 0.25756976 | 5.42E-05 | 0.0050757 | 0.012967  |
| 9mo_SIGAF3_ | 0.08434632 | 0.4983543  | 6.37E-05 | 0.018667  | 0.1136    |
| 9mo_SIGAF3_ | 0.01357162 | 0.07129328 | 3.24E-05 | 0.0057681 | 0.23179   |
| 9mo_SIGAF3_ | 0.03329703 | 0.19031823 | 4.37E-05 | 0.0041322 | -0.091175 |
| 9mo_SIGAF3_ | 0.02170058 | 0.12034416 | 3.49E-05 | 0.0044169 | -0.0356   |
| 9mo_SIGAF3_ | 0.14005888 | 0.8345289  | 6.74E-05 | 0.023558  | -0.49317  |
| 9mo_SIGAF3_ | 0.05272705 | 0.3075607  | 5.87E-05 | 0.0065755 | 0.057248  |
| 9mo_SIGAF3_ | 0.01031972 | 0.05167098 | 3.20E-05 | 0.0066628 | 0.37961   |

|             |            |            |          |           |           |
|-------------|------------|------------|----------|-----------|-----------|
| 9mo_SIGAF3_ | 0.02156922 | 0.11955154 | 3.49E-05 | 0.0044169 | -0.0356   |
| 9mo_SIGAF3_ | 0.02346992 | 0.13102053 | 3.58E-05 | 0.0042778 | -0.065623 |
| 9mo_SIGAF3_ | 0.12367314 | 0.7356559  | 6.67E-05 | 0.024153  | -0.39752  |
| 9mo_SIGAF3_ | 0.02977984 | 0.16909513 | 4.07E-05 | 0.0040668 | -0.10597  |
| 9mo_SIGAF3_ | 0.09860524 | 0.5843939  | 6.52E-05 | 0.024275  | -0.084641 |
| 9mo_SIGAF3_ | 0.08038852 | 0.47447255 | 6.32E-05 | 0.016854  | 0.13446   |
| 9mo_SIGAF3_ | 0.01275913 | 0.06639065 | 3.23E-05 | 0.0059016 | 0.25518   |
| 9mo_SIGAF3_ | 0.05658341 | 0.33083037 | 5.98E-05 | 0.0075425 | 0.068678  |
| 9mo_SIGAF3_ | 0.03477369 | 0.19922853 | 4.54E-05 | 0.0042028 | -0.078293 |
| 9mo_SIGAF3_ | 0.12341074 | 0.73407257 | 6.67E-05 | 0.024217  | -0.39346  |
| 9mo_SIGAF3_ | 0.0946875  | 0.5607539  | 6.49E-05 | 0.023073  | -0.017059 |
| 9mo_SIGAF3_ | 0.00721661 | 0.03294656 | 3.19E-05 | 0.0075925 | 0.51404   |
| 9mo_SIGAF3_ | 0.06497394 | 0.38145956 | 6.11E-05 | 0.010206  | 0.093303  |
| 9mo_SIGAF3_ | 0.01136916 | 0.05800339 | 3.21E-05 | 0.006339  | 0.32844   |
| 9mo_SIGAF3_ | 0.04609809 | 0.26756096 | 5.54E-05 | 0.0053171 | 0.025099  |
| 9mo_SIGAF3_ | 0.03709849 | 0.2132566  | 4.76E-05 | 0.0043355 | -0.057524 |
| 9mo_SIGAF3_ | 0.01844302 | 0.10068771 | 3.36E-05 | 0.0048202 | 0.050123  |
| 9mo_SIGAF3_ | 0.1293558  | 0.7699456  | 6.70E-05 | 0.023692  | -0.43556  |
| 9mo_SIGAF3_ | 0.08411128 | 0.49693605 | 6.37E-05 | 0.018667  | 0.1176    |
| 9mo_SIGAF3_ | 0.03862567 | 0.22247168 | 4.92E-05 | 0.0044639 | -0.040459 |
| 9mo_SIGAF3_ | 0.02434544 | 0.13630347 | 3.64E-05 | 0.0042065 | -0.080664 |
| 9mo_SIGAF3_ | 0.08072325 | 0.47649235 | 6.32E-05 | 0.016854  | 0.13314   |
| 9mo_SIGAF3_ | 0.02969679 | 0.16859405 | 4.02E-05 | 0.0040662 | -0.10597  |
| 9mo_SIGAF3_ | 0.01864762 | 0.10192233 | 3.36E-05 | 0.0048202 | 0.03364   |
| 9mo_SIGAF3_ | 0.02879329 | 0.16314223 | 3.97E-05 | 0.0040686 | -0.10664  |
| 9mo_SIGAF3_ | 0.11760663 | 0.69905007 | 6.64E-05 | 0.024917  | -0.34876  |
| 9mo_SIGAF3_ | 0.04657851 | 0.2704599  | 5.57E-05 | 0.0054037 | 0.028707  |
| 9mo_SIGAF3_ | 0.05451168 | 0.31832936 | 5.92E-05 | 0.0069681 | 0.062513  |
| 9mo_SIGAF3_ | 0.04048992 | 0.2337208  | 5.09E-05 | 0.0046173 | -0.023154 |
| 9mo_SIGAF3_ | 0.08274595 | 0.4886975  | 6.35E-05 | 0.017892  | 0.12434   |
| 9mo_SIGAF3_ | 0.02102219 | 0.11625072 | 3.47E-05 | 0.0044724 | -0.023601 |
| 9mo_SIGAF3_ | 0.03582475 | 0.20557068 | 4.59E-05 | 0.0042319 | -0.068307 |
| 9mo_SIGAF3_ | 0.02469928 | 0.13843858 | 3.64E-05 | 0.0042065 | -0.086782 |
| 9mo_SIGAF3_ | 0.10123999 | 0.6002922  | 6.54E-05 | 0.024809  | -0.13341  |
| 9mo_SIGAF3_ | 0.02917528 | 0.1654472  | 3.97E-05 | 0.0040686 | -0.10661  |
| 9mo_SIGAF3_ | 0.04492996 | 0.26051235 | 5.46E-05 | 0.0051531 | 0.017239  |
| 9mo_SIGAF3_ | 0.0212018  | 0.11733448 | 3.47E-05 | 0.0044724 | -0.023601 |
| 9mo_SIGAF3_ | 0.07519575 | 0.4431389  | 6.25E-05 | 0.014299  | 0.13345   |
| 9mo_SIGAF3_ | 0.02273383 | 0.12657887 | 3.55E-05 | 0.0043197 | -0.056631 |
| 9mo_SIGAF3_ | 0.02965653 | 0.16835113 | 4.02E-05 | 0.0040662 | -0.10597  |
| 9mo_SIGAF3_ | 0.03522513 | 0.20195253 | 4.54E-05 | 0.0042028 | -0.073417 |
| 9mo_SIGAF3_ | 0.01142087 | 0.05831545 | 3.21E-05 | 0.006339  | 0.32844   |
| 9mo_SIGAF3_ | 0.08259558 | 0.48779017 | 6.35E-05 | 0.017892  | 0.1271    |

|             |            |            |          |           |           |
|-------------|------------|------------|----------|-----------|-----------|
| 9mo_SIGAF3_ | 0.02297721 | 0.12804747 | 3.55E-05 | 0.0043197 | -0.056631 |
| 9mo_SIGAF3_ | 0.02106296 | 0.11649668 | 3.47E-05 | 0.0044724 | -0.023601 |
| 9mo_SIGAF3_ | 0.02537487 | 0.14251515 | 3.72E-05 | 0.0041509 | -0.092011 |
| 9mo_SIGAF3_ | 0.12460037 | 0.74125093 | 6.68E-05 | 0.024034  | -0.40152  |
| 9mo_SIGAF3_ | 0.04813077 | 0.27982637 | 5.67E-05 | 0.0056831 | 0.038361  |
| 9mo_SIGAF3_ | 0.12925182 | 0.7693182  | 6.70E-05 | 0.023692  | -0.43556  |
| 9mo_SIGAF3_ | 0.08654026 | 0.5115927  | 6.40E-05 | 0.019681  | 0.099025  |
| 9mo_SIGAF3_ | 0.13591847 | 0.80954534 | 6.72E-05 | 0.023527  | -0.47464  |
| 9mo_SIGAF3_ | 0.0123373  | 0.06384528 | 3.23E-05 | 0.0060411 | 0.2791    |
| 9mo_SIGAF3_ | 0.02348135 | 0.13108948 | 3.58E-05 | 0.0042778 | -0.065623 |
| 9mo_SIGAF3_ | 0.1009559  | 0.598578   | 6.54E-05 | 0.024809  | -0.13341  |
| 9mo_SIGAF3_ | 0.03438513 | 0.19688393 | 4.48E-05 | 0.0041765 | -0.082901 |
| 9mo_SIGAF3_ | 0.02174899 | 0.12063627 | 3.49E-05 | 0.0044169 | -0.0356   |
| 9mo_SIGAF3_ | 0.01175668 | 0.06034173 | 3.22E-05 | 0.0061869 | 0.30353   |
| 9mo_SIGAF3_ | 0.01612482 | 0.08669953 | 3.30E-05 | 0.0051875 | 0.12392   |
| 9mo_SIGAF3_ | 0.07472548 | 0.44030127 | 6.25E-05 | 0.014299  | 0.13218   |
| 9mo_SIGAF3_ | 0.01103249 | 0.05597189 | 3.21E-05 | 0.006339  | 0.32844   |
| 9mo_SIGAF3_ | 0.03903116 | 0.2249185  | 4.92E-05 | 0.0044639 | -0.040459 |
| 9mo_SIGAF3_ | 0.08122078 | 0.4794945  | 6.33E-05 | 0.017113  | 0.13148   |
| 9mo_SIGAF3_ | 0.02595593 | 0.14602129 | 3.76E-05 | 0.0041286 | -0.096385 |
| 9mo_SIGAF3_ | 0.030147   | 0.17131065 | 4.07E-05 | 0.0040668 | -0.10597  |
| 9mo_SIGAF3_ | 0.0873228  | 0.5163146  | 6.41E-05 | 0.01993   | 0.087329  |
| 9mo_SIGAF3_ | 0.09719753 | 0.57589966 | 6.51E-05 | 0.023799  | -0.065044 |
| 9mo_SIGAF3_ | 0.04105223 | 0.23711382 | 5.14E-05 | 0.0046741 | -0.017493 |
| 9mo_SIGAF3_ | 0.12820628 | 0.7630093  | 6.69E-05 | 0.023757  | -0.4283   |
| 9mo_SIGAF3_ | 0.0206428  | 0.11396144 | 3.44E-05 | 0.0045325 | -0.01065  |
| 9mo_SIGAF3_ | 0.0952519  | 0.5641596  | 6.49E-05 | 0.023263  | -0.026471 |
| 9mo_SIGAF3_ | 0.0275561  | 0.15567693 | 3.88E-05 | 0.0040827 | -0.10472  |
| 9mo_SIGAF3_ | 0.09451528 | 0.55971473 | 6.48E-05 | 0.022877  | -0.017059 |
| 9mo_SIGAF3_ | 0.09335397 | 0.55270725 | 6.47E-05 | 0.022469  | 0.0013661 |
| 9mo_SIGAF3_ | 0.02080165 | 0.1149199  | 3.44E-05 | 0.0045325 | -0.01065  |
| 9mo_SIGAF3_ | 0.09245285 | 0.5472698  | 6.46E-05 | 0.022258  | 0.019141  |
| 9mo_SIGAF3_ | 0.01984836 | 0.10916766 | 3.42E-05 | 0.0045972 | 0.0032259 |
| 9mo_SIGAF3_ | 0.02498178 | 0.14014325 | 3.68E-05 | 0.0041768 | -0.086782 |
| 9mo_SIGAF3_ | 0.01412168 | 0.07461238 | 3.25E-05 | 0.0056405 | 0.20898   |
| 9mo_SIGAF3_ | 0.0176176  | 0.09570709 | 3.34E-05 | 0.0049043 | 0.067421  |
| 9mo_SIGAF3_ | 0.01427471 | 0.07553577 | 3.26E-05 | 0.0055188 | 0.18676   |
| 9mo_SIGAF3_ | 0.01201598 | 0.06190636 | 3.23E-05 | 0.0060411 | 0.2791    |
| 9mo_SIGAF3_ | 0.01908358 | 0.10455291 | 3.38E-05 | 0.004741  | 0.03364   |
| 9mo_SIGAF3_ | 0.01182477 | 0.06075258 | 3.22E-05 | 0.0061869 | 0.30353   |
| 9mo_SIGAF3_ | 0.02747333 | 0.15517747 | 3.84E-05 | 0.0040947 | -0.10472  |
| 9mo_SIGAF3_ | 0.13820629 | 0.82335025 | 6.73E-05 | 0.023534  | -0.48567  |
| 9mo_SIGAF3_ | 0.02407841 | 0.1346922  | 3.61E-05 | 0.0042401 | -0.073623 |

|             |            |            |          |           |           |
|-------------|------------|------------|----------|-----------|-----------|
| 9mo_SIGAF3_ | 0.07724121 | 0.45548138 | 6.28E-05 | 0.015307  | 0.13646   |
| 9mo_SIGAF3_ | 0.01141508 | 0.05828047 | 3.21E-05 | 0.006339  | 0.32844   |
| 9mo_SIGAF3_ | 0.14141987 | 0.8427413  | 6.74E-05 | 0.023575  | -0.49999  |
| 9mo_SIGAF3_ | 0.04159514 | 0.2403898  | 5.19E-05 | 0.0047337 | -0.011944 |
| 9mo_SIGAF3_ | 0.01468577 | 0.07801615 | 3.26E-05 | 0.0055188 | 0.18676   |
| 9mo_SIGAF3_ | 0.02525901 | 0.1418161  | 3.68E-05 | 0.0041768 | -0.092011 |
| 9mo_SIGAF3_ | 0.01462832 | 0.07766948 | 3.26E-05 | 0.0055188 | 0.18676   |
| 9mo_SIGAF3_ | 0.04686484 | 0.27218762 | 5.57E-05 | 0.0054037 | 0.032113  |
| 9mo_SIGAF3_ | 0.01229984 | 0.06361926 | 3.23E-05 | 0.0060411 | 0.2791    |
| 9mo_SIGAF3_ | 0.01912289 | 0.10479015 | 3.38E-05 | 0.004741  | 0.03364   |
| 9mo_SIGAF3_ | 0.09047968 | 0.53536355 | 6.44E-05 | 0.021369  | 0.044278  |
| 9mo_SIGAF3_ | 0.01423726 | 0.07530979 | 3.26E-05 | 0.0055188 | 0.18676   |
| 9mo_SIGAF3_ | 0.13616863 | 0.8110548  | 6.72E-05 | 0.023527  | -0.47464  |
| 9mo_SIGAF3_ | 0.01761848 | 0.09571239 | 3.34E-05 | 0.0049043 | 0.067421  |
| 9mo_SIGAF3_ | 0.05247946 | 0.30606675 | 5.87E-05 | 0.0065755 | 0.057248  |
| 9mo_SIGAF3_ | 0.02575142 | 0.14478728 | 3.72E-05 | 0.0041509 | -0.092011 |
| 9mo_SIGAF3_ | 0.03072679 | 0.17480913 | 4.11E-05 | 0.0040705 | -0.10475  |
| 9mo_SIGAF3_ | 0.11834388 | 0.70349866 | 6.65E-05 | 0.024847  | -0.35363  |
| 9mo_SIGAF3_ | 0.02427712 | 0.13589121 | 3.64E-05 | 0.0042065 | -0.080664 |
| 9mo_SIGAF3_ | 0.0294421  | 0.16705722 | 4.02E-05 | 0.0040662 | -0.10661  |
| 9mo_SIGAF3_ | 0.08300037 | 0.4902327  | 6.36E-05 | 0.018151  | 0.12434   |
| 9mo_SIGAF3_ | 0.05889495 | 0.3447784  | 6.02E-05 | 0.0081753 | 0.074438  |
| 9mo_SIGAF3_ | 0.01561367 | 0.08361516 | 3.28E-05 | 0.0052924 | 0.1442    |
| 9mo_SIGAF3_ | 0.07928785 | 0.46783102 | 6.31E-05 | 0.016335  | 0.13613   |
| 9mo_SIGAF3_ | 0.0455802  | 0.26443598 | 5.50E-05 | 0.0052335 | 0.021279  |
| 9mo_SIGAF3_ | 0.03739397 | 0.21503954 | 4.76E-05 | 0.0043355 | -0.05192  |
| 9mo_SIGAF3_ | 0.00793021 | 0.03725249 | 3.19E-05 | 0.0073923 | 0.48652   |
| 9mo_SIGAF3_ | 0.11898791 | 0.7073848  | 6.65E-05 | 0.024704  | -0.3584   |
| 9mo_SIGAF3_ | 0.0226593  | 0.12612918 | 3.55E-05 | 0.0043197 | -0.056631 |
| 9mo_SIGAF3_ | 0.02488192 | 0.13954067 | 3.68E-05 | 0.0041768 | -0.086782 |
| 9mo_SIGAF3_ | 0.02011987 | 0.11080603 | 3.42E-05 | 0.0045972 | 0.0032259 |
| 9mo_SIGAF3_ | 0.03832463 | 0.22065523 | 4.87E-05 | 0.0044183 | -0.04622  |
| 9mo_SIGAF3_ | 0.14548485 | 0.86726975 | 6.75E-05 | 0.023641  | -0.51294  |
| 9mo_SIGAF3_ | 0.02154694 | 0.11941707 | 3.49E-05 | 0.0044169 | -0.0356   |
| 9mo_SIGAF3_ | 0.05481751 | 0.32017478 | 5.94E-05 | 0.0071062 | 0.064127  |
| 9mo_SIGAF3_ | 0.13194026 | 0.78554046 | 6.71E-05 | 0.023582  | -0.45284  |
| 9mo_SIGAF3_ | 0.01764911 | 0.09589721 | 3.34E-05 | 0.0049043 | 0.067421  |
| 9mo_SIGAF3_ | 0.04990991 | 0.29056188 | 5.76E-05 | 0.005992  | 0.046466  |
| 9mo_SIGAF3_ | 0.02201348 | 0.12223221 | 3.52E-05 | 0.0043661 | -0.046619 |
| 9mo_SIGAF3_ | 0.02907833 | 0.1648622  | 3.97E-05 | 0.0040686 | -0.10664  |
| 9mo_SIGAF3_ | 0.00724266 | 0.03310375 | 3.19E-05 | 0.0075925 | 0.51404   |
| 9mo_SIGAF3_ | 0.01528591 | 0.08163746 | 3.27E-05 | 0.0054028 | 0.16515   |
| 9mo_SIGAF3_ | 0.04710724 | 0.27365032 | 5.61E-05 | 0.0054936 | 0.032113  |

|             |            |            |          |           |            |
|-------------|------------|------------|----------|-----------|------------|
| 9mo_SIGAF3_ | 0.09428261 | 0.55831075 | 6.48E-05 | 0.022877  | -0.0077738 |
| 9mo_SIGAF3_ | 0.05265914 | 0.30715096 | 5.87E-05 | 0.0065755 | 0.057248   |
| 9mo_SIGAF3_ | 0.12168542 | 0.7236618  | 6.66E-05 | 0.024419  | -0.38089   |
| 9mo_SIGAF3_ | 0.03388657 | 0.19387554 | 4.43E-05 | 0.004153  | -0.087207  |
| 9mo_SIGAF3_ | 0.09140597 | 0.5409528  | 6.45E-05 | 0.021822  | 0.036126   |
| 9mo_SIGAF3_ | 0.03095891 | 0.17620978 | 4.16E-05 | 0.0040771 | -0.10299   |
| 9mo_SIGAF3_ | 0.01234896 | 0.06391559 | 3.23E-05 | 0.0060411 | 0.2791     |
| 9mo_SIGAF3_ | 0.02892274 | 0.16392335 | 3.97E-05 | 0.0040686 | -0.10664   |
| 9mo_SIGAF3_ | 0.03052618 | 0.17359863 | 4.11E-05 | 0.0040705 | -0.10475   |
| 9mo_SIGAF3_ | 0.0442039  | 0.25613126 | 5.42E-05 | 0.0050757 | 0.012967   |
| 9mo_SIGAF3_ | 0.04965271 | 0.2890099  | 5.73E-05 | 0.0058857 | 0.046466   |
| 9mo_SIGAF3_ | 0.01753796 | 0.0952265  | 3.33E-05 | 0.0049935 | 0.067421   |
| 9mo_SIGAF3_ | 0.11519788 | 0.6845154  | 6.63E-05 | 0.025182  | -0.32268   |
| 9mo_SIGAF3_ | 0.14234042 | 0.848296   | 6.74E-05 | 0.023593  | -0.5021    |
| 9mo_SIGAF3_ | 0.07208718 | 0.4243815  | 6.21E-05 | 0.01308   | 0.12348    |
| 9mo_SIGAF3_ | 0.10445622 | 0.61969924 | 6.56E-05 | 0.025367  | -0.18901   |
| 9mo_SIGAF3_ | 0.01516357 | 0.08089922 | 3.27E-05 | 0.0054028 | 0.16515    |
| 9mo_SIGAF3_ | 0.02315043 | 0.1290927  | 3.58E-05 | 0.0042778 | -0.065623  |
| 9mo_SIGAF3_ | 0.10203388 | 0.60508263 | 6.55E-05 | 0.025029  | -0.15246   |
| 9mo_SIGAF3_ | 0.12352543 | 0.7347646  | 6.67E-05 | 0.024153  | -0.39346   |
| 9mo_SIGAF3_ | 0.01121414 | 0.05706802 | 3.21E-05 | 0.006339  | 0.32844    |
| 9mo_SIGAF3_ | 0.04363869 | 0.25272074 | 5.38E-05 | 0.0050014 | 0.008455   |
| 9mo_SIGAF3_ | 0.10100017 | 0.5988451  | 6.54E-05 | 0.024809  | -0.13341   |
| 9mo_SIGAF3_ | 0.00618211 | 0.02670431 | 3.18E-05 | 0.008015  | 0.56984    |
| 9mo_SIGAF3_ | 0.01932417 | 0.10600468 | 3.40E-05 | 0.0046667 | 0.017998   |
| 9mo_SIGAF3_ | 0.01321057 | 0.06911466 | 3.24E-05 | 0.0057681 | 0.23179    |
| 9mo_SIGAF3_ | 0.0374723  | 0.2155122  | 4.76E-05 | 0.0043355 | -0.05192   |
| 9mo_SIGAF3_ | 0.02513857 | 0.14108928 | 3.68E-05 | 0.0041768 | -0.086782  |
| 9mo_SIGAF3_ | 0.03009333 | 0.17098677 | 4.07E-05 | 0.0040668 | -0.10597   |
| 9mo_SIGAF3_ | 0.02069637 | 0.11428468 | 3.44E-05 | 0.0045325 | -0.01065   |
| 9mo_SIGAF3_ | 0.01842023 | 0.10055023 | 3.36E-05 | 0.0048202 | 0.050123   |
| 9mo_SIGAF3_ | 0.08776183 | 0.51896375 | 6.41E-05 | 0.020177  | 0.080939   |
| 9mo_SIGAF3_ | 0.03253062 | 0.18569365 | 4.32E-05 | 0.0041142 | -0.094772  |
| 9mo_SIGAF3_ | 0.0684615  | 0.40250385 | 6.16E-05 | 0.011474  | 0.10977    |
| 9mo_SIGAF3_ | 0.05533509 | 0.32329792 | 5.95E-05 | 0.007248  | 0.065685   |
| 9mo_SIGAF3_ | 0.04683105 | 0.27198374 | 5.57E-05 | 0.0054037 | 0.032113   |
| 9mo_SIGAF3_ | 0.03876291 | 0.22329983 | 4.92E-05 | 0.0044639 | -0.040459  |
| 9mo_SIGAF3_ | 0.01959695 | 0.10765066 | 3.40E-05 | 0.0046667 | 0.017998   |
| 9mo_SIGAF3_ | 0.08745541 | 0.5171148  | 6.41E-05 | 0.020177  | 0.087329   |
| 9mo_SIGAF3_ | 0.08729618 | 0.516154   | 6.41E-05 | 0.01993   | 0.087329   |
| 9mo_SIGAF3_ | 0.09520578 | 0.5638812  | 6.49E-05 | 0.023263  | -0.026471  |
| 9mo_SIGAF3_ | 0.01996246 | 0.10985616 | 3.42E-05 | 0.0045972 | 0.0032259  |
| 9mo_SIGAF3_ | 0.0317772  | 0.18114741 | 4.22E-05 | 0.0040866 | -0.10071   |

|             |            |            |          |           |           |
|-------------|------------|------------|----------|-----------|-----------|
| 9mo_SIGAF3_ | 0.00935992 | 0.04587946 | 3.20E-05 | 0.0068348 | 0.4058    |
| 9mo_SIGAF3_ | 0.1120489  | 0.6655142  | 6.61E-05 | 0.025489  | -0.29336  |
| 9mo_SIGAF3_ | 0.05906412 | 0.3457992  | 6.02E-05 | 0.0081753 | 0.075889  |
| 9mo_SIGAF3_ | 0.11246818 | 0.66804415 | 6.62E-05 | 0.025448  | -0.29336  |
| 9mo_SIGAF3_ | 0.12157793 | 0.7230132  | 6.66E-05 | 0.024419  | -0.38089  |
| 9mo_SIGAF3_ | 0.10117283 | 0.59988695 | 6.54E-05 | 0.024809  | -0.13341  |
| 9mo_SIGAF3_ | 0.0319395  | 0.18212673 | 4.22E-05 | 0.0040866 | -0.097962 |
| 9mo_SIGAF3_ | 0.12098963 | 0.71946335 | 6.66E-05 | 0.02449   | -0.37656  |
| 9mo_SIGAF3_ | 0.0200397  | 0.11032226 | 3.42E-05 | 0.0045972 | 0.0032259 |
| 9mo_SIGAF3_ | 0.07236854 | 0.42607927 | 6.21E-05 | 0.01308   | 0.12548   |
| 9mo_SIGAF3_ | 0.04311768 | 0.24957691 | 5.33E-05 | 0.0049301 | 0.0036923 |
| 9mo_SIGAF3_ | 0.0928493  | 0.54966205 | 6.46E-05 | 0.022258  | 0.010343  |
| 9mo_SIGAF3_ | 0.07130066 | 0.4196356  | 6.20E-05 | 0.012608  | 0.12136   |
| 9mo_SIGAF3_ | 0.03965254 | 0.22866796 | 4.98E-05 | 0.0045122 | -0.028892 |
| 9mo_SIGAF3_ | 0.02786334 | 0.15753081 | 3.88E-05 | 0.0040827 | -0.10472  |
| 9mo_SIGAF3_ | 0.01187429 | 0.0610514  | 3.22E-05 | 0.0061869 | 0.30353   |
| 9mo_SIGAF3_ | 0.08687399 | 0.5136065  | 6.41E-05 | 0.01993   | 0.093363  |
| 9mo_SIGAF3_ | 0.08178848 | 0.48292005 | 6.34E-05 | 0.017373  | 0.12948   |
| 9mo_SIGAF3_ | 0.10329436 | 0.6126885  | 6.56E-05 | 0.025216  | -0.17104  |
| 9mo_SIGAF3_ | 0.06156614 | 0.36089662 | 6.07E-05 | 0.0090475 | 0.082025  |
| 9mo_SIGAF3_ | 0.10894772 | 0.64680135 | 6.59E-05 | 0.025616  | -0.25305  |
| 9mo_SIGAF3_ | 0.08642679 | 0.510908   | 6.40E-05 | 0.019681  | 0.099025  |
| 9mo_SIGAF3_ | 0.06761587 | 0.3974012  | 6.15E-05 | 0.011255  | 0.10492   |
| 9mo_SIGAF3_ | 0.01812147 | 0.09874748 | 3.36E-05 | 0.0048202 | 0.050123  |
| 9mo_SIGAF3_ | 0.03735954 | 0.2148318  | 4.76E-05 | 0.0043355 | -0.057524 |
| 9mo_SIGAF3_ | 0.01655579 | 0.08930004 | 3.31E-05 | 0.0050879 | 0.10435   |
| 9mo_SIGAF3_ | 0.01888073 | 0.10332892 | 3.38E-05 | 0.004741  | 0.03364   |
| 9mo_SIGAF3_ | 0.10507163 | 0.6234127  | 6.57E-05 | 0.025429  | -0.19772  |
| 9mo_SIGAF3_ | 0.0142055  | 0.07511813 | 3.25E-05 | 0.0056405 | 0.18676   |
| 9mo_SIGAF3_ | 0.01439093 | 0.07623705 | 3.26E-05 | 0.0055188 | 0.18676   |
| 9mo_SIGAF3_ | 0.02074057 | 0.11455134 | 3.44E-05 | 0.0045325 | -0.01065  |
| 9mo_SIGAF3_ | 0.0367911  | 0.21140176 | 4.70E-05 | 0.0042982 | -0.062998 |
| 9mo_SIGAF3_ | 0.02040751 | 0.11254163 | 3.44E-05 | 0.0045325 | -0.01065  |
| 9mo_SIGAF3_ | 0.01347613 | 0.07071707 | 3.24E-05 | 0.0057681 | 0.23179   |
| 9mo_SIGAF3_ | 0.02508255 | 0.14075129 | 3.68E-05 | 0.0041768 | -0.086782 |
| 9mo_SIGAF3_ | 0.01984925 | 0.10917305 | 3.42E-05 | 0.0045972 | 0.0032259 |
| 9mo_SIGAF3_ | 0.0441519  | 0.2558175  | 5.38E-05 | 0.0050014 | 0.012967  |
| 9mo_SIGAF3_ | 0.07206296 | 0.42423537 | 6.21E-05 | 0.01308   | 0.12348   |
| 9mo_SIGAF3_ | 0.05536658 | 0.32348794 | 5.95E-05 | 0.007248  | 0.065685  |
| 9mo_SIGAF3_ | 0.07405585 | 0.43626067 | 6.23E-05 | 0.013805  | 0.13074   |
| 9mo_SIGAF3_ | 0.10066538 | 0.596825   | 6.53E-05 | 0.024687  | -0.12375  |
| 9mo_SIGAF3_ | 0.00777202 | 0.03629796 | 3.19E-05 | 0.0073923 | 0.48652   |
| 9mo_SIGAF3_ | 0.00732386 | 0.0335937  | 3.19E-05 | 0.0075925 | 0.51404   |

|             |            |            |          |           |           |
|-------------|------------|------------|----------|-----------|-----------|
| 9mo_SIGAF3_ | 0.01625606 | 0.08749142 | 3.30E-05 | 0.0051875 | 0.12392   |
| 9mo_SIGAF3_ | 0.01002632 | 0.04990061 | 3.20E-05 | 0.0066628 | 0.37961   |
| 9mo_SIGAF3_ | 0.02897368 | 0.1642307  | 3.97E-05 | 0.0040686 | -0.10664  |
| 9mo_SIGAF3_ | 0.09176156 | 0.5430985  | 6.45E-05 | 0.021822  | 0.027741  |
| 9mo_SIGAF3_ | 0.03369101 | 0.19269553 | 4.43E-05 | 0.004153  | -0.087207 |
| 9mo_SIGAF3_ | 0.01081548 | 0.05466243 | 3.21E-05 | 0.0064976 | 0.35381   |
| 9mo_SIGAF3_ | 0.01228294 | 0.06351724 | 3.23E-05 | 0.0060411 | 0.2791    |
| 9mo_SIGAF3_ | 0.01575851 | 0.08448913 | 3.28E-05 | 0.0052924 | 0.1442    |
| 9mo_SIGAF3_ | 0.01882584 | 0.10299768 | 3.38E-05 | 0.004741  | 0.03364   |
| 9mo_SIGAF3_ | 0.03600683 | 0.2066694  | 4.65E-05 | 0.0042637 | -0.068307 |
| 9mo_SIGAF3_ | 0.02423985 | 0.13566636 | 3.64E-05 | 0.0042065 | -0.080664 |
| 9mo_SIGAF3_ | 0.03277971 | 0.18719667 | 4.32E-05 | 0.0041142 | -0.094772 |
| 9mo_SIGAF3_ | 0.03887344 | 0.22396678 | 4.92E-05 | 0.0044639 | -0.040459 |
| 9mo_SIGAF3_ | 0.0366795  | 0.21072836 | 4.70E-05 | 0.0042982 | -0.062998 |
| 9mo_SIGAF3_ | 0.054557   | 0.31860286 | 5.92E-05 | 0.0069681 | 0.064127  |
| 9mo_SIGAF3_ | 0.01796527 | 0.09780495 | 3.34E-05 | 0.0049043 | 0.067421  |
| 9mo_SIGAF3_ | 0.01747789 | 0.09486403 | 3.33E-05 | 0.0049935 | 0.085504  |
| 9mo_SIGAF3_ | 0.01605975 | 0.08630687 | 3.30E-05 | 0.0051875 | 0.12392   |
| 9mo_SIGAF3_ | 0.03396575 | 0.19435334 | 4.43E-05 | 0.004153  | -0.087207 |
| 9mo_SIGAF3_ | 0.00847088 | 0.04051495 | 3.19E-05 | 0.0071994 | 0.45929   |
| 9mo_SIGAF3_ | 0.07660899 | 0.45166656 | 6.27E-05 | 0.015053  | 0.1354    |
| 9mo_SIGAF3_ | 0.08529397 | 0.5040725  | 6.39E-05 | 0.019177  | 0.10916   |
| 9mo_SIGAF3_ | 0.0877566  | 0.5189322  | 6.41E-05 | 0.020177  | 0.080939  |
| 9mo_SIGAF3_ | 0.02291649 | 0.12768106 | 3.55E-05 | 0.0043197 | -0.056631 |
| 9mo_SIGAF3_ | 0.06058914 | 0.3550013  | 6.05E-05 | 0.008688  | 0.07887   |
| 9mo_SIGAF3_ | 0.02559057 | 0.14381674 | 3.72E-05 | 0.0041509 | -0.092011 |
| 9mo_SIGAF3_ | 0.08731299 | 0.51625544 | 6.41E-05 | 0.01993   | 0.087329  |
| 9mo_SIGAF3_ | 0.01072689 | 0.05412789 | 3.21E-05 | 0.0064976 | 0.35381   |
| 9mo_SIGAF3_ | 0.09678125 | 0.57338774 | 6.50E-05 | 0.023626  | -0.055297 |
| 9mo_SIGAF3_ | 0.05499792 | 0.32126337 | 5.94E-05 | 0.0071062 | 0.064127  |
| 9mo_SIGAF3_ | 0.02116438 | 0.11710868 | 3.47E-05 | 0.0044724 | -0.023601 |
| 9mo_SIGAF3_ | 0.05788499 | 0.33868423 | 6.00E-05 | 0.0078516 | 0.073002  |
| 9mo_SIGAF3_ | 0.01646135 | 0.08873016 | 3.31E-05 | 0.0050879 | 0.10435   |
| 9mo_SIGAF3_ | 0.08469333 | 0.50044817 | 6.38E-05 | 0.018923  | 0.1136    |
| 9mo_SIGAF3_ | 0.01530493 | 0.08175222 | 3.27E-05 | 0.0054028 | 0.1442    |
| 9mo_SIGAF3_ | 0.0226766  | 0.12623358 | 3.55E-05 | 0.0043197 | -0.056631 |
| 9mo_SIGAF3_ | 0.04151778 | 0.23992297 | 5.19E-05 | 0.0047337 | -0.011944 |
| 9mo_SIGAF3_ | 0.09927782 | 0.58845234 | 6.53E-05 | 0.02442   | -0.10426  |
| 9mo_SIGAF3_ | 0.01957202 | 0.10750021 | 3.40E-05 | 0.0046667 | 0.017998  |
| 9mo_SIGAF3_ | 0.01453172 | 0.07708659 | 3.26E-05 | 0.0055188 | 0.18676   |
| 9mo_SIGAF3_ | 0.01667858 | 0.09004092 | 3.31E-05 | 0.0050879 | 0.10435   |
| 9mo_SIGAF3_ | 0.0460453  | 0.26724243 | 5.54E-05 | 0.0053171 | 0.025099  |
| 9mo_SIGAF3_ | 0.01045894 | 0.05251104 | 3.21E-05 | 0.0064976 | 0.35381   |



|             |            |            |          |           |           |
|-------------|------------|------------|----------|-----------|-----------|
| 9mo_SIGAF3_ | 0.02276193 | 0.12674843 | 3.55E-05 | 0.0043197 | -0.056631 |
| 9mo_SIGAF3_ | 0.07448594 | 0.43885583 | 6.24E-05 | 0.014051  | 0.13218   |
| 9mo_SIGAF3_ | 0.05346    | 0.3119834  | 5.89E-05 | 0.0067028 | 0.060836  |
| 9mo_SIGAF3_ | 0.05319458 | 0.3103819  | 5.89E-05 | 0.0067028 | 0.059084  |
| 9mo_SIGAF3_ | 0.01704621 | 0.09225926 | 3.33E-05 | 0.0049935 | 0.085504  |
| 9mo_SIGAF3_ | 0.03610535 | 0.2072639  | 4.65E-05 | 0.0042637 | -0.068307 |
| 9mo_SIGAF3_ | 0.08458518 | 0.4997956  | 6.37E-05 | 0.018667  | 0.1136    |
| 9mo_SIGAF3_ | 0.09617899 | 0.5697537  | 6.50E-05 | 0.023448  | -0.045608 |
| 9mo_SIGAF3_ | 0.02102088 | 0.11624277 | 3.47E-05 | 0.0044724 | -0.023601 |
| 9mo_SIGAF3_ | 0.05337764 | 0.31148642 | 5.89E-05 | 0.0067028 | 0.059084  |
| 9mo_SIGAF3_ | 0.10146917 | 0.60167515 | 6.54E-05 | 0.024923  | -0.14299  |
| 9mo_SIGAF3_ | 0.01497459 | 0.0797589  | 3.27E-05 | 0.0054028 | 0.16515   |
| 9mo_SIGAF3_ | 0.02227569 | 0.12381443 | 3.52E-05 | 0.0043661 | -0.046619 |
| 9mo_SIGAF3_ | 0.07747722 | 0.4569055  | 6.29E-05 | 0.015562  | 0.13646   |
| 9mo_SIGAF3_ | 0.08112611 | 0.47892326 | 6.33E-05 | 0.017113  | 0.13148   |
| 9mo_SIGAF3_ | 0.02495566 | 0.1399856  | 3.68E-05 | 0.0041768 | -0.086782 |
| 9mo_SIGAF3_ | 0.01823239 | 0.09941676 | 3.36E-05 | 0.0048202 | 0.050123  |
| 9mo_SIGAF3_ | 0.08320361 | 0.49145907 | 6.36E-05 | 0.018151  | 0.12434   |
| 9mo_SIGAF3_ | 0.01652499 | 0.08911417 | 3.31E-05 | 0.0050879 | 0.10435   |
| 9mo_SIGAF3_ | 0.07473702 | 0.4403709  | 6.25E-05 | 0.014299  | 0.13218   |
| 9mo_SIGAF3_ | 0.03419092 | 0.19571203 | 4.48E-05 | 0.0041765 | -0.082901 |
| 9mo_SIGAF3_ | 0.02312662 | 0.128949   | 3.58E-05 | 0.0042778 | -0.065623 |
| 9mo_SIGAF3_ | 0.01698911 | 0.09191469 | 3.31E-05 | 0.0050879 | 0.085504  |
| 9mo_SIGAF3_ | 0.0932045  | 0.5518053  | 6.47E-05 | 0.022469  | 0.0013661 |
| 9mo_SIGAF3_ | 0.10829694 | 0.6428745  | 6.59E-05 | 0.025614  | -0.24573  |
| 9mo_SIGAF3_ | 0.0451396  | 0.26177734 | 5.46E-05 | 0.0051531 | 0.021279  |
| 9mo_SIGAF3_ | 0.07191429 | 0.4233383  | 6.21E-05 | 0.01308   | 0.12348   |
| 9mo_SIGAF3_ | 0.07984714 | 0.4712058  | 6.32E-05 | 0.016594  | 0.13545   |
| 9mo_SIGAF3_ | 0.01896515 | 0.10383833 | 3.38E-05 | 0.004741  | 0.03364   |
| 9mo_SIGAF3_ | 0.07129238 | 0.41958562 | 6.20E-05 | 0.012608  | 0.12136   |
| 9mo_SIGAF3_ | 0.01932371 | 0.10600187 | 3.40E-05 | 0.0046667 | 0.017998  |
| 9mo_SIGAF3_ | 0.09715225 | 0.57562643 | 6.51E-05 | 0.023799  | -0.065044 |
| 9mo_SIGAF3_ | 0.01969058 | 0.10821564 | 3.40E-05 | 0.0046667 | 0.017998  |
| 9mo_SIGAF3_ | 0.0326291  | 0.18628788 | 4.32E-05 | 0.0041142 | -0.094772 |
| 9mo_SIGAF3_ | 0.02214154 | 0.12300497 | 3.52E-05 | 0.0043661 | -0.046619 |
| 9mo_SIGAF3_ | 0.01508181 | 0.08040587 | 3.27E-05 | 0.0054028 | 0.16515   |
| 9mo_SIGAF3_ | 0.03244605 | 0.18518335 | 4.27E-05 | 0.004099  | -0.094772 |
| 9mo_SIGAF3_ | 0.06491271 | 0.3810901  | 6.11E-05 | 0.010206  | 0.093303  |
| 9mo_SIGAF3_ | 0.04173152 | 0.24121271 | 5.19E-05 | 0.0047337 | -0.011944 |
| 9mo_SIGAF3_ | 0.12279078 | 0.7303317  | 6.67E-05 | 0.024282  | -0.38934  |
| 9mo_SIGAF3_ | 0.01949698 | 0.10704745 | 3.40E-05 | 0.0046667 | 0.017998  |
| 9mo_SIGAF3_ | 0.02535752 | 0.14241049 | 3.72E-05 | 0.0041509 | -0.092011 |
| 9mo_SIGAF3_ | 0.09248918 | 0.54748905 | 6.46E-05 | 0.022258  | 0.019141  |

|             |            |            |          |           |           |
|-------------|------------|------------|----------|-----------|-----------|
| 9mo_SIGAF3_ | 0.1207144  | 0.71780264 | 6.66E-05 | 0.02449   | -0.37215  |
| 9mo_SIGAF3_ | 0.03368456 | 0.19265662 | 4.43E-05 | 0.004153  | -0.087207 |
| 9mo_SIGAF3_ | 0.02835291 | 0.16048492 | 3.93E-05 | 0.004074  | -0.10603  |
| 9mo_SIGAF3_ | 0.0442476  | 0.25639498 | 5.42E-05 | 0.0050757 | 0.012967  |
| 9mo_SIGAF3_ | 0.05454306 | 0.3185187  | 5.92E-05 | 0.0069681 | 0.064127  |
| 9mo_SIGAF3_ | 0.02485165 | 0.13935804 | 3.68E-05 | 0.0041768 | -0.086782 |
| 9mo_SIGAF3_ | 0.10941463 | 0.64961874 | 6.60E-05 | 0.025611  | -0.2602   |
| 9mo_SIGAF3_ | 0.05612683 | 0.32807535 | 5.97E-05 | 0.0073934 | 0.067199  |
| 9mo_SIGAF3_ | 0.06904535 | 0.40602684 | 6.16E-05 | 0.011695  | 0.11218   |
| 9mo_SIGAF3_ | 0.10084308 | 0.59789723 | 6.54E-05 | 0.024809  | -0.12375  |
| 9mo_SIGAF3_ | 0.0936037  | 0.5542142  | 6.48E-05 | 0.022676  | 0.0013661 |
| 9mo_SIGAF3_ | 0.02193291 | 0.12174607 | 3.49E-05 | 0.0044169 | -0.046619 |
| 9mo_SIGAF3_ | 0.05150269 | 0.30017287 | 5.83E-05 | 0.0063316 | 0.053285  |
| 9mo_SIGAF3_ | 0.03188244 | 0.18178247 | 4.22E-05 | 0.0040866 | -0.097962 |
| 9mo_SIGAF3_ | 0.02846604 | 0.16116755 | 3.93E-05 | 0.004074  | -0.10603  |
| 9mo_SIGAF3_ | 0.09575997 | 0.5672253  | 6.50E-05 | 0.023448  | -0.035993 |
| 9mo_SIGAF3_ | 0.00988649 | 0.04905685 | 3.20E-05 | 0.0066628 | 0.37961   |
| 9mo_SIGAF3_ | 0.07266542 | 0.42787066 | 6.22E-05 | 0.01332   | 0.12548   |
| 9mo_SIGAF3_ | 0.08795777 | 0.5201461  | 6.42E-05 | 0.020421  | 0.080939  |
| 9mo_SIGAF3_ | 0.1144753  | 0.6801553  | 6.63E-05 | 0.025299  | -0.3171   |
| 9mo_SIGAF3_ | 0.12235083 | 0.727677   | 6.67E-05 | 0.024282  | -0.38515  |
| 9mo_SIGAF3_ | 0.01864402 | 0.10190058 | 3.36E-05 | 0.0048202 | 0.03364   |
| 9mo_SIGAF3_ | 0.1328238  | 0.7908718  | 6.71E-05 | 0.023568  | -0.45613  |
| 9mo_SIGAF3_ | 0.08041737 | 0.47464666 | 6.32E-05 | 0.016854  | 0.13446   |
| 9mo_SIGAF3_ | 0.01947671 | 0.10692514 | 3.40E-05 | 0.0046667 | 0.017998  |
| 9mo_SIGAF3_ | 0.02217232 | 0.12319071 | 3.52E-05 | 0.0043661 | -0.046619 |
| 9mo_SIGAF3_ | 0.02841317 | 0.16084853 | 3.93E-05 | 0.004074  | -0.10603  |
| 9mo_SIGAF3_ | 0.04120414 | 0.23803042 | 5.14E-05 | 0.0046741 | -0.017493 |
| 9mo_SIGAF3_ | 0.00921095 | 0.04498059 | 3.19E-05 | 0.0070136 | 0.43237   |
| 9mo_SIGAF3_ | 0.09581464 | 0.5675551  | 6.50E-05 | 0.023448  | -0.035993 |
| 9mo_SIGAF3_ | 0.03662578 | 0.21040422 | 4.70E-05 | 0.0042982 | -0.062998 |
| 9mo_SIGAF3_ | 0.05547266 | 0.324128   | 5.95E-05 | 0.007248  | 0.065685  |
| 9mo_SIGAF3_ | 0.01752874 | 0.09517089 | 3.33E-05 | 0.0049935 | 0.067421  |
| 9mo_SIGAF3_ | 0.02943513 | 0.16701514 | 4.02E-05 | 0.0040662 | -0.10661  |
| 9mo_SIGAF3_ | 0.11456994 | 0.68072635 | 6.63E-05 | 0.025242  | -0.3171   |
| 9mo_SIGAF3_ | 0.10684584 | 0.63411844 | 6.58E-05 | 0.025586  | -0.22263  |
| 9mo_SIGAF3_ | 0.02957874 | 0.16788173 | 4.02E-05 | 0.0040662 | -0.10661  |
| 9mo_SIGAF3_ | 0.06007157 | 0.35187823 | 6.04E-05 | 0.0085136 | 0.07887   |
| 9mo_SIGAF3_ | 0.10942093 | 0.6496568  | 6.60E-05 | 0.025611  | -0.2602   |
| 9mo_SIGAF3_ | 0.02312029 | 0.12891081 | 3.58E-05 | 0.0042778 | -0.065623 |
| 9mo_SIGAF3_ | 0.01519696 | 0.0811007  | 3.27E-05 | 0.0054028 | 0.16515   |
| 9mo_SIGAF3_ | 0.02033059 | 0.11207749 | 3.44E-05 | 0.0045325 | -0.01065  |
| 9mo_SIGAF3_ | 0.09136832 | 0.54072565 | 6.45E-05 | 0.021822  | 0.036126  |

|             |            |            |          |           |           |
|-------------|------------|------------|----------|-----------|-----------|
| 9mo_SIGAF3_ | 0.06490324 | 0.38103294 | 6.11E-05 | 0.010206  | 0.093303  |
| 9mo_SIGAF3_ | 0.08015312 | 0.47305217 | 6.32E-05 | 0.016594  | 0.13446   |
| 9mo_SIGAF3_ | 0.07673705 | 0.45243925 | 6.27E-05 | 0.015053  | 0.13605   |
| 9mo_SIGAF3_ | 0.05845721 | 0.34213704 | 6.01E-05 | 0.0080116 | 0.074438  |
| 9mo_SIGAF3_ | 0.00717617 | 0.0327025  | 3.19E-05 | 0.0075925 | 0.51404   |
| 9mo_SIGAF3_ | 0.01150647 | 0.05883198 | 3.22E-05 | 0.0061869 | 0.30353   |
| 9mo_SIGAF3_ | 0.01740153 | 0.09440327 | 3.33E-05 | 0.0049935 | 0.085504  |
| 9mo_SIGAF3_ | 0.02648672 | 0.14922413 | 3.80E-05 | 0.0041099 | -0.099939 |
| 9mo_SIGAF3_ | 0.01316784 | 0.06885679 | 3.24E-05 | 0.0057681 | 0.23179   |
| 9mo_SIGAF3_ | 0.01292845 | 0.0674123  | 3.23E-05 | 0.0059016 | 0.25518   |
| 9mo_SIGAF3_ | 0.0239336  | 0.1338184  | 3.61E-05 | 0.0042401 | -0.073623 |
| 9mo_SIGAF3_ | 0.02183009 | 0.12112563 | 3.49E-05 | 0.0044169 | -0.0356   |
| 9mo_SIGAF3_ | 0.0658133  | 0.38652432 | 6.13E-05 | 0.010616  | 0.097788  |
| 9mo_SIGAF3_ | 0.10610531 | 0.62965    | 6.58E-05 | 0.025526  | -0.21453  |
| 9mo_SIGAF3_ | 0.04889145 | 0.28441638 | 5.70E-05 | 0.0057827 | 0.041222  |
| 9mo_SIGAF3_ | 0.11594815 | 0.6890426  | 6.63E-05 | 0.025119  | -0.33347  |
| 9mo_SIGAF3_ | 0.02432937 | 0.13620654 | 3.64E-05 | 0.0042065 | -0.080664 |
| 9mo_SIGAF3_ | 0.08898094 | 0.52632    | 6.42E-05 | 0.020663  | 0.067165  |
| 9mo_SIGAF3_ | 0.14575687 | 0.8689112  | 6.75E-05 | 0.02365   | -0.51443  |
| 9mo_SIGAF3_ | 0.02359121 | 0.13175242 | 3.58E-05 | 0.0042778 | -0.073623 |
| 9mo_SIGAF3_ | 0.03402475 | 0.19470936 | 4.43E-05 | 0.004153  | -0.087207 |
| 9mo_SIGAF3_ | 0.01115539 | 0.05671353 | 3.21E-05 | 0.006339  | 0.32844   |
| 9mo_SIGAF3_ | 0.01281046 | 0.06670037 | 3.23E-05 | 0.0059016 | 0.25518   |
| 9mo_SIGAF3_ | 0.00990847 | 0.0491895  | 3.20E-05 | 0.0066628 | 0.37961   |
| 9mo_SIGAF3_ | 0.01021678 | 0.05104983 | 3.20E-05 | 0.0066628 | 0.37961   |
| 9mo_SIGAF3_ | 0.10820779 | 0.64233655 | 6.59E-05 | 0.025614  | -0.24573  |
| 9mo_SIGAF3_ | 0.0212922  | 0.11787995 | 3.47E-05 | 0.0044724 | -0.023601 |
| 9mo_SIGAF3_ | 0.03633375 | 0.20864207 | 4.65E-05 | 0.0042637 | -0.062998 |
| 9mo_SIGAF3_ | 0.03425947 | 0.19612566 | 4.48E-05 | 0.0041765 | -0.082901 |
| 9mo_SIGAF3_ | 0.02616599 | 0.14728887 | 3.76E-05 | 0.0041286 | -0.096385 |
| 9mo_SIGAF3_ | 0.04615559 | 0.26790792 | 5.54E-05 | 0.0053171 | 0.025099  |
| 9mo_SIGAF3_ | 0.01220195 | 0.06302853 | 3.23E-05 | 0.0060411 | 0.2791    |
| 9mo_SIGAF3_ | 0.12501536 | 0.74375504 | 6.68E-05 | 0.024034  | -0.40548  |
| 9mo_SIGAF3_ | 0.02148251 | 0.11902832 | 3.49E-05 | 0.0044169 | -0.0356   |
| 9mo_SIGAF3_ | 0.08561885 | 0.5060328  | 6.39E-05 | 0.019177  | 0.1043    |
| 9mo_SIGAF3_ | 0.02544275 | 0.14292476 | 3.72E-05 | 0.0041509 | -0.092011 |
| 9mo_SIGAF3_ | 0.03310739 | 0.18917388 | 4.37E-05 | 0.0041322 | -0.091175 |
| 9mo_SIGAF3_ | 0.0306522  | 0.17435905 | 4.11E-05 | 0.0040705 | -0.10475  |
| 9mo_SIGAF3_ | 0.03395169 | 0.19426847 | 4.43E-05 | 0.004153  | -0.087207 |
| 9mo_SIGAF3_ | 0.05350888 | 0.3122784  | 5.89E-05 | 0.0067028 | 0.060836  |
| 9mo_SIGAF3_ | 0.06882937 | 0.4047236  | 6.16E-05 | 0.011695  | 0.10977   |
| 9mo_SIGAF3_ | 0.01626977 | 0.08757412 | 3.30E-05 | 0.0051875 | 0.12392   |
| 9mo_SIGAF3_ | 0.02061636 | 0.11380185 | 3.44E-05 | 0.0045325 | -0.01065  |

|             |            |            |          |           |           |
|-------------|------------|------------|----------|-----------|-----------|
| 9mo_SIGAF3_ | 0.01476111 | 0.07847074 | 3.26E-05 | 0.0055188 | 0.16515   |
| 9mo_SIGAF3_ | 0.05363747 | 0.3130543  | 5.91E-05 | 0.0068337 | 0.060836  |
| 9mo_SIGAF3_ | 0.08180185 | 0.48300076 | 6.34E-05 | 0.017373  | 0.12948   |
| 9mo_SIGAF3_ | 0.02368815 | 0.13233732 | 3.61E-05 | 0.0042401 | -0.073623 |
| 9mo_SIGAF3_ | 0.02856646 | 0.16177349 | 3.93E-05 | 0.004074  | -0.10664  |
| 9mo_SIGAF3_ | 0.01364994 | 0.07176586 | 3.24E-05 | 0.0057681 | 0.20898   |
| 9mo_SIGAF3_ | 0.08914034 | 0.5272818  | 6.43E-05 | 0.020902  | 0.067165  |
| 9mo_SIGAF3_ | 0.02220245 | 0.12337245 | 3.52E-05 | 0.0043661 | -0.046619 |
| 9mo_SIGAF3_ | 0.08869727 | 0.5246083  | 6.42E-05 | 0.020663  | 0.074212  |
| 9mo_SIGAF3_ | 0.04142991 | 0.23939276 | 5.19E-05 | 0.0047337 | -0.011944 |
| 9mo_SIGAF3_ | 0.01803162 | 0.09820531 | 3.34E-05 | 0.0049043 | 0.067421  |
| 9mo_SIGAF3_ | 0.09363672 | 0.5544134  | 6.48E-05 | 0.022676  | 0.0013661 |
| 9mo_SIGAF3_ | 0.04607744 | 0.2674364  | 5.54E-05 | 0.0053171 | 0.025099  |
| 9mo_SIGAF3_ | 0.03576325 | 0.20519963 | 4.59E-05 | 0.0042319 | -0.068307 |
| 9mo_SIGAF3_ | 0.02666959 | 0.15032764 | 3.80E-05 | 0.0041099 | -0.099939 |
| 9mo_SIGAF3_ | 0.05317338 | 0.31025395 | 5.89E-05 | 0.0067028 | 0.059084  |
| 9mo_SIGAF3_ | 0.02022231 | 0.11142416 | 3.42E-05 | 0.0045972 | 0.0032259 |
| 9mo_SIGAF3_ | 0.02121772 | 0.11743055 | 3.47E-05 | 0.0044724 | -0.023601 |
| 9mo_SIGAF3_ | 0.03298521 | 0.18843669 | 4.32E-05 | 0.0041142 | -0.091175 |
| 9mo_SIGAF3_ | 0.01614209 | 0.08680369 | 3.30E-05 | 0.0051875 | 0.12392   |
| 9mo_SIGAF3_ | 0.01871078 | 0.10230342 | 3.38E-05 | 0.004741  | 0.03364   |
| 9mo_SIGAF3_ | 0.06590551 | 0.38708076 | 6.13E-05 | 0.010616  | 0.097788  |
| 9mo_SIGAF3_ | 0.04107716 | 0.2372642  | 5.14E-05 | 0.0046741 | -0.017493 |
| 9mo_SIGAF3_ | 0.02282412 | 0.12712368 | 3.55E-05 | 0.0043197 | -0.056631 |
| 9mo_SIGAF3_ | 0.08264399 | 0.48808232 | 6.35E-05 | 0.017892  | 0.1271    |
| 9mo_SIGAF3_ | 0.1575841  | 0.94027776 | 6.78E-05 | 0.023703  | -0.52697  |
| 9mo_SIGAF3_ | 0.09161818 | 0.54223335 | 6.45E-05 | 0.021822  | 0.027741  |
| 9mo_SIGAF3_ | 0.10405728 | 0.617292   | 6.56E-05 | 0.025367  | -0.18011  |
| 9mo_SIGAF3_ | 0.03329123 | 0.19028321 | 4.37E-05 | 0.0041322 | -0.091175 |
| 9mo_SIGAF3_ | 0.05106727 | 0.29754546 | 5.81E-05 | 0.006215  | 0.051138  |
| 9mo_SIGAF3_ | 0.01127829 | 0.0574551  | 3.21E-05 | 0.006339  | 0.32844   |
| 9mo_SIGAF3_ | 0.02096055 | 0.11587875 | 3.47E-05 | 0.0044724 | -0.023601 |
| 9mo_SIGAF3_ | 0.13994665 | 0.8338518  | 6.73E-05 | 0.023551  | -0.49317  |
| 9mo_SIGAF3_ | 0.02050624 | 0.11313736 | 3.44E-05 | 0.0045325 | -0.01065  |
| 9mo_SIGAF3_ | 0.02251065 | 0.1252322  | 3.52E-05 | 0.0043661 | -0.056631 |
| 9mo_SIGAF3_ | 0.0797179  | 0.47042602 | 6.32E-05 | 0.016594  | 0.13545   |
| 9mo_SIGAF3_ | 0.05767847 | 0.33743805 | 6.00E-05 | 0.0078516 | 0.071569  |
| 9mo_SIGAF3_ | 0.01900143 | 0.10405725 | 3.38E-05 | 0.004741  | 0.03364   |
| 9mo_SIGAF3_ | 0.02939218 | 0.166756   | 4.02E-05 | 0.0040662 | -0.10661  |
| 9mo_SIGAF3_ | 0.01571549 | 0.08422957 | 3.28E-05 | 0.0052924 | 0.1442    |
| 9mo_SIGAF3_ | 0.11109981 | 0.6597873  | 6.61E-05 | 0.025556  | -0.28058  |
| 9mo_SIGAF3_ | 0.02557947 | 0.14374973 | 3.72E-05 | 0.0041509 | -0.092011 |
| 9mo_SIGAF3_ | 0.04465573 | 0.25885767 | 5.42E-05 | 0.0050757 | 0.017239  |

|             |            |            |          |           |            |
|-------------|------------|------------|----------|-----------|------------|
| 9mo_SIGAF3_ | 0.02006881 | 0.11049791 | 3.42E-05 | 0.0045972 | 0.0032259  |
| 9mo_SIGAF3_ | 0.01482515 | 0.0788572  | 3.27E-05 | 0.0054028 | 0.16515    |
| 9mo_SIGAF3_ | 0.10047966 | 0.5957043  | 6.53E-05 | 0.024687  | -0.12375   |
| 9mo_SIGAF3_ | 0.09055428 | 0.5358137  | 6.44E-05 | 0.021369  | 0.044278   |
| 9mo_SIGAF3_ | 0.02303454 | 0.1283934  | 3.55E-05 | 0.0043197 | -0.065623  |
| 9mo_SIGAF3_ | 0.04236554 | 0.24503846 | 5.24E-05 | 0.0047963 | -0.0013165 |
| 9mo_SIGAF3_ | 0.09393482 | 0.5562121  | 6.48E-05 | 0.022676  | -0.0077738 |
| 9mo_SIGAF3_ | 0.04832776 | 0.281015   | 5.67E-05 | 0.0056831 | 0.038361   |
| 9mo_SIGAF3_ | 0.03260815 | 0.18616143 | 4.32E-05 | 0.0041142 | -0.094772  |
| 9mo_SIGAF3_ | 0.01555803 | 0.08327943 | 3.28E-05 | 0.0052924 | 0.1442     |
| 9mo_SIGAF3_ | 0.03410458 | 0.19519106 | 4.43E-05 | 0.004153  | -0.082901  |
| 9mo_SIGAF3_ | 0.12436445 | 0.73982733 | 6.67E-05 | 0.024092  | -0.40152   |
| 9mo_SIGAF3_ | 0.02359883 | 0.13179839 | 3.58E-05 | 0.0042778 | -0.073623  |
| 9mo_SIGAF3_ | 0.12353846 | 0.73484325 | 6.67E-05 | 0.024153  | -0.39346   |
| 9mo_SIGAF3_ | 0.09940306 | 0.589208   | 6.53E-05 | 0.02442   | -0.10426   |
| 9mo_SIGAF3_ | 0.01317368 | 0.06889204 | 3.24E-05 | 0.0057681 | 0.23179    |
| 9mo_SIGAF3_ | 0.02124268 | 0.11758111 | 3.47E-05 | 0.0044724 | -0.023601  |
| 9mo_SIGAF3_ | 0.12530471 | 0.745501   | 6.68E-05 | 0.023978  | -0.40938   |
| 9mo_SIGAF3_ | 0.09626409 | 0.5702672  | 6.50E-05 | 0.023626  | -0.045608  |
| 9mo_SIGAF3_ | 0.03238438 | 0.18481117 | 4.27E-05 | 0.004099  | -0.097962  |
| 9mo_SIGAF3_ | 0.01683113 | 0.09096145 | 3.31E-05 | 0.0050879 | 0.10435    |
| 9mo_SIGAF3_ | 0.03566541 | 0.20460923 | 4.59E-05 | 0.0042319 | -0.073417  |
| 9mo_SIGAF3_ | 0.02047521 | 0.11295016 | 3.44E-05 | 0.0045325 | -0.01065   |
| 9mo_SIGAF3_ | 0.02474158 | 0.13869381 | 3.64E-05 | 0.0042065 | -0.086782  |
| 9mo_SIGAF3_ | 0.02070096 | 0.11431237 | 3.44E-05 | 0.0045325 | -0.01065   |
| 9mo_SIGAF3_ | 0.00801213 | 0.03774677 | 3.19E-05 | 0.0073923 | 0.48652    |
| 9mo_SIGAF3_ | 0.09942973 | 0.589369   | 6.53E-05 | 0.02442   | -0.10426   |
| 9mo_SIGAF3_ | 0.1198421  | 0.7125391  | 6.65E-05 | 0.024632  | -0.36766   |
| 9mo_SIGAF3_ | 0.08712716 | 0.51513416 | 6.41E-05 | 0.01993   | 0.087329   |
| 9mo_SIGAF3_ | 0.0180479  | 0.09830357 | 3.34E-05 | 0.0049043 | 0.067421   |
| 9mo_SIGAF3_ | 0.01294248 | 0.06749697 | 3.23E-05 | 0.0059016 | 0.25518    |
| 9mo_SIGAF3_ | 0.07140876 | 0.42028785 | 6.20E-05 | 0.012843  | 0.12136    |
| 9mo_SIGAF3_ | 0.10135413 | 0.60098094 | 6.54E-05 | 0.024923  | -0.13341   |
| 9mo_SIGAF3_ | 0.09043635 | 0.53510207 | 6.44E-05 | 0.021369  | 0.044278   |
| 9mo_SIGAF3_ | 0.02689362 | 0.15167943 | 3.80E-05 | 0.0041099 | -0.10271   |
| 9mo_SIGAF3_ | 0.08183473 | 0.48319915 | 6.34E-05 | 0.017373  | 0.12948    |
| 9mo_SIGAF3_ | 0.05563069 | 0.32508156 | 5.95E-05 | 0.007248  | 0.067199   |
| 9mo_SIGAF3_ | 0.03231033 | 0.1843644  | 4.27E-05 | 0.004099  | -0.097962  |
| 9mo_SIGAF3_ | 0.0331081  | 0.18917821 | 4.37E-05 | 0.0041322 | -0.091175  |
| 9mo_SIGAF3_ | 0.02137017 | 0.11835041 | 3.47E-05 | 0.0044724 | -0.0356    |
| 9mo_SIGAF3_ | 0.01762045 | 0.09572429 | 3.34E-05 | 0.0049043 | 0.067421   |
| 9mo_SIGAF3_ | 0.05352002 | 0.3123456  | 5.89E-05 | 0.0067028 | 0.060836   |
| 9mo_SIGAF3_ | 0.02944565 | 0.16707864 | 4.02E-05 | 0.0040662 | -0.10661   |

|             |            |            |          |           |           |
|-------------|------------|------------|----------|-----------|-----------|
| 9mo_SIGAF3_ | 0.11929148 | 0.7092166  | 6.65E-05 | 0.024704  | -0.36308  |
| 9mo_SIGAF3_ | 0.05498811 | 0.32120416 | 5.94E-05 | 0.0071062 | 0.064127  |
| 9mo_SIGAF3_ | 0.02176653 | 0.12074212 | 3.49E-05 | 0.0044169 | -0.0356   |
| 9mo_SIGAF3_ | 0.08453186 | 0.49947387 | 6.37E-05 | 0.018667  | 0.1136    |
| 9mo_SIGAF3_ | 0.03098152 | 0.1763462  | 4.16E-05 | 0.0040771 | -0.10299  |
| 9mo_SIGAF3_ | 0.09992997 | 0.5923875  | 6.53E-05 | 0.024558  | -0.11403  |
| 9mo_SIGAF3_ | 0.02278189 | 0.1268689  | 3.55E-05 | 0.0043197 | -0.056631 |
| 9mo_SIGAF3_ | 0.07832987 | 0.46205047 | 6.29E-05 | 0.015819  | 0.13651   |
| 9mo_SIGAF3_ | 0.09097484 | 0.53835136 | 6.45E-05 | 0.021597  | 0.036126  |
| 9mo_SIGAF3_ | 0.07723633 | 0.45545197 | 6.28E-05 | 0.015307  | 0.13646   |
| 9mo_SIGAF3_ | 0.02849102 | 0.1613183  | 3.93E-05 | 0.004074  | -0.10603  |
| 9mo_SIGAF3_ | 0.11627948 | 0.6910419  | 6.64E-05 | 0.025054  | -0.33347  |
| 9mo_SIGAF3_ | 0.05052793 | 0.29429108 | 5.78E-05 | 0.0061018 | 0.048868  |
| 9mo_SIGAF3_ | 0.08414988 | 0.49716893 | 6.37E-05 | 0.018667  | 0.1176    |
| 9mo_SIGAF3_ | 0.06434587 | 0.37766978 | 6.10E-05 | 0.010005  | 0.091185  |
| 9mo_SIGAF3_ | 0.01943321 | 0.10666265 | 3.40E-05 | 0.0046667 | 0.017998  |
| 9mo_SIGAF3_ | 0.02788894 | 0.15768531 | 3.88E-05 | 0.0040827 | -0.10472  |
| 9mo_SIGAF3_ | 0.021796   | 0.12091993 | 3.49E-05 | 0.0044169 | -0.0356   |
| 9mo_SIGAF3_ | 0.02359988 | 0.13180469 | 3.58E-05 | 0.0042778 | -0.073623 |
| 9mo_SIGAF3_ | 0.06469642 | 0.37978503 | 6.11E-05 | 0.010206  | 0.093303  |
| 9mo_SIGAF3_ | 0.03449573 | 0.1975513  | 4.48E-05 | 0.0041765 | -0.082901 |
| 9mo_SIGAF3_ | 0.07319569 | 0.43107036 | 6.23E-05 | 0.013561  | 0.12737   |
| 9mo_SIGAF3_ | 0.0533363  | 0.31123704 | 5.89E-05 | 0.0067028 | 0.059084  |
| 9mo_SIGAF3_ | 0.02136004 | 0.11828928 | 3.47E-05 | 0.0044724 | -0.023601 |
| 9mo_SIGAF3_ | 0.07179937 | 0.42264482 | 6.20E-05 | 0.012843  | 0.12348   |
| 9mo_SIGAF3_ | 0.00909269 | 0.04426696 | 3.19E-05 | 0.0070136 | 0.43237   |
| 9mo_SIGAF3_ | 0.0111894  | 0.05691872 | 3.21E-05 | 0.006339  | 0.32844   |
| 9mo_SIGAF3_ | 0.07238886 | 0.42620188 | 6.21E-05 | 0.01308   | 0.12548   |
| 9mo_SIGAF3_ | 0.07663404 | 0.45181766 | 6.27E-05 | 0.015053  | 0.13605   |
| 9mo_SIGAF3_ | 0.00977644 | 0.04839278 | 3.20E-05 | 0.0068348 | 0.37961   |
| 9mo_SIGAF3_ | 0.05881501 | 0.34429604 | 6.02E-05 | 0.0081753 | 0.074438  |
| 9mo_SIGAF3_ | 0.07296432 | 0.42967427 | 6.22E-05 | 0.01332   | 0.12737   |
| 9mo_SIGAF3_ | 0.00787471 | 0.03691756 | 3.19E-05 | 0.0073923 | 0.48652   |
| 9mo_SIGAF3_ | 0.13152929 | 0.7830606  | 6.70E-05 | 0.023599  | -0.44949  |
| 9mo_SIGAF3_ | 0.04150532 | 0.23984781 | 5.19E-05 | 0.0047337 | -0.011944 |
| 9mo_SIGAF3_ | 0.11870463 | 0.7056755  | 6.65E-05 | 0.024776  | -0.3584   |
| 9mo_SIGAF3_ | 0.03228005 | 0.18418166 | 4.27E-05 | 0.004099  | -0.097962 |
| 9mo_SIGAF3_ | 0.04123572 | 0.23822097 | 5.14E-05 | 0.0046741 | -0.017493 |
| 9mo_SIGAF3_ | 0.09842978 | 0.58333516 | 6.52E-05 | 0.024123  | -0.084641 |
| 9mo_SIGAF3_ | 0.02150603 | 0.1191702  | 3.49E-05 | 0.0044169 | -0.0356   |
| 9mo_SIGAF3_ | 0.0343493  | 0.1966677  | 4.48E-05 | 0.0041765 | -0.082901 |
| 9mo_SIGAF3_ | 0.02446687 | 0.1370362  | 3.64E-05 | 0.0042065 | -0.080664 |
| 9mo_SIGAF3_ | 0.01310159 | 0.06845705 | 3.23E-05 | 0.0059016 | 0.23179   |

|             |            |            |          |           |           |
|-------------|------------|------------|----------|-----------|-----------|
| 9mo_SIGAF3_ | 0.02416697 | 0.1352266  | 3.61E-05 | 0.0042401 | -0.080664 |
| 9mo_SIGAF3_ | 0.00942074 | 0.0462465  | 3.20E-05 | 0.0068348 | 0.4058    |
| 9mo_SIGAF3_ | 0.03084624 | 0.17552993 | 4.11E-05 | 0.0040705 | -0.10299  |
| 9mo_SIGAF3_ | 0.03034063 | 0.17247903 | 4.11E-05 | 0.0040705 | -0.10475  |
| 9mo_SIGAF3_ | 0.00571276 | 0.02387217 | 3.18E-05 | 0.0082375 | 0.59807   |
| 9mo_SIGAF3_ | 0.10980167 | 0.65195423 | 6.60E-05 | 0.025599  | -0.26716  |
| 9mo_SIGAF3_ | 0.0214329  | 0.11872893 | 3.47E-05 | 0.0044724 | -0.0356   |
| 9mo_SIGAF3_ | 0.06449159 | 0.37854907 | 6.10E-05 | 0.010005  | 0.093303  |
| 9mo_SIGAF3_ | 0.06622611 | 0.3890153  | 6.13E-05 | 0.010616  | 0.10013   |
| 9mo_SIGAF3_ | 0.01210762 | 0.06245937 | 3.23E-05 | 0.0060411 | 0.2791    |
| 9mo_SIGAF3_ | 0.04129736 | 0.23859292 | 5.14E-05 | 0.0046741 | -0.011944 |
| 9mo_SIGAF3_ | 0.00936743 | 0.04592481 | 3.20E-05 | 0.0068348 | 0.4058    |
| 9mo_SIGAF3_ | 0.01104544 | 0.05605006 | 3.21E-05 | 0.006339  | 0.32844   |
| 9mo_SIGAF3_ | 0.01676618 | 0.0905695  | 3.31E-05 | 0.0050879 | 0.10435   |
| 9mo_SIGAF3_ | 0.1390868  | 0.82866335 | 6.73E-05 | 0.023544  | -0.49075  |
| 9mo_SIGAF3_ | 0.05690128 | 0.33274844 | 5.98E-05 | 0.0075425 | 0.070131  |
| 9mo_SIGAF3_ | 0.08642858 | 0.5109188  | 6.40E-05 | 0.019681  | 0.099025  |
| 9mo_SIGAF3_ | 0.02150695 | 0.11917576 | 3.49E-05 | 0.0044169 | -0.0356   |
| 9mo_SIGAF3_ | 0.02676824 | 0.15092285 | 3.80E-05 | 0.0041099 | -0.099939 |
| 9mo_SIGAF3_ | 0.09363252 | 0.55438805 | 6.48E-05 | 0.022676  | 0.0013661 |
| 9mo_SIGAF3_ | 0.03319956 | 0.18973005 | 4.37E-05 | 0.0041322 | -0.091175 |
| 9mo_SIGAF3_ | 0.12390066 | 0.7370288  | 6.67E-05 | 0.024153  | -0.39752  |
| 9mo_SIGAF3_ | 0.11235245 | 0.6673459  | 6.62E-05 | 0.025448  | -0.29336  |
| 9mo_SIGAF3_ | 0.08793416 | 0.5200036  | 6.41E-05 | 0.020177  | 0.080939  |
| 9mo_SIGAF3_ | 0.12256535 | 0.7289714  | 6.67E-05 | 0.024282  | -0.38934  |
| 9mo_SIGAF3_ | 0.03631657 | 0.20853837 | 4.65E-05 | 0.0042637 | -0.062998 |
| 9mo_SIGAF3_ | 0.04077211 | 0.23542356 | 5.09E-05 | 0.0046173 | -0.017493 |
| 9mo_SIGAF3_ | 0.10296295 | 0.61068875 | 6.56E-05 | 0.025216  | -0.16182  |
| 9mo_SIGAF3_ | 0.09235144 | 0.5466579  | 6.46E-05 | 0.022042  | 0.019141  |
| 9mo_SIGAF3_ | 0.02123991 | 0.11756442 | 3.47E-05 | 0.0044724 | -0.023601 |
| 9mo_SIGAF3_ | 0.11684917 | 0.69447947 | 6.64E-05 | 0.024986  | -0.33868  |
| 9mo_SIGAF3_ | 0.07545096 | 0.44467887 | 6.26E-05 | 0.014549  | 0.13345   |
| 9mo_SIGAF3_ | 0.02245391 | 0.12488984 | 3.52E-05 | 0.0043661 | -0.046619 |
| 9mo_SIGAF3_ | 0.03658897 | 0.21018212 | 4.70E-05 | 0.0042982 | -0.062998 |
| 9mo_SIGAF3_ | 0.0196144  | 0.10775597 | 3.40E-05 | 0.0046667 | 0.017998  |
| 9mo_SIGAF3_ | 0.01733453 | 0.09399901 | 3.33E-05 | 0.0049935 | 0.085504  |
| 9mo_SIGAF3_ | 0.0857456  | 0.5067977  | 6.39E-05 | 0.01943   | 0.1043    |
| 9mo_SIGAF3_ | 0.05437804 | 0.31752297 | 5.92E-05 | 0.0069681 | 0.062513  |
| 9mo_SIGAF3_ | 0.0186562  | 0.10197406 | 3.36E-05 | 0.0048202 | 0.03364   |
| 9mo_SIGAF3_ | 0.1369198  | 0.81558746 | 6.73E-05 | 0.023528  | -0.48029  |
| 9mo_SIGAF3_ | 0.0291683  | 0.16540511 | 3.97E-05 | 0.0040686 | -0.10661  |
| 9mo_SIGAF3_ | 0.0397747  | 0.22940508 | 5.03E-05 | 0.0045634 | -0.028892 |
| 9mo_SIGAF3_ | 0.11365265 | 0.6751914  | 6.62E-05 | 0.025353  | -0.31137  |

|             |            |            |          |           |           |
|-------------|------------|------------|----------|-----------|-----------|
| 9mo_SIGAF3_ | 0.1378722  | 0.82133436 | 6.73E-05 | 0.023534  | -0.48301  |
| 9mo_SIGAF3_ | 0.06033346 | 0.3534585  | 6.05E-05 | 0.008688  | 0.07887   |
| 9mo_SIGAF3_ | 0.07434445 | 0.43800208 | 6.24E-05 | 0.014051  | 0.13074   |
| 9mo_SIGAF3_ | 0.03308528 | 0.18904051 | 4.37E-05 | 0.0041322 | -0.091175 |
| 9mo_SIGAF3_ | 0.03417071 | 0.19559005 | 4.43E-05 | 0.004153  | -0.082901 |
| 9mo_SIGAF3_ | 0.01501157 | 0.07998207 | 3.27E-05 | 0.0054028 | 0.16515   |
| 9mo_SIGAF3_ | 0.09618626 | 0.5697976  | 6.50E-05 | 0.023448  | -0.045608 |
| 9mo_SIGAF3_ | 0.0192182  | 0.10536522 | 3.40E-05 | 0.0046667 | 0.017998  |
| 9mo_SIGAF3_ | 0.01926898 | 0.10567165 | 3.40E-05 | 0.0046667 | 0.017998  |
| 9mo_SIGAF3_ | 0.05761096 | 0.33703068 | 6.00E-05 | 0.0078516 | 0.071569  |
| 9mo_SIGAF3_ | 0.02767581 | 0.15639924 | 3.88E-05 | 0.0040827 | -0.10472  |
| 9mo_SIGAF3_ | 0.09842949 | 0.5833334  | 6.52E-05 | 0.024123  | -0.084641 |
| 9mo_SIGAF3_ | 0.01938407 | 0.10636611 | 3.40E-05 | 0.0046667 | 0.017998  |
| 9mo_SIGAF3_ | 0.03703885 | 0.2128967  | 4.76E-05 | 0.0043355 | -0.057524 |
| 9mo_SIGAF3_ | 0.01580819 | 0.08478894 | 3.28E-05 | 0.0052924 | 0.1442    |
| 9mo_SIGAF3_ | 0.07131455 | 0.4197194  | 6.20E-05 | 0.012608  | 0.12136   |
| 9mo_SIGAF3_ | 0.09613672 | 0.5694986  | 6.50E-05 | 0.023448  | -0.045608 |
| 9mo_SIGAF3_ | 0.02699072 | 0.15226535 | 3.84E-05 | 0.0040947 | -0.10271  |
| 9mo_SIGAF3_ | 0.06027301 | 0.35309377 | 6.05E-05 | 0.008688  | 0.07887   |
| 9mo_SIGAF3_ | 0.01175727 | 0.06034529 | 3.22E-05 | 0.0061869 | 0.30353   |
| 9mo_SIGAF3_ | 0.02058346 | 0.11360337 | 3.44E-05 | 0.0045325 | -0.01065  |
| 9mo_SIGAF3_ | 0.04195468 | 0.24255925 | 5.24E-05 | 0.0047963 | -0.00654  |
| 9mo_SIGAF3_ | 0.01788084 | 0.09729551 | 3.34E-05 | 0.0049043 | 0.067421  |
| 9mo_SIGAF3_ | 0.05887641 | 0.34466654 | 6.02E-05 | 0.0081753 | 0.074438  |
| 9mo_SIGAF3_ | 0.11276346 | 0.6698259  | 6.62E-05 | 0.025448  | -0.29951  |
| 9mo_SIGAF3_ | 0.06872509 | 0.4040944  | 6.16E-05 | 0.011695  | 0.10977   |
| 9mo_SIGAF3_ | 0.03344819 | 0.19123034 | 4.37E-05 | 0.0041322 | -0.091175 |
| 9mo_SIGAF3_ | 0.01063996 | 0.05360334 | 3.21E-05 | 0.0064976 | 0.35381   |
| 9mo_SIGAF3_ | 0.02919253 | 0.16555126 | 4.02E-05 | 0.0040662 | -0.10661  |
| 9mo_SIGAF3_ | 0.02823733 | 0.1597875  | 3.93E-05 | 0.004074  | -0.10603  |
| 9mo_SIGAF3_ | 0.09717412 | 0.5757584  | 6.51E-05 | 0.023799  | -0.065044 |
| 9mo_SIGAF3_ | 0.0160114  | 0.0860151  | 3.30E-05 | 0.0051875 | 0.12392   |
| 9mo_SIGAF3_ | 0.10522933 | 0.62436426 | 6.57E-05 | 0.025482  | -0.19772  |
| 9mo_SIGAF3_ | 0.08496412 | 0.50208217 | 6.38E-05 | 0.018923  | 0.10916   |
| 9mo_SIGAF3_ | 0.06129142 | 0.35923892 | 6.06E-05 | 0.008866  | 0.082025  |
| 9mo_SIGAF3_ | 0.05471279 | 0.31954286 | 5.94E-05 | 0.0071062 | 0.064127  |
| 9mo_SIGAF3_ | 0.0296765  | 0.16847159 | 4.02E-05 | 0.0040662 | -0.10597  |
| 9mo_SIGAF3_ | 0.14404577 | 0.85858625 | 6.75E-05 | 0.023623  | -0.50968  |
| 9mo_SIGAF3_ | 0.04391292 | 0.25437546 | 5.38E-05 | 0.0050014 | 0.008455  |
| 9mo_SIGAF3_ | 0.02286072 | 0.12734452 | 3.55E-05 | 0.0043197 | -0.056631 |
| 9mo_SIGAF3_ | 0.03116634 | 0.17746142 | 4.16E-05 | 0.0040771 | -0.10299  |
| 9mo_SIGAF3_ | 0.03564588 | 0.20449139 | 4.59E-05 | 0.0042319 | -0.073417 |
| 9mo_SIGAF3_ | 0.05702394 | 0.33348855 | 5.99E-05 | 0.0076952 | 0.070131  |



|             |            |            |          |           |           |
|-------------|------------|------------|----------|-----------|-----------|
| 9mo_SIGAF3_ | 0.10476533 | 0.62156445 | 6.57E-05 | 0.025429  | -0.18901  |
| 9mo_SIGAF3_ | 0.01929283 | 0.10581558 | 3.40E-05 | 0.0046667 | 0.017998  |
| 9mo_SIGAF3_ | 0.09278496 | 0.5492738  | 6.46E-05 | 0.022258  | 0.010343  |
| 9mo_SIGAF3_ | 0.02096439 | 0.11590191 | 3.47E-05 | 0.0044724 | -0.023601 |
| 9mo_SIGAF3_ | 0.08731481 | 0.5162664  | 6.41E-05 | 0.01993   | 0.087329  |
| 9mo_SIGAF3_ | 0.07305015 | 0.43019217 | 6.23E-05 | 0.013561  | 0.12737   |
| 9mo_SIGAF3_ | 0.02236377 | 0.12434591 | 3.52E-05 | 0.0043661 | -0.046619 |
| 9mo_SIGAF3_ | 0.090217   | 0.5337785  | 6.44E-05 | 0.021369  | 0.05218   |
| 9mo_SIGAF3_ | 0.01636464 | 0.08814662 | 3.30E-05 | 0.0051875 | 0.12392   |
| 9mo_SIGAF3_ | 0.01277137 | 0.06646448 | 3.23E-05 | 0.0059016 | 0.25518   |
| 9mo_SIGAF3_ | 0.02234285 | 0.12421965 | 3.52E-05 | 0.0043661 | -0.046619 |
| 9mo_SIGAF3_ | 0.10158324 | 0.60236347 | 6.54E-05 | 0.024923  | -0.14299  |
| 9mo_SIGAF3_ | 0.00973846 | 0.04816364 | 3.20E-05 | 0.0068348 | 0.4058    |
| 9mo_SIGAF3_ | 0.01855363 | 0.10135517 | 3.36E-05 | 0.0048202 | 0.050123  |
| 9mo_SIGAF3_ | 0.15043679 | 0.8971502  | 6.77E-05 | 0.023699  | -0.52306  |
| 9mo_SIGAF3_ | 0.08634198 | 0.51039624 | 6.40E-05 | 0.019681  | 0.099025  |
| 9mo_SIGAF3_ | 0.02944681 | 0.16708562 | 4.02E-05 | 0.0040662 | -0.10661  |
| 9mo_SIGAF3_ | 0.04756793 | 0.2764301  | 5.64E-05 | 0.0055867 | 0.035328  |
| 9mo_SIGAF3_ | 0.02358297 | 0.13170268 | 3.58E-05 | 0.0042778 | -0.073623 |
| 9mo_SIGAF3_ | 0.01922159 | 0.10538572 | 3.40E-05 | 0.0046667 | 0.017998  |
| 9mo_SIGAF3_ | 0.01978615 | 0.10879229 | 3.42E-05 | 0.0045972 | 0.0032259 |
| 9mo_SIGAF3_ | 0.02030537 | 0.11192533 | 3.42E-05 | 0.0045972 | -0.01065  |
| 9mo_SIGAF3_ | 0.05355835 | 0.3125769  | 5.89E-05 | 0.0067028 | 0.060836  |
| 9mo_SIGAF3_ | 0.11272104 | 0.66956997 | 6.62E-05 | 0.025448  | -0.29951  |
| 9mo_SIGAF3_ | 0.01666421 | 0.08995425 | 3.31E-05 | 0.0050879 | 0.10435   |
| 9mo_SIGAF3_ | 0.02487279 | 0.13948555 | 3.68E-05 | 0.0041768 | -0.086782 |
| 9mo_SIGAF3_ | 0.02899594 | 0.16436501 | 3.97E-05 | 0.0040686 | -0.10664  |
| 9mo_SIGAF3_ | 0.017229   | 0.0933622  | 3.33E-05 | 0.0049935 | 0.085504  |
| 9mo_SIGAF3_ | 0.01554018 | 0.08317176 | 3.28E-05 | 0.0052924 | 0.1442    |
| 9mo_SIGAF3_ | 0.02380953 | 0.13306977 | 3.61E-05 | 0.0042401 | -0.073623 |
| 9mo_SIGAF3_ | 0.01959863 | 0.10766082 | 3.40E-05 | 0.0046667 | 0.017998  |
| 9mo_SIGAF3_ | 0.01126289 | 0.05736216 | 3.21E-05 | 0.006339  | 0.32844   |
| 9mo_SIGAF3_ | 0.10248283 | 0.6077916  | 6.55E-05 | 0.025127  | -0.15246  |
| 9mo_SIGAF3_ | 0.04608276 | 0.26746848 | 5.54E-05 | 0.0053171 | 0.025099  |
| 9mo_SIGAF3_ | 0.01807217 | 0.09844998 | 3.34E-05 | 0.0049043 | 0.050123  |
| 9mo_SIGAF3_ | 0.02220789 | 0.12340529 | 3.52E-05 | 0.0043661 | -0.046619 |
| 9mo_SIGAF3_ | 0.07388829 | 0.43524963 | 6.23E-05 | 0.013805  | 0.13074   |
| 9mo_SIGAF3_ | 0.08630913 | 0.51019806 | 6.40E-05 | 0.019681  | 0.099025  |
| 9mo_SIGAF3_ | 0.11202891 | 0.6653936  | 6.61E-05 | 0.025489  | -0.29336  |
| 9mo_SIGAF3_ | 0.14325666 | 0.85382473 | 6.75E-05 | 0.023603  | -0.50606  |
| 9mo_SIGAF3_ | 0.04019387 | 0.23193441 | 5.03E-05 | 0.0045634 | -0.023154 |
| 9mo_SIGAF3_ | 0.01599666 | 0.08592616 | 3.30E-05 | 0.0051875 | 0.12392   |
| 9mo_SIGAF3_ | 0.0300812  | 0.1709136  | 4.07E-05 | 0.0040668 | -0.10597  |

|             |            |            |          |           |           |
|-------------|------------|------------|----------|-----------|-----------|
| 9mo_SIGAF3_ | 0.10110376 | 0.5994702  | 6.54E-05 | 0.024809  | -0.13341  |
| 9mo_SIGAF3_ | 0.03617047 | 0.2076568  | 4.65E-05 | 0.0042637 | -0.068307 |
| 9mo_SIGAF3_ | 0.09968196 | 0.59089094 | 6.53E-05 | 0.024558  | -0.10426  |
| 9mo_SIGAF3_ | 0.00747775 | 0.03452229 | 3.19E-05 | 0.0075925 | 0.51404   |
| 9mo_SIGAF3_ | 0.09270565 | 0.5487952  | 6.46E-05 | 0.022258  | 0.010343  |
| 9mo_SIGAF3_ | 0.0207979  | 0.11489729 | 3.44E-05 | 0.0045325 | -0.01065  |
| 9mo_SIGAF3_ | 0.10859714 | 0.644686   | 6.59E-05 | 0.025616  | -0.24573  |
| 9mo_SIGAF3_ | 0.02256036 | 0.12553215 | 3.55E-05 | 0.0043197 | -0.056631 |
| 9mo_SIGAF3_ | 0.01170706 | 0.06004234 | 3.22E-05 | 0.0061869 | 0.30353   |
| 9mo_SIGAF3_ | 0.03299221 | 0.1884789  | 4.32E-05 | 0.0041142 | -0.091175 |
| 9mo_SIGAF3_ | 0.09031633 | 0.5343778  | 6.44E-05 | 0.021369  | 0.05218   |
| 9mo_SIGAF3_ | 0.07740359 | 0.45646122 | 6.28E-05 | 0.015307  | 0.13646   |
| 9mo_SIGAF3_ | 0.01816785 | 0.09902734 | 3.36E-05 | 0.0048202 | 0.050123  |
| 9mo_SIGAF3_ | 0.12323593 | 0.73301774 | 6.67E-05 | 0.024217  | -0.39346  |
| 9mo_SIGAF3_ | 0.04014858 | 0.23166108 | 5.03E-05 | 0.0045634 | -0.028892 |
| 9mo_SIGAF3_ | 0.0655288  | 0.38480762 | 6.12E-05 | 0.01041   | 0.095509  |
| 9mo_SIGAF3_ | 0.09809715 | 0.58132803 | 6.52E-05 | 0.024123  | -0.074831 |
| 9mo_SIGAF3_ | 0.02991751 | 0.1699259  | 4.07E-05 | 0.0040668 | -0.10597  |
| 9mo_SIGAF3_ | 0.02697764 | 0.15218644 | 3.84E-05 | 0.0040947 | -0.10271  |
| 9mo_SIGAF3_ | 0.02857348 | 0.16181585 | 3.93E-05 | 0.004074  | -0.10664  |
| 9mo_SIGAF3_ | 0.07781508 | 0.4589442  | 6.29E-05 | 0.015562  | 0.13662   |
| 9mo_SIGAF3_ | 0.12503225 | 0.7438569  | 6.68E-05 | 0.024034  | -0.40548  |
| 9mo_SIGAF3_ | 0.01147356 | 0.05863337 | 3.22E-05 | 0.0061869 | 0.30353   |
| 9mo_SIGAF3_ | 0.0478916  | 0.2783832  | 5.64E-05 | 0.0055867 | 0.038361  |
| 9mo_SIGAF3_ | 0.03365887 | 0.19250159 | 4.43E-05 | 0.004153  | -0.087207 |
| 9mo_SIGAF3_ | 0.01970291 | 0.10829    | 3.40E-05 | 0.0046667 | 0.017998  |
| 9mo_SIGAF3_ | 0.01860822 | 0.1016846  | 3.36E-05 | 0.0048202 | 0.03364   |
| 9mo_SIGAF3_ | 0.02633718 | 0.14832179 | 3.76E-05 | 0.0041286 | -0.096385 |
| 9mo_SIGAF3_ | 0.02970706 | 0.168656   | 4.02E-05 | 0.0040662 | -0.10597  |
| 9mo_SIGAF3_ | 0.07825209 | 0.4615811  | 6.29E-05 | 0.015819  | 0.13662   |
| 9mo_SIGAF3_ | 0.02747132 | 0.15516534 | 3.84E-05 | 0.0040947 | -0.10472  |
| 9mo_SIGAF3_ | 0.09861234 | 0.5844367  | 6.52E-05 | 0.024275  | -0.084641 |
| 9mo_SIGAF3_ | 0.08612144 | 0.5090655  | 6.39E-05 | 0.01943   | 0.099025  |
| 9mo_SIGAF3_ | 0.08472491 | 0.5006387  | 6.38E-05 | 0.018923  | 0.1136    |
| 9mo_SIGAF3_ | 0.08266608 | 0.48821557 | 6.35E-05 | 0.017892  | 0.1271    |
| 9mo_SIGAF3_ | 0.02383712 | 0.13323621 | 3.61E-05 | 0.0042401 | -0.073623 |
| 9mo_SIGAF3_ | 0.01628358 | 0.0876575  | 3.30E-05 | 0.0051875 | 0.12392   |
| 9mo_SIGAF3_ | 0.05421992 | 0.31656882 | 5.92E-05 | 0.0069681 | 0.062513  |
| 9mo_SIGAF3_ | 0.11931502 | 0.70935863 | 6.65E-05 | 0.024704  | -0.36308  |
| 9mo_SIGAF3_ | 0.02234099 | 0.12420844 | 3.52E-05 | 0.0043661 | -0.046619 |
| 9mo_SIGAF3_ | 0.02536344 | 0.1424462  | 3.72E-05 | 0.0041509 | -0.092011 |
| 9mo_SIGAF3_ | 0.02586819 | 0.1454919  | 3.76E-05 | 0.0041286 | -0.096385 |
| 9mo_SIGAF3_ | 0.09087431 | 0.53774476 | 6.45E-05 | 0.021597  | 0.044278  |

|             |            |            |          |           |            |
|-------------|------------|------------|----------|-----------|------------|
| 9mo_SIGAF3_ | 0.08810826 | 0.52105415 | 6.42E-05 | 0.020421  | 0.080939   |
| 9mo_SIGAF3_ | 0.07777399 | 0.45869625 | 6.29E-05 | 0.015562  | 0.13662    |
| 9mo_SIGAF3_ | 0.01059042 | 0.05330444 | 3.21E-05 | 0.0064976 | 0.35381    |
| 9mo_SIGAF3_ | 0.07084256 | 0.41687134 | 6.20E-05 | 0.012608  | 0.11916    |
| 9mo_SIGAF3_ | 0.02013428 | 0.11089297 | 3.42E-05 | 0.0045972 | 0.0032259  |
| 9mo_SIGAF3_ | 0.09732686 | 0.57668006 | 6.51E-05 | 0.023799  | -0.065044  |
| 9mo_SIGAF3_ | 0.10646445 | 0.6318171  | 6.58E-05 | 0.02556   | -0.22263   |
| 9mo_SIGAF3_ | 0.02509839 | 0.14084683 | 3.68E-05 | 0.0041768 | -0.086782  |
| 9mo_SIGAF3_ | 0.11622749 | 0.6907282  | 6.64E-05 | 0.025054  | -0.33347   |
| 9mo_SIGAF3_ | 0.10234395 | 0.6069537  | 6.55E-05 | 0.025029  | -0.15246   |
| 9mo_SIGAF3_ | 0.01244243 | 0.06447961 | 3.23E-05 | 0.0060411 | 0.2791     |
| 9mo_SIGAF3_ | 0.02519967 | 0.14145796 | 3.68E-05 | 0.0041768 | -0.086782  |
| 9mo_SIGAF3_ | 0.06423324 | 0.37699017 | 6.10E-05 | 0.010005  | 0.091185   |
| 9mo_SIGAF3_ | 0.12071884 | 0.7178294  | 6.66E-05 | 0.02449   | -0.37215   |
| 9mo_SIGAF3_ | 0.08345833 | 0.49299613 | 6.36E-05 | 0.018151  | 0.12117    |
| 9mo_SIGAF3_ | 0.07859966 | 0.46367845 | 6.30E-05 | 0.016077  | 0.13651    |
| 9mo_SIGAF3_ | 0.06058357 | 0.3549677  | 6.05E-05 | 0.008688  | 0.07887    |
| 9mo_SIGAF3_ | 0.01060727 | 0.05340612 | 3.21E-05 | 0.0064976 | 0.35381    |
| 9mo_SIGAF3_ | 0.14088164 | 0.83949363 | 6.74E-05 | 0.023566  | -0.4978    |
| 9mo_SIGAF3_ | 0.02292381 | 0.12772521 | 3.55E-05 | 0.0043197 | -0.056631  |
| 9mo_SIGAF3_ | 0.0426801  | 0.24693651 | 5.29E-05 | 0.0048617 | -0.0013165 |
| 9mo_SIGAF3_ | 0.02504531 | 0.14052658 | 3.68E-05 | 0.0041768 | -0.086782  |
| 9mo_SIGAF3_ | 0.13487127 | 0.8032265  | 6.72E-05 | 0.023533  | -0.46872   |
| 9mo_SIGAF3_ | 0.02054041 | 0.11334356 | 3.44E-05 | 0.0045325 | -0.01065   |
| 9mo_SIGAF3_ | 0.07917535 | 0.46715218 | 6.31E-05 | 0.016335  | 0.13613    |
| 9mo_SIGAF3_ | 0.01621759 | 0.08725928 | 3.30E-05 | 0.0051875 | 0.12392    |
| 9mo_SIGAF3_ | 0.0158601  | 0.08510215 | 3.28E-05 | 0.0052924 | 0.12392    |
| 9mo_SIGAF3_ | 0.0339094  | 0.19401328 | 4.43E-05 | 0.004153  | -0.087207  |
| 9mo_SIGAF3_ | 0.02219275 | 0.12331399 | 3.52E-05 | 0.0043661 | -0.046619  |
| 9mo_SIGAF3_ | 0.01453546 | 0.07710916 | 3.26E-05 | 0.0055188 | 0.18676    |
| 9mo_SIGAF3_ | 0.11291732 | 0.6707543  | 6.62E-05 | 0.025403  | -0.29951   |
| 9mo_SIGAF3_ | 0.0844857  | 0.49919534 | 6.37E-05 | 0.018667  | 0.1136     |
| 9mo_SIGAF3_ | 0.08724088 | 0.51582026 | 6.41E-05 | 0.01993   | 0.087329   |
| 9mo_SIGAF3_ | 0.01494686 | 0.07959157 | 3.27E-05 | 0.0054028 | 0.16515    |
| 9mo_SIGAF3_ | 0.03707606 | 0.21312125 | 4.76E-05 | 0.0043355 | -0.057524  |
| 9mo_SIGAF3_ | 0.06163568 | 0.3613162  | 6.07E-05 | 0.0090475 | 0.082025   |
| 9mo_SIGAF3_ | 0.02344582 | 0.13087513 | 3.58E-05 | 0.0042778 | -0.065623  |
| 9mo_SIGAF3_ | 0.08069906 | 0.47634637 | 6.32E-05 | 0.016854  | 0.13314    |
| 9mo_SIGAF3_ | 0.08782306 | 0.51933324 | 6.41E-05 | 0.020177  | 0.080939   |
| 9mo_SIGAF3_ | 0.05499568 | 0.32124984 | 5.94E-05 | 0.0071062 | 0.064127   |
| 9mo_SIGAF3_ | 0.11286064 | 0.6704123  | 6.62E-05 | 0.025448  | -0.29951   |
| 9mo_SIGAF3_ | 0.11235703 | 0.6673735  | 6.62E-05 | 0.025448  | -0.29336   |
| 9mo_SIGAF3_ | 0.05938605 | 0.34774175 | 6.03E-05 | 0.0083426 | 0.075889   |

|             |            |            |          |           |           |
|-------------|------------|------------|----------|-----------|-----------|
| 9mo_SIGAF3_ | 0.11639332 | 0.69172883 | 6.64E-05 | 0.025054  | -0.33868  |
| 9mo_SIGAF3_ | 0.05197506 | 0.30302316 | 5.85E-05 | 0.0064518 | 0.055318  |
| 9mo_SIGAF3_ | 0.02436665 | 0.13643149 | 3.64E-05 | 0.0042065 | -0.080664 |
| 9mo_SIGAF3_ | 0.0797426  | 0.47057506 | 6.32E-05 | 0.016594  | 0.13545   |
| 9mo_SIGAF3_ | 0.07155227 | 0.4211538  | 6.20E-05 | 0.012843  | 0.12136   |
| 9mo_SIGAF3_ | 0.0992903  | 0.5885276  | 6.53E-05 | 0.02442   | -0.10426  |
| 9mo_SIGAF3_ | 0.03777911 | 0.2173635  | 4.81E-05 | 0.0043756 | -0.05192  |
| 9mo_SIGAF3_ | 0.02458938 | 0.13777545 | 3.64E-05 | 0.0042065 | -0.080664 |
| 9mo_SIGAF3_ | 0.01732676 | 0.09395213 | 3.33E-05 | 0.0049935 | 0.085504  |
| 9mo_SIGAF3_ | 0.05469375 | 0.319428   | 5.94E-05 | 0.0071062 | 0.064127  |
| 9mo_SIGAF3_ | 0.08940186 | 0.5288599  | 6.43E-05 | 0.020902  | 0.059815  |
| 9mo_SIGAF3_ | 0.01926347 | 0.10563841 | 3.40E-05 | 0.0046667 | 0.017998  |
| 9mo_SIGAF3_ | 0.08502781 | 0.50246644 | 6.38E-05 | 0.018923  | 0.10916   |
| 9mo_SIGAF3_ | 0.00677464 | 0.03027964 | 3.18E-05 | 0.0078    | 0.54183   |
| 9mo_SIGAF3_ | 0.0213608  | 0.1182939  | 3.47E-05 | 0.0044724 | -0.023601 |
| 9mo_SIGAF3_ | 0.01893317 | 0.10364533 | 3.38E-05 | 0.004741  | 0.03364   |
| 9mo_SIGAF3_ | 0.04383669 | 0.2539155  | 5.38E-05 | 0.0050014 | 0.008455  |
| 9mo_SIGAF3_ | 0.02803017 | 0.15853746 | 3.88E-05 | 0.0040827 | -0.10603  |
| 9mo_SIGAF3_ | 0.02518075 | 0.14134383 | 3.68E-05 | 0.0041768 | -0.086782 |
| 9mo_SIGAF3_ | 0.03236298 | 0.18468207 | 4.27E-05 | 0.004099  | -0.097962 |
| 9mo_SIGAF3_ | 0.04944343 | 0.28774706 | 5.73E-05 | 0.0058857 | 0.04392   |
| 9mo_SIGAF3_ | 0.02033138 | 0.1120823  | 3.44E-05 | 0.0045325 | -0.01065  |
| 9mo_SIGAF3_ | 0.07269486 | 0.4280483  | 6.22E-05 | 0.01332   | 0.12548   |
| 9mo_SIGAF3_ | 0.01379868 | 0.07266334 | 3.25E-05 | 0.0056405 | 0.20898   |
| 9mo_SIGAF3_ | 0.01365031 | 0.07176811 | 3.24E-05 | 0.0057681 | 0.20898   |
| 9mo_SIGAF3_ | 0.01213195 | 0.06260616 | 3.23E-05 | 0.0060411 | 0.2791    |
| 9mo_SIGAF3_ | 0.0151681  | 0.08092655 | 3.27E-05 | 0.0054028 | 0.16515   |
| 9mo_SIGAF3_ | 0.01810494 | 0.09864774 | 3.34E-05 | 0.0049043 | 0.050123  |
| 9mo_SIGAF3_ | 0.12189025 | 0.7248978  | 6.66E-05 | 0.02435   | -0.38089  |
| 9mo_SIGAF3_ | 0.0171776  | 0.09305208 | 3.33E-05 | 0.0049935 | 0.085504  |
| 9mo_SIGAF3_ | 0.02598903 | 0.14622109 | 3.76E-05 | 0.0041286 | -0.096385 |
| 9mo_SIGAF3_ | 0.01918668 | 0.10517503 | 3.38E-05 | 0.004741  | 0.017998  |
| 9mo_SIGAF3_ | 0.01661995 | 0.08968718 | 3.31E-05 | 0.0050879 | 0.10435   |
| 9mo_SIGAF3_ | 0.06169393 | 0.3616677  | 6.07E-05 | 0.0090475 | 0.082025  |
| 9mo_SIGAF3_ | 0.05101724 | 0.29724362 | 5.81E-05 | 0.006215  | 0.051138  |
| 9mo_SIGAF3_ | 0.07258239 | 0.42736965 | 6.22E-05 | 0.01332   | 0.12548   |
| 9mo_SIGAF3_ | 0.08212152 | 0.48492965 | 6.35E-05 | 0.017633  | 0.12948   |
| 9mo_SIGAF3_ | 0.0298847  | 0.16972792 | 4.07E-05 | 0.0040668 | -0.10597  |
| 9mo_SIGAF3_ | 0.06213129 | 0.36430678 | 6.07E-05 | 0.0092324 | 0.083692  |
| 9mo_SIGAF3_ | 0.10824502 | 0.64256126 | 6.59E-05 | 0.025614  | -0.24573  |
| 9mo_SIGAF3_ | 0.01949401 | 0.10702948 | 3.40E-05 | 0.0046667 | 0.017998  |
| 9mo_SIGAF3_ | 0.02596014 | 0.14604673 | 3.76E-05 | 0.0041286 | -0.096385 |
| 9mo_SIGAF3_ | 0.07907721 | 0.46655998 | 6.31E-05 | 0.016335  | 0.13613   |

|             |            |            |          |           |           |
|-------------|------------|------------|----------|-----------|-----------|
| 9mo_SIGAF3_ | 0.07968508 | 0.47022793 | 6.32E-05 | 0.016594  | 0.13545   |
| 9mo_SIGAF3_ | 0.02376961 | 0.13282888 | 3.61E-05 | 0.0042401 | -0.073623 |
| 9mo_SIGAF3_ | 0.06462684 | 0.37936515 | 6.10E-05 | 0.010005  | 0.093303  |
| 9mo_SIGAF3_ | 0.12098033 | 0.71940726 | 6.66E-05 | 0.02449   | -0.37656  |
| 9mo_SIGAF3_ | 0.08714586 | 0.5152469  | 6.41E-05 | 0.01993   | 0.087329  |
| 9mo_SIGAF3_ | 0.05684178 | 0.33238938 | 5.98E-05 | 0.0075425 | 0.070131  |
| 9mo_SIGAF3_ | 0.08935386 | 0.52857023 | 6.43E-05 | 0.020902  | 0.059815  |
| 9mo_SIGAF3_ | 0.03163107 | 0.18026564 | 4.22E-05 | 0.0040866 | -0.10071  |
| 9mo_SIGAF3_ | 0.04916487 | 0.28606623 | 5.73E-05 | 0.0058857 | 0.04392   |
| 9mo_SIGAF3_ | 0.09638842 | 0.57101744 | 6.50E-05 | 0.023626  | -0.045608 |
| 9mo_SIGAF3_ | 0.06033439 | 0.35346416 | 6.05E-05 | 0.008688  | 0.07887   |
| 9mo_SIGAF3_ | 0.01650182 | 0.08897435 | 3.31E-05 | 0.0050879 | 0.10435   |
| 9mo_SIGAF3_ | 0.02641735 | 0.14880556 | 3.76E-05 | 0.0041286 | -0.099939 |
| 9mo_SIGAF3_ | 0.08311161 | 0.49090397 | 6.36E-05 | 0.018151  | 0.12434   |
| 9mo_SIGAF3_ | 0.04682609 | 0.2719538  | 5.57E-05 | 0.0054037 | 0.032113  |
| 9mo_SIGAF3_ | 0.02120368 | 0.11734581 | 3.47E-05 | 0.0044724 | -0.023601 |
| 9mo_SIGAF3_ | 0.01682927 | 0.09095024 | 3.31E-05 | 0.0050879 | 0.10435   |
| 9mo_SIGAF3_ | 0.08340438 | 0.49267054 | 6.36E-05 | 0.018151  | 0.12117   |
| 9mo_SIGAF3_ | 0.07835023 | 0.46217334 | 6.29E-05 | 0.015819  | 0.13651   |
| 9mo_SIGAF3_ | 0.02222063 | 0.12348215 | 3.52E-05 | 0.0043661 | -0.046619 |
| 9mo_SIGAF3_ | 0.01825881 | 0.09957618 | 3.36E-05 | 0.0048202 | 0.050123  |
| 9mo_SIGAF3_ | 0.11063799 | 0.65700066 | 6.60E-05 | 0.02558   | -0.27396  |
| 9mo_SIGAF3_ | 0.11630933 | 0.691222   | 6.64E-05 | 0.025054  | -0.33347  |
| 9mo_SIGAF3_ | 0.01567225 | 0.08396863 | 3.28E-05 | 0.0052924 | 0.1442    |
| 9mo_SIGAF3_ | 0.02035033 | 0.11219662 | 3.44E-05 | 0.0045325 | -0.01065  |
| 9mo_SIGAF3_ | 0.01853281 | 0.10122954 | 3.36E-05 | 0.0048202 | 0.050123  |
| 9mo_SIGAF3_ | 0.06235158 | 0.36563602 | 6.07E-05 | 0.0092324 | 0.085432  |
| 9mo_SIGAF3_ | 0.02196668 | 0.12194981 | 3.49E-05 | 0.0044169 | -0.046619 |
| 9mo_SIGAF3_ | 0.04469404 | 0.25908884 | 5.42E-05 | 0.0050757 | 0.017239  |
| 9mo_SIGAF3_ | 0.0936558  | 0.5545285  | 6.48E-05 | 0.022676  | 0.0013661 |
| 9mo_SIGAF3_ | 0.08764298 | 0.5182466  | 6.41E-05 | 0.020177  | 0.087329  |
| 9mo_SIGAF3_ | 0.03964604 | 0.22862875 | 4.98E-05 | 0.0045122 | -0.028892 |
| 9mo_SIGAF3_ | 0.05706507 | 0.33373672 | 5.99E-05 | 0.0076952 | 0.070131  |
| 9mo_SIGAF3_ | 0.09465876 | 0.56058043 | 6.49E-05 | 0.023073  | -0.017059 |
| 9mo_SIGAF3_ | 0.02069197 | 0.11425813 | 3.44E-05 | 0.0045325 | -0.01065  |
| 9mo_SIGAF3_ | 0.01404822 | 0.07416908 | 3.25E-05 | 0.0056405 | 0.20898   |
| 9mo_SIGAF3_ | 0.02339201 | 0.1305504  | 3.58E-05 | 0.0042778 | -0.065623 |
| 9mo_SIGAF3_ | 0.12228683 | 0.7272908  | 6.66E-05 | 0.02435   | -0.38515  |
| 9mo_SIGAF3_ | 0.09188282 | 0.5438302  | 6.46E-05 | 0.022042  | 0.027741  |
| 9mo_SIGAF3_ | 0.01897487 | 0.103897   | 3.38E-05 | 0.004741  | 0.03364   |
| 9mo_SIGAF3_ | 0.06866248 | 0.40371656 | 6.16E-05 | 0.011695  | 0.10977   |
| 9mo_SIGAF3_ | 0.02856266 | 0.16175057 | 3.93E-05 | 0.004074  | -0.10664  |
| 9mo_SIGAF3_ | 0.04577831 | 0.2656314  | 5.50E-05 | 0.0052335 | 0.025099  |

|             |            |            |          |           |           |
|-------------|------------|------------|----------|-----------|-----------|
| 9mo_SIGAF3_ | 0.08738319 | 0.516679   | 6.41E-05 | 0.01993   | 0.087329  |
| 9mo_SIGAF3_ | 0.0907965  | 0.53727525 | 6.45E-05 | 0.021597  | 0.044278  |
| 9mo_SIGAF3_ | 0.02107216 | 0.11655224 | 3.47E-05 | 0.0044724 | -0.023601 |
| 9mo_SIGAF3_ | 0.04975096 | 0.28960276 | 5.76E-05 | 0.005992  | 0.046466  |
| 9mo_SIGAF3_ | 0.02096235 | 0.11588959 | 3.47E-05 | 0.0044724 | -0.023601 |
| 9mo_SIGAF3_ | 0.01758364 | 0.09550218 | 3.34E-05 | 0.0049043 | 0.067421  |
| 9mo_SIGAF3_ | 0.07137891 | 0.42010775 | 6.20E-05 | 0.012843  | 0.12136   |
| 9mo_SIGAF3_ | 0.10059515 | 0.59640115 | 6.53E-05 | 0.024687  | -0.12375  |
| 9mo_SIGAF3_ | 0.02364529 | 0.1320787  | 3.58E-05 | 0.0042778 | -0.073623 |
| 9mo_SIGAF3_ | 0.07640299 | 0.45042348 | 6.27E-05 | 0.015053  | 0.1354    |
| 9mo_SIGAF3_ | 0.03872063 | 0.22304474 | 4.92E-05 | 0.0044639 | -0.040459 |
| 9mo_SIGAF3_ | 0.12639071 | 0.752054   | 6.68E-05 | 0.023879  | -0.41707  |
| 9mo_SIGAF3_ | 0.02304017 | 0.12842737 | 3.55E-05 | 0.0043197 | -0.065623 |
| 9mo_SIGAF3_ | 0.01638258 | 0.08825487 | 3.30E-05 | 0.0051875 | 0.12392   |
| 9mo_SIGAF3_ | 0.0105736  | 0.05320296 | 3.21E-05 | 0.0064976 | 0.35381   |
| 9mo_SIGAF3_ | 0.04585848 | 0.26611516 | 5.54E-05 | 0.0053171 | 0.025099  |
| 9mo_SIGAF3_ | 0.03265926 | 0.18646984 | 4.32E-05 | 0.0041142 | -0.094772 |
| 9mo_SIGAF3_ | 0.03161242 | 0.18015312 | 4.22E-05 | 0.0040866 | -0.10071  |
| 9mo_SIGAF3_ | 0.09253387 | 0.5477587  | 6.46E-05 | 0.022258  | 0.019141  |
| 9mo_SIGAF3_ | 0.09715567 | 0.57564706 | 6.51E-05 | 0.023799  | -0.065044 |
| 9mo_SIGAF3_ | 0.03304532 | 0.18879938 | 4.32E-05 | 0.0041142 | -0.091175 |
| 9mo_SIGAF3_ | 0.03720752 | 0.21391448 | 4.76E-05 | 0.0043355 | -0.057524 |
| 9mo_SIGAF3_ | 0.10463084 | 0.62075293 | 6.57E-05 | 0.025429  | -0.18901  |
| 9mo_SIGAF3_ | 0.090602   | 0.53610164 | 6.44E-05 | 0.021369  | 0.044278  |
| 9mo_SIGAF3_ | 0.06495046 | 0.38131788 | 6.11E-05 | 0.010206  | 0.093303  |
| 9mo_SIGAF3_ | 0.01226024 | 0.06338026 | 3.23E-05 | 0.0060411 | 0.2791    |
| 9mo_SIGAF3_ | 0.07812578 | 0.46081895 | 6.29E-05 | 0.015819  | 0.13662   |
| 9mo_SIGAF3_ | 0.02713576 | 0.15314052 | 3.84E-05 | 0.0040947 | -0.10271  |
| 9mo_SIGAF3_ | 0.03347549 | 0.19139504 | 4.37E-05 | 0.0041322 | -0.091175 |
| 9mo_SIGAF3_ | 0.09998392 | 0.592713   | 6.53E-05 | 0.024558  | -0.11403  |
| 9mo_SIGAF3_ | 0.01910261 | 0.10466775 | 3.38E-05 | 0.004741  | 0.03364   |
| 9mo_SIGAF3_ | 0.11320499 | 0.6724902  | 6.62E-05 | 0.025403  | -0.30551  |
| 9mo_SIGAF3_ | 0.06987485 | 0.41103214 | 6.18E-05 | 0.012147  | 0.11455   |
| 9mo_SIGAF3_ | 0.08831435 | 0.52229774 | 6.42E-05 | 0.020421  | 0.074212  |
| 9mo_SIGAF3_ | 0.05144732 | 0.29983875 | 5.83E-05 | 0.0063316 | 0.053285  |
| 9mo_SIGAF3_ | 0.02407941 | 0.13469826 | 3.61E-05 | 0.0042401 | -0.073623 |
| 9mo_SIGAF3_ | 0.04401219 | 0.25497445 | 5.38E-05 | 0.0050014 | 0.008455  |
| 9mo_SIGAF3_ | 0.01552042 | 0.08305249 | 3.28E-05 | 0.0052924 | 0.1442    |
| 9mo_SIGAF3_ | 0.0076315  | 0.03545005 | 3.19E-05 | 0.0073923 | 0.48652   |
| 9mo_SIGAF3_ | 0.0556525  | 0.3252132  | 5.95E-05 | 0.007248  | 0.067199  |
| 9mo_SIGAF3_ | 0.03056855 | 0.17385432 | 4.11E-05 | 0.0040705 | -0.10475  |
| 9mo_SIGAF3_ | 0.12683573 | 0.7547393  | 6.69E-05 | 0.023834  | -0.41707  |
| 9mo_SIGAF3_ | 0.10031559 | 0.59471434 | 6.53E-05 | 0.024687  | -0.11403  |

|             |            |            |          |           |            |
|-------------|------------|------------|----------|-----------|------------|
| 9mo_SIGAF3_ | 0.01272252 | 0.06616974 | 3.23E-05 | 0.0059016 | 0.25518    |
| 9mo_SIGAF3_ | 0.07294937 | 0.42958403 | 6.22E-05 | 0.01332   | 0.12737    |
| 9mo_SIGAF3_ | 0.02316409 | 0.1291751  | 3.58E-05 | 0.0042778 | -0.065623  |
| 9mo_SIGAF3_ | 0.00901369 | 0.04379029 | 3.19E-05 | 0.0070136 | 0.43237    |
| 9mo_SIGAF3_ | 0.09842276 | 0.5832928  | 6.52E-05 | 0.024123  | -0.084641  |
| 9mo_SIGAF3_ | 0.12267472 | 0.72963136 | 6.67E-05 | 0.024282  | -0.38934   |
| 9mo_SIGAF3_ | 0.09702959 | 0.57488626 | 6.51E-05 | 0.023799  | -0.055297  |
| 9mo_SIGAF3_ | 0.01474707 | 0.07838604 | 3.26E-05 | 0.0055188 | 0.16515    |
| 9mo_SIGAF3_ | 0.08684606 | 0.5134379  | 6.41E-05 | 0.01993   | 0.093363   |
| 9mo_SIGAF3_ | 0.12026701 | 0.71510303 | 6.66E-05 | 0.024561  | -0.37215   |
| 9mo_SIGAF3_ | 0.01660337 | 0.08958711 | 3.31E-05 | 0.0050879 | 0.10435    |
| 9mo_SIGAF3_ | 0.0581873  | 0.34050837 | 6.01E-05 | 0.0080116 | 0.073002   |
| 9mo_SIGAF3_ | 0.08861601 | 0.524118   | 6.42E-05 | 0.020663  | 0.074212   |
| 9mo_SIGAF3_ | 0.10683076 | 0.6340275  | 6.58E-05 | 0.025586  | -0.22263   |
| 9mo_SIGAF3_ | 0.12068889 | 0.7176486  | 6.66E-05 | 0.02449   | -0.37215   |
| 9mo_SIGAF3_ | 0.02661225 | 0.14998163 | 3.80E-05 | 0.0041099 | -0.099939  |
| 9mo_SIGAF3_ | 0.02531242 | 0.14213832 | 3.68E-05 | 0.0041768 | -0.092011  |
| 9mo_SIGAF3_ | 0.01179245 | 0.06055759 | 3.22E-05 | 0.0061869 | 0.30353    |
| 9mo_SIGAF3_ | 0.01151703 | 0.0588957  | 3.22E-05 | 0.0061869 | 0.30353    |
| 9mo_SIGAF3_ | 0.0181082  | 0.09866741 | 3.36E-05 | 0.0048202 | 0.050123   |
| 9mo_SIGAF3_ | 0.02153053 | 0.11931805 | 3.49E-05 | 0.0044169 | -0.0356    |
| 9mo_SIGAF3_ | 0.08071421 | 0.4764378  | 6.32E-05 | 0.016854  | 0.13314    |
| 9mo_SIGAF3_ | 0.02154873 | 0.11942786 | 3.49E-05 | 0.0044169 | -0.0356    |
| 9mo_SIGAF3_ | 0.1111488  | 0.66008294 | 6.61E-05 | 0.025556  | -0.28058   |
| 9mo_SIGAF3_ | 0.10375803 | 0.6154863  | 6.56E-05 | 0.025296  | -0.18011   |
| 9mo_SIGAF3_ | 0.0209699  | 0.11593515 | 3.47E-05 | 0.0044724 | -0.023601  |
| 9mo_SIGAF3_ | 0.0155697  | 0.08334987 | 3.28E-05 | 0.0052924 | 0.1442     |
| 9mo_SIGAF3_ | 0.02115921 | 0.11707746 | 3.47E-05 | 0.0044724 | -0.023601  |
| 9mo_SIGAF3_ | 0.02184485 | 0.12121472 | 3.49E-05 | 0.0044169 | -0.0356    |
| 9mo_SIGAF3_ | 0.01863051 | 0.10181907 | 3.36E-05 | 0.0048202 | 0.03364    |
| 9mo_SIGAF3_ | 0.07514721 | 0.44284603 | 6.25E-05 | 0.014299  | 0.13345    |
| 9mo_SIGAF3_ | 0.06296661 | 0.36934718 | 6.08E-05 | 0.0094206 | 0.087254   |
| 9mo_SIGAF3_ | 0.09341127 | 0.553053   | 6.47E-05 | 0.022469  | 0.0013661  |
| 9mo_SIGAF3_ | 0.09425703 | 0.5581564  | 6.48E-05 | 0.022877  | -0.0077738 |
| 9mo_SIGAF3_ | 0.0894552  | 0.5291817  | 6.43E-05 | 0.020902  | 0.059815   |
| 9mo_SIGAF3_ | 0.10832614 | 0.6430507  | 6.59E-05 | 0.025614  | -0.24573   |
| 9mo_SIGAF3_ | 0.10331018 | 0.61278397 | 6.56E-05 | 0.025216  | -0.17104   |
| 9mo_SIGAF3_ | 0.03271999 | 0.18683632 | 4.32E-05 | 0.0041142 | -0.094772  |
| 9mo_SIGAF3_ | 0.02026733 | 0.11169575 | 3.42E-05 | 0.0045972 | -0.01065   |
| 9mo_SIGAF3_ | 0.0190072  | 0.10409202 | 3.38E-05 | 0.004741  | 0.03364    |
| 9mo_SIGAF3_ | 0.09968594 | 0.5909149  | 6.53E-05 | 0.024558  | -0.10426   |
| 9mo_SIGAF3_ | 0.04440132 | 0.25732252 | 5.42E-05 | 0.0050757 | 0.012967   |
| 9mo_SIGAF3_ | 0.05280821 | 0.30805048 | 5.87E-05 | 0.0065755 | 0.057248   |

|             |            |            |          |           |           |
|-------------|------------|------------|----------|-----------|-----------|
| 9mo_SIGAF3_ | 0.0196445  | 0.1079376  | 3.40E-05 | 0.0046667 | 0.017998  |
| 9mo_SIGAF3_ | 0.09256859 | 0.5479682  | 6.46E-05 | 0.022258  | 0.019141  |
| 9mo_SIGAF3_ | 0.03415541 | 0.19549774 | 4.43E-05 | 0.004153  | -0.082901 |
| 9mo_SIGAF3_ | 0.0689282  | 0.40531993 | 6.16E-05 | 0.011695  | 0.11218   |
| 9mo_SIGAF3_ | 0.07174732 | 0.42233077 | 6.20E-05 | 0.012843  | 0.12348   |
| 9mo_SIGAF3_ | 0.0267177  | 0.15061793 | 3.80E-05 | 0.0041099 | -0.099939 |
| 9mo_SIGAF3_ | 0.01632167 | 0.08788733 | 3.30E-05 | 0.0051875 | 0.12392   |
| 9mo_SIGAF3_ | 0.02451516 | 0.13732758 | 3.64E-05 | 0.0042065 | -0.080664 |
| 9mo_SIGAF3_ | 0.02950281 | 0.16742353 | 4.02E-05 | 0.0040662 | -0.10661  |
| 9mo_SIGAF3_ | 0.02811153 | 0.15902843 | 3.93E-05 | 0.004074  | -0.10603  |
| 9mo_SIGAF3_ | 0.01782676 | 0.09696915 | 3.34E-05 | 0.0049043 | 0.067421  |
| 9mo_SIGAF3_ | 0.04785924 | 0.27818796 | 5.64E-05 | 0.0055867 | 0.035328  |
| 9mo_SIGAF3_ | 0.01168923 | 0.05993472 | 3.22E-05 | 0.0061869 | 0.30353   |
| 9mo_SIGAF3_ | 0.01734618 | 0.09406928 | 3.33E-05 | 0.0049935 | 0.085504  |
| 9mo_SIGAF3_ | 0.09807407 | 0.5811888  | 6.52E-05 | 0.024123  | -0.074831 |
| 9mo_SIGAF3_ | 0.01334994 | 0.06995564 | 3.24E-05 | 0.0057681 | 0.23179   |
| 9mo_SIGAF3_ | 0.08438338 | 0.49857795 | 6.37E-05 | 0.018667  | 0.1136    |
| 9mo_SIGAF3_ | 0.01704179 | 0.09223257 | 3.33E-05 | 0.0049935 | 0.085504  |
| 9mo_SIGAF3_ | 0.09459236 | 0.5601798  | 6.48E-05 | 0.022877  | -0.017059 |
| 9mo_SIGAF3_ | 0.03201693 | 0.18259394 | 4.27E-05 | 0.004099  | -0.097962 |
| 9mo_SIGAF3_ | 0.05890552 | 0.34484223 | 6.02E-05 | 0.0081753 | 0.074438  |
| 9mo_SIGAF3_ | 0.0099333  | 0.04933928 | 3.20E-05 | 0.0066628 | 0.37961   |
| 9mo_SIGAF3_ | 0.01783737 | 0.09703321 | 3.34E-05 | 0.0049043 | 0.067421  |
| 9mo_SIGAF3_ | 0.07701888 | 0.45413986 | 6.28E-05 | 0.015307  | 0.13605   |
| 9mo_SIGAF3_ | 0.07267889 | 0.427952   | 6.22E-05 | 0.01332   | 0.12548   |
| 9mo_SIGAF3_ | 0.10597025 | 0.628835   | 6.58E-05 | 0.025526  | -0.21453  |
| 9mo_SIGAF3_ | 0.04519191 | 0.262093   | 5.46E-05 | 0.0051531 | 0.021279  |
| 9mo_SIGAF3_ | 0.02284725 | 0.12726331 | 3.55E-05 | 0.0043197 | -0.056631 |
| 9mo_SIGAF3_ | 0.06556538 | 0.38502836 | 6.12E-05 | 0.01041   | 0.097788  |
| 9mo_SIGAF3_ | 0.02879672 | 0.16316292 | 3.97E-05 | 0.0040686 | -0.10664  |
| 9mo_SIGAF3_ | 0.09603163 | 0.5688645  | 6.50E-05 | 0.023448  | -0.045608 |
| 9mo_SIGAF3_ | 0.02463439 | 0.13804705 | 3.64E-05 | 0.0042065 | -0.080664 |
| 9mo_SIGAF3_ | 0.0195062  | 0.10710308 | 3.40E-05 | 0.0046667 | 0.017998  |
| 9mo_SIGAF3_ | 0.13709536 | 0.8166468  | 6.73E-05 | 0.023528  | -0.48029  |
| 9mo_SIGAF3_ | 0.00547158 | 0.02241688 | 3.18E-05 | 0.0082375 | 0.59807   |
| 9mo_SIGAF3_ | 0.08274332 | 0.48868164 | 6.35E-05 | 0.017892  | 0.12434   |
| 9mo_SIGAF3_ | 0.03504036 | 0.20083766 | 4.54E-05 | 0.0042028 | -0.078293 |
| 9mo_SIGAF3_ | 0.01199072 | 0.06175398 | 3.22E-05 | 0.0061869 | 0.2791    |
| 9mo_SIGAF3_ | 0.07644968 | 0.45070523 | 6.27E-05 | 0.015053  | 0.1354    |
| 9mo_SIGAF3_ | 0.08113056 | 0.47895014 | 6.33E-05 | 0.017113  | 0.13148   |
| 9mo_SIGAF3_ | 0.05157412 | 0.30060384 | 5.83E-05 | 0.0063316 | 0.053285  |
| 9mo_SIGAF3_ | 0.01612942 | 0.08672724 | 3.30E-05 | 0.0051875 | 0.12392   |
| 9mo_SIGAF3_ | 0.02727061 | 0.15395421 | 3.84E-05 | 0.0040947 | -0.10271  |



|             |            |            |          |           |           |
|-------------|------------|------------|----------|-----------|-----------|
| 9mo_SIGAF3_ | 0.01425473 | 0.07541519 | 3.26E-05 | 0.0055188 | 0.18676   |
| 9mo_SIGAF3_ | 0.10172533 | 0.60322076 | 6.54E-05 | 0.024923  | -0.14299  |
| 9mo_SIGAF3_ | 0.05593476 | 0.32691634 | 5.97E-05 | 0.0073934 | 0.067199  |
| 9mo_SIGAF3_ | 0.03824683 | 0.22018576 | 4.87E-05 | 0.0044183 | -0.04622  |
| 9mo_SIGAF3_ | 0.05009083 | 0.29165354 | 5.76E-05 | 0.005992  | 0.046466  |
| 9mo_SIGAF3_ | 0.04339479 | 0.251249   | 5.33E-05 | 0.0049301 | 0.0036923 |
| 9mo_SIGAF3_ | 0.02760319 | 0.15596104 | 3.88E-05 | 0.0040827 | -0.10472  |
| 9mo_SIGAF3_ | 0.12037079 | 0.71572924 | 6.66E-05 | 0.024561  | -0.37215  |
| 9mo_SIGAF3_ | 0.08873567 | 0.52484    | 6.42E-05 | 0.020663  | 0.074212  |
| 9mo_SIGAF3_ | 0.02415527 | 0.13515602 | 3.61E-05 | 0.0042401 | -0.080664 |
| 9mo_SIGAF3_ | 0.02588741 | 0.14560787 | 3.76E-05 | 0.0041286 | -0.096385 |
| 9mo_SIGAF3_ | 0.02377707 | 0.13287386 | 3.61E-05 | 0.0042401 | -0.073623 |
| 9mo_SIGAF3_ | 0.03723945 | 0.21410714 | 4.76E-05 | 0.0043355 | -0.057524 |
| 9mo_SIGAF3_ | 0.01365991 | 0.07182603 | 3.24E-05 | 0.0057681 | 0.20898   |
| 9mo_SIGAF3_ | 0.10703762 | 0.63527566 | 6.58E-05 | 0.025586  | -0.23052  |
| 9mo_SIGAF3_ | 0.02026559 | 0.11168528 | 3.42E-05 | 0.0045972 | -0.01065  |
| 9mo_SIGAF3_ | 0.0105162  | 0.05285658 | 3.21E-05 | 0.0064976 | 0.35381   |
| 9mo_SIGAF3_ | 0.02212044 | 0.12287765 | 3.52E-05 | 0.0043661 | -0.046619 |
| 9mo_SIGAF3_ | 0.02017724 | 0.11115217 | 3.42E-05 | 0.0045972 | 0.0032259 |
| 9mo_SIGAF3_ | 0.01358648 | 0.07138293 | 3.24E-05 | 0.0057681 | 0.23179   |
| 9mo_SIGAF3_ | 0.02003469 | 0.11029203 | 3.42E-05 | 0.0045972 | 0.0032259 |
| 9mo_SIGAF3_ | 0.0273803  | 0.15461609 | 3.84E-05 | 0.0040947 | -0.10271  |
| 9mo_SIGAF3_ | 0.03134221 | 0.17852262 | 4.16E-05 | 0.0040771 | -0.10071  |
| 9mo_SIGAF3_ | 0.0197295  | 0.1084505  | 3.40E-05 | 0.0046667 | 0.0032259 |
| 9mo_SIGAF3_ | 0.06496422 | 0.3814009  | 6.11E-05 | 0.010206  | 0.093303  |
| 9mo_SIGAF3_ | 0.02797123 | 0.15818188 | 3.88E-05 | 0.0040827 | -0.10472  |
| 9mo_SIGAF3_ | 0.01380058 | 0.07267483 | 3.25E-05 | 0.0056405 | 0.20898   |
| 9mo_SIGAF3_ | 0.02077916 | 0.11478424 | 3.44E-05 | 0.0045325 | -0.01065  |
| 9mo_SIGAF3_ | 0.12019909 | 0.7146932  | 6.66E-05 | 0.024561  | -0.36766  |
| 9mo_SIGAF3_ | 0.01702671 | 0.0921416  | 3.33E-05 | 0.0049935 | 0.085504  |
| 9mo_SIGAF3_ | 0.08250528 | 0.4872453  | 6.35E-05 | 0.017892  | 0.1271    |
| 9mo_SIGAF3_ | 0.02919907 | 0.16559075 | 4.02E-05 | 0.0040662 | -0.10661  |
| 9mo_SIGAF3_ | 0.02681716 | 0.15121809 | 3.80E-05 | 0.0041099 | -0.099939 |
| 9mo_SIGAF3_ | 0.02583223 | 0.14527489 | 3.72E-05 | 0.0041509 | -0.096385 |
| 9mo_SIGAF3_ | 0.11930493 | 0.7092978  | 6.65E-05 | 0.024704  | -0.36308  |
| 9mo_SIGAF3_ | 0.08900049 | 0.526438   | 6.42E-05 | 0.020663  | 0.067165  |
| 9mo_SIGAF3_ | 0.08963712 | 0.53027946 | 6.44E-05 | 0.021137  | 0.059815  |
| 9mo_SIGAF3_ | 0.01121664 | 0.05708307 | 3.21E-05 | 0.006339  | 0.32844   |
| 9mo_SIGAF3_ | 0.08977965 | 0.53113943 | 6.44E-05 | 0.021137  | 0.059815  |
| 9mo_SIGAF3_ | 0.02593492 | 0.14589459 | 3.76E-05 | 0.0041286 | -0.096385 |
| 9mo_SIGAF3_ | 0.1130137  | 0.6713359  | 6.62E-05 | 0.025403  | -0.29951  |
| 9mo_SIGAF3_ | 0.03223348 | 0.18390065 | 4.27E-05 | 0.004099  | -0.097962 |
| 9mo_SIGAF3_ | 0.10650142 | 0.6320402  | 6.58E-05 | 0.02556   | -0.22263  |

|             |            |            |          |           |           |
|-------------|------------|------------|----------|-----------|-----------|
| 9mo_SIGAF3_ | 0.01530801 | 0.0817708  | 3.27E-05 | 0.0054028 | 0.1442    |
| 9mo_SIGAF3_ | 0.08660594 | 0.511989   | 6.40E-05 | 0.019681  | 0.093363  |
| 9mo_SIGAF3_ | 0.10066415 | 0.59681755 | 6.53E-05 | 0.024687  | -0.12375  |
| 9mo_SIGAF3_ | 0.00705944 | 0.03199815 | 3.19E-05 | 0.0075925 | 0.51404   |
| 9mo_SIGAF3_ | 0.02154939 | 0.11943188 | 3.49E-05 | 0.0044169 | -0.0356   |
| 9mo_SIGAF3_ | 0.01901429 | 0.10413481 | 3.38E-05 | 0.004741  | 0.03364   |
| 9mo_SIGAF3_ | 0.02917466 | 0.16544344 | 3.97E-05 | 0.0040686 | -0.10661  |
| 9mo_SIGAF3_ | 0.05625233 | 0.3288326  | 5.97E-05 | 0.0073934 | 0.068678  |
| 9mo_SIGAF3_ | 0.02715582 | 0.15326162 | 3.84E-05 | 0.0040947 | -0.10271  |
| 9mo_SIGAF3_ | 0.02593291 | 0.14588244 | 3.76E-05 | 0.0041286 | -0.096385 |
| 9mo_SIGAF3_ | 0.09261772 | 0.5482647  | 6.46E-05 | 0.022258  | 0.019141  |
| 9mo_SIGAF3_ | 0.02660131 | 0.1499156  | 3.80E-05 | 0.0041099 | -0.099939 |
| 9mo_SIGAF3_ | 0.10736945 | 0.63727796 | 6.59E-05 | 0.025604  | -0.23052  |
| 9mo_SIGAF3_ | 0.01583307 | 0.08493909 | 3.28E-05 | 0.0052924 | 0.1442    |
| 9mo_SIGAF3_ | 0.08477289 | 0.5009282  | 6.38E-05 | 0.018923  | 0.1136    |
| 9mo_SIGAF3_ | 0.01367198 | 0.07189887 | 3.24E-05 | 0.0057681 | 0.20898   |
| 9mo_SIGAF3_ | 0.02106332 | 0.11649888 | 3.47E-05 | 0.0044724 | -0.023601 |
| 9mo_SIGAF3_ | 0.14903615 | 0.8886987  | 6.76E-05 | 0.023691  | -0.52143  |
| 9mo_SIGAF3_ | 0.06161289 | 0.36117873 | 6.07E-05 | 0.0090475 | 0.082025  |
| 9mo_SIGAF3_ | 0.09327964 | 0.55225873 | 6.47E-05 | 0.022469  | 0.0013661 |
| 9mo_SIGAF3_ | 0.08275316 | 0.488741   | 6.35E-05 | 0.017892  | 0.12434   |
| 9mo_SIGAF3_ | 0.03927607 | 0.22639628 | 4.98E-05 | 0.0045122 | -0.034672 |
| 9mo_SIGAF3_ | 0.04526402 | 0.26252812 | 5.46E-05 | 0.0051531 | 0.021279  |
| 9mo_SIGAF3_ | 0.0835356  | 0.49346232 | 6.37E-05 | 0.01841   | 0.12117   |
| 9mo_SIGAF3_ | 0.01430209 | 0.07570098 | 3.26E-05 | 0.0055188 | 0.18676   |
| 9mo_SIGAF3_ | 0.0765838  | 0.45151457 | 6.27E-05 | 0.015053  | 0.1354    |
| 9mo_SIGAF3_ | 0.08163498 | 0.4819938  | 6.34E-05 | 0.017373  | 0.12948   |
| 9mo_SIGAF3_ | 0.03938494 | 0.22705324 | 4.98E-05 | 0.0045122 | -0.034672 |
| 9mo_SIGAF3_ | 0.14454316 | 0.8615875  | 6.75E-05 | 0.023632  | -0.50968  |
| 9mo_SIGAF3_ | 0.02046051 | 0.11286143 | 3.44E-05 | 0.0045325 | -0.01065  |
| 9mo_SIGAF3_ | 0.02011893 | 0.11080031 | 3.42E-05 | 0.0045972 | 0.0032259 |
| 9mo_SIGAF3_ | 0.0243928  | 0.13658929 | 3.64E-05 | 0.0042065 | -0.080664 |
| 9mo_SIGAF3_ | 0.03313335 | 0.18933058 | 4.37E-05 | 0.0041322 | -0.091175 |
| 9mo_SIGAF3_ | 0.08011206 | 0.4728044  | 6.32E-05 | 0.016594  | 0.13446   |
| 9mo_SIGAF3_ | 0.03548298 | 0.20350847 | 4.59E-05 | 0.0042319 | -0.073417 |
| 9mo_SIGAF3_ | 0.01507357 | 0.0803562  | 3.27E-05 | 0.0054028 | 0.16515   |
| 9mo_SIGAF3_ | 0.05967723 | 0.34949875 | 6.03E-05 | 0.0083426 | 0.077363  |
| 9mo_SIGAF3_ | 0.07827319 | 0.4617085  | 6.29E-05 | 0.015819  | 0.13651   |
| 9mo_SIGAF3_ | 0.0618614  | 0.36267826 | 6.07E-05 | 0.0090475 | 0.083692  |
| 9mo_SIGAF3_ | 0.02641328 | 0.14878106 | 3.76E-05 | 0.0041286 | -0.099939 |
| 9mo_SIGAF3_ | 0.1212153  | 0.7208251  | 6.66E-05 | 0.024419  | -0.37656  |
| 9mo_SIGAF3_ | 0.02505882 | 0.14060806 | 3.68E-05 | 0.0041768 | -0.086782 |
| 9mo_SIGAF3_ | 0.01894242 | 0.10370119 | 3.38E-05 | 0.004741  | 0.03364   |

|             |            |            |          |           |           |
|-------------|------------|------------|----------|-----------|-----------|
| 9mo_SIGAF3_ | 0.05797672 | 0.3392377  | 6.00E-05 | 0.0078516 | 0.073002  |
| 9mo_SIGAF3_ | 0.02199361 | 0.12211233 | 3.52E-05 | 0.0043661 | -0.046619 |
| 9mo_SIGAF3_ | 0.03752128 | 0.21580775 | 4.81E-05 | 0.0043756 | -0.05192  |
| 9mo_SIGAF3_ | 0.01781206 | 0.09688047 | 3.34E-05 | 0.0049043 | 0.067421  |
| 9mo_SIGAF3_ | 0.06633546 | 0.38967514 | 6.13E-05 | 0.010826  | 0.10013   |
| 9mo_SIGAF3_ | 0.10694218 | 0.63469976 | 6.58E-05 | 0.025586  | -0.22263  |
| 9mo_SIGAF3_ | 0.02112714 | 0.11688399 | 3.47E-05 | 0.0044724 | -0.023601 |
| 9mo_SIGAF3_ | 0.10044818 | 0.5955144  | 6.53E-05 | 0.024687  | -0.12375  |
| 9mo_SIGAF3_ | 0.08776918 | 0.5190081  | 6.41E-05 | 0.020177  | 0.080939  |
| 9mo_SIGAF3_ | 0.0251031  | 0.14087528 | 3.68E-05 | 0.0041768 | -0.086782 |
| 9mo_SIGAF3_ | 0.02514361 | 0.14111975 | 3.68E-05 | 0.0041768 | -0.086782 |
| 9mo_SIGAF3_ | 0.04821051 | 0.28030753 | 5.67E-05 | 0.0056831 | 0.038361  |
| 9mo_SIGAF3_ | 0.01734948 | 0.0940892  | 3.33E-05 | 0.0049935 | 0.085504  |
| 9mo_SIGAF3_ | 0.01938242 | 0.10635613 | 3.40E-05 | 0.0046667 | 0.017998  |
| 9mo_SIGAF3_ | 0.03727013 | 0.21429223 | 4.76E-05 | 0.0043355 | -0.057524 |
| 9mo_SIGAF3_ | 0.01306883 | 0.0682594  | 3.23E-05 | 0.0059016 | 0.25518   |
| 9mo_SIGAF3_ | 0.0268055  | 0.15114774 | 3.80E-05 | 0.0041099 | -0.099939 |
| 9mo_SIGAF3_ | 0.08197559 | 0.48404908 | 6.35E-05 | 0.017633  | 0.12948   |
| 9mo_SIGAF3_ | 0.11036971 | 0.65538174 | 6.60E-05 | 0.02558   | -0.27396  |
| 9mo_SIGAF3_ | 0.02160944 | 0.11979418 | 3.49E-05 | 0.0044169 | -0.0356   |
| 9mo_SIGAF3_ | 0.13266514 | 0.7899145  | 6.71E-05 | 0.023568  | -0.45613  |
| 9mo_SIGAF3_ | 0.0747381  | 0.4403774  | 6.25E-05 | 0.014299  | 0.13218   |
| 9mo_SIGAF3_ | 0.02888133 | 0.16367348 | 3.97E-05 | 0.0040686 | -0.10664  |
| 9mo_SIGAF3_ | 0.06462876 | 0.37937674 | 6.10E-05 | 0.010005  | 0.093303  |
| 9mo_SIGAF3_ | 0.01888266 | 0.10334059 | 3.38E-05 | 0.004741  | 0.03364   |
| 9mo_SIGAF3_ | 0.0696706  | 0.40979964 | 6.18E-05 | 0.012147  | 0.11455   |
| 9mo_SIGAF3_ | 0.05093003 | 0.29671735 | 5.81E-05 | 0.006215  | 0.051138  |
| 9mo_SIGAF3_ | 0.07459834 | 0.43953407 | 6.24E-05 | 0.014051  | 0.13218   |
| 9mo_SIGAF3_ | 0.0724986  | 0.42686406 | 6.22E-05 | 0.01332   | 0.12548   |
| 9mo_SIGAF3_ | 0.01624288 | 0.0874119  | 3.30E-05 | 0.0051875 | 0.12392   |
| 9mo_SIGAF3_ | 0.06607169 | 0.3880835  | 6.13E-05 | 0.010616  | 0.097788  |
| 9mo_SIGAF3_ | 0.1016403  | 0.60270774 | 6.54E-05 | 0.024923  | -0.14299  |
| 9mo_SIGAF3_ | 0.01907291 | 0.10448853 | 3.38E-05 | 0.004741  | 0.03364   |
| 9mo_SIGAF3_ | 0.01259205 | 0.06538244 | 3.23E-05 | 0.0059016 | 0.25518   |
| 9mo_SIGAF3_ | 0.0255699  | 0.14369196 | 3.72E-05 | 0.0041509 | -0.092011 |
| 9mo_SIGAF3_ | 0.08930147 | 0.5282541  | 6.43E-05 | 0.020902  | 0.067165  |
| 9mo_SIGAF3_ | 0.0283518  | 0.1604782  | 3.93E-05 | 0.004074  | -0.10603  |
| 9mo_SIGAF3_ | 0.10495544 | 0.6227116  | 6.57E-05 | 0.025429  | -0.19772  |
| 9mo_SIGAF3_ | 0.01427333 | 0.07552743 | 3.26E-05 | 0.0055188 | 0.18676   |
| 9mo_SIGAF3_ | 0.02700302 | 0.15233958 | 3.84E-05 | 0.0040947 | -0.10271  |
| 9mo_SIGAF3_ | 0.09897333 | 0.58661497 | 6.52E-05 | 0.024275  | -0.094455 |
| 9mo_SIGAF3_ | 0.07440916 | 0.43839255 | 6.24E-05 | 0.014051  | 0.13218   |
| 9mo_SIGAF3_ | 0.01712534 | 0.09273674 | 3.33E-05 | 0.0049935 | 0.085504  |

|             |            |            |          |           |            |
|-------------|------------|------------|----------|-----------|------------|
| 9mo_SIGAF3_ | 0.10467929 | 0.62104523 | 6.57E-05 | 0.025429  | -0.18901   |
| 9mo_SIGAF3_ | 0.01247328 | 0.06466577 | 3.23E-05 | 0.0060411 | 0.2791     |
| 9mo_SIGAF3_ | 0.08710993 | 0.51503015 | 6.41E-05 | 0.01993   | 0.087329   |
| 9mo_SIGAF3_ | 0.07617272 | 0.44903404 | 6.26E-05 | 0.0148    | 0.1354     |
| 9mo_SIGAF3_ | 0.02150849 | 0.11918509 | 3.49E-05 | 0.0044169 | -0.0356    |
| 9mo_SIGAF3_ | 0.01741647 | 0.09449344 | 3.33E-05 | 0.0049935 | 0.085504   |
| 9mo_SIGAF3_ | 0.02475249 | 0.13875967 | 3.64E-05 | 0.0042065 | -0.086782  |
| 9mo_SIGAF3_ | 0.06709248 | 0.39424303 | 6.14E-05 | 0.011039  | 0.10251    |
| 9mo_SIGAF3_ | 0.11801361 | 0.7015058  | 6.65E-05 | 0.024847  | -0.34876   |
| 9mo_SIGAF3_ | 0.02115346 | 0.1170428  | 3.47E-05 | 0.0044724 | -0.023601  |
| 9mo_SIGAF3_ | 0.0146783  | 0.07797105 | 3.26E-05 | 0.0055188 | 0.18676    |
| 9mo_SIGAF3_ | 0.06973442 | 0.41018477 | 6.18E-05 | 0.012147  | 0.11455    |
| 9mo_SIGAF3_ | 0.01534867 | 0.08201615 | 3.28E-05 | 0.0052924 | 0.1442     |
| 9mo_SIGAF3_ | 0.02694528 | 0.15199114 | 3.80E-05 | 0.0041099 | -0.10271   |
| 9mo_SIGAF3_ | 0.0873737  | 0.5166217  | 6.41E-05 | 0.01993   | 0.087329   |
| 9mo_SIGAF3_ | 0.01635487 | 0.08808765 | 3.30E-05 | 0.0051875 | 0.12392    |
| 9mo_SIGAF3_ | 0.06069135 | 0.35561803 | 6.05E-05 | 0.008688  | 0.080421   |
| 9mo_SIGAF3_ | 0.04049153 | 0.23373047 | 5.09E-05 | 0.0046173 | -0.023154  |
| 9mo_SIGAF3_ | 0.01757342 | 0.09544047 | 3.34E-05 | 0.0049043 | 0.067421   |
| 9mo_SIGAF3_ | 0.09406702 | 0.5570098  | 6.48E-05 | 0.022877  | -0.0077738 |
| 9mo_SIGAF3_ | 0.01869346 | 0.10219889 | 3.38E-05 | 0.004741  | 0.03364    |
| 9mo_SIGAF3_ | 0.0584285  | 0.34196383 | 6.01E-05 | 0.0080116 | 0.074438   |
| 9mo_SIGAF3_ | 0.08783387 | 0.5193985  | 6.41E-05 | 0.020177  | 0.080939   |
| 9mo_SIGAF3_ | 0.02299144 | 0.12813331 | 3.55E-05 | 0.0043197 | -0.056631  |
| 9mo_SIGAF3_ | 0.02096789 | 0.11592306 | 3.47E-05 | 0.0044724 | -0.023601  |
| 9mo_SIGAF3_ | 0.1379429  | 0.82176095 | 6.73E-05 | 0.023534  | -0.48567   |
| 9mo_SIGAF3_ | 0.02348585 | 0.13111666 | 3.58E-05 | 0.0042778 | -0.065623  |
| 9mo_SIGAF3_ | 0.01026186 | 0.05132185 | 3.20E-05 | 0.0066628 | 0.37961    |
| 9mo_SIGAF3_ | 0.12625    | 0.7512049  | 6.68E-05 | 0.023879  | -0.41325   |
| 9mo_SIGAF3_ | 0.0375738  | 0.21612461 | 4.81E-05 | 0.0043756 | -0.05192   |
| 9mo_SIGAF3_ | 0.10853548 | 0.6443139  | 6.59E-05 | 0.025616  | -0.24573   |
| 9mo_SIGAF3_ | 0.14539039 | 0.8666998  | 6.75E-05 | 0.023641  | -0.51294   |
| 9mo_SIGAF3_ | 0.07940948 | 0.46856496 | 6.31E-05 | 0.016335  | 0.13545    |
| 9mo_SIGAF3_ | 0.13244478 | 0.7885848  | 6.71E-05 | 0.023568  | -0.45613   |
| 9mo_SIGAF3_ | 0.02311141 | 0.12885727 | 3.58E-05 | 0.0042778 | -0.065623  |
| 9mo_SIGAF3_ | 0.01742431 | 0.09454077 | 3.33E-05 | 0.0049935 | 0.085504   |
| 9mo_SIGAF3_ | 0.04760353 | 0.27664495 | 5.64E-05 | 0.0055867 | 0.035328   |
| 9mo_SIGAF3_ | 0.09114593 | 0.53938377 | 6.45E-05 | 0.021597  | 0.036126   |
| 9mo_SIGAF3_ | 0.01522615 | 0.08127687 | 3.27E-05 | 0.0054028 | 0.16515    |
| 9mo_SIGAF3_ | 0.01978465 | 0.10878325 | 3.42E-05 | 0.0045972 | 0.0032259  |
| 9mo_SIGAF3_ | 0.01039279 | 0.05211188 | 3.21E-05 | 0.0064976 | 0.35381    |
| 9mo_SIGAF3_ | 0.01503226 | 0.08010692 | 3.27E-05 | 0.0054028 | 0.16515    |
| 9mo_SIGAF3_ | 0.02192556 | 0.1217017  | 3.49E-05 | 0.0044169 | -0.046619  |

|             |            |            |          |           |           |
|-------------|------------|------------|----------|-----------|-----------|
| 9mo_SIGAF3_ | 0.02286935 | 0.1273966  | 3.55E-05 | 0.0043197 | -0.056631 |
| 9mo_SIGAF3_ | 0.01879662 | 0.10282137 | 3.38E-05 | 0.004741  | 0.03364   |
| 9mo_SIGAF3_ | 0.02027915 | 0.11176708 | 3.42E-05 | 0.0045972 | -0.01065  |
| 9mo_SIGAF3_ | 0.02945929 | 0.16716091 | 4.02E-05 | 0.0040662 | -0.10661  |
| 9mo_SIGAF3_ | 0.01408615 | 0.07439799 | 3.25E-05 | 0.0056405 | 0.20898   |
| 9mo_SIGAF3_ | 0.02276374 | 0.12675932 | 3.55E-05 | 0.0043197 | -0.056631 |
| 9mo_SIGAF3_ | 0.02763086 | 0.15612799 | 3.88E-05 | 0.0040827 | -0.10472  |
| 9mo_SIGAF3_ | 0.0101584  | 0.05069756 | 3.20E-05 | 0.0066628 | 0.37961   |
| 9mo_SIGAF3_ | 0.11391476 | 0.67677295 | 6.62E-05 | 0.025353  | -0.31137  |
| 9mo_SIGAF3_ | 0.07234681 | 0.42594814 | 6.21E-05 | 0.01308   | 0.12548   |
| 9mo_SIGAF3_ | 0.13728006 | 0.81776136 | 6.73E-05 | 0.02353   | -0.48029  |
| 9mo_SIGAF3_ | 0.02988052 | 0.16970268 | 4.07E-05 | 0.0040668 | -0.10597  |
| 9mo_SIGAF3_ | 0.05027377 | 0.29275742 | 5.78E-05 | 0.0061018 | 0.048868  |
| 9mo_SIGAF3_ | 0.0173763  | 0.09425103 | 3.33E-05 | 0.0049935 | 0.085504  |
| 9mo_SIGAF3_ | 0.04951024 | 0.28815022 | 5.73E-05 | 0.0058857 | 0.04392   |
| 9mo_SIGAF3_ | 0.04759494 | 0.2765931  | 5.64E-05 | 0.0055867 | 0.035328  |
| 9mo_SIGAF3_ | 0.10225378 | 0.60640955 | 6.55E-05 | 0.025029  | -0.15246  |
| 9mo_SIGAF3_ | 0.06460195 | 0.37921497 | 6.10E-05 | 0.010005  | 0.093303  |
| 9mo_SIGAF3_ | 0.02110723 | 0.11676379 | 3.47E-05 | 0.0044724 | -0.023601 |
| 9mo_SIGAF3_ | 0.01759836 | 0.09559099 | 3.34E-05 | 0.0049043 | 0.067421  |
| 9mo_SIGAF3_ | 0.10911683 | 0.6478218  | 6.60E-05 | 0.025611  | -0.25305  |
| 9mo_SIGAF3_ | 0.09589727 | 0.5680537  | 6.50E-05 | 0.023448  | -0.035993 |
| 9mo_SIGAF3_ | 0.09160881 | 0.5421768  | 6.45E-05 | 0.021822  | 0.027741  |
| 9mo_SIGAF3_ | 0.02843731 | 0.16099422 | 3.93E-05 | 0.004074  | -0.10603  |
| 9mo_SIGAF3_ | 0.12138155 | 0.7218283  | 6.66E-05 | 0.024419  | -0.38089  |
| 9mo_SIGAF3_ | 0.02084495 | 0.11518122 | 3.44E-05 | 0.0045325 | -0.023601 |
| 9mo_SIGAF3_ | 0.09852966 | 0.5839378  | 6.52E-05 | 0.024275  | -0.084641 |
| 9mo_SIGAF3_ | 0.01178539 | 0.06051496 | 3.22E-05 | 0.0061869 | 0.30353   |
| 9mo_SIGAF3_ | 0.10473939 | 0.6214079  | 6.57E-05 | 0.025429  | -0.18901  |
| 9mo_SIGAF3_ | 0.07882828 | 0.46505797 | 6.30E-05 | 0.016077  | 0.13613   |
| 9mo_SIGAF3_ | 0.05510856 | 0.321931   | 5.94E-05 | 0.0071062 | 0.065685  |
| 9mo_SIGAF3_ | 0.09546958 | 0.565473   | 6.49E-05 | 0.023263  | -0.035993 |
| 9mo_SIGAF3_ | 0.10435668 | 0.61909866 | 6.56E-05 | 0.025367  | -0.18901  |
| 9mo_SIGAF3_ | 0.03821225 | 0.21997708 | 4.87E-05 | 0.0044183 | -0.04622  |
| 9mo_SIGAF3_ | 0.09371062 | 0.55485934 | 6.48E-05 | 0.022676  | 0.0013661 |
| 9mo_SIGAF3_ | 0.01181417 | 0.06068865 | 3.22E-05 | 0.0061869 | 0.30353   |
| 9mo_SIGAF3_ | 0.09241983 | 0.54707056 | 6.46E-05 | 0.022258  | 0.019141  |
| 9mo_SIGAF3_ | 0.01746011 | 0.09475677 | 3.33E-05 | 0.0049935 | 0.085504  |
| 9mo_SIGAF3_ | 0.14820176 | 0.8836639  | 6.76E-05 | 0.02368   | -0.51946  |
| 9mo_SIGAF3_ | 0.0915387  | 0.5417537  | 6.45E-05 | 0.021822  | 0.027741  |
| 9mo_SIGAF3_ | 0.02295137 | 0.12789156 | 3.55E-05 | 0.0043197 | -0.056631 |
| 9mo_SIGAF3_ | 0.1042013  | 0.6181611  | 6.56E-05 | 0.025367  | -0.18011  |
| 9mo_SIGAF3_ | 0.07182769 | 0.4228157  | 6.20E-05 | 0.012843  | 0.12348   |

|             |            |            |          |           |           |
|-------------|------------|------------|----------|-----------|-----------|
| 9mo_SIGAF3_ | 0.0100831  | 0.05024321 | 3.20E-05 | 0.0066628 | 0.37961   |
| 9mo_SIGAF3_ | 0.08211815 | 0.48490933 | 6.35E-05 | 0.017633  | 0.12948   |
| 9mo_SIGAF3_ | 0.01794501 | 0.09768271 | 3.34E-05 | 0.0049043 | 0.067421  |
| 9mo_SIGAF3_ | 0.00776122 | 0.03623275 | 3.19E-05 | 0.0073923 | 0.48652   |
| 9mo_SIGAF3_ | 0.02120316 | 0.11734267 | 3.47E-05 | 0.0044724 | -0.023601 |
| 9mo_SIGAF3_ | 0.01993551 | 0.10969355 | 3.42E-05 | 0.0045972 | 0.0032259 |
| 9mo_SIGAF3_ | 0.02072346 | 0.11444815 | 3.44E-05 | 0.0045325 | -0.01065  |
| 9mo_SIGAF3_ | 0.02209133 | 0.12270196 | 3.52E-05 | 0.0043661 | -0.046619 |
| 9mo_SIGAF3_ | 0.12116215 | 0.72050434 | 6.66E-05 | 0.02449   | -0.37656  |
| 9mo_SIGAF3_ | 0.01617781 | 0.08701928 | 3.30E-05 | 0.0051875 | 0.12392   |
| 9mo_SIGAF3_ | 0.01881936 | 0.10295863 | 3.38E-05 | 0.004741  | 0.03364   |
| 9mo_SIGAF3_ | 0.01084643 | 0.0548492  | 3.21E-05 | 0.0064976 | 0.35381   |
| 9mo_SIGAF3_ | 0.01718799 | 0.09311474 | 3.33E-05 | 0.0049935 | 0.085504  |
| 9mo_SIGAF3_ | 0.11483398 | 0.68231964 | 6.63E-05 | 0.025242  | -0.32268  |
| 9mo_SIGAF3_ | 0.02427167 | 0.13585837 | 3.64E-05 | 0.0042065 | -0.080664 |
| 9mo_SIGAF3_ | 0.02411499 | 0.13491291 | 3.61E-05 | 0.0042401 | -0.073623 |
| 9mo_SIGAF3_ | 0.11080279 | 0.657995   | 6.61E-05 | 0.025556  | -0.27396  |
| 9mo_SIGAF3_ | 0.03501848 | 0.20070559 | 4.54E-05 | 0.0042028 | -0.078293 |
| 9mo_SIGAF3_ | 0.01448243 | 0.07678916 | 3.26E-05 | 0.0055188 | 0.18676   |
| 9mo_SIGAF3_ | 0.01511757 | 0.08062168 | 3.27E-05 | 0.0054028 | 0.16515   |
| 9mo_SIGAF3_ | 0.046661   | 0.27095768 | 5.57E-05 | 0.0054037 | 0.028707  |
| 9mo_SIGAF3_ | 0.04822603 | 0.28040114 | 5.67E-05 | 0.0056831 | 0.038361  |
| 9mo_SIGAF3_ | 0.02214305 | 0.12301407 | 3.52E-05 | 0.0043661 | -0.046619 |
| 9mo_SIGAF3_ | 0.10220565 | 0.6061191  | 6.55E-05 | 0.025029  | -0.15246  |
| 9mo_SIGAF3_ | 0.01864133 | 0.10188439 | 3.36E-05 | 0.0048202 | 0.03364   |
| 9mo_SIGAF3_ | 0.01479667 | 0.07868531 | 3.27E-05 | 0.0054028 | 0.16515   |
| 9mo_SIGAF3_ | 0.01509441 | 0.08048193 | 3.27E-05 | 0.0054028 | 0.16515   |
| 9mo_SIGAF3_ | 0.08246417 | 0.48699722 | 6.35E-05 | 0.017892  | 0.1271    |
| 9mo_SIGAF3_ | 0.07686676 | 0.45322195 | 6.28E-05 | 0.015307  | 0.13605   |
| 9mo_SIGAF3_ | 0.13068722 | 0.77797955 | 6.70E-05 | 0.023618  | -0.44263  |
| 9mo_SIGAF3_ | 0.0133459  | 0.06993127 | 3.24E-05 | 0.0057681 | 0.23179   |
| 9mo_SIGAF3_ | 0.08018471 | 0.4732428  | 6.32E-05 | 0.016594  | 0.13446   |
| 9mo_SIGAF3_ | 0.08070604 | 0.4763885  | 6.32E-05 | 0.016854  | 0.13314   |
| 9mo_SIGAF3_ | 0.02667749 | 0.15037532 | 3.80E-05 | 0.0041099 | -0.099939 |
| 9mo_SIGAF3_ | 0.01906084 | 0.10441575 | 3.38E-05 | 0.004741  | 0.03364   |
| 9mo_SIGAF3_ | 0.03384861 | 0.19364648 | 4.43E-05 | 0.004153  | -0.087207 |
| 9mo_SIGAF3_ | 0.01289189 | 0.0671917  | 3.23E-05 | 0.0059016 | 0.25518   |
| 9mo_SIGAF3_ | 0.09442725 | 0.55918354 | 6.48E-05 | 0.022877  | -0.017059 |
| 9mo_SIGAF3_ | 0.03652519 | 0.20979725 | 4.70E-05 | 0.0042982 | -0.062998 |
| 9mo_SIGAF3_ | 0.00934246 | 0.04577411 | 3.20E-05 | 0.0068348 | 0.4058    |
| 9mo_SIGAF3_ | 0.0224176  | 0.12467069 | 3.52E-05 | 0.0043661 | -0.046619 |
| 9mo_SIGAF3_ | 0.09452644 | 0.559782   | 6.48E-05 | 0.022877  | -0.017059 |
| 9mo_SIGAF3_ | 0.13294314 | 0.79159194 | 6.71E-05 | 0.023556  | -0.45613  |

|             |            |            |          |           |           |
|-------------|------------|------------|----------|-----------|-----------|
| 9mo_SIGAF3_ | 0.03986074 | 0.22992425 | 5.03E-05 | 0.0045634 | -0.028892 |
| 9mo_SIGAF3_ | 0.09610643 | 0.56931585 | 6.50E-05 | 0.023448  | -0.045608 |
| 9mo_SIGAF3_ | 0.04114991 | 0.23770323 | 5.14E-05 | 0.0046741 | -0.017493 |
| 9mo_SIGAF3_ | 0.08438977 | 0.4986165  | 6.37E-05 | 0.018667  | 0.1136    |
| 9mo_SIGAF3_ | 0.11489169 | 0.68266785 | 6.63E-05 | 0.025242  | -0.32268  |
| 9mo_SIGAF3_ | 0.03072828 | 0.17481817 | 4.11E-05 | 0.0040705 | -0.10475  |
| 9mo_SIGAF3_ | 0.02789178 | 0.15770242 | 3.88E-05 | 0.0040827 | -0.10472  |
| 9mo_SIGAF3_ | 0.03652657 | 0.20980556 | 4.70E-05 | 0.0042982 | -0.062998 |
| 9mo_SIGAF3_ | 0.01595813 | 0.08569371 | 3.30E-05 | 0.0051875 | 0.12392   |
| 9mo_SIGAF3_ | 0.10392637 | 0.6165021  | 6.56E-05 | 0.025296  | -0.18011  |
| 9mo_SIGAF3_ | 0.0121374  | 0.06263906 | 3.23E-05 | 0.0060411 | 0.2791    |
| 9mo_SIGAF3_ | 0.06419977 | 0.37678817 | 6.10E-05 | 0.010005  | 0.091185  |
| 9mo_SIGAF3_ | 0.10751838 | 0.6381766  | 6.59E-05 | 0.025604  | -0.23052  |
| 9mo_SIGAF3_ | 0.03376071 | 0.19311611 | 4.43E-05 | 0.004153  | -0.087207 |
| 9mo_SIGAF3_ | 0.01403215 | 0.07407214 | 3.25E-05 | 0.0056405 | 0.20898   |
| 9mo_SIGAF3_ | 0.0150799  | 0.08039438 | 3.27E-05 | 0.0054028 | 0.16515   |
| 9mo_SIGAF3_ | 0.09246835 | 0.54736334 | 6.46E-05 | 0.022258  | 0.019141  |
| 9mo_SIGAF3_ | 0.03378974 | 0.19329125 | 4.43E-05 | 0.004153  | -0.087207 |
| 9mo_SIGAF3_ | 0.06724519 | 0.3951645  | 6.14E-05 | 0.011039  | 0.10492   |
| 9mo_SIGAF3_ | 0.02097981 | 0.11599495 | 3.47E-05 | 0.0044724 | -0.023601 |
| 9mo_SIGAF3_ | 0.02208985 | 0.12269301 | 3.52E-05 | 0.0043661 | -0.046619 |
| 9mo_SIGAF3_ | 0.01326513 | 0.06944387 | 3.24E-05 | 0.0057681 | 0.23179   |
| 9mo_SIGAF3_ | 0.04318085 | 0.24995811 | 5.33E-05 | 0.0049301 | 0.0036923 |
| 9mo_SIGAF3_ | 0.120031   | 0.7136789  | 6.65E-05 | 0.024632  | -0.36766  |
| 9mo_SIGAF3_ | 0.01916046 | 0.10501685 | 3.38E-05 | 0.004741  | 0.017998  |
| 9mo_SIGAF3_ | 0.02408981 | 0.13476098 | 3.61E-05 | 0.0042401 | -0.073623 |
| 9mo_SIGAF3_ | 0.12990913 | 0.77328444 | 6.70E-05 | 0.023664  | -0.43912  |
| 9mo_SIGAF3_ | 0.03682376 | 0.21159881 | 4.70E-05 | 0.0042982 | -0.062998 |
| 9mo_SIGAF3_ | 0.01274408 | 0.06629983 | 3.23E-05 | 0.0059016 | 0.25518   |
| 9mo_SIGAF3_ | 0.0133611  | 0.07002295 | 3.24E-05 | 0.0057681 | 0.23179   |
| 9mo_SIGAF3_ | 0.08123742 | 0.47959492 | 6.33E-05 | 0.017113  | 0.13148   |
| 9mo_SIGAF3_ | 0.02460364 | 0.13786149 | 3.64E-05 | 0.0042065 | -0.080664 |
| 9mo_SIGAF3_ | 0.01564942 | 0.08383091 | 3.28E-05 | 0.0052924 | 0.1442    |
| 9mo_SIGAF3_ | 0.03271325 | 0.1867956  | 4.32E-05 | 0.0041142 | -0.094772 |
| 9mo_SIGAF3_ | 0.01940527 | 0.10649404 | 3.40E-05 | 0.0046667 | 0.017998  |
| 9mo_SIGAF3_ | 0.01376108 | 0.07243646 | 3.25E-05 | 0.0056405 | 0.20898   |
| 9mo_SIGAF3_ | 0.03180991 | 0.1813448  | 4.22E-05 | 0.0040866 | -0.10071  |
| 9mo_SIGAF3_ | 0.03024696 | 0.17191377 | 4.07E-05 | 0.0040668 | -0.10475  |
| 9mo_SIGAF3_ | 0.10440859 | 0.6194118  | 6.56E-05 | 0.025367  | -0.18901  |
| 9mo_SIGAF3_ | 0.01748574 | 0.0949114  | 3.33E-05 | 0.0049935 | 0.085504  |
| 9mo_SIGAF3_ | 0.05377491 | 0.3138836  | 5.91E-05 | 0.0068337 | 0.060836  |
| 9mo_SIGAF3_ | 0.02683282 | 0.15131257 | 3.80E-05 | 0.0041099 | -0.099939 |
| 9mo_SIGAF3_ | 0.02295258 | 0.12789884 | 3.55E-05 | 0.0043197 | -0.056631 |

|             |            |            |          |           |           |
|-------------|------------|------------|----------|-----------|-----------|
| 9mo_SIGAF3_ | 0.02943696 | 0.16702618 | 4.02E-05 | 0.0040662 | -0.10661  |
| 9mo_SIGAF3_ | 0.03181851 | 0.18139668 | 4.22E-05 | 0.0040866 | -0.10071  |
| 9mo_SIGAF3_ | 0.09978152 | 0.5914917  | 6.53E-05 | 0.024558  | -0.10426  |
| 9mo_SIGAF3_ | 0.01388313 | 0.07317295 | 3.25E-05 | 0.0056405 | 0.20898   |
| 9mo_SIGAF3_ | 0.06889645 | 0.40512836 | 6.16E-05 | 0.011695  | 0.11218   |
| 9mo_SIGAF3_ | 0.06794643 | 0.39939588 | 6.15E-05 | 0.011255  | 0.10734   |
| 9mo_SIGAF3_ | 0.02791856 | 0.15786405 | 3.88E-05 | 0.0040827 | -0.10472  |
| 9mo_SIGAF3_ | 0.01812589 | 0.09877417 | 3.36E-05 | 0.0048202 | 0.050123  |
| 9mo_SIGAF3_ | 0.0829655  | 0.4900223  | 6.36E-05 | 0.018151  | 0.12434   |
| 9mo_SIGAF3_ | 0.08799318 | 0.52035975 | 6.42E-05 | 0.020421  | 0.080939  |
| 9mo_SIGAF3_ | 0.01722014 | 0.09330875 | 3.33E-05 | 0.0049935 | 0.085504  |
| 9mo_SIGAF3_ | 0.03631285 | 0.20851591 | 4.65E-05 | 0.0042637 | -0.062998 |
| 9mo_SIGAF3_ | 0.01911449 | 0.10473944 | 3.38E-05 | 0.004741  | 0.03364   |
| 9mo_SIGAF3_ | 0.01894873 | 0.10373925 | 3.38E-05 | 0.004741  | 0.03364   |
| 9mo_SIGAF3_ | 0.02569837 | 0.14446719 | 3.72E-05 | 0.0041509 | -0.092011 |
| 9mo_SIGAF3_ | 0.02256428 | 0.1255558  | 3.55E-05 | 0.0043197 | -0.056631 |
| 9mo_SIGAF3_ | 0.03055785 | 0.17378972 | 4.11E-05 | 0.0040705 | -0.10475  |
| 9mo_SIGAF3_ | 0.06003995 | 0.35168743 | 6.04E-05 | 0.0085136 | 0.07887   |
| 9mo_SIGAF3_ | 0.0090445  | 0.0439762  | 3.19E-05 | 0.0070136 | 0.43237   |
| 9mo_SIGAF3_ | 0.12746583 | 0.75854135 | 6.69E-05 | 0.023794  | -0.4246   |
| 9mo_SIGAF3_ | 0.05066876 | 0.2951408  | 5.78E-05 | 0.0061018 | 0.051138  |
| 9mo_SIGAF3_ | 0.11917439 | 0.70851004 | 6.65E-05 | 0.024704  | -0.36308  |
| 9mo_SIGAF3_ | 0.08061428 | 0.47583485 | 6.32E-05 | 0.016854  | 0.13314   |
| 9mo_SIGAF3_ | 0.03010305 | 0.17104545 | 4.07E-05 | 0.0040668 | -0.10597  |
| 9mo_SIGAF3_ | 0.13822332 | 0.82345307 | 6.73E-05 | 0.023534  | -0.48567  |
| 9mo_SIGAF3_ | 0.02312831 | 0.12895921 | 3.58E-05 | 0.0042778 | -0.065623 |
| 9mo_SIGAF3_ | 0.02632675 | 0.1482589  | 3.76E-05 | 0.0041286 | -0.096385 |
| 9mo_SIGAF3_ | 0.02130996 | 0.11798713 | 3.47E-05 | 0.0044724 | -0.023601 |
| 9mo_SIGAF3_ | 0.01056077 | 0.0531255  | 3.21E-05 | 0.0064976 | 0.35381   |
| 9mo_SIGAF3_ | 0.10848783 | 0.64402634 | 6.59E-05 | 0.025616  | -0.24573  |
| 9mo_SIGAF3_ | 0.05643904 | 0.32995924 | 5.98E-05 | 0.0075425 | 0.068678  |
| 9mo_SIGAF3_ | 0.06021051 | 0.35271662 | 6.04E-05 | 0.0085136 | 0.07887   |
| 9mo_SIGAF3_ | 0.0107904  | 0.05451115 | 3.21E-05 | 0.0064976 | 0.35381   |
| 9mo_SIGAF3_ | 0.06203019 | 0.36369672 | 6.07E-05 | 0.0092324 | 0.083692  |
| 9mo_SIGAF3_ | 0.07571188 | 0.44625333 | 6.26E-05 | 0.014549  | 0.13453   |
| 9mo_SIGAF3_ | 0.08705083 | 0.51467353 | 6.41E-05 | 0.01993   | 0.093363  |
| 9mo_SIGAF3_ | 0.01638377 | 0.08826201 | 3.30E-05 | 0.0051875 | 0.12392   |
| 9mo_SIGAF3_ | 0.00826022 | 0.0392438  | 3.19E-05 | 0.0071994 | 0.45929   |
| 9mo_SIGAF3_ | 0.01355469 | 0.0711911  | 3.24E-05 | 0.0057681 | 0.23179   |
| 9mo_SIGAF3_ | 0.11050814 | 0.6562171  | 6.60E-05 | 0.02558   | -0.27396  |
| 9mo_SIGAF3_ | 0.09712886 | 0.5754853  | 6.51E-05 | 0.023799  | -0.065044 |
| 9mo_SIGAF3_ | 0.02411317 | 0.13490191 | 3.61E-05 | 0.0042401 | -0.073623 |
| 9mo_SIGAF3_ | 0.02068155 | 0.11419526 | 3.44E-05 | 0.0045325 | -0.01065  |



|             |            |            |          |           |           |
|-------------|------------|------------|----------|-----------|-----------|
| 9mo_SIGAF3_ | 0.00792394 | 0.03721464 | 3.19E-05 | 0.0073923 | 0.48652   |
| 9mo_SIGAF3_ | 0.0216886  | 0.12027187 | 3.49E-05 | 0.0044169 | -0.0356   |
| 9mo_SIGAF3_ | 0.10189078 | 0.60421914 | 6.55E-05 | 0.025029  | -0.14299  |
| 9mo_SIGAF3_ | 0.07122374 | 0.41917145 | 6.20E-05 | 0.012608  | 0.12136   |
| 9mo_SIGAF3_ | 0.03575366 | 0.20514174 | 4.59E-05 | 0.0042319 | -0.068307 |
| 9mo_SIGAF3_ | 0.06974538 | 0.41025087 | 6.18E-05 | 0.012147  | 0.11455   |
| 9mo_SIGAF3_ | 0.04025837 | 0.2323236  | 5.03E-05 | 0.0045634 | -0.023154 |
| 9mo_SIGAF3_ | 0.03684099 | 0.2117028  | 4.70E-05 | 0.0042982 | -0.057524 |
| 9mo_SIGAF3_ | 0.11032023 | 0.65508324 | 6.60E-05 | 0.02558   | -0.27396  |
| 9mo_SIGAF3_ | 0.03301467 | 0.18861443 | 4.32E-05 | 0.0041142 | -0.091175 |
| 9mo_SIGAF3_ | 0.01887339 | 0.10328464 | 3.38E-05 | 0.004741  | 0.03364   |
| 9mo_SIGAF3_ | 0.08924373 | 0.52790564 | 6.43E-05 | 0.020902  | 0.067165  |
| 9mo_SIGAF3_ | 0.05355144 | 0.31253517 | 5.89E-05 | 0.0067028 | 0.060836  |
| 9mo_SIGAF3_ | 0.01040119 | 0.0521626  | 3.21E-05 | 0.0064976 | 0.35381   |
| 9mo_SIGAF3_ | 0.08127977 | 0.47985044 | 6.33E-05 | 0.017113  | 0.13148   |
| 9mo_SIGAF3_ | 0.02263946 | 0.12600946 | 3.55E-05 | 0.0043197 | -0.056631 |
| 9mo_SIGAF3_ | 0.01890633 | 0.10348342 | 3.38E-05 | 0.004741  | 0.03364   |
| 9mo_SIGAF3_ | 0.02014179 | 0.11093827 | 3.42E-05 | 0.0045972 | 0.0032259 |
| 9mo_SIGAF3_ | 0.08212633 | 0.4849587  | 6.35E-05 | 0.017633  | 0.12948   |
| 9mo_SIGAF3_ | 0.02420767 | 0.13547213 | 3.64E-05 | 0.0042065 | -0.080664 |
| 9mo_SIGAF3_ | 0.01900851 | 0.10409996 | 3.38E-05 | 0.004741  | 0.03364   |
| 9mo_SIGAF3_ | 0.02824565 | 0.15983772 | 3.93E-05 | 0.004074  | -0.10603  |
| 9mo_SIGAF3_ | 0.02545286 | 0.14298575 | 3.72E-05 | 0.0041509 | -0.092011 |
| 9mo_SIGAF3_ | 0.06385362 | 0.3746995  | 6.10E-05 | 0.0098069 | 0.089169  |
| 9mo_SIGAF3_ | 0.02987988 | 0.16969882 | 4.07E-05 | 0.0040668 | -0.10597  |
| 9mo_SIGAF3_ | 0.06581191 | 0.38651597 | 6.13E-05 | 0.010616  | 0.097788  |
| 9mo_SIGAF3_ | 0.0611016  | 0.35809353 | 6.06E-05 | 0.008866  | 0.080421  |
| 9mo_SIGAF3_ | 0.1327047  | 0.7901532  | 6.71E-05 | 0.023568  | -0.45613  |
| 9mo_SIGAF3_ | 0.10061619 | 0.5965282  | 6.53E-05 | 0.024687  | -0.12375  |
| 9mo_SIGAF3_ | 0.04509581 | 0.26151314 | 5.46E-05 | 0.0051531 | 0.017239  |
| 9mo_SIGAF3_ | 0.08042698 | 0.47470462 | 6.32E-05 | 0.016854  | 0.13446   |
| 9mo_SIGAF3_ | 0.02770325 | 0.15656482 | 3.88E-05 | 0.0040827 | -0.10472  |
| 9mo_SIGAF3_ | 0.01657229 | 0.08939959 | 3.31E-05 | 0.0050879 | 0.10435   |
| 9mo_SIGAF3_ | 0.04364725 | 0.25277236 | 5.38E-05 | 0.0050014 | 0.008455  |
| 9mo_SIGAF3_ | 0.08198993 | 0.48413563 | 6.35E-05 | 0.017633  | 0.12948   |
| 9mo_SIGAF3_ | 0.03474782 | 0.19907242 | 4.54E-05 | 0.0042028 | -0.078293 |
| 9mo_SIGAF3_ | 0.05452952 | 0.318437   | 5.92E-05 | 0.0069681 | 0.064127  |
| 9mo_SIGAF3_ | 0.14733928 | 0.87845963 | 6.76E-05 | 0.023673  | -0.51834  |
| 9mo_SIGAF3_ | 0.01572094 | 0.08426248 | 3.28E-05 | 0.0052924 | 0.1442    |
| 9mo_SIGAF3_ | 0.08318804 | 0.4913651  | 6.36E-05 | 0.018151  | 0.12434   |
| 9mo_SIGAF3_ | 0.01476402 | 0.07848831 | 3.26E-05 | 0.0055188 | 0.16515   |
| 9mo_SIGAF3_ | 0.01386523 | 0.07306495 | 3.25E-05 | 0.0056405 | 0.20898   |
| 9mo_SIGAF3_ | 0.06189618 | 0.3628881  | 6.07E-05 | 0.0092324 | 0.083692  |

|             |            |            |          |           |           |
|-------------|------------|------------|----------|-----------|-----------|
| 9mo_SIGAF3_ | 0.02268404 | 0.12627846 | 3.55E-05 | 0.0043197 | -0.056631 |
| 9mo_SIGAF3_ | 0.09962758 | 0.59056276 | 6.53E-05 | 0.024558  | -0.10426  |
| 9mo_SIGAF3_ | 0.02039805 | 0.1124846  | 3.44E-05 | 0.0045325 | -0.01065  |
| 9mo_SIGAF3_ | 0.13564505 | 0.8078955  | 6.72E-05 | 0.023527  | -0.47171  |
| 9mo_SIGAF3_ | 0.01358762 | 0.07138981 | 3.24E-05 | 0.0057681 | 0.23179   |
| 9mo_SIGAF3_ | 0.130361   | 0.7760111  | 6.70E-05 | 0.02364   | -0.44263  |
| 9mo_SIGAF3_ | 0.01052389 | 0.05290297 | 3.21E-05 | 0.0064976 | 0.35381   |
| 9mo_SIGAF3_ | 0.01118111 | 0.05686872 | 3.21E-05 | 0.006339  | 0.32844   |
| 9mo_SIGAF3_ | 0.05331441 | 0.31110495 | 5.89E-05 | 0.0067028 | 0.059084  |
| 9mo_SIGAF3_ | 0.09560038 | 0.5662623  | 6.49E-05 | 0.023263  | -0.035993 |
| 9mo_SIGAF3_ | 0.06181169 | 0.3623783  | 6.07E-05 | 0.0090475 | 0.083692  |
| 9mo_SIGAF3_ | 0.06662051 | 0.39139515 | 6.13E-05 | 0.010826  | 0.10013   |
| 9mo_SIGAF3_ | 0.08473295 | 0.50068724 | 6.38E-05 | 0.018923  | 0.1136    |
| 9mo_SIGAF3_ | 0.11430567 | 0.67913175 | 6.63E-05 | 0.025299  | -0.3171   |
| 9mo_SIGAF3_ | 0.06404874 | 0.37587684 | 6.10E-05 | 0.0098069 | 0.091185  |
| 9mo_SIGAF3_ | 0.0259924  | 0.14624141 | 3.76E-05 | 0.0041286 | -0.096385 |
| 9mo_SIGAF3_ | 0.05549702 | 0.324275   | 5.95E-05 | 0.007248  | 0.065685  |
| 9mo_SIGAF3_ | 0.01644837 | 0.08865184 | 3.31E-05 | 0.0050879 | 0.10435   |
| 9mo_SIGAF3_ | 0.08287888 | 0.48949963 | 6.35E-05 | 0.017892  | 0.12434   |
| 9mo_SIGAF3_ | 0.0194173  | 0.1065666  | 3.40E-05 | 0.0046667 | 0.017998  |
| 9mo_SIGAF3_ | 0.0281712  | 0.15938847 | 3.93E-05 | 0.004074  | -0.10603  |
| 9mo_SIGAF3_ | 0.01884391 | 0.10310672 | 3.38E-05 | 0.004741  | 0.03364   |
| 9mo_SIGAF3_ | 0.02818982 | 0.15950084 | 3.93E-05 | 0.004074  | -0.10603  |
| 9mo_SIGAF3_ | 0.03489209 | 0.19994298 | 4.54E-05 | 0.0042028 | -0.078293 |
| 9mo_SIGAF3_ | 0.0179562  | 0.09775023 | 3.34E-05 | 0.0049043 | 0.067421  |
| 9mo_SIGAF3_ | 0.05284695 | 0.30828425 | 5.87E-05 | 0.0065755 | 0.057248  |
| 9mo_SIGAF3_ | 0.01822404 | 0.09936639 | 3.36E-05 | 0.0048202 | 0.050123  |
| 9mo_SIGAF3_ | 0.05157103 | 0.30058524 | 5.83E-05 | 0.0063316 | 0.053285  |
| 9mo_SIGAF3_ | 0.05355131 | 0.31253442 | 5.89E-05 | 0.0067028 | 0.060836  |
| 9mo_SIGAF3_ | 0.01538779 | 0.08225218 | 3.28E-05 | 0.0052924 | 0.1442    |
| 9mo_SIGAF3_ | 0.04711076 | 0.27367154 | 5.61E-05 | 0.0054936 | 0.032113  |
| 9mo_SIGAF3_ | 0.04189299 | 0.24218705 | 5.19E-05 | 0.0047337 | -0.00654  |
| 9mo_SIGAF3_ | 0.02017726 | 0.11115231 | 3.42E-05 | 0.0045972 | 0.0032259 |
| 9mo_SIGAF3_ | 0.02513874 | 0.14109036 | 3.68E-05 | 0.0041768 | -0.086782 |
| 9mo_SIGAF3_ | 0.02347094 | 0.13102666 | 3.58E-05 | 0.0042778 | -0.065623 |
| 9mo_SIGAF3_ | 0.015171   | 0.08094408 | 3.27E-05 | 0.0054028 | 0.16515   |
| 9mo_SIGAF3_ | 0.01437993 | 0.0761707  | 3.26E-05 | 0.0055188 | 0.18676   |
| 9mo_SIGAF3_ | 0.11377861 | 0.6759514  | 6.62E-05 | 0.025353  | -0.31137  |
| 9mo_SIGAF3_ | 0.0080233  | 0.0378142  | 3.19E-05 | 0.0073923 | 0.48652   |
| 9mo_SIGAF3_ | 0.0272191  | 0.15364338 | 3.84E-05 | 0.0040947 | -0.10271  |
| 9mo_SIGAF3_ | 0.10209326 | 0.605441   | 6.55E-05 | 0.025029  | -0.15246  |
| 9mo_SIGAF3_ | 0.01313505 | 0.06865893 | 3.24E-05 | 0.0057681 | 0.23179   |
| 9mo_SIGAF3_ | 0.01835505 | 0.10015692 | 3.36E-05 | 0.0048202 | 0.050123  |

|             |            |            |          |           |           |
|-------------|------------|------------|----------|-----------|-----------|
| 9mo_SIGAF3_ | 0.09463431 | 0.560433   | 6.49E-05 | 0.023073  | -0.017059 |
| 9mo_SIGAF3_ | 0.01324286 | 0.06930947 | 3.24E-05 | 0.0057681 | 0.23179   |
| 9mo_SIGAF3_ | 0.08858835 | 0.52395105 | 6.42E-05 | 0.020663  | 0.074212  |
| 9mo_SIGAF3_ | 0.0636064  | 0.37320772 | 6.10E-05 | 0.0098069 | 0.089169  |
| 9mo_SIGAF3_ | 0.02488821 | 0.13957864 | 3.68E-05 | 0.0041768 | -0.086782 |
| 9mo_SIGAF3_ | 0.03228374 | 0.18420392 | 4.27E-05 | 0.004099  | -0.097962 |
| 9mo_SIGAF3_ | 0.03389023 | 0.1938976  | 4.43E-05 | 0.004153  | -0.087207 |
| 9mo_SIGAF3_ | 0.01838909 | 0.10036233 | 3.36E-05 | 0.0048202 | 0.050123  |
| 9mo_SIGAF3_ | 0.0171444  | 0.09285171 | 3.33E-05 | 0.0049935 | 0.085504  |
| 9mo_SIGAF3_ | 0.01952434 | 0.10721251 | 3.40E-05 | 0.0046667 | 0.017998  |
| 9mo_SIGAF3_ | 0.07997388 | 0.4719706  | 6.32E-05 | 0.016594  | 0.13446   |
| 9mo_SIGAF3_ | 0.01115444 | 0.05670777 | 3.21E-05 | 0.006339  | 0.32844   |
| 9mo_SIGAF3_ | 0.11525936 | 0.6848864  | 6.63E-05 | 0.025182  | -0.32268  |
| 9mo_SIGAF3_ | 0.00717044 | 0.03266797 | 3.19E-05 | 0.0075925 | 0.51404   |
| 9mo_SIGAF3_ | 0.06420704 | 0.37683207 | 6.10E-05 | 0.010005  | 0.091185  |
| 9mo_SIGAF3_ | 0.02657365 | 0.1497487  | 3.80E-05 | 0.0041099 | -0.099939 |
| 9mo_SIGAF3_ | 0.10258587 | 0.6084134  | 6.55E-05 | 0.025127  | -0.16182  |
| 9mo_SIGAF3_ | 0.04195849 | 0.24258225 | 5.24E-05 | 0.0047963 | -0.00654  |
| 9mo_SIGAF3_ | 0.04899744 | 0.2850559  | 5.70E-05 | 0.0057827 | 0.04392   |
| 9mo_SIGAF3_ | 0.04667216 | 0.271025   | 5.57E-05 | 0.0054037 | 0.028707  |
| 9mo_SIGAF3_ | 0.04937814 | 0.28735313 | 5.73E-05 | 0.0058857 | 0.04392   |
| 9mo_SIGAF3_ | 0.02237091 | 0.12438899 | 3.52E-05 | 0.0043661 | -0.046619 |
| 9mo_SIGAF3_ | 0.03270334 | 0.18673581 | 4.32E-05 | 0.0041142 | -0.094772 |
| 9mo_SIGAF3_ | 0.00892935 | 0.04328136 | 3.19E-05 | 0.0070136 | 0.43237   |
| 9mo_SIGAF3_ | 0.0403916  | 0.2331275  | 5.09E-05 | 0.0046173 | -0.023154 |
| 9mo_SIGAF3_ | 0.08389761 | 0.49564672 | 6.37E-05 | 0.01841   | 0.1176    |
| 9mo_SIGAF3_ | 0.01552538 | 0.08308244 | 3.28E-05 | 0.0052924 | 0.1442    |
| 9mo_SIGAF3_ | 0.04484848 | 0.26002073 | 5.46E-05 | 0.0051531 | 0.017239  |
| 9mo_SIGAF3_ | 0.07206596 | 0.42425346 | 6.21E-05 | 0.01308   | 0.12348   |
| 9mo_SIGAF3_ | 0.01222155 | 0.06314684 | 3.23E-05 | 0.0060411 | 0.2791    |
| 9mo_SIGAF3_ | 0.01636878 | 0.08817157 | 3.30E-05 | 0.0051875 | 0.12392   |
| 9mo_SIGAF3_ | 0.02218949 | 0.12329425 | 3.52E-05 | 0.0043661 | -0.046619 |
| 9mo_SIGAF3_ | 0.07683467 | 0.45302832 | 6.27E-05 | 0.015053  | 0.13605   |
| 9mo_SIGAF3_ | 0.03523921 | 0.20203747 | 4.54E-05 | 0.0042028 | -0.073417 |
| 9mo_SIGAF3_ | 0.00897847 | 0.04357777 | 3.19E-05 | 0.0070136 | 0.43237   |
| 9mo_SIGAF3_ | 0.02725442 | 0.15385653 | 3.84E-05 | 0.0040947 | -0.10271  |
| 9mo_SIGAF3_ | 0.0722952  | 0.42563677 | 6.21E-05 | 0.01308   | 0.12548   |
| 9mo_SIGAF3_ | 0.02203915 | 0.12238712 | 3.52E-05 | 0.0043661 | -0.046619 |
| 9mo_SIGAF3_ | 0.02818845 | 0.15949258 | 3.93E-05 | 0.004074  | -0.10603  |
| 9mo_SIGAF3_ | 0.02933725 | 0.16642454 | 4.02E-05 | 0.0040662 | -0.10661  |
| 9mo_SIGAF3_ | 0.01925883 | 0.10561042 | 3.40E-05 | 0.0046667 | 0.017998  |
| 9mo_SIGAF3_ | 0.10976658 | 0.65174246 | 6.60E-05 | 0.025599  | -0.26716  |
| 9mo_SIGAF3_ | 0.05057894 | 0.29459888 | 5.78E-05 | 0.0061018 | 0.048868  |

|             |            |            |          |           |            |
|-------------|------------|------------|----------|-----------|------------|
| 9mo_SIGAF3_ | 0.06911162 | 0.4064267  | 6.17E-05 | 0.01192   | 0.11218    |
| 9mo_SIGAF3_ | 0.02931156 | 0.1662695  | 4.02E-05 | 0.0040662 | -0.10661   |
| 9mo_SIGAF3_ | 0.0234147  | 0.13068731 | 3.58E-05 | 0.0042778 | -0.065623  |
| 9mo_SIGAF3_ | 0.11240757 | 0.6676785  | 6.62E-05 | 0.025448  | -0.29336   |
| 9mo_SIGAF3_ | 0.06791199 | 0.39918804 | 6.15E-05 | 0.011255  | 0.10734    |
| 9mo_SIGAF3_ | 0.11515984 | 0.6842859  | 6.63E-05 | 0.025182  | -0.32268   |
| 9mo_SIGAF3_ | 0.01608543 | 0.08646183 | 3.30E-05 | 0.0051875 | 0.12392    |
| 9mo_SIGAF3_ | 0.01334431 | 0.06992167 | 3.24E-05 | 0.0057681 | 0.23179    |
| 9mo_SIGAF3_ | 0.02908767 | 0.16491853 | 3.97E-05 | 0.0040686 | -0.10664   |
| 9mo_SIGAF3_ | 0.06778713 | 0.3984346  | 6.15E-05 | 0.011255  | 0.10734    |
| 9mo_SIGAF3_ | 0.02781964 | 0.15726714 | 3.88E-05 | 0.0040827 | -0.10472   |
| 9mo_SIGAF3_ | 0.04895952 | 0.28482708 | 5.70E-05 | 0.0057827 | 0.041222   |
| 9mo_SIGAF3_ | 0.07319307 | 0.43105453 | 6.23E-05 | 0.013561  | 0.12737    |
| 9mo_SIGAF3_ | 0.02282803 | 0.12714732 | 3.55E-05 | 0.0043197 | -0.056631  |
| 9mo_SIGAF3_ | 0.09692636 | 0.5742634  | 6.51E-05 | 0.023799  | -0.055297  |
| 9mo_SIGAF3_ | 0.033755   | 0.19308165 | 4.43E-05 | 0.004153  | -0.087207  |
| 9mo_SIGAF3_ | 0.02691491 | 0.15180793 | 3.80E-05 | 0.0041099 | -0.10271   |
| 9mo_SIGAF3_ | 0.02614823 | 0.14718167 | 3.76E-05 | 0.0041286 | -0.096385  |
| 9mo_SIGAF3_ | 0.12186643 | 0.72475404 | 6.66E-05 | 0.02435   | -0.38089   |
| 9mo_SIGAF3_ | 0.08621616 | 0.50963706 | 6.39E-05 | 0.01943   | 0.099025   |
| 9mo_SIGAF3_ | 0.07885857 | 0.46524072 | 6.30E-05 | 0.016077  | 0.13613    |
| 9mo_SIGAF3_ | 0.02198955 | 0.12208786 | 3.52E-05 | 0.0043661 | -0.046619  |
| 9mo_SIGAF3_ | 0.03884159 | 0.22377463 | 4.92E-05 | 0.0044639 | -0.040459  |
| 9mo_SIGAF3_ | 0.01745295 | 0.09471355 | 3.33E-05 | 0.0049935 | 0.085504   |
| 9mo_SIGAF3_ | 0.08101953 | 0.47828013 | 6.33E-05 | 0.017113  | 0.13314    |
| 9mo_SIGAF3_ | 0.04283363 | 0.24786292 | 5.29E-05 | 0.0048617 | -0.0013165 |
| 9mo_SIGAF3_ | 0.0217857  | 0.12085775 | 3.49E-05 | 0.0044169 | -0.0356    |
| 9mo_SIGAF3_ | 0.02401229 | 0.13429321 | 3.61E-05 | 0.0042401 | -0.073623  |
| 9mo_SIGAF3_ | 0.03432595 | 0.1965268  | 4.48E-05 | 0.0041765 | -0.082901  |
| 9mo_SIGAF3_ | 0.01095372 | 0.05549663 | 3.21E-05 | 0.006339  | 0.32844    |
| 9mo_SIGAF3_ | 0.10384847 | 0.616032   | 6.56E-05 | 0.025296  | -0.18011   |
| 9mo_SIGAF3_ | 0.05077045 | 0.29575443 | 5.78E-05 | 0.0061018 | 0.051138   |
| 9mo_SIGAF3_ | 0.12216302 | 0.7265437  | 6.66E-05 | 0.02435   | -0.38515   |
| 9mo_SIGAF3_ | 0.09709176 | 0.5752614  | 6.51E-05 | 0.023799  | -0.065044  |
| 9mo_SIGAF3_ | 0.06781545 | 0.39860553 | 6.15E-05 | 0.011255  | 0.10734    |
| 9mo_SIGAF3_ | 0.01619451 | 0.08712002 | 3.30E-05 | 0.0051875 | 0.12392    |
| 9mo_SIGAF3_ | 0.00778986 | 0.03640557 | 3.19E-05 | 0.0073923 | 0.48652    |
| 9mo_SIGAF3_ | 0.10811566 | 0.6417806  | 6.59E-05 | 0.025614  | -0.24573   |
| 9mo_SIGAF3_ | 0.06937297 | 0.40800372 | 6.17E-05 | 0.01192   | 0.11218    |
| 9mo_SIGAF3_ | 0.12272324 | 0.72992414 | 6.67E-05 | 0.024282  | -0.38934   |
| 9mo_SIGAF3_ | 0.00454272 | 0.01681208 | 3.18E-05 | 0.0087056 | 0.65503    |
| 9mo_SIGAF3_ | 0.01871436 | 0.10232502 | 3.38E-05 | 0.004741  | 0.03364    |
| 9mo_SIGAF3_ | 0.12217851 | 0.7266372  | 6.66E-05 | 0.02435   | -0.38515   |

|             |            |            |          |           |           |
|-------------|------------|------------|----------|-----------|-----------|
| 9mo_SIGAF3_ | 0.01999287 | 0.11003966 | 3.42E-05 | 0.0045972 | 0.0032259 |
| 9mo_SIGAF3_ | 0.03718141 | 0.2137569  | 4.76E-05 | 0.0043355 | -0.057524 |
| 9mo_SIGAF3_ | 0.10650747 | 0.6320767  | 6.58E-05 | 0.02556   | -0.22263  |
| 9mo_SIGAF3_ | 0.09439149 | 0.5589677  | 6.48E-05 | 0.022877  | -0.017059 |
| 9mo_SIGAF3_ | 0.0947897  | 0.56137055 | 6.49E-05 | 0.023073  | -0.017059 |
| 9mo_SIGAF3_ | 0.0828457  | 0.4892994  | 6.35E-05 | 0.017892  | 0.12434   |
| 9mo_SIGAF3_ | 0.06079807 | 0.35626203 | 6.06E-05 | 0.008866  | 0.080421  |
| 9mo_SIGAF3_ | 0.05787909 | 0.33864862 | 6.00E-05 | 0.0078516 | 0.073002  |
| 9mo_SIGAF3_ | 0.02378782 | 0.13293876 | 3.61E-05 | 0.0042401 | -0.073623 |
| 9mo_SIGAF3_ | 0.00969471 | 0.04789964 | 3.20E-05 | 0.0068348 | 0.4058    |
| 9mo_SIGAF3_ | 0.02803814 | 0.15858555 | 3.88E-05 | 0.0040827 | -0.10603  |
| 9mo_SIGAF3_ | 0.03515671 | 0.20153971 | 4.54E-05 | 0.0042028 | -0.078293 |
| 9mo_SIGAF3_ | 0.02505152 | 0.14056407 | 3.68E-05 | 0.0041768 | -0.086782 |
| 9mo_SIGAF3_ | 0.08980405 | 0.5312867  | 6.44E-05 | 0.021137  | 0.059815  |
| 9mo_SIGAF3_ | 0.01914792 | 0.10494114 | 3.38E-05 | 0.004741  | 0.03364   |
| 9mo_SIGAF3_ | 0.07976593 | 0.47071582 | 6.32E-05 | 0.016594  | 0.13545   |
| 9mo_SIGAF3_ | 0.01593228 | 0.08553769 | 3.30E-05 | 0.0051875 | 0.12392   |
| 9mo_SIGAF3_ | 0.03251846 | 0.18562026 | 4.32E-05 | 0.0041142 | -0.094772 |
| 9mo_SIGAF3_ | 0.03838904 | 0.22104384 | 4.87E-05 | 0.0044183 | -0.04622  |
| 9mo_SIGAF3_ | 0.03488321 | 0.19988938 | 4.54E-05 | 0.0042028 | -0.078293 |
| 9mo_SIGAF3_ | 0.03078873 | 0.17518288 | 4.11E-05 | 0.0040705 | -0.10299  |
| 9mo_SIGAF3_ | 0.09528305 | 0.5643475  | 6.49E-05 | 0.023263  | -0.026471 |
| 9mo_SIGAF3_ | 0.02252003 | 0.12528881 | 3.52E-05 | 0.0043661 | -0.056631 |
| 9mo_SIGAF3_ | 0.0664731  | 0.39050567 | 6.13E-05 | 0.010826  | 0.10013   |
| 9mo_SIGAF3_ | 0.02179725 | 0.12092744 | 3.49E-05 | 0.0044169 | -0.0356   |
| 9mo_SIGAF3_ | 0.05749186 | 0.33631203 | 6.00E-05 | 0.0078516 | 0.071569  |
| 9mo_SIGAF3_ | 0.03104297 | 0.17671697 | 4.16E-05 | 0.0040771 | -0.10299  |
| 9mo_SIGAF3_ | 0.02786247 | 0.15752558 | 3.88E-05 | 0.0040827 | -0.10472  |
| 9mo_SIGAF3_ | 0.01840216 | 0.10044121 | 3.36E-05 | 0.0048202 | 0.050123  |
| 9mo_SIGAF3_ | 0.02891346 | 0.16386732 | 3.97E-05 | 0.0040686 | -0.10664  |
| 9mo_SIGAF3_ | 0.11949679 | 0.7104554  | 6.65E-05 | 0.024704  | -0.36308  |
| 9mo_SIGAF3_ | 0.0121176  | 0.06251957 | 3.23E-05 | 0.0060411 | 0.2791    |
| 9mo_SIGAF3_ | 0.03701756 | 0.21276823 | 4.76E-05 | 0.0043355 | -0.057524 |
| 9mo_SIGAF3_ | 0.1134771  | 0.67413205 | 6.62E-05 | 0.025353  | -0.30551  |
| 9mo_SIGAF3_ | 0.02055753 | 0.11344689 | 3.44E-05 | 0.0045325 | -0.01065  |
| 9mo_SIGAF3_ | 0.01975793 | 0.10862202 | 3.40E-05 | 0.0046667 | 0.0032259 |
| 9mo_SIGAF3_ | 0.07849425 | 0.46304238 | 6.29E-05 | 0.015819  | 0.13651   |
| 9mo_SIGAF3_ | 0.06287627 | 0.36880207 | 6.08E-05 | 0.0094206 | 0.087254  |
| 9mo_SIGAF3_ | 0.00841721 | 0.04019111 | 3.19E-05 | 0.0071994 | 0.45929   |
| 9mo_SIGAF3_ | 0.06437717 | 0.3778586  | 6.10E-05 | 0.010005  | 0.091185  |
| 9mo_SIGAF3_ | 0.01407661 | 0.07434042 | 3.25E-05 | 0.0056405 | 0.20898   |
| 9mo_SIGAF3_ | 0.02394841 | 0.1339078  | 3.61E-05 | 0.0042401 | -0.073623 |
| 9mo_SIGAF3_ | 0.02593537 | 0.14589725 | 3.76E-05 | 0.0041286 | -0.096385 |

|             |            |            |          |           |           |
|-------------|------------|------------|----------|-----------|-----------|
| 9mo_SIGAF3_ | 0.01033848 | 0.05178423 | 3.20E-05 | 0.0066628 | 0.35381   |
| 9mo_SIGAF3_ | 0.03874548 | 0.22319467 | 4.92E-05 | 0.0044639 | -0.040459 |
| 9mo_SIGAF3_ | 0.02194831 | 0.12183899 | 3.49E-05 | 0.0044169 | -0.046619 |
| 9mo_SIGAF3_ | 0.0196529  | 0.10798827 | 3.40E-05 | 0.0046667 | 0.017998  |
| 9mo_SIGAF3_ | 0.09591595 | 0.5681665  | 6.50E-05 | 0.023448  | -0.035993 |
| 9mo_SIGAF3_ | 0.02199077 | 0.12209518 | 3.52E-05 | 0.0043661 | -0.046619 |
| 9mo_SIGAF3_ | 0.01331754 | 0.06976009 | 3.24E-05 | 0.0057681 | 0.23179   |
| 9mo_SIGAF3_ | 0.00621624 | 0.02691021 | 3.18E-05 | 0.008015  | 0.56984   |
| 9mo_SIGAF3_ | 0.03059333 | 0.17400385 | 4.11E-05 | 0.0040705 | -0.10475  |
| 9mo_SIGAF3_ | 0.07454348 | 0.43920305 | 6.24E-05 | 0.014051  | 0.13218   |
| 9mo_SIGAF3_ | 0.02433072 | 0.13621467 | 3.64E-05 | 0.0042065 | -0.080664 |
| 9mo_SIGAF3_ | 0.08804316 | 0.52066135 | 6.42E-05 | 0.020421  | 0.080939  |
| 9mo_SIGAF3_ | 0.02339065 | 0.13054219 | 3.58E-05 | 0.0042778 | -0.065623 |
| 9mo_SIGAF3_ | 0.03126652 | 0.17806594 | 4.16E-05 | 0.0040771 | -0.10299  |
| 9mo_SIGAF3_ | 0.06173469 | 0.36191365 | 6.07E-05 | 0.0090475 | 0.083692  |
| 9mo_SIGAF3_ | 0.02126591 | 0.11772132 | 3.47E-05 | 0.0044724 | -0.023601 |
| 9mo_SIGAF3_ | 0.01723337 | 0.09338859 | 3.33E-05 | 0.0049935 | 0.085504  |
| 9mo_SIGAF3_ | 0.05276161 | 0.3077693  | 5.87E-05 | 0.0065755 | 0.057248  |
| 9mo_SIGAF3_ | 0.03250202 | 0.18552104 | 4.27E-05 | 0.004099  | -0.094772 |
| 9mo_SIGAF3_ | 0.0132592  | 0.06940811 | 3.24E-05 | 0.0057681 | 0.23179   |
| 9mo_SIGAF3_ | 0.11224449 | 0.6666944  | 6.61E-05 | 0.025489  | -0.29336  |
| 9mo_SIGAF3_ | 0.01931913 | 0.10597424 | 3.40E-05 | 0.0046667 | 0.017998  |
| 9mo_SIGAF3_ | 0.09117783 | 0.53957623 | 6.45E-05 | 0.021597  | 0.036126  |
| 9mo_SIGAF3_ | 0.01233044 | 0.06380386 | 3.23E-05 | 0.0060411 | 0.2791    |
| 9mo_SIGAF3_ | 0.01042034 | 0.05227816 | 3.21E-05 | 0.0064976 | 0.35381   |
| 9mo_SIGAF3_ | 0.03484351 | 0.19964983 | 4.54E-05 | 0.0042028 | -0.078293 |
| 9mo_SIGAF3_ | 0.11260083 | 0.6688446  | 6.62E-05 | 0.025448  | -0.29951  |
| 9mo_SIGAF3_ | 0.02905876 | 0.16474406 | 3.97E-05 | 0.0040686 | -0.10664  |
| 9mo_SIGAF3_ | 0.0824123  | 0.48668426 | 6.35E-05 | 0.017892  | 0.1271    |
| 9mo_SIGAF3_ | 0.08938221 | 0.5287413  | 6.43E-05 | 0.020902  | 0.059815  |
| 9mo_SIGAF3_ | 0.07158304 | 0.42133948 | 6.20E-05 | 0.012843  | 0.12136   |
| 9mo_SIGAF3_ | 0.0355555  | 0.20394605 | 4.59E-05 | 0.0042319 | -0.073417 |
| 9mo_SIGAF3_ | 0.02427119 | 0.13585545 | 3.64E-05 | 0.0042065 | -0.080664 |
| 9mo_SIGAF3_ | 0.03536141 | 0.2027749  | 4.59E-05 | 0.0042319 | -0.073417 |
| 9mo_SIGAF3_ | 0.07349944 | 0.43290323 | 6.23E-05 | 0.013561  | 0.12913   |
| 9mo_SIGAF3_ | 0.02683312 | 0.15131436 | 3.80E-05 | 0.0041099 | -0.099939 |
| 9mo_SIGAF3_ | 0.0730734  | 0.43033242 | 6.23E-05 | 0.013561  | 0.12737   |
| 9mo_SIGAF3_ | 0.02433215 | 0.13622329 | 3.64E-05 | 0.0042065 | -0.080664 |
| 9mo_SIGAF3_ | 0.07250081 | 0.4268774  | 6.22E-05 | 0.01332   | 0.12548   |
| 9mo_SIGAF3_ | 0.020069   | 0.11049905 | 3.42E-05 | 0.0045972 | 0.0032259 |
| 9mo_SIGAF3_ | 0.0970679  | 0.57511747 | 6.51E-05 | 0.023799  | -0.065044 |
| 9mo_SIGAF3_ | 0.08287437 | 0.48947245 | 6.35E-05 | 0.017892  | 0.12434   |
| 9mo_SIGAF3_ | 0.0099799  | 0.04962049 | 3.20E-05 | 0.0066628 | 0.37961   |

|             |            |            |          |           |           |
|-------------|------------|------------|----------|-----------|-----------|
| 9mo_SIGAF3_ | 0.05106504 | 0.29753202 | 5.81E-05 | 0.006215  | 0.051138  |
| 9mo_SIGAF3_ | 0.08293551 | 0.48984134 | 6.35E-05 | 0.017892  | 0.12434   |
| 9mo_SIGAF3_ | 0.01618132 | 0.08704045 | 3.30E-05 | 0.0051875 | 0.12392   |
| 9mo_SIGAF3_ | 0.08308883 | 0.4907665  | 6.36E-05 | 0.018151  | 0.12434   |
| 9mo_SIGAF3_ | 0.02529274 | 0.14201957 | 3.68E-05 | 0.0041768 | -0.092011 |
| 9mo_SIGAF3_ | 0.06461777 | 0.37931043 | 6.10E-05 | 0.010005  | 0.093303  |
| 9mo_SIGAF3_ | 0.02213397 | 0.12295929 | 3.52E-05 | 0.0043661 | -0.046619 |
| 9mo_SIGAF3_ | 0.09046289 | 0.53526217 | 6.44E-05 | 0.021369  | 0.044278  |
| 9mo_SIGAF3_ | 0.02005792 | 0.11043218 | 3.42E-05 | 0.0045972 | 0.0032259 |
| 9mo_SIGAF3_ | 0.07367418 | 0.43395764 | 6.23E-05 | 0.013805  | 0.12913   |
| 9mo_SIGAF3_ | 0.01615446 | 0.08687833 | 3.30E-05 | 0.0051875 | 0.12392   |
| 9mo_SIGAF3_ | 0.02665412 | 0.15023424 | 3.80E-05 | 0.0041099 | -0.099939 |
| 9mo_SIGAF3_ | 0.02098485 | 0.11602539 | 3.47E-05 | 0.0044724 | -0.023601 |
| 9mo_SIGAF3_ | 0.02277051 | 0.12680021 | 3.55E-05 | 0.0043197 | -0.056631 |
| 9mo_SIGAF3_ | 0.02358752 | 0.13173014 | 3.58E-05 | 0.0042778 | -0.073623 |
| 9mo_SIGAF3_ | 0.03105839 | 0.17681006 | 4.16E-05 | 0.0040771 | -0.10299  |
| 9mo_SIGAF3_ | 0.06941906 | 0.40828183 | 6.17E-05 | 0.01192   | 0.11218   |
| 9mo_SIGAF3_ | 0.01740358 | 0.09441567 | 3.33E-05 | 0.0049935 | 0.085504  |
| 9mo_SIGAF3_ | 0.08591766 | 0.50783587 | 6.39E-05 | 0.01943   | 0.1043    |
| 9mo_SIGAF3_ | 0.07708165 | 0.45451862 | 6.28E-05 | 0.015307  | 0.13605   |
| 9mo_SIGAF3_ | 0.10318    | 0.61199844 | 6.56E-05 | 0.025216  | -0.17104  |
| 9mo_SIGAF3_ | 0.01358421 | 0.07136924 | 3.24E-05 | 0.0057681 | 0.23179   |
| 9mo_SIGAF3_ | 0.07758283 | 0.45754278 | 6.29E-05 | 0.015562  | 0.13646   |
| 9mo_SIGAF3_ | 0.04962393 | 0.2888362  | 5.73E-05 | 0.0058857 | 0.046466  |
| 9mo_SIGAF3_ | 0.09305568 | 0.5509074  | 6.47E-05 | 0.022469  | 0.010343  |
| 9mo_SIGAF3_ | 0.05506311 | 0.32165673 | 5.94E-05 | 0.0071062 | 0.064127  |
| 9mo_SIGAF3_ | 0.05048415 | 0.29402685 | 5.78E-05 | 0.0061018 | 0.048868  |
| 9mo_SIGAF3_ | 0.01355613 | 0.07119978 | 3.24E-05 | 0.0057681 | 0.23179   |
| 9mo_SIGAF3_ | 0.02878242 | 0.16307667 | 3.97E-05 | 0.0040686 | -0.10664  |
| 9mo_SIGAF3_ | 0.02023523 | 0.11150208 | 3.42E-05 | 0.0045972 | 0.0032259 |
| 9mo_SIGAF3_ | 0.05181122 | 0.30203453 | 5.83E-05 | 0.0063316 | 0.055318  |
| 9mo_SIGAF3_ | 0.08272313 | 0.4885598  | 6.35E-05 | 0.017892  | 0.12434   |
| 9mo_SIGAF3_ | 0.01365635 | 0.07180455 | 3.24E-05 | 0.0057681 | 0.20898   |
| 9mo_SIGAF3_ | 0.01414183 | 0.07473396 | 3.25E-05 | 0.0056405 | 0.20898   |
| 9mo_SIGAF3_ | 0.02271491 | 0.1264647  | 3.55E-05 | 0.0043197 | -0.056631 |
| 9mo_SIGAF3_ | 0.06418777 | 0.37671575 | 6.10E-05 | 0.010005  | 0.091185  |
| 9mo_SIGAF3_ | 0.07351439 | 0.4329934  | 6.23E-05 | 0.013561  | 0.12913   |
| 9mo_SIGAF3_ | 0.09436899 | 0.558832   | 6.48E-05 | 0.022877  | -0.017059 |
| 9mo_SIGAF3_ | 0.0246503  | 0.13814303 | 3.64E-05 | 0.0042065 | -0.080664 |
| 9mo_SIGAF3_ | 0.01448387 | 0.07679787 | 3.26E-05 | 0.0055188 | 0.18676   |
| 9mo_SIGAF3_ | 0.03360781 | 0.1921935  | 4.37E-05 | 0.0041322 | -0.087207 |
| 9mo_SIGAF3_ | 0.03446431 | 0.19736168 | 4.48E-05 | 0.0041765 | -0.082901 |
| 9mo_SIGAF3_ | 0.09991898 | 0.5923211  | 6.53E-05 | 0.024558  | -0.11403  |

|             |            |            |          |           |           |
|-------------|------------|------------|----------|-----------|-----------|
| 9mo_SIGAF3_ | 0.02185416 | 0.12127084 | 3.49E-05 | 0.0044169 | -0.0356   |
| 9mo_SIGAF3_ | 0.0253402  | 0.14230597 | 3.72E-05 | 0.0041509 | -0.092011 |
| 9mo_SIGAF3_ | 0.01374512 | 0.07234018 | 3.25E-05 | 0.0056405 | 0.20898   |
| 9mo_SIGAF3_ | 0.09038777 | 0.53480893 | 6.44E-05 | 0.021369  | 0.05218   |
| 9mo_SIGAF3_ | 0.00688509 | 0.03094613 | 3.18E-05 | 0.0078    | 0.54183   |
| 9mo_SIGAF3_ | 0.03951752 | 0.22785324 | 4.98E-05 | 0.0045122 | -0.034672 |
| 9mo_SIGAF3_ | 0.02612466 | 0.14703947 | 3.76E-05 | 0.0041286 | -0.096385 |
| 9mo_SIGAF3_ | 0.09493221 | 0.5622305  | 6.49E-05 | 0.023073  | -0.026471 |
| 9mo_SIGAF3_ | 0.07398015 | 0.43580386 | 6.23E-05 | 0.013805  | 0.13074   |
| 9mo_SIGAF3_ | 0.04655324 | 0.2703074  | 5.57E-05 | 0.0054037 | 0.028707  |
| 9mo_SIGAF3_ | 0.04811096 | 0.2797068  | 5.67E-05 | 0.0056831 | 0.038361  |
| 9mo_SIGAF3_ | 0.03195741 | 0.18223482 | 4.22E-05 | 0.0040866 | -0.097962 |
| 9mo_SIGAF3_ | 0.03730965 | 0.21453074 | 4.76E-05 | 0.0043355 | -0.057524 |
| 9mo_SIGAF3_ | 0.0260588  | 0.14664203 | 3.76E-05 | 0.0041286 | -0.096385 |
| 9mo_SIGAF3_ | 0.01192213 | 0.0613401  | 3.22E-05 | 0.0061869 | 0.30353   |
| 9mo_SIGAF3_ | 0.05130722 | 0.29899335 | 5.81E-05 | 0.006215  | 0.053285  |
| 9mo_SIGAF3_ | 0.07683973 | 0.45305884 | 6.27E-05 | 0.015053  | 0.13605   |
| 9mo_SIGAF3_ | 0.01398645 | 0.07379637 | 3.25E-05 | 0.0056405 | 0.20898   |
| 9mo_SIGAF3_ | 0.02414695 | 0.1351058  | 3.61E-05 | 0.0042401 | -0.080664 |
| 9mo_SIGAF3_ | 0.03708736 | 0.21318941 | 4.76E-05 | 0.0043355 | -0.057524 |
| 9mo_SIGAF3_ | 0.01748684 | 0.09491807 | 3.33E-05 | 0.0049935 | 0.085504  |
| 9mo_SIGAF3_ | 0.05125175 | 0.29865864 | 5.81E-05 | 0.006215  | 0.053285  |
| 9mo_SIGAF3_ | 0.10511953 | 0.62370175 | 6.57E-05 | 0.025429  | -0.19772  |
| 9mo_SIGAF3_ | 0.02281944 | 0.12709548 | 3.55E-05 | 0.0043197 | -0.056631 |
| 9mo_SIGAF3_ | 0.08828013 | 0.5220912  | 6.42E-05 | 0.020421  | 0.074212  |
| 9mo_SIGAF3_ | 0.06065131 | 0.35537645 | 6.05E-05 | 0.008688  | 0.080421  |
| 9mo_SIGAF3_ | 0.05044044 | 0.2937631  | 5.78E-05 | 0.0061018 | 0.048868  |
| 9mo_SIGAF3_ | 0.05272067 | 0.30752224 | 5.87E-05 | 0.0065755 | 0.057248  |
| 9mo_SIGAF3_ | 0.01886754 | 0.10324932 | 3.38E-05 | 0.004741  | 0.03364   |
| 9mo_SIGAF3_ | 0.00931043 | 0.04558082 | 3.20E-05 | 0.0068348 | 0.4058    |
| 9mo_SIGAF3_ | 0.00820418 | 0.03890562 | 3.19E-05 | 0.0071994 | 0.45929   |
| 9mo_SIGAF3_ | 0.0129761  | 0.06769982 | 3.23E-05 | 0.0059016 | 0.25518   |
| 9mo_SIGAF3_ | 0.02915558 | 0.16532831 | 3.97E-05 | 0.0040686 | -0.10661  |
| 9mo_SIGAF3_ | 0.0366733  | 0.21069096 | 4.70E-05 | 0.0042982 | -0.062998 |
| 9mo_SIGAF3_ | 0.0203213  | 0.11202142 | 3.42E-05 | 0.0045972 | -0.01065  |
| 9mo_SIGAF3_ | 0.10592997 | 0.628592   | 6.58E-05 | 0.025526  | -0.21453  |
| 9mo_SIGAF3_ | 0.04814681 | 0.27992314 | 5.67E-05 | 0.0056831 | 0.038361  |
| 9mo_SIGAF3_ | 0.02321379 | 0.12947503 | 3.58E-05 | 0.0042778 | -0.065623 |
| 9mo_SIGAF3_ | 0.06664041 | 0.39151523 | 6.13E-05 | 0.010826  | 0.10013   |
| 9mo_SIGAF3_ | 0.01068302 | 0.05386317 | 3.21E-05 | 0.0064976 | 0.35381   |
| 9mo_SIGAF3_ | 0.01266247 | 0.06580739 | 3.23E-05 | 0.0059016 | 0.25518   |
| 9mo_SIGAF3_ | 0.0260569  | 0.14663061 | 3.76E-05 | 0.0041286 | -0.096385 |
| 9mo_SIGAF3_ | 0.03225734 | 0.18404463 | 4.27E-05 | 0.004099  | -0.097962 |



|             |            |            |          |           |           |
|-------------|------------|------------|----------|-----------|-----------|
| 9mo_SIGAF3_ | 0.06404279 | 0.37584096 | 6.10E-05 | 0.0098069 | 0.091185  |
| 9mo_SIGAF3_ | 0.08516127 | 0.50327176 | 6.38E-05 | 0.018923  | 0.10916   |
| 9mo_SIGAF3_ | 0.03059835 | 0.17403413 | 4.11E-05 | 0.0040705 | -0.10475  |
| 9mo_SIGAF3_ | 0.01891958 | 0.10356338 | 3.38E-05 | 0.004741  | 0.03364   |
| 9mo_SIGAF3_ | 0.01606874 | 0.08636114 | 3.30E-05 | 0.0051875 | 0.12392   |
| 9mo_SIGAF3_ | 0.02263522 | 0.12598388 | 3.55E-05 | 0.0043197 | -0.056631 |
| 9mo_SIGAF3_ | 0.03241062 | 0.18496953 | 4.27E-05 | 0.004099  | -0.097962 |
| 9mo_SIGAF3_ | 0.03012501 | 0.17117794 | 4.07E-05 | 0.0040668 | -0.10597  |
| 9mo_SIGAF3_ | 0.02145363 | 0.11885405 | 3.49E-05 | 0.0044169 | -0.0356   |
| 9mo_SIGAF3_ | 0.02397766 | 0.13408425 | 3.61E-05 | 0.0042401 | -0.073623 |
| 9mo_SIGAF3_ | 0.08331795 | 0.49214903 | 6.36E-05 | 0.018151  | 0.12117   |
| 9mo_SIGAF3_ | 0.08325605 | 0.4917755  | 6.36E-05 | 0.018151  | 0.12117   |
| 9mo_SIGAF3_ | 0.0950445  | 0.56290805 | 6.49E-05 | 0.023073  | -0.026471 |
| 9mo_SIGAF3_ | 0.01832604 | 0.0999819  | 3.36E-05 | 0.0048202 | 0.050123  |
| 9mo_SIGAF3_ | 0.01638792 | 0.08828705 | 3.30E-05 | 0.0051875 | 0.12392   |
| 9mo_SIGAF3_ | 0.08447177 | 0.49911126 | 6.37E-05 | 0.018667  | 0.1136    |
| 9mo_SIGAF3_ | 0.06857984 | 0.4032179  | 6.16E-05 | 0.011695  | 0.10977   |
| 9mo_SIGAF3_ | 0.02373488 | 0.13261934 | 3.61E-05 | 0.0042401 | -0.073623 |
| 9mo_SIGAF3_ | 0.02519251 | 0.14141478 | 3.68E-05 | 0.0041768 | -0.086782 |
| 9mo_SIGAF3_ | 0.02557487 | 0.14372197 | 3.72E-05 | 0.0041509 | -0.092011 |
| 9mo_SIGAF3_ | 0.04483988 | 0.25996882 | 5.46E-05 | 0.0051531 | 0.017239  |
| 9mo_SIGAF3_ | 0.08403428 | 0.4964714  | 6.37E-05 | 0.01841   | 0.1176    |
| 9mo_SIGAF3_ | 0.01559866 | 0.08352458 | 3.28E-05 | 0.0052924 | 0.1442    |
| 9mo_SIGAF3_ | 0.02195449 | 0.12187626 | 3.49E-05 | 0.0044169 | -0.046619 |
| 9mo_SIGAF3_ | 0.01073595 | 0.0541826  | 3.21E-05 | 0.0064976 | 0.35381   |
| 9mo_SIGAF3_ | 0.11604287 | 0.6896142  | 6.63E-05 | 0.025119  | -0.33347  |
| 9mo_SIGAF3_ | 0.08568738 | 0.5064463  | 6.39E-05 | 0.019177  | 0.1043    |
| 9mo_SIGAF3_ | 0.12256218 | 0.7289523  | 6.67E-05 | 0.024282  | -0.38934  |
| 9mo_SIGAF3_ | 0.02171121 | 0.12040829 | 3.49E-05 | 0.0044169 | -0.0356   |
| 9mo_SIGAF3_ | 0.14207853 | 0.84671575 | 6.74E-05 | 0.023584  | -0.5021   |
| 9mo_SIGAF3_ | 0.03801221 | 0.21877007 | 4.81E-05 | 0.0043756 | -0.04622  |
| 9mo_SIGAF3_ | 0.09158665 | 0.5420431  | 6.45E-05 | 0.021822  | 0.027741  |
| 9mo_SIGAF3_ | 0.07705889 | 0.4543813  | 6.28E-05 | 0.015307  | 0.13605   |
| 9mo_SIGAF3_ | 0.03448959 | 0.1975142  | 4.48E-05 | 0.0041765 | -0.082901 |
| 9mo_SIGAF3_ | 0.01828307 | 0.09972256 | 3.36E-05 | 0.0048202 | 0.050123  |
| 9mo_SIGAF3_ | 0.02398788 | 0.13414593 | 3.61E-05 | 0.0042401 | -0.073623 |
| 9mo_SIGAF3_ | 0.08351518 | 0.49333915 | 6.37E-05 | 0.01841   | 0.12117   |
| 9mo_SIGAF3_ | 0.02921671 | 0.16569719 | 4.02E-05 | 0.0040662 | -0.10661  |
| 9mo_SIGAF3_ | 0.00778945 | 0.0364031  | 3.19E-05 | 0.0073923 | 0.48652   |
| 9mo_SIGAF3_ | 0.05016352 | 0.29209214 | 5.76E-05 | 0.005992  | 0.048868  |
| 9mo_SIGAF3_ | 0.03363561 | 0.19236124 | 4.43E-05 | 0.004153  | -0.087207 |
| 9mo_SIGAF3_ | 0.03265515 | 0.18644507 | 4.32E-05 | 0.0041142 | -0.094772 |
| 9mo_SIGAF3_ | 0.1039094  | 0.6163997  | 6.56E-05 | 0.025296  | -0.18011  |

|             |            |            |          |           |           |
|-------------|------------|------------|----------|-----------|-----------|
| 9mo_SIGAF3_ | 0.02373035 | 0.13259198 | 3.61E-05 | 0.0042401 | -0.073623 |
| 9mo_SIGAF3_ | 0.01881022 | 0.10290346 | 3.38E-05 | 0.004741  | 0.03364   |
| 9mo_SIGAF3_ | 0.01320461 | 0.06907868 | 3.24E-05 | 0.0057681 | 0.23179   |
| 9mo_SIGAF3_ | 0.11209731 | 0.6658063  | 6.61E-05 | 0.025489  | -0.29336  |
| 9mo_SIGAF3_ | 0.01285456 | 0.06696648 | 3.23E-05 | 0.0059016 | 0.25518   |
| 9mo_SIGAF3_ | 0.03151545 | 0.17956796 | 4.22E-05 | 0.0040866 | -0.10071  |
| 9mo_SIGAF3_ | 0.02345066 | 0.13090427 | 3.58E-05 | 0.0042778 | -0.065623 |
| 9mo_SIGAF3_ | 0.06739624 | 0.39607596 | 6.14E-05 | 0.011039  | 0.10492   |
| 9mo_SIGAF3_ | 0.02951618 | 0.1675042  | 4.02E-05 | 0.0040662 | -0.10661  |
| 9mo_SIGAF3_ | 0.01318093 | 0.06893579 | 3.24E-05 | 0.0057681 | 0.23179   |
| 9mo_SIGAF3_ | 0.11957414 | 0.7109222  | 6.65E-05 | 0.024632  | -0.36308  |
| 9mo_SIGAF3_ | 0.08142374 | 0.48071918 | 6.34E-05 | 0.017373  | 0.13148   |
| 9mo_SIGAF3_ | 0.07626963 | 0.4496188  | 6.26E-05 | 0.0148    | 0.1354    |
| 9mo_SIGAF3_ | 0.07856984 | 0.46349847 | 6.30E-05 | 0.016077  | 0.13651   |
| 9mo_SIGAF3_ | 0.0119721  | 0.0616416  | 3.22E-05 | 0.0061869 | 0.30353   |
| 9mo_SIGAF3_ | 0.01392608 | 0.0734321  | 3.25E-05 | 0.0056405 | 0.20898   |
| 9mo_SIGAF3_ | 0.02110199 | 0.11673221 | 3.47E-05 | 0.0044724 | -0.023601 |
| 9mo_SIGAF3_ | 0.02085386 | 0.11523496 | 3.44E-05 | 0.0045325 | -0.023601 |
| 9mo_SIGAF3_ | 0.09211191 | 0.54521257 | 6.46E-05 | 0.022042  | 0.019141  |
| 9mo_SIGAF3_ | 0.01785172 | 0.09711978 | 3.34E-05 | 0.0049043 | 0.067421  |
| 9mo_SIGAF3_ | 0.04687089 | 0.27222413 | 5.57E-05 | 0.0054037 | 0.032113  |
| 9mo_SIGAF3_ | 0.05111792 | 0.2978511  | 5.81E-05 | 0.006215  | 0.051138  |
| 9mo_SIGAF3_ | 0.09020435 | 0.5337022  | 6.44E-05 | 0.021369  | 0.05218   |
| 9mo_SIGAF3_ | 0.07076615 | 0.41641033 | 6.20E-05 | 0.012608  | 0.11916   |
| 9mo_SIGAF3_ | 0.01744976 | 0.0946943  | 3.33E-05 | 0.0049935 | 0.085504  |
| 9mo_SIGAF3_ | 0.00815055 | 0.03858205 | 3.19E-05 | 0.0071994 | 0.45929   |
| 9mo_SIGAF3_ | 0.0227774  | 0.1268418  | 3.55E-05 | 0.0043197 | -0.056631 |
| 9mo_SIGAF3_ | 0.09441475 | 0.5591081  | 6.48E-05 | 0.022877  | -0.017059 |
| 9mo_SIGAF3_ | 0.03362825 | 0.19231682 | 4.43E-05 | 0.004153  | -0.087207 |
| 9mo_SIGAF3_ | 0.02924028 | 0.16583939 | 4.02E-05 | 0.0040662 | -0.10661  |
| 9mo_SIGAF3_ | 0.05139569 | 0.29952717 | 5.83E-05 | 0.0063316 | 0.053285  |
| 9mo_SIGAF3_ | 0.09991856 | 0.5923186  | 6.53E-05 | 0.024558  | -0.11403  |
| 9mo_SIGAF3_ | 0.01645776 | 0.08870853 | 3.31E-05 | 0.0050879 | 0.10435   |
| 9mo_SIGAF3_ | 0.05234599 | 0.3052614  | 5.85E-05 | 0.0064518 | 0.057248  |
| 9mo_SIGAF3_ | 0.07136732 | 0.42003784 | 6.20E-05 | 0.012843  | 0.12136   |
| 9mo_SIGAF3_ | 0.01513971 | 0.08075524 | 3.27E-05 | 0.0054028 | 0.16515   |
| 9mo_SIGAF3_ | 0.10178065 | 0.60355467 | 6.54E-05 | 0.024923  | -0.14299  |
| 9mo_SIGAF3_ | 0.01310973 | 0.06850619 | 3.23E-05 | 0.0059016 | 0.23179   |
| 9mo_SIGAF3_ | 0.06223446 | 0.36492935 | 6.07E-05 | 0.0092324 | 0.083692  |
| 9mo_SIGAF3_ | 0.03345936 | 0.19129774 | 4.37E-05 | 0.0041322 | -0.091175 |
| 9mo_SIGAF3_ | 0.09452754 | 0.5597887  | 6.48E-05 | 0.022877  | -0.017059 |
| 9mo_SIGAF3_ | 0.06772669 | 0.39806992 | 6.15E-05 | 0.011255  | 0.10492   |
| 9mo_SIGAF3_ | 0.01371372 | 0.07215069 | 3.25E-05 | 0.0056405 | 0.20898   |

|             |            |            |          |           |           |
|-------------|------------|------------|----------|-----------|-----------|
| 9mo_SIGAF3_ | 0.0241876  | 0.13535109 | 3.61E-05 | 0.0042401 | -0.080664 |
| 9mo_SIGAF3_ | 0.03649288 | 0.20960225 | 4.70E-05 | 0.0042982 | -0.062998 |
| 9mo_SIGAF3_ | 0.02780838 | 0.15719922 | 3.88E-05 | 0.0040827 | -0.10472  |
| 9mo_SIGAF3_ | 0.0189832  | 0.10394722 | 3.38E-05 | 0.004741  | 0.03364   |
| 9mo_SIGAF3_ | 0.02197297 | 0.12198781 | 3.49E-05 | 0.0044169 | -0.046619 |
| 9mo_SIGAF3_ | 0.02026111 | 0.11165824 | 3.42E-05 | 0.0045972 | 0.0032259 |
| 9mo_SIGAF3_ | 0.0985471  | 0.5840431  | 6.52E-05 | 0.024275  | -0.084641 |
| 9mo_SIGAF3_ | 0.08286528 | 0.48941758 | 6.35E-05 | 0.017892  | 0.12434   |
| 9mo_SIGAF3_ | 0.02421365 | 0.13550824 | 3.64E-05 | 0.0042065 | -0.080664 |
| 9mo_SIGAF3_ | 0.01323517 | 0.06926309 | 3.24E-05 | 0.0057681 | 0.23179   |
| 9mo_SIGAF3_ | 0.09858217 | 0.5842547  | 6.52E-05 | 0.024275  | -0.084641 |
| 9mo_SIGAF3_ | 0.04420647 | 0.25614676 | 5.42E-05 | 0.0050757 | 0.012967  |
| 9mo_SIGAF3_ | 0.07544269 | 0.444629   | 6.26E-05 | 0.014549  | 0.13345   |
| 9mo_SIGAF3_ | 0.04455589 | 0.25825518 | 5.42E-05 | 0.0050757 | 0.012967  |
| 9mo_SIGAF3_ | 0.04504654 | 0.26121584 | 5.46E-05 | 0.0051531 | 0.017239  |
| 9mo_SIGAF3_ | 0.01560898 | 0.08358686 | 3.28E-05 | 0.0052924 | 0.1442    |
| 9mo_SIGAF3_ | 0.01937529 | 0.10631315 | 3.40E-05 | 0.0046667 | 0.017998  |
| 9mo_SIGAF3_ | 0.03198234 | 0.18238528 | 4.27E-05 | 0.004099  | -0.097962 |
| 9mo_SIGAF3_ | 0.02407312 | 0.13466027 | 3.61E-05 | 0.0042401 | -0.073623 |
| 9mo_SIGAF3_ | 0.08196725 | 0.48399878 | 6.35E-05 | 0.017633  | 0.12948   |
| 9mo_SIGAF3_ | 0.02309546 | 0.12876098 | 3.58E-05 | 0.0042778 | -0.065623 |
| 9mo_SIGAF3_ | 0.01842935 | 0.10060526 | 3.36E-05 | 0.0048202 | 0.050123  |
| 9mo_SIGAF3_ | 0.01060858 | 0.05341398 | 3.21E-05 | 0.0064976 | 0.35381   |
| 9mo_SIGAF3_ | 0.06481121 | 0.38047764 | 6.11E-05 | 0.010206  | 0.093303  |
| 9mo_SIGAF3_ | 0.08212807 | 0.48496917 | 6.35E-05 | 0.017633  | 0.12948   |
| 9mo_SIGAF3_ | 0.03772386 | 0.21703011 | 4.81E-05 | 0.0043756 | -0.05192  |
| 9mo_SIGAF3_ | 0.01670836 | 0.09022066 | 3.31E-05 | 0.0050879 | 0.10435   |
| 9mo_SIGAF3_ | 0.01216224 | 0.06278896 | 3.23E-05 | 0.0060411 | 0.2791    |
| 9mo_SIGAF3_ | 0.0205933  | 0.11366271 | 3.44E-05 | 0.0045325 | -0.01065  |
| 9mo_SIGAF3_ | 0.07958037 | 0.4695961  | 6.31E-05 | 0.016335  | 0.13545   |
| 9mo_SIGAF3_ | 0.03307308 | 0.18896687 | 4.37E-05 | 0.0041322 | -0.091175 |
| 9mo_SIGAF3_ | 0.06141458 | 0.3599821  | 6.07E-05 | 0.0090475 | 0.082025  |
| 9mo_SIGAF3_ | 0.08063751 | 0.47597498 | 6.32E-05 | 0.016854  | 0.13314   |
| 9mo_SIGAF3_ | 0.01656253 | 0.08934066 | 3.31E-05 | 0.0050879 | 0.10435   |
| 9mo_SIGAF3_ | 0.01894691 | 0.10372824 | 3.38E-05 | 0.004741  | 0.03364   |
| 9mo_SIGAF3_ | 0.11010632 | 0.6537925  | 6.60E-05 | 0.025599  | -0.26716  |
| 9mo_SIGAF3_ | 0.02872864 | 0.16275214 | 3.97E-05 | 0.0040686 | -0.10664  |
| 9mo_SIGAF3_ | 0.10347677 | 0.61378914 | 6.56E-05 | 0.025296  | -0.17104  |
| 9mo_SIGAF3_ | 0.03118976 | 0.17760274 | 4.16E-05 | 0.0040771 | -0.10299  |
| 9mo_SIGAF3_ | 0.01607772 | 0.08641528 | 3.30E-05 | 0.0051875 | 0.12392   |
| 9mo_SIGAF3_ | 0.02475697 | 0.13878669 | 3.64E-05 | 0.0042065 | -0.086782 |
| 9mo_SIGAF3_ | 0.02277285 | 0.12681435 | 3.55E-05 | 0.0043197 | -0.056631 |
| 9mo_SIGAF3_ | 0.01602506 | 0.08609753 | 3.30E-05 | 0.0051875 | 0.12392   |

|             |            |            |          |           |           |
|-------------|------------|------------|----------|-----------|-----------|
| 9mo_SIGAF3_ | 0.0529756  | 0.30906054 | 5.87E-05 | 0.0065755 | 0.059084  |
| 9mo_SIGAF3_ | 0.03167309 | 0.18051918 | 4.22E-05 | 0.0040866 | -0.10071  |
| 9mo_SIGAF3_ | 0.03567683 | 0.20467815 | 4.59E-05 | 0.0042319 | -0.073417 |
| 9mo_SIGAF3_ | 0.01896164 | 0.10381716 | 3.38E-05 | 0.004741  | 0.03364   |
| 9mo_SIGAF3_ | 0.01181704 | 0.06070598 | 3.22E-05 | 0.0061869 | 0.30353   |
| 9mo_SIGAF3_ | 0.02592689 | 0.14584613 | 3.76E-05 | 0.0041286 | -0.096385 |
| 9mo_SIGAF3_ | 0.02263046 | 0.12595518 | 3.55E-05 | 0.0043197 | -0.056631 |
| 9mo_SIGAF3_ | 0.07194337 | 0.42351377 | 6.21E-05 | 0.01308   | 0.12348   |
| 9mo_SIGAF3_ | 0.02785193 | 0.15746199 | 3.88E-05 | 0.0040827 | -0.10472  |
| 9mo_SIGAF3_ | 0.01343279 | 0.07045557 | 3.24E-05 | 0.0057681 | 0.23179   |
| 9mo_SIGAF3_ | 0.01812182 | 0.09874957 | 3.36E-05 | 0.0048202 | 0.050123  |
| 9mo_SIGAF3_ | 0.02371728 | 0.1325131  | 3.61E-05 | 0.0042401 | -0.073623 |
| 9mo_SIGAF3_ | 0.13125783 | 0.7814227  | 6.70E-05 | 0.023599  | -0.44608  |
| 9mo_SIGAF3_ | 0.03883851 | 0.22375602 | 4.92E-05 | 0.0044639 | -0.040459 |
| 9mo_SIGAF3_ | 0.02677982 | 0.15099278 | 3.80E-05 | 0.0041099 | -0.099939 |
| 9mo_SIGAF3_ | 0.02359398 | 0.1317691  | 3.58E-05 | 0.0042778 | -0.073623 |
| 9mo_SIGAF3_ | 0.02565731 | 0.14421944 | 3.72E-05 | 0.0041509 | -0.092011 |
| 9mo_SIGAF3_ | 0.04229519 | 0.24461393 | 5.24E-05 | 0.0047963 | -0.00654  |
| 9mo_SIGAF3_ | 0.0248025  | 0.13906144 | 3.68E-05 | 0.0041768 | -0.086782 |
| 9mo_SIGAF3_ | 0.02894904 | 0.16408205 | 3.97E-05 | 0.0040686 | -0.10664  |
| 9mo_SIGAF3_ | 0.02256653 | 0.12556939 | 3.55E-05 | 0.0043197 | -0.056631 |
| 9mo_SIGAF3_ | 0.05889624 | 0.3447862  | 6.02E-05 | 0.0081753 | 0.074438  |
| 9mo_SIGAF3_ | 0.00976761 | 0.04833949 | 3.20E-05 | 0.0068348 | 0.4058    |
| 9mo_SIGAF3_ | 0.01412212 | 0.07461503 | 3.25E-05 | 0.0056405 | 0.20898   |
| 9mo_SIGAF3_ | 0.11163013 | 0.6629873  | 6.61E-05 | 0.025525  | -0.28705  |
| 9mo_SIGAF3_ | 0.08085365 | 0.4772792  | 6.33E-05 | 0.017113  | 0.13314   |
| 9mo_SIGAF3_ | 0.07761867 | 0.45775902 | 6.29E-05 | 0.015562  | 0.13646   |
| 9mo_SIGAF3_ | 0.12224364 | 0.72703016 | 6.66E-05 | 0.02435   | -0.38515  |
| 9mo_SIGAF3_ | 0.09343938 | 0.5532226  | 6.47E-05 | 0.022469  | 0.0013661 |
| 9mo_SIGAF3_ | 0.09884188 | 0.5858218  | 6.52E-05 | 0.024275  | -0.094455 |
| 9mo_SIGAF3_ | 0.02044383 | 0.11276078 | 3.44E-05 | 0.0045325 | -0.01065  |
| 9mo_SIGAF3_ | 0.04543499 | 0.2635598  | 5.50E-05 | 0.0052335 | 0.021279  |
| 9mo_SIGAF3_ | 0.02043288 | 0.11269473 | 3.44E-05 | 0.0045325 | -0.01065  |
| 9mo_SIGAF3_ | 0.02175597 | 0.1206784  | 3.49E-05 | 0.0044169 | -0.0356   |
| 9mo_SIGAF3_ | 0.01524853 | 0.08141189 | 3.27E-05 | 0.0054028 | 0.16515   |
| 9mo_SIGAF3_ | 0.12884948 | 0.7668904  | 6.69E-05 | 0.023723  | -0.43195  |
| 9mo_SIGAF3_ | 0.01455062 | 0.07720064 | 3.26E-05 | 0.0055188 | 0.18676   |
| 9mo_SIGAF3_ | 0.02305383 | 0.12850982 | 3.55E-05 | 0.0043197 | -0.065623 |
| 9mo_SIGAF3_ | 0.02431529 | 0.13612157 | 3.64E-05 | 0.0042065 | -0.080664 |
| 9mo_SIGAF3_ | 0.00998972 | 0.04967972 | 3.20E-05 | 0.0066628 | 0.37961   |
| 9mo_SIGAF3_ | 0.01211062 | 0.06247744 | 3.23E-05 | 0.0060411 | 0.2791    |
| 9mo_SIGAF3_ | 0.0862012  | 0.50954676 | 6.39E-05 | 0.01943   | 0.099025  |
| 9mo_SIGAF3_ | 0.02319197 | 0.12934335 | 3.58E-05 | 0.0042778 | -0.065623 |

|             |            |            |          |           |           |
|-------------|------------|------------|----------|-----------|-----------|
| 9mo_SIGAF3_ | 0.02637158 | 0.14852938 | 3.76E-05 | 0.0041286 | -0.099939 |
| 9mo_SIGAF3_ | 0.08383903 | 0.49529326 | 6.37E-05 | 0.01841   | 0.1176    |
| 9mo_SIGAF3_ | 0.11866869 | 0.7054586  | 6.65E-05 | 0.024776  | -0.3584   |
| 9mo_SIGAF3_ | 0.02270693 | 0.12641655 | 3.55E-05 | 0.0043197 | -0.056631 |
| 9mo_SIGAF3_ | 0.01707403 | 0.09242714 | 3.33E-05 | 0.0049935 | 0.085504  |
| 9mo_SIGAF3_ | 0.02299585 | 0.12815993 | 3.55E-05 | 0.0043197 | -0.056631 |
| 9mo_SIGAF3_ | 0.09024991 | 0.5339771  | 6.44E-05 | 0.021369  | 0.05218   |
| 9mo_SIGAF3_ | 0.03140518 | 0.17890263 | 4.16E-05 | 0.0040771 | -0.10071  |
| 9mo_SIGAF3_ | 0.04354235 | 0.2521394  | 5.33E-05 | 0.0049301 | 0.008455  |
| 9mo_SIGAF3_ | 0.05360078 | 0.3128329  | 5.91E-05 | 0.0068337 | 0.060836  |
| 9mo_SIGAF3_ | 0.01116145 | 0.05675005 | 3.21E-05 | 0.006339  | 0.32844   |
| 9mo_SIGAF3_ | 0.04008883 | 0.23130055 | 5.03E-05 | 0.0045634 | -0.028892 |
| 9mo_SIGAF3_ | 0.02387592 | 0.13347036 | 3.61E-05 | 0.0042401 | -0.073623 |
| 9mo_SIGAF3_ | 0.0958193  | 0.5675833  | 6.50E-05 | 0.023448  | -0.035993 |
| 9mo_SIGAF3_ | 0.02089319 | 0.11547227 | 3.47E-05 | 0.0044724 | -0.023601 |
| 9mo_SIGAF3_ | 0.01353439 | 0.07106862 | 3.24E-05 | 0.0057681 | 0.23179   |
| 9mo_SIGAF3_ | 0.03935712 | 0.22688532 | 4.98E-05 | 0.0045122 | -0.034672 |
| 9mo_SIGAF3_ | 0.03018975 | 0.17156857 | 4.07E-05 | 0.0040668 | -0.10597  |
| 9mo_SIGAF3_ | 0.01663014 | 0.08974866 | 3.31E-05 | 0.0050879 | 0.10435   |
| 9mo_SIGAF3_ | 0.02707943 | 0.15280062 | 3.84E-05 | 0.0040947 | -0.10271  |
| 9mo_SIGAF3_ | 0.10268978 | 0.6090404  | 6.55E-05 | 0.025127  | -0.16182  |
| 9mo_SIGAF3_ | 0.04953798 | 0.28831756 | 5.73E-05 | 0.0058857 | 0.04392   |
| 9mo_SIGAF3_ | 0.0219938  | 0.12211346 | 3.52E-05 | 0.0043661 | -0.046619 |
| 9mo_SIGAF3_ | 0.06194082 | 0.36315745 | 6.07E-05 | 0.0092324 | 0.083692  |
| 9mo_SIGAF3_ | 0.03653295 | 0.20984405 | 4.70E-05 | 0.0042982 | -0.062998 |
| 9mo_SIGAF3_ | 0.01556007 | 0.08329175 | 3.28E-05 | 0.0052924 | 0.1442    |
| 9mo_SIGAF3_ | 0.1041263  | 0.61770844 | 6.56E-05 | 0.025367  | -0.18011  |
| 9mo_SIGAF3_ | 0.0432661  | 0.25047252 | 5.33E-05 | 0.0049301 | 0.0036923 |
| 9mo_SIGAF3_ | 0.01749368 | 0.09495936 | 3.33E-05 | 0.0049935 | 0.085504  |
| 9mo_SIGAF3_ | 0.01616309 | 0.08693045 | 3.30E-05 | 0.0051875 | 0.12392   |
| 9mo_SIGAF3_ | 0.09560306 | 0.5662785  | 6.49E-05 | 0.023263  | -0.035993 |
| 9mo_SIGAF3_ | 0.06261417 | 0.36722055 | 6.08E-05 | 0.0094206 | 0.085432  |
| 9mo_SIGAF3_ | 0.01155615 | 0.05913173 | 3.22E-05 | 0.0061869 | 0.30353   |
| 9mo_SIGAF3_ | 0.10932495 | 0.6490776  | 6.60E-05 | 0.025611  | -0.2602   |
| 9mo_SIGAF3_ | 0.02449278 | 0.13719255 | 3.64E-05 | 0.0042065 | -0.080664 |
| 9mo_SIGAF3_ | 0.02065832 | 0.11405508 | 3.44E-05 | 0.0045325 | -0.01065  |
| 9mo_SIGAF3_ | 0.07905802 | 0.46644422 | 6.30E-05 | 0.016077  | 0.13613   |
| 9mo_SIGAF3_ | 0.07445392 | 0.43866265 | 6.24E-05 | 0.014051  | 0.13218   |
| 9mo_SIGAF3_ | 0.10685404 | 0.6341679  | 6.58E-05 | 0.025586  | -0.22263  |
| 9mo_SIGAF3_ | 0.03771248 | 0.21696144 | 4.81E-05 | 0.0043756 | -0.05192  |
| 9mo_SIGAF3_ | 0.01929033 | 0.10580048 | 3.40E-05 | 0.0046667 | 0.017998  |
| 9mo_SIGAF3_ | 0.08173388 | 0.48259062 | 6.34E-05 | 0.017373  | 0.12948   |
| 9mo_SIGAF3_ | 0.09880698 | 0.5856112  | 6.52E-05 | 0.024275  | -0.094455 |

|             |            |            |          |           |            |
|-------------|------------|------------|----------|-----------|------------|
| 9mo_SIGAF3_ | 0.02434272 | 0.13628708 | 3.64E-05 | 0.0042065 | -0.080664  |
| 9mo_SIGAF3_ | 0.04377645 | 0.25355196 | 5.38E-05 | 0.0050014 | 0.008455   |
| 9mo_SIGAF3_ | 0.01648087 | 0.08884796 | 3.31E-05 | 0.0050879 | 0.10435    |
| 9mo_SIGAF3_ | 0.02383266 | 0.13320932 | 3.61E-05 | 0.0042401 | -0.073623  |
| 9mo_SIGAF3_ | 0.03601113 | 0.20669535 | 4.65E-05 | 0.0042637 | -0.068307  |
| 9mo_SIGAF3_ | 0.02001942 | 0.11019988 | 3.42E-05 | 0.0045972 | 0.0032259  |
| 9mo_SIGAF3_ | 0.02861679 | 0.16207722 | 3.93E-05 | 0.004074  | -0.10664   |
| 9mo_SIGAF3_ | 0.02352281 | 0.13133964 | 3.58E-05 | 0.0042778 | -0.065623  |
| 9mo_SIGAF3_ | 0.06339841 | 0.37195268 | 6.09E-05 | 0.0096122 | 0.089169   |
| 9mo_SIGAF3_ | 0.08742524 | 0.5169327  | 6.41E-05 | 0.020177  | 0.087329   |
| 9mo_SIGAF3_ | 0.07444807 | 0.43862736 | 6.24E-05 | 0.014051  | 0.13218    |
| 9mo_SIGAF3_ | 0.03215423 | 0.18342246 | 4.27E-05 | 0.004099  | -0.097962  |
| 9mo_SIGAF3_ | 0.04619828 | 0.26816556 | 5.54E-05 | 0.0053171 | 0.025099   |
| 9mo_SIGAF3_ | 0.05889554 | 0.344782   | 6.02E-05 | 0.0081753 | 0.074438   |
| 9mo_SIGAF3_ | 0.02971368 | 0.16869597 | 4.02E-05 | 0.0040662 | -0.10597   |
| 9mo_SIGAF3_ | 0.01313117 | 0.06863555 | 3.24E-05 | 0.0057681 | 0.23179    |
| 9mo_SIGAF3_ | 0.01691893 | 0.09149122 | 3.31E-05 | 0.0050879 | 0.10435    |
| 9mo_SIGAF3_ | 0.02157412 | 0.1195811  | 3.49E-05 | 0.0044169 | -0.0356    |
| 9mo_SIGAF3_ | 0.02411448 | 0.13490988 | 3.61E-05 | 0.0042401 | -0.073623  |
| 9mo_SIGAF3_ | 0.07988554 | 0.4714375  | 6.32E-05 | 0.016594  | 0.13545    |
| 9mo_SIGAF3_ | 0.06648234 | 0.39056137 | 6.13E-05 | 0.010826  | 0.10013    |
| 9mo_SIGAF3_ | 0.03811784 | 0.21940741 | 4.87E-05 | 0.0044183 | -0.04622   |
| 9mo_SIGAF3_ | 0.01098399 | 0.05567927 | 3.21E-05 | 0.006339  | 0.32844    |
| 9mo_SIGAF3_ | 0.02471201 | 0.1385154  | 3.64E-05 | 0.0042065 | -0.086782  |
| 9mo_SIGAF3_ | 0.0941001  | 0.55720943 | 6.48E-05 | 0.022877  | -0.0077738 |
| 9mo_SIGAF3_ | 0.11162417 | 0.66295135 | 6.61E-05 | 0.025525  | -0.28705   |
| 9mo_SIGAF3_ | 0.09073906 | 0.53692865 | 6.45E-05 | 0.021597  | 0.044278   |
| 9mo_SIGAF3_ | 0.01184574 | 0.06087914 | 3.22E-05 | 0.0061869 | 0.30353    |
| 9mo_SIGAF3_ | 0.0200729  | 0.11052257 | 3.42E-05 | 0.0045972 | 0.0032259  |
| 9mo_SIGAF3_ | 0.09940539 | 0.5892221  | 6.53E-05 | 0.02442   | -0.10426   |
| 9mo_SIGAF3_ | 0.04498822 | 0.26086393 | 5.46E-05 | 0.0051531 | 0.017239   |
| 9mo_SIGAF3_ | 0.05625389 | 0.328842   | 5.97E-05 | 0.0073934 | 0.068678   |
| 9mo_SIGAF3_ | 0.06089502 | 0.356847   | 6.06E-05 | 0.008866  | 0.080421   |
| 9mo_SIGAF3_ | 0.08572194 | 0.50665486 | 6.39E-05 | 0.019177  | 0.1043     |
| 9mo_SIGAF3_ | 0.02514263 | 0.14111383 | 3.68E-05 | 0.0041768 | -0.086782  |
| 9mo_SIGAF3_ | 0.05668958 | 0.331471   | 5.98E-05 | 0.0075425 | 0.068678   |
| 9mo_SIGAF3_ | 0.01004245 | 0.04999794 | 3.20E-05 | 0.0066628 | 0.37961    |
| 9mo_SIGAF3_ | 0.02693115 | 0.15190592 | 3.80E-05 | 0.0041099 | -0.10271   |
| 9mo_SIGAF3_ | 0.00982935 | 0.04871207 | 3.20E-05 | 0.0066628 | 0.37961    |
| 9mo_SIGAF3_ | 0.03247741 | 0.18537256 | 4.27E-05 | 0.004099  | -0.094772  |
| 9mo_SIGAF3_ | 0.09268388 | 0.5486639  | 6.46E-05 | 0.022258  | 0.010343   |
| 9mo_SIGAF3_ | 0.07003541 | 0.41200092 | 6.18E-05 | 0.012147  | 0.11689    |
| 9mo_SIGAF3_ | 0.05276365 | 0.3077816  | 5.87E-05 | 0.0065755 | 0.057248   |

|             |            |            |          |           |           |
|-------------|------------|------------|----------|-----------|-----------|
| 9mo_SIGAF3_ | 0.02362321 | 0.13194549 | 3.58E-05 | 0.0042778 | -0.073623 |
| 9mo_SIGAF3_ | 0.02046997 | 0.11291853 | 3.44E-05 | 0.0045325 | -0.01065  |
| 9mo_SIGAF3_ | 0.04887052 | 0.28429008 | 5.70E-05 | 0.0057827 | 0.041222  |
| 9mo_SIGAF3_ | 0.06690544 | 0.39311442 | 6.14E-05 | 0.011039  | 0.10251   |
| 9mo_SIGAF3_ | 0.06643201 | 0.3902577  | 6.13E-05 | 0.010826  | 0.10013   |
| 9mo_SIGAF3_ | 0.04747877 | 0.27589217 | 5.61E-05 | 0.0054936 | 0.035328  |
| 9mo_SIGAF3_ | 0.05098985 | 0.2970783  | 5.81E-05 | 0.006215  | 0.051138  |
| 9mo_SIGAF3_ | 0.08890461 | 0.5258594  | 6.42E-05 | 0.020663  | 0.067165  |
| 9mo_SIGAF3_ | 0.08966778 | 0.5304645  | 6.44E-05 | 0.021137  | 0.059815  |
| 9mo_SIGAF3_ | 0.0112316  | 0.05717338 | 3.21E-05 | 0.006339  | 0.32844   |
| 9mo_SIGAF3_ | 0.02073177 | 0.11449827 | 3.44E-05 | 0.0045325 | -0.01065  |
| 9mo_SIGAF3_ | 0.01414024 | 0.07472438 | 3.25E-05 | 0.0056405 | 0.20898   |
| 9mo_SIGAF3_ | 0.0355038  | 0.20363407 | 4.59E-05 | 0.0042319 | -0.073417 |
| 9mo_SIGAF3_ | 0.01962398 | 0.10781379 | 3.40E-05 | 0.0046667 | 0.017998  |
| 9mo_SIGAF3_ | 0.09705601 | 0.5750457  | 6.51E-05 | 0.023799  | -0.065044 |
| 9mo_SIGAF3_ | 0.01728067 | 0.09367399 | 3.33E-05 | 0.0049935 | 0.085504  |
| 9mo_SIGAF3_ | 0.02282109 | 0.12710543 | 3.55E-05 | 0.0043197 | -0.056631 |
| 9mo_SIGAF3_ | 0.01490872 | 0.07936145 | 3.27E-05 | 0.0054028 | 0.16515   |
| 9mo_SIGAF3_ | 0.02762844 | 0.15611343 | 3.88E-05 | 0.0040827 | -0.10472  |
| 9mo_SIGAF3_ | 0.07988553 | 0.47143748 | 6.32E-05 | 0.016594  | 0.13545   |
| 9mo_SIGAF3_ | 0.03671234 | 0.21092652 | 4.70E-05 | 0.0042982 | -0.062998 |
| 9mo_SIGAF3_ | 0.04816711 | 0.28004566 | 5.67E-05 | 0.0056831 | 0.038361  |
| 9mo_SIGAF3_ | 0.01507424 | 0.0803602  | 3.27E-05 | 0.0054028 | 0.16515   |
| 9mo_SIGAF3_ | 0.09794169 | 0.58039    | 6.52E-05 | 0.024123  | -0.074831 |
| 9mo_SIGAF3_ | 0.07197543 | 0.42370722 | 6.21E-05 | 0.01308   | 0.12348   |
| 9mo_SIGAF3_ | 0.01248626 | 0.06474409 | 3.23E-05 | 0.0060411 | 0.2791    |
| 9mo_SIGAF3_ | 0.02073471 | 0.11451601 | 3.44E-05 | 0.0045325 | -0.01065  |
| 9mo_SIGAF3_ | 0.01987391 | 0.10932186 | 3.42E-05 | 0.0045972 | 0.0032259 |
| 9mo_SIGAF3_ | 0.01531874 | 0.08183557 | 3.27E-05 | 0.0054028 | 0.1442    |
| 9mo_SIGAF3_ | 0.03492855 | 0.20016295 | 4.54E-05 | 0.0042028 | -0.078293 |
| 9mo_SIGAF3_ | 0.10565856 | 0.6269543  | 6.57E-05 | 0.025482  | -0.20623  |
| 9mo_SIGAF3_ | 0.01859678 | 0.10161554 | 3.36E-05 | 0.0048202 | 0.050123  |
| 9mo_SIGAF3_ | 0.02903361 | 0.16459231 | 3.97E-05 | 0.0040686 | -0.10664  |
| 9mo_SIGAF3_ | 0.02781267 | 0.15722506 | 3.88E-05 | 0.0040827 | -0.10472  |
| 9mo_SIGAF3_ | 0.02127584 | 0.11778122 | 3.47E-05 | 0.0044724 | -0.023601 |
| 9mo_SIGAF3_ | 0.04965695 | 0.28903547 | 5.73E-05 | 0.0058857 | 0.046466  |
| 9mo_SIGAF3_ | 0.06146535 | 0.36028847 | 6.07E-05 | 0.0090475 | 0.082025  |
| 9mo_SIGAF3_ | 0.03206188 | 0.1828652  | 4.27E-05 | 0.004099  | -0.097962 |
| 9mo_SIGAF3_ | 0.03196312 | 0.18226929 | 4.22E-05 | 0.0040866 | -0.097962 |
| 9mo_SIGAF3_ | 0.01302447 | 0.06799171 | 3.23E-05 | 0.0059016 | 0.25518   |
| 9mo_SIGAF3_ | 0.085371   | 0.5045373  | 6.39E-05 | 0.019177  | 0.10916   |
| 9mo_SIGAF3_ | 0.01161005 | 0.05945698 | 3.22E-05 | 0.0061869 | 0.30353   |
| 9mo_SIGAF3_ | 0.02298404 | 0.12808867 | 3.55E-05 | 0.0043197 | -0.056631 |

|             |            |            |          |           |            |
|-------------|------------|------------|----------|-----------|------------|
| 9mo_SIGAF3_ | 0.01220168 | 0.06302694 | 3.23E-05 | 0.0060411 | 0.2791     |
| 9mo_SIGAF3_ | 0.01959358 | 0.10763032 | 3.40E-05 | 0.0046667 | 0.017998   |
| 9mo_SIGAF3_ | 0.09151619 | 0.54161793 | 6.45E-05 | 0.021822  | 0.036126   |
| 9mo_SIGAF3_ | 0.11057256 | 0.65660584 | 6.60E-05 | 0.02558   | -0.27396   |
| 9mo_SIGAF3_ | 0.06801127 | 0.3997871  | 6.16E-05 | 0.011474  | 0.10734    |
| 9mo_SIGAF3_ | 0.09254581 | 0.54783076 | 6.46E-05 | 0.022258  | 0.019141   |
| 9mo_SIGAF3_ | 0.09566637 | 0.5666605  | 6.49E-05 | 0.023263  | -0.035993  |
| 9mo_SIGAF3_ | 0.05986184 | 0.3506127  | 6.04E-05 | 0.0085136 | 0.077363   |
| 9mo_SIGAF3_ | 0.09141334 | 0.5409973  | 6.45E-05 | 0.021822  | 0.036126   |
| 9mo_SIGAF3_ | 0.09477199 | 0.56126374 | 6.49E-05 | 0.023073  | -0.017059  |
| 9mo_SIGAF3_ | 0.04281623 | 0.24775796 | 5.29E-05 | 0.0048617 | -0.0013165 |
| 9mo_SIGAF3_ | 0.03345137 | 0.1912495  | 4.37E-05 | 0.0041322 | -0.091175  |
| 9mo_SIGAF3_ | 0.02754854 | 0.1556313  | 3.88E-05 | 0.0040827 | -0.10472   |
| 9mo_SIGAF3_ | 0.02717386 | 0.15337043 | 3.84E-05 | 0.0040947 | -0.10271   |
| 9mo_SIGAF3_ | 0.02084613 | 0.1151883  | 3.44E-05 | 0.0045325 | -0.023601  |
| 9mo_SIGAF3_ | 0.02576063 | 0.1448429  | 3.72E-05 | 0.0041509 | -0.092011  |
| 9mo_SIGAF3_ | 0.01923954 | 0.10549401 | 3.40E-05 | 0.0046667 | 0.017998   |
| 9mo_SIGAF3_ | 0.013153   | 0.06876726 | 3.24E-05 | 0.0057681 | 0.23179    |
| 9mo_SIGAF3_ | 0.0180691  | 0.09843145 | 3.34E-05 | 0.0049043 | 0.050123   |
| 9mo_SIGAF3_ | 0.02411756 | 0.13492842 | 3.61E-05 | 0.0042401 | -0.073623  |
| 9mo_SIGAF3_ | 0.0473419  | 0.27506626 | 5.61E-05 | 0.0054936 | 0.035328   |
| 9mo_SIGAF3_ | 0.03118811 | 0.17759277 | 4.16E-05 | 0.0040771 | -0.10299   |
| 9mo_SIGAF3_ | 0.09112805 | 0.5392759  | 6.45E-05 | 0.021597  | 0.036126   |
| 9mo_SIGAF3_ | 0.07568789 | 0.44610852 | 6.26E-05 | 0.014549  | 0.13453    |
| 9mo_SIGAF3_ | 0.01600092 | 0.0859519  | 3.30E-05 | 0.0051875 | 0.12392    |
| 9mo_SIGAF3_ | 0.04921961 | 0.2863965  | 5.73E-05 | 0.0058857 | 0.04392    |
| 9mo_SIGAF3_ | 0.08247301 | 0.48705056 | 6.35E-05 | 0.017892  | 0.1271     |
| 9mo_SIGAF3_ | 0.02168164 | 0.12022986 | 3.49E-05 | 0.0044169 | -0.0356    |
| 9mo_SIGAF3_ | 0.08950321 | 0.5294714  | 6.43E-05 | 0.020902  | 0.059815   |
| 9mo_SIGAF3_ | 0.03260433 | 0.18613839 | 4.32E-05 | 0.0041142 | -0.094772  |
| 9mo_SIGAF3_ | 0.10954001 | 0.6503753  | 6.60E-05 | 0.025611  | -0.2602    |
| 9mo_SIGAF3_ | 0.09058477 | 0.5359976  | 6.44E-05 | 0.021369  | 0.044278   |
| 9mo_SIGAF3_ | 0.0712274  | 0.41919354 | 6.20E-05 | 0.012608  | 0.12136    |
| 9mo_SIGAF3_ | 0.08602687 | 0.50849485 | 6.39E-05 | 0.01943   | 0.099025   |
| 9mo_SIGAF3_ | 0.00898504 | 0.04361739 | 3.19E-05 | 0.0070136 | 0.43237    |
| 9mo_SIGAF3_ | 0.01218516 | 0.06292721 | 3.23E-05 | 0.0060411 | 0.2791     |
| 9mo_SIGAF3_ | 0.10324176 | 0.6123711  | 6.56E-05 | 0.025216  | -0.17104   |
| 9mo_SIGAF3_ | 0.01553852 | 0.08316173 | 3.28E-05 | 0.0052924 | 0.1442     |
| 9mo_SIGAF3_ | 0.02392226 | 0.13374998 | 3.61E-05 | 0.0042401 | -0.073623  |
| 9mo_SIGAF3_ | 0.09129316 | 0.5402721  | 6.45E-05 | 0.021822  | 0.036126   |
| 9mo_SIGAF3_ | 0.05787924 | 0.3386495  | 6.00E-05 | 0.0078516 | 0.073002   |
| 9mo_SIGAF3_ | 0.10957506 | 0.6505868  | 6.60E-05 | 0.025599  | -0.2602    |
| 9mo_SIGAF3_ | 0.12728818 | 0.7574694  | 6.69E-05 | 0.023834  | -0.42086   |



|             |            |            |          |           |           |
|-------------|------------|------------|----------|-----------|-----------|
| 9mo_SIGAF3_ | 0.01862244 | 0.10177038 | 3.36E-05 | 0.0048202 | 0.03364   |
| 9mo_SIGAF3_ | 0.04534783 | 0.2630338  | 5.50E-05 | 0.0052335 | 0.021279  |
| 9mo_SIGAF3_ | 0.01303908 | 0.06807989 | 3.23E-05 | 0.0059016 | 0.25518   |
| 9mo_SIGAF3_ | 0.02081248 | 0.1149853  | 3.44E-05 | 0.0045325 | -0.01065  |
| 9mo_SIGAF3_ | 0.05633719 | 0.32934466 | 5.97E-05 | 0.0073934 | 0.068678  |
| 9mo_SIGAF3_ | 0.03496176 | 0.20036337 | 4.54E-05 | 0.0042028 | -0.078293 |
| 9mo_SIGAF3_ | 0.08791132 | 0.51986575 | 6.41E-05 | 0.020177  | 0.080939  |
| 9mo_SIGAF3_ | 0.01664393 | 0.08983184 | 3.31E-05 | 0.0050879 | 0.10435   |
| 9mo_SIGAF3_ | 0.02623734 | 0.14771941 | 3.76E-05 | 0.0041286 | -0.096385 |
| 9mo_SIGAF3_ | 0.03931261 | 0.22661677 | 4.98E-05 | 0.0045122 | -0.034672 |
| 9mo_SIGAF3_ | 0.02698817 | 0.15224996 | 3.84E-05 | 0.0040947 | -0.10271  |
| 9mo_SIGAF3_ | 0.05405764 | 0.3155896  | 5.91E-05 | 0.0068337 | 0.062513  |
| 9mo_SIGAF3_ | 0.05055906 | 0.2944789  | 5.78E-05 | 0.0061018 | 0.048868  |
| 9mo_SIGAF3_ | 0.06390063 | 0.37498313 | 6.10E-05 | 0.0098069 | 0.089169  |
| 9mo_SIGAF3_ | 0.06466687 | 0.3796067  | 6.11E-05 | 0.010206  | 0.093303  |
| 9mo_SIGAF3_ | 0.035854   | 0.20574722 | 4.65E-05 | 0.0042637 | -0.068307 |
| 9mo_SIGAF3_ | 0.01252724 | 0.06499137 | 3.23E-05 | 0.0060411 | 0.2791    |
| 9mo_SIGAF3_ | 0.02339874 | 0.130591   | 3.58E-05 | 0.0042778 | -0.065623 |
| 9mo_SIGAF3_ | 0.01450661 | 0.07693506 | 3.26E-05 | 0.0055188 | 0.18676   |
| 9mo_SIGAF3_ | 0.01427693 | 0.07554919 | 3.26E-05 | 0.0055188 | 0.18676   |
| 9mo_SIGAF3_ | 0.03666459 | 0.2106384  | 4.70E-05 | 0.0042982 | -0.062998 |
| 9mo_SIGAF3_ | 0.0239103  | 0.13367781 | 3.61E-05 | 0.0042401 | -0.073623 |
| 9mo_SIGAF3_ | 0.02994672 | 0.17010212 | 4.07E-05 | 0.0040668 | -0.10597  |
| 9mo_SIGAF3_ | 0.03194428 | 0.1821556  | 4.22E-05 | 0.0040866 | -0.097962 |
| 9mo_SIGAF3_ | 0.01360822 | 0.07151411 | 3.24E-05 | 0.0057681 | 0.23179   |
| 9mo_SIGAF3_ | 0.01751116 | 0.0950648  | 3.33E-05 | 0.0049935 | 0.067421  |
| 9mo_SIGAF3_ | 0.05487105 | 0.32049784 | 5.94E-05 | 0.0071062 | 0.064127  |
| 9mo_SIGAF3_ | 0.03005275 | 0.17074192 | 4.07E-05 | 0.0040668 | -0.10597  |
| 9mo_SIGAF3_ | 0.06139993 | 0.35989368 | 6.07E-05 | 0.0090475 | 0.082025  |
| 9mo_SIGAF3_ | 0.02335614 | 0.13033397 | 3.58E-05 | 0.0042778 | -0.065623 |
| 9mo_SIGAF3_ | 0.02471235 | 0.13851742 | 3.64E-05 | 0.0042065 | -0.086782 |
| 9mo_SIGAF3_ | 0.03520711 | 0.20184383 | 4.54E-05 | 0.0042028 | -0.073417 |
| 9mo_SIGAF3_ | 0.07378189 | 0.43460757 | 6.23E-05 | 0.013805  | 0.12913   |
| 9mo_SIGAF3_ | 0.10122146 | 0.6001804  | 6.54E-05 | 0.024809  | -0.13341  |
| 9mo_SIGAF3_ | 0.04625872 | 0.26853025 | 5.54E-05 | 0.0053171 | 0.028707  |
| 9mo_SIGAF3_ | 0.02171133 | 0.12040901 | 3.49E-05 | 0.0044169 | -0.0356   |
| 9mo_SIGAF3_ | 0.0756678  | 0.4459873  | 6.26E-05 | 0.014549  | 0.13453   |
| 9mo_SIGAF3_ | 0.01646457 | 0.08874962 | 3.31E-05 | 0.0050879 | 0.10435   |
| 9mo_SIGAF3_ | 0.02513278 | 0.14105435 | 3.68E-05 | 0.0041768 | -0.086782 |
| 9mo_SIGAF3_ | 0.00673451 | 0.03003754 | 3.18E-05 | 0.0078    | 0.54183   |
| 9mo_SIGAF3_ | 0.0734804  | 0.4327883  | 6.23E-05 | 0.013561  | 0.12913   |
| 9mo_SIGAF3_ | 0.01529235 | 0.08167632 | 3.27E-05 | 0.0054028 | 0.1442    |
| 9mo_SIGAF3_ | 0.02314969 | 0.1290882  | 3.58E-05 | 0.0042778 | -0.065623 |

|             |            |            |          |           |            |
|-------------|------------|------------|----------|-----------|------------|
| 9mo_SIGAF3_ | 0.0852459  | 0.5037824  | 6.39E-05 | 0.019177  | 0.10916    |
| 9mo_SIGAF3_ | 0.03212994 | 0.18327591 | 4.27E-05 | 0.004099  | -0.097962  |
| 9mo_SIGAF3_ | 0.01502627 | 0.08007076 | 3.27E-05 | 0.0054028 | 0.16515    |
| 9mo_SIGAF3_ | 0.06864904 | 0.40363547 | 6.16E-05 | 0.011695  | 0.10977    |
| 9mo_SIGAF3_ | 0.01254875 | 0.06512119 | 3.23E-05 | 0.0060411 | 0.25518    |
| 9mo_SIGAF3_ | 0.05412738 | 0.31601045 | 5.91E-05 | 0.0068337 | 0.062513   |
| 9mo_SIGAF3_ | 0.08066742 | 0.4761555  | 6.32E-05 | 0.016854  | 0.13314    |
| 9mo_SIGAF3_ | 0.0860184  | 0.5084438  | 6.39E-05 | 0.01943   | 0.099025   |
| 9mo_SIGAF3_ | 0.02063895 | 0.11393821 | 3.44E-05 | 0.0045325 | -0.01065   |
| 9mo_SIGAF3_ | 0.11884558 | 0.7065259  | 6.65E-05 | 0.024776  | -0.3584    |
| 9mo_SIGAF3_ | 0.04742421 | 0.2755629  | 5.61E-05 | 0.0054936 | 0.035328   |
| 9mo_SIGAF3_ | 0.02091656 | 0.11561333 | 3.47E-05 | 0.0044724 | -0.023601  |
| 9mo_SIGAF3_ | 0.01363451 | 0.07167273 | 3.24E-05 | 0.0057681 | 0.23179    |
| 9mo_SIGAF3_ | 0.02162344 | 0.11987869 | 3.49E-05 | 0.0044169 | -0.0356    |
| 9mo_SIGAF3_ | 0.02481494 | 0.13913651 | 3.68E-05 | 0.0041768 | -0.086782  |
| 9mo_SIGAF3_ | 0.10708685 | 0.63557273 | 6.58E-05 | 0.025586  | -0.23052   |
| 9mo_SIGAF3_ | 0.09631777 | 0.5705911  | 6.50E-05 | 0.023626  | -0.045608  |
| 9mo_SIGAF3_ | 0.01933204 | 0.10605215 | 3.40E-05 | 0.0046667 | 0.017998   |
| 9mo_SIGAF3_ | 0.01081317 | 0.05464853 | 3.21E-05 | 0.0064976 | 0.35381    |
| 9mo_SIGAF3_ | 0.0207718  | 0.11473983 | 3.44E-05 | 0.0045325 | -0.01065   |
| 9mo_SIGAF3_ | 0.02900076 | 0.16439414 | 3.97E-05 | 0.0040686 | -0.10664   |
| 9mo_SIGAF3_ | 0.02092456 | 0.11566157 | 3.47E-05 | 0.0044724 | -0.023601  |
| 9mo_SIGAF3_ | 0.02178811 | 0.1208723  | 3.49E-05 | 0.0044169 | -0.0356    |
| 9mo_SIGAF3_ | 0.01628271 | 0.08765225 | 3.30E-05 | 0.0051875 | 0.12392    |
| 9mo_SIGAF3_ | 0.01798093 | 0.09789944 | 3.34E-05 | 0.0049043 | 0.067421   |
| 9mo_SIGAF3_ | 0.01646979 | 0.08878107 | 3.31E-05 | 0.0050879 | 0.10435    |
| 9mo_SIGAF3_ | 0.07105469 | 0.41815138 | 6.20E-05 | 0.012608  | 0.11916    |
| 9mo_SIGAF3_ | 0.09335757 | 0.552729   | 6.47E-05 | 0.022469  | 0.0013661  |
| 9mo_SIGAF3_ | 0.02487045 | 0.13947143 | 3.68E-05 | 0.0041768 | -0.086782  |
| 9mo_SIGAF3_ | 0.02706857 | 0.15273511 | 3.84E-05 | 0.0040947 | -0.10271   |
| 9mo_SIGAF3_ | 0.01387468 | 0.07312197 | 3.25E-05 | 0.0056405 | 0.20898    |
| 9mo_SIGAF3_ | 0.01177247 | 0.06043702 | 3.22E-05 | 0.0061869 | 0.30353    |
| 9mo_SIGAF3_ | 0.0334883  | 0.19147238 | 4.37E-05 | 0.0041322 | -0.091175  |
| 9mo_SIGAF3_ | 0.09532923 | 0.56462616 | 6.49E-05 | 0.023263  | -0.026471  |
| 9mo_SIGAF3_ | 0.07745551 | 0.45677453 | 6.29E-05 | 0.015562  | 0.13646    |
| 9mo_SIGAF3_ | 0.02418483 | 0.13533431 | 3.61E-05 | 0.0042401 | -0.080664  |
| 9mo_SIGAF3_ | 0.08503505 | 0.50251013 | 6.38E-05 | 0.018923  | 0.10916    |
| 9mo_SIGAF3_ | 0.08391278 | 0.49573824 | 6.37E-05 | 0.01841   | 0.1176     |
| 9mo_SIGAF3_ | 0.03566632 | 0.20461471 | 4.59E-05 | 0.0042319 | -0.073417  |
| 9mo_SIGAF3_ | 0.01445279 | 0.0766103  | 3.26E-05 | 0.0055188 | 0.18676    |
| 9mo_SIGAF3_ | 0.0128485  | 0.06692987 | 3.23E-05 | 0.0059016 | 0.25518    |
| 9mo_SIGAF3_ | 0.02027698 | 0.111754   | 3.42E-05 | 0.0045972 | -0.01065   |
| 9mo_SIGAF3_ | 0.04276492 | 0.24744835 | 5.29E-05 | 0.0048617 | -0.0013165 |

|             |            |            |          |           |           |
|-------------|------------|------------|----------|-----------|-----------|
| 9mo_SIGAF3_ | 0.07759324 | 0.45760557 | 6.29E-05 | 0.015562  | 0.13646   |
| 9mo_SIGAF3_ | 0.02192913 | 0.12172325 | 3.49E-05 | 0.0044169 | -0.046619 |
| 9mo_SIGAF3_ | 0.02011127 | 0.1107541  | 3.42E-05 | 0.0045972 | 0.0032259 |
| 9mo_SIGAF3_ | 0.019839   | 0.10911119 | 3.42E-05 | 0.0045972 | 0.0032259 |
| 9mo_SIGAF3_ | 0.02499318 | 0.140212   | 3.68E-05 | 0.0041768 | -0.086782 |
| 9mo_SIGAF3_ | 0.03104016 | 0.17670007 | 4.16E-05 | 0.0040771 | -0.10299  |
| 9mo_SIGAF3_ | 0.09679159 | 0.57345015 | 6.50E-05 | 0.023626  | -0.055297 |
| 9mo_SIGAF3_ | 0.01992405 | 0.10962441 | 3.42E-05 | 0.0045972 | 0.0032259 |
| 9mo_SIGAF3_ | 0.03387262 | 0.19379139 | 4.43E-05 | 0.004153  | -0.087207 |
| 9mo_SIGAF3_ | 0.08429683 | 0.49805567 | 6.37E-05 | 0.018667  | 0.1176    |
| 9mo_SIGAF3_ | 0.02568019 | 0.14435749 | 3.72E-05 | 0.0041509 | -0.092011 |
| 9mo_SIGAF3_ | 0.02370654 | 0.13244827 | 3.61E-05 | 0.0042401 | -0.073623 |
| 9mo_SIGAF3_ | 0.02034064 | 0.11213818 | 3.44E-05 | 0.0045325 | -0.01065  |
| 9mo_SIGAF3_ | 0.01153218 | 0.05898711 | 3.22E-05 | 0.0061869 | 0.30353   |
| 9mo_SIGAF3_ | 0.01850755 | 0.10107711 | 3.36E-05 | 0.0048202 | 0.050123  |
| 9mo_SIGAF3_ | 0.08764111 | 0.5182353  | 6.41E-05 | 0.020177  | 0.087329  |
| 9mo_SIGAF3_ | 0.08764464 | 0.5182566  | 6.41E-05 | 0.020177  | 0.087329  |
| 9mo_SIGAF3_ | 0.02857844 | 0.16184579 | 3.93E-05 | 0.004074  | -0.10664  |
| 9mo_SIGAF3_ | 0.02609424 | 0.14685589 | 3.76E-05 | 0.0041286 | -0.096385 |
| 9mo_SIGAF3_ | 0.01702089 | 0.09210645 | 3.33E-05 | 0.0049935 | 0.085504  |
| 9mo_SIGAF3_ | 0.10537139 | 0.62522143 | 6.57E-05 | 0.025482  | -0.20623  |
| 9mo_SIGAF3_ | 0.02672487 | 0.1506612  | 3.80E-05 | 0.0041099 | -0.099939 |
| 9mo_SIGAF3_ | 0.09863379 | 0.5845662  | 6.52E-05 | 0.024275  | -0.084641 |
| 9mo_SIGAF3_ | 0.03525752 | 0.202148   | 4.54E-05 | 0.0042028 | -0.073417 |
| 9mo_SIGAF3_ | 0.0718438  | 0.42291293 | 6.20E-05 | 0.012843  | 0.12348   |
| 9mo_SIGAF3_ | 0.02676824 | 0.15092285 | 3.80E-05 | 0.0041099 | -0.099939 |
| 9mo_SIGAF3_ | 0.0183372  | 0.10004921 | 3.36E-05 | 0.0048202 | 0.050123  |
| 9mo_SIGAF3_ | 0.07050113 | 0.41481116 | 6.19E-05 | 0.012376  | 0.11689   |
| 9mo_SIGAF3_ | 0.09121945 | 0.53982735 | 6.45E-05 | 0.021597  | 0.036126  |
| 9mo_SIGAF3_ | 0.01568261 | 0.08403118 | 3.28E-05 | 0.0052924 | 0.1442    |
| 9mo_SIGAF3_ | 0.10770398 | 0.63929653 | 6.59E-05 | 0.025604  | -0.23822  |
| 9mo_SIGAF3_ | 0.0137995  | 0.07266831 | 3.25E-05 | 0.0056405 | 0.20898   |
| 9mo_SIGAF3_ | 0.01452405 | 0.07704032 | 3.26E-05 | 0.0055188 | 0.18676   |
| 9mo_SIGAF3_ | 0.08663864 | 0.51218635 | 6.40E-05 | 0.019681  | 0.093363  |
| 9mo_SIGAF3_ | 0.0332901  | 0.19027641 | 4.37E-05 | 0.0041322 | -0.091175 |
| 9mo_SIGAF3_ | 0.01816788 | 0.09902754 | 3.36E-05 | 0.0048202 | 0.050123  |
| 9mo_SIGAF3_ | 0.03472385 | 0.19892779 | 4.48E-05 | 0.0041765 | -0.078293 |
| 9mo_SIGAF3_ | 0.02192511 | 0.12169902 | 3.49E-05 | 0.0044169 | -0.046619 |
| 9mo_SIGAF3_ | 0.05699825 | 0.33333358 | 5.99E-05 | 0.0076952 | 0.070131  |
| 9mo_SIGAF3_ | 0.01983169 | 0.10906711 | 3.42E-05 | 0.0045972 | 0.0032259 |
| 9mo_SIGAF3_ | 0.03234137 | 0.18455167 | 4.27E-05 | 0.004099  | -0.097962 |
| 9mo_SIGAF3_ | 0.02351012 | 0.13126306 | 3.58E-05 | 0.0042778 | -0.065623 |
| 9mo_SIGAF3_ | 0.08480077 | 0.5010964  | 6.38E-05 | 0.018923  | 0.1136    |

|             |            |            |          |           |           |
|-------------|------------|------------|----------|-----------|-----------|
| 9mo_SIGAF3_ | 0.07379053 | 0.4346597  | 6.23E-05 | 0.013805  | 0.12913   |
| 9mo_SIGAF3_ | 0.10409305 | 0.6175078  | 6.56E-05 | 0.025367  | -0.18011  |
| 9mo_SIGAF3_ | 0.01802187 | 0.09814649 | 3.34E-05 | 0.0049043 | 0.067421  |
| 9mo_SIGAF3_ | 0.02021327 | 0.11136961 | 3.42E-05 | 0.0045972 | 0.0032259 |
| 9mo_SIGAF3_ | 0.03805605 | 0.21903458 | 4.81E-05 | 0.0043756 | -0.04622  |
| 9mo_SIGAF3_ | 0.08366916 | 0.49426827 | 6.37E-05 | 0.01841   | 0.12117   |
| 9mo_SIGAF3_ | 0.05824205 | 0.34083876 | 6.01E-05 | 0.0080116 | 0.073002  |
| 9mo_SIGAF3_ | 0.01504958 | 0.0802114  | 3.27E-05 | 0.0054028 | 0.16515   |
| 9mo_SIGAF3_ | 0.02098326 | 0.11601576 | 3.47E-05 | 0.0044724 | -0.023601 |
| 9mo_SIGAF3_ | 0.09286431 | 0.5497526  | 6.46E-05 | 0.022258  | 0.010343  |
| 9mo_SIGAF3_ | 0.07318414 | 0.43100068 | 6.23E-05 | 0.013561  | 0.12737   |
| 9mo_SIGAF3_ | 0.01753244 | 0.09519319 | 3.33E-05 | 0.0049935 | 0.067421  |
| 9mo_SIGAF3_ | 0.05179424 | 0.30193207 | 5.83E-05 | 0.0063316 | 0.055318  |
| 9mo_SIGAF3_ | 0.11109329 | 0.65974796 | 6.61E-05 | 0.025556  | -0.28058  |
| 9mo_SIGAF3_ | 0.02728995 | 0.15407091 | 3.84E-05 | 0.0040947 | -0.10271  |
| 9mo_SIGAF3_ | 0.04294904 | 0.24855931 | 5.29E-05 | 0.0048617 | 0.0036923 |
| 9mo_SIGAF3_ | 0.09358321 | 0.5540905  | 6.48E-05 | 0.022676  | 0.0013661 |
| 9mo_SIGAF3_ | 0.0106267  | 0.05352334 | 3.21E-05 | 0.0064976 | 0.35381   |
| 9mo_SIGAF3_ | 0.02525611 | 0.14179853 | 3.68E-05 | 0.0041768 | -0.092011 |
| 9mo_SIGAF3_ | 0.07096188 | 0.41759133 | 6.20E-05 | 0.012608  | 0.11916   |
| 9mo_SIGAF3_ | 0.03442969 | 0.1971528  | 4.48E-05 | 0.0041765 | -0.082901 |
| 9mo_SIGAF3_ | 0.01781815 | 0.09691721 | 3.34E-05 | 0.0049043 | 0.067421  |
| 9mo_SIGAF3_ | 0.09900262 | 0.5867917  | 6.52E-05 | 0.024275  | -0.094455 |
| 9mo_SIGAF3_ | 0.0135853  | 0.0713758  | 3.24E-05 | 0.0057681 | 0.23179   |
| 9mo_SIGAF3_ | 0.01838939 | 0.1003641  | 3.36E-05 | 0.0048202 | 0.050123  |
| 9mo_SIGAF3_ | 0.0166647  | 0.08995722 | 3.31E-05 | 0.0050879 | 0.10435   |
| 9mo_SIGAF3_ | 0.02633296 | 0.14829636 | 3.76E-05 | 0.0041286 | -0.096385 |
| 9mo_SIGAF3_ | 0.0171642  | 0.09297124 | 3.33E-05 | 0.0049935 | 0.085504  |
| 9mo_SIGAF3_ | 0.03060301 | 0.17406225 | 4.11E-05 | 0.0040705 | -0.10475  |
| 9mo_SIGAF3_ | 0.02270841 | 0.12642549 | 3.55E-05 | 0.0043197 | -0.056631 |
| 9mo_SIGAF3_ | 0.11482459 | 0.68226296 | 6.63E-05 | 0.025242  | -0.32268  |
| 9mo_SIGAF3_ | 0.07948928 | 0.4690465  | 6.31E-05 | 0.016335  | 0.13545   |
| 9mo_SIGAF3_ | 0.01526637 | 0.08151955 | 3.27E-05 | 0.0054028 | 0.16515   |
| 9mo_SIGAF3_ | 0.0437351  | 0.25330248 | 5.38E-05 | 0.0050014 | 0.008455  |
| 9mo_SIGAF3_ | 0.02609069 | 0.14683451 | 3.76E-05 | 0.0041286 | -0.096385 |
| 9mo_SIGAF3_ | 0.01928598 | 0.10577422 | 3.40E-05 | 0.0046667 | 0.017998  |
| 9mo_SIGAF3_ | 0.06090807 | 0.3569258  | 6.06E-05 | 0.008866  | 0.080421  |
| 9mo_SIGAF3_ | 0.07224326 | 0.4253233  | 6.21E-05 | 0.01308   | 0.12548   |
| 9mo_SIGAF3_ | 0.08329183 | 0.4919914  | 6.36E-05 | 0.018151  | 0.12117   |
| 9mo_SIGAF3_ | 0.05296127 | 0.30897403 | 5.87E-05 | 0.0065755 | 0.059084  |
| 9mo_SIGAF3_ | 0.0166009  | 0.08957219 | 3.31E-05 | 0.0050879 | 0.10435   |
| 9mo_SIGAF3_ | 0.0281329  | 0.15915734 | 3.93E-05 | 0.004074  | -0.10603  |
| 9mo_SIGAF3_ | 0.08552221 | 0.50544965 | 6.39E-05 | 0.019177  | 0.1043    |

|             |            |            |          |           |           |
|-------------|------------|------------|----------|-----------|-----------|
| 9mo_SIGAF3_ | 0.034558   | 0.19792703 | 4.48E-05 | 0.0041765 | -0.082901 |
| 9mo_SIGAF3_ | 0.08937054 | 0.5286709  | 6.43E-05 | 0.020902  | 0.059815  |
| 9mo_SIGAF3_ | 0.07061233 | 0.41548216 | 6.19E-05 | 0.012376  | 0.11916   |
| 9mo_SIGAF3_ | 0.0140069  | 0.0739198  | 3.25E-05 | 0.0056405 | 0.20898   |
| 9mo_SIGAF3_ | 0.067089   | 0.39422205 | 6.14E-05 | 0.011039  | 0.10251   |
| 9mo_SIGAF3_ | 0.09659345 | 0.57225454 | 6.50E-05 | 0.023626  | -0.055297 |
| 9mo_SIGAF3_ | 0.03693581 | 0.21227492 | 4.70E-05 | 0.0042982 | -0.057524 |
| 9mo_SIGAF3_ | 0.02748026 | 0.1552193  | 3.84E-05 | 0.0040947 | -0.10472  |
| 9mo_SIGAF3_ | 0.08515281 | 0.5032207  | 6.38E-05 | 0.018923  | 0.10916   |
| 9mo_SIGAF3_ | 0.07247546 | 0.42672446 | 6.22E-05 | 0.01332   | 0.12548   |
| 9mo_SIGAF3_ | 0.05339006 | 0.31156144 | 5.89E-05 | 0.0067028 | 0.059084  |
| 9mo_SIGAF3_ | 0.08779167 | 0.5191438  | 6.41E-05 | 0.020177  | 0.080939  |
| 9mo_SIGAF3_ | 0.06440332 | 0.3780164  | 6.10E-05 | 0.010005  | 0.091185  |
| 9mo_SIGAF3_ | 0.05543076 | 0.3238752  | 5.95E-05 | 0.007248  | 0.065685  |
| 9mo_SIGAF3_ | 0.0116836  | 0.05990078 | 3.22E-05 | 0.0061869 | 0.30353   |
| 9mo_SIGAF3_ | 0.01655249 | 0.08928013 | 3.31E-05 | 0.0050879 | 0.10435   |
| 9mo_SIGAF3_ | 0.05430484 | 0.31708127 | 5.92E-05 | 0.0069681 | 0.062513  |
| 9mo_SIGAF3_ | 0.01992027 | 0.10960159 | 3.42E-05 | 0.0045972 | 0.0032259 |
| 9mo_SIGAF3_ | 0.02607329 | 0.14672951 | 3.76E-05 | 0.0041286 | -0.096385 |
| 9mo_SIGAF3_ | 0.01895948 | 0.1038041  | 3.38E-05 | 0.004741  | 0.03364   |
| 9mo_SIGAF3_ | 0.02220918 | 0.12341307 | 3.52E-05 | 0.0043661 | -0.046619 |
| 9mo_SIGAF3_ | 0.0790198  | 0.46621358 | 6.30E-05 | 0.016077  | 0.13613   |
| 9mo_SIGAF3_ | 0.105447   | 0.6256777  | 6.57E-05 | 0.025482  | -0.20623  |
| 9mo_SIGAF3_ | 0.02258362 | 0.12567252 | 3.55E-05 | 0.0043197 | -0.056631 |
| 9mo_SIGAF3_ | 0.06280994 | 0.3684018  | 6.08E-05 | 0.0094206 | 0.087254  |
| 9mo_SIGAF3_ | 0.0305456  | 0.17371583 | 4.11E-05 | 0.0040705 | -0.10475  |
| 9mo_SIGAF3_ | 0.08294914 | 0.4899236  | 6.35E-05 | 0.017892  | 0.12434   |
| 9mo_SIGAF3_ | 0.02719673 | 0.15350845 | 3.84E-05 | 0.0040947 | -0.10271  |
| 9mo_SIGAF3_ | 0.10955294 | 0.6504533  | 6.60E-05 | 0.025611  | -0.2602   |
| 9mo_SIGAF3_ | 0.01870225 | 0.10225198 | 3.38E-05 | 0.004741  | 0.03364   |
| 9mo_SIGAF3_ | 0.08601768 | 0.50843936 | 6.39E-05 | 0.01943   | 0.099025  |
| 9mo_SIGAF3_ | 0.06326713 | 0.37116057 | 6.09E-05 | 0.0096122 | 0.087254  |
| 9mo_SIGAF3_ | 0.01782704 | 0.09697086 | 3.34E-05 | 0.0049043 | 0.067421  |
| 9mo_SIGAF3_ | 0.01787306 | 0.09724855 | 3.34E-05 | 0.0049043 | 0.067421  |
| 9mo_SIGAF3_ | 0.01176778 | 0.06040873 | 3.22E-05 | 0.0061869 | 0.30353   |
| 9mo_SIGAF3_ | 0.08091617 | 0.47765648 | 6.33E-05 | 0.017113  | 0.13314   |
| 9mo_SIGAF3_ | 0.05912411 | 0.34616122 | 6.03E-05 | 0.0083426 | 0.075889  |
| 9mo_SIGAF3_ | 0.03462486 | 0.19833048 | 4.48E-05 | 0.0041765 | -0.082901 |
| 9mo_SIGAF3_ | 0.04033582 | 0.23279093 | 5.09E-05 | 0.0046173 | -0.023154 |
| 9mo_SIGAF3_ | 0.01757716 | 0.09546306 | 3.34E-05 | 0.0049043 | 0.067421  |
| 9mo_SIGAF3_ | 0.12471316 | 0.7419315  | 6.68E-05 | 0.024034  | -0.40548  |
| 9mo_SIGAF3_ | 0.10327012 | 0.6125422  | 6.56E-05 | 0.025216  | -0.17104  |
| 9mo_SIGAF3_ | 0.03326763 | 0.1901408  | 4.37E-05 | 0.0041322 | -0.091175 |

|             |            |            |          |           |           |
|-------------|------------|------------|----------|-----------|-----------|
| 9mo_SIGAF3_ | 0.06451409 | 0.3786848  | 6.10E-05 | 0.010005  | 0.093303  |
| 9mo_SIGAF3_ | 0.1301761  | 0.77489537 | 6.70E-05 | 0.02364   | -0.43912  |
| 9mo_SIGAF3_ | 0.03731472 | 0.21456133 | 4.76E-05 | 0.0043355 | -0.057524 |
| 9mo_SIGAF3_ | 0.07208536 | 0.42437053 | 6.21E-05 | 0.01308   | 0.12348   |
| 9mo_SIGAF3_ | 0.10843258 | 0.64369303 | 6.59E-05 | 0.025614  | -0.24573  |
| 9mo_SIGAF3_ | 0.02373722 | 0.13263343 | 3.61E-05 | 0.0042401 | -0.073623 |
| 9mo_SIGAF3_ | 0.01351421 | 0.07094683 | 3.24E-05 | 0.0057681 | 0.23179   |
| 9mo_SIGAF3_ | 0.02031572 | 0.11198778 | 3.42E-05 | 0.0045972 | -0.01065  |
| 9mo_SIGAF3_ | 0.03217427 | 0.18354335 | 4.27E-05 | 0.004099  | -0.097962 |
| 9mo_SIGAF3_ | 0.0766694  | 0.45203102 | 6.27E-05 | 0.015053  | 0.13605   |
| 9mo_SIGAF3_ | 0.0175568  | 0.0953402  | 3.34E-05 | 0.0049043 | 0.067421  |
| 9mo_SIGAF3_ | 0.02747843 | 0.15520824 | 3.84E-05 | 0.0040947 | -0.10472  |
| 9mo_SIGAF3_ | 0.03518727 | 0.2017241  | 4.54E-05 | 0.0042028 | -0.073417 |
| 9mo_SIGAF3_ | 0.03339171 | 0.19088951 | 4.37E-05 | 0.0041322 | -0.091175 |
| 9mo_SIGAF3_ | 0.03720345 | 0.21388991 | 4.76E-05 | 0.0043355 | -0.057524 |
| 9mo_SIGAF3_ | 0.01920634 | 0.1052937  | 3.38E-05 | 0.004741  | 0.017998  |
| 9mo_SIGAF3_ | 0.01124399 | 0.05724814 | 3.21E-05 | 0.006339  | 0.32844   |
| 9mo_SIGAF3_ | 0.08614957 | 0.5092352  | 6.39E-05 | 0.01943   | 0.099025  |
| 9mo_SIGAF3_ | 0.03880711 | 0.22356652 | 4.92E-05 | 0.0044639 | -0.040459 |
| 9mo_SIGAF3_ | 0.03430731 | 0.19641432 | 4.48E-05 | 0.0041765 | -0.082901 |
| 9mo_SIGAF3_ | 0.01133974 | 0.05782588 | 3.21E-05 | 0.006339  | 0.32844   |
| 9mo_SIGAF3_ | 0.03398236 | 0.19445357 | 4.43E-05 | 0.004153  | -0.087207 |
| 9mo_SIGAF3_ | 0.02024863 | 0.11158298 | 3.42E-05 | 0.0045972 | 0.0032259 |
| 9mo_SIGAF3_ | 0.10265713 | 0.6088434  | 6.55E-05 | 0.025127  | -0.16182  |
| 9mo_SIGAF3_ | 0.01895938 | 0.10380347 | 3.38E-05 | 0.004741  | 0.03364   |
| 9mo_SIGAF3_ | 0.01171141 | 0.06006858 | 3.22E-05 | 0.0061869 | 0.30353   |
| 9mo_SIGAF3_ | 0.01627785 | 0.08762288 | 3.30E-05 | 0.0051875 | 0.12392   |
| 9mo_SIGAF3_ | 0.06185726 | 0.36265326 | 6.07E-05 | 0.0090475 | 0.083692  |
| 9mo_SIGAF3_ | 0.02541143 | 0.14273573 | 3.72E-05 | 0.0041509 | -0.092011 |
| 9mo_SIGAF3_ | 0.04482253 | 0.25986412 | 5.46E-05 | 0.0051531 | 0.017239  |
| 9mo_SIGAF3_ | 0.04405661 | 0.2552425  | 5.38E-05 | 0.0050014 | 0.012967  |
| 9mo_SIGAF3_ | 0.08534237 | 0.50436455 | 6.39E-05 | 0.019177  | 0.10916   |
| 9mo_SIGAF3_ | 0.02718104 | 0.15341373 | 3.84E-05 | 0.0040947 | -0.10271  |
| 9mo_SIGAF3_ | 0.0293989  | 0.16679654 | 4.02E-05 | 0.0040662 | -0.10661  |
| 9mo_SIGAF3_ | 0.07401314 | 0.43600297 | 6.23E-05 | 0.013805  | 0.13074   |
| 9mo_SIGAF3_ | 0.01030334 | 0.05157214 | 3.20E-05 | 0.0066628 | 0.37961   |
| 9mo_SIGAF3_ | 0.01348443 | 0.07076715 | 3.24E-05 | 0.0057681 | 0.23179   |
| 9mo_SIGAF3_ | 0.02459627 | 0.13781705 | 3.64E-05 | 0.0042065 | -0.080664 |
| 9mo_SIGAF3_ | 0.06427945 | 0.377269   | 6.10E-05 | 0.010005  | 0.091185  |
| 9mo_SIGAF3_ | 0.03210833 | 0.18314548 | 4.27E-05 | 0.004099  | -0.097962 |
| 9mo_SIGAF3_ | 0.06961267 | 0.40945014 | 6.17E-05 | 0.01192   | 0.11455   |
| 9mo_SIGAF3_ | 0.11210225 | 0.6658361  | 6.61E-05 | 0.025489  | -0.29336  |
| 9mo_SIGAF3_ | 0.11470712 | 0.68155414 | 6.63E-05 | 0.025242  | -0.3171   |

|             |            |            |          |           |            |
|-------------|------------|------------|----------|-----------|------------|
| 9mo_SIGAF3_ | 0.06754337 | 0.39696378 | 6.15E-05 | 0.011255  | 0.10492    |
| 9mo_SIGAF3_ | 0.05267544 | 0.3072493  | 5.87E-05 | 0.0065755 | 0.057248   |
| 9mo_SIGAF3_ | 0.02643502 | 0.14891222 | 3.80E-05 | 0.0041099 | -0.099939  |
| 9mo_SIGAF3_ | 0.09866618 | 0.5847352  | 6.52E-05 | 0.024275  | -0.084641  |
| 9mo_SIGAF3_ | 0.01868714 | 0.10216074 | 3.38E-05 | 0.004741  | 0.03364    |
| 9mo_SIGAF3_ | 0.05268131 | 0.30728474 | 5.87E-05 | 0.0065755 | 0.057248   |
| 9mo_SIGAF3_ | 0.03204093 | 0.18273878 | 4.27E-05 | 0.004099  | -0.097962  |
| 9mo_SIGAF3_ | 0.09201328 | 0.5446174  | 6.46E-05 | 0.022042  | 0.027741   |
| 9mo_SIGAF3_ | 0.0215346  | 0.11934262 | 3.49E-05 | 0.0044169 | -0.0356    |
| 9mo_SIGAF3_ | 0.02477784 | 0.13891262 | 3.68E-05 | 0.0041768 | -0.086782  |
| 9mo_SIGAF3_ | 0.02135687 | 0.11827018 | 3.47E-05 | 0.0044724 | -0.023601  |
| 9mo_SIGAF3_ | 0.05691969 | 0.3328595  | 5.99E-05 | 0.0076952 | 0.070131   |
| 9mo_SIGAF3_ | 0.03211383 | 0.18317866 | 4.27E-05 | 0.004099  | -0.097962  |
| 9mo_SIGAF3_ | 0.07739662 | 0.4564192  | 6.28E-05 | 0.015307  | 0.13646    |
| 9mo_SIGAF3_ | 0.00764939 | 0.035558   | 3.19E-05 | 0.0073923 | 0.48652    |
| 9mo_SIGAF3_ | 0.02665789 | 0.15025704 | 3.80E-05 | 0.0041099 | -0.099939  |
| 9mo_SIGAF3_ | 0.01218545 | 0.06292896 | 3.23E-05 | 0.0060411 | 0.2791     |
| 9mo_SIGAF3_ | 0.04244155 | 0.24549706 | 5.24E-05 | 0.0047963 | -0.0013165 |
| 9mo_SIGAF3_ | 0.02586529 | 0.14547442 | 3.72E-05 | 0.0041509 | -0.096385  |
| 9mo_SIGAF3_ | 0.12299118 | 0.7315409  | 6.67E-05 | 0.024217  | -0.38934   |
| 9mo_SIGAF3_ | 0.02148356 | 0.11903466 | 3.49E-05 | 0.0044169 | -0.0356    |
| 9mo_SIGAF3_ | 0.0292994  | 0.16619612 | 4.02E-05 | 0.0040662 | -0.10661   |
| 9mo_SIGAF3_ | 0.01477812 | 0.0785734  | 3.26E-05 | 0.0055188 | 0.16515    |
| 9mo_SIGAF3_ | 0.02227005 | 0.12378041 | 3.52E-05 | 0.0043661 | -0.046619  |
| 9mo_SIGAF3_ | 0.05514199 | 0.3221327  | 5.94E-05 | 0.0071062 | 0.065685   |
| 9mo_SIGAF3_ | 0.0289821  | 0.16428152 | 3.97E-05 | 0.0040686 | -0.10664   |
| 9mo_SIGAF3_ | 0.03740594 | 0.21511175 | 4.76E-05 | 0.0043355 | -0.05192   |
| 9mo_SIGAF3_ | 0.03488294 | 0.19988777 | 4.54E-05 | 0.0042028 | -0.078293  |
| 9mo_SIGAF3_ | 0.02649501 | 0.1492742  | 3.80E-05 | 0.0041099 | -0.099939  |
| 9mo_SIGAF3_ | 0.01327698 | 0.06951538 | 3.24E-05 | 0.0057681 | 0.23179    |
| 9mo_SIGAF3_ | 0.08364219 | 0.4941055  | 6.37E-05 | 0.01841   | 0.12117    |
| 9mo_SIGAF3_ | 0.09678236 | 0.5733945  | 6.50E-05 | 0.023626  | -0.055297  |
| 9mo_SIGAF3_ | 0.08321498 | 0.4915277  | 6.36E-05 | 0.018151  | 0.12434    |
| 9mo_SIGAF3_ | 0.02551818 | 0.14337994 | 3.72E-05 | 0.0041509 | -0.092011  |
| 9mo_SIGAF3_ | 0.09311487 | 0.5512645  | 6.47E-05 | 0.022469  | 0.010343   |
| 9mo_SIGAF3_ | 0.01291104 | 0.06730728 | 3.23E-05 | 0.0059016 | 0.25518    |
| 9mo_SIGAF3_ | 0.02026711 | 0.11169445 | 3.42E-05 | 0.0045972 | -0.01065   |
| 9mo_SIGAF3_ | 0.0205869  | 0.11362412 | 3.44E-05 | 0.0045325 | -0.01065   |
| 9mo_SIGAF3_ | 0.09454247 | 0.5598788  | 6.48E-05 | 0.022877  | -0.017059  |
| 9mo_SIGAF3_ | 0.02420427 | 0.13545163 | 3.64E-05 | 0.0042065 | -0.080664  |
| 9mo_SIGAF3_ | 0.01919752 | 0.10524044 | 3.38E-05 | 0.004741  | 0.017998   |
| 9mo_SIGAF3_ | 0.01289511 | 0.06721111 | 3.23E-05 | 0.0059016 | 0.25518    |
| 9mo_SIGAF3_ | 0.0194588  | 0.10681704 | 3.40E-05 | 0.0046667 | 0.017998   |

|             |            |            |          |           |           |
|-------------|------------|------------|----------|-----------|-----------|
| 9mo_SIGAF3_ | 0.06881726 | 0.4046505  | 6.16E-05 | 0.011695  | 0.10977   |
| 9mo_SIGAF3_ | 0.04302693 | 0.24902934 | 5.29E-05 | 0.0048617 | 0.0036923 |
| 9mo_SIGAF3_ | 0.01210186 | 0.06242458 | 3.23E-05 | 0.0060411 | 0.2791    |
| 9mo_SIGAF3_ | 0.01029514 | 0.0515227  | 3.20E-05 | 0.0066628 | 0.37961   |
| 9mo_SIGAF3_ | 0.10199327 | 0.6048376  | 6.55E-05 | 0.025029  | -0.14299  |
| 9mo_SIGAF3_ | 0.03201288 | 0.18256953 | 4.27E-05 | 0.004099  | -0.097962 |
| 9mo_SIGAF3_ | 0.02448482 | 0.13714455 | 3.64E-05 | 0.0042065 | -0.080664 |
| 9mo_SIGAF3_ | 0.03532498 | 0.20255508 | 4.59E-05 | 0.0042319 | -0.073417 |
| 9mo_SIGAF3_ | 0.10143509 | 0.60146946 | 6.54E-05 | 0.024923  | -0.13341  |
| 9mo_SIGAF3_ | 0.01936283 | 0.10623796 | 3.40E-05 | 0.0046667 | 0.017998  |
| 9mo_SIGAF3_ | 0.03616481 | 0.20762268 | 4.65E-05 | 0.0042637 | -0.068307 |
| 9mo_SIGAF3_ | 0.10651491 | 0.63212156 | 6.58E-05 | 0.02556   | -0.22263  |
| 9mo_SIGAF3_ | 0.01348782 | 0.07078758 | 3.24E-05 | 0.0057681 | 0.23179   |
| 9mo_SIGAF3_ | 0.0627619  | 0.36811197 | 6.08E-05 | 0.0094206 | 0.085432  |
| 9mo_SIGAF3_ | 0.0316422  | 0.18033278 | 4.22E-05 | 0.0040866 | -0.10071  |
| 9mo_SIGAF3_ | 0.11752021 | 0.6985285  | 6.64E-05 | 0.024917  | -0.34876  |
| 9mo_SIGAF3_ | 0.01930559 | 0.10589255 | 3.40E-05 | 0.0046667 | 0.017998  |
| 9mo_SIGAF3_ | 0.0140836  | 0.07438263 | 3.25E-05 | 0.0056405 | 0.20898   |
| 9mo_SIGAF3_ | 0.03456305 | 0.19795747 | 4.48E-05 | 0.0041765 | -0.082901 |
| 9mo_SIGAF3_ | 0.02306595 | 0.12858294 | 3.55E-05 | 0.0043197 | -0.065623 |
| 9mo_SIGAF3_ | 0.01718016 | 0.09306751 | 3.33E-05 | 0.0049935 | 0.085504  |
| 9mo_SIGAF3_ | 0.11171321 | 0.66348857 | 6.61E-05 | 0.025525  | -0.28705  |
| 9mo_SIGAF3_ | 0.02453506 | 0.13744769 | 3.64E-05 | 0.0042065 | -0.080664 |
| 9mo_SIGAF3_ | 0.01176064 | 0.06036564 | 3.22E-05 | 0.0061869 | 0.30353   |
| 9mo_SIGAF3_ | 0.02951875 | 0.16751972 | 4.02E-05 | 0.0040662 | -0.10661  |
| 9mo_SIGAF3_ | 0.04141963 | 0.23933074 | 5.19E-05 | 0.0047337 | -0.011944 |
| 9mo_SIGAF3_ | 0.07691354 | 0.45350423 | 6.28E-05 | 0.015307  | 0.13605   |
| 9mo_SIGAF3_ | 0.02727883 | 0.15400386 | 3.84E-05 | 0.0040947 | -0.10271  |
| 9mo_SIGAF3_ | 0.07825134 | 0.46157664 | 6.29E-05 | 0.015819  | 0.13662   |
| 9mo_SIGAF3_ | 0.0184528  | 0.10074677 | 3.36E-05 | 0.0048202 | 0.050123  |
| 9mo_SIGAF3_ | 0.02895935 | 0.16414426 | 3.97E-05 | 0.0040686 | -0.10664  |
| 9mo_SIGAF3_ | 0.01739043 | 0.09433629 | 3.33E-05 | 0.0049935 | 0.085504  |
| 9mo_SIGAF3_ | 0.079642   | 0.469968   | 6.32E-05 | 0.016594  | 0.13545   |
| 9mo_SIGAF3_ | 0.03101182 | 0.17652902 | 4.16E-05 | 0.0040771 | -0.10299  |
| 9mo_SIGAF3_ | 0.12747528 | 0.7585984  | 6.69E-05 | 0.023794  | -0.4246   |
| 9mo_SIGAF3_ | 0.1056399  | 0.62684166 | 6.57E-05 | 0.025482  | -0.20623  |
| 9mo_SIGAF3_ | 0.07688659 | 0.45334163 | 6.28E-05 | 0.015307  | 0.13605   |
| 9mo_SIGAF3_ | 0.06702145 | 0.39381444 | 6.14E-05 | 0.011039  | 0.10251   |
| 9mo_SIGAF3_ | 0.08022229 | 0.4734695  | 6.32E-05 | 0.016854  | 0.13446   |
| 9mo_SIGAF3_ | 0.04001205 | 0.23083729 | 5.03E-05 | 0.0045634 | -0.028892 |
| 9mo_SIGAF3_ | 0.09545536 | 0.56538725 | 6.49E-05 | 0.023263  | -0.035993 |
| 9mo_SIGAF3_ | 0.00950876 | 0.0467776  | 3.20E-05 | 0.0068348 | 0.4058    |
| 9mo_SIGAF3_ | 0.02793236 | 0.15794726 | 3.88E-05 | 0.0040827 | -0.10472  |



|             |            |            |          |           |           |
|-------------|------------|------------|----------|-----------|-----------|
| 9mo_SIGAF3_ | 0.08909696 | 0.5270201  | 6.43E-05 | 0.020902  | 0.067165  |
| 9mo_SIGAF3_ | 0.01131066 | 0.05765044 | 3.21E-05 | 0.006339  | 0.32844   |
| 9mo_SIGAF3_ | 0.00860779 | 0.04134103 | 3.19E-05 | 0.0071994 | 0.45929   |
| 9mo_SIGAF3_ | 0.00712672 | 0.03240415 | 3.19E-05 | 0.0075925 | 0.51404   |
| 9mo_SIGAF3_ | 0.0132014  | 0.06905929 | 3.24E-05 | 0.0057681 | 0.23179   |
| 9mo_SIGAF3_ | 0.02689444 | 0.15168437 | 3.80E-05 | 0.0041099 | -0.10271  |
| 9mo_SIGAF3_ | 0.02531088 | 0.14212903 | 3.68E-05 | 0.0041768 | -0.092011 |
| 9mo_SIGAF3_ | 0.02794339 | 0.15801385 | 3.88E-05 | 0.0040827 | -0.10472  |
| 9mo_SIGAF3_ | 0.09063128 | 0.5362783  | 6.44E-05 | 0.021369  | 0.044278  |
| 9mo_SIGAF3_ | 0.02029655 | 0.11187212 | 3.42E-05 | 0.0045972 | -0.01065  |
| 9mo_SIGAF3_ | 0.01719641 | 0.09316555 | 3.33E-05 | 0.0049935 | 0.085504  |
| 9mo_SIGAF3_ | 0.02769183 | 0.1564959  | 3.88E-05 | 0.0040827 | -0.10472  |
| 9mo_SIGAF3_ | 0.02772892 | 0.15671971 | 3.88E-05 | 0.0040827 | -0.10472  |
| 9mo_SIGAF3_ | 0.02627034 | 0.14791851 | 3.76E-05 | 0.0041286 | -0.096385 |
| 9mo_SIGAF3_ | 0.11413609 | 0.67810845 | 6.63E-05 | 0.025299  | -0.31137  |
| 9mo_SIGAF3_ | 0.02321236 | 0.12946635 | 3.58E-05 | 0.0042778 | -0.065623 |
| 9mo_SIGAF3_ | 0.01286001 | 0.06699932 | 3.23E-05 | 0.0059016 | 0.25518   |
| 9mo_SIGAF3_ | 0.07616279 | 0.44897413 | 6.26E-05 | 0.0148    | 0.1354    |
| 9mo_SIGAF3_ | 0.07115512 | 0.4187574  | 6.20E-05 | 0.012608  | 0.12136   |
| 9mo_SIGAF3_ | 0.0452126  | 0.26221785 | 5.46E-05 | 0.0051531 | 0.021279  |
| 9mo_SIGAF3_ | 0.01492028 | 0.07943121 | 3.27E-05 | 0.0054028 | 0.16515   |
| 9mo_SIGAF3_ | 0.09050469 | 0.5355145  | 6.44E-05 | 0.021369  | 0.044278  |
| 9mo_SIGAF3_ | 0.01676672 | 0.0905728  | 3.31E-05 | 0.0050879 | 0.10435   |
| 9mo_SIGAF3_ | 0.02458216 | 0.13773185 | 3.64E-05 | 0.0042065 | -0.080664 |
| 9mo_SIGAF3_ | 0.02873505 | 0.16279078 | 3.97E-05 | 0.0040686 | -0.10664  |
| 9mo_SIGAF3_ | 0.01811914 | 0.09873339 | 3.36E-05 | 0.0048202 | 0.050123  |
| 9mo_SIGAF3_ | 0.02617087 | 0.1473183  | 3.76E-05 | 0.0041286 | -0.096385 |
| 9mo_SIGAF3_ | 0.02117792 | 0.11719037 | 3.47E-05 | 0.0044724 | -0.023601 |
| 9mo_SIGAF3_ | 0.03201244 | 0.18256687 | 4.27E-05 | 0.004099  | -0.097962 |
| 9mo_SIGAF3_ | 0.0226815  | 0.12626311 | 3.55E-05 | 0.0043197 | -0.056631 |
| 9mo_SIGAF3_ | 0.0560864  | 0.32783136 | 5.97E-05 | 0.0073934 | 0.067199  |
| 9mo_SIGAF3_ | 0.02257178 | 0.12560104 | 3.55E-05 | 0.0043197 | -0.056631 |
| 9mo_SIGAF3_ | 0.02549353 | 0.1432312  | 3.72E-05 | 0.0041509 | -0.092011 |
| 9mo_SIGAF3_ | 0.0753459  | 0.44404495 | 6.26E-05 | 0.014549  | 0.13345   |
| 9mo_SIGAF3_ | 0.03127192 | 0.17809848 | 4.16E-05 | 0.0040771 | -0.10299  |
| 9mo_SIGAF3_ | 0.02063338 | 0.11390458 | 3.44E-05 | 0.0045325 | -0.01065  |
| 9mo_SIGAF3_ | 0.09238719 | 0.5468736  | 6.46E-05 | 0.022258  | 0.019141  |
| 9mo_SIGAF3_ | 0.02768567 | 0.15645877 | 3.88E-05 | 0.0040827 | -0.10472  |
| 9mo_SIGAF3_ | 0.06989011 | 0.4111242  | 6.18E-05 | 0.012147  | 0.11455   |
| 9mo_SIGAF3_ | 0.0370507  | 0.21296822 | 4.76E-05 | 0.0043355 | -0.057524 |
| 9mo_SIGAF3_ | 0.01940681 | 0.10650332 | 3.40E-05 | 0.0046667 | 0.017998  |
| 9mo_SIGAF3_ | 0.03243034 | 0.18508853 | 4.27E-05 | 0.004099  | -0.094772 |
| 9mo_SIGAF3_ | 0.01806145 | 0.0983853  | 3.34E-05 | 0.0049043 | 0.050123  |

|             |            |            |          |           |            |
|-------------|------------|------------|----------|-----------|------------|
| 9mo_SIGAF3_ | 0.05648765 | 0.33025256 | 5.98E-05 | 0.0075425 | 0.068678   |
| 9mo_SIGAF3_ | 0.00766907 | 0.03567673 | 3.19E-05 | 0.0073923 | 0.48652    |
| 9mo_SIGAF3_ | 0.11517053 | 0.6843504  | 6.63E-05 | 0.025182  | -0.32268   |
| 9mo_SIGAF3_ | 0.10236182 | 0.60706145 | 6.55E-05 | 0.025127  | -0.15246   |
| 9mo_SIGAF3_ | 0.09546977 | 0.5654742  | 6.49E-05 | 0.023263  | -0.035993  |
| 9mo_SIGAF3_ | 0.0160587  | 0.08630052 | 3.30E-05 | 0.0051875 | 0.12392    |
| 9mo_SIGAF3_ | 0.01086981 | 0.05499027 | 3.21E-05 | 0.0064976 | 0.35381    |
| 9mo_SIGAF3_ | 0.08908691 | 0.5269594  | 6.43E-05 | 0.020902  | 0.067165   |
| 9mo_SIGAF3_ | 0.02137662 | 0.11838936 | 3.47E-05 | 0.0044724 | -0.0356    |
| 9mo_SIGAF3_ | 0.0819682  | 0.48400447 | 6.35E-05 | 0.017633  | 0.12948    |
| 9mo_SIGAF3_ | 0.08681398 | 0.51324433 | 6.40E-05 | 0.019681  | 0.093363   |
| 9mo_SIGAF3_ | 0.03533442 | 0.20261201 | 4.59E-05 | 0.0042319 | -0.073417  |
| 9mo_SIGAF3_ | 0.01466267 | 0.07787676 | 3.26E-05 | 0.0055188 | 0.18676    |
| 9mo_SIGAF3_ | 0.07342415 | 0.4324489  | 6.23E-05 | 0.013561  | 0.12913    |
| 9mo_SIGAF3_ | 0.02997844 | 0.17029355 | 4.07E-05 | 0.0040668 | -0.10597   |
| 9mo_SIGAF3_ | 0.11871531 | 0.7057399  | 6.65E-05 | 0.024776  | -0.3584    |
| 9mo_SIGAF3_ | 0.0193873  | 0.10638558 | 3.40E-05 | 0.0046667 | 0.017998   |
| 9mo_SIGAF3_ | 0.02697036 | 0.15214252 | 3.80E-05 | 0.0041099 | -0.10271   |
| 9mo_SIGAF3_ | 0.04967183 | 0.28912526 | 5.73E-05 | 0.0058857 | 0.046466   |
| 9mo_SIGAF3_ | 0.02661161 | 0.14997779 | 3.80E-05 | 0.0041099 | -0.099939  |
| 9mo_SIGAF3_ | 0.01989943 | 0.10947587 | 3.42E-05 | 0.0045972 | 0.0032259  |
| 9mo_SIGAF3_ | 0.10759567 | 0.63864297 | 6.59E-05 | 0.025604  | -0.23822   |
| 9mo_SIGAF3_ | 0.09398764 | 0.5565309  | 6.48E-05 | 0.022676  | -0.0077738 |
| 9mo_SIGAF3_ | 0.06466657 | 0.3796049  | 6.11E-05 | 0.010206  | 0.093303   |
| 9mo_SIGAF3_ | 0.02350088 | 0.13120736 | 3.58E-05 | 0.0042778 | -0.065623  |
| 9mo_SIGAF3_ | 0.02116297 | 0.11710016 | 3.47E-05 | 0.0044724 | -0.023601  |
| 9mo_SIGAF3_ | 0.02506281 | 0.14063218 | 3.68E-05 | 0.0041768 | -0.086782  |
| 9mo_SIGAF3_ | 0.09670375 | 0.57292014 | 6.50E-05 | 0.023626  | -0.055297  |
| 9mo_SIGAF3_ | 0.09641088 | 0.5711529  | 6.50E-05 | 0.023626  | -0.045608  |
| 9mo_SIGAF3_ | 0.12111    | 0.7201897  | 6.66E-05 | 0.02449   | -0.37656   |
| 9mo_SIGAF3_ | 0.0458528  | 0.26608086 | 5.54E-05 | 0.0053171 | 0.025099   |
| 9mo_SIGAF3_ | 0.02375239 | 0.13272499 | 3.61E-05 | 0.0042401 | -0.073623  |
| 9mo_SIGAF3_ | 0.02158854 | 0.11966811 | 3.49E-05 | 0.0044169 | -0.0356    |
| 9mo_SIGAF3_ | 0.02800245 | 0.15837024 | 3.88E-05 | 0.0040827 | -0.10603   |
| 9mo_SIGAF3_ | 0.06758716 | 0.39722797 | 6.15E-05 | 0.011255  | 0.10492    |
| 9mo_SIGAF3_ | 0.11454297 | 0.6805636  | 6.63E-05 | 0.025299  | -0.3171    |
| 9mo_SIGAF3_ | 0.03688037 | 0.21194044 | 4.70E-05 | 0.0042982 | -0.057524  |
| 9mo_SIGAF3_ | 0.0385002  | 0.22171463 | 4.87E-05 | 0.0044183 | -0.040459  |
| 9mo_SIGAF3_ | 0.02626483 | 0.14788523 | 3.76E-05 | 0.0041286 | -0.096385  |
| 9mo_SIGAF3_ | 0.02590173 | 0.1456943  | 3.76E-05 | 0.0041286 | -0.096385  |
| 9mo_SIGAF3_ | 0.0893998  | 0.52884746 | 6.43E-05 | 0.020902  | 0.059815   |
| 9mo_SIGAF3_ | 0.04995923 | 0.29085946 | 5.76E-05 | 0.005992  | 0.046466   |
| 9mo_SIGAF3_ | 0.07168898 | 0.42197874 | 6.20E-05 | 0.012843  | 0.12348    |

|             |            |            |          |           |            |
|-------------|------------|------------|----------|-----------|------------|
| 9mo_SIGAF3_ | 0.01181573 | 0.06069807 | 3.22E-05 | 0.0061869 | 0.30353    |
| 9mo_SIGAF3_ | 0.0576382  | 0.33719507 | 6.00E-05 | 0.0078516 | 0.071569   |
| 9mo_SIGAF3_ | 0.01536864 | 0.08213665 | 3.28E-05 | 0.0052924 | 0.1442     |
| 9mo_SIGAF3_ | 0.01281109 | 0.06670418 | 3.23E-05 | 0.0059016 | 0.25518    |
| 9mo_SIGAF3_ | 0.12435354 | 0.7397615  | 6.67E-05 | 0.024092  | -0.40152   |
| 9mo_SIGAF3_ | 0.02814469 | 0.1592285  | 3.93E-05 | 0.004074  | -0.10603   |
| 9mo_SIGAF3_ | 0.11131308 | 0.6610742  | 6.61E-05 | 0.025525  | -0.28058   |
| 9mo_SIGAF3_ | 0.10442889 | 0.6195343  | 6.56E-05 | 0.025367  | -0.18901   |
| 9mo_SIGAF3_ | 0.03832696 | 0.2206693  | 4.87E-05 | 0.0044183 | -0.04622   |
| 9mo_SIGAF3_ | 0.04151845 | 0.239927   | 5.19E-05 | 0.0047337 | -0.011944  |
| 9mo_SIGAF3_ | 0.01962399 | 0.10781379 | 3.40E-05 | 0.0046667 | 0.017998   |
| 9mo_SIGAF3_ | 0.08878722 | 0.5251511  | 6.42E-05 | 0.020663  | 0.067165   |
| 9mo_SIGAF3_ | 0.02873444 | 0.16278711 | 3.97E-05 | 0.0040686 | -0.10664   |
| 9mo_SIGAF3_ | 0.02996105 | 0.17018862 | 4.07E-05 | 0.0040668 | -0.10597   |
| 9mo_SIGAF3_ | 0.04288931 | 0.24819893 | 5.29E-05 | 0.0048617 | -0.0013165 |
| 9mo_SIGAF3_ | 0.03075712 | 0.17499216 | 4.11E-05 | 0.0040705 | -0.10475   |
| 9mo_SIGAF3_ | 0.01846004 | 0.10079042 | 3.36E-05 | 0.0048202 | 0.050123   |
| 9mo_SIGAF3_ | 0.07080492 | 0.41664422 | 6.20E-05 | 0.012608  | 0.11916    |
| 9mo_SIGAF3_ | 0.01897884 | 0.10392094 | 3.38E-05 | 0.004741  | 0.03364    |
| 9mo_SIGAF3_ | 0.02102052 | 0.11624064 | 3.47E-05 | 0.0044724 | -0.023601  |
| 9mo_SIGAF3_ | 0.08430576 | 0.49810952 | 6.37E-05 | 0.018667  | 0.1176     |
| 9mo_SIGAF3_ | 0.03182131 | 0.18141356 | 4.22E-05 | 0.0040866 | -0.10071   |
| 9mo_SIGAF3_ | 0.04691928 | 0.2725161  | 5.57E-05 | 0.0054037 | 0.032113   |
| 9mo_SIGAF3_ | 0.09220954 | 0.54580164 | 6.46E-05 | 0.022042  | 0.019141   |
| 9mo_SIGAF3_ | 0.02640568 | 0.14873515 | 3.76E-05 | 0.0041286 | -0.099939  |
| 9mo_SIGAF3_ | 0.01820446 | 0.09924826 | 3.36E-05 | 0.0048202 | 0.050123   |
| 9mo_SIGAF3_ | 0.01842255 | 0.10056421 | 3.36E-05 | 0.0048202 | 0.050123   |
| 9mo_SIGAF3_ | 0.0230133  | 0.12826522 | 3.55E-05 | 0.0043197 | -0.056631  |
| 9mo_SIGAF3_ | 0.01356822 | 0.07127274 | 3.24E-05 | 0.0057681 | 0.23179    |
| 9mo_SIGAF3_ | 0.09315853 | 0.5515279  | 6.47E-05 | 0.022469  | 0.010343   |
| 9mo_SIGAF3_ | 0.02424212 | 0.13568006 | 3.64E-05 | 0.0042065 | -0.080664  |
| 9mo_SIGAF3_ | 0.03408142 | 0.19505131 | 4.43E-05 | 0.004153  | -0.082901  |
| 9mo_SIGAF3_ | 0.02037644 | 0.11235418 | 3.44E-05 | 0.0045325 | -0.01065   |
| 9mo_SIGAF3_ | 0.08744326 | 0.51704144 | 6.41E-05 | 0.020177  | 0.087329   |
| 9mo_SIGAF3_ | 0.08327209 | 0.4918723  | 6.36E-05 | 0.018151  | 0.12117    |
| 9mo_SIGAF3_ | 0.01078942 | 0.05450523 | 3.21E-05 | 0.0064976 | 0.35381    |
| 9mo_SIGAF3_ | 0.02279728 | 0.12696175 | 3.55E-05 | 0.0043197 | -0.056631  |
| 9mo_SIGAF3_ | 0.09666643 | 0.57269496 | 6.50E-05 | 0.023626  | -0.055297  |
| 9mo_SIGAF3_ | 0.02614546 | 0.147165   | 3.76E-05 | 0.0041286 | -0.096385  |
| 9mo_SIGAF3_ | 0.04274155 | 0.24730729 | 5.29E-05 | 0.0048617 | -0.0013165 |
| 9mo_SIGAF3_ | 0.05733675 | 0.33537608 | 5.99E-05 | 0.0076952 | 0.071569   |
| 9mo_SIGAF3_ | 0.02656234 | 0.14968048 | 3.80E-05 | 0.0041099 | -0.099939  |
| 9mo_SIGAF3_ | 0.02478221 | 0.13893896 | 3.68E-05 | 0.0041768 | -0.086782  |

|             |            |            |          |           |           |
|-------------|------------|------------|----------|-----------|-----------|
| 9mo_SIGAF3_ | 0.01915532 | 0.10498583 | 3.38E-05 | 0.004741  | 0.03364   |
| 9mo_SIGAF3_ | 0.05788331 | 0.3386741  | 6.00E-05 | 0.0078516 | 0.073002  |
| 9mo_SIGAF3_ | 0.0109523  | 0.05548802 | 3.21E-05 | 0.006339  | 0.32844   |
| 9mo_SIGAF3_ | 0.01459562 | 0.07747217 | 3.26E-05 | 0.0055188 | 0.18676   |
| 9mo_SIGAF3_ | 0.10920727 | 0.6483675  | 6.60E-05 | 0.025611  | -0.2602   |
| 9mo_SIGAF3_ | 0.01487404 | 0.0791522  | 3.27E-05 | 0.0054028 | 0.16515   |
| 9mo_SIGAF3_ | 0.02214569 | 0.12303001 | 3.52E-05 | 0.0043661 | -0.046619 |
| 9mo_SIGAF3_ | 0.01464867 | 0.07779227 | 3.26E-05 | 0.0055188 | 0.18676   |
| 9mo_SIGAF3_ | 0.03425747 | 0.19611359 | 4.48E-05 | 0.0041765 | -0.082901 |
| 9mo_SIGAF3_ | 0.10454122 | 0.62021214 | 6.56E-05 | 0.025367  | -0.18901  |
| 9mo_SIGAF3_ | 0.01885237 | 0.10315781 | 3.38E-05 | 0.004741  | 0.03364   |
| 9mo_SIGAF3_ | 0.02723066 | 0.15371318 | 3.84E-05 | 0.0040947 | -0.10271  |
| 9mo_SIGAF3_ | 0.05608733 | 0.327837   | 5.97E-05 | 0.0073934 | 0.067199  |
| 9mo_SIGAF3_ | 0.02316774 | 0.1291971  | 3.58E-05 | 0.0042778 | -0.065623 |
| 9mo_SIGAF3_ | 0.01271031 | 0.06609602 | 3.23E-05 | 0.0059016 | 0.25518   |
| 9mo_SIGAF3_ | 0.02340897 | 0.13065274 | 3.58E-05 | 0.0042778 | -0.065623 |
| 9mo_SIGAF3_ | 0.08569533 | 0.50649434 | 6.39E-05 | 0.019177  | 0.1043    |
| 9mo_SIGAF3_ | 0.02996332 | 0.17020229 | 4.07E-05 | 0.0040668 | -0.10597  |
| 9mo_SIGAF3_ | 0.02749965 | 0.15533629 | 3.84E-05 | 0.0040947 | -0.10472  |
| 9mo_SIGAF3_ | 0.02279532 | 0.12694992 | 3.55E-05 | 0.0043197 | -0.056631 |
| 9mo_SIGAF3_ | 0.07967015 | 0.4701379  | 6.32E-05 | 0.016594  | 0.13545   |
| 9mo_SIGAF3_ | 0.08105546 | 0.47849697 | 6.33E-05 | 0.017113  | 0.13148   |
| 9mo_SIGAF3_ | 0.07561941 | 0.44569534 | 6.26E-05 | 0.014549  | 0.13453   |
| 9mo_SIGAF3_ | 0.02240487 | 0.1245939  | 3.52E-05 | 0.0043661 | -0.046619 |
| 9mo_SIGAF3_ | 0.03068868 | 0.17457914 | 4.11E-05 | 0.0040705 | -0.10475  |
| 9mo_SIGAF3_ | 0.01738984 | 0.09433274 | 3.33E-05 | 0.0049935 | 0.085504  |
| 9mo_SIGAF3_ | 0.08956364 | 0.52983606 | 6.43E-05 | 0.020902  | 0.059815  |
| 9mo_SIGAF3_ | 0.02451989 | 0.13735613 | 3.64E-05 | 0.0042065 | -0.080664 |
| 9mo_SIGAF3_ | 0.03595246 | 0.2063413  | 4.65E-05 | 0.0042637 | -0.068307 |
| 9mo_SIGAF3_ | 0.03527872 | 0.2022759  | 4.54E-05 | 0.0042028 | -0.073417 |
| 9mo_SIGAF3_ | 0.01154645 | 0.0590732  | 3.22E-05 | 0.0061869 | 0.30353   |
| 9mo_SIGAF3_ | 0.01016392 | 0.05073086 | 3.20E-05 | 0.0066628 | 0.37961   |
| 9mo_SIGAF3_ | 0.02605989 | 0.14664866 | 3.76E-05 | 0.0041286 | -0.096385 |
| 9mo_SIGAF3_ | 0.07004261 | 0.4120444  | 6.18E-05 | 0.012147  | 0.11689   |
| 9mo_SIGAF3_ | 0.0211547  | 0.11705028 | 3.47E-05 | 0.0044724 | -0.023601 |
| 9mo_SIGAF3_ | 0.09790915 | 0.58019364 | 6.51E-05 | 0.023964  | -0.074831 |
| 9mo_SIGAF3_ | 0.08679005 | 0.51309997 | 6.40E-05 | 0.019681  | 0.093363  |
| 9mo_SIGAF3_ | 0.02492727 | 0.13981433 | 3.68E-05 | 0.0041768 | -0.086782 |
| 9mo_SIGAF3_ | 0.11933296 | 0.7094669  | 6.65E-05 | 0.024704  | -0.36308  |
| 9mo_SIGAF3_ | 0.06641508 | 0.39015555 | 6.13E-05 | 0.010826  | 0.10013   |
| 9mo_SIGAF3_ | 0.02761436 | 0.15602843 | 3.88E-05 | 0.0040827 | -0.10472  |
| 9mo_SIGAF3_ | 0.07437484 | 0.43818548 | 6.24E-05 | 0.014051  | 0.13074   |
| 9mo_SIGAF3_ | 0.10563961 | 0.62683994 | 6.57E-05 | 0.025482  | -0.20623  |

|             |            |            |          |           |           |
|-------------|------------|------------|----------|-----------|-----------|
| 9mo_SIGAF3_ | 0.05863512 | 0.34321058 | 6.02E-05 | 0.0081753 | 0.074438  |
| 9mo_SIGAF3_ | 0.07436192 | 0.43810752 | 6.24E-05 | 0.014051  | 0.13074   |
| 9mo_SIGAF3_ | 0.02058976 | 0.11364138 | 3.44E-05 | 0.0045325 | -0.01065  |
| 9mo_SIGAF3_ | 0.127456   | 0.75848204 | 6.69E-05 | 0.023794  | -0.4246   |
| 9mo_SIGAF3_ | 0.04966167 | 0.289064   | 5.73E-05 | 0.0058857 | 0.046466  |
| 9mo_SIGAF3_ | 0.02698573 | 0.15223525 | 3.84E-05 | 0.0040947 | -0.10271  |
| 9mo_SIGAF3_ | 0.07942068 | 0.46863252 | 6.31E-05 | 0.016335  | 0.13545   |
| 9mo_SIGAF3_ | 0.02531774 | 0.14217041 | 3.72E-05 | 0.0041509 | -0.092011 |
| 9mo_SIGAF3_ | 0.03878702 | 0.22344531 | 4.92E-05 | 0.0044639 | -0.040459 |
| 9mo_SIGAF3_ | 0.05494687 | 0.32095537 | 5.94E-05 | 0.0071062 | 0.064127  |
| 9mo_SIGAF3_ | 0.02845373 | 0.1610933  | 3.93E-05 | 0.004074  | -0.10603  |
| 9mo_SIGAF3_ | 0.03652553 | 0.20979929 | 4.70E-05 | 0.0042982 | -0.062998 |
| 9mo_SIGAF3_ | 0.06441003 | 0.3780569  | 6.10E-05 | 0.010005  | 0.091185  |
| 9mo_SIGAF3_ | 0.02097547 | 0.11596879 | 3.47E-05 | 0.0044724 | -0.023601 |
| 9mo_SIGAF3_ | 0.01232345 | 0.06376172 | 3.23E-05 | 0.0060411 | 0.2791    |
| 9mo_SIGAF3_ | 0.087098   | 0.5149582  | 6.41E-05 | 0.01993   | 0.093363  |
| 9mo_SIGAF3_ | 0.06037209 | 0.35369164 | 6.05E-05 | 0.008688  | 0.07887   |
| 9mo_SIGAF3_ | 0.11018752 | 0.65428245 | 6.60E-05 | 0.02558   | -0.26716  |
| 9mo_SIGAF3_ | 0.04103673 | 0.23702028 | 5.14E-05 | 0.0046741 | -0.017493 |
| 9mo_SIGAF3_ | 0.08579748 | 0.5071107  | 6.39E-05 | 0.01943   | 0.1043    |
| 9mo_SIGAF3_ | 0.02544793 | 0.142956   | 3.72E-05 | 0.0041509 | -0.092011 |
| 9mo_SIGAF3_ | 0.03488472 | 0.19989847 | 4.54E-05 | 0.0042028 | -0.078293 |
| 9mo_SIGAF3_ | 0.03262435 | 0.18625923 | 4.32E-05 | 0.0041142 | -0.094772 |
| 9mo_SIGAF3_ | 0.03458967 | 0.1981181  | 4.48E-05 | 0.0041765 | -0.082901 |
| 9mo_SIGAF3_ | 0.08206068 | 0.48456255 | 6.35E-05 | 0.017633  | 0.12948   |
| 9mo_SIGAF3_ | 0.0365424  | 0.20990105 | 4.70E-05 | 0.0042982 | -0.062998 |
| 9mo_SIGAF3_ | 0.01473176 | 0.07829364 | 3.26E-05 | 0.0055188 | 0.18676   |
| 9mo_SIGAF3_ | 0.0702639  | 0.41337967 | 6.19E-05 | 0.012376  | 0.11689   |
| 9mo_SIGAF3_ | 0.02007436 | 0.11053138 | 3.42E-05 | 0.0045972 | 0.0032259 |
| 9mo_SIGAF3_ | 0.10054527 | 0.5961002  | 6.53E-05 | 0.024687  | -0.12375  |
| 9mo_SIGAF3_ | 0.07589138 | 0.44733644 | 6.26E-05 | 0.0148    | 0.13453   |
| 9mo_SIGAF3_ | 0.11085147 | 0.65828884 | 6.61E-05 | 0.025556  | -0.27396  |
| 9mo_SIGAF3_ | 0.0840195  | 0.49638227 | 6.37E-05 | 0.01841   | 0.1176    |
| 9mo_SIGAF3_ | 0.03482773 | 0.1995546  | 4.54E-05 | 0.0042028 | -0.078293 |
| 9mo_SIGAF3_ | 0.0325224  | 0.18564405 | 4.32E-05 | 0.0041142 | -0.094772 |
| 9mo_SIGAF3_ | 0.06247861 | 0.36640254 | 6.08E-05 | 0.0094206 | 0.085432  |
| 9mo_SIGAF3_ | 0.01985447 | 0.10920455 | 3.42E-05 | 0.0045972 | 0.0032259 |
| 9mo_SIGAF3_ | 0.01216817 | 0.06282469 | 3.23E-05 | 0.0060411 | 0.2791    |
| 9mo_SIGAF3_ | 0.06915141 | 0.40666682 | 6.17E-05 | 0.01192   | 0.11218   |
| 9mo_SIGAF3_ | 0.02943797 | 0.16703229 | 4.02E-05 | 0.0040662 | -0.10661  |
| 9mo_SIGAF3_ | 0.03187329 | 0.18172726 | 4.22E-05 | 0.0040866 | -0.097962 |
| 9mo_SIGAF3_ | 0.0181278  | 0.09878565 | 3.36E-05 | 0.0048202 | 0.050123  |
| 9mo_SIGAF3_ | 0.08441701 | 0.49878085 | 6.37E-05 | 0.018667  | 0.1136    |

|             |            |            |          |           |           |
|-------------|------------|------------|----------|-----------|-----------|
| 9mo_SIGAF3_ | 0.11133372 | 0.66119874 | 6.61E-05 | 0.025525  | -0.28058  |
| 9mo_SIGAF3_ | 0.05099654 | 0.29711866 | 5.81E-05 | 0.006215  | 0.051138  |
| 9mo_SIGAF3_ | 0.14207351 | 0.84668547 | 6.74E-05 | 0.023584  | -0.5021   |
| 9mo_SIGAF3_ | 0.02859052 | 0.1619187  | 3.93E-05 | 0.004074  | -0.10664  |
| 9mo_SIGAF3_ | 0.00960572 | 0.04736267 | 3.20E-05 | 0.0068348 | 0.4058    |
| 9mo_SIGAF3_ | 0.02936492 | 0.16659151 | 4.02E-05 | 0.0040662 | -0.10661  |
| 9mo_SIGAF3_ | 0.01412108 | 0.07460877 | 3.25E-05 | 0.0056405 | 0.20898   |
| 9mo_SIGAF3_ | 0.07987659 | 0.47138357 | 6.32E-05 | 0.016594  | 0.13545   |
| 9mo_SIGAF3_ | 0.02793304 | 0.15795141 | 3.88E-05 | 0.0040827 | -0.10472  |
| 9mo_SIGAF3_ | 0.01491526 | 0.07940092 | 3.27E-05 | 0.0054028 | 0.16515   |
| 9mo_SIGAF3_ | 0.05657857 | 0.33080113 | 5.98E-05 | 0.0075425 | 0.068678  |
| 9mo_SIGAF3_ | 0.0449566  | 0.26067314 | 5.46E-05 | 0.0051531 | 0.017239  |
| 9mo_SIGAF3_ | 0.03645168 | 0.20935367 | 4.70E-05 | 0.0042982 | -0.062998 |
| 9mo_SIGAF3_ | 0.0881625  | 0.52138144 | 6.42E-05 | 0.020421  | 0.080939  |
| 9mo_SIGAF3_ | 0.04812061 | 0.27976507 | 5.67E-05 | 0.0056831 | 0.038361  |
| 9mo_SIGAF3_ | 0.07220192 | 0.42507383 | 6.21E-05 | 0.01308   | 0.12548   |
| 9mo_SIGAF3_ | 0.03381778 | 0.19346046 | 4.43E-05 | 0.004153  | -0.087207 |
| 9mo_SIGAF3_ | 0.01249311 | 0.06478546 | 3.23E-05 | 0.0060411 | 0.2791    |
| 9mo_SIGAF3_ | 0.03513341 | 0.2013991  | 4.54E-05 | 0.0042028 | -0.078293 |
| 9mo_SIGAF3_ | 0.02432037 | 0.13615221 | 3.64E-05 | 0.0042065 | -0.080664 |
| 9mo_SIGAF3_ | 0.06846216 | 0.40250784 | 6.16E-05 | 0.011474  | 0.10977   |
| 9mo_SIGAF3_ | 0.01730339 | 0.09381111 | 3.33E-05 | 0.0049935 | 0.085504  |
| 9mo_SIGAF3_ | 0.01605662 | 0.08628796 | 3.30E-05 | 0.0051875 | 0.12392   |
| 9mo_SIGAF3_ | 0.03128553 | 0.17818065 | 4.16E-05 | 0.0040771 | -0.10299  |
| 9mo_SIGAF3_ | 0.01819722 | 0.09920454 | 3.36E-05 | 0.0048202 | 0.050123  |
| 9mo_SIGAF3_ | 0.04826733 | 0.28065038 | 5.67E-05 | 0.0056831 | 0.038361  |
| 9mo_SIGAF3_ | 0.01524062 | 0.08136418 | 3.27E-05 | 0.0054028 | 0.16515   |
| 9mo_SIGAF3_ | 0.01404189 | 0.07413093 | 3.25E-05 | 0.0056405 | 0.20898   |
| 9mo_SIGAF3_ | 0.01490146 | 0.07931761 | 3.27E-05 | 0.0054028 | 0.16515   |
| 9mo_SIGAF3_ | 0.03522886 | 0.20197505 | 4.54E-05 | 0.0042028 | -0.073417 |
| 9mo_SIGAF3_ | 0.03481977 | 0.1995066  | 4.54E-05 | 0.0042028 | -0.078293 |
| 9mo_SIGAF3_ | 0.05202331 | 0.30331433 | 5.85E-05 | 0.0064518 | 0.055318  |
| 9mo_SIGAF3_ | 0.01485614 | 0.07904416 | 3.27E-05 | 0.0054028 | 0.16515   |
| 9mo_SIGAF3_ | 0.02148578 | 0.11904806 | 3.49E-05 | 0.0044169 | -0.0356   |
| 9mo_SIGAF3_ | 0.02299856 | 0.12817627 | 3.55E-05 | 0.0043197 | -0.056631 |
| 9mo_SIGAF3_ | 0.02974526 | 0.16888653 | 4.02E-05 | 0.0040662 | -0.10597  |
| 9mo_SIGAF3_ | 0.09590662 | 0.5681102  | 6.50E-05 | 0.023448  | -0.035993 |
| 9mo_SIGAF3_ | 0.08952573 | 0.5296073  | 6.43E-05 | 0.020902  | 0.059815  |
| 9mo_SIGAF3_ | 0.10210648 | 0.6055207  | 6.55E-05 | 0.025029  | -0.15246  |
| 9mo_SIGAF3_ | 0.01167405 | 0.05984318 | 3.22E-05 | 0.0061869 | 0.30353   |
| 9mo_SIGAF3_ | 0.08491603 | 0.50179195 | 6.38E-05 | 0.018923  | 0.10916   |
| 9mo_SIGAF3_ | 0.07856794 | 0.463487   | 6.30E-05 | 0.016077  | 0.13651   |
| 9mo_SIGAF3_ | 0.01272711 | 0.06619743 | 3.23E-05 | 0.0059016 | 0.25518   |

|             |            |            |          |           |            |
|-------------|------------|------------|----------|-----------|------------|
| 9mo_SIGAF3_ | 0.03366745 | 0.19255333 | 4.43E-05 | 0.004153  | -0.087207  |
| 9mo_SIGAF3_ | 0.0316341  | 0.18028392 | 4.22E-05 | 0.0040866 | -0.10071   |
| 9mo_SIGAF3_ | 0.02923903 | 0.16583188 | 4.02E-05 | 0.0040662 | -0.10661   |
| 9mo_SIGAF3_ | 0.0197852  | 0.10878655 | 3.42E-05 | 0.0045972 | 0.0032259  |
| 9mo_SIGAF3_ | 0.01388042 | 0.0731566  | 3.25E-05 | 0.0056405 | 0.20898    |
| 9mo_SIGAF3_ | 0.02356562 | 0.13159797 | 3.58E-05 | 0.0042778 | -0.065623  |
| 9mo_SIGAF3_ | 0.02392307 | 0.13375488 | 3.61E-05 | 0.0042401 | -0.073623  |
| 9mo_SIGAF3_ | 0.01694307 | 0.09163689 | 3.31E-05 | 0.0050879 | 0.10435    |
| 9mo_SIGAF3_ | 0.04331845 | 0.25078836 | 5.33E-05 | 0.0049301 | 0.0036923  |
| 9mo_SIGAF3_ | 0.05662263 | 0.33106703 | 5.98E-05 | 0.0075425 | 0.068678   |
| 9mo_SIGAF3_ | 0.08111537 | 0.47885847 | 6.33E-05 | 0.017113  | 0.13148    |
| 9mo_SIGAF3_ | 0.07470005 | 0.44014782 | 6.25E-05 | 0.014299  | 0.13218    |
| 9mo_SIGAF3_ | 0.02886539 | 0.16357726 | 3.97E-05 | 0.0040686 | -0.10664   |
| 9mo_SIGAF3_ | 0.02467464 | 0.13828991 | 3.64E-05 | 0.0042065 | -0.080664  |
| 9mo_SIGAF3_ | 0.02467666 | 0.13830212 | 3.64E-05 | 0.0042065 | -0.080664  |
| 9mo_SIGAF3_ | 0.07387068 | 0.43514332 | 6.23E-05 | 0.013805  | 0.13074    |
| 9mo_SIGAF3_ | 0.09722927 | 0.5760912  | 6.51E-05 | 0.023799  | -0.065044  |
| 9mo_SIGAF3_ | 0.02034733 | 0.1121785  | 3.44E-05 | 0.0045325 | -0.01065   |
| 9mo_SIGAF3_ | 0.04695663 | 0.2727415  | 5.61E-05 | 0.0054936 | 0.032113   |
| 9mo_SIGAF3_ | 0.02609851 | 0.1468817  | 3.76E-05 | 0.0041286 | -0.096385  |
| 9mo_SIGAF3_ | 0.08175311 | 0.4827066  | 6.34E-05 | 0.017373  | 0.12948    |
| 9mo_SIGAF3_ | 0.09420108 | 0.55781883 | 6.48E-05 | 0.022877  | -0.0077738 |
| 9mo_SIGAF3_ | 0.07332711 | 0.43186337 | 6.23E-05 | 0.013561  | 0.12913    |
| 9mo_SIGAF3_ | 0.11154915 | 0.66249865 | 6.61E-05 | 0.025525  | -0.28705   |
| 9mo_SIGAF3_ | 0.01160293 | 0.05941398 | 3.22E-05 | 0.0061869 | 0.30353    |
| 9mo_SIGAF3_ | 0.04668219 | 0.27108547 | 5.57E-05 | 0.0054037 | 0.028707   |
| 9mo_SIGAF3_ | 0.10663506 | 0.63284653 | 6.58E-05 | 0.02556   | -0.22263   |
| 9mo_SIGAF3_ | 0.01632473 | 0.08790577 | 3.30E-05 | 0.0051875 | 0.12392    |
| 9mo_SIGAF3_ | 0.02141451 | 0.11861797 | 3.47E-05 | 0.0044724 | -0.0356    |
| 9mo_SIGAF3_ | 0.08944327 | 0.5291098  | 6.43E-05 | 0.020902  | 0.059815   |
| 9mo_SIGAF3_ | 0.06668533 | 0.39178625 | 6.13E-05 | 0.010826  | 0.10251    |
| 9mo_SIGAF3_ | 0.01558533 | 0.08344414 | 3.28E-05 | 0.0052924 | 0.1442     |
| 9mo_SIGAF3_ | 0.11936623 | 0.7096676  | 6.65E-05 | 0.024704  | -0.36308   |
| 9mo_SIGAF3_ | 0.02217632 | 0.12321483 | 3.52E-05 | 0.0043661 | -0.046619  |
| 9mo_SIGAF3_ | 0.04391775 | 0.25440457 | 5.38E-05 | 0.0050014 | 0.008455   |
| 9mo_SIGAF3_ | 0.09897967 | 0.5866533  | 6.52E-05 | 0.024275  | -0.094455  |
| 9mo_SIGAF3_ | 0.05195443 | 0.30289868 | 5.85E-05 | 0.0064518 | 0.055318   |
| 9mo_SIGAF3_ | 0.02202206 | 0.12228397 | 3.52E-05 | 0.0043661 | -0.046619  |
| 9mo_SIGAF3_ | 0.01750846 | 0.09504849 | 3.33E-05 | 0.0049935 | 0.067421   |
| 9mo_SIGAF3_ | 0.01268599 | 0.06594926 | 3.23E-05 | 0.0059016 | 0.25518    |
| 9mo_SIGAF3_ | 0.03280434 | 0.1873453  | 4.32E-05 | 0.0041142 | -0.094772  |
| 9mo_SIGAF3_ | 0.05272787 | 0.30756566 | 5.87E-05 | 0.0065755 | 0.057248   |
| 9mo_SIGAF3_ | 0.02040166 | 0.11250634 | 3.44E-05 | 0.0045325 | -0.01065   |

|             |            |            |          |           |           |
|-------------|------------|------------|----------|-----------|-----------|
| 9mo_SIGAF3_ | 0.01318991 | 0.06899001 | 3.24E-05 | 0.0057681 | 0.23179   |
| 9mo_SIGAF3_ | 0.01676579 | 0.09056719 | 3.31E-05 | 0.0050879 | 0.10435   |
| 9mo_SIGAF3_ | 0.09284977 | 0.54966486 | 6.46E-05 | 0.022258  | 0.010343  |
| 9mo_SIGAF3_ | 0.08315249 | 0.49115062 | 6.36E-05 | 0.018151  | 0.12434   |
| 9mo_SIGAF3_ | 0.05042207 | 0.29365227 | 5.78E-05 | 0.0061018 | 0.048868  |
| 9mo_SIGAF3_ | 0.08030684 | 0.47397968 | 6.32E-05 | 0.016854  | 0.13446   |
| 9mo_SIGAF3_ | 0.02490196 | 0.1396616  | 3.68E-05 | 0.0041768 | -0.086782 |
| 9mo_SIGAF3_ | 0.01784689 | 0.09709065 | 3.34E-05 | 0.0049043 | 0.067421  |
| 9mo_SIGAF3_ | 0.01971531 | 0.10836484 | 3.40E-05 | 0.0046667 | 0.0032259 |
| 9mo_SIGAF3_ | 0.01954866 | 0.10735927 | 3.40E-05 | 0.0046667 | 0.017998  |
| 9mo_SIGAF3_ | 0.02808778 | 0.15888512 | 3.93E-05 | 0.004074  | -0.10603  |
| 9mo_SIGAF3_ | 0.09737372 | 0.5769628  | 6.51E-05 | 0.023964  | -0.065044 |
| 9mo_SIGAF3_ | 0.01601697 | 0.08604874 | 3.30E-05 | 0.0051875 | 0.12392   |
| 9mo_SIGAF3_ | 0.02167158 | 0.12016919 | 3.49E-05 | 0.0044169 | -0.0356   |
| 9mo_SIGAF3_ | 0.02281618 | 0.12707576 | 3.55E-05 | 0.0043197 | -0.056631 |
| 9mo_SIGAF3_ | 0.07299361 | 0.42985103 | 6.23E-05 | 0.013561  | 0.12737   |
| 9mo_SIGAF3_ | 0.04137906 | 0.23908591 | 5.14E-05 | 0.0046741 | -0.011944 |
| 9mo_SIGAF3_ | 0.02162815 | 0.1199071  | 3.49E-05 | 0.0044169 | -0.0356   |
| 9mo_SIGAF3_ | 0.02851231 | 0.16144678 | 3.93E-05 | 0.004074  | -0.10603  |
| 9mo_SIGAF3_ | 0.02490696 | 0.13969176 | 3.68E-05 | 0.0041768 | -0.086782 |
| 9mo_SIGAF3_ | 0.11082859 | 0.65815073 | 6.61E-05 | 0.025556  | -0.27396  |
| 9mo_SIGAF3_ | 0.0834484  | 0.4929362  | 6.36E-05 | 0.018151  | 0.12117   |
| 9mo_SIGAF3_ | 0.0681792  | 0.4008004  | 6.16E-05 | 0.011474  | 0.10734   |
| 9mo_SIGAF3_ | 0.01827445 | 0.09967055 | 3.36E-05 | 0.0048202 | 0.050123  |
| 9mo_SIGAF3_ | 0.02418887 | 0.13535875 | 3.61E-05 | 0.0042401 | -0.080664 |
| 9mo_SIGAF3_ | 0.02506078 | 0.1406199  | 3.68E-05 | 0.0041768 | -0.086782 |
| 9mo_SIGAF3_ | 0.04933563 | 0.28709656 | 5.73E-05 | 0.0058857 | 0.04392   |
| 9mo_SIGAF3_ | 0.12697051 | 0.7555526  | 6.69E-05 | 0.023834  | -0.42086  |
| 9mo_SIGAF3_ | 0.09058495 | 0.5359987  | 6.44E-05 | 0.021369  | 0.044278  |
| 9mo_SIGAF3_ | 0.00601922 | 0.0257214  | 3.18E-05 | 0.008015  | 0.56984   |
| 9mo_SIGAF3_ | 0.02977628 | 0.16907366 | 4.07E-05 | 0.0040668 | -0.10597  |
| 9mo_SIGAF3_ | 0.07982981 | 0.47110128 | 6.32E-05 | 0.016594  | 0.13545   |
| 9mo_SIGAF3_ | 0.09697945 | 0.5745837  | 6.51E-05 | 0.023799  | -0.055297 |
| 9mo_SIGAF3_ | 0.09513275 | 0.56344056 | 6.49E-05 | 0.023073  | -0.026471 |
| 9mo_SIGAF3_ | 0.02080939 | 0.11496662 | 3.44E-05 | 0.0045325 | -0.01065  |
| 9mo_SIGAF3_ | 0.04903069 | 0.28525656 | 5.70E-05 | 0.0057827 | 0.04392   |
| 9mo_SIGAF3_ | 0.02670322 | 0.15053056 | 3.80E-05 | 0.0041099 | -0.099939 |
| 9mo_SIGAF3_ | 0.0282351  | 0.15977407 | 3.93E-05 | 0.004074  | -0.10603  |
| 9mo_SIGAF3_ | 0.01285888 | 0.06699251 | 3.23E-05 | 0.0059016 | 0.25518   |
| 9mo_SIGAF3_ | 0.04030642 | 0.23261349 | 5.09E-05 | 0.0046173 | -0.023154 |
| 9mo_SIGAF3_ | 0.00987211 | 0.04897006 | 3.20E-05 | 0.0066628 | 0.37961   |
| 9mo_SIGAF3_ | 0.01340652 | 0.07029705 | 3.24E-05 | 0.0057681 | 0.23179   |
| 9mo_SIGAF3_ | 0.1193592  | 0.7096252  | 6.65E-05 | 0.024704  | -0.36308  |



|             |            |            |          |           |           |
|-------------|------------|------------|----------|-----------|-----------|
| 9mo_SIGAF3_ | 0.07198814 | 0.42378393 | 6.21E-05 | 0.01308   | 0.12348   |
| 9mo_SIGAF3_ | 0.03249227 | 0.18546219 | 4.27E-05 | 0.004099  | -0.094772 |
| 9mo_SIGAF3_ | 0.08311722 | 0.49093783 | 6.36E-05 | 0.018151  | 0.12434   |
| 9mo_SIGAF3_ | 0.01536279 | 0.08210137 | 3.28E-05 | 0.0052924 | 0.1442    |
| 9mo_SIGAF3_ | 0.12163018 | 0.7233285  | 6.66E-05 | 0.024419  | -0.38089  |
| 9mo_SIGAF3_ | 0.0138819  | 0.07316551 | 3.25E-05 | 0.0056405 | 0.20898   |
| 9mo_SIGAF3_ | 0.02422497 | 0.13557655 | 3.64E-05 | 0.0042065 | -0.080664 |
| 9mo_SIGAF3_ | 0.07177901 | 0.422522   | 6.20E-05 | 0.012843  | 0.12348   |
| 9mo_SIGAF3_ | 0.09085587 | 0.5376335  | 6.45E-05 | 0.021597  | 0.044278  |
| 9mo_SIGAF3_ | 0.02540055 | 0.14267012 | 3.72E-05 | 0.0041509 | -0.092011 |
| 9mo_SIGAF3_ | 0.12646715 | 0.75251526 | 6.68E-05 | 0.023879  | -0.41707  |
| 9mo_SIGAF3_ | 0.02692455 | 0.15186606 | 3.80E-05 | 0.0041099 | -0.10271  |
| 9mo_SIGAF3_ | 0.0249541  | 0.13997617 | 3.68E-05 | 0.0041768 | -0.086782 |
| 9mo_SIGAF3_ | 0.09066001 | 0.53645164 | 6.44E-05 | 0.021369  | 0.044278  |
| 9mo_SIGAF3_ | 0.06606811 | 0.38806188 | 6.13E-05 | 0.010616  | 0.097788  |
| 9mo_SIGAF3_ | 0.09070601 | 0.5367292  | 6.44E-05 | 0.021369  | 0.044278  |
| 9mo_SIGAF3_ | 0.01481655 | 0.07880525 | 3.27E-05 | 0.0054028 | 0.16515   |
| 9mo_SIGAF3_ | 0.0531918  | 0.3103651  | 5.89E-05 | 0.0067028 | 0.059084  |
| 9mo_SIGAF3_ | 0.01906382 | 0.10443368 | 3.38E-05 | 0.004741  | 0.03364   |
| 9mo_SIGAF3_ | 0.05578905 | 0.32603714 | 5.95E-05 | 0.007248  | 0.067199  |
| 9mo_SIGAF3_ | 0.01797435 | 0.09785975 | 3.34E-05 | 0.0049043 | 0.067421  |
| 9mo_SIGAF3_ | 0.03108987 | 0.177      | 4.16E-05 | 0.0040771 | -0.10299  |
| 9mo_SIGAF3_ | 0.00997043 | 0.04956333 | 3.20E-05 | 0.0066628 | 0.37961   |
| 9mo_SIGAF3_ | 0.01270335 | 0.06605402 | 3.23E-05 | 0.0059016 | 0.25518   |
| 9mo_SIGAF3_ | 0.0298712  | 0.16964644 | 4.07E-05 | 0.0040668 | -0.10597  |
| 9mo_SIGAF3_ | 0.02124833 | 0.11761522 | 3.47E-05 | 0.0044724 | -0.023601 |
| 9mo_SIGAF3_ | 0.08252756 | 0.48737976 | 6.35E-05 | 0.017892  | 0.1271    |
| 9mo_SIGAF3_ | 0.0218285  | 0.12111606 | 3.49E-05 | 0.0044169 | -0.0356   |
| 9mo_SIGAF3_ | 0.07928705 | 0.46782622 | 6.31E-05 | 0.016335  | 0.13613   |
| 9mo_SIGAF3_ | 0.0800928  | 0.4726882  | 6.32E-05 | 0.016594  | 0.13446   |
| 9mo_SIGAF3_ | 0.03701393 | 0.21274632 | 4.76E-05 | 0.0043355 | -0.057524 |
| 9mo_SIGAF3_ | 0.01666509 | 0.08995955 | 3.31E-05 | 0.0050879 | 0.10435   |
| 9mo_SIGAF3_ | 0.09714244 | 0.57556725 | 6.51E-05 | 0.023799  | -0.065044 |
| 9mo_SIGAF3_ | 0.02150833 | 0.11918408 | 3.49E-05 | 0.0044169 | -0.0356   |
| 9mo_SIGAF3_ | 0.02408039 | 0.13470413 | 3.61E-05 | 0.0042401 | -0.073623 |
| 9mo_SIGAF3_ | 0.03658875 | 0.21018074 | 4.70E-05 | 0.0042982 | -0.062998 |
| 9mo_SIGAF3_ | 0.06357089 | 0.37299344 | 6.10E-05 | 0.0098069 | 0.089169  |
| 9mo_SIGAF3_ | 0.07935883 | 0.46825933 | 6.31E-05 | 0.016335  | 0.13613   |
| 9mo_SIGAF3_ | 0.07600111 | 0.44799852 | 6.26E-05 | 0.0148    | 0.13453   |
| 9mo_SIGAF3_ | 0.03257927 | 0.1859872  | 4.32E-05 | 0.0041142 | -0.094772 |
| 9mo_SIGAF3_ | 0.01787692 | 0.09727186 | 3.34E-05 | 0.0049043 | 0.067421  |
| 9mo_SIGAF3_ | 0.11043972 | 0.6558042  | 6.60E-05 | 0.02558   | -0.27396  |
| 9mo_SIGAF3_ | 0.01377366 | 0.07251237 | 3.25E-05 | 0.0056405 | 0.20898   |

|             |            |            |          |           |           |
|-------------|------------|------------|----------|-----------|-----------|
| 9mo_SIGAF3_ | 0.0913526  | 0.5406308  | 6.45E-05 | 0.021822  | 0.036126  |
| 9mo_SIGAF3_ | 0.0679037  | 0.399138   | 6.15E-05 | 0.011255  | 0.10734   |
| 9mo_SIGAF3_ | 0.07810225 | 0.460677   | 6.29E-05 | 0.015819  | 0.13662   |
| 9mo_SIGAF3_ | 0.05102554 | 0.2972937  | 5.81E-05 | 0.006215  | 0.051138  |
| 9mo_SIGAF3_ | 0.01993746 | 0.10970531 | 3.42E-05 | 0.0045972 | 0.0032259 |
| 9mo_SIGAF3_ | 0.06397511 | 0.37543258 | 6.10E-05 | 0.0098069 | 0.091185  |
| 9mo_SIGAF3_ | 0.02487394 | 0.13949248 | 3.68E-05 | 0.0041768 | -0.086782 |
| 9mo_SIGAF3_ | 0.08340911 | 0.4926991  | 6.36E-05 | 0.018151  | 0.12117   |
| 9mo_SIGAF3_ | 0.01977096 | 0.10870062 | 3.42E-05 | 0.0045972 | 0.0032259 |
| 9mo_SIGAF3_ | 0.01283425 | 0.06684392 | 3.23E-05 | 0.0059016 | 0.25518   |
| 9mo_SIGAF3_ | 0.05709906 | 0.33394185 | 5.99E-05 | 0.0076952 | 0.070131  |
| 9mo_SIGAF3_ | 0.03593033 | 0.20620778 | 4.65E-05 | 0.0042637 | -0.068307 |
| 9mo_SIGAF3_ | 0.01288699 | 0.06716214 | 3.23E-05 | 0.0059016 | 0.25518   |
| 9mo_SIGAF3_ | 0.11692014 | 0.6949077  | 6.64E-05 | 0.024986  | -0.33868  |
| 9mo_SIGAF3_ | 0.05118989 | 0.29828534 | 5.81E-05 | 0.006215  | 0.051138  |
| 9mo_SIGAF3_ | 0.04430109 | 0.2567177  | 5.42E-05 | 0.0050757 | 0.012967  |
| 9mo_SIGAF3_ | 0.09682678 | 0.5736625  | 6.51E-05 | 0.023799  | -0.055297 |
| 9mo_SIGAF3_ | 0.01842399 | 0.10057289 | 3.36E-05 | 0.0048202 | 0.050123  |
| 9mo_SIGAF3_ | 0.0367666  | 0.2112539  | 4.70E-05 | 0.0042982 | -0.062998 |
| 9mo_SIGAF3_ | 0.02337396 | 0.13044146 | 3.58E-05 | 0.0042778 | -0.065623 |
| 9mo_SIGAF3_ | 0.0075954  | 0.03523218 | 3.19E-05 | 0.0073923 | 0.48652   |
| 9mo_SIGAF3_ | 0.05441463 | 0.31774372 | 5.92E-05 | 0.0069681 | 0.062513  |
| 9mo_SIGAF3_ | 0.01222779 | 0.06318445 | 3.23E-05 | 0.0060411 | 0.2791    |
| 9mo_SIGAF3_ | 0.046652   | 0.27090335 | 5.57E-05 | 0.0054037 | 0.028707  |
| 9mo_SIGAF3_ | 0.05259909 | 0.30678862 | 5.87E-05 | 0.0065755 | 0.057248  |
| 9mo_SIGAF3_ | 0.05789065 | 0.33871835 | 6.00E-05 | 0.0078516 | 0.073002  |
| 9mo_SIGAF3_ | 0.01599477 | 0.08591475 | 3.30E-05 | 0.0051875 | 0.12392   |
| 9mo_SIGAF3_ | 0.07796217 | 0.45983174 | 6.29E-05 | 0.015562  | 0.13662   |
| 9mo_SIGAF3_ | 0.11940596 | 0.70990735 | 6.65E-05 | 0.024704  | -0.36308  |
| 9mo_SIGAF3_ | 0.03644532 | 0.20931529 | 4.70E-05 | 0.0042982 | -0.062998 |
| 9mo_SIGAF3_ | 0.05697485 | 0.33319235 | 5.99E-05 | 0.0076952 | 0.070131  |
| 9mo_SIGAF3_ | 0.02301205 | 0.12825769 | 3.55E-05 | 0.0043197 | -0.056631 |
| 9mo_SIGAF3_ | 0.02041642 | 0.11259545 | 3.44E-05 | 0.0045325 | -0.01065  |
| 9mo_SIGAF3_ | 0.14361742 | 0.85600156 | 6.75E-05 | 0.023613  | -0.50792  |
| 9mo_SIGAF3_ | 0.01534748 | 0.08200899 | 3.28E-05 | 0.0052924 | 0.1442    |
| 9mo_SIGAF3_ | 0.01819168 | 0.09917114 | 3.36E-05 | 0.0048202 | 0.050123  |
| 9mo_SIGAF3_ | 0.02234252 | 0.1242177  | 3.52E-05 | 0.0043661 | -0.046619 |
| 9mo_SIGAF3_ | 0.07319975 | 0.43109486 | 6.23E-05 | 0.013561  | 0.12737   |
| 9mo_SIGAF3_ | 0.07622498 | 0.4493494  | 6.26E-05 | 0.0148    | 0.1354    |
| 9mo_SIGAF3_ | 0.05585674 | 0.32644555 | 5.97E-05 | 0.0073934 | 0.067199  |
| 9mo_SIGAF3_ | 0.10080146 | 0.5976461  | 6.54E-05 | 0.024809  | -0.12375  |
| 9mo_SIGAF3_ | 0.01823194 | 0.09941404 | 3.36E-05 | 0.0048202 | 0.050123  |
| 9mo_SIGAF3_ | 0.01924015 | 0.10549767 | 3.40E-05 | 0.0046667 | 0.017998  |

|             |            |            |          |           |           |
|-------------|------------|------------|----------|-----------|-----------|
| 9mo_SIGAF3_ | 0.02274768 | 0.12666246 | 3.55E-05 | 0.0043197 | -0.056631 |
| 9mo_SIGAF3_ | 0.04754576 | 0.27629635 | 5.64E-05 | 0.0055867 | 0.035328  |
| 9mo_SIGAF3_ | 0.04788481 | 0.27834222 | 5.64E-05 | 0.0055867 | 0.038361  |
| 9mo_SIGAF3_ | 0.12665284 | 0.7536357  | 6.68E-05 | 0.023879  | -0.41707  |
| 9mo_SIGAF3_ | 0.08064126 | 0.4759976  | 6.32E-05 | 0.016854  | 0.13314   |
| 9mo_SIGAF3_ | 0.0721221  | 0.42459223 | 6.21E-05 | 0.01308   | 0.12348   |
| 9mo_SIGAF3_ | 0.0084     | 0.04008722 | 3.19E-05 | 0.0071994 | 0.45929   |
| 9mo_SIGAF3_ | 0.02846904 | 0.16118564 | 3.93E-05 | 0.004074  | -0.10603  |
| 9mo_SIGAF3_ | 0.07908548 | 0.46660993 | 6.31E-05 | 0.016335  | 0.13613   |
| 9mo_SIGAF3_ | 0.02070006 | 0.11430693 | 3.44E-05 | 0.0045325 | -0.01065  |
| 9mo_SIGAF3_ | 0.05129842 | 0.29894024 | 5.81E-05 | 0.006215  | 0.053285  |
| 9mo_SIGAF3_ | 0.06572203 | 0.38597363 | 6.12E-05 | 0.01041   | 0.097788  |
| 9mo_SIGAF3_ | 0.02107736 | 0.1165836  | 3.47E-05 | 0.0044724 | -0.023601 |
| 5mo_SIGAE9_ | 0.07821024 | 0.4613286  | 6.29E-05 | 0.015819  | 0.13662   |
| 5mo_SIGAE9_ | 0.01060128 | 0.05336997 | 3.21E-05 | 0.0064976 | 0.35381   |
| 5mo_SIGAE9_ | 0.1245626  | 0.741023   | 6.68E-05 | 0.024034  | -0.40152  |
| 5mo_SIGAE9_ | 0.0991378  | 0.5876074  | 6.53E-05 | 0.02442   | -0.094455 |
| 5mo_SIGAE9_ | 0.04937412 | 0.2873288  | 5.73E-05 | 0.0058857 | 0.04392   |
| 5mo_SIGAE9_ | 0.01981243 | 0.10895088 | 3.42E-05 | 0.0045972 | 0.0032259 |
| 5mo_SIGAE9_ | 0.02500892 | 0.140307   | 3.68E-05 | 0.0041768 | -0.086782 |
| 5mo_SIGAE9_ | 0.07541215 | 0.44444472 | 6.26E-05 | 0.014549  | 0.13345   |
| 5mo_SIGAE9_ | 0.10899036 | 0.64705867 | 6.59E-05 | 0.025616  | -0.25305  |
| 5mo_SIGAE9_ | 0.08323202 | 0.4916305  | 6.36E-05 | 0.018151  | 0.12434   |
| 5mo_SIGAE9_ | 0.02929161 | 0.16614912 | 4.02E-05 | 0.0040662 | -0.10661  |
| 5mo_SIGAE9_ | 0.0179295  | 0.09758912 | 3.34E-05 | 0.0049043 | 0.067421  |
| 5mo_SIGAE9_ | 0.12505828 | 0.74401397 | 6.68E-05 | 0.024034  | -0.40548  |
| 5mo_SIGAE9_ | 0.01414782 | 0.07477012 | 3.25E-05 | 0.0056405 | 0.20898   |
| 5mo_SIGAE9_ | 0.03275788 | 0.18706492 | 4.32E-05 | 0.0041142 | -0.094772 |
| 5mo_SIGAE9_ | 0.04812257 | 0.27977687 | 5.67E-05 | 0.0056831 | 0.038361  |
| 5mo_SIGAE9_ | 0.05263155 | 0.3069845  | 5.87E-05 | 0.0065755 | 0.057248  |
| 5mo_SIGAE9_ | 0.08662168 | 0.512084   | 6.40E-05 | 0.019681  | 0.093363  |
| 5mo_SIGAE9_ | 0.09900822 | 0.5868255  | 6.52E-05 | 0.024275  | -0.094455 |
| 5mo_SIGAE9_ | 0.01164942 | 0.05969454 | 3.22E-05 | 0.0061869 | 0.30353   |
| 5mo_SIGAE9_ | 0.08335677 | 0.49238324 | 6.36E-05 | 0.018151  | 0.12117   |
| 5mo_SIGAE9_ | 0.01960308 | 0.10768766 | 3.40E-05 | 0.0046667 | 0.017998  |
| 5mo_SIGAE9_ | 0.01550202 | 0.0829415  | 3.28E-05 | 0.0052924 | 0.1442    |
| 5mo_SIGAE9_ | 0.01953076 | 0.10725126 | 3.40E-05 | 0.0046667 | 0.017998  |
| 5mo_SIGAE9_ | 0.02621635 | 0.14759274 | 3.76E-05 | 0.0041286 | -0.096385 |
| 5mo_SIGAE9_ | 0.0344314  | 0.19716312 | 4.48E-05 | 0.0041765 | -0.082901 |
| 5mo_SIGAE9_ | 0.06782043 | 0.39863557 | 6.15E-05 | 0.011255  | 0.10734   |
| 5mo_SIGAE9_ | 0.08424641 | 0.49775144 | 6.37E-05 | 0.018667  | 0.1176    |
| 5mo_SIGAE9_ | 0.03694575 | 0.21233492 | 4.70E-05 | 0.0042982 | -0.057524 |
| 5mo_SIGAE9_ | 0.08088257 | 0.47745374 | 6.33E-05 | 0.017113  | 0.13314   |

|             |            |            |          |           |            |
|-------------|------------|------------|----------|-----------|------------|
| 5mo_SIGAE9_ | 0.0511906  | 0.29828963 | 5.81E-05 | 0.006215  | 0.051138   |
| 5mo_SIGAE9_ | 0.05469814 | 0.3194545  | 5.94E-05 | 0.0071062 | 0.064127   |
| 5mo_SIGAE9_ | 0.02530188 | 0.1420747  | 3.68E-05 | 0.0041768 | -0.092011  |
| 5mo_SIGAE9_ | 0.01452787 | 0.07706335 | 3.26E-05 | 0.0055188 | 0.18676    |
| 5mo_SIGAE9_ | 0.02749651 | 0.15531734 | 3.84E-05 | 0.0040947 | -0.10472   |
| 5mo_SIGAE9_ | 0.09966235 | 0.59077257 | 6.53E-05 | 0.024558  | -0.10426   |
| 5mo_SIGAE9_ | 0.08231069 | 0.48607114 | 6.35E-05 | 0.017633  | 0.1271     |
| 5mo_SIGAE9_ | 0.02301429 | 0.1282712  | 3.55E-05 | 0.0043197 | -0.056631  |
| 5mo_SIGAE9_ | 0.12204192 | 0.725813   | 6.66E-05 | 0.02435   | -0.38515   |
| 5mo_SIGAE9_ | 0.0211711  | 0.11714926 | 3.47E-05 | 0.0044724 | -0.023601  |
| 5mo_SIGAE9_ | 0.01333933 | 0.06989161 | 3.24E-05 | 0.0057681 | 0.23179    |
| 5mo_SIGAE9_ | 0.0162234  | 0.08729434 | 3.30E-05 | 0.0051875 | 0.12392    |
| 5mo_SIGAE9_ | 0.03959123 | 0.22829798 | 4.98E-05 | 0.0045122 | -0.034672  |
| 5mo_SIGAE9_ | 0.06750997 | 0.39676222 | 6.15E-05 | 0.011255  | 0.10492    |
| 5mo_SIGAE9_ | 0.10100341 | 0.5988647  | 6.54E-05 | 0.024809  | -0.13341   |
| 5mo_SIGAE9_ | 0.04210386 | 0.24345943 | 5.24E-05 | 0.0047963 | -0.00654   |
| 5mo_SIGAE9_ | 0.08920782 | 0.52768904 | 6.43E-05 | 0.020902  | 0.067165   |
| 5mo_SIGAE9_ | 0.11142403 | 0.66174364 | 6.61E-05 | 0.025525  | -0.28705   |
| 5mo_SIGAE9_ | 0.00843429 | 0.04029414 | 3.19E-05 | 0.0071994 | 0.45929    |
| 5mo_SIGAE9_ | 0.09129338 | 0.5402735  | 6.45E-05 | 0.021822  | 0.036126   |
| 5mo_SIGAE9_ | 0.01987257 | 0.10931379 | 3.42E-05 | 0.0045972 | 0.0032259  |
| 5mo_SIGAE9_ | 0.02030261 | 0.1119087  | 3.42E-05 | 0.0045972 | -0.01065   |
| 5mo_SIGAE9_ | 0.01805108 | 0.09832274 | 3.34E-05 | 0.0049043 | 0.067421   |
| 5mo_SIGAE9_ | 0.0351643  | 0.20158552 | 4.54E-05 | 0.0042028 | -0.078293  |
| 5mo_SIGAE9_ | 0.0420884  | 0.24336615 | 5.24E-05 | 0.0047963 | -0.00654   |
| 5mo_SIGAE9_ | 0.02949761 | 0.16739218 | 4.02E-05 | 0.0040662 | -0.10661   |
| 5mo_SIGAE9_ | 0.02662714 | 0.15007146 | 3.80E-05 | 0.0041099 | -0.099939  |
| 5mo_SIGAE9_ | 0.11373975 | 0.67571694 | 6.62E-05 | 0.025353  | -0.31137   |
| 5mo_SIGAE9_ | 0.05251632 | 0.30628914 | 5.87E-05 | 0.0065755 | 0.057248   |
| 5mo_SIGAE9_ | 0.02671661 | 0.15061134 | 3.80E-05 | 0.0041099 | -0.099939  |
| 5mo_SIGAE9_ | 0.04271073 | 0.24712136 | 5.29E-05 | 0.0048617 | -0.0013165 |
| 5mo_SIGAE9_ | 0.07637612 | 0.45026135 | 6.27E-05 | 0.015053  | 0.1354     |
| 5mo_SIGAE9_ | 0.08648553 | 0.5112624  | 6.40E-05 | 0.019681  | 0.099025   |
| 5mo_SIGAE9_ | 0.0821739  | 0.4852457  | 6.35E-05 | 0.017633  | 0.1271     |
| 5mo_SIGAE9_ | 0.09201118 | 0.5446047  | 6.46E-05 | 0.022042  | 0.027741   |
| 5mo_SIGAE9_ | 0.0917882  | 0.54325926 | 6.45E-05 | 0.021822  | 0.027741   |
| 5mo_SIGAE9_ | 0.0723417  | 0.42591733 | 6.21E-05 | 0.01308   | 0.12548    |
| 5mo_SIGAE9_ | 0.01644741 | 0.08864602 | 3.31E-05 | 0.0050879 | 0.10435    |
| 5mo_SIGAE9_ | 0.09610043 | 0.5692796  | 6.50E-05 | 0.023448  | -0.045608  |
| 5mo_SIGAE9_ | 0.01332854 | 0.06982646 | 3.24E-05 | 0.0057681 | 0.23179    |
| 5mo_SIGAE9_ | 0.01140367 | 0.05821165 | 3.21E-05 | 0.006339  | 0.32844    |
| 5mo_SIGAE9_ | 0.05678339 | 0.33203703 | 5.98E-05 | 0.0075425 | 0.070131   |
| 5mo_SIGAE9_ | 0.06285169 | 0.36865374 | 6.08E-05 | 0.0094206 | 0.087254   |

|             |            |            |          |           |           |
|-------------|------------|------------|----------|-----------|-----------|
| 5mo_SIGAE9_ | 0.09152999 | 0.5417012  | 6.45E-05 | 0.021822  | 0.027741  |
| 5mo_SIGAE9_ | 0.05684012 | 0.3323794  | 5.98E-05 | 0.0075425 | 0.070131  |
| 5mo_SIGAE9_ | 0.02020557 | 0.1113231  | 3.42E-05 | 0.0045972 | 0.0032259 |
| 5mo_SIGAE9_ | 0.03546414 | 0.20339477 | 4.59E-05 | 0.0042319 | -0.073417 |
| 5mo_SIGAE9_ | 0.11010496 | 0.6537843  | 6.60E-05 | 0.025599  | -0.26716  |
| 5mo_SIGAE9_ | 0.0320917  | 0.18304516 | 4.27E-05 | 0.004099  | -0.097962 |
| 5mo_SIGAE9_ | 0.01593941 | 0.08558072 | 3.30E-05 | 0.0051875 | 0.12392   |
| 5mo_SIGAE9_ | 0.02479624 | 0.13902366 | 3.68E-05 | 0.0041768 | -0.086782 |
| 5mo_SIGAE9_ | 0.11737724 | 0.6976659  | 6.64E-05 | 0.024917  | -0.34377  |
| 5mo_SIGAE9_ | 0.10271806 | 0.609211   | 6.55E-05 | 0.025127  | -0.16182  |
| 5mo_SIGAE9_ | 0.00709737 | 0.03222703 | 3.19E-05 | 0.0075925 | 0.51404   |
| 5mo_SIGAE9_ | 0.01671157 | 0.09023998 | 3.31E-05 | 0.0050879 | 0.10435   |
| 5mo_SIGAE9_ | 0.05529251 | 0.32304093 | 5.95E-05 | 0.007248  | 0.065685  |
| 5mo_SIGAE9_ | 0.0185008  | 0.10103636 | 3.36E-05 | 0.0048202 | 0.050123  |
| 5mo_SIGAE9_ | 0.01925759 | 0.10560289 | 3.40E-05 | 0.0046667 | 0.017998  |
| 5mo_SIGAE9_ | 0.03522049 | 0.20192455 | 4.54E-05 | 0.0042028 | -0.073417 |
| 5mo_SIGAE9_ | 0.02132067 | 0.11805173 | 3.47E-05 | 0.0044724 | -0.023601 |
| 5mo_SIGAE9_ | 0.02676283 | 0.15089025 | 3.80E-05 | 0.0041099 | -0.099939 |
| 5mo_SIGAE9_ | 0.00664231 | 0.02948117 | 3.18E-05 | 0.0078    | 0.54183   |
| 5mo_SIGAE9_ | 0.01277657 | 0.06649588 | 3.23E-05 | 0.0059016 | 0.25518   |
| 5mo_SIGAE9_ | 0.12998459 | 0.77373976 | 6.70E-05 | 0.023664  | -0.43912  |
| 5mo_SIGAE9_ | 0.01557049 | 0.08335465 | 3.28E-05 | 0.0052924 | 0.1442    |
| 5mo_SIGAE9_ | 0.00738325 | 0.0339521  | 3.19E-05 | 0.0075925 | 0.51404   |
| 5mo_SIGAE9_ | 0.02955574 | 0.16774294 | 4.02E-05 | 0.0040662 | -0.10661  |
| 5mo_SIGAE9_ | 0.04643223 | 0.26957723 | 5.57E-05 | 0.0054037 | 0.028707  |
| 5mo_SIGAE9_ | 0.01828729 | 0.09974808 | 3.36E-05 | 0.0048202 | 0.050123  |
| 5mo_SIGAE9_ | 0.13725957 | 0.8176377  | 6.73E-05 | 0.023528  | -0.48029  |
| 5mo_SIGAE9_ | 0.01882991 | 0.10302229 | 3.38E-05 | 0.004741  | 0.03364   |
| 5mo_SIGAE9_ | 0.07004275 | 0.41204527 | 6.18E-05 | 0.012147  | 0.11689   |
| 5mo_SIGAE9_ | 0.02204959 | 0.12245011 | 3.52E-05 | 0.0043661 | -0.046619 |
| 5mo_SIGAE9_ | 0.08722907 | 0.5157491  | 6.41E-05 | 0.01993   | 0.087329  |
| 5mo_SIGAE9_ | 0.05947869 | 0.34830076 | 6.03E-05 | 0.0083426 | 0.075889  |
| 5mo_SIGAE9_ | 0.03329416 | 0.19030091 | 4.37E-05 | 0.0041322 | -0.091175 |
| 5mo_SIGAE9_ | 0.01459146 | 0.07744706 | 3.26E-05 | 0.0055188 | 0.18676   |
| 5mo_SIGAE9_ | 0.01896674 | 0.10384791 | 3.38E-05 | 0.004741  | 0.03364   |
| 5mo_SIGAE9_ | 0.03138578 | 0.17878555 | 4.16E-05 | 0.0040771 | -0.10071  |
| 5mo_SIGAE9_ | 0.01983729 | 0.10910088 | 3.42E-05 | 0.0045972 | 0.0032259 |
| 5mo_SIGAE9_ | 0.06396055 | 0.3753447  | 6.10E-05 | 0.0098069 | 0.091185  |
| 5mo_SIGAE9_ | 0.11629973 | 0.6911641  | 6.64E-05 | 0.025054  | -0.33347  |
| 5mo_SIGAE9_ | 0.02886244 | 0.16355948 | 3.97E-05 | 0.0040686 | -0.10664  |
| 5mo_SIGAE9_ | 0.03937551 | 0.22699635 | 4.98E-05 | 0.0045122 | -0.034672 |
| 5mo_SIGAE9_ | 0.11246208 | 0.6680074  | 6.62E-05 | 0.025448  | -0.29336  |
| 5mo_SIGAE9_ | 0.13584267 | 0.80908793 | 6.72E-05 | 0.023527  | -0.47464  |

|             |            |            |          |           |           |
|-------------|------------|------------|----------|-----------|-----------|
| 5mo_SIGAE9_ | 0.038643   | 0.22257628 | 4.92E-05 | 0.0044639 | -0.040459 |
| 5mo_SIGAE9_ | 0.03555011 | 0.20391348 | 4.59E-05 | 0.0042319 | -0.073417 |
| 5mo_SIGAE9_ | 0.01994506 | 0.10975117 | 3.42E-05 | 0.0045972 | 0.0032259 |
| 5mo_SIGAE9_ | 0.07482408 | 0.44089624 | 6.25E-05 | 0.014299  | 0.13218   |
| 5mo_SIGAE9_ | 0.03547603 | 0.20346649 | 4.59E-05 | 0.0042319 | -0.073417 |
| 5mo_SIGAE9_ | 0.08455473 | 0.49961188 | 6.37E-05 | 0.018667  | 0.1136    |
| 5mo_SIGAE9_ | 0.05138181 | 0.29944342 | 5.83E-05 | 0.0063316 | 0.053285  |
| 5mo_SIGAE9_ | 0.00690965 | 0.03109431 | 3.18E-05 | 0.0078    | 0.54183   |
| 5mo_SIGAE9_ | 0.02590431 | 0.14570983 | 3.76E-05 | 0.0041286 | -0.096385 |
| 5mo_SIGAE9_ | 0.01954997 | 0.10736716 | 3.40E-05 | 0.0046667 | 0.017998  |
| 5mo_SIGAE9_ | 0.01268119 | 0.06592031 | 3.23E-05 | 0.0059016 | 0.25518   |
| 5mo_SIGAE9_ | 0.02349103 | 0.13114788 | 3.58E-05 | 0.0042778 | -0.065623 |
| 5mo_SIGAE9_ | 0.02087883 | 0.11538564 | 3.47E-05 | 0.0044724 | -0.023601 |
| 5mo_SIGAE9_ | 0.10366232 | 0.6149088  | 6.56E-05 | 0.025296  | -0.17104  |
| 5mo_SIGAE9_ | 0.02255149 | 0.1254786  | 3.55E-05 | 0.0043197 | -0.056631 |
| 5mo_SIGAE9_ | 0.10894761 | 0.6468007  | 6.59E-05 | 0.025616  | -0.25305  |
| 5mo_SIGAE9_ | 0.03525397 | 0.20212658 | 4.54E-05 | 0.0042028 | -0.073417 |
| 5mo_SIGAE9_ | 0.01716222 | 0.09295928 | 3.33E-05 | 0.0049935 | 0.085504  |
| 5mo_SIGAE9_ | 0.11271485 | 0.6695326  | 6.62E-05 | 0.025448  | -0.29951  |
| 5mo_SIGAE9_ | 0.12951507 | 0.7709066  | 6.70E-05 | 0.023664  | -0.43556  |
| 5mo_SIGAE9_ | 0.01325112 | 0.06935933 | 3.24E-05 | 0.0057681 | 0.23179   |
| 5mo_SIGAE9_ | 0.05042706 | 0.29368243 | 5.78E-05 | 0.0061018 | 0.048868  |
| 5mo_SIGAE9_ | 0.01111802 | 0.056488   | 3.21E-05 | 0.006339  | 0.32844   |
| 5mo_SIGAE9_ | 0.01014099 | 0.05059253 | 3.20E-05 | 0.0066628 | 0.37961   |
| 5mo_SIGAE9_ | 0.00784242 | 0.03672277 | 3.19E-05 | 0.0073923 | 0.48652   |
| 5mo_SIGAE9_ | 0.12382931 | 0.73659825 | 6.67E-05 | 0.024153  | -0.39752  |
| 5mo_SIGAE9_ | 0.01394584 | 0.07355136 | 3.25E-05 | 0.0056405 | 0.20898   |
| 5mo_SIGAE9_ | 0.08491256 | 0.50177103 | 6.38E-05 | 0.018923  | 0.10916   |
| 5mo_SIGAE9_ | 0.0662529  | 0.3891769  | 6.13E-05 | 0.010616  | 0.10013   |
| 5mo_SIGAE9_ | 0.01218824 | 0.0629458  | 3.23E-05 | 0.0060411 | 0.2791    |
| 5mo_SIGAE9_ | 0.02151411 | 0.11921898 | 3.49E-05 | 0.0044169 | -0.0356   |
| 5mo_SIGAE9_ | 0.0289456  | 0.16406125 | 3.97E-05 | 0.0040686 | -0.10664  |
| 5mo_SIGAE9_ | 0.07464697 | 0.43982753 | 6.25E-05 | 0.014299  | 0.13218   |
| 5mo_SIGAE9_ | 0.05405573 | 0.31557813 | 5.91E-05 | 0.0068337 | 0.062513  |
| 5mo_SIGAE9_ | 0.00973865 | 0.04816476 | 3.20E-05 | 0.0068348 | 0.4058    |
| 5mo_SIGAE9_ | 0.10949676 | 0.6501143  | 6.60E-05 | 0.025611  | -0.2602   |
| 5mo_SIGAE9_ | 0.01534156 | 0.08197325 | 3.28E-05 | 0.0052924 | 0.1442    |
| 5mo_SIGAE9_ | 0.03483708 | 0.19961098 | 4.54E-05 | 0.0042028 | -0.078293 |
| 5mo_SIGAE9_ | 0.10234433 | 0.60695595 | 6.55E-05 | 0.025029  | -0.15246  |
| 5mo_SIGAE9_ | 0.0099348  | 0.04934838 | 3.20E-05 | 0.0066628 | 0.37961   |
| 5mo_SIGAE9_ | 0.09652551 | 0.5718446  | 6.50E-05 | 0.023626  | -0.055297 |
| 5mo_SIGAE9_ | 0.02943411 | 0.16700898 | 4.02E-05 | 0.0040662 | -0.10661  |
| 5mo_SIGAE9_ | 0.00629705 | 0.02739786 | 3.18E-05 | 0.008015  | 0.56984   |

|             |            |            |          |           |           |
|-------------|------------|------------|----------|-----------|-----------|
| 5mo_SIGAE9_ | 0.10536878 | 0.6252057  | 6.57E-05 | 0.025482  | -0.20623  |
| 5mo_SIGAE9_ | 0.0235556  | 0.13153753 | 3.58E-05 | 0.0042778 | -0.065623 |
| 5mo_SIGAE9_ | 0.01286567 | 0.06703347 | 3.23E-05 | 0.0059016 | 0.25518   |
| 5mo_SIGAE9_ | 0.0918396  | 0.54356945 | 6.46E-05 | 0.022042  | 0.027741  |
| 5mo_SIGAE9_ | 0.09032851 | 0.53445137 | 6.44E-05 | 0.021369  | 0.05218   |
| 5mo_SIGAE9_ | 0.0169892  | 0.09191523 | 3.31E-05 | 0.0050879 | 0.085504  |
| 5mo_SIGAE9_ | 0.0764841  | 0.45091292 | 6.27E-05 | 0.015053  | 0.1354    |
| 5mo_SIGAE9_ | 0.04931166 | 0.28695196 | 5.73E-05 | 0.0058857 | 0.04392   |
| 5mo_SIGAE9_ | 0.1130865  | 0.67177516 | 6.62E-05 | 0.025403  | -0.30551  |
| 5mo_SIGAE9_ | 0.08928459 | 0.5281522  | 6.43E-05 | 0.020902  | 0.067165  |
| 5mo_SIGAE9_ | 0.01265397 | 0.06575608 | 3.23E-05 | 0.0059016 | 0.25518   |
| 5mo_SIGAE9_ | 0.08156353 | 0.4815627  | 6.34E-05 | 0.017373  | 0.13148   |
| 5mo_SIGAE9_ | 0.01490062 | 0.07931258 | 3.27E-05 | 0.0054028 | 0.16515   |
| 5mo_SIGAE9_ | 0.01721037 | 0.09324984 | 3.33E-05 | 0.0049935 | 0.085504  |
| 5mo_SIGAE9_ | 0.0406126  | 0.23446102 | 5.09E-05 | 0.0046173 | -0.023154 |
| 5mo_SIGAE9_ | 0.02608448 | 0.14679702 | 3.76E-05 | 0.0041286 | -0.096385 |
| 5mo_SIGAE9_ | 0.09830493 | 0.5825818  | 6.52E-05 | 0.024123  | -0.084641 |
| 5mo_SIGAE9_ | 0.03005376 | 0.17074803 | 4.07E-05 | 0.0040668 | -0.10597  |
| 5mo_SIGAE9_ | 0.02903992 | 0.16463041 | 3.97E-05 | 0.0040686 | -0.10664  |
| 5mo_SIGAE9_ | 0.01208896 | 0.06234678 | 3.23E-05 | 0.0060411 | 0.2791    |
| 5mo_SIGAE9_ | 0.02142072 | 0.11865544 | 3.47E-05 | 0.0044724 | -0.0356   |
| 5mo_SIGAE9_ | 0.09842777 | 0.583323   | 6.52E-05 | 0.024123  | -0.084641 |
| 5mo_SIGAE9_ | 0.02755689 | 0.1556817  | 3.88E-05 | 0.0040827 | -0.10472  |
| 5mo_SIGAE9_ | 0.00814602 | 0.03855467 | 3.19E-05 | 0.0071994 | 0.45929   |
| 5mo_SIGAE9_ | 0.04140307 | 0.23923078 | 5.19E-05 | 0.0047337 | -0.011944 |
| 5mo_SIGAE9_ | 0.07785385 | 0.45917815 | 6.29E-05 | 0.015562  | 0.13662   |
| 5mo_SIGAE9_ | 0.02149082 | 0.11907845 | 3.49E-05 | 0.0044169 | -0.0356   |
| 5mo_SIGAE9_ | 0.02104542 | 0.11639085 | 3.47E-05 | 0.0044724 | -0.023601 |
| 5mo_SIGAE9_ | 0.01456666 | 0.0772974  | 3.26E-05 | 0.0055188 | 0.18676   |
| 5mo_SIGAE9_ | 0.15450627 | 0.92170584 | 6.78E-05 | 0.023711  | -0.52667  |
| 5mo_SIGAE9_ | 0.0306709  | 0.17447188 | 4.11E-05 | 0.0040705 | -0.10475  |
| 5mo_SIGAE9_ | 0.01519587 | 0.08109414 | 3.27E-05 | 0.0054028 | 0.16515   |
| 5mo_SIGAE9_ | 0.07993123 | 0.47171324 | 6.32E-05 | 0.016594  | 0.13446   |
| 5mo_SIGAE9_ | 0.08806492 | 0.52079266 | 6.42E-05 | 0.020421  | 0.080939  |
| 5mo_SIGAE9_ | 0.01838417 | 0.10033266 | 3.36E-05 | 0.0048202 | 0.050123  |
| 5mo_SIGAE9_ | 0.02670891 | 0.15056486 | 3.80E-05 | 0.0041099 | -0.099939 |
| 5mo_SIGAE9_ | 0.11116783 | 0.6601977  | 6.61E-05 | 0.025556  | -0.28058  |
| 5mo_SIGAE9_ | 0.04042764 | 0.23334497 | 5.09E-05 | 0.0046173 | -0.023154 |
| 5mo_SIGAE9_ | 0.09372409 | 0.5549406  | 6.48E-05 | 0.022676  | 0.0013661 |
| 5mo_SIGAE9_ | 0.07504195 | 0.44221088 | 6.25E-05 | 0.014299  | 0.13345   |
| 5mo_SIGAE9_ | 0.03348582 | 0.1914574  | 4.37E-05 | 0.0041322 | -0.091175 |
| 5mo_SIGAE9_ | 0.02721372 | 0.15361096 | 3.84E-05 | 0.0040947 | -0.10271  |
| 5mo_SIGAE9_ | 0.0199971  | 0.11006519 | 3.42E-05 | 0.0045972 | 0.0032259 |

|             |            |            |          |           |           |
|-------------|------------|------------|----------|-----------|-----------|
| 5mo_SIGAE9_ | 0.09217314 | 0.545582   | 6.46E-05 | 0.022042  | 0.019141  |
| 5mo_SIGAE9_ | 0.02035876 | 0.1122475  | 3.44E-05 | 0.0045325 | -0.01065  |
| 5mo_SIGAE9_ | 0.01568142 | 0.08402397 | 3.28E-05 | 0.0052924 | 0.1442    |
| 5mo_SIGAE9_ | 0.03668059 | 0.21073493 | 4.70E-05 | 0.0042982 | -0.062998 |
| 5mo_SIGAE9_ | 0.09430537 | 0.55844814 | 6.48E-05 | 0.022877  | -0.017059 |
| 5mo_SIGAE9_ | 0.0120203  | 0.06193243 | 3.23E-05 | 0.0060411 | 0.2791    |
| 5mo_SIGAE9_ | 0.08873987 | 0.5248653  | 6.42E-05 | 0.020663  | 0.074212  |
| 5mo_SIGAE9_ | 0.05664137 | 0.3311801  | 5.98E-05 | 0.0075425 | 0.068678  |
| 5mo_SIGAE9_ | 0.03194384 | 0.18215294 | 4.22E-05 | 0.0040866 | -0.097962 |
| 5mo_SIGAE9_ | 0.01758294 | 0.09549795 | 3.34E-05 | 0.0049043 | 0.067421  |
| 5mo_SIGAE9_ | 0.04884335 | 0.2841261  | 5.70E-05 | 0.0057827 | 0.041222  |
| 5mo_SIGAE9_ | 0.01330187 | 0.06966556 | 3.24E-05 | 0.0057681 | 0.23179   |
| 5mo_SIGAE9_ | 0.10996769 | 0.65295595 | 6.60E-05 | 0.025599  | -0.26716  |
| 5mo_SIGAE9_ | 0.02526327 | 0.14184174 | 3.68E-05 | 0.0041768 | -0.092011 |
| 5mo_SIGAE9_ | 0.10827582 | 0.6427471  | 6.59E-05 | 0.025614  | -0.24573  |
| 5mo_SIGAE9_ | 0.06655509 | 0.3910004  | 6.13E-05 | 0.010826  | 0.10013   |
| 5mo_SIGAE9_ | 0.02753611 | 0.15555626 | 3.88E-05 | 0.0040827 | -0.10472  |
| 5mo_SIGAE9_ | 0.10375512 | 0.61546874 | 6.56E-05 | 0.025296  | -0.18011  |
| 5mo_SIGAE9_ | 0.06623025 | 0.3890403  | 6.13E-05 | 0.010616  | 0.10013   |
| 5mo_SIGAE9_ | 0.1249094  | 0.7431156  | 6.68E-05 | 0.024034  | -0.40548  |
| 5mo_SIGAE9_ | 0.01464074 | 0.07774444 | 3.26E-05 | 0.0055188 | 0.18676   |
| 5mo_SIGAE9_ | 0.01454876 | 0.07718943 | 3.26E-05 | 0.0055188 | 0.18676   |
| 5mo_SIGAE9_ | 0.11481235 | 0.6821891  | 6.63E-05 | 0.025242  | -0.32268  |
| 5mo_SIGAE9_ | 0.01302144 | 0.06797345 | 3.23E-05 | 0.0059016 | 0.25518   |
| 5mo_SIGAE9_ | 0.03239873 | 0.18489781 | 4.27E-05 | 0.004099  | -0.097962 |
| 5mo_SIGAE9_ | 0.01634953 | 0.0880554  | 3.30E-05 | 0.0051875 | 0.12392   |
| 5mo_SIGAE9_ | 0.06536504 | 0.3838195  | 6.12E-05 | 0.01041   | 0.095509  |
| 5mo_SIGAE9_ | 0.05106703 | 0.297544   | 5.81E-05 | 0.006215  | 0.051138  |
| 5mo_SIGAE9_ | 0.00972504 | 0.04808267 | 3.20E-05 | 0.0068348 | 0.4058    |
| 5mo_SIGAE9_ | 0.07298632 | 0.429807   | 6.23E-05 | 0.013561  | 0.12737   |
| 5mo_SIGAE9_ | 0.11925165 | 0.7089762  | 6.65E-05 | 0.024704  | -0.36308  |
| 5mo_SIGAE9_ | 0.04754169 | 0.27627176 | 5.64E-05 | 0.0055867 | 0.035328  |
| 5mo_SIGAE9_ | 0.02151441 | 0.11922079 | 3.49E-05 | 0.0044169 | -0.0356   |
| 5mo_SIGAE9_ | 0.02797287 | 0.15819177 | 3.88E-05 | 0.0040827 | -0.10472  |
| 5mo_SIGAE9_ | 0.01548008 | 0.08280911 | 3.28E-05 | 0.0052924 | 0.1442    |
| 5mo_SIGAE9_ | 0.02853119 | 0.1615607  | 3.93E-05 | 0.004074  | -0.10603  |
| 5mo_SIGAE9_ | 0.00896003 | 0.04346649 | 3.19E-05 | 0.0070136 | 0.43237   |
| 5mo_SIGAE9_ | 0.02381624 | 0.13311027 | 3.61E-05 | 0.0042401 | -0.073623 |
| 5mo_SIGAE9_ | 0.0208963  | 0.11549106 | 3.47E-05 | 0.0044724 | -0.023601 |
| 5mo_SIGAE9_ | 0.07763587 | 0.45786282 | 6.29E-05 | 0.015562  | 0.13646   |
| 5mo_SIGAE9_ | 0.09361334 | 0.55427235 | 6.48E-05 | 0.022676  | 0.0013661 |
| 5mo_SIGAE9_ | 0.09063723 | 0.5363142  | 6.44E-05 | 0.021369  | 0.044278  |
| 5mo_SIGAE9_ | 0.01433919 | 0.07592485 | 3.26E-05 | 0.0055188 | 0.18676   |



|             |            |            |          |           |           |
|-------------|------------|------------|----------|-----------|-----------|
| 5mo_SIGAE9_ | 0.01274452 | 0.06630249 | 3.23E-05 | 0.0059016 | 0.25518   |
| 5mo_SIGAE9_ | 0.03374328 | 0.19301093 | 4.43E-05 | 0.004153  | -0.087207 |
| 5mo_SIGAE9_ | 0.01625329 | 0.08747467 | 3.30E-05 | 0.0051875 | 0.12392   |
| 5mo_SIGAE9_ | 0.055896   | 0.32668245 | 5.97E-05 | 0.0073934 | 0.067199  |
| 5mo_SIGAE9_ | 0.12053674 | 0.7167306  | 6.66E-05 | 0.024561  | -0.37215  |
| 5mo_SIGAE9_ | 0.02895126 | 0.16409545 | 3.97E-05 | 0.0040686 | -0.10664  |
| 5mo_SIGAE9_ | 0.09561785 | 0.56636775 | 6.49E-05 | 0.023263  | -0.035993 |
| 5mo_SIGAE9_ | 0.02199149 | 0.12209955 | 3.52E-05 | 0.0043661 | -0.046619 |
| 5mo_SIGAE9_ | 0.04749032 | 0.27596185 | 5.64E-05 | 0.0055867 | 0.035328  |
| 5mo_SIGAE9_ | 0.02720822 | 0.1535778  | 3.84E-05 | 0.0040947 | -0.10271  |
| 5mo_SIGAE9_ | 0.01276834 | 0.0664462  | 3.23E-05 | 0.0059016 | 0.25518   |
| 5mo_SIGAE9_ | 0.01858828 | 0.10156423 | 3.36E-05 | 0.0048202 | 0.050123  |
| 5mo_SIGAE9_ | 0.08486889 | 0.5015075  | 6.38E-05 | 0.018923  | 0.1136    |
| 5mo_SIGAE9_ | 0.0319841  | 0.18239586 | 4.27E-05 | 0.004099  | -0.097962 |
| 5mo_SIGAE9_ | 0.03641378 | 0.20912495 | 4.70E-05 | 0.0042982 | -0.062998 |
| 5mo_SIGAE9_ | 0.01684106 | 0.09102138 | 3.31E-05 | 0.0050879 | 0.10435   |
| 5mo_SIGAE9_ | 0.03618273 | 0.20773079 | 4.65E-05 | 0.0042637 | -0.068307 |
| 5mo_SIGAE9_ | 0.02949897 | 0.16740035 | 4.02E-05 | 0.0040662 | -0.10661  |
| 5mo_SIGAE9_ | 0.10373842 | 0.615368   | 6.56E-05 | 0.025296  | -0.18011  |
| 5mo_SIGAE9_ | 0.01668372 | 0.09007194 | 3.31E-05 | 0.0050879 | 0.10435   |
| 5mo_SIGAE9_ | 0.00745369 | 0.0343771  | 3.19E-05 | 0.0075925 | 0.51404   |
| 5mo_SIGAE9_ | 0.06857024 | 0.40316    | 6.16E-05 | 0.011695  | 0.10977   |
| 5mo_SIGAE9_ | 0.01392947 | 0.07345257 | 3.25E-05 | 0.0056405 | 0.20898   |
| 5mo_SIGAE9_ | 0.02541318 | 0.14274634 | 3.72E-05 | 0.0041509 | -0.092011 |
| 5mo_SIGAE9_ | 0.06529101 | 0.3833728  | 6.12E-05 | 0.01041   | 0.095509  |
| 5mo_SIGAE9_ | 0.01745757 | 0.09474143 | 3.33E-05 | 0.0049935 | 0.085504  |
| 5mo_SIGAE9_ | 0.13110705 | 0.7805128  | 6.70E-05 | 0.023618  | -0.44608  |
| 5mo_SIGAE9_ | 0.02465918 | 0.13819665 | 3.64E-05 | 0.0042065 | -0.080664 |
| 5mo_SIGAE9_ | 0.01921416 | 0.10534083 | 3.38E-05 | 0.004741  | 0.017998  |
| 5mo_SIGAE9_ | 0.10791487 | 0.64056903 | 6.59E-05 | 0.025614  | -0.23822  |
| 5mo_SIGAE9_ | 0.03387399 | 0.19379963 | 4.43E-05 | 0.004153  | -0.087207 |
| 5mo_SIGAE9_ | 0.0228533  | 0.12729976 | 3.55E-05 | 0.0043197 | -0.056631 |
| 5mo_SIGAE9_ | 0.06937978 | 0.40804482 | 6.17E-05 | 0.01192   | 0.11218   |
| 5mo_SIGAE9_ | 0.02968212 | 0.16850553 | 4.02E-05 | 0.0040662 | -0.10597  |
| 5mo_SIGAE9_ | 0.089177   | 0.527503   | 6.43E-05 | 0.020902  | 0.067165  |
| 5mo_SIGAE9_ | 0.02368793 | 0.13233604 | 3.61E-05 | 0.0042401 | -0.073623 |
| 5mo_SIGAE9_ | 0.0367273  | 0.21101679 | 4.70E-05 | 0.0042982 | -0.062998 |
| 5mo_SIGAE9_ | 0.01594671 | 0.08562478 | 3.30E-05 | 0.0051875 | 0.12392   |
| 5mo_SIGAE9_ | 0.01376509 | 0.07246068 | 3.25E-05 | 0.0056405 | 0.20898   |
| 5mo_SIGAE9_ | 0.01446293 | 0.07667148 | 3.26E-05 | 0.0055188 | 0.18676   |
| 5mo_SIGAE9_ | 0.00911683 | 0.04441266 | 3.19E-05 | 0.0070136 | 0.43237   |
| 5mo_SIGAE9_ | 0.10359945 | 0.61452943 | 6.56E-05 | 0.025296  | -0.17104  |
| 5mo_SIGAE9_ | 0.01553054 | 0.08311357 | 3.28E-05 | 0.0052924 | 0.1442    |

|             |            |            |          |           |           |
|-------------|------------|------------|----------|-----------|-----------|
| 5mo_SIGAE9_ | 0.0288265  | 0.16334264 | 3.97E-05 | 0.0040686 | -0.10664  |
| 5mo_SIGAE9_ | 0.0078346  | 0.03667552 | 3.19E-05 | 0.0073923 | 0.48652   |
| 5mo_SIGAE9_ | 0.01780493 | 0.09683745 | 3.34E-05 | 0.0049043 | 0.067421  |
| 5mo_SIGAE9_ | 0.01319669 | 0.06903093 | 3.24E-05 | 0.0057681 | 0.23179   |
| 5mo_SIGAE9_ | 0.01336355 | 0.07003772 | 3.24E-05 | 0.0057681 | 0.23179   |
| 5mo_SIGAE9_ | 0.04674128 | 0.2714421  | 5.57E-05 | 0.0054037 | 0.028707  |
| 5mo_SIGAE9_ | 0.01557402 | 0.08337592 | 3.28E-05 | 0.0052924 | 0.1442    |
| 5mo_SIGAE9_ | 0.01123669 | 0.05720411 | 3.21E-05 | 0.006339  | 0.32844   |
| 5mo_SIGAE9_ | 0.08849603 | 0.523394   | 6.42E-05 | 0.020421  | 0.074212  |
| 5mo_SIGAE9_ | 0.06115709 | 0.35842836 | 6.06E-05 | 0.008866  | 0.082025  |
| 5mo_SIGAE9_ | 0.03450167 | 0.19758712 | 4.48E-05 | 0.0041765 | -0.082901 |
| 5mo_SIGAE9_ | 0.10424311 | 0.6184133  | 6.56E-05 | 0.025367  | -0.18901  |
| 5mo_SIGAE9_ | 0.01644107 | 0.0886078  | 3.30E-05 | 0.0051875 | 0.10435   |
| 5mo_SIGAE9_ | 0.01514084 | 0.08076207 | 3.27E-05 | 0.0054028 | 0.16515   |
| 5mo_SIGAE9_ | 0.02670634 | 0.15054935 | 3.80E-05 | 0.0041099 | -0.099939 |
| 5mo_SIGAE9_ | 0.07208245 | 0.424353   | 6.21E-05 | 0.01308   | 0.12348   |
| 5mo_SIGAE9_ | 0.03486427 | 0.19977506 | 4.54E-05 | 0.0042028 | -0.078293 |
| 5mo_SIGAE9_ | 0.07762258 | 0.45778263 | 6.29E-05 | 0.015562  | 0.13646   |
| 5mo_SIGAE9_ | 0.09750506 | 0.57775533 | 6.51E-05 | 0.023964  | -0.065044 |
| 5mo_SIGAE9_ | 0.01519473 | 0.08108728 | 3.27E-05 | 0.0054028 | 0.16515   |
| 5mo_SIGAE9_ | 0.0141845  | 0.07499141 | 3.25E-05 | 0.0056405 | 0.20898   |
| 5mo_SIGAE9_ | 0.14248389 | 0.84916174 | 6.74E-05 | 0.023593  | -0.50412  |
| 5mo_SIGAE9_ | 0.09584126 | 0.56771576 | 6.50E-05 | 0.023448  | -0.035993 |
| 5mo_SIGAE9_ | 0.03213303 | 0.18329452 | 4.27E-05 | 0.004099  | -0.097962 |
| 5mo_SIGAE9_ | 0.06059941 | 0.35506326 | 6.05E-05 | 0.008688  | 0.080421  |
| 5mo_SIGAE9_ | 0.1245124  | 0.7407201  | 6.67E-05 | 0.024092  | -0.40152  |
| 5mo_SIGAE9_ | 0.07971218 | 0.47039148 | 6.32E-05 | 0.016594  | 0.13545   |
| 5mo_SIGAE9_ | 0.0132265  | 0.06921075 | 3.24E-05 | 0.0057681 | 0.23179   |
| 5mo_SIGAE9_ | 0.02556874 | 0.14368501 | 3.72E-05 | 0.0041509 | -0.092011 |
| 5mo_SIGAE9_ | 0.07035888 | 0.4139528  | 6.19E-05 | 0.012376  | 0.11689   |
| 5mo_SIGAE9_ | 0.07929171 | 0.46785432 | 6.31E-05 | 0.016335  | 0.13613   |
| 5mo_SIGAE9_ | 0.03171023 | 0.18074332 | 4.22E-05 | 0.0040866 | -0.10071  |
| 5mo_SIGAE9_ | 0.02806947 | 0.15877466 | 3.88E-05 | 0.0040827 | -0.10603  |
| 5mo_SIGAE9_ | 0.01938487 | 0.10637095 | 3.40E-05 | 0.0046667 | 0.017998  |
| 5mo_SIGAE9_ | 0.10967597 | 0.6511957  | 6.60E-05 | 0.025599  | -0.2602   |
| 5mo_SIGAE9_ | 0.01715165 | 0.09289552 | 3.33E-05 | 0.0049935 | 0.085504  |
| 5mo_SIGAE9_ | 0.02505844 | 0.1406058  | 3.68E-05 | 0.0041768 | -0.086782 |
| 5mo_SIGAE9_ | 0.07107558 | 0.41827744 | 6.20E-05 | 0.012608  | 0.11916   |
| 5mo_SIGAE9_ | 0.02398028 | 0.13410008 | 3.61E-05 | 0.0042401 | -0.073623 |
| 5mo_SIGAE9_ | 0.08930198 | 0.5282572  | 6.43E-05 | 0.020902  | 0.067165  |
| 5mo_SIGAE9_ | 0.01346426 | 0.07064543 | 3.24E-05 | 0.0057681 | 0.23179   |
| 5mo_SIGAE9_ | 0.06710287 | 0.39430574 | 6.14E-05 | 0.011039  | 0.10251   |
| 5mo_SIGAE9_ | 0.10331994 | 0.6128428  | 6.56E-05 | 0.025216  | -0.17104  |

|             |            |            |          |           |           |
|-------------|------------|------------|----------|-----------|-----------|
| 5mo_SIGAE9_ | 0.0901692  | 0.53349006 | 6.44E-05 | 0.021369  | 0.05218   |
| 5mo_SIGAE9_ | 0.04848395 | 0.28195748 | 5.67E-05 | 0.0056831 | 0.041222  |
| 5mo_SIGAE9_ | 0.06883266 | 0.40474343 | 6.16E-05 | 0.011695  | 0.10977   |
| 5mo_SIGAE9_ | 0.0709111  | 0.41728497 | 6.20E-05 | 0.012608  | 0.11916   |
| 5mo_SIGAE9_ | 0.07131813 | 0.41974097 | 6.20E-05 | 0.012843  | 0.12136   |
| 5mo_SIGAE9_ | 0.01855995 | 0.1013933  | 3.36E-05 | 0.0048202 | 0.050123  |
| 5mo_SIGAE9_ | 0.02941258 | 0.16687906 | 4.02E-05 | 0.0040662 | -0.10661  |
| 5mo_SIGAE9_ | 0.0903194  | 0.53439635 | 6.44E-05 | 0.021369  | 0.05218   |
| 5mo_SIGAE9_ | 0.0506528  | 0.29504448 | 5.78E-05 | 0.0061018 | 0.051138  |
| 5mo_SIGAE9_ | 0.02129122 | 0.11787403 | 3.47E-05 | 0.0044724 | -0.023601 |
| 5mo_SIGAE9_ | 0.01410199 | 0.07449359 | 3.25E-05 | 0.0056405 | 0.20898   |
| 5mo_SIGAE9_ | 0.10898529 | 0.6470281  | 6.59E-05 | 0.025616  | -0.25305  |
| 5mo_SIGAE9_ | 0.12452979 | 0.74082506 | 6.68E-05 | 0.024034  | -0.40152  |
| 5mo_SIGAE9_ | 0.01451542 | 0.07698824 | 3.26E-05 | 0.0055188 | 0.18676   |
| 5mo_SIGAE9_ | 0.03732685 | 0.21463452 | 4.76E-05 | 0.0043355 | -0.057524 |
| 5mo_SIGAE9_ | 0.07584997 | 0.44708657 | 6.26E-05 | 0.0148    | 0.13453   |
| 5mo_SIGAE9_ | 0.02219337 | 0.12331772 | 3.52E-05 | 0.0043661 | -0.046619 |
| 5mo_SIGAE9_ | 0.07057096 | 0.4152325  | 6.19E-05 | 0.012376  | 0.11916   |
| 5mo_SIGAE9_ | 0.01902457 | 0.10419687 | 3.38E-05 | 0.004741  | 0.03364   |
| 5mo_SIGAE9_ | 0.08808204 | 0.52089596 | 6.42E-05 | 0.020421  | 0.080939  |
| 5mo_SIGAE9_ | 0.05117016 | 0.2981663  | 5.81E-05 | 0.006215  | 0.051138  |
| 5mo_SIGAE9_ | 0.03623236 | 0.20803027 | 4.65E-05 | 0.0042637 | -0.068307 |
| 5mo_SIGAE9_ | 0.01658221 | 0.08945943 | 3.31E-05 | 0.0050879 | 0.10435   |
| 5mo_SIGAE9_ | 0.01469725 | 0.07808541 | 3.26E-05 | 0.0055188 | 0.18676   |
| 5mo_SIGAE9_ | 0.07025487 | 0.4133252  | 6.19E-05 | 0.012376  | 0.11689   |
| 5mo_SIGAE9_ | 0.07462803 | 0.43971327 | 6.24E-05 | 0.014051  | 0.13218   |
| 5mo_SIGAE9_ | 0.00822382 | 0.03902417 | 3.19E-05 | 0.0071994 | 0.45929   |
| 5mo_SIGAE9_ | 0.01817943 | 0.09909721 | 3.36E-05 | 0.0048202 | 0.050123  |
| 5mo_SIGAE9_ | 0.0729967  | 0.42986965 | 6.23E-05 | 0.013561  | 0.12737   |
| 5mo_SIGAE9_ | 0.08362992 | 0.4940315  | 6.37E-05 | 0.01841   | 0.12117   |
| 5mo_SIGAE9_ | 0.11538079 | 0.6856191  | 6.63E-05 | 0.025182  | -0.32814  |
| 5mo_SIGAE9_ | 0.01575777 | 0.08448467 | 3.28E-05 | 0.0052924 | 0.1442    |
| 5mo_SIGAE9_ | 0.06490181 | 0.38102433 | 6.11E-05 | 0.010206  | 0.093303  |
| 5mo_SIGAE9_ | 0.01046794 | 0.05256537 | 3.21E-05 | 0.0064976 | 0.35381   |
| 5mo_SIGAE9_ | 0.0186136  | 0.10171701 | 3.36E-05 | 0.0048202 | 0.03364   |
| 5mo_SIGAE9_ | 0.01521874 | 0.08123211 | 3.27E-05 | 0.0054028 | 0.16515   |
| 5mo_SIGAE9_ | 0.02802116 | 0.1584831  | 3.88E-05 | 0.0040827 | -0.10603  |
| 5mo_SIGAE9_ | 0.00686372 | 0.03081721 | 3.18E-05 | 0.0078    | 0.54183   |
| 5mo_SIGAE9_ | 0.04897785 | 0.28493774 | 5.70E-05 | 0.0057827 | 0.041222  |
| 5mo_SIGAE9_ | 0.01510634 | 0.0805539  | 3.27E-05 | 0.0054028 | 0.16515   |
| 5mo_SIGAE9_ | 0.10942874 | 0.6497039  | 6.60E-05 | 0.025611  | -0.2602   |
| 5mo_SIGAE9_ | 0.01741692 | 0.09449617 | 3.33E-05 | 0.0049935 | 0.085504  |
| 5mo_SIGAE9_ | 0.01675603 | 0.0905083  | 3.31E-05 | 0.0050879 | 0.10435   |

|             |            |            |          |           |            |
|-------------|------------|------------|----------|-----------|------------|
| 5mo_SIGAE9_ | 0.0204581  | 0.11284689 | 3.44E-05 | 0.0045325 | -0.01065   |
| 5mo_SIGAE9_ | 0.02271489 | 0.12646464 | 3.55E-05 | 0.0043197 | -0.056631  |
| 5mo_SIGAE9_ | 0.01228704 | 0.06354199 | 3.23E-05 | 0.0060411 | 0.2791     |
| 5mo_SIGAE9_ | 0.08147872 | 0.4810509  | 6.34E-05 | 0.017373  | 0.13148    |
| 5mo_SIGAE9_ | 0.10743518 | 0.63767457 | 6.59E-05 | 0.025604  | -0.23052   |
| 5mo_SIGAE9_ | 0.09396993 | 0.556424   | 6.48E-05 | 0.022676  | -0.0077738 |
| 5mo_SIGAE9_ | 0.037522   | 0.21581209 | 4.81E-05 | 0.0043756 | -0.05192   |
| 5mo_SIGAE9_ | 0.01783571 | 0.0970232  | 3.34E-05 | 0.0049043 | 0.067421   |
| 5mo_SIGAE9_ | 0.01022281 | 0.05108624 | 3.20E-05 | 0.0066628 | 0.37961    |
| 5mo_SIGAE9_ | 0.05847845 | 0.34226522 | 6.01E-05 | 0.0080116 | 0.074438   |
| 5mo_SIGAE9_ | 0.03879276 | 0.22347993 | 4.92E-05 | 0.0044639 | -0.040459  |
| 5mo_SIGAE9_ | 0.04784619 | 0.27810922 | 5.64E-05 | 0.0055867 | 0.035328   |
| 5mo_SIGAE9_ | 0.0134524  | 0.07057386 | 3.24E-05 | 0.0057681 | 0.23179    |
| 5mo_SIGAE9_ | 0.02323569 | 0.12960714 | 3.58E-05 | 0.0042778 | -0.065623  |
| 5mo_SIGAE9_ | 0.00445327 | 0.01627232 | 3.18E-05 | 0.0087056 | 0.65503    |
| 5mo_SIGAE9_ | 0.03294451 | 0.18819106 | 4.32E-05 | 0.0041142 | -0.094772  |
| 5mo_SIGAE9_ | 0.01133944 | 0.0578241  | 3.21E-05 | 0.006339  | 0.32844    |
| 5mo_SIGAE9_ | 0.00950883 | 0.046778   | 3.20E-05 | 0.0068348 | 0.4058     |
| 5mo_SIGAE9_ | 0.00864913 | 0.04159048 | 3.19E-05 | 0.0071994 | 0.45929    |
| 5mo_SIGAE9_ | 0.01953507 | 0.10727727 | 3.40E-05 | 0.0046667 | 0.017998   |
| 5mo_SIGAE9_ | 0.05676949 | 0.3319532  | 5.98E-05 | 0.0075425 | 0.070131   |
| 5mo_SIGAE9_ | 0.01781979 | 0.09692712 | 3.34E-05 | 0.0049043 | 0.067421   |
| 5mo_SIGAE9_ | 0.04035289 | 0.23289388 | 5.09E-05 | 0.0046173 | -0.023154  |
| 5mo_SIGAE9_ | 0.03302999 | 0.18870685 | 4.32E-05 | 0.0041142 | -0.091175  |
| 5mo_SIGAE9_ | 0.02049952 | 0.11309686 | 3.44E-05 | 0.0045325 | -0.01065   |
| 5mo_SIGAE9_ | 0.0448605  | 0.26009327 | 5.46E-05 | 0.0051531 | 0.017239   |
| 5mo_SIGAE9_ | 0.03068607 | 0.17456345 | 4.11E-05 | 0.0040705 | -0.10475   |
| 5mo_SIGAE9_ | 0.0091123  | 0.04438529 | 3.19E-05 | 0.0070136 | 0.43237    |
| 5mo_SIGAE9_ | 0.09143948 | 0.54115504 | 6.45E-05 | 0.021822  | 0.036126   |
| 5mo_SIGAE9_ | 0.07340752 | 0.4323486  | 6.23E-05 | 0.013561  | 0.12913    |
| 5mo_SIGAE9_ | 0.01266119 | 0.06579965 | 3.23E-05 | 0.0059016 | 0.25518    |
| 5mo_SIGAE9_ | 0.01724996 | 0.09348867 | 3.33E-05 | 0.0049935 | 0.085504   |
| 5mo_SIGAE9_ | 0.01186536 | 0.06099753 | 3.22E-05 | 0.0061869 | 0.30353    |
| 5mo_SIGAE9_ | 0.10397781 | 0.6168125  | 6.56E-05 | 0.025296  | -0.18011   |
| 5mo_SIGAE9_ | 0.11812054 | 0.702151   | 6.65E-05 | 0.024847  | -0.35363   |
| 5mo_SIGAE9_ | 0.11924017 | 0.708907   | 6.65E-05 | 0.024704  | -0.36308   |
| 5mo_SIGAE9_ | 0.11157057 | 0.66262794 | 6.61E-05 | 0.025525  | -0.28705   |
| 5mo_SIGAE9_ | 0.11792425 | 0.7009666  | 6.65E-05 | 0.024847  | -0.34876   |
| 5mo_SIGAE9_ | 0.06346609 | 0.37236112 | 6.09E-05 | 0.0096122 | 0.089169   |
| 5mo_SIGAE9_ | 0.09027433 | 0.53412443 | 6.44E-05 | 0.021369  | 0.05218    |
| 5mo_SIGAE9_ | 0.02541526 | 0.14275888 | 3.72E-05 | 0.0041509 | -0.092011  |
| 5mo_SIGAE9_ | 0.07439841 | 0.43832773 | 6.24E-05 | 0.014051  | 0.13074    |
| 5mo_SIGAE9_ | 0.02481539 | 0.1391392  | 3.68E-05 | 0.0041768 | -0.086782  |

|             |            |            |          |           |           |
|-------------|------------|------------|----------|-----------|-----------|
| 5mo_SIGAE9_ | 0.01463355 | 0.07770102 | 3.26E-05 | 0.0055188 | 0.18676   |
| 5mo_SIGAE9_ | 0.03313767 | 0.18935661 | 4.37E-05 | 0.0041322 | -0.091175 |
| 5mo_SIGAE9_ | 0.01887072 | 0.10326854 | 3.38E-05 | 0.004741  | 0.03364   |
| 5mo_SIGAE9_ | 0.01901192 | 0.10412051 | 3.38E-05 | 0.004741  | 0.03364   |
| 5mo_SIGAE9_ | 0.02089019 | 0.11545418 | 3.47E-05 | 0.0044724 | -0.023601 |
| 5mo_SIGAE9_ | 0.07440803 | 0.43838575 | 6.24E-05 | 0.014051  | 0.13218   |
| 5mo_SIGAE9_ | 0.07069605 | 0.4159873  | 6.19E-05 | 0.012376  | 0.11916   |
| 5mo_SIGAE9_ | 0.0287165  | 0.16267885 | 3.97E-05 | 0.0040686 | -0.10664  |
| 5mo_SIGAE9_ | 0.02471883 | 0.13855655 | 3.64E-05 | 0.0042065 | -0.086782 |
| 5mo_SIGAE9_ | 0.01982333 | 0.10901665 | 3.42E-05 | 0.0045972 | 0.0032259 |
| 5mo_SIGAE9_ | 0.06756298 | 0.39708206 | 6.15E-05 | 0.011255  | 0.10492   |
| 5mo_SIGAE9_ | 0.02915081 | 0.16529956 | 3.97E-05 | 0.0040686 | -0.10661  |
| 5mo_SIGAE9_ | 0.02914422 | 0.1652598  | 3.97E-05 | 0.0040686 | -0.10661  |
| 5mo_SIGAE9_ | 0.01793204 | 0.09760441 | 3.34E-05 | 0.0049043 | 0.067421  |
| 5mo_SIGAE9_ | 0.06670827 | 0.3919247  | 6.13E-05 | 0.010826  | 0.10251   |
| 5mo_SIGAE9_ | 0.14612518 | 0.8711336  | 6.75E-05 | 0.02365   | -0.51443  |
| 5mo_SIGAE9_ | 0.05117322 | 0.29818478 | 5.81E-05 | 0.006215  | 0.051138  |
| 5mo_SIGAE9_ | 0.07538477 | 0.4442795  | 6.26E-05 | 0.014549  | 0.13345   |
| 5mo_SIGAE9_ | 0.0826828  | 0.48831648 | 6.35E-05 | 0.017892  | 0.1271    |
| 5mo_SIGAE9_ | 0.04398779 | 0.25482726 | 5.38E-05 | 0.0050014 | 0.008455  |
| 5mo_SIGAE9_ | 0.01771808 | 0.09631335 | 3.34E-05 | 0.0049043 | 0.067421  |
| 5mo_SIGAE9_ | 0.07770453 | 0.45827717 | 6.29E-05 | 0.015562  | 0.13646   |
| 5mo_SIGAE9_ | 0.0367836  | 0.21135649 | 4.70E-05 | 0.0042982 | -0.062998 |
| 5mo_SIGAE9_ | 0.01881174 | 0.10291261 | 3.38E-05 | 0.004741  | 0.03364   |
| 5mo_SIGAE9_ | 0.02336139 | 0.13036567 | 3.58E-05 | 0.0042778 | -0.065623 |
| 5mo_SIGAE9_ | 0.01899441 | 0.1040149  | 3.38E-05 | 0.004741  | 0.03364   |
| 5mo_SIGAE9_ | 0.01255058 | 0.06513223 | 3.23E-05 | 0.0060411 | 0.25518   |
| 5mo_SIGAE9_ | 0.01346631 | 0.07065783 | 3.24E-05 | 0.0057681 | 0.23179   |
| 5mo_SIGAE9_ | 0.04985305 | 0.29021877 | 5.76E-05 | 0.005992  | 0.046466  |
| 5mo_SIGAE9_ | 0.04943335 | 0.2876863  | 5.73E-05 | 0.0058857 | 0.04392   |
| 5mo_SIGAE9_ | 0.02263819 | 0.12600179 | 3.55E-05 | 0.0043197 | -0.056631 |
| 5mo_SIGAE9_ | 0.02889846 | 0.16377681 | 3.97E-05 | 0.0040686 | -0.10664  |
| 5mo_SIGAE9_ | 0.11654146 | 0.6926227  | 6.64E-05 | 0.025054  | -0.33868  |
| 5mo_SIGAE9_ | 0.00523561 | 0.02099304 | 3.18E-05 | 0.0084677 | 0.62647   |
| 5mo_SIGAE9_ | 0.01661158 | 0.08963667 | 3.31E-05 | 0.0050879 | 0.10435   |
| 5mo_SIGAE9_ | 0.02850656 | 0.16141208 | 3.93E-05 | 0.004074  | -0.10603  |
| 5mo_SIGAE9_ | 0.09126663 | 0.540112   | 6.45E-05 | 0.021597  | 0.036126  |
| 5mo_SIGAE9_ | 0.11891785 | 0.70696205 | 6.65E-05 | 0.024776  | -0.3584   |
| 5mo_SIGAE9_ | 0.12013765 | 0.71432245 | 6.66E-05 | 0.024561  | -0.36766  |
| 5mo_SIGAE9_ | 0.03168714 | 0.18060401 | 4.22E-05 | 0.0040866 | -0.10071  |
| 5mo_SIGAE9_ | 0.04520409 | 0.26216653 | 5.46E-05 | 0.0051531 | 0.021279  |
| 5mo_SIGAE9_ | 0.05302371 | 0.30935082 | 5.87E-05 | 0.0065755 | 0.059084  |
| 5mo_SIGAE9_ | 0.08796362 | 0.52018136 | 6.42E-05 | 0.020421  | 0.080939  |

|             |            |            |          |           |           |
|-------------|------------|------------|----------|-----------|-----------|
| 5mo_SIGAE9_ | 0.01293648 | 0.06746075 | 3.23E-05 | 0.0059016 | 0.25518   |
| 5mo_SIGAE9_ | 0.02984708 | 0.1695009  | 4.07E-05 | 0.0040668 | -0.10597  |
| 5mo_SIGAE9_ | 0.02601089 | 0.14635299 | 3.76E-05 | 0.0041286 | -0.096385 |
| 5mo_SIGAE9_ | 0.01550172 | 0.08293964 | 3.28E-05 | 0.0052924 | 0.1442    |
| 5mo_SIGAE9_ | 0.13501845 | 0.8041146  | 6.72E-05 | 0.023533  | -0.46872  |
| 5mo_SIGAE9_ | 0.11258008 | 0.66871935 | 6.62E-05 | 0.025448  | -0.29951  |
| 5mo_SIGAE9_ | 0.03830341 | 0.22052719 | 4.87E-05 | 0.0044183 | -0.04622  |
| 5mo_SIGAE9_ | 0.01102559 | 0.05593027 | 3.21E-05 | 0.006339  | 0.32844   |
| 5mo_SIGAE9_ | 0.07527196 | 0.44359875 | 6.26E-05 | 0.014549  | 0.13345   |
| 5mo_SIGAE9_ | 0.05584657 | 0.3263842  | 5.97E-05 | 0.0073934 | 0.067199  |
| 5mo_SIGAE9_ | 0.01122874 | 0.05715613 | 3.21E-05 | 0.006339  | 0.32844   |
| 5mo_SIGAE9_ | 0.04039181 | 0.23312879 | 5.09E-05 | 0.0046173 | -0.023154 |
| 5mo_SIGAE9_ | 0.01353147 | 0.07105102 | 3.24E-05 | 0.0057681 | 0.23179   |
| 5mo_SIGAE9_ | 0.07040159 | 0.4142105  | 6.19E-05 | 0.012376  | 0.11689   |
| 5mo_SIGAE9_ | 0.08331539 | 0.49213356 | 6.36E-05 | 0.018151  | 0.12117   |
| 5mo_SIGAE9_ | 0.06592307 | 0.38718668 | 6.13E-05 | 0.010616  | 0.097788  |
| 5mo_SIGAE9_ | 0.03156667 | 0.17987707 | 4.22E-05 | 0.0040866 | -0.10071  |
| 5mo_SIGAE9_ | 0.04763635 | 0.27684295 | 5.64E-05 | 0.0055867 | 0.035328  |
| 5mo_SIGAE9_ | 0.01124184 | 0.05723516 | 3.21E-05 | 0.006339  | 0.32844   |
| 5mo_SIGAE9_ | 0.02491779 | 0.1397571  | 3.68E-05 | 0.0041768 | -0.086782 |
| 5mo_SIGAE9_ | 0.09819646 | 0.5819273  | 6.52E-05 | 0.024123  | -0.084641 |
| 5mo_SIGAE9_ | 0.05233631 | 0.30520296 | 5.85E-05 | 0.0064518 | 0.057248  |
| 5mo_SIGAE9_ | 0.07142752 | 0.4204011  | 6.20E-05 | 0.012843  | 0.12136   |
| 5mo_SIGAE9_ | 0.0931422  | 0.5514294  | 6.47E-05 | 0.022469  | 0.010343  |
| 5mo_SIGAE9_ | 0.01578402 | 0.08464307 | 3.28E-05 | 0.0052924 | 0.1442    |
| 5mo_SIGAE9_ | 0.12004598 | 0.71376926 | 6.65E-05 | 0.024632  | -0.36766  |
| 5mo_SIGAE9_ | 0.02117113 | 0.11714939 | 3.47E-05 | 0.0044724 | -0.023601 |
| 5mo_SIGAE9_ | 0.02943943 | 0.16704111 | 4.02E-05 | 0.0040662 | -0.10661  |
| 5mo_SIGAE9_ | 0.1287131  | 0.7660675  | 6.69E-05 | 0.023723  | -0.43195  |
| 5mo_SIGAE9_ | 0.01571665 | 0.08423658 | 3.28E-05 | 0.0052924 | 0.1442    |
| 5mo_SIGAE9_ | 0.01536898 | 0.08213869 | 3.28E-05 | 0.0052924 | 0.1442    |
| 5mo_SIGAE9_ | 0.01404626 | 0.07415726 | 3.25E-05 | 0.0056405 | 0.20898   |
| 5mo_SIGAE9_ | 0.0262237  | 0.14763711 | 3.76E-05 | 0.0041286 | -0.096385 |
| 5mo_SIGAE9_ | 0.01300655 | 0.0678836  | 3.23E-05 | 0.0059016 | 0.25518   |
| 5mo_SIGAE9_ | 0.1114893  | 0.6621375  | 6.61E-05 | 0.025525  | -0.28705  |
| 5mo_SIGAE9_ | 0.06770062 | 0.3979126  | 6.15E-05 | 0.011255  | 0.10492   |
| 5mo_SIGAE9_ | 0.01781874 | 0.0969208  | 3.34E-05 | 0.0049043 | 0.067421  |
| 5mo_SIGAE9_ | 0.01531122 | 0.08179019 | 3.27E-05 | 0.0054028 | 0.1442    |
| 5mo_SIGAE9_ | 0.02231715 | 0.1240646  | 3.52E-05 | 0.0043661 | -0.046619 |
| 5mo_SIGAE9_ | 0.05113483 | 0.2979531  | 5.81E-05 | 0.006215  | 0.051138  |
| 5mo_SIGAE9_ | 0.06802726 | 0.39988357 | 6.16E-05 | 0.011474  | 0.10734   |
| 5mo_SIGAE9_ | 0.02283526 | 0.12719092 | 3.55E-05 | 0.0043197 | -0.056631 |
| 5mo_SIGAE9_ | 0.13264649 | 0.7898019  | 6.71E-05 | 0.023568  | -0.45613  |

|             |            |            |          |           |           |
|-------------|------------|------------|----------|-----------|-----------|
| 5mo_SIGAE9_ | 0.08518868 | 0.50343716 | 6.39E-05 | 0.019177  | 0.10916   |
| 5mo_SIGAE9_ | 0.04998438 | 0.2910112  | 5.76E-05 | 0.005992  | 0.046466  |
| 5mo_SIGAE9_ | 0.02429278 | 0.1359857  | 3.64E-05 | 0.0042065 | -0.080664 |
| 5mo_SIGAE9_ | 0.01354029 | 0.07110421 | 3.24E-05 | 0.0057681 | 0.23179   |
| 5mo_SIGAE9_ | 0.02259241 | 0.12572557 | 3.55E-05 | 0.0043197 | -0.056631 |
| 5mo_SIGAE9_ | 0.02486902 | 0.13946278 | 3.68E-05 | 0.0041768 | -0.086782 |
| 5mo_SIGAE9_ | 0.03262758 | 0.18627866 | 4.32E-05 | 0.0041142 | -0.094772 |
| 5mo_SIGAE9_ | 0.02334647 | 0.13027559 | 3.58E-05 | 0.0042778 | -0.065623 |
| 5mo_SIGAE9_ | 0.02213817 | 0.12298458 | 3.52E-05 | 0.0043661 | -0.046619 |
| 5mo_SIGAE9_ | 0.00688657 | 0.03095507 | 3.18E-05 | 0.0078    | 0.54183   |
| 5mo_SIGAE9_ | 0.08258782 | 0.48774338 | 6.35E-05 | 0.017892  | 0.1271    |
| 5mo_SIGAE9_ | 0.01557055 | 0.08335497 | 3.28E-05 | 0.0052924 | 0.1442    |
| 5mo_SIGAE9_ | 0.03007995 | 0.17090608 | 4.07E-05 | 0.0040668 | -0.10597  |
| 5mo_SIGAE9_ | 0.06996307 | 0.41156444 | 6.18E-05 | 0.012147  | 0.11455   |
| 5mo_SIGAE9_ | 0.07187618 | 0.42310834 | 6.21E-05 | 0.01308   | 0.12348   |
| 5mo_SIGAE9_ | 0.1220864  | 0.7260814  | 6.66E-05 | 0.02435   | -0.38515  |
| 5mo_SIGAE9_ | 0.09141149 | 0.5409861  | 6.45E-05 | 0.021822  | 0.036126  |
| 5mo_SIGAE9_ | 0.08455954 | 0.49964088 | 6.37E-05 | 0.018667  | 0.1136    |
| 5mo_SIGAE9_ | 0.10016926 | 0.59383136 | 6.53E-05 | 0.024687  | -0.11403  |
| 5mo_SIGAE9_ | 0.02604133 | 0.14653662 | 3.76E-05 | 0.0041286 | -0.096385 |
| 5mo_SIGAE9_ | 0.02345511 | 0.13093115 | 3.58E-05 | 0.0042778 | -0.065623 |
| 5mo_SIGAE9_ | 0.08447454 | 0.499128   | 6.37E-05 | 0.018667  | 0.1136    |
| 5mo_SIGAE9_ | 0.11437385 | 0.67954314 | 6.63E-05 | 0.025299  | -0.3171   |
| 5mo_SIGAE9_ | 0.03038373 | 0.1727391  | 4.11E-05 | 0.0040705 | -0.10475  |
| 5mo_SIGAE9_ | 0.06692425 | 0.39322793 | 6.14E-05 | 0.011039  | 0.10251   |
| 5mo_SIGAE9_ | 0.02700429 | 0.1523472  | 3.84E-05 | 0.0040947 | -0.10271  |
| 5mo_SIGAE9_ | 0.01054761 | 0.05304608 | 3.21E-05 | 0.0064976 | 0.35381   |
| 5mo_SIGAE9_ | 0.03447932 | 0.19745228 | 4.48E-05 | 0.0041765 | -0.082901 |
| 5mo_SIGAE9_ | 0.02139597 | 0.1185061  | 3.47E-05 | 0.0044724 | -0.0356   |
| 5mo_SIGAE9_ | 0.03532731 | 0.20256913 | 4.59E-05 | 0.0042319 | -0.073417 |
| 5mo_SIGAE9_ | 0.04665228 | 0.27090505 | 5.57E-05 | 0.0054037 | 0.028707  |
| 5mo_SIGAE9_ | 0.10625498 | 0.6305531  | 6.58E-05 | 0.02556   | -0.21453  |
| 5mo_SIGAE9_ | 0.02953398 | 0.16761161 | 4.02E-05 | 0.0040662 | -0.10661  |
| 5mo_SIGAE9_ | 0.0930823  | 0.551068   | 6.47E-05 | 0.022469  | 0.010343  |
| 5mo_SIGAE9_ | 0.13134468 | 0.78194666 | 6.70E-05 | 0.023599  | -0.44949  |
| 5mo_SIGAE9_ | 0.02608521 | 0.1468014  | 3.76E-05 | 0.0041286 | -0.096385 |
| 5mo_SIGAE9_ | 0.01641993 | 0.08848022 | 3.30E-05 | 0.0051875 | 0.10435   |
| 5mo_SIGAE9_ | 0.02184188 | 0.12119678 | 3.49E-05 | 0.0044169 | -0.0356   |
| 5mo_SIGAE9_ | 0.08308177 | 0.49072388 | 6.36E-05 | 0.018151  | 0.12434   |
| 5mo_SIGAE9_ | 0.01781758 | 0.09691375 | 3.34E-05 | 0.0049043 | 0.067421  |
| 5mo_SIGAE9_ | 0.01872105 | 0.10236539 | 3.38E-05 | 0.004741  | 0.03364   |
| 5mo_SIGAE9_ | 0.03432158 | 0.19650042 | 4.48E-05 | 0.0041765 | -0.082901 |
| 5mo_SIGAE9_ | 0.02706883 | 0.1527367  | 3.84E-05 | 0.0040947 | -0.10271  |

|             |            |            |          |           |            |
|-------------|------------|------------|----------|-----------|------------|
| 5mo_SIGAE9_ | 0.01900974 | 0.1041074  | 3.38E-05 | 0.004741  | 0.03364    |
| 5mo_SIGAE9_ | 0.05742834 | 0.33592877 | 5.99E-05 | 0.0076952 | 0.071569   |
| 5mo_SIGAE9_ | 0.01603407 | 0.08615191 | 3.30E-05 | 0.0051875 | 0.12392    |
| 5mo_SIGAE9_ | 0.02395988 | 0.13397697 | 3.61E-05 | 0.0042401 | -0.073623  |
| 5mo_SIGAE9_ | 0.01317137 | 0.06887811 | 3.24E-05 | 0.0057681 | 0.23179    |
| 5mo_SIGAE9_ | 0.08899432 | 0.52640074 | 6.42E-05 | 0.020663  | 0.067165   |
| 5mo_SIGAE9_ | 0.13756709 | 0.8194933  | 6.73E-05 | 0.02353   | -0.48301   |
| 5mo_SIGAE9_ | 0.01375849 | 0.07242084 | 3.25E-05 | 0.0056405 | 0.20898    |
| 5mo_SIGAE9_ | 0.03111921 | 0.17717704 | 4.16E-05 | 0.0040771 | -0.10299   |
| 5mo_SIGAE9_ | 0.11256585 | 0.6686335  | 6.62E-05 | 0.025448  | -0.29951   |
| 5mo_SIGAE9_ | 0.04861346 | 0.28273895 | 5.70E-05 | 0.0057827 | 0.041222   |
| 5mo_SIGAE9_ | 0.05231955 | 0.30510184 | 5.85E-05 | 0.0064518 | 0.057248   |
| 5mo_SIGAE9_ | 0.08097456 | 0.4780088  | 6.33E-05 | 0.017113  | 0.13314    |
| 5mo_SIGAE9_ | 0.03871901 | 0.22303492 | 4.92E-05 | 0.0044639 | -0.040459  |
| 5mo_SIGAE9_ | 0.02198081 | 0.1220351  | 3.49E-05 | 0.0044169 | -0.046619  |
| 5mo_SIGAE9_ | 0.02289114 | 0.12752812 | 3.55E-05 | 0.0043197 | -0.056631  |
| 5mo_SIGAE9_ | 0.0217412  | 0.12058924 | 3.49E-05 | 0.0044169 | -0.0356    |
| 5mo_SIGAE9_ | 0.06210531 | 0.36415005 | 6.07E-05 | 0.0092324 | 0.083692   |
| 5mo_SIGAE9_ | 0.02028672 | 0.11181282 | 3.42E-05 | 0.0045972 | -0.01065   |
| 5mo_SIGAE9_ | 0.09886342 | 0.58595175 | 6.52E-05 | 0.024275  | -0.094455  |
| 5mo_SIGAE9_ | 0.04276265 | 0.2474346  | 5.29E-05 | 0.0048617 | -0.0013165 |
| 5mo_SIGAE9_ | 0.02284382 | 0.12724255 | 3.55E-05 | 0.0043197 | -0.056631  |
| 5mo_SIGAE9_ | 0.03119655 | 0.17764372 | 4.16E-05 | 0.0040771 | -0.10299   |
| 5mo_SIGAE9_ | 0.09082127 | 0.53742474 | 6.45E-05 | 0.021597  | 0.044278   |
| 5mo_SIGAE9_ | 0.0185843  | 0.10154024 | 3.36E-05 | 0.0048202 | 0.050123   |
| 5mo_SIGAE9_ | 0.01896067 | 0.10381129 | 3.38E-05 | 0.004741  | 0.03364    |
| 5mo_SIGAE9_ | 0.01432042 | 0.0758116  | 3.26E-05 | 0.0055188 | 0.18676    |
| 5mo_SIGAE9_ | 0.03109436 | 0.17702709 | 4.16E-05 | 0.0040771 | -0.10299   |
| 5mo_SIGAE9_ | 0.02207046 | 0.12257607 | 3.52E-05 | 0.0043661 | -0.046619  |
| 5mo_SIGAE9_ | 0.08342046 | 0.4927676  | 6.36E-05 | 0.018151  | 0.12117    |
| 5mo_SIGAE9_ | 0.06752957 | 0.39688048 | 6.15E-05 | 0.011255  | 0.10492    |
| 5mo_SIGAE9_ | 0.01485148 | 0.07901606 | 3.27E-05 | 0.0054028 | 0.16515    |
| 5mo_SIGAE9_ | 0.02142114 | 0.11865801 | 3.47E-05 | 0.0044724 | -0.0356    |
| 5mo_SIGAE9_ | 0.0903485  | 0.53457195 | 6.44E-05 | 0.021369  | 0.05218    |
| 5mo_SIGAE9_ | 0.07420272 | 0.4371469  | 6.24E-05 | 0.014051  | 0.13074    |
| 5mo_SIGAE9_ | 0.01508359 | 0.08041666 | 3.27E-05 | 0.0054028 | 0.16515    |
| 5mo_SIGAE9_ | 0.01467847 | 0.07797208 | 3.26E-05 | 0.0055188 | 0.18676    |
| 5mo_SIGAE9_ | 0.01471898 | 0.07821654 | 3.26E-05 | 0.0055188 | 0.18676    |
| 5mo_SIGAE9_ | 0.04244907 | 0.24554244 | 5.24E-05 | 0.0047963 | -0.0013165 |
| 5mo_SIGAE9_ | 0.08719061 | 0.51551694 | 6.41E-05 | 0.01993   | 0.087329   |
| 5mo_SIGAE9_ | 0.02936188 | 0.16657317 | 4.02E-05 | 0.0040662 | -0.10661   |
| 5mo_SIGAE9_ | 0.02291354 | 0.12766327 | 3.55E-05 | 0.0043197 | -0.056631  |
| 5mo_SIGAE9_ | 0.01914881 | 0.10494653 | 3.38E-05 | 0.004741  | 0.03364    |



|             |            |            |          |           |           |
|-------------|------------|------------|----------|-----------|-----------|
| 5mo_SIGAE9_ | 0.01861217 | 0.10170838 | 3.36E-05 | 0.0048202 | 0.03364   |
| 5mo_SIGAE9_ | 0.08485281 | 0.5014105  | 6.38E-05 | 0.018923  | 0.1136    |
| 5mo_SIGAE9_ | 0.08119914 | 0.47936392 | 6.33E-05 | 0.017113  | 0.13148   |
| 5mo_SIGAE9_ | 0.06884188 | 0.40479904 | 6.16E-05 | 0.011695  | 0.10977   |
| 5mo_SIGAE9_ | 0.07171077 | 0.42211026 | 6.20E-05 | 0.012843  | 0.12348   |
| 5mo_SIGAE9_ | 0.12384883 | 0.7367161  | 6.67E-05 | 0.024153  | -0.39752  |
| 5mo_SIGAE9_ | 0.01459572 | 0.07747278 | 3.26E-05 | 0.0055188 | 0.18676   |
| 5mo_SIGAE9_ | 0.02069405 | 0.11427065 | 3.44E-05 | 0.0045325 | -0.01065  |
| 5mo_SIGAE9_ | 0.04507865 | 0.26140958 | 5.46E-05 | 0.0051531 | 0.017239  |
| 5mo_SIGAE9_ | 0.08085912 | 0.4773122  | 6.33E-05 | 0.017113  | 0.13314   |
| 5mo_SIGAE9_ | 0.03285041 | 0.18762325 | 4.32E-05 | 0.0041142 | -0.094772 |
| 5mo_SIGAE9_ | 0.08239295 | 0.48656747 | 6.35E-05 | 0.017633  | 0.1271    |
| 5mo_SIGAE9_ | 0.05399527 | 0.31521326 | 5.91E-05 | 0.0068337 | 0.062513  |
| 5mo_SIGAE9_ | 0.00917842 | 0.04478427 | 3.19E-05 | 0.0070136 | 0.43237   |
| 5mo_SIGAE9_ | 0.01239561 | 0.06419712 | 3.23E-05 | 0.0060411 | 0.2791    |
| 5mo_SIGAE9_ | 0.11061543 | 0.6568645  | 6.60E-05 | 0.02558   | -0.27396  |
| 5mo_SIGAE9_ | 0.02116915 | 0.11713745 | 3.47E-05 | 0.0044724 | -0.023601 |
| 5mo_SIGAE9_ | 0.04433707 | 0.25693482 | 5.42E-05 | 0.0050757 | 0.012967  |
| 5mo_SIGAE9_ | 0.08747312 | 0.5172216  | 6.41E-05 | 0.020177  | 0.087329  |
| 5mo_SIGAE9_ | 0.02478753 | 0.1389711  | 3.68E-05 | 0.0041768 | -0.086782 |
| 5mo_SIGAE9_ | 0.01069445 | 0.05393213 | 3.21E-05 | 0.0064976 | 0.35381   |
| 5mo_SIGAE9_ | 0.02768686 | 0.15646592 | 3.88E-05 | 0.0040827 | -0.10472  |
| 5mo_SIGAE9_ | 0.02901528 | 0.16448171 | 3.97E-05 | 0.0040686 | -0.10664  |
| 5mo_SIGAE9_ | 0.02343855 | 0.13083127 | 3.58E-05 | 0.0042778 | -0.065623 |
| 5mo_SIGAE9_ | 0.07093173 | 0.41740945 | 6.20E-05 | 0.012608  | 0.11916   |
| 5mo_SIGAE9_ | 0.02989835 | 0.16981024 | 4.07E-05 | 0.0040668 | -0.10597  |
| 5mo_SIGAE9_ | 0.02740841 | 0.15478572 | 3.84E-05 | 0.0040947 | -0.10271  |
| 5mo_SIGAE9_ | 0.02309133 | 0.1287361  | 3.55E-05 | 0.0043197 | -0.065623 |
| 5mo_SIGAE9_ | 0.0273066  | 0.15417142 | 3.84E-05 | 0.0040947 | -0.10271  |
| 5mo_SIGAE9_ | 0.021349   | 0.11822268 | 3.47E-05 | 0.0044724 | -0.023601 |
| 5mo_SIGAE9_ | 0.10724973 | 0.63655555 | 6.58E-05 | 0.025586  | -0.23052  |
| 5mo_SIGAE9_ | 0.13196756 | 0.7857052  | 6.71E-05 | 0.023582  | -0.45284  |
| 5mo_SIGAE9_ | 0.07925805 | 0.4676512  | 6.31E-05 | 0.016335  | 0.13613   |
| 5mo_SIGAE9_ | 0.03034491 | 0.17250483 | 4.11E-05 | 0.0040705 | -0.10475  |
| 5mo_SIGAE9_ | 0.01314479 | 0.0687177  | 3.24E-05 | 0.0057681 | 0.23179   |
| 5mo_SIGAE9_ | 0.04997066 | 0.29092842 | 5.76E-05 | 0.005992  | 0.046466  |
| 5mo_SIGAE9_ | 0.0343837  | 0.19687527 | 4.48E-05 | 0.0041765 | -0.082901 |
| 5mo_SIGAE9_ | 0.02687421 | 0.15156233 | 3.80E-05 | 0.0041099 | -0.099939 |
| 5mo_SIGAE9_ | 0.11747779 | 0.6982726  | 6.64E-05 | 0.024917  | -0.34377  |
| 5mo_SIGAE9_ | 0.09487144 | 0.5618638  | 6.49E-05 | 0.023073  | -0.026471 |
| 5mo_SIGAE9_ | 0.08873519 | 0.5248371  | 6.42E-05 | 0.020663  | 0.074212  |
| 5mo_SIGAE9_ | 0.09489911 | 0.5620308  | 6.49E-05 | 0.023073  | -0.026471 |
| 5mo_SIGAE9_ | 0.02614674 | 0.14717269 | 3.76E-05 | 0.0041286 | -0.096385 |

|             |            |            |          |           |           |
|-------------|------------|------------|----------|-----------|-----------|
| 5mo_SIGAE9_ | 0.02586055 | 0.1454458  | 3.72E-05 | 0.0041509 | -0.096385 |
| 5mo_SIGAE9_ | 0.02799901 | 0.15834947 | 3.88E-05 | 0.0040827 | -0.10603  |
| 5mo_SIGAE9_ | 0.0164222  | 0.08849394 | 3.30E-05 | 0.0051875 | 0.10435   |
| 5mo_SIGAE9_ | 0.04736551 | 0.27520874 | 5.61E-05 | 0.0054936 | 0.035328  |
| 5mo_SIGAE9_ | 0.01358181 | 0.07135476 | 3.24E-05 | 0.0057681 | 0.23179   |
| 5mo_SIGAE9_ | 0.0891843  | 0.52754706 | 6.43E-05 | 0.020902  | 0.067165  |
| 5mo_SIGAE9_ | 0.06409629 | 0.3761638  | 6.10E-05 | 0.0098069 | 0.091185  |
| 5mo_SIGAE9_ | 0.07810113 | 0.46067023 | 6.29E-05 | 0.015819  | 0.13662   |
| 5mo_SIGAE9_ | 0.13644359 | 0.812714   | 6.72E-05 | 0.023527  | -0.4775   |
| 5mo_SIGAE9_ | 0.0261431  | 0.14715073 | 3.76E-05 | 0.0041286 | -0.096385 |
| 5mo_SIGAE9_ | 0.00346215 | 0.0102918  | 3.18E-05 | 0.0092049 | 0.71249   |
| 5mo_SIGAE9_ | 0.06531744 | 0.3835323  | 6.12E-05 | 0.01041   | 0.095509  |
| 5mo_SIGAE9_ | 0.01404714 | 0.07416257 | 3.25E-05 | 0.0056405 | 0.20898   |
| 5mo_SIGAE9_ | 0.0069492  | 0.03133295 | 3.18E-05 | 0.0078    | 0.54183   |
| 5mo_SIGAE9_ | 0.01293219 | 0.06743486 | 3.23E-05 | 0.0059016 | 0.25518   |
| 5mo_SIGAE9_ | 0.02300178 | 0.12819575 | 3.55E-05 | 0.0043197 | -0.056631 |
| 5mo_SIGAE9_ | 0.02991208 | 0.16989312 | 4.07E-05 | 0.0040668 | -0.10597  |
| 5mo_SIGAE9_ | 0.09364375 | 0.5544558  | 6.48E-05 | 0.022676  | 0.0013661 |
| 5mo_SIGAE9_ | 0.01368873 | 0.07199992 | 3.25E-05 | 0.0056405 | 0.20898   |
| 5mo_SIGAE9_ | 0.04100957 | 0.23685637 | 5.14E-05 | 0.0046741 | -0.017493 |
| 5mo_SIGAE9_ | 0.12429063 | 0.7393819  | 6.67E-05 | 0.024092  | -0.40152  |
| 5mo_SIGAE9_ | 0.11431252 | 0.67917305 | 6.63E-05 | 0.025299  | -0.3171   |
| 5mo_SIGAE9_ | 0.01333746 | 0.06988029 | 3.24E-05 | 0.0057681 | 0.23179   |
| 5mo_SIGAE9_ | 0.08114718 | 0.4790504  | 6.33E-05 | 0.017113  | 0.13148   |
| 5mo_SIGAE9_ | 0.01887466 | 0.10329232 | 3.38E-05 | 0.004741  | 0.03364   |
| 5mo_SIGAE9_ | 0.06665386 | 0.39159635 | 6.13E-05 | 0.010826  | 0.10013   |
| 5mo_SIGAE9_ | 0.07729092 | 0.45578137 | 6.28E-05 | 0.015307  | 0.13646   |
| 5mo_SIGAE9_ | 0.03377024 | 0.19317362 | 4.43E-05 | 0.004153  | -0.087207 |
| 5mo_SIGAE9_ | 0.08347957 | 0.49312425 | 6.36E-05 | 0.018151  | 0.12117   |
| 5mo_SIGAE9_ | 0.01893305 | 0.10364461 | 3.38E-05 | 0.004741  | 0.03364   |
| 5mo_SIGAE9_ | 0.02739701 | 0.15471695 | 3.84E-05 | 0.0040947 | -0.10271  |
| 5mo_SIGAE9_ | 0.13708673 | 0.8165948  | 6.73E-05 | 0.023528  | -0.48029  |
| 5mo_SIGAE9_ | 0.06012432 | 0.35219654 | 6.04E-05 | 0.0085136 | 0.07887   |
| 5mo_SIGAE9_ | 0.02600754 | 0.14633273 | 3.76E-05 | 0.0041286 | -0.096385 |
| 5mo_SIGAE9_ | 0.07230062 | 0.42566943 | 6.21E-05 | 0.01308   | 0.12548   |
| 5mo_SIGAE9_ | 0.12847725 | 0.7646443  | 6.69E-05 | 0.023723  | -0.4283   |
| 5mo_SIGAE9_ | 0.02802633 | 0.15851429 | 3.88E-05 | 0.0040827 | -0.10603  |
| 5mo_SIGAE9_ | 0.09188356 | 0.5438346  | 6.46E-05 | 0.022042  | 0.027741  |
| 5mo_SIGAE9_ | 0.01094181 | 0.05542475 | 3.21E-05 | 0.006339  | 0.32844   |
| 5mo_SIGAE9_ | 0.09548871 | 0.5655885  | 6.49E-05 | 0.023263  | -0.035993 |
| 5mo_SIGAE9_ | 0.01007201 | 0.05017628 | 3.20E-05 | 0.0066628 | 0.37961   |
| 5mo_SIGAE9_ | 0.09504242 | 0.5628955  | 6.49E-05 | 0.023073  | -0.026471 |
| 5mo_SIGAE9_ | 0.00764458 | 0.03552897 | 3.19E-05 | 0.0073923 | 0.48652   |

|             |            |            |          |           |           |
|-------------|------------|------------|----------|-----------|-----------|
| 5mo_SIGAE9_ | 0.01198695 | 0.06173123 | 3.22E-05 | 0.0061869 | 0.2791    |
| 5mo_SIGAE9_ | 0.11702378 | 0.6955331  | 6.64E-05 | 0.024986  | -0.34377  |
| 5mo_SIGAE9_ | 0.03084892 | 0.17554608 | 4.11E-05 | 0.0040705 | -0.10299  |
| 5mo_SIGAE9_ | 0.02533922 | 0.14230005 | 3.72E-05 | 0.0041509 | -0.092011 |
| 5mo_SIGAE9_ | 0.02006796 | 0.11049278 | 3.42E-05 | 0.0045972 | 0.0032259 |
| 5mo_SIGAE9_ | 0.1223539  | 0.72769547 | 6.67E-05 | 0.024282  | -0.38515  |
| 5mo_SIGAE9_ | 0.11264204 | 0.66909325 | 6.62E-05 | 0.025448  | -0.29951  |
| 5mo_SIGAE9_ | 0.02425604 | 0.13576406 | 3.64E-05 | 0.0042065 | -0.080664 |
| 5mo_SIGAE9_ | 0.09044965 | 0.5351823  | 6.44E-05 | 0.021369  | 0.044278  |
| 5mo_SIGAE9_ | 0.01333644 | 0.06987414 | 3.24E-05 | 0.0057681 | 0.23179   |
| 5mo_SIGAE9_ | 0.01787388 | 0.09725352 | 3.34E-05 | 0.0049043 | 0.067421  |
| 5mo_SIGAE9_ | 0.05001167 | 0.29117587 | 5.76E-05 | 0.005992  | 0.046466  |
| 5mo_SIGAE9_ | 0.02692789 | 0.15188622 | 3.80E-05 | 0.0041099 | -0.10271  |
| 5mo_SIGAE9_ | 0.01883031 | 0.10302471 | 3.38E-05 | 0.004741  | 0.03364   |
| 5mo_SIGAE9_ | 0.01604846 | 0.08623876 | 3.30E-05 | 0.0051875 | 0.12392   |
| 5mo_SIGAE9_ | 0.04836053 | 0.28121275 | 5.67E-05 | 0.0056831 | 0.038361  |
| 5mo_SIGAE9_ | 0.07318938 | 0.4310323  | 6.23E-05 | 0.013561  | 0.12737   |
| 5mo_SIGAE9_ | 0.00911972 | 0.04443009 | 3.19E-05 | 0.0070136 | 0.43237   |
| 5mo_SIGAE9_ | 0.1096347  | 0.6509467  | 6.60E-05 | 0.025599  | -0.2602   |
| 5mo_SIGAE9_ | 0.02602727 | 0.14645183 | 3.76E-05 | 0.0041286 | -0.096385 |
| 5mo_SIGAE9_ | 0.03362208 | 0.19227956 | 4.37E-05 | 0.0041322 | -0.087207 |
| 5mo_SIGAE9_ | 0.10624004 | 0.630463   | 6.58E-05 | 0.02556   | -0.21453  |
| 5mo_SIGAE9_ | 0.09572581 | 0.5670191  | 6.50E-05 | 0.023448  | -0.035993 |
| 5mo_SIGAE9_ | 0.01056984 | 0.05318026 | 3.21E-05 | 0.0064976 | 0.35381   |
| 5mo_SIGAE9_ | 0.03887162 | 0.22395578 | 4.92E-05 | 0.0044639 | -0.040459 |
| 5mo_SIGAE9_ | 0.10091111 | 0.5983077  | 6.54E-05 | 0.024809  | -0.12375  |
| 5mo_SIGAE9_ | 0.09976595 | 0.5913977  | 6.53E-05 | 0.024558  | -0.10426  |
| 5mo_SIGAE9_ | 0.01247473 | 0.06467455 | 3.23E-05 | 0.0060411 | 0.2791    |
| 5mo_SIGAE9_ | 0.04564157 | 0.2648063  | 5.50E-05 | 0.0052335 | 0.021279  |
| 5mo_SIGAE9_ | 0.04453844 | 0.2581499  | 5.42E-05 | 0.0050757 | 0.012967  |
| 5mo_SIGAE9_ | 0.06875787 | 0.40429217 | 6.16E-05 | 0.011695  | 0.10977   |
| 5mo_SIGAE9_ | 0.08160399 | 0.4818068  | 6.34E-05 | 0.017373  | 0.12948   |
| 5mo_SIGAE9_ | 0.03538167 | 0.20289713 | 4.59E-05 | 0.0042319 | -0.073417 |
| 5mo_SIGAE9_ | 0.01349854 | 0.0708523  | 3.24E-05 | 0.0057681 | 0.23179   |
| 5mo_SIGAE9_ | 0.01704937 | 0.09227833 | 3.33E-05 | 0.0049935 | 0.085504  |
| 5mo_SIGAE9_ | 0.02048029 | 0.11298082 | 3.44E-05 | 0.0045325 | -0.01065  |
| 5mo_SIGAE9_ | 0.0155455  | 0.08320386 | 3.28E-05 | 0.0052924 | 0.1442    |
| 5mo_SIGAE9_ | 0.01781326 | 0.09688773 | 3.34E-05 | 0.0049043 | 0.067421  |
| 5mo_SIGAE9_ | 0.00833108 | 0.03967134 | 3.19E-05 | 0.0071994 | 0.45929   |
| 5mo_SIGAE9_ | 0.01280968 | 0.06669567 | 3.23E-05 | 0.0059016 | 0.25518   |
| 5mo_SIGAE9_ | 0.01122477 | 0.05713214 | 3.21E-05 | 0.006339  | 0.32844   |
| 5mo_SIGAE9_ | 0.05445454 | 0.31798458 | 5.92E-05 | 0.0069681 | 0.062513  |
| 5mo_SIGAE9_ | 0.0260518  | 0.14659983 | 3.76E-05 | 0.0041286 | -0.096385 |

|             |            |            |          |           |           |
|-------------|------------|------------|----------|-----------|-----------|
| 5mo_SIGAE9_ | 0.0282815  | 0.16005406 | 3.93E-05 | 0.004074  | -0.10603  |
| 5mo_SIGAE9_ | 0.00900336 | 0.04372794 | 3.19E-05 | 0.0070136 | 0.43237   |
| 5mo_SIGAE9_ | 0.01790286 | 0.09742837 | 3.34E-05 | 0.0049043 | 0.067421  |
| 5mo_SIGAE9_ | 0.04142802 | 0.23938133 | 5.19E-05 | 0.0047337 | -0.011944 |
| 5mo_SIGAE9_ | 0.02569934 | 0.14447308 | 3.72E-05 | 0.0041509 | -0.092011 |
| 5mo_SIGAE9_ | 0.11404762 | 0.67757463 | 6.63E-05 | 0.025299  | -0.31137  |
| 5mo_SIGAE9_ | 0.05287984 | 0.3084827  | 5.87E-05 | 0.0065755 | 0.059084  |
| 5mo_SIGAE9_ | 0.10477297 | 0.6216106  | 6.57E-05 | 0.025429  | -0.18901  |
| 5mo_SIGAE9_ | 0.08977789 | 0.5311288  | 6.44E-05 | 0.021137  | 0.059815  |
| 5mo_SIGAE9_ | 0.09626246 | 0.5702573  | 6.50E-05 | 0.023626  | -0.045608 |
| 5mo_SIGAE9_ | 0.01916901 | 0.10506846 | 3.38E-05 | 0.004741  | 0.017998  |
| 5mo_SIGAE9_ | 0.02405836 | 0.13457124 | 3.61E-05 | 0.0042401 | -0.073623 |
| 5mo_SIGAE9_ | 0.07639508 | 0.4503758  | 6.27E-05 | 0.015053  | 0.1354    |
| 5mo_SIGAE9_ | 0.02057064 | 0.11352599 | 3.44E-05 | 0.0045325 | -0.01065  |
| 5mo_SIGAE9_ | 0.07591724 | 0.44749248 | 6.26E-05 | 0.0148    | 0.13453   |
| 5mo_SIGAE9_ | 0.06392965 | 0.37515825 | 6.10E-05 | 0.0098069 | 0.091185  |
| 5mo_SIGAE9_ | 0.12894653 | 0.767476   | 6.69E-05 | 0.023723  | -0.43195  |
| 5mo_SIGAE9_ | 0.0090492  | 0.04400455 | 3.19E-05 | 0.0070136 | 0.43237   |
| 5mo_SIGAE9_ | 0.02607384 | 0.14673279 | 3.76E-05 | 0.0041286 | -0.096385 |
| 5mo_SIGAE9_ | 0.02863776 | 0.16220374 | 3.93E-05 | 0.004074  | -0.10664  |
| 5mo_SIGAE9_ | 0.01175789 | 0.06034907 | 3.22E-05 | 0.0061869 | 0.30353   |
| 5mo_SIGAE9_ | 0.01650549 | 0.0889965  | 3.31E-05 | 0.0050879 | 0.10435   |
| 5mo_SIGAE9_ | 0.01959598 | 0.1076448  | 3.40E-05 | 0.0046667 | 0.017998  |
| 5mo_SIGAE9_ | 0.03447726 | 0.19743985 | 4.48E-05 | 0.0041765 | -0.082901 |
| 5mo_SIGAE9_ | 0.01913899 | 0.1048873  | 3.38E-05 | 0.004741  | 0.03364   |
| 5mo_SIGAE9_ | 0.07365237 | 0.43382603 | 6.23E-05 | 0.013805  | 0.12913   |
| 5mo_SIGAE9_ | 0.02250901 | 0.12522233 | 3.52E-05 | 0.0043661 | -0.056631 |
| 5mo_SIGAE9_ | 0.12265249 | 0.72949725 | 6.67E-05 | 0.024282  | -0.38934  |
| 5mo_SIGAE9_ | 0.04672515 | 0.27134472 | 5.57E-05 | 0.0054037 | 0.028707  |
| 5mo_SIGAE9_ | 0.02961705 | 0.16811287 | 4.02E-05 | 0.0040662 | -0.10661  |
| 5mo_SIGAE9_ | 0.01544544 | 0.08260005 | 3.28E-05 | 0.0052924 | 0.1442    |
| 5mo_SIGAE9_ | 0.01719226 | 0.09314052 | 3.33E-05 | 0.0049935 | 0.085504  |
| 5mo_SIGAE9_ | 0.01606921 | 0.08636395 | 3.30E-05 | 0.0051875 | 0.12392   |
| 5mo_SIGAE9_ | 0.01359992 | 0.07146404 | 3.24E-05 | 0.0057681 | 0.23179   |
| 5mo_SIGAE9_ | 0.01887135 | 0.10327234 | 3.38E-05 | 0.004741  | 0.03364   |
| 5mo_SIGAE9_ | 0.0289841  | 0.16429362 | 3.97E-05 | 0.0040686 | -0.10664  |
| 5mo_SIGAE9_ | 0.09527773 | 0.56431544 | 6.49E-05 | 0.023263  | -0.026471 |
| 5mo_SIGAE9_ | 0.11121154 | 0.6604615  | 6.61E-05 | 0.025556  | -0.28058  |
| 5mo_SIGAE9_ | 0.13458012 | 0.8014696  | 6.72E-05 | 0.023533  | -0.46567  |
| 5mo_SIGAE9_ | 0.08302233 | 0.4903652  | 6.36E-05 | 0.018151  | 0.12434   |
| 5mo_SIGAE9_ | 0.13028236 | 0.77553654 | 6.70E-05 | 0.02364   | -0.44263  |
| 5mo_SIGAE9_ | 0.05352058 | 0.312349   | 5.89E-05 | 0.0067028 | 0.060836  |
| 5mo_SIGAE9_ | 0.08341721 | 0.492748   | 6.36E-05 | 0.018151  | 0.12117   |

|             |            |            |          |           |           |
|-------------|------------|------------|----------|-----------|-----------|
| 5mo_SIGAE9_ | 0.05899284 | 0.34536913 | 6.02E-05 | 0.0081753 | 0.075889  |
| 5mo_SIGAE9_ | 0.10063952 | 0.59666896 | 6.53E-05 | 0.024687  | -0.12375  |
| 5mo_SIGAE9_ | 0.00602925 | 0.02578194 | 3.18E-05 | 0.008015  | 0.56984   |
| 5mo_SIGAE9_ | 0.02247425 | 0.12501258 | 3.52E-05 | 0.0043661 | -0.056631 |
| 5mo_SIGAE9_ | 0.02123592 | 0.11754034 | 3.47E-05 | 0.0044724 | -0.023601 |
| 5mo_SIGAE9_ | 0.01691967 | 0.09149571 | 3.31E-05 | 0.0050879 | 0.10435   |
| 5mo_SIGAE9_ | 0.13121733 | 0.78117824 | 6.70E-05 | 0.023599  | -0.44608  |
| 5mo_SIGAE9_ | 0.03220547 | 0.18373165 | 4.27E-05 | 0.004099  | -0.097962 |
| 5mo_SIGAE9_ | 0.01567257 | 0.08397061 | 3.28E-05 | 0.0052924 | 0.1442    |
| 5mo_SIGAE9_ | 0.03641243 | 0.2091168  | 4.70E-05 | 0.0042982 | -0.062998 |
| 5mo_SIGAE9_ | 0.01956582 | 0.10746281 | 3.40E-05 | 0.0046667 | 0.017998  |
| 5mo_SIGAE9_ | 0.09153549 | 0.54173434 | 6.45E-05 | 0.021822  | 0.027741  |
| 5mo_SIGAE9_ | 0.01509695 | 0.08049725 | 3.27E-05 | 0.0054028 | 0.16515   |
| 5mo_SIGAE9_ | 0.13208511 | 0.78641456 | 6.71E-05 | 0.023582  | -0.45284  |
| 5mo_SIGAE9_ | 0.02591328 | 0.14576396 | 3.76E-05 | 0.0041286 | -0.096385 |
| 5mo_SIGAE9_ | 0.05887939 | 0.34468454 | 6.02E-05 | 0.0081753 | 0.074438  |
| 5mo_SIGAE9_ | 0.02694066 | 0.15196331 | 3.80E-05 | 0.0041099 | -0.10271  |
| 5mo_SIGAE9_ | 0.03250551 | 0.18554212 | 4.27E-05 | 0.004099  | -0.094772 |
| 5mo_SIGAE9_ | 0.03749722 | 0.21566257 | 4.76E-05 | 0.0043355 | -0.05192  |
| 5mo_SIGAE9_ | 0.02539286 | 0.14262372 | 3.72E-05 | 0.0041509 | -0.092011 |
| 5mo_SIGAE9_ | 0.09125376 | 0.5400344  | 6.45E-05 | 0.021597  | 0.036126  |
| 5mo_SIGAE9_ | 0.01994485 | 0.10974995 | 3.42E-05 | 0.0045972 | 0.0032259 |
| 5mo_SIGAE9_ | 0.01239516 | 0.06419442 | 3.23E-05 | 0.0060411 | 0.2791    |
| 5mo_SIGAE9_ | 0.02881097 | 0.1632489  | 3.97E-05 | 0.0040686 | -0.10664  |
| 5mo_SIGAE9_ | 0.06004354 | 0.35170913 | 6.04E-05 | 0.0085136 | 0.07887   |
| 5mo_SIGAE9_ | 0.10793516 | 0.6406915  | 6.59E-05 | 0.025614  | -0.23822  |
| 5mo_SIGAE9_ | 0.01356337 | 0.07124345 | 3.24E-05 | 0.0057681 | 0.23179   |
| 5mo_SIGAE9_ | 0.02102539 | 0.11627    | 3.47E-05 | 0.0044724 | -0.023601 |
| 5mo_SIGAE9_ | 0.09211424 | 0.54522663 | 6.46E-05 | 0.022042  | 0.019141  |
| 5mo_SIGAE9_ | 0.03177999 | 0.18116423 | 4.22E-05 | 0.0040866 | -0.10071  |
| 5mo_SIGAE9_ | 0.02190068 | 0.12155158 | 3.49E-05 | 0.0044169 | -0.0356   |
| 5mo_SIGAE9_ | 0.08019988 | 0.4733343  | 6.32E-05 | 0.016854  | 0.13446   |
| 5mo_SIGAE9_ | 0.01872986 | 0.10241853 | 3.38E-05 | 0.004741  | 0.03364   |
| 5mo_SIGAE9_ | 0.10970467 | 0.6513689  | 6.60E-05 | 0.025599  | -0.2602   |
| 5mo_SIGAE9_ | 0.0171952  | 0.09315831 | 3.33E-05 | 0.0049935 | 0.085504  |
| 5mo_SIGAE9_ | 0.05924466 | 0.34688857 | 6.03E-05 | 0.0083426 | 0.075889  |
| 5mo_SIGAE9_ | 0.0197094  | 0.10832918 | 3.40E-05 | 0.0046667 | 0.017998  |
| 5mo_SIGAE9_ | 0.01607271 | 0.08638506 | 3.30E-05 | 0.0051875 | 0.12392   |
| 5mo_SIGAE9_ | 0.02501723 | 0.14035715 | 3.68E-05 | 0.0041768 | -0.086782 |
| 5mo_SIGAE9_ | 0.07154211 | 0.42109254 | 6.20E-05 | 0.012843  | 0.12136   |
| 5mo_SIGAE9_ | 0.01299155 | 0.06779303 | 3.23E-05 | 0.0059016 | 0.25518   |
| 5mo_SIGAE9_ | 0.01161022 | 0.05945796 | 3.22E-05 | 0.0061869 | 0.30353   |
| 5mo_SIGAE9_ | 0.1280197  | 0.7618835  | 6.69E-05 | 0.023757  | -0.4283   |

|             |            |            |          |           |           |
|-------------|------------|------------|----------|-----------|-----------|
| 5mo_SIGAE9_ | 0.01114665 | 0.05666078 | 3.21E-05 | 0.006339  | 0.32844   |
| 5mo_SIGAE9_ | 0.00785038 | 0.03677075 | 3.19E-05 | 0.0073923 | 0.48652   |
| 5mo_SIGAE9_ | 0.02434218 | 0.1362838  | 3.64E-05 | 0.0042065 | -0.080664 |
| 5mo_SIGAE9_ | 0.03447511 | 0.19742689 | 4.48E-05 | 0.0041765 | -0.082901 |
| 5mo_SIGAE9_ | 0.01840366 | 0.10045023 | 3.36E-05 | 0.0048202 | 0.050123  |
| 5mo_SIGAE9_ | 0.03643193 | 0.20923449 | 4.70E-05 | 0.0042982 | -0.062998 |
| 5mo_SIGAE9_ | 0.0193414  | 0.10610867 | 3.40E-05 | 0.0046667 | 0.017998  |
| 5mo_SIGAE9_ | 0.04722013 | 0.2743315  | 5.61E-05 | 0.0054936 | 0.032113  |
| 5mo_SIGAE9_ | 0.02243895 | 0.12479954 | 3.52E-05 | 0.0043661 | -0.046619 |
| 5mo_SIGAE9_ | 0.01982616 | 0.10903373 | 3.42E-05 | 0.0045972 | 0.0032259 |
| 5mo_SIGAE9_ | 0.00458282 | 0.01705401 | 3.18E-05 | 0.0087056 | 0.65503   |
| 5mo_SIGAE9_ | 0.09762835 | 0.57849926 | 6.51E-05 | 0.023964  | -0.074831 |
| 5mo_SIGAE9_ | 0.09854534 | 0.5840325  | 6.52E-05 | 0.024275  | -0.084641 |
| 5mo_SIGAE9_ | 0.02420225 | 0.13543946 | 3.61E-05 | 0.0042401 | -0.080664 |
| 5mo_SIGAE9_ | 0.05425961 | 0.31680837 | 5.92E-05 | 0.0069681 | 0.062513  |
| 5mo_SIGAE9_ | 0.02345058 | 0.13090381 | 3.58E-05 | 0.0042778 | -0.065623 |
| 5mo_SIGAE9_ | 0.00982345 | 0.04867645 | 3.20E-05 | 0.0066628 | 0.37961   |
| 5mo_SIGAE9_ | 0.02801793 | 0.15846363 | 3.88E-05 | 0.0040827 | -0.10603  |
| 5mo_SIGAE9_ | 0.03947207 | 0.227579   | 4.98E-05 | 0.0045122 | -0.034672 |
| 5mo_SIGAE9_ | 0.07899547 | 0.46606675 | 6.30E-05 | 0.016077  | 0.13613   |
| 5mo_SIGAE9_ | 0.02251793 | 0.12527613 | 3.52E-05 | 0.0043661 | -0.056631 |
| 5mo_SIGAE9_ | 0.11071903 | 0.65748966 | 6.61E-05 | 0.025556  | -0.27396  |
| 5mo_SIGAE9_ | 0.01856739 | 0.10143819 | 3.36E-05 | 0.0048202 | 0.050123  |
| 5mo_SIGAE9_ | 0.03517366 | 0.20164199 | 4.54E-05 | 0.0042028 | -0.078293 |
| 5mo_SIGAE9_ | 0.02032821 | 0.11206317 | 3.44E-05 | 0.0045325 | -0.01065  |
| 5mo_SIGAE9_ | 0.03424063 | 0.19601198 | 4.48E-05 | 0.0041765 | -0.082901 |
| 5mo_SIGAE9_ | 0.07719534 | 0.45520464 | 6.28E-05 | 0.015307  | 0.13646   |
| 5mo_SIGAE9_ | 0.04472158 | 0.259255   | 5.46E-05 | 0.0051531 | 0.017239  |
| 5mo_SIGAE9_ | 0.02394793 | 0.13390487 | 3.61E-05 | 0.0042401 | -0.073623 |
| 5mo_SIGAE9_ | 0.06703977 | 0.39392495 | 6.14E-05 | 0.011039  | 0.10251   |
| 5mo_SIGAE9_ | 0.01407026 | 0.07430209 | 3.25E-05 | 0.0056405 | 0.20898   |
| 5mo_SIGAE9_ | 0.03833862 | 0.22073963 | 4.87E-05 | 0.0044183 | -0.04622  |
| 5mo_SIGAE9_ | 0.03528183 | 0.20229465 | 4.54E-05 | 0.0042028 | -0.073417 |
| 5mo_SIGAE9_ | 0.1004363  | 0.5954427  | 6.53E-05 | 0.024687  | -0.12375  |
| 5mo_SIGAE9_ | 0.12749091 | 0.7586927  | 6.69E-05 | 0.023794  | -0.4246   |
| 5mo_SIGAE9_ | 0.01619082 | 0.08709774 | 3.30E-05 | 0.0051875 | 0.12392   |
| 5mo_SIGAE9_ | 0.00425806 | 0.01509441 | 3.18E-05 | 0.0087056 | 0.65503   |
| 5mo_SIGAE9_ | 0.01456364 | 0.07727921 | 3.26E-05 | 0.0055188 | 0.18676   |
| 5mo_SIGAE9_ | 0.02554137 | 0.14351985 | 3.72E-05 | 0.0041509 | -0.092011 |
| 5mo_SIGAE9_ | 0.060518   | 0.35457206 | 6.05E-05 | 0.008688  | 0.07887   |
| 5mo_SIGAE9_ | 0.01425531 | 0.07541869 | 3.26E-05 | 0.0055188 | 0.18676   |
| 5mo_SIGAE9_ | 0.01323611 | 0.06926874 | 3.24E-05 | 0.0057681 | 0.23179   |
| 5mo_SIGAE9_ | 0.02507081 | 0.14068042 | 3.68E-05 | 0.0041768 | -0.086782 |

|             |            |            |          |           |           |
|-------------|------------|------------|----------|-----------|-----------|
| 5mo_SIGAE9_ | 0.10614495 | 0.6298892  | 6.58E-05 | 0.025526  | -0.21453  |
| 5mo_SIGAE9_ | 0.02250859 | 0.12521978 | 3.52E-05 | 0.0043661 | -0.056631 |
| 5mo_SIGAE9_ | 0.08837085 | 0.5226386  | 6.42E-05 | 0.020421  | 0.074212  |
| 5mo_SIGAE9_ | 0.02141861 | 0.11864272 | 3.47E-05 | 0.0044724 | -0.0356   |
| 5mo_SIGAE9_ | 0.02536576 | 0.14246021 | 3.72E-05 | 0.0041509 | -0.092011 |
| 5mo_SIGAE9_ | 0.01669816 | 0.09015909 | 3.31E-05 | 0.0050879 | 0.10435   |
| 5mo_SIGAE9_ | 0.02955199 | 0.16772026 | 4.02E-05 | 0.0040662 | -0.10661  |
| 5mo_SIGAE9_ | 0.02977432 | 0.16906185 | 4.07E-05 | 0.0040668 | -0.10597  |
| 5mo_SIGAE9_ | 0.01345191 | 0.07057094 | 3.24E-05 | 0.0057681 | 0.23179   |
| 5mo_SIGAE9_ | 0.09939414 | 0.5891542  | 6.53E-05 | 0.02442   | -0.10426  |
| 5mo_SIGAE9_ | 0.01525895 | 0.08147477 | 3.27E-05 | 0.0054028 | 0.16515   |
| 5mo_SIGAE9_ | 0.02023312 | 0.11148936 | 3.42E-05 | 0.0045972 | 0.0032259 |
| 5mo_SIGAE9_ | 0.05303298 | 0.30940673 | 5.89E-05 | 0.0067028 | 0.059084  |
| 5mo_SIGAE9_ | 0.01555751 | 0.08327632 | 3.28E-05 | 0.0052924 | 0.1442    |
| 5mo_SIGAE9_ | 0.02162871 | 0.11991046 | 3.49E-05 | 0.0044169 | -0.0356   |
| 5mo_SIGAE9_ | 0.05355693 | 0.3125683  | 5.89E-05 | 0.0067028 | 0.060836  |
| 5mo_SIGAE9_ | 0.0066261  | 0.02938333 | 3.18E-05 | 0.0078    | 0.54183   |
| 5mo_SIGAE9_ | 0.08053313 | 0.47534513 | 6.32E-05 | 0.016854  | 0.13314   |
| 5mo_SIGAE9_ | 0.01328232 | 0.06954758 | 3.24E-05 | 0.0057681 | 0.23179   |
| 5mo_SIGAE9_ | 0.01608161 | 0.08643878 | 3.30E-05 | 0.0051875 | 0.12392   |
| 5mo_SIGAE9_ | 0.05834465 | 0.34145784 | 6.01E-05 | 0.0080116 | 0.073002  |
| 5mo_SIGAE9_ | 0.03596417 | 0.20641196 | 4.65E-05 | 0.0042637 | -0.068307 |
| 5mo_SIGAE9_ | 0.02091947 | 0.11563088 | 3.47E-05 | 0.0044724 | -0.023601 |
| 5mo_SIGAE9_ | 0.00942455 | 0.04626945 | 3.20E-05 | 0.0068348 | 0.4058    |
| 5mo_SIGAE9_ | 0.0230328  | 0.1283829  | 3.55E-05 | 0.0043197 | -0.065623 |
| 5mo_SIGAE9_ | 0.0883478  | 0.52249956 | 6.42E-05 | 0.020421  | 0.074212  |
| 5mo_SIGAE9_ | 0.01153943 | 0.05903084 | 3.22E-05 | 0.0061869 | 0.30353   |
| 5mo_SIGAE9_ | 0.01469475 | 0.07807033 | 3.26E-05 | 0.0055188 | 0.18676   |
| 5mo_SIGAE9_ | 0.05146987 | 0.29997483 | 5.83E-05 | 0.0063316 | 0.053285  |
| 5mo_SIGAE9_ | 0.08828644 | 0.5221293  | 6.42E-05 | 0.020421  | 0.074212  |
| 5mo_SIGAE9_ | 0.0361575  | 0.20757855 | 4.65E-05 | 0.0042637 | -0.068307 |
| 5mo_SIGAE9_ | 0.02110318 | 0.11673936 | 3.47E-05 | 0.0044724 | -0.023601 |
| 5mo_SIGAE9_ | 0.0099557  | 0.04947446 | 3.20E-05 | 0.0066628 | 0.37961   |
| 5mo_SIGAE9_ | 0.02522707 | 0.14162333 | 3.68E-05 | 0.0041768 | -0.086782 |
| 5mo_SIGAE9_ | 0.07990997 | 0.47158498 | 6.32E-05 | 0.016594  | 0.13545   |
| 5mo_SIGAE9_ | 0.01823717 | 0.09944563 | 3.36E-05 | 0.0048202 | 0.050123  |
| 5mo_SIGAE9_ | 0.01895232 | 0.10376091 | 3.38E-05 | 0.004741  | 0.03364   |
| 5mo_SIGAE9_ | 0.07327727 | 0.43156266 | 6.23E-05 | 0.013561  | 0.12737   |
| 5mo_SIGAE9_ | 0.04130622 | 0.2386464  | 5.14E-05 | 0.0046741 | -0.011944 |
| 5mo_SIGAE9_ | 0.00697668 | 0.03149878 | 3.18E-05 | 0.0078    | 0.54183   |
| 5mo_SIGAE9_ | 0.02332827 | 0.13016579 | 3.58E-05 | 0.0042778 | -0.065623 |
| 5mo_SIGAE9_ | 0.0088099  | 0.04256059 | 3.19E-05 | 0.0070136 | 0.43237   |
| 5mo_SIGAE9_ | 0.02117259 | 0.1171582  | 3.47E-05 | 0.0044724 | -0.023601 |

|             |            |            |          |           |            |
|-------------|------------|------------|----------|-----------|------------|
| 5mo_SIGAE9_ | 0.02812691 | 0.15912122 | 3.93E-05 | 0.004074  | -0.10603   |
| 5mo_SIGAE9_ | 0.05395066 | 0.31494415 | 5.91E-05 | 0.0068337 | 0.060836   |
| 5mo_SIGAE9_ | 0.02091768 | 0.11562003 | 3.47E-05 | 0.0044724 | -0.023601  |
| 5mo_SIGAE9_ | 0.04117517 | 0.23785564 | 5.14E-05 | 0.0046741 | -0.017493  |
| 5mo_SIGAE9_ | 0.1596062  | 0.9524793  | 6.78E-05 | 0.023691  | -0.52638   |
| 5mo_SIGAE9_ | 0.02872609 | 0.16273671 | 3.97E-05 | 0.0040686 | -0.10664   |
| 5mo_SIGAE9_ | 0.05779925 | 0.33816686 | 6.00E-05 | 0.0078516 | 0.071569   |
| 5mo_SIGAE9_ | 0.01709134 | 0.0925316  | 3.33E-05 | 0.0049935 | 0.085504   |
| 5mo_SIGAE9_ | 0.03397648 | 0.19441806 | 4.43E-05 | 0.004153  | -0.087207  |
| 5mo_SIGAE9_ | 0.0198083  | 0.10892595 | 3.42E-05 | 0.0045972 | 0.0032259  |
| 5mo_SIGAE9_ | 0.08779308 | 0.5191523  | 6.41E-05 | 0.020177  | 0.080939   |
| 5mo_SIGAE9_ | 0.01975922 | 0.10862981 | 3.40E-05 | 0.0046667 | 0.0032259  |
| 5mo_SIGAE9_ | 0.02604355 | 0.14655001 | 3.76E-05 | 0.0041286 | -0.096385  |
| 5mo_SIGAE9_ | 0.0206592  | 0.11406037 | 3.44E-05 | 0.0045325 | -0.01065   |
| 5mo_SIGAE9_ | 0.06406045 | 0.3759475  | 6.10E-05 | 0.0098069 | 0.091185   |
| 5mo_SIGAE9_ | 0.11131985 | 0.661115   | 6.61E-05 | 0.025525  | -0.28058   |
| 5mo_SIGAE9_ | 0.03088412 | 0.17575848 | 4.16E-05 | 0.0040771 | -0.10299   |
| 5mo_SIGAE9_ | 0.07826363 | 0.46165076 | 6.29E-05 | 0.015819  | 0.13662    |
| 5mo_SIGAE9_ | 0.01905116 | 0.1043573  | 3.38E-05 | 0.004741  | 0.03364    |
| 5mo_SIGAE9_ | 0.14076594 | 0.8387954  | 6.74E-05 | 0.023566  | -0.4978    |
| 5mo_SIGAE9_ | 0.0668927  | 0.39303756 | 6.14E-05 | 0.011039  | 0.10251    |
| 5mo_SIGAE9_ | 0.02508922 | 0.1407915  | 3.68E-05 | 0.0041768 | -0.086782  |
| 5mo_SIGAE9_ | 0.09364466 | 0.55446136 | 6.48E-05 | 0.022676  | 0.0013661  |
| 5mo_SIGAE9_ | 0.0720861  | 0.42437503 | 6.21E-05 | 0.01308   | 0.12348    |
| 5mo_SIGAE9_ | 0.04825079 | 0.2805506  | 5.67E-05 | 0.0056831 | 0.038361   |
| 5mo_SIGAE9_ | 0.01710073 | 0.09258825 | 3.33E-05 | 0.0049935 | 0.085504   |
| 5mo_SIGAE9_ | 0.0261911  | 0.14744036 | 3.76E-05 | 0.0041286 | -0.096385  |
| 5mo_SIGAE9_ | 0.02373816 | 0.13263912 | 3.61E-05 | 0.0042401 | -0.073623  |
| 5mo_SIGAE9_ | 0.02087371 | 0.11535475 | 3.44E-05 | 0.0045325 | -0.023601  |
| 5mo_SIGAE9_ | 0.09373806 | 0.5550249  | 6.48E-05 | 0.022676  | -0.0077738 |
| 5mo_SIGAE9_ | 0.0801761  | 0.4731908  | 6.32E-05 | 0.016594  | 0.13446    |
| 5mo_SIGAE9_ | 0.01317002 | 0.06886996 | 3.24E-05 | 0.0057681 | 0.23179    |
| 5mo_SIGAE9_ | 0.02346393 | 0.13098437 | 3.58E-05 | 0.0042778 | -0.065623  |
| 5mo_SIGAE9_ | 0.02002221 | 0.1102167  | 3.42E-05 | 0.0045972 | 0.0032259  |
| 5mo_SIGAE9_ | 0.09075674 | 0.5370353  | 6.45E-05 | 0.021597  | 0.044278   |
| 5mo_SIGAE9_ | 0.02352092 | 0.13132827 | 3.58E-05 | 0.0042778 | -0.065623  |
| 5mo_SIGAE9_ | 0.02502683 | 0.14041503 | 3.68E-05 | 0.0041768 | -0.086782  |
| 5mo_SIGAE9_ | 0.01744648 | 0.09467454 | 3.33E-05 | 0.0049935 | 0.085504   |
| 5mo_SIGAE9_ | 0.03106523 | 0.17685132 | 4.16E-05 | 0.0040771 | -0.10299   |
| 5mo_SIGAE9_ | 0.12907192 | 0.76823264 | 6.70E-05 | 0.023692  | -0.43195   |
| 5mo_SIGAE9_ | 0.02313205 | 0.1289818  | 3.58E-05 | 0.0042778 | -0.065623  |
| 5mo_SIGAE9_ | 0.01052407 | 0.05290404 | 3.21E-05 | 0.0064976 | 0.35381    |
| 5mo_SIGAE9_ | 0.02017685 | 0.11114983 | 3.42E-05 | 0.0045972 | 0.0032259  |



|             |            |            |          |           |           |
|-------------|------------|------------|----------|-----------|-----------|
| 5mo_SIGAE9_ | 0.02533075 | 0.14224891 | 3.72E-05 | 0.0041509 | -0.092011 |
| 5mo_SIGAE9_ | 0.01466034 | 0.07786271 | 3.26E-05 | 0.0055188 | 0.18676   |
| 5mo_SIGAE9_ | 0.08454073 | 0.49952736 | 6.37E-05 | 0.018667  | 0.1136    |
| 5mo_SIGAE9_ | 0.10743277 | 0.63766    | 6.59E-05 | 0.025604  | -0.23052  |
| 5mo_SIGAE9_ | 0.09600489 | 0.5687032  | 6.50E-05 | 0.023448  | -0.045608 |
| 5mo_SIGAE9_ | 0.01568078 | 0.08402012 | 3.28E-05 | 0.0052924 | 0.1442    |
| 5mo_SIGAE9_ | 0.04930874 | 0.28693432 | 5.73E-05 | 0.0058857 | 0.04392   |
| 5mo_SIGAE9_ | 0.02061274 | 0.11378003 | 3.44E-05 | 0.0045325 | -0.01065  |
| 5mo_SIGAE9_ | 0.00936374 | 0.04590252 | 3.20E-05 | 0.0068348 | 0.4058    |
| 5mo_SIGAE9_ | 0.03876327 | 0.22330204 | 4.92E-05 | 0.0044639 | -0.040459 |
| 5mo_SIGAE9_ | 0.13636854 | 0.81226116 | 6.72E-05 | 0.023527  | -0.4775   |
| 5mo_SIGAE9_ | 0.08740232 | 0.51679444 | 6.41E-05 | 0.020177  | 0.087329  |
| 5mo_SIGAE9_ | 0.09475201 | 0.56114316 | 6.49E-05 | 0.023073  | -0.017059 |
| 5mo_SIGAE9_ | 0.12364627 | 0.73549384 | 6.67E-05 | 0.024153  | -0.39752  |
| 5mo_SIGAE9_ | 0.0170036  | 0.09200217 | 3.33E-05 | 0.0049935 | 0.085504  |
| 5mo_SIGAE9_ | 0.1008125  | 0.59771276 | 6.54E-05 | 0.024809  | -0.12375  |
| 5mo_SIGAE9_ | 0.01558583 | 0.08344718 | 3.28E-05 | 0.0052924 | 0.1442    |
| 5mo_SIGAE9_ | 0.02311887 | 0.12890227 | 3.58E-05 | 0.0042778 | -0.065623 |
| 5mo_SIGAE9_ | 0.08148208 | 0.48107117 | 6.34E-05 | 0.017373  | 0.13148   |
| 5mo_SIGAE9_ | 0.045013   | 0.26101348 | 5.46E-05 | 0.0051531 | 0.017239  |
| 5mo_SIGAE9_ | 0.01292317 | 0.06738046 | 3.23E-05 | 0.0059016 | 0.25518   |
| 5mo_SIGAE9_ | 0.02174955 | 0.12063965 | 3.49E-05 | 0.0044169 | -0.0356   |
| 5mo_SIGAE9_ | 0.02888972 | 0.16372408 | 3.97E-05 | 0.0040686 | -0.10664  |
| 5mo_SIGAE9_ | 0.0786667  | 0.46408296 | 6.30E-05 | 0.016077  | 0.13651   |
| 5mo_SIGAE9_ | 0.09955998 | 0.5901549  | 6.53E-05 | 0.02442   | -0.10426  |
| 5mo_SIGAE9_ | 0.01717469 | 0.09303453 | 3.33E-05 | 0.0049935 | 0.085504  |
| 5mo_SIGAE9_ | 0.01153079 | 0.0589787  | 3.22E-05 | 0.0061869 | 0.30353   |
| 5mo_SIGAE9_ | 0.11057384 | 0.6566135  | 6.60E-05 | 0.02558   | -0.27396  |
| 5mo_SIGAE9_ | 0.01868594 | 0.10215353 | 3.38E-05 | 0.004741  | 0.03364   |
| 5mo_SIGAE9_ | 0.03627021 | 0.20825867 | 4.65E-05 | 0.0042637 | -0.068307 |
| 5mo_SIGAE9_ | 0.0190016  | 0.10405827 | 3.38E-05 | 0.004741  | 0.03364   |
| 5mo_SIGAE9_ | 0.05044145 | 0.2937692  | 5.78E-05 | 0.0061018 | 0.048868  |
| 5mo_SIGAE9_ | 0.02400155 | 0.13422844 | 3.61E-05 | 0.0042401 | -0.073623 |
| 5mo_SIGAE9_ | 0.0495026  | 0.2881041  | 5.73E-05 | 0.0058857 | 0.04392   |
| 5mo_SIGAE9_ | 0.02171069 | 0.12040515 | 3.49E-05 | 0.0044169 | -0.0356   |
| 5mo_SIGAE9_ | 0.01801021 | 0.09807615 | 3.34E-05 | 0.0049043 | 0.067421  |
| 5mo_SIGAE9_ | 0.11341949 | 0.67378443 | 6.62E-05 | 0.025403  | -0.30551  |
| 5mo_SIGAE9_ | 0.01683975 | 0.09101345 | 3.31E-05 | 0.0050879 | 0.10435   |
| 5mo_SIGAE9_ | 0.01529604 | 0.08169855 | 3.27E-05 | 0.0054028 | 0.1442    |
| 5mo_SIGAE9_ | 0.01764931 | 0.09589841 | 3.34E-05 | 0.0049043 | 0.067421  |
| 5mo_SIGAE9_ | 0.05101889 | 0.29725355 | 5.81E-05 | 0.006215  | 0.051138  |
| 5mo_SIGAE9_ | 0.02560047 | 0.14387645 | 3.72E-05 | 0.0041509 | -0.092011 |
| 5mo_SIGAE9_ | 0.09478641 | 0.5613507  | 6.49E-05 | 0.023073  | -0.017059 |

|             |            |            |          |           |           |
|-------------|------------|------------|----------|-----------|-----------|
| 5mo_SIGAE9_ | 0.03405801 | 0.19491003 | 4.43E-05 | 0.004153  | -0.087207 |
| 5mo_SIGAE9_ | 0.02539642 | 0.14264521 | 3.72E-05 | 0.0041509 | -0.092011 |
| 5mo_SIGAE9_ | 0.02993929 | 0.17005728 | 4.07E-05 | 0.0040668 | -0.10597  |
| 5mo_SIGAE9_ | 0.02830446 | 0.16019255 | 3.93E-05 | 0.004074  | -0.10603  |
| 5mo_SIGAE9_ | 0.01563469 | 0.08374204 | 3.28E-05 | 0.0052924 | 0.1442    |
| 5mo_SIGAE9_ | 0.11178824 | 0.6639413  | 6.61E-05 | 0.025489  | -0.28705  |
| 5mo_SIGAE9_ | 0.04361495 | 0.2525775  | 5.38E-05 | 0.0050014 | 0.008455  |
| 5mo_SIGAE9_ | 0.08253164 | 0.48740435 | 6.35E-05 | 0.017892  | 0.1271    |
| 5mo_SIGAE9_ | 0.01389115 | 0.07322136 | 3.25E-05 | 0.0056405 | 0.20898   |
| 5mo_SIGAE9_ | 0.00918352 | 0.04481509 | 3.19E-05 | 0.0070136 | 0.43237   |
| 5mo_SIGAE9_ | 0.02493471 | 0.1398592  | 3.68E-05 | 0.0041768 | -0.086782 |
| 5mo_SIGAE9_ | 0.13307042 | 0.79236    | 6.71E-05 | 0.023556  | -0.45937  |
| 5mo_SIGAE9_ | 0.02203309 | 0.12235057 | 3.52E-05 | 0.0043661 | -0.046619 |
| 5mo_SIGAE9_ | 0.055286   | 0.32300165 | 5.95E-05 | 0.007248  | 0.065685  |
| 5mo_SIGAE9_ | 0.04116658 | 0.23780382 | 5.14E-05 | 0.0046741 | -0.017493 |
| 5mo_SIGAE9_ | 0.01380998 | 0.07273153 | 3.25E-05 | 0.0056405 | 0.20898   |
| 5mo_SIGAE9_ | 0.01009887 | 0.05033837 | 3.20E-05 | 0.0066628 | 0.37961   |
| 5mo_SIGAE9_ | 0.02519502 | 0.14142995 | 3.68E-05 | 0.0041768 | -0.086782 |
| 5mo_SIGAE9_ | 0.0209161  | 0.11561054 | 3.47E-05 | 0.0044724 | -0.023601 |
| 5mo_SIGAE9_ | 0.0198226  | 0.10901226 | 3.42E-05 | 0.0045972 | 0.0032259 |
| 5mo_SIGAE9_ | 0.02564524 | 0.14414662 | 3.72E-05 | 0.0041509 | -0.092011 |
| 5mo_SIGAE9_ | 0.00934521 | 0.0457907  | 3.20E-05 | 0.0068348 | 0.4058    |
| 5mo_SIGAE9_ | 0.01208004 | 0.06229292 | 3.23E-05 | 0.0060411 | 0.2791    |
| 5mo_SIGAE9_ | 0.04640898 | 0.26943693 | 5.57E-05 | 0.0054037 | 0.028707  |
| 5mo_SIGAE9_ | 0.02332369 | 0.13013816 | 3.58E-05 | 0.0042778 | -0.065623 |
| 5mo_SIGAE9_ | 0.02211411 | 0.12283946 | 3.52E-05 | 0.0043661 | -0.046619 |
| 5mo_SIGAE9_ | 0.01682076 | 0.09089888 | 3.31E-05 | 0.0050879 | 0.10435   |
| 5mo_SIGAE9_ | 0.03211388 | 0.18317896 | 4.27E-05 | 0.004099  | -0.097962 |
| 5mo_SIGAE9_ | 0.09553604 | 0.56587404 | 6.49E-05 | 0.023263  | -0.035993 |
| 5mo_SIGAE9_ | 0.06458464 | 0.37911054 | 6.10E-05 | 0.010005  | 0.093303  |
| 5mo_SIGAE9_ | 0.00968821 | 0.04786041 | 3.20E-05 | 0.0068348 | 0.4058    |
| 5mo_SIGAE9_ | 0.02317793 | 0.12925863 | 3.58E-05 | 0.0042778 | -0.065623 |
| 5mo_SIGAE9_ | 0.01686719 | 0.09117901 | 3.31E-05 | 0.0050879 | 0.10435   |
| 5mo_SIGAE9_ | 0.09028468 | 0.5341869  | 6.44E-05 | 0.021369  | 0.05218   |
| 5mo_SIGAE9_ | 0.03601882 | 0.20674172 | 4.65E-05 | 0.0042637 | -0.068307 |
| 5mo_SIGAE9_ | 0.02019107 | 0.11123563 | 3.42E-05 | 0.0045972 | 0.0032259 |
| 5mo_SIGAE9_ | 0.0746214  | 0.43967324 | 6.24E-05 | 0.014051  | 0.13218   |
| 5mo_SIGAE9_ | 0.08751068 | 0.5174483  | 6.41E-05 | 0.020177  | 0.087329  |
| 5mo_SIGAE9_ | 0.0315081  | 0.17952366 | 4.22E-05 | 0.0040866 | -0.10071  |
| 5mo_SIGAE9_ | 0.02065015 | 0.11400578 | 3.44E-05 | 0.0045325 | -0.01065  |
| 5mo_SIGAE9_ | 0.01424143 | 0.07533493 | 3.26E-05 | 0.0055188 | 0.18676   |
| 5mo_SIGAE9_ | 0.08752582 | 0.5175396  | 6.41E-05 | 0.020177  | 0.087329  |
| 5mo_SIGAE9_ | 0.02389366 | 0.1335774  | 3.61E-05 | 0.0042401 | -0.073623 |

|             |            |            |          |           |            |
|-------------|------------|------------|----------|-----------|------------|
| 5mo_SIGAE9_ | 0.01211682 | 0.06251484 | 3.23E-05 | 0.0060411 | 0.2791     |
| 5mo_SIGAE9_ | 0.01739499 | 0.09436384 | 3.33E-05 | 0.0049935 | 0.085504   |
| 5mo_SIGAE9_ | 0.01771375 | 0.09628728 | 3.34E-05 | 0.0049043 | 0.067421   |
| 5mo_SIGAE9_ | 0.04012499 | 0.23151876 | 5.03E-05 | 0.0045634 | -0.028892  |
| 5mo_SIGAE9_ | 0.0160464  | 0.08622629 | 3.30E-05 | 0.0051875 | 0.12392    |
| 5mo_SIGAE9_ | 0.04236908 | 0.24505982 | 5.24E-05 | 0.0047963 | -0.0013165 |
| 5mo_SIGAE9_ | 0.05250837 | 0.30624118 | 5.87E-05 | 0.0065755 | 0.057248   |
| 5mo_SIGAE9_ | 0.06953946 | 0.40900832 | 6.17E-05 | 0.01192   | 0.11455    |
| 5mo_SIGAE9_ | 0.04179273 | 0.24158204 | 5.19E-05 | 0.0047337 | -0.011944  |
| 5mo_SIGAE9_ | 0.04537688 | 0.26320913 | 5.50E-05 | 0.0052335 | 0.021279   |
| 5mo_SIGAE9_ | 0.04629916 | 0.26877427 | 5.54E-05 | 0.0053171 | 0.028707   |
| 5mo_SIGAE9_ | 0.07241018 | 0.42633054 | 6.21E-05 | 0.01308   | 0.12548    |
| 5mo_SIGAE9_ | 0.01659372 | 0.08952889 | 3.31E-05 | 0.0050879 | 0.10435    |
| 5mo_SIGAE9_ | 0.06079372 | 0.35623577 | 6.06E-05 | 0.008866  | 0.080421   |
| 5mo_SIGAE9_ | 0.00612155 | 0.02633888 | 3.18E-05 | 0.008015  | 0.56984    |
| 5mo_SIGAE9_ | 0.02800228 | 0.15836921 | 3.88E-05 | 0.0040827 | -0.10603   |
| 5mo_SIGAE9_ | 0.03506541 | 0.20098877 | 4.54E-05 | 0.0042028 | -0.078293  |
| 5mo_SIGAE9_ | 0.13271506 | 0.79021573 | 6.71E-05 | 0.023568  | -0.45613   |
| 5mo_SIGAE9_ | 0.02881678 | 0.16328396 | 3.97E-05 | 0.0040686 | -0.10664   |
| 5mo_SIGAE9_ | 0.1014308  | 0.6014436  | 6.54E-05 | 0.024923  | -0.13341   |
| 5mo_SIGAE9_ | 0.02205523 | 0.12248413 | 3.52E-05 | 0.0043661 | -0.046619  |
| 5mo_SIGAE9_ | 0.02375792 | 0.13275832 | 3.61E-05 | 0.0042401 | -0.073623  |
| 5mo_SIGAE9_ | 0.01573325 | 0.08433676 | 3.28E-05 | 0.0052924 | 0.1442     |
| 5mo_SIGAE9_ | 0.02161397 | 0.1198215  | 3.49E-05 | 0.0044169 | -0.0356    |
| 5mo_SIGAE9_ | 0.01056616 | 0.05315803 | 3.21E-05 | 0.0064976 | 0.35381    |
| 5mo_SIGAE9_ | 0.06714896 | 0.39458385 | 6.14E-05 | 0.011039  | 0.10251    |
| 5mo_SIGAE9_ | 0.00639809 | 0.02800753 | 3.18E-05 | 0.008015  | 0.56984    |
| 5mo_SIGAE9_ | 0.10227328 | 0.6065272  | 6.55E-05 | 0.025029  | -0.15246   |
| 5mo_SIGAE9_ | 0.01744339 | 0.09465589 | 3.33E-05 | 0.0049935 | 0.085504   |
| 5mo_SIGAE9_ | 0.0412495  | 0.23830412 | 5.14E-05 | 0.0046741 | -0.017493  |
| 5mo_SIGAE9_ | 0.10566513 | 0.6269939  | 6.57E-05 | 0.025482  | -0.20623   |
| 5mo_SIGAE9_ | 0.00755838 | 0.03500883 | 3.19E-05 | 0.0075925 | 0.51404    |
| 5mo_SIGAE9_ | 0.14377406 | 0.8569467  | 6.75E-05 | 0.023613  | -0.50792   |
| 5mo_SIGAE9_ | 0.02883959 | 0.16342157 | 3.97E-05 | 0.0040686 | -0.10664   |
| 5mo_SIGAE9_ | 0.05706742 | 0.33375096 | 5.99E-05 | 0.0076952 | 0.070131   |
| 5mo_SIGAE9_ | 0.075046   | 0.44223532 | 6.25E-05 | 0.014299  | 0.13345    |
| 5mo_SIGAE9_ | 0.04269827 | 0.24704617 | 5.29E-05 | 0.0048617 | -0.0013165 |
| 5mo_SIGAE9_ | 0.04854929 | 0.28235173 | 5.67E-05 | 0.0056831 | 0.041222   |
| 5mo_SIGAE9_ | 0.10586518 | 0.62820107 | 6.58E-05 | 0.025526  | -0.20623   |
| 5mo_SIGAE9_ | 0.02408436 | 0.13472813 | 3.61E-05 | 0.0042401 | -0.073623  |
| 5mo_SIGAE9_ | 0.07316247 | 0.4308699  | 6.23E-05 | 0.013561  | 0.12737    |
| 5mo_SIGAE9_ | 0.10031265 | 0.5946966  | 6.53E-05 | 0.024687  | -0.11403   |
| 5mo_SIGAE9_ | 0.01284098 | 0.06688453 | 3.23E-05 | 0.0059016 | 0.25518    |

|             |            |            |          |           |           |
|-------------|------------|------------|----------|-----------|-----------|
| 5mo_SIGAE9_ | 0.03310925 | 0.18918511 | 4.37E-05 | 0.0041322 | -0.091175 |
| 5mo_SIGAE9_ | 0.1347387  | 0.8024265  | 6.72E-05 | 0.023533  | -0.46872  |
| 5mo_SIGAE9_ | 0.03315624 | 0.18946868 | 4.37E-05 | 0.0041322 | -0.091175 |
| 5mo_SIGAE9_ | 0.01201189 | 0.06188171 | 3.23E-05 | 0.0060411 | 0.2791    |
| 5mo_SIGAE9_ | 0.0346918  | 0.1987344  | 4.48E-05 | 0.0041765 | -0.078293 |
| 5mo_SIGAE9_ | 0.02493205 | 0.13984315 | 3.68E-05 | 0.0041768 | -0.086782 |
| 5mo_SIGAE9_ | 0.09365832 | 0.55454373 | 6.48E-05 | 0.022676  | 0.0013661 |
| 5mo_SIGAE9_ | 0.10399608 | 0.6169227  | 6.56E-05 | 0.025296  | -0.18011  |
| 5mo_SIGAE9_ | 0.01547685 | 0.08278958 | 3.28E-05 | 0.0052924 | 0.1442    |
| 5mo_SIGAE9_ | 0.11326088 | 0.67282736 | 6.62E-05 | 0.025403  | -0.30551  |
| 5mo_SIGAE9_ | 0.01158186 | 0.05928684 | 3.22E-05 | 0.0061869 | 0.30353   |
| 5mo_SIGAE9_ | 0.0122662  | 0.06341623 | 3.23E-05 | 0.0060411 | 0.2791    |
| 5mo_SIGAE9_ | 0.00891422 | 0.0431901  | 3.19E-05 | 0.0070136 | 0.43237   |
| 5mo_SIGAE9_ | 0.02297496 | 0.12803389 | 3.55E-05 | 0.0043197 | -0.056631 |
| 5mo_SIGAE9_ | 0.09862189 | 0.58449435 | 6.52E-05 | 0.024275  | -0.084641 |
| 5mo_SIGAE9_ | 0.03093597 | 0.17607138 | 4.16E-05 | 0.0040771 | -0.10299  |
| 5mo_SIGAE9_ | 0.08963741 | 0.53028125 | 6.44E-05 | 0.021137  | 0.059815  |
| 5mo_SIGAE9_ | 0.12386374 | 0.73680604 | 6.67E-05 | 0.024153  | -0.39752  |
| 5mo_SIGAE9_ | 0.03569531 | 0.20478965 | 4.59E-05 | 0.0042319 | -0.073417 |
| 5mo_SIGAE9_ | 0.05341054 | 0.31168497 | 5.89E-05 | 0.0067028 | 0.060836  |
| 5mo_SIGAE9_ | 0.01815215 | 0.09893259 | 3.36E-05 | 0.0048202 | 0.050123  |
| 5mo_SIGAE9_ | 0.05005933 | 0.29146343 | 5.76E-05 | 0.005992  | 0.046466  |
| 5mo_SIGAE9_ | 0.05616108 | 0.32828197 | 5.97E-05 | 0.0073934 | 0.067199  |
| 5mo_SIGAE9_ | 0.0330569  | 0.18886922 | 4.32E-05 | 0.0041142 | -0.091175 |
| 5mo_SIGAE9_ | 0.02507505 | 0.14070602 | 3.68E-05 | 0.0041768 | -0.086782 |
| 5mo_SIGAE9_ | 0.0127848  | 0.06654553 | 3.23E-05 | 0.0059016 | 0.25518   |
| 5mo_SIGAE9_ | 0.07128761 | 0.41955686 | 6.20E-05 | 0.012608  | 0.12136   |
| 5mo_SIGAE9_ | 0.02225708 | 0.12370212 | 3.52E-05 | 0.0043661 | -0.046619 |
| 5mo_SIGAE9_ | 0.06311547 | 0.37024543 | 6.09E-05 | 0.0096122 | 0.087254  |
| 5mo_SIGAE9_ | 0.07975067 | 0.4706237  | 6.32E-05 | 0.016594  | 0.13545   |
| 5mo_SIGAE9_ | 0.06766948 | 0.39772472 | 6.15E-05 | 0.011255  | 0.10492   |
| 5mo_SIGAE9_ | 0.03104767 | 0.17674538 | 4.16E-05 | 0.0040771 | -0.10299  |
| 5mo_SIGAE9_ | 0.00908483 | 0.04421955 | 3.19E-05 | 0.0070136 | 0.43237   |
| 5mo_SIGAE9_ | 0.0378563  | 0.21782924 | 4.81E-05 | 0.0043756 | -0.05192  |
| 5mo_SIGAE9_ | 0.02086298 | 0.11528997 | 3.44E-05 | 0.0045325 | -0.023601 |
| 5mo_SIGAE9_ | 0.03233393 | 0.1845068  | 4.27E-05 | 0.004099  | -0.097962 |
| 5mo_SIGAE9_ | 0.13112149 | 0.78059995 | 6.70E-05 | 0.023618  | -0.44608  |
| 5mo_SIGAE9_ | 0.12979427 | 0.77259135 | 6.70E-05 | 0.023664  | -0.43912  |
| 5mo_SIGAE9_ | 0.0221252  | 0.12290636 | 3.52E-05 | 0.0043661 | -0.046619 |
| 5mo_SIGAE9_ | 0.01999452 | 0.11004961 | 3.42E-05 | 0.0045972 | 0.0032259 |
| 5mo_SIGAE9_ | 0.07891049 | 0.46555397 | 6.30E-05 | 0.016077  | 0.13613   |
| 5mo_SIGAE9_ | 0.03802718 | 0.21886034 | 4.81E-05 | 0.0043756 | -0.04622  |
| 5mo_SIGAE9_ | 0.10306484 | 0.61130357 | 6.56E-05 | 0.025216  | -0.16182  |

|             |            |            |          |           |           |
|-------------|------------|------------|----------|-----------|-----------|
| 5mo_SIGAE9_ | 0.12209045 | 0.7261058  | 6.66E-05 | 0.02435   | -0.38515  |
| 5mo_SIGAE9_ | 0.06735653 | 0.39583632 | 6.14E-05 | 0.011039  | 0.10492   |
| 5mo_SIGAE9_ | 0.07688288 | 0.4533192  | 6.28E-05 | 0.015307  | 0.13605   |
| 5mo_SIGAE9_ | 0.03740903 | 0.2151304  | 4.76E-05 | 0.0043355 | -0.05192  |
| 5mo_SIGAE9_ | 0.02211094 | 0.12282028 | 3.52E-05 | 0.0043661 | -0.046619 |
| 5mo_SIGAE9_ | 0.0635122  | 0.37263933 | 6.09E-05 | 0.0096122 | 0.089169  |
| 5mo_SIGAE9_ | 0.10147198 | 0.6016921  | 6.54E-05 | 0.024923  | -0.14299  |
| 5mo_SIGAE9_ | 0.04492754 | 0.26049778 | 5.46E-05 | 0.0051531 | 0.017239  |
| 5mo_SIGAE9_ | 0.09832092 | 0.58267826 | 6.52E-05 | 0.024123  | -0.084641 |
| 5mo_SIGAE9_ | 0.04444369 | 0.2575782  | 5.42E-05 | 0.0050757 | 0.012967  |
| 5mo_SIGAE9_ | 0.02403524 | 0.13443173 | 3.61E-05 | 0.0042401 | -0.073623 |
| 5mo_SIGAE9_ | 0.05929957 | 0.3472199  | 6.03E-05 | 0.0083426 | 0.075889  |
| 5mo_SIGAE9_ | 0.01893298 | 0.10364419 | 3.38E-05 | 0.004741  | 0.03364   |
| 5mo_SIGAE9_ | 0.10875431 | 0.64563435 | 6.59E-05 | 0.025616  | -0.25305  |
| 5mo_SIGAE9_ | 0.02755665 | 0.15568021 | 3.88E-05 | 0.0040827 | -0.10472  |
| 5mo_SIGAE9_ | 0.12569074 | 0.74783033 | 6.68E-05 | 0.023927  | -0.40938  |
| 5mo_SIGAE9_ | 0.09118664 | 0.53962934 | 6.45E-05 | 0.021597  | 0.036126  |
| 5mo_SIGAE9_ | 0.00986019 | 0.04889818 | 3.20E-05 | 0.0066628 | 0.37961   |
| 5mo_SIGAE9_ | 0.00767486 | 0.03571169 | 3.19E-05 | 0.0073923 | 0.48652   |
| 5mo_SIGAE9_ | 0.15438388 | 0.92096734 | 6.77E-05 | 0.023711  | -0.52645  |
| 5mo_SIGAE9_ | 0.0959276  | 0.5682368  | 6.50E-05 | 0.023448  | -0.035993 |
| 5mo_SIGAE9_ | 0.04046647 | 0.23357926 | 5.09E-05 | 0.0046173 | -0.023154 |
| 5mo_SIGAE9_ | 0.03436571 | 0.19676675 | 4.48E-05 | 0.0041765 | -0.082901 |
| 5mo_SIGAE9_ | 0.05201054 | 0.3032373  | 5.85E-05 | 0.0064518 | 0.055318  |
| 5mo_SIGAE9_ | 0.04072999 | 0.2351694  | 5.09E-05 | 0.0046173 | -0.017493 |
| 5mo_SIGAE9_ | 0.09059021 | 0.5360305  | 6.44E-05 | 0.021369  | 0.044278  |
| 5mo_SIGAE9_ | 0.0381188  | 0.2194132  | 4.87E-05 | 0.0044183 | -0.04622  |
| 5mo_SIGAE9_ | 0.01489075 | 0.07925299 | 3.27E-05 | 0.0054028 | 0.16515   |
| 5mo_SIGAE9_ | 0.08109557 | 0.47873896 | 6.33E-05 | 0.017113  | 0.13148   |
| 5mo_SIGAE9_ | 0.01805092 | 0.0983218  | 3.34E-05 | 0.0049043 | 0.067421  |
| 5mo_SIGAE9_ | 0.02331534 | 0.13008778 | 3.58E-05 | 0.0042778 | -0.065623 |
| 5mo_SIGAE9_ | 0.01836684 | 0.10022806 | 3.36E-05 | 0.0048202 | 0.050123  |
| 5mo_SIGAE9_ | 0.01643287 | 0.0885583  | 3.30E-05 | 0.0051875 | 0.10435   |
| 5mo_SIGAE9_ | 0.01565056 | 0.0838378  | 3.28E-05 | 0.0052924 | 0.1442    |
| 5mo_SIGAE9_ | 0.02161502 | 0.11982784 | 3.49E-05 | 0.0044169 | -0.0356   |
| 5mo_SIGAE9_ | 0.01337701 | 0.07011896 | 3.24E-05 | 0.0057681 | 0.23179   |
| 5mo_SIGAE9_ | 0.01443066 | 0.0764768  | 3.26E-05 | 0.0055188 | 0.18676   |
| 5mo_SIGAE9_ | 0.01844295 | 0.10068733 | 3.36E-05 | 0.0048202 | 0.050123  |
| 5mo_SIGAE9_ | 0.02349334 | 0.13116181 | 3.58E-05 | 0.0042778 | -0.065623 |
| 5mo_SIGAE9_ | 0.08706842 | 0.5147797  | 6.41E-05 | 0.01993   | 0.093363  |
| 5mo_SIGAE9_ | 0.0422228  | 0.24417712 | 5.24E-05 | 0.0047963 | -0.00654  |
| 5mo_SIGAE9_ | 0.00924415 | 0.04518088 | 3.20E-05 | 0.0068348 | 0.4058    |
| 5mo_SIGAE9_ | 0.08572777 | 0.5066901  | 6.39E-05 | 0.01943   | 0.1043    |

|             |            |            |          |           |           |
|-------------|------------|------------|----------|-----------|-----------|
| 5mo_SIGAE9_ | 0.09839438 | 0.58312154 | 6.52E-05 | 0.024123  | -0.084641 |
| 5mo_SIGAE9_ | 0.01798163 | 0.09790365 | 3.34E-05 | 0.0049043 | 0.067421  |
| 5mo_SIGAE9_ | 0.02418046 | 0.13530797 | 3.61E-05 | 0.0042401 | -0.080664 |
| 5mo_SIGAE9_ | 0.04335675 | 0.25101948 | 5.33E-05 | 0.0049301 | 0.0036923 |
| 5mo_SIGAE9_ | 0.04788668 | 0.27835348 | 5.64E-05 | 0.0055867 | 0.038361  |
| 5mo_SIGAE9_ | 0.09312797 | 0.55134356 | 6.47E-05 | 0.022469  | 0.010343  |
| 5mo_SIGAE9_ | 0.02713929 | 0.15316182 | 3.84E-05 | 0.0040947 | -0.10271  |
| 5mo_SIGAE9_ | 0.03021379 | 0.17171362 | 4.07E-05 | 0.0040668 | -0.10475  |
| 5mo_SIGAE9_ | 0.04172432 | 0.24116929 | 5.19E-05 | 0.0047337 | -0.011944 |
| 5mo_SIGAE9_ | 0.02490569 | 0.13968411 | 3.68E-05 | 0.0041768 | -0.086782 |
| 5mo_SIGAE9_ | 0.11568803 | 0.68747306 | 6.63E-05 | 0.025119  | -0.32814  |
| 5mo_SIGAE9_ | 0.05205732 | 0.3035195  | 5.85E-05 | 0.0064518 | 0.055318  |
| 5mo_SIGAE9_ | 0.02664567 | 0.1501833  | 3.80E-05 | 0.0041099 | -0.099939 |
| 5mo_SIGAE9_ | 0.0110946  | 0.05634669 | 3.21E-05 | 0.006339  | 0.32844   |
| 5mo_SIGAE9_ | 0.09593902 | 0.5683057  | 6.50E-05 | 0.023448  | -0.035993 |
| 5mo_SIGAE9_ | 0.01296075 | 0.0676072  | 3.23E-05 | 0.0059016 | 0.25518   |
| 5mo_SIGAE9_ | 0.08511864 | 0.5030145  | 6.38E-05 | 0.018923  | 0.10916   |
| 5mo_SIGAE9_ | 0.02558255 | 0.1437683  | 3.72E-05 | 0.0041509 | -0.092011 |
| 5mo_SIGAE9_ | 0.02211895 | 0.12286861 | 3.52E-05 | 0.0043661 | -0.046619 |
| 5mo_SIGAE9_ | 0.01391055 | 0.0733384  | 3.25E-05 | 0.0056405 | 0.20898   |
| 5mo_SIGAE9_ | 0.06716219 | 0.39466366 | 6.14E-05 | 0.011039  | 0.10251   |
| 5mo_SIGAE9_ | 0.04708902 | 0.27354035 | 5.61E-05 | 0.0054936 | 0.032113  |
| 5mo_SIGAE9_ | 0.01112171 | 0.05651026 | 3.21E-05 | 0.006339  | 0.32844   |
| 5mo_SIGAE9_ | 0.00979502 | 0.0485049  | 3.20E-05 | 0.0066628 | 0.37961   |
| 5mo_SIGAE9_ | 0.02400024 | 0.13422054 | 3.61E-05 | 0.0042401 | -0.073623 |
| 5mo_SIGAE9_ | 0.14729972 | 0.8782209  | 6.76E-05 | 0.023673  | -0.51713  |
| 5mo_SIGAE9_ | 0.01089737 | 0.05515659 | 3.21E-05 | 0.0064976 | 0.32844   |
| 5mo_SIGAE9_ | 0.05312759 | 0.30997765 | 5.89E-05 | 0.0067028 | 0.059084  |
| 5mo_SIGAE9_ | 0.02975548 | 0.16894816 | 4.07E-05 | 0.0040668 | -0.10597  |
| 5mo_SIGAE9_ | 0.01360314 | 0.07148346 | 3.24E-05 | 0.0057681 | 0.23179   |
| 5mo_SIGAE9_ | 0.07964538 | 0.4699884  | 6.32E-05 | 0.016594  | 0.13545   |
| 5mo_SIGAE9_ | 0.09655434 | 0.57201856 | 6.50E-05 | 0.023626  | -0.055297 |
| 5mo_SIGAE9_ | 0.07333653 | 0.43192023 | 6.23E-05 | 0.013561  | 0.12913   |
| 5mo_SIGAE9_ | 0.04518262 | 0.26203692 | 5.46E-05 | 0.0051531 | 0.021279  |
| 5mo_SIGAE9_ | 0.04401805 | 0.25500983 | 5.38E-05 | 0.0050014 | 0.012967  |
| 5mo_SIGAE9_ | 0.03899895 | 0.22472413 | 4.92E-05 | 0.0044639 | -0.040459 |
| 5mo_SIGAE9_ | 0.01906122 | 0.104418   | 3.38E-05 | 0.004741  | 0.03364   |
| 5mo_SIGAE9_ | 0.02522109 | 0.14158721 | 3.68E-05 | 0.0041768 | -0.086782 |
| 5mo_SIGAE9_ | 0.01385786 | 0.07302048 | 3.25E-05 | 0.0056405 | 0.20898   |
| 5mo_SIGAE9_ | 0.0181683  | 0.09903006 | 3.36E-05 | 0.0048202 | 0.050123  |
| 5mo_SIGAE9_ | 0.11982585 | 0.712441   | 6.65E-05 | 0.024632  | -0.36766  |
| 5mo_SIGAE9_ | 0.02970581 | 0.16864845 | 4.02E-05 | 0.0040662 | -0.10597  |
| 5mo_SIGAE9_ | 0.02428326 | 0.13592827 | 3.64E-05 | 0.0042065 | -0.080664 |

|             |            |            |          |           |           |
|-------------|------------|------------|----------|-----------|-----------|
| 5mo_SIGAE9_ | 0.02964096 | 0.16825712 | 4.02E-05 | 0.0040662 | -0.10661  |
| 5mo_SIGAE9_ | 0.0443631  | 0.2570919  | 5.42E-05 | 0.0050757 | 0.012967  |
| 5mo_SIGAE9_ | 0.01530081 | 0.08172734 | 3.27E-05 | 0.0054028 | 0.1442    |
| 5mo_SIGAE9_ | 0.09529153 | 0.5643987  | 6.49E-05 | 0.023263  | -0.026471 |
| 5mo_SIGAE9_ | 0.02022575 | 0.11144491 | 3.42E-05 | 0.0045972 | 0.0032259 |
| 5mo_SIGAE9_ | 0.08789847 | 0.51978827 | 6.41E-05 | 0.020177  | 0.080939  |
| 5mo_SIGAE9_ | 0.01583587 | 0.08495597 | 3.28E-05 | 0.0052924 | 0.1442    |
| 5mo_SIGAE9_ | 0.09247466 | 0.5474014  | 6.46E-05 | 0.022258  | 0.019141  |
| 5mo_SIGAE9_ | 0.02857885 | 0.16184829 | 3.93E-05 | 0.004074  | -0.10664  |
| 5mo_SIGAE9_ | 0.10809815 | 0.641675   | 6.59E-05 | 0.025614  | -0.24573  |
| 5mo_SIGAE9_ | 0.00965757 | 0.04767555 | 3.20E-05 | 0.0068348 | 0.4058    |
| 5mo_SIGAE9_ | 0.10885307 | 0.6462303  | 6.59E-05 | 0.025616  | -0.25305  |
| 5mo_SIGAE9_ | 0.11023212 | 0.65455157 | 6.60E-05 | 0.02558   | -0.26716  |
| 5mo_SIGAE9_ | 0.00947413 | 0.04656861 | 3.20E-05 | 0.0068348 | 0.4058    |
| 5mo_SIGAE9_ | 0.08346131 | 0.4930141  | 6.36E-05 | 0.018151  | 0.12117   |
| 5mo_SIGAE9_ | 0.10039337 | 0.5951837  | 6.53E-05 | 0.024687  | -0.12375  |
| 5mo_SIGAE9_ | 0.02137341 | 0.11836999 | 3.47E-05 | 0.0044724 | -0.0356   |
| 5mo_SIGAE9_ | 0.07455608 | 0.43927905 | 6.24E-05 | 0.014051  | 0.13218   |
| 5mo_SIGAE9_ | 0.0551207  | 0.32200426 | 5.94E-05 | 0.0071062 | 0.065685  |
| 5mo_SIGAE9_ | 0.08358604 | 0.4937667  | 6.37E-05 | 0.01841   | 0.12117   |
| 5mo_SIGAE9_ | 0.01708819 | 0.09251257 | 3.33E-05 | 0.0049935 | 0.085504  |
| 5mo_SIGAE9_ | 0.03955754 | 0.22809473 | 4.98E-05 | 0.0045122 | -0.034672 |
| 5mo_SIGAE9_ | 0.08688327 | 0.51366246 | 6.41E-05 | 0.01993   | 0.093363  |
| 5mo_SIGAE9_ | 0.06837705 | 0.40199426 | 6.16E-05 | 0.011474  | 0.10977   |
| 5mo_SIGAE9_ | 0.01741156 | 0.0944638  | 3.33E-05 | 0.0049935 | 0.085504  |
| 5mo_SIGAE9_ | 0.0113817  | 0.05807909 | 3.21E-05 | 0.006339  | 0.32844   |
| 5mo_SIGAE9_ | 0.02740289 | 0.15475242 | 3.84E-05 | 0.0040947 | -0.10271  |
| 5mo_SIGAE9_ | 0.1293211  | 0.76973623 | 6.70E-05 | 0.023692  | -0.43556  |
| 5mo_SIGAE9_ | 0.1063039  | 0.63084835 | 6.58E-05 | 0.02556   | -0.21453  |
| 5mo_SIGAE9_ | 0.13883406 | 0.8271383  | 6.73E-05 | 0.023538  | -0.48824  |
| 5mo_SIGAE9_ | 0.06086271 | 0.35665208 | 6.06E-05 | 0.008866  | 0.080421  |
| 5mo_SIGAE9_ | 0.06867847 | 0.40381303 | 6.16E-05 | 0.011695  | 0.10977   |
| 5mo_SIGAE9_ | 0.12021218 | 0.71477216 | 6.66E-05 | 0.024561  | -0.36766  |
| 5mo_SIGAE9_ | 0.03074752 | 0.17493421 | 4.11E-05 | 0.0040705 | -0.10475  |
| 5mo_SIGAE9_ | 0.08356383 | 0.4936327  | 6.37E-05 | 0.01841   | 0.12117   |
| 5mo_SIGAE9_ | 0.02402254 | 0.1343551  | 3.61E-05 | 0.0042401 | -0.073623 |
| 5mo_SIGAE9_ | 0.0300863  | 0.17094438 | 4.07E-05 | 0.0040668 | -0.10597  |
| 5mo_SIGAE9_ | 0.01116317 | 0.05676044 | 3.21E-05 | 0.006339  | 0.32844   |
| 5mo_SIGAE9_ | 0.01868313 | 0.10213656 | 3.38E-05 | 0.004741  | 0.03364   |
| 5mo_SIGAE9_ | 0.01293645 | 0.06746061 | 3.23E-05 | 0.0059016 | 0.25518   |
| 5mo_SIGAE9_ | 0.03323656 | 0.18995331 | 4.37E-05 | 0.0041322 | -0.091175 |
| 5mo_SIGAE9_ | 0.01765373 | 0.09592507 | 3.34E-05 | 0.0049043 | 0.067421  |
| 5mo_SIGAE9_ | 0.01202754 | 0.06197615 | 3.23E-05 | 0.0060411 | 0.2791    |

|             |            |            |          |           |           |
|-------------|------------|------------|----------|-----------|-----------|
| 5mo_SIGAE9_ | 0.01522956 | 0.08129742 | 3.27E-05 | 0.0054028 | 0.16515   |
| 5mo_SIGAE9_ | 0.01836444 | 0.10021357 | 3.36E-05 | 0.0048202 | 0.050123  |
| 5mo_SIGAE9_ | 0.03430624 | 0.19640785 | 4.48E-05 | 0.0041765 | -0.082901 |
| 5mo_SIGAE9_ | 0.02015353 | 0.11100912 | 3.42E-05 | 0.0045972 | 0.0032259 |
| 5mo_SIGAE9_ | 0.08489082 | 0.50163984 | 6.38E-05 | 0.018923  | 0.1136    |
| 5mo_SIGAE9_ | 0.02123756 | 0.11755025 | 3.47E-05 | 0.0044724 | -0.023601 |
| 5mo_SIGAE9_ | 0.0157406  | 0.08438111 | 3.28E-05 | 0.0052924 | 0.1442    |
| 5mo_SIGAE9_ | 0.08383916 | 0.49529403 | 6.37E-05 | 0.01841   | 0.1176    |
| 5mo_SIGAE9_ | 0.01920728 | 0.10529936 | 3.38E-05 | 0.004741  | 0.017998  |
| 5mo_SIGAE9_ | 0.02047519 | 0.11295005 | 3.44E-05 | 0.0045325 | -0.01065  |
| 5mo_SIGAE9_ | 0.01652315 | 0.08910304 | 3.31E-05 | 0.0050879 | 0.10435   |
| 5mo_SIGAE9_ | 0.08689965 | 0.5137613  | 6.41E-05 | 0.01993   | 0.093363  |
| 5mo_SIGAE9_ | 0.08350924 | 0.49330327 | 6.36E-05 | 0.018151  | 0.12117   |
| 5mo_SIGAE9_ | 0.1179568  | 0.701163   | 6.65E-05 | 0.024847  | -0.34876  |
| 5mo_SIGAE9_ | 0.00976981 | 0.04835276 | 3.20E-05 | 0.0068348 | 0.37961   |
| 5mo_SIGAE9_ | 0.01140477 | 0.0582183  | 3.21E-05 | 0.006339  | 0.32844   |
| 5mo_SIGAE9_ | 0.08166163 | 0.4821546  | 6.34E-05 | 0.017373  | 0.12948   |
| 5mo_SIGAE9_ | 0.0783419  | 0.4621231  | 6.29E-05 | 0.015819  | 0.13651   |
| 5mo_SIGAE9_ | 0.0182444  | 0.09948928 | 3.36E-05 | 0.0048202 | 0.050123  |
| 5mo_SIGAE9_ | 0.04408138 | 0.25539196 | 5.38E-05 | 0.0050014 | 0.012967  |
| 5mo_SIGAE9_ | 0.1045735  | 0.6204069  | 6.57E-05 | 0.025429  | -0.18901  |
| 5mo_SIGAE9_ | 0.02167007 | 0.12016006 | 3.49E-05 | 0.0044169 | -0.0356   |
| 5mo_SIGAE9_ | 0.01527704 | 0.08158392 | 3.27E-05 | 0.0054028 | 0.16515   |
| 5mo_SIGAE9_ | 0.09594487 | 0.56834096 | 6.50E-05 | 0.023448  | -0.045608 |
| 5mo_SIGAE9_ | 0.02213572 | 0.12296984 | 3.52E-05 | 0.0043661 | -0.046619 |
| 5mo_SIGAE9_ | 0.03715934 | 0.21362376 | 4.76E-05 | 0.0043355 | -0.057524 |
| 5mo_SIGAE9_ | 0.02108951 | 0.11665689 | 3.47E-05 | 0.0044724 | -0.023601 |
| 5mo_SIGAE9_ | 0.02381182 | 0.1330836  | 3.61E-05 | 0.0042401 | -0.073623 |
| 5mo_SIGAE9_ | 0.01817615 | 0.0990774  | 3.36E-05 | 0.0048202 | 0.050123  |
| 5mo_SIGAE9_ | 0.01651597 | 0.08905976 | 3.31E-05 | 0.0050879 | 0.10435   |
| 5mo_SIGAE9_ | 0.02719476 | 0.15349652 | 3.84E-05 | 0.0040947 | -0.10271  |
| 5mo_SIGAE9_ | 0.07320259 | 0.431112   | 6.23E-05 | 0.013561  | 0.12737   |
| 5mo_SIGAE9_ | 0.02192695 | 0.1217101  | 3.49E-05 | 0.0044169 | -0.046619 |
| 5mo_SIGAE9_ | 0.0674247  | 0.39624768 | 6.14E-05 | 0.011039  | 0.10492   |
| 5mo_SIGAE9_ | 0.03108631 | 0.17697851 | 4.16E-05 | 0.0040771 | -0.10299  |
| 5mo_SIGAE9_ | 0.00970376 | 0.04795422 | 3.20E-05 | 0.0068348 | 0.4058    |
| 5mo_SIGAE9_ | 0.01539699 | 0.0823077  | 3.28E-05 | 0.0052924 | 0.1442    |
| 5mo_SIGAE9_ | 0.05365177 | 0.31314057 | 5.91E-05 | 0.0068337 | 0.060836  |
| 5mo_SIGAE9_ | 0.0317812  | 0.18117155 | 4.22E-05 | 0.0040866 | -0.10071  |
| 5mo_SIGAE9_ | 0.02106217 | 0.11649193 | 3.47E-05 | 0.0044724 | -0.023601 |
| 5mo_SIGAE9_ | 0.02109299 | 0.1166779  | 3.47E-05 | 0.0044724 | -0.023601 |
| 5mo_SIGAE9_ | 0.01841553 | 0.10052186 | 3.36E-05 | 0.0048202 | 0.050123  |
| 5mo_SIGAE9_ | 0.01887748 | 0.10330932 | 3.38E-05 | 0.004741  | 0.03364   |



|             |            |            |          |           |           |
|-------------|------------|------------|----------|-----------|-----------|
| 5mo_SIGAE9_ | 0.02351544 | 0.13129516 | 3.58E-05 | 0.0042778 | -0.065623 |
| 5mo_SIGAE9_ | 0.04205737 | 0.24317893 | 5.24E-05 | 0.0047963 | -0.00654  |
| 5mo_SIGAE9_ | 0.01469538 | 0.07807414 | 3.26E-05 | 0.0055188 | 0.18676   |
| 5mo_SIGAE9_ | 0.02740789 | 0.15478256 | 3.84E-05 | 0.0040947 | -0.10271  |
| 5mo_SIGAE9_ | 0.13972127 | 0.8324918  | 6.73E-05 | 0.023551  | -0.49317  |
| 5mo_SIGAE9_ | 0.0881943  | 0.5215733  | 6.42E-05 | 0.020421  | 0.080939  |
| 5mo_SIGAE9_ | 0.06546588 | 0.384428   | 6.12E-05 | 0.01041   | 0.095509  |
| 5mo_SIGAE9_ | 0.00850916 | 0.04074593 | 3.19E-05 | 0.0071994 | 0.45929   |
| 5mo_SIGAE9_ | 0.06360035 | 0.37317127 | 6.10E-05 | 0.0098069 | 0.089169  |
| 5mo_SIGAE9_ | 0.11056156 | 0.65653944 | 6.60E-05 | 0.02558   | -0.27396  |
| 5mo_SIGAE9_ | 0.07551784 | 0.44508246 | 6.26E-05 | 0.014549  | 0.13453   |
| 5mo_SIGAE9_ | 0.08647056 | 0.5111721  | 6.40E-05 | 0.019681  | 0.099025  |
| 5mo_SIGAE9_ | 0.07981058 | 0.47098523 | 6.32E-05 | 0.016594  | 0.13545   |
| 5mo_SIGAE9_ | 0.09449672 | 0.55960274 | 6.48E-05 | 0.022877  | -0.017059 |
| 5mo_SIGAE9_ | 0.11532313 | 0.68527114 | 6.63E-05 | 0.025182  | -0.32814  |
| 5mo_SIGAE9_ | 0.03090013 | 0.17585509 | 4.16E-05 | 0.0040771 | -0.10299  |
| 5mo_SIGAE9_ | 0.01433382 | 0.07589245 | 3.26E-05 | 0.0055188 | 0.18676   |
| 5mo_SIGAE9_ | 0.03779166 | 0.21743922 | 4.81E-05 | 0.0043756 | -0.05192  |
| 5mo_SIGAE9_ | 0.04738164 | 0.27530605 | 5.61E-05 | 0.0054936 | 0.035328  |
| 5mo_SIGAE9_ | 0.02303617 | 0.12840326 | 3.55E-05 | 0.0043197 | -0.065623 |
| 5mo_SIGAE9_ | 0.03042197 | 0.17296985 | 4.11E-05 | 0.0040705 | -0.10475  |
| 5mo_SIGAE9_ | 0.03733134 | 0.21466158 | 4.76E-05 | 0.0043355 | -0.057524 |
| 5mo_SIGAE9_ | 0.06749838 | 0.39669228 | 6.15E-05 | 0.011255  | 0.10492   |
| 5mo_SIGAE9_ | 0.04367345 | 0.25293043 | 5.38E-05 | 0.0050014 | 0.008455  |
| 5mo_SIGAE9_ | 0.09976579 | 0.59139675 | 6.53E-05 | 0.024558  | -0.10426  |
| 5mo_SIGAE9_ | 0.07566951 | 0.4459976  | 6.26E-05 | 0.014549  | 0.13453   |
| 5mo_SIGAE9_ | 0.14508657 | 0.86486655 | 6.75E-05 | 0.023641  | -0.51136  |
| 5mo_SIGAE9_ | 0.01754321 | 0.09525821 | 3.33E-05 | 0.0049935 | 0.067421  |
| 5mo_SIGAE9_ | 0.02302917 | 0.128361   | 3.55E-05 | 0.0043197 | -0.065623 |
| 5mo_SIGAE9_ | 0.01682992 | 0.09095413 | 3.31E-05 | 0.0050879 | 0.10435   |
| 5mo_SIGAE9_ | 0.08480515 | 0.5011229  | 6.38E-05 | 0.018923  | 0.1136    |
| 5mo_SIGAE9_ | 0.01162745 | 0.05956198 | 3.22E-05 | 0.0061869 | 0.30353   |
| 5mo_SIGAE9_ | 0.01575797 | 0.08448592 | 3.28E-05 | 0.0052924 | 0.1442    |
| 5mo_SIGAE9_ | 0.04129898 | 0.23860273 | 5.14E-05 | 0.0046741 | -0.011944 |
| 5mo_SIGAE9_ | 0.03050582 | 0.17347579 | 4.11E-05 | 0.0040705 | -0.10475  |
| 5mo_SIGAE9_ | 0.07107894 | 0.4182977  | 6.20E-05 | 0.012608  | 0.11916   |
| 5mo_SIGAE9_ | 0.01840338 | 0.10044853 | 3.36E-05 | 0.0048202 | 0.050123  |
| 5mo_SIGAE9_ | 0.09891095 | 0.58623856 | 6.52E-05 | 0.024275  | -0.094455 |
| 5mo_SIGAE9_ | 0.08650671 | 0.51139027 | 6.40E-05 | 0.019681  | 0.099025  |
| 5mo_SIGAE9_ | 0.1335881  | 0.7954837  | 6.71E-05 | 0.023546  | -0.46255  |
| 5mo_SIGAE9_ | 0.11307845 | 0.6717266  | 6.62E-05 | 0.025403  | -0.30551  |
| 5mo_SIGAE9_ | 0.01380576 | 0.07270607 | 3.25E-05 | 0.0056405 | 0.20898   |
| 5mo_SIGAE9_ | 0.02000032 | 0.11008464 | 3.42E-05 | 0.0045972 | 0.0032259 |

|             |            |            |          |           |           |
|-------------|------------|------------|----------|-----------|-----------|
| 5mo_SIGAE9_ | 0.02981033 | 0.16927916 | 4.07E-05 | 0.0040668 | -0.10597  |
| 5mo_SIGAE9_ | 0.02098279 | 0.11601291 | 3.47E-05 | 0.0044724 | -0.023601 |
| 5mo_SIGAE9_ | 0.07096266 | 0.41759607 | 6.20E-05 | 0.012608  | 0.11916   |
| 5mo_SIGAE9_ | 0.09082657 | 0.5374567  | 6.45E-05 | 0.021597  | 0.044278  |
| 5mo_SIGAE9_ | 0.0580876  | 0.3399068  | 6.01E-05 | 0.0080116 | 0.073002  |
| 5mo_SIGAE9_ | 0.04132892 | 0.23878339 | 5.14E-05 | 0.0046741 | -0.011944 |
| 5mo_SIGAE9_ | 0.05943537 | 0.34803936 | 6.03E-05 | 0.0083426 | 0.075889  |
| 5mo_SIGAE9_ | 0.03205939 | 0.1828502  | 4.27E-05 | 0.004099  | -0.097962 |
| 5mo_SIGAE9_ | 0.01806954 | 0.09843415 | 3.34E-05 | 0.0049043 | 0.050123  |
| 5mo_SIGAE9_ | 0.02075487 | 0.11463764 | 3.44E-05 | 0.0045325 | -0.01065  |
| 5mo_SIGAE9_ | 0.03648645 | 0.20956346 | 4.70E-05 | 0.0042982 | -0.062998 |
| 5mo_SIGAE9_ | 0.02539567 | 0.14264065 | 3.72E-05 | 0.0041509 | -0.092011 |
| 5mo_SIGAE9_ | 0.02230331 | 0.12398111 | 3.52E-05 | 0.0043661 | -0.046619 |
| 5mo_SIGAE9_ | 0.02642089 | 0.14882694 | 3.76E-05 | 0.0041286 | -0.099939 |
| 5mo_SIGAE9_ | 0.07737296 | 0.45627642 | 6.28E-05 | 0.015307  | 0.13646   |
| 5mo_SIGAE9_ | 0.04937192 | 0.28731555 | 5.73E-05 | 0.0058857 | 0.04392   |
| 5mo_SIGAE9_ | 0.10407597 | 0.61740476 | 6.56E-05 | 0.025367  | -0.18011  |
| 5mo_SIGAE9_ | 0.05276677 | 0.3078004  | 5.87E-05 | 0.0065755 | 0.057248  |
| 5mo_SIGAE9_ | 0.1453146  | 0.8662425  | 6.75E-05 | 0.023641  | -0.51294  |
| 5mo_SIGAE9_ | 0.03102108 | 0.1765849  | 4.16E-05 | 0.0040771 | -0.10299  |
| 5mo_SIGAE9_ | 0.06446846 | 0.37840948 | 6.10E-05 | 0.010005  | 0.093303  |
| 5mo_SIGAE9_ | 0.01197081 | 0.0616338  | 3.22E-05 | 0.0061869 | 0.30353   |
| 5mo_SIGAE9_ | 0.04132787 | 0.23877703 | 5.14E-05 | 0.0046741 | -0.011944 |
| 5mo_SIGAE9_ | 0.01179305 | 0.06056123 | 3.22E-05 | 0.0061869 | 0.30353   |
| 5mo_SIGAE9_ | 0.03763564 | 0.21649781 | 4.81E-05 | 0.0043756 | -0.05192  |
| 5mo_SIGAE9_ | 0.03363587 | 0.19236283 | 4.43E-05 | 0.004153  | -0.087207 |
| 5mo_SIGAE9_ | 0.14012218 | 0.8349109  | 6.74E-05 | 0.023558  | -0.49317  |
| 5mo_SIGAE9_ | 0.01790846 | 0.09746213 | 3.34E-05 | 0.0049043 | 0.067421  |
| 5mo_SIGAE9_ | 0.06697909 | 0.39355883 | 6.14E-05 | 0.011039  | 0.10251   |
| 5mo_SIGAE9_ | 0.09283312 | 0.5495644  | 6.46E-05 | 0.022258  | 0.010343  |
| 5mo_SIGAE9_ | 0.01344401 | 0.07052326 | 3.24E-05 | 0.0057681 | 0.23179   |
| 5mo_SIGAE9_ | 0.02244348 | 0.12482689 | 3.52E-05 | 0.0043661 | -0.046619 |
| 5mo_SIGAE9_ | 0.05874643 | 0.3438822  | 6.02E-05 | 0.0081753 | 0.074438  |
| 5mo_SIGAE9_ | 0.06650634 | 0.39070624 | 6.13E-05 | 0.010826  | 0.10013   |
| 5mo_SIGAE9_ | 0.10032982 | 0.5948002  | 6.53E-05 | 0.024687  | -0.11403  |
| 5mo_SIGAE9_ | 0.0126947  | 0.06600188 | 3.23E-05 | 0.0059016 | 0.25518   |
| 5mo_SIGAE9_ | 0.04314258 | 0.24972714 | 5.33E-05 | 0.0049301 | 0.0036923 |
| 5mo_SIGAE9_ | 0.05955482 | 0.3487601  | 6.03E-05 | 0.0083426 | 0.077363  |
| 5mo_SIGAE9_ | 0.02195204 | 0.12186147 | 3.49E-05 | 0.0044169 | -0.046619 |
| 5mo_SIGAE9_ | 0.05571641 | 0.3255988  | 5.95E-05 | 0.007248  | 0.067199  |
| 5mo_SIGAE9_ | 0.01173579 | 0.06021567 | 3.22E-05 | 0.0061869 | 0.30353   |
| 5mo_SIGAE9_ | 0.0820512  | 0.48450536 | 6.35E-05 | 0.017633  | 0.12948   |
| 5mo_SIGAE9_ | 0.11636178 | 0.69153845 | 6.64E-05 | 0.025054  | -0.33347  |

|             |            |            |          |           |           |
|-------------|------------|------------|----------|-----------|-----------|
| 5mo_SIGAE9_ | 0.03473362 | 0.19898671 | 4.48E-05 | 0.0041765 | -0.078293 |
| 5mo_SIGAE9_ | 0.02429214 | 0.13598189 | 3.64E-05 | 0.0042065 | -0.080664 |
| 5mo_SIGAE9_ | 0.08411503 | 0.49695867 | 6.37E-05 | 0.018667  | 0.1176    |
| 5mo_SIGAE9_ | 0.08945195 | 0.5291621  | 6.43E-05 | 0.020902  | 0.059815  |
| 5mo_SIGAE9_ | 0.14230588 | 0.8480876  | 6.74E-05 | 0.023593  | -0.5021   |
| 5mo_SIGAE9_ | 0.0090189  | 0.04382176 | 3.19E-05 | 0.0070136 | 0.43237   |
| 5mo_SIGAE9_ | 0.0886924  | 0.5245789  | 6.42E-05 | 0.020663  | 0.074212  |
| 5mo_SIGAE9_ | 0.02490241 | 0.1396643  | 3.68E-05 | 0.0041768 | -0.086782 |
| 5mo_SIGAE9_ | 0.03848856 | 0.2216444  | 4.87E-05 | 0.0044183 | -0.04622  |
| 5mo_SIGAE9_ | 0.01622786 | 0.08732128 | 3.30E-05 | 0.0051875 | 0.12392   |
| 5mo_SIGAE9_ | 0.09166809 | 0.54253453 | 6.45E-05 | 0.021822  | 0.027741  |
| 5mo_SIGAE9_ | 0.00748279 | 0.03455268 | 3.19E-05 | 0.0075925 | 0.51404   |
| 5mo_SIGAE9_ | 0.09050756 | 0.53553176 | 6.44E-05 | 0.021369  | 0.044278  |
| 5mo_SIGAE9_ | 0.066175   | 0.3887069  | 6.13E-05 | 0.010616  | 0.10013   |
| 5mo_SIGAE9_ | 0.02259844 | 0.12576193 | 3.55E-05 | 0.0043197 | -0.056631 |
| 5mo_SIGAE9_ | 0.01931764 | 0.10596525 | 3.40E-05 | 0.0046667 | 0.017998  |
| 5mo_SIGAE9_ | 0.02048938 | 0.11303566 | 3.44E-05 | 0.0045325 | -0.01065  |
| 5mo_SIGAE9_ | 0.01817834 | 0.09909064 | 3.36E-05 | 0.0048202 | 0.050123  |
| 5mo_SIGAE9_ | 0.09797079 | 0.5805656  | 6.52E-05 | 0.024123  | -0.074831 |
| 5mo_SIGAE9_ | 0.0174207  | 0.09451895 | 3.33E-05 | 0.0049935 | 0.085504  |
| 5mo_SIGAE9_ | 0.12604272 | 0.7499542  | 6.68E-05 | 0.023927  | -0.41325  |
| 5mo_SIGAE9_ | 0.00474691 | 0.01804417 | 3.18E-05 | 0.0087056 | 0.65503   |
| 5mo_SIGAE9_ | 0.10947851 | 0.6500042  | 6.60E-05 | 0.025611  | -0.2602   |
| 5mo_SIGAE9_ | 0.01708747 | 0.09250823 | 3.33E-05 | 0.0049935 | 0.085504  |
| 5mo_SIGAE9_ | 0.08474141 | 0.50073826 | 6.38E-05 | 0.018923  | 0.1136    |
| 5mo_SIGAE9_ | 0.02028262 | 0.11178803 | 3.42E-05 | 0.0045972 | -0.01065  |
| 5mo_SIGAE9_ | 0.04343968 | 0.25151992 | 5.33E-05 | 0.0049301 | 0.0036923 |
| 5mo_SIGAE9_ | 0.07875142 | 0.46459413 | 6.30E-05 | 0.016077  | 0.13651   |
| 5mo_SIGAE9_ | 0.07220154 | 0.4250716  | 6.21E-05 | 0.01308   | 0.12548   |
| 5mo_SIGAE9_ | 0.030117   | 0.17112961 | 4.07E-05 | 0.0040668 | -0.10597  |
| 5mo_SIGAE9_ | 0.0896307  | 0.5302407  | 6.44E-05 | 0.021137  | 0.059815  |
| 5mo_SIGAE9_ | 0.0084795  | 0.04056695 | 3.19E-05 | 0.0071994 | 0.45929   |
| 5mo_SIGAE9_ | 0.01435769 | 0.07603648 | 3.26E-05 | 0.0055188 | 0.18676   |
| 5mo_SIGAE9_ | 0.01898073 | 0.10393231 | 3.38E-05 | 0.004741  | 0.03364   |
| 5mo_SIGAE9_ | 0.03209285 | 0.18305211 | 4.27E-05 | 0.004099  | -0.097962 |
| 5mo_SIGAE9_ | 0.05688827 | 0.3326699  | 5.98E-05 | 0.0075425 | 0.070131  |
| 5mo_SIGAE9_ | 0.0181409  | 0.09886473 | 3.36E-05 | 0.0048202 | 0.050123  |
| 5mo_SIGAE9_ | 0.07432468 | 0.43788278 | 6.24E-05 | 0.014051  | 0.13074   |
| 5mo_SIGAE9_ | 0.07683241 | 0.45301464 | 6.27E-05 | 0.015053  | 0.13605   |
| 5mo_SIGAE9_ | 0.02378625 | 0.1329293  | 3.61E-05 | 0.0042401 | -0.073623 |
| 5mo_SIGAE9_ | 0.00516802 | 0.02058514 | 3.18E-05 | 0.0084677 | 0.62647   |
| 5mo_SIGAE9_ | 0.09608828 | 0.56920636 | 6.50E-05 | 0.023448  | -0.045608 |
| 5mo_SIGAE9_ | 0.10146388 | 0.6016432  | 6.54E-05 | 0.024923  | -0.13341  |

|             |            |            |          |           |           |
|-------------|------------|------------|----------|-----------|-----------|
| 5mo_SIGAE9_ | 0.02472462 | 0.13859148 | 3.64E-05 | 0.0042065 | -0.086782 |
| 5mo_SIGAE9_ | 0.03201086 | 0.18255733 | 4.27E-05 | 0.004099  | -0.097962 |
| 5mo_SIGAE9_ | 0.08995696 | 0.5322094  | 6.44E-05 | 0.021137  | 0.05218   |
| 5mo_SIGAE9_ | 0.02538568 | 0.1425804  | 3.72E-05 | 0.0041509 | -0.092011 |
| 5mo_SIGAE9_ | 0.06411742 | 0.3762913  | 6.10E-05 | 0.010005  | 0.091185  |
| 5mo_SIGAE9_ | 0.11270151 | 0.6694521  | 6.62E-05 | 0.025448  | -0.29951  |
| 5mo_SIGAE9_ | 0.01583927 | 0.08497648 | 3.28E-05 | 0.0052924 | 0.1442    |
| 5mo_SIGAE9_ | 0.0736066  | 0.43354985 | 6.23E-05 | 0.013805  | 0.12913   |
| 5mo_SIGAE9_ | 0.03193155 | 0.18207875 | 4.22E-05 | 0.0040866 | -0.097962 |
| 5mo_SIGAE9_ | 0.01364272 | 0.07172227 | 3.24E-05 | 0.0057681 | 0.20898   |
| 5mo_SIGAE9_ | 0.05851986 | 0.34251508 | 6.01E-05 | 0.0080116 | 0.074438  |
| 5mo_SIGAE9_ | 0.13976717 | 0.8327688  | 6.73E-05 | 0.023551  | -0.49317  |
| 5mo_SIGAE9_ | 0.034833   | 0.19958639 | 4.54E-05 | 0.0042028 | -0.078293 |
| 5mo_SIGAE9_ | 0.09560154 | 0.5662693  | 6.49E-05 | 0.023263  | -0.035993 |
| 5mo_SIGAE9_ | 0.02176305 | 0.1207211  | 3.49E-05 | 0.0044169 | -0.0356   |
| 5mo_SIGAE9_ | 0.15040247 | 0.89694315 | 6.77E-05 | 0.023699  | -0.52306  |
| 5mo_SIGAE9_ | 0.02287488 | 0.12743002 | 3.55E-05 | 0.0043197 | -0.056631 |
| 5mo_SIGAE9_ | 0.03982146 | 0.22968721 | 5.03E-05 | 0.0045634 | -0.028892 |
| 5mo_SIGAE9_ | 0.0674622  | 0.39647397 | 6.15E-05 | 0.011255  | 0.10492   |
| 5mo_SIGAE9_ | 0.02406863 | 0.13463317 | 3.61E-05 | 0.0042401 | -0.073623 |
| 5mo_SIGAE9_ | 0.01883303 | 0.10304108 | 3.38E-05 | 0.004741  | 0.03364   |
| 5mo_SIGAE9_ | 0.01564073 | 0.08377846 | 3.28E-05 | 0.0052924 | 0.1442    |
| 5mo_SIGAE9_ | 0.10152927 | 0.6020378  | 6.54E-05 | 0.024923  | -0.14299  |
| 5mo_SIGAE9_ | 0.10955857 | 0.6504873  | 6.60E-05 | 0.025611  | -0.2602   |
| 5mo_SIGAE9_ | 0.02879095 | 0.1631281  | 3.97E-05 | 0.0040686 | -0.10664  |
| 5mo_SIGAE9_ | 0.02121976 | 0.11744283 | 3.47E-05 | 0.0044724 | -0.023601 |
| 5mo_SIGAE9_ | 0.02737358 | 0.15457559 | 3.84E-05 | 0.0040947 | -0.10271  |
| 5mo_SIGAE9_ | 0.11497493 | 0.68317014 | 6.63E-05 | 0.025242  | -0.32268  |
| 5mo_SIGAE9_ | 0.00572289 | 0.0239333  | 3.18E-05 | 0.0082375 | 0.59807   |
| 5mo_SIGAE9_ | 0.03751411 | 0.21576448 | 4.81E-05 | 0.0043756 | -0.05192  |
| 5mo_SIGAE9_ | 0.04613638 | 0.26779202 | 5.54E-05 | 0.0053171 | 0.025099  |
| 5mo_SIGAE9_ | 0.12538795 | 0.74600327 | 6.68E-05 | 0.023978  | -0.40938  |
| 5mo_SIGAE9_ | 0.08656663 | 0.51175183 | 6.40E-05 | 0.019681  | 0.093363  |
| 5mo_SIGAE9_ | 0.10814542 | 0.6419602  | 6.59E-05 | 0.025614  | -0.24573  |
| 5mo_SIGAE9_ | 0.01830119 | 0.09983192 | 3.36E-05 | 0.0048202 | 0.050123  |
| 5mo_SIGAE9_ | 0.05949757 | 0.34841466 | 6.03E-05 | 0.0083426 | 0.077363  |
| 5mo_SIGAE9_ | 0.09229643 | 0.546326   | 6.46E-05 | 0.022042  | 0.019141  |
| 5mo_SIGAE9_ | 0.02075385 | 0.1146315  | 3.44E-05 | 0.0045325 | -0.01065  |
| 5mo_SIGAE9_ | 0.06452867 | 0.37877277 | 6.10E-05 | 0.010005  | 0.093303  |
| 5mo_SIGAE9_ | 0.02561357 | 0.1439555  | 3.72E-05 | 0.0041509 | -0.092011 |
| 5mo_SIGAE9_ | 0.06259    | 0.3670747  | 6.08E-05 | 0.0094206 | 0.085432  |
| 5mo_SIGAE9_ | 0.03056468 | 0.17383094 | 4.11E-05 | 0.0040705 | -0.10475  |
| 5mo_SIGAE9_ | 0.02375707 | 0.1327532  | 3.61E-05 | 0.0042401 | -0.073623 |

|             |            |            |          |           |           |
|-------------|------------|------------|----------|-----------|-----------|
| 5mo_SIGAE9_ | 0.02795461 | 0.15808155 | 3.88E-05 | 0.0040827 | -0.10472  |
| 5mo_SIGAE9_ | 0.0446537  | 0.25884542 | 5.42E-05 | 0.0050757 | 0.017239  |
| 5mo_SIGAE9_ | 0.03430336 | 0.19639048 | 4.48E-05 | 0.0041765 | -0.082901 |
| 5mo_SIGAE9_ | 0.0130963  | 0.06842512 | 3.23E-05 | 0.0059016 | 0.23179   |
| 5mo_SIGAE9_ | 0.06552652 | 0.38479388 | 6.12E-05 | 0.01041   | 0.095509  |
| 5mo_SIGAE9_ | 0.02742127 | 0.15486334 | 3.84E-05 | 0.0040947 | -0.10271  |
| 5mo_SIGAE9_ | 0.03133373 | 0.17847146 | 4.16E-05 | 0.0040771 | -0.10071  |
| 5mo_SIGAE9_ | 0.02857632 | 0.161833   | 3.93E-05 | 0.004074  | -0.10664  |
| 5mo_SIGAE9_ | 0.02056337 | 0.11348212 | 3.44E-05 | 0.0045325 | -0.01065  |
| 5mo_SIGAE9_ | 0.02628449 | 0.14800392 | 3.76E-05 | 0.0041286 | -0.096385 |
| 5mo_SIGAE9_ | 0.10457053 | 0.62038904 | 6.56E-05 | 0.025367  | -0.18901  |
| 5mo_SIGAE9_ | 0.10949466 | 0.65010166 | 6.60E-05 | 0.025611  | -0.2602   |
| 5mo_SIGAE9_ | 0.03760761 | 0.21632865 | 4.81E-05 | 0.0043756 | -0.05192  |
| 5mo_SIGAE9_ | 0.08864946 | 0.5243198  | 6.42E-05 | 0.020663  | 0.074212  |
| 5mo_SIGAE9_ | 0.01671596 | 0.0902665  | 3.31E-05 | 0.0050879 | 0.10435   |
| 5mo_SIGAE9_ | 0.03481635 | 0.19948591 | 4.54E-05 | 0.0042028 | -0.078293 |
| 5mo_SIGAE9_ | 0.02021583 | 0.11138506 | 3.42E-05 | 0.0045972 | 0.0032259 |
| 5mo_SIGAE9_ | 0.0233649  | 0.13038684 | 3.58E-05 | 0.0042778 | -0.065623 |
| 5mo_SIGAE9_ | 0.11714957 | 0.6962921  | 6.64E-05 | 0.024986  | -0.34377  |
| 5mo_SIGAE9_ | 0.05498578 | 0.32119012 | 5.94E-05 | 0.0071062 | 0.064127  |
| 5mo_SIGAE9_ | 0.04101786 | 0.2369064  | 5.14E-05 | 0.0046741 | -0.017493 |
| 5mo_SIGAE9_ | 0.02498576 | 0.14016727 | 3.68E-05 | 0.0041768 | -0.086782 |
| 5mo_SIGAE9_ | 0.03582878 | 0.20559503 | 4.59E-05 | 0.0042319 | -0.068307 |
| 5mo_SIGAE9_ | 0.01482986 | 0.07888561 | 3.27E-05 | 0.0054028 | 0.16515   |
| 5mo_SIGAE9_ | 0.11701857 | 0.6955016  | 6.64E-05 | 0.024986  | -0.34377  |
| 5mo_SIGAE9_ | 0.01459645 | 0.07747716 | 3.26E-05 | 0.0055188 | 0.18676   |
| 5mo_SIGAE9_ | 0.13278322 | 0.790627   | 6.71E-05 | 0.023568  | -0.45613  |
| 5mo_SIGAE9_ | 0.09696863 | 0.57451844 | 6.51E-05 | 0.023799  | -0.055297 |
| 5mo_SIGAE9_ | 0.02285592 | 0.12731558 | 3.55E-05 | 0.0043197 | -0.056631 |
| 5mo_SIGAE9_ | 0.02380327 | 0.13303201 | 3.61E-05 | 0.0042401 | -0.073623 |
| 5mo_SIGAE9_ | 0.00677056 | 0.03025505 | 3.18E-05 | 0.0078    | 0.54183   |
| 5mo_SIGAE9_ | 0.0179097  | 0.09746963 | 3.34E-05 | 0.0049043 | 0.067421  |
| 5mo_SIGAE9_ | 0.01972356 | 0.10841462 | 3.40E-05 | 0.0046667 | 0.0032259 |
| 5mo_SIGAE9_ | 0.04360556 | 0.25252083 | 5.38E-05 | 0.0050014 | 0.008455  |
| 5mo_SIGAE9_ | 0.03106533 | 0.17685193 | 4.16E-05 | 0.0040771 | -0.10299  |
| 5mo_SIGAE9_ | 0.02408418 | 0.13472702 | 3.61E-05 | 0.0042401 | -0.073623 |
| 5mo_SIGAE9_ | 0.10941017 | 0.64959186 | 6.60E-05 | 0.025611  | -0.2602   |
| 5mo_SIGAE9_ | 0.13683067 | 0.8150497  | 6.73E-05 | 0.023528  | -0.48029  |
| 5mo_SIGAE9_ | 0.06196189 | 0.36328465 | 6.07E-05 | 0.0092324 | 0.083692  |
| 5mo_SIGAE9_ | 0.01603255 | 0.08614274 | 3.30E-05 | 0.0051875 | 0.12392   |
| 5mo_SIGAE9_ | 0.01675362 | 0.09049373 | 3.31E-05 | 0.0050879 | 0.10435   |
| 5mo_SIGAE9_ | 0.10842805 | 0.6436657  | 6.59E-05 | 0.025614  | -0.24573  |
| 5mo_SIGAE9_ | 0.08753841 | 0.5176156  | 6.41E-05 | 0.020177  | 0.087329  |

|             |            |            |          |           |           |
|-------------|------------|------------|----------|-----------|-----------|
| 5mo_SIGAE9_ | 0.00776047 | 0.03622826 | 3.19E-05 | 0.0073923 | 0.48652   |
| 5mo_SIGAE9_ | 0.05439633 | 0.31763333 | 5.92E-05 | 0.0069681 | 0.062513  |
| 5mo_SIGAE9_ | 0.06308297 | 0.37004933 | 6.09E-05 | 0.0096122 | 0.087254  |
| 5mo_SIGAE9_ | 0.07860133 | 0.4636885  | 6.30E-05 | 0.016077  | 0.13651   |
| 5mo_SIGAE9_ | 0.08265488 | 0.48814797 | 6.35E-05 | 0.017892  | 0.1271    |
| 5mo_SIGAE9_ | 0.02409449 | 0.13478923 | 3.61E-05 | 0.0042401 | -0.073623 |
| 5mo_SIGAE9_ | 0.01052671 | 0.05291997 | 3.21E-05 | 0.0064976 | 0.35381   |
| 5mo_SIGAE9_ | 0.08792713 | 0.5199612  | 6.41E-05 | 0.020177  | 0.080939  |
| 5mo_SIGAE9_ | 0.07596099 | 0.44775644 | 6.26E-05 | 0.0148    | 0.13453   |
| 5mo_SIGAE9_ | 0.05785658 | 0.33851278 | 6.00E-05 | 0.0078516 | 0.073002  |
| 5mo_SIGAE9_ | 0.02665033 | 0.15021141 | 3.80E-05 | 0.0041099 | -0.099939 |
| 5mo_SIGAE9_ | 0.13230012 | 0.7877119  | 6.71E-05 | 0.023568  | -0.45284  |
| 5mo_SIGAE9_ | 0.01553209 | 0.08312292 | 3.28E-05 | 0.0052924 | 0.1442    |
| 5mo_SIGAE9_ | 0.06305172 | 0.36986077 | 6.09E-05 | 0.0096122 | 0.087254  |
| 5mo_SIGAE9_ | 0.08977867 | 0.5311336  | 6.44E-05 | 0.021137  | 0.059815  |
| 5mo_SIGAE9_ | 0.02478409 | 0.13895033 | 3.68E-05 | 0.0041768 | -0.086782 |
| 5mo_SIGAE9_ | 0.06758583 | 0.39721993 | 6.15E-05 | 0.011255  | 0.10492   |
| 5mo_SIGAE9_ | 0.01657328 | 0.08940557 | 3.31E-05 | 0.0050879 | 0.10435   |
| 5mo_SIGAE9_ | 0.02372624 | 0.13256718 | 3.61E-05 | 0.0042401 | -0.073623 |
| 5mo_SIGAE9_ | 0.01639605 | 0.08833612 | 3.30E-05 | 0.0051875 | 0.12392   |
| 5mo_SIGAE9_ | 0.03224077 | 0.18394467 | 4.27E-05 | 0.004099  | -0.097962 |
| 5mo_SIGAE9_ | 0.02493171 | 0.13984111 | 3.68E-05 | 0.0041768 | -0.086782 |
| 5mo_SIGAE9_ | 0.03117998 | 0.17754371 | 4.16E-05 | 0.0040771 | -0.10299  |
| 5mo_SIGAE9_ | 0.10811755 | 0.64179206 | 6.59E-05 | 0.025614  | -0.24573  |
| 5mo_SIGAE9_ | 0.01804408 | 0.09828048 | 3.34E-05 | 0.0049043 | 0.067421  |
| 5mo_SIGAE9_ | 0.03312929 | 0.18930604 | 4.37E-05 | 0.0041322 | -0.091175 |
| 5mo_SIGAE9_ | 0.01436468 | 0.07607868 | 3.26E-05 | 0.0055188 | 0.18676   |
| 5mo_SIGAE9_ | 0.01270719 | 0.0660772  | 3.23E-05 | 0.0059016 | 0.25518   |
| 5mo_SIGAE9_ | 0.08750942 | 0.5174407  | 6.41E-05 | 0.020177  | 0.087329  |
| 5mo_SIGAE9_ | 0.02522887 | 0.14163417 | 3.68E-05 | 0.0041768 | -0.086782 |
| 5mo_SIGAE9_ | 0.02087844 | 0.11538328 | 3.44E-05 | 0.0045325 | -0.023601 |
| 5mo_SIGAE9_ | 0.07064313 | 0.415668   | 6.19E-05 | 0.012376  | 0.11916   |
| 5mo_SIGAE9_ | 0.01831777 | 0.09993198 | 3.36E-05 | 0.0048202 | 0.050123  |
| 5mo_SIGAE9_ | 0.02953153 | 0.16759685 | 4.02E-05 | 0.0040662 | -0.10661  |
| 5mo_SIGAE9_ | 0.08407719 | 0.49673033 | 6.37E-05 | 0.018667  | 0.1176    |
| 5mo_SIGAE9_ | 0.02113335 | 0.11692141 | 3.47E-05 | 0.0044724 | -0.023601 |
| 5mo_SIGAE9_ | 0.01258302 | 0.06532795 | 3.23E-05 | 0.0059016 | 0.25518   |
| 5mo_SIGAE9_ | 0.01619707 | 0.08713546 | 3.30E-05 | 0.0051875 | 0.12392   |
| 5mo_SIGAE9_ | 0.02169127 | 0.12028799 | 3.49E-05 | 0.0044169 | -0.0356   |
| 5mo_SIGAE9_ | 0.02224829 | 0.1236491  | 3.52E-05 | 0.0043661 | -0.046619 |
| 5mo_SIGAE9_ | 0.0248845  | 0.13955623 | 3.68E-05 | 0.0041768 | -0.086782 |
| 5mo_SIGAE9_ | 0.02791717 | 0.15785564 | 3.88E-05 | 0.0040827 | -0.10472  |
| 5mo_SIGAE9_ | 0.02420905 | 0.13548048 | 3.64E-05 | 0.0042065 | -0.080664 |

|             |            |            |          |           |           |
|-------------|------------|------------|----------|-----------|-----------|
| 5mo_SIGAE9_ | 0.07483985 | 0.44099137 | 6.25E-05 | 0.014299  | 0.13218   |
| 5mo_SIGAE9_ | 0.02190843 | 0.12159832 | 3.49E-05 | 0.0044169 | -0.0356   |
| 5mo_SIGAE9_ | 0.03717282 | 0.21370511 | 4.76E-05 | 0.0043355 | -0.057524 |
| 5mo_SIGAE9_ | 0.02191429 | 0.1216337  | 3.49E-05 | 0.0044169 | -0.0356   |
| 5mo_SIGAE9_ | 0.07431595 | 0.43783012 | 6.24E-05 | 0.014051  | 0.13074   |
| 5mo_SIGAE9_ | 0.01727268 | 0.09362581 | 3.33E-05 | 0.0049935 | 0.085504  |
| 5mo_SIGAE9_ | 0.02140916 | 0.11858571 | 3.47E-05 | 0.0044724 | -0.0356   |
| 5mo_SIGAE9_ | 0.01993594 | 0.10969616 | 3.42E-05 | 0.0045972 | 0.0032259 |
| 5mo_SIGAE9_ | 0.07727744 | 0.45570007 | 6.28E-05 | 0.015307  | 0.13646   |
| 5mo_SIGAE9_ | 0.01812975 | 0.09879743 | 3.36E-05 | 0.0048202 | 0.050123  |
| 5mo_SIGAE9_ | 0.03084955 | 0.17554986 | 4.11E-05 | 0.0040705 | -0.10299  |
| 5mo_SIGAE9_ | 0.03628061 | 0.20832139 | 4.65E-05 | 0.0042637 | -0.068307 |
| 5mo_SIGAE9_ | 0.0266227  | 0.15004465 | 3.80E-05 | 0.0041099 | -0.099939 |
| 5mo_SIGAE9_ | 0.01791393 | 0.09749514 | 3.34E-05 | 0.0049043 | 0.067421  |
| 5mo_SIGAE9_ | 0.03841784 | 0.22121762 | 4.87E-05 | 0.0044183 | -0.04622  |
| 5mo_SIGAE9_ | 0.12819389 | 0.7629345  | 6.69E-05 | 0.023757  | -0.4283   |
| 5mo_SIGAE9_ | 0.01397689 | 0.07373871 | 3.25E-05 | 0.0056405 | 0.20898   |
| 5mo_SIGAE9_ | 0.01603473 | 0.08615588 | 3.30E-05 | 0.0051875 | 0.12392   |
| 5mo_SIGAE9_ | 0.01553952 | 0.08316775 | 3.28E-05 | 0.0052924 | 0.1442    |
| 5mo_SIGAE9_ | 0.01353758 | 0.07108785 | 3.24E-05 | 0.0057681 | 0.23179   |
| 5mo_SIGAE9_ | 0.02073351 | 0.11450875 | 3.44E-05 | 0.0045325 | -0.01065  |
| 5mo_SIGAE9_ | 0.12537287 | 0.74591225 | 6.68E-05 | 0.023978  | -0.40938  |
| 5mo_SIGAE9_ | 0.01322959 | 0.06922939 | 3.24E-05 | 0.0057681 | 0.23179   |
| 5mo_SIGAE9_ | 0.05090875 | 0.29658893 | 5.81E-05 | 0.006215  | 0.051138  |
| 5mo_SIGAE9_ | 0.05994626 | 0.35112214 | 6.04E-05 | 0.0085136 | 0.077363  |
| 5mo_SIGAE9_ | 0.07032198 | 0.4137301  | 6.19E-05 | 0.012376  | 0.11689   |
| 5mo_SIGAE9_ | 0.02624291 | 0.147753   | 3.76E-05 | 0.0041286 | -0.096385 |
| 5mo_SIGAE9_ | 0.08480584 | 0.50112706 | 6.38E-05 | 0.018923  | 0.1136    |
| 5mo_SIGAE9_ | 0.08056292 | 0.4755249  | 6.32E-05 | 0.016854  | 0.13314   |
| 5mo_SIGAE9_ | 0.08636235 | 0.5105192  | 6.40E-05 | 0.019681  | 0.099025  |
| 5mo_SIGAD9_ | 0.00975403 | 0.0482576  | 3.20E-05 | 0.0068348 | 0.4058    |
| 5mo_SIGAD9_ | 0.0853708  | 0.5045361  | 6.39E-05 | 0.019177  | 0.10916   |
| 5mo_SIGAD9_ | 0.0208074  | 0.11495464 | 3.44E-05 | 0.0045325 | -0.01065  |
| 5mo_SIGAD9_ | 0.01692174 | 0.09150822 | 3.31E-05 | 0.0050879 | 0.10435   |
| 5mo_SIGAD9_ | 0.06336696 | 0.37176293 | 6.09E-05 | 0.0096122 | 0.089169  |
| 5mo_SIGAD9_ | 0.00847164 | 0.04051953 | 3.19E-05 | 0.0071994 | 0.45929   |
| 5mo_SIGAD9_ | 0.07413282 | 0.43672508 | 6.24E-05 | 0.014051  | 0.13074   |
| 5mo_SIGAD9_ | 0.02024473 | 0.11155944 | 3.42E-05 | 0.0045972 | 0.0032259 |
| 5mo_SIGAD9_ | 0.08765751 | 0.5183343  | 6.41E-05 | 0.020177  | 0.087329  |
| 5mo_SIGAD9_ | 0.02761267 | 0.15601824 | 3.88E-05 | 0.0040827 | -0.10472  |
| 5mo_SIGAD9_ | 0.02653375 | 0.14950792 | 3.80E-05 | 0.0041099 | -0.099939 |
| 5mo_SIGAD9_ | 0.03405229 | 0.1948755  | 4.43E-05 | 0.004153  | -0.087207 |
| 5mo_SIGAD9_ | 0.01486192 | 0.07907902 | 3.27E-05 | 0.0054028 | 0.16515   |

|            |            |            |          |           |           |
|------------|------------|------------|----------|-----------|-----------|
| 5mo_SIGAD9 | 0.03344933 | 0.19123718 | 4.37E-05 | 0.0041322 | -0.091175 |
| 5mo_SIGAD9 | 0.02422411 | 0.1355714  | 3.64E-05 | 0.0042065 | -0.080664 |
| 5mo_SIGAD9 | 0.12552154 | 0.74680936 | 6.68E-05 | 0.023978  | -0.40938  |
| 5mo_SIGAD9 | 0.02327145 | 0.12982291 | 3.58E-05 | 0.0042778 | -0.065623 |
| 5mo_SIGAD9 | 0.01529239 | 0.08167652 | 3.27E-05 | 0.0054028 | 0.1442    |
| 5mo_SIGAD9 | 0.02338789 | 0.13052553 | 3.58E-05 | 0.0042778 | -0.065623 |
| 5mo_SIGAD9 | 0.01264454 | 0.06569917 | 3.23E-05 | 0.0059016 | 0.25518   |
| 5mo_SIGAD9 | 0.03285068 | 0.18762489 | 4.32E-05 | 0.0041142 | -0.094772 |
| 5mo_SIGAD9 | 0.11115946 | 0.6601472  | 6.61E-05 | 0.025556  | -0.28058  |
| 5mo_SIGAD9 | 0.06157481 | 0.36094892 | 6.07E-05 | 0.0090475 | 0.082025  |
| 5mo_SIGAD9 | 0.02188925 | 0.1214826  | 3.49E-05 | 0.0044169 | -0.0356   |
| 5mo_SIGAD9 | 0.04894503 | 0.2847397  | 5.70E-05 | 0.0057827 | 0.041222  |
| 5mo_SIGAD9 | 0.04219266 | 0.2439953  | 5.24E-05 | 0.0047963 | -0.00654  |
| 5mo_SIGAD9 | 0.04955332 | 0.2884102  | 5.73E-05 | 0.0058857 | 0.046466  |
| 5mo_SIGAD9 | 0.09896185 | 0.5865457  | 6.52E-05 | 0.024275  | -0.094455 |
| 5mo_SIGAD9 | 0.02758046 | 0.15582392 | 3.88E-05 | 0.0040827 | -0.10472  |
| 5mo_SIGAD9 | 0.01270411 | 0.0660586  | 3.23E-05 | 0.0059016 | 0.25518   |
| 5mo_SIGAD9 | 0.03198454 | 0.18239854 | 4.27E-05 | 0.004099  | -0.097962 |
| 5mo_SIGAD9 | 0.02919322 | 0.16555542 | 4.02E-05 | 0.0040662 | -0.10661  |
| 5mo_SIGAD9 | 0.03782873 | 0.2176629  | 4.81E-05 | 0.0043756 | -0.05192  |
| 5mo_SIGAD9 | 0.02119666 | 0.11730346 | 3.47E-05 | 0.0044724 | -0.023601 |
| 5mo_SIGAD9 | 0.07361431 | 0.43359634 | 6.23E-05 | 0.013805  | 0.12913   |
| 5mo_SIGAD9 | 0.02244837 | 0.12485638 | 3.52E-05 | 0.0043661 | -0.046619 |
| 5mo_SIGAD9 | 0.01134948 | 0.05788468 | 3.21E-05 | 0.006339  | 0.32844   |
| 5mo_SIGAD9 | 0.00793421 | 0.0372766  | 3.19E-05 | 0.0073923 | 0.48652   |
| 5mo_SIGAD9 | 0.07217177 | 0.42489195 | 6.21E-05 | 0.01308   | 0.12348   |
| 5mo_SIGAD9 | 0.02021845 | 0.11140088 | 3.42E-05 | 0.0045972 | 0.0032259 |
| 5mo_SIGAD9 | 0.01914928 | 0.10494939 | 3.38E-05 | 0.004741  | 0.03364   |
| 5mo_SIGAD9 | 0.05707882 | 0.33381975 | 5.99E-05 | 0.0076952 | 0.070131  |
| 5mo_SIGAD9 | 0.10806479 | 0.64147365 | 6.59E-05 | 0.025614  | -0.23822  |
| 5mo_SIGAD9 | 0.13325234 | 0.7934577  | 6.71E-05 | 0.023556  | -0.45937  |
| 5mo_SIGAD9 | 0.01863012 | 0.10181671 | 3.36E-05 | 0.0048202 | 0.03364   |
| 5mo_SIGAD9 | 0.01517664 | 0.0809781  | 3.27E-05 | 0.0054028 | 0.16515   |
| 5mo_SIGAD9 | 0.12263528 | 0.72939336 | 6.67E-05 | 0.024282  | -0.38934  |
| 5mo_SIGAD9 | 0.02578153 | 0.144969   | 3.72E-05 | 0.0041509 | -0.092011 |
| 5mo_SIGAD9 | 0.01757164 | 0.09542975 | 3.34E-05 | 0.0049043 | 0.067421  |
| 5mo_SIGAD9 | 0.11618935 | 0.690498   | 6.63E-05 | 0.025119  | -0.33347  |
| 5mo_SIGAD9 | 0.10272342 | 0.6092434  | 6.55E-05 | 0.025127  | -0.16182  |
| 5mo_SIGAD9 | 0.07729924 | 0.45583156 | 6.28E-05 | 0.015307  | 0.13646   |
| 5mo_SIGAD9 | 0.01625114 | 0.08746171 | 3.30E-05 | 0.0051875 | 0.12392   |
| 5mo_SIGAD9 | 0.02413041 | 0.135006   | 3.61E-05 | 0.0042401 | -0.073623 |
| 5mo_SIGAD9 | 0.01615085 | 0.08685658 | 3.30E-05 | 0.0051875 | 0.12392   |
| 5mo_SIGAD9 | 0.02569975 | 0.14447552 | 3.72E-05 | 0.0041509 | -0.092011 |



|            |            |            |          |           |            |
|------------|------------|------------|----------|-----------|------------|
| 5mo_SIGAD9 | 0.05469601 | 0.31944165 | 5.94E-05 | 0.0071062 | 0.064127   |
| 5mo_SIGAD9 | 0.08888767 | 0.5257572  | 6.42E-05 | 0.020663  | 0.067165   |
| 5mo_SIGAD9 | 0.02471011 | 0.13850395 | 3.64E-05 | 0.0042065 | -0.086782  |
| 5mo_SIGAD9 | 0.06029472 | 0.35322475 | 6.05E-05 | 0.008688  | 0.07887    |
| 5mo_SIGAD9 | 0.015317   | 0.08182505 | 3.27E-05 | 0.0054028 | 0.1442     |
| 5mo_SIGAD9 | 0.01248492 | 0.06473602 | 3.23E-05 | 0.0060411 | 0.2791     |
| 5mo_SIGAD9 | 0.00872616 | 0.04205528 | 3.19E-05 | 0.0070136 | 0.43237    |
| 5mo_SIGAD9 | 0.06055045 | 0.35476786 | 6.05E-05 | 0.008688  | 0.07887    |
| 5mo_SIGAD9 | 0.03417235 | 0.19559999 | 4.43E-05 | 0.004153  | -0.082901  |
| 5mo_SIGAD9 | 0.11588337 | 0.6886517  | 6.63E-05 | 0.025119  | -0.33347   |
| 5mo_SIGAD9 | 0.03974625 | 0.22923338 | 5.03E-05 | 0.0045634 | -0.028892  |
| 5mo_SIGAD9 | 0.03415899 | 0.19551939 | 4.43E-05 | 0.004153  | -0.082901  |
| 5mo_SIGAD9 | 0.03046959 | 0.17325717 | 4.11E-05 | 0.0040705 | -0.10475   |
| 5mo_SIGAD9 | 0.04895352 | 0.28479087 | 5.70E-05 | 0.0057827 | 0.041222   |
| 5mo_SIGAD9 | 0.04315465 | 0.2498     | 5.33E-05 | 0.0049301 | 0.0036923  |
| 5mo_SIGAD9 | 0.01915011 | 0.10495438 | 3.38E-05 | 0.004741  | 0.03364    |
| 5mo_SIGAD9 | 0.02537989 | 0.14254546 | 3.72E-05 | 0.0041509 | -0.092011  |
| 5mo_SIGAD9 | 0.04442972 | 0.25749385 | 5.42E-05 | 0.0050757 | 0.012967   |
| 5mo_SIGAD9 | 0.03907481 | 0.22518188 | 4.92E-05 | 0.0044639 | -0.034672  |
| 5mo_SIGAD9 | 0.01680676 | 0.09081439 | 3.31E-05 | 0.0050879 | 0.10435    |
| 5mo_SIGAD9 | 0.01642535 | 0.08851294 | 3.30E-05 | 0.0051875 | 0.10435    |
| 5mo_SIGAD9 | 0.01544947 | 0.08262438 | 3.28E-05 | 0.0052924 | 0.1442     |
| 5mo_SIGAD9 | 0.01925083 | 0.10556211 | 3.40E-05 | 0.0046667 | 0.017998   |
| 5mo_SIGAD9 | 0.0442638  | 0.25649273 | 5.42E-05 | 0.0050757 | 0.012967   |
| 5mo_SIGAD9 | 0.00702113 | 0.03176699 | 3.18E-05 | 0.0078    | 0.51404    |
| 5mo_SIGAD9 | 0.01621624 | 0.08725115 | 3.30E-05 | 0.0051875 | 0.12392    |
| 5mo_SIGAD9 | 0.0631282  | 0.3703222  | 6.09E-05 | 0.0096122 | 0.087254   |
| 5mo_SIGAD9 | 0.09817356 | 0.5817891  | 6.52E-05 | 0.024123  | -0.084641  |
| 5mo_SIGAD9 | 0.01592885 | 0.08551699 | 3.30E-05 | 0.0051875 | 0.12392    |
| 5mo_SIGAD9 | 0.03516502 | 0.20158984 | 4.54E-05 | 0.0042028 | -0.078293  |
| 5mo_SIGAD9 | 0.02796538 | 0.15814656 | 3.88E-05 | 0.0040827 | -0.10472   |
| 5mo_SIGAD9 | 0.07760428 | 0.4576722  | 6.29E-05 | 0.015562  | 0.13646    |
| 5mo_SIGAD9 | 0.07550731 | 0.44501892 | 6.26E-05 | 0.014549  | 0.13453    |
| 5mo_SIGAD9 | 0.15141112 | 0.90302944 | 6.77E-05 | 0.023705  | -0.52438   |
| 5mo_SIGAD9 | 0.09384672 | 0.5556805  | 6.48E-05 | 0.022676  | -0.0077738 |
| 5mo_SIGAD9 | 0.04001677 | 0.23086575 | 5.03E-05 | 0.0045634 | -0.028892  |
| 5mo_SIGAD9 | 0.02080788 | 0.11495753 | 3.44E-05 | 0.0045325 | -0.01065   |
| 5mo_SIGAD9 | 0.05141938 | 0.29967016 | 5.83E-05 | 0.0063316 | 0.053285   |
| 5mo_SIGAD9 | 0.04321296 | 0.25015184 | 5.33E-05 | 0.0049301 | 0.0036923  |
| 5mo_SIGAD9 | 0.01663061 | 0.08975149 | 3.31E-05 | 0.0050879 | 0.10435    |
| 5mo_SIGAD9 | 0.04268333 | 0.24695604 | 5.29E-05 | 0.0048617 | -0.0013165 |
| 5mo_SIGAD9 | 0.09266163 | 0.5485296  | 6.46E-05 | 0.022258  | 0.010343   |
| 5mo_SIGAD9 | 0.0171475  | 0.09287047 | 3.33E-05 | 0.0049935 | 0.085504   |

|            |            |            |          |           |           |
|------------|------------|------------|----------|-----------|-----------|
| 5mo_SIGAD9 | 0.02534174 | 0.14231522 | 3.72E-05 | 0.0041509 | -0.092011 |
| 5mo_SIGAD9 | 0.08335123 | 0.4923498  | 6.36E-05 | 0.018151  | 0.12117   |
| 5mo_SIGAD9 | 0.03056245 | 0.17381749 | 4.11E-05 | 0.0040705 | -0.10475  |
| 5mo_SIGAD9 | 0.11891753 | 0.7069601  | 6.65E-05 | 0.024776  | -0.3584   |
| 5mo_SIGAD9 | 0.04087101 | 0.23602028 | 5.14E-05 | 0.0046741 | -0.017493 |
| 5mo_SIGAD9 | 0.01853402 | 0.10123682 | 3.36E-05 | 0.0048202 | 0.050123  |
| 5mo_SIGAD9 | 0.09259448 | 0.5481244  | 6.46E-05 | 0.022258  | 0.019141  |
| 5mo_SIGAD9 | 0.06608356 | 0.3881551  | 6.13E-05 | 0.010616  | 0.097788  |
| 5mo_SIGAD9 | 0.03424474 | 0.1960368  | 4.48E-05 | 0.0041765 | -0.082901 |
| 5mo_SIGAD9 | 0.06822191 | 0.40105814 | 6.16E-05 | 0.011474  | 0.10734   |
| 5mo_SIGAD9 | 0.11308408 | 0.67176056 | 6.62E-05 | 0.025403  | -0.30551  |
| 5mo_SIGAD9 | 0.05460787 | 0.31890976 | 5.92E-05 | 0.0069681 | 0.064127  |
| 5mo_SIGAD9 | 0.01130162 | 0.05759587 | 3.21E-05 | 0.006339  | 0.32844   |
| 5mo_SIGAD9 | 0.06563824 | 0.38546807 | 6.12E-05 | 0.01041   | 0.097788  |
| 5mo_SIGAD9 | 0.08938678 | 0.5287689  | 6.43E-05 | 0.020902  | 0.059815  |
| 5mo_SIGAD9 | 0.05298268 | 0.30910325 | 5.87E-05 | 0.0065755 | 0.059084  |
| 5mo_SIGAD9 | 0.15275335 | 0.9111286  | 6.77E-05 | 0.023709  | -0.52541  |
| 5mo_SIGAD9 | 0.04114164 | 0.23765329 | 5.14E-05 | 0.0046741 | -0.017493 |
| 5mo_SIGAD9 | 0.00888822 | 0.04303318 | 3.19E-05 | 0.0070136 | 0.43237   |
| 5mo_SIGAD9 | 0.03276749 | 0.18712294 | 4.32E-05 | 0.0041142 | -0.094772 |
| 5mo_SIGAD9 | 0.01896214 | 0.10382017 | 3.38E-05 | 0.004741  | 0.03364   |
| 5mo_SIGAD9 | 0.07779506 | 0.45882338 | 6.29E-05 | 0.015562  | 0.13662   |
| 5mo_SIGAD9 | 0.0554134  | 0.3237704  | 5.95E-05 | 0.007248  | 0.065685  |
| 5mo_SIGAD9 | 0.02197115 | 0.12197682 | 3.49E-05 | 0.0044169 | -0.046619 |
| 5mo_SIGAD9 | 0.02307608 | 0.12864406 | 3.55E-05 | 0.0043197 | -0.065623 |
| 5mo_SIGAD9 | 0.06614779 | 0.38854268 | 6.13E-05 | 0.010616  | 0.10013   |
| 5mo_SIGAD9 | 0.01417095 | 0.07490967 | 3.25E-05 | 0.0056405 | 0.20898   |
| 5mo_SIGAD9 | 0.02355124 | 0.13151123 | 3.58E-05 | 0.0042778 | -0.065623 |
| 5mo_SIGAD9 | 0.03140263 | 0.1788872  | 4.16E-05 | 0.0040771 | -0.10071  |
| 5mo_SIGAD9 | 0.05519762 | 0.32246837 | 5.94E-05 | 0.0071062 | 0.065685  |
| 5mo_SIGAD9 | 0.01959739 | 0.10765329 | 3.40E-05 | 0.0046667 | 0.017998  |
| 5mo_SIGAD9 | 0.0592988  | 0.34721527 | 6.03E-05 | 0.0083426 | 0.075889  |
| 5mo_SIGAD9 | 0.1095942  | 0.6507023  | 6.60E-05 | 0.025599  | -0.2602   |
| 5mo_SIGAD9 | 0.01962731 | 0.10783384 | 3.40E-05 | 0.0046667 | 0.017998  |
| 5mo_SIGAD9 | 0.11547087 | 0.68616265 | 6.63E-05 | 0.025182  | -0.32814  |
| 5mo_SIGAD9 | 0.04222673 | 0.24420084 | 5.24E-05 | 0.0047963 | -0.00654  |
| 5mo_SIGAD9 | 0.01710763 | 0.09262987 | 3.33E-05 | 0.0049935 | 0.085504  |
| 5mo_SIGAD9 | 0.08566012 | 0.50628185 | 6.39E-05 | 0.019177  | 0.1043    |
| 5mo_SIGAD9 | 0.06845962 | 0.40249252 | 6.16E-05 | 0.011474  | 0.10977   |
| 5mo_SIGAD9 | 0.05126512 | 0.2987393  | 5.81E-05 | 0.006215  | 0.053285  |
| 5mo_SIGAD9 | 0.00906647 | 0.04410876 | 3.19E-05 | 0.0070136 | 0.43237   |
| 5mo_SIGAD9 | 0.01796176 | 0.09778375 | 3.34E-05 | 0.0049043 | 0.067421  |
| 5mo_SIGAD9 | 0.01620912 | 0.0872082  | 3.30E-05 | 0.0051875 | 0.12392   |

|            |            |            |          |           |           |
|------------|------------|------------|----------|-----------|-----------|
| 5mo_SIGAD9 | 0.06064219 | 0.35532144 | 6.05E-05 | 0.008688  | 0.080421  |
| 5mo_SIGAD9 | 0.01602165 | 0.08607695 | 3.30E-05 | 0.0051875 | 0.12392   |
| 5mo_SIGAD9 | 0.08557747 | 0.50578314 | 6.39E-05 | 0.019177  | 0.1043    |
| 5mo_SIGAD9 | 0.11441261 | 0.679777   | 6.63E-05 | 0.025299  | -0.3171   |
| 5mo_SIGAD9 | 0.09853464 | 0.5839679  | 6.52E-05 | 0.024275  | -0.084641 |
| 5mo_SIGAD9 | 0.07194187 | 0.42350468 | 6.21E-05 | 0.01308   | 0.12348   |
| 5mo_SIGAD9 | 0.0093536  | 0.04584136 | 3.20E-05 | 0.0068348 | 0.4058    |
| 5mo_SIGAD9 | 0.0237424  | 0.13266465 | 3.61E-05 | 0.0042401 | -0.073623 |
| 5mo_SIGAD9 | 0.02679544 | 0.15108702 | 3.80E-05 | 0.0041099 | -0.099939 |
| 5mo_SIGAD9 | 0.02654596 | 0.14958166 | 3.80E-05 | 0.0041099 | -0.099939 |
| 5mo_SIGAD9 | 0.01556844 | 0.08334224 | 3.28E-05 | 0.0052924 | 0.1442    |
| 5mo_SIGAD9 | 0.05919817 | 0.34660807 | 6.03E-05 | 0.0083426 | 0.075889  |
| 5mo_SIGAD9 | 0.00829299 | 0.0394415  | 3.19E-05 | 0.0071994 | 0.45929   |
| 5mo_SIGAD9 | 0.09691775 | 0.5742114  | 6.51E-05 | 0.023799  | -0.055297 |
| 5mo_SIGAD9 | 0.08965037 | 0.5303594  | 6.44E-05 | 0.021137  | 0.059815  |
| 5mo_SIGAD9 | 0.03110683 | 0.17710234 | 4.16E-05 | 0.0040771 | -0.10299  |
| 5mo_SIGAD9 | 0.02797519 | 0.1582057  | 3.88E-05 | 0.0040827 | -0.10472  |
| 5mo_SIGAD9 | 0.01930573 | 0.10589338 | 3.40E-05 | 0.0046667 | 0.017998  |
| 5mo_SIGAD9 | 0.01140907 | 0.05824426 | 3.21E-05 | 0.006339  | 0.32844   |
| 5mo_SIGAD9 | 0.03042767 | 0.17300422 | 4.11E-05 | 0.0040705 | -0.10475  |
| 5mo_SIGAD9 | 0.00856367 | 0.04107484 | 3.19E-05 | 0.0071994 | 0.45929   |
| 5mo_SIGAD9 | 0.03289424 | 0.18788771 | 4.32E-05 | 0.0041142 | -0.094772 |
| 5mo_SIGAD9 | 0.03011454 | 0.17111474 | 4.07E-05 | 0.0040668 | -0.10597  |
| 5mo_SIGAD9 | 0.053712   | 0.31350398 | 5.91E-05 | 0.0068337 | 0.060836  |
| 5mo_SIGAD9 | 0.03780828 | 0.21753949 | 4.81E-05 | 0.0043756 | -0.05192  |
| 5mo_SIGAD9 | 0.08224191 | 0.48565608 | 6.35E-05 | 0.017633  | 0.1271    |
| 5mo_SIGAD9 | 0.06341533 | 0.3720548  | 6.09E-05 | 0.0096122 | 0.089169  |
| 5mo_SIGAD9 | 0.02103714 | 0.1163409  | 3.47E-05 | 0.0044724 | -0.023601 |
| 5mo_SIGAD9 | 0.07464402 | 0.43980974 | 6.25E-05 | 0.014299  | 0.13218   |
| 5mo_SIGAD9 | 0.0367837  | 0.21135707 | 4.70E-05 | 0.0042982 | -0.062998 |
| 5mo_SIGAD9 | 0.01298632 | 0.06776148 | 3.23E-05 | 0.0059016 | 0.25518   |
| 5mo_SIGAD9 | 0.00523368 | 0.02098137 | 3.18E-05 | 0.0084677 | 0.62647   |
| 5mo_SIGAD9 | 0.02976312 | 0.16899426 | 4.07E-05 | 0.0040668 | -0.10597  |
| 5mo_SIGAD9 | 0.02233208 | 0.12415469 | 3.52E-05 | 0.0043661 | -0.046619 |
| 5mo_SIGAD9 | 0.00707262 | 0.03207769 | 3.19E-05 | 0.0075925 | 0.51404   |
| 5mo_SIGAD9 | 0.08456621 | 0.49968112 | 6.37E-05 | 0.018667  | 0.1136    |
| 5mo_SIGAD9 | 0.0786483  | 0.4639719  | 6.30E-05 | 0.016077  | 0.13651   |
| 5mo_SIGAD9 | 0.01682608 | 0.09093098 | 3.31E-05 | 0.0050879 | 0.10435   |
| 5mo_SIGAD9 | 0.01980257 | 0.1088914  | 3.42E-05 | 0.0045972 | 0.0032259 |
| 5mo_SIGAD9 | 0.01195516 | 0.06153939 | 3.22E-05 | 0.0061869 | 0.30353   |
| 5mo_SIGAD9 | 0.05099485 | 0.29710847 | 5.81E-05 | 0.006215  | 0.051138  |
| 5mo_SIGAD9 | 0.01507795 | 0.08038259 | 3.27E-05 | 0.0054028 | 0.16515   |
| 5mo_SIGAD9 | 0.0062136  | 0.02689432 | 3.18E-05 | 0.008015  | 0.56984   |

|            |            |            |          |           |           |
|------------|------------|------------|----------|-----------|-----------|
| 5mo_SIGAD9 | 0.02587246 | 0.14551765 | 3.76E-05 | 0.0041286 | -0.096385 |
| 5mo_SIGAD9 | 0.02530864 | 0.14211555 | 3.68E-05 | 0.0041768 | -0.092011 |
| 5mo_SIGAD9 | 0.03211758 | 0.1832013  | 4.27E-05 | 0.004099  | -0.097962 |
| 5mo_SIGAD9 | 0.02605797 | 0.14663705 | 3.76E-05 | 0.0041286 | -0.096385 |
| 5mo_SIGAD9 | 0.01896485 | 0.10383651 | 3.38E-05 | 0.004741  | 0.03364   |
| 5mo_SIGAD9 | 0.08203296 | 0.4843953  | 6.35E-05 | 0.017633  | 0.12948   |
| 5mo_SIGAD9 | 0.02579027 | 0.14502174 | 3.72E-05 | 0.0041509 | -0.096385 |
| 5mo_SIGAD9 | 0.09038539 | 0.53479457 | 6.44E-05 | 0.021369  | 0.05218   |
| 5mo_SIGAD9 | 0.02003302 | 0.11028195 | 3.42E-05 | 0.0045972 | 0.0032259 |
| 5mo_SIGAD9 | 0.03080233 | 0.17526497 | 4.11E-05 | 0.0040705 | -0.10299  |
| 5mo_SIGAD9 | 0.03963852 | 0.22858332 | 4.98E-05 | 0.0045122 | -0.028892 |
| 5mo_SIGAD9 | 0.04588644 | 0.26628387 | 5.54E-05 | 0.0053171 | 0.025099  |
| 5mo_SIGAD9 | 0.01579603 | 0.08471556 | 3.28E-05 | 0.0052924 | 0.1442    |
| 5mo_SIGAD9 | 0.10503813 | 0.62321055 | 6.57E-05 | 0.025429  | -0.19772  |
| 5mo_SIGAD9 | 0.01083875 | 0.05480288 | 3.21E-05 | 0.0064976 | 0.35381   |
| 5mo_SIGAD9 | 0.0720056  | 0.42388925 | 6.21E-05 | 0.01308   | 0.12348   |
| 5mo_SIGAD9 | 0.0752759  | 0.44362253 | 6.26E-05 | 0.014549  | 0.13345   |
| 5mo_SIGAD9 | 0.08581703 | 0.5072287  | 6.39E-05 | 0.01943   | 0.1043    |
| 5mo_SIGAD9 | 0.03427456 | 0.19621673 | 4.48E-05 | 0.0041765 | -0.082901 |
| 5mo_SIGAD9 | 0.01865484 | 0.1019659  | 3.36E-05 | 0.0048202 | 0.03364   |
| 5mo_SIGAD9 | 0.03503741 | 0.20081985 | 4.54E-05 | 0.0042028 | -0.078293 |
| 5mo_SIGAD9 | 0.04706832 | 0.27341548 | 5.61E-05 | 0.0054936 | 0.032113  |
| 5mo_SIGAD9 | 0.04061412 | 0.23447019 | 5.09E-05 | 0.0046173 | -0.023154 |
| 5mo_SIGAD9 | 0.0138579  | 0.07302072 | 3.25E-05 | 0.0056405 | 0.20898   |
| 5mo_SIGAD9 | 0.02915813 | 0.16534372 | 3.97E-05 | 0.0040686 | -0.10661  |
| 5mo_SIGAD9 | 0.08403005 | 0.4964459  | 6.37E-05 | 0.01841   | 0.1176    |
| 5mo_SIGAD9 | 0.03581027 | 0.20548333 | 4.59E-05 | 0.0042319 | -0.068307 |
| 5mo_SIGAD9 | 0.02296851 | 0.12799494 | 3.55E-05 | 0.0043197 | -0.056631 |
| 5mo_SIGAD9 | 0.03043254 | 0.17303358 | 4.11E-05 | 0.0040705 | -0.10475  |
| 5mo_SIGAD9 | 0.06208053 | 0.3640005  | 6.07E-05 | 0.0092324 | 0.083692  |
| 5mo_SIGAD9 | 0.01168814 | 0.05992818 | 3.22E-05 | 0.0061869 | 0.30353   |
| 5mo_SIGAD9 | 0.02347988 | 0.1310806  | 3.58E-05 | 0.0042778 | -0.065623 |
| 5mo_SIGAD9 | 0.01708863 | 0.09251522 | 3.33E-05 | 0.0049935 | 0.085504  |
| 5mo_SIGAD9 | 0.03063444 | 0.1742519  | 4.11E-05 | 0.0040705 | -0.10475  |
| 5mo_SIGAD9 | 0.01178501 | 0.06051267 | 3.22E-05 | 0.0061869 | 0.30353   |
| 5mo_SIGAD9 | 0.07336713 | 0.4321049  | 6.23E-05 | 0.013561  | 0.12913   |
| 5mo_SIGAD9 | 0.04885737 | 0.2842107  | 5.70E-05 | 0.0057827 | 0.041222  |
| 5mo_SIGAD9 | 0.11049967 | 0.65616596 | 6.60E-05 | 0.02558   | -0.27396  |
| 5mo_SIGAD9 | 0.10723198 | 0.63644844 | 6.58E-05 | 0.025586  | -0.23052  |
| 5mo_SIGAD9 | 0.03212372 | 0.18323833 | 4.27E-05 | 0.004099  | -0.097962 |
| 5mo_SIGAD9 | 0.03429169 | 0.19632007 | 4.48E-05 | 0.0041765 | -0.082901 |
| 5mo_SIGAD9 | 0.02092098 | 0.11563994 | 3.47E-05 | 0.0044724 | -0.023601 |
| 5mo_SIGAD9 | 0.03973948 | 0.22919257 | 5.03E-05 | 0.0045634 | -0.028892 |

|            |            |            |          |           |           |
|------------|------------|------------|----------|-----------|-----------|
| 5mo_SIGAD9 | 0.14261399 | 0.84994674 | 6.74E-05 | 0.023593  | -0.50412  |
| 5mo_SIGAD9 | 0.01045959 | 0.05251499 | 3.21E-05 | 0.0064976 | 0.35381   |
| 5mo_SIGAD9 | 0.11367074 | 0.6753005  | 6.62E-05 | 0.025353  | -0.31137  |
| 5mo_SIGAD9 | 0.01622142 | 0.0872824  | 3.30E-05 | 0.0051875 | 0.12392   |
| 5mo_SIGAD9 | 0.04659069 | 0.27053338 | 5.57E-05 | 0.0054037 | 0.028707  |
| 5mo_SIGAD9 | 0.01392392 | 0.07341908 | 3.25E-05 | 0.0056405 | 0.20898   |
| 5mo_SIGAD9 | 0.01503874 | 0.08014598 | 3.27E-05 | 0.0054028 | 0.16515   |
| 5mo_SIGAD9 | 0.03527841 | 0.20227402 | 4.54E-05 | 0.0042028 | -0.073417 |
| 5mo_SIGAD9 | 0.06148351 | 0.36039802 | 6.07E-05 | 0.0090475 | 0.082025  |
| 5mo_SIGAD9 | 0.0838587  | 0.49541196 | 6.37E-05 | 0.01841   | 0.1176    |
| 5mo_SIGAD9 | 0.01790974 | 0.09746986 | 3.34E-05 | 0.0049043 | 0.067421  |
| 5mo_SIGAD9 | 0.12368676 | 0.7357381  | 6.67E-05 | 0.024153  | -0.39752  |
| 5mo_SIGAD9 | 0.06256483 | 0.3669228  | 6.08E-05 | 0.0094206 | 0.085432  |
| 5mo_SIGAD9 | 0.03243118 | 0.18509361 | 4.27E-05 | 0.004099  | -0.094772 |
| 5mo_SIGAD9 | 0.00679549 | 0.0304055  | 3.18E-05 | 0.0078    | 0.54183   |
| 5mo_SIGAD9 | 0.05733122 | 0.33534274 | 5.99E-05 | 0.0076952 | 0.071569  |
| 5mo_SIGAD9 | 0.0211542  | 0.11704725 | 3.47E-05 | 0.0044724 | -0.023601 |
| 5mo_SIGAD9 | 0.01623683 | 0.08737537 | 3.30E-05 | 0.0051875 | 0.12392   |
| 5mo_SIGAD9 | 0.07597749 | 0.447856   | 6.26E-05 | 0.0148    | 0.13453   |
| 5mo_SIGAD9 | 0.07923448 | 0.467509   | 6.31E-05 | 0.016335  | 0.13613   |
| 5mo_SIGAD9 | 0.00939358 | 0.04608261 | 3.20E-05 | 0.0068348 | 0.4058    |
| 5mo_SIGAD9 | 0.0567438  | 0.33179817 | 5.98E-05 | 0.0075425 | 0.070131  |
| 5mo_SIGAD9 | 0.02923049 | 0.16578032 | 4.02E-05 | 0.0040662 | -0.10661  |
| 5mo_SIGAD9 | 0.02698802 | 0.15224904 | 3.84E-05 | 0.0040947 | -0.10271  |
| 5mo_SIGAD9 | 0.07663266 | 0.45180938 | 6.27E-05 | 0.015053  | 0.13605   |
| 5mo_SIGAD9 | 0.04599771 | 0.2669553  | 5.54E-05 | 0.0053171 | 0.025099  |
| 5mo_SIGAD9 | 0.0166427  | 0.08982445 | 3.31E-05 | 0.0050879 | 0.10435   |
| 5mo_SIGAD9 | 0.0794337  | 0.4687111  | 6.31E-05 | 0.016335  | 0.13545   |
| 5mo_SIGAD9 | 0.01222823 | 0.06318711 | 3.23E-05 | 0.0060411 | 0.2791    |
| 5mo_SIGAD9 | 0.0735479  | 0.43319565 | 6.23E-05 | 0.013805  | 0.12913   |
| 5mo_SIGAD9 | 0.10842514 | 0.6436481  | 6.59E-05 | 0.025614  | -0.24573  |
| 5mo_SIGAD9 | 0.02646442 | 0.1490896  | 3.80E-05 | 0.0041099 | -0.099939 |
| 5mo_SIGAD9 | 0.04151059 | 0.23987956 | 5.19E-05 | 0.0047337 | -0.011944 |
| 5mo_SIGAD9 | 0.12466407 | 0.74163526 | 6.68E-05 | 0.024034  | -0.40152  |
| 5mo_SIGAD9 | 0.04117042 | 0.23782699 | 5.14E-05 | 0.0046741 | -0.017493 |
| 5mo_SIGAD9 | 0.0827933  | 0.48898324 | 6.35E-05 | 0.017892  | 0.12434   |
| 5mo_SIGAD9 | 0.02795007 | 0.15805414 | 3.88E-05 | 0.0040827 | -0.10472  |
| 5mo_SIGAD9 | 0.10217903 | 0.60595846 | 6.55E-05 | 0.025029  | -0.15246  |
| 5mo_SIGAD9 | 0.06683029 | 0.39266098 | 6.13E-05 | 0.010826  | 0.10251   |
| 5mo_SIGAD9 | 0.02287333 | 0.12742063 | 3.55E-05 | 0.0043197 | -0.056631 |
| 5mo_SIGAD9 | 0.05179289 | 0.30192396 | 5.83E-05 | 0.0063316 | 0.055318  |
| 5mo_SIGAD9 | 0.01455235 | 0.07721107 | 3.26E-05 | 0.0055188 | 0.18676   |
| 5mo_SIGAD9 | 0.13204227 | 0.78615606 | 6.71E-05 | 0.023582  | -0.45284  |

|            |            |            |          |           |           |
|------------|------------|------------|----------|-----------|-----------|
| 5mo_SIGAD9 | 0.0127545  | 0.06636271 | 3.23E-05 | 0.0059016 | 0.25518   |
| 5mo_SIGAD9 | 0.02564958 | 0.1441728  | 3.72E-05 | 0.0041509 | -0.092011 |
| 5mo_SIGAD9 | 0.06721345 | 0.394973   | 6.14E-05 | 0.011039  | 0.10251   |
| 5mo_SIGAD9 | 0.10660244 | 0.6326497  | 6.58E-05 | 0.02556   | -0.22263  |
| 5mo_SIGAD9 | 0.0189877  | 0.10397435 | 3.38E-05 | 0.004741  | 0.03364   |
| 5mo_SIGAD9 | 0.0539562  | 0.31497753 | 5.91E-05 | 0.0068337 | 0.060836  |
| 5mo_SIGAD9 | 0.03261549 | 0.18620571 | 4.32E-05 | 0.0041142 | -0.094772 |
| 5mo_SIGAD9 | 0.1475315  | 0.8796194  | 6.76E-05 | 0.023673  | -0.51834  |
| 5mo_SIGAD9 | 0.093141   | 0.5514222  | 6.47E-05 | 0.022469  | 0.010343  |
| 5mo_SIGAD9 | 0.0169985  | 0.09197136 | 3.31E-05 | 0.0050879 | 0.085504  |
| 5mo_SIGAD9 | 0.02223188 | 0.12355006 | 3.52E-05 | 0.0043661 | -0.046619 |
| 5mo_SIGAD9 | 0.02349421 | 0.13116707 | 3.58E-05 | 0.0042778 | -0.065623 |
| 5mo_SIGAD9 | 0.02514439 | 0.14112446 | 3.68E-05 | 0.0041768 | -0.086782 |
| 5mo_SIGAD9 | 0.02964295 | 0.16826916 | 4.02E-05 | 0.0040662 | -0.10661  |
| 5mo_SIGAD9 | 0.05227541 | 0.3048355  | 5.85E-05 | 0.0064518 | 0.055318  |
| 5mo_SIGAD9 | 0.04961284 | 0.28876927 | 5.73E-05 | 0.0058857 | 0.046466  |
| 5mo_SIGAD9 | 0.01553371 | 0.08313271 | 3.28E-05 | 0.0052924 | 0.1442    |
| 5mo_SIGAD9 | 0.12150372 | 0.7225654  | 6.66E-05 | 0.024419  | -0.38089  |
| 5mo_SIGAD9 | 0.02198822 | 0.12207979 | 3.52E-05 | 0.0043661 | -0.046619 |
| 5mo_SIGAD9 | 0.01125928 | 0.05734037 | 3.21E-05 | 0.006339  | 0.32844   |
| 5mo_SIGAD9 | 0.01767878 | 0.09607625 | 3.34E-05 | 0.0049043 | 0.067421  |
| 5mo_SIGAD9 | 0.02337126 | 0.13042518 | 3.58E-05 | 0.0042778 | -0.065623 |
| 5mo_SIGAD9 | 0.09155203 | 0.5418342  | 6.45E-05 | 0.021822  | 0.027741  |
| 5mo_SIGAD9 | 0.08369608 | 0.49443066 | 6.37E-05 | 0.01841   | 0.12117   |
| 5mo_SIGAD9 | 0.02645952 | 0.14906003 | 3.80E-05 | 0.0041099 | -0.099939 |
| 5mo_SIGAD9 | 0.02138369 | 0.11843201 | 3.47E-05 | 0.0044724 | -0.0356   |
| 5mo_SIGAD9 | 0.02361053 | 0.13186897 | 3.58E-05 | 0.0042778 | -0.073623 |
| 5mo_SIGAD9 | 0.05782383 | 0.3383152  | 6.00E-05 | 0.0078516 | 0.071569  |
| 5mo_SIGAD9 | 0.01015104 | 0.05065319 | 3.20E-05 | 0.0066628 | 0.37961   |
| 5mo_SIGAD9 | 0.00675292 | 0.03014857 | 3.18E-05 | 0.0078    | 0.54183   |
| 5mo_SIGAD9 | 0.02599672 | 0.14626749 | 3.76E-05 | 0.0041286 | -0.096385 |
| 5mo_SIGAD9 | 0.02564716 | 0.14415817 | 3.72E-05 | 0.0041509 | -0.092011 |
| 5mo_SIGAD9 | 0.10520056 | 0.6241907  | 6.57E-05 | 0.025482  | -0.19772  |
| 5mo_SIGAD9 | 0.08131348 | 0.48005387 | 6.34E-05 | 0.017373  | 0.13148   |
| 5mo_SIGAD9 | 0.0755378  | 0.4452029  | 6.26E-05 | 0.014549  | 0.13453   |
| 5mo_SIGAD9 | 0.01319922 | 0.06904616 | 3.24E-05 | 0.0057681 | 0.23179   |
| 5mo_SIGAD9 | 0.02062177 | 0.11383452 | 3.44E-05 | 0.0045325 | -0.01065  |
| 5mo_SIGAD9 | 0.01252644 | 0.06498654 | 3.23E-05 | 0.0060411 | 0.2791    |
| 5mo_SIGAD9 | 0.02268729 | 0.12629804 | 3.55E-05 | 0.0043197 | -0.056631 |
| 5mo_SIGAD9 | 0.0864339  | 0.5109509  | 6.40E-05 | 0.019681  | 0.099025  |
| 5mo_SIGAD9 | 0.02140495 | 0.11856029 | 3.47E-05 | 0.0044724 | -0.0356   |
| 5mo_SIGAD9 | 0.13644171 | 0.81270266 | 6.72E-05 | 0.023527  | -0.4775   |
| 5mo_SIGAD9 | 0.05438586 | 0.31757015 | 5.92E-05 | 0.0069681 | 0.062513  |

|            |            |            |          |           |           |
|------------|------------|------------|----------|-----------|-----------|
| 5mo_SIGAD9 | 0.04594284 | 0.2666242  | 5.54E-05 | 0.0053171 | 0.025099  |
| 5mo_SIGAD9 | 0.0183441  | 0.10009083 | 3.36E-05 | 0.0048202 | 0.050123  |
| 5mo_SIGAD9 | 0.0237654  | 0.1328035  | 3.61E-05 | 0.0042401 | -0.073623 |
| 5mo_SIGAD9 | 0.0200766  | 0.11054489 | 3.42E-05 | 0.0045972 | 0.0032259 |
| 5mo_SIGAD9 | 0.09109811 | 0.53909516 | 6.45E-05 | 0.021597  | 0.036126  |
| 5mo_SIGAD9 | 0.0186499  | 0.10193604 | 3.36E-05 | 0.0048202 | 0.03364   |
| 5mo_SIGAD9 | 0.02069444 | 0.11427301 | 3.44E-05 | 0.0045325 | -0.01065  |
| 5mo_SIGAD9 | 0.02632526 | 0.14824991 | 3.76E-05 | 0.0041286 | -0.096385 |
| 5mo_SIGAD9 | 0.07465456 | 0.4398733  | 6.25E-05 | 0.014299  | 0.13218   |
| 5mo_SIGAD9 | 0.03452989 | 0.19775741 | 4.48E-05 | 0.0041765 | -0.082901 |
| 5mo_SIGAD9 | 0.06018223 | 0.35254598 | 6.04E-05 | 0.0085136 | 0.07887   |
| 5mo_SIGAD9 | 0.02347574 | 0.13105565 | 3.58E-05 | 0.0042778 | -0.065623 |
| 5mo_SIGAD9 | 0.01161225 | 0.05947023 | 3.22E-05 | 0.0061869 | 0.30353   |
| 5mo_SIGAD9 | 0.12666912 | 0.75373393 | 6.68E-05 | 0.023879  | -0.41707  |
| 5mo_SIGAD9 | 0.08736749 | 0.5165843  | 6.41E-05 | 0.01993   | 0.087329  |
| 5mo_SIGAD9 | 0.0910539  | 0.53882843 | 6.45E-05 | 0.021597  | 0.036126  |
| 5mo_SIGAD9 | 0.02376588 | 0.13280636 | 3.61E-05 | 0.0042401 | -0.073623 |
| 5mo_SIGAD9 | 0.00757718 | 0.03512224 | 3.19E-05 | 0.0073923 | 0.48652   |
| 5mo_SIGAD9 | 0.0253045  | 0.14209057 | 3.68E-05 | 0.0041768 | -0.092011 |
| 5mo_SIGAD9 | 0.03086142 | 0.17562154 | 4.16E-05 | 0.0040771 | -0.10299  |
| 5mo_SIGAD9 | 0.05923811 | 0.34684908 | 6.03E-05 | 0.0083426 | 0.075889  |
| 5mo_SIGAD9 | 0.02734661 | 0.15441282 | 3.84E-05 | 0.0040947 | -0.10271  |
| 5mo_SIGAD9 | 0.0212839  | 0.11782987 | 3.47E-05 | 0.0044724 | -0.023601 |
| 5mo_SIGAD9 | 0.05954496 | 0.3487006  | 6.03E-05 | 0.0083426 | 0.077363  |
| 5mo_SIGAD9 | 0.07302624 | 0.4300479  | 6.23E-05 | 0.013561  | 0.12737   |
| 5mo_SIGAD9 | 0.05798047 | 0.33926034 | 6.00E-05 | 0.0078516 | 0.073002  |
| 5mo_SIGAD9 | 0.00877541 | 0.04235252 | 3.19E-05 | 0.0070136 | 0.43237   |
| 5mo_SIGAD9 | 0.09521151 | 0.56391585 | 6.49E-05 | 0.023263  | -0.026471 |
| 5mo_SIGAD9 | 0.03426746 | 0.19617388 | 4.48E-05 | 0.0041765 | -0.082901 |
| 5mo_SIGAD9 | 0.09262824 | 0.54832816 | 6.46E-05 | 0.022258  | 0.019141  |
| 5mo_SIGAD9 | 0.01327697 | 0.06951533 | 3.24E-05 | 0.0057681 | 0.23179   |
| 5mo_SIGAD9 | 0.03640109 | 0.20904842 | 4.70E-05 | 0.0042982 | -0.062998 |
| 5mo_SIGAD9 | 0.1418371  | 0.84525895 | 6.74E-05 | 0.023584  | -0.5021   |
| 5mo_SIGAD9 | 0.01084141 | 0.05481894 | 3.21E-05 | 0.0064976 | 0.35381   |
| 5mo_SIGAD9 | 0.04317436 | 0.24991891 | 5.33E-05 | 0.0049301 | 0.0036923 |
| 5mo_SIGAD9 | 0.02586337 | 0.14546281 | 3.72E-05 | 0.0041509 | -0.096385 |
| 5mo_SIGAD9 | 0.05837749 | 0.34165603 | 6.01E-05 | 0.0080116 | 0.073002  |
| 5mo_SIGAD9 | 0.07736266 | 0.45621428 | 6.28E-05 | 0.015307  | 0.13646   |
| 5mo_SIGAD9 | 0.01523192 | 0.08131164 | 3.27E-05 | 0.0054028 | 0.16515   |
| 5mo_SIGAD9 | 0.01652024 | 0.08908551 | 3.31E-05 | 0.0050879 | 0.10435   |
| 5mo_SIGAD9 | 0.10835607 | 0.6432313  | 6.59E-05 | 0.025614  | -0.24573  |
| 5mo_SIGAD9 | 0.07234368 | 0.42592925 | 6.21E-05 | 0.01308   | 0.12548   |
| 5mo_SIGAD9 | 0.11827079 | 0.7030576  | 6.65E-05 | 0.024847  | -0.35363  |

|            |            |            |          |           |           |
|------------|------------|------------|----------|-----------|-----------|
| 5mo_SIGAD9 | 0.03859482 | 0.22228557 | 4.87E-05 | 0.0044183 | -0.040459 |
| 5mo_SIGAD9 | 0.01790516 | 0.09744221 | 3.34E-05 | 0.0049043 | 0.067421  |
| 5mo_SIGAD9 | 0.0108884  | 0.05510245 | 3.21E-05 | 0.0064976 | 0.32844   |
| 5mo_SIGAD9 | 0.03162237 | 0.18021314 | 4.22E-05 | 0.0040866 | -0.10071  |
| 5mo_SIGAD9 | 0.06576517 | 0.3862339  | 6.12E-05 | 0.01041   | 0.097788  |
| 5mo_SIGAD9 | 0.05998173 | 0.35133615 | 6.04E-05 | 0.0085136 | 0.077363  |
| 5mo_SIGAD9 | 0.02194406 | 0.12181335 | 3.49E-05 | 0.0044169 | -0.046619 |
| 5mo_SIGAD9 | 0.07432266 | 0.43787062 | 6.24E-05 | 0.014051  | 0.13074   |
| 5mo_SIGAD9 | 0.01243188 | 0.06441598 | 3.23E-05 | 0.0060411 | 0.2791    |
| 5mo_SIGAD9 | 0.09019791 | 0.53366333 | 6.44E-05 | 0.021369  | 0.05218   |
| 5mo_SIGAD9 | 0.08256815 | 0.48762465 | 6.35E-05 | 0.017892  | 0.1271    |
| 5mo_SIGAD9 | 0.1084085  | 0.6435477  | 6.59E-05 | 0.025614  | -0.24573  |
| 5mo_SIGAD9 | 0.02204901 | 0.12244664 | 3.52E-05 | 0.0043661 | -0.046619 |
| 5mo_SIGAD9 | 0.01389362 | 0.07323623 | 3.25E-05 | 0.0056405 | 0.20898   |
| 5mo_SIGAD9 | 0.0332805  | 0.19021845 | 4.37E-05 | 0.0041322 | -0.091175 |
| 5mo_SIGAD9 | 0.02657214 | 0.14973962 | 3.80E-05 | 0.0041099 | -0.099939 |
| 5mo_SIGAD9 | 0.00758868 | 0.03519167 | 3.19E-05 | 0.0073923 | 0.48652   |
| 5mo_SIGAD9 | 0.09724291 | 0.5761735  | 6.51E-05 | 0.023799  | -0.065044 |
| 5mo_SIGAD9 | 0.04466562 | 0.25891736 | 5.42E-05 | 0.0050757 | 0.017239  |
| 5mo_SIGAD9 | 0.06861711 | 0.40344277 | 6.16E-05 | 0.011695  | 0.10977   |
| 5mo_SIGAD9 | 0.0275856  | 0.1558549  | 3.88E-05 | 0.0040827 | -0.10472  |
| 5mo_SIGAD9 | 0.09759697 | 0.5783099  | 6.51E-05 | 0.023964  | -0.065044 |
| 5mo_SIGAD9 | 0.03334758 | 0.19062324 | 4.37E-05 | 0.0041322 | -0.091175 |
| 5mo_SIGAD9 | 0.02491413 | 0.13973498 | 3.68E-05 | 0.0041768 | -0.086782 |
| 5mo_SIGAD9 | 0.02499018 | 0.14019391 | 3.68E-05 | 0.0041768 | -0.086782 |
| 5mo_SIGAD9 | 0.01363547 | 0.07167855 | 3.24E-05 | 0.0057681 | 0.20898   |
| 5mo_SIGAD9 | 0.05399371 | 0.3152039  | 5.91E-05 | 0.0068337 | 0.062513  |
| 5mo_SIGAD9 | 0.02896047 | 0.164151   | 3.97E-05 | 0.0040686 | -0.10664  |
| 5mo_SIGAD9 | 0.02507778 | 0.14072247 | 3.68E-05 | 0.0041768 | -0.086782 |
| 5mo_SIGAD9 | 0.0189946  | 0.10401605 | 3.38E-05 | 0.004741  | 0.03364   |
| 5mo_SIGAD9 | 0.01440921 | 0.07634737 | 3.26E-05 | 0.0055188 | 0.18676   |
| 5mo_SIGAD9 | 0.06363732 | 0.37339428 | 6.10E-05 | 0.0098069 | 0.089169  |
| 5mo_SIGAD9 | 0.02114778 | 0.11700852 | 3.47E-05 | 0.0044724 | -0.023601 |
| 5mo_SIGAD9 | 0.07562277 | 0.44571558 | 6.26E-05 | 0.014549  | 0.13453   |
| 5mo_SIGAD9 | 0.05166405 | 0.3011465  | 5.83E-05 | 0.0063316 | 0.053285  |
| 5mo_SIGAD9 | 0.08130601 | 0.48000878 | 6.34E-05 | 0.017373  | 0.13148   |
| 5mo_SIGAD9 | 0.02737026 | 0.15455556 | 3.84E-05 | 0.0040947 | -0.10271  |
| 5mo_SIGAD9 | 0.02729113 | 0.15407808 | 3.84E-05 | 0.0040947 | -0.10271  |
| 5mo_SIGAD9 | 0.00658172 | 0.02911558 | 3.18E-05 | 0.0078    | 0.54183   |
| 5mo_SIGAD9 | 0.08215285 | 0.48511872 | 6.35E-05 | 0.017633  | 0.1271    |
| 5mo_SIGAD9 | 0.02998769 | 0.17034933 | 4.07E-05 | 0.0040668 | -0.10597  |
| 5mo_SIGAD9 | 0.01557268 | 0.08336785 | 3.28E-05 | 0.0052924 | 0.1442    |
| 5mo_SIGAD9 | 0.02968344 | 0.16851349 | 4.02E-05 | 0.0040662 | -0.10597  |



|            |            |            |          |           |            |
|------------|------------|------------|----------|-----------|------------|
| 5mo_SIGAD9 | 0.02201092 | 0.12221675 | 3.52E-05 | 0.0043661 | -0.046619  |
| 5mo_SIGAD9 | 0.0271829  | 0.15342496 | 3.84E-05 | 0.0040947 | -0.10271   |
| 5mo_SIGAD9 | 0.01905734 | 0.10439462 | 3.38E-05 | 0.004741  | 0.03364    |
| 5mo_SIGAD9 | 0.01146458 | 0.05857917 | 3.22E-05 | 0.0061869 | 0.30353    |
| 5mo_SIGAD9 | 0.13119593 | 0.78104913 | 6.70E-05 | 0.023599  | -0.44608   |
| 5mo_SIGAD9 | 0.05620598 | 0.32855296 | 5.97E-05 | 0.0073934 | 0.068678   |
| 5mo_SIGAD9 | 0.01626913 | 0.0875703  | 3.30E-05 | 0.0051875 | 0.12392    |
| 5mo_SIGAD9 | 0.02529551 | 0.14203627 | 3.68E-05 | 0.0041768 | -0.092011  |
| 5mo_SIGAD9 | 0.06812337 | 0.40046352 | 6.16E-05 | 0.011474  | 0.10734    |
| 5mo_SIGAD9 | 0.03703203 | 0.21285553 | 4.76E-05 | 0.0043355 | -0.057524  |
| 5mo_SIGAD9 | 0.13351111 | 0.79501915 | 6.71E-05 | 0.023546  | -0.46255   |
| 5mo_SIGAD9 | 0.10648069 | 0.6319151  | 6.58E-05 | 0.02556   | -0.22263   |
| 5mo_SIGAD9 | 0.08431207 | 0.4981476  | 6.37E-05 | 0.018667  | 0.1176     |
| 5mo_SIGAD9 | 0.10752443 | 0.6382131  | 6.59E-05 | 0.025604  | -0.23052   |
| 5mo_SIGAD9 | 0.01974026 | 0.1085154  | 3.40E-05 | 0.0046667 | 0.0032259  |
| 5mo_SIGAD9 | 0.05133314 | 0.29914978 | 5.81E-05 | 0.006215  | 0.053285   |
| 5mo_SIGAD9 | 0.08005329 | 0.47244978 | 6.32E-05 | 0.016594  | 0.13446    |
| 5mo_SIGAD9 | 0.02562451 | 0.14402153 | 3.72E-05 | 0.0041509 | -0.092011  |
| 5mo_SIGAD9 | 0.01819193 | 0.09917267 | 3.36E-05 | 0.0048202 | 0.050123   |
| 5mo_SIGAD9 | 0.04941534 | 0.28757757 | 5.73E-05 | 0.0058857 | 0.04392    |
| 5mo_SIGAD9 | 0.04433994 | 0.25695214 | 5.42E-05 | 0.0050757 | 0.012967   |
| 5mo_SIGAD9 | 0.08604471 | 0.50860256 | 6.39E-05 | 0.01943   | 0.099025   |
| 5mo_SIGAD9 | 0.07513407 | 0.44276673 | 6.25E-05 | 0.014299  | 0.13345    |
| 5mo_SIGAD9 | 0.0046891  | 0.01769533 | 3.18E-05 | 0.0087056 | 0.65503    |
| 5mo_SIGAD9 | 0.0107104  | 0.05402841 | 3.21E-05 | 0.0064976 | 0.35381    |
| 5mo_SIGAD9 | 0.0112805  | 0.05746844 | 3.21E-05 | 0.006339  | 0.32844    |
| 5mo_SIGAD9 | 0.03955116 | 0.22805619 | 4.98E-05 | 0.0045122 | -0.034672  |
| 5mo_SIGAD9 | 0.0167862  | 0.09069034 | 3.31E-05 | 0.0050879 | 0.10435    |
| 5mo_SIGAD9 | 0.03644166 | 0.20929319 | 4.70E-05 | 0.0042982 | -0.062998  |
| 5mo_SIGAD9 | 0.02025669 | 0.1116316  | 3.42E-05 | 0.0045972 | 0.0032259  |
| 5mo_SIGAD9 | 0.01672653 | 0.0903303  | 3.31E-05 | 0.0050879 | 0.10435    |
| 5mo_SIGAD9 | 0.02658729 | 0.14983104 | 3.80E-05 | 0.0041099 | -0.099939  |
| 5mo_SIGAD9 | 0.05824387 | 0.34084973 | 6.01E-05 | 0.0080116 | 0.073002   |
| 5mo_SIGAD9 | 0.11712962 | 0.6961717  | 6.64E-05 | 0.024986  | -0.34377   |
| 5mo_SIGAD9 | 0.03862112 | 0.22244424 | 4.92E-05 | 0.0044639 | -0.040459  |
| 5mo_SIGAD9 | 0.09411285 | 0.55728644 | 6.48E-05 | 0.022877  | -0.0077738 |
| 5mo_SIGAD9 | 0.03260975 | 0.18617108 | 4.32E-05 | 0.0041142 | -0.094772  |
| 5mo_SIGAD9 | 0.11510393 | 0.6839485  | 6.63E-05 | 0.025182  | -0.32268   |
| 5mo_SIGAD9 | 0.13945527 | 0.8308868  | 6.73E-05 | 0.023544  | -0.49075   |
| 5mo_SIGAD9 | 0.01292058 | 0.06736481 | 3.23E-05 | 0.0059016 | 0.25518    |
| 5mo_SIGAD9 | 0.09796369 | 0.5805227  | 6.52E-05 | 0.024123  | -0.074831  |
| 5mo_SIGAD9 | 0.02621324 | 0.14757395 | 3.76E-05 | 0.0041286 | -0.096385  |
| 5mo_SIGAD9 | 0.02422221 | 0.13555993 | 3.64E-05 | 0.0042065 | -0.080664  |

|            |            |            |          |           |           |
|------------|------------|------------|----------|-----------|-----------|
| 5mo_SIGAD9 | 0.04781983 | 0.27795014 | 5.64E-05 | 0.0055867 | 0.035328  |
| 5mo_SIGAD9 | 0.01096911 | 0.05558947 | 3.21E-05 | 0.006339  | 0.32844   |
| 5mo_SIGAD9 | 0.02814954 | 0.15925777 | 3.93E-05 | 0.004074  | -0.10603  |
| 5mo_SIGAD9 | 0.02757169 | 0.15577099 | 3.88E-05 | 0.0040827 | -0.10472  |
| 5mo_SIGAD9 | 0.01364191 | 0.07171741 | 3.24E-05 | 0.0057681 | 0.20898   |
| 5mo_SIGAD9 | 0.02411684 | 0.13492408 | 3.61E-05 | 0.0042401 | -0.073623 |
| 5mo_SIGAD9 | 0.11450014 | 0.6803052  | 6.63E-05 | 0.025299  | -0.3171   |
| 5mo_SIGAD9 | 0.02456235 | 0.13761234 | 3.64E-05 | 0.0042065 | -0.080664 |
| 5mo_SIGAD9 | 0.01825022 | 0.09952439 | 3.36E-05 | 0.0048202 | 0.050123  |
| 5mo_SIGAD9 | 0.08771925 | 0.51870686 | 6.41E-05 | 0.020177  | 0.080939  |
| 5mo_SIGAD9 | 0.03504092 | 0.200841   | 4.54E-05 | 0.0042028 | -0.078293 |
| 5mo_SIGAD9 | 0.04691687 | 0.27250156 | 5.57E-05 | 0.0054037 | 0.032113  |
| 5mo_SIGAD9 | 0.01509257 | 0.08047083 | 3.27E-05 | 0.0054028 | 0.16515   |
| 5mo_SIGAD9 | 0.0168265  | 0.09093349 | 3.31E-05 | 0.0050879 | 0.10435   |
| 5mo_SIGAD9 | 0.07360481 | 0.43353903 | 6.23E-05 | 0.013805  | 0.12913   |
| 5mo_SIGAD9 | 0.01736856 | 0.09420433 | 3.33E-05 | 0.0049935 | 0.085504  |
| 5mo_SIGAD9 | 0.05403671 | 0.31546336 | 5.91E-05 | 0.0068337 | 0.062513  |
| 5mo_SIGAD9 | 0.02636513 | 0.14849047 | 3.76E-05 | 0.0041286 | -0.099939 |
| 5mo_SIGAD9 | 0.02610634 | 0.14692892 | 3.76E-05 | 0.0041286 | -0.096385 |
| 5mo_SIGAD9 | 0.02809678 | 0.15893944 | 3.93E-05 | 0.004074  | -0.10603  |
| 5mo_SIGAD9 | 0.044414   | 0.257399   | 5.42E-05 | 0.0050757 | 0.012967  |
| 5mo_SIGAD9 | 0.10816596 | 0.6420842  | 6.59E-05 | 0.025614  | -0.24573  |
| 5mo_SIGAD9 | 0.03205114 | 0.1828004  | 4.27E-05 | 0.004099  | -0.097962 |
| 5mo_SIGAD9 | 0.10151492 | 0.6019512  | 6.54E-05 | 0.024923  | -0.14299  |
| 5mo_SIGAD9 | 0.08793722 | 0.5200221  | 6.41E-05 | 0.020177  | 0.080939  |
| 5mo_SIGAD9 | 0.00430816 | 0.0153967  | 3.18E-05 | 0.0087056 | 0.65503   |
| 5mo_SIGAD9 | 0.0563613  | 0.32949013 | 5.98E-05 | 0.0075425 | 0.068678  |
| 5mo_SIGAD9 | 0.13045712 | 0.77659106 | 6.70E-05 | 0.02364   | -0.44263  |
| 5mo_SIGAD9 | 0.01636268 | 0.0881348  | 3.30E-05 | 0.0051875 | 0.12392   |
| 5mo_SIGAD9 | 0.06369993 | 0.3737721  | 6.10E-05 | 0.0098069 | 0.089169  |
| 5mo_SIGAD9 | 0.06060094 | 0.35507253 | 6.05E-05 | 0.008688  | 0.080421  |
| 5mo_SIGAD9 | 0.02113173 | 0.11691168 | 3.47E-05 | 0.0044724 | -0.023601 |
| 5mo_SIGAD9 | 0.09882899 | 0.5857441  | 6.52E-05 | 0.024275  | -0.094455 |
| 5mo_SIGAD9 | 0.07445164 | 0.43864888 | 6.24E-05 | 0.014051  | 0.13218   |
| 5mo_SIGAD9 | 0.10089217 | 0.59819347 | 6.54E-05 | 0.024809  | -0.12375  |
| 5mo_SIGAD9 | 0.0863428  | 0.5104012  | 6.40E-05 | 0.019681  | 0.099025  |
| 5mo_SIGAD9 | 0.01655121 | 0.08927238 | 3.31E-05 | 0.0050879 | 0.10435   |
| 5mo_SIGAD9 | 0.02110685 | 0.1167615  | 3.47E-05 | 0.0044724 | -0.023601 |
| 5mo_SIGAD9 | 0.08717335 | 0.5154128  | 6.41E-05 | 0.01993   | 0.087329  |
| 5mo_SIGAD9 | 0.11182962 | 0.664191   | 6.61E-05 | 0.025489  | -0.28705  |
| 5mo_SIGAD9 | 0.02088549 | 0.11542581 | 3.47E-05 | 0.0044724 | -0.023601 |
| 5mo_SIGAD9 | 0.01840042 | 0.10043069 | 3.36E-05 | 0.0048202 | 0.050123  |
| 5mo_SIGAD9 | 0.14248325 | 0.84915787 | 6.74E-05 | 0.023593  | -0.50412  |

|            |            |            |          |           |           |
|------------|------------|------------|----------|-----------|-----------|
| 5mo_SIGAD9 | 0.01641045 | 0.08842302 | 3.30E-05 | 0.0051875 | 0.10435   |
| 5mo_SIGAD9 | 0.02214723 | 0.12303927 | 3.52E-05 | 0.0043661 | -0.046619 |
| 5mo_SIGAD9 | 0.03491727 | 0.20009488 | 4.54E-05 | 0.0042028 | -0.078293 |
| 5mo_SIGAD9 | 0.01802364 | 0.09815715 | 3.34E-05 | 0.0049043 | 0.067421  |
| 5mo_SIGAD9 | 0.01877581 | 0.10269581 | 3.38E-05 | 0.004741  | 0.03364   |
| 5mo_SIGAD9 | 0.0289027  | 0.16380243 | 3.97E-05 | 0.0040686 | -0.10664  |
| 5mo_SIGAD9 | 0.01413683 | 0.07470378 | 3.25E-05 | 0.0056405 | 0.20898   |
| 5mo_SIGAD9 | 0.08156174 | 0.48155186 | 6.34E-05 | 0.017373  | 0.13148   |
| 5mo_SIGAD9 | 0.03517312 | 0.20163873 | 4.54E-05 | 0.0042028 | -0.078293 |
| 5mo_SIGAD9 | 0.01423911 | 0.07532093 | 3.26E-05 | 0.0055188 | 0.18676   |
| 5mo_SIGAD9 | 0.02395264 | 0.13393326 | 3.61E-05 | 0.0042401 | -0.073623 |
| 5mo_SIGAD9 | 0.03305489 | 0.18885714 | 4.32E-05 | 0.0041142 | -0.091175 |
| 5mo_SIGAD9 | 0.02677566 | 0.15096766 | 3.80E-05 | 0.0041099 | -0.099939 |
| 5mo_SIGAD9 | 0.09613806 | 0.5695067  | 6.50E-05 | 0.023448  | -0.045608 |
| 5mo_SIGAD9 | 0.00530092 | 0.02138707 | 3.18E-05 | 0.0084677 | 0.62647   |
| 5mo_SIGAD9 | 0.01929892 | 0.10585231 | 3.40E-05 | 0.0046667 | 0.017998  |
| 5mo_SIGAD9 | 0.09522575 | 0.56400174 | 6.49E-05 | 0.023263  | -0.026471 |
| 5mo_SIGAD9 | 0.01772597 | 0.096361   | 3.34E-05 | 0.0049043 | 0.067421  |
| 5mo_SIGAD9 | 0.08748066 | 0.51726717 | 6.41E-05 | 0.020177  | 0.087329  |
| 5mo_SIGAD9 | 0.0186581  | 0.10198554 | 3.36E-05 | 0.0048202 | 0.03364   |
| 5mo_SIGAD9 | 0.04327799 | 0.25054422 | 5.33E-05 | 0.0049301 | 0.0036923 |
| 5mo_SIGAD9 | 0.12379426 | 0.7363868  | 6.67E-05 | 0.024153  | -0.39752  |
| 5mo_SIGAD9 | 0.02461004 | 0.13790008 | 3.64E-05 | 0.0042065 | -0.080664 |
| 5mo_SIGAD9 | 0.02211632 | 0.12285277 | 3.52E-05 | 0.0043661 | -0.046619 |
| 5mo_SIGAD9 | 0.08673814 | 0.51278675 | 6.40E-05 | 0.019681  | 0.093363  |
| 5mo_SIGAD9 | 0.01375171 | 0.07237992 | 3.25E-05 | 0.0056405 | 0.20898   |
| 5mo_SIGAD9 | 0.03517083 | 0.2016249  | 4.54E-05 | 0.0042028 | -0.078293 |
| 5mo_SIGAD9 | 0.07813904 | 0.460899   | 6.29E-05 | 0.015819  | 0.13662   |
| 5mo_SIGAD9 | 0.10080104 | 0.59764355 | 6.54E-05 | 0.024809  | -0.12375  |
| 5mo_SIGAD9 | 0.08667391 | 0.51239914 | 6.40E-05 | 0.019681  | 0.093363  |
| 5mo_SIGAD9 | 0.03053632 | 0.17365986 | 4.11E-05 | 0.0040705 | -0.10475  |
| 5mo_SIGAD9 | 0.0118623  | 0.06097909 | 3.22E-05 | 0.0061869 | 0.30353   |
| 5mo_SIGAD9 | 0.12891012 | 0.7672564  | 6.69E-05 | 0.023723  | -0.43195  |
| 5mo_SIGAD9 | 0.05904232 | 0.3456677  | 6.02E-05 | 0.0081753 | 0.075889  |
| 5mo_SIGAD9 | 0.09024407 | 0.53394186 | 6.44E-05 | 0.021369  | 0.05218   |
| 5mo_SIGAD9 | 0.02158397 | 0.11964053 | 3.49E-05 | 0.0044169 | -0.0356   |
| 5mo_SIGAD9 | 0.00334381 | 0.0095777  | 3.18E-05 | 0.0092049 | 0.71249   |
| 5mo_SIGAD9 | 0.08693361 | 0.5139662  | 6.41E-05 | 0.01993   | 0.093363  |
| 5mo_SIGAD9 | 0.1413563  | 0.84235775 | 6.74E-05 | 0.023575  | -0.49999  |
| 5mo_SIGAD9 | 0.02679896 | 0.15110824 | 3.80E-05 | 0.0041099 | -0.099939 |
| 5mo_SIGAD9 | 0.01631872 | 0.08786954 | 3.30E-05 | 0.0051875 | 0.12392   |
| 5mo_SIGAD9 | 0.04340341 | 0.25130102 | 5.33E-05 | 0.0049301 | 0.0036923 |
| 5mo_SIGAD9 | 0.028672   | 0.16241035 | 3.97E-05 | 0.0040686 | -0.10664  |

|            |            |            |          |           |           |
|------------|------------|------------|----------|-----------|-----------|
| 5mo_SIGAD9 | 0.01793772 | 0.09763874 | 3.34E-05 | 0.0049043 | 0.067421  |
| 5mo_SIGAD9 | 0.0099494  | 0.04943643 | 3.20E-05 | 0.0066628 | 0.37961   |
| 5mo_SIGAD9 | 0.01566548 | 0.08392781 | 3.28E-05 | 0.0052924 | 0.1442    |
| 5mo_SIGAD9 | 0.03037668 | 0.17269656 | 4.11E-05 | 0.0040705 | -0.10475  |
| 5mo_SIGAD9 | 0.14604332 | 0.8706396  | 6.75E-05 | 0.02365   | -0.51443  |
| 5mo_SIGAD9 | 0.02272234 | 0.12650956 | 3.55E-05 | 0.0043197 | -0.056631 |
| 5mo_SIGAD9 | 0.03655163 | 0.20995674 | 4.70E-05 | 0.0042982 | -0.062998 |
| 5mo_SIGAD9 | 0.08155057 | 0.48148447 | 6.34E-05 | 0.017373  | 0.13148   |
| 5mo_SIGAD9 | 0.08928231 | 0.5281385  | 6.43E-05 | 0.020902  | 0.067165  |
| 5mo_SIGAD9 | 0.02968044 | 0.16849539 | 4.02E-05 | 0.0040662 | -0.10597  |
| 5mo_SIGAD9 | 0.03503151 | 0.20078424 | 4.54E-05 | 0.0042028 | -0.078293 |
| 5mo_SIGAD9 | 0.08665653 | 0.5122943  | 6.40E-05 | 0.019681  | 0.093363  |
| 5mo_SIGAD9 | 0.03124289 | 0.17792335 | 4.16E-05 | 0.0040771 | -0.10299  |
| 5mo_SIGAD9 | 0.10459512 | 0.6205374  | 6.57E-05 | 0.025429  | -0.18901  |
| 5mo_SIGAD9 | 0.01545204 | 0.08263987 | 3.28E-05 | 0.0052924 | 0.1442    |
| 5mo_SIGAD9 | 0.0134426  | 0.07051473 | 3.24E-05 | 0.0057681 | 0.23179   |
| 5mo_SIGAD9 | 0.08326242 | 0.49181396 | 6.36E-05 | 0.018151  | 0.12117   |
| 5mo_SIGAD9 | 0.02923907 | 0.16583213 | 4.02E-05 | 0.0040662 | -0.10661  |
| 5mo_SIGAD9 | 0.08732391 | 0.51632136 | 6.41E-05 | 0.01993   | 0.087329  |
| 5mo_SIGAD9 | 0.11529208 | 0.6850838  | 6.63E-05 | 0.025182  | -0.32814  |
| 5mo_SIGAD9 | 0.01381161 | 0.0727414  | 3.25E-05 | 0.0056405 | 0.20898   |
| 5mo_SIGAD9 | 0.05475509 | 0.3197981  | 5.94E-05 | 0.0071062 | 0.064127  |
| 5mo_SIGAD9 | 0.0141963  | 0.07506266 | 3.25E-05 | 0.0056405 | 0.18676   |
| 5mo_SIGAD9 | 0.02770691 | 0.1565869  | 3.88E-05 | 0.0040827 | -0.10472  |
| 5mo_SIGAD9 | 0.02067742 | 0.11417031 | 3.44E-05 | 0.0045325 | -0.01065  |
| 5mo_SIGAD9 | 0.04798413 | 0.27894154 | 5.64E-05 | 0.0055867 | 0.038361  |
| 5mo_SIGAD9 | 0.01981849 | 0.10898747 | 3.42E-05 | 0.0045972 | 0.0032259 |
| 5mo_SIGAD9 | 0.03264338 | 0.18637404 | 4.32E-05 | 0.0041142 | -0.094772 |
| 5mo_SIGAD9 | 0.09216698 | 0.54554486 | 6.46E-05 | 0.022042  | 0.019141  |
| 5mo_SIGAD9 | 0.08666812 | 0.5123642  | 6.40E-05 | 0.019681  | 0.093363  |
| 5mo_SIGAD9 | 0.04968074 | 0.289179   | 5.73E-05 | 0.0058857 | 0.046466  |
| 5mo_SIGAD9 | 0.11053926 | 0.65640485 | 6.60E-05 | 0.02558   | -0.27396  |
| 5mo_SIGAD9 | 0.06239021 | 0.36586913 | 6.07E-05 | 0.0092324 | 0.085432  |
| 5mo_SIGAD9 | 0.02429603 | 0.13600533 | 3.64E-05 | 0.0042065 | -0.080664 |
| 5mo_SIGAD9 | 0.14993209 | 0.89410484 | 6.76E-05 | 0.023695  | -0.52228  |
| 5mo_SIGAD9 | 0.11555156 | 0.68664956 | 6.63E-05 | 0.025182  | -0.32814  |
| 5mo_SIGAD9 | 0.01816783 | 0.09902723 | 3.36E-05 | 0.0048202 | 0.050123  |
| 5mo_SIGAD9 | 0.01819531 | 0.09919303 | 3.36E-05 | 0.0048202 | 0.050123  |
| 5mo_SIGAD9 | 0.07973815 | 0.47054815 | 6.32E-05 | 0.016594  | 0.13545   |
| 5mo_SIGAD9 | 0.06391727 | 0.37508357 | 6.10E-05 | 0.0098069 | 0.091185  |
| 5mo_SIGAD9 | 0.02766381 | 0.15632686 | 3.88E-05 | 0.0040827 | -0.10472  |
| 5mo_SIGAD9 | 0.02505193 | 0.1405665  | 3.68E-05 | 0.0041768 | -0.086782 |
| 5mo_SIGAD9 | 0.01871357 | 0.10232028 | 3.38E-05 | 0.004741  | 0.03364   |

|            |            |            |          |           |           |
|------------|------------|------------|----------|-----------|-----------|
| 5mo_SIGAD9 | 0.0313702  | 0.17869152 | 4.16E-05 | 0.0040771 | -0.10071  |
| 5mo_SIGAD9 | 0.01114983 | 0.05667996 | 3.21E-05 | 0.006339  | 0.32844   |
| 5mo_SIGAD9 | 0.02752808 | 0.15550785 | 3.84E-05 | 0.0040947 | -0.10472  |
| 5mo_SIGAD9 | 0.02171395 | 0.12042486 | 3.49E-05 | 0.0044169 | -0.0356   |
| 5mo_SIGAD9 | 0.08532692 | 0.50427127 | 6.39E-05 | 0.019177  | 0.10916   |
| 5mo_SIGAD9 | 0.02908067 | 0.1648763  | 3.97E-05 | 0.0040686 | -0.10664  |
| 5mo_SIGAD9 | 0.02384329 | 0.1332735  | 3.61E-05 | 0.0042401 | -0.073623 |
| 5mo_SIGAD9 | 0.01765271 | 0.09591893 | 3.34E-05 | 0.0049043 | 0.067421  |
| 5mo_SIGAD9 | 0.02718688 | 0.153449   | 3.84E-05 | 0.0040947 | -0.10271  |
| 5mo_SIGAD9 | 0.02589556 | 0.14565705 | 3.76E-05 | 0.0041286 | -0.096385 |
| 5mo_SIGAD9 | 0.09158677 | 0.5420438  | 6.45E-05 | 0.021822  | 0.027741  |
| 5mo_SIGAD9 | 0.01961903 | 0.10778389 | 3.40E-05 | 0.0046667 | 0.017998  |
| 5mo_SIGAD9 | 0.08518962 | 0.5034428  | 6.39E-05 | 0.019177  | 0.10916   |
| 5mo_SIGAD9 | 0.05723062 | 0.3347357  | 5.99E-05 | 0.0076952 | 0.070131  |
| 5mo_SIGAD9 | 0.11218689 | 0.66634685 | 6.61E-05 | 0.025489  | -0.29336  |
| 5mo_SIGAD9 | 0.11244314 | 0.66789305 | 6.62E-05 | 0.025448  | -0.29336  |
| 5mo_SIGAD9 | 0.0879503  | 0.520101   | 6.42E-05 | 0.020421  | 0.080939  |
| 5mo_SIGAD9 | 0.0108288  | 0.05474284 | 3.21E-05 | 0.0064976 | 0.35381   |
| 5mo_SIGAD9 | 0.01395856 | 0.07362808 | 3.25E-05 | 0.0056405 | 0.20898   |
| 5mo_SIGAD9 | 0.04843809 | 0.28168076 | 5.67E-05 | 0.0056831 | 0.041222  |
| 5mo_SIGAD9 | 0.01701478 | 0.09206961 | 3.33E-05 | 0.0049935 | 0.085504  |
| 5mo_SIGAD9 | 0.03039166 | 0.17278697 | 4.11E-05 | 0.0040705 | -0.10475  |
| 5mo_SIGAD9 | 0.01635101 | 0.08806434 | 3.30E-05 | 0.0051875 | 0.12392   |
| 5mo_SIGAD9 | 0.01280571 | 0.06667171 | 3.23E-05 | 0.0059016 | 0.25518   |
| 5mo_SIGAD9 | 0.02311259 | 0.12886433 | 3.58E-05 | 0.0042778 | -0.065623 |
| 5mo_SIGAD9 | 0.06467062 | 0.37962934 | 6.11E-05 | 0.010206  | 0.093303  |
| 5mo_SIGAD9 | 0.08414542 | 0.49714205 | 6.37E-05 | 0.018667  | 0.1176    |
| 5mo_SIGAD9 | 0.03134704 | 0.17855178 | 4.16E-05 | 0.0040771 | -0.10071  |
| 5mo_SIGAD9 | 0.08665715 | 0.51229805 | 6.40E-05 | 0.019681  | 0.093363  |
| 5mo_SIGAD9 | 0.01802512 | 0.09816612 | 3.34E-05 | 0.0049043 | 0.067421  |
| 5mo_SIGAD9 | 0.02867075 | 0.1624028  | 3.97E-05 | 0.0040686 | -0.10664  |
| 5mo_SIGAD9 | 0.01543943 | 0.08256377 | 3.28E-05 | 0.0052924 | 0.1442    |
| 5mo_SIGAD9 | 0.02547263 | 0.14310509 | 3.72E-05 | 0.0041509 | -0.092011 |
| 5mo_SIGAD9 | 0.09214883 | 0.5454353  | 6.46E-05 | 0.022042  | 0.019141  |
| 5mo_SIGAD9 | 0.08782819 | 0.5193642  | 6.41E-05 | 0.020177  | 0.080939  |
| 5mo_SIGAD9 | 0.09556169 | 0.56602883 | 6.49E-05 | 0.023263  | -0.035993 |
| 5mo_SIGAD9 | 0.10561041 | 0.62666374 | 6.57E-05 | 0.025482  | -0.20623  |
| 5mo_SIGAD9 | 0.03093044 | 0.176038   | 4.16E-05 | 0.0040771 | -0.10299  |
| 5mo_SIGAD9 | 0.02118275 | 0.11721952 | 3.47E-05 | 0.0044724 | -0.023601 |
| 5mo_SIGAD9 | 0.01006921 | 0.05015941 | 3.20E-05 | 0.0066628 | 0.37961   |
| 5mo_SIGAD9 | 0.0284474  | 0.16105509 | 3.93E-05 | 0.004074  | -0.10603  |
| 5mo_SIGAD9 | 0.00762258 | 0.03539624 | 3.19E-05 | 0.0073923 | 0.48652   |
| 5mo_SIGAD9 | 0.02448217 | 0.13712853 | 3.64E-05 | 0.0042065 | -0.080664 |

|            |            |            |          |           |           |
|------------|------------|------------|----------|-----------|-----------|
| 5mo_SIGAD9 | 0.01163776 | 0.05962417 | 3.22E-05 | 0.0061869 | 0.30353   |
| 5mo_SIGAD9 | 0.01917948 | 0.10513158 | 3.38E-05 | 0.004741  | 0.017998  |
| 5mo_SIGAD9 | 0.01664573 | 0.08984274 | 3.31E-05 | 0.0050879 | 0.10435   |
| 5mo_SIGAD9 | 0.11025066 | 0.65466344 | 6.60E-05 | 0.02558   | -0.26716  |
| 5mo_SIGAD9 | 0.03300377 | 0.18854864 | 4.32E-05 | 0.0041142 | -0.091175 |
| 5mo_SIGAD9 | 0.06206498 | 0.36390665 | 6.07E-05 | 0.0092324 | 0.083692  |
| 5mo_SIGAD9 | 0.0495055  | 0.2881216  | 5.73E-05 | 0.0058857 | 0.04392   |
| 5mo_SIGAD9 | 0.02986616 | 0.16961603 | 4.07E-05 | 0.0040668 | -0.10597  |
| 5mo_SIGAD9 | 0.04454025 | 0.2581608  | 5.42E-05 | 0.0050757 | 0.012967  |
| 5mo_SIGAD9 | 0.03196587 | 0.18228585 | 4.27E-05 | 0.004099  | -0.097962 |
| 5mo_SIGAD9 | 0.07141927 | 0.4203513  | 6.20E-05 | 0.012843  | 0.12136   |
| 5mo_SIGAD9 | 0.01415143 | 0.07479192 | 3.25E-05 | 0.0056405 | 0.20898   |
| 5mo_SIGAD9 | 0.00958642 | 0.0472462  | 3.20E-05 | 0.0068348 | 0.4058    |
| 5mo_SIGAD9 | 0.01639721 | 0.08834316 | 3.30E-05 | 0.0051875 | 0.10435   |
| 5mo_SIGAD9 | 0.06782924 | 0.39868873 | 6.15E-05 | 0.011255  | 0.10734   |
| 5mo_SIGAD9 | 0.07468073 | 0.44003126 | 6.25E-05 | 0.014299  | 0.13218   |
| 5mo_SIGAD9 | 0.13387614 | 0.7972218  | 6.71E-05 | 0.023546  | -0.46255  |
| 5mo_SIGAD9 | 0.03043498 | 0.17304835 | 4.11E-05 | 0.0040705 | -0.10475  |
| 5mo_SIGAD9 | 0.02239641 | 0.12454288 | 3.52E-05 | 0.0043661 | -0.046619 |
| 5mo_SIGAD9 | 0.02606391 | 0.14667287 | 3.76E-05 | 0.0041286 | -0.096385 |
| 5mo_SIGAD9 | 0.05403737 | 0.31546736 | 5.91E-05 | 0.0068337 | 0.062513  |
| 5mo_SIGAD9 | 0.01770004 | 0.09620451 | 3.34E-05 | 0.0049043 | 0.067421  |
| 5mo_SIGAD9 | 0.08121488 | 0.47945887 | 6.33E-05 | 0.017113  | 0.13148   |
| 5mo_SIGAD9 | 0.02744485 | 0.15500557 | 3.84E-05 | 0.0040947 | -0.10271  |
| 5mo_SIGAD9 | 0.0543706  | 0.3174781  | 5.92E-05 | 0.0069681 | 0.062513  |
| 5mo_SIGAD9 | 0.04801385 | 0.27912086 | 5.64E-05 | 0.0055867 | 0.038361  |
| 5mo_SIGAD9 | 0.01302292 | 0.06798233 | 3.23E-05 | 0.0059016 | 0.25518   |
| 5mo_SIGAD9 | 0.01948922 | 0.10700057 | 3.40E-05 | 0.0046667 | 0.017998  |
| 5mo_SIGAD9 | 0.02036367 | 0.11227712 | 3.44E-05 | 0.0045325 | -0.01065  |
| 5mo_SIGAD9 | 0.01105147 | 0.05608644 | 3.21E-05 | 0.006339  | 0.32844   |
| 5mo_SIGAD9 | 0.08298896 | 0.4901639  | 6.36E-05 | 0.018151  | 0.12434   |
| 5mo_SIGAD9 | 0.03998745 | 0.23068881 | 5.03E-05 | 0.0045634 | -0.028892 |
| 5mo_SIGAD9 | 0.015173   | 0.08095611 | 3.27E-05 | 0.0054028 | 0.16515   |
| 5mo_SIGAD9 | 0.09281296 | 0.54944277 | 6.46E-05 | 0.022258  | 0.010343  |
| 5mo_SIGAD9 | 0.08009494 | 0.4727011  | 6.32E-05 | 0.016594  | 0.13446   |
| 5mo_SIGAD9 | 0.03059732 | 0.17402788 | 4.11E-05 | 0.0040705 | -0.10475  |
| 5mo_SIGAD9 | 0.09855748 | 0.58410573 | 6.52E-05 | 0.024275  | -0.084641 |
| 5mo_SIGAD9 | 0.02002251 | 0.11021854 | 3.42E-05 | 0.0045972 | 0.0032259 |
| 5mo_SIGAD9 | 0.03829518 | 0.22047749 | 4.87E-05 | 0.0044183 | -0.04622  |
| 5mo_SIGAD9 | 0.02595262 | 0.14600134 | 3.76E-05 | 0.0041286 | -0.096385 |
| 5mo_SIGAD9 | 0.01341606 | 0.07035463 | 3.24E-05 | 0.0057681 | 0.23179   |
| 5mo_SIGAD9 | 0.06527226 | 0.38325968 | 6.12E-05 | 0.01041   | 0.095509  |
| 5mo_SIGAD9 | 0.02078401 | 0.11481347 | 3.44E-05 | 0.0045325 | -0.01065  |

|            |            |            |          |           |           |
|------------|------------|------------|----------|-----------|-----------|
| 5mo_SIGAD9 | 0.03105521 | 0.17679083 | 4.16E-05 | 0.0040771 | -0.10299  |
| 5mo_SIGAD9 | 0.0066983  | 0.02981901 | 3.18E-05 | 0.0078    | 0.54183   |
| 5mo_SIGAD9 | 0.07378876 | 0.43464902 | 6.23E-05 | 0.013805  | 0.12913   |
| 5mo_SIGAD9 | 0.02898543 | 0.16430162 | 3.97E-05 | 0.0040686 | -0.10664  |
| 5mo_SIGAD9 | 0.0885842  | 0.523926   | 6.42E-05 | 0.020663  | 0.074212  |
| 5mo_SIGAD9 | 0.03715401 | 0.21359158 | 4.76E-05 | 0.0043355 | -0.057524 |
| 5mo_SIGAD9 | 0.03167894 | 0.1805545  | 4.22E-05 | 0.0040866 | -0.10071  |
| 5mo_SIGAD9 | 0.01525199 | 0.08143275 | 3.27E-05 | 0.0054028 | 0.16515   |
| 5mo_SIGAD9 | 0.01290903 | 0.06729516 | 3.23E-05 | 0.0059016 | 0.25518   |
| 5mo_SIGAD9 | 0.02741589 | 0.15483087 | 3.84E-05 | 0.0040947 | -0.10271  |
| 5mo_SIGAD9 | 0.02647378 | 0.1491461  | 3.80E-05 | 0.0041099 | -0.099939 |
| 5mo_SIGAD9 | 0.09261841 | 0.5482688  | 6.46E-05 | 0.022258  | 0.019141  |
| 5mo_SIGAD9 | 0.02616165 | 0.14726266 | 3.76E-05 | 0.0041286 | -0.096385 |
| 5mo_SIGAD9 | 0.12074129 | 0.7179648  | 6.66E-05 | 0.02449   | -0.37215  |
| 5mo_SIGAD9 | 0.02099201 | 0.11606856 | 3.47E-05 | 0.0044724 | -0.023601 |
| 5mo_SIGAD9 | 0.01000794 | 0.04978969 | 3.20E-05 | 0.0066628 | 0.37961   |
| 5mo_SIGAD9 | 0.07100826 | 0.4178712  | 6.20E-05 | 0.012608  | 0.11916   |
| 5mo_SIGAD9 | 0.06212207 | 0.36425117 | 6.07E-05 | 0.0092324 | 0.083692  |
| 5mo_SIGAD9 | 0.12178204 | 0.72424483 | 6.66E-05 | 0.02435   | -0.38089  |
| 5mo_SIGAD9 | 0.0193993  | 0.10645803 | 3.40E-05 | 0.0046667 | 0.017998  |
| 5mo_SIGAD9 | 0.02894125 | 0.16403502 | 3.97E-05 | 0.0040686 | -0.10664  |
| 5mo_SIGAD9 | 0.01526017 | 0.08148213 | 3.27E-05 | 0.0054028 | 0.16515   |
| 5mo_SIGAD9 | 0.01507297 | 0.08035252 | 3.27E-05 | 0.0054028 | 0.16515   |
| 5mo_SIGAD9 | 0.0168534  | 0.09109582 | 3.31E-05 | 0.0050879 | 0.10435   |
| 5mo_SIGAD9 | 0.02728805 | 0.15405945 | 3.84E-05 | 0.0040947 | -0.10271  |
| 5mo_SIGAD9 | 0.0222788  | 0.12383319 | 3.52E-05 | 0.0043661 | -0.046619 |
| 5mo_SIGAD9 | 0.02268987 | 0.12631364 | 3.55E-05 | 0.0043197 | -0.056631 |
| 5mo_SIGAD9 | 0.00856438 | 0.04107912 | 3.19E-05 | 0.0071994 | 0.45929   |
| 5mo_SIGAD9 | 0.03136151 | 0.17863913 | 4.16E-05 | 0.0040771 | -0.10071  |
| 5mo_SIGAD9 | 0.01099128 | 0.05572323 | 3.21E-05 | 0.006339  | 0.32844   |
| 5mo_SIGAD9 | 0.02603748 | 0.14651345 | 3.76E-05 | 0.0041286 | -0.096385 |
| 5mo_SIGAD9 | 0.09222242 | 0.54587936 | 6.46E-05 | 0.022042  | 0.019141  |
| 5mo_SIGAD9 | 0.10495289 | 0.6226962  | 6.57E-05 | 0.025429  | -0.19772  |
| 5mo_SIGAD9 | 0.090391   | 0.5348284  | 6.44E-05 | 0.021369  | 0.05218   |
| 5mo_SIGAD9 | 0.0173904  | 0.0943361  | 3.33E-05 | 0.0049935 | 0.085504  |
| 5mo_SIGAD9 | 0.03141923 | 0.17898737 | 4.22E-05 | 0.0040866 | -0.10071  |
| 5mo_SIGAD9 | 0.10247613 | 0.6077512  | 6.55E-05 | 0.025127  | -0.15246  |
| 5mo_SIGAD9 | 0.09271315 | 0.54884046 | 6.46E-05 | 0.022258  | 0.010343  |
| 5mo_SIGAD9 | 0.04112133 | 0.23753074 | 5.14E-05 | 0.0046741 | -0.017493 |
| 5mo_SIGAD9 | 0.02146423 | 0.11891797 | 3.49E-05 | 0.0044169 | -0.0356   |
| 5mo_SIGAD9 | 0.05732516 | 0.33530614 | 5.99E-05 | 0.0076952 | 0.071569  |
| 5mo_SIGAD9 | 0.07840721 | 0.46251714 | 6.29E-05 | 0.015819  | 0.13651   |
| 5mo_SIGAD9 | 0.1035947  | 0.61450076 | 6.56E-05 | 0.025296  | -0.17104  |

|            |            |            |          |           |           |
|------------|------------|------------|----------|-----------|-----------|
| 5mo_SIGAD9 | 0.09470107 | 0.56083584 | 6.49E-05 | 0.023073  | -0.017059 |
| 5mo_SIGAD9 | 0.11443866 | 0.6799342  | 6.63E-05 | 0.025299  | -0.3171   |
| 5mo_SIGAD9 | 0.0368163  | 0.21155381 | 4.70E-05 | 0.0042982 | -0.062998 |
| 5mo_SIGAD9 | 0.02991131 | 0.16988847 | 4.07E-05 | 0.0040668 | -0.10597  |
| 5mo_SIGAD9 | 0.0978464  | 0.579815   | 6.51E-05 | 0.023964  | -0.074831 |
| 5mo_SIGAD9 | 0.01292375 | 0.06738398 | 3.23E-05 | 0.0059016 | 0.25518   |
| 5mo_SIGAD9 | 0.03809486 | 0.21926875 | 4.87E-05 | 0.0044183 | -0.04622  |
| 5mo_SIGAD9 | 0.01718338 | 0.09308694 | 3.33E-05 | 0.0049935 | 0.085504  |
| 5mo_SIGAD9 | 0.10630439 | 0.63085127 | 6.58E-05 | 0.02556   | -0.21453  |
| 5mo_SIGAD9 | 0.0541497  | 0.31614515 | 5.92E-05 | 0.0069681 | 0.062513  |
| 5mo_SIGAD9 | 0.01753333 | 0.09519859 | 3.33E-05 | 0.0049935 | 0.067421  |
| 5mo_SIGAD9 | 0.01178339 | 0.06050292 | 3.22E-05 | 0.0061869 | 0.30353   |
| 5mo_SIGAD9 | 0.05147826 | 0.3000254  | 5.83E-05 | 0.0063316 | 0.053285  |
| 5mo_SIGAD9 | 0.01806909 | 0.09843141 | 3.34E-05 | 0.0049043 | 0.050123  |
| 5mo_SIGAD9 | 0.02834888 | 0.1604606  | 3.93E-05 | 0.004074  | -0.10603  |
| 5mo_SIGAD9 | 0.02839654 | 0.1607482  | 3.93E-05 | 0.004074  | -0.10603  |
| 5mo_SIGAD9 | 0.12331989 | 0.7335244  | 6.67E-05 | 0.024217  | -0.39346  |
| 5mo_SIGAD9 | 0.03611569 | 0.20732628 | 4.65E-05 | 0.0042637 | -0.068307 |
| 5mo_SIGAD9 | 0.01821218 | 0.09929482 | 3.36E-05 | 0.0048202 | 0.050123  |
| 5mo_SIGAD9 | 0.01354483 | 0.07113162 | 3.24E-05 | 0.0057681 | 0.23179   |
| 5mo_SIGAD9 | 0.01307145 | 0.06827519 | 3.23E-05 | 0.0059016 | 0.25518   |
| 5mo_SIGAD9 | 0.01946549 | 0.1068574  | 3.40E-05 | 0.0046667 | 0.017998  |
| 5mo_SIGAD9 | 0.00540627 | 0.02202278 | 3.18E-05 | 0.0082375 | 0.59807   |
| 5mo_SIGAD9 | 0.03004042 | 0.17066756 | 4.07E-05 | 0.0040668 | -0.10597  |
| 5mo_SIGAD9 | 0.03090363 | 0.1758762  | 4.16E-05 | 0.0040771 | -0.10299  |
| 5mo_SIGAD9 | 0.01759353 | 0.09556183 | 3.34E-05 | 0.0049043 | 0.067421  |
| 5mo_SIGAD9 | 0.02412975 | 0.13500199 | 3.61E-05 | 0.0042401 | -0.073623 |
| 5mo_SIGAD9 | 0.02014545 | 0.11096039 | 3.42E-05 | 0.0045972 | 0.0032259 |
| 5mo_SIGAD9 | 0.00858534 | 0.04120558 | 3.19E-05 | 0.0071994 | 0.45929   |
| 5mo_SIGAD9 | 0.00894654 | 0.04338513 | 3.19E-05 | 0.0070136 | 0.43237   |
| 5mo_SIGAD9 | 0.01524023 | 0.08136181 | 3.27E-05 | 0.0054028 | 0.16515   |
| 5mo_SIGAD9 | 0.083598   | 0.49383885 | 6.37E-05 | 0.01841   | 0.12117   |
| 5mo_SIGAD9 | 0.09775645 | 0.5792723  | 6.51E-05 | 0.023964  | -0.074831 |
| 5mo_SIGAD9 | 0.02197981 | 0.12202903 | 3.49E-05 | 0.0044169 | -0.046619 |
| 5mo_SIGAD9 | 0.03629391 | 0.20840165 | 4.65E-05 | 0.0042637 | -0.062998 |
| 5mo_SIGAD9 | 0.01421621 | 0.07518276 | 3.25E-05 | 0.0056405 | 0.18676   |
| 5mo_SIGAD9 | 0.02642744 | 0.14886646 | 3.80E-05 | 0.0041099 | -0.099939 |
| 5mo_SIGAD9 | 0.02968597 | 0.16852875 | 4.02E-05 | 0.0040662 | -0.10597  |
| 5mo_SIGAD9 | 0.02366238 | 0.13218184 | 3.61E-05 | 0.0042401 | -0.073623 |
| 5mo_SIGAD9 | 0.08663082 | 0.51213914 | 6.40E-05 | 0.019681  | 0.093363  |
| 5mo_SIGAD9 | 0.02240602 | 0.12460085 | 3.52E-05 | 0.0043661 | -0.046619 |
| 5mo_SIGAD9 | 0.02687325 | 0.15155655 | 3.80E-05 | 0.0041099 | -0.099939 |
| 5mo_SIGAD9 | 0.0796799  | 0.4701967  | 6.32E-05 | 0.016594  | 0.13545   |



|            |            |            |          |           |           |
|------------|------------|------------|----------|-----------|-----------|
| 5mo_SIGAD9 | 0.0614184  | 0.36000514 | 6.07E-05 | 0.0090475 | 0.082025  |
| 5mo_SIGAD9 | 0.03898408 | 0.2246344  | 4.92E-05 | 0.0044639 | -0.040459 |
| 5mo_SIGAD9 | 0.0902245  | 0.5338238  | 6.44E-05 | 0.021369  | 0.05218   |
| 5mo_SIGAD9 | 0.09562562 | 0.56641465 | 6.49E-05 | 0.023263  | -0.035993 |
| 5mo_SIGAD9 | 0.00539015 | 0.02192554 | 3.18E-05 | 0.0082375 | 0.59807   |
| 5mo_SIGAD9 | 0.05295264 | 0.30892196 | 5.87E-05 | 0.0065755 | 0.059084  |
| 5mo_SIGAD9 | 0.03989192 | 0.23011239 | 5.03E-05 | 0.0045634 | -0.028892 |
| 5mo_SIGAD9 | 0.11578556 | 0.68806154 | 6.63E-05 | 0.025119  | -0.32814  |
| 5mo_SIGAD9 | 0.04430353 | 0.2567324  | 5.42E-05 | 0.0050757 | 0.012967  |
| 5mo_SIGAD9 | 0.01596695 | 0.08574693 | 3.30E-05 | 0.0051875 | 0.12392   |
| 5mo_SIGAD9 | 0.01766296 | 0.09598078 | 3.34E-05 | 0.0049043 | 0.067421  |
| 5mo_SIGAD9 | 0.0596447  | 0.3493025  | 6.03E-05 | 0.0083426 | 0.077363  |
| 5mo_SIGAD9 | 0.01387876 | 0.07314655 | 3.25E-05 | 0.0056405 | 0.20898   |
| 5mo_SIGAD9 | 0.07630076 | 0.44980666 | 6.26E-05 | 0.0148    | 0.1354    |
| 5mo_SIGAD9 | 0.01731138 | 0.09385931 | 3.33E-05 | 0.0049935 | 0.085504  |
| 5mo_SIGAD9 | 0.03638094 | 0.20892678 | 4.65E-05 | 0.0042637 | -0.062998 |
| 5mo_SIGAD9 | 0.0038301  | 0.01251203 | 3.18E-05 | 0.0089513 | 0.68371   |
| 5mo_SIGAD9 | 0.08651728 | 0.51145405 | 6.40E-05 | 0.019681  | 0.099025  |
| 5mo_SIGAD9 | 0.02259857 | 0.12576269 | 3.55E-05 | 0.0043197 | -0.056631 |
| 5mo_SIGAD9 | 0.01602145 | 0.08607574 | 3.30E-05 | 0.0051875 | 0.12392   |
| 5mo_SIGAD9 | 0.02985003 | 0.1695187  | 4.07E-05 | 0.0040668 | -0.10597  |
| 5mo_SIGAD9 | 0.01561775 | 0.08363982 | 3.28E-05 | 0.0052924 | 0.1442    |
| 5mo_SIGAD9 | 0.0175953  | 0.09557252 | 3.34E-05 | 0.0049043 | 0.067421  |
| 5mo_SIGAD9 | 0.01831539 | 0.09991761 | 3.36E-05 | 0.0048202 | 0.050123  |
| 5mo_SIGAD9 | 0.02619718 | 0.14747705 | 3.76E-05 | 0.0041286 | -0.096385 |
| 5mo_SIGAD9 | 0.02058282 | 0.11359948 | 3.44E-05 | 0.0045325 | -0.01065  |
| 5mo_SIGAD9 | 0.02834164 | 0.16041692 | 3.93E-05 | 0.004074  | -0.10603  |
| 5mo_SIGAD9 | 0.05444572 | 0.31793132 | 5.92E-05 | 0.0069681 | 0.062513  |
| 5mo_SIGAD9 | 0.03405588 | 0.19489717 | 4.43E-05 | 0.004153  | -0.087207 |
| 5mo_SIGAD9 | 0.03230909 | 0.18435691 | 4.27E-05 | 0.004099  | -0.097962 |
| 5mo_SIGAD9 | 0.04717784 | 0.2740763  | 5.61E-05 | 0.0054936 | 0.032113  |
| 5mo_SIGAD9 | 0.07063861 | 0.41564074 | 6.19E-05 | 0.012376  | 0.11916   |
| 5mo_SIGAD9 | 0.02703003 | 0.15250255 | 3.84E-05 | 0.0040947 | -0.10271  |
| 5mo_SIGAD9 | 0.01619111 | 0.08709949 | 3.30E-05 | 0.0051875 | 0.12392   |
| 5mo_SIGAD9 | 0.02358464 | 0.13171276 | 3.58E-05 | 0.0042778 | -0.073623 |
| 5mo_SIGAD9 | 0.02707439 | 0.15277022 | 3.84E-05 | 0.0040947 | -0.10271  |
| 5mo_SIGAD9 | 0.08691372 | 0.5138462  | 6.41E-05 | 0.01993   | 0.093363  |
| 5mo_SIGAD9 | 0.01919202 | 0.10520726 | 3.38E-05 | 0.004741  | 0.017998  |
| 5mo_SIGAD9 | 0.01287655 | 0.06709915 | 3.23E-05 | 0.0059016 | 0.25518   |
| 5mo_SIGAD9 | 0.08947793 | 0.52931887 | 6.43E-05 | 0.020902  | 0.059815  |
| 5mo_SIGAD9 | 0.05761537 | 0.33705732 | 6.00E-05 | 0.0078516 | 0.071569  |
| 5mo_SIGAD9 | 0.03574576 | 0.20509408 | 4.59E-05 | 0.0042319 | -0.068307 |
| 5mo_SIGAD9 | 0.12464186 | 0.7415013  | 6.68E-05 | 0.024034  | -0.40152  |

|            |            |            |          |           |           |
|------------|------------|------------|----------|-----------|-----------|
| 5mo_SIGAD9 | 0.01321312 | 0.06913003 | 3.24E-05 | 0.0057681 | 0.23179   |
| 5mo_SIGAD9 | 0.02373972 | 0.13264851 | 3.61E-05 | 0.0042401 | -0.073623 |
| 5mo_SIGAD9 | 0.03686542 | 0.2118502  | 4.70E-05 | 0.0042982 | -0.057524 |
| 5mo_SIGAD9 | 0.01749641 | 0.09497578 | 3.33E-05 | 0.0049935 | 0.085504  |
| 5mo_SIGAD9 | 0.02500126 | 0.14026076 | 3.68E-05 | 0.0041768 | -0.086782 |
| 5mo_SIGAD9 | 0.01876527 | 0.10263219 | 3.38E-05 | 0.004741  | 0.03364   |
| 5mo_SIGAD9 | 0.01985189 | 0.10918899 | 3.42E-05 | 0.0045972 | 0.0032259 |
| 5mo_SIGAD9 | 0.1081785  | 0.6421598  | 6.59E-05 | 0.025614  | -0.24573  |
| 5mo_SIGAD9 | 0.01355052 | 0.07116596 | 3.24E-05 | 0.0057681 | 0.23179   |
| 5mo_SIGAD9 | 0.03293145 | 0.18811227 | 4.32E-05 | 0.0041142 | -0.094772 |
| 5mo_SIGAD9 | 0.01621469 | 0.08724178 | 3.30E-05 | 0.0051875 | 0.12392   |
| 5mo_SIGAD9 | 0.02478313 | 0.13894457 | 3.68E-05 | 0.0041768 | -0.086782 |
| 5mo_SIGAD9 | 0.01536229 | 0.08209835 | 3.28E-05 | 0.0052924 | 0.1442    |
| 5mo_SIGAD9 | 0.01454229 | 0.07715039 | 3.26E-05 | 0.0055188 | 0.18676   |
| 5mo_SIGAD9 | 0.0460654  | 0.26736373 | 5.54E-05 | 0.0053171 | 0.025099  |
| 5mo_SIGAD9 | 0.10517984 | 0.62406564 | 6.57E-05 | 0.025482  | -0.19772  |
| 5mo_SIGAD9 | 0.01716259 | 0.09296153 | 3.33E-05 | 0.0049935 | 0.085504  |
| 5mo_SIGAD9 | 0.01127585 | 0.05744039 | 3.21E-05 | 0.006339  | 0.32844   |
| 5mo_SIGAD9 | 0.06195708 | 0.3632556  | 6.07E-05 | 0.0092324 | 0.083692  |
| 5mo_SIGAD9 | 0.02323285 | 0.12959003 | 3.58E-05 | 0.0042778 | -0.065623 |
| 5mo_SIGAD9 | 0.01168755 | 0.05992459 | 3.22E-05 | 0.0061869 | 0.30353   |
| 5mo_SIGAD9 | 0.01892775 | 0.10361267 | 3.38E-05 | 0.004741  | 0.03364   |
| 5mo_SIGAD9 | 0.03072545 | 0.17480108 | 4.11E-05 | 0.0040705 | -0.10475  |
| 5mo_SIGAD9 | 0.11129471 | 0.66096336 | 6.61E-05 | 0.025525  | -0.28058  |
| 5mo_SIGAD9 | 0.01827482 | 0.09967282 | 3.36E-05 | 0.0048202 | 0.050123  |
| 5mo_SIGAD9 | 0.04131843 | 0.23872009 | 5.14E-05 | 0.0046741 | -0.011944 |
| 5mo_SIGAD9 | 0.01768105 | 0.09608993 | 3.34E-05 | 0.0049043 | 0.067421  |
| 5mo_SIGAD9 | 0.01538967 | 0.08226354 | 3.28E-05 | 0.0052924 | 0.1442    |
| 5mo_SIGAD9 | 0.03180274 | 0.1813015  | 4.22E-05 | 0.0040866 | -0.10071  |
| 5mo_SIGAD9 | 0.01225084 | 0.06332357 | 3.23E-05 | 0.0060411 | 0.2791    |
| 5mo_SIGAD9 | 0.01513031 | 0.08069854 | 3.27E-05 | 0.0054028 | 0.16515   |
| 5mo_SIGAD9 | 0.02941934 | 0.16691986 | 4.02E-05 | 0.0040662 | -0.10661  |
| 5mo_SIGAD9 | 0.01482131 | 0.07883402 | 3.27E-05 | 0.0054028 | 0.16515   |
| 5mo_SIGAD9 | 0.03479819 | 0.19937634 | 4.54E-05 | 0.0042028 | -0.078293 |
| 5mo_SIGAD9 | 0.02415694 | 0.13516605 | 3.61E-05 | 0.0042401 | -0.080664 |
| 5mo_SIGAD9 | 0.00590649 | 0.02504117 | 3.18E-05 | 0.0082375 | 0.56984   |
| 5mo_SIGAD9 | 0.03495186 | 0.20030363 | 4.54E-05 | 0.0042028 | -0.078293 |
| 5mo_SIGAD9 | 0.12974179 | 0.7722747  | 6.70E-05 | 0.023664  | -0.43912  |
| 5mo_SIGAD9 | 0.0111593  | 0.05673707 | 3.21E-05 | 0.006339  | 0.32844   |
| 5mo_SIGAD9 | 0.12778904 | 0.7604916  | 6.69E-05 | 0.023794  | -0.4246   |
| 5mo_SIGAD9 | 0.09317368 | 0.55161935 | 6.47E-05 | 0.022469  | 0.010343  |
| 5mo_SIGAD9 | 0.01357225 | 0.07129708 | 3.24E-05 | 0.0057681 | 0.23179   |
| 5mo_SIGAD9 | 0.01253614 | 0.06504505 | 3.23E-05 | 0.0060411 | 0.25518   |

|            |            |            |          |           |            |
|------------|------------|------------|----------|-----------|------------|
| 5mo_SIGAD9 | 0.0858434  | 0.50738776 | 6.39E-05 | 0.01943   | 0.1043     |
| 5mo_SIGAD9 | 0.09263826 | 0.5483886  | 6.46E-05 | 0.022258  | 0.010343   |
| 5mo_SIGAD9 | 0.03005658 | 0.17076504 | 4.07E-05 | 0.0040668 | -0.10597   |
| 5mo_SIGAD9 | 0.02281005 | 0.1270388  | 3.55E-05 | 0.0043197 | -0.056631  |
| 5mo_SIGAD9 | 0.01128068 | 0.05746952 | 3.21E-05 | 0.006339  | 0.32844    |
| 5mo_SIGAD9 | 0.003201   | 0.00871596 | 3.18E-05 | 0.0092049 | 0.71249    |
| 5mo_SIGAD9 | 0.08940741 | 0.52889335 | 6.43E-05 | 0.020902  | 0.059815   |
| 5mo_SIGAD9 | 0.02290741 | 0.12762631 | 3.55E-05 | 0.0043197 | -0.056631  |
| 5mo_SIGAD9 | 0.01440218 | 0.07630494 | 3.26E-05 | 0.0055188 | 0.18676    |
| 5mo_SIGAD9 | 0.0091193  | 0.04442758 | 3.19E-05 | 0.0070136 | 0.43237    |
| 5mo_SIGAD9 | 0.01239749 | 0.06420843 | 3.23E-05 | 0.0060411 | 0.2791     |
| 5mo_SIGAD9 | 0.00614468 | 0.02647844 | 3.18E-05 | 0.008015  | 0.56984    |
| 5mo_SIGAD9 | 0.10168447 | 0.60297424 | 6.54E-05 | 0.024923  | -0.14299   |
| 5mo_SIGAD9 | 0.02133727 | 0.11815194 | 3.47E-05 | 0.0044724 | -0.023601  |
| 5mo_SIGAD9 | 0.13356774 | 0.7953608  | 6.71E-05 | 0.023546  | -0.46255   |
| 5mo_SIGAD9 | 0.00952826 | 0.04689525 | 3.20E-05 | 0.0068348 | 0.4058     |
| 5mo_SIGAD9 | 0.01814735 | 0.09890362 | 3.36E-05 | 0.0048202 | 0.050123   |
| 5mo_SIGAD9 | 0.02216376 | 0.12313901 | 3.52E-05 | 0.0043661 | -0.046619  |
| 5mo_SIGAD9 | 0.01658628 | 0.089484   | 3.31E-05 | 0.0050879 | 0.10435    |
| 5mo_SIGAD9 | 0.03958575 | 0.22826491 | 4.98E-05 | 0.0045122 | -0.034672  |
| 5mo_SIGAD9 | 0.02778652 | 0.15706731 | 3.88E-05 | 0.0040827 | -0.10472   |
| 5mo_SIGAD9 | 0.00738024 | 0.03393391 | 3.19E-05 | 0.0075925 | 0.51404    |
| 5mo_SIGAD9 | 0.09404736 | 0.55689126 | 6.48E-05 | 0.022877  | -0.0077738 |
| 5mo_SIGAD9 | 0.07059784 | 0.41539466 | 6.19E-05 | 0.012376  | 0.11916    |
| 5mo_SIGAD9 | 0.03457008 | 0.19799994 | 4.48E-05 | 0.0041765 | -0.082901  |
| 5mo_SIGAD9 | 0.01226979 | 0.0634379  | 3.23E-05 | 0.0060411 | 0.2791     |
| 5mo_SIGAD9 | 0.02843544 | 0.16098292 | 3.93E-05 | 0.004074  | -0.10603   |
| 5mo_SIGAD9 | 0.02398839 | 0.13414901 | 3.61E-05 | 0.0042401 | -0.073623  |
| 5mo_SIGAD9 | 0.09929223 | 0.5885393  | 6.53E-05 | 0.02442   | -0.10426   |
| 5mo_SIGAD9 | 0.03207473 | 0.18294275 | 4.27E-05 | 0.004099  | -0.097962  |
| 5mo_SIGAD9 | 0.02085891 | 0.11526542 | 3.44E-05 | 0.0045325 | -0.023601  |
| 5mo_SIGAD9 | 0.01062699 | 0.05352508 | 3.21E-05 | 0.0064976 | 0.35381    |
| 5mo_SIGAD9 | 0.02009852 | 0.1106772  | 3.42E-05 | 0.0045972 | 0.0032259  |
| 5mo_SIGAD9 | 0.07116853 | 0.4188383  | 6.20E-05 | 0.012608  | 0.12136    |
| 5mo_SIGAD9 | 0.01419068 | 0.07502872 | 3.25E-05 | 0.0056405 | 0.18676    |
| 5mo_SIGAD9 | 0.07870268 | 0.46430007 | 6.30E-05 | 0.016077  | 0.13651    |
| 5mo_SIGAD9 | 0.08374579 | 0.49473062 | 6.37E-05 | 0.01841   | 0.12117    |
| 5mo_SIGAD9 | 0.02359268 | 0.1317613  | 3.58E-05 | 0.0042778 | -0.073623  |
| 5mo_SIGAD9 | 0.09951384 | 0.58987653 | 6.53E-05 | 0.02442   | -0.10426   |
| 5mo_SIGAD9 | 0.07203536 | 0.4240688  | 6.21E-05 | 0.01308   | 0.12348    |
| 5mo_SIGAD9 | 0.09647474 | 0.5715383  | 6.50E-05 | 0.023626  | -0.045608  |
| 5mo_SIGAD9 | 0.14130054 | 0.8420213  | 6.74E-05 | 0.023575  | -0.49999   |
| 5mo_SIGAD9 | 0.13305834 | 0.79228705 | 6.71E-05 | 0.023556  | -0.45937   |

|            |            |            |          |           |            |
|------------|------------|------------|----------|-----------|------------|
| 5mo_SIGAD9 | 0.05729014 | 0.33509484 | 5.99E-05 | 0.0076952 | 0.071569   |
| 5mo_SIGAD9 | 0.03452318 | 0.19771692 | 4.48E-05 | 0.0041765 | -0.082901  |
| 5mo_SIGAD9 | 0.05433494 | 0.31726286 | 5.92E-05 | 0.0069681 | 0.062513   |
| 5mo_SIGAD9 | 0.02891933 | 0.16390277 | 3.97E-05 | 0.0040686 | -0.10664   |
| 5mo_SIGAD9 | 0.01195461 | 0.06153605 | 3.22E-05 | 0.0061869 | 0.30353    |
| 5mo_SIGAD9 | 0.01522985 | 0.08129919 | 3.27E-05 | 0.0054028 | 0.16515    |
| 5mo_SIGAD9 | 0.0968623  | 0.57387686 | 6.51E-05 | 0.023799  | -0.055297  |
| 5mo_SIGAD9 | 0.0216834  | 0.12024047 | 3.49E-05 | 0.0044169 | -0.0356    |
| 5mo_SIGAD9 | 0.02148471 | 0.11904158 | 3.49E-05 | 0.0044169 | -0.0356    |
| 5mo_SIGAD9 | 0.02946636 | 0.1672036  | 4.02E-05 | 0.0040662 | -0.10661   |
| 5mo_SIGAD9 | 0.09311958 | 0.55129296 | 6.47E-05 | 0.022469  | 0.010343   |
| 5mo_SIGAD9 | 0.00763966 | 0.0354993  | 3.19E-05 | 0.0073923 | 0.48652    |
| 5mo_SIGAD9 | 0.03916552 | 0.22572921 | 4.92E-05 | 0.0044639 | -0.034672  |
| 5mo_SIGAD9 | 0.04914733 | 0.28596035 | 5.73E-05 | 0.0058857 | 0.04392    |
| 5mo_SIGAD9 | 0.01975388 | 0.10859755 | 3.40E-05 | 0.0046667 | 0.0032259  |
| 5mo_SIGAD9 | 0.01696409 | 0.09176374 | 3.31E-05 | 0.0050879 | 0.085504   |
| 5mo_SIGAD9 | 0.10432022 | 0.6188786  | 6.56E-05 | 0.025367  | -0.18901   |
| 5mo_SIGAD9 | 0.02031896 | 0.11200734 | 3.42E-05 | 0.0045972 | -0.01065   |
| 5mo_SIGAD9 | 0.01729976 | 0.09378921 | 3.33E-05 | 0.0049935 | 0.085504   |
| 5mo_SIGAD9 | 0.0722489  | 0.42535734 | 6.21E-05 | 0.01308   | 0.12548    |
| 5mo_SIGAD9 | 0.04616999 | 0.26799482 | 5.54E-05 | 0.0053171 | 0.025099   |
| 5mo_SIGAD9 | 0.0224325  | 0.12476063 | 3.52E-05 | 0.0043661 | -0.046619  |
| 5mo_SIGAD9 | 0.01346869 | 0.07067214 | 3.24E-05 | 0.0057681 | 0.23179    |
| 5mo_SIGAD9 | 0.0280464  | 0.15863542 | 3.88E-05 | 0.0040827 | -0.10603   |
| 5mo_SIGAD9 | 0.01604692 | 0.08622944 | 3.30E-05 | 0.0051875 | 0.12392    |
| 5mo_SIGAD9 | 0.04672372 | 0.27133608 | 5.57E-05 | 0.0054037 | 0.028707   |
| 5mo_SIGAD9 | 0.01954273 | 0.10732348 | 3.40E-05 | 0.0046667 | 0.017998   |
| 5mo_SIGAD9 | 0.01383966 | 0.07291061 | 3.25E-05 | 0.0056405 | 0.20898    |
| 5mo_SIGAD9 | 0.01224946 | 0.06331521 | 3.23E-05 | 0.0060411 | 0.2791     |
| 5mo_SIGAD9 | 0.06796917 | 0.3995331  | 6.15E-05 | 0.011255  | 0.10734    |
| 5mo_SIGAD9 | 0.04742256 | 0.27555296 | 5.61E-05 | 0.0054936 | 0.035328   |
| 5mo_SIGAD9 | 0.05025284 | 0.29263112 | 5.76E-05 | 0.005992  | 0.048868   |
| 5mo_SIGAD9 | 0.04235777 | 0.24499157 | 5.24E-05 | 0.0047963 | -0.00654   |
| 5mo_SIGAD9 | 0.08793736 | 0.5200229  | 6.41E-05 | 0.020177  | 0.080939   |
| 5mo_SIGAD9 | 0.01875398 | 0.1025641  | 3.38E-05 | 0.004741  | 0.03364    |
| 5mo_SIGAD9 | 0.02053364 | 0.11330274 | 3.44E-05 | 0.0045325 | -0.01065   |
| 5mo_SIGAD9 | 0.01832318 | 0.09996464 | 3.36E-05 | 0.0048202 | 0.050123   |
| 5mo_SIGAD9 | 0.01129598 | 0.05756183 | 3.21E-05 | 0.006339  | 0.32844    |
| 5mo_SIGAD9 | 0.04381293 | 0.25377214 | 5.38E-05 | 0.0050014 | 0.008455   |
| 5mo_SIGAD9 | 0.04571749 | 0.26526442 | 5.50E-05 | 0.0052335 | 0.025099   |
| 5mo_SIGAD9 | 0.03559016 | 0.20415518 | 4.59E-05 | 0.0042319 | -0.073417  |
| 5mo_SIGAD9 | 0.04255414 | 0.2461765  | 5.29E-05 | 0.0048617 | -0.0013165 |
| 5mo_SIGAD9 | 0.01698252 | 0.09187493 | 3.31E-05 | 0.0050879 | 0.085504   |

|            |            |            |          |           |           |
|------------|------------|------------|----------|-----------|-----------|
| 5mo_SIGAD9 | 0.00953695 | 0.04694771 | 3.20E-05 | 0.0068348 | 0.4058    |
| 5mo_SIGAD9 | 0.09339029 | 0.5529264  | 6.47E-05 | 0.022469  | 0.0013661 |
| 5mo_SIGAD9 | 0.02950215 | 0.16741955 | 4.02E-05 | 0.0040662 | -0.10661  |
| 5mo_SIGAD9 | 0.01435041 | 0.07599255 | 3.26E-05 | 0.0055188 | 0.18676   |
| 5mo_SIGAD9 | 0.02357201 | 0.13163655 | 3.58E-05 | 0.0042778 | -0.065623 |
| 5mo_SIGAD9 | 0.00796491 | 0.03746188 | 3.19E-05 | 0.0073923 | 0.48652   |
| 5mo_SIGAD9 | 0.02940964 | 0.16686134 | 4.02E-05 | 0.0040662 | -0.10661  |
| 5mo_SIGAD9 | 0.0114151  | 0.0582806  | 3.21E-05 | 0.006339  | 0.32844   |
| 5mo_SIGAD9 | 0.03518684 | 0.20172147 | 4.54E-05 | 0.0042028 | -0.073417 |
| 5mo_SIGAD9 | 0.02000628 | 0.11012058 | 3.42E-05 | 0.0045972 | 0.0032259 |
| 5mo_SIGAD9 | 0.0641895  | 0.37672624 | 6.10E-05 | 0.010005  | 0.091185  |
| 5mo_SIGAD9 | 0.06546126 | 0.3844001  | 6.12E-05 | 0.01041   | 0.095509  |
| 5mo_SIGAD9 | 0.10970292 | 0.6513583  | 6.60E-05 | 0.025599  | -0.2602   |
| 5mo_SIGAD9 | 0.02220326 | 0.12337738 | 3.52E-05 | 0.0043661 | -0.046619 |
| 5mo_SIGAD9 | 0.028432   | 0.16096215 | 3.93E-05 | 0.004074  | -0.10603  |
| 5mo_SIGAD9 | 0.01958163 | 0.10755823 | 3.40E-05 | 0.0046667 | 0.017998  |
| 5mo_SIGAD9 | 0.04760547 | 0.27665663 | 5.64E-05 | 0.0055867 | 0.035328  |
| 5mo_SIGAD9 | 0.02333774 | 0.13022292 | 3.58E-05 | 0.0042778 | -0.065623 |
| 5mo_SIGAD9 | 0.01618462 | 0.08706033 | 3.30E-05 | 0.0051875 | 0.12392   |
| 5mo_SIGAD9 | 0.08704944 | 0.5146651  | 6.41E-05 | 0.01993   | 0.093363  |
| 5mo_SIGAD9 | 0.01559117 | 0.08347943 | 3.28E-05 | 0.0052924 | 0.1442    |
| 5mo_SIGAD9 | 0.01268281 | 0.06593008 | 3.23E-05 | 0.0059016 | 0.25518   |
| 5mo_SIGAD9 | 0.02716404 | 0.15331121 | 3.84E-05 | 0.0040947 | -0.10271  |
| 5mo_SIGAD9 | 0.01637068 | 0.08818308 | 3.30E-05 | 0.0051875 | 0.12392   |
| 5mo_SIGAD9 | 0.09261961 | 0.548276   | 6.46E-05 | 0.022258  | 0.019141  |
| 5mo_SIGAD9 | 0.03046656 | 0.1732389  | 4.11E-05 | 0.0040705 | -0.10475  |
| 5mo_SIGAD9 | 0.0203241  | 0.11203833 | 3.42E-05 | 0.0045972 | -0.01065  |
| 5mo_SIGAD9 | 0.02550674 | 0.14331086 | 3.72E-05 | 0.0041509 | -0.092011 |
| 5mo_SIGAD9 | 0.0171949  | 0.09315647 | 3.33E-05 | 0.0049935 | 0.085504  |
| 5mo_SIGAD9 | 0.0575878  | 0.33689097 | 6.00E-05 | 0.0078516 | 0.071569  |
| 5mo_SIGAD9 | 0.05867498 | 0.3434511  | 6.02E-05 | 0.0081753 | 0.074438  |
| 5mo_SIGAD9 | 0.03232354 | 0.18444405 | 4.27E-05 | 0.004099  | -0.097962 |
| 5mo_SIGAD9 | 0.01249998 | 0.06482686 | 3.23E-05 | 0.0060411 | 0.2791    |
| 5mo_SIGAD9 | 0.00320965 | 0.0087682  | 3.18E-05 | 0.0092049 | 0.71249   |
| 5mo_SIGAD9 | 0.01677665 | 0.09063273 | 3.31E-05 | 0.0050879 | 0.10435   |
| 5mo_SIGAD9 | 0.00818893 | 0.03881361 | 3.19E-05 | 0.0071994 | 0.45929   |
| 5mo_SIGAD9 | 0.02358866 | 0.131737   | 3.58E-05 | 0.0042778 | -0.073623 |
| 5mo_SIGAD9 | 0.02008262 | 0.11058126 | 3.42E-05 | 0.0045972 | 0.0032259 |
| 5mo_SIGAD9 | 0.11239445 | 0.66759926 | 6.62E-05 | 0.025448  | -0.29336  |
| 5mo_SIGAD9 | 0.01521591 | 0.08121506 | 3.27E-05 | 0.0054028 | 0.16515   |
| 5mo_SIGAD9 | 0.03263488 | 0.18632272 | 4.32E-05 | 0.0041142 | -0.094772 |
| 5mo_SIGAD9 | 0.05410257 | 0.31586078 | 5.91E-05 | 0.0068337 | 0.062513  |
| 5mo_SIGAD9 | 0.12020692 | 0.7147404  | 6.66E-05 | 0.024561  | -0.36766  |

|            |            |            |          |           |            |
|------------|------------|------------|----------|-----------|------------|
| 5mo_SIGAD9 | 0.01428125 | 0.07557524 | 3.26E-05 | 0.0055188 | 0.18676    |
| 5mo_SIGAD9 | 0.0160547  | 0.08627639 | 3.30E-05 | 0.0051875 | 0.12392    |
| 5mo_SIGAD9 | 0.07651747 | 0.4511143  | 6.27E-05 | 0.015053  | 0.1354     |
| 5mo_SIGAD9 | 0.06827398 | 0.40137234 | 6.16E-05 | 0.011474  | 0.10734    |
| 5mo_SIGAD9 | 0.02566723 | 0.14427929 | 3.72E-05 | 0.0041509 | -0.092011  |
| 5mo_SIGAD9 | 0.07521854 | 0.44327646 | 6.26E-05 | 0.014549  | 0.13345    |
| 5mo_SIGAD9 | 0.09281264 | 0.54944086 | 6.46E-05 | 0.022258  | 0.010343   |
| 5mo_SIGAD9 | 0.01815278 | 0.09893642 | 3.36E-05 | 0.0048202 | 0.050123   |
| 5mo_SIGAD9 | 0.02785845 | 0.15750131 | 3.88E-05 | 0.0040827 | -0.10472   |
| 5mo_SIGAD9 | 0.013805   | 0.07270151 | 3.25E-05 | 0.0056405 | 0.20898    |
| 5mo_SIGAD9 | 0.02140188 | 0.11854177 | 3.47E-05 | 0.0044724 | -0.0356    |
| 5mo_SIGAD9 | 0.09824842 | 0.5822408  | 6.52E-05 | 0.024123  | -0.084641  |
| 5mo_SIGAD9 | 0.01034284 | 0.05181048 | 3.20E-05 | 0.0066628 | 0.35381    |
| 5mo_SIGAD9 | 0.06767313 | 0.39774674 | 6.15E-05 | 0.011255  | 0.10492    |
| 5mo_SIGAD9 | 0.02023567 | 0.11150478 | 3.42E-05 | 0.0045972 | 0.0032259  |
| 5mo_SIGAD9 | 0.01693633 | 0.09159621 | 3.31E-05 | 0.0050879 | 0.10435    |
| 5mo_SIGAD9 | 0.01185158 | 0.06091441 | 3.22E-05 | 0.0061869 | 0.30353    |
| 5mo_SIGAD9 | 0.05301528 | 0.30929998 | 5.87E-05 | 0.0065755 | 0.059084   |
| 5mo_SIGAD9 | 0.01506966 | 0.08033258 | 3.27E-05 | 0.0054028 | 0.16515    |
| 5mo_SIGAD9 | 0.01773938 | 0.09644193 | 3.34E-05 | 0.0049043 | 0.067421   |
| 5mo_SIGAD9 | 0.11618558 | 0.6904753  | 6.63E-05 | 0.025119  | -0.33347   |
| 5mo_SIGAD9 | 0.01550351 | 0.08295045 | 3.28E-05 | 0.0052924 | 0.1442     |
| 5mo_SIGAD9 | 0.03119941 | 0.17766096 | 4.16E-05 | 0.0040771 | -0.10299   |
| 5mo_SIGAD9 | 0.05162719 | 0.3009241  | 5.83E-05 | 0.0063316 | 0.053285   |
| 5mo_SIGAD9 | 0.02302785 | 0.12835303 | 3.55E-05 | 0.0043197 | -0.065623  |
| 5mo_SIGAD9 | 0.0098907  | 0.04908228 | 3.20E-05 | 0.0066628 | 0.37961    |
| 5mo_SIGAD9 | 0.05338971 | 0.31155932 | 5.89E-05 | 0.0067028 | 0.059084   |
| 5mo_SIGAD9 | 0.08191256 | 0.48366874 | 6.35E-05 | 0.017633  | 0.12948    |
| 5mo_SIGAD9 | 0.10109109 | 0.5993937  | 6.54E-05 | 0.024809  | -0.13341   |
| 5mo_SIGAD9 | 0.03118042 | 0.17754637 | 4.16E-05 | 0.0040771 | -0.10299   |
| 5mo_SIGAD9 | 0.01936874 | 0.10627364 | 3.40E-05 | 0.0046667 | 0.017998   |
| 5mo_SIGAD9 | 0.00663654 | 0.02944638 | 3.18E-05 | 0.0078    | 0.54183    |
| 5mo_SIGAD9 | 0.02624087 | 0.14774069 | 3.76E-05 | 0.0041286 | -0.096385  |
| 5mo_SIGAD9 | 0.01015117 | 0.05065398 | 3.20E-05 | 0.0066628 | 0.37961    |
| 5mo_SIGAD9 | 0.030234   | 0.1718356  | 4.07E-05 | 0.0040668 | -0.10475   |
| 5mo_SIGAD9 | 0.01157488 | 0.05924476 | 3.22E-05 | 0.0061869 | 0.30353    |
| 5mo_SIGAD9 | 0.09384315 | 0.555659   | 6.48E-05 | 0.022676  | -0.0077738 |
| 5mo_SIGAD9 | 0.02742146 | 0.15486446 | 3.84E-05 | 0.0040947 | -0.10271   |
| 5mo_SIGAD9 | 0.03877317 | 0.22336176 | 4.92E-05 | 0.0044639 | -0.040459  |
| 5mo_SIGAD9 | 0.12934773 | 0.7698969  | 6.70E-05 | 0.023692  | -0.43556   |
| 5mo_SIGAD9 | 0.09498842 | 0.5625697  | 6.49E-05 | 0.023073  | -0.026471  |
| 5mo_SIGAD9 | 0.03222847 | 0.18387042 | 4.27E-05 | 0.004099  | -0.097962  |
| 5mo_SIGAD9 | 0.02119775 | 0.11731003 | 3.47E-05 | 0.0044724 | -0.023601  |

|            |            |            |          |           |           |
|------------|------------|------------|----------|-----------|-----------|
| 5mo_SIGAD9 | 0.03696488 | 0.21245037 | 4.76E-05 | 0.0043355 | -0.057524 |
| 5mo_SIGAD9 | 0.01022916 | 0.05112453 | 3.20E-05 | 0.0066628 | 0.37961   |
| 5mo_SIGAD9 | 0.10788944 | 0.64041567 | 6.59E-05 | 0.025604  | -0.23822  |
| 5mo_SIGAD9 | 0.05519511 | 0.32245326 | 5.94E-05 | 0.0071062 | 0.065685  |
| 5mo_SIGAD9 | 0.10843932 | 0.6437336  | 6.59E-05 | 0.025614  | -0.24573  |
| 5mo_SIGAD9 | 0.02172547 | 0.12049431 | 3.49E-05 | 0.0044169 | -0.0356   |
| 5mo_SIGAD9 | 0.01997204 | 0.10991398 | 3.42E-05 | 0.0045972 | 0.0032259 |
| 5mo_SIGAD9 | 0.01153369 | 0.0589962  | 3.22E-05 | 0.0061869 | 0.30353   |
| 5mo_SIGAD9 | 0.08855257 | 0.52373517 | 6.42E-05 | 0.020663  | 0.074212  |
| 5mo_SIGAD9 | 0.02523224 | 0.14165454 | 3.68E-05 | 0.0041768 | -0.086782 |
| 5mo_SIGAD9 | 0.11021335 | 0.6544383  | 6.60E-05 | 0.02558   | -0.26716  |
| 5mo_SIGAD9 | 0.02787947 | 0.15762818 | 3.88E-05 | 0.0040827 | -0.10472  |
| 5mo_SIGAD9 | 0.03505019 | 0.20089695 | 4.54E-05 | 0.0042028 | -0.078293 |
| 5mo_SIGAD9 | 0.020539   | 0.11333509 | 3.44E-05 | 0.0045325 | -0.01065  |
| 5mo_SIGAD9 | 0.01886394 | 0.10322763 | 3.38E-05 | 0.004741  | 0.03364   |
| 5mo_SIGAD9 | 0.06801347 | 0.39980042 | 6.16E-05 | 0.011474  | 0.10734   |
| 5mo_SIGAD9 | 0.03929263 | 0.22649622 | 4.98E-05 | 0.0045122 | -0.034672 |
| 5mo_SIGAD9 | 0.03495952 | 0.20034982 | 4.54E-05 | 0.0042028 | -0.078293 |
| 5mo_SIGAD9 | 0.03145646 | 0.17921205 | 4.22E-05 | 0.0040866 | -0.10071  |
| 5mo_SIGAD9 | 0.01689228 | 0.0913304  | 3.31E-05 | 0.0050879 | 0.10435   |
| 5mo_SIGAD9 | 0.1336743  | 0.7960038  | 6.71E-05 | 0.023546  | -0.46255  |
| 5mo_SIGAD9 | 0.03039819 | 0.17282635 | 4.11E-05 | 0.0040705 | -0.10475  |
| 5mo_SIGAD9 | 0.05403334 | 0.31544304 | 5.91E-05 | 0.0068337 | 0.062513  |
| 5mo_SIGAD9 | 0.00386695 | 0.0127344  | 3.18E-05 | 0.0089513 | 0.68371   |
| 5mo_SIGAD9 | 0.01419387 | 0.07504795 | 3.25E-05 | 0.0056405 | 0.18676   |
| 5mo_SIGAD9 | 0.02991626 | 0.1699183  | 4.07E-05 | 0.0040668 | -0.10597  |
| 5mo_SIGAD9 | 0.02653035 | 0.1494874  | 3.80E-05 | 0.0041099 | -0.099939 |
| 5mo_SIGAD9 | 0.02262415 | 0.12591705 | 3.55E-05 | 0.0043197 | -0.056631 |
| 5mo_SIGAD9 | 0.01586704 | 0.08514406 | 3.28E-05 | 0.0052924 | 0.12392   |
| 5mo_SIGAD9 | 0.0862973  | 0.5101267  | 6.40E-05 | 0.019681  | 0.099025  |
| 5mo_SIGAD9 | 0.10524202 | 0.62444085 | 6.57E-05 | 0.025482  | -0.19772  |
| 5mo_SIGAD9 | 0.08299885 | 0.49022353 | 6.36E-05 | 0.018151  | 0.12434   |
| 5mo_SIGAD9 | 0.03789856 | 0.21808425 | 4.81E-05 | 0.0043756 | -0.05192  |
| 5mo_SIGAD9 | 0.01661592 | 0.08966286 | 3.31E-05 | 0.0050879 | 0.10435   |
| 5mo_SIGAD9 | 0.01577783 | 0.08460574 | 3.28E-05 | 0.0052924 | 0.1442    |
| 5mo_SIGAD9 | 0.02581481 | 0.14516978 | 3.72E-05 | 0.0041509 | -0.096385 |
| 5mo_SIGAD9 | 0.03515696 | 0.20154122 | 4.54E-05 | 0.0042028 | -0.078293 |
| 5mo_SIGAD9 | 0.02245135 | 0.12487435 | 3.52E-05 | 0.0043661 | -0.046619 |
| 5mo_SIGAD9 | 0.04007334 | 0.23120709 | 5.03E-05 | 0.0045634 | -0.028892 |
| 5mo_SIGAD9 | 0.0242024  | 0.13544038 | 3.61E-05 | 0.0042401 | -0.080664 |
| 5mo_SIGAD9 | 0.02609625 | 0.14686804 | 3.76E-05 | 0.0041286 | -0.096385 |
| 5mo_SIGAD9 | 0.00807729 | 0.03813995 | 3.19E-05 | 0.0073923 | 0.48652   |
| 5mo_SIGAD9 | 0.020306   | 0.11192915 | 3.42E-05 | 0.0045972 | -0.01065  |

|            |            |            |          |           |           |
|------------|------------|------------|----------|-----------|-----------|
| 5mo_SIGAD9 | 0.09863247 | 0.5845582  | 6.52E-05 | 0.024275  | -0.084641 |
| 5mo_SIGAD9 | 0.03221737 | 0.18380341 | 4.27E-05 | 0.004099  | -0.097962 |
| 5mo_SIGAD9 | 0.0216405  | 0.11998162 | 3.49E-05 | 0.0044169 | -0.0356   |
| 5mo_SIGAD9 | 0.02576242 | 0.14485367 | 3.72E-05 | 0.0041509 | -0.092011 |
| 5mo_SIGAD9 | 0.06404754 | 0.3758696  | 6.10E-05 | 0.0098069 | 0.091185  |
| 5mo_SIGAD9 | 0.05184194 | 0.3022199  | 5.83E-05 | 0.0063316 | 0.055318  |
| 5mo_SIGAD9 | 0.02623552 | 0.1477084  | 3.76E-05 | 0.0041286 | -0.096385 |
| 5mo_SIGAD9 | 0.06553002 | 0.384815   | 6.12E-05 | 0.01041   | 0.095509  |
| 5mo_SIGAD9 | 0.11822666 | 0.70279133 | 6.65E-05 | 0.024847  | -0.35363  |
| 5mo_SIGAD9 | 0.09966379 | 0.59078133 | 6.53E-05 | 0.024558  | -0.10426  |
| 5mo_SIGAD9 | 0.01751635 | 0.09509614 | 3.33E-05 | 0.0049935 | 0.067421  |
| 5mo_SIGAD9 | 0.02025572 | 0.11162571 | 3.42E-05 | 0.0045972 | 0.0032259 |
| 5mo_SIGAD9 | 0.02656375 | 0.14968896 | 3.80E-05 | 0.0041099 | -0.099939 |
| 5mo_SIGAD9 | 0.01474531 | 0.07837543 | 3.26E-05 | 0.0055188 | 0.16515   |
| 5mo_SIGAD9 | 0.00815914 | 0.03863384 | 3.19E-05 | 0.0071994 | 0.45929   |
| 5mo_SIGAD9 | 0.09825163 | 0.5822602  | 6.52E-05 | 0.024123  | -0.084641 |
| 5mo_SIGAD9 | 0.02700718 | 0.15236464 | 3.84E-05 | 0.0040947 | -0.10271  |
| 5mo_SIGAD9 | 0.02158886 | 0.11967002 | 3.49E-05 | 0.0044169 | -0.0356   |
| 5mo_SIGAD9 | 0.04832694 | 0.2810101  | 5.67E-05 | 0.0056831 | 0.038361  |
| 5mo_SIGAD9 | 0.09130619 | 0.54035074 | 6.45E-05 | 0.021822  | 0.036126  |
| 5mo_SIGAD9 | 0.09066001 | 0.5364517  | 6.44E-05 | 0.021369  | 0.044278  |
| 5mo_SIGAD9 | 0.01093578 | 0.05538839 | 3.21E-05 | 0.006339  | 0.32844   |
| 5mo_SIGAD9 | 0.00859842 | 0.04128452 | 3.19E-05 | 0.0071994 | 0.45929   |
| 5mo_SIGAD9 | 0.12427521 | 0.73928887 | 6.67E-05 | 0.024092  | -0.40152  |
| 5mo_SIGAD9 | 0.07561652 | 0.4456779  | 6.26E-05 | 0.014549  | 0.13453   |
| 5mo_SIGAD9 | 0.03000709 | 0.17046638 | 4.07E-05 | 0.0040668 | -0.10597  |
| 5mo_SIGAD9 | 0.01600471 | 0.08597478 | 3.30E-05 | 0.0051875 | 0.12392   |
| 5mo_SIGAD9 | 0.06653141 | 0.39085752 | 6.13E-05 | 0.010826  | 0.10013   |
| 5mo_SIGAD9 | 0.02498101 | 0.14013861 | 3.68E-05 | 0.0041768 | -0.086782 |
| 5mo_SIGAD9 | 0.06335712 | 0.37170354 | 6.09E-05 | 0.0096122 | 0.089169  |
| 5mo_SIGAD9 | 0.03005583 | 0.17076053 | 4.07E-05 | 0.0040668 | -0.10597  |
| 5mo_SIGAD9 | 0.02231247 | 0.12403638 | 3.52E-05 | 0.0043661 | -0.046619 |
| 5mo_SIGAD9 | 0.02250746 | 0.12521292 | 3.52E-05 | 0.0043661 | -0.056631 |
| 5mo_SIGAD9 | 0.0205822  | 0.11359575 | 3.44E-05 | 0.0045325 | -0.01065  |
| 5mo_SIGAD9 | 0.0283887  | 0.16070089 | 3.93E-05 | 0.004074  | -0.10603  |
| 5mo_SIGAD9 | 0.02512328 | 0.14099705 | 3.68E-05 | 0.0041768 | -0.086782 |
| 5mo_SIGAD9 | 0.01358736 | 0.07138825 | 3.24E-05 | 0.0057681 | 0.23179   |
| 5mo_SIGAD9 | 0.03872963 | 0.22309905 | 4.92E-05 | 0.0044639 | -0.040459 |
| 5mo_SIGAD9 | 0.03282007 | 0.18744016 | 4.32E-05 | 0.0041142 | -0.094772 |
| 5mo_SIGAD9 | 0.02785244 | 0.15746507 | 3.88E-05 | 0.0040827 | -0.10472  |
| 5mo_SIGAD9 | 0.01786943 | 0.09722664 | 3.34E-05 | 0.0049043 | 0.067421  |
| 5mo_SIGAD9 | 0.12088275 | 0.7188184  | 6.66E-05 | 0.02449   | -0.37656  |
| 5mo_SIGAD9 | 0.10114754 | 0.59973437 | 6.54E-05 | 0.024809  | -0.13341  |



|              |            |            |          |           |           |
|--------------|------------|------------|----------|-----------|-----------|
| 5mo_SIGAD9   | 0.04706517 | 0.27339646 | 5.61E-05 | 0.0054936 | 0.032113  |
| 5mo_SIGAD9   | 0.13848184 | 0.825013   | 6.73E-05 | 0.023538  | -0.48824  |
| 5mo_SIGAD9   | 0.0536865  | 0.3133501  | 5.91E-05 | 0.0068337 | 0.060836  |
| 5mo_SIGAD9   | 0.0161972  | 0.08713627 | 3.30E-05 | 0.0051875 | 0.12392   |
| 5mo_SIGAD9   | 0.02141111 | 0.11859749 | 3.47E-05 | 0.0044724 | -0.0356   |
| 5mo_SIGAD9   | 0.02683435 | 0.15132178 | 3.80E-05 | 0.0041099 | -0.099939 |
| 5mo_SIGAD9   | 0.02399232 | 0.13417271 | 3.61E-05 | 0.0042401 | -0.073623 |
| 5mo_SIGAD9   | 0.00936897 | 0.04593409 | 3.20E-05 | 0.0068348 | 0.4058    |
| 5mo_SIGAD9   | 0.0294536  | 0.1671266  | 4.02E-05 | 0.0040662 | -0.10661  |
| 5mo_SIGAD9   | 0.01773103 | 0.0963915  | 3.34E-05 | 0.0049043 | 0.067421  |
| 5mo_SIGAD9   | 0.01256773 | 0.0652357  | 3.23E-05 | 0.0059016 | 0.25518   |
| 5mo_SIGAD9   | 0.00832756 | 0.03965011 | 3.19E-05 | 0.0071994 | 0.45929   |
| 5mo_SIGAD9   | 0.04159412 | 0.24038363 | 5.19E-05 | 0.0047337 | -0.011944 |
| 5mo_SIGAD9   | 0.02001613 | 0.11018006 | 3.42E-05 | 0.0045972 | 0.0032259 |
| 5mo_SIGAD9   | 0.1020706  | 0.6053042  | 6.55E-05 | 0.025029  | -0.15246  |
| 5mo_SIGAD9   | 0.13779177 | 0.820849   | 6.73E-05 | 0.02353   | -0.48301  |
| 5mo_SIGAD9   | 0.06085686 | 0.35661677 | 6.06E-05 | 0.008866  | 0.080421  |
| 5mo_SIGAD9   | 0.01057627 | 0.05321905 | 3.21E-05 | 0.0064976 | 0.35381   |
| 5mo_SIGAD9   | 0.02852801 | 0.16154148 | 3.93E-05 | 0.004074  | -0.10603  |
| 5mo_SIGAD9   | 0.11624244 | 0.69081837 | 6.64E-05 | 0.025054  | -0.33347  |
| 7dr2_7dold_9 | 0.00800021 | 0.03767484 | 3.19E-05 | 0.0073923 | 0.48652   |
| 7dr2_7dold_9 | 0.03005401 | 0.17074952 | 4.07E-05 | 0.0040668 | -0.10597  |
| 7dr2_7dold_9 | 0.03652062 | 0.20976962 | 4.70E-05 | 0.0042982 | -0.062998 |
| 7dr2_7dold_9 | 0.01825905 | 0.09957767 | 3.36E-05 | 0.0048202 | 0.050123  |
| 7dr2_7dold_9 | 0.01097777 | 0.0556417  | 3.21E-05 | 0.006339  | 0.32844   |
| 7dr2_7dold_9 | 0.01262396 | 0.06557497 | 3.23E-05 | 0.0059016 | 0.25518   |
| 7dr2_7dold_9 | 0.01562611 | 0.08369026 | 3.28E-05 | 0.0052924 | 0.1442    |
| 7dr2_7dold_9 | 0.0297562  | 0.16895254 | 4.07E-05 | 0.0040668 | -0.10597  |
| 7dr2_7dold_9 | 0.02521245 | 0.14153513 | 3.68E-05 | 0.0041768 | -0.086782 |
| 7dr2_7dold_9 | 0.01890384 | 0.10346833 | 3.38E-05 | 0.004741  | 0.03364   |
| 7dr2_7dold_9 | 0.02773055 | 0.15672955 | 3.88E-05 | 0.0040827 | -0.10472  |
| 7dr2_7dold_9 | 0.0213957  | 0.1185045  | 3.47E-05 | 0.0044724 | -0.0356   |
| 7dr2_7dold_9 | 0.00998462 | 0.04964897 | 3.20E-05 | 0.0066628 | 0.37961   |
| 7dr2_7dold_9 | 0.0200148  | 0.11017201 | 3.42E-05 | 0.0045972 | 0.0032259 |
| 7dr2_7dold_9 | 0.01020011 | 0.05094925 | 3.20E-05 | 0.0066628 | 0.37961   |
| 7dr2_7dold_9 | 0.02889398 | 0.16374981 | 3.97E-05 | 0.0040686 | -0.10664  |
| 7dr2_7dold_9 | 0.04151833 | 0.23992628 | 5.19E-05 | 0.0047337 | -0.011944 |
| 7dr2_7dold_9 | 0.02621676 | 0.14759524 | 3.76E-05 | 0.0041286 | -0.096385 |
| 7dr2_7dold_9 | 0.01636798 | 0.08816675 | 3.30E-05 | 0.0051875 | 0.12392   |
| 7dr2_7dold_9 | 0.01334409 | 0.06992031 | 3.24E-05 | 0.0057681 | 0.23179   |
| 7dr2_7dold_9 | 0.03920294 | 0.22595504 | 4.98E-05 | 0.0045122 | -0.034672 |
| 7dr2_7dold_9 | 0.01895862 | 0.10379895 | 3.38E-05 | 0.004741  | 0.03364   |
| 7dr2_7dold_9 | 0.054865   | 0.32046133 | 5.94E-05 | 0.0071062 | 0.064127  |

|              |            |            |          |           |            |
|--------------|------------|------------|----------|-----------|------------|
| 7dr2_7dold_9 | 0.0427682  | 0.2474681  | 5.29E-05 | 0.0048617 | -0.0013165 |
| 7dr2_7dold_9 | 0.12449229 | 0.74059874 | 6.67E-05 | 0.024092  | -0.40152   |
| 7dr2_7dold_9 | 0.01407001 | 0.0743006  | 3.25E-05 | 0.0056405 | 0.20898    |
| 7dr2_7dold_9 | 0.02672925 | 0.15068763 | 3.80E-05 | 0.0041099 | -0.099939  |
| 7dr2_7dold_9 | 0.01957406 | 0.10751255 | 3.40E-05 | 0.0046667 | 0.017998   |
| 7dr2_7dold_9 | 0.01673476 | 0.09037995 | 3.31E-05 | 0.0050879 | 0.10435    |
| 7dr2_7dold_9 | 0.02672052 | 0.15063497 | 3.80E-05 | 0.0041099 | -0.099939  |
| 7dr2_7dold_9 | 0.02599525 | 0.14625861 | 3.76E-05 | 0.0041286 | -0.096385  |
| 7dr2_7dold_9 | 0.01856935 | 0.10145001 | 3.36E-05 | 0.0048202 | 0.050123   |
| 7dr2_7dold_9 | 0.01388473 | 0.07318262 | 3.25E-05 | 0.0056405 | 0.20898    |
| 7dr2_7dold_9 | 0.01058645 | 0.05328049 | 3.21E-05 | 0.0064976 | 0.35381    |
| 7dr2_7dold_9 | 0.02706663 | 0.15272339 | 3.84E-05 | 0.0040947 | -0.10271   |
| 7dr2_7dold_9 | 0.02959036 | 0.16795184 | 4.02E-05 | 0.0040662 | -0.10661   |
| 7dr2_7dold_9 | 0.08755255 | 0.51770097 | 6.41E-05 | 0.020177  | 0.087329   |
| 7dr2_7dold_9 | 0.03883436 | 0.223731   | 4.92E-05 | 0.0044639 | -0.040459  |
| 7dr2_7dold_9 | 0.00632026 | 0.0275379  | 3.18E-05 | 0.008015  | 0.56984    |
| 7dr2_7dold_9 | 0.02297808 | 0.12805271 | 3.55E-05 | 0.0043197 | -0.056631  |
| 7dr2_7dold_9 | 0.1237777  | 0.7362869  | 6.67E-05 | 0.024153  | -0.39752   |
| 7dr2_7dold_9 | 0.01020074 | 0.05095303 | 3.20E-05 | 0.0066628 | 0.37961    |
| 7dr2_7dold_9 | 0.0601819  | 0.352544   | 6.04E-05 | 0.0085136 | 0.07887    |
| 7dr2_7dold_9 | 0.02234967 | 0.12426084 | 3.52E-05 | 0.0043661 | -0.046619  |
| 7dr2_7dold_9 | 0.01696857 | 0.09179075 | 3.31E-05 | 0.0050879 | 0.085504   |
| 7dr2_7dold_9 | 0.01882784 | 0.10300977 | 3.38E-05 | 0.004741  | 0.03364    |
| 7dr2_7dold_9 | 0.02419369 | 0.13538782 | 3.61E-05 | 0.0042401 | -0.080664  |
| 7dr2_7dold_9 | 0.02308531 | 0.12869976 | 3.55E-05 | 0.0043197 | -0.065623  |
| 7dr2_7dold_9 | 0.02951072 | 0.16747126 | 4.02E-05 | 0.0040662 | -0.10661   |
| 7dr2_7dold_9 | 0.0161364  | 0.08676937 | 3.30E-05 | 0.0051875 | 0.12392    |
| 7dr2_7dold_9 | 0.03340203 | 0.19095181 | 4.37E-05 | 0.0041322 | -0.091175  |
| 7dr2_7dold_9 | 0.02504582 | 0.14052965 | 3.68E-05 | 0.0041768 | -0.086782  |
| 7dr2_7dold_9 | 0.04321089 | 0.25013936 | 5.33E-05 | 0.0049301 | 0.0036923  |
| 7dr2_7dold_9 | 0.02149423 | 0.11909899 | 3.49E-05 | 0.0044169 | -0.0356    |
| 7dr2_7dold_9 | 0.01489436 | 0.07927479 | 3.27E-05 | 0.0054028 | 0.16515    |
| 7dr2_7dold_9 | 0.01623141 | 0.08734268 | 3.30E-05 | 0.0051875 | 0.12392    |
| 7dr2_7dold_9 | 0.00637564 | 0.02787205 | 3.18E-05 | 0.008015  | 0.56984    |
| 7dr2_7dold_9 | 0.01495319 | 0.07962976 | 3.27E-05 | 0.0054028 | 0.16515    |
| 7dr2_7dold_9 | 0.01789652 | 0.09739011 | 3.34E-05 | 0.0049043 | 0.067421   |
| 7dr2_7dold_9 | 0.01282439 | 0.06678438 | 3.23E-05 | 0.0059016 | 0.25518    |
| 7dr2_7dold_9 | 0.02832577 | 0.16032115 | 3.93E-05 | 0.004074  | -0.10603   |
| 7dr2_7dold_9 | 0.03188784 | 0.18181501 | 4.22E-05 | 0.0040866 | -0.097962  |
| 7dr2_7dold_9 | 0.01955326 | 0.10738703 | 3.40E-05 | 0.0046667 | 0.017998   |
| 7dr2_7dold_9 | 0.05676007 | 0.33189636 | 5.98E-05 | 0.0075425 | 0.070131   |
| 7dr2_7dold_9 | 0.03118547 | 0.17757683 | 4.16E-05 | 0.0040771 | -0.10299   |
| 7dr2_7dold_9 | 0.02292253 | 0.12771752 | 3.55E-05 | 0.0043197 | -0.056631  |

|              |            |            |          |           |           |
|--------------|------------|------------|----------|-----------|-----------|
| 7dr2_7dold_9 | 0.04875372 | 0.28358528 | 5.70E-05 | 0.0057827 | 0.041222  |
| 7dr2_7dold_9 | 0.02074303 | 0.11456622 | 3.44E-05 | 0.0045325 | -0.01065  |
| 7dr2_7dold_9 | 0.0156175  | 0.08363827 | 3.28E-05 | 0.0052924 | 0.1442    |
| 7dr2_7dold_9 | 0.04596564 | 0.26676175 | 5.54E-05 | 0.0053171 | 0.025099  |
| 7dr2_7dold_9 | 0.00497952 | 0.01944775 | 3.18E-05 | 0.0084677 | 0.62647   |
| 7dr2_7dold_9 | 0.02620397 | 0.147518   | 3.76E-05 | 0.0041286 | -0.096385 |
| 7dr2_7dold_9 | 0.01790142 | 0.09741964 | 3.34E-05 | 0.0049043 | 0.067421  |
| 7dr2_7dold_9 | 0.024598   | 0.13782744 | 3.64E-05 | 0.0042065 | -0.080664 |
| 7dr2_7dold_9 | 0.00757419 | 0.0351042  | 3.19E-05 | 0.0075925 | 0.48652   |
| 7dr2_7dold_9 | 0.01979018 | 0.10881661 | 3.42E-05 | 0.0045972 | 0.0032259 |
| 7dr2_7dold_9 | 0.01872717 | 0.10240234 | 3.38E-05 | 0.004741  | 0.03364   |
| 7dr2_7dold_9 | 0.01532078 | 0.08184783 | 3.27E-05 | 0.0054028 | 0.1442    |
| 7dr2_7dold_9 | 0.01290207 | 0.06725314 | 3.23E-05 | 0.0059016 | 0.25518   |
| 7dr2_7dold_9 | 0.01748751 | 0.09492212 | 3.33E-05 | 0.0049935 | 0.085504  |
| 7dr2_7dold_9 | 0.02699521 | 0.15229242 | 3.84E-05 | 0.0040947 | -0.10271  |
| 7dr2_7dold_9 | 0.05306095 | 0.30957553 | 5.89E-05 | 0.0067028 | 0.059084  |
| 7dr2_7dold_9 | 0.08631624 | 0.5102409  | 6.40E-05 | 0.019681  | 0.099025  |
| 7dr2_7dold_9 | 0.0217882  | 0.12087284 | 3.49E-05 | 0.0044169 | -0.0356   |
| 7dr2_7dold_9 | 0.0159338  | 0.08554687 | 3.30E-05 | 0.0051875 | 0.12392   |
| 7dr2_7dold_9 | 0.0162419  | 0.087406   | 3.30E-05 | 0.0051875 | 0.12392   |
| 7dr2_7dold_9 | 0.00599878 | 0.02559802 | 3.18E-05 | 0.008015  | 0.56984   |
| 7dr2_7dold_9 | 0.02190177 | 0.12155815 | 3.49E-05 | 0.0044169 | -0.0356   |
| 7dr2_7dold_9 | 0.01953151 | 0.1072558  | 3.40E-05 | 0.0046667 | 0.017998  |
| 7dr2_7dold_9 | 0.02255864 | 0.12552176 | 3.55E-05 | 0.0043197 | -0.056631 |
| 7dr2_7dold_9 | 0.07295789 | 0.42963547 | 6.22E-05 | 0.01332   | 0.12737   |
| 7dr2_7dold_9 | 0.01988121 | 0.10936588 | 3.42E-05 | 0.0045972 | 0.0032259 |
| 7dr2_7dold_9 | 0.02106598 | 0.11651491 | 3.47E-05 | 0.0044724 | -0.023601 |
| 7dr2_7dold_9 | 0.02011236 | 0.11076068 | 3.42E-05 | 0.0045972 | 0.0032259 |
| 7dr2_7dold_9 | 0.02854444 | 0.16164063 | 3.93E-05 | 0.004074  | -0.10603  |
| 7dr2_7dold_9 | 0.09817529 | 0.5817995  | 6.52E-05 | 0.024123  | -0.084641 |
| 7dr2_7dold_9 | 0.1232287  | 0.7329741  | 6.67E-05 | 0.024217  | -0.39346  |
| 7dr2_7dold_9 | 0.01616379 | 0.08693463 | 3.30E-05 | 0.0051875 | 0.12392   |
| 7dr2_7dold_9 | 0.01317657 | 0.06890947 | 3.24E-05 | 0.0057681 | 0.23179   |
| 7dr2_7dold_9 | 0.02465791 | 0.13818896 | 3.64E-05 | 0.0042065 | -0.080664 |
| 7dr2_7dold_9 | 0.01256886 | 0.06524251 | 3.23E-05 | 0.0059016 | 0.25518   |
| 7dr2_7dold_9 | 0.06079211 | 0.35622603 | 6.06E-05 | 0.008866  | 0.080421  |
| 7dr2_7dold_9 | 0.04459968 | 0.2585194  | 5.42E-05 | 0.0050757 | 0.017239  |
| 7dr2_7dold_9 | 0.0896786  | 0.53052974 | 6.44E-05 | 0.021137  | 0.059815  |
| 7dr2_7dold_9 | 0.01665782 | 0.08991566 | 3.31E-05 | 0.0050879 | 0.10435   |
| 7dr2_7dold_9 | 0.02309807 | 0.12877676 | 3.58E-05 | 0.0042778 | -0.065623 |
| 7dr2_7dold_9 | 0.03137098 | 0.17869626 | 4.16E-05 | 0.0040771 | -0.10071  |
| 7dr2_7dold_9 | 0.02500259 | 0.1402688  | 3.68E-05 | 0.0041768 | -0.086782 |
| 7dr2_7dold_9 | 0.02142542 | 0.11868384 | 3.47E-05 | 0.0044724 | -0.0356   |

|              |            |            |          |           |            |
|--------------|------------|------------|----------|-----------|------------|
| 7dr2_7dold_9 | 0.02249294 | 0.1251253  | 3.52E-05 | 0.0043661 | -0.056631  |
| 7dr2_7dold_9 | 0.05563257 | 0.3250929  | 5.95E-05 | 0.007248  | 0.067199   |
| 7dr2_7dold_9 | 0.05418127 | 0.31633562 | 5.92E-05 | 0.0069681 | 0.062513   |
| 7dr2_7dold_9 | 0.01607475 | 0.08639737 | 3.30E-05 | 0.0051875 | 0.12392    |
| 7dr2_7dold_9 | 0.01774041 | 0.09644812 | 3.34E-05 | 0.0049043 | 0.067421   |
| 7dr2_7dold_9 | 0.02164282 | 0.11999565 | 3.49E-05 | 0.0044169 | -0.0356    |
| 7dr2_7dold_9 | 0.01952189 | 0.10719776 | 3.40E-05 | 0.0046667 | 0.017998   |
| 7dr2_7dold_9 | 0.00556657 | 0.02299005 | 3.18E-05 | 0.0082375 | 0.59807    |
| 7dr2_7dold_9 | 0.06462376 | 0.37934658 | 6.10E-05 | 0.010005  | 0.093303   |
| 7dr2_7dold_9 | 0.0158997  | 0.0853411  | 3.30E-05 | 0.0051875 | 0.12392    |
| 7dr2_7dold_9 | 0.03494418 | 0.20025727 | 4.54E-05 | 0.0042028 | -0.078293  |
| 7dr2_7dold_9 | 0.01958265 | 0.10756437 | 3.40E-05 | 0.0046667 | 0.017998   |
| 7dr2_7dold_9 | 0.02172524 | 0.12049294 | 3.49E-05 | 0.0044169 | -0.0356    |
| 7dr2_7dold_9 | 0.10495532 | 0.6227109  | 6.57E-05 | 0.025429  | -0.19772   |
| 7dr2_7dold_9 | 0.01253608 | 0.06504474 | 3.23E-05 | 0.0060411 | 0.25518    |
| 7dr2_7dold_9 | 0.02766873 | 0.15635651 | 3.88E-05 | 0.0040827 | -0.10472   |
| 7dr2_7dold_9 | 0.03695601 | 0.21239683 | 4.76E-05 | 0.0043355 | -0.057524  |
| 7dr2_7dold_9 | 0.01672725 | 0.09033465 | 3.31E-05 | 0.0050879 | 0.10435    |
| 7dr2_7dold_9 | 0.00739231 | 0.03400676 | 3.19E-05 | 0.0075925 | 0.51404    |
| 7dr2_7dold_9 | 0.05261753 | 0.30689988 | 5.87E-05 | 0.0065755 | 0.057248   |
| 7dr2_7dold_9 | 0.0417234  | 0.24116373 | 5.19E-05 | 0.0047337 | -0.011944  |
| 7dr2_7dold_9 | 0.01082764 | 0.05473581 | 3.21E-05 | 0.0064976 | 0.35381    |
| 7dr2_7dold_9 | 0.01514289 | 0.08077444 | 3.27E-05 | 0.0054028 | 0.16515    |
| 7dr2_7dold_9 | 0.02317176 | 0.12922138 | 3.58E-05 | 0.0042778 | -0.065623  |
| 7dr2_7dold_9 | 0.00582871 | 0.02457181 | 3.18E-05 | 0.0082375 | 0.59807    |
| 7dr2_7dold_9 | 0.01804024 | 0.09825731 | 3.34E-05 | 0.0049043 | 0.067421   |
| 7dr2_7dold_9 | 0.02095857 | 0.11586682 | 3.47E-05 | 0.0044724 | -0.023601  |
| 7dr2_7dold_9 | 0.05019598 | 0.29228804 | 5.76E-05 | 0.005992  | 0.048868   |
| 7dr2_7dold_9 | 0.04276789 | 0.24746624 | 5.29E-05 | 0.0048617 | -0.0013165 |
| 7dr2_7dold_9 | 0.0395615  | 0.2281186  | 4.98E-05 | 0.0045122 | -0.034672  |
| 7dr2_7dold_9 | 0.08611561 | 0.50903034 | 6.39E-05 | 0.01943   | 0.099025   |
| 7dr2_7dold_9 | 0.038614   | 0.22240129 | 4.87E-05 | 0.0044183 | -0.040459  |
| 7dr2_7dold_9 | 0.0262459  | 0.14777105 | 3.76E-05 | 0.0041286 | -0.096385  |
| 7dr2_7dold_9 | 0.01599741 | 0.08593071 | 3.30E-05 | 0.0051875 | 0.12392    |
| 7dr2_7dold_9 | 0.02990356 | 0.16984166 | 4.07E-05 | 0.0040668 | -0.10597   |
| 7dr2_7dold_9 | 0.02731908 | 0.1542467  | 3.84E-05 | 0.0040947 | -0.10271   |
| 7dr2_7dold_9 | 0.03006305 | 0.1708041  | 4.07E-05 | 0.0040668 | -0.10597   |
| 7dr2_7dold_9 | 0.03348049 | 0.19142522 | 4.37E-05 | 0.0041322 | -0.091175  |
| 7dr2_7dold_9 | 0.02687664 | 0.15157697 | 3.80E-05 | 0.0041099 | -0.099939  |
| 7dr2_7dold_9 | 0.02751546 | 0.15543167 | 3.84E-05 | 0.0040947 | -0.10472   |
| 7dr2_7dold_9 | 0.03997079 | 0.23058827 | 5.03E-05 | 0.0045634 | -0.028892  |
| 7dr2_7dold_9 | 0.02318829 | 0.12932111 | 3.58E-05 | 0.0042778 | -0.065623  |
| 7dr2_7dold_9 | 0.05123625 | 0.29856512 | 5.81E-05 | 0.006215  | 0.053285   |

|              |            |            |          |           |           |
|--------------|------------|------------|----------|-----------|-----------|
| 7dr2_7dold_9 | 0.0199138  | 0.10956255 | 3.42E-05 | 0.0045972 | 0.0032259 |
| 7dr2_7dold_9 | 0.01643438 | 0.08856744 | 3.30E-05 | 0.0051875 | 0.10435   |
| 7dr2_7dold_9 | 0.08791027 | 0.51985943 | 6.41E-05 | 0.020177  | 0.080939  |
| 7dr2_7dold_9 | 0.019049   | 0.10434429 | 3.38E-05 | 0.004741  | 0.03364   |
| 7dr2_7dold_9 | 0.08445203 | 0.49899217 | 6.37E-05 | 0.018667  | 0.1136    |
| 7dr2_7dold_9 | 0.05663978 | 0.33117053 | 5.98E-05 | 0.0075425 | 0.068678  |
| 7dr2_7dold_9 | 0.05062974 | 0.29490536 | 5.78E-05 | 0.0061018 | 0.048868  |
| 7dr2_7dold_9 | 0.02693144 | 0.15190767 | 3.80E-05 | 0.0041099 | -0.10271  |
| 7dr2_7dold_9 | 0.01629402 | 0.08772047 | 3.30E-05 | 0.0051875 | 0.12392   |
| 7dr2_7dold_9 | 0.03760942 | 0.21633957 | 4.81E-05 | 0.0043756 | -0.05192  |
| 7dr2_7dold_9 | 0.01857014 | 0.1014548  | 3.36E-05 | 0.0048202 | 0.050123  |
| 7dr2_7dold_9 | 0.022676   | 0.12622991 | 3.55E-05 | 0.0043197 | -0.056631 |
| 7dr2_7dold_9 | 0.02627117 | 0.14792351 | 3.76E-05 | 0.0041286 | -0.096385 |
| 7dr2_7dold_9 | 0.00653557 | 0.02883707 | 3.18E-05 | 0.0078    | 0.54183   |
| 7dr2_7dold_9 | 0.02760408 | 0.15596646 | 3.88E-05 | 0.0040827 | -0.10472  |
| 7dr2_7dold_9 | 0.01188056 | 0.06108926 | 3.22E-05 | 0.0061869 | 0.30353   |
| 7dr2_7dold_9 | 0.01275957 | 0.06639329 | 3.23E-05 | 0.0059016 | 0.25518   |
| 7dr2_7dold_9 | 0.01078672 | 0.05448894 | 3.21E-05 | 0.0064976 | 0.35381   |
| 7dr2_7dold_9 | 0.01552687 | 0.08309142 | 3.28E-05 | 0.0052924 | 0.1442    |
| 7dr2_7dold_9 | 0.0078157  | 0.03656149 | 3.19E-05 | 0.0073923 | 0.48652   |
| 7dr2_7dold_9 | 0.01993051 | 0.10966336 | 3.42E-05 | 0.0045972 | 0.0032259 |
| 7dr2_7dold_9 | 0.01627362 | 0.08759738 | 3.30E-05 | 0.0051875 | 0.12392   |
| 7dr2_7dold_9 | 0.01946611 | 0.10686114 | 3.40E-05 | 0.0046667 | 0.017998  |
| 7dr2_7dold_9 | 0.01058621 | 0.053279   | 3.21E-05 | 0.0064976 | 0.35381   |
| 7dr2_7dold_9 | 0.0309464  | 0.17613432 | 4.16E-05 | 0.0040771 | -0.10299  |
| 7dr2_7dold_9 | 0.01520974 | 0.08117784 | 3.27E-05 | 0.0054028 | 0.16515   |
| 7dr2_7dold_9 | 0.0133819  | 0.07014845 | 3.24E-05 | 0.0057681 | 0.23179   |
| 7dr2_7dold_9 | 0.02014229 | 0.11094128 | 3.42E-05 | 0.0045972 | 0.0032259 |
| 7dr2_7dold_9 | 0.01306259 | 0.06822173 | 3.23E-05 | 0.0059016 | 0.25518   |
| 7dr2_7dold_9 | 0.00907123 | 0.04413747 | 3.19E-05 | 0.0070136 | 0.43237   |
| 7dr2_7dold_9 | 0.01499211 | 0.07986462 | 3.27E-05 | 0.0054028 | 0.16515   |
| 7dr2_7dold_9 | 0.02187264 | 0.12138236 | 3.49E-05 | 0.0044169 | -0.0356   |
| 7dr2_7dold_9 | 0.0248431  | 0.1393064  | 3.68E-05 | 0.0041768 | -0.086782 |
| 7dr2_7dold_9 | 0.01742296 | 0.09453259 | 3.33E-05 | 0.0049935 | 0.085504  |
| 7dr2_7dold_9 | 0.00365391 | 0.01144887 | 3.18E-05 | 0.0092049 | 0.71249   |
| 7dr2_7dold_9 | 0.01310693 | 0.06848927 | 3.23E-05 | 0.0059016 | 0.23179   |
| 7dr2_7dold_9 | 0.02922795 | 0.165765   | 4.02E-05 | 0.0040662 | -0.10661  |
| 7dr2_7dold_9 | 0.01860712 | 0.10167795 | 3.36E-05 | 0.0048202 | 0.03364   |
| 7dr2_7dold_9 | 0.01555758 | 0.08327676 | 3.28E-05 | 0.0052924 | 0.1442    |
| 7dr2_7dold_9 | 0.01580875 | 0.08479232 | 3.28E-05 | 0.0052924 | 0.1442    |
| 7dr2_7dold_9 | 0.0138174  | 0.07277632 | 3.25E-05 | 0.0056405 | 0.20898   |
| 7dr2_7dold_9 | 0.00887531 | 0.04295529 | 3.19E-05 | 0.0070136 | 0.43237   |
| 7dr2_7dold_9 | 0.01573644 | 0.08435601 | 3.28E-05 | 0.0052924 | 0.1442    |

|              |            |            |          |           |           |
|--------------|------------|------------|----------|-----------|-----------|
| 7dr2_7dold_9 | 0.01364772 | 0.07175247 | 3.24E-05 | 0.0057681 | 0.20898   |
| 7dr2_7dold_9 | 0.02978877 | 0.16914907 | 4.07E-05 | 0.0040668 | -0.10597  |
| 7dr2_7dold_9 | 0.02235638 | 0.12430131 | 3.52E-05 | 0.0043661 | -0.046619 |
| 7dr2_7dold_9 | 0.02304651 | 0.12846561 | 3.55E-05 | 0.0043197 | -0.065623 |
| 7dr2_7dold_9 | 0.00763469 | 0.0354693  | 3.19E-05 | 0.0073923 | 0.48652   |
| 7dr2_7dold_9 | 0.0219026  | 0.12156314 | 3.49E-05 | 0.0044169 | -0.0356   |
| 7dr2_7dold_9 | 0.01680103 | 0.09077983 | 3.31E-05 | 0.0050879 | 0.10435   |
| 7dr2_7dold_9 | 0.00910559 | 0.04434482 | 3.19E-05 | 0.0070136 | 0.43237   |
| 7dr2_7dold_9 | 0.00786302 | 0.03684704 | 3.19E-05 | 0.0073923 | 0.48652   |
| 7dr2_7dold_9 | 0.02139893 | 0.11852396 | 3.47E-05 | 0.0044724 | -0.0356   |
| 7dr2_7dold_9 | 0.03157841 | 0.17994788 | 4.22E-05 | 0.0040866 | -0.10071  |
| 7dr2_7dold_9 | 0.01103832 | 0.05600709 | 3.21E-05 | 0.006339  | 0.32844   |
| 7dr2_7dold_9 | 0.02110247 | 0.11673509 | 3.47E-05 | 0.0044724 | -0.023601 |
| 7dr2_7dold_9 | 0.01261717 | 0.06553402 | 3.23E-05 | 0.0059016 | 0.25518   |
| 7dr2_7dold_9 | 0.01223873 | 0.06325048 | 3.23E-05 | 0.0060411 | 0.2791    |
| 7dr2_7dold_9 | 0.00956538 | 0.04711923 | 3.20E-05 | 0.0068348 | 0.4058    |
| 7dr2_7dold_9 | 0.01843535 | 0.10064145 | 3.36E-05 | 0.0048202 | 0.050123  |
| 7dr2_7dold_9 | 0.01413664 | 0.07470267 | 3.25E-05 | 0.0056405 | 0.20898   |
| 7dr2_7dold_9 | 0.05254394 | 0.30645585 | 5.87E-05 | 0.0065755 | 0.057248  |
| 7dr2_7dold_9 | 0.01486424 | 0.07909306 | 3.27E-05 | 0.0054028 | 0.16515   |
| 7dr2_7dold_9 | 0.02452536 | 0.13738915 | 3.64E-05 | 0.0042065 | -0.080664 |
| 7dr2_7dold_9 | 0.01449836 | 0.07688528 | 3.26E-05 | 0.0055188 | 0.18676   |
| 7dr2_7dold_9 | 0.03422238 | 0.19590186 | 4.48E-05 | 0.0041765 | -0.082901 |
| 7dr2_7dold_9 | 0.02868941 | 0.16251542 | 3.97E-05 | 0.0040686 | -0.10664  |
| 7dr2_7dold_9 | 0.02619956 | 0.14749143 | 3.76E-05 | 0.0041286 | -0.096385 |
| 7dr2_7dold_9 | 0.01204085 | 0.06205648 | 3.23E-05 | 0.0060411 | 0.2791    |
| 7dr2_7dold_9 | 0.01503167 | 0.08010335 | 3.27E-05 | 0.0054028 | 0.16515   |
| 7dr2_7dold_9 | 0.01004662 | 0.0500231  | 3.20E-05 | 0.0066628 | 0.37961   |
| 7dr2_7dold_9 | 0.01630366 | 0.08777867 | 3.30E-05 | 0.0051875 | 0.12392   |
| 7dr2_7dold_9 | 0.01806445 | 0.0984034  | 3.34E-05 | 0.0049043 | 0.050123  |
| 7dr2_7dold_9 | 0.02185834 | 0.12129609 | 3.49E-05 | 0.0044169 | -0.0356   |
| 7dr2_7dold_9 | 0.01641814 | 0.08846944 | 3.30E-05 | 0.0051875 | 0.10435   |
| 7dr2_7dold_9 | 0.01423322 | 0.07528541 | 3.26E-05 | 0.0055188 | 0.18676   |
| 7dr2_7dold_9 | 0.0142345  | 0.07529314 | 3.26E-05 | 0.0055188 | 0.18676   |
| 7dr2_7dold_9 | 0.02650179 | 0.14931509 | 3.80E-05 | 0.0041099 | -0.099939 |
| 7dr2_7dold_9 | 0.02355391 | 0.13152729 | 3.58E-05 | 0.0042778 | -0.065623 |
| 7dr2_7dold_9 | 0.01247981 | 0.06470519 | 3.23E-05 | 0.0060411 | 0.2791    |
| 7dr2_7dold_9 | 0.01376581 | 0.07246504 | 3.25E-05 | 0.0056405 | 0.20898   |
| 7dr2_7dold_9 | 0.0206273  | 0.11386786 | 3.44E-05 | 0.0045325 | -0.01065  |
| 7dr2_7dold_9 | 0.02029316 | 0.11185163 | 3.42E-05 | 0.0045972 | -0.01065  |
| 7dr2_7dold_9 | 0.01520095 | 0.08112478 | 3.27E-05 | 0.0054028 | 0.16515   |
| 7dr2_7dold_9 | 0.02813607 | 0.15917651 | 3.93E-05 | 0.004074  | -0.10603  |
| 7dr2_7dold_9 | 0.02119888 | 0.11731688 | 3.47E-05 | 0.0044724 | -0.023601 |

|              |            |            |          |           |           |
|--------------|------------|------------|----------|-----------|-----------|
| 7dr2_7dold_9 | 0.00508041 | 0.02005651 | 3.18E-05 | 0.0084677 | 0.62647   |
| 7dr2_7dold_9 | 0.01961321 | 0.1077488  | 3.40E-05 | 0.0046667 | 0.017998  |
| 7dr2_7dold_9 | 0.01924907 | 0.1055515  | 3.40E-05 | 0.0046667 | 0.017998  |
| 7dr2_7dold_9 | 0.01380212 | 0.07268412 | 3.25E-05 | 0.0056405 | 0.20898   |
| 7dr2_7dold_9 | 0.01974145 | 0.10852256 | 3.40E-05 | 0.0046667 | 0.0032259 |
| 7dr2_7dold_9 | 0.01900876 | 0.10410147 | 3.38E-05 | 0.004741  | 0.03364   |
| 7dr2_7dold_9 | 0.0171018  | 0.09259472 | 3.33E-05 | 0.0049935 | 0.085504  |
| 7dr2_7dold_9 | 0.02226228 | 0.12373353 | 3.52E-05 | 0.0043661 | -0.046619 |
| 7dr2_7dold_9 | 0.013881   | 0.07316008 | 3.25E-05 | 0.0056405 | 0.20898   |
| 7dr2_7dold_9 | 0.01543746 | 0.0825519  | 3.28E-05 | 0.0052924 | 0.1442    |
| 7dr2_7dold_9 | 0.01436567 | 0.07608464 | 3.26E-05 | 0.0055188 | 0.18676   |
| 7dr2_7dold_9 | 0.0225487  | 0.1254618  | 3.55E-05 | 0.0043197 | -0.056631 |
| 7dr2_7dold_9 | 0.01353064 | 0.071046   | 3.24E-05 | 0.0057681 | 0.23179   |
| 7dr2_7dold_9 | 0.01852313 | 0.10117111 | 3.36E-05 | 0.0048202 | 0.050123  |
| 7dr2_7dold_9 | 0.02600213 | 0.1463001  | 3.76E-05 | 0.0041286 | -0.096385 |
| 7dr2_7dold_9 | 0.01686452 | 0.09116294 | 3.31E-05 | 0.0050879 | 0.10435   |
| 7dr2_7dold_9 | 0.01089155 | 0.05512146 | 3.21E-05 | 0.0064976 | 0.32844   |
| 7dr2_7dold_9 | 0.08508854 | 0.50283295 | 6.38E-05 | 0.018923  | 0.10916   |
| 7dr2_7dold_9 | 0.01233129 | 0.06380899 | 3.23E-05 | 0.0060411 | 0.2791    |
| 7dr2_7dold_9 | 0.01779709 | 0.09679013 | 3.34E-05 | 0.0049043 | 0.067421  |
| 7dr2_7dold_9 | 0.01329183 | 0.06960496 | 3.24E-05 | 0.0057681 | 0.23179   |
| 7dr2_7dold_9 | 0.02555963 | 0.14362998 | 3.72E-05 | 0.0041509 | -0.092011 |
| 7dr2_7dold_9 | 0.02623239 | 0.14768954 | 3.76E-05 | 0.0041286 | -0.096385 |
| 7dr2_7dold_9 | 0.01980498 | 0.10890594 | 3.42E-05 | 0.0045972 | 0.0032259 |
| 7dr2_7dold_9 | 0.01758282 | 0.09549722 | 3.34E-05 | 0.0049043 | 0.067421  |
| 7dr2_7dold_9 | 0.0216814  | 0.12022842 | 3.49E-05 | 0.0044169 | -0.0356   |
| 7dr2_7dold_9 | 0.01846153 | 0.10079943 | 3.36E-05 | 0.0048202 | 0.050123  |
| 7dr2_7dold_9 | 0.01093962 | 0.05541155 | 3.21E-05 | 0.006339  | 0.32844   |
| 7dr2_7dold_9 | 0.0247241  | 0.13858838 | 3.64E-05 | 0.0042065 | -0.086782 |
| 7dr2_7dold_9 | 0.02543056 | 0.14285123 | 3.72E-05 | 0.0041509 | -0.092011 |
| 7dr2_7dold_9 | 0.01080106 | 0.05457543 | 3.21E-05 | 0.0064976 | 0.35381   |
| 7dr2_7dold_9 | 0.01004936 | 0.05003961 | 3.20E-05 | 0.0066628 | 0.37961   |
| 7dr2_7dold_9 | 0.01952543 | 0.10721909 | 3.40E-05 | 0.0046667 | 0.017998  |
| 7dr2_7dold_9 | 0.00967764 | 0.04779664 | 3.20E-05 | 0.0068348 | 0.4058    |
| 7dr2_7dold_9 | 0.01790267 | 0.09742719 | 3.34E-05 | 0.0049043 | 0.067421  |
| 7dr2_7dold_9 | 0.0208582  | 0.11526113 | 3.44E-05 | 0.0045325 | -0.023601 |
| 7dr2_7dold_9 | 0.0121376  | 0.06264027 | 3.23E-05 | 0.0060411 | 0.2791    |
| 7dr2_7dold_9 | 0.00869926 | 0.04189299 | 3.19E-05 | 0.0070136 | 0.43237   |
| 7dr2_7dold_9 | 0.01678512 | 0.09068381 | 3.31E-05 | 0.0050879 | 0.10435   |
| 7dr2_7dold_9 | 0.13454756 | 0.80127317 | 6.72E-05 | 0.023533  | -0.46567  |
| 7dr2_7dold_9 | 0.00924563 | 0.04518986 | 3.20E-05 | 0.0068348 | 0.4058    |
| 7dr2_7dold_9 | 0.01133597 | 0.05780312 | 3.21E-05 | 0.006339  | 0.32844   |
| 7dr2_7dold_9 | 0.0132247  | 0.0691999  | 3.24E-05 | 0.0057681 | 0.23179   |

|              |            |            |          |           |           |
|--------------|------------|------------|----------|-----------|-----------|
| 7dr2_7dold_9 | 0.01270668 | 0.06607412 | 3.23E-05 | 0.0059016 | 0.25518   |
| 7dr2_7dold_9 | 0.01252582 | 0.06498281 | 3.23E-05 | 0.0060411 | 0.2791    |
| 7dr2_7dold_9 | 0.02383418 | 0.13321851 | 3.61E-05 | 0.0042401 | -0.073623 |
| 7dr2_7dold_9 | 0.02427284 | 0.13586542 | 3.64E-05 | 0.0042065 | -0.080664 |
| 7dr2_7dold_9 | 0.02018073 | 0.11117324 | 3.42E-05 | 0.0045972 | 0.0032259 |
| 7dr2_7dold_9 | 0.00983218 | 0.04872914 | 3.20E-05 | 0.0066628 | 0.37961   |
| 7dr2_7dold_9 | 0.0079045  | 0.03709731 | 3.19E-05 | 0.0073923 | 0.48652   |
| 7dr2_7dold_9 | 0.01224306 | 0.06327663 | 3.23E-05 | 0.0060411 | 0.2791    |
| 7dr2_7dold_9 | 0.0156475  | 0.0838193  | 3.28E-05 | 0.0052924 | 0.1442    |
| 7dr2_7dold_9 | 0.01814337 | 0.09887964 | 3.36E-05 | 0.0048202 | 0.050123  |
| 7dr2_7dold_9 | 0.02656554 | 0.1496998  | 3.80E-05 | 0.0041099 | -0.099939 |
| 7dr2_7dold_9 | 0.019604   | 0.10769319 | 3.40E-05 | 0.0046667 | 0.017998  |
| 7dr2_7dold_9 | 0.02578828 | 0.14500971 | 3.72E-05 | 0.0041509 | -0.096385 |
| 7dr2_7dold_9 | 0.01477106 | 0.07853077 | 3.26E-05 | 0.0055188 | 0.16515   |
| 7dr2_7dold_9 | 0.02078828 | 0.11483927 | 3.44E-05 | 0.0045325 | -0.01065  |
| 7dr2_7dold_9 | 0.01574468 | 0.08440571 | 3.28E-05 | 0.0052924 | 0.1442    |
| 7dr2_7dold_9 | 0.01746103 | 0.09476232 | 3.33E-05 | 0.0049935 | 0.085504  |
| 7dr2_7dold_9 | 0.0083407  | 0.03972939 | 3.19E-05 | 0.0071994 | 0.45929   |
| 7dr2_7dold_9 | 0.01931743 | 0.10596399 | 3.40E-05 | 0.0046667 | 0.017998  |
| 7dr2_7dold_9 | 0.02455077 | 0.13754247 | 3.64E-05 | 0.0042065 | -0.080664 |
| 7dr2_7dold_9 | 0.02010596 | 0.11072209 | 3.42E-05 | 0.0045972 | 0.0032259 |
| 7dr2_7dold_9 | 0.01149926 | 0.05878845 | 3.22E-05 | 0.0061869 | 0.30353   |
| 7dr2_7dold_9 | 0.01629878 | 0.0877492  | 3.30E-05 | 0.0051875 | 0.12392   |
| 7dr2_7dold_9 | 0.01885418 | 0.10316871 | 3.38E-05 | 0.004741  | 0.03364   |
| 7dr2_7dold_9 | 0.01998479 | 0.10999093 | 3.42E-05 | 0.0045972 | 0.0032259 |
| 7dr2_7dold_9 | 0.0411163  | 0.23750038 | 5.14E-05 | 0.0046741 | -0.017493 |
| 7dr2_7dold_9 | 0.01307087 | 0.06827167 | 3.23E-05 | 0.0059016 | 0.25518   |
| 7dr2_7dold_9 | 0.00415524 | 0.01447396 | 3.18E-05 | 0.0089513 | 0.68371   |
| 7dr2_7dold_9 | 0.01281686 | 0.06673897 | 3.23E-05 | 0.0059016 | 0.25518   |
| 7dr2_7dold_9 | 0.01628315 | 0.08765487 | 3.30E-05 | 0.0051875 | 0.12392   |
| 7dr2_7dold_9 | 0.01334603 | 0.06993201 | 3.24E-05 | 0.0057681 | 0.23179   |
| 7dr2_7dold_9 | 0.02724767 | 0.15381582 | 3.84E-05 | 0.0040947 | -0.10271  |
| 7dr2_7dold_9 | 0.01308457 | 0.06835437 | 3.23E-05 | 0.0059016 | 0.23179   |
| 7dr2_7dold_9 | 0.01236398 | 0.06400628 | 3.23E-05 | 0.0060411 | 0.2791    |
| 7dr2_7dold_9 | 0.02090784 | 0.1155607  | 3.47E-05 | 0.0044724 | -0.023601 |
| 7dr2_7dold_9 | 0.01465251 | 0.07781545 | 3.26E-05 | 0.0055188 | 0.18676   |
| 7dr2_7dold_9 | 0.02041695 | 0.11259864 | 3.44E-05 | 0.0045325 | -0.01065  |
| 7dr2_7dold_9 | 0.02422359 | 0.13556826 | 3.64E-05 | 0.0042065 | -0.080664 |
| 7dr2_7dold_9 | 0.01929919 | 0.10585398 | 3.40E-05 | 0.0046667 | 0.017998  |
| 7dr2_7dold_9 | 0.0198613  | 0.10924578 | 3.42E-05 | 0.0045972 | 0.0032259 |
| 7dr2_7dold_9 | 0.0290447  | 0.16465923 | 3.97E-05 | 0.0040686 | -0.10664  |
| 7dr2_7dold_9 | 0.02640618 | 0.14873815 | 3.76E-05 | 0.0041286 | -0.099939 |
| 7dr2_7dold_9 | 0.01106423 | 0.05616345 | 3.21E-05 | 0.006339  | 0.32844   |



|              |            |            |          |           |           |
|--------------|------------|------------|----------|-----------|-----------|
| 7dr2_7dold_§ | 0.01725198 | 0.09350091 | 3.33E-05 | 0.0049935 | 0.085504  |
| 7dr2_7dold_§ | 0.00550398 | 0.02261235 | 3.18E-05 | 0.0082375 | 0.59807   |
| 7dr2_7dold_§ | 0.02633934 | 0.14833488 | 3.76E-05 | 0.0041286 | -0.096385 |
| 7dr2_7dold_§ | 0.02857159 | 0.16180445 | 3.93E-05 | 0.004074  | -0.10664  |
| 7dr2_7dold_§ | 0.02651041 | 0.14936712 | 3.80E-05 | 0.0041099 | -0.099939 |
| 7dr2_7dold_§ | 0.02254905 | 0.1254639  | 3.55E-05 | 0.0043197 | -0.056631 |
| 7dr2_7dold_§ | 0.01727107 | 0.0936161  | 3.33E-05 | 0.0049935 | 0.085504  |
| 7dr2_7dold_§ | 0.01386839 | 0.07308399 | 3.25E-05 | 0.0056405 | 0.20898   |
| 7dr2_7dold_§ | 0.01023183 | 0.05114068 | 3.20E-05 | 0.0066628 | 0.37961   |
| 7dr2_7dold_§ | 0.01164524 | 0.05966929 | 3.22E-05 | 0.0061869 | 0.30353   |
| 7dr2_7dold_§ | 0.01440704 | 0.07633424 | 3.26E-05 | 0.0055188 | 0.18676   |
| 7dr2_7dold_§ | 0.01511052 | 0.08057915 | 3.27E-05 | 0.0054028 | 0.16515   |
| 7dr2_7dold_§ | 0.0137788  | 0.07254343 | 3.25E-05 | 0.0056405 | 0.20898   |
| 7dr2_7dold_§ | 0.01957742 | 0.10753281 | 3.40E-05 | 0.0046667 | 0.017998  |
| 7dr2_7dold_§ | 0.00760949 | 0.03531724 | 3.19E-05 | 0.0073923 | 0.48652   |
| 7dr2_7dold_§ | 0.01166126 | 0.05976596 | 3.22E-05 | 0.0061869 | 0.30353   |
| 7dr2_7dold_§ | 0.0218501  | 0.12124639 | 3.49E-05 | 0.0044169 | -0.0356   |
| 7dr2_7dold_§ | 0.02503498 | 0.14046422 | 3.68E-05 | 0.0041768 | -0.086782 |
| 7dr2_7dold_§ | 0.02426071 | 0.13579224 | 3.64E-05 | 0.0042065 | -0.080664 |
| 7dr2_7dold_§ | 0.06224878 | 0.36501575 | 6.07E-05 | 0.0092324 | 0.085432  |
| 7dr2_7dold_§ | 0.01818106 | 0.09910703 | 3.36E-05 | 0.0048202 | 0.050123  |
| 7dr2_7dold_§ | 0.01825381 | 0.09954602 | 3.36E-05 | 0.0048202 | 0.050123  |
| 7dr2_7dold_§ | 0.0292346  | 0.16580513 | 4.02E-05 | 0.0040662 | -0.10661  |
| 7dr2_7dold_§ | 0.01079606 | 0.05454527 | 3.21E-05 | 0.0064976 | 0.35381   |
| 7dr2_7dold_§ | 0.01925336 | 0.1055774  | 3.40E-05 | 0.0046667 | 0.017998  |
| 7dr2_7dold_§ | 0.02107463 | 0.11656712 | 3.47E-05 | 0.0044724 | -0.023601 |
| 7dr2_7dold_§ | 0.0168537  | 0.09109763 | 3.31E-05 | 0.0050879 | 0.10435   |
| 7dr2_7dold_§ | 0.02309269 | 0.12874424 | 3.55E-05 | 0.0043197 | -0.065623 |
| 7dr2_7dold_§ | 0.02065849 | 0.11405609 | 3.44E-05 | 0.0045325 | -0.01065  |
| 7dr2_7dold_§ | 0.03119996 | 0.17766427 | 4.16E-05 | 0.0040771 | -0.10299  |
| 7dr2_7dold_§ | 0.03877346 | 0.2233635  | 4.92E-05 | 0.0044639 | -0.040459 |
| 7dr2_7dold_§ | 0.02641844 | 0.14881217 | 3.76E-05 | 0.0041286 | -0.099939 |
| 7dr2_7dold_§ | 0.02186588 | 0.12134156 | 3.49E-05 | 0.0044169 | -0.0356   |
| 7dr2_7dold_§ | 0.02549969 | 0.14326833 | 3.72E-05 | 0.0041509 | -0.092011 |
| 7dr2_7dold_§ | 0.02545159 | 0.14297813 | 3.72E-05 | 0.0041509 | -0.092011 |
| 7dr2_7dold_§ | 0.02135218 | 0.11824188 | 3.47E-05 | 0.0044724 | -0.023601 |
| 7dr2_7dold_§ | 0.02349856 | 0.13119332 | 3.58E-05 | 0.0042778 | -0.065623 |
| 7dr2_7dold_§ | 0.01860427 | 0.10166075 | 3.36E-05 | 0.0048202 | 0.050123  |
| 7dr2_7dold_§ | 0.05305054 | 0.30951273 | 5.89E-05 | 0.0067028 | 0.059084  |
| 7dr2_7dold_§ | 0.02199322 | 0.12210996 | 3.52E-05 | 0.0043661 | -0.046619 |
| 7dr2_7dold_§ | 0.01546806 | 0.08273657 | 3.28E-05 | 0.0052924 | 0.1442    |
| 7dr2_7dold_§ | 0.01889329 | 0.10340472 | 3.38E-05 | 0.004741  | 0.03364   |
| 7dr2_7dold_§ | 0.02060132 | 0.11371109 | 3.44E-05 | 0.0045325 | -0.01065  |

|              |            |            |          |           |           |
|--------------|------------|------------|----------|-----------|-----------|
| 7dr2_7dold_§ | 0.0309292  | 0.17603049 | 4.16E-05 | 0.0040771 | -0.10299  |
| 7dr2_7dold_§ | 0.02621804 | 0.14760293 | 3.76E-05 | 0.0041286 | -0.096385 |
| 7dr2_7dold_§ | 0.02379401 | 0.1329761  | 3.61E-05 | 0.0042401 | -0.073623 |
| 7dr2_7dold_§ | 0.01996785 | 0.10988867 | 3.42E-05 | 0.0045972 | 0.0032259 |
| 7dr2_7dold_§ | 0.01980976 | 0.10893476 | 3.42E-05 | 0.0045972 | 0.0032259 |
| 7dr2_7dold_§ | 0.01380562 | 0.07270522 | 3.25E-05 | 0.0056405 | 0.20898   |
| 7dr2_7dold_§ | 0.01766482 | 0.09599198 | 3.34E-05 | 0.0049043 | 0.067421  |
| 7dr2_7dold_§ | 0.02815507 | 0.15929113 | 3.93E-05 | 0.004074  | -0.10603  |
| 7dr2_7dold_§ | 0.02500554 | 0.14028661 | 3.68E-05 | 0.0041768 | -0.086782 |
| 7dr2_7dold_§ | 0.02275784 | 0.12672377 | 3.55E-05 | 0.0043197 | -0.056631 |
| 7dr2_7dold_§ | 0.01436212 | 0.07606319 | 3.26E-05 | 0.0055188 | 0.18676   |
| 7dr2_7dold_§ | 0.02042687 | 0.11265849 | 3.44E-05 | 0.0045325 | -0.01065  |
| 7dr2_7dold_§ | 0.01598658 | 0.08586538 | 3.30E-05 | 0.0051875 | 0.12392   |
| 7dr2_7dold_§ | 0.02159624 | 0.11971455 | 3.49E-05 | 0.0044169 | -0.0356   |
| 7dr2_7dold_§ | 0.02806874 | 0.15877023 | 3.88E-05 | 0.0040827 | -0.10603  |
| 7dr2_7dold_§ | 0.01553171 | 0.08312059 | 3.28E-05 | 0.0052924 | 0.1442    |
| 7dr2_7dold_§ | 0.01772983 | 0.09638429 | 3.34E-05 | 0.0049043 | 0.067421  |
| 7dr2_7dold_§ | 0.01792581 | 0.09756686 | 3.34E-05 | 0.0049043 | 0.067421  |
| 7dr2_7dold_§ | 0.01942724 | 0.10662659 | 3.40E-05 | 0.0046667 | 0.017998  |
| 7dr2_7dold_§ | 0.02700417 | 0.15234652 | 3.84E-05 | 0.0040947 | -0.10271  |
| 7dr2_7dold_§ | 0.00666967 | 0.02964626 | 3.18E-05 | 0.0078    | 0.54183   |
| 7dr2_7dold_§ | 0.02547036 | 0.14309135 | 3.72E-05 | 0.0041509 | -0.092011 |
| 7dr2_7dold_§ | 0.01992906 | 0.10965462 | 3.42E-05 | 0.0045972 | 0.0032259 |
| 7dr2_7dold_§ | 0.01523349 | 0.08132114 | 3.27E-05 | 0.0054028 | 0.16515   |
| 7dr2_7dold_§ | 0.00827249 | 0.03931783 | 3.19E-05 | 0.0071994 | 0.45929   |
| 7dr2_7dold_§ | 0.01947125 | 0.10689214 | 3.40E-05 | 0.0046667 | 0.017998  |
| 7dr2_7dold_§ | 0.02552253 | 0.14340617 | 3.72E-05 | 0.0041509 | -0.092011 |
| 7dr2_7dold_§ | 0.01889046 | 0.10338765 | 3.38E-05 | 0.004741  | 0.03364   |
| 7dr2_7dold_§ | 0.01962819 | 0.10783915 | 3.40E-05 | 0.0046667 | 0.017998  |
| 7dr2_7dold_§ | 0.02321127 | 0.12945981 | 3.58E-05 | 0.0042778 | -0.065623 |
| 7dr2_7dold_§ | 0.02344943 | 0.13089685 | 3.58E-05 | 0.0042778 | -0.065623 |
| 7dr2_7dold_§ | 0.00686558 | 0.03082843 | 3.18E-05 | 0.0078    | 0.54183   |
| 7dr2_7dold_§ | 0.02354012 | 0.13144413 | 3.58E-05 | 0.0042778 | -0.065623 |
| 7dr2_7dold_§ | 0.02017561 | 0.11114235 | 3.42E-05 | 0.0045972 | 0.0032259 |
| 7dr2_7dold_§ | 0.12506172 | 0.74403477 | 6.68E-05 | 0.024034  | -0.40548  |
| 7dr2_7dold_§ | 0.00919362 | 0.04487602 | 3.19E-05 | 0.0070136 | 0.43237   |
| 7dr2_7dold_§ | 0.01244848 | 0.06451611 | 3.23E-05 | 0.0060411 | 0.2791    |
| 7dr2_7dold_§ | 0.02358069 | 0.13168894 | 3.58E-05 | 0.0042778 | -0.073623 |
| 7dr2_7dold_§ | 0.00836421 | 0.03987126 | 3.19E-05 | 0.0071994 | 0.45929   |
| 7dr2_7dold_§ | 0.01469532 | 0.07807378 | 3.26E-05 | 0.0055188 | 0.18676   |
| 7dr2_7dold_§ | 0.02860886 | 0.16202936 | 3.93E-05 | 0.004074  | -0.10664  |
| 7dr2_7dold_§ | 0.02915141 | 0.16530316 | 3.97E-05 | 0.0040686 | -0.10661  |
| 7dr2_7dold_§ | 0.02170985 | 0.12040009 | 3.49E-05 | 0.0044169 | -0.0356   |

|              |            |            |          |           |           |
|--------------|------------|------------|----------|-----------|-----------|
| 7dr2_7dold_§ | 0.02419472 | 0.13539402 | 3.61E-05 | 0.0042401 | -0.080664 |
| 7dr2_7dold_§ | 0.00615353 | 0.02653181 | 3.18E-05 | 0.008015  | 0.56984   |
| 7dr2_7dold_§ | 0.01570265 | 0.08415208 | 3.28E-05 | 0.0052924 | 0.1442    |
| 7dr2_7dold_§ | 0.0150153  | 0.08000457 | 3.27E-05 | 0.0054028 | 0.16515   |
| 7dr2_7dold_§ | 0.00814304 | 0.03853672 | 3.19E-05 | 0.0071994 | 0.45929   |
| 7dr2_7dold_§ | 0.00999697 | 0.04972352 | 3.20E-05 | 0.0066628 | 0.37961   |
| 7dr2_7dold_§ | 0.01962648 | 0.10782883 | 3.40E-05 | 0.0046667 | 0.017998  |
| 7dr2_7dold_§ | 0.01541356 | 0.08240767 | 3.28E-05 | 0.0052924 | 0.1442    |
| 7dr2_7dold_§ | 0.01377006 | 0.07249064 | 3.25E-05 | 0.0056405 | 0.20898   |
| 7dr2_7dold_§ | 0.02292721 | 0.12774576 | 3.55E-05 | 0.0043197 | -0.056631 |
| 7dr2_7dold_§ | 0.01830568 | 0.09985901 | 3.36E-05 | 0.0048202 | 0.050123  |
| 7dr2_7dold_§ | 0.02260491 | 0.12580097 | 3.55E-05 | 0.0043197 | -0.056631 |
| 7dr2_7dold_§ | 0.01467349 | 0.07794207 | 3.26E-05 | 0.0055188 | 0.18676   |
| 7dr2_7dold_§ | 0.01459427 | 0.07746401 | 3.26E-05 | 0.0055188 | 0.18676   |
| 7dr2_7dold_§ | 0.0221491  | 0.12305053 | 3.52E-05 | 0.0043661 | -0.046619 |
| 7dr2_7dold_§ | 0.02855814 | 0.16172329 | 3.93E-05 | 0.004074  | -0.10664  |
| 7dr2_7dold_§ | 0.01764401 | 0.09586642 | 3.34E-05 | 0.0049043 | 0.067421  |
| 7dr2_7dold_§ | 0.01451677 | 0.07699639 | 3.26E-05 | 0.0055188 | 0.18676   |
| 7dr2_7dold_§ | 0.00639294 | 0.02797643 | 3.18E-05 | 0.008015  | 0.56984   |
| 7dr2_7dold_§ | 0.00746079 | 0.03441995 | 3.19E-05 | 0.0075925 | 0.51404   |
| 7dr2_7dold_§ | 0.02266206 | 0.12614584 | 3.55E-05 | 0.0043197 | -0.056631 |
| 7dr2_7dold_§ | 0.02716549 | 0.15331993 | 3.84E-05 | 0.0040947 | -0.10271  |
| 7dr2_7dold_§ | 0.01428646 | 0.07560667 | 3.26E-05 | 0.0055188 | 0.18676   |
| 7dr2_7dold_§ | 0.02135578 | 0.1182636  | 3.47E-05 | 0.0044724 | -0.023601 |
| 7dr2_7dold_§ | 0.01131878 | 0.05769942 | 3.21E-05 | 0.006339  | 0.32844   |
| 7dr2_7dold_§ | 0.01435286 | 0.07600734 | 3.26E-05 | 0.0055188 | 0.18676   |
| 7dr2_7dold_§ | 0.01912105 | 0.10477902 | 3.38E-05 | 0.004741  | 0.03364   |
| 7dr2_7dold_§ | 0.02403113 | 0.13440694 | 3.61E-05 | 0.0042401 | -0.073623 |
| 7dr2_7dold_§ | 0.02727763 | 0.15399657 | 3.84E-05 | 0.0040947 | -0.10271  |
| 7dr2_7dold_§ | 0.03293864 | 0.18815564 | 4.32E-05 | 0.0041142 | -0.094772 |
| 7dr2_7dold_§ | 0.02229994 | 0.12396072 | 3.52E-05 | 0.0043661 | -0.046619 |
| 7dr2_7dold_§ | 0.02114879 | 0.11701461 | 3.47E-05 | 0.0044724 | -0.023601 |
| 7dr2_7dold_§ | 0.01799107 | 0.09796061 | 3.34E-05 | 0.0049043 | 0.067421  |
| 7dr2_7dold_§ | 0.02998753 | 0.17034838 | 4.07E-05 | 0.0040668 | -0.10597  |
| 7dr2_7dold_§ | 0.02085907 | 0.11526641 | 3.44E-05 | 0.0045325 | -0.023601 |
| 7dr2_7dold_§ | 0.01286101 | 0.06700537 | 3.23E-05 | 0.0059016 | 0.25518   |
| 7dr2_7dold_§ | 0.0143655  | 0.07608361 | 3.26E-05 | 0.0055188 | 0.18676   |
| 7dr2_7dold_§ | 0.01423602 | 0.0753023  | 3.26E-05 | 0.0055188 | 0.18676   |
| 7dr2_7dold_§ | 0.01500901 | 0.07996663 | 3.27E-05 | 0.0054028 | 0.16515   |
| 7dr2_7dold_§ | 0.01005153 | 0.05005271 | 3.20E-05 | 0.0066628 | 0.37961   |
| 7dr2_7dold_§ | 0.02804293 | 0.15861447 | 3.88E-05 | 0.0040827 | -0.10603  |
| 7dr2_7dold_§ | 0.01007557 | 0.05019778 | 3.20E-05 | 0.0066628 | 0.37961   |
| 7dr2_7dold_§ | 0.02687877 | 0.15158987 | 3.80E-05 | 0.0041099 | -0.099939 |

|              |            |            |          |           |           |
|--------------|------------|------------|----------|-----------|-----------|
| 7dr2_7dold_§ | 0.01722009 | 0.09330844 | 3.33E-05 | 0.0049935 | 0.085504  |
| 7dr2_7dold_§ | 0.02124027 | 0.11756662 | 3.47E-05 | 0.0044724 | -0.023601 |
| 7dr2_7dold_§ | 0.13348168 | 0.7948416  | 6.71E-05 | 0.023546  | -0.45937  |
| 7dr2_7dold_§ | 0.02561234 | 0.14394806 | 3.72E-05 | 0.0041509 | -0.092011 |
| 7dr2_7dold_§ | 0.02085166 | 0.11522168 | 3.44E-05 | 0.0045325 | -0.023601 |
| 7dr2_7dold_§ | 0.00378383 | 0.01223284 | 3.18E-05 | 0.0089513 | 0.68371   |
| 7dr2_7dold_§ | 0.01883736 | 0.10306722 | 3.38E-05 | 0.004741  | 0.03364   |
| 7dr2_7dold_§ | 0.01235666 | 0.06396207 | 3.23E-05 | 0.0060411 | 0.2791    |
| 7dr2_7dold_§ | 0.00586852 | 0.02481205 | 3.18E-05 | 0.0082375 | 0.59807   |
| 7dr2_7dold_§ | 0.00571365 | 0.02387757 | 3.18E-05 | 0.0082375 | 0.59807   |
| 7dr2_7dold_§ | 0.014755   | 0.07843389 | 3.26E-05 | 0.0055188 | 0.16515   |
| 7dr2_7dold_§ | 0.02673918 | 0.15074752 | 3.80E-05 | 0.0041099 | -0.099939 |
| 7dr2_7dold_§ | 0.01834134 | 0.1000742  | 3.36E-05 | 0.0048202 | 0.050123  |
| 7dr2_7dold_§ | 0.01264496 | 0.06570171 | 3.23E-05 | 0.0059016 | 0.25518   |
| 7dr2_7dold_§ | 0.01193471 | 0.06141598 | 3.22E-05 | 0.0061869 | 0.30353   |
| 7dr2_7dold_§ | 0.01939937 | 0.10645841 | 3.40E-05 | 0.0046667 | 0.017998  |
| 7dr2_7dold_§ | 0.00640439 | 0.02804557 | 3.18E-05 | 0.008015  | 0.56984   |
| 7dr2_7dold_§ | 0.02060399 | 0.11372721 | 3.44E-05 | 0.0045325 | -0.01065  |
| 7dr2_7dold_§ | 0.01166757 | 0.05980403 | 3.22E-05 | 0.0061869 | 0.30353   |
| 7dr2_7dold_§ | 0.00785932 | 0.0368247  | 3.19E-05 | 0.0073923 | 0.48652   |
| 7dr2_7dold_§ | 0.02618219 | 0.1473866  | 3.76E-05 | 0.0041286 | -0.096385 |
| 7dr2_7dold_§ | 0.02143262 | 0.11872729 | 3.47E-05 | 0.0044724 | -0.0356   |
| 7dr2_7dold_§ | 0.01419944 | 0.07508156 | 3.25E-05 | 0.0056405 | 0.18676   |
| 7dr2_7dold_§ | 0.01970331 | 0.10829245 | 3.40E-05 | 0.0046667 | 0.017998  |
| 7dr2_7dold_§ | 0.01963996 | 0.10791018 | 3.40E-05 | 0.0046667 | 0.017998  |
| 7dr2_7dold_§ | 0.02833797 | 0.16039482 | 3.93E-05 | 0.004074  | -0.10603  |
| 7dr2_7dold_§ | 0.01484875 | 0.0789996  | 3.27E-05 | 0.0054028 | 0.16515   |
| 7dr2_7dold_§ | 0.01741858 | 0.0945062  | 3.33E-05 | 0.0049935 | 0.085504  |
| 7dr2_7dold_§ | 0.01612875 | 0.08672319 | 3.30E-05 | 0.0051875 | 0.12392   |
| 7dr2_7dold_§ | 0.01526163 | 0.08149096 | 3.27E-05 | 0.0054028 | 0.16515   |
| 7dr2_7dold_§ | 0.01370774 | 0.07211462 | 3.25E-05 | 0.0056405 | 0.20898   |
| 7dr2_7dold_§ | 0.01520543 | 0.08115182 | 3.27E-05 | 0.0054028 | 0.16515   |
| 7dr2_7dold_§ | 0.02063477 | 0.11391297 | 3.44E-05 | 0.0045325 | -0.01065  |
| 7dr2_7dold_§ | 0.01689647 | 0.09135571 | 3.31E-05 | 0.0050879 | 0.10435   |
| 7dr2_7dold_§ | 0.01742934 | 0.09457109 | 3.33E-05 | 0.0049935 | 0.085504  |
| 7dr2_7dold_§ | 0.0071769  | 0.03270692 | 3.19E-05 | 0.0075925 | 0.51404   |
| 7dr2_7dold_§ | 0.02216914 | 0.12317147 | 3.52E-05 | 0.0043661 | -0.046619 |
| 7dr2_7dold_§ | 0.01091497 | 0.05526279 | 3.21E-05 | 0.006339  | 0.32844   |
| 7dr2_7dold_§ | 0.01464312 | 0.07775879 | 3.26E-05 | 0.0055188 | 0.18676   |
| 7dr2_7dold_§ | 0.02047438 | 0.11294517 | 3.44E-05 | 0.0045325 | -0.01065  |
| 7dr2_7dold_§ | 0.02124367 | 0.11758712 | 3.47E-05 | 0.0044724 | -0.023601 |
| 7dr2_7dold_§ | 0.02750792 | 0.15538616 | 3.84E-05 | 0.0040947 | -0.10472  |
| 7dr2_7dold_§ | 0.01698864 | 0.09191187 | 3.31E-05 | 0.0050879 | 0.085504  |

|              |            |            |          |           |           |
|--------------|------------|------------|----------|-----------|-----------|
| 7dr2_7dold_9 | 0.0232862  | 0.12991193 | 3.58E-05 | 0.0042778 | -0.065623 |
| 7dr2_7dold_9 | 0.02154849 | 0.11942642 | 3.49E-05 | 0.0044169 | -0.0356   |
| 7dr2_7dold_9 | 0.01943903 | 0.10669774 | 3.40E-05 | 0.0046667 | 0.017998  |
| 7dr2_7dold_9 | 0.0323525  | 0.18461883 | 4.27E-05 | 0.004099  | -0.097962 |
| 7dr2_7dold_9 | 0.01291034 | 0.06730301 | 3.23E-05 | 0.0059016 | 0.25518   |
| 7dr2_7dold_9 | 0.01073887 | 0.05420018 | 3.21E-05 | 0.0064976 | 0.35381   |
| 7dr2_7dold_9 | 0.08724626 | 0.5158528  | 6.41E-05 | 0.01993   | 0.087329  |
| 7dr2_7dold_9 | 0.03112052 | 0.17718492 | 4.16E-05 | 0.0040771 | -0.10299  |
| 7dr2_7dold_9 | 0.00566786 | 0.02360127 | 3.18E-05 | 0.0082375 | 0.59807   |
| 7dr2_7dold_9 | 0.01873481 | 0.1024484  | 3.38E-05 | 0.004741  | 0.03364   |
| 7dr2_7dold_9 | 0.01688269 | 0.09127254 | 3.31E-05 | 0.0050879 | 0.10435   |
| 7dr2_7dold_9 | 0.02258457 | 0.12567824 | 3.55E-05 | 0.0043197 | -0.056631 |
| 7dr2_7dold_9 | 0.01181361 | 0.0606853  | 3.22E-05 | 0.0061869 | 0.30353   |
| 7dr2_7dold_9 | 0.00577263 | 0.02423341 | 3.18E-05 | 0.0082375 | 0.59807   |
| 7dr2_7dold_9 | 0.01371104 | 0.07213454 | 3.25E-05 | 0.0056405 | 0.20898   |
| 7dr2_7dold_9 | 0.01842792 | 0.10059661 | 3.36E-05 | 0.0048202 | 0.050123  |
| 7dr2_7dold_9 | 0.01660225 | 0.08958035 | 3.31E-05 | 0.0050879 | 0.10435   |
| 7dr2_7dold_9 | 0.0223775  | 0.12442873 | 3.52E-05 | 0.0043661 | -0.046619 |
| 7dr2_7dold_9 | 0.01755855 | 0.09535078 | 3.34E-05 | 0.0049043 | 0.067421  |
| 7dr2_7dold_9 | 0.02012407 | 0.11083136 | 3.42E-05 | 0.0045972 | 0.0032259 |
| 7dr2_7dold_9 | 0.01555487 | 0.08326039 | 3.28E-05 | 0.0052924 | 0.1442    |
| 7dr2_7dold_9 | 0.01771976 | 0.09632354 | 3.34E-05 | 0.0049043 | 0.067421  |
| 7dr2_7dold_9 | 0.02952714 | 0.16757032 | 4.02E-05 | 0.0040662 | -0.10661  |
| 7dr2_7dold_9 | 0.02847283 | 0.16120853 | 3.93E-05 | 0.004074  | -0.10603  |
| 7dr2_7dold_9 | 0.02086534 | 0.11530425 | 3.44E-05 | 0.0045325 | -0.023601 |
| 7dr2_7dold_9 | 0.01571779 | 0.08424344 | 3.28E-05 | 0.0052924 | 0.1442    |
| 7dr2_7dold_9 | 0.01635355 | 0.08807969 | 3.30E-05 | 0.0051875 | 0.12392   |
| 7dr2_7dold_9 | 0.00635994 | 0.02777735 | 3.18E-05 | 0.008015  | 0.56984   |
| 7dr2_7dold_9 | 0.01778158 | 0.09669656 | 3.34E-05 | 0.0049043 | 0.067421  |
| 7dr2_7dold_9 | 0.01877856 | 0.10271239 | 3.38E-05 | 0.004741  | 0.03364   |
| 7dr2_7dold_9 | 0.01106448 | 0.05616497 | 3.21E-05 | 0.006339  | 0.32844   |
| 7dr2_7dold_9 | 0.01793435 | 0.09761836 | 3.34E-05 | 0.0049043 | 0.067421  |
| 7dr2_7dold_9 | 0.02833635 | 0.16038501 | 3.93E-05 | 0.004074  | -0.10603  |
| 7dr2_7dold_9 | 0.01853511 | 0.10124341 | 3.36E-05 | 0.0048202 | 0.050123  |
| 7dr2_7dold_9 | 0.02763241 | 0.15613739 | 3.88E-05 | 0.0040827 | -0.10472  |
| 7dr2_7dold_9 | 0.00231081 | 0.0033445  | 3.17E-05 | 0.0097357 | 0.77022   |
| 7dr2_7dold_9 | 0.01540495 | 0.08235574 | 3.28E-05 | 0.0052924 | 0.1442    |
| 7dr2_7dold_9 | 0.01345562 | 0.07059331 | 3.24E-05 | 0.0057681 | 0.23179   |
| 7dr2_7dold_9 | 0.01828142 | 0.09971263 | 3.36E-05 | 0.0048202 | 0.050123  |
| 7dr2_7dold_9 | 0.02263125 | 0.12595989 | 3.55E-05 | 0.0043197 | -0.056631 |
| 7dr2_7dold_9 | 0.02518746 | 0.14138433 | 3.68E-05 | 0.0041768 | -0.086782 |
| 7dr2_7dold_9 | 0.01397581 | 0.07373219 | 3.25E-05 | 0.0056405 | 0.20898   |
| 7dr2_7dold_9 | 0.00950632 | 0.04676286 | 3.20E-05 | 0.0068348 | 0.4058    |

|              |            |            |          |           |           |
|--------------|------------|------------|----------|-----------|-----------|
| 7dr2_7dold_9 | 0.02106298 | 0.11649681 | 3.47E-05 | 0.0044724 | -0.023601 |
| 7dr2_7dold_9 | 0.01120504 | 0.05701309 | 3.21E-05 | 0.006339  | 0.32844   |
| 7dr2_7dold_9 | 0.00925195 | 0.04522798 | 3.20E-05 | 0.0068348 | 0.4058    |
| 7dr2_7dold_9 | 0.02276828 | 0.12678677 | 3.55E-05 | 0.0043197 | -0.056631 |
| 7dr2_7dold_9 | 0.02253002 | 0.12534906 | 3.52E-05 | 0.0043661 | -0.056631 |
| 7dr2_7dold_9 | 0.01501609 | 0.08000931 | 3.27E-05 | 0.0054028 | 0.16515   |
| 7dr2_7dold_9 | 0.01134554 | 0.05786086 | 3.21E-05 | 0.006339  | 0.32844   |
| 7dr2_7dold_9 | 0.0117452  | 0.06027247 | 3.22E-05 | 0.0061869 | 0.30353   |
| 7dr2_7dold_9 | 0.00728058 | 0.03333253 | 3.19E-05 | 0.0075925 | 0.51404   |
| 7dr2_7dold_9 | 0.01874596 | 0.10251573 | 3.38E-05 | 0.004741  | 0.03364   |
| 7dr2_7dold_9 | 0.01264433 | 0.06569792 | 3.23E-05 | 0.0059016 | 0.25518   |
| 7dr2_7dold_9 | 0.01580064 | 0.08474335 | 3.28E-05 | 0.0052924 | 0.1442    |
| 7dr2_7dold_9 | 0.01957284 | 0.10750516 | 3.40E-05 | 0.0046667 | 0.017998  |
| 7dr2_7dold_9 | 0.03801714 | 0.21879977 | 4.81E-05 | 0.0043756 | -0.04622  |
| 7dr2_7dold_9 | 0.01538999 | 0.08226546 | 3.28E-05 | 0.0052924 | 0.1442    |
| 7dr2_7dold_9 | 0.01732434 | 0.09393753 | 3.33E-05 | 0.0049935 | 0.085504  |
| 7dr2_7dold_9 | 0.0095599  | 0.04708618 | 3.20E-05 | 0.0068348 | 0.4058    |
| 7dr2_7dold_9 | 0.02728987 | 0.15407047 | 3.84E-05 | 0.0040947 | -0.10271  |
| 7dr2_7dold_9 | 0.0295113  | 0.16747475 | 4.02E-05 | 0.0040662 | -0.10661  |
| 7dr2_7dold_9 | 0.01809556 | 0.09859116 | 3.34E-05 | 0.0049043 | 0.050123  |
| 7dr2_7dold_9 | 0.01802997 | 0.09819534 | 3.34E-05 | 0.0049043 | 0.067421  |
| 7dr2_7dold_9 | 0.02338067 | 0.13048199 | 3.58E-05 | 0.0042778 | -0.065623 |
| 7dr2_7dold_9 | 0.00872336 | 0.04203842 | 3.19E-05 | 0.0070136 | 0.43237   |
| 7dr2_7dold_9 | 0.01001805 | 0.04985071 | 3.20E-05 | 0.0066628 | 0.37961   |
| 7dr2_7dold_9 | 0.01890139 | 0.10345356 | 3.38E-05 | 0.004741  | 0.03364   |
| 7dr2_7dold_9 | 0.02718359 | 0.15342915 | 3.84E-05 | 0.0040947 | -0.10271  |
| 7dr2_7dold_9 | 0.02432827 | 0.13619989 | 3.64E-05 | 0.0042065 | -0.080664 |
| 7dr2_7dold_9 | 0.01672915 | 0.09034609 | 3.31E-05 | 0.0050879 | 0.10435   |
| 7dr2_7dold_9 | 0.02357888 | 0.131678   | 3.58E-05 | 0.0042778 | -0.073623 |
| 7dr2_7dold_9 | 0.01802909 | 0.09819003 | 3.34E-05 | 0.0049043 | 0.067421  |
| 7dr2_7dold_9 | 0.02189431 | 0.12151314 | 3.49E-05 | 0.0044169 | -0.0356   |
| 7dr2_7dold_9 | 0.02570149 | 0.144486   | 3.72E-05 | 0.0041509 | -0.092011 |
| 7dr2_7dold_9 | 0.01347591 | 0.07071574 | 3.24E-05 | 0.0057681 | 0.23179   |
| 7dr2_7dold_9 | 0.02576293 | 0.14485672 | 3.72E-05 | 0.0041509 | -0.092011 |
| 7dr2_7dold_9 | 0.01449105 | 0.07684121 | 3.26E-05 | 0.0055188 | 0.18676   |
| 7dr2_7dold_9 | 0.02514426 | 0.14112368 | 3.68E-05 | 0.0041768 | -0.086782 |
| 7dr2_7dold_9 | 0.02734763 | 0.15441898 | 3.84E-05 | 0.0040947 | -0.10271  |
| 7dr2_7dold_9 | 0.02180409 | 0.12096875 | 3.49E-05 | 0.0044169 | -0.0356   |
| 7dr2_7dold_9 | 0.01164089 | 0.05964305 | 3.22E-05 | 0.0061869 | 0.30353   |
| 7dr2_7dold_9 | 0.01176355 | 0.06038319 | 3.22E-05 | 0.0061869 | 0.30353   |
| 7dr2_7dold_9 | 0.0143368  | 0.07591044 | 3.26E-05 | 0.0055188 | 0.18676   |
| 7dr2_7dold_9 | 0.022719   | 0.1264894  | 3.55E-05 | 0.0043197 | -0.056631 |
| 7dr2_7dold_9 | 0.02190791 | 0.12159519 | 3.49E-05 | 0.0044169 | -0.0356   |

|              |            |            |          |           |           |
|--------------|------------|------------|----------|-----------|-----------|
| 7dr2_7dold_§ | 0.01641263 | 0.08843615 | 3.30E-05 | 0.0051875 | 0.10435   |
| 7dr2_7dold_§ | 0.02289464 | 0.12754925 | 3.55E-05 | 0.0043197 | -0.056631 |
| 7dr2_7dold_§ | 0.02019235 | 0.11124335 | 3.42E-05 | 0.0045972 | 0.0032259 |
| 7dr2_7dold_§ | 0.02592239 | 0.14581895 | 3.76E-05 | 0.0041286 | -0.096385 |
| 7dr2_7dold_§ | 0.0107794  | 0.05444476 | 3.21E-05 | 0.0064976 | 0.35381   |
| 7dr2_7dold_§ | 0.00993263 | 0.04933527 | 3.20E-05 | 0.0066628 | 0.37961   |
| 7dr2_7dold_§ | 0.01290594 | 0.0672765  | 3.23E-05 | 0.0059016 | 0.25518   |
| 7dr2_7dold_§ | 0.01101469 | 0.05586454 | 3.21E-05 | 0.006339  | 0.32844   |
| 7dr2_7dold_§ | 0.02337235 | 0.13043177 | 3.58E-05 | 0.0042778 | -0.065623 |
| 7dr2_7dold_§ | 0.02127066 | 0.11774997 | 3.47E-05 | 0.0044724 | -0.023601 |
| 7dr2_7dold_§ | 0.02146852 | 0.11894389 | 3.49E-05 | 0.0044169 | -0.0356   |
| 7dr2_7dold_§ | 0.02029111 | 0.1118393  | 3.42E-05 | 0.0045972 | -0.01065  |
| 7dr2_7dold_§ | 0.01263902 | 0.06566588 | 3.23E-05 | 0.0059016 | 0.25518   |
| 7dr2_7dold_§ | 0.01879281 | 0.1027984  | 3.38E-05 | 0.004741  | 0.03364   |
| 7dr2_7dold_§ | 0.01909753 | 0.10463709 | 3.38E-05 | 0.004741  | 0.03364   |
| 7dr2_7dold_§ | 0.01618044 | 0.0870351  | 3.30E-05 | 0.0051875 | 0.12392   |
| 7dr2_7dold_§ | 0.02158595 | 0.11965244 | 3.49E-05 | 0.0044169 | -0.0356   |
| 7dr2_7dold_§ | 0.01070187 | 0.05397692 | 3.21E-05 | 0.0064976 | 0.35381   |
| 7dr2_7dold_§ | 0.01788054 | 0.09729366 | 3.34E-05 | 0.0049043 | 0.067421  |
| 7dr2_7dold_§ | 0.02006015 | 0.11044562 | 3.42E-05 | 0.0045972 | 0.0032259 |
| 7dr2_7dold_§ | 0.0120978  | 0.06240007 | 3.23E-05 | 0.0060411 | 0.2791    |
| 7dr2_7dold_§ | 0.0204748  | 0.11294769 | 3.44E-05 | 0.0045325 | -0.01065  |
| 7dr2_7dold_§ | 0.00949982 | 0.04672365 | 3.20E-05 | 0.0068348 | 0.4058    |
| 7dr2_7dold_§ | 0.02007641 | 0.11054374 | 3.42E-05 | 0.0045972 | 0.0032259 |
| 7dr2_7dold_§ | 0.07729036 | 0.45577797 | 6.28E-05 | 0.015307  | 0.13646   |
| 7dr2_7dold_§ | 0.01015027 | 0.05064855 | 3.20E-05 | 0.0066628 | 0.37961   |
| 7dr2_7dold_§ | 0.03063855 | 0.17427668 | 4.11E-05 | 0.0040705 | -0.10475  |
| 7dr2_7dold_§ | 0.02999133 | 0.17037131 | 4.07E-05 | 0.0040668 | -0.10597  |
| 7dr2_7dold_§ | 0.02052826 | 0.1132703  | 3.44E-05 | 0.0045325 | -0.01065  |
| 7dr2_7dold_§ | 0.01481734 | 0.07881003 | 3.27E-05 | 0.0054028 | 0.16515   |
| 7dr2_7dold_§ | 0.01077417 | 0.05441318 | 3.21E-05 | 0.0064976 | 0.35381   |
| 7dr2_7dold_§ | 0.01245525 | 0.06455696 | 3.23E-05 | 0.0060411 | 0.2791    |
| 7dr2_7dold_§ | 0.01154444 | 0.05906104 | 3.22E-05 | 0.0061869 | 0.30353   |
| 7dr2_7dold_§ | 0.01629765 | 0.0877424  | 3.30E-05 | 0.0051875 | 0.12392   |
| 7dr2_7dold_§ | 0.01887298 | 0.10328216 | 3.38E-05 | 0.004741  | 0.03364   |
| 7dr2_7dold_§ | 0.01354391 | 0.07112604 | 3.24E-05 | 0.0057681 | 0.23179   |
| 7dr2_7dold_§ | 0.0073947  | 0.03402114 | 3.19E-05 | 0.0075925 | 0.51404   |
| 7dr2_7dold_§ | 0.09039611 | 0.53485924 | 6.44E-05 | 0.021369  | 0.05218   |
| 7dr2_7dold_§ | 0.0149827  | 0.07980786 | 3.27E-05 | 0.0054028 | 0.16515   |
| 7dr2_7dold_§ | 0.02825717 | 0.15990722 | 3.93E-05 | 0.004074  | -0.10603  |
| 7dr2_7dold_§ | 0.01317707 | 0.06891251 | 3.24E-05 | 0.0057681 | 0.23179   |
| 7dr2_7dold_§ | 0.03136214 | 0.1786429  | 4.16E-05 | 0.0040771 | -0.10071  |
| 7dr2_7dold_§ | 0.01196089 | 0.06157397 | 3.22E-05 | 0.0061869 | 0.30353   |

|              |            |            |          |           |           |
|--------------|------------|------------|----------|-----------|-----------|
| 7dr2_7dold_§ | 0.01535985 | 0.08208363 | 3.28E-05 | 0.0052924 | 0.1442    |
| 7dr2_7dold_§ | 0.02030071 | 0.11189719 | 3.42E-05 | 0.0045972 | -0.01065  |
| 7dr2_7dold_§ | 0.01568686 | 0.08405681 | 3.28E-05 | 0.0052924 | 0.1442    |
| 7dr2_7dold_§ | 0.02007426 | 0.11053077 | 3.42E-05 | 0.0045972 | 0.0032259 |
| 7dr2_7dold_§ | 0.03355024 | 0.19184613 | 4.37E-05 | 0.0041322 | -0.087207 |
| 7dr2_7dold_§ | 0.02560012 | 0.14387438 | 3.72E-05 | 0.0041509 | -0.092011 |
| 7dr2_7dold_§ | 0.01646442 | 0.08874867 | 3.31E-05 | 0.0050879 | 0.10435   |
| 7dr2_7dold_§ | 0.03211527 | 0.18318738 | 4.27E-05 | 0.004099  | -0.097962 |
| 7dr2_7dold_§ | 0.0972628  | 0.57629347 | 6.51E-05 | 0.023799  | -0.065044 |
| 7dr2_7dold_§ | 0.00382201 | 0.0124632  | 3.18E-05 | 0.0089513 | 0.68371   |
| 7dr2_7dold_§ | 0.03046507 | 0.17322989 | 4.11E-05 | 0.0040705 | -0.10475  |
| 7dr2_7dold_§ | 0.00485599 | 0.01870237 | 3.18E-05 | 0.0084677 | 0.62647   |
| 7dr2_7dold_§ | 0.02473569 | 0.13865831 | 3.64E-05 | 0.0042065 | -0.086782 |
| 7dr2_7dold_§ | 0.01219507 | 0.06298705 | 3.23E-05 | 0.0060411 | 0.2791    |
| 7dr2_7dold_§ | 0.06441383 | 0.37807986 | 6.10E-05 | 0.010005  | 0.091185  |
| 7dr2_7dold_§ | 0.02346139 | 0.13096906 | 3.58E-05 | 0.0042778 | -0.065623 |
| 7dr2_7dold_§ | 0.01457492 | 0.07734727 | 3.26E-05 | 0.0055188 | 0.18676   |
| 7dr2_7dold_§ | 0.01549634 | 0.08290722 | 3.28E-05 | 0.0052924 | 0.1442    |
| 7dr2_7dold_§ | 0.02097531 | 0.1159678  | 3.47E-05 | 0.0044724 | -0.023601 |
| 7dr2_7dold_§ | 0.0293414  | 0.16644956 | 4.02E-05 | 0.0040662 | -0.10661  |
| 7dr2_7dold_§ | 0.01235981 | 0.06398107 | 3.23E-05 | 0.0060411 | 0.2791    |
| 7dr2_7dold_§ | 0.03053308 | 0.17364025 | 4.11E-05 | 0.0040705 | -0.10475  |
| 7dr2_7dold_§ | 0.01939505 | 0.10643236 | 3.40E-05 | 0.0046667 | 0.017998  |
| 7dr2_7dold_§ | 0.02135697 | 0.11827076 | 3.47E-05 | 0.0044724 | -0.023601 |
| 7dr2_7dold_§ | 0.01558826 | 0.08346186 | 3.28E-05 | 0.0052924 | 0.1442    |
| 7dr2_7dold_§ | 0.01271358 | 0.06611574 | 3.23E-05 | 0.0059016 | 0.25518   |
| 7dr2_7dold_§ | 0.01623787 | 0.08738165 | 3.30E-05 | 0.0051875 | 0.12392   |
| 7dr2_7dold_§ | 0.01748767 | 0.09492308 | 3.33E-05 | 0.0049935 | 0.085504  |
| 7dr2_7dold_§ | 0.02475119 | 0.1387518  | 3.64E-05 | 0.0042065 | -0.086782 |
| 7dr2_7dold_§ | 0.02311215 | 0.12886173 | 3.58E-05 | 0.0042778 | -0.065623 |
| 7dr2_7dold_§ | 0.018655   | 0.10196684 | 3.36E-05 | 0.0048202 | 0.03364   |
| 7dr2_7dold_§ | 0.02282542 | 0.12713154 | 3.55E-05 | 0.0043197 | -0.056631 |
| 7dr2_7dold_§ | 0.02104983 | 0.11641746 | 3.47E-05 | 0.0044724 | -0.023601 |
| 7dr2_7dold_§ | 0.01709144 | 0.09253217 | 3.33E-05 | 0.0049935 | 0.085504  |
| 7dr2_7dold_§ | 0.0174263  | 0.09455275 | 3.33E-05 | 0.0049935 | 0.085504  |
| 7dr2_7dold_§ | 0.01629415 | 0.08772127 | 3.30E-05 | 0.0051875 | 0.12392   |
| 7dr2_7dold_§ | 0.01287878 | 0.06711258 | 3.23E-05 | 0.0059016 | 0.25518   |
| 7dr2_7dold_§ | 0.11043314 | 0.6557645  | 6.60E-05 | 0.02558   | -0.27396  |
| 7dr2_7dold_§ | 0.02267683 | 0.12623492 | 3.55E-05 | 0.0043197 | -0.056631 |
| 7dr2_7dold_§ | 0.01783561 | 0.09702257 | 3.34E-05 | 0.0049043 | 0.067421  |
| 7dr2_7dold_§ | 0.01532251 | 0.08185831 | 3.27E-05 | 0.0054028 | 0.1442    |
| 7dr2_7dold_§ | 0.02413119 | 0.13501072 | 3.61E-05 | 0.0042401 | -0.080664 |
| 7dr2_7dold_§ | 0.01580119 | 0.08474669 | 3.28E-05 | 0.0052924 | 0.1442    |



|              |            |            |          |           |           |
|--------------|------------|------------|----------|-----------|-----------|
| 7dr2_7dold_9 | 0.02864005 | 0.16221753 | 3.97E-05 | 0.0040686 | -0.10664  |
| 7dr2_7dold_9 | 0.01739813 | 0.09438278 | 3.33E-05 | 0.0049935 | 0.085504  |
| 7dr2_7dold_9 | 0.020054   | 0.11040853 | 3.42E-05 | 0.0045972 | 0.0032259 |
| 7dr2_7dold_9 | 0.01923573 | 0.10547103 | 3.40E-05 | 0.0046667 | 0.017998  |
| 7dr2_7dold_9 | 0.01898009 | 0.10392845 | 3.38E-05 | 0.004741  | 0.03364   |
| 7dr2_7dold_9 | 0.03818796 | 0.21983054 | 4.87E-05 | 0.0044183 | -0.04622  |
| 7dr2_7dold_9 | 0.02650339 | 0.14932477 | 3.80E-05 | 0.0041099 | -0.099939 |
| 7dr2_7dold_9 | 0.01250671 | 0.06486751 | 3.23E-05 | 0.0060411 | 0.2791    |
| 7dr2_7dold_9 | 0.01350445 | 0.07088795 | 3.24E-05 | 0.0057681 | 0.23179   |
| 7dr2_7dold_9 | 0.01533882 | 0.0819567  | 3.28E-05 | 0.0052924 | 0.1442    |
| 7dr2_7dold_9 | 0.01319774 | 0.06903725 | 3.24E-05 | 0.0057681 | 0.23179   |
| 7dr2_7dold_9 | 0.01069356 | 0.05392676 | 3.21E-05 | 0.0064976 | 0.35381   |
| 7dr2_7dold_9 | 0.01803712 | 0.0982385  | 3.34E-05 | 0.0049043 | 0.067421  |
| 7dr2_7dold_9 | 0.02044603 | 0.11277406 | 3.44E-05 | 0.0045325 | -0.01065  |
| 7dr2_7dold_9 | 0.03078793 | 0.17517808 | 4.11E-05 | 0.0040705 | -0.10299  |
| 7dr2_7dold_9 | 0.01339502 | 0.07022763 | 3.24E-05 | 0.0057681 | 0.23179   |
| 7dr2_7dold_9 | 0.14727017 | 0.8780426  | 6.76E-05 | 0.023673  | -0.51713  |
| 7dr2_7dold_9 | 0.0118979  | 0.06119391 | 3.22E-05 | 0.0061869 | 0.30353   |
| 7dr2_7dold_9 | 0.02399452 | 0.13418601 | 3.61E-05 | 0.0042401 | -0.073623 |
| 7dr2_7dold_9 | 0.0181149  | 0.09870783 | 3.36E-05 | 0.0048202 | 0.050123  |
| 7dr2_7dold_9 | 0.01609677 | 0.08653022 | 3.30E-05 | 0.0051875 | 0.12392   |
| 7dr2_7dold_9 | 0.02277018 | 0.1267982  | 3.55E-05 | 0.0043197 | -0.056631 |
| 7dr2_7dold_9 | 0.02143371 | 0.11873382 | 3.49E-05 | 0.0044169 | -0.0356   |
| 7dr2_7dold_9 | 0.02254356 | 0.1254308  | 3.55E-05 | 0.0043197 | -0.056631 |
| 7dr2_7dold_9 | 0.02265053 | 0.12607624 | 3.55E-05 | 0.0043197 | -0.056631 |
| 7dr2_7dold_9 | 0.01153552 | 0.05900727 | 3.22E-05 | 0.0061869 | 0.30353   |
| 7dr2_7dold_9 | 0.02231374 | 0.124044   | 3.52E-05 | 0.0043661 | -0.046619 |
| 7dr2_7dold_9 | 0.02401242 | 0.13429403 | 3.61E-05 | 0.0042401 | -0.073623 |
| 7dr2_7dold_9 | 0.01767997 | 0.09608341 | 3.34E-05 | 0.0049043 | 0.067421  |
| 7dr2_7dold_9 | 0.01832245 | 0.09996019 | 3.36E-05 | 0.0048202 | 0.050123  |
| 7dr2_7dold_9 | 0.0072091  | 0.03290121 | 3.19E-05 | 0.0075925 | 0.51404   |
| 7dr2_7dold_9 | 0.0175866  | 0.09552    | 3.34E-05 | 0.0049043 | 0.067421  |
| 7dr2_7dold_9 | 0.02647041 | 0.14912573 | 3.80E-05 | 0.0041099 | -0.099939 |
| 7dr2_7dold_9 | 0.02545257 | 0.14298403 | 3.72E-05 | 0.0041509 | -0.092011 |
| 7dr2_7dold_9 | 0.02034641 | 0.11217298 | 3.44E-05 | 0.0045325 | -0.01065  |
| 7dr2_7dold_9 | 0.00724472 | 0.03311617 | 3.19E-05 | 0.0075925 | 0.51404   |
| 7dr2_7dold_9 | 0.02275455 | 0.12670389 | 3.55E-05 | 0.0043197 | -0.056631 |
| 7dr2_7dold_9 | 0.00932344 | 0.04565934 | 3.20E-05 | 0.0068348 | 0.4058    |
| 7dr2_7dold_9 | 0.02214254 | 0.12301099 | 3.52E-05 | 0.0043661 | -0.046619 |
| 7dr2_7dold_9 | 0.01346774 | 0.07066642 | 3.24E-05 | 0.0057681 | 0.23179   |
| 7dr2_7dold_9 | 0.01836958 | 0.10024457 | 3.36E-05 | 0.0048202 | 0.050123  |
| 7dr2_7dold_9 | 0.02299097 | 0.12813051 | 3.55E-05 | 0.0043197 | -0.056631 |
| 7dr2_7dold_9 | 0.03483452 | 0.19959554 | 4.54E-05 | 0.0042028 | -0.078293 |

|              |            |            |          |           |           |
|--------------|------------|------------|----------|-----------|-----------|
| 7dr2_7dold_9 | 0.0133154  | 0.06974723 | 3.24E-05 | 0.0057681 | 0.23179   |
| 7dr2_7dold_9 | 0.00621081 | 0.02687743 | 3.18E-05 | 0.008015  | 0.56984   |
| 7dr2_7dold_9 | 0.01148975 | 0.05873108 | 3.22E-05 | 0.0061869 | 0.30353   |
| 7dr2_7dold_9 | 0.01431514 | 0.07577971 | 3.26E-05 | 0.0055188 | 0.18676   |
| 7dr2_7dold_9 | 0.02271438 | 0.12646155 | 3.55E-05 | 0.0043197 | -0.056631 |
| 7dr2_7dold_9 | 0.01895818 | 0.10379625 | 3.38E-05 | 0.004741  | 0.03364   |
| 7dr2_7dold_9 | 0.01425966 | 0.07544496 | 3.26E-05 | 0.0055188 | 0.18676   |
| 7dr2_7dold_9 | 0.01595065 | 0.08564856 | 3.30E-05 | 0.0051875 | 0.12392   |
| 7dr2_7dold_9 | 0.01728103 | 0.0936762  | 3.33E-05 | 0.0049935 | 0.085504  |
| 7dr2_7dold_9 | 0.01853491 | 0.10124224 | 3.36E-05 | 0.0048202 | 0.050123  |
| 7dr2_7dold_9 | 0.02159008 | 0.11967737 | 3.49E-05 | 0.0044169 | -0.0356   |
| 7dr2_7dold_9 | 0.01262893 | 0.06560497 | 3.23E-05 | 0.0059016 | 0.25518   |
| 7dr2_7dold_9 | 0.02489307 | 0.13960794 | 3.68E-05 | 0.0041768 | -0.086782 |
| 7dr2_7dold_9 | 0.01690112 | 0.09138376 | 3.31E-05 | 0.0050879 | 0.10435   |
| 7dr2_7dold_9 | 0.02075078 | 0.11461298 | 3.44E-05 | 0.0045325 | -0.01065  |
| 7dr2_7dold_9 | 0.01316009 | 0.06881005 | 3.24E-05 | 0.0057681 | 0.23179   |
| 7dr2_7dold_9 | 0.01776098 | 0.09657223 | 3.34E-05 | 0.0049043 | 0.067421  |
| 7dr2_7dold_9 | 0.02231263 | 0.12403733 | 3.52E-05 | 0.0043661 | -0.046619 |
| 7dr2_7dold_9 | 0.02604424 | 0.14655423 | 3.76E-05 | 0.0041286 | -0.096385 |
| 7dr2_7dold_9 | 0.01300793 | 0.06789189 | 3.23E-05 | 0.0059016 | 0.25518   |
| 7dr2_7dold_9 | 0.01508475 | 0.08042362 | 3.27E-05 | 0.0054028 | 0.16515   |
| 7dr2_7dold_9 | 0.01123471 | 0.05719214 | 3.21E-05 | 0.006339  | 0.32844   |
| 7dr2_7dold_9 | 0.02008642 | 0.11060415 | 3.42E-05 | 0.0045972 | 0.0032259 |
| 7dr2_7dold_9 | 0.0221705  | 0.1231797  | 3.52E-05 | 0.0043661 | -0.046619 |
| 7dr2_7dold_9 | 0.01838456 | 0.10033499 | 3.36E-05 | 0.0048202 | 0.050123  |
| 7dr2_7dold_9 | 0.01956323 | 0.10744719 | 3.40E-05 | 0.0046667 | 0.017998  |
| 7dr2_7dold_9 | 0.01567891 | 0.08400886 | 3.28E-05 | 0.0052924 | 0.1442    |
| 7dr2_7dold_9 | 0.01228109 | 0.0635061  | 3.23E-05 | 0.0060411 | 0.2791    |
| 7dr2_7dold_9 | 0.01370042 | 0.07207044 | 3.25E-05 | 0.0056405 | 0.20898   |
| 7dr2_7dold_9 | 0.0155025  | 0.08294437 | 3.28E-05 | 0.0052924 | 0.1442    |
| 7dr2_7dold_9 | 0.02344402 | 0.13086425 | 3.58E-05 | 0.0042778 | -0.065623 |
| 7dr2_7dold_9 | 0.0173336  | 0.09399338 | 3.33E-05 | 0.0049935 | 0.085504  |
| 7dr2_7dold_9 | 0.01218495 | 0.06292597 | 3.23E-05 | 0.0060411 | 0.2791    |
| 7dr2_7dold_9 | 0.01431121 | 0.075756   | 3.26E-05 | 0.0055188 | 0.18676   |
| 7dr2_7dold_9 | 0.0280449  | 0.15862636 | 3.88E-05 | 0.0040827 | -0.10603  |
| 7dr2_7dold_9 | 0.01583864 | 0.08497266 | 3.28E-05 | 0.0052924 | 0.1442    |
| 7dr2_7dold_9 | 0.04093121 | 0.23638359 | 5.14E-05 | 0.0046741 | -0.017493 |
| 7dr2_7dold_9 | 0.02082301 | 0.1150488  | 3.44E-05 | 0.0045325 | -0.023601 |
| 7dr2_7dold_9 | 0.01250793 | 0.06487484 | 3.23E-05 | 0.0060411 | 0.2791    |
| 7dr2_7dold_9 | 0.01598224 | 0.08583918 | 3.30E-05 | 0.0051875 | 0.12392   |
| 7dr2_7dold_9 | 0.01641332 | 0.08844034 | 3.30E-05 | 0.0051875 | 0.10435   |
| 7dr2_7dold_9 | 0.01443643 | 0.07651161 | 3.26E-05 | 0.0055188 | 0.18676   |
| 7dr2_7dold_9 | 0.0221538  | 0.12307894 | 3.52E-05 | 0.0043661 | -0.046619 |

|              |            |            |          |           |           |
|--------------|------------|------------|----------|-----------|-----------|
| 7dr2_7dold_9 | 0.00573661 | 0.02401609 | 3.18E-05 | 0.0082375 | 0.59807   |
| 7dr2_7dold_9 | 0.01559988 | 0.08353195 | 3.28E-05 | 0.0052924 | 0.1442    |
| 7dr2_7dold_9 | 0.01914522 | 0.10492489 | 3.38E-05 | 0.004741  | 0.03364   |
| 7dr2_7dold_9 | 0.00860415 | 0.04131906 | 3.19E-05 | 0.0071994 | 0.45929   |
| 7dr2_7dold_9 | 0.07363812 | 0.43374002 | 6.23E-05 | 0.013805  | 0.12913   |
| 7dr2_7dold_9 | 0.01361151 | 0.07153399 | 3.24E-05 | 0.0057681 | 0.23179   |
| 7dr2_7dold_9 | 0.01343203 | 0.07045099 | 3.24E-05 | 0.0057681 | 0.23179   |
| 7dr2_7dold_9 | 0.00430794 | 0.01539538 | 3.18E-05 | 0.0087056 | 0.65503   |
| 7dr2_7dold_9 | 0.01766546 | 0.0959959  | 3.34E-05 | 0.0049043 | 0.067421  |
| 7dr2_7dold_9 | 0.0270048  | 0.15235032 | 3.84E-05 | 0.0040947 | -0.10271  |
| 7dr2_7dold_9 | 0.00564514 | 0.02346416 | 3.18E-05 | 0.0082375 | 0.59807   |
| 7dr2_7dold_9 | 0.00492748 | 0.01913375 | 3.18E-05 | 0.0084677 | 0.62647   |
| 7dr2_7dold_9 | 0.04648813 | 0.2699145  | 5.57E-05 | 0.0054037 | 0.028707  |
| 7dr2_7dold_9 | 0.00646115 | 0.02838804 | 3.18E-05 | 0.008015  | 0.54183   |
| 7dr2_7dold_9 | 0.00912731 | 0.04447587 | 3.19E-05 | 0.0070136 | 0.43237   |
| 7dr2_7dold_9 | 0.01616235 | 0.08692598 | 3.30E-05 | 0.0051875 | 0.12392   |
| 7dr2_7dold_9 | 0.01183875 | 0.06083698 | 3.22E-05 | 0.0061869 | 0.30353   |
| 7dr2_7dold_9 | 0.01839797 | 0.10041588 | 3.36E-05 | 0.0048202 | 0.050123  |
| 7dr2_7dold_9 | 0.02963625 | 0.16822873 | 4.02E-05 | 0.0040662 | -0.10661  |
| 7dr2_7dold_9 | 0.0166786  | 0.09004104 | 3.31E-05 | 0.0050879 | 0.10435   |
| 7dr2_7dold_9 | 0.00878306 | 0.04239868 | 3.19E-05 | 0.0070136 | 0.43237   |
| 7dr2_7dold_9 | 0.00764216 | 0.03551433 | 3.19E-05 | 0.0073923 | 0.48652   |
| 7dr2_7dold_9 | 0.02345162 | 0.13091007 | 3.58E-05 | 0.0042778 | -0.065623 |
| 7dr2_7dold_9 | 0.01400095 | 0.07388385 | 3.25E-05 | 0.0056405 | 0.20898   |
| 7dr2_7dold_9 | 0.02670047 | 0.15051392 | 3.80E-05 | 0.0041099 | -0.099939 |
| 7dr2_7dold_9 | 0.01451765 | 0.0770017  | 3.26E-05 | 0.0055188 | 0.18676   |
| 7dr2_7dold_9 | 0.02540966 | 0.14272508 | 3.72E-05 | 0.0041509 | -0.092011 |
| 7dr2_7dold_9 | 0.01921287 | 0.10533311 | 3.38E-05 | 0.004741  | 0.017998  |
| 7dr2_7dold_9 | 0.01012475 | 0.05049455 | 3.20E-05 | 0.0066628 | 0.37961   |
| 7dr2_7dold_9 | 0.01945356 | 0.10678543 | 3.40E-05 | 0.0046667 | 0.017998  |
| 7dr2_7dold_9 | 0.01991085 | 0.10954474 | 3.42E-05 | 0.0045972 | 0.0032259 |
| 7dr2_7dold_9 | 0.02112562 | 0.11687479 | 3.47E-05 | 0.0044724 | -0.023601 |
| 7dr2_7dold_9 | 0.03001667 | 0.17052422 | 4.07E-05 | 0.0040668 | -0.10597  |
| 7dr2_7dold_9 | 0.02997029 | 0.17024437 | 4.07E-05 | 0.0040668 | -0.10597  |
| 7dr2_7dold_9 | 0.01459611 | 0.07747513 | 3.26E-05 | 0.0055188 | 0.18676   |
| 7dr2_7dold_9 | 0.02395569 | 0.13395168 | 3.61E-05 | 0.0042401 | -0.073623 |
| 7dr2_7dold_9 | 0.01635218 | 0.08807143 | 3.30E-05 | 0.0051875 | 0.12392   |
| 7dr2_7dold_9 | 0.01794143 | 0.09766109 | 3.34E-05 | 0.0049043 | 0.067421  |
| 7dr2_7dold_9 | 0.02655016 | 0.14960697 | 3.80E-05 | 0.0041099 | -0.099939 |
| 7dr2_7dold_9 | 0.02290442 | 0.12760821 | 3.55E-05 | 0.0043197 | -0.056631 |
| 7dr2_7dold_9 | 0.01665182 | 0.0898795  | 3.31E-05 | 0.0050879 | 0.10435   |
| 7dr2_7dold_9 | 0.02687671 | 0.15157741 | 3.80E-05 | 0.0041099 | -0.099939 |
| 7dr2_7dold_9 | 0.01354194 | 0.07111418 | 3.24E-05 | 0.0057681 | 0.23179   |

|              |            |            |          |           |           |
|--------------|------------|------------|----------|-----------|-----------|
| 7dr2_7dold_§ | 0.02198983 | 0.12208954 | 3.52E-05 | 0.0043661 | -0.046619 |
| 7dr2_7dold_§ | 0.02440145 | 0.13664149 | 3.64E-05 | 0.0042065 | -0.080664 |
| 7dr2_7dold_§ | 0.02469696 | 0.13842459 | 3.64E-05 | 0.0042065 | -0.086782 |
| 7dr2_7dold_§ | 0.02755754 | 0.15568559 | 3.88E-05 | 0.0040827 | -0.10472  |
| 7dr2_7dold_§ | 0.02555653 | 0.14361128 | 3.72E-05 | 0.0041509 | -0.092011 |
| 7dr2_7dold_§ | 0.00594538 | 0.02527585 | 3.18E-05 | 0.008015  | 0.56984   |
| 7dr2_7dold_§ | 0.02312064 | 0.12891293 | 3.58E-05 | 0.0042778 | -0.065623 |
| 7dr2_7dold_§ | 0.01772171 | 0.09633528 | 3.34E-05 | 0.0049043 | 0.067421  |
| 7dr2_7dold_§ | 0.00623805 | 0.02704182 | 3.18E-05 | 0.008015  | 0.56984   |
| 7dr2_7dold_§ | 0.01782473 | 0.09695691 | 3.34E-05 | 0.0049043 | 0.067421  |
| 7dr2_7dold_§ | 0.01491387 | 0.07939249 | 3.27E-05 | 0.0054028 | 0.16515   |
| 7dr2_7dold_§ | 0.0257716  | 0.14490905 | 3.72E-05 | 0.0041509 | -0.092011 |
| 7dr2_7dold_§ | 0.01331259 | 0.06973023 | 3.24E-05 | 0.0057681 | 0.23179   |
| 7dr2_7dold_§ | 0.01536732 | 0.08212871 | 3.28E-05 | 0.0052924 | 0.1442    |
| 7dr2_7dold_§ | 0.01787201 | 0.09724222 | 3.34E-05 | 0.0049043 | 0.067421  |
| 7dr2_7dold_§ | 0.01344813 | 0.07054814 | 3.24E-05 | 0.0057681 | 0.23179   |
| 7dr2_7dold_§ | 0.03405057 | 0.19486512 | 4.43E-05 | 0.004153  | -0.087207 |
| 7dr2_7dold_§ | 0.0075441  | 0.03492267 | 3.19E-05 | 0.0075925 | 0.51404   |
| 7dr2_7dold_§ | 0.01556619 | 0.08332871 | 3.28E-05 | 0.0052924 | 0.1442    |
| 7dr2_7dold_§ | 0.00304256 | 0.00775996 | 3.17E-05 | 0.0094663 | 0.74133   |
| 7dr2_7dold_§ | 0.01146794 | 0.05859944 | 3.22E-05 | 0.0061869 | 0.30353   |
| 7dr2_7dold_§ | 0.01188734 | 0.06113019 | 3.22E-05 | 0.0061869 | 0.30353   |
| 7dr2_7dold_§ | 0.04585847 | 0.2661151  | 5.54E-05 | 0.0053171 | 0.025099  |
| 7dr2_7dold_§ | 0.01905912 | 0.10440531 | 3.38E-05 | 0.004741  | 0.03364   |
| 7dr2_7dold_§ | 0.01954675 | 0.10734773 | 3.40E-05 | 0.0046667 | 0.017998  |
| 7dr2_7dold_§ | 0.00877563 | 0.04235379 | 3.19E-05 | 0.0070136 | 0.43237   |
| 7dr2_7dold_§ | 0.0191278  | 0.10481978 | 3.38E-05 | 0.004741  | 0.03364   |
| 7dr2_7dold_§ | 0.0230597  | 0.12854522 | 3.55E-05 | 0.0043197 | -0.065623 |
| 7dr2_7dold_§ | 0.00643993 | 0.02825999 | 3.18E-05 | 0.008015  | 0.56984   |
| 7dr2_7dold_§ | 0.01145968 | 0.05854961 | 3.22E-05 | 0.0061869 | 0.30353   |
| 7dr2_7dold_§ | 0.01269252 | 0.06598871 | 3.23E-05 | 0.0059016 | 0.25518   |
| 7dr2_7dold_§ | 0.01558406 | 0.0834365  | 3.28E-05 | 0.0052924 | 0.1442    |
| 7dr2_7dold_§ | 0.02023724 | 0.11151424 | 3.42E-05 | 0.0045972 | 0.0032259 |
| 7dr2_7dold_§ | 0.02532733 | 0.14222828 | 3.72E-05 | 0.0041509 | -0.092011 |
| 7dr2_7dold_§ | 0.02292298 | 0.12772025 | 3.55E-05 | 0.0043197 | -0.056631 |
| 7dr2_7dold_§ | 0.0116036  | 0.05941806 | 3.22E-05 | 0.0061869 | 0.30353   |
| 7dr2_7dold_§ | 0.01991047 | 0.10954245 | 3.42E-05 | 0.0045972 | 0.0032259 |
| 7dr2_7dold_§ | 0.01339608 | 0.07023402 | 3.24E-05 | 0.0057681 | 0.23179   |
| 7dr2_7dold_§ | 0.01459364 | 0.07746024 | 3.26E-05 | 0.0055188 | 0.18676   |
| 7dr2_7dold_§ | 0.01859008 | 0.10157508 | 3.36E-05 | 0.0048202 | 0.050123  |
| 7dr2_7dold_§ | 0.01467397 | 0.07794494 | 3.26E-05 | 0.0055188 | 0.18676   |
| 7dr2_7dold_§ | 0.01418284 | 0.07498141 | 3.25E-05 | 0.0056405 | 0.20898   |
| 7dr2_7dold_§ | 0.0116228  | 0.05953389 | 3.22E-05 | 0.0061869 | 0.30353   |

|              |            |            |          |           |           |
|--------------|------------|------------|----------|-----------|-----------|
| 7dr2_7dold_§ | 0.01711457 | 0.09267176 | 3.33E-05 | 0.0049935 | 0.085504  |
| 7dr2_7dold_§ | 0.02537059 | 0.1424893  | 3.72E-05 | 0.0041509 | -0.092011 |
| 7dr2_7dold_§ | 0.01475296 | 0.07842159 | 3.26E-05 | 0.0055188 | 0.16515   |
| 7dr2_7dold_§ | 0.08440753 | 0.49872366 | 6.37E-05 | 0.018667  | 0.1136    |
| 7dr2_7dold_§ | 0.02289213 | 0.12753408 | 3.55E-05 | 0.0043197 | -0.056631 |
| 7dr2_7dold_§ | 0.01820615 | 0.09925842 | 3.36E-05 | 0.0048202 | 0.050123  |
| 7dr2_7dold_§ | 0.01750423 | 0.09502298 | 3.33E-05 | 0.0049935 | 0.067421  |
| 7dr2_7dold_§ | 0.01698746 | 0.09190477 | 3.31E-05 | 0.0050879 | 0.085504  |
| 7dr2_7dold_§ | 0.02266629 | 0.12617132 | 3.55E-05 | 0.0043197 | -0.056631 |
| 7dr2_7dold_§ | 0.01566885 | 0.08394812 | 3.28E-05 | 0.0052924 | 0.1442    |
| 7dr2_7dold_§ | 0.02636297 | 0.14847746 | 3.76E-05 | 0.0041286 | -0.099939 |
| 7dr2_7dold_§ | 0.00606387 | 0.02599078 | 3.18E-05 | 0.008015  | 0.56984   |
| 7dr2_7dold_§ | 0.01677355 | 0.09061398 | 3.31E-05 | 0.0050879 | 0.10435   |
| 7dr2_7dold_§ | 0.01953241 | 0.1072612  | 3.40E-05 | 0.0046667 | 0.017998  |
| 7dr2_7dold_§ | 0.05493473 | 0.32088208 | 5.94E-05 | 0.0071062 | 0.064127  |
| 7dr2_7dold_§ | 0.01255108 | 0.06513523 | 3.23E-05 | 0.0060411 | 0.25518   |
| 7dr2_7dold_§ | 0.021526   | 0.1192907  | 3.49E-05 | 0.0044169 | -0.0356   |
| 7dr2_7dold_§ | 0.02816239 | 0.15933535 | 3.93E-05 | 0.004074  | -0.10603  |
| 7dr2_7dold_§ | 0.01417859 | 0.07495575 | 3.25E-05 | 0.0056405 | 0.20898   |
| 7dr2_7dold_§ | 0.01999462 | 0.11005025 | 3.42E-05 | 0.0045972 | 0.0032259 |
| 7dr2_7dold_§ | 0.01740482 | 0.09442313 | 3.33E-05 | 0.0049935 | 0.085504  |
| 7dr2_7dold_§ | 0.02004646 | 0.11036301 | 3.42E-05 | 0.0045972 | 0.0032259 |
| 7dr2_7dold_§ | 0.02423355 | 0.13562834 | 3.64E-05 | 0.0042065 | -0.080664 |
| 7dr2_7dold_§ | 0.01997891 | 0.10995543 | 3.42E-05 | 0.0045972 | 0.0032259 |
| 7dr2_7dold_§ | 0.01594167 | 0.08559436 | 3.30E-05 | 0.0051875 | 0.12392   |
| 7dr2_7dold_§ | 0.00916566 | 0.04470731 | 3.19E-05 | 0.0070136 | 0.43237   |
| 7dr2_7dold_§ | 0.01291059 | 0.06730457 | 3.23E-05 | 0.0059016 | 0.25518   |
| 7dr2_7dold_§ | 0.02611842 | 0.14700182 | 3.76E-05 | 0.0041286 | -0.096385 |
| 7dr2_7dold_§ | 0.01521554 | 0.08121283 | 3.27E-05 | 0.0054028 | 0.16515   |
| 7dr2_7dold_§ | 0.02869153 | 0.16252819 | 3.97E-05 | 0.0040686 | -0.10664  |
| 7dr2_7dold_§ | 0.01727715 | 0.09365279 | 3.33E-05 | 0.0049935 | 0.085504  |
| 7dr2_7dold_§ | 0.04490658 | 0.26037133 | 5.46E-05 | 0.0051531 | 0.017239  |
| 7dr2_7dold_§ | 0.06581663 | 0.38654447 | 6.13E-05 | 0.010616  | 0.097788  |
| 7dr2_7dold_§ | 0.02072508 | 0.11445788 | 3.44E-05 | 0.0045325 | -0.01065  |
| 7dr2_7dold_§ | 0.05735526 | 0.33548775 | 5.99E-05 | 0.0076952 | 0.071569  |
| 7dr2_7dold_§ | 0.07875308 | 0.4646042  | 6.30E-05 | 0.016077  | 0.13651   |
| 7dr2_7dold_§ | 0.00963747 | 0.04755426 | 3.20E-05 | 0.0068348 | 0.4058    |
| 7dr2_7dold_§ | 0.02186311 | 0.12132488 | 3.49E-05 | 0.0044169 | -0.0356   |
| 7dr2_7dold_§ | 0.05093513 | 0.2967481  | 5.81E-05 | 0.006215  | 0.051138  |
| 7dr2_7dold_§ | 0.07641809 | 0.4505146  | 6.27E-05 | 0.015053  | 0.1354    |
| 7dr2_7dold_§ | 0.02366132 | 0.13217545 | 3.61E-05 | 0.0042401 | -0.073623 |
| 7dr2_7dold_§ | 0.13939886 | 0.8305463  | 6.73E-05 | 0.023544  | -0.49075  |
| 7dr2_7dold_§ | 0.06656715 | 0.39107317 | 6.13E-05 | 0.010826  | 0.10013   |

|              |            |            |          |           |           |
|--------------|------------|------------|----------|-----------|-----------|
| 7dr2_7dold_9 | 0.01671399 | 0.09025464 | 3.31E-05 | 0.0050879 | 0.10435   |
| 7dr2_7dold_9 | 0.04362735 | 0.25265232 | 5.38E-05 | 0.0050014 | 0.008455  |
| 7dr2_7dold_9 | 0.02743254 | 0.15493135 | 3.84E-05 | 0.0040947 | -0.10271  |
| 7dr2_7dold_9 | 0.02935655 | 0.166541   | 4.02E-05 | 0.0040662 | -0.10661  |
| 7dr2_7dold_9 | 0.05096567 | 0.2969324  | 5.81E-05 | 0.006215  | 0.051138  |
| 7dr2_7dold_9 | 0.05026952 | 0.2927318  | 5.78E-05 | 0.0061018 | 0.048868  |
| 7dr2_7dold_9 | 0.01537979 | 0.08220391 | 3.28E-05 | 0.0052924 | 0.1442    |
| 7dr2_7dold_9 | 0.01416294 | 0.07486136 | 3.25E-05 | 0.0056405 | 0.20898   |
| 7dr2_7dold_9 | 0.04382993 | 0.25387466 | 5.38E-05 | 0.0050014 | 0.008455  |
| 7dr2_7dold_9 | 0.04949981 | 0.28808725 | 5.73E-05 | 0.0058857 | 0.04392   |
| 7dr2_7dold_9 | 0.01823184 | 0.09941346 | 3.36E-05 | 0.0048202 | 0.050123  |
| 7dr2_7dold_9 | 0.05063969 | 0.2949654  | 5.78E-05 | 0.0061018 | 0.048868  |
| 7dr2_7dold_9 | 0.02340354 | 0.13061999 | 3.58E-05 | 0.0042778 | -0.065623 |
| 7dr2_7dold_9 | 0.03774592 | 0.21716319 | 4.81E-05 | 0.0043756 | -0.05192  |
| 7dr2_7dold_9 | 0.02518656 | 0.1413789  | 3.68E-05 | 0.0041768 | -0.086782 |
| 7dr2_7dold_9 | 0.0638732  | 0.37481764 | 6.10E-05 | 0.0098069 | 0.089169  |
| 7dr2_7dold_9 | 0.02756113 | 0.15570726 | 3.88E-05 | 0.0040827 | -0.10472  |
| 7dr2_7dold_9 | 0.0841625  | 0.49724513 | 6.37E-05 | 0.018667  | 0.1176    |
| 7dr2_7dold_9 | 0.00831039 | 0.03954652 | 3.19E-05 | 0.0071994 | 0.45929   |
| 7dr2_7dold_9 | 0.00515335 | 0.02049666 | 3.18E-05 | 0.0084677 | 0.62647   |
| 7dr2_7dold_9 | 0.07054558 | 0.41507936 | 6.19E-05 | 0.012376  | 0.11916   |
| 7dr2_7dold_9 | 0.01140471 | 0.05821794 | 3.21E-05 | 0.006339  | 0.32844   |
| 7dr2_7dold_9 | 0.01023007 | 0.05113003 | 3.20E-05 | 0.0066628 | 0.37961   |
| 7dr2_7dold_9 | 0.00929507 | 0.04548815 | 3.20E-05 | 0.0068348 | 0.4058    |
| 7dr2_7dold_9 | 0.02726142 | 0.15389878 | 3.84E-05 | 0.0040947 | -0.10271  |
| 7dr2_7dold_9 | 0.01194845 | 0.0614989  | 3.22E-05 | 0.0061869 | 0.30353   |
| 7dr2_7dold_9 | 0.02061334 | 0.11378365 | 3.44E-05 | 0.0045325 | -0.01065  |
| 7dr2_7dold_9 | 0.02060745 | 0.11374813 | 3.44E-05 | 0.0045325 | -0.01065  |
| 7dr2_7dold_9 | 0.03788554 | 0.21800567 | 4.81E-05 | 0.0043756 | -0.05192  |
| 7dr2_7dold_9 | 0.01733183 | 0.09398269 | 3.33E-05 | 0.0049935 | 0.085504  |
| 7dr2_7dold_9 | 0.02905825 | 0.164741   | 3.97E-05 | 0.0040686 | -0.10664  |
| 7dr2_7dold_9 | 0.01181404 | 0.06068788 | 3.22E-05 | 0.0061869 | 0.30353   |
| 7dr2_7dold_9 | 0.02058009 | 0.11358298 | 3.44E-05 | 0.0045325 | -0.01065  |
| 7dr2_7dold_9 | 0.01461683 | 0.07760013 | 3.26E-05 | 0.0055188 | 0.18676   |
| 7dr2_7dold_9 | 0.0148273  | 0.07887015 | 3.27E-05 | 0.0054028 | 0.16515   |
| 7dr2_7dold_9 | 0.09117333 | 0.53954905 | 6.45E-05 | 0.021597  | 0.036126  |
| 7dr2_7dold_9 | 0.0260062  | 0.14632465 | 3.76E-05 | 0.0041286 | -0.096385 |
| 7dr2_7dold_9 | 0.01544574 | 0.08260186 | 3.28E-05 | 0.0052924 | 0.1442    |
| 7dr2_7dold_9 | 0.04427481 | 0.25655916 | 5.42E-05 | 0.0050757 | 0.012967  |
| 7dr2_7dold_9 | 0.02097757 | 0.11598146 | 3.47E-05 | 0.0044724 | -0.023601 |
| 7dr2_7dold_9 | 0.01036318 | 0.05193326 | 3.21E-05 | 0.0064976 | 0.35381   |
| 7dr2_7dold_9 | 0.03052839 | 0.17361195 | 4.11E-05 | 0.0040705 | -0.10475  |
| 7dr2_7dold_9 | 0.01560338 | 0.08355308 | 3.28E-05 | 0.0052924 | 0.1442    |

|              |            |            |          |           |           |
|--------------|------------|------------|----------|-----------|-----------|
| 7dr2_7dold_§ | 0.01869597 | 0.10221406 | 3.38E-05 | 0.004741  | 0.03364   |
| 7dr2_7dold_§ | 0.02603877 | 0.14652118 | 3.76E-05 | 0.0041286 | -0.096385 |
| 7dr2_7dold_§ | 0.01764595 | 0.09587814 | 3.34E-05 | 0.0049043 | 0.067421  |
| 7dr2_7dold_§ | 0.01914974 | 0.10495216 | 3.38E-05 | 0.004741  | 0.03364   |
| 7dr2_7dold_§ | 0.01652403 | 0.08910838 | 3.31E-05 | 0.0050879 | 0.10435   |
| 7dr2_7dold_§ | 0.00538151 | 0.02187338 | 3.18E-05 | 0.0082375 | 0.59807   |
| 7dr2_7dold_§ | 0.00992787 | 0.04930655 | 3.20E-05 | 0.0066628 | 0.37961   |
| 7dr2_7dold_§ | 0.00984194 | 0.04878803 | 3.20E-05 | 0.0066628 | 0.37961   |
| 7dr2_7dold_§ | 0.02478505 | 0.13895614 | 3.68E-05 | 0.0041768 | -0.086782 |
| 7dr2_7dold_§ | 0.01705189 | 0.09229352 | 3.33E-05 | 0.0049935 | 0.085504  |
| 7dr2_7dold_§ | 0.02322929 | 0.12956852 | 3.58E-05 | 0.0042778 | -0.065623 |
| 7dr2_7dold_§ | 0.07826291 | 0.46164644 | 6.29E-05 | 0.015819  | 0.13662   |
| 7dr2_7dold_§ | 0.01495302 | 0.07962877 | 3.27E-05 | 0.0054028 | 0.16515   |
| 7dr2_7dold_§ | 0.01348398 | 0.07076445 | 3.24E-05 | 0.0057681 | 0.23179   |
| 7dr2_7dold_§ | 0.01299096 | 0.06778949 | 3.23E-05 | 0.0059016 | 0.25518   |
| 7dr2_7dold_§ | 0.01800483 | 0.09804363 | 3.34E-05 | 0.0049043 | 0.067421  |
| 7dr2_7dold_§ | 0.00917364 | 0.04475543 | 3.19E-05 | 0.0070136 | 0.43237   |
| 7dr2_7dold_§ | 0.00901329 | 0.04378785 | 3.19E-05 | 0.0070136 | 0.43237   |
| 7dr2_7dold_§ | 0.03104681 | 0.17674014 | 4.16E-05 | 0.0040771 | -0.10299  |
| 7dr2_7dold_§ | 0.02967088 | 0.16843766 | 4.02E-05 | 0.0040662 | -0.10597  |
| 7dr2_7dold_§ | 0.01228026 | 0.06350107 | 3.23E-05 | 0.0060411 | 0.2791    |
| 7dr2_7dold_§ | 0.02147788 | 0.11900036 | 3.49E-05 | 0.0044169 | -0.0356   |
| 7dr2_7dold_§ | 0.01521093 | 0.08118502 | 3.27E-05 | 0.0054028 | 0.16515   |
| 7dr2_7dold_§ | 0.02135581 | 0.11826377 | 3.47E-05 | 0.0044724 | -0.023601 |
| 7dr2_7dold_§ | 0.01558638 | 0.08345052 | 3.28E-05 | 0.0052924 | 0.1442    |
| 7dr2_7dold_§ | 0.01835623 | 0.100164   | 3.36E-05 | 0.0048202 | 0.050123  |
| 7dr2_7dold_§ | 0.0157184  | 0.08424712 | 3.28E-05 | 0.0052924 | 0.1442    |
| 7dr2_7dold_§ | 0.01557599 | 0.08338779 | 3.28E-05 | 0.0052924 | 0.1442    |
| 7dr2_7dold_§ | 0.09555433 | 0.5659844  | 6.49E-05 | 0.023263  | -0.035993 |
| 7dr2_7dold_§ | 0.03283491 | 0.18752974 | 4.32E-05 | 0.0041142 | -0.094772 |
| 7dr2_7dold_§ | 0.0133941  | 0.07022207 | 3.24E-05 | 0.0057681 | 0.23179   |
| 7dr2_7dold_§ | 0.03167276 | 0.1805172  | 4.22E-05 | 0.0040866 | -0.10071  |
| 7dr2_7dold_§ | 0.0193464  | 0.1061388  | 3.40E-05 | 0.0046667 | 0.017998  |
| 7dr2_7dold_§ | 0.02020989 | 0.11134918 | 3.42E-05 | 0.0045972 | 0.0032259 |
| 7dr2_7dold_§ | 0.00732743 | 0.03361523 | 3.19E-05 | 0.0075925 | 0.51404   |
| 7dr2_7dold_§ | 0.02880402 | 0.16320698 | 3.97E-05 | 0.0040686 | -0.10664  |
| 7dr2_7dold_§ | 0.01510969 | 0.08057413 | 3.27E-05 | 0.0054028 | 0.16515   |
| 7dr2_7dold_§ | 0.02768436 | 0.15645085 | 3.88E-05 | 0.0040827 | -0.10472  |
| 7dr2_7dold_§ | 0.01861888 | 0.10174889 | 3.36E-05 | 0.0048202 | 0.03364   |
| 7dr2_7dold_§ | 0.01825987 | 0.09958259 | 3.36E-05 | 0.0048202 | 0.050123  |
| 7dr2_7dold_§ | 0.0217572  | 0.12068579 | 3.49E-05 | 0.0044169 | -0.0356   |
| 7dr2_7dold_§ | 0.01574996 | 0.08443757 | 3.28E-05 | 0.0052924 | 0.1442    |
| 7dr2_7dold_§ | 0.01950597 | 0.10710169 | 3.40E-05 | 0.0046667 | 0.017998  |

|              |            |            |          |           |           |
|--------------|------------|------------|----------|-----------|-----------|
| 7dr2_7dold_§ | 0.01820304 | 0.09923968 | 3.36E-05 | 0.0048202 | 0.050123  |
| 7dr2_7dold_§ | 0.0127557  | 0.06636992 | 3.23E-05 | 0.0059016 | 0.25518   |
| 7dr2_7dold_§ | 0.01800584 | 0.09804976 | 3.34E-05 | 0.0049043 | 0.067421  |
| 7dr2_7dold_§ | 0.03623414 | 0.20804098 | 4.65E-05 | 0.0042637 | -0.068307 |
| 7dr2_7dold_§ | 0.01300373 | 0.06786654 | 3.23E-05 | 0.0059016 | 0.25518   |
| 7dr2_7dold_§ | 0.01036657 | 0.0519537  | 3.21E-05 | 0.0064976 | 0.35381   |
| 7dr2_7dold_§ | 0.01189127 | 0.06115389 | 3.22E-05 | 0.0061869 | 0.30353   |
| 7dr2_7dold_§ | 0.01623291 | 0.08735172 | 3.30E-05 | 0.0051875 | 0.12392   |
| 7dr2_7dold_§ | 0.03428227 | 0.19626325 | 4.48E-05 | 0.0041765 | -0.082901 |
| 7dr2_7dold_§ | 0.01757021 | 0.09542111 | 3.34E-05 | 0.0049043 | 0.067421  |
| 7dr2_7dold_§ | 0.01268904 | 0.0659677  | 3.23E-05 | 0.0059016 | 0.25518   |
| 7dr2_7dold_§ | 0.01789186 | 0.09736199 | 3.34E-05 | 0.0049043 | 0.067421  |
| 7dr2_7dold_§ | 0.01859793 | 0.10162247 | 3.36E-05 | 0.0048202 | 0.050123  |
| 7dr2_7dold_§ | 0.01163891 | 0.05963108 | 3.22E-05 | 0.0061869 | 0.30353   |
| 7dr2_7dold_§ | 0.01389673 | 0.07325499 | 3.25E-05 | 0.0056405 | 0.20898   |
| 7dr2_7dold_§ | 0.02055952 | 0.11345887 | 3.44E-05 | 0.0045325 | -0.01065  |
| 7dr2_7dold_§ | 0.01801294 | 0.09809256 | 3.34E-05 | 0.0049043 | 0.067421  |
| 7dr2_7dold_§ | 0.02810522 | 0.15899037 | 3.93E-05 | 0.004074  | -0.10603  |
| 7dr2_7dold_§ | 0.02385061 | 0.13331763 | 3.61E-05 | 0.0042401 | -0.073623 |
| 7dr2_7dold_§ | 0.02476711 | 0.13884786 | 3.68E-05 | 0.0041768 | -0.086782 |
| 7dr2_7dold_§ | 0.01012266 | 0.05048195 | 3.20E-05 | 0.0066628 | 0.37961   |
| 7dr2_7dold_§ | 0.01349479 | 0.07082966 | 3.24E-05 | 0.0057681 | 0.23179   |
| 7dr2_7dold_§ | 0.01755773 | 0.0953458  | 3.34E-05 | 0.0049043 | 0.067421  |
| 7dr2_7dold_§ | 0.02426717 | 0.1358312  | 3.64E-05 | 0.0042065 | -0.080664 |
| 7dr2_7dold_§ | 0.0136119  | 0.07153634 | 3.24E-05 | 0.0057681 | 0.23179   |
| 7dr2_7dold_§ | 0.01258139 | 0.0653181  | 3.23E-05 | 0.0059016 | 0.25518   |
| 7dr2_7dold_§ | 0.02327464 | 0.1298422  | 3.58E-05 | 0.0042778 | -0.065623 |
| 7dr2_7dold_§ | 0.01898671 | 0.1039684  | 3.38E-05 | 0.004741  | 0.03364   |
| 7dr2_7dold_§ | 0.02573896 | 0.14471212 | 3.72E-05 | 0.0041509 | -0.092011 |
| 7dr2_7dold_§ | 0.02766537 | 0.15633625 | 3.88E-05 | 0.0040827 | -0.10472  |
| 7dr2_7dold_§ | 0.01630725 | 0.08780029 | 3.30E-05 | 0.0051875 | 0.12392   |
| 7dr2_7dold_§ | 0.02116817 | 0.11713152 | 3.47E-05 | 0.0044724 | -0.023601 |
| 7dr2_7dold_§ | 0.01795162 | 0.09772258 | 3.34E-05 | 0.0049043 | 0.067421  |
| 7dr2_7dold_§ | 0.01644853 | 0.08865278 | 3.31E-05 | 0.0050879 | 0.10435   |
| 7dr2_7dold_§ | 0.00933744 | 0.04574383 | 3.20E-05 | 0.0068348 | 0.4058    |
| 7dr2_7dold_§ | 0.02494684 | 0.13993241 | 3.68E-05 | 0.0041768 | -0.086782 |
| 7dr2_7dold_§ | 0.02375077 | 0.13271521 | 3.61E-05 | 0.0042401 | -0.073623 |
| 7dr2_7dold_§ | 0.024167   | 0.13522674 | 3.61E-05 | 0.0042401 | -0.080664 |
| 7dr2_7dold_§ | 0.00991882 | 0.04925196 | 3.20E-05 | 0.0066628 | 0.37961   |
| 7dr2_7dold_§ | 0.01463236 | 0.07769389 | 3.26E-05 | 0.0055188 | 0.18676   |
| 7dr2_7dold_§ | 0.01286729 | 0.06704329 | 3.23E-05 | 0.0059016 | 0.25518   |
| 7dr2_7dold_§ | 0.0242577  | 0.13577408 | 3.64E-05 | 0.0042065 | -0.080664 |
| 7dr2_7dold_§ | 0.01155505 | 0.05912509 | 3.22E-05 | 0.0061869 | 0.30353   |



|              |            |            |          |           |           |
|--------------|------------|------------|----------|-----------|-----------|
| 7dr2_7dold_§ | 0.02344627 | 0.1308778  | 3.58E-05 | 0.0042778 | -0.065623 |
| 7dr2_7dold_§ | 0.01223648 | 0.06323691 | 3.23E-05 | 0.0060411 | 0.2791    |
| 7dr2_7dold_§ | 0.02057122 | 0.1135295  | 3.44E-05 | 0.0045325 | -0.01065  |
| 7dr2_7dold_§ | 0.01734913 | 0.09408708 | 3.33E-05 | 0.0049935 | 0.085504  |
| 7dr2_7dold_§ | 0.01227897 | 0.0634933  | 3.23E-05 | 0.0060411 | 0.2791    |
| 7dr2_7dold_§ | 0.01520058 | 0.08112256 | 3.27E-05 | 0.0054028 | 0.16515   |
| 7dr2_7dold_§ | 0.01061942 | 0.05347939 | 3.21E-05 | 0.0064976 | 0.35381   |
| 7dr2_7dold_§ | 0.00812282 | 0.03841468 | 3.19E-05 | 0.0073923 | 0.45929   |
| 7dr2_7dold_§ | 0.02841553 | 0.16086277 | 3.93E-05 | 0.004074  | -0.10603  |
| 7dr2_7dold_§ | 0.01428798 | 0.07561582 | 3.26E-05 | 0.0055188 | 0.18676   |
| 7dr2_7dold_§ | 0.0143163  | 0.07578675 | 3.26E-05 | 0.0055188 | 0.18676   |
| 7dr2_7dold_§ | 0.01408721 | 0.07440438 | 3.25E-05 | 0.0056405 | 0.20898   |
| 7dr2_7dold_§ | 0.02233296 | 0.12416001 | 3.52E-05 | 0.0043661 | -0.046619 |
| 7dr2_7dold_§ | 0.01787659 | 0.09726983 | 3.34E-05 | 0.0049043 | 0.067421  |
| 7dr2_7dold_§ | 0.02283459 | 0.1271869  | 3.55E-05 | 0.0043197 | -0.056631 |
| 7dr2_7dold_§ | 0.01112258 | 0.05651554 | 3.21E-05 | 0.006339  | 0.32844   |
| 7dr2_7dold_§ | 0.01380396 | 0.07269525 | 3.25E-05 | 0.0056405 | 0.20898   |
| 7dr2_7dold_§ | 0.02319884 | 0.12938479 | 3.58E-05 | 0.0042778 | -0.065623 |
| 7dr2_7dold_§ | 0.02324224 | 0.1296467  | 3.58E-05 | 0.0042778 | -0.065623 |
| 7dr2_7dold_§ | 0.02968768 | 0.16853906 | 4.02E-05 | 0.0040662 | -0.10597  |
| 7dr2_7dold_§ | 0.01707149 | 0.09241181 | 3.33E-05 | 0.0049935 | 0.085504  |
| 7dr2_7dold_§ | 0.00978525 | 0.04844593 | 3.20E-05 | 0.0068348 | 0.37961   |
| 7dr2_7dold_§ | 0.01603124 | 0.08613484 | 3.30E-05 | 0.0051875 | 0.12392   |
| 7dr2_7dold_§ | 0.00779776 | 0.03645327 | 3.19E-05 | 0.0073923 | 0.48652   |
| 7dr2_7dold_§ | 0.01701961 | 0.09209874 | 3.33E-05 | 0.0049935 | 0.085504  |
| 7dr2_7dold_§ | 0.01794684 | 0.09769374 | 3.34E-05 | 0.0049043 | 0.067421  |
| 7dr2_7dold_§ | 0.02855716 | 0.16171737 | 3.93E-05 | 0.004074  | -0.10664  |
| 7dr2_7dold_§ | 0.02848621 | 0.16128926 | 3.93E-05 | 0.004074  | -0.10603  |
| 7dr2_7dold_§ | 0.00925115 | 0.04522317 | 3.20E-05 | 0.0068348 | 0.4058    |
| 7dr2_7dold_§ | 0.0174735  | 0.09483753 | 3.33E-05 | 0.0049935 | 0.085504  |
| 7dr2_7dold_§ | 0.01220545 | 0.06304967 | 3.23E-05 | 0.0060411 | 0.2791    |
| 7dr2_7dold_§ | 0.02119902 | 0.11731769 | 3.47E-05 | 0.0044724 | -0.023601 |
| 7dr2_7dold_§ | 0.0200921  | 0.11063845 | 3.42E-05 | 0.0045972 | 0.0032259 |
| 7dr2_7dold_§ | 0.02274495 | 0.12664597 | 3.55E-05 | 0.0043197 | -0.056631 |
| 7dr2_7dold_§ | 0.0191863  | 0.10517276 | 3.38E-05 | 0.004741  | 0.017998  |
| 7dr2_7dold_§ | 0.01676688 | 0.09057378 | 3.31E-05 | 0.0050879 | 0.10435   |
| 7dr2_7dold_§ | 0.01376334 | 0.0724501  | 3.25E-05 | 0.0056405 | 0.20898   |
| 7dr2_7dold_§ | 0.01780756 | 0.09685332 | 3.34E-05 | 0.0049043 | 0.067421  |
| 7dr2_7dold_§ | 0.01589556 | 0.08531614 | 3.30E-05 | 0.0051875 | 0.12392   |
| 7dr2_7dold_§ | 0.0257412  | 0.14472562 | 3.72E-05 | 0.0041509 | -0.092011 |
| 7dr2_7dold_§ | 0.01515742 | 0.08086214 | 3.27E-05 | 0.0054028 | 0.16515   |
| 7dr2_7dold_§ | 0.01187992 | 0.06108536 | 3.22E-05 | 0.0061869 | 0.30353   |
| 7dr2_7dold_§ | 0.02152104 | 0.11926077 | 3.49E-05 | 0.0044169 | -0.0356   |

|              |            |            |          |           |           |
|--------------|------------|------------|----------|-----------|-----------|
| 7dr2_7dold_§ | 0.01140661 | 0.05822939 | 3.21E-05 | 0.006339  | 0.32844   |
| 7dr2_7dold_§ | 0.00870715 | 0.04194063 | 3.19E-05 | 0.0070136 | 0.43237   |
| 7dr2_7dold_§ | 0.01887254 | 0.10327949 | 3.38E-05 | 0.004741  | 0.03364   |
| 7dr2_7dold_§ | 0.0115666  | 0.05919478 | 3.22E-05 | 0.0061869 | 0.30353   |
| 7dr2_7dold_§ | 0.02128826 | 0.11785615 | 3.47E-05 | 0.0044724 | -0.023601 |
| 7dr2_7dold_§ | 0.02021309 | 0.11136849 | 3.42E-05 | 0.0045972 | 0.0032259 |
| 7dr2_7dold_§ | 0.01006663 | 0.05014383 | 3.20E-05 | 0.0066628 | 0.37961   |
| 7dr2_7dold_§ | 0.02197539 | 0.12200237 | 3.49E-05 | 0.0044169 | -0.046619 |
| 7dr2_7dold_§ | 0.00541949 | 0.02210255 | 3.18E-05 | 0.0082375 | 0.59807   |
| 7dr2_7dold_§ | 0.0122456  | 0.06329195 | 3.23E-05 | 0.0060411 | 0.2791    |
| 7dr2_7dold_§ | 0.0392079  | 0.22598496 | 4.98E-05 | 0.0045122 | -0.034672 |
| 7dr2_7dold_§ | 0.01170395 | 0.06002355 | 3.22E-05 | 0.0061869 | 0.30353   |
| 7dr2_7dold_§ | 0.01507404 | 0.080359   | 3.27E-05 | 0.0054028 | 0.16515   |
| 7dr2_7dold_§ | 0.0193609  | 0.1062263  | 3.40E-05 | 0.0046667 | 0.017998  |
| 7dr2_7dold_§ | 0.01912235 | 0.10478687 | 3.38E-05 | 0.004741  | 0.03364   |
| 7dr2_7dold_§ | 0.01821096 | 0.09928747 | 3.36E-05 | 0.0048202 | 0.050123  |
| 7dr2_7dold_§ | 0.01953019 | 0.10724784 | 3.40E-05 | 0.0046667 | 0.017998  |
| 7dr2_7dold_§ | 0.03090989 | 0.175914   | 4.16E-05 | 0.0040771 | -0.10299  |
| 7dr2_7dold_§ | 0.0155344  | 0.08313688 | 3.28E-05 | 0.0052924 | 0.1442    |
| 7dr2_7dold_§ | 0.03185048 | 0.18158959 | 4.22E-05 | 0.0040866 | -0.10071  |
| 7dr2_7dold_§ | 0.01722743 | 0.09335277 | 3.33E-05 | 0.0049935 | 0.085504  |
| 7dr2_7dold_§ | 0.0243717  | 0.13646197 | 3.64E-05 | 0.0042065 | -0.080664 |
| 7dr2_7dold_§ | 0.00487153 | 0.01879612 | 3.18E-05 | 0.0084677 | 0.62647   |
| 7dr2_7dold_§ | 0.01945515 | 0.10679501 | 3.40E-05 | 0.0046667 | 0.017998  |
| 7dr2_7dold_§ | 0.01760648 | 0.09563999 | 3.34E-05 | 0.0049043 | 0.067421  |
| 7dr2_7dold_§ | 0.01324699 | 0.06933443 | 3.24E-05 | 0.0057681 | 0.23179   |
| 7dr2_7dold_§ | 0.02768614 | 0.1564616  | 3.88E-05 | 0.0040827 | -0.10472  |
| 7dr2_7dold_§ | 0.01390672 | 0.0733153  | 3.25E-05 | 0.0056405 | 0.20898   |
| 7dr2_7dold_§ | 0.02561769 | 0.14398037 | 3.72E-05 | 0.0041509 | -0.092011 |
| 7dr2_7dold_§ | 0.02437363 | 0.13647358 | 3.64E-05 | 0.0042065 | -0.080664 |
| 7dr2_7dold_§ | 0.01358061 | 0.07134748 | 3.24E-05 | 0.0057681 | 0.23179   |
| 7dr2_7dold_§ | 0.00651041 | 0.0286853  | 3.18E-05 | 0.0078    | 0.54183   |
| 7dr2_7dold_§ | 0.01195637 | 0.06154672 | 3.22E-05 | 0.0061869 | 0.30353   |
| 7dr2_7dold_§ | 0.01703893 | 0.09221532 | 3.33E-05 | 0.0049935 | 0.085504  |
| 7dr2_7dold_§ | 0.0220959  | 0.12272956 | 3.52E-05 | 0.0043661 | -0.046619 |
| 7dr2_7dold_§ | 0.02414722 | 0.13510741 | 3.61E-05 | 0.0042401 | -0.080664 |
| 7dr2_7dold_§ | 0.02764105 | 0.15618952 | 3.88E-05 | 0.0040827 | -0.10472  |
| 7dr2_7dold_§ | 0.02087162 | 0.11534213 | 3.44E-05 | 0.0045325 | -0.023601 |
| 7dr2_7dold_§ | 0.01409435 | 0.07444747 | 3.25E-05 | 0.0056405 | 0.20898   |
| 7dr2_7dold_§ | 0.01740975 | 0.09445289 | 3.33E-05 | 0.0049935 | 0.085504  |
| 7dr2_7dold_§ | 0.02417768 | 0.13529123 | 3.61E-05 | 0.0042401 | -0.080664 |
| 7dr2_7dold_§ | 0.00873326 | 0.04209818 | 3.19E-05 | 0.0070136 | 0.43237   |
| 7dr2_7dold_§ | 0.00544294 | 0.02224405 | 3.18E-05 | 0.0082375 | 0.59807   |

|              |            |            |          |           |           |
|--------------|------------|------------|----------|-----------|-----------|
| 7dr2_7dold_§ | 0.01801399 | 0.09809895 | 3.34E-05 | 0.0049043 | 0.067421  |
| 7dr2_7dold_§ | 0.01835498 | 0.10015652 | 3.36E-05 | 0.0048202 | 0.050123  |
| 7dr2_7dold_§ | 0.02758871 | 0.15587369 | 3.88E-05 | 0.0040827 | -0.10472  |
| 7dr2_7dold_§ | 0.01431846 | 0.07579975 | 3.26E-05 | 0.0055188 | 0.18676   |
| 7dr2_7dold_§ | 0.01850469 | 0.10105987 | 3.36E-05 | 0.0048202 | 0.050123  |
| 7dr2_7dold_§ | 0.01820267 | 0.09923745 | 3.36E-05 | 0.0048202 | 0.050123  |
| 7dr2_7dold_§ | 0.02257676 | 0.12563112 | 3.55E-05 | 0.0043197 | -0.056631 |
| 7dr2_7dold_§ | 0.01457564 | 0.07735162 | 3.26E-05 | 0.0055188 | 0.18676   |
| 7dr2_7dold_§ | 0.00912736 | 0.04447619 | 3.19E-05 | 0.0070136 | 0.43237   |
| 7dr2_7dold_§ | 0.01627027 | 0.08757719 | 3.30E-05 | 0.0051875 | 0.12392   |
| 7dr2_7dold_§ | 0.0190628  | 0.10442755 | 3.38E-05 | 0.004741  | 0.03364   |
| 7dr2_7dold_§ | 0.02648579 | 0.14921854 | 3.80E-05 | 0.0041099 | -0.099939 |
| 7dr2_7dold_§ | 0.02933816 | 0.16643    | 4.02E-05 | 0.0040662 | -0.10661  |
| 7dr2_7dold_§ | 0.03668499 | 0.21076147 | 4.70E-05 | 0.0042982 | -0.062998 |
| 7dr2_7dold_§ | 0.01282381 | 0.06678089 | 3.23E-05 | 0.0059016 | 0.25518   |
| 7dr2_7dold_§ | 0.01643859 | 0.08859284 | 3.30E-05 | 0.0051875 | 0.10435   |
| 7dr2_7dold_§ | 0.0311756  | 0.17751732 | 4.16E-05 | 0.0040771 | -0.10299  |
| 7dr2_7dold_§ | 0.02452083 | 0.13736181 | 3.64E-05 | 0.0042065 | -0.080664 |
| 7dr2_7dold_§ | 0.01457497 | 0.07734758 | 3.26E-05 | 0.0055188 | 0.18676   |
| 7dr2_7dold_§ | 0.01403741 | 0.07410386 | 3.25E-05 | 0.0056405 | 0.20898   |
| 7dr2_7dold_§ | 0.02533659 | 0.14228421 | 3.72E-05 | 0.0041509 | -0.092011 |
| 7dr2_7dold_§ | 0.01491499 | 0.07939929 | 3.27E-05 | 0.0054028 | 0.16515   |
| 7dr2_7dold_§ | 0.01967646 | 0.1081304  | 3.40E-05 | 0.0046667 | 0.017998  |
| 7dr2_7dold_§ | 0.01688251 | 0.09127148 | 3.31E-05 | 0.0050879 | 0.10435   |
| 7dr2_7dold_§ | 0.0094684  | 0.04653406 | 3.20E-05 | 0.0068348 | 0.4058    |
| 7dr2_7dold_§ | 0.01970256 | 0.10828793 | 3.40E-05 | 0.0046667 | 0.017998  |
| 7dr2_7dold_§ | 0.01568777 | 0.08406228 | 3.28E-05 | 0.0052924 | 0.1442    |
| 7dr2_7dold_§ | 0.01296759 | 0.06764851 | 3.23E-05 | 0.0059016 | 0.25518   |
| 7dr2_7dold_§ | 0.01015715 | 0.05069002 | 3.20E-05 | 0.0066628 | 0.37961   |
| 7dr2_7dold_§ | 0.02059566 | 0.11367699 | 3.44E-05 | 0.0045325 | -0.01065  |
| 7dr2_7dold_§ | 0.02512344 | 0.14099804 | 3.68E-05 | 0.0041768 | -0.086782 |
| 7dr2_7dold_§ | 0.00738616 | 0.03396962 | 3.19E-05 | 0.0075925 | 0.51404   |
| 7dr2_7dold_§ | 0.02310207 | 0.12880087 | 3.58E-05 | 0.0042778 | -0.065623 |
| 7dr2_7dold_§ | 0.02385237 | 0.13332827 | 3.61E-05 | 0.0042401 | -0.073623 |
| 7dr2_7dold_§ | 0.01702385 | 0.09212435 | 3.33E-05 | 0.0049935 | 0.085504  |
| 7dr2_7dold_§ | 0.02873457 | 0.16278793 | 3.97E-05 | 0.0040686 | -0.10664  |
| 7dr2_7dold_§ | 0.01790262 | 0.09742691 | 3.34E-05 | 0.0049043 | 0.067421  |
| 7dr2_7dold_§ | 0.02575789 | 0.14482637 | 3.72E-05 | 0.0041509 | -0.092011 |
| 7dr2_7dold_§ | 0.01436886 | 0.07610386 | 3.26E-05 | 0.0055188 | 0.18676   |
| 7dr2_7dold_§ | 0.06136822 | 0.35970232 | 6.07E-05 | 0.0090475 | 0.082025  |
| 7dr2_7dold_§ | 0.00776816 | 0.03627467 | 3.19E-05 | 0.0073923 | 0.48652   |
| 7dr2_7dold_§ | 0.00975508 | 0.04826391 | 3.20E-05 | 0.0068348 | 0.4058    |
| 7dr2_7dold_§ | 0.00638028 | 0.02790007 | 3.18E-05 | 0.008015  | 0.56984   |

|              |            |            |          |           |           |
|--------------|------------|------------|----------|-----------|-----------|
| 7dr2_7dold_9 | 0.02861632 | 0.16207434 | 3.93E-05 | 0.004074  | -0.10664  |
| 7dr2_7dold_9 | 0.0200165  | 0.11018226 | 3.42E-05 | 0.0045972 | 0.0032259 |
| 7dr2_7dold_9 | 0.03369212 | 0.19270223 | 4.43E-05 | 0.004153  | -0.087207 |
| 7dr2_7dold_9 | 0.03078028 | 0.1751319  | 4.11E-05 | 0.0040705 | -0.10299  |
| 7dr2_7dold_9 | 0.00554559 | 0.02286345 | 3.18E-05 | 0.0082375 | 0.59807   |
| 7dr2_7dold_9 | 0.02060922 | 0.11375881 | 3.44E-05 | 0.0045325 | -0.01065  |
| 7dr2_7dold_9 | 0.0299498  | 0.17012072 | 4.07E-05 | 0.0040668 | -0.10597  |
| 7dr2_7dold_9 | 0.00697211 | 0.03147123 | 3.18E-05 | 0.0078    | 0.54183   |
| 7dr2_7dold_9 | 0.0165551  | 0.08929585 | 3.31E-05 | 0.0050879 | 0.10435   |
| 7dr2_7dold_9 | 0.09305102 | 0.5508792  | 6.47E-05 | 0.022469  | 0.010343  |
| 7dr2_7dold_9 | 0.01551529 | 0.08302153 | 3.28E-05 | 0.0052924 | 0.1442    |
| 7dr2_7dold_9 | 0.02150741 | 0.11917855 | 3.49E-05 | 0.0044169 | -0.0356   |
| 7dr2_7dold_9 | 0.01545001 | 0.08262765 | 3.28E-05 | 0.0052924 | 0.1442    |
| 7dr2_7dold_9 | 0.04677486 | 0.2716447  | 5.57E-05 | 0.0054037 | 0.028707  |
| 7dr2_7dold_9 | 0.00893385 | 0.04330854 | 3.19E-05 | 0.0070136 | 0.43237   |
| 7dr2_7dold_9 | 0.02136725 | 0.1183328  | 3.47E-05 | 0.0044724 | -0.023601 |
| 7dr2_7dold_9 | 0.01962347 | 0.10781066 | 3.40E-05 | 0.0046667 | 0.017998  |
| 7dr2_7dold_9 | 0.0153329  | 0.081921   | 3.27E-05 | 0.0054028 | 0.1442    |
| 7dr2_7dold_9 | 0.02467849 | 0.13831316 | 3.64E-05 | 0.0042065 | -0.080664 |
| 7dr2_7dold_9 | 0.0169444  | 0.09164494 | 3.31E-05 | 0.0050879 | 0.10435   |
| 7dr2_7dold_9 | 0.02559525 | 0.14384498 | 3.72E-05 | 0.0041509 | -0.092011 |
| 7dr2_7dold_9 | 0.01500858 | 0.07996398 | 3.27E-05 | 0.0054028 | 0.16515   |
| 7dr2_7dold_9 | 0.02644034 | 0.1489443  | 3.80E-05 | 0.0041099 | -0.099939 |
| 7dr2_7dold_9 | 0.01461057 | 0.07756238 | 3.26E-05 | 0.0055188 | 0.18676   |
| 7dr2_7dold_9 | 0.00566035 | 0.02355596 | 3.18E-05 | 0.0082375 | 0.59807   |
| 7dr2_7dold_9 | 0.01417758 | 0.07494968 | 3.25E-05 | 0.0056405 | 0.20898   |
| 7dr2_7dold_9 | 0.01670484 | 0.09019937 | 3.31E-05 | 0.0050879 | 0.10435   |
| 7dr2_7dold_9 | 0.06962266 | 0.40951037 | 6.17E-05 | 0.01192   | 0.11455   |
| 7dr2_7dold_9 | 0.00911893 | 0.04442531 | 3.19E-05 | 0.0070136 | 0.43237   |
| 7dr2_7dold_9 | 0.0166567  | 0.08990894 | 3.31E-05 | 0.0050879 | 0.10435   |
| 7dr2_7dold_9 | 0.01920251 | 0.10527057 | 3.38E-05 | 0.004741  | 0.017998  |
| 7dr2_7dold_9 | 0.01292515 | 0.06739241 | 3.23E-05 | 0.0059016 | 0.25518   |
| 7dr2_7dold_9 | 0.01778897 | 0.09674113 | 3.34E-05 | 0.0049043 | 0.067421  |
| 7dr2_7dold_9 | 0.01570436 | 0.0841624  | 3.28E-05 | 0.0052924 | 0.1442    |
| 7dr2_7dold_9 | 0.01880702 | 0.10288415 | 3.38E-05 | 0.004741  | 0.03364   |
| 7dr2_7dold_9 | 0.02567036 | 0.14429815 | 3.72E-05 | 0.0041509 | -0.092011 |
| 7dr2_7dold_9 | 0.02601274 | 0.14636414 | 3.76E-05 | 0.0041286 | -0.096385 |
| 7dr2_7dold_9 | 0.02101983 | 0.11623646 | 3.47E-05 | 0.0044724 | -0.023601 |
| 7dr2_7dold_9 | 0.02322716 | 0.1295557  | 3.58E-05 | 0.0042778 | -0.065623 |
| 7dr2_7dold_9 | 0.0107991  | 0.05456364 | 3.21E-05 | 0.0064976 | 0.35381   |
| 7dr2_7dold_9 | 0.01746826 | 0.09480594 | 3.33E-05 | 0.0049935 | 0.085504  |
| 7dr2_7dold_9 | 0.01651005 | 0.08902402 | 3.31E-05 | 0.0050879 | 0.10435   |
| 7dr2_7dold_9 | 0.01321072 | 0.06911558 | 3.24E-05 | 0.0057681 | 0.23179   |

|              |            |            |          |           |           |
|--------------|------------|------------|----------|-----------|-----------|
| 7dr2_7dold_9 | 0.01255164 | 0.06513859 | 3.23E-05 | 0.0060411 | 0.25518   |
| 7dr2_7dold_9 | 0.01922167 | 0.1053862  | 3.40E-05 | 0.0046667 | 0.017998  |
| 7dr2_7dold_9 | 0.01968119 | 0.10815897 | 3.40E-05 | 0.0046667 | 0.017998  |
| 7dr2_7dold_9 | 0.02049207 | 0.1130519  | 3.44E-05 | 0.0045325 | -0.01065  |
| 7dr2_7dold_9 | 0.02578477 | 0.14498854 | 3.72E-05 | 0.0041509 | -0.092011 |
| 7dr2_7dold_9 | 0.03184225 | 0.18153992 | 4.22E-05 | 0.0040866 | -0.10071  |
| 7dr2_7dold_9 | 0.0235345  | 0.13141018 | 3.58E-05 | 0.0042778 | -0.065623 |
| 7dr2_7dold_9 | 0.01883573 | 0.10305738 | 3.38E-05 | 0.004741  | 0.03364   |
| 7dr2_7dold_9 | 0.01513942 | 0.08075351 | 3.27E-05 | 0.0054028 | 0.16515   |
| 7dr2_7dold_9 | 0.01309022 | 0.06838845 | 3.23E-05 | 0.0059016 | 0.23179   |
| 7dr2_7dold_9 | 0.01312011 | 0.06856878 | 3.24E-05 | 0.0057681 | 0.23179   |
| 7dr2_7dold_9 | 0.01957062 | 0.10749175 | 3.40E-05 | 0.0046667 | 0.017998  |
| 7dr2_7dold_9 | 0.014679   | 0.07797533 | 3.26E-05 | 0.0055188 | 0.18676   |
| 7dr2_7dold_9 | 0.02105162 | 0.11642827 | 3.47E-05 | 0.0044724 | -0.023601 |
| 7dr2_7dold_9 | 0.0197844  | 0.10878173 | 3.42E-05 | 0.0045972 | 0.0032259 |
| 7dr2_7dold_9 | 0.02063617 | 0.1139214  | 3.44E-05 | 0.0045325 | -0.01065  |
| 7dr2_7dold_9 | 0.02590557 | 0.14571746 | 3.76E-05 | 0.0041286 | -0.096385 |
| 7dr2_7dold_9 | 0.0186559  | 0.10197226 | 3.36E-05 | 0.0048202 | 0.03364   |
| 7dr2_7dold_9 | 0.01724054 | 0.09343185 | 3.33E-05 | 0.0049935 | 0.085504  |
| 7dr2_7dold_9 | 0.01238508 | 0.06413355 | 3.23E-05 | 0.0060411 | 0.2791    |
| 7dr2_7dold_9 | 0.0643888  | 0.37792885 | 6.10E-05 | 0.010005  | 0.091185  |
| 7dr2_7dold_9 | 0.01781321 | 0.0968874  | 3.34E-05 | 0.0049043 | 0.067421  |
| 7dr2_7dold_9 | 0.0094515  | 0.04643205 | 3.20E-05 | 0.0068348 | 0.4058    |
| 7dr2_7dold_9 | 0.00619389 | 0.02677537 | 3.18E-05 | 0.008015  | 0.56984   |
| 7dr2_7dold_9 | 0.01828606 | 0.09974062 | 3.36E-05 | 0.0048202 | 0.050123  |
| 7dr2_7dold_9 | 0.02129933 | 0.117923   | 3.47E-05 | 0.0044724 | -0.023601 |
| 7dr2_7dold_9 | 0.01957888 | 0.10754161 | 3.40E-05 | 0.0046667 | 0.017998  |
| 7dr2_7dold_9 | 0.01009058 | 0.05028833 | 3.20E-05 | 0.0066628 | 0.37961   |
| 7dr2_7dold_9 | 0.02799214 | 0.158308   | 3.88E-05 | 0.0040827 | -0.10472  |
| 7dr2_7dold_9 | 0.01994097 | 0.10972648 | 3.42E-05 | 0.0045972 | 0.0032259 |
| 7dr2_7dold_9 | 0.02083845 | 0.11514197 | 3.44E-05 | 0.0045325 | -0.023601 |
| 7dr2_7dold_9 | 0.02931977 | 0.16631907 | 4.02E-05 | 0.0040662 | -0.10661  |
| 7dr2_7dold_9 | 0.00597997 | 0.02548453 | 3.18E-05 | 0.008015  | 0.56984   |
| 7dr2_7dold_9 | 0.01893138 | 0.10363454 | 3.38E-05 | 0.004741  | 0.03364   |
| 7dr2_7dold_9 | 0.02977528 | 0.16906768 | 4.07E-05 | 0.0040668 | -0.10597  |
| 7dr2_7dold_9 | 0.01979764 | 0.10886163 | 3.42E-05 | 0.0045972 | 0.0032259 |
| 7dr2_7dold_9 | 0.03606952 | 0.20704766 | 4.65E-05 | 0.0042637 | -0.068307 |
| 7dr2_7dold_9 | 0.0166832  | 0.09006882 | 3.31E-05 | 0.0050879 | 0.10435   |
| 7dr2_7dold_9 | 0.01864963 | 0.10193445 | 3.36E-05 | 0.0048202 | 0.03364   |
| 7dr2_7dold_9 | 0.01320338 | 0.06907128 | 3.24E-05 | 0.0057681 | 0.23179   |
| 7dr2_7dold_9 | 0.02221014 | 0.12341889 | 3.52E-05 | 0.0043661 | -0.046619 |
| 7dr2_7dold_9 | 0.02142884 | 0.11870445 | 3.47E-05 | 0.0044724 | -0.0356   |
| 7dr2_7dold_9 | 0.00907638 | 0.04416856 | 3.19E-05 | 0.0070136 | 0.43237   |

|              |            |            |          |           |           |
|--------------|------------|------------|----------|-----------|-----------|
| 7dr2_7dold_9 | 0.02294819 | 0.12787233 | 3.55E-05 | 0.0043197 | -0.056631 |
| 7dr2_7dold_9 | 0.01556031 | 0.08329319 | 3.28E-05 | 0.0052924 | 0.1442    |
| 7dr2_7dold_9 | 0.01679863 | 0.09076535 | 3.31E-05 | 0.0050879 | 0.10435   |
| 7dr2_7dold_9 | 0.02451086 | 0.13730164 | 3.64E-05 | 0.0042065 | -0.080664 |
| 7dr2_7dold_9 | 0.01288732 | 0.06716415 | 3.23E-05 | 0.0059016 | 0.25518   |
| 7dr2_7dold_9 | 0.00843752 | 0.0403136  | 3.19E-05 | 0.0071994 | 0.45929   |
| 7dr2_7dold_9 | 0.00345019 | 0.01021961 | 3.18E-05 | 0.0092049 | 0.71249   |
| 7dr2_7dold_9 | 0.14636323 | 0.87257    | 6.76E-05 | 0.023659  | -0.51583  |
| 7dr2_7dold_9 | 0.01914603 | 0.10492975 | 3.38E-05 | 0.004741  | 0.03364   |
| 7dr2_7dold_9 | 0.0258601  | 0.14544305 | 3.72E-05 | 0.0041509 | -0.096385 |
| 7dr2_7dold_9 | 0.02721255 | 0.15360387 | 3.84E-05 | 0.0040947 | -0.10271  |
| 7dr2_7dold_9 | 0.01868245 | 0.10213246 | 3.38E-05 | 0.004741  | 0.03364   |
| 7dr2_7dold_9 | 0.00671116 | 0.02989663 | 3.18E-05 | 0.0078    | 0.54183   |
| 7dr2_7dold_9 | 0.02146956 | 0.11895017 | 3.49E-05 | 0.0044169 | -0.0356   |
| 7dr2_7dold_9 | 0.01313031 | 0.06863035 | 3.24E-05 | 0.0057681 | 0.23179   |
| 7dr2_7dold_9 | 0.02007607 | 0.11054172 | 3.42E-05 | 0.0045972 | 0.0032259 |
| 7dr2_7dold_9 | 0.02249953 | 0.1251651  | 3.52E-05 | 0.0043661 | -0.056631 |
| 7dr2_7dold_9 | 0.01222953 | 0.06319498 | 3.23E-05 | 0.0060411 | 0.2791    |
| 7dr2_7dold_9 | 0.01398544 | 0.0737903  | 3.25E-05 | 0.0056405 | 0.20898   |
| 7dr2_7dold_9 | 0.00764936 | 0.03555779 | 3.19E-05 | 0.0073923 | 0.48652   |
| 7dr2_7dold_9 | 0.02699015 | 0.1522619  | 3.84E-05 | 0.0040947 | -0.10271  |
| 7dr2_7dold_9 | 0.0102721  | 0.05138366 | 3.20E-05 | 0.0066628 | 0.37961   |
| 7dr2_7dold_9 | 0.02490001 | 0.13964981 | 3.68E-05 | 0.0041768 | -0.086782 |
| 7dr2_7dold_9 | 0.01472449 | 0.07824978 | 3.26E-05 | 0.0055188 | 0.18676   |
| 7dr2_7dold_9 | 0.01783424 | 0.09701432 | 3.34E-05 | 0.0049043 | 0.067421  |
| 7dr2_7dold_9 | 0.02269736 | 0.12635885 | 3.55E-05 | 0.0043197 | -0.056631 |
| 7dr2_7dold_9 | 0.02148452 | 0.11904046 | 3.49E-05 | 0.0044169 | -0.0356   |
| 7dr2_7dold_9 | 0.0033751  | 0.00976654 | 3.18E-05 | 0.0092049 | 0.71249   |
| 7dr2_7dold_9 | 0.00835739 | 0.03983013 | 3.19E-05 | 0.0071994 | 0.45929   |
| 7dr2_7dold_9 | 0.02393046 | 0.13379946 | 3.61E-05 | 0.0042401 | -0.073623 |
| 7dr2_7dold_9 | 0.01557354 | 0.08337306 | 3.28E-05 | 0.0052924 | 0.1442    |
| 7dr2_7dold_9 | 0.0211207  | 0.11684512 | 3.47E-05 | 0.0044724 | -0.023601 |
| 3d7d_SITTB7  | 0.02672671 | 0.15067226 | 3.80E-05 | 0.0041099 | -0.099939 |
| 3d7d_SITTB7  | 0.0235135  | 0.13128349 | 3.58E-05 | 0.0042778 | -0.065623 |
| 3d7d_SITTB7  | 0.01418432 | 0.07499036 | 3.25E-05 | 0.0056405 | 0.20898   |
| 3d7d_SITTB7  | 0.0200368  | 0.11030475 | 3.42E-05 | 0.0045972 | 0.0032259 |
| 3d7d_SITTB7  | 0.00670465 | 0.02985733 | 3.18E-05 | 0.0078    | 0.54183   |
| 3d7d_SITTB7  | 0.01139747 | 0.05817425 | 3.21E-05 | 0.006339  | 0.32844   |
| 3d7d_SITTB7  | 0.01881146 | 0.10291095 | 3.38E-05 | 0.004741  | 0.03364   |
| 3d7d_SITTB7  | 0.02039084 | 0.11244109 | 3.44E-05 | 0.0045325 | -0.01065  |
| 3d7d_SITTB7  | 0.01205904 | 0.06216622 | 3.23E-05 | 0.0060411 | 0.2791    |
| 3d7d_SITTB7  | 0.09132667 | 0.54047436 | 6.45E-05 | 0.021822  | 0.036126  |
| 3d7d_SITTB7  | 0.05729893 | 0.3351479  | 5.99E-05 | 0.0076952 | 0.071569  |

|             |            |            |          |           |           |
|-------------|------------|------------|----------|-----------|-----------|
| 3d7d_SITTB7 | 0.02804721 | 0.15864028 | 3.88E-05 | 0.0040827 | -0.10603  |
| 3d7d_SITTB7 | 0.00951109 | 0.04679164 | 3.20E-05 | 0.0068348 | 0.4058    |
| 3d7d_SITTB7 | 0.00455572 | 0.01689052 | 3.18E-05 | 0.0087056 | 0.65503   |
| 3d7d_SITTB7 | 0.01763472 | 0.09581041 | 3.34E-05 | 0.0049043 | 0.067421  |
| 3d7d_SITTB7 | 0.01939902 | 0.10645634 | 3.40E-05 | 0.0046667 | 0.017998  |
| 3d7d_SITTB7 | 0.08903408 | 0.52664065 | 6.42E-05 | 0.020663  | 0.067165  |
| 3d7d_SITTB7 | 0.02591616 | 0.14578134 | 3.76E-05 | 0.0041286 | -0.096385 |
| 3d7d_SITTB7 | 0.04306983 | 0.24928817 | 5.33E-05 | 0.0049301 | 0.0036923 |
| 3d7d_SITTB7 | 0.01585789 | 0.0850888  | 3.28E-05 | 0.0052924 | 0.12392   |
| 3d7d_SITTB7 | 0.01833691 | 0.10004745 | 3.36E-05 | 0.0048202 | 0.050123  |
| 3d7d_SITTB7 | 0.01225783 | 0.06336571 | 3.23E-05 | 0.0060411 | 0.2791    |
| 3d7d_SITTB7 | 0.00406948 | 0.01395646 | 3.18E-05 | 0.0089513 | 0.68371   |
| 3d7d_SITTB7 | 0.03784086 | 0.21773611 | 4.81E-05 | 0.0043756 | -0.05192  |
| 3d7d_SITTB7 | 0.02919599 | 0.16557218 | 4.02E-05 | 0.0040662 | -0.10661  |
| 3d7d_SITTB7 | 0.01491975 | 0.07942797 | 3.27E-05 | 0.0054028 | 0.16515   |
| 3d7d_SITTB7 | 0.02719696 | 0.15350984 | 3.84E-05 | 0.0040947 | -0.10271  |
| 3d7d_SITTB7 | 0.01241087 | 0.0642892  | 3.23E-05 | 0.0060411 | 0.2791    |
| 3d7d_SITTB7 | 0.01567188 | 0.08396643 | 3.28E-05 | 0.0052924 | 0.1442    |
| 3d7d_SITTB7 | 0.02306608 | 0.12858368 | 3.55E-05 | 0.0043197 | -0.065623 |
| 3d7d_SITTB7 | 0.0199059  | 0.10951487 | 3.42E-05 | 0.0045972 | 0.0032259 |
| 3d7d_SITTB7 | 0.01366606 | 0.07186309 | 3.24E-05 | 0.0057681 | 0.20898   |
| 3d7d_SITTB7 | 0.02633952 | 0.14833596 | 3.76E-05 | 0.0041286 | -0.096385 |
| 3d7d_SITTB7 | 0.01992663 | 0.10963998 | 3.42E-05 | 0.0045972 | 0.0032259 |
| 3d7d_SITTB7 | 0.01985556 | 0.10921115 | 3.42E-05 | 0.0045972 | 0.0032259 |
| 3d7d_SITTB7 | 0.02092706 | 0.11567665 | 3.47E-05 | 0.0044724 | -0.023601 |
| 3d7d_SITTB7 | 0.00474589 | 0.01803803 | 3.18E-05 | 0.0087056 | 0.65503   |
| 3d7d_SITTB7 | 0.01646274 | 0.08873855 | 3.31E-05 | 0.0050879 | 0.10435   |
| 3d7d_SITTB7 | 0.12107954 | 0.7200059  | 6.66E-05 | 0.02449   | -0.37656  |
| 3d7d_SITTB7 | 0.01994594 | 0.10975649 | 3.42E-05 | 0.0045972 | 0.0032259 |
| 3d7d_SITTB7 | 0.00821105 | 0.03894709 | 3.19E-05 | 0.0071994 | 0.45929   |
| 3d7d_SITTB7 | 0.00872998 | 0.04207838 | 3.19E-05 | 0.0070136 | 0.43237   |
| 3d7d_SITTB7 | 0.03121039 | 0.17772724 | 4.16E-05 | 0.0040771 | -0.10299  |
| 3d7d_SITTB7 | 0.02112014 | 0.1168417  | 3.47E-05 | 0.0044724 | -0.023601 |
| 3d7d_SITTB7 | 0.01107983 | 0.05625759 | 3.21E-05 | 0.006339  | 0.32844   |
| 3d7d_SITTB7 | 0.01671747 | 0.09027559 | 3.31E-05 | 0.0050879 | 0.10435   |
| 3d7d_SITTB7 | 0.00889211 | 0.04305664 | 3.19E-05 | 0.0070136 | 0.43237   |
| 3d7d_SITTB7 | 0.01211957 | 0.06253146 | 3.23E-05 | 0.0060411 | 0.2791    |
| 3d7d_SITTB7 | 0.06699664 | 0.39366475 | 6.14E-05 | 0.011039  | 0.10251   |
| 3d7d_SITTB7 | 0.00963332 | 0.04752921 | 3.20E-05 | 0.0068348 | 0.4058    |
| 3d7d_SITTB7 | 0.09591116 | 0.5681376  | 6.50E-05 | 0.023448  | -0.035993 |
| 3d7d_SITTB7 | 0.01767434 | 0.09604944 | 3.34E-05 | 0.0049043 | 0.067421  |
| 3d7d_SITTB7 | 0.02624322 | 0.14775488 | 3.76E-05 | 0.0041286 | -0.096385 |
| 3d7d_SITTB7 | 0.0135906  | 0.07140777 | 3.24E-05 | 0.0057681 | 0.23179   |

|             |            |            |          |           |           |
|-------------|------------|------------|----------|-----------|-----------|
| 3d7d_SITTB7 | 0.05493133 | 0.32086158 | 5.94E-05 | 0.0071062 | 0.064127  |
| 3d7d_SITTB7 | 0.01938541 | 0.10637418 | 3.40E-05 | 0.0046667 | 0.017998  |
| 3d7d_SITTB7 | 0.12444805 | 0.74033177 | 6.67E-05 | 0.024092  | -0.40152  |
| 2w4w_SITTC4 | 0.01763498 | 0.09581196 | 3.34E-05 | 0.0049043 | 0.067421  |
| 2w4w_SITTC4 | 0.01760042 | 0.0956034  | 3.34E-05 | 0.0049043 | 0.067421  |
| 2w4w_SITTC4 | 0.04093628 | 0.23641418 | 5.14E-05 | 0.0046741 | -0.017493 |
| 2w4w_SITTC4 | 0.09910073 | 0.58738375 | 6.53E-05 | 0.02442   | -0.094455 |
| 2w4w_SITTC4 | 0.01490285 | 0.079326   | 3.27E-05 | 0.0054028 | 0.16515   |
| 2w4w_SITTC4 | 0.14279728 | 0.8510527  | 6.74E-05 | 0.023593  | -0.50412  |
| 2w4w_SITTC4 | 0.01812474 | 0.09876722 | 3.36E-05 | 0.0048202 | 0.050123  |
| 2w4w_SITTC4 | 0.09240261 | 0.5469667  | 6.46E-05 | 0.022258  | 0.019141  |
| 2w4w_SITTC4 | 0.09497488 | 0.56248796 | 6.49E-05 | 0.023073  | -0.026471 |
| 2w4w_SITTC4 | 0.01691846 | 0.09148841 | 3.31E-05 | 0.0050879 | 0.10435   |
| 2w4w_SITTC4 | 0.09677056 | 0.5733233  | 6.50E-05 | 0.023626  | -0.055297 |
| 2w4w_SITTC4 | 0.0154656  | 0.08272171 | 3.28E-05 | 0.0052924 | 0.1442    |
| 2w4w_SITTC4 | 0.02128444 | 0.1178331  | 3.47E-05 | 0.0044724 | -0.023601 |
| 2w4w_SITTC4 | 0.03478771 | 0.19931309 | 4.54E-05 | 0.0042028 | -0.078293 |
| 2w4w_SITTC4 | 0.09291472 | 0.5500568  | 6.46E-05 | 0.022258  | 0.010343  |
| 2w4w_SITTC4 | 0.0320006  | 0.18249542 | 4.27E-05 | 0.004099  | -0.097962 |
| 2w4w_SITTC4 | 0.02504201 | 0.14050665 | 3.68E-05 | 0.0041768 | -0.086782 |
| 2w4w_SITTC4 | 0.02365439 | 0.13213362 | 3.61E-05 | 0.0042401 | -0.073623 |
| 2w4w_SITTC4 | 0.15278168 | 0.9112995  | 6.77E-05 | 0.023709  | -0.52541  |
| 2w4w_SITTC4 | 0.02352229 | 0.1313365  | 3.58E-05 | 0.0042778 | -0.065623 |
| 2w4w_SITTC4 | 0.01299794 | 0.06783164 | 3.23E-05 | 0.0059016 | 0.25518   |
| 2w4w_SITTC4 | 0.03007705 | 0.17088854 | 4.07E-05 | 0.0040668 | -0.10597  |
| 2w4w_SITTC4 | 0.09315362 | 0.5514983  | 6.47E-05 | 0.022469  | 0.010343  |
| 2w4w_SITTC4 | 0.01330114 | 0.06966116 | 3.24E-05 | 0.0057681 | 0.23179   |
| 2w4w_SITTC4 | 0.06011128 | 0.35211787 | 6.04E-05 | 0.0085136 | 0.07887   |
| 2w4w_SITTC4 | 0.03984373 | 0.22982161 | 5.03E-05 | 0.0045634 | -0.028892 |
| 2w4w_SITTC4 | 0.01578396 | 0.0846427  | 3.28E-05 | 0.0052924 | 0.1442    |
| 2w4w_SITTC4 | 0.04723087 | 0.27439627 | 5.61E-05 | 0.0054936 | 0.032113  |
| 2w4w_SITTC4 | 0.0129542  | 0.06756771 | 3.23E-05 | 0.0059016 | 0.25518   |
| 2w4w_SITTC4 | 0.10030153 | 0.5946295  | 6.53E-05 | 0.024687  | -0.11403  |
| 2w4w_SITTC4 | 0.01628853 | 0.08768737 | 3.30E-05 | 0.0051875 | 0.12392   |
| 2w4w_SITTC4 | 0.0833237  | 0.49218374 | 6.36E-05 | 0.018151  | 0.12117   |
| 2w4w_SITTC4 | 0.06552714 | 0.38479763 | 6.12E-05 | 0.01041   | 0.095509  |
| 2w4w_SITTC4 | 0.09118983 | 0.53964865 | 6.45E-05 | 0.021597  | 0.036126  |
| 2w4w_SITTC4 | 0.02055948 | 0.11345865 | 3.44E-05 | 0.0045325 | -0.01065  |
| 2w4w_SITTC4 | 0.05118197 | 0.29823756 | 5.81E-05 | 0.006215  | 0.051138  |
| 2w4w_SITTC4 | 0.01646441 | 0.08874859 | 3.31E-05 | 0.0050879 | 0.10435   |
| 2w4w_SITTC4 | 0.10516285 | 0.6239631  | 6.57E-05 | 0.025482  | -0.19772  |
| 2w4w_SITTC4 | 0.02294415 | 0.12784795 | 3.55E-05 | 0.0043197 | -0.056631 |
| 2w4w_SITTC4 | 0.10844538 | 0.6437702  | 6.59E-05 | 0.025614  | -0.24573  |



|                         |            |            |          |           |           |
|-------------------------|------------|------------|----------|-----------|-----------|
| 2w4w_SITTC <sup>z</sup> | 0.01679036 | 0.0907154  | 3.31E-05 | 0.0050879 | 0.10435   |
| 2w4w_SITTC <sup>z</sup> | 0.02392385 | 0.13375959 | 3.61E-05 | 0.0042401 | -0.073623 |
| 2w4w_SITTC <sup>z</sup> | 0.04683374 | 0.27199996 | 5.57E-05 | 0.0054037 | 0.032113  |
| 2w4w_SITTC <sup>z</sup> | 0.06697223 | 0.39351743 | 6.14E-05 | 0.011039  | 0.10251   |
| 2w4w_SITTC <sup>z</sup> | 0.02293184 | 0.12777373 | 3.55E-05 | 0.0043197 | -0.056631 |
| 2w4w_SITTC <sup>z</sup> | 0.04829412 | 0.280812   | 5.67E-05 | 0.0056831 | 0.038361  |
| 2w4w_SITTC <sup>z</sup> | 0.02724643 | 0.15380833 | 3.84E-05 | 0.0040947 | -0.10271  |
| 2w4w_SITTC <sup>z</sup> | 0.017022   | 0.09211319 | 3.33E-05 | 0.0049935 | 0.085504  |
| 2w4w_SITTC <sup>z</sup> | 0.05855005 | 0.34269723 | 6.01E-05 | 0.0080116 | 0.074438  |
| 2w4w_SITTC <sup>z</sup> | 0.02448506 | 0.13714597 | 3.64E-05 | 0.0042065 | -0.080664 |
| 2w4w_SITTC <sup>z</sup> | 0.08646038 | 0.51111107 | 6.40E-05 | 0.019681  | 0.099025  |
| 2w4w_SITTC <sup>z</sup> | 0.02675025 | 0.15081432 | 3.80E-05 | 0.0041099 | -0.099939 |
| 2w4w_SITTC <sup>z</sup> | 0.1264636  | 0.75249386 | 6.68E-05 | 0.023879  | -0.41707  |
| 2w4w_SITTC <sup>z</sup> | 0.01053596 | 0.05297583 | 3.21E-05 | 0.0064976 | 0.35381   |
| 2w4w_SITTC <sup>z</sup> | 0.07004799 | 0.41207686 | 6.18E-05 | 0.012147  | 0.11689   |
| 2w4w_SITTC <sup>z</sup> | 0.09586716 | 0.56787205 | 6.50E-05 | 0.023448  | -0.035993 |
| 2w4w_SITTC <sup>z</sup> | 0.0195712  | 0.10749526 | 3.40E-05 | 0.0046667 | 0.017998  |
| 2w4w_SITTC <sup>z</sup> | 0.02756234 | 0.15571456 | 3.88E-05 | 0.0040827 | -0.10472  |
| 2w4w_SITTC <sup>z</sup> | 0.01968497 | 0.10818181 | 3.40E-05 | 0.0046667 | 0.017998  |
| 2w4w_SITTC <sup>z</sup> | 0.12826908 | 0.7633882  | 6.69E-05 | 0.023757  | -0.4283   |
| 2w4w_SITTC <sup>z</sup> | 0.11209155 | 0.66577154 | 6.61E-05 | 0.025489  | -0.29336  |
| 2w4w_SITTC <sup>z</sup> | 0.0484045  | 0.28147805 | 5.67E-05 | 0.0056831 | 0.038361  |
| 2w4w_SITTC <sup>z</sup> | 0.04946952 | 0.28790453 | 5.73E-05 | 0.0058857 | 0.04392   |
| 2w4w_SITTC <sup>z</sup> | 0.08096901 | 0.4779753  | 6.33E-05 | 0.017113  | 0.13314   |
| 2w4w_SITTC <sup>z</sup> | 0.09816246 | 0.58172214 | 6.52E-05 | 0.024123  | -0.084641 |
| 2w4w_SITTC <sup>z</sup> | 0.02138406 | 0.11843427 | 3.47E-05 | 0.0044724 | -0.0356   |
| 2w4w_SITTC <sup>z</sup> | 0.08075165 | 0.47666374 | 6.33E-05 | 0.017113  | 0.13314   |
| 2w4w_SITTC <sup>z</sup> | 0.02954018 | 0.16764902 | 4.02E-05 | 0.0040662 | -0.10661  |
| 2w4w_SITTC <sup>z</sup> | 0.02114237 | 0.11697587 | 3.47E-05 | 0.0044724 | -0.023601 |
| 2w4w_SITTC <sup>z</sup> | 0.04604866 | 0.26726276 | 5.54E-05 | 0.0053171 | 0.025099  |
| 2w4w_SITTC <sup>z</sup> | 0.09968624 | 0.59091675 | 6.53E-05 | 0.024558  | -0.10426  |
| 2w4w_SITTC <sup>z</sup> | 0.08266968 | 0.48823726 | 6.35E-05 | 0.017892  | 0.1271    |
| 2w4w_SITTC <sup>z</sup> | 0.09243641 | 0.54717064 | 6.46E-05 | 0.022258  | 0.019141  |
| 2w4w_SITTC <sup>z</sup> | 0.13397591 | 0.7978238  | 6.71E-05 | 0.023539  | -0.46255  |
| 2w4w_SITTC <sup>z</sup> | 0.01898782 | 0.1039751  | 3.38E-05 | 0.004741  | 0.03364   |
| 2w4w_SITTC <sup>z</sup> | 0.03066932 | 0.17446235 | 4.11E-05 | 0.0040705 | -0.10475  |
| 2w4w_SITTC <sup>z</sup> | 0.01613046 | 0.08673354 | 3.30E-05 | 0.0051875 | 0.12392   |
| 2w4w_SITTC <sup>z</sup> | 0.0387599  | 0.22328168 | 4.92E-05 | 0.0044639 | -0.040459 |
| 2w4w_SITTC <sup>z</sup> | 0.06317387 | 0.3705978  | 6.09E-05 | 0.0096122 | 0.087254  |
| 2w4w_SITTC <sup>z</sup> | 0.03110337 | 0.17708144 | 4.16E-05 | 0.0040771 | -0.10299  |
| 2w4w_SITTC <sup>z</sup> | 0.01577136 | 0.08456671 | 3.28E-05 | 0.0052924 | 0.1442    |
| 2w4w_SITTC <sup>z</sup> | 0.02852081 | 0.16149807 | 3.93E-05 | 0.004074  | -0.10603  |
| 2w4w_SITTC <sup>z</sup> | 0.0294882  | 0.16733538 | 4.02E-05 | 0.0040662 | -0.10661  |

|                         |            |            |          |           |           |
|-------------------------|------------|------------|----------|-----------|-----------|
| 2w4w_SITTC <sup>z</sup> | 0.07136913 | 0.4200487  | 6.20E-05 | 0.012843  | 0.12136   |
| 2w4w_SITTC <sup>z</sup> | 0.09333517 | 0.5525938  | 6.47E-05 | 0.022469  | 0.0013661 |
| 2w4w_SITTC <sup>z</sup> | 0.01506997 | 0.08033443 | 3.27E-05 | 0.0054028 | 0.16515   |
| 2w4w_SITTC <sup>z</sup> | 0.02029982 | 0.11189186 | 3.42E-05 | 0.0045972 | -0.01065  |
| 2w4w_SITTC <sup>z</sup> | 0.08275412 | 0.48874682 | 6.35E-05 | 0.017892  | 0.12434   |
| 2w4w_SITTC <sup>z</sup> | 0.01972842 | 0.10844394 | 3.40E-05 | 0.0046667 | 0.0032259 |
| 2w4w_SITTC <sup>z</sup> | 0.02394079 | 0.13386177 | 3.61E-05 | 0.0042401 | -0.073623 |
| 2w4w_SITTC <sup>z</sup> | 0.03774667 | 0.21716774 | 4.81E-05 | 0.0043756 | -0.05192  |
| 2w4w_SITTC <sup>z</sup> | 0.02463905 | 0.13807516 | 3.64E-05 | 0.0042065 | -0.080664 |
| 2w4w_SITTC <sup>z</sup> | 0.12121878 | 0.72084606 | 6.66E-05 | 0.024419  | -0.37656  |
| 2w4w_SITTC <sup>z</sup> | 0.03670966 | 0.21091034 | 4.70E-05 | 0.0042982 | -0.062998 |
| 2w4w_SITTC <sup>z</sup> | 0.09863157 | 0.58455276 | 6.52E-05 | 0.024275  | -0.084641 |
| 2w4w_SITTC <sup>z</sup> | 0.02378795 | 0.13293952 | 3.61E-05 | 0.0042401 | -0.073623 |
| 2w4w_SITTC <sup>z</sup> | 0.02193562 | 0.12176243 | 3.49E-05 | 0.0044169 | -0.046619 |
| 2w4w_SITTC <sup>z</sup> | 0.04033148 | 0.23276475 | 5.09E-05 | 0.0046173 | -0.023154 |
| 2w4w_SITTC <sup>z</sup> | 0.11442563 | 0.6798556  | 6.63E-05 | 0.025299  | -0.3171   |
| 2w4w_SITTC <sup>z</sup> | 0.04226137 | 0.24440984 | 5.24E-05 | 0.0047963 | -0.00654  |
| 2w4w_SITTC <sup>z</sup> | 0.0562534  | 0.32883906 | 5.97E-05 | 0.0073934 | 0.068678  |
| 2w4w_SITTC <sup>z</sup> | 0.0138902  | 0.07321557 | 3.25E-05 | 0.0056405 | 0.20898   |
| 2w4w_SITTC <sup>z</sup> | 0.05748145 | 0.3362492  | 6.00E-05 | 0.0078516 | 0.071569  |
| 2w4w_SITTC <sup>z</sup> | 0.01859295 | 0.10159246 | 3.36E-05 | 0.0048202 | 0.050123  |
| 2w4w_SITTC <sup>z</sup> | 0.06023791 | 0.35288194 | 6.05E-05 | 0.008688  | 0.07887   |
| 2w4w_SITTC <sup>z</sup> | 0.05735968 | 0.3355145  | 5.99E-05 | 0.0076952 | 0.071569  |
| 2w4w_SITTC <sup>z</sup> | 0.01266502 | 0.06582273 | 3.23E-05 | 0.0059016 | 0.25518   |
| 2w4w_SITTC <sup>z</sup> | 0.12610152 | 0.750309   | 6.68E-05 | 0.023927  | -0.41325  |
| 2w4w_SITTC <sup>z</sup> | 0.04696434 | 0.272788   | 5.61E-05 | 0.0054936 | 0.032113  |
| 2w4w_SITTC <sup>z</sup> | 0.0239347  | 0.13382505 | 3.61E-05 | 0.0042401 | -0.073623 |
| 2w4w_SITTC <sup>z</sup> | 0.03961019 | 0.22841239 | 4.98E-05 | 0.0045122 | -0.028892 |
| 2w4w_SITTC <sup>z</sup> | 0.09832983 | 0.582732   | 6.52E-05 | 0.024123  | -0.084641 |
| 2w4w_SITTC <sup>z</sup> | 0.01699873 | 0.09197275 | 3.31E-05 | 0.0050879 | 0.085504  |
| 2w4w_SITTC <sup>z</sup> | 0.0210946  | 0.11668763 | 3.47E-05 | 0.0044724 | -0.023601 |
| 2w4w_SITTC <sup>z</sup> | 0.01826281 | 0.09960032 | 3.36E-05 | 0.0048202 | 0.050123  |
| 2w4w_SITTC <sup>z</sup> | 0.02832034 | 0.16028838 | 3.93E-05 | 0.004074  | -0.10603  |
| 2w4w_SITTC <sup>z</sup> | 0.06835934 | 0.4018874  | 6.16E-05 | 0.011474  | 0.10977   |
| 2w4w_SITTC <sup>z</sup> | 0.0132419  | 0.06930371 | 3.24E-05 | 0.0057681 | 0.23179   |
| 2w4w_SITTC <sup>z</sup> | 0.01439782 | 0.07627866 | 3.26E-05 | 0.0055188 | 0.18676   |
| 2w4w_SITTC <sup>z</sup> | 0.14035642 | 0.8363244  | 6.74E-05 | 0.023558  | -0.49553  |
| 2w4w_SITTC <sup>z</sup> | 0.01473812 | 0.07833205 | 3.26E-05 | 0.0055188 | 0.18676   |
| 2w4w_SITTC <sup>z</sup> | 0.13340954 | 0.7944063  | 6.71E-05 | 0.023546  | -0.45937  |
| 2w4w_SITTC <sup>z</sup> | 0.0886082  | 0.52407086 | 6.42E-05 | 0.020663  | 0.074212  |
| 2w4w_SITTC <sup>z</sup> | 0.01261973 | 0.06554947 | 3.23E-05 | 0.0059016 | 0.25518   |
| 2w4w_SITTC <sup>z</sup> | 0.08477528 | 0.50094265 | 6.38E-05 | 0.018923  | 0.1136    |
| 2w4w_SITTC <sup>z</sup> | 0.08439402 | 0.49864215 | 6.37E-05 | 0.018667  | 0.1136    |

|                    |            |            |          |           |           |
|--------------------|------------|------------|----------|-----------|-----------|
| 2w4w_SITTC $\zeta$ | 0.09437713 | 0.5588811  | 6.48E-05 | 0.022877  | -0.017059 |
| 2w4w_SITTC $\zeta$ | 0.08043778 | 0.4747698  | 6.32E-05 | 0.016854  | 0.13446   |
| 2w4w_SITTC $\zeta$ | 0.01395103 | 0.07358264 | 3.25E-05 | 0.0056405 | 0.20898   |
| 2w4w_SITTC $\zeta$ | 0.02994748 | 0.17010674 | 4.07E-05 | 0.0040668 | -0.10597  |
| 2w4w_SITTC $\zeta$ | 0.12912208 | 0.7685353  | 6.70E-05 | 0.023692  | -0.43556  |
| 2w4w_SITTC $\zeta$ | 0.14571509 | 0.8686591  | 6.75E-05 | 0.02365   | -0.51443  |
| 2w4w_SITTC $\zeta$ | 0.07503423 | 0.4421643  | 6.25E-05 | 0.014299  | 0.13345   |
| 2w4w_SITTC $\zeta$ | 0.11228807 | 0.6669573  | 6.61E-05 | 0.025489  | -0.29336  |
| 2w4w_SITTC $\zeta$ | 0.01986585 | 0.10927324 | 3.42E-05 | 0.0045972 | 0.0032259 |
| 2w4w_SITTC $\zeta$ | 0.02726243 | 0.15390487 | 3.84E-05 | 0.0040947 | -0.10271  |
| 2w4w_SITTC $\zeta$ | 0.0308948  | 0.17582293 | 4.16E-05 | 0.0040771 | -0.10299  |
| 2w4w_SITTC $\zeta$ | 0.08023735 | 0.4735604  | 6.32E-05 | 0.016854  | 0.13446   |
| 2w4w_SITTC $\zeta$ | 0.04432179 | 0.25684264 | 5.42E-05 | 0.0050757 | 0.012967  |
| 2w4w_SITTC $\zeta$ | 0.04508535 | 0.26145002 | 5.46E-05 | 0.0051531 | 0.017239  |
| 2w4w_SITTC $\zeta$ | 0.01157498 | 0.05924533 | 3.22E-05 | 0.0061869 | 0.30353   |
| 2w4w_SITTC $\zeta$ | 0.07249983 | 0.4268715  | 6.22E-05 | 0.01332   | 0.12548   |
| 2w4w_SITTC $\zeta$ | 0.02979784 | 0.16920374 | 4.07E-05 | 0.0040668 | -0.10597  |
| 2w4w_SITTC $\zeta$ | 0.00706561 | 0.03203542 | 3.19E-05 | 0.0075925 | 0.51404   |
| 2w4w_SITTC $\zeta$ | 0.01866112 | 0.10200378 | 3.36E-05 | 0.0048202 | 0.03364   |
| 2w4w_SITTC $\zeta$ | 0.13575919 | 0.8085843  | 6.72E-05 | 0.023527  | -0.47464  |
| 2w4w_SITTC $\zeta$ | 0.09696453 | 0.5744937  | 6.51E-05 | 0.023799  | -0.055297 |
| 2w4w_SITTC $\zeta$ | 0.03541939 | 0.20312473 | 4.59E-05 | 0.0042319 | -0.073417 |
| 2w4w_SITTC $\zeta$ | 0.01445717 | 0.07663674 | 3.26E-05 | 0.0055188 | 0.18676   |
| 2w4w_SITTC $\zeta$ | 0.0216764  | 0.12019823 | 3.49E-05 | 0.0044169 | -0.0356   |
| 2w4w_SITTC $\zeta$ | 0.01840769 | 0.10047457 | 3.36E-05 | 0.0048202 | 0.050123  |
| 2w4w_SITTC $\zeta$ | 0.09469301 | 0.56078714 | 6.49E-05 | 0.023073  | -0.017059 |
| 2w4w_SITTC $\zeta$ | 0.01430075 | 0.07569287 | 3.26E-05 | 0.0055188 | 0.18676   |
| 2w4w_SITTC $\zeta$ | 0.08434577 | 0.49835095 | 6.37E-05 | 0.018667  | 0.1136    |
| 2w4w_SITTC $\zeta$ | 0.10591639 | 0.62851006 | 6.58E-05 | 0.025526  | -0.21453  |
| 2w4w_SITTC $\zeta$ | 0.00852368 | 0.04083353 | 3.19E-05 | 0.0071994 | 0.45929   |
| 2w4w_SITTC $\zeta$ | 0.01791288 | 0.09748881 | 3.34E-05 | 0.0049043 | 0.067421  |
| 2w4w_SITTC $\zeta$ | 0.10465968 | 0.6209269  | 6.57E-05 | 0.025429  | -0.18901  |
| 2w4w_SITTC $\zeta$ | 0.02340857 | 0.13065036 | 3.58E-05 | 0.0042778 | -0.065623 |
| 2w4w_SITTC $\zeta$ | 0.02282243 | 0.1271135  | 3.55E-05 | 0.0043197 | -0.056631 |
| 2w4w_SITTC $\zeta$ | 0.11609928 | 0.6899545  | 6.63E-05 | 0.025119  | -0.33347  |
| 2w4w_SITTC $\zeta$ | 0.02200413 | 0.12217582 | 3.52E-05 | 0.0043661 | -0.046619 |
| 2w4w_SITTC $\zeta$ | 0.01093308 | 0.05537205 | 3.21E-05 | 0.006339  | 0.32844   |
| 2w4w_SITTC $\zeta$ | 0.03632569 | 0.20859344 | 4.65E-05 | 0.0042637 | -0.062998 |
| 2w4w_SITTC $\zeta$ | 0.08267441 | 0.4882658  | 6.35E-05 | 0.017892  | 0.1271    |
| 2w4w_SITTC $\zeta$ | 0.09708235 | 0.5752046  | 6.51E-05 | 0.023799  | -0.065044 |
| 2w4w_SITTC $\zeta$ | 0.0691465  | 0.4066372  | 6.17E-05 | 0.01192   | 0.11218   |
| 2w4w_SITTC $\zeta$ | 0.02644216 | 0.14895532 | 3.80E-05 | 0.0041099 | -0.099939 |
| 2w4w_SITTC $\zeta$ | 0.03120012 | 0.17766523 | 4.16E-05 | 0.0040771 | -0.10299  |

|                         |            |            |          |           |            |
|-------------------------|------------|------------|----------|-----------|------------|
| 2w4w_SITTC <sup>Δ</sup> | 0.10335881 | 0.6130774  | 6.56E-05 | 0.025216  | -0.17104   |
| 2w4w_SITTC <sup>Δ</sup> | 0.01532967 | 0.08190151 | 3.27E-05 | 0.0054028 | 0.1442     |
| 2w4w_SITTC <sup>Δ</sup> | 0.09359551 | 0.55416477 | 6.48E-05 | 0.022676  | 0.0013661  |
| 2w4w_SITTC <sup>Δ</sup> | 0.04271893 | 0.24717084 | 5.29E-05 | 0.0048617 | -0.0013165 |
| 2w4w_SITTC <sup>Δ</sup> | 0.06901051 | 0.4058166  | 6.16E-05 | 0.011695  | 0.11218    |
| 2w4w_SITTC <sup>Δ</sup> | 0.08380138 | 0.49506608 | 6.37E-05 | 0.01841   | 0.1176     |
| 2w4w_SITTC <sup>Δ</sup> | 0.05005974 | 0.2914659  | 5.76E-05 | 0.005992  | 0.046466   |
| 2w4w_SITTC <sup>Δ</sup> | 0.03532855 | 0.20257658 | 4.59E-05 | 0.0042319 | -0.073417  |
| 2w4w_SITTC <sup>Δ</sup> | 0.03947729 | 0.22761048 | 4.98E-05 | 0.0045122 | -0.034672  |
| 2w4w_SITTC <sup>Δ</sup> | 0.08253345 | 0.48741528 | 6.35E-05 | 0.017892  | 0.1271     |
| 2w4w_SITTC <sup>Δ</sup> | 0.10331181 | 0.6127938  | 6.56E-05 | 0.025216  | -0.17104   |
| 2w4w_SITTC <sup>Δ</sup> | 0.014954   | 0.07963467 | 3.27E-05 | 0.0054028 | 0.16515    |
| 2w4w_SITTC <sup>Δ</sup> | 0.085769   | 0.5069388  | 6.39E-05 | 0.01943   | 0.1043     |
| 2w4w_SITTC <sup>Δ</sup> | 0.08100359 | 0.47818398 | 6.33E-05 | 0.017113  | 0.13314    |
| 2w4w_SITTC <sup>Δ</sup> | 0.06301353 | 0.3696303  | 6.09E-05 | 0.0096122 | 0.087254   |
| 2w4w_SITTC <sup>Δ</sup> | 0.02471987 | 0.13856281 | 3.64E-05 | 0.0042065 | -0.086782  |
| 2w4w_SITTC <sup>Δ</sup> | 0.08882932 | 0.5254051  | 6.42E-05 | 0.020663  | 0.067165   |
| 2w4w_SITTC <sup>Δ</sup> | 0.02385739 | 0.13335855 | 3.61E-05 | 0.0042401 | -0.073623  |
| 2w4w_SITTC <sup>Δ</sup> | 0.02556195 | 0.14364402 | 3.72E-05 | 0.0041509 | -0.092011  |
| 2w4w_SITTC <sup>Δ</sup> | 0.02442855 | 0.136805   | 3.64E-05 | 0.0042065 | -0.080664  |
| 2w4w_SITTC <sup>Δ</sup> | 0.13162456 | 0.78363556 | 6.70E-05 | 0.023599  | -0.44949   |
| 2w4w_SITTC <sup>Δ</sup> | 0.09162038 | 0.5422466  | 6.45E-05 | 0.021822  | 0.027741   |
| 2w4w_SITTC <sup>Δ</sup> | 0.01347175 | 0.07069062 | 3.24E-05 | 0.0057681 | 0.23179    |
| 2w4w_SITTC <sup>Δ</sup> | 0.07136179 | 0.42000443 | 6.20E-05 | 0.012843  | 0.12136    |
| 2w4w_SITTC <sup>Δ</sup> | 0.02005894 | 0.11043836 | 3.42E-05 | 0.0045972 | 0.0032259  |
| 2w4w_SITTC <sup>Δ</sup> | 0.03000483 | 0.17045274 | 4.07E-05 | 0.0040668 | -0.10597   |
| 2w4w_SITTC <sup>Δ</sup> | 0.09286216 | 0.5497396  | 6.46E-05 | 0.022258  | 0.010343   |
| 2w4w_SITTC <sup>Δ</sup> | 0.13875811 | 0.82668    | 6.73E-05 | 0.023538  | -0.48824   |
| 2w4w_SITTC <sup>Δ</sup> | 0.12565024 | 0.74758595 | 6.68E-05 | 0.023927  | -0.40938   |
| 2w4w_SITTC <sup>Δ</sup> | 0.02058833 | 0.1136327  | 3.44E-05 | 0.0045325 | -0.01065   |
| 2w4w_SITTC <sup>Δ</sup> | 0.04805949 | 0.27939627 | 5.67E-05 | 0.0056831 | 0.038361   |
| 2w4w_SITTC <sup>Δ</sup> | 0.0286816  | 0.1624683  | 3.97E-05 | 0.0040686 | -0.10664   |
| 2w4w_SITTC <sup>Δ</sup> | 0.08987913 | 0.5317397  | 6.44E-05 | 0.021137  | 0.05218    |
| 2w4w_SITTC <sup>Δ</sup> | 0.0507072  | 0.29537275 | 5.78E-05 | 0.0061018 | 0.051138   |
| 2w4w_SITTC <sup>Δ</sup> | 0.02128522 | 0.11783782 | 3.47E-05 | 0.0044724 | -0.023601  |
| 2w4w_SITTC <sup>Δ</sup> | 0.09272748 | 0.54892695 | 6.46E-05 | 0.022258  | 0.010343   |
| 2w4w_SITTC <sup>Δ</sup> | 0.08169627 | 0.48236367 | 6.34E-05 | 0.017373  | 0.12948    |
| 2w4w_SITTC <sup>Δ</sup> | 0.09118195 | 0.5396011  | 6.45E-05 | 0.021597  | 0.036126   |
| 2w4w_SITTC <sup>Δ</sup> | 0.01888111 | 0.10333123 | 3.38E-05 | 0.004741  | 0.03364    |
| 2w4w_SITTC <sup>Δ</sup> | 0.04939086 | 0.28742984 | 5.73E-05 | 0.0058857 | 0.04392    |
| 2w4w_SITTC <sup>Δ</sup> | 0.07463187 | 0.43973643 | 6.24E-05 | 0.014051  | 0.13218    |
| 2w4w_SITTC <sup>Δ</sup> | 0.09685739 | 0.57384723 | 6.51E-05 | 0.023799  | -0.055297  |
| 2w4w_SITTC <sup>Δ</sup> | 0.09275412 | 0.5490877  | 6.46E-05 | 0.022258  | 0.010343   |

|                    |            |            |          |           |           |
|--------------------|------------|------------|----------|-----------|-----------|
| 2w4w_SITTC $\zeta$ | 0.02241079 | 0.12462964 | 3.52E-05 | 0.0043661 | -0.046619 |
| 2w4w_SITTC $\zeta$ | 0.00894098 | 0.04335154 | 3.19E-05 | 0.0070136 | 0.43237   |
| 2w4w_SITTC $\zeta$ | 0.02894344 | 0.16404827 | 3.97E-05 | 0.0040686 | -0.10664  |
| 2w4w_SITTC $\zeta$ | 0.02795978 | 0.15811273 | 3.88E-05 | 0.0040827 | -0.10472  |
| 2w4w_SITTC $\zeta$ | 0.07874874 | 0.464578   | 6.30E-05 | 0.016077  | 0.13651   |
| 2w4w_SITTC $\zeta$ | 0.02241361 | 0.12464663 | 3.52E-05 | 0.0043661 | -0.046619 |
| 2w4w_SITTC $\zeta$ | 0.03978498 | 0.2294671  | 5.03E-05 | 0.0045634 | -0.028892 |
| 2w4w_SITTC $\zeta$ | 0.05583251 | 0.32629937 | 5.97E-05 | 0.0073934 | 0.067199  |
| 2w4w_SITTC $\zeta$ | 0.06565472 | 0.38556746 | 6.12E-05 | 0.01041   | 0.097788  |
| 2w4w_SITTC $\zeta$ | 0.04486863 | 0.2601423  | 5.46E-05 | 0.0051531 | 0.017239  |
| 2w4w_SITTC $\zeta$ | 0.02952236 | 0.16754149 | 4.02E-05 | 0.0040662 | -0.10661  |
| 2w4w_SITTC $\zeta$ | 0.05494678 | 0.32095477 | 5.94E-05 | 0.0071062 | 0.064127  |
| 2w4w_SITTC $\zeta$ | 0.0140644  | 0.07426676 | 3.25E-05 | 0.0056405 | 0.20898   |
| 2w4w_SITTC $\zeta$ | 0.0231229  | 0.12892658 | 3.58E-05 | 0.0042778 | -0.065623 |
| 2w4w_SITTC $\zeta$ | 0.01066858 | 0.05377605 | 3.21E-05 | 0.0064976 | 0.35381   |
| 2w4w_SITTC $\zeta$ | 0.0294218  | 0.16693473 | 4.02E-05 | 0.0040662 | -0.10661  |
| 2w4w_SITTC $\zeta$ | 0.0086005  | 0.04129709 | 3.19E-05 | 0.0071994 | 0.45929   |
| 2w4w_SITTC $\zeta$ | 0.07658743 | 0.45153645 | 6.27E-05 | 0.015053  | 0.1354    |
| 2w4w_SITTC $\zeta$ | 0.01992773 | 0.10964662 | 3.42E-05 | 0.0045972 | 0.0032259 |
| 2w4w_SITTC $\zeta$ | 0.00485603 | 0.01870258 | 3.18E-05 | 0.0084677 | 0.62647   |
| 2w4w_SITTC $\zeta$ | 0.03785529 | 0.21782318 | 4.81E-05 | 0.0043756 | -0.05192  |
| 2w4w_SITTC $\zeta$ | 0.06331322 | 0.37143868 | 6.09E-05 | 0.0096122 | 0.087254  |
| 2w4w_SITTC $\zeta$ | 0.00992316 | 0.04927814 | 3.20E-05 | 0.0066628 | 0.37961   |
| 2w4w_SITTC $\zeta$ | 0.01421772 | 0.07519188 | 3.25E-05 | 0.0056405 | 0.18676   |
| 2w4w_SITTC $\zeta$ | 0.02625903 | 0.14785023 | 3.76E-05 | 0.0041286 | -0.096385 |
| 2w4w_SITTC $\zeta$ | 0.01402106 | 0.07400519 | 3.25E-05 | 0.0056405 | 0.20898   |
| 2w4w_SITTC $\zeta$ | 0.01642511 | 0.08851145 | 3.30E-05 | 0.0051875 | 0.10435   |
| 2w4w_SITTC $\zeta$ | 0.02028417 | 0.11179738 | 3.42E-05 | 0.0045972 | -0.01065  |
| 2w4w_SITTC $\zeta$ | 0.02173833 | 0.12057193 | 3.49E-05 | 0.0044169 | -0.0356   |
| 2w4w_SITTC $\zeta$ | 0.10398013 | 0.6168265  | 6.56E-05 | 0.025296  | -0.18011  |
| 2w4w_SITTC $\zeta$ | 0.03530086 | 0.20240948 | 4.59E-05 | 0.0042319 | -0.073417 |
| 2w4w_SITTC $\zeta$ | 0.02240739 | 0.12460912 | 3.52E-05 | 0.0043661 | -0.046619 |
| 2w4w_SITTC $\zeta$ | 0.01332262 | 0.0697908  | 3.24E-05 | 0.0057681 | 0.23179   |
| 2w4w_SITTC $\zeta$ | 0.02155294 | 0.11945328 | 3.49E-05 | 0.0044169 | -0.0356   |
| 2w4w_SITTC $\zeta$ | 0.03168292 | 0.18057854 | 4.22E-05 | 0.0040866 | -0.10071  |
| 2w4w_SITTC $\zeta$ | 0.07665102 | 0.45192015 | 6.27E-05 | 0.015053  | 0.13605   |
| 2w4w_SITTC $\zeta$ | 0.02147288 | 0.11897022 | 3.49E-05 | 0.0044169 | -0.0356   |
| 2w4w_SITTC $\zeta$ | 0.02893637 | 0.16400558 | 3.97E-05 | 0.0040686 | -0.10664  |
| 2w4w_SITTC $\zeta$ | 0.02981985 | 0.16933657 | 4.07E-05 | 0.0040668 | -0.10597  |
| 2w4w_SITTC $\zeta$ | 0.06812448 | 0.40047023 | 6.16E-05 | 0.011474  | 0.10734   |
| 2w4w_SITTC $\zeta$ | 0.02654926 | 0.14960155 | 3.80E-05 | 0.0041099 | -0.099939 |
| 2w4w_SITTC $\zeta$ | 0.08382839 | 0.49522907 | 6.37E-05 | 0.01841   | 0.1176    |
| 2w4w_SITTC $\zeta$ | 0.02102381 | 0.11626045 | 3.47E-05 | 0.0044724 | -0.023601 |

|                         |            |            |          |           |           |
|-------------------------|------------|------------|----------|-----------|-----------|
| 2w4w_SITTC <sup>Δ</sup> | 0.02497607 | 0.14010873 | 3.68E-05 | 0.0041768 | -0.086782 |
| 2w4w_SITTC <sup>Δ</sup> | 0.05791935 | 0.33889154 | 6.00E-05 | 0.0078516 | 0.073002  |
| 2w4w_SITTC <sup>Δ</sup> | 0.07091032 | 0.41728023 | 6.20E-05 | 0.012608  | 0.11916   |
| 2w4w_SITTC <sup>Δ</sup> | 0.02723096 | 0.15371497 | 3.84E-05 | 0.0040947 | -0.10271  |
| 2w4w_SITTC <sup>Δ</sup> | 0.01294633 | 0.0675202  | 3.23E-05 | 0.0059016 | 0.25518   |
| 2w4w_SITTC <sup>Δ</sup> | 0.06195911 | 0.3632678  | 6.07E-05 | 0.0092324 | 0.083692  |
| 2w4w_SITTC <sup>Δ</sup> | 0.02300685 | 0.12822634 | 3.55E-05 | 0.0043197 | -0.056631 |
| 2w4w_SITTC <sup>Δ</sup> | 0.03900088 | 0.22473575 | 4.92E-05 | 0.0044639 | -0.040459 |
| 2w4w_SITTC <sup>Δ</sup> | 0.02273654 | 0.12659523 | 3.55E-05 | 0.0043197 | -0.056631 |
| 2w4w_SITTC <sup>Δ</sup> | 0.05826815 | 0.34099627 | 6.01E-05 | 0.0080116 | 0.073002  |
| 2w4w_SITTC <sup>Δ</sup> | 0.03984091 | 0.22980462 | 5.03E-05 | 0.0045634 | -0.028892 |
| 2w4w_SITTC <sup>Δ</sup> | 0.10031155 | 0.5946899  | 6.53E-05 | 0.024687  | -0.11403  |
| 2w4w_SITTC <sup>Δ</sup> | 0.09957688 | 0.59025687 | 6.53E-05 | 0.02442   | -0.10426  |
| 2w4w_SITTC <sup>Δ</sup> | 0.05209041 | 0.3037192  | 5.85E-05 | 0.0064518 | 0.055318  |
| 2w4w_SITTC <sup>Δ</sup> | 0.01604565 | 0.08622176 | 3.30E-05 | 0.0051875 | 0.12392   |
| 2w4w_SITTC <sup>Δ</sup> | 0.0152549  | 0.08145036 | 3.27E-05 | 0.0054028 | 0.16515   |
| 2w4w_SITTC <sup>Δ</sup> | 0.0180119  | 0.09808631 | 3.34E-05 | 0.0049043 | 0.067421  |
| 2w4w_SITTC <sup>Δ</sup> | 0.01255876 | 0.06518158 | 3.23E-05 | 0.0060411 | 0.25518   |
| 2w4w_SITTC <sup>Δ</sup> | 0.01389041 | 0.07321686 | 3.25E-05 | 0.0056405 | 0.20898   |
| 2w4w_SITTC <sup>Δ</sup> | 0.02182069 | 0.12106892 | 3.49E-05 | 0.0044169 | -0.0356   |
| 2w4w_SITTC <sup>Δ</sup> | 0.02728482 | 0.15403996 | 3.84E-05 | 0.0040947 | -0.10271  |
| 2w4w_SITTC <sup>Δ</sup> | 0.08021098 | 0.4734013  | 6.32E-05 | 0.016854  | 0.13446   |
| 2w4w_SITTC <sup>Δ</sup> | 0.00909671 | 0.04429124 | 3.19E-05 | 0.0070136 | 0.43237   |
| 2w4w_SITTC <sup>Δ</sup> | 0.00575492 | 0.02412656 | 3.18E-05 | 0.0082375 | 0.59807   |
| 2w4w_SITTC <sup>Δ</sup> | 0.06389132 | 0.37492698 | 6.10E-05 | 0.0098069 | 0.089169  |
| 2w4w_SITTC <sup>Δ</sup> | 0.08676624 | 0.51295626 | 6.40E-05 | 0.019681  | 0.093363  |
| 2w4w_SITTC <sup>Δ</sup> | 0.1150806  | 0.68380773 | 6.63E-05 | 0.025242  | -0.32268  |
| 2w4w_SITTC <sup>Δ</sup> | 0.00437638 | 0.01580835 | 3.18E-05 | 0.0087056 | 0.65503   |
| 2w4w_SITTC <sup>Δ</sup> | 0.0168416  | 0.09102461 | 3.31E-05 | 0.0050879 | 0.10435   |
| 2w4w_SITTC <sup>Δ</sup> | 0.01668828 | 0.09009948 | 3.31E-05 | 0.0050879 | 0.10435   |
| 2w4w_SITTC <sup>Δ</sup> | 0.02786884 | 0.15756403 | 3.88E-05 | 0.0040827 | -0.10472  |
| 2w4w_SITTC <sup>Δ</sup> | 0.03429222 | 0.19632329 | 4.48E-05 | 0.0041765 | -0.082901 |
| 2w4w_SITTC <sup>Δ</sup> | 0.01043104 | 0.05234271 | 3.21E-05 | 0.0064976 | 0.35381   |
| 2w4w_SITTC <sup>Δ</sup> | 0.01591981 | 0.08546243 | 3.30E-05 | 0.0051875 | 0.12392   |
| 2w4w_SITTC <sup>Δ</sup> | 0.04220765 | 0.24408571 | 5.24E-05 | 0.0047963 | -0.00654  |
| 2w4w_SITTC <sup>Δ</sup> | 0.01605545 | 0.08628094 | 3.30E-05 | 0.0051875 | 0.12392   |
| 2w4w_SITTC <sup>Δ</sup> | 0.02149065 | 0.11907741 | 3.49E-05 | 0.0044169 | -0.0356   |
| 2w4w_SITTC <sup>Δ</sup> | 0.08605621 | 0.5086719  | 6.39E-05 | 0.01943   | 0.099025  |
| 2w4w_SITTC <sup>Δ</sup> | 0.04458334 | 0.25842085 | 5.42E-05 | 0.0050757 | 0.017239  |
| 2w4w_SITTC <sup>Δ</sup> | 0.14709006 | 0.8769558  | 6.76E-05 | 0.023666  | -0.51713  |
| 2w4w_SITTC <sup>Δ</sup> | 0.01645892 | 0.08871549 | 3.31E-05 | 0.0050879 | 0.10435   |
| 2w4w_SITTC <sup>Δ</sup> | 0.0136333  | 0.07166546 | 3.24E-05 | 0.0057681 | 0.23179   |
| 2w4w_SITTC <sup>Δ</sup> | 0.02254487 | 0.12543866 | 3.55E-05 | 0.0043197 | -0.056631 |

|                         |            |            |          |           |           |
|-------------------------|------------|------------|----------|-----------|-----------|
| 2w4w_SITTC <sup>Δ</sup> | 0.01912324 | 0.10479224 | 3.38E-05 | 0.004741  | 0.03364   |
| 2w4w_SITTC <sup>Δ</sup> | 0.14554264 | 0.8676185  | 6.75E-05 | 0.023641  | -0.51294  |
| 2w4w_SITTC <sup>Δ</sup> | 0.02005615 | 0.11042152 | 3.42E-05 | 0.0045972 | 0.0032259 |
| 2w4w_SITTC <sup>Δ</sup> | 0.02794112 | 0.15800013 | 3.88E-05 | 0.0040827 | -0.10472  |
| 2w4w_SITTC <sup>Δ</sup> | 0.03185175 | 0.18159723 | 4.22E-05 | 0.0040866 | -0.10071  |
| 2w4w_SITTC <sup>Δ</sup> | 0.11491115 | 0.6827853  | 6.63E-05 | 0.025242  | -0.32268  |
| 2w4w_SITTC <sup>Δ</sup> | 0.07475074 | 0.44045368 | 6.25E-05 | 0.014299  | 0.13218   |
| 2w4w_SITTC <sup>Δ</sup> | 0.09904471 | 0.5870457  | 6.53E-05 | 0.02442   | -0.094455 |
| 2w4w_SITTC <sup>Δ</sup> | 0.06299456 | 0.36951587 | 6.08E-05 | 0.0094206 | 0.087254  |
| 2w4w_SITTC <sup>Δ</sup> | 0.01997234 | 0.1099158  | 3.42E-05 | 0.0045972 | 0.0032259 |
| 2w4w_SITTC <sup>Δ</sup> | 0.02649844 | 0.1492949  | 3.80E-05 | 0.0041099 | -0.099939 |
| 2w4w_SITTC <sup>Δ</sup> | 0.0261678  | 0.1472998  | 3.76E-05 | 0.0041286 | -0.096385 |
| 2w4w_SITTC <sup>Δ</sup> | 0.03041655 | 0.1729371  | 4.11E-05 | 0.0040705 | -0.10475  |
| 2w4w_SITTC <sup>Δ</sup> | 0.04352573 | 0.25203913 | 5.33E-05 | 0.0049301 | 0.008455  |
| 2w4w_SITTC <sup>Δ</sup> | 0.03807414 | 0.21914373 | 4.87E-05 | 0.0044183 | -0.04622  |
| 2w4w_SITTC <sup>Δ</sup> | 0.08321438 | 0.49152407 | 6.36E-05 | 0.018151  | 0.12434   |
| 2w4w_SITTC <sup>Δ</sup> | 0.01124485 | 0.05725334 | 3.21E-05 | 0.006339  | 0.32844   |
| 2w4w_SITTC <sup>Δ</sup> | 0.01276056 | 0.06639926 | 3.23E-05 | 0.0059016 | 0.25518   |
| 2w4w_SITTC <sup>Δ</sup> | 0.02698556 | 0.1522342  | 3.84E-05 | 0.0040947 | -0.10271  |
| 2w4w_SITTC <sup>Δ</sup> | 0.10147927 | 0.60173607 | 6.54E-05 | 0.024923  | -0.14299  |
| 2w4w_SITTC <sup>Δ</sup> | 0.10383093 | 0.6159262  | 6.56E-05 | 0.025296  | -0.18011  |
| 2w4w_SITTC <sup>Δ</sup> | 0.14509359 | 0.8649089  | 6.75E-05 | 0.023641  | -0.51136  |
| 2w4w_SITTC <sup>Δ</sup> | 0.07607357 | 0.44843578 | 6.26E-05 | 0.0148    | 0.1354    |
| 2w4w_SITTC <sup>Δ</sup> | 0.02357972 | 0.13168305 | 3.58E-05 | 0.0042778 | -0.073623 |
| 2w4w_SITTC <sup>Δ</sup> | 0.01930592 | 0.10589453 | 3.40E-05 | 0.0046667 | 0.017998  |
| 2w4w_SITTC <sup>Δ</sup> | 0.01498065 | 0.07979548 | 3.27E-05 | 0.0054028 | 0.16515   |
| 2w4w_SITTC <sup>Δ</sup> | 0.02085564 | 0.11524569 | 3.44E-05 | 0.0045325 | -0.023601 |
| 2w4w_SITTC <sup>Δ</sup> | 0.14417572 | 0.8593704  | 6.75E-05 | 0.023623  | -0.50968  |
| 2w4w_SITTC <sup>Δ</sup> | 0.032382   | 0.18479684 | 4.27E-05 | 0.004099  | -0.097962 |
| 2w4w_SITTC <sup>Δ</sup> | 0.02328762 | 0.1299205  | 3.58E-05 | 0.0042778 | -0.065623 |
| 2w4w_SITTC <sup>Δ</sup> | 0.03768586 | 0.21680084 | 4.81E-05 | 0.0043756 | -0.05192  |
| 2w4w_SITTC <sup>Δ</sup> | 0.01892749 | 0.10361105 | 3.38E-05 | 0.004741  | 0.03364   |
| 2w4w_SITTC <sup>Δ</sup> | 0.09140539 | 0.54094934 | 6.45E-05 | 0.021822  | 0.036126  |
| 2w4w_SITTC <sup>Δ</sup> | 0.01769154 | 0.09615325 | 3.34E-05 | 0.0049043 | 0.067421  |
| 2w4w_SITTC <sup>Δ</sup> | 0.0209269  | 0.1156757  | 3.47E-05 | 0.0044724 | -0.023601 |
| 2w4w_SITTC <sup>Δ</sup> | 0.02877535 | 0.16303395 | 3.97E-05 | 0.0040686 | -0.10664  |
| 2w4w_SITTC <sup>Δ</sup> | 0.02974283 | 0.16887182 | 4.02E-05 | 0.0040662 | -0.10597  |
| 2w4w_SITTC <sup>Δ</sup> | 0.13651079 | 0.8131195  | 6.72E-05 | 0.023527  | -0.4775   |
| 2w4w_SITTC <sup>Δ</sup> | 0.03080779 | 0.17529789 | 4.11E-05 | 0.0040705 | -0.10299  |
| 2w4w_SITTC <sup>Δ</sup> | 0.10105129 | 0.5991536  | 6.54E-05 | 0.024809  | -0.13341  |
| 2w4w_SITTC <sup>Δ</sup> | 0.01555362 | 0.08325286 | 3.28E-05 | 0.0052924 | 0.1442    |
| 2w4w_SITTC <sup>Δ</sup> | 0.03065901 | 0.17440018 | 4.11E-05 | 0.0040705 | -0.10475  |
| 2w4w_SITTC <sup>Δ</sup> | 0.09571961 | 0.56698173 | 6.50E-05 | 0.023448  | -0.035993 |

|                         |            |            |          |           |           |
|-------------------------|------------|------------|----------|-----------|-----------|
| 2w4w_SITTC <sup>Δ</sup> | 0.01176442 | 0.06038845 | 3.22E-05 | 0.0061869 | 0.30353   |
| 2w4w_SITTC <sup>Δ</sup> | 0.01576989 | 0.08455785 | 3.28E-05 | 0.0052924 | 0.1442    |
| 2w4w_SITTC <sup>Δ</sup> | 0.02177724 | 0.12080675 | 3.49E-05 | 0.0044169 | -0.0356   |
| 2w4w_SITTC <sup>Δ</sup> | 0.0276745  | 0.15639137 | 3.88E-05 | 0.0040827 | -0.10472  |
| 2w4w_SITTC <sup>Δ</sup> | 0.01663434 | 0.08977398 | 3.31E-05 | 0.0050879 | 0.10435   |
| 2w4w_SITTC <sup>Δ</sup> | 0.01699699 | 0.09196223 | 3.31E-05 | 0.0050879 | 0.085504  |
| 2w4w_SITTC <sup>Δ</sup> | 0.02240558 | 0.12459818 | 3.52E-05 | 0.0043661 | -0.046619 |
| 2w4w_SITTC <sup>Δ</sup> | 0.02229767 | 0.12394708 | 3.52E-05 | 0.0043661 | -0.046619 |
| 2w4w_SITTC <sup>Δ</sup> | 0.07046762 | 0.41460896 | 6.19E-05 | 0.012376  | 0.11689   |
| 2w4w_SITTC <sup>Δ</sup> | 0.04405172 | 0.25521302 | 5.38E-05 | 0.0050014 | 0.012967  |
| 2w4w_SITTC <sup>Δ</sup> | 0.02136673 | 0.11832966 | 3.47E-05 | 0.0044724 | -0.023601 |
| 2w4w_SITTC <sup>Δ</sup> | 0.03099252 | 0.17641258 | 4.16E-05 | 0.0040771 | -0.10299  |
| 2w4w_SITTC <sup>Δ</sup> | 0.1119834  | 0.66511893 | 6.61E-05 | 0.025489  | -0.29336  |
| 2w4w_SITTC <sup>Δ</sup> | 0.01753504 | 0.09520887 | 3.33E-05 | 0.0049935 | 0.067421  |
| 2w4w_SITTC <sup>Δ</sup> | 0.01600299 | 0.08596435 | 3.30E-05 | 0.0051875 | 0.12392   |
| 2w4w_SITTC <sup>Δ</sup> | 0.01720736 | 0.09323163 | 3.33E-05 | 0.0049935 | 0.085504  |
| 2w4w_SITTC <sup>Δ</sup> | 0.11431168 | 0.679168   | 6.63E-05 | 0.025299  | -0.3171   |
| 2w4w_SITTC <sup>Δ</sup> | 0.05304789 | 0.3094967  | 5.89E-05 | 0.0067028 | 0.059084  |
| 2w4w_SITTC <sup>Δ</sup> | 0.0185418  | 0.1012838  | 3.36E-05 | 0.0048202 | 0.050123  |
| 2w4w_SITTC <sup>Δ</sup> | 0.00879565 | 0.04247463 | 3.19E-05 | 0.0070136 | 0.43237   |
| 2w4w_SITTC <sup>Δ</sup> | 0.08156876 | 0.48159426 | 6.34E-05 | 0.017373  | 0.13148   |
| 2w4w_SITTC <sup>Δ</sup> | 0.03125405 | 0.17799067 | 4.16E-05 | 0.0040771 | -0.10299  |
| 2w4w_SITTC <sup>Δ</sup> | 0.01856207 | 0.10140609 | 3.36E-05 | 0.0048202 | 0.050123  |
| 2w4w_SITTC <sup>Δ</sup> | 0.11148005 | 0.6620817  | 6.61E-05 | 0.025525  | -0.28705  |
| 2w4w_SITTC <sup>Δ</sup> | 0.09104303 | 0.53876287 | 6.45E-05 | 0.021597  | 0.036126  |
| 2w4w_SITTC <sup>Δ</sup> | 0.13675165 | 0.8145729  | 6.73E-05 | 0.023528  | -0.4775   |
| 2w4w_SITTC <sup>Δ</sup> | 0.07698261 | 0.453921   | 6.28E-05 | 0.015307  | 0.13605   |
| 2w4w_SITTC <sup>Δ</sup> | 0.12913959 | 0.768641   | 6.70E-05 | 0.023692  | -0.43556  |
| 2w4w_SITTC <sup>Δ</sup> | 0.07221308 | 0.4251412  | 6.21E-05 | 0.01308   | 0.12548   |
| 2w4w_SITTC <sup>Δ</sup> | 0.02104129 | 0.11636594 | 3.47E-05 | 0.0044724 | -0.023601 |
| 2w4w_SITTC <sup>Δ</sup> | 0.01712773 | 0.09275115 | 3.33E-05 | 0.0049935 | 0.085504  |
| 2w4w_SITTC <sup>Δ</sup> | 0.01951078 | 0.10713071 | 3.40E-05 | 0.0046667 | 0.017998  |
| 2w4w_SITTC <sup>Δ</sup> | 0.04581544 | 0.26585543 | 5.50E-05 | 0.0052335 | 0.025099  |
| 2w4w_SITTC <sup>Δ</sup> | 0.02281499 | 0.12706864 | 3.55E-05 | 0.0043197 | -0.056631 |
| 2w4w_SITTC <sup>Δ</sup> | 0.01504621 | 0.08019107 | 3.27E-05 | 0.0054028 | 0.16515   |
| 2w4w_SITTC <sup>Δ</sup> | 0.03228691 | 0.18422303 | 4.27E-05 | 0.004099  | -0.097962 |
| 2w4w_SITTC <sup>Δ</sup> | 0.05535761 | 0.3234338  | 5.95E-05 | 0.007248  | 0.065685  |
| 2w4w_SITTC <sup>Δ</sup> | 0.10580292 | 0.6278254  | 6.58E-05 | 0.025526  | -0.20623  |
| 2w4w_SITTC <sup>Δ</sup> | 0.02385897 | 0.13336807 | 3.61E-05 | 0.0042401 | -0.073623 |
| 2w4w_SITTC <sup>Δ</sup> | 0.09194147 | 0.5441841  | 6.46E-05 | 0.022042  | 0.027741  |
| 2w4w_SITTC <sup>Δ</sup> | 0.02155213 | 0.11944842 | 3.49E-05 | 0.0044169 | -0.0356   |
| 2w4w_SITTC <sup>Δ</sup> | 0.03810556 | 0.21933334 | 4.87E-05 | 0.0044183 | -0.04622  |
| 2w4w_SITTC <sup>Δ</sup> | 0.10109438 | 0.59941363 | 6.54E-05 | 0.024809  | -0.13341  |



|                    |            |            |          |           |           |
|--------------------|------------|------------|----------|-----------|-----------|
| 2w4w_SITTC $\zeta$ | 0.10937112 | 0.6493562  | 6.60E-05 | 0.025611  | -0.2602   |
| 2w4w_SITTC $\zeta$ | 0.06396951 | 0.37539876 | 6.10E-05 | 0.0098069 | 0.091185  |
| 2w4w_SITTC $\zeta$ | 0.0386556  | 0.22265233 | 4.92E-05 | 0.0044639 | -0.040459 |
| 2w4w_SITTC $\zeta$ | 0.03805359 | 0.21901971 | 4.81E-05 | 0.0043756 | -0.04622  |
| 2w4w_SITTC $\zeta$ | 0.00709344 | 0.03220333 | 3.19E-05 | 0.0075925 | 0.51404   |
| 2w4w_SITTC $\zeta$ | 0.00709839 | 0.03223317 | 3.19E-05 | 0.0075925 | 0.51404   |
| 2w4w_SITTC $\zeta$ | 0.04297536 | 0.24871816 | 5.29E-05 | 0.0048617 | 0.0036923 |
| 2w4w_SITTC $\zeta$ | 0.05754937 | 0.33665904 | 6.00E-05 | 0.0078516 | 0.071569  |
| 2w4w_SITTC $\zeta$ | 0.04030653 | 0.23261419 | 5.09E-05 | 0.0046173 | -0.023154 |
| 2w4w_SITTC $\zeta$ | 0.01513062 | 0.08070039 | 3.27E-05 | 0.0054028 | 0.16515   |
| 2w4w_SITTC $\zeta$ | 0.09042772 | 0.53505    | 6.44E-05 | 0.021369  | 0.044278  |
| 2w4w_SITTC $\zeta$ | 0.01096632 | 0.05557261 | 3.21E-05 | 0.006339  | 0.32844   |
| 2w4w_SITTC $\zeta$ | 0.02566909 | 0.14429055 | 3.72E-05 | 0.0041509 | -0.092011 |
| 2w4w_SITTC $\zeta$ | 0.0247826  | 0.13894133 | 3.68E-05 | 0.0041768 | -0.086782 |
| 2w4w_SITTC $\zeta$ | 0.04867887 | 0.28313366 | 5.70E-05 | 0.0057827 | 0.041222  |
| 2w4w_SITTC $\zeta$ | 0.11332353 | 0.6732054  | 6.62E-05 | 0.025403  | -0.30551  |
| 2w4w_SITTC $\zeta$ | 0.08132368 | 0.48011538 | 6.34E-05 | 0.017373  | 0.13148   |
| 2w4w_SITTC $\zeta$ | 0.03698191 | 0.2125531  | 4.76E-05 | 0.0043355 | -0.057524 |
| 2w4w_SITTC $\zeta$ | 0.07590798 | 0.4474366  | 6.26E-05 | 0.0148    | 0.13453   |
| 2w4w_SITTC $\zeta$ | 0.01207143 | 0.06224101 | 3.23E-05 | 0.0060411 | 0.2791    |
| 2w4w_SITTC $\zeta$ | 0.09154202 | 0.5417738  | 6.45E-05 | 0.021822  | 0.027741  |
| 2w4w_SITTC $\zeta$ | 0.00755219 | 0.03497149 | 3.19E-05 | 0.0075925 | 0.51404   |
| 2w4w_SITTC $\zeta$ | 0.09064493 | 0.5363607  | 6.44E-05 | 0.021369  | 0.044278  |
| 2w4w_SITTC $\zeta$ | 0.01628048 | 0.08763878 | 3.30E-05 | 0.0051875 | 0.12392   |
| 2w4w_SITTC $\zeta$ | 0.0063139  | 0.0274995  | 3.18E-05 | 0.008015  | 0.56984   |
| 2w4w_SITTC $\zeta$ | 0.01528669 | 0.08164218 | 3.27E-05 | 0.0054028 | 0.16515   |
| 2w4w_SITTC $\zeta$ | 0.10228064 | 0.6065716  | 6.55E-05 | 0.025029  | -0.15246  |
| 2w4w_SITTC $\zeta$ | 0.05519389 | 0.32244587 | 5.94E-05 | 0.0071062 | 0.065685  |
| 2w4w_SITTC $\zeta$ | 0.01283418 | 0.06684346 | 3.23E-05 | 0.0059016 | 0.25518   |
| 2w4w_SITTC $\zeta$ | 0.01334673 | 0.06993625 | 3.24E-05 | 0.0057681 | 0.23179   |
| 2w4w_SITTC $\zeta$ | 0.05904036 | 0.34565586 | 6.02E-05 | 0.0081753 | 0.075889  |
| 2w4w_SITTC $\zeta$ | 0.06313558 | 0.37036675 | 6.09E-05 | 0.0096122 | 0.087254  |
| 2w4w_SITTC $\zeta$ | 0.04886771 | 0.28427312 | 5.70E-05 | 0.0057827 | 0.041222  |
| 2w4w_SITTC $\zeta$ | 0.06286003 | 0.36870405 | 6.08E-05 | 0.0094206 | 0.087254  |
| 2w4w_SITTC $\zeta$ | 0.11683119 | 0.694371   | 6.64E-05 | 0.024986  | -0.33868  |
| 2w4w_SITTC $\zeta$ | 0.01770698 | 0.09624642 | 3.34E-05 | 0.0049043 | 0.067421  |
| 2w4w_SITTC $\zeta$ | 0.01798649 | 0.09793299 | 3.34E-05 | 0.0049043 | 0.067421  |
| 2w4w_SITTC $\zeta$ | 0.10133134 | 0.6008434  | 6.54E-05 | 0.024923  | -0.13341  |
| 2w4w_SITTC $\zeta$ | 0.02003366 | 0.11028577 | 3.42E-05 | 0.0045972 | 0.0032259 |
| 2w4w_SITTC $\zeta$ | 0.02407478 | 0.13467032 | 3.61E-05 | 0.0042401 | -0.073623 |
| 2w4w_SITTC $\zeta$ | 0.02071301 | 0.11438509 | 3.44E-05 | 0.0045325 | -0.01065  |
| 2w4w_SITTC $\zeta$ | 0.04756022 | 0.2763836  | 5.64E-05 | 0.0055867 | 0.035328  |
| 2w4w_SITTC $\zeta$ | 0.02572778 | 0.14464466 | 3.72E-05 | 0.0041509 | -0.092011 |

|                    |            |            |          |           |           |
|--------------------|------------|------------|----------|-----------|-----------|
| 2w4w_SITTC $\zeta$ | 0.00957753 | 0.04719254 | 3.20E-05 | 0.0068348 | 0.4058    |
| 2w4w_SITTC $\zeta$ | 0.01882837 | 0.10301296 | 3.38E-05 | 0.004741  | 0.03364   |
| 2w4w_SITTC $\zeta$ | 0.0916822  | 0.54261965 | 6.45E-05 | 0.021822  | 0.027741  |
| 2w4w_SITTC $\zeta$ | 0.04709861 | 0.2735982  | 5.61E-05 | 0.0054936 | 0.032113  |
| 2w4w_SITTC $\zeta$ | 0.08952285 | 0.52958995 | 6.43E-05 | 0.020902  | 0.059815  |
| 2w4w_SITTC $\zeta$ | 0.08518397 | 0.50340873 | 6.39E-05 | 0.019177  | 0.10916   |
| 2w4w_SITTC $\zeta$ | 0.03329261 | 0.19029154 | 4.37E-05 | 0.0041322 | -0.091175 |
| 2w4w_SITTC $\zeta$ | 0.02314018 | 0.12903081 | 3.58E-05 | 0.0042778 | -0.065623 |
| 2w4w_SITTC $\zeta$ | 0.01052051 | 0.05288256 | 3.21E-05 | 0.0064976 | 0.35381   |
| 2w4w_SITTC $\zeta$ | 0.10804197 | 0.641336   | 6.59E-05 | 0.025614  | -0.23822  |
| 2w4w_SITTC $\zeta$ | 0.0271435  | 0.15318726 | 3.84E-05 | 0.0040947 | -0.10271  |
| 2w4w_SITTC $\zeta$ | 0.02209914 | 0.12274909 | 3.52E-05 | 0.0043661 | -0.046619 |
| 2w4w_SITTC $\zeta$ | 0.06875679 | 0.40428564 | 6.16E-05 | 0.011695  | 0.10977   |
| 2w4w_SITTC $\zeta$ | 0.14062615 | 0.8379519  | 6.74E-05 | 0.023566  | -0.49553  |
| 2w4w_SITTC $\zeta$ | 0.01950866 | 0.10711789 | 3.40E-05 | 0.0046667 | 0.017998  |
| 2w4w_SITTC $\zeta$ | 0.04945783 | 0.28783396 | 5.73E-05 | 0.0058857 | 0.04392   |
| 2w4w_SITTC $\zeta$ | 0.01064338 | 0.05362397 | 3.21E-05 | 0.0064976 | 0.35381   |
| 2w4w_SITTC $\zeta$ | 0.11570349 | 0.6875663  | 6.63E-05 | 0.025119  | -0.32814  |
| 2w4w_SITTC $\zeta$ | 0.03515235 | 0.20151341 | 4.54E-05 | 0.0042028 | -0.078293 |
| 2w4w_SITTC $\zeta$ | 0.02088917 | 0.11544802 | 3.47E-05 | 0.0044724 | -0.023601 |
| 2w4w_SITTC $\zeta$ | 0.08190478 | 0.4836218  | 6.35E-05 | 0.017633  | 0.12948   |
| 2w4w_SITTC $\zeta$ | 0.02220654 | 0.12339716 | 3.52E-05 | 0.0043661 | -0.046619 |
| 2w4w_SITTC $\zeta$ | 0.0182212  | 0.09934924 | 3.36E-05 | 0.0048202 | 0.050123  |
| 2w4w_SITTC $\zeta$ | 0.02815577 | 0.15929538 | 3.93E-05 | 0.004074  | -0.10603  |
| 2w4w_SITTC $\zeta$ | 0.0215615  | 0.11950491 | 3.49E-05 | 0.0044169 | -0.0356   |
| 2w4w_SITTC $\zeta$ | 0.03057171 | 0.17387336 | 4.11E-05 | 0.0040705 | -0.10475  |
| 2w4w_SITTC $\zeta$ | 0.06376349 | 0.37415564 | 6.10E-05 | 0.0098069 | 0.089169  |
| 2w4w_SITTC $\zeta$ | 0.01579555 | 0.08471268 | 3.28E-05 | 0.0052924 | 0.1442    |
| 2w4w_SITTC $\zeta$ | 0.02124413 | 0.11758991 | 3.47E-05 | 0.0044724 | -0.023601 |
| 2w4w_SITTC $\zeta$ | 0.10268648 | 0.6090205  | 6.55E-05 | 0.025127  | -0.16182  |
| 2w4w_SITTC $\zeta$ | 0.02614155 | 0.1471414  | 3.76E-05 | 0.0041286 | -0.096385 |
| 2w4w_SITTC $\zeta$ | 0.02748892 | 0.15527155 | 3.84E-05 | 0.0040947 | -0.10472  |
| 2w4w_SITTC $\zeta$ | 0.05505747 | 0.3216227  | 5.94E-05 | 0.0071062 | 0.064127  |
| 2w4w_SITTC $\zeta$ | 0.04384633 | 0.25397366 | 5.38E-05 | 0.0050014 | 0.008455  |
| 2w4w_SITTC $\zeta$ | 0.03828851 | 0.22043724 | 4.87E-05 | 0.0044183 | -0.04622  |
| 2w4w_SITTC $\zeta$ | 0.03152741 | 0.17964014 | 4.22E-05 | 0.0040866 | -0.10071  |
| 2w4w_SITTC $\zeta$ | 0.03140599 | 0.17890753 | 4.16E-05 | 0.0040771 | -0.10071  |
| 2w4w_SITTC $\zeta$ | 0.0529016  | 0.30861402 | 5.87E-05 | 0.0065755 | 0.059084  |
| 2w4w_SITTC $\zeta$ | 0.00742236 | 0.03418804 | 3.19E-05 | 0.0075925 | 0.51404   |
| 2w4w_SITTC $\zeta$ | 0.01307514 | 0.06829744 | 3.23E-05 | 0.0059016 | 0.25518   |
| 2w4w_SITTC $\zeta$ | 0.01566157 | 0.08390423 | 3.28E-05 | 0.0052924 | 0.1442    |
| 2w4w_SITTC $\zeta$ | 0.09939063 | 0.589133   | 6.53E-05 | 0.02442   | -0.10426  |
| 2w4w_SITTC $\zeta$ | 0.09202728 | 0.5447019  | 6.46E-05 | 0.022042  | 0.027741  |

|                         |            |            |          |           |           |
|-------------------------|------------|------------|----------|-----------|-----------|
| 2w4w_SITTC <sup>z</sup> | 0.10387214 | 0.6161748  | 6.56E-05 | 0.025296  | -0.18011  |
| 2w4w_SITTC <sup>z</sup> | 0.07733154 | 0.4560265  | 6.28E-05 | 0.015307  | 0.13646   |
| 2w4w_SITTC <sup>z</sup> | 0.03648523 | 0.20955607 | 4.70E-05 | 0.0042982 | -0.062998 |
| 2w4w_SITTC <sup>z</sup> | 0.03467401 | 0.19862704 | 4.48E-05 | 0.0041765 | -0.078293 |
| 2w4w_SITTC <sup>z</sup> | 0.02249578 | 0.12514246 | 3.52E-05 | 0.0043661 | -0.056631 |
| 2w4w_SITTC <sup>z</sup> | 0.01873882 | 0.10247261 | 3.38E-05 | 0.004741  | 0.03364   |
| 2w4w_SITTC <sup>z</sup> | 0.0242122  | 0.13549954 | 3.64E-05 | 0.0042065 | -0.080664 |
| 2w4w_SITTC <sup>z</sup> | 0.01671417 | 0.09025569 | 3.31E-05 | 0.0050879 | 0.10435   |
| 2w4w_SITTC <sup>z</sup> | 0.09783331 | 0.579736   | 6.51E-05 | 0.023964  | -0.074831 |
| 2w4w_SITTC <sup>z</sup> | 0.01684471 | 0.09104339 | 3.31E-05 | 0.0050879 | 0.10435   |
| 2w4w_SITTC <sup>z</sup> | 0.01747544 | 0.09484929 | 3.33E-05 | 0.0049935 | 0.085504  |
| 2w4w_SITTC <sup>z</sup> | 0.03110071 | 0.17706542 | 4.16E-05 | 0.0040771 | -0.10299  |
| 2w4w_SITTC <sup>z</sup> | 0.01618101 | 0.08703853 | 3.30E-05 | 0.0051875 | 0.12392   |
| 2w4w_SITTC <sup>z</sup> | 0.09661464 | 0.57238245 | 6.50E-05 | 0.023626  | -0.055297 |
| 2w4w_SITTC <sup>z</sup> | 0.01947963 | 0.10694276 | 3.40E-05 | 0.0046667 | 0.017998  |
| 2w4w_SITTC <sup>z</sup> | 0.0170788  | 0.09245588 | 3.33E-05 | 0.0049935 | 0.085504  |
| 2w4w_SITTC <sup>z</sup> | 0.07287983 | 0.42916444 | 6.22E-05 | 0.01332   | 0.12737   |
| 2w4w_SITTC <sup>z</sup> | 0.09929027 | 0.58852744 | 6.53E-05 | 0.02442   | -0.10426  |
| 2w4w_SITTC <sup>z</sup> | 0.09760397 | 0.57835215 | 6.51E-05 | 0.023964  | -0.074831 |
| 2w4w_SITTC <sup>z</sup> | 0.12763222 | 0.7595453  | 6.69E-05 | 0.023794  | -0.4246   |
| 2w4w_SITTC <sup>z</sup> | 0.01498395 | 0.07981541 | 3.27E-05 | 0.0054028 | 0.16515   |
| 2w4w_SITTC <sup>z</sup> | 0.03402736 | 0.19472511 | 4.43E-05 | 0.004153  | -0.087207 |
| 2w4w_SITTC <sup>z</sup> | 0.09844582 | 0.58343196 | 6.52E-05 | 0.024123  | -0.084641 |
| 2w4w_SITTC <sup>z</sup> | 0.02553564 | 0.14348525 | 3.72E-05 | 0.0041509 | -0.092011 |
| 2w4w_SITTC <sup>z</sup> | 0.02844771 | 0.16105697 | 3.93E-05 | 0.004074  | -0.10603  |
| 2w4w_SITTC <sup>z</sup> | 0.0213567  | 0.11826917 | 3.47E-05 | 0.0044724 | -0.023601 |
| 2w4w_SITTC <sup>z</sup> | 0.01323343 | 0.06925259 | 3.24E-05 | 0.0057681 | 0.23179   |
| 2w4w_SITTC <sup>z</sup> | 0.01797227 | 0.09784721 | 3.34E-05 | 0.0049043 | 0.067421  |
| 2w4w_SITTC <sup>z</sup> | 0.01068871 | 0.0538975  | 3.21E-05 | 0.0064976 | 0.35381   |
| 2w4w_SITTC <sup>z</sup> | 0.01873057 | 0.10242285 | 3.38E-05 | 0.004741  | 0.03364   |
| 2w4w_SITTC <sup>z</sup> | 0.01802359 | 0.09815686 | 3.34E-05 | 0.0049043 | 0.067421  |
| 2w4w_SITTC <sup>z</sup> | 0.01936688 | 0.10626237 | 3.40E-05 | 0.0046667 | 0.017998  |
| 2w4w_SITTC <sup>z</sup> | 0.01192088 | 0.06133255 | 3.22E-05 | 0.0061869 | 0.30353   |
| 2w4w_SITTC <sup>z</sup> | 0.03555586 | 0.20394818 | 4.59E-05 | 0.0042319 | -0.073417 |
| 2w4w_SITTC <sup>z</sup> | 0.01204029 | 0.06205308 | 3.23E-05 | 0.0060411 | 0.2791    |
| 2w4w_SITTC <sup>z</sup> | 0.00366494 | 0.01151547 | 3.18E-05 | 0.0092049 | 0.71249   |
| 2w4w_SITTC <sup>z</sup> | 0.02006989 | 0.1105044  | 3.42E-05 | 0.0045972 | 0.0032259 |
| 2w4w_SITTC <sup>z</sup> | 0.01177807 | 0.06047085 | 3.22E-05 | 0.0061869 | 0.30353   |
| 2w4w_SITTC <sup>z</sup> | 0.06178444 | 0.36221385 | 6.07E-05 | 0.0090475 | 0.083692  |
| 2w4w_SITTC <sup>z</sup> | 0.02309136 | 0.12873624 | 3.55E-05 | 0.0043197 | -0.065623 |
| 2w4w_SITTC <sup>z</sup> | 0.02268909 | 0.1263089  | 3.55E-05 | 0.0043197 | -0.056631 |
| 2w4w_SITTC <sup>z</sup> | 0.0163587  | 0.08811076 | 3.30E-05 | 0.0051875 | 0.12392   |
| 2w4w_SITTC <sup>z</sup> | 0.01542187 | 0.08245786 | 3.28E-05 | 0.0052924 | 0.1442    |

|                    |            |            |          |           |           |
|--------------------|------------|------------|----------|-----------|-----------|
| 2w4w_SITTC $\zeta$ | 0.01219433 | 0.06298258 | 3.23E-05 | 0.0060411 | 0.2791    |
| 2w4w_SITTC $\zeta$ | 0.07543931 | 0.4446086  | 6.26E-05 | 0.014549  | 0.13345   |
| 2w4w_SITTC $\zeta$ | 0.0163316  | 0.08794723 | 3.30E-05 | 0.0051875 | 0.12392   |
| 2w4w_SITTC $\zeta$ | 0.01199093 | 0.06175521 | 3.22E-05 | 0.0061869 | 0.2791    |
| 2w4w_SITTC $\zeta$ | 0.07733217 | 0.45603028 | 6.28E-05 | 0.015307  | 0.13646   |
| 2w4w_SITTC $\zeta$ | 0.01492311 | 0.07944825 | 3.27E-05 | 0.0054028 | 0.16515   |
| 2w4w_SITTC $\zeta$ | 0.02043827 | 0.11272728 | 3.44E-05 | 0.0045325 | -0.01065  |
| 2w4w_SITTC $\zeta$ | 0.02705164 | 0.15263292 | 3.84E-05 | 0.0040947 | -0.10271  |
| 2w4w_SITTC $\zeta$ | 0.07572039 | 0.44630465 | 6.26E-05 | 0.014549  | 0.13453   |
| 2w4w_SITTC $\zeta$ | 0.0174291  | 0.09456962 | 3.33E-05 | 0.0049935 | 0.085504  |
| 2w4w_SITTC $\zeta$ | 0.0114505  | 0.05849424 | 3.21E-05 | 0.006339  | 0.30353   |
| 2w4w_SITTC $\zeta$ | 0.00937551 | 0.04597352 | 3.20E-05 | 0.0068348 | 0.4058    |
| 2w4w_SITTC $\zeta$ | 0.00635995 | 0.02777739 | 3.18E-05 | 0.008015  | 0.56984   |
| 2w4w_SITTC $\zeta$ | 0.06300806 | 0.3695973  | 6.09E-05 | 0.0096122 | 0.087254  |
| 2w4w_SITTC $\zeta$ | 0.01554179 | 0.08318145 | 3.28E-05 | 0.0052924 | 0.1442    |
| 2w4w_SITTC $\zeta$ | 0.02316544 | 0.12918326 | 3.58E-05 | 0.0042778 | -0.065623 |
| 2w4w_SITTC $\zeta$ | 0.06057447 | 0.35491282 | 6.05E-05 | 0.008688  | 0.07887   |
| 2w4w_SITTC $\zeta$ | 0.03471966 | 0.1989025  | 4.48E-05 | 0.0041765 | -0.078293 |
| 2w4w_SITTC $\zeta$ | 0.01223672 | 0.06323837 | 3.23E-05 | 0.0060411 | 0.2791    |
| 2w4w_SITTC $\zeta$ | 0.02064555 | 0.113978   | 3.44E-05 | 0.0045325 | -0.01065  |
| 2w4w_SITTC $\zeta$ | 0.0792138  | 0.4673842  | 6.31E-05 | 0.016335  | 0.13613   |
| 2w4w_SITTC $\zeta$ | 0.01891502 | 0.10353582 | 3.38E-05 | 0.004741  | 0.03364   |
| 2w4w_SITTC $\zeta$ | 0.02198429 | 0.1220561  | 3.49E-05 | 0.0044169 | -0.046619 |
| 2w4w_SITTC $\zeta$ | 0.01256561 | 0.06522291 | 3.23E-05 | 0.0059016 | 0.25518   |
| 2w4w_SITTC $\zeta$ | 0.03685425 | 0.21178281 | 4.70E-05 | 0.0042982 | -0.057524 |
| 2w4w_SITTC $\zeta$ | 0.03769668 | 0.21686609 | 4.81E-05 | 0.0043756 | -0.05192  |
| 2w4w_SITTC $\zeta$ | 0.01070757 | 0.05401129 | 3.21E-05 | 0.0064976 | 0.35381   |
| 2w4w_SITTC $\zeta$ | 0.02375218 | 0.13272369 | 3.61E-05 | 0.0042401 | -0.073623 |
| 2w4w_SITTC $\zeta$ | 0.02601263 | 0.14636347 | 3.76E-05 | 0.0041286 | -0.096385 |
| 2w4w_SITTC $\zeta$ | 0.02673703 | 0.15073453 | 3.80E-05 | 0.0041099 | -0.099939 |
| 2w4w_SITTC $\zeta$ | 0.0294762  | 0.16726297 | 4.02E-05 | 0.0040662 | -0.10661  |
| 2w4w_SITTC $\zeta$ | 0.01912591 | 0.10480838 | 3.38E-05 | 0.004741  | 0.03364   |
| 2w4w_SITTC $\zeta$ | 0.02200763 | 0.12219691 | 3.52E-05 | 0.0043661 | -0.046619 |
| 2w4w_SITTC $\zeta$ | 0.01720355 | 0.09320865 | 3.33E-05 | 0.0049935 | 0.085504  |
| 2w4w_SITTD $\zeta$ | 0.01300432 | 0.06787015 | 3.23E-05 | 0.0059016 | 0.25518   |
| 2w4w_SITTD $\zeta$ | 0.01076321 | 0.05434707 | 3.21E-05 | 0.0064976 | 0.35381   |
| 2w4w_SITTD $\zeta$ | 0.05337856 | 0.311492   | 5.89E-05 | 0.0067028 | 0.059084  |
| 2w4w_SITTD $\zeta$ | 0.01823827 | 0.09945224 | 3.36E-05 | 0.0048202 | 0.050123  |
| 2w4w_SITTD $\zeta$ | 0.01320603 | 0.06908725 | 3.24E-05 | 0.0057681 | 0.23179   |
| 2w4w_SITTD $\zeta$ | 0.02723926 | 0.15376507 | 3.84E-05 | 0.0040947 | -0.10271  |
| 2w4w_SITTD $\zeta$ | 0.03600483 | 0.20665735 | 4.65E-05 | 0.0042637 | -0.068307 |
| 2w4w_SITTD $\zeta$ | 0.01795959 | 0.09777065 | 3.34E-05 | 0.0049043 | 0.067421  |
| 2w4w_SITTD $\zeta$ | 0.09292787 | 0.55013615 | 6.46E-05 | 0.022258  | 0.010343  |

|            |            |            |          |           |            |
|------------|------------|------------|----------|-----------|------------|
| 2w4w_SITTD | 0.0097988  | 0.04852774 | 3.20E-05 | 0.0066628 | 0.37961    |
| 2w4w_SITTD | 0.01783239 | 0.09700312 | 3.34E-05 | 0.0049043 | 0.067421   |
| 2w4w_SITTD | 0.12644948 | 0.7524086  | 6.68E-05 | 0.023879  | -0.41707   |
| 2w4w_SITTD | 0.01813128 | 0.09880669 | 3.36E-05 | 0.0048202 | 0.050123   |
| 2w4w_SITTD | 0.02288009 | 0.1274614  | 3.55E-05 | 0.0043197 | -0.056631  |
| 2w4w_SITTD | 0.01441824 | 0.07640184 | 3.26E-05 | 0.0055188 | 0.18676    |
| 2w4w_SITTD | 0.01204336 | 0.0620716  | 3.23E-05 | 0.0060411 | 0.2791     |
| 2w4w_SITTD | 0.02619045 | 0.14743643 | 3.76E-05 | 0.0041286 | -0.096385  |
| 2w4w_SITTD | 0.01790384 | 0.09743428 | 3.34E-05 | 0.0049043 | 0.067421   |
| 2w4w_SITTD | 0.0131559  | 0.06878474 | 3.24E-05 | 0.0057681 | 0.23179    |
| 2w4w_SITTD | 0.01201746 | 0.06191535 | 3.23E-05 | 0.0060411 | 0.2791     |
| 2w4w_SITTD | 0.10631627 | 0.630923   | 6.58E-05 | 0.02556   | -0.21453   |
| 2w4w_SITTD | 0.07270994 | 0.42813933 | 6.22E-05 | 0.01332   | 0.12548    |
| 2w4w_SITTD | 0.09172386 | 0.542871   | 6.45E-05 | 0.021822  | 0.027741   |
| 2w4w_SITTD | 0.08566141 | 0.50628966 | 6.39E-05 | 0.019177  | 0.1043     |
| 2w4w_SITTD | 0.09597082 | 0.56849754 | 6.50E-05 | 0.023448  | -0.045608  |
| 2w4w_SITTD | 0.05007261 | 0.2915436  | 5.76E-05 | 0.005992  | 0.046466   |
| 2w4w_SITTD | 0.01424164 | 0.07533623 | 3.26E-05 | 0.0055188 | 0.18676    |
| 2w4w_SITTD | 0.09414504 | 0.55748063 | 6.48E-05 | 0.022877  | -0.0077738 |
| 2w4w_SITTD | 0.07983992 | 0.47116223 | 6.32E-05 | 0.016594  | 0.13545    |
| 2w4w_SITTD | 0.02121303 | 0.11740226 | 3.47E-05 | 0.0044724 | -0.023601  |
| 2w4w_SITTD | 0.07540876 | 0.4444242  | 6.26E-05 | 0.014549  | 0.13345    |
| 2w4w_SITTD | 0.08739424 | 0.5167457  | 6.41E-05 | 0.020177  | 0.087329   |
| 2w4w_SITTD | 0.03774492 | 0.2171572  | 4.81E-05 | 0.0043756 | -0.05192   |
| 2w4w_SITTD | 0.0652895  | 0.3833637  | 6.12E-05 | 0.01041   | 0.095509   |
| 2w4w_SITTD | 0.03971165 | 0.22902462 | 4.98E-05 | 0.0045122 | -0.028892  |
| 2w4w_SITTD | 0.01353259 | 0.07105775 | 3.24E-05 | 0.0057681 | 0.23179    |
| 2w4w_SITTD | 0.02103411 | 0.1163226  | 3.47E-05 | 0.0044724 | -0.023601  |
| 2w4w_SITTD | 0.01569958 | 0.08413356 | 3.28E-05 | 0.0052924 | 0.1442     |
| 2w4w_SITTD | 0.02473592 | 0.13865969 | 3.64E-05 | 0.0042065 | -0.086782  |
| 2w4w_SITTD | 0.02991574 | 0.1699152  | 4.07E-05 | 0.0040668 | -0.10597   |
| 2w4w_SITTD | 0.10301012 | 0.61097336 | 6.56E-05 | 0.025216  | -0.16182   |
| 2w4w_SITTD | 0.07976219 | 0.47069323 | 6.32E-05 | 0.016594  | 0.13545    |
| 2w4w_SITTD | 0.10461745 | 0.62067217 | 6.57E-05 | 0.025429  | -0.18901   |
| 2w4w_SITTD | 0.04856847 | 0.28246748 | 5.67E-05 | 0.0056831 | 0.041222   |
| 2w4w_SITTD | 0.04665753 | 0.27093673 | 5.57E-05 | 0.0054037 | 0.028707   |
| 2w4w_SITTD | 0.01416907 | 0.07489833 | 3.25E-05 | 0.0056405 | 0.20898    |
| 2w4w_SITTD | 0.10665336 | 0.632957   | 6.58E-05 | 0.02556   | -0.22263   |
| 2w4w_SITTD | 0.06393682 | 0.37520152 | 6.10E-05 | 0.0098069 | 0.091185   |
| 2w4w_SITTD | 0.00624154 | 0.0270629  | 3.18E-05 | 0.008015  | 0.56984    |
| 2w4w_SITTD | 0.02033749 | 0.11211914 | 3.44E-05 | 0.0045325 | -0.01065   |
| 2w4w_SITTD | 0.00747079 | 0.03448029 | 3.19E-05 | 0.0075925 | 0.51404    |
| 2w4w_SITTD | 0.02591009 | 0.14574474 | 3.76E-05 | 0.0041286 | -0.096385  |

|            |            |            |          |           |           |
|------------|------------|------------|----------|-----------|-----------|
| 2w4w_SITTD | 0.01142978 | 0.05836922 | 3.21E-05 | 0.006339  | 0.30353   |
| 2w4w_SITTD | 0.0498111  | 0.2899656  | 5.76E-05 | 0.005992  | 0.046466  |
| 2w4w_SITTD | 0.03669303 | 0.21081    | 4.70E-05 | 0.0042982 | -0.062998 |
| 2w4w_SITTD | 0.10192692 | 0.6044372  | 6.55E-05 | 0.025029  | -0.14299  |
| 2w4w_SITTD | 0.09987299 | 0.59204364 | 6.53E-05 | 0.024558  | -0.11403  |
| 2w4w_SITTD | 0.08158815 | 0.48171124 | 6.34E-05 | 0.017373  | 0.12948   |
| 2w4w_SITTD | 0.01680156 | 0.090783   | 3.31E-05 | 0.0050879 | 0.10435   |
| 2w4w_SITTD | 0.01550712 | 0.08297227 | 3.28E-05 | 0.0052924 | 0.1442    |
| 2w4w_SITTD | 0.07955606 | 0.4694494  | 6.31E-05 | 0.016335  | 0.13545   |
| 2w4w_SITTD | 0.08158352 | 0.4816833  | 6.34E-05 | 0.017373  | 0.12948   |
| 2w4w_SITTD | 0.09638953 | 0.5710241  | 6.50E-05 | 0.023626  | -0.045608 |
| 2w4w_SITTD | 0.03106757 | 0.17686546 | 4.16E-05 | 0.0040771 | -0.10299  |
| 2w4w_SITTD | 0.01429676 | 0.0756688  | 3.26E-05 | 0.0055188 | 0.18676   |
| 2w4w_SITTD | 0.0893893  | 0.5287841  | 6.43E-05 | 0.020902  | 0.059815  |
| 2w4w_SITTD | 0.11771561 | 0.6997076  | 6.64E-05 | 0.024917  | -0.34876  |
| 2w4w_SITTD | 0.13669603 | 0.81423724 | 6.72E-05 | 0.023527  | -0.4775   |
| 2w4w_SITTD | 0.02991086 | 0.16988572 | 4.07E-05 | 0.0040668 | -0.10597  |
| 2w4w_SITTD | 0.01280818 | 0.06668662 | 3.23E-05 | 0.0059016 | 0.25518   |
| 2w4w_SITTD | 0.09936407 | 0.58897275 | 6.53E-05 | 0.02442   | -0.10426  |
| 2w4w_SITTD | 0.11609072 | 0.68990284 | 6.63E-05 | 0.025119  | -0.33347  |
| 2w4w_SITTD | 0.01930548 | 0.10589192 | 3.40E-05 | 0.0046667 | 0.017998  |
| 2w4w_SITTD | 0.02050143 | 0.11310834 | 3.44E-05 | 0.0045325 | -0.01065  |
| 2w4w_SITTD | 0.013129   | 0.06862244 | 3.24E-05 | 0.0057681 | 0.23179   |
| 2w4w_SITTD | 0.06585096 | 0.3867516  | 6.13E-05 | 0.010616  | 0.097788  |
| 2w4w_SITTD | 0.06378356 | 0.37427673 | 6.10E-05 | 0.0098069 | 0.089169  |
| 2w4w_SITTD | 0.00876099 | 0.04226548 | 3.19E-05 | 0.0070136 | 0.43237   |
| 2w4w_SITTD | 0.0170438  | 0.09224471 | 3.33E-05 | 0.0049935 | 0.085504  |
| 2w4w_SITTD | 0.12580587 | 0.748525   | 6.68E-05 | 0.023927  | -0.41325  |
| 2w4w_SITTD | 0.09442163 | 0.55914956 | 6.48E-05 | 0.022877  | -0.017059 |
| 2w4w_SITTD | 0.01370403 | 0.07209221 | 3.25E-05 | 0.0056405 | 0.20898   |
| 2w4w_SITTD | 0.09514727 | 0.5635282  | 6.49E-05 | 0.023073  | -0.026471 |
| 2w4w_SITTD | 0.03383573 | 0.19356877 | 4.43E-05 | 0.004153  | -0.087207 |
| 2w4w_SITTD | 0.04351849 | 0.25199544 | 5.33E-05 | 0.0049301 | 0.008455  |
| 2w4w_SITTD | 0.03518789 | 0.20172784 | 4.54E-05 | 0.0042028 | -0.073417 |
| 2w4w_SITTD | 0.08864444 | 0.5242895  | 6.42E-05 | 0.020663  | 0.074212  |
| 2w4w_SITTD | 0.00922266 | 0.04505122 | 3.19E-05 | 0.0070136 | 0.4058    |
| 2w4w_SITTD | 0.10531102 | 0.6248572  | 6.57E-05 | 0.025482  | -0.19772  |
| 2w4w_SITTD | 0.03053261 | 0.17363742 | 4.11E-05 | 0.0040705 | -0.10475  |
| 2w4w_SITTD | 0.12824982 | 0.76327205 | 6.69E-05 | 0.023757  | -0.4283   |
| 2w4w_SITTD | 0.05007291 | 0.29154542 | 5.76E-05 | 0.005992  | 0.046466  |
| 2w4w_SITTD | 0.04578483 | 0.26567072 | 5.50E-05 | 0.0052335 | 0.025099  |
| 2w4w_SITTD | 0.01191239 | 0.06128133 | 3.22E-05 | 0.0061869 | 0.30353   |
| 2w4w_SITTD | 0.02213598 | 0.12297139 | 3.52E-05 | 0.0043661 | -0.046619 |

|             |            |            |          |           |            |
|-------------|------------|------------|----------|-----------|------------|
| 2w4w_SITTD: | 0.01417362 | 0.07492578 | 3.25E-05 | 0.0056405 | 0.20898    |
| 2w4w_SITTD: | 0.06048643 | 0.35438153 | 6.05E-05 | 0.008688  | 0.07887    |
| 2w4w_SITTD: | 0.02306804 | 0.12859558 | 3.55E-05 | 0.0043197 | -0.065623  |
| 2w4w_SITTD: | 0.02407478 | 0.1346703  | 3.61E-05 | 0.0042401 | -0.073623  |
| 2w4w_SITTD: | 0.02590028 | 0.14568551 | 3.76E-05 | 0.0041286 | -0.096385  |
| 2w4w_SITTD: | 0.02259059 | 0.12571456 | 3.55E-05 | 0.0043197 | -0.056631  |
| 2w4w_SITTD: | 0.0101036  | 0.05036693 | 3.20E-05 | 0.0066628 | 0.37961    |
| 2w4w_SITTD: | 0.01214332 | 0.0626748  | 3.23E-05 | 0.0060411 | 0.2791     |
| 2w4w_SITTD: | 0.07604873 | 0.44828588 | 6.26E-05 | 0.0148    | 0.13453    |
| 2w4w_SITTD: | 0.02179731 | 0.12092782 | 3.49E-05 | 0.0044169 | -0.0356    |
| 2w4w_SITTD: | 0.12913178 | 0.76859385 | 6.70E-05 | 0.023692  | -0.43556   |
| 2w4w_SITTD: | 0.02157055 | 0.11955956 | 3.49E-05 | 0.0044169 | -0.0356    |
| 2w4w_SITTD: | 0.03221043 | 0.18376158 | 4.27E-05 | 0.004099  | -0.097962  |
| 2w4w_SITTD: | 0.0224605  | 0.12492958 | 3.52E-05 | 0.0043661 | -0.046619  |
| 2w4w_SITTD: | 0.09522466 | 0.5639951  | 6.49E-05 | 0.023263  | -0.026471  |
| 2w4w_SITTD: | 0.06375214 | 0.37408713 | 6.10E-05 | 0.0098069 | 0.089169   |
| 2w4w_SITTD: | 0.01425582 | 0.07542178 | 3.26E-05 | 0.0055188 | 0.18676    |
| 2w4w_SITTD: | 0.03017527 | 0.17148122 | 4.07E-05 | 0.0040668 | -0.10597   |
| 2w4w_SITTD: | 0.11694377 | 0.6950503  | 6.64E-05 | 0.024986  | -0.34377   |
| 2w4w_SITTD: | 0.01159738 | 0.05938051 | 3.22E-05 | 0.0061869 | 0.30353    |
| 2w4w_SITTD: | 0.08722432 | 0.51572037 | 6.41E-05 | 0.01993   | 0.087329   |
| 2w4w_SITTD: | 0.01533795 | 0.08195148 | 3.28E-05 | 0.0052924 | 0.1442     |
| 2w4w_SITTD: | 0.00895403 | 0.04343033 | 3.19E-05 | 0.0070136 | 0.43237    |
| 2w4w_SITTD: | 0.12727839 | 0.7574103  | 6.69E-05 | 0.023834  | -0.42086   |
| 2w4w_SITTD: | 0.03011291 | 0.17110495 | 4.07E-05 | 0.0040668 | -0.10597   |
| 2w4w_SITTD: | 0.09413744 | 0.5574348  | 6.48E-05 | 0.022877  | -0.0077738 |
| 2w4w_SITTD: | 0.02655271 | 0.14962237 | 3.80E-05 | 0.0041099 | -0.099939  |
| 2w4w_SITTD: | 0.07966305 | 0.47009504 | 6.32E-05 | 0.016594  | 0.13545    |
| 2w4w_SITTD: | 0.08385986 | 0.49541897 | 6.37E-05 | 0.01841   | 0.1176     |
| 2w4w_SITTD: | 0.0171391  | 0.09281979 | 3.33E-05 | 0.0049935 | 0.085504   |
| 2w4w_SITTD: | 0.0498029  | 0.28991616 | 5.76E-05 | 0.005992  | 0.046466   |
| 2w4w_SITTD: | 0.03867452 | 0.22276646 | 4.92E-05 | 0.0044639 | -0.040459  |
| 2w4w_SITTD: | 0.03819282 | 0.21985988 | 4.87E-05 | 0.0044183 | -0.04622   |
| 2w4w_SITTD: | 0.04457031 | 0.2583422  | 5.42E-05 | 0.0050757 | 0.017239   |
| 2w4w_SITTD: | 0.00740977 | 0.03411209 | 3.19E-05 | 0.0075925 | 0.51404    |
| 2w4w_SITTD: | 0.02437555 | 0.13648514 | 3.64E-05 | 0.0042065 | -0.080664  |
| 2w4w_SITTD: | 0.02722517 | 0.15368006 | 3.84E-05 | 0.0040947 | -0.10271   |
| 2w4w_SITTD: | 0.06543112 | 0.38421825 | 6.12E-05 | 0.01041   | 0.095509   |
| 2w4w_SITTD: | 0.12943526 | 0.7704251  | 6.70E-05 | 0.023692  | -0.43556   |
| 2w4w_SITTD: | 0.14573751 | 0.8687944  | 6.75E-05 | 0.02365   | -0.51443   |
| 2w4w_SITTD: | 0.03065807 | 0.17439446 | 4.11E-05 | 0.0040705 | -0.10475   |
| 2w4w_SITTD: | 0.09400231 | 0.5566194  | 6.48E-05 | 0.022676  | -0.0077738 |
| 2w4w_SITTD: | 0.0375611  | 0.21604799 | 4.81E-05 | 0.0043756 | -0.05192   |

|            |            |            |          |           |           |
|------------|------------|------------|----------|-----------|-----------|
| 2w4w_SITTD | 0.0180931  | 0.09857629 | 3.34E-05 | 0.0049043 | 0.050123  |
| 2w4w_SITTD | 0.14121453 | 0.8415023  | 6.74E-05 | 0.023575  | -0.4978   |
| 2w4w_SITTD | 0.10496871 | 0.6227917  | 6.57E-05 | 0.025429  | -0.19772  |
| 2w4w_SITTD | 0.00918942 | 0.04485065 | 3.19E-05 | 0.0070136 | 0.43237   |
| 2w4w_SITTD | 0.12267285 | 0.72962004 | 6.67E-05 | 0.024282  | -0.38934  |
| 2w4w_SITTD | 0.0552066  | 0.3225226  | 5.94E-05 | 0.0071062 | 0.065685  |
| 2w4w_SITTD | 0.02339139 | 0.13054669 | 3.58E-05 | 0.0042778 | -0.065623 |
| 2w4w_SITTD | 0.02889239 | 0.16374022 | 3.97E-05 | 0.0040686 | -0.10664  |
| 2w4w_SITTD | 0.01211754 | 0.06251922 | 3.23E-05 | 0.0060411 | 0.2791    |
| 2w4w_SITTD | 0.04747351 | 0.27586037 | 5.61E-05 | 0.0054936 | 0.035328  |
| 2w4w_SITTD | 0.00893719 | 0.04332866 | 3.19E-05 | 0.0070136 | 0.43237   |
| 2w4w_SITTD | 0.01652958 | 0.08914189 | 3.31E-05 | 0.0050879 | 0.10435   |
| 2w4w_SITTD | 0.02128857 | 0.11785803 | 3.47E-05 | 0.0044724 | -0.023601 |
| 2w4w_SITTD | 0.01483012 | 0.07888715 | 3.27E-05 | 0.0054028 | 0.16515   |
| 2w4w_SITTD | 0.07412202 | 0.43665993 | 6.24E-05 | 0.014051  | 0.13074   |
| 2w4w_SITTD | 0.03443133 | 0.19716267 | 4.48E-05 | 0.0041765 | -0.082901 |
| 2w4w_SITTD | 0.08694992 | 0.51406467 | 6.41E-05 | 0.01993   | 0.093363  |
| 2w4w_SITTD | 0.07405932 | 0.43628162 | 6.23E-05 | 0.013805  | 0.13074   |
| 2w4w_SITTD | 0.09291633 | 0.5500665  | 6.46E-05 | 0.022258  | 0.010343  |
| 2w4w_SITTD | 0.11837746 | 0.7037013  | 6.65E-05 | 0.024847  | -0.35363  |
| 2w4w_SITTD | 0.01251081 | 0.06489224 | 3.23E-05 | 0.0060411 | 0.2791    |
| 2w4w_SITTD | 0.02569292 | 0.14443427 | 3.72E-05 | 0.0041509 | -0.092011 |
| 2w4w_SITTD | 0.00956583 | 0.04712194 | 3.20E-05 | 0.0068348 | 0.4058    |
| 2w4w_SITTD | 0.14242183 | 0.84878725 | 6.74E-05 | 0.023593  | -0.50412  |
| 2w4w_SITTD | 0.02408881 | 0.13475496 | 3.61E-05 | 0.0042401 | -0.073623 |
| 2w4w_SITTD | 0.0653175  | 0.38353267 | 6.12E-05 | 0.01041   | 0.095509  |
| 2w4w_SITTD | 0.08191434 | 0.48367947 | 6.35E-05 | 0.017633  | 0.12948   |
| 2w4w_SITTD | 0.02814072 | 0.15920457 | 3.93E-05 | 0.004074  | -0.10603  |
| 2w4w_SITTD | 0.03199851 | 0.18248281 | 4.27E-05 | 0.004099  | -0.097962 |
| 2w4w_SITTD | 0.1421918  | 0.8473992  | 6.74E-05 | 0.023584  | -0.5021   |
| 2w4w_SITTD | 0.03917844 | 0.22580718 | 4.98E-05 | 0.0045122 | -0.034672 |
| 2w4w_SITTD | 0.00826345 | 0.03926325 | 3.19E-05 | 0.0071994 | 0.45929   |
| 2w4w_SITTD | 0.10710776 | 0.63569885 | 6.58E-05 | 0.025586  | -0.23052  |
| 2w4w_SITTD | 0.00661757 | 0.02933189 | 3.18E-05 | 0.0078    | 0.54183   |
| 2w4w_SITTD | 0.06725719 | 0.3952369  | 6.14E-05 | 0.011039  | 0.10492   |
| 2w4w_SITTD | 0.07168663 | 0.42196453 | 6.20E-05 | 0.012843  | 0.12348   |
| 2w4w_SITTD | 0.01509362 | 0.08047716 | 3.27E-05 | 0.0054028 | 0.16515   |
| 2w4w_SITTD | 0.09071774 | 0.5368     | 6.45E-05 | 0.021597  | 0.044278  |
| 2w4w_SITTD | 0.08556213 | 0.5056906  | 6.39E-05 | 0.019177  | 0.1043    |
| 2w4w_SITTD | 0.04671054 | 0.27125654 | 5.57E-05 | 0.0054037 | 0.028707  |
| 2w4w_SITTD | 0.01923236 | 0.10545069 | 3.40E-05 | 0.0046667 | 0.017998  |
| 2w4w_SITTD | 0.03955253 | 0.22806449 | 4.98E-05 | 0.0045122 | -0.034672 |
| 2w4w_SITTD | 0.07281077 | 0.4287477  | 6.22E-05 | 0.01332   | 0.12737   |



|            |            |            |          |           |           |
|------------|------------|------------|----------|-----------|-----------|
| 2w4w_SITTD | 0.0164714  | 0.08879078 | 3.31E-05 | 0.0050879 | 0.10435   |
| 2w4w_SITTD | 0.00740893 | 0.03410705 | 3.19E-05 | 0.0075925 | 0.51404   |
| 2w4w_SITTD | 0.01167178 | 0.05982946 | 3.22E-05 | 0.0061869 | 0.30353   |
| 2w4w_SITTD | 0.05883792 | 0.34443426 | 6.02E-05 | 0.0081753 | 0.074438  |
| 2w4w_SITTD | 0.02689308 | 0.15167616 | 3.80E-05 | 0.0041099 | -0.10271  |
| 2w4w_SITTD | 0.02193428 | 0.1217543  | 3.49E-05 | 0.0044169 | -0.046619 |
| 2w4w_SITTD | 0.01328413 | 0.06955851 | 3.24E-05 | 0.0057681 | 0.23179   |
| 2w4w_SITTD | 0.12454354 | 0.74090797 | 6.68E-05 | 0.024034  | -0.40152  |
| 2w4w_SITTD | 0.05018313 | 0.29221052 | 5.76E-05 | 0.005992  | 0.048868  |
| 2w4w_SITTD | 0.11895046 | 0.70715886 | 6.65E-05 | 0.024776  | -0.3584   |
| 2w4w_SITTD | 0.03953617 | 0.22796574 | 4.98E-05 | 0.0045122 | -0.034672 |
| 2w4w_SITTD | 0.11975893 | 0.7120372  | 6.65E-05 | 0.024632  | -0.36766  |
| 2w4w_SITTD | 0.09282444 | 0.549512   | 6.46E-05 | 0.022258  | 0.010343  |
| 2w4w_SITTD | 0.02587375 | 0.14552541 | 3.76E-05 | 0.0041286 | -0.096385 |
| 2w4w_SITTD | 0.09322587 | 0.5519343  | 6.47E-05 | 0.022469  | 0.0013661 |
| 2w4w_SITTD | 0.04785625 | 0.2781699  | 5.64E-05 | 0.0055867 | 0.035328  |
| 2w4w_SITTD | 0.04016337 | 0.23175032 | 5.03E-05 | 0.0045634 | -0.023154 |
| 2w4w_SITTD | 0.02151309 | 0.11921281 | 3.49E-05 | 0.0044169 | -0.0356   |
| 2w4w_SITTD | 0.02239343 | 0.12452487 | 3.52E-05 | 0.0043661 | -0.046619 |
| 2w4w_SITTD | 0.01436376 | 0.0760731  | 3.26E-05 | 0.0055188 | 0.18676   |
| 2w4w_SITTD | 0.02464285 | 0.13809806 | 3.64E-05 | 0.0042065 | -0.080664 |
| 2w4w_SITTD | 0.01598058 | 0.08582913 | 3.30E-05 | 0.0051875 | 0.12392   |
| 2w4w_SITTD | 0.01409328 | 0.07444099 | 3.25E-05 | 0.0056405 | 0.20898   |
| 2w4w_SITTD | 0.05515434 | 0.3222072  | 5.94E-05 | 0.0071062 | 0.065685  |
| 2w4w_SITTD | 0.04353435 | 0.2520911  | 5.33E-05 | 0.0049301 | 0.008455  |
| 2w4w_SITTD | 0.0198349  | 0.10908649 | 3.42E-05 | 0.0045972 | 0.0032259 |
| 2w4w_SITTD | 0.02255825 | 0.1255194  | 3.55E-05 | 0.0043197 | -0.056631 |
| 2w4w_SITTD | 0.01028988 | 0.05149093 | 3.20E-05 | 0.0066628 | 0.37961   |
| 2w4w_SITTD | 0.02564241 | 0.14412953 | 3.72E-05 | 0.0041509 | -0.092011 |
| 2w4w_SITTD | 0.01671757 | 0.09027619 | 3.31E-05 | 0.0050879 | 0.10435   |
| 2w4w_SITTD | 0.04854367 | 0.28231782 | 5.67E-05 | 0.0056831 | 0.041222  |
| 2w4w_SITTD | 0.01502631 | 0.080071   | 3.27E-05 | 0.0054028 | 0.16515   |
| 2w4w_SITTD | 0.01928291 | 0.10575572 | 3.40E-05 | 0.0046667 | 0.017998  |
| 2w4w_SITTD | 0.02270873 | 0.12642746 | 3.55E-05 | 0.0043197 | -0.056631 |
| 2w4w_SITTD | 0.11275433 | 0.66977084 | 6.62E-05 | 0.025448  | -0.29951  |
| 2w4w_SITTD | 0.02505039 | 0.14055718 | 3.68E-05 | 0.0041768 | -0.086782 |
| 2w4w_SITTD | 0.01291409 | 0.06732569 | 3.23E-05 | 0.0059016 | 0.25518   |
| 2w4w_SITTD | 0.09326382 | 0.5521633  | 6.47E-05 | 0.022469  | 0.0013661 |
| 2w4w_SITTD | 0.01185912 | 0.06095987 | 3.22E-05 | 0.0061869 | 0.30353   |
| 2w4w_SITTD | 0.02245911 | 0.12492119 | 3.52E-05 | 0.0043661 | -0.046619 |
| 2w4w_SITTD | 0.04453941 | 0.2581558  | 5.42E-05 | 0.0050757 | 0.012967  |
| 2w4w_SITTD | 0.07956017 | 0.46947423 | 6.31E-05 | 0.016335  | 0.13545   |
| 2w4w_SITTD | 0.01222273 | 0.06315392 | 3.23E-05 | 0.0060411 | 0.2791    |

|             |            |            |          |           |           |
|-------------|------------|------------|----------|-----------|-----------|
| 2w4w_SITTD: | 0.02985949 | 0.16957581 | 4.07E-05 | 0.0040668 | -0.10597  |
| 2w4w_SITTD: | 0.01509744 | 0.08050022 | 3.27E-05 | 0.0054028 | 0.16515   |
| 2w4w_SITTD: | 0.03242899 | 0.1850804  | 4.27E-05 | 0.004099  | -0.094772 |
| 2w4w_SITTD: | 0.03541263 | 0.20308395 | 4.59E-05 | 0.0042319 | -0.073417 |
| 2w4w_SITTD: | 0.01895918 | 0.1038023  | 3.38E-05 | 0.004741  | 0.03364   |
| 2w4w_SITTD: | 0.12129044 | 0.7212785  | 6.66E-05 | 0.024419  | -0.37656  |
| 2w4w_SITTD: | 0.0245192  | 0.13735199 | 3.64E-05 | 0.0042065 | -0.080664 |
| 2w4w_SITTD: | 0.00866799 | 0.0417043  | 3.19E-05 | 0.0071994 | 0.43237   |
| 2w4w_SITTD: | 0.07309387 | 0.43045598 | 6.23E-05 | 0.013561  | 0.12737   |
| 2w4w_SITTD: | 0.02754234 | 0.15559387 | 3.88E-05 | 0.0040827 | -0.10472  |
| 2w4w_SITTD: | 0.02557088 | 0.14369792 | 3.72E-05 | 0.0041509 | -0.092011 |
| 2w4w_SITTD: | 0.02167047 | 0.12016247 | 3.49E-05 | 0.0044169 | -0.0356   |
| 2w4w_SITTD: | 0.03564189 | 0.20446731 | 4.59E-05 | 0.0042319 | -0.073417 |
| 2w4w_SITTD: | 0.03243865 | 0.18513866 | 4.27E-05 | 0.004099  | -0.094772 |
| 2w4w_SITTD: | 0.02211035 | 0.12281676 | 3.52E-05 | 0.0043661 | -0.046619 |
| 2w4w_SITTD: | 0.01316345 | 0.0688303  | 3.24E-05 | 0.0057681 | 0.23179   |
| 2w4w_SITTD: | 0.04605252 | 0.267286   | 5.54E-05 | 0.0053171 | 0.025099  |
| 2w4w_SITTD: | 0.08287317 | 0.48946515 | 6.35E-05 | 0.017892  | 0.12434   |
| 2w4w_SITTD: | 0.02672967 | 0.15069014 | 3.80E-05 | 0.0041099 | -0.099939 |
| 2w4w_SITTD: | 0.08261254 | 0.4878925  | 6.35E-05 | 0.017892  | 0.1271    |
| 2w4w_SITTD: | 0.01345235 | 0.07057355 | 3.24E-05 | 0.0057681 | 0.23179   |
| 2w4w_SITTD: | 0.02680969 | 0.15117303 | 3.80E-05 | 0.0041099 | -0.099939 |
| 2w4w_SITTD: | 0.02107362 | 0.11656099 | 3.47E-05 | 0.0044724 | -0.023601 |
| 2w4w_SITTD: | 0.01286973 | 0.06705799 | 3.23E-05 | 0.0059016 | 0.25518   |
| 2w4w_SITTD: | 0.01497722 | 0.07977477 | 3.27E-05 | 0.0054028 | 0.16515   |
| 2w4w_SITTD: | 0.00974138 | 0.04818127 | 3.20E-05 | 0.0068348 | 0.4058    |
| 2w4w_SITTD: | 0.0207542  | 0.11463361 | 3.44E-05 | 0.0045325 | -0.01065  |
| 2w4w_SITTD: | 0.01508093 | 0.08040059 | 3.27E-05 | 0.0054028 | 0.16515   |
| 2w4w_SITTD: | 0.01942108 | 0.10658946 | 3.40E-05 | 0.0046667 | 0.017998  |
| 2w4w_SITTD: | 0.02002361 | 0.11022515 | 3.42E-05 | 0.0045972 | 0.0032259 |
| 2w4w_SITTD: | 0.07467477 | 0.4399953  | 6.25E-05 | 0.014299  | 0.13218   |
| 2w4w_SITTD: | 0.00908248 | 0.04420539 | 3.19E-05 | 0.0070136 | 0.43237   |
| 2w4w_SITTD: | 0.0547722  | 0.31990138 | 5.94E-05 | 0.0071062 | 0.064127  |
| 2w4w_SITTD: | 0.02673793 | 0.15074    | 3.80E-05 | 0.0041099 | -0.099939 |
| 2w4w_SITTD: | 0.00750254 | 0.03467188 | 3.19E-05 | 0.0075925 | 0.51404   |
| 2w4w_SITTD: | 0.02365753 | 0.13215259 | 3.61E-05 | 0.0042401 | -0.073623 |
| 2w4w_SITTD: | 0.02509891 | 0.14085    | 3.68E-05 | 0.0041768 | -0.086782 |
| 2w4w_SITTD: | 0.08771745 | 0.518696   | 6.41E-05 | 0.020177  | 0.080939  |
| 2w4w_SITTD: | 0.09826977 | 0.5823696  | 6.52E-05 | 0.024123  | -0.084641 |
| 2w4w_SITTD: | 0.01504347 | 0.08017454 | 3.27E-05 | 0.0054028 | 0.16515   |
| 2w4w_SITTD: | 0.01040477 | 0.05218422 | 3.21E-05 | 0.0064976 | 0.35381   |
| 2w4w_SITTD: | 0.0169541  | 0.09170348 | 3.31E-05 | 0.0050879 | 0.085504  |
| 2w4w_SITTD: | 0.02143946 | 0.11876854 | 3.49E-05 | 0.0044169 | -0.0356   |

|            |            |            |          |           |           |
|------------|------------|------------|----------|-----------|-----------|
| 2w4w_SITTD | 0.02032942 | 0.11207043 | 3.44E-05 | 0.0045325 | -0.01065  |
| 2w4w_SITTD | 0.07802036 | 0.46018285 | 6.29E-05 | 0.015819  | 0.13662   |
| 2w4w_SITTD | 0.01651243 | 0.0890384  | 3.31E-05 | 0.0050879 | 0.10435   |
| 2w4w_SITTD | 0.02442804 | 0.13680188 | 3.64E-05 | 0.0042065 | -0.080664 |
| 2w4w_SITTD | 0.01614395 | 0.08681493 | 3.30E-05 | 0.0051875 | 0.12392   |
| 2w4w_SITTD | 0.05456417 | 0.31864607 | 5.92E-05 | 0.0069681 | 0.064127  |
| 2w4w_SITTD | 0.01332624 | 0.0698126  | 3.24E-05 | 0.0057681 | 0.23179   |
| 2w4w_SITTD | 0.02755147 | 0.15564899 | 3.88E-05 | 0.0040827 | -0.10472  |
| 2w4w_SITTD | 0.02447248 | 0.13707004 | 3.64E-05 | 0.0042065 | -0.080664 |
| 2w4w_SITTD | 0.09540985 | 0.5651126  | 6.49E-05 | 0.023263  | -0.035993 |
| 2w4w_SITTD | 0.00687948 | 0.03091228 | 3.18E-05 | 0.0078    | 0.54183   |
| 2w4w_SITTD | 0.0207879  | 0.11483698 | 3.44E-05 | 0.0045325 | -0.01065  |
| 2w4w_SITTD | 0.01592212 | 0.0854764  | 3.30E-05 | 0.0051875 | 0.12392   |
| 2w4w_SITTD | 0.11088637 | 0.65849936 | 6.61E-05 | 0.025556  | -0.28058  |
| 2w4w_SITTD | 0.01296653 | 0.0676421  | 3.23E-05 | 0.0059016 | 0.25518   |
| 2w4w_SITTD | 0.074906   | 0.44139054 | 6.25E-05 | 0.014299  | 0.13218   |
| 2w4w_SITTD | 0.01984716 | 0.10916045 | 3.42E-05 | 0.0045972 | 0.0032259 |
| 2w4w_SITTD | 0.01827278 | 0.09966048 | 3.36E-05 | 0.0048202 | 0.050123  |
| 2w4w_SITTD | 0.03501025 | 0.2006559  | 4.54E-05 | 0.0042028 | -0.078293 |
| 2w4w_SITTD | 0.11914739 | 0.70834714 | 6.65E-05 | 0.024704  | -0.36308  |
| 2w4w_SITTD | 0.1164318  | 0.69196105 | 6.64E-05 | 0.025054  | -0.33868  |
| 2w4w_SITTD | 0.02230007 | 0.12396153 | 3.52E-05 | 0.0043661 | -0.046619 |
| 2w4w_SITTD | 0.06269211 | 0.3676908  | 6.08E-05 | 0.0094206 | 0.085432  |
| 2w4w_SITTD | 0.09522975 | 0.5640259  | 6.49E-05 | 0.023263  | -0.026471 |
| 2w4w_SITTD | 0.07623018 | 0.44938076 | 6.26E-05 | 0.0148    | 0.1354    |
| 2w4w_SITTD | 0.02047447 | 0.11294571 | 3.44E-05 | 0.0045325 | -0.01065  |
| 2w4w_SITTD | 0.11241375 | 0.6677157  | 6.62E-05 | 0.025448  | -0.29336  |
| 2w4w_SITTD | 0.01457343 | 0.07733826 | 3.26E-05 | 0.0055188 | 0.18676   |
| 2w4w_SITTD | 0.03317383 | 0.18957481 | 4.37E-05 | 0.0041322 | -0.091175 |
| 2w4w_SITTD | 0.02399317 | 0.13417785 | 3.61E-05 | 0.0042401 | -0.073623 |
| 2w4w_SITTD | 0.10229706 | 0.6066707  | 6.55E-05 | 0.025029  | -0.15246  |
| 2w4w_SITTD | 0.01095492 | 0.05550385 | 3.21E-05 | 0.006339  | 0.32844   |
| 2w4w_SITTD | 0.01605213 | 0.08626089 | 3.30E-05 | 0.0051875 | 0.12392   |
| 2w4w_SITTD | 0.08135582 | 0.48030934 | 6.34E-05 | 0.017373  | 0.13148   |
| 2w4w_SITTD | 0.00980403 | 0.04855929 | 3.20E-05 | 0.0066628 | 0.37961   |
| 2w4w_SITTD | 0.01748535 | 0.09490907 | 3.33E-05 | 0.0049935 | 0.085504  |
| 2w4w_SITTD | 0.0257241  | 0.14462247 | 3.72E-05 | 0.0041509 | -0.092011 |
| 2w4w_SITTD | 0.02916812 | 0.165404   | 3.97E-05 | 0.0040686 | -0.10661  |
| 2w4w_SITTD | 0.01870191 | 0.10224989 | 3.38E-05 | 0.004741  | 0.03364   |
| 2w4w_SITTD | 0.05345871 | 0.31197563 | 5.89E-05 | 0.0067028 | 0.060836  |
| 2w4w_SITTD | 0.01320344 | 0.06907161 | 3.24E-05 | 0.0057681 | 0.23179   |
| 2w4w_SITTD | 0.01311476 | 0.06853651 | 3.23E-05 | 0.0059016 | 0.23179   |
| 2w4w_SITTD | 0.09121873 | 0.539823   | 6.45E-05 | 0.021597  | 0.036126  |

|            |            |            |          |           |           |
|------------|------------|------------|----------|-----------|-----------|
| 2w4w_SITTD | 0.13030359 | 0.7756647  | 6.70E-05 | 0.02364   | -0.44263  |
| 2w4w_SITTD | 0.03122038 | 0.17778751 | 4.16E-05 | 0.0040771 | -0.10299  |
| 2w4w_SITTD | 0.01958933 | 0.10760469 | 3.40E-05 | 0.0046667 | 0.017998  |
| 2w4w_SITTD | 0.08121827 | 0.47947934 | 6.33E-05 | 0.017113  | 0.13148   |
| 2w4w_SITTD | 0.01675419 | 0.09049716 | 3.31E-05 | 0.0050879 | 0.10435   |
| 2w4w_SITTD | 0.01325764 | 0.06939865 | 3.24E-05 | 0.0057681 | 0.23179   |
| 2w4w_SITTD | 0.10470072 | 0.62117463 | 6.57E-05 | 0.025429  | -0.18901  |
| 2w4w_SITTD | 0.02081648 | 0.11500941 | 3.44E-05 | 0.0045325 | -0.023601 |
| 2w4w_SITTD | 0.02584078 | 0.14532652 | 3.72E-05 | 0.0041509 | -0.096385 |
| 2w4w_SITTD | 0.14166602 | 0.84422666 | 6.74E-05 | 0.023575  | -0.49999  |
| 2w4w_SITTD | 0.09094841 | 0.5381919  | 6.45E-05 | 0.021597  | 0.044278  |
| 2w4w_SITTD | 0.0117052  | 0.06003108 | 3.22E-05 | 0.0061869 | 0.30353   |
| 2w4w_SITTD | 0.09101788 | 0.53861105 | 6.45E-05 | 0.021597  | 0.036126  |
| 2w4w_SITTD | 0.02854768 | 0.1616602  | 3.93E-05 | 0.004074  | -0.10603  |
| 2w4w_SITTD | 0.09719838 | 0.5759048  | 6.51E-05 | 0.023799  | -0.065044 |
| 2w4w_SITTD | 0.02498238 | 0.14014684 | 3.68E-05 | 0.0041768 | -0.086782 |
| 2w4w_SITTD | 0.0143024  | 0.07570285 | 3.26E-05 | 0.0055188 | 0.18676   |
| 2w4w_SITTD | 0.02851482 | 0.16146192 | 3.93E-05 | 0.004074  | -0.10603  |
| 2w4w_SITTD | 0.04026634 | 0.23237166 | 5.03E-05 | 0.0045634 | -0.023154 |
| 2w4w_SITTD | 0.02033879 | 0.11212698 | 3.44E-05 | 0.0045325 | -0.01065  |
| 2w4w_SITTD | 0.0535412  | 0.31247336 | 5.89E-05 | 0.0067028 | 0.060836  |
| 2w4w_SITTD | 0.06897415 | 0.40559724 | 6.16E-05 | 0.011695  | 0.11218   |
| 2w4w_SITTD | 0.1217706  | 0.7241758  | 6.66E-05 | 0.02435   | -0.38089  |
| 2w4w_SITTD | 0.01529238 | 0.0816765  | 3.27E-05 | 0.0054028 | 0.1442    |
| 2w4w_SITTD | 0.01392443 | 0.07342212 | 3.25E-05 | 0.0056405 | 0.20898   |
| 2w4w_SITTD | 0.0105385  | 0.05299116 | 3.21E-05 | 0.0064976 | 0.35381   |
| 2w4w_SITTD | 0.02285026 | 0.12728144 | 3.55E-05 | 0.0043197 | -0.056631 |
| 2w4w_SITTD | 0.01076913 | 0.05438275 | 3.21E-05 | 0.0064976 | 0.35381   |
| 2w4w_SITTD | 0.02789224 | 0.15770519 | 3.88E-05 | 0.0040827 | -0.10472  |
| 2w4w_SITTD | 0.0515844  | 0.3006659  | 5.83E-05 | 0.0063316 | 0.053285  |
| 2w4w_SITTD | 0.11565861 | 0.6872955  | 6.63E-05 | 0.025119  | -0.32814  |
| 2w4w_SITTD | 0.02010339 | 0.11070658 | 3.42E-05 | 0.0045972 | 0.0032259 |
| 2w4w_SITTD | 0.06962122 | 0.4095017  | 6.17E-05 | 0.01192   | 0.11455   |
| 2w4w_SITTD | 0.01902309 | 0.10418797 | 3.38E-05 | 0.004741  | 0.03364   |
| 2w4w_SITTD | 0.02231293 | 0.12403913 | 3.52E-05 | 0.0043661 | -0.046619 |
| 2w4w_SITTD | 0.02083083 | 0.11509603 | 3.44E-05 | 0.0045325 | -0.023601 |
| 2w4w_SITTD | 0.01650509 | 0.08899409 | 3.31E-05 | 0.0050879 | 0.10435   |
| 2w4w_SITTD | 0.01389715 | 0.07325754 | 3.25E-05 | 0.0056405 | 0.20898   |
| 2w4w_SITTD | 0.03478263 | 0.19928245 | 4.54E-05 | 0.0042028 | -0.078293 |
| 2w4w_SITTD | 0.03520085 | 0.20180605 | 4.54E-05 | 0.0042028 | -0.073417 |
| 2w4w_SITTD | 0.02423311 | 0.13562566 | 3.64E-05 | 0.0042065 | -0.080664 |
| 2w4w_SITTD | 0.04973153 | 0.2894855  | 5.76E-05 | 0.005992  | 0.046466  |
| 2w4w_SITTD | 0.01524664 | 0.08140046 | 3.27E-05 | 0.0054028 | 0.16515   |

|             |            |            |          |           |           |
|-------------|------------|------------|----------|-----------|-----------|
| 2w4w_SITTD: | 0.06467504 | 0.37965602 | 6.11E-05 | 0.010206  | 0.093303  |
| 2w4w_SITTD: | 0.01308438 | 0.06835318 | 3.23E-05 | 0.0059016 | 0.23179   |
| 2w4w_SITTD: | 0.00641825 | 0.02812917 | 3.18E-05 | 0.008015  | 0.56984   |
| 2w4w_SITTD: | 0.00513003 | 0.02035595 | 3.18E-05 | 0.0084677 | 0.62647   |
| 2w4w_SITTD: | 0.02359256 | 0.13176054 | 3.58E-05 | 0.0042778 | -0.073623 |
| 2w4w_SITTD: | 0.02048492 | 0.11300874 | 3.44E-05 | 0.0045325 | -0.01065  |
| 2w4w_SITTD: | 0.01332195 | 0.06978674 | 3.24E-05 | 0.0057681 | 0.23179   |
| 2w4w_SITTD: | 0.0172445  | 0.09345576 | 3.33E-05 | 0.0049935 | 0.085504  |
| 2w4w_SITTD: | 0.00988822 | 0.0490673  | 3.20E-05 | 0.0066628 | 0.37961   |
| 2w4w_SITTD: | 0.02723303 | 0.15372749 | 3.84E-05 | 0.0040947 | -0.10271  |
| 2w4w_SITTD: | 0.06181525 | 0.3623998  | 6.07E-05 | 0.0090475 | 0.083692  |
| 2w4w_SITTD: | 0.09252732 | 0.5477191  | 6.46E-05 | 0.022258  | 0.019141  |
| 2w4w_SITTD: | 0.11037047 | 0.6553864  | 6.60E-05 | 0.02558   | -0.27396  |
| 2w4w_SITTD: | 0.06541818 | 0.38414013 | 6.12E-05 | 0.01041   | 0.095509  |
| 2w4w_SITTD: | 0.01241922 | 0.06433956 | 3.23E-05 | 0.0060411 | 0.2791    |
| 2w4w_SITTD: | 0.01636306 | 0.08813705 | 3.30E-05 | 0.0051875 | 0.12392   |
| 2w4w_SITTD: | 0.05119159 | 0.29829565 | 5.81E-05 | 0.006215  | 0.051138  |
| 2w4w_SITTD: | 0.02349217 | 0.1311548  | 3.58E-05 | 0.0042778 | -0.065623 |
| 2w4w_SITTD: | 0.02180577 | 0.12097889 | 3.49E-05 | 0.0044169 | -0.0356   |
| 2w4w_SITTD: | 0.05593412 | 0.32691252 | 5.97E-05 | 0.0073934 | 0.067199  |
| 2w4w_SITTD: | 0.01899902 | 0.10404271 | 3.38E-05 | 0.004741  | 0.03364   |
| 2w4w_SITTD: | 0.01218643 | 0.06293491 | 3.23E-05 | 0.0060411 | 0.2791    |
| 2w4w_SITTD: | 0.01289874 | 0.06723303 | 3.23E-05 | 0.0059016 | 0.25518   |
| 2w4w_SITTD: | 0.02624668 | 0.14777574 | 3.76E-05 | 0.0041286 | -0.096385 |
| 2w4w_SITTD: | 0.01691163 | 0.0914472  | 3.31E-05 | 0.0050879 | 0.10435   |
| 2w4w_SITTD: | 0.03882933 | 0.2237006  | 4.92E-05 | 0.0044639 | -0.040459 |
| 2w4w_SITTD: | 0.0215964  | 0.11971552 | 3.49E-05 | 0.0044169 | -0.0356   |
| 2w4w_SITTD: | 0.00790888 | 0.03712374 | 3.19E-05 | 0.0073923 | 0.48652   |
| 2w4w_SITTD: | 0.09074213 | 0.5369472  | 6.45E-05 | 0.021597  | 0.044278  |
| 2w4w_SITTD: | 0.08809472 | 0.52097243 | 6.42E-05 | 0.020421  | 0.080939  |
| 2w4w_SITTD: | 0.02245005 | 0.12486655 | 3.52E-05 | 0.0043661 | -0.046619 |
| 2w4w_SITTD: | 0.01174515 | 0.06027217 | 3.22E-05 | 0.0061869 | 0.30353   |
| 2w4w_SITTD: | 0.02309308 | 0.12874663 | 3.55E-05 | 0.0043197 | -0.065623 |
| 2w4w_SITTD: | 0.01611433 | 0.0866362  | 3.30E-05 | 0.0051875 | 0.12392   |
| 2w4w_SITTD: | 0.01713747 | 0.09280994 | 3.33E-05 | 0.0049935 | 0.085504  |
| 2w4w_SITTD: | 0.02264815 | 0.12606187 | 3.55E-05 | 0.0043197 | -0.056631 |
| 2w4w_SITTD: | 0.01370156 | 0.07207732 | 3.25E-05 | 0.0056405 | 0.20898   |
| 2w4w_SITTD: | 0.02702394 | 0.15246579 | 3.84E-05 | 0.0040947 | -0.10271  |
| 2w4w_SITTD: | 0.02458209 | 0.13773148 | 3.64E-05 | 0.0042065 | -0.080664 |
| 2w4w_SITTD: | 0.0836753  | 0.49430528 | 6.37E-05 | 0.01841   | 0.12117   |
| 2w4w_SITTD: | 0.01345012 | 0.07056014 | 3.24E-05 | 0.0057681 | 0.23179   |
| 2w4w_SITTD: | 0.01703314 | 0.0921804  | 3.33E-05 | 0.0049935 | 0.085504  |
| 2w4w_SITTD: | 0.09150109 | 0.5415268  | 6.45E-05 | 0.021822  | 0.036126  |

|            |            |            |          |           |           |
|------------|------------|------------|----------|-----------|-----------|
| 2w4w_SITTD | 0.03848461 | 0.22162057 | 4.87E-05 | 0.0044183 | -0.04622  |
| 2w4w_SITTD | 0.01321875 | 0.069164   | 3.24E-05 | 0.0057681 | 0.23179   |
| 2w4w_SITTD | 0.0630697  | 0.36996925 | 6.09E-05 | 0.0096122 | 0.087254  |
| 2w4w_SITTD | 0.0539834  | 0.31514165 | 5.91E-05 | 0.0068337 | 0.062513  |
| 2w4w_SITTD | 0.04615486 | 0.26790357 | 5.54E-05 | 0.0053171 | 0.025099  |
| 2w4w_SITTD | 0.02931678 | 0.16630101 | 4.02E-05 | 0.0040662 | -0.10661  |
| 2w4w_SITTD | 0.02162811 | 0.11990686 | 3.49E-05 | 0.0044169 | -0.0356   |
| 2w4w_SITTD | 0.04801438 | 0.27912408 | 5.64E-05 | 0.0055867 | 0.038361  |
| 2w4w_SITTD | 0.05103529 | 0.29735246 | 5.81E-05 | 0.006215  | 0.051138  |
| 2w4w_SITTD | 0.04313507 | 0.24968188 | 5.33E-05 | 0.0049301 | 0.0036923 |
| 2w4w_SITTD | 0.0279623  | 0.15812796 | 3.88E-05 | 0.0040827 | -0.10472  |
| 2w4w_SITTD | 0.01565598 | 0.08387048 | 3.28E-05 | 0.0052924 | 0.1442    |
| 2w4w_SITTD | 0.05438104 | 0.31754106 | 5.92E-05 | 0.0069681 | 0.062513  |
| 2w4w_SITTD | 0.01454911 | 0.0771915  | 3.26E-05 | 0.0055188 | 0.18676   |
| 2w4w_SITTD | 0.04091077 | 0.23626024 | 5.14E-05 | 0.0046741 | -0.017493 |
| 2w4w_SITTD | 0.02622647 | 0.14765377 | 3.76E-05 | 0.0041286 | -0.096385 |
| 2w4w_SITTD | 0.01974194 | 0.10852553 | 3.40E-05 | 0.0046667 | 0.0032259 |
| 2w4w_SITTD | 0.08643645 | 0.5109663  | 6.40E-05 | 0.019681  | 0.099025  |
| 2w4w_SITTD | 0.02119568 | 0.11729755 | 3.47E-05 | 0.0044724 | -0.023601 |
| 2w4w_SITTD | 0.01705978 | 0.09234111 | 3.33E-05 | 0.0049935 | 0.085504  |
| 2w4w_SITTD | 0.11004045 | 0.653395   | 6.60E-05 | 0.025599  | -0.26716  |
| 2w4w_SITTD | 0.07537063 | 0.44419417 | 6.26E-05 | 0.014549  | 0.13345   |
| 2w4w_SITTD | 0.0162721  | 0.08758823 | 3.30E-05 | 0.0051875 | 0.12392   |
| 2w4w_SITTD | 0.02034059 | 0.11213785 | 3.44E-05 | 0.0045325 | -0.01065  |
| 2w4w_SITTD | 0.05604123 | 0.32755882 | 5.97E-05 | 0.0073934 | 0.067199  |
| 2w4w_SITTD | 0.01623861 | 0.08738611 | 3.30E-05 | 0.0051875 | 0.12392   |
| 2w4w_SITTD | 0.03827143 | 0.22033419 | 4.87E-05 | 0.0044183 | -0.04622  |
| 2w4w_SITTD | 0.01708679 | 0.09250411 | 3.33E-05 | 0.0049935 | 0.085504  |
| 2w4w_SITTD | 0.02956553 | 0.167802   | 4.02E-05 | 0.0040662 | -0.10661  |
| 2w4w_SITTD | 0.04312306 | 0.24960938 | 5.33E-05 | 0.0049301 | 0.0036923 |
| 2w4w_SITTD | 0.01238812 | 0.06415193 | 3.23E-05 | 0.0060411 | 0.2791    |
| 2w4w_SITTD | 0.01918014 | 0.10513556 | 3.38E-05 | 0.004741  | 0.017998  |
| 2w4w_SITTD | 0.01226575 | 0.06341352 | 3.23E-05 | 0.0060411 | 0.2791    |
| 2w4w_SITTD | 0.02966932 | 0.16842827 | 4.02E-05 | 0.0040662 | -0.10597  |
| 2w4w_SITTD | 0.0633033  | 0.3713788  | 6.09E-05 | 0.0096122 | 0.087254  |
| 2w4w_SITTD | 0.01494335 | 0.07957038 | 3.27E-05 | 0.0054028 | 0.16515   |
| 2w4w_SITTD | 0.09131109 | 0.54038036 | 6.45E-05 | 0.021822  | 0.036126  |
| 2w4w_SITTD | 0.09212763 | 0.5453074  | 6.46E-05 | 0.022042  | 0.019141  |
| 2w4w_SITTD | 0.01563004 | 0.08371393 | 3.28E-05 | 0.0052924 | 0.1442    |
| 2w4w_SITTD | 0.02600262 | 0.14630304 | 3.76E-05 | 0.0041286 | -0.096385 |
| 2w4w_SITTD | 0.02543968 | 0.14290622 | 3.72E-05 | 0.0041509 | -0.092011 |
| 2w4w_SITTD | 0.01539279 | 0.08228235 | 3.28E-05 | 0.0052924 | 0.1442    |
| 2w4w_SITTD | 0.03799506 | 0.21866658 | 4.81E-05 | 0.0043756 | -0.04622  |

|            |            |            |          |           |           |
|------------|------------|------------|----------|-----------|-----------|
| 2w4w_SITTD | 0.02466626 | 0.13823934 | 3.64E-05 | 0.0042065 | -0.080664 |
| 2w4w_SITTD | 0.03023445 | 0.17183834 | 4.07E-05 | 0.0040668 | -0.10475  |
| 2w4w_SITTD | 0.08553737 | 0.50554115 | 6.39E-05 | 0.019177  | 0.1043    |
| 2w4w_SITTD | 0.00559003 | 0.0231316  | 3.18E-05 | 0.0082375 | 0.59807   |
| 2w4w_SITTD | 0.1367803  | 0.8147458  | 6.73E-05 | 0.023528  | -0.4775   |
| 2w4w_SITTD | 0.0204706  | 0.11292236 | 3.44E-05 | 0.0045325 | -0.01065  |
| 2w4w_SITTD | 0.08522493 | 0.50365585 | 6.39E-05 | 0.019177  | 0.10916   |
| 2w4w_SITTD | 0.02128978 | 0.11786534 | 3.47E-05 | 0.0044724 | -0.023601 |
| 2w4w_SITTD | 0.02774593 | 0.15682238 | 3.88E-05 | 0.0040827 | -0.10472  |
| 2w4w_SITTD | 0.05567332 | 0.32533884 | 5.95E-05 | 0.007248  | 0.067199  |
| 2w4w_SITTD | 0.01791062 | 0.09747519 | 3.34E-05 | 0.0049043 | 0.067421  |
| 2w4w_SITTD | 0.02326891 | 0.12980762 | 3.58E-05 | 0.0042778 | -0.065623 |
| 2w4w_SITTD | 0.02935397 | 0.16652542 | 4.02E-05 | 0.0040662 | -0.10661  |
| 2w4w_SITTD | 0.0807097  | 0.47641063 | 6.32E-05 | 0.016854  | 0.13314   |
| 2w4w_SITTD | 0.0248557  | 0.13938242 | 3.68E-05 | 0.0041768 | -0.086782 |
| 2w4w_SITTD | 0.01706061 | 0.09234617 | 3.33E-05 | 0.0049935 | 0.085504  |
| 2w4w_SITTD | 0.02052211 | 0.11323316 | 3.44E-05 | 0.0045325 | -0.01065  |
| 2w4w_SITTD | 0.04701581 | 0.27309856 | 5.61E-05 | 0.0054936 | 0.032113  |
| 2w4w_SITTD | 0.02821461 | 0.15965043 | 3.93E-05 | 0.004074  | -0.10603  |
| 2w4w_SITTD | 0.00731987 | 0.03356966 | 3.19E-05 | 0.0075925 | 0.51404   |
| 2w4w_SITTD | 0.0231102  | 0.12884992 | 3.58E-05 | 0.0042778 | -0.065623 |
| 2w4w_SITTD | 0.01857966 | 0.10151223 | 3.36E-05 | 0.0048202 | 0.050123  |
| 2w4w_SITTD | 0.01347151 | 0.07068919 | 3.24E-05 | 0.0057681 | 0.23179   |
| 2w4w_SITTD | 0.05711803 | 0.33405632 | 5.99E-05 | 0.0076952 | 0.070131  |
| 2w4w_SITTD | 0.09527437 | 0.5642951  | 6.49E-05 | 0.023263  | -0.026471 |
| 2w4w_SITTD | 0.01743883 | 0.09462837 | 3.33E-05 | 0.0049935 | 0.085504  |
| 2w4w_SITTD | 0.0850554  | 0.5026329  | 6.38E-05 | 0.018923  | 0.10916   |
| 2w4w_SITTD | 0.02772436 | 0.15669218 | 3.88E-05 | 0.0040827 | -0.10472  |
| 2w4w_SITTD | 0.02740981 | 0.15479417 | 3.84E-05 | 0.0040947 | -0.10271  |
| 2w4w_SITTD | 0.01645735 | 0.08870599 | 3.31E-05 | 0.0050879 | 0.10435   |
| 2w4w_SITTD | 0.06092175 | 0.3570083  | 6.06E-05 | 0.008866  | 0.080421  |
| 2w4w_SITTD | 0.13653815 | 0.8132846  | 6.72E-05 | 0.023527  | -0.4775   |
| 2w4w_SITTD | 0.13819925 | 0.8233078  | 6.73E-05 | 0.023534  | -0.48567  |
| 2w4w_SITTD | 0.04658247 | 0.2704838  | 5.57E-05 | 0.0054037 | 0.028707  |
| 2w4w_SITTD | 0.03231011 | 0.18436305 | 4.27E-05 | 0.004099  | -0.097962 |
| 2w4w_SITTD | 0.02775377 | 0.15686963 | 3.88E-05 | 0.0040827 | -0.10472  |
| 2w4w_SITTD | 0.02836926 | 0.16058357 | 3.93E-05 | 0.004074  | -0.10603  |
| 2w4w_SITTD | 0.010379   | 0.05202868 | 3.21E-05 | 0.0064976 | 0.35381   |
| 2w4w_SITTD | 0.01417208 | 0.07491649 | 3.25E-05 | 0.0056405 | 0.20898   |
| 2w4w_SITTD | 0.09357063 | 0.55401456 | 6.48E-05 | 0.022676  | 0.0013661 |
| 2w4w_SITTD | 0.02544478 | 0.14293699 | 3.72E-05 | 0.0041509 | -0.092011 |
| 2w4w_SITTD | 0.02626427 | 0.14788191 | 3.76E-05 | 0.0041286 | -0.096385 |
| 2w4w_SITTD | 0.12830612 | 0.76361173 | 6.69E-05 | 0.023757  | -0.4283   |

|            |            |            |          |           |           |
|------------|------------|------------|----------|-----------|-----------|
| 2w4w_SITTD | 0.01581493 | 0.08482957 | 3.28E-05 | 0.0052924 | 0.1442    |
| 2w4w_SITTD | 0.0219122  | 0.12162109 | 3.49E-05 | 0.0044169 | -0.0356   |
| 2w4w_SITTD | 0.02189767 | 0.12153339 | 3.49E-05 | 0.0044169 | -0.0356   |
| 2w4w_SITTD | 0.01171261 | 0.06007584 | 3.22E-05 | 0.0061869 | 0.30353   |
| 2w4w_SITTD | 0.0306069  | 0.17408569 | 4.11E-05 | 0.0040705 | -0.10475  |
| 2w4w_SITTD | 0.02445344 | 0.13695514 | 3.64E-05 | 0.0042065 | -0.080664 |
| 2w4w_SITTD | 0.09701382 | 0.57479113 | 6.51E-05 | 0.023799  | -0.055297 |
| 2w4w_SITTD | 0.01780423 | 0.09683323 | 3.34E-05 | 0.0049043 | 0.067421  |
| 2w4w_SITTD | 0.07525198 | 0.44347823 | 6.26E-05 | 0.014549  | 0.13345   |
| 2w4w_SITTD | 0.01556073 | 0.08329576 | 3.28E-05 | 0.0052924 | 0.1442    |
| 2w4w_SITTD | 0.02815412 | 0.15928544 | 3.93E-05 | 0.004074  | -0.10603  |
| 2w4w_SITTD | 0.02518924 | 0.14139503 | 3.68E-05 | 0.0041768 | -0.086782 |
| 2w4w_SITTD | 0.07962187 | 0.46984655 | 6.31E-05 | 0.016335  | 0.13545   |
| 2w4w_SITTD | 0.0222464  | 0.1236377  | 3.52E-05 | 0.0043661 | -0.046619 |
| 2w4w_SITTD | 0.02988023 | 0.16970092 | 4.07E-05 | 0.0040668 | -0.10597  |
| 2w4w_SITTD | 0.07129342 | 0.4195919  | 6.20E-05 | 0.012608  | 0.12136   |
| 2w4w_SITTD | 0.02288544 | 0.12749371 | 3.55E-05 | 0.0043197 | -0.056631 |
| 2w4w_SITTD | 0.03459387 | 0.19814347 | 4.48E-05 | 0.0041765 | -0.082901 |
| 2w4w_SITTD | 0.12983623 | 0.77284455 | 6.70E-05 | 0.023664  | -0.43912  |
| 2w4w_SITTD | 0.01484529 | 0.07897869 | 3.27E-05 | 0.0054028 | 0.16515   |
| 2w4w_SITTD | 0.01464988 | 0.07779957 | 3.26E-05 | 0.0055188 | 0.18676   |
| 2w4w_SITTD | 0.0108207  | 0.05469395 | 3.21E-05 | 0.0064976 | 0.35381   |
| 2w4w_SITTD | 0.01639109 | 0.08830621 | 3.30E-05 | 0.0051875 | 0.12392   |
| 2w4w_SITTD | 0.02899844 | 0.16438012 | 3.97E-05 | 0.0040686 | -0.10664  |
| 2w4w_SITTD | 0.03794501 | 0.21836452 | 4.81E-05 | 0.0043756 | -0.04622  |
| 2w4w_SITTD | 0.02497572 | 0.14010665 | 3.68E-05 | 0.0041768 | -0.086782 |
| 2w4w_SITTD | 0.05585552 | 0.32643825 | 5.97E-05 | 0.0073934 | 0.067199  |
| 2w4w_SITTD | 0.01442893 | 0.07646634 | 3.26E-05 | 0.0055188 | 0.18676   |
| 2w4w_SITTD | 0.02669451 | 0.15047798 | 3.80E-05 | 0.0041099 | -0.099939 |
| 2w4w_SITTD | 0.09807729 | 0.5812082  | 6.52E-05 | 0.024123  | -0.074831 |
| 2w4w_SITTD | 0.02849653 | 0.16135153 | 3.93E-05 | 0.004074  | -0.10603  |
| 2w4w_SITTD | 0.02494527 | 0.13992293 | 3.68E-05 | 0.0041768 | -0.086782 |
| 2w4w_SITTD | 0.01169777 | 0.0599863  | 3.22E-05 | 0.0061869 | 0.30353   |
| 2w4w_SITTD | 0.01778862 | 0.09673905 | 3.34E-05 | 0.0049043 | 0.067421  |
| 2w4w_SITTD | 0.02841721 | 0.16087294 | 3.93E-05 | 0.004074  | -0.10603  |
| 2w4w_SITTD | 0.06789511 | 0.3990862  | 6.15E-05 | 0.011255  | 0.10734   |
| 2w4w_SITTD | 0.00519177 | 0.02072847 | 3.18E-05 | 0.0084677 | 0.62647   |
| 2w4w_SITTD | 0.09224773 | 0.5460321  | 6.46E-05 | 0.022042  | 0.019141  |
| 2w4w_SITTD | 0.01186726 | 0.06100901 | 3.22E-05 | 0.0061869 | 0.30353   |
| 2w4w_SITTD | 0.02509154 | 0.14080551 | 3.68E-05 | 0.0041768 | -0.086782 |
| 2w4w_SITTD | 0.02179071 | 0.12088801 | 3.49E-05 | 0.0044169 | -0.0356   |
| 2w4w_SITTD | 0.12519516 | 0.7448399  | 6.68E-05 | 0.023978  | -0.40548  |
| 2w4w_SITTD | 0.02644393 | 0.14896594 | 3.80E-05 | 0.0041099 | -0.099939 |



|            |            |            |          |           |           |
|------------|------------|------------|----------|-----------|-----------|
| 2w4w_SITTD | 0.12662499 | 0.7534676  | 6.68E-05 | 0.023879  | -0.41707  |
| 2w4w_SITTD | 0.03265419 | 0.18643923 | 4.32E-05 | 0.0041142 | -0.094772 |
| 2w4w_SITTD | 0.01313625 | 0.06866618 | 3.24E-05 | 0.0057681 | 0.23179   |
| 2w4w_SITTD | 0.0973399  | 0.57675874 | 6.51E-05 | 0.023799  | -0.065044 |
| 2w4w_SITTD | 0.05078896 | 0.2958661  | 5.78E-05 | 0.0061018 | 0.051138  |
| 2w4w_SITTD | 0.02018658 | 0.11120853 | 3.42E-05 | 0.0045972 | 0.0032259 |
| 2w4w_SITTD | 0.01446224 | 0.07666737 | 3.26E-05 | 0.0055188 | 0.18676   |
| 2w4w_SITTD | 0.01786516 | 0.09720086 | 3.34E-05 | 0.0049043 | 0.067421  |
| 2w4w_SITTD | 0.12083367 | 0.71852225 | 6.66E-05 | 0.02449   | -0.37656  |
| 2w4w_SITTD | 0.05086052 | 0.29629794 | 5.81E-05 | 0.006215  | 0.051138  |
| 2w4w_SITTD | 0.07507746 | 0.44242513 | 6.25E-05 | 0.014299  | 0.13345   |
| 2w4w_SITTD | 0.0882623  | 0.5219836  | 6.42E-05 | 0.020421  | 0.074212  |
| 2w4w_SITTD | 0.09042225 | 0.535017   | 6.44E-05 | 0.021369  | 0.044278  |
| 2w4w_SITTD | 0.02984616 | 0.16949536 | 4.07E-05 | 0.0040668 | -0.10597  |
| 2w4w_SITTD | 0.03368277 | 0.19264579 | 4.43E-05 | 0.004153  | -0.087207 |
| 2w4w_SITTD | 0.04880671 | 0.28390506 | 5.70E-05 | 0.0057827 | 0.041222  |
| 2w4w_SITTD | 0.01746397 | 0.09478006 | 3.33E-05 | 0.0049935 | 0.085504  |
| 2w4w_SITTD | 0.03236528 | 0.18469596 | 4.27E-05 | 0.004099  | -0.097962 |
| 2w4w_SITTD | 0.00463584 | 0.01737393 | 3.18E-05 | 0.0087056 | 0.65503   |
| 2w4w_SITTD | 0.08464751 | 0.50017166 | 6.38E-05 | 0.018923  | 0.1136    |
| 2w4w_SITTD | 0.00945726 | 0.04646684 | 3.20E-05 | 0.0068348 | 0.4058    |
| 2w4w_SITTD | 0.03084218 | 0.17550543 | 4.11E-05 | 0.0040705 | -0.10299  |
| 2w4w_SITTD | 0.0206834  | 0.11420643 | 3.44E-05 | 0.0045325 | -0.01065  |
| 2w4w_SITTD | 0.05523007 | 0.3226642  | 5.94E-05 | 0.0071062 | 0.065685  |
| 2w4w_SITTD | 0.02849548 | 0.1613452  | 3.93E-05 | 0.004074  | -0.10603  |
| 2w4w_SITTD | 0.05784958 | 0.33847052 | 6.00E-05 | 0.0078516 | 0.073002  |
| 2w4w_SITTD | 0.10580444 | 0.62783456 | 6.58E-05 | 0.025526  | -0.20623  |
| 2w4w_SITTD | 0.00784807 | 0.03675682 | 3.19E-05 | 0.0073923 | 0.48652   |
| 2w4w_SITTD | 0.01141158 | 0.05825939 | 3.21E-05 | 0.006339  | 0.32844   |
| 2w4w_SITTD | 0.02782853 | 0.15732078 | 3.88E-05 | 0.0040827 | -0.10472  |
| 2w4w_SITTD | 0.00828082 | 0.0393681  | 3.19E-05 | 0.0071994 | 0.45929   |
| 2w4w_SITTD | 0.08169938 | 0.48238242 | 6.34E-05 | 0.017373  | 0.12948   |
| 2w4w_SITTD | 0.01351643 | 0.07096022 | 3.24E-05 | 0.0057681 | 0.23179   |
| 2w4w_SITTD | 0.02906948 | 0.16480881 | 3.97E-05 | 0.0040686 | -0.10664  |
| 2w4w_SITTD | 0.03777963 | 0.21736665 | 4.81E-05 | 0.0043756 | -0.05192  |
| 2w4w_SITTD | 0.03523001 | 0.20198202 | 4.54E-05 | 0.0042028 | -0.073417 |
| 2w4w_SITTD | 0.0985913  | 0.58430976 | 6.52E-05 | 0.024275  | -0.084641 |
| 2w4w_SITTD | 0.01500745 | 0.07995718 | 3.27E-05 | 0.0054028 | 0.16515   |
| 2w4w_SITTD | 0.08909304 | 0.52699643 | 6.43E-05 | 0.020902  | 0.067165  |
| 2w4w_SITTD | 0.04741348 | 0.27549815 | 5.61E-05 | 0.0054936 | 0.035328  |
| 2w4w_SITTD | 0.00897988 | 0.04358631 | 3.19E-05 | 0.0070136 | 0.43237   |
| 2w4w_SITTD | 0.02538407 | 0.14257067 | 3.72E-05 | 0.0041509 | -0.092011 |
| 2w4w_SITTD | 0.0977497  | 0.57923144 | 6.51E-05 | 0.023964  | -0.074831 |

|            |            |            |          |           |           |
|------------|------------|------------|----------|-----------|-----------|
| 2w4w_SITTD | 0.00639752 | 0.02800406 | 3.18E-05 | 0.008015  | 0.56984   |
| 2w4w_SITTD | 0.03002115 | 0.17055126 | 4.07E-05 | 0.0040668 | -0.10597  |
| 2w4w_SITTD | 0.02265511 | 0.12610385 | 3.55E-05 | 0.0043197 | -0.056631 |
| 2w4w_SITTD | 0.01986234 | 0.10925204 | 3.42E-05 | 0.0045972 | 0.0032259 |
| 2w4w_SITTD | 0.01855615 | 0.10137039 | 3.36E-05 | 0.0048202 | 0.050123  |
| 2w4w_SITTD | 0.06129149 | 0.35923937 | 6.06E-05 | 0.008866  | 0.082025  |
| 2w4w_SITTD | 0.01116332 | 0.05676137 | 3.21E-05 | 0.006339  | 0.32844   |
| 2w4w_SITTD | 0.0216986  | 0.1203322  | 3.49E-05 | 0.0044169 | -0.0356   |
| 2w4w_SITTD | 0.01667469 | 0.09001746 | 3.31E-05 | 0.0050879 | 0.10435   |
| 2w4w_SITTD | 0.05698005 | 0.33322373 | 5.99E-05 | 0.0076952 | 0.070131  |
| 2w4w_SITTD | 0.08510529 | 0.502934   | 6.38E-05 | 0.018923  | 0.10916   |
| 2w4w_SITTD | 0.02714174 | 0.15317664 | 3.84E-05 | 0.0040947 | -0.10271  |
| 2w4w_SITTD | 0.01496001 | 0.07967092 | 3.27E-05 | 0.0054028 | 0.16515   |
| 2w4w_SITTD | 0.0148548  | 0.07903609 | 3.27E-05 | 0.0054028 | 0.16515   |
| 2w4w_SITTD | 0.02000191 | 0.11009423 | 3.42E-05 | 0.0045972 | 0.0032259 |
| 2w4w_SITTD | 0.01037809 | 0.05202318 | 3.21E-05 | 0.0064976 | 0.35381   |
| 2w4w_SITTD | 0.05432931 | 0.3172289  | 5.92E-05 | 0.0069681 | 0.062513  |
| 2w4w_SITTD | 0.03525609 | 0.20213935 | 4.54E-05 | 0.0042028 | -0.073417 |
| 2w4w_SITTD | 0.05134814 | 0.29924026 | 5.81E-05 | 0.006215  | 0.053285  |
| 2w4w_SITTD | 0.05022331 | 0.29245293 | 5.76E-05 | 0.005992  | 0.048868  |
| 2w4w_SITTD | 0.00778886 | 0.03639954 | 3.19E-05 | 0.0073923 | 0.48652   |
| 2w4w_SITTD | 0.06086159 | 0.35664532 | 6.06E-05 | 0.008866  | 0.080421  |
| 2w4w_SITTD | 0.03084089 | 0.17549764 | 4.11E-05 | 0.0040705 | -0.10299  |
| 2w4w_SITTD | 0.02785692 | 0.15749207 | 3.88E-05 | 0.0040827 | -0.10472  |
| 2w4w_SITTD | 0.01153716 | 0.05901716 | 3.22E-05 | 0.0061869 | 0.30353   |
| 2w4w_SITTD | 0.0151759  | 0.08097361 | 3.27E-05 | 0.0054028 | 0.16515   |
| 2w4w_SITTD | 0.05644857 | 0.33001673 | 5.98E-05 | 0.0075425 | 0.068678  |
| 2w4w_SITTD | 0.02500135 | 0.14026128 | 3.68E-05 | 0.0041768 | -0.086782 |
| 2w4w_SITTD | 0.01003472 | 0.04995126 | 3.20E-05 | 0.0066628 | 0.37961   |
| 2w4w_SITTD | 0.07774421 | 0.45851654 | 6.29E-05 | 0.015562  | 0.13662   |
| 2w4w_SITTD | 0.00367125 | 0.01155353 | 3.18E-05 | 0.0092049 | 0.71249   |
| 2w4w_SITTD | 0.06131634 | 0.3593893  | 6.06E-05 | 0.008866  | 0.082025  |
| 2w4w_SITTD | 0.01278552 | 0.06654984 | 3.23E-05 | 0.0059016 | 0.25518   |
| 2w4w_SITTD | 0.01131606 | 0.05768299 | 3.21E-05 | 0.006339  | 0.32844   |
| 2w4w_SITTD | 0.09321781 | 0.55188566 | 6.47E-05 | 0.022469  | 0.0013661 |
| 2w4w_SITTD | 0.05190882 | 0.30262345 | 5.83E-05 | 0.0063316 | 0.055318  |
| 2w4w_SITTD | 0.00493835 | 0.01919932 | 3.18E-05 | 0.0084677 | 0.62647   |
| 2w4w_SITTD | 0.01821698 | 0.09932382 | 3.36E-05 | 0.0048202 | 0.050123  |
| 2w4w_SITTD | 0.02725744 | 0.15387474 | 3.84E-05 | 0.0040947 | -0.10271  |
| 2w4w_SITTD | 0.09307084 | 0.55099887 | 6.47E-05 | 0.022469  | 0.010343  |
| 2w4w_SITTD | 0.09701966 | 0.57482636 | 6.51E-05 | 0.023799  | -0.055297 |
| 2w4w_SITTD | 0.05852865 | 0.34256813 | 6.01E-05 | 0.0080116 | 0.074438  |
| 2w4w_SITTD | 0.05037445 | 0.2933649  | 5.78E-05 | 0.0061018 | 0.048868  |

|            |            |            |          |           |            |
|------------|------------|------------|----------|-----------|------------|
| 2w4w_SITTD | 0.02212771 | 0.1229215  | 3.52E-05 | 0.0043661 | -0.046619  |
| 2w4w_SITTD | 0.03420851 | 0.19581819 | 4.48E-05 | 0.0041765 | -0.082901  |
| 2w4w_SITTD | 0.12249155 | 0.7285261  | 6.67E-05 | 0.024282  | -0.38934   |
| 2w4w_SITTD | 0.08048723 | 0.47506818 | 6.32E-05 | 0.016854  | 0.13314    |
| 2w4w_SITTD | 0.01859986 | 0.10163416 | 3.36E-05 | 0.0048202 | 0.050123   |
| 2w4w_SITTD | 0.04033341 | 0.23277637 | 5.09E-05 | 0.0046173 | -0.023154  |
| 2w4w_SITTD | 0.00764242 | 0.03551595 | 3.19E-05 | 0.0073923 | 0.48652    |
| 2w4w_SITTD | 0.08437504 | 0.4985276  | 6.37E-05 | 0.018667  | 0.1136     |
| 2w4w_SITTD | 0.03957133 | 0.22817789 | 4.98E-05 | 0.0045122 | -0.034672  |
| 2w4w_SITTD | 0.01552623 | 0.08308756 | 3.28E-05 | 0.0052924 | 0.1442     |
| 2w4w_SITTD | 0.01958785 | 0.10759576 | 3.40E-05 | 0.0046667 | 0.017998   |
| 2w4w_SITTD | 0.02349639 | 0.13118023 | 3.58E-05 | 0.0042778 | -0.065623  |
| 2w4w_SITTD | 0.01368957 | 0.07200499 | 3.25E-05 | 0.0056405 | 0.20898    |
| 2w4w_SITTD | 0.05414355 | 0.31610805 | 5.92E-05 | 0.0069681 | 0.062513   |
| 2w4w_SITTD | 0.02040698 | 0.11253846 | 3.44E-05 | 0.0045325 | -0.01065   |
| 2w4w_SITTD | 0.09408566 | 0.55712235 | 6.48E-05 | 0.022877  | -0.0077738 |
| 2w4w_SITTD | 0.0204841  | 0.11300379 | 3.44E-05 | 0.0045325 | -0.01065   |
| 2w4w_SITTD | 0.02689007 | 0.151658   | 3.80E-05 | 0.0041099 | -0.099939  |
| 2w4w_SITTD | 0.0153011  | 0.08172908 | 3.27E-05 | 0.0054028 | 0.1442     |
| 2w4w_SITTD | 0.01507182 | 0.08034559 | 3.27E-05 | 0.0054028 | 0.16515    |
| 2w4w_SITTD | 0.01724253 | 0.09344385 | 3.33E-05 | 0.0049935 | 0.085504   |
| 2w4w_SITTD | 0.01104139 | 0.05602561 | 3.21E-05 | 0.006339  | 0.32844    |
| 2w4w_SITTD | 0.10711119 | 0.63571954 | 6.58E-05 | 0.025586  | -0.23052   |
| 2w4w_SITTD | 0.01772073 | 0.09632935 | 3.34E-05 | 0.0049043 | 0.067421   |
| 2w4w_SITTD | 0.04940843 | 0.2875359  | 5.73E-05 | 0.0058857 | 0.04392    |
| 2w4w_SITTD | 0.05486387 | 0.3204545  | 5.94E-05 | 0.0071062 | 0.064127   |
| 2w4w_SITTD | 0.09002508 | 0.53262043 | 6.44E-05 | 0.021137  | 0.05218    |
| 2w4w_SITTD | 0.04246056 | 0.24561177 | 5.24E-05 | 0.0047963 | -0.0013165 |
| 2w4w_SITTD | 0.10317475 | 0.6119667  | 6.56E-05 | 0.025216  | -0.17104   |
| 2w4w_SITTD | 0.02473008 | 0.13862444 | 3.64E-05 | 0.0042065 | -0.086782  |
| 2w4w_SITTD | 0.0870014  | 0.51437527 | 6.41E-05 | 0.01993   | 0.093363   |
| 2w4w_SITTD | 0.09497583 | 0.5624937  | 6.49E-05 | 0.023073  | -0.026471  |
| 2w4w_SITTD | 0.01485136 | 0.07901534 | 3.27E-05 | 0.0054028 | 0.16515    |
| 2w4w_SITTD | 0.01993816 | 0.10970953 | 3.42E-05 | 0.0045972 | 0.0032259  |
| 2w4w_SITTD | 0.01483847 | 0.07893758 | 3.27E-05 | 0.0054028 | 0.16515    |
| 2w4w_SITTD | 0.01364389 | 0.07172933 | 3.24E-05 | 0.0057681 | 0.20898    |
| 2w4w_SITTD | 0.03302569 | 0.18868095 | 4.32E-05 | 0.0041142 | -0.091175  |
| 2w4w_SITTD | 0.06198893 | 0.3634478  | 6.07E-05 | 0.0092324 | 0.083692   |
| 2w4w_SITTD | 0.09196955 | 0.54435354 | 6.46E-05 | 0.022042  | 0.027741   |
| 2w4w_SITTD | 0.0595966  | 0.34901223 | 6.03E-05 | 0.0083426 | 0.077363   |
| 2w4w_SITTD | 0.03089861 | 0.17584589 | 4.16E-05 | 0.0040771 | -0.10299   |
| 2w4w_SITTD | 0.01375065 | 0.07237352 | 3.25E-05 | 0.0056405 | 0.20898    |
| 2w4w_SITTD | 0.07519084 | 0.44310927 | 6.25E-05 | 0.014299  | 0.13345    |

|            |            |            |          |           |           |
|------------|------------|------------|----------|-----------|-----------|
| 2w4w_SITTD | 0.02951763 | 0.16751295 | 4.02E-05 | 0.0040662 | -0.10661  |
| 2w4w_SITTD | 0.01382728 | 0.07283593 | 3.25E-05 | 0.0056405 | 0.20898   |
| 2w4w_SITTD | 0.10971784 | 0.65144837 | 6.60E-05 | 0.025599  | -0.2602   |
| 2w4w_SITTD | 0.01720494 | 0.09321705 | 3.33E-05 | 0.0049935 | 0.085504  |
| 2w4w_SITTD | 0.0278927  | 0.15770797 | 3.88E-05 | 0.0040827 | -0.10472  |
| 2w4w_SITTD | 0.02442083 | 0.13675842 | 3.64E-05 | 0.0042065 | -0.080664 |
| 2w4w_SITTD | 0.08074615 | 0.47663057 | 6.33E-05 | 0.017113  | 0.13314   |
| 2w4w_SITTD | 0.02060621 | 0.1137406  | 3.44E-05 | 0.0045325 | -0.01065  |
| 2w4w_SITTD | 0.11794453 | 0.70108896 | 6.65E-05 | 0.024847  | -0.34876  |
| 2w4w_SITTD | 0.03252987 | 0.18568909 | 4.32E-05 | 0.0041142 | -0.094772 |
| 2w4w_SITTD | 0.04635067 | 0.2690851  | 5.54E-05 | 0.0053171 | 0.028707  |
| 2w4w_SITTD | 0.03471384 | 0.19886734 | 4.48E-05 | 0.0041765 | -0.078293 |
| 2w4w_SITTD | 0.02544993 | 0.14296807 | 3.72E-05 | 0.0041509 | -0.092011 |
| 2w4w_SITTD | 0.00452036 | 0.01667713 | 3.18E-05 | 0.0087056 | 0.65503   |
| 2w4w_SITTD | 0.09917137 | 0.58781    | 6.53E-05 | 0.02442   | -0.094455 |
| 2w4w_SITTD | 0.09299257 | 0.55052656 | 6.47E-05 | 0.022469  | 0.010343  |
| 2w4w_SITTD | 0.10368127 | 0.61502314 | 6.56E-05 | 0.025296  | -0.18011  |
| 2w4w_SITTD | 0.01289136 | 0.06718853 | 3.23E-05 | 0.0059016 | 0.25518   |
| 2w4w_SITTD | 0.08647826 | 0.5112186  | 6.40E-05 | 0.019681  | 0.099025  |
| 2w4w_SITTD | 0.00735191 | 0.03376293 | 3.19E-05 | 0.0075925 | 0.51404   |
| 2w4w_SITTD | 0.12319986 | 0.73280007 | 6.67E-05 | 0.024217  | -0.39346  |
| 2w4w_SITTD | 0.01235327 | 0.06394163 | 3.23E-05 | 0.0060411 | 0.2791    |
| 2w4w_SITTD | 0.02608211 | 0.14678273 | 3.76E-05 | 0.0041286 | -0.096385 |
| 2w4w_SITTD | 0.02487084 | 0.13947378 | 3.68E-05 | 0.0041768 | -0.086782 |
| 2w4w_SITTD | 0.01124255 | 0.05723945 | 3.21E-05 | 0.006339  | 0.32844   |
| 2w4w_SITTD | 0.01214859 | 0.0627066  | 3.23E-05 | 0.0060411 | 0.2791    |
| 2w4w_SITTD | 0.01912114 | 0.10477954 | 3.38E-05 | 0.004741  | 0.03364   |
| 2w4w_SITTD | 0.1147425  | 0.6817676  | 6.63E-05 | 0.025242  | -0.32268  |
| 2w4w_SITTD | 0.05406701 | 0.3156462  | 5.91E-05 | 0.0068337 | 0.062513  |
| 2w4w_SITTD | 0.11102253 | 0.659321   | 6.61E-05 | 0.025556  | -0.28058  |
| 2w4w_SITTD | 0.01792997 | 0.09759194 | 3.34E-05 | 0.0049043 | 0.067421  |
| 2w4w_SITTD | 0.09507459 | 0.56308967 | 6.49E-05 | 0.023073  | -0.026471 |
| 2w4w_SITTD | 0.02641053 | 0.14876445 | 3.76E-05 | 0.0041286 | -0.099939 |
| 2w4w_SITTD | 0.01869886 | 0.10223151 | 3.38E-05 | 0.004741  | 0.03364   |
| 2w4w_SITTD | 0.01058423 | 0.05326706 | 3.21E-05 | 0.0064976 | 0.35381   |
| 2w4w_SITTD | 0.02949557 | 0.16737984 | 4.02E-05 | 0.0040662 | -0.10661  |
| 2w4w_SITTD | 0.02766355 | 0.15632528 | 3.88E-05 | 0.0040827 | -0.10472  |
| 2w4w_SITTD | 0.10774486 | 0.6395432  | 6.59E-05 | 0.025604  | -0.23822  |
| 2w4w_SITTD | 0.01824657 | 0.09950234 | 3.36E-05 | 0.0048202 | 0.050123  |
| 2w4w_SITTD | 0.10242342 | 0.60743314 | 6.55E-05 | 0.025127  | -0.15246  |
| 2w4w_SITTD | 0.01890267 | 0.10346132 | 3.38E-05 | 0.004741  | 0.03364   |
| 2w4w_SITTD | 0.02375929 | 0.13276659 | 3.61E-05 | 0.0042401 | -0.073623 |
| 2w4w_SITTD | 0.02410007 | 0.13482293 | 3.61E-05 | 0.0042401 | -0.073623 |

|            |            |            |          |           |            |
|------------|------------|------------|----------|-----------|------------|
| 2w4w_SITTD | 0.02187861 | 0.12141839 | 3.49E-05 | 0.0044169 | -0.0356    |
| 2w4w_SITTD | 0.05191617 | 0.30266783 | 5.83E-05 | 0.0063316 | 0.055318   |
| 2w4w_SITTD | 0.02217291 | 0.12319422 | 3.52E-05 | 0.0043661 | -0.046619  |
| 2w4w_SITTD | 0.04020957 | 0.23202914 | 5.03E-05 | 0.0045634 | -0.023154  |
| 2w4w_SITTD | 0.07496239 | 0.44173077 | 6.25E-05 | 0.014299  | 0.13345    |
| 2w4w_SITTD | 0.01243886 | 0.0644581  | 3.23E-05 | 0.0060411 | 0.2791     |
| 2w4w_SITTD | 0.02426712 | 0.13583088 | 3.64E-05 | 0.0042065 | -0.080664  |
| 2w4w_SITTD | 0.01590856 | 0.08539455 | 3.30E-05 | 0.0051875 | 0.12392    |
| 2w4w_SITTD | 0.01836002 | 0.10018691 | 3.36E-05 | 0.0048202 | 0.050123   |
| 2w4w_SITTD | 0.05527968 | 0.3229635  | 5.95E-05 | 0.007248  | 0.065685   |
| 2w4w_SITTD | 0.01833664 | 0.10004581 | 3.36E-05 | 0.0048202 | 0.050123   |
| 2w4w_SITTD | 0.10059108 | 0.59637666 | 6.53E-05 | 0.024687  | -0.12375   |
| 2w4w_SITTD | 0.04273593 | 0.24727339 | 5.29E-05 | 0.0048617 | -0.0013165 |
| 2w4w_SITTD | 0.0135103  | 0.07092325 | 3.24E-05 | 0.0057681 | 0.23179    |
| 2w4w_SITTD | 0.01916957 | 0.10507181 | 3.38E-05 | 0.004741  | 0.017998   |
| 2w4w_SITTD | 0.07932527 | 0.4680568  | 6.31E-05 | 0.016335  | 0.13613    |
| 2w4w_SITTD | 0.02365042 | 0.13210967 | 3.61E-05 | 0.0042401 | -0.073623  |
| 2w4w_SITTD | 0.02404381 | 0.13448346 | 3.61E-05 | 0.0042401 | -0.073623  |
| 2w4w_SITTD | 0.02584585 | 0.14535712 | 3.72E-05 | 0.0041509 | -0.096385  |
| 2w4w_SITTD | 0.02936616 | 0.16659899 | 4.02E-05 | 0.0040662 | -0.10661   |
| 2w4w_SITTD | 0.02471083 | 0.13850829 | 3.64E-05 | 0.0042065 | -0.086782  |
| 2w4w_SITTD | 0.01907235 | 0.10448518 | 3.38E-05 | 0.004741  | 0.03364    |
| 2w4w_SITTD | 0.0500166  | 0.2912056  | 5.76E-05 | 0.005992  | 0.046466   |
| 2w4w_SITTD | 0.11641698 | 0.6918716  | 6.64E-05 | 0.025054  | -0.33868   |
| 2w4w_SITTD | 0.0956974  | 0.56684774 | 6.49E-05 | 0.023263  | -0.035993  |
| 2w4w_SITTE | 0.03496033 | 0.20035474 | 4.54E-05 | 0.0042028 | -0.078293  |
| 2w4w_SITTE | 0.01711494 | 0.09267396 | 3.33E-05 | 0.0049935 | 0.085504   |
| 2w4w_SITTE | 0.01997961 | 0.10995966 | 3.42E-05 | 0.0045972 | 0.0032259  |
| 2w4w_SITTE | 0.02497632 | 0.14011028 | 3.68E-05 | 0.0041768 | -0.086782  |
| 2w4w_SITTE | 0.00625938 | 0.02717054 | 3.18E-05 | 0.008015  | 0.56984    |
| 2w4w_SITTE | 0.02708813 | 0.1528531  | 3.84E-05 | 0.0040947 | -0.10271   |
| 2w4w_SITTE | 0.0151999  | 0.08111847 | 3.27E-05 | 0.0054028 | 0.16515    |
| 2w4w_SITTE | 0.13723336 | 0.81747955 | 6.73E-05 | 0.023528  | -0.48029   |
| 2w4w_SITTE | 0.07559458 | 0.4455455  | 6.26E-05 | 0.014549  | 0.13453    |
| 2w4w_SITTE | 0.03230088 | 0.18430734 | 4.27E-05 | 0.004099  | -0.097962  |
| 2w4w_SITTE | 0.00771098 | 0.03592964 | 3.19E-05 | 0.0073923 | 0.48652    |
| 2w4w_SITTE | 0.01397143 | 0.07370574 | 3.25E-05 | 0.0056405 | 0.20898    |
| 2w4w_SITTE | 0.11976842 | 0.7120945  | 6.65E-05 | 0.024632  | -0.36766   |
| 2w4w_SITTE | 0.03222454 | 0.18384668 | 4.27E-05 | 0.004099  | -0.097962  |
| 2w4w_SITTE | 0.02645214 | 0.14901552 | 3.80E-05 | 0.0041099 | -0.099939  |
| 2w4w_SITTE | 0.02327492 | 0.12984389 | 3.58E-05 | 0.0042778 | -0.065623  |
| 2w4w_SITTE | 0.06585041 | 0.38674825 | 6.13E-05 | 0.010616  | 0.097788   |
| 2w4w_SITTE | 0.10349832 | 0.6139192  | 6.56E-05 | 0.025296  | -0.17104   |

|                         |            |            |          |           |           |
|-------------------------|------------|------------|----------|-----------|-----------|
| 2w4w_SITTE <sup>z</sup> | 0.07765114 | 0.45795494 | 6.29E-05 | 0.015562  | 0.13646   |
| 2w4w_SITTE <sup>z</sup> | 0.00853769 | 0.04091806 | 3.19E-05 | 0.0071994 | 0.45929   |
| 2w4w_SITTE <sup>z</sup> | 0.03554104 | 0.20385875 | 4.59E-05 | 0.0042319 | -0.073417 |
| 2w4w_SITTE <sup>z</sup> | 0.02317956 | 0.12926848 | 3.58E-05 | 0.0042778 | -0.065623 |
| 2w4w_SITTE <sup>z</sup> | 0.01634394 | 0.08802171 | 3.30E-05 | 0.0051875 | 0.12392   |
| 2w4w_SITTE <sup>z</sup> | 0.0113931  | 0.05814789 | 3.21E-05 | 0.006339  | 0.32844   |
| 2w4w_SITTE <sup>z</sup> | 0.02505842 | 0.1406057  | 3.68E-05 | 0.0041768 | -0.086782 |
| 2w4w_SITTE <sup>z</sup> | 0.02028815 | 0.11182144 | 3.42E-05 | 0.0045972 | -0.01065  |
| 2w4w_SITTE <sup>z</sup> | 0.02248224 | 0.12506077 | 3.52E-05 | 0.0043661 | -0.056631 |
| 2w4w_SITTE <sup>z</sup> | 0.01409881 | 0.07447439 | 3.25E-05 | 0.0056405 | 0.20898   |
| 2w4w_SITTE <sup>z</sup> | 0.08616236 | 0.5093124  | 6.39E-05 | 0.01943   | 0.099025  |
| 2w4w_SITTE <sup>z</sup> | 0.0330556  | 0.1888614  | 4.32E-05 | 0.0041142 | -0.091175 |
| 2w4w_SITTE <sup>z</sup> | 0.03531683 | 0.20250589 | 4.59E-05 | 0.0042319 | -0.073417 |
| 2w4w_SITTE <sup>z</sup> | 0.08999952 | 0.5324662  | 6.44E-05 | 0.021137  | 0.05218   |
| 2w4w_SITTE <sup>z</sup> | 0.07288924 | 0.4292212  | 6.22E-05 | 0.01332   | 0.12737   |
| 2w4w_SITTE <sup>z</sup> | 0.05549877 | 0.32428557 | 5.95E-05 | 0.007248  | 0.065685  |
| 2w4w_SITTE <sup>z</sup> | 0.11654067 | 0.69261795 | 6.64E-05 | 0.025054  | -0.33868  |
| 2w4w_SITTE <sup>z</sup> | 0.02022734 | 0.11145446 | 3.42E-05 | 0.0045972 | 0.0032259 |
| 2w4w_SITTE <sup>z</sup> | 0.01965693 | 0.10801256 | 3.40E-05 | 0.0046667 | 0.017998  |
| 2w4w_SITTE <sup>z</sup> | 0.01151248 | 0.0588682  | 3.22E-05 | 0.0061869 | 0.30353   |
| 2w4w_SITTE <sup>z</sup> | 0.13178453 | 0.7846008  | 6.71E-05 | 0.023582  | -0.44949  |
| 2w4w_SITTE <sup>z</sup> | 0.02444594 | 0.13690992 | 3.64E-05 | 0.0042065 | -0.080664 |
| 2w4w_SITTE <sup>z</sup> | 0.05571102 | 0.3255663  | 5.95E-05 | 0.007248  | 0.067199  |
| 2w4w_SITTE <sup>z</sup> | 0.02648447 | 0.14921056 | 3.80E-05 | 0.0041099 | -0.099939 |
| 2w4w_SITTE <sup>z</sup> | 0.01204419 | 0.06207659 | 3.23E-05 | 0.0060411 | 0.2791    |
| 2w4w_SITTE <sup>z</sup> | 0.03304624 | 0.18880494 | 4.32E-05 | 0.0041142 | -0.091175 |
| 2w4w_SITTE <sup>z</sup> | 0.03658135 | 0.2101361  | 4.70E-05 | 0.0042982 | -0.062998 |
| 2w4w_SITTE <sup>z</sup> | 0.06701217 | 0.39375845 | 6.14E-05 | 0.011039  | 0.10251   |
| 2w4w_SITTE <sup>z</sup> | 0.06430493 | 0.37742275 | 6.10E-05 | 0.010005  | 0.091185  |
| 2w4w_SITTE <sup>z</sup> | 0.07563587 | 0.4457946  | 6.26E-05 | 0.014549  | 0.13453   |
| 2w4w_SITTE <sup>z</sup> | 0.0222093  | 0.12341383 | 3.52E-05 | 0.0043661 | -0.046619 |
| 2w4w_SITTE <sup>z</sup> | 0.07706969 | 0.4544464  | 6.28E-05 | 0.015307  | 0.13605   |
| 2w4w_SITTE <sup>z</sup> | 0.01482345 | 0.07884691 | 3.27E-05 | 0.0054028 | 0.16515   |
| 2w4w_SITTE <sup>z</sup> | 0.02774642 | 0.15682532 | 3.88E-05 | 0.0040827 | -0.10472  |
| 2w4w_SITTE <sup>z</sup> | 0.03998294 | 0.23066162 | 5.03E-05 | 0.0045634 | -0.028892 |
| 2w4w_SITTE <sup>z</sup> | 0.09930144 | 0.5885948  | 6.53E-05 | 0.02442   | -0.10426  |
| 2w4w_SITTE <sup>z</sup> | 0.02339659 | 0.13057807 | 3.58E-05 | 0.0042778 | -0.065623 |
| 2w4w_SITTE <sup>z</sup> | 0.01215084 | 0.06272013 | 3.23E-05 | 0.0060411 | 0.2791    |
| 2w4w_SITTE <sup>z</sup> | 0.10054661 | 0.5961083  | 6.53E-05 | 0.024687  | -0.12375  |
| 2w4w_SITTE <sup>z</sup> | 0.02204293 | 0.12240991 | 3.52E-05 | 0.0043661 | -0.046619 |
| 2w4w_SITTE <sup>z</sup> | 0.02213386 | 0.12295862 | 3.52E-05 | 0.0043661 | -0.046619 |
| 2w4w_SITTE <sup>z</sup> | 0.07083552 | 0.41682887 | 6.20E-05 | 0.012608  | 0.11916   |
| 2w4w_SITTE <sup>z</sup> | 0.08409482 | 0.49683675 | 6.37E-05 | 0.018667  | 0.1176    |

|                         |            |            |          |           |           |
|-------------------------|------------|------------|----------|-----------|-----------|
| 2w4w_SITTE <sup>z</sup> | 0.10204376 | 0.60514224 | 6.55E-05 | 0.025029  | -0.15246  |
| 2w4w_SITTE <sup>z</sup> | 0.08725661 | 0.5159152  | 6.41E-05 | 0.01993   | 0.087329  |
| 2w4w_SITTE <sup>z</sup> | 0.08102219 | 0.4782962  | 6.33E-05 | 0.017113  | 0.13314   |
| 2w4w_SITTE <sup>z</sup> | 0.02966322 | 0.1683915  | 4.02E-05 | 0.0040662 | -0.10597  |
| 2w4w_SITTE <sup>z</sup> | 0.01894133 | 0.1036946  | 3.38E-05 | 0.004741  | 0.03364   |
| 2w4w_SITTE <sup>z</sup> | 0.10683452 | 0.63405013 | 6.58E-05 | 0.025586  | -0.22263  |
| 2w4w_SITTE <sup>z</sup> | 0.04682643 | 0.27195585 | 5.57E-05 | 0.0054037 | 0.032113  |
| 2w4w_SITTE <sup>z</sup> | 0.03360212 | 0.19215913 | 4.37E-05 | 0.0041322 | -0.087207 |
| 2w4w_SITTE <sup>z</sup> | 0.0933832  | 0.5528836  | 6.47E-05 | 0.022469  | 0.0013661 |
| 2w4w_SITTE <sup>z</sup> | 0.09923813 | 0.5882128  | 6.53E-05 | 0.02442   | -0.094455 |
| 2w4w_SITTE <sup>z</sup> | 0.08273229 | 0.4886151  | 6.35E-05 | 0.017892  | 0.12434   |
| 2w4w_SITTE <sup>z</sup> | 0.01537279 | 0.08216166 | 3.28E-05 | 0.0052924 | 0.1442    |
| 2w4w_SITTE <sup>z</sup> | 0.09153601 | 0.5417375  | 6.45E-05 | 0.021822  | 0.027741  |
| 2w4w_SITTE <sup>z</sup> | 0.10294356 | 0.61057174 | 6.56E-05 | 0.025216  | -0.16182  |
| 2w4w_SITTE <sup>z</sup> | 0.09464807 | 0.560516   | 6.49E-05 | 0.023073  | -0.017059 |
| 2w4w_SITTE <sup>z</sup> | 0.03348534 | 0.19145449 | 4.37E-05 | 0.0041322 | -0.091175 |
| 2w4w_SITTE <sup>z</sup> | 0.00917655 | 0.04477302 | 3.19E-05 | 0.0070136 | 0.43237   |
| 2w4w_SITTE <sup>z</sup> | 0.01661595 | 0.08966301 | 3.31E-05 | 0.0050879 | 0.10435   |
| 2w4w_SITTE <sup>z</sup> | 0.02877697 | 0.16304375 | 3.97E-05 | 0.0040686 | -0.10664  |
| 2w4w_SITTE <sup>z</sup> | 0.02953669 | 0.167628   | 4.02E-05 | 0.0040662 | -0.10661  |
| 2w4w_SITTE <sup>z</sup> | 0.02677604 | 0.15096997 | 3.80E-05 | 0.0041099 | -0.099939 |
| 2w4w_SITTE <sup>z</sup> | 0.01861307 | 0.10171384 | 3.36E-05 | 0.0048202 | 0.03364   |
| 2w4w_SITTE <sup>z</sup> | 0.01853047 | 0.10121545 | 3.36E-05 | 0.0048202 | 0.050123  |
| 2w4w_SITTE <sup>z</sup> | 0.09466713 | 0.560631   | 6.49E-05 | 0.023073  | -0.017059 |
| 2w4w_SITTE <sup>z</sup> | 0.012521   | 0.0649537  | 3.23E-05 | 0.0060411 | 0.2791    |
| 2w4w_SITTE <sup>z</sup> | 0.08256548 | 0.48760855 | 6.35E-05 | 0.017892  | 0.1271    |
| 2w4w_SITTE <sup>z</sup> | 0.12566184 | 0.74765587 | 6.68E-05 | 0.023927  | -0.40938  |
| 2w4w_SITTE <sup>z</sup> | 0.01171513 | 0.06009102 | 3.22E-05 | 0.0061869 | 0.30353   |
| 2w4w_SITTE <sup>z</sup> | 0.04834408 | 0.28111348 | 5.67E-05 | 0.0056831 | 0.038361  |
| 2w4w_SITTE <sup>z</sup> | 0.01860152 | 0.10164414 | 3.36E-05 | 0.0048202 | 0.050123  |
| 2w4w_SITTE <sup>z</sup> | 0.01093809 | 0.0554023  | 3.21E-05 | 0.006339  | 0.32844   |
| 2w4w_SITTE <sup>z</sup> | 0.01888911 | 0.10337947 | 3.38E-05 | 0.004741  | 0.03364   |
| 2w4w_SITTE <sup>z</sup> | 0.08801819 | 0.5205107  | 6.42E-05 | 0.020421  | 0.080939  |
| 2w4w_SITTE <sup>z</sup> | 0.00461707 | 0.01726067 | 3.18E-05 | 0.0087056 | 0.65503   |
| 2w4w_SITTE <sup>z</sup> | 0.01913853 | 0.10488449 | 3.38E-05 | 0.004741  | 0.03364   |
| 2w4w_SITTE <sup>z</sup> | 0.02080307 | 0.11492851 | 3.44E-05 | 0.0045325 | -0.01065  |
| 2w4w_SITTE <sup>z</sup> | 0.00985135 | 0.04884479 | 3.20E-05 | 0.0066628 | 0.37961   |
| 2w4w_SITTE <sup>z</sup> | 0.03340331 | 0.19095953 | 4.37E-05 | 0.0041322 | -0.091175 |
| 2w4w_SITTE <sup>z</sup> | 0.01066376 | 0.05374696 | 3.21E-05 | 0.0064976 | 0.35381   |
| 2w4w_SITTE <sup>z</sup> | 0.01776867 | 0.09661864 | 3.34E-05 | 0.0049043 | 0.067421  |
| 2w4w_SITTE <sup>z</sup> | 0.04539799 | 0.26333648 | 5.50E-05 | 0.0052335 | 0.021279  |
| 2w4w_SITTE <sup>z</sup> | 0.02271145 | 0.12644383 | 3.55E-05 | 0.0043197 | -0.056631 |
| 2w4w_SITTE <sup>z</sup> | 0.01363334 | 0.07166571 | 3.24E-05 | 0.0057681 | 0.23179   |

|                     |            |            |          |           |            |
|---------------------|------------|------------|----------|-----------|------------|
| 2w4w_SITTE $\angle$ | 0.02973705 | 0.16883698 | 4.02E-05 | 0.0040662 | -0.10597   |
| 2w4w_SITTE $\angle$ | 0.01632055 | 0.08788055 | 3.30E-05 | 0.0051875 | 0.12392    |
| 2w4w_SITTE $\angle$ | 0.05838829 | 0.3417212  | 6.01E-05 | 0.0080116 | 0.074438   |
| 2w4w_SITTE $\angle$ | 0.02496832 | 0.14006202 | 3.68E-05 | 0.0041768 | -0.086782  |
| 2w4w_SITTE $\angle$ | 0.10711381 | 0.6357354  | 6.58E-05 | 0.025586  | -0.23052   |
| 2w4w_SITTE $\angle$ | 0.0310928  | 0.17701767 | 4.16E-05 | 0.0040771 | -0.10299   |
| 2w4w_SITTE $\angle$ | 0.08041371 | 0.4746246  | 6.32E-05 | 0.016854  | 0.13446    |
| 2w4w_SITTE $\angle$ | 0.01798865 | 0.097946   | 3.34E-05 | 0.0049043 | 0.067421   |
| 2w4w_SITTE $\angle$ | 0.03455381 | 0.19790174 | 4.48E-05 | 0.0041765 | -0.082901  |
| 2w4w_SITTE $\angle$ | 0.00821593 | 0.03897655 | 3.19E-05 | 0.0071994 | 0.45929    |
| 2w4w_SITTE $\angle$ | 0.03826015 | 0.22026613 | 4.87E-05 | 0.0044183 | -0.04622   |
| 2w4w_SITTE $\angle$ | 0.02462114 | 0.13796708 | 3.64E-05 | 0.0042065 | -0.080664  |
| 2w4w_SITTE $\angle$ | 0.04557092 | 0.26437998 | 5.50E-05 | 0.0052335 | 0.021279   |
| 2w4w_SITTE $\angle$ | 0.09876595 | 0.5853637  | 6.52E-05 | 0.024275  | -0.094455  |
| 2w4w_SITTE $\angle$ | 0.02096862 | 0.11592747 | 3.47E-05 | 0.0044724 | -0.023601  |
| 2w4w_SITTE $\angle$ | 0.05059206 | 0.29467803 | 5.78E-05 | 0.0061018 | 0.048868   |
| 2w4w_SITTE $\angle$ | 0.11642452 | 0.69191706 | 6.64E-05 | 0.025054  | -0.33868   |
| 2w4w_SITTE $\angle$ | 0.02535737 | 0.14240955 | 3.72E-05 | 0.0041509 | -0.092011  |
| 2w4w_SITTE $\angle$ | 0.09939056 | 0.5891326  | 6.53E-05 | 0.02442   | -0.10426   |
| 2w4w_SITTE $\angle$ | 0.00922009 | 0.04503571 | 3.19E-05 | 0.0070136 | 0.4058     |
| 2w4w_SITTE $\angle$ | 0.01472669 | 0.07826308 | 3.26E-05 | 0.0055188 | 0.18676    |
| 2w4w_SITTE $\angle$ | 0.01402661 | 0.07403868 | 3.25E-05 | 0.0056405 | 0.20898    |
| 2w4w_SITTE $\angle$ | 0.01418687 | 0.07500573 | 3.25E-05 | 0.0056405 | 0.20898    |
| 2w4w_SITTE $\angle$ | 0.04758139 | 0.27651134 | 5.64E-05 | 0.0055867 | 0.035328   |
| 2w4w_SITTE $\angle$ | 0.04279282 | 0.24761666 | 5.29E-05 | 0.0048617 | -0.0013165 |
| 2w4w_SITTE $\angle$ | 0.06214273 | 0.36437583 | 6.07E-05 | 0.0092324 | 0.083692   |
| 2w4w_SITTE $\angle$ | 0.03246217 | 0.18528058 | 4.27E-05 | 0.004099  | -0.094772  |
| 2w4w_SITTE $\angle$ | 0.07628063 | 0.4496852  | 6.26E-05 | 0.0148    | 0.1354     |
| 2w4w_SITTE $\angle$ | 0.00933459 | 0.0457266  | 3.20E-05 | 0.0068348 | 0.4058     |
| 2w4w_SITTE $\angle$ | 0.01308549 | 0.06835989 | 3.23E-05 | 0.0059016 | 0.23179    |
| 2w4w_SITTE $\angle$ | 0.08259918 | 0.4878119  | 6.35E-05 | 0.017892  | 0.1271     |
| 7w11w_SITTC         | 0.01203591 | 0.06202667 | 3.23E-05 | 0.0060411 | 0.2791     |
| 7w11w_SITTC         | 0.03168427 | 0.18058667 | 4.22E-05 | 0.0040866 | -0.10071   |
| 7w11w_SITTC         | 0.08130629 | 0.48001045 | 6.34E-05 | 0.017373  | 0.13148    |
| 7w11w_SITTC         | 0.03130173 | 0.17827839 | 4.16E-05 | 0.0040771 | -0.10299   |
| 7w11w_SITTC         | 0.05976238 | 0.35001254 | 6.04E-05 | 0.0085136 | 0.077363   |
| 7w11w_SITTC         | 0.05850015 | 0.34239614 | 6.01E-05 | 0.0080116 | 0.074438   |
| 7w11w_SITTC         | 0.01360372 | 0.07148696 | 3.24E-05 | 0.0057681 | 0.23179    |
| 7w11w_SITTC         | 0.01564638 | 0.08381255 | 3.28E-05 | 0.0052924 | 0.1442     |
| 7w11w_SITTC         | 0.025451   | 0.14297453 | 3.72E-05 | 0.0041509 | -0.092011  |
| 7w11w_SITTC         | 0.02215753 | 0.12310145 | 3.52E-05 | 0.0043661 | -0.046619  |
| 7w11w_SITTC         | 0.02029678 | 0.11187347 | 3.42E-05 | 0.0045972 | -0.01065   |
| 7w11w_SITTC         | 0.01142789 | 0.05835781 | 3.21E-05 | 0.006339  | 0.30353    |



|             |            |            |          |           |           |
|-------------|------------|------------|----------|-----------|-----------|
| 7w11w_SITTC | 0.01209309 | 0.06237165 | 3.23E-05 | 0.0060411 | 0.2791    |
| 7w11w_SITTC | 0.09281431 | 0.54945093 | 6.46E-05 | 0.022258  | 0.010343  |
| 7w11w_SITTC | 0.03123963 | 0.17790364 | 4.16E-05 | 0.0040771 | -0.10299  |
| 7w11w_SITTC | 0.07145866 | 0.42058897 | 6.20E-05 | 0.012843  | 0.12136   |
| 7w11w_SITTC | 0.0159912  | 0.08589325 | 3.30E-05 | 0.0051875 | 0.12392   |
| 7w11w_SITTC | 0.03357556 | 0.19199887 | 4.37E-05 | 0.0041322 | -0.087207 |
| 7w11w_SITTC | 0.07553817 | 0.44520512 | 6.26E-05 | 0.014549  | 0.13453   |
| 7w11w_SITTC | 0.02696963 | 0.15213808 | 3.80E-05 | 0.0041099 | -0.10271  |
| 7w11w_SITTC | 0.03366275 | 0.19252498 | 4.43E-05 | 0.004153  | -0.087207 |
| 7w11w_SITTC | 0.01876106 | 0.10260683 | 3.38E-05 | 0.004741  | 0.03364   |
| 7w11w_SITTC | 0.00708635 | 0.03216057 | 3.19E-05 | 0.0075925 | 0.51404   |
| 7w11w_SITTC | 0.10393578 | 0.61655885 | 6.56E-05 | 0.025296  | -0.18011  |
| 7w11w_SITTC | 0.02232523 | 0.12411333 | 3.52E-05 | 0.0043661 | -0.046619 |
| 7w11w_SITTC | 0.01564921 | 0.08382966 | 3.28E-05 | 0.0052924 | 0.1442    |
| 7w11w_SITTC | 0.03101822 | 0.17656764 | 4.16E-05 | 0.0040771 | -0.10299  |
| 7w11w_SITTC | 0.02088684 | 0.11543395 | 3.47E-05 | 0.0044724 | -0.023601 |
| 7w11w_SITTC | 0.01248717 | 0.0647496  | 3.23E-05 | 0.0060411 | 0.2791    |
| 7w11w_SITTC | 0.02336224 | 0.13037078 | 3.58E-05 | 0.0042778 | -0.065623 |
| 7w11w_SITTC | 0.02353512 | 0.13141397 | 3.58E-05 | 0.0042778 | -0.065623 |
| 7w11w_SITTC | 0.02182392 | 0.12108843 | 3.49E-05 | 0.0044169 | -0.0356   |
| 7w11w_SITTC | 0.09184417 | 0.543597   | 6.46E-05 | 0.022042  | 0.027741  |
| 7w11w_SITTC | 0.01375344 | 0.07239038 | 3.25E-05 | 0.0056405 | 0.20898   |
| 7w11w_SITTC | 0.03388003 | 0.19383608 | 4.43E-05 | 0.004153  | -0.087207 |
| 7w11w_SITTC | 0.06287272 | 0.3687806  | 6.08E-05 | 0.0094206 | 0.087254  |
| 7w11w_SITTC | 0.02394929 | 0.13391308 | 3.61E-05 | 0.0042401 | -0.073623 |
| 7w11w_SITTC | 0.01882987 | 0.10302204 | 3.38E-05 | 0.004741  | 0.03364   |
| 7w11w_SITTC | 0.02934362 | 0.16646296 | 4.02E-05 | 0.0040662 | -0.10661  |
| 7w11w_SITTC | 0.04047345 | 0.23362142 | 5.09E-05 | 0.0046173 | -0.023154 |
| 7w11w_SITTC | 0.01337826 | 0.0701265  | 3.24E-05 | 0.0057681 | 0.23179   |
| 7w11w_SITTC | 0.01951001 | 0.10712607 | 3.40E-05 | 0.0046667 | 0.017998  |
| 7w11w_SITTC | 0.01295602 | 0.0675787  | 3.23E-05 | 0.0059016 | 0.25518   |
| 7w11w_SITTC | 0.03815412 | 0.21962635 | 4.87E-05 | 0.0044183 | -0.04622  |
| 7w11w_SITTC | 0.11424045 | 0.6787382  | 6.63E-05 | 0.025299  | -0.3171   |
| 7w11w_SITTC | 0.0862242  | 0.5096856  | 6.39E-05 | 0.01943   | 0.099025  |
| 7w11w_SITTC | 0.06008592 | 0.35196486 | 6.04E-05 | 0.0085136 | 0.07887   |
| 7w11w_SITTC | 0.10337587 | 0.6131803  | 6.56E-05 | 0.025216  | -0.17104  |
| 7w11w_SITTC | 0.12595199 | 0.7494067  | 6.68E-05 | 0.023927  | -0.41325  |
| 7w11w_SITTC | 0.03093339 | 0.1760558  | 4.16E-05 | 0.0040771 | -0.10299  |
| 7w11w_SITTC | 0.02360693 | 0.13184723 | 3.58E-05 | 0.0042778 | -0.073623 |
| 7w11w_SITTC | 0.02239735 | 0.12454852 | 3.52E-05 | 0.0043661 | -0.046619 |
| 7w11w_SITTC | 0.02589964 | 0.1456817  | 3.76E-05 | 0.0041286 | -0.096385 |
| 7w11w_SITTC | 0.0242978  | 0.13601601 | 3.64E-05 | 0.0042065 | -0.080664 |
| 7w11w_SITTC | 0.0141382  | 0.07471207 | 3.25E-05 | 0.0056405 | 0.20898   |

|             |            |            |          |           |           |
|-------------|------------|------------|----------|-----------|-----------|
| 7w11w_SITTC | 0.12033705 | 0.7155256  | 6.66E-05 | 0.024561  | -0.37215  |
| 7w11w_SITTC | 0.00657078 | 0.02904958 | 3.18E-05 | 0.0078    | 0.54183   |
| 7w11w_SITTC | 0.02144035 | 0.11877391 | 3.49E-05 | 0.0044169 | -0.0356   |
| 7w11w_SITTC | 0.02192477 | 0.12169695 | 3.49E-05 | 0.0044169 | -0.046619 |
| 7w11w_SITTC | 0.03164924 | 0.18037532 | 4.22E-05 | 0.0040866 | -0.10071  |
| 7w11w_SITTC | 0.01512265 | 0.08065229 | 3.27E-05 | 0.0054028 | 0.16515   |
| 7w11w_SITTC | 0.01794827 | 0.09770235 | 3.34E-05 | 0.0049043 | 0.067421  |
| 7w11w_SITTC | 0.04739822 | 0.2754061  | 5.61E-05 | 0.0054936 | 0.035328  |
| 7w11w_SITTC | 0.03550015 | 0.20361201 | 4.59E-05 | 0.0042319 | -0.073417 |
| 7w11w_SITTC | 0.06958702 | 0.4092953  | 6.17E-05 | 0.01192   | 0.11455   |
| 7w11w_SITTC | 0.01622095 | 0.08727959 | 3.30E-05 | 0.0051875 | 0.12392   |
| 7w11w_SITTC | 0.03410402 | 0.19518766 | 4.43E-05 | 0.004153  | -0.082901 |
| 7w11w_SITTC | 0.01555525 | 0.08326265 | 3.28E-05 | 0.0052924 | 0.1442    |
| 7w11w_SITTC | 0.01586287 | 0.08511885 | 3.28E-05 | 0.0052924 | 0.12392   |
| 7w11w_SITTC | 0.02945424 | 0.16713046 | 4.02E-05 | 0.0040662 | -0.10661  |
| 7w11w_SITTC | 0.03649677 | 0.20962574 | 4.70E-05 | 0.0042982 | -0.062998 |
| 7w11w_SITTC | 0.10076088 | 0.5974012  | 6.54E-05 | 0.024809  | -0.12375  |
| 7w11w_SITTC | 0.03095502 | 0.17618626 | 4.16E-05 | 0.0040771 | -0.10299  |
| 7w11w_SITTC | 0.03268648 | 0.18663412 | 4.32E-05 | 0.0041142 | -0.094772 |
| 7w11w_SITTC | 0.03859997 | 0.22231662 | 4.87E-05 | 0.0044183 | -0.040459 |
| 7w11w_SITTC | 0.01806015 | 0.09837748 | 3.34E-05 | 0.0049043 | 0.050123  |
| 7w11w_SITTC | 0.01638126 | 0.0882469  | 3.30E-05 | 0.0051875 | 0.12392   |
| 7w11w_SITTC | 0.10165519 | 0.6027976  | 6.54E-05 | 0.024923  | -0.14299  |
| 7w11w_SITTC | 0.03081605 | 0.17534776 | 4.11E-05 | 0.0040705 | -0.10299  |
| 7w11w_SITTC | 0.02468879 | 0.13837528 | 3.64E-05 | 0.0042065 | -0.086782 |
| 7w11w_SITTC | 0.07591238 | 0.44746312 | 6.26E-05 | 0.0148    | 0.13453   |
| 7w11w_SITTC | 0.0286398  | 0.16221607 | 3.97E-05 | 0.0040686 | -0.10664  |
| 7w11w_SITTC | 0.03216407 | 0.18348183 | 4.27E-05 | 0.004099  | -0.097962 |
| 7w11w_SITTC | 0.02581934 | 0.14519717 | 3.72E-05 | 0.0041509 | -0.096385 |
| 7w11w_SITTC | 0.02363721 | 0.13203    | 3.58E-05 | 0.0042778 | -0.073623 |
| 7w11w_SITTC | 0.01978185 | 0.10876637 | 3.42E-05 | 0.0045972 | 0.0032259 |
| 7w11w_SITTC | 0.11392017 | 0.67680556 | 6.62E-05 | 0.025353  | -0.31137  |
| 7w11w_SITTC | 0.02200518 | 0.12218211 | 3.52E-05 | 0.0043661 | -0.046619 |
| 7w11w_SITTC | 0.03311055 | 0.18919297 | 4.37E-05 | 0.0041322 | -0.091175 |
| 7w11w_SITTC | 0.07767703 | 0.45811117 | 6.29E-05 | 0.015562  | 0.13646   |
| 7w11w_SITTC | 0.09052099 | 0.53561276 | 6.44E-05 | 0.021369  | 0.044278  |
| 7w11w_SITTC | 0.0741365  | 0.43674728 | 6.24E-05 | 0.014051  | 0.13074   |
| 7w11w_SITTC | 0.03738871 | 0.21500778 | 4.76E-05 | 0.0043355 | -0.05192  |
| 7w11w_SITTC | 0.03687019 | 0.211879   | 4.70E-05 | 0.0042982 | -0.057524 |
| 7w11w_SITTC | 0.06927646 | 0.40742138 | 6.17E-05 | 0.01192   | 0.11218   |
| 7w11w_SITTC | 0.05556935 | 0.3247114  | 5.95E-05 | 0.007248  | 0.065685  |
| 7w11w_SITTC | 0.06474067 | 0.380052   | 6.11E-05 | 0.010206  | 0.093303  |
| 7w11w_SITTC | 0.01338013 | 0.07013778 | 3.24E-05 | 0.0057681 | 0.23179   |

|             |            |            |          |           |           |
|-------------|------------|------------|----------|-----------|-----------|
| 7w11w_SITTC | 0.02582697 | 0.14524315 | 3.72E-05 | 0.0041509 | -0.096385 |
| 7w11w_SITTC | 0.02610622 | 0.1469282  | 3.76E-05 | 0.0041286 | -0.096385 |
| 7w11w_SITTC | 0.08184166 | 0.48324096 | 6.34E-05 | 0.017373  | 0.12948   |
| 7w11w_SITTC | 0.10041206 | 0.5952964  | 6.53E-05 | 0.024687  | -0.12375  |
| 7w11w_SITTC | 0.01446537 | 0.07668621 | 3.26E-05 | 0.0055188 | 0.18676   |
| 7w11w_SITTC | 0.02004261 | 0.11033984 | 3.42E-05 | 0.0045972 | 0.0032259 |
| 7w11w_SITTC | 0.02173439 | 0.12054817 | 3.49E-05 | 0.0044169 | -0.0356   |
| 7w11w_SITTC | 0.01881724 | 0.10294583 | 3.38E-05 | 0.004741  | 0.03364   |
| 7w11w_SITTC | 0.02230865 | 0.1240133  | 3.52E-05 | 0.0043661 | -0.046619 |
| 7w11w_SITTC | 0.12326409 | 0.7331877  | 6.67E-05 | 0.024217  | -0.39346  |
| 7w11w_SITTC | 0.01780892 | 0.09686153 | 3.34E-05 | 0.0049043 | 0.067421  |
| 7w11w_SITTC | 0.01953369 | 0.10726894 | 3.40E-05 | 0.0046667 | 0.017998  |
| 7w11w_SITTC | 0.04898039 | 0.28495303 | 5.70E-05 | 0.0057827 | 0.041222  |
| 7w11w_SITTC | 0.02157434 | 0.11958242 | 3.49E-05 | 0.0044169 | -0.0356   |
| 7w11w_SITTC | 0.02124939 | 0.11762162 | 3.47E-05 | 0.0044724 | -0.023601 |
| 7w11w_SITTC | 0.08292701 | 0.48979005 | 6.35E-05 | 0.017892  | 0.12434   |
| 7w11w_SITTC | 0.05844138 | 0.34204155 | 6.01E-05 | 0.0080116 | 0.074438  |
| 7w11w_SITTC | 0.01297329 | 0.06768288 | 3.23E-05 | 0.0059016 | 0.25518   |
| 7w11w_SITTC | 0.02525409 | 0.1417864  | 3.68E-05 | 0.0041768 | -0.092011 |
| 7w11w_SITTC | 0.02947391 | 0.16724917 | 4.02E-05 | 0.0040662 | -0.10661  |
| 7w11w_SITTC | 0.01780648 | 0.0968468  | 3.34E-05 | 0.0049043 | 0.067421  |
| 7w11w_SITTC | 0.03390016 | 0.19395758 | 4.43E-05 | 0.004153  | -0.087207 |
| 7w11w_SITTC | 0.03678163 | 0.2113446  | 4.70E-05 | 0.0042982 | -0.062998 |
| 7w11w_SITTC | 0.02735412 | 0.1544581  | 3.84E-05 | 0.0040947 | -0.10271  |
| 7w11w_SITTC | 0.03180551 | 0.18131825 | 4.22E-05 | 0.0040866 | -0.10071  |
| 7w11w_SITTC | 0.01856893 | 0.10144747 | 3.36E-05 | 0.0048202 | 0.050123  |
| 7w11w_SITTC | 0.00688692 | 0.03095719 | 3.18E-05 | 0.0078    | 0.54183   |
| 7w11w_SITTC | 0.0161481  | 0.08683999 | 3.30E-05 | 0.0051875 | 0.12392   |
| 7w11w_SITTC | 0.0259692  | 0.14610142 | 3.76E-05 | 0.0041286 | -0.096385 |
| 7w11w_SITTC | 0.01863678 | 0.10185687 | 3.36E-05 | 0.0048202 | 0.03364   |
| 7w11w_SITTC | 0.02095439 | 0.11584158 | 3.47E-05 | 0.0044724 | -0.023601 |
| 7w11w_SITTC | 0.02698941 | 0.15225744 | 3.84E-05 | 0.0040947 | -0.10271  |
| 7w11w_SITTC | 0.01255318 | 0.06514792 | 3.23E-05 | 0.0060411 | 0.25518   |
| 7w11w_SITTC | 0.01637743 | 0.08822381 | 3.30E-05 | 0.0051875 | 0.12392   |
| 7w11w_SITTC | 0.01283441 | 0.06684487 | 3.23E-05 | 0.0059016 | 0.25518   |
| 7w11w_SITTC | 0.01476571 | 0.07849851 | 3.26E-05 | 0.0055188 | 0.16515   |
| 7w11w_SITTC | 0.0411022  | 0.23741533 | 5.14E-05 | 0.0046741 | -0.017493 |
| 7w11w_SITTC | 0.01936899 | 0.10627512 | 3.40E-05 | 0.0046667 | 0.017998  |
| 7w11w_SITTC | 0.02667097 | 0.15033595 | 3.80E-05 | 0.0041099 | -0.099939 |
| 7w11w_SITTC | 0.02603192 | 0.14647985 | 3.76E-05 | 0.0041286 | -0.096385 |
| 7w11w_SITTC | 0.12197806 | 0.7254276  | 6.66E-05 | 0.02435   | -0.38515  |
| 7w11w_SITTC | 0.03411706 | 0.19526634 | 4.43E-05 | 0.004153  | -0.082901 |
| 7w11w_SITTC | 0.04719418 | 0.2741749  | 5.61E-05 | 0.0054936 | 0.032113  |

|             |            |            |          |           |           |
|-------------|------------|------------|----------|-----------|-----------|
| 7w11w_SITTC | 0.08889416 | 0.52579635 | 6.42E-05 | 0.020663  | 0.067165  |
| 7w11w_SITTC | 0.02173231 | 0.12053559 | 3.49E-05 | 0.0044169 | -0.0356   |
| 7w11w_SITTC | 0.01581578 | 0.08483472 | 3.28E-05 | 0.0052924 | 0.1442    |
| 7w11w_SITTC | 0.02728649 | 0.15405008 | 3.84E-05 | 0.0040947 | -0.10271  |
| 7w11w_SITTC | 0.0921508  | 0.54544723 | 6.46E-05 | 0.022042  | 0.019141  |
| 7w11w_SITTC | 0.01365982 | 0.07182548 | 3.24E-05 | 0.0057681 | 0.20898   |
| 7w11w_SITTC | 0.01370447 | 0.0720949  | 3.25E-05 | 0.0056405 | 0.20898   |
| 7w11w_SITTC | 0.00958929 | 0.04726352 | 3.20E-05 | 0.0068348 | 0.4058    |
| 7w11w_SITTC | 0.01001491 | 0.04983176 | 3.20E-05 | 0.0066628 | 0.37961   |
| 7w11w_SITTC | 0.03905555 | 0.22506566 | 4.92E-05 | 0.0044639 | -0.034672 |
| 7w11w_SITTC | 0.02572878 | 0.1446507  | 3.72E-05 | 0.0041509 | -0.092011 |
| 7w11w_SITTC | 0.00657555 | 0.02907834 | 3.18E-05 | 0.0078    | 0.54183   |
| 7w11w_SITTC | 0.07306742 | 0.4302964  | 6.23E-05 | 0.013561  | 0.12737   |
| 7w11w_SITTC | 0.02480107 | 0.13905282 | 3.68E-05 | 0.0041768 | -0.086782 |
| 7w11w_SITTC | 0.01819197 | 0.09917287 | 3.36E-05 | 0.0048202 | 0.050123  |
| 7w11w_SITTC | 0.05751408 | 0.33644614 | 6.00E-05 | 0.0078516 | 0.071569  |
| 7w11w_SITTC | 0.09602157 | 0.5688038  | 6.50E-05 | 0.023448  | -0.045608 |
| 7w11w_SITTC | 0.00497534 | 0.01942252 | 3.18E-05 | 0.0084677 | 0.62647   |
| 7w11w_SITTC | 0.01917009 | 0.10507494 | 3.38E-05 | 0.004741  | 0.017998  |
| 7w11w_SITTC | 0.07664517 | 0.45188484 | 6.27E-05 | 0.015053  | 0.13605   |
| 7w11w_SITTC | 0.10331252 | 0.61279804 | 6.56E-05 | 0.025216  | -0.17104  |
| 7w11w_SITTC | 0.02779215 | 0.15710126 | 3.88E-05 | 0.0040827 | -0.10472  |
| 7w11w_SITTC | 0.08572388 | 0.5066666  | 6.39E-05 | 0.019177  | 0.1043    |
| 7w11w_SITTC | 0.02311224 | 0.12886225 | 3.58E-05 | 0.0042778 | -0.065623 |
| 7w11w_SITTC | 0.01258274 | 0.06532625 | 3.23E-05 | 0.0059016 | 0.25518   |
| 7w11w_SITTC | 0.01532204 | 0.08185547 | 3.27E-05 | 0.0054028 | 0.1442    |
| 7w11w_SITTC | 0.1198041  | 0.7123098  | 6.65E-05 | 0.024632  | -0.36766  |
| 7w11w_SITTC | 0.12241439 | 0.7280605  | 6.67E-05 | 0.024282  | -0.38515  |
| 7w11w_SITTC | 0.03462578 | 0.19833602 | 4.48E-05 | 0.0041765 | -0.082901 |
| 7w11w_SITTC | 0.03044547 | 0.1731116  | 4.11E-05 | 0.0040705 | -0.10475  |
| 7w11w_SITTC | 0.04196027 | 0.24259299 | 5.24E-05 | 0.0047963 | -0.00654  |
| 7w11w_SITTC | 0.01506682 | 0.08031546 | 3.27E-05 | 0.0054028 | 0.16515   |
| 7w11w_SITTC | 0.03142491 | 0.17902167 | 4.22E-05 | 0.0040866 | -0.10071  |
| 7w11w_SITTC | 0.08270644 | 0.48845914 | 6.35E-05 | 0.017892  | 0.12434   |
| 7w11w_SITTC | 0.0153191  | 0.08183774 | 3.27E-05 | 0.0054028 | 0.1442    |
| 7w11w_SITTC | 0.04167794 | 0.24088937 | 5.19E-05 | 0.0047337 | -0.011944 |
| 7w11w_SITTC | 0.14870898 | 0.88672453 | 6.76E-05 | 0.023686  | -0.52048  |
| 7w11w_SITTC | 0.05582594 | 0.3262597  | 5.97E-05 | 0.0073934 | 0.067199  |
| 7w11w_SITTC | 0.02223352 | 0.12355999 | 3.52E-05 | 0.0043661 | -0.046619 |
| 7w11w_SITTC | 0.01815978 | 0.09897868 | 3.36E-05 | 0.0048202 | 0.050123  |
| 7w11w_SITTC | 0.03735926 | 0.21483009 | 4.76E-05 | 0.0043355 | -0.057524 |
| 7w11w_SITTC | 0.03517635 | 0.20165819 | 4.54E-05 | 0.0042028 | -0.078293 |
| 7w11w_SITTC | 0.01294331 | 0.06750201 | 3.23E-05 | 0.0059016 | 0.25518   |

|             |            |            |          |           |           |
|-------------|------------|------------|----------|-----------|-----------|
| 7w11w_SITTC | 0.02645733 | 0.14904681 | 3.80E-05 | 0.0041099 | -0.099939 |
| 7w11w_SITTC | 0.02023591 | 0.11150617 | 3.42E-05 | 0.0045972 | 0.0032259 |
| 7w11w_SITTC | 0.03699591 | 0.21263757 | 4.76E-05 | 0.0043355 | -0.057524 |
| 7w11w_SITTC | 0.02067208 | 0.11413807 | 3.44E-05 | 0.0045325 | -0.01065  |
| 7w11w_SITTC | 0.03096268 | 0.17623253 | 4.16E-05 | 0.0040771 | -0.10299  |
| 7w11w_SITTC | 0.07951921 | 0.46922708 | 6.31E-05 | 0.016335  | 0.13545   |
| 7w11w_SITTC | 0.02094631 | 0.11579282 | 3.47E-05 | 0.0044724 | -0.023601 |
| 7w11w_SITTC | 0.02693127 | 0.15190661 | 3.80E-05 | 0.0041099 | -0.10271  |
| 7w11w_SITTC | 0.07566249 | 0.44595525 | 6.26E-05 | 0.014549  | 0.13453   |
| 7w11w_SITTC | 0.02342294 | 0.130737   | 3.58E-05 | 0.0042778 | -0.065623 |
| 7w11w_SITTC | 0.03610256 | 0.20724702 | 4.65E-05 | 0.0042637 | -0.068307 |
| 7w11w_SITTC | 0.03131573 | 0.17836286 | 4.16E-05 | 0.0040771 | -0.10071  |
| 7w11w_SITTC | 0.07625127 | 0.449508   | 6.26E-05 | 0.0148    | 0.1354    |
| 7w11w_SITTC | 0.02781822 | 0.15725859 | 3.88E-05 | 0.0040827 | -0.10472  |
| 7w11w_SITTC | 0.06565974 | 0.38559777 | 6.12E-05 | 0.01041   | 0.097788  |
| 7w11w_SITTC | 0.01838717 | 0.10035075 | 3.36E-05 | 0.0048202 | 0.050123  |
| 7w11w_SITTC | 0.02341153 | 0.13066821 | 3.58E-05 | 0.0042778 | -0.065623 |
| 7w11w_SITTC | 0.00679668 | 0.03041266 | 3.18E-05 | 0.0078    | 0.54183   |
| 7w11w_SITTC | 0.02143781 | 0.1187586  | 3.49E-05 | 0.0044169 | -0.0356   |
| 7w11w_SITTC | 0.13387719 | 0.7972281  | 6.71E-05 | 0.023546  | -0.46255  |
| 7w11w_SITTC | 0.02458635 | 0.13775717 | 3.64E-05 | 0.0042065 | -0.080664 |
| 7w11w_SITTC | 0.0641543  | 0.3765138  | 6.10E-05 | 0.010005  | 0.091185  |
| 7w11w_SITTC | 0.01838914 | 0.1003626  | 3.36E-05 | 0.0048202 | 0.050123  |
| 7w11w_SITTC | 0.02534917 | 0.14236012 | 3.72E-05 | 0.0041509 | -0.092011 |
| 7w11w_SITTC | 0.01978212 | 0.10876801 | 3.42E-05 | 0.0045972 | 0.0032259 |
| 7w11w_SITTC | 0.02911778 | 0.1651002  | 3.97E-05 | 0.0040686 | -0.10661  |
| 7w11w_SITTC | 0.03444037 | 0.19721723 | 4.48E-05 | 0.0041765 | -0.082901 |
| 7w11w_SITTC | 0.05352552 | 0.31237876 | 5.89E-05 | 0.0067028 | 0.060836  |
| 7w11w_SITTC | 0.05095161 | 0.29684758 | 5.81E-05 | 0.006215  | 0.051138  |
| 7w11w_SITTC | 0.0203321  | 0.11208662 | 3.44E-05 | 0.0045325 | -0.01065  |
| 7w11w_SITTC | 0.00877048 | 0.04232275 | 3.19E-05 | 0.0070136 | 0.43237   |
| 7w11w_SITTC | 0.11279094 | 0.6699917  | 6.62E-05 | 0.025448  | -0.29951  |
| 7w11w_SITTC | 0.02247575 | 0.12502159 | 3.52E-05 | 0.0043661 | -0.056631 |
| 7w11w_SITTC | 0.05805981 | 0.33973908 | 6.01E-05 | 0.0080116 | 0.073002  |
| 7w11w_SITTC | 0.1171599  | 0.6963544  | 6.64E-05 | 0.024986  | -0.34377  |
| 7w11w_SITTC | 0.02166689 | 0.12014088 | 3.49E-05 | 0.0044169 | -0.0356   |
| 7w11w_SITTC | 0.01656407 | 0.08934998 | 3.31E-05 | 0.0050879 | 0.10435   |
| 7w11w_SITTC | 0.02749601 | 0.15531431 | 3.84E-05 | 0.0040947 | -0.10472  |
| 7w11w_SITTC | 0.01782899 | 0.09698261 | 3.34E-05 | 0.0049043 | 0.067421  |
| 7w11w_SITTC | 0.03081462 | 0.17533909 | 4.11E-05 | 0.0040705 | -0.10299  |
| 7w11w_SITTC | 0.0165243  | 0.08910999 | 3.31E-05 | 0.0050879 | 0.10435   |
| 7w11w_SITTC | 0.06014467 | 0.35231933 | 6.04E-05 | 0.0085136 | 0.07887   |
| 7w11w_SITTC | 0.01630605 | 0.08779305 | 3.30E-05 | 0.0051875 | 0.12392   |

|             |            |            |          |           |           |
|-------------|------------|------------|----------|-----------|-----------|
| 7w11w_SITTC | 0.02097918 | 0.11599118 | 3.47E-05 | 0.0044724 | -0.023601 |
| 7w11w_SITTC | 0.00878225 | 0.04239376 | 3.19E-05 | 0.0070136 | 0.43237   |
| 7w11w_SITTC | 0.0290661  | 0.16478842 | 3.97E-05 | 0.0040686 | -0.10664  |
| 7w11w_SITTC | 0.01293241 | 0.06743623 | 3.23E-05 | 0.0059016 | 0.25518   |
| 7w11w_SITTC | 0.01882722 | 0.10300601 | 3.38E-05 | 0.004741  | 0.03364   |
| 7w11w_SITTC | 0.01304168 | 0.06809554 | 3.23E-05 | 0.0059016 | 0.25518   |
| 7w11w_SITTC | 0.03770519 | 0.21691746 | 4.81E-05 | 0.0043756 | -0.05192  |
| 7w11w_SITTC | 0.00940548 | 0.04615441 | 3.20E-05 | 0.0068348 | 0.4058    |
| 7w11w_SITTC | 0.06845016 | 0.40243542 | 6.16E-05 | 0.011474  | 0.10977   |
| 7w11w_SITTC | 0.03222251 | 0.18383446 | 4.27E-05 | 0.004099  | -0.097962 |
| 7w11w_SITTC | 0.01854114 | 0.10127978 | 3.36E-05 | 0.0048202 | 0.050123  |
| 7w11w_SITTC | 0.01320091 | 0.06905636 | 3.24E-05 | 0.0057681 | 0.23179   |
| 7w11w_SITTC | 0.05363635 | 0.31304756 | 5.91E-05 | 0.0068337 | 0.060836  |
| 7w11w_SITTC | 0.02898539 | 0.16430138 | 3.97E-05 | 0.0040686 | -0.10664  |
| 7w11w_SITTC | 0.01637856 | 0.0882306  | 3.30E-05 | 0.0051875 | 0.12392   |
| 7w11w_SITTC | 0.02606878 | 0.14670229 | 3.76E-05 | 0.0041286 | -0.096385 |
| 7w11w_SITTC | 0.06656931 | 0.39108616 | 6.13E-05 | 0.010826  | 0.10013   |
| 7w11w_SITTC | 0.00615902 | 0.02656493 | 3.18E-05 | 0.008015  | 0.56984   |
| 7w11w_SITTC | 0.07811293 | 0.46074146 | 6.29E-05 | 0.015819  | 0.13662   |
| 7w11w_SITTC | 0.02435111 | 0.13633773 | 3.64E-05 | 0.0042065 | -0.080664 |
| 7w11w_SITTC | 0.03287374 | 0.18776402 | 4.32E-05 | 0.0041142 | -0.094772 |
| 7w11w_SITTC | 0.0196231  | 0.10780842 | 3.40E-05 | 0.0046667 | 0.017998  |
| 7w11w_SITTC | 0.01334414 | 0.06992064 | 3.24E-05 | 0.0057681 | 0.23179   |
| 7w11w_SITTC | 0.06024816 | 0.3529438  | 6.05E-05 | 0.008688  | 0.07887   |
| 7w11w_SITTC | 0.02415763 | 0.13517025 | 3.61E-05 | 0.0042401 | -0.080664 |
| 7w11w_SITTC | 0.01022578 | 0.05110417 | 3.20E-05 | 0.0066628 | 0.37961   |
| 7w11w_SITTC | 0.08190258 | 0.48360854 | 6.35E-05 | 0.017633  | 0.12948   |
| 7w11w_SITTC | 0.02005656 | 0.110424   | 3.42E-05 | 0.0045972 | 0.0032259 |
| 7w11w_SITTC | 0.08768447 | 0.51849693 | 6.41E-05 | 0.020177  | 0.080939  |
| 7w11w_SITTC | 0.01342921 | 0.07043393 | 3.24E-05 | 0.0057681 | 0.23179   |
| 7w11w_SITTC | 0.07984443 | 0.47118947 | 6.32E-05 | 0.016594  | 0.13545   |
| 7w11w_SITTC | 0.02689829 | 0.15170762 | 3.80E-05 | 0.0041099 | -0.10271  |
| 7w11w_SITTC | 0.0320685  | 0.18290512 | 4.27E-05 | 0.004099  | -0.097962 |
| 7w11w_SITTC | 0.02898112 | 0.16427562 | 3.97E-05 | 0.0040686 | -0.10664  |
| 7w11w_SITTC | 0.02958807 | 0.16793801 | 4.02E-05 | 0.0040662 | -0.10661  |
| 7w11w_SITTC | 0.02191169 | 0.12161799 | 3.49E-05 | 0.0044169 | -0.0356   |
| 7w11w_SITTC | 0.02263479 | 0.12598129 | 3.55E-05 | 0.0043197 | -0.056631 |
| 7w11w_SITTC | 0.0429972  | 0.24884991 | 5.29E-05 | 0.0048617 | 0.0036923 |
| 7w11w_SITTC | 0.01684285 | 0.09103218 | 3.31E-05 | 0.0050879 | 0.10435   |
| 7w11w_SITTC | 0.08348694 | 0.4931687  | 6.36E-05 | 0.018151  | 0.12117   |
| 7w11w_SITTC | 0.01548489 | 0.08283812 | 3.28E-05 | 0.0052924 | 0.1442    |
| 7w11w_SITTC | 0.01649562 | 0.08893693 | 3.31E-05 | 0.0050879 | 0.10435   |
| 7w11w_SITTC | 0.01636145 | 0.08812737 | 3.30E-05 | 0.0051875 | 0.12392   |

|             |            |            |          |           |           |
|-------------|------------|------------|----------|-----------|-----------|
| 7w11w_SITTC | 0.11056166 | 0.65654004 | 6.60E-05 | 0.02558   | -0.27396  |
| 7w11w_SITTC | 0.06284705 | 0.36862573 | 6.08E-05 | 0.0094206 | 0.087254  |
| 7w11w_SITTC | 0.0483506  | 0.28115284 | 5.67E-05 | 0.0056831 | 0.038361  |
| 7w11w_SITTC | 0.02503613 | 0.14047116 | 3.68E-05 | 0.0041768 | -0.086782 |
| 7w11w_SITTC | 0.02091431 | 0.11559971 | 3.47E-05 | 0.0044724 | -0.023601 |
| 7w11w_SITTC | 0.01175089 | 0.06030683 | 3.22E-05 | 0.0061869 | 0.30353   |
| 7w11w_SITTC | 0.01032069 | 0.05167688 | 3.20E-05 | 0.0066628 | 0.35381   |
| 7w11w_SITTC | 0.11615874 | 0.69031334 | 6.63E-05 | 0.025119  | -0.33347  |
| 7w11w_SITTC | 0.06152491 | 0.36064783 | 6.07E-05 | 0.0090475 | 0.082025  |
| 7w11w_SITTC | 0.01213217 | 0.0626075  | 3.23E-05 | 0.0060411 | 0.2791    |
| 7w11w_SITTC | 0.0318221  | 0.18141837 | 4.22E-05 | 0.0040866 | -0.10071  |
| 7w11w_SITTC | 0.01528105 | 0.08160811 | 3.27E-05 | 0.0054028 | 0.16515   |
| 7w11w_SITTC | 0.01575697 | 0.08447989 | 3.28E-05 | 0.0052924 | 0.1442    |
| 7w11w_SITTC | 0.03271436 | 0.1868023  | 4.32E-05 | 0.0041142 | -0.094772 |
| 7w11w_SITTC | 0.09168166 | 0.54261637 | 6.45E-05 | 0.021822  | 0.027741  |
| 7w11w_SITTC | 0.02025715 | 0.11163437 | 3.42E-05 | 0.0045972 | 0.0032259 |
| 7w11w_SITTC | 0.03314535 | 0.18940294 | 4.37E-05 | 0.0041322 | -0.091175 |
| 7w11w_SITTC | 0.01439669 | 0.07627178 | 3.26E-05 | 0.0055188 | 0.18676   |
| 7w11w_SITTC | 0.01932201 | 0.10599166 | 3.40E-05 | 0.0046667 | 0.017998  |
| 7w11w_SITTC | 0.05587521 | 0.32655704 | 5.97E-05 | 0.0073934 | 0.067199  |
| 7w11w_SITTC | 0.01371456 | 0.07215576 | 3.25E-05 | 0.0056405 | 0.20898   |
| 7w11w_SITTC | 0.01697746 | 0.09184443 | 3.31E-05 | 0.0050879 | 0.085504  |
| 7w11w_SITTC | 0.01201812 | 0.06191929 | 3.23E-05 | 0.0060411 | 0.2791    |
| 7w11w_SITTC | 0.01398447 | 0.07378444 | 3.25E-05 | 0.0056405 | 0.20898   |
| 7w11w_SITTC | 0.09996955 | 0.5926263  | 6.53E-05 | 0.024558  | -0.11403  |
| 7w11w_SITTC | 0.03572635 | 0.20497698 | 4.59E-05 | 0.0042319 | -0.073417 |
| 7w11w_SITTC | 0.01143843 | 0.05842141 | 3.21E-05 | 0.006339  | 0.30353   |
| 7w11w_SITTC | 0.01886789 | 0.10325146 | 3.38E-05 | 0.004741  | 0.03364   |
| 7w11w_SITTC | 0.02103148 | 0.11630677 | 3.47E-05 | 0.0044724 | -0.023601 |
| 7w11w_SITTC | 0.0143803  | 0.07617291 | 3.26E-05 | 0.0055188 | 0.18676   |
| 7w11w_SITTC | 0.01665574 | 0.0899031  | 3.31E-05 | 0.0050879 | 0.10435   |
| 7w11w_SITTC | 0.09243476 | 0.5471606  | 6.46E-05 | 0.022258  | 0.019141  |
| 7w11w_SITTC | 0.01634773 | 0.08804455 | 3.30E-05 | 0.0051875 | 0.12392   |
| 7w11w_SITTC | 0.08823489 | 0.5218182  | 6.42E-05 | 0.020421  | 0.074212  |
| 7w11w_SITTC | 0.01942848 | 0.10663413 | 3.40E-05 | 0.0046667 | 0.017998  |
| 7w11w_SITTC | 0.03668179 | 0.21074216 | 4.70E-05 | 0.0042982 | -0.062998 |
| 7w11w_SITTC | 0.01152669 | 0.05895395 | 3.22E-05 | 0.0061869 | 0.30353   |
| 7w11w_SITTC | 0.01902635 | 0.10420759 | 3.38E-05 | 0.004741  | 0.03364   |
| 7w11w_SITTC | 0.03429405 | 0.19633435 | 4.48E-05 | 0.0041765 | -0.082901 |
| 7w11w_SITTC | 0.02083514 | 0.11512199 | 3.44E-05 | 0.0045325 | -0.023601 |
| 7w11w_SITTC | 0.12442281 | 0.7401795  | 6.67E-05 | 0.024092  | -0.40152  |
| 7w11w_SITTC | 0.01716278 | 0.09296266 | 3.33E-05 | 0.0049935 | 0.085504  |
| 7w11w_SITTC | 0.02584888 | 0.14537537 | 3.72E-05 | 0.0041509 | -0.096385 |

|             |            |            |          |           |           |
|-------------|------------|------------|----------|-----------|-----------|
| 7w11w_SITTC | 0.08573632 | 0.50674164 | 6.39E-05 | 0.01943   | 0.1043    |
| 7w11w_SITTC | 0.01692998 | 0.09155788 | 3.31E-05 | 0.0050879 | 0.10435   |
| 7w11w_SITTC | 0.11183123 | 0.6642007  | 6.61E-05 | 0.025489  | -0.28705  |
| 7w11w_SITTC | 0.02464796 | 0.1381289  | 3.64E-05 | 0.0042065 | -0.080664 |
| 7w11w_SITTC | 0.03195649 | 0.18222928 | 4.22E-05 | 0.0040866 | -0.097962 |
| 7w11w_SITTC | 0.11724582 | 0.69687283 | 6.64E-05 | 0.024986  | -0.34377  |
| 7w11w_SITTC | 0.01796082 | 0.09777813 | 3.34E-05 | 0.0049043 | 0.067421  |
| 7w11w_SITTC | 0.0490141  | 0.28515643 | 5.70E-05 | 0.0057827 | 0.04392   |
| 7w11w_SITTC | 0.00853638 | 0.04091014 | 3.19E-05 | 0.0071994 | 0.45929   |
| 7w11w_SITTC | 0.02832387 | 0.16030969 | 3.93E-05 | 0.004074  | -0.10603  |
| 7w11w_SITTC | 0.02636185 | 0.14847067 | 3.76E-05 | 0.0041286 | -0.099939 |
| 7w11w_SITTC | 0.01986787 | 0.10928541 | 3.42E-05 | 0.0045972 | 0.0032259 |
| 7w11w_SITTC | 0.0161666  | 0.08695158 | 3.30E-05 | 0.0051875 | 0.12392   |
| 7w11w_SITTC | 0.02714117 | 0.15317316 | 3.84E-05 | 0.0040947 | -0.10271  |
| 7w11w_SITTC | 0.06160389 | 0.36112443 | 6.07E-05 | 0.0090475 | 0.082025  |
| 7w11w_SITTC | 0.07215183 | 0.42477164 | 6.21E-05 | 0.01308   | 0.12348   |
| 7w11w_SITTC | 0.01436077 | 0.07605506 | 3.26E-05 | 0.0055188 | 0.18676   |
| 7w11w_SITTC | 0.08863538 | 0.52423483 | 6.42E-05 | 0.020663  | 0.074212  |
| 7w11w_SITTC | 0.07995156 | 0.47183588 | 6.32E-05 | 0.016594  | 0.13446   |
| 7w11w_SITTC | 0.02637655 | 0.14855942 | 3.76E-05 | 0.0041286 | -0.099939 |
| 7w11w_SITTC | 0.01402434 | 0.07402504 | 3.25E-05 | 0.0056405 | 0.20898   |
| 7w11w_SITTC | 0.00832868 | 0.03965686 | 3.19E-05 | 0.0071994 | 0.45929   |
| 7w11w_SITTC | 0.02193312 | 0.12174731 | 3.49E-05 | 0.0044169 | -0.046619 |
| 7w11w_SITTC | 0.10352442 | 0.61407673 | 6.56E-05 | 0.025296  | -0.17104  |
| 7w11w_SITTC | 0.07991801 | 0.4716335  | 6.32E-05 | 0.016594  | 0.13545   |
| 7w11w_SITTC | 0.02829749 | 0.1601505  | 3.93E-05 | 0.004074  | -0.10603  |
| 7w11w_SITTC | 0.11576422 | 0.6879328  | 6.63E-05 | 0.025119  | -0.32814  |
| 7w11w_SITTC | 0.03086274 | 0.17562947 | 4.16E-05 | 0.0040771 | -0.10299  |
| 7w11w_SITTC | 0.06998759 | 0.41171238 | 6.18E-05 | 0.012147  | 0.11689   |
| 7w11w_SITTC | 0.11007752 | 0.6536187  | 6.60E-05 | 0.025599  | -0.26716  |
| 7w11w_SITTC | 0.05378782 | 0.31396154 | 5.91E-05 | 0.0068337 | 0.060836  |
| 7w11w_SITTC | 0.01356221 | 0.07123651 | 3.24E-05 | 0.0057681 | 0.23179   |
| 7w11w_SITTC | 0.02022899 | 0.11146445 | 3.42E-05 | 0.0045972 | 0.0032259 |
| 7w11w_SITTC | 0.05586229 | 0.32647908 | 5.97E-05 | 0.0073934 | 0.067199  |
| 7w11w_SITTC | 0.03727935 | 0.21434791 | 4.76E-05 | 0.0043355 | -0.057524 |
| 7w11w_SITTC | 0.10007627 | 0.59327024 | 6.53E-05 | 0.024558  | -0.11403  |
| 7w11w_SITTC | 0.02226751 | 0.12376504 | 3.52E-05 | 0.0043661 | -0.046619 |
| 7w11w_SITTC | 0.08000516 | 0.47215936 | 6.32E-05 | 0.016594  | 0.13446   |
| 7w11w_SITTC | 0.02800005 | 0.15835574 | 3.88E-05 | 0.0040827 | -0.10603  |
| 7w11w_SITTC | 0.02612993 | 0.14707129 | 3.76E-05 | 0.0041286 | -0.096385 |
| 7w11w_SITTC | 0.04968303 | 0.2891929  | 5.73E-05 | 0.0058857 | 0.046466  |
| 7w11w_SITTC | 0.10518014 | 0.6240675  | 6.57E-05 | 0.025482  | -0.19772  |
| 7w11w_SITTC | 0.03269544 | 0.18668815 | 4.32E-05 | 0.0041142 | -0.094772 |



|             |            |            |          |           |           |
|-------------|------------|------------|----------|-----------|-----------|
| 7w11w_SITTC | 0.01852614 | 0.10118928 | 3.36E-05 | 0.0048202 | 0.050123  |
| 7w11w_SITTC | 0.01917713 | 0.10511742 | 3.38E-05 | 0.004741  | 0.017998  |
| 7w11w_SITTC | 0.03077678 | 0.17511079 | 4.11E-05 | 0.0040705 | -0.10299  |
| 7w11w_SITTC | 0.0217759  | 0.12079866 | 3.49E-05 | 0.0044169 | -0.0356   |
| 7w11w_SITTC | 0.0122179  | 0.06312479 | 3.23E-05 | 0.0060411 | 0.2791    |
| 7w11w_SITTC | 0.01641803 | 0.08846875 | 3.30E-05 | 0.0051875 | 0.10435   |
| 7w11w_SITTC | 0.01990327 | 0.10949905 | 3.42E-05 | 0.0045972 | 0.0032259 |
| 7w11w_SITTC | 0.04949376 | 0.28805077 | 5.73E-05 | 0.0058857 | 0.04392   |
| 7w11w_SITTC | 0.02002117 | 0.11021043 | 3.42E-05 | 0.0045972 | 0.0032259 |
| 7w11w_SITTC | 0.078403   | 0.46249178 | 6.29E-05 | 0.015819  | 0.13651   |
| 7w11w_SITTC | 0.04873443 | 0.28346887 | 5.70E-05 | 0.0057827 | 0.041222  |
| 7w11w_SITTC | 0.01346491 | 0.07064936 | 3.24E-05 | 0.0057681 | 0.23179   |
| 7w11w_SITTC | 0.01230543 | 0.06365299 | 3.23E-05 | 0.0060411 | 0.2791    |
| 7w11w_SITTC | 0.02203758 | 0.12237768 | 3.52E-05 | 0.0043661 | -0.046619 |
| 7w11w_SITTC | 0.05408522 | 0.31575608 | 5.91E-05 | 0.0068337 | 0.062513  |
| 7w11w_SITTC | 0.02283184 | 0.12717031 | 3.55E-05 | 0.0043197 | -0.056631 |
| 7w11w_SITTC | 0.01407539 | 0.07433306 | 3.25E-05 | 0.0056405 | 0.20898   |
| 7w11w_SITTC | 0.03605026 | 0.20693149 | 4.65E-05 | 0.0042637 | -0.068307 |
| 7w11w_SITTC | 0.08968224 | 0.53055173 | 6.44E-05 | 0.021137  | 0.059815  |
| 7w11w_SITTC | 0.00873925 | 0.04213432 | 3.19E-05 | 0.0070136 | 0.43237   |
| 7w11w_SITTC | 0.03163572 | 0.1802937  | 4.22E-05 | 0.0040866 | -0.10071  |
| 7w11w_SITTC | 0.02160976 | 0.11979611 | 3.49E-05 | 0.0044169 | -0.0356   |
| 7w11w_SITTC | 0.01519342 | 0.08107937 | 3.27E-05 | 0.0054028 | 0.16515   |
| 7w11w_SITTC | 0.11243001 | 0.66781384 | 6.62E-05 | 0.025448  | -0.29336  |
| 7w11w_SITTC | 0.01684122 | 0.09102234 | 3.31E-05 | 0.0050879 | 0.10435   |
| 7w11w_SITTC | 0.01697099 | 0.09180536 | 3.31E-05 | 0.0050879 | 0.085504  |
| 7w11w_SITTC | 0.02151136 | 0.11920238 | 3.49E-05 | 0.0044169 | -0.0356   |
| 7w11w_SITTC | 0.01713389 | 0.09278834 | 3.33E-05 | 0.0049935 | 0.085504  |
| 7w11w_SITTC | 0.12766972 | 0.75977165 | 6.69E-05 | 0.023794  | -0.4246   |
| 7w11w_SITTC | 0.08607152 | 0.50876427 | 6.39E-05 | 0.01943   | 0.099025  |
| 7w11w_SITTC | 0.0440481  | 0.25519115 | 5.38E-05 | 0.0050014 | 0.012967  |
| 7w11w_SITTC | 0.01889641 | 0.10342351 | 3.38E-05 | 0.004741  | 0.03364   |
| 7w11w_SITTC | 0.02182002 | 0.12106485 | 3.49E-05 | 0.0044169 | -0.0356   |
| 7w11w_SITTC | 0.02890021 | 0.16378738 | 3.97E-05 | 0.0040686 | -0.10664  |
| 7w11w_SITTC | 0.01265245 | 0.06574687 | 3.23E-05 | 0.0059016 | 0.25518   |
| 7w11w_SITTC | 0.01483718 | 0.07892979 | 3.27E-05 | 0.0054028 | 0.16515   |
| 7w11w_SITTC | 0.02279956 | 0.12697548 | 3.55E-05 | 0.0043197 | -0.056631 |
| 7w11w_SITTC | 0.00543942 | 0.02222279 | 3.18E-05 | 0.0082375 | 0.59807   |
| 7w11w_SITTC | 0.02344565 | 0.13087404 | 3.58E-05 | 0.0042778 | -0.065623 |
| 7w11w_SITTC | 0.02845488 | 0.16110022 | 3.93E-05 | 0.004074  | -0.10603  |
| 7w11w_SITTC | 0.06451148 | 0.37866905 | 6.10E-05 | 0.010005  | 0.093303  |
| 7w11w_SITTC | 0.03618376 | 0.207737   | 4.65E-05 | 0.0042637 | -0.068307 |
| 7w11w_SITTC | 0.02305173 | 0.12849714 | 3.55E-05 | 0.0043197 | -0.065623 |

|             |            |            |          |           |           |
|-------------|------------|------------|----------|-----------|-----------|
| 7w11w_SITTC | 0.01992983 | 0.10965927 | 3.42E-05 | 0.0045972 | 0.0032259 |
| 7w11w_SITTC | 0.11504906 | 0.6836175  | 6.63E-05 | 0.025242  | -0.32268  |
| 7w11w_SITTC | 0.07032085 | 0.4137233  | 6.19E-05 | 0.012376  | 0.11689   |
| 7w11w_SITTC | 0.02320193 | 0.12940344 | 3.58E-05 | 0.0042778 | -0.065623 |
| 7w11w_SITTC | 0.02181673 | 0.121045   | 3.49E-05 | 0.0044169 | -0.0356   |
| 7w11w_SITTC | 0.07416578 | 0.43692395 | 6.24E-05 | 0.014051  | 0.13074   |
| 7w11w_SITTC | 0.02175198 | 0.12065432 | 3.49E-05 | 0.0044169 | -0.0356   |
| 7w11w_SITTC | 0.02229032 | 0.12390268 | 3.52E-05 | 0.0043661 | -0.046619 |
| 7w11w_SITTC | 0.01630824 | 0.08780626 | 3.30E-05 | 0.0051875 | 0.12392   |
| 7w11w_SITTC | 0.02945768 | 0.16715123 | 4.02E-05 | 0.0040662 | -0.10661  |
| 7w11w_SITTC | 0.05266356 | 0.30717763 | 5.87E-05 | 0.0065755 | 0.057248  |
| 7w11w_SITTC | 0.04468731 | 0.2590482  | 5.42E-05 | 0.0050757 | 0.017239  |
| 7w11w_SITTC | 0.03967249 | 0.22878835 | 4.98E-05 | 0.0045122 | -0.028892 |
| 7w11w_SITTC | 0.04851497 | 0.28214464 | 5.67E-05 | 0.0056831 | 0.041222  |
| 7w11w_SITTC | 0.03460688 | 0.19822198 | 4.48E-05 | 0.0041765 | -0.082901 |
| 7w11w_SITTC | 0.02253603 | 0.12538536 | 3.52E-05 | 0.0043661 | -0.056631 |
| 7w11w_SITTC | 0.12698066 | 0.7556138  | 6.69E-05 | 0.023834  | -0.42086  |
| 7w11w_SITTC | 0.06361241 | 0.373244   | 6.10E-05 | 0.0098069 | 0.089169  |
| 7w11w_SITTC | 0.03354286 | 0.1918016  | 4.37E-05 | 0.0041322 | -0.087207 |
| 7w11w_SITTC | 0.0203856  | 0.11240946 | 3.44E-05 | 0.0045325 | -0.01065  |
| 7w11w_SITTC | 0.04133395 | 0.23881371 | 5.14E-05 | 0.0046741 | -0.011944 |
| 7w11w_SITTC | 0.0244871  | 0.13715829 | 3.64E-05 | 0.0042065 | -0.080664 |
| 7w11w_SITTC | 0.02111532 | 0.11681264 | 3.47E-05 | 0.0044724 | -0.023601 |
| 7w11w_SITTC | 0.02614126 | 0.14713962 | 3.76E-05 | 0.0041286 | -0.096385 |
| 7w11w_SITTC | 0.08395542 | 0.49599555 | 6.37E-05 | 0.01841   | 0.1176    |
| 7w11w_SITTC | 0.03075399 | 0.1749733  | 4.11E-05 | 0.0040705 | -0.10475  |
| 7w11w_SITTC | 0.12086757 | 0.7187268  | 6.66E-05 | 0.02449   | -0.37656  |
| 7w11w_SITTC | 0.00829709 | 0.03946628 | 3.19E-05 | 0.0071994 | 0.45929   |
| 7w11w_SITTC | 0.02591371 | 0.14576659 | 3.76E-05 | 0.0041286 | -0.096385 |
| 7w11w_SITTC | 0.01832076 | 0.09995002 | 3.36E-05 | 0.0048202 | 0.050123  |
| 7w11w_SITTC | 0.02349029 | 0.13114345 | 3.58E-05 | 0.0042778 | -0.065623 |
| 7w11w_SITTC | 0.02803562 | 0.15857038 | 3.88E-05 | 0.0040827 | -0.10603  |
| 7w11w_SITTC | 0.05592155 | 0.32683665 | 5.97E-05 | 0.0073934 | 0.067199  |
| 7w11w_SITTC | 0.02776675 | 0.15694799 | 3.88E-05 | 0.0040827 | -0.10472  |
| 7w11w_SITTC | 0.0183633  | 0.10020673 | 3.36E-05 | 0.0048202 | 0.050123  |
| 7w11w_SITTC | 0.02366096 | 0.13217327 | 3.61E-05 | 0.0042401 | -0.073623 |
| 7w11w_SITTC | 0.09551117 | 0.565724   | 6.49E-05 | 0.023263  | -0.035993 |
| 7w11w_SITTC | 0.08612859 | 0.5091086  | 6.39E-05 | 0.01943   | 0.099025  |
| 7w11w_SITTC | 0.02431893 | 0.1361435  | 3.64E-05 | 0.0042065 | -0.080664 |
| 7w11w_SITTC | 0.09874728 | 0.585251   | 6.52E-05 | 0.024275  | -0.094455 |
| 7w11w_SITTC | 0.01792987 | 0.09759134 | 3.34E-05 | 0.0049043 | 0.067421  |
| 7w11w_SITTC | 0.02810453 | 0.15898618 | 3.93E-05 | 0.004074  | -0.10603  |
| 7w11w_SITTC | 0.01989896 | 0.10947304 | 3.42E-05 | 0.0045972 | 0.0032259 |

|             |            |            |          |           |           |
|-------------|------------|------------|----------|-----------|-----------|
| 7w11w_SITTC | 0.03252156 | 0.18563896 | 4.32E-05 | 0.0041142 | -0.094772 |
| 7w11w_SITTC | 0.0615745  | 0.3609471  | 6.07E-05 | 0.0090475 | 0.082025  |
| 7w11w_SITTC | 0.01512264 | 0.08065225 | 3.27E-05 | 0.0054028 | 0.16515   |
| 7w11w_SITTC | 0.02479599 | 0.13902214 | 3.68E-05 | 0.0041768 | -0.086782 |
| 7w11w_SITTC | 0.09819324 | 0.58190787 | 6.52E-05 | 0.024123  | -0.084641 |
| 7w11w_SITTC | 0.05490052 | 0.32067567 | 5.94E-05 | 0.0071062 | 0.064127  |
| 7w11w_SITTC | 0.02289619 | 0.12755856 | 3.55E-05 | 0.0043197 | -0.056631 |
| 7w11w_SITTC | 0.01733889 | 0.09402528 | 3.33E-05 | 0.0049935 | 0.085504  |
| 7w11w_SITTC | 0.02376529 | 0.13280278 | 3.61E-05 | 0.0042401 | -0.073623 |
| 7w11w_SITTC | 0.02576042 | 0.1448416  | 3.72E-05 | 0.0041509 | -0.092011 |
| 7w11w_SITTC | 0.02917285 | 0.16543254 | 3.97E-05 | 0.0040686 | -0.10661  |
| 7w11w_SITTC | 0.00758816 | 0.03518851 | 3.19E-05 | 0.0073923 | 0.48652   |
| 7w11w_SITTC | 0.02118205 | 0.1172153  | 3.47E-05 | 0.0044724 | -0.023601 |
| 7w11w_SITTC | 0.00943132 | 0.04631032 | 3.20E-05 | 0.0068348 | 0.4058    |
| 7w11w_SITTC | 0.03103036 | 0.17664093 | 4.16E-05 | 0.0040771 | -0.10299  |
| 7w11w_SITTC | 0.019612   | 0.10774145 | 3.40E-05 | 0.0046667 | 0.017998  |
| 7w11w_SITTC | 0.02131195 | 0.11799911 | 3.47E-05 | 0.0044724 | -0.023601 |
| 7w11w_SITTC | 0.01454237 | 0.07715088 | 3.26E-05 | 0.0055188 | 0.18676   |
| 7w11w_SITTC | 0.01175218 | 0.06031462 | 3.22E-05 | 0.0061869 | 0.30353   |
| 7w11w_SITTC | 0.01653302 | 0.08916264 | 3.31E-05 | 0.0050879 | 0.10435   |
| 7w11w_SITTC | 0.02838468 | 0.16067663 | 3.93E-05 | 0.004074  | -0.10603  |
| 7w11w_SITTC | 0.0159859  | 0.08586123 | 3.30E-05 | 0.0051875 | 0.12392   |
| 7w11w_SITTC | 0.01344379 | 0.0705219  | 3.24E-05 | 0.0057681 | 0.23179   |
| 7w11w_SITTC | 0.01956251 | 0.10744282 | 3.40E-05 | 0.0046667 | 0.017998  |
| 7w11w_SITTC | 0.02318602 | 0.12930745 | 3.58E-05 | 0.0042778 | -0.065623 |
| 7w11w_SITTC | 0.09458895 | 0.56015927 | 6.48E-05 | 0.022877  | -0.017059 |
| 7w11w_SITTC | 0.11555496 | 0.68667006 | 6.63E-05 | 0.025182  | -0.32814  |
| 7w11w_SITTC | 0.01752204 | 0.09513047 | 3.33E-05 | 0.0049935 | 0.067421  |
| 7w11w_SITTC | 0.04212898 | 0.24361101 | 5.24E-05 | 0.0047963 | -0.00654  |
| 7w11w_SITTC | 0.09274697 | 0.54904455 | 6.46E-05 | 0.022258  | 0.010343  |
| 7w11w_SITTC | 0.01284171 | 0.06688892 | 3.23E-05 | 0.0059016 | 0.25518   |
| 7w11w_SITTC | 0.11127473 | 0.6608428  | 6.61E-05 | 0.025525  | -0.28058  |
| 7w11w_SITTC | 0.02840077 | 0.16077374 | 3.93E-05 | 0.004074  | -0.10603  |
| 7w11w_SITTC | 0.03238533 | 0.18481696 | 4.27E-05 | 0.004099  | -0.097962 |
| 7w11w_SITTC | 0.04075047 | 0.23529296 | 5.09E-05 | 0.0046173 | -0.017493 |
| 7w11w_SITTC | 0.02607328 | 0.14672942 | 3.76E-05 | 0.0041286 | -0.096385 |
| 7w11w_SITTC | 0.01537254 | 0.08216015 | 3.28E-05 | 0.0052924 | 0.1442    |
| 7w11w_SITTC | 0.10713288 | 0.6358505  | 6.58E-05 | 0.025586  | -0.23052  |
| 7w11w_SITTC | 0.05152249 | 0.3002923  | 5.83E-05 | 0.0063316 | 0.053285  |
| 7w11w_SITTC | 0.10062303 | 0.5965695  | 6.53E-05 | 0.024687  | -0.12375  |
| 7w11w_SITTC | 0.08243293 | 0.48680872 | 6.35E-05 | 0.017892  | 0.1271    |
| 7w11w_SITTC | 0.07135905 | 0.4199879  | 6.20E-05 | 0.012843  | 0.12136   |
| 7w11w_SITTC | 0.0164738  | 0.0888053  | 3.31E-05 | 0.0050879 | 0.10435   |

|             |            |            |          |           |           |
|-------------|------------|------------|----------|-----------|-----------|
| 7w11w_SITTC | 0.13219418 | 0.78707266 | 6.71E-05 | 0.023582  | -0.45284  |
| 7w11w_SITTC | 0.01861614 | 0.10173237 | 3.36E-05 | 0.0048202 | 0.03364   |
| 7w11w_SITTC | 0.07303979 | 0.43012962 | 6.23E-05 | 0.013561  | 0.12737   |
| 7w11w_SITTC | 0.11748943 | 0.6983428  | 6.64E-05 | 0.024917  | -0.34876  |
| 7w11w_SITTC | 0.01235008 | 0.0639224  | 3.23E-05 | 0.0060411 | 0.2791    |
| 7w11w_SITTC | 0.0983956  | 0.5831289  | 6.52E-05 | 0.024123  | -0.084641 |
| 7w11w_SITTC | 0.12991993 | 0.77334964 | 6.70E-05 | 0.023664  | -0.43912  |
| 7w11w_SITTC | 0.01577466 | 0.08458662 | 3.28E-05 | 0.0052924 | 0.1442    |
| 7w11w_SITTC | 0.04658232 | 0.2704829  | 5.57E-05 | 0.0054037 | 0.028707  |
| 7w11w_SITTC | 0.02435317 | 0.13635011 | 3.64E-05 | 0.0042065 | -0.080664 |
| 7w11w_SITTC | 0.02649285 | 0.14926113 | 3.80E-05 | 0.0041099 | -0.099939 |
| 7w11w_SITTC | 0.0154455  | 0.08260044 | 3.28E-05 | 0.0052924 | 0.1442    |
| 7w11w_SITTC | 0.01883004 | 0.10302308 | 3.38E-05 | 0.004741  | 0.03364   |
| 7w11w_SITTC | 0.01386864 | 0.07308552 | 3.25E-05 | 0.0056405 | 0.20898   |
| 7w11w_SITTC | 0.04184042 | 0.24186979 | 5.19E-05 | 0.0047337 | -0.00654  |
| 7w11w_SITTC | 0.01475341 | 0.07842426 | 3.26E-05 | 0.0055188 | 0.16515   |
| 7w11w_SITTC | 0.00831679 | 0.03958511 | 3.19E-05 | 0.0071994 | 0.45929   |
| 7w11w_SITTC | 0.02619189 | 0.14744513 | 3.76E-05 | 0.0041286 | -0.096385 |
| 7w11w_SITTC | 0.01473791 | 0.07833076 | 3.26E-05 | 0.0055188 | 0.18676   |
| 7w11w_SITTC | 0.0069058  | 0.03107109 | 3.18E-05 | 0.0078    | 0.54183   |
| 7w11w_SITTC | 0.05791184 | 0.33884627 | 6.00E-05 | 0.0078516 | 0.073002  |
| 7w11w_SITTC | 0.02004775 | 0.11037086 | 3.42E-05 | 0.0045972 | 0.0032259 |
| 7w11w_SITTC | 0.01362274 | 0.0716017  | 3.24E-05 | 0.0057681 | 0.23179   |
| 7w11w_SITTC | 0.02176643 | 0.12074149 | 3.49E-05 | 0.0044169 | -0.0356   |
| 7w11w_SITTC | 0.01234729 | 0.06390555 | 3.23E-05 | 0.0060411 | 0.2791    |
| 7w11w_SITTC | 0.01254289 | 0.06508581 | 3.23E-05 | 0.0060411 | 0.25518   |
| 7w11w_SITTC | 0.08615135 | 0.509246   | 6.39E-05 | 0.01943   | 0.099025  |
| 7w11w_SITTC | 0.04969205 | 0.2892473  | 5.73E-05 | 0.0058857 | 0.046466  |
| 7w11w_SITTC | 0.03483329 | 0.19958812 | 4.54E-05 | 0.0042028 | -0.078293 |
| 7w11w_SITTC | 0.01856661 | 0.10143349 | 3.36E-05 | 0.0048202 | 0.050123  |
| 7w11w_SITTC | 0.08437842 | 0.498548   | 6.37E-05 | 0.018667  | 0.1136    |
| 7w11w_SITTC | 0.02260592 | 0.12580703 | 3.55E-05 | 0.0043197 | -0.056631 |
| 7w11w_SITTC | 0.09981091 | 0.591669   | 6.53E-05 | 0.024558  | -0.11403  |
| 7w11w_SITTC | 0.10421488 | 0.61824304 | 6.56E-05 | 0.025367  | -0.18011  |
| 7w11w_SITTC | 0.01230819 | 0.06366961 | 3.23E-05 | 0.0060411 | 0.2791    |
| 7w11w_SITTC | 0.03257809 | 0.18598004 | 4.32E-05 | 0.0041142 | -0.094772 |
| 7w11w_SITTC | 0.02211417 | 0.12283979 | 3.52E-05 | 0.0043661 | -0.046619 |
| 7w11w_SITTC | 0.00796425 | 0.03745788 | 3.19E-05 | 0.0073923 | 0.48652   |
| 7w11w_SITTC | 0.01839001 | 0.10036788 | 3.36E-05 | 0.0048202 | 0.050123  |
| 7w11w_SITTC | 0.01298351 | 0.06774454 | 3.23E-05 | 0.0059016 | 0.25518   |
| 7w11w_SITTC | 0.01888846 | 0.10337556 | 3.38E-05 | 0.004741  | 0.03364   |
| 7w11w_SITTC | 0.00933492 | 0.04572862 | 3.20E-05 | 0.0068348 | 0.4058    |
| 7w11w_SITTC | 0.079866   | 0.47131965 | 6.32E-05 | 0.016594  | 0.13545   |

|             |            |            |          |           |           |
|-------------|------------|------------|----------|-----------|-----------|
| 7w11w_SITTC | 0.01487326 | 0.07914745 | 3.27E-05 | 0.0054028 | 0.16515   |
| 7w11w_SITTC | 0.01336662 | 0.07005627 | 3.24E-05 | 0.0057681 | 0.23179   |
| 7w11w_SITTC | 0.02998117 | 0.17031    | 4.07E-05 | 0.0040668 | -0.10597  |
| 7w11w_SITTC | 0.01357387 | 0.07130685 | 3.24E-05 | 0.0057681 | 0.23179   |
| 7w11w_SITTC | 0.07073269 | 0.41620842 | 6.19E-05 | 0.012376  | 0.11916   |
| 7w11w_SITTC | 0.02319256 | 0.1293469  | 3.58E-05 | 0.0042778 | -0.065623 |
| 7w11w_SITTC | 0.00828037 | 0.0393654  | 3.19E-05 | 0.0071994 | 0.45929   |
| 7w11w_SITTC | 0.0570576  | 0.33369172 | 5.99E-05 | 0.0076952 | 0.070131  |
| 7w11w_SITTC | 0.10998642 | 0.65306896 | 6.60E-05 | 0.025599  | -0.26716  |
| 7w11w_SITTC | 0.02828909 | 0.16009985 | 3.93E-05 | 0.004074  | -0.10603  |
| 7w11w_SITTC | 0.01548497 | 0.08283861 | 3.28E-05 | 0.0052924 | 0.1442    |
| 7w11w_SITTC | 0.08785481 | 0.5195248  | 6.41E-05 | 0.020177  | 0.080939  |
| 7w11w_SITTC | 0.01178076 | 0.06048705 | 3.22E-05 | 0.0061869 | 0.30353   |
| 7w11w_SITTC | 0.06497911 | 0.38149077 | 6.11E-05 | 0.010206  | 0.093303  |
| 7w11w_SITTC | 0.01632089 | 0.0878826  | 3.30E-05 | 0.0051875 | 0.12392   |
| 7w11w_SITTC | 0.02137732 | 0.11839356 | 3.47E-05 | 0.0044724 | -0.0356   |
| 7w11w_SITTC | 0.01004896 | 0.0500372  | 3.20E-05 | 0.0066628 | 0.37961   |
| 7w11w_SITTC | 0.01505466 | 0.08024208 | 3.27E-05 | 0.0054028 | 0.16515   |
| 7w11w_SITTC | 0.01610759 | 0.08659556 | 3.30E-05 | 0.0051875 | 0.12392   |
| 7w11w_SITTC | 0.03170634 | 0.18071987 | 4.22E-05 | 0.0040866 | -0.10071  |
| 7w11w_SITTC | 0.01834361 | 0.10008791 | 3.36E-05 | 0.0048202 | 0.050123  |
| 7w11w_SITTC | 0.06999623 | 0.41176453 | 6.18E-05 | 0.012147  | 0.11689   |
| 7w11w_SITTC | 0.00764933 | 0.03555759 | 3.19E-05 | 0.0073923 | 0.48652   |
| 7w11w_SITTC | 0.08031315 | 0.47401777 | 6.32E-05 | 0.016854  | 0.13446   |
| 7w11w_SITTC | 0.01726082 | 0.09355426 | 3.33E-05 | 0.0049935 | 0.085504  |
| 7w11w_SITTC | 0.00884427 | 0.04276801 | 3.19E-05 | 0.0070136 | 0.43237   |
| 7w11w_SITTC | 0.036357   | 0.20878237 | 4.65E-05 | 0.0042637 | -0.062998 |
| 7w11w_SITTC | 0.03563244 | 0.20441031 | 4.59E-05 | 0.0042319 | -0.073417 |
| 7w11w_SITTC | 0.01445815 | 0.07664266 | 3.26E-05 | 0.0055188 | 0.18676   |
| 7w11w_SITTC | 0.02597663 | 0.14614624 | 3.76E-05 | 0.0041286 | -0.096385 |
| 7w11w_SITTC | 0.03026682 | 0.17203365 | 4.07E-05 | 0.0040668 | -0.10475  |
| 7w11w_SITTC | 0.02950995 | 0.16746666 | 4.02E-05 | 0.0040662 | -0.10661  |
| 7w11w_SITTC | 0.09963218 | 0.59059054 | 6.53E-05 | 0.024558  | -0.10426  |
| 7w11w_SITTC | 0.11498974 | 0.6832595  | 6.63E-05 | 0.025242  | -0.32268  |
| 7w11w_SITTC | 0.01666641 | 0.0899675  | 3.31E-05 | 0.0050879 | 0.10435   |
| 7w11w_SITTC | 0.02118683 | 0.11724412 | 3.47E-05 | 0.0044724 | -0.023601 |
| 7w11w_SITTC | 0.12985478 | 0.77295655 | 6.70E-05 | 0.023664  | -0.43912  |
| 7w11w_SITTC | 0.03826875 | 0.22031805 | 4.87E-05 | 0.0044183 | -0.04622  |
| 7w11w_SITTC | 0.04294149 | 0.24851374 | 5.29E-05 | 0.0048617 | 0.0036923 |
| 7w11w_SITTC | 0.02198643 | 0.12206898 | 3.49E-05 | 0.0044169 | -0.046619 |
| 7w11w_SITTC | 0.02184802 | 0.12123382 | 3.49E-05 | 0.0044169 | -0.0356   |
| 7w11w_SITTC | 0.07520092 | 0.4431701  | 6.26E-05 | 0.014549  | 0.13345   |
| 7w11w_SITTC | 0.01607937 | 0.08642527 | 3.30E-05 | 0.0051875 | 0.12392   |

|             |            |            |          |           |           |
|-------------|------------|------------|----------|-----------|-----------|
| 7w11w_SITTC | 0.02371539 | 0.13250172 | 3.61E-05 | 0.0042401 | -0.073623 |
| 7w11w_SITTC | 0.01749072 | 0.09494145 | 3.33E-05 | 0.0049935 | 0.085504  |
| 7w11w_SITTC | 0.01321084 | 0.06911629 | 3.24E-05 | 0.0057681 | 0.23179   |
| 7w11w_SITTC | 0.08200325 | 0.484216   | 6.35E-05 | 0.017633  | 0.12948   |
| 7w11w_SITTC | 0.02043738 | 0.11272189 | 3.44E-05 | 0.0045325 | -0.01065  |
| 7w11w_SITTC | 0.01893656 | 0.10366578 | 3.38E-05 | 0.004741  | 0.03364   |
| 7w11w_SITTC | 0.01843511 | 0.10064004 | 3.36E-05 | 0.0048202 | 0.050123  |
| 7w11w_SITTC | 0.02465123 | 0.13814864 | 3.64E-05 | 0.0042065 | -0.080664 |
| 7w11w_SITTC | 0.01408355 | 0.07438231 | 3.25E-05 | 0.0056405 | 0.20898   |
| 7w11w_SITTC | 0.0151401  | 0.0807576  | 3.27E-05 | 0.0054028 | 0.16515   |
| 7w11w_SITTC | 0.02075347 | 0.11462921 | 3.44E-05 | 0.0045325 | -0.01065  |
| 7w11w_SITTC | 0.00976622 | 0.04833112 | 3.20E-05 | 0.0068348 | 0.4058    |
| 7w11w_SITTC | 0.11838698 | 0.7037588  | 6.65E-05 | 0.024847  | -0.35363  |
| 7w11w_SITTC | 0.02649489 | 0.14927348 | 3.80E-05 | 0.0041099 | -0.099939 |
| 7w11w_SITTC | 0.07263959 | 0.42771482 | 6.22E-05 | 0.01332   | 0.12548   |
| 7w11w_SITTC | 0.03948821 | 0.22767635 | 4.98E-05 | 0.0045122 | -0.034672 |
| 7w11w_SITTC | 0.01595594 | 0.08568045 | 3.30E-05 | 0.0051875 | 0.12392   |
| 7w11w_SITTC | 0.02791035 | 0.1578145  | 3.88E-05 | 0.0040827 | -0.10472  |
| 7w11w_SITTC | 0.06966104 | 0.40974194 | 6.18E-05 | 0.012147  | 0.11455   |
| 7w11w_SITTC | 0.03379569 | 0.19332716 | 4.43E-05 | 0.004153  | -0.087207 |
| 7w11w_SITTC | 0.02903608 | 0.16460727 | 3.97E-05 | 0.0040686 | -0.10664  |
| 7w11w_SITTC | 0.04647352 | 0.26982638 | 5.57E-05 | 0.0054037 | 0.028707  |
| 7w11w_SITTC | 0.02063618 | 0.11392149 | 3.44E-05 | 0.0045325 | -0.01065  |
| 7w11w_SITTC | 0.02339621 | 0.13057578 | 3.58E-05 | 0.0042778 | -0.065623 |
| 7w11w_SITTC | 0.08488774 | 0.5016213  | 6.38E-05 | 0.018923  | 0.1136    |
| 7w11w_SITTC | 0.01217235 | 0.06284992 | 3.23E-05 | 0.0060411 | 0.2791    |
| 7w11w_SITTC | 0.09851981 | 0.5838784  | 6.52E-05 | 0.024275  | -0.084641 |
| 7w11w_SITTC | 0.01973063 | 0.10845731 | 3.40E-05 | 0.0046667 | 0.0032259 |
| 7w11w_SITTC | 0.02471862 | 0.13855527 | 3.64E-05 | 0.0042065 | -0.086782 |
| 7w11w_SITTC | 0.06358592 | 0.3730842  | 6.10E-05 | 0.0098069 | 0.089169  |
| 7w11w_SITTC | 0.02144598 | 0.1188079  | 3.49E-05 | 0.0044169 | -0.0356   |
| 7w11w_SITTC | 0.02044543 | 0.11277046 | 3.44E-05 | 0.0045325 | -0.01065  |
| 7w11w_SITTC | 0.02680052 | 0.15111768 | 3.80E-05 | 0.0041099 | -0.099939 |
| 7w11w_SITTC | 0.02343708 | 0.13082235 | 3.58E-05 | 0.0042778 | -0.065623 |
| 7w11w_SITTC | 0.04364745 | 0.25277355 | 5.38E-05 | 0.0050014 | 0.008455  |
| 7w11w_SITTC | 0.03081606 | 0.1753478  | 4.11E-05 | 0.0040705 | -0.10299  |
| 7w11w_SITTC | 0.01705412 | 0.09230699 | 3.33E-05 | 0.0049935 | 0.085504  |
| 7w11w_SITTC | 0.03083416 | 0.17545703 | 4.11E-05 | 0.0040705 | -0.10299  |
| 7w11w_SITTC | 0.03669723 | 0.21083532 | 4.70E-05 | 0.0042982 | -0.062998 |
| 7w11w_SITTC | 0.0226136  | 0.12585339 | 3.55E-05 | 0.0043197 | -0.056631 |
| 7w11w_SITTC | 0.12173569 | 0.7239651  | 6.66E-05 | 0.024419  | -0.38089  |
| 7w11w_SITTC | 0.13936108 | 0.8303184  | 6.73E-05 | 0.023544  | -0.49075  |
| 7w11w_SITTC | 0.01135714 | 0.05793089 | 3.21E-05 | 0.006339  | 0.32844   |

|             |            |            |          |           |           |
|-------------|------------|------------|----------|-----------|-----------|
| 7w11w_SITTC | 0.01680415 | 0.09079865 | 3.31E-05 | 0.0050879 | 0.10435   |
| 7w11w_SITTC | 0.01144065 | 0.05843477 | 3.21E-05 | 0.006339  | 0.30353   |
| 7w11w_SITTC | 0.08250234 | 0.48722756 | 6.35E-05 | 0.017892  | 0.1271    |
| 7w11w_SITTC | 0.07804893 | 0.46035528 | 6.29E-05 | 0.015819  | 0.13662   |
| 7w11w_SITTC | 0.01163495 | 0.05960721 | 3.22E-05 | 0.0061869 | 0.30353   |
| 7w11w_SITTC | 0.00890309 | 0.04312293 | 3.19E-05 | 0.0070136 | 0.43237   |
| 7w11w_SITTC | 0.01464728 | 0.07778391 | 3.26E-05 | 0.0055188 | 0.18676   |
| 7w11w_SITTC | 0.01341522 | 0.07034951 | 3.24E-05 | 0.0057681 | 0.23179   |
| 7w11w_SITTC | 0.01500929 | 0.07996833 | 3.27E-05 | 0.0054028 | 0.16515   |
| 7w11w_SITTC | 0.00968385 | 0.04783407 | 3.20E-05 | 0.0068348 | 0.4058    |
| 7w11w_SITTC | 0.00966312 | 0.04770903 | 3.20E-05 | 0.0068348 | 0.4058    |
| 7w11w_SITTC | 0.08911634 | 0.527137   | 6.43E-05 | 0.020902  | 0.067165  |
| 7w11w_SITTC | 0.03319976 | 0.18973126 | 4.37E-05 | 0.0041322 | -0.091175 |
| 7w11w_SITTC | 0.01406773 | 0.07428686 | 3.25E-05 | 0.0056405 | 0.20898   |
| 7w11w_SITTC | 0.14866535 | 0.88646126 | 6.76E-05 | 0.023686  | -0.52048  |
| 7w11w_SITTC | 0.13171211 | 0.7841638  | 6.70E-05 | 0.023599  | -0.44949  |
| 7w11w_SITTC | 0.02006692 | 0.11048646 | 3.42E-05 | 0.0045972 | 0.0032259 |
| 7w11w_SITTC | 0.05654468 | 0.3305967  | 5.98E-05 | 0.0075425 | 0.068678  |
| 7w11w_SITTC | 0.01438994 | 0.07623111 | 3.26E-05 | 0.0055188 | 0.18676   |
| 7w11w_SITTC | 0.02757422 | 0.15578626 | 3.88E-05 | 0.0040827 | -0.10472  |
| 7w11w_SITTC | 0.01764845 | 0.0958932  | 3.34E-05 | 0.0049043 | 0.067421  |
| 7w11w_SITTC | 0.07250041 | 0.42687497 | 6.22E-05 | 0.01332   | 0.12548   |
| 7w11w_SITTC | 0.01271017 | 0.06609518 | 3.23E-05 | 0.0059016 | 0.25518   |
| 7w11w_SITTC | 0.05986558 | 0.3506353  | 6.04E-05 | 0.0085136 | 0.077363  |
| 7w11w_SITTC | 0.02719671 | 0.15350834 | 3.84E-05 | 0.0040947 | -0.10271  |
| 7w11w_SITTC | 0.02486854 | 0.13945995 | 3.68E-05 | 0.0041768 | -0.086782 |
| 7w11w_SITTC | 0.10389195 | 0.6162944  | 6.56E-05 | 0.025296  | -0.18011  |
| 7w11w_SITTC | 0.01387396 | 0.07311759 | 3.25E-05 | 0.0056405 | 0.20898   |
| 7w11w_SITTC | 0.01771673 | 0.09630526 | 3.34E-05 | 0.0049043 | 0.067421  |
| 7w11w_SITTC | 0.09937141 | 0.58901703 | 6.53E-05 | 0.02442   | -0.10426  |
| 7w11w_SITTC | 0.03010294 | 0.1710448  | 4.07E-05 | 0.0040668 | -0.10597  |
| 7w11w_SITTC | 0.01221075 | 0.06308162 | 3.23E-05 | 0.0060411 | 0.2791    |
| 7w11w_SITTC | 0.04045038 | 0.2334822  | 5.09E-05 | 0.0046173 | -0.023154 |
| 7w11w_SITTC | 0.06804541 | 0.3999931  | 6.16E-05 | 0.011474  | 0.10734   |
| 7w11w_SITTC | 0.0126248  | 0.06558004 | 3.23E-05 | 0.0059016 | 0.25518   |
| 7w11w_SITTC | 0.05436939 | 0.31747076 | 5.92E-05 | 0.0069681 | 0.062513  |
| 7w11w_SITTC | 0.03308811 | 0.1890576  | 4.37E-05 | 0.0041322 | -0.091175 |
| 7w11w_SITTC | 0.03139099 | 0.178817   | 4.16E-05 | 0.0040771 | -0.10071  |
| 7w11w_SITTC | 0.07178973 | 0.4225867  | 6.20E-05 | 0.012843  | 0.12348   |
| 7w11w_SITTC | 0.03339692 | 0.19092093 | 4.37E-05 | 0.0041322 | -0.091175 |
| 7w11w_SITTC | 0.09434764 | 0.5587032  | 6.48E-05 | 0.022877  | -0.017059 |
| 7w11w_SITTC | 0.10607577 | 0.6294718  | 6.58E-05 | 0.025526  | -0.21453  |
| 7w11w_SITTC | 0.02570354 | 0.14449841 | 3.72E-05 | 0.0041509 | -0.092011 |

|             |            |            |          |           |            |
|-------------|------------|------------|----------|-----------|------------|
| 7w11w_SITTC | 0.03036131 | 0.17260379 | 4.11E-05 | 0.0040705 | -0.10475   |
| 7w11w_SITTC | 0.04245082 | 0.24555302 | 5.24E-05 | 0.0047963 | -0.0013165 |
| 7w11w_SITTC | 0.06407567 | 0.37603936 | 6.10E-05 | 0.0098069 | 0.091185   |
| 7w11w_SITTC | 0.01996622 | 0.10987889 | 3.42E-05 | 0.0045972 | 0.0032259  |
| 7w11w_SITTC | 0.01678461 | 0.09068076 | 3.31E-05 | 0.0050879 | 0.10435    |
| 7w11w_SITTC | 0.00687894 | 0.03090899 | 3.18E-05 | 0.0078    | 0.54183    |
| 7w11w_SITTC | 0.01640233 | 0.088374   | 3.30E-05 | 0.0051875 | 0.10435    |
| 7w11w_SITTC | 0.0180445  | 0.09828302 | 3.34E-05 | 0.0049043 | 0.067421   |
| 7w11w_SITTC | 0.01560623 | 0.08357026 | 3.28E-05 | 0.0052924 | 0.1442     |
| 7w11w_SITTC | 0.0132804  | 0.06953601 | 3.24E-05 | 0.0057681 | 0.23179    |
| 7w11w_SITTC | 0.0251374  | 0.14108224 | 3.68E-05 | 0.0041768 | -0.086782  |
| 7w11w_SITTC | 0.01583168 | 0.08493066 | 3.28E-05 | 0.0052924 | 0.1442     |
| 7w11w_SITTC | 0.02444166 | 0.13688408 | 3.64E-05 | 0.0042065 | -0.080664  |
| 7w11w_SITTC | 0.07475244 | 0.44046396 | 6.25E-05 | 0.014299  | 0.13218    |
| 7w11w_SITTC | 0.03401981 | 0.19467956 | 4.43E-05 | 0.004153  | -0.087207  |
| 7w11w_SITTC | 0.03368308 | 0.1926477  | 4.43E-05 | 0.004153  | -0.087207  |
| 7w11w_SITTC | 0.01604179 | 0.0861985  | 3.30E-05 | 0.0051875 | 0.12392    |
| 7w11w_SITTC | 0.02272662 | 0.12653537 | 3.55E-05 | 0.0043197 | -0.056631  |
| 7w11w_SITTC | 0.01214467 | 0.0626829  | 3.23E-05 | 0.0060411 | 0.2791     |
| 7w11w_SITTC | 0.03488674 | 0.1999107  | 4.54E-05 | 0.0042028 | -0.078293  |
| 7w11w_SITTC | 0.07653133 | 0.45119792 | 6.27E-05 | 0.015053  | 0.1354     |
| 7w11w_SITTC | 0.049672   | 0.28912628 | 5.73E-05 | 0.0058857 | 0.046466   |
| 7w11w_SITTC | 0.11472239 | 0.6816462  | 6.63E-05 | 0.025242  | -0.3171    |
| 7w11w_SITTC | 0.06227551 | 0.36517704 | 6.07E-05 | 0.0092324 | 0.085432   |
| 7w11w_SITTC | 0.01920766 | 0.10530168 | 3.38E-05 | 0.004741  | 0.017998   |
| 7w11w_SITTC | 0.01311471 | 0.06853622 | 3.23E-05 | 0.0059016 | 0.23179    |
| 7w11w_SITTC | 0.09427685 | 0.558276   | 6.48E-05 | 0.022877  | -0.0077738 |
| 7w11w_SITTC | 0.07425994 | 0.43749213 | 6.24E-05 | 0.014051  | 0.13074    |
| 7w11w_SITTC | 0.06786714 | 0.3989174  | 6.15E-05 | 0.011255  | 0.10734    |
| 7w11w_SITTC | 0.03818681 | 0.21982358 | 4.87E-05 | 0.0044183 | -0.04622   |
| 7w11w_SITTC | 0.02570164 | 0.14448695 | 3.72E-05 | 0.0041509 | -0.092011  |
| 7w11w_SITTC | 0.05151854 | 0.30026847 | 5.83E-05 | 0.0063316 | 0.053285   |
| 7w11w_SITTC | 0.11538758 | 0.6856601  | 6.63E-05 | 0.025182  | -0.32814   |
| 7w11w_SITTC | 0.09026595 | 0.5340739  | 6.44E-05 | 0.021369  | 0.05218    |
| 7w11w_SITTC | 0.02279774 | 0.12696451 | 3.55E-05 | 0.0043197 | -0.056631  |
| 7w11w_SITTC | 0.09042979 | 0.5350625  | 6.44E-05 | 0.021369  | 0.044278   |
| 7w11w_SITTC | 0.02016047 | 0.11105097 | 3.42E-05 | 0.0045972 | 0.0032259  |
| 7w11w_SITTC | 0.01030173 | 0.05156243 | 3.20E-05 | 0.0066628 | 0.37961    |
| 7w11w_SITTC | 0.02709368 | 0.15288663 | 3.84E-05 | 0.0040947 | -0.10271   |
| 7w11w_SITTC | 0.0225108  | 0.12523313 | 3.52E-05 | 0.0043661 | -0.056631  |
| 7w11w_SITTC | 0.07353565 | 0.43312174 | 6.23E-05 | 0.013805  | 0.12913    |
| 7w11w_SITTC | 0.06608791 | 0.38818136 | 6.13E-05 | 0.010616  | 0.097788   |
| 7w11w_SITTC | 0.02720003 | 0.15352832 | 3.84E-05 | 0.0040947 | -0.10271   |



|             |            |            |          |           |           |
|-------------|------------|------------|----------|-----------|-----------|
| 7w11w_SITTC | 0.01022699 | 0.05111148 | 3.20E-05 | 0.0066628 | 0.37961   |
| 7w11w_SITTC | 0.0174313  | 0.09458295 | 3.33E-05 | 0.0049935 | 0.085504  |
| 7w11w_SITTC | 0.00764307 | 0.03551985 | 3.19E-05 | 0.0073923 | 0.48652   |
| 7w11w_SITTC | 0.05494411 | 0.3209387  | 5.94E-05 | 0.0071062 | 0.064127  |
| 7w11w_SITTC | 0.03039958 | 0.17283474 | 4.11E-05 | 0.0040705 | -0.10475  |
| 7w11w_SITTC | 0.01811907 | 0.09873303 | 3.36E-05 | 0.0048202 | 0.050123  |
| 7w11w_SITTC | 0.03022599 | 0.17178729 | 4.07E-05 | 0.0040668 | -0.10475  |
| 7w11w_SITTC | 0.09097564 | 0.5383562  | 6.45E-05 | 0.021597  | 0.036126  |
| 7w11w_SITTC | 0.02206394 | 0.12253669 | 3.52E-05 | 0.0043661 | -0.046619 |
| 7w11w_SITTC | 0.01477666 | 0.07856461 | 3.26E-05 | 0.0055188 | 0.16515   |
| 7w11w_SITTC | 0.03291603 | 0.18801922 | 4.32E-05 | 0.0041142 | -0.094772 |
| 7w11w_SITTC | 0.02073247 | 0.11450248 | 3.44E-05 | 0.0045325 | -0.01065  |
| 7w11w_SITTC | 0.01479998 | 0.07870529 | 3.27E-05 | 0.0054028 | 0.16515   |
| 7w11w_SITTC | 0.01521414 | 0.08120439 | 3.27E-05 | 0.0054028 | 0.16515   |
| 7w11w_SITTC | 0.05560684 | 0.32493767 | 5.95E-05 | 0.007248  | 0.065685  |
| 7w11w_SITTC | 0.07093334 | 0.41741917 | 6.20E-05 | 0.012608  | 0.11916   |
| 7w11w_SITTC | 0.00682956 | 0.03061106 | 3.18E-05 | 0.0078    | 0.54183   |
| 7w11w_SITTC | 0.06033761 | 0.35348356 | 6.05E-05 | 0.008688  | 0.07887   |
| 7w11w_SITTC | 0.04636403 | 0.2691657  | 5.54E-05 | 0.0053171 | 0.028707  |
| 7w11w_SITTC | 0.02030806 | 0.11194156 | 3.42E-05 | 0.0045972 | -0.01065  |
| 7w11w_SITTC | 0.01786109 | 0.09717629 | 3.34E-05 | 0.0049043 | 0.067421  |
| 7w11w_SITTC | 0.08603021 | 0.508515   | 6.39E-05 | 0.01943   | 0.099025  |
| 7w11w_SITTC | 0.05406072 | 0.31560823 | 5.91E-05 | 0.0068337 | 0.062513  |
| 7w11w_SITTC | 0.06375729 | 0.3741182  | 6.10E-05 | 0.0098069 | 0.089169  |
| 7w11w_SITTC | 0.00893724 | 0.04332898 | 3.19E-05 | 0.0070136 | 0.43237   |
| 7w11w_SITTC | 0.01108888 | 0.05631219 | 3.21E-05 | 0.006339  | 0.32844   |
| 7w11w_SITTC | 0.12886396 | 0.7669778  | 6.69E-05 | 0.023723  | -0.43195  |
| 7w11w_SITTC | 0.06932735 | 0.4077285  | 6.17E-05 | 0.01192   | 0.11218   |
| 7w11w_SITTC | 0.09242271 | 0.54708797 | 6.46E-05 | 0.022258  | 0.019141  |
| 7w11w_SITTC | 0.01080036 | 0.0545712  | 3.21E-05 | 0.0064976 | 0.35381   |
| 7w11w_SITTC | 0.144337   | 0.8603435  | 6.75E-05 | 0.023623  | -0.50968  |
| 7w11w_SITTC | 0.01465031 | 0.07780219 | 3.26E-05 | 0.0055188 | 0.18676   |
| 7w11w_SITTC | 0.01632322 | 0.08789669 | 3.30E-05 | 0.0051875 | 0.12392   |
| 7w11w_SITTC | 0.09660715 | 0.5723372  | 6.50E-05 | 0.023626  | -0.055297 |
| 7w11w_SITTC | 0.06418008 | 0.37666935 | 6.10E-05 | 0.010005  | 0.091185  |
| 7w11w_SITTC | 0.07579862 | 0.44677672 | 6.26E-05 | 0.0148    | 0.13453   |
| 7w11w_SITTC | 0.08842167 | 0.5229453  | 6.42E-05 | 0.020421  | 0.074212  |
| 7w11w_SITTC | 0.10588318 | 0.62830967 | 6.58E-05 | 0.025526  | -0.20623  |
| 7w11w_SITTC | 0.02126422 | 0.11771109 | 3.47E-05 | 0.0044724 | -0.023601 |
| 7w11w_SITTC | 0.05465034 | 0.31916606 | 5.92E-05 | 0.0069681 | 0.064127  |
| 7w11w_SITTC | 0.01735019 | 0.09409351 | 3.33E-05 | 0.0049935 | 0.085504  |
| 7w11w_SITTC | 0.00887355 | 0.04294469 | 3.19E-05 | 0.0070136 | 0.43237   |
| 7w11w_SITTC | 0.02332775 | 0.13016264 | 3.58E-05 | 0.0042778 | -0.065623 |

|             |            |            |          |           |           |
|-------------|------------|------------|----------|-----------|-----------|
| 7w11w_SITTC | 0.03949916 | 0.22774246 | 4.98E-05 | 0.0045122 | -0.034672 |
| 7w11w_SITTC | 0.02529293 | 0.14202076 | 3.68E-05 | 0.0041768 | -0.092011 |
| 7w11w_SITTC | 0.06341727 | 0.37206653 | 6.09E-05 | 0.0096122 | 0.089169  |
| 7w11w_SITTC | 0.03580864 | 0.20547351 | 4.59E-05 | 0.0042319 | -0.068307 |
| 7w11w_SITTC | 0.02238397 | 0.12446778 | 3.52E-05 | 0.0043661 | -0.046619 |
| 7w11w_SITTC | 0.03494087 | 0.2002373  | 4.54E-05 | 0.0042028 | -0.078293 |
| 7w11w_SITTC | 0.02793366 | 0.15795512 | 3.88E-05 | 0.0040827 | -0.10472  |
| 7w11w_SITTC | 0.01863774 | 0.10186268 | 3.36E-05 | 0.0048202 | 0.03364   |
| 7w11w_SITTC | 0.07634805 | 0.45009202 | 6.27E-05 | 0.015053  | 0.1354    |
| 7w11w_SITTC | 0.02527816 | 0.14193162 | 3.68E-05 | 0.0041768 | -0.092011 |
| 7w11w_SITTC | 0.02859705 | 0.1619581  | 3.93E-05 | 0.004074  | -0.10664  |
| 7w11w_SITTC | 0.05619801 | 0.3285048  | 5.97E-05 | 0.0073934 | 0.068678  |
| 7w11w_SITTC | 0.00907701 | 0.04417235 | 3.19E-05 | 0.0070136 | 0.43237   |
| 7w11w_SITTC | 0.01179177 | 0.06055348 | 3.22E-05 | 0.0061869 | 0.30353   |
| 7w11w_SITTC | 0.01742276 | 0.09453142 | 3.33E-05 | 0.0049935 | 0.085504  |
| 7w11w_SITTC | 0.07674281 | 0.45247403 | 6.27E-05 | 0.015053  | 0.13605   |
| 7w11w_SITTC | 0.10773917 | 0.63950884 | 6.59E-05 | 0.025604  | -0.23822  |
| 7w11w_SITTC | 0.01282961 | 0.06681593 | 3.23E-05 | 0.0059016 | 0.25518   |
| 7w11w_SITTC | 0.02773928 | 0.15678224 | 3.88E-05 | 0.0040827 | -0.10472  |
| 7w11w_SITTC | 0.03502847 | 0.2007659  | 4.54E-05 | 0.0042028 | -0.078293 |
| 7w11w_SITTC | 0.02024248 | 0.11154582 | 3.42E-05 | 0.0045972 | 0.0032259 |
| 7w11w_SITTC | 0.00673226 | 0.03002392 | 3.18E-05 | 0.0078    | 0.54183   |
| 7w11w_SITTC | 0.01190694 | 0.06124842 | 3.22E-05 | 0.0061869 | 0.30353   |
| 7w11w_SITTC | 0.02212409 | 0.12289963 | 3.52E-05 | 0.0043661 | -0.046619 |
| 7w11w_SITTC | 0.0168293  | 0.09095041 | 3.31E-05 | 0.0050879 | 0.10435   |
| 7w11w_SITTC | 0.09911329 | 0.58745956 | 6.53E-05 | 0.02442   | -0.094455 |
| 7w11w_SITTC | 0.01803914 | 0.0982507  | 3.34E-05 | 0.0049043 | 0.067421  |
| 7w11w_SITTC | 0.08678586 | 0.5130747  | 6.40E-05 | 0.019681  | 0.093363  |
| 7w11w_SITTC | 0.08159836 | 0.48177287 | 6.34E-05 | 0.017373  | 0.12948   |
| 7w11w_SITTC | 0.01952542 | 0.10721907 | 3.40E-05 | 0.0046667 | 0.017998  |
| 7w11w_SITTC | 0.03008012 | 0.1709071  | 4.07E-05 | 0.0040668 | -0.10597  |
| 7w11w_SITTC | 0.04365864 | 0.2528411  | 5.38E-05 | 0.0050014 | 0.008455  |
| 7w11w_SITTC | 0.02076035 | 0.11467075 | 3.44E-05 | 0.0045325 | -0.01065  |
| 7w11w_SITTC | 0.06870379 | 0.40396586 | 6.16E-05 | 0.011695  | 0.10977   |
| 7w11w_SITTC | 0.05522036 | 0.3226056  | 5.94E-05 | 0.0071062 | 0.065685  |
| 7w11w_SITTC | 0.03858701 | 0.22223845 | 4.87E-05 | 0.0044183 | -0.040459 |
| 7w11w_SITTC | 0.03003703 | 0.17064708 | 4.07E-05 | 0.0040668 | -0.10597  |
| 7w11w_SITTC | 0.00607267 | 0.02604389 | 3.18E-05 | 0.008015  | 0.56984   |
| 7w11w_SITTC | 0.05439059 | 0.31759873 | 5.92E-05 | 0.0069681 | 0.062513  |
| 7w11w_SITTC | 0.02356842 | 0.1316149  | 3.58E-05 | 0.0042778 | -0.065623 |
| 7w11w_SITTC | 0.04799519 | 0.27900827 | 5.64E-05 | 0.0055867 | 0.038361  |
| 7w11w_SITTC | 0.09054106 | 0.5357339  | 6.44E-05 | 0.021369  | 0.044278  |
| 7w11w_SITTC | 0.02965941 | 0.16836847 | 4.02E-05 | 0.0040662 | -0.10597  |

|             |            |            |          |           |           |
|-------------|------------|------------|----------|-----------|-----------|
| 7w11w_SITTC | 0.02085689 | 0.11525324 | 3.44E-05 | 0.0045325 | -0.023601 |
| 7w11w_SITTC | 0.02153341 | 0.11933543 | 3.49E-05 | 0.0044169 | -0.0356   |
| 7w11w_SITTC | 0.07124313 | 0.41928846 | 6.20E-05 | 0.012608  | 0.12136   |
| 7w11w_SITTC | 0.0287951  | 0.16315316 | 3.97E-05 | 0.0040686 | -0.10664  |
| 7w11w_SITTC | 0.07058512 | 0.41531798 | 6.19E-05 | 0.012376  | 0.11916   |
| 7w11w_SITTC | 0.02261534 | 0.12586388 | 3.55E-05 | 0.0043197 | -0.056631 |
| 7w11w_SITTC | 0.0489067  | 0.2845084  | 5.70E-05 | 0.0057827 | 0.041222  |
| 7w11w_SITTC | 0.03533519 | 0.20261665 | 4.59E-05 | 0.0042319 | -0.073417 |
| 7w11w_SITTC | 0.01508638 | 0.08043347 | 3.27E-05 | 0.0054028 | 0.16515   |
| 7w11w_SITTC | 0.06382709 | 0.3745394  | 6.10E-05 | 0.0098069 | 0.089169  |
| 7w11w_SITTC | 0.01681362 | 0.09085577 | 3.31E-05 | 0.0050879 | 0.10435   |
| 7w11w_SITTC | 0.02946704 | 0.16720772 | 4.02E-05 | 0.0040662 | -0.10661  |
| 7w11w_SITTC | 0.03320353 | 0.18975401 | 4.37E-05 | 0.0041322 | -0.091175 |
| 7w11w_SITTC | 0.01511245 | 0.08059079 | 3.27E-05 | 0.0054028 | 0.16515   |
| 7w11w_SITTC | 0.02259148 | 0.1257199  | 3.55E-05 | 0.0043197 | -0.056631 |
| 7w11w_SITTC | 0.01114849 | 0.05667188 | 3.21E-05 | 0.006339  | 0.32844   |
| 7w11w_SITTC | 0.12545455 | 0.74640507 | 6.68E-05 | 0.023978  | -0.40938  |
| 7w11w_SITTC | 0.05511412 | 0.32196453 | 5.94E-05 | 0.0071062 | 0.065685  |
| 7w11w_SITTC | 0.01989281 | 0.10943592 | 3.42E-05 | 0.0045972 | 0.0032259 |
| 7w11w_SITTC | 0.01371177 | 0.07213894 | 3.25E-05 | 0.0056405 | 0.20898   |
| 7w11w_SITTC | 0.01893209 | 0.10363884 | 3.38E-05 | 0.004741  | 0.03364   |
| 7w11w_SITTC | 0.02277605 | 0.12683365 | 3.55E-05 | 0.0043197 | -0.056631 |
| 7w11w_SITTC | 0.06876491 | 0.40433463 | 6.16E-05 | 0.011695  | 0.10977   |
| 7w11w_SITTC | 0.0087803  | 0.04238199 | 3.19E-05 | 0.0070136 | 0.43237   |
| 7w11w_SITTC | 0.01583266 | 0.08493657 | 3.28E-05 | 0.0052924 | 0.1442    |
| 7w11w_SITTC | 0.0158047  | 0.08476789 | 3.28E-05 | 0.0052924 | 0.1442    |
| 7w11w_SITTC | 0.01850979 | 0.10109064 | 3.36E-05 | 0.0048202 | 0.050123  |
| 7w11w_SITTC | 0.07080227 | 0.41662827 | 6.20E-05 | 0.012608  | 0.11916   |
| 7w11w_SITTC | 0.02008865 | 0.11061765 | 3.42E-05 | 0.0045972 | 0.0032259 |
| 7w11w_SITTC | 0.01319979 | 0.06904958 | 3.24E-05 | 0.0057681 | 0.23179   |
| 7w11w_SITTC | 0.01623127 | 0.08734181 | 3.30E-05 | 0.0051875 | 0.12392   |
| 7w11w_SITTC | 0.08646345 | 0.51112926 | 6.40E-05 | 0.019681  | 0.099025  |
| 7w11w_SITTC | 0.02721096 | 0.1535943  | 3.84E-05 | 0.0040947 | -0.10271  |
| 7w11w_SITTC | 0.02852045 | 0.16149586 | 3.93E-05 | 0.004074  | -0.10603  |
| 7w11w_SITTC | 0.00767018 | 0.03568343 | 3.19E-05 | 0.0073923 | 0.48652   |
| 7w11w_SITTC | 0.07436454 | 0.4381233  | 6.24E-05 | 0.014051  | 0.13074   |
| 7w11w_SITTC | 0.01550659 | 0.08296906 | 3.28E-05 | 0.0052924 | 0.1442    |
| 7w11w_SITTC | 0.01433104 | 0.07587568 | 3.26E-05 | 0.0055188 | 0.18676   |
| 7w11w_SITTC | 0.01912299 | 0.10479076 | 3.38E-05 | 0.004741  | 0.03364   |
| 7w11w_SITTC | 0.03293794 | 0.18815143 | 4.32E-05 | 0.0041142 | -0.094772 |
| 7w11w_SITTC | 0.02446499 | 0.13702485 | 3.64E-05 | 0.0042065 | -0.080664 |
| 7w11w_SITTC | 0.01219695 | 0.06299836 | 3.23E-05 | 0.0060411 | 0.2791    |
| 7w11w_SITTC | 0.00917042 | 0.04473602 | 3.19E-05 | 0.0070136 | 0.43237   |

|             |            |            |          |           |           |
|-------------|------------|------------|----------|-----------|-----------|
| 7w11w_SITTC | 0.01643398 | 0.088565   | 3.30E-05 | 0.0051875 | 0.10435   |
| 7w11w_SITTC | 0.0766356  | 0.4518271  | 6.27E-05 | 0.015053  | 0.13605   |
| 7w11w_SITTC | 0.02275551 | 0.12670967 | 3.55E-05 | 0.0043197 | -0.056631 |
| 7w11w_SITTC | 0.02616876 | 0.14730555 | 3.76E-05 | 0.0041286 | -0.096385 |
| 7w11w_SITTC | 0.06116135 | 0.3584541  | 6.06E-05 | 0.008866  | 0.082025  |
| 7w11w_SITTC | 0.05191797 | 0.30267867 | 5.85E-05 | 0.0064518 | 0.055318  |
| 7w11w_SITTC | 0.02593782 | 0.14591205 | 3.76E-05 | 0.0041286 | -0.096385 |
| 7w11w_SITTC | 0.02617814 | 0.14736217 | 3.76E-05 | 0.0041286 | -0.096385 |
| 7w11w_SITTC | 0.01648647 | 0.08888175 | 3.31E-05 | 0.0050879 | 0.10435   |
| 7w11w_SITTC | 0.04938765 | 0.2874105  | 5.73E-05 | 0.0058857 | 0.04392   |
| 7w11w_SITTC | 0.01948734 | 0.10698924 | 3.40E-05 | 0.0046667 | 0.017998  |
| 7w11w_SITTC | 0.0173313  | 0.09397952 | 3.33E-05 | 0.0049935 | 0.085504  |
| 7w11w_SITTC | 0.03262163 | 0.18624276 | 4.32E-05 | 0.0041142 | -0.094772 |
| 7w11w_SITTC | 0.02716953 | 0.15334429 | 3.84E-05 | 0.0040947 | -0.10271  |
| 7w11w_SITTC | 0.08605775 | 0.5086812  | 6.39E-05 | 0.01943   | 0.099025  |
| 7w11w_SITTC | 0.04727409 | 0.27465707 | 5.61E-05 | 0.0054936 | 0.032113  |
| 7w11w_SITTC | 0.03626644 | 0.20823592 | 4.65E-05 | 0.0042637 | -0.068307 |
| 7w11w_SITTC | 0.01754119 | 0.09524599 | 3.33E-05 | 0.0049935 | 0.067421  |
| 7w11w_SITTC | 0.01461892 | 0.07761274 | 3.26E-05 | 0.0055188 | 0.18676   |
| 7w11w_SITTC | 0.01379909 | 0.07266582 | 3.25E-05 | 0.0056405 | 0.20898   |
| 7w11w_SITTC | 0.0964803  | 0.5715718  | 6.50E-05 | 0.023626  | -0.045608 |
| 7w11w_SITTC | 0.02853439 | 0.16158003 | 3.93E-05 | 0.004074  | -0.10603  |
| 7w11w_SITTC | 0.02071985 | 0.11442636 | 3.44E-05 | 0.0045325 | -0.01065  |
| 7w11w_SITTC | 0.08422365 | 0.49761412 | 6.37E-05 | 0.018667  | 0.1176    |
| 7w11w_SITTC | 0.08657453 | 0.51179945 | 6.40E-05 | 0.019681  | 0.093363  |
| 7w11w_SITTC | 0.10826955 | 0.64270926 | 6.59E-05 | 0.025614  | -0.24573  |
| 7w11w_SITTC | 0.08364549 | 0.4941254  | 6.37E-05 | 0.01841   | 0.12117   |
| 7w11w_SITTC | 0.07446826 | 0.4387492  | 6.24E-05 | 0.014051  | 0.13218   |
| 7w11w_SITTC | 0.04801266 | 0.27911365 | 5.64E-05 | 0.0055867 | 0.038361  |
| 7w11w_SITTC | 0.07440841 | 0.43838802 | 6.24E-05 | 0.014051  | 0.13218   |
| 7w11w_SITTC | 0.02062194 | 0.11383551 | 3.44E-05 | 0.0045325 | -0.01065  |
| 7w11w_SITTC | 0.07585868 | 0.44713908 | 6.26E-05 | 0.0148    | 0.13453   |
| 7w11w_SITTC | 0.01973916 | 0.10850874 | 3.40E-05 | 0.0046667 | 0.0032259 |
| 7w11w_SITTC | 0.0277182  | 0.15665504 | 3.88E-05 | 0.0040827 | -0.10472  |
| 7w11w_SITTC | 0.1195072  | 0.71051824 | 6.65E-05 | 0.024704  | -0.36308  |
| 7w11w_SITTC | 0.01073937 | 0.05420322 | 3.21E-05 | 0.0064976 | 0.35381   |
| 7w11w_SITTC | 0.02935906 | 0.16655612 | 4.02E-05 | 0.0040662 | -0.10661  |
| 7w11w_SITTC | 0.01499734 | 0.07989621 | 3.27E-05 | 0.0054028 | 0.16515   |
| 7w11w_SITTC | 0.02118138 | 0.11721123 | 3.47E-05 | 0.0044724 | -0.023601 |
| 7w11w_SITTC | 0.03535626 | 0.2027438  | 4.59E-05 | 0.0042319 | -0.073417 |
| 7w11w_SITTC | 0.08049738 | 0.47512946 | 6.32E-05 | 0.016854  | 0.13314   |
| 7w11w_SITTC | 0.02925883 | 0.16595134 | 4.02E-05 | 0.0040662 | -0.10661  |
| 7w11w_SITTC | 0.09859031 | 0.58430386 | 6.52E-05 | 0.024275  | -0.084641 |

|             |            |            |          |           |           |
|-------------|------------|------------|----------|-----------|-----------|
| 7w11w_SITTC | 0.02002639 | 0.11024192 | 3.42E-05 | 0.0045972 | 0.0032259 |
| 7w11w_SITTC | 0.02645596 | 0.14903858 | 3.80E-05 | 0.0041099 | -0.099939 |
| 7w11w_SITTC | 0.01037652 | 0.05201376 | 3.21E-05 | 0.0064976 | 0.35381   |
| 7w11w_SITTC | 0.03371518 | 0.19284138 | 4.43E-05 | 0.004153  | -0.087207 |
| 7w11w_SITTC | 0.07905977 | 0.46645474 | 6.30E-05 | 0.016077  | 0.13613   |
| 7w11w_SITTC | 0.03856086 | 0.22208062 | 4.87E-05 | 0.0044183 | -0.040459 |
| 7w11w_SITTC | 0.01127368 | 0.05742728 | 3.21E-05 | 0.006339  | 0.32844   |
| 7w11w_SITTC | 0.01296956 | 0.06766038 | 3.23E-05 | 0.0059016 | 0.25518   |
| 7w11w_SITTC | 0.02836717 | 0.16057096 | 3.93E-05 | 0.004074  | -0.10603  |
| 7w11w_SITTC | 0.02424711 | 0.13571014 | 3.64E-05 | 0.0042065 | -0.080664 |
| 7w11w_SITTC | 0.10212945 | 0.6056593  | 6.55E-05 | 0.025029  | -0.15246  |
| 7w11w_SITTC | 0.03235741 | 0.18464848 | 4.27E-05 | 0.004099  | -0.097962 |
| 7w11w_SITTC | 0.0796301  | 0.4698962  | 6.31E-05 | 0.016335  | 0.13545   |
| 7w11w_SITTC | 0.03464156 | 0.19843121 | 4.48E-05 | 0.0041765 | -0.078293 |
| 7w11w_SITTC | 0.10667592 | 0.6330931  | 6.58E-05 | 0.02556   | -0.22263  |
| 7w11w_SITTC | 0.02940608 | 0.16683982 | 4.02E-05 | 0.0040662 | -0.10661  |
| 7w11w_SITTC | 0.06018516 | 0.35256368 | 6.04E-05 | 0.0085136 | 0.07887   |
| 7w11w_SITTC | 0.03017259 | 0.17146504 | 4.07E-05 | 0.0040668 | -0.10597  |
| 7w11w_SITTC | 0.01935042 | 0.10616304 | 3.40E-05 | 0.0046667 | 0.017998  |
| 7w11w_SITTC | 0.01144673 | 0.05847148 | 3.21E-05 | 0.006339  | 0.30353   |
| 7w11w_SITTC | 0.02202088 | 0.12227688 | 3.52E-05 | 0.0043661 | -0.046619 |
| 7w11w_SITTC | 0.06994073 | 0.41142964 | 6.18E-05 | 0.012147  | 0.11455   |
| 7w11w_SITTC | 0.015099   | 0.08050964 | 3.27E-05 | 0.0054028 | 0.16515   |
| 7w11w_SITTC | 0.06688976 | 0.39301983 | 6.14E-05 | 0.011039  | 0.10251   |
| 7w11w_SITTC | 0.07606056 | 0.44835728 | 6.26E-05 | 0.0148    | 0.1354    |
| 7w11w_SITTC | 0.02368897 | 0.13234226 | 3.61E-05 | 0.0042401 | -0.073623 |
| 7w11w_SITTC | 0.01884837 | 0.10313369 | 3.38E-05 | 0.004741  | 0.03364   |
| 7w11w_SITTC | 0.03086506 | 0.17564344 | 4.16E-05 | 0.0040771 | -0.10299  |
| 7w11w_SITTC | 0.0224949  | 0.12513715 | 3.52E-05 | 0.0043661 | -0.056631 |
| 7w11w_SITTC | 0.11580795 | 0.68819666 | 6.63E-05 | 0.025119  | -0.32814  |
| 7w11w_SITTC | 0.03563097 | 0.20440143 | 4.59E-05 | 0.0042319 | -0.073417 |
| 7w11w_SITTC | 0.01669267 | 0.09012596 | 3.31E-05 | 0.0050879 | 0.10435   |
| 7w11w_SITTC | 0.01387794 | 0.07314162 | 3.25E-05 | 0.0056405 | 0.20898   |
| 7w11w_SITTC | 0.08587316 | 0.5075674  | 6.39E-05 | 0.01943   | 0.1043    |
| 7w11w_SITTC | 0.02061599 | 0.11379961 | 3.44E-05 | 0.0045325 | -0.01065  |
| 7w11w_SITTC | 0.06590828 | 0.38709745 | 6.13E-05 | 0.010616  | 0.097788  |
| 7w11w_SITTC | 0.01324868 | 0.0693446  | 3.24E-05 | 0.0057681 | 0.23179   |
| 7w11w_SITTC | 0.00370939 | 0.01178364 | 3.18E-05 | 0.0089513 | 0.68371   |
| 7w11w_SITTC | 0.03290613 | 0.1879595  | 4.32E-05 | 0.0041142 | -0.094772 |
| 7w11w_SITTC | 0.02350977 | 0.13126095 | 3.58E-05 | 0.0042778 | -0.065623 |
| 7w11w_SITTC | 0.09267148 | 0.54858905 | 6.46E-05 | 0.022258  | 0.010343  |
| 7w11w_SITTC | 0.00868393 | 0.04180051 | 3.19E-05 | 0.0071994 | 0.43237   |
| 7w11w_SITTC | 0.09697152 | 0.5745359  | 6.51E-05 | 0.023799  | -0.055297 |

|             |            |            |          |           |            |
|-------------|------------|------------|----------|-----------|------------|
| 7w11w_SITTC | 0.0087644  | 0.04228603 | 3.19E-05 | 0.0070136 | 0.43237    |
| 7w11w_SITTC | 0.01722076 | 0.09331253 | 3.33E-05 | 0.0049935 | 0.085504   |
| 7w11w_SITTC | 0.01379947 | 0.07266813 | 3.25E-05 | 0.0056405 | 0.20898    |
| 7w11w_SITTC | 0.02161975 | 0.11985644 | 3.49E-05 | 0.0044169 | -0.0356    |
| 7w11w_SITTC | 0.01682176 | 0.0909049  | 3.31E-05 | 0.0050879 | 0.10435    |
| 7w11w_SITTC | 0.01877198 | 0.10267274 | 3.38E-05 | 0.004741  | 0.03364    |
| 7w11w_SITTC | 0.02138729 | 0.11845374 | 3.47E-05 | 0.0044724 | -0.0356    |
| 7w11w_SITTC | 0.06680269 | 0.3924944  | 6.13E-05 | 0.010826  | 0.10251    |
| 7w11w_SITTC | 0.02721864 | 0.15364064 | 3.84E-05 | 0.0040947 | -0.10271   |
| 7w11w_SITTC | 0.114366   | 0.67949575 | 6.63E-05 | 0.025299  | -0.3171    |
| 7w11w_SITTC | 0.10302208 | 0.61104554 | 6.56E-05 | 0.025216  | -0.16182   |
| 7w11w_SITTC | 0.020026   | 0.11023956 | 3.42E-05 | 0.0045972 | 0.0032259  |
| 7w11w_SITTC | 0.02500637 | 0.14029159 | 3.68E-05 | 0.0041768 | -0.086782  |
| 7w11w_SITTC | 0.01325861 | 0.06940454 | 3.24E-05 | 0.0057681 | 0.23179    |
| 7w11w_SITTC | 0.02783115 | 0.15733658 | 3.88E-05 | 0.0040827 | -0.10472   |
| 7w11w_SITTC | 0.05483022 | 0.32025144 | 5.94E-05 | 0.0071062 | 0.064127   |
| 7w11w_SITTC | 0.00693055 | 0.03122043 | 3.18E-05 | 0.0078    | 0.54183    |
| 7w11w_SITTC | 0.12709682 | 0.7563147  | 6.69E-05 | 0.023834  | -0.42086   |
| 7w11w_SITTC | 0.01291678 | 0.06734192 | 3.23E-05 | 0.0059016 | 0.25518    |
| 7w11w_SITTC | 0.09416653 | 0.5576103  | 6.48E-05 | 0.022877  | -0.0077738 |
| 7w11w_SITTC | 0.02344623 | 0.1308776  | 3.58E-05 | 0.0042778 | -0.065623  |
| 7w11w_SITTC | 0.012476   | 0.06468216 | 3.23E-05 | 0.0060411 | 0.2791     |
| 7w11w_SITTC | 0.0270472  | 0.15260616 | 3.84E-05 | 0.0040947 | -0.10271   |
| 7w11w_SITTC | 0.03844914 | 0.22140649 | 4.87E-05 | 0.0044183 | -0.04622   |
| 7w11w_SITTC | 0.0209945  | 0.11608359 | 3.47E-05 | 0.0044724 | -0.023601  |
| 7w11w_SITTC | 0.0249299  | 0.13983019 | 3.68E-05 | 0.0041768 | -0.086782  |
| 7w11w_SITTC | 0.03900165 | 0.2247404  | 4.92E-05 | 0.0044639 | -0.040459  |
| 7w11w_SITTC | 0.04279738 | 0.2476442  | 5.29E-05 | 0.0048617 | -0.0013165 |
| 7w11w_SITTC | 0.02223508 | 0.12356934 | 3.52E-05 | 0.0043661 | -0.046619  |
| 7w11w_SITTC | 0.01451835 | 0.07700589 | 3.26E-05 | 0.0055188 | 0.18676    |
| 7w11w_SITTC | 0.02883426 | 0.16338941 | 3.97E-05 | 0.0040686 | -0.10664   |
| 7w11w_SITTC | 0.01322004 | 0.06917176 | 3.24E-05 | 0.0057681 | 0.23179    |
| 7w11w_SITTC | 0.02442177 | 0.13676403 | 3.64E-05 | 0.0042065 | -0.080664  |
| 7w11w_SITTC | 0.02203351 | 0.12235306 | 3.52E-05 | 0.0043661 | -0.046619  |
| 7w11w_SITTC | 0.01717337 | 0.09302655 | 3.33E-05 | 0.0049935 | 0.085504   |
| 7w11w_SITTC | 0.02049658 | 0.11307909 | 3.44E-05 | 0.0045325 | -0.01065   |
| 7w11w_SITTC | 0.02639502 | 0.14867082 | 3.76E-05 | 0.0041286 | -0.099939  |
| 7w11w_SITTC | 0.02161129 | 0.11980534 | 3.49E-05 | 0.0044169 | -0.0356    |
| 7w11w_SITTC | 0.04456563 | 0.25831395 | 5.42E-05 | 0.0050757 | 0.012967   |
| 7w11w_SITTC | 0.04533873 | 0.2629789  | 5.50E-05 | 0.0052335 | 0.021279   |
| 7w11w_SITTC | 0.01602837 | 0.08611754 | 3.30E-05 | 0.0051875 | 0.12392    |
| 7w11w_SITTC | 0.09732817 | 0.57668793 | 6.51E-05 | 0.023799  | -0.065044  |
| 7w11w_SITTC | 0.09798741 | 0.5806658  | 6.52E-05 | 0.024123  | -0.074831  |

|             |            |            |          |           |           |
|-------------|------------|------------|----------|-----------|-----------|
| 7w11w_SITTC | 0.05511633 | 0.32197788 | 5.94E-05 | 0.0071062 | 0.065685  |
| 7w11w_SITTC | 0.02083851 | 0.11514233 | 3.44E-05 | 0.0045325 | -0.023601 |
| 7w11w_SITTC | 0.00913272 | 0.04450853 | 3.19E-05 | 0.0070136 | 0.43237   |
| 7w11w_SITTC | 0.00715406 | 0.03256914 | 3.19E-05 | 0.0075925 | 0.51404   |
| 7w11w_SITTC | 0.03410985 | 0.19522282 | 4.43E-05 | 0.004153  | -0.082901 |
| 7w11w_SITTC | 0.02043832 | 0.11272758 | 3.44E-05 | 0.0045325 | -0.01065  |
| 7w11w_SITTC | 0.08356004 | 0.49360982 | 6.37E-05 | 0.01841   | 0.12117   |
| 7w11w_SITTC | 0.03900302 | 0.22474866 | 4.92E-05 | 0.0044639 | -0.040459 |
| 7w11w_SITTC | 0.02191142 | 0.12161636 | 3.49E-05 | 0.0044169 | -0.0356   |
| 7w11w_SITTC | 0.04822543 | 0.28039753 | 5.67E-05 | 0.0056831 | 0.038361  |
| 7w11w_SITTC | 0.01798601 | 0.09793013 | 3.34E-05 | 0.0049043 | 0.067421  |
| 7w11w_SITTC | 0.01498593 | 0.07982732 | 3.27E-05 | 0.0054028 | 0.16515   |
| 7w11w_SITTC | 0.03054171 | 0.17369235 | 4.11E-05 | 0.0040705 | -0.10475  |
| 7w11w_SITTC | 0.12486946 | 0.7428746  | 6.68E-05 | 0.024034  | -0.40548  |
| 7w11w_SITTC | 0.02762395 | 0.15608634 | 3.88E-05 | 0.0040827 | -0.10472  |
| 7w11w_SITTC | 0.02077973 | 0.11478768 | 3.44E-05 | 0.0045325 | -0.01065  |
| 7w11w_SITTC | 0.01870575 | 0.10227307 | 3.38E-05 | 0.004741  | 0.03364   |
| 7w11w_SITTC | 0.0126678  | 0.0658395  | 3.23E-05 | 0.0059016 | 0.25518   |
| 7w11w_SITTC | 0.01742425 | 0.0945404  | 3.33E-05 | 0.0049935 | 0.085504  |
| 7w11w_SITTC | 0.01879538 | 0.10281389 | 3.38E-05 | 0.004741  | 0.03364   |
| 7w11w_SITTC | 0.129604   | 0.77144325 | 6.70E-05 | 0.023664  | -0.43556  |
| 7w11w_SITTC | 0.02175583 | 0.12067752 | 3.49E-05 | 0.0044169 | -0.0356   |
| 7w11w_SITTC | 0.03391271 | 0.1940333  | 4.43E-05 | 0.004153  | -0.087207 |
| 7w11w_SITTC | 0.0210804  | 0.11660192 | 3.47E-05 | 0.0044724 | -0.023601 |
| 7w11w_SITTC | 0.03177192 | 0.18111558 | 4.22E-05 | 0.0040866 | -0.10071  |
| 7w11w_SITTC | 0.00878748 | 0.04242531 | 3.19E-05 | 0.0070136 | 0.43237   |
| 7w11w_SITTC | 0.01477017 | 0.07852545 | 3.26E-05 | 0.0055188 | 0.16515   |
| 7w11w_SITTC | 0.11197597 | 0.6650741  | 6.61E-05 | 0.025489  | -0.29336  |
| 7w11w_SITTC | 0.01399671 | 0.07385828 | 3.25E-05 | 0.0056405 | 0.20898   |
| 7w11w_SITTC | 0.01424236 | 0.07534055 | 3.26E-05 | 0.0055188 | 0.18676   |
| 7w11w_SITTC | 0.03399926 | 0.19455552 | 4.43E-05 | 0.004153  | -0.087207 |
| 7w11w_SITTC | 0.02866749 | 0.16238311 | 3.97E-05 | 0.0040686 | -0.10664  |
| 7w11w_SITTC | 0.02208232 | 0.1226476  | 3.52E-05 | 0.0043661 | -0.046619 |
| 7w11w_SITTC | 0.02299435 | 0.12815088 | 3.55E-05 | 0.0043197 | -0.056631 |
| 7w11w_SITTC | 0.11262564 | 0.66899425 | 6.62E-05 | 0.025448  | -0.29951  |
| 7w11w_SITTC | 0.1061856  | 0.6301345  | 6.58E-05 | 0.025526  | -0.21453  |
| 7w11w_SITTC | 0.02742703 | 0.15489809 | 3.84E-05 | 0.0040947 | -0.10271  |
| 7w11w_SITTC | 0.11339515 | 0.67363757 | 6.62E-05 | 0.025403  | -0.30551  |
| 7w11w_SITTC | 0.03870064 | 0.22292407 | 4.92E-05 | 0.0044639 | -0.040459 |
| 7w11w_SITTC | 0.05088529 | 0.2964474  | 5.81E-05 | 0.006215  | 0.051138  |
| 7w11w_SITTC | 0.03560451 | 0.20424177 | 4.59E-05 | 0.0042319 | -0.073417 |
| 7w11w_SITTC | 0.02361606 | 0.13190235 | 3.58E-05 | 0.0042778 | -0.073623 |
| 7w11w_SITTC | 0.014062   | 0.07425224 | 3.25E-05 | 0.0056405 | 0.20898   |

|             |            |            |          |           |           |
|-------------|------------|------------|----------|-----------|-----------|
| 7w11w_SITTC | 0.00550359 | 0.02261002 | 3.18E-05 | 0.0082375 | 0.59807   |
| 7w11w_SITTC | 0.07878915 | 0.46482185 | 6.30E-05 | 0.016077  | 0.13651   |
| 7w11w_SITTC | 0.02918509 | 0.1655064  | 3.97E-05 | 0.0040686 | -0.10661  |
| 7w11w_SITTC | 0.09662243 | 0.5724294  | 6.50E-05 | 0.023626  | -0.055297 |
| 7w11w_SITTC | 0.02511517 | 0.14094812 | 3.68E-05 | 0.0041768 | -0.086782 |
| 7w11w_SITTC | 0.01974594 | 0.1085497  | 3.40E-05 | 0.0046667 | 0.0032259 |
| 7w11w_SITTC | 0.01845017 | 0.1007309  | 3.36E-05 | 0.0048202 | 0.050123  |
| 7w11w_SITTC | 0.0102781  | 0.05141983 | 3.20E-05 | 0.0066628 | 0.37961   |
| 7w11w_SITTC | 0.02276912 | 0.12679185 | 3.55E-05 | 0.0043197 | -0.056631 |
| 7w11w_SITTC | 0.02028398 | 0.11179624 | 3.42E-05 | 0.0045972 | -0.01065  |
| 7w11w_SITTC | 0.08564143 | 0.5061691  | 6.39E-05 | 0.019177  | 0.1043    |
| 7w11w_SITTC | 0.05491696 | 0.32077485 | 5.94E-05 | 0.0071062 | 0.064127  |
| 7w11w_SITTC | 0.08019402 | 0.47329894 | 6.32E-05 | 0.016854  | 0.13446   |
| 7w11w_SITTC | 0.02884363 | 0.163446   | 3.97E-05 | 0.0040686 | -0.10664  |
| 7w11w_SITTC | 0.02247518 | 0.1250182  | 3.52E-05 | 0.0043661 | -0.056631 |
| 7w11w_SITTC | 0.12466051 | 0.7416138  | 6.68E-05 | 0.024034  | -0.40152  |
| 7w11w_SITTC | 0.02281143 | 0.12704715 | 3.55E-05 | 0.0043197 | -0.056631 |
| 7w11w_SITTC | 0.09432887 | 0.55858994 | 6.48E-05 | 0.022877  | -0.017059 |
| 7w11w_SITTC | 0.02736815 | 0.1545428  | 3.84E-05 | 0.0040947 | -0.10271  |
| 7w11w_SITTC | 0.01501171 | 0.07998289 | 3.27E-05 | 0.0054028 | 0.16515   |
| 7w11w_SITTC | 0.01623728 | 0.08737809 | 3.30E-05 | 0.0051875 | 0.12392   |
| 7w11w_SITTC | 0.08504554 | 0.50257343 | 6.38E-05 | 0.018923  | 0.10916   |
| 7w11w_SITTC | 0.02082696 | 0.11507265 | 3.44E-05 | 0.0045325 | -0.023601 |
| 7w11w_SITTC | 0.02711231 | 0.15299904 | 3.84E-05 | 0.0040947 | -0.10271  |
| 7w11w_SITTC | 0.01039199 | 0.0521071  | 3.21E-05 | 0.0064976 | 0.35381   |
| 7w11w_SITTC | 0.03841326 | 0.22119004 | 4.87E-05 | 0.0044183 | -0.04622  |
| 7w11w_SITTC | 0.03508817 | 0.20112611 | 4.54E-05 | 0.0042028 | -0.078293 |
| 7w11w_SITTC | 0.01709668 | 0.09256378 | 3.33E-05 | 0.0049935 | 0.085504  |
| 7w11w_SITTC | 0.01255873 | 0.06518139 | 3.23E-05 | 0.0060411 | 0.25518   |
| 7w11w_SITTC | 0.09061187 | 0.5361612  | 6.44E-05 | 0.021369  | 0.044278  |
| 7w11w_SITTC | 0.10104749 | 0.5991307  | 6.54E-05 | 0.024809  | -0.13341  |
| 7w11w_SITTC | 0.00936248 | 0.04589494 | 3.20E-05 | 0.0068348 | 0.4058    |
| 7w11w_SITTC | 0.03017141 | 0.17145795 | 4.07E-05 | 0.0040668 | -0.10597  |
| 7w11w_SITTC | 0.02327764 | 0.12986027 | 3.58E-05 | 0.0042778 | -0.065623 |
| 7w11w_SITTC | 0.02588385 | 0.14558639 | 3.76E-05 | 0.0041286 | -0.096385 |
| 7w11w_SITTC | 0.06009246 | 0.35200432 | 6.04E-05 | 0.0085136 | 0.07887   |
| 7w11w_SITTC | 0.00537126 | 0.02181153 | 3.18E-05 | 0.0082375 | 0.59807   |
| 7w11w_SITTC | 0.02444368 | 0.13689628 | 3.64E-05 | 0.0042065 | -0.080664 |
| 7w11w_SITTC | 0.00974532 | 0.048205   | 3.20E-05 | 0.0068348 | 0.4058    |
| 7w11w_SITTC | 0.01564629 | 0.083812   | 3.28E-05 | 0.0052924 | 0.1442    |
| 7w11w_SITTC | 0.02258705 | 0.1256932  | 3.55E-05 | 0.0043197 | -0.056631 |
| 7w11w_SITTC | 0.03727722 | 0.21433504 | 4.76E-05 | 0.0043355 | -0.057524 |
| 7w11w_SITTC | 0.02404162 | 0.1344702  | 3.61E-05 | 0.0042401 | -0.073623 |



|             |            |            |          |           |           |
|-------------|------------|------------|----------|-----------|-----------|
| 7w11w_SITTC | 0.0363574  | 0.20878474 | 4.65E-05 | 0.0042637 | -0.062998 |
| 7w11w_SITTC | 0.07030097 | 0.4136034  | 6.19E-05 | 0.012376  | 0.11689   |
| 7w11w_SITTC | 0.01788102 | 0.09729657 | 3.34E-05 | 0.0049043 | 0.067421  |
| 7w11w_SITTC | 0.00860329 | 0.04131391 | 3.19E-05 | 0.0071994 | 0.45929   |
| 7w11w_SITTC | 0.0401499  | 0.23166904 | 5.03E-05 | 0.0045634 | -0.028892 |
| 7w11w_SITTC | 0.01009423 | 0.05031036 | 3.20E-05 | 0.0066628 | 0.37961   |
| 7w11w_SITTC | 0.03188781 | 0.18181488 | 4.22E-05 | 0.0040866 | -0.097962 |
| 7w11w_SITTC | 0.0305116  | 0.17351064 | 4.11E-05 | 0.0040705 | -0.10475  |
| 7w11w_SITTC | 0.04495532 | 0.26066542 | 5.46E-05 | 0.0051531 | 0.017239  |
| 7w11w_SITTC | 0.03209573 | 0.18306944 | 4.27E-05 | 0.004099  | -0.097962 |
| 7w11w_SITTC | 0.0226821  | 0.12626675 | 3.55E-05 | 0.0043197 | -0.056631 |
| 7w11w_SITTC | 0.14968665 | 0.89262384 | 6.76E-05 | 0.023695  | -0.52228  |
| 7w11w_SITTC | 0.04344145 | 0.25153053 | 5.33E-05 | 0.0049301 | 0.0036923 |
| 7w11w_SITTC | 0.02712252 | 0.15306066 | 3.84E-05 | 0.0040947 | -0.10271  |
| 7w11w_SITTC | 0.0331166  | 0.18922947 | 4.37E-05 | 0.0041322 | -0.091175 |
| 7w11w_SITTC | 0.00642442 | 0.02816637 | 3.18E-05 | 0.008015  | 0.56984   |
| 7w11w_SITTC | 0.11321826 | 0.67257017 | 6.62E-05 | 0.025403  | -0.30551  |
| 7w11w_SITTC | 0.01424804 | 0.07537481 | 3.26E-05 | 0.0055188 | 0.18676   |
| 7w11w_SITTC | 0.02455509 | 0.13756853 | 3.64E-05 | 0.0042065 | -0.080664 |
| 7w11w_SITTC | 0.01591994 | 0.08546323 | 3.30E-05 | 0.0051875 | 0.12392   |
| 7w11w_SITTC | 0.00959038 | 0.04727007 | 3.20E-05 | 0.0068348 | 0.4058    |
| 7w11w_SITTC | 0.0242797  | 0.13590682 | 3.64E-05 | 0.0042065 | -0.080664 |
| 7w11w_SITTC | 0.09591389 | 0.56815404 | 6.50E-05 | 0.023448  | -0.035993 |
| 7w11w_SITTC | 0.02436085 | 0.13639644 | 3.64E-05 | 0.0042065 | -0.080664 |
| 7w11w_SITTC | 0.05743587 | 0.33597422 | 5.99E-05 | 0.0076952 | 0.071569  |
| 7w11w_SITTC | 0.02021667 | 0.11139011 | 3.42E-05 | 0.0045972 | 0.0032259 |
| 7w11w_SITTC | 0.01940286 | 0.10647947 | 3.40E-05 | 0.0046667 | 0.017998  |
| 7w11w_SITTC | 0.01907777 | 0.10451786 | 3.38E-05 | 0.004741  | 0.03364   |
| 7w11w_SITTC | 0.1037404  | 0.6153799  | 6.56E-05 | 0.025296  | -0.18011  |
| 7w11w_SITTC | 0.02178869 | 0.12087581 | 3.49E-05 | 0.0044169 | -0.0356   |
| 7w11w_SITTC | 0.08579566 | 0.5070997  | 6.39E-05 | 0.01943   | 0.1043    |
| 7w11w_SITTC | 0.02406622 | 0.13461863 | 3.61E-05 | 0.0042401 | -0.073623 |
| 7w11w_SITTC | 0.01711847 | 0.09269525 | 3.33E-05 | 0.0049935 | 0.085504  |
| 7w11w_SITTC | 0.02520969 | 0.14151843 | 3.68E-05 | 0.0041768 | -0.086782 |
| 7w11w_SITTC | 0.02315668 | 0.12913041 | 3.58E-05 | 0.0042778 | -0.065623 |
| 7w11w_SITTC | 0.02282078 | 0.12710357 | 3.55E-05 | 0.0043197 | -0.056631 |
| 7w11w_SITTC | 0.03786352 | 0.21787283 | 4.81E-05 | 0.0043756 | -0.05192  |
| 7w11w_SITTC | 0.01621386 | 0.08723681 | 3.30E-05 | 0.0051875 | 0.12392   |
| 7w11w_SITTC | 0.05464406 | 0.31912813 | 5.92E-05 | 0.0069681 | 0.064127  |
| 7w11w_SITTC | 0.01834524 | 0.10009775 | 3.36E-05 | 0.0048202 | 0.050123  |
| 7w11w_SITTC | 0.02602488 | 0.1464374  | 3.76E-05 | 0.0041286 | -0.096385 |
| 7w11w_SITTC | 0.03345507 | 0.19127187 | 4.37E-05 | 0.0041322 | -0.091175 |
| 7w11w_SITTC | 0.01399696 | 0.07385981 | 3.25E-05 | 0.0056405 | 0.20898   |

|             |            |            |          |           |            |
|-------------|------------|------------|----------|-----------|------------|
| 7w11w_SITTC | 0.03475576 | 0.1991203  | 4.54E-05 | 0.0042028 | -0.078293  |
| 7w11w_SITTC | 0.08612813 | 0.50910586 | 6.39E-05 | 0.01943   | 0.099025   |
| 7w11w_SITTC | 0.00984538 | 0.04880877 | 3.20E-05 | 0.0066628 | 0.37961    |
| 7w11w_SITTC | 0.02819345 | 0.15952276 | 3.93E-05 | 0.004074  | -0.10603   |
| 7w11w_SITTC | 0.02520783 | 0.14150725 | 3.68E-05 | 0.0041768 | -0.086782  |
| 7w11w_SITTC | 0.02174985 | 0.12064149 | 3.49E-05 | 0.0044169 | -0.0356    |
| 7w11w_SITTC | 0.04386658 | 0.25409585 | 5.38E-05 | 0.0050014 | 0.008455   |
| 7w11w_SITTC | 0.017558   | 0.09534742 | 3.34E-05 | 0.0049043 | 0.067421   |
| 7w11w_SITTC | 0.02334692 | 0.1302783  | 3.58E-05 | 0.0042778 | -0.065623  |
| 7w11w_SITTC | 0.04561938 | 0.26467237 | 5.50E-05 | 0.0052335 | 0.021279   |
| 7w11w_SITTC | 0.04700882 | 0.2730564  | 5.61E-05 | 0.0054936 | 0.032113   |
| 7w11w_SITTC | 0.08336905 | 0.4924574  | 6.36E-05 | 0.018151  | 0.12117    |
| 7w11w_SITTC | 0.09816397 | 0.58173126 | 6.52E-05 | 0.024123  | -0.084641  |
| 7w11w_SITTC | 0.01819403 | 0.0991853  | 3.36E-05 | 0.0048202 | 0.050123   |
| 7w11w_SITTC | 0.10417108 | 0.6179787  | 6.56E-05 | 0.025367  | -0.18011   |
| 7w11w_SITTC | 0.03464702 | 0.19846418 | 4.48E-05 | 0.0041765 | -0.078293  |
| 7w11w_SITTC | 0.05937246 | 0.34765974 | 6.03E-05 | 0.0083426 | 0.075889   |
| 7w11w_SITTC | 0.01894962 | 0.10374462 | 3.38E-05 | 0.004741  | 0.03364    |
| 7w11w_SITTC | 0.02318903 | 0.12932561 | 3.58E-05 | 0.0042778 | -0.065623  |
| 7w11w_SITTC | 0.02146299 | 0.11891053 | 3.49E-05 | 0.0044169 | -0.0356    |
| 7w11w_SITTC | 0.09744764 | 0.57740885 | 6.51E-05 | 0.023964  | -0.065044  |
| 7w11w_SITTC | 0.01390117 | 0.0732818  | 3.25E-05 | 0.0056405 | 0.20898    |
| 7w11w_SITTC | 0.01714568 | 0.09285947 | 3.33E-05 | 0.0049935 | 0.085504   |
| 7w11w_SITTC | 0.01604846 | 0.08623874 | 3.30E-05 | 0.0051875 | 0.12392    |
| 7w11w_SITTC | 0.06363121 | 0.37335742 | 6.10E-05 | 0.0098069 | 0.089169   |
| 7w11w_SITTC | 0.00828053 | 0.03936633 | 3.19E-05 | 0.0071994 | 0.45929    |
| 7w11w_SITTC | 0.02170645 | 0.12037961 | 3.49E-05 | 0.0044169 | -0.0356    |
| 7w11w_SITTC | 0.0199429  | 0.10973815 | 3.42E-05 | 0.0045972 | 0.0032259  |
| 7w11w_SITTC | 0.02603307 | 0.14648683 | 3.76E-05 | 0.0041286 | -0.096385  |
| 7w11w_SITTC | 0.10700519 | 0.63508    | 6.58E-05 | 0.025586  | -0.23052   |
| 7w11w_SITTC | 0.02328543 | 0.1299073  | 3.58E-05 | 0.0042778 | -0.065623  |
| 7w11w_SITTC | 0.05517282 | 0.32231873 | 5.94E-05 | 0.0071062 | 0.065685   |
| 7w11w_SITTC | 0.08902664 | 0.5265957  | 6.42E-05 | 0.020663  | 0.067165   |
| 7w11w_SITTC | 0.04528307 | 0.26264307 | 5.50E-05 | 0.0052335 | 0.021279   |
| 7w11w_SITTC | 0.033899   | 0.19395056 | 4.43E-05 | 0.004153  | -0.087207  |
| 7w11w_SITTC | 0.06392274 | 0.37511656 | 6.10E-05 | 0.0098069 | 0.091185   |
| 7w11w_SITTC | 0.01915863 | 0.10500579 | 3.38E-05 | 0.004741  | 0.03364    |
| 7w11w_SITTC | 0.10766919 | 0.6390866  | 6.59E-05 | 0.025604  | -0.23822   |
| 7w11w_SITTC | 0.04628477 | 0.26868746 | 5.54E-05 | 0.0053171 | 0.028707   |
| 7w11w_SITTC | 0.04283084 | 0.2478461  | 5.29E-05 | 0.0048617 | -0.0013165 |
| 7w11w_SITTC | 0.01751622 | 0.09509534 | 3.33E-05 | 0.0049935 | 0.067421   |
| 7w11w_SITTC | 0.01213011 | 0.06259504 | 3.23E-05 | 0.0060411 | 0.2791     |
| 7w11w_SITTC | 0.02342025 | 0.13072082 | 3.58E-05 | 0.0042778 | -0.065623  |

|             |            |            |          |           |           |
|-------------|------------|------------|----------|-----------|-----------|
| 7w11w_SITTC | 0.02824013 | 0.1598044  | 3.93E-05 | 0.004074  | -0.10603  |
| 7w11w_SITTC | 0.01049261 | 0.05271423 | 3.21E-05 | 0.0064976 | 0.35381   |
| 7w11w_SITTC | 0.02841559 | 0.16086318 | 3.93E-05 | 0.004074  | -0.10603  |
| 7w11w_SITTC | 0.02150343 | 0.11915457 | 3.49E-05 | 0.0044169 | -0.0356   |
| 7w11w_SITTC | 0.0225046  | 0.12519571 | 3.52E-05 | 0.0043661 | -0.056631 |
| 7w11w_SITTC | 0.02417612 | 0.13528179 | 3.61E-05 | 0.0042401 | -0.080664 |
| 7w11w_SITTC | 0.03667146 | 0.21067986 | 4.70E-05 | 0.0042982 | -0.062998 |
| 7w11w_SITTC | 0.01013523 | 0.05055779 | 3.20E-05 | 0.0066628 | 0.37961   |
| 7w11w_SITTC | 0.01826569 | 0.0996177  | 3.36E-05 | 0.0048202 | 0.050123  |
| 7w11w_SITTC | 0.08152895 | 0.481354   | 6.34E-05 | 0.017373  | 0.13148   |
| 7w11w_SITTC | 0.1031993  | 0.61211485 | 6.56E-05 | 0.025216  | -0.17104  |
| 7w11w_SITTC | 0.01043079 | 0.05234118 | 3.21E-05 | 0.0064976 | 0.35381   |
| 7w11w_SITTC | 0.02807192 | 0.15878941 | 3.88E-05 | 0.0040827 | -0.10603  |
| 7w11w_SITTC | 0.02759462 | 0.15590934 | 3.88E-05 | 0.0040827 | -0.10472  |
| 7w11w_SITTC | 0.01842123 | 0.10055623 | 3.36E-05 | 0.0048202 | 0.050123  |
| 7w11w_SITTC | 0.08341067 | 0.49270847 | 6.36E-05 | 0.018151  | 0.12117   |
| 7w11w_SITTC | 0.01897169 | 0.10387776 | 3.38E-05 | 0.004741  | 0.03364   |
| 7w11w_SITTC | 0.01721269 | 0.09326381 | 3.33E-05 | 0.0049935 | 0.085504  |
| 7w11w_SITTC | 0.02269777 | 0.1263613  | 3.55E-05 | 0.0043197 | -0.056631 |
| 7w11w_SITTC | 0.02495918 | 0.14000687 | 3.68E-05 | 0.0041768 | -0.086782 |
| 7w11w_SITTC | 0.03396101 | 0.19432475 | 4.43E-05 | 0.004153  | -0.087207 |
| 7w11w_SITTC | 0.0090098  | 0.0437668  | 3.19E-05 | 0.0070136 | 0.43237   |
| 7w11w_SITTC | 0.04034196 | 0.23282793 | 5.09E-05 | 0.0046173 | -0.023154 |
| 7w11w_SITTC | 0.0894312  | 0.5290369  | 6.43E-05 | 0.020902  | 0.059815  |
| 7w11w_SITTC | 0.13704851 | 0.81636417 | 6.73E-05 | 0.023528  | -0.48029  |
| 7w11w_SITTC | 0.0291668  | 0.16539602 | 3.97E-05 | 0.0040686 | -0.10661  |
| 7w11w_SITTC | 0.02061888 | 0.11381705 | 3.44E-05 | 0.0045325 | -0.01065  |
| 7w11w_SITTC | 0.03188898 | 0.18182191 | 4.22E-05 | 0.0040866 | -0.097962 |
| 7w11w_SITTC | 0.00787042 | 0.03689169 | 3.19E-05 | 0.0073923 | 0.48652   |
| 7w11w_SITTC | 0.02668205 | 0.15040278 | 3.80E-05 | 0.0041099 | -0.099939 |
| 7w11w_SITTC | 0.05134023 | 0.29919252 | 5.81E-05 | 0.006215  | 0.053285  |
| 7w11w_SITTC | 0.02438738 | 0.13655654 | 3.64E-05 | 0.0042065 | -0.080664 |
| 7w11w_SITTC | 0.01702945 | 0.09215813 | 3.33E-05 | 0.0049935 | 0.085504  |
| 7w11w_SITTC | 0.11961269 | 0.7111548  | 6.65E-05 | 0.024632  | -0.36308  |
| 7w11w_SITTC | 0.08382972 | 0.4952371  | 6.37E-05 | 0.01841   | 0.1176    |
| 7w11w_SITTC | 0.01439927 | 0.07628736 | 3.26E-05 | 0.0055188 | 0.18676   |
| 7w11w_SITTC | 0.07293505 | 0.42949766 | 6.22E-05 | 0.01332   | 0.12737   |
| 7w11w_SITTC | 0.0673459  | 0.39577222 | 6.14E-05 | 0.011039  | 0.10492   |
| 7w11w_SITTC | 0.01874221 | 0.10249309 | 3.38E-05 | 0.004741  | 0.03364   |
| 7w11w_SITTC | 0.04476817 | 0.25953612 | 5.46E-05 | 0.0051531 | 0.017239  |
| 7w11w_SITTC | 0.08369275 | 0.4944106  | 6.37E-05 | 0.01841   | 0.12117   |
| 7w11w_SITTC | 0.03889034 | 0.22406876 | 4.92E-05 | 0.0044639 | -0.040459 |
| 7w11w_SITTC | 0.11139856 | 0.6615899  | 6.61E-05 | 0.025525  | -0.28058  |

|             |            |            |          |           |           |
|-------------|------------|------------|----------|-----------|-----------|
| 7w11w_SITTC | 0.0476592  | 0.27698088 | 5.64E-05 | 0.0055867 | 0.035328  |
| 7w11w_SITTC | 0.01648148 | 0.08885162 | 3.31E-05 | 0.0050879 | 0.10435   |
| 7w11w_SITTC | 0.01543573 | 0.08254148 | 3.28E-05 | 0.0052924 | 0.1442    |
| 7w11w_SITTC | 0.01947484 | 0.10691383 | 3.40E-05 | 0.0046667 | 0.017998  |
| 7w11w_SITTC | 0.02504058 | 0.14049803 | 3.68E-05 | 0.0041768 | -0.086782 |
| 7w11w_SITTC | 0.00556605 | 0.02298691 | 3.18E-05 | 0.0082375 | 0.59807   |
| 7w11w_SITTC | 0.02234675 | 0.12424319 | 3.52E-05 | 0.0043661 | -0.046619 |
| 7w11w_SITTC | 0.02778425 | 0.15705357 | 3.88E-05 | 0.0040827 | -0.10472  |
| 7w11w_SITTC | 0.01670289 | 0.09018764 | 3.31E-05 | 0.0050879 | 0.10435   |
| 7w11w_SITTC | 0.02545755 | 0.14301407 | 3.72E-05 | 0.0041509 | -0.092011 |
| 7w11w_SITTC | 0.09139512 | 0.54088736 | 6.45E-05 | 0.021822  | 0.036126  |
| 7w11w_SITTC | 0.01808504 | 0.09852764 | 3.34E-05 | 0.0049043 | 0.050123  |
| 7w11w_SITTC | 0.01379864 | 0.07266311 | 3.25E-05 | 0.0056405 | 0.20898   |
| 7w11w_SITTC | 0.08681699 | 0.5132625  | 6.40E-05 | 0.019681  | 0.093363  |
| 7w11w_SITTC | 0.08365727 | 0.49419647 | 6.37E-05 | 0.01841   | 0.12117   |
| 7w11w_SITTC | 0.01035791 | 0.05190145 | 3.21E-05 | 0.0064976 | 0.35381   |
| 7w11w_SITTC | 0.08303846 | 0.49046257 | 6.36E-05 | 0.018151  | 0.12434   |
| 7w11w_SITTC | 0.09056557 | 0.5358818  | 6.44E-05 | 0.021369  | 0.044278  |
| 7w11w_SITTC | 0.01788708 | 0.09733313 | 3.34E-05 | 0.0049043 | 0.067421  |
| 7w11w_SITTC | 0.09890496 | 0.58620244 | 6.52E-05 | 0.024275  | -0.094455 |
| 7w11w_SITTC | 0.11520969 | 0.6845867  | 6.63E-05 | 0.025182  | -0.32268  |
| 7w11w_SITTC | 0.00860754 | 0.04133953 | 3.19E-05 | 0.0071994 | 0.45929   |
| 7w11w_SITTC | 0.0854326  | 0.50490904 | 6.39E-05 | 0.019177  | 0.10916   |
| 7w11w_SITTC | 0.01815414 | 0.09894464 | 3.36E-05 | 0.0048202 | 0.050123  |
| 7w11w_SITTC | 0.10216099 | 0.6058496  | 6.55E-05 | 0.025029  | -0.15246  |
| 7w11w_SITTC | 0.07992922 | 0.4717011  | 6.32E-05 | 0.016594  | 0.13446   |
| 7w11w_SITTC | 0.01004601 | 0.05001939 | 3.20E-05 | 0.0066628 | 0.37961   |
| 7w11w_SITTC | 0.04628338 | 0.26867905 | 5.54E-05 | 0.0053171 | 0.028707  |
| 7w11w_SITTC | 0.01786094 | 0.09717541 | 3.34E-05 | 0.0049043 | 0.067421  |
| 7w11w_SITTC | 0.01605179 | 0.08625884 | 3.30E-05 | 0.0051875 | 0.12392   |
| 7w11w_SITTC | 0.02044228 | 0.11275145 | 3.44E-05 | 0.0045325 | -0.01065  |
| 7w11w_SITTC | 0.09099201 | 0.538455   | 6.45E-05 | 0.021597  | 0.036126  |
| 7w11w_SITTC | 0.08729605 | 0.5161532  | 6.41E-05 | 0.01993   | 0.087329  |
| 7w11w_SITTC | 0.02544225 | 0.14292173 | 3.72E-05 | 0.0041509 | -0.092011 |
| 7w11w_SITTC | 0.02208326 | 0.12265329 | 3.52E-05 | 0.0043661 | -0.046619 |
| 7w11w_SITTC | 0.01595814 | 0.08569373 | 3.30E-05 | 0.0051875 | 0.12392   |
| 7w11w_SITTC | 0.07432558 | 0.4378882  | 6.24E-05 | 0.014051  | 0.13074   |
| 7w11w_SITTC | 0.08093301 | 0.47775805 | 6.33E-05 | 0.017113  | 0.13314   |
| 7w11w_SITTC | 0.04589655 | 0.2663449  | 5.54E-05 | 0.0053171 | 0.025099  |
| 7w11w_SITTC | 0.02516109 | 0.14122519 | 3.68E-05 | 0.0041768 | -0.086782 |
| 7w11w_SITTC | 0.04905777 | 0.28541994 | 5.70E-05 | 0.0057827 | 0.04392   |
| 7w11w_SITTC | 0.0440498  | 0.2552014  | 5.38E-05 | 0.0050014 | 0.012967  |
| 7w11w_SITTC | 0.04572227 | 0.26529324 | 5.50E-05 | 0.0052335 | 0.025099  |

|             |            |            |          |           |           |
|-------------|------------|------------|----------|-----------|-----------|
| 7w11w_SITTC | 0.01658586 | 0.08948147 | 3.31E-05 | 0.0050879 | 0.10435   |
| 7w11w_SITTC | 0.01796626 | 0.0978109  | 3.34E-05 | 0.0049043 | 0.067421  |
| 7w11w_SITTC | 0.00464173 | 0.01740949 | 3.18E-05 | 0.0087056 | 0.65503   |
| 7w11w_SITTC | 0.08199439 | 0.4841625  | 6.35E-05 | 0.017633  | 0.12948   |
| 7w11w_SITTC | 0.01449712 | 0.0768778  | 3.26E-05 | 0.0055188 | 0.18676   |
| 7w11w_SITTC | 0.0642971  | 0.3773755  | 6.10E-05 | 0.010005  | 0.091185  |
| 7w11w_SITTC | 0.02420218 | 0.13543907 | 3.61E-05 | 0.0042401 | -0.080664 |
| 7w11w_SITTC | 0.0410041  | 0.2368234  | 5.14E-05 | 0.0046741 | -0.017493 |
| 7w11w_SITTC | 0.01833882 | 0.10005898 | 3.36E-05 | 0.0048202 | 0.050123  |
| 7w11w_SITTC | 0.01077146 | 0.05439686 | 3.21E-05 | 0.0064976 | 0.35381   |
| 7w11w_SITTC | 0.02335864 | 0.13034903 | 3.58E-05 | 0.0042778 | -0.065623 |
| 7w11w_SITTC | 0.09324234 | 0.55203366 | 6.47E-05 | 0.022469  | 0.0013661 |
| 7w11w_SITTC | 0.02091395 | 0.11559757 | 3.47E-05 | 0.0044724 | -0.023601 |
| 7w11w_SITTC | 0.02674632 | 0.15079063 | 3.80E-05 | 0.0041099 | -0.099939 |
| 7w11w_SITTC | 0.01936548 | 0.10625394 | 3.40E-05 | 0.0046667 | 0.017998  |
| 7w11w_SITTC | 0.02123987 | 0.11756419 | 3.47E-05 | 0.0044724 | -0.023601 |
| 7w11w_SITTC | 0.01932272 | 0.10599595 | 3.40E-05 | 0.0046667 | 0.017998  |
| 7w11w_SITTC | 0.00896177 | 0.04347702 | 3.19E-05 | 0.0070136 | 0.43237   |
| 7w11w_SITTC | 0.01183684 | 0.06082542 | 3.22E-05 | 0.0061869 | 0.30353   |
| 7w11w_SITTC | 0.09126729 | 0.540116   | 6.45E-05 | 0.021597  | 0.036126  |
| 7w11w_SITTC | 0.01698578 | 0.09189463 | 3.31E-05 | 0.0050879 | 0.085504  |
| 7w11w_SITTC | 0.02652073 | 0.14942937 | 3.80E-05 | 0.0041099 | -0.099939 |
| 7w11w_SITTC | 0.02195096 | 0.12185495 | 3.49E-05 | 0.0044169 | -0.046619 |
| 7w11w_SITTC | 0.01506133 | 0.08028229 | 3.27E-05 | 0.0054028 | 0.16515   |
| 7w11w_SITTC | 0.012921   | 0.06736738 | 3.23E-05 | 0.0059016 | 0.25518   |
| 7w11w_SITTC | 0.01929924 | 0.10585425 | 3.40E-05 | 0.0046667 | 0.017998  |
| 7w11w_SITTC | 0.03340158 | 0.19094905 | 4.37E-05 | 0.0041322 | -0.091175 |
| 7w11w_SITTC | 0.0245437  | 0.13749984 | 3.64E-05 | 0.0042065 | -0.080664 |
| 7w11w_SITTC | 0.01782196 | 0.09694021 | 3.34E-05 | 0.0049043 | 0.067421  |
| 7w11w_SITTC | 0.0173669  | 0.09419431 | 3.33E-05 | 0.0049935 | 0.085504  |
| 7w11w_SITTC | 0.0410553  | 0.23713233 | 5.14E-05 | 0.0046741 | -0.017493 |
| 7w11w_SITTC | 0.0214279  | 0.11869878 | 3.47E-05 | 0.0044724 | -0.0356   |
| 7w11w_SITTC | 0.02321793 | 0.1295     | 3.58E-05 | 0.0042778 | -0.065623 |
| 7w11w_SITTC | 0.06564058 | 0.38548216 | 6.12E-05 | 0.01041   | 0.097788  |
| 7w11w_SITTC | 0.0472103  | 0.27427214 | 5.61E-05 | 0.0054936 | 0.032113  |
| 7w11w_SITTC | 0.08157557 | 0.4816353  | 6.34E-05 | 0.017373  | 0.13148   |
| 7w11w_SITTC | 0.01699561 | 0.09195393 | 3.31E-05 | 0.0050879 | 0.085504  |
| 7w11w_SITTC | 0.02751279 | 0.1554156  | 3.84E-05 | 0.0040947 | -0.10472  |
| 7w11w_SITTC | 0.01601904 | 0.0860612  | 3.30E-05 | 0.0051875 | 0.12392   |
| 7w11w_SITTC | 0.10292596 | 0.6104655  | 6.56E-05 | 0.025216  | -0.16182  |
| 7w11w_SITTC | 0.01557865 | 0.08340384 | 3.28E-05 | 0.0052924 | 0.1442    |
| 7w11w_SITTC | 0.00558593 | 0.02310687 | 3.18E-05 | 0.0082375 | 0.59807   |
| 7w11w_SITTC | 0.01051365 | 0.05284116 | 3.21E-05 | 0.0064976 | 0.35381   |

|             |            |            |          |           |           |
|-------------|------------|------------|----------|-----------|-----------|
| 7w11w_SITTC | 0.06315424 | 0.37047935 | 6.09E-05 | 0.0096122 | 0.087254  |
| 7w11w_SITTC | 0.06301743 | 0.36965382 | 6.09E-05 | 0.0096122 | 0.087254  |
| 7w11w_SITTC | 0.01488277 | 0.07920486 | 3.27E-05 | 0.0054028 | 0.16515   |
| 7w11w_SITTC | 0.10092907 | 0.5984161  | 6.54E-05 | 0.024809  | -0.13341  |
| 7w11w_SITTC | 0.02324497 | 0.12966315 | 3.58E-05 | 0.0042778 | -0.065623 |
| 7w11w_SITTC | 0.0206444  | 0.11397108 | 3.44E-05 | 0.0045325 | -0.01065  |
| 7w11w_SITTC | 0.04877329 | 0.2837034  | 5.70E-05 | 0.0057827 | 0.041222  |
| 7w11w_SITTC | 0.05522627 | 0.32264128 | 5.94E-05 | 0.0071062 | 0.065685  |
| 7w11w_SITTC | 0.01263958 | 0.06566925 | 3.23E-05 | 0.0059016 | 0.25518   |
| 7w11w_SITTC | 0.09429804 | 0.55840385 | 6.48E-05 | 0.022877  | -0.017059 |
| 7w11w_SITTC | 0.01864823 | 0.10192598 | 3.36E-05 | 0.0048202 | 0.03364   |
| 7w11w_SITTC | 0.02853371 | 0.16157587 | 3.93E-05 | 0.004074  | -0.10603  |
| 7w11w_SITTC | 0.01913236 | 0.10484729 | 3.38E-05 | 0.004741  | 0.03364   |
| 7w11w_SITTC | 0.08858846 | 0.52395177 | 6.42E-05 | 0.020663  | 0.074212  |
| 7w11w_SITTC | 0.07515103 | 0.44286907 | 6.25E-05 | 0.014299  | 0.13345   |
| 7w11w_SITTC | 0.0263366  | 0.1483183  | 3.76E-05 | 0.0041286 | -0.096385 |
| 7w11w_SITTC | 0.02855615 | 0.16171132 | 3.93E-05 | 0.004074  | -0.10664  |
| 7w11w_SITTC | 0.027105   | 0.15295494 | 3.84E-05 | 0.0040947 | -0.10271  |
| 7w11w_SITTC | 0.02054742 | 0.11338586 | 3.44E-05 | 0.0045325 | -0.01065  |
| 7w11w_SITTC | 0.06374185 | 0.37402505 | 6.10E-05 | 0.0098069 | 0.089169  |
| 7w11w_SITTC | 0.02148113 | 0.11901998 | 3.49E-05 | 0.0044169 | -0.0356   |
| 7w11w_SITTC | 0.02307455 | 0.12863483 | 3.55E-05 | 0.0043197 | -0.065623 |
| 7w11w_SITTC | 0.01927486 | 0.10570712 | 3.40E-05 | 0.0046667 | 0.017998  |
| 7w11w_SITTC | 0.01909478 | 0.1046205  | 3.38E-05 | 0.004741  | 0.03364   |
| 7w11w_SITTC | 0.03104672 | 0.17673963 | 4.16E-05 | 0.0040771 | -0.10299  |
| 7w11w_SITTC | 0.02651181 | 0.14937556 | 3.80E-05 | 0.0041099 | -0.099939 |
| 7w11w_SITTC | 0.01698377 | 0.09188251 | 3.31E-05 | 0.0050879 | 0.085504  |
| 7w11w_SITTC | 0.03862263 | 0.22245337 | 4.92E-05 | 0.0044639 | -0.040459 |
| 7w11w_SITTC | 0.02702995 | 0.15250206 | 3.84E-05 | 0.0040947 | -0.10271  |
| 7w11w_SITTC | 0.02067901 | 0.11417992 | 3.44E-05 | 0.0045325 | -0.01065  |
| 7w11w_SITTC | 0.01596313 | 0.08572386 | 3.30E-05 | 0.0051875 | 0.12392   |
| 7w11w_SITTC | 0.01440118 | 0.07629889 | 3.26E-05 | 0.0055188 | 0.18676   |
| 7w11w_SITTC | 0.04042058 | 0.23330235 | 5.09E-05 | 0.0046173 | -0.023154 |
| 7w11w_SITTC | 0.02798161 | 0.15824448 | 3.88E-05 | 0.0040827 | -0.10472  |
| 7w11w_SITTC | 0.11406894 | 0.6777033  | 6.63E-05 | 0.025299  | -0.31137  |
| 7w11w_SITTC | 0.0282342  | 0.15976864 | 3.93E-05 | 0.004074  | -0.10603  |
| 7w11w_SITTC | 0.0668934  | 0.39304176 | 6.14E-05 | 0.011039  | 0.10251   |
| 7w11w_SITTC | 0.03349933 | 0.19153889 | 4.37E-05 | 0.0041322 | -0.091175 |
| 7w11w_SITTC | 0.01017601 | 0.05080386 | 3.20E-05 | 0.0066628 | 0.37961   |
| 7w11w_SITTC | 0.01058122 | 0.05324889 | 3.21E-05 | 0.0064976 | 0.35381   |
| 7w11w_SITTC | 0.01583835 | 0.08497093 | 3.28E-05 | 0.0052924 | 0.1442    |
| 7w11w_SITTC | 0.03100374 | 0.17648026 | 4.16E-05 | 0.0040771 | -0.10299  |
| 7w11w_SITTC | 0.01019999 | 0.0509485  | 3.20E-05 | 0.0066628 | 0.37961   |

|             |            |            |          |           |           |
|-------------|------------|------------|----------|-----------|-----------|
| 7w11w_SITTC | 0.02081895 | 0.11502432 | 3.44E-05 | 0.0045325 | -0.023601 |
| 7w11w_SITTC | 0.02025732 | 0.1116354  | 3.42E-05 | 0.0045972 | 0.0032259 |
| 7w11w_SITTC | 0.01609371 | 0.0865118  | 3.30E-05 | 0.0051875 | 0.12392   |
| 7w11w_SITTC | 0.0861875  | 0.5094641  | 6.39E-05 | 0.01943   | 0.099025  |
| 7w11w_SITTC | 0.06268307 | 0.36763626 | 6.08E-05 | 0.0094206 | 0.085432  |
| 7w11w_SITTC | 0.02569654 | 0.14445618 | 3.72E-05 | 0.0041509 | -0.092011 |
| 7w11w_SITTC | 0.07603127 | 0.4481805  | 6.26E-05 | 0.0148    | 0.13453   |
| 7w11w_SITTC | 0.03075063 | 0.17495301 | 4.11E-05 | 0.0040705 | -0.10475  |
| 7w11w_SITTC | 0.01625346 | 0.08747571 | 3.30E-05 | 0.0051875 | 0.12392   |
| 7w11w_SITTC | 0.09756501 | 0.5781171  | 6.51E-05 | 0.023964  | -0.065044 |
| 7w11w_SITTC | 0.01421627 | 0.07518312 | 3.25E-05 | 0.0056405 | 0.18676   |
| 7w11w_SITTC | 0.05509814 | 0.3218681  | 5.94E-05 | 0.0071062 | 0.065685  |
| 7w11w_SITTC | 0.09134905 | 0.5406094  | 6.45E-05 | 0.021822  | 0.036126  |
| 7w11w_SITTC | 0.07737025 | 0.45626006 | 6.28E-05 | 0.015307  | 0.13646   |
| 7w11w_SITTC | 0.09607066 | 0.5691     | 6.50E-05 | 0.023448  | -0.045608 |
| 7w11w_SITTC | 0.07443469 | 0.43854663 | 6.24E-05 | 0.014051  | 0.13218   |
| 7w11w_SITTC | 0.01925338 | 0.10557754 | 3.40E-05 | 0.0046667 | 0.017998  |
| 7w11w_SITTC | 0.0174635  | 0.09477725 | 3.33E-05 | 0.0049935 | 0.085504  |
| 7w11w_SITTC | 0.00831165 | 0.0395541  | 3.19E-05 | 0.0071994 | 0.45929   |
| 7w11w_SITTC | 0.05105821 | 0.29749084 | 5.81E-05 | 0.006215  | 0.051138  |
| 7w11w_SITTC | 0.04654091 | 0.270233   | 5.57E-05 | 0.0054037 | 0.028707  |
| 7w11w_SITTC | 0.02216946 | 0.1231734  | 3.52E-05 | 0.0043661 | -0.046619 |
| 7w11w_SITTC | 0.03712907 | 0.21344107 | 4.76E-05 | 0.0043355 | -0.057524 |
| 7w11w_SITTC | 0.01646097 | 0.08872787 | 3.31E-05 | 0.0050879 | 0.10435   |
| 7w11w_SITTC | 0.01284944 | 0.06693555 | 3.23E-05 | 0.0059016 | 0.25518   |
| 7w11w_SITTC | 0.00935465 | 0.04584767 | 3.20E-05 | 0.0068348 | 0.4058    |
| 7w11w_SITTC | 0.01742955 | 0.09457235 | 3.33E-05 | 0.0049935 | 0.085504  |
| 7w11w_SITTC | 0.02134459 | 0.11819609 | 3.47E-05 | 0.0044724 | -0.023601 |
| 7w11w_SITTC | 0.08135498 | 0.48030424 | 6.34E-05 | 0.017373  | 0.13148   |
| 7w11w_SITTC | 0.10797753 | 0.64094716 | 6.59E-05 | 0.025614  | -0.23822  |
| 7w11w_SITTC | 0.08764458 | 0.5182563  | 6.41E-05 | 0.020177  | 0.087329  |
| 7w11w_SITTC | 0.06598716 | 0.38757345 | 6.13E-05 | 0.010616  | 0.097788  |
| 7w11w_SITTC | 0.0096678  | 0.04773723 | 3.20E-05 | 0.0068348 | 0.4058    |
| 7w11w_SITTC | 0.0215256  | 0.11928829 | 3.49E-05 | 0.0044169 | -0.0356   |
| 7w11w_SITTC | 0.03628293 | 0.20833541 | 4.65E-05 | 0.0042637 | -0.068307 |
| 7w11w_SITTC | 0.0554925  | 0.32424772 | 5.95E-05 | 0.007248  | 0.065685  |
| 7w11w_SITTC | 0.01827966 | 0.09970204 | 3.36E-05 | 0.0048202 | 0.050123  |
| 7w11w_SITTC | 0.07755819 | 0.4573941  | 6.29E-05 | 0.015562  | 0.13646   |
| 7w11w_SITTC | 0.0161012  | 0.08655696 | 3.30E-05 | 0.0051875 | 0.12392   |
| 7w11w_SITTC | 0.01574647 | 0.08441649 | 3.28E-05 | 0.0052924 | 0.1442    |
| 7w11w_SITTC | 0.01070835 | 0.05401601 | 3.21E-05 | 0.0064976 | 0.35381   |
| 7w11w_SITTC | 0.01850043 | 0.10103416 | 3.36E-05 | 0.0048202 | 0.050123  |
| 7w11w_SITTC | 0.05312369 | 0.3099541  | 5.89E-05 | 0.0067028 | 0.059084  |

|             |            |            |          |           |            |
|-------------|------------|------------|----------|-----------|------------|
| 7w11w_SITTC | 0.0307815  | 0.17513925 | 4.11E-05 | 0.0040705 | -0.10299   |
| 7w11w_SITTC | 0.01502998 | 0.08009317 | 3.27E-05 | 0.0054028 | 0.16515    |
| 7w11w_SITTC | 0.00644658 | 0.02830011 | 3.18E-05 | 0.008015  | 0.56984    |
| 7w11w_SITTC | 0.01289687 | 0.06722175 | 3.23E-05 | 0.0059016 | 0.25518    |
| 7w11w_SITTC | 0.01905781 | 0.1043974  | 3.38E-05 | 0.004741  | 0.03364    |
| 7w11w_SITTC | 0.01615769 | 0.08689787 | 3.30E-05 | 0.0051875 | 0.12392    |
| 7w11w_SITTC | 0.11805675 | 0.70176613 | 6.65E-05 | 0.024847  | -0.35363   |
| 7w11w_SITTC | 0.02452725 | 0.13740054 | 3.64E-05 | 0.0042065 | -0.080664  |
| 7w11w_SITTC | 0.0124519  | 0.06453674 | 3.23E-05 | 0.0060411 | 0.2791     |
| 7w11w_SITTC | 0.01397574 | 0.07373179 | 3.25E-05 | 0.0056405 | 0.20898    |
| 7w11w_SITTC | 0.0252622  | 0.14183533 | 3.68E-05 | 0.0041768 | -0.092011  |
| 7w11w_SITTC | 0.01866777 | 0.1020439  | 3.38E-05 | 0.004741  | 0.03364    |
| 7w11w_SITTC | 0.01488368 | 0.07921036 | 3.27E-05 | 0.0054028 | 0.16515    |
| 7w11w_SITTC | 0.1260759  | 0.7501544  | 6.68E-05 | 0.023927  | -0.41325   |
| 7w11w_SITTC | 0.12629788 | 0.7514938  | 6.68E-05 | 0.023879  | -0.41325   |
| 7w11w_SITTC | 0.02183189 | 0.12113646 | 3.49E-05 | 0.0044169 | -0.0356    |
| 7w11w_SITTC | 0.03089667 | 0.17583421 | 4.16E-05 | 0.0040771 | -0.10299   |
| 7w11w_SITTC | 0.12561613 | 0.74738014 | 6.68E-05 | 0.023978  | -0.40938   |
| 7w11w_SITTC | 0.09396477 | 0.5563929  | 6.48E-05 | 0.022676  | -0.0077738 |
| 7w11w_SITTC | 0.01106631 | 0.05617597 | 3.21E-05 | 0.006339  | 0.32844    |
| 7w11w_SITTC | 0.05590055 | 0.32670993 | 5.97E-05 | 0.0073934 | 0.067199   |
| 7w11w_SITTC | 0.06141816 | 0.36000368 | 6.07E-05 | 0.0090475 | 0.082025   |
| 7w11w_SITTC | 0.02600894 | 0.14634119 | 3.76E-05 | 0.0041286 | -0.096385  |
| 7w11w_SITTC | 0.02839833 | 0.16075902 | 3.93E-05 | 0.004074  | -0.10603   |
| 7w11w_SITTC | 0.02616451 | 0.14727993 | 3.76E-05 | 0.0041286 | -0.096385  |
| 7w11w_SITTC | 0.01077763 | 0.05443406 | 3.21E-05 | 0.0064976 | 0.35381    |
| 7w11w_SITTC | 0.01623915 | 0.08738938 | 3.30E-05 | 0.0051875 | 0.12392    |
| 7w11w_SITTC | 0.02073839 | 0.11453824 | 3.44E-05 | 0.0045325 | -0.01065   |
| 7w11w_SITTC | 0.01025571 | 0.05128476 | 3.20E-05 | 0.0066628 | 0.37961    |
| 7w11w_SITTC | 0.01737225 | 0.09422661 | 3.33E-05 | 0.0049935 | 0.085504   |
| 7w11w_SITTC | 0.02798783 | 0.158282   | 3.88E-05 | 0.0040827 | -0.10472   |
| 7w11w_SITTC | 0.02574658 | 0.14475809 | 3.72E-05 | 0.0041509 | -0.092011  |
| 7w11w_SITTC | 0.01284393 | 0.06690231 | 3.23E-05 | 0.0059016 | 0.25518    |
| 7w11w_SITTC | 0.01239532 | 0.06419536 | 3.23E-05 | 0.0060411 | 0.2791     |
| 7w11w_SITTC | 0.10586414 | 0.62819475 | 6.58E-05 | 0.025526  | -0.20623   |
| 7w11w_SITTC | 0.11059076 | 0.65671563 | 6.60E-05 | 0.02558   | -0.27396   |
| 7w11w_SITTC | 0.01698881 | 0.09191288 | 3.31E-05 | 0.0050879 | 0.085504   |
| 7w11w_SITTC | 0.02728127 | 0.15401854 | 3.84E-05 | 0.0040947 | -0.10271   |
| 7w11w_SITTC | 0.09460567 | 0.5602601  | 6.49E-05 | 0.023073  | -0.017059  |
| 7w11w_SITTC | 0.02434372 | 0.1362931  | 3.64E-05 | 0.0042065 | -0.080664  |
| 7w11w_SITTC | 0.02886035 | 0.16354688 | 3.97E-05 | 0.0040686 | -0.10664   |
| 7w11w_SITTC | 0.0505026  | 0.29413816 | 5.78E-05 | 0.0061018 | 0.048868   |
| 7w11w_SITTC | 0.05146399 | 0.2999393  | 5.83E-05 | 0.0063316 | 0.053285   |



|             |            |            |          |           |            |
|-------------|------------|------------|----------|-----------|------------|
| 7w11w_SITTC | 0.06765062 | 0.39761093 | 6.15E-05 | 0.011255  | 0.10492    |
| 7w11w_SITTC | 0.01851089 | 0.10109725 | 3.36E-05 | 0.0048202 | 0.050123   |
| 7w11w_SITTC | 0.10674574 | 0.63351446 | 6.58E-05 | 0.02556   | -0.22263   |
| 7w11w_SITTC | 0.01685214 | 0.09108821 | 3.31E-05 | 0.0050879 | 0.10435    |
| 7w11w_SITTC | 0.09417195 | 0.557643   | 6.48E-05 | 0.022877  | -0.0077738 |
| 7w11w_SITTC | 0.08647677 | 0.5112096  | 6.40E-05 | 0.019681  | 0.099025   |
| 7w11w_SITTC | 0.03020137 | 0.17163871 | 4.07E-05 | 0.0040668 | -0.10597   |
| 7w11w_SITTC | 0.04208035 | 0.24331756 | 5.24E-05 | 0.0047963 | -0.00654   |
| 7w11w_SITTC | 0.02393611 | 0.13383354 | 3.61E-05 | 0.0042401 | -0.073623  |
| 7w11w_SITTC | 0.03646586 | 0.20943923 | 4.70E-05 | 0.0042982 | -0.062998  |
| 7w11w_SITTC | 0.00809635 | 0.03825495 | 3.19E-05 | 0.0073923 | 0.48652    |
| 7w11w_SITTC | 0.0242625  | 0.13580303 | 3.64E-05 | 0.0042065 | -0.080664  |
| 7w11w_SITTC | 0.01827107 | 0.09965018 | 3.36E-05 | 0.0048202 | 0.050123   |
| 7w11w_SITTC | 0.05411431 | 0.3159316  | 5.91E-05 | 0.0068337 | 0.062513   |
| 7w11w_SITTC | 0.0193219  | 0.10599098 | 3.40E-05 | 0.0046667 | 0.017998   |
| 7w11w_SITTC | 0.01015641 | 0.05068554 | 3.20E-05 | 0.0066628 | 0.37961    |
| 7w11w_SITTC | 0.11164865 | 0.66309905 | 6.61E-05 | 0.025525  | -0.28705   |
| 7w11w_SITTC | 0.00881785 | 0.04260857 | 3.19E-05 | 0.0070136 | 0.43237    |
| 7w11w_SITTC | 0.04106366 | 0.2371828  | 5.14E-05 | 0.0046741 | -0.017493  |
| 7w11w_SITTC | 0.09560344 | 0.5662808  | 6.49E-05 | 0.023263  | -0.035993  |
| 7w11w_SITTC | 0.09401941 | 0.5567226  | 6.48E-05 | 0.022676  | -0.0077738 |
| 7w11w_SITTC | 0.01105336 | 0.05609786 | 3.21E-05 | 0.006339  | 0.32844    |
| 7w11w_SITTC | 0.04493072 | 0.26051697 | 5.46E-05 | 0.0051531 | 0.017239   |
| 7w11w_SITTC | 0.0214208  | 0.11865591 | 3.47E-05 | 0.0044724 | -0.0356    |
| 7w11w_SITTC | 0.01888675 | 0.10336524 | 3.38E-05 | 0.004741  | 0.03364    |
| 7w11w_SITTC | 0.02357723 | 0.13166803 | 3.58E-05 | 0.0042778 | -0.065623  |
| 7w11w_SITTC | 0.02113623 | 0.11693879 | 3.47E-05 | 0.0044724 | -0.023601  |
| 7w11w_SITTC | 0.08992177 | 0.5319971  | 6.44E-05 | 0.021137  | 0.05218    |
| 7w11w_SITTC | 0.01083777 | 0.05479697 | 3.21E-05 | 0.0064976 | 0.35381    |
| 7w11w_SITTC | 0.02393467 | 0.1338249  | 3.61E-05 | 0.0042401 | -0.073623  |
| 7w11w_SITTC | 0.09817862 | 0.58181965 | 6.52E-05 | 0.024123  | -0.084641  |
| 7w11w_SITTC | 0.0154597  | 0.0826861  | 3.28E-05 | 0.0052924 | 0.1442     |
| 7w11w_SITTC | 0.03079507 | 0.17522115 | 4.11E-05 | 0.0040705 | -0.10299   |
| 7w11w_SITTC | 0.01361639 | 0.07156339 | 3.24E-05 | 0.0057681 | 0.23179    |
| 7w11w_SITTC | 0.01443849 | 0.07652402 | 3.26E-05 | 0.0055188 | 0.18676    |
| 7w11w_SITTC | 0.03903357 | 0.224933   | 4.92E-05 | 0.0044639 | -0.040459  |
| 7w11w_SITTC | 0.02725382 | 0.15385294 | 3.84E-05 | 0.0040947 | -0.10271   |
| 7w11w_SITTC | 0.01637541 | 0.08821161 | 3.30E-05 | 0.0051875 | 0.12392    |
| 7w11w_SITTC | 0.02094667 | 0.11579502 | 3.47E-05 | 0.0044724 | -0.023601  |
| 7w11w_SITTC | 0.08697567 | 0.51422    | 6.41E-05 | 0.01993   | 0.093363   |
| 7w11w_SITTC | 0.01623531 | 0.08736619 | 3.30E-05 | 0.0051875 | 0.12392    |
| 7w11w_SITTC | 0.02729344 | 0.15409198 | 3.84E-05 | 0.0040947 | -0.10271   |
| 7w11w_SITTC | 0.00741369 | 0.03413573 | 3.19E-05 | 0.0075925 | 0.51404    |

|             |            |            |          |           |           |
|-------------|------------|------------|----------|-----------|-----------|
| 7w11w_SITTC | 0.02110359 | 0.11674185 | 3.47E-05 | 0.0044724 | -0.023601 |
| 7w11w_SITTC | 0.05602714 | 0.32747382 | 5.97E-05 | 0.0073934 | 0.067199  |
| 7w11w_SITTC | 0.1205261  | 0.7166664  | 6.66E-05 | 0.024561  | -0.37215  |
| 7w11w_SITTC | 0.04035893 | 0.23293035 | 5.09E-05 | 0.0046173 | -0.023154 |
| 7w11w_SITTC | 0.03509004 | 0.20113742 | 4.54E-05 | 0.0042028 | -0.078293 |
| 7w11w_SITTC | 0.00796426 | 0.03745792 | 3.19E-05 | 0.0073923 | 0.48652   |
| 7w11w_SITTC | 0.05966501 | 0.34942502 | 6.03E-05 | 0.0083426 | 0.077363  |
| 7w11w_SITTC | 0.03241003 | 0.18496595 | 4.27E-05 | 0.004099  | -0.097962 |
| 7w11w_SITTC | 0.05446176 | 0.31802812 | 5.92E-05 | 0.0069681 | 0.062513  |
| 7w11w_SITTC | 0.05225651 | 0.30472144 | 5.85E-05 | 0.0064518 | 0.055318  |
| 7w11w_SITTC | 0.01261749 | 0.06553593 | 3.23E-05 | 0.0059016 | 0.25518   |
| 7w11w_SITTC | 0.0818264  | 0.4831489  | 6.34E-05 | 0.017373  | 0.12948   |
| 7w11w_SITTC | 0.01863685 | 0.10185731 | 3.36E-05 | 0.0048202 | 0.03364   |
| 7w11w_SITTC | 0.0487121  | 0.28333417 | 5.70E-05 | 0.0057827 | 0.041222  |
| 7w11w_SITTC | 0.00897599 | 0.04356282 | 3.19E-05 | 0.0070136 | 0.43237   |
| 7w11w_SITTC | 0.01830642 | 0.09986346 | 3.36E-05 | 0.0048202 | 0.050123  |
| 7w11w_SITTC | 0.07887654 | 0.46534914 | 6.30E-05 | 0.016077  | 0.13613   |
| 7w11w_SITTC | 0.05017709 | 0.29217407 | 5.76E-05 | 0.005992  | 0.048868  |
| 7w11w_SITTC | 0.00898155 | 0.04359635 | 3.19E-05 | 0.0070136 | 0.43237   |
| 7w11w_SITTC | 0.08615057 | 0.5092413  | 6.39E-05 | 0.01943   | 0.099025  |
| 7w11w_SITTC | 0.02485956 | 0.13940574 | 3.68E-05 | 0.0041768 | -0.086782 |
| 7w11w_SITTC | 0.03324763 | 0.19002011 | 4.37E-05 | 0.0041322 | -0.091175 |
| 7w11w_SITTC | 0.14209403 | 0.84680927 | 6.74E-05 | 0.023584  | -0.5021   |
| 7w11w_SITTC | 0.01242106 | 0.06435067 | 3.23E-05 | 0.0060411 | 0.2791    |
| 7w11w_SITTC | 0.02292484 | 0.12773147 | 3.55E-05 | 0.0043197 | -0.056631 |
| 7w11w_SITTC | 0.02879022 | 0.16312368 | 3.97E-05 | 0.0040686 | -0.10664  |
| 7w11w_SITTC | 0.06089946 | 0.35687384 | 6.06E-05 | 0.008866  | 0.080421  |
| 7w11w_SITTC | 0.03786098 | 0.21785748 | 4.81E-05 | 0.0043756 | -0.05192  |
| 7w11w_SITTC | 0.02433696 | 0.13625228 | 3.64E-05 | 0.0042065 | -0.080664 |
| 7w11w_SITTC | 0.01612566 | 0.08670458 | 3.30E-05 | 0.0051875 | 0.12392   |
| 7w11w_SITTC | 0.01254057 | 0.06507181 | 3.23E-05 | 0.0060411 | 0.25518   |
| 7w11w_SITTC | 0.07962925 | 0.46989107 | 6.31E-05 | 0.016335  | 0.13545   |
| 7w11w_SITTC | 0.02307927 | 0.1286633  | 3.55E-05 | 0.0043197 | -0.065623 |
| 7w11w_SITTC | 0.01237617 | 0.06407981 | 3.23E-05 | 0.0060411 | 0.2791    |
| 7w11w_SITTC | 0.02525748 | 0.14180681 | 3.68E-05 | 0.0041768 | -0.092011 |
| 7w11w_SITTC | 0.01032101 | 0.05167877 | 3.20E-05 | 0.0066628 | 0.35381   |
| 7w11w_SITTC | 0.01316317 | 0.06882867 | 3.24E-05 | 0.0057681 | 0.23179   |
| 7w11w_SITTC | 0.01771254 | 0.09627993 | 3.34E-05 | 0.0049043 | 0.067421  |
| 7w11w_SITTC | 0.0310545  | 0.17678659 | 4.16E-05 | 0.0040771 | -0.10299  |
| 7w11w_SITTC | 0.02867411 | 0.16242309 | 3.97E-05 | 0.0040686 | -0.10664  |
| 7w11w_SITTC | 0.01292433 | 0.06738745 | 3.23E-05 | 0.0059016 | 0.25518   |
| 7w11w_SITTC | 0.04338515 | 0.25119084 | 5.33E-05 | 0.0049301 | 0.0036923 |
| 7w11w_SITTC | 0.01913991 | 0.10489284 | 3.38E-05 | 0.004741  | 0.03364   |

|             |            |            |          |           |           |
|-------------|------------|------------|----------|-----------|-----------|
| 7w11w_SITTC | 0.09101293 | 0.53858125 | 6.45E-05 | 0.021597  | 0.036126  |
| 7w11w_SITTC | 0.02744573 | 0.15501092 | 3.84E-05 | 0.0040947 | -0.10472  |
| 7w11w_SITTC | 0.03851163 | 0.22178356 | 4.87E-05 | 0.0044183 | -0.040459 |
| 7w11w_SITTC | 0.0072528  | 0.03316494 | 3.19E-05 | 0.0075925 | 0.51404   |
| 7w11w_SITTC | 0.02709034 | 0.15286645 | 3.84E-05 | 0.0040947 | -0.10271  |
| 7w11w_SITTC | 0.00731135 | 0.03351823 | 3.19E-05 | 0.0075925 | 0.51404   |
| 7w11w_SITTC | 0.08591455 | 0.5078171  | 6.39E-05 | 0.01943   | 0.1043    |
| 7w11w_SITTC | 0.02223921 | 0.12359431 | 3.52E-05 | 0.0043661 | -0.046619 |
| 7w11w_SITTC | 0.12535289 | 0.7457917  | 6.68E-05 | 0.023978  | -0.40938  |
| 7w11w_SITTC | 0.02493275 | 0.1398474  | 3.68E-05 | 0.0041768 | -0.086782 |
| 7w11w_SITTC | 0.03631513 | 0.2085297  | 4.65E-05 | 0.0042637 | -0.062998 |
| 7w11w_SITTC | 0.01223989 | 0.06325746 | 3.23E-05 | 0.0060411 | 0.2791    |
| 7w11w_SITTC | 0.01105201 | 0.05608969 | 3.21E-05 | 0.006339  | 0.32844   |
| 7w11w_SITTC | 0.02032964 | 0.11207181 | 3.44E-05 | 0.0045325 | -0.01065  |
| 7w11w_SITTC | 0.0797056  | 0.4703518  | 6.32E-05 | 0.016594  | 0.13545   |
| 7w11w_SITTC | 0.01855242 | 0.10134789 | 3.36E-05 | 0.0048202 | 0.050123  |
| 7w11w_SITTC | 0.1020809  | 0.60536635 | 6.55E-05 | 0.025029  | -0.15246  |
| 7w11w_SITTC | 0.01852044 | 0.10115489 | 3.36E-05 | 0.0048202 | 0.050123  |
| 7w11w_SITTC | 0.01034391 | 0.05181699 | 3.20E-05 | 0.0066628 | 0.35381   |
| 7w11w_SITTC | 0.01744825 | 0.09468518 | 3.33E-05 | 0.0049935 | 0.085504  |
| 7w11w_SITTC | 0.02205715 | 0.12249576 | 3.52E-05 | 0.0043661 | -0.046619 |
| 7w11w_SITTC | 0.02262805 | 0.12594064 | 3.55E-05 | 0.0043197 | -0.056631 |
| 7w11w_SITTC | 0.02126787 | 0.11773312 | 3.47E-05 | 0.0044724 | -0.023601 |
| 7w11w_SITTC | 0.09684338 | 0.5737627  | 6.51E-05 | 0.023799  | -0.055297 |
| 7w11w_SITTC | 0.07752047 | 0.4571665  | 6.29E-05 | 0.015562  | 0.13646   |
| 7w11w_SITTC | 0.02587944 | 0.14555982 | 3.76E-05 | 0.0041286 | -0.096385 |
| 7w11w_SITTC | 0.1060253  | 0.62916726 | 6.58E-05 | 0.025526  | -0.21453  |
| 7w11w_SITTC | 0.05645535 | 0.33005765 | 5.98E-05 | 0.0075425 | 0.068678  |
| 7w11w_SITTC | 0.03521868 | 0.20191361 | 4.54E-05 | 0.0042028 | -0.073417 |
| 7w11w_SITTC | 0.05796878 | 0.33918983 | 6.00E-05 | 0.0078516 | 0.073002  |
| 7w11w_SITTC | 0.01360328 | 0.07148428 | 3.24E-05 | 0.0057681 | 0.23179   |
| 7w11w_SITTC | 0.07342807 | 0.4324726  | 6.23E-05 | 0.013561  | 0.12913   |
| 7w11w_SITTC | 0.01404063 | 0.07412332 | 3.25E-05 | 0.0056405 | 0.20898   |
| 7w11w_SITTC | 0.09060234 | 0.53610367 | 6.44E-05 | 0.021369  | 0.044278  |
| 7w11w_SITTC | 0.10263798 | 0.6087278  | 6.55E-05 | 0.025127  | -0.16182  |
| 7w11w_SITTC | 0.02512327 | 0.14099698 | 3.68E-05 | 0.0041768 | -0.086782 |
| 7w11w_SITTC | 0.0192279  | 0.10542376 | 3.40E-05 | 0.0046667 | 0.017998  |
| 7w11w_SITTC | 0.04099622 | 0.23677583 | 5.14E-05 | 0.0046741 | -0.017493 |
| 7w11w_SITTC | 0.11456153 | 0.6806756  | 6.63E-05 | 0.025242  | -0.3171   |
| 7w11w_SITTC | 0.04812305 | 0.27977976 | 5.67E-05 | 0.0056831 | 0.038361  |
| 7w11w_SITTC | 0.04851479 | 0.28214356 | 5.67E-05 | 0.0056831 | 0.041222  |
| 7w11w_SITTC | 0.01516428 | 0.08090353 | 3.27E-05 | 0.0054028 | 0.16515   |
| 7w11w_SITTC | 0.083277   | 0.4919019  | 6.36E-05 | 0.018151  | 0.12117   |

|             |            |            |          |           |           |
|-------------|------------|------------|----------|-----------|-----------|
| 7w11w_SITTC | 0.01637636 | 0.0882173  | 3.30E-05 | 0.0051875 | 0.12392   |
| 7w11w_SITTC | 0.01064334 | 0.05362376 | 3.21E-05 | 0.0064976 | 0.35381   |
| 7w11w_SITTC | 0.01537454 | 0.08217224 | 3.28E-05 | 0.0052924 | 0.1442    |
| 7w11w_SITTC | 0.0600227  | 0.3515834  | 6.04E-05 | 0.0085136 | 0.077363  |
| 7w11w_SITTC | 0.03957422 | 0.22819534 | 4.98E-05 | 0.0045122 | -0.034672 |
| 7w11w_SITTC | 0.02874258 | 0.16283621 | 3.97E-05 | 0.0040686 | -0.10664  |
| 7w11w_SITTC | 0.08293537 | 0.4898405  | 6.35E-05 | 0.017892  | 0.12434   |
| 7w11w_SITTC | 0.01975815 | 0.10862334 | 3.40E-05 | 0.0046667 | 0.0032259 |
| 7w11w_SITTC | 0.04456371 | 0.2583024  | 5.42E-05 | 0.0050757 | 0.012967  |
| 7w11w_SITTC | 0.01176516 | 0.06039292 | 3.22E-05 | 0.0061869 | 0.30353   |
| 7w11w_SITTC | 0.01597689 | 0.08580685 | 3.30E-05 | 0.0051875 | 0.12392   |
| 7w11w_SITTC | 0.15906613 | 0.9492205  | 6.78E-05 | 0.023695  | -0.52658  |
| 7w11w_SITTC | 0.02678707 | 0.15103652 | 3.80E-05 | 0.0041099 | -0.099939 |
| 7w11w_SITTC | 0.0072986  | 0.0334413  | 3.19E-05 | 0.0075925 | 0.51404   |
| 7w11w_SITTC | 0.02200265 | 0.12216687 | 3.52E-05 | 0.0043661 | -0.046619 |
| 7w11w_SITTC | 0.08219855 | 0.48539442 | 6.35E-05 | 0.017633  | 0.1271    |
| 7w11w_SITTC | 0.00828884 | 0.03941648 | 3.19E-05 | 0.0071994 | 0.45929   |
| 7w11w_SITTC | 0.01400378 | 0.07390095 | 3.25E-05 | 0.0056405 | 0.20898   |
| 7w11w_SITTC | 0.11890208 | 0.7068669  | 6.65E-05 | 0.024776  | -0.3584   |
| 7w11w_SITTC | 0.1152302  | 0.68471044 | 6.63E-05 | 0.025182  | -0.32268  |
| 7w11w_SITTC | 0.01518097 | 0.08100424 | 3.27E-05 | 0.0054028 | 0.16515   |
| 7w11w_SITTC | 0.02854035 | 0.16161595 | 3.93E-05 | 0.004074  | -0.10603  |
| 7w11w_SITTC | 0.00698961 | 0.03157681 | 3.18E-05 | 0.0078    | 0.54183   |
| 7w11w_SITTC | 0.022657   | 0.12611529 | 3.55E-05 | 0.0043197 | -0.056631 |
| 7w11w_SITTC | 0.02146441 | 0.11891908 | 3.49E-05 | 0.0044169 | -0.0356   |
| 7w11w_SITTC | 0.0182065  | 0.09926054 | 3.36E-05 | 0.0048202 | 0.050123  |
| 7w11w_SITTC | 0.11187444 | 0.6644615  | 6.61E-05 | 0.025489  | -0.28705  |
| 7w11w_SITTC | 0.01436791 | 0.07609813 | 3.26E-05 | 0.0055188 | 0.18676   |
| 7w11w_SITTC | 0.02646878 | 0.1491159  | 3.80E-05 | 0.0041099 | -0.099939 |
| 7w11w_SITTC | 0.0225046  | 0.12519568 | 3.52E-05 | 0.0043661 | -0.056631 |
| 7w11w_SITTC | 0.01727842 | 0.09366041 | 3.33E-05 | 0.0049935 | 0.085504  |
| 7w11w_SITTC | 0.01848402 | 0.10093515 | 3.36E-05 | 0.0048202 | 0.050123  |
| 7w11w_SITTC | 0.02895747 | 0.16413292 | 3.97E-05 | 0.0040686 | -0.10664  |
| 7w11w_SITTC | 0.08752604 | 0.517541   | 6.41E-05 | 0.020177  | 0.087329  |
| 7w11w_SITTC | 0.02131853 | 0.11803885 | 3.47E-05 | 0.0044724 | -0.023601 |
| 7w11w_SITTC | 0.0196148  | 0.10775838 | 3.40E-05 | 0.0046667 | 0.017998  |
| 7w11w_SITTC | 0.01731079 | 0.09385573 | 3.33E-05 | 0.0049935 | 0.085504  |
| 7w11w_SITTC | 0.10897791 | 0.64698356 | 6.59E-05 | 0.025616  | -0.25305  |
| 7w11w_SITTC | 0.05538052 | 0.32357204 | 5.95E-05 | 0.007248  | 0.065685  |
| 7w11w_SITTC | 0.03025671 | 0.1719726  | 4.07E-05 | 0.0040668 | -0.10475  |
| 7w11w_SITTC | 0.02672342 | 0.15065241 | 3.80E-05 | 0.0041099 | -0.099939 |
| 7w11w_SITTC | 0.01630976 | 0.08781542 | 3.30E-05 | 0.0051875 | 0.12392   |
| 7w11w_SITTC | 0.00281977 | 0.00641562 | 3.17E-05 | 0.0094663 | 0.74133   |

|             |            |            |          |           |           |
|-------------|------------|------------|----------|-----------|-----------|
| 7w11w_SITTC | 0.02029817 | 0.11188188 | 3.42E-05 | 0.0045972 | -0.01065  |
| 7w11w_SITTC | 0.10375038 | 0.61544013 | 6.56E-05 | 0.025296  | -0.18011  |
| 7w11w_SITTC | 0.02453675 | 0.13745789 | 3.64E-05 | 0.0042065 | -0.080664 |
| 7w11w_SITTC | 0.01644656 | 0.08864091 | 3.31E-05 | 0.0050879 | 0.10435   |
| 7w11w_SITTC | 0.0115652  | 0.05918632 | 3.22E-05 | 0.0061869 | 0.30353   |
| 7w11w_SITTC | 0.0178345  | 0.09701585 | 3.34E-05 | 0.0049043 | 0.067421  |
| 7w11w_SITTC | 0.01757689 | 0.09546145 | 3.34E-05 | 0.0049043 | 0.067421  |
| 7w11w_SITTC | 0.03215296 | 0.18341479 | 4.27E-05 | 0.004099  | -0.097962 |
| 7w11w_SITTC | 0.09977768 | 0.5914685  | 6.53E-05 | 0.024558  | -0.10426  |
| 7w11w_SITTC | 0.0609539  | 0.3572023  | 6.06E-05 | 0.008866  | 0.080421  |
| 7w11w_SITTC | 0.01563723 | 0.08375735 | 3.28E-05 | 0.0052924 | 0.1442    |
| 7w11w_SITTC | 0.02808976 | 0.15889703 | 3.93E-05 | 0.004074  | -0.10603  |
| 7w11w_SITTC | 0.00934883 | 0.04581253 | 3.20E-05 | 0.0068348 | 0.4058    |
| 7w11w_SITTC | 0.03437263 | 0.19680847 | 4.48E-05 | 0.0041765 | -0.082901 |
| 7w11w_SITTC | 0.02733634 | 0.15435086 | 3.84E-05 | 0.0040947 | -0.10271  |
| 7w11w_SITTC | 0.0220931  | 0.12271266 | 3.52E-05 | 0.0043661 | -0.046619 |
| 7w11w_SITTC | 0.02531118 | 0.14213088 | 3.68E-05 | 0.0041768 | -0.092011 |
| 7w11w_SITTC | 0.09827878 | 0.582424   | 6.52E-05 | 0.024123  | -0.084641 |
| 7w11w_SITTC | 0.02027214 | 0.11172482 | 3.42E-05 | 0.0045972 | -0.01065  |
| 7w11w_SITTC | 0.0654814  | 0.38452166 | 6.12E-05 | 0.01041   | 0.095509  |
| 7w11w_SITTC | 0.07532779 | 0.44393566 | 6.26E-05 | 0.014549  | 0.13345   |
| 7w11w_SITTC | 0.02743615 | 0.15495314 | 3.84E-05 | 0.0040947 | -0.10271  |
| 7w11w_SITTC | 0.09536919 | 0.56486726 | 6.49E-05 | 0.023263  | -0.026471 |
| 7w11w_SITTC | 0.00978441 | 0.04844087 | 3.20E-05 | 0.0068348 | 0.37961   |
| 7w11w_SITTC | 0.02485331 | 0.13936801 | 3.68E-05 | 0.0041768 | -0.086782 |
| 7w11w_SITTC | 0.02380812 | 0.13306125 | 3.61E-05 | 0.0042401 | -0.073623 |
| 7w11w_SITTC | 0.13107967 | 0.78034765 | 6.70E-05 | 0.023618  | -0.44608  |
| 7w11w_SITTC | 0.01529166 | 0.08167213 | 3.27E-05 | 0.0054028 | 0.16515   |
| 7w11w_SITTC | 0.1097296  | 0.65151936 | 6.60E-05 | 0.025599  | -0.2602   |
| 7w11w_SITTC | 0.1059223  | 0.62854576 | 6.58E-05 | 0.025526  | -0.21453  |
| 7w11w_SITTC | 0.07526441 | 0.4435532  | 6.26E-05 | 0.014549  | 0.13345   |
| 7w11w_SITTC | 0.08517114 | 0.5033313  | 6.38E-05 | 0.018923  | 0.10916   |
| 7w11w_SITTC | 0.02098211 | 0.11600882 | 3.47E-05 | 0.0044724 | -0.023601 |
| 7w11w_SITTC | 0.01812273 | 0.0987551  | 3.36E-05 | 0.0048202 | 0.050123  |
| 7w11w_SITTC | 0.02176475 | 0.12073133 | 3.49E-05 | 0.0044169 | -0.0356   |
| 7w11w_SITTC | 0.02476755 | 0.13885054 | 3.68E-05 | 0.0041768 | -0.086782 |
| 7w11w_SITTC | 0.0995937  | 0.5903584  | 6.53E-05 | 0.024558  | -0.10426  |
| 7w11w_SITTC | 0.01278748 | 0.06656171 | 3.23E-05 | 0.0059016 | 0.25518   |
| 7w11w_SITTC | 0.09588195 | 0.5679613  | 6.50E-05 | 0.023448  | -0.035993 |
| 7w11w_SITTC | 0.03458116 | 0.19806674 | 4.48E-05 | 0.0041765 | -0.082901 |
| 7w11w_SITTC | 0.01843197 | 0.10062106 | 3.36E-05 | 0.0048202 | 0.050123  |
| 7w11w_SITTC | 0.02996619 | 0.17021962 | 4.07E-05 | 0.0040668 | -0.10597  |
| 7w11w_SITTC | 0.02688931 | 0.15165341 | 3.80E-05 | 0.0041099 | -0.099939 |

|             |            |            |          |           |           |
|-------------|------------|------------|----------|-----------|-----------|
| 7w11w_SITTC | 0.08712502 | 0.5151212  | 6.41E-05 | 0.01993   | 0.087329  |
| 7w11w_SITTC | 0.02548337 | 0.14316985 | 3.72E-05 | 0.0041509 | -0.092011 |
| 7w11w_SITTC | 0.01867721 | 0.10210083 | 3.38E-05 | 0.004741  | 0.03364   |
| 7w11w_SITTC | 0.04883558 | 0.28407928 | 5.70E-05 | 0.0057827 | 0.041222  |
| 7w11w_SITTC | 0.13181034 | 0.78475654 | 6.71E-05 | 0.023582  | -0.44949  |
| 7w11w_SITTC | 0.10070596 | 0.59706986 | 6.54E-05 | 0.024809  | -0.12375  |
| 7w11w_SITTC | 0.05194331 | 0.30283156 | 5.85E-05 | 0.0064518 | 0.055318  |
| 7w11w_SITTC | 0.01401368 | 0.07396071 | 3.25E-05 | 0.0056405 | 0.20898   |
| 7w11w_SITTC | 0.02263754 | 0.12599786 | 3.55E-05 | 0.0043197 | -0.056631 |
| 7w11w_SITTC | 0.0122169  | 0.06311873 | 3.23E-05 | 0.0060411 | 0.2791    |
| 7w11w_SITTC | 0.02263083 | 0.1259574  | 3.55E-05 | 0.0043197 | -0.056631 |
| 7w11w_SITTC | 0.01989555 | 0.10945244 | 3.42E-05 | 0.0045972 | 0.0032259 |
| 7w11w_SITTC | 0.02087355 | 0.11535379 | 3.44E-05 | 0.0045325 | -0.023601 |
| 7w11w_SITTC | 0.036695   | 0.21082185 | 4.70E-05 | 0.0042982 | -0.062998 |
| 7w11w_SITTC | 0.02360569 | 0.1318398  | 3.58E-05 | 0.0042778 | -0.073623 |
| 7w11w_SITTC | 0.0191742  | 0.10509978 | 3.38E-05 | 0.004741  | 0.017998  |
| 7w11w_SITTC | 0.05993035 | 0.3510261  | 6.04E-05 | 0.0085136 | 0.077363  |
| 7w11w_SITTC | 0.00788537 | 0.03698191 | 3.19E-05 | 0.0073923 | 0.48652   |
| 7w11w_SITTC | 0.11883274 | 0.7064485  | 6.65E-05 | 0.024776  | -0.3584   |
| 7w11w_SITTC | 0.06352148 | 0.37269533 | 6.09E-05 | 0.0096122 | 0.089169  |
| 7w11w_SITTC | 0.02332788 | 0.13016345 | 3.58E-05 | 0.0042778 | -0.065623 |
| 7w11w_SITTC | 0.04820883 | 0.28029737 | 5.67E-05 | 0.0056831 | 0.038361  |
| 7w11w_SITTC | 0.12000082 | 0.7134968  | 6.65E-05 | 0.024632  | -0.36766  |
| 7w11w_SITTC | 0.00917051 | 0.04473654 | 3.19E-05 | 0.0070136 | 0.43237   |
| 7w11w_SITTC | 0.01154369 | 0.05905652 | 3.22E-05 | 0.0061869 | 0.30353   |
| 7w11w_SITTC | 0.10982215 | 0.6520778  | 6.60E-05 | 0.025599  | -0.26716  |
| 7w11w_SITTC | 0.07107624 | 0.41828144 | 6.20E-05 | 0.012608  | 0.11916   |
| 7w11w_SITTC | 0.04697808 | 0.27287093 | 5.61E-05 | 0.0054936 | 0.032113  |
| 7w11w_SITTC | 0.0618715  | 0.36273918 | 6.07E-05 | 0.0090475 | 0.083692  |
| 7w11w_SITTC | 0.01921799 | 0.10536394 | 3.40E-05 | 0.0046667 | 0.017998  |
| 7w11w_SITTC | 0.03327621 | 0.19019257 | 4.37E-05 | 0.0041322 | -0.091175 |
| 7w11w_SITTC | 0.01368651 | 0.07198655 | 3.25E-05 | 0.0056405 | 0.20898   |
| 7w11w_SITTC | 0.02988493 | 0.16972929 | 4.07E-05 | 0.0040668 | -0.10597  |
| 7w11w_SITTC | 0.02484313 | 0.13930659 | 3.68E-05 | 0.0041768 | -0.086782 |
| 7w11w_SITTC | 0.02640083 | 0.14870593 | 3.76E-05 | 0.0041286 | -0.099939 |
| 7w11w_SITTC | 0.06816699 | 0.4007267  | 6.16E-05 | 0.011474  | 0.10734   |
| 7w11w_SITTC | 0.02411325 | 0.13490243 | 3.61E-05 | 0.0042401 | -0.073623 |
| 7w11w_SITTC | 0.03919018 | 0.225878   | 4.98E-05 | 0.0045122 | -0.034672 |
| 7w11w_SITTC | 0.01974997 | 0.10857397 | 3.40E-05 | 0.0046667 | 0.0032259 |
| 7w11w_SITTC | 0.09223873 | 0.54597783 | 6.46E-05 | 0.022042  | 0.019141  |
| 7w11w_SITTC | 0.02470196 | 0.13845478 | 3.64E-05 | 0.0042065 | -0.086782 |
| 7w11w_SITTC | 0.01544756 | 0.08261284 | 3.28E-05 | 0.0052924 | 0.1442    |
| 7w11w_SITTC | 0.01190188 | 0.0612179  | 3.22E-05 | 0.0061869 | 0.30353   |

|             |            |            |          |           |           |
|-------------|------------|------------|----------|-----------|-----------|
| 7w11w_SITTC | 0.01238807 | 0.06415159 | 3.23E-05 | 0.0060411 | 0.2791    |
| 7w11w_SITTC | 0.05399784 | 0.31522882 | 5.91E-05 | 0.0068337 | 0.062513  |
| 7w11w_SITTC | 0.01535864 | 0.0820763  | 3.28E-05 | 0.0052924 | 0.1442    |
| 7w11w_SITTC | 0.0148121  | 0.07877842 | 3.27E-05 | 0.0054028 | 0.16515   |
| 7w11w_SITTC | 0.01940325 | 0.10648184 | 3.40E-05 | 0.0046667 | 0.017998  |
| 7w11w_SITTC | 0.01668181 | 0.09006041 | 3.31E-05 | 0.0050879 | 0.10435   |
| 7w11w_SITTC | 0.0310688  | 0.17687283 | 4.16E-05 | 0.0040771 | -0.10299  |
| 7w11w_SITTC | 0.04358646 | 0.25240558 | 5.33E-05 | 0.0049301 | 0.008455  |
| 7w11w_SITTC | 0.02810301 | 0.15897703 | 3.93E-05 | 0.004074  | -0.10603  |
| 7w11w_SITTC | 0.10867301 | 0.64514375 | 6.59E-05 | 0.025616  | -0.25305  |
| 7w11w_SITTC | 0.06215664 | 0.36445972 | 6.07E-05 | 0.0092324 | 0.083692  |
| 7w11w_SITTC | 0.0733471  | 0.43198398 | 6.23E-05 | 0.013561  | 0.12913   |
| 7w11w_SITTC | 0.01702219 | 0.09211432 | 3.33E-05 | 0.0049935 | 0.085504  |
| 7w11w_SITTC | 0.03158802 | 0.18000591 | 4.22E-05 | 0.0040866 | -0.10071  |
| 7w11w_SITTC | 0.01604319 | 0.08620696 | 3.30E-05 | 0.0051875 | 0.12392   |
| 7w11w_SITTC | 0.01181895 | 0.06071746 | 3.22E-05 | 0.0061869 | 0.30353   |
| 7w11w_SITTC | 0.01581096 | 0.08480565 | 3.28E-05 | 0.0052924 | 0.1442    |
| 7w11w_SITTC | 0.02174701 | 0.12062433 | 3.49E-05 | 0.0044169 | -0.0356   |
| 7w11w_SITTC | 0.07008937 | 0.41232654 | 6.18E-05 | 0.012147  | 0.11689   |
| 7w11w_SITTC | 0.0200769  | 0.11054671 | 3.42E-05 | 0.0045972 | 0.0032259 |
| 7w11w_SITTC | 0.0325886  | 0.18604347 | 4.32E-05 | 0.0041142 | -0.094772 |
| 7w11w_SITTC | 0.01797066 | 0.09783749 | 3.34E-05 | 0.0049043 | 0.067421  |
| 7w11w_SITTC | 0.0167265  | 0.09033009 | 3.31E-05 | 0.0050879 | 0.10435   |
| 7w11w_SITTC | 0.02396006 | 0.13397808 | 3.61E-05 | 0.0042401 | -0.073623 |
| 7w11w_SITTC | 0.00861106 | 0.0413608  | 3.19E-05 | 0.0071994 | 0.45929   |
| 7w11w_SITTC | 0.01979735 | 0.1088599  | 3.42E-05 | 0.0045972 | 0.0032259 |
| 7w11w_SITTC | 0.00793054 | 0.03725449 | 3.19E-05 | 0.0073923 | 0.48652   |
| 7w11w_SITTC | 0.13102071 | 0.7799918  | 6.70E-05 | 0.023618  | -0.44608  |
| 7w11w_SITTC | 0.07883418 | 0.46509355 | 6.30E-05 | 0.016077  | 0.13613   |
| 7w11w_SITTC | 0.10230202 | 0.6067006  | 6.55E-05 | 0.025029  | -0.15246  |
| 7w11w_SITTC | 0.0347357  | 0.19899927 | 4.54E-05 | 0.0042028 | -0.078293 |
| 7w11w_SITTC | 0.02416282 | 0.13520151 | 3.61E-05 | 0.0042401 | -0.080664 |
| 7w11w_SITTC | 0.05288463 | 0.30851158 | 5.87E-05 | 0.0065755 | 0.059084  |
| 7w11w_SITTC | 0.11053253 | 0.65636426 | 6.60E-05 | 0.02558   | -0.27396  |
| 7w11w_SITTC | 0.08819379 | 0.52157027 | 6.42E-05 | 0.020421  | 0.080939  |
| 7w11w_SITTC | 0.11854757 | 0.70472777 | 6.65E-05 | 0.024776  | -0.35363  |
| 7w11w_SITTC | 0.12673962 | 0.75415933 | 6.68E-05 | 0.023879  | -0.41707  |
| 7w11w_SITTC | 0.03988219 | 0.23005368 | 5.03E-05 | 0.0045634 | -0.028892 |
| 7w11w_SITTC | 0.03156203 | 0.17984907 | 4.22E-05 | 0.0040866 | -0.10071  |
| 7w11w_SITTC | 0.00936278 | 0.04589676 | 3.20E-05 | 0.0068348 | 0.4058    |
| 7w11w_SITTC | 0.02945887 | 0.1671584  | 4.02E-05 | 0.0040662 | -0.10661  |
| 7w11w_SITTC | 0.03967482 | 0.22880235 | 4.98E-05 | 0.0045122 | -0.028892 |
| 7w11w_SITTC | 0.02540386 | 0.14269006 | 3.72E-05 | 0.0041509 | -0.092011 |

|             |            |            |          |           |           |
|-------------|------------|------------|----------|-----------|-----------|
| 7w11w_SITTC | 0.02322597 | 0.12954848 | 3.58E-05 | 0.0042778 | -0.065623 |
| 7w11w_SITTC | 0.02207512 | 0.12260412 | 3.52E-05 | 0.0043661 | -0.046619 |
| 7w11w_SITTC | 0.02714863 | 0.15321818 | 3.84E-05 | 0.0040947 | -0.10271  |
| 7w11w_SITTC | 0.02905086 | 0.16469646 | 3.97E-05 | 0.0040686 | -0.10664  |
| 7w11w_SITTC | 0.02647194 | 0.14913501 | 3.80E-05 | 0.0041099 | -0.099939 |
| 7w11w_SITTC | 0.08553099 | 0.5055027  | 6.39E-05 | 0.019177  | 0.1043    |
| 7w11w_SITTC | 0.01798855 | 0.09794539 | 3.34E-05 | 0.0049043 | 0.067421  |
| 7w11w_SITTC | 0.01002692 | 0.04990424 | 3.20E-05 | 0.0066628 | 0.37961   |
| 7w11w_SITTC | 0.09683564 | 0.5737159  | 6.51E-05 | 0.023799  | -0.055297 |
| 7w11w_SITTC | 0.03302813 | 0.18869562 | 4.32E-05 | 0.0041142 | -0.091175 |
| 7w11w_SITTC | 0.01514882 | 0.08081023 | 3.27E-05 | 0.0054028 | 0.16515   |
| 7w11w_SITTC | 0.02644287 | 0.14895959 | 3.80E-05 | 0.0041099 | -0.099939 |
| 7w11w_SITTC | 0.01540755 | 0.08237145 | 3.28E-05 | 0.0052924 | 0.1442    |
| 7w11w_SITTC | 0.01985964 | 0.10923577 | 3.42E-05 | 0.0045972 | 0.0032259 |
| 7w11w_SITTC | 0.09282499 | 0.5495153  | 6.46E-05 | 0.022258  | 0.010343  |
| 7w11w_SITTC | 0.06439906 | 0.37799075 | 6.10E-05 | 0.010005  | 0.091185  |
| 7w11w_SITTC | 0.02963039 | 0.16819334 | 4.02E-05 | 0.0040662 | -0.10661  |
| 7w11w_SITTC | 0.01171418 | 0.06008527 | 3.22E-05 | 0.0061869 | 0.30353   |
| 7w11w_SITTC | 0.01138893 | 0.05812272 | 3.21E-05 | 0.006339  | 0.32844   |
| 7w11w_SITTC | 0.03698498 | 0.21257162 | 4.76E-05 | 0.0043355 | -0.057524 |
| 7w11w_SITTC | 0.06560076 | 0.38524187 | 6.12E-05 | 0.01041   | 0.097788  |
| 7w11w_SITTC | 0.05296722 | 0.30900994 | 5.87E-05 | 0.0065755 | 0.059084  |
| 7w11w_SITTC | 0.01506138 | 0.08028259 | 3.27E-05 | 0.0054028 | 0.16515   |
| 7w11w_SITTC | 0.05908971 | 0.34595358 | 6.02E-05 | 0.0081753 | 0.075889  |
| 7w11w_SITTC | 0.0583437  | 0.34145212 | 6.01E-05 | 0.0080116 | 0.073002  |
| 7w11w_SITTC | 0.0114207  | 0.05831442 | 3.21E-05 | 0.006339  | 0.32844   |
| 7w11w_SITTC | 0.03742916 | 0.21525185 | 4.76E-05 | 0.0043355 | -0.05192  |
| 7w11w_SITTC | 0.02814397 | 0.15922418 | 3.93E-05 | 0.004074  | -0.10603  |
| 7w11w_SITTC | 0.0794842  | 0.46901584 | 6.31E-05 | 0.016335  | 0.13545   |
| 7w11w_SITTC | 0.00841072 | 0.04015193 | 3.19E-05 | 0.0071994 | 0.45929   |
| 7w11w_SITTC | 0.01949855 | 0.10705691 | 3.40E-05 | 0.0046667 | 0.017998  |
| 7w11w_SITTC | 0.02383016 | 0.13319421 | 3.61E-05 | 0.0042401 | -0.073623 |
| 7w11w_SITTC | 0.04881594 | 0.28396073 | 5.70E-05 | 0.0057827 | 0.041222  |
| 7w11w_SITTC | 0.00950883 | 0.04677804 | 3.20E-05 | 0.0068348 | 0.4058    |
| 7w11w_SITTC | 0.02242665 | 0.12472533 | 3.52E-05 | 0.0043661 | -0.046619 |
| 7w11w_SITTC | 0.03132544 | 0.17842144 | 4.16E-05 | 0.0040771 | -0.10071  |
| 7w11w_SITTC | 0.00874627 | 0.04217667 | 3.19E-05 | 0.0070136 | 0.43237   |
| 7w11w_SITTC | 0.02680686 | 0.15115592 | 3.80E-05 | 0.0041099 | -0.099939 |
| 7w11w_SITTC | 0.04909881 | 0.28566763 | 5.70E-05 | 0.0057827 | 0.04392   |
| 7w11w_SITTC | 0.11043706 | 0.6557882  | 6.60E-05 | 0.02558   | -0.27396  |
| 7w11w_SITTC | 0.02103551 | 0.11633107 | 3.47E-05 | 0.0044724 | -0.023601 |
| 7w11w_SITTC | 0.0633039  | 0.37138245 | 6.09E-05 | 0.0096122 | 0.087254  |
| 7w11w_SITTC | 0.02005073 | 0.11038879 | 3.42E-05 | 0.0045972 | 0.0032259 |



|             |            |            |          |           |            |
|-------------|------------|------------|----------|-----------|------------|
| 7w11w_SITTC | 0.11548205 | 0.6862301  | 6.63E-05 | 0.025182  | -0.32814   |
| 7w11w_SITTC | 0.05998566 | 0.35135987 | 6.04E-05 | 0.0085136 | 0.077363   |
| 7w11w_SITTC | 0.08082647 | 0.47711518 | 6.33E-05 | 0.017113  | 0.13314    |
| 7w11w_SITTC | 0.02736747 | 0.15453872 | 3.84E-05 | 0.0040947 | -0.10271   |
| 7w11w_SITTC | 0.05205473 | 0.3035039  | 5.85E-05 | 0.0064518 | 0.055318   |
| 7w11w_SITTC | 0.09322762 | 0.55194485 | 6.47E-05 | 0.022469  | 0.0013661  |
| 7w11w_SITTC | 0.05228935 | 0.3049196  | 5.85E-05 | 0.0064518 | 0.055318   |
| 7w11w_SITTC | 0.02177056 | 0.12076645 | 3.49E-05 | 0.0044169 | -0.0356    |
| 7w11w_SITTC | 0.01949711 | 0.10704823 | 3.40E-05 | 0.0046667 | 0.017998   |
| 7w11w_SITTC | 0.01730012 | 0.0937914  | 3.33E-05 | 0.0049935 | 0.085504   |
| 7w11w_SITTC | 0.01532317 | 0.08186229 | 3.27E-05 | 0.0054028 | 0.1442     |
| 7w11w_SITTC | 0.02169761 | 0.1203262  | 3.49E-05 | 0.0044169 | -0.0356    |
| 7w11w_SITTC | 0.08493195 | 0.50188804 | 6.38E-05 | 0.018923  | 0.10916    |
| 7w11w_SITTC | 0.10605637 | 0.6293547  | 6.58E-05 | 0.025526  | -0.21453   |
| 7w11w_SITTC | 0.03556039 | 0.20397554 | 4.59E-05 | 0.0042319 | -0.073417  |
| 7w11w_SITTC | 0.01111501 | 0.05646984 | 3.21E-05 | 0.006339  | 0.32844    |
| 7w11w_SITTC | 0.0245158  | 0.13733143 | 3.64E-05 | 0.0042065 | -0.080664  |
| 7w11w_SITTC | 0.02141196 | 0.11860257 | 3.47E-05 | 0.0044724 | -0.0356    |
| 7w11w_SITTC | 0.00755805 | 0.03500684 | 3.19E-05 | 0.0075925 | 0.51404    |
| 7w11w_SITTC | 0.02231487 | 0.12405081 | 3.52E-05 | 0.0043661 | -0.046619  |
| 7w11w_SITTC | 0.04897832 | 0.28494054 | 5.70E-05 | 0.0057827 | 0.041222   |
| 7w11w_SITTC | 0.01933847 | 0.10609095 | 3.40E-05 | 0.0046667 | 0.017998   |
| 7w11w_SITTC | 0.04733495 | 0.27502432 | 5.61E-05 | 0.0054936 | 0.035328   |
| 7w11w_SITTC | 0.09424602 | 0.5580899  | 6.48E-05 | 0.022877  | -0.0077738 |
| 7w11w_SITTC | 0.03609461 | 0.20719907 | 4.65E-05 | 0.0042637 | -0.068307  |
| 7w11w_SITTC | 0.02309667 | 0.1287683  | 3.58E-05 | 0.0042778 | -0.065623  |
| 7w11w_SITTC | 0.0373894  | 0.21501194 | 4.76E-05 | 0.0043355 | -0.05192   |
| 7w11w_SITTC | 0.04486739 | 0.26013482 | 5.46E-05 | 0.0051531 | 0.017239   |
| 7w11w_SITTC | 0.02916616 | 0.16539216 | 3.97E-05 | 0.0040686 | -0.10661   |
| 7w11w_SITTC | 0.02562009 | 0.14399487 | 3.72E-05 | 0.0041509 | -0.092011  |
| 7w11w_SITTC | 0.02509114 | 0.14080308 | 3.68E-05 | 0.0041768 | -0.086782  |
| 7w11w_SITTC | 0.02701602 | 0.152418   | 3.84E-05 | 0.0040947 | -0.10271   |
| 7w11w_SITTC | 0.03841826 | 0.22122021 | 4.87E-05 | 0.0044183 | -0.04622   |
| 7w11w_SITTC | 0.03094747 | 0.17614073 | 4.16E-05 | 0.0040771 | -0.10299   |
| 7w11w_SITTC | 0.02442115 | 0.13676032 | 3.64E-05 | 0.0042065 | -0.080664  |
| 7w11w_SITTC | 0.0263164  | 0.14819641 | 3.76E-05 | 0.0041286 | -0.096385  |
| 7w11w_SITTC | 0.05761588 | 0.3370604  | 6.00E-05 | 0.0078516 | 0.071569   |
| 7w11w_SITTC | 0.1287603  | 0.7663523  | 6.69E-05 | 0.023723  | -0.43195   |
| 7w11w_SITTC | 0.02466827 | 0.1382515  | 3.64E-05 | 0.0042065 | -0.080664  |
| 7w11w_SITTC | 0.01804873 | 0.09830856 | 3.34E-05 | 0.0049043 | 0.067421   |
| 7w11w_SITTC | 0.013888   | 0.07320233 | 3.25E-05 | 0.0056405 | 0.20898    |
| 7w11w_SITTC | 0.08040728 | 0.47458574 | 6.32E-05 | 0.016854  | 0.13446    |
| 7w11w_SITTC | 0.09123036 | 0.5398932  | 6.45E-05 | 0.021597  | 0.036126   |

|             |            |            |          |           |           |
|-------------|------------|------------|----------|-----------|-----------|
| 7w11w_SITTC | 0.01995932 | 0.10983723 | 3.42E-05 | 0.0045972 | 0.0032259 |
| 7w11w_SITTC | 0.01350488 | 0.07089053 | 3.24E-05 | 0.0057681 | 0.23179   |
| 7w11w_SITTC | 0.0218845  | 0.12145396 | 3.49E-05 | 0.0044169 | -0.0356   |
| 7w11w_SITTC | 0.02045775 | 0.11284478 | 3.44E-05 | 0.0045325 | -0.01065  |
| 7w11w_SITTC | 0.01790131 | 0.09741899 | 3.34E-05 | 0.0049043 | 0.067421  |
| 7w11w_SITTC | 0.0212037  | 0.11734592 | 3.47E-05 | 0.0044724 | -0.023601 |
| 7w11w_SITTC | 0.0207209  | 0.11443268 | 3.44E-05 | 0.0045325 | -0.01065  |
| 7w11w_SITTC | 0.03312144 | 0.18925866 | 4.37E-05 | 0.0041322 | -0.091175 |
| 7w11w_SITTC | 0.00948543 | 0.0466368  | 3.20E-05 | 0.0068348 | 0.4058    |
| 7w11w_SITTC | 0.0540113  | 0.31531006 | 5.91E-05 | 0.0068337 | 0.062513  |
| 7w11w_SITTC | 0.06823378 | 0.40112975 | 6.16E-05 | 0.011474  | 0.10734   |
| 7w11w_SITTC | 0.02436498 | 0.1364214  | 3.64E-05 | 0.0042065 | -0.080664 |
| 7w11w_SITTC | 0.0489626  | 0.28484568 | 5.70E-05 | 0.0057827 | 0.041222  |
| 7w11w_SITTC | 0.03334548 | 0.19061059 | 4.37E-05 | 0.0041322 | -0.091175 |
| 7w11w_SITTC | 0.02902455 | 0.1645377  | 3.97E-05 | 0.0040686 | -0.10664  |
| 7w11w_SITTC | 0.08687429 | 0.5136083  | 6.41E-05 | 0.01993   | 0.093363  |
| 7w11w_SITTC | 0.01627335 | 0.08759575 | 3.30E-05 | 0.0051875 | 0.12392   |
| 7w11w_SITTC | 0.05008382 | 0.29161122 | 5.76E-05 | 0.005992  | 0.046466  |
| 7w11w_SITTC | 0.12317267 | 0.73263603 | 6.67E-05 | 0.024217  | -0.39346  |
| 7w11w_SITTC | 0.02032402 | 0.11203784 | 3.42E-05 | 0.0045972 | -0.01065  |
| 7w11w_SITTC | 0.01436194 | 0.07606214 | 3.26E-05 | 0.0055188 | 0.18676   |
| 7w11w_SITTC | 0.01192254 | 0.06134256 | 3.22E-05 | 0.0061869 | 0.30353   |
| 7w11w_SITTC | 0.01958774 | 0.10759507 | 3.40E-05 | 0.0046667 | 0.017998  |
| 7w11w_SITTC | 0.01676525 | 0.09056395 | 3.31E-05 | 0.0050879 | 0.10435   |
| 7w11w_SITTC | 0.00782364 | 0.03660945 | 3.19E-05 | 0.0073923 | 0.48652   |
| 7w11w_SITTC | 0.04747595 | 0.2758751  | 5.61E-05 | 0.0054936 | 0.035328  |
| 7w11w_SITTC | 0.02545021 | 0.14296976 | 3.72E-05 | 0.0041509 | -0.092011 |
| 7w11w_SITTC | 0.02109743 | 0.11670472 | 3.47E-05 | 0.0044724 | -0.023601 |
| 7w11w_SITTC | 0.02388338 | 0.13351536 | 3.61E-05 | 0.0042401 | -0.073623 |
| 7w11w_SITTC | 0.01013487 | 0.0505556  | 3.20E-05 | 0.0066628 | 0.37961   |
| 7w11w_SITTC | 0.12218627 | 0.726684   | 6.66E-05 | 0.02435   | -0.38515  |
| 7w11w_SITTC | 0.02472526 | 0.13859536 | 3.64E-05 | 0.0042065 | -0.086782 |
| 7w11w_SITTC | 0.02723089 | 0.15371454 | 3.84E-05 | 0.0040947 | -0.10271  |
| 7w11w_SITTC | 0.12615079 | 0.7506063  | 6.68E-05 | 0.023927  | -0.41325  |
| 7w11w_SITTC | 0.07275699 | 0.42842323 | 6.22E-05 | 0.01332   | 0.12737   |
| 7w11w_SITTC | 0.01031977 | 0.05167129 | 3.20E-05 | 0.0066628 | 0.37961   |
| 7w11w_SITTC | 0.01269191 | 0.06598499 | 3.23E-05 | 0.0059016 | 0.25518   |
| 7w11w_SITTC | 0.01347815 | 0.07072929 | 3.24E-05 | 0.0057681 | 0.23179   |
| 7w11w_SITTC | 0.08509366 | 0.50286376 | 6.38E-05 | 0.018923  | 0.10916   |
| 7w11w_SITTC | 0.08939589 | 0.52882385 | 6.43E-05 | 0.020902  | 0.059815  |
| 7w11w_SITTC | 0.02209949 | 0.12275121 | 3.52E-05 | 0.0043661 | -0.046619 |
| 7w11w_SITTC | 0.05350213 | 0.31223765 | 5.89E-05 | 0.0067028 | 0.060836  |
| 7w11w_SITTC | 0.02406748 | 0.13462625 | 3.61E-05 | 0.0042401 | -0.073623 |

|             |            |            |          |           |           |
|-------------|------------|------------|----------|-----------|-----------|
| 7w11w_SITTC | 0.0093386  | 0.04575085 | 3.20E-05 | 0.0068348 | 0.4058    |
| 7w11w_SITTC | 0.02763917 | 0.15617815 | 3.88E-05 | 0.0040827 | -0.10472  |
| 7w11w_SITTC | 0.01625682 | 0.08749602 | 3.30E-05 | 0.0051875 | 0.12392   |
| 7w11w_SITTC | 0.03078615 | 0.17516732 | 4.11E-05 | 0.0040705 | -0.10299  |
| 7w11w_SITTC | 0.01952565 | 0.10722044 | 3.40E-05 | 0.0046667 | 0.017998  |
| 7w11w_SITTC | 0.0829718  | 0.49006036 | 6.36E-05 | 0.018151  | 0.12434   |
| 7w11w_SITTC | 0.08308009 | 0.49071375 | 6.36E-05 | 0.018151  | 0.12434   |
| 7w11w_SITTC | 0.06503949 | 0.3818551  | 6.11E-05 | 0.010206  | 0.095509  |
| 7w11w_SITTC | 0.00969705 | 0.04791375 | 3.20E-05 | 0.0068348 | 0.4058    |
| 7w11w_SITTC | 0.1086442  | 0.6449699  | 6.59E-05 | 0.025616  | -0.24573  |
| 7w11w_SITTC | 0.01660518 | 0.08959805 | 3.31E-05 | 0.0050879 | 0.10435   |
| 7w11w_SITTC | 0.12494402 | 0.7433246  | 6.68E-05 | 0.024034  | -0.40548  |
| 7w11w_SITTC | 0.01606613 | 0.08634539 | 3.30E-05 | 0.0051875 | 0.12392   |
| 7w11w_SITTC | 0.02533994 | 0.14230439 | 3.72E-05 | 0.0041509 | -0.092011 |
| 7w11w_SITTC | 0.05012894 | 0.2918835  | 5.76E-05 | 0.005992  | 0.048868  |
| 7w11w_SITTC | 0.02732875 | 0.15430503 | 3.84E-05 | 0.0040947 | -0.10271  |
| 7w11w_SITTC | 0.09825233 | 0.5822644  | 6.52E-05 | 0.024123  | -0.084641 |
| 7w11w_SITTC | 0.01227449 | 0.06346625 | 3.23E-05 | 0.0060411 | 0.2791    |
| 7w11w_SITTC | 0.02656791 | 0.14971407 | 3.80E-05 | 0.0041099 | -0.099939 |
| 7w11w_SITTC | 0.0352766  | 0.20226315 | 4.54E-05 | 0.0042028 | -0.073417 |
| 7w11w_SITTC | 0.02011182 | 0.1107574  | 3.42E-05 | 0.0045972 | 0.0032259 |
| 7w11w_SITTC | 0.0826792  | 0.48829472 | 6.35E-05 | 0.017892  | 0.1271    |
| 7w11w_SITTC | 0.039851   | 0.22986545 | 5.03E-05 | 0.0045634 | -0.028892 |
| 7w11w_SITTC | 0.0131506  | 0.06875282 | 3.24E-05 | 0.0057681 | 0.23179   |
| 7w11w_SITTC | 0.0236159  | 0.13190137 | 3.58E-05 | 0.0042778 | -0.073623 |
| 7w11w_SITTC | 0.02461657 | 0.1379395  | 3.64E-05 | 0.0042065 | -0.080664 |
| 7w11w_SITTC | 0.01684    | 0.09101494 | 3.31E-05 | 0.0050879 | 0.10435   |
| 7w11w_SITTC | 0.0072228  | 0.03298392 | 3.19E-05 | 0.0075925 | 0.51404   |
| 7w11w_SITTC | 0.02306766 | 0.12859328 | 3.55E-05 | 0.0043197 | -0.065623 |
| 7w11w_SITTC | 0.1164287  | 0.69194233 | 6.64E-05 | 0.025054  | -0.33868  |
| 7w11w_SITTC | 0.03175129 | 0.18099108 | 4.22E-05 | 0.0040866 | -0.10071  |
| 7w11w_SITTC | 0.02801707 | 0.15845843 | 3.88E-05 | 0.0040827 | -0.10603  |
| 7w11w_SITTC | 0.02841632 | 0.16086759 | 3.93E-05 | 0.004074  | -0.10603  |
| 7w11w_SITTC | 0.08803781 | 0.52062905 | 6.42E-05 | 0.020421  | 0.080939  |
| 7w11w_SITTC | 0.02928886 | 0.16613254 | 4.02E-05 | 0.0040662 | -0.10661  |
| 7w11w_SITTC | 0.02302351 | 0.12832683 | 3.55E-05 | 0.0043197 | -0.056631 |
| 7w11w_SITTC | 0.02545662 | 0.14300846 | 3.72E-05 | 0.0041509 | -0.092011 |
| 7w11w_SITTC | 0.02380495 | 0.13304211 | 3.61E-05 | 0.0042401 | -0.073623 |
| 7w11w_SITTC | 0.02483531 | 0.1392594  | 3.68E-05 | 0.0041768 | -0.086782 |
| 7w11w_SITTC | 0.05143848 | 0.2997854  | 5.83E-05 | 0.0063316 | 0.053285  |
| 7w11w_SITTC | 0.01538928 | 0.08226121 | 3.28E-05 | 0.0052924 | 0.1442    |
| 7w11w_SITTC | 0.08066899 | 0.47616494 | 6.32E-05 | 0.016854  | 0.13314   |
| 7w11w_SITTC | 0.04734431 | 0.27508077 | 5.61E-05 | 0.0054936 | 0.035328  |

|             |            |            |          |           |           |
|-------------|------------|------------|----------|-----------|-----------|
| 7w11w_SITTC | 0.05068044 | 0.2952113  | 5.78E-05 | 0.0061018 | 0.051138  |
| 7w11w_SITTC | 0.01924216 | 0.10550983 | 3.40E-05 | 0.0046667 | 0.017998  |
| 7w11w_SITTC | 0.05919302 | 0.346577   | 6.03E-05 | 0.0083426 | 0.075889  |
| 7w11w_SITTC | 0.02394593 | 0.1338928  | 3.61E-05 | 0.0042401 | -0.073623 |
| 7w11w_SITTC | 0.01617498 | 0.08700217 | 3.30E-05 | 0.0051875 | 0.12392   |
| 7w11w_SITTC | 0.11679582 | 0.69415754 | 6.64E-05 | 0.024986  | -0.33868  |
| 7w11w_SITTC | 0.01251833 | 0.06493758 | 3.23E-05 | 0.0060411 | 0.2791    |
| 7w11w_SITTC | 0.02146242 | 0.11890705 | 3.49E-05 | 0.0044169 | -0.0356   |
| 7w11w_SITTC | 0.02775265 | 0.15686291 | 3.88E-05 | 0.0040827 | -0.10472  |
| 7w11w_SITTC | 0.07810054 | 0.4606667  | 6.29E-05 | 0.015819  | 0.13662   |
| 7w11w_SITTC | 0.02502385 | 0.1403971  | 3.68E-05 | 0.0041768 | -0.086782 |
| 7w11w_SITTC | 0.03660658 | 0.21028832 | 4.70E-05 | 0.0042982 | -0.062998 |
| 7w11w_SITTC | 0.11010303 | 0.65377265 | 6.60E-05 | 0.025599  | -0.26716  |
| 7w11w_SITTC | 0.03409165 | 0.19511303 | 4.43E-05 | 0.004153  | -0.082901 |
| 7w11w_SITTC | 0.02835519 | 0.1604987  | 3.93E-05 | 0.004074  | -0.10603  |
| 7w11w_SITTC | 0.03431846 | 0.19648159 | 4.48E-05 | 0.0041765 | -0.082901 |
| 7w11w_SITTC | 0.02939019 | 0.16674396 | 4.02E-05 | 0.0040662 | -0.10661  |
| 7w11w_SITTC | 0.02699312 | 0.15227982 | 3.84E-05 | 0.0040947 | -0.10271  |
| 7w11w_SITTC | 0.01846423 | 0.10081573 | 3.36E-05 | 0.0048202 | 0.050123  |
| 7w11w_SITTC | 0.01987667 | 0.10933852 | 3.42E-05 | 0.0045972 | 0.0032259 |
| 7w11w_SITTC | 0.04773217 | 0.2774212  | 5.64E-05 | 0.0055867 | 0.035328  |
| 7w11w_SITTC | 0.01391328 | 0.07335489 | 3.25E-05 | 0.0056405 | 0.20898   |
| 7w11w_SITTC | 0.03740564 | 0.21510994 | 4.76E-05 | 0.0043355 | -0.05192  |
| 7w11w_SITTC | 0.12009909 | 0.71408975 | 6.66E-05 | 0.024561  | -0.36766  |
| 7w11w_SITTC | 0.07248489 | 0.42678133 | 6.22E-05 | 0.01332   | 0.12548   |
| 7w11w_SITTC | 0.03057085 | 0.17386821 | 4.11E-05 | 0.0040705 | -0.10475  |
| 7w11w_SITTC | 0.06609719 | 0.38823736 | 6.13E-05 | 0.010616  | 0.097788  |
| 7w11w_SITTC | 0.02964368 | 0.16827352 | 4.02E-05 | 0.0040662 | -0.10661  |
| 7w11w_SITTC | 0.11798852 | 0.7013544  | 6.65E-05 | 0.024847  | -0.34876  |
| 7w11w_SITTC | 0.11729132 | 0.6971474  | 6.64E-05 | 0.024986  | -0.34377  |
| 7w11w_SITTC | 0.09900567 | 0.5868101  | 6.52E-05 | 0.024275  | -0.094455 |
| 7w11w_SITTC | 0.02818329 | 0.15946141 | 3.93E-05 | 0.004074  | -0.10603  |
| 7w11w_SITTC | 0.13945231 | 0.8308689  | 6.73E-05 | 0.023544  | -0.49075  |
| 7w11w_SITTC | 0.01784656 | 0.09708867 | 3.34E-05 | 0.0049043 | 0.067421  |
| 7w11w_SITTC | 0.02546511 | 0.1430597  | 3.72E-05 | 0.0041509 | -0.092011 |
| 7w11w_SITTC | 0.08320902 | 0.4914917  | 6.36E-05 | 0.018151  | 0.12434   |
| 7w11w_SITTC | 0.10342535 | 0.6134789  | 6.56E-05 | 0.025216  | -0.17104  |
| 7w11w_SITTC | 0.11145926 | 0.6619562  | 6.61E-05 | 0.025525  | -0.28705  |
| 7w11w_SITTC | 0.08778491 | 0.51910305 | 6.41E-05 | 0.020177  | 0.080939  |
| 7w11w_SITTC | 0.10911126 | 0.64778817 | 6.60E-05 | 0.025611  | -0.25305  |
| 7w11w_SITTC | 0.12501405 | 0.7437471  | 6.68E-05 | 0.024034  | -0.40548  |
| 7w11w_SITTC | 0.06842542 | 0.4022861  | 6.16E-05 | 0.011474  | 0.10977   |
| 7w11w_SITTC | 0.08292624 | 0.48978537 | 6.35E-05 | 0.017892  | 0.12434   |

|             |            |            |          |           |           |
|-------------|------------|------------|----------|-----------|-----------|
| 7w11w_SITTI | 0.08355766 | 0.49359545 | 6.37E-05 | 0.01841   | 0.12117   |
| 7w11w_SITTI | 0.08472569 | 0.50064343 | 6.38E-05 | 0.018923  | 0.1136    |
| 7w11w_SITTI | 0.01953225 | 0.10726027 | 3.40E-05 | 0.0046667 | 0.017998  |
| 7w11w_SITTI | 0.08320332 | 0.49145734 | 6.36E-05 | 0.018151  | 0.12434   |
| 7w11w_SITTI | 0.10831305 | 0.6429717  | 6.59E-05 | 0.025614  | -0.24573  |
| 7w11w_SITTI | 0.10549232 | 0.62595123 | 6.57E-05 | 0.025482  | -0.20623  |
| 7w11w_SITTI | 0.10904041 | 0.6473607  | 6.60E-05 | 0.025611  | -0.25305  |
| 7w11w_SITTI | 0.08629596 | 0.5101186  | 6.40E-05 | 0.019681  | 0.099025  |
| 7w11w_SITTI | 0.08737498 | 0.51662946 | 6.41E-05 | 0.01993   | 0.087329  |
| 7w11w_SITTI | 0.11252699 | 0.66839904 | 6.62E-05 | 0.025448  | -0.29951  |
| 7w11w_SITTI | 0.0494802  | 0.28796893 | 5.73E-05 | 0.0058857 | 0.04392   |
| 7w11w_SITTI | 0.047901   | 0.2784399  | 5.64E-05 | 0.0055867 | 0.038361  |
| 7w11w_SITTI | 0.02267082 | 0.12619863 | 3.55E-05 | 0.0043197 | -0.056631 |
| 7w11w_SITTI | 0.03080414 | 0.1752759  | 4.11E-05 | 0.0040705 | -0.10299  |
| 7w11w_SITTI | 0.13650428 | 0.8130802  | 6.72E-05 | 0.023527  | -0.4775   |
| 7w11w_SITTI | 0.09785257 | 0.5798522  | 6.51E-05 | 0.023964  | -0.074831 |
| 7w11w_SITTI | 0.02754335 | 0.15559997 | 3.88E-05 | 0.0040827 | -0.10472  |
| 7w11w_SITTI | 0.05415123 | 0.31615436 | 5.92E-05 | 0.0069681 | 0.062513  |
| 7w11w_SITTI | 0.02093885 | 0.11574782 | 3.47E-05 | 0.0044724 | -0.023601 |
| 7w11w_SITTI | 0.10896785 | 0.6469228  | 6.59E-05 | 0.025616  | -0.25305  |
| 7w11w_SITTI | 0.04573667 | 0.26538014 | 5.50E-05 | 0.0052335 | 0.025099  |
| 7w11w_SITTI | 0.0131724  | 0.06888433 | 3.24E-05 | 0.0057681 | 0.23179   |
| 7w11w_SITTI | 0.02158525 | 0.11964826 | 3.49E-05 | 0.0044169 | -0.0356   |
| 7w11w_SITTI | 0.01265643 | 0.06577095 | 3.23E-05 | 0.0059016 | 0.25518   |
| 7w11w_SITTI | 0.10582273 | 0.6279449  | 6.58E-05 | 0.025526  | -0.20623  |
| 7w11w_SITTI | 0.01046159 | 0.05252704 | 3.21E-05 | 0.0064976 | 0.35381   |
| 7w11w_SITTI | 0.00862495 | 0.04144463 | 3.19E-05 | 0.0071994 | 0.45929   |
| 7w11w_SITTI | 0.13230562 | 0.7877451  | 6.71E-05 | 0.023568  | -0.45284  |
| 7w11w_SITTI | 0.01688868 | 0.0913087  | 3.31E-05 | 0.0050879 | 0.10435   |
| 7w11w_SITTI | 0.01765943 | 0.09595946 | 3.34E-05 | 0.0049043 | 0.067421  |
| 7w11w_SITTI | 0.02213767 | 0.12298159 | 3.52E-05 | 0.0043661 | -0.046619 |
| 7w11w_SITTI | 0.03676948 | 0.2112713  | 4.70E-05 | 0.0042982 | -0.062998 |
| 7w11w_SITTI | 0.07615945 | 0.44895396 | 6.26E-05 | 0.0148    | 0.1354    |
| 7w11w_SITTI | 0.01860608 | 0.10167163 | 3.36E-05 | 0.0048202 | 0.050123  |
| 7w11w_SITTI | 0.01913986 | 0.10489252 | 3.38E-05 | 0.004741  | 0.03364   |
| 7w11w_SITTI | 0.11909284 | 0.70801795 | 6.65E-05 | 0.024704  | -0.3584   |
| 7w11w_SITTI | 0.01418062 | 0.07496804 | 3.25E-05 | 0.0056405 | 0.20898   |
| 7w11w_SITTI | 0.02879665 | 0.16316248 | 3.97E-05 | 0.0040686 | -0.10664  |
| 7w11w_SITTI | 0.0195754  | 0.10752064 | 3.40E-05 | 0.0046667 | 0.017998  |
| 7w11w_SITTI | 0.10400988 | 0.617006   | 6.56E-05 | 0.025296  | -0.18011  |
| 7w11w_SITTI | 0.09319646 | 0.5517568  | 6.47E-05 | 0.022469  | 0.0013661 |
| 7w11w_SITTI | 0.07051092 | 0.41487026 | 6.19E-05 | 0.012376  | 0.11689   |
| 7w11w_SITTI | 0.01040087 | 0.05216067 | 3.21E-05 | 0.0064976 | 0.35381   |

|             |            |            |          |           |           |
|-------------|------------|------------|----------|-----------|-----------|
| 7w11w_SITTI | 0.07297706 | 0.42975113 | 6.22E-05 | 0.01332   | 0.12737   |
| 7w11w_SITTI | 0.11752667 | 0.69856757 | 6.64E-05 | 0.024917  | -0.34876  |
| 7w11w_SITTI | 0.02619175 | 0.1474443  | 3.76E-05 | 0.0041286 | -0.096385 |
| 7w11w_SITTI | 0.03732342 | 0.21461384 | 4.76E-05 | 0.0043355 | -0.057524 |
| 7w11w_SITTI | 0.07292705 | 0.42944938 | 6.22E-05 | 0.01332   | 0.12737   |
| 7w11w_SITTI | 0.014947   | 0.07959243 | 3.27E-05 | 0.0054028 | 0.16515   |
| 7w11w_SITTI | 0.03202418 | 0.18263774 | 4.27E-05 | 0.004099  | -0.097962 |
| 7w11w_SITTI | 0.12397141 | 0.7374557  | 6.67E-05 | 0.024153  | -0.39752  |
| 7w11w_SITTI | 0.07045158 | 0.41451216 | 6.19E-05 | 0.012376  | 0.11689   |
| 7w11w_SITTI | 0.0251375  | 0.14108284 | 3.68E-05 | 0.0041768 | -0.086782 |
| 7w11w_SITTI | 0.12320326 | 0.7328206  | 6.67E-05 | 0.024217  | -0.39346  |
| 7w11w_SITTI | 0.02631124 | 0.14816532 | 3.76E-05 | 0.0041286 | -0.096385 |
| 7w11w_SITTI | 0.11992759 | 0.7130549  | 6.65E-05 | 0.024632  | -0.36766  |
| 7w11w_SITTI | 0.01493595 | 0.07952572 | 3.27E-05 | 0.0054028 | 0.16515   |
| 7w11w_SITTI | 0.05692632 | 0.3328995  | 5.99E-05 | 0.0076952 | 0.070131  |
| 7w11w_SITTI | 0.02243047 | 0.12474837 | 3.52E-05 | 0.0043661 | -0.046619 |
| 7w11w_SITTI | 0.0097209  | 0.04805764 | 3.20E-05 | 0.0068348 | 0.4058    |
| 7w11w_SITTI | 0.10664275 | 0.632893   | 6.58E-05 | 0.02556   | -0.22263  |
| 7w11w_SITTI | 0.04880465 | 0.28389263 | 5.70E-05 | 0.0057827 | 0.041222  |
| 7w11w_SITTI | 0.0513436  | 0.29921287 | 5.81E-05 | 0.006215  | 0.053285  |
| 7w11w_SITTI | 0.00932225 | 0.04565216 | 3.20E-05 | 0.0068348 | 0.4058    |
| 7w11w_SITTI | 0.0423044  | 0.24466951 | 5.24E-05 | 0.0047963 | -0.00654  |
| 7w11w_SITTI | 0.02587277 | 0.14551951 | 3.76E-05 | 0.0041286 | -0.096385 |
| 7w11w_SITTI | 0.0838161  | 0.4951549  | 6.37E-05 | 0.01841   | 0.1176    |
| 7w11w_SITTI | 0.11915954 | 0.70842046 | 6.65E-05 | 0.024704  | -0.36308  |
| 7w11w_SITTI | 0.02340813 | 0.13064766 | 3.58E-05 | 0.0042778 | -0.065623 |
| 7w11w_SITTI | 0.01625362 | 0.0874767  | 3.30E-05 | 0.0051875 | 0.12392   |
| 7w11w_SITTI | 0.1122536  | 0.66674936 | 6.61E-05 | 0.025489  | -0.29336  |
| 7w11w_SITTI | 0.02923759 | 0.16582315 | 4.02E-05 | 0.0040662 | -0.10661  |
| 7w11w_SITTI | 0.01345284 | 0.07057653 | 3.24E-05 | 0.0057681 | 0.23179   |
| 7w11w_SITTI | 0.03850614 | 0.22175045 | 4.87E-05 | 0.0044183 | -0.040459 |
| 7w11w_SITTI | 0.03290991 | 0.1879823  | 4.32E-05 | 0.0041142 | -0.094772 |
| 7w11w_SITTI | 0.10145803 | 0.6016079  | 6.54E-05 | 0.024923  | -0.13341  |
| 7w11w_SITTI | 0.0243132  | 0.13610896 | 3.64E-05 | 0.0042065 | -0.080664 |
| 7w11w_SITTI | 0.01192634 | 0.06136551 | 3.22E-05 | 0.0061869 | 0.30353   |
| 7w11w_SITTI | 0.01106997 | 0.0561981  | 3.21E-05 | 0.006339  | 0.32844   |
| 7w11w_SITTI | 0.04539354 | 0.2633097  | 5.50E-05 | 0.0052335 | 0.021279  |
| 7w11w_SITTI | 0.13037169 | 0.7760756  | 6.70E-05 | 0.02364   | -0.44263  |
| 7w11w_SITTI | 0.07620687 | 0.44924012 | 6.26E-05 | 0.0148    | 0.1354    |
| 7w11w_SITTI | 0.10384081 | 0.6159858  | 6.56E-05 | 0.025296  | -0.18011  |
| 7w11w_SITTI | 0.03787246 | 0.21792676 | 4.81E-05 | 0.0043756 | -0.05192  |
| 7w11w_SITTI | 0.02398306 | 0.13411687 | 3.61E-05 | 0.0042401 | -0.073623 |
| 7w11w_SITTI | 0.04933455 | 0.28709006 | 5.73E-05 | 0.0058857 | 0.04392   |

|             |            |            |          |           |           |
|-------------|------------|------------|----------|-----------|-----------|
| 7w11w_SITTI | 0.08872839 | 0.52479607 | 6.42E-05 | 0.020663  | 0.074212  |
| 7w11w_SITTI | 0.02182086 | 0.12106991 | 3.49E-05 | 0.0044169 | -0.0356   |
| 7w11w_SITTI | 0.02502118 | 0.14038093 | 3.68E-05 | 0.0041768 | -0.086782 |
| 7w11w_SITTI | 0.0767222  | 0.45234963 | 6.27E-05 | 0.015053  | 0.13605   |
| 7w11w_SITTI | 0.02761561 | 0.156036   | 3.88E-05 | 0.0040827 | -0.10472  |
| 7w11w_SITTI | 0.01668988 | 0.09010914 | 3.31E-05 | 0.0050879 | 0.10435   |
| 7w11w_SITTI | 0.01524887 | 0.08141393 | 3.27E-05 | 0.0054028 | 0.16515   |
| 7w11w_SITTI | 0.08193664 | 0.4838141  | 6.35E-05 | 0.017633  | 0.12948   |
| 7w11w_SITTI | 0.07116967 | 0.4188452  | 6.20E-05 | 0.012608  | 0.12136   |
| 7w11w_SITTI | 0.02256188 | 0.12554134 | 3.55E-05 | 0.0043197 | -0.056631 |
| 7w11w_SITTI | 0.13191418 | 0.7853831  | 6.71E-05 | 0.023582  | -0.45284  |
| 7w11w_SITTI | 0.0252818  | 0.14195359 | 3.68E-05 | 0.0041768 | -0.092011 |
| 7w11w_SITTI | 0.1158096  | 0.68820655 | 6.63E-05 | 0.025119  | -0.32814  |
| 7w11w_SITTI | 0.03502541 | 0.20074745 | 4.54E-05 | 0.0042028 | -0.078293 |
| 7w11w_SITTI | 0.01360342 | 0.07148517 | 3.24E-05 | 0.0057681 | 0.23179   |
| 7w11w_SITTI | 0.06881473 | 0.40463528 | 6.16E-05 | 0.011695  | 0.10977   |
| 7w11w_SITTI | 0.03962884 | 0.22852494 | 4.98E-05 | 0.0045122 | -0.028892 |
| 7w11w_SITTI | 0.07290444 | 0.42931294 | 6.22E-05 | 0.01332   | 0.12737   |
| 7w11w_SITTI | 0.10697555 | 0.6349011  | 6.58E-05 | 0.025586  | -0.22263  |
| 7w11w_SITTI | 0.06686715 | 0.3928834  | 6.13E-05 | 0.010826  | 0.10251   |
| 7w11w_SITTI | 0.14609763 | 0.8709673  | 6.75E-05 | 0.02365   | -0.51443  |
| 7w11w_SITTI | 0.0443516  | 0.2570225  | 5.42E-05 | 0.0050757 | 0.012967  |
| 7w11w_SITTI | 0.11969864 | 0.71167344 | 6.65E-05 | 0.024632  | -0.36766  |
| 7w11w_SITTI | 0.01281894 | 0.0667515  | 3.23E-05 | 0.0059016 | 0.25518   |
| 7w11w_SITTI | 0.11205382 | 0.66554385 | 6.61E-05 | 0.025489  | -0.29336  |
| 7w11w_SITTI | 0.02877341 | 0.16302226 | 3.97E-05 | 0.0040686 | -0.10664  |
| 7w11w_SITTI | 0.01998249 | 0.10997705 | 3.42E-05 | 0.0045972 | 0.0032259 |
| 7w11w_SITTI | 0.09838057 | 0.5830383  | 6.52E-05 | 0.024123  | -0.084641 |
| 7w11w_SITTI | 0.0329539  | 0.18824776 | 4.32E-05 | 0.0041142 | -0.094772 |
| 7w11w_SITTI | 0.01231343 | 0.06370122 | 3.23E-05 | 0.0060411 | 0.2791    |
| 7w11w_SITTI | 0.02275115 | 0.1266834  | 3.55E-05 | 0.0043197 | -0.056631 |
| 7w11w_SITTI | 0.07184899 | 0.42294425 | 6.20E-05 | 0.012843  | 0.12348   |
| 7w11w_SITTI | 0.03106027 | 0.17682138 | 4.16E-05 | 0.0040771 | -0.10299  |
| 7w11w_SITTI | 0.01230349 | 0.06364127 | 3.23E-05 | 0.0060411 | 0.2791    |
| 7w11w_SITTI | 0.01233574 | 0.06383585 | 3.23E-05 | 0.0060411 | 0.2791    |
| 7w11w_SITTI | 0.01560623 | 0.08357029 | 3.28E-05 | 0.0052924 | 0.1442    |
| 7w11w_SITTI | 0.07455082 | 0.4392473  | 6.24E-05 | 0.014051  | 0.13218   |
| 7w11w_SITTI | 0.02878984 | 0.16312137 | 3.97E-05 | 0.0040686 | -0.10664  |
| 7w11w_SITTI | 0.05052455 | 0.29427063 | 5.78E-05 | 0.0061018 | 0.048868  |
| 7w11w_SITTI | 0.01208514 | 0.06232369 | 3.23E-05 | 0.0060411 | 0.2791    |
| 7w11w_SITTI | 0.02506878 | 0.14066817 | 3.68E-05 | 0.0041768 | -0.086782 |
| 7w11w_SITTI | 0.08250731 | 0.48725757 | 6.35E-05 | 0.017892  | 0.1271    |
| 7w11w_SITTI | 0.04857289 | 0.2824942  | 5.67E-05 | 0.0056831 | 0.041222  |

|             |            |            |          |           |           |
|-------------|------------|------------|----------|-----------|-----------|
| 7w11w_SITTI | 0.09657265 | 0.5721291  | 6.50E-05 | 0.023626  | -0.055297 |
| 7w11w_SITTI | 0.04202627 | 0.24299122 | 5.24E-05 | 0.0047963 | -0.00654  |
| 7w11w_SITTI | 0.06088568 | 0.3567907  | 6.06E-05 | 0.008866  | 0.080421  |
| 7w11w_SITTI | 0.12603332 | 0.7498975  | 6.68E-05 | 0.023927  | -0.41325  |
| 7w11w_SITTI | 0.11016101 | 0.6541225  | 6.60E-05 | 0.02558   | -0.26716  |
| 7w11w_SITTI | 0.10171732 | 0.6031725  | 6.54E-05 | 0.024923  | -0.14299  |
| 7w11w_SITTI | 0.02216193 | 0.12312798 | 3.52E-05 | 0.0043661 | -0.046619 |
| 7w11w_SITTI | 0.01428713 | 0.07561073 | 3.26E-05 | 0.0055188 | 0.18676   |
| 7w11w_SITTI | 0.01551621 | 0.08302712 | 3.28E-05 | 0.0052924 | 0.1442    |
| 7w11w_SITTI | 0.02489995 | 0.13964948 | 3.68E-05 | 0.0041768 | -0.086782 |
| 7w11w_SITTI | 0.10046184 | 0.5955968  | 6.53E-05 | 0.024687  | -0.12375  |
| 7w11w_SITTI | 0.01648794 | 0.08889061 | 3.31E-05 | 0.0050879 | 0.10435   |
| 7w11w_SITTI | 0.08095731 | 0.4779047  | 6.33E-05 | 0.017113  | 0.13314   |
| 7w11w_SITTI | 0.11364171 | 0.67512536 | 6.62E-05 | 0.025353  | -0.31137  |
| 7w11w_SITTI | 0.02011561 | 0.11078031 | 3.42E-05 | 0.0045972 | 0.0032259 |
| 7w11w_SITTI | 0.01231739 | 0.0637251  | 3.23E-05 | 0.0060411 | 0.2791    |
| 7w11w_SITTI | 0.08653159 | 0.5115404  | 6.40E-05 | 0.019681  | 0.099025  |
| 7w11w_SITTI | 0.02386006 | 0.13337466 | 3.61E-05 | 0.0042401 | -0.073623 |
| 7w11w_SITTI | 0.06947558 | 0.40862292 | 6.17E-05 | 0.01192   | 0.11455   |
| 7w11w_SITTI | 0.07025948 | 0.41335303 | 6.19E-05 | 0.012376  | 0.11689   |
| 7w11w_SITTI | 0.08919445 | 0.52760834 | 6.43E-05 | 0.020902  | 0.067165  |
| 7w11w_SITTI | 0.08010043 | 0.4727342  | 6.32E-05 | 0.016594  | 0.13446   |
| 7w11w_SITTI | 0.04776235 | 0.27760327 | 5.64E-05 | 0.0055867 | 0.035328  |
| 7w11w_SITTI | 0.09818529 | 0.5818599  | 6.52E-05 | 0.024123  | -0.084641 |
| 7w11w_SITTI | 0.01387893 | 0.07314759 | 3.25E-05 | 0.0056405 | 0.20898   |
| 7w11w_SITTI | 0.00689764 | 0.03102183 | 3.18E-05 | 0.0078    | 0.54183   |
| 7w11w_SITTI | 0.01018204 | 0.05084023 | 3.20E-05 | 0.0066628 | 0.37961   |
| 7w11w_SITTI | 0.0644629  | 0.37837595 | 6.10E-05 | 0.010005  | 0.093303  |
| 7w11w_SITTI | 0.10837511 | 0.6433462  | 6.59E-05 | 0.025614  | -0.24573  |
| 7w11w_SITTI | 0.13337947 | 0.79422486 | 6.71E-05 | 0.023556  | -0.45937  |
| 7w11w_SITTI | 0.07224879 | 0.42535672 | 6.21E-05 | 0.01308   | 0.12548   |
| 7w11w_SITTI | 0.01922028 | 0.10537779 | 3.40E-05 | 0.0046667 | 0.017998  |
| 7w11w_SITTI | 0.08687328 | 0.5136022  | 6.41E-05 | 0.01993   | 0.093363  |
| 7w11w_SITTI | 0.08080333 | 0.47697556 | 6.33E-05 | 0.017113  | 0.13314   |
| 7w11w_SITTI | 0.01532336 | 0.0818634  | 3.27E-05 | 0.0054028 | 0.1442    |
| 7w11w_SITTI | 0.00935441 | 0.04584621 | 3.20E-05 | 0.0068348 | 0.4058    |
| 7w11w_SITTI | 0.12537946 | 0.745952   | 6.68E-05 | 0.023978  | -0.40938  |
| 7w11w_SITTI | 0.06209588 | 0.36409312 | 6.07E-05 | 0.0092324 | 0.083692  |
| 7w11w_SITTI | 0.02438377 | 0.1365348  | 3.64E-05 | 0.0042065 | -0.080664 |
| 7w11w_SITTI | 0.13048851 | 0.77678055 | 6.70E-05 | 0.02364   | -0.44263  |
| 7w11w_SITTI | 0.10656146 | 0.6324025  | 6.58E-05 | 0.02556   | -0.22263  |
| 7w11w_SITTI | 0.05324171 | 0.31066626 | 5.89E-05 | 0.0067028 | 0.059084  |
| 7w11w_SITTI | 0.00831048 | 0.03954706 | 3.19E-05 | 0.0071994 | 0.45929   |



|             |            |            |          |           |           |
|-------------|------------|------------|----------|-----------|-----------|
| 7w11w_SITTI | 0.0167638  | 0.09055518 | 3.31E-05 | 0.0050879 | 0.10435   |
| 7w11w_SITTI | 0.01805711 | 0.09835912 | 3.34E-05 | 0.0049043 | 0.050123  |
| 7w11w_SITTI | 0.08785027 | 0.5194974  | 6.41E-05 | 0.020177  | 0.080939  |
| 7w11w_SITTI | 0.07237701 | 0.42613038 | 6.21E-05 | 0.01308   | 0.12548   |
| 7w11w_SITTI | 0.10425338 | 0.6184753  | 6.56E-05 | 0.025367  | -0.18901  |
| 7w11w_SITTI | 0.0859765  | 0.50819093 | 6.39E-05 | 0.01943   | 0.1043    |
| 7w11w_SITTI | 0.02696705 | 0.15212254 | 3.80E-05 | 0.0041099 | -0.10271  |
| 7w11w_SITTI | 0.01655225 | 0.08927865 | 3.31E-05 | 0.0050879 | 0.10435   |
| 7w11w_SITTI | 0.04573559 | 0.26537362 | 5.50E-05 | 0.0052335 | 0.025099  |
| 7w11w_SITTI | 0.09309283 | 0.5511315  | 6.47E-05 | 0.022469  | 0.010343  |
| 7w11w_SITTI | 0.06896242 | 0.40552643 | 6.16E-05 | 0.011695  | 0.11218   |
| 7w11w_SITTI | 0.02295678 | 0.1279242  | 3.55E-05 | 0.0043197 | -0.056631 |
| 7w11w_SITTI | 0.03179704 | 0.18126716 | 4.22E-05 | 0.0040866 | -0.10071  |
| 7w11w_SITTI | 0.07163681 | 0.42166397 | 6.20E-05 | 0.012843  | 0.12136   |
| 7w11w_SITTI | 0.08839616 | 0.5227914  | 6.42E-05 | 0.020421  | 0.074212  |
| 7w11w_SITTI | 0.01692875 | 0.0915505  | 3.31E-05 | 0.0050879 | 0.10435   |
| 7w11w_SITTI | 0.09592433 | 0.56821704 | 6.50E-05 | 0.023448  | -0.035993 |
| 7w11w_SITTI | 0.01193048 | 0.0613905  | 3.22E-05 | 0.0061869 | 0.30353   |
| 7w11w_SITTI | 0.05328969 | 0.31095573 | 5.89E-05 | 0.0067028 | 0.059084  |
| 7w11w_SITTI | 0.02143763 | 0.11875747 | 3.49E-05 | 0.0044169 | -0.0356   |
| 7w11w_SITTI | 0.0710028  | 0.4178383  | 6.20E-05 | 0.012608  | 0.11916   |
| 7w11w_SITTI | 0.12409028 | 0.738173   | 6.67E-05 | 0.024092  | -0.39752  |
| 7w11w_SITTI | 0.0114756  | 0.05864569 | 3.22E-05 | 0.0061869 | 0.30353   |
| 7w11w_SITTI | 0.09719147 | 0.57586306 | 6.51E-05 | 0.023799  | -0.065044 |
| 7w11w_SITTI | 0.04319436 | 0.25003958 | 5.33E-05 | 0.0049301 | 0.0036923 |
| 7w11w_SITTI | 0.04539577 | 0.2633231  | 5.50E-05 | 0.0052335 | 0.021279  |
| 7w11w_SITTI | 0.03075028 | 0.17495085 | 4.11E-05 | 0.0040705 | -0.10475  |
| 7w11w_SITTI | 0.08484884 | 0.5013866  | 6.38E-05 | 0.018923  | 0.1136    |
| 7w11w_SITTI | 0.08070689 | 0.47639364 | 6.32E-05 | 0.016854  | 0.13314   |
| 7w11w_SITTI | 0.02551401 | 0.14335473 | 3.72E-05 | 0.0041509 | -0.092011 |
| 7w11w_SITTI | 0.14013398 | 0.8349821  | 6.74E-05 | 0.023558  | -0.49317  |
| 7w11w_SITTI | 0.03426664 | 0.1961689  | 4.48E-05 | 0.0041765 | -0.082901 |
| 7w11w_SITTI | 0.01721767 | 0.09329388 | 3.33E-05 | 0.0049935 | 0.085504  |
| 7w11w_SITTI | 0.01537297 | 0.08216278 | 3.28E-05 | 0.0052924 | 0.1442    |
| 7w11w_SITTI | 0.01130225 | 0.0575997  | 3.21E-05 | 0.006339  | 0.32844   |
| 7w11w_SITTI | 0.10276371 | 0.6094865  | 6.55E-05 | 0.025127  | -0.16182  |
| 7w11w_SITTI | 0.01569135 | 0.08408391 | 3.28E-05 | 0.0052924 | 0.1442    |
| 7w11w_SITTI | 0.02272613 | 0.12653245 | 3.55E-05 | 0.0043197 | -0.056631 |
| 7w11w_SITTI | 0.05620768 | 0.3285632  | 5.97E-05 | 0.0073934 | 0.068678  |
| 7w11w_SITTI | 0.09601263 | 0.56874985 | 6.50E-05 | 0.023448  | -0.045608 |
| 7w11w_SITTI | 0.10065189 | 0.5967436  | 6.53E-05 | 0.024687  | -0.12375  |
| 7w11w_SITTI | 0.09157661 | 0.5419825  | 6.45E-05 | 0.021822  | 0.027741  |
| 7w11w_SITTI | 0.08912463 | 0.527187   | 6.43E-05 | 0.020902  | 0.067165  |

|             |            |            |          |           |            |
|-------------|------------|------------|----------|-----------|------------|
| 7w11w_SITTI | 0.02434983 | 0.13632996 | 3.64E-05 | 0.0042065 | -0.080664  |
| 7w11w_SITTI | 0.0577554  | 0.33790228 | 6.00E-05 | 0.0078516 | 0.071569   |
| 7w11w_SITTI | 0.10147061 | 0.6016838  | 6.54E-05 | 0.024923  | -0.14299   |
| 7w11w_SITTI | 0.02669363 | 0.1504727  | 3.80E-05 | 0.0041099 | -0.099939  |
| 7w11w_SITTI | 0.01549543 | 0.08290172 | 3.28E-05 | 0.0052924 | 0.1442     |
| 7w11w_SITTI | 0.05623255 | 0.32871324 | 5.97E-05 | 0.0073934 | 0.068678   |
| 7w11w_SITTI | 0.07815824 | 0.46101484 | 6.29E-05 | 0.015819  | 0.13662    |
| 7w11w_SITTI | 0.06130297 | 0.35930863 | 6.06E-05 | 0.008866  | 0.082025   |
| 7w11w_SITTI | 0.09310788 | 0.5512223  | 6.47E-05 | 0.022469  | 0.010343   |
| 7w11w_SITTI | 0.03867267 | 0.2227553  | 4.92E-05 | 0.0044639 | -0.040459  |
| 7w11w_SITTI | 0.01348438 | 0.07076681 | 3.24E-05 | 0.0057681 | 0.23179    |
| 7w11w_SITTI | 0.02522758 | 0.14162637 | 3.68E-05 | 0.0041768 | -0.086782  |
| 7w11w_SITTI | 0.01430624 | 0.075726   | 3.26E-05 | 0.0055188 | 0.18676    |
| 7w11w_SITTI | 0.04784924 | 0.27812758 | 5.64E-05 | 0.0055867 | 0.035328   |
| 7w11w_SITTI | 0.02011263 | 0.11076233 | 3.42E-05 | 0.0045972 | 0.0032259  |
| 7w11w_SITTI | 0.07518662 | 0.44308382 | 6.25E-05 | 0.014299  | 0.13345    |
| 7w11w_SITTI | 0.02435829 | 0.13638102 | 3.64E-05 | 0.0042065 | -0.080664  |
| 7w11w_SITTI | 0.03474917 | 0.19908053 | 4.54E-05 | 0.0042028 | -0.078293  |
| 7w11w_SITTI | 0.0175704  | 0.09542224 | 3.34E-05 | 0.0049043 | 0.067421   |
| 7w11w_SITTI | 0.02483912 | 0.13928239 | 3.68E-05 | 0.0041768 | -0.086782  |
| 7w11w_SITTI | 0.02305768 | 0.12853304 | 3.55E-05 | 0.0043197 | -0.065623  |
| 7w11w_SITTI | 0.08496907 | 0.502112   | 6.38E-05 | 0.018923  | 0.10916    |
| 7w11w_SITTI | 0.02354358 | 0.131465   | 3.58E-05 | 0.0042778 | -0.065623  |
| 7w11w_SITTI | 0.06592081 | 0.38717306 | 6.13E-05 | 0.010616  | 0.097788   |
| 7w11w_SITTI | 0.05422099 | 0.31657532 | 5.92E-05 | 0.0069681 | 0.062513   |
| 7w11w_SITTI | 0.03532755 | 0.20257054 | 4.59E-05 | 0.0042319 | -0.073417  |
| 7w11w_SITTI | 0.1023368  | 0.60691047 | 6.55E-05 | 0.025029  | -0.15246   |
| 7w11w_SITTI | 0.08742754 | 0.5169467  | 6.41E-05 | 0.020177  | 0.087329   |
| 7w11w_SITTI | 0.01600184 | 0.08595744 | 3.30E-05 | 0.0051875 | 0.12392    |
| 7w11w_SITTI | 0.03520867 | 0.20185325 | 4.54E-05 | 0.0042028 | -0.073417  |
| 7w11w_SITTI | 0.01338325 | 0.07015665 | 3.24E-05 | 0.0057681 | 0.23179    |
| 7w11w_SITTI | 0.09412214 | 0.55734247 | 6.48E-05 | 0.022877  | -0.0077738 |
| 7w11w_SITTI | 0.06428102 | 0.37727845 | 6.10E-05 | 0.010005  | 0.091185   |
| 7w11w_SITTI | 0.00968208 | 0.04782341 | 3.20E-05 | 0.0068348 | 0.4058     |
| 7w11w_SITTI | 0.02325522 | 0.12972498 | 3.58E-05 | 0.0042778 | -0.065623  |
| 7w11w_SITTI | 0.01838423 | 0.100333   | 3.36E-05 | 0.0048202 | 0.050123   |
| 7w11w_SITTI | 0.07941874 | 0.46862084 | 6.31E-05 | 0.016335  | 0.13545    |
| 7w11w_SITTI | 0.02198801 | 0.12207851 | 3.52E-05 | 0.0043661 | -0.046619  |
| 7w11w_SITTI | 0.10281809 | 0.6098146  | 6.55E-05 | 0.025127  | -0.16182   |
| 7w11w_SITTI | 0.0954427  | 0.56531084 | 6.49E-05 | 0.023263  | -0.035993  |
| 7w11w_SITTI | 0.0169233  | 0.09151763 | 3.31E-05 | 0.0050879 | 0.10435    |
| 7w11w_SITTI | 0.08200546 | 0.48422936 | 6.35E-05 | 0.017633  | 0.12948    |
| 7w11w_SITTI | 0.00797398 | 0.03751657 | 3.19E-05 | 0.0073923 | 0.48652    |

|             |            |            |          |           |            |
|-------------|------------|------------|----------|-----------|------------|
| 7w11w_SITTI | 0.07677673 | 0.45267868 | 6.27E-05 | 0.015053  | 0.13605    |
| 7w11w_SITTI | 0.02144594 | 0.11880762 | 3.49E-05 | 0.0044169 | -0.0356    |
| 7w11w_SITTI | 0.09227642 | 0.5462052  | 6.46E-05 | 0.022042  | 0.019141   |
| 7w11w_SITTI | 0.08247135 | 0.48704055 | 6.35E-05 | 0.017892  | 0.1271     |
| 7w11w_SITTI | 0.01665427 | 0.08989424 | 3.31E-05 | 0.0050879 | 0.10435    |
| 7w11w_SITTI | 0.0424018  | 0.24525724 | 5.24E-05 | 0.0047963 | -0.0013165 |
| 7w11w_SITTI | 0.01471401 | 0.07818653 | 3.26E-05 | 0.0055188 | 0.18676    |
| 7w11w_SITTI | 0.0822145  | 0.48549068 | 6.35E-05 | 0.017633  | 0.1271     |
| 7w11w_SITTI | 0.02334556 | 0.13027011 | 3.58E-05 | 0.0042778 | -0.065623  |
| 7w11w_SITTI | 0.06048127 | 0.35435045 | 6.05E-05 | 0.008688  | 0.07887    |
| 7w11w_SITTI | 0.03622837 | 0.20800622 | 4.65E-05 | 0.0042637 | -0.068307  |
| 7w11w_SITTI | 0.09748456 | 0.5776316  | 6.51E-05 | 0.023964  | -0.065044  |
| 7w11w_SITTI | 0.04837047 | 0.28127277 | 5.67E-05 | 0.0056831 | 0.038361   |
| 7w11w_SITTI | 0.10160235 | 0.60247874 | 6.54E-05 | 0.024923  | -0.14299   |
| 7w11w_SITTI | 0.03365815 | 0.19249722 | 4.43E-05 | 0.004153  | -0.087207  |
| 7w11w_SITTI | 0.015245   | 0.08139057 | 3.27E-05 | 0.0054028 | 0.16515    |
| 7w11w_SITTI | 0.017178   | 0.09305447 | 3.33E-05 | 0.0049935 | 0.085504   |
| 7w11w_SITTI | 0.03060237 | 0.17405838 | 4.11E-05 | 0.0040705 | -0.10475   |
| 7w11w_SITTI | 0.01172823 | 0.06017009 | 3.22E-05 | 0.0061869 | 0.30353    |
| 7w11w_SITTI | 0.12104    | 0.71976733 | 6.66E-05 | 0.02449   | -0.37656   |
| 7w11w_SITTI | 0.01919559 | 0.1052288  | 3.38E-05 | 0.004741  | 0.017998   |
| 7w11w_SITTI | 0.02411475 | 0.13491148 | 3.61E-05 | 0.0042401 | -0.073623  |
| 7w11w_SITTI | 0.01783305 | 0.09700713 | 3.34E-05 | 0.0049043 | 0.067421   |
| 7w11w_SITTI | 0.01698396 | 0.09188364 | 3.31E-05 | 0.0050879 | 0.085504   |
| 7w11w_SITTI | 0.0959973  | 0.56865734 | 6.50E-05 | 0.023448  | -0.045608  |
| 7w11w_SITTI | 0.0221702  | 0.12317787 | 3.52E-05 | 0.0043661 | -0.046619  |
| 7w11w_SITTI | 0.0422152  | 0.24413128 | 5.24E-05 | 0.0047963 | -0.00654   |
| 7w11w_SITTI | 0.11004838 | 0.65344286 | 6.60E-05 | 0.025599  | -0.26716   |
| 7w11w_SITTI | 0.03838347 | 0.22101025 | 4.87E-05 | 0.0044183 | -0.04622   |
| 7w11w_SITTI | 0.06225339 | 0.36504358 | 6.07E-05 | 0.0092324 | 0.085432   |
| 7w11w_SITTI | 0.05870063 | 0.34360588 | 6.02E-05 | 0.0081753 | 0.074438   |
| 7w11w_SITTI | 0.06952506 | 0.40892142 | 6.17E-05 | 0.01192   | 0.11455    |
| 7w11w_SITTI | 0.06191682 | 0.36301264 | 6.07E-05 | 0.0092324 | 0.083692   |
| 7w11w_SITTI | 0.12457756 | 0.74111325 | 6.68E-05 | 0.024034  | -0.40152   |
| 7w11w_SITTI | 0.02446549 | 0.13702789 | 3.64E-05 | 0.0042065 | -0.080664  |
| 7w11w_SITTI | 0.01162578 | 0.05955189 | 3.22E-05 | 0.0061869 | 0.30353    |
| 7w11w_SITTI | 0.01496247 | 0.07968581 | 3.27E-05 | 0.0054028 | 0.16515    |
| 7w11w_SITTI | 0.1030948  | 0.61148435 | 6.56E-05 | 0.025216  | -0.16182   |
| 7w11w_SITTI | 0.08546749 | 0.5051195  | 6.39E-05 | 0.019177  | 0.1043     |
| 7w11w_SITTI | 0.05054249 | 0.29437888 | 5.78E-05 | 0.0061018 | 0.048868   |
| 7w11w_SITTI | 0.08779264 | 0.5191497  | 6.41E-05 | 0.020177  | 0.080939   |
| 7w11w_SITTI | 0.00994056 | 0.04938313 | 3.20E-05 | 0.0066628 | 0.37961    |
| 7w11w_SITTI | 0.03953072 | 0.22793286 | 4.98E-05 | 0.0045122 | -0.034672  |

|             |            |            |          |           |            |
|-------------|------------|------------|----------|-----------|------------|
| 7w11w_SITTI | 0.01151138 | 0.05886158 | 3.22E-05 | 0.0061869 | 0.30353    |
| 7w11w_SITTI | 0.01143893 | 0.05842439 | 3.21E-05 | 0.006339  | 0.30353    |
| 7w11w_SITTI | 0.01326345 | 0.06943373 | 3.24E-05 | 0.0057681 | 0.23179    |
| 7w11w_SITTI | 0.01494317 | 0.07956931 | 3.27E-05 | 0.0054028 | 0.16515    |
| 7w11w_SITTI | 0.03497358 | 0.20043465 | 4.54E-05 | 0.0042028 | -0.078293  |
| 7w11w_SITTI | 0.05504449 | 0.32154438 | 5.94E-05 | 0.0071062 | 0.064127   |
| 7w11w_SITTI | 0.02702505 | 0.1524725  | 3.84E-05 | 0.0040947 | -0.10271   |
| 7w11w_SITTI | 0.14340386 | 0.8547129  | 6.75E-05 | 0.023613  | -0.50606   |
| 7w11w_SITTI | 0.11423583 | 0.67871034 | 6.63E-05 | 0.025299  | -0.3171    |
| 7w11w_SITTI | 0.09729759 | 0.5765034  | 6.51E-05 | 0.023799  | -0.065044  |
| 7w11w_SITTI | 0.05990473 | 0.35087153 | 6.04E-05 | 0.0085136 | 0.077363   |
| 7w11w_SITTI | 0.05924058 | 0.34686396 | 6.03E-05 | 0.0083426 | 0.075889   |
| 7w11w_SITTI | 0.01191274 | 0.06128345 | 3.22E-05 | 0.0061869 | 0.30353    |
| 7w11w_SITTI | 0.02610195 | 0.14690244 | 3.76E-05 | 0.0041286 | -0.096385  |
| 7w11w_SITTI | 0.1144119  | 0.67977273 | 6.63E-05 | 0.025299  | -0.3171    |
| 7w11w_SITTI | 0.03008515 | 0.17093746 | 4.07E-05 | 0.0040668 | -0.10597   |
| 7w11w_SITTI | 0.02884596 | 0.16346005 | 3.97E-05 | 0.0040686 | -0.10664   |
| 7w11w_SITTI | 0.02351735 | 0.13130674 | 3.58E-05 | 0.0042778 | -0.065623  |
| 7w11w_SITTI | 0.09389395 | 0.55596554 | 6.48E-05 | 0.022676  | -0.0077738 |
| 7w11w_SITTI | 0.10669634 | 0.6332163  | 6.58E-05 | 0.02556   | -0.22263   |
| 7w11w_SITTI | 0.04741501 | 0.2755074  | 5.61E-05 | 0.0054936 | 0.035328   |
| 7w11w_SITTI | 0.02957184 | 0.1678401  | 4.02E-05 | 0.0040662 | -0.10661   |
| 7w11w_SITTI | 0.07387449 | 0.4351663  | 6.23E-05 | 0.013805  | 0.13074    |
| 7w11w_SITTI | 0.02886551 | 0.163578   | 3.97E-05 | 0.0040686 | -0.10664   |
| 7w11w_SITTI | 0.10329599 | 0.6126983  | 6.56E-05 | 0.025216  | -0.17104   |
| 7w11w_SITTI | 0.11580123 | 0.68815607 | 6.63E-05 | 0.025119  | -0.32814   |
| 7w11w_SITTI | 0.11317415 | 0.67230403 | 6.62E-05 | 0.025403  | -0.30551   |
| 7w11w_SITTI | 0.05562857 | 0.3250688  | 5.95E-05 | 0.007248  | 0.067199   |
| 7w11w_SITTI | 0.06928518 | 0.40747398 | 6.17E-05 | 0.01192   | 0.11218    |
| 7w11w_SITTI | 0.01908349 | 0.10455237 | 3.38E-05 | 0.004741  | 0.03364    |
| 7w11w_SITTI | 0.01833917 | 0.10006112 | 3.36E-05 | 0.0048202 | 0.050123   |
| 7w11w_SITTI | 0.047529   | 0.27619523 | 5.64E-05 | 0.0055867 | 0.035328   |
| 7w11w_SITTI | 0.09148348 | 0.5414206  | 6.45E-05 | 0.021822  | 0.036126   |
| 7w11w_SITTI | 0.12386458 | 0.73681104 | 6.67E-05 | 0.024153  | -0.39752   |
| 7w11w_SITTI | 0.08698553 | 0.5142795  | 6.41E-05 | 0.01993   | 0.093363   |
| 7w11w_SITTI | 0.10804109 | 0.64133066 | 6.59E-05 | 0.025614  | -0.23822   |
| 7w11w_SITTI | 0.06528906 | 0.38336104 | 6.12E-05 | 0.01041   | 0.095509   |
| 7w11w_SITTI | 0.01256949 | 0.06524634 | 3.23E-05 | 0.0059016 | 0.25518    |
| 7w11w_SITTI | 0.11117023 | 0.6602122  | 6.61E-05 | 0.025556  | -0.28058   |
| 7w11w_SITTI | 0.0098588  | 0.04888977 | 3.20E-05 | 0.0066628 | 0.37961    |
| 7w11w_SITTI | 0.00895142 | 0.04341452 | 3.19E-05 | 0.0070136 | 0.43237    |
| 7w11w_SITTI | 0.0789819  | 0.46598488 | 6.30E-05 | 0.016077  | 0.13613    |
| 7w11w_SITTI | 0.0149452  | 0.07958159 | 3.27E-05 | 0.0054028 | 0.16515    |

|             |            |            |          |           |            |
|-------------|------------|------------|----------|-----------|------------|
| 7w11w_SITTI | 0.10889494 | 0.64648294 | 6.59E-05 | 0.025616  | -0.25305   |
| 7w11w_SITTI | 0.10789563 | 0.640453   | 6.59E-05 | 0.025604  | -0.23822   |
| 7w11w_SITTI | 0.08733456 | 0.51638556 | 6.41E-05 | 0.01993   | 0.087329   |
| 7w11w_SITTI | 0.08008608 | 0.47264758 | 6.32E-05 | 0.016594  | 0.13446    |
| 7w11w_SITTI | 0.01664156 | 0.08981755 | 3.31E-05 | 0.0050879 | 0.10435    |
| 7w11w_SITTI | 0.02598535 | 0.14619885 | 3.76E-05 | 0.0041286 | -0.096385  |
| 7w11w_SITTI | 0.05755571 | 0.33669728 | 6.00E-05 | 0.0078516 | 0.071569   |
| 7w11w_SITTI | 0.01912878 | 0.10482569 | 3.38E-05 | 0.004741  | 0.03364    |
| 7w11w_SITTI | 0.10877771 | 0.6457755  | 6.59E-05 | 0.025616  | -0.25305   |
| 7w11w_SITTI | 0.10147259 | 0.6016957  | 6.54E-05 | 0.024923  | -0.14299   |
| 7w11w_SITTI | 0.0919397  | 0.5441734  | 6.46E-05 | 0.022042  | 0.027741   |
| 7w11w_SITTI | 0.11818124 | 0.70251733 | 6.65E-05 | 0.024847  | -0.35363   |
| 7w11w_SITTI | 0.05766387 | 0.33734995 | 6.00E-05 | 0.0078516 | 0.071569   |
| 7w11w_SITTI | 0.0201537  | 0.11101013 | 3.42E-05 | 0.0045972 | 0.0032259  |
| 7w11w_SITTI | 0.0968885  | 0.5740349  | 6.51E-05 | 0.023799  | -0.055297  |
| 7w11w_SITTI | 0.01557327 | 0.08337142 | 3.28E-05 | 0.0052924 | 0.1442     |
| 7w11w_SITTI | 0.01681748 | 0.09087908 | 3.31E-05 | 0.0050879 | 0.10435    |
| 7w11w_SITTI | 0.01425928 | 0.07544266 | 3.26E-05 | 0.0055188 | 0.18676    |
| 7w11w_SITTI | 0.11420224 | 0.6785076  | 6.63E-05 | 0.025299  | -0.3171    |
| 7w11w_SITTI | 0.05703512 | 0.333556   | 5.99E-05 | 0.0076952 | 0.070131   |
| 7w11w_SITTI | 0.07526293 | 0.44354427 | 6.26E-05 | 0.014549  | 0.13345    |
| 7w11w_SITTI | 0.08132955 | 0.48015085 | 6.34E-05 | 0.017373  | 0.13148    |
| 7w11w_SITTI | 0.03547114 | 0.203437   | 4.59E-05 | 0.0042319 | -0.073417  |
| 7w11w_SITTI | 0.01990394 | 0.10950305 | 3.42E-05 | 0.0045972 | 0.0032259  |
| 7w11w_SITTI | 0.01888988 | 0.10338415 | 3.38E-05 | 0.004741  | 0.03364    |
| 7w11w_SITTI | 0.04706387 | 0.2733886  | 5.61E-05 | 0.0054936 | 0.032113   |
| 7w11w_SITTI | 0.02974261 | 0.16887051 | 4.02E-05 | 0.0040662 | -0.10597   |
| 7w11w_SITTI | 0.03211618 | 0.18319285 | 4.27E-05 | 0.004099  | -0.097962  |
| 7w11w_SITTI | 0.02757604 | 0.15579721 | 3.88E-05 | 0.0040827 | -0.10472   |
| 7w11w_SITTI | 0.03264684 | 0.18639491 | 4.32E-05 | 0.0041142 | -0.094772  |
| 7w11w_SITTI | 0.10374882 | 0.6154308  | 6.56E-05 | 0.025296  | -0.18011   |
| 7w11w_SITTI | 0.05045624 | 0.2938585  | 5.78E-05 | 0.0061018 | 0.048868   |
| 7w11w_SITTI | 0.09384675 | 0.5556807  | 6.48E-05 | 0.022676  | -0.0077738 |
| 7w11w_SITTI | 0.10762332 | 0.6388098  | 6.59E-05 | 0.025604  | -0.23822   |
| 7w11w_SITTI | 0.08935507 | 0.5285775  | 6.43E-05 | 0.020902  | 0.059815   |
| 7w11w_SITTI | 0.15401655 | 0.9187509  | 6.77E-05 | 0.023711  | -0.52645   |
| 7w11w_SITTI | 0.11295804 | 0.671      | 6.62E-05 | 0.025403  | -0.29951   |
| 7w11w_SITTI | 0.01711667 | 0.09268444 | 3.33E-05 | 0.0049935 | 0.085504   |
| 7w11w_SITTI | 0.03309695 | 0.18911092 | 4.37E-05 | 0.0041322 | -0.091175  |
| 7w11w_SITTI | 0.05381661 | 0.31413525 | 5.91E-05 | 0.0068337 | 0.060836   |
| 7w11w_SITTI | 0.0338365  | 0.1935734  | 4.43E-05 | 0.004153  | -0.087207  |
| 7w11w_SITTI | 0.0245584  | 0.13758849 | 3.64E-05 | 0.0042065 | -0.080664  |
| 7w11w_SITTI | 0.01318928 | 0.06898617 | 3.24E-05 | 0.0057681 | 0.23179    |

|             |            |            |          |           |           |
|-------------|------------|------------|----------|-----------|-----------|
| 7w11w_SITTI | 0.10508601 | 0.6234995  | 6.57E-05 | 0.025429  | -0.19772  |
| 7w11w_SITTI | 0.10747032 | 0.6378866  | 6.59E-05 | 0.025604  | -0.23052  |
| 7w11w_SITTI | 0.05316427 | 0.31019896 | 5.89E-05 | 0.0067028 | 0.059084  |
| 7w11w_SITTI | 0.0181456  | 0.09889305 | 3.36E-05 | 0.0048202 | 0.050123  |
| 7w11w_SITTI | 0.00907018 | 0.04413116 | 3.19E-05 | 0.0070136 | 0.43237   |
| 7w11w_SITTI | 0.06690948 | 0.3931388  | 6.14E-05 | 0.011039  | 0.10251   |
| 7w11w_SITTI | 0.02399442 | 0.13418539 | 3.61E-05 | 0.0042401 | -0.073623 |
| 7w11w_SITTI | 0.08275314 | 0.4887409  | 6.35E-05 | 0.017892  | 0.12434   |
| 7w11w_SITTI | 0.02330115 | 0.13000211 | 3.58E-05 | 0.0042778 | -0.065623 |
| 7w11w_SITTI | 0.05941663 | 0.34792626 | 6.03E-05 | 0.0083426 | 0.075889  |
| 7w11w_SITTI | 0.02192769 | 0.12171456 | 3.49E-05 | 0.0044169 | -0.046619 |
| 7w11w_SITTI | 0.04032678 | 0.23273636 | 5.09E-05 | 0.0046173 | -0.023154 |
| 7w11w_SITTI | 0.08679619 | 0.513137   | 6.40E-05 | 0.019681  | 0.093363  |
| 7w11w_SITTI | 0.08006456 | 0.47251776 | 6.32E-05 | 0.016594  | 0.13446   |
| 7w11w_SITTI | 0.10933924 | 0.64916384 | 6.60E-05 | 0.025611  | -0.2602   |
| 7w11w_SITTI | 0.02373645 | 0.13262878 | 3.61E-05 | 0.0042401 | -0.073623 |
| 7w11w_SITTI | 0.03058798 | 0.17397158 | 4.11E-05 | 0.0040705 | -0.10475  |
| 7w11w_SITTI | 0.12283693 | 0.7306102  | 6.67E-05 | 0.024282  | -0.38934  |
| 7w11w_SITTI | 0.1078971  | 0.6404618  | 6.59E-05 | 0.025604  | -0.23822  |
| 7w11w_SITTI | 0.03511561 | 0.2012917  | 4.54E-05 | 0.0042028 | -0.078293 |
| 7w11w_SITTI | 0.09250914 | 0.54760945 | 6.46E-05 | 0.022258  | 0.019141  |
| 7w11w_SITTI | 0.01788479 | 0.0973193  | 3.34E-05 | 0.0049043 | 0.067421  |
| 7w11w_SITTI | 0.02273237 | 0.12657008 | 3.55E-05 | 0.0043197 | -0.056631 |
| 7w11w_SITTI | 0.01621767 | 0.08725975 | 3.30E-05 | 0.0051875 | 0.12392   |
| 7w11w_SITTI | 0.06591594 | 0.3871437  | 6.13E-05 | 0.010616  | 0.097788  |
| 7w11w_SITTI | 0.02981619 | 0.16931449 | 4.07E-05 | 0.0040668 | -0.10597  |
| 7w11w_SITTI | 0.04961114 | 0.28875902 | 5.73E-05 | 0.0058857 | 0.046466  |
| 7w11w_SITTI | 0.11838912 | 0.70377165 | 6.65E-05 | 0.024847  | -0.35363  |
| 7w11w_SITTI | 0.0182701  | 0.09964432 | 3.36E-05 | 0.0048202 | 0.050123  |
| 7w11w_SITTI | 0.11265089 | 0.66914666 | 6.62E-05 | 0.025448  | -0.29951  |
| 7w11w_SITTI | 0.08837033 | 0.5226355  | 6.42E-05 | 0.020421  | 0.074212  |
| 7w11w_SITTI | 0.10807741 | 0.6415499  | 6.59E-05 | 0.025614  | -0.23822  |
| 7w11w_SITTI | 0.11234852 | 0.6673221  | 6.62E-05 | 0.025448  | -0.29336  |
| 7w11w_SITTI | 0.13211319 | 0.78658396 | 6.71E-05 | 0.023582  | -0.45284  |
| 7w11w_SITTI | 0.12140079 | 0.72194433 | 6.66E-05 | 0.024419  | -0.38089  |
| 7w11w_SITTI | 0.07864831 | 0.46397197 | 6.30E-05 | 0.016077  | 0.13651   |
| 7w11w_SITTI | 0.08783931 | 0.5194313  | 6.41E-05 | 0.020177  | 0.080939  |
| 7w11w_SITTI | 0.01064545 | 0.05363646 | 3.21E-05 | 0.0064976 | 0.35381   |
| 7w11w_SITTI | 0.0817583  | 0.48273793 | 6.34E-05 | 0.017373  | 0.12948   |
| 7w11w_SITTI | 0.0272281  | 0.15369774 | 3.84E-05 | 0.0040947 | -0.10271  |
| 7w11w_SITTI | 0.0191797  | 0.10513295 | 3.38E-05 | 0.004741  | 0.017998  |
| 7w11w_SITTI | 0.12963109 | 0.77160674 | 6.70E-05 | 0.023664  | -0.43556  |
| 7w11w_SITTI | 0.02137528 | 0.11838129 | 3.47E-05 | 0.0044724 | -0.0356   |

|             |            |            |          |           |            |
|-------------|------------|------------|----------|-----------|------------|
| 7w11w_SITTI | 0.02973096 | 0.16880018 | 4.02E-05 | 0.0040662 | -0.10597   |
| 7w11w_SITTI | 0.02688698 | 0.15163939 | 3.80E-05 | 0.0041099 | -0.099939  |
| 7w11w_SITTI | 0.06654036 | 0.3909115  | 6.13E-05 | 0.010826  | 0.10013    |
| 7w11w_SITTI | 0.0220073  | 0.1221949  | 3.52E-05 | 0.0043661 | -0.046619  |
| 7w11w_SITTI | 0.01509753 | 0.08050077 | 3.27E-05 | 0.0054028 | 0.16515    |
| 7w11w_SITTI | 0.10762777 | 0.6388367  | 6.59E-05 | 0.025604  | -0.23822   |
| 7w11w_SITTI | 0.01877771 | 0.10270727 | 3.38E-05 | 0.004741  | 0.03364    |
| 7w11w_SITTI | 0.09325361 | 0.5521017  | 6.47E-05 | 0.022469  | 0.0013661  |
| 7w11w_SITTI | 0.06224808 | 0.36501148 | 6.07E-05 | 0.0092324 | 0.085432   |
| 7w11w_SITTI | 0.11229704 | 0.6670115  | 6.61E-05 | 0.025489  | -0.29336   |
| 7w11w_SITTI | 0.02212098 | 0.12288091 | 3.52E-05 | 0.0043661 | -0.046619  |
| 7w11w_SITTI | 0.01689668 | 0.09135697 | 3.31E-05 | 0.0050879 | 0.10435    |
| 7w11w_SITTI | 0.01147914 | 0.05866707 | 3.22E-05 | 0.0061869 | 0.30353    |
| 7w11w_SITTI | 0.10040782 | 0.5952709  | 6.53E-05 | 0.024687  | -0.12375   |
| 7w11w_SITTI | 0.01159787 | 0.05938349 | 3.22E-05 | 0.0061869 | 0.30353    |
| 7w11w_SITTI | 0.09223861 | 0.5459771  | 6.46E-05 | 0.022042  | 0.019141   |
| 7w11w_SITTI | 0.06947273 | 0.4086057  | 6.17E-05 | 0.01192   | 0.11455    |
| 7w11w_SITTI | 0.02278792 | 0.12690523 | 3.55E-05 | 0.0043197 | -0.056631  |
| 7w11w_SITTI | 0.10886917 | 0.6463274  | 6.59E-05 | 0.025616  | -0.25305   |
| 7w11w_SITTI | 0.09421287 | 0.55788994 | 6.48E-05 | 0.022877  | -0.0077738 |
| 7w11w_SITTI | 0.02588142 | 0.14557172 | 3.76E-05 | 0.0041286 | -0.096385  |
| 7w11w_SITTI | 0.0740922  | 0.43648002 | 6.24E-05 | 0.014051  | 0.13074    |
| 7w11w_SITTI | 0.01638153 | 0.08824852 | 3.30E-05 | 0.0051875 | 0.12392    |
| 7w11w_SITTI | 0.08564164 | 0.50617033 | 6.39E-05 | 0.019177  | 0.1043     |
| 7w11w_SITTI | 0.05660106 | 0.33093688 | 5.98E-05 | 0.0075425 | 0.068678   |
| 7w11w_SITTI | 0.09338807 | 0.55291307 | 6.47E-05 | 0.022469  | 0.0013661  |
| 7w11w_SITTI | 0.03137008 | 0.1786908  | 4.16E-05 | 0.0040771 | -0.10071   |
| 7w11w_SITTI | 0.12855104 | 0.7650896  | 6.69E-05 | 0.023723  | -0.43195   |
| 7w11w_SITTI | 0.00793203 | 0.03726343 | 3.19E-05 | 0.0073923 | 0.48652    |
| 7w11w_SITTI | 0.01511502 | 0.08060629 | 3.27E-05 | 0.0054028 | 0.16515    |
| 7w11w_SITTI | 0.02067348 | 0.11414652 | 3.44E-05 | 0.0045325 | -0.01065   |
| 7w11w_SITTI | 0.02058382 | 0.11360553 | 3.44E-05 | 0.0045325 | -0.01065   |
| 7w11w_SITTI | 0.02374232 | 0.13266419 | 3.61E-05 | 0.0042401 | -0.073623  |
| 7w11w_SITTI | 0.01099827 | 0.05576542 | 3.21E-05 | 0.006339  | 0.32844    |
| 7w11w_SITTI | 0.09614094 | 0.56952405 | 6.50E-05 | 0.023448  | -0.045608  |
| 7w11w_SITTI | 0.11687391 | 0.6946287  | 6.64E-05 | 0.024986  | -0.33868   |
| 7w11w_SITTI | 0.08031694 | 0.47404066 | 6.32E-05 | 0.016854  | 0.13446    |
| 7w11w_SITTI | 0.05809742 | 0.33996603 | 6.01E-05 | 0.0080116 | 0.073002   |
| 7w11w_SITTI | 0.08569938 | 0.5065188  | 6.39E-05 | 0.019177  | 0.1043     |
| 7w11w_SITTI | 0.01141328 | 0.05826961 | 3.21E-05 | 0.006339  | 0.32844    |
| 7w11w_SITTI | 0.02426624 | 0.13582562 | 3.64E-05 | 0.0042065 | -0.080664  |
| 7w11w_SITTI | 0.00918588 | 0.0448293  | 3.19E-05 | 0.0070136 | 0.43237    |
| 7w11w_SITTI | 0.01267526 | 0.06588455 | 3.23E-05 | 0.0059016 | 0.25518    |

|             |            |            |          |           |           |
|-------------|------------|------------|----------|-----------|-----------|
| 7w11w_SITTI | 0.11064781 | 0.65705985 | 6.60E-05 | 0.02558   | -0.27396  |
| 7w11w_SITTI | 0.10634539 | 0.6310986  | 6.58E-05 | 0.02556   | -0.21453  |
| 7w11w_SITTI | 0.0167888  | 0.09070601 | 3.31E-05 | 0.0050879 | 0.10435   |
| 7w11w_SITTI | 0.01608887 | 0.08648258 | 3.30E-05 | 0.0051875 | 0.12392   |
| 7w11w_SITTI | 0.02245477 | 0.12489503 | 3.52E-05 | 0.0043661 | -0.046619 |
| 7w11w_SITTI | 0.02667135 | 0.15033825 | 3.80E-05 | 0.0041099 | -0.099939 |
| 7w11w_SITTI | 0.07853644 | 0.46329692 | 6.30E-05 | 0.016077  | 0.13651   |
| 7w11w_SITTI | 0.08568101 | 0.5064079  | 6.39E-05 | 0.019177  | 0.1043    |
| 7w11w_SITTI | 0.07165544 | 0.42177635 | 6.20E-05 | 0.012843  | 0.12348   |
| 7w11w_SITTI | 0.13968043 | 0.8322454  | 6.73E-05 | 0.023551  | -0.49317  |
| 7w11w_SITTI | 0.01417487 | 0.07493333 | 3.25E-05 | 0.0056405 | 0.20898   |
| 7w11w_SITTI | 0.01525005 | 0.08142104 | 3.27E-05 | 0.0054028 | 0.16515   |
| 7w11w_SITTI | 0.09658752 | 0.5722188  | 6.50E-05 | 0.023626  | -0.055297 |
| 7w11w_SITTI | 0.12522751 | 0.7450351  | 6.68E-05 | 0.023978  | -0.40938  |
| 7w11w_SITTI | 0.12165605 | 0.7234846  | 6.66E-05 | 0.024419  | -0.38089  |
| 7w11w_SITTI | 0.07113347 | 0.41862673 | 6.20E-05 | 0.012608  | 0.12136   |
| 7w11w_SITTI | 0.08758931 | 0.51792276 | 6.41E-05 | 0.020177  | 0.087329  |
| 7w11w_SITTI | 0.1222272  | 0.726931   | 6.66E-05 | 0.02435   | -0.38515  |
| 7w11w_SITTI | 0.11909193 | 0.70801246 | 6.65E-05 | 0.024704  | -0.3584   |
| 7w11w_SITTI | 0.10616179 | 0.6299908  | 6.58E-05 | 0.025526  | -0.21453  |
| 7w11w_SITTI | 0.02092915 | 0.11568926 | 3.47E-05 | 0.0044724 | -0.023601 |
| 7w11w_SITTI | 0.10501956 | 0.6230985  | 6.57E-05 | 0.025429  | -0.19772  |
| 7w11w_SITTI | 0.05411042 | 0.31590813 | 5.91E-05 | 0.0068337 | 0.062513  |
| 7w11w_SITTI | 0.02728344 | 0.15403165 | 3.84E-05 | 0.0040947 | -0.10271  |
| 7w11w_SITTI | 0.12044764 | 0.71619296 | 6.66E-05 | 0.024561  | -0.37215  |
| 7w11w_SITTI | 0.06249755 | 0.36651683 | 6.08E-05 | 0.0094206 | 0.085432  |
| 7w11w_SITTI | 0.07044511 | 0.4144731  | 6.19E-05 | 0.012376  | 0.11689   |
| 7w11w_SITTI | 0.08604453 | 0.5086014  | 6.39E-05 | 0.01943   | 0.099025  |
| 7w11w_SITTI | 0.0640663  | 0.37598282 | 6.10E-05 | 0.0098069 | 0.091185  |
| 7w11w_SITTI | 0.01913188 | 0.10484437 | 3.38E-05 | 0.004741  | 0.03364   |
| 7w11w_SITTI | 0.03500104 | 0.20060037 | 4.54E-05 | 0.0042028 | -0.078293 |
| 7w11w_SITTI | 0.01568013 | 0.08401623 | 3.28E-05 | 0.0052924 | 0.1442    |
| 7w11w_SITTI | 0.0856352  | 0.5061315  | 6.39E-05 | 0.019177  | 0.1043    |
| 7w11w_SITTI | 0.10195154 | 0.60458577 | 6.55E-05 | 0.025029  | -0.14299  |
| 7w11w_SITTI | 0.01575832 | 0.08448802 | 3.28E-05 | 0.0052924 | 0.1442    |
| 7w11w_SITTI | 0.02726532 | 0.1539223  | 3.84E-05 | 0.0040947 | -0.10271  |
| 7w11w_SITTI | 0.08267282 | 0.48825625 | 6.35E-05 | 0.017892  | 0.1271    |
| 7w11w_SITTI | 0.12731571 | 0.75763553 | 6.69E-05 | 0.023794  | -0.42086  |
| 7w11w_SITTI | 0.01615259 | 0.08686708 | 3.30E-05 | 0.0051875 | 0.12392   |
| 7w11w_SITTI | 0.08716583 | 0.51536745 | 6.41E-05 | 0.01993   | 0.087329  |
| 7w11w_SITTI | 0.0301023  | 0.17104092 | 4.07E-05 | 0.0040668 | -0.10597  |
| 7w11w_SITTI | 0.09122537 | 0.5398631  | 6.45E-05 | 0.021597  | 0.036126  |
| 7w11w_SITTI | 0.00783532 | 0.03667991 | 3.19E-05 | 0.0073923 | 0.48652   |



|             |            |            |          |           |            |
|-------------|------------|------------|----------|-----------|------------|
| 7w11w_SITTI | 0.10526754 | 0.6245948  | 6.57E-05 | 0.025482  | -0.19772   |
| 7w11w_SITTI | 0.05697389 | 0.3331866  | 5.99E-05 | 0.0076952 | 0.070131   |
| 7w11w_SITTI | 0.05577    | 0.3259222  | 5.95E-05 | 0.007248  | 0.067199   |
| 7w11w_SITTI | 0.03507407 | 0.20104101 | 4.54E-05 | 0.0042028 | -0.078293  |
| 7w11w_SITTI | 0.08331191 | 0.49211258 | 6.36E-05 | 0.018151  | 0.12117    |
| 7w11w_SITTI | 0.11295106 | 0.67095786 | 6.62E-05 | 0.025403  | -0.29951   |
| 7w11w_SITTI | 0.04760411 | 0.27664846 | 5.64E-05 | 0.0055867 | 0.035328   |
| 7w11w_SITTI | 0.09524655 | 0.56412727 | 6.49E-05 | 0.023263  | -0.026471  |
| 7w11w_SITTI | 0.07367763 | 0.43397844 | 6.23E-05 | 0.013805  | 0.12913    |
| 7w11w_SITTI | 0.12861305 | 0.7654638  | 6.69E-05 | 0.023723  | -0.43195   |
| 7w11w_SITTI | 0.01488682 | 0.07922927 | 3.27E-05 | 0.0054028 | 0.16515    |
| 7w11w_SITTI | 0.01024803 | 0.05123839 | 3.20E-05 | 0.0066628 | 0.37961    |
| 7w11w_SITTI | 0.09414594 | 0.55748606 | 6.48E-05 | 0.022877  | -0.0077738 |
| 7w11w_SITTI | 0.1008487  | 0.59793115 | 6.54E-05 | 0.024809  | -0.12375   |
| 7w11w_SITTI | 0.07244869 | 0.42656294 | 6.22E-05 | 0.01332   | 0.12548    |
| 7w11w_SITTI | 0.09237813 | 0.546819   | 6.46E-05 | 0.022042  | 0.019141   |
| 7w11w_SITTI | 0.12810355 | 0.7623894  | 6.69E-05 | 0.023757  | -0.4283    |
| 7w11w_SITTI | 0.02368243 | 0.13230287 | 3.61E-05 | 0.0042401 | -0.073623  |
| 7w11w_SITTI | 0.09144658 | 0.5411979  | 6.45E-05 | 0.021822  | 0.036126   |
| 7w11w_SITTI | 0.09907141 | 0.58720684 | 6.53E-05 | 0.02442   | -0.094455  |
| 7w11w_SITTI | 0.0208609  | 0.11527745 | 3.44E-05 | 0.0045325 | -0.023601  |
| 7w11w_SITTI | 0.03272057 | 0.18683977 | 4.32E-05 | 0.0041142 | -0.094772  |
| 7w11w_SITTI | 0.09149803 | 0.5415083  | 6.45E-05 | 0.021822  | 0.036126   |
| 7w11w_SITTI | 0.07581212 | 0.44685814 | 6.26E-05 | 0.0148    | 0.13453    |
| 7w11w_SITTI | 0.06255343 | 0.366854   | 6.08E-05 | 0.0094206 | 0.085432   |
| 7w11w_SITTI | 0.03220544 | 0.18373148 | 4.27E-05 | 0.004099  | -0.097962  |
| 7w11w_SITTI | 0.02525117 | 0.14176872 | 3.68E-05 | 0.0041768 | -0.092011  |
| 7w11w_SITTI | 0.01088422 | 0.05507726 | 3.21E-05 | 0.0064976 | 0.32844    |
| 7w11w_SITTI | 0.02805888 | 0.15871073 | 3.88E-05 | 0.0040827 | -0.10603   |
| 7w11w_SITTI | 0.06816746 | 0.4007296  | 6.16E-05 | 0.011474  | 0.10734    |
| 7w11w_SITTI | 0.09974658 | 0.5912808  | 6.53E-05 | 0.024558  | -0.10426   |
| 7w11w_SITTI | 0.01783451 | 0.0970159  | 3.34E-05 | 0.0049043 | 0.067421   |
| 7w11w_SITTI | 0.02401115 | 0.13428634 | 3.61E-05 | 0.0042401 | -0.073623  |
| 7w11w_SITTI | 0.01895382 | 0.10376993 | 3.38E-05 | 0.004741  | 0.03364    |
| 7w11w_SITTI | 0.0418407  | 0.24187152 | 5.19E-05 | 0.0047337 | -0.00654   |
| 7w11w_SITTI | 0.0515416  | 0.30040762 | 5.83E-05 | 0.0063316 | 0.053285   |
| 7w11w_SITTI | 0.08519331 | 0.5034651  | 6.39E-05 | 0.019177  | 0.10916    |
| 7w11w_SITTI | 0.00750375 | 0.0346792  | 3.19E-05 | 0.0075925 | 0.51404    |
| 7w11w_SITTI | 0.04704878 | 0.27329755 | 5.61E-05 | 0.0054936 | 0.032113   |
| 7w11w_SITTI | 0.01698409 | 0.09188441 | 3.31E-05 | 0.0050879 | 0.085504   |
| 7w11w_SITTI | 0.04646104 | 0.26975107 | 5.57E-05 | 0.0054037 | 0.028707   |
| 7w11w_SITTI | 0.02184211 | 0.12119817 | 3.49E-05 | 0.0044169 | -0.0356    |
| 7w11w_SITTI | 0.03460384 | 0.19820364 | 4.48E-05 | 0.0041765 | -0.082901  |

|             |            |            |          |           |           |
|-------------|------------|------------|----------|-----------|-----------|
| 7w11w_SITTI | 0.02394417 | 0.13388216 | 3.61E-05 | 0.0042401 | -0.073623 |
| 7w11w_SITTI | 0.02980981 | 0.16927601 | 4.07E-05 | 0.0040668 | -0.10597  |
| 7w11w_SITTI | 0.02690825 | 0.15176775 | 3.80E-05 | 0.0041099 | -0.10271  |
| 7w11w_SITTI | 0.08527348 | 0.50394887 | 6.39E-05 | 0.019177  | 0.10916   |
| 7w11w_SITTI | 0.04766178 | 0.27699643 | 5.64E-05 | 0.0055867 | 0.035328  |
| 7w11w_SITTI | 0.10609613 | 0.6295946  | 6.58E-05 | 0.025526  | -0.21453  |
| 7w11w_SITTI | 0.026928   | 0.15188693 | 3.80E-05 | 0.0041099 | -0.10271  |
| 7w11w_SITTI | 0.09481184 | 0.5615042  | 6.49E-05 | 0.023073  | -0.017059 |
| 7w11w_SITTI | 0.0278837  | 0.15765369 | 3.88E-05 | 0.0040827 | -0.10472  |
| 7w11w_SITTI | 0.02003847 | 0.11031486 | 3.42E-05 | 0.0045972 | 0.0032259 |
| 7w11w_SITTI | 0.0249366  | 0.1398706  | 3.68E-05 | 0.0041768 | -0.086782 |
| 7w11w_SITTI | 0.06825732 | 0.4012718  | 6.16E-05 | 0.011474  | 0.10734   |
| 7w11w_SITTI | 0.03845369 | 0.22143398 | 4.87E-05 | 0.0044183 | -0.04622  |
| 7w11w_SITTI | 0.07162462 | 0.42159042 | 6.20E-05 | 0.012843  | 0.12136   |
| 7w11w_SITTI | 0.09503632 | 0.5628587  | 6.49E-05 | 0.023073  | -0.026471 |
| 7w11w_SITTI | 0.07629442 | 0.44976836 | 6.26E-05 | 0.0148    | 0.1354    |
| 7w11w_SITTI | 0.02415115 | 0.1351311  | 3.61E-05 | 0.0042401 | -0.080664 |
| 7w11w_SITTI | 0.01732213 | 0.09392421 | 3.33E-05 | 0.0049935 | 0.085504  |
| 7w11w_SITTI | 0.03306378 | 0.18891078 | 4.32E-05 | 0.0041142 | -0.091175 |
| 7w11w_SITTI | 0.1092565  | 0.6486646  | 6.60E-05 | 0.025611  | -0.2602   |
| 7w11w_SITTI | 0.04404129 | 0.25515008 | 5.38E-05 | 0.0050014 | 0.012967  |
| 7w11w_SITTI | 0.02426324 | 0.13580751 | 3.64E-05 | 0.0042065 | -0.080664 |
| 7w11w_SITTI | 0.02029299 | 0.11185063 | 3.42E-05 | 0.0045972 | -0.01065  |
| 7w11w_SITTI | 0.01333534 | 0.0698675  | 3.24E-05 | 0.0057681 | 0.23179   |
| 7w11w_SITTI | 0.03184161 | 0.18153605 | 4.22E-05 | 0.0040866 | -0.10071  |
| 7w11w_SITTI | 0.02307476 | 0.1286361  | 3.55E-05 | 0.0043197 | -0.065623 |
| 7w11w_SITTI | 0.02574945 | 0.14477542 | 3.72E-05 | 0.0041509 | -0.092011 |
| 7w11w_SITTI | 0.10418782 | 0.6180797  | 6.56E-05 | 0.025367  | -0.18011  |
| 7w11w_SITTI | 0.01674868 | 0.09046392 | 3.31E-05 | 0.0050879 | 0.10435   |
| 7w11w_SITTI | 0.07974394 | 0.4705831  | 6.32E-05 | 0.016594  | 0.13545   |
| 7w11w_SITTI | 0.07472698 | 0.4403103  | 6.25E-05 | 0.014299  | 0.13218   |
| 7w11w_SITTI | 0.0434852  | 0.25179458 | 5.33E-05 | 0.0049301 | 0.008455  |
| 7w11w_SITTI | 0.0188191  | 0.10295703 | 3.38E-05 | 0.004741  | 0.03364   |
| 7w11w_SITTI | 0.09959113 | 0.5903428  | 6.53E-05 | 0.024558  | -0.10426  |
| 7w11w_SITTI | 0.01922407 | 0.10540067 | 3.40E-05 | 0.0046667 | 0.017998  |
| 7w11w_SITTI | 0.0875181  | 0.5174931  | 6.41E-05 | 0.020177  | 0.087329  |
| 7w11w_SITTI | 0.01685309 | 0.09109394 | 3.31E-05 | 0.0050879 | 0.10435   |
| 7w11w_SITTI | 0.08149067 | 0.48112303 | 6.34E-05 | 0.017373  | 0.13148   |
| 7w11w_SITTI | 0.03311781 | 0.18923679 | 4.37E-05 | 0.0041322 | -0.091175 |
| 7w11w_SITTI | 0.12311743 | 0.7323027  | 6.67E-05 | 0.024217  | -0.39346  |
| 7w11w_SITTI | 0.01581683 | 0.08484108 | 3.28E-05 | 0.0052924 | 0.1442    |
| 7w11w_SITTI | 0.01826676 | 0.09962415 | 3.36E-05 | 0.0048202 | 0.050123  |
| 7w11w_SITTI | 0.02352898 | 0.13137689 | 3.58E-05 | 0.0042778 | -0.065623 |

|             |            |            |          |           |           |
|-------------|------------|------------|----------|-----------|-----------|
| 7w11w_SITTI | 0.10035278 | 0.5949387  | 6.53E-05 | 0.024687  | -0.11403  |
| 7w11w_SITTI | 0.03225495 | 0.18403018 | 4.27E-05 | 0.004099  | -0.097962 |
| 7w11w_SITTI | 0.02853915 | 0.16160874 | 3.93E-05 | 0.004074  | -0.10603  |
| 7w11w_SITTI | 0.03822288 | 0.22004122 | 4.87E-05 | 0.0044183 | -0.04622  |
| 7w11w_SITTI | 0.04016837 | 0.2317805  | 5.03E-05 | 0.0045634 | -0.023154 |
| 7w11w_SITTI | 0.02335715 | 0.13034005 | 3.58E-05 | 0.0042778 | -0.065623 |
| 7w11w_SITTI | 0.02542473 | 0.14281604 | 3.72E-05 | 0.0041509 | -0.092011 |
| 7w11w_SITTI | 0.11960349 | 0.71109927 | 6.65E-05 | 0.024632  | -0.36308  |
| 7w11w_SITTI | 0.02754156 | 0.15558915 | 3.88E-05 | 0.0040827 | -0.10472  |
| 7w11w_SITTI | 0.049868   | 0.29030898 | 5.76E-05 | 0.005992  | 0.046466  |
| 7w11w_SITTI | 0.01399833 | 0.07386808 | 3.25E-05 | 0.0056405 | 0.20898   |
| 7w11w_SITTI | 0.02192983 | 0.12172748 | 3.49E-05 | 0.0044169 | -0.046619 |
| 7w11w_SITTI | 0.08488762 | 0.50162053 | 6.38E-05 | 0.018923  | 0.1136    |
| 7w11w_SITTI | 0.0234853  | 0.13111334 | 3.58E-05 | 0.0042778 | -0.065623 |
| 7w11w_SITTI | 0.02775198 | 0.15685886 | 3.88E-05 | 0.0040827 | -0.10472  |
| 7w11w_SITTI | 0.04570029 | 0.2651606  | 5.50E-05 | 0.0052335 | 0.025099  |
| 7w11w_SITTI | 0.03755641 | 0.21601968 | 4.81E-05 | 0.0043756 | -0.05192  |
| 7w11w_SITTI | 0.07239692 | 0.42625052 | 6.21E-05 | 0.01308   | 0.12548   |
| 7w11w_SITTI | 0.01503645 | 0.0801322  | 3.27E-05 | 0.0054028 | 0.16515   |
| 7w11w_SITTI | 0.06087658 | 0.35673577 | 6.06E-05 | 0.008866  | 0.080421  |
| 7w11w_SITTI | 0.01978379 | 0.10877808 | 3.42E-05 | 0.0045972 | 0.0032259 |
| 7w11w_SITTI | 0.0917986  | 0.54332197 | 6.45E-05 | 0.021822  | 0.027741  |
| 7w11w_SITTI | 0.019174   | 0.10509852 | 3.38E-05 | 0.004741  | 0.017998  |
| 7w11w_SITTI | 0.09290567 | 0.55000216 | 6.46E-05 | 0.022258  | 0.010343  |
| 7w11w_SITTI | 0.01951372 | 0.10714846 | 3.40E-05 | 0.0046667 | 0.017998  |
| 7w11w_SITTI | 0.01463589 | 0.0777152  | 3.26E-05 | 0.0055188 | 0.18676   |
| 7w11w_SITTI | 0.05953445 | 0.3486372  | 6.03E-05 | 0.0083426 | 0.077363  |
| 7w11w_SITTI | 0.03456783 | 0.1979863  | 4.48E-05 | 0.0041765 | -0.082901 |
| 7w11w_SITTI | 0.01574881 | 0.08443065 | 3.28E-05 | 0.0052924 | 0.1442    |
| 7w11w_SITTI | 0.09229033 | 0.54628915 | 6.46E-05 | 0.022042  | 0.019141  |
| 7w11w_SITTI | 0.02114737 | 0.11700604 | 3.47E-05 | 0.0044724 | -0.023601 |
| 7w11w_SITTI | 0.11130322 | 0.6610147  | 6.61E-05 | 0.025525  | -0.28058  |
| 7w11w_SITTI | 0.00671929 | 0.02994567 | 3.18E-05 | 0.0078    | 0.54183   |
| 7w11w_SITTI | 0.02000133 | 0.11009075 | 3.42E-05 | 0.0045972 | 0.0032259 |
| 7w11w_SITTI | 0.00812524 | 0.03842928 | 3.19E-05 | 0.0073923 | 0.45929   |
| 7w11w_SITTI | 0.04670175 | 0.27120352 | 5.57E-05 | 0.0054037 | 0.028707  |
| 7w11w_SITTI | 0.09930242 | 0.58860075 | 6.53E-05 | 0.02442   | -0.10426  |
| 7w11w_SITTI | 0.02635184 | 0.14841029 | 3.76E-05 | 0.0041286 | -0.099939 |
| 7w11w_SITTI | 0.06547667 | 0.3844931  | 6.12E-05 | 0.01041   | 0.095509  |
| 7w11w_SITTI | 0.01301895 | 0.06795839 | 3.23E-05 | 0.0059016 | 0.25518   |
| 7w11w_SITTI | 0.0568732  | 0.33257896 | 5.98E-05 | 0.0075425 | 0.070131  |
| 7w11w_SITTI | 0.08702683 | 0.5145287  | 6.41E-05 | 0.01993   | 0.093363  |
| 7w11w_SITTI | 0.0208077  | 0.11495641 | 3.44E-05 | 0.0045325 | -0.01065  |

|             |            |            |          |           |           |
|-------------|------------|------------|----------|-----------|-----------|
| 7w11w_SITTI | 0.04984775 | 0.29018676 | 5.76E-05 | 0.005992  | 0.046466  |
| 7w11w_SITTI | 0.0754339  | 0.4445759  | 6.26E-05 | 0.014549  | 0.13345   |
| 7w11w_SITTI | 0.01802997 | 0.09819536 | 3.34E-05 | 0.0049043 | 0.067421  |
| 7w11w_SITTI | 0.03083876 | 0.17548478 | 4.11E-05 | 0.0040705 | -0.10299  |
| 7w11w_SITTI | 0.15159011 | 0.9041095  | 6.77E-05 | 0.023705  | -0.52438  |
| 7w11w_SITTI | 0.1016715  | 0.602896   | 6.54E-05 | 0.024923  | -0.14299  |
| 7w11w_SITTI | 0.02135563 | 0.11826272 | 3.47E-05 | 0.0044724 | -0.023601 |
| 7w11w_SITTI | 0.03576635 | 0.2052183  | 4.59E-05 | 0.0042319 | -0.068307 |
| 7w11w_SITTI | 0.04650321 | 0.27000552 | 5.57E-05 | 0.0054037 | 0.028707  |
| 7w11w_SITTI | 0.14287291 | 0.85150915 | 6.75E-05 | 0.023603  | -0.50412  |
| 7w11w_SITTI | 0.08984602 | 0.5315399  | 6.44E-05 | 0.021137  | 0.059815  |
| 7w11w_SITTI | 0.03010248 | 0.17104197 | 4.07E-05 | 0.0040668 | -0.10597  |
| 7w11w_SITTI | 0.01101019 | 0.05583737 | 3.21E-05 | 0.006339  | 0.32844   |
| 7w11w_SITTI | 0.04776684 | 0.27763036 | 5.64E-05 | 0.0055867 | 0.035328  |
| 7w11w_SITTI | 0.01386556 | 0.07306691 | 3.25E-05 | 0.0056405 | 0.20898   |
| 7w11w_SITTI | 0.13202633 | 0.78605986 | 6.71E-05 | 0.023582  | -0.45284  |
| 7w11w_SITTI | 0.04848692 | 0.28197542 | 5.67E-05 | 0.0056831 | 0.041222  |
| 7w11w_SITTI | 0.09553818 | 0.56588703 | 6.49E-05 | 0.023263  | -0.035993 |
| 7w11w_SITTI | 0.02095219 | 0.11582829 | 3.47E-05 | 0.0044724 | -0.023601 |
| 7w11w_SITTI | 0.13488834 | 0.80332947 | 6.72E-05 | 0.023533  | -0.46872  |
| 7w11w_SITTI | 0.05907553 | 0.34586808 | 6.02E-05 | 0.0081753 | 0.075889  |
| 7w11w_SITTI | 0.0843925  | 0.49863294 | 6.37E-05 | 0.018667  | 0.1136    |
| 7w11w_SITTI | 0.03734703 | 0.21475628 | 4.76E-05 | 0.0043355 | -0.057524 |
| 7w11w_SITTI | 0.02487101 | 0.13947481 | 3.68E-05 | 0.0041768 | -0.086782 |
| 7w11w_SITTI | 0.017925   | 0.09756197 | 3.34E-05 | 0.0049043 | 0.067421  |
| 7w11w_SITTI | 0.03849042 | 0.22165562 | 4.87E-05 | 0.0044183 | -0.04622  |
| 7w11w_SITTI | 0.0540754  | 0.3156968  | 5.91E-05 | 0.0068337 | 0.062513  |
| 7w11w_SITTI | 0.08935642 | 0.5285857  | 6.43E-05 | 0.020902  | 0.059815  |
| 7w11w_SITTI | 0.10471818 | 0.62127995 | 6.57E-05 | 0.025429  | -0.18901  |
| 7w11w_SITTI | 0.01286595 | 0.06703521 | 3.23E-05 | 0.0059016 | 0.25518   |
| 7w11w_SITTI | 0.12621179 | 0.75097436 | 6.68E-05 | 0.023879  | -0.41325  |
| 7w11w_SITTI | 0.07453787 | 0.4391692  | 6.24E-05 | 0.014051  | 0.13218   |
| 7w11w_SITTI | 0.14980075 | 0.89331234 | 6.76E-05 | 0.023695  | -0.52228  |
| 7w11w_SITTI | 0.05628682 | 0.3290407  | 5.97E-05 | 0.0073934 | 0.068678  |
| 7w11w_SITTI | 0.03458994 | 0.19811973 | 4.48E-05 | 0.0041765 | -0.082901 |
| 7w11w_SITTI | 0.02730282 | 0.15414861 | 3.84E-05 | 0.0040947 | -0.10271  |
| 7w11w_SITTI | 0.02323311 | 0.12959158 | 3.58E-05 | 0.0042778 | -0.065623 |
| 7w11w_SITTI | 0.14643578 | 0.8730078  | 6.76E-05 | 0.023659  | -0.51583  |
| 7w11w_SITTI | 0.02736353 | 0.15451494 | 3.84E-05 | 0.0040947 | -0.10271  |
| 7w11w_SITTI | 0.03377957 | 0.19322987 | 4.43E-05 | 0.004153  | -0.087207 |
| 7w11w_SITTI | 0.02637418 | 0.1485451  | 3.76E-05 | 0.0041286 | -0.099939 |
| 7w11w_SITTI | 0.09137051 | 0.5407389  | 6.45E-05 | 0.021822  | 0.036126  |
| 7w11w_SITTI | 0.02465483 | 0.13817035 | 3.64E-05 | 0.0042065 | -0.080664 |

|             |            |            |          |           |           |
|-------------|------------|------------|----------|-----------|-----------|
| 7w11w_SITTI | 0.11155102 | 0.66251    | 6.61E-05 | 0.025525  | -0.28705  |
| 7w11w_SITTI | 0.03031518 | 0.17232545 | 4.11E-05 | 0.0040705 | -0.10475  |
| 7w11w_SITTI | 0.0367813  | 0.21134265 | 4.70E-05 | 0.0042982 | -0.062998 |
| 7w11w_SITTI | 0.0981527  | 0.5816632  | 6.52E-05 | 0.024123  | -0.074831 |
| 7w11w_SITTI | 0.00764781 | 0.03554843 | 3.19E-05 | 0.0073923 | 0.48652   |
| 7w11w_SITTI | 0.01566327 | 0.08391445 | 3.28E-05 | 0.0052924 | 0.1442    |
| 7w11w_SITTI | 0.08652051 | 0.51147354 | 6.40E-05 | 0.019681  | 0.099025  |
| 7w11w_SITTI | 0.06550677 | 0.38467473 | 6.12E-05 | 0.01041   | 0.095509  |
| 7w11w_SITTI | 0.0147183  | 0.07821241 | 3.26E-05 | 0.0055188 | 0.18676   |
| 7w11w_SITTI | 0.0551968  | 0.32246342 | 5.94E-05 | 0.0071062 | 0.065685  |
| 7w11w_SITTI | 0.10528968 | 0.62472844 | 6.57E-05 | 0.025482  | -0.19772  |
| 7w11w_SITTI | 0.01365304 | 0.07178454 | 3.24E-05 | 0.0057681 | 0.20898   |
| 7w11w_SITTI | 0.07539935 | 0.4443675  | 6.26E-05 | 0.014549  | 0.13345   |
| 7w11w_SITTI | 0.05156989 | 0.30057833 | 5.83E-05 | 0.0063316 | 0.053285  |
| 7w11w_SITTI | 0.01277717 | 0.06649948 | 3.23E-05 | 0.0059016 | 0.25518   |
| 7w11w_SITTI | 0.01859476 | 0.10160336 | 3.36E-05 | 0.0048202 | 0.050123  |
| 7w11w_SITTI | 0.10754998 | 0.6383673  | 6.59E-05 | 0.025604  | -0.23822  |
| 7w11w_SITTI | 0.01772566 | 0.09635912 | 3.34E-05 | 0.0049043 | 0.067421  |
| 7w11w_SITTI | 0.06070247 | 0.35568514 | 6.05E-05 | 0.008688  | 0.080421  |
| 7w11w_SITTI | 0.07019013 | 0.41293457 | 6.18E-05 | 0.012147  | 0.11689   |
| 7w11w_SITTI | 0.01770904 | 0.09625884 | 3.34E-05 | 0.0049043 | 0.067421  |
| 7w11w_SITTI | 0.08741998 | 0.516901   | 6.41E-05 | 0.020177  | 0.087329  |
| 7w11w_SITTI | 0.01871762 | 0.10234471 | 3.38E-05 | 0.004741  | 0.03364   |
| 7w11w_SITTI | 0.1264861  | 0.7526295  | 6.68E-05 | 0.023879  | -0.41707  |
| 7w11w_SITTI | 0.10629143 | 0.63077307 | 6.58E-05 | 0.02556   | -0.21453  |
| 7w11w_SITTI | 0.02013009 | 0.11086766 | 3.42E-05 | 0.0045972 | 0.0032259 |
| 7w11w_SITTI | 0.0214001  | 0.11853103 | 3.47E-05 | 0.0044724 | -0.0356   |
| 7w11w_SITTI | 0.11588211 | 0.6886442  | 6.63E-05 | 0.025119  | -0.33347  |
| 7w11w_SITTI | 0.07083943 | 0.41685247 | 6.20E-05 | 0.012608  | 0.11916   |
| 7w11w_SITTI | 0.08838017 | 0.5226949  | 6.42E-05 | 0.020421  | 0.074212  |
| 7w11w_SITTI | 0.02261203 | 0.12584393 | 3.55E-05 | 0.0043197 | -0.056631 |
| 7w11w_SITTI | 0.02181788 | 0.12105195 | 3.49E-05 | 0.0044169 | -0.0356   |
| 7w11w_SITTI | 0.06291501 | 0.3690358  | 6.08E-05 | 0.0094206 | 0.087254  |
| 7w11w_SITTI | 0.10756518 | 0.638459   | 6.59E-05 | 0.025604  | -0.23822  |
| 7w11w_SITTI | 0.11542013 | 0.68585646 | 6.63E-05 | 0.025182  | -0.32814  |
| 7w11w_SITTI | 0.01783327 | 0.09700847 | 3.34E-05 | 0.0049043 | 0.067421  |
| 7w11w_SITTI | 0.01223224 | 0.06321134 | 3.23E-05 | 0.0060411 | 0.2791    |
| 7w11w_SITTI | 0.02037104 | 0.11232161 | 3.44E-05 | 0.0045325 | -0.01065  |
| 7w11w_SITTI | 0.02012654 | 0.11084624 | 3.42E-05 | 0.0045972 | 0.0032259 |
| 7w11w_SITTI | 0.02708165 | 0.15281402 | 3.84E-05 | 0.0040947 | -0.10271  |
| 7w11w_SITTI | 0.07379917 | 0.43471184 | 6.23E-05 | 0.013805  | 0.12913   |
| 7w11w_SITTI | 0.04876623 | 0.2836608  | 5.70E-05 | 0.0057827 | 0.041222  |
| 7w11w_SITTI | 0.04358316 | 0.25238562 | 5.33E-05 | 0.0049301 | 0.008455  |

|             |            |            |          |           |           |
|-------------|------------|------------|----------|-----------|-----------|
| 7w11w_SITTI | 0.05119352 | 0.29830727 | 5.81E-05 | 0.006215  | 0.051138  |
| 7w11w_SITTI | 0.02078136 | 0.11479751 | 3.44E-05 | 0.0045325 | -0.01065  |
| 7w11w_SITTI | 0.02106917 | 0.11653417 | 3.47E-05 | 0.0044724 | -0.023601 |
| 7w11w_SITTI | 0.02920038 | 0.16559862 | 4.02E-05 | 0.0040662 | -0.10661  |
| 7w11w_SITTI | 0.10300402 | 0.6109365  | 6.56E-05 | 0.025216  | -0.16182  |
| 7w11w_SITTI | 0.09655038 | 0.5719947  | 6.50E-05 | 0.023626  | -0.055297 |
| 7w11w_SITTI | 0.01600899 | 0.08600059 | 3.30E-05 | 0.0051875 | 0.12392   |
| 7w11w_SITTI | 0.1007071  | 0.5970767  | 6.54E-05 | 0.024809  | -0.12375  |
| 7w11w_SITTI | 0.03044904 | 0.17313316 | 4.11E-05 | 0.0040705 | -0.10475  |
| 7w11w_SITTI | 0.03711223 | 0.21333945 | 4.76E-05 | 0.0043355 | -0.057524 |
| 7w11w_SITTI | 0.03768577 | 0.21680027 | 4.81E-05 | 0.0043756 | -0.05192  |
| 7w11w_SITTI | 0.09700813 | 0.5747568  | 6.51E-05 | 0.023799  | -0.055297 |
| 7w11w_SITTI | 0.02597088 | 0.14611155 | 3.76E-05 | 0.0041286 | -0.096385 |
| 7w11w_SITTI | 0.05638912 | 0.329658   | 5.98E-05 | 0.0075425 | 0.068678  |
| 7w11w_SITTI | 0.10861372 | 0.64478594 | 6.59E-05 | 0.025616  | -0.24573  |
| 7w11w_SITTI | 0.01141449 | 0.05827693 | 3.21E-05 | 0.006339  | 0.32844   |
| 7w11w_SITTI | 0.07812978 | 0.46084312 | 6.29E-05 | 0.015819  | 0.13662   |
| 7w11w_SITTI | 0.01930592 | 0.10589457 | 3.40E-05 | 0.0046667 | 0.017998  |
| 7w11w_SITTI | 0.03161792 | 0.18018632 | 4.22E-05 | 0.0040866 | -0.10071  |
| 7w11w_SITTI | 0.06382407 | 0.3745212  | 6.10E-05 | 0.0098069 | 0.089169  |
| 7w11w_SITTI | 0.01147282 | 0.05862892 | 3.22E-05 | 0.0061869 | 0.30353   |
| 7w11w_SITTI | 0.03072396 | 0.17479205 | 4.11E-05 | 0.0040705 | -0.10475  |
| 7w11w_SITTI | 0.03950058 | 0.227751   | 4.98E-05 | 0.0045122 | -0.034672 |
| 7w11w_SITTI | 0.0934818  | 0.5534786  | 6.47E-05 | 0.022469  | 0.0013661 |
| 7w11w_SITTI | 0.10889046 | 0.6464559  | 6.59E-05 | 0.025616  | -0.25305  |
| 7w11w_SITTI | 0.02222259 | 0.12349401 | 3.52E-05 | 0.0043661 | -0.046619 |
| 7w11w_SITTI | 0.01991804 | 0.10958812 | 3.42E-05 | 0.0045972 | 0.0032259 |
| 7w11w_SITTI | 0.03104681 | 0.17674014 | 4.16E-05 | 0.0040771 | -0.10299  |
| 7w11w_SITTI | 0.05298383 | 0.3091102  | 5.87E-05 | 0.0065755 | 0.059084  |
| 7w11w_SITTI | 0.11795853 | 0.7011734  | 6.65E-05 | 0.024847  | -0.34876  |
| 7w11w_SITTI | 0.07860398 | 0.46370447 | 6.30E-05 | 0.016077  | 0.13651   |
| 7w11w_SITTI | 0.01084421 | 0.05483582 | 3.21E-05 | 0.0064976 | 0.35381   |
| 7w11w_SITTI | 0.11033572 | 0.6551767  | 6.60E-05 | 0.02558   | -0.27396  |
| 7w11w_SITTI | 0.02575876 | 0.14483161 | 3.72E-05 | 0.0041509 | -0.092011 |
| 7w11w_SITTI | 0.1293203  | 0.76973134 | 6.70E-05 | 0.023692  | -0.43556  |
| 7w11w_SITTI | 0.0493835  | 0.28738543 | 5.73E-05 | 0.0058857 | 0.04392   |
| 7w11w_SITTI | 0.03044571 | 0.17311306 | 4.11E-05 | 0.0040705 | -0.10475  |
| 7w11w_SITTI | 0.05449092 | 0.3182041  | 5.92E-05 | 0.0069681 | 0.062513  |
| 7w11w_SITTI | 0.09186535 | 0.5437248  | 6.46E-05 | 0.022042  | 0.027741  |
| 7w11w_SITTI | 0.01083393 | 0.0547738  | 3.21E-05 | 0.0064976 | 0.35381   |
| 7w11w_SITTI | 0.02059128 | 0.11365053 | 3.44E-05 | 0.0045325 | -0.01065  |
| 7w11w_SITTI | 0.06615879 | 0.3886091  | 6.13E-05 | 0.010616  | 0.10013   |
| 7w11w_SITTI | 0.06004692 | 0.3517295  | 6.04E-05 | 0.0085136 | 0.07887   |

|             |            |            |          |           |           |
|-------------|------------|------------|----------|-----------|-----------|
| 7w11w_SITTI | 0.0157537  | 0.08446013 | 3.28E-05 | 0.0052924 | 0.1442    |
| 7w11w_SITTI | 0.08690261 | 0.51377916 | 6.41E-05 | 0.01993   | 0.093363  |
| 7w11w_SITTI | 0.11110624 | 0.6598261  | 6.61E-05 | 0.025556  | -0.28058  |
| 7w11w_SITTI | 0.01256753 | 0.06523451 | 3.23E-05 | 0.0059016 | 0.25518   |
| 7w11w_SITTI | 0.11998683 | 0.71341234 | 6.65E-05 | 0.024632  | -0.36766  |
| 7w11w_SITTI | 0.01680887 | 0.0908271  | 3.31E-05 | 0.0050879 | 0.10435   |
| 7w11w_SITTI | 0.06904143 | 0.4060032  | 6.16E-05 | 0.011695  | 0.11218   |
| 7w11w_SITTI | 0.00791233 | 0.03714457 | 3.19E-05 | 0.0073923 | 0.48652   |
| 7w11w_SITTI | 0.01887837 | 0.10331465 | 3.38E-05 | 0.004741  | 0.03364   |
| 7w11w_SITTI | 0.06146907 | 0.36031088 | 6.07E-05 | 0.0090475 | 0.082025  |
| 7w11w_SITTI | 0.01304772 | 0.06813201 | 3.23E-05 | 0.0059016 | 0.25518   |
| 7w11w_SITTI | 0.02703367 | 0.15252453 | 3.84E-05 | 0.0040947 | -0.10271  |
| 7w11w_SITTI | 0.08834936 | 0.522509   | 6.42E-05 | 0.020421  | 0.074212  |
| 7w11w_SITTI | 0.12023809 | 0.7149285  | 6.66E-05 | 0.024561  | -0.36766  |
| 7w11w_SITTI | 0.05142368 | 0.29969612 | 5.83E-05 | 0.0063316 | 0.053285  |
| 7w11w_SITTI | 0.02312462 | 0.12893698 | 3.58E-05 | 0.0042778 | -0.065623 |
| 7w11w_SITTI | 0.02313829 | 0.12901944 | 3.58E-05 | 0.0042778 | -0.065623 |
| 7w11w_SITTI | 0.09917571 | 0.5878362  | 6.53E-05 | 0.02442   | -0.094455 |
| 7w11w_SITTI | 0.0088837  | 0.04300592 | 3.19E-05 | 0.0070136 | 0.43237   |
| 7w11w_SITTI | 0.0162122  | 0.08722676 | 3.30E-05 | 0.0051875 | 0.12392   |
| 7w11w_SITTI | 0.02805644 | 0.15869601 | 3.88E-05 | 0.0040827 | -0.10603  |
| 7w11w_SITTI | 0.11004721 | 0.6534358  | 6.60E-05 | 0.025599  | -0.26716  |
| 7w11w_SITTI | 0.05368668 | 0.3133512  | 5.91E-05 | 0.0068337 | 0.060836  |
| 7w11w_SITTI | 0.08362366 | 0.49399373 | 6.37E-05 | 0.01841   | 0.12117   |
| 7w11w_SITTI | 0.05333789 | 0.31124663 | 5.89E-05 | 0.0067028 | 0.059084  |
| 7w11w_SITTI | 0.08945677 | 0.5291912  | 6.43E-05 | 0.020902  | 0.059815  |
| 7w11w_SITTI | 0.11849402 | 0.70440465 | 6.65E-05 | 0.024776  | -0.35363  |
| 7w11w_SITTI | 0.11666802 | 0.6933864  | 6.64E-05 | 0.025054  | -0.33868  |
| 7w11w_SITTI | 0.01818644 | 0.09913951 | 3.36E-05 | 0.0048202 | 0.050123  |
| 7w11w_SITTI | 0.02135614 | 0.11826578 | 3.47E-05 | 0.0044724 | -0.023601 |
| 7w11w_SITTI | 0.06583656 | 0.3866647  | 6.13E-05 | 0.010616  | 0.097788  |
| 7w11w_SITTI | 0.03124861 | 0.17795786 | 4.16E-05 | 0.0040771 | -0.10299  |
| 7w11w_SITTI | 0.04588641 | 0.2662837  | 5.54E-05 | 0.0053171 | 0.025099  |
| 7w11w_SITTI | 0.0952715  | 0.5642778  | 6.49E-05 | 0.023263  | -0.026471 |
| 7w11w_SITTI | 0.0213554  | 0.1182613  | 3.47E-05 | 0.0044724 | -0.023601 |
| 7w11w_SITTI | 0.02063624 | 0.11392182 | 3.44E-05 | 0.0045325 | -0.01065  |
| 7w11w_SITTI | 0.01809272 | 0.09857401 | 3.34E-05 | 0.0049043 | 0.050123  |
| 7w11w_SITTI | 0.11416843 | 0.6783036  | 6.63E-05 | 0.025299  | -0.31137  |
| 7w11w_SITTI | 0.01352872 | 0.0710344  | 3.24E-05 | 0.0057681 | 0.23179   |
| 7w11w_SITTI | 0.09002185 | 0.53260094 | 6.44E-05 | 0.021137  | 0.05218   |
| 7w11w_SITTI | 0.01141792 | 0.05829763 | 3.21E-05 | 0.006339  | 0.32844   |
| 7w11w_SITTI | 0.09650426 | 0.57171637 | 6.50E-05 | 0.023626  | -0.055297 |
| 7w11w_SITTI | 0.10724405 | 0.6365212  | 6.58E-05 | 0.025586  | -0.23052  |

|             |            |            |          |           |            |
|-------------|------------|------------|----------|-----------|------------|
| 7w11w_SITTI | 0.05264415 | 0.30706048 | 5.87E-05 | 0.0065755 | 0.057248   |
| 7w11w_SITTI | 0.06207706 | 0.36397955 | 6.07E-05 | 0.0092324 | 0.083692   |
| 7w11w_SITTI | 0.04280247 | 0.24767493 | 5.29E-05 | 0.0048617 | -0.0013165 |
| 7w11w_SITTI | 0.02780935 | 0.15720503 | 3.88E-05 | 0.0040827 | -0.10472   |
| 7w11w_SITTI | 0.07547723 | 0.4448374  | 6.26E-05 | 0.014549  | 0.13345    |
| 7w11w_SITTI | 0.01083376 | 0.05477275 | 3.21E-05 | 0.0064976 | 0.35381    |
| 7w11w_SITTI | 0.02023128 | 0.11147827 | 3.42E-05 | 0.0045972 | 0.0032259  |
| 7w11w_SITTI | 0.01788833 | 0.09734067 | 3.34E-05 | 0.0049043 | 0.067421   |
| 7w11w_SITTI | 0.00970708 | 0.04797425 | 3.20E-05 | 0.0068348 | 0.4058     |
| 7w11w_SITTI | 0.07723057 | 0.4554172  | 6.28E-05 | 0.015307  | 0.13646    |
| 7w11w_SITTI | 0.00353314 | 0.01072013 | 3.18E-05 | 0.0092049 | 0.71249    |
| 7w11w_SITTI | 0.09008768 | 0.53299814 | 6.44E-05 | 0.021137  | 0.05218    |
| 7w11w_SITTI | 0.01636817 | 0.08816788 | 3.30E-05 | 0.0051875 | 0.12392    |
| 7w11w_SITTI | 0.01881206 | 0.10291457 | 3.38E-05 | 0.004741  | 0.03364    |
| 7w11w_SITTI | 0.08322651 | 0.49159727 | 6.36E-05 | 0.018151  | 0.12434    |
| 7w11w_SITTI | 0.01020286 | 0.05096583 | 3.20E-05 | 0.0066628 | 0.37961    |
| 7w11w_SITTI | 0.07437068 | 0.43816033 | 6.24E-05 | 0.014051  | 0.13074    |
| 7w11w_SITTI | 0.04545816 | 0.2636996  | 5.50E-05 | 0.0052335 | 0.021279   |
| 7w11w_SITTI | 0.03906411 | 0.22511728 | 4.92E-05 | 0.0044639 | -0.034672  |
| 7w11w_SITTI | 0.01362001 | 0.07158525 | 3.24E-05 | 0.0057681 | 0.23179    |
| 7w11w_SITTI | 0.0559432  | 0.32696727 | 5.97E-05 | 0.0073934 | 0.067199   |
| 7w11w_SITTI | 0.08435475 | 0.4984052  | 6.37E-05 | 0.018667  | 0.1136     |
| 7w11w_SITTI | 0.01370814 | 0.07211701 | 3.25E-05 | 0.0056405 | 0.20898    |
| 7w11w_SITTI | 0.10047002 | 0.59564614 | 6.53E-05 | 0.024687  | -0.12375   |
| 7w11w_SITTI | 0.08157979 | 0.4816608  | 6.34E-05 | 0.017373  | 0.13148    |
| 7w11w_SITTI | 0.05835456 | 0.34151763 | 6.01E-05 | 0.0080116 | 0.073002   |
| 7w11w_SITTI | 0.08177912 | 0.4828636  | 6.34E-05 | 0.017373  | 0.12948    |
| 7w11w_SITTI | 0.02383989 | 0.13325296 | 3.61E-05 | 0.0042401 | -0.073623  |
| 7w11w_SITTI | 0.02282291 | 0.1271164  | 3.55E-05 | 0.0043197 | -0.056631  |
| 7w11w_SITTI | 0.06259901 | 0.36712906 | 6.08E-05 | 0.0094206 | 0.085432   |
| 7w11w_SITTI | 0.1085517  | 0.64441174 | 6.59E-05 | 0.025616  | -0.24573   |
| 7w11w_SITTI | 0.10281875 | 0.60981864 | 6.55E-05 | 0.025127  | -0.16182   |
| 7w11w_SITTI | 0.03599523 | 0.20659938 | 4.65E-05 | 0.0042637 | -0.068307  |
| 7w11w_SITTI | 0.01674064 | 0.0904154  | 3.31E-05 | 0.0050879 | 0.10435    |
| 7w11w_SITTI | 0.11769964 | 0.69961125 | 6.64E-05 | 0.024917  | -0.34876   |
| 7w11w_SITTI | 0.09260373 | 0.5481802  | 6.46E-05 | 0.022258  | 0.019141   |
| 7w11w_SITTI | 0.024654   | 0.13816538 | 3.64E-05 | 0.0042065 | -0.080664  |
| 7w11w_SITTI | 0.08921385 | 0.5277254  | 6.43E-05 | 0.020902  | 0.067165   |
| 7w11w_SITTI | 0.07099164 | 0.41777095 | 6.20E-05 | 0.012608  | 0.11916    |
| 7w11w_SITTI | 0.03481771 | 0.19949414 | 4.54E-05 | 0.0042028 | -0.078293  |
| 7w11w_SITTI | 0.03189994 | 0.18188803 | 4.22E-05 | 0.0040866 | -0.097962  |
| 7w11w_SITTI | 0.02883988 | 0.16342337 | 3.97E-05 | 0.0040686 | -0.10664   |
| 7w11w_SITTI | 0.07382258 | 0.43485308 | 6.23E-05 | 0.013805  | 0.12913    |



|             |            |            |          |           |           |
|-------------|------------|------------|----------|-----------|-----------|
| 7w11w_SITTI | 0.09435769 | 0.5587638  | 6.48E-05 | 0.022877  | -0.017059 |
| 7w11w_SITTI | 0.01858475 | 0.10154291 | 3.36E-05 | 0.0048202 | 0.050123  |
| 7w11w_SITTI | 0.09944253 | 0.5894462  | 6.53E-05 | 0.02442   | -0.10426  |
| 7w11w_SITTI | 0.0537979  | 0.31402233 | 5.91E-05 | 0.0068337 | 0.060836  |
| 7w11w_SITTI | 0.07344706 | 0.43258718 | 6.23E-05 | 0.013561  | 0.12913   |
| 7w11w_SITTI | 0.00526771 | 0.0211867  | 3.18E-05 | 0.0084677 | 0.62647   |
| 7w11w_SITTI | 0.09664136 | 0.5725437  | 6.50E-05 | 0.023626  | -0.055297 |
| 7w11w_SITTI | 0.07863412 | 0.46388635 | 6.30E-05 | 0.016077  | 0.13651   |
| 7w11w_SITTI | 0.10009074 | 0.59335756 | 6.53E-05 | 0.024558  | -0.11403  |
| 7w11w_SITTI | 0.12284648 | 0.7306678  | 6.67E-05 | 0.024282  | -0.38934  |
| 7w11w_SITTI | 0.02939025 | 0.16674437 | 4.02E-05 | 0.0040662 | -0.10661  |
| 7w11w_SITTI | 0.0169318  | 0.09156892 | 3.31E-05 | 0.0050879 | 0.10435   |
| 7w11w_SITTI | 0.10541674 | 0.62549514 | 6.57E-05 | 0.025482  | -0.20623  |
| 7w11w_SITTI | 0.1067629  | 0.633618   | 6.58E-05 | 0.02556   | -0.22263  |
| 7w11w_SITTI | 0.10143496 | 0.6014687  | 6.54E-05 | 0.024923  | -0.13341  |
| 7w11w_SITTI | 0.01653894 | 0.08919837 | 3.31E-05 | 0.0050879 | 0.10435   |
| 7w11w_SITTI | 0.08507712 | 0.502764   | 6.38E-05 | 0.018923  | 0.10916   |
| 7w11w_SITTI | 0.01928254 | 0.10575347 | 3.40E-05 | 0.0046667 | 0.017998  |
| 7w11w_SITTI | 0.11020199 | 0.6543697  | 6.60E-05 | 0.02558   | -0.26716  |
| 7w11w_SITTI | 0.02679721 | 0.15109771 | 3.80E-05 | 0.0041099 | -0.099939 |
| 7w11w_SITTI | 0.08875757 | 0.52497214 | 6.42E-05 | 0.020663  | 0.074212  |
| 7w11w_SITTI | 0.07747836 | 0.45691243 | 6.29E-05 | 0.015562  | 0.13646   |
| 7w11w_SITTI | 0.04171793 | 0.24113071 | 5.19E-05 | 0.0047337 | -0.011944 |
| 7w11w_SITTI | 0.04317525 | 0.24992429 | 5.33E-05 | 0.0049301 | 0.0036923 |
| 7w11w_SITTI | 0.11297985 | 0.6711316  | 6.62E-05 | 0.025403  | -0.29951  |
| 7w11w_SITTI | 0.10864695 | 0.6449865  | 6.59E-05 | 0.025616  | -0.24573  |
| 7w11w_SITTI | 0.11491331 | 0.68279827 | 6.63E-05 | 0.025242  | -0.32268  |
| 7w11w_SITTI | 0.1211147  | 0.72021806 | 6.66E-05 | 0.02449   | -0.37656  |
| 7w11w_SITTI | 0.10241252 | 0.6073674  | 6.55E-05 | 0.025127  | -0.15246  |
| 7w11w_SITTI | 0.1166823  | 0.69347256 | 6.64E-05 | 0.025054  | -0.33868  |
| 7w11w_SITTI | 0.03075417 | 0.17497437 | 4.11E-05 | 0.0040705 | -0.10475  |
| 7w11w_SITTI | 0.06083832 | 0.35650486 | 6.06E-05 | 0.008866  | 0.080421  |
| 7w11w_SITTI | 0.13211262 | 0.7865805  | 6.71E-05 | 0.023582  | -0.45284  |
| 7w11w_SITTI | 0.03233014 | 0.18448393 | 4.27E-05 | 0.004099  | -0.097962 |
| 7w11w_SITTI | 0.09743802 | 0.57735074 | 6.51E-05 | 0.023964  | -0.065044 |
| 7w11w_SITTI | 0.07553908 | 0.4452106  | 6.26E-05 | 0.014549  | 0.13453   |
| 7w11w_SITTI | 0.03760095 | 0.21628848 | 4.81E-05 | 0.0043756 | -0.05192  |
| 7w11w_SITTI | 0.0228246  | 0.1271266  | 3.55E-05 | 0.0043197 | -0.056631 |
| 7w11w_SITTI | 0.01069686 | 0.05394672 | 3.21E-05 | 0.0064976 | 0.35381   |
| 7w11w_SITTI | 0.09360535 | 0.5542241  | 6.48E-05 | 0.022676  | 0.0013661 |
| 7w11w_SITTI | 0.09907176 | 0.5872089  | 6.53E-05 | 0.02442   | -0.094455 |
| 7w11w_SITTI | 0.08348135 | 0.49313498 | 6.36E-05 | 0.018151  | 0.12117   |
| 7w11w_SITTI | 0.10371403 | 0.61522084 | 6.56E-05 | 0.025296  | -0.18011  |

|             |            |            |          |           |           |
|-------------|------------|------------|----------|-----------|-----------|
| 7w11w_SITTI | 0.07775717 | 0.45859474 | 6.29E-05 | 0.015562  | 0.13662   |
| 7w11w_SITTI | 0.01369576 | 0.07204231 | 3.25E-05 | 0.0056405 | 0.20898   |
| 7w11w_SITTI | 0.13347246 | 0.7947859  | 6.71E-05 | 0.023546  | -0.45937  |
| 7w11w_SITTI | 0.12353186 | 0.7348034  | 6.67E-05 | 0.024153  | -0.39346  |
| 7w11w_SITTI | 0.0652685  | 0.383237   | 6.12E-05 | 0.01041   | 0.095509  |
| 7w11w_SITTI | 0.08925302 | 0.52796173 | 6.43E-05 | 0.020902  | 0.067165  |
| 7w11w_SITTI | 0.09505155 | 0.5629506  | 6.49E-05 | 0.023073  | -0.026471 |
| 7w11w_SITTI | 0.01566571 | 0.08392922 | 3.28E-05 | 0.0052924 | 0.1442    |
| 7w11w_SITTI | 0.07361198 | 0.4335823  | 6.23E-05 | 0.013805  | 0.12913   |
| 7w11w_SITTI | 0.14412963 | 0.8590923  | 6.75E-05 | 0.023623  | -0.50968  |
| 7w11w_SITTI | 0.11621748 | 0.69066775 | 6.64E-05 | 0.025054  | -0.33347  |
| 7w11w_SITTI | 0.00673866 | 0.03006258 | 3.18E-05 | 0.0078    | 0.54183   |
| 7w11w_SITTI | 0.1046794  | 0.62104595 | 6.57E-05 | 0.025429  | -0.18901  |
| 7w11w_SITTI | 0.01136025 | 0.05794964 | 3.21E-05 | 0.006339  | 0.32844   |
| 7w11w_SITTI | 0.01531059 | 0.08178635 | 3.27E-05 | 0.0054028 | 0.1442    |
| 7w11w_SITTI | 0.01953692 | 0.10728844 | 3.40E-05 | 0.0046667 | 0.017998  |
| 7w11w_SITTI | 0.03891221 | 0.22420076 | 4.92E-05 | 0.0044639 | -0.040459 |
| 7w11w_SITTI | 0.04719605 | 0.2741862  | 5.61E-05 | 0.0054936 | 0.032113  |
| 7w11w_SITTI | 0.02888253 | 0.16368069 | 3.97E-05 | 0.0040686 | -0.10664  |
| 7w11w_SITTI | 0.12338439 | 0.73391354 | 6.67E-05 | 0.024217  | -0.39346  |
| 7w11w_SITTI | 0.06422893 | 0.37696415 | 6.10E-05 | 0.010005  | 0.091185  |
| 7w11w_SITTI | 0.01975138 | 0.10858247 | 3.40E-05 | 0.0046667 | 0.0032259 |
| 7w11w_SITTI | 0.05828777 | 0.34111464 | 6.01E-05 | 0.0080116 | 0.073002  |
| 7w11w_SITTI | 0.10351006 | 0.61399    | 6.56E-05 | 0.025296  | -0.17104  |
| 7w11w_SITTI | 0.11266114 | 0.66920847 | 6.62E-05 | 0.025448  | -0.29951  |
| 7w11w_SITTI | 0.02157136 | 0.11956439 | 3.49E-05 | 0.0044169 | -0.0356   |
| 7w11w_SITTI | 0.08737275 | 0.51661605 | 6.41E-05 | 0.01993   | 0.087329  |
| 7w11w_SITTI | 0.07936336 | 0.46828666 | 6.31E-05 | 0.016335  | 0.13613   |
| 7w11w_SITTI | 0.10938585 | 0.64944506 | 6.60E-05 | 0.025611  | -0.2602   |
| 7w11w_SITTI | 0.1268733  | 0.75496596 | 6.69E-05 | 0.023834  | -0.41707  |
| 7w11w_SITTI | 0.00978487 | 0.04844366 | 3.20E-05 | 0.0068348 | 0.37961   |
| 7w11w_SITTI | 0.0619323  | 0.36310607 | 6.07E-05 | 0.0092324 | 0.083692  |
| 7w11w_SITTI | 0.10512672 | 0.6237451  | 6.57E-05 | 0.025482  | -0.19772  |
| 7w11w_SITTI | 0.01061245 | 0.05343736 | 3.21E-05 | 0.0064976 | 0.35381   |
| 7w11w_SITTI | 0.01321787 | 0.06915867 | 3.24E-05 | 0.0057681 | 0.23179   |
| 7w11w_SITTI | 0.01055117 | 0.05306759 | 3.21E-05 | 0.0064976 | 0.35381   |
| 7w11w_SITTI | 0.01928855 | 0.10578976 | 3.40E-05 | 0.0046667 | 0.017998  |
| 7w11w_SITTI | 0.10594712 | 0.6286954  | 6.58E-05 | 0.025526  | -0.21453  |
| 7w11w_SITTI | 0.1252948  | 0.7454412  | 6.68E-05 | 0.023978  | -0.40938  |
| 7w11w_SITTI | 0.00931091 | 0.04558372 | 3.20E-05 | 0.0068348 | 0.4058    |
| 7w11w_SITTI | 0.01435283 | 0.07600714 | 3.26E-05 | 0.0055188 | 0.18676   |
| 7w11w_SITTI | 0.09786233 | 0.5799111  | 6.51E-05 | 0.023964  | -0.074831 |
| 7w11w_SITTI | 0.02461358 | 0.13792148 | 3.64E-05 | 0.0042065 | -0.080664 |

|             |            |            |          |           |            |
|-------------|------------|------------|----------|-----------|------------|
| 7w11w_SITTI | 0.03134773 | 0.17855595 | 4.16E-05 | 0.0040771 | -0.10071   |
| 7w11w_SITTI | 0.00517992 | 0.02065698 | 3.18E-05 | 0.0084677 | 0.62647    |
| 7w11w_SITTI | 0.10962869 | 0.65091044 | 6.60E-05 | 0.025599  | -0.2602    |
| 7w11w_SITTI | 0.09543812 | 0.56528324 | 6.49E-05 | 0.023263  | -0.035993  |
| 7w11w_SITTI | 0.13503566 | 0.8042184  | 6.72E-05 | 0.023533  | -0.46872   |
| 7w11w_SITTI | 0.08888178 | 0.52572167 | 6.42E-05 | 0.020663  | 0.067165   |
| 7w11w_SITTI | 0.016404   | 0.0883841  | 3.30E-05 | 0.0051875 | 0.10435    |
| 7w11w_SITTI | 0.10005268 | 0.59312785 | 6.53E-05 | 0.024558  | -0.11403   |
| 7w11w_SITTI | 0.03729578 | 0.21444705 | 4.76E-05 | 0.0043355 | -0.057524  |
| 7w11w_SITTI | 0.06063446 | 0.3552748  | 6.05E-05 | 0.008688  | 0.080421   |
| 7w11w_SITTI | 0.03905905 | 0.22508678 | 4.92E-05 | 0.0044639 | -0.034672  |
| 7w11w_SITTI | 0.09827546 | 0.58240396 | 6.52E-05 | 0.024123  | -0.084641  |
| 7w11w_SITTI | 0.02469705 | 0.1384251  | 3.64E-05 | 0.0042065 | -0.086782  |
| 7w11w_SITTI | 0.08748465 | 0.51729125 | 6.41E-05 | 0.020177  | 0.087329   |
| 7w11w_SITTI | 0.04480366 | 0.25975025 | 5.46E-05 | 0.0051531 | 0.017239   |
| 7w11w_SITTI | 0.11879458 | 0.70621824 | 6.65E-05 | 0.024776  | -0.3584    |
| 7w11w_SITTI | 0.09265912 | 0.5485145  | 6.46E-05 | 0.022258  | 0.010343   |
| 7w11w_SITTI | 0.01811091 | 0.09868377 | 3.36E-05 | 0.0048202 | 0.050123   |
| 7w11w_SITTI | 0.02925317 | 0.16591722 | 4.02E-05 | 0.0040662 | -0.10661   |
| 7w11w_SITTI | 0.10994019 | 0.65279    | 6.60E-05 | 0.025599  | -0.26716   |
| 7w11w_SITTI | 0.09477487 | 0.5612811  | 6.49E-05 | 0.023073  | -0.017059  |
| 7w11w_SITTI | 0.07671865 | 0.45232823 | 6.27E-05 | 0.015053  | 0.13605    |
| 7w11w_SITTI | 0.02222249 | 0.12349343 | 3.52E-05 | 0.0043661 | -0.046619  |
| 7w11w_SITTI | 0.08393578 | 0.49587703 | 6.37E-05 | 0.01841   | 0.1176     |
| 7w11w_SITTI | 0.00988661 | 0.04905754 | 3.20E-05 | 0.0066628 | 0.37961    |
| 7w11w_SITTI | 0.05204737 | 0.30345947 | 5.85E-05 | 0.0064518 | 0.055318   |
| 7w11w_SITTI | 0.11701967 | 0.69550824 | 6.64E-05 | 0.024986  | -0.34377   |
| 7w11w_SITTI | 0.09412585 | 0.5573648  | 6.48E-05 | 0.022877  | -0.0077738 |
| 7w11w_SITTI | 0.03078971 | 0.17518878 | 4.11E-05 | 0.0040705 | -0.10299   |
| 7w11w_SITTI | 0.08198576 | 0.48411044 | 6.35E-05 | 0.017633  | 0.12948    |
| 7w11w_SITTI | 0.07487901 | 0.4412277  | 6.25E-05 | 0.014299  | 0.13218    |
| 7w11w_SITTI | 0.01347879 | 0.07073313 | 3.24E-05 | 0.0057681 | 0.23179    |
| 7w11w_SITTI | 0.0787942  | 0.46485233 | 6.30E-05 | 0.016077  | 0.13651    |
| 7w11w_SITTI | 0.02621556 | 0.14758798 | 3.76E-05 | 0.0041286 | -0.096385  |
| 7w11w_SITTI | 0.13022451 | 0.7751875  | 6.70E-05 | 0.02364   | -0.44263   |
| 7w11w_SITTI | 0.0881462  | 0.5212831  | 6.42E-05 | 0.020421  | 0.080939   |
| 7w11w_SITTI | 0.11044578 | 0.6558408  | 6.60E-05 | 0.02558   | -0.27396   |
| 7w11w_SITTI | 0.03337003 | 0.1907587  | 4.37E-05 | 0.0041322 | -0.091175  |
| 7w11w_SITTI | 0.11841484 | 0.70392686 | 6.65E-05 | 0.024847  | -0.35363   |
| 7w11w_SITTI | 0.05547159 | 0.32412153 | 5.95E-05 | 0.007248  | 0.065685   |
| 7w11w_SITTI | 0.01266597 | 0.0658285  | 3.23E-05 | 0.0059016 | 0.25518    |
| 7w11w_SITTI | 0.01575255 | 0.08445319 | 3.28E-05 | 0.0052924 | 0.1442     |
| 7w11w_SITTI | 0.1175816  | 0.698899   | 6.64E-05 | 0.024917  | -0.34876   |

|             |            |            |          |           |           |
|-------------|------------|------------|----------|-----------|-----------|
| 7w11w_SITTI | 0.01528535 | 0.08163409 | 3.27E-05 | 0.0054028 | 0.16515   |
| 7w11w_SITTI | 0.11252986 | 0.6684163  | 6.62E-05 | 0.025448  | -0.29951  |
| 7w11w_SITTI | 0.0621025  | 0.36413306 | 6.07E-05 | 0.0092324 | 0.083692  |
| 7w11w_SITTI | 0.09457564 | 0.5600789  | 6.48E-05 | 0.022877  | -0.017059 |
| 7w11w_SITTI | 0.02026443 | 0.11167831 | 3.42E-05 | 0.0045972 | -0.01065  |
| 7w11w_SITTI | 0.04746679 | 0.27581984 | 5.61E-05 | 0.0054936 | 0.035328  |
| 7w11w_SITTI | 0.13445789 | 0.8007321  | 6.71E-05 | 0.023539  | -0.46567  |
| 7w11w_SITTI | 0.10324602 | 0.6123968  | 6.56E-05 | 0.025216  | -0.17104  |
| 7w11w_SITTI | 0.08855688 | 0.52376115 | 6.42E-05 | 0.020663  | 0.074212  |
| 7w11w_SITTI | 0.10103802 | 0.5990735  | 6.54E-05 | 0.024809  | -0.13341  |
| 7w11w_SITTI | 0.00899836 | 0.04369782 | 3.19E-05 | 0.0070136 | 0.43237   |
| 7w11w_SITTI | 0.04224621 | 0.24431838 | 5.24E-05 | 0.0047963 | -0.00654  |
| 7w11w_SITTI | 0.01597101 | 0.08577137 | 3.30E-05 | 0.0051875 | 0.12392   |
| 7w11w_SITTI | 0.0274967  | 0.15531851 | 3.84E-05 | 0.0040947 | -0.10472  |
| 7w11w_SITTI | 0.15332136 | 0.91455597 | 6.77E-05 | 0.02371   | -0.52582  |
| 7w11w_SITTI | 0.11993803 | 0.71311796 | 6.65E-05 | 0.024632  | -0.36766  |
| 7w11w_SITTI | 0.09831874 | 0.58266515 | 6.52E-05 | 0.024123  | -0.084641 |
| 7w11w_SITTI | 0.1313001  | 0.7816777  | 6.70E-05 | 0.023599  | -0.44949  |
| 7w11w_SITTI | 0.04468824 | 0.2590538  | 5.42E-05 | 0.0050757 | 0.017239  |
| 7w11w_SITTI | 0.04620408 | 0.26820055 | 5.54E-05 | 0.0053171 | 0.025099  |
| 7w11w_SITTI | 0.12035162 | 0.71561354 | 6.66E-05 | 0.024561  | -0.37215  |
| 7w11w_SITTI | 0.10209139 | 0.60542965 | 6.55E-05 | 0.025029  | -0.15246  |
| 7w11w_SITTI | 0.10195163 | 0.6045863  | 6.55E-05 | 0.025029  | -0.14299  |
| 7w11w_SITTI | 0.01923752 | 0.10548184 | 3.40E-05 | 0.0046667 | 0.017998  |
| 7w11w_SITTI | 0.02202795 | 0.12231953 | 3.52E-05 | 0.0043661 | -0.046619 |
| 7w11w_SITTI | 0.01991264 | 0.10955555 | 3.42E-05 | 0.0045972 | 0.0032259 |
| 7w11w_SITTI | 0.01567531 | 0.0839871  | 3.28E-05 | 0.0052924 | 0.1442    |
| 7w11w_SITTI | 0.09231052 | 0.546411   | 6.46E-05 | 0.022042  | 0.019141  |
| 7w11w_SITTF | 0.01261189 | 0.06550218 | 3.23E-05 | 0.0059016 | 0.25518   |
| 7w11w_SITTF | 0.08638106 | 0.5106321  | 6.40E-05 | 0.019681  | 0.099025  |
| 7w11w_SITTF | 0.01666793 | 0.0899767  | 3.31E-05 | 0.0050879 | 0.10435   |
| 7w11w_SITTF | 0.03596666 | 0.206427   | 4.65E-05 | 0.0042637 | -0.068307 |
| 7w11w_SITTF | 0.02873622 | 0.16279784 | 3.97E-05 | 0.0040686 | -0.10664  |
| 7w11w_SITTF | 0.06745091 | 0.39640585 | 6.15E-05 | 0.011255  | 0.10492   |
| 7w11w_SITTF | 0.01402922 | 0.07405449 | 3.25E-05 | 0.0056405 | 0.20898   |
| 7w11w_SITTF | 0.01699724 | 0.09196378 | 3.31E-05 | 0.0050879 | 0.085504  |
| 7w11w_SITTF | 0.10556576 | 0.62639433 | 6.57E-05 | 0.025482  | -0.20623  |
| 7w11w_SITTF | 0.02332945 | 0.13017291 | 3.58E-05 | 0.0042778 | -0.065623 |
| 7w11w_SITTF | 0.03353618 | 0.19176127 | 4.37E-05 | 0.0041322 | -0.087207 |
| 7w11w_SITTF | 0.11363068 | 0.6750588  | 6.62E-05 | 0.025353  | -0.31137  |
| 7w11w_SITTF | 0.08728989 | 0.5161161  | 6.41E-05 | 0.01993   | 0.087329  |
| 7w11w_SITTF | 0.00774975 | 0.03616356 | 3.19E-05 | 0.0073923 | 0.48652   |
| 7w11w_SITTF | 0.07949697 | 0.46909285 | 6.31E-05 | 0.016335  | 0.13545   |

|             |            |            |          |           |           |
|-------------|------------|------------|----------|-----------|-----------|
| 7w11w_SITTF | 0.10947947 | 0.65001005 | 6.60E-05 | 0.025611  | -0.2602   |
| 7w11w_SITTF | 0.01143669 | 0.0584109  | 3.21E-05 | 0.006339  | 0.30353   |
| 7w11w_SITTF | 0.09281469 | 0.5494532  | 6.46E-05 | 0.022258  | 0.010343  |
| 7w11w_SITTF | 0.03185398 | 0.1816107  | 4.22E-05 | 0.0040866 | -0.10071  |
| 7w11w_SITTF | 0.02104574 | 0.11639275 | 3.47E-05 | 0.0044724 | -0.023601 |
| 7w11w_SITTF | 0.01277897 | 0.06651032 | 3.23E-05 | 0.0059016 | 0.25518   |
| 7w11w_SITTF | 0.07370756 | 0.43415904 | 6.23E-05 | 0.013805  | 0.12913   |
| 7w11w_SITTF | 0.00946817 | 0.04653269 | 3.20E-05 | 0.0068348 | 0.4058    |
| 7w11w_SITTF | 0.07501859 | 0.44206995 | 6.25E-05 | 0.014299  | 0.13345   |
| 7w11w_SITTF | 0.05501723 | 0.32137987 | 5.94E-05 | 0.0071062 | 0.064127  |
| 7w11w_SITTF | 0.1518585  | 0.90572894 | 6.77E-05 | 0.023707  | -0.52493  |
| 7w11w_SITTF | 0.01775416 | 0.09653107 | 3.34E-05 | 0.0049043 | 0.067421  |
| 7w11w_SITTF | 0.10198203 | 0.60476977 | 6.55E-05 | 0.025029  | -0.14299  |
| 7w11w_SITTF | 0.04712959 | 0.27378514 | 5.61E-05 | 0.0054936 | 0.032113  |
| 7w11w_SITTF | 0.13628925 | 0.8117827  | 6.72E-05 | 0.023527  | -0.4775   |
| 7w11w_SITTF | 0.01514931 | 0.0808132  | 3.27E-05 | 0.0054028 | 0.16515   |
| 7w11w_SITTF | 0.10210427 | 0.6055074  | 6.55E-05 | 0.025029  | -0.15246  |
| 7w11w_SITTF | 0.05621436 | 0.3286035  | 5.97E-05 | 0.0073934 | 0.068678  |
| 7w11w_SITTF | 0.07379945 | 0.43471354 | 6.23E-05 | 0.013805  | 0.12913   |
| 7w11w_SITTF | 0.03047576 | 0.17329438 | 4.11E-05 | 0.0040705 | -0.10475  |
| 7w11w_SITTF | 0.06502472 | 0.381766   | 6.11E-05 | 0.010206  | 0.095509  |
| 7w11w_SITTF | 0.08807415 | 0.52084833 | 6.42E-05 | 0.020421  | 0.080939  |
| 7w11w_SITTF | 0.03934167 | 0.2267921  | 4.98E-05 | 0.0045122 | -0.034672 |
| 7w11w_SITTF | 0.1163925  | 0.6917239  | 6.64E-05 | 0.025054  | -0.33868  |
| 7w11w_SITTF | 0.06422915 | 0.3769655  | 6.10E-05 | 0.010005  | 0.091185  |
| 7w11w_SITTF | 0.09127507 | 0.540163   | 6.45E-05 | 0.021822  | 0.036126  |
| 7w11w_SITTF | 0.10737377 | 0.637304   | 6.59E-05 | 0.025604  | -0.23052  |
| 7w11w_SITTF | 0.11285772 | 0.6703947  | 6.62E-05 | 0.025448  | -0.29951  |
| 7w11w_SITTF | 0.03304833 | 0.18881753 | 4.32E-05 | 0.0041142 | -0.091175 |
| 7w11w_SITTF | 0.01881049 | 0.10290508 | 3.38E-05 | 0.004741  | 0.03364   |
| 7w11w_SITTF | 0.01625178 | 0.08746556 | 3.30E-05 | 0.0051875 | 0.12392   |
| 7w11w_SITTF | 0.08976634 | 0.53105915 | 6.44E-05 | 0.021137  | 0.059815  |
| 7w11w_SITTF | 0.01928414 | 0.10576317 | 3.40E-05 | 0.0046667 | 0.017998  |
| 7w11w_SITTF | 0.11647379 | 0.69221437 | 6.64E-05 | 0.025054  | -0.33868  |
| 7w11w_SITTF | 0.02448305 | 0.13713385 | 3.64E-05 | 0.0042065 | -0.080664 |
| 7w11w_SITTF | 0.05513688 | 0.32210186 | 5.94E-05 | 0.0071062 | 0.065685  |
| 7w11w_SITTF | 0.05784414 | 0.33843777 | 6.00E-05 | 0.0078516 | 0.073002  |
| 7w11w_SITTF | 0.09451594 | 0.55971867 | 6.48E-05 | 0.022877  | -0.017059 |
| 7w11w_SITTF | 0.06255185 | 0.36684448 | 6.08E-05 | 0.0094206 | 0.085432  |
| 7w11w_SITTF | 0.06749843 | 0.39669257 | 6.15E-05 | 0.011255  | 0.10492   |
| 7w11w_SITTF | 0.02026328 | 0.11167139 | 3.42E-05 | 0.0045972 | 0.0032259 |
| 7w11w_SITTF | 0.10511082 | 0.6236492  | 6.57E-05 | 0.025429  | -0.19772  |
| 7w11w_SITTF | 0.14576565 | 0.86896414 | 6.75E-05 | 0.02365   | -0.51443  |

|             |            |            |          |           |           |
|-------------|------------|------------|----------|-----------|-----------|
| 7w11w_SITTF | 0.01700362 | 0.09200227 | 3.33E-05 | 0.0049935 | 0.085504  |
| 7w11w_SITTF | 0.1306016  | 0.7774629  | 6.70E-05 | 0.02364   | -0.44263  |
| 7w11w_SITTF | 0.09665652 | 0.5726351  | 6.50E-05 | 0.023626  | -0.055297 |
| 7w11w_SITTF | 0.08063087 | 0.47593492 | 6.32E-05 | 0.016854  | 0.13314   |
| 7w11w_SITTF | 0.05035415 | 0.29324245 | 5.78E-05 | 0.0061018 | 0.048868  |
| 7w11w_SITTF | 0.06158499 | 0.3610104  | 6.07E-05 | 0.0090475 | 0.082025  |
| 7w11w_SITTF | 0.0922278  | 0.54591185 | 6.46E-05 | 0.022042  | 0.019141  |
| 7w11w_SITTF | 0.01812839 | 0.0987892  | 3.36E-05 | 0.0048202 | 0.050123  |
| 7w11w_SITTF | 0.08592382 | 0.50787306 | 6.39E-05 | 0.01943   | 0.1043    |
| 7w11w_SITTF | 0.02955457 | 0.16773587 | 4.02E-05 | 0.0040662 | -0.10661  |
| 7w11w_SITTF | 0.04997896 | 0.2909785  | 5.76E-05 | 0.005992  | 0.046466  |
| 7w11w_SITTF | 0.14681809 | 0.87531465 | 6.76E-05 | 0.023666  | -0.51713  |
| 7w11w_SITTF | 0.06989428 | 0.41114935 | 6.18E-05 | 0.012147  | 0.11455   |
| 7w11w_SITTF | 0.09263746 | 0.5483838  | 6.46E-05 | 0.022258  | 0.010343  |
| 7w11w_SITTF | 0.09997506 | 0.59265953 | 6.53E-05 | 0.024558  | -0.11403  |
| 7w11w_SITTF | 0.06825184 | 0.40123874 | 6.16E-05 | 0.011474  | 0.10734   |
| 7w11w_SITTF | 0.13460699 | 0.80163175 | 6.72E-05 | 0.023533  | -0.46567  |
| 7w11w_SITTF | 0.08768504 | 0.51850045 | 6.41E-05 | 0.020177  | 0.080939  |
| 7w11w_SITTF | 0.04864665 | 0.28293923 | 5.70E-05 | 0.0057827 | 0.041222  |
| 7w11w_SITTF | 0.0198404  | 0.10911969 | 3.42E-05 | 0.0045972 | 0.0032259 |
| 7w11w_SITTF | 0.01911787 | 0.10475983 | 3.38E-05 | 0.004741  | 0.03364   |
| 7w11w_SITTF | 0.05816574 | 0.34037828 | 6.01E-05 | 0.0080116 | 0.073002  |
| 7w11w_SITTF | 0.12855354 | 0.7651047  | 6.69E-05 | 0.023723  | -0.43195  |
| 7w11w_SITTF | 0.11432146 | 0.679227   | 6.63E-05 | 0.025299  | -0.3171   |
| 7w11w_SITTF | 0.02174011 | 0.12058266 | 3.49E-05 | 0.0044169 | -0.0356   |
| 7w11w_SITTF | 0.08337244 | 0.49247783 | 6.36E-05 | 0.018151  | 0.12117   |
| 7w11w_SITTF | 0.08686857 | 0.51357377 | 6.41E-05 | 0.01993   | 0.093363  |
| 7w11w_SITTF | 0.05735045 | 0.33545873 | 5.99E-05 | 0.0076952 | 0.071569  |
| 7w11w_SITTF | 0.0208846  | 0.11542044 | 3.47E-05 | 0.0044724 | -0.023601 |
| 7w11w_SITTF | 0.00479287 | 0.01832145 | 3.18E-05 | 0.0087056 | 0.65503   |
| 7w11w_SITTF | 0.13316092 | 0.79290605 | 6.71E-05 | 0.023556  | -0.45937  |
| 7w11w_SITTF | 0.01186497 | 0.06099519 | 3.22E-05 | 0.0061869 | 0.30353   |
| 7w11w_SITTF | 0.04205621 | 0.24317192 | 5.24E-05 | 0.0047963 | -0.00654  |
| 7w11w_SITTF | 0.02007384 | 0.11052823 | 3.42E-05 | 0.0045972 | 0.0032259 |
| 7w11w_SITTF | 0.08392746 | 0.49582687 | 6.37E-05 | 0.01841   | 0.1176    |
| 7w11w_SITTF | 0.13083136 | 0.7788493  | 6.70E-05 | 0.023618  | -0.44608  |
| 7w11w_SITTF | 0.11166682 | 0.66320866 | 6.61E-05 | 0.025525  | -0.28705  |
| 7w11w_SITTF | 0.01457389 | 0.07734107 | 3.26E-05 | 0.0055188 | 0.18676   |
| 7w11w_SITTF | 0.14133751 | 0.8422444  | 6.74E-05 | 0.023575  | -0.49999  |
| 7w11w_SITTF | 0.0739441  | 0.43558633 | 6.23E-05 | 0.013805  | 0.13074   |
| 7w11w_SITTF | 0.02605641 | 0.14662763 | 3.76E-05 | 0.0041286 | -0.096385 |
| 7w11w_SITTF | 0.00981134 | 0.04860337 | 3.20E-05 | 0.0066628 | 0.37961   |
| 7w11w_SITTF | 0.06704947 | 0.39398348 | 6.14E-05 | 0.011039  | 0.10251   |

|             |            |            |          |           |            |
|-------------|------------|------------|----------|-----------|------------|
| 7w11w_SITTF | 0.01214691 | 0.06269642 | 3.23E-05 | 0.0060411 | 0.2791     |
| 7w11w_SITTF | 0.01272636 | 0.06619287 | 3.23E-05 | 0.0059016 | 0.25518    |
| 7w11w_SITTF | 0.02378592 | 0.1329273  | 3.61E-05 | 0.0042401 | -0.073623  |
| 7w11w_SITTF | 0.02606927 | 0.14670521 | 3.76E-05 | 0.0041286 | -0.096385  |
| 7w11w_SITTF | 0.09104808 | 0.53879327 | 6.45E-05 | 0.021597  | 0.036126   |
| 7w11w_SITTF | 0.09328671 | 0.5523014  | 6.47E-05 | 0.022469  | 0.0013661  |
| 7w11w_SITTF | 0.02960261 | 0.16802575 | 4.02E-05 | 0.0040662 | -0.10661   |
| 7w11w_SITTF | 0.02654596 | 0.14958164 | 3.80E-05 | 0.0041099 | -0.099939  |
| 7w11w_SITTF | 0.08442617 | 0.49883613 | 6.37E-05 | 0.018667  | 0.1136     |
| 7w11w_SITTF | 0.08989816 | 0.53185457 | 6.44E-05 | 0.021137  | 0.05218    |
| 7w11w_SITTF | 0.02850795 | 0.16142045 | 3.93E-05 | 0.004074  | -0.10603   |
| 7w11w_SITTF | 0.0895484  | 0.5297441  | 6.43E-05 | 0.020902  | 0.059815   |
| 7w11w_SITTF | 0.01370191 | 0.07207941 | 3.25E-05 | 0.0056405 | 0.20898    |
| 7w11w_SITTF | 0.02704679 | 0.15260369 | 3.84E-05 | 0.0040947 | -0.10271   |
| 7w11w_SITTF | 0.02415268 | 0.13514037 | 3.61E-05 | 0.0042401 | -0.080664  |
| 7w11w_SITTF | 0.01289281 | 0.06719726 | 3.23E-05 | 0.0059016 | 0.25518    |
| 7w11w_SITTF | 0.10292332 | 0.6104496  | 6.56E-05 | 0.025216  | -0.16182   |
| 7w11w_SITTF | 0.01874623 | 0.10251732 | 3.38E-05 | 0.004741  | 0.03364    |
| 7w11w_SITTF | 0.10753684 | 0.63828796 | 6.59E-05 | 0.025604  | -0.23052   |
| 7w11w_SITTF | 0.02467855 | 0.1383135  | 3.64E-05 | 0.0042065 | -0.080664  |
| 7w11w_SITTF | 0.02272857 | 0.12654714 | 3.55E-05 | 0.0043197 | -0.056631  |
| 7w11w_SITTF | 0.07242395 | 0.42641363 | 6.21E-05 | 0.01308   | 0.12548    |
| 7w11w_SITTF | 0.05133359 | 0.29915246 | 5.81E-05 | 0.006215  | 0.053285   |
| 7w11w_SITTF | 0.13937308 | 0.8303908  | 6.73E-05 | 0.023544  | -0.49075   |
| 7w11w_SITTF | 0.10620971 | 0.63027996 | 6.58E-05 | 0.025526  | -0.21453   |
| 7w11w_SITTF | 0.10858049 | 0.64458543 | 6.59E-05 | 0.025616  | -0.24573   |
| 7w11w_SITTF | 0.02642866 | 0.14887385 | 3.80E-05 | 0.0041099 | -0.099939  |
| 7w11w_SITTF | 0.01942317 | 0.10660203 | 3.40E-05 | 0.0046667 | 0.017998   |
| 7w11w_SITTF | 0.08764368 | 0.5182508  | 6.41E-05 | 0.020177  | 0.087329   |
| 7w11w_SITTF | 0.03227221 | 0.18413436 | 4.27E-05 | 0.004099  | -0.097962  |
| 7w11w_SITTF | 0.09527776 | 0.5643156  | 6.49E-05 | 0.023263  | -0.026471  |
| 7w11w_SITTF | 0.01392968 | 0.07345382 | 3.25E-05 | 0.0056405 | 0.20898    |
| 7w11w_SITTF | 0.08518427 | 0.5034105  | 6.39E-05 | 0.019177  | 0.10916    |
| 7w11w_SITTF | 0.02512628 | 0.14101513 | 3.68E-05 | 0.0041768 | -0.086782  |
| 7w11w_SITTF | 0.10284933 | 0.6100031  | 6.55E-05 | 0.025127  | -0.16182   |
| 7w11w_SITTF | 0.00890153 | 0.04311353 | 3.19E-05 | 0.0070136 | 0.43237    |
| 7w11w_SITTF | 0.01817657 | 0.09907994 | 3.36E-05 | 0.0048202 | 0.050123   |
| 7w11w_SITTF | 0.06060362 | 0.35508868 | 6.05E-05 | 0.008688  | 0.080421   |
| 7w11w_SITTF | 0.09507129 | 0.56306976 | 6.49E-05 | 0.023073  | -0.026471  |
| 7w11w_SITTF | 0.06566383 | 0.38562244 | 6.12E-05 | 0.01041   | 0.097788   |
| 7w11w_SITTF | 0.01306601 | 0.06824238 | 3.23E-05 | 0.0059016 | 0.25518    |
| 7w11w_SITTF | 0.02386487 | 0.13340366 | 3.61E-05 | 0.0042401 | -0.073623  |
| 7w11w_SITTF | 0.04284582 | 0.24793649 | 5.29E-05 | 0.0048617 | -0.0013165 |

|             |            |            |          |           |            |
|-------------|------------|------------|----------|-----------|------------|
| 7w11w_SITTF | 0.03331344 | 0.19041723 | 4.37E-05 | 0.0041322 | -0.091175  |
| 7w11w_SITTF | 0.08394752 | 0.4959479  | 6.37E-05 | 0.01841   | 0.1176     |
| 7w11w_SITTF | 0.08419213 | 0.4974239  | 6.37E-05 | 0.018667  | 0.1176     |
| 7w11w_SITTF | 0.08171067 | 0.48245052 | 6.34E-05 | 0.017373  | 0.12948    |
| 7w11w_SITTF | 0.0636564  | 0.37350944 | 6.10E-05 | 0.0098069 | 0.089169   |
| 7w11w_SITTF | 0.0142369  | 0.0753076  | 3.26E-05 | 0.0055188 | 0.18676    |
| 7w11w_SITTF | 0.01492805 | 0.07947809 | 3.27E-05 | 0.0054028 | 0.16515    |
| 7w11w_SITTF | 0.07790398 | 0.4594806  | 6.29E-05 | 0.015562  | 0.13662    |
| 7w11w_SITTF | 0.09432782 | 0.55858356 | 6.48E-05 | 0.022877  | -0.017059  |
| 7w11w_SITTF | 0.12426999 | 0.7392574  | 6.67E-05 | 0.024092  | -0.40152   |
| 7w11w_SITTF | 0.02823984 | 0.15980266 | 3.93E-05 | 0.004074  | -0.10603   |
| 7w11w_SITTF | 0.01884328 | 0.10310296 | 3.38E-05 | 0.004741  | 0.03364    |
| 7w11w_SITTF | 0.04685033 | 0.27210006 | 5.57E-05 | 0.0054037 | 0.032113   |
| 7w11w_SITTF | 0.04271137 | 0.24712521 | 5.29E-05 | 0.0048617 | -0.0013165 |
| 7w11w_SITTF | 0.0802758  | 0.47379243 | 6.32E-05 | 0.016854  | 0.13446    |
| 7w11w_SITTF | 0.09464496 | 0.56049716 | 6.49E-05 | 0.023073  | -0.017059  |
| 7w11w_SITTF | 0.07439612 | 0.43831387 | 6.24E-05 | 0.014051  | 0.13074    |
| 7w11w_SITTF | 0.00709941 | 0.03223934 | 3.19E-05 | 0.0075925 | 0.51404    |
| 7w11w_SITTF | 0.03346185 | 0.19131278 | 4.37E-05 | 0.0041322 | -0.091175  |
| 7w11w_SITTF | 0.00888466 | 0.0430117  | 3.19E-05 | 0.0070136 | 0.43237    |
| 7w11w_SITTF | 0.02005251 | 0.11039951 | 3.42E-05 | 0.0045972 | 0.0032259  |
| 7w11w_SITTF | 0.10115279 | 0.599766   | 6.54E-05 | 0.024809  | -0.13341   |
| 7w11w_SITTF | 0.01854144 | 0.1012816  | 3.36E-05 | 0.0048202 | 0.050123   |
| 7w11w_SITTF | 0.02895924 | 0.16414362 | 3.97E-05 | 0.0040686 | -0.10664   |
| 7w11w_SITTF | 0.1308187  | 0.77877283 | 6.70E-05 | 0.023618  | -0.44608   |
| 7w11w_SITTF | 0.01341742 | 0.07036279 | 3.24E-05 | 0.0057681 | 0.23179    |
| 7w11w_SITTF | 0.0351131  | 0.20127653 | 4.54E-05 | 0.0042028 | -0.078293  |
| 7w11w_SITTF | 0.04155971 | 0.24017599 | 5.19E-05 | 0.0047337 | -0.011944  |
| 7w11w_SITTF | 0.02217909 | 0.12323151 | 3.52E-05 | 0.0043661 | -0.046619  |
| 7w11w_SITTF | 0.08882885 | 0.52540225 | 6.42E-05 | 0.020663  | 0.067165   |
| 7w11w_SITTF | 0.02012274 | 0.11082331 | 3.42E-05 | 0.0045972 | 0.0032259  |
| 7w11w_SITTF | 0.09223583 | 0.5459603  | 6.46E-05 | 0.022042  | 0.019141   |
| 7w11w_SITTF | 0.13103113 | 0.7800547  | 6.70E-05 | 0.023618  | -0.44608   |
| 7w11w_SITTF | 0.05926073 | 0.34698558 | 6.03E-05 | 0.0083426 | 0.075889   |
| 7w11w_SITTF | 0.0677056  | 0.39794266 | 6.15E-05 | 0.011255  | 0.10492    |
| 7w11w_SITTF | 0.12503062 | 0.7438471  | 6.68E-05 | 0.024034  | -0.40548   |
| 7w11w_SITTF | 0.09388267 | 0.5558975  | 6.48E-05 | 0.022676  | -0.0077738 |
| 7w11w_SITTF | 0.01953498 | 0.1072767  | 3.40E-05 | 0.0046667 | 0.017998   |
| 7w11w_SITTF | 0.0428552  | 0.24799307 | 5.29E-05 | 0.0048617 | -0.0013165 |
| 7w11w_SITTF | 0.08317456 | 0.49128377 | 6.36E-05 | 0.018151  | 0.12434    |
| 7w11w_SITTF | 0.02173179 | 0.12053246 | 3.49E-05 | 0.0044169 | -0.0356    |
| 7w11w_SITTF | 0.09003094 | 0.5326558  | 6.44E-05 | 0.021137  | 0.05218    |
| 7w11w_SITTF | 0.02843719 | 0.16099352 | 3.93E-05 | 0.004074  | -0.10603   |



|             |            |            |          |           |           |
|-------------|------------|------------|----------|-----------|-----------|
| 7w11w_SITTF | 0.01578057 | 0.08462226 | 3.28E-05 | 0.0052924 | 0.1442    |
| 7w11w_SITTF | 0.0916713  | 0.5425539  | 6.45E-05 | 0.021822  | 0.027741  |
| 7w11w_SITTF | 0.02072947 | 0.1144844  | 3.44E-05 | 0.0045325 | -0.01065  |
| 7w11w_SITTF | 0.04959271 | 0.28864786 | 5.73E-05 | 0.0058857 | 0.046466  |
| 7w11w_SITTF | 0.016697   | 0.09015209 | 3.31E-05 | 0.0050879 | 0.10435   |
| 7w11w_SITTF | 0.01804235 | 0.09827003 | 3.34E-05 | 0.0049043 | 0.067421  |
| 7w11w_SITTF | 0.00922193 | 0.04504683 | 3.19E-05 | 0.0070136 | 0.4058    |
| 7w11w_SITTF | 0.00882776 | 0.04266835 | 3.19E-05 | 0.0070136 | 0.43237   |
| 7w11w_SITTF | 0.01707421 | 0.09242821 | 3.33E-05 | 0.0049935 | 0.085504  |
| 7w11w_SITTF | 0.04361283 | 0.2525647  | 5.38E-05 | 0.0050014 | 0.008455  |
| 7w11w_SITTF | 0.02066682 | 0.11410633 | 3.44E-05 | 0.0045325 | -0.01065  |
| 7w11w_SITTF | 0.08542255 | 0.5048483  | 6.39E-05 | 0.019177  | 0.10916   |
| 7w11w_SITTF | 0.08809687 | 0.5209854  | 6.42E-05 | 0.020421  | 0.080939  |
| 7w11w_SITTF | 0.0430501  | 0.24916913 | 5.33E-05 | 0.0049301 | 0.0036923 |
| 7w11w_SITTF | 0.06495198 | 0.38132706 | 6.11E-05 | 0.010206  | 0.093303  |
| 7w11w_SITTF | 0.08685203 | 0.5134739  | 6.41E-05 | 0.01993   | 0.093363  |
| 7w11w_SITTF | 0.0132037  | 0.06907319 | 3.24E-05 | 0.0057681 | 0.23179   |
| 7w11w_SITTF | 0.00997759 | 0.04960657 | 3.20E-05 | 0.0066628 | 0.37961   |
| 7w11w_SITTF | 0.00900364 | 0.04372965 | 3.19E-05 | 0.0070136 | 0.43237   |
| 7w11w_SITTF | 0.01539414 | 0.08229054 | 3.28E-05 | 0.0052924 | 0.1442    |
| 7w11w_SITTF | 0.01359932 | 0.07146042 | 3.24E-05 | 0.0057681 | 0.23179   |
| 7w11w_SITTF | 0.02899337 | 0.16434954 | 3.97E-05 | 0.0040686 | -0.10664  |
| 7w11w_SITTF | 0.11200225 | 0.6652327  | 6.61E-05 | 0.025489  | -0.29336  |
| 7w11w_SITTF | 0.0806647  | 0.47613907 | 6.32E-05 | 0.016854  | 0.13314   |
| 7w11w_SITTF | 0.10497853 | 0.62285095 | 6.57E-05 | 0.025429  | -0.19772  |
| 7w11w_SITTF | 0.09432318 | 0.55855554 | 6.48E-05 | 0.022877  | -0.017059 |
| 7w11w_SITTF | 0.10466795 | 0.62097687 | 6.57E-05 | 0.025429  | -0.18901  |
| 7w11w_SITTF | 0.02851775 | 0.16147959 | 3.93E-05 | 0.004074  | -0.10603  |
| 7w11w_SITTF | 0.13301171 | 0.7920057  | 6.71E-05 | 0.023556  | -0.45937  |
| 7w11w_SITTF | 0.05762254 | 0.33710057 | 6.00E-05 | 0.0078516 | 0.071569  |
| 7w11w_SITTF | 0.11180258 | 0.66402787 | 6.61E-05 | 0.025489  | -0.28705  |
| 7w11w_SITTF | 0.13385196 | 0.79707587 | 6.71E-05 | 0.023546  | -0.46255  |
| 7w11w_SITTF | 0.10218906 | 0.606019   | 6.55E-05 | 0.025029  | -0.15246  |
| 7w11w_SITTF | 0.07658119 | 0.45149878 | 6.27E-05 | 0.015053  | 0.1354    |
| 7w11w_SITTF | 0.01748172 | 0.09488718 | 3.33E-05 | 0.0049935 | 0.085504  |
| 7w11w_SITTF | 0.03398217 | 0.1944524  | 4.43E-05 | 0.004153  | -0.087207 |
| 7w11w_SITTF | 0.07686738 | 0.45322567 | 6.28E-05 | 0.015307  | 0.13605   |
| 7w11w_SITTF | 0.09963997 | 0.59063756 | 6.53E-05 | 0.024558  | -0.10426  |
| 7w11w_SITTF | 0.10078062 | 0.59752035 | 6.54E-05 | 0.024809  | -0.12375  |
| 7w11w_SITTF | 0.0352493  | 0.20209841 | 4.54E-05 | 0.0042028 | -0.073417 |
| 7w11w_SITTF | 0.14577003 | 0.8689906  | 6.75E-05 | 0.02365   | -0.51443  |
| 7w11w_SITTF | 0.00865159 | 0.04160532 | 3.19E-05 | 0.0071994 | 0.45929   |
| 7w11w_SITTF | 0.02026665 | 0.11169166 | 3.42E-05 | 0.0045972 | -0.01065  |

|             |            |            |          |           |            |
|-------------|------------|------------|----------|-----------|------------|
| 7w11w_SITTF | 0.05998127 | 0.35133335 | 6.04E-05 | 0.0085136 | 0.077363   |
| 7w11w_SITTF | 0.06598197 | 0.38754213 | 6.13E-05 | 0.010616  | 0.097788   |
| 7w11w_SITTF | 0.10261672 | 0.60859954 | 6.55E-05 | 0.025127  | -0.16182   |
| 7w11w_SITTF | 0.00358233 | 0.01101698 | 3.18E-05 | 0.0092049 | 0.71249    |
| 7w11w_SITTF | 0.0852862  | 0.5040256  | 6.39E-05 | 0.019177  | 0.10916    |
| 7w11w_SITTF | 0.08043395 | 0.4747467  | 6.32E-05 | 0.016854  | 0.13446    |
| 7w11w_SITTF | 0.0437666  | 0.25349256 | 5.38E-05 | 0.0050014 | 0.008455   |
| 7w11w_SITTF | 0.08563227 | 0.50611377 | 6.39E-05 | 0.019177  | 0.1043     |
| 7w11w_SITTF | 0.05341513 | 0.31171268 | 5.89E-05 | 0.0067028 | 0.060836   |
| 7w11w_SITTF | 0.01946094 | 0.10682996 | 3.40E-05 | 0.0046667 | 0.017998   |
| 7w11w_SITTF | 0.12453621 | 0.74086374 | 6.68E-05 | 0.024034  | -0.40152   |
| 7w11w_SITTF | 0.05812996 | 0.3401624  | 6.01E-05 | 0.0080116 | 0.073002   |
| 7w11w_SITTF | 0.10032528 | 0.59477276 | 6.53E-05 | 0.024687  | -0.11403   |
| 7w11w_SITTF | 0.08562841 | 0.50609046 | 6.39E-05 | 0.019177  | 0.1043     |
| 7w11w_SITTF | 0.02705578 | 0.15265793 | 3.84E-05 | 0.0040947 | -0.10271   |
| 7w11w_SITTF | 0.02776648 | 0.15694635 | 3.88E-05 | 0.0040827 | -0.10472   |
| 7w11w_SITTF | 0.01678987 | 0.0907125  | 3.31E-05 | 0.0050879 | 0.10435    |
| 7w11w_SITTF | 0.01822968 | 0.09940042 | 3.36E-05 | 0.0048202 | 0.050123   |
| 7w11w_SITTF | 0.1015056  | 0.6018949  | 6.54E-05 | 0.024923  | -0.14299   |
| 7w11w_SITTF | 0.06406269 | 0.37596104 | 6.10E-05 | 0.0098069 | 0.091185   |
| 7w11w_SITTF | 0.07172465 | 0.422194   | 6.20E-05 | 0.012843  | 0.12348    |
| 7w11w_SITTF | 0.02893398 | 0.16399114 | 3.97E-05 | 0.0040686 | -0.10664   |
| 7w11w_SITTF | 0.09396572 | 0.5563986  | 6.48E-05 | 0.022676  | -0.0077738 |
| 7w11w_SITTF | 0.02937967 | 0.16668049 | 4.02E-05 | 0.0040662 | -0.10661   |
| 7w11w_SITTF | 0.01518747 | 0.08104345 | 3.27E-05 | 0.0054028 | 0.16515    |
| 7w11w_SITTF | 0.1202456  | 0.7149738  | 6.66E-05 | 0.024561  | -0.36766   |
| 7w11w_SITTF | 0.00919428 | 0.04488001 | 3.19E-05 | 0.0070136 | 0.43237    |
| 7w11w_SITTF | 0.07727945 | 0.45571214 | 6.28E-05 | 0.015307  | 0.13646    |
| 7w11w_SITTF | 0.08890744 | 0.5258765  | 6.42E-05 | 0.020663  | 0.067165   |
| 7w11w_SITTF | 0.01771596 | 0.09630057 | 3.34E-05 | 0.0049043 | 0.067421   |
| 7w11w_SITTF | 0.08733067 | 0.51636213 | 6.41E-05 | 0.01993   | 0.087329   |
| 7w11w_SITTF | 0.09372907 | 0.5549707  | 6.48E-05 | 0.022676  | 0.0013661  |
| 7w11w_SITTF | 0.1113399  | 0.661236   | 6.61E-05 | 0.025525  | -0.28058   |
| 7w11w_SITTF | 0.02759709 | 0.15592426 | 3.88E-05 | 0.0040827 | -0.10472   |
| 7w11w_SITTF | 0.04063822 | 0.23461561 | 5.09E-05 | 0.0046173 | -0.023154  |
| 7w11w_SITTF | 0.05761892 | 0.33707875 | 6.00E-05 | 0.0078516 | 0.071569   |
| 7w11w_SITTF | 0.02004043 | 0.11032662 | 3.42E-05 | 0.0045972 | 0.0032259  |
| 7w11w_SITTF | 0.12029164 | 0.7152516  | 6.66E-05 | 0.024561  | -0.37215   |
| 7w11w_SITTF | 0.08913983 | 0.5272787  | 6.43E-05 | 0.020902  | 0.067165   |
| 7w11w_SITTF | 0.1260489  | 0.7499914  | 6.68E-05 | 0.023927  | -0.41325   |
| 7w11w_SITTF | 0.03762576 | 0.21643814 | 4.81E-05 | 0.0043756 | -0.05192   |
| 7w11w_SITTF | 0.03078031 | 0.17513208 | 4.11E-05 | 0.0040705 | -0.10299   |
| 7w11w_SITTF | 0.02061392 | 0.11378713 | 3.44E-05 | 0.0045325 | -0.01065   |

|             |            |            |          |           |           |
|-------------|------------|------------|----------|-----------|-----------|
| 7w11w_SITTF | 0.13031381 | 0.7757264  | 6.70E-05 | 0.02364   | -0.44263  |
| 7w11w_SITTF | 0.03400459 | 0.19458768 | 4.43E-05 | 0.004153  | -0.087207 |
| 7w11w_SITTF | 0.01346262 | 0.07063555 | 3.24E-05 | 0.0057681 | 0.23179   |
| 7w11w_SITTF | 0.14280182 | 0.8510801  | 6.74E-05 | 0.023593  | -0.50412  |
| 7w11w_SITTF | 0.05970168 | 0.34964627 | 6.04E-05 | 0.0085136 | 0.077363  |
| 7w11w_SITTF | 0.00840819 | 0.04013663 | 3.19E-05 | 0.0071994 | 0.45929   |
| 7w11w_SITTF | 0.11970677 | 0.7117225  | 6.65E-05 | 0.024632  | -0.36766  |
| 7w11w_SITTF | 0.02117782 | 0.11718979 | 3.47E-05 | 0.0044724 | -0.023601 |
| 7w11w_SITTF | 0.0159656  | 0.08573876 | 3.30E-05 | 0.0051875 | 0.12392   |
| 7w11w_SITTF | 0.09270681 | 0.5488022  | 6.46E-05 | 0.022258  | 0.010343  |
| 7w11w_SITTF | 0.09273358 | 0.5489637  | 6.46E-05 | 0.022258  | 0.010343  |
| 7w11w_SITTF | 0.10588776 | 0.6283373  | 6.58E-05 | 0.025526  | -0.21453  |
| 7w11w_SITTF | 0.12090099 | 0.7189285  | 6.66E-05 | 0.02449   | -0.37656  |
| 7w11w_SITTF | 0.03117875 | 0.1775363  | 4.16E-05 | 0.0040771 | -0.10299  |
| 7w11w_SITTF | 0.04759378 | 0.27658615 | 5.64E-05 | 0.0055867 | 0.035328  |
| 7w11w_SITTF | 0.00853676 | 0.04091248 | 3.19E-05 | 0.0071994 | 0.45929   |
| 7w11w_SITTF | 0.02510713 | 0.14089963 | 3.68E-05 | 0.0041768 | -0.086782 |
| 7w11w_SITTF | 0.04669026 | 0.27113423 | 5.57E-05 | 0.0054037 | 0.028707  |
| 7w11w_SITTF | 0.00373043 | 0.01191061 | 3.18E-05 | 0.0089513 | 0.68371   |
| 7w11w_SITTF | 0.10730597 | 0.63689494 | 6.58E-05 | 0.025586  | -0.23052  |
| 7w11w_SITTF | 0.02182337 | 0.1210851  | 3.49E-05 | 0.0044169 | -0.0356   |
| 7w11w_SITTF | 0.01075929 | 0.05432341 | 3.21E-05 | 0.0064976 | 0.35381   |
| 7w11w_SITTF | 0.01650992 | 0.08902326 | 3.31E-05 | 0.0050879 | 0.10435   |
| 7w11w_SITTF | 0.03379863 | 0.19334492 | 4.43E-05 | 0.004153  | -0.087207 |
| 7w11w_SITTF | 0.02371769 | 0.1325156  | 3.61E-05 | 0.0042401 | -0.073623 |
| 7w11w_SITTF | 0.02561894 | 0.14398792 | 3.72E-05 | 0.0041509 | -0.092011 |
| 7w11w_SITTF | 0.06128507 | 0.35920063 | 6.06E-05 | 0.008866  | 0.082025  |
| 7w11w_SITTF | 0.15125632 | 0.9020954  | 6.77E-05 | 0.023705  | -0.52438  |
| 7w11w_SITTF | 0.01221428 | 0.06310296 | 3.23E-05 | 0.0060411 | 0.2791    |
| 7w11w_SITTF | 0.08793132 | 0.5199865  | 6.41E-05 | 0.020177  | 0.080939  |
| 7w11w_SITTF | 0.02030988 | 0.11195257 | 3.42E-05 | 0.0045972 | -0.01065  |
| 7w11w_SITTF | 0.04705208 | 0.27331746 | 5.61E-05 | 0.0054936 | 0.032113  |
| 7w11w_SITTF | 0.01250956 | 0.06488469 | 3.23E-05 | 0.0060411 | 0.2791    |
| 7w11w_SITTF | 0.01284817 | 0.0669279  | 3.23E-05 | 0.0059016 | 0.25518   |
| 7w11w_SITTF | 0.02715853 | 0.1532779  | 3.84E-05 | 0.0040947 | -0.10271  |
| 7w11w_SITTF | 0.08221909 | 0.48551837 | 6.35E-05 | 0.017633  | 0.1271    |
| 7w11w_SITTF | 0.01587464 | 0.08518989 | 3.28E-05 | 0.0052924 | 0.12392   |
| 7w11w_SITTF | 0.05120159 | 0.29835594 | 5.81E-05 | 0.006215  | 0.053285  |
| 7w11w_SITTF | 0.02651727 | 0.1494085  | 3.80E-05 | 0.0041099 | -0.099939 |
| 7w11w_SITTF | 0.08471106 | 0.50055516 | 6.38E-05 | 0.018923  | 0.1136    |
| 7w11w_SITTF | 0.02099743 | 0.11610125 | 3.47E-05 | 0.0044724 | -0.023601 |
| 7w11w_SITTF | 0.01694841 | 0.09166911 | 3.31E-05 | 0.0050879 | 0.10435   |
| 7w11w_SITTF | 0.06155659 | 0.36083898 | 6.07E-05 | 0.0090475 | 0.082025  |

|             |            |            |          |           |            |
|-------------|------------|------------|----------|-----------|------------|
| 7w11w_SITTF | 0.02499754 | 0.14023833 | 3.68E-05 | 0.0041768 | -0.086782  |
| 7w11w_SITTF | 0.11980753 | 0.7123305  | 6.65E-05 | 0.024632  | -0.36766   |
| 7w11w_SITTF | 0.09399147 | 0.55655396 | 6.48E-05 | 0.022676  | -0.0077738 |
| 7w11w_SITTF | 0.03623505 | 0.20804647 | 4.65E-05 | 0.0042637 | -0.068307  |
| 7w11w_SITTF | 0.01970717 | 0.10831574 | 3.40E-05 | 0.0046667 | 0.017998   |
| 7w11w_SITTF | 0.12370519 | 0.73584926 | 6.67E-05 | 0.024153  | -0.39752   |
| 7w11w_SITTF | 0.06493834 | 0.38124478 | 6.11E-05 | 0.010206  | 0.093303   |
| 7w11w_SITTF | 0.02696271 | 0.15209632 | 3.80E-05 | 0.0041099 | -0.10271   |
| 7w11w_SITTF | 0.11814954 | 0.702326   | 6.65E-05 | 0.024847  | -0.35363   |
| 7w11w_SITTF | 0.01424372 | 0.07534875 | 3.26E-05 | 0.0055188 | 0.18676    |
| 7w11w_SITTF | 0.10516489 | 0.6239754  | 6.57E-05 | 0.025482  | -0.19772   |
| 7w11w_SITTF | 0.03290542 | 0.1879552  | 4.32E-05 | 0.0041142 | -0.094772  |
| 7w11w_SITTF | 0.09768041 | 0.5788134  | 6.51E-05 | 0.023964  | -0.074831  |
| 7w11w_SITTF | 0.09082346 | 0.537438   | 6.45E-05 | 0.021597  | 0.044278   |
| 7w11w_SITTF | 0.02246185 | 0.12493769 | 3.52E-05 | 0.0043661 | -0.046619  |
| 7w11w_SITTF | 0.06345075 | 0.3722685  | 6.09E-05 | 0.0096122 | 0.089169   |
| 7w11w_SITTF | 0.07858075 | 0.46356428 | 6.30E-05 | 0.016077  | 0.13651    |
| 7w11w_SITTF | 0.09351362 | 0.5536706  | 6.48E-05 | 0.022676  | 0.0013661  |
| 7w11w_SITTF | 0.13509512 | 0.8045772  | 6.72E-05 | 0.023529  | -0.46872   |
| 7w11w_SITTF | 0.09250266 | 0.5475704  | 6.46E-05 | 0.022258  | 0.019141   |
| 7w11w_SITTF | 0.07642744 | 0.45057103 | 6.27E-05 | 0.015053  | 0.1354     |
| 7w11w_SITTF | 0.02390021 | 0.13361694 | 3.61E-05 | 0.0042401 | -0.073623  |
| 7w11w_SITTF | 0.01547442 | 0.08277494 | 3.28E-05 | 0.0052924 | 0.1442     |
| 7w11w_SITTF | 0.03258641 | 0.1860303  | 4.32E-05 | 0.0041142 | -0.094772  |
| 7w11w_SITTF | 0.03209075 | 0.18303941 | 4.27E-05 | 0.004099  | -0.097962  |
| 7w11w_SITTF | 0.12684302 | 0.7547833  | 6.69E-05 | 0.023834  | -0.41707   |
| 7w11w_SITTF | 0.0259338  | 0.14588778 | 3.76E-05 | 0.0041286 | -0.096385  |
| 7w11w_SITTF | 0.09169746 | 0.54271173 | 6.45E-05 | 0.021822  | 0.027741   |
| 7w11w_SITTF | 0.08271587 | 0.488516   | 6.35E-05 | 0.017892  | 0.12434    |
| 7w11w_SITTF | 0.02076754 | 0.11471411 | 3.44E-05 | 0.0045325 | -0.01065   |
| 7w11w_SITTF | 0.02342514 | 0.1307503  | 3.58E-05 | 0.0042778 | -0.065623  |
| 7w11w_SITTF | 0.11711612 | 0.6960902  | 6.64E-05 | 0.024986  | -0.34377   |
| 7w11w_SITTF | 0.05231944 | 0.3051012  | 5.85E-05 | 0.0064518 | 0.057248   |
| 7w11w_SITTF | 0.01886018 | 0.10320491 | 3.38E-05 | 0.004741  | 0.03364    |
| 7w11w_SITTF | 0.03742557 | 0.21523018 | 4.76E-05 | 0.0043355 | -0.05192   |
| 7w11w_SITTF | 0.10769524 | 0.6392438  | 6.59E-05 | 0.025604  | -0.23822   |
| 7w11w_SITTF | 0.15162499 | 0.90431994 | 6.77E-05 | 0.023705  | -0.52438   |
| 7w11w_SITTF | 0.10635237 | 0.6311408  | 6.58E-05 | 0.02556   | -0.21453   |
| 7w11w_SITTF | 0.10333479 | 0.61293244 | 6.56E-05 | 0.025216  | -0.17104   |
| 7w11w_SITTF | 0.06758246 | 0.39719963 | 6.15E-05 | 0.011255  | 0.10492    |
| 7w11w_SITTF | 0.13491929 | 0.8035162  | 6.72E-05 | 0.023533  | -0.46872   |
| 7w11w_SITTF | 0.13394214 | 0.79762    | 6.71E-05 | 0.023546  | -0.46255   |
| 7w11w_SITTF | 0.09359222 | 0.55414486 | 6.48E-05 | 0.022676  | 0.0013661  |

|             |            |            |          |           |            |
|-------------|------------|------------|----------|-----------|------------|
| 7w11w_SITTF | 0.08752923 | 0.51756024 | 6.41E-05 | 0.020177  | 0.087329   |
| 7w11w_SITTF | 0.03115174 | 0.1773733  | 4.16E-05 | 0.0040771 | -0.10299   |
| 7w11w_SITTF | 0.02188619 | 0.12146416 | 3.49E-05 | 0.0044169 | -0.0356    |
| 7w11w_SITTF | 0.05780792 | 0.33821917 | 6.00E-05 | 0.0078516 | 0.071569   |
| 7w11w_SITTF | 0.1353472  | 0.8060983  | 6.72E-05 | 0.023529  | -0.47171   |
| 7w11w_SITTF | 0.05991515 | 0.3509344  | 6.04E-05 | 0.0085136 | 0.077363   |
| 7w11w_SITTF | 0.08868828 | 0.524554   | 6.42E-05 | 0.020663  | 0.074212   |
| 7w11w_SITTF | 0.02276269 | 0.12675303 | 3.55E-05 | 0.0043197 | -0.056631  |
| 7w11w_SITTF | 0.01666815 | 0.08997798 | 3.31E-05 | 0.0050879 | 0.10435    |
| 7w11w_SITTF | 0.1010005  | 0.5988471  | 6.54E-05 | 0.024809  | -0.13341   |
| 7w11w_SITTF | 0.04473247 | 0.25932068 | 5.46E-05 | 0.0051531 | 0.017239   |
| 7w11w_SITTF | 0.07466684 | 0.43994746 | 6.25E-05 | 0.014299  | 0.13218    |
| 7w11w_SITTF | 0.09661066 | 0.5723584  | 6.50E-05 | 0.023626  | -0.055297  |
| 7w11w_SITTF | 0.09186762 | 0.5437385  | 6.46E-05 | 0.022042  | 0.027741   |
| 7w11w_SITTF | 0.12084097 | 0.71856636 | 6.66E-05 | 0.02449   | -0.37656   |
| 7w11w_SITTF | 0.03360527 | 0.19217819 | 4.37E-05 | 0.0041322 | -0.087207  |
| 7w11w_SITTF | 0.0187622  | 0.10261369 | 3.38E-05 | 0.004741  | 0.03364    |
| 7w11w_SITTF | 0.04287895 | 0.24813642 | 5.29E-05 | 0.0048617 | -0.0013165 |
| 7w11w_SITTF | 0.07986338 | 0.47130382 | 6.32E-05 | 0.016594  | 0.13545    |
| 7w11w_SITTF | 0.0301137  | 0.1711097  | 4.07E-05 | 0.0040668 | -0.10597   |
| 7w11w_SITTF | 0.02414044 | 0.13506648 | 3.61E-05 | 0.0042401 | -0.080664  |
| 7w11w_SITTF | 0.01053424 | 0.05296543 | 3.21E-05 | 0.0064976 | 0.35381    |
| 7w11w_SITTF | 0.07828888 | 0.46180314 | 6.29E-05 | 0.015819  | 0.13651    |
| 7w11w_SITTF | 0.0063372  | 0.0276401  | 3.18E-05 | 0.008015  | 0.56984    |
| 7w11w_SITTF | 0.09337828 | 0.55285394 | 6.47E-05 | 0.022469  | 0.0013661  |
| 7w11w_SITTF | 0.10257696 | 0.60835963 | 6.55E-05 | 0.025127  | -0.16182   |
| 7w11w_SITTF | 0.07150586 | 0.4208738  | 6.20E-05 | 0.012843  | 0.12136    |
| 7w11w_SITTF | 0.08321639 | 0.4915362  | 6.36E-05 | 0.018151  | 0.12434    |
| 7w11w_SITTF | 0.13141549 | 0.78237396 | 6.70E-05 | 0.023599  | -0.44949   |
| 7w11w_SITTF | 0.01724423 | 0.09345415 | 3.33E-05 | 0.0049935 | 0.085504   |
| 7w11w_SITTF | 0.08541615 | 0.50480974 | 6.39E-05 | 0.019177  | 0.10916    |
| 7w11w_SITTF | 0.01980547 | 0.10890888 | 3.42E-05 | 0.0045972 | 0.0032259  |
| 7w11w_SITTF | 0.01193374 | 0.06141011 | 3.22E-05 | 0.0061869 | 0.30353    |
| 7w11w_SITTF | 0.00889237 | 0.04305825 | 3.19E-05 | 0.0070136 | 0.43237    |
| 7w11w_SITTF | 0.01807082 | 0.09844182 | 3.34E-05 | 0.0049043 | 0.050123   |
| 7w11w_SITTF | 0.07328365 | 0.43160114 | 6.23E-05 | 0.013561  | 0.12737    |
| 7w11w_SITTF | 0.10322844 | 0.6122907  | 6.56E-05 | 0.025216  | -0.17104   |
| 7w11w_SITTF | 0.09061494 | 0.53617966 | 6.44E-05 | 0.021369  | 0.044278   |
| 7w11w_SITTF | 0.08692899 | 0.51393837 | 6.41E-05 | 0.01993   | 0.093363   |
| 7w11w_SITTF | 0.09765056 | 0.57863325 | 6.51E-05 | 0.023964  | -0.074831  |
| 7w11w_SITTF | 0.04288995 | 0.24820277 | 5.29E-05 | 0.0048617 | -0.0013165 |
| 7w11w_SITTF | 0.06576996 | 0.3862628  | 6.12E-05 | 0.01041   | 0.097788   |
| 7w11w_SITTF | 0.03246294 | 0.18528526 | 4.27E-05 | 0.004099  | -0.094772  |

|             |            |            |          |           |           |
|-------------|------------|------------|----------|-----------|-----------|
| 7w11w_SITTF | 0.01915191 | 0.10496524 | 3.38E-05 | 0.004741  | 0.03364   |
| 7w11w_SITTF | 0.04209507 | 0.24340641 | 5.24E-05 | 0.0047963 | -0.00654  |
| 7w11w_SITTF | 0.03136844 | 0.17868091 | 4.16E-05 | 0.0040771 | -0.10071  |
| 7w11w_SITTF | 0.02935954 | 0.16655906 | 4.02E-05 | 0.0040662 | -0.10661  |
| 7w11w_SITTF | 0.10931733 | 0.64903164 | 6.60E-05 | 0.025611  | -0.2602   |
| 7w11w_SITTF | 0.07834963 | 0.4621697  | 6.29E-05 | 0.015819  | 0.13651   |
| 7w11w_SITTF | 0.01191307 | 0.06128543 | 3.22E-05 | 0.0061869 | 0.30353   |
| 7w11w_SITTF | 0.05799375 | 0.3393405  | 6.00E-05 | 0.0078516 | 0.073002  |
| 7w11w_SITTF | 0.05744128 | 0.33600685 | 5.99E-05 | 0.0076952 | 0.071569  |
| 7w11w_SITTF | 0.02709002 | 0.15286453 | 3.84E-05 | 0.0040947 | -0.10271  |
| 7w11w_SITTF | 0.08282098 | 0.48915026 | 6.35E-05 | 0.017892  | 0.12434   |
| 7w11w_SITTF | 0.01640415 | 0.08838501 | 3.30E-05 | 0.0051875 | 0.10435   |
| 7w11w_SITTF | 0.12930475 | 0.7696376  | 6.70E-05 | 0.023692  | -0.43556  |
| 7w11w_SITTF | 0.01464177 | 0.07775067 | 3.26E-05 | 0.0055188 | 0.18676   |
| 7w11w_SITTF | 0.00513962 | 0.02041378 | 3.18E-05 | 0.0084677 | 0.62647   |
| 7w11w_SITTF | 0.03066434 | 0.17443232 | 4.11E-05 | 0.0040705 | -0.10475  |
| 7w11w_SITTF | 0.01593677 | 0.08556477 | 3.30E-05 | 0.0051875 | 0.12392   |
| 7w11w_SITTF | 0.07350621 | 0.43294406 | 6.23E-05 | 0.013561  | 0.12913   |
| 7w11w_SITTF | 0.02338656 | 0.13051753 | 3.58E-05 | 0.0042778 | -0.065623 |
| 7w11w_SITTF | 0.09287932 | 0.5498432  | 6.46E-05 | 0.022258  | 0.010343  |
| 7w11w_SITTF | 0.08233102 | 0.48619378 | 6.35E-05 | 0.017633  | 0.1271    |
| 7w11w_SITTF | 0.12114549 | 0.72040385 | 6.66E-05 | 0.02449   | -0.37656  |
| 7w11w_SITTF | 0.09561871 | 0.56637293 | 6.49E-05 | 0.023263  | -0.035993 |
| 7w11w_SITTF | 0.03308305 | 0.18902704 | 4.37E-05 | 0.0041322 | -0.091175 |
| 7w11w_SITTF | 0.10652309 | 0.6321709  | 6.58E-05 | 0.02556   | -0.22263  |
| 7w11w_SITTF | 0.07828099 | 0.46175557 | 6.29E-05 | 0.015819  | 0.13651   |
| 7w11w_SITTF | 0.10446109 | 0.6197286  | 6.56E-05 | 0.025367  | -0.18901  |
| 7w11w_SITTF | 0.10000256 | 0.5928255  | 6.53E-05 | 0.024558  | -0.11403  |
| 7w11w_SITTF | 0.02191088 | 0.12161311 | 3.49E-05 | 0.0044169 | -0.0356   |
| 7w11w_SITTF | 0.01251219 | 0.06490056 | 3.23E-05 | 0.0060411 | 0.2791    |
| 7w11w_SITTF | 0.10340161 | 0.6133356  | 6.56E-05 | 0.025216  | -0.17104  |
| 7w11w_SITTF | 0.06184996 | 0.3626092  | 6.07E-05 | 0.0090475 | 0.083692  |
| 7w11w_SITTF | 0.0765435  | 0.45127133 | 6.27E-05 | 0.015053  | 0.1354    |
| 7w11w_SITTF | 0.0330232  | 0.18866588 | 4.32E-05 | 0.0041142 | -0.091175 |
| 7w11w_SITTF | 0.11118718 | 0.6603145  | 6.61E-05 | 0.025556  | -0.28058  |
| 7w11w_SITTF | 0.11002214 | 0.6532845  | 6.60E-05 | 0.025599  | -0.26716  |
| 7w11w_SITTF | 0.03629745 | 0.20842303 | 4.65E-05 | 0.0042637 | -0.062998 |
| 7w11w_SITTF | 0.09195566 | 0.54426974 | 6.46E-05 | 0.022042  | 0.027741  |
| 7w11w_SITTF | 0.14401345 | 0.8583912  | 6.75E-05 | 0.023623  | -0.50968  |
| 7w11w_SITTF | 0.11844782 | 0.7041258  | 6.65E-05 | 0.024776  | -0.35363  |
| 7w11w_SITTF | 0.0915056  | 0.54155403 | 6.45E-05 | 0.021822  | 0.036126  |
| 7w11w_SITTF | 0.14793704 | 0.88206655 | 6.76E-05 | 0.02368   | -0.51946  |
| 7w11w_SITTF | 0.11671092 | 0.69364524 | 6.64E-05 | 0.025054  | -0.33868  |

|             |            |            |          |           |           |
|-------------|------------|------------|----------|-----------|-----------|
| 7w11w_SITTF | 0.08795872 | 0.5201518  | 6.42E-05 | 0.020421  | 0.080939  |
| 7w11w_SITTF | 0.1529333  | 0.9122144  | 6.77E-05 | 0.02371   | -0.52582  |
| 7w11w_SITTF | 0.11168494 | 0.66331804 | 6.61E-05 | 0.025525  | -0.28705  |
| 7w11w_SITTF | 0.10072848 | 0.5972057  | 6.54E-05 | 0.024809  | -0.12375  |
| 7w11w_SITTF | 0.08588298 | 0.50762665 | 6.39E-05 | 0.01943   | 0.1043    |
| 7w11w_SITTF | 0.08896974 | 0.5262524  | 6.42E-05 | 0.020663  | 0.067165  |
| 7w11w_SITTF | 0.01404494 | 0.07414932 | 3.25E-05 | 0.0056405 | 0.20898   |
| 7w11w_SITTF | 0.09168289 | 0.5426238  | 6.45E-05 | 0.021822  | 0.027741  |
| 7w11w_SITTF | 0.00859038 | 0.04123597 | 3.19E-05 | 0.0071994 | 0.45929   |
| 7w11w_SITTF | 0.07526299 | 0.44354463 | 6.26E-05 | 0.014549  | 0.13345   |
| 7w11w_SITTF | 0.11316373 | 0.6722412  | 6.62E-05 | 0.025403  | -0.30551  |
| 7w11w_SITTF | 0.02561269 | 0.14395018 | 3.72E-05 | 0.0041509 | -0.092011 |
| 7w11w_SITTF | 0.06828495 | 0.40143853 | 6.16E-05 | 0.011474  | 0.10734   |
| 7w11w_SITTF | 0.09029491 | 0.5342486  | 6.44E-05 | 0.021369  | 0.05218   |
| 7w11w_SITTF | 0.1358261  | 0.808988   | 6.72E-05 | 0.023527  | -0.47464  |
| 7w11w_SITTF | 0.09970864 | 0.59105194 | 6.53E-05 | 0.024558  | -0.10426  |
| 7w11w_SITTF | 0.02325083 | 0.12969851 | 3.58E-05 | 0.0042778 | -0.065623 |
| 7w11w_SITTF | 0.01276099 | 0.06640182 | 3.23E-05 | 0.0059016 | 0.25518   |
| 7w11w_SITTF | 0.07281137 | 0.42875138 | 6.22E-05 | 0.01332   | 0.12737   |
| 7w11w_SITTF | 0.05324207 | 0.31066844 | 5.89E-05 | 0.0067028 | 0.059084  |
| 7w11w_SITTF | 0.08386292 | 0.49543744 | 6.37E-05 | 0.01841   | 0.1176    |
| 7w11w_SITTF | 0.11101828 | 0.6592953  | 6.61E-05 | 0.025556  | -0.28058  |
| 7w11w_SITTF | 0.05607013 | 0.32773322 | 5.97E-05 | 0.0073934 | 0.067199  |
| 7w11w_SITTF | 0.04300633 | 0.24890503 | 5.29E-05 | 0.0048617 | 0.0036923 |
| 7w11w_SITTF | 0.02346626 | 0.13099842 | 3.58E-05 | 0.0042778 | -0.065623 |
| 7w11w_SITTF | 0.0141048  | 0.0745105  | 3.25E-05 | 0.0056405 | 0.20898   |
| 7w11w_SITTF | 0.01930584 | 0.1058941  | 3.40E-05 | 0.0046667 | 0.017998  |
| 7w11w_SITTF | 0.08814026 | 0.52124727 | 6.42E-05 | 0.020421  | 0.080939  |
| 7w11w_SITTF | 0.09878512 | 0.5854793  | 6.52E-05 | 0.024275  | -0.094455 |
| 7w11w_SITTF | 0.08507805 | 0.5027696  | 6.38E-05 | 0.018923  | 0.10916   |
| 7w11w_SITTF | 0.14744575 | 0.87910205 | 6.76E-05 | 0.023673  | -0.51834  |
| 7w11w_SITTF | 0.03508358 | 0.20109843 | 4.54E-05 | 0.0042028 | -0.078293 |
| 7w11w_SITTF | 0.05642059 | 0.32984793 | 5.98E-05 | 0.0075425 | 0.068678  |
| 7w11w_SITTF | 0.0799858  | 0.4720425  | 6.32E-05 | 0.016594  | 0.13446   |
| 7w11w_SITTF | 0.03218901 | 0.1836323  | 4.27E-05 | 0.004099  | -0.097962 |
| 7w11w_SITTF | 0.11995694 | 0.71323204 | 6.65E-05 | 0.024632  | -0.36766  |
| 7w11w_SITTF | 0.03212351 | 0.1832371  | 4.27E-05 | 0.004099  | -0.097962 |
| 7w11w_SITTF | 0.12503262 | 0.7438591  | 6.68E-05 | 0.024034  | -0.40548  |
| 7w11w_SITTF | 0.12267635 | 0.7296412  | 6.67E-05 | 0.024282  | -0.38934  |
| 7w11w_SITTF | 0.10145979 | 0.6016185  | 6.54E-05 | 0.024923  | -0.13341  |
| 7w11w_SITTF | 0.00950829 | 0.04677476 | 3.20E-05 | 0.0068348 | 0.4058    |
| 7w11w_SITTF | 0.06290906 | 0.36899993 | 6.08E-05 | 0.0094206 | 0.087254  |
| 7w11w_SITTF | 0.01287072 | 0.06706394 | 3.23E-05 | 0.0059016 | 0.25518   |

|             |            |            |          |           |            |
|-------------|------------|------------|----------|-----------|------------|
| 7w11w_SITTF | 0.10968348 | 0.651241   | 6.60E-05 | 0.025599  | -0.2602    |
| 7w11w_SITTF | 0.12263107 | 0.729368   | 6.67E-05 | 0.024282  | -0.38934   |
| 7w11w_SITTF | 0.00511448 | 0.02026211 | 3.18E-05 | 0.0084677 | 0.62647    |
| 7w11w_SITTF | 0.08805105 | 0.520709   | 6.42E-05 | 0.020421  | 0.080939   |
| 7w11w_SITTF | 0.02184144 | 0.12119412 | 3.49E-05 | 0.0044169 | -0.0356    |
| 7w11w_SITTF | 0.01320475 | 0.06907953 | 3.24E-05 | 0.0057681 | 0.23179    |
| 7w11w_SITTF | 0.06423772 | 0.3770172  | 6.10E-05 | 0.010005  | 0.091185   |
| 7w11w_SITTF | 0.02421046 | 0.13548905 | 3.64E-05 | 0.0042065 | -0.080664  |
| 7w11w_SITTF | 0.1359307  | 0.8096192  | 6.72E-05 | 0.023527  | -0.47464   |
| 7w11w_SITTF | 0.09974918 | 0.59129655 | 6.53E-05 | 0.024558  | -0.10426   |
| 7w11w_SITTF | 0.10033786 | 0.5948487  | 6.53E-05 | 0.024687  | -0.11403   |
| 7w11w_SITTF | 0.04634002 | 0.2690208  | 5.54E-05 | 0.0053171 | 0.028707   |
| 7w11w_SITTF | 0.08453533 | 0.49949482 | 6.37E-05 | 0.018667  | 0.1136     |
| 7w11w_SITTF | 0.0887689  | 0.5250405  | 6.42E-05 | 0.020663  | 0.067165   |
| 7w11w_SITTF | 0.097096   | 0.575287   | 6.51E-05 | 0.023799  | -0.065044  |
| 7w11w_SITTF | 0.087663   | 0.5183674  | 6.41E-05 | 0.020177  | 0.080939   |
| 7w11w_SITTF | 0.08043735 | 0.4747672  | 6.32E-05 | 0.016854  | 0.13446    |
| 7w11w_SITTF | 0.13045792 | 0.77659595 | 6.70E-05 | 0.02364   | -0.44263   |
| 7w11w_SITTF | 0.02993261 | 0.17001697 | 4.07E-05 | 0.0040668 | -0.10597   |
| 7w11w_SITTF | 0.05588255 | 0.3266013  | 5.97E-05 | 0.0073934 | 0.067199   |
| 7w11w_SITTF | 0.09365033 | 0.5544956  | 6.48E-05 | 0.022676  | 0.0013661  |
| 7w11w_SITTF | 0.08590992 | 0.5077892  | 6.39E-05 | 0.01943   | 0.1043     |
| 7w11w_SITTF | 0.11105299 | 0.6595048  | 6.61E-05 | 0.025556  | -0.28058   |
| 7w11w_SITTF | 0.1202155  | 0.7147922  | 6.66E-05 | 0.024561  | -0.36766   |
| 7w11w_SITTF | 0.14551537 | 0.86745393 | 6.75E-05 | 0.023641  | -0.51294   |
| 7w11w_SITTF | 0.06802192 | 0.39985138 | 6.16E-05 | 0.011474  | 0.10734    |
| 7w11w_SITTF | 0.01284192 | 0.06689018 | 3.23E-05 | 0.0059016 | 0.25518    |
| 7w11w_SITTF | 0.02952848 | 0.16757844 | 4.02E-05 | 0.0040662 | -0.10661   |
| 7w11w_SITTF | 0.0790901  | 0.46663776 | 6.31E-05 | 0.016335  | 0.13613    |
| 7w11w_SITTF | 0.07083434 | 0.41682178 | 6.20E-05 | 0.012608  | 0.11916    |
| 7w11w_SITTF | 0.13883115 | 0.8271208  | 6.73E-05 | 0.023538  | -0.48824   |
| 7w11w_SITTF | 0.01933396 | 0.10606378 | 3.40E-05 | 0.0046667 | 0.017998   |
| 7w11w_SITTF | 0.08786925 | 0.51961195 | 6.41E-05 | 0.020177  | 0.080939   |
| 7w11w_SITTF | 0.06955323 | 0.40909147 | 6.17E-05 | 0.01192   | 0.11455    |
| 7w11w_SITTF | 0.10500398 | 0.62300444 | 6.57E-05 | 0.025429  | -0.19772   |
| 7w11w_SITTF | 0.0428961  | 0.2482399  | 5.29E-05 | 0.0048617 | -0.0013165 |
| 7w11w_SITTF | 0.09014957 | 0.5333716  | 6.44E-05 | 0.021137  | 0.05218    |
| 7w11w_SITTF | 0.0217364  | 0.1205603  | 3.49E-05 | 0.0044169 | -0.0356    |
| 7w11w_SITTF | 0.01744506 | 0.09466595 | 3.33E-05 | 0.0049935 | 0.085504   |
| 7w11w_SITTF | 0.01817056 | 0.09904366 | 3.36E-05 | 0.0048202 | 0.050123   |
| 7w11w_SITTF | 0.01428716 | 0.0756109  | 3.26E-05 | 0.0055188 | 0.18676    |
| 7w11w_SITTF | 0.04698046 | 0.2728853  | 5.61E-05 | 0.0054936 | 0.032113   |
| 7w11w_SITTF | 0.11321074 | 0.6725248  | 6.62E-05 | 0.025403  | -0.30551   |



|             |            |            |          |           |           |
|-------------|------------|------------|----------|-----------|-----------|
| 7w11w_SITTF | 0.10632922 | 0.6310011  | 6.58E-05 | 0.02556   | -0.21453  |
| 7w11w_SITTF | 0.04977987 | 0.28977716 | 5.76E-05 | 0.005992  | 0.046466  |
| 7w11w_SITTF | 0.00625919 | 0.02716938 | 3.18E-05 | 0.008015  | 0.56984   |
| 7w11w_SITTF | 0.00907154 | 0.04413935 | 3.19E-05 | 0.0070136 | 0.43237   |
| 7w11w_SITTF | 0.01751781 | 0.09510496 | 3.33E-05 | 0.0049935 | 0.067421  |
| 7w11w_SITTF | 0.09439979 | 0.55901784 | 6.48E-05 | 0.022877  | -0.017059 |
| 7w11w_SITTF | 0.02569728 | 0.14446065 | 3.72E-05 | 0.0041509 | -0.092011 |
| 7w11w_SITTF | 0.01546498 | 0.08271796 | 3.28E-05 | 0.0052924 | 0.1442    |
| 7w11w_SITTF | 0.07410248 | 0.43654206 | 6.24E-05 | 0.014051  | 0.13074   |
| 7w11w_SITTF | 0.12837803 | 0.76404566 | 6.69E-05 | 0.023757  | -0.4283   |
| 7w11w_SITTF | 0.0155098  | 0.0829884  | 3.28E-05 | 0.0052924 | 0.1442    |
| 7w11w_SITTF | 0.01449352 | 0.07685611 | 3.26E-05 | 0.0055188 | 0.18676   |
| 7w11w_SITTF | 0.01127627 | 0.05744292 | 3.21E-05 | 0.006339  | 0.32844   |
| 7w11w_SITTF | 0.0360405  | 0.20687258 | 4.65E-05 | 0.0042637 | -0.068307 |
| 7w11w_SITTF | 0.0133501  | 0.0699566  | 3.24E-05 | 0.0057681 | 0.23179   |
| 7w11w_SITTF | 0.01382214 | 0.07280491 | 3.25E-05 | 0.0056405 | 0.20898   |
| 7w11w_SITTF | 0.01862514 | 0.10178663 | 3.36E-05 | 0.0048202 | 0.03364   |
| 7w11w_SITTF | 0.08838517 | 0.52272505 | 6.42E-05 | 0.020421  | 0.074212  |
| 7w11w_SITTF | 0.08647388 | 0.51119214 | 6.40E-05 | 0.019681  | 0.099025  |
| 7w11w_SITTF | 0.11428749 | 0.679022   | 6.63E-05 | 0.025299  | -0.3171   |
| 7w11w_SITTF | 0.00791755 | 0.03717606 | 3.19E-05 | 0.0073923 | 0.48652   |
| 7w11w_SITTF | 0.07843871 | 0.46270722 | 6.29E-05 | 0.015819  | 0.13651   |
| 7w11w_SITTF | 0.05840851 | 0.3418432  | 6.01E-05 | 0.0080116 | 0.074438  |
| 7w11w_SITTF | 0.09371279 | 0.55487245 | 6.48E-05 | 0.022676  | 0.0013661 |
| 7w11w_SITTF | 0.04437752 | 0.2571789  | 5.42E-05 | 0.0050757 | 0.012967  |
| 7w11w_SITTF | 0.01635329 | 0.08807812 | 3.30E-05 | 0.0051875 | 0.12392   |
| 7w11w_SITTF | 0.03027492 | 0.17208253 | 4.07E-05 | 0.0040668 | -0.10475  |
| 7w11w_SITTF | 0.0495027  | 0.2881047  | 5.73E-05 | 0.0058857 | 0.04392   |
| 7w11w_SITTF | 0.06528589 | 0.3833419  | 6.12E-05 | 0.01041   | 0.095509  |
| 7w11w_SITTF | 0.06961316 | 0.40945306 | 6.17E-05 | 0.01192   | 0.11455   |
| 7w11w_SITTF | 0.02647675 | 0.14916404 | 3.80E-05 | 0.0041099 | -0.099939 |
| 7w11w_SITTF | 0.07788792 | 0.45938373 | 6.29E-05 | 0.015562  | 0.13662   |
| 7w11w_SITTF | 0.12749095 | 0.758693   | 6.69E-05 | 0.023794  | -0.4246   |
| 7w11w_SITTF | 0.0988796  | 0.58604944 | 6.52E-05 | 0.024275  | -0.094455 |
| 7w11w_SITTF | 0.00913742 | 0.04453689 | 3.19E-05 | 0.0070136 | 0.43237   |
| 7w11w_SITTF | 0.06346584 | 0.3723596  | 6.09E-05 | 0.0096122 | 0.089169  |
| 7w11w_SITTF | 0.11293796 | 0.6708788  | 6.62E-05 | 0.025403  | -0.29951  |
| 7w11w_SITTF | 0.04827381 | 0.28068948 | 5.67E-05 | 0.0056831 | 0.038361  |
| 7w11w_SITTF | 0.03594919 | 0.20632161 | 4.65E-05 | 0.0042637 | -0.068307 |
| 7w11w_SITTF | 0.0953961  | 0.5650297  | 6.49E-05 | 0.023263  | -0.035993 |
| 7w11w_SITTF | 0.01894072 | 0.10369094 | 3.38E-05 | 0.004741  | 0.03364   |
| 7w11w_SITTF | 0.10042293 | 0.595362   | 6.53E-05 | 0.024687  | -0.12375  |
| 7w11w_SITTF | 0.01138922 | 0.05812447 | 3.21E-05 | 0.006339  | 0.32844   |

|             |            |            |          |           |            |
|-------------|------------|------------|----------|-----------|------------|
| 7w11w_SITTF | 0.05403335 | 0.31544307 | 5.91E-05 | 0.0068337 | 0.062513   |
| 7w11w_SITTF | 0.02078225 | 0.11480288 | 3.44E-05 | 0.0045325 | -0.01065   |
| 7w11w_SITTF | 0.07977426 | 0.47076607 | 6.32E-05 | 0.016594  | 0.13545    |
| 7w11w_SITTF | 0.01522513 | 0.08127067 | 3.27E-05 | 0.0054028 | 0.16515    |
| 7w11w_SITTF | 0.074936   | 0.4415716  | 6.25E-05 | 0.014299  | 0.13218    |
| 7w11w_SITTF | 0.09448071 | 0.5595061  | 6.48E-05 | 0.022877  | -0.017059  |
| 7w11w_SITTF | 0.03939997 | 0.22714391 | 4.98E-05 | 0.0045122 | -0.034672  |
| 7w11w_SITTF | 0.01695241 | 0.09169328 | 3.31E-05 | 0.0050879 | 0.085504   |
| 7w11w_SITTF | 0.04604679 | 0.26725146 | 5.54E-05 | 0.0053171 | 0.025099   |
| 7w11w_SITTF | 0.0272821  | 0.1540236  | 3.84E-05 | 0.0040947 | -0.10271   |
| 7w11w_SITTF | 0.00572245 | 0.02393067 | 3.18E-05 | 0.0082375 | 0.59807    |
| 7w11w_SITTF | 0.0427873  | 0.24758337 | 5.29E-05 | 0.0048617 | -0.0013165 |
| 7w11w_SITTF | 0.07251179 | 0.42694366 | 6.22E-05 | 0.01332   | 0.12548    |
| 7w11w_SITTF | 0.15194327 | 0.90624046 | 6.77E-05 | 0.023707  | -0.52493   |
| 7w11w_SITTF | 0.04804959 | 0.2793365  | 5.67E-05 | 0.0056831 | 0.038361   |
| 7w11w_SITTF | 0.07237772 | 0.42613468 | 6.21E-05 | 0.01308   | 0.12548    |
| 7w11w_SITTF | 0.05137245 | 0.29938698 | 5.83E-05 | 0.0063316 | 0.053285   |
| 7w11w_SITTF | 0.13043553 | 0.77646077 | 6.70E-05 | 0.02364   | -0.44263   |
| 7w11w_SITTF | 0.10152224 | 0.60199535 | 6.54E-05 | 0.024923  | -0.14299   |
| 7w11w_SITTF | 0.02753362 | 0.15554126 | 3.88E-05 | 0.0040827 | -0.10472   |
| 7w11w_SITTF | 0.01272013 | 0.06615532 | 3.23E-05 | 0.0059016 | 0.25518    |
| 7w11w_SITTF | 0.11445932 | 0.6800589  | 6.63E-05 | 0.025299  | -0.3171    |
| 7w11w_SITTF | 0.0071308  | 0.03242874 | 3.19E-05 | 0.0075925 | 0.51404    |
| 7w11w_SITTF | 0.05112713 | 0.29790667 | 5.81E-05 | 0.006215  | 0.051138   |
| 7w11w_SITTF | 0.06637818 | 0.38993287 | 6.13E-05 | 0.010826  | 0.10013    |
| 7w11w_SITTF | 0.08750828 | 0.5174338  | 6.41E-05 | 0.020177  | 0.087329   |
| 7w11w_SITTF | 0.03480375 | 0.19940992 | 4.54E-05 | 0.0042028 | -0.078293  |
| 7w11w_SITTF | 0.02538189 | 0.14255755 | 3.72E-05 | 0.0041509 | -0.092011  |
| 7w11w_SITTF | 0.02063431 | 0.11391016 | 3.44E-05 | 0.0045325 | -0.01065   |
| 7w11w_SITTF | 0.00903731 | 0.04393282 | 3.19E-05 | 0.0070136 | 0.43237    |
| 7w11w_SITTF | 0.08025312 | 0.47365558 | 6.32E-05 | 0.016854  | 0.13446    |
| 7w11w_SITTF | 0.09378373 | 0.5553005  | 6.48E-05 | 0.022676  | -0.0077738 |
| 7w11w_SITTF | 0.02406207 | 0.13459362 | 3.61E-05 | 0.0042401 | -0.073623  |
| 7w11w_SITTF | 0.1213239  | 0.72148037 | 6.66E-05 | 0.024419  | -0.37656   |
| 7w11w_SITTF | 0.08729512 | 0.51614755 | 6.41E-05 | 0.01993   | 0.087329   |
| 7w11w_SITTF | 0.07791197 | 0.4595288  | 6.29E-05 | 0.015562  | 0.13662    |
| 7w11w_SITTF | 0.02624894 | 0.14778936 | 3.76E-05 | 0.0041286 | -0.096385  |
| 7w11w_SITTF | 0.11540436 | 0.68576133 | 6.63E-05 | 0.025182  | -0.32814   |
| 7w11w_SITTF | 0.07920598 | 0.46733704 | 6.31E-05 | 0.016335  | 0.13613    |
| 7w11w_SITTF | 0.12755992 | 0.7591091  | 6.69E-05 | 0.023794  | -0.4246    |
| 7w11w_SITTF | 0.00743879 | 0.03428718 | 3.19E-05 | 0.0075925 | 0.51404    |
| 7w11w_SITTF | 0.12165701 | 0.72349036 | 6.66E-05 | 0.024419  | -0.38089   |
| 7w11w_SITTF | 0.03831545 | 0.22059985 | 4.87E-05 | 0.0044183 | -0.04622   |

|             |            |            |          |           |           |
|-------------|------------|------------|----------|-----------|-----------|
| 7w11w_SITTF | 0.01516384 | 0.08090086 | 3.27E-05 | 0.0054028 | 0.16515   |
| 7w11w_SITTF | 0.02593098 | 0.14587077 | 3.76E-05 | 0.0041286 | -0.096385 |
| 7w11w_SITTF | 0.03950446 | 0.2277744  | 4.98E-05 | 0.0045122 | -0.034672 |
| 7w11w_SITTF | 0.13126124 | 0.78144324 | 6.70E-05 | 0.023599  | -0.44608  |
| 7w11w_SITTF | 0.12549448 | 0.74664605 | 6.68E-05 | 0.023978  | -0.40938  |
| 7w11w_SITTF | 0.00785131 | 0.0367764  | 3.19E-05 | 0.0073923 | 0.48652   |
| 7w11w_SITTF | 0.10157006 | 0.6022839  | 6.54E-05 | 0.024923  | -0.14299  |
| 7w11w_SITTF | 0.02315898 | 0.12914428 | 3.58E-05 | 0.0042778 | -0.065623 |
| 7w11w_SITTF | 0.05945654 | 0.3481671  | 6.03E-05 | 0.0083426 | 0.075889  |
| 7w11w_SITTF | 0.11511688 | 0.68402666 | 6.63E-05 | 0.025182  | -0.32268  |
| 7w11w_SITTF | 0.08974868 | 0.53095263 | 6.44E-05 | 0.021137  | 0.059815  |
| 7w11w_SITTF | 0.08889169 | 0.5257814  | 6.42E-05 | 0.020663  | 0.067165  |
| 7w11w_SITTF | 0.01233368 | 0.06382342 | 3.23E-05 | 0.0060411 | 0.2791    |
| 7w11w_SITTF | 0.05839426 | 0.3417572  | 6.01E-05 | 0.0080116 | 0.074438  |
| 7w11w_SITTF | 0.12164468 | 0.723416   | 6.66E-05 | 0.024419  | -0.38089  |
| 7w11w_SITTF | 0.07476111 | 0.44051626 | 6.25E-05 | 0.014299  | 0.13218   |
| 7w11w_SITTF | 0.01355073 | 0.07116724 | 3.24E-05 | 0.0057681 | 0.23179   |
| 7w11w_SITTF | 0.04483316 | 0.25992826 | 5.46E-05 | 0.0051531 | 0.017239  |
| 7w11w_SITTF | 0.02625124 | 0.14780328 | 3.76E-05 | 0.0041286 | -0.096385 |
| 7w11w_SITTF | 0.05354558 | 0.31249985 | 5.89E-05 | 0.0067028 | 0.060836  |
| 7w11w_SITTF | 0.13299225 | 0.7918883  | 6.71E-05 | 0.023556  | -0.45937  |
| 7w11w_SITTF | 0.0555175  | 0.32439858 | 5.95E-05 | 0.007248  | 0.065685  |
| 7w11w_SITTF | 0.04549884 | 0.26394504 | 5.50E-05 | 0.0052335 | 0.021279  |
| 7w11w_SITTF | 0.05497574 | 0.32112956 | 5.94E-05 | 0.0071062 | 0.064127  |
| 7w11w_SITTF | 0.07879429 | 0.46485287 | 6.30E-05 | 0.016077  | 0.13651   |
| 7w11w_SITTF | 0.08744814 | 0.5170709  | 6.41E-05 | 0.020177  | 0.087329  |
| 7w11w_SITTF | 0.10202616 | 0.605036   | 6.55E-05 | 0.025029  | -0.15246  |
| 7w11w_SITTF | 0.01347684 | 0.07072134 | 3.24E-05 | 0.0057681 | 0.23179   |
| 7w11w_SITTF | 0.04476592 | 0.25952256 | 5.46E-05 | 0.0051531 | 0.017239  |
| 7w11w_SITTF | 0.11511269 | 0.6840014  | 6.63E-05 | 0.025182  | -0.32268  |
| 7w11w_SITTF | 0.0238904  | 0.13355775 | 3.61E-05 | 0.0042401 | -0.073623 |
| 7w11w_SITTF | 0.01793022 | 0.09759344 | 3.34E-05 | 0.0049043 | 0.067421  |
| 7w11w_SITTF | 0.02363907 | 0.1320412  | 3.58E-05 | 0.0042778 | -0.073623 |
| 7w11w_SITTF | 0.05449965 | 0.31825674 | 5.92E-05 | 0.0069681 | 0.062513  |
| 7w11w_SITTF | 0.02666502 | 0.15030006 | 3.80E-05 | 0.0041099 | -0.099939 |
| 7w11w_SITTF | 0.0392862  | 0.22645739 | 4.98E-05 | 0.0045122 | -0.034672 |
| 7w11w_SITTF | 0.04537099 | 0.26317358 | 5.50E-05 | 0.0052335 | 0.021279  |
| 7w11w_SITTF | 0.01615879 | 0.08690447 | 3.30E-05 | 0.0051875 | 0.12392   |
| 7w11w_SITTF | 0.02139745 | 0.11851504 | 3.47E-05 | 0.0044724 | -0.0356   |
| 7w11w_SITTF | 0.04527092 | 0.2625698  | 5.50E-05 | 0.0052335 | 0.021279  |
| 7w11w_SITTF | 0.07660978 | 0.45167127 | 6.27E-05 | 0.015053  | 0.13605   |
| 7w11w_SITTF | 0.01886236 | 0.1032181  | 3.38E-05 | 0.004741  | 0.03364   |
| 7w11w_SITTF | 0.0120974  | 0.06239767 | 3.23E-05 | 0.0060411 | 0.2791    |

|             |            |            |          |           |           |
|-------------|------------|------------|----------|-----------|-----------|
| 7w11w_SITTF | 0.0213878  | 0.11845682 | 3.47E-05 | 0.0044724 | -0.0356   |
| 7w11w_SITTF | 0.02464007 | 0.13808131 | 3.64E-05 | 0.0042065 | -0.080664 |
| 7w11w_SITTF | 0.07142049 | 0.42035866 | 6.20E-05 | 0.012843  | 0.12136   |
| 7w11w_SITTF | 0.02511463 | 0.14094484 | 3.68E-05 | 0.0041768 | -0.086782 |
| 7w11w_SITTF | 0.07272329 | 0.42821988 | 6.22E-05 | 0.01332   | 0.12548   |
| 7w11w_SITTF | 0.0188447  | 0.10311153 | 3.38E-05 | 0.004741  | 0.03364   |
| 7w11w_SITTF | 0.02129462 | 0.11789454 | 3.47E-05 | 0.0044724 | -0.023601 |
| 7w11w_SITTF | 0.01063941 | 0.05360003 | 3.21E-05 | 0.0064976 | 0.35381   |
| 7w11w_SITTF | 0.00880462 | 0.04252876 | 3.19E-05 | 0.0070136 | 0.43237   |
| 7w11w_SITTF | 0.03452773 | 0.1977444  | 4.48E-05 | 0.0041765 | -0.082901 |
| 7w11w_SITTF | 0.04603076 | 0.2671547  | 5.54E-05 | 0.0053171 | 0.025099  |
| 7w11w_SITTF | 0.0156061  | 0.08356953 | 3.28E-05 | 0.0052924 | 0.1442    |
| 7w11w_SITTF | 0.09949689 | 0.58977425 | 6.53E-05 | 0.02442   | -0.10426  |
| 7w11w_SITTF | 0.03150248 | 0.17948975 | 4.22E-05 | 0.0040866 | -0.10071  |
| 7w11w_SITTF | 0.11223135 | 0.6666151  | 6.61E-05 | 0.025489  | -0.29336  |
| 7w11w_SITTF | 0.02829478 | 0.16013415 | 3.93E-05 | 0.004074  | -0.10603  |
| 7w11w_SITTF | 0.05772473 | 0.3377172  | 6.00E-05 | 0.0078516 | 0.071569  |
| 7w11w_SITTF | 0.0314269  | 0.1790337  | 4.22E-05 | 0.0040866 | -0.10071  |
| 7w11w_SITTF | 0.03035258 | 0.17255114 | 4.11E-05 | 0.0040705 | -0.10475  |
| 7w11w_SITTF | 0.04799353 | 0.27899826 | 5.64E-05 | 0.0055867 | 0.038361  |
| 7w11w_SITTF | 0.02852631 | 0.16153127 | 3.93E-05 | 0.004074  | -0.10603  |
| 7w11w_SITTF | 0.07424158 | 0.43738136 | 6.24E-05 | 0.014051  | 0.13074   |
| 7w11w_SITTF | 0.0237211  | 0.13253619 | 3.61E-05 | 0.0042401 | -0.073623 |
| 7w11w_SITTF | 0.03987786 | 0.23002756 | 5.03E-05 | 0.0045634 | -0.028892 |
| 7w11w_SITTF | 0.04226178 | 0.24441236 | 5.24E-05 | 0.0047963 | -0.00654  |
| 7w11w_SITTF | 0.05651101 | 0.33039352 | 5.98E-05 | 0.0075425 | 0.068678  |
| 7w11w_SITTF | 0.03051939 | 0.17355767 | 4.11E-05 | 0.0040705 | -0.10475  |
| 7w11w_SITTF | 0.04378462 | 0.2536013  | 5.38E-05 | 0.0050014 | 0.008455  |
| 7w11w_SITTF | 0.03746374 | 0.21546052 | 4.76E-05 | 0.0043355 | -0.05192  |
| 7w11w_SITTF | 0.02892273 | 0.16392328 | 3.97E-05 | 0.0040686 | -0.10664  |
| 7w11w_SITTF | 0.01887716 | 0.10330736 | 3.38E-05 | 0.004741  | 0.03364   |
| 7w11w_SITTF | 0.12172985 | 0.72392994 | 6.66E-05 | 0.024419  | -0.38089  |
| 7w11w_SITTF | 0.01908559 | 0.10456505 | 3.38E-05 | 0.004741  | 0.03364   |
| 7w11w_SITTF | 0.03330301 | 0.19035429 | 4.37E-05 | 0.0041322 | -0.091175 |
| 7w11w_SITTF | 0.0804551  | 0.4748743  | 6.32E-05 | 0.016854  | 0.13446   |
| 7w11w_SITTF | 0.01259784 | 0.06541741 | 3.23E-05 | 0.0059016 | 0.25518   |
| 7w11w_SITTF | 0.10380437 | 0.6157659  | 6.56E-05 | 0.025296  | -0.18011  |
| 7w11w_SITTF | 0.08298547 | 0.4901428  | 6.36E-05 | 0.018151  | 0.12434   |
| 7w11w_SITTF | 0.03082548 | 0.17540461 | 4.11E-05 | 0.0040705 | -0.10299  |
| 7w11w_SITTF | 0.11982098 | 0.71241164 | 6.65E-05 | 0.024632  | -0.36766  |
| 7w11w_SITTF | 0.00809462 | 0.03824455 | 3.19E-05 | 0.0073923 | 0.48652   |
| 7w11w_SITTF | 0.01782798 | 0.0969765  | 3.34E-05 | 0.0049043 | 0.067421  |
| 7w11w_SITTF | 0.00937761 | 0.04598621 | 3.20E-05 | 0.0068348 | 0.4058    |

|             |            |            |          |           |           |
|-------------|------------|------------|----------|-----------|-----------|
| 7w11w_SITTF | 0.02508768 | 0.14078227 | 3.68E-05 | 0.0041768 | -0.086782 |
| 7w11w_SITTF | 0.07530289 | 0.44378543 | 6.26E-05 | 0.014549  | 0.13345   |
| 7w11w_SITTF | 0.01577512 | 0.08458936 | 3.28E-05 | 0.0052924 | 0.1442    |
| 7w11w_SITTF | 0.05640692 | 0.3297654  | 5.98E-05 | 0.0075425 | 0.068678  |
| 7w11w_SITTF | 0.10648491 | 0.6319406  | 6.58E-05 | 0.02556   | -0.22263  |
| 7w11w_SITTF | 0.01990148 | 0.10948825 | 3.42E-05 | 0.0045972 | 0.0032259 |
| 7w11w_SITTF | 0.02449779 | 0.1372228  | 3.64E-05 | 0.0042065 | -0.080664 |
| 7w11w_SITTF | 0.03007592 | 0.17088173 | 4.07E-05 | 0.0040668 | -0.10597  |
| 7w11w_SITTF | 0.01776713 | 0.09660935 | 3.34E-05 | 0.0049043 | 0.067421  |
| 7w11w_SITTF | 0.03446797 | 0.19738379 | 4.48E-05 | 0.0041765 | -0.082901 |
| 7w11w_SITTF | 0.02419412 | 0.13539043 | 3.61E-05 | 0.0042401 | -0.080664 |
| 7w11w_SITTF | 0.02414526 | 0.13509557 | 3.61E-05 | 0.0042401 | -0.080664 |
| 7w11w_SITTF | 0.1062977  | 0.6308109  | 6.58E-05 | 0.02556   | -0.21453  |
| 7w11w_SITTF | 0.02213052 | 0.12293845 | 3.52E-05 | 0.0043661 | -0.046619 |
| 7w11w_SITTF | 0.06546597 | 0.38442853 | 6.12E-05 | 0.01041   | 0.095509  |
| 7w11w_SITTF | 0.03063834 | 0.1742754  | 4.11E-05 | 0.0040705 | -0.10475  |
| 7w11w_SITTF | 0.0129311  | 0.06742831 | 3.23E-05 | 0.0059016 | 0.25518   |
| 7w11w_SITTF | 0.03906852 | 0.22514391 | 4.92E-05 | 0.0044639 | -0.034672 |
| 7w11w_SITTF | 0.097036   | 0.57492495 | 6.51E-05 | 0.023799  | -0.055297 |
| 7w11w_SITTF | 0.0321365  | 0.18331549 | 4.27E-05 | 0.004099  | -0.097962 |
| 7w11w_SITTF | 0.02761003 | 0.15600233 | 3.88E-05 | 0.0040827 | -0.10472  |
| 7w11w_SITTF | 0.02303931 | 0.12842217 | 3.55E-05 | 0.0043197 | -0.065623 |
| 7w11w_SITTF | 0.02409921 | 0.13481772 | 3.61E-05 | 0.0042401 | -0.073623 |
| 7w11w_SITTF | 0.07514963 | 0.44286063 | 6.25E-05 | 0.014299  | 0.13345   |
| 7w11w_SITTF | 0.11325054 | 0.67276496 | 6.62E-05 | 0.025403  | -0.30551  |
| 7w11w_SITTF | 0.0202203  | 0.111412   | 3.42E-05 | 0.0045972 | 0.0032259 |
| 7w11w_SITTF | 0.02073055 | 0.11449087 | 3.44E-05 | 0.0045325 | -0.01065  |
| 7w11w_SITTF | 0.08112066 | 0.47889033 | 6.33E-05 | 0.017113  | 0.13148   |
| 7w11w_SITTF | 0.07194431 | 0.42351943 | 6.21E-05 | 0.01308   | 0.12348   |
| 7w11w_SITTF | 0.09667023 | 0.57271785 | 6.50E-05 | 0.023626  | -0.055297 |
| 7w11w_SITTF | 0.0092924  | 0.04547203 | 3.20E-05 | 0.0068348 | 0.4058    |
| 7w11w_SITTF | 0.03893162 | 0.22431786 | 4.92E-05 | 0.0044639 | -0.040459 |
| 7w11w_SITTF | 0.03437272 | 0.19680901 | 4.48E-05 | 0.0041765 | -0.082901 |
| 7w11w_SITTF | 0.04763369 | 0.27682695 | 5.64E-05 | 0.0055867 | 0.035328  |
| 7w11w_SITTF | 0.06386221 | 0.3747513  | 6.10E-05 | 0.0098069 | 0.089169  |
| 7w11w_SITTF | 0.07035848 | 0.41395038 | 6.19E-05 | 0.012376  | 0.11689   |
| 7w11w_SITTF | 0.01519854 | 0.08111027 | 3.27E-05 | 0.0054028 | 0.16515   |
| 7w11w_SITTF | 0.02716904 | 0.15334137 | 3.84E-05 | 0.0040947 | -0.10271  |
| 7w11w_SITTF | 0.10495511 | 0.6227096  | 6.57E-05 | 0.025429  | -0.19772  |
| 7w11w_SITTF | 0.07988643 | 0.4714429  | 6.32E-05 | 0.016594  | 0.13545   |
| 7w11w_SITTF | 0.02488125 | 0.13953663 | 3.68E-05 | 0.0041768 | -0.086782 |
| 7w11w_SITTF | 0.03583268 | 0.20561856 | 4.59E-05 | 0.0042319 | -0.068307 |
| 7w11w_SITTF | 0.04703941 | 0.27324095 | 5.61E-05 | 0.0054936 | 0.032113  |

|             |            |            |          |           |            |
|-------------|------------|------------|----------|-----------|------------|
| 7w11w_SITTF | 0.05747386 | 0.33620346 | 6.00E-05 | 0.0078516 | 0.071569   |
| 7w11w_SITTF | 0.07261261 | 0.42755198 | 6.22E-05 | 0.01332   | 0.12548    |
| 7w11w_SITTF | 0.03463393 | 0.1983852  | 4.48E-05 | 0.0041765 | -0.078293  |
| 7w11w_SITTF | 0.04706504 | 0.27339566 | 5.61E-05 | 0.0054936 | 0.032113   |
| 7w11w_SITTF | 0.01952091 | 0.10719185 | 3.40E-05 | 0.0046667 | 0.017998   |
| 7w11w_SITTF | 0.02623258 | 0.14769065 | 3.76E-05 | 0.0041286 | -0.096385  |
| 7w11w_SITTF | 0.08469854 | 0.5004796  | 6.38E-05 | 0.018923  | 0.1136     |
| 7w11w_SITTF | 0.03397029 | 0.19438075 | 4.43E-05 | 0.004153  | -0.087207  |
| 7w11w_SITTF | 0.01684398 | 0.09103897 | 3.31E-05 | 0.0050879 | 0.10435    |
| 7w11w_SITTF | 0.03684251 | 0.21171194 | 4.70E-05 | 0.0042982 | -0.057524  |
| 7w11w_SITTF | 0.09389734 | 0.555986   | 6.48E-05 | 0.022676  | -0.0077738 |
| 7w11w_SITTF | 0.01575287 | 0.08445516 | 3.28E-05 | 0.0052924 | 0.1442     |
| 7w11w_SITTF | 0.02541675 | 0.14276783 | 3.72E-05 | 0.0041509 | -0.092011  |
| 7w11w_SITTF | 0.08166605 | 0.48218128 | 6.34E-05 | 0.017373  | 0.12948    |
| 7w11w_SITTF | 0.04664891 | 0.2708847  | 5.57E-05 | 0.0054037 | 0.028707   |
| 7w11w_SITTF | 0.01917582 | 0.10510951 | 3.38E-05 | 0.004741  | 0.017998   |
| 7w11w_SITTF | 0.02205465 | 0.12248068 | 3.52E-05 | 0.0043661 | -0.046619  |
| 7w11w_SITTF | 0.10849194 | 0.6440512  | 6.59E-05 | 0.025616  | -0.24573   |
| 7w11w_SITTF | 0.01215256 | 0.06273055 | 3.23E-05 | 0.0060411 | 0.2791     |
| 7w11w_SITTF | 0.02310811 | 0.12883736 | 3.58E-05 | 0.0042778 | -0.065623  |
| 7w11w_SITTF | 0.02237015 | 0.12438442 | 3.52E-05 | 0.0043661 | -0.046619  |
| 7w11w_SITTF | 0.01018135 | 0.05083605 | 3.20E-05 | 0.0066628 | 0.37961    |
| 7w11w_SITTF | 0.0564895  | 0.3302637  | 5.98E-05 | 0.0075425 | 0.068678   |
| 7w11w_SITTF | 0.03848903 | 0.22164723 | 4.87E-05 | 0.0044183 | -0.04622   |
| 7w11w_SITTF | 0.02956761 | 0.16781458 | 4.02E-05 | 0.0040662 | -0.10661   |
| 7w11w_SITTF | 0.0517151  | 0.30145454 | 5.83E-05 | 0.0063316 | 0.053285   |
| 7w11w_SITTF | 0.0902551  | 0.53400844 | 6.44E-05 | 0.021369  | 0.05218    |
| 7w11w_SITTF | 0.00490136 | 0.01897613 | 3.18E-05 | 0.0084677 | 0.62647    |
| 7w11w_SITTF | 0.06706985 | 0.3941065  | 6.14E-05 | 0.011039  | 0.10251    |
| 7w11w_SITTF | 0.03843207 | 0.2213035  | 4.87E-05 | 0.0044183 | -0.04622   |
| 7w11w_SITTF | 0.01231233 | 0.0636946  | 3.23E-05 | 0.0060411 | 0.2791     |
| 7w11w_SITTF | 0.06868222 | 0.40383565 | 6.16E-05 | 0.011695  | 0.10977    |
| 7w11w_SITTF | 0.03143887 | 0.17910592 | 4.22E-05 | 0.0040866 | -0.10071   |
| 7w11w_SITTF | 0.02676215 | 0.15088618 | 3.80E-05 | 0.0041099 | -0.099939  |
| 7w11w_SITTF | 0.02261003 | 0.12583186 | 3.55E-05 | 0.0043197 | -0.056631  |
| 7w11w_SITTF | 0.01669647 | 0.09014892 | 3.31E-05 | 0.0050879 | 0.10435    |
| 7w11w_SITTF | 0.11273304 | 0.6696423  | 6.62E-05 | 0.025448  | -0.29951   |
| 7w11w_SITTF | 0.01662024 | 0.08968889 | 3.31E-05 | 0.0050879 | 0.10435    |
| 7w11w_SITTF | 0.04365778 | 0.25283593 | 5.38E-05 | 0.0050014 | 0.008455   |
| 7w11w_SITTF | 0.02556806 | 0.14368089 | 3.72E-05 | 0.0041509 | -0.092011  |
| 7w11w_SITTF | 0.05104179 | 0.2973917  | 5.81E-05 | 0.006215  | 0.051138   |
| 7w11w_SITTF | 0.07358974 | 0.43344814 | 6.23E-05 | 0.013805  | 0.12913    |
| 7w11w_SITTF | 0.01117223 | 0.05681513 | 3.21E-05 | 0.006339  | 0.32844    |

|             |            |            |          |           |            |
|-------------|------------|------------|----------|-----------|------------|
| 7w11w_SITTF | 0.09392077 | 0.55612737 | 6.48E-05 | 0.022676  | -0.0077738 |
| 7w11w_SITTF | 0.01855072 | 0.10133764 | 3.36E-05 | 0.0048202 | 0.050123   |
| 7w11w_SITTF | 0.01103348 | 0.05597787 | 3.21E-05 | 0.006339  | 0.32844    |
| 7w11w_SITTF | 0.03208538 | 0.18300702 | 4.27E-05 | 0.004099  | -0.097962  |
| 7w11w_SITTF | 0.04355425 | 0.25221118 | 5.33E-05 | 0.0049301 | 0.008455   |
| 7w11w_SITTF | 0.02508573 | 0.14077047 | 3.68E-05 | 0.0041768 | -0.086782  |
| 7w11w_SITTF | 0.06078012 | 0.35615373 | 6.05E-05 | 0.008688  | 0.080421   |
| 7w11w_SITTF | 0.01105752 | 0.05612294 | 3.21E-05 | 0.006339  | 0.32844    |
| 7w11w_SITTF | 0.04951914 | 0.28820395 | 5.73E-05 | 0.0058857 | 0.04392    |
| 7w11w_SITTF | 0.05150485 | 0.3001859  | 5.83E-05 | 0.0063316 | 0.053285   |
| 7w11w_SITTF | 0.09017929 | 0.5335509  | 6.44E-05 | 0.021369  | 0.05218    |
| 7w11w_SITTF | 0.0149939  | 0.0798754  | 3.27E-05 | 0.0054028 | 0.16515    |
| 7w11w_SITTF | 0.02312168 | 0.12891923 | 3.58E-05 | 0.0042778 | -0.065623  |
| 7w11w_SITTF | 0.05165284 | 0.30107886 | 5.83E-05 | 0.0063316 | 0.053285   |
| 7w11w_SITTF | 0.01366589 | 0.07186211 | 3.24E-05 | 0.0057681 | 0.20898    |
| 7w11w_SITTF | 0.12022044 | 0.714822   | 6.66E-05 | 0.024561  | -0.36766   |
| 7w11w_SITTF | 0.01567359 | 0.08397675 | 3.28E-05 | 0.0052924 | 0.1442     |
| 7w11w_SITTF | 0.02964827 | 0.16830122 | 4.02E-05 | 0.0040662 | -0.10661   |
| 7w11w_SITTF | 0.07725307 | 0.455553   | 6.28E-05 | 0.015307  | 0.13646    |
| 7w11w_SITTF | 0.0150972  | 0.08049877 | 3.27E-05 | 0.0054028 | 0.16515    |
| 7w11w_SITTF | 0.00515423 | 0.02050196 | 3.18E-05 | 0.0084677 | 0.62647    |
| 7w11w_SITTF | 0.04766413 | 0.2770106  | 5.64E-05 | 0.0055867 | 0.035328   |
| 7w11w_SITTF | 0.0133242  | 0.0698003  | 3.24E-05 | 0.0057681 | 0.23179    |
| 7w11w_SITTF | 0.08566995 | 0.50634116 | 6.39E-05 | 0.019177  | 0.1043     |
| 7w11w_SITTF | 0.02133203 | 0.11812027 | 3.47E-05 | 0.0044724 | -0.023601  |
| 7w11w_SITTF | 0.04208577 | 0.24335028 | 5.24E-05 | 0.0047963 | -0.00654   |
| 7w11w_SITTF | 0.01606016 | 0.08630932 | 3.30E-05 | 0.0051875 | 0.12392    |
| 7w11w_SITTF | 0.03989239 | 0.23011522 | 5.03E-05 | 0.0045634 | -0.028892  |
| 7w11w_SITTF | 0.05091177 | 0.2966072  | 5.81E-05 | 0.006215  | 0.051138   |
| 7w11w_SITTF | 0.0870221  | 0.51450014 | 6.41E-05 | 0.01993   | 0.093363   |
| 7w11w_SITTF | 0.07468812 | 0.44007584 | 6.25E-05 | 0.014299  | 0.13218    |
| 7w11w_SITTF | 0.01904425 | 0.1043156  | 3.38E-05 | 0.004741  | 0.03364    |
| 7w11w_SITTF | 0.02975668 | 0.16895537 | 4.07E-05 | 0.0040668 | -0.10597   |
| 7w11w_SITTF | 0.02506597 | 0.14065124 | 3.68E-05 | 0.0041768 | -0.086782  |
| 7w11w_SITTF | 0.03292458 | 0.1880708  | 4.32E-05 | 0.0041142 | -0.094772  |
| 7w11w_SITTF | 0.01869807 | 0.1022267  | 3.38E-05 | 0.004741  | 0.03364    |
| 7w11w_SITTF | 0.08525776 | 0.503854   | 6.39E-05 | 0.019177  | 0.10916    |
| 7w11w_SITTF | 0.01970989 | 0.10833213 | 3.40E-05 | 0.0046667 | 0.017998   |
| 7w11w_SITTF | 0.01950272 | 0.10708206 | 3.40E-05 | 0.0046667 | 0.017998   |
| 7w11w_SITTF | 0.02199811 | 0.12213949 | 3.52E-05 | 0.0043661 | -0.046619  |
| 7w11w_SITTF | 0.01007367 | 0.05018633 | 3.20E-05 | 0.0066628 | 0.37961    |
| 7w11w_SITTF | 0.03278376 | 0.18722111 | 4.32E-05 | 0.0041142 | -0.094772  |
| 7w11w_SITTF | 0.03871291 | 0.22299814 | 4.92E-05 | 0.0044639 | -0.040459  |

|             |            |            |          |           |           |
|-------------|------------|------------|----------|-----------|-----------|
| 7w11w_SITTF | 0.04761593 | 0.27671978 | 5.64E-05 | 0.0055867 | 0.035328  |
| 7w11w_SITTF | 0.03250613 | 0.18554586 | 4.27E-05 | 0.004099  | -0.094772 |
| 7w11w_SITTF | 0.02784325 | 0.15740961 | 3.88E-05 | 0.0040827 | -0.10472  |
| 7w11w_SITTF | 0.00973662 | 0.04815253 | 3.20E-05 | 0.0068348 | 0.4058    |
| 7w11w_SITTF | 0.01293687 | 0.06746314 | 3.23E-05 | 0.0059016 | 0.25518   |
| 7w11w_SITTF | 0.02084019 | 0.11515252 | 3.44E-05 | 0.0045325 | -0.023601 |
| 7w11w_SITTF | 0.05779043 | 0.33811364 | 6.00E-05 | 0.0078516 | 0.071569  |
| 7w11w_SITTF | 0.05405609 | 0.3155803  | 5.91E-05 | 0.0068337 | 0.062513  |
| 7w11w_SITTF | 0.0562356  | 0.32873166 | 5.97E-05 | 0.0073934 | 0.068678  |
| 7w11w_SITTF | 0.022217   | 0.12346026 | 3.52E-05 | 0.0043661 | -0.046619 |
| 7w11w_SITTF | 0.01712432 | 0.09273058 | 3.33E-05 | 0.0049935 | 0.085504  |
| 7w11w_SITTF | 0.02738297 | 0.15463223 | 3.84E-05 | 0.0040947 | -0.10271  |
| 7w11w_SITTF | 0.01911873 | 0.10476502 | 3.38E-05 | 0.004741  | 0.03364   |
| 7w11w_SITTF | 0.03346568 | 0.19133584 | 4.37E-05 | 0.0041322 | -0.091175 |
| 7w11w_SITTF | 0.06163412 | 0.3613068  | 6.07E-05 | 0.0090475 | 0.082025  |
| 7w11w_SITTF | 0.0343383  | 0.19660133 | 4.48E-05 | 0.0041765 | -0.082901 |
| 7w11w_SITTF | 0.09935183 | 0.5888989  | 6.53E-05 | 0.02442   | -0.10426  |
| 7w11w_SITTF | 0.05885079 | 0.34451193 | 6.02E-05 | 0.0081753 | 0.074438  |
| 7w11w_SITTF | 0.01324877 | 0.06934515 | 3.24E-05 | 0.0057681 | 0.23179   |
| 7w11w_SITTF | 0.03297667 | 0.1883851  | 4.32E-05 | 0.0041142 | -0.091175 |
| 7w11w_SITTF | 0.04581361 | 0.2658444  | 5.50E-05 | 0.0052335 | 0.025099  |
| 7w11w_SITTF | 0.01898649 | 0.10396712 | 3.38E-05 | 0.004741  | 0.03364   |
| 7w11w_SITTF | 0.01816758 | 0.09902573 | 3.36E-05 | 0.0048202 | 0.050123  |
| 7w11w_SITTF | 0.05666916 | 0.3313478  | 5.98E-05 | 0.0075425 | 0.068678  |
| 7w11w_SITTF | 0.03596727 | 0.20643067 | 4.65E-05 | 0.0042637 | -0.068307 |
| 7w11w_SITTF | 0.06841978 | 0.40225208 | 6.16E-05 | 0.011474  | 0.10977   |
| 7w11w_SITTF | 0.01344506 | 0.0705296  | 3.24E-05 | 0.0057681 | 0.23179   |
| 7w11w_SITTF | 0.02467543 | 0.13829468 | 3.64E-05 | 0.0042065 | -0.080664 |
| 7w11w_SITTF | 0.02861569 | 0.16207059 | 3.93E-05 | 0.004074  | -0.10664  |
| 7w11w_SITTF | 0.07429829 | 0.43772358 | 6.24E-05 | 0.014051  | 0.13074   |
| 7w11w_SITTF | 0.01734394 | 0.09405578 | 3.33E-05 | 0.0049935 | 0.085504  |
| 7w11w_SITTF | 0.04330494 | 0.25070688 | 5.33E-05 | 0.0049301 | 0.0036923 |
| 7w11w_SITTF | 0.01498753 | 0.07983698 | 3.27E-05 | 0.0054028 | 0.16515   |
| 7w11w_SITTF | 0.00713245 | 0.03243869 | 3.19E-05 | 0.0075925 | 0.51404   |
| 7w11w_SITTF | 0.04032147 | 0.23270431 | 5.09E-05 | 0.0046173 | -0.023154 |
| 7w11w_SITTF | 0.01969804 | 0.10826067 | 3.40E-05 | 0.0046667 | 0.017998  |
| 7w11w_SITTF | 0.02829416 | 0.16013043 | 3.93E-05 | 0.004074  | -0.10603  |
| 7w11w_SITTF | 0.07544951 | 0.44467014 | 6.26E-05 | 0.014549  | 0.13345   |
| 7w11w_SITTF | 0.03368342 | 0.19264975 | 4.43E-05 | 0.004153  | -0.087207 |
| 7w11w_SITTF | 0.03319358 | 0.18969399 | 4.37E-05 | 0.0041322 | -0.091175 |
| 7w11w_SITTF | 0.01815879 | 0.09897265 | 3.36E-05 | 0.0048202 | 0.050123  |
| 7w11w_SITTF | 0.07830212 | 0.46188307 | 6.29E-05 | 0.015819  | 0.13651   |
| 7w11w_SITTF | 0.01897566 | 0.10390174 | 3.38E-05 | 0.004741  | 0.03364   |



|             |            |            |          |           |           |
|-------------|------------|------------|----------|-----------|-----------|
| 7w11w_SITTF | 0.06630909 | 0.38951597 | 6.13E-05 | 0.010616  | 0.10013   |
| 7w11w_SITTF | 0.03031979 | 0.17235325 | 4.11E-05 | 0.0040705 | -0.10475  |
| 7w11w_SITTF | 0.06036729 | 0.35366264 | 6.05E-05 | 0.008688  | 0.07887   |
| 7w11w_SITTF | 0.02358909 | 0.13173963 | 3.58E-05 | 0.0042778 | -0.073623 |
| 7w11w_SITTF | 0.05503115 | 0.3214639  | 5.94E-05 | 0.0071062 | 0.064127  |
| 7w11w_SITTF | 0.01734204 | 0.09404435 | 3.33E-05 | 0.0049935 | 0.085504  |
| 7w11w_SITTF | 0.0153304  | 0.08190589 | 3.27E-05 | 0.0054028 | 0.1442    |
| 7w11w_SITTF | 0.01123351 | 0.0571849  | 3.21E-05 | 0.006339  | 0.32844   |
| 7w11w_SITTF | 0.06844746 | 0.40241915 | 6.16E-05 | 0.011474  | 0.10977   |
| 7w11w_SITTF | 0.03306782 | 0.18893516 | 4.32E-05 | 0.0041142 | -0.091175 |
| 7w11w_SITTF | 0.04538595 | 0.26326385 | 5.50E-05 | 0.0052335 | 0.021279  |
| 7w11w_SITTF | 0.04952817 | 0.2882584  | 5.73E-05 | 0.0058857 | 0.04392   |
| 7w11w_SITTF | 0.02014446 | 0.1109544  | 3.42E-05 | 0.0045972 | 0.0032259 |
| 7w11w_SITTF | 0.05002574 | 0.29126075 | 5.76E-05 | 0.005992  | 0.046466  |
| 7w11w_SITTF | 0.03148418 | 0.17937933 | 4.22E-05 | 0.0040866 | -0.10071  |
| 7w11w_SITTF | 0.0334707  | 0.19136614 | 4.37E-05 | 0.0041322 | -0.091175 |
| 7w11w_SITTF | 0.02925137 | 0.16590634 | 4.02E-05 | 0.0040662 | -0.10661  |
| 7w11w_SITTF | 0.0111217  | 0.05651021 | 3.21E-05 | 0.006339  | 0.32844   |
| 7w11w_SITTF | 0.0783925  | 0.4624284  | 6.29E-05 | 0.015819  | 0.13651   |
| 16w_SITTD12 | 0.0257922  | 0.14503337 | 3.72E-05 | 0.0041509 | -0.096385 |
| 16w_SITTD12 | 0.03126905 | 0.1780812  | 4.16E-05 | 0.0040771 | -0.10299  |
| 16w_SITTD12 | 0.01818199 | 0.09911265 | 3.36E-05 | 0.0048202 | 0.050123  |
| 16w_SITTD12 | 0.02025085 | 0.11159633 | 3.42E-05 | 0.0045972 | 0.0032259 |
| 16w_SITTD12 | 0.03453918 | 0.19781345 | 4.48E-05 | 0.0041765 | -0.082901 |
| 16w_SITTD12 | 0.13633762 | 0.8120746  | 6.72E-05 | 0.023527  | -0.4775   |
| 16w_SITTD12 | 0.08025571 | 0.47367117 | 6.32E-05 | 0.016854  | 0.13446   |
| 16w_SITTD12 | 0.11404108 | 0.6775352  | 6.63E-05 | 0.025299  | -0.31137  |
| 16w_SITTD12 | 0.04729573 | 0.2747877  | 5.61E-05 | 0.0054936 | 0.032113  |
| 16w_SITTD12 | 0.0567074  | 0.33157855 | 5.98E-05 | 0.0075425 | 0.068678  |
| 16w_SITTD12 | 0.02268737 | 0.12629852 | 3.55E-05 | 0.0043197 | -0.056631 |
| 16w_SITTD12 | 0.10205342 | 0.6052005  | 6.55E-05 | 0.025029  | -0.15246  |
| 16w_SITTD12 | 0.02134748 | 0.11821351 | 3.47E-05 | 0.0044724 | -0.023601 |
| 16w_SITTD12 | 0.07947869 | 0.46898258 | 6.31E-05 | 0.016335  | 0.13545   |
| 16w_SITTD12 | 0.07459698 | 0.43952587 | 6.24E-05 | 0.014051  | 0.13218   |
| 16w_SITTD12 | 0.05668786 | 0.33146065 | 5.98E-05 | 0.0075425 | 0.068678  |
| 16w_SITTD12 | 0.04314871 | 0.24976416 | 5.33E-05 | 0.0049301 | 0.0036923 |
| 16w_SITTD12 | 0.02274901 | 0.12667046 | 3.55E-05 | 0.0043197 | -0.056631 |
| 16w_SITTD12 | 0.05805323 | 0.3396994  | 6.01E-05 | 0.0080116 | 0.073002  |
| 16w_SITTD12 | 0.01569888 | 0.08412936 | 3.28E-05 | 0.0052924 | 0.1442    |
| 16w_SITTD12 | 0.10978459 | 0.6518511  | 6.60E-05 | 0.025599  | -0.26716  |
| 16w_SITTD12 | 0.05307521 | 0.30966154 | 5.89E-05 | 0.0067028 | 0.059084  |
| 16w_SITTD12 | 0.03196834 | 0.18230076 | 4.27E-05 | 0.004099  | -0.097962 |
| 16w_SITTD12 | 0.11504438 | 0.68358916 | 6.63E-05 | 0.025242  | -0.32268  |

|             |            |            |          |           |           |
|-------------|------------|------------|----------|-----------|-----------|
| 16w_SITTD12 | 0.00830291 | 0.03950138 | 3.19E-05 | 0.0071994 | 0.45929   |
| 16w_SITTD12 | 0.02128136 | 0.11781456 | 3.47E-05 | 0.0044724 | -0.023601 |
| 16w_SITTD12 | 0.03523381 | 0.20200491 | 4.54E-05 | 0.0042028 | -0.073417 |
| 16w_SITTD12 | 0.02230688 | 0.12400264 | 3.52E-05 | 0.0043661 | -0.046619 |
| 16w_SITTD12 | 0.13138515 | 0.78219086 | 6.70E-05 | 0.023599  | -0.44949  |
| 16w_SITTD12 | 0.07551614 | 0.44507214 | 6.26E-05 | 0.014549  | 0.13453   |
| 16w_SITTD12 | 0.03735916 | 0.21482946 | 4.76E-05 | 0.0043355 | -0.057524 |
| 16w_SITTD12 | 0.03346058 | 0.19130509 | 4.37E-05 | 0.0041322 | -0.091175 |
| 16w_SITTD12 | 0.02717242 | 0.15336174 | 3.84E-05 | 0.0040947 | -0.10271  |
| 16w_SITTD12 | 0.02852844 | 0.16154411 | 3.93E-05 | 0.004074  | -0.10603  |
| 16w_SITTD12 | 0.07223599 | 0.42527944 | 6.21E-05 | 0.01308   | 0.12548   |
| 16w_SITTD12 | 0.01903876 | 0.10428251 | 3.38E-05 | 0.004741  | 0.03364   |
| 16w_SITTD12 | 0.03165866 | 0.18043213 | 4.22E-05 | 0.0040866 | -0.10071  |
| 16w_SITTD12 | 0.05064976 | 0.29502618 | 5.78E-05 | 0.0061018 | 0.051138  |
| 16w_SITTD12 | 0.08223325 | 0.48560384 | 6.35E-05 | 0.017633  | 0.1271    |
| 16w_SITTD12 | 0.08334776 | 0.4923289  | 6.36E-05 | 0.018151  | 0.12117   |
| 16w_SITTD12 | 0.00619147 | 0.02676076 | 3.18E-05 | 0.008015  | 0.56984   |
| 16w_SITTD12 | 0.07413106 | 0.43671447 | 6.24E-05 | 0.014051  | 0.13074   |
| 16w_SITTD12 | 0.01707798 | 0.09245097 | 3.33E-05 | 0.0049935 | 0.085504  |
| 16w_SITTD12 | 0.04891305 | 0.2845467  | 5.70E-05 | 0.0057827 | 0.041222  |
| 16w_SITTD12 | 0.02618613 | 0.14741035 | 3.76E-05 | 0.0041286 | -0.096385 |
| 16w_SITTD12 | 0.11487487 | 0.68256634 | 6.63E-05 | 0.025242  | -0.32268  |
| 16w_SITTD12 | 0.02142691 | 0.11869282 | 3.47E-05 | 0.0044724 | -0.0356   |
| 16w_SITTD12 | 0.05029887 | 0.2929089  | 5.78E-05 | 0.0061018 | 0.048868  |
| 16w_SITTD12 | 0.01907187 | 0.10448228 | 3.38E-05 | 0.004741  | 0.03364   |
| 16w_SITTD12 | 0.00551891 | 0.02270244 | 3.18E-05 | 0.0082375 | 0.59807   |
| 16w_SITTD12 | 0.09983128 | 0.591792   | 6.53E-05 | 0.024558  | -0.11403  |
| 16w_SITTD12 | 0.02315027 | 0.12909171 | 3.58E-05 | 0.0042778 | -0.065623 |
| 16w_SITTD12 | 0.02624063 | 0.14773922 | 3.76E-05 | 0.0041286 | -0.096385 |
| 16w_SITTD12 | 0.01528624 | 0.08163945 | 3.27E-05 | 0.0054028 | 0.16515   |
| 16w_SITTD12 | 0.07387503 | 0.43516958 | 6.23E-05 | 0.013805  | 0.13074   |
| 16w_SITTD12 | 0.07769497 | 0.45821944 | 6.29E-05 | 0.015562  | 0.13646   |
| 16w_SITTD12 | 0.01938021 | 0.10634285 | 3.40E-05 | 0.0046667 | 0.017998  |
| 16w_SITTD12 | 0.0783799  | 0.46235237 | 6.29E-05 | 0.015819  | 0.13651   |
| 16w_SITTD12 | 0.11141432 | 0.66168505 | 6.61E-05 | 0.025525  | -0.28705  |
| 16w_SITTD12 | 0.10099068 | 0.59878784 | 6.54E-05 | 0.024809  | -0.13341  |
| 16w_SITTD12 | 0.06886224 | 0.40492198 | 6.16E-05 | 0.011695  | 0.10977   |
| 16w_SITTD12 | 0.02490899 | 0.139704   | 3.68E-05 | 0.0041768 | -0.086782 |
| 16w_SITTD12 | 0.09624827 | 0.5701717  | 6.50E-05 | 0.023448  | -0.045608 |
| 16w_SITTD12 | 0.02134314 | 0.11818732 | 3.47E-05 | 0.0044724 | -0.023601 |
| 16w_SITTD12 | 0.01590571 | 0.08537737 | 3.30E-05 | 0.0051875 | 0.12392   |
| 16w_SITTD12 | 0.0194549  | 0.10679355 | 3.40E-05 | 0.0046667 | 0.017998  |
| 16w_SITTD12 | 0.04203425 | 0.24303943 | 5.24E-05 | 0.0047963 | -0.00654  |

|             |            |            |          |           |           |
|-------------|------------|------------|----------|-----------|-----------|
| 16w_SITTD12 | 0.01552332 | 0.08306997 | 3.28E-05 | 0.0052924 | 0.1442    |
| 16w_SITTD12 | 0.08618639 | 0.5094574  | 6.39E-05 | 0.01943   | 0.099025  |
| 16w_SITTD12 | 0.01716562 | 0.09297978 | 3.33E-05 | 0.0049935 | 0.085504  |
| 16w_SITTD12 | 0.06378847 | 0.37430635 | 6.10E-05 | 0.0098069 | 0.089169  |
| 16w_SITTD12 | 0.0153064  | 0.08176111 | 3.27E-05 | 0.0054028 | 0.1442    |
| 16w_SITTD12 | 0.11642553 | 0.69192314 | 6.64E-05 | 0.025054  | -0.33868  |
| 16w_SITTD12 | 0.01277649 | 0.06649538 | 3.23E-05 | 0.0059016 | 0.25518   |
| 16w_SITTD12 | 0.03608337 | 0.20713127 | 4.65E-05 | 0.0042637 | -0.068307 |
| 16w_SITTD12 | 0.03865497 | 0.2226485  | 4.92E-05 | 0.0044639 | -0.040459 |
| 16w_SITTD12 | 0.074742   | 0.440401   | 6.25E-05 | 0.014299  | 0.13218   |
| 16w_SITTD12 | 0.02745357 | 0.15505822 | 3.84E-05 | 0.0040947 | -0.10472  |
| 16w_SITTD12 | 0.09102694 | 0.5386658  | 6.45E-05 | 0.021597  | 0.036126  |
| 16w_SITTD12 | 0.07128098 | 0.41951683 | 6.20E-05 | 0.012608  | 0.12136   |
| 16w_SITTD12 | 0.02218476 | 0.12326574 | 3.52E-05 | 0.0043661 | -0.046619 |
| 16w_SITTD12 | 0.03449803 | 0.19756517 | 4.48E-05 | 0.0041765 | -0.082901 |
| 16w_SITTD12 | 0.01825319 | 0.09954226 | 3.36E-05 | 0.0048202 | 0.050123  |
| 16w_SITTD12 | 0.06350729 | 0.3726097  | 6.09E-05 | 0.0096122 | 0.089169  |
| 16w_SITTD12 | 0.08129144 | 0.47992086 | 6.33E-05 | 0.017113  | 0.13148   |
| 16w_SITTD12 | 0.0536245  | 0.312976   | 5.91E-05 | 0.0068337 | 0.060836  |
| 16w_SITTD12 | 0.09447804 | 0.55949    | 6.48E-05 | 0.022877  | -0.017059 |
| 16w_SITTD12 | 0.07467802 | 0.44001487 | 6.25E-05 | 0.014299  | 0.13218   |
| 16w_SITTD12 | 0.06174458 | 0.36197335 | 6.07E-05 | 0.0090475 | 0.083692  |
| 16w_SITTD12 | 0.08606014 | 0.50869566 | 6.39E-05 | 0.01943   | 0.099025  |
| 16w_SITTD12 | 0.07016325 | 0.41277236 | 6.18E-05 | 0.012147  | 0.11689   |
| 16w_SITTD12 | 0.10238793 | 0.607219   | 6.55E-05 | 0.025127  | -0.15246  |
| 16w_SITTD12 | 0.04992821 | 0.2906723  | 5.76E-05 | 0.005992  | 0.046466  |
| 16w_SITTD12 | 0.04671982 | 0.27131256 | 5.57E-05 | 0.0054037 | 0.028707  |
| 16w_SITTD12 | 0.03273305 | 0.18691508 | 4.32E-05 | 0.0041142 | -0.094772 |
| 16w_SITTD12 | 0.01478666 | 0.07862493 | 3.27E-05 | 0.0054028 | 0.16515   |
| 16w_SITTD12 | 0.05818314 | 0.3404833  | 6.01E-05 | 0.0080116 | 0.073002  |
| 16w_SITTD12 | 0.01337145 | 0.07008544 | 3.24E-05 | 0.0057681 | 0.23179   |
| 16w_SITTD12 | 0.02919476 | 0.16556473 | 4.02E-05 | 0.0040662 | -0.10661  |
| 16w_SITTD12 | 0.00895418 | 0.04343119 | 3.19E-05 | 0.0070136 | 0.43237   |
| 16w_SITTD12 | 0.02309658 | 0.12876776 | 3.58E-05 | 0.0042778 | -0.065623 |
| 16w_SITTD12 | 0.01048411 | 0.05266295 | 3.21E-05 | 0.0064976 | 0.35381   |
| 16w_SITTD12 | 0.03319708 | 0.1897151  | 4.37E-05 | 0.0041322 | -0.091175 |
| 16w_SITTD12 | 0.01902035 | 0.10417143 | 3.38E-05 | 0.004741  | 0.03364   |
| 16w_SITTD12 | 0.00967328 | 0.04777033 | 3.20E-05 | 0.0068348 | 0.4058    |
| 16w_SITTD12 | 0.0237402  | 0.13265139 | 3.61E-05 | 0.0042401 | -0.073623 |
| 16w_SITTD12 | 0.00771578 | 0.03595861 | 3.19E-05 | 0.0073923 | 0.48652   |
| 16w_SITTD12 | 0.02717234 | 0.15336126 | 3.84E-05 | 0.0040947 | -0.10271  |
| 16w_SITTD12 | 0.08552644 | 0.5054752  | 6.39E-05 | 0.019177  | 0.1043    |
| 16w_SITTD12 | 0.02118096 | 0.11720869 | 3.47E-05 | 0.0044724 | -0.023601 |

|             |            |            |          |           |           |
|-------------|------------|------------|----------|-----------|-----------|
| 16w_SITTD12 | 0.08033485 | 0.47414872 | 6.32E-05 | 0.016854  | 0.13446   |
| 16w_SITTD12 | 0.07647243 | 0.45084253 | 6.27E-05 | 0.015053  | 0.1354    |
| 16w_SITTD12 | 0.02122529 | 0.11747623 | 3.47E-05 | 0.0044724 | -0.023601 |
| 16w_SITTD12 | 0.01911864 | 0.10476452 | 3.38E-05 | 0.004741  | 0.03364   |
| 16w_SITTD12 | 0.03128474 | 0.17817588 | 4.16E-05 | 0.0040771 | -0.10299  |
| 16w_SITTD12 | 0.08160114 | 0.48178962 | 6.34E-05 | 0.017373  | 0.12948   |
| 16w_SITTD12 | 0.08432852 | 0.49824688 | 6.37E-05 | 0.018667  | 0.1176    |
| 16w_SITTD12 | 0.0324594  | 0.1852639  | 4.27E-05 | 0.004099  | -0.094772 |
| 16w_SITTD12 | 0.07551862 | 0.44508713 | 6.26E-05 | 0.014549  | 0.13453   |
| 16w_SITTD12 | 0.03961607 | 0.22844791 | 4.98E-05 | 0.0045122 | -0.028892 |
| 16w_SITTD12 | 0.08826959 | 0.5220277  | 6.42E-05 | 0.020421  | 0.074212  |
| 16w_SITTD12 | 0.05851391 | 0.34247917 | 6.01E-05 | 0.0080116 | 0.074438  |
| 16w_SITTD12 | 0.10431641 | 0.61885566 | 6.56E-05 | 0.025367  | -0.18901  |
| 16w_SITTD12 | 0.02341967 | 0.13071729 | 3.58E-05 | 0.0042778 | -0.065623 |
| 16w_SITTD12 | 0.09076032 | 0.5370569  | 6.45E-05 | 0.021597  | 0.044278  |
| 16w_SITTD12 | 0.0904186  | 0.53499496 | 6.44E-05 | 0.021369  | 0.05218   |
| 16w_SITTD12 | 0.01247851 | 0.06469732 | 3.23E-05 | 0.0060411 | 0.2791    |
| 16w_SITTD12 | 0.03229164 | 0.18425159 | 4.27E-05 | 0.004099  | -0.097962 |
| 16w_SITTD12 | 0.03219391 | 0.1836619  | 4.27E-05 | 0.004099  | -0.097962 |
| 16w_SITTD12 | 0.0295652  | 0.1678     | 4.02E-05 | 0.0040662 | -0.10661  |
| 16w_SITTD12 | 0.09476793 | 0.56123924 | 6.49E-05 | 0.023073  | -0.017059 |
| 16w_SITTD12 | 0.08044636 | 0.4748216  | 6.32E-05 | 0.016854  | 0.13446   |
| 16w_SITTD12 | 0.00760848 | 0.0353111  | 3.19E-05 | 0.0073923 | 0.48652   |
| 16w_SITTD12 | 0.02644351 | 0.14896345 | 3.80E-05 | 0.0041099 | -0.099939 |
| 16w_SITTD12 | 0.01961691 | 0.10777108 | 3.40E-05 | 0.0046667 | 0.017998  |
| 16w_SITTD12 | 0.09539409 | 0.5650175  | 6.49E-05 | 0.023263  | -0.035993 |
| 16w_SITTD12 | 0.03541555 | 0.20310153 | 4.59E-05 | 0.0042319 | -0.073417 |
| 16w_SITTD12 | 0.08579221 | 0.5070789  | 6.39E-05 | 0.01943   | 0.1043    |
| 16w_SITTD12 | 0.01656346 | 0.08934631 | 3.31E-05 | 0.0050879 | 0.10435   |
| 16w_SITTD12 | 0.01456904 | 0.07731179 | 3.26E-05 | 0.0055188 | 0.18676   |
| 16w_SITTD12 | 0.01873907 | 0.10247415 | 3.38E-05 | 0.004741  | 0.03364   |
| 16w_SITTD12 | 0.08945966 | 0.5292086  | 6.43E-05 | 0.020902  | 0.059815  |
| 16w_SITTD12 | 0.01741151 | 0.09446354 | 3.33E-05 | 0.0049935 | 0.085504  |
| 16w_SITTD12 | 0.02079811 | 0.11489855 | 3.44E-05 | 0.0045325 | -0.01065  |
| 16w_SITTD12 | 0.02069289 | 0.11426368 | 3.44E-05 | 0.0045325 | -0.01065  |
| 16w_SITTD12 | 0.09728286 | 0.5764145  | 6.51E-05 | 0.023799  | -0.065044 |
| 16w_SITTD12 | 0.02365124 | 0.13211462 | 3.61E-05 | 0.0042401 | -0.073623 |
| 16w_SITTD12 | 0.0949562  | 0.56237525 | 6.49E-05 | 0.023073  | -0.026471 |
| 16w_SITTD12 | 0.01125528 | 0.05731624 | 3.21E-05 | 0.006339  | 0.32844   |
| 16w_SITTD12 | 0.01698141 | 0.09186825 | 3.31E-05 | 0.0050879 | 0.085504  |
| 16w_SITTD12 | 0.09800306 | 0.5807603  | 6.52E-05 | 0.024123  | -0.074831 |
| 16w_SITTD12 | 0.01587236 | 0.08517616 | 3.28E-05 | 0.0052924 | 0.12392   |
| 16w_SITTD12 | 0.10134105 | 0.6009021  | 6.54E-05 | 0.024923  | -0.13341  |

|             |            |            |          |           |            |
|-------------|------------|------------|----------|-----------|------------|
| 16w_SITTD12 | 0.14625645 | 0.87192565 | 6.76E-05 | 0.023659  | -0.51583   |
| 16w_SITTD12 | 0.02291559 | 0.12767565 | 3.55E-05 | 0.0043197 | -0.056631  |
| 16w_SITTD12 | 0.08046856 | 0.47495553 | 6.32E-05 | 0.016854  | 0.13446    |
| 16w_SITTD12 | 0.07546089 | 0.4447388  | 6.26E-05 | 0.014549  | 0.13345    |
| 16w_SITTD12 | 0.06449948 | 0.37859663 | 6.10E-05 | 0.010005  | 0.093303   |
| 16w_SITTD12 | 0.09418353 | 0.5577129  | 6.48E-05 | 0.022877  | -0.0077738 |
| 16w_SITTD12 | 0.02361146 | 0.13187462 | 3.58E-05 | 0.0042778 | -0.073623  |
| 16w_SITTD12 | 0.0801873  | 0.47325838 | 6.32E-05 | 0.016854  | 0.13446    |
| 16w_SITTD12 | 0.11772414 | 0.69975907 | 6.64E-05 | 0.024917  | -0.34876   |
| 16w_SITTD12 | 0.01498992 | 0.07985144 | 3.27E-05 | 0.0054028 | 0.16515    |
| 16w_SITTD12 | 0.05576482 | 0.32589096 | 5.95E-05 | 0.007248  | 0.067199   |
| 16w_SITTD12 | 0.05327783 | 0.31088418 | 5.89E-05 | 0.0067028 | 0.059084   |
| 16w_SITTD12 | 0.07851588 | 0.46317288 | 6.29E-05 | 0.015819  | 0.13651    |
| 16w_SITTD12 | 0.02137091 | 0.1183549  | 3.47E-05 | 0.0044724 | -0.0356    |
| 16w_SITTD12 | 0.01137209 | 0.05802108 | 3.21E-05 | 0.006339  | 0.32844    |
| 16w_SITTD12 | 0.02285055 | 0.12728316 | 3.55E-05 | 0.0043197 | -0.056631  |
| 16w_SITTD12 | 0.02373114 | 0.13259676 | 3.61E-05 | 0.0042401 | -0.073623  |
| 16w_SITTD12 | 0.01527565 | 0.08157553 | 3.27E-05 | 0.0054028 | 0.16515    |
| 16w_SITTD12 | 0.01385536 | 0.07300535 | 3.25E-05 | 0.0056405 | 0.20898    |
| 16w_SITTD12 | 0.02667208 | 0.15034261 | 3.80E-05 | 0.0041099 | -0.099939  |
| 16w_SITTD12 | 0.02407564 | 0.13467547 | 3.61E-05 | 0.0042401 | -0.073623  |
| 16w_SITTD12 | 0.08271765 | 0.48852676 | 6.35E-05 | 0.017892  | 0.12434    |
| 16w_SITTD12 | 0.10942794 | 0.64969903 | 6.60E-05 | 0.025611  | -0.2602    |
| 16w_SITTD12 | 0.02215435 | 0.12308227 | 3.52E-05 | 0.0043661 | -0.046619  |
| 16w_SITTD12 | 0.0744563  | 0.43867698 | 6.24E-05 | 0.014051  | 0.13218    |
| 16w_SITTD12 | 0.01201234 | 0.06188445 | 3.23E-05 | 0.0060411 | 0.2791     |
| 16w_SITTD12 | 0.04650119 | 0.26999334 | 5.57E-05 | 0.0054037 | 0.028707   |
| 16w_SITTD12 | 0.07174455 | 0.42231408 | 6.20E-05 | 0.012843  | 0.12348    |
| 16w_SITTD12 | 0.01274203 | 0.06628746 | 3.23E-05 | 0.0059016 | 0.25518    |
| 16w_SITTD12 | 0.10163641 | 0.60268426 | 6.54E-05 | 0.024923  | -0.14299   |
| 16w_SITTD12 | 0.01389761 | 0.07326031 | 3.25E-05 | 0.0056405 | 0.20898    |
| 16w_SITTD12 | 0.06623236 | 0.38905302 | 6.13E-05 | 0.010616  | 0.10013    |
| 16w_SITTD12 | 0.07572162 | 0.44631207 | 6.26E-05 | 0.014549  | 0.13453    |
| 16w_SITTD12 | 0.03270774 | 0.1867624  | 4.32E-05 | 0.0041142 | -0.094772  |
| 16w_SITTD12 | 0.01390674 | 0.07331538 | 3.25E-05 | 0.0056405 | 0.20898    |
| 16w_SITTD12 | 0.02880134 | 0.16319077 | 3.97E-05 | 0.0040686 | -0.10664   |
| 16w_SITTD12 | 0.13045436 | 0.77657443 | 6.70E-05 | 0.02364   | -0.44263   |
| 16w_SITTD12 | 0.08810175 | 0.52101487 | 6.42E-05 | 0.020421  | 0.080939   |
| 16w_SITTD12 | 0.01597874 | 0.08581802 | 3.30E-05 | 0.0051875 | 0.12392    |
| 16w_SITTD12 | 0.02341639 | 0.13069752 | 3.58E-05 | 0.0042778 | -0.065623  |
| 16w_SITTD12 | 0.14296767 | 0.8520809  | 6.75E-05 | 0.023603  | -0.50606   |
| 16w_SITTD12 | 0.02600587 | 0.1463227  | 3.76E-05 | 0.0041286 | -0.096385  |
| 16w_SITTD12 | 0.11743303 | 0.6980025  | 6.64E-05 | 0.024917  | -0.34377   |

|             |            |            |          |           |           |
|-------------|------------|------------|----------|-----------|-----------|
| 16w_SITTD12 | 0.02495142 | 0.13996007 | 3.68E-05 | 0.0041768 | -0.086782 |
| 16w_SITTD12 | 0.08400008 | 0.49626505 | 6.37E-05 | 0.01841   | 0.1176    |
| 16w_SITTD12 | 0.03942454 | 0.22729214 | 4.98E-05 | 0.0045122 | -0.034672 |
| 16w_SITTD12 | 0.01599105 | 0.08589234 | 3.30E-05 | 0.0051875 | 0.12392   |
| 16w_SITTD12 | 0.01198682 | 0.06173044 | 3.22E-05 | 0.0061869 | 0.2791    |
| 16w_SITTD12 | 0.05920205 | 0.34663147 | 6.03E-05 | 0.0083426 | 0.075889  |
| 16w_SITTD12 | 0.1330562  | 0.7922741  | 6.71E-05 | 0.023556  | -0.45937  |
| 16w_SITTD12 | 0.08117937 | 0.47924465 | 6.33E-05 | 0.017113  | 0.13148   |
| 16w_SITTD12 | 0.04961664 | 0.28879222 | 5.73E-05 | 0.0058857 | 0.046466  |
| 16w_SITTD12 | 0.02161436 | 0.11982389 | 3.49E-05 | 0.0044169 | -0.0356   |
| 16w_SITTD12 | 0.02667444 | 0.1503569  | 3.80E-05 | 0.0041099 | -0.099939 |
| 16w_SITTD12 | 0.01415629 | 0.07482124 | 3.25E-05 | 0.0056405 | 0.20898   |
| 16w_SITTD12 | 0.0456877  | 0.26508465 | 5.50E-05 | 0.0052335 | 0.025099  |
| 16w_SITTD12 | 0.08770695 | 0.5186326  | 6.41E-05 | 0.020177  | 0.080939  |
| 16w_SITTD12 | 0.01681015 | 0.09083486 | 3.31E-05 | 0.0050879 | 0.10435   |
| 16w_SITTD12 | 0.02099326 | 0.1160761  | 3.47E-05 | 0.0044724 | -0.023601 |
| 16w_SITTD12 | 0.08030854 | 0.47398996 | 6.32E-05 | 0.016854  | 0.13446   |
| 16w_SITTD12 | 0.07883988 | 0.46512792 | 6.30E-05 | 0.016077  | 0.13613   |
| 16w_SITTD12 | 0.01305752 | 0.06819113 | 3.23E-05 | 0.0059016 | 0.25518   |
| 16w_SITTD12 | 0.05647287 | 0.33016336 | 5.98E-05 | 0.0075425 | 0.068678  |
| 16w_SITTD12 | 0.01887656 | 0.10330375 | 3.38E-05 | 0.004741  | 0.03364   |
| 16w_SITTD12 | 0.09957229 | 0.5902292  | 6.53E-05 | 0.02442   | -0.10426  |
| 16w_SITTD12 | 0.04694952 | 0.27269858 | 5.61E-05 | 0.0054936 | 0.032113  |
| 16w_SITTD12 | 0.08583413 | 0.50733185 | 6.39E-05 | 0.01943   | 0.1043    |
| 16w_SITTD12 | 0.01475834 | 0.07845403 | 3.26E-05 | 0.0055188 | 0.16515   |
| 16w_SITTD12 | 0.06174624 | 0.3619834  | 6.07E-05 | 0.0090475 | 0.083692  |
| 16w_SITTD12 | 0.12610978 | 0.7503588  | 6.68E-05 | 0.023927  | -0.41325  |
| 16w_SITTD12 | 0.08815279 | 0.52132285 | 6.42E-05 | 0.020421  | 0.080939  |
| 16w_SITTD12 | 0.00986144 | 0.04890568 | 3.20E-05 | 0.0066628 | 0.37961   |
| 16w_SITTD12 | 0.10174268 | 0.6033255  | 6.54E-05 | 0.024923  | -0.14299  |
| 16w_SITTD12 | 0.0408739  | 0.23603775 | 5.14E-05 | 0.0046741 | -0.017493 |
| 16w_SITTD12 | 0.02484579 | 0.13932264 | 3.68E-05 | 0.0041768 | -0.086782 |
| 16w_SITTD12 | 0.05837093 | 0.34161642 | 6.01E-05 | 0.0080116 | 0.073002  |
| 16w_SITTD12 | 0.06820698 | 0.40096804 | 6.16E-05 | 0.011474  | 0.10734   |
| 16w_SITTD12 | 0.01877438 | 0.1026872  | 3.38E-05 | 0.004741  | 0.03364   |
| 16w_SITTD12 | 0.08881631 | 0.5253266  | 6.42E-05 | 0.020663  | 0.067165  |
| 16w_SITTD12 | 0.04549612 | 0.26392862 | 5.50E-05 | 0.0052335 | 0.021279  |
| 16w_SITTD12 | 0.06280389 | 0.36836535 | 6.08E-05 | 0.0094206 | 0.087254  |
| 16w_SITTD12 | 0.0797478  | 0.47060642 | 6.32E-05 | 0.016594  | 0.13545   |
| 16w_SITTD12 | 0.09081835 | 0.53740704 | 6.45E-05 | 0.021597  | 0.044278  |
| 16w_SITTD12 | 0.02440514 | 0.13666369 | 3.64E-05 | 0.0042065 | -0.080664 |
| 16w_SITTD12 | 0.09547026 | 0.56547713 | 6.49E-05 | 0.023263  | -0.035993 |
| 16w_SITTD12 | 0.03984863 | 0.22985117 | 5.03E-05 | 0.0045634 | -0.028892 |

|             |            |            |          |           |           |
|-------------|------------|------------|----------|-----------|-----------|
| 16w_SITTD12 | 0.11250577 | 0.668271   | 6.62E-05 | 0.025448  | -0.29336  |
| 16w_SITTD12 | 0.0296152  | 0.16810171 | 4.02E-05 | 0.0040662 | -0.10661  |
| 16w_SITTD12 | 0.01088703 | 0.05509421 | 3.21E-05 | 0.0064976 | 0.32844   |
| 16w_SITTD12 | 0.02235959 | 0.12432069 | 3.52E-05 | 0.0043661 | -0.046619 |
| 16w_SITTD12 | 0.08238248 | 0.4865043  | 6.35E-05 | 0.017633  | 0.1271    |
| 16w_SITTD12 | 0.05765426 | 0.33729196 | 6.00E-05 | 0.0078516 | 0.071569  |
| 16w_SITTD12 | 0.02671815 | 0.15062062 | 3.80E-05 | 0.0041099 | -0.099939 |
| 16w_SITTD12 | 0.01076495 | 0.05435756 | 3.21E-05 | 0.0064976 | 0.35381   |
| 16w_SITTD12 | 0.08884271 | 0.5254859  | 6.42E-05 | 0.020663  | 0.067165  |
| 16w_SITTD12 | 0.03428666 | 0.19628973 | 4.48E-05 | 0.0041765 | -0.082901 |
| 16w_SITTD12 | 0.01255846 | 0.06517975 | 3.23E-05 | 0.0060411 | 0.25518   |
| 16w_SITTD12 | 0.02408361 | 0.13472354 | 3.61E-05 | 0.0042401 | -0.073623 |
| 16w_SITTD12 | 0.07107937 | 0.41830033 | 6.20E-05 | 0.012608  | 0.11916   |
| 16w_SITTD12 | 0.1041231  | 0.6176892  | 6.56E-05 | 0.025367  | -0.18011  |
| 16w_SITTD12 | 0.02754623 | 0.15561736 | 3.88E-05 | 0.0040827 | -0.10472  |
| 16w_SITTD12 | 0.01568976 | 0.08407433 | 3.28E-05 | 0.0052924 | 0.1442    |
| 16w_SITTD12 | 0.02703274 | 0.1525189  | 3.84E-05 | 0.0040947 | -0.10271  |
| 16w_SITTD12 | 0.08324906 | 0.49173334 | 6.36E-05 | 0.018151  | 0.12117   |
| 16w_SITTD12 | 0.02529931 | 0.14205919 | 3.68E-05 | 0.0041768 | -0.092011 |
| 16w_SITTD12 | 0.01388958 | 0.07321186 | 3.25E-05 | 0.0056405 | 0.20898   |
| 16w_SITTD12 | 0.02656795 | 0.14971429 | 3.80E-05 | 0.0041099 | -0.099939 |
| 16w_SITTD12 | 0.0842962  | 0.4980519  | 6.37E-05 | 0.018667  | 0.1176    |
| 16w_SITTD12 | 0.02587042 | 0.14550538 | 3.76E-05 | 0.0041286 | -0.096385 |
| 16w_SITTD12 | 0.02350076 | 0.13120659 | 3.58E-05 | 0.0042778 | -0.065623 |
| 16w_SITTD12 | 0.02769779 | 0.15653184 | 3.88E-05 | 0.0040827 | -0.10472  |
| 16w_SITTD12 | 0.0262652  | 0.14788753 | 3.76E-05 | 0.0041286 | -0.096385 |
| 16w_SITTD12 | 0.08117074 | 0.47919255 | 6.33E-05 | 0.017113  | 0.13148   |
| 16w_SITTD12 | 0.03404927 | 0.19485731 | 4.43E-05 | 0.004153  | -0.087207 |
| 16w_SITTD12 | 0.09192624 | 0.5440922  | 6.46E-05 | 0.022042  | 0.027741  |
| 16w_SITTD12 | 0.02650028 | 0.149306   | 3.80E-05 | 0.0041099 | -0.099939 |
| 16w_SITTD12 | 0.0750064  | 0.44199634 | 6.25E-05 | 0.014299  | 0.13345   |
| 16w_SITTD12 | 0.03114717 | 0.17734574 | 4.16E-05 | 0.0040771 | -0.10299  |
| 16w_SITTD12 | 0.08534798 | 0.5043984  | 6.39E-05 | 0.019177  | 0.10916   |
| 16w_SITTD12 | 0.02916738 | 0.1653995  | 3.97E-05 | 0.0040686 | -0.10661  |
| 16w_SITTD12 | 0.01667965 | 0.09004739 | 3.31E-05 | 0.0050879 | 0.10435   |
| 16w_SITTD12 | 0.03640771 | 0.20908836 | 4.70E-05 | 0.0042982 | -0.062998 |
| 16w_SITTD12 | 0.05213156 | 0.30396754 | 5.85E-05 | 0.0064518 | 0.055318  |
| 16w_SITTD12 | 0.03023921 | 0.17186703 | 4.07E-05 | 0.0040668 | -0.10475  |
| 16w_SITTD12 | 0.02917789 | 0.16546294 | 3.97E-05 | 0.0040686 | -0.10661  |
| 16w_SITTD12 | 0.05537354 | 0.32352987 | 5.95E-05 | 0.007248  | 0.065685  |
| 16w_SITTD12 | 0.00640021 | 0.02802033 | 3.18E-05 | 0.008015  | 0.56984   |
| 16w_SITTD12 | 0.02031158 | 0.1119628  | 3.42E-05 | 0.0045972 | -0.01065  |
| 16w_SITTD12 | 0.08605138 | 0.50864273 | 6.39E-05 | 0.01943   | 0.099025  |

|             |            |            |          |           |           |
|-------------|------------|------------|----------|-----------|-----------|
| 16w_SITTD12 | 0.10424889 | 0.6184482  | 6.56E-05 | 0.025367  | -0.18901  |
| 16w_SITTD12 | 0.07007158 | 0.4122192  | 6.18E-05 | 0.012147  | 0.11689   |
| 16w_SITTD12 | 0.08268996 | 0.48835966 | 6.35E-05 | 0.017892  | 0.12434   |
| 16w_SITTD12 | 0.01083772 | 0.05479664 | 3.21E-05 | 0.0064976 | 0.35381   |
| 16w_SITTD12 | 0.02154639 | 0.11941374 | 3.49E-05 | 0.0044169 | -0.0356   |
| 16w_SITTD12 | 0.04555922 | 0.26430938 | 5.50E-05 | 0.0052335 | 0.021279  |
| 16w_SITTD12 | 0.13425708 | 0.7995204  | 6.71E-05 | 0.023539  | -0.46567  |
| 16w_SITTD12 | 0.02331465 | 0.13008358 | 3.58E-05 | 0.0042778 | -0.065623 |
| 16w_SITTD12 | 0.04420323 | 0.2561272  | 5.42E-05 | 0.0050757 | 0.012967  |
| 16w_SITTD12 | 0.03186529 | 0.18167897 | 4.22E-05 | 0.0040866 | -0.097962 |
| 16w_SITTD12 | 0.0394865  | 0.22766604 | 4.98E-05 | 0.0045122 | -0.034672 |
| 16w_SITTD12 | 0.04732709 | 0.27497688 | 5.61E-05 | 0.0054936 | 0.032113  |
| 16w_SITTD12 | 0.02107929 | 0.11659527 | 3.47E-05 | 0.0044724 | -0.023601 |
| 16w_SITTD12 | 0.0579792  | 0.33925268 | 6.00E-05 | 0.0078516 | 0.073002  |
| 16w_SITTD12 | 0.02413602 | 0.13503985 | 3.61E-05 | 0.0042401 | -0.080664 |
| 16w_SITTD12 | 0.02688408 | 0.15162185 | 3.80E-05 | 0.0041099 | -0.099939 |
| 16w_SITTD12 | 0.01250381 | 0.06485    | 3.23E-05 | 0.0060411 | 0.2791    |
| 16w_SITTD12 | 0.00749558 | 0.03462985 | 3.19E-05 | 0.0075925 | 0.51404   |
| 16w_SITTD12 | 0.04427138 | 0.25653848 | 5.42E-05 | 0.0050757 | 0.012967  |
| 16w_SITTD12 | 0.04818922 | 0.28017905 | 5.67E-05 | 0.0056831 | 0.038361  |
| 16w_SITTD12 | 0.04196272 | 0.24260779 | 5.24E-05 | 0.0047963 | -0.00654  |
| 16w_SITTD12 | 0.03149303 | 0.17943269 | 4.22E-05 | 0.0040866 | -0.10071  |
| 16w_SITTD12 | 0.02812417 | 0.15910472 | 3.93E-05 | 0.004074  | -0.10603  |
| 16w_SITTD12 | 0.02185359 | 0.12126741 | 3.49E-05 | 0.0044169 | -0.0356   |
| 16w_SITTD12 | 0.08133864 | 0.4802057  | 6.34E-05 | 0.017373  | 0.13148   |
| 16w_SITTD12 | 0.02655657 | 0.14964564 | 3.80E-05 | 0.0041099 | -0.099939 |
| 16w_SITTD12 | 0.01852215 | 0.10116521 | 3.36E-05 | 0.0048202 | 0.050123  |
| 16w_SITTD12 | 0.02523374 | 0.14166357 | 3.68E-05 | 0.0041768 | -0.086782 |
| 16w_SITTD12 | 0.02215288 | 0.12307339 | 3.52E-05 | 0.0043661 | -0.046619 |
| 16w_SITTD12 | 0.10463382 | 0.6207709  | 6.57E-05 | 0.025429  | -0.18901  |
| 16w_SITTD12 | 0.06027708 | 0.35311833 | 6.05E-05 | 0.008688  | 0.07887   |
| 16w_SITTD12 | 0.00688208 | 0.03092795 | 3.18E-05 | 0.0078    | 0.54183   |
| 16w_SITTD12 | 0.0213839  | 0.11843329 | 3.47E-05 | 0.0044724 | -0.0356   |
| 16w_SITTD12 | 0.11921653 | 0.7087643  | 6.65E-05 | 0.024704  | -0.36308  |
| 16w_SITTD12 | 0.0242924  | 0.13598347 | 3.64E-05 | 0.0042065 | -0.080664 |
| 16w_SITTD12 | 0.04825788 | 0.28059334 | 5.67E-05 | 0.0056831 | 0.038361  |
| 16w_SITTD12 | 0.02439478 | 0.13660124 | 3.64E-05 | 0.0042065 | -0.080664 |
| 16w_SITTD12 | 0.07692068 | 0.4535473  | 6.28E-05 | 0.015307  | 0.13605   |
| 16w_SITTD12 | 0.05520666 | 0.32252294 | 5.94E-05 | 0.0071062 | 0.065685  |
| 16w_SITTD12 | 0.03453624 | 0.19779572 | 4.48E-05 | 0.0041765 | -0.082901 |
| 16w_SITTD12 | 0.13090588 | 0.77929896 | 6.70E-05 | 0.023618  | -0.44608  |
| 16w_SITTD12 | 0.0186026  | 0.10165066 | 3.36E-05 | 0.0048202 | 0.050123  |
| 16w_SITTD12 | 0.0717008  | 0.4220501  | 6.20E-05 | 0.012843  | 0.12348   |



|             |            |            |          |           |           |
|-------------|------------|------------|----------|-----------|-----------|
| 16w_SITTD12 | 0.01822814 | 0.09939112 | 3.36E-05 | 0.0048202 | 0.050123  |
| 16w_SITTD12 | 0.03007203 | 0.17085826 | 4.07E-05 | 0.0040668 | -0.10597  |
| 16w_SITTD12 | 0.13865685 | 0.82606906 | 6.73E-05 | 0.023538  | -0.48824  |
| 16w_SITTD12 | 0.04767824 | 0.27709576 | 5.64E-05 | 0.0055867 | 0.035328  |
| 16w_SITTD12 | 0.02623447 | 0.14770204 | 3.76E-05 | 0.0041286 | -0.096385 |
| 16w_SITTD12 | 0.02240101 | 0.12457059 | 3.52E-05 | 0.0043661 | -0.046619 |
| 16w_SITTD12 | 0.05221514 | 0.30447182 | 5.85E-05 | 0.0064518 | 0.055318  |
| 16w_SITTD12 | 0.01063312 | 0.0535621  | 3.21E-05 | 0.0064976 | 0.35381   |
| 16w_SITTD12 | 0.01887816 | 0.10331339 | 3.38E-05 | 0.004741  | 0.03364   |
| 16w_SITTD12 | 0.03203735 | 0.18271717 | 4.27E-05 | 0.004099  | -0.097962 |
| 16w_SITTD12 | 0.01588199 | 0.08523422 | 3.28E-05 | 0.0052924 | 0.12392   |
| 16w_SITTD12 | 0.09124335 | 0.5399716  | 6.45E-05 | 0.021597  | 0.036126  |
| 16w_SITTD12 | 0.09775908 | 0.5792881  | 6.51E-05 | 0.023964  | -0.074831 |
| 16w_SITTD12 | 0.02403438 | 0.13442649 | 3.61E-05 | 0.0042401 | -0.073623 |
| 16w_SITTD12 | 0.0214892  | 0.11906869 | 3.49E-05 | 0.0044169 | -0.0356   |
| 16w_SITTD12 | 0.01655344 | 0.08928584 | 3.31E-05 | 0.0050879 | 0.10435   |
| 16w_SITTD12 | 0.026951   | 0.15202564 | 3.80E-05 | 0.0041099 | -0.10271  |
| 16w_SITTD12 | 0.00962009 | 0.04744936 | 3.20E-05 | 0.0068348 | 0.4058    |
| 16w_SITTD12 | 0.0172271  | 0.09335075 | 3.33E-05 | 0.0049935 | 0.085504  |
| 16w_SITTD12 | 0.05998597 | 0.3513617  | 6.04E-05 | 0.0085136 | 0.077363  |
| 16w_SITTD12 | 0.01445979 | 0.07665256 | 3.26E-05 | 0.0055188 | 0.18676   |
| 16w_SITTD12 | 0.08535426 | 0.50443625 | 6.39E-05 | 0.019177  | 0.10916   |
| 16w_SITTD12 | 0.09660851 | 0.5723455  | 6.50E-05 | 0.023626  | -0.055297 |
| 16w_SITTD12 | 0.01840736 | 0.10047259 | 3.36E-05 | 0.0048202 | 0.050123  |
| 16w_SITTD12 | 0.01268306 | 0.06593159 | 3.23E-05 | 0.0059016 | 0.25518   |
| 16w_SITTD12 | 0.0649156  | 0.38110754 | 6.11E-05 | 0.010206  | 0.093303  |
| 16w_SITTD12 | 0.05485002 | 0.32037094 | 5.94E-05 | 0.0071062 | 0.064127  |
| 16w_SITTD12 | 0.01227453 | 0.0634665  | 3.23E-05 | 0.0060411 | 0.2791    |
| 16w_SITTD12 | 0.02665317 | 0.15022853 | 3.80E-05 | 0.0041099 | -0.099939 |
| 16w_SITTD12 | 0.09093531 | 0.5381128  | 6.45E-05 | 0.021597  | 0.044278  |
| 16w_SITTD12 | 0.12150959 | 0.7226009  | 6.66E-05 | 0.024419  | -0.38089  |
| 16w_SITTD12 | 0.09332487 | 0.55253166 | 6.47E-05 | 0.022469  | 0.0013661 |
| 16w_SITTD12 | 0.12022119 | 0.7148265  | 6.66E-05 | 0.024561  | -0.36766  |
| 16w_SITTD12 | 0.02391494 | 0.1337058  | 3.61E-05 | 0.0042401 | -0.073623 |
| 16w_SITTD12 | 0.01747431 | 0.09484246 | 3.33E-05 | 0.0049935 | 0.085504  |
| 16w_SITTD12 | 0.09831742 | 0.58265716 | 6.52E-05 | 0.024123  | -0.084641 |
| 16w_SITTD12 | 0.04683592 | 0.27201313 | 5.57E-05 | 0.0054037 | 0.032113  |
| 16w_SITTD12 | 0.01439331 | 0.07625144 | 3.26E-05 | 0.0055188 | 0.18676   |
| 16w_SITTD12 | 0.10095855 | 0.598594   | 6.54E-05 | 0.024809  | -0.13341  |
| 16w_SITTD12 | 0.02219499 | 0.12332745 | 3.52E-05 | 0.0043661 | -0.046619 |
| 16w_SITTD12 | 0.08536968 | 0.50452936 | 6.39E-05 | 0.019177  | 0.10916   |
| 16w_SITTD12 | 0.01973752 | 0.10849887 | 3.40E-05 | 0.0046667 | 0.0032259 |
| 16w_SITTD12 | 0.04449883 | 0.25791088 | 5.42E-05 | 0.0050757 | 0.012967  |

|             |            |            |          |           |           |
|-------------|------------|------------|----------|-----------|-----------|
| 16w_SITTD12 | 0.01478137 | 0.07859302 | 3.26E-05 | 0.0055188 | 0.16515   |
| 16w_SITTD12 | 0.04435124 | 0.2570203  | 5.42E-05 | 0.0050757 | 0.012967  |
| 16w_SITTD12 | 0.06897438 | 0.40559858 | 6.16E-05 | 0.011695  | 0.11218   |
| 16w_SITTD12 | 0.03248352 | 0.18540943 | 4.27E-05 | 0.004099  | -0.094772 |
| 16w_SITTD12 | 0.0137651  | 0.07246076 | 3.25E-05 | 0.0056405 | 0.20898   |
| 16w_SITTD12 | 0.09140229 | 0.5409306  | 6.45E-05 | 0.021822  | 0.036126  |
| 16w_SITTD12 | 0.02134067 | 0.11817242 | 3.47E-05 | 0.0044724 | -0.023601 |
| 16w_SITTD12 | 0.08778684 | 0.5191147  | 6.41E-05 | 0.020177  | 0.080939  |
| 16w_SITTD12 | 0.09249443 | 0.5475207  | 6.46E-05 | 0.022258  | 0.019141  |
| 16w_SITTD12 | 0.06807749 | 0.4001867  | 6.16E-05 | 0.011474  | 0.10734   |
| 16w_SITTD12 | 0.00745112 | 0.03436158 | 3.19E-05 | 0.0075925 | 0.51404   |
| 16w_SITTD12 | 0.02382532 | 0.13316505 | 3.61E-05 | 0.0042401 | -0.073623 |
| 16w_SITTD12 | 0.1149854  | 0.6832333  | 6.63E-05 | 0.025242  | -0.32268  |
| 16w_SITTD12 | 0.01125387 | 0.05730774 | 3.21E-05 | 0.006339  | 0.32844   |
| 16w_SITTD12 | 0.0342813  | 0.19625738 | 4.48E-05 | 0.0041765 | -0.082901 |
| 16w_SITTD12 | 0.00856246 | 0.04106752 | 3.19E-05 | 0.0071994 | 0.45929   |
| 16w_SITTD12 | 0.01375661 | 0.07240952 | 3.25E-05 | 0.0056405 | 0.20898   |
| 16w_SITTD12 | 0.08321218 | 0.4915108  | 6.36E-05 | 0.018151  | 0.12434   |
| 16w_SITTD12 | 0.01094765 | 0.05546001 | 3.21E-05 | 0.006339  | 0.32844   |
| 16w_SITTD12 | 0.08185741 | 0.483336   | 6.35E-05 | 0.017633  | 0.12948   |
| 16w_SITTD12 | 0.0148585  | 0.07905841 | 3.27E-05 | 0.0054028 | 0.16515   |
| 16w_SITTD12 | 0.02058967 | 0.11364079 | 3.44E-05 | 0.0045325 | -0.01065  |
| 16w_SITTD12 | 0.08246247 | 0.48698696 | 6.35E-05 | 0.017892  | 0.1271    |
| 16w_SITTD12 | 0.0475516  | 0.27633157 | 5.64E-05 | 0.0055867 | 0.035328  |
| 16w_SITTD12 | 0.01830578 | 0.09985964 | 3.36E-05 | 0.0048202 | 0.050123  |
| 16w_SITTD12 | 0.04491262 | 0.26040775 | 5.46E-05 | 0.0051531 | 0.017239  |
| 16w_SITTD12 | 0.02943717 | 0.16702746 | 4.02E-05 | 0.0040662 | -0.10661  |
| 16w_SITTD12 | 0.11248862 | 0.6681675  | 6.62E-05 | 0.025448  | -0.29336  |
| 16w_SITTD12 | 0.01315045 | 0.06875191 | 3.24E-05 | 0.0057681 | 0.23179   |
| 16w_SITTD12 | 0.11571528 | 0.68763745 | 6.63E-05 | 0.025119  | -0.32814  |
| 16w_SITTD12 | 0.09686469 | 0.5738913  | 6.51E-05 | 0.023799  | -0.055297 |
| 16w_SITTD12 | 0.1042821  | 0.6186486  | 6.56E-05 | 0.025367  | -0.18901  |
| 16w_SITTD12 | 0.07440195 | 0.43834907 | 6.24E-05 | 0.014051  | 0.13218   |
| 16w_SITTD12 | 0.01060863 | 0.05341433 | 3.21E-05 | 0.0064976 | 0.35381   |
| 16w_SITTD12 | 0.10034065 | 0.5948655  | 6.53E-05 | 0.024687  | -0.11403  |
| 16w_SITTD12 | 0.03390151 | 0.19396567 | 4.43E-05 | 0.004153  | -0.087207 |
| 16w_SITTD12 | 0.1040788  | 0.61742187 | 6.56E-05 | 0.025367  | -0.18011  |
| 16w_SITTD12 | 0.01456868 | 0.07730959 | 3.26E-05 | 0.0055188 | 0.18676   |
| 16w_SITTD12 | 0.12752622 | 0.75890577 | 6.69E-05 | 0.023794  | -0.4246   |
| 16w_SITTD12 | 0.03653773 | 0.20987292 | 4.70E-05 | 0.0042982 | -0.062998 |
| 16w_SITTD12 | 0.01571389 | 0.0842199  | 3.28E-05 | 0.0052924 | 0.1442    |
| 16w_SITTD12 | 0.02931024 | 0.16626154 | 4.02E-05 | 0.0040662 | -0.10661  |
| 16w_SITTD12 | 0.01602833 | 0.08611727 | 3.30E-05 | 0.0051875 | 0.12392   |

|             |            |            |          |           |            |
|-------------|------------|------------|----------|-----------|------------|
| 16w_SITTD12 | 0.0231063  | 0.12882642 | 3.58E-05 | 0.0042778 | -0.065623  |
| 16w_SITTD12 | 0.08688958 | 0.51370054 | 6.41E-05 | 0.01993   | 0.093363   |
| 16w_SITTD12 | 0.03757373 | 0.21612419 | 4.81E-05 | 0.0043756 | -0.05192   |
| 16w_SITTD12 | 0.09414104 | 0.55745655 | 6.48E-05 | 0.022877  | -0.0077738 |
| 16w_SITTD12 | 0.09382889 | 0.5555729  | 6.48E-05 | 0.022676  | -0.0077738 |
| 16w_SITTD12 | 0.07485012 | 0.44105336 | 6.25E-05 | 0.014299  | 0.13218    |
| 16w_SITTD12 | 0.01660166 | 0.0895768  | 3.31E-05 | 0.0050879 | 0.10435    |
| 16w_SITTD12 | 0.0178871  | 0.09733326 | 3.34E-05 | 0.0049043 | 0.067421   |
| 16w_SITTD12 | 0.02442518 | 0.13678464 | 3.64E-05 | 0.0042065 | -0.080664  |
| 16w_SITTD12 | 0.09910025 | 0.5873809  | 6.53E-05 | 0.02442   | -0.094455  |
| 16w_SITTD12 | 0.02507216 | 0.1406886  | 3.68E-05 | 0.0041768 | -0.086782  |
| 16w_SITTD12 | 0.01799281 | 0.09797113 | 3.34E-05 | 0.0049043 | 0.067421   |
| 16w_SITTD12 | 0.01943752 | 0.10668863 | 3.40E-05 | 0.0046667 | 0.017998   |
| 16w_SITTD12 | 0.06454089 | 0.37884656 | 6.10E-05 | 0.010005  | 0.093303   |
| 16w_SITTD12 | 0.04141263 | 0.23928846 | 5.19E-05 | 0.0047337 | -0.011944  |
| 16w_SITTD12 | 0.01993634 | 0.10969856 | 3.42E-05 | 0.0045972 | 0.0032259  |
| 16w_SITTD12 | 0.10397798 | 0.6168135  | 6.56E-05 | 0.025296  | -0.18011   |
| 16w_SITTD12 | 0.02146143 | 0.11890109 | 3.49E-05 | 0.0044169 | -0.0356    |
| 16w_SITTD12 | 0.08261517 | 0.48790842 | 6.35E-05 | 0.017892  | 0.1271     |
| 16w_SITTD12 | 0.01280106 | 0.06664366 | 3.23E-05 | 0.0059016 | 0.25518    |
| 16w_SITTD12 | 0.10623701 | 0.6304447  | 6.58E-05 | 0.02556   | -0.21453   |
| 16w_SITTD12 | 0.07096472 | 0.41760847 | 6.20E-05 | 0.012608  | 0.11916    |
| 16w_SITTD12 | 0.122094   | 0.7261272  | 6.66E-05 | 0.02435   | -0.38515   |
| 16w_SITTD12 | 0.00878235 | 0.04239439 | 3.19E-05 | 0.0070136 | 0.43237    |
| 16w_SITTD12 | 0.03578617 | 0.20533794 | 4.59E-05 | 0.0042319 | -0.068307  |
| 16w_SITTD12 | 0.01486514 | 0.07909846 | 3.27E-05 | 0.0054028 | 0.16515    |
| 16w_SITTD12 | 0.04649247 | 0.2699407  | 5.57E-05 | 0.0054037 | 0.028707   |
| 16w_SITTD12 | 0.09224884 | 0.5460388  | 6.46E-05 | 0.022042  | 0.019141   |
| 16w_SITTD12 | 0.01126563 | 0.05737873 | 3.21E-05 | 0.006339  | 0.32844    |
| 16w_SITTD12 | 0.10175799 | 0.6034179  | 6.54E-05 | 0.024923  | -0.14299   |
| 16w_SITTD12 | 0.1016284  | 0.6026359  | 6.54E-05 | 0.024923  | -0.14299   |
| 16w_SITTD12 | 0.05277401 | 0.30784407 | 5.87E-05 | 0.0065755 | 0.057248   |
| 16w_SITTD12 | 0.01344241 | 0.07051359 | 3.24E-05 | 0.0057681 | 0.23179    |
| 16w_SITTD12 | 0.01406432 | 0.07426625 | 3.25E-05 | 0.0056405 | 0.20898    |
| 16w_SITTD12 | 0.12493273 | 0.7432564  | 6.68E-05 | 0.024034  | -0.40548   |
| 16w_SITTD12 | 0.06384563 | 0.37465125 | 6.10E-05 | 0.0098069 | 0.089169   |
| 16w_SITTD12 | 0.09162156 | 0.54225373 | 6.45E-05 | 0.021822  | 0.027741   |
| 16w_SITTD12 | 0.00874834 | 0.04218912 | 3.19E-05 | 0.0070136 | 0.43237    |
| 16w_SITTD12 | 0.10111588 | 0.59954333 | 6.54E-05 | 0.024809  | -0.13341   |
| 16w_SITTD12 | 0.01689856 | 0.09136833 | 3.31E-05 | 0.0050879 | 0.10435    |
| 16w_SITTD12 | 0.15160054 | 0.9041724  | 6.77E-05 | 0.023705  | -0.52438   |
| 16w_SITTD12 | 0.02346383 | 0.13098375 | 3.58E-05 | 0.0042778 | -0.065623  |
| 16w_SITTD12 | 0.0161422  | 0.08680436 | 3.30E-05 | 0.0051875 | 0.12392    |

|             |            |            |          |           |            |
|-------------|------------|------------|----------|-----------|------------|
| 16w_SITTD12 | 0.02456382 | 0.1376212  | 3.64E-05 | 0.0042065 | -0.080664  |
| 16w_SITTD12 | 0.06764178 | 0.39755756 | 6.15E-05 | 0.011255  | 0.10492    |
| 16w_SITTD12 | 0.01494379 | 0.07957309 | 3.27E-05 | 0.0054028 | 0.16515    |
| 16w_SITTD12 | 0.11715981 | 0.69635385 | 6.64E-05 | 0.024986  | -0.34377   |
| 16w_SITTD12 | 0.04871341 | 0.28334206 | 5.70E-05 | 0.0057827 | 0.041222   |
| 16w_SITTD12 | 0.07546856 | 0.4447851  | 6.26E-05 | 0.014549  | 0.13345    |
| 16w_SITTD12 | 0.0428996  | 0.248261   | 5.29E-05 | 0.0048617 | -0.0013165 |
| 16w_SITTD12 | 0.02670493 | 0.1505409  | 3.80E-05 | 0.0041099 | -0.099939  |
| 16w_SITTD12 | 0.0098931  | 0.04909674 | 3.20E-05 | 0.0066628 | 0.37961    |
| 16w_SITTD12 | 0.08719585 | 0.5155486  | 6.41E-05 | 0.01993   | 0.087329   |
| 16w_SITTD12 | 0.03378498 | 0.19326253 | 4.43E-05 | 0.004153  | -0.087207  |
| 16w_SITTD12 | 0.02075208 | 0.11462083 | 3.44E-05 | 0.0045325 | -0.01065   |
| 16w_SITTD12 | 0.0822086  | 0.48545513 | 6.35E-05 | 0.017633  | 0.1271     |
| 16w_SITTD12 | 0.02761041 | 0.15600465 | 3.88E-05 | 0.0040827 | -0.10472   |
| 16w_SITTD12 | 0.11226749 | 0.6668332  | 6.61E-05 | 0.025489  | -0.29336   |
| 16w_SITTD12 | 0.10553833 | 0.6262288  | 6.57E-05 | 0.025482  | -0.20623   |
| 16w_SITTD12 | 0.01521136 | 0.08118758 | 3.27E-05 | 0.0054028 | 0.16515    |
| 16w_SITTD12 | 0.02771906 | 0.15666021 | 3.88E-05 | 0.0040827 | -0.10472   |
| 16w_SITTD12 | 0.09088424 | 0.53780466 | 6.45E-05 | 0.021597  | 0.044278   |
| 16w_SITTD12 | 0.01199592 | 0.06178535 | 3.22E-05 | 0.0061869 | 0.2791     |
| 16w_SITTD12 | 0.01351454 | 0.07094885 | 3.24E-05 | 0.0057681 | 0.23179    |
| 16w_SITTD12 | 0.07332928 | 0.43187645 | 6.23E-05 | 0.013561  | 0.12913    |
| 16w_SITTD12 | 0.02255213 | 0.12548251 | 3.55E-05 | 0.0043197 | -0.056631  |
| 16w_SITTD12 | 0.02023013 | 0.11147135 | 3.42E-05 | 0.0045972 | 0.0032259  |
| 16w_SITTD12 | 0.02231776 | 0.12406826 | 3.52E-05 | 0.0043661 | -0.046619  |
| 16w_SITTD12 | 0.09138779 | 0.5408432  | 6.45E-05 | 0.021822  | 0.036126   |
| 16w_SITTD12 | 0.05081118 | 0.2960002  | 5.81E-05 | 0.006215  | 0.051138   |
| 16w_SITTD12 | 0.08335543 | 0.49237517 | 6.36E-05 | 0.018151  | 0.12117    |
| 16w_SITTD12 | 0.02974602 | 0.1688911  | 4.02E-05 | 0.0040662 | -0.10597   |
| 16w_SITTD12 | 0.07421514 | 0.4372218  | 6.24E-05 | 0.014051  | 0.13074    |
| 16w_SITTD12 | 0.08507541 | 0.5027537  | 6.38E-05 | 0.018923  | 0.10916    |
| 16w_SITTD12 | 0.0337179  | 0.19285776 | 4.43E-05 | 0.004153  | -0.087207  |
| 16w_SITTD12 | 0.02576533 | 0.14487126 | 3.72E-05 | 0.0041509 | -0.092011  |
| 16w_SITTD12 | 0.02516393 | 0.14124233 | 3.68E-05 | 0.0041768 | -0.086782  |
| 16w_SITTD12 | 0.06004021 | 0.35168904 | 6.04E-05 | 0.0085136 | 0.07887    |
| 16w_SITTD12 | 0.09234427 | 0.54661465 | 6.46E-05 | 0.022042  | 0.019141   |
| 16w_SITTD12 | 0.0232946  | 0.12996264 | 3.58E-05 | 0.0042778 | -0.065623  |
| 16w_SITTD12 | 0.02710949 | 0.15298204 | 3.84E-05 | 0.0040947 | -0.10271   |
| 16w_SITTD12 | 0.02344811 | 0.1308889  | 3.58E-05 | 0.0042778 | -0.065623  |
| 16w_SITTD12 | 0.00763555 | 0.03547445 | 3.19E-05 | 0.0073923 | 0.48652    |
| 16w_SITTD12 | 0.10184095 | 0.6039185  | 6.55E-05 | 0.025029  | -0.14299   |
| 16w_SITTD12 | 0.02118755 | 0.1172485  | 3.47E-05 | 0.0044724 | -0.023601  |
| 16w_SITTD12 | 0.01196699 | 0.06161078 | 3.22E-05 | 0.0061869 | 0.30353    |

|             |            |            |          |           |           |
|-------------|------------|------------|----------|-----------|-----------|
| 16w_SITTD12 | 0.01406189 | 0.07425161 | 3.25E-05 | 0.0056405 | 0.20898   |
| 16w_SITTD12 | 0.02683282 | 0.15131254 | 3.80E-05 | 0.0041099 | -0.099939 |
| 16w_SITTD12 | 0.11627701 | 0.691027   | 6.64E-05 | 0.025054  | -0.33347  |
| 16w_SITTD12 | 0.10586616 | 0.62820697 | 6.58E-05 | 0.025526  | -0.20623  |
| 16w_SITTD12 | 0.0568135  | 0.33221877 | 5.98E-05 | 0.0075425 | 0.070131  |
| 16w_SITTD12 | 0.02239587 | 0.12453959 | 3.52E-05 | 0.0043661 | -0.046619 |
| 16w_SITTD12 | 0.03102427 | 0.17660415 | 4.16E-05 | 0.0040771 | -0.10299  |
| 16w_SITTD12 | 0.05164605 | 0.3010379  | 5.83E-05 | 0.0063316 | 0.053285  |
| 16w_SITTD12 | 0.02418531 | 0.13533725 | 3.61E-05 | 0.0042401 | -0.080664 |
| 16w_SITTD12 | 0.03418245 | 0.19566093 | 4.48E-05 | 0.0041765 | -0.082901 |
| 16w_SITTD12 | 0.01931392 | 0.10594284 | 3.40E-05 | 0.0046667 | 0.017998  |
| 16w_SITTD12 | 0.01910583 | 0.10468722 | 3.38E-05 | 0.004741  | 0.03364   |
| 16w_SITTD12 | 0.06066338 | 0.3554493  | 6.05E-05 | 0.008688  | 0.080421  |
| 16w_SITTD12 | 0.01802133 | 0.09814323 | 3.34E-05 | 0.0049043 | 0.067421  |
| 16w_SITTD12 | 0.01800265 | 0.0980305  | 3.34E-05 | 0.0049043 | 0.067421  |
| 16w_SITTD12 | 0.08341146 | 0.49271327 | 6.36E-05 | 0.018151  | 0.12117   |
| 16w_SITTD12 | 0.1453764  | 0.86661536 | 6.75E-05 | 0.023641  | -0.51294  |
| 16w_SITTD12 | 0.07216233 | 0.424835   | 6.21E-05 | 0.01308   | 0.12348   |
| 16w_SITTD12 | 0.00355308 | 0.01084047 | 3.18E-05 | 0.0092049 | 0.71249   |
| 16w_SITTD12 | 0.026439   | 0.14893626 | 3.80E-05 | 0.0041099 | -0.099939 |
| 16w_SITTD12 | 0.01623298 | 0.08735216 | 3.30E-05 | 0.0051875 | 0.12392   |
| 16w_SITTD12 | 0.07321752 | 0.43120208 | 6.23E-05 | 0.013561  | 0.12737   |
| 16w_SITTD12 | 0.06195849 | 0.36326408 | 6.07E-05 | 0.0092324 | 0.083692  |
| 16w_SITTD12 | 0.04557574 | 0.2644091  | 5.50E-05 | 0.0052335 | 0.021279  |
| 16w_SITTD12 | 0.03823436 | 0.22011052 | 4.87E-05 | 0.0044183 | -0.04622  |
| 16w_SITTD12 | 0.09958807 | 0.5903244  | 6.53E-05 | 0.024558  | -0.10426  |
| 16w_SITTD12 | 0.03116639 | 0.17746171 | 4.16E-05 | 0.0040771 | -0.10299  |
| 16w_SITTD12 | 0.10210942 | 0.6055384  | 6.55E-05 | 0.025029  | -0.15246  |
| 16w_SITTD12 | 0.03040964 | 0.17289545 | 4.11E-05 | 0.0040705 | -0.10475  |
| 16w_SITTD12 | 0.0172902  | 0.09373152 | 3.33E-05 | 0.0049935 | 0.085504  |
| 16w_SITTD12 | 0.00784101 | 0.03671425 | 3.19E-05 | 0.0073923 | 0.48652   |
| 16w_SITTD12 | 0.08017656 | 0.47319356 | 6.32E-05 | 0.016594  | 0.13446   |
| 16w_SITTD12 | 0.01535182 | 0.08203515 | 3.28E-05 | 0.0052924 | 0.1442    |
| 16w_SITTD12 | 0.02098877 | 0.11604901 | 3.47E-05 | 0.0044724 | -0.023601 |
| 16w_SITTD12 | 0.03298005 | 0.18840553 | 4.32E-05 | 0.0041142 | -0.091175 |
| 16w_SITTD12 | 0.01351944 | 0.07097843 | 3.24E-05 | 0.0057681 | 0.23179   |
| 16w_SITTD12 | 0.01964634 | 0.10794866 | 3.40E-05 | 0.0046667 | 0.017998  |
| 16w_SITTD12 | 0.05578782 | 0.3260297  | 5.95E-05 | 0.007248  | 0.067199  |
| 16w_SITTD12 | 0.03142108 | 0.17899856 | 4.22E-05 | 0.0040866 | -0.10071  |
| 16w_SITTD12 | 0.02047139 | 0.11292712 | 3.44E-05 | 0.0045325 | -0.01065  |
| 16w_SITTD12 | 0.08687127 | 0.5135901  | 6.41E-05 | 0.01993   | 0.093363  |
| 16w_SITTD12 | 0.02426778 | 0.13583486 | 3.64E-05 | 0.0042065 | -0.080664 |
| 16w_SITTD12 | 0.08136655 | 0.48037407 | 6.34E-05 | 0.017373  | 0.13148   |

|             |            |            |          |           |            |
|-------------|------------|------------|----------|-----------|------------|
| 16w_SITTD12 | 0.02442016 | 0.13675432 | 3.64E-05 | 0.0042065 | -0.080664  |
| 16w_SITTD12 | 0.03951605 | 0.22784433 | 4.98E-05 | 0.0045122 | -0.034672  |
| 16w_SITTD12 | 0.04526028 | 0.26250556 | 5.46E-05 | 0.0051531 | 0.021279   |
| 16w_SITTD12 | 0.08000177 | 0.47213888 | 6.32E-05 | 0.016594  | 0.13446    |
| 16w_SITTD12 | 0.04692146 | 0.27252927 | 5.57E-05 | 0.0054037 | 0.032113   |
| 16w_SITTD12 | 0.04245259 | 0.24556367 | 5.24E-05 | 0.0047963 | -0.0013165 |
| 16w_SITTD12 | 0.09636109 | 0.57085246 | 6.50E-05 | 0.023626  | -0.045608  |
| 16w_SITTD12 | 0.03070787 | 0.174695   | 4.11E-05 | 0.0040705 | -0.10475   |
| 16w_SITTD12 | 0.08984965 | 0.53156185 | 6.44E-05 | 0.021137  | 0.059815   |
| 16w_SITTD12 | 0.02575988 | 0.14483838 | 3.72E-05 | 0.0041509 | -0.092011  |
| 16w_SITTD12 | 0.07857112 | 0.4635062  | 6.30E-05 | 0.016077  | 0.13651    |
| 16w_SITTD12 | 0.03451859 | 0.19768919 | 4.48E-05 | 0.0041765 | -0.082901  |
| 16w_SITTD12 | 0.01447122 | 0.07672156 | 3.26E-05 | 0.0055188 | 0.18676    |
| 16w_SITTD12 | 0.07007956 | 0.41226736 | 6.18E-05 | 0.012147  | 0.11689    |
| 16w_SITTD12 | 0.01371182 | 0.07213925 | 3.25E-05 | 0.0056405 | 0.20898    |
| 16w_SITTD12 | 0.03309504 | 0.18909939 | 4.37E-05 | 0.0041322 | -0.091175  |
| 16w_SITTD12 | 0.10882497 | 0.6460607  | 6.59E-05 | 0.025616  | -0.25305   |
| 16w_SITTD12 | 0.0168918  | 0.09132751 | 3.31E-05 | 0.0050879 | 0.10435    |
| 16w_SITTD12 | 0.0134729  | 0.0706976  | 3.24E-05 | 0.0057681 | 0.23179    |
| 16w_SITTD12 | 0.02800275 | 0.15837206 | 3.88E-05 | 0.0040827 | -0.10603   |
| 16w_SITTD12 | 0.02210821 | 0.12280381 | 3.52E-05 | 0.0043661 | -0.046619  |
| 16w_SITTD12 | 0.10086903 | 0.5980538  | 6.54E-05 | 0.024809  | -0.12375   |
| 16w_SITTD12 | 0.02076053 | 0.11467178 | 3.44E-05 | 0.0045325 | -0.01065   |
| 16w_SITTD12 | 0.1047627  | 0.6215486  | 6.57E-05 | 0.025429  | -0.18901   |
| 16w_SITTD12 | 0.05083354 | 0.29613513 | 5.81E-05 | 0.006215  | 0.051138   |
| 16w_SITTD12 | 0.03048532 | 0.1733521  | 4.11E-05 | 0.0040705 | -0.10475   |
| 16w_SITTD12 | 0.03565819 | 0.20456569 | 4.59E-05 | 0.0042319 | -0.073417  |
| 16w_SITTD12 | 0.02150323 | 0.11915331 | 3.49E-05 | 0.0044169 | -0.0356    |
| 16w_SITTD12 | 0.02169882 | 0.12033353 | 3.49E-05 | 0.0044169 | -0.0356    |
| 16w_SITTD12 | 0.11318571 | 0.67237383 | 6.62E-05 | 0.025403  | -0.30551   |
| 16w_SITTD12 | 0.06438372 | 0.3778982  | 6.10E-05 | 0.010005  | 0.091185   |
| 16w_SITTD12 | 0.0979737  | 0.5805831  | 6.52E-05 | 0.024123  | -0.074831  |
| 16w_SITTD12 | 0.1267498  | 0.7542208  | 6.69E-05 | 0.023834  | -0.41707   |
| 16w_SITTD12 | 0.08695004 | 0.5140654  | 6.41E-05 | 0.01993   | 0.093363   |
| 16w_SITTD12 | 0.022798   | 0.12696606 | 3.55E-05 | 0.0043197 | -0.056631  |
| 16w_SITTD12 | 0.04457607 | 0.258377   | 5.42E-05 | 0.0050757 | 0.017239   |
| 16w_SITTD12 | 0.04741441 | 0.27550378 | 5.61E-05 | 0.0054936 | 0.035328   |
| 16w_SITTD12 | 0.01339364 | 0.07021929 | 3.24E-05 | 0.0057681 | 0.23179    |
| 16w_SITTD12 | 0.01557482 | 0.08338074 | 3.28E-05 | 0.0052924 | 0.1442     |
| 16w_SITTD12 | 0.02064442 | 0.11397121 | 3.44E-05 | 0.0045325 | -0.01065   |
| 16w_SITTD12 | 0.01536362 | 0.08210633 | 3.28E-05 | 0.0052924 | 0.1442     |
| 16w_SITTD12 | 0.05144197 | 0.29980645 | 5.83E-05 | 0.0063316 | 0.053285   |
| 16w_SITTD12 | 0.0437076  | 0.25313655 | 5.38E-05 | 0.0050014 | 0.008455   |

|             |            |            |          |           |           |
|-------------|------------|------------|----------|-----------|-----------|
| 16w_SITTD12 | 0.07956718 | 0.46951652 | 6.31E-05 | 0.016335  | 0.13545   |
| 16w_SITTD12 | 0.1173574  | 0.6975461  | 6.64E-05 | 0.024917  | -0.34377  |
| 16w_SITTD12 | 0.01365918 | 0.07182159 | 3.24E-05 | 0.0057681 | 0.20898   |
| 16w_SITTD12 | 0.0239306  | 0.13380033 | 3.61E-05 | 0.0042401 | -0.073623 |
| 16w_SITTD12 | 0.1112555  | 0.6607267  | 6.61E-05 | 0.025525  | -0.28058  |
| 16w_SITTD12 | 0.01960189 | 0.10768045 | 3.40E-05 | 0.0046667 | 0.017998  |
| 16w_SITTD12 | 0.0288641  | 0.16356951 | 3.97E-05 | 0.0040686 | -0.10664  |
| 16w_SITTD12 | 0.05155003 | 0.3004585  | 5.83E-05 | 0.0063316 | 0.053285  |
| 16w_SITTD12 | 0.02972762 | 0.16878006 | 4.02E-05 | 0.0040662 | -0.10597  |
| 16w_SITTD12 | 0.06252351 | 0.3666735  | 6.08E-05 | 0.0094206 | 0.085432  |
| 16w_SITTD12 | 0.02020809 | 0.11133836 | 3.42E-05 | 0.0045972 | 0.0032259 |
| 16w_SITTD12 | 0.06620332 | 0.38887775 | 6.13E-05 | 0.010616  | 0.10013   |
| 16w_SITTD12 | 0.02052696 | 0.11326243 | 3.44E-05 | 0.0045325 | -0.01065  |
| 16w_SITTD12 | 0.09372903 | 0.5549704  | 6.48E-05 | 0.022676  | 0.0013661 |
| 16w_SITTD12 | 0.01567811 | 0.08400404 | 3.28E-05 | 0.0052924 | 0.1442    |
| 16w_SITTD12 | 0.09454275 | 0.55988044 | 6.48E-05 | 0.022877  | -0.017059 |
| 16w_SITTD12 | 0.08132198 | 0.48010513 | 6.34E-05 | 0.017373  | 0.13148   |
| 16w_SITTD12 | 0.07069853 | 0.41600227 | 6.19E-05 | 0.012376  | 0.11916   |
| 16w_SITTD12 | 0.07532968 | 0.44394708 | 6.26E-05 | 0.014549  | 0.13345   |
| 16w_SITTD12 | 0.02456373 | 0.13762067 | 3.64E-05 | 0.0042065 | -0.080664 |
| 16w_SITTD12 | 0.02247856 | 0.12503853 | 3.52E-05 | 0.0043661 | -0.056631 |
| 16w_SITTD12 | 0.07235547 | 0.42600042 | 6.21E-05 | 0.01308   | 0.12548   |
| 16w_SITTD12 | 0.09083688 | 0.5375189  | 6.45E-05 | 0.021597  | 0.044278  |
| 16w_SITTD12 | 0.07866684 | 0.46408382 | 6.30E-05 | 0.016077  | 0.13651   |
| 16w_SITTD12 | 0.01111475 | 0.0564683  | 3.21E-05 | 0.006339  | 0.32844   |
| 16w_SITTD12 | 0.00999422 | 0.0497069  | 3.20E-05 | 0.0066628 | 0.37961   |
| 16w_SITTD12 | 0.07993607 | 0.47174242 | 6.32E-05 | 0.016594  | 0.13446   |
| 16w_SITTD12 | 0.0290316  | 0.1645802  | 3.97E-05 | 0.0040686 | -0.10664  |
| 16w_SITTD12 | 0.07403047 | 0.43610755 | 6.23E-05 | 0.013805  | 0.13074   |
| 16w_SITTD12 | 0.07926782 | 0.46771014 | 6.31E-05 | 0.016335  | 0.13613   |
| 16w_SITTD12 | 0.00846872 | 0.04050191 | 3.19E-05 | 0.0071994 | 0.45929   |
| 16w_SITTD12 | 0.08988273 | 0.53176147 | 6.44E-05 | 0.021137  | 0.05218   |
| 16w_SITTD12 | 0.03775897 | 0.21724196 | 4.81E-05 | 0.0043756 | -0.05192  |
| 16w_SITTD12 | 0.08323732 | 0.4916625  | 6.36E-05 | 0.018151  | 0.12434   |
| 16w_SITTD12 | 0.0856436  | 0.50618213 | 6.39E-05 | 0.019177  | 0.1043    |
| 16w_SITTD12 | 0.09640139 | 0.5710957  | 6.50E-05 | 0.023626  | -0.045608 |
| 16w_SITTD12 | 0.01811652 | 0.09871763 | 3.36E-05 | 0.0048202 | 0.050123  |
| 16w_SITTD12 | 0.01664914 | 0.0898633  | 3.31E-05 | 0.0050879 | 0.10435   |
| 16w_SITTD12 | 0.05236745 | 0.3053909  | 5.85E-05 | 0.0064518 | 0.057248  |
| 16w_SITTD12 | 0.09805994 | 0.5811035  | 6.52E-05 | 0.024123  | -0.074831 |
| 16w_SITTD12 | 0.05600746 | 0.32735503 | 5.97E-05 | 0.0073934 | 0.067199  |
| 16w_SITTD12 | 0.10719661 | 0.63623506 | 6.58E-05 | 0.025586  | -0.23052  |
| 16w_SITTD12 | 0.02204832 | 0.12244246 | 3.52E-05 | 0.0043661 | -0.046619 |

|             |            |            |          |           |           |
|-------------|------------|------------|----------|-----------|-----------|
| 16w_SITTD12 | 0.03196188 | 0.18226178 | 4.22E-05 | 0.0040866 | -0.097962 |
| 16w_SITTD12 | 0.04161342 | 0.24050005 | 5.19E-05 | 0.0047337 | -0.011944 |
| 16w_SITTD12 | 0.13520794 | 0.8052579  | 6.72E-05 | 0.023529  | -0.47171  |
| 16w_SITTD12 | 0.03435769 | 0.19671834 | 4.48E-05 | 0.0041765 | -0.082901 |
| 16w_SITTD12 | 0.02795741 | 0.15809843 | 3.88E-05 | 0.0040827 | -0.10472  |
| 16w_SITTD12 | 0.01595449 | 0.08567169 | 3.30E-05 | 0.0051875 | 0.12392   |
| 16w_SITTD12 | 0.06099121 | 0.35742745 | 6.06E-05 | 0.008866  | 0.080421  |
| 16w_SITTD12 | 0.07881869 | 0.4650001  | 6.30E-05 | 0.016077  | 0.13651   |
| 16w_SITTD12 | 0.00764017 | 0.03550233 | 3.19E-05 | 0.0073923 | 0.48652   |
| 16w_SITTD12 | 0.0848221  | 0.50122523 | 6.38E-05 | 0.018923  | 0.1136    |
| 16w_SITTD12 | 0.09159601 | 0.54209954 | 6.45E-05 | 0.021822  | 0.027741  |
| 16w_SITTD12 | 0.02377943 | 0.13288814 | 3.61E-05 | 0.0042401 | -0.073623 |
| 16w_SITTD12 | 0.04918463 | 0.28618547 | 5.73E-05 | 0.0058857 | 0.04392   |
| 16w_SITTD12 | 0.14032036 | 0.8361068  | 6.74E-05 | 0.023558  | -0.49553  |
| 16w_SITTD12 | 0.08234433 | 0.48627412 | 6.35E-05 | 0.017633  | 0.1271    |
| 16w_SITTD12 | 0.01390818 | 0.07332409 | 3.25E-05 | 0.0056405 | 0.20898   |
| 16w_SITTD12 | 0.11076192 | 0.6577484  | 6.61E-05 | 0.025556  | -0.27396  |
| 16w_SITTD12 | 0.0106232  | 0.05350221 | 3.21E-05 | 0.0064976 | 0.35381   |
| 16w_SITTD12 | 0.08426694 | 0.4978753  | 6.37E-05 | 0.018667  | 0.1176    |
| 16w_SITTD12 | 0.08817834 | 0.52147704 | 6.42E-05 | 0.020421  | 0.080939  |
| 16w_SITTD12 | 0.04428222 | 0.25660387 | 5.42E-05 | 0.0050757 | 0.012967  |
| 16w_SITTD12 | 0.02824424 | 0.1598292  | 3.93E-05 | 0.004074  | -0.10603  |
| 16w_SITTD12 | 0.01483653 | 0.07892586 | 3.27E-05 | 0.0054028 | 0.16515   |
| 16w_SITTD12 | 0.0356634  | 0.20459709 | 4.59E-05 | 0.0042319 | -0.073417 |
| 16w_SITTD12 | 0.03661191 | 0.21032049 | 4.70E-05 | 0.0042982 | -0.062998 |
| 16w_SITTD12 | 0.09478456 | 0.56133956 | 6.49E-05 | 0.023073  | -0.017059 |
| 16w_SITTD12 | 0.07248907 | 0.42680654 | 6.22E-05 | 0.01332   | 0.12548   |
| 16w_SITTD12 | 0.09088869 | 0.5378315  | 6.45E-05 | 0.021597  | 0.044278  |
| 16w_SITTD12 | 0.07259513 | 0.42744657 | 6.22E-05 | 0.01332   | 0.12548   |
| 16w_SITTD12 | 0.01533691 | 0.08194517 | 3.28E-05 | 0.0052924 | 0.1442    |
| 16w_SITTD12 | 0.10496562 | 0.62277305 | 6.57E-05 | 0.025429  | -0.19772  |
| 16w_SITTD12 | 0.01834726 | 0.1001099  | 3.36E-05 | 0.0048202 | 0.050123  |
| 16w_SITTD12 | 0.08855438 | 0.5237461  | 6.42E-05 | 0.020663  | 0.074212  |
| 16w_SITTD12 | 0.09430385 | 0.5584389  | 6.48E-05 | 0.022877  | -0.017059 |
| 16w_SITTD12 | 0.10013232 | 0.59360844 | 6.53E-05 | 0.024558  | -0.11403  |
| 16w_SITTD12 | 0.03906197 | 0.22510438 | 4.92E-05 | 0.0044639 | -0.034672 |
| 16w_SITTD12 | 0.03407152 | 0.19499156 | 4.43E-05 | 0.004153  | -0.087207 |
| 16w_SITTD12 | 0.02255257 | 0.12548514 | 3.55E-05 | 0.0043197 | -0.056631 |
| 16w_SITTD12 | 0.02563612 | 0.14409159 | 3.72E-05 | 0.0041509 | -0.092011 |
| 16w_SITTD12 | 0.01297225 | 0.06767663 | 3.23E-05 | 0.0059016 | 0.25518   |
| 16w_SITTD12 | 0.10916545 | 0.6481152  | 6.60E-05 | 0.025611  | -0.25305  |
| 16w_SITTD12 | 0.03135278 | 0.17858644 | 4.16E-05 | 0.0040771 | -0.10071  |
| 16w_SITTD12 | 0.08311012 | 0.49089494 | 6.36E-05 | 0.018151  | 0.12434   |



|             |            |            |          |           |           |
|-------------|------------|------------|----------|-----------|-----------|
| 16w_SITTD12 | 0.03375889 | 0.1931051  | 4.43E-05 | 0.004153  | -0.087207 |
| 16w_SITTD12 | 0.04359604 | 0.25246337 | 5.33E-05 | 0.0049301 | 0.008455  |
| 16w_SITTD12 | 0.0211492  | 0.11701711 | 3.47E-05 | 0.0044724 | -0.023601 |
| 16w_SITTD12 | 0.05959122 | 0.34897977 | 6.03E-05 | 0.0083426 | 0.077363  |
| 16w_SITTD12 | 0.04763929 | 0.27686074 | 5.64E-05 | 0.0055867 | 0.035328  |
| 16w_SITTD12 | 0.0283559  | 0.16050296 | 3.93E-05 | 0.004074  | -0.10603  |
| 16w_SITTD12 | 0.07899872 | 0.46608642 | 6.30E-05 | 0.016077  | 0.13613   |
| 16w_SITTD12 | 0.0903239  | 0.53442353 | 6.44E-05 | 0.021369  | 0.05218   |
| 16w_SITTD12 | 0.00839886 | 0.04008035 | 3.19E-05 | 0.0071994 | 0.45929   |
| 16w_SITTD12 | 0.0902926  | 0.53423464 | 6.44E-05 | 0.021369  | 0.05218   |
| 16w_SITTD12 | 0.05203971 | 0.30341324 | 5.85E-05 | 0.0064518 | 0.055318  |
| 16w_SITTD12 | 0.02797189 | 0.15818581 | 3.88E-05 | 0.0040827 | -0.10472  |
| 16w_SITTD12 | 0.01086394 | 0.05495486 | 3.21E-05 | 0.0064976 | 0.35381   |
| 16w_SITTD12 | 0.02306387 | 0.12857035 | 3.55E-05 | 0.0043197 | -0.065623 |
| 16w_SITTD12 | 0.01071816 | 0.05407521 | 3.21E-05 | 0.0064976 | 0.35381   |
| 16w_SITTD12 | 0.0091578  | 0.04465984 | 3.19E-05 | 0.0070136 | 0.43237   |
| 16w_SITTD12 | 0.12996088 | 0.7735967  | 6.70E-05 | 0.023664  | -0.43912  |
| 16w_SITTD12 | 0.0800404  | 0.47237197 | 6.32E-05 | 0.016594  | 0.13446   |
| 16w_SITTD12 | 0.01513236 | 0.0807109  | 3.27E-05 | 0.0054028 | 0.16515   |
| 16w_SITTD12 | 0.11815073 | 0.70233315 | 6.65E-05 | 0.024847  | -0.35363  |
| 16w_SITTD12 | 0.03120519 | 0.17769587 | 4.16E-05 | 0.0040771 | -0.10299  |
| 16w_SITTD12 | 0.03472829 | 0.19895454 | 4.48E-05 | 0.0041765 | -0.078293 |
| 16w_SITTD12 | 0.08259112 | 0.48776326 | 6.35E-05 | 0.017892  | 0.1271    |
| 16w_SITTD12 | 0.02367477 | 0.1322566  | 3.61E-05 | 0.0042401 | -0.073623 |
| 16w_SITTD12 | 0.013489   | 0.07079473 | 3.24E-05 | 0.0057681 | 0.23179   |
| 16w_SITTD12 | 0.01613274 | 0.08674727 | 3.30E-05 | 0.0051875 | 0.12392   |
| 16w_SITTD12 | 0.10316622 | 0.61191523 | 6.56E-05 | 0.025216  | -0.17104  |
| 16w_SITTD12 | 0.02246684 | 0.12496784 | 3.52E-05 | 0.0043661 | -0.046619 |
| 16w_SITTD12 | 0.05777564 | 0.3380244  | 6.00E-05 | 0.0078516 | 0.071569  |
| 16w_SITTD12 | 0.0203788  | 0.11236838 | 3.44E-05 | 0.0045325 | -0.01065  |
| 16w_SITTD12 | 0.0861018  | 0.508947   | 6.39E-05 | 0.01943   | 0.099025  |
| 16w_SITTD12 | 0.02074216 | 0.11456094 | 3.44E-05 | 0.0045325 | -0.01065  |
| 16w_SITTD12 | 0.01370691 | 0.07210961 | 3.25E-05 | 0.0056405 | 0.20898   |
| 16w_SITTD12 | 0.078604   | 0.46370462 | 6.30E-05 | 0.016077  | 0.13651   |
| 16w_SITTD12 | 0.11662265 | 0.6931126  | 6.64E-05 | 0.025054  | -0.33868  |
| 16w_SITTD12 | 0.03135561 | 0.1786035  | 4.16E-05 | 0.0040771 | -0.10071  |
| 16w_SITTD12 | 0.00849491 | 0.0406599  | 3.19E-05 | 0.0071994 | 0.45929   |
| 16w_SITTD12 | 0.00814043 | 0.03852095 | 3.19E-05 | 0.0071994 | 0.45929   |
| 16w_SITTD12 | 0.01838926 | 0.10036334 | 3.36E-05 | 0.0048202 | 0.050123  |
| 16w_SITTD12 | 0.02255254 | 0.12548494 | 3.55E-05 | 0.0043197 | -0.056631 |
| 16w_SITTD12 | 0.02017871 | 0.11116103 | 3.42E-05 | 0.0045972 | 0.0032259 |
| 16w_SITTD12 | 0.00726668 | 0.03324869 | 3.19E-05 | 0.0075925 | 0.51404   |
| 16w_SITTD12 | 0.1141149  | 0.67798066 | 6.63E-05 | 0.025299  | -0.31137  |

|             |            |            |          |           |           |
|-------------|------------|------------|----------|-----------|-----------|
| 16w_SITTD12 | 0.0138365  | 0.07289159 | 3.25E-05 | 0.0056405 | 0.20898   |
| 16w_SITTD12 | 0.05608111 | 0.32779947 | 5.97E-05 | 0.0073934 | 0.067199  |
| 16w_SITTD12 | 0.01476697 | 0.07850611 | 3.26E-05 | 0.0055188 | 0.16515   |
| 16w_SITTD12 | 0.08183104 | 0.48317686 | 6.34E-05 | 0.017373  | 0.12948   |
| 16w_SITTD12 | 0.10168921 | 0.60300285 | 6.54E-05 | 0.024923  | -0.14299  |
| 16w_SITTD12 | 0.12623505 | 0.75111147 | 6.68E-05 | 0.023879  | -0.41325  |
| 16w_SITTD12 | 0.02125012 | 0.11762603 | 3.47E-05 | 0.0044724 | -0.023601 |
| 16w_SITTD12 | 0.11288152 | 0.6705383  | 6.62E-05 | 0.025448  | -0.29951  |
| 16w_SITTD12 | 0.02386487 | 0.13340366 | 3.61E-05 | 0.0042401 | -0.073623 |
| 16w_SITTD12 | 0.01092624 | 0.05533079 | 3.21E-05 | 0.006339  | 0.32844   |
| 16w_SITTD12 | 0.07716943 | 0.45504826 | 6.28E-05 | 0.015307  | 0.13646   |
| 16w_SITTD12 | 0.01494902 | 0.07960462 | 3.27E-05 | 0.0054028 | 0.16515   |
| 16w_SITTD12 | 0.02868375 | 0.16248126 | 3.97E-05 | 0.0040686 | -0.10664  |
| 16w_SITTD12 | 0.09191801 | 0.5440425  | 6.46E-05 | 0.022042  | 0.027741  |
| 16w_SITTD12 | 0.01629347 | 0.08771715 | 3.30E-05 | 0.0051875 | 0.12392   |
| 16w_SITTD12 | 0.0347109  | 0.1988496  | 4.48E-05 | 0.0041765 | -0.078293 |
| 16w_SITTD12 | 0.11180328 | 0.6640321  | 6.61E-05 | 0.025489  | -0.28705  |
| 16w_SITTD12 | 0.0158114  | 0.08480827 | 3.28E-05 | 0.0052924 | 0.1442    |
| 16w_SITTD12 | 0.02359865 | 0.13179731 | 3.58E-05 | 0.0042778 | -0.073623 |
| 16w_SITTD12 | 0.06758713 | 0.3972278  | 6.15E-05 | 0.011255  | 0.10492   |
| 16w_SITTD12 | 0.09441553 | 0.5591128  | 6.48E-05 | 0.022877  | -0.017059 |
| 16w_SITTD12 | 0.01227462 | 0.06346707 | 3.23E-05 | 0.0060411 | 0.2791    |
| 16w_SITTD12 | 0.03161443 | 0.18016528 | 4.22E-05 | 0.0040866 | -0.10071  |
| 16w_SITTD12 | 0.07557345 | 0.445418   | 6.26E-05 | 0.014549  | 0.13453   |
| 16w_SITTD12 | 0.08137365 | 0.48041695 | 6.34E-05 | 0.017373  | 0.13148   |
| 16w_SITTD12 | 0.02363087 | 0.13199171 | 3.58E-05 | 0.0042778 | -0.073623 |
| 16w_SITTD12 | 0.03689587 | 0.21203393 | 4.70E-05 | 0.0042982 | -0.057524 |
| 16w_SITTD12 | 0.0284074  | 0.16081375 | 3.93E-05 | 0.004074  | -0.10603  |
| 16w_SITTD12 | 0.0283442  | 0.16043235 | 3.93E-05 | 0.004074  | -0.10603  |
| 16w_SITTD12 | 0.0222194  | 0.12347475 | 3.52E-05 | 0.0043661 | -0.046619 |
| 16w_SITTD12 | 0.04905117 | 0.28538013 | 5.70E-05 | 0.0057827 | 0.04392   |
| 16w_SITTD12 | 0.01148353 | 0.05869356 | 3.22E-05 | 0.0061869 | 0.30353   |
| 16w_SITTD12 | 0.01707904 | 0.09245734 | 3.33E-05 | 0.0049935 | 0.085504  |
| 16w_SITTD12 | 0.0129687  | 0.06765518 | 3.23E-05 | 0.0059016 | 0.25518   |
| 16w_SITTD12 | 0.0506667  | 0.29512838 | 5.78E-05 | 0.0061018 | 0.051138  |
| 16w_SITTD12 | 0.03208159 | 0.18298411 | 4.27E-05 | 0.004099  | -0.097962 |
| 16w_SITTD12 | 0.12885877 | 0.7669465  | 6.69E-05 | 0.023723  | -0.43195  |
| 16w_SITTD12 | 0.0254787  | 0.1431417  | 3.72E-05 | 0.0041509 | -0.092011 |
| 16w_SITTD12 | 0.08769333 | 0.51855046 | 6.41E-05 | 0.020177  | 0.080939  |
| 16w_SITTD12 | 0.06572733 | 0.3860056  | 6.12E-05 | 0.01041   | 0.097788  |
| 16w_SITTD12 | 0.01951662 | 0.1071659  | 3.40E-05 | 0.0046667 | 0.017998  |
| 16w_SITTD12 | 0.08743873 | 0.51701415 | 6.41E-05 | 0.020177  | 0.087329  |
| 16w_SITTD12 | 0.02461704 | 0.13794233 | 3.64E-05 | 0.0042065 | -0.080664 |

|             |            |            |          |           |            |
|-------------|------------|------------|----------|-----------|------------|
| 16w_SITTD12 | 0.03637932 | 0.20891705 | 4.65E-05 | 0.0042637 | -0.062998  |
| 16w_SITTD12 | 0.04575838 | 0.26551116 | 5.50E-05 | 0.0052335 | 0.025099   |
| 16w_SITTD12 | 0.03081928 | 0.17536725 | 4.11E-05 | 0.0040705 | -0.10299   |
| 16w_SITTD12 | 0.03001476 | 0.17051268 | 4.07E-05 | 0.0040668 | -0.10597   |
| 16w_SITTD12 | 0.02332398 | 0.1301399  | 3.58E-05 | 0.0042778 | -0.065623  |
| 16w_SITTD12 | 0.03294919 | 0.18821934 | 4.32E-05 | 0.0041142 | -0.094772  |
| 16w_SITTD12 | 0.05293152 | 0.30879453 | 5.87E-05 | 0.0065755 | 0.059084   |
| 16w_SITTD12 | 0.12336555 | 0.7337999  | 6.67E-05 | 0.024217  | -0.39346   |
| 16w_SITTD12 | 0.12746127 | 0.75851387 | 6.69E-05 | 0.023794  | -0.4246    |
| 16w_SITTD12 | 0.02024588 | 0.11156637 | 3.42E-05 | 0.0045972 | 0.0032259  |
| 16w_SITTD12 | 0.01238642 | 0.06414168 | 3.23E-05 | 0.0060411 | 0.2791     |
| 16w_SITTD12 | 0.02094513 | 0.1157857  | 3.47E-05 | 0.0044724 | -0.023601  |
| 16w_SITTD12 | 0.0196331  | 0.10786881 | 3.40E-05 | 0.0046667 | 0.017998   |
| 16w_SITTD12 | 0.0245302  | 0.13741837 | 3.64E-05 | 0.0042065 | -0.080664  |
| 16w_SITTD12 | 0.04784391 | 0.27809542 | 5.64E-05 | 0.0055867 | 0.035328   |
| 16w_SITTD12 | 0.01765775 | 0.09594932 | 3.34E-05 | 0.0049043 | 0.067421   |
| 16w_SITTD12 | 0.01751341 | 0.09507838 | 3.33E-05 | 0.0049935 | 0.067421   |
| 16w_SITTD12 | 0.0108882  | 0.05510125 | 3.21E-05 | 0.0064976 | 0.32844    |
| 16w_SITTD12 | 0.09382743 | 0.55556417 | 6.48E-05 | 0.022676  | -0.0077738 |
| 16w_SITTD12 | 0.11633678 | 0.69138765 | 6.64E-05 | 0.025054  | -0.33347   |
| 16w_SITTD12 | 0.05436874 | 0.31746686 | 5.92E-05 | 0.0069681 | 0.062513   |
| 16w_SITTD12 | 0.00890603 | 0.04314069 | 3.19E-05 | 0.0070136 | 0.43237    |
| 16w_SITTD12 | 0.01930728 | 0.10590273 | 3.40E-05 | 0.0046667 | 0.017998   |
| 16w_SITTD12 | 0.03018395 | 0.17153357 | 4.07E-05 | 0.0040668 | -0.10597   |
| 16w_SITTD12 | 0.01114146 | 0.05662946 | 3.21E-05 | 0.006339  | 0.32844    |
| 16w_SITTD12 | 0.0487815  | 0.28375292 | 5.70E-05 | 0.0057827 | 0.041222   |
| 16w_SITTD12 | 0.03047552 | 0.17329296 | 4.11E-05 | 0.0040705 | -0.10475   |
| 16w_SITTD12 | 0.01949494 | 0.10703512 | 3.40E-05 | 0.0046667 | 0.017998   |
| 16w_SITTD12 | 0.01157302 | 0.05923351 | 3.22E-05 | 0.0061869 | 0.30353    |
| 16w_SITTD12 | 0.03231778 | 0.1844093  | 4.27E-05 | 0.004099  | -0.097962  |
| 16w_SITTD12 | 0.10781004 | 0.6399365  | 6.59E-05 | 0.025604  | -0.23822   |
| 16w_SITTD12 | 0.01823094 | 0.09940802 | 3.36E-05 | 0.0048202 | 0.050123   |
| 16w_SITTD12 | 0.06890298 | 0.40516776 | 6.16E-05 | 0.011695  | 0.11218    |
| 16w_SITTD12 | 0.01908314 | 0.10455028 | 3.38E-05 | 0.004741  | 0.03364    |
| 16w_SITTD12 | 0.0128014  | 0.06664565 | 3.23E-05 | 0.0059016 | 0.25518    |
| 16w_SITTD12 | 0.11807306 | 0.70186454 | 6.65E-05 | 0.024847  | -0.35363   |
| 16w_SITTD12 | 0.05861868 | 0.34311137 | 6.02E-05 | 0.0081753 | 0.074438   |
| 16w_SITTD12 | 0.00710783 | 0.03229015 | 3.19E-05 | 0.0075925 | 0.51404    |
| 16w_SITTD12 | 0.02180616 | 0.12098125 | 3.49E-05 | 0.0044169 | -0.0356    |
| 16w_SITTD12 | 0.02144762 | 0.11881774 | 3.49E-05 | 0.0044169 | -0.0356    |
| 16w_SITTD12 | 0.02400839 | 0.1342697  | 3.61E-05 | 0.0042401 | -0.073623  |
| 16w_SITTD12 | 0.03242626 | 0.18506393 | 4.27E-05 | 0.004099  | -0.094772  |
| 16w_SITTD12 | 0.07261851 | 0.4275876  | 6.22E-05 | 0.01332   | 0.12548    |

|             |            |            |          |           |           |
|-------------|------------|------------|----------|-----------|-----------|
| 16w_SITTD12 | 0.02587188 | 0.14551418 | 3.76E-05 | 0.0041286 | -0.096385 |
| 16w_SITTD12 | 0.04332777 | 0.25084463 | 5.33E-05 | 0.0049301 | 0.0036923 |
| 16w_SITTD12 | 0.11570389 | 0.6875687  | 6.63E-05 | 0.025119  | -0.32814  |
| 16w_SITTD12 | 0.01496303 | 0.07968915 | 3.27E-05 | 0.0054028 | 0.16515   |
| 16w_SITTD12 | 0.01601545 | 0.08603957 | 3.30E-05 | 0.0051875 | 0.12392   |
| 16w_SITTD12 | 0.0417966  | 0.24160542 | 5.19E-05 | 0.0047337 | -0.011944 |
| 16w_SITTD12 | 0.13635162 | 0.812159   | 6.72E-05 | 0.023527  | -0.4775   |
| 16w_SITTD12 | 0.00694292 | 0.03129509 | 3.18E-05 | 0.0078    | 0.54183   |
| 16w_SITTD12 | 0.01651908 | 0.08907852 | 3.31E-05 | 0.0050879 | 0.10435   |
| 16w_SITTD12 | 0.02100566 | 0.11615091 | 3.47E-05 | 0.0044724 | -0.023601 |
| 16w_SITTD12 | 0.01924935 | 0.10555319 | 3.40E-05 | 0.0046667 | 0.017998  |
| 16w_SITTD12 | 0.01866603 | 0.10203338 | 3.38E-05 | 0.004741  | 0.03364   |
| 16w_SITTD12 | 0.0097951  | 0.04850537 | 3.20E-05 | 0.0066628 | 0.37961   |
| 16w_SITTD12 | 0.02113739 | 0.1169458  | 3.47E-05 | 0.0044724 | -0.023601 |
| 16w_SITTD12 | 0.01379792 | 0.07265875 | 3.25E-05 | 0.0056405 | 0.20898   |
| 16w_SITTD12 | 0.02731108 | 0.15419844 | 3.84E-05 | 0.0040947 | -0.10271  |
| 16w_SITTD12 | 0.02442974 | 0.13681217 | 3.64E-05 | 0.0042065 | -0.080664 |
| 16w_SITTD12 | 0.03664231 | 0.21050397 | 4.70E-05 | 0.0042982 | -0.062998 |
| 16w_SITTD12 | 0.10376445 | 0.615525   | 6.56E-05 | 0.025296  | -0.18011  |
| 16w_SITTD12 | 0.04211031 | 0.24349836 | 5.24E-05 | 0.0047963 | -0.00654  |
| 16w_SITTD12 | 0.04095956 | 0.23655464 | 5.14E-05 | 0.0046741 | -0.017493 |
| 16w_SITTD12 | 0.03397498 | 0.19440903 | 4.43E-05 | 0.004153  | -0.087207 |
| 16w_SITTD12 | 0.01288491 | 0.06714962 | 3.23E-05 | 0.0059016 | 0.25518   |
| 16w_SITTD12 | 0.10991055 | 0.6526112  | 6.60E-05 | 0.025599  | -0.26716  |
| 16w_SITTD12 | 0.04515219 | 0.26185334 | 5.46E-05 | 0.0051531 | 0.021279  |
| 16w_SITTD12 | 0.04081443 | 0.23567887 | 5.09E-05 | 0.0046173 | -0.017493 |
| 16w_SITTD12 | 0.02111587 | 0.11681596 | 3.47E-05 | 0.0044724 | -0.023601 |
| 16w_SITTD12 | 0.01649024 | 0.08890447 | 3.31E-05 | 0.0050879 | 0.10435   |
| 16w_SITTD12 | 0.03521313 | 0.20188014 | 4.54E-05 | 0.0042028 | -0.073417 |
| 16w_SITTD12 | 0.08568024 | 0.50640327 | 6.39E-05 | 0.019177  | 0.1043    |
| 16w_SITTD12 | 0.01986644 | 0.10927677 | 3.42E-05 | 0.0045972 | 0.0032259 |
| 16w_SITTD12 | 0.0228668  | 0.12738122 | 3.55E-05 | 0.0043197 | -0.056631 |
| 16w_SITTD12 | 0.01576261 | 0.0845139  | 3.28E-05 | 0.0052924 | 0.1442    |
| 16w_SITTD12 | 0.05137485 | 0.29940143 | 5.83E-05 | 0.0063316 | 0.053285  |
| 16w_SITTD12 | 0.0211653  | 0.11711421 | 3.47E-05 | 0.0044724 | -0.023601 |
| 16w_SITTD12 | 0.08329126 | 0.49198794 | 6.36E-05 | 0.018151  | 0.12117   |
| 16w_SITTD12 | 0.0859962  | 0.50830984 | 6.39E-05 | 0.01943   | 0.1043    |
| 16w_SITTD12 | 0.02747311 | 0.1551761  | 3.84E-05 | 0.0040947 | -0.10472  |
| 16w_SITTD12 | 0.03194878 | 0.18218276 | 4.22E-05 | 0.0040866 | -0.097962 |
| 16w_SITTD12 | 0.02123041 | 0.11750707 | 3.47E-05 | 0.0044724 | -0.023601 |
| 16w_SITTD12 | 0.12796286 | 0.7615405  | 6.69E-05 | 0.023757  | -0.4246   |
| 16w_SITTD12 | 0.03105144 | 0.17676811 | 4.16E-05 | 0.0040771 | -0.10299  |
| 16w_SITTD12 | 0.01917601 | 0.10511068 | 3.38E-05 | 0.004741  | 0.017998  |

|             |            |            |          |           |           |
|-------------|------------|------------|----------|-----------|-----------|
| 16w_SITTD12 | 0.10692653 | 0.63460535 | 6.58E-05 | 0.025586  | -0.22263  |
| 16w_SITTD12 | 0.01409279 | 0.07443804 | 3.25E-05 | 0.0056405 | 0.20898   |
| 16w_SITTD12 | 0.05391498 | 0.3147288  | 5.91E-05 | 0.0068337 | 0.060836  |
| 16w_SITTD12 | 0.02910679 | 0.16503394 | 3.97E-05 | 0.0040686 | -0.10661  |
| 16w_SITTD12 | 0.01379475 | 0.07263964 | 3.25E-05 | 0.0056405 | 0.20898   |
| 16w_SITTD12 | 0.09951215 | 0.5898663  | 6.53E-05 | 0.02442   | -0.10426  |
| 16w_SITTD12 | 0.07776359 | 0.45863348 | 6.29E-05 | 0.015562  | 0.13662   |
| 16w_SITTD12 | 0.13355723 | 0.79529744 | 6.71E-05 | 0.023546  | -0.46255  |
| 16w_SITTD12 | 0.02038096 | 0.11238142 | 3.44E-05 | 0.0045325 | -0.01065  |
| 16w_SITTD12 | 0.04229229 | 0.24459644 | 5.24E-05 | 0.0047963 | -0.00654  |
| 16w_SITTD12 | 0.06266248 | 0.36751202 | 6.08E-05 | 0.0094206 | 0.085432  |
| 16w_SITTD12 | 0.01827777 | 0.09969062 | 3.36E-05 | 0.0048202 | 0.050123  |
| 16w_SITTD12 | 0.02300593 | 0.12822074 | 3.55E-05 | 0.0043197 | -0.056631 |
| 16w_SITTD12 | 0.06420386 | 0.37681285 | 6.10E-05 | 0.010005  | 0.091185  |
| 16w_SITTD12 | 0.01622589 | 0.08730935 | 3.30E-05 | 0.0051875 | 0.12392   |
| 16w_SITTD12 | 0.03604198 | 0.20688151 | 4.65E-05 | 0.0042637 | -0.068307 |
| 16w_SITTD12 | 0.02635831 | 0.14844936 | 3.76E-05 | 0.0041286 | -0.099939 |
| 16w_SITTD12 | 0.08233599 | 0.48622376 | 6.35E-05 | 0.017633  | 0.1271    |
| 16w_SITTD12 | 0.08633994 | 0.5103839  | 6.40E-05 | 0.019681  | 0.099025  |
| 16w_SITTD12 | 0.05357802 | 0.31269553 | 5.89E-05 | 0.0067028 | 0.060836  |
| 16w_SITTD12 | 0.01376469 | 0.07245826 | 3.25E-05 | 0.0056405 | 0.20898   |
| 16w_SITTD12 | 0.04543986 | 0.26358917 | 5.50E-05 | 0.0052335 | 0.021279  |
| 16w_SITTD12 | 0.1343228  | 0.799917   | 6.71E-05 | 0.023539  | -0.46567  |
| 16w_SITTD12 | 0.01241782 | 0.0643311  | 3.23E-05 | 0.0060411 | 0.2791    |
| 16w_SITTD12 | 0.0240372  | 0.13444354 | 3.61E-05 | 0.0042401 | -0.073623 |
| 16w_SITTD12 | 0.05531212 | 0.3231593  | 5.95E-05 | 0.007248  | 0.065685  |
| 16w_SITTD12 | 0.07471897 | 0.44026196 | 6.25E-05 | 0.014299  | 0.13218   |
| 16w_SITTD12 | 0.02143342 | 0.11873212 | 3.49E-05 | 0.0044169 | -0.0356   |
| 16w_SITTD12 | 0.05764494 | 0.33723575 | 6.00E-05 | 0.0078516 | 0.071569  |
| 16w_SITTD12 | 0.09869718 | 0.58494866 | 6.52E-05 | 0.024275  | -0.084641 |
| 16w_SITTD12 | 0.05872142 | 0.34373134 | 6.02E-05 | 0.0081753 | 0.074438  |
| 16w_SITTD12 | 0.01754799 | 0.09528703 | 3.33E-05 | 0.0049935 | 0.067421  |
| 16w_SITTD12 | 0.02048636 | 0.11301744 | 3.44E-05 | 0.0045325 | -0.01065  |
| 16w_SITTD12 | 0.01018783 | 0.05087517 | 3.20E-05 | 0.0066628 | 0.37961   |
| 16w_SITTD12 | 0.01943231 | 0.10665721 | 3.40E-05 | 0.0046667 | 0.017998  |
| 16w_SITTD12 | 0.07639878 | 0.4503981  | 6.27E-05 | 0.015053  | 0.1354    |
| 16w_SITTD12 | 0.02155543 | 0.11946829 | 3.49E-05 | 0.0044169 | -0.0356   |
| 16w_SITTD12 | 0.0128363  | 0.06685627 | 3.23E-05 | 0.0059016 | 0.25518   |
| 16w_SITTD12 | 0.10464075 | 0.6208127  | 6.57E-05 | 0.025429  | -0.18901  |
| 16w_SITTD12 | 0.0976042  | 0.5783535  | 6.51E-05 | 0.023964  | -0.074831 |
| 16w_SITTD12 | 0.05194255 | 0.30282703 | 5.85E-05 | 0.0064518 | 0.055318  |
| 16w_SITTD12 | 0.01713379 | 0.0927877  | 3.33E-05 | 0.0049935 | 0.085504  |
| 16w_SITTD12 | 0.02584792 | 0.14536957 | 3.72E-05 | 0.0041509 | -0.096385 |

|             |            |            |          |           |           |
|-------------|------------|------------|----------|-----------|-----------|
| 16w_SITTD12 | 0.01220522 | 0.0630483  | 3.23E-05 | 0.0060411 | 0.2791    |
| 16w_SITTD12 | 0.06395079 | 0.37528577 | 6.10E-05 | 0.0098069 | 0.091185  |
| 16w_SITTD12 | 0.08970889 | 0.5307125  | 6.44E-05 | 0.021137  | 0.059815  |
| 16w_SITTD12 | 0.09311862 | 0.5512871  | 6.47E-05 | 0.022469  | 0.010343  |
| 16w_SITTD12 | 0.04944048 | 0.2877293  | 5.73E-05 | 0.0058857 | 0.04392   |
| 16w_SITTD12 | 0.02277944 | 0.12685412 | 3.55E-05 | 0.0043197 | -0.056631 |
| 16w_SITTD12 | 0.01881253 | 0.1029174  | 3.38E-05 | 0.004741  | 0.03364   |
| 16w_SITTD12 | 0.0736666  | 0.4339119  | 6.23E-05 | 0.013805  | 0.12913   |
| 16w_SITTD12 | 0.02096431 | 0.11590142 | 3.47E-05 | 0.0044724 | -0.023601 |
| 16w_SITTD12 | 0.10709462 | 0.63561964 | 6.58E-05 | 0.025586  | -0.23052  |
| 16w_SITTD12 | 0.04974873 | 0.2895893  | 5.76E-05 | 0.005992  | 0.046466  |
| 16w_SITTD12 | 0.07093674 | 0.41743967 | 6.20E-05 | 0.012608  | 0.11916   |
| 16w_SITTD12 | 0.03544788 | 0.20329666 | 4.59E-05 | 0.0042319 | -0.073417 |
| 16w_SITTD12 | 0.00796033 | 0.03743419 | 3.19E-05 | 0.0073923 | 0.48652   |
| 16w_SITTD12 | 0.02270455 | 0.12640218 | 3.55E-05 | 0.0043197 | -0.056631 |
| 16w_SITTD12 | 0.02567623 | 0.14433362 | 3.72E-05 | 0.0041509 | -0.092011 |
| 16w_SITTD12 | 0.01693277 | 0.09157474 | 3.31E-05 | 0.0050879 | 0.10435   |
| 16w_SITTD12 | 0.03607442 | 0.20707725 | 4.65E-05 | 0.0042637 | -0.068307 |
| 16w_SITTD12 | 0.02144045 | 0.11877451 | 3.49E-05 | 0.0044169 | -0.0356   |
| 16w_SITTD12 | 0.14042145 | 0.8367168  | 6.74E-05 | 0.023558  | -0.49553  |
| 16w_SITTD12 | 0.07050958 | 0.41486213 | 6.19E-05 | 0.012376  | 0.11689   |
| 16w_SITTD12 | 0.05240439 | 0.3056138  | 5.85E-05 | 0.0064518 | 0.057248  |
| 16w_SITTD12 | 0.09107357 | 0.5389471  | 6.45E-05 | 0.021597  | 0.036126  |
| 16w_SITTD12 | 0.05194491 | 0.30284122 | 5.85E-05 | 0.0064518 | 0.055318  |
| 16w_SITTD12 | 0.02201165 | 0.1222212  | 3.52E-05 | 0.0043661 | -0.046619 |
| 16w_SITTD12 | 0.00920859 | 0.04496633 | 3.19E-05 | 0.0070136 | 0.43237   |
| 16w_SITTD12 | 0.02578929 | 0.14501582 | 3.72E-05 | 0.0041509 | -0.096385 |
| 16w_SITTD12 | 0.01871917 | 0.10235404 | 3.38E-05 | 0.004741  | 0.03364   |
| 16w_SITTD12 | 0.07189491 | 0.42322138 | 6.21E-05 | 0.01308   | 0.12348   |
| 16w_SITTD12 | 0.02773195 | 0.15673797 | 3.88E-05 | 0.0040827 | -0.10472  |
| 16w_SITTD12 | 0.02627972 | 0.14797509 | 3.76E-05 | 0.0041286 | -0.096385 |
| 16w_SITTD12 | 0.03819419 | 0.21986815 | 4.87E-05 | 0.0044183 | -0.04622  |
| 16w_SITTD12 | 0.03359114 | 0.19209293 | 4.37E-05 | 0.0041322 | -0.087207 |
| 16w_SITTD12 | 0.079762   | 0.47069207 | 6.32E-05 | 0.016594  | 0.13545   |
| 16w_SITTD12 | 0.01554706 | 0.08321325 | 3.28E-05 | 0.0052924 | 0.1442    |
| 16w_SITTD12 | 0.01130414 | 0.05761108 | 3.21E-05 | 0.006339  | 0.32844   |
| 16w_SITTD12 | 0.02238314 | 0.12446281 | 3.52E-05 | 0.0043661 | -0.046619 |
| 16w_SITTD12 | 0.04183435 | 0.2418332  | 5.19E-05 | 0.0047337 | -0.00654  |
| 16w_SITTD12 | 0.10859779 | 0.64468986 | 6.59E-05 | 0.025616  | -0.24573  |
| 16w_SITTD12 | 0.03091737 | 0.1759591  | 4.16E-05 | 0.0040771 | -0.10299  |
| 16w_SITTD12 | 0.07252809 | 0.42704204 | 6.22E-05 | 0.01332   | 0.12548   |
| 16w_SITTD12 | 0.1456359  | 0.8681812  | 6.75E-05 | 0.02365   | -0.51294  |
| 16w_SITTD12 | 0.11142096 | 0.66172516 | 6.61E-05 | 0.025525  | -0.28705  |

|             |            |            |          |           |            |
|-------------|------------|------------|----------|-----------|------------|
| 16w_SITTD12 | 0.0494925  | 0.28804317 | 5.73E-05 | 0.0058857 | 0.04392    |
| 16w_SITTD12 | 0.03411797 | 0.19527185 | 4.43E-05 | 0.004153  | -0.082901  |
| 16w_SITTD12 | 0.01776712 | 0.09660929 | 3.34E-05 | 0.0049043 | 0.067421   |
| 16w_SITTD12 | 0.02523312 | 0.14165984 | 3.68E-05 | 0.0041768 | -0.086782  |
| 16w_SITTD12 | 0.12654278 | 0.7529716  | 6.68E-05 | 0.023879  | -0.41707   |
| 16w_SITTD12 | 0.0115827  | 0.05929195 | 3.22E-05 | 0.0061869 | 0.30353    |
| 16w_SITTD12 | 0.01684319 | 0.09103422 | 3.31E-05 | 0.0050879 | 0.10435    |
| 16w_SITTD12 | 0.0200588  | 0.11043748 | 3.42E-05 | 0.0045972 | 0.0032259  |
| 16w_SITTD12 | 0.11355447 | 0.67459893 | 6.62E-05 | 0.025353  | -0.30551   |
| 16w_SITTD12 | 0.08784605 | 0.51947194 | 6.41E-05 | 0.020177  | 0.080939   |
| 16w_SITTD12 | 0.09728638 | 0.5764358  | 6.51E-05 | 0.023799  | -0.065044  |
| 16w_SITTD12 | 0.02739903 | 0.15472911 | 3.84E-05 | 0.0040947 | -0.10271   |
| 16w_SITTD12 | 0.11161027 | 0.6628675  | 6.61E-05 | 0.025525  | -0.28705   |
| 16w_SITTD12 | 0.00483888 | 0.0185991  | 3.18E-05 | 0.0084677 | 0.62647    |
| 16w_SITTD12 | 0.01451131 | 0.07696346 | 3.26E-05 | 0.0055188 | 0.18676    |
| 16w_SITTD12 | 0.10756959 | 0.6384856  | 6.59E-05 | 0.025604  | -0.23822   |
| 16w_SITTD12 | 0.11367343 | 0.67531675 | 6.62E-05 | 0.025353  | -0.31137   |
| 16w_SITTD12 | 0.09742086 | 0.5772472  | 6.51E-05 | 0.023964  | -0.065044  |
| 16w_SITTD12 | 0.01296393 | 0.06762639 | 3.23E-05 | 0.0059016 | 0.25518    |
| 16w_SITTD12 | 0.02623676 | 0.14771591 | 3.76E-05 | 0.0041286 | -0.096385  |
| 16w_SITTD12 | 0.03516613 | 0.20159651 | 4.54E-05 | 0.0042028 | -0.078293  |
| 16w_SITTD12 | 0.0938563  | 0.55573833 | 6.48E-05 | 0.022676  | -0.0077738 |
| 16w_SITTD12 | 0.10784192 | 0.6401289  | 6.59E-05 | 0.025604  | -0.23822   |
| 16w_SITTD12 | 0.01566587 | 0.08393017 | 3.28E-05 | 0.0052924 | 0.1442     |
| 16w_SITTD12 | 0.02386932 | 0.13343051 | 3.61E-05 | 0.0042401 | -0.073623  |
| 16w_SITTD12 | 0.03803821 | 0.21892692 | 4.81E-05 | 0.0043756 | -0.04622   |
| 16w_SITTD12 | 0.06595413 | 0.38737416 | 6.13E-05 | 0.010616  | 0.097788   |
| 16w_SITTD12 | 0.02745795 | 0.15508468 | 3.84E-05 | 0.0040947 | -0.10472   |
| 16w_SITTD12 | 0.08643486 | 0.51095676 | 6.40E-05 | 0.019681  | 0.099025   |
| 16w_SITTD12 | 0.10907021 | 0.6475405  | 6.60E-05 | 0.025611  | -0.25305   |
| 16w_SITTD12 | 0.01868922 | 0.10217333 | 3.38E-05 | 0.004741  | 0.03364    |
| 16w_SITTD12 | 0.1000514  | 0.59312016 | 6.53E-05 | 0.024558  | -0.11403   |
| 16w_SITTD12 | 0.10025703 | 0.59436095 | 6.53E-05 | 0.024687  | -0.11403   |
| 16w_SITTD12 | 0.01232079 | 0.06374566 | 3.23E-05 | 0.0060411 | 0.2791     |
| 16w_SITTD12 | 0.02341342 | 0.13067962 | 3.58E-05 | 0.0042778 | -0.065623  |
| 16w_SITTD12 | 0.09778471 | 0.5794428  | 6.51E-05 | 0.023964  | -0.074831  |
| 16w_SITTD12 | 0.02845439 | 0.16109727 | 3.93E-05 | 0.004074  | -0.10603   |
| 16w_SITTD12 | 0.03200536 | 0.18252414 | 4.27E-05 | 0.004099  | -0.097962  |
| 16w_SITTD12 | 0.08198965 | 0.4841339  | 6.35E-05 | 0.017633  | 0.12948    |
| 16w_SITTD12 | 0.04916892 | 0.2860906  | 5.73E-05 | 0.0058857 | 0.04392    |
| 16w_SITTD12 | 0.01606157 | 0.08631783 | 3.30E-05 | 0.0051875 | 0.12392    |
| 16w_SITTD12 | 0.01654862 | 0.08925673 | 3.31E-05 | 0.0050879 | 0.10435    |
| 16w_SITTD12 | 0.00878732 | 0.04242433 | 3.19E-05 | 0.0070136 | 0.43237    |

|             |            |            |          |           |           |
|-------------|------------|------------|----------|-----------|-----------|
| 16w_SITTD12 | 0.01174558 | 0.06027474 | 3.22E-05 | 0.0061869 | 0.30353   |
| 16w_SITTD12 | 0.00909436 | 0.04427706 | 3.19E-05 | 0.0070136 | 0.43237   |
| 16w_SITTD12 | 0.03892803 | 0.2242962  | 4.92E-05 | 0.0044639 | -0.040459 |
| 16w_SITTD12 | 0.1443476  | 0.8604075  | 6.75E-05 | 0.023623  | -0.50968  |
| 16w_SITTD12 | 0.03056555 | 0.1738362  | 4.11E-05 | 0.0040705 | -0.10475  |
| 16w_SITTD12 | 0.01526042 | 0.08148366 | 3.27E-05 | 0.0054028 | 0.16515   |
| 16w_SITTD12 | 0.02626886 | 0.1479096  | 3.76E-05 | 0.0041286 | -0.096385 |
| 16w_SITTD12 | 0.01554329 | 0.08319049 | 3.28E-05 | 0.0052924 | 0.1442    |
| 16w_SITTD12 | 0.02150893 | 0.1191877  | 3.49E-05 | 0.0044169 | -0.0356   |
| 16w_SITTD12 | 0.05422404 | 0.3165937  | 5.92E-05 | 0.0069681 | 0.062513  |
| 16w_SITTD12 | 0.11403791 | 0.67751604 | 6.63E-05 | 0.025299  | -0.31137  |
| 16w_SITTD12 | 0.03518945 | 0.20173727 | 4.54E-05 | 0.0042028 | -0.073417 |
| 16w_SITTD12 | 0.01960249 | 0.10768408 | 3.40E-05 | 0.0046667 | 0.017998  |
| 16w_SITTD12 | 0.01657816 | 0.08943502 | 3.31E-05 | 0.0050879 | 0.10435   |
| 16w_SITTD12 | 0.00888802 | 0.043032   | 3.19E-05 | 0.0070136 | 0.43237   |
| 16w_SITTD12 | 0.01019227 | 0.05090192 | 3.20E-05 | 0.0066628 | 0.37961   |
| 16w_SITTD12 | 0.04225817 | 0.24439055 | 5.24E-05 | 0.0047963 | -0.00654  |
| 16w_SITTD12 | 0.01825781 | 0.09957016 | 3.36E-05 | 0.0048202 | 0.050123  |
| 16w_SITTD12 | 0.01570523 | 0.08416764 | 3.28E-05 | 0.0052924 | 0.1442    |
| 16w_SITTD12 | 0.05215631 | 0.30411687 | 5.85E-05 | 0.0064518 | 0.055318  |
| 16w_SITTD12 | 0.01617295 | 0.08698993 | 3.30E-05 | 0.0051875 | 0.12392   |
| 16w_SITTD12 | 0.01256996 | 0.06524914 | 3.23E-05 | 0.0059016 | 0.25518   |
| 16w_SITTD12 | 0.14264046 | 0.8501065  | 6.74E-05 | 0.023593  | -0.50412  |
| 16w_SITTD12 | 0.02083756 | 0.1151366  | 3.44E-05 | 0.0045325 | -0.023601 |
| 16w_SITTD12 | 0.02179907 | 0.12093843 | 3.49E-05 | 0.0044169 | -0.0356   |
| 16w_SITTD12 | 0.0812171  | 0.47947228 | 6.33E-05 | 0.017113  | 0.13148   |
| 16w_SITTD12 | 0.01450948 | 0.07695242 | 3.26E-05 | 0.0055188 | 0.18676   |
| 16w_SITTD12 | 0.10276843 | 0.60951495 | 6.55E-05 | 0.025127  | -0.16182  |
| 16w_SITTD12 | 0.06322275 | 0.37089276 | 6.09E-05 | 0.0096122 | 0.087254  |
| 16w_SITTD12 | 0.00736079 | 0.03381654 | 3.19E-05 | 0.0075925 | 0.51404   |
| 16w_SITTD12 | 0.03201001 | 0.1825522  | 4.27E-05 | 0.004099  | -0.097962 |
| 16w_SITTD12 | 0.0221457  | 0.12303007 | 3.52E-05 | 0.0043661 | -0.046619 |
| 16w_SITTD12 | 0.02458536 | 0.1377512  | 3.64E-05 | 0.0042065 | -0.080664 |
| 16w_SITTD12 | 0.01828726 | 0.09974785 | 3.36E-05 | 0.0048202 | 0.050123  |
| 16w_SITTD12 | 0.07709481 | 0.454598   | 6.28E-05 | 0.015307  | 0.13605   |
| 16w_SITTD12 | 0.02607693 | 0.14675145 | 3.76E-05 | 0.0041286 | -0.096385 |
| 16w_SITTD12 | 0.08831065 | 0.5222754  | 6.42E-05 | 0.020421  | 0.074212  |
| 16w_SITTD12 | 0.01544312 | 0.08258604 | 3.28E-05 | 0.0052924 | 0.1442    |
| 16w_SITTD12 | 0.11062285 | 0.6569093  | 6.60E-05 | 0.02558   | -0.27396  |
| 16w_SITTD12 | 0.01495012 | 0.07961125 | 3.27E-05 | 0.0054028 | 0.16515   |
| 16w_SITTD12 | 0.00890475 | 0.04313292 | 3.19E-05 | 0.0070136 | 0.43237   |
| 16w_SITTD12 | 0.02840257 | 0.16078456 | 3.93E-05 | 0.004074  | -0.10603  |
| 16w_SITTD12 | 0.10163894 | 0.6026996  | 6.54E-05 | 0.024923  | -0.14299  |



|             |            |            |          |           |           |
|-------------|------------|------------|----------|-----------|-----------|
| 16w_SITTD12 | 0.0289064  | 0.16382475 | 3.97E-05 | 0.0040686 | -0.10664  |
| 16w_SITTD12 | 0.08774973 | 0.51889074 | 6.41E-05 | 0.020177  | 0.080939  |
| 16w_SITTD12 | 0.09517773 | 0.563712   | 6.49E-05 | 0.023263  | -0.026471 |
| 16w_SITTD12 | 0.01674188 | 0.0904229  | 3.31E-05 | 0.0050879 | 0.10435   |
| 16w_SITTD12 | 0.02376058 | 0.13277437 | 3.61E-05 | 0.0042401 | -0.073623 |
| 16w_SITTD12 | 0.08937372 | 0.5286901  | 6.43E-05 | 0.020902  | 0.059815  |
| 16w_SITTD12 | 0.03827316 | 0.22034466 | 4.87E-05 | 0.0044183 | -0.04622  |
| 16w_SITTD12 | 0.0323074  | 0.1843467  | 4.27E-05 | 0.004099  | -0.097962 |
| 16w_SITTD12 | 0.01381252 | 0.07274685 | 3.25E-05 | 0.0056405 | 0.20898   |
| 16w_SITTD12 | 0.07826524 | 0.46166047 | 6.29E-05 | 0.015819  | 0.13662   |
| 16w_SITTD12 | 0.01473058 | 0.07828655 | 3.26E-05 | 0.0055188 | 0.18676   |
| 16w_SITTD12 | 0.02771367 | 0.15662767 | 3.88E-05 | 0.0040827 | -0.10472  |
| 16w_SITTD12 | 0.01847463 | 0.10087849 | 3.36E-05 | 0.0048202 | 0.050123  |
| 16w_SITTD12 | 0.04649797 | 0.2699739  | 5.57E-05 | 0.0054037 | 0.028707  |
| 16w_SITTD12 | 0.13685112 | 0.81517303 | 6.73E-05 | 0.023528  | -0.48029  |
| 16w_SITTD12 | 0.02157147 | 0.11956509 | 3.49E-05 | 0.0044169 | -0.0356   |
| 16w_SITTD12 | 0.01349387 | 0.07082412 | 3.24E-05 | 0.0057681 | 0.23179   |
| 16w_SITTD12 | 0.03388084 | 0.19384098 | 4.43E-05 | 0.004153  | -0.087207 |
| 16w_SITTD12 | 0.01406074 | 0.07424464 | 3.25E-05 | 0.0056405 | 0.20898   |
| 16w_SITTD12 | 0.02496981 | 0.14007097 | 3.68E-05 | 0.0041768 | -0.086782 |
| 16w_SITTD12 | 0.07854517 | 0.4633496  | 6.30E-05 | 0.016077  | 0.13651   |
| 16w_SITTD12 | 0.0180102  | 0.09807606 | 3.34E-05 | 0.0049043 | 0.067421  |
| 16w_SITTD12 | 0.03018439 | 0.17153627 | 4.07E-05 | 0.0040668 | -0.10597  |
| 16w_SITTD12 | 0.1129931  | 0.67121154 | 6.62E-05 | 0.025403  | -0.29951  |
| 16w_SITTD12 | 0.1334486  | 0.794642   | 6.71E-05 | 0.023546  | -0.45937  |
| 16w_SITTD12 | 0.01956879 | 0.10748076 | 3.40E-05 | 0.0046667 | 0.017998  |
| 16w_SITTD12 | 0.01810791 | 0.09866563 | 3.36E-05 | 0.0048202 | 0.050123  |
| 16w_SITTD12 | 0.0724648  | 0.42666012 | 6.22E-05 | 0.01332   | 0.12548   |
| 16w_SITTD12 | 0.04366916 | 0.25290462 | 5.38E-05 | 0.0050014 | 0.008455  |
| 16w_SITTD12 | 0.096228   | 0.57004946 | 6.50E-05 | 0.023448  | -0.045608 |
| 16w_SITTD12 | 0.01807754 | 0.09848239 | 3.34E-05 | 0.0049043 | 0.050123  |
| 16w_SITTD12 | 0.08122139 | 0.4794982  | 6.33E-05 | 0.017113  | 0.13148   |
| 16w_SITTD12 | 0.10010593 | 0.59344923 | 6.53E-05 | 0.024558  | -0.11403  |
| 16w_SITTD12 | 0.02464163 | 0.13809071 | 3.64E-05 | 0.0042065 | -0.080664 |
| 16w_SITTD12 | 0.04932118 | 0.2870094  | 5.73E-05 | 0.0058857 | 0.04392   |
| 16w_SITTD12 | 0.04691567 | 0.27249435 | 5.57E-05 | 0.0054037 | 0.032113  |
| 16w_SITTD12 | 0.09780836 | 0.5795855  | 6.51E-05 | 0.023964  | -0.074831 |
| 16w_SITTD12 | 0.01674606 | 0.09044813 | 3.31E-05 | 0.0050879 | 0.10435   |
| 16w_SITTD12 | 0.06255783 | 0.36688057 | 6.08E-05 | 0.0094206 | 0.085432  |
| 16w_SITTD12 | 0.03626267 | 0.20821314 | 4.65E-05 | 0.0042637 | -0.068307 |
| 16w_SITTD12 | 0.04197391 | 0.24267529 | 5.24E-05 | 0.0047963 | -0.00654  |
| 16w_SITTD12 | 0.05171344 | 0.30144453 | 5.83E-05 | 0.0063316 | 0.053285  |
| 16w_SITTD12 | 0.07947422 | 0.46895558 | 6.31E-05 | 0.016335  | 0.13545   |

|             |            |            |          |           |            |
|-------------|------------|------------|----------|-----------|------------|
| 16w_SITTD12 | 0.02722772 | 0.15369543 | 3.84E-05 | 0.0040947 | -0.10271   |
| 16w_SITTD12 | 0.0154991  | 0.08292384 | 3.28E-05 | 0.0052924 | 0.1442     |
| 16w_SITTD12 | 0.01411906 | 0.07459656 | 3.25E-05 | 0.0056405 | 0.20898    |
| 16w_SITTD12 | 0.08584329 | 0.5073871  | 6.39E-05 | 0.01943   | 0.1043     |
| 16w_SITTD12 | 0.01325712 | 0.06939556 | 3.24E-05 | 0.0057681 | 0.23179    |
| 16w_SITTD12 | 0.10941966 | 0.6496491  | 6.60E-05 | 0.025611  | -0.2602    |
| 16w_SITTD12 | 0.07060704 | 0.41545025 | 6.19E-05 | 0.012376  | 0.11916    |
| 16w_SITTD12 | 0.05186291 | 0.30234644 | 5.83E-05 | 0.0063316 | 0.055318   |
| 16w_SITTD12 | 0.06660982 | 0.39133063 | 6.13E-05 | 0.010826  | 0.10013    |
| 16w_SITTD12 | 0.01845021 | 0.10073114 | 3.36E-05 | 0.0048202 | 0.050123   |
| 16w_SITTD12 | 0.07809902 | 0.4606575  | 6.29E-05 | 0.015819  | 0.13662    |
| 16w_SITTD12 | 0.03139776 | 0.17885785 | 4.16E-05 | 0.0040771 | -0.10071   |
| 16w_SITTD12 | 0.08292329 | 0.48976764 | 6.35E-05 | 0.017892  | 0.12434    |
| 16w_SITTD12 | 0.07396855 | 0.43573388 | 6.23E-05 | 0.013805  | 0.13074    |
| 16w_SITTD12 | 0.05418776 | 0.3163748  | 5.92E-05 | 0.0069681 | 0.062513   |
| 16w_SITTD12 | 0.01695525 | 0.09171038 | 3.31E-05 | 0.0050879 | 0.085504   |
| 16w_SITTD12 | 0.03340836 | 0.19098999 | 4.37E-05 | 0.0041322 | -0.091175  |
| 16w_SITTD12 | 0.0090935  | 0.0442719  | 3.19E-05 | 0.0070136 | 0.43237    |
| 16w_SITTD12 | 0.01309738 | 0.06843164 | 3.23E-05 | 0.0059016 | 0.23179    |
| 16w_SITTD12 | 0.01135435 | 0.05791403 | 3.21E-05 | 0.006339  | 0.32844    |
| 16w_SITTD12 | 0.01852137 | 0.10116048 | 3.36E-05 | 0.0048202 | 0.050123   |
| 16w_SITTD12 | 0.02343395 | 0.13080348 | 3.58E-05 | 0.0042778 | -0.065623  |
| 16w_SITTD12 | 0.08928303 | 0.5281428  | 6.43E-05 | 0.020902  | 0.067165   |
| 16w_SITTD12 | 0.0693095  | 0.40762076 | 6.17E-05 | 0.01192   | 0.11218    |
| 16w_SITTD12 | 0.03091263 | 0.1759305  | 4.16E-05 | 0.0040771 | -0.10299   |
| 16w_SITTD12 | 0.09869672 | 0.5849459  | 6.52E-05 | 0.024275  | -0.084641  |
| 16w_SITTD12 | 0.03807687 | 0.21916023 | 4.87E-05 | 0.0044183 | -0.04622   |
| 16w_SITTD12 | 0.02240444 | 0.12459134 | 3.52E-05 | 0.0043661 | -0.046619  |
| 16w_SITTD12 | 0.05592603 | 0.32686365 | 5.97E-05 | 0.0073934 | 0.067199   |
| 16w_SITTD12 | 0.02566598 | 0.14427178 | 3.72E-05 | 0.0041509 | -0.092011  |
| 16w_SITTD12 | 0.07134526 | 0.41990468 | 6.20E-05 | 0.012843  | 0.12136    |
| 16w_SITTD12 | 0.025269   | 0.14187633 | 3.68E-05 | 0.0041768 | -0.092011  |
| 16w_SITTD12 | 0.08968161 | 0.5305479  | 6.44E-05 | 0.021137  | 0.059815   |
| 16w_SITTD12 | 0.09419238 | 0.5577663  | 6.48E-05 | 0.022877  | -0.0077738 |
| 16w_SITTD12 | 0.01946787 | 0.10687177 | 3.40E-05 | 0.0046667 | 0.017998   |
| 16w_SITTD12 | 0.11498734 | 0.683245   | 6.63E-05 | 0.025242  | -0.32268   |
| 16w_SITTD12 | 0.04421102 | 0.25617424 | 5.42E-05 | 0.0050757 | 0.012967   |
| 16w_SITTD12 | 0.12435196 | 0.73975194 | 6.67E-05 | 0.024092  | -0.40152   |
| 16w_SITTD12 | 0.01888056 | 0.10332791 | 3.38E-05 | 0.004741  | 0.03364    |
| 16w_SITTD12 | 0.08850186 | 0.52342916 | 6.42E-05 | 0.020663  | 0.074212   |
| 16w_SITTD12 | 0.00948408 | 0.04662868 | 3.20E-05 | 0.0068348 | 0.4058     |
| 16w_SITTD12 | 0.07324444 | 0.43136454 | 6.23E-05 | 0.013561  | 0.12737    |
| 16w_SITTD12 | 0.0161623  | 0.08692568 | 3.30E-05 | 0.0051875 | 0.12392    |

|             |            |            |          |           |           |
|-------------|------------|------------|----------|-----------|-----------|
| 16w_SITTD12 | 0.02041541 | 0.11258933 | 3.44E-05 | 0.0045325 | -0.01065  |
| 16w_SITTD12 | 0.01300094 | 0.06784973 | 3.23E-05 | 0.0059016 | 0.25518   |
| 16w_SITTD12 | 0.06662542 | 0.39142478 | 6.13E-05 | 0.010826  | 0.10013   |
| 16w_SITTD12 | 0.123367   | 0.73380864 | 6.67E-05 | 0.024217  | -0.39346  |
| 16w_SITTD12 | 0.03356215 | 0.19191797 | 4.37E-05 | 0.0041322 | -0.087207 |
| 16w_SITTD12 | 0.02292739 | 0.12774684 | 3.55E-05 | 0.0043197 | -0.056631 |
| 16w_SITTD12 | 0.01769537 | 0.09617636 | 3.34E-05 | 0.0049043 | 0.067421  |
| 16w_SITTD12 | 0.0249596  | 0.1400094  | 3.68E-05 | 0.0041768 | -0.086782 |
| 16w_SITTD12 | 0.01347931 | 0.07073624 | 3.24E-05 | 0.0057681 | 0.23179   |
| 16w_SITTD12 | 0.00821066 | 0.03894471 | 3.19E-05 | 0.0071994 | 0.45929   |
| 16w_SITTD12 | 0.11713015 | 0.69617486 | 6.64E-05 | 0.024986  | -0.34377  |
| 16w_SITTD12 | 0.08006357 | 0.47251177 | 6.32E-05 | 0.016594  | 0.13446   |
| 16w_SITTD12 | 0.01438397 | 0.07619503 | 3.26E-05 | 0.0055188 | 0.18676   |
| 16w_SITTD12 | 0.11425211 | 0.67880857 | 6.63E-05 | 0.025299  | -0.3171   |
| 16w_SITTD12 | 0.0609713  | 0.3573073  | 6.06E-05 | 0.008866  | 0.080421  |
| 16w_SITTD12 | 0.01838208 | 0.10032    | 3.36E-05 | 0.0048202 | 0.050123  |
| 16w_SITTD12 | 0.0275911  | 0.15588808 | 3.88E-05 | 0.0040827 | -0.10472  |
| 16w_SITTD12 | 0.09311554 | 0.5512685  | 6.47E-05 | 0.022469  | 0.010343  |
| 16w_SITTD12 | 0.03698093 | 0.21254723 | 4.76E-05 | 0.0043355 | -0.057524 |
| 16w_SITTD12 | 0.005781   | 0.02428395 | 3.18E-05 | 0.0082375 | 0.59807   |
| 16w_SITTD12 | 0.0251148  | 0.14094587 | 3.68E-05 | 0.0041768 | -0.086782 |
| 16w_SITTD12 | 0.04624384 | 0.26844049 | 5.54E-05 | 0.0053171 | 0.028707  |
| 16w_SITTD12 | 0.07865521 | 0.4640136  | 6.30E-05 | 0.016077  | 0.13651   |
| 16w_SITTD12 | 0.0536734  | 0.3132711  | 5.91E-05 | 0.0068337 | 0.060836  |
| 16w_SITTD12 | 0.03340634 | 0.19097778 | 4.37E-05 | 0.0041322 | -0.091175 |
| 16w_SITTD12 | 0.00673683 | 0.03005152 | 3.18E-05 | 0.0078    | 0.54183   |
| 16w_SITTD12 | 0.01266644 | 0.0658313  | 3.23E-05 | 0.0059016 | 0.25518   |
| 16w_SITTD12 | 0.02493771 | 0.13987727 | 3.68E-05 | 0.0041768 | -0.086782 |
| 16w_SITTD12 | 0.02136288 | 0.11830646 | 3.47E-05 | 0.0044724 | -0.023601 |
| 16w_SITTD12 | 0.09590156 | 0.56807965 | 6.50E-05 | 0.023448  | -0.035993 |
| 16w_SITTD12 | 0.0665234  | 0.39080918 | 6.13E-05 | 0.010826  | 0.10013   |
| 16w_SITTD12 | 0.06886259 | 0.40492404 | 6.16E-05 | 0.011695  | 0.10977   |
| 16w_SITTD12 | 0.11014998 | 0.65405595 | 6.60E-05 | 0.02558   | -0.26716  |
| 16w_SITTD12 | 0.03955743 | 0.22809406 | 4.98E-05 | 0.0045122 | -0.034672 |
| 16w_SITTD12 | 0.11409213 | 0.6778433  | 6.63E-05 | 0.025299  | -0.31137  |
| 16w_SITTD12 | 0.03519305 | 0.20175898 | 4.54E-05 | 0.0042028 | -0.073417 |
| 16w_SITTD12 | 0.07053247 | 0.41500026 | 6.19E-05 | 0.012376  | 0.11689   |
| 16w_SITTD12 | 0.00792552 | 0.03722417 | 3.19E-05 | 0.0073923 | 0.48652   |
| 16w_SITTD12 | 0.04513597 | 0.26175547 | 5.46E-05 | 0.0051531 | 0.021279  |
| 16w_SITTD12 | 0.08717853 | 0.5154441  | 6.41E-05 | 0.01993   | 0.087329  |
| 16w_SITTD12 | 0.02014511 | 0.11095832 | 3.42E-05 | 0.0045972 | 0.0032259 |
| 16w_SITTD12 | 0.11281601 | 0.670143   | 6.62E-05 | 0.025448  | -0.29951  |
| 16w_SITTD12 | 0.03992938 | 0.23033841 | 5.03E-05 | 0.0045634 | -0.028892 |

|             |            |            |          |           |           |
|-------------|------------|------------|----------|-----------|-----------|
| 16w_SITTD12 | 0.01735934 | 0.0941487  | 3.33E-05 | 0.0049935 | 0.085504  |
| 16w_SITTD12 | 0.02282029 | 0.12710057 | 3.55E-05 | 0.0043197 | -0.056631 |
| 16w_SITTD12 | 0.02007036 | 0.11050724 | 3.42E-05 | 0.0045972 | 0.0032259 |
| 16w_SITTD12 | 0.09054771 | 0.53577405 | 6.44E-05 | 0.021369  | 0.044278  |
| 16w_SITTD12 | 0.11058497 | 0.6566807  | 6.60E-05 | 0.02558   | -0.27396  |
| 16w_SITTD12 | 0.11135317 | 0.66131604 | 6.61E-05 | 0.025525  | -0.28058  |
| 16w_SITTD12 | 0.02835887 | 0.16052093 | 3.93E-05 | 0.004074  | -0.10603  |
| 16w_SITTD12 | 0.03680381 | 0.21147844 | 4.70E-05 | 0.0042982 | -0.062998 |
| 16w_SITTD12 | 0.07639577 | 0.45037997 | 6.27E-05 | 0.015053  | 0.1354    |
| 16w_SITTD12 | 0.03877397 | 0.22336657 | 4.92E-05 | 0.0044639 | -0.040459 |
| 16w_SITTD12 | 0.07229273 | 0.42562184 | 6.21E-05 | 0.01308   | 0.12548   |
| 16w_SITTD12 | 0.13029364 | 0.7756046  | 6.70E-05 | 0.02364   | -0.44263  |
| 16w_SITTD12 | 0.02599545 | 0.14625977 | 3.76E-05 | 0.0041286 | -0.096385 |
| 16w_SITTD12 | 0.01752772 | 0.09516471 | 3.33E-05 | 0.0049935 | 0.067421  |
| 16w_SITTD12 | 0.07802551 | 0.46021396 | 6.29E-05 | 0.015819  | 0.13662   |
| 16w_SITTD12 | 0.02457698 | 0.13770062 | 3.64E-05 | 0.0042065 | -0.080664 |
| 16w_SITTD12 | 0.02965147 | 0.16832055 | 4.02E-05 | 0.0040662 | -0.10661  |
| 16w_SITTD12 | 0.01776114 | 0.09657322 | 3.34E-05 | 0.0049043 | 0.067421  |
| 16w_SITTD12 | 0.03133998 | 0.1785092  | 4.16E-05 | 0.0040771 | -0.10071  |
| 16w_SITTD12 | 0.08532024 | 0.504231   | 6.39E-05 | 0.019177  | 0.10916   |
| 16w_SITTD12 | 0.01248386 | 0.06472963 | 3.23E-05 | 0.0060411 | 0.2791    |
| 16w_SITTD12 | 0.08770549 | 0.51862377 | 6.41E-05 | 0.020177  | 0.080939  |
| 16w_SITTD12 | 0.03730493 | 0.21450227 | 4.76E-05 | 0.0043355 | -0.057524 |
| 16w_SITTD12 | 0.0920592  | 0.54489446 | 6.46E-05 | 0.022042  | 0.027741  |
| 16w_SITTD12 | 0.05520967 | 0.3225411  | 5.94E-05 | 0.0071062 | 0.065685  |
| 16w_SITTD12 | 0.04505897 | 0.26129082 | 5.46E-05 | 0.0051531 | 0.017239  |
| 16w_SITTD12 | 0.1153046  | 0.6851594  | 6.63E-05 | 0.025182  | -0.32814  |
| 16w_SITTD12 | 0.03383444 | 0.19356102 | 4.43E-05 | 0.004153  | -0.087207 |
| 16w_SITTD12 | 0.07797582 | 0.4599141  | 6.29E-05 | 0.015819  | 0.13662   |
| 16w_SITTD12 | 0.03190109 | 0.18189499 | 4.22E-05 | 0.0040866 | -0.097962 |
| 16w_SITTD12 | 0.01346477 | 0.07064851 | 3.24E-05 | 0.0057681 | 0.23179   |
| 16w_SITTD12 | 0.02741933 | 0.15485165 | 3.84E-05 | 0.0040947 | -0.10271  |
| 16w_SITTD12 | 0.1003697  | 0.5950408  | 6.53E-05 | 0.024687  | -0.12375  |
| 16w_SITTD12 | 0.02964945 | 0.16830839 | 4.02E-05 | 0.0040662 | -0.10661  |
| 16w_SITTD12 | 0.04577398 | 0.2656053  | 5.50E-05 | 0.0052335 | 0.025099  |
| 16w_SITTD12 | 0.0086113  | 0.04136225 | 3.19E-05 | 0.0071994 | 0.45929   |
| 16w_SITTD12 | 0.11361347 | 0.67495495 | 6.62E-05 | 0.025353  | -0.30551  |
| 16w_SITTD12 | 0.03653484 | 0.20985547 | 4.70E-05 | 0.0042982 | -0.062998 |
| 16w_SITTD12 | 0.01893471 | 0.10365464 | 3.38E-05 | 0.004741  | 0.03364   |
| 16w_SITTD12 | 0.12956761 | 0.77122366 | 6.70E-05 | 0.023664  | -0.43556  |
| 16w_SITTD12 | 0.10669893 | 0.633232   | 6.58E-05 | 0.02556   | -0.22263  |
| 16w_SITTD12 | 0.01874281 | 0.10249669 | 3.38E-05 | 0.004741  | 0.03364   |
| 16w_SITTD12 | 0.00946887 | 0.04653688 | 3.20E-05 | 0.0068348 | 0.4058    |

|             |            |            |          |           |           |
|-------------|------------|------------|----------|-----------|-----------|
| 16w_SITTD12 | 0.01396533 | 0.07366895 | 3.25E-05 | 0.0056405 | 0.20898   |
| 16w_SITTD12 | 0.08031192 | 0.47401035 | 6.32E-05 | 0.016854  | 0.13446   |
| 16w_SITTD12 | 0.01194329 | 0.06146775 | 3.22E-05 | 0.0061869 | 0.30353   |
| 16w_SITTD12 | 0.08186782 | 0.48339882 | 6.35E-05 | 0.017633  | 0.12948   |
| 16w_SITTD12 | 0.09998176 | 0.59269994 | 6.53E-05 | 0.024558  | -0.11403  |
| 16w_SITTD12 | 0.01960667 | 0.10770928 | 3.40E-05 | 0.0046667 | 0.017998  |
| 16w_SITTD12 | 0.02821701 | 0.15966491 | 3.93E-05 | 0.004074  | -0.10603  |
| 16w_SITTD12 | 0.01923019 | 0.10543761 | 3.40E-05 | 0.0046667 | 0.017998  |
| 16w_SITTD12 | 0.02539387 | 0.14262982 | 3.72E-05 | 0.0041509 | -0.092011 |
| 16w_SITTD12 | 0.06081752 | 0.35637936 | 6.06E-05 | 0.008866  | 0.080421  |
| 16w_SITTD12 | 0.0869545  | 0.51409227 | 6.41E-05 | 0.01993   | 0.093363  |
| 16w_SITTD12 | 0.01867842 | 0.10210817 | 3.38E-05 | 0.004741  | 0.03364   |
| 16w_SITTD12 | 0.01915624 | 0.10499135 | 3.38E-05 | 0.004741  | 0.03364   |
| 16w_SITTD12 | 0.03433782 | 0.19659846 | 4.48E-05 | 0.0041765 | -0.082901 |
| 16w_SITTD12 | 0.05145905 | 0.29990953 | 5.83E-05 | 0.0063316 | 0.053285  |
| 16w_SITTD12 | 0.0226088  | 0.12582445 | 3.55E-05 | 0.0043197 | -0.056631 |
| 16w_SITTD12 | 0.13321806 | 0.79325086 | 6.71E-05 | 0.023556  | -0.45937  |
| 16w_SITTD12 | 0.06586443 | 0.38683286 | 6.13E-05 | 0.010616  | 0.097788  |
| 16w_SITTD12 | 0.02660053 | 0.14991093 | 3.80E-05 | 0.0041099 | -0.099939 |
| 16w_SITTD12 | 0.12699005 | 0.7556705  | 6.69E-05 | 0.023834  | -0.42086  |
| 16w_SITTD12 | 0.03079183 | 0.17520161 | 4.11E-05 | 0.0040705 | -0.10299  |
| 16w_SITTD12 | 0.0229815  | 0.12807335 | 3.55E-05 | 0.0043197 | -0.056631 |
| 16w_SITTD12 | 0.09714217 | 0.5755656  | 6.51E-05 | 0.023799  | -0.065044 |
| 16w_SITTD12 | 0.08547778 | 0.5051816  | 6.39E-05 | 0.019177  | 0.1043    |
| 16w_SITTD12 | 0.04837842 | 0.2813207  | 5.67E-05 | 0.0056831 | 0.038361  |
| 16w_SITTD12 | 0.02633286 | 0.14829575 | 3.76E-05 | 0.0041286 | -0.096385 |
| 16w_SITTD12 | 0.05757729 | 0.33682755 | 6.00E-05 | 0.0078516 | 0.071569  |
| 16w_SITTD12 | 0.02077077 | 0.11473358 | 3.44E-05 | 0.0045325 | -0.01065  |
| 16w_SITTD12 | 0.09071101 | 0.53675944 | 6.44E-05 | 0.021369  | 0.044278  |
| 16w_SITTD12 | 0.02813815 | 0.15918906 | 3.93E-05 | 0.004074  | -0.10603  |
| 16w_SITTD12 | 0.10872538 | 0.6454597  | 6.59E-05 | 0.025616  | -0.25305  |
| 16w_SITTD12 | 0.01237928 | 0.06409855 | 3.23E-05 | 0.0060411 | 0.2791    |
| 16w_SITTD12 | 0.08468149 | 0.5003767  | 6.38E-05 | 0.018923  | 0.1136    |
| 16w_SITTD12 | 0.05549571 | 0.3242671  | 5.95E-05 | 0.007248  | 0.065685  |
| 16w_SITTD12 | 0.09523524 | 0.564059   | 6.49E-05 | 0.023263  | -0.026471 |
| 16w_SITTD12 | 0.03848372 | 0.22161518 | 4.87E-05 | 0.0044183 | -0.04622  |
| 16w_SITTD12 | 0.05944651 | 0.3481066  | 6.03E-05 | 0.0083426 | 0.075889  |
| 16w_SITTD12 | 0.02407512 | 0.13467236 | 3.61E-05 | 0.0042401 | -0.073623 |
| 16w_SITTD12 | 0.04647847 | 0.26985624 | 5.57E-05 | 0.0054037 | 0.028707  |
| 16w_SITTD12 | 0.0934361  | 0.5532028  | 6.47E-05 | 0.022469  | 0.0013661 |
| 16w_SITTD12 | 0.0950065  | 0.5626788  | 6.49E-05 | 0.023073  | -0.026471 |
| 16w_SITTD12 | 0.01575701 | 0.08448011 | 3.28E-05 | 0.0052924 | 0.1442    |
| 16w_SITTD12 | 0.08352511 | 0.49339902 | 6.37E-05 | 0.01841   | 0.12117   |

|             |            |            |          |           |           |
|-------------|------------|------------|----------|-----------|-----------|
| 16w_SITTD12 | 0.11028655 | 0.65488    | 6.60E-05 | 0.02558   | -0.26716  |
| 16w_SITTD12 | 0.01874976 | 0.10253863 | 3.38E-05 | 0.004741  | 0.03364   |
| 16w_SITTD12 | 0.04345782 | 0.25162932 | 5.33E-05 | 0.0049301 | 0.0036923 |
| 16w_SITTD12 | 0.02932977 | 0.16637938 | 4.02E-05 | 0.0040662 | -0.10661  |
| 16w_SITTD12 | 0.01219654 | 0.0629959  | 3.23E-05 | 0.0060411 | 0.2791    |
| 16w_SITTD12 | 0.10633463 | 0.6310338  | 6.58E-05 | 0.02556   | -0.21453  |
| 16w_SITTD12 | 0.0390378  | 0.22495854 | 4.92E-05 | 0.0044639 | -0.040459 |
| 16w_SITTD12 | 0.10397344 | 0.6167861  | 6.56E-05 | 0.025296  | -0.18011  |
| 16w_SITTD12 | 0.08920874 | 0.5276945  | 6.43E-05 | 0.020902  | 0.067165  |
| 16w_SITTD12 | 0.02808539 | 0.15887067 | 3.93E-05 | 0.004074  | -0.10603  |
| 16w_SITTD12 | 0.01355512 | 0.07119371 | 3.24E-05 | 0.0057681 | 0.23179   |
| 16w_SITTD12 | 0.12349268 | 0.734567   | 6.67E-05 | 0.024153  | -0.39346  |
| 16w_SITTD12 | 0.02466704 | 0.13824406 | 3.64E-05 | 0.0042065 | -0.080664 |
| 16w_SITTD12 | 0.04975746 | 0.28964195 | 5.76E-05 | 0.005992  | 0.046466  |
| 16w_SITTD12 | 0.01748798 | 0.09492496 | 3.33E-05 | 0.0049935 | 0.085504  |
| 16w_SITTD12 | 0.01836131 | 0.10019471 | 3.36E-05 | 0.0048202 | 0.050123  |
| 16w_SITTD12 | 0.02551269 | 0.14334677 | 3.72E-05 | 0.0041509 | -0.092011 |
| 16w_SITTD12 | 0.10621101 | 0.6302878  | 6.58E-05 | 0.025526  | -0.21453  |
| 16w_SITTD12 | 0.0161698  | 0.0869709  | 3.30E-05 | 0.0051875 | 0.12392   |
| 16w_SITTD12 | 0.09737831 | 0.5769905  | 6.51E-05 | 0.023964  | -0.065044 |
| 16w_SITTD12 | 0.07546669 | 0.44477382 | 6.26E-05 | 0.014549  | 0.13345   |
| 16w_SITTD12 | 0.01902727 | 0.10421314 | 3.38E-05 | 0.004741  | 0.03364   |
| 16w_SITTD12 | 0.10352599 | 0.61408615 | 6.56E-05 | 0.025296  | -0.17104  |
| 16w_SITTD12 | 0.01550341 | 0.08294985 | 3.28E-05 | 0.0052924 | 0.1442    |
| 16w_SITTD12 | 0.05011655 | 0.29180872 | 5.76E-05 | 0.005992  | 0.048868  |
| 16w_SITTD12 | 0.03694374 | 0.2123228  | 4.70E-05 | 0.0042982 | -0.057524 |
| 16w_SITTD12 | 0.07136879 | 0.4200467  | 6.20E-05 | 0.012843  | 0.12136   |
| 16w_SITTD12 | 0.06486969 | 0.3808305  | 6.11E-05 | 0.010206  | 0.093303  |
| 16w_SITTD12 | 0.02024663 | 0.11157087 | 3.42E-05 | 0.0045972 | 0.0032259 |
| 16w_SITTD12 | 0.03829488 | 0.2204757  | 4.87E-05 | 0.0044183 | -0.04622  |
| 16w_SITTD12 | 0.01696806 | 0.09178769 | 3.31E-05 | 0.0050879 | 0.085504  |
| 16w_SITTD12 | 0.02427274 | 0.13586484 | 3.64E-05 | 0.0042065 | -0.080664 |
| 16w_SITTD12 | 0.01571713 | 0.08423948 | 3.28E-05 | 0.0052924 | 0.1442    |
| 16w_SITTD12 | 0.02339023 | 0.13053967 | 3.58E-05 | 0.0042778 | -0.065623 |
| 16w_SITTD12 | 0.09549955 | 0.56565386 | 6.49E-05 | 0.023263  | -0.035993 |
| 16w_SITTD12 | 0.01932637 | 0.10601792 | 3.40E-05 | 0.0046667 | 0.017998  |
| 16w_SITTD12 | 0.09037647 | 0.53474075 | 6.44E-05 | 0.021369  | 0.05218   |
| 16w_SITTD12 | 0.09171141 | 0.5427959  | 6.45E-05 | 0.021822  | 0.027741  |
| 16w_SITTD12 | 0.02632318 | 0.14823735 | 3.76E-05 | 0.0041286 | -0.096385 |
| 16w_SITTD12 | 0.02874932 | 0.16287692 | 3.97E-05 | 0.0040686 | -0.10664  |
| 16w_SITTD12 | 0.05532953 | 0.32326433 | 5.95E-05 | 0.007248  | 0.065685  |
| 16w_SITTD12 | 0.02398378 | 0.13412121 | 3.61E-05 | 0.0042401 | -0.073623 |
| 16w_SITTD12 | 0.02129866 | 0.11791895 | 3.47E-05 | 0.0044724 | -0.023601 |

|             |            |            |          |           |           |
|-------------|------------|------------|----------|-----------|-----------|
| 16w_SITTD12 | 0.06516301 | 0.38260043 | 6.11E-05 | 0.010206  | 0.095509  |
| 16w_SITTD12 | 0.10030245 | 0.594635   | 6.53E-05 | 0.024687  | -0.11403  |
| 16w_SITTD12 | 0.02461341 | 0.13792041 | 3.64E-05 | 0.0042065 | -0.080664 |
| 16w_SITTD12 | 0.08526324 | 0.50388706 | 6.39E-05 | 0.019177  | 0.10916   |
| 16w_SITTD12 | 0.01133038 | 0.05776941 | 3.21E-05 | 0.006339  | 0.32844   |
| 16w_SITTD12 | 0.07785405 | 0.4591793  | 6.29E-05 | 0.015562  | 0.13662   |
| 16w_SITTD12 | 0.08474044 | 0.5007324  | 6.38E-05 | 0.018923  | 0.1136    |
| 16w_SITTD12 | 0.02078244 | 0.114804   | 3.44E-05 | 0.0045325 | -0.01065  |
| 16w_SITTD12 | 0.06610117 | 0.3882614  | 6.13E-05 | 0.010616  | 0.097788  |
| 16w_SITTD12 | 0.02554075 | 0.1435161  | 3.72E-05 | 0.0041509 | -0.092011 |
| 16w_SITTD12 | 0.01802952 | 0.09819264 | 3.34E-05 | 0.0049043 | 0.067421  |
| 16w_SITTD12 | 0.07226862 | 0.42547634 | 6.21E-05 | 0.01308   | 0.12548   |
| 16w_SITTD12 | 0.0935288  | 0.5537622  | 6.48E-05 | 0.022676  | 0.0013661 |
| 16w_SITTD12 | 0.08168137 | 0.48227376 | 6.34E-05 | 0.017373  | 0.12948   |
| 16w_SITTD12 | 0.06888755 | 0.40507466 | 6.16E-05 | 0.011695  | 0.11218   |
| 16w_SITTD12 | 0.04608004 | 0.26745206 | 5.54E-05 | 0.0053171 | 0.025099  |
| 16w_SITTD12 | 0.07314596 | 0.4307703  | 6.23E-05 | 0.013561  | 0.12737   |
| 16w_SITTD12 | 0.05496991 | 0.32109433 | 5.94E-05 | 0.0071062 | 0.064127  |
| 16w_SITTD12 | 0.07889656 | 0.46546996 | 6.30E-05 | 0.016077  | 0.13613   |
| 16w_SITTD12 | 0.02556475 | 0.1436609  | 3.72E-05 | 0.0041509 | -0.092011 |
| 16w_SITTD12 | 0.06960532 | 0.40940577 | 6.17E-05 | 0.01192   | 0.11455   |
| 16w_SITTD12 | 0.01471854 | 0.07821387 | 3.26E-05 | 0.0055188 | 0.18676   |
| 16w_SITTD12 | 0.05659356 | 0.33089158 | 5.98E-05 | 0.0075425 | 0.068678  |
| 16w_SITTD12 | 0.04553442 | 0.26415977 | 5.50E-05 | 0.0052335 | 0.021279  |
| 16w_SITTD12 | 0.06411035 | 0.37624863 | 6.10E-05 | 0.0098069 | 0.091185  |
| 16w_SITTD12 | 0.02184664 | 0.12122548 | 3.49E-05 | 0.0044169 | -0.0356   |
| 16w_SITTD12 | 0.05235235 | 0.30529976 | 5.85E-05 | 0.0064518 | 0.057248  |
| 16w_SITTD12 | 0.0380453  | 0.2189697  | 4.81E-05 | 0.0043756 | -0.04622  |
| 16w_SITTD12 | 0.06840894 | 0.40218666 | 6.16E-05 | 0.011474  | 0.10977   |
| 16w_SITTD12 | 0.0514409  | 0.29979995 | 5.83E-05 | 0.0063316 | 0.053285  |
| 16w_SITTD12 | 0.08339847 | 0.4926349  | 6.36E-05 | 0.018151  | 0.12117   |
| 16w_SITTD12 | 0.00908755 | 0.04423599 | 3.19E-05 | 0.0070136 | 0.43237   |
| 16w_SITTD12 | 0.02136651 | 0.11832833 | 3.47E-05 | 0.0044724 | -0.023601 |
| 16w_SITTD12 | 0.03103503 | 0.17666909 | 4.16E-05 | 0.0040771 | -0.10299  |
| 16w_SITTD12 | 0.10586722 | 0.62821335 | 6.58E-05 | 0.025526  | -0.20623  |
| 16w_SITTD12 | 0.02240314 | 0.12458347 | 3.52E-05 | 0.0043661 | -0.046619 |
| 16w_SITTD12 | 0.02317339 | 0.12923124 | 3.58E-05 | 0.0042778 | -0.065623 |
| 16w_SITTD12 | 0.0888004  | 0.5252306  | 6.42E-05 | 0.020663  | 0.067165  |
| 16w_SITTD12 | 0.07470561 | 0.44018137 | 6.25E-05 | 0.014299  | 0.13218   |
| 16w_SITTD12 | 0.05105127 | 0.29744896 | 5.81E-05 | 0.006215  | 0.051138  |
| 16w_SITTD12 | 0.10243318 | 0.6074921  | 6.55E-05 | 0.025127  | -0.15246  |
| 16w_SITTD12 | 0.07356335 | 0.43328884 | 6.23E-05 | 0.013805  | 0.12913   |
| 16w_SITTD12 | 0.02195201 | 0.12186132 | 3.49E-05 | 0.0044169 | -0.046619 |

|             |            |            |          |           |           |
|-------------|------------|------------|----------|-----------|-----------|
| 16w_SITTD12 | 0.08777963 | 0.51907116 | 6.41E-05 | 0.020177  | 0.080939  |
| 16w_SITTD12 | 0.0250985  | 0.1408475  | 3.68E-05 | 0.0041768 | -0.086782 |
| 16w_SITTD12 | 0.11171954 | 0.66352683 | 6.61E-05 | 0.025525  | -0.28705  |
| 16w_SITTD12 | 0.08600558 | 0.5083664  | 6.39E-05 | 0.01943   | 0.099025  |
| 16w_SITTD12 | 0.09017672 | 0.5335355  | 6.44E-05 | 0.021369  | 0.05218   |
| 16w_SITTD12 | 0.08536354 | 0.5044923  | 6.39E-05 | 0.019177  | 0.10916   |
| 16w_SITTD12 | 0.13655739 | 0.8134006  | 6.72E-05 | 0.023527  | -0.4775   |
| 16w_SITTD12 | 0.06581583 | 0.3865396  | 6.13E-05 | 0.010616  | 0.097788  |
| 16w_SITTD12 | 0.07164935 | 0.4217396  | 6.20E-05 | 0.012843  | 0.12348   |
| 16w_SITTD12 | 0.10082931 | 0.59781414 | 6.54E-05 | 0.024809  | -0.12375  |
| 16w_SITTD12 | 0.07282118 | 0.42881054 | 6.22E-05 | 0.01332   | 0.12737   |
| 16w_SITTD12 | 0.02278377 | 0.12688021 | 3.55E-05 | 0.0043197 | -0.056631 |
| 16w_SITTD12 | 0.02028843 | 0.11182314 | 3.42E-05 | 0.0045972 | -0.01065  |
| 16w_SITTD12 | 0.01344302 | 0.07051729 | 3.24E-05 | 0.0057681 | 0.23179   |
| 16w_SITTD12 | 0.03760794 | 0.21633065 | 4.81E-05 | 0.0043756 | -0.05192  |
| 16w_SITTD12 | 0.02076533 | 0.11470074 | 3.44E-05 | 0.0045325 | -0.01065  |
| 16w_SITTD12 | 0.06740174 | 0.39610916 | 6.14E-05 | 0.011039  | 0.10492   |
| 16w_SITTD12 | 0.09639288 | 0.5710443  | 6.50E-05 | 0.023626  | -0.045608 |
| 16w_SITTD12 | 0.01565004 | 0.08383466 | 3.28E-05 | 0.0052924 | 0.1442    |
| 16w_SITTD12 | 0.01221152 | 0.06308632 | 3.23E-05 | 0.0060411 | 0.2791    |
| 16w_SITTD12 | 0.01612868 | 0.0867228  | 3.30E-05 | 0.0051875 | 0.12392   |
| 16w_SITTD12 | 0.11014486 | 0.654025   | 6.60E-05 | 0.02558   | -0.26716  |
| 16w_SITTD12 | 0.09115925 | 0.5394641  | 6.45E-05 | 0.021597  | 0.036126  |
| 16w_SITTD12 | 0.03316534 | 0.18952356 | 4.37E-05 | 0.0041322 | -0.091175 |
| 16w_SITTD12 | 0.03273775 | 0.18694347 | 4.32E-05 | 0.0041142 | -0.094772 |
| 16w_SITTD12 | 0.01773072 | 0.09638964 | 3.34E-05 | 0.0049043 | 0.067421  |
| 16w_SITTD12 | 0.08100688 | 0.4782038  | 6.33E-05 | 0.017113  | 0.13314   |
| 16w_SITTD12 | 0.0294548  | 0.16713382 | 4.02E-05 | 0.0040662 | -0.10661  |
| 16w_SITTD12 | 0.09711556 | 0.57540506 | 6.51E-05 | 0.023799  | -0.065044 |
| 16w_SITTD12 | 0.0205087  | 0.11315224 | 3.44E-05 | 0.0045325 | -0.01065  |
| 16w_SITTD12 | 0.0215723  | 0.11957013 | 3.49E-05 | 0.0044169 | -0.0356   |
| 16w_SITTD12 | 0.06114349 | 0.3583463  | 6.06E-05 | 0.008866  | 0.082025  |
| 16w_SITTD12 | 0.02036949 | 0.11231221 | 3.44E-05 | 0.0045325 | -0.01065  |
| 16w_SITTD12 | 0.07942216 | 0.46864146 | 6.31E-05 | 0.016335  | 0.13545   |
| 16w_SITTD12 | 0.04816349 | 0.28002378 | 5.67E-05 | 0.0056831 | 0.038361  |
| 16w_SITTD12 | 0.1018128  | 0.60374856 | 6.55E-05 | 0.025029  | -0.14299  |
| 16w_SITTD12 | 0.01903987 | 0.10428917 | 3.38E-05 | 0.004741  | 0.03364   |
| 16w_SITTD12 | 0.00949087 | 0.04666963 | 3.20E-05 | 0.0068348 | 0.4058    |
| 16w_SITTD12 | 0.06512889 | 0.38239458 | 6.11E-05 | 0.010206  | 0.095509  |
| 16w_SITTD12 | 0.03517119 | 0.20162706 | 4.54E-05 | 0.0042028 | -0.078293 |
| 16w_SITTD12 | 0.09158292 | 0.54202056 | 6.45E-05 | 0.021822  | 0.027741  |
| 16w_SITTD12 | 0.01661696 | 0.08966913 | 3.31E-05 | 0.0050879 | 0.10435   |
| 16w_SITTD12 | 0.02554988 | 0.14357117 | 3.72E-05 | 0.0041509 | -0.092011 |



|             |            |            |          |           |            |
|-------------|------------|------------|----------|-----------|------------|
| 16w_SITTD12 | 0.09504442 | 0.5629076  | 6.49E-05 | 0.023073  | -0.026471  |
| 16w_SITTD12 | 0.08595283 | 0.5080481  | 6.39E-05 | 0.01943   | 0.1043     |
| 16w_SITTD12 | 0.02659245 | 0.14986216 | 3.80E-05 | 0.0041099 | -0.099939  |
| 16w_SITTD12 | 0.09131897 | 0.54042786 | 6.45E-05 | 0.021822  | 0.036126   |
| 16w_SITTD12 | 0.02829095 | 0.16011104 | 3.93E-05 | 0.004074  | -0.10603   |
| 16w_SITTD12 | 0.04093544 | 0.2364091  | 5.14E-05 | 0.0046741 | -0.017493  |
| 16w_SITTD12 | 0.04755987 | 0.27638152 | 5.64E-05 | 0.0055867 | 0.035328   |
| 16w_SITTD12 | 0.09328558 | 0.55229455 | 6.47E-05 | 0.022469  | 0.0013661  |
| 16w_SITTD12 | 0.12233505 | 0.7275818  | 6.67E-05 | 0.024282  | -0.38515   |
| 16w_SITTD12 | 0.01412194 | 0.07461394 | 3.25E-05 | 0.0056405 | 0.20898    |
| 16w_SITTD12 | 0.00590489 | 0.02503151 | 3.18E-05 | 0.0082375 | 0.56984    |
| 16w_SITTD12 | 0.05427803 | 0.31691948 | 5.92E-05 | 0.0069681 | 0.062513   |
| 16w_SITTD12 | 0.11853723 | 0.70466536 | 6.65E-05 | 0.024776  | -0.35363   |
| 16w_SITTD12 | 0.02785391 | 0.1574739  | 3.88E-05 | 0.0040827 | -0.10472   |
| 16w_SITTD12 | 0.13132651 | 0.78183705 | 6.70E-05 | 0.023599  | -0.44949   |
| 16w_SITTD12 | 0.02302858 | 0.12835744 | 3.55E-05 | 0.0043197 | -0.065623  |
| 16w_SITTD12 | 0.0224238  | 0.12470812 | 3.52E-05 | 0.0043661 | -0.046619  |
| 16w_SITTD12 | 0.0129605  | 0.06760572 | 3.23E-05 | 0.0059016 | 0.25518    |
| 16w_SITTD12 | 0.0094638  | 0.04650629 | 3.20E-05 | 0.0068348 | 0.4058     |
| 16w_SITTD12 | 0.01812305 | 0.09875699 | 3.36E-05 | 0.0048202 | 0.050123   |
| 16w_SITTD12 | 0.01871824 | 0.10234844 | 3.38E-05 | 0.004741  | 0.03364    |
| 16w_SITTD12 | 0.07325424 | 0.43142363 | 6.23E-05 | 0.013561  | 0.12737    |
| 16w_SITTD12 | 0.10063103 | 0.5966177  | 6.53E-05 | 0.024687  | -0.12375   |
| 16w_SITTD12 | 0.03944732 | 0.2274296  | 4.98E-05 | 0.0045122 | -0.034672  |
| 16w_SITTD12 | 0.10043175 | 0.59541523 | 6.53E-05 | 0.024687  | -0.12375   |
| 16w_SITTD12 | 0.03229125 | 0.18424924 | 4.27E-05 | 0.004099  | -0.097962  |
| 16w_SITTD12 | 0.01888277 | 0.10334124 | 3.38E-05 | 0.004741  | 0.03364    |
| 16w_SITTD12 | 0.0425842  | 0.24635784 | 5.29E-05 | 0.0048617 | -0.0013165 |
| 16w_SITTD12 | 0.09101407 | 0.53858805 | 6.45E-05 | 0.021597  | 0.036126   |
| 16w_SITTD12 | 0.02671878 | 0.15062442 | 3.80E-05 | 0.0041099 | -0.099939  |
| 16w_SITTD12 | 0.03278939 | 0.1872551  | 4.32E-05 | 0.0041142 | -0.094772  |
| 16w_SITTD12 | 0.01923801 | 0.10548479 | 3.40E-05 | 0.0046667 | 0.017998   |
| 16w_SITTD12 | 0.01484762 | 0.07899277 | 3.27E-05 | 0.0054028 | 0.16515    |
| 16w_SITTD12 | 0.03969745 | 0.22893895 | 4.98E-05 | 0.0045122 | -0.028892  |
| 16w_SITTD12 | 0.01659414 | 0.08953143 | 3.31E-05 | 0.0050879 | 0.10435    |
| 16w_SITTD12 | 0.0891531  | 0.52735883 | 6.43E-05 | 0.020902  | 0.067165   |
| 16w_SITTD12 | 0.02293368 | 0.12778476 | 3.55E-05 | 0.0043197 | -0.056631  |
| 16w_SITTD12 | 0.02315784 | 0.12913743 | 3.58E-05 | 0.0042778 | -0.065623  |
| 16w_SITTD12 | 0.02348883 | 0.13113461 | 3.58E-05 | 0.0042778 | -0.065623  |
| 16w_SITTD12 | 0.02639135 | 0.14864868 | 3.76E-05 | 0.0041286 | -0.099939  |
| 16w_SITTD12 | 0.03269169 | 0.18666555 | 4.32E-05 | 0.0041142 | -0.094772  |
| 16w_SITTD12 | 0.01227416 | 0.06346427 | 3.23E-05 | 0.0060411 | 0.2791     |
| 16w_SITTD12 | 0.05921528 | 0.3467113  | 6.03E-05 | 0.0083426 | 0.075889   |

|             |            |            |          |           |           |
|-------------|------------|------------|----------|-----------|-----------|
| 16w_SITTD12 | 0.06695961 | 0.39344132 | 6.14E-05 | 0.011039  | 0.10251   |
| 16w_SITTD12 | 0.0320653  | 0.18288586 | 4.27E-05 | 0.004099  | -0.097962 |
| 16w_SITTD12 | 0.07356566 | 0.43330282 | 6.23E-05 | 0.013805  | 0.12913   |
| 16w_SITTD12 | 0.09212189 | 0.54527277 | 6.46E-05 | 0.022042  | 0.019141  |
| 16w_SITTD12 | 0.12500624 | 0.74369997 | 6.68E-05 | 0.024034  | -0.40548  |
| 16w_SITTD12 | 0.09260651 | 0.548197   | 6.46E-05 | 0.022258  | 0.019141  |
| 16w_SITTD12 | 0.03680733 | 0.2114997  | 4.70E-05 | 0.0042982 | -0.062998 |
| 16w_SITTD12 | 0.02282942 | 0.12715568 | 3.55E-05 | 0.0043197 | -0.056631 |
| 16w_SITTD12 | 0.02333746 | 0.13022126 | 3.58E-05 | 0.0042778 | -0.065623 |
| 16w_SITTD12 | 0.08387001 | 0.4954802  | 6.37E-05 | 0.01841   | 0.1176    |
| 16w_SITTD12 | 0.02240479 | 0.12459343 | 3.52E-05 | 0.0043661 | -0.046619 |
| 16w_SITTD12 | 0.02355992 | 0.13156357 | 3.58E-05 | 0.0042778 | -0.065623 |
| 16w_SITTD12 | 0.07154198 | 0.42109174 | 6.20E-05 | 0.012843  | 0.12136   |
| 16w_SITTD12 | 0.02482438 | 0.13919345 | 3.68E-05 | 0.0041768 | -0.086782 |
| 16w_SITTD12 | 0.02930936 | 0.16625626 | 4.02E-05 | 0.0040662 | -0.10661  |
| 16w_SITTD12 | 0.01755626 | 0.09533692 | 3.34E-05 | 0.0049043 | 0.067421  |
| 16w_SITTD12 | 0.03784947 | 0.21778804 | 4.81E-05 | 0.0043756 | -0.05192  |
| 16w_SITTD12 | 0.02473844 | 0.13867491 | 3.64E-05 | 0.0042065 | -0.086782 |
| 16w_SITTD12 | 0.10993473 | 0.65275705 | 6.60E-05 | 0.025599  | -0.26716  |
| 16w_SITTD12 | 0.0537694  | 0.31385034 | 5.91E-05 | 0.0068337 | 0.060836  |
| 16w_SITTD12 | 0.03452067 | 0.1977018  | 4.48E-05 | 0.0041765 | -0.082901 |
| 16w_SITTD12 | 0.02083484 | 0.11512017 | 3.44E-05 | 0.0045325 | -0.023601 |
| 16w_SITTD12 | 0.09690192 | 0.5741159  | 6.51E-05 | 0.023799  | -0.055297 |
| 16w_SITTD12 | 0.0067357  | 0.03004471 | 3.18E-05 | 0.0078    | 0.54183   |
| 16w_SITTD12 | 0.08232565 | 0.48616135 | 6.35E-05 | 0.017633  | 0.1271    |
| 16w_SITTD12 | 0.08550466 | 0.5053438  | 6.39E-05 | 0.019177  | 0.1043    |
| 16w_SITTD12 | 0.02393655 | 0.1338362  | 3.61E-05 | 0.0042401 | -0.073623 |
| 16w_SITTD12 | 0.11701588 | 0.69548535 | 6.64E-05 | 0.024986  | -0.34377  |
| 16w_SITTD12 | 0.12419522 | 0.7388062  | 6.67E-05 | 0.024092  | -0.40152  |
| 16w_SITTD12 | 0.02600179 | 0.14629804 | 3.76E-05 | 0.0041286 | -0.096385 |
| 16w_SITTD12 | 0.00907284 | 0.0441472  | 3.19E-05 | 0.0070136 | 0.43237   |
| 16w_SITTD12 | 0.0204404  | 0.11274011 | 3.44E-05 | 0.0045325 | -0.01065  |
| 16w_SITTD12 | 0.02492675 | 0.13981116 | 3.68E-05 | 0.0041768 | -0.086782 |
| 16w_SITTD12 | 0.11343613 | 0.67388487 | 6.62E-05 | 0.025403  | -0.30551  |
| 16w_SITTD12 | 0.0172699  | 0.09360904 | 3.33E-05 | 0.0049935 | 0.085504  |
| 16w_SITTD12 | 0.11069388 | 0.65733784 | 6.61E-05 | 0.025556  | -0.27396  |
| 16w_SITTD12 | 0.0531056  | 0.30984497 | 5.89E-05 | 0.0067028 | 0.059084  |
| 16w_SITTD12 | 0.0795951  | 0.46968502 | 6.31E-05 | 0.016335  | 0.13545   |
| 16w_SITTD12 | 0.09204196 | 0.5447905  | 6.46E-05 | 0.022042  | 0.027741  |
| 16w_SITTD12 | 0.08241484 | 0.48669955 | 6.35E-05 | 0.017892  | 0.1271    |
| 16w_SITTD12 | 0.03120078 | 0.17766921 | 4.16E-05 | 0.0040771 | -0.10299  |
| 16w_SITTD12 | 0.01517112 | 0.08094479 | 3.27E-05 | 0.0054028 | 0.16515   |
| 16w_SITTD12 | 0.05095096 | 0.29684362 | 5.81E-05 | 0.006215  | 0.051138  |

|             |            |            |          |           |            |
|-------------|------------|------------|----------|-----------|------------|
| 16w_SITTD12 | 0.05787871 | 0.33864635 | 6.00E-05 | 0.0078516 | 0.073002   |
| 16w_SITTD12 | 0.01394209 | 0.07352869 | 3.25E-05 | 0.0056405 | 0.20898    |
| 16w_SITTD12 | 0.08461648 | 0.49998444 | 6.37E-05 | 0.018667  | 0.1136     |
| 16w_SITTD12 | 0.07430927 | 0.4377898  | 6.24E-05 | 0.014051  | 0.13074    |
| 16w_SITTD12 | 0.02625817 | 0.14784506 | 3.76E-05 | 0.0041286 | -0.096385  |
| 16w_SITTD12 | 0.01724254 | 0.09344393 | 3.33E-05 | 0.0049935 | 0.085504   |
| 16w_SITTD12 | 0.01130755 | 0.05763164 | 3.21E-05 | 0.006339  | 0.32844    |
| 16w_SITTD12 | 0.00679442 | 0.03039902 | 3.18E-05 | 0.0078    | 0.54183    |
| 16w_SITTD12 | 0.08672234 | 0.5126914  | 6.40E-05 | 0.019681  | 0.093363   |
| 16w_SITTD12 | 0.12214056 | 0.7264082  | 6.66E-05 | 0.02435   | -0.38515   |
| 16w_SITTD12 | 0.01923012 | 0.1054372  | 3.40E-05 | 0.0046667 | 0.017998   |
| 16w_SITTD12 | 0.07934685 | 0.46818703 | 6.31E-05 | 0.016335  | 0.13613    |
| 16w_SITTD12 | 0.04919582 | 0.28625295 | 5.73E-05 | 0.0058857 | 0.04392    |
| 16w_SITTD12 | 0.01099413 | 0.05574044 | 3.21E-05 | 0.006339  | 0.32844    |
| 16w_SITTD12 | 0.0265126  | 0.14938037 | 3.80E-05 | 0.0041099 | -0.099939  |
| 16w_SITTD12 | 0.04850844 | 0.28210524 | 5.67E-05 | 0.0056831 | 0.041222   |
| 16w_SITTD12 | 0.13956766 | 0.8315649  | 6.73E-05 | 0.023551  | -0.49075   |
| 16w_SITTD12 | 0.07998081 | 0.47201243 | 6.32E-05 | 0.016594  | 0.13446    |
| 16w_SITTD12 | 0.01920022 | 0.10525674 | 3.38E-05 | 0.004741  | 0.017998   |
| 16w_SITTD12 | 0.10493442 | 0.62258476 | 6.57E-05 | 0.025429  | -0.19772   |
| 16w_SITTD12 | 0.04852758 | 0.28222078 | 5.67E-05 | 0.0056831 | 0.041222   |
| 16w_SITTD12 | 0.01345147 | 0.07056824 | 3.24E-05 | 0.0057681 | 0.23179    |
| 16w_SITTD12 | 0.06393946 | 0.37521744 | 6.10E-05 | 0.0098069 | 0.091185   |
| 16w_SITTD12 | 0.10563449 | 0.62680906 | 6.57E-05 | 0.025482  | -0.20623   |
| 16w_SITTD12 | 0.02738546 | 0.15464725 | 3.84E-05 | 0.0040947 | -0.10271   |
| 16w_SITTD12 | 0.01730757 | 0.0938363  | 3.33E-05 | 0.0049935 | 0.085504   |
| 16w_SITTD12 | 0.03696488 | 0.21245033 | 4.76E-05 | 0.0043355 | -0.057524  |
| 16w_SITTD12 | 0.01033511 | 0.05176385 | 3.20E-05 | 0.0066628 | 0.35381    |
| 16w_SITTD12 | 0.02422703 | 0.13558896 | 3.64E-05 | 0.0042065 | -0.080664  |
| 16w_SITTD12 | 0.01539478 | 0.08229438 | 3.28E-05 | 0.0052924 | 0.1442     |
| 16w_SITTD12 | 0.07951832 | 0.46922168 | 6.31E-05 | 0.016335  | 0.13545    |
| 16w_SITTD12 | 0.03458016 | 0.19806074 | 4.48E-05 | 0.0041765 | -0.082901  |
| 16w_SITTD12 | 0.02475585 | 0.13877995 | 3.64E-05 | 0.0042065 | -0.086782  |
| 16w_SITTD12 | 0.12717113 | 0.7567631  | 6.69E-05 | 0.023834  | -0.42086   |
| 16w_SITTD12 | 0.08975518 | 0.5309918  | 6.44E-05 | 0.021137  | 0.059815   |
| 16w_SITTD12 | 0.02137566 | 0.11838356 | 3.47E-05 | 0.0044724 | -0.0356    |
| 16w_SITTD12 | 0.10472316 | 0.62131    | 6.57E-05 | 0.025429  | -0.18901   |
| 16w_SITTD12 | 0.02743974 | 0.15497476 | 3.84E-05 | 0.0040947 | -0.10271   |
| 16w_SITTD12 | 0.03712405 | 0.21341082 | 4.76E-05 | 0.0043355 | -0.057524  |
| 16w_SITTD12 | 0.09732913 | 0.5766938  | 6.51E-05 | 0.023799  | -0.065044  |
| 16w_SITTD12 | 0.02270931 | 0.12643096 | 3.55E-05 | 0.0043197 | -0.056631  |
| 16w_SITTD12 | 0.04251765 | 0.24595629 | 5.29E-05 | 0.0048617 | -0.0013165 |
| 16w_SITTD12 | 0.01539298 | 0.08228351 | 3.28E-05 | 0.0052924 | 0.1442     |

|             |            |            |          |           |           |
|-------------|------------|------------|----------|-----------|-----------|
| 16w_SITTD12 | 0.03878813 | 0.22345203 | 4.92E-05 | 0.0044639 | -0.040459 |
| 16w_SITTD12 | 0.01691625 | 0.09147506 | 3.31E-05 | 0.0050879 | 0.10435   |
| 16w_SITTD12 | 0.02822474 | 0.15971152 | 3.93E-05 | 0.004074  | -0.10603  |
| 16w_SITTD12 | 0.01741599 | 0.09449054 | 3.33E-05 | 0.0049935 | 0.085504  |
| 16w_SITTD12 | 0.02231158 | 0.12403099 | 3.52E-05 | 0.0043661 | -0.046619 |
| 16w_SITTD12 | 0.01227477 | 0.06346793 | 3.23E-05 | 0.0060411 | 0.2791    |
| 16w_SITTD12 | 0.02115728 | 0.11706584 | 3.47E-05 | 0.0044724 | -0.023601 |
| 16w_SITTD12 | 0.0723504  | 0.4259698  | 6.21E-05 | 0.01308   | 0.12548   |
| 16w_SITTD12 | 0.0890615  | 0.5268061  | 6.43E-05 | 0.020902  | 0.067165  |
| 16w_SITTD12 | 0.04223164 | 0.24423046 | 5.24E-05 | 0.0047963 | -0.00654  |
| 16w_SITTD12 | 0.11870671 | 0.705688   | 6.65E-05 | 0.024776  | -0.3584   |
| 16w_SITTD12 | 0.10426481 | 0.6185443  | 6.56E-05 | 0.025367  | -0.18901  |
| 16w_SITTD12 | 0.01985897 | 0.1092317  | 3.42E-05 | 0.0045972 | 0.0032259 |
| 16w_SITTD12 | 0.02508074 | 0.14074032 | 3.68E-05 | 0.0041768 | -0.086782 |
| 16w_SITTD12 | 0.02408765 | 0.13474797 | 3.61E-05 | 0.0042401 | -0.073623 |
| 16w_SITTD12 | 0.10960403 | 0.6507616  | 6.60E-05 | 0.025599  | -0.2602   |
| 16w_SITTD12 | 0.07626549 | 0.44959384 | 6.26E-05 | 0.0148    | 0.1354    |
| 16w_SITTD12 | 0.02428571 | 0.13594308 | 3.64E-05 | 0.0042065 | -0.080664 |
| 16w_SITTD12 | 0.02449474 | 0.1372044  | 3.64E-05 | 0.0042065 | -0.080664 |
| 16w_SITTD12 | 0.01802108 | 0.0981417  | 3.34E-05 | 0.0049043 | 0.067421  |
| 16w_SITTD12 | 0.02235306 | 0.12428127 | 3.52E-05 | 0.0043661 | -0.046619 |
| 16w_SITTD12 | 0.09619596 | 0.5698561  | 6.50E-05 | 0.023448  | -0.045608 |
| 16w_SITTD12 | 0.09618985 | 0.5698192  | 6.50E-05 | 0.023448  | -0.045608 |
| 16w_SITTD12 | 0.02642724 | 0.14886524 | 3.80E-05 | 0.0041099 | -0.099939 |
| 16w_SITTD12 | 0.050808   | 0.295981   | 5.78E-05 | 0.0061018 | 0.051138  |
| 16w_SITTD12 | 0.02309886 | 0.12878151 | 3.58E-05 | 0.0042778 | -0.065623 |
| 16w_SITTD12 | 0.03602811 | 0.2067978  | 4.65E-05 | 0.0042637 | -0.068307 |
| 16w_SITTD12 | 0.04794129 | 0.278683   | 5.64E-05 | 0.0055867 | 0.038361  |
| 16w_SITTD12 | 0.04922954 | 0.28645644 | 5.73E-05 | 0.0058857 | 0.04392   |
| 16w_SITTD12 | 0.07588889 | 0.44732141 | 6.26E-05 | 0.0148    | 0.13453   |
| 16w_SITTD12 | 0.02740756 | 0.15478061 | 3.84E-05 | 0.0040947 | -0.10271  |
| 16w_SITTD12 | 0.08965826 | 0.530407   | 6.44E-05 | 0.021137  | 0.059815  |
| 16w_SITTD12 | 0.08494924 | 0.50199234 | 6.38E-05 | 0.018923  | 0.10916   |
| 16w_SITTD12 | 0.03168722 | 0.18060446 | 4.22E-05 | 0.0040866 | -0.10071  |
| 16w_SITTD12 | 0.09613437 | 0.5694845  | 6.50E-05 | 0.023448  | -0.045608 |
| 16w_SITTD12 | 0.10914891 | 0.6480153  | 6.60E-05 | 0.025611  | -0.25305  |
| 16w_SITTD12 | 0.04704396 | 0.27326846 | 5.61E-05 | 0.0054936 | 0.032113  |
| 16w_SITTD12 | 0.06911925 | 0.40647277 | 6.17E-05 | 0.01192   | 0.11218   |
| 16w_SITTD12 | 0.02095215 | 0.11582809 | 3.47E-05 | 0.0044724 | -0.023601 |
| 16w_SITTD12 | 0.00962124 | 0.04745629 | 3.20E-05 | 0.0068348 | 0.4058    |
| 16w_SITTD12 | 0.02612826 | 0.14706121 | 3.76E-05 | 0.0041286 | -0.096385 |
| 16w_SITTD12 | 0.00953845 | 0.04695672 | 3.20E-05 | 0.0068348 | 0.4058    |
| 16w_SITTD12 | 0.03081113 | 0.17531808 | 4.11E-05 | 0.0040705 | -0.10299  |

|             |            |            |          |           |           |
|-------------|------------|------------|----------|-----------|-----------|
| 16w_SITTD12 | 0.06669439 | 0.39184096 | 6.13E-05 | 0.010826  | 0.10251   |
| 16w_SITTD12 | 0.04550107 | 0.2639585  | 5.50E-05 | 0.0052335 | 0.021279  |
| 16w_SITTD12 | 0.04466977 | 0.25894234 | 5.42E-05 | 0.0050757 | 0.017239  |
| 16w_SITTD12 | 0.02190144 | 0.12155617 | 3.49E-05 | 0.0044169 | -0.0356   |
| 16w_SITTD12 | 0.03728958 | 0.21440959 | 4.76E-05 | 0.0043355 | -0.057524 |
| 16w_SITTD12 | 0.03801408 | 0.2187813  | 4.81E-05 | 0.0043756 | -0.04622  |
| 16w_SITTD12 | 0.02382489 | 0.13316244 | 3.61E-05 | 0.0042401 | -0.073623 |
| 16w_SITTD12 | 0.07852078 | 0.46320248 | 6.29E-05 | 0.015819  | 0.13651   |
| 16w_SITTD12 | 0.10503744 | 0.62320644 | 6.57E-05 | 0.025429  | -0.19772  |
| 16w_SITTD12 | 0.0669453  | 0.39335495 | 6.14E-05 | 0.011039  | 0.10251   |
| 16w_SITTD12 | 0.07646019 | 0.45076868 | 6.27E-05 | 0.015053  | 0.1354    |
| 16w_SITTD12 | 0.07720426 | 0.45525843 | 6.28E-05 | 0.015307  | 0.13646   |
| 16w_SITTD12 | 0.02640637 | 0.14873937 | 3.76E-05 | 0.0041286 | -0.099939 |
| 16w_SITTD12 | 0.00566213 | 0.0235667  | 3.18E-05 | 0.0082375 | 0.59807   |
| 16w_SITTD12 | 0.02829943 | 0.16016221 | 3.93E-05 | 0.004074  | -0.10603  |
| 16w_SITTD12 | 0.11514337 | 0.6841865  | 6.63E-05 | 0.025182  | -0.32268  |
| 16w_SITTD12 | 0.0306189  | 0.1741581  | 4.11E-05 | 0.0040705 | -0.10475  |
| 16w_SITTD12 | 0.01299953 | 0.06784122 | 3.23E-05 | 0.0059016 | 0.25518   |
| 16w_SITTD12 | 0.0145816  | 0.07738758 | 3.26E-05 | 0.0055188 | 0.18676   |
| 16w_SITTD12 | 0.02358218 | 0.13169794 | 3.58E-05 | 0.0042778 | -0.073623 |
| 16w_SITTD12 | 0.0516148  | 0.3008493  | 5.83E-05 | 0.0063316 | 0.053285  |
| 16w_SITTD12 | 0.01377041 | 0.0724928  | 3.25E-05 | 0.0056405 | 0.20898   |
| 16w_SITTD12 | 0.08426998 | 0.49789366 | 6.37E-05 | 0.018667  | 0.1176    |
| 16w_SITTD12 | 0.04167206 | 0.24085388 | 5.19E-05 | 0.0047337 | -0.011944 |
| 16w_SITTD12 | 0.08017775 | 0.4732008  | 6.32E-05 | 0.016594  | 0.13446   |
| 16w_SITTD12 | 0.01932278 | 0.10599629 | 3.40E-05 | 0.0046667 | 0.017998  |
| 16w_SITTD12 | 0.05486202 | 0.3204433  | 5.94E-05 | 0.0071062 | 0.064127  |
| 16w_SITTD12 | 0.02798577 | 0.15826961 | 3.88E-05 | 0.0040827 | -0.10472  |
| 16w_SITTD12 | 0.05150373 | 0.30017912 | 5.83E-05 | 0.0063316 | 0.053285  |
| 16w_SITTD12 | 0.05600561 | 0.32734388 | 5.97E-05 | 0.0073934 | 0.067199  |
| 16w_SITTD12 | 0.03120471 | 0.17769295 | 4.16E-05 | 0.0040771 | -0.10299  |
| 16w_SITTD12 | 0.01975493 | 0.1086039  | 3.40E-05 | 0.0046667 | 0.0032259 |
| 16w_SITTD12 | 0.08958019 | 0.52993596 | 6.43E-05 | 0.020902  | 0.059815  |
| 16w_SITTD12 | 0.07395009 | 0.43562248 | 6.23E-05 | 0.013805  | 0.13074   |
| 16w_SITTD12 | 0.05308703 | 0.30973285 | 5.89E-05 | 0.0067028 | 0.059084  |
| 16w_SITTD12 | 0.04436737 | 0.25711763 | 5.42E-05 | 0.0050757 | 0.012967  |
| 16w_SITTD12 | 0.03263936 | 0.18634978 | 4.32E-05 | 0.0041142 | -0.094772 |
| 16w_SITTD12 | 0.01546008 | 0.08268839 | 3.28E-05 | 0.0052924 | 0.1442    |
| 16w_SITTD12 | 0.08683299 | 0.513359   | 6.40E-05 | 0.019681  | 0.093363  |
| 16w_SITTD12 | 0.10666485 | 0.63302636 | 6.58E-05 | 0.02556   | -0.22263  |
| 16w_SITTD12 | 0.1210838  | 0.7200316  | 6.66E-05 | 0.02449   | -0.37656  |
| 16w_SITTD12 | 0.0394017  | 0.22715433 | 4.98E-05 | 0.0045122 | -0.034672 |
| 16w_SITTD12 | 0.10830271 | 0.64290935 | 6.59E-05 | 0.025614  | -0.24573  |

|             |            |            |          |           |            |
|-------------|------------|------------|----------|-----------|------------|
| 16w_SITTD12 | 0.02607084 | 0.1467147  | 3.76E-05 | 0.0041286 | -0.096385  |
| 16w_SITTD12 | 0.04133584 | 0.23882511 | 5.14E-05 | 0.0046741 | -0.011944  |
| 16w_SITTD12 | 0.11852583 | 0.7045966  | 6.65E-05 | 0.024776  | -0.35363   |
| 16w_SITTD12 | 0.07305551 | 0.43022448 | 6.23E-05 | 0.013561  | 0.12737    |
| 16w_SITTD12 | 0.08048066 | 0.47502854 | 6.32E-05 | 0.016854  | 0.13314    |
| 16w_SITTD12 | 0.02193593 | 0.12176428 | 3.49E-05 | 0.0044169 | -0.046619  |
| 16w_SITTD12 | 0.11565213 | 0.6872564  | 6.63E-05 | 0.025182  | -0.32814   |
| 16w_SITTD12 | 0.08773588 | 0.51880723 | 6.41E-05 | 0.020177  | 0.080939   |
| 16w_SITTD12 | 0.03553868 | 0.20384452 | 4.59E-05 | 0.0042319 | -0.073417  |
| 16w_SITTD12 | 0.0822798  | 0.48588473 | 6.35E-05 | 0.017633  | 0.1271     |
| 16w_SITTD12 | 0.02815574 | 0.15929517 | 3.93E-05 | 0.004074  | -0.10603   |
| 16w_SITTD12 | 0.12009436 | 0.7140612  | 6.66E-05 | 0.024561  | -0.36766   |
| 16w_SITTD12 | 0.01071061 | 0.05402966 | 3.21E-05 | 0.0064976 | 0.35381    |
| 16w_SITTD12 | 0.02806125 | 0.15872501 | 3.88E-05 | 0.0040827 | -0.10603   |
| 16w_SITTD12 | 0.06237198 | 0.36575916 | 6.07E-05 | 0.0092324 | 0.085432   |
| 16w_SITTD12 | 0.08819056 | 0.5215507  | 6.42E-05 | 0.020421  | 0.080939   |
| 16w_SITTD12 | 0.05636349 | 0.32950336 | 5.98E-05 | 0.0075425 | 0.068678   |
| 16w_SITTD12 | 0.04919253 | 0.28623313 | 5.73E-05 | 0.0058857 | 0.04392    |
| 16w_SITTD12 | 0.05905522 | 0.3457455  | 6.02E-05 | 0.0081753 | 0.075889   |
| 16w_SITTD12 | 0.04971255 | 0.28937098 | 5.76E-05 | 0.005992  | 0.046466   |
| 16w_SITTD12 | 0.09399147 | 0.556554   | 6.48E-05 | 0.022676  | -0.0077738 |
| 16w_SITTD12 | 0.01851295 | 0.10110973 | 3.36E-05 | 0.0048202 | 0.050123   |
| 16w_SITTD12 | 0.02830544 | 0.16019851 | 3.93E-05 | 0.004074  | -0.10603   |
| 16w_SITTD12 | 0.02840588 | 0.16080458 | 3.93E-05 | 0.004074  | -0.10603   |
| 16w_SITTD12 | 0.09133279 | 0.54051125 | 6.45E-05 | 0.021822  | 0.036126   |
| 16w_SITTD12 | 0.05810508 | 0.34001225 | 6.01E-05 | 0.0080116 | 0.073002   |
| 16w_SITTD12 | 0.01472432 | 0.07824875 | 3.26E-05 | 0.0055188 | 0.18676    |
| 16w_SITTD12 | 0.05055098 | 0.2944301  | 5.78E-05 | 0.0061018 | 0.048868   |
| 16w_SITTD12 | 0.07494488 | 0.44162512 | 6.25E-05 | 0.014299  | 0.13218    |
| 16w_SITTD12 | 0.02376417 | 0.13279602 | 3.61E-05 | 0.0042401 | -0.073623  |
| 16w_SITTD12 | 0.03660513 | 0.2102796  | 4.70E-05 | 0.0042982 | -0.062998  |
| 16w_SITTD12 | 0.01597756 | 0.08581094 | 3.30E-05 | 0.0051875 | 0.12392    |
| 16w_SITTD12 | 0.09329673 | 0.55236185 | 6.47E-05 | 0.022469  | 0.0013661  |
| 16w_SITTD12 | 0.09390488 | 0.55603147 | 6.48E-05 | 0.022676  | -0.0077738 |
| 16w_SITTD12 | 0.10412842 | 0.61772126 | 6.56E-05 | 0.025367  | -0.18011   |
| 16w_SITTD12 | 0.03457779 | 0.19804645 | 4.48E-05 | 0.0041765 | -0.082901  |
| 16w_SITTD12 | 0.00535747 | 0.02172832 | 3.18E-05 | 0.0084677 | 0.59807    |
| 16w_SITTD12 | 0.02845215 | 0.16108379 | 3.93E-05 | 0.004074  | -0.10603   |
| 16w_SITTD12 | 0.01443149 | 0.07648178 | 3.26E-05 | 0.0055188 | 0.18676    |
| 16w_SITTD12 | 0.02655528 | 0.14963788 | 3.80E-05 | 0.0041099 | -0.099939  |
| 16w_SITTD12 | 0.04003736 | 0.23099    | 5.03E-05 | 0.0045634 | -0.028892  |
| 16w_SITTD12 | 0.07252297 | 0.4270111  | 6.22E-05 | 0.01332   | 0.12548    |
| 16w_SITTD12 | 0.04544543 | 0.26362276 | 5.50E-05 | 0.0052335 | 0.021279   |

|             |            |            |          |           |            |
|-------------|------------|------------|----------|-----------|------------|
| 16w_SITTD12 | 0.10268649 | 0.60902053 | 6.55E-05 | 0.025127  | -0.16182   |
| 16w_SITTD12 | 0.01409476 | 0.07444991 | 3.25E-05 | 0.0056405 | 0.20898    |
| 16w_SITTD12 | 0.01235737 | 0.06396639 | 3.23E-05 | 0.0060411 | 0.2791     |
| 16w_SITTD12 | 0.09069984 | 0.53669196 | 6.44E-05 | 0.021369  | 0.044278   |
| 16w_SITTD12 | 0.05506206 | 0.3216504  | 5.94E-05 | 0.0071062 | 0.064127   |
| 16w_SITTD12 | 0.11666315 | 0.693357   | 6.64E-05 | 0.025054  | -0.33868   |
| 16w_SITTD12 | 0.09020157 | 0.5336854  | 6.44E-05 | 0.021369  | 0.05218    |
| 16w_SITTD12 | 0.01887182 | 0.10327517 | 3.38E-05 | 0.004741  | 0.03364    |
| 16w_SITTD12 | 0.00784283 | 0.03672523 | 3.19E-05 | 0.0073923 | 0.48652    |
| 16w_SITTD12 | 0.12252574 | 0.7287324  | 6.67E-05 | 0.024282  | -0.38934   |
| 16w_SITTD12 | 0.01896812 | 0.10385623 | 3.38E-05 | 0.004741  | 0.03364    |
| 16w_SITTD12 | 0.03056186 | 0.17381395 | 4.11E-05 | 0.0040705 | -0.10475   |
| 16w_SITTD12 | 0.03408498 | 0.19507277 | 4.43E-05 | 0.004153  | -0.082901  |
| 16w_SITTD12 | 0.02388273 | 0.13351142 | 3.61E-05 | 0.0042401 | -0.073623  |
| 16w_SITTD12 | 0.00964204 | 0.0475818  | 3.20E-05 | 0.0068348 | 0.4058     |
| 16w_SITTD12 | 0.11549203 | 0.6862904  | 6.63E-05 | 0.025182  | -0.32814   |
| 16w_SITTD12 | 0.03385244 | 0.19366963 | 4.43E-05 | 0.004153  | -0.087207  |
| 16w_SITTD12 | 0.09708378 | 0.57521325 | 6.51E-05 | 0.023799  | -0.065044  |
| 16w_SITTD12 | 0.03756463 | 0.2160693  | 4.81E-05 | 0.0043756 | -0.05192   |
| 16w_SITTD12 | 0.02054167 | 0.11335118 | 3.44E-05 | 0.0045325 | -0.01065   |
| 16w_SITTD12 | 0.00648111 | 0.02850846 | 3.18E-05 | 0.0078    | 0.54183    |
| 16w_SITTD12 | 0.03380325 | 0.19337282 | 4.43E-05 | 0.004153  | -0.087207  |
| 16w_SITTD12 | 0.11665563 | 0.69331163 | 6.64E-05 | 0.025054  | -0.33868   |
| 16w_SITTD12 | 0.02533328 | 0.14226422 | 3.72E-05 | 0.0041509 | -0.092011  |
| 16w_SITTD12 | 0.01500303 | 0.07993052 | 3.27E-05 | 0.0054028 | 0.16515    |
| 16w_SITTD12 | 0.02616018 | 0.14725383 | 3.76E-05 | 0.0041286 | -0.096385  |
| 16w_SITTD12 | 0.03090045 | 0.17585702 | 4.16E-05 | 0.0040771 | -0.10299   |
| 16w_SITTD12 | 0.01658999 | 0.08950637 | 3.31E-05 | 0.0050879 | 0.10435    |
| 16w_SITTD12 | 0.0424148  | 0.24533565 | 5.24E-05 | 0.0047963 | -0.0013165 |
| 16w_SITTD12 | 0.06469058 | 0.3797498  | 6.11E-05 | 0.010206  | 0.093303   |
| 16w_SITTD12 | 0.01187426 | 0.06105125 | 3.22E-05 | 0.0061869 | 0.30353    |
| 16w_SITTD12 | 0.09607098 | 0.569102   | 6.50E-05 | 0.023448  | -0.045608  |
| 16w_SITTD12 | 0.02568914 | 0.1444115  | 3.72E-05 | 0.0041509 | -0.092011  |
| 16w_SITTD12 | 0.015397   | 0.08230778 | 3.28E-05 | 0.0052924 | 0.1442     |
| 16w_SITTD12 | 0.11183618 | 0.66423064 | 6.61E-05 | 0.025489  | -0.28705   |
| 16w_SITTD12 | 0.01526858 | 0.08153287 | 3.27E-05 | 0.0054028 | 0.16515    |
| 16w_SITTD12 | 0.03451886 | 0.19769084 | 4.48E-05 | 0.0041765 | -0.082901  |
| 16w_SITTD12 | 0.01305649 | 0.06818494 | 3.23E-05 | 0.0059016 | 0.25518    |
| 16w_SITTD12 | 0.01560945 | 0.0835897  | 3.28E-05 | 0.0052924 | 0.1442     |
| 16w_SITTD12 | 0.08806873 | 0.5208157  | 6.42E-05 | 0.020421  | 0.080939   |
| 16w_SITTD12 | 0.01684269 | 0.09103121 | 3.31E-05 | 0.0050879 | 0.10435    |
| 16w_SITTD12 | 0.01645935 | 0.0887181  | 3.31E-05 | 0.0050879 | 0.10435    |
| 16w_SITTD12 | 0.02438401 | 0.13653624 | 3.64E-05 | 0.0042065 | -0.080664  |

|             |            |            |          |           |           |
|-------------|------------|------------|----------|-----------|-----------|
| 16w_SITTD12 | 0.01356567 | 0.07125737 | 3.24E-05 | 0.0057681 | 0.23179   |
| 16w_SITTD12 | 0.02486995 | 0.1394684  | 3.68E-05 | 0.0041768 | -0.086782 |
| 16w_SITTD12 | 0.0861292  | 0.50911236 | 6.39E-05 | 0.01943   | 0.099025  |
| 16w_SITTD12 | 0.1181707  | 0.7024537  | 6.65E-05 | 0.024847  | -0.35363  |
| 16w_SITTD12 | 0.10381721 | 0.6158434  | 6.56E-05 | 0.025296  | -0.18011  |
| 16w_SITTD12 | 0.03329449 | 0.1903029  | 4.37E-05 | 0.0041322 | -0.091175 |
| 16w_SITTD12 | 0.10830867 | 0.6429453  | 6.59E-05 | 0.025614  | -0.24573  |
| 16w_SITTD12 | 0.12441932 | 0.74015844 | 6.67E-05 | 0.024092  | -0.40152  |
| 16w_SITTD12 | 0.01731373 | 0.09387351 | 3.33E-05 | 0.0049935 | 0.085504  |
| 16w_SITTD12 | 0.05100351 | 0.2971607  | 5.81E-05 | 0.006215  | 0.051138  |
| 16w_SITTD12 | 0.0814454  | 0.48084986 | 6.34E-05 | 0.017373  | 0.13148   |
| 16w_SITTD12 | 0.02411939 | 0.13493946 | 3.61E-05 | 0.0042401 | -0.073623 |
| 16w_SITTD12 | 0.01480537 | 0.07873783 | 3.27E-05 | 0.0054028 | 0.16515   |
| 16w_SITTD12 | 0.01840846 | 0.10047922 | 3.36E-05 | 0.0048202 | 0.050123  |
| 16w_SITTD12 | 0.09195159 | 0.5442451  | 6.46E-05 | 0.022042  | 0.027741  |
| 16w_SITTD12 | 0.0160923  | 0.08650326 | 3.30E-05 | 0.0051875 | 0.12392   |
| 16w_SITTD12 | 0.01185021 | 0.06090614 | 3.22E-05 | 0.0061869 | 0.30353   |
| 16w_SITTD12 | 0.02106512 | 0.11650971 | 3.47E-05 | 0.0044724 | -0.023601 |
| 16w_SITTD12 | 0.12007262 | 0.71393    | 6.65E-05 | 0.024632  | -0.36766  |
| 16w_SITTD12 | 0.0919018  | 0.5439447  | 6.46E-05 | 0.022042  | 0.027741  |
| 16w_SITTD12 | 0.02349074 | 0.13114612 | 3.58E-05 | 0.0042778 | -0.065623 |
| 16w_SITTD12 | 0.05985722 | 0.35058486 | 6.04E-05 | 0.0085136 | 0.077363  |
| 16w_SITTD12 | 0.02189356 | 0.12150861 | 3.49E-05 | 0.0044169 | -0.0356   |
| 16w_SITTD12 | 0.00633316 | 0.02761575 | 3.18E-05 | 0.008015  | 0.56984   |
| 16w_SITTD12 | 0.04591711 | 0.2664689  | 5.54E-05 | 0.0053171 | 0.025099  |
| 16w_SITTD12 | 0.02205261 | 0.12246831 | 3.52E-05 | 0.0043661 | -0.046619 |
| 16w_SITTD12 | 0.02797366 | 0.15819652 | 3.88E-05 | 0.0040827 | -0.10472  |
| 16w_SITTD12 | 0.02987749 | 0.16968437 | 4.07E-05 | 0.0040668 | -0.10597  |
| 16w_SITTD12 | 0.03097251 | 0.17629181 | 4.16E-05 | 0.0040771 | -0.10299  |
| 16w_SITTD12 | 0.08605611 | 0.5086713  | 6.39E-05 | 0.01943   | 0.099025  |
| 16w_SITTD12 | 0.02556427 | 0.143658   | 3.72E-05 | 0.0041509 | -0.092011 |
| 16w_SITTD12 | 0.05512461 | 0.32202783 | 5.94E-05 | 0.0071062 | 0.065685  |
| 16w_SITTD12 | 0.01832262 | 0.09996124 | 3.36E-05 | 0.0048202 | 0.050123  |
| 16w_SITTD12 | 0.03173688 | 0.18090415 | 4.22E-05 | 0.0040866 | -0.10071  |
| 16w_SITTD12 | 0.04786125 | 0.27820003 | 5.64E-05 | 0.0055867 | 0.035328  |
| 16w_SITTD12 | 0.02041527 | 0.11258847 | 3.44E-05 | 0.0045325 | -0.01065  |
| 16w_SITTD12 | 0.08904661 | 0.5267163  | 6.42E-05 | 0.020663  | 0.067165  |
| 16w_SITTD12 | 0.02737856 | 0.15460561 | 3.84E-05 | 0.0040947 | -0.10271  |
| 16w_SITTD12 | 0.10027135 | 0.5944474  | 6.53E-05 | 0.024687  | -0.11403  |
| 16w_SITTD12 | 0.11676126 | 0.693949   | 6.64E-05 | 0.025054  | -0.33868  |
| 16w_SITTD12 | 0.04064325 | 0.23464599 | 5.09E-05 | 0.0046173 | -0.023154 |
| 16w_SITTD12 | 0.01832755 | 0.09999099 | 3.36E-05 | 0.0048202 | 0.050123  |
| 16w_SITTD12 | 0.04005105 | 0.23107257 | 5.03E-05 | 0.0045634 | -0.028892 |



|             |            |            |          |           |           |
|-------------|------------|------------|----------|-----------|-----------|
| 16w_SITTD12 | 0.06309901 | 0.37014613 | 6.09E-05 | 0.0096122 | 0.087254  |
| 16w_SITTD12 | 0.0489323  | 0.28466284 | 5.70E-05 | 0.0057827 | 0.041222  |
| 16w_SITTD12 | 0.06184528 | 0.36258096 | 6.07E-05 | 0.0090475 | 0.083692  |
| 16w_SITTD12 | 0.09973734 | 0.5912251  | 6.53E-05 | 0.024558  | -0.10426  |
| 16w_SITTD12 | 0.02217691 | 0.12321836 | 3.52E-05 | 0.0043661 | -0.046619 |
| 16w_SITTD12 | 0.01927766 | 0.10572405 | 3.40E-05 | 0.0046667 | 0.017998  |
| 16w_SITTD12 | 0.01958097 | 0.10755423 | 3.40E-05 | 0.0046667 | 0.017998  |
| 16w_SITTD12 | 0.076624   | 0.4517571  | 6.27E-05 | 0.015053  | 0.13605   |
| 16w_SITTD12 | 0.03500737 | 0.20063858 | 4.54E-05 | 0.0042028 | -0.078293 |
| 16w_SITTD12 | 0.01617699 | 0.0870143  | 3.30E-05 | 0.0051875 | 0.12392   |
| 16w_SITTD12 | 0.05343891 | 0.31185615 | 5.89E-05 | 0.0067028 | 0.060836  |
| 16w_SITTD12 | 0.09819366 | 0.5819104  | 6.52E-05 | 0.024123  | -0.084641 |
| 16w_SITTD12 | 0.04625875 | 0.2685304  | 5.54E-05 | 0.0053171 | 0.028707  |
| 16w_SITTD12 | 0.01955745 | 0.10741229 | 3.40E-05 | 0.0046667 | 0.017998  |
| 16w_SITTD12 | 0.02539126 | 0.14261408 | 3.72E-05 | 0.0041509 | -0.092011 |
| 16w_SITTD12 | 0.10892168 | 0.64664423 | 6.59E-05 | 0.025616  | -0.25305  |
| 16w_SITTD12 | 0.1212206  | 0.7208571  | 6.66E-05 | 0.024419  | -0.37656  |
| 16w_SITTD12 | 0.02700112 | 0.15232812 | 3.84E-05 | 0.0040947 | -0.10271  |
| 16w_SITTD12 | 0.03200848 | 0.18254298 | 4.27E-05 | 0.004099  | -0.097962 |
| 16w_SITTD12 | 0.11541424 | 0.68582094 | 6.63E-05 | 0.025182  | -0.32814  |
| 16w_SITTD12 | 0.07261147 | 0.42754516 | 6.22E-05 | 0.01332   | 0.12548   |
| 16w_SITTD12 | 0.06991625 | 0.4112819  | 6.18E-05 | 0.012147  | 0.11455   |
| 16w_SITTD12 | 0.13389137 | 0.7973137  | 6.71E-05 | 0.023546  | -0.46255  |
| 16w_SITTD12 | 0.00662711 | 0.02938945 | 3.18E-05 | 0.0078    | 0.54183   |
| 16w_SITTD12 | 0.0156579  | 0.08388206 | 3.28E-05 | 0.0052924 | 0.1442    |
| 16w_SITTD12 | 0.10180765 | 0.60371757 | 6.55E-05 | 0.025029  | -0.14299  |
| 16w_SITTD12 | 0.00338856 | 0.00984773 | 3.18E-05 | 0.0092049 | 0.71249   |
| 16w_SITTD12 | 0.00834063 | 0.03972898 | 3.19E-05 | 0.0071994 | 0.45929   |
| 16w_SITTD12 | 0.02650742 | 0.1493491  | 3.80E-05 | 0.0041099 | -0.099939 |
| 16w_SITTD12 | 0.03186628 | 0.18168496 | 4.22E-05 | 0.0040866 | -0.097962 |
| 16w_SITTD12 | 0.03810281 | 0.21931675 | 4.87E-05 | 0.0044183 | -0.04622  |
| 16w_SITTD12 | 0.02273348 | 0.12657675 | 3.55E-05 | 0.0043197 | -0.056631 |
| 16w_SITTD12 | 0.01832694 | 0.09998732 | 3.36E-05 | 0.0048202 | 0.050123  |
| 16w_SITTD12 | 0.01690332 | 0.09139703 | 3.31E-05 | 0.0050879 | 0.10435   |
| 16w_SITTD12 | 0.09332456 | 0.55252975 | 6.47E-05 | 0.022469  | 0.0013661 |
| 16w_SITTD12 | 0.06863205 | 0.40353295 | 6.16E-05 | 0.011695  | 0.10977   |
| 16w_SITTD12 | 0.01625305 | 0.08747323 | 3.30E-05 | 0.0051875 | 0.12392   |
| 16w_SITTD12 | 0.10633833 | 0.6310561  | 6.58E-05 | 0.02556   | -0.21453  |
| 16w_SITTD12 | 0.08986008 | 0.5316248  | 6.44E-05 | 0.021137  | 0.059815  |
| 16w_SITTD12 | 0.12121326 | 0.72081274 | 6.66E-05 | 0.024419  | -0.37656  |
| 16w_SITTD12 | 0.11353594 | 0.6744871  | 6.62E-05 | 0.025353  | -0.30551  |
| 16w_SITTD12 | 0.01752093 | 0.09512379 | 3.33E-05 | 0.0049935 | 0.067421  |
| 16w_SITTD12 | 0.035019   | 0.20070872 | 4.54E-05 | 0.0042028 | -0.078293 |

|             |            |            |          |           |           |
|-------------|------------|------------|----------|-----------|-----------|
| 16w_SITTD12 | 0.02499779 | 0.1402398  | 3.68E-05 | 0.0041768 | -0.086782 |
| 16w_SITTD12 | 0.04726171 | 0.2745824  | 5.61E-05 | 0.0054936 | 0.032113  |
| 16w_SITTD12 | 0.02693145 | 0.1519077  | 3.80E-05 | 0.0041099 | -0.10271  |
| 16w_SITTD12 | 0.01521505 | 0.08120988 | 3.27E-05 | 0.0054028 | 0.16515   |
| 16w_SITTD12 | 0.02151739 | 0.11923874 | 3.49E-05 | 0.0044169 | -0.0356   |
| 16w_SITTD12 | 0.01501537 | 0.08000501 | 3.27E-05 | 0.0054028 | 0.16515   |
| 16w_SITTD12 | 0.0148462  | 0.07898417 | 3.27E-05 | 0.0054028 | 0.16515   |
| 16w_SITTD12 | 0.04620339 | 0.2681964  | 5.54E-05 | 0.0053171 | 0.025099  |
| 16w_SITTD12 | 0.01358437 | 0.07137018 | 3.24E-05 | 0.0057681 | 0.23179   |
| 16w_SITTD12 | 0.03929861 | 0.22653231 | 4.98E-05 | 0.0045122 | -0.034672 |
| 16w_SITTD12 | 0.01878894 | 0.10277502 | 3.38E-05 | 0.004741  | 0.03364   |
| 16w_SITTD12 | 0.01886268 | 0.10322001 | 3.38E-05 | 0.004741  | 0.03364   |
| 16w_SITTD12 | 0.10200453 | 0.60490555 | 6.55E-05 | 0.025029  | -0.14299  |
| 16w_SITTD12 | 0.01376392 | 0.07245364 | 3.25E-05 | 0.0056405 | 0.20898   |
| 16w_SITTD12 | 0.00724264 | 0.0331036  | 3.19E-05 | 0.0075925 | 0.51404   |
| 16w_SITTD12 | 0.02738337 | 0.15463464 | 3.84E-05 | 0.0040947 | -0.10271  |
| 16w_SITTD12 | 0.02216886 | 0.12316982 | 3.52E-05 | 0.0043661 | -0.046619 |
| 16w_SITTD12 | 0.08691605 | 0.5138603  | 6.41E-05 | 0.01993   | 0.093363  |
| 16w_SITTD12 | 0.05744012 | 0.33599988 | 5.99E-05 | 0.0076952 | 0.071569  |
| 16w_SITTD12 | 0.02219073 | 0.12330175 | 3.52E-05 | 0.0043661 | -0.046619 |
| 16w_SITTD12 | 0.02951318 | 0.1674861  | 4.02E-05 | 0.0040662 | -0.10661  |
| 16w_SITTD12 | 0.01463949 | 0.07773686 | 3.26E-05 | 0.0055188 | 0.18676   |
| 16w_SITTD12 | 0.02636163 | 0.14846937 | 3.76E-05 | 0.0041286 | -0.099939 |
| 16w_SITTD12 | 0.031944   | 0.1821539  | 4.22E-05 | 0.0040866 | -0.097962 |
| 16w_SITTD12 | 0.08855394 | 0.5237434  | 6.42E-05 | 0.020663  | 0.074212  |
| 16w_SITTD12 | 0.11616185 | 0.6903321  | 6.63E-05 | 0.025119  | -0.33347  |
| 16w_SITTD12 | 0.1136286  | 0.67504627 | 6.62E-05 | 0.025353  | -0.31137  |
| 16w_SITTD12 | 0.02305281 | 0.12850362 | 3.55E-05 | 0.0043197 | -0.065623 |
| 16w_SITTD12 | 0.03306268 | 0.18890414 | 4.32E-05 | 0.0041142 | -0.091175 |
| 16w_SITTD12 | 0.02103923 | 0.11635348 | 3.47E-05 | 0.0044724 | -0.023601 |
| 16w_SITTD12 | 0.03804983 | 0.21899706 | 4.81E-05 | 0.0043756 | -0.04622  |
| 16w_SITTD12 | 0.03136618 | 0.1786673  | 4.16E-05 | 0.0040771 | -0.10071  |
| 16w_SITTD12 | 0.07466489 | 0.43993565 | 6.25E-05 | 0.014299  | 0.13218   |
| 16w_SITTD12 | 0.10636465 | 0.6312149  | 6.58E-05 | 0.02556   | -0.21453  |
| 16w_SITTD12 | 0.01229879 | 0.06361286 | 3.23E-05 | 0.0060411 | 0.2791    |
| 16w_SITTD12 | 0.0413898  | 0.23915073 | 5.19E-05 | 0.0047337 | -0.011944 |
| 16w_SITTD12 | 0.08513594 | 0.50311893 | 6.38E-05 | 0.018923  | 0.10916   |
| 16w_SITTD12 | 0.02482855 | 0.1392186  | 3.68E-05 | 0.0041768 | -0.086782 |
| 16w_SITTD12 | 0.01195313 | 0.06152716 | 3.22E-05 | 0.0061869 | 0.30353   |
| 16w_SITTD12 | 0.02245111 | 0.12487293 | 3.52E-05 | 0.0043661 | -0.046619 |
| 16w_SITTD12 | 0.02284449 | 0.1272466  | 3.55E-05 | 0.0043197 | -0.056631 |
| 16w_SITTD12 | 0.02253119 | 0.12535614 | 3.52E-05 | 0.0043661 | -0.056631 |
| 16w_SITTD12 | 0.08619673 | 0.5095198  | 6.39E-05 | 0.01943   | 0.099025  |

|             |            |            |          |           |           |
|-------------|------------|------------|----------|-----------|-----------|
| 16w_SITTD12 | 0.0704299  | 0.41438133 | 6.19E-05 | 0.012376  | 0.11689   |
| 16w_SITTD12 | 0.12301932 | 0.7317107  | 6.67E-05 | 0.024217  | -0.39346  |
| 16w_SITTD12 | 0.0152465  | 0.08139962 | 3.27E-05 | 0.0054028 | 0.16515   |
| 16w_SITTD12 | 0.0806779  | 0.4762187  | 6.32E-05 | 0.016854  | 0.13314   |
| 16w_SITTD12 | 0.01494954 | 0.07960776 | 3.27E-05 | 0.0054028 | 0.16515   |
| 16w_SITTD12 | 0.08392847 | 0.49583298 | 6.37E-05 | 0.01841   | 0.1176    |
| 16w_SITTD12 | 0.00834771 | 0.03977168 | 3.19E-05 | 0.0071994 | 0.45929   |
| 16w_SITTD12 | 0.09064856 | 0.53638256 | 6.44E-05 | 0.021369  | 0.044278  |
| 16w_SITTD12 | 0.06981105 | 0.41064715 | 6.18E-05 | 0.012147  | 0.11455   |
| 16w_SITTD12 | 0.05144978 | 0.29985356 | 5.83E-05 | 0.0063316 | 0.053285  |
| 16w_SITTD12 | 0.12301681 | 0.7316956  | 6.67E-05 | 0.024217  | -0.39346  |
| 16w_SITTD12 | 0.05401375 | 0.31532478 | 5.91E-05 | 0.0068337 | 0.062513  |
| 16w_SITTD12 | 0.02643241 | 0.14889644 | 3.80E-05 | 0.0041099 | -0.099939 |
| 16w_SITTD12 | 0.00619684 | 0.02679314 | 3.18E-05 | 0.008015  | 0.56984   |
| 16w_SITTD12 | 0.02761338 | 0.15602252 | 3.88E-05 | 0.0040827 | -0.10472  |
| 16w_SITTD12 | 0.01801091 | 0.09808034 | 3.34E-05 | 0.0049043 | 0.067421  |
| 16w_SITTD12 | 0.0308233  | 0.17539148 | 4.11E-05 | 0.0040705 | -0.10299  |
| 16w_SITTD12 | 0.01516091 | 0.08088316 | 3.27E-05 | 0.0054028 | 0.16515   |
| 16w_SITTD12 | 0.10959656 | 0.65071654 | 6.60E-05 | 0.025599  | -0.2602   |
| 16w_SITTD12 | 0.01682086 | 0.09089946 | 3.31E-05 | 0.0050879 | 0.10435   |
| 16w_SITTD12 | 0.02234837 | 0.12425297 | 3.52E-05 | 0.0043661 | -0.046619 |
| 16w_SITTD12 | 0.08229655 | 0.48598582 | 6.35E-05 | 0.017633  | 0.1271    |
| 16w_SITTD12 | 0.05460705 | 0.31890482 | 5.92E-05 | 0.0069681 | 0.064127  |
| 16w_SITTD12 | 0.04216848 | 0.24384938 | 5.24E-05 | 0.0047963 | -0.00654  |
| 16w_SITTD12 | 0.08115032 | 0.47906932 | 6.33E-05 | 0.017113  | 0.13148   |
| 16w_SITTD12 | 0.01379002 | 0.07261108 | 3.25E-05 | 0.0056405 | 0.20898   |
| 16w_SITTD12 | 0.02215801 | 0.12310435 | 3.52E-05 | 0.0043661 | -0.046619 |
| 16w_SITTD12 | 0.01315549 | 0.06878229 | 3.24E-05 | 0.0057681 | 0.23179   |
| 16w_SITTD12 | 0.0131299  | 0.06862786 | 3.24E-05 | 0.0057681 | 0.23179   |
| 16w_SITTD12 | 0.00993403 | 0.0493437  | 3.20E-05 | 0.0066628 | 0.37961   |
| 16w_SITTD12 | 0.10358308 | 0.61443067 | 6.56E-05 | 0.025296  | -0.17104  |
| 16w_SITTD12 | 0.02454846 | 0.13752854 | 3.64E-05 | 0.0042065 | -0.080664 |
| 16w_SITTD12 | 0.10920124 | 0.6483311  | 6.60E-05 | 0.025611  | -0.25305  |
| 16w_SITTD12 | 0.0285523  | 0.16168809 | 3.93E-05 | 0.004074  | -0.10664  |
| 16w_SITTD12 | 0.01350886 | 0.07091457 | 3.24E-05 | 0.0057681 | 0.23179   |
| 16w_SITTD12 | 0.08834609 | 0.52248925 | 6.42E-05 | 0.020421  | 0.074212  |
| 16w_SITTD12 | 0.11948032 | 0.71035606 | 6.65E-05 | 0.024704  | -0.36308  |
| 16w_SITTD12 | 0.02552014 | 0.14339173 | 3.72E-05 | 0.0041509 | -0.092011 |
| 16w_SITTD12 | 0.0819128  | 0.48367023 | 6.35E-05 | 0.017633  | 0.12948   |
| 16w_SITTD12 | 0.01349299 | 0.07081883 | 3.24E-05 | 0.0057681 | 0.23179   |
| 16w_SITTD12 | 0.10469259 | 0.6211255  | 6.57E-05 | 0.025429  | -0.18901  |
| 16w_SITTD12 | 0.02316556 | 0.12918398 | 3.58E-05 | 0.0042778 | -0.065623 |
| 16w_SITTD12 | 0.08262122 | 0.48794487 | 6.35E-05 | 0.017892  | 0.1271    |

|             |            |            |          |           |           |
|-------------|------------|------------|----------|-----------|-----------|
| 16w_SITTD12 | 0.01154245 | 0.05904909 | 3.22E-05 | 0.0061869 | 0.30353   |
| 16w_SITTD12 | 0.02273457 | 0.12658337 | 3.55E-05 | 0.0043197 | -0.056631 |
| 16w_SITTD12 | 0.09777799 | 0.5794022  | 6.51E-05 | 0.023964  | -0.074831 |
| 16w_SITTD12 | 0.01016569 | 0.05074155 | 3.20E-05 | 0.0066628 | 0.37961   |
| 16w_SITTD12 | 0.10017144 | 0.5938445  | 6.53E-05 | 0.024687  | -0.11403  |
| 16w_SITTD12 | 0.00361496 | 0.01121384 | 3.18E-05 | 0.0092049 | 0.71249   |
| 16w_SITTD12 | 0.07957625 | 0.46957123 | 6.31E-05 | 0.016335  | 0.13545   |
| 16w_SITTD12 | 0.0994489  | 0.58948463 | 6.53E-05 | 0.02442   | -0.10426  |
| 16w_SITTD12 | 0.12107226 | 0.71996194 | 6.66E-05 | 0.02449   | -0.37656  |
| 16w_SITTD12 | 0.13254379 | 0.78918225 | 6.71E-05 | 0.023568  | -0.45613  |
| 16w_SITTD12 | 0.02668283 | 0.15040754 | 3.80E-05 | 0.0041099 | -0.099939 |
| 16w_SITTD12 | 0.02336325 | 0.13037686 | 3.58E-05 | 0.0042778 | -0.065623 |
| 16w_SITTD12 | 0.03301759 | 0.18863203 | 4.32E-05 | 0.0041142 | -0.091175 |
| 16w_SITTD12 | 0.08009948 | 0.47272846 | 6.32E-05 | 0.016594  | 0.13446   |
| 16w_SITTD12 | 0.06020069 | 0.35265735 | 6.04E-05 | 0.0085136 | 0.07887   |
| 16w_SITTD12 | 0.02366265 | 0.13218348 | 3.61E-05 | 0.0042401 | -0.073623 |
| 16w_SITTD12 | 0.09682977 | 0.5736806  | 6.51E-05 | 0.023799  | -0.055297 |
| 16w_SITTD12 | 0.01805616 | 0.09835341 | 3.34E-05 | 0.0049043 | 0.050123  |
| 16w_SITTD12 | 0.07112108 | 0.418552   | 6.20E-05 | 0.012608  | 0.12136   |
| 16w_SITTD12 | 0.01887568 | 0.10329846 | 3.38E-05 | 0.004741  | 0.03364   |
| 16w_SITTD12 | 0.01283975 | 0.0668771  | 3.23E-05 | 0.0059016 | 0.25518   |
| 16w_SITTD12 | 0.01976729 | 0.10867852 | 3.40E-05 | 0.0046667 | 0.0032259 |
| 16w_SITTD12 | 0.01418139 | 0.07497264 | 3.25E-05 | 0.0056405 | 0.20898   |
| 16w_SITTD12 | 0.01553466 | 0.08313845 | 3.28E-05 | 0.0052924 | 0.1442    |
| 16w_SITTD12 | 0.10351047 | 0.6139925  | 6.56E-05 | 0.025296  | -0.17104  |
| 16w_SITTD12 | 0.0467385  | 0.27142528 | 5.57E-05 | 0.0054037 | 0.028707  |
| 16w_SITTD12 | 0.02892603 | 0.16394317 | 3.97E-05 | 0.0040686 | -0.10664  |
| 16w_SITTD12 | 0.08045427 | 0.4748693  | 6.32E-05 | 0.016854  | 0.13446   |
| 16w_SITTD12 | 0.03033152 | 0.17242406 | 4.11E-05 | 0.0040705 | -0.10475  |
| 16w_SITTD12 | 0.03676378 | 0.21123688 | 4.70E-05 | 0.0042982 | -0.062998 |
| 16w_SITTD12 | 0.04706016 | 0.27336618 | 5.61E-05 | 0.0054936 | 0.032113  |
| 16w_SITTD12 | 0.08938191 | 0.5287395  | 6.43E-05 | 0.020902  | 0.059815  |
| 16w_SITTD12 | 0.02288277 | 0.12747759 | 3.55E-05 | 0.0043197 | -0.056631 |
| 16w_SITTD12 | 0.01395834 | 0.07362673 | 3.25E-05 | 0.0056405 | 0.20898   |
| 16w_SITTD12 | 0.01788826 | 0.09734025 | 3.34E-05 | 0.0049043 | 0.067421  |
| 16w_SITTD12 | 0.10232789 | 0.6068567  | 6.55E-05 | 0.025029  | -0.15246  |
| 16w_SITTD12 | 0.01096366 | 0.0555566  | 3.21E-05 | 0.006339  | 0.32844   |
| 16w_SITTD12 | 0.04697068 | 0.2728263  | 5.61E-05 | 0.0054936 | 0.032113  |
| 16w_SITTD12 | 0.05585507 | 0.3264355  | 5.97E-05 | 0.0073934 | 0.067199  |
| 16w_SITTD12 | 0.05549263 | 0.3242485  | 5.95E-05 | 0.007248  | 0.065685  |
| 16w_SITTD12 | 0.09583567 | 0.5676821  | 6.50E-05 | 0.023448  | -0.035993 |
| 16w_SITTD12 | 0.10276198 | 0.60947603 | 6.55E-05 | 0.025127  | -0.16182  |
| 16w_SITTD12 | 0.08167574 | 0.48223975 | 6.34E-05 | 0.017373  | 0.12948   |

|             |            |            |          |           |            |
|-------------|------------|------------|----------|-----------|------------|
| 16w_SITTD12 | 0.0921716  | 0.54557276 | 6.46E-05 | 0.022042  | 0.019141   |
| 16w_SITTD12 | 0.03010418 | 0.17105228 | 4.07E-05 | 0.0040668 | -0.10597   |
| 16w_SITTD12 | 0.01182915 | 0.06077903 | 3.22E-05 | 0.0061869 | 0.30353    |
| 16w_SITTD12 | 0.02122977 | 0.11750325 | 3.47E-05 | 0.0044724 | -0.023601  |
| 16w_SITTD12 | 0.01311826 | 0.06855764 | 3.23E-05 | 0.0059016 | 0.23179    |
| 16w_SITTD12 | 0.05113615 | 0.2979611  | 5.81E-05 | 0.006215  | 0.051138   |
| 16w_SITTD12 | 0.08378114 | 0.49494395 | 6.37E-05 | 0.01841   | 0.12117    |
| 16w_SITTD12 | 0.07886347 | 0.46527028 | 6.30E-05 | 0.016077  | 0.13613    |
| 16w_SITTD12 | 0.06535275 | 0.3837453  | 6.12E-05 | 0.01041   | 0.095509   |
| 16w_SITTD12 | 0.01560519 | 0.08356404 | 3.28E-05 | 0.0052924 | 0.1442     |
| 16w_SITTD12 | 0.0139256  | 0.07342919 | 3.25E-05 | 0.0056405 | 0.20898    |
| 16w_SITTD12 | 0.01463708 | 0.07772233 | 3.26E-05 | 0.0055188 | 0.18676    |
| 16w_SITTD12 | 0.05656762 | 0.3307351  | 5.98E-05 | 0.0075425 | 0.068678   |
| 16w_SITTD12 | 0.03984522 | 0.22983058 | 5.03E-05 | 0.0045634 | -0.028892  |
| 16w_SITTD12 | 0.0507325  | 0.29552546 | 5.78E-05 | 0.0061018 | 0.051138   |
| 16w_SITTD12 | 0.01190926 | 0.06126244 | 3.22E-05 | 0.0061869 | 0.30353    |
| 16w_SITTD12 | 0.02360316 | 0.1318245  | 3.58E-05 | 0.0042778 | -0.073623  |
| 16w_SITTD12 | 0.02153562 | 0.11934874 | 3.49E-05 | 0.0044169 | -0.0356    |
| 16w_SITTD12 | 0.04732206 | 0.2749465  | 5.61E-05 | 0.0054936 | 0.032113   |
| 16w_SITTD12 | 0.10839228 | 0.64344984 | 6.59E-05 | 0.025614  | -0.24573   |
| 16w_SITTD12 | 0.08318494 | 0.4913464  | 6.36E-05 | 0.018151  | 0.12434    |
| 16w_SITTD12 | 0.05956769 | 0.34883782 | 6.03E-05 | 0.0083426 | 0.077363   |
| 16w_SITTD12 | 0.01668081 | 0.09005439 | 3.31E-05 | 0.0050879 | 0.10435    |
| 16w_SITTD12 | 0.11302776 | 0.6714207  | 6.62E-05 | 0.025403  | -0.29951   |
| 16w_SITTD12 | 0.04449603 | 0.25789398 | 5.42E-05 | 0.0050757 | 0.012967   |
| 16w_SITTD12 | 0.0282996  | 0.16016324 | 3.93E-05 | 0.004074  | -0.10603   |
| 16w_SITTD12 | 0.05581654 | 0.326203   | 5.97E-05 | 0.0073934 | 0.067199   |
| 16w_SITTD12 | 0.04315967 | 0.24983028 | 5.33E-05 | 0.0049301 | 0.0036923  |
| 16w_SITTD12 | 0.09350381 | 0.5536114  | 6.48E-05 | 0.022676  | 0.0013661  |
| 16w_SITTD12 | 0.02917338 | 0.16543575 | 3.97E-05 | 0.0040686 | -0.10661   |
| 16w_SITTD12 | 0.14578685 | 0.8690921  | 6.75E-05 | 0.02365   | -0.51443   |
| 16w_SITTD12 | 0.10132486 | 0.6008043  | 6.54E-05 | 0.024923  | -0.13341   |
| 16w_SITTD12 | 0.02588236 | 0.14557743 | 3.76E-05 | 0.0041286 | -0.096385  |
| 16w_SITTD12 | 0.04281356 | 0.24774182 | 5.29E-05 | 0.0048617 | -0.0013165 |
| 16w_SITTD12 | 0.02259786 | 0.12575844 | 3.55E-05 | 0.0043197 | -0.056631  |
| 16w_SITTD12 | 0.01837595 | 0.10028303 | 3.36E-05 | 0.0048202 | 0.050123   |
| 16w_SITTD12 | 0.08349184 | 0.49319828 | 6.36E-05 | 0.018151  | 0.12117    |
| 16w_SITTD12 | 0.02405183 | 0.13453181 | 3.61E-05 | 0.0042401 | -0.073623  |
| 16w_SITTD12 | 0.02560286 | 0.1438909  | 3.72E-05 | 0.0041509 | -0.092011  |
| 16w_SITTD12 | 0.01201524 | 0.06190193 | 3.23E-05 | 0.0060411 | 0.2791     |
| 16w_SITTD12 | 0.03246182 | 0.18527848 | 4.27E-05 | 0.004099  | -0.094772  |
| 16w_SITTD12 | 0.05994912 | 0.35113934 | 6.04E-05 | 0.0085136 | 0.077363   |
| 16w_SITTD12 | 0.01759041 | 0.09554303 | 3.34E-05 | 0.0049043 | 0.067421   |

|             |            |            |          |           |           |
|-------------|------------|------------|----------|-----------|-----------|
| 16w_SITTD12 | 0.01904242 | 0.10430457 | 3.38E-05 | 0.004741  | 0.03364   |
| 16w_SITTD12 | 0.09116381 | 0.5394916  | 6.45E-05 | 0.021597  | 0.036126  |
| 16w_SITTD12 | 0.03119684 | 0.17764543 | 4.16E-05 | 0.0040771 | -0.10299  |
| 16w_SITTD12 | 0.02173787 | 0.12056917 | 3.49E-05 | 0.0044169 | -0.0356   |
| 16w_SITTD12 | 0.01337411 | 0.0701015  | 3.24E-05 | 0.0057681 | 0.23179   |
| 16w_SITTD12 | 0.02344086 | 0.13084513 | 3.58E-05 | 0.0042778 | -0.065623 |
| 16w_SITTD12 | 0.05028326 | 0.29281467 | 5.78E-05 | 0.0061018 | 0.048868  |
| 16w_SITTD12 | 0.03206816 | 0.18290313 | 4.27E-05 | 0.004099  | -0.097962 |
| 16w_SITTD12 | 0.05069742 | 0.29531375 | 5.78E-05 | 0.0061018 | 0.051138  |
| 16w_SITTD12 | 0.10642379 | 0.63157177 | 6.58E-05 | 0.02556   | -0.21453  |
| 16w_SITTD12 | 0.05040045 | 0.2935218  | 5.78E-05 | 0.0061018 | 0.048868  |
| 16w_SITTD12 | 0.02605638 | 0.14662744 | 3.76E-05 | 0.0041286 | -0.096385 |
| 16w_SITTD12 | 0.09794951 | 0.5804371  | 6.52E-05 | 0.024123  | -0.074831 |
| 16w_SITTD12 | 0.01747857 | 0.09486815 | 3.33E-05 | 0.0049935 | 0.085504  |
| 16w_SITTD12 | 0.05073279 | 0.2955272  | 5.78E-05 | 0.0061018 | 0.051138  |
| 16w_SITTD12 | 0.02740466 | 0.15476313 | 3.84E-05 | 0.0040947 | -0.10271  |
| 16w_SITTD12 | 0.10648506 | 0.6319415  | 6.58E-05 | 0.02556   | -0.22263  |
| 16w_SITTD12 | 0.02263743 | 0.1259972  | 3.55E-05 | 0.0043197 | -0.056631 |
| 16w_SITTD12 | 0.01516763 | 0.0809237  | 3.27E-05 | 0.0054028 | 0.16515   |
| 16w_SITTD12 | 0.02606557 | 0.14668289 | 3.76E-05 | 0.0041286 | -0.096385 |
| 16w_SITTD12 | 0.02425928 | 0.13578355 | 3.64E-05 | 0.0042065 | -0.080664 |
| 16w_SITTD12 | 0.10626598 | 0.6306195  | 6.58E-05 | 0.02556   | -0.21453  |
| 16w_SITTD12 | 0.12089504 | 0.7188926  | 6.66E-05 | 0.02449   | -0.37656  |
| 16w_SITTD12 | 0.01362442 | 0.07161185 | 3.24E-05 | 0.0057681 | 0.23179   |
| 16w_SITTD12 | 0.08463278 | 0.5000828  | 6.38E-05 | 0.018923  | 0.1136    |
| 16w_SITTD12 | 0.01863932 | 0.10187221 | 3.36E-05 | 0.0048202 | 0.03364   |
| 16w_SITTD12 | 0.00289963 | 0.00689748 | 3.17E-05 | 0.0094663 | 0.74133   |
| 16w_SITTD12 | 0.03023031 | 0.17181334 | 4.07E-05 | 0.0040668 | -0.10475  |
| 16w_SITTD12 | 0.02953638 | 0.16762611 | 4.02E-05 | 0.0040662 | -0.10661  |
| 16w_SITTD12 | 0.0241065  | 0.13486172 | 3.61E-05 | 0.0042401 | -0.073623 |
| 16w_SITTD12 | 0.10885241 | 0.6462263  | 6.59E-05 | 0.025616  | -0.25305  |
| 16w_SITTD12 | 0.05416659 | 0.31624705 | 5.92E-05 | 0.0069681 | 0.062513  |
| 16w_SITTD12 | 0.02437489 | 0.13648118 | 3.64E-05 | 0.0042065 | -0.080664 |
| 16w_SITTD12 | 0.02351606 | 0.13129893 | 3.58E-05 | 0.0042778 | -0.065623 |
| 16w_SITTD12 | 0.11315236 | 0.67217255 | 6.62E-05 | 0.025403  | -0.30551  |
| 16w_SITTD12 | 0.01761842 | 0.09571204 | 3.34E-05 | 0.0049043 | 0.067421  |
| 16w_SITTD12 | 0.02683677 | 0.1513364  | 3.80E-05 | 0.0041099 | -0.099939 |
| 16w_SITTD12 | 0.01601036 | 0.08600884 | 3.30E-05 | 0.0051875 | 0.12392   |
| 16w_SITTD12 | 0.01915369 | 0.10497598 | 3.38E-05 | 0.004741  | 0.03364   |
| 16w_SITTD12 | 0.03927847 | 0.22641075 | 4.98E-05 | 0.0045122 | -0.034672 |
| 16w_SITTD12 | 0.05631758 | 0.32922632 | 5.97E-05 | 0.0073934 | 0.068678  |
| 16w_SITTD12 | 0.02193721 | 0.12177201 | 3.49E-05 | 0.0044169 | -0.046619 |
| 16w_SITTD12 | 0.01737291 | 0.09423058 | 3.33E-05 | 0.0049935 | 0.085504  |

|             |            |            |          |           |           |
|-------------|------------|------------|----------|-----------|-----------|
| 16w_SITTD12 | 0.01435738 | 0.07603458 | 3.26E-05 | 0.0055188 | 0.18676   |
| 16w_SITTD12 | 0.02063721 | 0.11392772 | 3.44E-05 | 0.0045325 | -0.01065  |
| 16w_SITTD12 | 0.13063529 | 0.77766615 | 6.70E-05 | 0.023618  | -0.44263  |
| 16w_SITTD12 | 0.01953046 | 0.10724946 | 3.40E-05 | 0.0046667 | 0.017998  |
| 16w_SITTD12 | 0.03304696 | 0.18880925 | 4.32E-05 | 0.0041142 | -0.091175 |
| 16w_SITTD12 | 0.02913253 | 0.16518922 | 3.97E-05 | 0.0040686 | -0.10661  |
| 16w_SITTD12 | 0.10789415 | 0.64044404 | 6.59E-05 | 0.025604  | -0.23822  |
| 16w_SITTD12 | 0.11546713 | 0.6861401  | 6.63E-05 | 0.025182  | -0.32814  |
| 16w_SITTD12 | 0.02614352 | 0.14715329 | 3.76E-05 | 0.0041286 | -0.096385 |
| 16w_SITTD12 | 0.08583263 | 0.5073228  | 6.39E-05 | 0.01943   | 0.1043    |
| 16w_SITTD12 | 0.08500177 | 0.5023094  | 6.38E-05 | 0.018923  | 0.10916   |
| 16w_SITTD12 | 0.05283311 | 0.30820075 | 5.87E-05 | 0.0065755 | 0.057248  |
| 16w_SITTD12 | 0.06310317 | 0.3701712  | 6.09E-05 | 0.0096122 | 0.087254  |
| 16w_SITTD12 | 0.02075482 | 0.11463737 | 3.44E-05 | 0.0045325 | -0.01065  |
| 16w_SITTD12 | 0.09644857 | 0.5713804  | 6.50E-05 | 0.023626  | -0.045608 |
| 16w_SITTD12 | 0.01818816 | 0.09914992 | 3.36E-05 | 0.0048202 | 0.050123  |
| 16w_SITTD12 | 0.01829551 | 0.09979767 | 3.36E-05 | 0.0048202 | 0.050123  |
| 16w_SITTD12 | 0.10492619 | 0.6225351  | 6.57E-05 | 0.025429  | -0.19772  |
| 16w_SITTD12 | 0.10653475 | 0.6322413  | 6.58E-05 | 0.02556   | -0.22263  |
| 16w_SITTD12 | 0.01343138 | 0.07044704 | 3.24E-05 | 0.0057681 | 0.23179   |
| 16w_SITTD12 | 0.07853673 | 0.46329868 | 6.30E-05 | 0.016077  | 0.13651   |
| 16w_SITTD12 | 0.01200756 | 0.06185561 | 3.22E-05 | 0.0061869 | 0.2791    |
| 16w_SITTD12 | 0.11550944 | 0.6863954  | 6.63E-05 | 0.025182  | -0.32814  |
| 16w_SITTD12 | 0.02941994 | 0.1669235  | 4.02E-05 | 0.0040662 | -0.10661  |
| 16w_SITTD12 | 0.02229086 | 0.12390596 | 3.52E-05 | 0.0043661 | -0.046619 |
| 16w_SITTD12 | 0.00817321 | 0.03871878 | 3.19E-05 | 0.0071994 | 0.45929   |
| 16w_SITTD12 | 0.02002622 | 0.11024091 | 3.42E-05 | 0.0045972 | 0.0032259 |
| 16w_SITTD12 | 0.07347594 | 0.4327614  | 6.23E-05 | 0.013561  | 0.12913   |
| 16w_SITTD12 | 0.01520377 | 0.08114182 | 3.27E-05 | 0.0054028 | 0.16515   |
| 16w_SITTD12 | 0.01371314 | 0.07214718 | 3.25E-05 | 0.0056405 | 0.20898   |
| 16w_SITTD12 | 0.01956621 | 0.10746516 | 3.40E-05 | 0.0046667 | 0.017998  |
| 16w_SITTD12 | 0.04624433 | 0.2684434  | 5.54E-05 | 0.0053171 | 0.028707  |
| 16w_SITTD12 | 0.07892784 | 0.46565866 | 6.30E-05 | 0.016077  | 0.13613   |
| 16w_SITTD12 | 0.02067216 | 0.11413859 | 3.44E-05 | 0.0045325 | -0.01065  |
| 16w_SITTD12 | 0.04229155 | 0.24459198 | 5.24E-05 | 0.0047963 | -0.00654  |
| 16w_SITTD12 | 0.09991382 | 0.59229    | 6.53E-05 | 0.024558  | -0.11403  |
| 16w_SITTD12 | 0.02930925 | 0.16625553 | 4.02E-05 | 0.0040662 | -0.10661  |
| 16w_SITTD12 | 0.05222119 | 0.30450833 | 5.85E-05 | 0.0064518 | 0.055318  |
| 16w_SITTD12 | 0.0485839  | 0.28256062 | 5.67E-05 | 0.0056831 | 0.041222  |
| 16w_SITTD12 | 0.04565468 | 0.26488543 | 5.50E-05 | 0.0052335 | 0.021279  |
| 16w_SITTD12 | 0.05999336 | 0.35140634 | 6.04E-05 | 0.0085136 | 0.077363  |
| 16w_SITTD12 | 0.02748628 | 0.15525562 | 3.84E-05 | 0.0040947 | -0.10472  |
| 16w_SITTD12 | 0.02553319 | 0.14347048 | 3.72E-05 | 0.0041509 | -0.092011 |

|             |            |            |          |           |           |
|-------------|------------|------------|----------|-----------|-----------|
| 16w_SITTD12 | 0.0708333  | 0.41681546 | 6.20E-05 | 0.012608  | 0.11916   |
| 16w_SITTD12 | 0.00902836 | 0.04387881 | 3.19E-05 | 0.0070136 | 0.43237   |
| 16w_SITTD12 | 0.03151566 | 0.17956927 | 4.22E-05 | 0.0040866 | -0.10071  |
| 16w_SITTD12 | 0.02856395 | 0.1617584  | 3.93E-05 | 0.004074  | -0.10664  |
| 16w_SITTD12 | 0.0166074  | 0.08961145 | 3.31E-05 | 0.0050879 | 0.10435   |
| 16w_SITTD12 | 0.01875979 | 0.10259914 | 3.38E-05 | 0.004741  | 0.03364   |
| 16w_SITTD12 | 0.01660525 | 0.08959848 | 3.31E-05 | 0.0050879 | 0.10435   |
| 16w_SITTD12 | 0.07455303 | 0.43926066 | 6.24E-05 | 0.014051  | 0.13218   |
| 16w_SITTD12 | 0.01066984 | 0.05378365 | 3.21E-05 | 0.0064976 | 0.35381   |
| 16w_SITTD12 | 0.05317809 | 0.31028235 | 5.89E-05 | 0.0067028 | 0.059084  |
| 16w_SITTD12 | 0.11191449 | 0.66470313 | 6.61E-05 | 0.025489  | -0.28705  |
| 16w_SITTD12 | 0.07185119 | 0.4229575  | 6.20E-05 | 0.012843  | 0.12348   |
| 16w_SITTD12 | 0.03856562 | 0.22210935 | 4.87E-05 | 0.0044183 | -0.040459 |
| 16w_SITTE12 | 0.02152364 | 0.11927649 | 3.49E-05 | 0.0044169 | -0.0356   |
| 16w_SITTE12 | 0.01225484 | 0.06334771 | 3.23E-05 | 0.0060411 | 0.2791    |
| 16w_SITTE12 | 0.01780622 | 0.0968452  | 3.34E-05 | 0.0049043 | 0.067421  |
| 16w_SITTE12 | 0.12262504 | 0.72933155 | 6.67E-05 | 0.024282  | -0.38934  |
| 16w_SITTE12 | 0.01942711 | 0.10662586 | 3.40E-05 | 0.0046667 | 0.017998  |
| 16w_SITTE12 | 0.01760976 | 0.09565977 | 3.34E-05 | 0.0049043 | 0.067421  |
| 16w_SITTE12 | 0.09680305 | 0.5735193  | 6.50E-05 | 0.023626  | -0.055297 |
| 16w_SITTE12 | 0.08482605 | 0.501249   | 6.38E-05 | 0.018923  | 0.1136    |
| 16w_SITTE12 | 0.0979913  | 0.5806894  | 6.52E-05 | 0.024123  | -0.074831 |
| 16w_SITTE12 | 0.01876596 | 0.1026364  | 3.38E-05 | 0.004741  | 0.03364   |
| 16w_SITTE12 | 0.01730835 | 0.09384105 | 3.33E-05 | 0.0049935 | 0.085504  |
| 16w_SITTE12 | 0.05001972 | 0.29122442 | 5.76E-05 | 0.005992  | 0.046466  |
| 16w_SITTE12 | 0.02154356 | 0.1193967  | 3.49E-05 | 0.0044169 | -0.0356   |
| 16w_SITTE12 | 0.1409098  | 0.83966357 | 6.74E-05 | 0.023566  | -0.4978   |
| 16w_SITTE12 | 0.02445718 | 0.13697776 | 3.64E-05 | 0.0042065 | -0.080664 |
| 16w_SITTE12 | 0.10786594 | 0.6402738  | 6.59E-05 | 0.025604  | -0.23822  |
| 16w_SITTE12 | 0.00894095 | 0.04335139 | 3.19E-05 | 0.0070136 | 0.43237   |
| 16w_SITTE12 | 0.10240544 | 0.60732466 | 6.55E-05 | 0.025127  | -0.15246  |
| 16w_SITTE12 | 0.0190435  | 0.10431106 | 3.38E-05 | 0.004741  | 0.03364   |
| 16w_SITTE12 | 0.0259979  | 0.1462746  | 3.76E-05 | 0.0041286 | -0.096385 |
| 16w_SITTE12 | 0.02194973 | 0.12184756 | 3.49E-05 | 0.0044169 | -0.046619 |
| 16w_SITTE12 | 0.14591005 | 0.8698355  | 6.75E-05 | 0.02365   | -0.51443  |
| 16w_SITTE12 | 0.03330264 | 0.19035204 | 4.37E-05 | 0.0041322 | -0.091175 |
| 16w_SITTE12 | 0.07229666 | 0.42564553 | 6.21E-05 | 0.01308   | 0.12548   |
| 16w_SITTE12 | 0.01749885 | 0.09499054 | 3.33E-05 | 0.0049935 | 0.085504  |
| 16w_SITTE12 | 0.02809485 | 0.15892781 | 3.93E-05 | 0.004074  | -0.10603  |
| 16w_SITTE12 | 0.04102343 | 0.23694003 | 5.14E-05 | 0.0046741 | -0.017493 |
| 16w_SITTE12 | 0.00796709 | 0.03747499 | 3.19E-05 | 0.0073923 | 0.48652   |
| 16w_SITTE12 | 0.01469    | 0.07804167 | 3.26E-05 | 0.0055188 | 0.18676   |
| 16w_SITTE12 | 0.01274735 | 0.06631956 | 3.23E-05 | 0.0059016 | 0.25518   |



|             |            |            |          |           |           |
|-------------|------------|------------|----------|-----------|-----------|
| 16w_SITTE12 | 0.09027104 | 0.5341046  | 6.44E-05 | 0.021369  | 0.05218   |
| 16w_SITTE12 | 0.04609211 | 0.26752493 | 5.54E-05 | 0.0053171 | 0.025099  |
| 16w_SITTE12 | 0.01890356 | 0.10346667 | 3.38E-05 | 0.004741  | 0.03364   |
| 16w_SITTE12 | 0.01739286 | 0.09435098 | 3.33E-05 | 0.0049935 | 0.085504  |
| 16w_SITTE12 | 0.02294512 | 0.12785381 | 3.55E-05 | 0.0043197 | -0.056631 |
| 16w_SITTE12 | 0.01516947 | 0.08093482 | 3.27E-05 | 0.0054028 | 0.16515   |
| 16w_SITTE12 | 0.0225916  | 0.12572068 | 3.55E-05 | 0.0043197 | -0.056631 |
| 16w_SITTE12 | 0.01541875 | 0.08243901 | 3.28E-05 | 0.0052924 | 0.1442    |
| 16w_SITTE12 | 0.0798588  | 0.47127616 | 6.32E-05 | 0.016594  | 0.13545   |
| 16w_SITTE12 | 0.03582268 | 0.20555823 | 4.59E-05 | 0.0042319 | -0.068307 |
| 16w_SITTE12 | 0.07167389 | 0.42188767 | 6.20E-05 | 0.012843  | 0.12348   |
| 16w_SITTE12 | 0.08702351 | 0.51450866 | 6.41E-05 | 0.01993   | 0.093363  |
| 16w_SITTE12 | 0.02752281 | 0.15547602 | 3.84E-05 | 0.0040947 | -0.10472  |
| 16w_SITTE12 | 0.05370199 | 0.3134436  | 5.91E-05 | 0.0068337 | 0.060836  |
| 16w_SITTE12 | 0.01546748 | 0.08273303 | 3.28E-05 | 0.0052924 | 0.1442    |
| 16w_SITTE12 | 0.01609669 | 0.08652976 | 3.30E-05 | 0.0051875 | 0.12392   |
| 16w_SITTE12 | 0.02462342 | 0.13798085 | 3.64E-05 | 0.0042065 | -0.080664 |
| 16w_SITTE12 | 0.02421438 | 0.13551265 | 3.64E-05 | 0.0042065 | -0.080664 |
| 16w_SITTE12 | 0.07858827 | 0.4636097  | 6.30E-05 | 0.016077  | 0.13651   |
| 16w_SITTE12 | 0.07183704 | 0.42287216 | 6.20E-05 | 0.012843  | 0.12348   |
| 16w_SITTE12 | 0.03214004 | 0.1833368  | 4.27E-05 | 0.004099  | -0.097962 |
| 16w_SITTE12 | 0.01970237 | 0.10828674 | 3.40E-05 | 0.0046667 | 0.017998  |
| 16w_SITTE12 | 0.03719942 | 0.2138656  | 4.76E-05 | 0.0043355 | -0.057524 |
| 16w_SITTE12 | 0.02424686 | 0.13570867 | 3.64E-05 | 0.0042065 | -0.080664 |
| 16w_SITTE12 | 0.11399353 | 0.67724824 | 6.62E-05 | 0.025353  | -0.31137  |
| 16w_SITTE12 | 0.01495177 | 0.07962121 | 3.27E-05 | 0.0054028 | 0.16515   |
| 16w_SITTE12 | 0.06147919 | 0.36037195 | 6.07E-05 | 0.0090475 | 0.082025  |
| 16w_SITTE12 | 0.01264015 | 0.0656727  | 3.23E-05 | 0.0059016 | 0.25518   |
| 16w_SITTE12 | 0.01102505 | 0.05592705 | 3.21E-05 | 0.006339  | 0.32844   |
| 16w_SITTE12 | 0.0190633  | 0.10443056 | 3.38E-05 | 0.004741  | 0.03364   |
| 16w_SITTE12 | 0.01966898 | 0.10808527 | 3.40E-05 | 0.0046667 | 0.017998  |
| 16w_SITTE12 | 0.04079718 | 0.2355748  | 5.09E-05 | 0.0046173 | -0.017493 |
| 16w_SITTE12 | 0.01506353 | 0.08029559 | 3.27E-05 | 0.0054028 | 0.16515   |
| 16w_SITTE12 | 0.03173764 | 0.1809087  | 4.22E-05 | 0.0040866 | -0.10071  |
| 16w_SITTE12 | 0.03646619 | 0.20944123 | 4.70E-05 | 0.0042982 | -0.062998 |
| 16w_SITTE12 | 0.05902146 | 0.3455418  | 6.02E-05 | 0.0081753 | 0.075889  |
| 16w_SITTE12 | 0.11773026 | 0.699796   | 6.64E-05 | 0.024917  | -0.34876  |
| 16w_SITTE12 | 0.07225204 | 0.42537633 | 6.21E-05 | 0.01308   | 0.12548   |
| 16w_SITTE12 | 0.13080579 | 0.778695   | 6.70E-05 | 0.023618  | -0.44608  |
| 16w_SITTE12 | 0.02399501 | 0.13418896 | 3.61E-05 | 0.0042401 | -0.073623 |
| 16w_SITTE12 | 0.03888612 | 0.22404331 | 4.92E-05 | 0.0044639 | -0.040459 |
| 16w_SITTE12 | 0.08310062 | 0.49083766 | 6.36E-05 | 0.018151  | 0.12434   |
| 16w_SITTE12 | 0.03331035 | 0.19039856 | 4.37E-05 | 0.0041322 | -0.091175 |

|             |            |            |          |           |           |
|-------------|------------|------------|----------|-----------|-----------|
| 16w_SITTE12 | 0.13853522 | 0.825335   | 6.73E-05 | 0.023538  | -0.48824  |
| 16w_SITTE12 | 0.02452829 | 0.13740684 | 3.64E-05 | 0.0042065 | -0.080664 |
| 16w_SITTE12 | 0.11876112 | 0.7060163  | 6.65E-05 | 0.024776  | -0.3584   |
| 16w_SITTE12 | 0.08978849 | 0.53119284 | 6.44E-05 | 0.021137  | 0.059815  |
| 16w_SITTE12 | 0.02700077 | 0.15232597 | 3.84E-05 | 0.0040947 | -0.10271  |
| 16w_SITTE12 | 0.03710425 | 0.2132913  | 4.76E-05 | 0.0043355 | -0.057524 |
| 16w_SITTE12 | 0.03336771 | 0.19074471 | 4.37E-05 | 0.0041322 | -0.091175 |
| 16w_SITTE12 | 0.02878845 | 0.16311301 | 3.97E-05 | 0.0040686 | -0.10664  |
| 16w_SITTE12 | 0.0603265  | 0.35341653 | 6.05E-05 | 0.008688  | 0.07887   |
| 16w_SITTE12 | 0.10066343 | 0.5968132  | 6.53E-05 | 0.024687  | -0.12375  |
| 16w_SITTE12 | 0.08096788 | 0.47796848 | 6.33E-05 | 0.017113  | 0.13314   |
| 16w_SITTE12 | 0.01922477 | 0.10540485 | 3.40E-05 | 0.0046667 | 0.017998  |
| 16w_SITTE12 | 0.01388333 | 0.07317416 | 3.25E-05 | 0.0056405 | 0.20898   |
| 16w_SITTE12 | 0.01358058 | 0.07134734 | 3.24E-05 | 0.0057681 | 0.23179   |
| 16w_SITTE12 | 0.01206106 | 0.0621784  | 3.23E-05 | 0.0060411 | 0.2791    |
| 16w_SITTE12 | 0.02013893 | 0.110921   | 3.42E-05 | 0.0045972 | 0.0032259 |
| 16w_SITTE12 | 0.05807958 | 0.3398584  | 6.01E-05 | 0.0080116 | 0.073002  |
| 16w_SITTE12 | 0.01974987 | 0.10857339 | 3.40E-05 | 0.0046667 | 0.0032259 |
| 16w_SITTE12 | 0.04571779 | 0.26526624 | 5.50E-05 | 0.0052335 | 0.025099  |
| 16w_SITTE12 | 0.03387187 | 0.19378686 | 4.43E-05 | 0.004153  | -0.087207 |
| 16w_SITTE12 | 0.02081766 | 0.11501652 | 3.44E-05 | 0.0045325 | -0.023601 |
| 16w_SITTE12 | 0.11547369 | 0.6861797  | 6.63E-05 | 0.025182  | -0.32814  |
| 16w_SITTE12 | 0.00651987 | 0.02874238 | 3.18E-05 | 0.0078    | 0.54183   |
| 16w_SITTE12 | 0.11905122 | 0.70776683 | 6.65E-05 | 0.024704  | -0.3584   |
| 16w_SITTE12 | 0.01958004 | 0.10754863 | 3.40E-05 | 0.0046667 | 0.017998  |
| 16w_SITTE12 | 0.10332594 | 0.61287904 | 6.56E-05 | 0.025216  | -0.17104  |
| 16w_SITTE12 | 0.02041899 | 0.11261093 | 3.44E-05 | 0.0045325 | -0.01065  |
| 16w_SITTE12 | 0.01488419 | 0.07921345 | 3.27E-05 | 0.0054028 | 0.16515   |
| 16w_SITTE12 | 0.01163852 | 0.05962873 | 3.22E-05 | 0.0061869 | 0.30353   |
| 16w_SITTE12 | 0.01497213 | 0.07974407 | 3.27E-05 | 0.0054028 | 0.16515   |
| 16w_SITTE12 | 0.09631454 | 0.5705716  | 6.50E-05 | 0.023626  | -0.045608 |
| 16w_SITTE12 | 0.07326255 | 0.43147382 | 6.23E-05 | 0.013561  | 0.12737   |
| 16w_SITTE12 | 0.01976354 | 0.10865586 | 3.40E-05 | 0.0046667 | 0.0032259 |
| 16w_SITTE12 | 0.0465228  | 0.2701237  | 5.57E-05 | 0.0054037 | 0.028707  |
| 16w_SITTE12 | 0.00956566 | 0.04712094 | 3.20E-05 | 0.0068348 | 0.4058    |
| 16w_SITTE12 | 0.01290984 | 0.06730003 | 3.23E-05 | 0.0059016 | 0.25518   |
| 16w_SITTE12 | 0.02158586 | 0.11965191 | 3.49E-05 | 0.0044169 | -0.0356   |
| 16w_SITTE12 | 0.12846142 | 0.76454884 | 6.69E-05 | 0.023723  | -0.4283   |
| 16w_SITTE12 | 0.02655608 | 0.14964268 | 3.80E-05 | 0.0041099 | -0.099939 |
| 16w_SITTE12 | 0.04858896 | 0.28259113 | 5.67E-05 | 0.0056831 | 0.041222  |
| 16w_SITTE12 | 0.09244238 | 0.54720664 | 6.46E-05 | 0.022258  | 0.019141  |
| 16w_SITTE12 | 0.09283534 | 0.5495778  | 6.46E-05 | 0.022258  | 0.010343  |
| 16w_SITTE12 | 0.03537144 | 0.20283538 | 4.59E-05 | 0.0042319 | -0.073417 |

|             |            |            |          |           |            |
|-------------|------------|------------|----------|-----------|------------|
| 16w_SITTE12 | 0.04254624 | 0.24612881 | 5.29E-05 | 0.0048617 | -0.0013165 |
| 16w_SITTE12 | 0.01951685 | 0.10716732 | 3.40E-05 | 0.0046667 | 0.017998   |
| 16w_SITTE12 | 0.0211451  | 0.11699233 | 3.47E-05 | 0.0044724 | -0.023601  |
| 16w_SITTE12 | 0.01899131 | 0.10399618 | 3.38E-05 | 0.004741  | 0.03364    |
| 16w_SITTE12 | 0.07972817 | 0.47048798 | 6.32E-05 | 0.016594  | 0.13545    |
| 16w_SITTE12 | 0.08874339 | 0.5248866  | 6.42E-05 | 0.020663  | 0.074212   |
| 16w_SITTE12 | 0.11292328 | 0.67079026 | 6.62E-05 | 0.025403  | -0.29951   |
| 16w_SITTE12 | 0.08355795 | 0.4935972  | 6.37E-05 | 0.01841   | 0.12117    |
| 16w_SITTE12 | 0.02315562 | 0.12912399 | 3.58E-05 | 0.0042778 | -0.065623  |
| 16w_SITTE12 | 0.12667422 | 0.7537647  | 6.68E-05 | 0.023879  | -0.41707   |
| 16w_SITTE12 | 0.05076396 | 0.29571527 | 5.78E-05 | 0.0061018 | 0.051138   |
| 16w_SITTE12 | 0.02874114 | 0.16282755 | 3.97E-05 | 0.0040686 | -0.10664   |
| 16w_SITTE12 | 0.01475596 | 0.07843969 | 3.26E-05 | 0.0055188 | 0.16515    |
| 16w_SITTE12 | 0.05904682 | 0.34569478 | 6.02E-05 | 0.0081753 | 0.075889   |
| 16w_SITTE12 | 0.02756379 | 0.15572333 | 3.88E-05 | 0.0040827 | -0.10472   |
| 16w_SITTE12 | 0.01955136 | 0.10737556 | 3.40E-05 | 0.0046667 | 0.017998   |
| 16w_SITTE12 | 0.02096375 | 0.11589804 | 3.47E-05 | 0.0044724 | -0.023601  |
| 16w_SITTE12 | 0.09096997 | 0.538322   | 6.45E-05 | 0.021597  | 0.044278   |
| 16w_SITTE12 | 0.03363861 | 0.19237936 | 4.43E-05 | 0.004153  | -0.087207  |
| 16w_SITTE12 | 0.13726382 | 0.8176633  | 6.73E-05 | 0.023528  | -0.48029   |
| 16w_SITTE12 | 0.0845909  | 0.49983016 | 6.37E-05 | 0.018667  | 0.1136     |
| 16w_SITTE12 | 0.02189733 | 0.12153135 | 3.49E-05 | 0.0044169 | -0.0356    |
| 16w_SITTE12 | 0.02610188 | 0.146902   | 3.76E-05 | 0.0041286 | -0.096385  |
| 16w_SITTE12 | 0.06608532 | 0.3881657  | 6.13E-05 | 0.010616  | 0.097788   |
| 16w_SITTE12 | 0.09590794 | 0.56811816 | 6.50E-05 | 0.023448  | -0.035993  |
| 16w_SITTE12 | 0.05255853 | 0.30654386 | 5.87E-05 | 0.0065755 | 0.057248   |
| 16w_SITTE12 | 0.08341    | 0.49270448 | 6.36E-05 | 0.018151  | 0.12117    |
| 16w_SITTE12 | 0.0156301  | 0.08371433 | 3.28E-05 | 0.0052924 | 0.1442     |
| 16w_SITTE12 | 0.01992216 | 0.10961299 | 3.42E-05 | 0.0045972 | 0.0032259  |
| 16w_SITTE12 | 0.01640626 | 0.08839776 | 3.30E-05 | 0.0051875 | 0.10435    |
| 16w_SITTE12 | 0.07130662 | 0.41967157 | 6.20E-05 | 0.012608  | 0.12136    |
| 16w_SITTE12 | 0.01951168 | 0.10713615 | 3.40E-05 | 0.0046667 | 0.017998   |
| 16w_SITTE12 | 0.04184707 | 0.24190994 | 5.19E-05 | 0.0047337 | -0.00654   |
| 16w_SITTE12 | 0.09312543 | 0.5513282  | 6.47E-05 | 0.022469  | 0.010343   |
| 16w_SITTE12 | 0.01138448 | 0.05809587 | 3.21E-05 | 0.006339  | 0.32844    |
| 16w_SITTE12 | 0.03851171 | 0.22178407 | 4.87E-05 | 0.0044183 | -0.040459  |
| 16w_SITTE12 | 0.01402487 | 0.07402819 | 3.25E-05 | 0.0056405 | 0.20898    |
| 16w_SITTE12 | 0.06732691 | 0.39565763 | 6.14E-05 | 0.011039  | 0.10492    |
| 16w_SITTE12 | 0.0443902  | 0.25725543 | 5.42E-05 | 0.0050757 | 0.012967   |
| 16w_SITTE12 | 0.04861159 | 0.2827277  | 5.70E-05 | 0.0057827 | 0.041222   |
| 16w_SITTE12 | 0.02034785 | 0.11218163 | 3.44E-05 | 0.0045325 | -0.01065   |
| 16w_SITTE12 | 0.02369143 | 0.1323571  | 3.61E-05 | 0.0042401 | -0.073623  |
| 16w_SITTE12 | 0.06354719 | 0.37285045 | 6.09E-05 | 0.0096122 | 0.089169   |

|             |            |            |          |           |           |
|-------------|------------|------------|----------|-----------|-----------|
| 16w_SITTE12 | 0.02465243 | 0.13815589 | 3.64E-05 | 0.0042065 | -0.080664 |
| 16w_SITTE12 | 0.04361085 | 0.25255275 | 5.38E-05 | 0.0050014 | 0.008455  |
| 16w_SITTE12 | 0.0235442  | 0.13146876 | 3.58E-05 | 0.0042778 | -0.065623 |
| 16w_SITTE12 | 0.07358757 | 0.433435   | 6.23E-05 | 0.013805  | 0.12913   |
| 16w_SITTE12 | 0.01350867 | 0.07091343 | 3.24E-05 | 0.0057681 | 0.23179   |
| 16w_SITTE12 | 0.01534511 | 0.08199464 | 3.28E-05 | 0.0052924 | 0.1442    |
| 16w_SITTE12 | 0.02881462 | 0.16327095 | 3.97E-05 | 0.0040686 | -0.10664  |
| 16w_SITTE12 | 0.0339056  | 0.19399035 | 4.43E-05 | 0.004153  | -0.087207 |
| 16w_SITTE12 | 0.13501608 | 0.8041003  | 6.72E-05 | 0.023533  | -0.46872  |
| 16w_SITTE12 | 0.02037167 | 0.11232539 | 3.44E-05 | 0.0045325 | -0.01065  |
| 16w_SITTE12 | 0.142444   | 0.848921   | 6.74E-05 | 0.023593  | -0.50412  |
| 16w_SITTE12 | 0.03162258 | 0.18021443 | 4.22E-05 | 0.0040866 | -0.10071  |
| 16w_SITTE12 | 0.04378146 | 0.25358224 | 5.38E-05 | 0.0050014 | 0.008455  |
| 16w_SITTE12 | 0.01812981 | 0.09879779 | 3.36E-05 | 0.0048202 | 0.050123  |
| 16w_SITTE12 | 0.0165477  | 0.08925123 | 3.31E-05 | 0.0050879 | 0.10435   |
| 16w_SITTE12 | 0.03769261 | 0.21684155 | 4.81E-05 | 0.0043756 | -0.05192  |
| 16w_SITTE12 | 0.03665284 | 0.2105675  | 4.70E-05 | 0.0042982 | -0.062998 |
| 16w_SITTE12 | 0.08251142 | 0.48728234 | 6.35E-05 | 0.017892  | 0.1271    |
| 16w_SITTE12 | 0.06416138 | 0.37655652 | 6.10E-05 | 0.010005  | 0.091185  |
| 16w_SITTE12 | 0.0324792  | 0.18538335 | 4.27E-05 | 0.004099  | -0.094772 |
| 16w_SITTE12 | 0.0244903  | 0.13717757 | 3.64E-05 | 0.0042065 | -0.080664 |
| 16w_SITTE12 | 0.02716318 | 0.15330596 | 3.84E-05 | 0.0040947 | -0.10271  |
| 16w_SITTE12 | 0.07242643 | 0.4264286  | 6.22E-05 | 0.01332   | 0.12548   |
| 16w_SITTE12 | 0.01268383 | 0.06593622 | 3.23E-05 | 0.0059016 | 0.25518   |
| 16w_SITTE12 | 0.02714429 | 0.15319201 | 3.84E-05 | 0.0040947 | -0.10271  |
| 16w_SITTE12 | 0.07096481 | 0.41760907 | 6.20E-05 | 0.012608  | 0.11916   |
| 16w_SITTE12 | 0.01742408 | 0.09453937 | 3.33E-05 | 0.0049935 | 0.085504  |
| 16w_SITTE12 | 0.0173993  | 0.09438983 | 3.33E-05 | 0.0049935 | 0.085504  |
| 16w_SITTE12 | 0.02259888 | 0.1257646  | 3.55E-05 | 0.0043197 | -0.056631 |
| 16w_SITTE12 | 0.01512334 | 0.08065647 | 3.27E-05 | 0.0054028 | 0.16515   |
| 16w_SITTE12 | 0.02554107 | 0.14351802 | 3.72E-05 | 0.0041509 | -0.092011 |
| 16w_SITTE12 | 0.13271418 | 0.7902104  | 6.71E-05 | 0.023568  | -0.45613  |
| 16w_SITTE12 | 0.05951502 | 0.34851998 | 6.03E-05 | 0.0083426 | 0.077363  |
| 16w_SITTE12 | 0.01936303 | 0.10623916 | 3.40E-05 | 0.0046667 | 0.017998  |
| 16w_SITTE12 | 0.11576175 | 0.6879179  | 6.63E-05 | 0.025119  | -0.32814  |
| 16w_SITTE12 | 0.01313486 | 0.06865783 | 3.24E-05 | 0.0057681 | 0.23179   |
| 16w_SITTE12 | 0.01428179 | 0.07557851 | 3.26E-05 | 0.0055188 | 0.18676   |
| 16w_SITTE12 | 0.01440498 | 0.07632182 | 3.26E-05 | 0.0055188 | 0.18676   |
| 16w_SITTE12 | 0.07553567 | 0.44519004 | 6.26E-05 | 0.014549  | 0.13453   |
| 16w_SITTE12 | 0.01511902 | 0.08063039 | 3.27E-05 | 0.0054028 | 0.16515   |
| 16w_SITTE12 | 0.01309042 | 0.06838968 | 3.23E-05 | 0.0059016 | 0.23179   |
| 16w_SITTE12 | 0.14590742 | 0.8698196  | 6.75E-05 | 0.02365   | -0.51443  |
| 16w_SITTE12 | 0.04761081 | 0.2766889  | 5.64E-05 | 0.0055867 | 0.035328  |

|             |            |            |          |           |           |
|-------------|------------|------------|----------|-----------|-----------|
| 16w_SITTE12 | 0.09981159 | 0.59167314 | 6.53E-05 | 0.024558  | -0.11403  |
| 16w_SITTE12 | 0.07904995 | 0.4663955  | 6.30E-05 | 0.016077  | 0.13613   |
| 16w_SITTE12 | 0.03736212 | 0.21484734 | 4.76E-05 | 0.0043355 | -0.057524 |
| 16w_SITTE12 | 0.12172992 | 0.72393036 | 6.66E-05 | 0.024419  | -0.38089  |
| 16w_SITTE12 | 0.10795394 | 0.64080477 | 6.59E-05 | 0.025614  | -0.23822  |
| 16w_SITTE12 | 0.01873753 | 0.10246486 | 3.38E-05 | 0.004741  | 0.03364   |
| 16w_SITTE12 | 0.03588268 | 0.20592028 | 4.65E-05 | 0.0042637 | -0.068307 |
| 16w_SITTE12 | 0.05361323 | 0.31290802 | 5.91E-05 | 0.0068337 | 0.060836  |
| 16w_SITTE12 | 0.07585668 | 0.447127   | 6.26E-05 | 0.0148    | 0.13453   |
| 16w_SITTE12 | 0.02239602 | 0.12454047 | 3.52E-05 | 0.0043661 | -0.046619 |
| 16w_SITTE12 | 0.10767549 | 0.63912463 | 6.59E-05 | 0.025604  | -0.23822  |
| 16w_SITTE12 | 0.01560949 | 0.08358995 | 3.28E-05 | 0.0052924 | 0.1442    |
| 16w_SITTE12 | 0.01586096 | 0.08510735 | 3.28E-05 | 0.0052924 | 0.12392   |
| 16w_SITTE12 | 0.01453978 | 0.07713524 | 3.26E-05 | 0.0055188 | 0.18676   |
| 16w_SITTE12 | 0.01095877 | 0.05552711 | 3.21E-05 | 0.006339  | 0.32844   |
| 16w_SITTE12 | 0.07486426 | 0.44113868 | 6.25E-05 | 0.014299  | 0.13218   |
| 16w_SITTE12 | 0.02357453 | 0.13165171 | 3.58E-05 | 0.0042778 | -0.065623 |
| 16w_SITTE12 | 0.09537869 | 0.5649246  | 6.49E-05 | 0.023263  | -0.026471 |
| 16w_SITTE12 | 0.03258157 | 0.18600108 | 4.32E-05 | 0.0041142 | -0.094772 |
| 16w_SITTE12 | 0.0567177  | 0.33164066 | 5.98E-05 | 0.0075425 | 0.068678  |
| 16w_SITTE12 | 0.09744935 | 0.57741916 | 6.51E-05 | 0.023964  | -0.065044 |
| 16w_SITTE12 | 0.07285161 | 0.42899418 | 6.22E-05 | 0.01332   | 0.12737   |
| 16w_SITTE12 | 0.02360473 | 0.13183397 | 3.58E-05 | 0.0042778 | -0.073623 |
| 16w_SITTE12 | 0.05223796 | 0.3046095  | 5.85E-05 | 0.0064518 | 0.055318  |
| 16w_SITTE12 | 0.01112358 | 0.05652155 | 3.21E-05 | 0.006339  | 0.32844   |
| 16w_SITTE12 | 0.01561823 | 0.08364268 | 3.28E-05 | 0.0052924 | 0.1442    |
| 16w_SITTE12 | 0.02685963 | 0.15147433 | 3.80E-05 | 0.0041099 | -0.099939 |
| 16w_SITTE12 | 0.02418677 | 0.13534603 | 3.61E-05 | 0.0042401 | -0.080664 |
| 16w_SITTE12 | 0.0301457  | 0.17130278 | 4.07E-05 | 0.0040668 | -0.10597  |
| 16w_SITTE12 | 0.01538751 | 0.08225053 | 3.28E-05 | 0.0052924 | 0.1442    |
| 16w_SITTE12 | 0.0440339  | 0.2551055  | 5.38E-05 | 0.0050014 | 0.012967  |
| 16w_SITTE12 | 0.10549922 | 0.6259928  | 6.57E-05 | 0.025482  | -0.20623  |
| 16w_SITTE12 | 0.12102708 | 0.71968937 | 6.66E-05 | 0.02449   | -0.37656  |
| 16w_SITTE12 | 0.01407354 | 0.07432189 | 3.25E-05 | 0.0056405 | 0.20898   |
| 16w_SITTE12 | 0.0439258  | 0.25445318 | 5.38E-05 | 0.0050014 | 0.008455  |
| 16w_SITTE12 | 0.12588908 | 0.7490271  | 6.68E-05 | 0.023927  | -0.41325  |
| 16w_SITTE12 | 0.06606039 | 0.38801533 | 6.13E-05 | 0.010616  | 0.097788  |
| 16w_SITTE12 | 0.02311121 | 0.12885603 | 3.58E-05 | 0.0042778 | -0.065623 |
| 16w_SITTE12 | 0.01868447 | 0.10214467 | 3.38E-05 | 0.004741  | 0.03364   |
| 16w_SITTE12 | 0.07377274 | 0.43455237 | 6.23E-05 | 0.013805  | 0.12913   |
| 16w_SITTE12 | 0.05026565 | 0.29270843 | 5.78E-05 | 0.0061018 | 0.048868  |
| 16w_SITTE12 | 0.04017759 | 0.23183616 | 5.03E-05 | 0.0045634 | -0.023154 |
| 16w_SITTE12 | 0.04867261 | 0.28309587 | 5.70E-05 | 0.0057827 | 0.041222  |

|             |            |            |          |           |           |
|-------------|------------|------------|----------|-----------|-----------|
| 16w_SITTE12 | 0.01659404 | 0.08953082 | 3.31E-05 | 0.0050879 | 0.10435   |
| 16w_SITTE12 | 0.02284178 | 0.12723026 | 3.55E-05 | 0.0043197 | -0.056631 |
| 16w_SITTE12 | 0.06697101 | 0.3935101  | 6.14E-05 | 0.011039  | 0.10251   |
| 16w_SITTE12 | 0.08984453 | 0.5315309  | 6.44E-05 | 0.021137  | 0.059815  |
| 16w_SITTE12 | 0.04634322 | 0.26904014 | 5.54E-05 | 0.0053171 | 0.028707  |
| 16w_SITTE12 | 0.014898   | 0.07929678 | 3.27E-05 | 0.0054028 | 0.16515   |
| 16w_SITTE12 | 0.00934834 | 0.04580957 | 3.20E-05 | 0.0068348 | 0.4058    |
| 16w_SITTE12 | 0.04930325 | 0.28690124 | 5.73E-05 | 0.0058857 | 0.04392   |
| 16w_SITTE12 | 0.0216745  | 0.12018676 | 3.49E-05 | 0.0044169 | -0.0356   |
| 16w_SITTE12 | 0.05047258 | 0.29395708 | 5.78E-05 | 0.0061018 | 0.048868  |
| 16w_SITTE12 | 0.11866451 | 0.70543337 | 6.65E-05 | 0.024776  | -0.3584   |
| 16w_SITTE12 | 0.07169218 | 0.42199808 | 6.20E-05 | 0.012843  | 0.12348   |
| 16w_SITTE12 | 0.04409647 | 0.25548306 | 5.38E-05 | 0.0050014 | 0.012967  |
| 16w_SITTE12 | 0.01127051 | 0.05740813 | 3.21E-05 | 0.006339  | 0.32844   |
| 16w_SITTE12 | 0.03492714 | 0.20015442 | 4.54E-05 | 0.0042028 | -0.078293 |
| 16w_SITTE12 | 0.06741777 | 0.39620587 | 6.14E-05 | 0.011039  | 0.10492   |
| 16w_SITTE12 | 0.02547417 | 0.14311434 | 3.72E-05 | 0.0041509 | -0.092011 |
| 16w_SITTE12 | 0.06846552 | 0.4025281  | 6.16E-05 | 0.011474  | 0.10977   |
| 16w_SITTE12 | 0.04950274 | 0.28810498 | 5.73E-05 | 0.0058857 | 0.04392   |
| 16w_SITTE12 | 0.10443849 | 0.6195923  | 6.56E-05 | 0.025367  | -0.18901  |
| 16w_SITTE12 | 0.02327669 | 0.12985459 | 3.58E-05 | 0.0042778 | -0.065623 |
| 16w_SITTE12 | 0.02489753 | 0.13963485 | 3.68E-05 | 0.0041768 | -0.086782 |
| 16w_SITTE12 | 0.10877296 | 0.6457469  | 6.59E-05 | 0.025616  | -0.25305  |
| 16w_SITTE12 | 0.04647313 | 0.26982403 | 5.57E-05 | 0.0054037 | 0.028707  |
| 16w_SITTE12 | 0.02022873 | 0.11146285 | 3.42E-05 | 0.0045972 | 0.0032259 |
| 16w_SITTE12 | 0.16692804 | 0.99665993 | 6.80E-05 | 0.02363   | -0.52148  |
| 16w_SITTE12 | 0.10603699 | 0.6292378  | 6.58E-05 | 0.025526  | -0.21453  |
| 16w_SITTE12 | 0.00722322 | 0.03298646 | 3.19E-05 | 0.0075925 | 0.51404   |
| 16w_SITTE12 | 0.02455394 | 0.13756162 | 3.64E-05 | 0.0042065 | -0.080664 |
| 16w_SITTE12 | 0.03068363 | 0.17454873 | 4.11E-05 | 0.0040705 | -0.10475  |
| 16w_SITTE12 | 0.04815577 | 0.27997723 | 5.67E-05 | 0.0056831 | 0.038361  |
| 16w_SITTE12 | 0.01532415 | 0.08186817 | 3.27E-05 | 0.0054028 | 0.1442    |
| 16w_SITTE12 | 0.07485665 | 0.44109273 | 6.25E-05 | 0.014299  | 0.13218   |
| 16w_SITTE12 | 0.02092353 | 0.11565534 | 3.47E-05 | 0.0044724 | -0.023601 |
| 16w_SITTE12 | 0.08011896 | 0.47284603 | 6.32E-05 | 0.016594  | 0.13446   |
| 16w_SITTE12 | 0.02473711 | 0.13866684 | 3.64E-05 | 0.0042065 | -0.086782 |
| 16w_SITTE12 | 0.05892142 | 0.34493816 | 6.02E-05 | 0.0081753 | 0.074438  |
| 16w_SITTE12 | 0.03001906 | 0.17053863 | 4.07E-05 | 0.0040668 | -0.10597  |
| 16w_SITTE12 | 0.06472988 | 0.3799869  | 6.11E-05 | 0.010206  | 0.093303  |
| 16w_SITTE12 | 0.08728022 | 0.5160577  | 6.41E-05 | 0.01993   | 0.087329  |
| 16w_SITTE12 | 0.01845856 | 0.10078152 | 3.36E-05 | 0.0048202 | 0.050123  |
| 16w_SITTE12 | 0.02289583 | 0.12755638 | 3.55E-05 | 0.0043197 | -0.056631 |
| 16w_SITTE12 | 0.02578485 | 0.14498898 | 3.72E-05 | 0.0041509 | -0.092011 |

|             |            |            |          |           |           |
|-------------|------------|------------|----------|-----------|-----------|
| 16w_SITTE12 | 0.02505839 | 0.14060552 | 3.68E-05 | 0.0041768 | -0.086782 |
| 16w_SITTE12 | 0.12528692 | 0.74539363 | 6.68E-05 | 0.023978  | -0.40938  |
| 16w_SITTE12 | 0.13664544 | 0.81393194 | 6.72E-05 | 0.023527  | -0.4775   |
| 16w_SITTE12 | 0.10085185 | 0.59795016 | 6.54E-05 | 0.024809  | -0.12375  |
| 16w_SITTE12 | 0.06779324 | 0.3984715  | 6.15E-05 | 0.011255  | 0.10734   |
| 16w_SITTE12 | 0.09214594 | 0.54541785 | 6.46E-05 | 0.022042  | 0.019141  |
| 16w_SITTE12 | 0.02128043 | 0.11780892 | 3.47E-05 | 0.0044724 | -0.023601 |
| 16w_SITTE12 | 0.07865442 | 0.46400884 | 6.30E-05 | 0.016077  | 0.13651   |
| 16w_SITTE12 | 0.0599347  | 0.35105234 | 6.04E-05 | 0.0085136 | 0.077363  |
| 16w_SITTE12 | 0.02668924 | 0.15044619 | 3.80E-05 | 0.0041099 | -0.099939 |
| 16w_SITTE12 | 0.12213056 | 0.72634786 | 6.66E-05 | 0.02435   | -0.38515  |
| 16w_SITTE12 | 0.06002997 | 0.35162726 | 6.04E-05 | 0.0085136 | 0.077363  |
| 16w_SITTE12 | 0.0360819  | 0.20712237 | 4.65E-05 | 0.0042637 | -0.068307 |
| 16w_SITTE12 | 0.10879591 | 0.64588535 | 6.59E-05 | 0.025616  | -0.25305  |
| 16w_SITTE12 | 0.04404495 | 0.25517213 | 5.38E-05 | 0.0050014 | 0.012967  |
| 16w_SITTE12 | 0.02185932 | 0.12130198 | 3.49E-05 | 0.0044169 | -0.0356   |
| 16w_SITTE12 | 0.03685242 | 0.21177179 | 4.70E-05 | 0.0042982 | -0.057524 |
| 16w_SITTE12 | 0.0243355  | 0.13624352 | 3.64E-05 | 0.0042065 | -0.080664 |
| 16w_SITTE12 | 0.0113056  | 0.0576199  | 3.21E-05 | 0.006339  | 0.32844   |
| 16w_SITTE12 | 0.07527714 | 0.44363004 | 6.26E-05 | 0.014549  | 0.13345   |
| 16w_SITTE12 | 0.1242132  | 0.7389147  | 6.67E-05 | 0.024092  | -0.40152  |
| 16w_SITTE12 | 0.02024599 | 0.111567   | 3.42E-05 | 0.0045972 | 0.0032259 |
| 16w_SITTE12 | 0.02503021 | 0.14043547 | 3.68E-05 | 0.0041768 | -0.086782 |
| 16w_SITTE12 | 0.10542043 | 0.6255174  | 6.57E-05 | 0.025482  | -0.20623  |
| 16w_SITTE12 | 0.08288628 | 0.48954427 | 6.35E-05 | 0.017892  | 0.12434   |
| 16w_SITTE12 | 0.05216764 | 0.3041852  | 5.85E-05 | 0.0064518 | 0.055318  |
| 16w_SITTE12 | 0.05174053 | 0.301608   | 5.83E-05 | 0.0063316 | 0.053285  |
| 16w_SITTE12 | 0.03156204 | 0.17984912 | 4.22E-05 | 0.0040866 | -0.10071  |
| 16w_SITTE12 | 0.01640661 | 0.08839984 | 3.30E-05 | 0.0051875 | 0.10435   |
| 16w_SITTE12 | 0.0977158  | 0.57902694 | 6.51E-05 | 0.023964  | -0.074831 |
| 16w_SITTE12 | 0.02291867 | 0.12769422 | 3.55E-05 | 0.0043197 | -0.056631 |
| 16w_SITTE12 | 0.0163378  | 0.08798464 | 3.30E-05 | 0.0051875 | 0.12392   |
| 16w_SITTE12 | 0.0476712  | 0.27705324 | 5.64E-05 | 0.0055867 | 0.035328  |
| 16w_SITTE12 | 0.0182532  | 0.09954235 | 3.36E-05 | 0.0048202 | 0.050123  |
| 16w_SITTE12 | 0.02403362 | 0.13442196 | 3.61E-05 | 0.0042401 | -0.073623 |
| 16w_SITTE12 | 0.01206049 | 0.06217495 | 3.23E-05 | 0.0060411 | 0.2791    |
| 16w_SITTE12 | 0.08708173 | 0.51486    | 6.41E-05 | 0.01993   | 0.093363  |
| 16w_SITTE12 | 0.01646782 | 0.08876921 | 3.31E-05 | 0.0050879 | 0.10435   |
| 16w_SITTE12 | 0.04657872 | 0.27046117 | 5.57E-05 | 0.0054037 | 0.028707  |
| 16w_SITTE12 | 0.07352849 | 0.43307853 | 6.23E-05 | 0.013561  | 0.12913   |
| 16w_SITTE12 | 0.0096813  | 0.04781873 | 3.20E-05 | 0.0068348 | 0.4058    |
| 16w_SITTE12 | 0.07468458 | 0.44005448 | 6.25E-05 | 0.014299  | 0.13218   |
| 16w_SITTE12 | 0.02946759 | 0.16721103 | 4.02E-05 | 0.0040662 | -0.10661  |

|             |            |            |          |           |           |
|-------------|------------|------------|----------|-----------|-----------|
| 16w_SITTE12 | 0.01311294 | 0.06852554 | 3.23E-05 | 0.0059016 | 0.23179   |
| 16w_SITTE12 | 0.01757066 | 0.09542385 | 3.34E-05 | 0.0049043 | 0.067421  |
| 16w_SITTE12 | 0.02104007 | 0.11635856 | 3.47E-05 | 0.0044724 | -0.023601 |
| 16w_SITTE12 | 0.10205413 | 0.6052048  | 6.55E-05 | 0.025029  | -0.15246  |
| 16w_SITTE12 | 0.02776353 | 0.15692852 | 3.88E-05 | 0.0040827 | -0.10472  |
| 16w_SITTE12 | 0.04488117 | 0.260218   | 5.46E-05 | 0.0051531 | 0.017239  |
| 16w_SITTE12 | 0.05981984 | 0.3503593  | 6.04E-05 | 0.0085136 | 0.077363  |
| 16w_SITTE12 | 0.09035996 | 0.5346411  | 6.44E-05 | 0.021369  | 0.05218   |
| 16w_SITTE12 | 0.01871866 | 0.10235098 | 3.38E-05 | 0.004741  | 0.03364   |
| 16w_SITTE12 | 0.02648723 | 0.14922722 | 3.80E-05 | 0.0041099 | -0.099939 |
| 16w_SITTE12 | 0.0541894  | 0.31638467 | 5.92E-05 | 0.0069681 | 0.062513  |
| 16w_SITTE12 | 0.01498653 | 0.07983095 | 3.27E-05 | 0.0054028 | 0.16515   |
| 16w_SITTE12 | 0.06110055 | 0.35808724 | 6.06E-05 | 0.008866  | 0.080421  |
| 16w_SITTE12 | 0.01612246 | 0.08668523 | 3.30E-05 | 0.0051875 | 0.12392   |
| 16w_SITTE12 | 0.07767244 | 0.4580835  | 6.29E-05 | 0.015562  | 0.13646   |
| 16w_SITTE12 | 0.07754756 | 0.45732996 | 6.29E-05 | 0.015562  | 0.13646   |
| 16w_SITTE12 | 0.05427133 | 0.31687903 | 5.92E-05 | 0.0069681 | 0.062513  |
| 16w_SITTE12 | 0.0522785  | 0.30485418 | 5.85E-05 | 0.0064518 | 0.055318  |
| 16w_SITTE12 | 0.02489284 | 0.13960654 | 3.68E-05 | 0.0041768 | -0.086782 |
| 16w_SITTE12 | 0.02809924 | 0.15895425 | 3.93E-05 | 0.004074  | -0.10603  |
| 16w_SITTE12 | 0.03970039 | 0.22895665 | 4.98E-05 | 0.0045122 | -0.028892 |
| 16w_SITTE12 | 0.02533344 | 0.14226517 | 3.72E-05 | 0.0041509 | -0.092011 |
| 16w_SITTE12 | 0.02406124 | 0.13458857 | 3.61E-05 | 0.0042401 | -0.073623 |
| 16w_SITTE12 | 0.10242511 | 0.60744333 | 6.55E-05 | 0.025127  | -0.15246  |
| 16w_SITTE12 | 0.03797367 | 0.21853746 | 4.81E-05 | 0.0043756 | -0.04622  |
| 16w_SITTE12 | 0.11341412 | 0.673752   | 6.62E-05 | 0.025403  | -0.30551  |
| 16w_SITTE12 | 0.02575024 | 0.14478017 | 3.72E-05 | 0.0041509 | -0.092011 |
| 16w_SITTE12 | 0.03718193 | 0.21376005 | 4.76E-05 | 0.0043355 | -0.057524 |
| 16w_SITTE12 | 0.01888986 | 0.10338401 | 3.38E-05 | 0.004741  | 0.03364   |
| 16w_SITTE12 | 0.08800256 | 0.5204163  | 6.42E-05 | 0.020421  | 0.080939  |
| 16w_SITTE12 | 0.09127977 | 0.54019135 | 6.45E-05 | 0.021822  | 0.036126  |
| 16w_SITTE12 | 0.01784496 | 0.09707898 | 3.34E-05 | 0.0049043 | 0.067421  |
| 16w_SITTE12 | 0.08061316 | 0.47582805 | 6.32E-05 | 0.016854  | 0.13314   |
| 16w_SITTE12 | 0.11091082 | 0.6586469  | 6.61E-05 | 0.025556  | -0.28058  |
| 16w_SITTE12 | 0.06557058 | 0.38505974 | 6.12E-05 | 0.01041   | 0.097788  |
| 16w_SITTE12 | 0.10016535 | 0.59380776 | 6.53E-05 | 0.024687  | -0.11403  |
| 16w_SITTE12 | 0.01959494 | 0.10763855 | 3.40E-05 | 0.0046667 | 0.017998  |
| 16w_SITTE12 | 0.08462835 | 0.5000561  | 6.38E-05 | 0.018923  | 0.1136    |
| 16w_SITTE12 | 0.0860957  | 0.5089102  | 6.39E-05 | 0.01943   | 0.099025  |
| 16w_SITTE12 | 0.07494336 | 0.44161594 | 6.25E-05 | 0.014299  | 0.13218   |
| 16w_SITTE12 | 0.01402877 | 0.07405174 | 3.25E-05 | 0.0056405 | 0.20898   |
| 16w_SITTE12 | 0.04572328 | 0.26529935 | 5.50E-05 | 0.0052335 | 0.025099  |
| 16w_SITTE12 | 0.08096003 | 0.4779211  | 6.33E-05 | 0.017113  | 0.13314   |



|             |            |            |          |           |           |
|-------------|------------|------------|----------|-----------|-----------|
| 16w_SITTE12 | 0.01856215 | 0.10140658 | 3.36E-05 | 0.0048202 | 0.050123  |
| 16w_SITTE12 | 0.12139712 | 0.72192216 | 6.66E-05 | 0.024419  | -0.38089  |
| 16w_SITTE12 | 0.08866035 | 0.5243855  | 6.42E-05 | 0.020663  | 0.074212  |
| 16w_SITTE12 | 0.00993578 | 0.04935426 | 3.20E-05 | 0.0066628 | 0.37961   |
| 16w_SITTE12 | 0.07040244 | 0.41421562 | 6.19E-05 | 0.012376  | 0.11689   |
| 16w_SITTE12 | 0.04498088 | 0.26081964 | 5.46E-05 | 0.0051531 | 0.017239  |
| 16w_SITTE12 | 0.03097929 | 0.17633274 | 4.16E-05 | 0.0040771 | -0.10299  |
| 16w_SITTE12 | 0.00513083 | 0.02036079 | 3.18E-05 | 0.0084677 | 0.62647   |
| 16w_SITTE12 | 0.1315782  | 0.78335583 | 6.70E-05 | 0.023599  | -0.44949  |
| 16w_SITTE12 | 0.12226961 | 0.72718686 | 6.66E-05 | 0.02435   | -0.38515  |
| 16w_SITTE12 | 0.11321872 | 0.672573   | 6.62E-05 | 0.025403  | -0.30551  |
| 16w_SITTE12 | 0.02779881 | 0.15714142 | 3.88E-05 | 0.0040827 | -0.10472  |
| 16w_SITTE12 | 0.10749109 | 0.63801193 | 6.59E-05 | 0.025604  | -0.23052  |
| 16w_SITTE12 | 0.03164224 | 0.18033306 | 4.22E-05 | 0.0040866 | -0.10071  |
| 16w_SITTE12 | 0.02255143 | 0.12547827 | 3.55E-05 | 0.0043197 | -0.056631 |
| 16w_SITTE12 | 0.02656908 | 0.14972115 | 3.80E-05 | 0.0041099 | -0.099939 |
| 16w_SITTE12 | 0.12433705 | 0.739662   | 6.67E-05 | 0.024092  | -0.40152  |
| 16w_SITTE12 | 0.02105296 | 0.11643639 | 3.47E-05 | 0.0044724 | -0.023601 |
| 16w_SITTE12 | 0.03020714 | 0.17167355 | 4.07E-05 | 0.0040668 | -0.10597  |
| 16w_SITTE12 | 0.01380679 | 0.07271227 | 3.25E-05 | 0.0056405 | 0.20898   |
| 16w_SITTE12 | 0.07525522 | 0.44349778 | 6.26E-05 | 0.014549  | 0.13345   |
| 16w_SITTE12 | 0.14515159 | 0.8652588  | 6.75E-05 | 0.023641  | -0.51294  |
| 16w_SITTE12 | 0.07764125 | 0.45789528 | 6.29E-05 | 0.015562  | 0.13646   |
| 16w_SITTE12 | 0.02083893 | 0.11514487 | 3.44E-05 | 0.0045325 | -0.023601 |
| 16w_SITTE12 | 0.02068949 | 0.11424314 | 3.44E-05 | 0.0045325 | -0.01065  |
| 16w_SITTE12 | 0.02645282 | 0.1490196  | 3.80E-05 | 0.0041099 | -0.099939 |
| 16w_SITTE12 | 0.08683586 | 0.5133764  | 6.40E-05 | 0.019681  | 0.093363  |
| 16w_SITTE12 | 0.12073769 | 0.7179432  | 6.66E-05 | 0.02449   | -0.37215  |
| 16w_SITTE12 | 0.05293782 | 0.3088326  | 5.87E-05 | 0.0065755 | 0.059084  |
| 16w_SITTE12 | 0.03815778 | 0.21964845 | 4.87E-05 | 0.0044183 | -0.04622  |
| 16w_SITTE12 | 0.07599653 | 0.44797087 | 6.26E-05 | 0.0148    | 0.13453   |
| 16w_SITTE12 | 0.05353658 | 0.31244555 | 5.89E-05 | 0.0067028 | 0.060836  |
| 16w_SITTE12 | 0.08151355 | 0.48126113 | 6.34E-05 | 0.017373  | 0.13148   |
| 16w_SITTE12 | 0.01048658 | 0.05267782 | 3.21E-05 | 0.0064976 | 0.35381   |
| 16w_SITTE12 | 0.01729573 | 0.09376488 | 3.33E-05 | 0.0049935 | 0.085504  |
| 16w_SITTE12 | 0.01965282 | 0.10798778 | 3.40E-05 | 0.0046667 | 0.017998  |
| 16w_SITTE12 | 0.10348164 | 0.6138186  | 6.56E-05 | 0.025296  | -0.17104  |
| 16w_SITTE12 | 0.08378204 | 0.49494937 | 6.37E-05 | 0.01841   | 0.12117   |
| 16w_SITTE12 | 0.02129708 | 0.11790939 | 3.47E-05 | 0.0044724 | -0.023601 |
| 16w_SITTE12 | 0.05537359 | 0.3235302  | 5.95E-05 | 0.007248  | 0.065685  |
| 16w_SITTE12 | 0.02436565 | 0.13642547 | 3.64E-05 | 0.0042065 | -0.080664 |
| 16w_SITTE12 | 0.02742491 | 0.15488532 | 3.84E-05 | 0.0040947 | -0.10271  |
| 16w_SITTE12 | 0.05050157 | 0.29413196 | 5.78E-05 | 0.0061018 | 0.048868  |

|             |            |            |          |           |            |
|-------------|------------|------------|----------|-----------|------------|
| 16w_SITTE12 | 0.01998834 | 0.11001235 | 3.42E-05 | 0.0045972 | 0.0032259  |
| 16w_SITTE12 | 0.02279771 | 0.12696433 | 3.55E-05 | 0.0043197 | -0.056631  |
| 16w_SITTE12 | 0.05231788 | 0.30509174 | 5.85E-05 | 0.0064518 | 0.057248   |
| 16w_SITTE12 | 0.1308266  | 0.7788206  | 6.70E-05 | 0.023618  | -0.44608   |
| 16w_SITTE12 | 0.04610061 | 0.26757616 | 5.54E-05 | 0.0053171 | 0.025099   |
| 16w_SITTE12 | 0.02232632 | 0.12411996 | 3.52E-05 | 0.0043661 | -0.046619  |
| 16w_SITTE12 | 0.00432689 | 0.01550969 | 3.18E-05 | 0.0087056 | 0.65503    |
| 16w_SITTE12 | 0.13979831 | 0.8329567  | 6.73E-05 | 0.023551  | -0.49317   |
| 16w_SITTE12 | 0.02008864 | 0.11061759 | 3.42E-05 | 0.0045972 | 0.0032259  |
| 16w_SITTE12 | 0.02184677 | 0.1212263  | 3.49E-05 | 0.0044169 | -0.0356    |
| 16w_SITTE12 | 0.02378493 | 0.13292132 | 3.61E-05 | 0.0042401 | -0.073623  |
| 16w_SITTE12 | 0.07723321 | 0.45543313 | 6.28E-05 | 0.015307  | 0.13646    |
| 16w_SITTE12 | 0.05213669 | 0.30399844 | 5.85E-05 | 0.0064518 | 0.055318   |
| 16w_SITTE12 | 0.01772078 | 0.0963297  | 3.34E-05 | 0.0049043 | 0.067421   |
| 16w_SITTE12 | 0.02290379 | 0.12760441 | 3.55E-05 | 0.0043197 | -0.056631  |
| 16w_SITTE12 | 0.04972909 | 0.2894708  | 5.76E-05 | 0.005992  | 0.046466   |
| 16w_SITTE12 | 0.07776731 | 0.45865592 | 6.29E-05 | 0.015562  | 0.13662    |
| 16w_SITTE12 | 0.01405253 | 0.07419512 | 3.25E-05 | 0.0056405 | 0.20898    |
| 16w_SITTE12 | 0.01893014 | 0.10362708 | 3.38E-05 | 0.004741  | 0.03364    |
| 16w_SITTE12 | 0.05462573 | 0.31901753 | 5.92E-05 | 0.0069681 | 0.064127   |
| 16w_SITTE12 | 0.0243326  | 0.13622601 | 3.64E-05 | 0.0042065 | -0.080664  |
| 16w_SITTE12 | 0.07808826 | 0.4605926  | 6.29E-05 | 0.015819  | 0.13662    |
| 16w_SITTE12 | 0.08796474 | 0.52018815 | 6.42E-05 | 0.020421  | 0.080939   |
| 16w_SITTE12 | 0.03121378 | 0.17774767 | 4.16E-05 | 0.0040771 | -0.10299   |
| 16w_SITTE12 | 0.03434852 | 0.196663   | 4.48E-05 | 0.0041765 | -0.082901  |
| 16w_SITTE12 | 0.13341951 | 0.79446644 | 6.71E-05 | 0.023546  | -0.45937   |
| 16w_SITTE12 | 0.01382905 | 0.07284659 | 3.25E-05 | 0.0056405 | 0.20898    |
| 16w_SITTE12 | 0.01697888 | 0.09185298 | 3.31E-05 | 0.0050879 | 0.085504   |
| 16w_SITTE12 | 0.09433111 | 0.5586034  | 6.48E-05 | 0.022877  | -0.017059  |
| 16w_SITTE12 | 0.06685557 | 0.39281353 | 6.13E-05 | 0.010826  | 0.10251    |
| 16w_SITTE12 | 0.11388108 | 0.67656976 | 6.62E-05 | 0.025353  | -0.31137   |
| 16w_SITTE12 | 0.0942136  | 0.55789435 | 6.48E-05 | 0.022877  | -0.0077738 |
| 16w_SITTE12 | 0.02278711 | 0.12690036 | 3.55E-05 | 0.0043197 | -0.056631  |
| 16w_SITTE12 | 0.07580338 | 0.4468054  | 6.26E-05 | 0.0148    | 0.13453    |
| 16w_SITTE12 | 0.10996216 | 0.6529226  | 6.60E-05 | 0.025599  | -0.26716   |
| 16w_SITTE12 | 0.0664324  | 0.39026007 | 6.13E-05 | 0.010826  | 0.10013    |
| 16w_SITTE12 | 0.07906106 | 0.46646255 | 6.30E-05 | 0.016077  | 0.13613    |
| 16w_SITTE12 | 0.07059485 | 0.41537666 | 6.19E-05 | 0.012376  | 0.11916    |
| 16w_SITTE12 | 0.06780674 | 0.39855292 | 6.15E-05 | 0.011255  | 0.10734    |
| 16w_SITTE12 | 0.02464433 | 0.13810703 | 3.64E-05 | 0.0042065 | -0.080664  |
| 16w_SITTE12 | 0.02242379 | 0.12470809 | 3.52E-05 | 0.0043661 | -0.046619  |
| 16w_SITTE12 | 0.09532011 | 0.56457114 | 6.49E-05 | 0.023263  | -0.026471  |
| 16w_SITTE12 | 0.08386745 | 0.49546477 | 6.37E-05 | 0.01841   | 0.1176     |

|             |            |            |          |           |            |
|-------------|------------|------------|----------|-----------|------------|
| 16w_SITTE12 | 0.01915029 | 0.10495548 | 3.38E-05 | 0.004741  | 0.03364    |
| 16w_SITTE12 | 0.00488926 | 0.01890309 | 3.18E-05 | 0.0084677 | 0.62647    |
| 16w_SITTE12 | 0.08139365 | 0.48053762 | 6.34E-05 | 0.017373  | 0.13148    |
| 16w_SITTE12 | 0.02852166 | 0.16150318 | 3.93E-05 | 0.004074  | -0.10603   |
| 16w_SITTE12 | 0.02035916 | 0.1122499  | 3.44E-05 | 0.0045325 | -0.01065   |
| 16w_SITTE12 | 0.02455246 | 0.13755268 | 3.64E-05 | 0.0042065 | -0.080664  |
| 16w_SITTE12 | 0.05193633 | 0.30278948 | 5.85E-05 | 0.0064518 | 0.055318   |
| 16w_SITTE12 | 0.01636485 | 0.08814783 | 3.30E-05 | 0.0051875 | 0.12392    |
| 16w_SITTE12 | 0.01447109 | 0.07672076 | 3.26E-05 | 0.0055188 | 0.18676    |
| 16w_SITTE12 | 0.00952584 | 0.04688065 | 3.20E-05 | 0.0068348 | 0.4058     |
| 16w_SITTE12 | 0.02812465 | 0.15910757 | 3.93E-05 | 0.004074  | -0.10603   |
| 16w_SITTE12 | 0.01297164 | 0.06767295 | 3.23E-05 | 0.0059016 | 0.25518    |
| 16w_SITTE12 | 0.15728581 | 0.9384779  | 6.78E-05 | 0.023703  | -0.52697   |
| 16w_SITTE12 | 0.01055114 | 0.0530674  | 3.21E-05 | 0.0064976 | 0.35381    |
| 16w_SITTE12 | 0.0742676  | 0.4375384  | 6.24E-05 | 0.014051  | 0.13074    |
| 16w_SITTE12 | 0.0273064  | 0.1541702  | 3.84E-05 | 0.0040947 | -0.10271   |
| 16w_SITTE12 | 0.04429403 | 0.25667515 | 5.42E-05 | 0.0050757 | 0.012967   |
| 16w_SITTE12 | 0.01075869 | 0.05431978 | 3.21E-05 | 0.0064976 | 0.35381    |
| 16w_SITTE12 | 0.01427207 | 0.07551985 | 3.26E-05 | 0.0055188 | 0.18676    |
| 16w_SITTE12 | 0.01464705 | 0.0777825  | 3.26E-05 | 0.0055188 | 0.18676    |
| 16w_SITTE12 | 0.01366642 | 0.07186527 | 3.24E-05 | 0.0057681 | 0.20898    |
| 16w_SITTE12 | 0.0388056  | 0.22355746 | 4.92E-05 | 0.0044639 | -0.040459  |
| 16w_SITTE12 | 0.00754154 | 0.0349072  | 3.19E-05 | 0.0075925 | 0.51404    |
| 16w_SITTE12 | 0.01039862 | 0.05214709 | 3.21E-05 | 0.0064976 | 0.35381    |
| 16w_SITTE12 | 0.08508796 | 0.5028294  | 6.38E-05 | 0.018923  | 0.10916    |
| 16w_SITTE12 | 0.04242844 | 0.24541797 | 5.24E-05 | 0.0047963 | -0.0013165 |
| 16w_SITTE12 | 0.08432037 | 0.49819773 | 6.37E-05 | 0.018667  | 0.1176     |
| 16w_SITTE12 | 0.05549149 | 0.3242416  | 5.95E-05 | 0.007248  | 0.065685   |
| 16w_SITTE12 | 0.01738108 | 0.0942799  | 3.33E-05 | 0.0049935 | 0.085504   |
| 16w_SITTE12 | 0.02462749 | 0.13800542 | 3.64E-05 | 0.0042065 | -0.080664  |
| 16w_SITTE12 | 0.01021678 | 0.05104985 | 3.20E-05 | 0.0066628 | 0.37961    |
| 16w_SITTE12 | 0.03339519 | 0.19091055 | 4.37E-05 | 0.0041322 | -0.091175  |
| 16w_SITTE12 | 0.0169782  | 0.09184887 | 3.31E-05 | 0.0050879 | 0.085504   |
| 16w_SITTE12 | 0.03752606 | 0.21583657 | 4.81E-05 | 0.0043756 | -0.05192   |
| 16w_SITTE12 | 0.0931721  | 0.5516099  | 6.47E-05 | 0.022469  | 0.010343   |
| 16w_SITTE12 | 0.06985937 | 0.4109387  | 6.18E-05 | 0.012147  | 0.11455    |
| 16w_SITTE12 | 0.02103598 | 0.11633391 | 3.47E-05 | 0.0044724 | -0.023601  |
| 16w_SITTE12 | 0.08398099 | 0.49614987 | 6.37E-05 | 0.01841   | 0.1176     |
| 16w_SITTE12 | 0.09672141 | 0.5730267  | 6.50E-05 | 0.023626  | -0.055297  |
| 16w_SITTE12 | 0.05850587 | 0.34243068 | 6.01E-05 | 0.0080116 | 0.074438   |
| 16w_SITTE12 | 0.08141324 | 0.48065582 | 6.34E-05 | 0.017373  | 0.13148    |
| 16w_SITTE12 | 0.02480356 | 0.13906781 | 3.68E-05 | 0.0041768 | -0.086782  |
| 16w_SITTE12 | 0.04117607 | 0.23786108 | 5.14E-05 | 0.0046741 | -0.017493  |

|             |            |            |          |           |            |
|-------------|------------|------------|----------|-----------|------------|
| 16w_SITTE12 | 0.04365122 | 0.25279635 | 5.38E-05 | 0.0050014 | 0.008455   |
| 16w_SITTE12 | 0.06521163 | 0.38289383 | 6.11E-05 | 0.010206  | 0.095509   |
| 16w_SITTE12 | 0.02227718 | 0.1238234  | 3.52E-05 | 0.0043661 | -0.046619  |
| 16w_SITTE12 | 0.01984087 | 0.10912252 | 3.42E-05 | 0.0045972 | 0.0032259  |
| 16w_SITTE12 | 0.01938009 | 0.10634213 | 3.40E-05 | 0.0046667 | 0.017998   |
| 16w_SITTE12 | 0.01586148 | 0.08511049 | 3.28E-05 | 0.0052924 | 0.12392    |
| 16w_SITTE12 | 0.07353732 | 0.4331318  | 6.23E-05 | 0.013805  | 0.12913    |
| 16w_SITTE12 | 0.01967143 | 0.10810006 | 3.40E-05 | 0.0046667 | 0.017998   |
| 16w_SITTE12 | 0.03508769 | 0.20112324 | 4.54E-05 | 0.0042028 | -0.078293  |
| 16w_SITTE12 | 0.06691964 | 0.3932001  | 6.14E-05 | 0.011039  | 0.10251    |
| 16w_SITTE12 | 0.08122724 | 0.47953346 | 6.33E-05 | 0.017113  | 0.13148    |
| 16w_SITTE12 | 0.07620013 | 0.44919944 | 6.26E-05 | 0.0148    | 0.1354     |
| 16w_SITTE12 | 0.014502   | 0.07690725 | 3.26E-05 | 0.0055188 | 0.18676    |
| 16w_SITTE12 | 0.03521245 | 0.20187601 | 4.54E-05 | 0.0042028 | -0.073417  |
| 16w_SITTE12 | 0.06974077 | 0.41022304 | 6.18E-05 | 0.012147  | 0.11455    |
| 16w_SITTE12 | 0.0941698  | 0.55763    | 6.48E-05 | 0.022877  | -0.0077738 |
| 16w_SITTE12 | 0.13588734 | 0.8093575  | 6.72E-05 | 0.023527  | -0.47464   |
| 16w_SITTE12 | 0.04481536 | 0.25982088 | 5.46E-05 | 0.0051531 | 0.017239   |
| 16w_SITTE12 | 0.10325975 | 0.6124796  | 6.56E-05 | 0.025216  | -0.17104   |
| 16w_SITTE12 | 0.1208707  | 0.7187457  | 6.66E-05 | 0.02449   | -0.37656   |
| 16w_SITTE12 | 0.02873889 | 0.16281396 | 3.97E-05 | 0.0040686 | -0.10664   |
| 16w_SITTE12 | 0.07039484 | 0.41416982 | 6.19E-05 | 0.012376  | 0.11689    |
| 16w_SITTE12 | 0.02248664 | 0.12508734 | 3.52E-05 | 0.0043661 | -0.056631  |
| 16w_SITTE12 | 0.06947076 | 0.40859377 | 6.17E-05 | 0.01192   | 0.11455    |
| 16w_SITTE12 | 0.02455701 | 0.13758014 | 3.64E-05 | 0.0042065 | -0.080664  |
| 16w_SITTE12 | 0.0990831  | 0.58727735 | 6.53E-05 | 0.02442   | -0.094455  |
| 16w_SITTE12 | 0.056965   | 0.3331329  | 5.99E-05 | 0.0076952 | 0.070131   |
| 16w_SITTE12 | 0.01520395 | 0.08114287 | 3.27E-05 | 0.0054028 | 0.16515    |
| 16w_SITTE12 | 0.07322733 | 0.4312613  | 6.23E-05 | 0.013561  | 0.12737    |
| 16w_SITTE12 | 0.01451969 | 0.07701398 | 3.26E-05 | 0.0055188 | 0.18676    |
| 16w_SITTE12 | 0.08943352 | 0.5290509  | 6.43E-05 | 0.020902  | 0.059815   |
| 16w_SITTE12 | 0.07633615 | 0.45002022 | 6.27E-05 | 0.015053  | 0.1354     |
| 16w_SITTE12 | 0.04343629 | 0.2514994  | 5.33E-05 | 0.0049301 | 0.0036923  |
| 16w_SITTE12 | 0.04627128 | 0.268606   | 5.54E-05 | 0.0053171 | 0.028707   |
| 16w_SITTE12 | 0.02146359 | 0.11891411 | 3.49E-05 | 0.0044169 | -0.0356    |
| 16w_SITTE12 | 0.01826566 | 0.09961754 | 3.36E-05 | 0.0048202 | 0.050123   |
| 16w_SITTE12 | 0.09228568 | 0.5462611  | 6.46E-05 | 0.022042  | 0.019141   |
| 16w_SITTE12 | 0.03728879 | 0.21440485 | 4.76E-05 | 0.0043355 | -0.057524  |
| 16w_SITTE12 | 0.08942863 | 0.5290214  | 6.43E-05 | 0.020902  | 0.059815   |
| 16w_SITTE12 | 0.09400859 | 0.55665725 | 6.48E-05 | 0.022676  | -0.0077738 |
| 16w_SITTE12 | 0.05174956 | 0.30166247 | 5.83E-05 | 0.0063316 | 0.053285   |
| 16w_SITTE12 | 0.01256152 | 0.06519824 | 3.23E-05 | 0.0060411 | 0.25518    |
| 16w_SITTE12 | 0.01484982 | 0.07900606 | 3.27E-05 | 0.0054028 | 0.16515    |

|             |            |            |          |           |            |
|-------------|------------|------------|----------|-----------|------------|
| 16w_SITTE12 | 0.01585438 | 0.08506763 | 3.28E-05 | 0.0052924 | 0.12392    |
| 16w_SITTE12 | 0.01509134 | 0.0804634  | 3.27E-05 | 0.0054028 | 0.16515    |
| 16w_SITTE12 | 0.01212454 | 0.06256142 | 3.23E-05 | 0.0060411 | 0.2791     |
| 16w_SITTE12 | 0.02099571 | 0.11609093 | 3.47E-05 | 0.0044724 | -0.023601  |
| 16w_SITTE12 | 0.02378763 | 0.1329376  | 3.61E-05 | 0.0042401 | -0.073623  |
| 16w_SITTE12 | 0.04198154 | 0.24272138 | 5.24E-05 | 0.0047963 | -0.00654   |
| 16w_SITTE12 | 0.05995666 | 0.35118484 | 6.04E-05 | 0.0085136 | 0.077363   |
| 16w_SITTE12 | 0.02727432 | 0.15397662 | 3.84E-05 | 0.0040947 | -0.10271   |
| 16w_SITTE12 | 0.02207957 | 0.12263101 | 3.52E-05 | 0.0043661 | -0.046619  |
| 16w_SITTE12 | 0.02483041 | 0.13922983 | 3.68E-05 | 0.0041768 | -0.086782  |
| 16w_SITTE12 | 0.09553514 | 0.5658686  | 6.49E-05 | 0.023263  | -0.035993  |
| 16w_SITTE12 | 0.10119164 | 0.6000005  | 6.54E-05 | 0.024809  | -0.13341   |
| 16w_SITTE12 | 0.07708667 | 0.45454887 | 6.28E-05 | 0.015307  | 0.13605    |
| 16w_SITTE12 | 0.02497435 | 0.1400984  | 3.68E-05 | 0.0041768 | -0.086782  |
| 16w_SITTE12 | 0.0506984  | 0.29531965 | 5.78E-05 | 0.0061018 | 0.051138   |
| 16w_SITTE12 | 0.09232365 | 0.54649025 | 6.46E-05 | 0.022042  | 0.019141   |
| 16w_SITTE12 | 0.05639212 | 0.3296761  | 5.98E-05 | 0.0075425 | 0.068678   |
| 16w_SITTE12 | 0.00681514 | 0.03052402 | 3.18E-05 | 0.0078    | 0.54183    |
| 16w_SITTE12 | 0.02298545 | 0.12809715 | 3.55E-05 | 0.0043197 | -0.056631  |
| 16w_SITTE12 | 0.02025029 | 0.11159296 | 3.42E-05 | 0.0045972 | 0.0032259  |
| 16w_SITTE12 | 0.0187237  | 0.10238137 | 3.38E-05 | 0.004741  | 0.03364    |
| 16w_SITTE12 | 0.08142382 | 0.48071966 | 6.34E-05 | 0.017373  | 0.13148    |
| 16w_SITTE12 | 0.08940881 | 0.5289018  | 6.43E-05 | 0.020902  | 0.059815   |
| 16w_SITTE12 | 0.04281276 | 0.24773699 | 5.29E-05 | 0.0048617 | -0.0013165 |
| 16w_SITTE12 | 0.08827926 | 0.522086   | 6.42E-05 | 0.020421  | 0.074212   |
| 16w_SITTE12 | 0.07327799 | 0.43156695 | 6.23E-05 | 0.013561  | 0.12737    |
| 16w_SITTE12 | 0.01834546 | 0.10009904 | 3.36E-05 | 0.0048202 | 0.050123   |
| 16w_SITTE12 | 0.05169011 | 0.3013037  | 5.83E-05 | 0.0063316 | 0.053285   |
| 16w_SITTE12 | 0.02359075 | 0.13174962 | 3.58E-05 | 0.0042778 | -0.073623  |
| 16w_SITTE12 | 0.01594684 | 0.08562553 | 3.30E-05 | 0.0051875 | 0.12392    |
| 16w_SITTE12 | 0.02505603 | 0.14059125 | 3.68E-05 | 0.0041768 | -0.086782  |
| 16w_SITTE12 | 0.06055561 | 0.35479897 | 6.05E-05 | 0.008688  | 0.07887    |
| 16w_SITTE12 | 0.06816732 | 0.40072873 | 6.16E-05 | 0.011474  | 0.10734    |
| 16w_SITTE12 | 0.01993832 | 0.10971052 | 3.42E-05 | 0.0045972 | 0.0032259  |
| 16w_SITTE12 | 0.02879571 | 0.1631568  | 3.97E-05 | 0.0040686 | -0.10664   |
| 16w_SITTE12 | 0.07866781 | 0.46408963 | 6.30E-05 | 0.016077  | 0.13651    |
| 16w_SITTE12 | 0.01309525 | 0.06841879 | 3.23E-05 | 0.0059016 | 0.23179    |
| 16w_SITTE12 | 0.08004126 | 0.47237718 | 6.32E-05 | 0.016594  | 0.13446    |
| 16w_SITTE12 | 0.1338299  | 0.7969428  | 6.71E-05 | 0.023546  | -0.46255   |
| 16w_SITTE12 | 0.08371056 | 0.49451807 | 6.37E-05 | 0.01841   | 0.12117    |
| 16w_SITTE12 | 0.0979947  | 0.5807099  | 6.52E-05 | 0.024123  | -0.074831  |
| 16w_SITTE12 | 0.07958891 | 0.46964768 | 6.31E-05 | 0.016335  | 0.13545    |
| 16w_SITTE12 | 0.1083263  | 0.6430517  | 6.59E-05 | 0.025614  | -0.24573   |

|             |            |            |          |           |           |
|-------------|------------|------------|----------|-----------|-----------|
| 16w_SITTE12 | 0.02876479 | 0.16297024 | 3.97E-05 | 0.0040686 | -0.10664  |
| 16w_SITTE12 | 0.09924562 | 0.58825797 | 6.53E-05 | 0.02442   | -0.094455 |
| 16w_SITTE12 | 0.09216245 | 0.54551756 | 6.46E-05 | 0.022042  | 0.019141  |
| 16w_SITTE12 | 0.03951166 | 0.22781783 | 4.98E-05 | 0.0045122 | -0.034672 |
| 16w_SITTE12 | 0.04411077 | 0.2555693  | 5.38E-05 | 0.0050014 | 0.012967  |
| 16w_SITTE12 | 0.00982956 | 0.04871335 | 3.20E-05 | 0.0066628 | 0.37961   |
| 16w_SITTE12 | 0.09881324 | 0.58564895 | 6.52E-05 | 0.024275  | -0.094455 |
| 16w_SITTE12 | 0.08041886 | 0.47465566 | 6.32E-05 | 0.016854  | 0.13446   |
| 16w_SITTE12 | 0.08615196 | 0.5092496  | 6.39E-05 | 0.01943   | 0.099025  |
| 16w_SITTE12 | 0.09451112 | 0.55968964 | 6.48E-05 | 0.022877  | -0.017059 |
| 16w_SITTE12 | 0.01298005 | 0.06772367 | 3.23E-05 | 0.0059016 | 0.25518   |
| 16w_SITTE12 | 0.07325606 | 0.43143466 | 6.23E-05 | 0.013561  | 0.12737   |
| 16w_SITTE12 | 0.01506521 | 0.08030573 | 3.27E-05 | 0.0054028 | 0.16515   |
| 16w_SITTE12 | 0.10730343 | 0.6368796  | 6.58E-05 | 0.025586  | -0.23052  |
| 16w_SITTE12 | 0.02001853 | 0.11019453 | 3.42E-05 | 0.0045972 | 0.0032259 |
| 16w_SITTE12 | 0.00998228 | 0.04963485 | 3.20E-05 | 0.0066628 | 0.37961   |
| 16w_SITTE12 | 0.03773853 | 0.21711862 | 4.81E-05 | 0.0043756 | -0.05192  |
| 16w_SITTE12 | 0.0142117  | 0.07515556 | 3.25E-05 | 0.0056405 | 0.18676   |
| 16w_SITTE12 | 0.02582464 | 0.14522913 | 3.72E-05 | 0.0041509 | -0.096385 |
| 16w_SITTE12 | 0.01142762 | 0.05835617 | 3.21E-05 | 0.006339  | 0.30353   |
| 16w_SITTE12 | 0.02578697 | 0.14500181 | 3.72E-05 | 0.0041509 | -0.092011 |
| 16w_SITTE12 | 0.08097032 | 0.47798318 | 6.33E-05 | 0.017113  | 0.13314   |
| 16w_SITTE12 | 0.02432801 | 0.13619834 | 3.64E-05 | 0.0042065 | -0.080664 |
| 16w_SITTE12 | 0.0900043  | 0.5324951  | 6.44E-05 | 0.021137  | 0.05218   |
| 16w_SITTE12 | 0.08673168 | 0.51274776 | 6.40E-05 | 0.019681  | 0.093363  |
| 16w_SITTE12 | 0.02596245 | 0.14606066 | 3.76E-05 | 0.0041286 | -0.096385 |
| 16w_SITTE12 | 0.02488932 | 0.1395853  | 3.68E-05 | 0.0041768 | -0.086782 |
| 16w_SITTE12 | 0.06897041 | 0.40557462 | 6.16E-05 | 0.011695  | 0.11218   |
| 16w_SITTE12 | 0.02178731 | 0.12086748 | 3.49E-05 | 0.0044169 | -0.0356   |
| 16w_SITTE12 | 0.03052765 | 0.17360753 | 4.11E-05 | 0.0040705 | -0.10475  |
| 16w_SITTE12 | 0.0914729  | 0.54135674 | 6.45E-05 | 0.021822  | 0.036126  |
| 16w_SITTE12 | 0.04986875 | 0.2903135  | 5.76E-05 | 0.005992  | 0.046466  |
| 16w_SITTE12 | 0.02665406 | 0.15023391 | 3.80E-05 | 0.0041099 | -0.099939 |
| 16w_SITTE12 | 0.02693992 | 0.15195884 | 3.80E-05 | 0.0041099 | -0.10271  |
| 16w_SITTE12 | 0.01852692 | 0.10119398 | 3.36E-05 | 0.0048202 | 0.050123  |
| 16w_SITTE12 | 0.01721853 | 0.09329903 | 3.33E-05 | 0.0049935 | 0.085504  |
| 16w_SITTE12 | 0.06261627 | 0.3672332  | 6.08E-05 | 0.0094206 | 0.085432  |
| 16w_SITTE12 | 0.01585198 | 0.08505317 | 3.28E-05 | 0.0052924 | 0.12392   |
| 16w_SITTE12 | 0.02673132 | 0.15070012 | 3.80E-05 | 0.0041099 | -0.099939 |
| 16w_SITTE12 | 0.03074529 | 0.17492074 | 4.11E-05 | 0.0040705 | -0.10475  |
| 16w_SITTE12 | 0.09836579 | 0.58294904 | 6.52E-05 | 0.024123  | -0.084641 |
| 16w_SITTE12 | 0.11197539 | 0.6650706  | 6.61E-05 | 0.025489  | -0.29336  |
| 16w_SITTE12 | 0.04599655 | 0.2669483  | 5.54E-05 | 0.0053171 | 0.025099  |

|             |            |            |          |           |           |
|-------------|------------|------------|----------|-----------|-----------|
| 16w_SITTE12 | 0.09883314 | 0.5857691  | 6.52E-05 | 0.024275  | -0.094455 |
| 16w_SITTE12 | 0.0457006  | 0.2651625  | 5.50E-05 | 0.0052335 | 0.025099  |
| 16w_SITTE12 | 0.03120259 | 0.17768016 | 4.16E-05 | 0.0040771 | -0.10299  |
| 16w_SITTE12 | 0.10465227 | 0.6208823  | 6.57E-05 | 0.025429  | -0.18901  |
| 16w_SITTE12 | 0.0209334  | 0.11571491 | 3.47E-05 | 0.0044724 | -0.023601 |
| 16w_SITTE12 | 0.0503406  | 0.29316068 | 5.78E-05 | 0.0061018 | 0.048868  |
| 16w_SITTE12 | 0.01200997 | 0.06187014 | 3.22E-05 | 0.0061869 | 0.2791    |
| 16w_SITTE12 | 0.1034823  | 0.6138225  | 6.56E-05 | 0.025296  | -0.17104  |
| 16w_SITTE12 | 0.01039353 | 0.05211634 | 3.21E-05 | 0.0064976 | 0.35381   |
| 16w_SITTE12 | 0.04720555 | 0.2742435  | 5.61E-05 | 0.0054936 | 0.032113  |
| 16w_SITTE12 | 0.06408469 | 0.3760938  | 6.10E-05 | 0.0098069 | 0.091185  |
| 16w_SITTE12 | 0.01798496 | 0.09792379 | 3.34E-05 | 0.0049043 | 0.067421  |
| 16w_SITTE12 | 0.09364078 | 0.55443794 | 6.48E-05 | 0.022676  | 0.0013661 |
| 16w_SITTE12 | 0.02660529 | 0.14993964 | 3.80E-05 | 0.0041099 | -0.099939 |
| 16w_SITTE12 | 0.01870823 | 0.10228804 | 3.38E-05 | 0.004741  | 0.03364   |
| 16w_SITTE12 | 0.08950695 | 0.529494   | 6.43E-05 | 0.020902  | 0.059815  |
| 16w_SITTE12 | 0.02323419 | 0.12959808 | 3.58E-05 | 0.0042778 | -0.065623 |
| 16w_SITTE12 | 0.06617483 | 0.38870585 | 6.13E-05 | 0.010616  | 0.10013   |
| 16w_SITTE12 | 0.03946425 | 0.22753176 | 4.98E-05 | 0.0045122 | -0.034672 |
| 16w_SITTE12 | 0.02188628 | 0.1214647  | 3.49E-05 | 0.0044169 | -0.0356   |
| 16w_SITTE12 | 0.07031658 | 0.41369754 | 6.19E-05 | 0.012376  | 0.11689   |
| 16w_SITTE12 | 0.09282029 | 0.549487   | 6.46E-05 | 0.022258  | 0.010343  |
| 16w_SITTE12 | 0.01793337 | 0.09761249 | 3.34E-05 | 0.0049043 | 0.067421  |
| 16w_SITTE12 | 0.02111127 | 0.11678818 | 3.47E-05 | 0.0044724 | -0.023601 |
| 16w_SITTE12 | 0.02315469 | 0.12911837 | 3.58E-05 | 0.0042778 | -0.065623 |
| 16w_SITTE12 | 0.00860234 | 0.04130818 | 3.19E-05 | 0.0071994 | 0.45929   |
| 16w_SITTE12 | 0.11483332 | 0.68231565 | 6.63E-05 | 0.025242  | -0.32268  |
| 16w_SITTE12 | 0.07084584 | 0.41689113 | 6.20E-05 | 0.012608  | 0.11916   |
| 16w_SITTE12 | 0.06153521 | 0.36071    | 6.07E-05 | 0.0090475 | 0.082025  |
| 16w_SITTE12 | 0.06552471 | 0.38478294 | 6.12E-05 | 0.01041   | 0.095509  |
| 16w_SITTE12 | 0.06527168 | 0.3832562  | 6.12E-05 | 0.01041   | 0.095509  |
| 16w_SITTE12 | 0.03443281 | 0.19717164 | 4.48E-05 | 0.0041765 | -0.082901 |
| 16w_SITTE12 | 0.03236718 | 0.18470742 | 4.27E-05 | 0.004099  | -0.097962 |
| 16w_SITTE12 | 0.01233491 | 0.06383085 | 3.23E-05 | 0.0060411 | 0.2791    |
| 16w_SITTE12 | 0.10865998 | 0.6450651  | 6.59E-05 | 0.025616  | -0.25305  |
| 16w_SITTE12 | 0.07067683 | 0.41587132 | 6.19E-05 | 0.012376  | 0.11916   |
| 16w_SITTE12 | 0.01279564 | 0.06661091 | 3.23E-05 | 0.0059016 | 0.25518   |
| 16w_SITTE12 | 0.029632   | 0.16820306 | 4.02E-05 | 0.0040662 | -0.10661  |
| 16w_SITTE12 | 0.014433   | 0.07649092 | 3.26E-05 | 0.0055188 | 0.18676   |
| 16w_SITTE12 | 0.01547297 | 0.08276618 | 3.28E-05 | 0.0052924 | 0.1442    |
| 16w_SITTE12 | 0.0883202  | 0.522333   | 6.42E-05 | 0.020421  | 0.074212  |
| 16w_SITTE12 | 0.02211455 | 0.12284207 | 3.52E-05 | 0.0043661 | -0.046619 |
| 16w_SITTE12 | 0.13529286 | 0.80577034 | 6.72E-05 | 0.023529  | -0.47171  |

|             |            |            |          |           |           |
|-------------|------------|------------|----------|-----------|-----------|
| 16w_SITTE12 | 0.01763273 | 0.09579834 | 3.34E-05 | 0.0049043 | 0.067421  |
| 16w_SITTE12 | 0.01618742 | 0.08707721 | 3.30E-05 | 0.0051875 | 0.12392   |
| 16w_SITTE12 | 0.12144296 | 0.7221988  | 6.66E-05 | 0.024419  | -0.38089  |
| 16w_SITTE12 | 0.1144547  | 0.680031   | 6.63E-05 | 0.025299  | -0.3171   |
| 16w_SITTE12 | 0.01784597 | 0.0970851  | 3.34E-05 | 0.0049043 | 0.067421  |
| 16w_SITTE12 | 0.04124528 | 0.23827867 | 5.14E-05 | 0.0046741 | -0.017493 |
| 16w_SITTE12 | 0.03241268 | 0.18498197 | 4.27E-05 | 0.004099  | -0.097962 |
| 16w_SITTE12 | 0.01423366 | 0.07528805 | 3.26E-05 | 0.0055188 | 0.18676   |
| 16w_SITTE12 | 0.01543483 | 0.08253603 | 3.28E-05 | 0.0052924 | 0.1442    |
| 16w_SITTE12 | 0.01784605 | 0.09708559 | 3.34E-05 | 0.0049043 | 0.067421  |
| 16w_SITTE12 | 0.02734663 | 0.15441293 | 3.84E-05 | 0.0040947 | -0.10271  |
| 16w_SITTE12 | 0.04222404 | 0.2441846  | 5.24E-05 | 0.0047963 | -0.00654  |
| 16w_SITTE12 | 0.10065402 | 0.59675646 | 6.53E-05 | 0.024687  | -0.12375  |
| 16w_SITTE12 | 0.05027525 | 0.29276636 | 5.78E-05 | 0.0061018 | 0.048868  |
| 16w_SITTE12 | 0.12935656 | 0.7699502  | 6.70E-05 | 0.023692  | -0.43556  |
| 16w_SITTE12 | 0.01833024 | 0.10000721 | 3.36E-05 | 0.0048202 | 0.050123  |
| 16w_SITTE12 | 0.02711694 | 0.153027   | 3.84E-05 | 0.0040947 | -0.10271  |
| 16w_SITTE12 | 0.01311486 | 0.06853714 | 3.23E-05 | 0.0059016 | 0.23179   |
| 16w_SITTE12 | 0.04897044 | 0.284893   | 5.70E-05 | 0.0057827 | 0.041222  |
| 16w_SITTE12 | 0.02139847 | 0.11852122 | 3.47E-05 | 0.0044724 | -0.0356   |
| 16w_SITTE12 | 0.00484374 | 0.01862844 | 3.18E-05 | 0.0084677 | 0.62647   |
| 16w_SITTE12 | 0.06368347 | 0.3736728  | 6.10E-05 | 0.0098069 | 0.089169  |
| 16w_SITTE12 | 0.02245131 | 0.12487415 | 3.52E-05 | 0.0043661 | -0.046619 |
| 16w_SITTE12 | 0.0226873  | 0.12629811 | 3.55E-05 | 0.0043197 | -0.056631 |
| 16w_SITTE12 | 0.12846726 | 0.76458406 | 6.69E-05 | 0.023723  | -0.4283   |
| 16w_SITTE12 | 0.09659382 | 0.5722568  | 6.50E-05 | 0.023626  | -0.055297 |
| 16w_SITTE12 | 0.02345894 | 0.13095425 | 3.58E-05 | 0.0042778 | -0.065623 |
| 16w_SITTE12 | 0.02257421 | 0.1256157  | 3.55E-05 | 0.0043197 | -0.056631 |
| 16w_SITTE12 | 0.03870221 | 0.22293356 | 4.92E-05 | 0.0044639 | -0.040459 |
| 16w_SITTE12 | 0.1160791  | 0.6898328  | 6.63E-05 | 0.025119  | -0.33347  |
| 16w_SITTE12 | 0.09077115 | 0.53712225 | 6.45E-05 | 0.021597  | 0.044278  |
| 16w_SITTE12 | 0.0851042  | 0.50292736 | 6.38E-05 | 0.018923  | 0.10916   |
| 16w_SITTE12 | 0.08486952 | 0.50151134 | 6.38E-05 | 0.018923  | 0.1136    |
| 16w_SITTE12 | 0.01450752 | 0.07694057 | 3.26E-05 | 0.0055188 | 0.18676   |
| 16w_SITTE12 | 0.02463485 | 0.13804983 | 3.64E-05 | 0.0042065 | -0.080664 |
| 16w_SITTE12 | 0.02482519 | 0.13919833 | 3.68E-05 | 0.0041768 | -0.086782 |
| 16w_SITTE12 | 0.11806385 | 0.701809   | 6.65E-05 | 0.024847  | -0.35363  |
| 16w_SITTE12 | 0.04520155 | 0.26215118 | 5.46E-05 | 0.0051531 | 0.021279  |
| 16w_SITTE12 | 0.08059537 | 0.4757207  | 6.32E-05 | 0.016854  | 0.13314   |
| 16w_SITTE12 | 0.06548581 | 0.38454828 | 6.12E-05 | 0.01041   | 0.095509  |
| 16w_SITTE12 | 0.10292006 | 0.6104299  | 6.56E-05 | 0.025216  | -0.16182  |
| 16w_SITTE12 | 0.01774776 | 0.09649245 | 3.34E-05 | 0.0049043 | 0.067421  |
| 16w_SITTE12 | 0.03125083 | 0.17797129 | 4.16E-05 | 0.0040771 | -0.10299  |



|             |            |            |          |           |           |
|-------------|------------|------------|----------|-----------|-----------|
| 16w_SITTE12 | 0.10141176 | 0.60132873 | 6.54E-05 | 0.024923  | -0.13341  |
| 16w_SITTE12 | 0.03770592 | 0.21692184 | 4.81E-05 | 0.0043756 | -0.05192  |
| 16w_SITTE12 | 0.03273056 | 0.18690008 | 4.32E-05 | 0.0041142 | -0.094772 |
| 16w_SITTE12 | 0.00469113 | 0.01770757 | 3.18E-05 | 0.0087056 | 0.65503   |
| 16w_SITTE12 | 0.01334154 | 0.06990492 | 3.24E-05 | 0.0057681 | 0.23179   |
| 16w_SITTE12 | 0.03293827 | 0.18815342 | 4.32E-05 | 0.0041142 | -0.094772 |
| 16w_SITTE12 | 0.03354927 | 0.19184026 | 4.37E-05 | 0.0041322 | -0.087207 |
| 16w_SITTE12 | 0.01763666 | 0.09582211 | 3.34E-05 | 0.0049043 | 0.067421  |
| 16w_SITTE12 | 0.01720594 | 0.0932231  | 3.33E-05 | 0.0049935 | 0.085504  |
| 16w_SITTE12 | 0.11541532 | 0.6858275  | 6.63E-05 | 0.025182  | -0.32814  |
| 16w_SITTE12 | 0.01686929 | 0.09119172 | 3.31E-05 | 0.0050879 | 0.10435   |
| 16w_SITTE12 | 0.09798437 | 0.58064747 | 6.52E-05 | 0.024123  | -0.074831 |
| 16w_SITTE12 | 0.01413651 | 0.07470188 | 3.25E-05 | 0.0056405 | 0.20898   |
| 16w_SITTE12 | 0.04501609 | 0.26103207 | 5.46E-05 | 0.0051531 | 0.017239  |
| 16w_SITTE12 | 0.02529707 | 0.1420457  | 3.68E-05 | 0.0041768 | -0.092011 |
| 16w_SITTE12 | 0.02833925 | 0.16040252 | 3.93E-05 | 0.004074  | -0.10603  |
| 16w_SITTE12 | 0.03098345 | 0.17635787 | 4.16E-05 | 0.0040771 | -0.10299  |
| 16w_SITTE12 | 0.02781637 | 0.15724738 | 3.88E-05 | 0.0040827 | -0.10472  |
| 16w_SITTE12 | 0.02749782 | 0.15532523 | 3.84E-05 | 0.0040947 | -0.10472  |
| 16w_SITTE12 | 0.0233512  | 0.13030414 | 3.58E-05 | 0.0042778 | -0.065623 |
| 16w_SITTE12 | 0.02059344 | 0.11366355 | 3.44E-05 | 0.0045325 | -0.01065  |
| 16w_SITTE12 | 0.04012911 | 0.23154362 | 5.03E-05 | 0.0045634 | -0.028892 |
| 16w_SITTE12 | 0.02085417 | 0.11523683 | 3.44E-05 | 0.0045325 | -0.023601 |
| 16w_SITTE12 | 0.02229748 | 0.12394591 | 3.52E-05 | 0.0043661 | -0.046619 |
| 16w_SITTE12 | 0.08447833 | 0.49915084 | 6.37E-05 | 0.018667  | 0.1136    |
| 16w_SITTE12 | 0.01977926 | 0.10875075 | 3.42E-05 | 0.0045972 | 0.0032259 |
| 16w_SITTE12 | 0.10300092 | 0.61091787 | 6.56E-05 | 0.025216  | -0.16182  |
| 16w_SITTE12 | 0.01590131 | 0.0853508  | 3.30E-05 | 0.0051875 | 0.12392   |
| 16w_SITTE12 | 0.02344239 | 0.1308544  | 3.58E-05 | 0.0042778 | -0.065623 |
| 16w_SITTE12 | 0.02386035 | 0.13337637 | 3.61E-05 | 0.0042401 | -0.073623 |
| 16w_SITTE12 | 0.02206586 | 0.12254831 | 3.52E-05 | 0.0043661 | -0.046619 |
| 16w_SITTE12 | 0.02023743 | 0.11151537 | 3.42E-05 | 0.0045972 | 0.0032259 |
| 16w_SITTE12 | 0.057887   | 0.33869636 | 6.00E-05 | 0.0078516 | 0.073002  |
| 16w_SITTE12 | 0.03148808 | 0.17940284 | 4.22E-05 | 0.0040866 | -0.10071  |
| 16w_SITTE12 | 0.1183548  | 0.7035645  | 6.65E-05 | 0.024847  | -0.35363  |
| 16w_SITTE12 | 0.02108387 | 0.11662285 | 3.47E-05 | 0.0044724 | -0.023601 |
| 16w_SITTE12 | 0.06684263 | 0.39273542 | 6.13E-05 | 0.010826  | 0.10251   |
| 16w_SITTE12 | 0.06632803 | 0.38963026 | 6.13E-05 | 0.010826  | 0.10013   |
| 16w_SITTE12 | 0.09768529 | 0.5788429  | 6.51E-05 | 0.023964  | -0.074831 |
| 16w_SITTE12 | 0.03695276 | 0.2123772  | 4.76E-05 | 0.0043355 | -0.057524 |
| 16w_SITTE12 | 0.01261751 | 0.06553607 | 3.23E-05 | 0.0059016 | 0.25518   |
| 16w_SITTE12 | 0.08711311 | 0.51504934 | 6.41E-05 | 0.01993   | 0.087329  |
| 16w_SITTE12 | 0.01604048 | 0.08619059 | 3.30E-05 | 0.0051875 | 0.12392   |

|             |            |            |          |           |           |
|-------------|------------|------------|----------|-----------|-----------|
| 16w_SITTE12 | 0.01359856 | 0.07145579 | 3.24E-05 | 0.0057681 | 0.23179   |
| 16w_SITTE12 | 0.01272926 | 0.06621038 | 3.23E-05 | 0.0059016 | 0.25518   |
| 16w_SITTE12 | 0.07337296 | 0.43214005 | 6.23E-05 | 0.013561  | 0.12913   |
| 16w_SITTE12 | 0.03685271 | 0.21177351 | 4.70E-05 | 0.0042982 | -0.057524 |
| 16w_SITTE12 | 0.03196058 | 0.18225393 | 4.22E-05 | 0.0040866 | -0.097962 |
| 16w_SITTE12 | 0.03930578 | 0.22657554 | 4.98E-05 | 0.0045122 | -0.034672 |
| 16w_SITTE12 | 0.01866854 | 0.10204855 | 3.38E-05 | 0.004741  | 0.03364   |
| 16w_SITTE12 | 0.02399835 | 0.1342091  | 3.61E-05 | 0.0042401 | -0.073623 |
| 16w_SITTE12 | 0.02023932 | 0.11152676 | 3.42E-05 | 0.0045972 | 0.0032259 |
| 16w_SITTE12 | 0.03255516 | 0.18584172 | 4.32E-05 | 0.0041142 | -0.094772 |
| 16w_SITTE12 | 0.04856172 | 0.2824267  | 5.67E-05 | 0.0056831 | 0.041222  |
| 16w_SITTE12 | 0.07787868 | 0.459328   | 6.29E-05 | 0.015562  | 0.13662   |
| 16w_SITTE12 | 0.08456633 | 0.49968183 | 6.37E-05 | 0.018667  | 0.1136    |
| 16w_SITTE12 | 0.02060857 | 0.1137549  | 3.44E-05 | 0.0045325 | -0.01065  |
| 16w_SITTE12 | 0.021734   | 0.12054582 | 3.49E-05 | 0.0044169 | -0.0356   |
| 16w_SITTE12 | 0.02138179 | 0.11842056 | 3.47E-05 | 0.0044724 | -0.0356   |
| 16w_SITTE12 | 0.03422978 | 0.1959465  | 4.48E-05 | 0.0041765 | -0.082901 |
| 16w_SITTE12 | 0.02350975 | 0.13126086 | 3.58E-05 | 0.0042778 | -0.065623 |
| 16w_SITTE12 | 0.0323217  | 0.18443298 | 4.27E-05 | 0.004099  | -0.097962 |
| 16w_SITTE12 | 0.11588565 | 0.68866545 | 6.63E-05 | 0.025119  | -0.33347  |
| 16w_SITTE12 | 0.01424232 | 0.07534034 | 3.26E-05 | 0.0055188 | 0.18676   |
| 16w_SITTE12 | 0.09783297 | 0.57973397 | 6.51E-05 | 0.023964  | -0.074831 |
| 16w_SITTE12 | 0.05753575 | 0.33657685 | 6.00E-05 | 0.0078516 | 0.071569  |
| 16w_SITTE12 | 0.01626132 | 0.08752316 | 3.30E-05 | 0.0051875 | 0.12392   |
| 16w_SITTE12 | 0.02211503 | 0.12284499 | 3.52E-05 | 0.0043661 | -0.046619 |
| 16w_SITTE12 | 0.07086622 | 0.41701412 | 6.20E-05 | 0.012608  | 0.11916   |
| 16w_SITTE12 | 0.02835037 | 0.1604696  | 3.93E-05 | 0.004074  | -0.10603  |
| 16w_SITTE12 | 0.01178087 | 0.06048773 | 3.22E-05 | 0.0061869 | 0.30353   |
| 16w_SITTE12 | 0.04685612 | 0.272135   | 5.57E-05 | 0.0054037 | 0.032113  |
| 16w_SITTE12 | 0.08491705 | 0.50179815 | 6.38E-05 | 0.018923  | 0.10916   |
| 16w_SITTE12 | 0.07624016 | 0.449441   | 6.26E-05 | 0.0148    | 0.1354    |
| 16w_SITTE12 | 0.01150015 | 0.05879381 | 3.22E-05 | 0.0061869 | 0.30353   |
| 16w_SITTE12 | 0.0081328  | 0.03847494 | 3.19E-05 | 0.0071994 | 0.45929   |
| 16w_SITTE12 | 0.09303603 | 0.55078876 | 6.47E-05 | 0.022469  | 0.010343  |
| 16w_SITTE12 | 0.09144615 | 0.5411953  | 6.45E-05 | 0.021822  | 0.036126  |
| 16w_SITTE12 | 0.03559965 | 0.20421243 | 4.59E-05 | 0.0042319 | -0.073417 |
| 16w_SITTE12 | 0.02934391 | 0.1664647  | 4.02E-05 | 0.0040662 | -0.10661  |
| 16w_SITTE12 | 0.02192811 | 0.1217171  | 3.49E-05 | 0.0044169 | -0.046619 |
| 16w_SITTE12 | 0.09144252 | 0.5411734  | 6.45E-05 | 0.021822  | 0.036126  |
| 16w_SITTE12 | 0.04196515 | 0.24262245 | 5.24E-05 | 0.0047963 | -0.00654  |
| 16w_SITTE12 | 0.07306236 | 0.43026584 | 6.23E-05 | 0.013561  | 0.12737   |
| 16w_SITTE12 | 0.05475342 | 0.31978804 | 5.94E-05 | 0.0071062 | 0.064127  |
| 16w_SITTE12 | 0.01389393 | 0.07323808 | 3.25E-05 | 0.0056405 | 0.20898   |

|             |            |            |          |           |            |
|-------------|------------|------------|----------|-----------|------------|
| 16w_SITTE12 | 0.0194876  | 0.10699084 | 3.40E-05 | 0.0046667 | 0.017998   |
| 16w_SITTE12 | 0.02371859 | 0.13252102 | 3.61E-05 | 0.0042401 | -0.073623  |
| 16w_SITTE12 | 0.11411663 | 0.6779911  | 6.63E-05 | 0.025299  | -0.31137   |
| 16w_SITTE12 | 0.10826783 | 0.6426989  | 6.59E-05 | 0.025614  | -0.24573   |
| 16w_SITTE12 | 0.09107408 | 0.5389502  | 6.45E-05 | 0.021597  | 0.036126   |
| 16w_SITTE12 | 0.1171409  | 0.6962398  | 6.64E-05 | 0.024986  | -0.34377   |
| 16w_SITTE12 | 0.09058045 | 0.5359716  | 6.44E-05 | 0.021369  | 0.044278   |
| 16w_SITTE12 | 0.10575888 | 0.6275596  | 6.58E-05 | 0.025526  | -0.20623   |
| 16w_SITTE12 | 0.04491486 | 0.26042128 | 5.46E-05 | 0.0051531 | 0.017239   |
| 16w_SITTE12 | 0.01667923 | 0.09004485 | 3.31E-05 | 0.0050879 | 0.10435    |
| 16w_SITTE12 | 0.02053579 | 0.11331571 | 3.44E-05 | 0.0045325 | -0.01065   |
| 16w_SITTE12 | 0.02086611 | 0.1153089  | 3.44E-05 | 0.0045325 | -0.023601  |
| 16w_SITTE12 | 0.0987266  | 0.5851262  | 6.52E-05 | 0.024275  | -0.094455  |
| 16w_SITTE12 | 0.01737632 | 0.0942512  | 3.33E-05 | 0.0049935 | 0.085504   |
| 16w_SITTE12 | 0.06374333 | 0.374034   | 6.10E-05 | 0.0098069 | 0.089169   |
| 16w_SITTE12 | 0.09344818 | 0.5532757  | 6.47E-05 | 0.022469  | 0.0013661  |
| 16w_SITTE12 | 0.05690866 | 0.33279297 | 5.99E-05 | 0.0076952 | 0.070131   |
| 16w_SITTE12 | 0.02866309 | 0.16235659 | 3.97E-05 | 0.0040686 | -0.10664   |
| 16w_SITTE12 | 0.01108067 | 0.05626263 | 3.21E-05 | 0.006339  | 0.32844    |
| 16w_SITTE12 | 0.1260356  | 0.74991125 | 6.68E-05 | 0.023927  | -0.41325   |
| 16w_SITTE12 | 0.08988994 | 0.531805   | 6.44E-05 | 0.021137  | 0.05218    |
| 16w_SITTE12 | 0.03525891 | 0.2021564  | 4.54E-05 | 0.0042028 | -0.073417  |
| 16w_SITTE12 | 0.02412389 | 0.13496666 | 3.61E-05 | 0.0042401 | -0.073623  |
| 16w_SITTE12 | 0.10545927 | 0.6257518  | 6.57E-05 | 0.025482  | -0.20623   |
| 16w_SITTE12 | 0.08689785 | 0.51375043 | 6.41E-05 | 0.01993   | 0.093363   |
| 16w_SITTE12 | 0.09381174 | 0.5554695  | 6.48E-05 | 0.022676  | -0.0077738 |
| 16w_SITTE12 | 0.0119175  | 0.06131216 | 3.22E-05 | 0.0061869 | 0.30353    |
| 16w_SITTE12 | 0.12816273 | 0.7627465  | 6.69E-05 | 0.023757  | -0.4283    |
| 16w_SITTE12 | 0.0608765  | 0.35673526 | 6.06E-05 | 0.008866  | 0.080421   |
| 16w_SITTE12 | 0.0285895  | 0.16191252 | 3.93E-05 | 0.004074  | -0.10664   |
| 16w_SITTE12 | 0.01433725 | 0.07591312 | 3.26E-05 | 0.0055188 | 0.18676    |
| 16w_SITTE12 | 0.03681361 | 0.2115376  | 4.70E-05 | 0.0042982 | -0.062998  |
| 16w_SITTE12 | 0.09136356 | 0.540697   | 6.45E-05 | 0.021822  | 0.036126   |
| 16w_SITTE12 | 0.01598332 | 0.08584566 | 3.30E-05 | 0.0051875 | 0.12392    |
| 16w_SITTE12 | 0.02964655 | 0.1682909  | 4.02E-05 | 0.0040662 | -0.10661   |
| 16w_SITTE12 | 0.03187607 | 0.18174398 | 4.22E-05 | 0.0040866 | -0.097962  |
| 16w_SITTE12 | 0.08666851 | 0.51236653 | 6.40E-05 | 0.019681  | 0.093363   |
| 16w_SITTE12 | 0.01613829 | 0.08678078 | 3.30E-05 | 0.0051875 | 0.12392    |
| 16w_SITTE12 | 0.1378027  | 0.82091504 | 6.73E-05 | 0.02353   | -0.48301   |
| 16w_SITTE12 | 0.08838012 | 0.5226946  | 6.42E-05 | 0.020421  | 0.074212   |
| 16w_SITTE12 | 0.06594608 | 0.38732556 | 6.13E-05 | 0.010616  | 0.097788   |
| 16w_SITTE12 | 0.0774039  | 0.45646307 | 6.28E-05 | 0.015307  | 0.13646    |
| 16w_SITTE12 | 0.05116197 | 0.29811692 | 5.81E-05 | 0.006215  | 0.051138   |

|             |            |            |          |           |           |
|-------------|------------|------------|----------|-----------|-----------|
| 16w_SITTE12 | 0.03000395 | 0.17044748 | 4.07E-05 | 0.0040668 | -0.10597  |
| 16w_SITTE12 | 0.06720794 | 0.39493975 | 6.14E-05 | 0.011039  | 0.10251   |
| 16w_SITTE12 | 0.04019118 | 0.23191813 | 5.03E-05 | 0.0045634 | -0.023154 |
| 16w_SITTE12 | 0.05914567 | 0.34629127 | 6.03E-05 | 0.0083426 | 0.075889  |
| 16w_SITTE12 | 0.01715687 | 0.092927   | 3.33E-05 | 0.0049935 | 0.085504  |
| 16w_SITTE12 | 0.09717135 | 0.5757417  | 6.51E-05 | 0.023799  | -0.065044 |
| 16w_SITTE12 | 0.06106212 | 0.3578553  | 6.06E-05 | 0.008866  | 0.080421  |
| 16w_SITTE12 | 0.04219716 | 0.24402241 | 5.24E-05 | 0.0047963 | -0.00654  |
| 16w_SITTE12 | 0.12097299 | 0.719363   | 6.66E-05 | 0.02449   | -0.37656  |
| 16w_SITTE12 | 0.1064802  | 0.6319122  | 6.58E-05 | 0.02556   | -0.22263  |
| 16w_SITTE12 | 0.01740085 | 0.0943992  | 3.33E-05 | 0.0049935 | 0.085504  |
| 16w_SITTE12 | 0.05414556 | 0.31612015 | 5.92E-05 | 0.0069681 | 0.062513  |
| 16w_SITTE12 | 0.01362341 | 0.07160574 | 3.24E-05 | 0.0057681 | 0.23179   |
| 16w_SITTE12 | 0.00402047 | 0.01366074 | 3.18E-05 | 0.0089513 | 0.68371   |
| 16w_SITTE12 | 0.10226418 | 0.6064723  | 6.55E-05 | 0.025029  | -0.15246  |
| 16w_SITTE12 | 0.01464798 | 0.07778814 | 3.26E-05 | 0.0055188 | 0.18676   |
| 16w_SITTE12 | 0.03067642 | 0.17450519 | 4.11E-05 | 0.0040705 | -0.10475  |
| 16w_SITTE12 | 0.03726    | 0.21423113 | 4.76E-05 | 0.0043355 | -0.057524 |
| 16w_SITTE12 | 0.01957072 | 0.10749241 | 3.40E-05 | 0.0046667 | 0.017998  |
| 16w_SITTE12 | 0.01498741 | 0.07983627 | 3.27E-05 | 0.0054028 | 0.16515   |
| 16w_SITTE12 | 0.12793106 | 0.7613486  | 6.69E-05 | 0.023757  | -0.4246   |
| 16w_SITTE12 | 0.01748944 | 0.09493372 | 3.33E-05 | 0.0049935 | 0.085504  |
| 16w_SITTE12 | 0.00551833 | 0.022699   | 3.18E-05 | 0.0082375 | 0.59807   |
| 16w_SITTE12 | 0.01204163 | 0.06206114 | 3.23E-05 | 0.0060411 | 0.2791    |
| 16w_SITTE12 | 0.0113359  | 0.05780273 | 3.21E-05 | 0.006339  | 0.32844   |
| 16w_SITTE12 | 0.02066905 | 0.11411982 | 3.44E-05 | 0.0045325 | -0.01065  |
| 16w_SITTE12 | 0.02000725 | 0.11012642 | 3.42E-05 | 0.0045972 | 0.0032259 |
| 16w_SITTE12 | 0.02618813 | 0.14742242 | 3.76E-05 | 0.0041286 | -0.096385 |
| 16w_SITTE12 | 0.02151177 | 0.11920485 | 3.49E-05 | 0.0044169 | -0.0356   |
| 16w_SITTE12 | 0.01843291 | 0.10062675 | 3.36E-05 | 0.0048202 | 0.050123  |
| 16w_SITTE12 | 0.01856896 | 0.10144765 | 3.36E-05 | 0.0048202 | 0.050123  |
| 16w_SITTE12 | 0.09520405 | 0.5638708  | 6.49E-05 | 0.023263  | -0.026471 |
| 16w_SITTE12 | 0.04620163 | 0.26818576 | 5.54E-05 | 0.0053171 | 0.025099  |
| 16w_SITTE12 | 0.09959004 | 0.59033626 | 6.53E-05 | 0.024558  | -0.10426  |
| 16w_SITTE12 | 0.03117751 | 0.17752886 | 4.16E-05 | 0.0040771 | -0.10299  |
| 16w_SITTE12 | 0.04425493 | 0.25643915 | 5.42E-05 | 0.0050757 | 0.012967  |
| 16w_SITTE12 | 0.04961132 | 0.28876013 | 5.73E-05 | 0.0058857 | 0.046466  |
| 16w_SITTE12 | 0.01604942 | 0.08624454 | 3.30E-05 | 0.0051875 | 0.12392   |
| 16w_SITTE12 | 0.03028276 | 0.1721298  | 4.07E-05 | 0.0040668 | -0.10475  |
| 16w_SITTE12 | 0.02206245 | 0.1225277  | 3.52E-05 | 0.0043661 | -0.046619 |
| 16w_SITTE12 | 0.01590998 | 0.08540313 | 3.30E-05 | 0.0051875 | 0.12392   |
| 16w_SITTE12 | 0.08875416 | 0.5249516  | 6.42E-05 | 0.020663  | 0.074212  |
| 16w_SITTE12 | 0.04608237 | 0.26746613 | 5.54E-05 | 0.0053171 | 0.025099  |

|             |            |            |          |           |           |
|-------------|------------|------------|----------|-----------|-----------|
| 16w_SITTE12 | 0.08660191 | 0.5119647  | 6.40E-05 | 0.019681  | 0.093363  |
| 16w_SITTE12 | 0.10731663 | 0.6369592  | 6.58E-05 | 0.025586  | -0.23052  |
| 16w_SITTE12 | 0.02589415 | 0.14564855 | 3.76E-05 | 0.0041286 | -0.096385 |
| 16w_SITTE12 | 0.01968001 | 0.10815185 | 3.40E-05 | 0.0046667 | 0.017998  |
| 16w_SITTE12 | 0.03882961 | 0.22370233 | 4.92E-05 | 0.0044639 | -0.040459 |
| 16w_SITTE12 | 0.02379246 | 0.13296679 | 3.61E-05 | 0.0042401 | -0.073623 |
| 16w_SITTE12 | 0.0226206  | 0.12589565 | 3.55E-05 | 0.0043197 | -0.056631 |
| 16w_SITTE12 | 0.06087707 | 0.35673875 | 6.06E-05 | 0.008866  | 0.080421  |
| 16w_SITTE12 | 0.04361308 | 0.25256622 | 5.38E-05 | 0.0050014 | 0.008455  |
| 16w_SITTE12 | 0.12259934 | 0.7291765  | 6.67E-05 | 0.024282  | -0.38934  |
| 16w_SITTE12 | 0.0476056  | 0.27665743 | 5.64E-05 | 0.0055867 | 0.035328  |
| 16w_SITTE12 | 0.01879432 | 0.10280748 | 3.38E-05 | 0.004741  | 0.03364   |
| 16w_SITTE12 | 0.07925542 | 0.46763536 | 6.31E-05 | 0.016335  | 0.13613   |
| 16w_SITTE12 | 0.03251708 | 0.18561195 | 4.27E-05 | 0.004099  | -0.094772 |
| 16w_SITTE12 | 0.02134633 | 0.11820659 | 3.47E-05 | 0.0044724 | -0.023601 |
| 16w_SITTE12 | 0.14321859 | 0.85359496 | 6.75E-05 | 0.023603  | -0.50606  |
| 16w_SITTE12 | 0.01810294 | 0.09863567 | 3.34E-05 | 0.0049043 | 0.050123  |
| 16w_SITTE12 | 0.04070947 | 0.23504554 | 5.09E-05 | 0.0046173 | -0.017493 |
| 16w_SITTE12 | 0.01248186 | 0.06471758 | 3.23E-05 | 0.0060411 | 0.2791    |
| 16w_SITTE12 | 0.08745732 | 0.5171263  | 6.41E-05 | 0.020177  | 0.087329  |
| 16w_SITTE12 | 0.0675738  | 0.3971474  | 6.15E-05 | 0.011255  | 0.10492   |
| 16w_SITTE12 | 0.01646617 | 0.08875926 | 3.31E-05 | 0.0050879 | 0.10435   |
| 16w_SITTE12 | 0.01553763 | 0.08315638 | 3.28E-05 | 0.0052924 | 0.1442    |
| 16w_SITTE12 | 0.09889255 | 0.5861275  | 6.52E-05 | 0.024275  | -0.094455 |
| 16w_SITTE12 | 0.01849993 | 0.10103112 | 3.36E-05 | 0.0048202 | 0.050123  |
| 16w_SITTE12 | 0.02956537 | 0.167801   | 4.02E-05 | 0.0040662 | -0.10661  |
| 16w_SITTE12 | 0.03086765 | 0.17565909 | 4.16E-05 | 0.0040771 | -0.10299  |
| 16w_SITTE12 | 0.05759352 | 0.33692545 | 6.00E-05 | 0.0078516 | 0.071569  |
| 16w_SITTE12 | 0.08183995 | 0.48323062 | 6.34E-05 | 0.017373  | 0.12948   |
| 16w_SITTE12 | 0.08294023 | 0.4898698  | 6.35E-05 | 0.017892  | 0.12434   |
| 16w_SITTE12 | 0.01762564 | 0.09575558 | 3.34E-05 | 0.0049043 | 0.067421  |
| 16w_SITTE12 | 0.10469285 | 0.62112707 | 6.57E-05 | 0.025429  | -0.18901  |
| 16w_SITTE12 | 0.0333312  | 0.19052438 | 4.37E-05 | 0.0041322 | -0.091175 |
| 16w_SITTE12 | 0.03733018 | 0.21465464 | 4.76E-05 | 0.0043355 | -0.057524 |
| 16w_SITTE12 | 0.02180287 | 0.12096136 | 3.49E-05 | 0.0044169 | -0.0356   |
| 16w_SITTE12 | 0.02346128 | 0.13096836 | 3.58E-05 | 0.0042778 | -0.065623 |
| 16w_SITTE12 | 0.0154608  | 0.08269274 | 3.28E-05 | 0.0052924 | 0.1442    |
| 16w_SITTE12 | 0.08269895 | 0.4884139  | 6.35E-05 | 0.017892  | 0.12434   |
| 16w_SITTE12 | 0.12863247 | 0.76558095 | 6.69E-05 | 0.023723  | -0.43195  |
| 16w_SITTE12 | 0.09736491 | 0.57690966 | 6.51E-05 | 0.023799  | -0.065044 |
| 16w_SITTE12 | 0.11206391 | 0.66560477 | 6.61E-05 | 0.025489  | -0.29336  |
| 16w_SITTE12 | 0.01804276 | 0.09827253 | 3.34E-05 | 0.0049043 | 0.067421  |
| 16w_SITTE12 | 0.04487794 | 0.2601985  | 5.46E-05 | 0.0051531 | 0.017239  |

|             |            |            |          |           |           |
|-------------|------------|------------|----------|-----------|-----------|
| 16w_SITTE12 | 0.09043111 | 0.5350704  | 6.44E-05 | 0.021369  | 0.044278  |
| 16w_SITTE12 | 0.00956648 | 0.04712588 | 3.20E-05 | 0.0068348 | 0.4058    |
| 16w_SITTE12 | 0.08622365 | 0.50968224 | 6.39E-05 | 0.01943   | 0.099025  |
| 16w_SITTE12 | 0.00921641 | 0.04501354 | 3.19E-05 | 0.0070136 | 0.4058    |
| 16w_SITTE12 | 0.05689956 | 0.33273804 | 5.98E-05 | 0.0075425 | 0.070131  |
| 16w_SITTE12 | 0.05269659 | 0.30737695 | 5.87E-05 | 0.0065755 | 0.057248  |
| 16w_SITTE12 | 0.09733398 | 0.57672304 | 6.51E-05 | 0.023799  | -0.065044 |
| 16w_SITTE12 | 0.01273105 | 0.06622121 | 3.23E-05 | 0.0059016 | 0.25518   |
| 16w_SITTE12 | 0.01660195 | 0.08957854 | 3.31E-05 | 0.0050879 | 0.10435   |
| 16w_SITTE12 | 0.02781569 | 0.15724327 | 3.88E-05 | 0.0040827 | -0.10472  |
| 16w_SITTE12 | 0.10569686 | 0.6271854  | 6.58E-05 | 0.025526  | -0.20623  |
| 16w_SITTE12 | 0.01483107 | 0.07889287 | 3.27E-05 | 0.0054028 | 0.16515   |
| 16w_SITTE12 | 0.01857313 | 0.10147283 | 3.36E-05 | 0.0048202 | 0.050123  |
| 16w_SITTE12 | 0.03852911 | 0.22188908 | 4.87E-05 | 0.0044183 | -0.040459 |
| 16w_SITTE12 | 0.0474865  | 0.27593878 | 5.64E-05 | 0.0055867 | 0.035328  |
| 16w_SITTE12 | 0.03387546 | 0.19380853 | 4.43E-05 | 0.004153  | -0.087207 |
| 16w_SITTE12 | 0.05548853 | 0.32422376 | 5.95E-05 | 0.007248  | 0.065685  |
| 16w_SITTE12 | 0.02504225 | 0.1405081  | 3.68E-05 | 0.0041768 | -0.086782 |
| 16w_SITTE12 | 0.05812581 | 0.34013736 | 6.01E-05 | 0.0080116 | 0.073002  |
| 16w_SITTE12 | 0.04699409 | 0.27296752 | 5.61E-05 | 0.0054936 | 0.032113  |
| 16w_SITTE12 | 0.03172436 | 0.18082856 | 4.22E-05 | 0.0040866 | -0.10071  |
| 16w_SITTE12 | 0.09373391 | 0.5549998  | 6.48E-05 | 0.022676  | 0.0013661 |
| 16w_SITTE12 | 0.01627671 | 0.08761603 | 3.30E-05 | 0.0051875 | 0.12392   |
| 16w_SITTE12 | 0.10455786 | 0.6203126  | 6.56E-05 | 0.025367  | -0.18901  |
| 16w_SITTE12 | 0.0222568  | 0.12370042 | 3.52E-05 | 0.0043661 | -0.046619 |
| 16w_SITTE12 | 0.03144956 | 0.17917041 | 4.22E-05 | 0.0040866 | -0.10071  |
| 16w_SITTE12 | 0.07063977 | 0.4156477  | 6.19E-05 | 0.012376  | 0.11916   |
| 16w_SITTE12 | 0.10020505 | 0.5940473  | 6.53E-05 | 0.024687  | -0.11403  |
| 16w_SITTE12 | 0.04837024 | 0.2812713  | 5.67E-05 | 0.0056831 | 0.038361  |
| 16w_SITTE12 | 0.10895276 | 0.6468318  | 6.59E-05 | 0.025616  | -0.25305  |
| 16w_SITTE12 | 0.1060183  | 0.629125   | 6.58E-05 | 0.025526  | -0.21453  |
| 16w_SITTE12 | 0.09350478 | 0.55361724 | 6.48E-05 | 0.022676  | 0.0013661 |
| 16w_SITTE12 | 0.11017106 | 0.6541831  | 6.60E-05 | 0.02558   | -0.26716  |
| 16w_SITTE12 | 0.05656258 | 0.33070472 | 5.98E-05 | 0.0075425 | 0.068678  |
| 16w_SITTE12 | 0.03478104 | 0.19927286 | 4.54E-05 | 0.0042028 | -0.078293 |
| 16w_SITTE12 | 0.01554961 | 0.08322865 | 3.28E-05 | 0.0052924 | 0.1442    |
| 16w_SITTE12 | 0.09716567 | 0.57570744 | 6.51E-05 | 0.023799  | -0.065044 |
| 16w_SITTE12 | 0.01473266 | 0.07829911 | 3.26E-05 | 0.0055188 | 0.18676   |
| 16w_SITTE12 | 0.11912651 | 0.70822114 | 6.65E-05 | 0.024704  | -0.3584   |
| 16w_SITTE12 | 0.14425711 | 0.8598615  | 6.75E-05 | 0.023623  | -0.50968  |
| 16w_SITTE12 | 0.0146937  | 0.07806401 | 3.26E-05 | 0.0055188 | 0.18676   |
| 16w_SITTE12 | 0.02999354 | 0.17038466 | 4.07E-05 | 0.0040668 | -0.10597  |
| 16w_SITTE12 | 0.09136276 | 0.5406921  | 6.45E-05 | 0.021822  | 0.036126  |

|             |            |            |          |           |           |
|-------------|------------|------------|----------|-----------|-----------|
| 16w_SITTE12 | 0.08080115 | 0.47696242 | 6.33E-05 | 0.017113  | 0.13314   |
| 16w_SITTE12 | 0.0227723  | 0.12681103 | 3.55E-05 | 0.0043197 | -0.056631 |
| 16w_SITTE12 | 0.02435219 | 0.13634422 | 3.64E-05 | 0.0042065 | -0.080664 |
| 16w_SITTE12 | 0.08300349 | 0.49025154 | 6.36E-05 | 0.018151  | 0.12434   |
| 16w_SITTE12 | 0.02009007 | 0.11062617 | 3.42E-05 | 0.0045972 | 0.0032259 |
| 16w_SITTE12 | 0.02728622 | 0.15404841 | 3.84E-05 | 0.0040947 | -0.10271  |
| 16w_SITTE12 | 0.10675847 | 0.63359123 | 6.58E-05 | 0.02556   | -0.22263  |
| 16w_SITTE12 | 0.04295725 | 0.24860889 | 5.29E-05 | 0.0048617 | 0.0036923 |
| 16w_SITTE12 | 0.04479027 | 0.25966948 | 5.46E-05 | 0.0051531 | 0.017239  |
| 16w_SITTE12 | 0.0179153  | 0.09750345 | 3.34E-05 | 0.0049043 | 0.067421  |
| 16w_SITTE12 | 0.01027958 | 0.05142881 | 3.20E-05 | 0.0066628 | 0.37961   |
| 16w_SITTE12 | 0.01044486 | 0.05242611 | 3.21E-05 | 0.0064976 | 0.35381   |
| 16w_SITTE12 | 0.11851844 | 0.704552   | 6.65E-05 | 0.024776  | -0.35363  |
| 16w_SITTE12 | 0.08139715 | 0.48055875 | 6.34E-05 | 0.017373  | 0.13148   |
| 16w_SITTE12 | 0.07113798 | 0.41865396 | 6.20E-05 | 0.012608  | 0.12136   |
| 16w_SITTE12 | 0.05147114 | 0.2999825  | 5.83E-05 | 0.0063316 | 0.053285  |
| 16w_SITTE12 | 0.091878   | 0.5438011  | 6.46E-05 | 0.022042  | 0.027741  |
| 16w_SITTE12 | 0.0518076  | 0.3020127  | 5.83E-05 | 0.0063316 | 0.055318  |
| 16w_SITTE12 | 0.05586895 | 0.32651925 | 5.97E-05 | 0.0073934 | 0.067199  |
| 16w_SITTE12 | 0.08590722 | 0.50777286 | 6.39E-05 | 0.01943   | 0.1043    |
| 16w_SITTE12 | 0.08306034 | 0.49059457 | 6.36E-05 | 0.018151  | 0.12434   |
| 16w_SITTE12 | 0.01111991 | 0.0564994  | 3.21E-05 | 0.006339  | 0.32844   |
| 16w_SITTE12 | 0.02477547 | 0.13889834 | 3.68E-05 | 0.0041768 | -0.086782 |
| 16w_SITTE12 | 0.0118237  | 0.06074617 | 3.22E-05 | 0.0061869 | 0.30353   |
| 16w_SITTE12 | 0.08599583 | 0.5083076  | 6.39E-05 | 0.01943   | 0.1043    |
| 16w_SITTE12 | 0.01108322 | 0.05627803 | 3.21E-05 | 0.006339  | 0.32844   |
| 16w_SITTE12 | 0.08178958 | 0.48292667 | 6.34E-05 | 0.017373  | 0.12948   |
| 16w_SITTE12 | 0.01364519 | 0.07173716 | 3.24E-05 | 0.0057681 | 0.20898   |
| 16w_SITTE12 | 0.03318315 | 0.18963107 | 4.37E-05 | 0.0041322 | -0.091175 |
| 16w_SITTE12 | 0.01901702 | 0.1041513  | 3.38E-05 | 0.004741  | 0.03364   |
| 16w_SITTE12 | 0.12142286 | 0.72207755 | 6.66E-05 | 0.024419  | -0.38089  |
| 16w_SITTE12 | 0.06320423 | 0.370781   | 6.09E-05 | 0.0096122 | 0.087254  |
| 16w_SITTE12 | 0.04846352 | 0.28183421 | 5.67E-05 | 0.0056831 | 0.041222  |
| 16w_SITTE12 | 0.11443701 | 0.6799243  | 6.63E-05 | 0.025299  | -0.3171   |
| 16w_SITTE12 | 0.09862422 | 0.5845084  | 6.52E-05 | 0.024275  | -0.084641 |
| 16w_SITTE12 | 0.01449375 | 0.07685746 | 3.26E-05 | 0.0055188 | 0.18676   |
| 16w_SITTE12 | 0.08612683 | 0.509098   | 6.39E-05 | 0.01943   | 0.099025  |
| 16w_SITTE12 | 0.02013788 | 0.11091469 | 3.42E-05 | 0.0045972 | 0.0032259 |
| 16w_SITTE12 | 0.02166415 | 0.12012434 | 3.49E-05 | 0.0044169 | -0.0356   |
| 16w_SITTE12 | 0.01847986 | 0.10091005 | 3.36E-05 | 0.0048202 | 0.050123  |
| 16w_SITTE12 | 0.03669189 | 0.21080314 | 4.70E-05 | 0.0042982 | -0.062998 |
| 16w_SITTE12 | 0.03281285 | 0.1873966  | 4.32E-05 | 0.0041142 | -0.094772 |
| 16w_SITTE12 | 0.09452571 | 0.5597776  | 6.48E-05 | 0.022877  | -0.017059 |

|             |            |            |          |           |           |
|-------------|------------|------------|----------|-----------|-----------|
| 16w_SITTE12 | 0.0358689  | 0.2058371  | 4.65E-05 | 0.0042637 | -0.068307 |
| 16w_SITTE12 | 0.09704947 | 0.57500625 | 6.51E-05 | 0.023799  | -0.065044 |
| 16w_SITTE12 | 0.02441754 | 0.13673854 | 3.64E-05 | 0.0042065 | -0.080664 |
| 16w_SITTE12 | 0.04103415 | 0.23700471 | 5.14E-05 | 0.0046741 | -0.017493 |
| 16w_SITTE12 | 0.02729646 | 0.15411018 | 3.84E-05 | 0.0040947 | -0.10271  |
| 16w_SITTE12 | 0.05798325 | 0.33927712 | 6.00E-05 | 0.0078516 | 0.073002  |
| 16w_SITTE12 | 0.00958615 | 0.04724455 | 3.20E-05 | 0.0068348 | 0.4058    |
| 16w_SITTE12 | 0.08337494 | 0.4924929  | 6.36E-05 | 0.018151  | 0.12117   |
| 16w_SITTE12 | 0.14079109 | 0.8389472  | 6.74E-05 | 0.023566  | -0.4978   |
| 16w_SITTE12 | 0.07876054 | 0.4646492  | 6.30E-05 | 0.016077  | 0.13651   |
| 16w_SITTE12 | 0.02453466 | 0.13744523 | 3.64E-05 | 0.0042065 | -0.080664 |
| 16w_SITTE12 | 0.07102366 | 0.41796413 | 6.20E-05 | 0.012608  | 0.11916   |
| 16w_SITTE12 | 0.09278662 | 0.5492838  | 6.46E-05 | 0.022258  | 0.010343  |
| 16w_SITTE12 | 0.07510693 | 0.442603   | 6.25E-05 | 0.014299  | 0.13345   |
| 16w_SITTE12 | 0.05315369 | 0.31013513 | 5.89E-05 | 0.0067028 | 0.059084  |
| 16w_SITTE12 | 0.01018143 | 0.05083653 | 3.20E-05 | 0.0066628 | 0.37961   |
| 16w_SITTE12 | 0.13052472 | 0.776999   | 6.70E-05 | 0.02364   | -0.44263  |
| 16w_SITTE12 | 0.05241329 | 0.30566746 | 5.85E-05 | 0.0064518 | 0.057248  |
| 16w_SITTE12 | 0.09016101 | 0.53344065 | 6.44E-05 | 0.021137  | 0.05218   |
| 16w_SITTE12 | 0.02880317 | 0.16320185 | 3.97E-05 | 0.0040686 | -0.10664  |
| 16w_SITTE12 | 0.00808168 | 0.03816645 | 3.19E-05 | 0.0073923 | 0.48652   |
| 16w_SITTE12 | 0.01635785 | 0.08810564 | 3.30E-05 | 0.0051875 | 0.12392   |
| 16w_SITTE12 | 0.01220432 | 0.06304287 | 3.23E-05 | 0.0060411 | 0.2791    |
| 16w_SITTE12 | 0.02715181 | 0.15323736 | 3.84E-05 | 0.0040947 | -0.10271  |
| 16w_SITTE12 | 0.03834727 | 0.2207918  | 4.87E-05 | 0.0044183 | -0.04622  |
| 16w_SITTE12 | 0.02114522 | 0.11699307 | 3.47E-05 | 0.0044724 | -0.023601 |
| 16w_SITTE12 | 0.04405024 | 0.25520405 | 5.38E-05 | 0.0050014 | 0.012967  |
| 16w_SITTE12 | 0.01517136 | 0.08094622 | 3.27E-05 | 0.0054028 | 0.16515   |
| 16w_SITTE12 | 0.01579092 | 0.08468472 | 3.28E-05 | 0.0052924 | 0.1442    |
| 16w_SITTE12 | 0.09489424 | 0.5620014  | 6.49E-05 | 0.023073  | -0.026471 |
| 16w_SITTE12 | 0.086496   | 0.5113256  | 6.40E-05 | 0.019681  | 0.099025  |
| 16w_SITTE12 | 0.02088891 | 0.11544649 | 3.47E-05 | 0.0044724 | -0.023601 |
| 16w_SITTE12 | 0.02290088 | 0.12758689 | 3.55E-05 | 0.0043197 | -0.056631 |
| 16w_SITTE12 | 0.07663228 | 0.45180705 | 6.27E-05 | 0.015053  | 0.13605   |
| 16w_SITTE12 | 0.02087414 | 0.11535732 | 3.44E-05 | 0.0045325 | -0.023601 |
| 16w_SITTE12 | 0.01814648 | 0.0988984  | 3.36E-05 | 0.0048202 | 0.050123  |
| 16w_SITTE12 | 0.01683739 | 0.0909992  | 3.31E-05 | 0.0050879 | 0.10435   |
| 16w_SITTE12 | 0.03585568 | 0.20575735 | 4.65E-05 | 0.0042637 | -0.068307 |
| 16w_SITTE12 | 0.05940839 | 0.34787658 | 6.03E-05 | 0.0083426 | 0.075889  |
| 16w_SITTE12 | 0.08486451 | 0.50148106 | 6.38E-05 | 0.018923  | 0.1136    |
| 16w_SITTE12 | 0.01492877 | 0.07948241 | 3.27E-05 | 0.0054028 | 0.16515   |
| 16w_SITTE12 | 0.03387452 | 0.19380283 | 4.43E-05 | 0.004153  | -0.087207 |
| 16w_SITTE12 | 0.01832066 | 0.09994942 | 3.36E-05 | 0.0048202 | 0.050123  |



|             |            |            |          |           |           |
|-------------|------------|------------|----------|-----------|-----------|
| 16w_SITTE12 | 0.08527348 | 0.50394887 | 6.39E-05 | 0.019177  | 0.10916   |
| 16w_SITTE12 | 0.11482132 | 0.6822432  | 6.63E-05 | 0.025242  | -0.32268  |
| 16w_SITTE12 | 0.10892519 | 0.64666545 | 6.59E-05 | 0.025616  | -0.25305  |
| 16w_SITTE12 | 0.00941826 | 0.04623148 | 3.20E-05 | 0.0068348 | 0.4058    |
| 16w_SITTE12 | 0.0677542  | 0.39823595 | 6.15E-05 | 0.011255  | 0.10492   |
| 16w_SITTE12 | 0.02709703 | 0.15290685 | 3.84E-05 | 0.0040947 | -0.10271  |
| 16w_SITTE12 | 0.00712393 | 0.03238733 | 3.19E-05 | 0.0075925 | 0.51404   |
| 16w_SITTE12 | 0.0522882  | 0.30491272 | 5.85E-05 | 0.0064518 | 0.055318  |
| 16w_SITTE12 | 0.020615   | 0.11379365 | 3.44E-05 | 0.0045325 | -0.01065  |
| 16w_SITTE12 | 0.06035017 | 0.35355932 | 6.05E-05 | 0.008688  | 0.07887   |
| 16w_SITTE12 | 0.03592779 | 0.20619246 | 4.65E-05 | 0.0042637 | -0.068307 |
| 16w_SITTE12 | 0.10117997 | 0.59993005 | 6.54E-05 | 0.024809  | -0.13341  |
| 16w_SITTE12 | 0.02173447 | 0.12054863 | 3.49E-05 | 0.0044169 | -0.0356   |
| 16w_SITTE12 | 0.08861764 | 0.5241278  | 6.42E-05 | 0.020663  | 0.074212  |
| 16w_SITTE12 | 0.10900471 | 0.6471453  | 6.59E-05 | 0.025616  | -0.25305  |
| 16w_SITTE12 | 0.02024264 | 0.11154683 | 3.42E-05 | 0.0045972 | 0.0032259 |
| 16w_SITTE12 | 0.01922141 | 0.10538463 | 3.40E-05 | 0.0046667 | 0.017998  |
| 16w_SITTE12 | 0.0498472  | 0.29018345 | 5.76E-05 | 0.005992  | 0.046466  |
| 16w_SITTE12 | 0.00965763 | 0.04767587 | 3.20E-05 | 0.0068348 | 0.4058    |
| 16w_SITTE12 | 0.00362728 | 0.01128819 | 3.18E-05 | 0.0092049 | 0.71249   |
| 16w_SITTE12 | 0.00822398 | 0.03902514 | 3.19E-05 | 0.0071994 | 0.45929   |
| 16w_SITTE12 | 0.0211985  | 0.11731456 | 3.47E-05 | 0.0044724 | -0.023601 |
| 16w_SITTE12 | 0.05175637 | 0.30170354 | 5.83E-05 | 0.0063316 | 0.055318  |
| 16w_SITTE12 | 0.02346383 | 0.13098378 | 3.58E-05 | 0.0042778 | -0.065623 |
| 16w_SITTE12 | 0.14535642 | 0.86649483 | 6.75E-05 | 0.023641  | -0.51294  |
| 16w_SITTE12 | 0.01365705 | 0.07180873 | 3.24E-05 | 0.0057681 | 0.20898   |
| 16w_SITTE12 | 0.0180077  | 0.09806098 | 3.34E-05 | 0.0049043 | 0.067421  |
| 16w_SITTE12 | 0.02121863 | 0.11743599 | 3.47E-05 | 0.0044724 | -0.023601 |
| 16w_SITTE12 | 0.13584612 | 0.8091088  | 6.72E-05 | 0.023527  | -0.47464  |
| 16w_SITTE12 | 0.11131547 | 0.6610886  | 6.61E-05 | 0.025525  | -0.28058  |
| 16w_SITTE12 | 0.02986343 | 0.16959955 | 4.07E-05 | 0.0040668 | -0.10597  |
| 16w_SITTE12 | 0.06237825 | 0.36579695 | 6.07E-05 | 0.0092324 | 0.085432  |
| 16w_SITTE12 | 0.10694272 | 0.63470304 | 6.58E-05 | 0.025586  | -0.22263  |
| 16w_SITTE12 | 0.02217845 | 0.12322769 | 3.52E-05 | 0.0043661 | -0.046619 |
| 16w_SITTE12 | 0.08068886 | 0.47628483 | 6.32E-05 | 0.016854  | 0.13314   |
| 16w_SITTE12 | 0.07144039 | 0.42047873 | 6.20E-05 | 0.012843  | 0.12136   |
| 16w_SITTE12 | 0.02372971 | 0.13258812 | 3.61E-05 | 0.0042401 | -0.073623 |
| 16w_SITTE12 | 0.10406689 | 0.61735004 | 6.56E-05 | 0.025367  | -0.18011  |
| 16w_SITTE12 | 0.026997   | 0.15230328 | 3.84E-05 | 0.0040947 | -0.10271  |
| 16w_SITTE12 | 0.1092324  | 0.64851916 | 6.60E-05 | 0.025611  | -0.2602   |
| 16w_SITTE12 | 0.04010077 | 0.2313726  | 5.03E-05 | 0.0045634 | -0.028892 |
| 16w_SITTE12 | 0.04877822 | 0.28373313 | 5.70E-05 | 0.0057827 | 0.041222  |
| 16w_SITTE12 | 0.0984847  | 0.5836665  | 6.52E-05 | 0.024275  | -0.084641 |

|             |            |            |          |           |            |
|-------------|------------|------------|----------|-----------|------------|
| 16w_SITTE12 | 0.09672605 | 0.5730547  | 6.50E-05 | 0.023626  | -0.055297  |
| 16w_SITTE12 | 0.01908339 | 0.10455179 | 3.38E-05 | 0.004741  | 0.03364    |
| 16w_SITTE12 | 0.04834061 | 0.28109255 | 5.67E-05 | 0.0056831 | 0.038361   |
| 16w_SITTE12 | 0.06706522 | 0.39407858 | 6.14E-05 | 0.011039  | 0.10251    |
| 16w_SITTE12 | 0.03683744 | 0.21168138 | 4.70E-05 | 0.0042982 | -0.057524  |
| 16w_SITTE12 | 0.03150513 | 0.17950572 | 4.22E-05 | 0.0040866 | -0.10071   |
| 16w_SITTE12 | 0.13241231 | 0.7883889  | 6.71E-05 | 0.023568  | -0.45613   |
| 16w_SITTE12 | 0.01033121 | 0.05174033 | 3.20E-05 | 0.0066628 | 0.35381    |
| 16w_SITTE12 | 0.02152336 | 0.1192748  | 3.49E-05 | 0.0044169 | -0.0356    |
| 16w_SITTE12 | 0.06920835 | 0.40701038 | 6.17E-05 | 0.01192   | 0.11218    |
| 16w_SITTE12 | 0.0395705  | 0.22817293 | 4.98E-05 | 0.0045122 | -0.034672  |
| 16w_SITTE12 | 0.05276156 | 0.30776897 | 5.87E-05 | 0.0065755 | 0.057248   |
| 16w_SITTE12 | 0.01502431 | 0.08005894 | 3.27E-05 | 0.0054028 | 0.16515    |
| 16w_SITTE12 | 0.01503647 | 0.08013231 | 3.27E-05 | 0.0054028 | 0.16515    |
| 16w_SITTE12 | 0.0219404  | 0.12179127 | 3.49E-05 | 0.0044169 | -0.046619  |
| 16w_SITTE12 | 0.08270343 | 0.488441   | 6.35E-05 | 0.017892  | 0.12434    |
| 16w_SITTE12 | 0.02660309 | 0.14992633 | 3.80E-05 | 0.0041099 | -0.099939  |
| 16w_SITTE12 | 0.00564981 | 0.02349231 | 3.18E-05 | 0.0082375 | 0.59807    |
| 16w_SITTE12 | 0.02492311 | 0.13978921 | 3.68E-05 | 0.0041768 | -0.086782  |
| 16w_SITTE12 | 0.08385006 | 0.49535984 | 6.37E-05 | 0.01841   | 0.1176     |
| 16w_SITTE12 | 0.0315485  | 0.1797674  | 4.22E-05 | 0.0040866 | -0.10071   |
| 16w_SITTE12 | 0.02384601 | 0.1332899  | 3.61E-05 | 0.0042401 | -0.073623  |
| 16w_SITTE12 | 0.08120338 | 0.47938952 | 6.33E-05 | 0.017113  | 0.13148    |
| 16w_SITTE12 | 0.01439715 | 0.07627459 | 3.26E-05 | 0.0055188 | 0.18676    |
| 16w_SITTE12 | 0.03632512 | 0.20859    | 4.65E-05 | 0.0042637 | -0.062998  |
| 16w_SITTE12 | 0.01934956 | 0.10615789 | 3.40E-05 | 0.0046667 | 0.017998   |
| 16w_SITTE12 | 0.02404082 | 0.13446538 | 3.61E-05 | 0.0042401 | -0.073623  |
| 16w_SITTE12 | 0.0864625  | 0.5111235  | 6.40E-05 | 0.019681  | 0.099025   |
| 16w_SITTE12 | 0.09411152 | 0.5572784  | 6.48E-05 | 0.022877  | -0.0077738 |
| 16w_SITTE12 | 0.07429384 | 0.4376967  | 6.24E-05 | 0.014051  | 0.13074    |
| 16w_SITTE12 | 0.01718931 | 0.09312271 | 3.33E-05 | 0.0049935 | 0.085504   |
| 16w_SITTE12 | 0.03194566 | 0.18216392 | 4.22E-05 | 0.0040866 | -0.097962  |
| 16w_SITTE12 | 0.13111585 | 0.7805659  | 6.70E-05 | 0.023618  | -0.44608   |
| 16w_SITTE12 | 0.06055132 | 0.3547731  | 6.05E-05 | 0.008688  | 0.07887    |
| 16w_SITTE12 | 0.01742549 | 0.09454784 | 3.33E-05 | 0.0049935 | 0.085504   |
| 16w_SITTE12 | 0.03170925 | 0.1807374  | 4.22E-05 | 0.0040866 | -0.10071   |
| 16w_SITTE12 | 0.01577332 | 0.08457849 | 3.28E-05 | 0.0052924 | 0.1442     |
| 16w_SITTE12 | 0.01326715 | 0.06945603 | 3.24E-05 | 0.0057681 | 0.23179    |
| 16w_SITTE12 | 0.01018755 | 0.05087347 | 3.20E-05 | 0.0066628 | 0.37961    |
| 16w_SITTE12 | 0.01161131 | 0.0594646  | 3.22E-05 | 0.0061869 | 0.30353    |
| 16w_SITTE12 | 0.02774064 | 0.15679042 | 3.88E-05 | 0.0040827 | -0.10472   |
| 16w_SITTE12 | 0.02179524 | 0.12091535 | 3.49E-05 | 0.0044169 | -0.0356    |
| 16w_SITTE12 | 0.03090118 | 0.17586145 | 4.16E-05 | 0.0040771 | -0.10299   |

|             |            |            |          |           |           |
|-------------|------------|------------|----------|-----------|-----------|
| 16w_SITTE12 | 0.09984963 | 0.5919027  | 6.53E-05 | 0.024558  | -0.11403  |
| 16w_SITTE12 | 0.01684686 | 0.09105635 | 3.31E-05 | 0.0050879 | 0.10435   |
| 16w_SITTE12 | 0.02282781 | 0.12714596 | 3.55E-05 | 0.0043197 | -0.056631 |
| 16w_SITTE12 | 0.13569097 | 0.80817264 | 6.72E-05 | 0.023527  | -0.47171  |
| 16w_SITTE12 | 0.10650755 | 0.63207716 | 6.58E-05 | 0.02556   | -0.22263  |
| 16w_SITTE12 | 0.0306201  | 0.17416538 | 4.11E-05 | 0.0040705 | -0.10475  |
| 16w_SITTE12 | 0.03433864 | 0.1966034  | 4.48E-05 | 0.0041765 | -0.082901 |
| 16w_SITTE12 | 0.01844091 | 0.10067501 | 3.36E-05 | 0.0048202 | 0.050123  |
| 16w_SITTE12 | 0.08702414 | 0.5145125  | 6.41E-05 | 0.01993   | 0.093363  |
| 16w_SITTE12 | 0.01592914 | 0.08551873 | 3.30E-05 | 0.0051875 | 0.12392   |
| 16w_SITTE12 | 0.02254834 | 0.12545966 | 3.55E-05 | 0.0043197 | -0.056631 |
| 16w_SITTE12 | 0.01415695 | 0.07482521 | 3.25E-05 | 0.0056405 | 0.20898   |
| 16w_SITTE12 | 0.05256156 | 0.30656216 | 5.87E-05 | 0.0065755 | 0.057248  |
| 16w_SITTE12 | 0.02428558 | 0.13594228 | 3.64E-05 | 0.0042065 | -0.080664 |
| 16w_SITTE12 | 0.06896596 | 0.40554783 | 6.16E-05 | 0.011695  | 0.11218   |
| 16w_SITTE12 | 0.10403753 | 0.61717284 | 6.56E-05 | 0.025367  | -0.18011  |
| 16w_SITTE12 | 0.1266803  | 0.7538014  | 6.68E-05 | 0.023879  | -0.41707  |
| 16w_SITTE12 | 0.01136356 | 0.05796964 | 3.21E-05 | 0.006339  | 0.32844   |
| 16w_SITTE12 | 0.03520433 | 0.20182703 | 4.54E-05 | 0.0042028 | -0.073417 |
| 16w_SITTE12 | 0.01384025 | 0.07291422 | 3.25E-05 | 0.0056405 | 0.20898   |
| 16w_SITTE12 | 0.02223028 | 0.12354039 | 3.52E-05 | 0.0043661 | -0.046619 |
| 16w_SITTE12 | 0.01939875 | 0.10645468 | 3.40E-05 | 0.0046667 | 0.017998  |
| 16w_SITTE12 | 0.0535962  | 0.31280524 | 5.91E-05 | 0.0068337 | 0.060836  |
| 16w_SITTE12 | 0.10161523 | 0.60255647 | 6.54E-05 | 0.024923  | -0.14299  |
| 16w_SITTE12 | 0.01793604 | 0.09762858 | 3.34E-05 | 0.0049043 | 0.067421  |
| 16w_SITTE12 | 0.03045274 | 0.17315549 | 4.11E-05 | 0.0040705 | -0.10475  |
| 16w_SITTE12 | 0.07382472 | 0.43486598 | 6.23E-05 | 0.013805  | 0.12913   |
| 16w_SITTE12 | 0.06622701 | 0.38902074 | 6.13E-05 | 0.010616  | 0.10013   |
| 16w_SITTE12 | 0.00901029 | 0.04376975 | 3.19E-05 | 0.0070136 | 0.43237   |
| 16w_SITTE12 | 0.02323461 | 0.12960061 | 3.58E-05 | 0.0042778 | -0.065623 |
| 16w_SITTE12 | 0.01128331 | 0.05748538 | 3.21E-05 | 0.006339  | 0.32844   |
| 16w_SITTE12 | 0.09006763 | 0.5328772  | 6.44E-05 | 0.021137  | 0.05218   |
| 16w_SITTE12 | 0.01797294 | 0.09785125 | 3.34E-05 | 0.0049043 | 0.067421  |
| 16w_SITTE12 | 0.02124565 | 0.11759908 | 3.47E-05 | 0.0044724 | -0.023601 |
| 16w_SITTE12 | 0.02304469 | 0.12845466 | 3.55E-05 | 0.0043197 | -0.065623 |
| 16w_SITTE12 | 0.01898161 | 0.10393762 | 3.38E-05 | 0.004741  | 0.03364   |
| 16w_SITTE12 | 0.07073301 | 0.41621035 | 6.19E-05 | 0.012376  | 0.11916   |
| 16w_SITTE12 | 0.01813151 | 0.09880806 | 3.36E-05 | 0.0048202 | 0.050123  |
| 16w_SITTE12 | 0.0352985  | 0.20239528 | 4.59E-05 | 0.0042319 | -0.073417 |
| 16w_SITTE12 | 0.10096064 | 0.59860665 | 6.54E-05 | 0.024809  | -0.13341  |
| 16w_SITTE12 | 0.02760857 | 0.15599352 | 3.88E-05 | 0.0040827 | -0.10472  |
| 16w_SITTE12 | 0.02321598 | 0.1294882  | 3.58E-05 | 0.0042778 | -0.065623 |
| 16w_SITTE12 | 0.05357784 | 0.31269446 | 5.89E-05 | 0.0067028 | 0.060836  |

|             |            |            |          |           |           |
|-------------|------------|------------|----------|-----------|-----------|
| 16w_SITTE12 | 0.01306152 | 0.06821528 | 3.23E-05 | 0.0059016 | 0.25518   |
| 16w_SITTE12 | 0.13683982 | 0.8151049  | 6.73E-05 | 0.023528  | -0.48029  |
| 16w_SITTE12 | 0.02852641 | 0.16153185 | 3.93E-05 | 0.004074  | -0.10603  |
| 16w_SITTE12 | 0.10307594 | 0.6113705  | 6.56E-05 | 0.025216  | -0.16182  |
| 16w_SITTE12 | 0.09927759 | 0.58845097 | 6.53E-05 | 0.02442   | -0.10426  |
| 16w_SITTE12 | 0.08293913 | 0.48986322 | 6.35E-05 | 0.017892  | 0.12434   |
| 16w_SITTE12 | 0.01859045 | 0.10157733 | 3.36E-05 | 0.0048202 | 0.050123  |
| 16w_SITTE12 | 0.09803031 | 0.5809247  | 6.52E-05 | 0.024123  | -0.074831 |
| 16w_SITTE12 | 0.0981674  | 0.58175194 | 6.52E-05 | 0.024123  | -0.084641 |
| 16w_SITTE12 | 0.02337306 | 0.13043606 | 3.58E-05 | 0.0042778 | -0.065623 |
| 16w_SITTE12 | 0.12262707 | 0.72934383 | 6.67E-05 | 0.024282  | -0.38934  |
| 16w_SITTE12 | 0.01395121 | 0.07358375 | 3.25E-05 | 0.0056405 | 0.20898   |
| 16w_SITTE12 | 0.09545668 | 0.5653952  | 6.49E-05 | 0.023263  | -0.035993 |
| 16w_SITTE12 | 0.03044369 | 0.1731009  | 4.11E-05 | 0.0040705 | -0.10475  |
| 16w_SITTE12 | 0.06139385 | 0.359857   | 6.07E-05 | 0.0090475 | 0.082025  |
| 16w_SITTE12 | 0.03704713 | 0.21294664 | 4.76E-05 | 0.0043355 | -0.057524 |
| 16w_SITTE12 | 0.02170101 | 0.12034677 | 3.49E-05 | 0.0044169 | -0.0356   |
| 16w_SITTE12 | 0.01453961 | 0.07713422 | 3.26E-05 | 0.0055188 | 0.18676   |
| 16w_SITTE12 | 0.02738939 | 0.15467097 | 3.84E-05 | 0.0040947 | -0.10271  |
| 16w_SITTE12 | 0.01702295 | 0.0921189  | 3.33E-05 | 0.0049935 | 0.085504  |
| 16w_SITTE12 | 0.02391986 | 0.13373552 | 3.61E-05 | 0.0042401 | -0.073623 |
| 16w_SITTE12 | 0.06131658 | 0.35939077 | 6.06E-05 | 0.008866  | 0.082025  |
| 16w_SITTE12 | 0.01003826 | 0.04997265 | 3.20E-05 | 0.0066628 | 0.37961   |
| 16w_SITTE12 | 0.02890187 | 0.16379742 | 3.97E-05 | 0.0040686 | -0.10664  |
| 16w_SITTE12 | 0.01070186 | 0.05397684 | 3.21E-05 | 0.0064976 | 0.35381   |
| 16w_SITTE12 | 0.03183102 | 0.18147217 | 4.22E-05 | 0.0040866 | -0.10071  |
| 16w_SITTE12 | 0.11301649 | 0.6713527  | 6.62E-05 | 0.025403  | -0.29951  |
| 16w_SITTE12 | 0.05113158 | 0.29793355 | 5.81E-05 | 0.006215  | 0.051138  |
| 16w_SITTE12 | 0.04106919 | 0.23721613 | 5.14E-05 | 0.0046741 | -0.017493 |
| 16w_SITTE12 | 0.04162418 | 0.24056499 | 5.19E-05 | 0.0047337 | -0.011944 |
| 16w_SITTE12 | 0.02820375 | 0.15958488 | 3.93E-05 | 0.004074  | -0.10603  |
| 16w_SITTE12 | 0.00916955 | 0.04473075 | 3.19E-05 | 0.0070136 | 0.43237   |
| 16w_SITTE12 | 0.12355493 | 0.7349426  | 6.67E-05 | 0.024153  | -0.39346  |
| 16w_SITTE12 | 0.03575206 | 0.2051321  | 4.59E-05 | 0.0042319 | -0.068307 |
| 16w_SITTE12 | 0.02916618 | 0.1653923  | 3.97E-05 | 0.0040686 | -0.10661  |
| 16w_SITTE12 | 0.04142014 | 0.23933382 | 5.19E-05 | 0.0047337 | -0.011944 |
| 16w_SITTE12 | 0.01977093 | 0.10870048 | 3.42E-05 | 0.0045972 | 0.0032259 |
| 16w_SITTE12 | 0.01956338 | 0.10744806 | 3.40E-05 | 0.0046667 | 0.017998  |
| 16w_SITTE12 | 0.03729728 | 0.21445607 | 4.76E-05 | 0.0043355 | -0.057524 |
| 16w_SITTE12 | 0.03244871 | 0.1851994  | 4.27E-05 | 0.004099  | -0.094772 |
| 16w_SITTE12 | 0.08773855 | 0.5188233  | 6.41E-05 | 0.020177  | 0.080939  |
| 16w_SITTE12 | 0.01737523 | 0.0942446  | 3.33E-05 | 0.0049935 | 0.085504  |
| 16w_SITTE12 | 0.08017564 | 0.473188   | 6.32E-05 | 0.016594  | 0.13446   |

|             |            |            |          |           |           |
|-------------|------------|------------|----------|-----------|-----------|
| 16w_SITTE12 | 0.12056088 | 0.71687627 | 6.66E-05 | 0.024561  | -0.37215  |
| 16w_SITTE12 | 0.07695156 | 0.45373362 | 6.28E-05 | 0.015307  | 0.13605   |
| 16w_SITTE12 | 0.0075144  | 0.03474346 | 3.19E-05 | 0.0075925 | 0.51404   |
| 16w_SITTE12 | 0.02129357 | 0.1178882  | 3.47E-05 | 0.0044724 | -0.023601 |
| 16w_SITTE12 | 0.08090321 | 0.47757825 | 6.33E-05 | 0.017113  | 0.13314   |
| 16w_SITTE12 | 0.01201329 | 0.06189014 | 3.23E-05 | 0.0060411 | 0.2791    |
| 16w_SITTE12 | 0.01951203 | 0.10713825 | 3.40E-05 | 0.0046667 | 0.017998  |
| 16w_SITTE12 | 0.08758362 | 0.5178884  | 6.41E-05 | 0.020177  | 0.087329  |
| 16w_SITTE12 | 0.07857771 | 0.46354595 | 6.30E-05 | 0.016077  | 0.13651   |
| 16w_SITTE12 | 0.07178508 | 0.4225586  | 6.20E-05 | 0.012843  | 0.12348   |
| 16w_SITTE12 | 0.10616149 | 0.629989   | 6.58E-05 | 0.025526  | -0.21453  |
| 16w_SITTE12 | 0.00726958 | 0.03326616 | 3.19E-05 | 0.0075925 | 0.51404   |
| 16w_SITTE12 | 0.01486373 | 0.07908998 | 3.27E-05 | 0.0054028 | 0.16515   |
| 16w_SITTE12 | 0.02761312 | 0.15602094 | 3.88E-05 | 0.0040827 | -0.10472  |
| 16w_SITTE12 | 0.11630372 | 0.69118816 | 6.64E-05 | 0.025054  | -0.33347  |
| 16w_SITTE12 | 0.0761239  | 0.44873947 | 6.26E-05 | 0.0148    | 0.1354    |
| 16w_SITTE12 | 0.0228776  | 0.12744641 | 3.55E-05 | 0.0043197 | -0.056631 |
| 16w_SITTE12 | 0.03442628 | 0.19713223 | 4.48E-05 | 0.0041765 | -0.082901 |
| 16w_SITTE12 | 0.05062242 | 0.29486117 | 5.78E-05 | 0.0061018 | 0.048868  |
| 16w_SITTE12 | 0.07163962 | 0.4216809  | 6.20E-05 | 0.012843  | 0.12348   |
| 16w_SITTE12 | 0.01333714 | 0.0698784  | 3.24E-05 | 0.0057681 | 0.23179   |
| 16w_SITTE12 | 0.08627725 | 0.51000565 | 6.39E-05 | 0.01943   | 0.099025  |
| 16w_SITTE12 | 0.0279143  | 0.15783833 | 3.88E-05 | 0.0040827 | -0.10472  |
| 16w_SITTE12 | 0.09772924 | 0.579108   | 6.51E-05 | 0.023964  | -0.074831 |
| 16w_SITTE12 | 0.10696042 | 0.6348098  | 6.58E-05 | 0.025586  | -0.22263  |
| 16w_SITTE12 | 0.10840529 | 0.64352834 | 6.59E-05 | 0.025614  | -0.24573  |
| 16w_SITTE12 | 0.0121027  | 0.06242964 | 3.23E-05 | 0.0060411 | 0.2791    |
| 16w_SITTE12 | 0.032656   | 0.18645017 | 4.32E-05 | 0.0041142 | -0.094772 |
| 16w_SITTE12 | 0.02112377 | 0.11686364 | 3.47E-05 | 0.0044724 | -0.023601 |
| 16w_SITTE12 | 0.14150807 | 0.8432735  | 6.74E-05 | 0.023575  | -0.49999  |
| 16w_SITTE12 | 0.0922938  | 0.54631007 | 6.46E-05 | 0.022042  | 0.019141  |
| 16w_SITTE12 | 0.08219261 | 0.4853586  | 6.35E-05 | 0.017633  | 0.1271    |
| 16w_SITTE12 | 0.00891066 | 0.04316858 | 3.19E-05 | 0.0070136 | 0.43237   |
| 16w_SITTE12 | 0.01559143 | 0.08348098 | 3.28E-05 | 0.0052924 | 0.1442    |
| 16w_SITTE12 | 0.03253876 | 0.18574275 | 4.32E-05 | 0.0041142 | -0.094772 |
| 16w_SITTE12 | 0.02637423 | 0.14854541 | 3.76E-05 | 0.0041286 | -0.099939 |
| 16w_SITTE12 | 0.106874   | 0.6342884  | 6.58E-05 | 0.025586  | -0.22263  |
| 16w_SITTE12 | 0.0136115  | 0.07153387 | 3.24E-05 | 0.0057681 | 0.23179   |
| 16w_SITTE12 | 0.02820506 | 0.15959279 | 3.93E-05 | 0.004074  | -0.10603  |
| 16w_SITTE12 | 0.03193587 | 0.18210487 | 4.22E-05 | 0.0040866 | -0.097962 |
| 16w_SITTE12 | 0.11390521 | 0.6767153  | 6.62E-05 | 0.025353  | -0.31137  |
| 16w_SITTE12 | 0.05435329 | 0.3173736  | 5.92E-05 | 0.0069681 | 0.062513  |
| 16w_SITTE12 | 0.03547311 | 0.20344889 | 4.59E-05 | 0.0042319 | -0.073417 |

|             |            |            |          |           |            |
|-------------|------------|------------|----------|-----------|------------|
| 16w_SITTE12 | 0.03064388 | 0.17430884 | 4.11E-05 | 0.0040705 | -0.10475   |
| 16w_SITTE12 | 0.04510031 | 0.2615403  | 5.46E-05 | 0.0051531 | 0.017239   |
| 16w_SITTE12 | 0.02922718 | 0.16576035 | 4.02E-05 | 0.0040662 | -0.10661   |
| 16w_SITTE12 | 0.05464887 | 0.31915715 | 5.92E-05 | 0.0069681 | 0.064127   |
| 16w_SITTE12 | 0.01370303 | 0.07208619 | 3.25E-05 | 0.0056405 | 0.20898    |
| 16w_SITTE12 | 0.01888622 | 0.10336205 | 3.38E-05 | 0.004741  | 0.03364    |
| 16w_SITTE12 | 0.03088709 | 0.17577639 | 4.16E-05 | 0.0040771 | -0.10299   |
| 16w_SITTE12 | 0.02075447 | 0.11463523 | 3.44E-05 | 0.0045325 | -0.01065   |
| 16w_SITTE12 | 0.0278012  | 0.15715583 | 3.88E-05 | 0.0040827 | -0.10472   |
| 16w_SITTE12 | 0.02253312 | 0.1253678  | 3.52E-05 | 0.0043661 | -0.056631  |
| 16w_SITTE12 | 0.10433238 | 0.618952   | 6.56E-05 | 0.025367  | -0.18901   |
| 16w_SITTE12 | 0.01124324 | 0.0572436  | 3.21E-05 | 0.006339  | 0.32844    |
| 16w_SITTE12 | 0.04268765 | 0.24698207 | 5.29E-05 | 0.0048617 | -0.0013165 |
| 16w_SITTE12 | 0.01700412 | 0.09200526 | 3.33E-05 | 0.0049935 | 0.085504   |
| 16w_SITTE12 | 0.07564155 | 0.4458289  | 6.26E-05 | 0.014549  | 0.13453    |
| 16w_SITTE12 | 0.02387453 | 0.13346195 | 3.61E-05 | 0.0042401 | -0.073623  |
| 16w_SITTE12 | 0.05891942 | 0.34492606 | 6.02E-05 | 0.0081753 | 0.074438   |
| 16w_SITTE12 | 0.01139728 | 0.05817311 | 3.21E-05 | 0.006339  | 0.32844    |
| 16w_SITTE12 | 0.06859595 | 0.4033151  | 6.16E-05 | 0.011695  | 0.10977    |
| 16w_SITTE12 | 0.02697601 | 0.15217659 | 3.84E-05 | 0.0040947 | -0.10271   |
| 16w_SITTE12 | 0.08861966 | 0.52414    | 6.42E-05 | 0.020663  | 0.074212   |
| 16w_SITTE12 | 0.02653922 | 0.14954098 | 3.80E-05 | 0.0041099 | -0.099939  |
| 16w_SITTE12 | 0.02295346 | 0.12790416 | 3.55E-05 | 0.0043197 | -0.056631  |
| 16w_SITTE12 | 0.03449377 | 0.19753945 | 4.48E-05 | 0.0041765 | -0.082901  |
| 16w_SITTE12 | 0.01611554 | 0.08664352 | 3.30E-05 | 0.0051875 | 0.12392    |
| 16w_SITTE12 | 0.00691806 | 0.03114507 | 3.18E-05 | 0.00078   | 0.54183    |
| 16w_SITTE12 | 0.02599886 | 0.14628036 | 3.76E-05 | 0.0041286 | -0.096385  |
| 16w_SITTE12 | 0.01441248 | 0.07636708 | 3.26E-05 | 0.0055188 | 0.18676    |
| 16w_SITTE12 | 0.01994669 | 0.10976103 | 3.42E-05 | 0.0045972 | 0.0032259  |
| 16w_SITTE12 | 0.11483371 | 0.682318   | 6.63E-05 | 0.025242  | -0.32268   |
| 16w_SITTE12 | 0.01365973 | 0.07182495 | 3.24E-05 | 0.0057681 | 0.20898    |
| 16w_SITTE12 | 0.02067616 | 0.11416268 | 3.44E-05 | 0.0045325 | -0.01065   |
| 16w_SITTE12 | 0.09041347 | 0.534964   | 6.44E-05 | 0.021369  | 0.05218    |
| 16w_SITTE12 | 0.01743004 | 0.09457531 | 3.33E-05 | 0.0049935 | 0.085504   |
| 16w_SITTE12 | 0.02689879 | 0.15171063 | 3.80E-05 | 0.0041099 | -0.10271   |
| 16w_SITTE12 | 0.02568925 | 0.14441217 | 3.72E-05 | 0.0041509 | -0.092011  |
| 16w_SITTE12 | 0.0139994  | 0.07387451 | 3.25E-05 | 0.0056405 | 0.20898    |
| 16w_SITTE12 | 0.03518996 | 0.20174032 | 4.54E-05 | 0.0042028 | -0.073417  |
| 16w_SITTE12 | 0.07065735 | 0.4157538  | 6.19E-05 | 0.012376  | 0.11916    |
| 16w_SITTE12 | 0.08653495 | 0.5115607  | 6.40E-05 | 0.019681  | 0.099025   |
| 16w_SITTE12 | 0.07775405 | 0.45857593 | 6.29E-05 | 0.015562  | 0.13662    |
| 16w_SITTE12 | 0.06712703 | 0.39445156 | 6.14E-05 | 0.011039  | 0.10251    |
| 16w_SITTE12 | 0.01320513 | 0.06908186 | 3.24E-05 | 0.0057681 | 0.23179    |

|             |            |            |          |           |           |
|-------------|------------|------------|----------|-----------|-----------|
| 16w_SITTE12 | 0.08494598 | 0.5019727  | 6.38E-05 | 0.018923  | 0.10916   |
| 16w_SITTE12 | 0.00932542 | 0.04567131 | 3.20E-05 | 0.0068348 | 0.4058    |
| 16w_SITTE12 | 0.02389979 | 0.1336144  | 3.61E-05 | 0.0042401 | -0.073623 |
| 16w_SITTE12 | 0.03062511 | 0.17419559 | 4.11E-05 | 0.0040705 | -0.10475  |
| 16w_SITTE12 | 0.08084712 | 0.47723982 | 6.33E-05 | 0.017113  | 0.13314   |
| 16w_SITTE12 | 0.06326103 | 0.37112376 | 6.09E-05 | 0.0096122 | 0.087254  |
| 16w_SITTE12 | 0.11385196 | 0.676394   | 6.62E-05 | 0.025353  | -0.31137  |
| 16w_SITTE12 | 0.01218168 | 0.06290624 | 3.23E-05 | 0.0060411 | 0.2791    |
| 16w_SITTE12 | 0.01392395 | 0.07341927 | 3.25E-05 | 0.0056405 | 0.20898   |
| 16w_SITTE12 | 0.01230686 | 0.06366158 | 3.23E-05 | 0.0060411 | 0.2791    |
| 16w_SITTE12 | 0.10438633 | 0.61927754 | 6.56E-05 | 0.025367  | -0.18901  |
| 16w_SITTE12 | 0.09006969 | 0.5328896  | 6.44E-05 | 0.021137  | 0.05218   |
| 16w_SITTE12 | 0.0739054  | 0.43535283 | 6.23E-05 | 0.013805  | 0.13074   |
| 16w_SITTE12 | 0.01659421 | 0.08953188 | 3.31E-05 | 0.0050879 | 0.10435   |
| 16w_SITTE12 | 0.11110504 | 0.6598188  | 6.61E-05 | 0.025556  | -0.28058  |
| 16w_SITTE12 | 0.04777885 | 0.27770287 | 5.64E-05 | 0.0055867 | 0.035328  |
| 16w_SITTE12 | 0.01515989 | 0.08087703 | 3.27E-05 | 0.0054028 | 0.16515   |
| 16w_SITTE12 | 0.02546838 | 0.1430794  | 3.72E-05 | 0.0041509 | -0.092011 |
| 16w_SITTE12 | 0.01289602 | 0.06721665 | 3.23E-05 | 0.0059016 | 0.25518   |
| 16w_SITTE12 | 0.07946428 | 0.4688956  | 6.31E-05 | 0.016335  | 0.13545   |
| 16w_SITTE12 | 0.08545698 | 0.5050561  | 6.39E-05 | 0.019177  | 0.1043    |
| 16w_SITTE12 | 0.01181307 | 0.06068203 | 3.22E-05 | 0.0061869 | 0.30353   |
| 16w_SITTE12 | 0.02085705 | 0.11525423 | 3.44E-05 | 0.0045325 | -0.023601 |
| 16w_SITTE12 | 0.07473865 | 0.44038075 | 6.25E-05 | 0.014299  | 0.13218   |
| 16w_SITTE12 | 0.08994541 | 0.53213966 | 6.44E-05 | 0.021137  | 0.05218   |
| 16w_SITTE12 | 0.03860197 | 0.22232868 | 4.87E-05 | 0.0044183 | -0.040459 |
| 16w_SITTE12 | 0.03827958 | 0.22038336 | 4.87E-05 | 0.0044183 | -0.04622  |
| 16w_SITTE12 | 0.13738512 | 0.81839526 | 6.73E-05 | 0.02353   | -0.48301  |
| 16w_SITTE12 | 0.01134441 | 0.05785405 | 3.21E-05 | 0.006339  | 0.32844   |
| 16w_SITTE12 | 0.08480495 | 0.5011217  | 6.38E-05 | 0.018923  | 0.1136    |
| 16w_SITTE12 | 0.08142992 | 0.4807565  | 6.34E-05 | 0.017373  | 0.13148   |
| 16w_SITTE12 | 0.1350496  | 0.8043025  | 6.72E-05 | 0.023533  | -0.46872  |
| 16w_SITTE12 | 0.01466981 | 0.07791983 | 3.26E-05 | 0.0055188 | 0.18676   |
| 16w_SITTE12 | 0.08281831 | 0.48913416 | 6.35E-05 | 0.017892  | 0.12434   |
| 16w_SITTE12 | 0.03588391 | 0.20592768 | 4.65E-05 | 0.0042637 | -0.068307 |
| 16w_SITTE12 | 0.05890797 | 0.34485698 | 6.02E-05 | 0.0081753 | 0.074438  |
| 16w_SITTE12 | 0.01931472 | 0.10594765 | 3.40E-05 | 0.0046667 | 0.017998  |
| 16w_SITTE12 | 0.01368214 | 0.07196014 | 3.25E-05 | 0.0056405 | 0.20898   |
| 16w_SITTE12 | 0.00801336 | 0.03775422 | 3.19E-05 | 0.0073923 | 0.48652   |
| 16w_SITTE12 | 0.0118582  | 0.0609543  | 3.22E-05 | 0.0061869 | 0.30353   |
| 16w_SITTE12 | 0.11398963 | 0.6772247  | 6.62E-05 | 0.025353  | -0.31137  |
| 16w_SITTE12 | 0.0661448  | 0.38852465 | 6.13E-05 | 0.010616  | 0.10013   |
| 16w_SITTE12 | 0.10678139 | 0.6337296  | 6.58E-05 | 0.02556   | -0.22263  |

|             |            |            |          |           |           |
|-------------|------------|------------|----------|-----------|-----------|
| 16w_SITTE12 | 0.05321386 | 0.3104982  | 5.89E-05 | 0.0067028 | 0.059084  |
| 16w_SITTE12 | 0.04950146 | 0.2880972  | 5.73E-05 | 0.0058857 | 0.04392   |
| 16w_SITTE12 | 0.04871545 | 0.28335434 | 5.70E-05 | 0.0057827 | 0.041222  |
| 16w_SITTE12 | 0.02226871 | 0.1237723  | 3.52E-05 | 0.0043661 | -0.046619 |
| 16w_SITTE12 | 0.01703661 | 0.09220133 | 3.33E-05 | 0.0049935 | 0.085504  |
| 16w_SITTE12 | 0.01579541 | 0.08471183 | 3.28E-05 | 0.0052924 | 0.1442    |
| 16w_SITTE12 | 0.11553887 | 0.68657297 | 6.63E-05 | 0.025182  | -0.32814  |
| 16w_SITTE12 | 0.03614398 | 0.20749697 | 4.65E-05 | 0.0042637 | -0.068307 |
| 16w_SITTE12 | 0.01053044 | 0.05294247 | 3.21E-05 | 0.0064976 | 0.35381   |
| 16w_SITTE12 | 0.0331455  | 0.18940386 | 4.37E-05 | 0.0041322 | -0.091175 |
| 16w_SITTE12 | 0.07725431 | 0.45556048 | 6.28E-05 | 0.015307  | 0.13646   |
| 16w_SITTE12 | 0.02370531 | 0.1324409  | 3.61E-05 | 0.0042401 | -0.073623 |
| 16w_SITTE12 | 0.08286561 | 0.48941958 | 6.35E-05 | 0.017892  | 0.12434   |
| 16w_SITTE12 | 0.07354713 | 0.43319097 | 6.23E-05 | 0.013805  | 0.12913   |
| 16w_SITTE12 | 0.02982618 | 0.16937478 | 4.07E-05 | 0.0040668 | -0.10597  |
| 16w_SITTE12 | 0.08561872 | 0.50603205 | 6.39E-05 | 0.019177  | 0.1043    |
| 16w_SITTE12 | 0.03055771 | 0.17378889 | 4.11E-05 | 0.0040705 | -0.10475  |
| 16w_SITTE12 | 0.08949765 | 0.52943784 | 6.43E-05 | 0.020902  | 0.059815  |
| 16w_SITTE12 | 0.07079478 | 0.41658303 | 6.20E-05 | 0.012608  | 0.11916   |
| 16w_SITTE12 | 0.07886323 | 0.46526885 | 6.30E-05 | 0.016077  | 0.13613   |
| 16w_SITTE12 | 0.01735455 | 0.0941198  | 3.33E-05 | 0.0049935 | 0.085504  |
| 16w_SITTE12 | 0.0331567  | 0.18947147 | 4.37E-05 | 0.0041322 | -0.091175 |
| 16w_SITTE12 | 0.08468796 | 0.50041574 | 6.38E-05 | 0.018923  | 0.1136    |
| 16w_SITTE12 | 0.02855613 | 0.16171117 | 3.93E-05 | 0.004074  | -0.10664  |
| 16w_SITTE12 | 0.01823388 | 0.09942576 | 3.36E-05 | 0.0048202 | 0.050123  |
| 16w_SITTE12 | 0.01448867 | 0.0768268  | 3.26E-05 | 0.0055188 | 0.18676   |
| 16w_SITTE12 | 0.11047024 | 0.6559884  | 6.60E-05 | 0.02558   | -0.27396  |
| 16w_SITTE12 | 0.02699287 | 0.15227835 | 3.84E-05 | 0.0040947 | -0.10271  |
| 16w_SITTE12 | 0.01150694 | 0.05883481 | 3.22E-05 | 0.0061869 | 0.30353   |
| 16w_SITTE12 | 0.06839857 | 0.40212414 | 6.16E-05 | 0.011474  | 0.10977   |
| 16w_SITTE12 | 0.0868184  | 0.51327103 | 6.40E-05 | 0.019681  | 0.093363  |
| 16w_SITTE12 | 0.06496669 | 0.3814158  | 6.11E-05 | 0.010206  | 0.093303  |
| 16w_SITTE12 | 0.08528622 | 0.5040257  | 6.39E-05 | 0.019177  | 0.10916   |
| 16w_SITTE12 | 0.11549659 | 0.68631786 | 6.63E-05 | 0.025182  | -0.32814  |
| 16w_SITTE12 | 0.01440442 | 0.07631847 | 3.26E-05 | 0.0055188 | 0.18676   |
| 16w_SITTE12 | 0.03970761 | 0.22900024 | 4.98E-05 | 0.0045122 | -0.028892 |
| 16w_SITTE12 | 0.095385   | 0.5649627  | 6.49E-05 | 0.023263  | -0.026471 |
| 16w_SITTE12 | 0.07673594 | 0.4524326  | 6.27E-05 | 0.015053  | 0.13605   |
| 16w_SITTE12 | 0.0331249  | 0.18927956 | 4.37E-05 | 0.0041322 | -0.091175 |
| 16w_SITTE12 | 0.07027462 | 0.41344437 | 6.19E-05 | 0.012376  | 0.11689   |
| 16w_SITTE12 | 0.04189984 | 0.24222834 | 5.19E-05 | 0.0047337 | -0.00654  |
| 16w_SITTE12 | 0.0169347  | 0.09158641 | 3.31E-05 | 0.0050879 | 0.10435   |
| 16w_SITTE12 | 0.0291754  | 0.16544788 | 3.97E-05 | 0.0040686 | -0.10661  |



|             |            |            |          |           |           |
|-------------|------------|------------|----------|-----------|-----------|
| 16w_SITTE12 | 0.01171423 | 0.06008557 | 3.22E-05 | 0.0061869 | 0.30353   |
| 16w_SITTE12 | 0.01798086 | 0.09789904 | 3.34E-05 | 0.0049043 | 0.067421  |
| 16w_SITTE12 | 0.11178015 | 0.6638925  | 6.61E-05 | 0.025489  | -0.28705  |
| 16w_SITTE12 | 0.04232601 | 0.24479991 | 5.24E-05 | 0.0047963 | -0.00654  |
| 16w_SITTE12 | 0.00983712 | 0.04875897 | 3.20E-05 | 0.0066628 | 0.37961   |
| 16w_SITTE12 | 0.01221753 | 0.06312255 | 3.23E-05 | 0.0060411 | 0.2791    |
| 16w_SITTE12 | 0.01188942 | 0.06114274 | 3.22E-05 | 0.0061869 | 0.30353   |
| 16w_SITTE12 | 0.02857808 | 0.16184361 | 3.93E-05 | 0.004074  | -0.10664  |
| 16w_SITTE12 | 0.02717107 | 0.15335362 | 3.84E-05 | 0.0040947 | -0.10271  |
| 16w_SITTE12 | 0.02682798 | 0.1512834  | 3.80E-05 | 0.0041099 | -0.099939 |
| 16w_SITTE12 | 0.0230894  | 0.12872444 | 3.55E-05 | 0.0043197 | -0.065623 |
| 16w_SITTE12 | 0.09973891 | 0.59123456 | 6.53E-05 | 0.024558  | -0.10426  |
| 16w_SITTE12 | 0.11087971 | 0.6584592  | 6.61E-05 | 0.025556  | -0.28058  |
| 16w_SITTE12 | 0.01779717 | 0.09679061 | 3.34E-05 | 0.0049043 | 0.067421  |
| 16w_SITTE12 | 0.01942563 | 0.10661686 | 3.40E-05 | 0.0046667 | 0.017998  |
| 16w_SITTE12 | 0.02854572 | 0.16164836 | 3.93E-05 | 0.004074  | -0.10603  |
| 16w_SITTE12 | 0.01421893 | 0.07519922 | 3.25E-05 | 0.0056405 | 0.18676   |
| 16w_SITTE12 | 0.04707795 | 0.27347356 | 5.61E-05 | 0.0054936 | 0.032113  |
| 16w_SITTE12 | 0.09690557 | 0.5741379  | 6.51E-05 | 0.023799  | -0.055297 |
| 16w_SITTE12 | 0.01448832 | 0.07682472 | 3.26E-05 | 0.0055188 | 0.18676   |
| 16w_SITTE12 | 0.0712319  | 0.4192207  | 6.20E-05 | 0.012608  | 0.12136   |
| 16w_SITTE12 | 0.02960676 | 0.16805077 | 4.02E-05 | 0.0040662 | -0.10661  |
| 16w_SITTE12 | 0.02328001 | 0.12987462 | 3.58E-05 | 0.0042778 | -0.065623 |
| 16w_SITTE12 | 0.01907074 | 0.10447547 | 3.38E-05 | 0.004741  | 0.03364   |
| 16w_SITTE12 | 0.01688736 | 0.09130074 | 3.31E-05 | 0.0050879 | 0.10435   |
| 16w_SITTE12 | 0.02264006 | 0.12601307 | 3.55E-05 | 0.0043197 | -0.056631 |
| 16w_SITTE12 | 0.04429579 | 0.25668573 | 5.42E-05 | 0.0050757 | 0.012967  |
| 16w_SITTE12 | 0.13445552 | 0.8007178  | 6.71E-05 | 0.023539  | -0.46567  |
| 16w_SITTE12 | 0.05043713 | 0.29374313 | 5.78E-05 | 0.0061018 | 0.048868  |
| 16w_SITTE12 | 0.00675106 | 0.03013741 | 3.18E-05 | 0.0078    | 0.54183   |
| 16w_SITTE12 | 0.01443226 | 0.07648645 | 3.26E-05 | 0.0055188 | 0.18676   |
| 16w_SITTE12 | 0.02687986 | 0.15159643 | 3.80E-05 | 0.0041099 | -0.099939 |
| 16w_SITTE12 | 0.01175798 | 0.0603496  | 3.22E-05 | 0.0061869 | 0.30353   |
| 16w_SITTE12 | 0.01668963 | 0.09010759 | 3.31E-05 | 0.0050879 | 0.10435   |
| 16w_SITTE12 | 0.11299303 | 0.6712112  | 6.62E-05 | 0.025403  | -0.29951  |
| 16w_SITTE12 | 0.08087484 | 0.47740707 | 6.33E-05 | 0.017113  | 0.13314   |
| 16w_SITTE12 | 0.09174366 | 0.5429905  | 6.45E-05 | 0.021822  | 0.027741  |
| 16w_SITTE12 | 0.00458863 | 0.0170891  | 3.18E-05 | 0.0087056 | 0.65503   |
| 16w_SITTE12 | 0.0419278  | 0.2423971  | 5.19E-05 | 0.0047337 | -0.00654  |
| 16w_SITTE12 | 0.02710653 | 0.15296417 | 3.84E-05 | 0.0040947 | -0.10271  |
| 16w_SITTE12 | 0.01108002 | 0.05625873 | 3.21E-05 | 0.006339  | 0.32844   |
| 16w_SITTE12 | 0.0807462  | 0.47663087 | 6.33E-05 | 0.017113  | 0.13314   |
| 16w_SITTE12 | 0.1061636  | 0.6300017  | 6.58E-05 | 0.025526  | -0.21453  |

|             |            |            |          |           |            |
|-------------|------------|------------|----------|-----------|------------|
| 16w_SITTE12 | 0.0527442  | 0.30766425 | 5.87E-05 | 0.0065755 | 0.057248   |
| 16w_SITTE12 | 0.02456817 | 0.13764745 | 3.64E-05 | 0.0042065 | -0.080664  |
| 16w_SITTE12 | 0.04885825 | 0.28421605 | 5.70E-05 | 0.0057827 | 0.041222   |
| 16w_SITTE12 | 0.01718782 | 0.09311373 | 3.33E-05 | 0.0049935 | 0.085504   |
| 16w_SITTE12 | 0.03206343 | 0.18287458 | 4.27E-05 | 0.004099  | -0.097962  |
| 16w_SITTE12 | 0.06927674 | 0.40742308 | 6.17E-05 | 0.01192   | 0.11218    |
| 16w_SITTE12 | 0.11736243 | 0.6975765  | 6.64E-05 | 0.024917  | -0.34377   |
| 16w_SITTE12 | 0.09491688 | 0.562138   | 6.49E-05 | 0.023073  | -0.026471  |
| 16w_SITTE12 | 0.02264316 | 0.12603179 | 3.55E-05 | 0.0043197 | -0.056631  |
| 16w_SITTE12 | 0.00687843 | 0.03090593 | 3.18E-05 | 0.0078    | 0.54183    |
| 16w_SITTE12 | 0.01936326 | 0.10624053 | 3.40E-05 | 0.0046667 | 0.017998   |
| 16w_SITTE12 | 0.11774412 | 0.69987965 | 6.64E-05 | 0.024917  | -0.34876   |
| 16w_SITTE12 | 0.02516807 | 0.14126728 | 3.68E-05 | 0.0041768 | -0.086782  |
| 16w_SITTE12 | 0.10645209 | 0.63174254 | 6.58E-05 | 0.02556   | -0.22263   |
| 16w_SITTE12 | 0.10243789 | 0.60752046 | 6.55E-05 | 0.025127  | -0.15246   |
| 16w_SITTE12 | 0.09442694 | 0.55918163 | 6.48E-05 | 0.022877  | -0.017059  |
| 16w_SITTE12 | 0.05866224 | 0.34337425 | 6.02E-05 | 0.0081753 | 0.074438   |
| 16w_SITTE12 | 0.03423571 | 0.1959823  | 4.48E-05 | 0.0041765 | -0.082901  |
| 16w_SITTE12 | 0.02104442 | 0.11638482 | 3.47E-05 | 0.0044724 | -0.023601  |
| 16w_SITTE12 | 0.03768444 | 0.21679223 | 4.81E-05 | 0.0043756 | -0.05192   |
| 16w_SITTE12 | 0.12782559 | 0.76071215 | 6.69E-05 | 0.023794  | -0.4246    |
| 16w_SITTE12 | 0.01519587 | 0.08109417 | 3.27E-05 | 0.0054028 | 0.16515    |
| 16w_SITTE12 | 0.10227569 | 0.60654175 | 6.55E-05 | 0.025029  | -0.15246   |
| 16w_SITTE12 | 0.08520577 | 0.5035403  | 6.39E-05 | 0.019177  | 0.10916    |
| 16w_SITTE12 | 0.09537486 | 0.5649015  | 6.49E-05 | 0.023263  | -0.026471  |
| 16w_SITTE12 | 0.10252588 | 0.60805136 | 6.55E-05 | 0.025127  | -0.15246   |
| 16w_SITTE12 | 0.00976681 | 0.04833467 | 3.20E-05 | 0.0068348 | 0.4058     |
| 16w_SITTE12 | 0.02719795 | 0.1535158  | 3.84E-05 | 0.0040947 | -0.10271   |
| 16w_SITTE12 | 0.01430627 | 0.07572623 | 3.26E-05 | 0.0055188 | 0.18676    |
| 16w_SITTE12 | 0.04275761 | 0.24740423 | 5.29E-05 | 0.0048617 | -0.0013165 |
| 16w_SITTE12 | 0.02894208 | 0.16404003 | 3.97E-05 | 0.0040686 | -0.10664   |
| 16w_SITTE12 | 0.01878401 | 0.1027453  | 3.38E-05 | 0.004741  | 0.03364    |
| 16w_SITTE12 | 0.01594195 | 0.08559604 | 3.30E-05 | 0.0051875 | 0.12392    |
| 16w_SITTE12 | 0.01463183 | 0.07769068 | 3.26E-05 | 0.0055188 | 0.18676    |
| 16w_SITTE12 | 0.02652319 | 0.14944421 | 3.80E-05 | 0.0041099 | -0.099939  |
| 16w_SITTE12 | 0.0855779  | 0.5057857  | 6.39E-05 | 0.019177  | 0.1043     |
| 16w_SITTE12 | 0.08918738 | 0.52756566 | 6.43E-05 | 0.020902  | 0.067165   |
| 16w_SITTE12 | 0.07333294 | 0.43189856 | 6.23E-05 | 0.013561  | 0.12913    |
| 16w_SITTE12 | 0.10059509 | 0.5964008  | 6.53E-05 | 0.024687  | -0.12375   |
| 16w_SITTE12 | 0.14526206 | 0.8659255  | 6.75E-05 | 0.023641  | -0.51294   |
| 16w_SITTE12 | 0.02092228 | 0.11564779 | 3.47E-05 | 0.0044724 | -0.023601  |
| 16w_SITTE12 | 0.08843873 | 0.5230483  | 6.42E-05 | 0.020421  | 0.074212   |
| 16w_SITTE12 | 0.01012687 | 0.0505073  | 3.20E-05 | 0.0066628 | 0.37961    |

|             |            |            |          |           |           |
|-------------|------------|------------|----------|-----------|-----------|
| 16w_SITTE12 | 0.06315399 | 0.37047786 | 6.09E-05 | 0.0096122 | 0.087254  |
| 16w_SITTE12 | 0.09307406 | 0.55101824 | 6.47E-05 | 0.022469  | 0.010343  |
| 16w_SITTE12 | 0.053101   | 0.3098172  | 5.89E-05 | 0.0067028 | 0.059084  |
| 16w_SITTE12 | 0.11376578 | 0.675874   | 6.62E-05 | 0.025353  | -0.31137  |
| 16w_SITTE12 | 0.02320454 | 0.12941922 | 3.58E-05 | 0.0042778 | -0.065623 |
| 16w_SITTE12 | 0.11958738 | 0.7110021  | 6.65E-05 | 0.024632  | -0.36308  |
| 16w_SITTE12 | 0.09284324 | 0.54962546 | 6.46E-05 | 0.022258  | 0.010343  |
| 16w_SITTE12 | 0.03425063 | 0.19607234 | 4.48E-05 | 0.0041765 | -0.082901 |
| 16w_SITTE12 | 0.02859284 | 0.16193269 | 3.93E-05 | 0.004074  | -0.10664  |
| 16w_SITTE12 | 0.01240378 | 0.06424642 | 3.23E-05 | 0.0060411 | 0.2791    |
| 16w_SITTE12 | 0.04986996 | 0.2903208  | 5.76E-05 | 0.005992  | 0.046466  |
| 16w_SITTE12 | 0.14515139 | 0.8652577  | 6.75E-05 | 0.023641  | -0.51294  |
| 16w_SITTE12 | 0.10014867 | 0.5937071  | 6.53E-05 | 0.024687  | -0.11403  |
| 16w_SITTE12 | 0.11621623 | 0.69066024 | 6.64E-05 | 0.025054  | -0.33347  |
| 16w_SITTE12 | 0.04325298 | 0.25039333 | 5.33E-05 | 0.0049301 | 0.0036923 |
| 16w_SITTE12 | 0.101447   | 0.60154134 | 6.54E-05 | 0.024923  | -0.13341  |
| 16w_SITTE12 | 0.01761416 | 0.09568629 | 3.34E-05 | 0.0049043 | 0.067421  |
| 16w_SITTE12 | 0.01527572 | 0.08157593 | 3.27E-05 | 0.0054028 | 0.16515   |
| 16w_SITTE12 | 0.01727689 | 0.09365123 | 3.33E-05 | 0.0049935 | 0.085504  |
| 16w_SITTE12 | 0.06042014 | 0.35398158 | 6.05E-05 | 0.008688  | 0.07887   |
| 16w_SITTE12 | 0.0123984  | 0.06421397 | 3.23E-05 | 0.0060411 | 0.2791    |
| 16w_SITTE12 | 0.07318156 | 0.43098512 | 6.23E-05 | 0.013561  | 0.12737   |
| 16w_SITTE12 | 0.01524167 | 0.08137047 | 3.27E-05 | 0.0054028 | 0.16515   |
| 16w_SITTE12 | 0.01560321 | 0.08355206 | 3.28E-05 | 0.0052924 | 0.1442    |
| 16w_SITTE12 | 0.02008548 | 0.11059852 | 3.42E-05 | 0.0045972 | 0.0032259 |
| 16w_SITTE12 | 0.03437267 | 0.19680874 | 4.48E-05 | 0.0041765 | -0.082901 |
| 16w_SITTE12 | 0.05878881 | 0.34413797 | 6.02E-05 | 0.0081753 | 0.074438  |
| 16w_SITTE12 | 0.00783121 | 0.03665512 | 3.19E-05 | 0.0073923 | 0.48652   |
| 16w_SITTE12 | 0.03637634 | 0.20889902 | 4.65E-05 | 0.0042637 | -0.062998 |
| 16w_SITTE12 | 0.02805385 | 0.15868041 | 3.88E-05 | 0.0040827 | -0.10603  |
| 16w_SITTE12 | 0.11358118 | 0.6747601  | 6.62E-05 | 0.025353  | -0.30551  |
| 16w_SITTE12 | 0.11636912 | 0.6915828  | 6.64E-05 | 0.025054  | -0.33347  |
| 16w_SITTE12 | 0.07234668 | 0.42594737 | 6.21E-05 | 0.01308   | 0.12548   |
| 16w_SITTE12 | 0.01143486 | 0.05839988 | 3.21E-05 | 0.006339  | 0.30353   |
| 16w_SITTE12 | 0.10551095 | 0.6260636  | 6.57E-05 | 0.025482  | -0.20623  |
| 16w_SITTE12 | 0.01150545 | 0.0588258  | 3.22E-05 | 0.0061869 | 0.30353   |
| 16w_SITTE12 | 0.09761289 | 0.578406   | 6.51E-05 | 0.023964  | -0.074831 |
| 16w_SITTE12 | 0.07615615 | 0.44893408 | 6.26E-05 | 0.0148    | 0.1354    |
| 16w_SITTE12 | 0.02294845 | 0.12787394 | 3.55E-05 | 0.0043197 | -0.056631 |
| 16w_SITTE12 | 0.02146404 | 0.11891687 | 3.49E-05 | 0.0044169 | -0.0356   |
| 16w_SITTE12 | 0.01227648 | 0.06347827 | 3.23E-05 | 0.0060411 | 0.2791    |
| 16w_SITTE12 | 0.06570949 | 0.385898   | 6.12E-05 | 0.01041   | 0.097788  |
| 16w_SITTE12 | 0.01552628 | 0.08308785 | 3.28E-05 | 0.0052924 | 0.1442    |

|             |            |            |          |           |           |
|-------------|------------|------------|----------|-----------|-----------|
| 16w_SITTE12 | 0.0101784  | 0.05081829 | 3.20E-05 | 0.0066628 | 0.37961   |
| 16w_SITTE12 | 0.00883146 | 0.0426907  | 3.19E-05 | 0.0070136 | 0.43237   |
| 16w_SITTE12 | 0.02029743 | 0.1118774  | 3.42E-05 | 0.0045972 | -0.01065  |
| 16w_SITTE12 | 0.10118356 | 0.59995174 | 6.54E-05 | 0.024809  | -0.13341  |
| 16w_SITTE12 | 0.02267689 | 0.1262353  | 3.55E-05 | 0.0043197 | -0.056631 |
| 16w_SITTE12 | 0.07790469 | 0.45948493 | 6.29E-05 | 0.015562  | 0.13662   |
| 16w_SITTE12 | 0.08955064 | 0.5297576  | 6.43E-05 | 0.020902  | 0.059815  |
| 16w_SITTE12 | 0.10001216 | 0.5928834  | 6.53E-05 | 0.024558  | -0.11403  |
| 16w_SITTE12 | 0.01771919 | 0.09632008 | 3.34E-05 | 0.0049043 | 0.067421  |
| 16w_SITTE12 | 0.03488012 | 0.19987072 | 4.54E-05 | 0.0042028 | -0.078293 |
| 16w_SITTE12 | 0.0840022  | 0.49627784 | 6.37E-05 | 0.01841   | 0.1176    |
| 16w_SITTE12 | 0.03180127 | 0.18129262 | 4.22E-05 | 0.0040866 | -0.10071  |
| 16w_SITTE12 | 0.05444052 | 0.3179     | 5.92E-05 | 0.0069681 | 0.062513  |
| 16w_SITTE12 | 0.11172144 | 0.6635383  | 6.61E-05 | 0.025525  | -0.28705  |
| 16w_SITTE12 | 0.01439983 | 0.07629078 | 3.26E-05 | 0.0055188 | 0.18676   |
| 16w_SITTE12 | 0.01297733 | 0.06770726 | 3.23E-05 | 0.0059016 | 0.25518   |
| 16w_SITTE12 | 0.07592204 | 0.44752145 | 6.26E-05 | 0.0148    | 0.13453   |
| 16w_SITTE12 | 0.04776256 | 0.27760455 | 5.64E-05 | 0.0055867 | 0.035328  |
| 16w_SITTE12 | 0.01707251 | 0.09241793 | 3.33E-05 | 0.0049935 | 0.085504  |
| 16w_SITTE12 | 0.02459963 | 0.1378373  | 3.64E-05 | 0.0042065 | -0.080664 |
| 16w_SITTE12 | 0.02559595 | 0.14384915 | 3.72E-05 | 0.0041509 | -0.092011 |
| 16w_SITTE12 | 0.02840862 | 0.1608211  | 3.93E-05 | 0.004074  | -0.10603  |
| 16w_SITTE12 | 0.1155214  | 0.6864676  | 6.63E-05 | 0.025182  | -0.32814  |
| 16w_SITTE12 | 0.09074418 | 0.5369596  | 6.45E-05 | 0.021597  | 0.044278  |
| 16w_SITTE12 | 0.01794935 | 0.0977089  | 3.34E-05 | 0.0049043 | 0.067421  |
| 16w_SITTE12 | 0.01903022 | 0.10423095 | 3.38E-05 | 0.004741  | 0.03364   |
| 16w_SITTE12 | 0.07049142 | 0.41475254 | 6.19E-05 | 0.012376  | 0.11689   |
| 16w_SITTE12 | 0.07733657 | 0.45605683 | 6.28E-05 | 0.015307  | 0.13646   |
| 16w_SITTE12 | 0.0102699  | 0.0513704  | 3.20E-05 | 0.0066628 | 0.37961   |
| 16w_SITTE12 | 0.09028681 | 0.5341998  | 6.44E-05 | 0.021369  | 0.05218   |
| 16w_SITTE12 | 0.11361565 | 0.67496806 | 6.62E-05 | 0.025353  | -0.30551  |
| 16w_SITTE12 | 0.01378156 | 0.07256009 | 3.25E-05 | 0.0056405 | 0.20898   |
| 16w_SITTE12 | 0.03237606 | 0.18476096 | 4.27E-05 | 0.004099  | -0.097962 |
| 16w_SITTE12 | 0.10405507 | 0.6172787  | 6.56E-05 | 0.025367  | -0.18011  |
| 16w_SITTE12 | 0.05899045 | 0.34535468 | 6.02E-05 | 0.0081753 | 0.075889  |
| 16w_SITTE12 | 0.02250513 | 0.1251989  | 3.52E-05 | 0.0043661 | -0.056631 |
| 16w_SITTE12 | 0.0716641  | 0.42182863 | 6.20E-05 | 0.012843  | 0.12348   |
| 16w_SITTE12 | 0.02448642 | 0.13715419 | 3.64E-05 | 0.0042065 | -0.080664 |
| 16w_SITTE12 | 0.02736297 | 0.15451153 | 3.84E-05 | 0.0040947 | -0.10271  |
| 16w_SITTE12 | 0.01821281 | 0.09929861 | 3.36E-05 | 0.0048202 | 0.050123  |
| 16w_SITTE12 | 0.02203772 | 0.12237848 | 3.52E-05 | 0.0043661 | -0.046619 |
| 16w_SITTE12 | 0.03602635 | 0.20678718 | 4.65E-05 | 0.0042637 | -0.068307 |
| 16w_SITTE12 | 0.0453663  | 0.2631453  | 5.50E-05 | 0.0052335 | 0.021279  |

|             |            |            |          |           |            |
|-------------|------------|------------|----------|-----------|------------|
| 16w_SITTE12 | 0.08529699 | 0.50409067 | 6.39E-05 | 0.019177  | 0.10916    |
| 16w_SITTE12 | 0.0230601  | 0.12854762 | 3.55E-05 | 0.0043197 | -0.065623  |
| 16w_SITTE12 | 0.05270539 | 0.30743003 | 5.87E-05 | 0.0065755 | 0.057248   |
| 16w_SITTE12 | 0.01019325 | 0.05090789 | 3.20E-05 | 0.0066628 | 0.37961    |
| 16w_SITTE12 | 0.01435489 | 0.07601956 | 3.26E-05 | 0.0055188 | 0.18676    |
| 16w_SITTE12 | 0.04832943 | 0.2810251  | 5.67E-05 | 0.0056831 | 0.038361   |
| 16w_SITTE12 | 0.02706336 | 0.15270364 | 3.84E-05 | 0.0040947 | -0.10271   |
| 16w_SITTE12 | 0.11253393 | 0.6684409  | 6.62E-05 | 0.025448  | -0.29951   |
| 16w_SITTE12 | 0.00731531 | 0.03354209 | 3.19E-05 | 0.0075925 | 0.51404    |
| 16w_SITTE12 | 0.15090322 | 0.89996475 | 6.77E-05 | 0.023702  | -0.52376   |
| 16w_SITTE12 | 0.09407833 | 0.5570781  | 6.48E-05 | 0.022877  | -0.0077738 |
| 16w_SITTE12 | 0.05764401 | 0.33723015 | 6.00E-05 | 0.0078516 | 0.071569   |
| 16w_SITTE12 | 0.12535599 | 0.7458104  | 6.68E-05 | 0.023978  | -0.40938   |
| 16w_SITTE12 | 0.02843621 | 0.16098756 | 3.93E-05 | 0.004074  | -0.10603   |
| 16w_SITTE12 | 0.01488351 | 0.07920936 | 3.27E-05 | 0.0054028 | 0.16515    |
| 16w_SITTE12 | 0.02900543 | 0.1644223  | 3.97E-05 | 0.0040686 | -0.10664   |
| 16w_SITTE12 | 0.06707162 | 0.39411715 | 6.14E-05 | 0.011039  | 0.10251    |
| 16w_SITTE12 | 0.07435547 | 0.43806857 | 6.24E-05 | 0.014051  | 0.13074    |
| 16w_SITTE12 | 0.08613426 | 0.5091429  | 6.39E-05 | 0.01943   | 0.099025   |
| 16w_SITTE12 | 0.02192812 | 0.12171714 | 3.49E-05 | 0.0044169 | -0.046619  |
| 16w_SITTE12 | 0.01240259 | 0.0642392  | 3.23E-05 | 0.0060411 | 0.2791     |
| 16w_SITTE12 | 0.01221274 | 0.06309363 | 3.23E-05 | 0.0060411 | 0.2791     |
| 16w_SITTE12 | 0.03431916 | 0.19648586 | 4.48E-05 | 0.0041765 | -0.082901  |
| 16w_SITTE12 | 0.01879951 | 0.10283881 | 3.38E-05 | 0.004741  | 0.03364    |
| 16w_SITTE12 | 0.01104438 | 0.05604364 | 3.21E-05 | 0.006339  | 0.32844    |
| 16w_SITTE12 | 0.02514023 | 0.1410993  | 3.68E-05 | 0.0041768 | -0.086782  |
| 16w_SITTE12 | 0.00885019 | 0.04280372 | 3.19E-05 | 0.0070136 | 0.43237    |
| 16w_SITTE12 | 0.01526742 | 0.08152586 | 3.27E-05 | 0.0054028 | 0.16515    |
| 16w_SITTE12 | 0.02108767 | 0.11664578 | 3.47E-05 | 0.0044724 | -0.023601  |
| 16w_SITTE12 | 0.01500548 | 0.0799453  | 3.27E-05 | 0.0054028 | 0.16515    |
| 16w_SITTE12 | 0.03840689 | 0.22115158 | 4.87E-05 | 0.0044183 | -0.04622   |
| 16w_SITTE12 | 0.02268342 | 0.12627469 | 3.55E-05 | 0.0043197 | -0.056631  |
| 16w_SITTE12 | 0.01585804 | 0.08508973 | 3.28E-05 | 0.0052924 | 0.12392    |
| 16w_SITTE12 | 0.01687899 | 0.09125026 | 3.31E-05 | 0.0050879 | 0.10435    |
| 16w_SITTE12 | 0.0154779  | 0.0827959  | 3.28E-05 | 0.0052924 | 0.1442     |
| 16w_SITTE12 | 0.0152165  | 0.08121861 | 3.27E-05 | 0.0054028 | 0.16515    |
| 16w_SITTE12 | 0.01141002 | 0.05824996 | 3.21E-05 | 0.006339  | 0.32844    |
| 16w_SITTE12 | 0.06271993 | 0.36785868 | 6.08E-05 | 0.0094206 | 0.085432   |
| 16w_SITTE12 | 0.01680708 | 0.09081633 | 3.31E-05 | 0.0050879 | 0.10435    |
| 16w_SITTE12 | 0.0325573  | 0.1858546  | 4.32E-05 | 0.0041142 | -0.094772  |
| 16w_SITTE12 | 0.12028262 | 0.7151972  | 6.66E-05 | 0.024561  | -0.37215   |
| 16w_SITTE12 | 0.07528499 | 0.4436774  | 6.26E-05 | 0.014549  | 0.13345    |
| 16w_SITTE12 | 0.07215753 | 0.424806   | 6.21E-05 | 0.01308   | 0.12348    |

|             |            |            |          |           |           |
|-------------|------------|------------|----------|-----------|-----------|
| 16w_SITTE12 | 0.00838696 | 0.04000854 | 3.19E-05 | 0.0071994 | 0.45929   |
| 16w_SITTE12 | 0.02069154 | 0.11425555 | 3.44E-05 | 0.0045325 | -0.01065  |
| 16w_SITTE12 | 0.0776206  | 0.45777068 | 6.29E-05 | 0.015562  | 0.13646   |
| 16w_SITTE12 | 0.04150559 | 0.23984942 | 5.19E-05 | 0.0047337 | -0.011944 |
| 16w_SITTE12 | 0.02685616 | 0.15145342 | 3.80E-05 | 0.0041099 | -0.099939 |
| 16w_SITTE12 | 0.03243412 | 0.18511131 | 4.27E-05 | 0.004099  | -0.094772 |
| 16w_SITTE12 | 0.02285355 | 0.12730129 | 3.55E-05 | 0.0043197 | -0.056631 |
| 16w_SITTE12 | 0.07422907 | 0.43730587 | 6.24E-05 | 0.014051  | 0.13074   |
| 16w_SITTE12 | 0.08720814 | 0.5156228  | 6.41E-05 | 0.01993   | 0.087329  |
| 16w_SITTE12 | 0.06098078 | 0.3573645  | 6.06E-05 | 0.008866  | 0.080421  |
| 16w_SITTE12 | 0.03801553 | 0.21879007 | 4.81E-05 | 0.0043756 | -0.04622  |
| 16w_SITTE12 | 0.01920275 | 0.10527203 | 3.38E-05 | 0.004741  | 0.017998  |
| 16w_SITTE12 | 0.09874785 | 0.58525443 | 6.52E-05 | 0.024275  | -0.094455 |
| 16w_SITTE12 | 0.01316437 | 0.06883588 | 3.24E-05 | 0.0057681 | 0.23179   |
| 16w_SITTE12 | 0.00761372 | 0.03534278 | 3.19E-05 | 0.0073923 | 0.48652   |
| 16w_SITTE12 | 0.03023973 | 0.17187017 | 4.07E-05 | 0.0040668 | -0.10475  |
| 16w_SITTE12 | 0.12110245 | 0.72014415 | 6.66E-05 | 0.02449   | -0.37656  |
| 16w_SITTE12 | 0.02116117 | 0.11708928 | 3.47E-05 | 0.0044724 | -0.023601 |
| 16w_SITTE12 | 0.05515406 | 0.32220554 | 5.94E-05 | 0.0071062 | 0.065685  |
| 16w_SITTE12 | 0.01762939 | 0.09577821 | 3.34E-05 | 0.0049043 | 0.067421  |
| 16w_SITTE12 | 0.09142398 | 0.5410615  | 6.45E-05 | 0.021822  | 0.036126  |
| 16w_SITTE12 | 0.00958973 | 0.04726616 | 3.20E-05 | 0.0068348 | 0.4058    |
| 16w_SITTE12 | 0.01217997 | 0.06289592 | 3.23E-05 | 0.0060411 | 0.2791    |
| 16w_SITTE12 | 0.0190919  | 0.10460313 | 3.38E-05 | 0.004741  | 0.03364   |
| 16w_SITTE12 | 0.07691632 | 0.45352095 | 6.28E-05 | 0.015307  | 0.13605   |
| 16w_SITTE12 | 0.02255253 | 0.12548491 | 3.55E-05 | 0.0043197 | -0.056631 |
| 16w_SITTE12 | 0.02440949 | 0.13668999 | 3.64E-05 | 0.0042065 | -0.080664 |
| 16w_SITTE12 | 0.10867368 | 0.6451478  | 6.59E-05 | 0.025616  | -0.25305  |
| 16w_SITTE12 | 0.09587034 | 0.56789124 | 6.50E-05 | 0.023448  | -0.035993 |
| 16w_SITTE12 | 0.07623963 | 0.4494378  | 6.26E-05 | 0.0148    | 0.1354    |
| 16w_SITTE12 | 0.11836975 | 0.70365477 | 6.65E-05 | 0.024847  | -0.35363  |
| 16w_SITTE12 | 0.02033997 | 0.11213414 | 3.44E-05 | 0.0045325 | -0.01065  |
| 16w_SITTE12 | 0.14795826 | 0.8821946  | 6.76E-05 | 0.02368   | -0.51946  |
| 16w_SITTE12 | 0.12804888 | 0.76205957 | 6.69E-05 | 0.023757  | -0.4283   |
| 16w_SITTE12 | 0.09899234 | 0.5867297  | 6.52E-05 | 0.024275  | -0.094455 |
| 16w_SITTE12 | 0.02544623 | 0.14294575 | 3.72E-05 | 0.0041509 | -0.092011 |
| 16w_SITTE12 | 0.08322622 | 0.4915955  | 6.36E-05 | 0.018151  | 0.12434   |
| 16w_SITTE12 | 0.00954052 | 0.04696921 | 3.20E-05 | 0.0068348 | 0.4058    |
| 16w_SITTE12 | 0.08159865 | 0.4817746  | 6.34E-05 | 0.017373  | 0.12948   |
| 16w_SITTE12 | 0.02624825 | 0.14778523 | 3.76E-05 | 0.0041286 | -0.096385 |
| 16w_SITTE12 | 0.02802275 | 0.15849273 | 3.88E-05 | 0.0040827 | -0.10603  |
| 16w_SITTE12 | 0.01693121 | 0.09156531 | 3.31E-05 | 0.0050879 | 0.10435   |
| 16w_SITTE12 | 0.0145292  | 0.0770714  | 3.26E-05 | 0.0055188 | 0.18676   |

|             |            |            |          |           |           |
|-------------|------------|------------|----------|-----------|-----------|
| 16w_SITTE12 | 0.07314274 | 0.43075085 | 6.23E-05 | 0.013561  | 0.12737   |
| 16w_SITTE12 | 0.09696006 | 0.57446676 | 6.51E-05 | 0.023799  | -0.055297 |
| 16w_SITTE12 | 0.06268141 | 0.36762625 | 6.08E-05 | 0.0094206 | 0.085432  |
| 16w_SITTE12 | 0.01984061 | 0.10912091 | 3.42E-05 | 0.0045972 | 0.0032259 |
| 16w_SITTE12 | 0.07485292 | 0.44107026 | 6.25E-05 | 0.014299  | 0.13218   |
| 16w_SITTE12 | 0.02481512 | 0.13913757 | 3.68E-05 | 0.0041768 | -0.086782 |
| 16w_SITTE12 | 0.04713382 | 0.27381068 | 5.61E-05 | 0.0054936 | 0.032113  |
| 16w_SITTE12 | 0.07151716 | 0.42094195 | 6.20E-05 | 0.012843  | 0.12136   |
| 16w_SITTE12 | 0.02033985 | 0.11213337 | 3.44E-05 | 0.0045325 | -0.01065  |
| 16w_SITTE12 | 0.05360156 | 0.3128376  | 5.91E-05 | 0.0068337 | 0.060836  |
| 16w_SITTE12 | 0.06734573 | 0.39577118 | 6.14E-05 | 0.011039  | 0.10492   |
| 16w_SITTE12 | 0.00833618 | 0.03970216 | 3.19E-05 | 0.0071994 | 0.45929   |
| 16w_SITTE12 | 0.00913919 | 0.04454759 | 3.19E-05 | 0.0070136 | 0.43237   |
| 16w_SITTE12 | 0.06192051 | 0.36303493 | 6.07E-05 | 0.0092324 | 0.083692  |
| 16w_SITTE12 | 0.01684673 | 0.09105559 | 3.31E-05 | 0.0050879 | 0.10435   |
| 16w_SITTE12 | 0.0865233  | 0.5114904  | 6.40E-05 | 0.019681  | 0.099025  |
| 16w_SITTE12 | 0.03085109 | 0.17555918 | 4.11E-05 | 0.0040705 | -0.10299  |
| 16w_SITTE12 | 0.10794676 | 0.6407615  | 6.59E-05 | 0.025614  | -0.23822  |
| 16w_SITTE12 | 0.0371205  | 0.2133894  | 4.76E-05 | 0.0043355 | -0.057524 |
| 16w_SITTE12 | 0.01058581 | 0.0532766  | 3.21E-05 | 0.0064976 | 0.35381   |
| 16w_SITTE12 | 0.07845035 | 0.46277744 | 6.29E-05 | 0.015819  | 0.13651   |
| 16w_SITTE12 | 0.01560782 | 0.08357987 | 3.28E-05 | 0.0052924 | 0.1442    |
| 16w_SITTE12 | 0.07564085 | 0.44582468 | 6.26E-05 | 0.014549  | 0.13453   |
| 16w_SITTE12 | 0.01734429 | 0.09405787 | 3.33E-05 | 0.0049935 | 0.085504  |
| 16w_SITTE12 | 0.05228861 | 0.30491516 | 5.85E-05 | 0.0064518 | 0.055318  |
| 16w_SITTE12 | 0.0393656  | 0.2269365  | 4.98E-05 | 0.0045122 | -0.034672 |
| 16w_SITTE12 | 0.0193909  | 0.10640734 | 3.40E-05 | 0.0046667 | 0.017998  |
| 16w_SITTE12 | 0.04317715 | 0.24993579 | 5.33E-05 | 0.0049301 | 0.0036923 |
| 16w_SITTE12 | 0.03050761 | 0.17348658 | 4.11E-05 | 0.0040705 | -0.10475  |
| 16w_SITTE12 | 0.02501487 | 0.14034288 | 3.68E-05 | 0.0041768 | -0.086782 |
| 16w_SITTE12 | 0.01304418 | 0.06811065 | 3.23E-05 | 0.0059016 | 0.25518   |
| 16w_SITTE12 | 0.01493177 | 0.07950053 | 3.27E-05 | 0.0054028 | 0.16515   |
| 16w_SITTE12 | 0.05333558 | 0.3112327  | 5.89E-05 | 0.0067028 | 0.059084  |
| 16w_SITTE12 | 0.01909489 | 0.10462116 | 3.38E-05 | 0.004741  | 0.03364   |
| 16w_SITTE12 | 0.02324163 | 0.12964302 | 3.58E-05 | 0.0042778 | -0.065623 |
| 16w_SITTE12 | 0.03785515 | 0.21782234 | 4.81E-05 | 0.0043756 | -0.05192  |
| 16w_SITTE12 | 0.05920209 | 0.34663174 | 6.03E-05 | 0.0083426 | 0.075889  |
| 16w_SITTE12 | 0.0391504  | 0.225638   | 4.92E-05 | 0.0044639 | -0.034672 |
| 16w_SITTE12 | 0.12300988 | 0.73165375 | 6.67E-05 | 0.024217  | -0.38934  |
| 16w_SITTE12 | 0.04324493 | 0.25034475 | 5.33E-05 | 0.0049301 | 0.0036923 |
| 16w_SITTE12 | 0.01523016 | 0.08130103 | 3.27E-05 | 0.0054028 | 0.16515   |
| 16w_SITTE12 | 0.01482279 | 0.07884294 | 3.27E-05 | 0.0054028 | 0.16515   |
| 16w_SITTE12 | 0.0898106  | 0.53132623 | 6.44E-05 | 0.021137  | 0.059815  |

|             |            |            |          |           |           |
|-------------|------------|------------|----------|-----------|-----------|
| 16w_SITTE12 | 0.02087564 | 0.11536642 | 3.44E-05 | 0.0045325 | -0.023601 |
| 16w_SITTE12 | 0.12036607 | 0.71570075 | 6.66E-05 | 0.024561  | -0.37215  |
| 16w_SITTE12 | 0.03650096 | 0.20965102 | 4.70E-05 | 0.0042982 | -0.062998 |
| 16w_SITTE12 | 0.02967021 | 0.16843364 | 4.02E-05 | 0.0040662 | -0.10597  |
| 16w_SITTE12 | 0.02953214 | 0.16760048 | 4.02E-05 | 0.0040662 | -0.10661  |
| 16w_SITTE12 | 0.09180889 | 0.5433841  | 6.45E-05 | 0.021822  | 0.027741  |
| 16w_SITTE12 | 0.01861694 | 0.1017372  | 3.36E-05 | 0.0048202 | 0.03364   |
| 16w_SITTE12 | 0.02359085 | 0.13175024 | 3.58E-05 | 0.0042778 | -0.073623 |
| 16w_SITTE12 | 0.07531568 | 0.44386262 | 6.26E-05 | 0.014549  | 0.13345   |
| 16w_SITTE12 | 0.0232318  | 0.1295837  | 3.58E-05 | 0.0042778 | -0.065623 |
| 16w_SITTE12 | 0.02482783 | 0.13921426 | 3.68E-05 | 0.0041768 | -0.086782 |
| 16w_SITTE12 | 0.03866986 | 0.22273837 | 4.92E-05 | 0.0044639 | -0.040459 |
| 16w_SITTE12 | 0.1396761  | 0.83221924 | 6.73E-05 | 0.023551  | -0.49317  |
| 16w_SITTE12 | 0.08216798 | 0.48521    | 6.35E-05 | 0.017633  | 0.1271    |
| 16w_SITTE12 | 0.03254965 | 0.18580845 | 4.32E-05 | 0.0041142 | -0.094772 |
| 16w_SITTE12 | 0.00956273 | 0.04710324 | 3.20E-05 | 0.0068348 | 0.4058    |
| 16w_SITTE12 | 0.02636676 | 0.14850032 | 3.76E-05 | 0.0041286 | -0.099939 |
| 16w_SITTE12 | 0.08829984 | 0.5222102  | 6.42E-05 | 0.020421  | 0.074212  |
| 16w_SITTE12 | 0.1061193  | 0.6297344  | 6.58E-05 | 0.025526  | -0.21453  |
| 16w_SITTE12 | 0.08431996 | 0.49819526 | 6.37E-05 | 0.018667  | 0.1176    |
| 16w_SITTE12 | 0.07241686 | 0.42637086 | 6.21E-05 | 0.01308   | 0.12548   |
| 16w_SITTE12 | 0.02090276 | 0.11553007 | 3.47E-05 | 0.0044724 | -0.023601 |
| 16w_SITTE12 | 0.01130747 | 0.05763118 | 3.21E-05 | 0.006339  | 0.32844   |
| 16w_SITTE12 | 0.07027634 | 0.4134547  | 6.19E-05 | 0.012376  | 0.11689   |
| 16w_SITTE12 | 0.01130187 | 0.05759737 | 3.21E-05 | 0.006339  | 0.32844   |
| 16w_SITTE12 | 0.09964636 | 0.5906761  | 6.53E-05 | 0.024558  | -0.10426  |
| 16w_SITTE12 | 0.016663   | 0.08994691 | 3.31E-05 | 0.0050879 | 0.10435   |
| 16w_SITTE12 | 0.02349754 | 0.1311872  | 3.58E-05 | 0.0042778 | -0.065623 |
| 16w_SITTE12 | 0.11866991 | 0.705466   | 6.65E-05 | 0.024776  | -0.3584   |
| 16w_SITTE12 | 0.01074526 | 0.05423875 | 3.21E-05 | 0.0064976 | 0.35381   |
| 16w_SITTE12 | 0.02510449 | 0.14088367 | 3.68E-05 | 0.0041768 | -0.086782 |
| 16w_SITTE12 | 0.02252246 | 0.12530342 | 3.52E-05 | 0.0043661 | -0.056631 |
| 16w_SITTE12 | 0.02357577 | 0.13165925 | 3.58E-05 | 0.0042778 | -0.065623 |
| 16w_SITTE12 | 0.07921907 | 0.467416   | 6.31E-05 | 0.016335  | 0.13613   |
| 16w_SITTE12 | 0.11909024 | 0.7080023  | 6.65E-05 | 0.024704  | -0.3584   |
| 16w_SITTE12 | 0.10470044 | 0.6211729  | 6.57E-05 | 0.025429  | -0.18901  |
| 16w_SITTE12 | 0.11733672 | 0.6974214  | 6.64E-05 | 0.024917  | -0.34377  |
| 16w_SITTE12 | 0.08278208 | 0.48891553 | 6.35E-05 | 0.017892  | 0.12434   |
| 16w_SITTE12 | 0.02137265 | 0.11836538 | 3.47E-05 | 0.0044724 | -0.0356   |
| 16w_SITTE12 | 0.02486772 | 0.13945495 | 3.68E-05 | 0.0041768 | -0.086782 |
| 16w_SITTE12 | 0.0091802  | 0.04479503 | 3.19E-05 | 0.0070136 | 0.43237   |
| 16w_SITTE12 | 0.01219967 | 0.06301478 | 3.23E-05 | 0.0060411 | 0.2791    |
| 16w_SITTE12 | 0.06651346 | 0.39074922 | 6.13E-05 | 0.010826  | 0.10013   |



|             |            |            |          |           |           |
|-------------|------------|------------|----------|-----------|-----------|
| 16w_SITTE12 | 0.11546062 | 0.68610084 | 6.63E-05 | 0.025182  | -0.32814  |
| 16w_SITTE12 | 0.05762171 | 0.3370956  | 6.00E-05 | 0.0078516 | 0.071569  |
| 16w_SITTE12 | 0.01503643 | 0.08013206 | 3.27E-05 | 0.0054028 | 0.16515   |
| 16w_SITTE12 | 0.01067231 | 0.05379859 | 3.21E-05 | 0.0064976 | 0.35381   |
| 16w_SITTE12 | 0.01805677 | 0.09835704 | 3.34E-05 | 0.0049043 | 0.050123  |
| 16w_SITTE12 | 0.01544926 | 0.08262313 | 3.28E-05 | 0.0052924 | 0.1442    |
| 16w_SITTE12 | 0.02265209 | 0.12608565 | 3.55E-05 | 0.0043197 | -0.056631 |
| 16w_SITTE12 | 0.0529464  | 0.30888435 | 5.87E-05 | 0.0065755 | 0.059084  |
| 16w_SITTE12 | 0.0471092  | 0.27366212 | 5.61E-05 | 0.0054936 | 0.032113  |
| 16w_SITTE12 | 0.01615345 | 0.08687224 | 3.30E-05 | 0.0051875 | 0.12392   |
| 16w_SITTE12 | 0.01043795 | 0.05238443 | 3.21E-05 | 0.0064976 | 0.35381   |
| 16w_SITTE12 | 0.08417393 | 0.49731407 | 6.37E-05 | 0.018667  | 0.1176    |
| 16w_SITTE12 | 0.08687768 | 0.5136287  | 6.41E-05 | 0.01993   | 0.093363  |
| 16w_SITTE12 | 0.01144654 | 0.05847031 | 3.21E-05 | 0.006339  | 0.30353   |
| 16w_SITTE12 | 0.01955782 | 0.10741452 | 3.40E-05 | 0.0046667 | 0.017998  |
| 16w_SITTE12 | 0.11899529 | 0.70742935 | 6.65E-05 | 0.024704  | -0.3584   |
| 16w_SITTE12 | 0.07876489 | 0.46467543 | 6.30E-05 | 0.016077  | 0.13651   |
| 16w_SITTE12 | 0.12172086 | 0.72387564 | 6.66E-05 | 0.024419  | -0.38089  |
| 16w_SITTE12 | 0.07692959 | 0.4536011  | 6.28E-05 | 0.015307  | 0.13605   |
| 16w_SITTE12 | 0.01443673 | 0.07651339 | 3.26E-05 | 0.0055188 | 0.18676   |
| 16w_SITTE12 | 0.02261042 | 0.12583421 | 3.55E-05 | 0.0043197 | -0.056631 |
| 16w_SITTE12 | 0.05705334 | 0.333666   | 5.99E-05 | 0.0076952 | 0.070131  |
| 16w_SITTE12 | 0.07271075 | 0.4281442  | 6.22E-05 | 0.01332   | 0.12548   |
| 16w_SITTE12 | 0.0979372  | 0.58036286 | 6.52E-05 | 0.024123  | -0.074831 |
| 16w_SITTE12 | 0.07522123 | 0.44329265 | 6.26E-05 | 0.014549  | 0.13345   |
| 16w_SITTE12 | 0.03781745 | 0.21759482 | 4.81E-05 | 0.0043756 | -0.05192  |
| 16w_SITTE12 | 0.06712369 | 0.39443135 | 6.14E-05 | 0.011039  | 0.10251   |
| 16w_SITTE12 | 0.07576029 | 0.44654542 | 6.26E-05 | 0.0148    | 0.13453   |
| 16w_SITTE12 | 0.05098542 | 0.29705155 | 5.81E-05 | 0.006215  | 0.051138  |
| 16w_SITTE12 | 0.0763609  | 0.45016956 | 6.27E-05 | 0.015053  | 0.1354    |
| 16w_SITTE12 | 0.02780071 | 0.1571529  | 3.88E-05 | 0.0040827 | -0.10472  |
| 16w_SITTE12 | 0.00612362 | 0.02635133 | 3.18E-05 | 0.008015  | 0.56984   |
| 16w_SITTE12 | 0.11411485 | 0.6779803  | 6.63E-05 | 0.025299  | -0.31137  |
| 16w_SITTE12 | 0.12375302 | 0.7361379  | 6.67E-05 | 0.024153  | -0.39752  |
| 16w_SITTE12 | 0.10497983 | 0.62285876 | 6.57E-05 | 0.025429  | -0.19772  |
| 16w_SITTE12 | 0.06900337 | 0.40577352 | 6.16E-05 | 0.011695  | 0.11218   |
| 16w_SITTE12 | 0.03231695 | 0.18440431 | 4.27E-05 | 0.004099  | -0.097962 |
| 16w_SITTE12 | 0.02766222 | 0.15631723 | 3.88E-05 | 0.0040827 | -0.10472  |
| 16w_SITTE12 | 0.01579732 | 0.08472337 | 3.28E-05 | 0.0052924 | 0.1442    |
| 16w_SITTE12 | 0.01958037 | 0.10755063 | 3.40E-05 | 0.0046667 | 0.017998  |
| 16w_SITTE12 | 0.05166515 | 0.30115315 | 5.83E-05 | 0.0063316 | 0.053285  |
| 16w_SITTE12 | 0.0741472  | 0.4368119  | 6.24E-05 | 0.014051  | 0.13074   |
| 16w_SITTE12 | 0.11730244 | 0.69721454 | 6.64E-05 | 0.024986  | -0.34377  |

|             |            |            |          |           |           |
|-------------|------------|------------|----------|-----------|-----------|
| 16w_SITTE12 | 0.01976025 | 0.10863604 | 3.40E-05 | 0.0046667 | 0.0032259 |
| 16w_SITTE12 | 0.01274681 | 0.06631628 | 3.23E-05 | 0.0059016 | 0.25518   |
| 16w_SITTE12 | 0.09502953 | 0.56281775 | 6.49E-05 | 0.023073  | -0.026471 |
| 16w_SITTE12 | 0.05632374 | 0.3292635  | 5.97E-05 | 0.0073934 | 0.068678  |
| 16w_SITTE12 | 0.03023359 | 0.17183313 | 4.07E-05 | 0.0040668 | -0.10475  |
| 16w_SITTE12 | 0.0237279  | 0.13257721 | 3.61E-05 | 0.0042401 | -0.073623 |
| 16w_SITTE12 | 0.06203187 | 0.3637069  | 6.07E-05 | 0.0092324 | 0.083692  |
| 16w_SITTE12 | 0.08149762 | 0.48116496 | 6.34E-05 | 0.017373  | 0.13148   |
| 16w_SITTE12 | 0.02081513 | 0.11500128 | 3.44E-05 | 0.0045325 | -0.01065  |
| 16w_SITTE12 | 0.09368715 | 0.55471766 | 6.48E-05 | 0.022676  | 0.0013661 |
| 16w_SITTE12 | 0.05352088 | 0.3123508  | 5.89E-05 | 0.0067028 | 0.060836  |
| 16w_SITTE12 | 0.09921901 | 0.58809745 | 6.53E-05 | 0.02442   | -0.094455 |
| 16w_SITTE12 | 0.02366816 | 0.13221674 | 3.61E-05 | 0.0042401 | -0.073623 |
| 16w_SITTE12 | 0.08285888 | 0.48937896 | 6.35E-05 | 0.017892  | 0.12434   |
| 16w_SITTE12 | 0.0470822  | 0.2734992  | 5.61E-05 | 0.0054936 | 0.032113  |
| 16w_SITTE12 | 0.02151327 | 0.11921391 | 3.49E-05 | 0.0044169 | -0.0356   |
| 16w_SITTE12 | 0.00564334 | 0.02345332 | 3.18E-05 | 0.0082375 | 0.59807   |
| 16w_SITTE12 | 0.03120859 | 0.17771639 | 4.16E-05 | 0.0040771 | -0.10299  |
| 16w_SITTE12 | 0.00514058 | 0.02041958 | 3.18E-05 | 0.0084677 | 0.62647   |
| 16w_SITTE12 | 0.01947549 | 0.10691776 | 3.40E-05 | 0.0046667 | 0.017998  |
| 16w_SITTE12 | 0.07797544 | 0.4599118  | 6.29E-05 | 0.015819  | 0.13662   |
| 16w_SITTE12 | 0.08714219 | 0.5152248  | 6.41E-05 | 0.01993   | 0.087329  |
| 16w_SITTE12 | 0.02981838 | 0.16932769 | 4.07E-05 | 0.0040668 | -0.10597  |
| 16w_SITTE12 | 0.02357075 | 0.13162895 | 3.58E-05 | 0.0042778 | -0.065623 |
| 16w_SITTE12 | 0.04312468 | 0.24961916 | 5.33E-05 | 0.0049301 | 0.0036923 |
| 16w_SITTE12 | 0.0955608  | 0.56602347 | 6.49E-05 | 0.023263  | -0.035993 |
| 16w_SITTE12 | 0.01043214 | 0.05234936 | 3.21E-05 | 0.0064976 | 0.35381   |
| 16w_SITTE12 | 0.01191336 | 0.06128718 | 3.22E-05 | 0.0061869 | 0.30353   |
| 16w_SITTE12 | 0.10053416 | 0.5960332  | 6.53E-05 | 0.024687  | -0.12375  |
| 16w_SITTE12 | 0.02331052 | 0.13005869 | 3.58E-05 | 0.0042778 | -0.065623 |
| 16w_SITTE12 | 0.09088419 | 0.5378044  | 6.45E-05 | 0.021597  | 0.044278  |
| 16w_SITTE12 | 0.01334592 | 0.06993138 | 3.24E-05 | 0.0057681 | 0.23179   |
| 16w_SITTE12 | 0.09098385 | 0.5384058  | 6.45E-05 | 0.021597  | 0.036126  |
| 16w_SITTE12 | 0.06416655 | 0.37658772 | 6.10E-05 | 0.010005  | 0.091185  |
| 16w_SITTE12 | 0.10238298 | 0.6071891  | 6.55E-05 | 0.025127  | -0.15246  |
| 16w_SITTE12 | 0.01601479 | 0.0860356  | 3.30E-05 | 0.0051875 | 0.12392   |
| 16w_SITTE12 | 0.05950398 | 0.34845334 | 6.03E-05 | 0.0083426 | 0.077363  |
| 16w_SITTE12 | 0.0363855  | 0.20895435 | 4.65E-05 | 0.0042637 | -0.062998 |
| 16w_SITTE12 | 0.04599099 | 0.26691473 | 5.54E-05 | 0.0053171 | 0.025099  |
| 16w_SITTE12 | 0.01752688 | 0.09515969 | 3.33E-05 | 0.0049935 | 0.067421  |
| 16w_SITTE12 | 0.01597963 | 0.08582339 | 3.30E-05 | 0.0051875 | 0.12392   |
| 16w_SITTE12 | 0.01830436 | 0.09985107 | 3.36E-05 | 0.0048202 | 0.050123  |
| 16w_SITTE12 | 0.02654858 | 0.14959742 | 3.80E-05 | 0.0041099 | -0.099939 |

|             |            |            |          |           |           |
|-------------|------------|------------|----------|-----------|-----------|
| 16w_SITTE12 | 0.0300267  | 0.17058474 | 4.07E-05 | 0.0040668 | -0.10597  |
| 16w_SITTE12 | 0.01945338 | 0.10678433 | 3.40E-05 | 0.0046667 | 0.017998  |
| 16w_SITTE12 | 0.07840281 | 0.46249062 | 6.29E-05 | 0.015819  | 0.13651   |
| 16w_SITTE12 | 0.11058413 | 0.65667564 | 6.60E-05 | 0.02558   | -0.27396  |
| 16w_SITTE12 | 0.02725508 | 0.15386051 | 3.84E-05 | 0.0040947 | -0.10271  |
| 16w_SITTE12 | 0.02167572 | 0.12019412 | 3.49E-05 | 0.0044169 | -0.0356   |
| 16w_SITTE12 | 0.07938635 | 0.46842536 | 6.31E-05 | 0.016335  | 0.13545   |
| 16w_SITTE12 | 0.10683058 | 0.63402635 | 6.58E-05 | 0.025586  | -0.22263  |
| 16w_SITTE12 | 0.03166789 | 0.18048784 | 4.22E-05 | 0.0040866 | -0.10071  |
| 16w_SITTE12 | 0.06261597 | 0.36723137 | 6.08E-05 | 0.0094206 | 0.085432  |
| 16w_SITTE12 | 0.02073284 | 0.1145047  | 3.44E-05 | 0.0045325 | -0.01065  |
| 16w_SITTE12 | 0.12550576 | 0.7467141  | 6.68E-05 | 0.023978  | -0.40938  |
| 16w_SITTE12 | 0.02111255 | 0.11679591 | 3.47E-05 | 0.0044724 | -0.023601 |
| 16w_SITTE12 | 0.01968381 | 0.10817477 | 3.40E-05 | 0.0046667 | 0.017998  |
| 16w_SITTE12 | 0.01605221 | 0.08626136 | 3.30E-05 | 0.0051875 | 0.12392   |
| 16w_SITTE12 | 0.01315201 | 0.06876129 | 3.24E-05 | 0.0057681 | 0.23179   |
| 16w_SITTE12 | 0.02848736 | 0.16129619 | 3.93E-05 | 0.004074  | -0.10603  |
| 16w_SITTE12 | 0.09618742 | 0.56980455 | 6.50E-05 | 0.023448  | -0.045608 |
| 16w_SITTE12 | 0.01462513 | 0.0776502  | 3.26E-05 | 0.0055188 | 0.18676   |
| 16w_SITTE12 | 0.09077767 | 0.53716165 | 6.45E-05 | 0.021597  | 0.044278  |
| 16w_SITTE12 | 0.06963304 | 0.409573   | 6.17E-05 | 0.01192   | 0.11455   |
| 16w_SITTE12 | 0.02385174 | 0.13332444 | 3.61E-05 | 0.0042401 | -0.073623 |
| 16w_SITTE12 | 0.03681865 | 0.211568   | 4.70E-05 | 0.0042982 | -0.062998 |
| 16w_SITTE12 | 0.01003846 | 0.04997383 | 3.20E-05 | 0.0066628 | 0.37961   |
| 16w_SITTE12 | 0.01857123 | 0.10146139 | 3.36E-05 | 0.0048202 | 0.050123  |
| 16w_SITTE12 | 0.01559481 | 0.08350138 | 3.28E-05 | 0.0052924 | 0.1442    |
| 16w_SITTE12 | 0.10655484 | 0.6323625  | 6.58E-05 | 0.02556   | -0.22263  |
| 16w_SITTE12 | 0.0285136  | 0.16145456 | 3.93E-05 | 0.004074  | -0.10603  |
| 16w_SITTE12 | 0.10032903 | 0.59479547 | 6.53E-05 | 0.024687  | -0.11403  |
| 16w_SITTE12 | 0.02175214 | 0.12065527 | 3.49E-05 | 0.0044169 | -0.0356   |
| 16w_SITTE12 | 0.01922176 | 0.10538673 | 3.40E-05 | 0.0046667 | 0.017998  |
| 16w_SITTE12 | 0.0306409  | 0.17429087 | 4.11E-05 | 0.0040705 | -0.10475  |
| 16w_SITTE12 | 0.01835473 | 0.10015499 | 3.36E-05 | 0.0048202 | 0.050123  |
| 16w_SITTE12 | 0.01456031 | 0.0772591  | 3.26E-05 | 0.0055188 | 0.18676   |
| 16w_SITTE12 | 0.01766166 | 0.09597291 | 3.34E-05 | 0.0049043 | 0.067421  |
| 16w_SITTE12 | 0.0544597  | 0.31801572 | 5.92E-05 | 0.0069681 | 0.062513  |
| 16w_SITTE12 | 0.09497644 | 0.5624974  | 6.49E-05 | 0.023073  | -0.026471 |
| 16w_SITTE12 | 0.01213033 | 0.06259637 | 3.23E-05 | 0.0060411 | 0.2791    |
| 16w_SITTE12 | 0.0437615  | 0.2534618  | 5.38E-05 | 0.0050014 | 0.008455  |
| 16w_SITTE12 | 0.04780142 | 0.277839   | 5.64E-05 | 0.0055867 | 0.035328  |
| 16w_SITTE12 | 0.08931637 | 0.528344   | 6.43E-05 | 0.020902  | 0.059815  |
| 16w_SITTE12 | 0.09123483 | 0.53992015 | 6.45E-05 | 0.021597  | 0.036126  |
| 16w_SITTE12 | 0.02216205 | 0.12312871 | 3.52E-05 | 0.0043661 | -0.046619 |

|             |            |            |          |           |            |
|-------------|------------|------------|----------|-----------|------------|
| 16w_SITTE12 | 0.01662597 | 0.08972346 | 3.31E-05 | 0.0050879 | 0.10435    |
| 16w_SITTE12 | 0.0725883  | 0.42740533 | 6.22E-05 | 0.01332   | 0.12548    |
| 16w_SITTE12 | 0.04061268 | 0.23446149 | 5.09E-05 | 0.0046173 | -0.023154  |
| 16w_SITTE12 | 0.06097071 | 0.35730374 | 6.06E-05 | 0.008866  | 0.080421   |
| 16w_SITTE12 | 0.09536379 | 0.5648347  | 6.49E-05 | 0.023263  | -0.026471  |
| 16w_SITTE12 | 0.02614358 | 0.1471536  | 3.76E-05 | 0.0041286 | -0.096385  |
| 16w_SITTE12 | 0.02210697 | 0.12279632 | 3.52E-05 | 0.0043661 | -0.046619  |
| 16w_SITTE12 | 0.07833175 | 0.46206182 | 6.29E-05 | 0.015819  | 0.13651    |
| 16w_SITTE12 | 0.01873205 | 0.10243174 | 3.38E-05 | 0.004741  | 0.03364    |
| 16w_SITTE12 | 0.01428123 | 0.07557509 | 3.26E-05 | 0.0055188 | 0.18676    |
| 16w_SITTE12 | 0.06212828 | 0.3642886  | 6.07E-05 | 0.0092324 | 0.083692   |
| 16w_SITTE12 | 0.0710794  | 0.41830045 | 6.20E-05 | 0.012608  | 0.11916    |
| 16w_SITTE12 | 0.01811579 | 0.09871318 | 3.36E-05 | 0.0048202 | 0.050123   |
| 16w_SITTE12 | 0.01697696 | 0.09184138 | 3.31E-05 | 0.0050879 | 0.085504   |
| 16w_SITTE12 | 0.02328127 | 0.12988217 | 3.58E-05 | 0.0042778 | -0.065623  |
| 16w_SITTE12 | 0.01764756 | 0.09588786 | 3.34E-05 | 0.0049043 | 0.067421   |
| 16w_SITTE12 | 0.01981575 | 0.1089709  | 3.42E-05 | 0.0045972 | 0.0032259  |
| 16w_SITTE12 | 0.03466231 | 0.19855647 | 4.48E-05 | 0.0041765 | -0.078293  |
| 16w_SITTE12 | 0.01814212 | 0.09887206 | 3.36E-05 | 0.0048202 | 0.050123   |
| 16w_SITTE12 | 0.09912253 | 0.5875153  | 6.53E-05 | 0.02442   | -0.094455  |
| 16w_SITTE12 | 0.00971377 | 0.04801463 | 3.20E-05 | 0.0068348 | 0.4058     |
| 16w_SITTE12 | 0.09641392 | 0.5711713  | 6.50E-05 | 0.023626  | -0.045608  |
| 16w_SITTE12 | 0.02374861 | 0.13270219 | 3.61E-05 | 0.0042401 | -0.073623  |
| 16w_SITTE12 | 0.03024242 | 0.17188641 | 4.07E-05 | 0.0040668 | -0.10475   |
| 16w_SITTE12 | 0.09683489 | 0.57371145 | 6.51E-05 | 0.023799  | -0.055297  |
| 16w_SITTE12 | 0.09656465 | 0.5720808  | 6.50E-05 | 0.023626  | -0.055297  |
| 16w_SITTE12 | 0.07722428 | 0.45537928 | 6.28E-05 | 0.015307  | 0.13646    |
| 16w_SITTE12 | 0.10616374 | 0.6300026  | 6.58E-05 | 0.025526  | -0.21453   |
| 16w_SITTE12 | 0.01625426 | 0.08748055 | 3.30E-05 | 0.0051875 | 0.12392    |
| 16w_SITTE12 | 0.04641869 | 0.2694955  | 5.57E-05 | 0.0054037 | 0.028707   |
| 16w_SITTE12 | 0.01773919 | 0.09644079 | 3.34E-05 | 0.0049043 | 0.067421   |
| 16w_SITTE12 | 0.02441569 | 0.1367274  | 3.64E-05 | 0.0042065 | -0.080664  |
| 16w_SITTE12 | 0.09404921 | 0.5569024  | 6.48E-05 | 0.022877  | -0.0077738 |
| 16w_SITTE12 | 0.02344843 | 0.13089083 | 3.58E-05 | 0.0042778 | -0.065623  |
| 16w_SITTE12 | 0.04887211 | 0.28429967 | 5.70E-05 | 0.0057827 | 0.041222   |
| 16w_SITTE12 | 0.05633312 | 0.32932007 | 5.97E-05 | 0.0073934 | 0.068678   |
| 16w_SITTE12 | 0.02918867 | 0.16552795 | 3.97E-05 | 0.0040686 | -0.10661   |
| 16w_SITTE12 | 0.05348682 | 0.3121453  | 5.89E-05 | 0.0067028 | 0.060836   |
| 16w_SITTE12 | 0.06140439 | 0.3599206  | 6.07E-05 | 0.0090475 | 0.082025   |
| 16w_SITTE12 | 0.0493849  | 0.28739393 | 5.73E-05 | 0.0058857 | 0.04392    |
| 16w_SITTE12 | 0.07969125 | 0.4702652  | 6.32E-05 | 0.016594  | 0.13545    |
| 16w_SITTE12 | 0.03838898 | 0.22104348 | 4.87E-05 | 0.0044183 | -0.04622   |
| 16w_SITTE12 | 0.0227987  | 0.1269703  | 3.55E-05 | 0.0043197 | -0.056631  |

|             |            |            |          |           |           |
|-------------|------------|------------|----------|-----------|-----------|
| 16w_SITTE12 | 0.01865061 | 0.10194034 | 3.36E-05 | 0.0048202 | 0.03364   |
| 16w_SITTE12 | 0.11496471 | 0.68310845 | 6.63E-05 | 0.025242  | -0.32268  |
| 16w_SITTE12 | 0.0227409  | 0.12662153 | 3.55E-05 | 0.0043197 | -0.056631 |
| 16w_SITTE12 | 0.02972585 | 0.16876939 | 4.02E-05 | 0.0040662 | -0.10597  |
| 16w_SITTE12 | 0.00626231 | 0.02718824 | 3.18E-05 | 0.008015  | 0.56984   |
| 16w_SITTE12 | 0.03547252 | 0.2034453  | 4.59E-05 | 0.0042319 | -0.073417 |
| 16w_SITTE12 | 0.08643397 | 0.51095134 | 6.40E-05 | 0.019681  | 0.099025  |
| 16w_SITTE12 | 0.07746612 | 0.45683855 | 6.29E-05 | 0.015562  | 0.13646   |
| 16w_SITTE12 | 0.01141815 | 0.05829905 | 3.21E-05 | 0.006339  | 0.32844   |
| 16w_SITTE12 | 0.04560633 | 0.26459366 | 5.50E-05 | 0.0052335 | 0.021279  |
| 16w_SITTE12 | 0.05432143 | 0.31718135 | 5.92E-05 | 0.0069681 | 0.062513  |
| 16w_SITTE12 | 0.09604389 | 0.5689385  | 6.50E-05 | 0.023448  | -0.045608 |
| 16w_SITTE12 | 0.08408411 | 0.49677208 | 6.37E-05 | 0.018667  | 0.1176    |
| 16w_SITTE12 | 0.05190565 | 0.30260432 | 5.83E-05 | 0.0063316 | 0.055318  |
| 16w_SITTE12 | 0.05112442 | 0.29789034 | 5.81E-05 | 0.006215  | 0.051138  |
| 16w_SITTE12 | 0.09643164 | 0.5712782  | 6.50E-05 | 0.023626  | -0.045608 |
| 16w_SITTE12 | 0.02022943 | 0.1114671  | 3.42E-05 | 0.0045972 | 0.0032259 |
| 16w_SITTE12 | 0.09093539 | 0.5381133  | 6.45E-05 | 0.021597  | 0.044278  |
| 16w_SITTE12 | 0.09821811 | 0.58205795 | 6.52E-05 | 0.024123  | -0.084641 |
| 16w_SITTE12 | 0.03145614 | 0.17921013 | 4.22E-05 | 0.0040866 | -0.10071  |
| 16w_SITTE12 | 0.01141454 | 0.05827727 | 3.21E-05 | 0.006339  | 0.32844   |
| 16w_SITTE12 | 0.10018119 | 0.59390336 | 6.53E-05 | 0.024687  | -0.11403  |
| 16w_SITTE12 | 0.02308405 | 0.12869212 | 3.55E-05 | 0.0043197 | -0.065623 |
| 16w_SITTE12 | 0.0900339  | 0.53267366 | 6.44E-05 | 0.021137  | 0.05218   |
| 16w_SITTE12 | 0.05638659 | 0.32964274 | 5.98E-05 | 0.0075425 | 0.068678  |
| 16w_SITTE12 | 0.07454348 | 0.43920305 | 6.24E-05 | 0.014051  | 0.13218   |
| 16w_SITTE12 | 0.01133429 | 0.057793   | 3.21E-05 | 0.006339  | 0.32844   |
| 16w_SITTE12 | 0.01920695 | 0.10529738 | 3.38E-05 | 0.004741  | 0.017998  |
| 16w_SITTE12 | 0.09937847 | 0.58905965 | 6.53E-05 | 0.02442   | -0.10426  |
| 16w_SITTE12 | 0.08281601 | 0.48912024 | 6.35E-05 | 0.017892  | 0.12434   |
| 16w_SITTE12 | 0.07098442 | 0.41772735 | 6.20E-05 | 0.012608  | 0.11916   |
| 16w_SITTE12 | 0.11020403 | 0.65438205 | 6.60E-05 | 0.02558   | -0.26716  |
| 16w_SITTE12 | 0.11139464 | 0.6615663  | 6.61E-05 | 0.025525  | -0.28058  |
| 16w_SITTE12 | 0.01830147 | 0.09983359 | 3.36E-05 | 0.0048202 | 0.050123  |
| 16w_SITTE12 | 0.0222265  | 0.12351762 | 3.52E-05 | 0.0043661 | -0.046619 |
| 16w_SITTE12 | 0.08320651 | 0.49147654 | 6.36E-05 | 0.018151  | 0.12434   |
| 16w_SITTE12 | 0.0828821  | 0.48951906 | 6.35E-05 | 0.017892  | 0.12434   |
| 16w_SITTE12 | 0.09050957 | 0.5355439  | 6.44E-05 | 0.021369  | 0.044278  |
| 16w_SITTE12 | 0.11837959 | 0.70371413 | 6.65E-05 | 0.024847  | -0.35363  |
| 16w_SITTE12 | 0.08485087 | 0.5013988  | 6.38E-05 | 0.018923  | 0.1136    |
| 16w_SITTE12 | 0.00876182 | 0.04227048 | 3.19E-05 | 0.0070136 | 0.43237   |
| 16w_SITTE12 | 0.03345784 | 0.19128855 | 4.37E-05 | 0.0041322 | -0.091175 |
| 16w_SITTE12 | 0.03992066 | 0.23028582 | 5.03E-05 | 0.0045634 | -0.028892 |

|             |            |            |          |           |            |
|-------------|------------|------------|----------|-----------|------------|
| 16w_SITTE12 | 0.01631232 | 0.08783091 | 3.30E-05 | 0.0051875 | 0.12392    |
| 16w_SITTE12 | 0.02946284 | 0.16718234 | 4.02E-05 | 0.0040662 | -0.10661   |
| 16w_SITTE12 | 0.11129684 | 0.6609762  | 6.61E-05 | 0.025525  | -0.28058   |
| 16w_SITTE12 | 0.05372465 | 0.31358036 | 5.91E-05 | 0.0068337 | 0.060836   |
| 16w_SITTE12 | 0.08627129 | 0.5099697  | 6.39E-05 | 0.01943   | 0.099025   |
| 16w_SITTE12 | 0.14108963 | 0.84074867 | 6.74E-05 | 0.023566  | -0.4978    |
| 16w_SITTE12 | 0.0238451  | 0.13328438 | 3.61E-05 | 0.0042401 | -0.073623  |
| 16w_SITTE12 | 0.02029424 | 0.11185817 | 3.42E-05 | 0.0045972 | -0.01065   |
| 16w_SITTE12 | 0.05255671 | 0.3065329  | 5.87E-05 | 0.0065755 | 0.057248   |
| 16w_SITTE12 | 0.01122284 | 0.05712049 | 3.21E-05 | 0.006339  | 0.32844    |
| 16w_SITTE12 | 0.03388697 | 0.19387797 | 4.43E-05 | 0.004153  | -0.087207  |
| 16w_SITTE12 | 0.07103383 | 0.4180255  | 6.20E-05 | 0.012608  | 0.11916    |
| 16w_SITTE12 | 0.0174682  | 0.09480557 | 3.33E-05 | 0.0049935 | 0.085504   |
| 16w_SITTE12 | 0.02331347 | 0.1300765  | 3.58E-05 | 0.0042778 | -0.065623  |
| 16w_SITTE12 | 0.02485132 | 0.13935602 | 3.68E-05 | 0.0041768 | -0.086782  |
| 16w_SITTE12 | 0.01761455 | 0.09568869 | 3.34E-05 | 0.0049043 | 0.067421   |
| 16w_SITTE12 | 0.02271165 | 0.12644506 | 3.55E-05 | 0.0043197 | -0.056631  |
| 16w_SITTE12 | 0.02808027 | 0.1588398  | 3.88E-05 | 0.0040827 | -0.10603   |
| 16w_SITTE12 | 0.01726755 | 0.09359486 | 3.33E-05 | 0.0049935 | 0.085504   |
| 16w_SITTE12 | 0.01668651 | 0.09008879 | 3.31E-05 | 0.0050879 | 0.10435    |
| 16w_SITTE12 | 0.08839733 | 0.5227984  | 6.42E-05 | 0.020421  | 0.074212   |
| 16w_SITTE12 | 0.01510674 | 0.08055633 | 3.27E-05 | 0.0054028 | 0.16515    |
| 16w_SITTE12 | 0.07917941 | 0.4671767  | 6.31E-05 | 0.016335  | 0.13613    |
| 16w_SITTE12 | 0.05015493 | 0.29204035 | 5.76E-05 | 0.005992  | 0.048868   |
| 16w_SITTE12 | 0.02597821 | 0.14615579 | 3.76E-05 | 0.0041286 | -0.096385  |
| 16w_SITTE12 | 0.0867146  | 0.51264465 | 6.40E-05 | 0.019681  | 0.093363   |
| 16w_SITTE12 | 0.05430245 | 0.31706682 | 5.92E-05 | 0.0069681 | 0.062513   |
| 16w_SITTE12 | 0.02523432 | 0.14166708 | 3.68E-05 | 0.0041768 | -0.086782  |
| 16w_SITTE12 | 0.00882706 | 0.04266416 | 3.19E-05 | 0.0070136 | 0.43237    |
| 16w_SITTE12 | 0.0253409  | 0.14231022 | 3.72E-05 | 0.0041509 | -0.092011  |
| 16w_SITTE12 | 0.01445433 | 0.07661961 | 3.26E-05 | 0.0055188 | 0.18676    |
| 16w_SITTE12 | 0.08919304 | 0.5275998  | 6.43E-05 | 0.020902  | 0.067165   |
| 16w_SITTE12 | 0.04638931 | 0.26931825 | 5.57E-05 | 0.0054037 | 0.028707   |
| 16w_SITTE12 | 0.0630425  | 0.3698051  | 6.09E-05 | 0.0096122 | 0.087254   |
| 16w_SITTE12 | 0.01155811 | 0.05914357 | 3.22E-05 | 0.0061869 | 0.30353    |
| 16w_SITTE12 | 0.09387448 | 0.55584806 | 6.48E-05 | 0.022676  | -0.0077738 |
| 16w_SITTE12 | 0.07719271 | 0.45518875 | 6.28E-05 | 0.015307  | 0.13646    |
| 16w_SITTE12 | 0.07230584 | 0.42570096 | 6.21E-05 | 0.01308   | 0.12548    |
| 16w_SITTE12 | 0.01617967 | 0.08703048 | 3.30E-05 | 0.0051875 | 0.12392    |
| 16w_SITTE12 | 0.07074438 | 0.41627896 | 6.19E-05 | 0.012376  | 0.11916    |
| 16w_SITTE12 | 0.03433055 | 0.1965546  | 4.48E-05 | 0.0041765 | -0.082901  |
| 16w_SITTE12 | 0.01177881 | 0.06047529 | 3.22E-05 | 0.0061869 | 0.30353    |
| 16w_SITTE12 | 0.01111709 | 0.05648241 | 3.21E-05 | 0.006339  | 0.32844    |

|             |            |            |          |           |           |
|-------------|------------|------------|----------|-----------|-----------|
| 16w_SITTE12 | 0.09618614 | 0.5697968  | 6.50E-05 | 0.023448  | -0.045608 |
| 16w_SITTE12 | 0.13031435 | 0.7757296  | 6.70E-05 | 0.02364   | -0.44263  |
| 16w_SITTE12 | 0.0470808  | 0.2734908  | 5.61E-05 | 0.0054936 | 0.032113  |
| 16w_SITTE12 | 0.04517444 | 0.26198757 | 5.46E-05 | 0.0051531 | 0.021279  |
| 16w_SITTE12 | 0.01288023 | 0.06712138 | 3.23E-05 | 0.0059016 | 0.25518   |
| 16w_SITTE12 | 0.03384478 | 0.19362341 | 4.43E-05 | 0.004153  | -0.087207 |
| 16w_SITTE12 | 0.02120773 | 0.11737024 | 3.47E-05 | 0.0044724 | -0.023601 |
| 16w_SITTE12 | 0.1303653  | 0.77603704 | 6.70E-05 | 0.02364   | -0.44263  |
| 16w_SITTE12 | 0.02703748 | 0.15254748 | 3.84E-05 | 0.0040947 | -0.10271  |
| 16w_SITTE12 | 0.10779408 | 0.6398402  | 6.59E-05 | 0.025604  | -0.23822  |
| 16w_SITTE12 | 0.1208462  | 0.71859795 | 6.66E-05 | 0.02449   | -0.37656  |
| 16w_SITTE12 | 0.01207335 | 0.06225259 | 3.23E-05 | 0.0060411 | 0.2791    |
| 16w_SITTE12 | 0.01074703 | 0.05424943 | 3.21E-05 | 0.0064976 | 0.35381   |
| 16w_SITTE12 | 0.02307892 | 0.12866119 | 3.55E-05 | 0.0043197 | -0.065623 |
| 16w_SITTE12 | 0.06242061 | 0.3660526  | 6.07E-05 | 0.0092324 | 0.085432  |
| 16w_SITTE12 | 0.01717711 | 0.09304914 | 3.33E-05 | 0.0049935 | 0.085504  |
| 16w_SITTE12 | 0.03458347 | 0.19808072 | 4.48E-05 | 0.0041765 | -0.082901 |
| 16w_SITTE12 | 0.01486581 | 0.07910252 | 3.27E-05 | 0.0054028 | 0.16515   |
| 16w_SITTE12 | 0.03239557 | 0.1848787  | 4.27E-05 | 0.004099  | -0.097962 |
| 16w_SITTE12 | 0.03062672 | 0.17420533 | 4.11E-05 | 0.0040705 | -0.10475  |
| 16w_SITTE12 | 0.0230758  | 0.12864235 | 3.55E-05 | 0.0043197 | -0.065623 |
| 16w_SITTE12 | 0.01194947 | 0.06150506 | 3.22E-05 | 0.0061869 | 0.30353   |
| 16w_SITTE12 | 0.10608041 | 0.62949973 | 6.58E-05 | 0.025526  | -0.21453  |
| 16w_SITTE12 | 0.10661849 | 0.6327466  | 6.58E-05 | 0.02556   | -0.22263  |
| 16w_SITTE12 | 0.1080691  | 0.6414997  | 6.59E-05 | 0.025614  | -0.23822  |
| 16w_SITTE12 | 0.06611623 | 0.38835225 | 6.13E-05 | 0.010616  | 0.10013   |
| 16w_SITTE12 | 0.01764033 | 0.09584425 | 3.34E-05 | 0.0049043 | 0.067421  |
| 16w_SITTE12 | 0.0289139  | 0.16387    | 3.97E-05 | 0.0040686 | -0.10664  |
| 16w_SITTE12 | 0.03592144 | 0.20615412 | 4.65E-05 | 0.0042637 | -0.068307 |
| 16w_SITTE12 | 0.01503659 | 0.08013302 | 3.27E-05 | 0.0054028 | 0.16515   |
| 16w_SITTE12 | 0.07995506 | 0.47185707 | 6.32E-05 | 0.016594  | 0.13446   |
| 16w_SITTE12 | 0.02819462 | 0.15952976 | 3.93E-05 | 0.004074  | -0.10603  |
| 16w_SITTE12 | 0.01627316 | 0.08759462 | 3.30E-05 | 0.0051875 | 0.12392   |
| 16w_SITTE12 | 0.01649943 | 0.08895996 | 3.31E-05 | 0.0050879 | 0.10435   |
| 16w_SITTE12 | 0.08928054 | 0.5281278  | 6.43E-05 | 0.020902  | 0.067165  |
| 16w_SITTE12 | 0.01433771 | 0.07591592 | 3.26E-05 | 0.0055188 | 0.18676   |
| 16w_SITTE12 | 0.03764603 | 0.21656045 | 4.81E-05 | 0.0043756 | -0.05192  |
| 16w_SITTE12 | 0.02244036 | 0.12480804 | 3.52E-05 | 0.0043661 | -0.046619 |
| 16w_SITTE12 | 0.03399232 | 0.19451368 | 4.43E-05 | 0.004153  | -0.087207 |
| 16w_SITTE12 | 0.0895224  | 0.5295872  | 6.43E-05 | 0.020902  | 0.059815  |
| 16w_SITTE12 | 0.05306414 | 0.30959475 | 5.89E-05 | 0.0067028 | 0.059084  |
| 16w_SITTE12 | 0.08947621 | 0.5293085  | 6.43E-05 | 0.020902  | 0.059815  |
| 16w_SITTE12 | 0.02385938 | 0.13337055 | 3.61E-05 | 0.0042401 | -0.073623 |

|             |            |            |          |           |           |
|-------------|------------|------------|----------|-----------|-----------|
| 16w_SITTE12 | 0.11191733 | 0.6647203  | 6.61E-05 | 0.025489  | -0.28705  |
| 16w_SITTE12 | 0.02427126 | 0.1358559  | 3.64E-05 | 0.0042065 | -0.080664 |
| 16w_SITTE12 | 0.02427582 | 0.13588339 | 3.64E-05 | 0.0042065 | -0.080664 |
| 16w_SITTE12 | 0.02944622 | 0.16708209 | 4.02E-05 | 0.0040662 | -0.10661  |
| 16w_SITTE12 | 0.06391753 | 0.37508515 | 6.10E-05 | 0.0098069 | 0.091185  |
| 16w_SITTE12 | 0.02122911 | 0.11749923 | 3.47E-05 | 0.0044724 | -0.023601 |
| 16w_SITTE12 | 0.06713086 | 0.39447466 | 6.14E-05 | 0.011039  | 0.10251   |
| 16w_SITTE12 | 0.04118394 | 0.23790856 | 5.14E-05 | 0.0046741 | -0.017493 |
| 16w_SITTE12 | 0.02536392 | 0.1424491  | 3.72E-05 | 0.0041509 | -0.092011 |
| 16w_SITTE12 | 0.02777943 | 0.15702449 | 3.88E-05 | 0.0040827 | -0.10472  |
| 16w_SITTE12 | 0.01482394 | 0.07884987 | 3.27E-05 | 0.0054028 | 0.16515   |
| 16w_SITTE12 | 0.02548321 | 0.1431689  | 3.72E-05 | 0.0041509 | -0.092011 |
| 16w_SITTE12 | 0.02318785 | 0.12931846 | 3.58E-05 | 0.0042778 | -0.065623 |
| 16w_SITTE12 | 0.05683652 | 0.33235765 | 5.98E-05 | 0.0075425 | 0.070131  |
| 16w_SITTE12 | 0.07959208 | 0.46966678 | 6.31E-05 | 0.016335  | 0.13545   |
| 16w_SITTE12 | 0.05072646 | 0.29548898 | 5.78E-05 | 0.0061018 | 0.051138  |
| 16w_SITTE12 | 0.01607486 | 0.08639801 | 3.30E-05 | 0.0051875 | 0.12392   |
| 16w_SITTE12 | 0.05566332 | 0.32527846 | 5.95E-05 | 0.007248  | 0.067199  |
| 16w_SITTE12 | 0.01504968 | 0.08021202 | 3.27E-05 | 0.0054028 | 0.16515   |
| 16w_SITTE12 | 0.04598383 | 0.2668715  | 5.54E-05 | 0.0053171 | 0.025099  |
| 16w_SITTE12 | 0.02362909 | 0.13198096 | 3.58E-05 | 0.0042778 | -0.073623 |
| 16w_SITTE12 | 0.07765014 | 0.45794892 | 6.29E-05 | 0.015562  | 0.13646   |
| 16w_SITTE12 | 0.02839537 | 0.16074117 | 3.93E-05 | 0.004074  | -0.10603  |
| 16w_SITTE12 | 0.03185021 | 0.18158795 | 4.22E-05 | 0.0040866 | -0.10071  |
| 16w_SITTE12 | 0.05777516 | 0.33802146 | 6.00E-05 | 0.0078516 | 0.071569  |
| 16w_SITTE12 | 0.06422431 | 0.37693626 | 6.10E-05 | 0.010005  | 0.091185  |
| 16w_SITTE12 | 0.02843335 | 0.1609703  | 3.93E-05 | 0.004074  | -0.10603  |
| 16w_SITTE12 | 0.05607734 | 0.3277767  | 5.97E-05 | 0.0073934 | 0.067199  |
| 16w_SITTE12 | 0.08334411 | 0.49230686 | 6.36E-05 | 0.018151  | 0.12117   |
| 16w_SITTE12 | 0.03022897 | 0.17180523 | 4.07E-05 | 0.0040668 | -0.10475  |
| 16w_SITTE12 | 0.04157889 | 0.24029168 | 5.19E-05 | 0.0047337 | -0.011944 |
| 16w_SITTE12 | 0.12989402 | 0.7731933  | 6.70E-05 | 0.023664  | -0.43912  |
| 16w_SITTE12 | 0.05369053 | 0.31337446 | 5.91E-05 | 0.0068337 | 0.060836  |
| 16w_SITTE12 | 0.04346091 | 0.251648   | 5.33E-05 | 0.0049301 | 0.0036923 |
| 16w_SITTE12 | 0.03550874 | 0.20366386 | 4.59E-05 | 0.0042319 | -0.073417 |
| 16w_SITTE12 | 0.08156136 | 0.48154962 | 6.34E-05 | 0.017373  | 0.13148   |
| 16w_SITTE12 | 0.03206034 | 0.18285593 | 4.27E-05 | 0.004099  | -0.097962 |
| 16w_SITTE12 | 0.02149282 | 0.11909054 | 3.49E-05 | 0.0044169 | -0.0356   |
| 16w_SITTE12 | 0.0172546  | 0.09351669 | 3.33E-05 | 0.0049935 | 0.085504  |
| 16w_SITTE12 | 0.08661602 | 0.51204985 | 6.40E-05 | 0.019681  | 0.093363  |
| 16w_SITTE12 | 0.01548729 | 0.08285258 | 3.28E-05 | 0.0052924 | 0.1442    |
| 16w_SITTE12 | 0.00739818 | 0.03404214 | 3.19E-05 | 0.0075925 | 0.51404   |
| 16w_SITTE12 | 0.10521986 | 0.62430716 | 6.57E-05 | 0.025482  | -0.19772  |



|             |            |            |          |           |           |
|-------------|------------|------------|----------|-----------|-----------|
| 16w_SITTE12 | 0.01881785 | 0.1029495  | 3.38E-05 | 0.004741  | 0.03364   |
| 16w_SITTE12 | 0.03539389 | 0.20297086 | 4.59E-05 | 0.0042319 | -0.073417 |
| 16w_SITTE12 | 0.02822571 | 0.15971737 | 3.93E-05 | 0.004074  | -0.10603  |
| 16w_SITTE12 | 0.11525516 | 0.68486106 | 6.63E-05 | 0.025182  | -0.32268  |
| 16w_SITTE12 | 0.02177313 | 0.12078191 | 3.49E-05 | 0.0044169 | -0.0356   |
| 16w_SITTE12 | 0.01773248 | 0.09640025 | 3.34E-05 | 0.0049043 | 0.067421  |
| 16w_SITTE12 | 0.01590101 | 0.08534901 | 3.30E-05 | 0.0051875 | 0.12392   |
| 16w_SITTE12 | 0.08800525 | 0.52043253 | 6.42E-05 | 0.020421  | 0.080939  |
| 16w_SITTE12 | 0.0866344  | 0.5121607  | 6.40E-05 | 0.019681  | 0.093363  |
| 16w_SITTE12 | 0.0362037  | 0.20785731 | 4.65E-05 | 0.0042637 | -0.068307 |
| 16w_SITTE12 | 0.10136928 | 0.60107243 | 6.54E-05 | 0.024923  | -0.13341  |
| 16w_SITTE12 | 0.01975425 | 0.10859985 | 3.40E-05 | 0.0046667 | 0.0032259 |
| 16w_SITTE12 | 0.02818084 | 0.15944664 | 3.93E-05 | 0.004074  | -0.10603  |
| 16w_SITTE12 | 0.02572688 | 0.14463924 | 3.72E-05 | 0.0041509 | -0.092011 |
| 0-SS2       | 0.02386477 | 0.13340311 | 3.61E-05 | 0.0042401 | -0.073623 |
| 1-SS2       | 0.0139309  | 0.07346119 | 3.25E-05 | 0.0056405 | 0.20898   |
| 7-SS2       | 0.01816943 | 0.09903685 | 3.36E-05 | 0.0048202 | 0.050123  |
| 8-SS2       | 0.11081675 | 0.6580793  | 6.61E-05 | 0.025556  | -0.27396  |
| 9-SS2       | 0.02068541 | 0.1142185  | 3.44E-05 | 0.0045325 | -0.01065  |
| 11-SS2      | 0.01870273 | 0.10225486 | 3.38E-05 | 0.004741  | 0.03364   |
| 19-SS2      | 0.01701349 | 0.0920618  | 3.33E-05 | 0.0049935 | 0.085504  |
| 21-SS2      | 0.01939058 | 0.10640539 | 3.40E-05 | 0.0046667 | 0.017998  |
| 25-SS2      | 0.04572008 | 0.26528004 | 5.50E-05 | 0.0052335 | 0.025099  |
| 29-SS2      | 0.01756097 | 0.09536539 | 3.34E-05 | 0.0049043 | 0.067421  |
| 42-SS2      | 0.02332793 | 0.13016371 | 3.58E-05 | 0.0042778 | -0.065623 |
| 44-SS2      | 0.08277249 | 0.4888577  | 6.35E-05 | 0.017892  | 0.12434   |
| 46-SS2      | 0.01988101 | 0.10936471 | 3.42E-05 | 0.0045972 | 0.0032259 |
| 49-SS2      | 0.02003816 | 0.11031295 | 3.42E-05 | 0.0045972 | 0.0032259 |
| 51-SS2      | 0.01775506 | 0.09653655 | 3.34E-05 | 0.0049043 | 0.067421  |
| 58-SS2      | 0.02936392 | 0.16658549 | 4.02E-05 | 0.0040662 | -0.10661  |
| 62-SS2      | 0.01647784 | 0.08882967 | 3.31E-05 | 0.0050879 | 0.10435   |
| 64-SS2      | 0.02034257 | 0.11214978 | 3.44E-05 | 0.0045325 | -0.01065  |
| 66-SS2      | 0.0286902  | 0.16252014 | 3.97E-05 | 0.0040686 | -0.10664  |
| 73-SS2      | 0.10357805 | 0.61440027 | 6.56E-05 | 0.025296  | -0.17104  |
| 76-SS2      | 0.0055546  | 0.02291785 | 3.18E-05 | 0.0082375 | 0.59807   |
| 77-SS2      | 0.02361429 | 0.13189165 | 3.58E-05 | 0.0042778 | -0.073623 |
| 78-SS2      | 0.01959389 | 0.10763223 | 3.40E-05 | 0.0046667 | 0.017998  |
| 85-SS2      | 0.01184    | 0.06084449 | 3.22E-05 | 0.0061869 | 0.30353   |
| 87-SS2      | 0.09485263 | 0.5617503  | 6.49E-05 | 0.023073  | -0.026471 |
| 88-SS2      | 0.01606688 | 0.08634989 | 3.30E-05 | 0.0051875 | 0.12392   |
| 91-SS2      | 0.03887015 | 0.22394694 | 4.92E-05 | 0.0044639 | -0.040459 |
| 92-SS2      | 0.06210864 | 0.36417013 | 6.07E-05 | 0.0092324 | 0.083692  |
| 97-SS2      | 0.1405252  | 0.83734286 | 6.74E-05 | 0.023558  | -0.49553  |

|         |            |            |          |           |           |
|---------|------------|------------|----------|-----------|-----------|
| 101-SS2 | 0.01701441 | 0.09206735 | 3.33E-05 | 0.0049935 | 0.085504  |
| 103-SS2 | 0.0158162  | 0.08483729 | 3.28E-05 | 0.0052924 | 0.1442    |
| 108-SS2 | 0.06133703 | 0.35951415 | 6.06E-05 | 0.008866  | 0.082025  |
| 112-SS2 | 0.14230156 | 0.8480615  | 6.74E-05 | 0.023593  | -0.5021   |
| 114-SS2 | 0.13953367 | 0.8313598  | 6.73E-05 | 0.023551  | -0.49075  |
| 115-SS2 | 0.11237834 | 0.6675021  | 6.62E-05 | 0.025448  | -0.29336  |
| 116-SS2 | 0.04080663 | 0.23563182 | 5.09E-05 | 0.0046173 | -0.017493 |
| 120-SS2 | 0.01478514 | 0.07861576 | 3.27E-05 | 0.0054028 | 0.16515   |
| 125-SS2 | 0.0523463  | 0.30526328 | 5.85E-05 | 0.0064518 | 0.057248  |
| 128-SS2 | 0.02052846 | 0.11327149 | 3.44E-05 | 0.0045325 | -0.01065  |
| 133-SS2 | 0.01457702 | 0.07735996 | 3.26E-05 | 0.0055188 | 0.18676   |
| 135-SS2 | 0.10523356 | 0.62438977 | 6.57E-05 | 0.025482  | -0.19772  |
| 142-SS2 | 0.02155881 | 0.11948871 | 3.49E-05 | 0.0044169 | -0.0356   |
| 143-SS2 | 0.0087399  | 0.0421382  | 3.19E-05 | 0.0070136 | 0.43237   |
| 144-SS2 | 0.00515381 | 0.02049941 | 3.18E-05 | 0.0084677 | 0.62647   |
| 146-SS2 | 0.01632365 | 0.08789929 | 3.30E-05 | 0.0051875 | 0.12392   |
| 147-SS2 | 0.07957283 | 0.4695506  | 6.31E-05 | 0.016335  | 0.13545   |
| 148-SS2 | 0.02078119 | 0.11479648 | 3.44E-05 | 0.0045325 | -0.01065  |
| 149-SS2 | 0.01762697 | 0.0957636  | 3.34E-05 | 0.0049043 | 0.067421  |
| 150-SS2 | 0.01970341 | 0.10829306 | 3.40E-05 | 0.0046667 | 0.017998  |
| 155-SS2 | 0.01049548 | 0.05273156 | 3.21E-05 | 0.0064976 | 0.35381   |
| 158-SS2 | 0.08866336 | 0.52440363 | 6.42E-05 | 0.020663  | 0.074212  |
| 162-SS2 | 0.0201112  | 0.11075369 | 3.42E-05 | 0.0045972 | 0.0032259 |
| 166-SS2 | 0.02921523 | 0.16568826 | 4.02E-05 | 0.0040662 | -0.10661  |
| 169-SS2 | 0.01570059 | 0.08413965 | 3.28E-05 | 0.0052924 | 0.1442    |
| 171-SS2 | 0.09157821 | 0.5419921  | 6.45E-05 | 0.021822  | 0.027741  |
| 172-SS2 | 0.13525298 | 0.8055298  | 6.72E-05 | 0.023529  | -0.47171  |
| 173-SS2 | 0.01252696 | 0.06498967 | 3.23E-05 | 0.0060411 | 0.2791    |
| 174-SS2 | 0.01034722 | 0.05183694 | 3.20E-05 | 0.0066628 | 0.35381   |
| 177-SS2 | 0.01603573 | 0.0861619  | 3.30E-05 | 0.0051875 | 0.12392   |
| 178-SS2 | 0.10876239 | 0.6456831  | 6.59E-05 | 0.025616  | -0.25305  |
| 181-SS2 | 0.01096167 | 0.0555446  | 3.21E-05 | 0.006339  | 0.32844   |
| 185-SS2 | 0.09098114 | 0.5383894  | 6.45E-05 | 0.021597  | 0.036126  |
| 188-SS2 | 0.00563077 | 0.02337743 | 3.18E-05 | 0.0082375 | 0.59807   |
| 189-SS2 | 0.07462651 | 0.4397041  | 6.24E-05 | 0.014051  | 0.13218   |
| 190-SS2 | 0.0803695  | 0.4743578  | 6.32E-05 | 0.016854  | 0.13446   |
| 195-SS2 | 0.01436998 | 0.07611062 | 3.26E-05 | 0.0055188 | 0.18676   |
| 196-SS2 | 0.02835845 | 0.16051833 | 3.93E-05 | 0.004074  | -0.10603  |
| 197-SS2 | 0.0057032  | 0.02381448 | 3.18E-05 | 0.0082375 | 0.59807   |
| 198-SS2 | 0.01645354 | 0.08868303 | 3.31E-05 | 0.0050879 | 0.10435   |
| 199-SS2 | 0.00483764 | 0.01859162 | 3.18E-05 | 0.0084677 | 0.62647   |
| 202-SS2 | 0.0238829  | 0.13351247 | 3.61E-05 | 0.0042401 | -0.073623 |
| 205-SS2 | 0.03295721 | 0.1882677  | 4.32E-05 | 0.0041142 | -0.094772 |

|         |            |            |          |           |           |
|---------|------------|------------|----------|-----------|-----------|
| 208-SS2 | 0.07297051 | 0.4297116  | 6.22E-05 | 0.01332   | 0.12737   |
| 209-SS2 | 0.02556982 | 0.14369154 | 3.72E-05 | 0.0041509 | -0.092011 |
| 211-SS2 | 0.04552863 | 0.2641248  | 5.50E-05 | 0.0052335 | 0.021279  |
| 212-SS2 | 0.14082481 | 0.83915067 | 6.74E-05 | 0.023566  | -0.4978   |
| 214-SS2 | 0.02425414 | 0.1357526  | 3.64E-05 | 0.0042065 | -0.080664 |
| 218-SS2 | 0.03888838 | 0.22405691 | 4.92E-05 | 0.0044639 | -0.040459 |
| 221-SS2 | 0.02194062 | 0.1217926  | 3.49E-05 | 0.0044169 | -0.046619 |
| 222-SS2 | 0.01748574 | 0.09491141 | 3.33E-05 | 0.0049935 | 0.085504  |
| 223-SS2 | 0.03220295 | 0.18371642 | 4.27E-05 | 0.004099  | -0.097962 |
| 224-SS2 | 0.03088523 | 0.17576516 | 4.16E-05 | 0.0040771 | -0.10299  |
| 226-SS2 | 0.01272904 | 0.06620903 | 3.23E-05 | 0.0059016 | 0.25518   |
| 233-SS2 | 0.00686597 | 0.03083073 | 3.18E-05 | 0.0078    | 0.54183   |
| 234-SS2 | 0.10060665 | 0.5964706  | 6.53E-05 | 0.024687  | -0.12375  |
| 238-SS2 | 0.02013415 | 0.11089218 | 3.42E-05 | 0.0045972 | 0.0032259 |
| 247-SS2 | 0.05393198 | 0.3148314  | 5.91E-05 | 0.0068337 | 0.060836  |
| 249-SS2 | 0.10594727 | 0.6286964  | 6.58E-05 | 0.025526  | -0.21453  |
| 254-SS2 | 0.01545075 | 0.08263207 | 3.28E-05 | 0.0052924 | 0.1442    |
| 258-SS2 | 0.01403787 | 0.07410664 | 3.25E-05 | 0.0056405 | 0.20898   |
| 259-SS2 | 0.01742842 | 0.09456556 | 3.33E-05 | 0.0049935 | 0.085504  |
| 262-SS2 | 0.02113257 | 0.11691672 | 3.47E-05 | 0.0044724 | -0.023601 |
| 264-SS2 | 0.05436849 | 0.31746534 | 5.92E-05 | 0.0069681 | 0.062513  |
| 266-SS2 | 0.14087081 | 0.83942825 | 6.74E-05 | 0.023566  | -0.4978   |
| 268-SS2 | 0.0911423  | 0.5393619  | 6.45E-05 | 0.021597  | 0.036126  |
| 272-SS2 | 0.10822469 | 0.64243853 | 6.59E-05 | 0.025614  | -0.24573  |
| 274-SS2 | 0.04216937 | 0.2438547  | 5.24E-05 | 0.0047963 | -0.00654  |
| 285-SS2 | 0.02794714 | 0.15803649 | 3.88E-05 | 0.0040827 | -0.10472  |
| 286-SS2 | 0.00814935 | 0.0385748  | 3.19E-05 | 0.0071994 | 0.45929   |
| 304-SS2 | 0.01352188 | 0.07099313 | 3.24E-05 | 0.0057681 | 0.23179   |
| 306-SS2 | 0.01494119 | 0.07955739 | 3.27E-05 | 0.0054028 | 0.16515   |
| 321-SS2 | 0.02383592 | 0.133229   | 3.61E-05 | 0.0042401 | -0.073623 |
| 322-SS2 | 0.0454746  | 0.26379877 | 5.50E-05 | 0.0052335 | 0.021279  |
| 328-SS2 | 0.12586394 | 0.7488754  | 6.68E-05 | 0.023927  | -0.41325  |
| 329-SS2 | 0.07421071 | 0.4371951  | 6.24E-05 | 0.014051  | 0.13074   |
| 330-SS2 | 0.03221623 | 0.18379655 | 4.27E-05 | 0.004099  | -0.097962 |
| 331-SS2 | 0.01823373 | 0.09942488 | 3.36E-05 | 0.0048202 | 0.050123  |
| 332-SS2 | 0.02285574 | 0.12731448 | 3.55E-05 | 0.0043197 | -0.056631 |
| 336-SS2 | 0.0259544  | 0.14601211 | 3.76E-05 | 0.0041286 | -0.096385 |
| 350-SS2 | 0.04003769 | 0.23099199 | 5.03E-05 | 0.0045634 | -0.028892 |
| 351-SS2 | 0.02701281 | 0.15239862 | 3.84E-05 | 0.0040947 | -0.10271  |
| 353-SS2 | 0.06709458 | 0.3942557  | 6.14E-05 | 0.011039  | 0.10251   |
| 357-SS2 | 0.01888211 | 0.10333728 | 3.38E-05 | 0.004741  | 0.03364   |
| 360-SS2 | 0.03140697 | 0.17891341 | 4.16E-05 | 0.0040771 | -0.10071  |
| 361-SS2 | 0.0047327  | 0.0179584  | 3.18E-05 | 0.0087056 | 0.65503   |

|         |            |            |          |           |           |
|---------|------------|------------|----------|-----------|-----------|
| 363-SS2 | 0.0154711  | 0.08275493 | 3.28E-05 | 0.0052924 | 0.1442    |
| 367-SS2 | 0.0223015  | 0.12397018 | 3.52E-05 | 0.0043661 | -0.046619 |
| 368-SS2 | 0.01838997 | 0.10036764 | 3.36E-05 | 0.0048202 | 0.050123  |
| 370-SS2 | 0.02400479 | 0.13424794 | 3.61E-05 | 0.0042401 | -0.073623 |
| 375-SS2 | 0.02144632 | 0.11880994 | 3.49E-05 | 0.0044169 | -0.0356   |
| 377-SS2 | 0.03054963 | 0.17374013 | 4.11E-05 | 0.0040705 | -0.10475  |
| 378-SS2 | 0.02390948 | 0.1336729  | 3.61E-05 | 0.0042401 | -0.073623 |
| 382-SS2 | 0.01438775 | 0.07621785 | 3.26E-05 | 0.0055188 | 0.18676   |
| 384-SS2 | 0.01623643 | 0.087373   | 3.30E-05 | 0.0051875 | 0.12392   |
| 387-SS2 | 0.01190296 | 0.06122443 | 3.22E-05 | 0.0061869 | 0.30353   |
| 393-SS2 | 0.02680712 | 0.15115748 | 3.80E-05 | 0.0041099 | -0.099939 |
| 398-SS2 | 0.02216447 | 0.12314332 | 3.52E-05 | 0.0043661 | -0.046619 |
| 400-SS2 | 0.02737977 | 0.15461293 | 3.84E-05 | 0.0040947 | -0.10271  |
| 401-SS2 | 0.09793232 | 0.5803335  | 6.52E-05 | 0.024123  | -0.074831 |
| 404-SS2 | 0.00659094 | 0.02917119 | 3.18E-05 | 0.0078    | 0.54183   |
| 410-SS2 | 0.01568962 | 0.08407344 | 3.28E-05 | 0.0052924 | 0.1442    |
| 415-SS2 | 0.00867257 | 0.04173194 | 3.19E-05 | 0.0071994 | 0.43237   |
| 417-SS2 | 0.02988324 | 0.16971911 | 4.07E-05 | 0.0040668 | -0.10597  |
| 419-SS2 | 0.00967217 | 0.04776361 | 3.20E-05 | 0.0068348 | 0.4058    |
| 424-SS2 | 0.03405298 | 0.19487971 | 4.43E-05 | 0.004153  | -0.087207 |
| 425-SS2 | 0.02569513 | 0.14444767 | 3.72E-05 | 0.0041509 | -0.092011 |
| 430-SS2 | 0.0276633  | 0.15632373 | 3.88E-05 | 0.0040827 | -0.10472  |
| 431-SS2 | 0.01528435 | 0.08162803 | 3.27E-05 | 0.0054028 | 0.16515   |
| 436-SS2 | 0.03324988 | 0.19003369 | 4.37E-05 | 0.0041322 | -0.091175 |
| 437-SS2 | 0.00858049 | 0.0411763  | 3.19E-05 | 0.0071994 | 0.45929   |
| 442-SS2 | 0.01578745 | 0.08466376 | 3.28E-05 | 0.0052924 | 0.1442    |
| 444-SS2 | 0.00841366 | 0.04016963 | 3.19E-05 | 0.0071994 | 0.45929   |
| 448-SS2 | 0.02209013 | 0.12269474 | 3.52E-05 | 0.0043661 | -0.046619 |
| 450-SS2 | 0.01861717 | 0.10173855 | 3.36E-05 | 0.0048202 | 0.03364   |
| 455-SS2 | 0.01443655 | 0.07651232 | 3.26E-05 | 0.0055188 | 0.18676   |
| 456-SS2 | 0.01439446 | 0.07625835 | 3.26E-05 | 0.0055188 | 0.18676   |
| 458-SS2 | 0.01050955 | 0.05281643 | 3.21E-05 | 0.0064976 | 0.35381   |
| 459-SS2 | 0.07873911 | 0.46451992 | 6.30E-05 | 0.016077  | 0.13651   |
| 466-SS2 | 0.02927106 | 0.16602513 | 4.02E-05 | 0.0040662 | -0.10661  |
| 472-SS2 | 0.01138828 | 0.05811879 | 3.21E-05 | 0.006339  | 0.32844   |
| 473-SS2 | 0.02367298 | 0.13224581 | 3.61E-05 | 0.0042401 | -0.073623 |
| 476-SS2 | 0.01415237 | 0.07479753 | 3.25E-05 | 0.0056405 | 0.20898   |
| 480-SS2 | 0.04926239 | 0.28665465 | 5.73E-05 | 0.0058857 | 0.04392   |
| 481-SS2 | 0.01005616 | 0.05008067 | 3.20E-05 | 0.0066628 | 0.37961   |
| 482-SS2 | 0.02759378 | 0.15590426 | 3.88E-05 | 0.0040827 | -0.10472  |
| 484-SS2 | 0.14441644 | 0.86082286 | 6.75E-05 | 0.023623  | -0.50968  |
| 485-SS2 | 0.0819752  | 0.48404673 | 6.35E-05 | 0.017633  | 0.12948   |
| 487-SS2 | 0.05896203 | 0.3451832  | 6.02E-05 | 0.0081753 | 0.075889  |

|         |            |            |          |           |           |
|---------|------------|------------|----------|-----------|-----------|
| 488-SS2 | 0.01562448 | 0.08368041 | 3.28E-05 | 0.0052924 | 0.1442    |
| 493-SS2 | 0.0301537  | 0.17135105 | 4.07E-05 | 0.0040668 | -0.10597  |
| 495-SS2 | 0.01877186 | 0.10267198 | 3.38E-05 | 0.004741  | 0.03364   |
| 497-SS2 | 0.13249964 | 0.7889158  | 6.71E-05 | 0.023568  | -0.45613  |
| 499-SS2 | 0.03134477 | 0.17853808 | 4.16E-05 | 0.0040771 | -0.10071  |
| 502-SS2 | 0.05454111 | 0.31850693 | 5.92E-05 | 0.0069681 | 0.064127  |
| 504-SS2 | 0.02438356 | 0.13653351 | 3.64E-05 | 0.0042065 | -0.080664 |
| 505-SS2 | 0.01096243 | 0.05554915 | 3.21E-05 | 0.006339  | 0.32844   |
| 506-SS2 | 0.04990894 | 0.290556   | 5.76E-05 | 0.005992  | 0.046466  |
| 509-SS2 | 0.04062734 | 0.23454998 | 5.09E-05 | 0.0046173 | -0.023154 |
| 510-SS2 | 0.01808699 | 0.09853942 | 3.34E-05 | 0.0049043 | 0.050123  |
| 511-SS2 | 0.02915403 | 0.16531897 | 3.97E-05 | 0.0040686 | -0.10661  |
| 513-SS2 | 0.03335489 | 0.19066736 | 4.37E-05 | 0.0041322 | -0.091175 |
| 515-SS2 | 0.03113863 | 0.1772942  | 4.16E-05 | 0.0040771 | -0.10299  |
| 522-SS2 | 0.02172475 | 0.12048998 | 3.49E-05 | 0.0044169 | -0.0356   |
| 524-SS2 | 0.02173914 | 0.12057684 | 3.49E-05 | 0.0044169 | -0.0356   |
| 532-SS2 | 0.0222661  | 0.12375654 | 3.52E-05 | 0.0043661 | -0.046619 |
| 534-SS2 | 0.0262704  | 0.14791887 | 3.76E-05 | 0.0041286 | -0.096385 |
| 535-SS2 | 0.01427393 | 0.07553104 | 3.26E-05 | 0.0055188 | 0.18676   |
| 536-SS2 | 0.08675677 | 0.51289916 | 6.40E-05 | 0.019681  | 0.093363  |
| 537-SS2 | 0.01638301 | 0.08825743 | 3.30E-05 | 0.0051875 | 0.12392   |
| 538-SS2 | 0.02365508 | 0.13213782 | 3.61E-05 | 0.0042401 | -0.073623 |
| 540-SS2 | 0.01038047 | 0.05203755 | 3.21E-05 | 0.0064976 | 0.35381   |
| 541-SS2 | 0.03042658 | 0.17299761 | 4.11E-05 | 0.0040705 | -0.10475  |
| 543-SS2 | 0.01178082 | 0.06048742 | 3.22E-05 | 0.0061869 | 0.30353   |
| 545-SS2 | 0.02588661 | 0.14560308 | 3.76E-05 | 0.0041286 | -0.096385 |
| 546-SS2 | 0.02400068 | 0.1342232  | 3.61E-05 | 0.0042401 | -0.073623 |
| 549-SS2 | 0.01158413 | 0.05930059 | 3.22E-05 | 0.0061869 | 0.30353   |
| 553-SS2 | 0.01666613 | 0.08996582 | 3.31E-05 | 0.0050879 | 0.10435   |
| 557-SS2 | 0.01741061 | 0.0944581  | 3.33E-05 | 0.0049935 | 0.085504  |
| 558-SS2 | 0.01363927 | 0.07170146 | 3.24E-05 | 0.0057681 | 0.20898   |
| 559-SS2 | 0.01818525 | 0.09913236 | 3.36E-05 | 0.0048202 | 0.050123  |
| 569-SS2 | 0.00673126 | 0.03001791 | 3.18E-05 | 0.0078    | 0.54183   |
| 571-SS2 | 0.02150504 | 0.11916425 | 3.49E-05 | 0.0044169 | -0.0356   |
| 572-SS2 | 0.02095358 | 0.11583668 | 3.47E-05 | 0.0044724 | -0.023601 |
| 575-SS2 | 0.0071481  | 0.03253315 | 3.19E-05 | 0.0075925 | 0.51404   |
| 576-SS2 | 0.01847566 | 0.10088467 | 3.36E-05 | 0.0048202 | 0.050123  |
| 577-SS2 | 0.01970636 | 0.10831084 | 3.40E-05 | 0.0046667 | 0.017998  |
| 578-SS2 | 0.01981371 | 0.10895861 | 3.42E-05 | 0.0045972 | 0.0032259 |
| 579-SS2 | 0.03044053 | 0.1730818  | 4.11E-05 | 0.0040705 | -0.10475  |
| 580-SS2 | 0.0208838  | 0.11541565 | 3.47E-05 | 0.0044724 | -0.023601 |
| 581-SS2 | 0.01834697 | 0.10010816 | 3.36E-05 | 0.0048202 | 0.050123  |
| 583-SS2 | 0.00770006 | 0.03586371 | 3.19E-05 | 0.0073923 | 0.48652   |

|         |            |            |          |           |           |
|---------|------------|------------|----------|-----------|-----------|
| 585-SS2 | 0.02447869 | 0.13710755 | 3.64E-05 | 0.0042065 | -0.080664 |
| 587-SS2 | 0.01308405 | 0.06835123 | 3.23E-05 | 0.0059016 | 0.23179   |
| 588-SS2 | 0.01012874 | 0.05051861 | 3.20E-05 | 0.0066628 | 0.37961   |
| 589-SS2 | 0.02544001 | 0.14290822 | 3.72E-05 | 0.0041509 | -0.092011 |
| 595-SS2 | 0.00874958 | 0.04219664 | 3.19E-05 | 0.0070136 | 0.43237   |
| 598-SS2 | 0.01641755 | 0.08846586 | 3.30E-05 | 0.0051875 | 0.10435   |
| 599-SS2 | 0.02293831 | 0.12781273 | 3.55E-05 | 0.0043197 | -0.056631 |
| 601-SS2 | 0.01481971 | 0.07882438 | 3.27E-05 | 0.0054028 | 0.16515   |
| 604-SS2 | 0.03017593 | 0.1714852  | 4.07E-05 | 0.0040668 | -0.10597  |
| 605-SS2 | 0.02044151 | 0.11274679 | 3.44E-05 | 0.0045325 | -0.01065  |
| 612-SS2 | 0.02295502 | 0.1279136  | 3.55E-05 | 0.0043197 | -0.056631 |
| 613-SS2 | 0.02281835 | 0.12708889 | 3.55E-05 | 0.0043197 | -0.056631 |
| 615-SS2 | 0.02201735 | 0.12225559 | 3.52E-05 | 0.0043661 | -0.046619 |
| 616-SS2 | 0.01453735 | 0.07712054 | 3.26E-05 | 0.0055188 | 0.18676   |
| 617-SS2 | 0.02251183 | 0.1252393  | 3.52E-05 | 0.0043661 | -0.056631 |
| 623-SS2 | 0.0132979  | 0.06964164 | 3.24E-05 | 0.0057681 | 0.23179   |
| 624-SS2 | 0.02345213 | 0.13091315 | 3.58E-05 | 0.0042778 | -0.065623 |
| 625-SS2 | 0.04536979 | 0.26316637 | 5.50E-05 | 0.0052335 | 0.021279  |
| 644-SS2 | 0.02023729 | 0.11151453 | 3.42E-05 | 0.0045972 | 0.0032259 |
| 647-SS2 | 0.01161033 | 0.05945863 | 3.22E-05 | 0.0061869 | 0.30353   |
| 648-SS2 | 0.03098132 | 0.17634499 | 4.16E-05 | 0.0040771 | -0.10299  |
| 652-SS2 | 0.08037929 | 0.47441685 | 6.32E-05 | 0.016854  | 0.13446   |
| 653-SS2 | 0.00962782 | 0.047496   | 3.20E-05 | 0.0068348 | 0.4058    |
| 656-SS2 | 0.01113264 | 0.0565762  | 3.21E-05 | 0.006339  | 0.32844   |
| 657-SS2 | 0.10778027 | 0.63975686 | 6.59E-05 | 0.025604  | -0.23822  |
| 660-SS2 | 0.07524142 | 0.4434145  | 6.26E-05 | 0.014549  | 0.13345   |
| 661-SS2 | 0.01959944 | 0.10766565 | 3.40E-05 | 0.0046667 | 0.017998  |
| 663-SS2 | 0.020199   | 0.11128347 | 3.42E-05 | 0.0045972 | 0.0032259 |
| 670-SS2 | 0.10164299 | 0.60272396 | 6.54E-05 | 0.024923  | -0.14299  |
| 671-SS2 | 0.02151123 | 0.11920156 | 3.49E-05 | 0.0044169 | -0.0356   |
| 674-SS2 | 0.01554512 | 0.08320156 | 3.28E-05 | 0.0052924 | 0.1442    |
| 676-SS2 | 0.01901913 | 0.104164   | 3.38E-05 | 0.004741  | 0.03364   |
| 677-SS2 | 0.02691432 | 0.15180434 | 3.80E-05 | 0.0041099 | -0.10271  |
| 680-SS2 | 0.01593112 | 0.08553071 | 3.30E-05 | 0.0051875 | 0.12392   |
| 681-SS2 | 0.0109569  | 0.05551579 | 3.21E-05 | 0.006339  | 0.32844   |
| 683-SS2 | 0.01676084 | 0.09053728 | 3.31E-05 | 0.0050879 | 0.10435   |
| 684-SS2 | 0.02042174 | 0.11262754 | 3.44E-05 | 0.0045325 | -0.01065  |
| 685-SS2 | 0.0070271  | 0.03180305 | 3.19E-05 | 0.0075925 | 0.51404   |
| 686-SS2 | 0.00879539 | 0.04247306 | 3.19E-05 | 0.0070136 | 0.43237   |
| 690-SS2 | 0.02096696 | 0.11591744 | 3.47E-05 | 0.0044724 | -0.023601 |
| 692-SS2 | 0.01733382 | 0.09399471 | 3.33E-05 | 0.0049935 | 0.085504  |
| 693-SS2 | 0.0198741  | 0.10932299 | 3.42E-05 | 0.0045972 | 0.0032259 |
| 694-SS2 | 0.0251525  | 0.14117339 | 3.68E-05 | 0.0041768 | -0.086782 |

|         |            |            |          |           |           |
|---------|------------|------------|----------|-----------|-----------|
| 695-SS2 | 0.02101916 | 0.11623244 | 3.47E-05 | 0.0044724 | -0.023601 |
| 697-SS2 | 0.01795394 | 0.09773659 | 3.34E-05 | 0.0049043 | 0.067421  |
| 698-SS2 | 0.03062422 | 0.17419024 | 4.11E-05 | 0.0040705 | -0.10475  |
| 699-SS2 | 0.01965181 | 0.1079817  | 3.40E-05 | 0.0046667 | 0.017998  |
| 703-SS2 | 0.02109666 | 0.11670004 | 3.47E-05 | 0.0044724 | -0.023601 |
| 705-SS2 | 0.02018386 | 0.11119209 | 3.42E-05 | 0.0045972 | 0.0032259 |
| 706-SS2 | 0.01130714 | 0.05762921 | 3.21E-05 | 0.006339  | 0.32844   |
| 707-SS2 | 0.01846974 | 0.10084895 | 3.36E-05 | 0.0048202 | 0.050123  |
| 709-SS2 | 0.13318616 | 0.7930584  | 6.71E-05 | 0.023556  | -0.45937  |
| 710-SS2 | 0.02416414 | 0.13520947 | 3.61E-05 | 0.0042401 | -0.080664 |
| 711-SS2 | 0.02074324 | 0.11456748 | 3.44E-05 | 0.0045325 | -0.01065  |
| 712-SS2 | 0.01597508 | 0.08579593 | 3.30E-05 | 0.0051875 | 0.12392   |
| 713-SS2 | 0.01858394 | 0.10153808 | 3.36E-05 | 0.0048202 | 0.050123  |
| 714-SS2 | 0.01146928 | 0.05860756 | 3.22E-05 | 0.0061869 | 0.30353   |
| 715-SS2 | 0.02116028 | 0.11708395 | 3.47E-05 | 0.0044724 | -0.023601 |
| 716-SS2 | 0.01181415 | 0.06068854 | 3.22E-05 | 0.0061869 | 0.30353   |
| 722-SS2 | 0.06941821 | 0.4082767  | 6.17E-05 | 0.01192   | 0.11218   |
| 723-SS2 | 0.00644872 | 0.02831303 | 3.18E-05 | 0.008015  | 0.56984   |
| 724-SS2 | 0.02507835 | 0.14072591 | 3.68E-05 | 0.0041768 | -0.086782 |
| 730-SS2 | 0.02455679 | 0.1375788  | 3.64E-05 | 0.0042065 | -0.080664 |
| 731-SS2 | 0.02694692 | 0.15200105 | 3.80E-05 | 0.0041099 | -0.10271  |
| 738-SS2 | 0.0113757  | 0.0580429  | 3.21E-05 | 0.006339  | 0.32844   |
| 740-SS2 | 0.01126001 | 0.05734481 | 3.21E-05 | 0.006339  | 0.32844   |
| 746-SS2 | 0.01967087 | 0.1080967  | 3.40E-05 | 0.0046667 | 0.017998  |
| 747-SS2 | 0.01309768 | 0.06843347 | 3.23E-05 | 0.0059016 | 0.23179   |
| 748-SS2 | 0.03427221 | 0.19620253 | 4.48E-05 | 0.0041765 | -0.082901 |
| 751-SS2 | 0.01411809 | 0.07459074 | 3.25E-05 | 0.0056405 | 0.20898   |
| 752-SS2 | 0.01217157 | 0.06284525 | 3.23E-05 | 0.0060411 | 0.2791    |
| 753-SS2 | 0.00539424 | 0.02195017 | 3.18E-05 | 0.0082375 | 0.59807   |
| 754-SS2 | 0.02062788 | 0.11387136 | 3.44E-05 | 0.0045325 | -0.01065  |
| 756-SS2 | 0.10764048 | 0.6389134  | 6.59E-05 | 0.025604  | -0.23822  |
| 757-SS2 | 0.06095796 | 0.35722682 | 6.06E-05 | 0.008866  | 0.080421  |
| 758-SS2 | 0.02624233 | 0.14774951 | 3.76E-05 | 0.0041286 | -0.096385 |
| 765-SS2 | 0.0272911  | 0.15407789 | 3.84E-05 | 0.0040947 | -0.10271  |
| 766-SS2 | 0.03098444 | 0.17636381 | 4.16E-05 | 0.0040771 | -0.10299  |
| 768-SS2 | 0.02758931 | 0.1558773  | 3.88E-05 | 0.0040827 | -0.10472  |
| 769-SS2 | 0.02229348 | 0.12392175 | 3.52E-05 | 0.0043661 | -0.046619 |
| 770-SS2 | 0.02695668 | 0.15205994 | 3.80E-05 | 0.0041099 | -0.10271  |
| 772-SS2 | 0.01533202 | 0.08191565 | 3.27E-05 | 0.0054028 | 0.1442    |
| 773-SS2 | 0.02644295 | 0.14896008 | 3.80E-05 | 0.0041099 | -0.099939 |
| 775-SS2 | 0.03067801 | 0.17451482 | 4.11E-05 | 0.0040705 | -0.10475  |
| 776-SS2 | 0.09680992 | 0.5735608  | 6.50E-05 | 0.023626  | -0.055297 |
| 777-SS2 | 0.07360713 | 0.43355304 | 6.23E-05 | 0.013805  | 0.12913   |

|         |            |            |          |           |           |
|---------|------------|------------|----------|-----------|-----------|
| 778-SS2 | 0.10566001 | 0.626963   | 6.57E-05 | 0.025482  | -0.20623  |
| 779-SS2 | 0.05881713 | 0.34430885 | 6.02E-05 | 0.0081753 | 0.074438  |
| 780-SS2 | 0.01406289 | 0.07425764 | 3.25E-05 | 0.0056405 | 0.20898   |
| 781-SS2 | 0.01114384 | 0.05664384 | 3.21E-05 | 0.006339  | 0.32844   |
| 784-SS2 | 0.04370867 | 0.253143   | 5.38E-05 | 0.0050014 | 0.008455  |
| 793-SS2 | 0.03582992 | 0.20560189 | 4.59E-05 | 0.0042319 | -0.068307 |
| 796-SS2 | 0.04494721 | 0.2606165  | 5.46E-05 | 0.0051531 | 0.017239  |
| 798-SS2 | 0.0829834  | 0.4901303  | 6.36E-05 | 0.018151  | 0.12434   |
| 799-SS2 | 0.04395969 | 0.2546577  | 5.38E-05 | 0.0050014 | 0.008455  |
| 801-SS2 | 0.01664038 | 0.08981043 | 3.31E-05 | 0.0050879 | 0.10435   |
| 803-SS2 | 0.06929168 | 0.40751323 | 6.17E-05 | 0.01192   | 0.11218   |
| 804-SS2 | 0.08035012 | 0.47424087 | 6.32E-05 | 0.016854  | 0.13446   |
| 809-SS2 | 0.11832225 | 0.7033682  | 6.65E-05 | 0.024847  | -0.35363  |
| 811-SS2 | 0.0977376  | 0.5791585  | 6.51E-05 | 0.023964  | -0.074831 |
| 812-SS2 | 0.01943947 | 0.10670039 | 3.40E-05 | 0.0046667 | 0.017998  |
| 815-SS2 | 0.02002032 | 0.1102053  | 3.42E-05 | 0.0045972 | 0.0032259 |
| 816-SS2 | 0.0810068  | 0.4782033  | 6.33E-05 | 0.017113  | 0.13314   |
| 818-SS2 | 0.00895187 | 0.04341729 | 3.19E-05 | 0.0070136 | 0.43237   |
| 825-SS2 | 0.02919164 | 0.16554591 | 3.97E-05 | 0.0040686 | -0.10661  |
| 827-SS2 | 0.01548454 | 0.08283598 | 3.28E-05 | 0.0052924 | 0.1442    |
| 828-SS2 | 0.0255847  | 0.14378129 | 3.72E-05 | 0.0041509 | -0.092011 |
| 829-SS2 | 0.01326362 | 0.06943477 | 3.24E-05 | 0.0057681 | 0.23179   |
| 830-SS2 | 0.04043315 | 0.2333782  | 5.09E-05 | 0.0046173 | -0.023154 |
| 839-SS2 | 0.05980922 | 0.35029522 | 6.04E-05 | 0.0085136 | 0.077363  |
| 840-SS2 | 0.02938388 | 0.1667059  | 4.02E-05 | 0.0040662 | -0.10661  |
| 841-SS2 | 0.01822349 | 0.09936308 | 3.36E-05 | 0.0048202 | 0.050123  |
| 843-SS2 | 0.02691889 | 0.15183192 | 3.80E-05 | 0.0041099 | -0.10271  |
| 846-SS2 | 0.03795635 | 0.21843298 | 4.81E-05 | 0.0043756 | -0.04622  |
| 850-SS2 | 0.1407443  | 0.8386649  | 6.74E-05 | 0.023566  | -0.4978   |
| 851-SS2 | 0.04198922 | 0.24276766 | 5.24E-05 | 0.0047963 | -0.00654  |
| 853-SS2 | 0.1173255  | 0.69735366 | 6.64E-05 | 0.024917  | -0.34377  |
| 859-SS2 | 0.08916589 | 0.527436   | 6.43E-05 | 0.020902  | 0.067165  |
| 862-SS2 | 0.02429225 | 0.13598256 | 3.64E-05 | 0.0042065 | -0.080664 |
| 865-SS2 | 0.12605181 | 0.75000906 | 6.68E-05 | 0.023927  | -0.41325  |
| 869-SS2 | 0.09483467 | 0.56164193 | 6.49E-05 | 0.023073  | -0.017059 |
| 870-SS2 | 0.02151024 | 0.11919561 | 3.49E-05 | 0.0044169 | -0.0356   |
| 872-SS2 | 0.00406652 | 0.01393861 | 3.18E-05 | 0.0089513 | 0.68371   |
| 874-SS2 | 0.0121778  | 0.06288282 | 3.23E-05 | 0.0060411 | 0.2791    |
| 881-SS2 | 0.02110491 | 0.11674981 | 3.47E-05 | 0.0044724 | -0.023601 |
| 882-SS2 | 0.02376887 | 0.13282444 | 3.61E-05 | 0.0042401 | -0.073623 |
| 884-SS2 | 0.02257684 | 0.12563162 | 3.55E-05 | 0.0043197 | -0.056631 |
| 886-SS2 | 0.11249953 | 0.66823334 | 6.62E-05 | 0.025448  | -0.29336  |
| 889-SS2 | 0.01477568 | 0.07855868 | 3.26E-05 | 0.0055188 | 0.16515   |



|          |            |            |          |           |           |
|----------|------------|------------|----------|-----------|-----------|
| 894-SS2  | 0.04179792 | 0.24161337 | 5.19E-05 | 0.0047337 | -0.011944 |
| 895-SS2  | 0.10593635 | 0.62863046 | 6.58E-05 | 0.025526  | -0.21453  |
| 898-SS2  | 0.01190568 | 0.06124082 | 3.22E-05 | 0.0061869 | 0.30353   |
| 900-SS2  | 0.02260704 | 0.1258138  | 3.55E-05 | 0.0043197 | -0.056631 |
| 901-SS2  | 0.03148735 | 0.17939843 | 4.22E-05 | 0.0040866 | -0.10071  |
| 904-SS2  | 0.02292062 | 0.12770599 | 3.55E-05 | 0.0043197 | -0.056631 |
| 907-SS2  | 0.01855496 | 0.1013632  | 3.36E-05 | 0.0048202 | 0.050123  |
| 911-SS2  | 0.02020385 | 0.11131276 | 3.42E-05 | 0.0045972 | 0.0032259 |
| 914-SS2  | 0.02231743 | 0.1240663  | 3.52E-05 | 0.0043661 | -0.046619 |
| 918-SS2  | 0.01736108 | 0.09415922 | 3.33E-05 | 0.0049935 | 0.085504  |
| 925-SS2  | 0.07663405 | 0.45181775 | 6.27E-05 | 0.015053  | 0.13605   |
| 926-SS2  | 0.07504284 | 0.44221622 | 6.25E-05 | 0.014299  | 0.13345   |
| 927-SS2  | 0.02477219 | 0.13887854 | 3.68E-05 | 0.0041768 | -0.086782 |
| 928-SS2  | 0.05607599 | 0.32776856 | 5.97E-05 | 0.0073934 | 0.067199  |
| 931-SS2  | 0.03251264 | 0.1855851  | 4.27E-05 | 0.004099  | -0.094772 |
| 937-SS2  | 0.03560482 | 0.20424363 | 4.59E-05 | 0.0042319 | -0.073417 |
| 941-SS2  | 0.01566989 | 0.08395444 | 3.28E-05 | 0.0052924 | 0.1442    |
| 945-SS2  | 0.0304451  | 0.1731094  | 4.11E-05 | 0.0040705 | -0.10475  |
| 946-SS2  | 0.01474377 | 0.07836615 | 3.26E-05 | 0.0055188 | 0.16515   |
| 947-SS2  | 0.02346095 | 0.13096641 | 3.58E-05 | 0.0042778 | -0.065623 |
| 949-SS2  | 0.01624761 | 0.08744041 | 3.30E-05 | 0.0051875 | 0.12392   |
| 950-SS2  | 0.03203497 | 0.18270284 | 4.27E-05 | 0.004099  | -0.097962 |
| 958-SS2  | 0.05096586 | 0.29693353 | 5.81E-05 | 0.006215  | 0.051138  |
| 960-SS2  | 0.09032735 | 0.53444433 | 6.44E-05 | 0.021369  | 0.05218   |
| 963-SS2  | 0.01996085 | 0.10984647 | 3.42E-05 | 0.0045972 | 0.0032259 |
| 964-SS2  | 0.015462   | 0.08269997 | 3.28E-05 | 0.0052924 | 0.1442    |
| 965-SS2  | 0.01940085 | 0.10646736 | 3.40E-05 | 0.0046667 | 0.017998  |
| 969-SS2  | 0.0359799  | 0.20650691 | 4.65E-05 | 0.0042637 | -0.068307 |
| 971-SS2  | 0.01540804 | 0.08237442 | 3.28E-05 | 0.0052924 | 0.1442    |
| 972-SS2  | 0.08019504 | 0.4733051  | 6.32E-05 | 0.016854  | 0.13446   |
| 979-SS2  | 0.02380192 | 0.13302381 | 3.61E-05 | 0.0042401 | -0.073623 |
| 980-SS2  | 0.02865171 | 0.16228794 | 3.97E-05 | 0.0040686 | -0.10664  |
| 981-SS2  | 0.00847807 | 0.04055829 | 3.19E-05 | 0.0071994 | 0.45929   |
| 986-SS2  | 0.02146705 | 0.11893499 | 3.49E-05 | 0.0044169 | -0.0356   |
| 991-SS2  | 0.00678695 | 0.03035395 | 3.18E-05 | 0.0078    | 0.54183   |
| 992-SS2  | 0.03461959 | 0.19829865 | 4.48E-05 | 0.0041765 | -0.082901 |
| 993-SS2  | 0.02100821 | 0.11616635 | 3.47E-05 | 0.0044724 | -0.023601 |
| 997-SS2  | 0.02174427 | 0.12060777 | 3.49E-05 | 0.0044169 | -0.0356   |
| 1001-SS2 | 0.02026787 | 0.11169908 | 3.42E-05 | 0.0045972 | -0.01065  |
| 1004-SS2 | 0.0200805  | 0.11056843 | 3.42E-05 | 0.0045972 | 0.0032259 |
| 1006-SS2 | 0.00273962 | 0.00593196 | 3.17E-05 | 0.0094663 | 0.74133   |
| 1008-SS2 | 0.03273962 | 0.18695474 | 4.32E-05 | 0.0041142 | -0.094772 |
| 1009-SS2 | 0.08667119 | 0.51238275 | 6.40E-05 | 0.019681  | 0.093363  |

|          |            |            |          |           |           |
|----------|------------|------------|----------|-----------|-----------|
| 1014-SS2 | 0.0115058  | 0.05882792 | 3.22E-05 | 0.0061869 | 0.30353   |
| 1015-SS2 | 0.02244257 | 0.12482139 | 3.52E-05 | 0.0043661 | -0.046619 |
| 1019-SS2 | 0.02969026 | 0.1685546  | 4.02E-05 | 0.0040662 | -0.10597  |
| 1025-SS2 | 0.02159876 | 0.11972975 | 3.49E-05 | 0.0044169 | -0.0356   |
| 1027-SS2 | 0.0160732  | 0.08638803 | 3.30E-05 | 0.0051875 | 0.12392   |
| 1029-SS2 | 0.02476054 | 0.13880828 | 3.68E-05 | 0.0041768 | -0.086782 |
| 1030-SS2 | 0.03387123 | 0.19378302 | 4.43E-05 | 0.004153  | -0.087207 |
| 1039-SS2 | 0.01675567 | 0.09050608 | 3.31E-05 | 0.0050879 | 0.10435   |
| 1045-SS2 | 0.01160536 | 0.05942865 | 3.22E-05 | 0.0061869 | 0.30353   |
| 1046-SS2 | 0.03661087 | 0.21031421 | 4.70E-05 | 0.0042982 | -0.062998 |
| 1047-SS2 | 0.03139139 | 0.17881939 | 4.16E-05 | 0.0040771 | -0.10071  |
| 1050-SS2 | 0.02230311 | 0.12397985 | 3.52E-05 | 0.0043661 | -0.046619 |
| 1057-SS2 | 0.03923725 | 0.22616202 | 4.98E-05 | 0.0045122 | -0.034672 |
| 1058-SS2 | 0.02325193 | 0.12970515 | 3.58E-05 | 0.0042778 | -0.065623 |
| 1062-SS2 | 0.00793969 | 0.03730966 | 3.19E-05 | 0.0073923 | 0.48652   |
| 1063-SS2 | 0.10587803 | 0.6282786  | 6.58E-05 | 0.025526  | -0.20623  |
| 1067-SS2 | 0.02603454 | 0.14649567 | 3.76E-05 | 0.0041286 | -0.096385 |
| 1068-SS2 | 0.01095843 | 0.05552505 | 3.21E-05 | 0.006339  | 0.32844   |
| 1080-SS2 | 0.01609856 | 0.08654102 | 3.30E-05 | 0.0051875 | 0.12392   |
| 1081-SS2 | 0.0081634  | 0.03865954 | 3.19E-05 | 0.0071994 | 0.45929   |
| 1082-SS2 | 0.02218554 | 0.12327045 | 3.52E-05 | 0.0043661 | -0.046619 |
| 1084-SS2 | 0.00772751 | 0.03602938 | 3.19E-05 | 0.0073923 | 0.48652   |
| 1085-SS2 | 0.01577611 | 0.08459535 | 3.28E-05 | 0.0052924 | 0.1442    |
| 1086-SS2 | 0.02008937 | 0.11062194 | 3.42E-05 | 0.0045972 | 0.0032259 |
| 1089-SS2 | 0.02687021 | 0.15153816 | 3.80E-05 | 0.0041099 | -0.099939 |
| 1090-SS2 | 0.04054404 | 0.23404737 | 5.09E-05 | 0.0046173 | -0.023154 |
| 1091-SS2 | 0.01926765 | 0.10566365 | 3.40E-05 | 0.0046667 | 0.017998  |
| 1092-SS2 | 0.02587156 | 0.14551222 | 3.76E-05 | 0.0041286 | -0.096385 |
| 1093-SS2 | 0.00947833 | 0.04659395 | 3.20E-05 | 0.0068348 | 0.4058    |
| 1097-SS2 | 0.02494488 | 0.13992056 | 3.68E-05 | 0.0041768 | -0.086782 |
| 1099-SS2 | 0.00982803 | 0.04870412 | 3.20E-05 | 0.0066628 | 0.37961   |
| 1101-SS2 | 0.01946567 | 0.10685848 | 3.40E-05 | 0.0046667 | 0.017998  |
| 1102-SS2 | 0.01858303 | 0.10153258 | 3.36E-05 | 0.0048202 | 0.050123  |
| 1105-SS2 | 0.02437693 | 0.13649347 | 3.64E-05 | 0.0042065 | -0.080664 |
| 1108-SS2 | 0.04593853 | 0.26659817 | 5.54E-05 | 0.0053171 | 0.025099  |
| 1110-SS2 | 0.07255771 | 0.42722073 | 6.22E-05 | 0.01332   | 0.12548   |
| 1111-SS2 | 0.02798622 | 0.15827228 | 3.88E-05 | 0.0040827 | -0.10472  |
| 1115-SS2 | 0.01768362 | 0.09610547 | 3.34E-05 | 0.0049043 | 0.067421  |
| 1119-SS2 | 0.00717523 | 0.03269687 | 3.19E-05 | 0.0075925 | 0.51404   |
| 1123-SS2 | 0.03511224 | 0.20127137 | 4.54E-05 | 0.0042028 | -0.078293 |
| 1125-SS2 | 0.03433032 | 0.19655319 | 4.48E-05 | 0.0041765 | -0.082901 |
| 1127-SS2 | 0.00992869 | 0.04931149 | 3.20E-05 | 0.0066628 | 0.37961   |
| 1128-SS2 | 0.01021165 | 0.05101892 | 3.20E-05 | 0.0066628 | 0.37961   |

|          |            |            |          |           |           |
|----------|------------|------------|----------|-----------|-----------|
| 1130-SS2 | 0.01816153 | 0.0989892  | 3.36E-05 | 0.0048202 | 0.050123  |
| 1131-SS2 | 0.00722286 | 0.03298429 | 3.19E-05 | 0.0075925 | 0.51404   |
| 1133-SS2 | 0.01432949 | 0.0758663  | 3.26E-05 | 0.0055188 | 0.18676   |
| 1137-SS2 | 0.0110084  | 0.05582656 | 3.21E-05 | 0.006339  | 0.32844   |
| 1138-SS2 | 0.01553059 | 0.08311389 | 3.28E-05 | 0.0052924 | 0.1442    |
| 1139-SS2 | 0.01877485 | 0.10269005 | 3.38E-05 | 0.004741  | 0.03364   |
| 1144-SS2 | 0.00737191 | 0.03388362 | 3.19E-05 | 0.0075925 | 0.51404   |
| 1150-SS2 | 0.01753974 | 0.09523726 | 3.33E-05 | 0.0049935 | 0.067421  |
| 1152-SS2 | 0.02108413 | 0.11662442 | 3.47E-05 | 0.0044724 | -0.023601 |
| 1158-SS2 | 0.00868146 | 0.04178561 | 3.19E-05 | 0.0071994 | 0.43237   |
| 1160-SS2 | 0.02005891 | 0.11043818 | 3.42E-05 | 0.0045972 | 0.0032259 |
| 1161-SS2 | 0.01912125 | 0.10478021 | 3.38E-05 | 0.004741  | 0.03364   |
| 1162-SS2 | 0.01030212 | 0.05156478 | 3.20E-05 | 0.0066628 | 0.37961   |
| 1163-SS2 | 0.02093995 | 0.11575447 | 3.47E-05 | 0.0044724 | -0.023601 |
| 1164-SS2 | 0.00768753 | 0.03578815 | 3.19E-05 | 0.0073923 | 0.48652   |
| 1165-SS2 | 0.01282559 | 0.06679164 | 3.23E-05 | 0.0059016 | 0.25518   |
| 1166-SS2 | 0.01692041 | 0.09150015 | 3.31E-05 | 0.0050879 | 0.10435   |
| 1169-SS2 | 0.02163786 | 0.11996569 | 3.49E-05 | 0.0044169 | -0.0356   |
| 1173-SS2 | 0.00648472 | 0.02853029 | 3.18E-05 | 0.0078    | 0.54183   |
| 1176-SS2 | 0.00521959 | 0.02089635 | 3.18E-05 | 0.0084677 | 0.62647   |
| 1180-SS2 | 0.01275753 | 0.06638098 | 3.23E-05 | 0.0059016 | 0.25518   |
| 1182-SS2 | 0.01835825 | 0.10017623 | 3.36E-05 | 0.0048202 | 0.050123  |
| 1184-SS2 | 0.01608416 | 0.08645417 | 3.30E-05 | 0.0051875 | 0.12392   |
| 1186-SS2 | 0.02081405 | 0.11499478 | 3.44E-05 | 0.0045325 | -0.01065  |
| 1187-SS2 | 0.01576745 | 0.08454309 | 3.28E-05 | 0.0052924 | 0.1442    |
| 1190-SS2 | 0.01188578 | 0.06112072 | 3.22E-05 | 0.0061869 | 0.30353   |
| 1192-SS2 | 0.02088506 | 0.11542325 | 3.47E-05 | 0.0044724 | -0.023601 |
| 1196-SS2 | 0.02737902 | 0.1546084  | 3.84E-05 | 0.0040947 | -0.10271  |
| 1199-SS2 | 0.00819444 | 0.03884688 | 3.19E-05 | 0.0071994 | 0.45929   |
| 1202-SS2 | 0.02144897 | 0.1188259  | 3.49E-05 | 0.0044169 | -0.0356   |
| 1203-SS2 | 0.01692436 | 0.09152398 | 3.31E-05 | 0.0050879 | 0.10435   |
| 1205-SS2 | 0.0191373  | 0.1048771  | 3.38E-05 | 0.004741  | 0.03364   |
| 1208-SS2 | 0.03245067 | 0.18521117 | 4.27E-05 | 0.004099  | -0.094772 |
| 1209-SS2 | 0.01624978 | 0.08745354 | 3.30E-05 | 0.0051875 | 0.12392   |
| 1211-SS2 | 0.01342964 | 0.07043656 | 3.24E-05 | 0.0057681 | 0.23179   |
| 1213-SS2 | 0.03502098 | 0.2007207  | 4.54E-05 | 0.0042028 | -0.078293 |
| 1215-SS2 | 0.0221111  | 0.12282129 | 3.52E-05 | 0.0043661 | -0.046619 |
| 1216-SS2 | 0.0117408  | 0.06024594 | 3.22E-05 | 0.0061869 | 0.30353   |
| 1222-SS2 | 0.00773799 | 0.03609257 | 3.19E-05 | 0.0073923 | 0.48652   |
| 1223-SS2 | 0.01667172 | 0.08999957 | 3.31E-05 | 0.0050879 | 0.10435   |
| 1229-SS2 | 0.01366621 | 0.07186404 | 3.24E-05 | 0.0057681 | 0.20898   |
| 1230-SS2 | 0.01530891 | 0.08177624 | 3.27E-05 | 0.0054028 | 0.1442    |
| 1232-SS2 | 0.03953541 | 0.2279612  | 4.98E-05 | 0.0045122 | -0.034672 |

|          |            |            |          |           |           |
|----------|------------|------------|----------|-----------|-----------|
| 1239-SS2 | 0.03178092 | 0.18116987 | 4.22E-05 | 0.0040866 | -0.10071  |
| 1240-SS2 | 0.02301141 | 0.1282538  | 3.55E-05 | 0.0043197 | -0.056631 |
| 1242-SS2 | 0.02608626 | 0.14680776 | 3.76E-05 | 0.0041286 | -0.096385 |
| 1243-SS2 | 0.02560086 | 0.14387883 | 3.72E-05 | 0.0041509 | -0.092011 |
| 1247-SS2 | 0.05202821 | 0.30334386 | 5.85E-05 | 0.0064518 | 0.055318  |
| 1248-SS2 | 0.01733418 | 0.09399688 | 3.33E-05 | 0.0049935 | 0.085504  |
| 1253-SS2 | 0.02098388 | 0.1160195  | 3.47E-05 | 0.0044724 | -0.023601 |
| 1258-SS2 | 0.00327814 | 0.00918145 | 3.18E-05 | 0.0092049 | 0.71249   |
| 1259-SS2 | 0.02024341 | 0.11155144 | 3.42E-05 | 0.0045972 | 0.0032259 |
| 1260-SS2 | 0.01507317 | 0.08035375 | 3.27E-05 | 0.0054028 | 0.16515   |
| 1262-SS2 | 0.02165085 | 0.12004407 | 3.49E-05 | 0.0044169 | -0.0356   |
| 1263-SS2 | 0.01933843 | 0.10609072 | 3.40E-05 | 0.0046667 | 0.017998  |
| 1265-SS2 | 0.02343099 | 0.13078558 | 3.58E-05 | 0.0042778 | -0.065623 |
| 1266-SS2 | 0.03635831 | 0.20879024 | 4.65E-05 | 0.0042637 | -0.062998 |
| 1270-SS2 | 0.01253821 | 0.06505755 | 3.23E-05 | 0.0060411 | 0.25518   |
| 1272-SS2 | 0.0232462  | 0.1296706  | 3.58E-05 | 0.0042778 | -0.065623 |
| 1273-SS2 | 0.02600796 | 0.1463353  | 3.76E-05 | 0.0041286 | -0.096385 |
| 1274-SS2 | 0.01198327 | 0.06170901 | 3.22E-05 | 0.0061869 | 0.2791    |
| 1275-SS2 | 0.02820666 | 0.15960242 | 3.93E-05 | 0.004074  | -0.10603  |
| 1277-SS2 | 0.0144627  | 0.0766701  | 3.26E-05 | 0.0055188 | 0.18676   |
| 1278-SS2 | 0.02659407 | 0.14987193 | 3.80E-05 | 0.0041099 | -0.099939 |
| 1279-SS2 | 0.02302526 | 0.1283374  | 3.55E-05 | 0.0043197 | -0.056631 |
| 1280-SS2 | 0.0455181  | 0.26406124 | 5.50E-05 | 0.0052335 | 0.021279  |
| 1283-SS2 | 0.01605177 | 0.0862587  | 3.30E-05 | 0.0051875 | 0.12392   |
| 1286-SS2 | 0.00829298 | 0.03944149 | 3.19E-05 | 0.0071994 | 0.45929   |

| cellid      | dpt_pseudot | dpt_pseudot | diffusion | diff_rate | net_proliferation |
|-------------|-------------|-------------|-----------|-----------|-------------------|
| 9mo_SIGAE3_ | 0.04843498  | 0.29068688  | 5.63E-05  | 0.005054  | -0.0087048        |
| 9mo_SIGAE3_ | 0.0198481   | 0.11427719  | 4.16E-05  | 0.0053955 | -0.012659         |
| 9mo_SIGAE3_ | 0.03773571  | 0.22466165  | 4.84E-05  | 0.0045696 | -0.084703         |
| 9mo_SIGAE3_ | 0.02900942  | 0.17081171  | 4.51E-05  | 0.0047064 | -0.12268          |
| 9mo_SIGAE3_ | 0.02320711  | 0.13500567  | 4.30E-05  | 0.0050782 | -0.077142         |
| 9mo_SIGAE3_ | 0.09681036  | 0.58921134  | 5.28E-05  | 0.0052469 | -1.03             |
| 9mo_SIGAE3_ | 0.02273564  | 0.13209622  | 4.28E-05  | 0.005125  | -0.077142         |
| 9mo_SIGAE3_ | 0.04095848  | 0.2445494   | 5.02E-05  | 0.0046325 | -0.058715         |
| 9mo_SIGAE3_ | 0.01306275  | 0.0724048   | 3.83E-05  | 0.0063061 | 0.19734           |
| 9mo_SIGAE3_ | 0.04296827  | 0.2569518   | 5.17E-05  | 0.0047101 | -0.042593         |
| 9mo_SIGAE3_ | 0.01818825  | 0.10403429  | 4.09E-05  | 0.0055879 | 0.030658          |
| 9mo_SIGAE3_ | 0.0246479   | 0.14389677  | 4.36E-05  | 0.0049516 | -0.098011         |
| 9mo_SIGAE3_ | 0.00816689  | 0.04219248  | 3.56E-05  | 0.0072456 | 0.40559           |
| 9mo_SIGAE3_ | 0.07185366  | 0.43520355  | 5.60E-05  | 0.012118  | 0.24161           |
| 9mo_SIGAE3_ | 0.01972778  | 0.11353472  | 4.16E-05  | 0.0053955 | -0.012659         |
| 9mo_SIGAE3_ | 0.02335591  | 0.13592395  | 4.32E-05  | 0.0050338 | -0.084895         |
| 9mo_SIGAE3_ | 0.02372377  | 0.13819398  | 4.32E-05  | 0.0050338 | -0.084895         |
| 9mo_SIGAE3_ | 0.030159    | 0.1779058   | 4.55E-05  | 0.0046645 | -0.12301          |
| 9mo_SIGAE3_ | 0.07611005  | 0.46146974  | 5.18E-05  | 0.013885  | 0.23393           |
| 9mo_SIGAE3_ | 0.03112989  | 0.18389714  | 4.58E-05  | 0.00463   | -0.12145          |
| 9mo_SIGAE3_ | 0.02356591  | 0.13721986  | 4.32E-05  | 0.0050338 | -0.084895         |
| 9mo_SIGAE3_ | 0.01904375  | 0.10931357  | 4.14E-05  | 0.0054571 | 0.0010121         |
| 9mo_SIGAE3_ | 0.01195028  | 0.06553978  | 3.77E-05  | 0.0064954 | 0.24064           |
| 9mo_SIGAE3_ | 0.09366616  | 0.5698085   | 5.06E-05  | 0.0067258 | -0.7829           |
| 9mo_SIGAE3_ | 0.06896532  | 0.4173796   | 5.87E-05  | 0.010741  | 0.21248           |
| 9mo_SIGAE3_ | 0.07772622  | 0.4714431   | 5.05E-05  | 0.014229  | 0.21153           |
| 9mo_SIGAE3_ | 0.0237586   | 0.13840894  | 4.32E-05  | 0.0050338 | -0.091842         |
| 9mo_SIGAE3_ | 0.02208717  | 0.1280945   | 4.26E-05  | 0.0051742 | -0.059109         |
| 9mo_SIGAE3_ | 0.08858227  | 0.53843576  | 4.82E-05  | 0.0098057 | -0.3844           |
| 9mo_SIGAE3_ | 0.08819806  | 0.5360648   | 4.80E-05  | 0.010188  | -0.3415           |
| 9mo_SIGAE3_ | 0.02719589  | 0.15962043  | 4.46E-05  | 0.0047834 | -0.11816          |
| 9mo_SIGAE3_ | 0.03550068  | 0.21086927  | 4.74E-05  | 0.0045622 | -0.10068          |
| 9mo_SIGAE3_ | 0.02786899  | 0.16377412  | 4.48E-05  | 0.0047558 | -0.12024          |
| 9mo_SIGAE3_ | 0.01537523  | 0.08667511  | 3.95E-05  | 0.0059603 | 0.11709           |
| 9mo_SIGAE3_ | 0.01802381  | 0.1030195   | 4.09E-05  | 0.0055879 | 0.030658          |
| 9mo_SIGAE3_ | 0.04334312  | 0.25926498  | 5.21E-05  | 0.0047343 | -0.038876         |
| 9mo_SIGAE3_ | 0.07867193  | 0.47727907  | 4.97E-05  | 0.014318  | 0.18889           |
| 9mo_SIGAE3_ | 0.08918954  | 0.5421833   | 4.84E-05  | 0.0094274 | -0.42792          |
| 9mo_SIGAE3_ | 0.02293684  | 0.13333787  | 4.30E-05  | 0.0050782 | -0.077142         |
| 9mo_SIGAE3_ | 0.08586095  | 0.5216425   | 4.76E-05  | 0.0117    | -0.14081          |
| 9mo_SIGAE3_ | 0.03147487  | 0.18602602  | 4.60E-05  | 0.0046154 | -0.12002          |
| 9mo_SIGAE3_ | 0.01827943  | 0.10459698  | 4.09E-05  | 0.0055879 | 0.030658          |

|             |            |            |          |           |           |
|-------------|------------|------------|----------|-----------|-----------|
| 9mo_SIGAE3_ | 0.02615666 | 0.15320732 | 4.42E-05 | 0.0048445 | -0.11213  |
| 9mo_SIGAE3_ | 0.08012995 | 0.48627654 | 4.90E-05 | 0.014278  | 0.14202   |
| 9mo_SIGAE3_ | 0.01581736 | 0.08940351 | 3.98E-05 | 0.0058806 | 0.098494  |
| 9mo_SIGAE3_ | 0.02295217 | 0.13343242 | 4.30E-05 | 0.0050782 | -0.077142 |
| 9mo_SIGAE3_ | 0.01378336 | 0.07685167 | 3.86E-05 | 0.0062156 | 0.17645   |
| 9mo_SIGAE3_ | 0.03125379 | 0.18466173 | 4.58E-05 | 0.00463   | -0.12145  |
| 9mo_SIGAE3_ | 0.0287945  | 0.16948548 | 4.51E-05 | 0.0047064 | -0.12268  |
| 9mo_SIGAE3_ | 0.01549813 | 0.08743354 | 3.95E-05 | 0.0059603 | 0.11709   |
| 9mo_SIGAE3_ | 0.04339228 | 0.25956836 | 5.21E-05 | 0.0047343 | -0.038876 |
| 9mo_SIGAE3_ | 0.07983927 | 0.4844828  | 4.90E-05 | 0.014278  | 0.15946   |
| 9mo_SIGAE3_ | 0.06236764 | 0.37666535 | 6.35E-05 | 0.0078047 | 0.11565   |
| 9mo_SIGAE3_ | 0.02866468 | 0.16868432 | 4.49E-05 | 0.0047302 | -0.12268  |
| 9mo_SIGAE3_ | 0.00777365 | 0.03976577 | 3.53E-05 | 0.0073641 | 0.43054   |
| 9mo_SIGAE3_ | 0.01508313 | 0.08487261 | 3.92E-05 | 0.0060428 | 0.1363    |
| 9mo_SIGAE3_ | 0.0285126  | 0.16774587 | 4.49E-05 | 0.0047302 | -0.12174  |
| 9mo_SIGAE3_ | 0.08535253 | 0.51850504 | 4.76E-05 | 0.012059  | -0.14081  |
| 9mo_SIGAE3_ | 0.02376612 | 0.13845532 | 4.32E-05 | 0.0050338 | -0.091842 |
| 9mo_SIGAE3_ | 0.01239419 | 0.06827916 | 3.77E-05 | 0.0064954 | 0.24064   |
| 9mo_SIGAE3_ | 0.02068625 | 0.11944947 | 4.21E-05 | 0.0052798 | -0.037579 |
| 9mo_SIGAE3_ | 0.02342029 | 0.1363212  | 4.32E-05 | 0.0050338 | -0.084895 |
| 9mo_SIGAE3_ | 0.06292284 | 0.3800915  | 6.33E-05 | 0.0080056 | 0.12359   |
| 9mo_SIGAE3_ | 0.02295907 | 0.13347505 | 4.30E-05 | 0.0050782 | -0.077142 |
| 9mo_SIGAE3_ | 0.0898791  | 0.5464385  | 4.86E-05 | 0.0090548 | -0.47194  |
| 9mo_SIGAE3_ | 0.01552766 | 0.08761577 | 3.95E-05 | 0.0059603 | 0.11709   |
| 9mo_SIGAE3_ | 0.03772869 | 0.22461836 | 4.84E-05 | 0.0045696 | -0.084703 |
| 9mo_SIGAE3_ | 0.01872272 | 0.10733248 | 4.11E-05 | 0.0055212 | 0.015459  |
| 9mo_SIGAE3_ | 0.08307882 | 0.504474   | 4.78E-05 | 0.013315  | 0.02505   |
| 9mo_SIGAE3_ | 0.0210323  | 0.12158493 | 4.21E-05 | 0.0052798 | -0.037579 |
| 9mo_SIGAE3_ | 0.01844763 | 0.10563493 | 4.11E-05 | 0.0055212 | 0.015459  |
| 9mo_SIGAE3_ | 0.01543655 | 0.08705352 | 3.95E-05 | 0.0059603 | 0.11709   |
| 9mo_SIGAE3_ | 0.04014535 | 0.23953155 | 4.99E-05 | 0.0046177 | -0.063007 |
| 9mo_SIGAE3_ | 0.02102515 | 0.12154079 | 4.21E-05 | 0.0052798 | -0.037579 |
| 9mo_SIGAE3_ | 0.07972919 | 0.48380342 | 4.90E-05 | 0.014278  | 0.15946   |
| 9mo_SIGAE3_ | 0.02026872 | 0.11687288 | 4.19E-05 | 0.0053364 | -0.025531 |
| 9mo_SIGAE3_ | 0.04328926 | 0.2589326  | 5.17E-05 | 0.0047101 | -0.038876 |
| 9mo_SIGAE3_ | 0.07851636 | 0.4763191  | 5.01E-05 | 0.014289  | 0.18889   |
| 9mo_SIGAE3_ | 0.01060908 | 0.05726324 | 3.68E-05 | 0.0068    | 0.30902   |
| 9mo_SIGAE3_ | 0.07266545 | 0.44021308 | 5.49E-05 | 0.012637  | 0.24373   |
| 9mo_SIGAE3_ | 0.01769703 | 0.10100298 | 4.06E-05 | 0.0056572 | 0.046584  |
| 9mo_SIGAE3_ | 0.01754743 | 0.10007975 | 4.06E-05 | 0.0056572 | 0.046584  |
| 9mo_SIGAE3_ | 0.07123752 | 0.43140134 | 5.65E-05 | 0.011849  | 0.23476   |
| 9mo_SIGAE3_ | 0.02370569 | 0.1380824  | 4.32E-05 | 0.0050338 | -0.084895 |
| 9mo_SIGAE3_ | 0.02621992 | 0.15359774 | 4.42E-05 | 0.0048445 | -0.11213  |

|             |            |            |          |           |            |
|-------------|------------|------------|----------|-----------|------------|
| 9mo_SIGAE3_ | 0.02046794 | 0.11810226 | 4.19E-05 | 0.0053364 | -0.025531  |
| 9mo_SIGAE3_ | 0.02334776 | 0.13587362 | 4.32E-05 | 0.0050338 | -0.084895  |
| 9mo_SIGAE3_ | 0.02478724 | 0.14475666 | 4.36E-05 | 0.0049516 | -0.098011  |
| 9mo_SIGAE3_ | 0.02647003 | 0.15514114 | 4.42E-05 | 0.0048445 | -0.11546   |
| 9mo_SIGAE3_ | 0.01152163 | 0.06289457 | 3.74E-05 | 0.0065941 | 0.263      |
| 9mo_SIGAE3_ | 0.02926114 | 0.17236508 | 4.53E-05 | 0.0046846 | -0.1231    |
| 9mo_SIGAE3_ | 0.01145284 | 0.06247004 | 3.74E-05 | 0.0065941 | 0.263      |
| 9mo_SIGAE3_ | 0.01412117 | 0.0789363  | 3.89E-05 | 0.0061278 | 0.1561     |
| 9mo_SIGAE3_ | 0.08474617 | 0.5147632  | 4.76E-05 | 0.012404  | -0.069378  |
| 9mo_SIGAE3_ | 0.02114978 | 0.12230989 | 4.24E-05 | 0.0052258 | -0.04878   |
| 9mo_SIGAE3_ | 0.02994777 | 0.17660232 | 4.55E-05 | 0.0046645 | -0.12301   |
| 9mo_SIGAE3_ | 0.01677097 | 0.09528825 | 4.00E-05 | 0.0058035 | 0.063215   |
| 9mo_SIGAE3_ | 0.0251807  | 0.14718468 | 4.38E-05 | 0.0049138 | -0.10343   |
| 9mo_SIGAE3_ | 0.07310463 | 0.44292328 | 5.49E-05 | 0.012637  | 0.24489    |
| 9mo_SIGAE3_ | 0.09047429 | 0.5501114  | 4.88E-05 | 0.0086895 | -0.51631   |
| 9mo_SIGAE3_ | 0.03302254 | 0.19557671 | 4.64E-05 | 0.0045915 | -0.11352   |
| 9mo_SIGAE3_ | 0.04230828 | 0.252879   | 5.13E-05 | 0.0046879 | -0.04643   |
| 9mo_SIGAE3_ | 0.08361123 | 0.50775945 | 4.77E-05 | 0.013036  | -0.0045591 |
| 9mo_SIGAE3_ | 0.00777953 | 0.03980206 | 3.53E-05 | 0.0073641 | 0.43054    |
| 9mo_SIGAE3_ | 0.01784634 | 0.10192432 | 4.06E-05 | 0.0056572 | 0.030658   |
| 9mo_SIGAE3_ | 0.08455753 | 0.51359916 | 4.76E-05 | 0.012404  | -0.069378  |
| 9mo_SIGAE3_ | 0.01884964 | 0.10811572 | 4.11E-05 | 0.0055212 | 0.015459   |
| 9mo_SIGAE3_ | 0.07086908 | 0.42912772 | 5.71E-05 | 0.011574  | 0.23476    |
| 9mo_SIGAE3_ | 0.02395062 | 0.1395939  | 4.34E-05 | 0.0049916 | -0.091842  |
| 9mo_SIGAE3_ | 0.02931292 | 0.17268465 | 4.53E-05 | 0.0046846 | -0.1231    |
| 9mo_SIGAE3_ | 0.07656111 | 0.46425322 | 5.13E-05 | 0.014025  | 0.22792    |
| 9mo_SIGAE3_ | 0.0110702  | 0.06010879 | 3.71E-05 | 0.0066957 | 0.2858     |
| 9mo_SIGAE3_ | 0.07448377 | 0.45143396 | 5.33E-05 | 0.013335  | 0.24406    |
| 9mo_SIGAE3_ | 0.05678104 | 0.34219038 | 6.27E-05 | 0.0061731 | 0.05269    |
| 9mo_SIGAE3_ | 0.07813782 | 0.4739831  | 5.01E-05 | 0.014289  | 0.20103    |
| 9mo_SIGAE3_ | 0.02604925 | 0.15254454 | 4.42E-05 | 0.0048445 | -0.11213   |
| 9mo_SIGAE3_ | 0.01975676 | 0.11371353 | 4.16E-05 | 0.0053955 | -0.012659  |
| 9mo_SIGAE3_ | 0.02059929 | 0.11891281 | 4.21E-05 | 0.0052798 | -0.037579  |
| 9mo_SIGAE3_ | 0.02478186 | 0.14472347 | 4.36E-05 | 0.0049516 | -0.098011  |
| 9mo_SIGAE3_ | 0.02691186 | 0.1578677  | 4.44E-05 | 0.004813  | -0.11546   |
| 9mo_SIGAE3_ | 0.0186228  | 0.10671592 | 4.11E-05 | 0.0055212 | 0.015459   |
| 9mo_SIGAE3_ | 0.01877217 | 0.10763763 | 4.11E-05 | 0.0055212 | 0.015459   |
| 9mo_SIGAE3_ | 0.01772736 | 0.10119014 | 4.06E-05 | 0.0056572 | 0.046584   |
| 9mo_SIGAE3_ | 0.05745076 | 0.34632322 | 6.32E-05 | 0.0064035 | 0.057806   |
| 9mo_SIGAE3_ | 0.01416636 | 0.07921516 | 3.89E-05 | 0.0061278 | 0.1561     |
| 9mo_SIGAE3_ | 0.02166612 | 0.12549625 | 4.26E-05 | 0.0051742 | -0.059109  |
| 9mo_SIGAE3_ | 0.06182294 | 0.37330398 | 6.36E-05 | 0.0076138 | 0.10802    |
| 9mo_SIGAE3_ | 0.06646492 | 0.4019496  | 6.12E-05 | 0.0093985 | 0.18233    |

|             |            |            |          |           |           |
|-------------|------------|------------|----------|-----------|-----------|
| 9mo_SIGAE3_ | 0.02478329 | 0.14473231 | 4.36E-05 | 0.0049516 | -0.098011 |
| 9mo_SIGAE3_ | 0.07191187 | 0.43556276 | 5.60E-05 | 0.012118  | 0.24161   |
| 9mo_SIGAE3_ | 0.06475219 | 0.3913804  | 6.24E-05 | 0.0086643 | 0.14863   |
| 9mo_SIGAE3_ | 0.08770095 | 0.53299713 | 4.79E-05 | 0.010571  | -0.29935  |
| 9mo_SIGAE3_ | 0.02928584 | 0.17251754 | 4.53E-05 | 0.0046846 | -0.1231   |
| 9mo_SIGAE3_ | 0.04632228 | 0.27764937 | 5.44E-05 | 0.0048874 | -0.021643 |
| 9mo_SIGAE3_ | 0.02212744 | 0.128343   | 4.26E-05 | 0.0051742 | -0.068556 |
| 9mo_SIGAE3_ | 0.02549481 | 0.14912306 | 4.40E-05 | 0.0048781 | -0.10813  |
| 9mo_SIGAE3_ | 0.01487867 | 0.08361083 | 3.92E-05 | 0.0060428 | 0.1363    |
| 9mo_SIGAE3_ | 0.08017968 | 0.48658344 | 4.90E-05 | 0.014278  | 0.14202   |
| 9mo_SIGAE3_ | 0.09368888 | 0.5699487  | 5.06E-05 | 0.0067258 | -0.7829   |
| 9mo_SIGAE3_ | 0.07549235 | 0.45765787 | 5.23E-05 | 0.013721  | 0.23858   |
| 9mo_SIGAE3_ | 0.01113389 | 0.06050183 | 3.71E-05 | 0.0066957 | 0.2858    |
| 9mo_SIGAE3_ | 0.02151606 | 0.12457018 | 4.24E-05 | 0.0052258 | -0.04878  |
| 9mo_SIGAE3_ | 0.06695489 | 0.40497324 | 6.07E-05 | 0.0096573 | 0.18233   |
| 9mo_SIGAE3_ | 0.01666386 | 0.09462725 | 4.00E-05 | 0.0058035 | 0.080526  |
| 9mo_SIGAE3_ | 0.01780821 | 0.10168903 | 4.06E-05 | 0.0056572 | 0.030658  |
| 9mo_SIGAE3_ | 0.05003925 | 0.30058685 | 5.78E-05 | 0.0052091 | 0.0010449 |
| 9mo_SIGAE3_ | 0.02462884 | 0.14377914 | 4.36E-05 | 0.0049516 | -0.098011 |
| 9mo_SIGAE3_ | 0.0141927  | 0.07937771 | 3.89E-05 | 0.0061278 | 0.1561    |
| 9mo_SIGAE3_ | 0.08685407 | 0.52777106 | 4.78E-05 | 0.010952  | -0.21781  |
| 9mo_SIGAE3_ | 0.07907541 | 0.479769   | 4.97E-05 | 0.014318  | 0.17506   |
| 9mo_SIGAE3_ | 0.04058161 | 0.2422237  | 4.99E-05 | 0.0046177 | -0.058715 |
| 9mo_SIGAE3_ | 0.09904184 | 0.6029818  | 5.45E-05 | 0.0045382 | -1.1701   |
| 9mo_SIGAE3_ | 0.02135569 | 0.12358054 | 4.24E-05 | 0.0052258 | -0.04878  |
| 9mo_SIGAE3_ | 0.02452878 | 0.14316171 | 4.36E-05 | 0.0049516 | -0.098011 |
| 9mo_SIGAE3_ | 0.07947758 | 0.48225075 | 4.93E-05 | 0.014315  | 0.15946   |
| 9mo_SIGAE3_ | 0.02099398 | 0.12134843 | 4.21E-05 | 0.0052798 | -0.037579 |
| 9mo_SIGAE3_ | 0.08646613 | 0.52537704 | 4.77E-05 | 0.01133   | -0.21781  |
| 9mo_SIGAE3_ | 0.04409808 | 0.26392388 | 5.25E-05 | 0.0047605 | -0.035266 |
| 9mo_SIGAE3_ | 0.10123175 | 0.6164957  | 5.62E-05 | 0.0040352 | -1.2808   |
| 9mo_SIGAE3_ | 0.01659171 | 0.094182   | 4.00E-05 | 0.0058035 | 0.080526  |
| 9mo_SIGAE3_ | 0.0257625  | 0.150775   | 4.40E-05 | 0.0048781 | -0.10813  |
| 9mo_SIGAE3_ | 0.01872605 | 0.10735303 | 4.11E-05 | 0.0055212 | 0.015459  |
| 9mo_SIGAE3_ | 0.04190444 | 0.25038686 | 5.09E-05 | 0.0046676 | -0.0504   |
| 9mo_SIGAE3_ | 0.08009823 | 0.48608077 | 4.90E-05 | 0.014278  | 0.14202   |
| 9mo_SIGAE3_ | 0.02477916 | 0.14470682 | 4.36E-05 | 0.0049516 | -0.098011 |
| 9mo_SIGAE3_ | 0.09385061 | 0.57094675 | 5.09E-05 | 0.0064439 | -0.7829   |
| 9mo_SIGAE3_ | 0.01486839 | 0.08354744 | 3.92E-05 | 0.0060428 | 0.1363    |
| 9mo_SIGAE3_ | 0.01165417 | 0.06371246 | 3.74E-05 | 0.0065941 | 0.263     |
| 9mo_SIGAE3_ | 0.01139413 | 0.06210777 | 3.74E-05 | 0.0065941 | 0.263     |
| 9mo_SIGAE3_ | 0.02017617 | 0.11630177 | 4.19E-05 | 0.0053364 | -0.025531 |
| 9mo_SIGAE3_ | 0.05424308 | 0.32652864 | 6.14E-05 | 0.0057798 | 0.030074  |



|             |            |            |          |           |           |
|-------------|------------|------------|----------|-----------|-----------|
| 9mo_SIGAE3_ | 0.00498828 | 0.02257726 | 3.38E-05 | 0.0079991 | 0.55892   |
| 9mo_SIGAE3_ | 0.04062066 | 0.2424647  | 4.99E-05 | 0.0046177 | -0.058715 |
| 9mo_SIGAE3_ | 0.05431379 | 0.32696497 | 6.14E-05 | 0.0057798 | 0.030074  |
| 9mo_SIGAE3_ | 0.00930466 | 0.04921364 | 3.62E-05 | 0.0070172 | 0.35661   |
| 9mo_SIGAE3_ | 0.030469   | 0.17981878 | 4.57E-05 | 0.0046464 | -0.12245  |
| 9mo_SIGAE3_ | 0.07486    | 0.45375568 | 5.28E-05 | 0.013537  | 0.24193   |
| 9mo_SIGAE3_ | 0.03251628 | 0.19245254 | 4.64E-05 | 0.0045915 | -0.11603  |
| 9mo_SIGAE3_ | 0.07016248 | 0.42476726 | 5.76E-05 | 0.011297  | 0.22487   |
| 9mo_SIGAE3_ | 0.01799022 | 0.10281227 | 4.09E-05 | 0.0055879 | 0.030658  |
| 9mo_SIGAE3_ | 0.03481929 | 0.20666446 | 4.72E-05 | 0.0045646 | -0.10426  |
| 9mo_SIGAE3_ | 0.02263985 | 0.1315051  | 4.28E-05 | 0.005125  | -0.068556 |
| 9mo_SIGAE3_ | 0.1001104  | 0.60957587 | 5.53E-05 | 0.004262  | -1.2296   |
| 9mo_SIGAE3_ | 0.07922681 | 0.4807033  | 4.93E-05 | 0.014315  | 0.17506   |
| 9mo_SIGAE3_ | 0.01225043 | 0.06739196 | 3.77E-05 | 0.0064954 | 0.24064   |
| 9mo_SIGAE3_ | 0.01896101 | 0.10880301 | 4.14E-05 | 0.0054571 | 0.0010121 |
| 9mo_SIGAE3_ | 0.0960008  | 0.5842155  | 5.24E-05 | 0.0054581 | -0.9515   |
| 9mo_SIGAE3_ | 0.04457671 | 0.2668775  | 5.30E-05 | 0.0047888 | -0.031751 |
| 9mo_SIGAE3_ | 0.01235189 | 0.06801812 | 3.77E-05 | 0.0064954 | 0.24064   |
| 9mo_SIGAE3_ | 0.04225522 | 0.2525516  | 5.13E-05 | 0.0046879 | -0.04643  |
| 9mo_SIGAE3_ | 0.01101638 | 0.05977666 | 3.71E-05 | 0.0066957 | 0.2858    |
| 9mo_SIGAE3_ | 0.00598047 | 0.02870007 | 3.44E-05 | 0.0077366 | 0.50694   |
| 9mo_SIGAE3_ | 0.01577357 | 0.08913326 | 3.98E-05 | 0.0058806 | 0.098494  |
| 9mo_SIGAE3_ | 0.08170769 | 0.49601275 | 4.83E-05 | 0.013957  | 0.078055  |
| 9mo_SIGAE3_ | 0.02395563 | 0.1396248  | 4.34E-05 | 0.0049916 | -0.091842 |
| 9mo_SIGAE3_ | 0.02418035 | 0.14101152 | 4.34E-05 | 0.0049916 | -0.091842 |
| 9mo_SIGAE3_ | 0.07822727 | 0.47453508 | 5.01E-05 | 0.014289  | 0.20103   |
| 9mo_SIGAE3_ | 0.02204892 | 0.1278585  | 4.26E-05 | 0.0051742 | -0.059109 |
| 9mo_SIGAE3_ | 0.02176011 | 0.1260762  | 4.26E-05 | 0.0051742 | -0.059109 |
| 9mo_SIGAE3_ | 0.03051387 | 0.18009569 | 4.57E-05 | 0.0046464 | -0.12245  |
| 9mo_SIGAE3_ | 0.02376952 | 0.1384763  | 4.32E-05 | 0.0050338 | -0.091842 |
| 9mo_SIGAE3_ | 0.08778273 | 0.5335018  | 4.80E-05 | 0.010188  | -0.29935  |
| 9mo_SIGAE3_ | 0.08812436 | 0.53561    | 4.80E-05 | 0.010188  | -0.3415   |
| 9mo_SIGAE3_ | 0.02215884 | 0.12853679 | 4.26E-05 | 0.0051742 | -0.068556 |
| 9mo_SIGAE3_ | 0.02268142 | 0.13176166 | 4.28E-05 | 0.005125  | -0.077142 |
| 9mo_SIGAE3_ | 0.02479568 | 0.14480872 | 4.36E-05 | 0.0049516 | -0.098011 |
| 9mo_SIGAE3_ | 0.07243806 | 0.4388099  | 5.54E-05 | 0.012382  | 0.24373   |
| 9mo_SIGAE3_ | 0.01602745 | 0.09069997 | 3.98E-05 | 0.0058806 | 0.098494  |
| 9mo_SIGAE3_ | 0.01609311 | 0.09110514 | 3.98E-05 | 0.0058806 | 0.098494  |
| 9mo_SIGAE3_ | 0.05313427 | 0.3196862  | 6.05E-05 | 0.0056127 | 0.022172  |
| 9mo_SIGAE3_ | 0.08102711 | 0.49181288 | 4.85E-05 | 0.0141    | 0.10139   |
| 9mo_SIGAE3_ | 0.00896087 | 0.04709213 | 3.59E-05 | 0.00713   | 0.38094   |
| 9mo_SIGAE3_ | 0.03547955 | 0.21073887 | 4.74E-05 | 0.0045622 | -0.10068  |
| 9mo_SIGAE3_ | 0.0888532  | 0.5401077  | 4.82E-05 | 0.0098057 | -0.3844   |

|             |            |            |          |           |           |
|-------------|------------|------------|----------|-----------|-----------|
| 9mo_SIGAE3_ | 0.07282295 | 0.44118506 | 5.49E-05 | 0.012637  | 0.24373   |
| 9mo_SIGAE3_ | 0.02271988 | 0.13199902 | 4.28E-05 | 0.005125  | -0.077142 |
| 9mo_SIGAE3_ | 0.02821556 | 0.16591279 | 4.49E-05 | 0.0047302 | -0.12174  |
| 9mo_SIGAE3_ | 0.02342601 | 0.1363565  | 4.32E-05 | 0.0050338 | -0.084895 |
| 9mo_SIGAE3_ | 0.03598338 | 0.21384804 | 4.77E-05 | 0.0045615 | -0.096915 |
| 9mo_SIGAE3_ | 0.01119143 | 0.06085689 | 3.71E-05 | 0.0066957 | 0.2858    |
| 9mo_SIGAE3_ | 0.01137121 | 0.0619663  | 3.74E-05 | 0.0065941 | 0.263     |
| 9mo_SIGAE3_ | 0.07191864 | 0.4356045  | 5.60E-05 | 0.012118  | 0.24161   |
| 9mo_SIGAE3_ | 0.02560521 | 0.14980435 | 4.40E-05 | 0.0048781 | -0.10813  |
| 9mo_SIGAE3_ | 0.09088101 | 0.5526213  | 4.91E-05 | 0.0083333 | -0.56091  |
| 9mo_SIGAE3_ | 0.00866154 | 0.04524492 | 3.59E-05 | 0.00713   | 0.38094   |
| 9mo_SIGAE3_ | 0.02106538 | 0.12178905 | 4.21E-05 | 0.0052798 | -0.04878  |
| 9mo_SIGAE3_ | 0.07658353 | 0.46439162 | 5.13E-05 | 0.014025  | 0.22792   |
| 9mo_SIGAE3_ | 0.03004036 | 0.17717364 | 4.55E-05 | 0.0046645 | -0.12301  |
| 9mo_SIGAE3_ | 0.01965522 | 0.11308694 | 4.16E-05 | 0.0053955 | -0.012659 |
| 9mo_SIGAE3_ | 0.03595296 | 0.21366033 | 4.77E-05 | 0.0045615 | -0.096915 |
| 9mo_SIGAE3_ | 0.03324506 | 0.19694984 | 4.66E-05 | 0.0045822 | -0.11352  |
| 9mo_SIGAE3_ | 0.03038505 | 0.17930073 | 4.57E-05 | 0.0046464 | -0.12245  |
| 9mo_SIGAE3_ | 0.01882424 | 0.10795897 | 4.11E-05 | 0.0055212 | 0.015459  |
| 9mo_SIGAE3_ | 0.02645112 | 0.15502444 | 4.42E-05 | 0.0048445 | -0.11546  |
| 9mo_SIGAE3_ | 0.06887037 | 0.41679367 | 5.87E-05 | 0.010741  | 0.21248   |
| 9mo_SIGAE3_ | 0.01824159 | 0.10436343 | 4.09E-05 | 0.0055879 | 0.030658  |
| 9mo_SIGAE3_ | 0.06317946 | 0.38167506 | 6.33E-05 | 0.0080056 | 0.13178   |
| 9mo_SIGAE3_ | 0.02774291 | 0.16299607 | 4.48E-05 | 0.0047558 | -0.12024  |
| 9mo_SIGAE3_ | 0.0646503  | 0.3907516  | 6.24E-05 | 0.0086643 | 0.14863   |
| 9mo_SIGAE3_ | 0.01730393 | 0.09857716 | 4.03E-05 | 0.005729  | 0.046584  |
| 9mo_SIGAE3_ | 0.02493397 | 0.14566214 | 4.38E-05 | 0.0049138 | -0.10343  |
| 9mo_SIGAE3_ | 0.01918853 | 0.11020702 | 4.14E-05 | 0.0054571 | 0.0010121 |
| 9mo_SIGAE3_ | 0.03362516 | 0.19929543 | 4.68E-05 | 0.0045746 | -0.11071  |
| 9mo_SIGAE3_ | 0.01663179 | 0.09442935 | 4.00E-05 | 0.0058035 | 0.080526  |
| 9mo_SIGAE3_ | 0.02520705 | 0.14734732 | 4.38E-05 | 0.0049138 | -0.10343  |
| 9mo_SIGAE3_ | 0.06373659 | 0.3851131  | 6.30E-05 | 0.008216  | 0.14015   |
| 9mo_SIGAE3_ | 0.020328   | 0.11723866 | 4.19E-05 | 0.0053364 | -0.025531 |
| 9mo_SIGAE3_ | 0.01583376 | 0.0895047  | 3.98E-05 | 0.0058806 | 0.098494  |
| 9mo_SIGAE3_ | 0.03050013 | 0.18001091 | 4.57E-05 | 0.0046464 | -0.12245  |
| 9mo_SIGAE3_ | 0.01123821 | 0.06114557 | 3.71E-05 | 0.0066957 | 0.2858    |
| 9mo_SIGAE3_ | 0.01594665 | 0.09020133 | 3.98E-05 | 0.0058806 | 0.098494  |
| 9mo_SIGAE3_ | 0.04174316 | 0.24939166 | 5.09E-05 | 0.0046676 | -0.0504   |
| 9mo_SIGAE3_ | 0.02726364 | 0.1600385  | 4.46E-05 | 0.0047834 | -0.11816  |
| 9mo_SIGAE3_ | 0.08829133 | 0.5366404  | 4.80E-05 | 0.010188  | -0.3415   |
| 9mo_SIGAE3_ | 0.01504673 | 0.08464798 | 3.92E-05 | 0.0060428 | 0.1363    |
| 9mo_SIGAE3_ | 0.09080187 | 0.55213296 | 4.91E-05 | 0.0083333 | -0.56091  |
| 9mo_SIGAE3_ | 0.04276384 | 0.25569028 | 5.13E-05 | 0.0046879 | -0.042593 |

|             |            |            |          |           |            |
|-------------|------------|------------|----------|-----------|------------|
| 9mo_SIGAE3_ | 0.07516776 | 0.45565486 | 5.28E-05 | 0.013537  | 0.23858    |
| 9mo_SIGAE3_ | 0.01965438 | 0.11308175 | 4.16E-05 | 0.0053955 | -0.012659  |
| 9mo_SIGAE3_ | 0.02639978 | 0.15470767 | 4.42E-05 | 0.0048445 | -0.11213   |
| 9mo_SIGAE3_ | 0.01853034 | 0.10614531 | 4.11E-05 | 0.0055212 | 0.015459   |
| 9mo_SIGAE3_ | 0.03709643 | 0.22071669 | 4.81E-05 | 0.0045652 | -0.088896  |
| 9mo_SIGAE3_ | 0.01608466 | 0.09105301 | 3.98E-05 | 0.0058806 | 0.098494   |
| 9mo_SIGAE3_ | 0.02436355 | 0.14214209 | 4.36E-05 | 0.0049516 | -0.098011  |
| 9mo_SIGAE3_ | 0.03284284 | 0.19446775 | 4.64E-05 | 0.0045915 | -0.11603   |
| 9mo_SIGAE3_ | 0.08949178 | 0.54404837 | 4.86E-05 | 0.0090548 | -0.42792   |
| 9mo_SIGAE3_ | 0.06722488 | 0.4066393  | 6.03E-05 | 0.009922  | 0.19037    |
| 9mo_SIGAE3_ | 0.07027099 | 0.42543685 | 5.76E-05 | 0.011297  | 0.23016    |
| 9mo_SIGAE3_ | 0.0180728  | 0.10332186 | 4.09E-05 | 0.0055879 | 0.030658   |
| 9mo_SIGAE3_ | 0.03189082 | 0.18859284 | 4.60E-05 | 0.0046154 | -0.11821   |
| 9mo_SIGAE3_ | 0.09536014 | 0.580262   | 5.16E-05 | 0.0059226 | -0.91061   |
| 9mo_SIGAE3_ | 0.01891398 | 0.10851279 | 4.11E-05 | 0.0055212 | 0.0010121  |
| 9mo_SIGAE3_ | 0.03851725 | 0.22948456 | 4.89E-05 | 0.0045836 | -0.076088  |
| 9mo_SIGAE3_ | 0.090887   | 0.55265826 | 4.91E-05 | 0.0083333 | -0.56091   |
| 9mo_SIGAE3_ | 0.06818724 | 0.41257805 | 5.98E-05 | 0.010192  | 0.20551    |
| 9mo_SIGAE3_ | 0.08276942 | 0.50256467 | 4.79E-05 | 0.013563  | 0.02505    |
| 9mo_SIGAE3_ | 0.03878192 | 0.23111784 | 4.89E-05 | 0.0045836 | -0.076088  |
| 9mo_SIGAE3_ | 0.02326853 | 0.13538471 | 4.30E-05 | 0.0050782 | -0.084895  |
| 9mo_SIGAE3_ | 0.07062785 | 0.4276391  | 5.71E-05 | 0.011574  | 0.23016    |
| 9mo_SIGAE3_ | 0.0481065  | 0.2886598  | 5.58E-05 | 0.0050083 | -0.0087048 |
| 9mo_SIGAE3_ | 0.08877953 | 0.53965306 | 4.82E-05 | 0.0098057 | -0.3844    |
| 9mo_SIGAE3_ | 0.091946   | 0.5591934  | 4.96E-05 | 0.0076529 | -0.6503    |
| 9mo_SIGAE3_ | 0.01062514 | 0.05736232 | 3.68E-05 | 0.0068    | 0.30902    |
| 9mo_SIGAE3_ | 0.03048205 | 0.17989935 | 4.57E-05 | 0.0046464 | -0.12245   |
| 9mo_SIGAE3_ | 0.0086503  | 0.04517557 | 3.59E-05 | 0.00713   | 0.38094    |
| 9mo_SIGAE3_ | 0.03061206 | 0.18070161 | 4.57E-05 | 0.0046464 | -0.12245   |
| 9mo_SIGAE3_ | 0.06281128 | 0.379403   | 6.35E-05 | 0.0078047 | 0.12359    |
| 9mo_SIGAE3_ | 0.02284654 | 0.13278058 | 4.30E-05 | 0.0050782 | -0.077142  |
| 9mo_SIGAE3_ | 0.03179236 | 0.18798524 | 4.60E-05 | 0.0046154 | -0.12002   |
| 9mo_SIGAE3_ | 0.08724257 | 0.5301685  | 4.79E-05 | 0.010571  | -0.25808   |
| 9mo_SIGAE3_ | 0.01390237 | 0.07758614 | 3.86E-05 | 0.0062156 | 0.17645    |
| 9mo_SIGAE3_ | 0.08629863 | 0.52434343 | 4.77E-05 | 0.01133   | -0.17867   |
| 9mo_SIGAE3_ | 0.01642522 | 0.09315459 | 4.00E-05 | 0.0058035 | 0.080526   |
| 9mo_SIGAE3_ | 0.02947142 | 0.17366275 | 4.53E-05 | 0.0046846 | -0.1231    |
| 9mo_SIGAE3_ | 0.01363193 | 0.07591724 | 3.86E-05 | 0.0062156 | 0.17645    |
| 9mo_SIGAE3_ | 0.03231356 | 0.19120155 | 4.62E-05 | 0.0046026 | -0.11821   |
| 9mo_SIGAE3_ | 0.02385113 | 0.13897991 | 4.34E-05 | 0.0049916 | -0.091842  |
| 9mo_SIGAE3_ | 0.07166345 | 0.4340298  | 5.60E-05 | 0.012118  | 0.2386     |
| 9mo_SIGAE3_ | 0.01795575 | 0.10259955 | 4.09E-05 | 0.0055879 | 0.030658   |
| 9mo_SIGAE3_ | 0.00828909 | 0.04294658 | 3.56E-05 | 0.0072456 | 0.40559    |

|             |            |            |          |           |           |
|-------------|------------|------------|----------|-----------|-----------|
| 9mo_SIGAE3_ | 0.01947018 | 0.11194509 | 4.14E-05 | 0.0054571 | -0.012659 |
| 9mo_SIGAE3_ | 0.08680668 | 0.5274786  | 4.78E-05 | 0.010952  | -0.21781  |
| 9mo_SIGAE3_ | 0.06678232 | 0.4039083  | 6.07E-05 | 0.0096573 | 0.18233   |
| 9mo_SIGAE3_ | 0.02042409 | 0.11783168 | 4.19E-05 | 0.0053364 | -0.025531 |
| 9mo_SIGAE3_ | 0.01500051 | 0.08436271 | 3.92E-05 | 0.0060428 | 0.1363    |
| 9mo_SIGAE3_ | 0.08895768 | 0.5407525  | 4.84E-05 | 0.0094274 | -0.3844   |
| 9mo_SIGAE3_ | 0.07531157 | 0.4565423  | 5.23E-05 | 0.013721  | 0.23858   |
| 9mo_SIGAE3_ | 0.08832058 | 0.5368209  | 4.82E-05 | 0.0098057 | -0.3415   |
| 9mo_SIGAE3_ | 0.04756733 | 0.28533262 | 5.53E-05 | 0.0049654 | -0.01192  |
| 9mo_SIGAE3_ | 0.09288348 | 0.56497854 | 5.02E-05 | 0.0070215 | -0.69483  |
| 9mo_SIGAE3_ | 0.01628381 | 0.09228201 | 4.00E-05 | 0.0058035 | 0.080526  |
| 9mo_SIGAE3_ | 0.02500661 | 0.1461104  | 4.38E-05 | 0.0049138 | -0.10343  |
| 9mo_SIGAE3_ | 0.02914929 | 0.17167489 | 4.51E-05 | 0.0047064 | -0.12268  |
| 9mo_SIGAE3_ | 0.02009378 | 0.1157933  | 4.19E-05 | 0.0053364 | -0.025531 |
| 9mo_SIGAE3_ | 0.08007132 | 0.48591474 | 4.90E-05 | 0.014278  | 0.14202   |
| 9mo_SIGAE3_ | 0.03400249 | 0.20162396 | 4.68E-05 | 0.0045746 | -0.11071  |
| 9mo_SIGAE3_ | 0.03226864 | 0.1909244  | 4.62E-05 | 0.0046026 | -0.11821  |
| 9mo_SIGAE3_ | 0.03640467 | 0.21644782 | 4.79E-05 | 0.0045625 | -0.092976 |
| 9mo_SIGAE3_ | 0.01953982 | 0.11237483 | 4.16E-05 | 0.0053955 | -0.012659 |
| 9mo_SIGAE3_ | 0.0915506  | 0.5567534  | 4.93E-05 | 0.0079874 | -0.60562  |
| 9mo_SIGAE3_ | 0.02284417 | 0.13276598 | 4.30E-05 | 0.0050782 | -0.077142 |
| 9mo_SIGAE3_ | 0.0891451  | 0.54190904 | 4.84E-05 | 0.0094274 | -0.42792  |
| 9mo_SIGAE3_ | 0.01317349 | 0.07308821 | 3.83E-05 | 0.0063061 | 0.19734   |
| 9mo_SIGAE3_ | 0.02503265 | 0.14627106 | 4.38E-05 | 0.0049138 | -0.10343  |
| 9mo_SIGAE3_ | 0.03015134 | 0.1778585  | 4.55E-05 | 0.0046645 | -0.12301  |
| 9mo_SIGAE3_ | 0.02293078 | 0.13330045 | 4.30E-05 | 0.0050782 | -0.077142 |
| 9mo_SIGAE3_ | 0.02093632 | 0.12099261 | 4.21E-05 | 0.0052798 | -0.037579 |
| 9mo_SIGAE3_ | 0.03068756 | 0.18116751 | 4.57E-05 | 0.0046464 | -0.12245  |
| 9mo_SIGAE3_ | 0.08071973 | 0.4899161  | 4.87E-05 | 0.014207  | 0.12269   |
| 9mo_SIGAE3_ | 0.02002744 | 0.11538394 | 4.16E-05 | 0.0053955 | -0.025531 |
| 9mo_SIGAE3_ | 0.0214564  | 0.12420201 | 4.24E-05 | 0.0052258 | -0.04878  |
| 9mo_SIGAE3_ | 0.01956141 | 0.11250803 | 4.16E-05 | 0.0053955 | -0.012659 |
| 9mo_SIGAE3_ | 0.08967497 | 0.5451788  | 4.86E-05 | 0.0090548 | -0.47194  |
| 9mo_SIGAE3_ | 0.03727725 | 0.2218325  | 4.81E-05 | 0.0045652 | -0.084703 |
| 9mo_SIGAE3_ | 0.08621243 | 0.52381146 | 4.77E-05 | 0.01133   | -0.17867  |
| 9mo_SIGAE3_ | 0.02592433 | 0.15177365 | 4.40E-05 | 0.0048781 | -0.11213  |
| 9mo_SIGAE3_ | 0.03362693 | 0.19930635 | 4.68E-05 | 0.0045746 | -0.11071  |
| 9mo_SIGAE3_ | 0.02705569 | 0.15875529 | 4.44E-05 | 0.004813  | -0.11816  |
| 9mo_SIGAE3_ | 0.01716286 | 0.0977066  | 4.03E-05 | 0.005729  | 0.063215  |
| 9mo_SIGAE3_ | 0.03783374 | 0.2252666  | 4.84E-05 | 0.0045696 | -0.080425 |
| 9mo_SIGAE3_ | 0.09324334 | 0.56719923 | 5.06E-05 | 0.0067258 | -0.73907  |
| 9mo_SIGAE3_ | 0.03185536 | 0.18837406 | 4.60E-05 | 0.0046154 | -0.11821  |
| 9mo_SIGAE3_ | 0.09284488 | 0.56474036 | 5.02E-05 | 0.0070215 | -0.69483  |

|             |            |            |          |           |            |
|-------------|------------|------------|----------|-----------|------------|
| 9mo_SIGAE3_ | 0.01781654 | 0.10174047 | 4.06E-05 | 0.0056572 | 0.030658   |
| 9mo_SIGAE3_ | 0.09918258 | 0.6038503  | 5.49E-05 | 0.0043938 | -1.1701    |
| 9mo_SIGAE3_ | 0.02993639 | 0.17653207 | 4.55E-05 | 0.0046645 | -0.12301   |
| 9mo_SIGAE3_ | 0.07079339 | 0.42866063 | 5.71E-05 | 0.011574  | 0.23476    |
| 9mo_SIGAE3_ | 0.03066846 | 0.18104969 | 4.57E-05 | 0.0046464 | -0.12245   |
| 9mo_SIGAE3_ | 0.08091962 | 0.49114957 | 4.85E-05 | 0.0141    | 0.12269    |
| 9mo_SIGAE3_ | 0.02381681 | 0.13876812 | 4.32E-05 | 0.0050338 | -0.091842  |
| 9mo_SIGAE3_ | 0.01673991 | 0.09509655 | 4.00E-05 | 0.0058035 | 0.063215   |
| 9mo_SIGAE3_ | 0.08196257 | 0.49758565 | 4.81E-05 | 0.013778  | 0.078055   |
| 9mo_SIGAE3_ | 0.03862307 | 0.23013753 | 4.89E-05 | 0.0045836 | -0.076088  |
| 9mo_SIGAE3_ | 0.08729237 | 0.5304758  | 4.79E-05 | 0.010571  | -0.25808   |
| 9mo_SIGAE3_ | 0.01962271 | 0.11288636 | 4.16E-05 | 0.0053955 | -0.012659  |
| 9mo_SIGAE3_ | 0.04929158 | 0.2959729  | 5.68E-05 | 0.0051026 | -0.0022352 |
| 9mo_SIGAE3_ | 0.02800348 | 0.16460407 | 4.48E-05 | 0.0047558 | -0.12024   |
| 9mo_SIGAE3_ | 0.09426869 | 0.5735267  | 5.09E-05 | 0.0064439 | -0.82618   |
| 9mo_SIGAE3_ | 0.01855947 | 0.10632511 | 4.11E-05 | 0.0055212 | 0.015459   |
| 9mo_SIGAE3_ | 0.0229185  | 0.13322468 | 4.30E-05 | 0.0050782 | -0.077142  |
| 9mo_SIGAE3_ | 0.08355776 | 0.50742954 | 4.77E-05 | 0.013036  | -0.0045591 |
| 9mo_SIGAE3_ | 0.0134843  | 0.07500622 | 3.83E-05 | 0.0063061 | 0.19734    |
| 9mo_SIGAE3_ | 0.02212282 | 0.12831452 | 4.26E-05 | 0.0051742 | -0.059109  |
| 9mo_SIGAE3_ | 0.07067042 | 0.42790177 | 5.71E-05 | 0.011574  | 0.23016    |
| 9mo_SIGAE3_ | 0.02332686 | 0.13574466 | 4.32E-05 | 0.0050338 | -0.084895  |
| 9mo_SIGAE3_ | 0.07319119 | 0.44345742 | 5.43E-05 | 0.012883  | 0.24489    |
| 9mo_SIGAE3_ | 0.01959013 | 0.11268531 | 4.16E-05 | 0.0053955 | -0.012659  |
| 9mo_SIGAE3_ | 0.04786236 | 0.2871532  | 5.58E-05 | 0.0050083 | -0.01192   |
| 9mo_SIGAE3_ | 0.02860043 | 0.16828784 | 4.49E-05 | 0.0047302 | -0.12174   |
| 9mo_SIGAE3_ | 0.02986546 | 0.17609438 | 4.55E-05 | 0.0046645 | -0.12301   |
| 9mo_SIGAE3_ | 0.01413552 | 0.07902489 | 3.89E-05 | 0.0061278 | 0.1561     |
| 9mo_SIGAE3_ | 0.0501942  | 0.301543   | 5.78E-05 | 0.0052091 | 0.0010449  |
| 9mo_SIGAE3_ | 0.09185422 | 0.558627   | 4.96E-05 | 0.0076529 | -0.6503    |
| 9mo_SIGAE3_ | 0.09873599 | 0.60109437 | 5.45E-05 | 0.0045382 | -1.1375    |
| 9mo_SIGAE3_ | 0.01646026 | 0.09337083 | 4.00E-05 | 0.0058035 | 0.080526   |
| 9mo_SIGAE3_ | 0.01217258 | 0.06691158 | 3.77E-05 | 0.0064954 | 0.24064    |
| 9mo_SIGAE3_ | 0.01596196 | 0.09029584 | 3.98E-05 | 0.0058806 | 0.098494   |
| 9mo_SIGAE3_ | 0.0326661  | 0.19337708 | 4.64E-05 | 0.0045915 | -0.11603   |
| 9mo_SIGAE3_ | 0.09734918 | 0.5925364  | 5.32E-05 | 0.0050496 | -1.0673    |
| 9mo_SIGAE3_ | 0.07318575 | 0.44342387 | 5.43E-05 | 0.012883  | 0.24489    |
| 9mo_SIGAE3_ | 0.05347319 | 0.32177767 | 6.05E-05 | 0.0056127 | 0.026054   |
| 9mo_SIGAE3_ | 0.08114209 | 0.49252245 | 4.85E-05 | 0.0141    | 0.10139    |
| 9mo_SIGAE3_ | 0.09423807 | 0.5733377  | 5.09E-05 | 0.0064439 | -0.82618   |
| 9mo_SIGAE3_ | 0.07959242 | 0.48295945 | 4.93E-05 | 0.014315  | 0.15946    |
| 9mo_SIGAE3_ | 0.06715751 | 0.40622362 | 6.07E-05 | 0.0096573 | 0.19037    |
| 9mo_SIGAE3_ | 0.07989254 | 0.48481148 | 4.90E-05 | 0.014278  | 0.15946    |

|             |            |            |          |           |           |
|-------------|------------|------------|----------|-----------|-----------|
| 9mo_SIGAE3_ | 0.0837938  | 0.5088861  | 4.77E-05 | 0.013036  | -0.036078 |
| 9mo_SIGAE3_ | 0.07907729 | 0.47978055 | 4.97E-05 | 0.014318  | 0.17506   |
| 9mo_SIGAE3_ | 0.07729368 | 0.4687739  | 5.09E-05 | 0.014141  | 0.21153   |
| 9mo_SIGAE3_ | 0.02142237 | 0.12399203 | 4.24E-05 | 0.0052258 | -0.04878  |
| 9mo_SIGAE3_ | 0.01376863 | 0.07676081 | 3.86E-05 | 0.0062156 | 0.17645   |
| 9mo_SIGAE3_ | 0.04451538 | 0.26649904 | 5.30E-05 | 0.0047888 | -0.031751 |
| 9mo_SIGAE3_ | 0.03019344 | 0.1781183  | 4.55E-05 | 0.0046645 | -0.12301  |
| 9mo_SIGAE3_ | 0.01931094 | 0.11096241 | 4.14E-05 | 0.0054571 | 0.0010121 |
| 9mo_SIGAE3_ | 0.07124157 | 0.43142635 | 5.65E-05 | 0.011849  | 0.23476   |
| 9mo_SIGAE3_ | 0.08899028 | 0.5409536  | 4.84E-05 | 0.0094274 | -0.3844   |
| 9mo_SIGAE3_ | 0.03062128 | 0.18075849 | 4.57E-05 | 0.0046464 | -0.12245  |
| 9mo_SIGAE3_ | 0.01873797 | 0.10742662 | 4.11E-05 | 0.0055212 | 0.015459  |
| 9mo_SIGAE3_ | 0.05796496 | 0.34949633 | 6.32E-05 | 0.0064035 | 0.06315   |
| 9mo_SIGAE3_ | 0.01643142 | 0.09319288 | 4.00E-05 | 0.0058035 | 0.080526  |
| 9mo_SIGAE3_ | 0.01655478 | 0.09395416 | 4.00E-05 | 0.0058035 | 0.080526  |
| 9mo_SIGAE3_ | 0.03633076 | 0.21599174 | 4.79E-05 | 0.0045625 | -0.092976 |
| 9mo_SIGAE3_ | 0.06122662 | 0.36962408 | 6.37E-05 | 0.0074328 | 0.10072   |
| 9mo_SIGAE3_ | 0.01584578 | 0.08957891 | 3.98E-05 | 0.0058806 | 0.098494  |
| 9mo_SIGAE3_ | 0.02312413 | 0.13449362 | 4.30E-05 | 0.0050782 | -0.077142 |
| 9mo_SIGAE3_ | 0.08485233 | 0.51541835 | 4.76E-05 | 0.012404  | -0.10433  |
| 9mo_SIGAE3_ | 0.03187109 | 0.1884711  | 4.60E-05 | 0.0046154 | -0.11821  |
| 9mo_SIGAE3_ | 0.02519748 | 0.14728825 | 4.38E-05 | 0.0049138 | -0.10343  |
| 9mo_SIGAE3_ | 0.02396202 | 0.1396642  | 4.34E-05 | 0.0049916 | -0.091842 |
| 9mo_SIGAE3_ | 0.06513727 | 0.3937567  | 6.20E-05 | 0.0089013 | 0.15715   |
| 9mo_SIGAE3_ | 0.027898   | 0.16395319 | 4.48E-05 | 0.0047558 | -0.12024  |
| 9mo_SIGAE3_ | 0.03273651 | 0.19381161 | 4.64E-05 | 0.0045915 | -0.11603  |
| 9mo_SIGAE3_ | 0.02067404 | 0.11937407 | 4.21E-05 | 0.0052798 | -0.037579 |
| 9mo_SIGAE3_ | 0.07426785 | 0.45010152 | 5.33E-05 | 0.013335  | 0.24406   |
| 9mo_SIGAE3_ | 0.07983983 | 0.48448622 | 4.90E-05 | 0.014278  | 0.15946   |
| 9mo_SIGAE3_ | 0.02117028 | 0.12243637 | 4.24E-05 | 0.0052258 | -0.04878  |
| 9mo_SIGAE3_ | 0.02812198 | 0.16533537 | 4.48E-05 | 0.0047558 | -0.12174  |
| 9mo_SIGAE3_ | 0.02718667 | 0.15956354 | 4.46E-05 | 0.0047834 | -0.11816  |
| 9mo_SIGAE3_ | 0.0962515  | 0.58576256 | 5.24E-05 | 0.0054581 | -0.99133  |
| 9mo_SIGAE3_ | 0.01760886 | 0.10045884 | 4.06E-05 | 0.0056572 | 0.046584  |
| 9mo_SIGAE3_ | 0.02045052 | 0.11799477 | 4.19E-05 | 0.0053364 | -0.025531 |
| 9mo_SIGAE3_ | 0.10498476 | 0.63965553 | 5.90E-05 | 0.0036036 | -1.3831   |
| 9mo_SIGAE3_ | 0.02329418 | 0.135543   | 4.32E-05 | 0.0050338 | -0.084895 |
| 9mo_SIGAE3_ | 0.04624835 | 0.27719316 | 5.44E-05 | 0.0048874 | -0.021643 |
| 9mo_SIGAE3_ | 0.08050324 | 0.4885801  | 4.87E-05 | 0.014207  | 0.12269   |
| 9mo_SIGAE3_ | 0.02417897 | 0.14100303 | 4.34E-05 | 0.0049916 | -0.091842 |
| 9mo_SIGAE3_ | 0.0172659  | 0.09834243 | 4.03E-05 | 0.005729  | 0.063215  |
| 9mo_SIGAE3_ | 0.01170514 | 0.06402702 | 3.74E-05 | 0.0065941 | 0.263     |
| 9mo_SIGAE3_ | 0.0890241  | 0.5411623  | 4.84E-05 | 0.0094274 | -0.3844   |

|             |            |            |          |           |           |
|-------------|------------|------------|----------|-----------|-----------|
| 9mo_SIGAE3_ | 0.01297516 | 0.07186432 | 3.80E-05 | 0.0063994 | 0.19734   |
| 9mo_SIGAE3_ | 0.01797804 | 0.10273706 | 4.09E-05 | 0.0055879 | 0.030658  |
| 9mo_SIGAE3_ | 0.01145816 | 0.06250292 | 3.74E-05 | 0.0065941 | 0.263     |
| 9mo_SIGAE3_ | 0.03086223 | 0.18224545 | 4.57E-05 | 0.0046464 | -0.12145  |
| 9mo_SIGAE3_ | 0.00940025 | 0.04980352 | 3.62E-05 | 0.0070172 | 0.35661   |
| 9mo_SIGAE3_ | 0.02114659 | 0.12229022 | 4.24E-05 | 0.0052258 | -0.04878  |
| 9mo_SIGAE3_ | 0.01656512 | 0.09401793 | 4.00E-05 | 0.0058035 | 0.080526  |
| 9mo_SIGAE3_ | 0.03180429 | 0.18805885 | 4.60E-05 | 0.0046154 | -0.12002  |
| 9mo_SIGAE3_ | 0.07779723 | 0.4718813  | 5.05E-05 | 0.014229  | 0.20103   |
| 9mo_SIGAE3_ | 0.025477   | 0.14901319 | 4.40E-05 | 0.0048781 | -0.10813  |
| 9mo_SIGAE3_ | 0.02326554 | 0.13536628 | 4.30E-05 | 0.0050782 | -0.084895 |
| 9mo_SIGAE3_ | 0.00807425 | 0.04162077 | 3.53E-05 | 0.0073641 | 0.43054   |
| 9mo_SIGAE3_ | 0.01105337 | 0.06000496 | 3.71E-05 | 0.0066957 | 0.2858    |
| 9mo_SIGAE3_ | 0.01578154 | 0.08918245 | 3.98E-05 | 0.0058806 | 0.098494  |
| 9mo_SIGAE3_ | 0.00267471 | 0.0083002  | 3.23E-05 | 0.0087041 | 0.69119   |
| 9mo_SIGAE3_ | 0.03521591 | 0.20911199 | 4.74E-05 | 0.0045622 | -0.10068  |
| 9mo_SIGAE3_ | 0.02399561 | 0.13987151 | 4.34E-05 | 0.0049916 | -0.091842 |
| 9mo_SIGAE3_ | 0.097377   | 0.59270805 | 5.32E-05 | 0.0050496 | -1.0673   |
| 9mo_SIGAE3_ | 0.00959644 | 0.05101421 | 3.62E-05 | 0.0070172 | 0.35661   |
| 9mo_SIGAE3_ | 0.09309791 | 0.5663018  | 5.02E-05 | 0.0070215 | -0.73907  |
| 9mo_SIGAE3_ | 0.0168854  | 0.09599439 | 4.03E-05 | 0.005729  | 0.063215  |
| 9mo_SIGAE3_ | 0.02597762 | 0.1521025  | 4.40E-05 | 0.0048781 | -0.11213  |
| 9mo_SIGAE3_ | 0.01694374 | 0.09635438 | 4.03E-05 | 0.005729  | 0.063215  |
| 9mo_SIGAE3_ | 0.02362657 | 0.13759416 | 4.32E-05 | 0.0050338 | -0.084895 |
| 9mo_SIGAE3_ | 0.08314426 | 0.5048778  | 4.78E-05 | 0.013315  | 0.02505   |
| 9mo_SIGAE3_ | 0.02705016 | 0.15872116 | 4.44E-05 | 0.004813  | -0.11816  |
| 9mo_SIGAE3_ | 0.03141751 | 0.18567207 | 4.60E-05 | 0.0046154 | -0.12002  |
| 9mo_SIGAE3_ | 0.01633088 | 0.09257244 | 4.00E-05 | 0.0058035 | 0.080526  |
| 9mo_SIGAE3_ | 0.03625966 | 0.21555296 | 4.77E-05 | 0.0045615 | -0.092976 |
| 9mo_SIGAE3_ | 0.08276551 | 0.5025406  | 4.79E-05 | 0.013563  | 0.02505   |
| 9mo_SIGAE3_ | 0.02255263 | 0.13096686 | 4.28E-05 | 0.005125  | -0.068556 |
| 9mo_SIGAE3_ | 0.08277573 | 0.50260365 | 4.79E-05 | 0.013563  | 0.02505   |
| 9mo_SIGAE3_ | 0.04269737 | 0.25528005 | 5.13E-05 | 0.0046879 | -0.042593 |
| 9mo_SIGAE3_ | 0.0785353  | 0.47643593 | 5.01E-05 | 0.014289  | 0.18889   |
| 9mo_SIGAE3_ | 0.08943042 | 0.5436697  | 4.86E-05 | 0.0090548 | -0.42792  |
| 9mo_SIGAE3_ | 0.0884351  | 0.53752756 | 4.82E-05 | 0.0098057 | -0.3415   |
| 9mo_SIGAE3_ | 0.03203874 | 0.18950568 | 4.62E-05 | 0.0046026 | -0.11821  |
| 9mo_SIGAE3_ | 0.03000317 | 0.1769442  | 4.55E-05 | 0.0046645 | -0.12301  |
| 9mo_SIGAE3_ | 0.03657083 | 0.21747321 | 4.79E-05 | 0.0045625 | -0.092976 |
| 9mo_SIGAE3_ | 0.0282348  | 0.16603158 | 4.49E-05 | 0.0047302 | -0.12174  |
| 9mo_SIGAE3_ | 0.12570435 | 0.76751614 | 6.95E-05 | 0.0054748 | -0.97507  |
| 9mo_SIGAE3_ | 0.0199396  | 0.11484185 | 4.16E-05 | 0.0053955 | -0.012659 |
| 9mo_SIGAE3_ | 0.01958944 | 0.11268105 | 4.16E-05 | 0.0053955 | -0.012659 |

|             |            |            |          |           |           |
|-------------|------------|------------|----------|-----------|-----------|
| 9mo_SIGAE3_ | 0.02264229 | 0.13152014 | 4.28E-05 | 0.005125  | -0.068556 |
| 9mo_SIGAE3_ | 0.00491325 | 0.02211427 | 3.38E-05 | 0.0079991 | 0.55892   |
| 9mo_SIGAE3_ | 0.09404775 | 0.5721632  | 5.09E-05 | 0.0064439 | -0.82618  |
| 9mo_SIGAE3_ | 0.0858238  | 0.52141327 | 4.76E-05 | 0.0117    | -0.14081  |
| 9mo_SIGAE3_ | 0.0331276  | 0.19622503 | 4.66E-05 | 0.0045822 | -0.11352  |
| 9mo_SIGAE3_ | 0.02804913 | 0.16488576 | 4.48E-05 | 0.0047558 | -0.12024  |
| 9mo_SIGAE3_ | 0.03542361 | 0.21039373 | 4.74E-05 | 0.0045622 | -0.10068  |
| 9mo_SIGAE3_ | 0.03447215 | 0.20452222 | 4.70E-05 | 0.0045688 | -0.10761  |
| 9mo_SIGAE3_ | 0.04223676 | 0.25243765 | 5.09E-05 | 0.0046676 | -0.04643  |
| 9mo_SIGAE3_ | 0.09037767 | 0.54951525 | 4.88E-05 | 0.0086895 | -0.51631  |
| 9mo_SIGAE3_ | 0.0296368  | 0.17468329 | 4.53E-05 | 0.0046846 | -0.1231   |
| 9mo_SIGAE3_ | 0.10576259 | 0.64445555 | 5.98E-05 | 0.0035674 | -1.3882   |
| 9mo_SIGAE3_ | 0.07216818 | 0.43714446 | 5.54E-05 | 0.012382  | 0.24161   |
| 9mo_SIGAE3_ | 0.02034908 | 0.11736879 | 4.19E-05 | 0.0053364 | -0.025531 |
| 9mo_SIGAE3_ | 0.02013883 | 0.11607131 | 4.19E-05 | 0.0053364 | -0.025531 |
| 9mo_SIGAE3_ | 0.02902336 | 0.17089774 | 4.51E-05 | 0.0047064 | -0.12268  |
| 9mo_SIGAE3_ | 0.03478401 | 0.2064467  | 4.72E-05 | 0.0045646 | -0.10426  |
| 9mo_SIGAE3_ | 0.04577298 | 0.27425966 | 5.39E-05 | 0.0048522 | -0.024952 |
| 9mo_SIGAE3_ | 0.1022713  | 0.6229108  | 5.70E-05 | 0.0038563 | -1.3227   |
| 9mo_SIGAE3_ | 0.10108382 | 0.6155829  | 5.62E-05 | 0.0040352 | -1.2808   |
| 9mo_SIGAE3_ | 0.0382228  | 0.22766751 | 4.87E-05 | 0.0045758 | -0.080425 |
| 9mo_SIGAE3_ | 0.03713767 | 0.22097118 | 4.81E-05 | 0.0045652 | -0.088896 |
| 9mo_SIGAE3_ | 0.02147021 | 0.12428727 | 4.24E-05 | 0.0052258 | -0.04878  |
| 9mo_SIGAE3_ | 0.09187699 | 0.5587675  | 4.96E-05 | 0.0076529 | -0.6503   |
| 9mo_SIGAE3_ | 0.02713844 | 0.15926594 | 4.46E-05 | 0.0047834 | -0.11816  |
| 9mo_SIGAE3_ | 0.06611455 | 0.39978746 | 6.12E-05 | 0.0093985 | 0.17407   |
| 9mo_SIGAE3_ | 0.08984409 | 0.5462225  | 4.86E-05 | 0.0090548 | -0.47194  |
| 9mo_SIGAE3_ | 0.02879185 | 0.16946912 | 4.51E-05 | 0.0047064 | -0.12268  |
| 9mo_SIGAE3_ | 0.02225089 | 0.12910487 | 4.28E-05 | 0.005125  | -0.068556 |
| 9mo_SIGAE3_ | 0.01522589 | 0.08575353 | 3.95E-05 | 0.0059603 | 0.11709   |
| 9mo_SIGAE3_ | 0.07399587 | 0.44842312 | 5.38E-05 | 0.013116  | 0.24406   |
| 9mo_SIGAE3_ | 0.0594193  | 0.35847113 | 6.37E-05 | 0.0067983 | 0.080679  |
| 9mo_SIGAE3_ | 0.03826889 | 0.22795194 | 4.87E-05 | 0.0045758 | -0.080425 |
| 9mo_SIGAE3_ | 0.0860666  | 0.52291155 | 4.76E-05 | 0.0117    | -0.17867  |
| 9mo_SIGAE3_ | 0.07593474 | 0.4603879  | 5.18E-05 | 0.013885  | 0.23393   |
| 9mo_SIGAE3_ | 0.02566329 | 0.15016274 | 4.40E-05 | 0.0048781 | -0.10813  |
| 9mo_SIGAE3_ | 0.03022679 | 0.1783241  | 4.55E-05 | 0.0046645 | -0.12301  |
| 9mo_SIGAE3_ | 0.02254489 | 0.13091908 | 4.28E-05 | 0.005125  | -0.068556 |
| 9mo_SIGAE3_ | 0.0866024  | 0.526218   | 4.77E-05 | 0.01133   | -0.21781  |
| 9mo_SIGAE3_ | 0.08417147 | 0.51121676 | 4.76E-05 | 0.012731  | -0.036078 |
| 9mo_SIGAE3_ | 0.02930031 | 0.1726068  | 4.53E-05 | 0.0046846 | -0.1231   |
| 9mo_SIGAE3_ | 0.09354238 | 0.56904465 | 5.06E-05 | 0.0067258 | -0.7829   |
| 9mo_SIGAE3_ | 0.01857106 | 0.10639662 | 4.11E-05 | 0.0055212 | 0.015459  |



|             |            |            |          |           |            |
|-------------|------------|------------|----------|-----------|------------|
| 9mo_SIGAE3_ | 0.03091245 | 0.18255532 | 4.58E-05 | 0.00463   | -0.12145   |
| 9mo_SIGAE3_ | 0.07866522 | 0.4772377  | 4.97E-05 | 0.014318  | 0.18889    |
| 9mo_SIGAE3_ | 0.01608951 | 0.09108297 | 3.98E-05 | 0.0058806 | 0.098494   |
| 9mo_SIGAE3_ | 0.00640335 | 0.03130966 | 3.44E-05 | 0.0077366 | 0.50694    |
| 9mo_SIGAE3_ | 0.02634159 | 0.15434854 | 4.42E-05 | 0.0048445 | -0.11213   |
| 9mo_SIGAE3_ | 0.04319005 | 0.2583204  | 5.17E-05 | 0.0047101 | -0.042593  |
| 9mo_SIGAE3_ | 0.01907421 | 0.10950155 | 4.14E-05 | 0.0054571 | 0.0010121  |
| 9mo_SIGAE3_ | 0.05251638 | 0.3158732  | 5.97E-05 | 0.0054628 | 0.018414   |
| 9mo_SIGAE3_ | 0.08449026 | 0.513184   | 4.76E-05 | 0.012731  | -0.069378  |
| 9mo_SIGAE3_ | 0.02151346 | 0.12455417 | 4.24E-05 | 0.0052258 | -0.04878   |
| 9mo_SIGAE3_ | 0.02826135 | 0.16619538 | 4.49E-05 | 0.0047302 | -0.12174   |
| 9mo_SIGAE3_ | 0.0192309  | 0.11046849 | 4.14E-05 | 0.0054571 | 0.0010121  |
| 9mo_SIGAE3_ | 0.01060336 | 0.0572279  | 3.68E-05 | 0.0068    | 0.30902    |
| 9mo_SIGAE3_ | 0.02859076 | 0.1682282  | 4.49E-05 | 0.0047302 | -0.12174   |
| 9mo_SIGAE3_ | 0.0228111  | 0.1325619  | 4.30E-05 | 0.0050782 | -0.077142  |
| 9mo_SIGAE3_ | 0.01925728 | 0.11063129 | 4.14E-05 | 0.0054571 | 0.0010121  |
| 9mo_SIGAE3_ | 0.02766576 | 0.16252    | 4.48E-05 | 0.0047558 | -0.12024   |
| 9mo_SIGAE3_ | 0.01709912 | 0.09731323 | 4.03E-05 | 0.005729  | 0.063215   |
| 9mo_SIGAE3_ | 0.07379396 | 0.44717717 | 5.38E-05 | 0.013116  | 0.24502    |
| 9mo_SIGAE3_ | 0.0378229  | 0.22519973 | 4.84E-05 | 0.0045696 | -0.080425  |
| 9mo_SIGAE3_ | 0.02820334 | 0.16583744 | 4.49E-05 | 0.0047302 | -0.12174   |
| 9mo_SIGAE3_ | 0.0259109  | 0.15169075 | 4.40E-05 | 0.0048781 | -0.11213   |
| 9mo_SIGAE3_ | 0.08383784 | 0.5091579  | 4.77E-05 | 0.013036  | -0.036078  |
| 9mo_SIGAE3_ | 0.03043129 | 0.17958608 | 4.57E-05 | 0.0046464 | -0.12245   |
| 9mo_SIGAE3_ | 0.08144071 | 0.49436525 | 4.83E-05 | 0.013957  | 0.10139    |
| 9mo_SIGAE3_ | 0.08355902 | 0.5074373  | 4.77E-05 | 0.013036  | -0.0045591 |
| 9mo_SIGAE3_ | 0.02811413 | 0.16528687 | 4.48E-05 | 0.0047558 | -0.12174   |
| 9mo_SIGAE3_ | 0.03530176 | 0.20964174 | 4.74E-05 | 0.0045622 | -0.10068   |
| 9mo_SIGAE3_ | 0.06791443 | 0.41089454 | 5.98E-05 | 0.010192  | 0.19812    |
| 9mo_SIGAE3_ | 0.09295397 | 0.56541353 | 5.02E-05 | 0.0070215 | -0.73907   |
| 9mo_SIGAE3_ | 0.08254371 | 0.5011718  | 4.79E-05 | 0.013563  | 0.05262    |
| 9mo_SIGAE3_ | 0.09559144 | 0.58168936 | 5.20E-05 | 0.0056833 | -0.9515    |
| 9mo_SIGAE3_ | 0.03535907 | 0.20999542 | 4.74E-05 | 0.0045622 | -0.10068   |
| 9mo_SIGAE3_ | 0.02290715 | 0.13315465 | 4.30E-05 | 0.0050782 | -0.077142  |
| 9mo_SIGAE3_ | 0.06987918 | 0.42301905 | 5.82E-05 | 0.011019  | 0.22487    |
| 9mo_SIGAE3_ | 0.01679678 | 0.0954475  | 4.03E-05 | 0.005729  | 0.063215   |
| 9mo_SIGAE3_ | 0.07442509 | 0.45107183 | 5.33E-05 | 0.013335  | 0.24406    |
| 9mo_SIGAE3_ | 0.01592534 | 0.09006984 | 3.98E-05 | 0.0058806 | 0.098494   |
| 9mo_SIGAE3_ | 0.02879539 | 0.16949093 | 4.51E-05 | 0.0047064 | -0.12268   |
| 9mo_SIGAE3_ | 0.08567657 | 0.5205047  | 4.76E-05 | 0.0117    | -0.14081   |
| 9mo_SIGAE3_ | 0.02931189 | 0.17267826 | 4.53E-05 | 0.0046846 | -0.1231    |
| 9mo_SIGAE3_ | 0.02021184 | 0.11652184 | 4.19E-05 | 0.0053364 | -0.025531  |
| 9mo_SIGAE3_ | 0.02680543 | 0.15721093 | 4.44E-05 | 0.004813  | -0.11546   |

|             |            |            |          |           |            |
|-------------|------------|------------|----------|-----------|------------|
| 9mo_SIGAE3_ | 0.0229261  | 0.13327159 | 4.30E-05 | 0.0050782 | -0.077142  |
| 9mo_SIGAE3_ | 0.08466055 | 0.51423484 | 4.76E-05 | 0.012404  | -0.069378  |
| 9mo_SIGAE3_ | 0.07723367 | 0.4684036  | 5.09E-05 | 0.014141  | 0.21153    |
| 9mo_SIGAE3_ | 0.02370665 | 0.13808832 | 4.32E-05 | 0.0050338 | -0.084895  |
| 9mo_SIGAE3_ | 0.04539947 | 0.27195475 | 5.34E-05 | 0.0048194 | -0.024952  |
| 9mo_SIGAE3_ | 0.01024514 | 0.05501736 | 3.65E-05 | 0.0069072 | 0.30902    |
| 9mo_SIGAE3_ | 0.08254173 | 0.50115967 | 4.79E-05 | 0.013563  | 0.05262    |
| 9mo_SIGAE3_ | 0.08133839 | 0.49373382 | 4.83E-05 | 0.013957  | 0.10139    |
| 9mo_SIGAE3_ | 0.02682748 | 0.15734698 | 4.44E-05 | 0.004813  | -0.11546   |
| 9mo_SIGAE3_ | 0.02344885 | 0.13649747 | 4.32E-05 | 0.0050338 | -0.084895  |
| 9mo_SIGAE3_ | 0.04933854 | 0.29626274 | 5.73E-05 | 0.0051543 | -0.0022352 |
| 9mo_SIGAE3_ | 0.01196343 | 0.06562092 | 3.77E-05 | 0.0064954 | 0.24064    |
| 9mo_SIGAE3_ | 0.02534967 | 0.14822741 | 4.38E-05 | 0.0049138 | -0.10343   |
| 9mo_SIGAE3_ | 0.09032663 | 0.54920024 | 4.88E-05 | 0.0086895 | -0.51631   |
| 9mo_SIGAE3_ | 0.04917287 | 0.2952404  | 5.68E-05 | 0.0051026 | -0.0022352 |
| 9mo_SIGAE3_ | 0.02206616 | 0.12796484 | 4.26E-05 | 0.0051742 | -0.059109  |
| 9mo_SIGAE3_ | 0.03174627 | 0.18770082 | 4.60E-05 | 0.0046154 | -0.12002   |
| 9mo_SIGAE3_ | 0.02403465 | 0.1401124  | 4.34E-05 | 0.0049916 | -0.091842  |
| 9mo_SIGAE3_ | 0.08659825 | 0.52619237 | 4.77E-05 | 0.01133   | -0.21781   |
| 9mo_SIGAE3_ | 0.02066507 | 0.11931872 | 4.21E-05 | 0.0052798 | -0.037579  |
| 9mo_SIGAE3_ | 0.04587956 | 0.27491736 | 5.39E-05 | 0.0048522 | -0.024952  |
| 9mo_SIGAE3_ | 0.04941046 | 0.29670656 | 5.73E-05 | 0.0051543 | -0.0022352 |
| 9mo_SIGAE3_ | 0.08873512 | 0.539379   | 4.82E-05 | 0.0098057 | -0.3844    |
| 9mo_SIGAE3_ | 0.03587525 | 0.21318078 | 4.77E-05 | 0.0045615 | -0.096915  |
| 9mo_SIGAE3_ | 0.0741027  | 0.44908237 | 5.38E-05 | 0.013116  | 0.24406    |
| 9mo_SIGAE3_ | 0.03250412 | 0.19237752 | 4.64E-05 | 0.0045915 | -0.11603   |
| 9mo_SIGAE3_ | 0.01065905 | 0.05757158 | 3.68E-05 | 0.0068    | 0.30902    |
| 9mo_SIGAE3_ | 0.07354913 | 0.44566628 | 5.43E-05 | 0.012883  | 0.24502    |
| 9mo_SIGAE3_ | 0.04849377 | 0.29104963 | 5.63E-05 | 0.005054  | -0.0087048 |
| 9mo_SIGAE3_ | 0.02196539 | 0.12734304 | 4.26E-05 | 0.0051742 | -0.059109  |
| 9mo_SIGAE3_ | 0.02740999 | 0.16094168 | 4.46E-05 | 0.0047834 | -0.11816   |
| 9mo_SIGAE3_ | 0.08372799 | 0.50848    | 4.77E-05 | 0.013036  | -0.036078  |
| 9mo_SIGAE3_ | 0.02829917 | 0.16642879 | 4.49E-05 | 0.0047302 | -0.12174   |
| 9mo_SIGAE3_ | 0.03190411 | 0.18867487 | 4.60E-05 | 0.0046154 | -0.11821   |
| 9mo_SIGAE3_ | 0.01509559 | 0.08494949 | 3.92E-05 | 0.0060428 | 0.1363     |
| 9mo_SIGAE3_ | 0.08513197 | 0.51714396 | 4.76E-05 | 0.012059  | -0.10433   |
| 9mo_SIGAE3_ | 0.06915389 | 0.41854328 | 5.87E-05 | 0.010741  | 0.21895    |
| 9mo_SIGAE3_ | 0.02196369 | 0.12733254 | 4.26E-05 | 0.0051742 | -0.059109  |
| 9mo_SIGAE3_ | 0.07396632 | 0.44824076 | 5.38E-05 | 0.013116  | 0.24502    |
| 9mo_SIGAE3_ | 0.01128702 | 0.06144676 | 3.71E-05 | 0.0066957 | 0.2858     |
| 9mo_SIGAE3_ | 0.08004747 | 0.48576754 | 4.90E-05 | 0.014278  | 0.14202    |
| 9mo_SIGAE3_ | 0.07741884 | 0.4695463  | 5.09E-05 | 0.014141  | 0.21153    |
| 9mo_SIGAE3_ | 0.02022935 | 0.11662992 | 4.19E-05 | 0.0053364 | -0.025531  |

|             |            |            |          |           |           |
|-------------|------------|------------|----------|-----------|-----------|
| 9mo_SIGAE3_ | 0.01154864 | 0.06306121 | 3.74E-05 | 0.0065941 | 0.263     |
| 9mo_SIGAE3_ | 0.08974665 | 0.54562116 | 4.86E-05 | 0.0090548 | -0.47194  |
| 9mo_SIGAE3_ | 0.02270433 | 0.13190302 | 4.28E-05 | 0.005125  | -0.077142 |
| 9mo_SIGAE3_ | 0.09704482 | 0.5906582  | 5.32E-05 | 0.0050496 | -1.03     |
| 9mo_SIGAE3_ | 0.05795419 | 0.34942994 | 6.32E-05 | 0.0064035 | 0.06315   |
| 9mo_SIGAE3_ | 0.09431624 | 0.5738201  | 5.13E-05 | 0.0061762 | -0.82618  |
| 9mo_SIGAE3_ | 0.1088116  | 0.66327095 | 6.15E-05 | 0.003602  | -1.3789   |
| 9mo_SIGAE3_ | 0.02371883 | 0.13816349 | 4.32E-05 | 0.0050338 | -0.084895 |
| 9mo_SIGAE3_ | 0.03485176 | 0.20686483 | 4.72E-05 | 0.0045646 | -0.10426  |
| 9mo_SIGAE3_ | 0.06265812 | 0.37845784 | 6.35E-05 | 0.0078047 | 0.12359   |
| 9mo_SIGAE3_ | 0.0735371  | 0.44559205 | 5.43E-05 | 0.012883  | 0.24502   |
| 9mo_SIGAE3_ | 0.0357027  | 0.21211597 | 4.74E-05 | 0.0045622 | -0.096915 |
| 9mo_SIGAE3_ | 0.02267551 | 0.13172516 | 4.28E-05 | 0.005125  | -0.077142 |
| 9mo_SIGAE3_ | 0.07911395 | 0.48000678 | 4.93E-05 | 0.014315  | 0.17506   |
| 9mo_SIGAE3_ | 0.08733157 | 0.53071773 | 4.79E-05 | 0.010571  | -0.25808  |
| 9mo_SIGAE3_ | 0.01265995 | 0.06991913 | 3.80E-05 | 0.0063994 | 0.21875   |
| 9mo_SIGAE3_ | 0.0814251  | 0.49426892 | 4.83E-05 | 0.013957  | 0.10139   |
| 9mo_SIGAE3_ | 0.09019382 | 0.5483807  | 4.88E-05 | 0.0086895 | -0.51631  |
| 9mo_SIGAE3_ | 0.08960547 | 0.54475    | 4.86E-05 | 0.0090548 | -0.42792  |
| 9mo_SIGAE3_ | 0.04416041 | 0.2643085  | 5.25E-05 | 0.0047605 | -0.035266 |
| 9mo_SIGAE3_ | 0.08591435 | 0.52197206 | 4.76E-05 | 0.0117    | -0.17867  |
| 9mo_SIGAE3_ | 0.07047629 | 0.42670378 | 5.71E-05 | 0.011574  | 0.23016   |
| 9mo_SIGAE3_ | 0.06187937 | 0.37365222 | 6.36E-05 | 0.0076138 | 0.10802   |
| 9mo_SIGAE3_ | 0.09142242 | 0.5559624  | 4.93E-05 | 0.0079874 | -0.60562  |
| 9mo_SIGAE3_ | 0.03137177 | 0.18538979 | 4.58E-05 | 0.00463   | -0.12002  |
| 9mo_SIGAE3_ | 0.03521252 | 0.20909107 | 4.74E-05 | 0.0045622 | -0.10068  |
| 9mo_SIGAE3_ | 0.00878099 | 0.04598204 | 3.59E-05 | 0.00713   | 0.38094   |
| 9mo_SIGAE3_ | 0.07874527 | 0.47773167 | 4.97E-05 | 0.014318  | 0.18889   |
| 9mo_SIGAE3_ | 0.04574236 | 0.2740707  | 5.39E-05 | 0.0048522 | -0.024952 |
| 9mo_SIGAE3_ | 0.01813765 | 0.10372201 | 4.09E-05 | 0.0055879 | 0.030658  |
| 9mo_SIGAE3_ | 0.00943766 | 0.05003435 | 3.62E-05 | 0.0070172 | 0.35661   |
| 9mo_SIGAE3_ | 0.08839896 | 0.5373046  | 4.82E-05 | 0.0098057 | -0.3415   |
| 9mo_SIGAE3_ | 0.04136239 | 0.24704191 | 5.05E-05 | 0.0046492 | -0.054504 |
| 9mo_SIGAE3_ | 0.04422645 | 0.26471603 | 5.25E-05 | 0.0047605 | -0.035266 |
| 9mo_SIGAE3_ | 0.071798   | 0.4348601  | 5.60E-05 | 0.012118  | 0.2386    |
| 9mo_SIGAE3_ | 0.09617337 | 0.5852805  | 5.24E-05 | 0.0054581 | -0.99133  |
| 9mo_SIGAE3_ | 0.01560184 | 0.08807353 | 3.95E-05 | 0.0059603 | 0.11709   |
| 9mo_SIGAE3_ | 0.03736912 | 0.22239941 | 4.81E-05 | 0.0045652 | -0.084703 |
| 9mo_SIGAE3_ | 0.07195455 | 0.43582612 | 5.60E-05 | 0.012118  | 0.24161   |
| 9mo_SIGAE3_ | 0.03384971 | 0.20068118 | 4.68E-05 | 0.0045746 | -0.11071  |
| 9mo_SIGAE3_ | 0.00530861 | 0.02455401 | 3.38E-05 | 0.0079991 | 0.55892   |
| 9mo_SIGAE3_ | 0.02811559 | 0.16529593 | 4.48E-05 | 0.0047558 | -0.12174  |
| 9mo_SIGAE3_ | 0.07918142 | 0.48042315 | 4.93E-05 | 0.014315  | 0.17506   |

|             |            |            |          |           |            |
|-------------|------------|------------|----------|-----------|------------|
| 9mo_SIGAE3_ | 0.02444647 | 0.1426538  | 4.36E-05 | 0.0049516 | -0.098011  |
| 9mo_SIGAE3_ | 0.02611785 | 0.15296784 | 4.42E-05 | 0.0048445 | -0.11213   |
| 9mo_SIGAE3_ | 0.01621346 | 0.09184784 | 3.98E-05 | 0.0058806 | 0.080526   |
| 9mo_SIGAE3_ | 0.01098671 | 0.05959356 | 3.71E-05 | 0.0066957 | 0.2858     |
| 9mo_SIGAE3_ | 0.02254916 | 0.13094547 | 4.28E-05 | 0.005125  | -0.068556  |
| 9mo_SIGAE3_ | 0.01815243 | 0.10381322 | 4.09E-05 | 0.0055879 | 0.030658   |
| 9mo_SIGAE3_ | 0.04766531 | 0.2859372  | 5.53E-05 | 0.0049654 | -0.01192   |
| 9mo_SIGAE3_ | 0.05055966 | 0.3037983  | 5.83E-05 | 0.0052672 | 0.0043724  |
| 9mo_SIGAE3_ | 0.0184769  | 0.10581555 | 4.11E-05 | 0.0055212 | 0.015459   |
| 9mo_SIGAE3_ | 0.02093083 | 0.12095874 | 4.21E-05 | 0.0052798 | -0.037579  |
| 9mo_SIGAE3_ | 0.05040691 | 0.30285564 | 5.83E-05 | 0.0052672 | 0.0043724  |
| 9mo_SIGAE3_ | 0.083768   | 0.50872695 | 4.77E-05 | 0.013036  | -0.036078  |
| 9mo_SIGAE3_ | 0.08933687 | 0.54309237 | 4.84E-05 | 0.0094274 | -0.42792   |
| 9mo_SIGAE3_ | 0.09691554 | 0.58986044 | 5.28E-05 | 0.0052469 | -1.03      |
| 9mo_SIGAE3_ | 0.088696   | 0.5391376  | 4.82E-05 | 0.0098057 | -0.3844    |
| 9mo_SIGAE3_ | 0.01755847 | 0.10014793 | 4.06E-05 | 0.0056572 | 0.046584   |
| 9mo_SIGAE3_ | 0.07624572 | 0.46230695 | 5.18E-05 | 0.013885  | 0.22792    |
| 9mo_SIGAE3_ | 0.0151333  | 0.08518221 | 3.92E-05 | 0.0060428 | 0.11709    |
| 9mo_SIGAE3_ | 0.07012444 | 0.42453253 | 5.76E-05 | 0.011297  | 0.22487    |
| 9mo_SIGAE3_ | 0.02526681 | 0.14771609 | 4.38E-05 | 0.0049138 | -0.10343   |
| 9mo_SIGAE3_ | 0.02333819 | 0.13581458 | 4.32E-05 | 0.0050338 | -0.084895  |
| 9mo_SIGAE3_ | 0.08278827 | 0.502681   | 4.79E-05 | 0.013563  | 0.02505    |
| 9mo_SIGAE3_ | 0.02295539 | 0.13345234 | 4.30E-05 | 0.0050782 | -0.077142  |
| 9mo_SIGAE3_ | 0.08404013 | 0.5104062  | 4.76E-05 | 0.012731  | -0.036078  |
| 9mo_SIGAE3_ | 0.09050267 | 0.5502866  | 4.91E-05 | 0.0083333 | -0.51631   |
| 9mo_SIGAE3_ | 0.01363595 | 0.07594203 | 3.86E-05 | 0.0062156 | 0.17645    |
| 9mo_SIGAE3_ | 0.05240786 | 0.31520352 | 5.97E-05 | 0.0054628 | 0.018414   |
| 9mo_SIGAE3_ | 0.04892199 | 0.2936922  | 5.68E-05 | 0.0051026 | -0.0054808 |
| 9mo_SIGAE3_ | 0.00838564 | 0.04354239 | 3.56E-05 | 0.0072456 | 0.40559    |
| 9mo_SIGAE3_ | 0.01832604 | 0.10488461 | 4.09E-05 | 0.0055879 | 0.030658   |
| 9mo_SIGAE3_ | 0.02854187 | 0.16792649 | 4.49E-05 | 0.0047302 | -0.12174   |
| 9mo_SIGAE3_ | 0.03149628 | 0.18615815 | 4.60E-05 | 0.0046154 | -0.12002   |
| 9mo_SIGAE3_ | 0.02469308 | 0.14417557 | 4.36E-05 | 0.0049516 | -0.098011  |
| 9mo_SIGAE3_ | 0.0301202  | 0.17766637 | 4.55E-05 | 0.0046645 | -0.12301   |
| 9mo_SIGAE3_ | 0.01489568 | 0.08371584 | 3.92E-05 | 0.0060428 | 0.1363     |
| 9mo_SIGAE3_ | 0.03612843 | 0.21474312 | 4.77E-05 | 0.0045615 | -0.096915  |
| 9mo_SIGAE3_ | 0.01747652 | 0.09964221 | 4.06E-05 | 0.0056572 | 0.046584   |
| 9mo_SIGAE3_ | 0.01077988 | 0.05831721 | 3.68E-05 | 0.0068    | 0.30902    |
| 9mo_SIGAE3_ | 0.0732791  | 0.44399992 | 5.43E-05 | 0.012883  | 0.24489    |
| 9mo_SIGAE3_ | 0.06887588 | 0.41682765 | 5.87E-05 | 0.010741  | 0.21248    |
| 9mo_SIGAE3_ | 0.0091417  | 0.04820801 | 3.59E-05 | 0.00713   | 0.38094    |
| 9mo_SIGAE3_ | 0.03312688 | 0.19622059 | 4.66E-05 | 0.0045822 | -0.11352   |
| 9mo_SIGAE3_ | 0.0207083  | 0.11958551 | 4.21E-05 | 0.0052798 | -0.037579  |

|             |            |            |          |           |           |
|-------------|------------|------------|----------|-----------|-----------|
| 9mo_SIGAE3_ | 0.02720925 | 0.15970285 | 4.46E-05 | 0.0047834 | -0.11816  |
| 9mo_SIGAE3_ | 0.03270294 | 0.19360445 | 4.64E-05 | 0.0045915 | -0.11603  |
| 9mo_SIGAE3_ | 0.0675615  | 0.40871662 | 6.03E-05 | 0.009922  | 0.19812   |
| 9mo_SIGAE3_ | 0.02345007 | 0.13650501 | 4.32E-05 | 0.0050338 | -0.084895 |
| 9mo_SIGAE3_ | 0.01490244 | 0.08375754 | 3.92E-05 | 0.0060428 | 0.1363    |
| 9mo_SIGAE3_ | 0.08650366 | 0.5256087  | 4.77E-05 | 0.01133   | -0.21781  |
| 9mo_SIGAE3_ | 0.09047201 | 0.55009735 | 4.88E-05 | 0.0086895 | -0.51631  |
| 9mo_SIGAE3_ | 0.04226561 | 0.2526157  | 5.13E-05 | 0.0046879 | -0.04643  |
| 9mo_SIGAE3_ | 0.01352848 | 0.07527883 | 3.86E-05 | 0.0062156 | 0.17645   |
| 9mo_SIGAE3_ | 0.08490244 | 0.5157276  | 4.76E-05 | 0.012404  | -0.10433  |
| 9mo_SIGAE3_ | 0.04034822 | 0.24078345 | 4.99E-05 | 0.0046177 | -0.063007 |
| 9mo_SIGAE3_ | 0.02255474 | 0.13097988 | 4.28E-05 | 0.005125  | -0.068556 |
| 9mo_SIGAE3_ | 0.07483111 | 0.45357743 | 5.28E-05 | 0.013537  | 0.24193   |
| 9mo_SIGAE3_ | 0.08211484 | 0.4985253  | 4.81E-05 | 0.013778  | 0.05262   |
| 9mo_SIGAE3_ | 0.06268521 | 0.37862504 | 6.35E-05 | 0.0078047 | 0.12359   |
| 9mo_SIGAE3_ | 0.01124078 | 0.06116146 | 3.71E-05 | 0.0066957 | 0.2858    |
| 9mo_SIGAE3_ | 0.01267895 | 0.07003639 | 3.80E-05 | 0.0063994 | 0.21875   |
| 9mo_SIGAE3_ | 0.01594103 | 0.09016667 | 3.98E-05 | 0.0058806 | 0.098494  |
| 9mo_SIGAE3_ | 0.06793694 | 0.41103348 | 5.98E-05 | 0.010192  | 0.19812   |
| 9mo_SIGAE3_ | 0.06719855 | 0.40647683 | 6.03E-05 | 0.009922  | 0.19037   |
| 9mo_SIGAE3_ | 0.02763566 | 0.16233426 | 4.48E-05 | 0.0047558 | -0.12024  |
| 9mo_SIGAE3_ | 0.03531665 | 0.20973362 | 4.74E-05 | 0.0045622 | -0.10068  |
| 9mo_SIGAE3_ | 0.03709984 | 0.2207377  | 4.81E-05 | 0.0045652 | -0.088896 |
| 9mo_SIGAE3_ | 0.08222493 | 0.49920464 | 4.81E-05 | 0.013778  | 0.05262   |
| 9mo_SIGAE3_ | 0.03658084 | 0.21753493 | 4.79E-05 | 0.0045625 | -0.092976 |
| 9mo_SIGAE3_ | 0.02308675 | 0.13426295 | 4.30E-05 | 0.0050782 | -0.077142 |
| 9mo_SIGAE3_ | 0.03495469 | 0.20750001 | 4.72E-05 | 0.0045646 | -0.10426  |
| 9mo_SIGAE3_ | 0.02938209 | 0.1731115  | 4.53E-05 | 0.0046846 | -0.1231   |
| 9mo_SIGAE3_ | 0.02511088 | 0.14675386 | 4.38E-05 | 0.0049138 | -0.10343  |
| 9mo_SIGAE3_ | 0.00616552 | 0.02984202 | 3.44E-05 | 0.0077366 | 0.50694   |
| 9mo_SIGAE3_ | 0.02269156 | 0.1318242  | 4.28E-05 | 0.005125  | -0.077142 |
| 9mo_SIGAE3_ | 0.02427824 | 0.14161561 | 4.34E-05 | 0.0049916 | -0.091842 |
| 9mo_SIGAE3_ | 0.02603186 | 0.15243718 | 4.42E-05 | 0.0048445 | -0.11213  |
| 9mo_SIGAE3_ | 0.02808434 | 0.1651031  | 4.48E-05 | 0.0047558 | -0.12174  |
| 9mo_SIGAE3_ | 0.08221976 | 0.49917275 | 4.81E-05 | 0.013778  | 0.05262   |
| 9mo_SIGAE3_ | 0.01811114 | 0.10355845 | 4.09E-05 | 0.0055879 | 0.030658  |
| 9mo_SIGAE3_ | 0.0177973  | 0.1016217  | 4.06E-05 | 0.0056572 | 0.046584  |
| 9mo_SIGAE3_ | 0.0306939  | 0.18120666 | 4.57E-05 | 0.0046464 | -0.12245  |
| 9mo_SIGAE3_ | 0.06441275 | 0.38928568 | 6.27E-05 | 0.0084357 | 0.14863   |
| 9mo_SIGAE3_ | 0.02095924 | 0.12113409 | 4.21E-05 | 0.0052798 | -0.037579 |
| 9mo_SIGAE3_ | 0.02132619 | 0.12339851 | 4.24E-05 | 0.0052258 | -0.04878  |
| 9mo_SIGAE3_ | 0.07284851 | 0.44134274 | 5.49E-05 | 0.012637  | 0.24373   |
| 9mo_SIGAE3_ | 0.02345455 | 0.1365326  | 4.32E-05 | 0.0050338 | -0.084895 |

|             |            |            |          |           |           |
|-------------|------------|------------|----------|-----------|-----------|
| 9mo_SIGAE3_ | 0.09452406 | 0.57510257 | 5.13E-05 | 0.0061762 | -0.8688   |
| 9mo_SIGAE3_ | 0.02828043 | 0.16631316 | 4.49E-05 | 0.0047302 | -0.12174  |
| 9mo_SIGAE3_ | 0.01971637 | 0.11346433 | 4.16E-05 | 0.0053955 | -0.012659 |
| 9mo_SIGAE3_ | 0.08105236 | 0.4919687  | 4.85E-05 | 0.0141    | 0.10139   |
| 9mo_SIGAE3_ | 0.01833401 | 0.1049338  | 4.09E-05 | 0.0055879 | 0.030658  |
| 9mo_SIGAE3_ | 0.08564157 | 0.5202887  | 4.76E-05 | 0.0117    | -0.14081  |
| 9mo_SIGAE3_ | 0.07980752 | 0.48428681 | 4.90E-05 | 0.014278  | 0.15946   |
| 9mo_SIGAE3_ | 0.02904812 | 0.17105058 | 4.51E-05 | 0.0047064 | -0.12268  |
| 9mo_SIGAE3_ | 0.07293406 | 0.44187072 | 5.49E-05 | 0.012637  | 0.24489   |
| 9mo_SIGAE3_ | 0.04239507 | 0.25341457 | 5.13E-05 | 0.0046879 | -0.04643  |
| 9mo_SIGAE3_ | 0.02074388 | 0.11980506 | 4.21E-05 | 0.0052798 | -0.037579 |
| 9mo_SIGAE3_ | 0.02886427 | 0.16991602 | 4.51E-05 | 0.0047064 | -0.12268  |
| 9mo_SIGAE3_ | 0.02869496 | 0.1688712  | 4.49E-05 | 0.0047302 | -0.12268  |
| 9mo_SIGAE3_ | 0.01498887 | 0.08429093 | 3.92E-05 | 0.0060428 | 0.1363    |
| 9mo_SIGAE3_ | 0.02793305 | 0.16416946 | 4.48E-05 | 0.0047558 | -0.12024  |
| 9mo_SIGAE3_ | 0.02592246 | 0.1517621  | 4.40E-05 | 0.0048781 | -0.11213  |
| 9mo_SIGAE3_ | 0.07631323 | 0.46272355 | 5.18E-05 | 0.013885  | 0.22792   |
| 9mo_SIGAE3_ | 0.02101811 | 0.12149734 | 4.21E-05 | 0.0052798 | -0.037579 |
| 9mo_SIGAE3_ | 0.01212383 | 0.06661074 | 3.77E-05 | 0.0064954 | 0.24064   |
| 9mo_SIGAE3_ | 0.03381979 | 0.20049651 | 4.68E-05 | 0.0045746 | -0.11071  |
| 9mo_SIGAE3_ | 0.08054616 | 0.488845   | 4.87E-05 | 0.014207  | 0.12269   |
| 9mo_SIGAE3_ | 0.03853956 | 0.22962222 | 4.89E-05 | 0.0045836 | -0.076088 |
| 9mo_SIGAE3_ | 0.08144195 | 0.4943729  | 4.83E-05 | 0.013957  | 0.10139   |
| 9mo_SIGAE3_ | 0.08397018 | 0.5099746  | 4.77E-05 | 0.013036  | -0.036078 |
| 9mo_SIGAE3_ | 0.01392418 | 0.07772072 | 3.86E-05 | 0.0062156 | 0.17645   |
| 9mo_SIGAE3_ | 0.09598506 | 0.5841184  | 5.24E-05 | 0.0054581 | -0.9515   |
| 9mo_SIGAE3_ | 0.01719794 | 0.09792306 | 4.03E-05 | 0.005729  | 0.063215  |
| 9mo_SIGAE3_ | 0.02263098 | 0.13145037 | 4.28E-05 | 0.005125  | -0.068556 |
| 9mo_SIGAE3_ | 0.08914372 | 0.5419005  | 4.84E-05 | 0.0094274 | -0.42792  |
| 9mo_SIGAE3_ | 0.02382629 | 0.13882662 | 4.34E-05 | 0.0049916 | -0.091842 |
| 9mo_SIGAE3_ | 0.0307437  | 0.18151398 | 4.57E-05 | 0.0046464 | -0.12245  |
| 9mo_SIGAE3_ | 0.09006807 | 0.5476046  | 4.88E-05 | 0.0086895 | -0.47194  |
| 9mo_SIGAE3_ | 0.01117605 | 0.06076196 | 3.71E-05 | 0.0066957 | 0.2858    |
| 9mo_SIGAE3_ | 0.0908602  | 0.5524929  | 4.91E-05 | 0.0083333 | -0.56091  |
| 9mo_SIGAE3_ | 0.03547183 | 0.21069129 | 4.74E-05 | 0.0045622 | -0.10068  |
| 9mo_SIGAE3_ | 0.01866841 | 0.10699734 | 4.11E-05 | 0.0055212 | 0.015459  |
| 9mo_SIGAE3_ | 0.09567587 | 0.5822104  | 5.20E-05 | 0.0056833 | -0.9515   |
| 9mo_SIGAE3_ | 0.08196251 | 0.49758527 | 4.81E-05 | 0.013778  | 0.078055  |
| 9mo_SIGAE3_ | 0.09202033 | 0.5596521  | 4.96E-05 | 0.0076529 | -0.6503   |
| 9mo_SIGAE3_ | 0.0216234  | 0.12523262 | 4.24E-05 | 0.0052258 | -0.059109 |
| 9mo_SIGAE3_ | 0.01523608 | 0.08581644 | 3.95E-05 | 0.0059603 | 0.11709   |
| 9mo_SIGAE3_ | 0.0137296  | 0.07651995 | 3.86E-05 | 0.0062156 | 0.17645   |
| 9mo_SIGAE3_ | 0.02575773 | 0.15074557 | 4.40E-05 | 0.0048781 | -0.10813  |

|             |            |            |          |           |           |
|-------------|------------|------------|----------|-----------|-----------|
| 9mo_SIGAE3_ | 0.07366099 | 0.44635656 | 5.43E-05 | 0.012883  | 0.24502   |
| 9mo_SIGAE3_ | 0.08008814 | 0.4860185  | 4.90E-05 | 0.014278  | 0.14202   |
| 9mo_SIGAE3_ | 0.02250357 | 0.13066414 | 4.28E-05 | 0.005125  | -0.068556 |
| 9mo_SIGAE3_ | 0.02118596 | 0.12253314 | 4.24E-05 | 0.0052258 | -0.04878  |
| 9mo_SIGAE3_ | 0.02567434 | 0.15023096 | 4.40E-05 | 0.0048781 | -0.10813  |
| 9mo_SIGAE3_ | 0.03477246 | 0.20637545 | 4.72E-05 | 0.0045646 | -0.10426  |
| 9mo_SIGAE3_ | 0.01933165 | 0.1110902  | 4.14E-05 | 0.0054571 | 0.0010121 |
| 9mo_SIGAE3_ | 0.01784053 | 0.1018885  | 4.06E-05 | 0.0056572 | 0.030658  |
| 9mo_SIGAE3_ | 0.01791117 | 0.10232443 | 4.09E-05 | 0.0055879 | 0.030658  |
| 9mo_SIGAE3_ | 0.02938739 | 0.17314416 | 4.53E-05 | 0.0046846 | -0.1231   |
| 9mo_SIGAE3_ | 0.08374038 | 0.5085565  | 4.77E-05 | 0.013036  | -0.036078 |
| 9mo_SIGAE3_ | 0.01851073 | 0.10602432 | 4.11E-05 | 0.0055212 | 0.015459  |
| 9mo_SIGAE3_ | 0.02254676 | 0.13093069 | 4.28E-05 | 0.005125  | -0.068556 |
| 9mo_SIGAE3_ | 0.02392034 | 0.13940704 | 4.34E-05 | 0.0049916 | -0.091842 |
| 9mo_SIGAE3_ | 0.01907193 | 0.10948746 | 4.14E-05 | 0.0054571 | 0.0010121 |
| 9mo_SIGAE3_ | 0.09006256 | 0.54757065 | 4.88E-05 | 0.0086895 | -0.47194  |
| 9mo_SIGAE3_ | 0.03676441 | 0.21866775 | 4.79E-05 | 0.0045625 | -0.088896 |
| 9mo_SIGAE3_ | 0.09012583 | 0.54796106 | 4.88E-05 | 0.0086895 | -0.47194  |
| 9mo_SIGAE3_ | 0.04225583 | 0.2525553  | 5.13E-05 | 0.0046879 | -0.04643  |
| 9mo_SIGAE3_ | 0.0138673  | 0.07736968 | 3.86E-05 | 0.0062156 | 0.17645   |
| 9mo_SIGAE3_ | 0.09315566 | 0.5666582  | 5.02E-05 | 0.0070215 | -0.73907  |
| 9mo_SIGAE3_ | 0.08926038 | 0.54262036 | 4.84E-05 | 0.0094274 | -0.42792  |
| 9mo_SIGAE3_ | 0.07360528 | 0.44601282 | 5.43E-05 | 0.012883  | 0.24502   |
| 9mo_SIGAE3_ | 0.08966073 | 0.5450909  | 4.86E-05 | 0.0090548 | -0.47194  |
| 9mo_SIGAE3_ | 0.04429057 | 0.2651117  | 5.25E-05 | 0.0047605 | -0.031751 |
| 9mo_SIGAE3_ | 0.02447763 | 0.14284606 | 4.36E-05 | 0.0049516 | -0.098011 |
| 9mo_SIGAE3_ | 0.0721038  | 0.43674716 | 5.54E-05 | 0.012382  | 0.24161   |
| 9mo_SIGAE3_ | 0.01316544 | 0.0730385  | 3.83E-05 | 0.0063061 | 0.19734   |
| 9mo_SIGAE3_ | 0.01878656 | 0.10772647 | 4.11E-05 | 0.0055212 | 0.015459  |
| 9mo_SIGAE3_ | 0.08919625 | 0.54222465 | 4.84E-05 | 0.0094274 | -0.42792  |
| 9mo_SIGAE3_ | 0.01993093 | 0.11478836 | 4.16E-05 | 0.0053955 | -0.012659 |
| 9mo_SIGAE3_ | 0.09859812 | 0.6002436  | 5.40E-05 | 0.0046955 | -1.1375   |
| 9mo_SIGAE3_ | 0.02762591 | 0.1622741  | 4.48E-05 | 0.0047558 | -0.12024  |
| 9mo_SIGAE3_ | 0.02226846 | 0.12921327 | 4.28E-05 | 0.005125  | -0.068556 |
| 9mo_SIGAE3_ | 0.01932899 | 0.11107378 | 4.14E-05 | 0.0054571 | 0.0010121 |
| 9mo_SIGAE3_ | 0.04574771 | 0.2741037  | 5.39E-05 | 0.0048522 | -0.024952 |
| 9mo_SIGAE3_ | 0.03054787 | 0.18030548 | 4.57E-05 | 0.0046464 | -0.12245  |
| 9mo_SIGAE3_ | 0.01868142 | 0.10707765 | 4.11E-05 | 0.0055212 | 0.015459  |
| 9mo_SIGAE3_ | 0.07276272 | 0.44081336 | 5.49E-05 | 0.012637  | 0.24373   |
| 9mo_SIGAE3_ | 0.01230709 | 0.06774163 | 3.77E-05 | 0.0064954 | 0.24064   |
| 9mo_SIGAE3_ | 0.01304717 | 0.07230865 | 3.83E-05 | 0.0063061 | 0.19734   |
| 9mo_SIGAE3_ | 0.08705942 | 0.5290383  | 4.78E-05 | 0.010952  | -0.25808  |
| 9mo_SIGAE3_ | 0.02725575 | 0.15998985 | 4.46E-05 | 0.0047834 | -0.11816  |

|             |            |            |          |           |           |
|-------------|------------|------------|----------|-----------|-----------|
| 9mo_SIGAE3_ | 0.04235539 | 0.25316972 | 5.13E-05 | 0.0046879 | -0.04643  |
| 9mo_SIGAE3_ | 0.05088087 | 0.30578047 | 5.83E-05 | 0.0052672 | 0.0077602 |
| 9mo_SIGAE3_ | 0.03562964 | 0.21166511 | 4.74E-05 | 0.0045622 | -0.10068  |
| 9mo_SIGAE3_ | 0.01505123 | 0.0846757  | 3.92E-05 | 0.0060428 | 0.1363    |
| 9mo_SIGAE3_ | 0.08906734 | 0.54142916 | 4.84E-05 | 0.0094274 | -0.3844   |
| 9mo_SIGAE3_ | 0.07375525 | 0.44693825 | 5.38E-05 | 0.013116  | 0.24502   |
| 9mo_SIGAE3_ | 0.01927097 | 0.11071574 | 4.14E-05 | 0.0054571 | 0.0010121 |
| 9mo_SIGAE3_ | 0.04447186 | 0.26623046 | 5.30E-05 | 0.0047888 | -0.031751 |
| 9mo_SIGAE3_ | 0.03905723 | 0.23281679 | 4.92E-05 | 0.0045932 | -0.071721 |
| 9mo_SIGAE3_ | 0.01583128 | 0.08948942 | 3.98E-05 | 0.0058806 | 0.098494  |
| 9mo_SIGAE3_ | 0.07426413 | 0.45007858 | 5.33E-05 | 0.013335  | 0.24406   |
| 9mo_SIGAE3_ | 0.02676631 | 0.15696949 | 4.44E-05 | 0.004813  | -0.11546  |
| 9mo_SIGAE3_ | 0.01890181 | 0.10843769 | 4.11E-05 | 0.0055212 | 0.0010121 |
| 9mo_SIGAE3_ | 0.09829398 | 0.59836674 | 5.40E-05 | 0.0046955 | -1.1375   |
| 9mo_SIGAE3_ | 0.02030814 | 0.11711615 | 4.19E-05 | 0.0053364 | -0.025531 |
| 9mo_SIGAE3_ | 0.08964913 | 0.5450193  | 4.86E-05 | 0.0090548 | -0.47194  |
| 9mo_SIGAE3_ | 0.01731547 | 0.09864835 | 4.03E-05 | 0.005729  | 0.046584  |
| 9mo_SIGAE3_ | 0.01484907 | 0.0834282  | 3.92E-05 | 0.0060428 | 0.1363    |
| 9mo_SIGAE3_ | 0.01757318 | 0.10023871 | 4.06E-05 | 0.0056572 | 0.046584  |
| 9mo_SIGAE3_ | 0.07916459 | 0.48031932 | 4.93E-05 | 0.014315  | 0.17506   |
| 9mo_SIGAE3_ | 0.02265555 | 0.131602   | 4.28E-05 | 0.005125  | -0.068556 |
| 9mo_SIGAE3_ | 0.0296914  | 0.17502025 | 4.53E-05 | 0.0046846 | -0.12301  |
| 9mo_SIGAE3_ | 0.0878683  | 0.5340299  | 4.80E-05 | 0.010188  | -0.29935  |
| 9mo_SIGAE3_ | 0.00698784 | 0.03491657 | 3.47E-05 | 0.0076096 | 0.48124   |
| 9mo_SIGAE3_ | 0.06219787 | 0.37561765 | 6.36E-05 | 0.0076138 | 0.11565   |
| 9mo_SIGAE3_ | 0.03084339 | 0.18212917 | 4.57E-05 | 0.0046464 | -0.12145  |
| 9mo_SIGAE3_ | 0.01852674 | 0.10612308 | 4.11E-05 | 0.0055212 | 0.015459  |
| 9mo_SIGAE3_ | 0.02859582 | 0.16825941 | 4.49E-05 | 0.0047302 | -0.12174  |
| 9mo_SIGAE3_ | 0.01938441 | 0.11141581 | 4.14E-05 | 0.0054571 | 0.0010121 |
| 9mo_SIGAE3_ | 0.08735034 | 0.53083354 | 4.79E-05 | 0.010571  | -0.25808  |
| 9mo_SIGAE3_ | 0.07169815 | 0.43424392 | 5.60E-05 | 0.012118  | 0.2386    |
| 9mo_SIGAE3_ | 0.0186865  | 0.10710897 | 4.11E-05 | 0.0055212 | 0.015459  |
| 9mo_SIGAE3_ | 0.06050605 | 0.36517742 | 6.38E-05 | 0.0070986 | 0.09374   |
| 9mo_SIGAE3_ | 0.02762561 | 0.16227221 | 4.48E-05 | 0.0047558 | -0.12024  |
| 9mo_SIGAE3_ | 0.05521288 | 0.33251327 | 6.17E-05 | 0.0058704 | 0.038579  |
| 9mo_SIGAE3_ | 0.07610612 | 0.46144545 | 5.18E-05 | 0.013885  | 0.23393   |
| 9mo_SIGAE3_ | 0.08600052 | 0.5225038  | 4.76E-05 | 0.0117    | -0.17867  |
| 9mo_SIGAE3_ | 0.0106717  | 0.05764966 | 3.68E-05 | 0.0068    | 0.30902   |
| 9mo_SIGAE3_ | 0.06327717 | 0.38227803 | 6.33E-05 | 0.0080056 | 0.13178   |
| 9mo_SIGAE3_ | 0.03634669 | 0.21609    | 4.79E-05 | 0.0045625 | -0.092976 |
| 9mo_SIGAE3_ | 0.09964083 | 0.6066782  | 5.49E-05 | 0.0043938 | -1.2008   |
| 9mo_SIGAE3_ | 0.02362675 | 0.1375953  | 4.32E-05 | 0.0050338 | -0.084895 |
| 9mo_SIGAE3_ | 0.01944629 | 0.11179762 | 4.14E-05 | 0.0054571 | -0.012659 |



|             |            |            |          |           |           |
|-------------|------------|------------|----------|-----------|-----------|
| 9mo_SIGAE3_ | 0.01938183 | 0.11139984 | 4.14E-05 | 0.0054571 | 0.0010121 |
| 9mo_SIGAE3_ | 0.01950119 | 0.11213642 | 4.16E-05 | 0.0053955 | -0.012659 |
| 9mo_SIGAE3_ | 0.0880847  | 0.5353653  | 4.80E-05 | 0.010188  | -0.3415   |
| 9mo_SIGAE3_ | 0.01534504 | 0.0864888  | 3.95E-05 | 0.0059603 | 0.11709   |
| 9mo_SIGAE3_ | 0.02922715 | 0.17215532 | 4.51E-05 | 0.0047064 | -0.1231   |
| 9mo_SIGAE3_ | 0.02384656 | 0.13895175 | 4.34E-05 | 0.0049916 | -0.091842 |
| 9mo_SIGAE3_ | 0.0202207  | 0.11657653 | 4.19E-05 | 0.0053364 | -0.025531 |
| 9mo_SIGAE3_ | 0.09134322 | 0.5554736  | 4.93E-05 | 0.0079874 | -0.60562  |
| 9mo_SIGAE3_ | 0.06932601 | 0.41960543 | 5.87E-05 | 0.010741  | 0.21895   |
| 9mo_SIGAE3_ | 0.07170489 | 0.43428552 | 5.60E-05 | 0.012118  | 0.2386    |
| 9mo_SIGAE3_ | 0.01894406 | 0.10869838 | 4.14E-05 | 0.0054571 | 0.0010121 |
| 9mo_SIGAE3_ | 0.02101058 | 0.1214509  | 4.21E-05 | 0.0052798 | -0.037579 |
| 9mo_SIGAE3_ | 0.08794446 | 0.5344999  | 4.80E-05 | 0.010188  | -0.29935  |
| 9mo_SIGAE3_ | 0.02057528 | 0.11876462 | 4.21E-05 | 0.0052798 | -0.037579 |
| 9mo_SIGAE3_ | 0.02402303 | 0.1400407  | 4.34E-05 | 0.0049916 | -0.091842 |
| 9mo_SIGAE3_ | 0.04598509 | 0.2755686  | 5.39E-05 | 0.0048522 | -0.021643 |
| 9mo_SIGAE3_ | 0.02206225 | 0.12794074 | 4.26E-05 | 0.0051742 | -0.059109 |
| 9mo_SIGAE3_ | 0.02232577 | 0.12956694 | 4.28E-05 | 0.005125  | -0.068556 |
| 9mo_SIGAE3_ | 0.08380248 | 0.50893974 | 4.77E-05 | 0.013036  | -0.036078 |
| 9mo_SIGAE3_ | 0.02159288 | 0.12504426 | 4.24E-05 | 0.0052258 | -0.059109 |
| 9mo_SIGAE3_ | 0.01672678 | 0.09501557 | 4.00E-05 | 0.0058035 | 0.063215  |
| 9mo_SIGAE3_ | 0.01480266 | 0.08314178 | 3.92E-05 | 0.0060428 | 0.1363    |
| 9mo_SIGAE3_ | 0.0214476  | 0.12414771 | 4.24E-05 | 0.0052258 | -0.04878  |
| 9mo_SIGAE3_ | 0.03789435 | 0.22564061 | 4.84E-05 | 0.0045696 | -0.080425 |
| 9mo_SIGAE3_ | 0.02959147 | 0.17440353 | 4.53E-05 | 0.0046846 | -0.1231   |
| 9mo_SIGAE3_ | 0.01168525 | 0.06390428 | 3.74E-05 | 0.0065941 | 0.263     |
| 9mo_SIGAE3_ | 0.02370556 | 0.13808158 | 4.32E-05 | 0.0050338 | -0.084895 |
| 9mo_SIGAE3_ | 0.02911902 | 0.1714881  | 4.51E-05 | 0.0047064 | -0.12268  |
| 9mo_SIGAE3_ | 0.06621879 | 0.40043074 | 6.12E-05 | 0.0093985 | 0.17407   |
| 9mo_SIGAE3_ | 0.01804468 | 0.1031483  | 4.09E-05 | 0.0055879 | 0.030658  |
| 9mo_SIGAE3_ | 0.07863753 | 0.47706684 | 4.97E-05 | 0.014318  | 0.18889   |
| 9mo_SIGAE3_ | 0.07813873 | 0.47398874 | 5.01E-05 | 0.014289  | 0.20103   |
| 9mo_SIGAE3_ | 0.02511998 | 0.14680998 | 4.38E-05 | 0.0049138 | -0.10343  |
| 9mo_SIGAE3_ | 0.0507419  | 0.30492288 | 5.83E-05 | 0.0052672 | 0.0043724 |
| 9mo_SIGAE3_ | 0.02073586 | 0.1197556  | 4.21E-05 | 0.0052798 | -0.037579 |
| 9mo_SIGAE3_ | 0.02301777 | 0.13383725 | 4.30E-05 | 0.0050782 | -0.077142 |
| 9mo_SIGAE3_ | 0.03026811 | 0.17857909 | 4.55E-05 | 0.0046645 | -0.12245  |
| 9mo_SIGAE3_ | 0.06453403 | 0.3900341  | 6.24E-05 | 0.0086643 | 0.14863   |
| 9mo_SIGAE3_ | 0.01208856 | 0.06639306 | 3.77E-05 | 0.0064954 | 0.24064   |
| 9mo_SIGAE3_ | 0.01972846 | 0.11353894 | 4.16E-05 | 0.0053955 | -0.012659 |
| 9mo_SIGAE3_ | 0.07123032 | 0.43135694 | 5.65E-05 | 0.011849  | 0.23476   |
| 9mo_SIGAE3_ | 0.09123881 | 0.5548293  | 4.93E-05 | 0.0079874 | -0.56091  |
| 9mo_SIGAE3_ | 0.0237032  | 0.13806704 | 4.32E-05 | 0.0050338 | -0.084895 |

|             |            |            |          |           |            |
|-------------|------------|------------|----------|-----------|------------|
| 9mo_SIGAE3_ | 0.02750726 | 0.16154192 | 4.46E-05 | 0.0047834 | -0.11816   |
| 9mo_SIGAE3_ | 0.07595485 | 0.460512   | 5.18E-05 | 0.013885  | 0.23393    |
| 9mo_SIGAE3_ | 0.08942764 | 0.5436526  | 4.86E-05 | 0.0090548 | -0.42792   |
| 9mo_SIGAE3_ | 0.03499928 | 0.20777515 | 4.72E-05 | 0.0045646 | -0.10426   |
| 9mo_SIGAE3_ | 0.02186296 | 0.12671092 | 4.26E-05 | 0.0051742 | -0.059109  |
| 9mo_SIGAE3_ | 0.01537405 | 0.08666784 | 3.95E-05 | 0.0059603 | 0.11709    |
| 9mo_SIGAE3_ | 0.0117306  | 0.06418411 | 3.74E-05 | 0.0065941 | 0.263      |
| 9mo_SIGAE3_ | 0.02499968 | 0.14606763 | 4.38E-05 | 0.0049138 | -0.10343   |
| 9mo_SIGAE3_ | 0.08295474 | 0.50370824 | 4.78E-05 | 0.013315  | 0.02505    |
| 9mo_SIGAE3_ | 0.02457692 | 0.14345877 | 4.36E-05 | 0.0049516 | -0.098011  |
| 9mo_SIGAE3_ | 0.01546397 | 0.08722277 | 3.95E-05 | 0.0059603 | 0.11709    |
| 9mo_SIGAE3_ | 0.02092094 | 0.12089772 | 4.21E-05 | 0.0052798 | -0.037579  |
| 9mo_SIGAE3_ | 0.0485444  | 0.2913621  | 5.63E-05 | 0.005054  | -0.0087048 |
| 9mo_SIGAE3_ | 0.0110156  | 0.05977184 | 3.71E-05 | 0.0066957 | 0.2858     |
| 9mo_SIGAE3_ | 0.01696856 | 0.09650759 | 4.03E-05 | 0.005729  | 0.063215   |
| 9mo_SIGAE3_ | 0.02220732 | 0.12883598 | 4.28E-05 | 0.005125  | -0.068556  |
| 9mo_SIGAE3_ | 0.03176771 | 0.18783315 | 4.60E-05 | 0.0046154 | -0.12002   |
| 9mo_SIGAE3_ | 0.02933925 | 0.17284712 | 4.53E-05 | 0.0046846 | -0.1231    |
| 9mo_SIGAE3_ | 0.01921949 | 0.11039808 | 4.14E-05 | 0.0054571 | 0.0010121  |
| 9mo_SIGAE3_ | 0.03545488 | 0.21058668 | 4.74E-05 | 0.0045622 | -0.10068   |
| 9mo_SIGAE3_ | 0.07450203 | 0.45154664 | 5.33E-05 | 0.013335  | 0.24406    |
| 9mo_SIGAE3_ | 0.06653624 | 0.40238976 | 6.12E-05 | 0.0093985 | 0.18233    |
| 9mo_SIGAE3_ | 0.00999442 | 0.05347017 | 3.65E-05 | 0.0069072 | 0.33263    |
| 9mo_SIGAE3_ | 0.02788209 | 0.163855   | 4.48E-05 | 0.0047558 | -0.12024   |
| 9mo_SIGAE3_ | 0.08197288 | 0.49764922 | 4.81E-05 | 0.013778  | 0.078055   |
| 9mo_SIGAE3_ | 0.0575886  | 0.34717387 | 6.32E-05 | 0.0064035 | 0.057806   |
| 9mo_SIGAE3_ | 0.03016344 | 0.17793319 | 4.55E-05 | 0.0046645 | -0.12301   |
| 9mo_SIGAE3_ | 0.01395119 | 0.07788739 | 3.86E-05 | 0.0062156 | 0.17645    |
| 9mo_SIGAE3_ | 0.1114118  | 0.6793168  | 6.31E-05 | 0.0037825 | -1.3299    |
| 9mo_SIGAE3_ | 0.01621804 | 0.09187611 | 3.98E-05 | 0.0058806 | 0.080526   |
| 9mo_SIGAE3_ | 0.03979979 | 0.23739912 | 4.95E-05 | 0.0046046 | -0.067351  |
| 9mo_SIGAE3_ | 0.03260091 | 0.19297482 | 4.64E-05 | 0.0045915 | -0.11603   |
| 9mo_SIGAE3_ | 0.0937278  | 0.5701888  | 5.06E-05 | 0.0067258 | -0.7829    |
| 9mo_SIGAE3_ | 0.02331105 | 0.1356471  | 4.32E-05 | 0.0050338 | -0.084895  |
| 9mo_SIGAE3_ | 0.02097494 | 0.12123095 | 4.21E-05 | 0.0052798 | -0.037579  |
| 9mo_SIGAE3_ | 0.03047853 | 0.1798776  | 4.57E-05 | 0.0046464 | -0.12245   |
| 9mo_SIGAE3_ | 0.03165489 | 0.18713692 | 4.60E-05 | 0.0046154 | -0.12002   |
| 9mo_SIGAE3_ | 0.02501861 | 0.14618444 | 4.38E-05 | 0.0049138 | -0.10343   |
| 9mo_SIGAE3_ | 0.01962243 | 0.11288457 | 4.16E-05 | 0.0053955 | -0.012659  |
| 9mo_SIGAE3_ | 0.03091816 | 0.18259054 | 4.58E-05 | 0.00463   | -0.12145   |
| 9mo_SIGAE3_ | 0.09286472 | 0.5648627  | 5.02E-05 | 0.0070215 | -0.69483   |
| 9mo_SIGAE3_ | 0.006914   | 0.03446087 | 3.47E-05 | 0.0076096 | 0.48124    |
| 9mo_SIGAE3_ | 0.02599414 | 0.15220445 | 4.42E-05 | 0.0048445 | -0.11213   |

|             |            |            |          |           |           |
|-------------|------------|------------|----------|-----------|-----------|
| 9mo_SIGAE3_ | 0.02956343 | 0.1742305  | 4.53E-05 | 0.0046846 | -0.1231   |
| 9mo_SIGAE3_ | 0.0823656  | 0.5000727  | 4.79E-05 | 0.013563  | 0.05262   |
| 9mo_SIGAE3_ | 0.08486687 | 0.51550806 | 4.76E-05 | 0.012404  | -0.10433  |
| 9mo_SIGAE3_ | 0.02084965 | 0.12045781 | 4.21E-05 | 0.0052798 | -0.037579 |
| 9mo_SIGAE3_ | 0.0087555  | 0.04582479 | 3.59E-05 | 0.00713   | 0.38094   |
| 9mo_SIGAE3_ | 0.01489419 | 0.08370666 | 3.92E-05 | 0.0060428 | 0.1363    |
| 9mo_SIGAE3_ | 0.07105326 | 0.43026426 | 5.65E-05 | 0.011849  | 0.23476   |
| 9mo_SIGAE3_ | 0.03590089 | 0.21333897 | 4.77E-05 | 0.0045615 | -0.096915 |
| 9mo_SIGAE3_ | 0.02388217 | 0.13917145 | 4.34E-05 | 0.0049916 | -0.091842 |
| 9mo_SIGAE3_ | 0.01129783 | 0.06151348 | 3.71E-05 | 0.0066957 | 0.2858    |
| 9mo_SIGAE3_ | 0.08686296 | 0.5278259  | 4.78E-05 | 0.010952  | -0.21781  |
| 9mo_SIGAE3_ | 0.08499397 | 0.51629233 | 4.76E-05 | 0.012404  | -0.10433  |
| 9mo_SIGAE3_ | 0.08543609 | 0.51902074 | 4.76E-05 | 0.012059  | -0.14081  |
| 9mo_SIGAE3_ | 0.02104494 | 0.12166293 | 4.21E-05 | 0.0052798 | -0.037579 |
| 9mo_SIGAE3_ | 0.02680077 | 0.15718213 | 4.44E-05 | 0.004813  | -0.11546  |
| 9mo_SIGAE3_ | 0.03077974 | 0.18173641 | 4.57E-05 | 0.0046464 | -0.12145  |
| 9mo_SIGAE3_ | 0.01912283 | 0.10980157 | 4.14E-05 | 0.0054571 | 0.0010121 |
| 9mo_SIGAE3_ | 0.02336956 | 0.13600814 | 4.32E-05 | 0.0050338 | -0.084895 |
| 9mo_SIGAE3_ | 0.08205819 | 0.4981757  | 4.81E-05 | 0.013778  | 0.078055  |
| 9mo_SIGAE3_ | 0.08096063 | 0.4914027  | 4.85E-05 | 0.0141    | 0.12269   |
| 9mo_SIGAE3_ | 0.03995474 | 0.23835532 | 4.95E-05 | 0.0046046 | -0.063007 |
| 9mo_SIGAE3_ | 0.01305165 | 0.0723363  | 3.83E-05 | 0.0063061 | 0.19734   |
| 9mo_SIGAE3_ | 0.04747779 | 0.28478006 | 5.53E-05 | 0.0049654 | -0.01514  |
| 9mo_SIGAE3_ | 0.08633888 | 0.5245918  | 4.77E-05 | 0.01133   | -0.17867  |
| 9mo_SIGAE3_ | 0.02622396 | 0.15362269 | 4.42E-05 | 0.0048445 | -0.11213  |
| 9mo_SIGAE3_ | 0.03803853 | 0.22653034 | 4.87E-05 | 0.0045758 | -0.080425 |
| 9mo_SIGAE3_ | 0.02040602 | 0.11772011 | 4.19E-05 | 0.0053364 | -0.025531 |
| 9mo_SIGAE3_ | 0.0619933  | 0.37435526 | 6.36E-05 | 0.0076138 | 0.10802   |
| 9mo_SIGAE3_ | 0.01265326 | 0.06987787 | 3.80E-05 | 0.0063994 | 0.21875   |
| 9mo_SIGAE3_ | 0.02236208 | 0.12979099 | 4.28E-05 | 0.005125  | -0.068556 |
| 9mo_SIGAE3_ | 0.03039255 | 0.17934704 | 4.57E-05 | 0.0046464 | -0.12245  |
| 9mo_SIGAE3_ | 0.019471   | 0.11195011 | 4.14E-05 | 0.0054571 | -0.012659 |
| 9mo_SIGAE3_ | 0.01635578 | 0.09272609 | 4.00E-05 | 0.0058035 | 0.080526  |
| 9mo_SIGAE3_ | 0.08691619 | 0.52815443 | 4.78E-05 | 0.010952  | -0.21781  |
| 9mo_SIGAE3_ | 0.08759529 | 0.5323451  | 4.79E-05 | 0.010571  | -0.29935  |
| 9mo_SIGAE3_ | 0.02141192 | 0.12392758 | 4.24E-05 | 0.0052258 | -0.04878  |
| 9mo_SIGAE3_ | 0.02007276 | 0.11566361 | 4.19E-05 | 0.0053364 | -0.025531 |
| 9mo_SIGAE3_ | 0.01558983 | 0.08799942 | 3.95E-05 | 0.0059603 | 0.11709   |
| 9mo_SIGAE3_ | 0.02367917 | 0.13791877 | 4.32E-05 | 0.0050338 | -0.084895 |
| 9mo_SIGAE3_ | 0.02646168 | 0.15508963 | 4.42E-05 | 0.0048445 | -0.11546  |
| 9mo_SIGAE3_ | 0.02493617 | 0.1456757  | 4.38E-05 | 0.0049138 | -0.10343  |
| 9mo_SIGAE3_ | 0.08297846 | 0.50385463 | 4.78E-05 | 0.013315  | 0.02505   |
| 9mo_SIGAE3_ | 0.02693986 | 0.15804045 | 4.44E-05 | 0.004813  | -0.11546  |

|             |            |            |          |           |           |
|-------------|------------|------------|----------|-----------|-----------|
| 9mo_SIGAE3_ | 0.08516335 | 0.5173376  | 4.76E-05 | 0.012059  | -0.10433  |
| 9mo_SIGAE3_ | 0.0145124  | 0.08135061 | 3.89E-05 | 0.0061278 | 0.1561    |
| 9mo_SIGAE3_ | 0.08856371 | 0.53832126 | 4.82E-05 | 0.0098057 | -0.3415   |
| 9mo_SIGAE3_ | 0.01742352 | 0.09931511 | 4.06E-05 | 0.0056572 | 0.046584  |
| 9mo_SIGAE3_ | 0.01711723 | 0.09742501 | 4.03E-05 | 0.005729  | 0.063215  |
| 9mo_SIGAE3_ | 0.08538654 | 0.5187149  | 4.76E-05 | 0.012059  | -0.14081  |
| 9mo_SIGAE3_ | 0.08009741 | 0.48607573 | 4.90E-05 | 0.014278  | 0.14202   |
| 9mo_SIGAE3_ | 0.0327795  | 0.19407688 | 4.64E-05 | 0.0045915 | -0.11603  |
| 9mo_SIGAE3_ | 0.02523797 | 0.1475381  | 4.38E-05 | 0.0049138 | -0.10343  |
| 9mo_SIGAE3_ | 0.02485262 | 0.14516012 | 4.36E-05 | 0.0049516 | -0.10343  |
| 9mo_SIGAE3_ | 0.0933757  | 0.56801605 | 5.06E-05 | 0.0067258 | -0.73907  |
| 9mo_SIGAE3_ | 0.090977   | 0.55321366 | 4.91E-05 | 0.0083333 | -0.56091  |
| 9mo_SIGAE3_ | 0.0111097  | 0.06035256 | 3.71E-05 | 0.0066957 | 0.2858    |
| 9mo_SIGAE3_ | 0.03005538 | 0.17726637 | 4.55E-05 | 0.0046645 | -0.12301  |
| 9mo_SIGAE3_ | 0.10354833 | 0.6307913  | 5.82E-05 | 0.0036742 | -1.3542   |
| 9mo_SIGAE3_ | 0.03409049 | 0.20216699 | 4.68E-05 | 0.0045746 | -0.10761  |
| 9mo_SIGAE3_ | 0.01289371 | 0.07136164 | 3.80E-05 | 0.0063994 | 0.21875   |
| 9mo_SIGAE3_ | 0.09309977 | 0.56631327 | 5.02E-05 | 0.0070215 | -0.73907  |
| 9mo_SIGAE3_ | 0.05340381 | 0.32134953 | 6.05E-05 | 0.0056127 | 0.022172  |
| 9mo_SIGAE3_ | 0.01442337 | 0.08080122 | 3.89E-05 | 0.0061278 | 0.1561    |
| 9mo_SIGAE3_ | 0.05362985 | 0.32274437 | 6.10E-05 | 0.005694  | 0.026054  |
| 9mo_SIGAE3_ | 0.0262441  | 0.15374693 | 4.42E-05 | 0.0048445 | -0.11213  |
| 9mo_SIGAE3_ | 0.02385588 | 0.13900925 | 4.34E-05 | 0.0049916 | -0.091842 |
| 9mo_SIGAE3_ | 0.01474339 | 0.08277602 | 3.92E-05 | 0.0060428 | 0.1363    |
| 9mo_SIGAE3_ | 0.07590675 | 0.46021515 | 5.18E-05 | 0.013885  | 0.23393   |
| 9mo_SIGAE3_ | 0.03829056 | 0.22808565 | 4.87E-05 | 0.0045758 | -0.080425 |
| 9mo_SIGAE3_ | 0.01740272 | 0.09918676 | 4.06E-05 | 0.0056572 | 0.046584  |
| 9mo_SIGAE3_ | 0.02074751 | 0.11982745 | 4.21E-05 | 0.0052798 | -0.037579 |
| 9mo_SIGAE3_ | 0.07164446 | 0.4339126  | 5.60E-05 | 0.012118  | 0.2386    |
| 9mo_SIGAE3_ | 0.08131907 | 0.4936146  | 4.83E-05 | 0.013957  | 0.10139   |
| 9mo_SIGAE3_ | 0.01400531 | 0.07822133 | 3.86E-05 | 0.0062156 | 0.17645   |
| 9mo_SIGAE3_ | 0.01476396 | 0.08290296 | 3.92E-05 | 0.0060428 | 0.1363    |
| 9mo_SIGAE3_ | 0.0311751  | 0.18417613 | 4.58E-05 | 0.00463   | -0.12145  |
| 9mo_SIGAE3_ | 0.02085701 | 0.12050318 | 4.21E-05 | 0.0052798 | -0.037579 |
| 9mo_SIGAE3_ | 0.01978076 | 0.11386166 | 4.16E-05 | 0.0053955 | -0.012659 |
| 9mo_SIGAE3_ | 0.03014051 | 0.1777917  | 4.55E-05 | 0.0046645 | -0.12301  |
| 9mo_SIGAE3_ | 0.02154261 | 0.12473404 | 4.24E-05 | 0.0052258 | -0.04878  |
| 9mo_SIGAE3_ | 0.09176447 | 0.55807316 | 4.96E-05 | 0.0076529 | -0.60562  |
| 9mo_SIGAE3_ | 0.09204656 | 0.5598139  | 4.96E-05 | 0.0076529 | -0.6503   |
| 9mo_SIGAE3_ | 0.00911228 | 0.04802648 | 3.59E-05 | 0.00713   | 0.38094   |
| 9mo_SIGAE3_ | 0.0332646  | 0.19707046 | 4.66E-05 | 0.0045822 | -0.11352  |
| 9mo_SIGAE3_ | 0.01678383 | 0.09536759 | 4.03E-05 | 0.005729  | 0.063215  |
| 9mo_SIGAE3_ | 0.09013271 | 0.54800355 | 4.88E-05 | 0.0086895 | -0.47194  |

|             |            |            |          |           |            |
|-------------|------------|------------|----------|-----------|------------|
| 9mo_SIGAE3_ | 0.08029702 | 0.48730755 | 4.87E-05 | 0.014207  | 0.14202    |
| 9mo_SIGAE3_ | 0.0309222  | 0.18261553 | 4.58E-05 | 0.00463   | -0.12145   |
| 9mo_SIGAE3_ | 0.02552076 | 0.14928323 | 4.40E-05 | 0.0048781 | -0.10813   |
| 9mo_SIGAE3_ | 0.01697509 | 0.09654786 | 4.03E-05 | 0.005729  | 0.063215   |
| 9mo_SIGAE3_ | 0.02557796 | 0.14963622 | 4.40E-05 | 0.0048781 | -0.10813   |
| 9mo_SIGAE3_ | 0.03310061 | 0.19605844 | 4.66E-05 | 0.0045822 | -0.11352   |
| 9mo_SIGAE3_ | 0.05972616 | 0.36036474 | 6.37E-05 | 0.0069445 | 0.080679   |
| 9mo_SIGAE3_ | 0.01590724 | 0.08995817 | 3.98E-05 | 0.0058806 | 0.098494   |
| 9mo_SIGAE3_ | 0.08188605 | 0.49711347 | 4.81E-05 | 0.013778  | 0.078055   |
| 9mo_SIGAE3_ | 0.07947195 | 0.48221603 | 4.93E-05 | 0.014315  | 0.15946    |
| 9mo_SIGAE3_ | 0.01764362 | 0.10067336 | 4.06E-05 | 0.0056572 | 0.046584   |
| 9mo_SIGAE3_ | 0.08323791 | 0.50545573 | 4.78E-05 | 0.013315  | -0.0045591 |
| 9mo_SIGAE3_ | 0.05246525 | 0.31555766 | 5.97E-05 | 0.0054628 | 0.018414   |
| 9mo_SIGAE3_ | 0.02060806 | 0.11896695 | 4.21E-05 | 0.0052798 | -0.037579  |
| 9mo_SIGAE3_ | 0.02128161 | 0.12312339 | 4.24E-05 | 0.0052258 | -0.04878   |
| 9mo_SIGAE3_ | 0.01465126 | 0.08220748 | 3.92E-05 | 0.0060428 | 0.1363     |
| 9mo_SIGAE3_ | 0.01309655 | 0.07261342 | 3.83E-05 | 0.0063061 | 0.19734    |
| 9mo_SIGAE3_ | 0.02299823 | 0.1337167  | 4.30E-05 | 0.0050782 | -0.077142  |
| 9mo_SIGAE3_ | 0.01479533 | 0.08309654 | 3.92E-05 | 0.0060428 | 0.1363     |
| 9mo_SIGAE3_ | 0.08955131 | 0.5444157  | 4.86E-05 | 0.0090548 | -0.42792   |
| 9mo_SIGAE3_ | 0.03799665 | 0.22627194 | 4.87E-05 | 0.0045758 | -0.080425  |
| 9mo_SIGAE3_ | 0.0873344  | 0.5307352  | 4.79E-05 | 0.010571  | -0.25808   |
| 9mo_SIGAE3_ | 0.09885842 | 0.6018499  | 5.45E-05 | 0.0045382 | -1.1701    |
| 9mo_SIGAE3_ | 0.0250051  | 0.14610109 | 4.38E-05 | 0.0049138 | -0.10343   |
| 9mo_SIGAE3_ | 0.09753509 | 0.59368366 | 5.36E-05 | 0.0048658 | -1.0673    |
| 9mo_SIGAE3_ | 0.04568047 | 0.27368882 | 5.39E-05 | 0.0048522 | -0.024952  |
| 9mo_SIGAE3_ | 0.06937694 | 0.4199197  | 5.82E-05 | 0.011019  | 0.21895    |
| 9mo_SIGAE3_ | 0.0256644  | 0.15016958 | 4.40E-05 | 0.0048781 | -0.10813   |
| 9mo_SIGAE3_ | 0.0228078  | 0.13254151 | 4.30E-05 | 0.0050782 | -0.077142  |
| 9mo_SIGAE3_ | 0.02160288 | 0.12510599 | 4.24E-05 | 0.0052258 | -0.059109  |
| 9mo_SIGAE3_ | 0.03364501 | 0.19941796 | 4.68E-05 | 0.0045746 | -0.11071   |
| 9mo_SIGAE3_ | 0.02212262 | 0.12831327 | 4.26E-05 | 0.0051742 | -0.059109  |
| 9mo_SIGAE3_ | 0.0823429  | 0.49993265 | 4.81E-05 | 0.013778  | 0.05262    |
| 9mo_SIGAE3_ | 0.01852112 | 0.10608845 | 4.11E-05 | 0.0055212 | 0.015459   |
| 9mo_SIGAE3_ | 0.01161259 | 0.06345589 | 3.74E-05 | 0.0065941 | 0.263      |
| 9mo_SIGAE3_ | 0.09116294 | 0.55436105 | 4.93E-05 | 0.0079874 | -0.56091   |
| 9mo_SIGAE3_ | 0.06622363 | 0.40046063 | 6.12E-05 | 0.0093985 | 0.17407    |
| 9mo_SIGAE3_ | 0.02031132 | 0.11713574 | 4.19E-05 | 0.0053364 | -0.025531  |
| 9mo_SIGAE3_ | 0.08910061 | 0.54163444 | 4.84E-05 | 0.0094274 | -0.3844    |
| 9mo_SIGAE3_ | 0.00859445 | 0.04483091 | 3.56E-05 | 0.0072456 | 0.40559    |
| 9mo_SIGAE3_ | 0.01900368 | 0.10906632 | 4.14E-05 | 0.0054571 | 0.0010121  |
| 9mo_SIGAE3_ | 0.02630171 | 0.15410247 | 4.42E-05 | 0.0048445 | -0.11213   |
| 9mo_SIGAE3_ | 0.07359282 | 0.4459359  | 5.43E-05 | 0.012883  | 0.24502    |

|             |            |            |          |           |            |
|-------------|------------|------------|----------|-----------|------------|
| 9mo_SIGAE3_ | 0.04214327 | 0.25186074 | 5.09E-05 | 0.0046676 | -0.04643   |
| 9mo_SIGAE3_ | 0.05227504 | 0.31438386 | 5.97E-05 | 0.0054628 | 0.014768   |
| 9mo_SIGAE3_ | 0.02307614 | 0.13419744 | 4.30E-05 | 0.0050782 | -0.077142  |
| 9mo_SIGAE3_ | 0.03220708 | 0.19054447 | 4.62E-05 | 0.0046026 | -0.11821   |
| 9mo_SIGAE3_ | 0.01585909 | 0.08966103 | 3.98E-05 | 0.0058806 | 0.098494   |
| 9mo_SIGAE3_ | 0.08884335 | 0.54004693 | 4.82E-05 | 0.0098057 | -0.3844    |
| 9mo_SIGAE3_ | 0.01276729 | 0.07058156 | 3.80E-05 | 0.0063994 | 0.21875    |
| 9mo_SIGAE3_ | 0.02570314 | 0.15040866 | 4.40E-05 | 0.0048781 | -0.10813   |
| 9mo_SIGAE3_ | 0.0070724  | 0.03543836 | 3.50E-05 | 0.0074854 | 0.45576    |
| 9mo_SIGAE3_ | 0.02445075 | 0.14268015 | 4.36E-05 | 0.0049516 | -0.098011  |
| 9mo_SIGAE3_ | 0.01492822 | 0.08391661 | 3.92E-05 | 0.0060428 | 0.1363     |
| 9mo_SIGAE3_ | 0.02272344 | 0.13202097 | 4.28E-05 | 0.005125  | -0.077142  |
| 9mo_SIGAE3_ | 0.03663307 | 0.21785727 | 4.79E-05 | 0.0045625 | -0.092976  |
| 9mo_SIGAE3_ | 0.02352682 | 0.13697861 | 4.32E-05 | 0.0050338 | -0.084895  |
| 9mo_SIGAE3_ | 0.04401331 | 0.26340073 | 5.25E-05 | 0.0047605 | -0.035266  |
| 9mo_SIGAE3_ | 0.09164481 | 0.5573347  | 4.96E-05 | 0.0076529 | -0.60562   |
| 9mo_SIGAE3_ | 0.0825121  | 0.50097674 | 4.79E-05 | 0.013563  | 0.05262    |
| 9mo_SIGAE3_ | 0.01836162 | 0.10510413 | 4.09E-05 | 0.0055879 | 0.015459   |
| 9mo_SIGAE3_ | 0.01052365 | 0.05673603 | 3.68E-05 | 0.0068    | 0.30902    |
| 9mo_SIGAE3_ | 0.02734768 | 0.16055715 | 4.46E-05 | 0.0047834 | -0.11816   |
| 9mo_SIGAE3_ | 0.07697231 | 0.46679077 | 5.09E-05 | 0.014141  | 0.22047    |
| 9mo_SIGAE3_ | 0.01800039 | 0.10287497 | 4.09E-05 | 0.0055879 | 0.030658   |
| 9mo_SIGAE3_ | 0.02351494 | 0.13690531 | 4.32E-05 | 0.0050338 | -0.084895  |
| 9mo_SIGAE3_ | 0.06262646 | 0.3782625  | 6.35E-05 | 0.0078047 | 0.11565    |
| 9mo_SIGAE3_ | 0.02454149 | 0.14324011 | 4.36E-05 | 0.0049516 | -0.098011  |
| 9mo_SIGAE3_ | 0.06390691 | 0.38616413 | 6.30E-05 | 0.008216  | 0.14015    |
| 9mo_SIGAE3_ | 0.02409073 | 0.14045848 | 4.34E-05 | 0.0049916 | -0.091842  |
| 9mo_SIGAE3_ | 0.08730499 | 0.53055364 | 4.79E-05 | 0.010571  | -0.25808   |
| 9mo_SIGAE3_ | 0.06367733 | 0.3847474  | 6.30E-05 | 0.008216  | 0.13178    |
| 9mo_SIGAE3_ | 0.04922668 | 0.29557243 | 5.68E-05 | 0.0051026 | -0.0022352 |
| 9mo_SIGAE3_ | 0.02690416 | 0.1578202  | 4.44E-05 | 0.004813  | -0.11546   |
| 9mo_SIGAE3_ | 0.05108379 | 0.30703267 | 5.87E-05 | 0.0053288 | 0.0077602  |
| 9mo_SIGAE3_ | 0.00599597 | 0.02879571 | 3.44E-05 | 0.0077366 | 0.50694    |
| 9mo_SIGAE3_ | 0.00449704 | 0.01954584 | 3.35E-05 | 0.0081345 | 0.58516    |
| 9mo_SIGAE3_ | 0.01639251 | 0.0929528  | 4.00E-05 | 0.0058035 | 0.080526   |
| 9mo_SIGAE3_ | 0.02860492 | 0.16831554 | 4.49E-05 | 0.0047302 | -0.12174   |
| 9mo_SIGAE3_ | 0.02134833 | 0.12353511 | 4.24E-05 | 0.0052258 | -0.04878   |
| 9mo_SIGAE3_ | 0.04924314 | 0.295674   | 5.68E-05 | 0.0051026 | -0.0022352 |
| 9mo_SIGAE3_ | 0.02287225 | 0.13293923 | 4.30E-05 | 0.0050782 | -0.077142  |
| 9mo_SIGAE3_ | 0.08343907 | 0.5066971  | 4.77E-05 | 0.013036  | -0.0045591 |
| 9mo_SIGAE3_ | 0.04940105 | 0.29664844 | 5.73E-05 | 0.0051543 | -0.0022352 |
| 9mo_SIGAE3_ | 0.04135124 | 0.24697313 | 5.05E-05 | 0.0046492 | -0.054504  |
| 9mo_SIGAE3_ | 0.08816915 | 0.5358864  | 4.80E-05 | 0.010188  | -0.3415    |

|             |            |            |          |           |           |
|-------------|------------|------------|----------|-----------|-----------|
| 9mo_SIGAE3_ | 0.10044836 | 0.61166143 | 5.58E-05 | 0.0041426 | -1.2296   |
| 9mo_SIGAE3_ | 0.08599369 | 0.52246165 | 4.76E-05 | 0.0117    | -0.17867  |
| 9mo_SIGAE3_ | 0.08645653 | 0.52531785 | 4.77E-05 | 0.01133   | -0.21781  |
| 9mo_SIGAE3_ | 0.03805511 | 0.22663267 | 4.87E-05 | 0.0045758 | -0.080425 |
| 9mo_SIGAE3_ | 0.08631664 | 0.5244546  | 4.77E-05 | 0.01133   | -0.17867  |
| 9mo_SIGAE3_ | 0.02112525 | 0.12215854 | 4.24E-05 | 0.0052258 | -0.04878  |
| 9mo_SIGAE3_ | 0.05763331 | 0.34744975 | 6.32E-05 | 0.0064035 | 0.057806  |
| 9mo_SIGAE3_ | 0.01572906 | 0.08885864 | 3.98E-05 | 0.0058806 | 0.098494  |
| 9mo_SIGAE3_ | 0.01870614 | 0.1072302  | 4.11E-05 | 0.0055212 | 0.015459  |
| 9mo_SIGAE3_ | 0.02238544 | 0.12993515 | 4.28E-05 | 0.005125  | -0.068556 |
| 9mo_SIGAE3_ | 0.01481768 | 0.08323447 | 3.92E-05 | 0.0060428 | 0.1363    |
| 9mo_SIGAE3_ | 0.08183277 | 0.49678466 | 4.81E-05 | 0.013778  | 0.078055  |
| 9mo_SIGAE3_ | 0.01433818 | 0.08027549 | 3.89E-05 | 0.0061278 | 0.1561    |
| 9mo_SIGAE3_ | 0.07685611 | 0.46607366 | 5.13E-05 | 0.014025  | 0.22047   |
| 9mo_SIGAE3_ | 0.08962611 | 0.54487735 | 4.86E-05 | 0.0090548 | -0.42792  |
| 9mo_SIGAE3_ | 0.0955325  | 0.58132565 | 5.20E-05 | 0.0056833 | -0.91061  |
| 9mo_SIGAE3_ | 0.01866563 | 0.10698017 | 4.11E-05 | 0.0055212 | 0.015459  |
| 9mo_SIGAE3_ | 0.08759305 | 0.5323313  | 4.79E-05 | 0.010571  | -0.29935  |
| 9mo_SIGAE3_ | 0.06308002 | 0.3810614  | 6.33E-05 | 0.0080056 | 0.12359   |
| 9mo_SIGAE3_ | 0.00997113 | 0.05332645 | 3.65E-05 | 0.0069072 | 0.33263   |
| 9mo_SIGAE3_ | 0.01350321 | 0.07512292 | 3.83E-05 | 0.0063061 | 0.17645   |
| 9mo_SIGAE3_ | 0.02334314 | 0.1358451  | 4.32E-05 | 0.0050338 | -0.084895 |
| 9mo_SIGAE3_ | 0.01999322 | 0.11517274 | 4.16E-05 | 0.0053955 | -0.025531 |
| 9mo_SIGAE3_ | 0.08562489 | 0.52018577 | 4.76E-05 | 0.0117    | -0.14081  |
| 9mo_SIGAE3_ | 0.09680144 | 0.58915627 | 5.28E-05 | 0.0052469 | -1.03     |
| 9mo_SIGAE3_ | 0.08438935 | 0.51256126 | 4.76E-05 | 0.012731  | -0.069378 |
| 9mo_SIGAE3_ | 0.09801129 | 0.5966222  | 5.36E-05 | 0.0048658 | -1.1032   |
| 9mo_SIGAE3_ | 0.02845964 | 0.16741902 | 4.49E-05 | 0.0047302 | -0.12174  |
| 9mo_SIGAE3_ | 0.01778101 | 0.10152121 | 4.06E-05 | 0.0056572 | 0.046584  |
| 9mo_SIGAE3_ | 0.04479007 | 0.2681941  | 5.30E-05 | 0.0047888 | -0.031751 |
| 9mo_SIGAE3_ | 0.01851735 | 0.10606513 | 4.11E-05 | 0.0055212 | 0.015459  |
| 9mo_SIGAE3_ | 0.01150002 | 0.06276118 | 3.74E-05 | 0.0065941 | 0.263     |
| 9mo_SIGAE3_ | 0.04207956 | 0.25146756 | 5.09E-05 | 0.0046676 | -0.0504   |
| 9mo_SIGAE3_ | 0.02320214 | 0.13497502 | 4.30E-05 | 0.0050782 | -0.077142 |
| 9mo_SIGAE3_ | 0.09207048 | 0.55996156 | 4.96E-05 | 0.0076529 | -0.6503   |
| 9mo_SIGAE3_ | 0.09234776 | 0.5616726  | 4.99E-05 | 0.0073308 | -0.69483  |
| 9mo_SIGAE3_ | 0.01553391 | 0.08765433 | 3.95E-05 | 0.0059603 | 0.11709   |
| 9mo_SIGAE3_ | 0.07400566 | 0.44848353 | 5.38E-05 | 0.013116  | 0.24406   |
| 9mo_SIGAE3_ | 0.01981599 | 0.1140791  | 4.16E-05 | 0.0053955 | -0.012659 |
| 9mo_SIGAE3_ | 0.01993888 | 0.11483743 | 4.16E-05 | 0.0053955 | -0.012659 |
| 9mo_SIGAE3_ | 0.02139648 | 0.12383224 | 4.24E-05 | 0.0052258 | -0.04878  |
| 9mo_SIGAE3_ | 0.01770406 | 0.10104634 | 4.06E-05 | 0.0056572 | 0.046584  |
| 9mo_SIGAE3_ | 0.02676025 | 0.15693213 | 4.44E-05 | 0.004813  | -0.11546  |

|             |            |            |          |           |           |
|-------------|------------|------------|----------|-----------|-----------|
| 9mo_SIGAE3_ | 0.07759364 | 0.47062495 | 5.05E-05 | 0.014229  | 0.21153   |
| 9mo_SIGAE3_ | 0.08155843 | 0.49509168 | 4.83E-05 | 0.013957  | 0.078055  |
| 9mo_SIGAE3_ | 0.0244426  | 0.14262988 | 4.36E-05 | 0.0049516 | -0.098011 |
| 9mo_SIGAE3_ | 0.08096814 | 0.49144903 | 4.85E-05 | 0.0141    | 0.12269   |
| 9mo_SIGAE3_ | 0.07510888 | 0.4552915  | 5.28E-05 | 0.013537  | 0.23858   |
| 9mo_SIGAE3_ | 0.08929617 | 0.54284126 | 4.84E-05 | 0.0094274 | -0.42792  |
| 9mo_SIGAE3_ | 0.01493745 | 0.08397359 | 3.92E-05 | 0.0060428 | 0.1363    |
| 9mo_SIGAE3_ | 0.01915607 | 0.11000673 | 4.14E-05 | 0.0054571 | 0.0010121 |
| 9mo_SIGAE3_ | 0.01207032 | 0.06628055 | 3.77E-05 | 0.0064954 | 0.24064   |
| 9mo_SIGAE3_ | 0.0690807  | 0.4180916  | 5.87E-05 | 0.010741  | 0.21248   |
| 9mo_SIGAE3_ | 0.1036477  | 0.6314046  | 5.82E-05 | 0.0036742 | -1.3542   |
| 9mo_SIGAE3_ | 0.01158992 | 0.06331596 | 3.74E-05 | 0.0065941 | 0.263     |
| 9mo_SIGAE3_ | 0.01510294 | 0.08499485 | 3.92E-05 | 0.0060428 | 0.1363    |
| 9mo_SIGAE3_ | 0.01766566 | 0.1008094  | 4.06E-05 | 0.0056572 | 0.046584  |
| 9mo_SIGAE3_ | 0.0084023  | 0.04364517 | 3.56E-05 | 0.0072456 | 0.40559   |
| 9mo_SIGAE3_ | 0.01185403 | 0.06494579 | 3.74E-05 | 0.0065941 | 0.263     |
| 9mo_SIGAE3_ | 0.09618656 | 0.5853619  | 5.24E-05 | 0.0054581 | -0.99133  |
| 9mo_SIGAE3_ | 0.0103008  | 0.05536082 | 3.68E-05 | 0.0068    | 0.30902   |
| 9mo_SIGAE3_ | 0.01649286 | 0.09357203 | 4.00E-05 | 0.0058035 | 0.080526  |
| 9mo_SIGAE3_ | 0.02192974 | 0.12712303 | 4.26E-05 | 0.0051742 | -0.059109 |
| 9mo_SIGAE3_ | 0.02682921 | 0.15735766 | 4.44E-05 | 0.004813  | -0.11546  |
| 9mo_SIGAE3_ | 0.07814989 | 0.47405756 | 5.01E-05 | 0.014289  | 0.20103   |
| 9mo_SIGAE3_ | 0.02170984 | 0.12576604 | 4.26E-05 | 0.0051742 | -0.059109 |
| 9mo_SIGAE3_ | 0.01474848 | 0.08280744 | 3.92E-05 | 0.0060428 | 0.1363    |
| 9mo_SIGAE3_ | 0.01811011 | 0.10355207 | 4.09E-05 | 0.0055879 | 0.030658  |
| 9mo_SIGAE3_ | 0.02714052 | 0.15927877 | 4.46E-05 | 0.0047834 | -0.11816  |
| 9mo_SIGAE3_ | 0.0258495  | 0.15131184 | 4.40E-05 | 0.0048781 | -0.10813  |
| 9mo_SIGAE3_ | 0.09230822 | 0.56142867 | 4.99E-05 | 0.0073308 | -0.6503   |
| 9mo_SIGAE3_ | 0.02559974 | 0.14977057 | 4.40E-05 | 0.0048781 | -0.10813  |
| 9mo_SIGAE3_ | 0.02261721 | 0.1313654  | 4.28E-05 | 0.005125  | -0.068556 |
| 9mo_SIGAE3_ | 0.0178513  | 0.10195497 | 4.06E-05 | 0.0056572 | 0.030658  |
| 9mo_SIGAE3_ | 0.01896603 | 0.10883393 | 4.14E-05 | 0.0054571 | 0.0010121 |
| 9mo_SIGAE3_ | 0.02540747 | 0.14858411 | 4.38E-05 | 0.0049138 | -0.10813  |
| 9mo_SIGAE3_ | 0.01745215 | 0.0994918  | 4.06E-05 | 0.0056572 | 0.046584  |
| 9mo_SIGAE3_ | 0.04055894 | 0.2420838  | 4.99E-05 | 0.0046177 | -0.058715 |
| 9mo_SIGAE3_ | 0.09214573 | 0.5604259  | 4.99E-05 | 0.0073308 | -0.6503   |
| 9mo_SIGAE3_ | 0.08817644 | 0.5359314  | 4.80E-05 | 0.010188  | -0.3415   |
| 9mo_SIGAE3_ | 0.02240334 | 0.13004561 | 4.28E-05 | 0.005125  | -0.068556 |
| 9mo_SIGAE3_ | 0.01611277 | 0.0912265  | 3.98E-05 | 0.0058806 | 0.098494  |
| 9mo_SIGAE3_ | 0.06770206 | 0.40958405 | 6.03E-05 | 0.009922  | 0.19812   |
| 9mo_SIGAE3_ | 0.01240054 | 0.06831832 | 3.77E-05 | 0.0064954 | 0.24064   |
| 9mo_SIGAE3_ | 0.0440634  | 0.26370987 | 5.25E-05 | 0.0047605 | -0.035266 |
| 9mo_SIGAE3_ | 0.0511282  | 0.3073067  | 5.87E-05 | 0.0053288 | 0.0077602 |



|             |            |            |          |           |           |
|-------------|------------|------------|----------|-----------|-----------|
| 9mo_SIGAE3_ | 0.03726095 | 0.22173195 | 4.81E-05 | 0.0045652 | -0.084703 |
| 9mo_SIGAE3_ | 0.02611234 | 0.15293384 | 4.42E-05 | 0.0048445 | -0.11213  |
| 9mo_SIGAE3_ | 0.03977236 | 0.23722984 | 4.95E-05 | 0.0046046 | -0.067351 |
| 9mo_SIGAE3_ | 0.01763604 | 0.10062661 | 4.06E-05 | 0.0056572 | 0.046584  |
| 9mo_SIGAE3_ | 0.02234591 | 0.1296912  | 4.28E-05 | 0.005125  | -0.068556 |
| 9mo_SIGAE3_ | 0.09327047 | 0.56736666 | 5.06E-05 | 0.0067258 | -0.73907  |
| 9mo_SIGAE3_ | 0.0892149  | 0.54233974 | 4.84E-05 | 0.0094274 | -0.42792  |
| 9mo_SIGAE3_ | 0.03159637 | 0.18677583 | 4.60E-05 | 0.0046154 | -0.12002  |
| 9mo_SIGAE3_ | 0.03440954 | 0.20413588 | 4.70E-05 | 0.0045688 | -0.10761  |
| 9mo_SIGAE3_ | 0.03242169 | 0.19186886 | 4.62E-05 | 0.0046026 | -0.11603  |
| 9mo_SIGAE3_ | 0.07527933 | 0.45634332 | 5.28E-05 | 0.013537  | 0.23858   |
| 9mo_SIGAE3_ | 0.02858045 | 0.16816458 | 4.49E-05 | 0.0047302 | -0.12174  |
| 9mo_SIGAE3_ | 0.01441255 | 0.0807344  | 3.89E-05 | 0.0061278 | 0.1561    |
| 9mo_SIGAE3_ | 0.07864727 | 0.47712693 | 4.97E-05 | 0.014318  | 0.18889   |
| 9mo_SIGAE3_ | 0.02864681 | 0.16857408 | 4.49E-05 | 0.0047302 | -0.12268  |
| 9mo_SIGAE3_ | 0.02340231 | 0.13621023 | 4.32E-05 | 0.0050338 | -0.084895 |
| 9mo_SIGAE3_ | 0.01504755 | 0.08465304 | 3.92E-05 | 0.0060428 | 0.1363    |
| 9mo_SIGAE3_ | 0.026211   | 0.15354268 | 4.42E-05 | 0.0048445 | -0.11213  |
| 9mo_SIGAE3_ | 0.02001265 | 0.11529266 | 4.16E-05 | 0.0053955 | -0.025531 |
| 9mo_SIGAE3_ | 0.01368547 | 0.0762476  | 3.86E-05 | 0.0062156 | 0.17645   |
| 9mo_SIGAE3_ | 0.08476017 | 0.5148496  | 4.76E-05 | 0.012404  | -0.069378 |
| 9mo_SIGAE3_ | 0.0117525  | 0.06431925 | 3.74E-05 | 0.0065941 | 0.263     |
| 9mo_SIGAE3_ | 0.07994606 | 0.48514172 | 4.90E-05 | 0.014278  | 0.14202   |
| 9mo_SIGAE3_ | 0.02976062 | 0.1754474  | 4.53E-05 | 0.0046846 | -0.12301  |
| 9mo_SIGAE3_ | 0.09831876 | 0.5985197  | 5.40E-05 | 0.0046955 | -1.1375   |
| 9mo_SIGAE3_ | 0.08096756 | 0.49144542 | 4.85E-05 | 0.0141    | 0.12269   |
| 9mo_SIGAE3_ | 0.03037402 | 0.17923267 | 4.57E-05 | 0.0046464 | -0.12245  |
| 9mo_SIGAE3_ | 0.08755491 | 0.5320959  | 4.79E-05 | 0.010571  | -0.29935  |
| 9mo_SIGAE3_ | 0.01943593 | 0.11173374 | 4.14E-05 | 0.0054571 | -0.012659 |
| 9mo_SIGAE3_ | 0.01964276 | 0.11301005 | 4.16E-05 | 0.0053955 | -0.012659 |
| 9mo_SIGAE3_ | 0.0222366  | 0.12901668 | 4.28E-05 | 0.005125  | -0.068556 |
| 9mo_SIGAE3_ | 0.02271144 | 0.13194689 | 4.28E-05 | 0.005125  | -0.077142 |
| 9mo_SIGAE3_ | 0.08263878 | 0.5017585  | 4.79E-05 | 0.013563  | 0.02505   |
| 9mo_SIGAE3_ | 0.01630068 | 0.09238606 | 4.00E-05 | 0.0058035 | 0.080526  |
| 9mo_SIGAE3_ | 0.02800065 | 0.16458663 | 4.48E-05 | 0.0047558 | -0.12024  |
| 9mo_SIGAE3_ | 0.09487977 | 0.5772976  | 5.16E-05 | 0.0059226 | -0.8688   |
| 9mo_SIGAE3_ | 0.029666   | 0.17486352 | 4.53E-05 | 0.0046846 | -0.1231   |
| 9mo_SIGAE3_ | 0.0349003  | 0.20716433 | 4.72E-05 | 0.0045646 | -0.10426  |
| 9mo_SIGAE3_ | 0.08291481 | 0.5034619  | 4.78E-05 | 0.013315  | 0.02505   |
| 9mo_SIGAE3_ | 0.02885053 | 0.16983122 | 4.51E-05 | 0.0047064 | -0.12268  |
| 9mo_SIGAE3_ | 0.08110913 | 0.49231905 | 4.85E-05 | 0.0141    | 0.10139   |
| 9mo_SIGAE3_ | 0.02723183 | 0.15984221 | 4.46E-05 | 0.0047834 | -0.11816  |
| 9mo_SIGAE3_ | 0.03980212 | 0.23741348 | 4.95E-05 | 0.0046046 | -0.067351 |

|             |            |            |          |           |           |
|-------------|------------|------------|----------|-----------|-----------|
| 9mo_SIGAE3_ | 0.01345141 | 0.07480326 | 3.83E-05 | 0.0063061 | 0.19734   |
| 9mo_SIGAE3_ | 0.02031127 | 0.11713544 | 4.19E-05 | 0.0053364 | -0.025531 |
| 9mo_SIGAE3_ | 0.08523069 | 0.5177532  | 4.76E-05 | 0.012059  | -0.10433  |
| 9mo_SIGAE3_ | 0.01582042 | 0.08942238 | 3.98E-05 | 0.0058806 | 0.098494  |
| 9mo_SIGAE3_ | 0.01980367 | 0.11400304 | 4.16E-05 | 0.0053955 | -0.012659 |
| 9mo_SIGAE3_ | 0.01001104 | 0.05357269 | 3.65E-05 | 0.0069072 | 0.33263   |
| 9mo_SIGAE3_ | 0.02113075 | 0.12219248 | 4.24E-05 | 0.0052258 | -0.04878  |
| 9mo_SIGAE3_ | 0.01070895 | 0.0578795  | 3.68E-05 | 0.0068    | 0.30902   |
| 9mo_SIGAE3_ | 0.01840238 | 0.10535567 | 4.11E-05 | 0.0055212 | 0.015459  |
| 9mo_SIGAE3_ | 0.01348071 | 0.07498407 | 3.83E-05 | 0.0063061 | 0.19734   |
| 9mo_SIGAE3_ | 0.02322311 | 0.13510439 | 4.30E-05 | 0.0050782 | -0.084895 |
| 9mo_SIGAE3_ | 0.02653493 | 0.15554167 | 4.44E-05 | 0.004813  | -0.11546  |
| 9mo_SIGAE3_ | 0.01046945 | 0.05640158 | 3.68E-05 | 0.0068    | 0.30902   |
| 9mo_SIGAE3_ | 0.02355658 | 0.13716225 | 4.32E-05 | 0.0050338 | -0.084895 |
| 9mo_SIGAE3_ | 0.06483831 | 0.39191183 | 6.24E-05 | 0.0086643 | 0.15715   |
| 9mo_SIGAE3_ | 0.04397277 | 0.26315054 | 5.25E-05 | 0.0047605 | -0.035266 |
| 9mo_SIGAE3_ | 0.07169177 | 0.43420452 | 5.60E-05 | 0.012118  | 0.2386    |
| 9mo_SIGAE3_ | 0.02639958 | 0.1547064  | 4.42E-05 | 0.0048445 | -0.11213  |
| 9mo_SIGAE3_ | 0.08048674 | 0.48847827 | 4.87E-05 | 0.014207  | 0.12269   |
| 9mo_SIGAE3_ | 0.09599975 | 0.584209   | 5.24E-05 | 0.0054581 | -0.9515   |
| 9mo_SIGAE3_ | 0.02688586 | 0.15770727 | 4.44E-05 | 0.004813  | -0.11546  |
| 9mo_SIGAE3_ | 0.08719759 | 0.52989095 | 4.78E-05 | 0.010952  | -0.25808  |
| 9mo_SIGAE3_ | 0.02021989 | 0.11657152 | 4.19E-05 | 0.0053364 | -0.025531 |
| 9mo_SIGAE3_ | 0.01764866 | 0.10070446 | 4.06E-05 | 0.0056572 | 0.046584  |
| 9mo_SIGAE3_ | 0.08149449 | 0.4946971  | 4.83E-05 | 0.013957  | 0.10139   |
| 9mo_SIGAE3_ | 0.02133825 | 0.12347291 | 4.24E-05 | 0.0052258 | -0.04878  |
| 9mo_SIGAE3_ | 0.07655843 | 0.46423668 | 5.13E-05 | 0.014025  | 0.22792   |
| 9mo_SIGAE3_ | 0.00784793 | 0.04022414 | 3.53E-05 | 0.0073641 | 0.43054   |
| 9mo_SIGAE3_ | 0.01413274 | 0.07900775 | 3.89E-05 | 0.0061278 | 0.1561    |
| 9mo_SIGAE3_ | 0.08673546 | 0.5270391  | 4.78E-05 | 0.010952  | -0.21781  |
| 9mo_SIGAE3_ | 0.01581675 | 0.08939973 | 3.98E-05 | 0.0058806 | 0.098494  |
| 9mo_SIGAE3_ | 0.02547439 | 0.14899704 | 4.40E-05 | 0.0048781 | -0.10813  |
| 9mo_SIGAE3_ | 0.02976617 | 0.17548162 | 4.53E-05 | 0.0046846 | -0.12301  |
| 9mo_SIGAE3_ | 0.00948399 | 0.05032026 | 3.62E-05 | 0.0070172 | 0.35661   |
| 9mo_SIGAE3_ | 0.0414036  | 0.24729623 | 5.05E-05 | 0.0046492 | -0.054504 |
| 9mo_SIGAE3_ | 0.02126639 | 0.12302951 | 4.24E-05 | 0.0052258 | -0.04878  |
| 9mo_SIGAE3_ | 0.02373412 | 0.13825788 | 4.32E-05 | 0.0050338 | -0.084895 |
| 9mo_SIGAE3_ | 0.01973365 | 0.11357093 | 4.16E-05 | 0.0053955 | -0.012659 |
| 9mo_SIGAE3_ | 0.0269848  | 0.1583178  | 4.44E-05 | 0.004813  | -0.11546  |
| 9mo_SIGAE3_ | 0.07337835 | 0.44461244 | 5.43E-05 | 0.012883  | 0.24489   |
| 9mo_SIGAE3_ | 0.00638163 | 0.03117562 | 3.44E-05 | 0.0077366 | 0.50694   |
| 9mo_SIGAE3_ | 0.01554925 | 0.087749   | 3.95E-05 | 0.0059603 | 0.11709   |
| 9mo_SIGAE3_ | 0.023592   | 0.13738082 | 4.32E-05 | 0.0050338 | -0.084895 |

|             |            |            |          |           |           |
|-------------|------------|------------|----------|-----------|-----------|
| 9mo_SIGAE3_ | 0.0771588  | 0.46794158 | 5.09E-05 | 0.014141  | 0.22047   |
| 9mo_SIGAE3_ | 0.0419762  | 0.2508297  | 5.09E-05 | 0.0046676 | -0.0504   |
| 9mo_SIGAE3_ | 0.08798992 | 0.5347804  | 4.80E-05 | 0.010188  | -0.29935  |
| 9mo_SIGAE3_ | 0.01072018 | 0.05794881 | 3.68E-05 | 0.0068    | 0.30902   |
| 9mo_SIGAE3_ | 0.01778783 | 0.10156331 | 4.06E-05 | 0.0056572 | 0.046584  |
| 9mo_SIGAE3_ | 0.07861955 | 0.47695583 | 4.97E-05 | 0.014318  | 0.18889   |
| 9mo_SIGAE3_ | 0.09438883 | 0.57426804 | 5.13E-05 | 0.0061762 | -0.82618  |
| 9mo_SIGAE3_ | 0.04271154 | 0.2553675  | 5.13E-05 | 0.0046879 | -0.042593 |
| 9mo_SIGAE3_ | 0.02736364 | 0.16065563 | 4.46E-05 | 0.0047834 | -0.11816  |
| 9mo_SIGAE3_ | 0.0289567  | 0.17048639 | 4.51E-05 | 0.0047064 | -0.12268  |
| 9mo_SIGAE3_ | 0.04147148 | 0.24771509 | 5.05E-05 | 0.0046492 | -0.054504 |
| 9mo_SIGAE3_ | 0.04604177 | 0.27591836 | 5.39E-05 | 0.0048522 | -0.021643 |
| 9mo_SIGAE3_ | 0.07092439 | 0.42946905 | 5.71E-05 | 0.011574  | 0.23476   |
| 9mo_SIGAE3_ | 0.02056005 | 0.11867068 | 4.19E-05 | 0.0053364 | -0.037579 |
| 9mo_SIGAE3_ | 0.08772805 | 0.5331644  | 4.79E-05 | 0.010571  | -0.29935  |
| 9mo_SIGAE3_ | 0.09432314 | 0.57386273 | 5.13E-05 | 0.0061762 | -0.82618  |
| 9mo_SIGAE3_ | 0.06601342 | 0.39916342 | 6.16E-05 | 0.0091463 | 0.17407   |
| 9mo_SIGAE3_ | 0.01873703 | 0.10742079 | 4.11E-05 | 0.0055212 | 0.015459  |
| 9mo_SIGAE3_ | 0.09059383 | 0.55084914 | 4.91E-05 | 0.0083333 | -0.51631  |
| 9mo_SIGAE3_ | 0.01827665 | 0.10457983 | 4.09E-05 | 0.0055879 | 0.030658  |
| 9mo_SIGAE3_ | 0.08534718 | 0.518472   | 4.76E-05 | 0.012059  | -0.14081  |
| 9mo_SIGAE3_ | 0.01929524 | 0.11086554 | 4.14E-05 | 0.0054571 | 0.0010121 |
| 9mo_SIGAE3_ | 0.02535954 | 0.14828834 | 4.38E-05 | 0.0049138 | -0.10343  |
| 9mo_SIGAE3_ | 0.02043068 | 0.11787235 | 4.19E-05 | 0.0053364 | -0.025531 |
| 9mo_SIGAE3_ | 0.09157082 | 0.5568781  | 4.96E-05 | 0.0076529 | -0.60562  |
| 9mo_SIGAE3_ | 0.02160266 | 0.12510462 | 4.24E-05 | 0.0052258 | -0.059109 |
| 9mo_SIGAE3_ | 0.01736428 | 0.09894956 | 4.06E-05 | 0.0056572 | 0.046584  |
| 9mo_SIGAE3_ | 0.03853841 | 0.2296151  | 4.89E-05 | 0.0045836 | -0.076088 |
| 9mo_SIGAE3_ | 0.01212737 | 0.06663259 | 3.77E-05 | 0.0064954 | 0.24064   |
| 9mo_SIGAE3_ | 0.01746648 | 0.09958021 | 4.06E-05 | 0.0056572 | 0.046584  |
| 9mo_SIGAE3_ | 0.01723404 | 0.09814582 | 4.03E-05 | 0.005729  | 0.063215  |
| 9mo_SIGAE3_ | 0.10033719 | 0.6109754  | 5.58E-05 | 0.0041426 | -1.2296   |
| 9mo_SIGAE3_ | 0.03254202 | 0.19261144 | 4.64E-05 | 0.0045915 | -0.11603  |
| 9mo_SIGAE3_ | 0.02332417 | 0.13572803 | 4.32E-05 | 0.0050338 | -0.084895 |
| 9mo_SIGAE3_ | 0.05489744 | 0.33056667 | 6.17E-05 | 0.0058704 | 0.034245  |
| 9mo_SIGAE3_ | 0.01748937 | 0.0997215  | 4.06E-05 | 0.0056572 | 0.046584  |
| 9mo_SIGAE3_ | 0.09390025 | 0.571253   | 5.09E-05 | 0.0064439 | -0.7829   |
| 9mo_SIGAE3_ | 0.02233159 | 0.12960282 | 4.28E-05 | 0.005125  | -0.068556 |
| 9mo_SIGAE3_ | 0.01676297 | 0.09523889 | 4.00E-05 | 0.0058035 | 0.063215  |
| 9mo_SIGAE3_ | 0.08177586 | 0.49643344 | 4.83E-05 | 0.013957  | 0.078055  |
| 9mo_SIGAE3_ | 0.01884667 | 0.10809737 | 4.11E-05 | 0.0055212 | 0.015459  |
| 9mo_SIGAE3_ | 0.02269496 | 0.13184522 | 4.28E-05 | 0.005125  | -0.077142 |
| 9mo_SIGAE3_ | 0.01154073 | 0.06301246 | 3.74E-05 | 0.0065941 | 0.263     |

|             |            |            |          |           |           |
|-------------|------------|------------|----------|-----------|-----------|
| 9mo_SIGAE3_ | 0.02574    | 0.15063614 | 4.40E-05 | 0.0048781 | -0.10813  |
| 9mo_SIGAE3_ | 0.00721893 | 0.03634263 | 3.50E-05 | 0.0074854 | 0.45576   |
| 9mo_SIGAE3_ | 0.018222   | 0.10424258 | 4.09E-05 | 0.0055879 | 0.030658  |
| 9mo_SIGAE3_ | 0.01174185 | 0.06425356 | 3.74E-05 | 0.0065941 | 0.263     |
| 9mo_SIGAE3_ | 0.09248123 | 0.56249624 | 4.99E-05 | 0.0073308 | -0.69483  |
| 9mo_SIGAE3_ | 0.00665903 | 0.03288748 | 3.47E-05 | 0.0076096 | 0.48124   |
| 9mo_SIGAE3_ | 0.02366369 | 0.13782324 | 4.32E-05 | 0.0050338 | -0.084895 |
| 9mo_SIGAE3_ | 0.02132478 | 0.12338981 | 4.24E-05 | 0.0052258 | -0.04878  |
| 9mo_SIGAE3_ | 0.09731926 | 0.59235173 | 5.32E-05 | 0.0050496 | -1.0673   |
| 9mo_SIGAE3_ | 0.01465886 | 0.08225443 | 3.92E-05 | 0.0060428 | 0.1363    |
| 9mo_SIGAE3_ | 0.08959028 | 0.5446562  | 4.86E-05 | 0.0090548 | -0.42792  |
| 9mo_SIGAE3_ | 0.02077504 | 0.1199974  | 4.21E-05 | 0.0052798 | -0.037579 |
| 9mo_SIGAE3_ | 0.01753259 | 0.0999882  | 4.06E-05 | 0.0056572 | 0.046584  |
| 9mo_SIGAE3_ | 0.07098112 | 0.42981908 | 5.65E-05 | 0.011849  | 0.23476   |
| 9mo_SIGAE3_ | 0.08596436 | 0.52228063 | 4.76E-05 | 0.0117    | -0.17867  |
| 9mo_SIGAE3_ | 0.02945005 | 0.17353089 | 4.53E-05 | 0.0046846 | -0.1231   |
| 9mo_SIGAE3_ | 0.01855764 | 0.10631381 | 4.11E-05 | 0.0055212 | 0.015459  |
| 9mo_SIGAE3_ | 0.02883726 | 0.16974935 | 4.51E-05 | 0.0047064 | -0.12268  |
| 9mo_SIGAE3_ | 0.01016949 | 0.0545505  | 3.65E-05 | 0.0069072 | 0.33263   |
| 9mo_SIGAE3_ | 0.08629467 | 0.524319   | 4.77E-05 | 0.01133   | -0.17867  |
| 9mo_SIGAE3_ | 0.01557076 | 0.08788174 | 3.95E-05 | 0.0059603 | 0.11709   |
| 9mo_SIGAE3_ | 0.04417107 | 0.26437426 | 5.25E-05 | 0.0047605 | -0.035266 |
| 9mo_SIGAE3_ | 0.01093502 | 0.05927456 | 3.71E-05 | 0.0066957 | 0.2858    |
| 9mo_SIGAE3_ | 0.0277604  | 0.16310406 | 4.48E-05 | 0.0047558 | -0.12024  |
| 9mo_SIGAE3_ | 0.08750727 | 0.53180194 | 4.79E-05 | 0.010571  | -0.29935  |
| 9mo_SIGAE3_ | 0.02140384 | 0.12387767 | 4.24E-05 | 0.0052258 | -0.04878  |
| 9mo_SIGAE3_ | 0.04074521 | 0.2432333  | 5.02E-05 | 0.0046325 | -0.058715 |
| 9mo_SIGAE3_ | 0.02428349 | 0.141648   | 4.34E-05 | 0.0049916 | -0.091842 |
| 9mo_SIGAE3_ | 0.0147551  | 0.08284828 | 3.92E-05 | 0.0060428 | 0.1363    |
| 9mo_SIGAE3_ | 0.0755949  | 0.45829073 | 5.23E-05 | 0.013721  | 0.23858   |
| 9mo_SIGAE3_ | 0.06100318 | 0.3682452  | 6.38E-05 | 0.0072613 | 0.09374   |
| 9mo_SIGAE3_ | 0.07135256 | 0.43211123 | 5.65E-05 | 0.011849  | 0.2386    |
| 9mo_SIGAE3_ | 0.01491176 | 0.08381508 | 3.92E-05 | 0.0060428 | 0.1363    |
| 9mo_SIGAE3_ | 0.02321608 | 0.13506106 | 4.30E-05 | 0.0050782 | -0.084895 |
| 9mo_SIGAE3_ | 0.06932304 | 0.4195871  | 5.87E-05 | 0.010741  | 0.21895   |
| 9mo_SIGAE3_ | 0.01759402 | 0.10036727 | 4.06E-05 | 0.0056572 | 0.046584  |
| 9mo_SIGAE3_ | 0.00792034 | 0.04067098 | 3.53E-05 | 0.0073641 | 0.43054   |
| 9mo_SIGAE3_ | 0.07089917 | 0.42931342 | 5.71E-05 | 0.011574  | 0.23476   |
| 9mo_SIGAE3_ | 0.03211179 | 0.18995649 | 4.62E-05 | 0.0046026 | -0.11821  |
| 9mo_SIGAE3_ | 0.02113103 | 0.12219416 | 4.24E-05 | 0.0052258 | -0.04878  |
| 9mo_SIGAE3_ | 0.01565927 | 0.08842792 | 3.95E-05 | 0.0059603 | 0.098494  |
| 9mo_SIGAE3_ | 0.09032112 | 0.54916626 | 4.88E-05 | 0.0086895 | -0.51631  |
| 9mo_SIGAE3_ | 0.02507188 | 0.1465132  | 4.38E-05 | 0.0049138 | -0.10343  |

|             |            |            |          |           |            |
|-------------|------------|------------|----------|-----------|------------|
| 9mo_SIGAE3_ | 0.04429565 | 0.26514307 | 5.25E-05 | 0.0047605 | -0.031751  |
| 9mo_SIGAE3_ | 0.02021394 | 0.11653481 | 4.19E-05 | 0.0053364 | -0.025531  |
| 9mo_SIGAE3_ | 0.05240375 | 0.31517813 | 5.97E-05 | 0.0054628 | 0.018414   |
| 9mo_SIGAE3_ | 0.08572109 | 0.52077943 | 4.76E-05 | 0.0117    | -0.14081   |
| 9mo_SIGAE3_ | 0.05436804 | 0.32729977 | 6.14E-05 | 0.0057798 | 0.030074   |
| 9mo_SIGAE3_ | 0.05666521 | 0.3414756  | 6.27E-05 | 0.0061731 | 0.047788   |
| 9mo_SIGAE3_ | 0.02462188 | 0.14373624 | 4.36E-05 | 0.0049516 | -0.098011  |
| 9mo_SIGAE3_ | 0.08247061 | 0.50072074 | 4.79E-05 | 0.013563  | 0.05262    |
| 9mo_SIGAE3_ | 0.02679119 | 0.15712304 | 4.44E-05 | 0.004813  | -0.11546   |
| 9mo_SIGAE3_ | 0.07678166 | 0.46561423 | 5.13E-05 | 0.014025  | 0.22047    |
| 9mo_SIGAE3_ | 0.03864593 | 0.23027861 | 4.89E-05 | 0.0045836 | -0.076088  |
| 9mo_SIGAE3_ | 0.00329639 | 0.01213662 | 3.29E-05 | 0.0084138 | 0.63801    |
| 9mo_SIGAE3_ | 0.01338927 | 0.07441975 | 3.83E-05 | 0.0063061 | 0.19734    |
| 9mo_SIGAE3_ | 0.01990179 | 0.11460855 | 4.16E-05 | 0.0053955 | -0.012659  |
| 9mo_SIGAE3_ | 0.05349481 | 0.32191107 | 6.05E-05 | 0.0056127 | 0.026054   |
| 9mo_SIGAE3_ | 0.04932262 | 0.29616448 | 5.73E-05 | 0.0051543 | -0.0022352 |
| 9mo_SIGAE3_ | 0.0923329  | 0.5615809  | 4.99E-05 | 0.0073308 | -0.6503    |
| 9mo_SIGAE3_ | 0.05984518 | 0.36109918 | 6.37E-05 | 0.0069445 | 0.080679   |
| 9mo_SIGAE3_ | 0.01061347 | 0.0572903  | 3.68E-05 | 0.0068    | 0.30902    |
| 9mo_SIGAE3_ | 0.01276694 | 0.07057937 | 3.80E-05 | 0.0063994 | 0.21875    |
| 9mo_SIGAE3_ | 0.02318104 | 0.13484478 | 4.30E-05 | 0.0050782 | -0.077142  |
| 9mo_SIGAE3_ | 0.02885336 | 0.16984867 | 4.51E-05 | 0.0047064 | -0.12268   |
| 9mo_SIGAE3_ | 0.06153885 | 0.37155086 | 6.37E-05 | 0.0074328 | 0.10072    |
| 9mo_SIGAE3_ | 0.01319    | 0.07319008 | 3.83E-05 | 0.0063061 | 0.19734    |
| 9mo_SIGAE3_ | 0.01407806 | 0.07867028 | 3.89E-05 | 0.0061278 | 0.1561     |
| 9mo_SIGAE3_ | 0.00480621 | 0.02145371 | 3.35E-05 | 0.0081345 | 0.58516    |
| 9mo_SIGAE3_ | 0.09035783 | 0.54939276 | 4.88E-05 | 0.0086895 | -0.51631   |
| 9mo_SIGAE3_ | 0.0171626  | 0.09770502 | 4.03E-05 | 0.005729  | 0.063215   |
| 9mo_SIGAE3_ | 0.07395171 | 0.4481506  | 5.38E-05 | 0.013116  | 0.24502    |
| 9mo_SIGAE3_ | 0.00832326 | 0.0431574  | 3.56E-05 | 0.0072456 | 0.40559    |
| 9mo_SIGAE3_ | 0.02186052 | 0.12669587 | 4.26E-05 | 0.0051742 | -0.059109  |
| 9mo_SIGAE3_ | 0.0184679  | 0.10575998 | 4.11E-05 | 0.0055212 | 0.015459   |
| 9mo_SIGAE3_ | 0.01537264 | 0.08665913 | 3.95E-05 | 0.0059603 | 0.11709    |
| 9mo_SIGAE3_ | 0.08901307 | 0.54109424 | 4.84E-05 | 0.0094274 | -0.3844    |
| 9mo_SIGAE3_ | 0.02035622 | 0.11741284 | 4.19E-05 | 0.0053364 | -0.025531  |
| 9mo_SIGAE3_ | 0.08002272 | 0.4856148  | 4.90E-05 | 0.014278  | 0.14202    |
| 9mo_SIGAE3_ | 0.08908902 | 0.5415629  | 4.84E-05 | 0.0094274 | -0.3844    |
| 9mo_SIGAE3_ | 0.07890747 | 0.4787326  | 4.97E-05 | 0.014318  | 0.17506    |
| 9mo_SIGAE3_ | 0.02363436 | 0.13764225 | 4.32E-05 | 0.0050338 | -0.084895  |
| 9mo_SIGAE3_ | 0.01037428 | 0.05581429 | 3.68E-05 | 0.0068    | 0.30902    |
| 9mo_SIGAE3_ | 0.0217646  | 0.12610392 | 4.26E-05 | 0.0051742 | -0.059109  |
| 9mo_SIGAE3_ | 0.01553017 | 0.08763124 | 3.95E-05 | 0.0059603 | 0.11709    |
| 9mo_SIGAE3_ | 0.00989396 | 0.05285019 | 3.65E-05 | 0.0069072 | 0.33263    |

|             |            |            |          |           |           |
|-------------|------------|------------|----------|-----------|-----------|
| 9mo_SIGAE3_ | 0.01497599 | 0.0842114  | 3.92E-05 | 0.0060428 | 0.1363    |
| 9mo_SIGAE3_ | 0.06681273 | 0.40409598 | 6.07E-05 | 0.0096573 | 0.18233   |
| 9mo_SIGAE3_ | 0.02201835 | 0.12766987 | 4.26E-05 | 0.0051742 | -0.059109 |
| 9mo_SIGAE3_ | 0.03544496 | 0.21052542 | 4.74E-05 | 0.0045622 | -0.10068  |
| 9mo_SIGAE3_ | 0.02302799 | 0.13390034 | 4.30E-05 | 0.0050782 | -0.077142 |
| 9mo_SIGAE3_ | 0.02637984 | 0.15458462 | 4.42E-05 | 0.0048445 | -0.11213  |
| 9mo_SIGAE3_ | 0.07056487 | 0.42725044 | 5.71E-05 | 0.011574  | 0.23016   |
| 9mo_SIGAE3_ | 0.04300427 | 0.25717393 | 5.17E-05 | 0.0047101 | -0.042593 |
| 9mo_SIGAE3_ | 0.0177051  | 0.10105278 | 4.06E-05 | 0.0056572 | 0.046584  |
| 9mo_SIGAE3_ | 0.06069783 | 0.3663609  | 6.38E-05 | 0.0072613 | 0.09374   |
| 9mo_SIGAE3_ | 0.10053732 | 0.6122104  | 5.58E-05 | 0.0041426 | -1.2563   |
| 9mo_SIGAE3_ | 0.03657562 | 0.21750273 | 4.79E-05 | 0.0045625 | -0.092976 |
| 9mo_SIGAE3_ | 0.02221721 | 0.12889698 | 4.28E-05 | 0.005125  | -0.068556 |
| 9mo_SIGAE3_ | 0.01950402 | 0.11215389 | 4.16E-05 | 0.0053955 | -0.012659 |
| 9mo_SIGAE3_ | 0.02722645 | 0.15980904 | 4.46E-05 | 0.0047834 | -0.11816  |
| 9mo_SIGAE3_ | 0.01062856 | 0.05738343 | 3.68E-05 | 0.0068    | 0.30902   |
| 9mo_SIGAE3_ | 0.01657402 | 0.09407285 | 4.00E-05 | 0.0058035 | 0.080526  |
| 9mo_SIGAE3_ | 0.03152812 | 0.1863546  | 4.60E-05 | 0.0046154 | -0.12002  |
| 9mo_SIGAE3_ | 0.01205138 | 0.06616364 | 3.77E-05 | 0.0064954 | 0.24064   |
| 9mo_SIGAE3_ | 0.00888362 | 0.04661541 | 3.59E-05 | 0.00713   | 0.38094   |
| 9mo_SIGAE3_ | 0.01500175 | 0.08437036 | 3.92E-05 | 0.0060428 | 0.1363    |
| 9mo_SIGAE3_ | 0.02072509 | 0.11968914 | 4.21E-05 | 0.0052798 | -0.037579 |
| 9mo_SIGAE3_ | 0.02760476 | 0.16214359 | 4.46E-05 | 0.0047834 | -0.12024  |
| 9mo_SIGAE3_ | 0.01987534 | 0.11444531 | 4.16E-05 | 0.0053955 | -0.012659 |
| 9mo_SIGAE3_ | 0.03114812 | 0.18400964 | 4.58E-05 | 0.00463   | -0.12145  |
| 9mo_SIGAE3_ | 0.09404612 | 0.57215315 | 5.09E-05 | 0.0064439 | -0.82618  |
| 9mo_SIGAE3_ | 0.03711501 | 0.22083133 | 4.81E-05 | 0.0045652 | -0.088896 |
| 9mo_SIGAE3_ | 0.0755816  | 0.45820865 | 5.23E-05 | 0.013721  | 0.23858   |
| 9mo_SIGAE3_ | 0.01744018 | 0.09941793 | 4.06E-05 | 0.0056572 | 0.046584  |
| 9mo_SIGAE3_ | 0.02219078 | 0.12873387 | 4.26E-05 | 0.0051742 | -0.068556 |
| 9mo_SIGAE3_ | 0.02690331 | 0.15781492 | 4.44E-05 | 0.004813  | -0.11546  |
| 9mo_SIGAE3_ | 0.01107782 | 0.06015579 | 3.71E-05 | 0.0066957 | 0.2858    |
| 9mo_SIGAE3_ | 0.01269698 | 0.07014768 | 3.80E-05 | 0.0063994 | 0.21875   |
| 9mo_SIGAE3_ | 0.0115734  | 0.06321403 | 3.74E-05 | 0.0065941 | 0.263     |
| 9mo_SIGAE3_ | 0.01440995 | 0.08071839 | 3.89E-05 | 0.0061278 | 0.1561    |
| 9mo_SIGAE3_ | 0.00978166 | 0.05215723 | 3.65E-05 | 0.0069072 | 0.33263   |
| 9mo_SIGAE3_ | 0.01471457 | 0.08259818 | 3.92E-05 | 0.0060428 | 0.1363    |
| 9mo_SIGAE3_ | 0.02147586 | 0.12432215 | 4.24E-05 | 0.0052258 | -0.04878  |
| 9mo_SIGAE3_ | 0.01789653 | 0.1022341  | 4.09E-05 | 0.0055879 | 0.030658  |
| 9mo_SIGAE3_ | 0.02933393 | 0.17281426 | 4.53E-05 | 0.0046846 | -0.1231   |
| 9mo_SIGAE3_ | 0.01476198 | 0.08289076 | 3.92E-05 | 0.0060428 | 0.1363    |
| 9mo_SIGAE3_ | 0.03735264 | 0.22229774 | 4.81E-05 | 0.0045652 | -0.084703 |
| 9mo_SIGAE3_ | 0.0349785  | 0.2076469  | 4.72E-05 | 0.0045646 | -0.10426  |

|             |            |            |          |           |           |
|-------------|------------|------------|----------|-----------|-----------|
| 9mo_SIGAE3_ | 0.01681088 | 0.09553453 | 4.03E-05 | 0.005729  | 0.063215  |
| 9mo_SIGAE3_ | 0.01848897 | 0.10589004 | 4.11E-05 | 0.0055212 | 0.015459  |
| 9mo_SIGAE3_ | 0.02346474 | 0.13659552 | 4.32E-05 | 0.0050338 | -0.084895 |
| 9mo_SIGAE3_ | 0.09477763 | 0.57666737 | 5.13E-05 | 0.0061762 | -0.8688   |
| 9mo_SIGAE3_ | 0.01894984 | 0.10873406 | 4.14E-05 | 0.0054571 | 0.0010121 |
| 9mo_SIGAE3_ | 0.02717823 | 0.15951149 | 4.46E-05 | 0.0047834 | -0.11816  |
| 9mo_SIGAE3_ | 0.06738549 | 0.40763044 | 6.03E-05 | 0.009922  | 0.19037   |
| 9mo_SIGAE3_ | 0.01938243 | 0.11140359 | 4.14E-05 | 0.0054571 | 0.0010121 |
| 9mo_SIGAE3_ | 0.03996746 | 0.23843381 | 4.95E-05 | 0.0046046 | -0.063007 |
| 9mo_SIGAE3_ | 0.08000783 | 0.48552293 | 4.90E-05 | 0.014278  | 0.14202   |
| 9mo_SIGAE3_ | 0.01556528 | 0.08784792 | 3.95E-05 | 0.0059603 | 0.11709   |
| 9mo_SIGAE3_ | 0.02028252 | 0.116958   | 4.19E-05 | 0.0053364 | -0.025531 |
| 9mo_SIGAE3_ | 0.00776092 | 0.03968725 | 3.53E-05 | 0.0073641 | 0.43054   |
| 9mo_SIGAE3_ | 0.00959873 | 0.05102836 | 3.62E-05 | 0.0070172 | 0.35661   |
| 9mo_SIGAE3_ | 0.02061269 | 0.11899547 | 4.21E-05 | 0.0052798 | -0.037579 |
| 9mo_SIGAE3_ | 0.06721678 | 0.4065894  | 6.03E-05 | 0.009922  | 0.19037   |
| 9mo_SIGAE3_ | 0.02747821 | 0.1613626  | 4.46E-05 | 0.0047834 | -0.11816  |
| 9mo_SIGAE3_ | 0.03463576 | 0.2055319  | 4.70E-05 | 0.0045688 | -0.10426  |
| 9mo_SIGAE3_ | 0.02952752 | 0.17400897 | 4.53E-05 | 0.0046846 | -0.1231   |
| 9mo_SIGAE3_ | 0.00982648 | 0.05243379 | 3.65E-05 | 0.0069072 | 0.33263   |
| 9mo_SIGAE3_ | 0.04420017 | 0.26455384 | 5.25E-05 | 0.0047605 | -0.035266 |
| 9mo_SIGAE3_ | 0.03715756 | 0.2210939  | 4.81E-05 | 0.0045652 | -0.088896 |
| 9mo_SIGAE3_ | 0.01714856 | 0.09761833 | 4.03E-05 | 0.005729  | 0.063215  |
| 9mo_SIGAE3_ | 0.00893991 | 0.04696275 | 3.59E-05 | 0.00713   | 0.38094   |
| 9mo_SIGAE3_ | 0.02518258 | 0.1471963  | 4.38E-05 | 0.0049138 | -0.10343  |
| 9mo_SIGAE3_ | 0.00707609 | 0.03546115 | 3.50E-05 | 0.0074854 | 0.45576   |
| 9mo_SIGAE3_ | 0.03061293 | 0.180707   | 4.57E-05 | 0.0046464 | -0.12245  |
| 9mo_SIGAE3_ | 0.01438324 | 0.08055355 | 3.89E-05 | 0.0061278 | 0.1561    |
| 9mo_SIGAE3_ | 0.06232911 | 0.37642756 | 6.35E-05 | 0.0078047 | 0.11565   |
| 9mo_SIGAE3_ | 0.0785026  | 0.47623417 | 5.01E-05 | 0.014289  | 0.18889   |
| 9mo_SIGAE3_ | 0.01410799 | 0.07885499 | 3.89E-05 | 0.0061278 | 0.1561    |
| 9mo_SIGAE3_ | 0.02271354 | 0.13195989 | 4.28E-05 | 0.005125  | -0.077142 |
| 9mo_SIGAE3_ | 0.07076491 | 0.4284849  | 5.71E-05 | 0.011574  | 0.23476   |
| 9mo_SIGAE3_ | 0.07828982 | 0.4749211  | 5.01E-05 | 0.014289  | 0.20103   |
| 9mo_SIGAE3_ | 0.02193801 | 0.12717405 | 4.26E-05 | 0.0051742 | -0.059109 |
| 9mo_SIGAE3_ | 0.01057773 | 0.05706978 | 3.68E-05 | 0.0068    | 0.30902   |
| 9mo_SIGAE3_ | 0.01362656 | 0.07588406 | 3.86E-05 | 0.0062156 | 0.17645   |
| 9mo_SIGAE3_ | 0.01858215 | 0.10646503 | 4.11E-05 | 0.0055212 | 0.015459  |
| 9mo_SIGAE3_ | 0.01702682 | 0.09686708 | 4.03E-05 | 0.005729  | 0.063215  |
| 9mo_SIGAE3_ | 0.05123479 | 0.3079645  | 5.87E-05 | 0.0053288 | 0.0077602 |
| 9mo_SIGAE3_ | 0.02072182 | 0.11966894 | 4.21E-05 | 0.0052798 | -0.037579 |
| 9mo_SIGAE3_ | 0.01489156 | 0.08369037 | 3.92E-05 | 0.0060428 | 0.1363    |
| 9mo_SIGAE3_ | 0.01282518 | 0.0709388  | 3.80E-05 | 0.0063994 | 0.21875   |

|             |            |            |          |           |           |
|-------------|------------|------------|----------|-----------|-----------|
| 9mo_SIGAE3_ | 0.01574398 | 0.08895066 | 3.98E-05 | 0.0058806 | 0.098494  |
| 9mo_SIGAE3_ | 0.02677983 | 0.15705293 | 4.44E-05 | 0.004813  | -0.11546  |
| 9mo_SIGAE3_ | 0.02029967 | 0.11706384 | 4.19E-05 | 0.0053364 | -0.025531 |
| 9mo_SIGAE3_ | 0.01733028 | 0.09873977 | 4.06E-05 | 0.0056572 | 0.046584  |
| 9mo_SIGAE3_ | 0.02416934 | 0.14094359 | 4.34E-05 | 0.0049916 | -0.091842 |
| 9mo_SIGAE3_ | 0.02144709 | 0.12414461 | 4.24E-05 | 0.0052258 | -0.04878  |
| 9mo_SIGAE3_ | 0.01044527 | 0.05625232 | 3.68E-05 | 0.0068    | 0.30902   |
| 9mo_SIGAE3_ | 0.05957265 | 0.3594174  | 6.37E-05 | 0.0067983 | 0.080679  |
| 9mo_SIGAE3_ | 0.0323979  | 0.19172205 | 4.62E-05 | 0.0046026 | -0.11603  |
| 9mo_SIGAE3_ | 0.01593583 | 0.09013456 | 3.98E-05 | 0.0058806 | 0.098494  |
| 9mo_SIGAE3_ | 0.01278866 | 0.07071343 | 3.80E-05 | 0.0063994 | 0.21875   |
| 9mo_SIGAE3_ | 0.01360903 | 0.07577594 | 3.86E-05 | 0.0062156 | 0.17645   |
| 9mo_SIGAE3_ | 0.02356162 | 0.13719335 | 4.32E-05 | 0.0050338 | -0.084895 |
| 9mo_SIGAE3_ | 0.01298053 | 0.07189742 | 3.80E-05 | 0.0063994 | 0.19734   |
| 9mo_SIGAE3_ | 0.02012891 | 0.11601012 | 4.19E-05 | 0.0053364 | -0.025531 |
| 9mo_SIGAE3_ | 0.03611198 | 0.21464163 | 4.77E-05 | 0.0045615 | -0.096915 |
| 9mo_SIGAE3_ | 0.03292736 | 0.19498932 | 4.64E-05 | 0.0045915 | -0.11603  |
| 9mo_SIGAE3_ | 0.08257335 | 0.50135475 | 4.79E-05 | 0.013563  | 0.05262   |
| 9mo_SIGAE3_ | 0.01742713 | 0.09933739 | 4.06E-05 | 0.0056572 | 0.046584  |
| 9mo_SIGAE3_ | 0.00983147 | 0.05246461 | 3.65E-05 | 0.0069072 | 0.33263   |
| 9mo_SIGAE3_ | 0.04623091 | 0.27708557 | 5.44E-05 | 0.0048874 | -0.021643 |
| 9mo_SIGAE3_ | 0.03395366 | 0.20132263 | 4.68E-05 | 0.0045746 | -0.11071  |
| 9mo_SIGAE3_ | 0.02854948 | 0.16797344 | 4.49E-05 | 0.0047302 | -0.12174  |
| 9mo_SIGAE3_ | 0.08596901 | 0.52230936 | 4.76E-05 | 0.0117    | -0.17867  |
| 9mo_SIGAE3_ | 0.05401434 | 0.32511708 | 6.10E-05 | 0.005694  | 0.030074  |
| 9mo_SIGAE3_ | 0.09651383 | 0.5873814  | 5.28E-05 | 0.0052469 | -0.99133  |
| 9mo_SIGAE3_ | 0.06010165 | 0.36268187 | 6.37E-05 | 0.0069445 | 0.087064  |
| 9mo_SIGAE3_ | 0.01628527 | 0.09229096 | 4.00E-05 | 0.0058035 | 0.080526  |
| 9mo_SIGAE3_ | 0.01724519 | 0.09821466 | 4.03E-05 | 0.005729  | 0.063215  |
| 9mo_SIGAE3_ | 0.01253087 | 0.06912261 | 3.80E-05 | 0.0063994 | 0.21875   |
| 9mo_SIGAE3_ | 0.01148235 | 0.06265219 | 3.74E-05 | 0.0065941 | 0.263     |
| 9mo_SIGAE3_ | 0.04321379 | 0.2584669  | 5.17E-05 | 0.0047101 | -0.038876 |
| 9mo_SIGAE3_ | 0.02028229 | 0.11695659 | 4.19E-05 | 0.0053364 | -0.025531 |
| 9mo_SIGAE3_ | 0.04692826 | 0.2813889  | 5.49E-05 | 0.0049251 | -0.018376 |
| 9mo_SIGAE3_ | 0.03575611 | 0.21244554 | 4.77E-05 | 0.0045615 | -0.096915 |
| 9mo_SIGAE3_ | 0.0102719  | 0.05518248 | 3.65E-05 | 0.0069072 | 0.30902   |
| 9mo_SIGAE3_ | 0.01785303 | 0.10196566 | 4.06E-05 | 0.0056572 | 0.030658  |
| 9mo_SIGAE3_ | 0.03583994 | 0.21296285 | 4.77E-05 | 0.0045615 | -0.096915 |
| 9mo_SIGAE3_ | 0.01123637 | 0.06113425 | 3.71E-05 | 0.0066957 | 0.2858    |
| 9mo_SIGAE3_ | 0.02165435 | 0.12542358 | 4.26E-05 | 0.0051742 | -0.059109 |
| 9mo_SIGAE3_ | 0.02824744 | 0.16610958 | 4.49E-05 | 0.0047302 | -0.12174  |
| 9mo_SIGAE3_ | 0.00782496 | 0.04008243 | 3.53E-05 | 0.0073641 | 0.43054   |
| 9mo_SIGAE3_ | 0.08711787 | 0.5293989  | 4.78E-05 | 0.010952  | -0.25808  |



|             |            |            |          |           |           |
|-------------|------------|------------|----------|-----------|-----------|
| 9mo_SIGAE3_ | 0.02047529 | 0.11814761 | 4.19E-05 | 0.0053364 | -0.025531 |
| 9mo_SIGAE3_ | 0.02407081 | 0.14033554 | 4.34E-05 | 0.0049916 | -0.091842 |
| 9mo_SIGAE3_ | 0.01534848 | 0.08651003 | 3.95E-05 | 0.0059603 | 0.11709   |
| 9mo_SIGAE3_ | 0.0886846  | 0.53906727 | 4.82E-05 | 0.0098057 | -0.3844   |
| 9mo_SIGAE3_ | 0.01500042 | 0.08436217 | 3.92E-05 | 0.0060428 | 0.1363    |
| 9mo_SIGAE3_ | 0.0162473  | 0.09205665 | 4.00E-05 | 0.0058035 | 0.080526  |
| 9mo_SIGAE3_ | 0.01667488 | 0.09469526 | 4.00E-05 | 0.0058035 | 0.080526  |
| 9mo_SIGAE3_ | 0.02947586 | 0.17369014 | 4.53E-05 | 0.0046846 | -0.1231   |
| 9mo_SIGAE3_ | 0.1030679  | 0.6278266  | 5.78E-05 | 0.003724  | -1.3397   |
| 9mo_SIGAE3_ | 0.00803368 | 0.04137043 | 3.53E-05 | 0.0073641 | 0.43054   |
| 9mo_SIGAE3_ | 0.04067264 | 0.24278545 | 5.02E-05 | 0.0046325 | -0.058715 |
| 9mo_SIGAE3_ | 0.07400087 | 0.448454   | 5.38E-05 | 0.013116  | 0.24406   |
| 9mo_SIGAE3_ | 0.02217247 | 0.12862092 | 4.26E-05 | 0.0051742 | -0.068556 |
| 9mo_SIGAE3_ | 0.02572662 | 0.15055357 | 4.40E-05 | 0.0048781 | -0.10813  |
| 9mo_SIGAE3_ | 0.08805679 | 0.535193   | 4.80E-05 | 0.010188  | -0.3415   |
| 9mo_SIGAE3_ | 0.01191577 | 0.0653268  | 3.77E-05 | 0.0064954 | 0.24064   |
| 9mo_SIGAE3_ | 0.02020888 | 0.1165036  | 4.19E-05 | 0.0053364 | -0.025531 |
| 9mo_SIGAE3_ | 0.02179638 | 0.12630005 | 4.26E-05 | 0.0051742 | -0.059109 |
| 9mo_SIGAE3_ | 0.02189707 | 0.12692145 | 4.26E-05 | 0.0051742 | -0.059109 |
| 9mo_SIGAE3_ | 0.02211491 | 0.1282657  | 4.26E-05 | 0.0051742 | -0.059109 |
| 9mo_SIGAE3_ | 0.03365759 | 0.19949557 | 4.68E-05 | 0.0045746 | -0.11071  |
| 9mo_SIGAE3_ | 0.01253806 | 0.06916695 | 3.80E-05 | 0.0063994 | 0.21875   |
| 9mo_SIGAE3_ | 0.01455151 | 0.08159194 | 3.89E-05 | 0.0061278 | 0.1561    |
| 9mo_SIGAE3_ | 0.09327546 | 0.5673974  | 5.06E-05 | 0.0067258 | -0.73907  |
| 9mo_SIGAE3_ | 0.01707414 | 0.0971591  | 4.03E-05 | 0.005729  | 0.063215  |
| 9mo_SIGAE3_ | 0.03991646 | 0.2381191  | 4.95E-05 | 0.0046046 | -0.067351 |
| 9mo_SIGAE3_ | 0.0400249  | 0.23878828 | 4.95E-05 | 0.0046046 | -0.063007 |
| 9mo_SIGAE3_ | 0.0253779  | 0.1484016  | 4.38E-05 | 0.0049138 | -0.10813  |
| 9mo_SIGAE3_ | 0.08715412 | 0.5296227  | 4.78E-05 | 0.010952  | -0.25808  |
| 9mo_SIGAE3_ | 0.01162806 | 0.06355137 | 3.74E-05 | 0.0065941 | 0.263     |
| 9mo_SIGAE3_ | 0.08808116 | 0.5353434  | 4.80E-05 | 0.010188  | -0.3415   |
| 9mo_SIGAE3_ | 0.08518162 | 0.5174504  | 4.76E-05 | 0.012059  | -0.10433  |
| 9mo_SIGAE3_ | 0.02633182 | 0.15428825 | 4.42E-05 | 0.0048445 | -0.11213  |
| 9mo_SIGAE3_ | 0.01520269 | 0.08561039 | 3.95E-05 | 0.0059603 | 0.11709   |
| 9mo_SIGAE3_ | 0.01418494 | 0.07932987 | 3.89E-05 | 0.0061278 | 0.1561    |
| 9mo_SIGAE3_ | 0.01835946 | 0.1050908  | 4.09E-05 | 0.0055879 | 0.015459  |
| 9mo_SIGAE3_ | 0.08796023 | 0.53459716 | 4.80E-05 | 0.010188  | -0.29935  |
| 9mo_SIGAE3_ | 0.01110156 | 0.06030233 | 3.71E-05 | 0.0066957 | 0.2858    |
| 9mo_SIGAE3_ | 0.0214267  | 0.12401874 | 4.24E-05 | 0.0052258 | -0.04878  |
| 9mo_SIGAE3_ | 0.03970614 | 0.23682119 | 4.95E-05 | 0.0046046 | -0.067351 |
| 9mo_SIGAE3_ | 0.01846304 | 0.10573001 | 4.11E-05 | 0.0055212 | 0.015459  |
| 9mo_SIGAE3_ | 0.03954071 | 0.23580033 | 4.95E-05 | 0.0046046 | -0.067351 |
| 9mo_SIGAE3_ | 0.00984169 | 0.05252767 | 3.65E-05 | 0.0069072 | 0.33263   |

|             |            |            |          |           |           |
|-------------|------------|------------|----------|-----------|-----------|
| 9mo_SIGAE3_ | 0.02860133 | 0.16829342 | 4.49E-05 | 0.0047302 | -0.12174  |
| 9mo_SIGAE3_ | 0.0241609  | 0.14089154 | 4.34E-05 | 0.0049916 | -0.091842 |
| 9mo_SIGAE3_ | 0.02347599 | 0.13666494 | 4.32E-05 | 0.0050338 | -0.084895 |
| 9mo_SIGAE3_ | 0.02547917 | 0.14902654 | 4.40E-05 | 0.0048781 | -0.10813  |
| 9mo_SIGAE3_ | 0.01287187 | 0.07122693 | 3.80E-05 | 0.0063994 | 0.21875   |
| 9mo_SIGAE3_ | 0.01403058 | 0.07837731 | 3.86E-05 | 0.0062156 | 0.1561    |
| 9mo_SIGAE3_ | 0.02402121 | 0.1400295  | 4.34E-05 | 0.0049916 | -0.091842 |
| 9mo_SIGAE3_ | 0.02273208 | 0.13207428 | 4.28E-05 | 0.005125  | -0.077142 |
| 9mo_SIGAE3_ | 0.018473   | 0.10579147 | 4.11E-05 | 0.0055212 | 0.015459  |
| 9mo_SIGAE3_ | 0.01776872 | 0.10144534 | 4.06E-05 | 0.0056572 | 0.046584  |
| 9mo_SIGAE3_ | 0.01103398 | 0.0598853  | 3.71E-05 | 0.0066957 | 0.2858    |
| 9mo_SIGAE3_ | 0.01375892 | 0.07670085 | 3.86E-05 | 0.0062156 | 0.17645   |
| 9mo_SIGAE3_ | 0.07628789 | 0.46256718 | 5.18E-05 | 0.013885  | 0.22792   |
| 9mo_SIGAE3_ | 0.02071615 | 0.11963397 | 4.21E-05 | 0.0052798 | -0.037579 |
| 9mo_SIGAE3_ | 0.01316325 | 0.07302503 | 3.83E-05 | 0.0063061 | 0.19734   |
| 9mo_SIGAE3_ | 0.01355943 | 0.07546983 | 3.86E-05 | 0.0062156 | 0.17645   |
| 9mo_SIGAE3_ | 0.01087989 | 0.05893439 | 3.71E-05 | 0.0066957 | 0.2858    |
| 9mo_SIGAE3_ | 0.0197327  | 0.11356509 | 4.16E-05 | 0.0053955 | -0.012659 |
| 9mo_SIGAE3_ | 0.02016565 | 0.11623681 | 4.19E-05 | 0.0053364 | -0.025531 |
| 9mo_SIGAE3_ | 0.08295754 | 0.5037255  | 4.78E-05 | 0.013315  | 0.02505   |
| 9mo_SIGAE3_ | 0.0145775  | 0.08175235 | 3.89E-05 | 0.0061278 | 0.1363    |
| 9mo_SIGAE3_ | 0.02327209 | 0.13540664 | 4.30E-05 | 0.0050782 | -0.084895 |
| 9mo_SIGAE3_ | 0.02943224 | 0.17342094 | 4.53E-05 | 0.0046846 | -0.1231   |
| 9mo_SIGAE3_ | 0.03601624 | 0.21405081 | 4.77E-05 | 0.0045615 | -0.096915 |
| 9mo_SIGAE3_ | 0.03550698 | 0.21090819 | 4.74E-05 | 0.0045622 | -0.10068  |
| 9mo_SIGAE3_ | 0.04425988 | 0.26492232 | 5.25E-05 | 0.0047605 | -0.035266 |
| 9mo_SIGAE3_ | 0.03461201 | 0.20538531 | 4.70E-05 | 0.0045688 | -0.10426  |
| 9mo_SIGAE3_ | 0.02663957 | 0.1561874  | 4.44E-05 | 0.004813  | -0.11546  |
| 9mo_SIGAE3_ | 0.01962484 | 0.11289948 | 4.16E-05 | 0.0053955 | -0.012659 |
| 9mo_SIGAE3_ | 0.03640428 | 0.2164454  | 4.79E-05 | 0.0045625 | -0.092976 |
| 9mo_SIGAE3_ | 0.04255041 | 0.25437316 | 5.13E-05 | 0.0046879 | -0.04643  |
| 9mo_SIGAE3_ | 0.01125319 | 0.06123801 | 3.71E-05 | 0.0066957 | 0.2858    |
| 9mo_SIGAE3_ | 0.01770744 | 0.10106722 | 4.06E-05 | 0.0056572 | 0.046584  |
| 9mo_SIGAE3_ | 0.01152594 | 0.06292114 | 3.74E-05 | 0.0065941 | 0.263     |
| 9mo_SIGAE3_ | 0.02991608 | 0.17640676 | 4.55E-05 | 0.0046645 | -0.12301  |
| 9mo_SIGAE3_ | 0.03183624 | 0.18825603 | 4.60E-05 | 0.0046154 | -0.12002  |
| 9mo_SIGAE3_ | 0.1012108  | 0.61636645 | 5.62E-05 | 0.0040352 | -1.2808   |
| 9mo_SIGAE3_ | 0.02595454 | 0.15196009 | 4.40E-05 | 0.0048781 | -0.11213  |
| 9mo_SIGAE3_ | 0.04451525 | 0.26649824 | 5.30E-05 | 0.0047888 | -0.031751 |
| 9mo_SIGAE3_ | 0.00821311 | 0.04247771 | 3.56E-05 | 0.0072456 | 0.40559   |
| 9mo_SIGAE3_ | 0.03105687 | 0.18344654 | 4.58E-05 | 0.00463   | -0.12145  |
| 9mo_SIGAE3_ | 0.03079696 | 0.18184264 | 4.57E-05 | 0.0046464 | -0.12145  |
| 9mo_SIGAE3_ | 0.01304571 | 0.07229967 | 3.83E-05 | 0.0063061 | 0.19734   |

|             |            |            |          |           |           |
|-------------|------------|------------|----------|-----------|-----------|
| 9mo_SIGAE3_ | 0.09044561 | 0.54993445 | 4.88E-05 | 0.0086895 | -0.51631  |
| 9mo_SIGAE3_ | 0.01804688 | 0.10316187 | 4.09E-05 | 0.0055879 | 0.030658  |
| 9mo_SIGAE3_ | 0.03288954 | 0.19475597 | 4.64E-05 | 0.0045915 | -0.11603  |
| 9mo_SIGAE3_ | 0.00963016 | 0.05122232 | 3.62E-05 | 0.0070172 | 0.35661   |
| 9mo_SIGAE3_ | 0.01752681 | 0.09995256 | 4.06E-05 | 0.0056572 | 0.046584  |
| 9mo_SIGAE3_ | 0.00684056 | 0.0340077  | 3.47E-05 | 0.0076096 | 0.48124   |
| 9mo_SIGAE3_ | 0.03087742 | 0.18233916 | 4.58E-05 | 0.00463   | -0.12145  |
| 9mo_SIGAE3_ | 0.04367977 | 0.2613425  | 5.21E-05 | 0.0047343 | -0.038876 |
| 9mo_SIGAE3_ | 0.02550792 | 0.14920397 | 4.40E-05 | 0.0048781 | -0.10813  |
| 9mo_SIGAE3_ | 0.08297377 | 0.5038257  | 4.78E-05 | 0.013315  | 0.02505   |
| 9mo_SIGAE3_ | 0.09463809 | 0.57580626 | 5.13E-05 | 0.0061762 | -0.8688   |
| 9mo_SIGAE3_ | 0.01049263 | 0.05654463 | 3.68E-05 | 0.0068    | 0.30902   |
| 9mo_SIGAE3_ | 0.01470647 | 0.08254824 | 3.92E-05 | 0.0060428 | 0.1363    |
| 9mo_SIGAE3_ | 0.01911796 | 0.10977155 | 4.14E-05 | 0.0054571 | 0.0010121 |
| 9mo_SIGAE3_ | 0.02560494 | 0.14980265 | 4.40E-05 | 0.0048781 | -0.10813  |
| 9mo_SIGAE3_ | 0.06057436 | 0.36559898 | 6.38E-05 | 0.0070986 | 0.09374   |
| 9mo_SIGAE3_ | 0.04176205 | 0.24950819 | 5.09E-05 | 0.0046676 | -0.0504   |
| 9mo_SIGAE3_ | 0.01657467 | 0.09407687 | 4.00E-05 | 0.0058035 | 0.080526  |
| 9mo_SIGAE3_ | 0.01210947 | 0.06652214 | 3.77E-05 | 0.0064954 | 0.24064   |
| 9mo_SIGAE3_ | 0.0177475  | 0.10131439 | 4.06E-05 | 0.0056572 | 0.046584  |
| 9mo_SIGAE3_ | 0.09264526 | 0.5635085  | 4.99E-05 | 0.0073308 | -0.69483  |
| 9mo_SIGAE3_ | 0.01637431 | 0.09284048 | 4.00E-05 | 0.0058035 | 0.080526  |
| 9mo_SIGAE3_ | 0.07691933 | 0.4664638  | 5.13E-05 | 0.014025  | 0.22047   |
| 9mo_SIGAE3_ | 0.01395698 | 0.07792312 | 3.86E-05 | 0.0062156 | 0.17645   |
| 9mo_SIGAE3_ | 0.01406226 | 0.07857281 | 3.86E-05 | 0.0062156 | 0.1561    |
| 9mo_SIGAE3_ | 0.01869573 | 0.10716595 | 4.11E-05 | 0.0055212 | 0.015459  |
| 9mo_SIGAE3_ | 0.01435059 | 0.08035211 | 3.89E-05 | 0.0061278 | 0.1561    |
| 9mo_SIGAE3_ | 0.0291926  | 0.17194211 | 4.51E-05 | 0.0047064 | -0.1231   |
| 9mo_SIGAE3_ | 0.03577085 | 0.21253653 | 4.77E-05 | 0.0045615 | -0.096915 |
| 9mo_SIGAE3_ | 0.09512419 | 0.5788059  | 5.16E-05 | 0.0059226 | -0.91061  |
| 9mo_SIGAE3_ | 0.01684708 | 0.09575792 | 4.03E-05 | 0.005729  | 0.063215  |
| 9mo_SIGAE3_ | 0.0175429  | 0.10005184 | 4.06E-05 | 0.0056572 | 0.046584  |
| 9mo_SIGAE3_ | 0.09618902 | 0.585377   | 5.24E-05 | 0.0054581 | -0.99133  |
| 9mo_SIGAE3_ | 0.01464337 | 0.08215883 | 3.92E-05 | 0.0060428 | 0.1363    |
| 9mo_SIGAE3_ | 0.02158899 | 0.12502025 | 4.24E-05 | 0.0052258 | -0.059109 |
| 9mo_SIGAE3_ | 0.01380628 | 0.07699315 | 3.86E-05 | 0.0062156 | 0.17645   |
| 9mo_SIGAE3_ | 0.00960726 | 0.05108098 | 3.62E-05 | 0.0070172 | 0.35661   |
| 9mo_SIGAE3_ | 0.06493802 | 0.39252716 | 6.24E-05 | 0.0086643 | 0.15715   |
| 9mo_SIGAE3_ | 0.08151859 | 0.49484584 | 4.83E-05 | 0.013957  | 0.10139   |
| 9mo_SIGAE3_ | 0.02178093 | 0.12620471 | 4.26E-05 | 0.0051742 | -0.059109 |
| 9mo_SIGAE3_ | 0.03427842 | 0.2033267  | 4.70E-05 | 0.0045688 | -0.10761  |
| 9mo_SIGAE3_ | 0.01624513 | 0.0920433  | 4.00E-05 | 0.0058035 | 0.080526  |
| 9mo_SIGAE3_ | 0.02773882 | 0.16297084 | 4.48E-05 | 0.0047558 | -0.12024  |

|             |            |            |          |           |            |
|-------------|------------|------------|----------|-----------|------------|
| 9mo_SIGAE3_ | 0.01190014 | 0.06523038 | 3.77E-05 | 0.0064954 | 0.24064    |
| 9mo_SIGAE3_ | 0.02315885 | 0.13470787 | 4.30E-05 | 0.0050782 | -0.077142  |
| 9mo_SIGAE3_ | 0.01636263 | 0.0927684  | 4.00E-05 | 0.0058035 | 0.080526   |
| 9mo_SIGAE3_ | 0.06898253 | 0.41748583 | 5.87E-05 | 0.010741  | 0.21248    |
| 9mo_SIGAE3_ | 0.08220024 | 0.49905232 | 4.81E-05 | 0.013778  | 0.05262    |
| 9mo_SIGAE3_ | 0.06378909 | 0.3854371  | 6.30E-05 | 0.008216  | 0.14015    |
| 9mo_SIGAE3_ | 0.01778668 | 0.1015562  | 4.06E-05 | 0.0056572 | 0.046584   |
| 9mo_SIGAE3_ | 0.02096147 | 0.12114781 | 4.21E-05 | 0.0052798 | -0.037579  |
| 9mo_SIGAE3_ | 0.03004419 | 0.17719732 | 4.55E-05 | 0.0046645 | -0.12301   |
| 9mo_SIGAE3_ | 0.00460779 | 0.02022924 | 3.35E-05 | 0.0081345 | 0.58516    |
| 9mo_SIGAE3_ | 0.01262407 | 0.06969772 | 3.80E-05 | 0.0063994 | 0.21875    |
| 9mo_SIGAE3_ | 0.04135489 | 0.24699563 | 5.05E-05 | 0.0046492 | -0.054504  |
| 9mo_SIGAE3_ | 0.01245996 | 0.06868497 | 3.80E-05 | 0.0063994 | 0.21875    |
| 9mo_SIGAE3_ | 0.01018173 | 0.05462605 | 3.65E-05 | 0.0069072 | 0.33263    |
| 9mo_SIGAE3_ | 0.03579816 | 0.21270502 | 4.77E-05 | 0.0045615 | -0.096915  |
| 9mo_SIGAE3_ | 0.05100368 | 0.3065383  | 5.87E-05 | 0.0053288 | 0.0077602  |
| 9mo_SIGAE3_ | 0.01618697 | 0.0916844  | 3.98E-05 | 0.0058806 | 0.080526   |
| 9mo_SIGAE3_ | 0.05353849 | 0.3221806  | 6.05E-05 | 0.0056127 | 0.026054   |
| 9mo_SIGAE3_ | 0.01474457 | 0.08278333 | 3.92E-05 | 0.0060428 | 0.1363     |
| 9mo_SIGAE3_ | 0.05968851 | 0.36013243 | 6.37E-05 | 0.0069445 | 0.080679   |
| 9mo_SIGAE3_ | 0.01581787 | 0.08940666 | 3.98E-05 | 0.0058806 | 0.098494   |
| 9mo_SIGAE3_ | 0.0359378  | 0.21356675 | 4.77E-05 | 0.0045615 | -0.096915  |
| 9mo_SIGAE3_ | 0.02372641 | 0.13821027 | 4.32E-05 | 0.0050338 | -0.084895  |
| 9mo_SIGAE3_ | 0.0115488  | 0.06306224 | 3.74E-05 | 0.0065941 | 0.263      |
| 9mo_SIGAE3_ | 0.01223195 | 0.06727796 | 3.77E-05 | 0.0064954 | 0.24064    |
| 9mo_SIGAE3_ | 0.07949905 | 0.48238325 | 4.93E-05 | 0.014315  | 0.15946    |
| 9mo_SIGAE3_ | 0.01568759 | 0.0886027  | 3.95E-05 | 0.0059603 | 0.098494   |
| 9mo_SIGAE3_ | 0.03064593 | 0.18091066 | 4.57E-05 | 0.0046464 | -0.12245   |
| 9mo_SIGAE3_ | 0.0727712  | 0.4408657  | 5.49E-05 | 0.012637  | 0.24373    |
| 9mo_SIGAE3_ | 0.09404194 | 0.5721274  | 5.09E-05 | 0.0064439 | -0.82618   |
| 9mo_SIGAE3_ | 0.02813827 | 0.16543585 | 4.48E-05 | 0.0047558 | -0.12174   |
| 9mo_SIGAE3_ | 0.02525224 | 0.14762615 | 4.38E-05 | 0.0049138 | -0.10343   |
| 9mo_SIGAE3_ | 0.08320256 | 0.5052376  | 4.78E-05 | 0.013315  | -0.0045591 |
| 9mo_SIGAE3_ | 0.01765294 | 0.1007309  | 4.06E-05 | 0.0056572 | 0.046584   |
| 9mo_SIGAE3_ | 0.10139057 | 0.6174758  | 5.66E-05 | 0.0039398 | -1.2808    |
| 9mo_SIGAE3_ | 0.09389058 | 0.57119334 | 5.09E-05 | 0.0064439 | -0.7829    |
| 9mo_SIGAE3_ | 0.03073734 | 0.18147473 | 4.57E-05 | 0.0046464 | -0.12245   |
| 9mo_SIGAE3_ | 0.03747616 | 0.22305998 | 4.84E-05 | 0.0045696 | -0.084703  |
| 9mo_SIGAE3_ | 0.01515077 | 0.08528998 | 3.95E-05 | 0.0059603 | 0.11709    |
| 9mo_SIGAE3_ | 0.0331146  | 0.19614479 | 4.66E-05 | 0.0045822 | -0.11352   |
| 9mo_SIGAE3_ | 0.01106801 | 0.0600953  | 3.71E-05 | 0.0066957 | 0.2858     |
| 9mo_SIGAE3_ | 0.04308491 | 0.2576716  | 5.17E-05 | 0.0047101 | -0.042593  |
| 9mo_SIGAE3_ | 0.02080243 | 0.1201664  | 4.21E-05 | 0.0052798 | -0.037579  |

|             |            |            |          |           |           |
|-------------|------------|------------|----------|-----------|-----------|
| 9mo_SIGAE3_ | 0.02360464 | 0.13745886 | 4.32E-05 | 0.0050338 | -0.084895 |
| 9mo_SIGAE3_ | 0.01864373 | 0.10684503 | 4.11E-05 | 0.0055212 | 0.015459  |
| 9mo_SIGAE3_ | 0.02204015 | 0.12780434 | 4.26E-05 | 0.0051742 | -0.059109 |
| 9mo_SIGAE3_ | 0.03042306 | 0.17953533 | 4.57E-05 | 0.0046464 | -0.12245  |
| 9mo_SIGAE3_ | 0.00737423 | 0.03730094 | 3.50E-05 | 0.0074854 | 0.45576   |
| 9mo_SIGAE3_ | 0.0243842  | 0.14226949 | 4.36E-05 | 0.0049516 | -0.098011 |
| 9mo_SIGAE3_ | 0.08565836 | 0.52039236 | 4.76E-05 | 0.0117    | -0.14081  |
| 9mo_SIGAE3_ | 0.02833892 | 0.16667408 | 4.49E-05 | 0.0047302 | -0.12174  |
| 9mo_SIGAE3_ | 0.03385737 | 0.20072843 | 4.68E-05 | 0.0045746 | -0.11071  |
| 9mo_SIGAE3_ | 0.08515322 | 0.51727515 | 4.76E-05 | 0.012059  | -0.10433  |
| 9mo_SIGAE3_ | 0.00767595 | 0.03916289 | 3.53E-05 | 0.0073641 | 0.43054   |
| 9mo_SIGAE3_ | 0.01546809 | 0.08724818 | 3.95E-05 | 0.0059603 | 0.11709   |
| 9mo_SIGAE3_ | 0.01727898 | 0.09842318 | 4.03E-05 | 0.005729  | 0.046584  |
| 9mo_SIGAE3_ | 0.01267604 | 0.07001845 | 3.80E-05 | 0.0063994 | 0.21875   |
| 9mo_SIGAE3_ | 0.08802872 | 0.5350198  | 4.80E-05 | 0.010188  | -0.3415   |
| 9mo_SIGAE3_ | 0.09001971 | 0.54730624 | 4.88E-05 | 0.0086895 | -0.47194  |
| 9mo_SIGAE3_ | 0.07126802 | 0.43158957 | 5.65E-05 | 0.011849  | 0.23476   |
| 9mo_SIGAE3_ | 0.04779132 | 0.28671485 | 5.58E-05 | 0.0050083 | -0.01192  |
| 9mo_SIGAE3_ | 0.01651861 | 0.09373092 | 4.00E-05 | 0.0058035 | 0.080526  |
| 9mo_SIGAE3_ | 0.0103367  | 0.05558238 | 3.68E-05 | 0.0068    | 0.30902   |
| 9mo_SIGAE3_ | 0.0161056  | 0.09118227 | 3.98E-05 | 0.0058806 | 0.098494  |
| 9mo_SIGAE3_ | 0.02735858 | 0.16062441 | 4.46E-05 | 0.0047834 | -0.11816  |
| 9mo_SIGAE3_ | 0.02724898 | 0.15994808 | 4.46E-05 | 0.0047834 | -0.11816  |
| 9mo_SIGAE3_ | 0.03116406 | 0.18410803 | 4.58E-05 | 0.00463   | -0.12145  |
| 9mo_SIGAE3_ | 0.0235233  | 0.1369569  | 4.32E-05 | 0.0050338 | -0.084895 |
| 9mo_SIGAE3_ | 0.03786352 | 0.2254504  | 4.84E-05 | 0.0045696 | -0.080425 |
| 9mo_SIGAE3_ | 0.0077002  | 0.03931251 | 3.53E-05 | 0.0073641 | 0.43054   |
| 9mo_SIGAE3_ | 0.01114458 | 0.06056779 | 3.71E-05 | 0.0066957 | 0.2858    |
| 9mo_SIGAE3_ | 0.03687098 | 0.21932538 | 4.81E-05 | 0.0045652 | -0.088896 |
| 9mo_SIGAE3_ | 0.0074894  | 0.03801164 | 3.50E-05 | 0.0074854 | 0.45576   |
| 9mo_SIGAE3_ | 0.0096823  | 0.05154406 | 3.62E-05 | 0.0070172 | 0.35661   |
| 9mo_SIGAE3_ | 0.06759461 | 0.40892094 | 6.03E-05 | 0.009922  | 0.19812   |
| 9mo_SIGAE3_ | 0.01418528 | 0.07933194 | 3.89E-05 | 0.0061278 | 0.1561    |
| 9mo_SIGAE3_ | 0.0743803  | 0.45079544 | 5.33E-05 | 0.013335  | 0.24406   |
| 9mo_SIGAE3_ | 0.08575887 | 0.5210126  | 4.76E-05 | 0.0117    | -0.14081  |
| 9mo_SIGAE3_ | 0.04078063 | 0.24345186 | 5.02E-05 | 0.0046325 | -0.058715 |
| 9mo_SIGAE3_ | 0.02232278 | 0.12954845 | 4.28E-05 | 0.005125  | -0.068556 |
| 9mo_SIGAE3_ | 0.04326931 | 0.2588095  | 5.17E-05 | 0.0047101 | -0.038876 |
| 9mo_SIGAE3_ | 0.08181078 | 0.49664894 | 4.83E-05 | 0.013957  | 0.078055  |
| 9mo_SIGAE3_ | 0.01310466 | 0.07266347 | 3.83E-05 | 0.0063061 | 0.19734   |
| 9mo_SIGAE3_ | 0.01980669 | 0.11402166 | 4.16E-05 | 0.0053955 | -0.012659 |
| 9mo_SIGAE3_ | 0.02708653 | 0.15894558 | 4.46E-05 | 0.0047834 | -0.11816  |
| 9mo_SIGAE3_ | 0.02597434 | 0.15208223 | 4.40E-05 | 0.0048781 | -0.11213  |

|             |            |            |          |           |           |
|-------------|------------|------------|----------|-----------|-----------|
| 9mo_SIGAE3_ | 0.01777941 | 0.10151135 | 4.06E-05 | 0.0056572 | 0.046584  |
| 9mo_SIGAE3_ | 0.02889628 | 0.17011353 | 4.51E-05 | 0.0047064 | -0.12268  |
| 9mo_SIGAE3_ | 0.01172235 | 0.0641332  | 3.74E-05 | 0.0065941 | 0.263     |
| 9mo_SIGAE3_ | 0.03422989 | 0.20302726 | 4.70E-05 | 0.0045688 | -0.10761  |
| 9mo_SIGAE3_ | 0.01784478 | 0.10191475 | 4.06E-05 | 0.0056572 | 0.030658  |
| 9mo_SIGAE3_ | 0.00716658 | 0.03601955 | 3.50E-05 | 0.0074854 | 0.45576   |
| 9mo_SIGAE3_ | 0.01913646 | 0.10988569 | 4.14E-05 | 0.0054571 | 0.0010121 |
| 9mo_SIGAE3_ | 0.05265076 | 0.31670246 | 6.01E-05 | 0.0055357 | 0.018414  |
| 9mo_SIGAE3_ | 0.01729426 | 0.09851746 | 4.03E-05 | 0.005729  | 0.046584  |
| 9mo_SIGAE3_ | 0.02746866 | 0.16130371 | 4.46E-05 | 0.0047834 | -0.11816  |
| 9mo_SIGAE3_ | 0.07112689 | 0.43071866 | 5.65E-05 | 0.011849  | 0.23476   |
| 9mo_SIGAE3_ | 0.00834406 | 0.04328578 | 3.56E-05 | 0.0072456 | 0.40559   |
| 9mo_SIGAE3_ | 0.07879212 | 0.4780208  | 4.97E-05 | 0.014318  | 0.18889   |
| 9mo_SIGAE3_ | 0.01333661 | 0.07409481 | 3.83E-05 | 0.0063061 | 0.19734   |
| 9mo_SIGAE3_ | 0.08516077 | 0.5173217  | 4.76E-05 | 0.012059  | -0.10433  |
| 9mo_SIGAE3_ | 0.01161461 | 0.06346836 | 3.74E-05 | 0.0065941 | 0.263     |
| 9mo_SIGAE3_ | 0.03659663 | 0.2176324  | 4.79E-05 | 0.0045625 | -0.092976 |
| 9mo_SIGAE3_ | 0.03323255 | 0.19687267 | 4.66E-05 | 0.0045822 | -0.11352  |
| 9mo_SIGAE3_ | 0.01203537 | 0.06606484 | 3.77E-05 | 0.0064954 | 0.24064   |
| 9mo_SIGAE3_ | 0.05212314 | 0.31344652 | 5.97E-05 | 0.0054628 | 0.014768  |
| 9mo_SIGAE3_ | 0.06213794 | 0.3752478  | 6.36E-05 | 0.0076138 | 0.11565   |
| 9mo_SIGAE3_ | 0.08379818 | 0.50891316 | 4.77E-05 | 0.013036  | -0.036078 |
| 9mo_SIGAE3_ | 0.01689624 | 0.09606127 | 4.03E-05 | 0.005729  | 0.063215  |
| 9mo_SIGAE3_ | 0.01492408 | 0.08389108 | 3.92E-05 | 0.0060428 | 0.1363    |
| 9mo_SIGAE3_ | 0.02006085 | 0.11559008 | 4.19E-05 | 0.0053364 | -0.025531 |
| 9mo_SIGAE3_ | 0.00638149 | 0.03117473 | 3.44E-05 | 0.0077366 | 0.50694   |
| 9mo_SIGAE3_ | 0.02609744 | 0.15284191 | 4.42E-05 | 0.0048445 | -0.11213  |
| 9mo_SIGAE3_ | 0.07475618 | 0.453115   | 5.33E-05 | 0.013335  | 0.24193   |
| 9mo_SIGAE3_ | 0.07564633 | 0.45860815 | 5.23E-05 | 0.013721  | 0.23393   |
| 9mo_SIGAE3_ | 0.07756576 | 0.47045293 | 5.05E-05 | 0.014229  | 0.21153   |
| 9mo_SIGAE3_ | 0.09830432 | 0.5984305  | 5.40E-05 | 0.0046955 | -1.1375   |
| 9mo_SIGAE3_ | 0.0238186  | 0.13877921 | 4.32E-05 | 0.0050338 | -0.091842 |
| 9mo_SIGAE3_ | 0.09086097 | 0.5524976  | 4.91E-05 | 0.0083333 | -0.56091  |
| 9mo_SIGAE3_ | 0.05974457 | 0.36047834 | 6.37E-05 | 0.0069445 | 0.080679  |
| 9mo_SIGAE3_ | 0.01372389 | 0.0764847  | 3.86E-05 | 0.0062156 | 0.17645   |
| 9mo_SIGAE3_ | 0.0121969  | 0.06706163 | 3.77E-05 | 0.0064954 | 0.24064   |
| 9mo_SIGAE3_ | 0.02781933 | 0.16346772 | 4.48E-05 | 0.0047558 | -0.12024  |
| 9mo_SIGAE3_ | 0.02611161 | 0.15292938 | 4.42E-05 | 0.0048445 | -0.11213  |
| 9mo_SIGAE3_ | 0.01956543 | 0.11253284 | 4.16E-05 | 0.0053955 | -0.012659 |
| 9mo_SIGAE3_ | 0.02087151 | 0.12059271 | 4.21E-05 | 0.0052798 | -0.037579 |
| 9mo_SIGAE3_ | 0.0248144  | 0.14492425 | 4.36E-05 | 0.0049516 | -0.098011 |
| 9mo_SIGAE3_ | 0.02252349 | 0.13078706 | 4.28E-05 | 0.005125  | -0.068556 |
| 9mo_SIGAE3_ | 0.07785194 | 0.47221893 | 5.05E-05 | 0.014229  | 0.20103   |

|             |            |            |          |           |            |
|-------------|------------|------------|----------|-----------|------------|
| 9mo_SIGAE3_ | 0.02223494 | 0.12900643 | 4.28E-05 | 0.005125  | -0.068556  |
| 9mo_SIGAE3_ | 0.02121801 | 0.12273091 | 4.24E-05 | 0.0052258 | -0.04878   |
| 9mo_SIGAE3_ | 0.03845703 | 0.22911292 | 4.89E-05 | 0.0045836 | -0.076088  |
| 9mo_SIGAE3_ | 0.08136494 | 0.49389765 | 4.83E-05 | 0.013957  | 0.10139    |
| 9mo_SIGAE3_ | 0.02046287 | 0.11807098 | 4.19E-05 | 0.0053364 | -0.025531  |
| 9mo_SIGAE3_ | 0.01645049 | 0.09331054 | 4.00E-05 | 0.0058035 | 0.080526   |
| 9mo_SIGAE3_ | 0.02559848 | 0.14976282 | 4.40E-05 | 0.0048781 | -0.10813   |
| 9mo_SIGAE3_ | 0.03406683 | 0.202021   | 4.68E-05 | 0.0045746 | -0.10761   |
| 9mo_SIGAE3_ | 0.08219011 | 0.4989898  | 4.81E-05 | 0.013778  | 0.05262    |
| 9mo_SIGAE3_ | 0.01165884 | 0.06374131 | 3.74E-05 | 0.0065941 | 0.263      |
| 9mo_SIGAE3_ | 0.0434298  | 0.2597999  | 5.21E-05 | 0.0047343 | -0.038876  |
| 9mo_SIGAE3_ | 0.07923652 | 0.4807632  | 4.93E-05 | 0.014315  | 0.17506    |
| 9mo_SIGAE3_ | 0.02585994 | 0.15137629 | 4.40E-05 | 0.0048781 | -0.10813   |
| 9mo_SIGAE3_ | 0.0826754  | 0.5019845  | 4.79E-05 | 0.013563  | 0.02505    |
| 9mo_SIGAE3_ | 0.08528126 | 0.5180653  | 4.76E-05 | 0.012059  | -0.10433   |
| 9mo_SIGAE3_ | 0.09285108 | 0.5647786  | 5.02E-05 | 0.0070215 | -0.69483   |
| 9mo_SIGAE3_ | 0.02114149 | 0.12225872 | 4.24E-05 | 0.0052258 | -0.04878   |
| 9mo_SIGAE3_ | 0.01145505 | 0.06248371 | 3.74E-05 | 0.0065941 | 0.263      |
| 9mo_SIGAE3_ | 0.01922181 | 0.1104124  | 4.14E-05 | 0.0054571 | 0.0010121  |
| 9mo_SIGAE3_ | 0.08335502 | 0.50617844 | 4.78E-05 | 0.013315  | -0.0045591 |
| 9mo_SIGAE3_ | 0.01387217 | 0.07739976 | 3.86E-05 | 0.0062156 | 0.17645    |
| 9mo_SIGAE3_ | 0.08365641 | 0.5080383  | 4.77E-05 | 0.013036  | -0.0045591 |
| 9mo_SIGAE3_ | 0.00452926 | 0.01974463 | 3.35E-05 | 0.0081345 | 0.58516    |
| 9mo_SIGAE3_ | 0.04093714 | 0.24441767 | 5.02E-05 | 0.0046325 | -0.058715  |
| 9mo_SIGAE3_ | 0.01653117 | 0.09380841 | 4.00E-05 | 0.0058035 | 0.080526   |
| 9mo_SIGAE3_ | 0.02838445 | 0.16695502 | 4.49E-05 | 0.0047302 | -0.12174   |
| 9mo_SIGAE3_ | 0.08177107 | 0.49640387 | 4.83E-05 | 0.013957  | 0.078055   |
| 9mo_SIGAE3_ | 0.08088292 | 0.49092314 | 4.85E-05 | 0.0141    | 0.12269    |
| 9mo_SIGAE3_ | 0.02947979 | 0.17371435 | 4.53E-05 | 0.0046846 | -0.1231    |
| 9mo_SIGAE3_ | 0.01945879 | 0.11187478 | 4.14E-05 | 0.0054571 | -0.012659  |
| 9mo_SIGAE3_ | 0.00851003 | 0.04430996 | 3.56E-05 | 0.0072456 | 0.40559    |
| 9mo_SIGAE3_ | 0.08242799 | 0.50045776 | 4.79E-05 | 0.013563  | 0.05262    |
| 9mo_SIGAE3_ | 0.03415472 | 0.20256336 | 4.70E-05 | 0.0045688 | -0.10761   |
| 9mo_SIGAE3_ | 0.01069692 | 0.05780525 | 3.68E-05 | 0.0068    | 0.30902    |
| 9mo_SIGAE3_ | 0.01307716 | 0.07249372 | 3.83E-05 | 0.0063061 | 0.19734    |
| 9mo_SIGAE3_ | 0.02053037 | 0.1184875  | 4.19E-05 | 0.0053364 | -0.037579  |
| 9mo_SIGAE3_ | 0.02053904 | 0.11854101 | 4.19E-05 | 0.0053364 | -0.037579  |
| 9mo_SIGAE3_ | 0.0793232  | 0.48129806 | 4.93E-05 | 0.014315  | 0.17506    |
| 9mo_SIGAE3_ | 0.09198905 | 0.55945903 | 4.96E-05 | 0.0076529 | -0.6503    |
| 9mo_SIGAE3_ | 0.02084903 | 0.12045394 | 4.21E-05 | 0.0052798 | -0.037579  |
| 9mo_SIGAE3_ | 0.02136849 | 0.12365954 | 4.24E-05 | 0.0052258 | -0.04878   |
| 9mo_SIGAE3_ | 0.06928287 | 0.41933918 | 5.87E-05 | 0.010741  | 0.21895    |
| 9mo_SIGAE3_ | 0.08778987 | 0.5335459  | 4.80E-05 | 0.010188  | -0.29935   |

|             |            |            |          |           |            |
|-------------|------------|------------|----------|-----------|------------|
| 9mo_SIGAE3_ | 0.01676505 | 0.09525172 | 4.00E-05 | 0.0058035 | 0.063215   |
| 9mo_SIGAE3_ | 0.02756921 | 0.16192421 | 4.46E-05 | 0.0047834 | -0.12024   |
| 9mo_SIGAE3_ | 0.08424161 | 0.5116496  | 4.76E-05 | 0.012731  | -0.036078  |
| 9mo_SIGAE3_ | 0.01110668 | 0.06033389 | 3.71E-05 | 0.0066957 | 0.2858     |
| 9mo_SIGAE3_ | 0.01507412 | 0.08481696 | 3.92E-05 | 0.0060428 | 0.1363     |
| 9mo_SIGAE3_ | 0.00280762 | 0.0091204  | 3.26E-05 | 0.0085576 | 0.66457    |
| 9mo_SIGAE3_ | 0.02521835 | 0.14741701 | 4.38E-05 | 0.0049138 | -0.10343   |
| 9mo_SIGAE3_ | 0.01452987 | 0.08145843 | 3.89E-05 | 0.0061278 | 0.1561     |
| 9mo_SIGAE3_ | 0.08220192 | 0.49906266 | 4.81E-05 | 0.013778  | 0.05262    |
| 9mo_SIGAE3_ | 0.02731411 | 0.16034995 | 4.46E-05 | 0.0047834 | -0.11816   |
| 9mo_SIGAE3_ | 0.01307817 | 0.07249995 | 3.83E-05 | 0.0063061 | 0.19734    |
| 9mo_SIGAE3_ | 0.01526999 | 0.0860257  | 3.95E-05 | 0.0059603 | 0.11709    |
| 9mo_SIGAE3_ | 0.03206843 | 0.18968888 | 4.62E-05 | 0.0046026 | -0.11821   |
| 9mo_SIGAE3_ | 0.06340049 | 0.38303906 | 6.30E-05 | 0.008216  | 0.13178    |
| 9mo_SIGAE3_ | 0.07799354 | 0.47309273 | 5.05E-05 | 0.014229  | 0.20103    |
| 9mo_SIGAE3_ | 0.01113549 | 0.06051171 | 3.71E-05 | 0.0066957 | 0.2858     |
| 9mo_SIGAE3_ | 0.0245554  | 0.14332595 | 4.36E-05 | 0.0049516 | -0.098011  |
| 9mo_SIGAE3_ | 0.01674029 | 0.09509893 | 4.00E-05 | 0.0058035 | 0.063215   |
| 9mo_SIGAE3_ | 0.0183958  | 0.10531507 | 4.09E-05 | 0.0055879 | 0.015459   |
| 9mo_SIGAE3_ | 0.04678007 | 0.2804744  | 5.49E-05 | 0.0049251 | -0.018376  |
| 9mo_SIGAE3_ | 0.01739791 | 0.09915706 | 4.06E-05 | 0.0056572 | 0.046584   |
| 9mo_SIGAE3_ | 0.02055367 | 0.11863129 | 4.19E-05 | 0.0053364 | -0.037579  |
| 9mo_SIGAE3_ | 0.03050718 | 0.18005438 | 4.57E-05 | 0.0046464 | -0.12245   |
| 9mo_SIGAE3_ | 0.02739827 | 0.16086935 | 4.46E-05 | 0.0047834 | -0.11816   |
| 9mo_SIGAE3_ | 0.02759767 | 0.16209984 | 4.46E-05 | 0.0047834 | -0.12024   |
| 9mo_SIGAE3_ | 0.02111095 | 0.12207027 | 4.21E-05 | 0.0052798 | -0.04878   |
| 9mo_SIGAE3_ | 0.03238596 | 0.19164836 | 4.62E-05 | 0.0046026 | -0.11821   |
| 9mo_SIGAE3_ | 0.0242876  | 0.1416734  | 4.34E-05 | 0.0049916 | -0.091842  |
| 9mo_SIGAE3_ | 0.04835057 | 0.290166   | 5.63E-05 | 0.005054  | -0.0087048 |
| 9mo_SIGAE3_ | 0.05308447 | 0.31937888 | 6.01E-05 | 0.0055357 | 0.022172   |
| 9mo_SIGAE3_ | 0.071068   | 0.43035528 | 5.65E-05 | 0.011849  | 0.23476    |
| 9mo_SIGAE3_ | 0.00968629 | 0.05156869 | 3.62E-05 | 0.0070172 | 0.35661    |
| 9mo_SIGAE3_ | 0.08342968 | 0.5066391  | 4.78E-05 | 0.013315  | -0.0045591 |
| 9mo_SIGAE3_ | 0.0333959  | 0.19788069 | 4.66E-05 | 0.0045822 | -0.11352   |
| 9mo_SIGAE3_ | 0.02397112 | 0.13972038 | 4.34E-05 | 0.0049916 | -0.091842  |
| 9mo_SIGAE3_ | 0.02472304 | 0.14436048 | 4.36E-05 | 0.0049516 | -0.098011  |
| 9mo_SIGAE3_ | 0.02908691 | 0.17128989 | 4.51E-05 | 0.0047064 | -0.12268   |
| 9mo_SIGAE3_ | 0.03029571 | 0.17874944 | 4.55E-05 | 0.0046645 | -0.12245   |
| 9mo_SIGAE3_ | 0.01496623 | 0.08415121 | 3.92E-05 | 0.0060428 | 0.1363     |
| 9mo_SIGAE3_ | 0.01394012 | 0.07781909 | 3.86E-05 | 0.0062156 | 0.17645    |
| 9mo_SIGAE3_ | 0.01697092 | 0.09652215 | 4.03E-05 | 0.005729  | 0.063215   |
| 9mo_SIGAE3_ | 0.01099963 | 0.05967327 | 3.71E-05 | 0.0066957 | 0.2858     |
| 9mo_SIGAE3_ | 0.03069592 | 0.18121913 | 4.57E-05 | 0.0046464 | -0.12245   |



|             |            |            |          |           |           |
|-------------|------------|------------|----------|-----------|-----------|
| 9mo_SIGAE3_ | 0.00830225 | 0.04302779 | 3.56E-05 | 0.0072456 | 0.40559   |
| 9mo_SIGAE3_ | 0.01592126 | 0.09004466 | 3.98E-05 | 0.0058806 | 0.098494  |
| 9mo_SIGAE3_ | 0.01185163 | 0.06493098 | 3.74E-05 | 0.0065941 | 0.263     |
| 9mo_SIGAE3_ | 0.03119004 | 0.18426836 | 4.58E-05 | 0.00463   | -0.12145  |
| 9mo_SIGAE3_ | 0.00831639 | 0.04311502 | 3.56E-05 | 0.0072456 | 0.40559   |
| 9mo_SIGAE3_ | 0.01826946 | 0.10453546 | 4.09E-05 | 0.0055879 | 0.030658  |
| 9mo_SIGAE3_ | 0.08156437 | 0.49512836 | 4.83E-05 | 0.013957  | 0.078055  |
| 9mo_SIGAE3_ | 0.0797068  | 0.48366526 | 4.90E-05 | 0.014278  | 0.15946   |
| 9mo_SIGAE3_ | 0.01545859 | 0.08718951 | 3.95E-05 | 0.0059603 | 0.11709   |
| 9mo_SIGAE3_ | 0.01840637 | 0.1053803  | 4.11E-05 | 0.0055212 | 0.015459  |
| 9mo_SIGAE3_ | 0.0716252  | 0.43379375 | 5.60E-05 | 0.012118  | 0.2386    |
| 9mo_SIGAE3_ | 0.01940597 | 0.11154881 | 4.14E-05 | 0.0054571 | 0.0010121 |
| 9mo_SIGAE3_ | 0.01949734 | 0.11211269 | 4.16E-05 | 0.0053955 | -0.012659 |
| 9mo_SIGAE3_ | 0.01501491 | 0.0844516  | 3.92E-05 | 0.0060428 | 0.1363    |
| 9mo_SIGAE3_ | 0.04373476 | 0.26168177 | 5.21E-05 | 0.0047343 | -0.035266 |
| 9mo_SIGAE3_ | 0.01414704 | 0.079096   | 3.89E-05 | 0.0061278 | 0.1561    |
| 9mo_SIGAE3_ | 0.00860517 | 0.0448971  | 3.56E-05 | 0.0072456 | 0.40559   |
| 9mo_SIGAE3_ | 0.03972959 | 0.23696591 | 4.95E-05 | 0.0046046 | -0.067351 |
| 9mo_SIGAE3_ | 0.02040471 | 0.11771204 | 4.19E-05 | 0.0053364 | -0.025531 |
| 9mo_SIGAE3_ | 0.02050748 | 0.11834627 | 4.19E-05 | 0.0053364 | -0.037579 |
| 9mo_SIGAE3_ | 0.01049252 | 0.05654391 | 3.68E-05 | 0.0068    | 0.30902   |
| 9mo_SIGAE3_ | 0.07690848 | 0.46639684 | 5.13E-05 | 0.014025  | 0.22047   |
| 9mo_SIGAE3_ | 0.01311086 | 0.07270169 | 3.83E-05 | 0.0063061 | 0.19734   |
| 9mo_SIGAE3_ | 0.02351925 | 0.13693191 | 4.32E-05 | 0.0050338 | -0.084895 |
| 9mo_SIGAE3_ | 0.03985758 | 0.23775572 | 4.95E-05 | 0.0046046 | -0.067351 |
| 9mo_SIGAE3_ | 0.02701358 | 0.15849541 | 4.44E-05 | 0.004813  | -0.11816  |
| 9mo_SIGAE3_ | 0.02845986 | 0.16742039 | 4.49E-05 | 0.0047302 | -0.12174  |
| 9mo_SIGAE3_ | 0.03251341 | 0.19243488 | 4.64E-05 | 0.0045915 | -0.11603  |
| 9mo_SIGAE3_ | 0.09286346 | 0.564855   | 5.02E-05 | 0.0070215 | -0.69483  |
| 9mo_SIGAE3_ | 0.02114436 | 0.12227644 | 4.24E-05 | 0.0052258 | -0.04878  |
| 9mo_SIGAE3_ | 0.03180381 | 0.18805592 | 4.60E-05 | 0.0046154 | -0.12002  |
| 9mo_SIGAE3_ | 0.02618397 | 0.15337588 | 4.42E-05 | 0.0048445 | -0.11213  |
| 9mo_SIGAE3_ | 0.00601264 | 0.02889856 | 3.44E-05 | 0.0077366 | 0.50694   |
| 9mo_SIGAE3_ | 0.08074687 | 0.49008355 | 4.85E-05 | 0.0141    | 0.12269   |
| 9mo_SIGAE3_ | 0.01940786 | 0.11156048 | 4.14E-05 | 0.0054571 | 0.0010121 |
| 9mo_SIGAE3_ | 0.01431544 | 0.08013517 | 3.89E-05 | 0.0061278 | 0.1561    |
| 9mo_SIGAE3_ | 0.05043544 | 0.3030317  | 5.83E-05 | 0.0052672 | 0.0043724 |
| 9mo_SIGAE3_ | 0.02232781 | 0.12957954 | 4.28E-05 | 0.005125  | -0.068556 |
| 9mo_SIGAE3_ | 0.08255926 | 0.5012678  | 4.79E-05 | 0.013563  | 0.05262   |
| 9mo_SIGAE3_ | 0.03496693 | 0.20757554 | 4.72E-05 | 0.0045646 | -0.10426  |
| 9mo_SIGAE3_ | 0.0728337  | 0.4412514  | 5.49E-05 | 0.012637  | 0.24373   |
| 9mo_SIGAE3_ | 0.04171382 | 0.24921058 | 5.09E-05 | 0.0046676 | -0.0504   |
| 9mo_SIGAE3_ | 0.02657368 | 0.15578079 | 4.44E-05 | 0.004813  | -0.11546  |

|             |            |            |          |           |            |
|-------------|------------|------------|----------|-----------|------------|
| 9mo_SIGAE3_ | 0.02460772 | 0.14364885 | 4.36E-05 | 0.0049516 | -0.098011  |
| 9mo_SIGAE3_ | 0.0783643  | 0.4753807  | 5.01E-05 | 0.014289  | 0.18889    |
| 9mo_SIGAE3_ | 0.01500463 | 0.08438817 | 3.92E-05 | 0.0060428 | 0.1363     |
| 9mo_SIGAE3_ | 0.0236455  | 0.13771097 | 4.32E-05 | 0.0050338 | -0.084895  |
| 9mo_SIGAE3_ | 0.02752372 | 0.1616435  | 4.46E-05 | 0.0047834 | -0.11816   |
| 9mo_SIGAE3_ | 0.01697743 | 0.0965623  | 4.03E-05 | 0.005729  | 0.063215   |
| 9mo_SIGAE3_ | 0.0369748  | 0.21996608 | 4.81E-05 | 0.0045652 | -0.088896  |
| 9mo_SIGAE3_ | 0.01521904 | 0.08571129 | 3.95E-05 | 0.0059603 | 0.11709    |
| 9mo_SIGAE3_ | 0.02084096 | 0.12040417 | 4.21E-05 | 0.0052798 | -0.037579  |
| 9mo_SIGAE3_ | 0.06804076 | 0.41167414 | 5.98E-05 | 0.010192  | 0.20551    |
| 9mo_SIGAE3_ | 0.01648371 | 0.09351556 | 4.00E-05 | 0.0058035 | 0.080526   |
| 9mo_SIGAE3_ | 0.02081813 | 0.12026327 | 4.21E-05 | 0.0052798 | -0.037579  |
| 9mo_SIGAE3_ | 0.07307407 | 0.44273466 | 5.49E-05 | 0.012637  | 0.24489    |
| 9mo_SIGAE3_ | 0.05900428 | 0.35591003 | 6.35E-05 | 0.0066597 | 0.074574   |
| 9mo_SIGAE3_ | 0.08309792 | 0.5045919  | 4.78E-05 | 0.013315  | 0.02505    |
| 9mo_SIGAE3_ | 0.05614611 | 0.33827224 | 6.24E-05 | 0.0060668 | 0.043089   |
| 9mo_SIGAE3_ | 0.01320439 | 0.0732789  | 3.83E-05 | 0.0063061 | 0.19734    |
| 9mo_SIGAE3_ | 0.02887176 | 0.16996223 | 4.51E-05 | 0.0047064 | -0.12268   |
| 9mo_SIGAE3_ | 0.04821498 | 0.28932923 | 5.63E-05 | 0.005054  | -0.0087048 |
| 9mo_SIGAE3_ | 0.03323577 | 0.19689256 | 4.66E-05 | 0.0045822 | -0.11352   |
| 9mo_SIGAE3_ | 0.01070391 | 0.05784843 | 3.68E-05 | 0.0068    | 0.30902    |
| 9mo_SIGAE3_ | 0.01672732 | 0.09501887 | 4.00E-05 | 0.0058035 | 0.063215   |
| 9mo_SIGAE3_ | 0.01982035 | 0.11410596 | 4.16E-05 | 0.0053955 | -0.012659  |
| 9mo_SIGAE3_ | 0.02119977 | 0.12261839 | 4.24E-05 | 0.0052258 | -0.04878   |
| 9mo_SIGAE3_ | 0.06835216 | 0.41359583 | 5.93E-05 | 0.010465  | 0.20551    |
| 9mo_SIGAE3_ | 0.02940997 | 0.1732835  | 4.53E-05 | 0.0046846 | -0.1231    |
| 9mo_SIGAE3_ | 0.05561059 | 0.33496758 | 6.21E-05 | 0.005966  | 0.038579   |
| 9mo_SIGAE3_ | 0.07839733 | 0.4755845  | 5.01E-05 | 0.014289  | 0.18889    |
| 9mo_SIGAE3_ | 0.07707909 | 0.46744967 | 5.09E-05 | 0.014141  | 0.22047    |
| 9mo_SIGAE3_ | 0.03830616 | 0.2281819  | 4.87E-05 | 0.0045758 | -0.080425  |
| 9mo_SIGAE3_ | 0.02738798 | 0.16080582 | 4.46E-05 | 0.0047834 | -0.11816   |
| 9mo_SIGAE3_ | 0.02185153 | 0.12664041 | 4.26E-05 | 0.0051742 | -0.059109  |
| 9mo_SIGAE3_ | 0.05735529 | 0.34573412 | 6.30E-05 | 0.0062853 | 0.057806   |
| 9mo_SIGAE3_ | 0.03742534 | 0.22274637 | 4.84E-05 | 0.0045696 | -0.084703  |
| 9mo_SIGAE3_ | 0.01511535 | 0.08507142 | 3.92E-05 | 0.0060428 | 0.11709    |
| 9mo_SIGAE3_ | 0.01803155 | 0.1030673  | 4.09E-05 | 0.0055879 | 0.030658   |
| 9mo_SIGAE3_ | 0.04780528 | 0.28680095 | 5.58E-05 | 0.0050083 | -0.01192   |
| 9mo_SIGAE3_ | 0.08301428 | 0.5040757  | 4.78E-05 | 0.013315  | 0.02505    |
| 9mo_SIGAE3_ | 0.01327171 | 0.0736943  | 3.83E-05 | 0.0063061 | 0.19734    |
| 9mo_SIGAE3_ | 0.01122525 | 0.0610656  | 3.71E-05 | 0.0066957 | 0.2858     |
| 9mo_SIGAE3_ | 0.02304465 | 0.13400316 | 4.30E-05 | 0.0050782 | -0.077142  |
| 9mo_SIGAE3_ | 0.01619507 | 0.09173435 | 3.98E-05 | 0.0058806 | 0.080526   |
| 9mo_SIGAE3_ | 0.01347899 | 0.07497342 | 3.83E-05 | 0.0063061 | 0.19734    |

|             |            |            |          |           |           |
|-------------|------------|------------|----------|-----------|-----------|
| 9mo_SIGAE3_ | 0.03453226 | 0.20489316 | 4.70E-05 | 0.0045688 | -0.10761  |
| 9mo_SIGAE3_ | 0.09540435 | 0.5805348  | 5.20E-05 | 0.0056833 | -0.91061  |
| 9mo_SIGAE3_ | 0.09342667 | 0.5683306  | 5.06E-05 | 0.0067258 | -0.73907  |
| 9mo_SIGAE3_ | 0.01737841 | 0.09903672 | 4.06E-05 | 0.0056572 | 0.046584  |
| 9mo_SIGAE3_ | 0.01563346 | 0.08826867 | 3.95E-05 | 0.0059603 | 0.11709   |
| 9mo_SIGAE3_ | 0.00822379 | 0.04254358 | 3.56E-05 | 0.0072456 | 0.40559   |
| 9mo_SIGAE3_ | 0.01856668 | 0.10636955 | 4.11E-05 | 0.0055212 | 0.015459  |
| 9mo_SIGAE3_ | 0.03246871 | 0.19215901 | 4.62E-05 | 0.0046026 | -0.11603  |
| 9mo_SIGAE3_ | 0.02010354 | 0.11585354 | 4.19E-05 | 0.0053364 | -0.025531 |
| 9mo_SIGAE3_ | 0.02299736 | 0.13371134 | 4.30E-05 | 0.0050782 | -0.077142 |
| 9mo_SIGAE3_ | 0.03873145 | 0.2308064  | 4.89E-05 | 0.0045836 | -0.076088 |
| 9mo_SIGAE3_ | 0.04796575 | 0.28779128 | 5.58E-05 | 0.0050083 | -0.01192  |
| 9mo_SIGAE3_ | 0.0207978  | 0.12013783 | 4.21E-05 | 0.0052798 | -0.037579 |
| 9mo_SIGAE3_ | 0.02085582 | 0.12049589 | 4.21E-05 | 0.0052798 | -0.037579 |
| 9mo_SIGAE3_ | 0.03455718 | 0.20504692 | 4.70E-05 | 0.0045688 | -0.10426  |
| 9mo_SIGAE3_ | 0.03309273 | 0.19600981 | 4.66E-05 | 0.0045822 | -0.11352  |
| 9mo_SIGAE3_ | 0.03156447 | 0.18657897 | 4.60E-05 | 0.0046154 | -0.12002  |
| 9mo_SIGAE3_ | 0.01414323 | 0.07907248 | 3.89E-05 | 0.0061278 | 0.1561    |
| 9mo_SIGAE3_ | 0.08182299 | 0.4967243  | 4.81E-05 | 0.013778  | 0.078055  |
| 9mo_SIGAE3_ | 0.07631698 | 0.46274668 | 5.18E-05 | 0.013885  | 0.22792   |
| 9mo_SIGAE3_ | 0.01072924 | 0.05800469 | 3.68E-05 | 0.0068    | 0.30902   |
| 9mo_SIGAE3_ | 0.02654726 | 0.15561777 | 4.44E-05 | 0.004813  | -0.11546  |
| 9mo_SIGAE3_ | 0.08156002 | 0.49510148 | 4.83E-05 | 0.013957  | 0.078055  |
| 9mo_SIGAE3_ | 0.01751031 | 0.09985073 | 4.06E-05 | 0.0056572 | 0.046584  |
| 9mo_SIGAE3_ | 0.04698681 | 0.2817502  | 5.49E-05 | 0.0049251 | -0.01514  |
| 9mo_SIGAE3_ | 0.02224913 | 0.129094   | 4.28E-05 | 0.005125  | -0.068556 |
| 9mo_SIGAE3_ | 0.02752727 | 0.16166537 | 4.46E-05 | 0.0047834 | -0.11816  |
| 9mo_SIGAE3_ | 0.01554304 | 0.08771069 | 3.95E-05 | 0.0059603 | 0.11709   |
| 9mo_SIGAE3_ | 0.01714074 | 0.09757008 | 4.03E-05 | 0.005729  | 0.063215  |
| 9mo_SIGAE3_ | 0.01860203 | 0.1065877  | 4.11E-05 | 0.0055212 | 0.015459  |
| 9mo_SIGAE3_ | 0.09056077 | 0.5506451  | 4.91E-05 | 0.0083333 | -0.51631  |
| 9mo_SIGAE3_ | 0.0220588  | 0.12791947 | 4.26E-05 | 0.0051742 | -0.059109 |
| 9mo_SIGAE3_ | 0.01004964 | 0.05381088 | 3.65E-05 | 0.0069072 | 0.33263   |
| 9mo_SIGAE3_ | 0.03831482 | 0.22823538 | 4.87E-05 | 0.0045758 | -0.080425 |
| 9mo_SIGAE3_ | 0.02606215 | 0.1526241  | 4.42E-05 | 0.0048445 | -0.11213  |
| 9mo_SIGAE3_ | 0.01357948 | 0.07559357 | 3.86E-05 | 0.0062156 | 0.17645   |
| 9mo_SIGAE3_ | 0.01120619 | 0.060948   | 3.71E-05 | 0.0066957 | 0.2858    |
| 9mo_SIGAE3_ | 0.02085766 | 0.12050724 | 4.21E-05 | 0.0052798 | -0.037579 |
| 9mo_SIGAE3_ | 0.01379662 | 0.0769335  | 3.86E-05 | 0.0062156 | 0.17645   |
| 9mo_SIGAE3_ | 0.07278552 | 0.44095406 | 5.49E-05 | 0.012637  | 0.24373   |
| 9mo_SIGAE3_ | 0.03227219 | 0.19094631 | 4.62E-05 | 0.0046026 | -0.11821  |
| 9mo_SIGAE3_ | 0.02115558 | 0.12234567 | 4.24E-05 | 0.0052258 | -0.04878  |
| 9mo_SIGAE3_ | 0.03586322 | 0.21310656 | 4.77E-05 | 0.0045615 | -0.096915 |

|             |            |            |          |           |           |
|-------------|------------|------------|----------|-----------|-----------|
| 9mo_SIGAE3_ | 0.03479853 | 0.20653632 | 4.72E-05 | 0.0045646 | -0.10426  |
| 9mo_SIGAE3_ | 0.02557313 | 0.1496064  | 4.40E-05 | 0.0048781 | -0.10813  |
| 9mo_SIGAE3_ | 0.01475259 | 0.08283279 | 3.92E-05 | 0.0060428 | 0.1363    |
| 9mo_SIGAE3_ | 0.03521285 | 0.20909308 | 4.74E-05 | 0.0045622 | -0.10068  |
| 9mo_SIGAE3_ | 0.0241088  | 0.14056998 | 4.34E-05 | 0.0049916 | -0.091842 |
| 9mo_SIGAE3_ | 0.00966895 | 0.05146167 | 3.62E-05 | 0.0070172 | 0.35661   |
| 9mo_SIGAE3_ | 0.00816447 | 0.0421775  | 3.56E-05 | 0.0072456 | 0.40559   |
| 9mo_SIGAE3_ | 0.01239339 | 0.06827422 | 3.77E-05 | 0.0064954 | 0.24064   |
| 9mo_SIGAE3_ | 0.0183591  | 0.10508858 | 4.09E-05 | 0.0055879 | 0.015459  |
| 9mo_SIGAE3_ | 0.0609207  | 0.36773625 | 6.38E-05 | 0.0072613 | 0.09374   |
| 9mo_SIGAE3_ | 0.03872667 | 0.23077685 | 4.89E-05 | 0.0045836 | -0.076088 |
| 9mo_SIGAE3_ | 0.02845878 | 0.16741374 | 4.49E-05 | 0.0047302 | -0.12174  |
| 9mo_SIGAE3_ | 0.02484385 | 0.145106   | 4.36E-05 | 0.0049516 | -0.10343  |
| 9mo_SIGAE3_ | 0.08095583 | 0.49137303 | 4.85E-05 | 0.0141    | 0.12269   |
| 9mo_SIGAE3_ | 0.02400585 | 0.13993469 | 4.34E-05 | 0.0049916 | -0.091842 |
| 9mo_SIGAE3_ | 0.07948104 | 0.4822721  | 4.93E-05 | 0.014315  | 0.15946   |
| 9mo_SIGAE3_ | 0.02049994 | 0.11829971 | 4.19E-05 | 0.0053364 | -0.025531 |
| 9mo_SIGAE3_ | 0.00355529 | 0.01373426 | 3.29E-05 | 0.0084138 | 0.63801   |
| 9mo_SIGAE3_ | 0.00971914 | 0.05177141 | 3.62E-05 | 0.0070172 | 0.33263   |
| 9mo_SIGAE3_ | 0.03860619 | 0.23003337 | 4.89E-05 | 0.0045836 | -0.076088 |
| 9mo_SIGAE3_ | 0.06933589 | 0.41966635 | 5.87E-05 | 0.010741  | 0.21895   |
| 9mo_SIGAE3_ | 0.0649018  | 0.39230362 | 6.24E-05 | 0.0086643 | 0.15715   |
| 9mo_SIGAE3_ | 0.01644579 | 0.09328155 | 4.00E-05 | 0.0058035 | 0.080526  |
| 9mo_SIGAE3_ | 0.06936935 | 0.41987288 | 5.82E-05 | 0.011019  | 0.21895   |
| 9mo_SIGAE3_ | 0.02403885 | 0.14013834 | 4.34E-05 | 0.0049916 | -0.091842 |
| 9mo_SIGAE3_ | 0.02553023 | 0.14934164 | 4.40E-05 | 0.0048781 | -0.10813  |
| 9mo_SIGAE3_ | 0.08106528 | 0.49204847 | 4.85E-05 | 0.0141    | 0.10139   |
| 9mo_SIGAE3_ | 0.02247398 | 0.13048151 | 4.28E-05 | 0.005125  | -0.068556 |
| 9mo_SIGAE3_ | 0.05635743 | 0.33957627 | 6.27E-05 | 0.0061731 | 0.047788  |
| 9mo_SIGAE3_ | 0.01671135 | 0.09492033 | 4.00E-05 | 0.0058035 | 0.080526  |
| 9mo_SIGAE3_ | 0.0143518  | 0.08035957 | 3.89E-05 | 0.0061278 | 0.1561    |
| 9mo_SIGAE3_ | 0.0213173  | 0.12334365 | 4.24E-05 | 0.0052258 | -0.04878  |
| 9mo_SIGAE3_ | 0.03352854 | 0.19869919 | 4.66E-05 | 0.0045822 | -0.11071  |
| 9mo_SIGAE3_ | 0.09023115 | 0.54861104 | 4.88E-05 | 0.0086895 | -0.51631  |
| 9mo_SIGAE3_ | 0.01882448 | 0.10796046 | 4.11E-05 | 0.0055212 | 0.015459  |
| 9mo_SIGAE3_ | 0.08747846 | 0.53162414 | 4.79E-05 | 0.010571  | -0.25808  |
| 9mo_SIGAE3_ | 0.01347323 | 0.07493791 | 3.83E-05 | 0.0063061 | 0.19734   |
| 9mo_SIGAE3_ | 0.01968141 | 0.11324857 | 4.16E-05 | 0.0053955 | -0.012659 |
| 9mo_SIGAE3_ | 0.02978433 | 0.17559372 | 4.55E-05 | 0.0046645 | -0.12301  |
| 9mo_SIGAE3_ | 0.06380464 | 0.38553306 | 6.30E-05 | 0.008216  | 0.14015   |
| 9mo_SIGAE3_ | 0.02573576 | 0.15060998 | 4.40E-05 | 0.0048781 | -0.10813  |
| 9mo_SIGAE3_ | 0.0329779  | 0.19530122 | 4.64E-05 | 0.0045915 | -0.11352  |
| 9mo_SIGAE3_ | 0.01545255 | 0.0871523  | 3.95E-05 | 0.0059603 | 0.11709   |

|             |            |            |          |           |           |
|-------------|------------|------------|----------|-----------|-----------|
| 9mo_SIGAE3_ | 0.01739622 | 0.09914666 | 4.06E-05 | 0.0056572 | 0.046584  |
| 9mo_SIGAE3_ | 0.073047   | 0.44256765 | 5.49E-05 | 0.012637  | 0.24489   |
| 9mo_SIGAE3_ | 0.0416477  | 0.24880254 | 5.05E-05 | 0.0046492 | -0.0504   |
| 9mo_SIGAE3_ | 0.02360934 | 0.13748783 | 4.32E-05 | 0.0050338 | -0.084895 |
| 9mo_SIGAE3_ | 0.0359541  | 0.21366736 | 4.77E-05 | 0.0045615 | -0.096915 |
| 9mo_SIGAE3_ | 0.0469473  | 0.2815064  | 5.49E-05 | 0.0049251 | -0.018376 |
| 9mo_SIGAE3_ | 0.02171212 | 0.12578009 | 4.26E-05 | 0.0051742 | -0.059109 |
| 9mo_SIGAE3_ | 0.01832158 | 0.10485706 | 4.09E-05 | 0.0055879 | 0.030658  |
| 9mo_SIGAE3_ | 0.01182423 | 0.06476193 | 3.74E-05 | 0.0065941 | 0.263     |
| 9mo_SIGAE3_ | 0.01818461 | 0.10401182 | 4.09E-05 | 0.0055879 | 0.030658  |
| 9mo_SIGAE3_ | 0.03247374 | 0.19219005 | 4.62E-05 | 0.0046026 | -0.11603  |
| 9mo_SIGAE3_ | 0.02334269 | 0.13584234 | 4.32E-05 | 0.0050338 | -0.084895 |
| 9mo_SIGAE3_ | 0.0331092  | 0.19611146 | 4.66E-05 | 0.0045822 | -0.11352  |
| 9mo_SIGAE3_ | 0.02370821 | 0.13809794 | 4.32E-05 | 0.0050338 | -0.084895 |
| 9mo_SIGAE3_ | 0.03336975 | 0.1977193  | 4.66E-05 | 0.0045822 | -0.11352  |
| 9mo_SIGAE3_ | 0.0148968  | 0.08372275 | 3.92E-05 | 0.0060428 | 0.1363    |
| 9mo_SIGAE3_ | 0.00766177 | 0.03907536 | 3.53E-05 | 0.0073641 | 0.43054   |
| 9mo_SIGAE3_ | 0.0181589  | 0.10385319 | 4.09E-05 | 0.0055879 | 0.030658  |
| 9mo_SIGAE3_ | 0.00895751 | 0.04707137 | 3.59E-05 | 0.00713   | 0.38094   |
| 9mo_SIGAE3_ | 0.09540146 | 0.580517   | 5.20E-05 | 0.0056833 | -0.91061  |
| 9mo_SIGAE3_ | 0.02917433 | 0.1718294  | 4.51E-05 | 0.0047064 | -0.1231   |
| 9mo_SIGAE3_ | 0.02531253 | 0.14799824 | 4.38E-05 | 0.0049138 | -0.10343  |
| 9mo_SIGAE3_ | 0.02489919 | 0.14544748 | 4.36E-05 | 0.0049516 | -0.10343  |
| 9mo_SIGAE3_ | 0.02560672 | 0.14981368 | 4.40E-05 | 0.0048781 | -0.10813  |
| 9mo_SIGAE3_ | 0.01285609 | 0.07112953 | 3.80E-05 | 0.0063994 | 0.21875   |
| 9mo_SIGAE3_ | 0.02086621 | 0.12055998 | 4.21E-05 | 0.0052798 | -0.037579 |
| 9mo_SIGAE3_ | 0.01640071 | 0.09300336 | 4.00E-05 | 0.0058035 | 0.080526  |
| 9mo_SIGAE3_ | 0.0208202  | 0.12027608 | 4.21E-05 | 0.0052798 | -0.037579 |
| 9mo_SIGAE3_ | 0.01667436 | 0.09469207 | 4.00E-05 | 0.0058035 | 0.080526  |
| 9mo_SIGAE3_ | 0.01630813 | 0.09243203 | 4.00E-05 | 0.0058035 | 0.080526  |
| 9mo_SIGAE3_ | 0.03648584 | 0.21694869 | 4.79E-05 | 0.0045625 | -0.092976 |
| 9mo_SIGAE3_ | 0.01345753 | 0.07484102 | 3.83E-05 | 0.0063061 | 0.19734   |
| 9mo_SIGAE3_ | 0.02335951 | 0.13594612 | 4.32E-05 | 0.0050338 | -0.084895 |
| 9mo_SIGAE3_ | 0.02578415 | 0.15090857 | 4.40E-05 | 0.0048781 | -0.10813  |
| 9mo_SIGAE3_ | 0.06213438 | 0.37522584 | 6.36E-05 | 0.0076138 | 0.11565   |
| 9mo_SIGAE3_ | 0.02012846 | 0.11600729 | 4.19E-05 | 0.0053364 | -0.025531 |
| 9mo_SIGAE3_ | 0.04536317 | 0.27173075 | 5.34E-05 | 0.0048194 | -0.024952 |
| 9mo_SIGAE3_ | 0.01182207 | 0.06474858 | 3.74E-05 | 0.0065941 | 0.263     |
| 9mo_SIGAE3_ | 0.03343728 | 0.19813605 | 4.66E-05 | 0.0045822 | -0.11352  |
| 9mo_SIGAE3_ | 0.01872036 | 0.10731792 | 4.11E-05 | 0.0055212 | 0.015459  |
| 9mo_SIGAE3_ | 0.05056386 | 0.3038242  | 5.83E-05 | 0.0052672 | 0.0043724 |
| 9mo_SIGAE3_ | 0.0138221  | 0.07709074 | 3.86E-05 | 0.0062156 | 0.17645   |
| 9mo_SIGAE3_ | 0.01408852 | 0.07873487 | 3.89E-05 | 0.0061278 | 0.1561    |

|             |            |            |          |           |            |
|-------------|------------|------------|----------|-----------|------------|
| 9mo_SIGAE3_ | 0.01797468 | 0.10271635 | 4.09E-05 | 0.0055879 | 0.030658   |
| 9mo_SIGAE3_ | 0.04025879 | 0.2402316  | 4.99E-05 | 0.0046177 | -0.063007  |
| 9mo_SIGAE3_ | 0.10374014 | 0.631975   | 5.82E-05 | 0.0036742 | -1.3662    |
| 9mo_SIGAE3_ | 0.0176938  | 0.10098305 | 4.06E-05 | 0.0056572 | 0.046584   |
| 9mo_SIGAE3_ | 0.08028365 | 0.48722503 | 4.87E-05 | 0.014207  | 0.14202    |
| 9mo_SIGAE3_ | 0.04845664 | 0.2908205  | 5.63E-05 | 0.005054  | -0.0087048 |
| 9mo_SIGAE3_ | 0.03009629 | 0.17751881 | 4.55E-05 | 0.0046645 | -0.12301   |
| 9mo_SIGAE3_ | 0.01016225 | 0.05450585 | 3.65E-05 | 0.0069072 | 0.33263    |
| 9mo_SIGAE3_ | 0.02371697 | 0.138152   | 4.32E-05 | 0.0050338 | -0.084895  |
| 9mo_SIGAE3_ | 0.01061306 | 0.05728777 | 3.68E-05 | 0.0068    | 0.30902    |
| 9mo_SIGAE3_ | 0.02117252 | 0.12245024 | 4.24E-05 | 0.0052258 | -0.04878   |
| 9mo_SIGAE3_ | 0.01132408 | 0.06167549 | 3.71E-05 | 0.0066957 | 0.2858     |
| 9mo_SIGAE3_ | 0.01220117 | 0.06708799 | 3.77E-05 | 0.0064954 | 0.24064    |
| 9mo_SIGAE3_ | 0.04885051 | 0.29325107 | 5.68E-05 | 0.0051026 | -0.0054808 |
| 9mo_SIGAE3_ | 0.09364452 | 0.56967497 | 5.06E-05 | 0.0067258 | -0.7829    |
| 9mo_SIGAE3_ | 0.01888694 | 0.1083459  | 4.11E-05 | 0.0055212 | 0.0010121  |
| 9mo_SIGAE3_ | 0.01444968 | 0.08096357 | 3.89E-05 | 0.0061278 | 0.1561     |
| 9mo_SIGAE3_ | 0.0113109  | 0.06159416 | 3.71E-05 | 0.0066957 | 0.2858     |
| 9mo_SIGAE3_ | 0.01858967 | 0.10651146 | 4.11E-05 | 0.0055212 | 0.015459   |
| 9mo_SIGAE3_ | 0.01423712 | 0.07965183 | 3.89E-05 | 0.0061278 | 0.1561     |
| 9mo_SIGAE3_ | 0.02659925 | 0.15593858 | 4.44E-05 | 0.004813  | -0.11546   |
| 9mo_SIGAE3_ | 0.01440152 | 0.08066636 | 3.89E-05 | 0.0061278 | 0.1561     |
| 9mo_SIGAE3_ | 0.02114258 | 0.12226544 | 4.24E-05 | 0.0052258 | -0.04878   |
| 9mo_SIGAE3_ | 0.01300636 | 0.07205686 | 3.83E-05 | 0.0063061 | 0.19734    |
| 9mo_SIGAE3_ | 0.01621197 | 0.09183865 | 3.98E-05 | 0.0058806 | 0.080526   |
| 9mo_SIGAE3_ | 0.02052646 | 0.1184634  | 4.19E-05 | 0.0053364 | -0.037579  |
| 9mo_SIGAE3_ | 0.07278102 | 0.44092628 | 5.49E-05 | 0.012637  | 0.24373    |
| 9mo_SIGAE3_ | 0.01991137 | 0.11466765 | 4.16E-05 | 0.0053955 | -0.012659  |
| 9mo_SIGAE3_ | 0.05428941 | 0.32681453 | 6.14E-05 | 0.0057798 | 0.030074   |
| 9mo_SIGAE3_ | 0.01415593 | 0.07915083 | 3.89E-05 | 0.0061278 | 0.1561     |
| 9mo_SIGAE3_ | 0.00593959 | 0.02844778 | 3.44E-05 | 0.0077366 | 0.50694    |
| 9mo_SIGAE3_ | 0.02054281 | 0.11856426 | 4.19E-05 | 0.0053364 | -0.037579  |
| 9mo_SIGAE3_ | 0.0040658  | 0.01688463 | 3.32E-05 | 0.0082728 | 0.61153    |
| 9mo_SIGAE3_ | 0.01261825 | 0.06966177 | 3.80E-05 | 0.0063994 | 0.21875    |
| 9mo_SIGAE3_ | 0.01302214 | 0.0721542  | 3.83E-05 | 0.0063061 | 0.19734    |
| 9mo_SIGAE3_ | 0.04319773 | 0.25836778 | 5.17E-05 | 0.0047101 | -0.038876  |
| 9mo_SIGAE3_ | 0.02554257 | 0.14941782 | 4.40E-05 | 0.0048781 | -0.10813   |
| 9mo_SIGAE3_ | 0.04134161 | 0.2469137  | 5.05E-05 | 0.0046492 | -0.054504  |
| 9mo_SIGAE3_ | 0.1509048  | 0.9230282  | 7.72E-05 | 0.00467   | -1.105     |
| 9mo_SIGAE3_ | 0.03709744 | 0.22072287 | 4.81E-05 | 0.0045652 | -0.088896  |
| 9mo_SIGAE3_ | 0.00853223 | 0.04444699 | 3.56E-05 | 0.0072456 | 0.40559    |
| 9mo_SIGAE3_ | 0.02815817 | 0.16555865 | 4.49E-05 | 0.0047302 | -0.12174   |
| 9mo_SIGAE3_ | 0.01134817 | 0.06182411 | 3.71E-05 | 0.0066957 | 0.263      |

|             |            |            |          |           |           |
|-------------|------------|------------|----------|-----------|-----------|
| 9mo_SIGAE3_ | 0.02992259 | 0.1764469  | 4.55E-05 | 0.0046645 | -0.12301  |
| 9mo_SIGAE3_ | 0.01223022 | 0.06726727 | 3.77E-05 | 0.0064954 | 0.24064   |
| 9mo_SIGAE3_ | 0.0999641  | 0.60867304 | 5.53E-05 | 0.004262  | -1.2296   |
| 9mo_SIGAE3_ | 0.01338061 | 0.07436634 | 3.83E-05 | 0.0063061 | 0.19734   |
| 9mo_SIGAE3_ | 0.02350389 | 0.1368371  | 4.32E-05 | 0.0050338 | -0.084895 |
| 9mo_SIGAE3_ | 0.01186542 | 0.06501611 | 3.74E-05 | 0.0065941 | 0.24064   |
| 9mo_SIGAE3_ | 0.08233175 | 0.49986383 | 4.81E-05 | 0.013778  | 0.05262   |
| 9mo_SIGAE3_ | 0.0248113  | 0.14490515 | 4.36E-05 | 0.0049516 | -0.098011 |
| 9mo_SIGAE3_ | 0.0179947  | 0.1028399  | 4.09E-05 | 0.0055879 | 0.030658  |
| 9mo_SIGAE3_ | 0.0224173  | 0.13013175 | 4.28E-05 | 0.005125  | -0.068556 |
| 9mo_SIGAE3_ | 0.01359868 | 0.07571202 | 3.86E-05 | 0.0062156 | 0.17645   |
| 9mo_SIGAE3_ | 0.02449773 | 0.14297013 | 4.36E-05 | 0.0049516 | -0.098011 |
| 9mo_SIGAE3_ | 0.0160956  | 0.0911205  | 3.98E-05 | 0.0058806 | 0.098494  |
| 9mo_SIGAE3_ | 0.08909056 | 0.5415724  | 4.84E-05 | 0.0094274 | -0.3844   |
| 9mo_SIGAE3_ | 0.01968431 | 0.11326647 | 4.16E-05 | 0.0053955 | -0.012659 |
| 9mo_SIGAE3_ | 0.02009542 | 0.11580341 | 4.19E-05 | 0.0053364 | -0.025531 |
| 9mo_SIGAE3_ | 0.05923281 | 0.35732028 | 6.37E-05 | 0.0067983 | 0.074574  |
| 9mo_SIGAE3_ | 0.00925509 | 0.04890772 | 3.62E-05 | 0.0070172 | 0.35661   |
| 9mo_SIGAE3_ | 0.07507955 | 0.45511055 | 5.28E-05 | 0.013537  | 0.23858   |
| 9mo_SIGAE3_ | 0.02014718 | 0.11612284 | 4.19E-05 | 0.0053364 | -0.025531 |
| 9mo_SIGAE3_ | 0.02020975 | 0.11650896 | 4.19E-05 | 0.0053364 | -0.025531 |
| 9mo_SIGAE3_ | 0.02540491 | 0.1485683  | 4.38E-05 | 0.0049138 | -0.10813  |
| 9mo_SIGAE3_ | 0.01967797 | 0.11322738 | 4.16E-05 | 0.0053955 | -0.012659 |
| 9mo_SIGAE3_ | 0.090281   | 0.54891866 | 4.88E-05 | 0.0086895 | -0.51631  |
| 9mo_SIGAE3_ | 0.02620747 | 0.15352088 | 4.42E-05 | 0.0048445 | -0.11213  |
| 9mo_SIGAE3_ | 0.02618665 | 0.1533924  | 4.42E-05 | 0.0048445 | -0.11213  |
| 9mo_SIGAE3_ | 0.09459979 | 0.5755699  | 5.13E-05 | 0.0061762 | -0.8688   |
| 9mo_SIGAE3_ | 0.02608238 | 0.15274899 | 4.42E-05 | 0.0048445 | -0.11213  |
| 9mo_SIGAE3_ | 0.02931942 | 0.17272472 | 4.53E-05 | 0.0046846 | -0.1231   |
| 9mo_SIGAE3_ | 0.01447781 | 0.08113716 | 3.89E-05 | 0.0061278 | 0.1561    |
| 9mo_SIGAE3_ | 0.03944723 | 0.23522343 | 4.92E-05 | 0.0045932 | -0.067351 |
| 9mo_SIGAE3_ | 0.03388133 | 0.20087625 | 4.68E-05 | 0.0045746 | -0.11071  |
| 9mo_SIGAE3_ | 0.07988118 | 0.48474136 | 4.90E-05 | 0.014278  | 0.15946   |
| 9mo_SIGAE3_ | 0.02462605 | 0.14376192 | 4.36E-05 | 0.0049516 | -0.098011 |
| 9mo_SIGAE3_ | 0.01688909 | 0.09601718 | 4.03E-05 | 0.005729  | 0.063215  |
| 9mo_SIGAE3_ | 0.0112643  | 0.06130658 | 3.71E-05 | 0.0066957 | 0.2858    |
| 9mo_SIGAE3_ | 0.04217478 | 0.25205517 | 5.09E-05 | 0.0046676 | -0.04643  |
| 9mo_SIGAE3_ | 0.02033438 | 0.11727804 | 4.19E-05 | 0.0053364 | -0.025531 |
| 9mo_SIGAE3_ | 0.02765897 | 0.16247813 | 4.48E-05 | 0.0047558 | -0.12024  |
| 9mo_SIGAE3_ | 0.02442028 | 0.14249216 | 4.36E-05 | 0.0049516 | -0.098011 |
| 9mo_SIGAE3_ | 0.03801495 | 0.22638482 | 4.87E-05 | 0.0045758 | -0.080425 |
| 9mo_SIGAE3_ | 0.01875685 | 0.10754309 | 4.11E-05 | 0.0055212 | 0.015459  |
| 9mo_SIGAE3_ | 0.01212871 | 0.06664088 | 3.77E-05 | 0.0064954 | 0.24064   |

|             |            |            |          |           |            |
|-------------|------------|------------|----------|-----------|------------|
| 9mo_SIGAE3_ | 0.08295439 | 0.50370616 | 4.78E-05 | 0.013315  | 0.02505    |
| 9mo_SIGAE3_ | 0.01226186 | 0.0674625  | 3.77E-05 | 0.0064954 | 0.24064    |
| 9mo_SIGAE3_ | 0.02978211 | 0.17557998 | 4.53E-05 | 0.0046846 | -0.12301   |
| 9mo_SIGAE3_ | 0.02852194 | 0.1678035  | 4.49E-05 | 0.0047302 | -0.12174   |
| 9mo_SIGAE3_ | 0.01921203 | 0.11035203 | 4.14E-05 | 0.0054571 | 0.0010121  |
| 9mo_SIGAE3_ | 0.01962214 | 0.11288284 | 4.16E-05 | 0.0053955 | -0.012659  |
| 9mo_SIGAE3_ | 0.03193617 | 0.18887271 | 4.60E-05 | 0.0046154 | -0.11821   |
| 9mo_SIGAE3_ | 0.09127344 | 0.555043   | 4.93E-05 | 0.0079874 | -0.60562   |
| 9mo_SIGAE3_ | 0.09295022 | 0.5653904  | 5.02E-05 | 0.0070215 | -0.73907   |
| 9mo_SIGAE3_ | 0.02491639 | 0.14555363 | 4.38E-05 | 0.0049138 | -0.10343   |
| 9mo_SIGAE3_ | 0.09621579 | 0.58554226 | 5.24E-05 | 0.0054581 | -0.99133   |
| 9mo_SIGAE3_ | 0.01506913 | 0.08478619 | 3.92E-05 | 0.0060428 | 0.1363     |
| 9mo_SIGAE3_ | 0.01731459 | 0.09864292 | 4.03E-05 | 0.005729  | 0.046584   |
| 9mo_SIGAE3_ | 0.03534792 | 0.20992659 | 4.74E-05 | 0.0045622 | -0.10068   |
| 9mo_SIGAE3_ | 0.04766082 | 0.28590953 | 5.53E-05 | 0.0049654 | -0.01192   |
| 9mo_SIGAE3_ | 0.04314221 | 0.25802517 | 5.17E-05 | 0.0047101 | -0.042593  |
| 9mo_SIGAE3_ | 0.03132753 | 0.18511683 | 4.58E-05 | 0.00463   | -0.12002   |
| 9mo_SIGAE3_ | 0.01481577 | 0.08322272 | 3.92E-05 | 0.0060428 | 0.1363     |
| 9mo_SIGAE3_ | 0.01763551 | 0.10062333 | 4.06E-05 | 0.0056572 | 0.046584   |
| 9mo_SIGAE3_ | 0.01222683 | 0.06724634 | 3.77E-05 | 0.0064954 | 0.24064    |
| 9mo_SIGAE3_ | 0.09292752 | 0.56525034 | 5.02E-05 | 0.0070215 | -0.73907   |
| 9mo_SIGAE3_ | 0.02451306 | 0.14306471 | 4.36E-05 | 0.0049516 | -0.098011  |
| 9mo_SIGAE3_ | 0.01982486 | 0.11413384 | 4.16E-05 | 0.0053955 | -0.012659  |
| 9mo_SIGAE3_ | 0.08335695 | 0.5061903  | 4.78E-05 | 0.013315  | -0.0045591 |
| 9mo_SIGAE3_ | 0.02709071 | 0.15897135 | 4.46E-05 | 0.0047834 | -0.11816   |
| 9mo_SIGAE3_ | 0.04305004 | 0.2574564  | 5.17E-05 | 0.0047101 | -0.042593  |
| 9mo_SIGAE3_ | 0.03882964 | 0.23141228 | 4.89E-05 | 0.0045836 | -0.076088  |
| 9mo_SIGAE3_ | 0.04475443 | 0.2679742  | 5.30E-05 | 0.0047888 | -0.031751  |
| 9mo_SIGAE3_ | 0.01929275 | 0.11085018 | 4.14E-05 | 0.0054571 | 0.0010121  |
| 9mo_SIGAE3_ | 0.0176546  | 0.10074112 | 4.06E-05 | 0.0056572 | 0.046584   |
| 9mo_SIGAE3_ | 0.09721722 | 0.5917221  | 5.32E-05 | 0.0050496 | -1.0673    |
| 9mo_SIGAE3_ | 0.01993408 | 0.11480783 | 4.16E-05 | 0.0053955 | -0.012659  |
| 9mo_SIGAE3_ | 0.05137374 | 0.30882198 | 5.87E-05 | 0.0053288 | 0.011221   |
| 9mo_SIGAE3_ | 0.03319158 | 0.19661987 | 4.66E-05 | 0.0045822 | -0.11352   |
| 9mo_SIGAE3_ | 0.01767832 | 0.10088749 | 4.06E-05 | 0.0056572 | 0.046584   |
| 9mo_SIGAE3_ | 0.08313859 | 0.5048428  | 4.78E-05 | 0.013315  | 0.02505    |
| 9mo_SIGAE3_ | 0.0124336  | 0.06852235 | 3.77E-05 | 0.0064954 | 0.21875    |
| 9mo_SIGAE3_ | 0.02170769 | 0.12575278 | 4.26E-05 | 0.0051742 | -0.059109  |
| 9mo_SIGAE3_ | 0.08104129 | 0.4919004  | 4.85E-05 | 0.0141    | 0.10139    |
| 9mo_SIGAE3_ | 0.02925027 | 0.17229801 | 4.53E-05 | 0.0046846 | -0.1231    |
| 9mo_SIGAE3_ | 0.07412521 | 0.44922128 | 5.38E-05 | 0.013116  | 0.24406    |
| 9mo_SIGAE3_ | 0.01944606 | 0.11179623 | 4.14E-05 | 0.0054571 | -0.012659  |
| 9mo_SIGAE3_ | 0.02932782 | 0.1727766  | 4.53E-05 | 0.0046846 | -0.1231    |



|             |            |            |          |           |           |
|-------------|------------|------------|----------|-----------|-----------|
| 9mo_SIGAE3_ | 0.02336073 | 0.13595366 | 4.32E-05 | 0.0050338 | -0.084895 |
| 9mo_SIGAE3_ | 0.0108337  | 0.05864937 | 3.71E-05 | 0.0066957 | 0.2858    |
| 9mo_SIGAE3_ | 0.01166934 | 0.06380609 | 3.74E-05 | 0.0065941 | 0.263     |
| 9mo_SIGAE3_ | 0.0238492  | 0.13896804 | 4.34E-05 | 0.0049916 | -0.091842 |
| 9mo_SIGAE3_ | 0.07314961 | 0.4432009  | 5.43E-05 | 0.012883  | 0.24489   |
| 9mo_SIGAE3_ | 0.02059194 | 0.11886749 | 4.21E-05 | 0.0052798 | -0.037579 |
| 9mo_SIGAE3_ | 0.01136426 | 0.06192341 | 3.74E-05 | 0.0065941 | 0.263     |
| 9mo_SIGAE3_ | 0.02037791 | 0.11754666 | 4.19E-05 | 0.0053364 | -0.025531 |
| 9mo_SIGAE3_ | 0.01353881 | 0.07534257 | 3.86E-05 | 0.0062156 | 0.17645   |
| 9mo_SIGAE3_ | 0.01243386 | 0.06852392 | 3.77E-05 | 0.0064954 | 0.21875   |
| 9mo_SIGAE3_ | 0.00519105 | 0.02382856 | 3.38E-05 | 0.0079991 | 0.55892   |
| 9mo_SIGAE3_ | 0.0708089  | 0.42875636 | 5.71E-05 | 0.011574  | 0.23476   |
| 9mo_SIGAE3_ | 0.08312795 | 0.50477713 | 4.78E-05 | 0.013315  | 0.02505   |
| 9mo_SIGAE3_ | 0.1012593  | 0.6166657  | 5.62E-05 | 0.0040352 | -1.2808   |
| 9mo_SIGAE3_ | 0.08562405 | 0.5201806  | 4.76E-05 | 0.0117    | -0.14081  |
| 9mo_SIGAE3_ | 0.03814279 | 0.22717378 | 4.87E-05 | 0.0045758 | -0.080425 |
| 9mo_SIGAE3_ | 0.02668021 | 0.15643816 | 4.44E-05 | 0.004813  | -0.11546  |
| 9mo_SIGAE3_ | 0.03129314 | 0.18490456 | 4.58E-05 | 0.00463   | -0.12145  |
| 9mo_SIGAE3_ | 0.0238539  | 0.13899702 | 4.34E-05 | 0.0049916 | -0.091842 |
| 9mo_SIGAE3_ | 0.04090022 | 0.24418983 | 5.02E-05 | 0.0046325 | -0.058715 |
| 9mo_SIGAE3_ | 0.01155965 | 0.06312918 | 3.74E-05 | 0.0065941 | 0.263     |
| 9mo_SIGAE3_ | 0.0133307  | 0.07405831 | 3.83E-05 | 0.0063061 | 0.19734   |
| 9mo_SIGAE3_ | 0.01872685 | 0.10735796 | 4.11E-05 | 0.0055212 | 0.015459  |
| 9mo_SIGAE3_ | 0.02738878 | 0.16081077 | 4.46E-05 | 0.0047834 | -0.11816  |
| 9mo_SIGAE3_ | 0.03300822 | 0.19548832 | 4.64E-05 | 0.0045915 | -0.11352  |
| 9mo_SIGAE3_ | 0.07075448 | 0.42842054 | 5.71E-05 | 0.011574  | 0.23476   |
| 9mo_SIGAE3_ | 0.02314796 | 0.13464063 | 4.30E-05 | 0.0050782 | -0.077142 |
| 9mo_SIGAE3_ | 0.02283414 | 0.1327041  | 4.30E-05 | 0.0050782 | -0.077142 |
| 9mo_SIGAE3_ | 0.00582592 | 0.02774631 | 3.41E-05 | 0.0078664 | 0.53284   |
| 9mo_SIGAE3_ | 0.02795921 | 0.16433091 | 4.48E-05 | 0.0047558 | -0.12024  |
| 9mo_SIGAE3_ | 0.02089218 | 0.12072023 | 4.21E-05 | 0.0052798 | -0.037579 |
| 9mo_SIGAE3_ | 0.01758835 | 0.10033228 | 4.06E-05 | 0.0056572 | 0.046584  |
| 9mo_SIGAE3_ | 0.09308378 | 0.5662146  | 5.02E-05 | 0.0070215 | -0.73907  |
| 9mo_SIGAE3_ | 0.02736242 | 0.16064808 | 4.46E-05 | 0.0047834 | -0.11816  |
| 9mo_SIGAE3_ | 0.03672074 | 0.21839827 | 4.79E-05 | 0.0045625 | -0.088896 |
| 9mo_SIGAE3_ | 0.0344084  | 0.20412882 | 4.70E-05 | 0.0045688 | -0.10761  |
| 9mo_SIGAE3_ | 0.01886124 | 0.10818733 | 4.11E-05 | 0.0055212 | 0.015459  |
| 9mo_SIGAE3_ | 0.02089205 | 0.12071941 | 4.21E-05 | 0.0052798 | -0.037579 |
| 9mo_SIGAE3_ | 0.01127877 | 0.06139587 | 3.71E-05 | 0.0066957 | 0.2858    |
| 9mo_SIGAE3_ | 0.01155468 | 0.06309851 | 3.74E-05 | 0.0065941 | 0.263     |
| 9mo_SIGAE3_ | 0.02491209 | 0.14552708 | 4.38E-05 | 0.0049138 | -0.10343  |
| 9mo_SIGAE3_ | 0.01225899 | 0.06744479 | 3.77E-05 | 0.0064954 | 0.24064   |
| 9mo_SIGAE3_ | 0.02278232 | 0.13238429 | 4.30E-05 | 0.0050782 | -0.077142 |

|             |            |            |          |           |            |
|-------------|------------|------------|----------|-----------|------------|
| 9mo_SIGAE3_ | 0.0214481  | 0.12415084 | 4.24E-05 | 0.0052258 | -0.04878   |
| 9mo_SIGAE3_ | 0.06816258 | 0.41242588 | 5.98E-05 | 0.010192  | 0.20551    |
| 9mo_SIGAE3_ | 0.02197987 | 0.12743239 | 4.26E-05 | 0.0051742 | -0.059109  |
| 9mo_SIGAE3_ | 0.01547322 | 0.0872798  | 3.95E-05 | 0.0059603 | 0.11709    |
| 9mo_SIGAE3_ | 0.0218112  | 0.1263915  | 4.26E-05 | 0.0051742 | -0.059109  |
| 9mo_SIGAE3_ | 0.03205519 | 0.1896072  | 4.62E-05 | 0.0046026 | -0.11821   |
| 9mo_SIGAE3_ | 0.02368723 | 0.13796847 | 4.32E-05 | 0.0050338 | -0.084895  |
| 9mo_SIGAE3_ | 0.01947998 | 0.11200558 | 4.14E-05 | 0.0054571 | -0.012659  |
| 9mo_SIGAE3_ | 0.01584849 | 0.08959562 | 3.98E-05 | 0.0058806 | 0.098494   |
| 9mo_SIGAE3_ | 0.03754063 | 0.22345784 | 4.84E-05 | 0.0045696 | -0.084703  |
| 9mo_SIGAE3_ | 0.04893736 | 0.29378703 | 5.68E-05 | 0.0051026 | -0.0054808 |
| 9mo_SIGAE3_ | 0.09828628 | 0.59831923 | 5.40E-05 | 0.0046955 | -1.1032    |
| 9mo_SIGAE3_ | 0.07344419 | 0.4450187  | 5.43E-05 | 0.012883  | 0.24502    |
| 9mo_SIGAE3_ | 0.0299635  | 0.17669934 | 4.55E-05 | 0.0046645 | -0.12301   |
| 9mo_SIGAE3_ | 0.00865263 | 0.04518994 | 3.59E-05 | 0.00713   | 0.38094    |
| 9mo_SIGAE3_ | 0.06261378 | 0.37818423 | 6.35E-05 | 0.0078047 | 0.11565    |
| 9mo_SIGAE3_ | 0.02402332 | 0.14004251 | 4.34E-05 | 0.0049916 | -0.091842  |
| 9mo_SIGAE3_ | 0.01646962 | 0.09342861 | 4.00E-05 | 0.0058035 | 0.080526   |
| 9mo_SIGAE3_ | 0.0645155  | 0.38991976 | 6.24E-05 | 0.0086643 | 0.14863    |
| 9mo_SIGAE3_ | 0.0158234  | 0.08944081 | 3.98E-05 | 0.0058806 | 0.098494   |
| 9mo_SIGAE3_ | 0.02711165 | 0.15910059 | 4.46E-05 | 0.0047834 | -0.11816   |
| 9mo_SIGAE3_ | 0.01947526 | 0.11197639 | 4.14E-05 | 0.0054571 | -0.012659  |
| 9mo_SIGAE3_ | 0.03380846 | 0.2004266  | 4.68E-05 | 0.0045746 | -0.11071   |
| 9mo_SIGAE3_ | 0.01837602 | 0.10519298 | 4.09E-05 | 0.0055879 | 0.015459   |
| 9mo_SIGAE3_ | 0.02118574 | 0.12253178 | 4.24E-05 | 0.0052258 | -0.04878   |
| 9mo_SIGAE3_ | 0.02386928 | 0.13909191 | 4.34E-05 | 0.0049916 | -0.091842  |
| 9mo_SIGAE3_ | 0.01631369 | 0.0924664  | 4.00E-05 | 0.0058035 | 0.080526   |
| 9mo_SIGAE3_ | 0.02025081 | 0.11676233 | 4.19E-05 | 0.0053364 | -0.025531  |
| 9mo_SIGAE3_ | 0.01586676 | 0.08970834 | 3.98E-05 | 0.0058806 | 0.098494   |
| 9mo_SIGAE3_ | 0.02317499 | 0.13480745 | 4.30E-05 | 0.0050782 | -0.077142  |
| 9mo_SIGAE3_ | 0.01621853 | 0.09187914 | 3.98E-05 | 0.0058806 | 0.080526   |
| 9mo_SIGAE3_ | 0.02783382 | 0.16355711 | 4.48E-05 | 0.0047558 | -0.12024   |
| 9mo_SIGAE3_ | 0.02781384 | 0.16343378 | 4.48E-05 | 0.0047558 | -0.12024   |
| 9mo_SIGAE3_ | 0.01688012 | 0.09596179 | 4.03E-05 | 0.005729  | 0.063215   |
| 9mo_SIGAE3_ | 0.03498619 | 0.20769438 | 4.72E-05 | 0.0045646 | -0.10426   |
| 9mo_SIGAE3_ | 0.07087195 | 0.42914543 | 5.71E-05 | 0.011574  | 0.23476    |
| 9mo_SIGAE3_ | 0.02056429 | 0.11869684 | 4.19E-05 | 0.0053364 | -0.037579  |
| 9mo_SIGAE3_ | 0.05912229 | 0.35663825 | 6.37E-05 | 0.0067983 | 0.074574   |
| 9mo_SIGAE3_ | 0.02589853 | 0.15161444 | 4.40E-05 | 0.0048781 | -0.10813   |
| 9mo_SIGAE3_ | 0.11421292 | 0.6966025  | 6.45E-05 | 0.0040757 | -1.257     |
| 9mo_SIGAE3_ | 0.05435547 | 0.3272222  | 6.14E-05 | 0.0057798 | 0.030074   |
| 9mo_SIGAE3_ | 0.03345217 | 0.19822793 | 4.66E-05 | 0.0045822 | -0.11352   |
| 9mo_SIGAE3_ | 0.08973587 | 0.54555464 | 4.86E-05 | 0.0090548 | -0.47194   |

|             |            |            |          |           |           |
|-------------|------------|------------|----------|-----------|-----------|
| 9mo_SIGAE3_ | 0.02357089 | 0.13725059 | 4.32E-05 | 0.0050338 | -0.084895 |
| 9mo_SIGAE3_ | 0.07063612 | 0.42769012 | 5.71E-05 | 0.011574  | 0.23016   |
| 9mo_SIGAE3_ | 0.02146122 | 0.12423181 | 4.24E-05 | 0.0052258 | -0.04878  |
| 9mo_SIGAE3_ | 0.01761783 | 0.10051422 | 4.06E-05 | 0.0056572 | 0.046584  |
| 9mo_SIGAE3_ | 0.03616105 | 0.21494442 | 4.77E-05 | 0.0045615 | -0.096915 |
| 9mo_SIGAE3_ | 0.0061781  | 0.02991962 | 3.44E-05 | 0.0077366 | 0.50694   |
| 9mo_SIGAE3_ | 0.02791144 | 0.1640361  | 4.48E-05 | 0.0047558 | -0.12024  |
| 9mo_SIGAE3_ | 0.0281485  | 0.165499   | 4.48E-05 | 0.0047558 | -0.12174  |
| 9mo_SIGAE3_ | 0.05118014 | 0.30762723 | 5.87E-05 | 0.0053288 | 0.0077602 |
| 9mo_SIGAE3_ | 0.00630125 | 0.03067957 | 3.44E-05 | 0.0077366 | 0.50694   |
| 9mo_SIGAE3_ | 0.09082631 | 0.55228376 | 4.91E-05 | 0.0083333 | -0.56091  |
| 9mo_SIGAE3_ | 0.02248717 | 0.13056293 | 4.28E-05 | 0.005125  | -0.068556 |
| 9mo_SIGAE3_ | 0.09047344 | 0.5501062  | 4.88E-05 | 0.0086895 | -0.51631  |
| 9mo_SIGAE3_ | 0.02063531 | 0.11913512 | 4.21E-05 | 0.0052798 | -0.037579 |
| 9mo_SIGAE3_ | 0.01816129 | 0.1038679  | 4.09E-05 | 0.0055879 | 0.030658  |
| 9mo_SIGAE3_ | 0.02846392 | 0.16744548 | 4.49E-05 | 0.0047302 | -0.12174  |
| 9mo_SIGAE3_ | 0.06927282 | 0.41927722 | 5.87E-05 | 0.010741  | 0.21895   |
| 9mo_SIGAE3_ | 0.02127721 | 0.12309628 | 4.24E-05 | 0.0052258 | -0.04878  |
| 9mo_SIGAE3_ | 0.09529001 | 0.5798292  | 5.16E-05 | 0.0059226 | -0.91061  |
| 9mo_SIGAE3_ | 0.08817323 | 0.53591156 | 4.80E-05 | 0.010188  | -0.3415   |
| 9mo_SIGAE3_ | 0.04202553 | 0.25113416 | 5.09E-05 | 0.0046676 | -0.0504   |
| 9mo_SIGAE3_ | 0.01413921 | 0.07904767 | 3.89E-05 | 0.0061278 | 0.1561    |
| 9mo_SIGAE3_ | 0.04115423 | 0.24575734 | 5.02E-05 | 0.0046325 | -0.054504 |
| 9mo_SIGAE3_ | 0.02038305 | 0.11757841 | 4.19E-05 | 0.0053364 | -0.025531 |
| 9mo_SIGAE3_ | 0.08978745 | 0.545873   | 4.86E-05 | 0.0090548 | -0.47194  |
| 9mo_SIGAE3_ | 0.08373342 | 0.5085135  | 4.77E-05 | 0.013036  | -0.036078 |
| 9mo_SIGAE3_ | 0.08310723 | 0.50464934 | 4.78E-05 | 0.013315  | 0.02505   |
| 9mo_SIGAF3_ | 0.0073736  | 0.03729709 | 3.50E-05 | 0.0074854 | 0.45576   |
| 9mo_SIGAF3_ | 0.06223128 | 0.37582383 | 6.36E-05 | 0.0076138 | 0.11565   |
| 9mo_SIGAF3_ | 0.02673468 | 0.15677433 | 4.44E-05 | 0.004813  | -0.11546  |
| 9mo_SIGAF3_ | 0.02198666 | 0.12747428 | 4.26E-05 | 0.0051742 | -0.059109 |
| 9mo_SIGAF3_ | 0.0250123  | 0.1461455  | 4.38E-05 | 0.0049138 | -0.10343  |
| 9mo_SIGAF3_ | 0.02319723 | 0.13494469 | 4.30E-05 | 0.0050782 | -0.077142 |
| 9mo_SIGAF3_ | 0.07955293 | 0.4827158  | 4.93E-05 | 0.014315  | 0.15946   |
| 9mo_SIGAF3_ | 0.0181582  | 0.10384887 | 4.09E-05 | 0.0055879 | 0.030658  |
| 9mo_SIGAF3_ | 0.01310923 | 0.07269162 | 3.83E-05 | 0.0063061 | 0.19734   |
| 9mo_SIGAF3_ | 0.03449628 | 0.20467114 | 4.70E-05 | 0.0045688 | -0.10761  |
| 9mo_SIGAF3_ | 0.01925678 | 0.1106282  | 4.14E-05 | 0.0054571 | 0.0010121 |
| 9mo_SIGAF3_ | 0.0532463  | 0.32037753 | 6.05E-05 | 0.0056127 | 0.022172  |
| 9mo_SIGAF3_ | 0.01705988 | 0.0970711  | 4.03E-05 | 0.005729  | 0.063215  |
| 9mo_SIGAF3_ | 0.07668833 | 0.46503827 | 5.13E-05 | 0.014025  | 0.22047   |
| 9mo_SIGAF3_ | 0.02229491 | 0.12937646 | 4.28E-05 | 0.005125  | -0.068556 |
| 9mo_SIGAF3_ | 0.02355821 | 0.13717234 | 4.32E-05 | 0.0050338 | -0.084895 |

|             |            |            |          |           |           |
|-------------|------------|------------|----------|-----------|-----------|
| 9mo_SIGAF3_ | 0.0889741  | 0.5408538  | 4.84E-05 | 0.0094274 | -0.3844   |
| 9mo_SIGAF3_ | 0.01371509 | 0.07643042 | 3.86E-05 | 0.0062156 | 0.17645   |
| 9mo_SIGAF3_ | 0.01897296 | 0.10887671 | 4.14E-05 | 0.0054571 | 0.0010121 |
| 9mo_SIGAF3_ | 0.07887688 | 0.47854385 | 4.97E-05 | 0.014318  | 0.17506   |
| 9mo_SIGAF3_ | 0.0190668  | 0.1094558  | 4.14E-05 | 0.0054571 | 0.0010121 |
| 9mo_SIGAF3_ | 0.01952488 | 0.1122826  | 4.16E-05 | 0.0053955 | -0.012659 |
| 9mo_SIGAF3_ | 0.02593652 | 0.1518489  | 4.40E-05 | 0.0048781 | -0.11213  |
| 9mo_SIGAF3_ | 0.02867406 | 0.16874225 | 4.49E-05 | 0.0047302 | -0.12268  |
| 9mo_SIGAF3_ | 0.01602594 | 0.09069067 | 3.98E-05 | 0.0058806 | 0.098494  |
| 9mo_SIGAF3_ | 0.01192996 | 0.06541436 | 3.77E-05 | 0.0064954 | 0.24064   |
| 9mo_SIGAF3_ | 0.01623978 | 0.09201029 | 4.00E-05 | 0.0058035 | 0.080526  |
| 9mo_SIGAF3_ | 0.05491199 | 0.3306565  | 6.17E-05 | 0.0058704 | 0.034245  |
| 9mo_SIGAF3_ | 0.02629042 | 0.1540328  | 4.42E-05 | 0.0048445 | -0.11213  |
| 9mo_SIGAF3_ | 0.08163182 | 0.49554455 | 4.83E-05 | 0.013957  | 0.078055  |
| 9mo_SIGAF3_ | 0.08624144 | 0.5239905  | 4.77E-05 | 0.01133   | -0.17867  |
| 9mo_SIGAF3_ | 0.04140239 | 0.24728872 | 5.05E-05 | 0.0046492 | -0.054504 |
| 9mo_SIGAF3_ | 0.09472575 | 0.57634723 | 5.13E-05 | 0.0061762 | -0.8688   |
| 9mo_SIGAF3_ | 0.02381243 | 0.13874112 | 4.32E-05 | 0.0050338 | -0.091842 |
| 9mo_SIGAF3_ | 0.01605066 | 0.09084319 | 3.98E-05 | 0.0058806 | 0.098494  |
| 9mo_SIGAF3_ | 0.00362707 | 0.01417722 | 3.29E-05 | 0.0084138 | 0.63801   |
| 9mo_SIGAF3_ | 0.08154739 | 0.49502355 | 4.83E-05 | 0.013957  | 0.078055  |
| 9mo_SIGAF3_ | 0.04094159 | 0.24444515 | 5.02E-05 | 0.0046325 | -0.058715 |
| 9mo_SIGAF3_ | 0.04464686 | 0.26731038 | 5.30E-05 | 0.0047888 | -0.031751 |
| 9mo_SIGAF3_ | 0.07295073 | 0.44197357 | 5.49E-05 | 0.012637  | 0.24489   |
| 9mo_SIGAF3_ | 0.03170571 | 0.18745056 | 4.60E-05 | 0.0046154 | -0.12002  |
| 9mo_SIGAF3_ | 0.02395298 | 0.13960843 | 4.34E-05 | 0.0049916 | -0.091842 |
| 9mo_SIGAF3_ | 0.07497465 | 0.45446318 | 5.28E-05 | 0.013537  | 0.24193   |
| 9mo_SIGAF3_ | 0.08791204 | 0.5342998  | 4.80E-05 | 0.010188  | -0.29935  |
| 9mo_SIGAF3_ | 0.04739399 | 0.28426293 | 5.53E-05 | 0.0049654 | -0.01514  |
| 9mo_SIGAF3_ | 0.02546924 | 0.1489653  | 4.40E-05 | 0.0048781 | -0.10813  |
| 9mo_SIGAF3_ | 0.02180917 | 0.12637898 | 4.26E-05 | 0.0051742 | -0.059109 |
| 9mo_SIGAF3_ | 0.02274938 | 0.13218102 | 4.30E-05 | 0.0050782 | -0.077142 |
| 9mo_SIGAF3_ | 0.09168422 | 0.5575779  | 4.96E-05 | 0.0076529 | -0.60562  |
| 9mo_SIGAF3_ | 0.01388103 | 0.07745445 | 3.86E-05 | 0.0062156 | 0.17645   |
| 9mo_SIGAF3_ | 0.07392797 | 0.44800413 | 5.38E-05 | 0.013116  | 0.24502   |
| 9mo_SIGAF3_ | 0.01856019 | 0.10632954 | 4.11E-05 | 0.0055212 | 0.015459  |
| 9mo_SIGAF3_ | 0.09470367 | 0.576211   | 5.13E-05 | 0.0061762 | -0.8688   |
| 9mo_SIGAF3_ | 0.02005241 | 0.115538   | 4.19E-05 | 0.0053364 | -0.025531 |
| 9mo_SIGAF3_ | 0.02157246 | 0.12491822 | 4.24E-05 | 0.0052258 | -0.04878  |
| 9mo_SIGAF3_ | 0.01517588 | 0.08544495 | 3.95E-05 | 0.0059603 | 0.11709   |
| 9mo_SIGAF3_ | 0.05478685 | 0.3298843  | 6.17E-05 | 0.0058704 | 0.034245  |
| 9mo_SIGAF3_ | 0.08657728 | 0.526063   | 4.77E-05 | 0.01133   | -0.21781  |
| 9mo_SIGAF3_ | 0.0818144  | 0.4966713  | 4.81E-05 | 0.013778  | 0.078055  |

|             |            |            |          |           |           |
|-------------|------------|------------|----------|-----------|-----------|
| 9mo_SIGAF3_ | 0.0206521  | 0.11923873 | 4.21E-05 | 0.0052798 | -0.037579 |
| 9mo_SIGAF3_ | 0.09044682 | 0.5499419  | 4.88E-05 | 0.0086895 | -0.51631  |
| 9mo_SIGAF3_ | 0.09710848 | 0.591051   | 5.32E-05 | 0.0050496 | -1.03     |
| 9mo_SIGAF3_ | 0.07031258 | 0.4256935  | 5.76E-05 | 0.011297  | 0.23016   |
| 9mo_SIGAF3_ | 0.07230718 | 0.4380022  | 5.54E-05 | 0.012382  | 0.24161   |
| 9mo_SIGAF3_ | 0.03140367 | 0.18558666 | 4.58E-05 | 0.00463   | -0.12002  |
| 9mo_SIGAF3_ | 0.01095795 | 0.05941607 | 3.71E-05 | 0.0066957 | 0.2858    |
| 9mo_SIGAF3_ | 0.01902045 | 0.10916981 | 4.14E-05 | 0.0054571 | 0.0010121 |
| 9mo_SIGAF3_ | 0.01121029 | 0.06097331 | 3.71E-05 | 0.0066957 | 0.2858    |
| 9mo_SIGAF3_ | 0.06943111 | 0.420254   | 5.82E-05 | 0.011019  | 0.21895   |
| 9mo_SIGAF3_ | 0.06031978 | 0.36402798 | 6.38E-05 | 0.0070986 | 0.087064  |
| 9mo_SIGAF3_ | 0.09335329 | 0.5678777  | 5.06E-05 | 0.0067258 | -0.73907  |
| 9mo_SIGAF3_ | 0.0327175  | 0.19369432 | 4.64E-05 | 0.0045915 | -0.11603  |
| 9mo_SIGAF3_ | 0.02235859 | 0.12976949 | 4.28E-05 | 0.005125  | -0.068556 |
| 9mo_SIGAF3_ | 0.02831457 | 0.1665238  | 4.49E-05 | 0.0047302 | -0.12174  |
| 9mo_SIGAF3_ | 0.01668934 | 0.09478451 | 4.00E-05 | 0.0058035 | 0.080526  |
| 9mo_SIGAF3_ | 0.01419716 | 0.07940523 | 3.89E-05 | 0.0061278 | 0.1561    |
| 9mo_SIGAF3_ | 0.02042689 | 0.11784891 | 4.19E-05 | 0.0053364 | -0.025531 |
| 9mo_SIGAF3_ | 0.07615775 | 0.4617641  | 5.18E-05 | 0.013885  | 0.22792   |
| 9mo_SIGAF3_ | 0.02487855 | 0.14532013 | 4.36E-05 | 0.0049516 | -0.10343  |
| 9mo_SIGAF3_ | 0.0299392  | 0.17654943 | 4.55E-05 | 0.0046645 | -0.12301  |
| 9mo_SIGAF3_ | 0.03910031 | 0.2330826  | 4.92E-05 | 0.0045932 | -0.071721 |
| 9mo_SIGAF3_ | 0.01376857 | 0.07676043 | 3.86E-05 | 0.0062156 | 0.17645   |
| 9mo_SIGAF3_ | 0.0799955  | 0.48544684 | 4.90E-05 | 0.014278  | 0.14202   |
| 9mo_SIGAF3_ | 0.01965879 | 0.11310899 | 4.16E-05 | 0.0053955 | -0.012659 |
| 9mo_SIGAF3_ | 0.01730748 | 0.09859905 | 4.03E-05 | 0.005729  | 0.046584  |
| 9mo_SIGAF3_ | 0.02968272 | 0.17496668 | 4.53E-05 | 0.0046846 | -0.1231   |
| 9mo_SIGAF3_ | 0.01096075 | 0.05943339 | 3.71E-05 | 0.0066957 | 0.2858    |
| 9mo_SIGAF3_ | 0.01657515 | 0.09407983 | 4.00E-05 | 0.0058035 | 0.080526  |
| 9mo_SIGAF3_ | 0.03091896 | 0.18259554 | 4.58E-05 | 0.00463   | -0.12145  |
| 9mo_SIGAF3_ | 0.08760589 | 0.5324105  | 4.79E-05 | 0.010571  | -0.29935  |
| 9mo_SIGAF3_ | 0.07806728 | 0.47354782 | 5.01E-05 | 0.014289  | 0.20103   |
| 9mo_SIGAF3_ | 0.01880475 | 0.10783869 | 4.11E-05 | 0.0055212 | 0.015459  |
| 9mo_SIGAF3_ | 0.02101523 | 0.12147955 | 4.21E-05 | 0.0052798 | -0.037579 |
| 9mo_SIGAF3_ | 0.07237631 | 0.43842882 | 5.54E-05 | 0.012382  | 0.24373   |
| 9mo_SIGAF3_ | 0.02376704 | 0.138461   | 4.32E-05 | 0.0050338 | -0.091842 |
| 9mo_SIGAF3_ | 0.08784862 | 0.5339084  | 4.80E-05 | 0.010188  | -0.29935  |
| 9mo_SIGAF3_ | 0.07950448 | 0.48241675 | 4.93E-05 | 0.014315  | 0.15946   |
| 9mo_SIGAF3_ | 0.0141839  | 0.07932342 | 3.89E-05 | 0.0061278 | 0.1561    |
| 9mo_SIGAF3_ | 0.02395762 | 0.13963708 | 4.34E-05 | 0.0049916 | -0.091842 |
| 9mo_SIGAF3_ | 0.03413326 | 0.20243096 | 4.70E-05 | 0.0045688 | -0.10761  |
| 9mo_SIGAF3_ | 0.01958979 | 0.11268318 | 4.16E-05 | 0.0053955 | -0.012659 |
| 9mo_SIGAF3_ | 0.08795301 | 0.53455263 | 4.80E-05 | 0.010188  | -0.29935  |

|             |            |            |          |           |            |
|-------------|------------|------------|----------|-----------|------------|
| 9mo_SIGAF3_ | 0.0819675  | 0.49761608 | 4.81E-05 | 0.013778  | 0.078055   |
| 9mo_SIGAF3_ | 0.01329985 | 0.07386793 | 3.83E-05 | 0.0063061 | 0.19734    |
| 9mo_SIGAF3_ | 0.08527595 | 0.5180325  | 4.76E-05 | 0.012059  | -0.10433   |
| 9mo_SIGAF3_ | 0.02215192 | 0.12849411 | 4.26E-05 | 0.0051742 | -0.068556  |
| 9mo_SIGAF3_ | 0.08354899 | 0.5073754  | 4.77E-05 | 0.013036  | -0.0045591 |
| 9mo_SIGAF3_ | 0.0120072  | 0.06589103 | 3.77E-05 | 0.0064954 | 0.24064    |
| 9mo_SIGAF3_ | 0.0404382  | 0.24133874 | 4.99E-05 | 0.0046177 | -0.063007  |
| 9mo_SIGAF3_ | 0.09668643 | 0.58844656 | 5.28E-05 | 0.0052469 | -1.03      |
| 9mo_SIGAF3_ | 0.02232686 | 0.12957366 | 4.28E-05 | 0.005125  | -0.068556  |
| 9mo_SIGAF3_ | 0.06552737 | 0.39616397 | 6.20E-05 | 0.0089013 | 0.16566    |
| 9mo_SIGAF3_ | 0.03037651 | 0.17924808 | 4.57E-05 | 0.0046464 | -0.12245   |
| 9mo_SIGAF3_ | 0.07283583 | 0.44126448 | 5.49E-05 | 0.012637  | 0.24373    |
| 9mo_SIGAF3_ | 0.01317105 | 0.07307316 | 3.83E-05 | 0.0063061 | 0.19734    |
| 9mo_SIGAF3_ | 0.0164652  | 0.09340136 | 4.00E-05 | 0.0058035 | 0.080526   |
| 9mo_SIGAF3_ | 0.01882187 | 0.10794434 | 4.11E-05 | 0.0055212 | 0.015459   |
| 9mo_SIGAF3_ | 0.01573153 | 0.08887389 | 3.98E-05 | 0.0058806 | 0.098494   |
| 9mo_SIGAF3_ | 0.01702666 | 0.09686612 | 4.03E-05 | 0.005729  | 0.063215   |
| 9mo_SIGAF3_ | 0.01546315 | 0.0872177  | 3.95E-05 | 0.0059603 | 0.11709    |
| 9mo_SIGAF3_ | 0.01587201 | 0.08974075 | 3.98E-05 | 0.0058806 | 0.098494   |
| 9mo_SIGAF3_ | 0.08021755 | 0.4868171  | 4.87E-05 | 0.014207  | 0.14202    |
| 9mo_SIGAF3_ | 0.07790177 | 0.47252646 | 5.05E-05 | 0.014229  | 0.20103    |
| 9mo_SIGAF3_ | 0.0223448  | 0.12968434 | 4.28E-05 | 0.005125  | -0.068556  |
| 9mo_SIGAF3_ | 0.05948537 | 0.35887882 | 6.37E-05 | 0.0067983 | 0.080679   |
| 9mo_SIGAF3_ | 0.04476982 | 0.26806915 | 5.30E-05 | 0.0047888 | -0.031751  |
| 9mo_SIGAF3_ | 0.04087954 | 0.24406226 | 5.02E-05 | 0.0046325 | -0.058715  |
| 9mo_SIGAF3_ | 0.02823588 | 0.16603819 | 4.49E-05 | 0.0047302 | -0.12174   |
| 9mo_SIGAF3_ | 0.12589136 | 0.7686702  | 6.97E-05 | 0.0054997 | -0.97067   |
| 9mo_SIGAF3_ | 0.0341044  | 0.20225286 | 4.68E-05 | 0.0045746 | -0.10761   |
| 9mo_SIGAF3_ | 0.07053607 | 0.4270727  | 5.71E-05 | 0.011574  | 0.23016    |
| 9mo_SIGAF3_ | 0.05892162 | 0.35539994 | 6.35E-05 | 0.0066597 | 0.074574   |
| 9mo_SIGAF3_ | 0.08170271 | 0.49598205 | 4.83E-05 | 0.013957  | 0.078055   |
| 9mo_SIGAF3_ | 0.01038428 | 0.05587598 | 3.68E-05 | 0.0068    | 0.30902    |
| 9mo_SIGAF3_ | 0.02220321 | 0.12881058 | 4.28E-05 | 0.005125  | -0.068556  |
| 9mo_SIGAF3_ | 0.01553566 | 0.08766515 | 3.95E-05 | 0.0059603 | 0.11709    |
| 9mo_SIGAF3_ | 0.03651432 | 0.21712449 | 4.79E-05 | 0.0045625 | -0.092976  |
| 9mo_SIGAF3_ | 0.02776396 | 0.16312599 | 4.48E-05 | 0.0047558 | -0.12024   |
| 9mo_SIGAF3_ | 0.06772074 | 0.40969932 | 6.03E-05 | 0.009922  | 0.19812    |
| 9mo_SIGAF3_ | 0.12080587 | 0.73728764 | 6.75E-05 | 0.0049988 | -1.0611    |
| 9mo_SIGAF3_ | 0.03413515 | 0.20244262 | 4.70E-05 | 0.0045688 | -0.10761   |
| 9mo_SIGAF3_ | 0.08128063 | 0.49337736 | 4.83E-05 | 0.013957  | 0.10139    |
| 9mo_SIGAF3_ | 0.03184839 | 0.188331   | 4.60E-05 | 0.0046154 | -0.12002   |
| 9mo_SIGAF3_ | 0.03841909 | 0.22887878 | 4.87E-05 | 0.0045758 | -0.076088  |
| 9mo_SIGAF3_ | 0.03025258 | 0.17848329 | 4.55E-05 | 0.0046645 | -0.12245   |

|             |            |            |          |           |            |
|-------------|------------|------------|----------|-----------|------------|
| 9mo_SIGAF3_ | 0.0267567  | 0.1569102  | 4.44E-05 | 0.004813  | -0.11546   |
| 9mo_SIGAF3_ | 0.05617157 | 0.33842936 | 6.24E-05 | 0.0060668 | 0.047788   |
| 9mo_SIGAF3_ | 0.0136217  | 0.07585409 | 3.86E-05 | 0.0062156 | 0.17645    |
| 9mo_SIGAF3_ | 0.05838229 | 0.3520717  | 6.34E-05 | 0.0065282 | 0.068735   |
| 9mo_SIGAF3_ | 0.01840014 | 0.10534188 | 4.09E-05 | 0.0055879 | 0.015459   |
| 9mo_SIGAF3_ | 0.05587493 | 0.33659878 | 6.24E-05 | 0.0060668 | 0.043089   |
| 9mo_SIGAF3_ | 0.01766207 | 0.10078725 | 4.06E-05 | 0.0056572 | 0.046584   |
| 9mo_SIGAF3_ | 0.02228935 | 0.12934218 | 4.28E-05 | 0.005125  | -0.068556  |
| 9mo_SIGAF3_ | 0.02690208 | 0.15780735 | 4.44E-05 | 0.004813  | -0.11546   |
| 9mo_SIGAF3_ | 0.01887261 | 0.10825748 | 4.11E-05 | 0.0055212 | 0.015459   |
| 9mo_SIGAF3_ | 0.01021582 | 0.05483643 | 3.65E-05 | 0.0069072 | 0.33263    |
| 9mo_SIGAF3_ | 0.02326644 | 0.13537179 | 4.30E-05 | 0.0050782 | -0.084895  |
| 9mo_SIGAF3_ | 0.01830558 | 0.10475834 | 4.09E-05 | 0.0055879 | 0.030658   |
| 9mo_SIGAF3_ | 0.08430386 | 0.51203376 | 4.76E-05 | 0.012731  | -0.069378  |
| 9mo_SIGAF3_ | 0.03096573 | 0.1828841  | 4.58E-05 | 0.00463   | -0.12145   |
| 9mo_SIGAF3_ | 0.03570001 | 0.21209937 | 4.74E-05 | 0.0045622 | -0.096915  |
| 9mo_SIGAF3_ | 0.02063065 | 0.11910636 | 4.21E-05 | 0.0052798 | -0.037579  |
| 9mo_SIGAF3_ | 0.02370655 | 0.13808773 | 4.32E-05 | 0.0050338 | -0.084895  |
| 9mo_SIGAF3_ | 0.08566222 | 0.5204162  | 4.76E-05 | 0.0117    | -0.14081   |
| 9mo_SIGAF3_ | 0.02220891 | 0.12884575 | 4.28E-05 | 0.005125  | -0.068556  |
| 9mo_SIGAF3_ | 0.01110431 | 0.0603193  | 3.71E-05 | 0.0066957 | 0.2858     |
| 9mo_SIGAF3_ | 0.02440645 | 0.14240682 | 4.36E-05 | 0.0049516 | -0.098011  |
| 9mo_SIGAF3_ | 0.06358676 | 0.38418847 | 6.30E-05 | 0.008216  | 0.13178    |
| 9mo_SIGAF3_ | 0.01547377 | 0.08728321 | 3.95E-05 | 0.0059603 | 0.11709    |
| 9mo_SIGAF3_ | 0.01838807 | 0.10526736 | 4.09E-05 | 0.0055879 | 0.015459   |
| 9mo_SIGAF3_ | 0.02308708 | 0.13426499 | 4.30E-05 | 0.0050782 | -0.077142  |
| 9mo_SIGAF3_ | 0.05083858 | 0.30551946 | 5.83E-05 | 0.0052672 | 0.0077602  |
| 9mo_SIGAF3_ | 0.08359723 | 0.5076731  | 4.77E-05 | 0.013036  | -0.0045591 |
| 9mo_SIGAF3_ | 0.08696518 | 0.52845675 | 4.78E-05 | 0.010952  | -0.25808   |
| 9mo_SIGAF3_ | 0.00944921 | 0.05010565 | 3.62E-05 | 0.0070172 | 0.35661    |
| 9mo_SIGAF3_ | 0.01458525 | 0.08180019 | 3.89E-05 | 0.0061278 | 0.1363     |
| 9mo_SIGAF3_ | 0.03234612 | 0.19140248 | 4.62E-05 | 0.0046026 | -0.11821   |
| 9mo_SIGAF3_ | 0.02143066 | 0.12404322 | 4.24E-05 | 0.0052258 | -0.04878   |
| 9mo_SIGAF3_ | 0.02659347 | 0.15590292 | 4.44E-05 | 0.004813  | -0.11546   |
| 9mo_SIGAF3_ | 0.01918415 | 0.11018001 | 4.14E-05 | 0.0054571 | 0.0010121  |
| 9mo_SIGAF3_ | 0.02737067 | 0.16069901 | 4.46E-05 | 0.0047834 | -0.11816   |
| 9mo_SIGAF3_ | 0.03806591 | 0.22669931 | 4.87E-05 | 0.0045758 | -0.080425  |
| 9mo_SIGAF3_ | 0.07867209 | 0.47728008 | 4.97E-05 | 0.014318  | 0.18889    |
| 9mo_SIGAF3_ | 0.03944928 | 0.2352361  | 4.92E-05 | 0.0045932 | -0.067351  |
| 9mo_SIGAF3_ | 0.03575512 | 0.21243946 | 4.77E-05 | 0.0045615 | -0.096915  |
| 9mo_SIGAF3_ | 0.00913583 | 0.04817179 | 3.59E-05 | 0.00713   | 0.38094    |
| 9mo_SIGAF3_ | 0.09031948 | 0.5491561  | 4.88E-05 | 0.0086895 | -0.51631   |
| 9mo_SIGAF3_ | 0.01992082 | 0.11472599 | 4.16E-05 | 0.0053955 | -0.012659  |

|             |            |            |          |           |           |
|-------------|------------|------------|----------|-----------|-----------|
| 9mo_SIGAF3_ | 0.02443236 | 0.14256671 | 4.36E-05 | 0.0049516 | -0.098011 |
| 9mo_SIGAF3_ | 0.08881209 | 0.539854   | 4.82E-05 | 0.0098057 | -0.3844   |
| 9mo_SIGAF3_ | 0.02308117 | 0.13422847 | 4.30E-05 | 0.0050782 | -0.077142 |
| 9mo_SIGAF3_ | 0.08257458 | 0.5013624  | 4.79E-05 | 0.013563  | 0.05262   |
| 9mo_SIGAF3_ | 0.02878615 | 0.16943392 | 4.51E-05 | 0.0047064 | -0.12268  |
| 9mo_SIGAF3_ | 0.02329664 | 0.13555814 | 4.32E-05 | 0.0050338 | -0.084895 |
| 9mo_SIGAF3_ | 0.02102635 | 0.12154821 | 4.21E-05 | 0.0052798 | -0.037579 |
| 9mo_SIGAF3_ | 0.02003064 | 0.11540368 | 4.19E-05 | 0.0053364 | -0.025531 |
| 9mo_SIGAF3_ | 0.07401615 | 0.44854826 | 5.38E-05 | 0.013116  | 0.24406   |
| 9mo_SIGAF3_ | 0.02089401 | 0.12073154 | 4.21E-05 | 0.0052798 | -0.037579 |
| 9mo_SIGAF3_ | 0.0133886  | 0.07441564 | 3.83E-05 | 0.0063061 | 0.19734   |
| 9mo_SIGAF3_ | 0.0804196  | 0.48806396 | 4.87E-05 | 0.014207  | 0.14202   |
| 9mo_SIGAF3_ | 0.01460083 | 0.08189632 | 3.89E-05 | 0.0061278 | 0.1363    |
| 9mo_SIGAF3_ | 0.02285829 | 0.13285312 | 4.30E-05 | 0.0050782 | -0.077142 |
| 9mo_SIGAF3_ | 0.02289713 | 0.13309279 | 4.30E-05 | 0.0050782 | -0.077142 |
| 9mo_SIGAF3_ | 0.00658708 | 0.03244343 | 3.47E-05 | 0.0076096 | 0.48124   |
| 9mo_SIGAF3_ | 0.05466649 | 0.3291415  | 6.14E-05 | 0.0057798 | 0.034245  |
| 9mo_SIGAF3_ | 0.04594103 | 0.2752967  | 5.39E-05 | 0.0048522 | -0.021643 |
| 9mo_SIGAF3_ | 0.02070789 | 0.11958297 | 4.21E-05 | 0.0052798 | -0.037579 |
| 9mo_SIGAF3_ | 0.01655108 | 0.09393129 | 4.00E-05 | 0.0058035 | 0.080526  |
| 9mo_SIGAF3_ | 0.0233067  | 0.13562024 | 4.32E-05 | 0.0050338 | -0.084895 |
| 9mo_SIGAF3_ | 0.01109583 | 0.06026696 | 3.71E-05 | 0.0066957 | 0.2858    |
| 9mo_SIGAF3_ | 0.12021264 | 0.73362684 | 6.73E-05 | 0.0049233 | -1.0756   |
| 9mo_SIGAF3_ | 0.0184764  | 0.10581246 | 4.11E-05 | 0.0055212 | 0.015459  |
| 9mo_SIGAF3_ | 0.09059144 | 0.55083436 | 4.91E-05 | 0.0083333 | -0.51631  |
| 9mo_SIGAF3_ | 0.03053334 | 0.18021585 | 4.57E-05 | 0.0046464 | -0.12245  |
| 9mo_SIGAF3_ | 0.08137631 | 0.49396786 | 4.83E-05 | 0.013957  | 0.10139   |
| 9mo_SIGAF3_ | 0.07086537 | 0.4291048  | 5.71E-05 | 0.011574  | 0.23476   |
| 9mo_SIGAF3_ | 0.092826   | 0.56462383 | 5.02E-05 | 0.0070215 | -0.69483  |
| 9mo_SIGAF3_ | 0.01289185 | 0.07135021 | 3.80E-05 | 0.0063994 | 0.21875   |
| 9mo_SIGAF3_ | 0.0232235  | 0.1351068  | 4.30E-05 | 0.0050782 | -0.084895 |
| 9mo_SIGAF3_ | 0.01324372 | 0.07352159 | 3.83E-05 | 0.0063061 | 0.19734   |
| 9mo_SIGAF3_ | 0.01917253 | 0.11010829 | 4.14E-05 | 0.0054571 | 0.0010121 |
| 9mo_SIGAF3_ | 0.02966687 | 0.17486884 | 4.53E-05 | 0.0046846 | -0.1231   |
| 9mo_SIGAF3_ | 0.02840495 | 0.16708156 | 4.49E-05 | 0.0047302 | -0.12174  |
| 9mo_SIGAF3_ | 0.08707052 | 0.52910674 | 4.78E-05 | 0.010952  | -0.25808  |
| 9mo_SIGAF3_ | 0.03226006 | 0.19087142 | 4.62E-05 | 0.0046026 | -0.11821  |
| 9mo_SIGAF3_ | 0.03133898 | 0.18518741 | 4.58E-05 | 0.00463   | -0.12002  |
| 9mo_SIGAF3_ | 0.09630832 | 0.5861133  | 5.24E-05 | 0.0054581 | -0.99133  |
| 9mo_SIGAF3_ | 0.01287695 | 0.07125825 | 3.80E-05 | 0.0063994 | 0.21875   |
| 9mo_SIGAF3_ | 0.01263152 | 0.06974371 | 3.80E-05 | 0.0063994 | 0.21875   |
| 9mo_SIGAF3_ | 0.02626945 | 0.15390337 | 4.42E-05 | 0.0048445 | -0.11213  |
| 9mo_SIGAF3_ | 0.07645268 | 0.4635841  | 5.13E-05 | 0.014025  | 0.22792   |



|             |            |            |          |           |           |
|-------------|------------|------------|----------|-----------|-----------|
| 9mo_SIGAF3_ | 0.01711222 | 0.09739409 | 4.03E-05 | 0.005729  | 0.063215  |
| 9mo_SIGAF3_ | 0.09018064 | 0.5482993  | 4.88E-05 | 0.0086895 | -0.47194  |
| 9mo_SIGAF3_ | 0.01727852 | 0.09842032 | 4.03E-05 | 0.005729  | 0.046584  |
| 9mo_SIGAF3_ | 0.02568982 | 0.1503265  | 4.40E-05 | 0.0048781 | -0.10813  |
| 9mo_SIGAF3_ | 0.02995832 | 0.1766674  | 4.55E-05 | 0.0046645 | -0.12301  |
| 9mo_SIGAF3_ | 0.08648587 | 0.5254989  | 4.77E-05 | 0.011133  | -0.21781  |
| 9mo_SIGAF3_ | 0.02551047 | 0.14921974 | 4.40E-05 | 0.0048781 | -0.10813  |
| 9mo_SIGAF3_ | 0.07786995 | 0.4723301  | 5.05E-05 | 0.014229  | 0.20103   |
| 9mo_SIGAF3_ | 0.02357129 | 0.13725305 | 4.32E-05 | 0.0050338 | -0.084895 |
| 9mo_SIGAF3_ | 0.02170429 | 0.12573177 | 4.26E-05 | 0.0051742 | -0.059109 |
| 9mo_SIGAF3_ | 0.0648016  | 0.3916853  | 6.24E-05 | 0.0086643 | 0.15715   |
| 9mo_SIGAF3_ | 0.03838795 | 0.22868665 | 4.87E-05 | 0.0045758 | -0.076088 |
| 9mo_SIGAF3_ | 0.02829469 | 0.16640116 | 4.49E-05 | 0.0047302 | -0.12174  |
| 9mo_SIGAF3_ | 0.08406342 | 0.51054996 | 4.76E-05 | 0.012731  | -0.036078 |
| 9mo_SIGAF3_ | 0.02466897 | 0.14402679 | 4.36E-05 | 0.0049516 | -0.098011 |
| 9mo_SIGAF3_ | 0.02421344 | 0.14121576 | 4.34E-05 | 0.0049916 | -0.091842 |
| 9mo_SIGAF3_ | 0.07065661 | 0.4278165  | 5.71E-05 | 0.011574  | 0.23016   |
| 9mo_SIGAF3_ | 0.03392263 | 0.20113114 | 4.68E-05 | 0.0045746 | -0.11071  |
| 9mo_SIGAF3_ | 0.09828463 | 0.59830904 | 5.40E-05 | 0.0046955 | -1.1032   |
| 9mo_SIGAF3_ | 0.01887752 | 0.10828779 | 4.11E-05 | 0.0055212 | 0.015459  |
| 9mo_SIGAF3_ | 0.09655397 | 0.58762914 | 5.28E-05 | 0.0052469 | -0.99133  |
| 9mo_SIGAF3_ | 0.06022151 | 0.36342153 | 6.38E-05 | 0.0070986 | 0.087064  |
| 9mo_SIGAF3_ | 0.09734584 | 0.5925158  | 5.32E-05 | 0.0050496 | -1.0673   |
| 9mo_SIGAF3_ | 0.0115695  | 0.06318999 | 3.74E-05 | 0.0065941 | 0.263     |
| 9mo_SIGAF3_ | 0.06894658 | 0.41726395 | 5.87E-05 | 0.010741  | 0.21248   |
| 9mo_SIGAF3_ | 0.04172571 | 0.24928394 | 5.09E-05 | 0.0046676 | -0.0504   |
| 9mo_SIGAF3_ | 0.01438894 | 0.08058874 | 3.89E-05 | 0.0061278 | 0.1561    |
| 9mo_SIGAF3_ | 0.02618789 | 0.1534001  | 4.42E-05 | 0.0048445 | -0.11213  |
| 9mo_SIGAF3_ | 0.01313533 | 0.07285273 | 3.83E-05 | 0.0063061 | 0.19734   |
| 9mo_SIGAF3_ | 0.0213806  | 0.12373427 | 4.24E-05 | 0.0052258 | -0.04878  |
| 9mo_SIGAF3_ | 0.03923341 | 0.23390396 | 4.92E-05 | 0.0045932 | -0.071721 |
| 9mo_SIGAF3_ | 0.0321901  | 0.19043972 | 4.62E-05 | 0.0046026 | -0.11821  |
| 9mo_SIGAF3_ | 0.02233137 | 0.1296015  | 4.28E-05 | 0.005125  | -0.068556 |
| 9mo_SIGAF3_ | 0.03080733 | 0.18190661 | 4.57E-05 | 0.0046464 | -0.12145  |
| 9mo_SIGAF3_ | 0.0194854  | 0.11203899 | 4.14E-05 | 0.0054571 | -0.012659 |
| 9mo_SIGAF3_ | 0.06015543 | 0.36301377 | 6.38E-05 | 0.0070986 | 0.087064  |
| 9mo_SIGAF3_ | 0.07730614 | 0.4688508  | 5.09E-05 | 0.014141  | 0.21153   |
| 9mo_SIGAF3_ | 0.07520466 | 0.45588255 | 5.28E-05 | 0.013537  | 0.23858   |
| 9mo_SIGAF3_ | 0.02832697 | 0.16660033 | 4.49E-05 | 0.0047302 | -0.12174  |
| 9mo_SIGAF3_ | 0.03416155 | 0.20260555 | 4.70E-05 | 0.0045688 | -0.10761  |
| 9mo_SIGAF3_ | 0.06163017 | 0.37211436 | 6.37E-05 | 0.0074328 | 0.10802   |
| 9mo_SIGAF3_ | 0.07272071 | 0.44055414 | 5.49E-05 | 0.012637  | 0.24373   |
| 9mo_SIGAF3_ | 0.02910835 | 0.17142224 | 4.51E-05 | 0.0047064 | -0.12268  |

|             |            |            |          |           |            |
|-------------|------------|------------|----------|-----------|------------|
| 9mo_SIGAF3_ | 0.05164793 | 0.310514   | 5.92E-05 | 0.0053939 | 0.011221   |
| 9mo_SIGAF3_ | 0.02041846 | 0.11779694 | 4.19E-05 | 0.0053364 | -0.025531  |
| 9mo_SIGAF3_ | 0.01641574 | 0.09309611 | 4.00E-05 | 0.0058035 | 0.080526   |
| 9mo_SIGAF3_ | 0.03403597 | 0.20183054 | 4.68E-05 | 0.0045746 | -0.10761   |
| 9mo_SIGAF3_ | 0.08332273 | 0.5059792  | 4.78E-05 | 0.013315  | -0.0045591 |
| 9mo_SIGAF3_ | 0.09839831 | 0.5990105  | 5.40E-05 | 0.0046955 | -1.1375    |
| 9mo_SIGAF3_ | 0.01278954 | 0.07071884 | 3.80E-05 | 0.0063994 | 0.21875    |
| 9mo_SIGAF3_ | 0.0412488  | 0.24634092 | 5.05E-05 | 0.0046492 | -0.054504  |
| 9mo_SIGAF3_ | 0.08460632 | 0.51390016 | 4.76E-05 | 0.012404  | -0.069378  |
| 9mo_SIGAF3_ | 0.01868733 | 0.10711413 | 4.11E-05 | 0.0055212 | 0.015459   |
| 9mo_SIGAF3_ | 0.0853616  | 0.518561   | 4.76E-05 | 0.012059  | -0.14081   |
| 9mo_SIGAF3_ | 0.09121525 | 0.55468386 | 4.93E-05 | 0.0079874 | -0.56091   |
| 9mo_SIGAF3_ | 0.01732898 | 0.09873174 | 4.06E-05 | 0.0056572 | 0.046584   |
| 9mo_SIGAF3_ | 0.01798659 | 0.10278984 | 4.09E-05 | 0.0055879 | 0.030658   |
| 9mo_SIGAF3_ | 0.01908757 | 0.10958397 | 4.14E-05 | 0.0054571 | 0.0010121  |
| 9mo_SIGAF3_ | 0.02527687 | 0.14777818 | 4.38E-05 | 0.0049138 | -0.10343   |
| 9mo_SIGAF3_ | 0.09656455 | 0.58769447 | 5.28E-05 | 0.0052469 | -0.99133   |
| 9mo_SIGAF3_ | 0.02601908 | 0.15235835 | 4.42E-05 | 0.0048445 | -0.11213   |
| 9mo_SIGAF3_ | 0.02307295 | 0.13417779 | 4.30E-05 | 0.0050782 | -0.077142  |
| 9mo_SIGAF3_ | 0.01647473 | 0.09346017 | 4.00E-05 | 0.0058035 | 0.080526   |
| 9mo_SIGAF3_ | 0.07668866 | 0.46504036 | 5.13E-05 | 0.014025  | 0.22047    |
| 9mo_SIGAF3_ | 0.02699745 | 0.15839589 | 4.44E-05 | 0.004813  | -0.11816   |
| 9mo_SIGAF3_ | 0.01759421 | 0.10036843 | 4.06E-05 | 0.0056572 | 0.046584   |
| 9mo_SIGAF3_ | 0.02078098 | 0.12003405 | 4.21E-05 | 0.0052798 | -0.037579  |
| 9mo_SIGAF3_ | 0.04556552 | 0.2729794  | 5.39E-05 | 0.0048522 | -0.024952  |
| 9mo_SIGAF3_ | 0.01852528 | 0.10611408 | 4.11E-05 | 0.0055212 | 0.015459   |
| 9mo_SIGAF3_ | 0.0299151  | 0.17640069 | 4.55E-05 | 0.0046645 | -0.12301   |
| 9mo_SIGAF3_ | 0.08946517 | 0.54388416 | 4.86E-05 | 0.0090548 | -0.42792   |
| 9mo_SIGAF3_ | 0.01156887 | 0.06318607 | 3.74E-05 | 0.0065941 | 0.263      |
| 9mo_SIGAF3_ | 0.08612815 | 0.52329135 | 4.76E-05 | 0.0117    | -0.17867   |
| 9mo_SIGAF3_ | 0.02207249 | 0.12800395 | 4.26E-05 | 0.0051742 | -0.059109  |
| 9mo_SIGAF3_ | 0.0096137  | 0.0511207  | 3.62E-05 | 0.0070172 | 0.35661    |
| 9mo_SIGAF3_ | 0.07591906 | 0.46029115 | 5.18E-05 | 0.013885  | 0.23393    |
| 9mo_SIGAF3_ | 0.03445196 | 0.20439763 | 4.70E-05 | 0.0045688 | -0.10761   |
| 9mo_SIGAF3_ | 0.05111329 | 0.30721468 | 5.87E-05 | 0.0053288 | 0.0077602  |
| 9mo_SIGAF3_ | 0.07682235 | 0.4658653  | 5.13E-05 | 0.014025  | 0.22047    |
| 9mo_SIGAF3_ | 0.03953169 | 0.23574466 | 4.92E-05 | 0.0045932 | -0.067351  |
| 9mo_SIGAF3_ | 0.04053213 | 0.24191839 | 4.99E-05 | 0.0046177 | -0.058715  |
| 9mo_SIGAF3_ | 0.07870375 | 0.4774755  | 4.97E-05 | 0.014318  | 0.18889    |
| 9mo_SIGAF3_ | 0.08852454 | 0.53807956 | 4.82E-05 | 0.0098057 | -0.3415    |
| 9mo_SIGAF3_ | 0.05289915 | 0.31823525 | 6.01E-05 | 0.0055357 | 0.018414   |
| 9mo_SIGAF3_ | 0.08637542 | 0.5248173  | 4.77E-05 | 0.01133   | -0.17867   |
| 9mo_SIGAF3_ | 0.01648521 | 0.09352484 | 4.00E-05 | 0.0058035 | 0.080526   |

|             |            |            |          |           |           |
|-------------|------------|------------|----------|-----------|-----------|
| 9mo_SIGAF3_ | 0.088289   | 0.53662604 | 4.80E-05 | 0.010188  | -0.3415   |
| 9mo_SIGAF3_ | 0.02447673 | 0.14284049 | 4.36E-05 | 0.0049516 | -0.098011 |
| 9mo_SIGAF3_ | 0.10069765 | 0.61319983 | 5.58E-05 | 0.0041426 | -1.2563   |
| 9mo_SIGAF3_ | 0.02224568 | 0.1290727  | 4.28E-05 | 0.005125  | -0.068556 |
| 9mo_SIGAF3_ | 0.09036085 | 0.5494114  | 4.88E-05 | 0.0086895 | -0.51631  |
| 9mo_SIGAF3_ | 0.01181198 | 0.06468634 | 3.74E-05 | 0.0065941 | 0.263     |
| 9mo_SIGAF3_ | 0.01676482 | 0.0952503  | 4.00E-05 | 0.0058035 | 0.063215  |
| 9mo_SIGAF3_ | 0.02441048 | 0.14243165 | 4.36E-05 | 0.0049516 | -0.098011 |
| 9mo_SIGAF3_ | 0.05933321 | 0.3579398  | 6.37E-05 | 0.0067983 | 0.074574  |
| 9mo_SIGAF3_ | 0.02418594 | 0.14104605 | 4.34E-05 | 0.0049916 | -0.091842 |
| 9mo_SIGAF3_ | 0.01860243 | 0.10659018 | 4.11E-05 | 0.0055212 | 0.015459  |
| 9mo_SIGAF3_ | 0.00851364 | 0.04433228 | 3.56E-05 | 0.0072456 | 0.40559   |
| 9mo_SIGAF3_ | 0.02283008 | 0.132679   | 4.30E-05 | 0.0050782 | -0.077142 |
| 9mo_SIGAF3_ | 0.02861017 | 0.16834797 | 4.49E-05 | 0.0047302 | -0.12268  |
| 9mo_SIGAF3_ | 0.09016338 | 0.5481928  | 4.88E-05 | 0.0086895 | -0.47194  |
| 9mo_SIGAF3_ | 0.0182497  | 0.10441347 | 4.09E-05 | 0.0055879 | 0.030658  |
| 9mo_SIGAF3_ | 0.02580317 | 0.15102595 | 4.40E-05 | 0.0048781 | -0.10813  |
| 9mo_SIGAF3_ | 0.00315424 | 0.01125938 | 3.26E-05 | 0.0085576 | 0.66457   |
| 9mo_SIGAF3_ | 0.01026859 | 0.05516203 | 3.65E-05 | 0.0069072 | 0.30902   |
| 9mo_SIGAF3_ | 0.04278093 | 0.25579575 | 5.13E-05 | 0.0046879 | -0.042593 |
| 9mo_SIGAF3_ | 0.02742886 | 0.16105813 | 4.46E-05 | 0.0047834 | -0.11816  |
| 9mo_SIGAF3_ | 0.01937719 | 0.11137125 | 4.14E-05 | 0.0054571 | 0.0010121 |
| 9mo_SIGAF3_ | 0.01892387 | 0.10857377 | 4.11E-05 | 0.0055212 | 0.0010121 |
| 9mo_SIGAF3_ | 0.07561664 | 0.45842487 | 5.23E-05 | 0.013721  | 0.23393   |
| 9mo_SIGAF3_ | 0.03465218 | 0.20563318 | 4.70E-05 | 0.0045688 | -0.10426  |
| 9mo_SIGAF3_ | 0.02017639 | 0.11630311 | 4.19E-05 | 0.0053364 | -0.025531 |
| 9mo_SIGAF3_ | 0.01282419 | 0.07093266 | 3.80E-05 | 0.0063994 | 0.21875   |
| 9mo_SIGAF3_ | 0.0415114  | 0.24796143 | 5.05E-05 | 0.0046492 | -0.054504 |
| 9mo_SIGAF3_ | 0.0291619  | 0.17175268 | 4.51E-05 | 0.0047064 | -0.1231   |
| 9mo_SIGAF3_ | 0.03871594 | 0.23071064 | 4.89E-05 | 0.0045836 | -0.076088 |
| 9mo_SIGAF3_ | 0.07735785 | 0.4691699  | 5.09E-05 | 0.014141  | 0.21153   |
| 9mo_SIGAF3_ | 0.08225293 | 0.49937743 | 4.81E-05 | 0.013778  | 0.05262   |
| 9mo_SIGAF3_ | 0.08734273 | 0.5307866  | 4.79E-05 | 0.010571  | -0.25808  |
| 9mo_SIGAF3_ | 0.07933846 | 0.48139226 | 4.93E-05 | 0.014315  | 0.17506   |
| 9mo_SIGAF3_ | 0.02374256 | 0.13830991 | 4.32E-05 | 0.0050338 | -0.084895 |
| 9mo_SIGAF3_ | 0.0694941  | 0.4206427  | 5.82E-05 | 0.011019  | 0.21895   |
| 9mo_SIGAF3_ | 0.02307224 | 0.13417341 | 4.30E-05 | 0.0050782 | -0.077142 |
| 9mo_SIGAF3_ | 0.00749977 | 0.03807567 | 3.50E-05 | 0.0074854 | 0.45576   |
| 9mo_SIGAF3_ | 0.01968807 | 0.11328966 | 4.16E-05 | 0.0053955 | -0.012659 |
| 9mo_SIGAF3_ | 0.06604803 | 0.39937702 | 6.16E-05 | 0.0091463 | 0.17407   |
| 9mo_SIGAF3_ | 0.03997295 | 0.2384677  | 4.95E-05 | 0.0046046 | -0.063007 |
| 9mo_SIGAF3_ | 0.09134822 | 0.55550444 | 4.93E-05 | 0.0079874 | -0.60562  |
| 9mo_SIGAF3_ | 0.03416697 | 0.20263898 | 4.70E-05 | 0.0045688 | -0.10761  |

|             |            |            |          |           |            |
|-------------|------------|------------|----------|-----------|------------|
| 9mo_SIGAF3_ | 0.09297217 | 0.5655259  | 5.02E-05 | 0.0070215 | -0.73907   |
| 9mo_SIGAF3_ | 0.08599085 | 0.5224441  | 4.76E-05 | 0.0117    | -0.17867   |
| 9mo_SIGAF3_ | 0.02375671 | 0.13839726 | 4.32E-05 | 0.0050338 | -0.091842  |
| 9mo_SIGAF3_ | 0.05646929 | 0.34026662 | 6.27E-05 | 0.0061731 | 0.047788   |
| 9mo_SIGAF3_ | 0.07428365 | 0.45019898 | 5.33E-05 | 0.013335  | 0.24406    |
| 9mo_SIGAF3_ | 0.06902046 | 0.41771987 | 5.87E-05 | 0.010741  | 0.21248    |
| 9mo_SIGAF3_ | 0.08494832 | 0.5160107  | 4.76E-05 | 0.012404  | -0.10433   |
| 9mo_SIGAF3_ | 0.08194582 | 0.4974823  | 4.81E-05 | 0.013778  | 0.078055   |
| 9mo_SIGAF3_ | 0.01041231 | 0.05604892 | 3.68E-05 | 0.0068    | 0.30902    |
| 9mo_SIGAF3_ | 0.03085431 | 0.18219656 | 4.57E-05 | 0.0046464 | -0.12145   |
| 9mo_SIGAF3_ | 0.08536436 | 0.51857805 | 4.76E-05 | 0.012059  | -0.14081   |
| 9mo_SIGAF3_ | 0.02608297 | 0.15275258 | 4.42E-05 | 0.0048445 | -0.11213   |
| 9mo_SIGAF3_ | 0.01850921 | 0.10601492 | 4.11E-05 | 0.0055212 | 0.015459   |
| 9mo_SIGAF3_ | 0.01692177 | 0.09621884 | 4.03E-05 | 0.005729  | 0.063215   |
| 9mo_SIGAF3_ | 0.01324486 | 0.07352859 | 3.83E-05 | 0.0063061 | 0.19734    |
| 9mo_SIGAF3_ | 0.02339693 | 0.13617706 | 4.32E-05 | 0.0050338 | -0.084895  |
| 9mo_SIGAF3_ | 0.01113399 | 0.06050242 | 3.71E-05 | 0.0066957 | 0.2858     |
| 9mo_SIGAF3_ | 0.01605779 | 0.09088718 | 3.98E-05 | 0.0058806 | 0.098494   |
| 9mo_SIGAF3_ | 0.01481    | 0.0831871  | 3.92E-05 | 0.0060428 | 0.1363     |
| 9mo_SIGAF3_ | 0.04873142 | 0.29251623 | 5.63E-05 | 0.005054  | -0.0054808 |
| 9mo_SIGAF3_ | 0.09830414 | 0.59842944 | 5.40E-05 | 0.0046955 | -1.1375    |
| 9mo_SIGAF3_ | 0.09121408 | 0.5546767  | 4.93E-05 | 0.0079874 | -0.56091   |
| 9mo_SIGAF3_ | 0.07737439 | 0.469272   | 5.09E-05 | 0.014141  | 0.21153    |
| 9mo_SIGAF3_ | 0.01487057 | 0.08356089 | 3.92E-05 | 0.0060428 | 0.1363     |
| 9mo_SIGAF3_ | 0.01019136 | 0.05468546 | 3.65E-05 | 0.0069072 | 0.33263    |
| 9mo_SIGAF3_ | 0.0160692  | 0.09095764 | 3.98E-05 | 0.0058806 | 0.098494   |
| 9mo_SIGAF3_ | 0.00769329 | 0.03926988 | 3.53E-05 | 0.0073641 | 0.43054    |
| 9mo_SIGAF3_ | 0.09203576 | 0.5597472  | 4.96E-05 | 0.0076529 | -0.6503    |
| 9mo_SIGAF3_ | 0.08133008 | 0.49368256 | 4.83E-05 | 0.013957  | 0.10139    |
| 9mo_SIGAF3_ | 0.02381257 | 0.13874196 | 4.32E-05 | 0.0050338 | -0.091842  |
| 9mo_SIGAF3_ | 0.04496826 | 0.26929373 | 5.34E-05 | 0.0048194 | -0.028317  |
| 9mo_SIGAF3_ | 0.08455942 | 0.5136108  | 4.76E-05 | 0.012404  | -0.069378  |
| 9mo_SIGAF3_ | 0.08563641 | 0.5202569  | 4.76E-05 | 0.0117    | -0.14081   |
| 9mo_SIGAF3_ | 0.08633997 | 0.52459854 | 4.77E-05 | 0.01133   | -0.17867   |
| 9mo_SIGAF3_ | 0.01526713 | 0.08600806 | 3.95E-05 | 0.0059603 | 0.11709    |
| 9mo_SIGAF3_ | 0.0295183  | 0.173952   | 4.53E-05 | 0.0046846 | -0.1231    |
| 9mo_SIGAF3_ | 0.01898256 | 0.10893598 | 4.14E-05 | 0.0054571 | 0.0010121  |
| 9mo_SIGAF3_ | 0.08819403 | 0.53603995 | 4.80E-05 | 0.010188  | -0.3415    |
| 9mo_SIGAF3_ | 0.0186282  | 0.10674918 | 4.11E-05 | 0.0055212 | 0.015459   |
| 9mo_SIGAF3_ | 0.08862531 | 0.5387014  | 4.82E-05 | 0.0098057 | -0.3844    |
| 9mo_SIGAF3_ | 0.00915823 | 0.04831003 | 3.59E-05 | 0.00713   | 0.38094    |
| 9mo_SIGAF3_ | 0.08828218 | 0.53658396 | 4.80E-05 | 0.010188  | -0.3415    |
| 9mo_SIGAF3_ | 0.01586881 | 0.08972099 | 3.98E-05 | 0.0058806 | 0.098494   |

|             |            |            |          |           |            |
|-------------|------------|------------|----------|-----------|------------|
| 9mo_SIGAF3_ | 0.01734699 | 0.09884287 | 4.06E-05 | 0.0056572 | 0.046584   |
| 9mo_SIGAF3_ | 0.03057892 | 0.18049714 | 4.57E-05 | 0.0046464 | -0.12245   |
| 9mo_SIGAF3_ | 0.01890246 | 0.10844167 | 4.11E-05 | 0.0055212 | 0.0010121  |
| 9mo_SIGAF3_ | 0.00800106 | 0.04116915 | 3.53E-05 | 0.0073641 | 0.43054    |
| 9mo_SIGAF3_ | 0.09273201 | 0.5640438  | 5.02E-05 | 0.0070215 | -0.69483   |
| 9mo_SIGAF3_ | 0.01922638 | 0.1104406  | 4.14E-05 | 0.0054571 | 0.0010121  |
| 9mo_SIGAF3_ | 0.0328551  | 0.1945434  | 4.64E-05 | 0.0045915 | -0.11603   |
| 9mo_SIGAF3_ | 0.08331291 | 0.50591856 | 4.78E-05 | 0.013315  | -0.0045591 |
| 9mo_SIGAF3_ | 0.02376715 | 0.13846171 | 4.32E-05 | 0.0050338 | -0.091842  |
| 9mo_SIGAF3_ | 0.02108271 | 0.12189598 | 4.21E-05 | 0.0052798 | -0.04878   |
| 9mo_SIGAF3_ | 0.020683   | 0.11942937 | 4.21E-05 | 0.0052798 | -0.037579  |
| 9mo_SIGAF3_ | 0.02148706 | 0.12439121 | 4.24E-05 | 0.0052258 | -0.04878   |
| 9mo_SIGAF3_ | 0.02345261 | 0.13652064 | 4.32E-05 | 0.0050338 | -0.084895  |
| 9mo_SIGAF3_ | 0.01552431 | 0.08759508 | 3.95E-05 | 0.0059603 | 0.11709    |
| 9mo_SIGAF3_ | 0.02730762 | 0.16030993 | 4.46E-05 | 0.0047834 | -0.11816   |
| 9mo_SIGAF3_ | 0.081412   | 0.4941881  | 4.83E-05 | 0.013957  | 0.10139    |
| 9mo_SIGAF3_ | 0.020405   | 0.11771384 | 4.19E-05 | 0.0053364 | -0.025531  |
| 9mo_SIGAF3_ | 0.0597622  | 0.36058712 | 6.37E-05 | 0.0069445 | 0.080679   |
| 9mo_SIGAF3_ | 0.03066943 | 0.18105564 | 4.57E-05 | 0.0046464 | -0.12245   |
| 9mo_SIGAF3_ | 0.09683752 | 0.58937895 | 5.28E-05 | 0.0052469 | -1.03      |
| 9mo_SIGAF3_ | 0.0187065  | 0.10723241 | 4.11E-05 | 0.0055212 | 0.015459   |
| 9mo_SIGAF3_ | 0.026003   | 0.1522591  | 4.42E-05 | 0.0048445 | -0.11213   |
| 9mo_SIGAF3_ | 0.01396404 | 0.0779667  | 3.86E-05 | 0.0062156 | 0.17645    |
| 9mo_SIGAF3_ | 0.07222287 | 0.43748197 | 5.54E-05 | 0.012382  | 0.24161    |
| 9mo_SIGAF3_ | 0.07873798 | 0.4776867  | 4.97E-05 | 0.014318  | 0.18889    |
| 9mo_SIGAF3_ | 0.01767048 | 0.10083913 | 4.06E-05 | 0.0056572 | 0.046584   |
| 9mo_SIGAF3_ | 0.02280624 | 0.13253191 | 4.30E-05 | 0.0050782 | -0.077142  |
| 9mo_SIGAF3_ | 0.06137254 | 0.37052456 | 6.37E-05 | 0.0074328 | 0.10072    |
| 9mo_SIGAF3_ | 0.08539372 | 0.51875925 | 4.76E-05 | 0.012059  | -0.14081   |
| 9mo_SIGAF3_ | 0.06460401 | 0.39046597 | 6.24E-05 | 0.0086643 | 0.14863    |
| 9mo_SIGAF3_ | 0.01710164 | 0.0973288  | 4.03E-05 | 0.005729  | 0.063215   |
| 9mo_SIGAF3_ | 0.02138057 | 0.12373408 | 4.24E-05 | 0.0052258 | -0.04878   |
| 9mo_SIGAF3_ | 0.03077525 | 0.1817087  | 4.57E-05 | 0.0046464 | -0.12145   |
| 9mo_SIGAF3_ | 0.04431965 | 0.26529112 | 5.25E-05 | 0.0047605 | -0.031751  |
| 9mo_SIGAF3_ | 0.0166289  | 0.09441153 | 4.00E-05 | 0.0058035 | 0.080526   |
| 9mo_SIGAF3_ | 0.08728978 | 0.5304598  | 4.79E-05 | 0.010571  | -0.25808   |
| 9mo_SIGAF3_ | 0.03732968 | 0.22215603 | 4.81E-05 | 0.0045652 | -0.084703  |
| 9mo_SIGAF3_ | 0.02221602 | 0.12888968 | 4.28E-05 | 0.005125  | -0.068556  |
| 9mo_SIGAF3_ | 0.09669603 | 0.5885058  | 5.28E-05 | 0.0052469 | -1.03      |
| 9mo_SIGAF3_ | 0.01337275 | 0.0743178  | 3.83E-05 | 0.0063061 | 0.19734    |
| 9mo_SIGAF3_ | 0.015112   | 0.08505071 | 3.92E-05 | 0.0060428 | 0.11709    |
| 9mo_SIGAF3_ | 0.02537755 | 0.14839949 | 4.38E-05 | 0.0049138 | -0.10813   |
| 9mo_SIGAF3_ | 0.01865614 | 0.1069216  | 4.11E-05 | 0.0055212 | 0.015459   |

|             |            |            |          |           |            |
|-------------|------------|------------|----------|-----------|------------|
| 9mo_SIGAF3_ | 0.08359677 | 0.5076703  | 4.77E-05 | 0.013036  | -0.0045591 |
| 9mo_SIGAF3_ | 0.09908088 | 0.6032227  | 5.45E-05 | 0.0045382 | -1.1701    |
| 9mo_SIGAF3_ | 0.08346659 | 0.50686693 | 4.77E-05 | 0.013036  | -0.0045591 |
| 9mo_SIGAF3_ | 0.02136362 | 0.12362952 | 4.24E-05 | 0.0052258 | -0.04878   |
| 9mo_SIGAF3_ | 0.07717238 | 0.4680254  | 5.09E-05 | 0.014141  | 0.22047    |
| 9mo_SIGAF3_ | 0.07486922 | 0.4538126  | 5.28E-05 | 0.013537  | 0.24193    |
| 9mo_SIGAF3_ | 0.01661063 | 0.09429881 | 4.00E-05 | 0.0058035 | 0.080526   |
| 9mo_SIGAF3_ | 0.09680251 | 0.5891629  | 5.28E-05 | 0.0052469 | -1.03      |
| 9mo_SIGAF3_ | 0.04360466 | 0.26087895 | 5.21E-05 | 0.0047343 | -0.038876  |
| 9mo_SIGAF3_ | 0.0299     | 0.1763075  | 4.55E-05 | 0.0046645 | -0.12301   |
| 9mo_SIGAF3_ | 0.03003945 | 0.17716807 | 4.55E-05 | 0.0046645 | -0.12301   |
| 9mo_SIGAF3_ | 0.06300822 | 0.38061833 | 6.33E-05 | 0.0080056 | 0.12359    |
| 9mo_SIGAF3_ | 0.02127204 | 0.12306432 | 4.24E-05 | 0.0052258 | -0.04878   |
| 9mo_SIGAF3_ | 0.02103444 | 0.12159811 | 4.21E-05 | 0.0052798 | -0.037579  |
| 9mo_SIGAF3_ | 0.00931852 | 0.04929914 | 3.62E-05 | 0.0070172 | 0.35661    |
| 9mo_SIGAF3_ | 0.01918446 | 0.11018187 | 4.14E-05 | 0.0054571 | 0.0010121  |
| 9mo_SIGAF3_ | 0.02014749 | 0.11612475 | 4.19E-05 | 0.0053364 | -0.025531  |
| 9mo_SIGAF3_ | 0.01717186 | 0.09776212 | 4.03E-05 | 0.005729  | 0.063215   |
| 9mo_SIGAF3_ | 0.04794476 | 0.2876617  | 5.58E-05 | 0.0050083 | -0.01192   |
| 9mo_SIGAF3_ | 0.10128369 | 0.6168163  | 5.62E-05 | 0.0040352 | -1.2808    |
| 9mo_SIGAF3_ | 0.06574446 | 0.39750367 | 6.16E-05 | 0.0091463 | 0.16566    |
| 9mo_SIGAF3_ | 0.0282566  | 0.16616608 | 4.49E-05 | 0.0047302 | -0.12174   |
| 9mo_SIGAF3_ | 0.0200286  | 0.11539107 | 4.19E-05 | 0.0053364 | -0.025531  |
| 9mo_SIGAF3_ | 0.01817466 | 0.10395043 | 4.09E-05 | 0.0055879 | 0.030658   |
| 9mo_SIGAF3_ | 0.02117574 | 0.1224701  | 4.24E-05 | 0.0052258 | -0.04878   |
| 9mo_SIGAF3_ | 0.08567458 | 0.5204924  | 4.76E-05 | 0.0117    | -0.14081   |
| 9mo_SIGAF3_ | 0.03141257 | 0.18564156 | 4.60E-05 | 0.0046154 | -0.12002   |
| 9mo_SIGAF3_ | 0.08084625 | 0.49069682 | 4.85E-05 | 0.0141    | 0.12269    |
| 9mo_SIGAF3_ | 0.02118553 | 0.12253051 | 4.24E-05 | 0.0052258 | -0.04878   |
| 9mo_SIGAF3_ | 0.02784753 | 0.1636417  | 4.48E-05 | 0.0047558 | -0.12024   |
| 9mo_SIGAF3_ | 0.06224072 | 0.37588212 | 6.36E-05 | 0.0076138 | 0.11565    |
| 9mo_SIGAF3_ | 0.01231291 | 0.06777757 | 3.77E-05 | 0.0064954 | 0.24064    |
| 9mo_SIGAF3_ | 0.01992276 | 0.11473794 | 4.16E-05 | 0.0053955 | -0.012659  |
| 9mo_SIGAF3_ | 0.02594207 | 0.15188314 | 4.40E-05 | 0.0048781 | -0.11213   |
| 9mo_SIGAF3_ | 0.06802956 | 0.41160503 | 5.98E-05 | 0.010192  | 0.19812    |
| 9mo_SIGAF3_ | 0.02153954 | 0.12471511 | 4.24E-05 | 0.0052258 | -0.04878   |
| 9mo_SIGAF3_ | 0.10326112 | 0.62901896 | 5.78E-05 | 0.003724  | -1.3542    |
| 9mo_SIGAF3_ | 0.02490983 | 0.14551315 | 4.38E-05 | 0.0049138 | -0.10343   |
| 9mo_SIGAF3_ | 0.08512588 | 0.5171064  | 4.76E-05 | 0.012059  | -0.10433   |
| 9mo_SIGAF3_ | 0.08501484 | 0.51642114 | 4.76E-05 | 0.012404  | -0.10433   |
| 9mo_SIGAF3_ | 0.03984333 | 0.2376678  | 4.95E-05 | 0.0046046 | -0.067351  |
| 9mo_SIGAF3_ | 0.090648   | 0.5511834  | 4.91E-05 | 0.0083333 | -0.51631   |
| 9mo_SIGAF3_ | 0.07215966 | 0.43709186 | 5.54E-05 | 0.012382  | 0.24161    |

|             |            |            |          |           |            |
|-------------|------------|------------|----------|-----------|------------|
| 9mo_SIGAF3_ | 0.03413793 | 0.2024598  | 4.70E-05 | 0.0045688 | -0.10761   |
| 9mo_SIGAF3_ | 0.02109124 | 0.12194862 | 4.21E-05 | 0.0052798 | -0.04878   |
| 9mo_SIGAF3_ | 0.03231082 | 0.19118465 | 4.62E-05 | 0.0046026 | -0.11821   |
| 9mo_SIGAF3_ | 0.08332367 | 0.50598496 | 4.78E-05 | 0.013315  | -0.0045591 |
| 9mo_SIGAF3_ | 0.01711027 | 0.09738208 | 4.03E-05 | 0.005729  | 0.063215   |
| 9mo_SIGAF3_ | 0.09798858 | 0.5964821  | 5.36E-05 | 0.0048658 | -1.1032    |
| 9mo_SIGAF3_ | 0.02507062 | 0.14650543 | 4.38E-05 | 0.0049138 | -0.10343   |
| 9mo_SIGAF3_ | 0.08938098 | 0.54336464 | 4.84E-05 | 0.0094274 | -0.42792   |
| 9mo_SIGAF3_ | 0.06820527 | 0.41268933 | 5.98E-05 | 0.010192  | 0.20551    |
| 9mo_SIGAF3_ | 0.0176945  | 0.10098738 | 4.06E-05 | 0.0056572 | 0.046584   |
| 9mo_SIGAF3_ | 0.0185489  | 0.10625988 | 4.11E-05 | 0.0055212 | 0.015459   |
| 9mo_SIGAF3_ | 0.03717544 | 0.22120424 | 4.81E-05 | 0.0045652 | -0.088896  |
| 9mo_SIGAF3_ | 0.08981211 | 0.5460251  | 4.86E-05 | 0.0090548 | -0.47194   |
| 9mo_SIGAF3_ | 0.02241067 | 0.13009083 | 4.28E-05 | 0.005125  | -0.068556  |
| 9mo_SIGAF3_ | 0.0628126  | 0.3794112  | 6.35E-05 | 0.0078047 | 0.12359    |
| 9mo_SIGAF3_ | 0.01540639 | 0.08686741 | 3.95E-05 | 0.0059603 | 0.11709    |
| 9mo_SIGAF3_ | 0.02173371 | 0.12591334 | 4.26E-05 | 0.0051742 | -0.059109  |
| 9mo_SIGAF3_ | 0.0970798  | 0.590874   | 5.32E-05 | 0.0050496 | -1.03      |
| 9mo_SIGAF3_ | 0.03384408 | 0.20064642 | 4.68E-05 | 0.0045746 | -0.11071   |
| 9mo_SIGAF3_ | 0.02893639 | 0.17036107 | 4.51E-05 | 0.0047064 | -0.12268   |
| 9mo_SIGAF3_ | 0.0240701  | 0.14033118 | 4.34E-05 | 0.0049916 | -0.091842  |
| 9mo_SIGAF3_ | 0.02513584 | 0.14690787 | 4.38E-05 | 0.0049138 | -0.10343   |
| 9mo_SIGAF3_ | 0.05786217 | 0.34886208 | 6.32E-05 | 0.0064035 | 0.06315    |
| 9mo_SIGAF3_ | 0.01382617 | 0.07711588 | 3.86E-05 | 0.0062156 | 0.17645    |
| 9mo_SIGAF3_ | 0.01034458 | 0.05563096 | 3.68E-05 | 0.0068    | 0.30902    |
| 9mo_SIGAF3_ | 0.01007446 | 0.05396407 | 3.65E-05 | 0.0069072 | 0.33263    |
| 9mo_SIGAF3_ | 0.03495591 | 0.20750752 | 4.72E-05 | 0.0045646 | -0.10426   |
| 9mo_SIGAF3_ | 0.01796498 | 0.10265651 | 4.09E-05 | 0.0055879 | 0.030658   |
| 9mo_SIGAF3_ | 0.02212885 | 0.12835173 | 4.26E-05 | 0.0051742 | -0.068556  |
| 9mo_SIGAF3_ | 0.0420882  | 0.25152084 | 5.09E-05 | 0.0046676 | -0.0504    |
| 9mo_SIGAF3_ | 0.03012564 | 0.17769991 | 4.55E-05 | 0.0046645 | -0.12301   |
| 9mo_SIGAF3_ | 0.02204612 | 0.12784119 | 4.26E-05 | 0.0051742 | -0.059109  |
| 9mo_SIGAF3_ | 0.08514699 | 0.51723665 | 4.76E-05 | 0.012059  | -0.10433   |
| 9mo_SIGAF3_ | 0.0181948  | 0.10407473 | 4.09E-05 | 0.0055879 | 0.030658   |
| 9mo_SIGAF3_ | 0.07109655 | 0.43053144 | 5.65E-05 | 0.011849  | 0.23476    |
| 9mo_SIGAF3_ | 0.02051137 | 0.11837028 | 4.19E-05 | 0.0053364 | -0.037579  |
| 9mo_SIGAF3_ | 0.08704452 | 0.5289463  | 4.78E-05 | 0.010952  | -0.25808   |
| 9mo_SIGAF3_ | 0.02929682 | 0.17258525 | 4.53E-05 | 0.0046846 | -0.1231    |
| 9mo_SIGAF3_ | 0.02032637 | 0.11722863 | 4.19E-05 | 0.0053364 | -0.025531  |
| 9mo_SIGAF3_ | 0.04537861 | 0.271826   | 5.34E-05 | 0.0048194 | -0.024952  |
| 9mo_SIGAF3_ | 0.03086363 | 0.18225405 | 4.57E-05 | 0.0046464 | -0.12145   |
| 9mo_SIGAF3_ | 0.00673313 | 0.03334473 | 3.47E-05 | 0.0076096 | 0.48124    |
| 9mo_SIGAF3_ | 0.01106024 | 0.06004734 | 3.71E-05 | 0.0066957 | 0.2858     |

|             |            |            |          |           |           |
|-------------|------------|------------|----------|-----------|-----------|
| 9mo_SIGAF3_ | 0.10312721 | 0.6281926  | 5.78E-05 | 0.003724  | -1.3397   |
| 9mo_SIGAF3_ | 0.07645088 | 0.46357298 | 5.13E-05 | 0.014025  | 0.22792   |
| 9mo_SIGAF3_ | 0.02056625 | 0.11870893 | 4.19E-05 | 0.0053364 | -0.037579 |
| 9mo_SIGAF3_ | 0.09061699 | 0.550992   | 4.91E-05 | 0.0083333 | -0.51631  |
| 9mo_SIGAF3_ | 0.07134602 | 0.4320709  | 5.65E-05 | 0.011849  | 0.2386    |
| 9mo_SIGAF3_ | 0.01460082 | 0.08189627 | 3.89E-05 | 0.0061278 | 0.1363    |
| 9mo_SIGAF3_ | 0.02225269 | 0.12911594 | 4.28E-05 | 0.005125  | -0.068556 |
| 9mo_SIGAF3_ | 0.02617308 | 0.15330869 | 4.42E-05 | 0.0048445 | -0.11213  |
| 9mo_SIGAF3_ | 0.01586469 | 0.08969556 | 3.98E-05 | 0.0058806 | 0.098494  |
| 9mo_SIGAF3_ | 0.0306066  | 0.18066792 | 4.57E-05 | 0.0046464 | -0.12245  |
| 9mo_SIGAF3_ | 0.01894732 | 0.10871853 | 4.14E-05 | 0.0054571 | 0.0010121 |
| 9mo_SIGAF3_ | 0.02962464 | 0.17460823 | 4.53E-05 | 0.0046846 | -0.1231   |
| 9mo_SIGAF3_ | 0.04128467 | 0.24656227 | 5.05E-05 | 0.0046492 | -0.054504 |
| 9mo_SIGAF3_ | 0.02710583 | 0.1590647  | 4.46E-05 | 0.0047834 | -0.11816  |
| 9mo_SIGAF3_ | 0.07536104 | 0.4568476  | 5.23E-05 | 0.013721  | 0.23858   |
| 9mo_SIGAF3_ | 0.01405782 | 0.07854542 | 3.86E-05 | 0.0062156 | 0.1561    |
| 9mo_SIGAF3_ | 0.07266023 | 0.4401809  | 5.49E-05 | 0.012637  | 0.24373   |
| 9mo_SIGAF3_ | 0.01699829 | 0.09669103 | 4.03E-05 | 0.005729  | 0.063215  |
| 9mo_SIGAF3_ | 0.03498337 | 0.20767698 | 4.72E-05 | 0.0045646 | -0.10426  |
| 9mo_SIGAF3_ | 0.0827496  | 0.50244236 | 4.79E-05 | 0.013563  | 0.02505   |
| 9mo_SIGAF3_ | 0.03955667 | 0.2358988  | 4.95E-05 | 0.0046046 | -0.067351 |
| 9mo_SIGAF3_ | 0.09505206 | 0.57836086 | 5.16E-05 | 0.0059226 | -0.91061  |
| 9mo_SIGAF3_ | 0.03222856 | 0.19067702 | 4.62E-05 | 0.0046026 | -0.11821  |
| 9mo_SIGAF3_ | 0.03039259 | 0.17934728 | 4.57E-05 | 0.0046464 | -0.12245  |
| 9mo_SIGAF3_ | 0.01937162 | 0.11133686 | 4.14E-05 | 0.0054571 | 0.0010121 |
| 9mo_SIGAF3_ | 0.01946552 | 0.11191633 | 4.14E-05 | 0.0054571 | -0.012659 |
| 9mo_SIGAF3_ | 0.06799381 | 0.41138437 | 5.98E-05 | 0.010192  | 0.19812   |
| 9mo_SIGAF3_ | 0.06968598 | 0.4218268  | 5.82E-05 | 0.011019  | 0.22487   |
| 9mo_SIGAF3_ | 0.02545022 | 0.14884792 | 4.40E-05 | 0.0048781 | -0.10813  |
| 9mo_SIGAF3_ | 0.03628652 | 0.21571873 | 4.77E-05 | 0.0045615 | -0.092976 |
| 9mo_SIGAF3_ | 0.02514808 | 0.14698337 | 4.38E-05 | 0.0049138 | -0.10343  |
| 9mo_SIGAF3_ | 0.05547295 | 0.3341182  | 6.21E-05 | 0.005966  | 0.038579  |
| 9mo_SIGAF3_ | 0.08734116 | 0.5307769  | 4.79E-05 | 0.010571  | -0.25808  |
| 9mo_SIGAF3_ | 0.02209747 | 0.12815806 | 4.26E-05 | 0.0051742 | -0.059109 |
| 9mo_SIGAF3_ | 0.01678294 | 0.09536212 | 4.03E-05 | 0.005729  | 0.063215  |
| 9mo_SIGAF3_ | 0.09664179 | 0.58817106 | 5.28E-05 | 0.0052469 | -0.99133  |
| 9mo_SIGAF3_ | 0.09405651 | 0.57221735 | 5.09E-05 | 0.0064439 | -0.82618  |
| 9mo_SIGAF3_ | 0.02589419 | 0.15158767 | 4.40E-05 | 0.0048781 | -0.10813  |
| 9mo_SIGAF3_ | 0.08517068 | 0.51738286 | 4.76E-05 | 0.012059  | -0.10433  |
| 9mo_SIGAF3_ | 0.0253442  | 0.14819364 | 4.38E-05 | 0.0049138 | -0.10343  |
| 9mo_SIGAF3_ | 0.03350114 | 0.19853015 | 4.66E-05 | 0.0045822 | -0.11071  |
| 9mo_SIGAF3_ | 0.02087019 | 0.12058452 | 4.21E-05 | 0.0052798 | -0.037579 |
| 9mo_SIGAF3_ | 0.01952796 | 0.11230164 | 4.16E-05 | 0.0053955 | -0.012659 |



|             |            |            |          |           |           |
|-------------|------------|------------|----------|-----------|-----------|
| 9mo_SIGAF3_ | 0.01155139 | 0.06307821 | 3.74E-05 | 0.0065941 | 0.263     |
| 9mo_SIGAF3_ | 0.01989387 | 0.11455969 | 4.16E-05 | 0.0053955 | -0.012659 |
| 9mo_SIGAF3_ | 0.08839361 | 0.53727156 | 4.82E-05 | 0.0098057 | -0.3415   |
| 9mo_SIGAF3_ | 0.0379722  | 0.22612102 | 4.87E-05 | 0.0045758 | -0.080425 |
| 9mo_SIGAF3_ | 0.03379382 | 0.20033625 | 4.68E-05 | 0.0045746 | -0.11071  |
| 9mo_SIGAF3_ | 0.02199807 | 0.12754469 | 4.26E-05 | 0.0051742 | -0.059109 |
| 9mo_SIGAF3_ | 0.02659255 | 0.15589723 | 4.44E-05 | 0.004813  | -0.11546  |
| 9mo_SIGAF3_ | 0.01341698 | 0.07459074 | 3.83E-05 | 0.0063061 | 0.19734   |
| 9mo_SIGAF3_ | 0.01714079 | 0.0975704  | 4.03E-05 | 0.005729  | 0.063215  |
| 9mo_SIGAF3_ | 0.01544642 | 0.08711442 | 3.95E-05 | 0.0059603 | 0.11709   |
| 9mo_SIGAF3_ | 0.09358367 | 0.5692994  | 5.06E-05 | 0.0067258 | -0.7829   |
| 9mo_SIGAF3_ | 0.01675713 | 0.09520286 | 4.00E-05 | 0.0058035 | 0.063215  |
| 9mo_SIGAF3_ | 0.04199529 | 0.25094756 | 5.09E-05 | 0.0046676 | -0.0504   |
| 9mo_SIGAF3_ | 0.02622951 | 0.15365689 | 4.42E-05 | 0.0048445 | -0.11213  |
| 9mo_SIGAF3_ | 0.01938882 | 0.11144298 | 4.14E-05 | 0.0054571 | 0.0010121 |
| 9mo_SIGAF3_ | 0.02236837 | 0.12982984 | 4.28E-05 | 0.005125  | -0.068556 |
| 9mo_SIGAF3_ | 0.05463096 | 0.32892224 | 6.14E-05 | 0.0057798 | 0.034245  |
| 9mo_SIGAF3_ | 0.0174718  | 0.09961304 | 4.06E-05 | 0.0056572 | 0.046584  |
| 9mo_SIGAF3_ | 0.02460798 | 0.14365044 | 4.36E-05 | 0.0049516 | -0.098011 |
| 9mo_SIGAF3_ | 0.01538686 | 0.08674689 | 3.95E-05 | 0.0059603 | 0.11709   |
| 9mo_SIGAF3_ | 0.0203395  | 0.11730962 | 4.19E-05 | 0.0053364 | -0.025531 |
| 9mo_SIGAF3_ | 0.02950112 | 0.17384604 | 4.53E-05 | 0.0046846 | -0.1231   |
| 9mo_SIGAF3_ | 0.0233252  | 0.13573442 | 4.32E-05 | 0.0050338 | -0.084895 |
| 9mo_SIGAF3_ | 0.01956758 | 0.11254612 | 4.16E-05 | 0.0053955 | -0.012659 |
| 9mo_SIGAF3_ | 0.04111878 | 0.24553858 | 5.02E-05 | 0.0046325 | -0.054504 |
| 9mo_SIGAF3_ | 0.09260106 | 0.56323576 | 4.99E-05 | 0.0073308 | -0.69483  |
| 9mo_SIGAF3_ | 0.06610701 | 0.399741   | 6.12E-05 | 0.0093985 | 0.17407   |
| 9mo_SIGAF3_ | 0.01627004 | 0.09219702 | 4.00E-05 | 0.0058035 | 0.080526  |
| 9mo_SIGAF3_ | 0.0297328  | 0.17527568 | 4.53E-05 | 0.0046846 | -0.12301  |
| 9mo_SIGAF3_ | 0.13783157 | 0.8423532  | 7.39E-05 | 0.0051198 | -1.03     |
| 9mo_SIGAF3_ | 0.03003936 | 0.17716752 | 4.55E-05 | 0.0046645 | -0.12301  |
| 9mo_SIGAF3_ | 0.03171686 | 0.18751933 | 4.60E-05 | 0.0046154 | -0.12002  |
| 9mo_SIGAF3_ | 0.08883921 | 0.54002136 | 4.82E-05 | 0.0098057 | -0.3844   |
| 9mo_SIGAF3_ | 0.01395793 | 0.07792898 | 3.86E-05 | 0.0062156 | 0.17645   |
| 9mo_SIGAF3_ | 0.01194363 | 0.06549875 | 3.77E-05 | 0.0064954 | 0.24064   |
| 9mo_SIGAF3_ | 0.02918755 | 0.17191094 | 4.51E-05 | 0.0047064 | -0.1231   |
| 9mo_SIGAF3_ | 0.01579113 | 0.08924162 | 3.98E-05 | 0.0058806 | 0.098494  |
| 9mo_SIGAF3_ | 0.09556475 | 0.58152467 | 5.20E-05 | 0.0056833 | -0.91061  |
| 9mo_SIGAF3_ | 0.01463888 | 0.08213113 | 3.92E-05 | 0.0060428 | 0.1363    |
| 9mo_SIGAF3_ | 0.01904991 | 0.10935157 | 4.14E-05 | 0.0054571 | 0.0010121 |
| 9mo_SIGAF3_ | 0.08798748 | 0.53476536 | 4.80E-05 | 0.010188  | -0.29935  |
| 9mo_SIGAF3_ | 0.02995209 | 0.17662892 | 4.55E-05 | 0.0046645 | -0.12301  |
| 9mo_SIGAF3_ | 0.02228463 | 0.12931308 | 4.28E-05 | 0.005125  | -0.068556 |

|             |            |            |          |           |           |
|-------------|------------|------------|----------|-----------|-----------|
| 9mo_SIGAF3_ | 0.03290829 | 0.1948717  | 4.64E-05 | 0.0045915 | -0.11603  |
| 9mo_SIGAF3_ | 0.0159315  | 0.09010784 | 3.98E-05 | 0.0058806 | 0.098494  |
| 9mo_SIGAF3_ | 0.01447752 | 0.08113538 | 3.89E-05 | 0.0061278 | 0.1561    |
| 9mo_SIGAF3_ | 0.0953173  | 0.57999766 | 5.16E-05 | 0.0059226 | -0.91061  |
| 9mo_SIGAF3_ | 0.02776014 | 0.1631024  | 4.48E-05 | 0.0047558 | -0.12024  |
| 9mo_SIGAF3_ | 0.01058513 | 0.05711541 | 3.68E-05 | 0.0068    | 0.30902   |
| 9mo_SIGAF3_ | 0.05844047 | 0.35243073 | 6.34E-05 | 0.0065282 | 0.068735  |
| 9mo_SIGAF3_ | 0.02073643 | 0.11975909 | 4.21E-05 | 0.0052798 | -0.037579 |
| 9mo_SIGAF3_ | 0.02377327 | 0.13849942 | 4.32E-05 | 0.0050338 | -0.091842 |
| 9mo_SIGAF3_ | 0.0751827  | 0.45574704 | 5.28E-05 | 0.013537  | 0.23858   |
| 9mo_SIGAF3_ | 0.01867826 | 0.10705811 | 4.11E-05 | 0.0055212 | 0.015459  |
| 9mo_SIGAF3_ | 0.01118986 | 0.06084721 | 3.71E-05 | 0.0066957 | 0.2858    |
| 9mo_SIGAF3_ | 0.01597118 | 0.09035275 | 3.98E-05 | 0.0058806 | 0.098494  |
| 9mo_SIGAF3_ | 0.01797929 | 0.10274482 | 4.09E-05 | 0.0055879 | 0.030658  |
| 9mo_SIGAF3_ | 0.02228628 | 0.12932326 | 4.28E-05 | 0.005125  | -0.068556 |
| 9mo_SIGAF3_ | 0.04422471 | 0.2647053  | 5.25E-05 | 0.0047605 | -0.035266 |
| 9mo_SIGAF3_ | 0.03300426 | 0.19546391 | 4.64E-05 | 0.0045915 | -0.11352  |
| 9mo_SIGAF3_ | 0.02790145 | 0.16397442 | 4.48E-05 | 0.0047558 | -0.12024  |
| 9mo_SIGAF3_ | 0.06816357 | 0.412432   | 5.98E-05 | 0.010192  | 0.20551   |
| 9mo_SIGAF3_ | 0.00688066 | 0.03425514 | 3.47E-05 | 0.0076096 | 0.48124   |
| 9mo_SIGAF3_ | 0.01548584 | 0.08735769 | 3.95E-05 | 0.0059603 | 0.11709   |
| 9mo_SIGAF3_ | 0.01416221 | 0.07918956 | 3.89E-05 | 0.0061278 | 0.1561    |
| 9mo_SIGAF3_ | 0.09480433 | 0.5768321  | 5.13E-05 | 0.0061762 | -0.8688   |
| 9mo_SIGAF3_ | 0.01128434 | 0.06143026 | 3.71E-05 | 0.0066957 | 0.2858    |
| 9mo_SIGAF3_ | 0.0163963  | 0.09297615 | 4.00E-05 | 0.0058035 | 0.080526  |
| 9mo_SIGAF3_ | 0.02185618 | 0.1266691  | 4.26E-05 | 0.0051742 | -0.059109 |
| 9mo_SIGAF3_ | 0.0931028  | 0.566332   | 5.02E-05 | 0.0070215 | -0.73907  |
| 9mo_SIGAF3_ | 0.05010566 | 0.30099663 | 5.78E-05 | 0.0052091 | 0.0010449 |
| 9mo_SIGAF3_ | 0.0991044  | 0.6033678  | 5.45E-05 | 0.0045382 | -1.1701   |
| 9mo_SIGAF3_ | 0.02254602 | 0.1309261  | 4.28E-05 | 0.005125  | -0.068556 |
| 9mo_SIGAF3_ | 0.00999309 | 0.05346191 | 3.65E-05 | 0.0069072 | 0.33263   |
| 9mo_SIGAF3_ | 0.02817085 | 0.16563693 | 4.49E-05 | 0.0047302 | -0.12174  |
| 9mo_SIGAF3_ | 0.02121403 | 0.12270635 | 4.24E-05 | 0.0052258 | -0.04878  |
| 9mo_SIGAF3_ | 0.06180077 | 0.37316716 | 6.36E-05 | 0.0076138 | 0.10802   |
| 9mo_SIGAF3_ | 0.01879298 | 0.10776607 | 4.11E-05 | 0.0055212 | 0.015459  |
| 9mo_SIGAF3_ | 0.0218952  | 0.1269099  | 4.26E-05 | 0.0051742 | -0.059109 |
| 9mo_SIGAF3_ | 0.01840956 | 0.10539997 | 4.11E-05 | 0.0055212 | 0.015459  |
| 9mo_SIGAF3_ | 0.02729515 | 0.16023296 | 4.46E-05 | 0.0047834 | -0.11816  |
| 9mo_SIGAF3_ | 0.02360224 | 0.13744403 | 4.32E-05 | 0.0050338 | -0.084895 |
| 9mo_SIGAF3_ | 0.08586524 | 0.521669   | 4.76E-05 | 0.0117    | -0.17867  |
| 9mo_SIGAF3_ | 0.02784223 | 0.16360903 | 4.48E-05 | 0.0047558 | -0.12024  |
| 9mo_SIGAF3_ | 0.01997984 | 0.11509018 | 4.16E-05 | 0.0053955 | -0.025531 |
| 9mo_SIGAF3_ | 0.02260277 | 0.13127632 | 4.28E-05 | 0.005125  | -0.068556 |

|             |            |            |          |           |           |
|-------------|------------|------------|----------|-----------|-----------|
| 9mo_SIGAF3_ | 0.01725511 | 0.0982759  | 4.03E-05 | 0.005729  | 0.063215  |
| 9mo_SIGAF3_ | 0.09366503 | 0.56980145 | 5.06E-05 | 0.0067258 | -0.7829   |
| 9mo_SIGAF3_ | 0.08940234 | 0.54349643 | 4.86E-05 | 0.0090548 | -0.42792  |
| 9mo_SIGAF3_ | 0.08771262 | 0.53306913 | 4.79E-05 | 0.010571  | -0.29935  |
| 9mo_SIGAF3_ | 0.0325214  | 0.19248417 | 4.64E-05 | 0.0045915 | -0.11603  |
| 9mo_SIGAF3_ | 0.0298774  | 0.17616804 | 4.55E-05 | 0.0046645 | -0.12301  |
| 9mo_SIGAF3_ | 0.01737782 | 0.09903312 | 4.06E-05 | 0.0056572 | 0.046584  |
| 9mo_SIGAF3_ | 0.01652885 | 0.09379412 | 4.00E-05 | 0.0058035 | 0.080526  |
| 9mo_SIGAF3_ | 0.0947748  | 0.57664984 | 5.13E-05 | 0.0061762 | -0.8688   |
| 9mo_SIGAF3_ | 0.01897875 | 0.10891248 | 4.14E-05 | 0.0054571 | 0.0010121 |
| 9mo_SIGAF3_ | 0.04166538 | 0.24891163 | 5.05E-05 | 0.0046492 | -0.0504   |
| 9mo_SIGAF3_ | 0.07790508 | 0.47254688 | 5.05E-05 | 0.014229  | 0.20103   |
| 9mo_SIGAF3_ | 0.09015988 | 0.5481712  | 4.88E-05 | 0.0086895 | -0.47194  |
| 9mo_SIGAF3_ | 0.02089017 | 0.12070785 | 4.21E-05 | 0.0052798 | -0.037579 |
| 9mo_SIGAF3_ | 0.02579629 | 0.15098354 | 4.40E-05 | 0.0048781 | -0.10813  |
| 9mo_SIGAF3_ | 0.0316817  | 0.18730237 | 4.60E-05 | 0.0046154 | -0.12002  |
| 9mo_SIGAF3_ | 0.0895502  | 0.54440886 | 4.86E-05 | 0.0090548 | -0.42792  |
| 9mo_SIGAF3_ | 0.02826708 | 0.16623074 | 4.49E-05 | 0.0047302 | -0.12174  |
| 9mo_SIGAF3_ | 0.05440049 | 0.32750002 | 6.14E-05 | 0.0057798 | 0.030074  |
| 9mo_SIGAF3_ | 0.03295177 | 0.19513997 | 4.64E-05 | 0.0045915 | -0.11352  |
| 9mo_SIGAF3_ | 0.08699998 | 0.52867144 | 4.78E-05 | 0.010952  | -0.25808  |
| 9mo_SIGAF3_ | 0.08282608 | 0.5029143  | 4.79E-05 | 0.013563  | 0.02505   |
| 9mo_SIGAF3_ | 0.01951904 | 0.11224657 | 4.16E-05 | 0.0053955 | -0.012659 |
| 9mo_SIGAF3_ | 0.03004574 | 0.17720689 | 4.55E-05 | 0.0046645 | -0.12301  |
| 9mo_SIGAF3_ | 0.07478834 | 0.45331347 | 5.28E-05 | 0.013537  | 0.24193   |
| 9mo_SIGAF3_ | 0.00856963 | 0.04467775 | 3.56E-05 | 0.0072456 | 0.40559   |
| 9mo_SIGAF3_ | 0.08925549 | 0.5425902  | 4.84E-05 | 0.0094274 | -0.42792  |
| 9mo_SIGAF3_ | 0.07019111 | 0.42494395 | 5.76E-05 | 0.011297  | 0.22487   |
| 9mo_SIGAF3_ | 0.02320897 | 0.13501713 | 4.30E-05 | 0.0050782 | -0.084895 |
| 9mo_SIGAF3_ | 0.03137162 | 0.18538885 | 4.58E-05 | 0.00463   | -0.12002  |
| 9mo_SIGAF3_ | 0.02469073 | 0.14416112 | 4.36E-05 | 0.0049516 | -0.098011 |
| 9mo_SIGAF3_ | 0.02352928 | 0.1369938  | 4.32E-05 | 0.0050338 | -0.084895 |
| 9mo_SIGAF3_ | 0.00773811 | 0.03954646 | 3.53E-05 | 0.0073641 | 0.43054   |
| 9mo_SIGAF3_ | 0.01289341 | 0.07135983 | 3.80E-05 | 0.0063994 | 0.21875   |
| 9mo_SIGAF3_ | 0.02047567 | 0.11814997 | 4.19E-05 | 0.0053364 | -0.025531 |
| 9mo_SIGAF3_ | 0.01488621 | 0.08365738 | 3.92E-05 | 0.0060428 | 0.1363    |
| 9mo_SIGAF3_ | 0.07403182 | 0.44864494 | 5.38E-05 | 0.013116  | 0.24406   |
| 9mo_SIGAF3_ | 0.02322645 | 0.13512501 | 4.30E-05 | 0.0050782 | -0.084895 |
| 9mo_SIGAF3_ | 0.02217822 | 0.1286564  | 4.26E-05 | 0.0051742 | -0.068556 |
| 9mo_SIGAF3_ | 0.0479021  | 0.2873985  | 5.58E-05 | 0.0050083 | -0.01192  |
| 9mo_SIGAF3_ | 0.01632406 | 0.09253039 | 4.00E-05 | 0.0058035 | 0.080526  |
| 9mo_SIGAF3_ | 0.01463401 | 0.08210108 | 3.92E-05 | 0.0060428 | 0.1363    |
| 9mo_SIGAF3_ | 0.0782365  | 0.47459206 | 5.01E-05 | 0.014289  | 0.20103   |

|             |            |            |          |           |            |
|-------------|------------|------------|----------|-----------|------------|
| 9mo_SIGAF3_ | 0.01350696 | 0.07514602 | 3.83E-05 | 0.0063061 | 0.17645    |
| 9mo_SIGAF3_ | 0.06823295 | 0.41286018 | 5.98E-05 | 0.010192  | 0.20551    |
| 9mo_SIGAF3_ | 0.08277052 | 0.50257146 | 4.79E-05 | 0.013563  | 0.02505    |
| 9mo_SIGAF3_ | 0.02663962 | 0.15618768 | 4.44E-05 | 0.004813  | -0.11546   |
| 9mo_SIGAF3_ | 0.0863311  | 0.5245438  | 4.77E-05 | 0.01133   | -0.17867   |
| 9mo_SIGAF3_ | 0.02003221 | 0.11541334 | 4.19E-05 | 0.0053364 | -0.025531  |
| 9mo_SIGAF3_ | 0.03415998 | 0.20259582 | 4.70E-05 | 0.0045688 | -0.10761   |
| 9mo_SIGAF3_ | 0.01868645 | 0.10710865 | 4.11E-05 | 0.0055212 | 0.015459   |
| 9mo_SIGAF3_ | 0.02328662 | 0.1354963  | 4.32E-05 | 0.0050338 | -0.084895  |
| 9mo_SIGAF3_ | 0.08602578 | 0.5226597  | 4.76E-05 | 0.0117    | -0.17867   |
| 9mo_SIGAF3_ | 0.09371921 | 0.5701359  | 5.06E-05 | 0.0067258 | -0.7829    |
| 9mo_SIGAF3_ | 0.01621996 | 0.09188799 | 3.98E-05 | 0.0058806 | 0.080526   |
| 9mo_SIGAF3_ | 0.07084709 | 0.42899203 | 5.71E-05 | 0.011574  | 0.23476    |
| 9mo_SIGAF3_ | 0.03219951 | 0.19049779 | 4.62E-05 | 0.0046026 | -0.11821   |
| 9mo_SIGAF3_ | 0.01136232 | 0.06191147 | 3.74E-05 | 0.0065941 | 0.263      |
| 9mo_SIGAF3_ | 0.01007881 | 0.05399092 | 3.65E-05 | 0.0069072 | 0.33263    |
| 9mo_SIGAF3_ | 0.03511057 | 0.20846193 | 4.72E-05 | 0.0045646 | -0.10068   |
| 9mo_SIGAF3_ | 0.02393594 | 0.13950329 | 4.34E-05 | 0.0049916 | -0.091842  |
| 9mo_SIGAF3_ | 0.0204413  | 0.11793783 | 4.19E-05 | 0.0053364 | -0.025531  |
| 9mo_SIGAF3_ | 0.02608419 | 0.15276013 | 4.42E-05 | 0.0048445 | -0.11213   |
| 9mo_SIGAF3_ | 0.02139178 | 0.12380329 | 4.24E-05 | 0.0052258 | -0.04878   |
| 9mo_SIGAF3_ | 0.0850173  | 0.51643634 | 4.76E-05 | 0.012404  | -0.10433   |
| 9mo_SIGAF3_ | 0.07041697 | 0.42633775 | 5.76E-05 | 0.011297  | 0.23016    |
| 9mo_SIGAF3_ | 0.01992446 | 0.11474843 | 4.16E-05 | 0.0053955 | -0.012659  |
| 9mo_SIGAF3_ | 0.01992036 | 0.1147231  | 4.16E-05 | 0.0053955 | -0.012659  |
| 9mo_SIGAF3_ | 0.04340265 | 0.25963238 | 5.21E-05 | 0.0047343 | -0.038876  |
| 9mo_SIGAF3_ | 0.02679539 | 0.15714896 | 4.44E-05 | 0.004813  | -0.11546   |
| 9mo_SIGAF3_ | 0.09461763 | 0.57567996 | 5.13E-05 | 0.0061762 | -0.8688    |
| 9mo_SIGAF3_ | 0.01828655 | 0.10464092 | 4.09E-05 | 0.0055879 | 0.030658   |
| 9mo_SIGAF3_ | 0.04060404 | 0.24236213 | 4.99E-05 | 0.0046177 | -0.058715  |
| 9mo_SIGAF3_ | 0.03168343 | 0.18731305 | 4.60E-05 | 0.0046154 | -0.12002   |
| 9mo_SIGAF3_ | 0.01357162 | 0.07554507 | 3.86E-05 | 0.0062156 | 0.17645    |
| 9mo_SIGAF3_ | 0.04402633 | 0.26348105 | 5.25E-05 | 0.0047605 | -0.035266  |
| 9mo_SIGAF3_ | 0.08361092 | 0.50775754 | 4.77E-05 | 0.013036  | -0.0045591 |
| 9mo_SIGAF3_ | 0.03329703 | 0.19727059 | 4.66E-05 | 0.0045822 | -0.11352   |
| 9mo_SIGAF3_ | 0.02170058 | 0.12570888 | 4.26E-05 | 0.0051742 | -0.059109  |
| 9mo_SIGAF3_ | 0.08026013 | 0.48707986 | 4.87E-05 | 0.014207  | 0.14202    |
| 9mo_SIGAF3_ | 0.01031972 | 0.05547756 | 3.68E-05 | 0.0068    | 0.30902    |
| 9mo_SIGAF3_ | 0.02156922 | 0.12489826 | 4.24E-05 | 0.0052258 | -0.04878   |
| 9mo_SIGAF3_ | 0.07862109 | 0.47696537 | 4.97E-05 | 0.014318  | 0.18889    |
| 9mo_SIGAF3_ | 0.09083606 | 0.5523439  | 4.91E-05 | 0.0083333 | -0.56091   |
| 9mo_SIGAF3_ | 0.02346992 | 0.13662748 | 4.32E-05 | 0.0050338 | -0.084895  |
| 9mo_SIGAF3_ | 0.02977984 | 0.17556597 | 4.53E-05 | 0.0046846 | -0.12301   |

|             |            |            |          |           |           |
|-------------|------------|------------|----------|-----------|-----------|
| 9mo_SIGAF3_ | 0.09923615 | 0.6041809  | 5.49E-05 | 0.0043938 | -1.1701   |
| 9mo_SIGAF3_ | 0.06404119 | 0.38699278 | 6.27E-05 | 0.0084357 | 0.14015   |
| 9mo_SIGAF3_ | 0.07724956 | 0.4685017  | 5.09E-05 | 0.014141  | 0.21153   |
| 9mo_SIGAF3_ | 0.01275913 | 0.0705312  | 3.80E-05 | 0.0063994 | 0.21875   |
| 9mo_SIGAF3_ | 0.03477369 | 0.20638305 | 4.72E-05 | 0.0045646 | -0.10426  |
| 9mo_SIGAF3_ | 0.00721661 | 0.03632829 | 3.50E-05 | 0.0074854 | 0.45576   |
| 9mo_SIGAF3_ | 0.0669682  | 0.4050554  | 6.07E-05 | 0.0096573 | 0.19037   |
| 9mo_SIGAF3_ | 0.01136916 | 0.06195365 | 3.74E-05 | 0.0065941 | 0.263     |
| 9mo_SIGAF3_ | 0.08943523 | 0.5436994  | 4.86E-05 | 0.0090548 | -0.42792  |
| 9mo_SIGAF3_ | 0.01844302 | 0.10560644 | 4.11E-05 | 0.0055212 | 0.015459  |
| 9mo_SIGAF3_ | 0.03862567 | 0.23015358 | 4.89E-05 | 0.0045836 | -0.076088 |
| 9mo_SIGAF3_ | 0.02908724 | 0.17129196 | 4.51E-05 | 0.0047064 | -0.12268  |
| 9mo_SIGAF3_ | 0.02434544 | 0.1420303  | 4.34E-05 | 0.0049916 | -0.098011 |
| 9mo_SIGAF3_ | 0.02969679 | 0.1750535  | 4.53E-05 | 0.0046846 | -0.12301  |
| 9mo_SIGAF3_ | 0.01864762 | 0.10686908 | 4.11E-05 | 0.0055212 | 0.015459  |
| 9mo_SIGAF3_ | 0.02879329 | 0.16947801 | 4.51E-05 | 0.0047064 | -0.12268  |
| 9mo_SIGAF3_ | 0.04975091 | 0.29880747 | 5.73E-05 | 0.0051543 | 0.0010449 |
| 9mo_SIGAF3_ | 0.09294723 | 0.56537193 | 5.02E-05 | 0.0070215 | -0.73907  |
| 9mo_SIGAF3_ | 0.02102219 | 0.12152255 | 4.21E-05 | 0.0052798 | -0.037579 |
| 9mo_SIGAF3_ | 0.03582475 | 0.21286911 | 4.77E-05 | 0.0045615 | -0.096915 |
| 9mo_SIGAF3_ | 0.14832313 | 0.9070967  | 7.66E-05 | 0.0046847 | -1.1037   |
| 9mo_SIGAF3_ | 0.02469928 | 0.14421386 | 4.36E-05 | 0.0049516 | -0.098011 |
| 9mo_SIGAF3_ | 0.02917528 | 0.17183527 | 4.51E-05 | 0.0047064 | -0.1231   |
| 9mo_SIGAF3_ | 0.06698073 | 0.4051327  | 6.07E-05 | 0.0096573 | 0.19037   |
| 9mo_SIGAF3_ | 0.0212018  | 0.12263092 | 4.24E-05 | 0.0052258 | -0.04878  |
| 9mo_SIGAF3_ | 0.06635055 | 0.40124387 | 6.12E-05 | 0.0093985 | 0.17407   |
| 9mo_SIGAF3_ | 0.02273383 | 0.13208504 | 4.28E-05 | 0.005125  | -0.077142 |
| 9mo_SIGAF3_ | 0.01142087 | 0.06227279 | 3.74E-05 | 0.0065941 | 0.263     |
| 9mo_SIGAF3_ | 0.08155743 | 0.49508554 | 4.83E-05 | 0.013957  | 0.078055  |
| 9mo_SIGAF3_ | 0.05951143 | 0.35903963 | 6.37E-05 | 0.0067983 | 0.080679  |
| 9mo_SIGAF3_ | 0.02297721 | 0.13358697 | 4.30E-05 | 0.0050782 | -0.077142 |
| 9mo_SIGAF3_ | 0.0787952  | 0.4780398  | 4.97E-05 | 0.014318  | 0.18889   |
| 9mo_SIGAF3_ | 0.02106296 | 0.12177411 | 4.21E-05 | 0.0052798 | -0.04878  |
| 9mo_SIGAF3_ | 0.02537487 | 0.1483829  | 4.38E-05 | 0.0049138 | -0.10813  |
| 9mo_SIGAF3_ | 0.09188678 | 0.55882794 | 4.96E-05 | 0.0076529 | -0.6503   |
| 9mo_SIGAF3_ | 0.0123373  | 0.06792808 | 3.77E-05 | 0.0064954 | 0.24064   |
| 9mo_SIGAF3_ | 0.02348135 | 0.136698   | 4.32E-05 | 0.0050338 | -0.084895 |
| 9mo_SIGAF3_ | 0.05750138 | 0.3466356  | 6.32E-05 | 0.0064035 | 0.057806  |
| 9mo_SIGAF3_ | 0.03438513 | 0.20398526 | 4.70E-05 | 0.0045688 | -0.10761  |
| 9mo_SIGAF3_ | 0.02174899 | 0.12600763 | 4.26E-05 | 0.0051742 | -0.059109 |
| 9mo_SIGAF3_ | 0.01175668 | 0.06434504 | 3.74E-05 | 0.0065941 | 0.263     |
| 9mo_SIGAF3_ | 0.01612482 | 0.09130088 | 3.98E-05 | 0.0058806 | 0.098494  |
| 9mo_SIGAF3_ | 0.01103249 | 0.05987605 | 3.71E-05 | 0.0066957 | 0.2858    |

|             |            |            |          |           |           |
|-------------|------------|------------|----------|-----------|-----------|
| 9mo_SIGAF3_ | 0.02595593 | 0.15196861 | 4.40E-05 | 0.0048781 | -0.11213  |
| 9mo_SIGAF3_ | 0.030147   | 0.17783177 | 4.55E-05 | 0.0046645 | -0.12301  |
| 9mo_SIGAF3_ | 0.08751478 | 0.5318483  | 4.79E-05 | 0.010571  | -0.29935  |
| 9mo_SIGAF3_ | 0.07928764 | 0.48107865 | 4.93E-05 | 0.014315  | 0.17506   |
| 9mo_SIGAF3_ | 0.03602974 | 0.21413411 | 4.77E-05 | 0.0045615 | -0.096915 |
| 9mo_SIGAF3_ | 0.09401806 | 0.57198    | 5.09E-05 | 0.0064439 | -0.82618  |
| 9mo_SIGAF3_ | 0.08018408 | 0.48661056 | 4.90E-05 | 0.014278  | 0.14202   |
| 9mo_SIGAF3_ | 0.0206428  | 0.11918133 | 4.21E-05 | 0.0052798 | -0.037579 |
| 9mo_SIGAF3_ | 0.0275561  | 0.16184331 | 4.46E-05 | 0.0047834 | -0.12024  |
| 9mo_SIGAF3_ | 0.02080165 | 0.12016156 | 4.21E-05 | 0.0052798 | -0.037579 |
| 9mo_SIGAF3_ | 0.01984836 | 0.1142788  | 4.16E-05 | 0.0053955 | -0.012659 |
| 9mo_SIGAF3_ | 0.02498178 | 0.14595719 | 4.38E-05 | 0.0049138 | -0.10343  |
| 9mo_SIGAF3_ | 0.05039896 | 0.30280662 | 5.83E-05 | 0.0052672 | 0.0043724 |
| 9mo_SIGAF3_ | 0.01412168 | 0.07893948 | 3.89E-05 | 0.0061278 | 0.1561    |
| 9mo_SIGAF3_ | 0.0176176  | 0.10051282 | 4.06E-05 | 0.0056572 | 0.046584  |
| 9mo_SIGAF3_ | 0.01427471 | 0.07988382 | 3.89E-05 | 0.0061278 | 0.1561    |
| 9mo_SIGAF3_ | 0.01201598 | 0.06594517 | 3.77E-05 | 0.0064954 | 0.24064   |
| 9mo_SIGAF3_ | 0.01908358 | 0.10955934 | 4.14E-05 | 0.0054571 | 0.0010121 |
| 9mo_SIGAF3_ | 0.01182477 | 0.06476522 | 3.74E-05 | 0.0065941 | 0.263     |
| 9mo_SIGAF3_ | 0.08519878 | 0.51755625 | 4.76E-05 | 0.012059  | -0.10433  |
| 9mo_SIGAF3_ | 0.02747333 | 0.16133253 | 4.46E-05 | 0.0047834 | -0.11816  |
| 9mo_SIGAF3_ | 0.03366735 | 0.1995558  | 4.68E-05 | 0.0045746 | -0.11071  |
| 9mo_SIGAF3_ | 0.02407841 | 0.14038248 | 4.34E-05 | 0.0049916 | -0.091842 |
| 9mo_SIGAF3_ | 0.0632124  | 0.38187835 | 6.33E-05 | 0.0080056 | 0.13178   |
| 9mo_SIGAF3_ | 0.01141508 | 0.06223701 | 3.74E-05 | 0.0065941 | 0.263     |
| 9mo_SIGAF3_ | 0.01468577 | 0.08242048 | 3.92E-05 | 0.0060428 | 0.1363    |
| 9mo_SIGAF3_ | 0.02525901 | 0.14766797 | 4.38E-05 | 0.0049138 | -0.10343  |
| 9mo_SIGAF3_ | 0.01462832 | 0.08206594 | 3.92E-05 | 0.0060428 | 0.1363    |
| 9mo_SIGAF3_ | 0.01229984 | 0.06769692 | 3.77E-05 | 0.0064954 | 0.24064   |
| 9mo_SIGAF3_ | 0.01912289 | 0.10980196 | 4.14E-05 | 0.0054571 | 0.0010121 |
| 9mo_SIGAF3_ | 0.06226479 | 0.37603065 | 6.36E-05 | 0.0076138 | 0.11565   |
| 9mo_SIGAF3_ | 0.01423726 | 0.07965271 | 3.89E-05 | 0.0061278 | 0.1561    |
| 9mo_SIGAF3_ | 0.0750954  | 0.45520833 | 5.28E-05 | 0.013537  | 0.23858   |
| 9mo_SIGAF3_ | 0.01761848 | 0.10051824 | 4.06E-05 | 0.0056572 | 0.046584  |
| 9mo_SIGAF3_ | 0.04111207 | 0.2454972  | 5.02E-05 | 0.0046325 | -0.054504 |
| 9mo_SIGAF3_ | 0.02575142 | 0.1507066  | 4.40E-05 | 0.0048781 | -0.10813  |
| 9mo_SIGAF3_ | 0.03072679 | 0.18140961 | 4.57E-05 | 0.0046464 | -0.12245  |
| 9mo_SIGAF3_ | 0.08849839 | 0.53791815 | 4.82E-05 | 0.0098057 | -0.3415   |
| 9mo_SIGAF3_ | 0.0294421  | 0.17348182 | 4.53E-05 | 0.0046846 | -0.1231   |
| 9mo_SIGAF3_ | 0.07772639 | 0.4714442  | 5.05E-05 | 0.014229  | 0.21153   |
| 9mo_SIGAF3_ | 0.01561367 | 0.08814652 | 3.95E-05 | 0.0059603 | 0.11709   |
| 9mo_SIGAF3_ | 0.06038163 | 0.36440963 | 6.38E-05 | 0.0070986 | 0.087064  |
| 9mo_SIGAF3_ | 0.0715721  | 0.43346605 | 5.60E-05 | 0.012118  | 0.2386    |

|             |            |            |          |           |           |
|-------------|------------|------------|----------|-----------|-----------|
| 9mo_SIGAF3_ | 0.00793021 | 0.04073193 | 3.53E-05 | 0.0073641 | 0.43054   |
| 9mo_SIGAF3_ | 0.07960621 | 0.4830445  | 4.93E-05 | 0.014315  | 0.15946   |
| 9mo_SIGAF3_ | 0.0226593  | 0.13162516 | 4.28E-05 | 0.005125  | -0.068556 |
| 9mo_SIGAF3_ | 0.02488192 | 0.14534095 | 4.36E-05 | 0.0049516 | -0.10343  |
| 9mo_SIGAF3_ | 0.0362958  | 0.21577597 | 4.79E-05 | 0.0045625 | -0.092976 |
| 9mo_SIGAF3_ | 0.02011987 | 0.11595434 | 4.19E-05 | 0.0053364 | -0.025531 |
| 9mo_SIGAF3_ | 0.03007907 | 0.17741252 | 4.55E-05 | 0.0046645 | -0.12301  |
| 9mo_SIGAF3_ | 0.02154694 | 0.12476076 | 4.24E-05 | 0.0052258 | -0.04878  |
| 9mo_SIGAF3_ | 0.01764911 | 0.10070726 | 4.06E-05 | 0.0056572 | 0.046584  |
| 9mo_SIGAF3_ | 0.03934329 | 0.23458204 | 4.92E-05 | 0.0045932 | -0.071721 |
| 9mo_SIGAF3_ | 0.02201348 | 0.12763979 | 4.26E-05 | 0.0051742 | -0.059109 |
| 9mo_SIGAF3_ | 0.03901239 | 0.23254004 | 4.92E-05 | 0.0045932 | -0.071721 |
| 9mo_SIGAF3_ | 0.00724266 | 0.03648905 | 3.50E-05 | 0.0074854 | 0.45576   |
| 9mo_SIGAF3_ | 0.01528591 | 0.08612395 | 3.95E-05 | 0.0059603 | 0.11709   |
| 9mo_SIGAF3_ | 0.01234896 | 0.06799998 | 3.77E-05 | 0.0064954 | 0.24064   |
| 9mo_SIGAF3_ | 0.02892274 | 0.17027684 | 4.51E-05 | 0.0047064 | -0.12268  |
| 9mo_SIGAF3_ | 0.03052618 | 0.18017164 | 4.57E-05 | 0.0046464 | -0.12245  |
| 9mo_SIGAF3_ | 0.08650629 | 0.5256249  | 4.77E-05 | 0.01133   | -0.21781  |
| 9mo_SIGAF3_ | 0.08864895 | 0.53884727 | 4.82E-05 | 0.0098057 | -0.3844   |
| 9mo_SIGAF3_ | 0.01753796 | 0.10002133 | 4.06E-05 | 0.0056572 | 0.046584  |
| 9mo_SIGAF3_ | 0.14188448 | 0.8673637  | 7.50E-05 | 0.0048896 | -1.0694   |
| 9mo_SIGAF3_ | 0.0863388  | 0.5245913  | 4.77E-05 | 0.01133   | -0.17867  |
| 9mo_SIGAF3_ | 0.01516357 | 0.08536896 | 3.95E-05 | 0.0059603 | 0.11709   |
| 9mo_SIGAF3_ | 0.05718702 | 0.34469572 | 6.30E-05 | 0.0062853 | 0.05269   |
| 9mo_SIGAF3_ | 0.02315043 | 0.13465591 | 4.30E-05 | 0.0050782 | -0.077142 |
| 9mo_SIGAF3_ | 0.01121414 | 0.06099705 | 3.71E-05 | 0.0066957 | 0.2858    |
| 9mo_SIGAF3_ | 0.08919213 | 0.54219925 | 4.84E-05 | 0.0094274 | -0.42792  |
| 9mo_SIGAF3_ | 0.08398847 | 0.51008743 | 4.76E-05 | 0.012731  | -0.036078 |
| 9mo_SIGAF3_ | 0.00618211 | 0.02994441 | 3.44E-05 | 0.0077366 | 0.50694   |
| 9mo_SIGAF3_ | 0.01932417 | 0.11104404 | 4.14E-05 | 0.0054571 | 0.0010121 |
| 9mo_SIGAF3_ | 0.01321057 | 0.07331702 | 3.83E-05 | 0.0063061 | 0.19734   |
| 9mo_SIGAF3_ | 0.02513857 | 0.1469247  | 4.38E-05 | 0.0049138 | -0.10343  |
| 9mo_SIGAF3_ | 0.03009333 | 0.17750053 | 4.55E-05 | 0.0046645 | -0.12301  |
| 9mo_SIGAF3_ | 0.02069637 | 0.11951192 | 4.21E-05 | 0.0052798 | -0.037579 |
| 9mo_SIGAF3_ | 0.08852478 | 0.538081   | 4.82E-05 | 0.0098057 | -0.3415   |
| 9mo_SIGAF3_ | 0.01842023 | 0.10546584 | 4.11E-05 | 0.0055212 | 0.015459  |
| 9mo_SIGAF3_ | 0.03253062 | 0.1925411  | 4.64E-05 | 0.0045915 | -0.11603  |
| 9mo_SIGAF3_ | 0.01959695 | 0.11272738 | 4.16E-05 | 0.0053955 | -0.012659 |
| 9mo_SIGAF3_ | 0.07955796 | 0.48274675 | 4.93E-05 | 0.014315  | 0.15946   |
| 9mo_SIGAF3_ | 0.08599256 | 0.5224547  | 4.76E-05 | 0.0117    | -0.17867  |
| 9mo_SIGAF3_ | 0.01996246 | 0.11498293 | 4.16E-05 | 0.0053955 | -0.012659 |
| 9mo_SIGAF3_ | 0.00935992 | 0.04955463 | 3.62E-05 | 0.0070172 | 0.35661   |
| 9mo_SIGAF3_ | 0.05106228 | 0.30689994 | 5.87E-05 | 0.0053288 | 0.0077602 |

|             |            |            |          |           |            |
|-------------|------------|------------|----------|-----------|------------|
| 9mo_SIGAF3_ | 0.05290353 | 0.31826225 | 6.01E-05 | 0.0055357 | 0.018414   |
| 9mo_SIGAF3_ | 0.08951609 | 0.5441984  | 4.86E-05 | 0.0090548 | -0.42792   |
| 9mo_SIGAF3_ | 0.09405945 | 0.5722354  | 5.09E-05 | 0.0064439 | -0.82618   |
| 9mo_SIGAF3_ | 0.05198724 | 0.31260788 | 5.92E-05 | 0.0053939 | 0.014768   |
| 9mo_SIGAF3_ | 0.04235975 | 0.2531966  | 5.13E-05 | 0.0046879 | -0.04643   |
| 9mo_SIGAF3_ | 0.0319395  | 0.18889323 | 4.60E-05 | 0.0046154 | -0.11821   |
| 9mo_SIGAF3_ | 0.04420046 | 0.26455563 | 5.25E-05 | 0.0047605 | -0.035266  |
| 9mo_SIGAF3_ | 0.0200397  | 0.11545959 | 4.19E-05 | 0.0053364 | -0.025531  |
| 9mo_SIGAF3_ | 0.07814885 | 0.47405118 | 5.01E-05 | 0.014289  | 0.20103    |
| 9mo_SIGAF3_ | 0.05832289 | 0.35170516 | 6.34E-05 | 0.0065282 | 0.068735   |
| 9mo_SIGAF3_ | 0.08421402 | 0.5114793  | 4.76E-05 | 0.012731  | -0.036078  |
| 9mo_SIGAF3_ | 0.02786334 | 0.16373926 | 4.48E-05 | 0.0047558 | -0.12024   |
| 9mo_SIGAF3_ | 0.01187429 | 0.06507082 | 3.74E-05 | 0.0065941 | 0.24064    |
| 9mo_SIGAF3_ | 0.09605805 | 0.5845688  | 5.24E-05 | 0.0054581 | -0.9515    |
| 9mo_SIGAF3_ | 0.042398   | 0.25343266 | 5.13E-05 | 0.0046879 | -0.04643   |
| 9mo_SIGAF3_ | 0.02672762 | 0.15673071 | 4.44E-05 | 0.004813  | -0.11546   |
| 9mo_SIGAF3_ | 0.08476367 | 0.5148712  | 4.76E-05 | 0.012404  | -0.069378  |
| 9mo_SIGAF3_ | 0.07107616 | 0.43040556 | 5.65E-05 | 0.011849  | 0.23476    |
| 9mo_SIGAF3_ | 0.07847438 | 0.47606003 | 5.01E-05 | 0.014289  | 0.18889    |
| 9mo_SIGAF3_ | 0.03578786 | 0.21264148 | 4.77E-05 | 0.0045615 | -0.096915  |
| 9mo_SIGAF3_ | 0.0897345  | 0.54554623 | 4.86E-05 | 0.0090548 | -0.47194   |
| 9mo_SIGAF3_ | 0.09089927 | 0.55273396 | 4.91E-05 | 0.0083333 | -0.56091   |
| 9mo_SIGAF3_ | 0.06360594 | 0.38430688 | 6.30E-05 | 0.008216  | 0.13178    |
| 9mo_SIGAF3_ | 0.01812147 | 0.10362218 | 4.09E-05 | 0.0055879 | 0.030658   |
| 9mo_SIGAF3_ | 0.09445597 | 0.5746824  | 5.13E-05 | 0.0061762 | -0.82618   |
| 9mo_SIGAF3_ | 0.01655579 | 0.09396039 | 4.00E-05 | 0.0058035 | 0.080526   |
| 9mo_SIGAF3_ | 0.05453519 | 0.32833126 | 6.14E-05 | 0.0057798 | 0.030074   |
| 9mo_SIGAF3_ | 0.01888073 | 0.10830759 | 4.11E-05 | 0.0055212 | 0.015459   |
| 9mo_SIGAF3_ | 0.08976663 | 0.5457445  | 4.86E-05 | 0.0090548 | -0.47194   |
| 9mo_SIGAF3_ | 0.0142055  | 0.07945671 | 3.89E-05 | 0.0061278 | 0.1561     |
| 9mo_SIGAF3_ | 0.0977908  | 0.59526163 | 5.36E-05 | 0.0048658 | -1.1032    |
| 9mo_SIGAF3_ | 0.08930954 | 0.54292375 | 4.84E-05 | 0.0094274 | -0.42792   |
| 9mo_SIGAF3_ | 0.05667747 | 0.34155127 | 6.27E-05 | 0.0061731 | 0.047788   |
| 9mo_SIGAF3_ | 0.01439093 | 0.08060101 | 3.89E-05 | 0.0061278 | 0.1561     |
| 9mo_SIGAF3_ | 0.02074057 | 0.11978462 | 4.21E-05 | 0.0052798 | -0.037579  |
| 9mo_SIGAF3_ | 0.0367911  | 0.21883248 | 4.79E-05 | 0.0045625 | -0.088896  |
| 9mo_SIGAF3_ | 0.02040751 | 0.11772931 | 4.19E-05 | 0.0053364 | -0.025531  |
| 9mo_SIGAF3_ | 0.01347613 | 0.07495579 | 3.83E-05 | 0.0063061 | 0.19734    |
| 9mo_SIGAF3_ | 0.09803877 | 0.59679186 | 5.36E-05 | 0.0048658 | -1.1032    |
| 9mo_SIGAF3_ | 0.08358126 | 0.50757456 | 4.77E-05 | 0.013036  | -0.0045591 |
| 9mo_SIGAF3_ | 0.08865166 | 0.53886396 | 4.82E-05 | 0.0098057 | -0.3844    |
| 9mo_SIGAF3_ | 0.08098359 | 0.49154434 | 4.85E-05 | 0.0141    | 0.12269    |
| 9mo_SIGAF3_ | 0.02508255 | 0.14657904 | 4.38E-05 | 0.0049138 | -0.10343   |



|             |            |            |          |           |           |
|-------------|------------|------------|----------|-----------|-----------|
| 9mo_SIGAF3_ | 0.01984925 | 0.11428431 | 4.16E-05 | 0.0053955 | -0.012659 |
| 9mo_SIGAF3_ | 0.08305018 | 0.50429726 | 4.78E-05 | 0.013315  | 0.02505   |
| 9mo_SIGAF3_ | 0.00777202 | 0.03975573 | 3.53E-05 | 0.0073641 | 0.43054   |
| 9mo_SIGAF3_ | 0.00732386 | 0.03699012 | 3.50E-05 | 0.0074854 | 0.45576   |
| 9mo_SIGAF3_ | 0.01625606 | 0.09211074 | 4.00E-05 | 0.0058035 | 0.080526  |
| 9mo_SIGAF3_ | 0.01002632 | 0.05366702 | 3.65E-05 | 0.0069072 | 0.33263   |
| 9mo_SIGAF3_ | 0.02897368 | 0.17059118 | 4.51E-05 | 0.0047064 | -0.12268  |
| 9mo_SIGAF3_ | 0.08287545 | 0.503219   | 4.79E-05 | 0.013563  | 0.02505   |
| 9mo_SIGAF3_ | 0.07109068 | 0.43049523 | 5.65E-05 | 0.011849  | 0.23476   |
| 9mo_SIGAF3_ | 0.08196852 | 0.49762237 | 4.81E-05 | 0.013778  | 0.078055  |
| 9mo_SIGAF3_ | 0.01081548 | 0.05853688 | 3.71E-05 | 0.0066957 | 0.2858    |
| 9mo_SIGAF3_ | 0.01228294 | 0.06759259 | 3.77E-05 | 0.0064954 | 0.24064   |
| 9mo_SIGAF3_ | 0.01575851 | 0.08904032 | 3.98E-05 | 0.0058806 | 0.098494  |
| 9mo_SIGAF3_ | 0.01882584 | 0.10796882 | 4.11E-05 | 0.0055212 | 0.015459  |
| 9mo_SIGAF3_ | 0.07459833 | 0.4521409  | 5.33E-05 | 0.013335  | 0.24193   |
| 9mo_SIGAF3_ | 0.04549227 | 0.2725274  | 5.34E-05 | 0.0048194 | -0.024952 |
| 9mo_SIGAF3_ | 0.02423985 | 0.14137872 | 4.34E-05 | 0.0049916 | -0.091842 |
| 9mo_SIGAF3_ | 0.07867272 | 0.47728395 | 4.97E-05 | 0.014318  | 0.18889   |
| 9mo_SIGAF3_ | 0.03277971 | 0.1940782  | 4.64E-05 | 0.0045915 | -0.11603  |
| 9mo_SIGAF3_ | 0.03887344 | 0.23168258 | 4.89E-05 | 0.0045836 | -0.071721 |
| 9mo_SIGAF3_ | 0.0830567  | 0.5043375  | 4.78E-05 | 0.013315  | 0.02505   |
| 9mo_SIGAF3_ | 0.09512296 | 0.5787984  | 5.16E-05 | 0.0059226 | -0.91061  |
| 9mo_SIGAF3_ | 0.09332483 | 0.5677021  | 5.06E-05 | 0.0067258 | -0.73907  |
| 9mo_SIGAF3_ | 0.01747789 | 0.09965061 | 4.06E-05 | 0.0056572 | 0.046584  |
| 9mo_SIGAF3_ | 0.01605975 | 0.09089931 | 3.98E-05 | 0.0058806 | 0.098494  |
| 9mo_SIGAF3_ | 0.08698446 | 0.5285757  | 4.78E-05 | 0.010952  | -0.25808  |
| 9mo_SIGAF3_ | 0.03396575 | 0.20139726 | 4.68E-05 | 0.0045746 | -0.11071  |
| 9mo_SIGAF3_ | 0.00847088 | 0.04406841 | 3.56E-05 | 0.0072456 | 0.40559   |
| 9mo_SIGAF3_ | 0.02291649 | 0.13321227 | 4.30E-05 | 0.0050782 | -0.077142 |
| 9mo_SIGAF3_ | 0.04448135 | 0.26628897 | 5.30E-05 | 0.0047888 | -0.031751 |
| 9mo_SIGAF3_ | 0.02559057 | 0.14971402 | 4.40E-05 | 0.0048781 | -0.10813  |
| 9mo_SIGAF3_ | 0.08263595 | 0.50174105 | 4.79E-05 | 0.013563  | 0.02505   |
| 9mo_SIGAF3_ | 0.01072689 | 0.05799022 | 3.68E-05 | 0.0068    | 0.30902   |
| 9mo_SIGAF3_ | 0.02116438 | 0.12239999 | 4.24E-05 | 0.0052258 | -0.04878  |
| 9mo_SIGAF3_ | 0.03793874 | 0.22591458 | 4.87E-05 | 0.0045758 | -0.080425 |
| 9mo_SIGAF3_ | 0.09091212 | 0.5528133  | 4.91E-05 | 0.0083333 | -0.56091  |
| 9mo_SIGAF3_ | 0.01646135 | 0.09337758 | 4.00E-05 | 0.0058035 | 0.080526  |
| 9mo_SIGAF3_ | 0.0795259  | 0.48254892 | 4.93E-05 | 0.014315  | 0.15946   |
| 9mo_SIGAF3_ | 0.07532916 | 0.45665082 | 5.23E-05 | 0.013721  | 0.23858   |
| 9mo_SIGAF3_ | 0.01530493 | 0.08624131 | 3.95E-05 | 0.0059603 | 0.11709   |
| 9mo_SIGAF3_ | 0.0226766  | 0.13173193 | 4.28E-05 | 0.005125  | -0.077142 |
| 9mo_SIGAF3_ | 0.03625279 | 0.21551058 | 4.77E-05 | 0.0045615 | -0.092976 |
| 9mo_SIGAF3_ | 0.01957202 | 0.1125735  | 4.16E-05 | 0.0053955 | -0.012659 |

|             |            |            |          |           |           |
|-------------|------------|------------|----------|-----------|-----------|
| 9mo_SIGAF3_ | 0.10064726 | 0.6128889  | 5.58E-05 | 0.0041426 | -1.2563   |
| 9mo_SIGAF3_ | 0.01453172 | 0.08146982 | 3.89E-05 | 0.0061278 | 0.1561    |
| 9mo_SIGAF3_ | 0.01667858 | 0.09471808 | 4.00E-05 | 0.0058035 | 0.080526  |
| 9mo_SIGAF3_ | 0.01045894 | 0.05633667 | 3.68E-05 | 0.0068    | 0.30902   |
| 9mo_SIGAF3_ | 0.02276193 | 0.13225846 | 4.30E-05 | 0.0050782 | -0.077142 |
| 9mo_SIGAF3_ | 0.09185385 | 0.5586247  | 4.96E-05 | 0.0076529 | -0.6503   |
| 9mo_SIGAF3_ | 0.08513992 | 0.517193   | 4.76E-05 | 0.012059  | -0.10433  |
| 9mo_SIGAF3_ | 0.02811689 | 0.16530392 | 4.48E-05 | 0.0047558 | -0.12174  |
| 9mo_SIGAF3_ | 0.01704621 | 0.09698675 | 4.03E-05 | 0.005729  | 0.063215  |
| 9mo_SIGAF3_ | 0.03610535 | 0.21460073 | 4.77E-05 | 0.0045615 | -0.096915 |
| 9mo_SIGAF3_ | 0.02102088 | 0.12151443 | 4.21E-05 | 0.0052798 | -0.037579 |
| 9mo_SIGAF3_ | 0.06523418 | 0.39435473 | 6.20E-05 | 0.0089013 | 0.15715   |
| 9mo_SIGAF3_ | 0.09205852 | 0.5598877  | 4.96E-05 | 0.0076529 | -0.6503   |
| 9mo_SIGAF3_ | 0.01497459 | 0.08420277 | 3.92E-05 | 0.0060428 | 0.1363    |
| 9mo_SIGAF3_ | 0.02227569 | 0.1292579  | 4.28E-05 | 0.005125  | -0.068556 |
| 9mo_SIGAF3_ | 0.08686534 | 0.5278406  | 4.78E-05 | 0.010952  | -0.21781  |
| 9mo_SIGAF3_ | 0.07239628 | 0.43855205 | 5.54E-05 | 0.012382  | 0.24373   |
| 9mo_SIGAF3_ | 0.08920655 | 0.54228824 | 4.84E-05 | 0.0094274 | -0.42792  |
| 9mo_SIGAF3_ | 0.02495566 | 0.14579596 | 4.38E-05 | 0.0049138 | -0.10343  |
| 9mo_SIGAF3_ | 0.01823239 | 0.10430666 | 4.09E-05 | 0.0055879 | 0.030658  |
| 9mo_SIGAF3_ | 0.09276718 | 0.56426084 | 5.02E-05 | 0.0070215 | -0.69483  |
| 9mo_SIGAF3_ | 0.01652499 | 0.09377031 | 4.00E-05 | 0.0058035 | 0.080526  |
| 9mo_SIGAF3_ | 0.08593261 | 0.5220847  | 4.76E-05 | 0.0117    | -0.17867  |
| 9mo_SIGAF3_ | 0.02312662 | 0.13450895 | 4.30E-05 | 0.0050782 | -0.077142 |
| 9mo_SIGAF3_ | 0.02208597 | 0.1280871  | 4.26E-05 | 0.0051742 | -0.059109 |
| 9mo_SIGAF3_ | 0.01698911 | 0.09663437 | 4.03E-05 | 0.005729  | 0.063215  |
| 9mo_SIGAF3_ | 0.06434947 | 0.38889515 | 6.27E-05 | 0.0084357 | 0.14863   |
| 9mo_SIGAF3_ | 0.08004627 | 0.48576018 | 4.90E-05 | 0.014278  | 0.14202   |
| 9mo_SIGAF3_ | 0.09134821 | 0.5555044  | 4.93E-05 | 0.0079874 | -0.60562  |
| 9mo_SIGAF3_ | 0.09477676 | 0.57666194 | 5.13E-05 | 0.0061762 | -0.8688   |
| 9mo_SIGAF3_ | 0.08623163 | 0.52392995 | 4.77E-05 | 0.01133   | -0.17867  |
| 9mo_SIGAF3_ | 0.01896515 | 0.10882855 | 4.14E-05 | 0.0054571 | 0.0010121 |
| 9mo_SIGAF3_ | 0.06006376 | 0.36244807 | 6.37E-05 | 0.0069445 | 0.087064  |
| 9mo_SIGAF3_ | 0.08409826 | 0.51076496 | 4.76E-05 | 0.012731  | -0.036078 |
| 9mo_SIGAF3_ | 0.08207208 | 0.49826142 | 4.81E-05 | 0.013778  | 0.078055  |
| 9mo_SIGAF3_ | 0.01932371 | 0.11104117 | 4.14E-05 | 0.0054571 | 0.0010121 |
| 9mo_SIGAF3_ | 0.01969058 | 0.11330517 | 4.16E-05 | 0.0053955 | -0.012659 |
| 9mo_SIGAF3_ | 0.0326291  | 0.1931488  | 4.64E-05 | 0.0045915 | -0.11603  |
| 9mo_SIGAF3_ | 0.08660041 | 0.5262057  | 4.77E-05 | 0.01133   | -0.21781  |
| 9mo_SIGAF3_ | 0.02214154 | 0.12843007 | 4.26E-05 | 0.0051742 | -0.068556 |
| 9mo_SIGAF3_ | 0.01508181 | 0.08486442 | 3.92E-05 | 0.0060428 | 0.1363    |
| 9mo_SIGAF3_ | 0.03244605 | 0.1920192  | 4.62E-05 | 0.0046026 | -0.11603  |
| 9mo_SIGAF3_ | 0.01949698 | 0.11211047 | 4.16E-05 | 0.0053955 | -0.012659 |

|             |            |            |          |           |            |
|-------------|------------|------------|----------|-----------|------------|
| 9mo_SIGAF3_ | 0.02535752 | 0.14827588 | 4.38E-05 | 0.0049138 | -0.10343   |
| 9mo_SIGAF3_ | 0.08501297 | 0.51640964 | 4.76E-05 | 0.012404  | -0.10433   |
| 9mo_SIGAF3_ | 0.07683223 | 0.4659263  | 5.13E-05 | 0.014025  | 0.22047    |
| 9mo_SIGAF3_ | 0.03368456 | 0.19966203 | 4.68E-05 | 0.0045746 | -0.11071   |
| 9mo_SIGAF3_ | 0.02835291 | 0.1667604  | 4.49E-05 | 0.0047302 | -0.12174   |
| 9mo_SIGAF3_ | 0.08562081 | 0.52016056 | 4.76E-05 | 0.0117    | -0.14081   |
| 9mo_SIGAF3_ | 0.02485165 | 0.14515416 | 4.36E-05 | 0.0049516 | -0.10343   |
| 9mo_SIGAF3_ | 0.07126267 | 0.43155652 | 5.65E-05 | 0.011849  | 0.23476    |
| 9mo_SIGAF3_ | 0.02193291 | 0.12714261 | 4.26E-05 | 0.0051742 | -0.059109  |
| 9mo_SIGAF3_ | 0.03188244 | 0.18854116 | 4.60E-05 | 0.0046154 | -0.11821   |
| 9mo_SIGAF3_ | 0.08345713 | 0.5068085  | 4.77E-05 | 0.013036  | -0.0045591 |
| 9mo_SIGAF3_ | 0.02846604 | 0.16745852 | 4.49E-05 | 0.0047302 | -0.12174   |
| 9mo_SIGAF3_ | 0.00988649 | 0.05280411 | 3.65E-05 | 0.0069072 | 0.33263    |
| 9mo_SIGAF3_ | 0.01864402 | 0.10684683 | 4.11E-05 | 0.0055212 | 0.015459   |
| 9mo_SIGAF3_ | 0.04039612 | 0.24107903 | 4.99E-05 | 0.0046177 | -0.063007  |
| 9mo_SIGAF3_ | 0.01947671 | 0.11198539 | 4.14E-05 | 0.0054571 | -0.012659  |
| 9mo_SIGAF3_ | 0.02217232 | 0.12862001 | 4.26E-05 | 0.0051742 | -0.068556  |
| 9mo_SIGAF3_ | 0.02841317 | 0.16713226 | 4.49E-05 | 0.0047302 | -0.12174   |
| 9mo_SIGAF3_ | 0.00921095 | 0.04863536 | 3.62E-05 | 0.0070172 | 0.35661    |
| 9mo_SIGAF3_ | 0.01752874 | 0.09996446 | 4.06E-05 | 0.0056572 | 0.046584   |
| 9mo_SIGAF3_ | 0.02943513 | 0.17343879 | 4.53E-05 | 0.0046846 | -0.1231    |
| 9mo_SIGAF3_ | 0.02957874 | 0.17432503 | 4.53E-05 | 0.0046846 | -0.1231    |
| 9mo_SIGAF3_ | 0.07189515 | 0.43545955 | 5.60E-05 | 0.012118  | 0.24161    |
| 9mo_SIGAF3_ | 0.02312029 | 0.13446991 | 4.30E-05 | 0.0050782 | -0.077142  |
| 9mo_SIGAF3_ | 0.01519696 | 0.08557501 | 3.95E-05 | 0.0059603 | 0.11709    |
| 9mo_SIGAF3_ | 0.0923688  | 0.5618025  | 4.99E-05 | 0.0073308 | -0.69483   |
| 9mo_SIGAF3_ | 0.04291848 | 0.25664455 | 5.17E-05 | 0.0047101 | -0.042593  |
| 9mo_SIGAF3_ | 0.03482517 | 0.20670071 | 4.72E-05 | 0.0045646 | -0.10426   |
| 9mo_SIGAF3_ | 0.02033059 | 0.11725465 | 4.19E-05 | 0.0053364 | -0.025531  |
| 9mo_SIGAF3_ | 0.08882414 | 0.5399284  | 4.82E-05 | 0.0098057 | -0.3844    |
| 9mo_SIGAF3_ | 0.00879504 | 0.04606875 | 3.59E-05 | 0.00713   | 0.38094    |
| 9mo_SIGAF3_ | 0.00717617 | 0.0360787  | 3.50E-05 | 0.0074854 | 0.45576    |
| 9mo_SIGAF3_ | 0.01150647 | 0.06280103 | 3.74E-05 | 0.0065941 | 0.263      |
| 9mo_SIGAF3_ | 0.01740153 | 0.0991794  | 4.06E-05 | 0.0056572 | 0.046584   |
| 9mo_SIGAF3_ | 0.02648672 | 0.15524413 | 4.42E-05 | 0.0048445 | -0.11546   |
| 9mo_SIGAF3_ | 0.08385553 | 0.50926703 | 4.77E-05 | 0.013036  | -0.036078  |
| 9mo_SIGAF3_ | 0.01316784 | 0.0730533  | 3.83E-05 | 0.0063061 | 0.19734    |
| 9mo_SIGAF3_ | 0.01292845 | 0.07157604 | 3.80E-05 | 0.0063994 | 0.21875    |
| 9mo_SIGAF3_ | 0.08774155 | 0.5332477  | 4.79E-05 | 0.010571  | -0.29935   |
| 9mo_SIGAF3_ | 0.0239336  | 0.13948885 | 4.34E-05 | 0.0049916 | -0.091842  |
| 9mo_SIGAF3_ | 0.02183009 | 0.12650809 | 4.26E-05 | 0.0051742 | -0.059109  |
| 9mo_SIGAF3_ | 0.08152959 | 0.4949137  | 4.83E-05 | 0.013957  | 0.10139    |
| 9mo_SIGAF3_ | 0.05095333 | 0.3062276  | 5.87E-05 | 0.0053288 | 0.0077602  |

|             |            |            |          |           |           |
|-------------|------------|------------|----------|-----------|-----------|
| 9mo_SIGAF3_ | 0.02432937 | 0.14193116 | 4.34E-05 | 0.0049916 | -0.098011 |
| 9mo_SIGAF3_ | 0.02359121 | 0.13737598 | 4.32E-05 | 0.0050338 | -0.084895 |
| 9mo_SIGAF3_ | 0.03402475 | 0.20176135 | 4.68E-05 | 0.0045746 | -0.10761  |
| 9mo_SIGAF3_ | 0.01115539 | 0.06063452 | 3.71E-05 | 0.0066957 | 0.2858    |
| 9mo_SIGAF3_ | 0.01281046 | 0.07084795 | 3.80E-05 | 0.0063994 | 0.21875   |
| 9mo_SIGAF3_ | 0.00990847 | 0.05293978 | 3.65E-05 | 0.0069072 | 0.33263   |
| 9mo_SIGAF3_ | 0.01021678 | 0.05484231 | 3.65E-05 | 0.0069072 | 0.33263   |
| 9mo_SIGAF3_ | 0.0212922  | 0.12318876 | 4.24E-05 | 0.0052258 | -0.04878  |
| 9mo_SIGAF3_ | 0.03425947 | 0.20320977 | 4.70E-05 | 0.0045688 | -0.10761  |
| 9mo_SIGAF3_ | 0.10036402 | 0.61114097 | 5.58E-05 | 0.0041426 | -1.2296   |
| 9mo_SIGAF3_ | 0.08879531 | 0.53975046 | 4.82E-05 | 0.0098057 | -0.3844   |
| 9mo_SIGAF3_ | 0.02616599 | 0.15326495 | 4.42E-05 | 0.0048445 | -0.11213  |
| 9mo_SIGAF3_ | 0.07832307 | 0.4751263  | 5.01E-05 | 0.014289  | 0.18889   |
| 9mo_SIGAF3_ | 0.01220195 | 0.0670928  | 3.77E-05 | 0.0064954 | 0.24064   |
| 9mo_SIGAF3_ | 0.02148251 | 0.12436318 | 4.24E-05 | 0.0052258 | -0.04878  |
| 9mo_SIGAF3_ | 0.02544275 | 0.1488018  | 4.38E-05 | 0.0049138 | -0.10813  |
| 9mo_SIGAF3_ | 0.03310739 | 0.19610028 | 4.66E-05 | 0.0045822 | -0.11352  |
| 9mo_SIGAF3_ | 0.0306522  | 0.18094933 | 4.57E-05 | 0.0046464 | -0.12245  |
| 9mo_SIGAF3_ | 0.03395169 | 0.20131044 | 4.68E-05 | 0.0045746 | -0.11071  |
| 9mo_SIGAF3_ | 0.01626977 | 0.09219531 | 4.00E-05 | 0.0058035 | 0.080526  |
| 9mo_SIGAF3_ | 0.02061636 | 0.11901813 | 4.21E-05 | 0.0052798 | -0.037579 |
| 9mo_SIGAF3_ | 0.01476111 | 0.08288539 | 3.92E-05 | 0.0060428 | 0.1363    |
| 9mo_SIGAF3_ | 0.07585856 | 0.45991775 | 5.18E-05 | 0.013885  | 0.23393   |
| 9mo_SIGAF3_ | 0.02368815 | 0.13797414 | 4.32E-05 | 0.0050338 | -0.084895 |
| 9mo_SIGAF3_ | 0.10121664 | 0.6164025  | 5.62E-05 | 0.0040352 | -1.2808   |
| 9mo_SIGAF3_ | 0.15991358 | 0.97862136 | 7.87E-05 | 0.0048117 | -1.0738   |
| 9mo_SIGAF3_ | 0.02856646 | 0.1680782  | 4.49E-05 | 0.0047302 | -0.12174  |
| 9mo_SIGAF3_ | 0.01364994 | 0.07602838 | 3.86E-05 | 0.0062156 | 0.17645   |
| 9mo_SIGAF3_ | 0.02220245 | 0.12880589 | 4.28E-05 | 0.005125  | -0.068556 |
| 9mo_SIGAF3_ | 0.04142991 | 0.24745858 | 5.05E-05 | 0.0046492 | -0.054504 |
| 9mo_SIGAF3_ | 0.01803162 | 0.10306772 | 4.09E-05 | 0.0055879 | 0.030658  |
| 9mo_SIGAF3_ | 0.03576325 | 0.21248963 | 4.77E-05 | 0.0045615 | -0.096915 |
| 9mo_SIGAF3_ | 0.07720432 | 0.4682225  | 5.09E-05 | 0.014141  | 0.22047   |
| 9mo_SIGAF3_ | 0.0804832  | 0.48845643 | 4.87E-05 | 0.014207  | 0.12269   |
| 9mo_SIGAF3_ | 0.07552529 | 0.45786119 | 5.23E-05 | 0.013721  | 0.23858   |
| 9mo_SIGAF3_ | 0.02022231 | 0.11658649 | 4.19E-05 | 0.0053364 | -0.025531 |
| 9mo_SIGAF3_ | 0.02121772 | 0.12272916 | 4.24E-05 | 0.0052258 | -0.04878  |
| 9mo_SIGAF3_ | 0.04464668 | 0.26730928 | 5.30E-05 | 0.0047888 | -0.031751 |
| 9mo_SIGAF3_ | 0.03298521 | 0.19534637 | 4.64E-05 | 0.0045915 | -0.11352  |
| 9mo_SIGAF3_ | 0.01614209 | 0.0914074  | 3.98E-05 | 0.0058806 | 0.098494  |
| 9mo_SIGAF3_ | 0.01871078 | 0.10725881 | 4.11E-05 | 0.0055212 | 0.015459  |
| 9mo_SIGAF3_ | 0.02282412 | 0.13264222 | 4.30E-05 | 0.0050782 | -0.077142 |
| 9mo_SIGAF3_ | 0.08926008 | 0.5426185  | 4.84E-05 | 0.0094274 | -0.42792  |

|             |            |            |          |           |           |
|-------------|------------|------------|----------|-----------|-----------|
| 9mo_SIGAF3_ | 0.07674217 | 0.4653705  | 5.13E-05 | 0.014025  | 0.22047   |
| 9mo_SIGAF3_ | 0.04453202 | 0.26660168 | 5.30E-05 | 0.0047888 | -0.031751 |
| 9mo_SIGAF3_ | 0.03329123 | 0.19723476 | 4.66E-05 | 0.0045822 | -0.11352  |
| 9mo_SIGAF3_ | 0.01127829 | 0.06139292 | 3.71E-05 | 0.0066957 | 0.2858    |
| 9mo_SIGAF3_ | 0.06314901 | 0.38148713 | 6.33E-05 | 0.0080056 | 0.12359   |
| 9mo_SIGAF3_ | 0.02096055 | 0.12114216 | 4.21E-05 | 0.0052798 | -0.037579 |
| 9mo_SIGAF3_ | 0.08036553 | 0.48773032 | 4.87E-05 | 0.014207  | 0.14202   |
| 9mo_SIGAF3_ | 0.0876842  | 0.5328938  | 4.79E-05 | 0.010571  | -0.29935  |
| 9mo_SIGAF3_ | 0.02050624 | 0.11833857 | 4.19E-05 | 0.0053364 | -0.025531 |
| 9mo_SIGAF3_ | 0.02251065 | 0.13070783 | 4.28E-05 | 0.005125  | -0.068556 |
| 9mo_SIGAF3_ | 0.00860233 | 0.04487956 | 3.56E-05 | 0.0072456 | 0.40559   |
| 9mo_SIGAF3_ | 0.07312744 | 0.44306406 | 5.49E-05 | 0.012637  | 0.24489   |
| 9mo_SIGAF3_ | 0.01900143 | 0.10905244 | 4.14E-05 | 0.0054571 | 0.0010121 |
| 9mo_SIGAF3_ | 0.02939218 | 0.17317377 | 4.53E-05 | 0.0046846 | -0.1231   |
| 9mo_SIGAF3_ | 0.01571549 | 0.08877487 | 3.98E-05 | 0.0058806 | 0.098494  |
| 9mo_SIGAF3_ | 0.02557947 | 0.14964549 | 4.40E-05 | 0.0048781 | -0.10813  |
| 9mo_SIGAF3_ | 0.04473752 | 0.26786983 | 5.30E-05 | 0.0047888 | -0.031751 |
| 9mo_SIGAF3_ | 0.05096918 | 0.30632544 | 5.87E-05 | 0.0053288 | 0.0077602 |
| 9mo_SIGAF3_ | 0.02006881 | 0.11563923 | 4.19E-05 | 0.0053364 | -0.025531 |
| 9mo_SIGAF3_ | 0.01482515 | 0.08328061 | 3.92E-05 | 0.0060428 | 0.1363    |
| 9mo_SIGAF3_ | 0.06859394 | 0.41508782 | 5.93E-05 | 0.010465  | 0.21248   |
| 9mo_SIGAF3_ | 0.03383194 | 0.20057152 | 4.68E-05 | 0.0045746 | -0.11071  |
| 9mo_SIGAF3_ | 0.02303454 | 0.13394076 | 4.30E-05 | 0.0050782 | -0.077142 |
| 9mo_SIGAF3_ | 0.08666018 | 0.5265746  | 4.77E-05 | 0.01133   | -0.21781  |
| 9mo_SIGAF3_ | 0.03260815 | 0.1930195  | 4.64E-05 | 0.0045915 | -0.11603  |
| 9mo_SIGAF3_ | 0.01555803 | 0.08780318 | 3.95E-05 | 0.0059603 | 0.11709   |
| 9mo_SIGAF3_ | 0.03410458 | 0.20225397 | 4.68E-05 | 0.0045746 | -0.10761  |
| 9mo_SIGAF3_ | 0.02359883 | 0.13742301 | 4.32E-05 | 0.0050338 | -0.084895 |
| 9mo_SIGAF3_ | 0.01317368 | 0.07308935 | 3.83E-05 | 0.0063061 | 0.19734   |
| 9mo_SIGAF3_ | 0.08533987 | 0.5184269  | 4.76E-05 | 0.012059  | -0.14081  |
| 9mo_SIGAF3_ | 0.02220731 | 0.12883589 | 4.28E-05 | 0.005125  | -0.068556 |
| 9mo_SIGAF3_ | 0.02124268 | 0.12288315 | 4.24E-05 | 0.0052258 | -0.04878  |
| 9mo_SIGAF3_ | 0.03238438 | 0.1916386  | 4.62E-05 | 0.0046026 | -0.11821  |
| 9mo_SIGAF3_ | 0.01683113 | 0.09565949 | 4.03E-05 | 0.005729  | 0.063215  |
| 9mo_SIGAF3_ | 0.05305531 | 0.3191989  | 6.01E-05 | 0.0055357 | 0.022172  |
| 9mo_SIGAF3_ | 0.03566541 | 0.21188582 | 4.74E-05 | 0.0045622 | -0.096915 |
| 9mo_SIGAF3_ | 0.08885872 | 0.54014176 | 4.84E-05 | 0.0094274 | -0.3844   |
| 9mo_SIGAF3_ | 0.02047521 | 0.11814711 | 4.19E-05 | 0.0053364 | -0.025531 |
| 9mo_SIGAF3_ | 0.07483816 | 0.4536209  | 5.28E-05 | 0.013537  | 0.24193   |
| 9mo_SIGAF3_ | 0.02474158 | 0.14447486 | 4.36E-05 | 0.0049516 | -0.098011 |
| 9mo_SIGAF3_ | 0.02070096 | 0.11954024 | 4.21E-05 | 0.0052798 | -0.037579 |
| 9mo_SIGAF3_ | 0.03283478 | 0.19441801 | 4.64E-05 | 0.0045915 | -0.11603  |
| 9mo_SIGAF3_ | 0.00801213 | 0.04123741 | 3.53E-05 | 0.0073641 | 0.43054   |

|             |            |            |          |           |           |
|-------------|------------|------------|----------|-----------|-----------|
| 9mo_SIGAF3_ | 0.09303743 | 0.5659286  | 5.02E-05 | 0.0070215 | -0.73907  |
| 9mo_SIGAF3_ | 0.03010957 | 0.17760074 | 4.55E-05 | 0.0046645 | -0.12301  |
| 9mo_SIGAF3_ | 0.0180479  | 0.1031682  | 4.09E-05 | 0.0055879 | 0.030658  |
| 9mo_SIGAF3_ | 0.03755566 | 0.22355059 | 4.84E-05 | 0.0045696 | -0.084703 |
| 9mo_SIGAF3_ | 0.01294248 | 0.07166262 | 3.80E-05 | 0.0063994 | 0.21875   |
| 9mo_SIGAF3_ | 0.02689362 | 0.1577551  | 4.44E-05 | 0.004813  | -0.11546  |
| 9mo_SIGAF3_ | 0.0539104  | 0.3244757  | 6.10E-05 | 0.005694  | 0.026054  |
| 9mo_SIGAF3_ | 0.08215784 | 0.49879062 | 4.81E-05 | 0.013778  | 0.05262   |
| 9mo_SIGAF3_ | 0.07674201 | 0.46536955 | 5.13E-05 | 0.014025  | 0.22047   |
| 9mo_SIGAF3_ | 0.0331081  | 0.19610472 | 4.66E-05 | 0.0045822 | -0.11352  |
| 9mo_SIGAF3_ | 0.02137017 | 0.12366989 | 4.24E-05 | 0.0052258 | -0.04878  |
| 9mo_SIGAF3_ | 0.01762045 | 0.1005304  | 4.06E-05 | 0.0056572 | 0.046584  |
| 9mo_SIGAF3_ | 0.02944565 | 0.17350374 | 4.53E-05 | 0.0046846 | -0.1231   |
| 9mo_SIGAF3_ | 0.08047762 | 0.488422   | 4.87E-05 | 0.014207  | 0.12269   |
| 9mo_SIGAF3_ | 0.03098152 | 0.18298157 | 4.58E-05 | 0.00463   | -0.12145  |
| 9mo_SIGAF3_ | 0.02278189 | 0.13238166 | 4.30E-05 | 0.0050782 | -0.077142 |
| 9mo_SIGAF3_ | 0.08606881 | 0.5229252  | 4.76E-05 | 0.0117    | -0.17867  |
| 9mo_SIGAF3_ | 0.0830024  | 0.50400245 | 4.78E-05 | 0.013315  | 0.02505   |
| 9mo_SIGAF3_ | 0.02849102 | 0.16761269 | 4.49E-05 | 0.0047302 | -0.12174  |
| 9mo_SIGAF3_ | 0.0825299  | 0.5010866  | 4.79E-05 | 0.013563  | 0.05262   |
| 9mo_SIGAF3_ | 0.07854159 | 0.4764748  | 5.01E-05 | 0.014289  | 0.18889   |
| 9mo_SIGAF3_ | 0.01943321 | 0.11171694 | 4.14E-05 | 0.0054571 | -0.012659 |
| 9mo_SIGAF3_ | 0.11171468 | 0.6811859  | 6.34E-05 | 0.0038331 | -1.3299   |
| 9mo_SIGAF3_ | 0.02788894 | 0.16389728 | 4.48E-05 | 0.0047558 | -0.12024  |
| 9mo_SIGAF3_ | 0.021796   | 0.12629773 | 4.26E-05 | 0.0051742 | -0.059109 |
| 9mo_SIGAF3_ | 0.02359988 | 0.13742945 | 4.32E-05 | 0.0050338 | -0.084895 |
| 9mo_SIGAF3_ | 0.03449573 | 0.20466778 | 4.70E-05 | 0.0045688 | -0.10761  |
| 9mo_SIGAF3_ | 0.04522162 | 0.27085721 | 5.34E-05 | 0.0048194 | -0.028317 |
| 9mo_SIGAF3_ | 0.02136004 | 0.12360738 | 4.24E-05 | 0.0052258 | -0.04878  |
| 9mo_SIGAF3_ | 0.09642097 | 0.5868084  | 5.24E-05 | 0.0054581 | -0.99133  |
| 9mo_SIGAF3_ | 0.00909269 | 0.04790554 | 3.59E-05 | 0.00713   | 0.38094   |
| 9mo_SIGAF3_ | 0.0111894  | 0.06084436 | 3.71E-05 | 0.0066957 | 0.2858    |
| 9mo_SIGAF3_ | 0.00977644 | 0.05212498 | 3.65E-05 | 0.0069072 | 0.33263   |
| 9mo_SIGAF3_ | 0.01988431 | 0.11450068 | 4.16E-05 | 0.0053955 | -0.012659 |
| 9mo_SIGAF3_ | 0.00787471 | 0.0403894  | 3.53E-05 | 0.0073641 | 0.43054   |
| 9mo_SIGAF3_ | 0.05192088 | 0.31219834 | 5.92E-05 | 0.0053939 | 0.014768  |
| 9mo_SIGAF3_ | 0.07907121 | 0.47974306 | 4.97E-05 | 0.014318  | 0.17506   |
| 9mo_SIGAF3_ | 0.0729813  | 0.44216222 | 5.49E-05 | 0.012637  | 0.24489   |
| 9mo_SIGAF3_ | 0.03228005 | 0.1909948  | 4.62E-05 | 0.0046026 | -0.11821  |
| 9mo_SIGAF3_ | 0.02150603 | 0.1245083  | 4.24E-05 | 0.0052258 | -0.04878  |
| 9mo_SIGAF3_ | 0.0343493  | 0.20376413 | 4.70E-05 | 0.0045688 | -0.10761  |
| 9mo_SIGAF3_ | 0.02446687 | 0.14277966 | 4.36E-05 | 0.0049516 | -0.098011 |
| 9mo_SIGAF3_ | 0.01310159 | 0.07264449 | 3.83E-05 | 0.0063061 | 0.19734   |

|             |            |            |          |           |           |
|-------------|------------|------------|----------|-----------|-----------|
| 9mo_SIGAF3_ | 0.037131   | 0.22093    | 4.81E-05 | 0.0045652 | -0.088896 |
| 9mo_SIGAF3_ | 0.02416697 | 0.140929   | 4.34E-05 | 0.0049916 | -0.091842 |
| 9mo_SIGAF3_ | 0.05733326 | 0.34559816 | 6.30E-05 | 0.0062853 | 0.057806  |
| 9mo_SIGAF3_ | 0.07558347 | 0.4582202  | 5.23E-05 | 0.013721  | 0.23858   |
| 9mo_SIGAF3_ | 0.00942074 | 0.04993    | 3.62E-05 | 0.0070172 | 0.35661   |
| 9mo_SIGAF3_ | 0.03084624 | 0.18214677 | 4.57E-05 | 0.0046464 | -0.12145  |
| 9mo_SIGAF3_ | 0.03034063 | 0.17902665 | 4.57E-05 | 0.0046464 | -0.12245  |
| 9mo_SIGAF3_ | 0.00571276 | 0.02704801 | 3.41E-05 | 0.0078664 | 0.53284   |
| 9mo_SIGAF3_ | 0.0214329  | 0.124057   | 4.24E-05 | 0.0052258 | -0.04878  |
| 9mo_SIGAF3_ | 0.04519522 | 0.27069432 | 5.34E-05 | 0.0048194 | -0.028317 |
| 9mo_SIGAF3_ | 0.01210762 | 0.06651072 | 3.77E-05 | 0.0064954 | 0.24064   |
| 9mo_SIGAF3_ | 0.00936743 | 0.04960101 | 3.62E-05 | 0.0070172 | 0.35661   |
| 9mo_SIGAF3_ | 0.01104544 | 0.059956   | 3.71E-05 | 0.0066957 | 0.2858    |
| 9mo_SIGAF3_ | 0.01676618 | 0.09525866 | 4.00E-05 | 0.0058035 | 0.063215  |
| 9mo_SIGAF3_ | 0.08571434 | 0.52073777 | 4.76E-05 | 0.0117    | -0.14081  |
| 9mo_SIGAF3_ | 0.02150695 | 0.12451398 | 4.24E-05 | 0.0052258 | -0.04878  |
| 9mo_SIGAF3_ | 0.02676824 | 0.1569814  | 4.44E-05 | 0.004813  | -0.11546  |
| 9mo_SIGAF3_ | 0.03319956 | 0.19666906 | 4.66E-05 | 0.0045822 | -0.11352  |
| 9mo_SIGAF3_ | 0.08964278 | 0.54498017 | 4.86E-05 | 0.0090548 | -0.42792  |
| 9mo_SIGAF3_ | 0.09426599 | 0.57351    | 5.09E-05 | 0.0064439 | -0.82618  |
| 9mo_SIGAF3_ | 0.09090073 | 0.552743   | 4.91E-05 | 0.0083333 | -0.56091  |
| 9mo_SIGAF3_ | 0.04464143 | 0.26727688 | 5.30E-05 | 0.0047888 | -0.031751 |
| 9mo_SIGAF3_ | 0.02123991 | 0.12286606 | 4.24E-05 | 0.0052258 | -0.04878  |
| 9mo_SIGAF3_ | 0.09336198 | 0.56793135 | 5.06E-05 | 0.0067258 | -0.73907  |
| 9mo_SIGAF3_ | 0.02245391 | 0.1303577  | 4.28E-05 | 0.005125  | -0.068556 |
| 9mo_SIGAF3_ | 0.0196144  | 0.11283508 | 4.16E-05 | 0.0053955 | -0.012659 |
| 9mo_SIGAF3_ | 0.01733453 | 0.09876598 | 4.06E-05 | 0.0056572 | 0.046584  |
| 9mo_SIGAF3_ | 0.04335019 | 0.25930864 | 5.21E-05 | 0.0047343 | -0.038876 |
| 9mo_SIGAF3_ | 0.0186562  | 0.10692198 | 4.11E-05 | 0.0055212 | 0.015459  |
| 9mo_SIGAF3_ | 0.0291683  | 0.17179221 | 4.51E-05 | 0.0047064 | -0.1231   |
| 9mo_SIGAF3_ | 0.07506282 | 0.45500728 | 5.28E-05 | 0.013537  | 0.23858   |
| 9mo_SIGAF3_ | 0.09380675 | 0.570676   | 5.09E-05 | 0.0064439 | -0.7829   |
| 9mo_SIGAF3_ | 0.06266687 | 0.37851188 | 6.35E-05 | 0.0078047 | 0.12359   |
| 9mo_SIGAF3_ | 0.07721715 | 0.46830162 | 5.09E-05 | 0.014141  | 0.22047   |
| 9mo_SIGAF3_ | 0.03417071 | 0.20266202 | 4.70E-05 | 0.0045688 | -0.10761  |
| 9mo_SIGAF3_ | 0.01501157 | 0.08443099 | 3.92E-05 | 0.0060428 | 0.1363    |
| 9mo_SIGAF3_ | 0.04430622 | 0.2652083  | 5.25E-05 | 0.0047605 | -0.031751 |
| 9mo_SIGAF3_ | 0.0192182  | 0.11039009 | 4.14E-05 | 0.0054571 | 0.0010121 |
| 9mo_SIGAF3_ | 0.01926898 | 0.11070346 | 4.14E-05 | 0.0054571 | 0.0010121 |
| 9mo_SIGAF3_ | 0.06582593 | 0.39800644 | 6.16E-05 | 0.0091463 | 0.16566   |
| 9mo_SIGAF3_ | 0.02767581 | 0.16258201 | 4.48E-05 | 0.0047558 | -0.12024  |
| 9mo_SIGAF3_ | 0.09074976 | 0.55181134 | 4.91E-05 | 0.0083333 | -0.56091  |
| 9mo_SIGAF3_ | 0.01938407 | 0.11141369 | 4.14E-05 | 0.0054571 | 0.0010121 |

|             |            |            |          |           |           |
|-------------|------------|------------|----------|-----------|-----------|
| 9mo_SIGAF3_ | 0.01580819 | 0.08934694 | 3.98E-05 | 0.0058806 | 0.098494  |
| 9mo_SIGAF3_ | 0.02699072 | 0.15835434 | 4.44E-05 | 0.004813  | -0.11816  |
| 9mo_SIGAF3_ | 0.01175727 | 0.06434868 | 3.74E-05 | 0.0065941 | 0.263     |
| 9mo_SIGAF3_ | 0.02058346 | 0.11881514 | 4.21E-05 | 0.0052798 | -0.037579 |
| 9mo_SIGAF3_ | 0.01788084 | 0.10213727 | 4.09E-05 | 0.0055879 | 0.030658  |
| 9mo_SIGAF3_ | 0.03579487 | 0.21268474 | 4.77E-05 | 0.0045615 | -0.096915 |
| 9mo_SIGAF3_ | 0.07723332 | 0.4684014  | 5.09E-05 | 0.014141  | 0.21153   |
| 9mo_SIGAF3_ | 0.03344819 | 0.1982034  | 4.66E-05 | 0.0045822 | -0.11352  |
| 9mo_SIGAF3_ | 0.0357856  | 0.21262752 | 4.77E-05 | 0.0045615 | -0.096915 |
| 9mo_SIGAF3_ | 0.01063996 | 0.05745376 | 3.68E-05 | 0.0068    | 0.30902   |
| 9mo_SIGAF3_ | 0.03389445 | 0.20095724 | 4.68E-05 | 0.0045746 | -0.11071  |
| 9mo_SIGAF3_ | 0.02919253 | 0.17194168 | 4.51E-05 | 0.0047064 | -0.1231   |
| 9mo_SIGAF3_ | 0.02823733 | 0.16604717 | 4.49E-05 | 0.0047302 | -0.12174  |
| 9mo_SIGAF3_ | 0.03923629 | 0.23392174 | 4.92E-05 | 0.0045932 | -0.071721 |
| 9mo_SIGAF3_ | 0.09419791 | 0.5730899  | 5.09E-05 | 0.0064439 | -0.82618  |
| 9mo_SIGAF3_ | 0.0160114  | 0.09060092 | 3.98E-05 | 0.0058806 | 0.098494  |
| 9mo_SIGAF3_ | 0.0296765  | 0.17492828 | 4.53E-05 | 0.0046846 | -0.1231   |
| 9mo_SIGAF3_ | 0.02286072 | 0.13286808 | 4.30E-05 | 0.0050782 | -0.077142 |
| 9mo_SIGAF3_ | 0.06023345 | 0.3634952  | 6.38E-05 | 0.0070986 | 0.087064  |
| 9mo_SIGAF3_ | 0.03116634 | 0.18412209 | 4.58E-05 | 0.00463   | -0.12145  |
| 9mo_SIGAF3_ | 0.07508978 | 0.45517367 | 5.28E-05 | 0.013537  | 0.23858   |
| 9mo_SIGAF3_ | 0.02544851 | 0.14883737 | 4.40E-05 | 0.0048781 | -0.10813  |
| 9mo_SIGAF3_ | 0.01929283 | 0.11085066 | 4.14E-05 | 0.0054571 | 0.0010121 |
| 9mo_SIGAF3_ | 0.02096439 | 0.12116584 | 4.21E-05 | 0.0052798 | -0.037579 |
| 9mo_SIGAF3_ | 0.02236377 | 0.12980144 | 4.28E-05 | 0.005125  | -0.068556 |
| 9mo_SIGAF3_ | 0.08223864 | 0.4992893  | 4.81E-05 | 0.013778  | 0.05262   |
| 9mo_SIGAF3_ | 0.01636464 | 0.0927808  | 4.00E-05 | 0.0058035 | 0.080526  |
| 9mo_SIGAF3_ | 0.01277137 | 0.0706067  | 3.80E-05 | 0.0063994 | 0.21875   |
| 9mo_SIGAF3_ | 0.02234285 | 0.12967232 | 4.28E-05 | 0.005125  | -0.068556 |
| 9mo_SIGAF3_ | 0.00973846 | 0.05189064 | 3.65E-05 | 0.0069072 | 0.33263   |
| 9mo_SIGAF3_ | 0.01855363 | 0.10628904 | 4.11E-05 | 0.0055212 | 0.015459  |
| 9mo_SIGAF3_ | 0.08841017 | 0.5373737  | 4.82E-05 | 0.0098057 | -0.3415   |
| 9mo_SIGAF3_ | 0.02944681 | 0.17351085 | 4.53E-05 | 0.0046846 | -0.1231   |
| 9mo_SIGAF3_ | 0.07760011 | 0.4706649  | 5.05E-05 | 0.014229  | 0.21153   |
| 9mo_SIGAF3_ | 0.07932266 | 0.48129475 | 4.93E-05 | 0.014315  | 0.17506   |
| 9mo_SIGAF3_ | 0.08881865 | 0.5398945  | 4.82E-05 | 0.0098057 | -0.3844   |
| 9mo_SIGAF3_ | 0.06480975 | 0.39173555 | 6.24E-05 | 0.0086643 | 0.15715   |
| 9mo_SIGAF3_ | 0.02358297 | 0.13732512 | 4.32E-05 | 0.0050338 | -0.084895 |
| 9mo_SIGAF3_ | 0.03524846 | 0.20931286 | 4.74E-05 | 0.0045622 | -0.10068  |
| 9mo_SIGAF3_ | 0.08092409 | 0.49117714 | 4.85E-05 | 0.0141    | 0.12269   |
| 9mo_SIGAF3_ | 0.01922159 | 0.11041104 | 4.14E-05 | 0.0054571 | 0.0010121 |
| 9mo_SIGAF3_ | 0.01978615 | 0.1138949  | 4.16E-05 | 0.0053955 | -0.012659 |
| 9mo_SIGAF3_ | 0.02030537 | 0.11709902 | 4.19E-05 | 0.0053364 | -0.025531 |



|             |            |            |          |           |           |
|-------------|------------|------------|----------|-----------|-----------|
| 9mo_SIGAF3_ | 0.01666421 | 0.09462944 | 4.00E-05 | 0.0058035 | 0.080526  |
| 9mo_SIGAF3_ | 0.02487279 | 0.1452846  | 4.36E-05 | 0.0049516 | -0.10343  |
| 9mo_SIGAF3_ | 0.02899594 | 0.17072853 | 4.51E-05 | 0.0047064 | -0.12268  |
| 9mo_SIGAF3_ | 0.04370857 | 0.2615202  | 5.21E-05 | 0.0047343 | -0.038876 |
| 9mo_SIGAF3_ | 0.03816405 | 0.22730497 | 4.87E-05 | 0.0045758 | -0.080425 |
| 9mo_SIGAF3_ | 0.017229   | 0.09811471 | 4.03E-05 | 0.005729  | 0.063215  |
| 9mo_SIGAF3_ | 0.01554018 | 0.08769307 | 3.95E-05 | 0.0059603 | 0.11709   |
| 9mo_SIGAF3_ | 0.02380953 | 0.13872322 | 4.32E-05 | 0.0050338 | -0.091842 |
| 9mo_SIGAF3_ | 0.01959863 | 0.11273776 | 4.16E-05 | 0.0053955 | -0.012659 |
| 9mo_SIGAF3_ | 0.01126289 | 0.06129786 | 3.71E-05 | 0.0066957 | 0.2858    |
| 9mo_SIGAF3_ | 0.01807217 | 0.10331794 | 4.09E-05 | 0.0055879 | 0.030658  |
| 9mo_SIGAF3_ | 0.08074748 | 0.4900873  | 4.85E-05 | 0.0141    | 0.12269   |
| 9mo_SIGAF3_ | 0.02220789 | 0.12883946 | 4.28E-05 | 0.005125  | -0.068556 |
| 9mo_SIGAF3_ | 0.05847684 | 0.3526552  | 6.34E-05 | 0.0065282 | 0.068735  |
| 9mo_SIGAF3_ | 0.08648457 | 0.5254909  | 4.77E-05 | 0.01133   | -0.21781  |
| 9mo_SIGAF3_ | 0.06441353 | 0.38929048 | 6.27E-05 | 0.0084357 | 0.14863   |
| 9mo_SIGAF3_ | 0.09016273 | 0.5481888  | 4.88E-05 | 0.0086895 | -0.47194  |
| 9mo_SIGAF3_ | 0.07678542 | 0.46563748 | 5.13E-05 | 0.014025  | 0.22047   |
| 9mo_SIGAF3_ | 0.01599666 | 0.09050996 | 3.98E-05 | 0.0058806 | 0.098494  |
| 9mo_SIGAF3_ | 0.0300812  | 0.17742571 | 4.55E-05 | 0.0046645 | -0.12301  |
| 9mo_SIGAF3_ | 0.04466553 | 0.26742563 | 5.30E-05 | 0.0047888 | -0.031751 |
| 9mo_SIGAF3_ | 0.07928339 | 0.4810524  | 4.93E-05 | 0.014315  | 0.17506   |
| 9mo_SIGAF3_ | 0.0822096  | 0.49911007 | 4.81E-05 | 0.013778  | 0.05262   |
| 9mo_SIGAF3_ | 0.08138458 | 0.49401885 | 4.83E-05 | 0.013957  | 0.10139   |
| 9mo_SIGAF3_ | 0.03617047 | 0.21500255 | 4.77E-05 | 0.0045615 | -0.096915 |
| 9mo_SIGAF3_ | 0.03541947 | 0.21036816 | 4.74E-05 | 0.0045622 | -0.10068  |
| 9mo_SIGAF3_ | 0.08173126 | 0.4961582  | 4.83E-05 | 0.013957  | 0.078055  |
| 9mo_SIGAF3_ | 0.05200377 | 0.31270987 | 5.92E-05 | 0.0053939 | 0.014768  |
| 9mo_SIGAF3_ | 0.00747775 | 0.03793978 | 3.50E-05 | 0.0074854 | 0.45576   |
| 9mo_SIGAF3_ | 0.0207979  | 0.12013842 | 4.21E-05 | 0.0052798 | -0.037579 |
| 9mo_SIGAF3_ | 0.02256036 | 0.13101457 | 4.28E-05 | 0.005125  | -0.068556 |
| 9mo_SIGAF3_ | 0.05878263 | 0.3545422  | 6.35E-05 | 0.0066597 | 0.068735  |
| 9mo_SIGAF3_ | 0.06365752 | 0.38462517 | 6.30E-05 | 0.008216  | 0.13178   |
| 9mo_SIGAF3_ | 0.01170706 | 0.06403886 | 3.74E-05 | 0.0065941 | 0.263     |
| 9mo_SIGAF3_ | 0.03299221 | 0.19538954 | 4.64E-05 | 0.0045915 | -0.11352  |
| 9mo_SIGAF3_ | 0.06659019 | 0.4027227  | 6.12E-05 | 0.0093985 | 0.18233   |
| 9mo_SIGAF3_ | 0.01816785 | 0.10390841 | 4.09E-05 | 0.0055879 | 0.030658  |
| 9mo_SIGAF3_ | 0.06582472 | 0.39799893 | 6.16E-05 | 0.0091463 | 0.16566   |
| 9mo_SIGAF3_ | 0.02991751 | 0.17641559 | 4.55E-05 | 0.0046645 | -0.12301  |
| 9mo_SIGAF3_ | 0.02697764 | 0.15827362 | 4.44E-05 | 0.004813  | -0.11546  |
| 9mo_SIGAF3_ | 0.02857348 | 0.16812153 | 4.49E-05 | 0.0047302 | -0.12174  |
| 9mo_SIGAF3_ | 0.09463498 | 0.57578707 | 5.13E-05 | 0.0061762 | -0.8688   |
| 9mo_SIGAF3_ | 0.08831742 | 0.5368014  | 4.82E-05 | 0.0098057 | -0.3415   |

|             |            |            |          |           |            |
|-------------|------------|------------|----------|-----------|------------|
| 9mo_SIGAF3_ | 0.01147356 | 0.06259792 | 3.74E-05 | 0.0065941 | 0.263      |
| 9mo_SIGAF3_ | 0.04279777 | 0.25589967 | 5.17E-05 | 0.0047101 | -0.042593  |
| 9mo_SIGAF3_ | 0.03365887 | 0.19950348 | 4.68E-05 | 0.0045746 | -0.11071   |
| 9mo_SIGAF3_ | 0.06157198 | 0.3717553  | 6.37E-05 | 0.0074328 | 0.10802    |
| 9mo_SIGAF3_ | 0.06542084 | 0.3955066  | 6.20E-05 | 0.0089013 | 0.16566    |
| 9mo_SIGAF3_ | 0.01970291 | 0.11338123 | 4.16E-05 | 0.0053955 | -0.012659  |
| 9mo_SIGAF3_ | 0.01860822 | 0.10662594 | 4.11E-05 | 0.0055212 | 0.015459   |
| 9mo_SIGAF3_ | 0.02633718 | 0.15432131 | 4.42E-05 | 0.0048445 | -0.11213   |
| 9mo_SIGAF3_ | 0.02970706 | 0.17511688 | 4.53E-05 | 0.0046846 | -0.12301   |
| 9mo_SIGAF3_ | 0.09064446 | 0.5511615  | 4.91E-05 | 0.0083333 | -0.51631   |
| 9mo_SIGAF3_ | 0.02747132 | 0.16132012 | 4.46E-05 | 0.0047834 | -0.11816   |
| 9mo_SIGAF3_ | 0.06727324 | 0.4069378  | 6.03E-05 | 0.009922  | 0.19037    |
| 9mo_SIGAF3_ | 0.09843922 | 0.599263   | 5.40E-05 | 0.0046955 | -1.1375    |
| 9mo_SIGAF3_ | 0.02383712 | 0.13889344 | 4.34E-05 | 0.0049916 | -0.091842  |
| 9mo_SIGAF3_ | 0.01628358 | 0.09228057 | 4.00E-05 | 0.0058035 | 0.080526   |
| 9mo_SIGAF3_ | 0.02234099 | 0.12966083 | 4.28E-05 | 0.005125  | -0.068556  |
| 9mo_SIGAF3_ | 0.02536344 | 0.1483124  | 4.38E-05 | 0.0049138 | -0.10343   |
| 9mo_SIGAF3_ | 0.09338959 | 0.56810176 | 5.06E-05 | 0.0067258 | -0.73907   |
| 9mo_SIGAF3_ | 0.02586819 | 0.1514272  | 4.40E-05 | 0.0048781 | -0.10813   |
| 9mo_SIGAF3_ | 0.01059042 | 0.05714808 | 3.68E-05 | 0.0068    | 0.30902    |
| 9mo_SIGAF3_ | 0.02013428 | 0.11604325 | 4.19E-05 | 0.0053364 | -0.025531  |
| 9mo_SIGAF3_ | 0.03662181 | 0.2177878  | 4.79E-05 | 0.0045625 | -0.092976  |
| 9mo_SIGAF3_ | 0.02509839 | 0.14667673 | 4.38E-05 | 0.0049138 | -0.10343   |
| 9mo_SIGAF3_ | 0.08655506 | 0.5259259  | 4.77E-05 | 0.01133   | -0.21781   |
| 9mo_SIGAF3_ | 0.01244243 | 0.0685768  | 3.80E-05 | 0.0063994 | 0.21875    |
| 9mo_SIGAF3_ | 0.02519967 | 0.14730173 | 4.38E-05 | 0.0049138 | -0.10343   |
| 9mo_SIGAF3_ | 0.01060727 | 0.05725207 | 3.68E-05 | 0.0068    | 0.30902    |
| 9mo_SIGAF3_ | 0.0723612  | 0.4383356  | 5.54E-05 | 0.012382  | 0.24373    |
| 9mo_SIGAF3_ | 0.05681474 | 0.34239835 | 6.27E-05 | 0.0061731 | 0.05269    |
| 9mo_SIGAF3_ | 0.02292381 | 0.1332574  | 4.30E-05 | 0.0050782 | -0.077142  |
| 9mo_SIGAF3_ | 0.04961853 | 0.29799056 | 5.73E-05 | 0.0051543 | -0.0022352 |
| 9mo_SIGAF3_ | 0.02504531 | 0.14634922 | 4.38E-05 | 0.0049138 | -0.10343   |
| 9mo_SIGAF3_ | 0.08728943 | 0.5304577  | 4.79E-05 | 0.010571  | -0.25808   |
| 9mo_SIGAF3_ | 0.02054041 | 0.11854944 | 4.19E-05 | 0.0053364 | -0.037579  |
| 9mo_SIGAF3_ | 0.08029136 | 0.48727262 | 4.87E-05 | 0.014207  | 0.14202    |
| 9mo_SIGAF3_ | 0.08506943 | 0.516758   | 4.76E-05 | 0.012059  | -0.10433   |
| 9mo_SIGAF3_ | 0.01621759 | 0.09187332 | 3.98E-05 | 0.0058806 | 0.080526   |
| 9mo_SIGAF3_ | 0.09000366 | 0.5472072  | 4.88E-05 | 0.0086895 | -0.47194   |
| 9mo_SIGAF3_ | 0.0158601  | 0.08966725 | 3.98E-05 | 0.0058806 | 0.098494   |
| 9mo_SIGAF3_ | 0.08426841 | 0.51181495 | 4.76E-05 | 0.012731  | -0.069378  |
| 9mo_SIGAF3_ | 0.02219275 | 0.12874609 | 4.26E-05 | 0.0051742 | -0.068556  |
| 9mo_SIGAF3_ | 0.01453546 | 0.08149291 | 3.89E-05 | 0.0061278 | 0.1561     |
| 9mo_SIGAF3_ | 0.08314073 | 0.50485605 | 4.78E-05 | 0.013315  | 0.02505    |

|             |            |            |          |           |            |
|-------------|------------|------------|----------|-----------|------------|
| 9mo_SIGAF3_ | 0.01494686 | 0.08403163 | 3.92E-05 | 0.0060428 | 0.1363     |
| 9mo_SIGAF3_ | 0.03707606 | 0.220591   | 4.81E-05 | 0.0045652 | -0.088896  |
| 9mo_SIGAF3_ | 0.09320344 | 0.566953   | 5.06E-05 | 0.0067258 | -0.73907   |
| 9mo_SIGAF3_ | 0.02344582 | 0.13647878 | 4.32E-05 | 0.0050338 | -0.084895  |
| 9mo_SIGAF3_ | 0.1282508  | 0.78323025 | 7.05E-05 | 0.0055477 | -0.96173   |
| 9mo_SIGAF3_ | 0.02436665 | 0.1421612  | 4.36E-05 | 0.0049516 | -0.098011  |
| 9mo_SIGAF3_ | 0.07215344 | 0.4370535  | 5.54E-05 | 0.012382  | 0.24161    |
| 9mo_SIGAF3_ | 0.07317589 | 0.44336304 | 5.43E-05 | 0.012883  | 0.24489    |
| 9mo_SIGAF3_ | 0.09392513 | 0.57140654 | 5.09E-05 | 0.0064439 | -0.7829    |
| 9mo_SIGAF3_ | 0.0213312  | 0.12342943 | 4.24E-05 | 0.0052258 | -0.04878   |
| 9mo_SIGAF3_ | 0.03777911 | 0.2249295  | 4.84E-05 | 0.0045696 | -0.084703  |
| 9mo_SIGAF3_ | 0.01732676 | 0.09871803 | 4.06E-05 | 0.0056572 | 0.046584   |
| 9mo_SIGAF3_ | 0.01926347 | 0.11066947 | 4.14E-05 | 0.0054571 | 0.0010121  |
| 9mo_SIGAF3_ | 0.00677464 | 0.03360086 | 3.47E-05 | 0.0076096 | 0.48124    |
| 9mo_SIGAF3_ | 0.0658085  | 0.39789885 | 6.16E-05 | 0.0091463 | 0.16566    |
| 9mo_SIGAF3_ | 0.0213608  | 0.1236121  | 4.24E-05 | 0.0052258 | -0.04878   |
| 9mo_SIGAF3_ | 0.01893317 | 0.10863117 | 4.11E-05 | 0.0055212 | 0.0010121  |
| 9mo_SIGAF3_ | 0.02803017 | 0.16476876 | 4.48E-05 | 0.0047558 | -0.12024   |
| 9mo_SIGAF3_ | 0.02518075 | 0.14718501 | 4.38E-05 | 0.0049138 | -0.10343   |
| 9mo_SIGAF3_ | 0.0653248  | 0.39491394 | 6.20E-05 | 0.0089013 | 0.15715    |
| 9mo_SIGAF3_ | 0.03236298 | 0.19150655 | 4.62E-05 | 0.0046026 | -0.11821   |
| 9mo_SIGAF3_ | 0.02033138 | 0.11725956 | 4.19E-05 | 0.0053364 | -0.025531  |
| 9mo_SIGAF3_ | 0.01379868 | 0.07694621 | 3.86E-05 | 0.0062156 | 0.17645    |
| 9mo_SIGAF3_ | 0.01365031 | 0.07603066 | 3.86E-05 | 0.0062156 | 0.17645    |
| 9mo_SIGAF3_ | 0.01213195 | 0.06666084 | 3.77E-05 | 0.0064954 | 0.24064    |
| 9mo_SIGAF3_ | 0.07709409 | 0.46754223 | 5.09E-05 | 0.014141  | 0.22047    |
| 9mo_SIGAF3_ | 0.0151681  | 0.08539692 | 3.95E-05 | 0.0059603 | 0.11709    |
| 9mo_SIGAF3_ | 0.01810494 | 0.10352019 | 4.09E-05 | 0.0055879 | 0.030658   |
| 9mo_SIGAF3_ | 0.08342527 | 0.50661194 | 4.78E-05 | 0.013315  | -0.0045591 |
| 9mo_SIGAF3_ | 0.0171776  | 0.09779756 | 4.03E-05 | 0.005729  | 0.063215   |
| 9mo_SIGAF3_ | 0.02598903 | 0.15217292 | 4.40E-05 | 0.0048781 | -0.11213   |
| 9mo_SIGAF3_ | 0.01918668 | 0.11019558 | 4.14E-05 | 0.0054571 | 0.0010121  |
| 9mo_SIGAF3_ | 0.08183606 | 0.49680495 | 4.81E-05 | 0.013778  | 0.078055   |
| 9mo_SIGAF3_ | 0.01661995 | 0.09435631 | 4.00E-05 | 0.0058035 | 0.080526   |
| 9mo_SIGAF3_ | 0.0298847  | 0.17621312 | 4.55E-05 | 0.0046645 | -0.12301   |
| 9mo_SIGAF3_ | 0.05729581 | 0.34536704 | 6.30E-05 | 0.0062853 | 0.057806   |
| 9mo_SIGAF3_ | 0.08985305 | 0.54627776 | 4.86E-05 | 0.0090548 | -0.47194   |
| 9mo_SIGAF3_ | 0.08982897 | 0.54612917 | 4.86E-05 | 0.0090548 | -0.47194   |
| 9mo_SIGAF3_ | 0.01949401 | 0.11209211 | 4.16E-05 | 0.0053955 | -0.012659  |
| 9mo_SIGAF3_ | 0.02596014 | 0.15199462 | 4.40E-05 | 0.0048781 | -0.11213   |
| 9mo_SIGAF3_ | 0.02376961 | 0.13847686 | 4.32E-05 | 0.0050338 | -0.091842  |
| 9mo_SIGAF3_ | 0.03163107 | 0.18698992 | 4.60E-05 | 0.0046154 | -0.12002   |
| 9mo_SIGAF3_ | 0.01650182 | 0.0936273  | 4.00E-05 | 0.0058035 | 0.080526   |

|             |            |            |          |           |            |
|-------------|------------|------------|----------|-----------|------------|
| 9mo_SIGAF3_ | 0.02641735 | 0.15481605 | 4.42E-05 | 0.0048445 | -0.11213   |
| 9mo_SIGAF3_ | 0.02120368 | 0.1226425  | 4.24E-05 | 0.0052258 | -0.04878   |
| 9mo_SIGAF3_ | 0.01682927 | 0.09564803 | 4.03E-05 | 0.005729  | 0.063215   |
| 9mo_SIGAF3_ | 0.08449718 | 0.5132267  | 4.76E-05 | 0.012731  | -0.069378  |
| 9mo_SIGAF3_ | 0.07851052 | 0.47628304 | 5.01E-05 | 0.014289  | 0.18889    |
| 9mo_SIGAF3_ | 0.08157977 | 0.49522337 | 4.83E-05 | 0.013957  | 0.078055   |
| 9mo_SIGAF3_ | 0.08295785 | 0.5037275  | 4.78E-05 | 0.013315  | 0.02505    |
| 9mo_SIGAF3_ | 0.09435559 | 0.57406294 | 5.13E-05 | 0.0061762 | -0.82618   |
| 9mo_SIGAF3_ | 0.03953357 | 0.23575623 | 4.92E-05 | 0.0045932 | -0.067351  |
| 9mo_SIGAF3_ | 0.02222063 | 0.12891808 | 4.28E-05 | 0.005125  | -0.068556  |
| 9mo_SIGAF3_ | 0.04990364 | 0.29974994 | 5.78E-05 | 0.0052091 | 0.0010449  |
| 9mo_SIGAF3_ | 0.0458626  | 0.2748127  | 5.39E-05 | 0.0048522 | -0.024952  |
| 9mo_SIGAF3_ | 0.01825881 | 0.1044697  | 4.09E-05 | 0.0055879 | 0.030658   |
| 9mo_SIGAF3_ | 0.05346063 | 0.32170016 | 6.05E-05 | 0.0056127 | 0.026054   |
| 9mo_SIGAF3_ | 0.01567225 | 0.08850802 | 3.95E-05 | 0.0059603 | 0.098494   |
| 9mo_SIGAF3_ | 0.02035033 | 0.11737648 | 4.19E-05 | 0.0053364 | -0.025531  |
| 9mo_SIGAF3_ | 0.01853281 | 0.10616057 | 4.11E-05 | 0.0055212 | 0.015459   |
| 9mo_SIGAF3_ | 0.02196668 | 0.12735097 | 4.26E-05 | 0.0051742 | -0.059109  |
| 9mo_SIGAF3_ | 0.08918996 | 0.54218584 | 4.84E-05 | 0.0094274 | -0.42792   |
| 9mo_SIGAF3_ | 0.09973017 | 0.6072295  | 5.53E-05 | 0.004262  | -1.2008    |
| 9mo_SIGAF3_ | 0.08867925 | 0.53903425 | 4.82E-05 | 0.0098057 | -0.3844    |
| 9mo_SIGAF3_ | 0.02069197 | 0.11948475 | 4.21E-05 | 0.0052798 | -0.037579  |
| 9mo_SIGAF3_ | 0.08360398 | 0.50771475 | 4.77E-05 | 0.013036  | -0.0045591 |
| 9mo_SIGAF3_ | 0.01404822 | 0.07848612 | 3.86E-05 | 0.0062156 | 0.1561     |
| 9mo_SIGAF3_ | 0.06600783 | 0.39912894 | 6.16E-05 | 0.0091463 | 0.17407    |
| 9mo_SIGAF3_ | 0.02339201 | 0.13614668 | 4.32E-05 | 0.0050338 | -0.084895  |
| 9mo_SIGAF3_ | 0.01897487 | 0.10888854 | 4.14E-05 | 0.0054571 | 0.0010121  |
| 9mo_SIGAF3_ | 0.07242727 | 0.43874332 | 5.54E-05 | 0.012382  | 0.24373    |
| 9mo_SIGAF3_ | 0.02856266 | 0.16805477 | 4.49E-05 | 0.0047302 | -0.12174   |
| 9mo_SIGAF3_ | 0.02107216 | 0.12183092 | 4.21E-05 | 0.0052798 | -0.04878   |
| 9mo_SIGAF3_ | 0.04933696 | 0.296253   | 5.73E-05 | 0.0051543 | -0.0022352 |
| 9mo_SIGAF3_ | 0.04205018 | 0.25128627 | 5.09E-05 | 0.0046676 | -0.0504    |
| 9mo_SIGAF3_ | 0.02452867 | 0.14316101 | 4.36E-05 | 0.0049516 | -0.098011  |
| 9mo_SIGAF3_ | 0.02096235 | 0.12115324 | 4.21E-05 | 0.0052798 | -0.037579  |
| 9mo_SIGAF3_ | 0.06713142 | 0.40606257 | 6.07E-05 | 0.0096573 | 0.19037    |
| 9mo_SIGAF3_ | 0.01758364 | 0.10030325 | 4.06E-05 | 0.0056572 | 0.046584   |
| 9mo_SIGAF3_ | 0.04855719 | 0.29144102 | 5.63E-05 | 0.005054  | -0.0087048 |
| 9mo_SIGAF3_ | 0.02364529 | 0.13770966 | 4.32E-05 | 0.0050338 | -0.084895  |
| 9mo_SIGAF3_ | 0.02304017 | 0.13397548 | 4.30E-05 | 0.0050782 | -0.077142  |
| 9mo_SIGAF3_ | 0.01638258 | 0.09289151 | 4.00E-05 | 0.0058035 | 0.080526   |
| 9mo_SIGAF3_ | 0.068933   | 0.41718018 | 5.87E-05 | 0.010741  | 0.21248    |
| 9mo_SIGAF3_ | 0.0105736  | 0.0570443  | 3.68E-05 | 0.0068    | 0.30902    |
| 9mo_SIGAF3_ | 0.05464792 | 0.3290269  | 6.14E-05 | 0.0057798 | 0.034245   |

|             |            |            |          |           |           |
|-------------|------------|------------|----------|-----------|-----------|
| 9mo_SIGAF3_ | 0.08948789 | 0.54402435 | 4.86E-05 | 0.0090548 | -0.42792  |
| 9mo_SIGAF3_ | 0.03265926 | 0.19333489 | 4.64E-05 | 0.0045915 | -0.11603  |
| 9mo_SIGAF3_ | 0.03161242 | 0.18687484 | 4.60E-05 | 0.0046154 | -0.12002  |
| 9mo_SIGAF3_ | 0.07553966 | 0.45794985 | 5.23E-05 | 0.013721  | 0.23858   |
| 9mo_SIGAF3_ | 0.10329572 | 0.62923247 | 5.78E-05 | 0.003724  | -1.3542   |
| 9mo_SIGAF3_ | 0.07900267 | 0.4793201  | 4.97E-05 | 0.014318  | 0.17506   |
| 9mo_SIGAF3_ | 0.01226024 | 0.06745251 | 3.77E-05 | 0.0064954 | 0.24064   |
| 9mo_SIGAF3_ | 0.02713576 | 0.15924935 | 4.46E-05 | 0.0047834 | -0.11816  |
| 9mo_SIGAF3_ | 0.01910261 | 0.10967678 | 4.14E-05 | 0.0054571 | 0.0010121 |
| 9mo_SIGAF3_ | 0.08409426 | 0.5107402  | 4.76E-05 | 0.012731  | -0.036078 |
| 9mo_SIGAF3_ | 0.07916687 | 0.4803334  | 4.93E-05 | 0.014315  | 0.17506   |
| 9mo_SIGAF3_ | 0.02407941 | 0.14038865 | 4.34E-05 | 0.0049916 | -0.091842 |
| 9mo_SIGAF3_ | 0.08286192 | 0.5031355  | 4.79E-05 | 0.013563  | 0.02505   |
| 9mo_SIGAF3_ | 0.01552042 | 0.08757108 | 3.95E-05 | 0.0059603 | 0.11709   |
| 9mo_SIGAF3_ | 0.07018568 | 0.42491043 | 5.76E-05 | 0.011297  | 0.22487   |
| 9mo_SIGAF3_ | 0.09189171 | 0.55885834 | 4.96E-05 | 0.0076529 | -0.6503   |
| 9mo_SIGAF3_ | 0.08293635 | 0.50359476 | 4.78E-05 | 0.013315  | 0.02505   |
| 9mo_SIGAF3_ | 0.0076315  | 0.03888859 | 3.53E-05 | 0.0073641 | 0.43054   |
| 9mo_SIGAF3_ | 0.03056855 | 0.18043314 | 4.57E-05 | 0.0046464 | -0.12245  |
| 9mo_SIGAF3_ | 0.01272252 | 0.07030528 | 3.80E-05 | 0.0063994 | 0.21875   |
| 9mo_SIGAF3_ | 0.07332899 | 0.44430783 | 5.43E-05 | 0.012883  | 0.24489   |
| 9mo_SIGAF3_ | 0.02316409 | 0.13474017 | 4.30E-05 | 0.0050782 | -0.077142 |
| 9mo_SIGAF3_ | 0.00901369 | 0.04741806 | 3.59E-05 | 0.00713   | 0.38094   |
| 9mo_SIGAF3_ | 0.01474707 | 0.08279876 | 3.92E-05 | 0.0060428 | 0.1363    |
| 9mo_SIGAF3_ | 0.01660337 | 0.09425397 | 4.00E-05 | 0.0058035 | 0.080526  |
| 9mo_SIGAF3_ | 0.02661225 | 0.1560188  | 4.44E-05 | 0.004813  | -0.11546  |
| 9mo_SIGAF3_ | 0.09284882 | 0.5647647  | 5.02E-05 | 0.0070215 | -0.69483  |
| 9mo_SIGAF3_ | 0.02531242 | 0.14799753 | 4.38E-05 | 0.0049138 | -0.10343  |
| 9mo_SIGAF3_ | 0.01179245 | 0.0645658  | 3.74E-05 | 0.0065941 | 0.263     |
| 9mo_SIGAF3_ | 0.01151703 | 0.0628662  | 3.74E-05 | 0.0065941 | 0.263     |
| 9mo_SIGAF3_ | 0.07811946 | 0.4738698  | 5.01E-05 | 0.014289  | 0.20103   |
| 9mo_SIGAF3_ | 0.0181082  | 0.10354031 | 4.09E-05 | 0.0055879 | 0.030658  |
| 9mo_SIGAF3_ | 0.02153053 | 0.12465948 | 4.24E-05 | 0.0052258 | -0.04878  |
| 9mo_SIGAF3_ | 0.07542485 | 0.45724136 | 5.23E-05 | 0.013721  | 0.23858   |
| 9mo_SIGAF3_ | 0.07888213 | 0.47857624 | 4.97E-05 | 0.014318  | 0.17506   |
| 9mo_SIGAF3_ | 0.09135453 | 0.55554336 | 4.93E-05 | 0.0079874 | -0.60562  |
| 9mo_SIGAF3_ | 0.02154873 | 0.12477178 | 4.24E-05 | 0.0052258 | -0.04878  |
| 9mo_SIGAF3_ | 0.00442494 | 0.01910086 | 3.35E-05 | 0.0081345 | 0.58516   |
| 9mo_SIGAF3_ | 0.08036285 | 0.48771375 | 4.87E-05 | 0.014207  | 0.14202   |
| 9mo_SIGAF3_ | 0.0209699  | 0.12119983 | 4.21E-05 | 0.0052798 | -0.037579 |
| 9mo_SIGAF3_ | 0.04146572 | 0.24767955 | 5.05E-05 | 0.0046492 | -0.054504 |
| 9mo_SIGAF3_ | 0.0155697  | 0.08787521 | 3.95E-05 | 0.0059603 | 0.11709   |
| 9mo_SIGAF3_ | 0.02115921 | 0.12236807 | 4.24E-05 | 0.0052258 | -0.04878  |

|             |            |            |          |           |           |
|-------------|------------|------------|----------|-----------|-----------|
| 9mo_SIGAF3_ | 0.02184485 | 0.1265992  | 4.26E-05 | 0.0051742 | -0.059109 |
| 9mo_SIGAF3_ | 0.01863051 | 0.10676348 | 4.11E-05 | 0.0055212 | 0.015459  |
| 9mo_SIGAF3_ | 0.08215529 | 0.4987749  | 4.81E-05 | 0.013778  | 0.05262   |
| 9mo_SIGAF3_ | 0.03271999 | 0.19370969 | 4.64E-05 | 0.0045915 | -0.11603  |
| 9mo_SIGAF3_ | 0.02026733 | 0.11686426 | 4.19E-05 | 0.0053364 | -0.025531 |
| 9mo_SIGAF3_ | 0.0190072  | 0.109088   | 4.14E-05 | 0.0054571 | 0.0010121 |
| 9mo_SIGAF3_ | 0.0874138  | 0.53122514 | 4.79E-05 | 0.010571  | -0.25808  |
| 9mo_SIGAF3_ | 0.09236252 | 0.5617637  | 4.99E-05 | 0.0073308 | -0.69483  |
| 9mo_SIGAF3_ | 0.0196445  | 0.11302083 | 4.16E-05 | 0.0053955 | -0.012659 |
| 9mo_SIGAF3_ | 0.09103058 | 0.5535443  | 4.93E-05 | 0.0079874 | -0.56091  |
| 9mo_SIGAF3_ | 0.04195926 | 0.25072515 | 5.09E-05 | 0.0046676 | -0.0504   |
| 9mo_SIGAF3_ | 0.0267177  | 0.15666954 | 4.44E-05 | 0.004813  | -0.11546  |
| 9mo_SIGAF3_ | 0.08501813 | 0.51644146 | 4.76E-05 | 0.012404  | -0.10433  |
| 9mo_SIGAF3_ | 0.0540167  | 0.32513165 | 6.10E-05 | 0.005694  | 0.030074  |
| 9mo_SIGAF3_ | 0.01632167 | 0.09251563 | 4.00E-05 | 0.0058035 | 0.080526  |
| 9mo_SIGAF3_ | 0.02451516 | 0.14307763 | 4.36E-05 | 0.0049516 | -0.098011 |
| 9mo_SIGAF3_ | 0.09410129 | 0.5724936  | 5.09E-05 | 0.0064439 | -0.82618  |
| 9mo_SIGAF3_ | 0.02950281 | 0.17385644 | 4.53E-05 | 0.0046846 | -0.1231   |
| 9mo_SIGAF3_ | 0.02811153 | 0.16527086 | 4.48E-05 | 0.0047558 | -0.12174  |
| 9mo_SIGAF3_ | 0.01782676 | 0.10180351 | 4.06E-05 | 0.0056572 | 0.030658  |
| 9mo_SIGAF3_ | 0.01168923 | 0.0639288  | 3.74E-05 | 0.0065941 | 0.263     |
| 9mo_SIGAF3_ | 0.01734618 | 0.09883784 | 4.06E-05 | 0.0056572 | 0.046584  |
| 9mo_SIGAF3_ | 0.01334994 | 0.07417708 | 3.83E-05 | 0.0063061 | 0.19734   |
| 9mo_SIGAF3_ | 0.03201693 | 0.18937105 | 4.62E-05 | 0.0046026 | -0.11821  |
| 9mo_SIGAF3_ | 0.0099333  | 0.05309295 | 3.65E-05 | 0.0069072 | 0.33263   |
| 9mo_SIGAF3_ | 0.01783737 | 0.10186902 | 4.06E-05 | 0.0056572 | 0.030658  |
| 9mo_SIGAF3_ | 0.02879672 | 0.16949916 | 4.51E-05 | 0.0047064 | -0.12268  |
| 9mo_SIGAF3_ | 0.02463439 | 0.14381343 | 4.36E-05 | 0.0049516 | -0.098011 |
| 9mo_SIGAF3_ | 0.0195062  | 0.11216737 | 4.16E-05 | 0.0053955 | -0.012659 |
| 9mo_SIGAF3_ | 0.09020956 | 0.54847777 | 4.88E-05 | 0.0086895 | -0.51631  |
| 9mo_SIGAF3_ | 0.00547158 | 0.02555971 | 3.41E-05 | 0.0078664 | 0.53284   |
| 9mo_SIGAF3_ | 0.08787847 | 0.5340926  | 4.80E-05 | 0.010188  | -0.29935  |
| 9mo_SIGAF3_ | 0.08399066 | 0.5101009  | 4.76E-05 | 0.012731  | -0.036078 |
| 9mo_SIGAF3_ | 0.03504036 | 0.20802869 | 4.72E-05 | 0.0045646 | -0.10426  |
| 9mo_SIGAF3_ | 0.01199072 | 0.06578933 | 3.77E-05 | 0.0064954 | 0.24064   |
| 9mo_SIGAF3_ | 0.01612942 | 0.09132921 | 3.98E-05 | 0.0058806 | 0.098494  |
| 9mo_SIGAF3_ | 0.0945286  | 0.5751306  | 5.13E-05 | 0.0061762 | -0.8688   |
| 9mo_SIGAF3_ | 0.02727061 | 0.16008152 | 4.46E-05 | 0.0047834 | -0.11816  |
| 9mo_SIGAF3_ | 0.01425473 | 0.07976051 | 3.89E-05 | 0.0061278 | 0.1561    |
| 9mo_SIGAF3_ | 0.02760319 | 0.16213387 | 4.46E-05 | 0.0047834 | -0.12024  |
| 9mo_SIGAF3_ | 0.06241543 | 0.37696022 | 6.35E-05 | 0.0078047 | 0.11565   |
| 9mo_SIGAF3_ | 0.02415527 | 0.1408568  | 4.34E-05 | 0.0049916 | -0.091842 |
| 9mo_SIGAF3_ | 0.02588741 | 0.1515458  | 4.40E-05 | 0.0048781 | -0.10813  |

|             |            |            |          |           |           |
|-------------|------------|------------|----------|-----------|-----------|
| 9mo_SIGAF3_ | 0.02914744 | 0.17166345 | 4.51E-05 | 0.0047064 | -0.12268  |
| 9mo_SIGAF3_ | 0.02377707 | 0.13852288 | 4.32E-05 | 0.0050338 | -0.091842 |
| 9mo_SIGAF3_ | 0.01365991 | 0.07608991 | 3.86E-05 | 0.0062156 | 0.17645   |
| 9mo_SIGAF3_ | 0.02026559 | 0.11685353 | 4.19E-05 | 0.0053364 | -0.025531 |
| 9mo_SIGAF3_ | 0.0105162  | 0.05669005 | 3.68E-05 | 0.0068    | 0.30902   |
| 9mo_SIGAF3_ | 0.02212044 | 0.12829985 | 4.26E-05 | 0.0051742 | -0.059109 |
| 9mo_SIGAF3_ | 0.01358648 | 0.07563675 | 3.86E-05 | 0.0062156 | 0.17645   |
| 9mo_SIGAF3_ | 0.07777157 | 0.47172296 | 5.05E-05 | 0.014229  | 0.20103   |
| 9mo_SIGAF3_ | 0.03837809 | 0.22862577 | 4.87E-05 | 0.0045758 | -0.076088 |
| 9mo_SIGAF3_ | 0.03940164 | 0.23494211 | 4.92E-05 | 0.0045932 | -0.071721 |
| 9mo_SIGAF3_ | 0.08524863 | 0.51786387 | 4.76E-05 | 0.012059  | -0.10433  |
| 9mo_SIGAF3_ | 0.03449218 | 0.20464584 | 4.70E-05 | 0.0045688 | -0.10761  |
| 9mo_SIGAF3_ | 0.07616061 | 0.46178174 | 5.18E-05 | 0.013885  | 0.22792   |
| 9mo_SIGAF3_ | 0.02003469 | 0.11542866 | 4.19E-05 | 0.0053364 | -0.025531 |
| 9mo_SIGAF3_ | 0.0273803  | 0.1607584  | 4.46E-05 | 0.0047834 | -0.11816  |
| 9mo_SIGAF3_ | 0.03134221 | 0.18520735 | 4.58E-05 | 0.00463   | -0.12002  |
| 9mo_SIGAF3_ | 0.0197295  | 0.11354536 | 4.16E-05 | 0.0053955 | -0.012659 |
| 9mo_SIGAF3_ | 0.03918067 | 0.23357853 | 4.92E-05 | 0.0045932 | -0.071721 |
| 9mo_SIGAF3_ | 0.03813472 | 0.22712393 | 4.87E-05 | 0.0045758 | -0.080425 |
| 9mo_SIGAF3_ | 0.09608591 | 0.5847407  | 5.24E-05 | 0.0054581 | -0.9515   |
| 9mo_SIGAF3_ | 0.06623766 | 0.4005472  | 6.12E-05 | 0.0093985 | 0.17407   |
| 9mo_SIGAF3_ | 0.0443782  | 0.26565248 | 5.25E-05 | 0.0047605 | -0.031751 |
| 9mo_SIGAF3_ | 0.02797123 | 0.1644051  | 4.48E-05 | 0.0047558 | -0.12024  |
| 9mo_SIGAF3_ | 0.08129224 | 0.49344903 | 4.83E-05 | 0.013957  | 0.10139   |
| 9mo_SIGAF3_ | 0.01380058 | 0.07695796 | 3.86E-05 | 0.0062156 | 0.17645   |
| 9mo_SIGAF3_ | 0.02077916 | 0.12002281 | 4.21E-05 | 0.0052798 | -0.037579 |
| 9mo_SIGAF3_ | 0.08408445 | 0.5106797  | 4.76E-05 | 0.012731  | -0.036078 |
| 9mo_SIGAF3_ | 0.01702671 | 0.09686642 | 4.03E-05 | 0.005729  | 0.063215  |
| 9mo_SIGAF3_ | 0.02919907 | 0.17198208 | 4.51E-05 | 0.0047064 | -0.1231   |
| 9mo_SIGAF3_ | 0.02681716 | 0.15728332 | 4.44E-05 | 0.004813  | -0.11546  |
| 9mo_SIGAF3_ | 0.02583223 | 0.15120526 | 4.40E-05 | 0.0048781 | -0.10813  |
| 9mo_SIGAF3_ | 0.0929786  | 0.5655655  | 5.02E-05 | 0.0070215 | -0.73907  |
| 9mo_SIGAF3_ | 0.0850213  | 0.516461   | 4.76E-05 | 0.012404  | -0.10433  |
| 9mo_SIGAF3_ | 0.01121664 | 0.06101244 | 3.71E-05 | 0.0066957 | 0.2858    |
| 9mo_SIGAF3_ | 0.02593492 | 0.15183902 | 4.40E-05 | 0.0048781 | -0.11213  |
| 9mo_SIGAF3_ | 0.03223348 | 0.19070742 | 4.62E-05 | 0.0046026 | -0.11821  |
| 9mo_SIGAF3_ | 0.01530801 | 0.08626032 | 3.95E-05 | 0.0059603 | 0.11709   |
| 9mo_SIGAF3_ | 0.00705944 | 0.03535837 | 3.50E-05 | 0.0074854 | 0.45576   |
| 9mo_SIGAF3_ | 0.02154939 | 0.12477589 | 4.24E-05 | 0.0052258 | -0.04878  |
| 9mo_SIGAF3_ | 0.06803855 | 0.41166052 | 5.98E-05 | 0.010192  | 0.19812   |
| 9mo_SIGAF3_ | 0.01901429 | 0.10913175 | 4.14E-05 | 0.0054571 | 0.0010121 |
| 9mo_SIGAF3_ | 0.02917466 | 0.17183141 | 4.51E-05 | 0.0047064 | -0.1231   |
| 9mo_SIGAF3_ | 0.02715582 | 0.1593732  | 4.46E-05 | 0.0047834 | -0.11816  |

|             |            |            |          |           |           |
|-------------|------------|------------|----------|-----------|-----------|
| 9mo_SIGAF3_ | 0.02593291 | 0.15182662 | 4.40E-05 | 0.0048781 | -0.11213  |
| 9mo_SIGAF3_ | 0.02660131 | 0.15595128 | 4.44E-05 | 0.004813  | -0.11546  |
| 9mo_SIGAF3_ | 0.01583307 | 0.08950049 | 3.98E-05 | 0.0058806 | 0.098494  |
| 9mo_SIGAF3_ | 0.01367198 | 0.0761644  | 3.86E-05 | 0.0062156 | 0.17645   |
| 9mo_SIGAF3_ | 0.02106332 | 0.12177634 | 4.21E-05 | 0.0052798 | -0.04878  |
| 9mo_SIGAF3_ | 0.08992355 | 0.5467128  | 4.86E-05 | 0.0090548 | -0.47194  |
| 9mo_SIGAF3_ | 0.07270519 | 0.44045833 | 5.49E-05 | 0.012637  | 0.24373   |
| 9mo_SIGAF3_ | 0.08050383 | 0.48858374 | 4.87E-05 | 0.014207  | 0.12269   |
| 9mo_SIGAF3_ | 0.08080541 | 0.49044478 | 4.85E-05 | 0.0141    | 0.12269   |
| 9mo_SIGAF3_ | 0.07711325 | 0.4676605  | 5.09E-05 | 0.014141  | 0.22047   |
| 9mo_SIGAF3_ | 0.07606861 | 0.461214   | 5.18E-05 | 0.013885  | 0.23393   |
| 9mo_SIGAF3_ | 0.01430209 | 0.08005277 | 3.89E-05 | 0.0061278 | 0.1561    |
| 9mo_SIGAF3_ | 0.06257606 | 0.37795144 | 6.35E-05 | 0.0078047 | 0.11565   |
| 9mo_SIGAF3_ | 0.02046051 | 0.11805637 | 4.19E-05 | 0.0053364 | -0.025531 |
| 9mo_SIGAF3_ | 0.02011893 | 0.11594848 | 4.19E-05 | 0.0053364 | -0.025531 |
| 9mo_SIGAF3_ | 0.08647486 | 0.5254309  | 4.77E-05 | 0.01133   | -0.21781  |
| 9mo_SIGAF3_ | 0.0243928  | 0.14232258 | 4.36E-05 | 0.0049516 | -0.098011 |
| 9mo_SIGAF3_ | 0.03595555 | 0.21367626 | 4.77E-05 | 0.0045615 | -0.096915 |
| 9mo_SIGAF3_ | 0.01507357 | 0.08481361 | 3.92E-05 | 0.0060428 | 0.1363    |
| 9mo_SIGAF3_ | 0.08825938 | 0.53644323 | 4.80E-05 | 0.010188  | -0.3415   |
| 9mo_SIGAF3_ | 0.02641328 | 0.15479098 | 4.42E-05 | 0.0048445 | -0.11213  |
| 9mo_SIGAF3_ | 0.09466248 | 0.57595676 | 5.13E-05 | 0.0061762 | -0.8688   |
| 9mo_SIGAF3_ | 0.02505882 | 0.14643255 | 4.38E-05 | 0.0049138 | -0.10343  |
| 9mo_SIGAF3_ | 0.07451624 | 0.45163432 | 5.33E-05 | 0.013335  | 0.24406   |
| 9mo_SIGAF3_ | 0.01894242 | 0.10868829 | 4.11E-05 | 0.0055212 | 0.0010121 |
| 9mo_SIGAF3_ | 0.02199361 | 0.12751718 | 4.26E-05 | 0.0051742 | -0.059109 |
| 9mo_SIGAF3_ | 0.01781206 | 0.10171282 | 4.06E-05 | 0.0056572 | 0.030658  |
| 9mo_SIGAF3_ | 0.03611733 | 0.21467467 | 4.77E-05 | 0.0045615 | -0.096915 |
| 9mo_SIGAF3_ | 0.04020819 | 0.23991932 | 4.99E-05 | 0.0046177 | -0.063007 |
| 9mo_SIGAF3_ | 0.02112714 | 0.12217019 | 4.24E-05 | 0.0052258 | -0.04878  |
| 9mo_SIGAF3_ | 0.07704967 | 0.4672681  | 5.09E-05 | 0.014141  | 0.22047   |
| 9mo_SIGAF3_ | 0.09408131 | 0.57237035 | 5.09E-05 | 0.0064439 | -0.82618  |
| 9mo_SIGAF3_ | 0.07789493 | 0.47248426 | 5.05E-05 | 0.014229  | 0.20103   |
| 9mo_SIGAF3_ | 0.09294964 | 0.56538683 | 5.02E-05 | 0.0070215 | -0.73907  |
| 9mo_SIGAF3_ | 0.0251031  | 0.14670585 | 4.38E-05 | 0.0049138 | -0.10343  |
| 9mo_SIGAF3_ | 0.02514361 | 0.14695585 | 4.38E-05 | 0.0049138 | -0.10343  |
| 9mo_SIGAF3_ | 0.06885386 | 0.41669175 | 5.87E-05 | 0.010741  | 0.21248   |
| 9mo_SIGAF3_ | 0.06555741 | 0.39634937 | 6.16E-05 | 0.0091463 | 0.16566   |
| 9mo_SIGAF3_ | 0.01734948 | 0.09885821 | 4.06E-05 | 0.0056572 | 0.046584  |
| 9mo_SIGAF3_ | 0.08892813 | 0.5405701  | 4.84E-05 | 0.0094274 | -0.3844   |
| 9mo_SIGAF3_ | 0.08624324 | 0.52400166 | 4.77E-05 | 0.01133   | -0.17867  |
| 9mo_SIGAF3_ | 0.01044657 | 0.05626039 | 3.68E-05 | 0.0068    | 0.30902   |
| 9mo_SIGAF3_ | 0.0479874  | 0.28792486 | 5.58E-05 | 0.0050083 | -0.01192  |



|             |            |            |          |           |           |
|-------------|------------|------------|----------|-----------|-----------|
| 9mo_SIGAF3_ | 0.01441384 | 0.0807424  | 3.89E-05 | 0.0061278 | 0.1561    |
| 9mo_SIGAF3_ | 0.01938242 | 0.11140348 | 4.14E-05 | 0.0054571 | 0.0010121 |
| 9mo_SIGAF3_ | 0.01306883 | 0.07244235 | 3.83E-05 | 0.0063061 | 0.19734   |
| 9mo_SIGAF3_ | 0.0268055  | 0.15721135 | 4.44E-05 | 0.004813  | -0.11546  |
| 9mo_SIGAF3_ | 0.08920638 | 0.5422872  | 4.84E-05 | 0.0094274 | -0.42792  |
| 9mo_SIGAF3_ | 0.02160944 | 0.12514642 | 4.24E-05 | 0.0052258 | -0.059109 |
| 9mo_SIGAF3_ | 0.03786349 | 0.22545019 | 4.84E-05 | 0.0045696 | -0.080425 |
| 9mo_SIGAF3_ | 0.08593638 | 0.52210796 | 4.76E-05 | 0.0117    | -0.17867  |
| 9mo_SIGAF3_ | 0.02888133 | 0.17002131 | 4.51E-05 | 0.0047064 | -0.12268  |
| 9mo_SIGAF3_ | 0.01888266 | 0.1083195  | 4.11E-05 | 0.0055212 | 0.015459  |
| 9mo_SIGAF3_ | 0.09697288 | 0.5902142  | 5.28E-05 | 0.0052469 | -1.03     |
| 9mo_SIGAF3_ | 0.08247365 | 0.5007395  | 4.79E-05 | 0.013563  | 0.05262   |
| 9mo_SIGAF3_ | 0.03460555 | 0.20534544 | 4.70E-05 | 0.0045688 | -0.10426  |
| 9mo_SIGAF3_ | 0.01624288 | 0.0920294  | 4.00E-05 | 0.0058035 | 0.080526  |
| 9mo_SIGAF3_ | 0.01907291 | 0.1094935  | 4.14E-05 | 0.0054571 | 0.0010121 |
| 9mo_SIGAF3_ | 0.05674917 | 0.34199372 | 6.27E-05 | 0.0061731 | 0.05269   |
| 9mo_SIGAF3_ | 0.01259205 | 0.06950012 | 3.80E-05 | 0.0063994 | 0.21875   |
| 9mo_SIGAF3_ | 0.0255699  | 0.14958642 | 4.40E-05 | 0.0048781 | -0.10813  |
| 9mo_SIGAF3_ | 0.04143445 | 0.2474866  | 5.05E-05 | 0.0046492 | -0.054504 |
| 9mo_SIGAF3_ | 0.0283518  | 0.16675355 | 4.49E-05 | 0.0047302 | -0.12174  |
| 9mo_SIGAF3_ | 0.08702805 | 0.52884465 | 4.78E-05 | 0.010952  | -0.25808  |
| 9mo_SIGAF3_ | 0.01427333 | 0.07987528 | 3.89E-05 | 0.0061278 | 0.1561    |
| 9mo_SIGAF3_ | 0.02700302 | 0.15843025 | 4.44E-05 | 0.004813  | -0.11816  |
| 9mo_SIGAF3_ | 0.01712534 | 0.09747506 | 4.03E-05 | 0.005729  | 0.063215  |
| 9mo_SIGAF3_ | 0.04127551 | 0.24650577 | 5.05E-05 | 0.0046492 | -0.054504 |
| 9mo_SIGAF3_ | 0.01247328 | 0.06876719 | 3.80E-05 | 0.0063994 | 0.21875   |
| 9mo_SIGAF3_ | 0.02150849 | 0.12452351 | 4.24E-05 | 0.0052258 | -0.04878  |
| 9mo_SIGAF3_ | 0.01741647 | 0.09927163 | 4.06E-05 | 0.0056572 | 0.046584  |
| 9mo_SIGAF3_ | 0.02475249 | 0.14454223 | 4.36E-05 | 0.0049516 | -0.098011 |
| 9mo_SIGAF3_ | 0.02115346 | 0.1223326  | 4.24E-05 | 0.0052258 | -0.04878  |
| 9mo_SIGAF3_ | 0.0146783  | 0.08237436 | 3.92E-05 | 0.0060428 | 0.1363    |
| 9mo_SIGAF3_ | 0.05819637 | 0.3509244  | 6.34E-05 | 0.0065282 | 0.06315   |
| 9mo_SIGAF3_ | 0.01534867 | 0.08651123 | 3.95E-05 | 0.0059603 | 0.11709   |
| 9mo_SIGAF3_ | 0.02694528 | 0.1580739  | 4.44E-05 | 0.004813  | -0.11546  |
| 9mo_SIGAF3_ | 0.01635487 | 0.09272049 | 4.00E-05 | 0.0058035 | 0.080526  |
| 9mo_SIGAF3_ | 0.07938071 | 0.481653   | 4.93E-05 | 0.014315  | 0.17506   |
| 9mo_SIGAF3_ | 0.01757342 | 0.10024015 | 4.06E-05 | 0.0056572 | 0.046584  |
| 9mo_SIGAF3_ | 0.01869346 | 0.1071519  | 4.11E-05 | 0.0055212 | 0.015459  |
| 9mo_SIGAF3_ | 0.07151375 | 0.43310598 | 5.65E-05 | 0.011849  | 0.2386    |
| 9mo_SIGAF3_ | 0.09419122 | 0.5730486  | 5.09E-05 | 0.0064439 | -0.82618  |
| 9mo_SIGAF3_ | 0.02299144 | 0.13367477 | 4.30E-05 | 0.0050782 | -0.077142 |
| 9mo_SIGAF3_ | 0.07422358 | 0.44982833 | 5.38E-05 | 0.013116  | 0.24406   |
| 9mo_SIGAF3_ | 0.02096789 | 0.12118746 | 4.21E-05 | 0.0052798 | -0.037579 |

|             |            |            |          |           |           |
|-------------|------------|------------|----------|-----------|-----------|
| 9mo_SIGAF3_ | 0.08830969 | 0.5367537  | 4.80E-05 | 0.010188  | -0.3415   |
| 9mo_SIGAF3_ | 0.01026186 | 0.0551205  | 3.65E-05 | 0.0069072 | 0.30902   |
| 9mo_SIGAF3_ | 0.00707361 | 0.03544581 | 3.50E-05 | 0.0074854 | 0.45576   |
| 9mo_SIGAF3_ | 0.08970132 | 0.54534143 | 4.86E-05 | 0.0090548 | -0.47194  |
| 9mo_SIGAF3_ | 0.08944503 | 0.5437599  | 4.86E-05 | 0.0090548 | -0.42792  |
| 9mo_SIGAF3_ | 0.02311141 | 0.13441513 | 4.30E-05 | 0.0050782 | -0.077142 |
| 9mo_SIGAF3_ | 0.01742431 | 0.09932002 | 4.06E-05 | 0.0056572 | 0.046584  |
| 9mo_SIGAF3_ | 0.06109614 | 0.36881885 | 6.38E-05 | 0.0072613 | 0.10072   |
| 9mo_SIGAF3_ | 0.01522615 | 0.08575518 | 3.95E-05 | 0.0059603 | 0.11709   |
| 9mo_SIGAF3_ | 0.01978465 | 0.11388567 | 4.16E-05 | 0.0053955 | -0.012659 |
| 9mo_SIGAF3_ | 0.01039279 | 0.05592846 | 3.68E-05 | 0.0068    | 0.30902   |
| 9mo_SIGAF3_ | 0.01503226 | 0.08455869 | 3.92E-05 | 0.0060428 | 0.1363    |
| 9mo_SIGAF3_ | 0.02192556 | 0.12709722 | 4.26E-05 | 0.0051742 | -0.059109 |
| 9mo_SIGAF3_ | 0.05722125 | 0.34490696 | 6.30E-05 | 0.0062853 | 0.05269   |
| 9mo_SIGAF3_ | 0.02286935 | 0.13292134 | 4.30E-05 | 0.0050782 | -0.077142 |
| 9mo_SIGAF3_ | 0.07114181 | 0.43081072 | 5.65E-05 | 0.011849  | 0.23476   |
| 9mo_SIGAF3_ | 0.07495343 | 0.45433223 | 5.28E-05 | 0.013537  | 0.24193   |
| 9mo_SIGAF3_ | 0.01879662 | 0.10778852 | 4.11E-05 | 0.0055212 | 0.015459  |
| 9mo_SIGAF3_ | 0.02027915 | 0.1169372  | 4.19E-05 | 0.0053364 | -0.025531 |
| 9mo_SIGAF3_ | 0.08938789 | 0.54340726 | 4.84E-05 | 0.0094274 | -0.42792  |
| 9mo_SIGAF3_ | 0.01408615 | 0.07872022 | 3.89E-05 | 0.0061278 | 0.1561    |
| 9mo_SIGAF3_ | 0.02276374 | 0.1322696  | 4.30E-05 | 0.0050782 | -0.077142 |
| 9mo_SIGAF3_ | 0.02763086 | 0.16230462 | 4.48E-05 | 0.0047558 | -0.12024  |
| 9mo_SIGAF3_ | 0.0101584  | 0.05448205 | 3.65E-05 | 0.0069072 | 0.33263   |
| 9mo_SIGAF3_ | 0.02779638 | 0.16332608 | 4.48E-05 | 0.0047558 | -0.12024  |
| 9mo_SIGAF3_ | 0.02988052 | 0.1761873  | 4.55E-05 | 0.0046645 | -0.12301  |
| 9mo_SIGAF3_ | 0.06386353 | 0.38589647 | 6.30E-05 | 0.008216  | 0.14015   |
| 9mo_SIGAF3_ | 0.0173763  | 0.09902372 | 4.06E-05 | 0.0056572 | 0.046584  |
| 9mo_SIGAF3_ | 0.08933073 | 0.5430545  | 4.84E-05 | 0.0094274 | -0.42792  |
| 9mo_SIGAF3_ | 0.01566431 | 0.08845903 | 3.95E-05 | 0.0059603 | 0.098494  |
| 9mo_SIGAF3_ | 0.02110723 | 0.12204728 | 4.21E-05 | 0.0052798 | -0.04878  |
| 9mo_SIGAF3_ | 0.01759836 | 0.10039408 | 4.06E-05 | 0.0056572 | 0.046584  |
| 9mo_SIGAF3_ | 0.05193888 | 0.31230944 | 5.92E-05 | 0.0053939 | 0.014768  |
| 9mo_SIGAF3_ | 0.02843731 | 0.16728126 | 4.49E-05 | 0.0047302 | -0.12174  |
| 9mo_SIGAF3_ | 0.02084495 | 0.1204288  | 4.21E-05 | 0.0052798 | -0.037579 |
| 9mo_SIGAF3_ | 0.01178539 | 0.06452221 | 3.74E-05 | 0.0065941 | 0.263     |
| 9mo_SIGAF3_ | 0.0862338  | 0.52394336 | 4.77E-05 | 0.01133   | -0.17867  |
| 9mo_SIGAF3_ | 0.03331603 | 0.19738783 | 4.66E-05 | 0.0045822 | -0.11352  |
| 9mo_SIGAF3_ | 0.05762873 | 0.3474215  | 6.32E-05 | 0.0064035 | 0.057806  |
| 9mo_SIGAF3_ | 0.08568721 | 0.52057034 | 4.76E-05 | 0.0117    | -0.14081  |
| 9mo_SIGAF3_ | 0.09805763 | 0.5969082  | 5.36E-05 | 0.0048658 | -1.1032   |
| 9mo_SIGAF3_ | 0.07344089 | 0.44499838 | 5.43E-05 | 0.012883  | 0.24489   |
| 9mo_SIGAF3_ | 0.03821225 | 0.22760238 | 4.87E-05 | 0.0045758 | -0.080425 |

|             |            |            |          |           |           |
|-------------|------------|------------|----------|-----------|-----------|
| 9mo_SIGAF3_ | 0.01181417 | 0.06469983 | 3.74E-05 | 0.0065941 | 0.263     |
| 9mo_SIGAF3_ | 0.01746011 | 0.09954093 | 4.06E-05 | 0.0056572 | 0.046584  |
| 9mo_SIGAF3_ | 0.02295137 | 0.13342753 | 4.30E-05 | 0.0050782 | -0.077142 |
| 9mo_SIGAF3_ | 0.07414282 | 0.44932997 | 5.38E-05 | 0.013116  | 0.24406   |
| 9mo_SIGAF3_ | 0.09728802 | 0.592159   | 5.32E-05 | 0.0050496 | -1.0673   |
| 9mo_SIGAF3_ | 0.0100831  | 0.05401739 | 3.65E-05 | 0.0069072 | 0.33263   |
| 9mo_SIGAF3_ | 0.01794501 | 0.10253325 | 4.09E-05 | 0.0055879 | 0.030658  |
| 9mo_SIGAF3_ | 0.00776122 | 0.03968905 | 3.53E-05 | 0.0073641 | 0.43054   |
| 9mo_SIGAF3_ | 0.02120316 | 0.12263928 | 4.24E-05 | 0.0052258 | -0.04878  |
| 9mo_SIGAF3_ | 0.08979993 | 0.54595    | 4.86E-05 | 0.0090548 | -0.47194  |
| 9mo_SIGAF3_ | 0.01993551 | 0.11481662 | 4.16E-05 | 0.0053955 | -0.012659 |
| 9mo_SIGAF3_ | 0.02072346 | 0.11967909 | 4.21E-05 | 0.0052798 | -0.037579 |
| 9mo_SIGAF3_ | 0.01031307 | 0.05543656 | 3.68E-05 | 0.0068    | 0.30902   |
| 9mo_SIGAF3_ | 0.07462775 | 0.45232245 | 5.33E-05 | 0.013335  | 0.24193   |
| 9mo_SIGAF3_ | 0.03293671 | 0.19504705 | 4.64E-05 | 0.0045915 | -0.11352  |
| 9mo_SIGAF3_ | 0.02209133 | 0.12812017 | 4.26E-05 | 0.0051742 | -0.059109 |
| 9mo_SIGAF3_ | 0.01617781 | 0.09162788 | 3.98E-05 | 0.0058806 | 0.098494  |
| 9mo_SIGAF3_ | 0.01881936 | 0.10792889 | 4.11E-05 | 0.0055212 | 0.015459  |
| 9mo_SIGAF3_ | 0.01084643 | 0.05872789 | 3.71E-05 | 0.0066957 | 0.2858    |
| 9mo_SIGAF3_ | 0.01718799 | 0.09786164 | 4.03E-05 | 0.005729  | 0.063215  |
| 9mo_SIGAF3_ | 0.02427167 | 0.1415751  | 4.34E-05 | 0.0049916 | -0.091842 |
| 9mo_SIGAF3_ | 0.02411499 | 0.14060819 | 4.34E-05 | 0.0049916 | -0.091842 |
| 9mo_SIGAF3_ | 0.09224711 | 0.5610515  | 4.99E-05 | 0.0073308 | -0.6503   |
| 9mo_SIGAF3_ | 0.07793787 | 0.47274923 | 5.05E-05 | 0.014229  | 0.20103   |
| 9mo_SIGAF3_ | 0.08984944 | 0.54625547 | 4.86E-05 | 0.0090548 | -0.47194  |
| 9mo_SIGAF3_ | 0.06767217 | 0.40939957 | 6.03E-05 | 0.009922  | 0.19812   |
| 9mo_SIGAF3_ | 0.01448243 | 0.08116565 | 3.89E-05 | 0.0061278 | 0.1561    |
| 9mo_SIGAF3_ | 0.01511757 | 0.08508512 | 3.92E-05 | 0.0060428 | 0.11709   |
| 9mo_SIGAF3_ | 0.03862817 | 0.23016904 | 4.89E-05 | 0.0045836 | -0.076088 |
| 9mo_SIGAF3_ | 0.05879177 | 0.35459864 | 6.35E-05 | 0.0066597 | 0.068735  |
| 9mo_SIGAF3_ | 0.07991336 | 0.48493993 | 4.90E-05 | 0.014278  | 0.15946   |
| 9mo_SIGAF3_ | 0.02214305 | 0.12843937 | 4.26E-05 | 0.0051742 | -0.068556 |
| 9mo_SIGAF3_ | 0.01864133 | 0.10683027 | 4.11E-05 | 0.0055212 | 0.015459  |
| 9mo_SIGAF3_ | 0.01479667 | 0.08310481 | 3.92E-05 | 0.0060428 | 0.1363    |
| 9mo_SIGAF3_ | 0.07383194 | 0.4474115  | 5.38E-05 | 0.013116  | 0.24502   |
| 9mo_SIGAF3_ | 0.01509441 | 0.08494221 | 3.92E-05 | 0.0060428 | 0.1363    |
| 9mo_SIGAF3_ | 0.0133459  | 0.07415216 | 3.83E-05 | 0.0063061 | 0.19734   |
| 9mo_SIGAF3_ | 0.06033317 | 0.3641106  | 6.38E-05 | 0.0070986 | 0.087064  |
| 9mo_SIGAF3_ | 0.02667749 | 0.15642141 | 4.44E-05 | 0.004813  | -0.11546  |
| 9mo_SIGAF3_ | 0.01906084 | 0.10941906 | 4.14E-05 | 0.0054571 | 0.0010121 |
| 9mo_SIGAF3_ | 0.01289189 | 0.07135043 | 3.80E-05 | 0.0063994 | 0.21875   |
| 9mo_SIGAF3_ | 0.04312789 | 0.2579368  | 5.17E-05 | 0.0047101 | -0.042593 |
| 9mo_SIGAF3_ | 0.08067022 | 0.48961052 | 4.87E-05 | 0.014207  | 0.12269   |

|             |            |            |          |           |            |
|-------------|------------|------------|----------|-----------|------------|
| 9mo_SIGAF3_ | 0.09658321 | 0.58780956 | 5.28E-05 | 0.0052469 | -0.99133   |
| 9mo_SIGAF3_ | 0.03652519 | 0.21719156 | 4.79E-05 | 0.0045625 | -0.092976  |
| 9mo_SIGAF3_ | 0.00934246 | 0.04944689 | 3.62E-05 | 0.0070172 | 0.35661    |
| 9mo_SIGAF3_ | 0.0224176  | 0.13013358 | 4.28E-05 | 0.005125  | -0.068556  |
| 9mo_SIGAF3_ | 0.08897108 | 0.54083514 | 4.84E-05 | 0.0094274 | -0.3844    |
| 9mo_SIGAF3_ | 0.02789178 | 0.16391477 | 4.48E-05 | 0.0047558 | -0.12024   |
| 9mo_SIGAF3_ | 0.07690395 | 0.46636888 | 5.13E-05 | 0.014025  | 0.22047    |
| 9mo_SIGAF3_ | 0.09069976 | 0.5515028  | 4.91E-05 | 0.0083333 | -0.51631   |
| 9mo_SIGAF3_ | 0.06839114 | 0.41383636 | 5.93E-05 | 0.010465  | 0.20551    |
| 9mo_SIGAF3_ | 0.03825352 | 0.22785705 | 4.87E-05 | 0.0045758 | -0.080425  |
| 9mo_SIGAF3_ | 0.0736815  | 0.44648317 | 5.43E-05 | 0.012883  | 0.24502    |
| 9mo_SIGAF3_ | 0.01595813 | 0.09027223 | 3.98E-05 | 0.0058806 | 0.098494   |
| 9mo_SIGAF3_ | 0.06678089 | 0.40389946 | 6.07E-05 | 0.0096573 | 0.18233    |
| 9mo_SIGAF3_ | 0.08243916 | 0.50052667 | 4.79E-05 | 0.013563  | 0.05262    |
| 9mo_SIGAF3_ | 0.0121374  | 0.06669448 | 3.77E-05 | 0.0064954 | 0.24064    |
| 9mo_SIGAF3_ | 0.08656625 | 0.52599496 | 4.77E-05 | 0.011133  | -0.21781   |
| 9mo_SIGAF3_ | 0.0949231  | 0.5775651  | 5.16E-05 | 0.0059226 | -0.8688    |
| 9mo_SIGAF3_ | 0.01403215 | 0.07838698 | 3.86E-05 | 0.0062156 | 0.1561     |
| 9mo_SIGAF3_ | 0.0150799  | 0.08485267 | 3.92E-05 | 0.0060428 | 0.1363     |
| 9mo_SIGAF3_ | 0.03637184 | 0.21624522 | 4.79E-05 | 0.0045625 | -0.092976  |
| 9mo_SIGAF3_ | 0.02097981 | 0.12126099 | 4.21E-05 | 0.0052798 | -0.037579  |
| 9mo_SIGAF3_ | 0.02208985 | 0.12811103 | 4.26E-05 | 0.0051742 | -0.059109  |
| 9mo_SIGAF3_ | 0.01326513 | 0.0736537  | 3.83E-05 | 0.0063061 | 0.19734    |
| 9mo_SIGAF3_ | 0.01916046 | 0.1100338  | 4.14E-05 | 0.0054571 | 0.0010121  |
| 9mo_SIGAF3_ | 0.02408981 | 0.1404528  | 4.34E-05 | 0.0049916 | -0.091842  |
| 9mo_SIGAF3_ | 0.03682376 | 0.219034   | 4.79E-05 | 0.0045625 | -0.088896  |
| 9mo_SIGAF3_ | 0.09219801 | 0.5607485  | 4.99E-05 | 0.0073308 | -0.6503    |
| 9mo_SIGAF3_ | 0.01274408 | 0.07043833 | 3.80E-05 | 0.0063994 | 0.21875    |
| 9mo_SIGAF3_ | 0.04924559 | 0.2956891  | 5.68E-05 | 0.0051026 | -0.0022352 |
| 9mo_SIGAF3_ | 0.0133611  | 0.07424592 | 3.83E-05 | 0.0063061 | 0.19734    |
| 9mo_SIGAF3_ | 0.04618754 | 0.27681792 | 5.44E-05 | 0.0048874 | -0.021643  |
| 9mo_SIGAF3_ | 0.02460364 | 0.14362366 | 4.36E-05 | 0.0049516 | -0.098011  |
| 9mo_SIGAF3_ | 0.01564942 | 0.08836716 | 3.95E-05 | 0.0059603 | 0.098494   |
| 9mo_SIGAF3_ | 0.03271325 | 0.19366805 | 4.64E-05 | 0.0045915 | -0.11603   |
| 9mo_SIGAF3_ | 0.01940527 | 0.11154451 | 4.14E-05 | 0.0054571 | 0.0010121  |
| 9mo_SIGAF3_ | 0.01376108 | 0.07671419 | 3.86E-05 | 0.0062156 | 0.17645    |
| 9mo_SIGAF3_ | 0.03180991 | 0.18809357 | 4.60E-05 | 0.0046154 | -0.12002   |
| 9mo_SIGAF3_ | 0.09512875 | 0.5788341  | 5.16E-05 | 0.0059226 | -0.91061   |
| 9mo_SIGAF3_ | 0.03024696 | 0.17844857 | 4.55E-05 | 0.0046645 | -0.12245   |
| 9mo_SIGAF3_ | 0.01748574 | 0.09969907 | 4.06E-05 | 0.0056572 | 0.046584   |
| 9mo_SIGAF3_ | 0.04435931 | 0.2655359  | 5.25E-05 | 0.0047605 | -0.031751  |
| 9mo_SIGAF3_ | 0.08614287 | 0.52338225 | 4.76E-05 | 0.0117    | -0.17867   |
| 9mo_SIGAF3_ | 0.08591864 | 0.5219985  | 4.76E-05 | 0.0117    | -0.17867   |

|             |            |            |          |           |           |
|-------------|------------|------------|----------|-----------|-----------|
| 9mo_SIGAF3_ | 0.02683282 | 0.15737993 | 4.44E-05 | 0.004813  | -0.11546  |
| 9mo_SIGAF3_ | 0.07930116 | 0.4811621  | 4.93E-05 | 0.014315  | 0.17506   |
| 9mo_SIGAF3_ | 0.02295258 | 0.13343497 | 4.30E-05 | 0.0050782 | -0.077142 |
| 9mo_SIGAF3_ | 0.02943696 | 0.17345007 | 4.53E-05 | 0.0046846 | -0.1231   |
| 9mo_SIGAF3_ | 0.03181851 | 0.18814662 | 4.60E-05 | 0.0046154 | -0.12002  |
| 9mo_SIGAF3_ | 0.04709319 | 0.2824067  | 5.49E-05 | 0.0049251 | -0.01514  |
| 9mo_SIGAF3_ | 0.03498525 | 0.20768857 | 4.72E-05 | 0.0045646 | -0.10426  |
| 9mo_SIGAF3_ | 0.01388313 | 0.07746739 | 3.86E-05 | 0.0062156 | 0.17645   |
| 9mo_SIGAF3_ | 0.07772612 | 0.4714425  | 5.05E-05 | 0.014229  | 0.21153   |
| 9mo_SIGAF3_ | 0.02791856 | 0.16408005 | 4.48E-05 | 0.0047558 | -0.12024  |
| 9mo_SIGAF3_ | 0.01812589 | 0.10364948 | 4.09E-05 | 0.0055879 | 0.030658  |
| 9mo_SIGAF3_ | 0.01722014 | 0.09806005 | 4.03E-05 | 0.005729  | 0.063215  |
| 9mo_SIGAF3_ | 0.03631285 | 0.21588117 | 4.79E-05 | 0.0045625 | -0.092976 |
| 9mo_SIGAF3_ | 0.01911449 | 0.10975009 | 4.14E-05 | 0.0054571 | 0.0010121 |
| 9mo_SIGAF3_ | 0.08761634 | 0.532475   | 4.79E-05 | 0.010571  | -0.29935  |
| 9mo_SIGAF3_ | 0.01033619 | 0.0555792  | 3.68E-05 | 0.0068    | 0.30902   |
| 9mo_SIGAF3_ | 0.01894873 | 0.10872721 | 4.14E-05 | 0.0054571 | 0.0010121 |
| 9mo_SIGAF3_ | 0.02569837 | 0.15037923 | 4.40E-05 | 0.0048781 | -0.10813  |
| 9mo_SIGAF3_ | 0.02256428 | 0.13103876 | 4.28E-05 | 0.005125  | -0.068556 |
| 9mo_SIGAF3_ | 0.08017134 | 0.48653194 | 4.90E-05 | 0.014278  | 0.14202   |
| 9mo_SIGAF3_ | 0.09074872 | 0.55180496 | 4.91E-05 | 0.0083333 | -0.56091  |
| 9mo_SIGAF3_ | 0.03055785 | 0.18036708 | 4.57E-05 | 0.0046464 | -0.12245  |
| 9mo_SIGAF3_ | 0.0090445  | 0.04760818 | 3.59E-05 | 0.00713   | 0.38094   |
| 9mo_SIGAF3_ | 0.03010305 | 0.17756052 | 4.55E-05 | 0.0046645 | -0.12301  |
| 9mo_SIGAF3_ | 0.08270434 | 0.5021631  | 4.79E-05 | 0.013563  | 0.02505   |
| 9mo_SIGAF3_ | 0.02312831 | 0.13451941 | 4.30E-05 | 0.0050782 | -0.077142 |
| 9mo_SIGAF3_ | 0.02632675 | 0.15425697 | 4.42E-05 | 0.0048445 | -0.11213  |
| 9mo_SIGAF3_ | 0.02130996 | 0.12329836 | 4.24E-05 | 0.0052258 | -0.04878  |
| 9mo_SIGAF3_ | 0.01056077 | 0.05696508 | 3.68E-05 | 0.0068    | 0.30902   |
| 9mo_SIGAF3_ | 0.08818576 | 0.5359889  | 4.80E-05 | 0.010188  | -0.3415   |
| 9mo_SIGAF3_ | 0.0107904  | 0.05838216 | 3.68E-05 | 0.0068    | 0.2858    |
| 9mo_SIGAF3_ | 0.01638377 | 0.0928988  | 4.00E-05 | 0.0058035 | 0.080526  |
| 9mo_SIGAF3_ | 0.00826022 | 0.04276842 | 3.56E-05 | 0.0072456 | 0.40559   |
| 9mo_SIGAF3_ | 0.01355469 | 0.07544057 | 3.86E-05 | 0.0062156 | 0.17645   |
| 9mo_SIGAF3_ | 0.0634907  | 0.3835957  | 6.30E-05 | 0.008216  | 0.13178   |
| 9mo_SIGAF3_ | 0.08004377 | 0.4857447  | 4.90E-05 | 0.014278  | 0.14202   |
| 9mo_SIGAF3_ | 0.07718223 | 0.46808618 | 5.09E-05 | 0.014141  | 0.22047   |
| 9mo_SIGAF3_ | 0.00832724 | 0.04318199 | 3.56E-05 | 0.0072456 | 0.40559   |
| 9mo_SIGAF3_ | 0.08540397 | 0.5188225  | 4.76E-05 | 0.012059  | -0.14081  |
| 9mo_SIGAF3_ | 0.09450346 | 0.57497543 | 5.13E-05 | 0.0061762 | -0.82618  |
| 9mo_SIGAF3_ | 0.02411317 | 0.14059694 | 4.34E-05 | 0.0049916 | -0.091842 |
| 9mo_SIGAF3_ | 0.02068155 | 0.11942045 | 4.21E-05 | 0.0052798 | -0.037579 |
| 9mo_SIGAF3_ | 0.00792394 | 0.04069322 | 3.53E-05 | 0.0073641 | 0.43054   |

|             |            |            |          |           |           |
|-------------|------------|------------|----------|-----------|-----------|
| 9mo_SIGAF3_ | 0.0216886  | 0.12563495 | 4.26E-05 | 0.0051742 | -0.059109 |
| 9mo_SIGAF3_ | 0.03575366 | 0.21243043 | 4.77E-05 | 0.0045615 | -0.096915 |
| 9mo_SIGAF3_ | 0.0964765  | 0.5871511  | 5.28E-05 | 0.0052469 | -0.99133  |
| 9mo_SIGAF3_ | 0.07955539 | 0.48273095 | 4.93E-05 | 0.014315  | 0.15946   |
| 9mo_SIGAF3_ | 0.09686741 | 0.58956337 | 5.28E-05 | 0.0052469 | -1.03     |
| 9mo_SIGAF3_ | 0.07539856 | 0.4570791  | 5.23E-05 | 0.013721  | 0.23858   |
| 9mo_SIGAF3_ | 0.03684099 | 0.21914035 | 4.81E-05 | 0.0045652 | -0.088896 |
| 9mo_SIGAF3_ | 0.05503355 | 0.33140662 | 6.17E-05 | 0.0058704 | 0.034245  |
| 9mo_SIGAF3_ | 0.03301467 | 0.19552813 | 4.64E-05 | 0.0045915 | -0.11352  |
| 9mo_SIGAF3_ | 0.1000229  | 0.6090359  | 5.53E-05 | 0.004262  | -1.2296   |
| 9mo_SIGAF3_ | 0.01887339 | 0.10826229 | 4.11E-05 | 0.0055212 | 0.015459  |
| 9mo_SIGAF3_ | 0.09493852 | 0.5776602  | 5.16E-05 | 0.0059226 | -0.8688   |
| 9mo_SIGAF3_ | 0.08858065 | 0.53842574 | 4.82E-05 | 0.0098057 | -0.3844   |
| 9mo_SIGAF3_ | 0.0771035  | 0.46760035 | 5.09E-05 | 0.014141  | 0.22047   |
| 9mo_SIGAF3_ | 0.01040119 | 0.05598033 | 3.68E-05 | 0.0068    | 0.30902   |
| 9mo_SIGAF3_ | 0.10090797 | 0.6144977  | 5.62E-05 | 0.0040352 | -1.2563   |
| 9mo_SIGAF3_ | 0.02263946 | 0.13150272 | 4.28E-05 | 0.005125  | -0.068556 |
| 9mo_SIGAF3_ | 0.01890633 | 0.10846558 | 4.11E-05 | 0.0055212 | 0.0010121 |
| 9mo_SIGAF3_ | 0.02014179 | 0.11608957 | 4.19E-05 | 0.0053364 | -0.025531 |
| 9mo_SIGAF3_ | 0.09101006 | 0.5534177  | 4.91E-05 | 0.0083333 | -0.56091  |
| 9mo_SIGAF3_ | 0.02420767 | 0.1411801  | 4.34E-05 | 0.0049916 | -0.091842 |
| 9mo_SIGAF3_ | 0.01900851 | 0.10909611 | 4.14E-05 | 0.0054571 | 0.0010121 |
| 9mo_SIGAF3_ | 0.08851627 | 0.5380285  | 4.82E-05 | 0.0098057 | -0.3415   |
| 9mo_SIGAF3_ | 0.02824565 | 0.16609852 | 4.49E-05 | 0.0047302 | -0.12174  |
| 9mo_SIGAF3_ | 0.081512   | 0.4948052  | 4.83E-05 | 0.013957  | 0.10139   |
| 9mo_SIGAF3_ | 0.08623248 | 0.52393526 | 4.77E-05 | 0.01133   | -0.17867  |
| 9mo_SIGAF3_ | 0.02545286 | 0.1488642  | 4.40E-05 | 0.0048781 | -0.10813  |
| 9mo_SIGAF3_ | 0.02987988 | 0.17618334 | 4.55E-05 | 0.0046645 | -0.12301  |
| 9mo_SIGAF3_ | 0.08768914 | 0.5329243  | 4.79E-05 | 0.010571  | -0.29935  |
| 9mo_SIGAF3_ | 0.06976433 | 0.4223103  | 5.82E-05 | 0.011019  | 0.22487   |
| 9mo_SIGAF3_ | 0.07661106 | 0.46456146 | 5.13E-05 | 0.014025  | 0.22792   |
| 9mo_SIGAF3_ | 0.08695675 | 0.5284047  | 4.78E-05 | 0.010952  | -0.25808  |
| 9mo_SIGAF3_ | 0.02770325 | 0.16275136 | 4.48E-05 | 0.0047558 | -0.12024  |
| 9mo_SIGAF3_ | 0.01657229 | 0.09406219 | 4.00E-05 | 0.0058035 | 0.080526  |
| 9mo_SIGAF3_ | 0.03474782 | 0.2062234  | 4.72E-05 | 0.0045646 | -0.10426  |
| 9mo_SIGAF3_ | 0.01572094 | 0.08880853 | 3.98E-05 | 0.0058806 | 0.098494  |
| 9mo_SIGAF3_ | 0.01476402 | 0.08290336 | 3.92E-05 | 0.0060428 | 0.1363    |
| 9mo_SIGAF3_ | 0.01386523 | 0.07735693 | 3.86E-05 | 0.0062156 | 0.17645   |
| 9mo_SIGAF3_ | 0.02268404 | 0.13177782 | 4.28E-05 | 0.005125  | -0.077142 |
| 9mo_SIGAF3_ | 0.02039805 | 0.11767099 | 4.19E-05 | 0.0053364 | -0.025531 |
| 9mo_SIGAF3_ | 0.09407069 | 0.5723048  | 5.09E-05 | 0.0064439 | -0.82618  |
| 9mo_SIGAF3_ | 0.01358762 | 0.07564379 | 3.86E-05 | 0.0062156 | 0.17645   |
| 9mo_SIGAF3_ | 0.01052389 | 0.05673751 | 3.68E-05 | 0.0068    | 0.30902   |

|             |            |            |          |           |           |
|-------------|------------|------------|----------|-----------|-----------|
| 9mo_SIGAF3_ | 0.01029076 | 0.05529886 | 3.68E-05 | 0.0068    | 0.30902   |
| 9mo_SIGAF3_ | 0.01118111 | 0.06079323 | 3.71E-05 | 0.0066957 | 0.2858    |
| 9mo_SIGAF3_ | 0.08709171 | 0.52923757 | 4.78E-05 | 0.010952  | -0.25808  |
| 9mo_SIGAF3_ | 0.0259924  | 0.15219373 | 4.42E-05 | 0.0048445 | -0.11213  |
| 9mo_SIGAF3_ | 0.01644837 | 0.09329749 | 4.00E-05 | 0.0058035 | 0.080526  |
| 9mo_SIGAF3_ | 0.0194173  | 0.11161872 | 4.14E-05 | 0.0054571 | 0.0010121 |
| 9mo_SIGAF3_ | 0.0281712  | 0.16563907 | 4.49E-05 | 0.0047302 | -0.12174  |
| 9mo_SIGAF3_ | 0.01884391 | 0.10808034 | 4.11E-05 | 0.0055212 | 0.015459  |
| 9mo_SIGAF3_ | 0.02818982 | 0.16575399 | 4.49E-05 | 0.0047302 | -0.12174  |
| 9mo_SIGAF3_ | 0.03489209 | 0.20711371 | 4.72E-05 | 0.0045646 | -0.10426  |
| 9mo_SIGAF3_ | 0.0179562  | 0.10260232 | 4.09E-05 | 0.0055879 | 0.030658  |
| 9mo_SIGAF3_ | 0.01822404 | 0.10425513 | 4.09E-05 | 0.0055879 | 0.030658  |
| 9mo_SIGAF3_ | 0.07891628 | 0.478787   | 4.97E-05 | 0.014318  | 0.17506   |
| 9mo_SIGAF3_ | 0.01538779 | 0.08675262 | 3.95E-05 | 0.0059603 | 0.11709   |
| 9mo_SIGAF3_ | 0.06150907 | 0.37136707 | 6.37E-05 | 0.0074328 | 0.10072   |
| 9mo_SIGAF3_ | 0.02017726 | 0.11630848 | 4.19E-05 | 0.0053364 | -0.025531 |
| 9mo_SIGAF3_ | 0.06513356 | 0.39373383 | 6.20E-05 | 0.0089013 | 0.15715   |
| 9mo_SIGAF3_ | 0.02513874 | 0.14692579 | 4.38E-05 | 0.0049138 | -0.10343  |
| 9mo_SIGAF3_ | 0.02347094 | 0.13663375 | 4.32E-05 | 0.0050338 | -0.084895 |
| 9mo_SIGAF3_ | 0.015171   | 0.08541483 | 3.95E-05 | 0.0059603 | 0.11709   |
| 9mo_SIGAF3_ | 0.09435376 | 0.5740516  | 5.13E-05 | 0.0061762 | -0.82618  |
| 9mo_SIGAF3_ | 0.01437993 | 0.08053315 | 3.89E-05 | 0.0061278 | 0.1561    |
| 9mo_SIGAF3_ | 0.07444223 | 0.45117763 | 5.33E-05 | 0.013335  | 0.24406   |
| 9mo_SIGAF3_ | 0.0080233  | 0.04130637 | 3.53E-05 | 0.0073641 | 0.43054   |
| 9mo_SIGAF3_ | 0.03722644 | 0.22151893 | 4.81E-05 | 0.0045652 | -0.088896 |
| 9mo_SIGAF3_ | 0.0299222  | 0.17644447 | 4.55E-05 | 0.0046645 | -0.12301  |
| 9mo_SIGAF3_ | 0.0272191  | 0.15976365 | 4.46E-05 | 0.0047834 | -0.11816  |
| 9mo_SIGAF3_ | 0.07001506 | 0.42385754 | 5.76E-05 | 0.011297  | 0.22487   |
| 9mo_SIGAF3_ | 0.01313505 | 0.07285095 | 3.83E-05 | 0.0063061 | 0.19734   |
| 9mo_SIGAF3_ | 0.01835505 | 0.1050636  | 4.09E-05 | 0.0055879 | 0.015459  |
| 9mo_SIGAF3_ | 0.01324286 | 0.07351624 | 3.83E-05 | 0.0063061 | 0.19734   |
| 9mo_SIGAF3_ | 0.06571868 | 0.3973446  | 6.16E-05 | 0.0091463 | 0.16566   |
| 9mo_SIGAF3_ | 0.08974622 | 0.54561853 | 4.86E-05 | 0.0090548 | -0.47194  |
| 9mo_SIGAF3_ | 0.02488821 | 0.14537977 | 4.36E-05 | 0.0049516 | -0.10343  |
| 9mo_SIGAF3_ | 0.03228374 | 0.19101755 | 4.62E-05 | 0.0046026 | -0.11821  |
| 9mo_SIGAF3_ | 0.01838909 | 0.10527369 | 4.09E-05 | 0.0055879 | 0.015459  |
| 9mo_SIGAF3_ | 0.0171444  | 0.09759265 | 4.03E-05 | 0.005729  | 0.063215  |
| 9mo_SIGAF3_ | 0.06607202 | 0.39952508 | 6.16E-05 | 0.0091463 | 0.17407   |
| 9mo_SIGAF3_ | 0.01952434 | 0.11227928 | 4.16E-05 | 0.0053955 | -0.012659 |
| 9mo_SIGAF3_ | 0.01115444 | 0.06062863 | 3.71E-05 | 0.0066957 | 0.2858    |
| 9mo_SIGAF3_ | 0.03930858 | 0.23436786 | 4.92E-05 | 0.0045932 | -0.071721 |
| 9mo_SIGAF3_ | 0.03935942 | 0.23468156 | 4.92E-05 | 0.0045932 | -0.071721 |
| 9mo_SIGAF3_ | 0.00717044 | 0.03604338 | 3.50E-05 | 0.0074854 | 0.45576   |

|             |            |            |          |           |            |
|-------------|------------|------------|----------|-----------|------------|
| 9mo_SIGAF3_ | 0.08749127 | 0.5317032  | 4.79E-05 | 0.010571  | -0.29935   |
| 9mo_SIGAF3_ | 0.02657365 | 0.15578058 | 4.44E-05 | 0.004813  | -0.11546   |
| 9mo_SIGAF3_ | 0.02237091 | 0.12984549 | 4.28E-05 | 0.005125  | -0.068556  |
| 9mo_SIGAF3_ | 0.09028284 | 0.54893    | 4.88E-05 | 0.0086895 | -0.51631   |
| 9mo_SIGAF3_ | 0.03270334 | 0.1936069  | 4.64E-05 | 0.0045915 | -0.11603   |
| 9mo_SIGAF3_ | 0.00892935 | 0.04689758 | 3.59E-05 | 0.00713   | 0.38094    |
| 9mo_SIGAF3_ | 0.01552538 | 0.08760171 | 3.95E-05 | 0.0059603 | 0.11709    |
| 9mo_SIGAF3_ | 0.04246424 | 0.2538414  | 5.13E-05 | 0.0046879 | -0.04643   |
| 9mo_SIGAF3_ | 0.01222155 | 0.06721379 | 3.77E-05 | 0.0064954 | 0.24064    |
| 9mo_SIGAF3_ | 0.01636878 | 0.09280632 | 4.00E-05 | 0.0058035 | 0.080526   |
| 9mo_SIGAF3_ | 0.02218949 | 0.12872592 | 4.26E-05 | 0.0051742 | -0.068556  |
| 9mo_SIGAF3_ | 0.03523921 | 0.20925573 | 4.74E-05 | 0.0045622 | -0.10068   |
| 9mo_SIGAF3_ | 0.05090024 | 0.3059     | 5.83E-05 | 0.0052672 | 0.0077602  |
| 9mo_SIGAF3_ | 0.00897847 | 0.04720072 | 3.59E-05 | 0.00713   | 0.38094    |
| 9mo_SIGAF3_ | 0.02725442 | 0.15998162 | 4.46E-05 | 0.0047834 | -0.11816   |
| 9mo_SIGAF3_ | 0.02203915 | 0.1277982  | 4.26E-05 | 0.0051742 | -0.059109  |
| 9mo_SIGAF3_ | 0.02818845 | 0.16574556 | 4.49E-05 | 0.0047302 | -0.12174   |
| 9mo_SIGAF3_ | 0.02933725 | 0.17283478 | 4.53E-05 | 0.0046846 | -0.1231    |
| 9mo_SIGAF3_ | 0.09730928 | 0.59229016 | 5.32E-05 | 0.0050496 | -1.0673    |
| 9mo_SIGAF3_ | 0.01925883 | 0.11064085 | 4.14E-05 | 0.0054571 | 0.0010121  |
| 9mo_SIGAF3_ | 0.02931156 | 0.17267622 | 4.53E-05 | 0.0046846 | -0.1231    |
| 9mo_SIGAF3_ | 0.08352544 | 0.5072301  | 4.77E-05 | 0.013036  | -0.0045591 |
| 9mo_SIGAF3_ | 0.0234147  | 0.13628672 | 4.32E-05 | 0.0050338 | -0.084895  |
| 9mo_SIGAF3_ | 0.06021575 | 0.363386   | 6.38E-05 | 0.0070986 | 0.087064   |
| 9mo_SIGAF3_ | 0.08601143 | 0.52257115 | 4.76E-05 | 0.0117    | -0.17867   |
| 9mo_SIGAF3_ | 0.01608543 | 0.09105779 | 3.98E-05 | 0.0058806 | 0.098494   |
| 9mo_SIGAF3_ | 0.01334431 | 0.07414234 | 3.83E-05 | 0.0063061 | 0.19734    |
| 9mo_SIGAF3_ | 0.02908767 | 0.17129461 | 4.51E-05 | 0.0047064 | -0.12268   |
| 9mo_SIGAF3_ | 0.02781964 | 0.16346963 | 4.48E-05 | 0.0047558 | -0.12024   |
| 9mo_SIGAF3_ | 0.08046497 | 0.48834398 | 4.87E-05 | 0.014207  | 0.12269    |
| 9mo_SIGAF3_ | 0.02282803 | 0.13266638 | 4.30E-05 | 0.0050782 | -0.077142  |
| 9mo_SIGAF3_ | 0.07950277 | 0.4824062  | 4.93E-05 | 0.014315  | 0.15946    |
| 9mo_SIGAF3_ | 0.02691491 | 0.15788653 | 4.44E-05 | 0.004813  | -0.11546   |
| 9mo_SIGAF3_ | 0.05871668 | 0.35413525 | 6.35E-05 | 0.0066597 | 0.068735   |
| 9mo_SIGAF3_ | 0.02614823 | 0.15315531 | 4.42E-05 | 0.0048445 | -0.11213   |
| 9mo_SIGAF3_ | 0.08988515 | 0.5464759  | 4.86E-05 | 0.0090548 | -0.47194   |
| 9mo_SIGAF3_ | 0.02198955 | 0.12749214 | 4.26E-05 | 0.0051742 | -0.059109  |
| 9mo_SIGAF3_ | 0.0217857  | 0.12623413 | 4.26E-05 | 0.0051742 | -0.059109  |
| 9mo_SIGAF3_ | 0.02401229 | 0.13997442 | 4.34E-05 | 0.0049916 | -0.091842  |
| 9mo_SIGAF3_ | 0.03432595 | 0.20362002 | 4.70E-05 | 0.0045688 | -0.10761   |
| 9mo_SIGAF3_ | 0.01095372 | 0.05939001 | 3.71E-05 | 0.0066957 | 0.2858     |
| 9mo_SIGAF3_ | 0.08502857 | 0.5165059  | 4.76E-05 | 0.012404  | -0.10433   |
| 9mo_SIGAF3_ | 0.01619451 | 0.09173091 | 3.98E-05 | 0.0058806 | 0.080526   |



|             |            |            |          |           |            |
|-------------|------------|------------|----------|-----------|------------|
| 9mo_SIGAF3_ | 0.10895187 | 0.6641366  | 6.18E-05 | 0.0036276 | -1.3789    |
| 9mo_SIGAF3_ | 0.00778986 | 0.03986579 | 3.53E-05 | 0.0073641 | 0.43054    |
| 9mo_SIGAF3_ | 0.00454272 | 0.01982774 | 3.35E-05 | 0.0081345 | 0.58516    |
| 9mo_SIGAF3_ | 0.01871436 | 0.1072809  | 4.11E-05 | 0.0055212 | 0.015459   |
| 9mo_SIGAF3_ | 0.07966919 | 0.48343316 | 4.90E-05 | 0.014278  | 0.15946    |
| 9mo_SIGAF3_ | 0.01999287 | 0.11517057 | 4.16E-05 | 0.0053955 | -0.025531  |
| 9mo_SIGAF3_ | 0.08075004 | 0.49010313 | 4.85E-05 | 0.0141    | 0.12269    |
| 9mo_SIGAF3_ | 0.08970181 | 0.5453445  | 4.86E-05 | 0.0090548 | -0.47194   |
| 9mo_SIGAF3_ | 0.02378782 | 0.13858923 | 4.32E-05 | 0.0050338 | -0.091842  |
| 9mo_SIGAF3_ | 0.04060439 | 0.24236427 | 4.99E-05 | 0.0046177 | -0.058715  |
| 9mo_SIGAF3_ | 0.00969471 | 0.05162065 | 3.62E-05 | 0.0070172 | 0.35661    |
| 9mo_SIGAF3_ | 0.08677546 | 0.52728593 | 4.78E-05 | 0.010952  | -0.21781   |
| 9mo_SIGAF3_ | 0.0849994  | 0.5163259  | 4.76E-05 | 0.012404  | -0.10433   |
| 9mo_SIGAF3_ | 0.03717722 | 0.22121522 | 4.81E-05 | 0.0045652 | -0.088896  |
| 9mo_SIGAF3_ | 0.02803814 | 0.16481793 | 4.48E-05 | 0.0047558 | -0.12024   |
| 9mo_SIGAF3_ | 0.03515671 | 0.20874667 | 4.72E-05 | 0.0045646 | -0.10068   |
| 9mo_SIGAF3_ | 0.08756602 | 0.5321645  | 4.79E-05 | 0.010571  | -0.29935   |
| 9mo_SIGAF3_ | 0.02505152 | 0.14638755 | 4.38E-05 | 0.0049138 | -0.10343   |
| 9mo_SIGAF3_ | 0.08315219 | 0.50492674 | 4.78E-05 | 0.013315  | 0.02505    |
| 9mo_SIGAF3_ | 0.01914792 | 0.10995638 | 4.14E-05 | 0.0054571 | 0.0010121  |
| 9mo_SIGAF3_ | 0.050071   | 0.30078274 | 5.78E-05 | 0.0052091 | 0.0010449  |
| 9mo_SIGAF3_ | 0.01593228 | 0.09011266 | 3.98E-05 | 0.0058806 | 0.098494   |
| 9mo_SIGAF3_ | 0.08345957 | 0.5068236  | 4.77E-05 | 0.013036  | -0.0045591 |
| 9mo_SIGAF3_ | 0.05639198 | 0.33978954 | 6.27E-05 | 0.0061731 | 0.047788   |
| 9mo_SIGAF3_ | 0.08360457 | 0.50771844 | 4.77E-05 | 0.013036  | -0.0045591 |
| 9mo_SIGAF3_ | 0.03251846 | 0.19246604 | 4.64E-05 | 0.0045915 | -0.11603   |
| 9mo_SIGAF3_ | 0.03488321 | 0.2070589  | 4.72E-05 | 0.0045646 | -0.10426   |
| 9mo_SIGAF3_ | 0.03078873 | 0.18179184 | 4.57E-05 | 0.0046464 | -0.12145   |
| 9mo_SIGAF3_ | 0.02252003 | 0.13076574 | 4.28E-05 | 0.005125  | -0.068556  |
| 9mo_SIGAF3_ | 0.03197251 | 0.18909696 | 4.62E-05 | 0.0046026 | -0.11821   |
| 9mo_SIGAF3_ | 0.0890601  | 0.54138446 | 4.84E-05 | 0.0094274 | -0.3844    |
| 9mo_SIGAF3_ | 0.09243374 | 0.5622032  | 4.99E-05 | 0.0073308 | -0.69483   |
| 9mo_SIGAF3_ | 0.05731738 | 0.34550014 | 6.30E-05 | 0.0062853 | 0.057806   |
| 9mo_SIGAF3_ | 0.03104297 | 0.18336074 | 4.58E-05 | 0.00463   | -0.12145   |
| 9mo_SIGAF3_ | 0.06206718 | 0.37481117 | 6.36E-05 | 0.0076138 | 0.10802    |
| 9mo_SIGAF3_ | 0.01840216 | 0.10535434 | 4.11E-05 | 0.0055212 | 0.015459   |
| 9mo_SIGAF3_ | 0.02891346 | 0.17021956 | 4.51E-05 | 0.0047064 | -0.12268   |
| 9mo_SIGAF3_ | 0.09436002 | 0.5740903  | 5.13E-05 | 0.0061762 | -0.82618   |
| 9mo_SIGAF3_ | 0.0121176  | 0.06657229 | 3.77E-05 | 0.0064954 | 0.24064    |
| 9mo_SIGAF3_ | 0.03701756 | 0.22022995 | 4.81E-05 | 0.0045652 | -0.088896  |
| 9mo_SIGAF3_ | 0.05574964 | 0.33582562 | 6.21E-05 | 0.005966  | 0.043089   |
| 9mo_SIGAF3_ | 0.07158306 | 0.43353364 | 5.60E-05 | 0.012118  | 0.2386     |
| 9mo_SIGAF3_ | 0.01975793 | 0.11372077 | 4.16E-05 | 0.0053955 | -0.012659  |

|             |            |            |          |           |            |
|-------------|------------|------------|----------|-----------|------------|
| 9mo_SIGAF3_ | 0.00841721 | 0.04373721 | 3.56E-05 | 0.0072456 | 0.40559    |
| 9mo_SIGAF3_ | 0.09173472 | 0.5578895  | 4.96E-05 | 0.0076529 | -0.60562   |
| 9mo_SIGAF3_ | 0.01407661 | 0.07866135 | 3.89E-05 | 0.0061278 | 0.1561     |
| 9mo_SIGAF3_ | 0.02394841 | 0.13958025 | 4.34E-05 | 0.0049916 | -0.091842  |
| 9mo_SIGAF3_ | 0.02593537 | 0.15184176 | 4.40E-05 | 0.0048781 | -0.11213   |
| 9mo_SIGAF3_ | 0.01033848 | 0.05559337 | 3.68E-05 | 0.0068    | 0.30902    |
| 9mo_SIGAF3_ | 0.02194831 | 0.12723765 | 4.26E-05 | 0.0051742 | -0.059109  |
| 9mo_SIGAF3_ | 0.0196529  | 0.11307265 | 4.16E-05 | 0.0053955 | -0.012659  |
| 9mo_SIGAF3_ | 0.03902699 | 0.23263018 | 4.92E-05 | 0.0045932 | -0.071721  |
| 9mo_SIGAF3_ | 0.02199077 | 0.12749964 | 4.26E-05 | 0.0051742 | -0.059109  |
| 9mo_SIGAF3_ | 0.01331754 | 0.0739771  | 3.83E-05 | 0.0063061 | 0.19734    |
| 9mo_SIGAF3_ | 0.00621624 | 0.03015499 | 3.44E-05 | 0.0077366 | 0.50694    |
| 9mo_SIGAF3_ | 0.03059333 | 0.18058605 | 4.57E-05 | 0.0046464 | -0.12245   |
| 9mo_SIGAF3_ | 0.07149077 | 0.43296418 | 5.65E-05 | 0.011849  | 0.2386     |
| 9mo_SIGAF3_ | 0.02433072 | 0.14193949 | 4.34E-05 | 0.0049916 | -0.098011  |
| 9mo_SIGAF3_ | 0.02339065 | 0.13613829 | 4.32E-05 | 0.0050338 | -0.084895  |
| 9mo_SIGAF3_ | 0.03126652 | 0.18474032 | 4.58E-05 | 0.00463   | -0.12145   |
| 9mo_SIGAF3_ | 0.02126591 | 0.12302654 | 4.24E-05 | 0.0052258 | -0.04878   |
| 9mo_SIGAF3_ | 0.08549783 | 0.5194017  | 4.76E-05 | 0.012059  | -0.14081   |
| 9mo_SIGAF3_ | 0.09127693 | 0.5550645  | 4.93E-05 | 0.0079874 | -0.60562   |
| 9mo_SIGAF3_ | 0.01723337 | 0.0981417  | 4.03E-05 | 0.005729  | 0.063215   |
| 9mo_SIGAF3_ | 0.03250202 | 0.19236456 | 4.64E-05 | 0.0045915 | -0.11603   |
| 9mo_SIGAF3_ | 0.01601397 | 0.09061678 | 3.98E-05 | 0.0058806 | 0.098494   |
| 9mo_SIGAF3_ | 0.04840096 | 0.29047692 | 5.63E-05 | 0.005054  | -0.0087048 |
| 9mo_SIGAF3_ | 0.0132592  | 0.07361713 | 3.83E-05 | 0.0063061 | 0.19734    |
| 9mo_SIGAF3_ | 0.05014777 | 0.30125648 | 5.78E-05 | 0.0052091 | 0.0010449  |
| 9mo_SIGAF3_ | 0.01931913 | 0.11101291 | 4.14E-05 | 0.0054571 | 0.0010121  |
| 9mo_SIGAF3_ | 0.05455014 | 0.32842353 | 6.14E-05 | 0.0057798 | 0.034245   |
| 9mo_SIGAF3_ | 0.01233044 | 0.06788572 | 3.77E-05 | 0.0064954 | 0.24064    |
| 9mo_SIGAF3_ | 0.04017191 | 0.23969546 | 4.99E-05 | 0.0046177 | -0.063007  |
| 9mo_SIGAF3_ | 0.01042034 | 0.05609851 | 3.68E-05 | 0.0068    | 0.30902    |
| 9mo_SIGAF3_ | 0.03484351 | 0.20681392 | 4.72E-05 | 0.0045646 | -0.10426   |
| 9mo_SIGAF3_ | 0.07792848 | 0.4726913  | 5.05E-05 | 0.014229  | 0.20103    |
| 9mo_SIGAF3_ | 0.02905876 | 0.17111619 | 4.51E-05 | 0.0047064 | -0.12268   |
| 9mo_SIGAF3_ | 0.08043135 | 0.48813647 | 4.87E-05 | 0.014207  | 0.14202    |
| 9mo_SIGAF3_ | 0.02427119 | 0.1415721  | 4.34E-05 | 0.0049916 | -0.091842  |
| 9mo_SIGAF3_ | 0.06290638 | 0.37998986 | 6.33E-05 | 0.0080056 | 0.12359    |
| 9mo_SIGAF3_ | 0.02683312 | 0.15738179 | 4.44E-05 | 0.004813  | -0.11546   |
| 9mo_SIGAF3_ | 0.08233883 | 0.49990752 | 4.81E-05 | 0.013778  | 0.05262    |
| 9mo_SIGAF3_ | 0.04490631 | 0.26891145 | 5.30E-05 | 0.0047888 | -0.028317  |
| 9mo_SIGAF3_ | 0.08386744 | 0.5093405  | 4.77E-05 | 0.013036  | -0.036078  |
| 9mo_SIGAF3_ | 0.02433215 | 0.14194828 | 4.34E-05 | 0.0049916 | -0.098011  |
| 9mo_SIGAF3_ | 0.09434472 | 0.5739959  | 5.13E-05 | 0.0061762 | -0.82618   |

|             |            |            |          |           |           |
|-------------|------------|------------|----------|-----------|-----------|
| 9mo_SIGAF3_ | 0.058583   | 0.35331026 | 6.35E-05 | 0.0066597 | 0.068735  |
| 9mo_SIGAF3_ | 0.020069   | 0.11564039 | 4.19E-05 | 0.0053364 | -0.025531 |
| 9mo_SIGAF3_ | 0.0099799  | 0.05338054 | 3.65E-05 | 0.0069072 | 0.33263   |
| 9mo_SIGAF3_ | 0.06419695 | 0.387954   | 6.27E-05 | 0.0084357 | 0.14015   |
| 9mo_SIGAF3_ | 0.01618132 | 0.09164953 | 3.98E-05 | 0.0058806 | 0.098494  |
| 9mo_SIGAF3_ | 0.08848266 | 0.5378211  | 4.82E-05 | 0.0098057 | -0.3415   |
| 9mo_SIGAF3_ | 0.02529274 | 0.14787607 | 4.38E-05 | 0.0049138 | -0.10343  |
| 9mo_SIGAF3_ | 0.09003607 | 0.5474072  | 4.88E-05 | 0.0086895 | -0.47194  |
| 9mo_SIGAF3_ | 0.02213397 | 0.12838335 | 4.26E-05 | 0.0051742 | -0.068556 |
| 9mo_SIGAF3_ | 0.02005792 | 0.11557201 | 4.19E-05 | 0.0053364 | -0.025531 |
| 9mo_SIGAF3_ | 0.09364779 | 0.56969506 | 5.06E-05 | 0.0067258 | -0.7829   |
| 9mo_SIGAF3_ | 0.04420439 | 0.2645799  | 5.25E-05 | 0.0047605 | -0.035266 |
| 9mo_SIGAF3_ | 0.10065793 | 0.6129547  | 5.58E-05 | 0.0041426 | -1.2563   |
| 9mo_SIGAF3_ | 0.01615446 | 0.09148373 | 3.98E-05 | 0.0058806 | 0.098494  |
| 9mo_SIGAF3_ | 0.02665412 | 0.15627715 | 4.44E-05 | 0.004813  | -0.11546  |
| 9mo_SIGAF3_ | 0.02098485 | 0.12129211 | 4.21E-05 | 0.0052798 | -0.037579 |
| 9mo_SIGAF3_ | 0.07506958 | 0.455049   | 5.28E-05 | 0.013537  | 0.23858   |
| 9mo_SIGAF3_ | 0.02277051 | 0.13231142 | 4.30E-05 | 0.0050782 | -0.077142 |
| 9mo_SIGAF3_ | 0.02358752 | 0.13735321 | 4.32E-05 | 0.0050338 | -0.084895 |
| 9mo_SIGAF3_ | 0.05242912 | 0.3153347  | 5.97E-05 | 0.0054628 | 0.018414  |
| 9mo_SIGAF3_ | 0.03105839 | 0.18345594 | 4.58E-05 | 0.00463   | -0.12145  |
| 9mo_SIGAF3_ | 0.08691289 | 0.528134   | 4.78E-05 | 0.010952  | -0.21781  |
| 9mo_SIGAF3_ | 0.06040255 | 0.36453876 | 6.38E-05 | 0.0070986 | 0.087064  |
| 9mo_SIGAF3_ | 0.08397832 | 0.5100248  | 4.77E-05 | 0.013036  | -0.036078 |
| 9mo_SIGAF3_ | 0.02368321 | 0.13794367 | 4.32E-05 | 0.0050338 | -0.084895 |
| 9mo_SIGAF3_ | 0.00596677 | 0.02861553 | 3.44E-05 | 0.0077366 | 0.50694   |
| 9mo_SIGAF3_ | 0.01740358 | 0.09919209 | 4.06E-05 | 0.0056572 | 0.046584  |
| 9mo_SIGAF3_ | 0.01358421 | 0.07562275 | 3.86E-05 | 0.0062156 | 0.17645   |
| 9mo_SIGAF3_ | 0.01355613 | 0.07544944 | 3.86E-05 | 0.0062156 | 0.17645   |
| 9mo_SIGAF3_ | 0.08421331 | 0.5114749  | 4.76E-05 | 0.012731  | -0.036078 |
| 9mo_SIGAF3_ | 0.02878242 | 0.16941094 | 4.51E-05 | 0.0047064 | -0.12268  |
| 9mo_SIGAF3_ | 0.06340298 | 0.3830544  | 6.30E-05 | 0.008216  | 0.13178   |
| 9mo_SIGAF3_ | 0.08490703 | 0.51575583 | 4.76E-05 | 0.012404  | -0.10433  |
| 9mo_SIGAF3_ | 0.02023523 | 0.11666618 | 4.19E-05 | 0.0053364 | -0.025531 |
| 9mo_SIGAF3_ | 0.01665578 | 0.09457739 | 4.00E-05 | 0.0058035 | 0.080526  |
| 9mo_SIGAF3_ | 0.01365635 | 0.07606795 | 3.86E-05 | 0.0062156 | 0.17645   |
| 9mo_SIGAF3_ | 0.01414183 | 0.07906382 | 3.89E-05 | 0.0061278 | 0.1561    |
| 9mo_SIGAF3_ | 0.02271491 | 0.13196829 | 4.28E-05 | 0.005125  | -0.077142 |
| 9mo_SIGAF3_ | 0.0246503  | 0.1439116  | 4.36E-05 | 0.0049516 | -0.098011 |
| 9mo_SIGAF3_ | 0.01448387 | 0.08117455 | 3.89E-05 | 0.0061278 | 0.1561    |
| 9mo_SIGAF3_ | 0.03360781 | 0.1991884  | 4.68E-05 | 0.0045746 | -0.11071  |
| 9mo_SIGAF3_ | 0.02185416 | 0.12665659 | 4.26E-05 | 0.0051742 | -0.059109 |
| 9mo_SIGAF3_ | 0.0253402  | 0.14816898 | 4.38E-05 | 0.0049138 | -0.10343  |

|             |            |            |          |           |           |
|-------------|------------|------------|----------|-----------|-----------|
| 9mo_SIGAF3_ | 0.01374512 | 0.07661573 | 3.86E-05 | 0.0062156 | 0.17645   |
| 9mo_SIGAF3_ | 0.00688509 | 0.03428248 | 3.47E-05 | 0.0076096 | 0.48124   |
| 9mo_SIGAF3_ | 0.02612466 | 0.15300988 | 4.42E-05 | 0.0048445 | -0.11213  |
| 9mo_SIGAF3_ | 0.03195741 | 0.18900378 | 4.62E-05 | 0.0046026 | -0.11821  |
| 9mo_SIGAF3_ | 0.0260588  | 0.15260343 | 4.42E-05 | 0.0048445 | -0.11213  |
| 9mo_SIGAF3_ | 0.01192213 | 0.06536606 | 3.77E-05 | 0.0064954 | 0.24064   |
| 9mo_SIGAF3_ | 0.01398645 | 0.07810495 | 3.86E-05 | 0.0062156 | 0.17645   |
| 9mo_SIGAF3_ | 0.02414695 | 0.14080545 | 4.34E-05 | 0.0049916 | -0.091842 |
| 9mo_SIGAF3_ | 0.01748684 | 0.09970589 | 4.06E-05 | 0.0056572 | 0.046584  |
| 9mo_SIGAF3_ | 0.02281944 | 0.13261339 | 4.30E-05 | 0.0050782 | -0.077142 |
| 9mo_SIGAF3_ | 0.04058865 | 0.24226715 | 4.99E-05 | 0.0046177 | -0.058715 |
| 9mo_SIGAF3_ | 0.01886754 | 0.10822618 | 4.11E-05 | 0.0055212 | 0.015459  |
| 9mo_SIGAF3_ | 0.00931043 | 0.04924922 | 3.62E-05 | 0.0070172 | 0.35661   |
| 9mo_SIGAF3_ | 0.00820418 | 0.04242256 | 3.56E-05 | 0.0072456 | 0.40559   |
| 9mo_SIGAF3_ | 0.0129761  | 0.07187007 | 3.80E-05 | 0.0063994 | 0.19734   |
| 9mo_SIGAF3_ | 0.02915558 | 0.1717137  | 4.51E-05 | 0.0047064 | -0.1231   |
| 9mo_SIGAF3_ | 0.07596127 | 0.46055162 | 5.18E-05 | 0.013885  | 0.23393   |
| 9mo_SIGAF3_ | 0.0366733  | 0.21810555 | 4.79E-05 | 0.0045625 | -0.092976 |
| 9mo_SIGAF3_ | 0.0203213  | 0.11719731 | 4.19E-05 | 0.0053364 | -0.025531 |
| 9mo_SIGAF3_ | 0.04244753 | 0.25373834 | 5.13E-05 | 0.0046879 | -0.04643  |
| 9mo_SIGAF3_ | 0.08311923 | 0.50472337 | 4.78E-05 | 0.013315  | 0.02505   |
| 9mo_SIGAF3_ | 0.08784875 | 0.5339092  | 4.80E-05 | 0.010188  | -0.29935  |
| 9mo_SIGAF3_ | 0.09445155 | 0.5746551  | 5.13E-05 | 0.0061762 | -0.82618  |
| 9mo_SIGAF3_ | 0.02321379 | 0.13504691 | 4.30E-05 | 0.0050782 | -0.084895 |
| 9mo_SIGAF3_ | 0.01068302 | 0.05771949 | 3.68E-05 | 0.0068    | 0.30902   |
| 9mo_SIGAF3_ | 0.01266247 | 0.0699347  | 3.80E-05 | 0.0063994 | 0.21875   |
| 9mo_SIGAF3_ | 0.0260569  | 0.15259174 | 4.42E-05 | 0.0048445 | -0.11213  |
| 9mo_SIGAF3_ | 0.03059835 | 0.18061702 | 4.57E-05 | 0.0046464 | -0.12245  |
| 9mo_SIGAF3_ | 0.01891958 | 0.10854735 | 4.11E-05 | 0.0055212 | 0.0010121 |
| 9mo_SIGAF3_ | 0.0116796  | 0.0638694  | 3.74E-05 | 0.0065941 | 0.263     |
| 9mo_SIGAF3_ | 0.01606874 | 0.0909548  | 3.98E-05 | 0.0058806 | 0.098494  |
| 9mo_SIGAF3_ | 0.02263522 | 0.13147655 | 4.28E-05 | 0.005125  | -0.068556 |
| 9mo_SIGAF3_ | 0.03241062 | 0.19180053 | 4.62E-05 | 0.0046026 | -0.11603  |
| 9mo_SIGAF3_ | 0.03012501 | 0.17769603 | 4.55E-05 | 0.0046645 | -0.12301  |
| 9mo_SIGAF3_ | 0.02145363 | 0.12418494 | 4.24E-05 | 0.0052258 | -0.04878  |
| 9mo_SIGAF3_ | 0.02397766 | 0.13976073 | 4.34E-05 | 0.0049916 | -0.091842 |
| 9mo_SIGAF3_ | 0.04697719 | 0.2816908  | 5.49E-05 | 0.0049251 | -0.01514  |
| 9mo_SIGAF3_ | 0.09894262 | 0.60236955 | 5.45E-05 | 0.0045382 | -1.1701   |
| 9mo_SIGAF3_ | 0.01832604 | 0.10488461 | 4.09E-05 | 0.0055879 | 0.030658  |
| 9mo_SIGAF3_ | 0.01638792 | 0.09292441 | 4.00E-05 | 0.0058035 | 0.080526  |
| 9mo_SIGAF3_ | 0.08674908 | 0.5271232  | 4.78E-05 | 0.010952  | -0.21781  |
| 9mo_SIGAF3_ | 0.02373488 | 0.13826257 | 4.32E-05 | 0.0050338 | -0.084895 |
| 9mo_SIGAF3_ | 0.02519251 | 0.14725758 | 4.38E-05 | 0.0049138 | -0.10343  |

|             |            |            |          |           |            |
|-------------|------------|------------|----------|-----------|------------|
| 9mo_SIGAF3_ | 0.0836796  | 0.5081814  | 4.77E-05 | 0.013036  | -0.0045591 |
| 9mo_SIGAF3_ | 0.02557487 | 0.14961712 | 4.40E-05 | 0.0048781 | -0.10813   |
| 9mo_SIGAF3_ | 0.01559866 | 0.08805388 | 3.95E-05 | 0.0059603 | 0.11709    |
| 9mo_SIGAF3_ | 0.04727408 | 0.28352293 | 5.53E-05 | 0.0049654 | -0.01514   |
| 9mo_SIGAF3_ | 0.02195449 | 0.12727575 | 4.26E-05 | 0.0051742 | -0.059109  |
| 9mo_SIGAF3_ | 0.01073595 | 0.05804616 | 3.68E-05 | 0.0068    | 0.30902    |
| 9mo_SIGAF3_ | 0.08436354 | 0.512402   | 4.76E-05 | 0.012731  | -0.069378  |
| 9mo_SIGAF3_ | 0.03889458 | 0.23181307 | 4.89E-05 | 0.0045836 | -0.071721  |
| 9mo_SIGAF3_ | 0.02171121 | 0.12577446 | 4.26E-05 | 0.0051742 | -0.059109  |
| 9mo_SIGAF3_ | 0.09634098 | 0.58631474 | 5.24E-05 | 0.0054581 | -0.99133   |
| 9mo_SIGAF3_ | 0.08261848 | 0.5016333  | 4.79E-05 | 0.013563  | 0.05262    |
| 9mo_SIGAF3_ | 0.03377249 | 0.20020464 | 4.68E-05 | 0.0045746 | -0.11071   |
| 9mo_SIGAF3_ | 0.08691326 | 0.5281363  | 4.78E-05 | 0.010952  | -0.21781   |
| 9mo_SIGAF3_ | 0.03448959 | 0.20462984 | 4.70E-05 | 0.0045688 | -0.10761   |
| 9mo_SIGAF3_ | 0.01828307 | 0.10461939 | 4.09E-05 | 0.0055879 | 0.030658   |
| 9mo_SIGAF3_ | 0.02398788 | 0.1398238  | 4.34E-05 | 0.0049916 | -0.091842  |
| 9mo_SIGAF3_ | 0.02921671 | 0.17209093 | 4.51E-05 | 0.0047064 | -0.1231    |
| 9mo_SIGAF3_ | 0.02555024 | 0.14946516 | 4.40E-05 | 0.0048781 | -0.10813   |
| 9mo_SIGAF3_ | 0.00778945 | 0.03986326 | 3.53E-05 | 0.0073641 | 0.43054    |
| 9mo_SIGAF3_ | 0.03363561 | 0.19935994 | 4.68E-05 | 0.0045746 | -0.11071   |
| 9mo_SIGAF3_ | 0.03265515 | 0.19330956 | 4.64E-05 | 0.0045915 | -0.11603   |
| 9mo_SIGAF3_ | 0.08264227 | 0.50178003 | 4.79E-05 | 0.013563  | 0.02505    |
| 9mo_SIGAF3_ | 0.02373035 | 0.13823459 | 4.32E-05 | 0.0050338 | -0.084895  |
| 9mo_SIGAF3_ | 0.01881022 | 0.10787247 | 4.11E-05 | 0.0055212 | 0.015459   |
| 9mo_SIGAF3_ | 0.01320461 | 0.07328022 | 3.83E-05 | 0.0063061 | 0.19734    |
| 9mo_SIGAF3_ | 0.01285456 | 0.0711201  | 3.80E-05 | 0.0063994 | 0.21875    |
| 9mo_SIGAF3_ | 0.03151545 | 0.18627642 | 4.60E-05 | 0.0046154 | -0.12002   |
| 9mo_SIGAF3_ | 0.02345066 | 0.1365086  | 4.32E-05 | 0.0050338 | -0.084895  |
| 9mo_SIGAF3_ | 0.07029774 | 0.42560196 | 5.76E-05 | 0.011297  | 0.23016    |
| 9mo_SIGAF3_ | 0.02951618 | 0.17393896 | 4.53E-05 | 0.0046846 | -0.1231    |
| 9mo_SIGAF3_ | 0.01318093 | 0.07313409 | 3.83E-05 | 0.0063061 | 0.19734    |
| 9mo_SIGAF3_ | 0.06640154 | 0.40155852 | 6.12E-05 | 0.0093985 | 0.17407    |
| 9mo_SIGAF3_ | 0.0322771  | 0.19097659 | 4.62E-05 | 0.0046026 | -0.11821   |
| 9mo_SIGAF3_ | 0.0119721  | 0.06567441 | 3.77E-05 | 0.0064954 | 0.24064    |
| 9mo_SIGAF3_ | 0.01392608 | 0.07773241 | 3.86E-05 | 0.0062156 | 0.17645    |
| 9mo_SIGAF3_ | 0.02110199 | 0.12201498 | 4.21E-05 | 0.0052798 | -0.04878   |
| 9mo_SIGAF3_ | 0.02085386 | 0.12048376 | 4.21E-05 | 0.0052798 | -0.037579  |
| 9mo_SIGAF3_ | 0.01785172 | 0.10195755 | 4.06E-05 | 0.0056572 | 0.030658   |
| 9mo_SIGAF3_ | 0.03920216 | 0.23371114 | 4.92E-05 | 0.0045932 | -0.071721  |
| 9mo_SIGAF3_ | 0.0857474  | 0.5209418  | 4.76E-05 | 0.0117    | -0.14081   |
| 9mo_SIGAF3_ | 0.01744976 | 0.09947704 | 4.06E-05 | 0.0056572 | 0.046584   |
| 9mo_SIGAF3_ | 0.00815055 | 0.04209165 | 3.56E-05 | 0.0072456 | 0.40559    |
| 9mo_SIGAF3_ | 0.0227774  | 0.13235395 | 4.30E-05 | 0.0050782 | -0.077142  |

|             |            |            |          |           |           |
|-------------|------------|------------|----------|-----------|-----------|
| 9mo_SIGAF3_ | 0.03362825 | 0.19931452 | 4.68E-05 | 0.0045746 | -0.11071  |
| 9mo_SIGAF3_ | 0.02924028 | 0.17223635 | 4.51E-05 | 0.0047064 | -0.1231   |
| 9mo_SIGAF3_ | 0.01645776 | 0.09335546 | 4.00E-05 | 0.0058035 | 0.080526  |
| 9mo_SIGAF3_ | 0.09130978 | 0.5552672  | 4.93E-05 | 0.0079874 | -0.60562  |
| 9mo_SIGAF3_ | 0.01513971 | 0.08522172 | 3.92E-05 | 0.0060428 | 0.11709   |
| 9mo_SIGAF3_ | 0.07504675 | 0.4549081  | 5.28E-05 | 0.013537  | 0.24193   |
| 9mo_SIGAF3_ | 0.03648499 | 0.21694346 | 4.79E-05 | 0.0045625 | -0.092976 |
| 9mo_SIGAF3_ | 0.07274051 | 0.4406763  | 5.49E-05 | 0.012637  | 0.24373   |
| 9mo_SIGAF3_ | 0.01310973 | 0.07269474 | 3.83E-05 | 0.0063061 | 0.19734   |
| 9mo_SIGAF3_ | 0.03345936 | 0.19827232 | 4.66E-05 | 0.0045822 | -0.11352  |
| 9mo_SIGAF3_ | 0.01371372 | 0.07642194 | 3.86E-05 | 0.0062156 | 0.17645   |
| 9mo_SIGAF3_ | 0.08685684 | 0.5277881  | 4.78E-05 | 0.010952  | -0.21781  |
| 9mo_SIGAF3_ | 0.06351046 | 0.38371763 | 6.30E-05 | 0.008216  | 0.13178   |
| 9mo_SIGAF3_ | 0.07939349 | 0.48173186 | 4.93E-05 | 0.014315  | 0.15946   |
| 9mo_SIGAF3_ | 0.0241876  | 0.14105631 | 4.34E-05 | 0.0049916 | -0.091842 |
| 9mo_SIGAF3_ | 0.03858195 | 0.22988378 | 4.89E-05 | 0.0045836 | -0.076088 |
| 9mo_SIGAF3_ | 0.0381073  | 0.22695476 | 4.87E-05 | 0.0045758 | -0.080425 |
| 9mo_SIGAF3_ | 0.04285378 | 0.25624532 | 5.17E-05 | 0.0047101 | -0.042593 |
| 9mo_SIGAF3_ | 0.02780838 | 0.16340014 | 4.48E-05 | 0.0047558 | -0.12024  |
| 9mo_SIGAF3_ | 0.0189832  | 0.1089399  | 4.14E-05 | 0.0054571 | 0.0010121 |
| 9mo_SIGAF3_ | 0.00469475 | 0.0207659  | 3.35E-05 | 0.0081345 | 0.58516   |
| 9mo_SIGAF3_ | 0.0502827  | 0.30208915 | 5.78E-05 | 0.0052091 | 0.0043724 |
| 9mo_SIGAF3_ | 0.02197297 | 0.12738982 | 4.26E-05 | 0.0051742 | -0.059109 |
| 9mo_SIGAF3_ | 0.02026111 | 0.11682589 | 4.19E-05 | 0.0053364 | -0.025531 |
| 9mo_SIGAF3_ | 0.06406397 | 0.38713336 | 6.27E-05 | 0.0084357 | 0.14015   |
| 9mo_SIGAF3_ | 0.02421365 | 0.14121701 | 4.34E-05 | 0.0049916 | -0.091842 |
| 9mo_SIGAF3_ | 0.08646651 | 0.5253794  | 4.77E-05 | 0.01133   | -0.21781  |
| 9mo_SIGAF3_ | 0.01323517 | 0.07346881 | 3.83E-05 | 0.0063061 | 0.19734   |
| 9mo_SIGAF3_ | 0.08559351 | 0.5199921  | 4.76E-05 | 0.012059  | -0.14081  |
| 9mo_SIGAF3_ | 0.08806037 | 0.53521514 | 4.80E-05 | 0.010188  | -0.3415   |
| 9mo_SIGAF3_ | 0.04256375 | 0.2544555  | 5.13E-05 | 0.0046879 | -0.04643  |
| 9mo_SIGAF3_ | 0.08125472 | 0.4932175  | 4.85E-05 | 0.0141    | 0.10139   |
| 9mo_SIGAF3_ | 0.01560898 | 0.08811759 | 3.95E-05 | 0.0059603 | 0.11709   |
| 9mo_SIGAF3_ | 0.08782633 | 0.5337709  | 4.80E-05 | 0.010188  | -0.29935  |
| 9mo_SIGAF3_ | 0.01937529 | 0.11135952 | 4.14E-05 | 0.0054571 | 0.0010121 |
| 9mo_SIGAF3_ | 0.03231163 | 0.19118968 | 4.62E-05 | 0.0046026 | -0.11821  |
| 9mo_SIGAF3_ | 0.0469756  | 0.28168103 | 5.49E-05 | 0.0049251 | -0.01514  |
| 9mo_SIGAF3_ | 0.02407312 | 0.14034982 | 4.34E-05 | 0.0049916 | -0.091842 |
| 9mo_SIGAF3_ | 0.02309546 | 0.13431667 | 4.30E-05 | 0.0050782 | -0.077142 |
| 9mo_SIGAF3_ | 0.01842935 | 0.10552213 | 4.11E-05 | 0.0055212 | 0.015459  |
| 9mo_SIGAF3_ | 0.01060858 | 0.05726011 | 3.68E-05 | 0.0068    | 0.30902   |
| 9mo_SIGAF3_ | 0.01670836 | 0.0949019  | 4.00E-05 | 0.0058035 | 0.080526  |
| 9mo_SIGAF3_ | 0.01216224 | 0.06684779 | 3.77E-05 | 0.0064954 | 0.24064   |

|             |            |            |          |           |            |
|-------------|------------|------------|----------|-----------|------------|
| 9mo_SIGAF3_ | 0.0205933  | 0.11887584 | 4.21E-05 | 0.0052798 | -0.037579  |
| 9mo_SIGAF3_ | 0.0380899  | 0.22684738 | 4.87E-05 | 0.0045758 | -0.080425  |
| 9mo_SIGAF3_ | 0.03307308 | 0.19588858 | 4.66E-05 | 0.0045822 | -0.11352   |
| 9mo_SIGAF3_ | 0.08995714 | 0.5469201  | 4.88E-05 | 0.0086895 | -0.47194   |
| 9mo_SIGAF3_ | 0.08727438 | 0.5303648  | 4.79E-05 | 0.010571  | -0.25808   |
| 9mo_SIGAF3_ | 0.01656253 | 0.09400193 | 4.00E-05 | 0.0058035 | 0.080526   |
| 9mo_SIGAF3_ | 0.01894691 | 0.10871595 | 4.14E-05 | 0.0054571 | 0.0010121  |
| 9mo_SIGAF3_ | 0.02872864 | 0.16907905 | 4.51E-05 | 0.0047064 | -0.12268   |
| 9mo_SIGAF3_ | 0.03118976 | 0.18426661 | 4.58E-05 | 0.00463   | -0.12145   |
| 9mo_SIGAF3_ | 0.01607772 | 0.09101017 | 3.98E-05 | 0.0058806 | 0.098494   |
| 9mo_SIGAF3_ | 0.02475697 | 0.14456986 | 4.36E-05 | 0.0049516 | -0.098011  |
| 9mo_SIGAF3_ | 0.02277285 | 0.13232587 | 4.30E-05 | 0.0050782 | -0.077142  |
| 9mo_SIGAF3_ | 0.01602506 | 0.09068521 | 3.98E-05 | 0.0058806 | 0.098494   |
| 9mo_SIGAF3_ | 0.03167309 | 0.18724921 | 4.60E-05 | 0.0046154 | -0.12002   |
| 9mo_SIGAF3_ | 0.08440047 | 0.51262987 | 4.76E-05 | 0.012731  | -0.069378  |
| 9mo_SIGAF3_ | 0.03567683 | 0.2119563  | 4.74E-05 | 0.0045622 | -0.096915  |
| 9mo_SIGAF3_ | 0.01896164 | 0.1088069  | 4.14E-05 | 0.0054571 | 0.0010121  |
| 9mo_SIGAF3_ | 0.07842597 | 0.47576126 | 5.01E-05 | 0.014289  | 0.18889    |
| 9mo_SIGAF3_ | 0.01181704 | 0.06471755 | 3.74E-05 | 0.0065941 | 0.263      |
| 9mo_SIGAF3_ | 0.09106192 | 0.5537377  | 4.93E-05 | 0.0079874 | -0.56091   |
| 9mo_SIGAF3_ | 0.02592689 | 0.15178947 | 4.40E-05 | 0.0048781 | -0.11213   |
| 9mo_SIGAF3_ | 0.02263046 | 0.1314472  | 4.28E-05 | 0.005125  | -0.068556  |
| 9mo_SIGAF3_ | 0.02785193 | 0.16366889 | 4.48E-05 | 0.0047558 | -0.12024   |
| 9mo_SIGAF3_ | 0.01343279 | 0.07468835 | 3.83E-05 | 0.0063061 | 0.19734    |
| 9mo_SIGAF3_ | 0.06790124 | 0.41081315 | 5.98E-05 | 0.010192  | 0.19812    |
| 9mo_SIGAF3_ | 0.01812182 | 0.10362432 | 4.09E-05 | 0.0055879 | 0.030658   |
| 9mo_SIGAF3_ | 0.02371728 | 0.13815393 | 4.32E-05 | 0.0050338 | -0.084895  |
| 9mo_SIGAF3_ | 0.02677982 | 0.15705289 | 4.44E-05 | 0.004813  | -0.11546   |
| 9mo_SIGAF3_ | 0.02359398 | 0.13739304 | 4.32E-05 | 0.0050338 | -0.084895  |
| 9mo_SIGAF3_ | 0.02565731 | 0.15012588 | 4.40E-05 | 0.0048781 | -0.10813   |
| 9mo_SIGAF3_ | 0.0248025  | 0.14485082 | 4.36E-05 | 0.0049516 | -0.098011  |
| 9mo_SIGAF3_ | 0.02894904 | 0.17043914 | 4.51E-05 | 0.0047064 | -0.12268   |
| 9mo_SIGAF3_ | 0.02256653 | 0.13105267 | 4.28E-05 | 0.005125  | -0.068556  |
| 9mo_SIGAF3_ | 0.00976761 | 0.05207048 | 3.65E-05 | 0.0069072 | 0.33263    |
| 9mo_SIGAF3_ | 0.08658655 | 0.5261202  | 4.77E-05 | 0.01133   | -0.21781   |
| 9mo_SIGAF3_ | 0.0839909  | 0.51010245 | 4.76E-05 | 0.012731  | -0.036078  |
| 9mo_SIGAF3_ | 0.01412212 | 0.07894219 | 3.89E-05 | 0.0061278 | 0.1561     |
| 9mo_SIGAF3_ | 0.08779675 | 0.53358835 | 4.80E-05 | 0.010188  | -0.29935   |
| 9mo_SIGAF3_ | 0.08308883 | 0.50453573 | 4.78E-05 | 0.013315  | 0.02505    |
| 9mo_SIGAF3_ | 0.07408545 | 0.44897595 | 5.38E-05 | 0.013116  | 0.24406    |
| 9mo_SIGAF3_ | 0.02044383 | 0.11795344 | 4.19E-05 | 0.0053364 | -0.025531  |
| 9mo_SIGAF3_ | 0.04887479 | 0.29340094 | 5.68E-05 | 0.0051026 | -0.0054808 |
| 9mo_SIGAF3_ | 0.02043288 | 0.1178859  | 4.19E-05 | 0.0053364 | -0.025531  |

|             |            |            |          |           |           |
|-------------|------------|------------|----------|-----------|-----------|
| 9mo_SIGAF3_ | 0.02175597 | 0.12605071 | 4.26E-05 | 0.0051742 | -0.059109 |
| 9mo_SIGAF3_ | 0.01524853 | 0.08589327 | 3.95E-05 | 0.0059603 | 0.11709   |
| 9mo_SIGAF3_ | 0.01455062 | 0.08158646 | 3.89E-05 | 0.0061278 | 0.1561    |
| 9mo_SIGAF3_ | 0.02305383 | 0.1340598  | 4.30E-05 | 0.0050782 | -0.077142 |
| 9mo_SIGAF3_ | 0.08386935 | 0.5093524  | 4.77E-05 | 0.013036  | -0.036078 |
| 9mo_SIGAF3_ | 0.02431529 | 0.14184426 | 4.34E-05 | 0.0049916 | -0.098011 |
| 9mo_SIGAF3_ | 0.00998972 | 0.05344112 | 3.65E-05 | 0.0069072 | 0.33263   |
| 9mo_SIGAF3_ | 0.07991244 | 0.48493427 | 4.90E-05 | 0.014278  | 0.15946   |
| 9mo_SIGAF3_ | 0.01211062 | 0.06652921 | 3.77E-05 | 0.0064954 | 0.24064   |
| 9mo_SIGAF3_ | 0.02319197 | 0.13491227 | 4.30E-05 | 0.0050782 | -0.077142 |
| 9mo_SIGAF3_ | 0.02637158 | 0.15453361 | 4.42E-05 | 0.0048445 | -0.11213  |
| 9mo_SIGAF3_ | 0.08070831 | 0.4898456  | 4.87E-05 | 0.014207  | 0.12269   |
| 9mo_SIGAF3_ | 0.02270693 | 0.13191906 | 4.28E-05 | 0.005125  | -0.077142 |
| 9mo_SIGAF3_ | 0.01707403 | 0.09715844 | 4.03E-05 | 0.005729  | 0.063215  |
| 9mo_SIGAF3_ | 0.02299585 | 0.13370198 | 4.30E-05 | 0.0050782 | -0.077142 |
| 9mo_SIGAF3_ | 0.03140518 | 0.18559597 | 4.58E-05 | 0.00463   | -0.12002  |
| 9mo_SIGAF3_ | 0.09377596 | 0.570486   | 5.09E-05 | 0.0064439 | -0.7829   |
| 9mo_SIGAF3_ | 0.01116145 | 0.06067187 | 3.71E-05 | 0.0066957 | 0.2858    |
| 9mo_SIGAF3_ | 0.02387592 | 0.1391329  | 4.34E-05 | 0.0049916 | -0.091842 |
| 9mo_SIGAF3_ | 0.02089319 | 0.12072645 | 4.21E-05 | 0.0052798 | -0.037579 |
| 9mo_SIGAF3_ | 0.037134   | 0.22094853 | 4.81E-05 | 0.0045652 | -0.088896 |
| 9mo_SIGAF3_ | 0.01353439 | 0.07531531 | 3.86E-05 | 0.0062156 | 0.17645   |
| 9mo_SIGAF3_ | 0.03935712 | 0.23466736 | 4.92E-05 | 0.0045932 | -0.071721 |
| 9mo_SIGAF3_ | 0.03018975 | 0.17809553 | 4.55E-05 | 0.0046645 | -0.12301  |
| 9mo_SIGAF3_ | 0.01663014 | 0.09441919 | 4.00E-05 | 0.0058035 | 0.080526  |
| 9mo_SIGAF3_ | 0.03115168 | 0.18403165 | 4.58E-05 | 0.00463   | -0.12145  |
| 9mo_SIGAF3_ | 0.0696303  | 0.42148322 | 5.82E-05 | 0.011019  | 0.21895   |
| 9mo_SIGAF3_ | 0.02707943 | 0.15890174 | 4.46E-05 | 0.0047834 | -0.11816  |
| 9mo_SIGAF3_ | 0.0219938  | 0.12751834 | 4.26E-05 | 0.0051742 | -0.059109 |
| 9mo_SIGAF3_ | 0.03653295 | 0.21723942 | 4.79E-05 | 0.0045625 | -0.092976 |
| 9mo_SIGAF3_ | 0.01556007 | 0.08781578 | 3.95E-05 | 0.0059603 | 0.11709   |
| 9mo_SIGAF3_ | 0.07989303 | 0.4848145  | 4.90E-05 | 0.014278  | 0.15946   |
| 9mo_SIGAF3_ | 0.01749368 | 0.09974811 | 4.06E-05 | 0.0056572 | 0.046584  |
| 9mo_SIGAF3_ | 0.01616309 | 0.09153704 | 3.98E-05 | 0.0058806 | 0.098494  |
| 9mo_SIGAF3_ | 0.01155615 | 0.06310759 | 3.74E-05 | 0.0065941 | 0.263     |
| 9mo_SIGAF3_ | 0.08179969 | 0.49658054 | 4.83E-05 | 0.013957  | 0.078055  |
| 9mo_SIGAF3_ | 0.01044664 | 0.05626083 | 3.68E-05 | 0.0068    | 0.30902   |
| 9mo_SIGAF3_ | 0.06082154 | 0.36712435 | 6.38E-05 | 0.0072613 | 0.09374   |
| 9mo_SIGAF3_ | 0.02449278 | 0.14293955 | 4.36E-05 | 0.0049516 | -0.098011 |
| 9mo_SIGAF3_ | 0.02065832 | 0.1192771  | 4.21E-05 | 0.0052798 | -0.037579 |
| 9mo_SIGAF3_ | 0.03771248 | 0.22451831 | 4.84E-05 | 0.0045696 | -0.084703 |
| 9mo_SIGAF3_ | 0.01929033 | 0.11083521 | 4.14E-05 | 0.0054571 | 0.0010121 |
| 9mo_SIGAF3_ | 0.08934165 | 0.5431219  | 4.84E-05 | 0.0094274 | -0.42792  |



|             |            |            |          |           |           |
|-------------|------------|------------|----------|-----------|-----------|
| 9mo_SIGAF3_ | 0.02434272 | 0.14201353 | 4.34E-05 | 0.0049916 | -0.098011 |
| 9mo_SIGAF3_ | 0.01648087 | 0.09349805 | 4.00E-05 | 0.0058035 | 0.080526  |
| 9mo_SIGAF3_ | 0.02383266 | 0.13886593 | 4.34E-05 | 0.0049916 | -0.091842 |
| 9mo_SIGAF3_ | 0.02001942 | 0.11533444 | 4.16E-05 | 0.0053955 | -0.025531 |
| 9mo_SIGAF3_ | 0.08029146 | 0.48727322 | 4.87E-05 | 0.014207  | 0.14202   |
| 9mo_SIGAF3_ | 0.05871642 | 0.35413364 | 6.35E-05 | 0.0066597 | 0.068735  |
| 9mo_SIGAF3_ | 0.02861679 | 0.16838881 | 4.49E-05 | 0.0047302 | -0.12268  |
| 9mo_SIGAF3_ | 0.02352281 | 0.13695383 | 4.32E-05 | 0.0050338 | -0.084895 |
| 9mo_SIGAF3_ | 0.07637982 | 0.4631345  | 5.18E-05 | 0.013885  | 0.22792   |
| 9mo_SIGAF3_ | 0.0529439  | 0.31851143 | 6.01E-05 | 0.0055357 | 0.022172  |
| 9mo_SIGAF3_ | 0.03215423 | 0.19021837 | 4.62E-05 | 0.0046026 | -0.11821  |
| 9mo_SIGAF3_ | 0.02971368 | 0.17515774 | 4.53E-05 | 0.0046846 | -0.12301  |
| 9mo_SIGAF3_ | 0.01313117 | 0.07282703 | 3.83E-05 | 0.0063061 | 0.19734   |
| 9mo_SIGAF3_ | 0.01691893 | 0.09620128 | 4.03E-05 | 0.005729  | 0.063215  |
| 9mo_SIGAF3_ | 0.02157412 | 0.1249285  | 4.24E-05 | 0.0052258 | -0.04878  |
| 9mo_SIGAF3_ | 0.09289661 | 0.5650596  | 5.02E-05 | 0.0070215 | -0.73907  |
| 9mo_SIGAF3_ | 0.02411448 | 0.14060508 | 4.34E-05 | 0.0049916 | -0.091842 |
| 9mo_SIGAF3_ | 0.03380153 | 0.20038384 | 4.68E-05 | 0.0045746 | -0.11071  |
| 9mo_SIGAF3_ | 0.04706809 | 0.2822518  | 5.49E-05 | 0.0049251 | -0.01514  |
| 9mo_SIGAF3_ | 0.03811784 | 0.22701977 | 4.87E-05 | 0.0045758 | -0.080425 |
| 9mo_SIGAF3_ | 0.01098399 | 0.05957679 | 3.71E-05 | 0.0066957 | 0.2858    |
| 9mo_SIGAF3_ | 0.08071746 | 0.48990205 | 4.87E-05 | 0.014207  | 0.12269   |
| 9mo_SIGAF3_ | 0.02471201 | 0.1442924  | 4.36E-05 | 0.0049516 | -0.098011 |
| 9mo_SIGAF3_ | 0.02922103 | 0.1721176  | 4.51E-05 | 0.0047064 | -0.1231   |
| 9mo_SIGAF3_ | 0.01184574 | 0.06489465 | 3.74E-05 | 0.0065941 | 0.263     |
| 9mo_SIGAF3_ | 0.0200729  | 0.11566444 | 4.19E-05 | 0.0053364 | -0.025531 |
| 9mo_SIGAF3_ | 0.02514263 | 0.14694978 | 4.38E-05 | 0.0049138 | -0.10343  |
| 9mo_SIGAF3_ | 0.08887518 | 0.5402433  | 4.84E-05 | 0.0094274 | -0.3844   |
| 9mo_SIGAF3_ | 0.07467281 | 0.45260054 | 5.33E-05 | 0.013335  | 0.24193   |
| 9mo_SIGAF3_ | 0.01004245 | 0.05376655 | 3.65E-05 | 0.0069072 | 0.33263   |
| 9mo_SIGAF3_ | 0.07472278 | 0.4529089  | 5.33E-05 | 0.013335  | 0.24193   |
| 9mo_SIGAF3_ | 0.02693115 | 0.15798676 | 4.44E-05 | 0.004813  | -0.11546  |
| 9mo_SIGAF3_ | 0.00982935 | 0.05245151 | 3.65E-05 | 0.0069072 | 0.33263   |
| 9mo_SIGAF3_ | 0.03247741 | 0.19221272 | 4.62E-05 | 0.0046026 | -0.11603  |
| 9mo_SIGAF3_ | 0.03648075 | 0.21691729 | 4.79E-05 | 0.0045625 | -0.092976 |
| 9mo_SIGAF3_ | 0.02362321 | 0.13757344 | 4.32E-05 | 0.0050338 | -0.084895 |
| 9mo_SIGAF3_ | 0.02046997 | 0.11811478 | 4.19E-05 | 0.0053364 | -0.025531 |
| 9mo_SIGAF3_ | 0.09673864 | 0.5887688  | 5.28E-05 | 0.0052469 | -1.03     |
| 9mo_SIGAF3_ | 0.09314229 | 0.5665757  | 5.02E-05 | 0.0070215 | -0.73907  |
| 9mo_SIGAF3_ | 0.04796576 | 0.2877913  | 5.58E-05 | 0.0050083 | -0.01192  |
| 9mo_SIGAF3_ | 0.05129856 | 0.30835804 | 5.87E-05 | 0.0053288 | 0.011221  |
| 9mo_SIGAF3_ | 0.08684696 | 0.5277272  | 4.78E-05 | 0.010952  | -0.21781  |
| 9mo_SIGAF3_ | 0.06413914 | 0.38759726 | 6.27E-05 | 0.0084357 | 0.14015   |

|             |            |            |          |           |           |
|-------------|------------|------------|----------|-----------|-----------|
| 9mo_SIGAF3_ | 0.05020427 | 0.30160517 | 5.78E-05 | 0.0052091 | 0.0010449 |
| 9mo_SIGAF3_ | 0.03000446 | 0.17695215 | 4.55E-05 | 0.0046645 | -0.12301  |
| 9mo_SIGAF3_ | 0.0112316  | 0.0611048  | 3.71E-05 | 0.0066957 | 0.2858    |
| 9mo_SIGAF3_ | 0.02073177 | 0.11973035 | 4.21E-05 | 0.0052798 | -0.037579 |
| 9mo_SIGAF3_ | 0.01414024 | 0.07905401 | 3.89E-05 | 0.0061278 | 0.1561    |
| 9mo_SIGAF3_ | 0.0355038  | 0.21088855 | 4.74E-05 | 0.0045622 | -0.10068  |
| 9mo_SIGAF3_ | 0.06103374 | 0.36843383 | 6.38E-05 | 0.0072613 | 0.10072   |
| 9mo_SIGAF3_ | 0.07724637 | 0.46848196 | 5.09E-05 | 0.014141  | 0.21153   |
| 9mo_SIGAF3_ | 0.01962398 | 0.1128942  | 4.16E-05 | 0.0053955 | -0.012659 |
| 9mo_SIGAF3_ | 0.01728067 | 0.09843358 | 4.03E-05 | 0.005729  | 0.046584  |
| 9mo_SIGAF3_ | 0.02282109 | 0.13262357 | 4.30E-05 | 0.0050782 | -0.077142 |
| 9mo_SIGAF3_ | 0.04969975 | 0.29849175 | 5.73E-05 | 0.0051543 | 0.0010449 |
| 9mo_SIGAF3_ | 0.01490872 | 0.0837963  | 3.92E-05 | 0.0060428 | 0.1363    |
| 9mo_SIGAF3_ | 0.02762844 | 0.16228971 | 4.48E-05 | 0.0047558 | -0.12024  |
| 9mo_SIGAF3_ | 0.01097132 | 0.05949862 | 3.71E-05 | 0.0066957 | 0.2858    |
| 9mo_SIGAF3_ | 0.03671234 | 0.21834646 | 4.79E-05 | 0.0045625 | -0.088896 |
| 9mo_SIGAF3_ | 0.01507424 | 0.08481772 | 3.92E-05 | 0.0060428 | 0.1363    |
| 9mo_SIGAF3_ | 0.05758099 | 0.3471269  | 6.32E-05 | 0.0064035 | 0.057806  |
| 9mo_SIGAF3_ | 0.07433444 | 0.4505124  | 5.33E-05 | 0.013335  | 0.24406   |
| 9mo_SIGAF3_ | 0.01248626 | 0.06884728 | 3.80E-05 | 0.0063994 | 0.21875   |
| 9mo_SIGAF3_ | 0.02073471 | 0.1197485  | 4.21E-05 | 0.0052798 | -0.037579 |
| 9mo_SIGAF3_ | 0.01987391 | 0.1144365  | 4.16E-05 | 0.0053955 | -0.012659 |
| 9mo_SIGAF3_ | 0.06731306 | 0.4071835  | 6.03E-05 | 0.009922  | 0.19037   |
| 9mo_SIGAF3_ | 0.07860026 | 0.4768368  | 4.97E-05 | 0.014318  | 0.18889   |
| 9mo_SIGAF3_ | 0.01531874 | 0.08632655 | 3.95E-05 | 0.0059603 | 0.11709   |
| 9mo_SIGAF3_ | 0.03492855 | 0.20733868 | 4.72E-05 | 0.0045646 | -0.10426  |
| 9mo_SIGAF3_ | 0.04459199 | 0.26697174 | 5.30E-05 | 0.0047888 | -0.031751 |
| 9mo_SIGAF3_ | 0.02903361 | 0.170961   | 4.51E-05 | 0.0047064 | -0.12268  |
| 9mo_SIGAF3_ | 0.02781267 | 0.16342658 | 4.48E-05 | 0.0047558 | -0.12024  |
| 9mo_SIGAF3_ | 0.02127584 | 0.12308779 | 4.24E-05 | 0.0052258 | -0.04878  |
| 9mo_SIGAF3_ | 0.085154   | 0.51728    | 4.76E-05 | 0.012059  | -0.10433  |
| 9mo_SIGAF3_ | 0.03206188 | 0.18964846 | 4.62E-05 | 0.0046026 | -0.11821  |
| 9mo_SIGAF3_ | 0.03196312 | 0.18903902 | 4.62E-05 | 0.0046026 | -0.11821  |
| 9mo_SIGAF3_ | 0.0553954  | 0.33363962 | 6.21E-05 | 0.005966  | 0.038579  |
| 9mo_SIGAF3_ | 0.01302447 | 0.07216859 | 3.83E-05 | 0.0063061 | 0.19734   |
| 9mo_SIGAF3_ | 0.04572277 | 0.27394983 | 5.39E-05 | 0.0048522 | -0.024952 |
| 9mo_SIGAF3_ | 0.04985791 | 0.29946774 | 5.78E-05 | 0.0052091 | 0.0010449 |
| 9mo_SIGAF3_ | 0.08172018 | 0.49608985 | 4.83E-05 | 0.013957  | 0.078055  |
| 9mo_SIGAF3_ | 0.01161005 | 0.06344022 | 3.74E-05 | 0.0065941 | 0.263     |
| 9mo_SIGAF3_ | 0.02298404 | 0.13362911 | 4.30E-05 | 0.0050782 | -0.077142 |
| 9mo_SIGAF3_ | 0.04193736 | 0.25059    | 5.09E-05 | 0.0046676 | -0.0504   |
| 9mo_SIGAF3_ | 0.01220168 | 0.06709117 | 3.77E-05 | 0.0064954 | 0.24064   |
| 9mo_SIGAF3_ | 0.01959358 | 0.11270657 | 4.16E-05 | 0.0053955 | -0.012659 |

|             |            |            |          |           |           |
|-------------|------------|------------|----------|-----------|-----------|
| 9mo_SIGAF3_ | 0.08809323 | 0.5354179  | 4.80E-05 | 0.010188  | -0.3415   |
| 9mo_SIGAF3_ | 0.05415165 | 0.32596445 | 6.10E-05 | 0.005694  | 0.030074  |
| 9mo_SIGAF3_ | 0.08953528 | 0.5443168  | 4.86E-05 | 0.0090548 | -0.42792  |
| 9mo_SIGAF3_ | 0.02754854 | 0.16179666 | 4.46E-05 | 0.0047834 | -0.12024  |
| 9mo_SIGAF3_ | 0.02717386 | 0.15948449 | 4.46E-05 | 0.0047834 | -0.11816  |
| 9mo_SIGAF3_ | 0.02084613 | 0.12043604 | 4.21E-05 | 0.0052798 | -0.037579 |
| 9mo_SIGAF3_ | 0.02576063 | 0.15076347 | 4.40E-05 | 0.0048781 | -0.10813  |
| 9mo_SIGAF3_ | 0.01923954 | 0.11052179 | 4.14E-05 | 0.0054571 | 0.0010121 |
| 9mo_SIGAF3_ | 0.08945166 | 0.54380083 | 4.86E-05 | 0.0090548 | -0.42792  |
| 9mo_SIGAF3_ | 0.013153   | 0.07296173 | 3.83E-05 | 0.0063061 | 0.19734   |
| 9mo_SIGAF3_ | 0.0180691  | 0.103299   | 4.09E-05 | 0.0055879 | 0.030658  |
| 9mo_SIGAF3_ | 0.05644296 | 0.3401041  | 6.27E-05 | 0.0061731 | 0.047788  |
| 9mo_SIGAF3_ | 0.02411756 | 0.14062405 | 4.34E-05 | 0.0049916 | -0.091842 |
| 9mo_SIGAF3_ | 0.03118811 | 0.1842564  | 4.58E-05 | 0.00463   | -0.12145  |
| 9mo_SIGAF3_ | 0.01600092 | 0.09053628 | 3.98E-05 | 0.0058806 | 0.098494  |
| 9mo_SIGAF3_ | 0.02168164 | 0.12559198 | 4.26E-05 | 0.0051742 | -0.059109 |
| 9mo_SIGAF3_ | 0.08915549 | 0.5419731  | 4.84E-05 | 0.0094274 | -0.42792  |
| 9mo_SIGAF3_ | 0.03260433 | 0.19299592 | 4.64E-05 | 0.0045915 | -0.11603  |
| 9mo_SIGAF3_ | 0.09571857 | 0.5824739  | 5.20E-05 | 0.0056833 | -0.9515   |
| 9mo_SIGAF3_ | 0.00898504 | 0.04724124 | 3.59E-05 | 0.00713   | 0.38094   |
| 9mo_SIGAF3_ | 0.01218516 | 0.06698918 | 3.77E-05 | 0.0064954 | 0.24064   |
| 9mo_SIGAF3_ | 0.01553852 | 0.08768281 | 3.95E-05 | 0.0059603 | 0.11709   |
| 9mo_SIGAF3_ | 0.02392226 | 0.13941886 | 4.34E-05 | 0.0049916 | -0.091842 |
| 9mo_SIGAF3_ | 0.0728619  | 0.4414254  | 5.49E-05 | 0.012637  | 0.24373   |
| 9mo_SIGAF3_ | 0.01862244 | 0.10671367 | 4.11E-05 | 0.0055212 | 0.015459  |
| 9mo_SIGAF3_ | 0.01303908 | 0.07225877 | 3.83E-05 | 0.0063061 | 0.19734   |
| 9mo_SIGAF3_ | 0.0286912  | 0.16884796 | 4.49E-05 | 0.0047302 | -0.12268  |
| 9mo_SIGAF3_ | 0.02081248 | 0.12022843 | 4.21E-05 | 0.0052798 | -0.037579 |
| 9mo_SIGAF3_ | 0.04542197 | 0.27209356 | 5.34E-05 | 0.0048194 | -0.024952 |
| 9mo_SIGAF3_ | 0.01664393 | 0.09450426 | 4.00E-05 | 0.0058035 | 0.080526  |
| 9mo_SIGAF3_ | 0.02623734 | 0.15370525 | 4.42E-05 | 0.0048445 | -0.11213  |
| 9mo_SIGAF3_ | 0.051067   | 0.30692908 | 5.87E-05 | 0.0053288 | 0.0077602 |
| 9mo_SIGAF3_ | 0.06568497 | 0.3971366  | 6.16E-05 | 0.0091463 | 0.16566   |
| 9mo_SIGAF3_ | 0.08173118 | 0.4961577  | 4.83E-05 | 0.013957  | 0.078055  |
| 9mo_SIGAF3_ | 0.08963654 | 0.5449417  | 4.86E-05 | 0.0090548 | -0.42792  |
| 9mo_SIGAF3_ | 0.02698817 | 0.15833859 | 4.44E-05 | 0.004813  | -0.11546  |
| 9mo_SIGAF3_ | 0.08830828 | 0.53674495 | 4.80E-05 | 0.010188  | -0.3415   |
| 9mo_SIGAF3_ | 0.07697485 | 0.46680638 | 5.09E-05 | 0.014141  | 0.22047   |
| 9mo_SIGAF3_ | 0.035854   | 0.21304964 | 4.77E-05 | 0.0045615 | -0.096915 |
| 9mo_SIGAF3_ | 0.01252724 | 0.06910017 | 3.80E-05 | 0.0063994 | 0.21875   |
| 9mo_SIGAF3_ | 0.02339874 | 0.13618822 | 4.32E-05 | 0.0050338 | -0.084895 |
| 9mo_SIGAF3_ | 0.0697643  | 0.4223101  | 5.82E-05 | 0.011019  | 0.22487   |
| 9mo_SIGAF3_ | 0.01450661 | 0.08131485 | 3.89E-05 | 0.0061278 | 0.1561    |

|             |            |            |          |           |            |
|-------------|------------|------------|----------|-----------|------------|
| 9mo_SIGAF3_ | 0.01427693 | 0.07989755 | 3.89E-05 | 0.0061278 | 0.1561     |
| 9mo_SIGAF3_ | 0.0239103  | 0.13934506 | 4.34E-05 | 0.0049916 | -0.091842  |
| 9mo_SIGAF3_ | 0.02994672 | 0.1765958  | 4.55E-05 | 0.0046645 | -0.12301   |
| 9mo_SIGAF3_ | 0.03194428 | 0.18892275 | 4.60E-05 | 0.0046154 | -0.11821   |
| 9mo_SIGAF3_ | 0.06307    | 0.38099957 | 6.33E-05 | 0.0080056 | 0.12359    |
| 9mo_SIGAF3_ | 0.01360822 | 0.07577091 | 3.86E-05 | 0.0062156 | 0.17645    |
| 9mo_SIGAF3_ | 0.08870517 | 0.53919417 | 4.82E-05 | 0.0098057 | -0.3844    |
| 9mo_SIGAF3_ | 0.03005275 | 0.17725012 | 4.55E-05 | 0.0046645 | -0.12301   |
| 9mo_SIGAF3_ | 0.02335614 | 0.13592534 | 4.32E-05 | 0.0050338 | -0.084895  |
| 9mo_SIGAF3_ | 0.02471235 | 0.14429449 | 4.36E-05 | 0.0049516 | -0.098011  |
| 9mo_SIGAF3_ | 0.03520711 | 0.20905769 | 4.74E-05 | 0.0045622 | -0.10068   |
| 9mo_SIGAF3_ | 0.0786807  | 0.47733322 | 4.97E-05 | 0.014318  | 0.18889    |
| 9mo_SIGAF3_ | 0.02171133 | 0.1257752  | 4.26E-05 | 0.0051742 | -0.059109  |
| 9mo_SIGAF3_ | 0.08418044 | 0.51127213 | 4.76E-05 | 0.012731  | -0.036078  |
| 9mo_SIGAF3_ | 0.04949464 | 0.297226   | 5.73E-05 | 0.0051543 | -0.0022352 |
| 9mo_SIGAF3_ | 0.01646457 | 0.09339748 | 4.00E-05 | 0.0058035 | 0.080526   |
| 9mo_SIGAF3_ | 0.02513278 | 0.14688896 | 4.38E-05 | 0.0049138 | -0.10343   |
| 9mo_SIGAF3_ | 0.03806336 | 0.22668359 | 4.87E-05 | 0.0045758 | -0.080425  |
| 9mo_SIGAF3_ | 0.00673451 | 0.03335327 | 3.47E-05 | 0.0076096 | 0.48124    |
| 9mo_SIGAF3_ | 0.05238534 | 0.31506452 | 5.97E-05 | 0.0054628 | 0.018414   |
| 9mo_SIGAF3_ | 0.0548736  | 0.33041963 | 6.17E-05 | 0.0058704 | 0.034245   |
| 9mo_SIGAF3_ | 0.01529235 | 0.08616369 | 3.95E-05 | 0.0059603 | 0.11709    |
| 9mo_SIGAF3_ | 0.02314969 | 0.13465132 | 4.30E-05 | 0.0050782 | -0.077142  |
| 9mo_SIGAF3_ | 0.03212994 | 0.19006848 | 4.62E-05 | 0.0046026 | -0.11821   |
| 9mo_SIGAF3_ | 0.01502627 | 0.0845217  | 3.92E-05 | 0.0060428 | 0.1363     |
| 9mo_SIGAF3_ | 0.07080732 | 0.42874655 | 5.71E-05 | 0.011574  | 0.23476    |
| 9mo_SIGAF3_ | 0.01254875 | 0.06923293 | 3.80E-05 | 0.0063994 | 0.21875    |
| 9mo_SIGAF3_ | 0.02063895 | 0.11915758 | 4.21E-05 | 0.0052798 | -0.037579  |
| 9mo_SIGAF3_ | 0.08374424 | 0.50858027 | 4.77E-05 | 0.013036  | -0.036078  |
| 9mo_SIGAF3_ | 0.09331286 | 0.56762826 | 5.06E-05 | 0.0067258 | -0.73907   |
| 9mo_SIGAF3_ | 0.02091656 | 0.1208707  | 4.21E-05 | 0.0052798 | -0.037579  |
| 9mo_SIGAF3_ | 0.01363451 | 0.07593313 | 3.86E-05 | 0.0062156 | 0.17645    |
| 9mo_SIGAF3_ | 0.02162344 | 0.12523285 | 4.24E-05 | 0.0052258 | -0.059109  |
| 9mo_SIGAF3_ | 0.02481494 | 0.1449276  | 4.36E-05 | 0.0049516 | -0.098011  |
| 9mo_SIGAF3_ | 0.01933204 | 0.11109261 | 4.14E-05 | 0.0054571 | 0.0010121  |
| 9mo_SIGAF3_ | 0.01081317 | 0.05852267 | 3.68E-05 | 0.0068    | 0.2858     |
| 9mo_SIGAF3_ | 0.03917341 | 0.23353371 | 4.92E-05 | 0.0045932 | -0.071721  |
| 9mo_SIGAF3_ | 0.07332905 | 0.44430822 | 5.43E-05 | 0.012883  | 0.24489    |
| 9mo_SIGAF3_ | 0.0207718  | 0.11997739 | 4.21E-05 | 0.0052798 | -0.037579  |
| 9mo_SIGAF3_ | 0.04349346 | 0.26019272 | 5.21E-05 | 0.0047343 | -0.038876  |
| 9mo_SIGAF3_ | 0.02092456 | 0.12092005 | 4.21E-05 | 0.0052798 | -0.037579  |
| 9mo_SIGAF3_ | 0.02178811 | 0.126249   | 4.26E-05 | 0.0051742 | -0.059109  |
| 9mo_SIGAF3_ | 0.01628271 | 0.09227521 | 4.00E-05 | 0.0058035 | 0.080526   |

|             |            |            |          |           |           |
|-------------|------------|------------|----------|-----------|-----------|
| 9mo_SIGAF3_ | 0.01798093 | 0.10275492 | 4.09E-05 | 0.0055879 | 0.030658  |
| 9mo_SIGAF3_ | 0.03204758 | 0.18956023 | 4.62E-05 | 0.0046026 | -0.11821  |
| 9mo_SIGAF3_ | 0.01646979 | 0.09342964 | 4.00E-05 | 0.0058035 | 0.080526  |
| 9mo_SIGAF3_ | 0.02134021 | 0.12348503 | 4.24E-05 | 0.0052258 | -0.04878  |
| 9mo_SIGAF3_ | 0.09207981 | 0.56001914 | 4.96E-05 | 0.0076529 | -0.6503   |
| 9mo_SIGAF3_ | 0.02706857 | 0.15883477 | 4.44E-05 | 0.004813  | -0.11816  |
| 9mo_SIGAF3_ | 0.01387468 | 0.07741525 | 3.86E-05 | 0.0062156 | 0.17645   |
| 9mo_SIGAF3_ | 0.09151725 | 0.5565475  | 4.93E-05 | 0.0079874 | -0.60562  |
| 9mo_SIGAF3_ | 0.08443092 | 0.5128178  | 4.76E-05 | 0.012731  | -0.069378 |
| 9mo_SIGAF3_ | 0.01177247 | 0.06444249 | 3.74E-05 | 0.0065941 | 0.263     |
| 9mo_SIGAF3_ | 0.0334883  | 0.19845092 | 4.66E-05 | 0.0045822 | -0.11071  |
| 9mo_SIGAF3_ | 0.03508507 | 0.20830455 | 4.72E-05 | 0.0045646 | -0.10426  |
| 9mo_SIGAF3_ | 0.02418483 | 0.14103916 | 4.34E-05 | 0.0049916 | -0.091842 |
| 9mo_SIGAF3_ | 0.03819026 | 0.22746672 | 4.87E-05 | 0.0045758 | -0.080425 |
| 9mo_SIGAF3_ | 0.08648941 | 0.52552074 | 4.77E-05 | 0.01133   | -0.21781  |
| 9mo_SIGAF3_ | 0.0332326  | 0.19687295 | 4.66E-05 | 0.0045822 | -0.11352  |
| 9mo_SIGAF3_ | 0.03566632 | 0.21189144 | 4.74E-05 | 0.0045622 | -0.096915 |
| 9mo_SIGAF3_ | 0.01445279 | 0.08098273 | 3.89E-05 | 0.0061278 | 0.1561    |
| 9mo_SIGAF3_ | 0.0128485  | 0.07108266 | 3.80E-05 | 0.0063994 | 0.21875   |
| 9mo_SIGAF3_ | 0.02027698 | 0.11692382 | 4.19E-05 | 0.0053364 | -0.025531 |
| 9mo_SIGAF3_ | 0.02192913 | 0.12711927 | 4.26E-05 | 0.0051742 | -0.059109 |
| 9mo_SIGAF3_ | 0.02011127 | 0.11590122 | 4.19E-05 | 0.0053364 | -0.025531 |
| 9mo_SIGAF3_ | 0.019839   | 0.11422105 | 4.16E-05 | 0.0053955 | -0.012659 |
| 9mo_SIGAF3_ | 0.02499318 | 0.1460275  | 4.38E-05 | 0.0049138 | -0.10343  |
| 9mo_SIGAF3_ | 0.03104016 | 0.18334346 | 4.58E-05 | 0.00463   | -0.12145  |
| 9mo_SIGAF3_ | 0.07580743 | 0.45960227 | 5.23E-05 | 0.013721  | 0.23393   |
| 9mo_SIGAF3_ | 0.08000937 | 0.48553246 | 4.90E-05 | 0.014278  | 0.14202   |
| 9mo_SIGAF3_ | 0.08021012 | 0.48677126 | 4.87E-05 | 0.014207  | 0.14202   |
| 9mo_SIGAF3_ | 0.05380482 | 0.32382414 | 6.10E-05 | 0.005694  | 0.026054  |
| 9mo_SIGAF3_ | 0.08994503 | 0.5468454  | 4.88E-05 | 0.0086895 | -0.47194  |
| 9mo_SIGAF3_ | 0.01992405 | 0.1147459  | 4.16E-05 | 0.0053955 | -0.012659 |
| 9mo_SIGAF3_ | 0.02568019 | 0.15026705 | 4.40E-05 | 0.0048781 | -0.10813  |
| 9mo_SIGAF3_ | 0.08154243 | 0.49499297 | 4.83E-05 | 0.013957  | 0.10139   |
| 9mo_SIGAF3_ | 0.02370654 | 0.13808763 | 4.32E-05 | 0.0050338 | -0.084895 |
| 9mo_SIGAF3_ | 0.02034064 | 0.11731671 | 4.19E-05 | 0.0053364 | -0.025531 |
| 9mo_SIGAF3_ | 0.04246556 | 0.25384957 | 5.13E-05 | 0.0046879 | -0.04643  |
| 9mo_SIGAF3_ | 0.01153218 | 0.06295968 | 3.74E-05 | 0.0065941 | 0.263     |
| 9mo_SIGAF3_ | 0.01675694 | 0.09520163 | 4.00E-05 | 0.0058035 | 0.063215  |
| 9mo_SIGAF3_ | 0.01850755 | 0.10600469 | 4.11E-05 | 0.0055212 | 0.015459  |
| 9mo_SIGAF3_ | 0.03738648 | 0.22250657 | 4.84E-05 | 0.0045696 | -0.084703 |
| 9mo_SIGAF3_ | 0.05755521 | 0.3469678  | 6.32E-05 | 0.0064035 | 0.057806  |
| 9mo_SIGAF3_ | 0.02857844 | 0.16815215 | 4.49E-05 | 0.0047302 | -0.12174  |
| 9mo_SIGAF3_ | 0.04012291 | 0.23939307 | 4.99E-05 | 0.0046177 | -0.063007 |

|             |            |            |          |           |           |
|-------------|------------|------------|----------|-----------|-----------|
| 9mo_SIGAF3_ | 0.03266436 | 0.19336636 | 4.64E-05 | 0.0045915 | -0.11603  |
| 9mo_SIGAF3_ | 0.02609424 | 0.15282214 | 4.42E-05 | 0.0048445 | -0.11213  |
| 9mo_SIGAF3_ | 0.04484403 | 0.2685271  | 5.30E-05 | 0.0047888 | -0.028317 |
| 9mo_SIGAF3_ | 0.01702089 | 0.09683048 | 4.03E-05 | 0.005729  | 0.063215  |
| 9mo_SIGAF3_ | 0.04304834 | 0.2574459  | 5.17E-05 | 0.0047101 | -0.042593 |
| 9mo_SIGAF3_ | 0.02672487 | 0.1567138  | 4.44E-05 | 0.004813  | -0.11546  |
| 9mo_SIGAF3_ | 0.03778244 | 0.22495005 | 4.84E-05 | 0.0045696 | -0.084703 |
| 9mo_SIGAF3_ | 0.09596229 | 0.5839779  | 5.24E-05 | 0.0054581 | -0.9515   |
| 9mo_SIGAF3_ | 0.03664415 | 0.21792562 | 4.79E-05 | 0.0045625 | -0.092976 |
| 9mo_SIGAF3_ | 0.08942615 | 0.54364336 | 4.86E-05 | 0.0090548 | -0.42792  |
| 9mo_SIGAF3_ | 0.0183372  | 0.10495345 | 4.09E-05 | 0.0055879 | 0.030658  |
| 9mo_SIGAF3_ | 0.05637735 | 0.33969924 | 6.27E-05 | 0.0061731 | 0.047788  |
| 9mo_SIGAF3_ | 0.0841158  | 0.5108732  | 4.76E-05 | 0.012731  | -0.036078 |
| 9mo_SIGAF3_ | 0.03462958 | 0.20549373 | 4.70E-05 | 0.0045688 | -0.10426  |
| 9mo_SIGAF3_ | 0.01568261 | 0.08857198 | 3.95E-05 | 0.0059603 | 0.098494  |
| 9mo_SIGAF3_ | 0.0137995  | 0.0769513  | 3.86E-05 | 0.0062156 | 0.17645   |
| 9mo_SIGAF3_ | 0.01452405 | 0.08142251 | 3.89E-05 | 0.0061278 | 0.1561    |
| 9mo_SIGAF3_ | 0.01816788 | 0.1039086  | 4.09E-05 | 0.0055879 | 0.030658  |
| 9mo_SIGAF3_ | 0.03472385 | 0.20607549 | 4.72E-05 | 0.0045646 | -0.10426  |
| 9mo_SIGAF3_ | 0.05883067 | 0.35483867 | 6.35E-05 | 0.0066597 | 0.068735  |
| 9mo_SIGAF3_ | 0.02192511 | 0.12709448 | 4.26E-05 | 0.0051742 | -0.059109 |
| 9mo_SIGAF3_ | 0.01983169 | 0.11417597 | 4.16E-05 | 0.0053955 | -0.012659 |
| 9mo_SIGAF3_ | 0.03234137 | 0.1913732  | 4.62E-05 | 0.0046026 | -0.11821  |
| 9mo_SIGAF3_ | 0.02351012 | 0.13687553 | 4.32E-05 | 0.0050338 | -0.084895 |
| 9mo_SIGAF3_ | 0.0479506  | 0.28769776 | 5.58E-05 | 0.0050083 | -0.01192  |
| 9mo_SIGAF3_ | 0.08871682 | 0.5392661  | 4.82E-05 | 0.0098057 | -0.3844   |
| 9mo_SIGAF3_ | 0.09063417 | 0.55109805 | 4.91E-05 | 0.0083333 | -0.51631  |
| 9mo_SIGAF3_ | 0.01802187 | 0.10300757 | 4.09E-05 | 0.0055879 | 0.030658  |
| 9mo_SIGAF3_ | 0.03876386 | 0.23100637 | 4.89E-05 | 0.0045836 | -0.076088 |
| 9mo_SIGAF3_ | 0.02021327 | 0.1165307  | 4.19E-05 | 0.0053364 | -0.025531 |
| 9mo_SIGAF3_ | 0.03570371 | 0.21212217 | 4.74E-05 | 0.0045622 | -0.096915 |
| 9mo_SIGAF3_ | 0.05949552 | 0.3589415  | 6.37E-05 | 0.0067983 | 0.080679  |
| 9mo_SIGAF3_ | 0.09209894 | 0.56013715 | 4.96E-05 | 0.0076529 | -0.6503   |
| 9mo_SIGAF3_ | 0.03805605 | 0.22663848 | 4.87E-05 | 0.0045758 | -0.080425 |
| 9mo_SIGAF3_ | 0.04785237 | 0.28709158 | 5.58E-05 | 0.0050083 | -0.01192  |
| 9mo_SIGAF3_ | 0.03320453 | 0.19669977 | 4.66E-05 | 0.0045822 | -0.11352  |
| 9mo_SIGAF3_ | 0.01504958 | 0.08466554 | 3.92E-05 | 0.0060428 | 0.1363    |
| 9mo_SIGAF3_ | 0.09869747 | 0.60085666 | 5.45E-05 | 0.0045382 | -1.1375   |
| 9mo_SIGAF3_ | 0.04403295 | 0.2635219  | 5.25E-05 | 0.0047605 | -0.035266 |
| 9mo_SIGAF3_ | 0.02098326 | 0.12128227 | 4.21E-05 | 0.0052798 | -0.037579 |
| 9mo_SIGAF3_ | 0.01753244 | 0.09998725 | 4.06E-05 | 0.0056572 | 0.046584  |
| 9mo_SIGAF3_ | 0.06228627 | 0.37616315 | 6.36E-05 | 0.0076138 | 0.11565   |
| 9mo_SIGAF3_ | 0.02728995 | 0.16020086 | 4.46E-05 | 0.0047834 | -0.11816  |

|             |            |            |          |           |           |
|-------------|------------|------------|----------|-----------|-----------|
| 9mo_SIGAF3_ | 0.08731752 | 0.530631   | 4.79E-05 | 0.010571  | -0.25808  |
| 9mo_SIGAF3_ | 0.0106267  | 0.05737195 | 3.68E-05 | 0.0068    | 0.30902   |
| 9mo_SIGAF3_ | 0.02525611 | 0.14765003 | 4.38E-05 | 0.0049138 | -0.10343  |
| 9mo_SIGAF3_ | 0.03442969 | 0.20426023 | 4.70E-05 | 0.0045688 | -0.10761  |
| 9mo_SIGAF3_ | 0.01781815 | 0.10175039 | 4.06E-05 | 0.0056572 | 0.030658  |
| 9mo_SIGAF3_ | 0.0135853  | 0.07562946 | 3.86E-05 | 0.0062156 | 0.17645   |
| 9mo_SIGAF3_ | 0.01838939 | 0.10527549 | 4.09E-05 | 0.0055879 | 0.015459  |
| 9mo_SIGAF3_ | 0.0166647  | 0.09463248 | 4.00E-05 | 0.0058035 | 0.080526  |
| 9mo_SIGAF3_ | 0.02633296 | 0.15429528 | 4.42E-05 | 0.0048445 | -0.11213  |
| 9mo_SIGAF3_ | 0.0171642  | 0.09771488 | 4.03E-05 | 0.005729  | 0.063215  |
| 9mo_SIGAF3_ | 0.03060301 | 0.1806458  | 4.57E-05 | 0.0046464 | -0.12245  |
| 9mo_SIGAF3_ | 0.02270841 | 0.1319282  | 4.28E-05 | 0.005125  | -0.077142 |
| 9mo_SIGAF3_ | 0.01526637 | 0.08600337 | 3.95E-05 | 0.0059603 | 0.11709   |
| 9mo_SIGAF3_ | 0.0437351  | 0.2616839  | 5.21E-05 | 0.0047343 | -0.035266 |
| 9mo_SIGAF3_ | 0.07815341 | 0.4740793  | 5.01E-05 | 0.014289  | 0.20103   |
| 9mo_SIGAF3_ | 0.02609069 | 0.15280028 | 4.42E-05 | 0.0048445 | -0.11213  |
| 9mo_SIGAF3_ | 0.01928598 | 0.11080837 | 4.14E-05 | 0.0054571 | 0.0010121 |
| 9mo_SIGAF3_ | 0.08828623 | 0.53660893 | 4.80E-05 | 0.010188  | -0.3415   |
| 9mo_SIGAF3_ | 0.0166009  | 0.09423871 | 4.00E-05 | 0.0058035 | 0.080526  |
| 9mo_SIGAF3_ | 0.0281329  | 0.1654027  | 4.48E-05 | 0.0047558 | -0.12174  |
| 9mo_SIGAF3_ | 0.034558   | 0.20505203 | 4.70E-05 | 0.0045688 | -0.10426  |
| 9mo_SIGAF3_ | 0.0140069  | 0.07823118 | 3.86E-05 | 0.0062156 | 0.17645   |
| 9mo_SIGAF3_ | 0.1512256  | 0.92500776 | 7.73E-05 | 0.0046709 | -1.1045   |
| 9mo_SIGAF3_ | 0.03744177 | 0.22284774 | 4.84E-05 | 0.0045696 | -0.084703 |
| 9mo_SIGAF3_ | 0.07751121 | 0.47011632 | 5.05E-05 | 0.014229  | 0.21153   |
| 9mo_SIGAF3_ | 0.04786306 | 0.2871575  | 5.58E-05 | 0.0050083 | -0.01192  |
| 9mo_SIGAF3_ | 0.08020733 | 0.48675403 | 4.87E-05 | 0.014207  | 0.14202   |
| 9mo_SIGAF3_ | 0.0116836  | 0.06389409 | 3.74E-05 | 0.0065941 | 0.263     |
| 9mo_SIGAF3_ | 0.01655249 | 0.09394002 | 4.00E-05 | 0.0058035 | 0.080526  |
| 9mo_SIGAF3_ | 0.06195268 | 0.3741046  | 6.36E-05 | 0.0076138 | 0.10802   |
| 9mo_SIGAF3_ | 0.01992027 | 0.11472257 | 4.16E-05 | 0.0053955 | -0.012659 |
| 9mo_SIGAF3_ | 0.02607329 | 0.1526929  | 4.42E-05 | 0.0048445 | -0.11213  |
| 9mo_SIGAF3_ | 0.0875132  | 0.53183854 | 4.79E-05 | 0.010571  | -0.29935  |
| 9mo_SIGAF3_ | 0.01895948 | 0.10879353 | 4.14E-05 | 0.0054571 | 0.0010121 |
| 9mo_SIGAF3_ | 0.06087207 | 0.36743617 | 6.38E-05 | 0.0072613 | 0.09374   |
| 9mo_SIGAF3_ | 0.09040052 | 0.5496562  | 4.88E-05 | 0.0086895 | -0.51631  |
| 9mo_SIGAF3_ | 0.02220918 | 0.12884742 | 4.28E-05 | 0.005125  | -0.068556 |
| 9mo_SIGAF3_ | 0.02258362 | 0.13115814 | 4.28E-05 | 0.005125  | -0.068556 |
| 9mo_SIGAF3_ | 0.0305456  | 0.18029152 | 4.57E-05 | 0.0046464 | -0.12245  |
| 9mo_SIGAF3_ | 0.07174322 | 0.43452203 | 5.60E-05 | 0.012118  | 0.2386    |
| 9mo_SIGAF3_ | 0.0780652  | 0.47353497 | 5.01E-05 | 0.014289  | 0.20103   |
| 9mo_SIGAF3_ | 0.02719673 | 0.15962563 | 4.46E-05 | 0.0047834 | -0.11816  |
| 9mo_SIGAF3_ | 0.01870225 | 0.1072062  | 4.11E-05 | 0.0055212 | 0.015459  |

|             |            |            |          |           |            |
|-------------|------------|------------|----------|-----------|------------|
| 9mo_SIGAF3_ | 0.08324704 | 0.5055121  | 4.78E-05 | 0.013315  | -0.0045591 |
| 9mo_SIGAF3_ | 0.01782704 | 0.10180526 | 4.06E-05 | 0.0056572 | 0.030658   |
| 9mo_SIGAF3_ | 0.01787306 | 0.10208925 | 4.09E-05 | 0.0055879 | 0.030658   |
| 9mo_SIGAF3_ | 0.04775235 | 0.28647435 | 5.58E-05 | 0.0050083 | -0.01192   |
| 9mo_SIGAF3_ | 0.01176778 | 0.06441356 | 3.74E-05 | 0.0065941 | 0.263      |
| 9mo_SIGAF3_ | 0.08199845 | 0.49780703 | 4.81E-05 | 0.013778  | 0.078055   |
| 9mo_SIGAF3_ | 0.08001109 | 0.485543   | 4.90E-05 | 0.014278  | 0.14202    |
| 9mo_SIGAF3_ | 0.08862665 | 0.53870964 | 4.82E-05 | 0.0098057 | -0.3844    |
| 9mo_SIGAF3_ | 0.03462486 | 0.20546463 | 4.70E-05 | 0.0045688 | -0.10426   |
| 9mo_SIGAF3_ | 0.01757716 | 0.10026325 | 4.06E-05 | 0.0056572 | 0.046584   |
| 9mo_SIGAF3_ | 0.03326763 | 0.19708914 | 4.66E-05 | 0.0045822 | -0.11352   |
| 9mo_SIGAF3_ | 0.04663387 | 0.27957222 | 5.49E-05 | 0.0049251 | -0.018376  |
| 9mo_SIGAF3_ | 0.03731472 | 0.22206374 | 4.81E-05 | 0.0045652 | -0.084703  |
| 9mo_SIGAF3_ | 0.02373722 | 0.138277   | 4.32E-05 | 0.0050338 | -0.084895  |
| 9mo_SIGAF3_ | 0.05731872 | 0.34550843 | 6.30E-05 | 0.0062853 | 0.057806   |
| 9mo_SIGAF3_ | 0.01351421 | 0.07519075 | 3.83E-05 | 0.0063061 | 0.17645    |
| 9mo_SIGAF3_ | 0.02031572 | 0.11716289 | 4.19E-05 | 0.0053364 | -0.025531  |
| 9mo_SIGAF3_ | 0.03217427 | 0.19034201 | 4.62E-05 | 0.0046026 | -0.11821   |
| 9mo_SIGAF3_ | 0.07944229 | 0.482033   | 4.93E-05 | 0.014315  | 0.15946    |
| 9mo_SIGAF3_ | 0.0175568  | 0.10013761 | 4.06E-05 | 0.0056572 | 0.046584   |
| 9mo_SIGAF3_ | 0.02747843 | 0.161364   | 4.46E-05 | 0.0047834 | -0.11816   |
| 9mo_SIGAF3_ | 0.03518727 | 0.20893525 | 4.72E-05 | 0.0045646 | -0.10068   |
| 9mo_SIGAF3_ | 0.03339171 | 0.19785482 | 4.66E-05 | 0.0045822 | -0.11352   |
| 9mo_SIGAF3_ | 0.03720345 | 0.22137709 | 4.81E-05 | 0.0045652 | -0.088896  |
| 9mo_SIGAF3_ | 0.01920634 | 0.11031693 | 4.14E-05 | 0.0054571 | 0.0010121  |
| 9mo_SIGAF3_ | 0.01124399 | 0.06118126 | 3.71E-05 | 0.0066957 | 0.2858     |
| 9mo_SIGAF3_ | 0.0542459  | 0.32654607 | 6.14E-05 | 0.0057798 | 0.030074   |
| 9mo_SIGAF3_ | 0.03880711 | 0.23127325 | 4.89E-05 | 0.0045836 | -0.076088  |
| 9mo_SIGAF3_ | 0.01059439 | 0.05717254 | 3.68E-05 | 0.0068    | 0.30902    |
| 9mo_SIGAF3_ | 0.08503707 | 0.51655835 | 4.76E-05 | 0.012404  | -0.10433   |
| 9mo_SIGAF3_ | 0.03430731 | 0.203505   | 4.70E-05 | 0.0045688 | -0.10761   |
| 9mo_SIGAF3_ | 0.01133974 | 0.0617721  | 3.71E-05 | 0.0066957 | 0.263      |
| 9mo_SIGAF3_ | 0.07146955 | 0.4328332  | 5.65E-05 | 0.011849  | 0.2386     |
| 9mo_SIGAF3_ | 0.03402763 | 0.20177907 | 4.68E-05 | 0.0045746 | -0.10761   |
| 9mo_SIGAF3_ | 0.02024863 | 0.11674891 | 4.19E-05 | 0.0053364 | -0.025531  |
| 9mo_SIGAF3_ | 0.08389967 | 0.5095394  | 4.77E-05 | 0.013036  | -0.036078  |
| 9mo_SIGAF3_ | 0.01895938 | 0.1087929  | 4.14E-05 | 0.0054571 | 0.0010121  |
| 9mo_SIGAF3_ | 0.01171141 | 0.0640657  | 3.74E-05 | 0.0065941 | 0.263      |
| 9mo_SIGAF3_ | 0.01627785 | 0.09224518 | 4.00E-05 | 0.0058035 | 0.080526   |
| 9mo_SIGAF3_ | 0.07939253 | 0.48172593 | 4.93E-05 | 0.014315  | 0.15946    |
| 9mo_SIGAF3_ | 0.02541143 | 0.1486085  | 4.38E-05 | 0.0049138 | -0.10813   |
| 9mo_SIGAF3_ | 0.07286986 | 0.44147453 | 5.49E-05 | 0.012637  | 0.24373    |
| 9mo_SIGAF3_ | 0.02718104 | 0.15952878 | 4.46E-05 | 0.0047834 | -0.11816   |



|             |            |            |          |           |            |
|-------------|------------|------------|----------|-----------|------------|
| 9mo_SIGAF3_ | 0.0293989  | 0.17321521 | 4.53E-05 | 0.0046846 | -0.1231    |
| 9mo_SIGAF3_ | 0.01030334 | 0.05537647 | 3.68E-05 | 0.0068    | 0.30902    |
| 9mo_SIGAF3_ | 0.08949813 | 0.5440876  | 4.86E-05 | 0.0090548 | -0.42792   |
| 9mo_SIGAF3_ | 0.01348443 | 0.075007   | 3.83E-05 | 0.0063061 | 0.19734    |
| 9mo_SIGAF3_ | 0.02459627 | 0.14357822 | 4.36E-05 | 0.0049516 | -0.098011  |
| 9mo_SIGAF3_ | 0.08442941 | 0.51280844 | 4.76E-05 | 0.012731  | -0.069378  |
| 9mo_SIGAF3_ | 0.03210833 | 0.1899351  | 4.62E-05 | 0.0046026 | -0.11821   |
| 9mo_SIGAF3_ | 0.08976325 | 0.5457236  | 4.86E-05 | 0.0090548 | -0.47194   |
| 9mo_SIGAF3_ | 0.04011448 | 0.23934104 | 4.99E-05 | 0.0046177 | -0.063007  |
| 9mo_SIGAF3_ | 0.08474441 | 0.5147523  | 4.76E-05 | 0.012404  | -0.069378  |
| 9mo_SIGAF3_ | 0.0586144  | 0.35350403 | 6.35E-05 | 0.0066597 | 0.068735   |
| 9mo_SIGAF3_ | 0.02643502 | 0.15492512 | 4.42E-05 | 0.0048445 | -0.11213   |
| 9mo_SIGAF3_ | 0.04827082 | 0.28967384 | 5.63E-05 | 0.005054  | -0.0087048 |
| 9mo_SIGAF3_ | 0.05214442 | 0.3135778  | 5.97E-05 | 0.0054628 | 0.014768   |
| 9mo_SIGAF3_ | 0.01868714 | 0.1071129  | 4.11E-05 | 0.0055212 | 0.015459   |
| 9mo_SIGAF3_ | 0.03204093 | 0.18951917 | 4.62E-05 | 0.0046026 | -0.11821   |
| 9mo_SIGAF3_ | 0.0215346  | 0.12468462 | 4.24E-05 | 0.0052258 | -0.04878   |
| 9mo_SIGAF3_ | 0.02477784 | 0.14469863 | 4.36E-05 | 0.0049516 | -0.098011  |
| 9mo_SIGAF3_ | 0.02135687 | 0.12358785 | 4.24E-05 | 0.0052258 | -0.04878   |
| 9mo_SIGAF3_ | 0.03211383 | 0.18996903 | 4.62E-05 | 0.0046026 | -0.11821   |
| 9mo_SIGAF3_ | 0.05273177 | 0.31720236 | 6.01E-05 | 0.0055357 | 0.018414   |
| 9mo_SIGAF3_ | 0.00764939 | 0.03899898 | 3.53E-05 | 0.0073641 | 0.43054    |
| 9mo_SIGAF3_ | 0.02665789 | 0.15630044 | 4.44E-05 | 0.004813  | -0.11546   |
| 9mo_SIGAF3_ | 0.03813111 | 0.22710168 | 4.87E-05 | 0.0045758 | -0.080425  |
| 9mo_SIGAF3_ | 0.07873381 | 0.47766095 | 4.97E-05 | 0.014318  | 0.18889    |
| 9mo_SIGAF3_ | 0.01218545 | 0.06699096 | 3.77E-05 | 0.0064954 | 0.24064    |
| 9mo_SIGAF3_ | 0.02586529 | 0.15140931 | 4.40E-05 | 0.0048781 | -0.10813   |
| 9mo_SIGAF3_ | 0.0449119  | 0.2689459  | 5.30E-05 | 0.0047888 | -0.028317  |
| 9mo_SIGAF3_ | 0.02148356 | 0.12436966 | 4.24E-05 | 0.0052258 | -0.04878   |
| 9mo_SIGAF3_ | 0.0292994  | 0.17260118 | 4.53E-05 | 0.0046846 | -0.1231    |
| 9mo_SIGAF3_ | 0.06573562 | 0.3974491  | 6.16E-05 | 0.0091463 | 0.16566    |
| 9mo_SIGAF3_ | 0.01477812 | 0.08299037 | 3.92E-05 | 0.0060428 | 0.1363     |
| 9mo_SIGAF3_ | 0.03030616 | 0.17881393 | 4.55E-05 | 0.0046645 | -0.12245   |
| 9mo_SIGAF3_ | 0.02227005 | 0.12922311 | 4.28E-05 | 0.005125  | -0.068556  |
| 9mo_SIGAF3_ | 0.08591398 | 0.52196974 | 4.76E-05 | 0.0117    | -0.17867   |
| 9mo_SIGAF3_ | 0.0289821  | 0.17064315 | 4.51E-05 | 0.0047064 | -0.12268   |
| 9mo_SIGAF3_ | 0.02649501 | 0.15529533 | 4.42E-05 | 0.0048445 | -0.11546   |
| 9mo_SIGAF3_ | 0.01327698 | 0.07372683 | 3.83E-05 | 0.0063061 | 0.19734    |
| 9mo_SIGAF3_ | 0.06474721 | 0.39134967 | 6.24E-05 | 0.0086643 | 0.14863    |
| 9mo_SIGAF3_ | 0.02551818 | 0.14926732 | 4.40E-05 | 0.0048781 | -0.10813   |
| 9mo_SIGAF3_ | 0.08400767 | 0.5102059  | 4.76E-05 | 0.012731  | -0.036078  |
| 9mo_SIGAF3_ | 0.01291104 | 0.07146863 | 3.80E-05 | 0.0063994 | 0.21875    |
| 9mo_SIGAF3_ | 0.07118876 | 0.43110046 | 5.65E-05 | 0.011849  | 0.23476    |

|             |            |            |          |           |            |
|-------------|------------|------------|----------|-----------|------------|
| 9mo_SIGAF3_ | 0.02026711 | 0.11686292 | 4.19E-05 | 0.0053364 | -0.025531  |
| 9mo_SIGAF3_ | 0.0205869  | 0.11883636 | 4.21E-05 | 0.0052798 | -0.037579  |
| 9mo_SIGAF3_ | 0.02420427 | 0.14115913 | 4.34E-05 | 0.0049916 | -0.091842  |
| 9mo_SIGAF3_ | 0.01919752 | 0.11026248 | 4.14E-05 | 0.0054571 | 0.0010121  |
| 9mo_SIGAF3_ | 0.01289511 | 0.07137028 | 3.80E-05 | 0.0063994 | 0.21875    |
| 9mo_SIGAF3_ | 0.08615667 | 0.52346736 | 4.77E-05 | 0.01133   | -0.17867   |
| 9mo_SIGAF3_ | 0.0194588  | 0.11187484 | 4.14E-05 | 0.0054571 | -0.012659  |
| 9mo_SIGAF3_ | 0.09685448 | 0.58948356 | 5.28E-05 | 0.0052469 | -1.03      |
| 9mo_SIGAF3_ | 0.10528421 | 0.64150345 | 5.94E-05 | 0.0035815 | -1.3831    |
| 9mo_SIGAF3_ | 0.01210186 | 0.06647515 | 3.77E-05 | 0.0064954 | 0.24064    |
| 9mo_SIGAF3_ | 0.01029514 | 0.05532591 | 3.68E-05 | 0.0068    | 0.30902    |
| 9mo_SIGAF3_ | 0.03201288 | 0.18934609 | 4.62E-05 | 0.0046026 | -0.11821   |
| 9mo_SIGAF3_ | 0.02448482 | 0.14289045 | 4.36E-05 | 0.0049516 | -0.098011  |
| 9mo_SIGAF3_ | 0.08627942 | 0.5242249  | 4.77E-05 | 0.01133   | -0.17867   |
| 9mo_SIGAF3_ | 0.09708281 | 0.5908926  | 5.32E-05 | 0.0050496 | -1.03      |
| 9mo_SIGAF3_ | 0.04188772 | 0.25028372 | 5.09E-05 | 0.0046676 | -0.0504    |
| 9mo_SIGAF3_ | 0.01348782 | 0.0750279  | 3.83E-05 | 0.0063061 | 0.17645    |
| 9mo_SIGAF3_ | 0.0527154  | 0.3171013  | 6.01E-05 | 0.0055357 | 0.018414   |
| 9mo_SIGAF3_ | 0.0316422  | 0.1870586  | 4.60E-05 | 0.0046154 | -0.12002   |
| 9mo_SIGAF3_ | 0.01930559 | 0.11092939 | 4.14E-05 | 0.0054571 | 0.0010121  |
| 9mo_SIGAF3_ | 0.0140836  | 0.07870451 | 3.89E-05 | 0.0061278 | 0.1561     |
| 9mo_SIGAF3_ | 0.02306595 | 0.13413459 | 4.30E-05 | 0.0050782 | -0.077142  |
| 9mo_SIGAF3_ | 0.00660441 | 0.0325504  | 3.47E-05 | 0.0076096 | 0.48124    |
| 9mo_SIGAF3_ | 0.01718016 | 0.09781334 | 4.03E-05 | 0.005729  | 0.063215   |
| 9mo_SIGAF3_ | 0.08120578 | 0.49291548 | 4.85E-05 | 0.0141    | 0.10139    |
| 9mo_SIGAF3_ | 0.02453506 | 0.14320046 | 4.36E-05 | 0.0049516 | -0.098011  |
| 9mo_SIGAF3_ | 0.01176064 | 0.06436949 | 3.74E-05 | 0.0065941 | 0.263      |
| 9mo_SIGAF3_ | 0.02951875 | 0.17395481 | 4.53E-05 | 0.0046846 | -0.1231    |
| 9mo_SIGAF3_ | 0.03419408 | 0.20280625 | 4.70E-05 | 0.0045688 | -0.10761   |
| 9mo_SIGAF3_ | 0.04141963 | 0.24739516 | 5.05E-05 | 0.0046492 | -0.054504  |
| 9mo_SIGAF3_ | 0.02727883 | 0.16013229 | 4.46E-05 | 0.0047834 | -0.11816   |
| 9mo_SIGAF3_ | 0.0184528  | 0.10566684 | 4.11E-05 | 0.0055212 | 0.015459   |
| 9mo_SIGAF3_ | 0.02895935 | 0.17050277 | 4.51E-05 | 0.0047064 | -0.12268   |
| 9mo_SIGAF3_ | 0.01739043 | 0.09911091 | 4.06E-05 | 0.0056572 | 0.046584   |
| 9mo_SIGAF3_ | 0.03101182 | 0.18316853 | 4.58E-05 | 0.00463   | -0.12145   |
| 9mo_SIGAF3_ | 0.00950876 | 0.05047315 | 3.62E-05 | 0.0070172 | 0.35661    |
| 9mo_SIGAF3_ | 0.02793236 | 0.16416517 | 4.48E-05 | 0.0047558 | -0.12024   |
| 9mo_SIGAF3_ | 0.08364879 | 0.5079913  | 4.77E-05 | 0.013036  | -0.0045591 |
| 9mo_SIGAF3_ | 0.04025128 | 0.24018526 | 4.99E-05 | 0.0046177 | -0.063007  |
| 9mo_SIGAF3_ | 0.01131066 | 0.06159268 | 3.71E-05 | 0.0066957 | 0.2858     |
| 9mo_SIGAF3_ | 0.03487033 | 0.20697938 | 4.72E-05 | 0.0045646 | -0.10426   |
| 9mo_SIGAF3_ | 0.00860779 | 0.04491323 | 3.56E-05 | 0.0072456 | 0.40559    |
| 9mo_SIGAF3_ | 0.00712672 | 0.03577357 | 3.50E-05 | 0.0074854 | 0.45576    |

|             |            |            |          |           |           |
|-------------|------------|------------|----------|-----------|-----------|
| 9mo_SIGAF3_ | 0.0132014  | 0.0732604  | 3.83E-05 | 0.0063061 | 0.19734   |
| 9mo_SIGAF3_ | 0.02689444 | 0.15776017 | 4.44E-05 | 0.004813  | -0.11546  |
| 9mo_SIGAF3_ | 0.02531088 | 0.14798804 | 4.38E-05 | 0.0049138 | -0.10343  |
| 9mo_SIGAF3_ | 0.02794339 | 0.16423325 | 4.48E-05 | 0.0047558 | -0.12024  |
| 9mo_SIGAF3_ | 0.02029655 | 0.11704463 | 4.19E-05 | 0.0053364 | -0.025531 |
| 9mo_SIGAF3_ | 0.01719641 | 0.09791361 | 4.03E-05 | 0.005729  | 0.063215  |
| 9mo_SIGAF3_ | 0.02769183 | 0.16268088 | 4.48E-05 | 0.0047558 | -0.12024  |
| 9mo_SIGAF3_ | 0.02772892 | 0.16290976 | 4.48E-05 | 0.0047558 | -0.12024  |
| 9mo_SIGAF3_ | 0.02627034 | 0.15390886 | 4.42E-05 | 0.0048445 | -0.11213  |
| 9mo_SIGAF3_ | 0.0314437  | 0.18583368 | 4.60E-05 | 0.0046154 | -0.12002  |
| 9mo_SIGAF3_ | 0.08152045 | 0.49485728 | 4.83E-05 | 0.013957  | 0.10139   |
| 9mo_SIGAF3_ | 0.02321236 | 0.13503806 | 4.30E-05 | 0.0050782 | -0.084895 |
| 9mo_SIGAF3_ | 0.01286001 | 0.07115368 | 3.80E-05 | 0.0063994 | 0.21875   |
| 9mo_SIGAF3_ | 0.06343503 | 0.38325214 | 6.30E-05 | 0.008216  | 0.13178   |
| 9mo_SIGAF3_ | 0.06698833 | 0.40517962 | 6.07E-05 | 0.0096573 | 0.19037   |
| 9mo_SIGAF3_ | 0.07477783 | 0.45324862 | 5.28E-05 | 0.013537  | 0.24193   |
| 9mo_SIGAF3_ | 0.04192926 | 0.25054005 | 5.09E-05 | 0.0046676 | -0.0504   |
| 9mo_SIGAF3_ | 0.01492028 | 0.08386764 | 3.92E-05 | 0.0060428 | 0.1363    |
| 9mo_SIGAF3_ | 0.06229926 | 0.37624335 | 6.36E-05 | 0.0076138 | 0.11565   |
| 9mo_SIGAF3_ | 0.05405422 | 0.3253632  | 6.10E-05 | 0.005694  | 0.030074  |
| 9mo_SIGAF3_ | 0.01676672 | 0.09526203 | 4.00E-05 | 0.0058035 | 0.063215  |
| 9mo_SIGAF3_ | 0.02458216 | 0.14349109 | 4.36E-05 | 0.0049516 | -0.098011 |
| 9mo_SIGAF3_ | 0.05635459 | 0.3395588  | 6.27E-05 | 0.0061731 | 0.047788  |
| 9mo_SIGAF3_ | 0.02873505 | 0.16911857 | 4.51E-05 | 0.0047064 | -0.12268  |
| 9mo_SIGAF3_ | 0.1093109  | 0.6663522  | 6.18E-05 | 0.0036276 | -1.3717   |
| 9mo_SIGAF3_ | 0.01811914 | 0.10360778 | 4.09E-05 | 0.0055879 | 0.030658  |
| 9mo_SIGAF3_ | 0.13787855 | 0.84264314 | 7.39E-05 | 0.0051198 | -1.03     |
| 9mo_SIGAF3_ | 0.02617087 | 0.15329504 | 4.42E-05 | 0.0048445 | -0.11213  |
| 9mo_SIGAF3_ | 0.02117792 | 0.12248354 | 4.24E-05 | 0.0052258 | -0.04878  |
| 9mo_SIGAF3_ | 0.03201244 | 0.18934335 | 4.62E-05 | 0.0046026 | -0.11821  |
| 9mo_SIGAF3_ | 0.0226815  | 0.13176213 | 4.28E-05 | 0.005125  | -0.077142 |
| 9mo_SIGAF3_ | 0.03407165 | 0.20205075 | 4.68E-05 | 0.0045746 | -0.10761  |
| 9mo_SIGAF3_ | 0.02257178 | 0.13108504 | 4.28E-05 | 0.005125  | -0.068556 |
| 9mo_SIGAF3_ | 0.02549353 | 0.1491152  | 4.40E-05 | 0.0048781 | -0.10813  |
| 9mo_SIGAF3_ | 0.03127192 | 0.1847736  | 4.58E-05 | 0.00463   | -0.12145  |
| 9mo_SIGAF3_ | 0.02063338 | 0.11912319 | 4.21E-05 | 0.0052798 | -0.037579 |
| 9mo_SIGAF3_ | 0.02768567 | 0.16264288 | 4.48E-05 | 0.0047558 | -0.12024  |
| 9mo_SIGAF3_ | 0.03237099 | 0.19155595 | 4.62E-05 | 0.0046026 | -0.11821  |
| 9mo_SIGAF3_ | 0.09995832 | 0.6086374  | 5.53E-05 | 0.004262  | -1.2296   |
| 9mo_SIGAF3_ | 0.0370507  | 0.22043447 | 4.81E-05 | 0.0045652 | -0.088896 |
| 9mo_SIGAF3_ | 0.01940681 | 0.111554   | 4.14E-05 | 0.0054571 | 0.0010121 |
| 9mo_SIGAF3_ | 0.03243034 | 0.19192223 | 4.62E-05 | 0.0046026 | -0.11603  |
| 9mo_SIGAF3_ | 0.01806145 | 0.10325179 | 4.09E-05 | 0.0055879 | 0.030658  |

|             |            |            |          |           |            |
|-------------|------------|------------|----------|-----------|------------|
| 9mo_SIGAF3_ | 0.00766907 | 0.03912041 | 3.53E-05 | 0.0073641 | 0.43054    |
| 9mo_SIGAF3_ | 0.0160587  | 0.0908928  | 3.98E-05 | 0.0058806 | 0.098494   |
| 9mo_SIGAF3_ | 0.059518   | 0.3590802  | 6.37E-05 | 0.0067983 | 0.080679   |
| 9mo_SIGAF3_ | 0.01086981 | 0.05887216 | 3.71E-05 | 0.0066957 | 0.2858     |
| 9mo_SIGAF3_ | 0.02137662 | 0.12370972 | 4.24E-05 | 0.0052258 | -0.04878   |
| 9mo_SIGAF3_ | 0.07886821 | 0.47849035 | 4.97E-05 | 0.014318  | 0.17506    |
| 9mo_SIGAF3_ | 0.05571685 | 0.33562332 | 6.21E-05 | 0.005966  | 0.043089   |
| 9mo_SIGAF3_ | 0.08857261 | 0.5383762  | 4.82E-05 | 0.0098057 | -0.3844    |
| 9mo_SIGAF3_ | 0.03533442 | 0.20984331 | 4.74E-05 | 0.0045622 | -0.10068   |
| 9mo_SIGAF3_ | 0.01466267 | 0.08227792 | 3.92E-05 | 0.0060428 | 0.1363     |
| 9mo_SIGAF3_ | 0.02997844 | 0.17679158 | 4.55E-05 | 0.0046645 | -0.12301   |
| 9mo_SIGAF3_ | 0.0193873  | 0.1114336  | 4.14E-05 | 0.0054571 | 0.0010121  |
| 9mo_SIGAF3_ | 0.02697036 | 0.15822873 | 4.44E-05 | 0.004813  | -0.11546   |
| 9mo_SIGAF3_ | 0.09587059 | 0.583412   | 5.20E-05 | 0.0056833 | -0.9515    |
| 9mo_SIGAF3_ | 0.0378416  | 0.22531508 | 4.84E-05 | 0.0045696 | -0.080425  |
| 9mo_SIGAF3_ | 0.06463891 | 0.39068136 | 6.24E-05 | 0.0086643 | 0.14863    |
| 9mo_SIGAF3_ | 0.02661161 | 0.15601486 | 4.44E-05 | 0.004813  | -0.11546   |
| 9mo_SIGAF3_ | 0.01989943 | 0.11459399 | 4.16E-05 | 0.0053955 | -0.012659  |
| 9mo_SIGAF3_ | 0.01649998 | 0.09361596 | 4.00E-05 | 0.0058035 | 0.080526   |
| 9mo_SIGAF3_ | 0.0365287  | 0.21721323 | 4.79E-05 | 0.0045625 | -0.092976  |
| 9mo_SIGAF3_ | 0.02350088 | 0.13681856 | 4.32E-05 | 0.0050338 | -0.084895  |
| 9mo_SIGAF3_ | 0.02116297 | 0.12239127 | 4.24E-05 | 0.0052258 | -0.04878   |
| 9mo_SIGAF3_ | 0.02506281 | 0.14645721 | 4.38E-05 | 0.0049138 | -0.10343   |
| 9mo_SIGAF3_ | 0.02375239 | 0.13837062 | 4.32E-05 | 0.0050338 | -0.091842  |
| 9mo_SIGAF3_ | 0.02158854 | 0.1250175  | 4.24E-05 | 0.0052258 | -0.059109  |
| 9mo_SIGAF3_ | 0.0509349  | 0.30611384 | 5.87E-05 | 0.0053288 | 0.0077602  |
| 9mo_SIGAF3_ | 0.02800245 | 0.16459775 | 4.48E-05 | 0.0047558 | -0.12024   |
| 9mo_SIGAF3_ | 0.04638379 | 0.27802896 | 5.44E-05 | 0.0048874 | -0.021643  |
| 9mo_SIGAF3_ | 0.04954463 | 0.2975345  | 5.73E-05 | 0.0051543 | -0.0022352 |
| 9mo_SIGAF3_ | 0.03471984 | 0.20605075 | 4.72E-05 | 0.0045646 | -0.10426   |
| 9mo_SIGAF3_ | 0.07031559 | 0.42571208 | 5.76E-05 | 0.011297  | 0.23016    |
| 9mo_SIGAF3_ | 0.02626483 | 0.15387484 | 4.42E-05 | 0.0048445 | -0.11213   |
| 9mo_SIGAF3_ | 0.02590173 | 0.1516342  | 4.40E-05 | 0.0048781 | -0.10813   |
| 9mo_SIGAF3_ | 0.09806523 | 0.5969551  | 5.36E-05 | 0.0048658 | -1.1032    |
| 9mo_SIGAF3_ | 0.08287061 | 0.50318915 | 4.79E-05 | 0.013563  | 0.02505    |
| 9mo_SIGAF3_ | 0.01181573 | 0.06470946 | 3.74E-05 | 0.0065941 | 0.263      |
| 9mo_SIGAF3_ | 0.01536864 | 0.08663447 | 3.95E-05 | 0.0059603 | 0.11709    |
| 9mo_SIGAF3_ | 0.01281109 | 0.07085185 | 3.80E-05 | 0.0063994 | 0.21875    |
| 9mo_SIGAF3_ | 0.02814469 | 0.16547547 | 4.48E-05 | 0.0047558 | -0.12174   |
| 9mo_SIGAF3_ | 0.06678588 | 0.40393028 | 6.07E-05 | 0.0096573 | 0.18233    |
| 9mo_SIGAF3_ | 0.09622289 | 0.585586   | 5.24E-05 | 0.0054581 | -0.99133   |
| 9mo_SIGAF3_ | 0.01962399 | 0.11289421 | 4.16E-05 | 0.0053955 | -0.012659  |
| 9mo_SIGAF3_ | 0.03421779 | 0.20295261 | 4.70E-05 | 0.0045688 | -0.10761   |

|             |            |            |          |           |            |
|-------------|------------|------------|----------|-----------|------------|
| 9mo_SIGAF3_ | 0.02873444 | 0.16911483 | 4.51E-05 | 0.0047064 | -0.12268   |
| 9mo_SIGAF3_ | 0.02996105 | 0.17668426 | 4.55E-05 | 0.0046645 | -0.12301   |
| 9mo_SIGAF3_ | 0.06981096 | 0.42259803 | 5.82E-05 | 0.011019  | 0.22487    |
| 9mo_SIGAF3_ | 0.03075712 | 0.18159679 | 4.57E-05 | 0.0046464 | -0.12245   |
| 9mo_SIGAF3_ | 0.01846004 | 0.10571148 | 4.11E-05 | 0.0055212 | 0.015459   |
| 9mo_SIGAF3_ | 0.08858554 | 0.53845596 | 4.82E-05 | 0.0098057 | -0.3844    |
| 9mo_SIGAF3_ | 0.08354002 | 0.50732005 | 4.77E-05 | 0.013036  | -0.0045591 |
| 9mo_SIGAF3_ | 0.01897884 | 0.10891303 | 4.14E-05 | 0.0054571 | 0.0010121  |
| 9mo_SIGAF3_ | 0.08105382 | 0.49197775 | 4.85E-05 | 0.0141    | 0.10139    |
| 9mo_SIGAF3_ | 0.02102052 | 0.12151225 | 4.21E-05 | 0.0052798 | -0.037579  |
| 9mo_SIGAF3_ | 0.03182131 | 0.18816389 | 4.60E-05 | 0.0046154 | -0.12002   |
| 9mo_SIGAF3_ | 0.02640568 | 0.15474404 | 4.42E-05 | 0.0048445 | -0.11213   |
| 9mo_SIGAF3_ | 0.01820446 | 0.10413434 | 4.09E-05 | 0.0055879 | 0.030658   |
| 9mo_SIGAF3_ | 0.01842255 | 0.10548015 | 4.11E-05 | 0.0055212 | 0.015459   |
| 9mo_SIGAF3_ | 0.0230133  | 0.13380966 | 4.30E-05 | 0.0050782 | -0.077142  |
| 9mo_SIGAF3_ | 0.01356822 | 0.07552406 | 3.86E-05 | 0.0062156 | 0.17645    |
| 9mo_SIGAF3_ | 0.02424212 | 0.14139274 | 4.34E-05 | 0.0049916 | -0.091842  |
| 9mo_SIGAF3_ | 0.09318546 | 0.5668421  | 5.02E-05 | 0.0070215 | -0.73907   |
| 9mo_SIGAF3_ | 0.01078942 | 0.05837612 | 3.68E-05 | 0.0068    | 0.2858     |
| 9mo_SIGAF3_ | 0.02279728 | 0.13247663 | 4.30E-05 | 0.0050782 | -0.077142  |
| 9mo_SIGAF3_ | 0.09727012 | 0.5920485  | 5.32E-05 | 0.0050496 | -1.0673    |
| 9mo_SIGAF3_ | 0.02614546 | 0.15313825 | 4.42E-05 | 0.0048445 | -0.11213   |
| 9mo_SIGAF3_ | 0.02656234 | 0.15571082 | 4.44E-05 | 0.004813  | -0.11546   |
| 9mo_SIGAF3_ | 0.02478221 | 0.14472559 | 4.36E-05 | 0.0049516 | -0.098011  |
| 9mo_SIGAF3_ | 0.01915532 | 0.11000207 | 4.14E-05 | 0.0054571 | 0.0010121  |
| 9mo_SIGAF3_ | 0.03939015 | 0.2348712  | 4.92E-05 | 0.0045932 | -0.071721  |
| 9mo_SIGAF3_ | 0.0109523  | 0.0593812  | 3.71E-05 | 0.0066957 | 0.2858     |
| 9mo_SIGAF3_ | 0.03767526 | 0.22428864 | 4.84E-05 | 0.0045696 | -0.084703  |
| 9mo_SIGAF3_ | 0.01459562 | 0.08186416 | 3.89E-05 | 0.0061278 | 0.1363     |
| 9mo_SIGAF3_ | 0.08410866 | 0.51082915 | 4.76E-05 | 0.012731  | -0.036078  |
| 9mo_SIGAF3_ | 0.01487404 | 0.0835823  | 3.92E-05 | 0.0060428 | 0.1363     |
| 9mo_SIGAF3_ | 0.02214569 | 0.12845567 | 4.26E-05 | 0.0051742 | -0.068556  |
| 9mo_SIGAF3_ | 0.06602689 | 0.39924654 | 6.16E-05 | 0.0091463 | 0.17407    |
| 9mo_SIGAF3_ | 0.01464867 | 0.08219151 | 3.92E-05 | 0.0060428 | 0.1363     |
| 9mo_SIGAF3_ | 0.03425747 | 0.20319743 | 4.70E-05 | 0.0045688 | -0.10761   |
| 9mo_SIGAF3_ | 0.01885237 | 0.10813259 | 4.11E-05 | 0.0055212 | 0.015459   |
| 9mo_SIGAF3_ | 0.03172558 | 0.18757318 | 4.60E-05 | 0.0046154 | -0.12002   |
| 9mo_SIGAF3_ | 0.08616004 | 0.5234882  | 4.77E-05 | 0.01133   | -0.17867   |
| 9mo_SIGAF3_ | 0.08961529 | 0.5448106  | 4.86E-05 | 0.0090548 | -0.42792   |
| 9mo_SIGAF3_ | 0.05147949 | 0.30947456 | 5.92E-05 | 0.0053939 | 0.011221   |
| 9mo_SIGAF3_ | 0.07503872 | 0.45485854 | 5.28E-05 | 0.013537  | 0.24193    |
| 9mo_SIGAF3_ | 0.02316774 | 0.13476269 | 4.30E-05 | 0.0050782 | -0.077142  |
| 9mo_SIGAF3_ | 0.01271031 | 0.07022989 | 3.80E-05 | 0.0063994 | 0.21875    |

|             |            |            |          |           |           |
|-------------|------------|------------|----------|-----------|-----------|
| 9mo_SIGAF3_ | 0.04510101 | 0.27011293 | 5.34E-05 | 0.0048194 | -0.028317 |
| 9mo_SIGAF3_ | 0.02340897 | 0.13625135 | 4.32E-05 | 0.0050338 | -0.084895 |
| 9mo_SIGAF3_ | 0.0761129  | 0.4614873  | 5.18E-05 | 0.013885  | 0.23393   |
| 9mo_SIGAF3_ | 0.02996332 | 0.17669825 | 4.55E-05 | 0.0046645 | -0.12301  |
| 9mo_SIGAF3_ | 0.02749965 | 0.16149496 | 4.46E-05 | 0.0047834 | -0.11816  |
| 9mo_SIGAF3_ | 0.02279532 | 0.13246453 | 4.30E-05 | 0.0050782 | -0.077142 |
| 9mo_SIGAF3_ | 0.02382118 | 0.1387951  | 4.34E-05 | 0.0049916 | -0.091842 |
| 9mo_SIGAF3_ | 0.04357573 | 0.26070046 | 5.21E-05 | 0.0047343 | -0.038876 |
| 9mo_SIGAF3_ | 0.02240487 | 0.13005504 | 4.28E-05 | 0.005125  | -0.068556 |
| 9mo_SIGAF3_ | 0.03068868 | 0.18117443 | 4.57E-05 | 0.0046464 | -0.12245  |
| 9mo_SIGAF3_ | 0.01738984 | 0.09910727 | 4.06E-05 | 0.0056572 | 0.046584  |
| 9mo_SIGAF3_ | 0.03428729 | 0.20338148 | 4.70E-05 | 0.0045688 | -0.10761  |
| 9mo_SIGAF3_ | 0.0156696  | 0.08849167 | 3.95E-05 | 0.0059603 | 0.098494  |
| 9mo_SIGAF3_ | 0.02451989 | 0.14310683 | 4.36E-05 | 0.0049516 | -0.098011 |
| 9mo_SIGAF3_ | 0.07175156 | 0.43457347 | 5.60E-05 | 0.012118  | 0.2386    |
| 9mo_SIGAF3_ | 0.0724669  | 0.43898788 | 5.54E-05 | 0.012382  | 0.24373   |
| 9mo_SIGAF3_ | 0.03595246 | 0.2136572  | 4.77E-05 | 0.0045615 | -0.096915 |
| 9mo_SIGAF3_ | 0.09360172 | 0.5694108  | 5.06E-05 | 0.0067258 | -0.7829   |
| 9mo_SIGAF3_ | 0.01154645 | 0.06304773 | 3.74E-05 | 0.0065941 | 0.263     |
| 9mo_SIGAF3_ | 0.01016392 | 0.05451611 | 3.65E-05 | 0.0069072 | 0.33263   |
| 9mo_SIGAF3_ | 0.02605989 | 0.1526102  | 4.42E-05 | 0.0048445 | -0.11213  |
| 9mo_SIGAF3_ | 0.08417799 | 0.511257   | 4.76E-05 | 0.012731  | -0.036078 |
| 9mo_SIGAF3_ | 0.0211547  | 0.12234026 | 4.24E-05 | 0.0052258 | -0.04878  |
| 9mo_SIGAF3_ | 0.02492727 | 0.14562081 | 4.38E-05 | 0.0049138 | -0.10343  |
| 9mo_SIGAF3_ | 0.02761436 | 0.16220279 | 4.46E-05 | 0.0047834 | -0.12024  |
| 9mo_SIGAF3_ | 0.09089104 | 0.55268323 | 4.91E-05 | 0.0083333 | -0.56091  |
| 9mo_SIGAF3_ | 0.08246858 | 0.5007082  | 4.79E-05 | 0.013563  | 0.05262   |
| 9mo_SIGAF3_ | 0.02058976 | 0.11885402 | 4.21E-05 | 0.0052798 | -0.037579 |
| 9mo_SIGAF3_ | 0.01422008 | 0.07954671 | 3.89E-05 | 0.0061278 | 0.1561    |
| 9mo_SIGAF3_ | 0.07791542 | 0.47261068 | 5.05E-05 | 0.014229  | 0.20103   |
| 9mo_SIGAF3_ | 0.02698573 | 0.15832356 | 4.44E-05 | 0.004813  | -0.11546  |
| 9mo_SIGAF3_ | 0.02531774 | 0.14803036 | 4.38E-05 | 0.0049138 | -0.10343  |
| 9mo_SIGAF3_ | 0.02845373 | 0.16738258 | 4.49E-05 | 0.0047302 | -0.12174  |
| 9mo_SIGAF3_ | 0.07177299 | 0.4347057  | 5.60E-05 | 0.012118  | 0.2386    |
| 9mo_SIGAF3_ | 0.02097547 | 0.12123424 | 4.21E-05 | 0.0052798 | -0.037579 |
| 9mo_SIGAF3_ | 0.07288494 | 0.44156757 | 5.49E-05 | 0.012637  | 0.24373   |
| 9mo_SIGAF3_ | 0.07385484 | 0.44755283 | 5.38E-05 | 0.013116  | 0.24502   |
| 9mo_SIGAF3_ | 0.04338532 | 0.25952542 | 5.21E-05 | 0.0047343 | -0.038876 |
| 9mo_SIGAF3_ | 0.09069022 | 0.55144393 | 4.91E-05 | 0.0083333 | -0.51631  |
| 9mo_SIGAF3_ | 0.04311397 | 0.25785092 | 5.17E-05 | 0.0047101 | -0.042593 |
| 9mo_SIGAF3_ | 0.01232345 | 0.06784262 | 3.77E-05 | 0.0064954 | 0.24064   |
| 9mo_SIGAF3_ | 0.01142344 | 0.06228866 | 3.74E-05 | 0.0065941 | 0.263     |
| 9mo_SIGAF3_ | 0.09088487 | 0.55264515 | 4.91E-05 | 0.0083333 | -0.56091  |

|             |            |            |          |           |            |
|-------------|------------|------------|----------|-----------|------------|
| 9mo_SIGAF3_ | 0.02544793 | 0.14883378 | 4.40E-05 | 0.0048781 | -0.10813   |
| 9mo_SIGAF3_ | 0.03488472 | 0.20706819 | 4.72E-05 | 0.0045646 | -0.10426   |
| 9mo_SIGAF3_ | 0.03262435 | 0.1931195  | 4.64E-05 | 0.0045915 | -0.11603   |
| 9mo_SIGAF3_ | 0.03458967 | 0.20524743 | 4.70E-05 | 0.0045688 | -0.10426   |
| 9mo_SIGAF3_ | 0.04936415 | 0.29642075 | 5.73E-05 | 0.0051543 | -0.0022352 |
| 9mo_SIGAF3_ | 0.01473176 | 0.08270427 | 3.92E-05 | 0.0060428 | 0.1363     |
| 9mo_SIGAF3_ | 0.08456615 | 0.5136523  | 4.76E-05 | 0.012404  | -0.069378  |
| 9mo_SIGAF3_ | 0.02007436 | 0.11567345 | 4.19E-05 | 0.0053364 | -0.025531  |
| 9mo_SIGAF3_ | 0.07011744 | 0.42448935 | 5.76E-05 | 0.011297  | 0.22487    |
| 9mo_SIGAF3_ | 0.07977582 | 0.4840912  | 4.90E-05 | 0.014278  | 0.15946    |
| 9mo_SIGAF3_ | 0.03685713 | 0.21923994 | 4.81E-05 | 0.0045652 | -0.088896  |
| 9mo_SIGAF3_ | 0.0325224  | 0.19249035 | 4.64E-05 | 0.0045915 | -0.11603   |
| 9mo_SIGAF3_ | 0.01985447 | 0.11431652 | 4.16E-05 | 0.0053955 | -0.012659  |
| 9mo_SIGAF3_ | 0.01216817 | 0.06688433 | 3.77E-05 | 0.0064954 | 0.24064    |
| 9mo_SIGAF3_ | 0.07501797 | 0.45473054 | 5.28E-05 | 0.013537  | 0.24193    |
| 9mo_SIGAF3_ | 0.02943797 | 0.17345633 | 4.53E-05 | 0.0046846 | -0.1231    |
| 9mo_SIGAF3_ | 0.03187329 | 0.1884847  | 4.60E-05 | 0.0046154 | -0.11821   |
| 9mo_SIGAF3_ | 0.0181278  | 0.10366122 | 4.09E-05 | 0.0055879 | 0.030658   |
| 9mo_SIGAF3_ | 0.04412084 | 0.26406434 | 5.25E-05 | 0.0047605 | -0.035266  |
| 9mo_SIGAF3_ | 0.04518052 | 0.27060357 | 5.34E-05 | 0.0048194 | -0.028317  |
| 9mo_SIGAF3_ | 0.04312849 | 0.25794053 | 5.17E-05 | 0.0047101 | -0.042593  |
| 9mo_SIGAF3_ | 0.02859052 | 0.1682267  | 4.49E-05 | 0.0047302 | -0.12174   |
| 9mo_SIGAF3_ | 0.00960572 | 0.05107149 | 3.62E-05 | 0.0070172 | 0.35661    |
| 9mo_SIGAF3_ | 0.02936492 | 0.17300555 | 4.53E-05 | 0.0046846 | -0.1231    |
| 9mo_SIGAF3_ | 0.01412108 | 0.07893578 | 3.89E-05 | 0.0061278 | 0.1561     |
| 9mo_SIGAF3_ | 0.08880906 | 0.5398353  | 4.82E-05 | 0.0098057 | -0.3844    |
| 9mo_SIGAF3_ | 0.02793304 | 0.16416942 | 4.48E-05 | 0.0047558 | -0.12024   |
| 9mo_SIGAF3_ | 0.01491526 | 0.08383667 | 3.92E-05 | 0.0060428 | 0.1363     |
| 9mo_SIGAF3_ | 0.09206212 | 0.55990994 | 4.96E-05 | 0.0076529 | -0.6503    |
| 9mo_SIGAF3_ | 0.08934636 | 0.54315096 | 4.84E-05 | 0.0094274 | -0.42792   |
| 9mo_SIGAF3_ | 0.04051219 | 0.24179532 | 4.99E-05 | 0.0046177 | -0.058715  |
| 9mo_SIGAF3_ | 0.05347144 | 0.32176688 | 6.05E-05 | 0.0056127 | 0.026054   |
| 9mo_SIGAF3_ | 0.03381778 | 0.20048411 | 4.68E-05 | 0.0045746 | -0.11071   |
| 9mo_SIGAF3_ | 0.01249311 | 0.06888959 | 3.80E-05 | 0.0063994 | 0.21875    |
| 9mo_SIGAF3_ | 0.02839221 | 0.16700295 | 4.49E-05 | 0.0047302 | -0.12174   |
| 9mo_SIGAF3_ | 0.03513341 | 0.20860288 | 4.72E-05 | 0.0045646 | -0.10068   |
| 9mo_SIGAF3_ | 0.02432037 | 0.1418756  | 4.34E-05 | 0.0049916 | -0.098011  |
| 9mo_SIGAF3_ | 0.01730339 | 0.09857381 | 4.03E-05 | 0.005729  | 0.046584   |
| 9mo_SIGAF3_ | 0.01605662 | 0.09087996 | 3.98E-05 | 0.0058806 | 0.098494   |
| 9mo_SIGAF3_ | 0.03128553 | 0.18485762 | 4.58E-05 | 0.00463   | -0.12145   |
| 9mo_SIGAF3_ | 0.01819722 | 0.10408962 | 4.09E-05 | 0.0055879 | 0.030658   |
| 9mo_SIGAF3_ | 0.01524062 | 0.08584447 | 3.95E-05 | 0.0059603 | 0.11709    |
| 9mo_SIGAF3_ | 0.01404189 | 0.0784471  | 3.86E-05 | 0.0062156 | 0.1561     |

|             |            |            |          |           |            |
|-------------|------------|------------|----------|-----------|------------|
| 9mo_SIGAF3_ | 0.01490146 | 0.08375146 | 3.92E-05 | 0.0060428 | 0.1363     |
| 9mo_SIGAF3_ | 0.03522886 | 0.20919189 | 4.74E-05 | 0.0045622 | -0.10068   |
| 9mo_SIGAF3_ | 0.03481977 | 0.20666742 | 4.72E-05 | 0.0045646 | -0.10426   |
| 9mo_SIGAF3_ | 0.02438901 | 0.14229918 | 4.36E-05 | 0.0049516 | -0.098011  |
| 9mo_SIGAF3_ | 0.01485614 | 0.08347181 | 3.92E-05 | 0.0060428 | 0.1363     |
| 9mo_SIGAF3_ | 0.02148578 | 0.12438336 | 4.24E-05 | 0.0052258 | -0.04878   |
| 9mo_SIGAF3_ | 0.02299856 | 0.13371871 | 4.30E-05 | 0.0050782 | -0.077142  |
| 9mo_SIGAF3_ | 0.02974526 | 0.17535262 | 4.53E-05 | 0.0046846 | -0.12301   |
| 9mo_SIGAF3_ | 0.0433335  | 0.25920567 | 5.21E-05 | 0.0047343 | -0.038876  |
| 9mo_SIGAF3_ | 0.07385732 | 0.44756815 | 5.38E-05 | 0.013116  | 0.24502    |
| 9mo_SIGAF3_ | 0.01167405 | 0.06383517 | 3.74E-05 | 0.0065941 | 0.263      |
| 9mo_SIGAF3_ | 0.07329251 | 0.44408268 | 5.43E-05 | 0.012883  | 0.24489    |
| 9mo_SIGAF3_ | 0.01272711 | 0.07033359 | 3.80E-05 | 0.0063994 | 0.21875    |
| 9mo_SIGAF3_ | 0.0316341  | 0.18700862 | 4.60E-05 | 0.0046154 | -0.12002   |
| 9mo_SIGAF3_ | 0.09399556 | 0.57184124 | 5.09E-05 | 0.0064439 | -0.82618   |
| 9mo_SIGAF3_ | 0.02923903 | 0.1722287  | 4.51E-05 | 0.0047064 | -0.1231    |
| 9mo_SIGAF3_ | 0.0197852  | 0.11388905 | 4.16E-05 | 0.0053955 | -0.012659  |
| 9mo_SIGAF3_ | 0.07037135 | 0.42605618 | 5.76E-05 | 0.011297  | 0.23016    |
| 9mo_SIGAF3_ | 0.01388042 | 0.07745067 | 3.86E-05 | 0.0062156 | 0.17645    |
| 9mo_SIGAF3_ | 0.02356562 | 0.13721803 | 4.32E-05 | 0.0050338 | -0.084895  |
| 9mo_SIGAF3_ | 0.02392307 | 0.13942388 | 4.34E-05 | 0.0049916 | -0.091842  |
| 9mo_SIGAF3_ | 0.01694307 | 0.09635025 | 4.03E-05 | 0.005729  | 0.063215   |
| 9mo_SIGAF3_ | 0.08408371 | 0.51067513 | 4.76E-05 | 0.012731  | -0.036078  |
| 9mo_SIGAF3_ | 0.08575322 | 0.5209777  | 4.76E-05 | 0.0117    | -0.14081   |
| 9mo_SIGAF3_ | 0.02886539 | 0.1699229  | 4.51E-05 | 0.0047064 | -0.12268   |
| 9mo_SIGAF3_ | 0.02467464 | 0.1440618  | 4.36E-05 | 0.0049516 | -0.098011  |
| 9mo_SIGAF3_ | 0.09259279 | 0.5631847  | 4.99E-05 | 0.0073308 | -0.69483   |
| 9mo_SIGAF3_ | 0.02467666 | 0.14407429 | 4.36E-05 | 0.0049516 | -0.098011  |
| 9mo_SIGAF3_ | 0.04847005 | 0.2909033  | 5.63E-05 | 0.005054  | -0.0087048 |
| 9mo_SIGAF3_ | 0.02034733 | 0.11735795 | 4.19E-05 | 0.0053364 | -0.025531  |
| 9mo_SIGAF3_ | 0.09538413 | 0.58041006 | 5.20E-05 | 0.0056833 | -0.91061   |
| 9mo_SIGAF3_ | 0.07494016 | 0.45425034 | 5.28E-05 | 0.013537  | 0.24193    |
| 9mo_SIGAF3_ | 0.0587245  | 0.3541835  | 6.35E-05 | 0.0066597 | 0.068735   |
| 9mo_SIGAF3_ | 0.08018546 | 0.48661909 | 4.90E-05 | 0.014278  | 0.14202    |
| 9mo_SIGAF3_ | 0.02609851 | 0.15284854 | 4.42E-05 | 0.0048445 | -0.11213   |
| 9mo_SIGAF3_ | 0.01160293 | 0.06339625 | 3.74E-05 | 0.0065941 | 0.263      |
| 9mo_SIGAF3_ | 0.01632473 | 0.09253449 | 4.00E-05 | 0.0058035 | 0.080526   |
| 9mo_SIGAF3_ | 0.02141451 | 0.12394352 | 4.24E-05 | 0.0052258 | -0.04878   |
| 9mo_SIGAF3_ | 0.01558533 | 0.08797163 | 3.95E-05 | 0.0059603 | 0.11709    |
| 9mo_SIGAF3_ | 0.05019493 | 0.3015475  | 5.78E-05 | 0.0052091 | 0.0010449  |
| 9mo_SIGAF3_ | 0.02217632 | 0.12864469 | 4.26E-05 | 0.0051742 | -0.068556  |
| 9mo_SIGAF3_ | 0.02202206 | 0.1276927  | 4.26E-05 | 0.0051742 | -0.059109  |
| 9mo_SIGAF3_ | 0.01750846 | 0.09983927 | 4.06E-05 | 0.0056572 | 0.046584   |



|             |            |            |          |           |            |
|-------------|------------|------------|----------|-----------|------------|
| 9mo_SIGAF3_ | 0.09017308 | 0.5482527  | 4.88E-05 | 0.0086895 | -0.47194   |
| 9mo_SIGAF3_ | 0.09901255 | 0.6028011  | 5.45E-05 | 0.0045382 | -1.1701    |
| 9mo_SIGAF3_ | 0.01268599 | 0.0700798  | 3.80E-05 | 0.0063994 | 0.21875    |
| 9mo_SIGAF3_ | 0.03280434 | 0.19423021 | 4.64E-05 | 0.0045915 | -0.11603   |
| 9mo_SIGAF3_ | 0.06092295 | 0.3677501  | 6.38E-05 | 0.0072613 | 0.09374    |
| 9mo_SIGAF3_ | 0.02040166 | 0.11769323 | 4.19E-05 | 0.0053364 | -0.025531  |
| 9mo_SIGAF3_ | 0.01318991 | 0.07318954 | 3.83E-05 | 0.0063061 | 0.19734    |
| 9mo_SIGAF3_ | 0.01676579 | 0.09525629 | 4.00E-05 | 0.0058035 | 0.063215   |
| 9mo_SIGAF3_ | 0.08714167 | 0.52954584 | 4.78E-05 | 0.010952  | -0.25808   |
| 9mo_SIGAF3_ | 0.05571726 | 0.3356258  | 6.21E-05 | 0.005966  | 0.043089   |
| 9mo_SIGAF3_ | 0.02490196 | 0.1454646  | 4.36E-05 | 0.0049516 | -0.10343   |
| 9mo_SIGAF3_ | 0.01784689 | 0.10192777 | 4.06E-05 | 0.0056572 | 0.030658   |
| 9mo_SIGAF3_ | 0.08478208 | 0.5149848  | 4.76E-05 | 0.012404  | -0.069378  |
| 9mo_SIGAF3_ | 0.01971531 | 0.11345775 | 4.16E-05 | 0.0053955 | -0.012659  |
| 9mo_SIGAF3_ | 0.01954866 | 0.11242937 | 4.16E-05 | 0.0053955 | -0.012659  |
| 9mo_SIGAF3_ | 0.02808778 | 0.16512431 | 4.48E-05 | 0.0047558 | -0.12174   |
| 9mo_SIGAF3_ | 0.04835171 | 0.29017302 | 5.63E-05 | 0.005054  | -0.0087048 |
| 9mo_SIGAF3_ | 0.01601697 | 0.09063532 | 3.98E-05 | 0.0058806 | 0.098494   |
| 9mo_SIGAF3_ | 0.07258822 | 0.43973652 | 5.54E-05 | 0.012382  | 0.24373    |
| 9mo_SIGAF3_ | 0.03240833 | 0.19178644 | 4.62E-05 | 0.0046026 | -0.11603   |
| 9mo_SIGAF3_ | 0.06865919 | 0.41549045 | 5.93E-05 | 0.010465  | 0.21248    |
| 9mo_SIGAF3_ | 0.03692348 | 0.21964936 | 4.81E-05 | 0.0045652 | -0.088896  |
| 9mo_SIGAF3_ | 0.02167158 | 0.12552993 | 4.26E-05 | 0.0051742 | -0.059109  |
| 9mo_SIGAF3_ | 0.09686974 | 0.5895778  | 5.28E-05 | 0.0052469 | -1.03      |
| 9mo_SIGAF3_ | 0.07480902 | 0.45344105 | 5.28E-05 | 0.013537  | 0.24193    |
| 9mo_SIGAF3_ | 0.06735813 | 0.4074616  | 6.03E-05 | 0.009922  | 0.19037    |
| 9mo_SIGAF3_ | 0.04137906 | 0.24714476 | 5.05E-05 | 0.0046492 | -0.054504  |
| 9mo_SIGAF3_ | 0.02162815 | 0.1252619  | 4.24E-05 | 0.0052258 | -0.059109  |
| 9mo_SIGAF3_ | 0.02851231 | 0.16774409 | 4.49E-05 | 0.0047302 | -0.12174   |
| 9mo_SIGAF3_ | 0.02490696 | 0.14549544 | 4.38E-05 | 0.0049138 | -0.10343   |
| 9mo_SIGAF3_ | 0.0686525  | 0.4154492  | 5.93E-05 | 0.010465  | 0.21248    |
| 9mo_SIGAF3_ | 0.01827445 | 0.10456621 | 4.09E-05 | 0.0055879 | 0.030658   |
| 9mo_SIGAF3_ | 0.02418887 | 0.14106414 | 4.34E-05 | 0.0049916 | -0.091842  |
| 9mo_SIGAF3_ | 0.02506078 | 0.14644466 | 4.38E-05 | 0.0049138 | -0.10343   |
| 9mo_SIGAF3_ | 0.08095212 | 0.49135017 | 4.85E-05 | 0.0141    | 0.12269    |
| 9mo_SIGAF3_ | 0.00601922 | 0.0289392  | 3.44E-05 | 0.0077366 | 0.50694    |
| 9mo_SIGAF3_ | 0.02977628 | 0.175544   | 4.53E-05 | 0.0046846 | -0.12301   |
| 9mo_SIGAF3_ | 0.02080939 | 0.12020933 | 4.21E-05 | 0.0052798 | -0.037579  |
| 9mo_SIGAF3_ | 0.02670322 | 0.15658018 | 4.44E-05 | 0.004813  | -0.11546   |
| 9mo_SIGAF3_ | 0.0282351  | 0.1660334  | 4.49E-05 | 0.0047302 | -0.12174   |
| 9mo_SIGAF3_ | 0.01285888 | 0.07114671 | 3.80E-05 | 0.0063994 | 0.21875    |
| 9mo_SIGAF3_ | 0.07674823 | 0.46540794 | 5.13E-05 | 0.014025  | 0.22047    |
| 9mo_SIGAF3_ | 0.00987211 | 0.05271535 | 3.65E-05 | 0.0069072 | 0.33263    |

|             |            |            |          |           |           |
|-------------|------------|------------|----------|-----------|-----------|
| 9mo_SIGAF3_ | 0.01340652 | 0.07452624 | 3.83E-05 | 0.0063061 | 0.19734   |
| 9mo_SIGAF3_ | 0.0409544  | 0.2445242  | 5.02E-05 | 0.0046325 | -0.058715 |
| 9mo_SIGAF3_ | 0.05791273 | 0.34917405 | 6.32E-05 | 0.0064035 | 0.06315   |
| 9mo_SIGAF3_ | 0.06663055 | 0.40297174 | 6.12E-05 | 0.0093985 | 0.18233   |
| 9mo_SIGAF3_ | 0.03249227 | 0.19230437 | 4.62E-05 | 0.0046026 | -0.11603  |
| 9mo_SIGAF3_ | 0.01536279 | 0.08659838 | 3.95E-05 | 0.0059603 | 0.11709   |
| 9mo_SIGAF3_ | 0.06987128 | 0.4229703  | 5.82E-05 | 0.011019  | 0.22487   |
| 9mo_SIGAF3_ | 0.0138819  | 0.07745978 | 3.86E-05 | 0.0062156 | 0.17645   |
| 9mo_SIGAF3_ | 0.02422497 | 0.14128688 | 4.34E-05 | 0.0049916 | -0.091842 |
| 9mo_SIGAF3_ | 0.02540055 | 0.1485414  | 4.38E-05 | 0.0049138 | -0.10813  |
| 9mo_SIGAF3_ | 0.02692455 | 0.15794599 | 4.44E-05 | 0.004813  | -0.11546  |
| 9mo_SIGAF3_ | 0.0249541  | 0.14578635 | 4.38E-05 | 0.0049138 | -0.10343  |
| 9mo_SIGAF3_ | 0.03757    | 0.22363904 | 4.84E-05 | 0.0045696 | -0.084703 |
| 9mo_SIGAF3_ | 0.09141307 | 0.5559046  | 4.93E-05 | 0.0079874 | -0.60562  |
| 9mo_SIGAF3_ | 0.08766076 | 0.5327491  | 4.79E-05 | 0.010571  | -0.29935  |
| 9mo_SIGAF3_ | 0.01481655 | 0.08322749 | 3.92E-05 | 0.0060428 | 0.1363    |
| 9mo_SIGAF3_ | 0.07069143 | 0.4280314  | 5.71E-05 | 0.011574  | 0.23016   |
| 9mo_SIGAF3_ | 0.08127264 | 0.49332806 | 4.83E-05 | 0.013957  | 0.10139   |
| 9mo_SIGAF3_ | 0.01906382 | 0.1094374  | 4.14E-05 | 0.0054571 | 0.0010121 |
| 9mo_SIGAF3_ | 0.01797435 | 0.10271431 | 4.09E-05 | 0.0055879 | 0.030658  |
| 9mo_SIGAF3_ | 0.03108987 | 0.18365018 | 4.58E-05 | 0.00463   | -0.12145  |
| 9mo_SIGAF3_ | 0.00997043 | 0.05332208 | 3.65E-05 | 0.0069072 | 0.33263   |
| 9mo_SIGAF3_ | 0.01270335 | 0.07018693 | 3.80E-05 | 0.0063994 | 0.21875   |
| 9mo_SIGAF3_ | 0.0298712  | 0.17612977 | 4.55E-05 | 0.0046645 | -0.12301  |
| 9mo_SIGAF3_ | 0.02124833 | 0.12291803 | 4.24E-05 | 0.0052258 | -0.04878  |
| 9mo_SIGAF3_ | 0.0218285  | 0.12649828 | 4.26E-05 | 0.0051742 | -0.059109 |
| 9mo_SIGAF3_ | 0.02807876 | 0.16506861 | 4.48E-05 | 0.0047558 | -0.12174  |
| 9mo_SIGAF3_ | 0.03558849 | 0.21141116 | 4.74E-05 | 0.0045622 | -0.10068  |
| 9mo_SIGAF3_ | 0.01666509 | 0.09463485 | 4.00E-05 | 0.0058035 | 0.080526  |
| 9mo_SIGAF3_ | 0.03475831 | 0.20628811 | 4.72E-05 | 0.0045646 | -0.10426  |
| 9mo_SIGAF3_ | 0.02150833 | 0.12452247 | 4.24E-05 | 0.0052258 | -0.04878  |
| 9mo_SIGAF3_ | 0.02408039 | 0.14039467 | 4.34E-05 | 0.0049916 | -0.091842 |
| 9mo_SIGAF3_ | 0.0910004  | 0.5533581  | 4.91E-05 | 0.0083333 | -0.56091  |
| 9mo_SIGAF3_ | 0.07731763 | 0.4689217  | 5.09E-05 | 0.014141  | 0.21153   |
| 9mo_SIGAF3_ | 0.03257927 | 0.1928413  | 4.64E-05 | 0.0045915 | -0.11603  |
| 9mo_SIGAF3_ | 0.01787692 | 0.10211308 | 4.09E-05 | 0.0055879 | 0.030658  |
| 9mo_SIGAF3_ | 0.08011454 | 0.4861814  | 4.90E-05 | 0.014278  | 0.14202   |
| 9mo_SIGAF3_ | 0.01377366 | 0.07679182 | 3.86E-05 | 0.0062156 | 0.17645   |
| 9mo_SIGAF3_ | 0.03892208 | 0.23198275 | 4.89E-05 | 0.0045836 | -0.071721 |
| 9mo_SIGAF3_ | 0.01993746 | 0.11482863 | 4.16E-05 | 0.0053955 | -0.012659 |
| 9mo_SIGAF3_ | 0.08936175 | 0.543246   | 4.84E-05 | 0.0094274 | -0.42792  |
| 9mo_SIGAF3_ | 0.02487394 | 0.14529166 | 4.36E-05 | 0.0049516 | -0.10343  |
| 9mo_SIGAF3_ | 0.07790026 | 0.47251713 | 5.05E-05 | 0.014229  | 0.20103   |

|             |            |            |          |           |           |
|-------------|------------|------------|----------|-----------|-----------|
| 9mo_SIGAF3_ | 0.01977096 | 0.11380116 | 4.16E-05 | 0.0053955 | -0.012659 |
| 9mo_SIGAF3_ | 0.01283425 | 0.07099476 | 3.80E-05 | 0.0063994 | 0.21875   |
| 9mo_SIGAF3_ | 0.03593033 | 0.21352065 | 4.77E-05 | 0.0045615 | -0.096915 |
| 9mo_SIGAF3_ | 0.01288699 | 0.0713202  | 3.80E-05 | 0.0063994 | 0.21875   |
| 9mo_SIGAF3_ | 0.08754151 | 0.53201324 | 4.79E-05 | 0.010571  | -0.29935  |
| 9mo_SIGAF3_ | 0.01842399 | 0.10548902 | 4.11E-05 | 0.0055212 | 0.015459  |
| 9mo_SIGAF3_ | 0.02337396 | 0.13603528 | 4.32E-05 | 0.0050338 | -0.084895 |
| 9mo_SIGAF3_ | 0.03818758 | 0.22745016 | 4.87E-05 | 0.0045758 | -0.080425 |
| 9mo_SIGAF3_ | 0.0075954  | 0.03866577 | 3.53E-05 | 0.0073641 | 0.43054   |
| 9mo_SIGAF3_ | 0.01222779 | 0.06725225 | 3.77E-05 | 0.0064954 | 0.24064   |
| 9mo_SIGAF3_ | 0.09401506 | 0.5719615  | 5.09E-05 | 0.0064439 | -0.82618  |
| 9mo_SIGAF3_ | 0.01599477 | 0.09049828 | 3.98E-05 | 0.0058806 | 0.098494  |
| 9mo_SIGAF3_ | 0.03644532 | 0.21669866 | 4.79E-05 | 0.0045625 | -0.092976 |
| 9mo_SIGAF3_ | 0.07556594 | 0.45811203 | 5.23E-05 | 0.013721  | 0.23858   |
| 9mo_SIGAF3_ | 0.07111234 | 0.43062887 | 5.65E-05 | 0.011849  | 0.23476   |
| 9mo_SIGAF3_ | 0.02301205 | 0.13380197 | 4.30E-05 | 0.0050782 | -0.077142 |
| 9mo_SIGAF3_ | 0.02041642 | 0.11778434 | 4.19E-05 | 0.0053364 | -0.025531 |
| 9mo_SIGAF3_ | 0.01534748 | 0.08650391 | 3.95E-05 | 0.0059603 | 0.11709   |
| 9mo_SIGAF3_ | 0.01819168 | 0.10405546 | 4.09E-05 | 0.0055879 | 0.030658  |
| 9mo_SIGAF3_ | 0.02234252 | 0.12967032 | 4.28E-05 | 0.005125  | -0.068556 |
| 9mo_SIGAF3_ | 0.05305    | 0.31916612 | 6.01E-05 | 0.0055357 | 0.022172  |
| 9mo_SIGAF3_ | 0.07813102 | 0.47394115 | 5.01E-05 | 0.014289  | 0.20103   |
| 9mo_SIGAF3_ | 0.03458231 | 0.20520206 | 4.70E-05 | 0.0045688 | -0.10426  |
| 9mo_SIGAF3_ | 0.01823194 | 0.10430388 | 4.09E-05 | 0.0055879 | 0.030658  |
| 9mo_SIGAF3_ | 0.06233717 | 0.37647727 | 6.35E-05 | 0.0078047 | 0.11565   |
| 9mo_SIGAF3_ | 0.01924015 | 0.11052554 | 4.14E-05 | 0.0054571 | 0.0010121 |
| 9mo_SIGAF3_ | 0.02274768 | 0.13217054 | 4.30E-05 | 0.0050782 | -0.077142 |
| 9mo_SIGAF3_ | 0.07755847 | 0.47040796 | 5.05E-05 | 0.014229  | 0.21153   |
| 9mo_SIGAF3_ | 0.10097572 | 0.6149158  | 5.62E-05 | 0.0040352 | -1.2563   |
| 9mo_SIGAF3_ | 0.09676357 | 0.58892256 | 5.28E-05 | 0.0052469 | -1.03     |
| 9mo_SIGAF3_ | 0.04269694 | 0.2552774  | 5.13E-05 | 0.0046879 | -0.042593 |
| 9mo_SIGAF3_ | 0.0084     | 0.04363097 | 3.56E-05 | 0.0072456 | 0.40559   |
| 9mo_SIGAF3_ | 0.02846904 | 0.16747703 | 4.49E-05 | 0.0047302 | -0.12174  |
| 9mo_SIGAF3_ | 0.02070006 | 0.11953468 | 4.21E-05 | 0.0052798 | -0.037579 |
| 9mo_SIGAF3_ | 0.02107736 | 0.12186299 | 4.21E-05 | 0.0052798 | -0.04878  |
| 9mo_SIGAF3_ | 0.08107315 | 0.49209702 | 4.85E-05 | 0.0141    | 0.10139   |
| 5mo_SIGAE9_ | 0.01060128 | 0.0572151  | 3.68E-05 | 0.0068    | 0.30902   |
| 5mo_SIGAE9_ | 0.08388984 | 0.50947875 | 4.77E-05 | 0.013036  | -0.036078 |
| 5mo_SIGAE9_ | 0.06602041 | 0.39920655 | 6.16E-05 | 0.0091463 | 0.17407   |
| 5mo_SIGAE9_ | 0.01981243 | 0.11405709 | 4.16E-05 | 0.0053955 | -0.012659 |
| 5mo_SIGAE9_ | 0.05578442 | 0.33604023 | 6.21E-05 | 0.005966  | 0.043089  |
| 5mo_SIGAE9_ | 0.0574794  | 0.3465     | 6.32E-05 | 0.0064035 | 0.057806  |
| 5mo_SIGAE9_ | 0.02500892 | 0.14612465 | 4.38E-05 | 0.0049138 | -0.10343  |

|             |            |            |          |           |            |
|-------------|------------|------------|----------|-----------|------------|
| 5mo_SIGAE9_ | 0.08936404 | 0.5432601  | 4.84E-05 | 0.0094274 | -0.42792   |
| 5mo_SIGAE9_ | 0.02929161 | 0.17255312 | 4.53E-05 | 0.0046846 | -0.1231    |
| 5mo_SIGAE9_ | 0.07778555 | 0.47180927 | 5.05E-05 | 0.014229  | 0.20103    |
| 5mo_SIGAE9_ | 0.0179295  | 0.10243755 | 4.09E-05 | 0.0055879 | 0.030658   |
| 5mo_SIGAE9_ | 0.01414782 | 0.07910079 | 3.89E-05 | 0.0061278 | 0.1561     |
| 5mo_SIGAE9_ | 0.03275788 | 0.19394347 | 4.64E-05 | 0.0045915 | -0.11603   |
| 5mo_SIGAE9_ | 0.09435084 | 0.5740336  | 5.13E-05 | 0.0061762 | -0.82618   |
| 5mo_SIGAE9_ | 0.04501794 | 0.26960027 | 5.34E-05 | 0.0048194 | -0.028317  |
| 5mo_SIGAE9_ | 0.01164942 | 0.06368316 | 3.74E-05 | 0.0065941 | 0.263      |
| 5mo_SIGAE9_ | 0.04153146 | 0.24808523 | 5.05E-05 | 0.0046492 | -0.054504  |
| 5mo_SIGAE9_ | 0.01960308 | 0.11276521 | 4.16E-05 | 0.0053955 | -0.012659  |
| 5mo_SIGAE9_ | 0.03237832 | 0.19160122 | 4.62E-05 | 0.0046026 | -0.11821   |
| 5mo_SIGAE9_ | 0.01550202 | 0.08745758 | 3.95E-05 | 0.0059603 | 0.11709    |
| 5mo_SIGAE9_ | 0.03624809 | 0.21548155 | 4.77E-05 | 0.0045615 | -0.092976  |
| 5mo_SIGAE9_ | 0.01953076 | 0.1123189  | 4.16E-05 | 0.0053955 | -0.012659  |
| 5mo_SIGAE9_ | 0.02621635 | 0.15357572 | 4.42E-05 | 0.0048445 | -0.11213   |
| 5mo_SIGAE9_ | 0.04749735 | 0.28490075 | 5.53E-05 | 0.0049654 | -0.01514   |
| 5mo_SIGAE9_ | 0.02530188 | 0.14793248 | 4.38E-05 | 0.0049138 | -0.10343   |
| 5mo_SIGAE9_ | 0.01269927 | 0.0701618  | 3.80E-05 | 0.0063994 | 0.21875    |
| 5mo_SIGAE9_ | 0.01452787 | 0.08144606 | 3.89E-05 | 0.0061278 | 0.1561     |
| 5mo_SIGAE9_ | 0.07726244 | 0.46858114 | 5.09E-05 | 0.014141  | 0.21153    |
| 5mo_SIGAE9_ | 0.02749651 | 0.16147557 | 4.46E-05 | 0.0047834 | -0.11816   |
| 5mo_SIGAE9_ | 0.02301429 | 0.1338158  | 4.30E-05 | 0.0050782 | -0.077142  |
| 5mo_SIGAE9_ | 0.06985711 | 0.42288285 | 5.82E-05 | 0.011019  | 0.22487    |
| 5mo_SIGAE9_ | 0.09986054 | 0.608034   | 5.53E-05 | 0.004262  | -1.2008    |
| 5mo_SIGAE9_ | 0.01333933 | 0.0741116  | 3.83E-05 | 0.0063061 | 0.19734    |
| 5mo_SIGAE9_ | 0.06577326 | 0.39768142 | 6.16E-05 | 0.0091463 | 0.16566    |
| 5mo_SIGAE9_ | 0.0162234  | 0.09190919 | 3.98E-05 | 0.0058806 | 0.080526   |
| 5mo_SIGAE9_ | 0.04664156 | 0.27961966 | 5.49E-05 | 0.0049251 | -0.018376  |
| 5mo_SIGAE9_ | 0.00843429 | 0.04384259 | 3.56E-05 | 0.0072456 | 0.40559    |
| 5mo_SIGAE9_ | 0.01987257 | 0.11442825 | 4.16E-05 | 0.0053955 | -0.012659  |
| 5mo_SIGAE9_ | 0.09208287 | 0.560038   | 4.96E-05 | 0.0076529 | -0.6503    |
| 5mo_SIGAE9_ | 0.01805108 | 0.10318781 | 4.09E-05 | 0.0055879 | 0.030658   |
| 5mo_SIGAE9_ | 0.02949761 | 0.17382438 | 4.53E-05 | 0.0046846 | -0.1231    |
| 5mo_SIGAE9_ | 0.02662714 | 0.15611066 | 4.44E-05 | 0.004813  | -0.11546   |
| 5mo_SIGAE9_ | 0.08458423 | 0.51376384 | 4.76E-05 | 0.012404  | -0.069378  |
| 5mo_SIGAE9_ | 0.02671661 | 0.15666279 | 4.44E-05 | 0.004813  | -0.11546   |
| 5mo_SIGAE9_ | 0.07431174 | 0.45037237 | 5.33E-05 | 0.013335  | 0.24406    |
| 5mo_SIGAE9_ | 0.08351176 | 0.50714564 | 4.77E-05 | 0.013036  | -0.0045591 |
| 5mo_SIGAE9_ | 0.01644741 | 0.09329153 | 4.00E-05 | 0.0058035 | 0.080526   |
| 5mo_SIGAE9_ | 0.07700252 | 0.46697715 | 5.09E-05 | 0.014141  | 0.22047    |
| 5mo_SIGAE9_ | 0.01332854 | 0.07404497 | 3.83E-05 | 0.0063061 | 0.19734    |
| 5mo_SIGAE9_ | 0.01140367 | 0.06216662 | 3.74E-05 | 0.0065941 | 0.263      |

|             |            |            |          |           |            |
|-------------|------------|------------|----------|-----------|------------|
| 5mo_SIGAE9_ | 0.02020557 | 0.11648314 | 4.19E-05 | 0.0053364 | -0.025531  |
| 5mo_SIGAE9_ | 0.03546414 | 0.21064381 | 4.74E-05 | 0.0045622 | -0.10068   |
| 5mo_SIGAE9_ | 0.01593941 | 0.09015668 | 3.98E-05 | 0.0058806 | 0.098494   |
| 5mo_SIGAE9_ | 0.02479624 | 0.14481221 | 4.36E-05 | 0.0049516 | -0.098011  |
| 5mo_SIGAE9_ | 0.06767964 | 0.4094457  | 6.03E-05 | 0.009922  | 0.19812    |
| 5mo_SIGAE9_ | 0.00709737 | 0.03559244 | 3.50E-05 | 0.0074854 | 0.45576    |
| 5mo_SIGAE9_ | 0.01671157 | 0.09492166 | 4.00E-05 | 0.0058035 | 0.080526   |
| 5mo_SIGAE9_ | 0.0185008  | 0.10596301 | 4.11E-05 | 0.0055212 | 0.015459   |
| 5mo_SIGAE9_ | 0.01925759 | 0.11063315 | 4.14E-05 | 0.0054571 | 0.0010121  |
| 5mo_SIGAE9_ | 0.03522049 | 0.20914024 | 4.74E-05 | 0.0045622 | -0.10068   |
| 5mo_SIGAE9_ | 0.02676283 | 0.15694803 | 4.44E-05 | 0.004813  | -0.11546   |
| 5mo_SIGAE9_ | 0.00664231 | 0.03278427 | 3.47E-05 | 0.0076096 | 0.48124    |
| 5mo_SIGAE9_ | 0.01277657 | 0.07063882 | 3.80E-05 | 0.0063994 | 0.21875    |
| 5mo_SIGAE9_ | 0.08320422 | 0.50524783 | 4.78E-05 | 0.013315  | -0.0045591 |
| 5mo_SIGAE9_ | 0.01557049 | 0.08788011 | 3.95E-05 | 0.0059603 | 0.11709    |
| 5mo_SIGAE9_ | 0.00738325 | 0.03735664 | 3.50E-05 | 0.0074854 | 0.45576    |
| 5mo_SIGAE9_ | 0.03034865 | 0.17907615 | 4.57E-05 | 0.0046464 | -0.12245   |
| 5mo_SIGAE9_ | 0.06843238 | 0.4140908  | 5.93E-05 | 0.010465  | 0.20551    |
| 5mo_SIGAE9_ | 0.02955574 | 0.17418309 | 4.53E-05 | 0.0046846 | -0.1231    |
| 5mo_SIGAE9_ | 0.01828729 | 0.10464548 | 4.09E-05 | 0.0055879 | 0.030658   |
| 5mo_SIGAE9_ | 0.01882991 | 0.10799398 | 4.11E-05 | 0.0055212 | 0.015459   |
| 5mo_SIGAE9_ | 0.02204959 | 0.12786262 | 4.26E-05 | 0.0051742 | -0.059109  |
| 5mo_SIGAE9_ | 0.07616724 | 0.46182266 | 5.18E-05 | 0.013885  | 0.22792    |
| 5mo_SIGAE9_ | 0.08660135 | 0.5262115  | 4.77E-05 | 0.01133   | -0.21781   |
| 5mo_SIGAE9_ | 0.04786416 | 0.28716433 | 5.58E-05 | 0.0050083 | -0.01192   |
| 5mo_SIGAE9_ | 0.03605701 | 0.21430244 | 4.77E-05 | 0.0045615 | -0.096915  |
| 5mo_SIGAE9_ | 0.0928798  | 0.56495583 | 5.02E-05 | 0.0070215 | -0.69483   |
| 5mo_SIGAE9_ | 0.01459146 | 0.08183847 | 3.89E-05 | 0.0061278 | 0.1363     |
| 5mo_SIGAE9_ | 0.01896674 | 0.10883834 | 4.14E-05 | 0.0054571 | 0.0010121  |
| 5mo_SIGAE9_ | 0.05967096 | 0.3600241  | 6.37E-05 | 0.0069445 | 0.080679   |
| 5mo_SIGAE9_ | 0.03138578 | 0.18547626 | 4.58E-05 | 0.00463   | -0.12002   |
| 5mo_SIGAE9_ | 0.01983729 | 0.1142105  | 4.16E-05 | 0.0053955 | -0.012659  |
| 5mo_SIGAE9_ | 0.09052116 | 0.5504007  | 4.91E-05 | 0.0083333 | -0.51631   |
| 5mo_SIGAE9_ | 0.02886244 | 0.16990472 | 4.51E-05 | 0.0047064 | -0.12268   |
| 5mo_SIGAE9_ | 0.08423115 | 0.511585   | 4.76E-05 | 0.012731  | -0.036078  |
| 5mo_SIGAE9_ | 0.038643   | 0.23026055 | 4.89E-05 | 0.0045836 | -0.076088  |
| 5mo_SIGAE9_ | 0.03555011 | 0.21117431 | 4.74E-05 | 0.0045622 | -0.10068   |
| 5mo_SIGAE9_ | 0.01994506 | 0.11487553 | 4.16E-05 | 0.0053955 | -0.012659  |
| 5mo_SIGAE9_ | 0.10086012 | 0.6142024  | 5.62E-05 | 0.0040352 | -1.2563    |
| 5mo_SIGAE9_ | 0.00690965 | 0.03443402 | 3.47E-05 | 0.0076096 | 0.48124    |
| 5mo_SIGAE9_ | 0.02590431 | 0.15165009 | 4.40E-05 | 0.0048781 | -0.10813   |
| 5mo_SIGAE9_ | 0.01268119 | 0.0700502  | 3.80E-05 | 0.0063994 | 0.21875    |
| 5mo_SIGAE9_ | 0.1021443  | 0.62212706 | 5.70E-05 | 0.0038563 | -1.3227    |

|             |            |            |          |           |            |
|-------------|------------|------------|----------|-----------|------------|
| 5mo_SIGAE9_ | 0.02349103 | 0.13675772 | 4.32E-05 | 0.0050338 | -0.084895  |
| 5mo_SIGAE9_ | 0.02087883 | 0.12063786 | 4.21E-05 | 0.0052798 | -0.037579  |
| 5mo_SIGAE9_ | 0.08195053 | 0.49751136 | 4.81E-05 | 0.013778  | 0.078055   |
| 5mo_SIGAE9_ | 0.02255149 | 0.13095982 | 4.28E-05 | 0.005125  | -0.068556  |
| 5mo_SIGAE9_ | 0.03525397 | 0.20934686 | 4.74E-05 | 0.0045622 | -0.10068   |
| 5mo_SIGAE9_ | 0.00310237 | 0.01093932 | 3.26E-05 | 0.0085576 | 0.66457    |
| 5mo_SIGAE9_ | 0.01716222 | 0.09770265 | 4.03E-05 | 0.005729  | 0.063215   |
| 5mo_SIGAE9_ | 0.08810635 | 0.53549886 | 4.80E-05 | 0.010188  | -0.3415    |
| 5mo_SIGAE9_ | 0.0954707  | 0.58094424 | 5.20E-05 | 0.0056833 | -0.91061   |
| 5mo_SIGAE9_ | 0.04914339 | 0.29505846 | 5.68E-05 | 0.0051026 | -0.0022352 |
| 5mo_SIGAE9_ | 0.01325112 | 0.07356723 | 3.83E-05 | 0.0063061 | 0.19734    |
| 5mo_SIGAE9_ | 0.072687   | 0.4403461  | 5.49E-05 | 0.012637  | 0.24373    |
| 5mo_SIGAE9_ | 0.00246329 | 0.00699552 | 3.23E-05 | 0.0087041 | 0.69119    |
| 5mo_SIGAE9_ | 0.09942353 | 0.6053372  | 5.49E-05 | 0.0043938 | -1.2008    |
| 5mo_SIGAE9_ | 0.01111802 | 0.06040388 | 3.71E-05 | 0.0066957 | 0.2858     |
| 5mo_SIGAE9_ | 0.01014099 | 0.05437463 | 3.65E-05 | 0.0069072 | 0.33263    |
| 5mo_SIGAE9_ | 0.00784242 | 0.04019018 | 3.53E-05 | 0.0073641 | 0.43054    |
| 5mo_SIGAE9_ | 0.01394584 | 0.07785439 | 3.86E-05 | 0.0062156 | 0.17645    |
| 5mo_SIGAE9_ | 0.03683393 | 0.21909678 | 4.81E-05 | 0.0045652 | -0.088896  |
| 5mo_SIGAE9_ | 0.01218824 | 0.06700819 | 3.77E-05 | 0.0064954 | 0.24064    |
| 5mo_SIGAE9_ | 0.02151411 | 0.12455818 | 4.24E-05 | 0.0052258 | -0.04878   |
| 5mo_SIGAE9_ | 0.09198478 | 0.5594327  | 4.96E-05 | 0.0076529 | -0.6503    |
| 5mo_SIGAE9_ | 0.09621019 | 0.5855077  | 5.24E-05 | 0.0054581 | -0.99133   |
| 5mo_SIGAE9_ | 0.02508208 | 0.14657609 | 4.38E-05 | 0.0049138 | -0.10343   |
| 5mo_SIGAE9_ | 0.00973865 | 0.05189178 | 3.65E-05 | 0.0069072 | 0.33263    |
| 5mo_SIGAE9_ | 0.07593188 | 0.46037027 | 5.18E-05 | 0.013885  | 0.23393    |
| 5mo_SIGAE9_ | 0.01534156 | 0.08646736 | 3.95E-05 | 0.0059603 | 0.11709    |
| 5mo_SIGAE9_ | 0.0099348  | 0.05310226 | 3.65E-05 | 0.0069072 | 0.33263    |
| 5mo_SIGAE9_ | 0.09455007 | 0.575263   | 5.13E-05 | 0.0061762 | -0.8688    |
| 5mo_SIGAE9_ | 0.02943411 | 0.17343248 | 4.53E-05 | 0.0046846 | -0.1231    |
| 5mo_SIGAE9_ | 0.08773925 | 0.5332335  | 4.79E-05 | 0.010571  | -0.29935   |
| 5mo_SIGAE9_ | 0.08112195 | 0.49239817 | 4.85E-05 | 0.0141    | 0.10139    |
| 5mo_SIGAE9_ | 0.00629705 | 0.0306537  | 3.44E-05 | 0.0077366 | 0.50694    |
| 5mo_SIGAE9_ | 0.09657497 | 0.5877587  | 5.28E-05 | 0.0052469 | -0.99133   |
| 5mo_SIGAE9_ | 0.0235556  | 0.1371562  | 4.32E-05 | 0.0050338 | -0.084895  |
| 5mo_SIGAE9_ | 0.01286567 | 0.07118861 | 3.80E-05 | 0.0063994 | 0.21875    |
| 5mo_SIGAE9_ | 0.0169892  | 0.09663492 | 4.03E-05 | 0.005729  | 0.063215   |
| 5mo_SIGAE9_ | 0.08134575 | 0.49377924 | 4.83E-05 | 0.013957  | 0.10139    |
| 5mo_SIGAE9_ | 0.05688686 | 0.34284344 | 6.30E-05 | 0.0062853 | 0.05269    |
| 5mo_SIGAE9_ | 0.01265397 | 0.06988223 | 3.80E-05 | 0.0063994 | 0.21875    |
| 5mo_SIGAE9_ | 0.01490062 | 0.08374632 | 3.92E-05 | 0.0060428 | 0.1363     |
| 5mo_SIGAE9_ | 0.12042033 | 0.73490846 | 6.75E-05 | 0.0049988 | -1.0756    |
| 5mo_SIGAE9_ | 0.01721037 | 0.0979998  | 4.03E-05 | 0.005729  | 0.063215   |

|             |            |            |          |           |           |
|-------------|------------|------------|----------|-----------|-----------|
| 5mo_SIGAE9_ | 0.02608448 | 0.15276192 | 4.42E-05 | 0.0048445 | -0.11213  |
| 5mo_SIGAE9_ | 0.03005376 | 0.17725636 | 4.55E-05 | 0.0046645 | -0.12301  |
| 5mo_SIGAE9_ | 0.02903992 | 0.17099994 | 4.51E-05 | 0.0047064 | -0.12268  |
| 5mo_SIGAE9_ | 0.01208896 | 0.06639558 | 3.77E-05 | 0.0064954 | 0.24064   |
| 5mo_SIGAE9_ | 0.02142072 | 0.12398184 | 4.24E-05 | 0.0052258 | -0.04878  |
| 5mo_SIGAE9_ | 0.08733282 | 0.5307254  | 4.79E-05 | 0.010571  | -0.25808  |
| 5mo_SIGAE9_ | 0.08940351 | 0.54350364 | 4.86E-05 | 0.0090548 | -0.42792  |
| 5mo_SIGAE9_ | 0.09794535 | 0.5962153  | 5.36E-05 | 0.0048658 | -1.1032   |
| 5mo_SIGAE9_ | 0.02755689 | 0.16184819 | 4.46E-05 | 0.0047834 | -0.12024  |
| 5mo_SIGAE9_ | 0.09472048 | 0.5763147  | 5.13E-05 | 0.0061762 | -0.8688   |
| 5mo_SIGAE9_ | 0.00814602 | 0.04206364 | 3.56E-05 | 0.0072456 | 0.40559   |
| 5mo_SIGAE9_ | 0.02149082 | 0.12441446 | 4.24E-05 | 0.0052258 | -0.04878  |
| 5mo_SIGAE9_ | 0.02104542 | 0.12166586 | 4.21E-05 | 0.0052798 | -0.037579 |
| 5mo_SIGAE9_ | 0.01456666 | 0.08168542 | 3.89E-05 | 0.0061278 | 0.1363    |
| 5mo_SIGAE9_ | 0.07553139 | 0.4578988  | 5.23E-05 | 0.013721  | 0.23858   |
| 5mo_SIGAE9_ | 0.0306709  | 0.18106472 | 4.57E-05 | 0.0046464 | -0.12245  |
| 5mo_SIGAE9_ | 0.01519587 | 0.0855683  | 3.95E-05 | 0.0059603 | 0.11709   |
| 5mo_SIGAE9_ | 0.06525499 | 0.39448318 | 6.20E-05 | 0.0089013 | 0.15715   |
| 5mo_SIGAE9_ | 0.01838417 | 0.10524333 | 4.09E-05 | 0.0055879 | 0.015459  |
| 5mo_SIGAE9_ | 0.02670891 | 0.15661527 | 4.44E-05 | 0.004813  | -0.11546  |
| 5mo_SIGAE9_ | 0.09117825 | 0.5544556  | 4.93E-05 | 0.0079874 | -0.56091  |
| 5mo_SIGAE9_ | 0.08850566 | 0.53796303 | 4.82E-05 | 0.0098057 | -0.3415   |
| 5mo_SIGAE9_ | 0.03348582 | 0.1984356  | 4.66E-05 | 0.0045822 | -0.11071  |
| 5mo_SIGAE9_ | 0.02721372 | 0.15973048 | 4.46E-05 | 0.0047834 | -0.11816  |
| 5mo_SIGAE9_ | 0.0199971  | 0.1151967  | 4.16E-05 | 0.0053955 | -0.025531 |
| 5mo_SIGAE9_ | 0.02035876 | 0.1174285  | 4.19E-05 | 0.0053364 | -0.025531 |
| 5mo_SIGAE9_ | 0.01568142 | 0.08856461 | 3.95E-05 | 0.0059603 | 0.098494  |
| 5mo_SIGAE9_ | 0.03668059 | 0.21815053 | 4.79E-05 | 0.0045625 | -0.092976 |
| 5mo_SIGAE9_ | 0.0120203  | 0.06597184 | 3.77E-05 | 0.0064954 | 0.24064   |
| 5mo_SIGAE9_ | 0.03194384 | 0.18892004 | 4.60E-05 | 0.0046154 | -0.11821  |
| 5mo_SIGAE9_ | 0.01758294 | 0.10029893 | 4.06E-05 | 0.0056572 | 0.046584  |
| 5mo_SIGAE9_ | 0.01330187 | 0.07388042 | 3.83E-05 | 0.0063061 | 0.19734   |
| 5mo_SIGAE9_ | 0.02526327 | 0.14769422 | 4.38E-05 | 0.0049138 | -0.10343  |
| 5mo_SIGAE9_ | 0.07653455 | 0.4640893  | 5.13E-05 | 0.014025  | 0.22792   |
| 5mo_SIGAE9_ | 0.02753611 | 0.16171992 | 4.46E-05 | 0.0047834 | -0.12024  |
| 5mo_SIGAE9_ | 0.01464074 | 0.0821426  | 3.92E-05 | 0.0060428 | 0.1363    |
| 5mo_SIGAE9_ | 0.01454876 | 0.081575   | 3.89E-05 | 0.0061278 | 0.1561    |
| 5mo_SIGAE9_ | 0.01302144 | 0.07214992 | 3.83E-05 | 0.0063061 | 0.19734   |
| 5mo_SIGAE9_ | 0.01634953 | 0.09268751 | 4.00E-05 | 0.0058035 | 0.080526  |
| 5mo_SIGAE9_ | 0.07956698 | 0.48280245 | 4.93E-05 | 0.014315  | 0.15946   |
| 5mo_SIGAE9_ | 0.00972504 | 0.05180783 | 3.62E-05 | 0.0070172 | 0.33263   |
| 5mo_SIGAE9_ | 0.02151441 | 0.12456002 | 4.24E-05 | 0.0052258 | -0.04878  |
| 5mo_SIGAE9_ | 0.02797287 | 0.16441521 | 4.48E-05 | 0.0047558 | -0.12024  |

|             |            |            |          |           |           |
|-------------|------------|------------|----------|-----------|-----------|
| 5mo_SIGAE9_ | 0.01548008 | 0.08732218 | 3.95E-05 | 0.0059603 | 0.11709   |
| 5mo_SIGAE9_ | 0.05400031 | 0.32503054 | 6.10E-05 | 0.005694  | 0.030074  |
| 5mo_SIGAE9_ | 0.02853119 | 0.16786058 | 4.49E-05 | 0.0047302 | -0.12174  |
| 5mo_SIGAE9_ | 0.03925022 | 0.23400772 | 4.92E-05 | 0.0045932 | -0.071721 |
| 5mo_SIGAE9_ | 0.00896003 | 0.04708691 | 3.59E-05 | 0.00713   | 0.38094   |
| 5mo_SIGAE9_ | 0.02381624 | 0.13876463 | 4.32E-05 | 0.0050338 | -0.091842 |
| 5mo_SIGAE9_ | 0.0208963  | 0.12074568 | 4.21E-05 | 0.0052798 | -0.037579 |
| 5mo_SIGAE9_ | 0.07634972 | 0.46294874 | 5.18E-05 | 0.013885  | 0.22792   |
| 5mo_SIGAE9_ | 0.08781955 | 0.533729   | 4.80E-05 | 0.010188  | -0.29935  |
| 5mo_SIGAE9_ | 0.01433919 | 0.08028173 | 3.89E-05 | 0.0061278 | 0.1561    |
| 5mo_SIGAE9_ | 0.01274452 | 0.07044104 | 3.80E-05 | 0.0063994 | 0.21875   |
| 5mo_SIGAE9_ | 0.09560424 | 0.5817684  | 5.20E-05 | 0.0056833 | -0.9515   |
| 5mo_SIGAE9_ | 0.08838282 | 0.537205   | 4.82E-05 | 0.0098057 | -0.3415   |
| 5mo_SIGAE9_ | 0.01625329 | 0.09209361 | 4.00E-05 | 0.0058035 | 0.080526  |
| 5mo_SIGAE9_ | 0.02895126 | 0.17045285 | 4.51E-05 | 0.0047064 | -0.12268  |
| 5mo_SIGAE9_ | 0.06744755 | 0.40801346 | 6.03E-05 | 0.009922  | 0.19037   |
| 5mo_SIGAE9_ | 0.09191077 | 0.558976   | 4.96E-05 | 0.0076529 | -0.6503   |
| 5mo_SIGAE9_ | 0.02199149 | 0.1275041  | 4.26E-05 | 0.0051742 | -0.059109 |
| 5mo_SIGAE9_ | 0.08753829 | 0.5319934  | 4.79E-05 | 0.010571  | -0.29935  |
| 5mo_SIGAE9_ | 0.02720822 | 0.15969655 | 4.46E-05 | 0.0047834 | -0.11816  |
| 5mo_SIGAE9_ | 0.01276834 | 0.07058802 | 3.80E-05 | 0.0063994 | 0.21875   |
| 5mo_SIGAE9_ | 0.01858828 | 0.10650285 | 4.11E-05 | 0.0055212 | 0.015459  |
| 5mo_SIGAE9_ | 0.0319841  | 0.18916848 | 4.62E-05 | 0.0046026 | -0.11821  |
| 5mo_SIGAE9_ | 0.03641378 | 0.21650402 | 4.79E-05 | 0.0045625 | -0.092976 |
| 5mo_SIGAE9_ | 0.01684106 | 0.09572079 | 4.03E-05 | 0.005729  | 0.063215  |
| 5mo_SIGAE9_ | 0.02949897 | 0.17383273 | 4.53E-05 | 0.0046846 | -0.1231   |
| 5mo_SIGAE9_ | 0.01668372 | 0.0947498  | 4.00E-05 | 0.0058035 | 0.080526  |
| 5mo_SIGAE9_ | 0.00745369 | 0.03779129 | 3.50E-05 | 0.0074854 | 0.45576   |
| 5mo_SIGAE9_ | 0.08413193 | 0.51097274 | 4.76E-05 | 0.012731  | -0.036078 |
| 5mo_SIGAE9_ | 0.01392947 | 0.07775335 | 3.86E-05 | 0.0062156 | 0.17645   |
| 5mo_SIGAE9_ | 0.04305986 | 0.25751698 | 5.17E-05 | 0.0047101 | -0.042593 |
| 5mo_SIGAE9_ | 0.02541318 | 0.14861935 | 4.38E-05 | 0.0049138 | -0.10813  |
| 5mo_SIGAE9_ | 0.01745757 | 0.09952524 | 4.06E-05 | 0.0056572 | 0.046584  |
| 5mo_SIGAE9_ | 0.02465918 | 0.14396642 | 4.36E-05 | 0.0049516 | -0.098011 |
| 5mo_SIGAE9_ | 0.01921416 | 0.11036515 | 4.14E-05 | 0.0054571 | 0.0010121 |
| 5mo_SIGAE9_ | 0.03387399 | 0.20083097 | 4.68E-05 | 0.0045746 | -0.11071  |
| 5mo_SIGAE9_ | 0.08153219 | 0.49492976 | 4.83E-05 | 0.013957  | 0.10139   |
| 5mo_SIGAE9_ | 0.0228533  | 0.13282229 | 4.30E-05 | 0.0050782 | -0.077142 |
| 5mo_SIGAE9_ | 0.02368793 | 0.13797283 | 4.32E-05 | 0.0050338 | -0.084895 |
| 5mo_SIGAE9_ | 0.08741898 | 0.53125715 | 4.79E-05 | 0.010571  | -0.25808  |
| 5mo_SIGAE9_ | 0.0367273  | 0.21843877 | 4.79E-05 | 0.0045625 | -0.088896 |
| 5mo_SIGAE9_ | 0.01594671 | 0.09020174 | 3.98E-05 | 0.0058806 | 0.098494  |
| 5mo_SIGAE9_ | 0.02607505 | 0.15270372 | 4.42E-05 | 0.0048445 | -0.11213  |



|             |            |            |          |           |           |
|-------------|------------|------------|----------|-----------|-----------|
| 5mo_SIGAE9_ | 0.06715506 | 0.40620852 | 6.07E-05 | 0.0096573 | 0.19037   |
| 5mo_SIGAE9_ | 0.01376509 | 0.07673895 | 3.86E-05 | 0.0062156 | 0.17645   |
| 5mo_SIGAE9_ | 0.01446293 | 0.0810453  | 3.89E-05 | 0.0061278 | 0.1561    |
| 5mo_SIGAE9_ | 0.00911683 | 0.04805455 | 3.59E-05 | 0.00713   | 0.38094   |
| 5mo_SIGAE9_ | 0.09440731 | 0.5743821  | 5.13E-05 | 0.0061762 | -0.82618  |
| 5mo_SIGAE9_ | 0.01553054 | 0.08763355 | 3.95E-05 | 0.0059603 | 0.11709   |
| 5mo_SIGAE9_ | 0.0288265  | 0.16968295 | 4.51E-05 | 0.0047064 | -0.12268  |
| 5mo_SIGAE9_ | 0.0078346  | 0.04014187 | 3.53E-05 | 0.0073641 | 0.43054   |
| 5mo_SIGAE9_ | 0.01780493 | 0.10166883 | 4.06E-05 | 0.0056572 | 0.046584  |
| 5mo_SIGAE9_ | 0.01319669 | 0.07323138 | 3.83E-05 | 0.0063061 | 0.19734   |
| 5mo_SIGAE9_ | 0.09966189 | 0.6068081  | 5.49E-05 | 0.0043938 | -1.2008   |
| 5mo_SIGAE9_ | 0.01336355 | 0.07426103 | 3.83E-05 | 0.0063061 | 0.19734   |
| 5mo_SIGAE9_ | 0.08542695 | 0.5189643  | 4.76E-05 | 0.012059  | -0.14081  |
| 5mo_SIGAE9_ | 0.07874681 | 0.47774118 | 4.97E-05 | 0.014318  | 0.18889   |
| 5mo_SIGAE9_ | 0.0415191  | 0.24800898 | 5.05E-05 | 0.0046492 | -0.054504 |
| 5mo_SIGAE9_ | 0.01557402 | 0.08790186 | 3.95E-05 | 0.0059603 | 0.11709   |
| 5mo_SIGAE9_ | 0.01123669 | 0.06113622 | 3.71E-05 | 0.0066957 | 0.2858    |
| 5mo_SIGAE9_ | 0.03450167 | 0.20470439 | 4.70E-05 | 0.0045688 | -0.10761  |
| 5mo_SIGAE9_ | 0.09389956 | 0.57124877 | 5.09E-05 | 0.0064439 | -0.7829   |
| 5mo_SIGAE9_ | 0.01644107 | 0.09325244 | 4.00E-05 | 0.0058035 | 0.080526  |
| 5mo_SIGAE9_ | 0.01514084 | 0.0852287  | 3.92E-05 | 0.0060428 | 0.11709   |
| 5mo_SIGAE9_ | 0.02670634 | 0.1565994  | 4.44E-05 | 0.004813  | -0.11546  |
| 5mo_SIGAE9_ | 0.03486427 | 0.20694198 | 4.72E-05 | 0.0045646 | -0.10426  |
| 5mo_SIGAE9_ | 0.01519473 | 0.08556128 | 3.95E-05 | 0.0059603 | 0.11709   |
| 5mo_SIGAE9_ | 0.0141845  | 0.07932711 | 3.89E-05 | 0.0061278 | 0.1561    |
| 5mo_SIGAE9_ | 0.03213303 | 0.19008753 | 4.62E-05 | 0.0046026 | -0.11821  |
| 5mo_SIGAE9_ | 0.05981908 | 0.36093813 | 6.37E-05 | 0.0069445 | 0.080679  |
| 5mo_SIGAE9_ | 0.0132265  | 0.07341529 | 3.83E-05 | 0.0063061 | 0.19734   |
| 5mo_SIGAE9_ | 0.02556874 | 0.14957932 | 4.40E-05 | 0.0048781 | -0.10813  |
| 5mo_SIGAE9_ | 0.04470661 | 0.2676791  | 5.30E-05 | 0.0047888 | -0.031751 |
| 5mo_SIGAE9_ | 0.07359772 | 0.44596615 | 5.43E-05 | 0.012883  | 0.24502   |
| 5mo_SIGAE9_ | 0.03171023 | 0.18747844 | 4.60E-05 | 0.0046154 | -0.12002  |
| 5mo_SIGAE9_ | 0.02806947 | 0.16501133 | 4.48E-05 | 0.0047558 | -0.12174  |
| 5mo_SIGAE9_ | 0.07624649 | 0.46231169 | 5.18E-05 | 0.013885  | 0.22792   |
| 5mo_SIGAE9_ | 0.06855691 | 0.41485932 | 5.93E-05 | 0.010465  | 0.20551   |
| 5mo_SIGAE9_ | 0.01938487 | 0.11141863 | 4.14E-05 | 0.0054571 | 0.0010121 |
| 5mo_SIGAE9_ | 0.01715165 | 0.09763745 | 4.03E-05 | 0.005729  | 0.063215  |
| 5mo_SIGAE9_ | 0.09331581 | 0.56764644 | 5.06E-05 | 0.0067258 | -0.73907  |
| 5mo_SIGAE9_ | 0.02505844 | 0.14643025 | 4.38E-05 | 0.0049138 | -0.10343  |
| 5mo_SIGAE9_ | 0.03585149 | 0.21303412 | 4.77E-05 | 0.0045615 | -0.096915 |
| 5mo_SIGAE9_ | 0.02398028 | 0.1397769  | 4.34E-05 | 0.0049916 | -0.091842 |
| 5mo_SIGAE9_ | 0.0863099  | 0.524413   | 4.77E-05 | 0.01133   | -0.17867  |
| 5mo_SIGAE9_ | 0.0747116  | 0.45283988 | 5.33E-05 | 0.013335  | 0.24193   |

|             |            |            |          |           |           |
|-------------|------------|------------|----------|-----------|-----------|
| 5mo_SIGAE9_ | 0.02591859 | 0.15173824 | 4.40E-05 | 0.0048781 | -0.11213  |
| 5mo_SIGAE9_ | 0.06566207 | 0.39699525 | 6.16E-05 | 0.0091463 | 0.16566   |
| 5mo_SIGAE9_ | 0.01346426 | 0.07488252 | 3.83E-05 | 0.0063061 | 0.19734   |
| 5mo_SIGAE9_ | 0.05194191 | 0.3123281  | 5.92E-05 | 0.0053939 | 0.014768  |
| 5mo_SIGAE9_ | 0.09677278 | 0.58897936 | 5.28E-05 | 0.0052469 | -1.03     |
| 5mo_SIGAE9_ | 0.06196224 | 0.37416363 | 6.36E-05 | 0.0076138 | 0.10802   |
| 5mo_SIGAE9_ | 0.0886492  | 0.5388488  | 4.82E-05 | 0.0098057 | -0.3844   |
| 5mo_SIGAE9_ | 0.07388824 | 0.4477589  | 5.38E-05 | 0.013116  | 0.24502   |
| 5mo_SIGAE9_ | 0.01855995 | 0.10632804 | 4.11E-05 | 0.0055212 | 0.015459  |
| 5mo_SIGAE9_ | 0.02941258 | 0.17329963 | 4.53E-05 | 0.0046846 | -0.1231   |
| 5mo_SIGAE9_ | 0.07960204 | 0.48301882 | 4.93E-05 | 0.014315  | 0.15946   |
| 5mo_SIGAE9_ | 0.03746928 | 0.2230175  | 4.84E-05 | 0.0045696 | -0.084703 |
| 5mo_SIGAE9_ | 0.02129122 | 0.12318271 | 4.24E-05 | 0.0052258 | -0.04878  |
| 5mo_SIGAE9_ | 0.01410199 | 0.07881799 | 3.89E-05 | 0.0061278 | 0.1561    |
| 5mo_SIGAE9_ | 0.01451542 | 0.08136924 | 3.89E-05 | 0.0061278 | 0.1561    |
| 5mo_SIGAE9_ | 0.08778005 | 0.5334853  | 4.80E-05 | 0.010188  | -0.29935  |
| 5mo_SIGAE9_ | 0.02219337 | 0.12874992 | 4.26E-05 | 0.0051742 | -0.068556 |
| 5mo_SIGAE9_ | 0.00776293 | 0.03969964 | 3.53E-05 | 0.0073641 | 0.43054   |
| 5mo_SIGAE9_ | 0.01902457 | 0.10919523 | 4.14E-05 | 0.0054571 | 0.0010121 |
| 5mo_SIGAE9_ | 0.08751884 | 0.53187335 | 4.79E-05 | 0.010571  | -0.29935  |
| 5mo_SIGAE9_ | 0.01658221 | 0.09412339 | 4.00E-05 | 0.0058035 | 0.080526  |
| 5mo_SIGAE9_ | 0.05908591 | 0.35641372 | 6.37E-05 | 0.0067983 | 0.074574  |
| 5mo_SIGAE9_ | 0.09750516 | 0.59349895 | 5.32E-05 | 0.0050496 | -1.0673   |
| 5mo_SIGAE9_ | 0.01469725 | 0.0824913  | 3.92E-05 | 0.0060428 | 0.1363    |
| 5mo_SIGAE9_ | 0.00822382 | 0.0425438  | 3.56E-05 | 0.0072456 | 0.40559   |
| 5mo_SIGAE9_ | 0.08530387 | 0.51820475 | 4.76E-05 | 0.012059  | -0.10433  |
| 5mo_SIGAE9_ | 0.01817943 | 0.10397986 | 4.09E-05 | 0.0055879 | 0.030658  |
| 5mo_SIGAE9_ | 0.08743182 | 0.53133637 | 4.79E-05 | 0.010571  | -0.25808  |
| 5mo_SIGAE9_ | 0.01575777 | 0.08903576 | 3.98E-05 | 0.0058806 | 0.098494  |
| 5mo_SIGAE9_ | 0.09027609 | 0.5488883  | 4.88E-05 | 0.0086895 | -0.51631  |
| 5mo_SIGAE9_ | 0.01046794 | 0.05639224 | 3.68E-05 | 0.0068    | 0.30902   |
| 5mo_SIGAE9_ | 0.09275819 | 0.5642054  | 5.02E-05 | 0.0070215 | -0.69483  |
| 5mo_SIGAE9_ | 0.0186136  | 0.10665909 | 4.11E-05 | 0.0055212 | 0.015459  |
| 5mo_SIGAE9_ | 0.01521874 | 0.08570941 | 3.95E-05 | 0.0059603 | 0.11709   |
| 5mo_SIGAE9_ | 0.02802116 | 0.16471317 | 4.48E-05 | 0.0047558 | -0.12024  |
| 5mo_SIGAE9_ | 0.00686372 | 0.03415063 | 3.47E-05 | 0.0076096 | 0.48124   |
| 5mo_SIGAE9_ | 0.01510634 | 0.08501581 | 3.92E-05 | 0.0060428 | 0.11709   |
| 5mo_SIGAE9_ | 0.08937446 | 0.5433244  | 4.84E-05 | 0.0094274 | -0.42792  |
| 5mo_SIGAE9_ | 0.01741692 | 0.09927442 | 4.06E-05 | 0.0056572 | 0.046584  |
| 5mo_SIGAE9_ | 0.09359558 | 0.5693729  | 5.06E-05 | 0.0067258 | -0.7829   |
| 5mo_SIGAE9_ | 0.0204581  | 0.1180415  | 4.19E-05 | 0.0053364 | -0.025531 |
| 5mo_SIGAE9_ | 0.09957762 | 0.6062881  | 5.49E-05 | 0.0043938 | -1.2008   |
| 5mo_SIGAE9_ | 0.02271489 | 0.13196822 | 4.28E-05 | 0.005125  | -0.077142 |

|             |            |            |          |           |            |
|-------------|------------|------------|----------|-----------|------------|
| 5mo_SIGAE9_ | 0.01228704 | 0.06761791 | 3.77E-05 | 0.0064954 | 0.24064    |
| 5mo_SIGAE9_ | 0.01783571 | 0.10185879 | 4.06E-05 | 0.0056572 | 0.030658   |
| 5mo_SIGAE9_ | 0.01022281 | 0.05487955 | 3.65E-05 | 0.0069072 | 0.33263    |
| 5mo_SIGAE9_ | 0.06048928 | 0.36507392 | 6.38E-05 | 0.0070986 | 0.09374    |
| 5mo_SIGAE9_ | 0.08362947 | 0.5078721  | 4.77E-05 | 0.013036  | -0.0045591 |
| 5mo_SIGAE9_ | 0.03879276 | 0.23118469 | 4.89E-05 | 0.0045836 | -0.076088  |
| 5mo_SIGAE9_ | 0.0134524  | 0.07480933 | 3.83E-05 | 0.0063061 | 0.19734    |
| 5mo_SIGAE9_ | 0.05920925 | 0.3571749  | 6.37E-05 | 0.0067983 | 0.074574   |
| 5mo_SIGAE9_ | 0.02323569 | 0.13518202 | 4.30E-05 | 0.0050782 | -0.084895  |
| 5mo_SIGAE9_ | 0.00445327 | 0.01927573 | 3.35E-05 | 0.0081345 | 0.58516    |
| 5mo_SIGAE9_ | 0.04000691 | 0.23867726 | 4.95E-05 | 0.0046046 | -0.063007  |
| 5mo_SIGAE9_ | 0.07563791 | 0.45855618 | 5.23E-05 | 0.013721  | 0.23393    |
| 5mo_SIGAE9_ | 0.08774076 | 0.5332428  | 4.79E-05 | 0.010571  | -0.29935   |
| 5mo_SIGAE9_ | 0.03294451 | 0.19509517 | 4.64E-05 | 0.0045915 | -0.11352   |
| 5mo_SIGAE9_ | 0.01133944 | 0.06177029 | 3.71E-05 | 0.0066957 | 0.263      |
| 5mo_SIGAE9_ | 0.00950883 | 0.05047356 | 3.62E-05 | 0.0070172 | 0.35661    |
| 5mo_SIGAE9_ | 0.00864913 | 0.04516834 | 3.59E-05 | 0.00713   | 0.38094    |
| 5mo_SIGAE9_ | 0.01953507 | 0.11234552 | 4.16E-05 | 0.0053955 | -0.012659  |
| 5mo_SIGAE9_ | 0.01781979 | 0.10176053 | 4.06E-05 | 0.0056572 | 0.030658   |
| 5mo_SIGAE9_ | 0.09222954 | 0.56094307 | 4.99E-05 | 0.0073308 | -0.6503    |
| 5mo_SIGAE9_ | 0.02049952 | 0.11829715 | 4.19E-05 | 0.0053364 | -0.025531  |
| 5mo_SIGAE9_ | 0.03068607 | 0.18115836 | 4.57E-05 | 0.0046464 | -0.12245   |
| 5mo_SIGAE9_ | 0.0091123  | 0.04802656 | 3.59E-05 | 0.00713   | 0.38094    |
| 5mo_SIGAE9_ | 0.01266119 | 0.0699268  | 3.80E-05 | 0.0063994 | 0.21875    |
| 5mo_SIGAE9_ | 0.06914082 | 0.41846263 | 5.87E-05 | 0.010741  | 0.21895    |
| 5mo_SIGAE9_ | 0.01724996 | 0.09824406 | 4.03E-05 | 0.005729  | 0.063215   |
| 5mo_SIGAE9_ | 0.01186536 | 0.06501572 | 3.74E-05 | 0.0065941 | 0.24064    |
| 5mo_SIGAE9_ | 0.09182438 | 0.55844283 | 4.96E-05 | 0.0076529 | -0.6503    |
| 5mo_SIGAE9_ | 0.06219723 | 0.37561375 | 6.36E-05 | 0.0076138 | 0.11565    |
| 5mo_SIGAE9_ | 0.02541526 | 0.14863215 | 4.38E-05 | 0.0049138 | -0.10813   |
| 5mo_SIGAE9_ | 0.02481539 | 0.14493038 | 4.36E-05 | 0.0049516 | -0.098011  |
| 5mo_SIGAE9_ | 0.01463355 | 0.08209819 | 3.92E-05 | 0.0060428 | 0.1363     |
| 5mo_SIGAE9_ | 0.03313767 | 0.19628714 | 4.66E-05 | 0.0045822 | -0.11352   |
| 5mo_SIGAE9_ | 0.08226814 | 0.4994713  | 4.81E-05 | 0.013778  | 0.05262    |
| 5mo_SIGAE9_ | 0.01887072 | 0.10824584 | 4.11E-05 | 0.0055212 | 0.015459   |
| 5mo_SIGAE9_ | 0.01901192 | 0.10911712 | 4.14E-05 | 0.0054571 | 0.0010121  |
| 5mo_SIGAE9_ | 0.070768   | 0.42850393 | 5.71E-05 | 0.011574  | 0.23476    |
| 5mo_SIGAE9_ | 0.02089019 | 0.12070794 | 4.21E-05 | 0.0052798 | -0.037579  |
| 5mo_SIGAE9_ | 0.0287165  | 0.16900413 | 4.51E-05 | 0.0047064 | -0.12268   |
| 5mo_SIGAE9_ | 0.02471883 | 0.1443345  | 4.36E-05 | 0.0049516 | -0.098011  |
| 5mo_SIGAE9_ | 0.01982333 | 0.11412435 | 4.16E-05 | 0.0053955 | -0.012659  |
| 5mo_SIGAE9_ | 0.02915081 | 0.17168428 | 4.51E-05 | 0.0047064 | -0.1231    |
| 5mo_SIGAE9_ | 0.02914422 | 0.17164361 | 4.51E-05 | 0.0047064 | -0.12268   |

|             |            |            |          |           |            |
|-------------|------------|------------|----------|-----------|------------|
| 5mo_SIGAE9_ | 0.0817087  | 0.496019   | 4.83E-05 | 0.013957  | 0.078055   |
| 5mo_SIGAE9_ | 0.01793204 | 0.10245318 | 4.09E-05 | 0.0055879 | 0.030658   |
| 5mo_SIGAE9_ | 0.07112318 | 0.43069574 | 5.65E-05 | 0.011849  | 0.23476    |
| 5mo_SIGAE9_ | 0.08842304 | 0.5374532  | 4.82E-05 | 0.0098057 | -0.3415    |
| 5mo_SIGAE9_ | 0.0679711  | 0.41124424 | 5.98E-05 | 0.010192  | 0.19812    |
| 5mo_SIGAE9_ | 0.09774055 | 0.5949515  | 5.36E-05 | 0.0048658 | -1.0673    |
| 5mo_SIGAE9_ | 0.01771808 | 0.10113283 | 4.06E-05 | 0.0056572 | 0.046584   |
| 5mo_SIGAE9_ | 0.0367836  | 0.21878618 | 4.79E-05 | 0.0045625 | -0.088896  |
| 5mo_SIGAE9_ | 0.01881174 | 0.10788182 | 4.11E-05 | 0.0055212 | 0.015459   |
| 5mo_SIGAE9_ | 0.02336139 | 0.13595776 | 4.32E-05 | 0.0050338 | -0.084895  |
| 5mo_SIGAE9_ | 0.0416783  | 0.2489914  | 5.05E-05 | 0.0046492 | -0.0504    |
| 5mo_SIGAE9_ | 0.05804306 | 0.3499783  | 6.34E-05 | 0.0065282 | 0.06315    |
| 5mo_SIGAE9_ | 0.01899441 | 0.10900912 | 4.14E-05 | 0.0054571 | 0.0010121  |
| 5mo_SIGAE9_ | 0.01255058 | 0.06924423 | 3.80E-05 | 0.0063994 | 0.21875    |
| 5mo_SIGAE9_ | 0.05094671 | 0.30618677 | 5.87E-05 | 0.0053288 | 0.0077602  |
| 5mo_SIGAE9_ | 0.01346631 | 0.0748952  | 3.83E-05 | 0.0063061 | 0.19734    |
| 5mo_SIGAE9_ | 0.07819184 | 0.47431645 | 5.01E-05 | 0.014289  | 0.20103    |
| 5mo_SIGAE9_ | 0.0612601  | 0.3698307  | 6.37E-05 | 0.0074328 | 0.10072    |
| 5mo_SIGAE9_ | 0.08701418 | 0.52875906 | 4.78E-05 | 0.010952  | -0.25808   |
| 5mo_SIGAE9_ | 0.02263819 | 0.1314949  | 4.28E-05 | 0.005125  | -0.068556  |
| 5mo_SIGAE9_ | 0.02889846 | 0.17012699 | 4.51E-05 | 0.0047064 | -0.12268   |
| 5mo_SIGAE9_ | 0.00523561 | 0.02410355 | 3.38E-05 | 0.0079991 | 0.55892    |
| 5mo_SIGAE9_ | 0.04721604 | 0.2831648  | 5.53E-05 | 0.0049654 | -0.01514   |
| 5mo_SIGAE9_ | 0.01661158 | 0.09430466 | 4.00E-05 | 0.0058035 | 0.080526   |
| 5mo_SIGAE9_ | 0.02850656 | 0.16770858 | 4.49E-05 | 0.0047302 | -0.12174   |
| 5mo_SIGAE9_ | 0.03168714 | 0.18733597 | 4.60E-05 | 0.0046154 | -0.12002   |
| 5mo_SIGAE9_ | 0.01293648 | 0.07162558 | 3.80E-05 | 0.0063994 | 0.21875    |
| 5mo_SIGAE9_ | 0.08932836 | 0.54303986 | 4.84E-05 | 0.0094274 | -0.42792   |
| 5mo_SIGAE9_ | 0.02984708 | 0.17598096 | 4.55E-05 | 0.0046645 | -0.12301   |
| 5mo_SIGAE9_ | 0.02601089 | 0.15230782 | 4.42E-05 | 0.0048445 | -0.11213   |
| 5mo_SIGAE9_ | 0.01550172 | 0.08745568 | 3.95E-05 | 0.0059603 | 0.11709    |
| 5mo_SIGAE9_ | 0.01102559 | 0.05983349 | 3.71E-05 | 0.0066957 | 0.2858     |
| 5mo_SIGAE9_ | 0.01122874 | 0.06108716 | 3.71E-05 | 0.0066957 | 0.2858     |
| 5mo_SIGAE9_ | 0.09940156 | 0.60520166 | 5.49E-05 | 0.0043938 | -1.2008    |
| 5mo_SIGAE9_ | 0.01419233 | 0.07937544 | 3.89E-05 | 0.0061278 | 0.1561     |
| 5mo_SIGAE9_ | 0.01353147 | 0.07529731 | 3.86E-05 | 0.0062156 | 0.17645    |
| 5mo_SIGAE9_ | 0.03156667 | 0.18659253 | 4.60E-05 | 0.0046154 | -0.12002   |
| 5mo_SIGAE9_ | 0.01124184 | 0.06116798 | 3.71E-05 | 0.0066957 | 0.2858     |
| 5mo_SIGAE9_ | 0.02491779 | 0.14556229 | 4.38E-05 | 0.0049138 | -0.10343   |
| 5mo_SIGAE9_ | 0.08908379 | 0.54153067 | 4.84E-05 | 0.0094274 | -0.3844    |
| 5mo_SIGAE9_ | 0.08342029 | 0.5065812  | 4.78E-05 | 0.013315  | -0.0045591 |
| 5mo_SIGAE9_ | 0.01578402 | 0.08919776 | 3.98E-05 | 0.0058806 | 0.098494   |
| 5mo_SIGAE9_ | 0.02943943 | 0.17346533 | 4.53E-05 | 0.0046846 | -0.1231    |

|             |            |            |          |           |            |
|-------------|------------|------------|----------|-----------|------------|
| 5mo_SIGAE9_ | 0.08742197 | 0.5312756  | 4.79E-05 | 0.010571  | -0.25808   |
| 5mo_SIGAE9_ | 0.01536898 | 0.08663655 | 3.95E-05 | 0.0059603 | 0.11709    |
| 5mo_SIGAE9_ | 0.01404626 | 0.07847404 | 3.86E-05 | 0.0062156 | 0.1561     |
| 5mo_SIGAE9_ | 0.01300655 | 0.07205802 | 3.83E-05 | 0.0063061 | 0.19734    |
| 5mo_SIGAE9_ | 0.0865872  | 0.5261242  | 4.77E-05 | 0.01133   | -0.21781   |
| 5mo_SIGAE9_ | 0.0901752  | 0.54826576 | 4.88E-05 | 0.0086895 | -0.47194   |
| 5mo_SIGAE9_ | 0.01781874 | 0.10175406 | 4.06E-05 | 0.0056572 | 0.030658   |
| 5mo_SIGAE9_ | 0.02231715 | 0.12951373 | 4.28E-05 | 0.005125  | -0.068556  |
| 5mo_SIGAE9_ | 0.02283526 | 0.132711   | 4.30E-05 | 0.0050782 | -0.077142  |
| 5mo_SIGAE9_ | 0.08925984 | 0.5426171  | 4.84E-05 | 0.0094274 | -0.42792   |
| 5mo_SIGAE9_ | 0.02429278 | 0.14170533 | 4.34E-05 | 0.0049916 | -0.098011  |
| 5mo_SIGAE9_ | 0.01354029 | 0.07535172 | 3.86E-05 | 0.0062156 | 0.17645    |
| 5mo_SIGAE9_ | 0.02259241 | 0.1312124  | 4.28E-05 | 0.005125  | -0.068556  |
| 5mo_SIGAE9_ | 0.02486902 | 0.1452613  | 4.36E-05 | 0.0049516 | -0.10343   |
| 5mo_SIGAE9_ | 0.09486017 | 0.5771767  | 5.16E-05 | 0.0059226 | -0.8688    |
| 5mo_SIGAE9_ | 0.04841158 | 0.29054248 | 5.63E-05 | 0.005054  | -0.0087048 |
| 5mo_SIGAE9_ | 0.03262758 | 0.19313937 | 4.64E-05 | 0.0045915 | -0.11603   |
| 5mo_SIGAE9_ | 0.02334647 | 0.13586564 | 4.32E-05 | 0.0050338 | -0.084895  |
| 5mo_SIGAE9_ | 0.02213817 | 0.12840922 | 4.26E-05 | 0.0051742 | -0.068556  |
| 5mo_SIGAE9_ | 0.00688657 | 0.03429162 | 3.47E-05 | 0.0076096 | 0.48124    |
| 5mo_SIGAE9_ | 0.01557055 | 0.08788043 | 3.95E-05 | 0.0059603 | 0.11709    |
| 5mo_SIGAE9_ | 0.03007995 | 0.177418   | 4.55E-05 | 0.0046645 | -0.12301   |
| 5mo_SIGAE9_ | 0.06667218 | 0.4032286  | 6.07E-05 | 0.0096573 | 0.18233    |
| 5mo_SIGAE9_ | 0.0742188  | 0.44979885 | 5.38E-05 | 0.013116  | 0.24406    |
| 5mo_SIGAE9_ | 0.02604133 | 0.15249562 | 4.42E-05 | 0.0048445 | -0.11213   |
| 5mo_SIGAE9_ | 0.02345511 | 0.13653609 | 4.32E-05 | 0.0050338 | -0.084895  |
| 5mo_SIGAE9_ | 0.04090031 | 0.24419041 | 5.02E-05 | 0.0046325 | -0.058715  |
| 5mo_SIGAE9_ | 0.03038373 | 0.17929262 | 4.57E-05 | 0.0046464 | -0.12245   |
| 5mo_SIGAE9_ | 0.01054761 | 0.05688386 | 3.68E-05 | 0.0068    | 0.30902    |
| 5mo_SIGAE9_ | 0.03447932 | 0.20456651 | 4.70E-05 | 0.0045688 | -0.10761   |
| 5mo_SIGAE9_ | 0.02139597 | 0.12382912 | 4.24E-05 | 0.0052258 | -0.04878   |
| 5mo_SIGAE9_ | 0.05175519 | 0.31117588 | 5.92E-05 | 0.0053939 | 0.011221   |
| 5mo_SIGAE9_ | 0.08830261 | 0.53671    | 4.80E-05 | 0.010188  | -0.3415    |
| 5mo_SIGAE9_ | 0.08291759 | 0.50347906 | 4.78E-05 | 0.013315  | 0.02505    |
| 5mo_SIGAE9_ | 0.04140575 | 0.24730945 | 5.05E-05 | 0.0046492 | -0.054504  |
| 5mo_SIGAE9_ | 0.02953398 | 0.1740488  | 4.53E-05 | 0.0046846 | -0.1231    |
| 5mo_SIGAE9_ | 0.02608521 | 0.1527664  | 4.42E-05 | 0.0048445 | -0.11213   |
| 5mo_SIGAE9_ | 0.01641993 | 0.09312197 | 4.00E-05 | 0.0058035 | 0.080526   |
| 5mo_SIGAE9_ | 0.02184188 | 0.12658083 | 4.26E-05 | 0.0051742 | -0.059109  |
| 5mo_SIGAE9_ | 0.01781758 | 0.10174685 | 4.06E-05 | 0.0056572 | 0.030658   |
| 5mo_SIGAE9_ | 0.0372249  | 0.22150949 | 4.81E-05 | 0.0045652 | -0.088896  |
| 5mo_SIGAE9_ | 0.01872105 | 0.10732219 | 4.11E-05 | 0.0055212 | 0.015459   |
| 5mo_SIGAE9_ | 0.03432158 | 0.20359305 | 4.70E-05 | 0.0045688 | -0.10761   |

|             |            |            |          |           |            |
|-------------|------------|------------|----------|-----------|------------|
| 5mo_SIGAE9_ | 0.03539363 | 0.21020868 | 4.74E-05 | 0.0045622 | -0.10068   |
| 5mo_SIGAE9_ | 0.02706883 | 0.15883638 | 4.44E-05 | 0.004813  | -0.11816   |
| 5mo_SIGAE9_ | 0.01900974 | 0.10910372 | 4.14E-05 | 0.0054571 | 0.0010121  |
| 5mo_SIGAE9_ | 0.07660331 | 0.46451363 | 5.13E-05 | 0.014025  | 0.22792    |
| 5mo_SIGAE9_ | 0.04101605 | 0.24490464 | 5.02E-05 | 0.0046325 | -0.058715  |
| 5mo_SIGAE9_ | 0.01603407 | 0.09074082 | 3.98E-05 | 0.0058806 | 0.098494   |
| 5mo_SIGAE9_ | 0.02395988 | 0.139651   | 4.34E-05 | 0.0049916 | -0.091842  |
| 5mo_SIGAE9_ | 0.01317137 | 0.0730751  | 3.83E-05 | 0.0063061 | 0.19734    |
| 5mo_SIGAE9_ | 0.0906682  | 0.5513081  | 4.91E-05 | 0.0083333 | -0.51631   |
| 5mo_SIGAE9_ | 0.01375849 | 0.07669821 | 3.86E-05 | 0.0062156 | 0.17645    |
| 5mo_SIGAE9_ | 0.03111921 | 0.18383124 | 4.58E-05 | 0.00463   | -0.12145   |
| 5mo_SIGAE9_ | 0.0470101  | 0.2818939  | 5.49E-05 | 0.0049251 | -0.01514   |
| 5mo_SIGAE9_ | 0.03871901 | 0.23072958 | 4.89E-05 | 0.0045836 | -0.076088  |
| 5mo_SIGAE9_ | 0.0821282  | 0.49860778 | 4.81E-05 | 0.013778  | 0.05262    |
| 5mo_SIGAE9_ | 0.07145761 | 0.43275952 | 5.65E-05 | 0.011849  | 0.2386     |
| 5mo_SIGAE9_ | 0.02198081 | 0.12743819 | 4.26E-05 | 0.0051742 | -0.059109  |
| 5mo_SIGAE9_ | 0.02289114 | 0.13305584 | 4.30E-05 | 0.0050782 | -0.077142  |
| 5mo_SIGAE9_ | 0.0217412  | 0.12595953 | 4.26E-05 | 0.0051742 | -0.059109  |
| 5mo_SIGAE9_ | 0.0393584  | 0.23467529 | 4.92E-05 | 0.0045932 | -0.071721  |
| 5mo_SIGAE9_ | 0.02028672 | 0.11698397 | 4.19E-05 | 0.0053364 | -0.025531  |
| 5mo_SIGAE9_ | 0.08435698 | 0.5123615  | 4.76E-05 | 0.012731  | -0.069378  |
| 5mo_SIGAE9_ | 0.02284382 | 0.13276379 | 4.30E-05 | 0.0050782 | -0.077142  |
| 5mo_SIGAE9_ | 0.09197302 | 0.5593601  | 4.96E-05 | 0.0076529 | -0.6503    |
| 5mo_SIGAE9_ | 0.03119655 | 0.18430853 | 4.58E-05 | 0.00463   | -0.12145   |
| 5mo_SIGAE9_ | 0.0185843  | 0.10647831 | 4.11E-05 | 0.0055212 | 0.015459   |
| 5mo_SIGAE9_ | 0.01896067 | 0.1088009  | 4.14E-05 | 0.0054571 | 0.0010121  |
| 5mo_SIGAE9_ | 0.01432042 | 0.08016591 | 3.89E-05 | 0.0061278 | 0.1561     |
| 5mo_SIGAE9_ | 0.03109436 | 0.1836779  | 4.58E-05 | 0.00463   | -0.12145   |
| 5mo_SIGAE9_ | 0.02207046 | 0.12799144 | 4.26E-05 | 0.0051742 | -0.059109  |
| 5mo_SIGAE9_ | 0.01485148 | 0.08344308 | 3.92E-05 | 0.0060428 | 0.1363     |
| 5mo_SIGAE9_ | 0.02142114 | 0.12398447 | 4.24E-05 | 0.0052258 | -0.04878   |
| 5mo_SIGAE9_ | 0.06226846 | 0.37605327 | 6.36E-05 | 0.0076138 | 0.11565    |
| 5mo_SIGAE9_ | 0.01508359 | 0.08487545 | 3.92E-05 | 0.0060428 | 0.1363     |
| 5mo_SIGAE9_ | 0.01467847 | 0.0823754  | 3.92E-05 | 0.0060428 | 0.1363     |
| 5mo_SIGAE9_ | 0.09055261 | 0.55059475 | 4.91E-05 | 0.0083333 | -0.51631   |
| 5mo_SIGAE9_ | 0.01471898 | 0.08262541 | 3.92E-05 | 0.0060428 | 0.1363     |
| 5mo_SIGAE9_ | 0.09006814 | 0.5476051  | 4.88E-05 | 0.0086895 | -0.47194   |
| 5mo_SIGAE9_ | 0.02936188 | 0.17298678 | 4.53E-05 | 0.0046846 | -0.1231    |
| 5mo_SIGAE9_ | 0.02291354 | 0.13319404 | 4.30E-05 | 0.0050782 | -0.077142  |
| 5mo_SIGAE9_ | 0.01914881 | 0.10996189 | 4.14E-05 | 0.0054571 | 0.0010121  |
| 5mo_SIGAE9_ | 0.01861217 | 0.10665026 | 4.11E-05 | 0.0055212 | 0.015459   |
| 5mo_SIGAE9_ | 0.0757577  | 0.45929536 | 5.23E-05 | 0.013721  | 0.23393    |
| 5mo_SIGAE9_ | 0.08325325 | 0.5055504  | 4.78E-05 | 0.013315  | -0.0045591 |

|             |            |            |          |           |           |
|-------------|------------|------------|----------|-----------|-----------|
| 5mo_SIGAE9_ | 0.01459572 | 0.08186477 | 3.89E-05 | 0.0061278 | 0.1363    |
| 5mo_SIGAE9_ | 0.02069405 | 0.11949756 | 4.21E-05 | 0.0052798 | -0.037579 |
| 5mo_SIGAE9_ | 0.03285041 | 0.19451447 | 4.64E-05 | 0.0045915 | -0.11603  |
| 5mo_SIGAE9_ | 0.08179048 | 0.49652365 | 4.83E-05 | 0.013957  | 0.078055  |
| 5mo_SIGAE9_ | 0.00917842 | 0.04843459 | 3.59E-05 | 0.00713   | 0.35661   |
| 5mo_SIGAE9_ | 0.01239561 | 0.06828791 | 3.77E-05 | 0.0064954 | 0.24064   |
| 5mo_SIGAE9_ | 0.02116915 | 0.12242942 | 4.24E-05 | 0.0052258 | -0.04878  |
| 5mo_SIGAE9_ | 0.08550528 | 0.5194477  | 4.76E-05 | 0.012059  | -0.14081  |
| 5mo_SIGAE9_ | 0.02478753 | 0.14475846 | 4.36E-05 | 0.0049516 | -0.098011 |
| 5mo_SIGAE9_ | 0.01069445 | 0.05779001 | 3.68E-05 | 0.0068    | 0.30902   |
| 5mo_SIGAE9_ | 0.02768686 | 0.1626502  | 4.48E-05 | 0.0047558 | -0.12024  |
| 5mo_SIGAE9_ | 0.02901528 | 0.17084788 | 4.51E-05 | 0.0047064 | -0.12268  |
| 5mo_SIGAE9_ | 0.02343855 | 0.13643393 | 4.32E-05 | 0.0050338 | -0.084895 |
| 5mo_SIGAE9_ | 0.02989835 | 0.1762973  | 4.55E-05 | 0.0046645 | -0.12301  |
| 5mo_SIGAE9_ | 0.05184314 | 0.3117186  | 5.92E-05 | 0.0053939 | 0.014768  |
| 5mo_SIGAE9_ | 0.02740841 | 0.16093189 | 4.46E-05 | 0.0047834 | -0.11816  |
| 5mo_SIGAE9_ | 0.02309133 | 0.13429122 | 4.30E-05 | 0.0050782 | -0.077142 |
| 5mo_SIGAE9_ | 0.0273066  | 0.16030365 | 4.46E-05 | 0.0047834 | -0.11816  |
| 5mo_SIGAE9_ | 0.021349   | 0.12353928 | 4.24E-05 | 0.0052258 | -0.04878  |
| 5mo_SIGAE9_ | 0.01314479 | 0.07291105 | 3.83E-05 | 0.0063061 | 0.19734   |
| 5mo_SIGAE9_ | 0.02687421 | 0.15763536 | 4.44E-05 | 0.004813  | -0.11546  |
| 5mo_SIGAE9_ | 0.09335271 | 0.5678742  | 5.06E-05 | 0.0067258 | -0.73907  |
| 5mo_SIGAE9_ | 0.09316991 | 0.5667461  | 5.02E-05 | 0.0070215 | -0.73907  |
| 5mo_SIGAE9_ | 0.04601008 | 0.27572283 | 5.39E-05 | 0.0048522 | -0.021643 |
| 5mo_SIGAE9_ | 0.02614674 | 0.15314612 | 4.42E-05 | 0.0048445 | -0.11213  |
| 5mo_SIGAE9_ | 0.05045504 | 0.30315265 | 5.83E-05 | 0.0052672 | 0.0043724 |
| 5mo_SIGAE9_ | 0.02586055 | 0.15138006 | 4.40E-05 | 0.0048781 | -0.10813  |
| 5mo_SIGAE9_ | 0.0164222  | 0.093136   | 4.00E-05 | 0.0058035 | 0.080526  |
| 5mo_SIGAE9_ | 0.01358181 | 0.07560795 | 3.86E-05 | 0.0062156 | 0.17645   |
| 5mo_SIGAE9_ | 0.0261431  | 0.15312365 | 4.42E-05 | 0.0048445 | -0.11213  |
| 5mo_SIGAE9_ | 0.09453598 | 0.5751762  | 5.13E-05 | 0.0061762 | -0.8688   |
| 5mo_SIGAE9_ | 0.09895302 | 0.6024337  | 5.45E-05 | 0.0045382 | -1.1701   |
| 5mo_SIGAE9_ | 0.00346215 | 0.01315952 | 3.29E-05 | 0.0084138 | 0.63801   |
| 5mo_SIGAE9_ | 0.01404714 | 0.07847946 | 3.86E-05 | 0.0062156 | 0.1561    |
| 5mo_SIGAE9_ | 0.0069492  | 0.03467807 | 3.47E-05 | 0.0076096 | 0.48124   |
| 5mo_SIGAE9_ | 0.08603572 | 0.52272105 | 4.76E-05 | 0.0117    | -0.17867  |
| 5mo_SIGAE9_ | 0.01293219 | 0.07159911 | 3.80E-05 | 0.0063994 | 0.21875   |
| 5mo_SIGAE9_ | 0.01693544 | 0.09630317 | 4.03E-05 | 0.005729  | 0.063215  |
| 5mo_SIGAE9_ | 0.08728791 | 0.53044826 | 4.79E-05 | 0.010571  | -0.25808  |
| 5mo_SIGAE9_ | 0.06921393 | 0.41891375 | 5.87E-05 | 0.010741  | 0.21895   |
| 5mo_SIGAE9_ | 0.02300178 | 0.1337386  | 4.30E-05 | 0.0050782 | -0.077142 |
| 5mo_SIGAE9_ | 0.04478898 | 0.2681874  | 5.30E-05 | 0.0047888 | -0.031751 |
| 5mo_SIGAE9_ | 0.02991208 | 0.17638205 | 4.55E-05 | 0.0046645 | -0.12301  |

|             |            |            |          |           |            |
|-------------|------------|------------|----------|-----------|------------|
| 5mo_SIGAE9_ | 0.01368873 | 0.07626774 | 3.86E-05 | 0.0062156 | 0.17645    |
| 5mo_SIGAE9_ | 0.04100957 | 0.24486464 | 5.02E-05 | 0.0046325 | -0.058715  |
| 5mo_SIGAE9_ | 0.01333746 | 0.07410002 | 3.83E-05 | 0.0063061 | 0.19734    |
| 5mo_SIGAE9_ | 0.01887466 | 0.10827015 | 4.11E-05 | 0.0055212 | 0.015459   |
| 5mo_SIGAE9_ | 0.03377024 | 0.20019075 | 4.68E-05 | 0.0045746 | -0.11071   |
| 5mo_SIGAE9_ | 0.01893305 | 0.10863043 | 4.11E-05 | 0.0055212 | 0.0010121  |
| 5mo_SIGAE9_ | 0.02739701 | 0.16086155 | 4.46E-05 | 0.0047834 | -0.11816   |
| 5mo_SIGAE9_ | 0.04378129 | 0.26196894 | 5.21E-05 | 0.0047343 | -0.035266  |
| 5mo_SIGAE9_ | 0.02600754 | 0.1522871  | 4.42E-05 | 0.0048445 | -0.11213   |
| 5mo_SIGAE9_ | 0.08256405 | 0.50129735 | 4.79E-05 | 0.013563  | 0.05262    |
| 5mo_SIGAE9_ | 0.08328278 | 0.50573266 | 4.78E-05 | 0.013315  | -0.0045591 |
| 5mo_SIGAE9_ | 0.07145809 | 0.4327625  | 5.65E-05 | 0.011849  | 0.2386     |
| 5mo_SIGAE9_ | 0.02802633 | 0.16474506 | 4.48E-05 | 0.0047558 | -0.12024   |
| 5mo_SIGAE9_ | 0.01094181 | 0.0593165  | 3.71E-05 | 0.0066957 | 0.2858     |
| 5mo_SIGAE9_ | 0.06133914 | 0.37031847 | 6.37E-05 | 0.0074328 | 0.10072    |
| 5mo_SIGAE9_ | 0.09303344 | 0.56590396 | 5.02E-05 | 0.0070215 | -0.73907   |
| 5mo_SIGAE9_ | 0.04703128 | 0.28202465 | 5.49E-05 | 0.0049251 | -0.01514   |
| 5mo_SIGAE9_ | 0.01007201 | 0.05394894 | 3.65E-05 | 0.0069072 | 0.33263    |
| 5mo_SIGAE9_ | 0.00764458 | 0.0389693  | 3.53E-05 | 0.0073641 | 0.43054    |
| 5mo_SIGAE9_ | 0.01198695 | 0.06576607 | 3.77E-05 | 0.0064954 | 0.24064    |
| 5mo_SIGAE9_ | 0.08929886 | 0.5428578  | 4.84E-05 | 0.0094274 | -0.42792   |
| 5mo_SIGAE9_ | 0.03084892 | 0.18216328 | 4.57E-05 | 0.0046464 | -0.12145   |
| 5mo_SIGAE9_ | 0.02533922 | 0.14816295 | 4.38E-05 | 0.0049138 | -0.10343   |
| 5mo_SIGAE9_ | 0.02006796 | 0.11563398 | 4.19E-05 | 0.0053364 | -0.025531  |
| 5mo_SIGAE9_ | 0.08358611 | 0.5076045  | 4.77E-05 | 0.013036  | -0.0045591 |
| 5mo_SIGAE9_ | 0.08808074 | 0.53534085 | 4.80E-05 | 0.010188  | -0.3415    |
| 5mo_SIGAE9_ | 0.03658635 | 0.21756895 | 4.79E-05 | 0.0045625 | -0.092976  |
| 5mo_SIGAE9_ | 0.02425604 | 0.14147864 | 4.34E-05 | 0.0049916 | -0.091842  |
| 5mo_SIGAE9_ | 0.01333644 | 0.07409373 | 3.83E-05 | 0.0063061 | 0.19734    |
| 5mo_SIGAE9_ | 0.01417253 | 0.07925329 | 3.89E-05 | 0.0061278 | 0.1561     |
| 5mo_SIGAE9_ | 0.04474671 | 0.26792654 | 5.30E-05 | 0.0047888 | -0.031751  |
| 5mo_SIGAE9_ | 0.01787388 | 0.10209433 | 4.09E-05 | 0.0055879 | 0.030658   |
| 5mo_SIGAE9_ | 0.02692789 | 0.15796661 | 4.44E-05 | 0.004813  | -0.11546   |
| 5mo_SIGAE9_ | 0.01883031 | 0.10799646 | 4.11E-05 | 0.0055212 | 0.015459   |
| 5mo_SIGAE9_ | 0.01604846 | 0.09082966 | 3.98E-05 | 0.0058806 | 0.098494   |
| 5mo_SIGAE9_ | 0.09867504 | 0.60071826 | 5.45E-05 | 0.0045382 | -1.1375    |
| 5mo_SIGAE9_ | 0.04585852 | 0.27478755 | 5.39E-05 | 0.0048522 | -0.024952  |
| 5mo_SIGAE9_ | 0.04444424 | 0.26606002 | 5.30E-05 | 0.0047888 | -0.031751  |
| 5mo_SIGAE9_ | 0.00911972 | 0.04807238 | 3.59E-05 | 0.00713   | 0.38094    |
| 5mo_SIGAE9_ | 0.02602727 | 0.15240891 | 4.42E-05 | 0.0048445 | -0.11213   |
| 5mo_SIGAE9_ | 0.03362208 | 0.19927642 | 4.68E-05 | 0.0045746 | -0.11071   |
| 5mo_SIGAE9_ | 0.04729084 | 0.2836264  | 5.53E-05 | 0.0049654 | -0.01514   |
| 5mo_SIGAE9_ | 0.07179714 | 0.43485478 | 5.60E-05 | 0.012118  | 0.2386     |



|             |            |            |          |           |           |
|-------------|------------|------------|----------|-----------|-----------|
| 5mo_SIGAE9_ | 0.01056984 | 0.05702108 | 3.68E-05 | 0.0068    | 0.30902   |
| 5mo_SIGAE9_ | 0.01247473 | 0.06877616 | 3.80E-05 | 0.0063994 | 0.21875   |
| 5mo_SIGAE9_ | 0.03538167 | 0.2101349  | 4.74E-05 | 0.0045622 | -0.10068  |
| 5mo_SIGAE9_ | 0.01349854 | 0.07509409 | 3.83E-05 | 0.0063061 | 0.17645   |
| 5mo_SIGAE9_ | 0.01704937 | 0.09700625 | 4.03E-05 | 0.005729  | 0.063215  |
| 5mo_SIGAE9_ | 0.02048029 | 0.11817846 | 4.19E-05 | 0.0053364 | -0.025531 |
| 5mo_SIGAE9_ | 0.0155455  | 0.08772589 | 3.95E-05 | 0.0059603 | 0.11709   |
| 5mo_SIGAE9_ | 0.01781326 | 0.10172024 | 4.06E-05 | 0.0056572 | 0.030658  |
| 5mo_SIGAE9_ | 0.10161363 | 0.6188523  | 5.66E-05 | 0.0039398 | -1.303    |
| 5mo_SIGAE9_ | 0.00833108 | 0.04320565 | 3.56E-05 | 0.0072456 | 0.40559   |
| 5mo_SIGAE9_ | 0.04048524 | 0.24162902 | 4.99E-05 | 0.0046177 | -0.063007 |
| 5mo_SIGAE9_ | 0.07819249 | 0.47432047 | 5.01E-05 | 0.014289  | 0.20103   |
| 5mo_SIGAE9_ | 0.01280968 | 0.07084315 | 3.80E-05 | 0.0063994 | 0.21875   |
| 5mo_SIGAE9_ | 0.01122477 | 0.06106263 | 3.71E-05 | 0.0066957 | 0.2858    |
| 5mo_SIGAE9_ | 0.0260518  | 0.15256026 | 4.42E-05 | 0.0048445 | -0.11213  |
| 5mo_SIGAE9_ | 0.0282815  | 0.16631976 | 4.49E-05 | 0.0047302 | -0.12174  |
| 5mo_SIGAE9_ | 0.00900336 | 0.0473543  | 3.59E-05 | 0.00713   | 0.38094   |
| 5mo_SIGAE9_ | 0.01790286 | 0.10227314 | 4.09E-05 | 0.0055879 | 0.030658  |
| 5mo_SIGAE9_ | 0.02569934 | 0.15038526 | 4.40E-05 | 0.0048781 | -0.10813  |
| 5mo_SIGAE9_ | 0.06116512 | 0.3692446  | 6.38E-05 | 0.0072613 | 0.10072   |
| 5mo_SIGAE9_ | 0.01916901 | 0.11008658 | 4.14E-05 | 0.0054571 | 0.0010121 |
| 5mo_SIGAE9_ | 0.02405836 | 0.14025874 | 4.34E-05 | 0.0049916 | -0.091842 |
| 5mo_SIGAE9_ | 0.0425926  | 0.25463355 | 5.13E-05 | 0.0046879 | -0.04643  |
| 5mo_SIGAE9_ | 0.05608545 | 0.33789793 | 6.24E-05 | 0.0060668 | 0.043089  |
| 5mo_SIGAE9_ | 0.02057064 | 0.11873602 | 4.21E-05 | 0.0052798 | -0.037579 |
| 5mo_SIGAE9_ | 0.0090492  | 0.04763718 | 3.59E-05 | 0.00713   | 0.38094   |
| 5mo_SIGAE9_ | 0.02607384 | 0.15269625 | 4.42E-05 | 0.0048445 | -0.11213  |
| 5mo_SIGAE9_ | 0.08164213 | 0.49560818 | 4.83E-05 | 0.013957  | 0.078055  |
| 5mo_SIGAE9_ | 0.02863776 | 0.16851822 | 4.49E-05 | 0.0047302 | -0.12268  |
| 5mo_SIGAE9_ | 0.01175789 | 0.06435254 | 3.74E-05 | 0.0065941 | 0.263     |
| 5mo_SIGAE9_ | 0.01650549 | 0.09364996 | 4.00E-05 | 0.0058035 | 0.080526  |
| 5mo_SIGAE9_ | 0.01959598 | 0.11272138 | 4.16E-05 | 0.0053955 | -0.012659 |
| 5mo_SIGAE9_ | 0.03447726 | 0.2045538  | 4.70E-05 | 0.0045688 | -0.10761  |
| 5mo_SIGAE9_ | 0.08730993 | 0.5305842  | 4.79E-05 | 0.010571  | -0.25808  |
| 5mo_SIGAE9_ | 0.01913899 | 0.10990132 | 4.14E-05 | 0.0054571 | 0.0010121 |
| 5mo_SIGAE9_ | 0.02250901 | 0.13069773 | 4.28E-05 | 0.005125  | -0.068556 |
| 5mo_SIGAE9_ | 0.02961705 | 0.17456141 | 4.53E-05 | 0.0046846 | -0.1231   |
| 5mo_SIGAE9_ | 0.01656527 | 0.09401888 | 4.00E-05 | 0.0058035 | 0.080526  |
| 5mo_SIGAE9_ | 0.01544544 | 0.08710838 | 3.95E-05 | 0.0059603 | 0.11709   |
| 5mo_SIGAE9_ | 0.08225665 | 0.49940044 | 4.81E-05 | 0.013778  | 0.05262   |
| 5mo_SIGAE9_ | 0.01719226 | 0.09788801 | 4.03E-05 | 0.005729  | 0.063215  |
| 5mo_SIGAE9_ | 0.01606921 | 0.09095768 | 3.98E-05 | 0.0058806 | 0.098494  |
| 5mo_SIGAE9_ | 0.01359992 | 0.07571971 | 3.86E-05 | 0.0062156 | 0.17645   |

|             |            |            |          |           |           |
|-------------|------------|------------|----------|-----------|-----------|
| 5mo_SIGAE9_ | 0.09432118 | 0.5738506  | 5.13E-05 | 0.0061762 | -0.82618  |
| 5mo_SIGAE9_ | 0.07655406 | 0.46420974 | 5.13E-05 | 0.014025  | 0.22792   |
| 5mo_SIGAE9_ | 0.07856581 | 0.47662422 | 4.97E-05 | 0.014318  | 0.18889   |
| 5mo_SIGAE9_ | 0.01887135 | 0.10824972 | 4.11E-05 | 0.0055212 | 0.015459  |
| 5mo_SIGAE9_ | 0.0289841  | 0.1706555  | 4.51E-05 | 0.0047064 | -0.12268  |
| 5mo_SIGAE9_ | 0.00602925 | 0.02900112 | 3.44E-05 | 0.0077366 | 0.50694   |
| 5mo_SIGAE9_ | 0.02247425 | 0.13048322 | 4.28E-05 | 0.005125  | -0.068556 |
| 5mo_SIGAE9_ | 0.09586578 | 0.5833823  | 5.20E-05 | 0.0056833 | -0.9515   |
| 5mo_SIGAE9_ | 0.09677708 | 0.58900595 | 5.28E-05 | 0.0052469 | -1.03     |
| 5mo_SIGAE9_ | 0.02123592 | 0.12284144 | 4.24E-05 | 0.0052258 | -0.04878  |
| 5mo_SIGAE9_ | 0.01691967 | 0.09620588 | 4.03E-05 | 0.005729  | 0.063215  |
| 5mo_SIGAE9_ | 0.03220547 | 0.19053456 | 4.62E-05 | 0.0046026 | -0.11821  |
| 5mo_SIGAE9_ | 0.01567257 | 0.08851004 | 3.95E-05 | 0.0059603 | 0.098494  |
| 5mo_SIGAE9_ | 0.01956582 | 0.11253526 | 4.16E-05 | 0.0053955 | -0.012659 |
| 5mo_SIGAE9_ | 0.01509695 | 0.08495788 | 3.92E-05 | 0.0060428 | 0.1363    |
| 5mo_SIGAE9_ | 0.02591328 | 0.15170543 | 4.40E-05 | 0.0048781 | -0.11213  |
| 5mo_SIGAE9_ | 0.02694066 | 0.15804544 | 4.44E-05 | 0.004813  | -0.11546  |
| 5mo_SIGAE9_ | 0.03250551 | 0.19238612 | 4.64E-05 | 0.0045915 | -0.11603  |
| 5mo_SIGAE9_ | 0.02539286 | 0.14849396 | 4.38E-05 | 0.0049138 | -0.10813  |
| 5mo_SIGAE9_ | 0.04557056 | 0.27301052 | 5.39E-05 | 0.0048522 | -0.024952 |
| 5mo_SIGAE9_ | 0.01994485 | 0.11487429 | 4.16E-05 | 0.0053955 | -0.012659 |
| 5mo_SIGAE9_ | 0.01239516 | 0.06828514 | 3.77E-05 | 0.0064954 | 0.24064   |
| 5mo_SIGAE9_ | 0.02881097 | 0.16958708 | 4.51E-05 | 0.0047064 | -0.12268  |
| 5mo_SIGAE9_ | 0.01356337 | 0.07549411 | 3.86E-05 | 0.0062156 | 0.17645   |
| 5mo_SIGAE9_ | 0.0577815  | 0.34836426 | 6.32E-05 | 0.0064035 | 0.06315   |
| 5mo_SIGAE9_ | 0.02102539 | 0.12154228 | 4.21E-05 | 0.0052798 | -0.037579 |
| 5mo_SIGAE9_ | 0.03177999 | 0.1879089  | 4.60E-05 | 0.0046154 | -0.12002  |
| 5mo_SIGAE9_ | 0.02190068 | 0.1269437  | 4.26E-05 | 0.0051742 | -0.059109 |
| 5mo_SIGAE9_ | 0.08682706 | 0.5276044  | 4.78E-05 | 0.010952  | -0.21781  |
| 5mo_SIGAE9_ | 0.05981099 | 0.3608882  | 6.37E-05 | 0.0069445 | 0.080679  |
| 5mo_SIGAE9_ | 0.01872986 | 0.10737654 | 4.11E-05 | 0.0055212 | 0.015459  |
| 5mo_SIGAE9_ | 0.0171952  | 0.0979062  | 4.03E-05 | 0.005729  | 0.063215  |
| 5mo_SIGAE9_ | 0.0197094  | 0.11342128 | 4.16E-05 | 0.0053955 | -0.012659 |
| 5mo_SIGAE9_ | 0.01607271 | 0.09097926 | 3.98E-05 | 0.0058806 | 0.098494  |
| 5mo_SIGAE9_ | 0.09327285 | 0.5673814  | 5.06E-05 | 0.0067258 | -0.73907  |
| 5mo_SIGAE9_ | 0.06923267 | 0.41902944 | 5.87E-05 | 0.010741  | 0.21895   |
| 5mo_SIGAE9_ | 0.01299155 | 0.07196541 | 3.83E-05 | 0.0063061 | 0.19734   |
| 5mo_SIGAE9_ | 0.01161022 | 0.06344122 | 3.74E-05 | 0.0065941 | 0.263     |
| 5mo_SIGAE9_ | 0.01114665 | 0.06058057 | 3.71E-05 | 0.0066957 | 0.2858    |
| 5mo_SIGAE9_ | 0.00785038 | 0.04023925 | 3.53E-05 | 0.0073641 | 0.43054   |
| 5mo_SIGAE9_ | 0.02434218 | 0.14201017 | 4.34E-05 | 0.0049916 | -0.098011 |
| 5mo_SIGAE9_ | 0.07206848 | 0.43652922 | 5.54E-05 | 0.012382  | 0.24161   |
| 5mo_SIGAE9_ | 0.01840366 | 0.10536357 | 4.11E-05 | 0.0055212 | 0.015459  |

|             |            |            |          |           |            |
|-------------|------------|------------|----------|-----------|------------|
| 5mo_SIGAE9_ | 0.08197331 | 0.49765193 | 4.81E-05 | 0.013778  | 0.078055   |
| 5mo_SIGAE9_ | 0.08566479 | 0.520432   | 4.76E-05 | 0.0117    | -0.14081   |
| 5mo_SIGAE9_ | 0.0193414  | 0.1111504  | 4.14E-05 | 0.0054571 | 0.0010121  |
| 5mo_SIGAE9_ | 0.08256519 | 0.5013044  | 4.79E-05 | 0.013563  | 0.05262    |
| 5mo_SIGAE9_ | 0.02243895 | 0.13026534 | 4.28E-05 | 0.005125  | -0.068556  |
| 5mo_SIGAE9_ | 0.01982616 | 0.11414182 | 4.16E-05 | 0.0053955 | -0.012659  |
| 5mo_SIGAE9_ | 0.08319081 | 0.5051651  | 4.78E-05 | 0.013315  | -0.0045591 |
| 5mo_SIGAE9_ | 0.00458282 | 0.02007515 | 3.35E-05 | 0.0081345 | 0.58516    |
| 5mo_SIGAE9_ | 0.08434569 | 0.51229185 | 4.76E-05 | 0.012731  | -0.069378  |
| 5mo_SIGAE9_ | 0.0895766  | 0.54457176 | 4.86E-05 | 0.0090548 | -0.42792   |
| 5mo_SIGAE9_ | 0.02420225 | 0.14114666 | 4.34E-05 | 0.0049916 | -0.091842  |
| 5mo_SIGAE9_ | 0.04671411 | 0.28006735 | 5.49E-05 | 0.0049251 | -0.018376  |
| 5mo_SIGAE9_ | 0.02345058 | 0.13650812 | 4.32E-05 | 0.0050338 | -0.084895  |
| 5mo_SIGAE9_ | 0.05865626 | 0.35376236 | 6.35E-05 | 0.0066597 | 0.068735   |
| 5mo_SIGAE9_ | 0.00982345 | 0.05241509 | 3.65E-05 | 0.0069072 | 0.33263    |
| 5mo_SIGAE9_ | 0.02801793 | 0.16469325 | 4.48E-05 | 0.0047558 | -0.12024   |
| 5mo_SIGAE9_ | 0.03914882 | 0.23338196 | 4.92E-05 | 0.0045932 | -0.071721  |
| 5mo_SIGAE9_ | 0.02251793 | 0.13075276 | 4.28E-05 | 0.005125  | -0.068556  |
| 5mo_SIGAE9_ | 0.04393851 | 0.26293918 | 5.25E-05 | 0.0047605 | -0.035266  |
| 5mo_SIGAE9_ | 0.07275286 | 0.44075254 | 5.49E-05 | 0.012637  | 0.24373    |
| 5mo_SIGAE9_ | 0.01856739 | 0.10637394 | 4.11E-05 | 0.0055212 | 0.015459   |
| 5mo_SIGAE9_ | 0.02032821 | 0.11724    | 4.19E-05 | 0.0053364 | -0.025531  |
| 5mo_SIGAE9_ | 0.03424063 | 0.20309353 | 4.70E-05 | 0.0045688 | -0.10761   |
| 5mo_SIGAE9_ | 0.05571515 | 0.33561277 | 6.21E-05 | 0.005966  | 0.043089   |
| 5mo_SIGAE9_ | 0.02394793 | 0.13957727 | 4.34E-05 | 0.0049916 | -0.091842  |
| 5mo_SIGAE9_ | 0.03074343 | 0.18151233 | 4.57E-05 | 0.0046464 | -0.12245   |
| 5mo_SIGAE9_ | 0.08963935 | 0.544959   | 4.86E-05 | 0.0090548 | -0.42792   |
| 5mo_SIGAE9_ | 0.01407026 | 0.07862215 | 3.89E-05 | 0.0061278 | 0.1561     |
| 5mo_SIGAE9_ | 0.01619082 | 0.09170812 | 3.98E-05 | 0.0058806 | 0.080526   |
| 5mo_SIGAE9_ | 0.00425806 | 0.01807109 | 3.32E-05 | 0.0082728 | 0.61153    |
| 5mo_SIGAE9_ | 0.01456364 | 0.08166681 | 3.89E-05 | 0.0061278 | 0.1561     |
| 5mo_SIGAE9_ | 0.02554137 | 0.1494104  | 4.40E-05 | 0.0048781 | -0.10813   |
| 5mo_SIGAE9_ | 0.05950967 | 0.3590288  | 6.37E-05 | 0.0067983 | 0.080679   |
| 5mo_SIGAE9_ | 0.074872   | 0.45382974 | 5.28E-05 | 0.013537  | 0.24193    |
| 5mo_SIGAE9_ | 0.01425531 | 0.07976408 | 3.89E-05 | 0.0061278 | 0.1561     |
| 5mo_SIGAE9_ | 0.01323611 | 0.07347459 | 3.83E-05 | 0.0063061 | 0.19734    |
| 5mo_SIGAE9_ | 0.02507081 | 0.14650655 | 4.38E-05 | 0.0049138 | -0.10343   |
| 5mo_SIGAE9_ | 0.05309705 | 0.31945652 | 6.05E-05 | 0.0056127 | 0.022172   |
| 5mo_SIGAE9_ | 0.02250859 | 0.13069513 | 4.28E-05 | 0.005125  | -0.068556  |
| 5mo_SIGAE9_ | 0.08688766 | 0.5279783  | 4.78E-05 | 0.010952  | -0.21781   |
| 5mo_SIGAE9_ | 0.09075605 | 0.5518502  | 4.91E-05 | 0.0083333 | -0.56091   |
| 5mo_SIGAE9_ | 0.02141861 | 0.12396883 | 4.24E-05 | 0.0052258 | -0.04878   |
| 5mo_SIGAE9_ | 0.02536576 | 0.14832672 | 4.38E-05 | 0.0049138 | -0.10343   |

|             |            |            |          |           |           |
|-------------|------------|------------|----------|-----------|-----------|
| 5mo_SIGAE9_ | 0.01669816 | 0.09483893 | 4.00E-05 | 0.0058035 | 0.080526  |
| 5mo_SIGAE9_ | 0.02955199 | 0.1741599  | 4.53E-05 | 0.0046846 | -0.1231   |
| 5mo_SIGAE9_ | 0.02977432 | 0.17553194 | 4.53E-05 | 0.0046846 | -0.12301  |
| 5mo_SIGAE9_ | 0.01345191 | 0.07480634 | 3.83E-05 | 0.0063061 | 0.19734   |
| 5mo_SIGAE9_ | 0.01525895 | 0.08595757 | 3.95E-05 | 0.0059603 | 0.11709   |
| 5mo_SIGAE9_ | 0.05864986 | 0.35372293 | 6.35E-05 | 0.0066597 | 0.068735  |
| 5mo_SIGAE9_ | 0.02023312 | 0.11665317 | 4.19E-05 | 0.0053364 | -0.025531 |
| 5mo_SIGAE9_ | 0.01555751 | 0.08779999 | 3.95E-05 | 0.0059603 | 0.11709   |
| 5mo_SIGAE9_ | 0.02162871 | 0.12526534 | 4.24E-05 | 0.0052258 | -0.059109 |
| 5mo_SIGAE9_ | 0.08766377 | 0.5327677  | 4.79E-05 | 0.010571  | -0.29935  |
| 5mo_SIGAE9_ | 0.04333793 | 0.259233   | 5.21E-05 | 0.0047343 | -0.038876 |
| 5mo_SIGAE9_ | 0.0066261  | 0.03268422 | 3.47E-05 | 0.0076096 | 0.48124   |
| 5mo_SIGAE9_ | 0.01328232 | 0.07375976 | 3.83E-05 | 0.0063061 | 0.19734   |
| 5mo_SIGAE9_ | 0.01608161 | 0.0910342  | 3.98E-05 | 0.0058806 | 0.098494  |
| 5mo_SIGAE9_ | 0.03596417 | 0.21372946 | 4.77E-05 | 0.0045615 | -0.096915 |
| 5mo_SIGAE9_ | 0.02091947 | 0.12088866 | 4.21E-05 | 0.0052798 | -0.037579 |
| 5mo_SIGAE9_ | 0.00942455 | 0.04995347 | 3.62E-05 | 0.0070172 | 0.35661   |
| 5mo_SIGAE9_ | 0.0230328  | 0.13393001 | 4.30E-05 | 0.0050782 | -0.077142 |
| 5mo_SIGAE9_ | 0.01153943 | 0.0630044  | 3.74E-05 | 0.0065941 | 0.263     |
| 5mo_SIGAE9_ | 0.0910111  | 0.55342406 | 4.91E-05 | 0.0083333 | -0.56091  |
| 5mo_SIGAE9_ | 0.09518661 | 0.57919115 | 5.16E-05 | 0.0059226 | -0.91061  |
| 5mo_SIGAE9_ | 0.01469475 | 0.08247589 | 3.92E-05 | 0.0060428 | 0.1363    |
| 5mo_SIGAE9_ | 0.02110318 | 0.12202229 | 4.21E-05 | 0.0052798 | -0.04878  |
| 5mo_SIGAE9_ | 0.09425646 | 0.5734512  | 5.09E-05 | 0.0064439 | -0.82618  |
| 5mo_SIGAE9_ | 0.0099557  | 0.0532312  | 3.65E-05 | 0.0069072 | 0.33263   |
| 5mo_SIGAE9_ | 0.02522707 | 0.14747086 | 4.38E-05 | 0.0049138 | -0.10343  |
| 5mo_SIGAE9_ | 0.08889911 | 0.540391   | 4.84E-05 | 0.0094274 | -0.3844   |
| 5mo_SIGAE9_ | 0.01823717 | 0.10433617 | 4.09E-05 | 0.0055879 | 0.030658  |
| 5mo_SIGAE9_ | 0.01895232 | 0.10874937 | 4.14E-05 | 0.0054571 | 0.0010121 |
| 5mo_SIGAE9_ | 0.06108168 | 0.36872968 | 6.38E-05 | 0.0072613 | 0.10072   |
| 5mo_SIGAE9_ | 0.0861408  | 0.5233695  | 4.76E-05 | 0.0117    | -0.17867  |
| 5mo_SIGAE9_ | 0.0710567  | 0.4302855  | 5.65E-05 | 0.011849  | 0.23476   |
| 5mo_SIGAE9_ | 0.00697668 | 0.03484767 | 3.47E-05 | 0.0076096 | 0.48124   |
| 5mo_SIGAE9_ | 0.02332827 | 0.13575333 | 4.32E-05 | 0.0050338 | -0.084895 |
| 5mo_SIGAE9_ | 0.02995747 | 0.17666216 | 4.55E-05 | 0.0046645 | -0.12301  |
| 5mo_SIGAE9_ | 0.06702196 | 0.40538713 | 6.07E-05 | 0.0096573 | 0.19037   |
| 5mo_SIGAE9_ | 0.0088099  | 0.04616045 | 3.59E-05 | 0.00713   | 0.38094   |
| 5mo_SIGAE9_ | 0.02117259 | 0.12245064 | 4.24E-05 | 0.0052258 | -0.04878  |
| 5mo_SIGAE9_ | 0.02812691 | 0.16536574 | 4.48E-05 | 0.0047558 | -0.12174  |
| 5mo_SIGAE9_ | 0.02872609 | 0.16906328 | 4.51E-05 | 0.0047064 | -0.12268  |
| 5mo_SIGAE9_ | 0.01709134 | 0.09726527 | 4.03E-05 | 0.005729  | 0.063215  |
| 5mo_SIGAE9_ | 0.06841189 | 0.41396442 | 5.93E-05 | 0.010465  | 0.20551   |
| 5mo_SIGAE9_ | 0.08383494 | 0.50914    | 4.77E-05 | 0.013036  | -0.036078 |

|             |            |            |          |           |            |
|-------------|------------|------------|----------|-----------|------------|
| 5mo_SIGAE9_ | 0.0198083  | 0.1140316  | 4.16E-05 | 0.0053955 | -0.012659  |
| 5mo_SIGAE9_ | 0.10295668 | 0.6271403  | 5.78E-05 | 0.003724  | -1.3397    |
| 5mo_SIGAE9_ | 0.01975922 | 0.11372875 | 4.16E-05 | 0.0053955 | -0.012659  |
| 5mo_SIGAE9_ | 0.02604355 | 0.15250933 | 4.42E-05 | 0.0048445 | -0.11213   |
| 5mo_SIGAE9_ | 0.0206592  | 0.1192825  | 4.21E-05 | 0.0052798 | -0.037579  |
| 5mo_SIGAE9_ | 0.03088412 | 0.1823805  | 4.58E-05 | 0.00463   | -0.12145   |
| 5mo_SIGAE9_ | 0.0517768  | 0.31130922 | 5.92E-05 | 0.0053939 | 0.011221   |
| 5mo_SIGAE9_ | 0.01905116 | 0.10935929 | 4.14E-05 | 0.0054571 | 0.0010121  |
| 5mo_SIGAE9_ | 0.08778153 | 0.5334944  | 4.80E-05 | 0.010188  | -0.29935   |
| 5mo_SIGAE9_ | 0.02508922 | 0.14662015 | 4.38E-05 | 0.0049138 | -0.10343   |
| 5mo_SIGAE9_ | 0.09396734 | 0.5716671  | 5.09E-05 | 0.0064439 | -0.82618   |
| 5mo_SIGAE9_ | 0.01710073 | 0.0973232  | 4.03E-05 | 0.005729  | 0.063215   |
| 5mo_SIGAE9_ | 0.0261911  | 0.15341987 | 4.42E-05 | 0.0048445 | -0.11213   |
| 5mo_SIGAE9_ | 0.02373816 | 0.13828279 | 4.32E-05 | 0.0050338 | -0.084895  |
| 5mo_SIGAE9_ | 0.04468728 | 0.26755983 | 5.30E-05 | 0.0047888 | -0.031751  |
| 5mo_SIGAE9_ | 0.02087371 | 0.12060627 | 4.21E-05 | 0.0052798 | -0.037579  |
| 5mo_SIGAE9_ | 0.01317002 | 0.07306676 | 3.83E-05 | 0.0063061 | 0.19734    |
| 5mo_SIGAE9_ | 0.02346393 | 0.1365905  | 4.32E-05 | 0.0050338 | -0.084895  |
| 5mo_SIGAE9_ | 0.02002221 | 0.11535163 | 4.16E-05 | 0.0053955 | -0.025531  |
| 5mo_SIGAE9_ | 0.07542049 | 0.45721447 | 5.23E-05 | 0.013721  | 0.23858    |
| 5mo_SIGAE9_ | 0.04910443 | 0.29481804 | 5.68E-05 | 0.0051026 | -0.0054808 |
| 5mo_SIGAE9_ | 0.08155665 | 0.4950807  | 4.83E-05 | 0.013957  | 0.078055   |
| 5mo_SIGAE9_ | 0.08041735 | 0.48805007 | 4.87E-05 | 0.014207  | 0.14202    |
| 5mo_SIGAE9_ | 0.02352092 | 0.13694221 | 4.32E-05 | 0.0050338 | -0.084895  |
| 5mo_SIGAE9_ | 0.0876851  | 0.5328994  | 4.79E-05 | 0.010571  | -0.29935   |
| 5mo_SIGAE9_ | 0.02502683 | 0.14623515 | 4.38E-05 | 0.0049138 | -0.10343   |
| 5mo_SIGAE9_ | 0.03106523 | 0.18349814 | 4.58E-05 | 0.00463   | -0.12145   |
| 5mo_SIGAE9_ | 0.02313205 | 0.13454251 | 4.30E-05 | 0.0050782 | -0.077142  |
| 5mo_SIGAE9_ | 0.05063854 | 0.30428505 | 5.83E-05 | 0.0052672 | 0.0043724  |
| 5mo_SIGAE9_ | 0.01052407 | 0.05673859 | 3.68E-05 | 0.0068    | 0.30902    |
| 5mo_SIGAE9_ | 0.02017685 | 0.11630595 | 4.19E-05 | 0.0053364 | -0.025531  |
| 5mo_SIGAE9_ | 0.02533075 | 0.14811063 | 4.38E-05 | 0.0049138 | -0.10343   |
| 5mo_SIGAE9_ | 0.01466034 | 0.08226355 | 3.92E-05 | 0.0060428 | 0.1363     |
| 5mo_SIGAE9_ | 0.07504987 | 0.45492736 | 5.28E-05 | 0.013537  | 0.24193    |
| 5mo_SIGAE9_ | 0.08335445 | 0.5061749  | 4.78E-05 | 0.013315  | -0.0045591 |
| 5mo_SIGAE9_ | 0.01568078 | 0.08856067 | 3.95E-05 | 0.0059603 | 0.098494   |
| 5mo_SIGAE9_ | 0.02061274 | 0.11899581 | 4.21E-05 | 0.0052798 | -0.037579  |
| 5mo_SIGAE9_ | 0.0432853  | 0.25890818 | 5.17E-05 | 0.0047101 | -0.038876  |
| 5mo_SIGAE9_ | 0.00936374 | 0.04957822 | 3.62E-05 | 0.0070172 | 0.35661    |
| 5mo_SIGAE9_ | 0.09559093 | 0.5816862  | 5.20E-05 | 0.0056833 | -0.9515    |
| 5mo_SIGAE9_ | 0.0170036  | 0.09672383 | 4.03E-05 | 0.005729  | 0.063215   |
| 5mo_SIGAE9_ | 0.01558583 | 0.08797474 | 3.95E-05 | 0.0059603 | 0.11709    |
| 5mo_SIGAE9_ | 0.02311887 | 0.13446116 | 4.30E-05 | 0.0050782 | -0.077142  |

|             |            |            |          |           |            |
|-------------|------------|------------|----------|-----------|------------|
| 5mo_SIGAE9_ | 0.01292317 | 0.07154347 | 3.80E-05 | 0.0063994 | 0.21875    |
| 5mo_SIGAE9_ | 0.02174955 | 0.12601106 | 4.26E-05 | 0.0051742 | -0.059109  |
| 5mo_SIGAE9_ | 0.02888972 | 0.17007305 | 4.51E-05 | 0.0047064 | -0.12268   |
| 5mo_SIGAE9_ | 0.01717469 | 0.0977796  | 4.03E-05 | 0.005729  | 0.063215   |
| 5mo_SIGAE9_ | 0.01153079 | 0.06295108 | 3.74E-05 | 0.0065941 | 0.263      |
| 5mo_SIGAE9_ | 0.01868594 | 0.10710552 | 4.11E-05 | 0.0055212 | 0.015459   |
| 5mo_SIGAE9_ | 0.0190016  | 0.10905348 | 4.14E-05 | 0.0054571 | 0.0010121  |
| 5mo_SIGAE9_ | 0.07668903 | 0.4650426  | 5.13E-05 | 0.014025  | 0.22047    |
| 5mo_SIGAE9_ | 0.02400155 | 0.13990818 | 4.34E-05 | 0.0049916 | -0.091842  |
| 5mo_SIGAE9_ | 0.02171069 | 0.12577125 | 4.26E-05 | 0.0051742 | -0.059109  |
| 5mo_SIGAE9_ | 0.01801021 | 0.10293563 | 4.09E-05 | 0.0055879 | 0.030658   |
| 5mo_SIGAE9_ | 0.01683975 | 0.09571268 | 4.03E-05 | 0.005729  | 0.063215   |
| 5mo_SIGAE9_ | 0.01529604 | 0.08618642 | 3.95E-05 | 0.0059603 | 0.11709    |
| 5mo_SIGAE9_ | 0.01764931 | 0.10070847 | 4.06E-05 | 0.0056572 | 0.046584   |
| 5mo_SIGAE9_ | 0.02560047 | 0.14977509 | 4.40E-05 | 0.0048781 | -0.10813   |
| 5mo_SIGAE9_ | 0.02539642 | 0.14851592 | 4.38E-05 | 0.0049138 | -0.10813   |
| 5mo_SIGAE9_ | 0.02993929 | 0.17654994 | 4.55E-05 | 0.0046645 | -0.12301   |
| 5mo_SIGAE9_ | 0.02830446 | 0.16646141 | 4.49E-05 | 0.0047302 | -0.12174   |
| 5mo_SIGAE9_ | 0.01563469 | 0.08827628 | 3.95E-05 | 0.0059603 | 0.11709    |
| 5mo_SIGAE9_ | 0.07777558 | 0.4717477  | 5.05E-05 | 0.014229  | 0.20103    |
| 5mo_SIGAE9_ | 0.01389115 | 0.0775169  | 3.86E-05 | 0.0062156 | 0.17645    |
| 5mo_SIGAE9_ | 0.00918352 | 0.04846611 | 3.59E-05 | 0.00713   | 0.35661    |
| 5mo_SIGAE9_ | 0.02493471 | 0.1456667  | 4.38E-05 | 0.0049138 | -0.10343   |
| 5mo_SIGAE9_ | 0.02203309 | 0.12776081 | 4.26E-05 | 0.0051742 | -0.059109  |
| 5mo_SIGAE9_ | 0.01380998 | 0.07701595 | 3.86E-05 | 0.0062156 | 0.17645    |
| 5mo_SIGAE9_ | 0.01009887 | 0.0541147  | 3.65E-05 | 0.0069072 | 0.33263    |
| 5mo_SIGAE9_ | 0.02519502 | 0.1472731  | 4.38E-05 | 0.0049138 | -0.10343   |
| 5mo_SIGAE9_ | 0.04811763 | 0.2887285  | 5.58E-05 | 0.0050083 | -0.0087048 |
| 5mo_SIGAE9_ | 0.0209161  | 0.12086786 | 4.21E-05 | 0.0052798 | -0.037579  |
| 5mo_SIGAE9_ | 0.0198226  | 0.11411987 | 4.16E-05 | 0.0053955 | -0.012659  |
| 5mo_SIGAE9_ | 0.02564524 | 0.15005139 | 4.40E-05 | 0.0048781 | -0.10813   |
| 5mo_SIGAE9_ | 0.00934521 | 0.04946386 | 3.62E-05 | 0.0070172 | 0.35661    |
| 5mo_SIGAE9_ | 0.01208004 | 0.06634049 | 3.77E-05 | 0.0064954 | 0.24064    |
| 5mo_SIGAE9_ | 0.09394979 | 0.5715587  | 5.09E-05 | 0.0064439 | -0.7829    |
| 5mo_SIGAE9_ | 0.02332369 | 0.13572508 | 4.32E-05 | 0.0050338 | -0.084895  |
| 5mo_SIGAE9_ | 0.0687042  | 0.41576824 | 5.93E-05 | 0.010465  | 0.21248    |
| 5mo_SIGAE9_ | 0.02211411 | 0.12826079 | 4.26E-05 | 0.0051742 | -0.059109  |
| 5mo_SIGAE9_ | 0.01682076 | 0.0955955  | 4.03E-05 | 0.005729  | 0.063215   |
| 5mo_SIGAE9_ | 0.03211388 | 0.18996933 | 4.62E-05 | 0.0046026 | -0.11821   |
| 5mo_SIGAE9_ | 0.07489173 | 0.45395148 | 5.28E-05 | 0.013537  | 0.24193    |
| 5mo_SIGAE9_ | 0.00968821 | 0.05158053 | 3.62E-05 | 0.0070172 | 0.35661    |
| 5mo_SIGAE9_ | 0.05584482 | 0.336413   | 6.24E-05 | 0.0060668 | 0.043089   |
| 5mo_SIGAE9_ | 0.02317793 | 0.1348256  | 4.30E-05 | 0.0050782 | -0.077142  |

|             |            |            |          |           |           |
|-------------|------------|------------|----------|-----------|-----------|
| 5mo_SIGAE9_ | 0.01686719 | 0.09588198 | 4.03E-05 | 0.005729  | 0.063215  |
| 5mo_SIGAE9_ | 0.03375052 | 0.20006907 | 4.68E-05 | 0.0045746 | -0.11071  |
| 5mo_SIGAE9_ | 0.03939889 | 0.23492512 | 4.92E-05 | 0.0045932 | -0.071721 |
| 5mo_SIGAE9_ | 0.02019107 | 0.1163937  | 4.19E-05 | 0.0053364 | -0.025531 |
| 5mo_SIGAE9_ | 0.09189303 | 0.55886644 | 4.96E-05 | 0.0076529 | -0.6503   |
| 5mo_SIGAE9_ | 0.0315081  | 0.1862311  | 4.60E-05 | 0.0046154 | -0.12002  |
| 5mo_SIGAE9_ | 0.02065015 | 0.11922669 | 4.21E-05 | 0.0052798 | -0.037579 |
| 5mo_SIGAE9_ | 0.01424143 | 0.07967842 | 3.89E-05 | 0.0061278 | 0.1561    |
| 5mo_SIGAE9_ | 0.02389366 | 0.13924238 | 4.34E-05 | 0.0049916 | -0.091842 |
| 5mo_SIGAE9_ | 0.06926943 | 0.4192563  | 5.87E-05 | 0.010741  | 0.21895   |
| 5mo_SIGAE9_ | 0.01211682 | 0.06656745 | 3.77E-05 | 0.0064954 | 0.24064   |
| 5mo_SIGAE9_ | 0.01739499 | 0.09913908 | 4.06E-05 | 0.0056572 | 0.046584  |
| 5mo_SIGAE9_ | 0.01771375 | 0.10110617 | 4.06E-05 | 0.0056572 | 0.046584  |
| 5mo_SIGAE9_ | 0.09030744 | 0.5490818  | 4.88E-05 | 0.0086895 | -0.51631  |
| 5mo_SIGAE9_ | 0.06639801 | 0.40153673 | 6.12E-05 | 0.0093985 | 0.17407   |
| 5mo_SIGAE9_ | 0.06685245 | 0.40434107 | 6.07E-05 | 0.0096573 | 0.18233   |
| 5mo_SIGAE9_ | 0.0160464  | 0.09081689 | 3.98E-05 | 0.0058806 | 0.098494  |
| 5mo_SIGAE9_ | 0.10975194 | 0.6690738  | 6.22E-05 | 0.0036587 | -1.363    |
| 5mo_SIGAE9_ | 0.03378615 | 0.20028892 | 4.68E-05 | 0.0045746 | -0.11071  |
| 5mo_SIGAE9_ | 0.00571929 | 0.02708834 | 3.41E-05 | 0.0078664 | 0.53284   |
| 5mo_SIGAE9_ | 0.01659372 | 0.09419443 | 4.00E-05 | 0.0058035 | 0.080526  |
| 5mo_SIGAE9_ | 0.00612155 | 0.02957069 | 3.44E-05 | 0.0077366 | 0.50694   |
| 5mo_SIGAE9_ | 0.02800228 | 0.16459669 | 4.48E-05 | 0.0047558 | -0.12024  |
| 5mo_SIGAE9_ | 0.03506541 | 0.20818323 | 4.72E-05 | 0.0045646 | -0.10426  |
| 5mo_SIGAE9_ | 0.02881678 | 0.16962294 | 4.51E-05 | 0.0047064 | -0.12268  |
| 5mo_SIGAE9_ | 0.0871017  | 0.5292992  | 4.78E-05 | 0.010952  | -0.25808  |
| 5mo_SIGAE9_ | 0.02205523 | 0.12789741 | 4.26E-05 | 0.0051742 | -0.059109 |
| 5mo_SIGAE9_ | 0.02375792 | 0.13840471 | 4.32E-05 | 0.0050338 | -0.091842 |
| 5mo_SIGAE9_ | 0.01573325 | 0.0888845  | 3.98E-05 | 0.0058806 | 0.098494  |
| 5mo_SIGAE9_ | 0.06741534 | 0.40781468 | 6.03E-05 | 0.009922  | 0.19037   |
| 5mo_SIGAE9_ | 0.02161397 | 0.12517437 | 4.24E-05 | 0.0052258 | -0.059109 |
| 5mo_SIGAE9_ | 0.01056616 | 0.05699834 | 3.68E-05 | 0.0068    | 0.30902   |
| 5mo_SIGAE9_ | 0.05126258 | 0.308136   | 5.87E-05 | 0.0053288 | 0.0077602 |
| 5mo_SIGAE9_ | 0.00639809 | 0.0312772  | 3.44E-05 | 0.0077366 | 0.50694   |
| 5mo_SIGAE9_ | 0.04222389 | 0.2523582  | 5.09E-05 | 0.0046676 | -0.04643  |
| 5mo_SIGAE9_ | 0.01744339 | 0.09943775 | 4.06E-05 | 0.0056572 | 0.046584  |
| 5mo_SIGAE9_ | 0.06922801 | 0.41900066 | 5.87E-05 | 0.010741  | 0.21895   |
| 5mo_SIGAE9_ | 0.00755838 | 0.03843736 | 3.50E-05 | 0.0074854 | 0.43054   |
| 5mo_SIGAE9_ | 0.03814111 | 0.22716336 | 4.87E-05 | 0.0045758 | -0.080425 |
| 5mo_SIGAE9_ | 0.02883959 | 0.1697637  | 4.51E-05 | 0.0047064 | -0.12268  |
| 5mo_SIGAE9_ | 0.09634171 | 0.58631927 | 5.24E-05 | 0.0054581 | -0.99133  |
| 5mo_SIGAE9_ | 0.04388379 | 0.26260146 | 5.25E-05 | 0.0047605 | -0.035266 |
| 5mo_SIGAE9_ | 0.06410374 | 0.38737878 | 6.27E-05 | 0.0084357 | 0.14015   |

|             |            |            |          |           |            |
|-------------|------------|------------|----------|-----------|------------|
| 5mo_SIGAE9_ | 0.04427263 | 0.265001   | 5.25E-05 | 0.0047605 | -0.035266  |
| 5mo_SIGAE9_ | 0.02408436 | 0.14041921 | 4.34E-05 | 0.0049916 | -0.091842  |
| 5mo_SIGAE9_ | 0.04819164 | 0.28918526 | 5.58E-05 | 0.0050083 | -0.0087048 |
| 5mo_SIGAE9_ | 0.0514801  | 0.30947828 | 5.92E-05 | 0.0053939 | 0.011221   |
| 5mo_SIGAE9_ | 0.01284098 | 0.07103629 | 3.80E-05 | 0.0063994 | 0.21875    |
| 5mo_SIGAE9_ | 0.03310925 | 0.19611177 | 4.66E-05 | 0.0045822 | -0.11352   |
| 5mo_SIGAE9_ | 0.07537784 | 0.4569513  | 5.23E-05 | 0.013721  | 0.23858    |
| 5mo_SIGAE9_ | 0.03315624 | 0.19640177 | 4.66E-05 | 0.0045822 | -0.11352   |
| 5mo_SIGAE9_ | 0.01201189 | 0.06591996 | 3.77E-05 | 0.0064954 | 0.24064    |
| 5mo_SIGAE9_ | 0.02493205 | 0.1456503  | 4.38E-05 | 0.0049138 | -0.10343   |
| 5mo_SIGAE9_ | 0.01547685 | 0.08730221 | 3.95E-05 | 0.0059603 | 0.11709    |
| 5mo_SIGAE9_ | 0.01158186 | 0.06326622 | 3.74E-05 | 0.0065941 | 0.263      |
| 5mo_SIGAE9_ | 0.0122662  | 0.06748929 | 3.77E-05 | 0.0064954 | 0.24064    |
| 5mo_SIGAE9_ | 0.00891422 | 0.04680425 | 3.59E-05 | 0.00713   | 0.38094    |
| 5mo_SIGAE9_ | 0.02297496 | 0.13357309 | 4.30E-05 | 0.0050782 | -0.077142  |
| 5mo_SIGAE9_ | 0.09979501 | 0.6076296  | 5.53E-05 | 0.004262  | -1.2008    |
| 5mo_SIGAE9_ | 0.03093597 | 0.1827005  | 4.58E-05 | 0.00463   | -0.12145   |
| 5mo_SIGAE9_ | 0.01815215 | 0.1038115  | 4.09E-05 | 0.0055879 | 0.030658   |
| 5mo_SIGAE9_ | 0.02507505 | 0.14653273 | 4.38E-05 | 0.0049138 | -0.10343   |
| 5mo_SIGAE9_ | 0.0127848  | 0.0706896  | 3.80E-05 | 0.0063994 | 0.21875    |
| 5mo_SIGAE9_ | 0.02225708 | 0.12914303 | 4.28E-05 | 0.005125  | -0.068556  |
| 5mo_SIGAE9_ | 0.06384442 | 0.38577852 | 6.30E-05 | 0.008216  | 0.14015    |
| 5mo_SIGAE9_ | 0.03277081 | 0.19402327 | 4.64E-05 | 0.0045915 | -0.11603   |
| 5mo_SIGAE9_ | 0.09788787 | 0.5958606  | 5.36E-05 | 0.0048658 | -1.1032    |
| 5mo_SIGAE9_ | 0.11066515 | 0.67470926 | 6.28E-05 | 0.0037364 | -1.3531    |
| 5mo_SIGAE9_ | 0.03104767 | 0.1833898  | 4.58E-05 | 0.00463   | -0.12145   |
| 5mo_SIGAE9_ | 0.00908483 | 0.04785707 | 3.59E-05 | 0.00713   | 0.38094    |
| 5mo_SIGAE9_ | 0.09285183 | 0.5647833  | 5.02E-05 | 0.0070215 | -0.69483   |
| 5mo_SIGAE9_ | 0.02086298 | 0.12054002 | 4.21E-05 | 0.0052798 | -0.037579  |
| 5mo_SIGAE9_ | 0.03233393 | 0.1913273  | 4.62E-05 | 0.0046026 | -0.11821   |
| 5mo_SIGAE9_ | 0.0221252  | 0.12832922 | 4.26E-05 | 0.0051742 | -0.059109  |
| 5mo_SIGAE9_ | 0.01999452 | 0.11518076 | 4.16E-05 | 0.0053955 | -0.025531  |
| 5mo_SIGAE9_ | 0.08642303 | 0.52511114 | 4.77E-05 | 0.01133   | -0.21781   |
| 5mo_SIGAE9_ | 0.02211094 | 0.1282412  | 4.26E-05 | 0.0051742 | -0.059109  |
| 5mo_SIGAE9_ | 0.08093545 | 0.49124727 | 4.85E-05 | 0.0141    | 0.12269    |
| 5mo_SIGAE9_ | 0.02658943 | 0.15587799 | 4.44E-05 | 0.004813  | -0.11546   |
| 5mo_SIGAE9_ | 0.08656681 | 0.52599835 | 4.77E-05 | 0.01133   | -0.21781   |
| 5mo_SIGAE9_ | 0.08521348 | 0.51764697 | 4.76E-05 | 0.012059  | -0.10433   |
| 5mo_SIGAE9_ | 0.01893298 | 0.10863    | 4.11E-05 | 0.0055212 | 0.0010121  |
| 5mo_SIGAE9_ | 0.02755665 | 0.16184667 | 4.46E-05 | 0.0047834 | -0.12024   |
| 5mo_SIGAE9_ | 0.08791658 | 0.5343278  | 4.80E-05 | 0.010188  | -0.29935   |
| 5mo_SIGAE9_ | 0.07315814 | 0.4432535  | 5.43E-05 | 0.012883  | 0.24489    |
| 5mo_SIGAE9_ | 0.00986019 | 0.05264184 | 3.65E-05 | 0.0069072 | 0.33263    |



|             |            |            |          |           |           |
|-------------|------------|------------|----------|-----------|-----------|
| 5mo_SIGAE9_ | 0.00767486 | 0.03915616 | 3.53E-05 | 0.0073641 | 0.43054   |
| 5mo_SIGAE9_ | 0.03436571 | 0.20386541 | 4.70E-05 | 0.0045688 | -0.10761  |
| 5mo_SIGAE9_ | 0.01489075 | 0.08368538 | 3.92E-05 | 0.0060428 | 0.1363    |
| 5mo_SIGAE9_ | 0.0385722  | 0.22982365 | 4.89E-05 | 0.0045836 | -0.076088 |
| 5mo_SIGAE9_ | 0.01805092 | 0.10318685 | 4.09E-05 | 0.0055879 | 0.030658  |
| 5mo_SIGAE9_ | 0.02331534 | 0.13567357 | 4.32E-05 | 0.0050338 | -0.084895 |
| 5mo_SIGAE9_ | 0.01836684 | 0.10513637 | 4.09E-05 | 0.0055879 | 0.015459  |
| 5mo_SIGAE9_ | 0.01643287 | 0.09320182 | 4.00E-05 | 0.0058035 | 0.080526  |
| 5mo_SIGAE9_ | 0.01565056 | 0.08837421 | 3.95E-05 | 0.0059603 | 0.098494  |
| 5mo_SIGAE9_ | 0.02161502 | 0.12518086 | 4.24E-05 | 0.0052258 | -0.059109 |
| 5mo_SIGAE9_ | 0.04672939 | 0.28016168 | 5.49E-05 | 0.0049251 | -0.018376 |
| 5mo_SIGAE9_ | 0.01337701 | 0.07434411 | 3.83E-05 | 0.0063061 | 0.19734   |
| 5mo_SIGAE9_ | 0.01443066 | 0.0808462  | 3.89E-05 | 0.0061278 | 0.1561    |
| 5mo_SIGAE9_ | 0.01844295 | 0.10560604 | 4.11E-05 | 0.0055212 | 0.015459  |
| 5mo_SIGAE9_ | 0.02349334 | 0.13677198 | 4.32E-05 | 0.0050338 | -0.084895 |
| 5mo_SIGAE9_ | 0.08439762 | 0.51261234 | 4.76E-05 | 0.012731  | -0.069378 |
| 5mo_SIGAE9_ | 0.06815969 | 0.41240802 | 5.98E-05 | 0.010192  | 0.20551   |
| 5mo_SIGAE9_ | 0.00924415 | 0.0488402  | 3.62E-05 | 0.0070172 | 0.35661   |
| 5mo_SIGAE9_ | 0.01798163 | 0.10275922 | 4.09E-05 | 0.0055879 | 0.030658  |
| 5mo_SIGAE9_ | 0.02418046 | 0.14101222 | 4.34E-05 | 0.0049916 | -0.091842 |
| 5mo_SIGAE9_ | 0.08704836 | 0.52897    | 4.78E-05 | 0.010952  | -0.25808  |
| 5mo_SIGAE9_ | 0.02713929 | 0.15927115 | 4.46E-05 | 0.0047834 | -0.11816  |
| 5mo_SIGAE9_ | 0.04172432 | 0.2492754  | 5.09E-05 | 0.0046676 | -0.0504   |
| 5mo_SIGAE9_ | 0.07653707 | 0.4641049  | 5.13E-05 | 0.014025  | 0.22792   |
| 5mo_SIGAE9_ | 0.02490569 | 0.14548764 | 4.38E-05 | 0.0049138 | -0.10343  |
| 5mo_SIGAE9_ | 0.02664567 | 0.15622506 | 4.44E-05 | 0.004813  | -0.11546  |
| 5mo_SIGAE9_ | 0.0110946  | 0.06025936 | 3.71E-05 | 0.0066957 | 0.2858    |
| 5mo_SIGAE9_ | 0.01296075 | 0.07177536 | 3.80E-05 | 0.0063994 | 0.19734   |
| 5mo_SIGAE9_ | 0.02558255 | 0.14966449 | 4.40E-05 | 0.0048781 | -0.10813  |
| 5mo_SIGAE9_ | 0.02211895 | 0.12829062 | 4.26E-05 | 0.0051742 | -0.059109 |
| 5mo_SIGAE9_ | 0.01391055 | 0.07763659 | 3.86E-05 | 0.0062156 | 0.17645   |
| 5mo_SIGAE9_ | 0.01112171 | 0.06042663 | 3.71E-05 | 0.0066957 | 0.2858    |
| 5mo_SIGAE9_ | 0.00979502 | 0.05223964 | 3.65E-05 | 0.0069072 | 0.33263   |
| 5mo_SIGAE9_ | 0.0913803  | 0.5557024  | 4.93E-05 | 0.0079874 | -0.60562  |
| 5mo_SIGAE9_ | 0.02400024 | 0.1399001  | 4.34E-05 | 0.0049916 | -0.091842 |
| 5mo_SIGAE9_ | 0.01089737 | 0.05904225 | 3.71E-05 | 0.0066957 | 0.2858    |
| 5mo_SIGAE9_ | 0.0839297  | 0.5097248  | 4.77E-05 | 0.013036  | -0.036078 |
| 5mo_SIGAE9_ | 0.07574063 | 0.45919004 | 5.23E-05 | 0.013721  | 0.23393   |
| 5mo_SIGAE9_ | 0.02975548 | 0.17541566 | 4.53E-05 | 0.0046846 | -0.12301  |
| 5mo_SIGAE9_ | 0.01360314 | 0.07573957 | 3.86E-05 | 0.0062156 | 0.17645   |
| 5mo_SIGAE9_ | 0.09574769 | 0.58265364 | 5.20E-05 | 0.0056833 | -0.9515   |
| 5mo_SIGAE9_ | 0.04735703 | 0.28403485 | 5.53E-05 | 0.0049654 | -0.01514  |
| 5mo_SIGAE9_ | 0.08459902 | 0.51385516 | 4.76E-05 | 0.012404  | -0.069378 |

|             |            |            |          |           |            |
|-------------|------------|------------|----------|-----------|------------|
| 5mo_SIGAE9_ | 0.01906122 | 0.10942135 | 4.14E-05 | 0.0054571 | 0.0010121  |
| 5mo_SIGAE9_ | 0.02522109 | 0.14743392 | 4.38E-05 | 0.0049138 | -0.10343   |
| 5mo_SIGAE9_ | 0.09628595 | 0.5859752  | 5.24E-05 | 0.0054581 | -0.99133   |
| 5mo_SIGAE9_ | 0.01385786 | 0.07731146 | 3.86E-05 | 0.0062156 | 0.17645    |
| 5mo_SIGAE9_ | 0.08776114 | 0.5333686  | 4.79E-05 | 0.010571  | -0.29935   |
| 5mo_SIGAE9_ | 0.09197011 | 0.55934215 | 4.96E-05 | 0.0076529 | -0.6503    |
| 5mo_SIGAE9_ | 0.0181683  | 0.10391118 | 4.09E-05 | 0.0055879 | 0.030658   |
| 5mo_SIGAE9_ | 0.09448276 | 0.5748477  | 5.13E-05 | 0.0061762 | -0.82618   |
| 5mo_SIGAE9_ | 0.02970581 | 0.17510916 | 4.53E-05 | 0.0046846 | -0.12301   |
| 5mo_SIGAE9_ | 0.02428326 | 0.14164658 | 4.34E-05 | 0.0049916 | -0.091842  |
| 5mo_SIGAE9_ | 0.02964096 | 0.17470895 | 4.53E-05 | 0.0046846 | -0.1231    |
| 5mo_SIGAE9_ | 0.04892029 | 0.29368168 | 5.68E-05 | 0.0051026 | -0.0054808 |
| 5mo_SIGAE9_ | 0.01530081 | 0.08621587 | 3.95E-05 | 0.0059603 | 0.11709    |
| 5mo_SIGAE9_ | 0.09163924 | 0.5573003  | 4.96E-05 | 0.0076529 | -0.60562   |
| 5mo_SIGAE9_ | 0.02022575 | 0.11660771 | 4.19E-05 | 0.0053364 | -0.025531  |
| 5mo_SIGAE9_ | 0.01583587 | 0.08951775 | 3.98E-05 | 0.0058806 | 0.098494   |
| 5mo_SIGAE9_ | 0.05413245 | 0.32584596 | 6.10E-05 | 0.005694  | 0.030074   |
| 5mo_SIGAE9_ | 0.06646823 | 0.40197006 | 6.12E-05 | 0.0093985 | 0.18233    |
| 5mo_SIGAE9_ | 0.02857885 | 0.16815472 | 4.49E-05 | 0.0047302 | -0.12174   |
| 5mo_SIGAE9_ | 0.00965757 | 0.05139147 | 3.62E-05 | 0.0070172 | 0.35661    |
| 5mo_SIGAE9_ | 0.00947413 | 0.05025942 | 3.62E-05 | 0.0070172 | 0.35661    |
| 5mo_SIGAE9_ | 0.02137341 | 0.12368992 | 4.24E-05 | 0.0052258 | -0.04878   |
| 5mo_SIGAE9_ | 0.04007364 | 0.23908901 | 4.95E-05 | 0.0046046 | -0.063007  |
| 5mo_SIGAE9_ | 0.01708819 | 0.09724581 | 4.03E-05 | 0.005729  | 0.063215   |
| 5mo_SIGAE9_ | 0.08995334 | 0.54689664 | 4.88E-05 | 0.0086895 | -0.47194   |
| 5mo_SIGAE9_ | 0.01741156 | 0.09924131 | 4.06E-05 | 0.0056572 | 0.046584   |
| 5mo_SIGAE9_ | 0.0113817  | 0.06203106 | 3.74E-05 | 0.0065941 | 0.263      |
| 5mo_SIGAE9_ | 0.02740289 | 0.16089784 | 4.46E-05 | 0.0047834 | -0.11816   |
| 5mo_SIGAE9_ | 0.03074752 | 0.18153752 | 4.57E-05 | 0.0046464 | -0.12245   |
| 5mo_SIGAE9_ | 0.02402254 | 0.14003772 | 4.34E-05 | 0.0049916 | -0.091842  |
| 5mo_SIGAE9_ | 0.0300863  | 0.17745718 | 4.55E-05 | 0.0046645 | -0.12301   |
| 5mo_SIGAE9_ | 0.01116317 | 0.06068249 | 3.71E-05 | 0.0066957 | 0.2858     |
| 5mo_SIGAE9_ | 0.01868313 | 0.10708816 | 4.11E-05 | 0.0055212 | 0.015459   |
| 5mo_SIGAE9_ | 0.01293645 | 0.07162544 | 3.80E-05 | 0.0063994 | 0.21875    |
| 5mo_SIGAE9_ | 0.03323656 | 0.19689739 | 4.66E-05 | 0.0045822 | -0.11352   |
| 5mo_SIGAE9_ | 0.08873184 | 0.5393588  | 4.82E-05 | 0.0098057 | -0.3844    |
| 5mo_SIGAE9_ | 0.06775887 | 0.4099346  | 5.98E-05 | 0.010192  | 0.19812    |
| 5mo_SIGAE9_ | 0.01765373 | 0.10073574 | 4.06E-05 | 0.0056572 | 0.046584   |
| 5mo_SIGAE9_ | 0.01202754 | 0.06601654 | 3.77E-05 | 0.0064954 | 0.24064    |
| 5mo_SIGAE9_ | 0.01522956 | 0.0857762  | 3.95E-05 | 0.0059603 | 0.11709    |
| 5mo_SIGAE9_ | 0.01836444 | 0.10512155 | 4.09E-05 | 0.0055879 | 0.015459   |
| 5mo_SIGAE9_ | 0.03671838 | 0.21838374 | 4.79E-05 | 0.0045625 | -0.088896  |
| 5mo_SIGAE9_ | 0.02015353 | 0.11616204 | 4.19E-05 | 0.0053364 | -0.025531  |

|             |            |            |          |           |           |
|-------------|------------|------------|----------|-----------|-----------|
| 5mo_SIGAE9_ | 0.02123756 | 0.12285159 | 4.24E-05 | 0.0052258 | -0.04878  |
| 5mo_SIGAE9_ | 0.0157406  | 0.08892985 | 3.98E-05 | 0.0058806 | 0.098494  |
| 5mo_SIGAE9_ | 0.01920728 | 0.11032272 | 4.14E-05 | 0.0054571 | 0.0010121 |
| 5mo_SIGAE9_ | 0.02047519 | 0.11814701 | 4.19E-05 | 0.0053364 | -0.025531 |
| 5mo_SIGAE9_ | 0.06416133 | 0.38773417 | 6.27E-05 | 0.0084357 | 0.14015   |
| 5mo_SIGAE9_ | 0.06249153 | 0.3774298  | 6.35E-05 | 0.0078047 | 0.11565   |
| 5mo_SIGAE9_ | 0.01652315 | 0.09375892 | 4.00E-05 | 0.0058035 | 0.080526  |
| 5mo_SIGAE9_ | 0.08403385 | 0.5103675  | 4.76E-05 | 0.012731  | -0.036078 |
| 5mo_SIGAE9_ | 0.08127885 | 0.4933664  | 4.83E-05 | 0.013957  | 0.10139   |
| 5mo_SIGAE9_ | 0.00976981 | 0.05208405 | 3.65E-05 | 0.0069072 | 0.33263   |
| 5mo_SIGAE9_ | 0.04754774 | 0.2852117  | 5.53E-05 | 0.0049654 | -0.01192  |
| 5mo_SIGAE9_ | 0.08494379 | 0.51598275 | 4.76E-05 | 0.012404  | -0.10433  |
| 5mo_SIGAE9_ | 0.01140477 | 0.06217343 | 3.74E-05 | 0.0065941 | 0.263     |
| 5mo_SIGAE9_ | 0.06819107 | 0.41260174 | 5.98E-05 | 0.010192  | 0.20551   |
| 5mo_SIGAE9_ | 0.09385445 | 0.5709704  | 5.09E-05 | 0.0064439 | -0.7829   |
| 5mo_SIGAE9_ | 0.0182444  | 0.10438082 | 4.09E-05 | 0.0055879 | 0.030658  |
| 5mo_SIGAE9_ | 0.07500766 | 0.45466685 | 5.28E-05 | 0.013537  | 0.24193   |
| 5mo_SIGAE9_ | 0.02167007 | 0.12552062 | 4.26E-05 | 0.0051742 | -0.059109 |
| 5mo_SIGAE9_ | 0.01527704 | 0.08606919 | 3.95E-05 | 0.0059603 | 0.11709   |
| 5mo_SIGAE9_ | 0.06109981 | 0.3688415  | 6.38E-05 | 0.0072613 | 0.10072   |
| 5mo_SIGAE9_ | 0.02213572 | 0.12839413 | 4.26E-05 | 0.0051742 | -0.068556 |
| 5mo_SIGAE9_ | 0.05507396 | 0.331656   | 6.17E-05 | 0.0058704 | 0.034245  |
| 5mo_SIGAE9_ | 0.02108951 | 0.12193795 | 4.21E-05 | 0.0052798 | -0.04878  |
| 5mo_SIGAE9_ | 0.02381182 | 0.13873735 | 4.32E-05 | 0.0050338 | -0.091842 |
| 5mo_SIGAE9_ | 0.01817615 | 0.10395961 | 4.09E-05 | 0.0055879 | 0.030658  |
| 5mo_SIGAE9_ | 0.01651597 | 0.09371465 | 4.00E-05 | 0.0058035 | 0.080526  |
| 5mo_SIGAE9_ | 0.0724024  | 0.4385898  | 5.54E-05 | 0.012382  | 0.24373   |
| 5mo_SIGAE9_ | 0.07191016 | 0.4355522  | 5.60E-05 | 0.012118  | 0.24161   |
| 5mo_SIGAE9_ | 0.02719476 | 0.15961345 | 4.46E-05 | 0.0047834 | -0.11816  |
| 5mo_SIGAE9_ | 0.02192695 | 0.12710582 | 4.26E-05 | 0.0051742 | -0.059109 |
| 5mo_SIGAE9_ | 0.03108631 | 0.18362822 | 4.58E-05 | 0.00463   | -0.12145  |
| 5mo_SIGAE9_ | 0.00970376 | 0.05167646 | 3.62E-05 | 0.0070172 | 0.35661   |
| 5mo_SIGAE9_ | 0.01539699 | 0.0868094  | 3.95E-05 | 0.0059603 | 0.11709   |
| 5mo_SIGAE9_ | 0.07723129 | 0.4683889  | 5.09E-05 | 0.014141  | 0.21153   |
| 5mo_SIGAE9_ | 0.02106217 | 0.12176924 | 4.21E-05 | 0.0052798 | -0.04878  |
| 5mo_SIGAE9_ | 0.02109299 | 0.12195943 | 4.21E-05 | 0.0052798 | -0.04878  |
| 5mo_SIGAE9_ | 0.01841553 | 0.10543684 | 4.11E-05 | 0.0055212 | 0.015459  |
| 5mo_SIGAE9_ | 0.01887748 | 0.10828752 | 4.11E-05 | 0.0055212 | 0.015459  |
| 5mo_SIGAE9_ | 0.07274547 | 0.44070694 | 5.49E-05 | 0.012637  | 0.24373   |
| 5mo_SIGAE9_ | 0.08856574 | 0.5383338  | 4.82E-05 | 0.0098057 | -0.3844   |
| 5mo_SIGAE9_ | 0.02351544 | 0.13690835 | 4.32E-05 | 0.0050338 | -0.084895 |
| 5mo_SIGAE9_ | 0.01469538 | 0.08247978 | 3.92E-05 | 0.0060428 | 0.1363    |
| 5mo_SIGAE9_ | 0.02740789 | 0.16092867 | 4.46E-05 | 0.0047834 | -0.11816  |

|             |            |            |          |           |           |
|-------------|------------|------------|----------|-----------|-----------|
| 5mo_SIGAE9_ | 0.06314734 | 0.38147688 | 6.33E-05 | 0.0080056 | 0.12359   |
| 5mo_SIGAE9_ | 0.0358415  | 0.21297249 | 4.77E-05 | 0.0045615 | -0.096915 |
| 5mo_SIGAE9_ | 0.00850916 | 0.04430462 | 3.56E-05 | 0.0072456 | 0.40559   |
| 5mo_SIGAE9_ | 0.06321438 | 0.38189057 | 6.33E-05 | 0.0080056 | 0.13178   |
| 5mo_SIGAE9_ | 0.09974591 | 0.6073266  | 5.53E-05 | 0.004262  | -1.2008   |
| 5mo_SIGAE9_ | 0.03090013 | 0.18247929 | 4.58E-05 | 0.00463   | -0.12145  |
| 5mo_SIGAE9_ | 0.01433382 | 0.08024859 | 3.89E-05 | 0.0061278 | 0.1561    |
| 5mo_SIGAE9_ | 0.04008599 | 0.23916526 | 4.99E-05 | 0.0046177 | -0.063007 |
| 5mo_SIGAE9_ | 0.03705107 | 0.22043675 | 4.81E-05 | 0.0045652 | -0.088896 |
| 5mo_SIGAE9_ | 0.02303617 | 0.13395083 | 4.30E-05 | 0.0050782 | -0.077142 |
| 5mo_SIGAE9_ | 0.08970732 | 0.54537845 | 4.86E-05 | 0.0090548 | -0.47194  |
| 5mo_SIGAE9_ | 0.03042197 | 0.1795286  | 4.57E-05 | 0.0046464 | -0.12245  |
| 5mo_SIGAE9_ | 0.03733134 | 0.22216627 | 4.81E-05 | 0.0045652 | -0.084703 |
| 5mo_SIGAE9_ | 0.01754321 | 0.10005375 | 4.06E-05 | 0.0056572 | 0.046584  |
| 5mo_SIGAE9_ | 0.02302917 | 0.13390762 | 4.30E-05 | 0.0050782 | -0.077142 |
| 5mo_SIGAE9_ | 0.07756143 | 0.4704262  | 5.05E-05 | 0.014229  | 0.21153   |
| 5mo_SIGAE9_ | 0.01682992 | 0.09565201 | 4.03E-05 | 0.005729  | 0.063215  |
| 5mo_SIGAE9_ | 0.01162745 | 0.0635476  | 3.74E-05 | 0.0065941 | 0.263     |
| 5mo_SIGAE9_ | 0.01575797 | 0.08903703 | 3.98E-05 | 0.0058806 | 0.098494  |
| 5mo_SIGAE9_ | 0.03050582 | 0.180046   | 4.57E-05 | 0.0046464 | -0.12245  |
| 5mo_SIGAE9_ | 0.06182369 | 0.37330857 | 6.36E-05 | 0.0076138 | 0.10802   |
| 5mo_SIGAE9_ | 0.01840338 | 0.10536185 | 4.11E-05 | 0.0055212 | 0.015459  |
| 5mo_SIGAE9_ | 0.07161945 | 0.43375826 | 5.60E-05 | 0.012118  | 0.2386    |
| 5mo_SIGAE9_ | 0.09212505 | 0.56029826 | 4.99E-05 | 0.0073308 | -0.6503   |
| 5mo_SIGAE9_ | 0.05096504 | 0.30629984 | 5.87E-05 | 0.0053288 | 0.0077602 |
| 5mo_SIGAE9_ | 0.01380576 | 0.07698991 | 3.86E-05 | 0.0062156 | 0.17645   |
| 5mo_SIGAE9_ | 0.02000032 | 0.11521657 | 4.16E-05 | 0.0053955 | -0.025531 |
| 5mo_SIGAE9_ | 0.02981033 | 0.17575417 | 4.55E-05 | 0.0046645 | -0.12301  |
| 5mo_SIGAE9_ | 0.02098279 | 0.12127936 | 4.21E-05 | 0.0052798 | -0.037579 |
| 5mo_SIGAE9_ | 0.09068863 | 0.55143416 | 4.91E-05 | 0.0083333 | -0.51631  |
| 5mo_SIGAE9_ | 0.04132892 | 0.24683538 | 5.05E-05 | 0.0046492 | -0.054504 |
| 5mo_SIGAE9_ | 0.03205939 | 0.18963313 | 4.62E-05 | 0.0046026 | -0.11821  |
| 5mo_SIGAE9_ | 0.01806954 | 0.10330174 | 4.09E-05 | 0.0055879 | 0.030658  |
| 5mo_SIGAE9_ | 0.02075487 | 0.11987288 | 4.21E-05 | 0.0052798 | -0.037579 |
| 5mo_SIGAE9_ | 0.03648645 | 0.21695249 | 4.79E-05 | 0.0045625 | -0.092976 |
| 5mo_SIGAE9_ | 0.02539567 | 0.14851126 | 4.38E-05 | 0.0049138 | -0.10813  |
| 5mo_SIGAE9_ | 0.07533227 | 0.45667005 | 5.23E-05 | 0.013721  | 0.23858   |
| 5mo_SIGAE9_ | 0.02230331 | 0.12942834 | 4.28E-05 | 0.005125  | -0.068556 |
| 5mo_SIGAE9_ | 0.02642089 | 0.1548379  | 4.42E-05 | 0.0048445 | -0.11213  |
| 5mo_SIGAE9_ | 0.03102108 | 0.18322568 | 4.58E-05 | 0.00463   | -0.12145  |
| 5mo_SIGAE9_ | 0.01197081 | 0.06566642 | 3.77E-05 | 0.0064954 | 0.24064   |
| 5mo_SIGAE9_ | 0.01179305 | 0.06456952 | 3.74E-05 | 0.0065941 | 0.263     |
| 5mo_SIGAE9_ | 0.03763564 | 0.22404416 | 4.84E-05 | 0.0045696 | -0.084703 |

|             |            |            |          |           |            |
|-------------|------------|------------|----------|-----------|------------|
| 5mo_SIGAE9_ | 0.03363587 | 0.19936158 | 4.68E-05 | 0.0045746 | -0.11071   |
| 5mo_SIGAE9_ | 0.03294926 | 0.19512448 | 4.64E-05 | 0.0045915 | -0.11352   |
| 5mo_SIGAE9_ | 0.01790846 | 0.10230768 | 4.09E-05 | 0.0055879 | 0.030658   |
| 5mo_SIGAE9_ | 0.01344401 | 0.07475758 | 3.83E-05 | 0.0063061 | 0.19734    |
| 5mo_SIGAE9_ | 0.08456409 | 0.51363957 | 4.76E-05 | 0.012404  | -0.069378  |
| 5mo_SIGAE9_ | 0.06498165 | 0.39279637 | 6.24E-05 | 0.0086643 | 0.15715    |
| 5mo_SIGAE9_ | 0.0126947  | 0.0701336  | 3.80E-05 | 0.0063994 | 0.21875    |
| 5mo_SIGAE9_ | 0.03717486 | 0.22120067 | 4.81E-05 | 0.0045652 | -0.088896  |
| 5mo_SIGAE9_ | 0.02195204 | 0.12726063 | 4.26E-05 | 0.0051742 | -0.059109  |
| 5mo_SIGAE9_ | 0.03642096 | 0.21654837 | 4.79E-05 | 0.0045625 | -0.092976  |
| 5mo_SIGAE9_ | 0.01173579 | 0.06421612 | 3.74E-05 | 0.0065941 | 0.263      |
| 5mo_SIGAE9_ | 0.07096912 | 0.42974505 | 5.71E-05 | 0.011574  | 0.23476    |
| 5mo_SIGAE9_ | 0.03473362 | 0.20613573 | 4.72E-05 | 0.0045646 | -0.10426   |
| 5mo_SIGAE9_ | 0.03493669 | 0.20738891 | 4.72E-05 | 0.0045646 | -0.10426   |
| 5mo_SIGAE9_ | 0.02429214 | 0.14170142 | 4.34E-05 | 0.0049916 | -0.098011  |
| 5mo_SIGAE9_ | 0.08366763 | 0.50810754 | 4.77E-05 | 0.013036  | -0.0045591 |
| 5mo_SIGAE9_ | 0.06965829 | 0.4216559  | 5.82E-05 | 0.011019  | 0.21895    |
| 5mo_SIGAE9_ | 0.08752907 | 0.53193647 | 4.79E-05 | 0.010571  | -0.29935   |
| 5mo_SIGAE9_ | 0.0090189  | 0.04745024 | 3.59E-05 | 0.00713   | 0.38094    |
| 5mo_SIGAE9_ | 0.09352937 | 0.56896436 | 5.06E-05 | 0.0067258 | -0.7829    |
| 5mo_SIGAE9_ | 0.0386577  | 0.23035128 | 4.89E-05 | 0.0045836 | -0.076088  |
| 5mo_SIGAE9_ | 0.02490241 | 0.14546739 | 4.36E-05 | 0.0049516 | -0.10343   |
| 5mo_SIGAE9_ | 0.01622786 | 0.09193674 | 3.98E-05 | 0.0058806 | 0.080526   |
| 5mo_SIGAE9_ | 0.00748279 | 0.03797085 | 3.50E-05 | 0.0074854 | 0.45576    |
| 5mo_SIGAE9_ | 0.084203   | 0.5114113  | 4.76E-05 | 0.012731  | -0.036078  |
| 5mo_SIGAE9_ | 0.02259844 | 0.13124958 | 4.28E-05 | 0.005125  | -0.068556  |
| 5mo_SIGAE9_ | 0.01931764 | 0.11100373 | 4.14E-05 | 0.0054571 | 0.0010121  |
| 5mo_SIGAE9_ | 0.02048938 | 0.11823456 | 4.19E-05 | 0.0053364 | -0.025531  |
| 5mo_SIGAE9_ | 0.01817834 | 0.10397314 | 4.09E-05 | 0.0055879 | 0.030658   |
| 5mo_SIGAE9_ | 0.0174207  | 0.0992977  | 4.06E-05 | 0.0056572 | 0.046584   |
| 5mo_SIGAE9_ | 0.00474691 | 0.02108778 | 3.35E-05 | 0.0081345 | 0.58516    |
| 5mo_SIGAE9_ | 0.01708747 | 0.09724137 | 4.03E-05 | 0.005729  | 0.063215   |
| 5mo_SIGAE9_ | 0.02028262 | 0.11695861 | 4.19E-05 | 0.0053364 | -0.025531  |
| 5mo_SIGAE9_ | 0.08597408 | 0.52234066 | 4.76E-05 | 0.0117    | -0.17867   |
| 5mo_SIGAE9_ | 0.09293506 | 0.5652968  | 5.02E-05 | 0.0070215 | -0.73907   |
| 5mo_SIGAE9_ | 0.04941844 | 0.29675576 | 5.73E-05 | 0.0051543 | -0.0022352 |
| 5mo_SIGAE9_ | 0.030117   | 0.17764659 | 4.55E-05 | 0.0046645 | -0.12301   |
| 5mo_SIGAE9_ | 0.01242053 | 0.06844167 | 3.77E-05 | 0.0064954 | 0.21875    |
| 5mo_SIGAE9_ | 0.099488   | 0.605735   | 5.49E-05 | 0.0043938 | -1.2008    |
| 5mo_SIGAE9_ | 0.0084795  | 0.04412159 | 3.56E-05 | 0.0072456 | 0.40559    |
| 5mo_SIGAE9_ | 0.01435769 | 0.08039589 | 3.89E-05 | 0.0061278 | 0.1561     |
| 5mo_SIGAE9_ | 0.01898073 | 0.10892466 | 4.14E-05 | 0.0054571 | 0.0010121  |
| 5mo_SIGAE9_ | 0.05805178 | 0.35003215 | 6.34E-05 | 0.0065282 | 0.06315    |

|             |            |            |          |           |            |
|-------------|------------|------------|----------|-----------|------------|
| 5mo_SIGAE9_ | 0.03209285 | 0.18983962 | 4.62E-05 | 0.0046026 | -0.11821   |
| 5mo_SIGAE9_ | 0.0181409  | 0.10374209 | 4.09E-05 | 0.0055879 | 0.030658   |
| 5mo_SIGAE9_ | 0.05002265 | 0.30048442 | 5.78E-05 | 0.0052091 | 0.0010449  |
| 5mo_SIGAE9_ | 0.08327733 | 0.505699   | 4.78E-05 | 0.013315  | -0.0045591 |
| 5mo_SIGAE9_ | 0.08022724 | 0.48687693 | 4.87E-05 | 0.014207  | 0.14202    |
| 5mo_SIGAE9_ | 0.02378625 | 0.13857956 | 4.32E-05 | 0.0050338 | -0.091842  |
| 5mo_SIGAE9_ | 0.00516802 | 0.02368641 | 3.38E-05 | 0.0079991 | 0.55892    |
| 5mo_SIGAE9_ | 0.09629911 | 0.5860564  | 5.24E-05 | 0.0054581 | -0.99133   |
| 5mo_SIGAE9_ | 0.08845373 | 0.53764254 | 4.82E-05 | 0.0098057 | -0.3415    |
| 5mo_SIGAE9_ | 0.02472462 | 0.14437023 | 4.36E-05 | 0.0049516 | -0.098011  |
| 5mo_SIGAE9_ | 0.03201086 | 0.1893336  | 4.62E-05 | 0.0046026 | -0.11821   |
| 5mo_SIGAE9_ | 0.0488014  | 0.29294807 | 5.68E-05 | 0.0051026 | -0.0054808 |
| 5mo_SIGAE9_ | 0.02538568 | 0.14844966 | 4.38E-05 | 0.0049138 | -0.10813   |
| 5mo_SIGAE9_ | 0.06942238 | 0.4202001  | 5.82E-05 | 0.011019  | 0.21895    |
| 5mo_SIGAE9_ | 0.01583927 | 0.08953873 | 3.98E-05 | 0.0058806 | 0.098494   |
| 5mo_SIGAE9_ | 0.07007481 | 0.42422628 | 5.76E-05 | 0.011297  | 0.22487    |
| 5mo_SIGAE9_ | 0.09261319 | 0.5633106  | 4.99E-05 | 0.0073308 | -0.69483   |
| 5mo_SIGAE9_ | 0.01364272 | 0.07598379 | 3.86E-05 | 0.0062156 | 0.17645    |
| 5mo_SIGAE9_ | 0.07827828 | 0.47484988 | 5.01E-05 | 0.014289  | 0.20103    |
| 5mo_SIGAE9_ | 0.0391668  | 0.23349291 | 4.92E-05 | 0.0045932 | -0.071721  |
| 5mo_SIGAE9_ | 0.04653593 | 0.27896783 | 5.44E-05 | 0.0048874 | -0.018376  |
| 5mo_SIGAE9_ | 0.09208867 | 0.5600738  | 4.96E-05 | 0.0076529 | -0.6503    |
| 5mo_SIGAE9_ | 0.02176305 | 0.12609437 | 4.26E-05 | 0.0051742 | -0.059109  |
| 5mo_SIGAE9_ | 0.06459868 | 0.39043307 | 6.24E-05 | 0.0086643 | 0.14863    |
| 5mo_SIGAE9_ | 0.02287488 | 0.13295552 | 4.30E-05 | 0.0050782 | -0.077142  |
| 5mo_SIGAE9_ | 0.09767246 | 0.59453136 | 5.36E-05 | 0.0048658 | -1.0673    |
| 5mo_SIGAE9_ | 0.05721659 | 0.34487817 | 6.30E-05 | 0.0062853 | 0.05269    |
| 5mo_SIGAE9_ | 0.02406863 | 0.14032209 | 4.34E-05 | 0.0049916 | -0.091842  |
| 5mo_SIGAE9_ | 0.01883303 | 0.10801321 | 4.11E-05 | 0.0055212 | 0.015459   |
| 5mo_SIGAE9_ | 0.01564073 | 0.08831352 | 3.95E-05 | 0.0059603 | 0.11709    |
| 5mo_SIGAE9_ | 0.07082979 | 0.42888522 | 5.71E-05 | 0.011574  | 0.23476    |
| 5mo_SIGAE9_ | 0.02879095 | 0.16946355 | 4.51E-05 | 0.0047064 | -0.12268   |
| 5mo_SIGAE9_ | 0.02121976 | 0.12274172 | 4.24E-05 | 0.0052258 | -0.04878   |
| 5mo_SIGAE9_ | 0.02737358 | 0.16071698 | 4.46E-05 | 0.0047834 | -0.11816   |
| 5mo_SIGAE9_ | 0.09523358 | 0.579481   | 5.16E-05 | 0.0059226 | -0.91061   |
| 5mo_SIGAE9_ | 0.00572289 | 0.02711053 | 3.41E-05 | 0.0078664 | 0.53284    |
| 5mo_SIGAE9_ | 0.03651565 | 0.21713267 | 4.79E-05 | 0.0045625 | -0.092976  |
| 5mo_SIGAE9_ | 0.03751411 | 0.22329418 | 4.84E-05 | 0.0045696 | -0.084703  |
| 5mo_SIGAE9_ | 0.05230568 | 0.31457293 | 5.97E-05 | 0.0054628 | 0.014768   |
| 5mo_SIGAE9_ | 0.08673824 | 0.5270563  | 4.78E-05 | 0.010952  | -0.21781   |
| 5mo_SIGAE9_ | 0.01830119 | 0.10473124 | 4.09E-05 | 0.0055879 | 0.030658   |
| 5mo_SIGAE9_ | 0.02075385 | 0.1198666  | 4.21E-05 | 0.0052798 | -0.037579  |
| 5mo_SIGAE9_ | 0.02561357 | 0.14985594 | 4.40E-05 | 0.0048781 | -0.10813   |

|             |            |            |          |           |           |
|-------------|------------|------------|----------|-----------|-----------|
| 5mo_SIGAE9_ | 0.07422306 | 0.44982514 | 5.38E-05 | 0.013116  | 0.24406   |
| 5mo_SIGAE9_ | 0.03056468 | 0.18040922 | 4.57E-05 | 0.0046464 | -0.12245  |
| 5mo_SIGAE9_ | 0.02375707 | 0.13839947 | 4.32E-05 | 0.0050338 | -0.091842 |
| 5mo_SIGAE9_ | 0.02795461 | 0.1643025  | 4.48E-05 | 0.0047558 | -0.12024  |
| 5mo_SIGAE9_ | 0.0130963  | 0.07261183 | 3.83E-05 | 0.0063061 | 0.19734   |
| 5mo_SIGAE9_ | 0.09011846 | 0.54791564 | 4.88E-05 | 0.0086895 | -0.47194  |
| 5mo_SIGAE9_ | 0.02742127 | 0.16101126 | 4.46E-05 | 0.0047834 | -0.11816  |
| 5mo_SIGAE9_ | 0.03133373 | 0.18515503 | 4.58E-05 | 0.00463   | -0.12002  |
| 5mo_SIGAE9_ | 0.02857632 | 0.16813907 | 4.49E-05 | 0.0047302 | -0.12174  |
| 5mo_SIGAE9_ | 0.02056337 | 0.11869114 | 4.19E-05 | 0.0053364 | -0.037579 |
| 5mo_SIGAE9_ | 0.02628449 | 0.15399621 | 4.42E-05 | 0.0048445 | -0.11213  |
| 5mo_SIGAE9_ | 0.09486401 | 0.5772004  | 5.16E-05 | 0.0059226 | -0.8688   |
| 5mo_SIGAE9_ | 0.08095544 | 0.49137062 | 4.85E-05 | 0.0141    | 0.12269   |
| 5mo_SIGAE9_ | 0.01671596 | 0.09494877 | 4.00E-05 | 0.0058035 | 0.080526  |
| 5mo_SIGAE9_ | 0.09173923 | 0.55791736 | 4.96E-05 | 0.0076529 | -0.60562  |
| 5mo_SIGAE9_ | 0.03481635 | 0.20664628 | 4.72E-05 | 0.0045646 | -0.10426  |
| 5mo_SIGAE9_ | 0.03362856 | 0.19931643 | 4.68E-05 | 0.0045746 | -0.11071  |
| 5mo_SIGAE9_ | 0.08527715 | 0.5180399  | 4.76E-05 | 0.012059  | -0.10433  |
| 5mo_SIGAE9_ | 0.03764742 | 0.22411685 | 4.84E-05 | 0.0045696 | -0.084703 |
| 5mo_SIGAE9_ | 0.08431326 | 0.5120917  | 4.76E-05 | 0.012731  | -0.069378 |
| 5mo_SIGAE9_ | 0.02021583 | 0.11654649 | 4.19E-05 | 0.0053364 | -0.025531 |
| 5mo_SIGAE9_ | 0.0233649  | 0.13597941 | 4.32E-05 | 0.0050338 | -0.084895 |
| 5mo_SIGAE9_ | 0.02498576 | 0.14598176 | 4.38E-05 | 0.0049138 | -0.10343  |
| 5mo_SIGAE9_ | 0.01482986 | 0.08330967 | 3.92E-05 | 0.0060428 | 0.1363    |
| 5mo_SIGAE9_ | 0.01459645 | 0.08186926 | 3.89E-05 | 0.0061278 | 0.1363    |
| 5mo_SIGAE9_ | 0.09219724 | 0.56074375 | 4.99E-05 | 0.0073308 | -0.6503   |
| 5mo_SIGAE9_ | 0.08388797 | 0.50946724 | 4.77E-05 | 0.013036  | -0.036078 |
| 5mo_SIGAE9_ | 0.09941422 | 0.60527974 | 5.49E-05 | 0.0043938 | -1.2008   |
| 5mo_SIGAE9_ | 0.0201195  | 0.115952   | 4.19E-05 | 0.0053364 | -0.025531 |
| 5mo_SIGAE9_ | 0.02285592 | 0.13283849 | 4.30E-05 | 0.0050782 | -0.077142 |
| 5mo_SIGAE9_ | 0.02380327 | 0.1386846  | 4.32E-05 | 0.0050338 | -0.091842 |
| 5mo_SIGAE9_ | 0.06931213 | 0.41951978 | 5.87E-05 | 0.010741  | 0.21895   |
| 5mo_SIGAE9_ | 0.10374276 | 0.63199115 | 5.82E-05 | 0.0036742 | -1.3662   |
| 5mo_SIGAE9_ | 0.00677056 | 0.03357571 | 3.47E-05 | 0.0076096 | 0.48124   |
| 5mo_SIGAE9_ | 0.0179097  | 0.10231534 | 4.09E-05 | 0.0055879 | 0.030658  |
| 5mo_SIGAE9_ | 0.09169407 | 0.5576387  | 4.96E-05 | 0.0076529 | -0.60562  |
| 5mo_SIGAE9_ | 0.01972356 | 0.11350866 | 4.16E-05 | 0.0053955 | -0.012659 |
| 5mo_SIGAE9_ | 0.08528651 | 0.51809764 | 4.76E-05 | 0.012059  | -0.10433  |
| 5mo_SIGAE9_ | 0.03106533 | 0.18349876 | 4.58E-05 | 0.00463   | -0.12145  |
| 5mo_SIGAE9_ | 0.02408418 | 0.14041807 | 4.34E-05 | 0.0049916 | -0.091842 |
| 5mo_SIGAE9_ | 0.0914235  | 0.555969   | 4.93E-05 | 0.0079874 | -0.60562  |
| 5mo_SIGAE9_ | 0.01603255 | 0.09073146 | 3.98E-05 | 0.0058806 | 0.098494  |
| 5mo_SIGAE9_ | 0.12305927 | 0.7511934  | 6.86E-05 | 0.0053184 | -1.0121   |

|             |            |            |          |           |            |
|-------------|------------|------------|----------|-----------|------------|
| 5mo_SIGAE9_ | 0.01675362 | 0.09518116 | 4.00E-05 | 0.0058035 | 0.063215   |
| 5mo_SIGAE9_ | 0.09155554 | 0.5567838  | 4.93E-05 | 0.0079874 | -0.60562   |
| 5mo_SIGAE9_ | 0.03825513 | 0.22786698 | 4.87E-05 | 0.0045758 | -0.080425  |
| 5mo_SIGAE9_ | 0.08918659 | 0.54216504 | 4.84E-05 | 0.0094274 | -0.42792   |
| 5mo_SIGAE9_ | 0.00776047 | 0.03968446 | 3.53E-05 | 0.0073641 | 0.43054    |
| 5mo_SIGAE9_ | 0.02409449 | 0.14048171 | 4.34E-05 | 0.0049916 | -0.091842  |
| 5mo_SIGAE9_ | 0.01052671 | 0.05675488 | 3.68E-05 | 0.0068    | 0.30902    |
| 5mo_SIGAE9_ | 0.07551377 | 0.4577901  | 5.23E-05 | 0.013721  | 0.23858    |
| 5mo_SIGAE9_ | 0.02665033 | 0.15625378 | 4.44E-05 | 0.004813  | -0.11546   |
| 5mo_SIGAE9_ | 0.01553209 | 0.08764312 | 3.95E-05 | 0.0059603 | 0.11709    |
| 5mo_SIGAE9_ | 0.02478409 | 0.14473723 | 4.36E-05 | 0.0049516 | -0.098011  |
| 5mo_SIGAE9_ | 0.01657328 | 0.09406831 | 4.00E-05 | 0.0058035 | 0.080526   |
| 5mo_SIGAE9_ | 0.02372624 | 0.13820922 | 4.32E-05 | 0.0050338 | -0.084895  |
| 5mo_SIGAE9_ | 0.03224077 | 0.19075243 | 4.62E-05 | 0.0046026 | -0.11821   |
| 5mo_SIGAE9_ | 0.02493171 | 0.1456482  | 4.38E-05 | 0.0049138 | -0.10343   |
| 5mo_SIGAE9_ | 0.03117998 | 0.18420625 | 4.58E-05 | 0.00463   | -0.12145   |
| 5mo_SIGAE9_ | 0.0335089  | 0.19857803 | 4.66E-05 | 0.0045822 | -0.11071   |
| 5mo_SIGAE9_ | 0.08368232 | 0.5081982  | 4.77E-05 | 0.013036  | -0.0045591 |
| 5mo_SIGAE9_ | 0.01804408 | 0.1031446  | 4.09E-05 | 0.0055879 | 0.030658   |
| 5mo_SIGAE9_ | 0.01436468 | 0.08043905 | 3.89E-05 | 0.0061278 | 0.1561     |
| 5mo_SIGAE9_ | 0.01270719 | 0.07021064 | 3.80E-05 | 0.0063994 | 0.21875    |
| 5mo_SIGAE9_ | 0.02522887 | 0.14748193 | 4.38E-05 | 0.0049138 | -0.10343   |
| 5mo_SIGAE9_ | 0.02087844 | 0.12063545 | 4.21E-05 | 0.0052798 | -0.037579  |
| 5mo_SIGAE9_ | 0.01831777 | 0.10483357 | 4.09E-05 | 0.0055879 | 0.030658   |
| 5mo_SIGAE9_ | 0.02953153 | 0.17403369 | 4.53E-05 | 0.0046846 | -0.1231    |
| 5mo_SIGAE9_ | 0.02113335 | 0.12220848 | 4.24E-05 | 0.0052258 | -0.04878   |
| 5mo_SIGAE9_ | 0.03919061 | 0.23363982 | 4.92E-05 | 0.0045932 | -0.071721  |
| 5mo_SIGAE9_ | 0.01258302 | 0.06944439 | 3.80E-05 | 0.0063994 | 0.21875    |
| 5mo_SIGAE9_ | 0.01619707 | 0.0917467  | 3.98E-05 | 0.0058806 | 0.080526   |
| 5mo_SIGAE9_ | 0.08871629 | 0.53926283 | 4.82E-05 | 0.0098057 | -0.3844    |
| 5mo_SIGAE9_ | 0.02169127 | 0.12565143 | 4.26E-05 | 0.0051742 | -0.059109  |
| 5mo_SIGAE9_ | 0.02224829 | 0.1290888  | 4.28E-05 | 0.005125  | -0.068556  |
| 5mo_SIGAE9_ | 0.0248845  | 0.14535686 | 4.36E-05 | 0.0049516 | -0.10343   |
| 5mo_SIGAE9_ | 0.02791717 | 0.16407146 | 4.48E-05 | 0.0047558 | -0.12024   |
| 5mo_SIGAE9_ | 0.02420905 | 0.14118864 | 4.34E-05 | 0.0049916 | -0.091842  |
| 5mo_SIGAE9_ | 0.05950998 | 0.3590307  | 6.37E-05 | 0.0067983 | 0.080679   |
| 5mo_SIGAE9_ | 0.02190843 | 0.1269915  | 4.26E-05 | 0.0051742 | -0.059109  |
| 5mo_SIGAE9_ | 0.02191429 | 0.12702769 | 4.26E-05 | 0.0051742 | -0.059109  |
| 5mo_SIGAE9_ | 0.01727268 | 0.09838431 | 4.03E-05 | 0.005729  | 0.046584   |
| 5mo_SIGAE9_ | 0.02140916 | 0.12391053 | 4.24E-05 | 0.0052258 | -0.04878   |
| 5mo_SIGAE9_ | 0.01993594 | 0.11481929 | 4.16E-05 | 0.0053955 | -0.012659  |
| 5mo_SIGAE9_ | 0.09389255 | 0.5712055  | 5.09E-05 | 0.0064439 | -0.7829    |
| 5mo_SIGAE9_ | 0.01812975 | 0.10367328 | 4.09E-05 | 0.0055879 | 0.030658   |



|             |            |            |          |           |           |
|-------------|------------|------------|----------|-----------|-----------|
| 5mo_SIGAE9_ | 0.03084955 | 0.18216716 | 4.57E-05 | 0.0046464 | -0.12145  |
| 5mo_SIGAE9_ | 0.02671931 | 0.15667948 | 4.44E-05 | 0.004813  | -0.11546  |
| 5mo_SIGAE9_ | 0.07627068 | 0.46246096 | 5.18E-05 | 0.013885  | 0.22792   |
| 5mo_SIGAE9_ | 0.03594643 | 0.21362004 | 4.77E-05 | 0.0045615 | -0.096915 |
| 5mo_SIGAE9_ | 0.0266227  | 0.15608326 | 4.44E-05 | 0.004813  | -0.11546  |
| 5mo_SIGAE9_ | 0.01791393 | 0.10234144 | 4.09E-05 | 0.0055879 | 0.030658  |
| 5mo_SIGAE9_ | 0.03841784 | 0.22887106 | 4.87E-05 | 0.0045758 | -0.076088 |
| 5mo_SIGAE9_ | 0.03659777 | 0.21763942 | 4.79E-05 | 0.0045625 | -0.092976 |
| 5mo_SIGAE9_ | 0.01397689 | 0.07804599 | 3.86E-05 | 0.0062156 | 0.17645   |
| 5mo_SIGAE9_ | 0.08840013 | 0.5373118  | 4.82E-05 | 0.0098057 | -0.3415   |
| 5mo_SIGAE9_ | 0.01603473 | 0.09074489 | 3.98E-05 | 0.0058806 | 0.098494  |
| 5mo_SIGAE9_ | 0.04039018 | 0.24104238 | 4.99E-05 | 0.0046177 | -0.063007 |
| 5mo_SIGAE9_ | 0.00274569 | 0.00873821 | 3.26E-05 | 0.0085576 | 0.66457   |
| 5mo_SIGAE9_ | 0.01553952 | 0.08768896 | 3.95E-05 | 0.0059603 | 0.11709   |
| 5mo_SIGAE9_ | 0.03917247 | 0.23352794 | 4.92E-05 | 0.0045932 | -0.071721 |
| 5mo_SIGAE9_ | 0.01353758 | 0.07533497 | 3.86E-05 | 0.0062156 | 0.17645   |
| 5mo_SIGAE9_ | 0.02073351 | 0.11974106 | 4.21E-05 | 0.0052798 | -0.037579 |
| 5mo_SIGAE9_ | 0.01322959 | 0.07343435 | 3.83E-05 | 0.0063061 | 0.19734   |
| 5mo_SIGAE9_ | 0.07912032 | 0.48004612 | 4.93E-05 | 0.014315  | 0.17506   |
| 5mo_SIGAE9_ | 0.09180777 | 0.5583403  | 4.96E-05 | 0.0076529 | -0.6503   |
| 5mo_SIGAE9_ | 0.02624291 | 0.15373959 | 4.42E-05 | 0.0048445 | -0.11213  |
| 5mo_SIGAD9  | 0.02943787 | 0.1734557  | 4.53E-05 | 0.0046846 | -0.1231   |
| 5mo_SIGAD9  | 0.00975403 | 0.05198673 | 3.65E-05 | 0.0069072 | 0.33263   |
| 5mo_SIGAD9  | 0.03955919 | 0.23591433 | 4.95E-05 | 0.0046046 | -0.067351 |
| 5mo_SIGAD9  | 0.0208074  | 0.12019707 | 4.21E-05 | 0.0052798 | -0.037579 |
| 5mo_SIGAD9  | 0.01692174 | 0.09621867 | 4.03E-05 | 0.005729  | 0.063215  |
| 5mo_SIGAD9  | 0.00847164 | 0.04407309 | 3.56E-05 | 0.0072456 | 0.40559   |
| 5mo_SIGAD9  | 0.08823136 | 0.53627026 | 4.80E-05 | 0.010188  | -0.3415   |
| 5mo_SIGAD9  | 0.02761267 | 0.16219239 | 4.46E-05 | 0.0047834 | -0.12024  |
| 5mo_SIGAD9  | 0.02653375 | 0.15553436 | 4.44E-05 | 0.004813  | -0.11546  |
| 5mo_SIGAD9  | 0.03405229 | 0.20193125 | 4.68E-05 | 0.0045746 | -0.10761  |
| 5mo_SIGAD9  | 0.01486192 | 0.08350746 | 3.92E-05 | 0.0060428 | 0.1363    |
| 5mo_SIGAD9  | 0.02422411 | 0.1412816  | 4.34E-05 | 0.0049916 | -0.091842 |
| 5mo_SIGAD9  | 0.05181443 | 0.31154144 | 5.92E-05 | 0.0053939 | 0.011221  |
| 5mo_SIGAD9  | 0.02327145 | 0.1354027  | 4.30E-05 | 0.0050782 | -0.084895 |
| 5mo_SIGAD9  | 0.01529239 | 0.0861639  | 3.95E-05 | 0.0059603 | 0.11709   |
| 5mo_SIGAD9  | 0.02338789 | 0.13612126 | 4.32E-05 | 0.0050338 | -0.084895 |
| 5mo_SIGAD9  | 0.01264454 | 0.06982403 | 3.80E-05 | 0.0063994 | 0.21875   |
| 5mo_SIGAD9  | 0.03285068 | 0.19451615 | 4.64E-05 | 0.0045915 | -0.11603  |
| 5mo_SIGAD9  | 0.02188925 | 0.12687315 | 4.26E-05 | 0.0051742 | -0.059109 |
| 5mo_SIGAD9  | 0.04668006 | 0.27985728 | 5.49E-05 | 0.0049251 | -0.018376 |
| 5mo_SIGAD9  | 0.02758046 | 0.16199364 | 4.46E-05 | 0.0047834 | -0.12024  |
| 5mo_SIGAD9  | 0.01270411 | 0.07019162 | 3.80E-05 | 0.0063994 | 0.21875   |

|            |            |            |          |           |           |
|------------|------------|------------|----------|-----------|-----------|
| 5mo_SIGAD9 | 0.03198454 | 0.18917121 | 4.62E-05 | 0.0046026 | -0.11821  |
| 5mo_SIGAD9 | 0.05349139 | 0.32189    | 6.05E-05 | 0.0056127 | 0.026054  |
| 5mo_SIGAD9 | 0.09317986 | 0.5668075  | 5.02E-05 | 0.0070215 | -0.73907  |
| 5mo_SIGAD9 | 0.08817344 | 0.53591293 | 4.80E-05 | 0.010188  | -0.3415   |
| 5mo_SIGAD9 | 0.09929379 | 0.6045366  | 5.49E-05 | 0.0043938 | -1.1701   |
| 5mo_SIGAD9 | 0.02919322 | 0.17194593 | 4.51E-05 | 0.0047064 | -0.1231   |
| 5mo_SIGAD9 | 0.08955964 | 0.5444671  | 4.86E-05 | 0.0090548 | -0.42792  |
| 5mo_SIGAD9 | 0.02119666 | 0.12259919 | 4.24E-05 | 0.0052258 | -0.04878  |
| 5mo_SIGAD9 | 0.07170606 | 0.43429273 | 5.60E-05 | 0.012118  | 0.2386    |
| 5mo_SIGAD9 | 0.02212453 | 0.12832509 | 4.26E-05 | 0.0051742 | -0.059109 |
| 5mo_SIGAD9 | 0.0923536  | 0.5617086  | 4.99E-05 | 0.0073308 | -0.69483  |
| 5mo_SIGAD9 | 0.02244837 | 0.1303235  | 4.28E-05 | 0.005125  | -0.068556 |
| 5mo_SIGAD9 | 0.0898959  | 0.5465422  | 4.86E-05 | 0.0090548 | -0.47194  |
| 5mo_SIGAD9 | 0.01134948 | 0.06183224 | 3.71E-05 | 0.0066957 | 0.263     |
| 5mo_SIGAD9 | 0.00793421 | 0.04075658 | 3.53E-05 | 0.0073641 | 0.43054   |
| 5mo_SIGAD9 | 0.02021845 | 0.11656268 | 4.19E-05 | 0.0053364 | -0.025531 |
| 5mo_SIGAD9 | 0.06415637 | 0.38770357 | 6.27E-05 | 0.0084357 | 0.14015   |
| 5mo_SIGAD9 | 0.01914928 | 0.10996482 | 4.14E-05 | 0.0054571 | 0.0010121 |
| 5mo_SIGAD9 | 0.01863012 | 0.10676106 | 4.11E-05 | 0.0055212 | 0.015459  |
| 5mo_SIGAD9 | 0.01517664 | 0.08544963 | 3.95E-05 | 0.0059603 | 0.11709   |
| 5mo_SIGAD9 | 0.05366855 | 0.3229832  | 6.10E-05 | 0.005694  | 0.026054  |
| 5mo_SIGAD9 | 0.02578153 | 0.15089244 | 4.40E-05 | 0.0048781 | -0.10813  |
| 5mo_SIGAD9 | 0.01757164 | 0.10022918 | 4.06E-05 | 0.0056572 | 0.046584  |
| 5mo_SIGAD9 | 0.09790821 | 0.5959861  | 5.36E-05 | 0.0048658 | -1.1032   |
| 5mo_SIGAD9 | 0.05516882 | 0.33224136 | 6.17E-05 | 0.0058704 | 0.038579  |
| 5mo_SIGAD9 | 0.03716013 | 0.22110975 | 4.81E-05 | 0.0045652 | -0.088896 |
| 5mo_SIGAD9 | 0.08301021 | 0.5040506  | 4.78E-05 | 0.013315  | 0.02505   |
| 5mo_SIGAD9 | 0.01625114 | 0.09208035 | 4.00E-05 | 0.0058035 | 0.080526  |
| 5mo_SIGAD9 | 0.02413041 | 0.14070338 | 4.34E-05 | 0.0049916 | -0.091842 |
| 5mo_SIGAD9 | 0.01615085 | 0.09146149 | 3.98E-05 | 0.0058806 | 0.098494  |
| 5mo_SIGAD9 | 0.02569975 | 0.15038776 | 4.40E-05 | 0.0048781 | -0.10813  |
| 5mo_SIGAD9 | 0.04038327 | 0.24099974 | 4.99E-05 | 0.0046177 | -0.063007 |
| 5mo_SIGAD9 | 0.02471011 | 0.1442807  | 4.36E-05 | 0.0049516 | -0.098011 |
| 5mo_SIGAD9 | 0.044244   | 0.2648243  | 5.25E-05 | 0.0047605 | -0.035266 |
| 5mo_SIGAD9 | 0.015317   | 0.0863158  | 3.95E-05 | 0.0059603 | 0.11709   |
| 5mo_SIGAD9 | 0.01248492 | 0.06883903 | 3.80E-05 | 0.0063994 | 0.21875   |
| 5mo_SIGAD9 | 0.00872616 | 0.04564369 | 3.59E-05 | 0.00713   | 0.38094   |
| 5mo_SIGAD9 | 0.03417235 | 0.20267218 | 4.70E-05 | 0.0045688 | -0.10761  |
| 5mo_SIGAD9 | 0.09349632 | 0.5687604  | 5.06E-05 | 0.0067258 | -0.7829   |
| 5mo_SIGAD9 | 0.03415899 | 0.20258975 | 4.70E-05 | 0.0045688 | -0.10761  |
| 5mo_SIGAD9 | 0.09061563 | 0.55098367 | 4.91E-05 | 0.0083333 | -0.51631  |
| 5mo_SIGAD9 | 0.03046959 | 0.17982244 | 4.57E-05 | 0.0046464 | -0.12245  |
| 5mo_SIGAD9 | 0.09887541 | 0.60195476 | 5.45E-05 | 0.0045382 | -1.1701   |

|            |            |            |          |           |           |
|------------|------------|------------|----------|-----------|-----------|
| 5mo_SIGAD9 | 0.01915011 | 0.10996992 | 4.14E-05 | 0.0054571 | 0.0010121 |
| 5mo_SIGAD9 | 0.02537989 | 0.14841391 | 4.38E-05 | 0.0049138 | -0.10813  |
| 5mo_SIGAD9 | 0.07144136 | 0.43265924 | 5.65E-05 | 0.011849  | 0.2386    |
| 5mo_SIGAD9 | 0.03907481 | 0.23292527 | 4.92E-05 | 0.0045932 | -0.071721 |
| 5mo_SIGAD9 | 0.01680676 | 0.0955091  | 4.03E-05 | 0.005729  | 0.063215  |
| 5mo_SIGAD9 | 0.01642535 | 0.09315543 | 4.00E-05 | 0.0058035 | 0.080526  |
| 5mo_SIGAD9 | 0.0075186  | 0.03819184 | 3.50E-05 | 0.0074854 | 0.45576   |
| 5mo_SIGAD9 | 0.08247522 | 0.50074923 | 4.79E-05 | 0.013563  | 0.05262   |
| 5mo_SIGAD9 | 0.01544947 | 0.08713326 | 3.95E-05 | 0.0059603 | 0.11709   |
| 5mo_SIGAD9 | 0.0353481  | 0.20992774 | 4.74E-05 | 0.0045622 | -0.10068  |
| 5mo_SIGAD9 | 0.01925083 | 0.11059143 | 4.14E-05 | 0.0054571 | 0.0010121 |
| 5mo_SIGAD9 | 0.05212331 | 0.31344754 | 5.97E-05 | 0.0054628 | 0.014768  |
| 5mo_SIGAD9 | 0.00702113 | 0.03512196 | 3.50E-05 | 0.0074854 | 0.45576   |
| 5mo_SIGAD9 | 0.01621624 | 0.09186501 | 3.98E-05 | 0.0058806 | 0.080526  |
| 5mo_SIGAD9 | 0.01592885 | 0.0900915  | 3.98E-05 | 0.0058806 | 0.098494  |
| 5mo_SIGAD9 | 0.03516502 | 0.20879793 | 4.72E-05 | 0.0045646 | -0.10068  |
| 5mo_SIGAD9 | 0.02796538 | 0.16436899 | 4.48E-05 | 0.0047558 | -0.12024  |
| 5mo_SIGAD9 | 0.09923225 | 0.6041568  | 5.49E-05 | 0.0043938 | -1.1701   |
| 5mo_SIGAD9 | 0.07462698 | 0.45231768 | 5.33E-05 | 0.013335  | 0.24193   |
| 5mo_SIGAD9 | 0.02080788 | 0.12020004 | 4.21E-05 | 0.0052798 | -0.037579 |
| 5mo_SIGAD9 | 0.0337869  | 0.20029359 | 4.68E-05 | 0.0045746 | -0.11071  |
| 5mo_SIGAD9 | 0.01663061 | 0.09442209 | 4.00E-05 | 0.0058035 | 0.080526  |
| 5mo_SIGAD9 | 0.0886787  | 0.53903085 | 4.82E-05 | 0.0098057 | -0.3844   |
| 5mo_SIGAD9 | 0.08810841 | 0.5355116  | 4.80E-05 | 0.010188  | -0.3415   |
| 5mo_SIGAD9 | 0.0171475  | 0.09761184 | 4.03E-05 | 0.005729  | 0.063215  |
| 5mo_SIGAD9 | 0.02534174 | 0.14817846 | 4.38E-05 | 0.0049138 | -0.10343  |
| 5mo_SIGAD9 | 0.03056245 | 0.18039547 | 4.57E-05 | 0.0046464 | -0.12245  |
| 5mo_SIGAD9 | 0.07415181 | 0.44938546 | 5.38E-05 | 0.013116  | 0.24406   |
| 5mo_SIGAD9 | 0.08305508 | 0.5043275  | 4.78E-05 | 0.013315  | 0.02505   |
| 5mo_SIGAD9 | 0.06212508 | 0.37516847 | 6.36E-05 | 0.0076138 | 0.11565   |
| 5mo_SIGAD9 | 0.08677214 | 0.5272654  | 4.78E-05 | 0.010952  | -0.21781  |
| 5mo_SIGAD9 | 0.089495   | 0.5440682  | 4.86E-05 | 0.0090548 | -0.42792  |
| 5mo_SIGAD9 | 0.01853402 | 0.10616802 | 4.11E-05 | 0.0055212 | 0.015459  |
| 5mo_SIGAD9 | 0.02225295 | 0.12911755 | 4.28E-05 | 0.005125  | -0.068556 |
| 5mo_SIGAD9 | 0.04744122 | 0.28455436 | 5.53E-05 | 0.0049654 | -0.01514  |
| 5mo_SIGAD9 | 0.02721301 | 0.15972611 | 4.46E-05 | 0.0047834 | -0.11816  |
| 5mo_SIGAD9 | 0.01130162 | 0.06153688 | 3.71E-05 | 0.0066957 | 0.2858    |
| 5mo_SIGAD9 | 0.0870892  | 0.529222   | 4.78E-05 | 0.010952  | -0.25808  |
| 5mo_SIGAD9 | 0.04114164 | 0.24567965 | 5.02E-05 | 0.0046325 | -0.054504 |
| 5mo_SIGAD9 | 0.00888822 | 0.04664378 | 3.59E-05 | 0.00713   | 0.38094   |
| 5mo_SIGAD9 | 0.03276749 | 0.1940028  | 4.64E-05 | 0.0045915 | -0.11603  |
| 5mo_SIGAD9 | 0.1598109  | 0.9779877  | 7.87E-05 | 0.0047979 | -1.0766   |
| 5mo_SIGAD9 | 0.01896214 | 0.10880998 | 4.14E-05 | 0.0054571 | 0.0010121 |

|            |            |            |          |           |           |
|------------|------------|------------|----------|-----------|-----------|
| 5mo_SIGAD9 | 0.08788468 | 0.53413093 | 4.80E-05 | 0.010188  | -0.29935  |
| 5mo_SIGAD9 | 0.08258248 | 0.5014111  | 4.79E-05 | 0.013563  | 0.05262   |
| 5mo_SIGAD9 | 0.02197115 | 0.12737858 | 4.26E-05 | 0.0051742 | -0.059109 |
| 5mo_SIGAD9 | 0.02307608 | 0.13419709 | 4.30E-05 | 0.0050782 | -0.077142 |
| 5mo_SIGAD9 | 0.01417095 | 0.07924351 | 3.89E-05 | 0.0061278 | 0.1561    |
| 5mo_SIGAD9 | 0.02355124 | 0.1371293  | 4.32E-05 | 0.0050338 | -0.084895 |
| 5mo_SIGAD9 | 0.06758804 | 0.4088804  | 6.03E-05 | 0.009922  | 0.19812   |
| 5mo_SIGAD9 | 0.03140263 | 0.18558021 | 4.58E-05 | 0.00463   | -0.12002  |
| 5mo_SIGAD9 | 0.04381742 | 0.2621919  | 5.21E-05 | 0.0047343 | -0.035266 |
| 5mo_SIGAD9 | 0.04340965 | 0.25967556 | 5.21E-05 | 0.0047343 | -0.038876 |
| 5mo_SIGAD9 | 0.00506325 | 0.02303992 | 3.38E-05 | 0.0079991 | 0.55892   |
| 5mo_SIGAD9 | 0.00473903 | 0.02103911 | 3.35E-05 | 0.0081345 | 0.58516   |
| 5mo_SIGAD9 | 0.01962731 | 0.1129147  | 4.16E-05 | 0.0053955 | -0.012659 |
| 5mo_SIGAD9 | 0.06985399 | 0.4228636  | 5.82E-05 | 0.011019  | 0.22487   |
| 5mo_SIGAD9 | 0.01710763 | 0.09736576 | 4.03E-05 | 0.005729  | 0.063215  |
| 5mo_SIGAD9 | 0.03962808 | 0.2363395  | 4.95E-05 | 0.0046046 | -0.067351 |
| 5mo_SIGAD9 | 0.09126067 | 0.5549642  | 4.93E-05 | 0.0079874 | -0.56091  |
| 5mo_SIGAD9 | 0.00906647 | 0.04774376 | 3.59E-05 | 0.00713   | 0.38094   |
| 5mo_SIGAD9 | 0.01796176 | 0.1026366  | 4.09E-05 | 0.0055879 | 0.030658  |
| 5mo_SIGAD9 | 0.01620912 | 0.09182109 | 3.98E-05 | 0.0058806 | 0.080526  |
| 5mo_SIGAD9 | 0.01602165 | 0.09066417 | 3.98E-05 | 0.0058806 | 0.098494  |
| 5mo_SIGAD9 | 0.0093536  | 0.04951567 | 3.62E-05 | 0.0070172 | 0.35661   |
| 5mo_SIGAD9 | 0.07663761 | 0.46472532 | 5.13E-05 | 0.014025  | 0.22792   |
| 5mo_SIGAD9 | 0.0237424  | 0.13830893 | 4.32E-05 | 0.0050338 | -0.084895 |
| 5mo_SIGAD9 | 0.02679544 | 0.15714927 | 4.44E-05 | 0.004813  | -0.11546  |
| 5mo_SIGAD9 | 0.02654596 | 0.15560976 | 4.44E-05 | 0.004813  | -0.11546  |
| 5mo_SIGAD9 | 0.00787754 | 0.0404069  | 3.53E-05 | 0.0073641 | 0.43054   |
| 5mo_SIGAD9 | 0.01556844 | 0.08786741 | 3.95E-05 | 0.0059603 | 0.11709   |
| 5mo_SIGAD9 | 0.00829299 | 0.0429706  | 3.56E-05 | 0.0072456 | 0.40559   |
| 5mo_SIGAD9 | 0.01930573 | 0.11093022 | 4.14E-05 | 0.0054571 | 0.0010121 |
| 5mo_SIGAD9 | 0.01140907 | 0.06219998 | 3.74E-05 | 0.0065941 | 0.263     |
| 5mo_SIGAD9 | 0.03042767 | 0.17956375 | 4.57E-05 | 0.0046464 | -0.12245  |
| 5mo_SIGAD9 | 0.00856367 | 0.044641   | 3.56E-05 | 0.0072456 | 0.40559   |
| 5mo_SIGAD9 | 0.03289424 | 0.19478494 | 4.64E-05 | 0.0045915 | -0.11603  |
| 5mo_SIGAD9 | 0.07762099 | 0.47079375 | 5.05E-05 | 0.014229  | 0.21153   |
| 5mo_SIGAD9 | 0.03011454 | 0.17763141 | 4.55E-05 | 0.0046645 | -0.12301  |
| 5mo_SIGAD9 | 0.04110641 | 0.24546225 | 5.02E-05 | 0.0046325 | -0.054504 |
| 5mo_SIGAD9 | 0.08389518 | 0.5095117  | 4.77E-05 | 0.013036  | -0.036078 |
| 5mo_SIGAD9 | 0.07697132 | 0.4667846  | 5.09E-05 | 0.014141  | 0.22047   |
| 5mo_SIGAD9 | 0.05033911 | 0.30243728 | 5.78E-05 | 0.0052091 | 0.0043724 |
| 5mo_SIGAD9 | 0.03780828 | 0.22510947 | 4.84E-05 | 0.0045696 | -0.080425 |
| 5mo_SIGAD9 | 0.02103714 | 0.12161479 | 4.21E-05 | 0.0052798 | -0.037579 |
| 5mo_SIGAD9 | 0.00474154 | 0.0210546  | 3.35E-05 | 0.0081345 | 0.58516   |

|            |            |            |          |           |           |
|------------|------------|------------|----------|-----------|-----------|
| 5mo_SIGAD9 | 0.09490798 | 0.5774718  | 5.16E-05 | 0.0059226 | -0.8688   |
| 5mo_SIGAD9 | 0.01298632 | 0.07193314 | 3.83E-05 | 0.0063061 | 0.19734   |
| 5mo_SIGAD9 | 0.00523368 | 0.02409163 | 3.38E-05 | 0.0079991 | 0.55892   |
| 5mo_SIGAD9 | 0.02976312 | 0.1754628  | 4.53E-05 | 0.0046846 | -0.12301  |
| 5mo_SIGAD9 | 0.02233208 | 0.12960587 | 4.28E-05 | 0.005125  | -0.068556 |
| 5mo_SIGAD9 | 0.00707262 | 0.03543971 | 3.50E-05 | 0.0074854 | 0.45576   |
| 5mo_SIGAD9 | 0.01682608 | 0.09562834 | 4.03E-05 | 0.005729  | 0.063215  |
| 5mo_SIGAD9 | 0.01980257 | 0.11399627 | 4.16E-05 | 0.0053955 | -0.012659 |
| 5mo_SIGAD9 | 0.01195516 | 0.06556987 | 3.77E-05 | 0.0064954 | 0.24064   |
| 5mo_SIGAD9 | 0.01507795 | 0.0848406  | 3.92E-05 | 0.0060428 | 0.1363    |
| 5mo_SIGAD9 | 0.0062136  | 0.03013873 | 3.44E-05 | 0.0077366 | 0.50694   |
| 5mo_SIGAD9 | 0.04090503 | 0.24421953 | 5.02E-05 | 0.0046325 | -0.058715 |
| 5mo_SIGAD9 | 0.02587246 | 0.15145352 | 4.40E-05 | 0.0048781 | -0.10813  |
| 5mo_SIGAD9 | 0.04206646 | 0.25138667 | 5.09E-05 | 0.0046676 | -0.0504   |
| 5mo_SIGAD9 | 0.02530864 | 0.14797425 | 4.38E-05 | 0.0049138 | -0.10343  |
| 5mo_SIGAD9 | 0.03211758 | 0.18999219 | 4.62E-05 | 0.0046026 | -0.11821  |
| 5mo_SIGAD9 | 0.02605797 | 0.15259834 | 4.42E-05 | 0.0048445 | -0.11213  |
| 5mo_SIGAD9 | 0.01896485 | 0.10882668 | 4.14E-05 | 0.0054571 | 0.0010121 |
| 5mo_SIGAD9 | 0.02579027 | 0.15094636 | 4.40E-05 | 0.0048781 | -0.10813  |
| 5mo_SIGAD9 | 0.02003302 | 0.11541838 | 4.19E-05 | 0.0053364 | -0.025531 |
| 5mo_SIGAD9 | 0.03080233 | 0.18187581 | 4.57E-05 | 0.0046464 | -0.12145  |
| 5mo_SIGAD9 | 0.01579603 | 0.08927189 | 3.98E-05 | 0.0058806 | 0.098494  |
| 5mo_SIGAD9 | 0.01083875 | 0.05868052 | 3.71E-05 | 0.0066957 | 0.2858    |
| 5mo_SIGAD9 | 0.08007084 | 0.48591176 | 4.90E-05 | 0.014278  | 0.14202   |
| 5mo_SIGAD9 | 0.01865484 | 0.10691363 | 4.11E-05 | 0.0055212 | 0.015459  |
| 5mo_SIGAD9 | 0.03503741 | 0.20801048 | 4.72E-05 | 0.0045646 | -0.10426  |
| 5mo_SIGAD9 | 0.03585443 | 0.21305226 | 4.77E-05 | 0.0045615 | -0.096915 |
| 5mo_SIGAD9 | 0.0696847  | 0.42181888 | 5.82E-05 | 0.011019  | 0.22487   |
| 5mo_SIGAD9 | 0.0138579  | 0.0773117  | 3.86E-05 | 0.0062156 | 0.17645   |
| 5mo_SIGAD9 | 0.02915813 | 0.17172945 | 4.51E-05 | 0.0047064 | -0.1231   |
| 5mo_SIGAD9 | 0.07810411 | 0.47377506 | 5.01E-05 | 0.014289  | 0.20103   |
| 5mo_SIGAD9 | 0.02296851 | 0.13353324 | 4.30E-05 | 0.0050782 | -0.077142 |
| 5mo_SIGAD9 | 0.0885958  | 0.53851926 | 4.82E-05 | 0.0098057 | -0.3844   |
| 5mo_SIGAD9 | 0.03043254 | 0.17959379 | 4.57E-05 | 0.0046464 | -0.12245  |
| 5mo_SIGAD9 | 0.11486977 | 0.70065594 | 6.48E-05 | 0.004145  | -1.2407   |
| 5mo_SIGAD9 | 0.05107627 | 0.30698627 | 5.87E-05 | 0.0053288 | 0.0077602 |
| 5mo_SIGAD9 | 0.01168814 | 0.0639221  | 3.74E-05 | 0.0065941 | 0.263     |
| 5mo_SIGAD9 | 0.02347988 | 0.13668892 | 4.32E-05 | 0.0050338 | -0.084895 |
| 5mo_SIGAD9 | 0.01708863 | 0.09724852 | 4.03E-05 | 0.005729  | 0.063215  |
| 5mo_SIGAD9 | 0.03063444 | 0.18083975 | 4.57E-05 | 0.0046464 | -0.12245  |
| 5mo_SIGAD9 | 0.01178501 | 0.06451986 | 3.74E-05 | 0.0065941 | 0.263     |
| 5mo_SIGAD9 | 0.06591486 | 0.39855522 | 6.16E-05 | 0.0091463 | 0.17407   |
| 5mo_SIGAD9 | 0.09234844 | 0.5616768  | 4.99E-05 | 0.0073308 | -0.69483  |

|            |            |            |          |           |            |
|------------|------------|------------|----------|-----------|------------|
| 5mo_SIGAD9 | 0.03212372 | 0.19003005 | 4.62E-05 | 0.0046026 | -0.11821   |
| 5mo_SIGAD9 | 0.02092098 | 0.12089793 | 4.21E-05 | 0.0052798 | -0.037579  |
| 5mo_SIGAD9 | 0.08452919 | 0.5134242  | 4.76E-05 | 0.012404  | -0.069378  |
| 5mo_SIGAD9 | 0.01045959 | 0.05634071 | 3.68E-05 | 0.0068    | 0.30902    |
| 5mo_SIGAD9 | 0.01622142 | 0.09189697 | 3.98E-05 | 0.0058806 | 0.080526   |
| 5mo_SIGAD9 | 0.01392392 | 0.0777191  | 3.86E-05 | 0.0062156 | 0.17645    |
| 5mo_SIGAD9 | 0.01503874 | 0.08459863 | 3.92E-05 | 0.0060428 | 0.1363     |
| 5mo_SIGAD9 | 0.03527841 | 0.20949765 | 4.74E-05 | 0.0045622 | -0.10068   |
| 5mo_SIGAD9 | 0.01790974 | 0.10231558 | 4.09E-05 | 0.0055879 | 0.030658   |
| 5mo_SIGAD9 | 0.03243118 | 0.19192743 | 4.62E-05 | 0.0046026 | -0.11603   |
| 5mo_SIGAD9 | 0.00679549 | 0.03372957 | 3.47E-05 | 0.0076096 | 0.48124    |
| 5mo_SIGAD9 | 0.0211542  | 0.12233716 | 4.24E-05 | 0.0052258 | -0.04878   |
| 5mo_SIGAD9 | 0.01623683 | 0.09199204 | 4.00E-05 | 0.0058035 | 0.080526   |
| 5mo_SIGAD9 | 0.00939358 | 0.04976239 | 3.62E-05 | 0.0070172 | 0.35661    |
| 5mo_SIGAD9 | 0.02923049 | 0.17217594 | 4.51E-05 | 0.0047064 | -0.1231    |
| 5mo_SIGAD9 | 0.02698802 | 0.15833764 | 4.44E-05 | 0.004813  | -0.11546   |
| 5mo_SIGAD9 | 0.0166427  | 0.0944967  | 4.00E-05 | 0.0058035 | 0.080526   |
| 5mo_SIGAD9 | 0.01222823 | 0.06725498 | 3.77E-05 | 0.0064954 | 0.24064    |
| 5mo_SIGAD9 | 0.08365167 | 0.508009   | 4.77E-05 | 0.013036  | -0.0045591 |
| 5mo_SIGAD9 | 0.09050588 | 0.5503064  | 4.91E-05 | 0.0083333 | -0.51631   |
| 5mo_SIGAD9 | 0.02646442 | 0.15510654 | 4.42E-05 | 0.0048445 | -0.11546   |
| 5mo_SIGAD9 | 0.08669508 | 0.5267899  | 4.78E-05 | 0.010952  | -0.21781   |
| 5mo_SIGAD9 | 0.08296796 | 0.50378984 | 4.78E-05 | 0.013315  | 0.02505    |
| 5mo_SIGAD9 | 0.06740679 | 0.4077619  | 6.03E-05 | 0.009922  | 0.19037    |
| 5mo_SIGAD9 | 0.07501806 | 0.45473105 | 5.28E-05 | 0.013537  | 0.24193    |
| 5mo_SIGAD9 | 0.02795007 | 0.16427448 | 4.48E-05 | 0.0047558 | -0.12024   |
| 5mo_SIGAD9 | 0.02287333 | 0.13294591 | 4.30E-05 | 0.0050782 | -0.077142  |
| 5mo_SIGAD9 | 0.04223348 | 0.2524174  | 5.09E-05 | 0.0046676 | -0.04643   |
| 5mo_SIGAD9 | 0.01455235 | 0.08159713 | 3.89E-05 | 0.0061278 | 0.1561     |
| 5mo_SIGAD9 | 0.0127545  | 0.07050262 | 3.80E-05 | 0.0063994 | 0.21875    |
| 5mo_SIGAD9 | 0.02564958 | 0.15007816 | 4.40E-05 | 0.0048781 | -0.10813   |
| 5mo_SIGAD9 | 0.07670187 | 0.46512187 | 5.13E-05 | 0.014025  | 0.22047    |
| 5mo_SIGAD9 | 0.0753401  | 0.4567184  | 5.23E-05 | 0.013721  | 0.23858    |
| 5mo_SIGAD9 | 0.0189877  | 0.10896766 | 4.14E-05 | 0.0054571 | 0.0010121  |
| 5mo_SIGAD9 | 0.07707389 | 0.46741757 | 5.09E-05 | 0.014141  | 0.22047    |
| 5mo_SIGAD9 | 0.03261549 | 0.19306478 | 4.64E-05 | 0.0045915 | -0.11603   |
| 5mo_SIGAD9 | 0.0169985  | 0.09669232 | 4.03E-05 | 0.005729  | 0.063215   |
| 5mo_SIGAD9 | 0.02223188 | 0.12898752 | 4.28E-05 | 0.005125  | -0.068556  |
| 5mo_SIGAD9 | 0.06210337 | 0.37503448 | 6.36E-05 | 0.0076138 | 0.11565    |
| 5mo_SIGAD9 | 0.02349421 | 0.13677736 | 4.32E-05 | 0.0050338 | -0.084895  |
| 5mo_SIGAD9 | 0.02514439 | 0.14696066 | 4.38E-05 | 0.0049138 | -0.10343   |
| 5mo_SIGAD9 | 0.02964295 | 0.17472126 | 4.53E-05 | 0.0046846 | -0.1231    |
| 5mo_SIGAD9 | 0.01553371 | 0.08765312 | 3.95E-05 | 0.0059603 | 0.11709    |

|            |            |            |          |           |            |
|------------|------------|------------|----------|-----------|------------|
| 5mo_SIGAD9 | 0.04868589 | 0.29223526 | 5.63E-05 | 0.005054  | -0.0054808 |
| 5mo_SIGAD9 | 0.02198822 | 0.12748389 | 4.26E-05 | 0.0051742 | -0.059109  |
| 5mo_SIGAD9 | 0.01125928 | 0.06127558 | 3.71E-05 | 0.0066957 | 0.2858     |
| 5mo_SIGAD9 | 0.07288859 | 0.4415901  | 5.49E-05 | 0.012637  | 0.24373    |
| 5mo_SIGAD9 | 0.08366471 | 0.5080895  | 4.77E-05 | 0.013036  | -0.0045591 |
| 5mo_SIGAD9 | 0.05030217 | 0.3022093  | 5.78E-05 | 0.0052091 | 0.0043724  |
| 5mo_SIGAD9 | 0.01767878 | 0.10089035 | 4.06E-05 | 0.0056572 | 0.046584   |
| 5mo_SIGAD9 | 0.07231462 | 0.43804812 | 5.54E-05 | 0.012382  | 0.24161    |
| 5mo_SIGAD9 | 0.02337126 | 0.13601863 | 4.32E-05 | 0.0050338 | -0.084895  |
| 5mo_SIGAD9 | 0.02645952 | 0.15507628 | 4.42E-05 | 0.0048445 | -0.11546   |
| 5mo_SIGAD9 | 0.02138369 | 0.12375333 | 4.24E-05 | 0.0052258 | -0.04878   |
| 5mo_SIGAD9 | 0.02361053 | 0.13749519 | 4.32E-05 | 0.0050338 | -0.084895  |
| 5mo_SIGAD9 | 0.07856665 | 0.4766294  | 4.97E-05 | 0.014318  | 0.18889    |
| 5mo_SIGAD9 | 0.01015104 | 0.05443667 | 3.65E-05 | 0.0069072 | 0.33263    |
| 5mo_SIGAD9 | 0.00675292 | 0.03346682 | 3.47E-05 | 0.0076096 | 0.48124    |
| 5mo_SIGAD9 | 0.08440276 | 0.512644   | 4.76E-05 | 0.012731  | -0.069378  |
| 5mo_SIGAD9 | 0.02599672 | 0.15222038 | 4.42E-05 | 0.0048445 | -0.11213   |
| 5mo_SIGAD9 | 0.03480616 | 0.20658338 | 4.72E-05 | 0.0045646 | -0.10426   |
| 5mo_SIGAD9 | 0.02564716 | 0.15006322 | 4.40E-05 | 0.0048781 | -0.10813   |
| 5mo_SIGAD9 | 0.01319922 | 0.07324696 | 3.83E-05 | 0.0063061 | 0.19734    |
| 5mo_SIGAD9 | 0.02062177 | 0.11905153 | 4.21E-05 | 0.0052798 | -0.037579  |
| 5mo_SIGAD9 | 0.01252644 | 0.06909524 | 3.80E-05 | 0.0063994 | 0.21875    |
| 5mo_SIGAD9 | 0.02268729 | 0.13179787 | 4.28E-05 | 0.005125  | -0.077142  |
| 5mo_SIGAD9 | 0.02140495 | 0.12388454 | 4.24E-05 | 0.0052258 | -0.04878   |
| 5mo_SIGAD9 | 0.0183441  | 0.10499603 | 4.09E-05 | 0.0055879 | 0.030658   |
| 5mo_SIGAD9 | 0.0237654  | 0.1384509  | 4.32E-05 | 0.0050338 | -0.091842  |
| 5mo_SIGAD9 | 0.0200766  | 0.11568727 | 4.19E-05 | 0.0053364 | -0.025531  |
| 5mo_SIGAD9 | 0.05536699 | 0.33346426 | 6.21E-05 | 0.005966  | 0.038579   |
| 5mo_SIGAD9 | 0.09763824 | 0.5943202  | 5.36E-05 | 0.0048658 | -1.0673    |
| 5mo_SIGAD9 | 0.07432157 | 0.45043302 | 5.33E-05 | 0.013335  | 0.24406    |
| 5mo_SIGAD9 | 0.0186499  | 0.10688309 | 4.11E-05 | 0.0055212 | 0.015459   |
| 5mo_SIGAD9 | 0.02069444 | 0.11949999 | 4.21E-05 | 0.0052798 | -0.037579  |
| 5mo_SIGAD9 | 0.02632526 | 0.15424779 | 4.42E-05 | 0.0048445 | -0.11213   |
| 5mo_SIGAD9 | 0.02347574 | 0.13666339 | 4.32E-05 | 0.0050338 | -0.084895  |
| 5mo_SIGAD9 | 0.01161225 | 0.06345376 | 3.74E-05 | 0.0065941 | 0.263      |
| 5mo_SIGAD9 | 0.02376588 | 0.13845383 | 4.32E-05 | 0.0050338 | -0.091842  |
| 5mo_SIGAD9 | 0.0943444  | 0.57399386 | 5.13E-05 | 0.0061762 | -0.82618   |
| 5mo_SIGAD9 | 0.00757718 | 0.03855334 | 3.53E-05 | 0.0073641 | 0.43054    |
| 5mo_SIGAD9 | 0.08054081 | 0.48881194 | 4.87E-05 | 0.014207  | 0.12269    |
| 5mo_SIGAD9 | 0.0253045  | 0.1479487  | 4.38E-05 | 0.0049138 | -0.10343   |
| 5mo_SIGAD9 | 0.03086142 | 0.18224044 | 4.57E-05 | 0.0046464 | -0.12145   |
| 5mo_SIGAD9 | 0.02734661 | 0.16055053 | 4.46E-05 | 0.0047834 | -0.11816   |
| 5mo_SIGAD9 | 0.05191474 | 0.31216046 | 5.92E-05 | 0.0053939 | 0.014768   |

|            |            |            |          |           |           |
|------------|------------|------------|----------|-----------|-----------|
| 5mo_SIGAD9 | 0.0212839  | 0.12313753 | 4.24E-05 | 0.0052258 | -0.04878  |
| 5mo_SIGAD9 | 0.00877541 | 0.04594766 | 3.59E-05 | 0.00713   | 0.38094   |
| 5mo_SIGAD9 | 0.03426746 | 0.20325908 | 4.70E-05 | 0.0045688 | -0.10761  |
| 5mo_SIGAD9 | 0.07374025 | 0.4468457  | 5.38E-05 | 0.013116  | 0.24502   |
| 5mo_SIGAD9 | 0.01327697 | 0.07372679 | 3.83E-05 | 0.0063061 | 0.19734   |
| 5mo_SIGAD9 | 0.03640109 | 0.21642575 | 4.79E-05 | 0.0045625 | -0.092976 |
| 5mo_SIGAD9 | 0.01970714 | 0.11340737 | 4.16E-05 | 0.0053955 | -0.012659 |
| 5mo_SIGAD9 | 0.01084141 | 0.05869694 | 3.71E-05 | 0.0066957 | 0.2858    |
| 5mo_SIGAD9 | 0.07963633 | 0.4832304  | 4.93E-05 | 0.014315  | 0.15946   |
| 5mo_SIGAD9 | 0.02586337 | 0.15139747 | 4.40E-05 | 0.0048781 | -0.10813  |
| 5mo_SIGAD9 | 0.08130416 | 0.49352255 | 4.83E-05 | 0.013957  | 0.10139   |
| 5mo_SIGAD9 | 0.01523192 | 0.08579075 | 3.95E-05 | 0.0059603 | 0.11709   |
| 5mo_SIGAD9 | 0.08276483 | 0.50253636 | 4.79E-05 | 0.013563  | 0.02505   |
| 5mo_SIGAD9 | 0.01790516 | 0.10228731 | 4.09E-05 | 0.0055879 | 0.030658  |
| 5mo_SIGAD9 | 0.0108884  | 0.05898689 | 3.71E-05 | 0.0066957 | 0.2858    |
| 5mo_SIGAD9 | 0.03162237 | 0.18693623 | 4.60E-05 | 0.0046154 | -0.12002  |
| 5mo_SIGAD9 | 0.02194406 | 0.12721139 | 4.26E-05 | 0.0051742 | -0.059109 |
| 5mo_SIGAD9 | 0.01243188 | 0.06851173 | 3.77E-05 | 0.0064954 | 0.21875   |
| 5mo_SIGAD9 | 0.02204901 | 0.12785906 | 4.26E-05 | 0.0051742 | -0.059109 |
| 5mo_SIGAD9 | 0.01389362 | 0.07753211 | 3.86E-05 | 0.0062156 | 0.17645   |
| 5mo_SIGAD9 | 0.0332805  | 0.19716853 | 4.66E-05 | 0.0045822 | -0.11352  |
| 5mo_SIGAD9 | 0.08870465 | 0.539191   | 4.82E-05 | 0.0098057 | -0.3844   |
| 5mo_SIGAD9 | 0.0976095  | 0.5941428  | 5.36E-05 | 0.0048658 | -1.0673   |
| 5mo_SIGAD9 | 0.09668841 | 0.5884587  | 5.28E-05 | 0.0052469 | -1.03     |
| 5mo_SIGAD9 | 0.02657214 | 0.15577129 | 4.44E-05 | 0.004813  | -0.11546  |
| 5mo_SIGAD9 | 0.09976688 | 0.607456   | 5.53E-05 | 0.004262  | -1.2008   |
| 5mo_SIGAD9 | 0.00758868 | 0.03862434 | 3.53E-05 | 0.0073641 | 0.43054   |
| 5mo_SIGAD9 | 0.05616379 | 0.33838135 | 6.24E-05 | 0.0060668 | 0.047788  |
| 5mo_SIGAD9 | 0.0275856  | 0.16202533 | 4.46E-05 | 0.0047834 | -0.12024  |
| 5mo_SIGAD9 | 0.08910217 | 0.5416441  | 4.84E-05 | 0.0094274 | -0.3844   |
| 5mo_SIGAD9 | 0.09025873 | 0.5487812  | 4.88E-05 | 0.0086895 | -0.51631  |
| 5mo_SIGAD9 | 0.03334758 | 0.19758251 | 4.66E-05 | 0.0045822 | -0.11352  |
| 5mo_SIGAD9 | 0.02491413 | 0.14553967 | 4.38E-05 | 0.0049138 | -0.10343  |
| 5mo_SIGAD9 | 0.02499018 | 0.14600901 | 4.38E-05 | 0.0049138 | -0.10343  |
| 5mo_SIGAD9 | 0.01363547 | 0.07593908 | 3.86E-05 | 0.0062156 | 0.17645   |
| 5mo_SIGAD9 | 0.08791679 | 0.5343291  | 4.80E-05 | 0.010188  | -0.29935  |
| 5mo_SIGAD9 | 0.08370973 | 0.50836736 | 4.77E-05 | 0.013036  | -0.036078 |
| 5mo_SIGAD9 | 0.02896047 | 0.17050965 | 4.51E-05 | 0.0047064 | -0.12268  |
| 5mo_SIGAD9 | 0.02507778 | 0.14654955 | 4.38E-05 | 0.0049138 | -0.10343  |
| 5mo_SIGAD9 | 0.0189946  | 0.10901029 | 4.14E-05 | 0.0054571 | 0.0010121 |
| 5mo_SIGAD9 | 0.04034326 | 0.24075288 | 4.99E-05 | 0.0046177 | -0.063007 |
| 5mo_SIGAD9 | 0.01440921 | 0.08071384 | 3.89E-05 | 0.0061278 | 0.1561    |
| 5mo_SIGAD9 | 0.09783629 | 0.5955424  | 5.36E-05 | 0.0048658 | -1.1032   |



|            |            |            |          |           |            |
|------------|------------|------------|----------|-----------|------------|
| 5mo_SIGAD9 | 0.02114778 | 0.12229756 | 4.24E-05 | 0.0052258 | -0.04878   |
| 5mo_SIGAD9 | 0.04176834 | 0.24954703 | 5.09E-05 | 0.0046676 | -0.0504    |
| 5mo_SIGAD9 | 0.02737026 | 0.16069649 | 4.46E-05 | 0.0047834 | -0.11816   |
| 5mo_SIGAD9 | 0.07616795 | 0.46182704 | 5.18E-05 | 0.013885  | 0.22792    |
| 5mo_SIGAD9 | 0.02729113 | 0.1602082  | 4.46E-05 | 0.0047834 | -0.11816   |
| 5mo_SIGAD9 | 0.07785859 | 0.47225997 | 5.05E-05 | 0.014229  | 0.20103    |
| 5mo_SIGAD9 | 0.00658172 | 0.03241039 | 3.47E-05 | 0.0076096 | 0.48124    |
| 5mo_SIGAD9 | 0.02998769 | 0.17684862 | 4.55E-05 | 0.0046645 | -0.12301   |
| 5mo_SIGAD9 | 0.02968344 | 0.17497112 | 4.53E-05 | 0.0046846 | -0.1231    |
| 5mo_SIGAD9 | 0.02201092 | 0.12762396 | 4.26E-05 | 0.0051742 | -0.059109  |
| 5mo_SIGAD9 | 0.0271829  | 0.15954027 | 4.46E-05 | 0.0047834 | -0.11816   |
| 5mo_SIGAD9 | 0.01905734 | 0.10939746 | 4.14E-05 | 0.0054571 | 0.0010121  |
| 5mo_SIGAD9 | 0.09383166 | 0.57082975 | 5.09E-05 | 0.0064439 | -0.7829    |
| 5mo_SIGAD9 | 0.01146458 | 0.06254249 | 3.74E-05 | 0.0065941 | 0.263      |
| 5mo_SIGAD9 | 0.01626913 | 0.09219141 | 4.00E-05 | 0.0058035 | 0.080526   |
| 5mo_SIGAD9 | 0.05050653 | 0.3034704  | 5.83E-05 | 0.0052672 | 0.0043724  |
| 5mo_SIGAD9 | 0.02529551 | 0.14789316 | 4.38E-05 | 0.0049138 | -0.10343   |
| 5mo_SIGAD9 | 0.03703203 | 0.22031924 | 4.81E-05 | 0.0045652 | -0.088896  |
| 5mo_SIGAD9 | 0.01974026 | 0.11361172 | 4.16E-05 | 0.0053955 | -0.012659  |
| 5mo_SIGAD9 | 0.08981558 | 0.54604656 | 4.86E-05 | 0.0090548 | -0.47194   |
| 5mo_SIGAD9 | 0.02562451 | 0.14992346 | 4.40E-05 | 0.0048781 | -0.10813   |
| 5mo_SIGAD9 | 0.01819193 | 0.10405701 | 4.09E-05 | 0.0055879 | 0.030658   |
| 5mo_SIGAD9 | 0.0046891  | 0.02073102 | 3.35E-05 | 0.0081345 | 0.58516    |
| 5mo_SIGAD9 | 0.0107104  | 0.05788848 | 3.68E-05 | 0.0068    | 0.30902    |
| 5mo_SIGAD9 | 0.0112805  | 0.06140655 | 3.71E-05 | 0.0066957 | 0.2858     |
| 5mo_SIGAD9 | 0.03955116 | 0.23586479 | 4.95E-05 | 0.0046046 | -0.067351  |
| 5mo_SIGAD9 | 0.0167862  | 0.09538224 | 4.03E-05 | 0.005729  | 0.063215   |
| 5mo_SIGAD9 | 0.02025669 | 0.11679865 | 4.19E-05 | 0.0053364 | -0.025531  |
| 5mo_SIGAD9 | 0.04914379 | 0.2950609  | 5.68E-05 | 0.0051026 | -0.0022352 |
| 5mo_SIGAD9 | 0.01672653 | 0.09501402 | 4.00E-05 | 0.0058035 | 0.063215   |
| 5mo_SIGAD9 | 0.02658729 | 0.1558648  | 4.44E-05 | 0.004813  | -0.11546   |
| 5mo_SIGAD9 | 0.0895958  | 0.54469025 | 4.86E-05 | 0.0090548 | -0.42792   |
| 5mo_SIGAD9 | 0.07543863 | 0.4573264  | 5.23E-05 | 0.013721  | 0.23858    |
| 5mo_SIGAD9 | 0.09160469 | 0.5570871  | 4.96E-05 | 0.0076529 | -0.60562   |
| 5mo_SIGAD9 | 0.03260975 | 0.19302934 | 4.64E-05 | 0.0045915 | -0.11603   |
| 5mo_SIGAD9 | 0.01292058 | 0.07152747 | 3.80E-05 | 0.0063994 | 0.21875    |
| 5mo_SIGAD9 | 0.02621324 | 0.15355648 | 4.42E-05 | 0.0048445 | -0.11213   |
| 5mo_SIGAD9 | 0.02422221 | 0.14126989 | 4.34E-05 | 0.0049916 | -0.091842  |
| 5mo_SIGAD9 | 0.01096911 | 0.05948495 | 3.71E-05 | 0.0066957 | 0.2858     |
| 5mo_SIGAD9 | 0.02814954 | 0.16550541 | 4.48E-05 | 0.0047558 | -0.12174   |
| 5mo_SIGAD9 | 0.02757169 | 0.1619395  | 4.46E-05 | 0.0047834 | -0.12024   |
| 5mo_SIGAD9 | 0.08867799 | 0.53902644 | 4.82E-05 | 0.0098057 | -0.3844    |
| 5mo_SIGAD9 | 0.01364191 | 0.07597883 | 3.86E-05 | 0.0062156 | 0.17645    |

|            |            |            |          |           |            |
|------------|------------|------------|----------|-----------|------------|
| 5mo_SIGAD9 | 0.10129143 | 0.616864   | 5.62E-05 | 0.0040352 | -1.2808    |
| 5mo_SIGAD9 | 0.02411684 | 0.14061962 | 4.34E-05 | 0.0049916 | -0.091842  |
| 5mo_SIGAD9 | 0.02456235 | 0.14336886 | 4.36E-05 | 0.0049516 | -0.098011  |
| 5mo_SIGAD9 | 0.01825022 | 0.10441672 | 4.09E-05 | 0.0055879 | 0.030658   |
| 5mo_SIGAD9 | 0.04312721 | 0.25793257 | 5.17E-05 | 0.0047101 | -0.042593  |
| 5mo_SIGAD9 | 0.03504092 | 0.2080321  | 4.72E-05 | 0.0045646 | -0.10426   |
| 5mo_SIGAD9 | 0.01509257 | 0.08493085 | 3.92E-05 | 0.0060428 | 0.1363     |
| 5mo_SIGAD9 | 0.08628045 | 0.52423126 | 4.77E-05 | 0.01133   | -0.17867   |
| 5mo_SIGAD9 | 0.0168265  | 0.09563091 | 4.03E-05 | 0.005729  | 0.063215   |
| 5mo_SIGAD9 | 0.01736856 | 0.09897595 | 4.06E-05 | 0.0056572 | 0.046584   |
| 5mo_SIGAD9 | 0.04267388 | 0.2551351  | 5.13E-05 | 0.0046879 | -0.042593  |
| 5mo_SIGAD9 | 0.02636513 | 0.15449382 | 4.42E-05 | 0.0048445 | -0.11213   |
| 5mo_SIGAD9 | 0.02610634 | 0.15289684 | 4.42E-05 | 0.0048445 | -0.11213   |
| 5mo_SIGAD9 | 0.02809678 | 0.16517983 | 4.48E-05 | 0.0047558 | -0.12174   |
| 5mo_SIGAD9 | 0.0439852  | 0.26322728 | 5.25E-05 | 0.0047605 | -0.035266  |
| 5mo_SIGAD9 | 0.00430816 | 0.01838025 | 3.32E-05 | 0.0082728 | 0.58516    |
| 5mo_SIGAD9 | 0.01636268 | 0.09276871 | 4.00E-05 | 0.0058035 | 0.080526   |
| 5mo_SIGAD9 | 0.02113173 | 0.12219852 | 4.24E-05 | 0.0052258 | -0.04878   |
| 5mo_SIGAD9 | 0.01655121 | 0.0939321  | 4.00E-05 | 0.0058035 | 0.080526   |
| 5mo_SIGAD9 | 0.02110685 | 0.12204494 | 4.21E-05 | 0.0052798 | -0.04878   |
| 5mo_SIGAD9 | 0.04979493 | 0.29907912 | 5.73E-05 | 0.0051543 | 0.0010449  |
| 5mo_SIGAD9 | 0.0629106  | 0.38001594 | 6.33E-05 | 0.0080056 | 0.12359    |
| 5mo_SIGAD9 | 0.08351275 | 0.5071518  | 4.77E-05 | 0.013036  | -0.0045591 |
| 5mo_SIGAD9 | 0.03744902 | 0.22289251 | 4.84E-05 | 0.0045696 | -0.084703  |
| 5mo_SIGAD9 | 0.01840042 | 0.10534358 | 4.09E-05 | 0.0055879 | 0.015459   |
| 5mo_SIGAD9 | 0.09796244 | 0.5963208  | 5.36E-05 | 0.0048658 | -1.1032    |
| 5mo_SIGAD9 | 0.01641045 | 0.09306347 | 4.00E-05 | 0.0058035 | 0.080526   |
| 5mo_SIGAD9 | 0.02214723 | 0.12846515 | 4.26E-05 | 0.0051742 | -0.068556  |
| 5mo_SIGAD9 | 0.08173177 | 0.49616134 | 4.83E-05 | 0.013957  | 0.078055   |
| 5mo_SIGAD9 | 0.04076577 | 0.24336019 | 5.02E-05 | 0.0046325 | -0.058715  |
| 5mo_SIGAD9 | 0.0946039  | 0.57559526 | 5.13E-05 | 0.0061762 | -0.8688    |
| 5mo_SIGAD9 | 0.09754751 | 0.59376025 | 5.36E-05 | 0.0048658 | -1.0673    |
| 5mo_SIGAD9 | 0.03491727 | 0.20726906 | 4.72E-05 | 0.0045646 | -0.10426   |
| 5mo_SIGAD9 | 0.01802364 | 0.10301846 | 4.09E-05 | 0.0055879 | 0.030658   |
| 5mo_SIGAD9 | 0.0289027  | 0.17015319 | 4.51E-05 | 0.0047064 | -0.12268   |
| 5mo_SIGAD9 | 0.01413683 | 0.07903296 | 3.89E-05 | 0.0061278 | 0.1561     |
| 5mo_SIGAD9 | 0.09068055 | 0.55138427 | 4.91E-05 | 0.0083333 | -0.51631   |
| 5mo_SIGAD9 | 0.08163666 | 0.49557444 | 4.83E-05 | 0.013957  | 0.078055   |
| 5mo_SIGAD9 | 0.03517312 | 0.20884794 | 4.72E-05 | 0.0045646 | -0.10068   |
| 5mo_SIGAD9 | 0.07876935 | 0.47788027 | 4.97E-05 | 0.014318  | 0.18889    |
| 5mo_SIGAD9 | 0.01423911 | 0.0796641  | 3.89E-05 | 0.0061278 | 0.1561     |
| 5mo_SIGAD9 | 0.02395264 | 0.13960631 | 4.34E-05 | 0.0049916 | -0.091842  |
| 5mo_SIGAD9 | 0.03305489 | 0.19577634 | 4.66E-05 | 0.0045822 | -0.11352   |

|            |            |            |          |           |           |
|------------|------------|------------|----------|-----------|-----------|
| 5mo_SIGAD9 | 0.02677566 | 0.15702718 | 4.44E-05 | 0.004813  | -0.11546  |
| 5mo_SIGAD9 | 0.04323548 | 0.25860074 | 5.17E-05 | 0.0047101 | -0.038876 |
| 5mo_SIGAD9 | 0.00530092 | 0.02450653 | 3.38E-05 | 0.0079991 | 0.55892   |
| 5mo_SIGAD9 | 0.0749892  | 0.45455298 | 5.28E-05 | 0.013537  | 0.24193   |
| 5mo_SIGAD9 | 0.01929892 | 0.11088822 | 4.14E-05 | 0.0054571 | 0.0010121 |
| 5mo_SIGAD9 | 0.0900513  | 0.54750115 | 4.88E-05 | 0.0086895 | -0.47194  |
| 5mo_SIGAD9 | 0.01772597 | 0.10118156 | 4.06E-05 | 0.0056572 | 0.046584  |
| 5mo_SIGAD9 | 0.08517181 | 0.51738983 | 4.76E-05 | 0.012059  | -0.10433  |
| 5mo_SIGAD9 | 0.0186581  | 0.10693373 | 4.11E-05 | 0.0055212 | 0.015459  |
| 5mo_SIGAD9 | 0.02461004 | 0.14366314 | 4.36E-05 | 0.0049516 | -0.098011 |
| 5mo_SIGAD9 | 0.02211632 | 0.1282744  | 4.26E-05 | 0.0051742 | -0.059109 |
| 5mo_SIGAD9 | 0.04271561 | 0.25539264 | 5.13E-05 | 0.0046879 | -0.042593 |
| 5mo_SIGAD9 | 0.01375171 | 0.07665636 | 3.86E-05 | 0.0062156 | 0.17645   |
| 5mo_SIGAD9 | 0.05102078 | 0.30664384 | 5.87E-05 | 0.0053288 | 0.0077602 |
| 5mo_SIGAD9 | 0.08777027 | 0.5334249  | 4.79E-05 | 0.010571  | -0.29935  |
| 5mo_SIGAD9 | 0.03517083 | 0.2088338  | 4.72E-05 | 0.0045646 | -0.10068  |
| 5mo_SIGAD9 | 0.03053632 | 0.18023427 | 4.57E-05 | 0.0046464 | -0.12245  |
| 5mo_SIGAD9 | 0.0118623  | 0.06499686 | 3.74E-05 | 0.0065941 | 0.263     |
| 5mo_SIGAD9 | 0.0995843  | 0.6063293  | 5.49E-05 | 0.0043938 | -1.2008   |
| 5mo_SIGAD9 | 0.05266282 | 0.31677687 | 6.01E-05 | 0.0055357 | 0.018414  |
| 5mo_SIGAD9 | 0.02158397 | 0.12498929 | 4.24E-05 | 0.0052258 | -0.04878  |
| 5mo_SIGAD9 | 0.00334381 | 0.01242921 | 3.29E-05 | 0.0084138 | 0.63801   |
| 5mo_SIGAD9 | 0.01246932 | 0.06874274 | 3.80E-05 | 0.0063994 | 0.21875   |
| 5mo_SIGAD9 | 0.02679896 | 0.15717098 | 4.44E-05 | 0.004813  | -0.11546  |
| 5mo_SIGAD9 | 0.05542188 | 0.33380303 | 6.21E-05 | 0.005966  | 0.038579  |
| 5mo_SIGAD9 | 0.01631872 | 0.09249743 | 4.00E-05 | 0.0058035 | 0.080526  |
| 5mo_SIGAD9 | 0.06086165 | 0.36737186 | 6.38E-05 | 0.0072613 | 0.09374   |
| 5mo_SIGAD9 | 0.0099494  | 0.0531923  | 3.65E-05 | 0.0069072 | 0.33263   |
| 5mo_SIGAD9 | 0.01566548 | 0.08846627 | 3.95E-05 | 0.0059603 | 0.098494  |
| 5mo_SIGAD9 | 0.03037668 | 0.17924911 | 4.57E-05 | 0.0046464 | -0.12245  |
| 5mo_SIGAD9 | 0.04281049 | 0.25597814 | 5.17E-05 | 0.0047101 | -0.042593 |
| 5mo_SIGAD9 | 0.09794742 | 0.5962281  | 5.36E-05 | 0.0048658 | -1.1032   |
| 5mo_SIGAD9 | 0.02272234 | 0.13201417 | 4.28E-05 | 0.005125  | -0.077142 |
| 5mo_SIGAD9 | 0.02968044 | 0.17495263 | 4.53E-05 | 0.0046846 | -0.1231   |
| 5mo_SIGAD9 | 0.03503151 | 0.20797406 | 4.72E-05 | 0.0045646 | -0.10426  |
| 5mo_SIGAD9 | 0.04142637 | 0.24743675 | 5.05E-05 | 0.0046492 | -0.054504 |
| 5mo_SIGAD9 | 0.06353745 | 0.38388422 | 6.30E-05 | 0.008216  | 0.13178   |
| 5mo_SIGAD9 | 0.03124289 | 0.1845945  | 4.58E-05 | 0.00463   | -0.12145  |
| 5mo_SIGAD9 | 0.08681779 | 0.5275472  | 4.78E-05 | 0.010952  | -0.21781  |
| 5mo_SIGAD9 | 0.01545204 | 0.0871491  | 3.95E-05 | 0.0059603 | 0.11709   |
| 5mo_SIGAD9 | 0.0134426  | 0.07474886 | 3.83E-05 | 0.0063061 | 0.19734   |
| 5mo_SIGAD9 | 0.03220907 | 0.19055676 | 4.62E-05 | 0.0046026 | -0.11821  |
| 5mo_SIGAD9 | 0.05953888 | 0.35920903 | 6.37E-05 | 0.0067983 | 0.080679  |

|            |            |            |          |           |           |
|------------|------------|------------|----------|-----------|-----------|
| 5mo_SIGAD9 | 0.02923907 | 0.17222893 | 4.51E-05 | 0.0047064 | -0.1231   |
| 5mo_SIGAD9 | 0.01381161 | 0.07702605 | 3.86E-05 | 0.0062156 | 0.17645   |
| 5mo_SIGAD9 | 0.0141963  | 0.07939997 | 3.89E-05 | 0.0061278 | 0.1561    |
| 5mo_SIGAD9 | 0.02770691 | 0.16277392 | 4.48E-05 | 0.0047558 | -0.12024  |
| 5mo_SIGAD9 | 0.09239443 | 0.56196064 | 4.99E-05 | 0.0073308 | -0.69483  |
| 5mo_SIGAD9 | 0.02067742 | 0.11939495 | 4.21E-05 | 0.0052798 | -0.037579 |
| 5mo_SIGAD9 | 0.01981849 | 0.11409451 | 4.16E-05 | 0.0053955 | -0.012659 |
| 5mo_SIGAD9 | 0.03628454 | 0.2157065  | 4.77E-05 | 0.0045615 | -0.092976 |
| 5mo_SIGAD9 | 0.03264338 | 0.19323692 | 4.64E-05 | 0.0045915 | -0.11603  |
| 5mo_SIGAD9 | 0.02429603 | 0.14172539 | 4.34E-05 | 0.0049916 | -0.098011 |
| 5mo_SIGAD9 | 0.01816783 | 0.10390828 | 4.09E-05 | 0.0055879 | 0.030658  |
| 5mo_SIGAD9 | 0.01819531 | 0.10407785 | 4.09E-05 | 0.0055879 | 0.030658  |
| 5mo_SIGAD9 | 0.0699129  | 0.42322713 | 5.76E-05 | 0.011297  | 0.22487   |
| 5mo_SIGAD9 | 0.08804339 | 0.53511035 | 4.80E-05 | 0.010188  | -0.3415   |
| 5mo_SIGAD9 | 0.02766381 | 0.162508   | 4.48E-05 | 0.0047558 | -0.12024  |
| 5mo_SIGAD9 | 0.02505193 | 0.14639005 | 4.38E-05 | 0.0049138 | -0.10343  |
| 5mo_SIGAD9 | 0.01871357 | 0.10727605 | 4.11E-05 | 0.0055212 | 0.015459  |
| 5mo_SIGAD9 | 0.0313702  | 0.18538009 | 4.58E-05 | 0.00463   | -0.12002  |
| 5mo_SIGAD9 | 0.01114983 | 0.06060019 | 3.71E-05 | 0.0066957 | 0.2858    |
| 5mo_SIGAD9 | 0.02752808 | 0.16167039 | 4.46E-05 | 0.0047834 | -0.11816  |
| 5mo_SIGAD9 | 0.02171395 | 0.1257914  | 4.26E-05 | 0.0051742 | -0.059109 |
| 5mo_SIGAD9 | 0.09791239 | 0.59601194 | 5.36E-05 | 0.0048658 | -1.1032   |
| 5mo_SIGAD9 | 0.02908067 | 0.17125142 | 4.51E-05 | 0.0047064 | -0.12268  |
| 5mo_SIGAD9 | 0.09194467 | 0.55918515 | 4.96E-05 | 0.0076529 | -0.6503   |
| 5mo_SIGAD9 | 0.02384329 | 0.13893156 | 4.34E-05 | 0.0049916 | -0.091842 |
| 5mo_SIGAD9 | 0.01765271 | 0.10072946 | 4.06E-05 | 0.0056572 | 0.046584  |
| 5mo_SIGAD9 | 0.07190138 | 0.43549803 | 5.60E-05 | 0.012118  | 0.24161   |
| 5mo_SIGAD9 | 0.02718688 | 0.15956482 | 4.46E-05 | 0.0047834 | -0.11816  |
| 5mo_SIGAD9 | 0.02589556 | 0.1515961  | 4.40E-05 | 0.0048781 | -0.10813  |
| 5mo_SIGAD9 | 0.01961903 | 0.11286362 | 4.16E-05 | 0.0053955 | -0.012659 |
| 5mo_SIGAD9 | 0.08846477 | 0.5377107  | 4.82E-05 | 0.0098057 | -0.3415   |
| 5mo_SIGAD9 | 0.09132525 | 0.5553627  | 4.93E-05 | 0.0079874 | -0.60562  |
| 5mo_SIGAD9 | 0.06849225 | 0.41446027 | 5.93E-05 | 0.010465  | 0.20551   |
| 5mo_SIGAD9 | 0.0108288  | 0.05861911 | 3.71E-05 | 0.0066957 | 0.2858    |
| 5mo_SIGAD9 | 0.01395856 | 0.07793284 | 3.86E-05 | 0.0062156 | 0.17645   |
| 5mo_SIGAD9 | 0.01701478 | 0.0967928  | 4.03E-05 | 0.005729  | 0.063215  |
| 5mo_SIGAD9 | 0.0620665  | 0.37480697 | 6.36E-05 | 0.0076138 | 0.10802   |
| 5mo_SIGAD9 | 0.03039166 | 0.17934155 | 4.57E-05 | 0.0046464 | -0.12245  |
| 5mo_SIGAD9 | 0.05517077 | 0.33225343 | 6.17E-05 | 0.0058704 | 0.038579  |
| 5mo_SIGAD9 | 0.01635101 | 0.09269665 | 4.00E-05 | 0.0058035 | 0.080526  |
| 5mo_SIGAD9 | 0.01280571 | 0.07081864 | 3.80E-05 | 0.0063994 | 0.21875   |
| 5mo_SIGAD9 | 0.02311259 | 0.13442238 | 4.30E-05 | 0.0050782 | -0.077142 |
| 5mo_SIGAD9 | 0.03008634 | 0.1774574  | 4.55E-05 | 0.0046645 | -0.12301  |

|            |            |            |          |           |           |
|------------|------------|------------|----------|-----------|-----------|
| 5mo_SIGAD9 | 0.04462142 | 0.26715338 | 5.30E-05 | 0.0047888 | -0.031751 |
| 5mo_SIGAD9 | 0.03134704 | 0.18523717 | 4.58E-05 | 0.00463   | -0.12002  |
| 5mo_SIGAD9 | 0.01802512 | 0.10302763 | 4.09E-05 | 0.0055879 | 0.030658  |
| 5mo_SIGAD9 | 0.02867075 | 0.1687218  | 4.49E-05 | 0.0047302 | -0.12268  |
| 5mo_SIGAD9 | 0.01543943 | 0.08707129 | 3.95E-05 | 0.0059603 | 0.11709   |
| 5mo_SIGAD9 | 0.0371665  | 0.22114909 | 4.81E-05 | 0.0045652 | -0.088896 |
| 5mo_SIGAD9 | 0.02547263 | 0.14898622 | 4.40E-05 | 0.0048781 | -0.10813  |
| 5mo_SIGAD9 | 0.03093044 | 0.18266638 | 4.58E-05 | 0.00463   | -0.12145  |
| 5mo_SIGAD9 | 0.02118275 | 0.12251335 | 4.24E-05 | 0.0052258 | -0.04878  |
| 5mo_SIGAD9 | 0.01006921 | 0.05393169 | 3.65E-05 | 0.0069072 | 0.33263   |
| 5mo_SIGAD9 | 0.0284474  | 0.16734351 | 4.49E-05 | 0.0047302 | -0.12174  |
| 5mo_SIGAD9 | 0.00762258 | 0.03883356 | 3.53E-05 | 0.0073641 | 0.43054   |
| 5mo_SIGAD9 | 0.02448217 | 0.14287406 | 4.36E-05 | 0.0049516 | -0.098011 |
| 5mo_SIGAD9 | 0.01163776 | 0.0636112  | 3.74E-05 | 0.0065941 | 0.263     |
| 5mo_SIGAD9 | 0.01917948 | 0.11015114 | 4.14E-05 | 0.0054571 | 0.0010121 |
| 5mo_SIGAD9 | 0.01664573 | 0.09451541 | 4.00E-05 | 0.0058035 | 0.080526  |
| 5mo_SIGAD9 | 0.0921317  | 0.56033933 | 4.99E-05 | 0.0073308 | -0.6503   |
| 5mo_SIGAD9 | 0.03300377 | 0.19546086 | 4.64E-05 | 0.0045915 | -0.11352  |
| 5mo_SIGAD9 | 0.07871719 | 0.47755843 | 4.97E-05 | 0.014318  | 0.18889   |
| 5mo_SIGAD9 | 0.05118221 | 0.30764002 | 5.87E-05 | 0.0053288 | 0.0077602 |
| 5mo_SIGAD9 | 0.02986616 | 0.17609867 | 4.55E-05 | 0.0046645 | -0.12301  |
| 5mo_SIGAD9 | 0.08816306 | 0.5358488  | 4.80E-05 | 0.010188  | -0.3415   |
| 5mo_SIGAD9 | 0.08206446 | 0.4982144  | 4.81E-05 | 0.013778  | 0.078055  |
| 5mo_SIGAD9 | 0.01415143 | 0.07912309 | 3.89E-05 | 0.0061278 | 0.1561    |
| 5mo_SIGAD9 | 0.00958642 | 0.05095238 | 3.62E-05 | 0.0070172 | 0.35661   |
| 5mo_SIGAD9 | 0.01639721 | 0.09298179 | 4.00E-05 | 0.0058035 | 0.080526  |
| 5mo_SIGAD9 | 0.03043498 | 0.17960888 | 4.57E-05 | 0.0046464 | -0.12245  |
| 5mo_SIGAD9 | 0.02239641 | 0.13000287 | 4.28E-05 | 0.005125  | -0.068556 |
| 5mo_SIGAD9 | 0.02606391 | 0.15263496 | 4.42E-05 | 0.0048445 | -0.11213  |
| 5mo_SIGAD9 | 0.03945936 | 0.23529828 | 4.92E-05 | 0.0045932 | -0.067351 |
| 5mo_SIGAD9 | 0.01770004 | 0.10102152 | 4.06E-05 | 0.0056572 | 0.046584  |
| 5mo_SIGAD9 | 0.07956019 | 0.48276055 | 4.93E-05 | 0.014315  | 0.15946   |
| 5mo_SIGAD9 | 0.0098801  | 0.0527647  | 3.65E-05 | 0.0069072 | 0.33263   |
| 5mo_SIGAD9 | 0.00757514 | 0.03854076 | 3.53E-05 | 0.0073641 | 0.43054   |
| 5mo_SIGAD9 | 0.02744485 | 0.16115674 | 4.46E-05 | 0.0047834 | -0.11816  |
| 5mo_SIGAD9 | 0.04377328 | 0.26191953 | 5.21E-05 | 0.0047343 | -0.035266 |
| 5mo_SIGAD9 | 0.01302292 | 0.072159   | 3.83E-05 | 0.0063061 | 0.19734   |
| 5mo_SIGAD9 | 0.01948922 | 0.11206254 | 4.16E-05 | 0.0053955 | -0.012659 |
| 5mo_SIGAD9 | 0.02036367 | 0.11745881 | 4.19E-05 | 0.0053364 | -0.025531 |
| 5mo_SIGAD9 | 0.01105147 | 0.0599932  | 3.71E-05 | 0.0066957 | 0.2858    |
| 5mo_SIGAD9 | 0.015173   | 0.08542714 | 3.95E-05 | 0.0059603 | 0.11709   |
| 5mo_SIGAD9 | 0.03059732 | 0.18061064 | 4.57E-05 | 0.0046464 | -0.12245  |
| 5mo_SIGAD9 | 0.03764132 | 0.22407919 | 4.84E-05 | 0.0045696 | -0.084703 |

|            |            |            |          |           |           |
|------------|------------|------------|----------|-----------|-----------|
| 5mo_SIGAD9 | 0.02002251 | 0.11535353 | 4.16E-05 | 0.0053955 | -0.025531 |
| 5mo_SIGAD9 | 0.02595262 | 0.1519482  | 4.40E-05 | 0.0048781 | -0.11213  |
| 5mo_SIGAD9 | 0.01341606 | 0.07458512 | 3.83E-05 | 0.0063061 | 0.19734   |
| 5mo_SIGAD9 | 0.02078401 | 0.1200527  | 4.21E-05 | 0.0052798 | -0.037579 |
| 5mo_SIGAD9 | 0.03105521 | 0.18343627 | 4.58E-05 | 0.00463   | -0.12145  |
| 5mo_SIGAD9 | 0.0066983  | 0.03312978 | 3.47E-05 | 0.0076096 | 0.48124   |
| 5mo_SIGAD9 | 0.02898543 | 0.1706637  | 4.51E-05 | 0.0047064 | -0.12268  |
| 5mo_SIGAD9 | 0.07822786 | 0.47453877 | 5.01E-05 | 0.014289  | 0.20103   |
| 5mo_SIGAD9 | 0.0070435  | 0.03526005 | 3.50E-05 | 0.0074854 | 0.45576   |
| 5mo_SIGAD9 | 0.13457741 | 0.8222718  | 7.29E-05 | 0.005328  | -0.99548  |
| 5mo_SIGAD9 | 0.03167894 | 0.18728533 | 4.60E-05 | 0.0046154 | -0.12002  |
| 5mo_SIGAD9 | 0.01525199 | 0.08591459 | 3.95E-05 | 0.0059603 | 0.11709   |
| 5mo_SIGAD9 | 0.03798161 | 0.22617914 | 4.87E-05 | 0.0045758 | -0.080425 |
| 5mo_SIGAD9 | 0.01290903 | 0.07145624 | 3.80E-05 | 0.0063994 | 0.21875   |
| 5mo_SIGAD9 | 0.05058164 | 0.30393392 | 5.83E-05 | 0.0052672 | 0.0043724 |
| 5mo_SIGAD9 | 0.02741589 | 0.16097808 | 4.46E-05 | 0.0047834 | -0.11816  |
| 5mo_SIGAD9 | 0.02647378 | 0.1551643  | 4.42E-05 | 0.0048445 | -0.11546  |
| 5mo_SIGAD9 | 0.02616165 | 0.15323813 | 4.42E-05 | 0.0048445 | -0.11213  |
| 5mo_SIGAD9 | 0.0763627  | 0.46302885 | 5.18E-05 | 0.013885  | 0.22792   |
| 5mo_SIGAD9 | 0.02099201 | 0.12133628 | 4.21E-05 | 0.0052798 | -0.037579 |
| 5mo_SIGAD9 | 0.01000794 | 0.05355359 | 3.65E-05 | 0.0069072 | 0.33263   |
| 5mo_SIGAD9 | 0.0193993  | 0.11150768 | 4.14E-05 | 0.0054571 | 0.0010121 |
| 5mo_SIGAD9 | 0.02894125 | 0.17039105 | 4.51E-05 | 0.0047064 | -0.12268  |
| 5mo_SIGAD9 | 0.01526017 | 0.08596509 | 3.95E-05 | 0.0059603 | 0.11709   |
| 5mo_SIGAD9 | 0.05767282 | 0.3476936  | 6.32E-05 | 0.0064035 | 0.057806  |
| 5mo_SIGAD9 | 0.01507297 | 0.08480986 | 3.92E-05 | 0.0060428 | 0.1363    |
| 5mo_SIGAD9 | 0.0168534  | 0.09579691 | 4.03E-05 | 0.005729  | 0.063215  |
| 5mo_SIGAD9 | 0.02728805 | 0.16018914 | 4.46E-05 | 0.0047834 | -0.11816  |
| 5mo_SIGAD9 | 0.0222788  | 0.1292771  | 4.28E-05 | 0.005125  | -0.068556 |
| 5mo_SIGAD9 | 0.02268987 | 0.1318138  | 4.28E-05 | 0.005125  | -0.077142 |
| 5mo_SIGAD9 | 0.00856438 | 0.04464537 | 3.56E-05 | 0.0072456 | 0.40559   |
| 5mo_SIGAD9 | 0.03136151 | 0.1853265  | 4.58E-05 | 0.00463   | -0.12002  |
| 5mo_SIGAD9 | 0.01099128 | 0.05962174 | 3.71E-05 | 0.0066957 | 0.2858    |
| 5mo_SIGAD9 | 0.02603748 | 0.15247191 | 4.42E-05 | 0.0048445 | -0.11213  |
| 5mo_SIGAD9 | 0.0912545  | 0.5549261  | 4.93E-05 | 0.0079874 | -0.56091  |
| 5mo_SIGAD9 | 0.0173904  | 0.09911072 | 4.06E-05 | 0.0056572 | 0.046584  |
| 5mo_SIGAD9 | 0.03141923 | 0.18568264 | 4.60E-05 | 0.0046154 | -0.12002  |
| 5mo_SIGAD9 | 0.10829458 | 0.6600805  | 6.12E-05 | 0.0035823 | -1.3848   |
| 5mo_SIGAD9 | 0.02146423 | 0.12425033 | 4.24E-05 | 0.0052258 | -0.04878  |
| 5mo_SIGAD9 | 0.07579958 | 0.4595538  | 5.23E-05 | 0.013721  | 0.23393   |
| 5mo_SIGAD9 | 0.02991131 | 0.1763773  | 4.55E-05 | 0.0046645 | -0.12301  |
| 5mo_SIGAD9 | 0.04096954 | 0.24461766 | 5.02E-05 | 0.0046325 | -0.058715 |
| 5mo_SIGAD9 | 0.04230887 | 0.25288266 | 5.13E-05 | 0.0046879 | -0.04643  |

|            |            |            |          |           |           |
|------------|------------|------------|----------|-----------|-----------|
| 5mo_SIGAD9 | 0.01292375 | 0.07154706 | 3.80E-05 | 0.0063994 | 0.21875   |
| 5mo_SIGAD9 | 0.01718338 | 0.09783322 | 4.03E-05 | 0.005729  | 0.063215  |
| 5mo_SIGAD9 | 0.01753333 | 0.09999277 | 4.06E-05 | 0.0056572 | 0.046584  |
| 5mo_SIGAD9 | 0.01178339 | 0.06450989 | 3.74E-05 | 0.0065941 | 0.263     |
| 5mo_SIGAD9 | 0.01806909 | 0.10329895 | 4.09E-05 | 0.0055879 | 0.030658  |
| 5mo_SIGAD9 | 0.02834888 | 0.16673554 | 4.49E-05 | 0.0047302 | -0.12174  |
| 5mo_SIGAD9 | 0.02839654 | 0.16702965 | 4.49E-05 | 0.0047302 | -0.12174  |
| 5mo_SIGAD9 | 0.01821218 | 0.10418194 | 4.09E-05 | 0.0055879 | 0.030658  |
| 5mo_SIGAD9 | 0.01354483 | 0.07537974 | 3.86E-05 | 0.0062156 | 0.17645   |
| 5mo_SIGAD9 | 0.01307145 | 0.07245851 | 3.83E-05 | 0.0063061 | 0.19734   |
| 5mo_SIGAD9 | 0.01946549 | 0.11191613 | 4.14E-05 | 0.0054571 | -0.012659 |
| 5mo_SIGAD9 | 0.03484457 | 0.20682041 | 4.72E-05 | 0.0045646 | -0.10426  |
| 5mo_SIGAD9 | 0.00540627 | 0.02515666 | 3.41E-05 | 0.0078664 | 0.53284   |
| 5mo_SIGAD9 | 0.03004042 | 0.17717406 | 4.55E-05 | 0.0046645 | -0.12301  |
| 5mo_SIGAD9 | 0.03090363 | 0.1825009  | 4.58E-05 | 0.00463   | -0.12145  |
| 5mo_SIGAD9 | 0.01759353 | 0.10036425 | 4.06E-05 | 0.0056572 | 0.046584  |
| 5mo_SIGAD9 | 0.02412975 | 0.1406993  | 4.34E-05 | 0.0049916 | -0.091842 |
| 5mo_SIGAD9 | 0.02014545 | 0.11611219 | 4.19E-05 | 0.0053364 | -0.025531 |
| 5mo_SIGAD9 | 0.00858534 | 0.04477471 | 3.56E-05 | 0.0072456 | 0.40559   |
| 5mo_SIGAD9 | 0.01143399 | 0.06235374 | 3.74E-05 | 0.0065941 | 0.263     |
| 5mo_SIGAD9 | 0.08774487 | 0.53326815 | 4.79E-05 | 0.010571  | -0.29935  |
| 5mo_SIGAD9 | 0.00894654 | 0.04700371 | 3.59E-05 | 0.00713   | 0.38094   |
| 5mo_SIGAD9 | 0.01524023 | 0.08584204 | 3.95E-05 | 0.0059603 | 0.11709   |
| 5mo_SIGAD9 | 0.08839927 | 0.5373065  | 4.82E-05 | 0.0098057 | -0.3415   |
| 5mo_SIGAD9 | 0.03810175 | 0.2269205  | 4.87E-05 | 0.0045758 | -0.080425 |
| 5mo_SIGAD9 | 0.02197981 | 0.12743197 | 4.26E-05 | 0.0051742 | -0.059109 |
| 5mo_SIGAD9 | 0.01421621 | 0.0795228  | 3.89E-05 | 0.0061278 | 0.1561    |
| 5mo_SIGAD9 | 0.07429621 | 0.4502765  | 5.33E-05 | 0.013335  | 0.24406   |
| 5mo_SIGAD9 | 0.02642744 | 0.15487833 | 4.42E-05 | 0.0048445 | -0.11213  |
| 5mo_SIGAD9 | 0.03208565 | 0.18979518 | 4.62E-05 | 0.0046026 | -0.11821  |
| 5mo_SIGAD9 | 0.08470198 | 0.5144905  | 4.76E-05 | 0.012404  | -0.069378 |
| 5mo_SIGAD9 | 0.02968597 | 0.17498673 | 4.53E-05 | 0.0046846 | -0.1231   |
| 5mo_SIGAD9 | 0.02366238 | 0.13781513 | 4.32E-05 | 0.0050338 | -0.084895 |
| 5mo_SIGAD9 | 0.02240602 | 0.13006215 | 4.28E-05 | 0.005125  | -0.068556 |
| 5mo_SIGAD9 | 0.02687325 | 0.15762945 | 4.44E-05 | 0.004813  | -0.11546  |
| 5mo_SIGAD9 | 0.08313614 | 0.50482774 | 4.78E-05 | 0.013315  | 0.02505   |
| 5mo_SIGAD9 | 0.00539015 | 0.02505721 | 3.38E-05 | 0.0079991 | 0.53284   |
| 5mo_SIGAD9 | 0.03838567 | 0.22867258 | 4.87E-05 | 0.0045758 | -0.076088 |
| 5mo_SIGAD9 | 0.01596695 | 0.09032666 | 3.98E-05 | 0.0058806 | 0.098494  |
| 5mo_SIGAD9 | 0.01766296 | 0.10079271 | 4.06E-05 | 0.0056572 | 0.046584  |
| 5mo_SIGAD9 | 0.01387876 | 0.07744039 | 3.86E-05 | 0.0062156 | 0.17645   |
| 5mo_SIGAD9 | 0.01731138 | 0.0986231  | 4.03E-05 | 0.005729  | 0.046584  |
| 5mo_SIGAD9 | 0.0038301  | 0.01543013 | 3.32E-05 | 0.0082728 | 0.61153   |

|            |            |            |          |           |           |
|------------|------------|------------|----------|-----------|-----------|
| 5mo_SIGAD9 | 0.04153394 | 0.24810056 | 5.05E-05 | 0.0046492 | -0.054504 |
| 5mo_SIGAD9 | 0.02259857 | 0.13125035 | 4.28E-05 | 0.005125  | -0.068556 |
| 5mo_SIGAD9 | 0.01602145 | 0.09066293 | 3.98E-05 | 0.0058806 | 0.098494  |
| 5mo_SIGAD9 | 0.05255315 | 0.3161001  | 6.01E-05 | 0.0055357 | 0.018414  |
| 5mo_SIGAD9 | 0.0940235  | 0.5720136  | 5.09E-05 | 0.0064439 | -0.82618  |
| 5mo_SIGAD9 | 0.02985003 | 0.17599913 | 4.55E-05 | 0.0046645 | -0.12301  |
| 5mo_SIGAD9 | 0.01561775 | 0.08817175 | 3.95E-05 | 0.0059603 | 0.11709   |
| 5mo_SIGAD9 | 0.07147512 | 0.43286756 | 5.65E-05 | 0.011849  | 0.2386    |
| 5mo_SIGAD9 | 0.0175953  | 0.10037519 | 4.06E-05 | 0.0056572 | 0.046584  |
| 5mo_SIGAD9 | 0.04408538 | 0.26384544 | 5.25E-05 | 0.0047605 | -0.035266 |
| 5mo_SIGAD9 | 0.01831539 | 0.10481887 | 4.09E-05 | 0.0055879 | 0.030658  |
| 5mo_SIGAD9 | 0.02619718 | 0.15345739 | 4.42E-05 | 0.0048445 | -0.11213  |
| 5mo_SIGAD9 | 0.02058282 | 0.11881116 | 4.21E-05 | 0.0052798 | -0.037579 |
| 5mo_SIGAD9 | 0.02834164 | 0.16669084 | 4.49E-05 | 0.0047302 | -0.12174  |
| 5mo_SIGAD9 | 0.09472372 | 0.5763347  | 5.13E-05 | 0.0061762 | -0.8688   |
| 5mo_SIGAD9 | 0.03230909 | 0.19117402 | 4.62E-05 | 0.0046026 | -0.11821  |
| 5mo_SIGAD9 | 0.02703003 | 0.15859692 | 4.44E-05 | 0.004813  | -0.11816  |
| 5mo_SIGAD9 | 0.01619111 | 0.0917099  | 3.98E-05 | 0.0058806 | 0.080526  |
| 5mo_SIGAD9 | 0.05344581 | 0.3216087  | 6.05E-05 | 0.0056127 | 0.022172  |
| 5mo_SIGAD9 | 0.02861    | 0.16834694 | 4.49E-05 | 0.0047302 | -0.12268  |
| 5mo_SIGAD9 | 0.02358464 | 0.13733542 | 4.32E-05 | 0.0050338 | -0.084895 |
| 5mo_SIGAD9 | 0.04362143 | 0.26098242 | 5.21E-05 | 0.0047343 | -0.038876 |
| 5mo_SIGAD9 | 0.08913592 | 0.54185236 | 4.84E-05 | 0.0094274 | -0.42792  |
| 5mo_SIGAD9 | 0.02707439 | 0.15887067 | 4.46E-05 | 0.0047834 | -0.11816  |
| 5mo_SIGAD9 | 0.01919202 | 0.11022855 | 4.14E-05 | 0.0054571 | 0.0010121 |
| 5mo_SIGAD9 | 0.01287655 | 0.07125577 | 3.80E-05 | 0.0063994 | 0.21875   |
| 5mo_SIGAD9 | 0.05234296 | 0.31480303 | 5.97E-05 | 0.0054628 | 0.014768  |
| 5mo_SIGAD9 | 0.03632576 | 0.21596089 | 4.79E-05 | 0.0045625 | -0.092976 |
| 5mo_SIGAD9 | 0.01321312 | 0.07333273 | 3.83E-05 | 0.0063061 | 0.19734   |
| 5mo_SIGAD9 | 0.02373972 | 0.13829242 | 4.32E-05 | 0.0050338 | -0.084895 |
| 5mo_SIGAD9 | 0.01749641 | 0.09976491 | 4.06E-05 | 0.0056572 | 0.046584  |
| 5mo_SIGAD9 | 0.02500126 | 0.14607736 | 4.38E-05 | 0.0049138 | -0.10343  |
| 5mo_SIGAD9 | 0.00431516 | 0.01842343 | 3.35E-05 | 0.0081345 | 0.58516   |
| 5mo_SIGAD9 | 0.01876527 | 0.10759505 | 4.11E-05 | 0.0055212 | 0.015459  |
| 5mo_SIGAD9 | 0.03774661 | 0.22472894 | 4.84E-05 | 0.0045696 | -0.084703 |
| 5mo_SIGAD9 | 0.01985189 | 0.11430062 | 4.16E-05 | 0.0053955 | -0.012659 |
| 5mo_SIGAD9 | 0.01355052 | 0.07541486 | 3.86E-05 | 0.0062156 | 0.17645   |
| 5mo_SIGAD9 | 0.01493015 | 0.08392853 | 3.92E-05 | 0.0060428 | 0.1363    |
| 5mo_SIGAD9 | 0.01621469 | 0.09185542 | 3.98E-05 | 0.0058806 | 0.080526  |
| 5mo_SIGAD9 | 0.02478313 | 0.1447313  | 4.36E-05 | 0.0049516 | -0.098011 |
| 5mo_SIGAD9 | 0.01536229 | 0.0865953  | 3.95E-05 | 0.0059603 | 0.11709   |
| 5mo_SIGAD9 | 0.01454229 | 0.08153508 | 3.89E-05 | 0.0061278 | 0.1561    |
| 5mo_SIGAD9 | 0.01716259 | 0.09770495 | 4.03E-05 | 0.005729  | 0.063215  |



|            |            |            |          |           |           |
|------------|------------|------------|----------|-----------|-----------|
| 5mo_SIGAD9 | 0.01127585 | 0.06137788 | 3.71E-05 | 0.0066957 | 0.2858    |
| 5mo_SIGAD9 | 0.02323285 | 0.13516454 | 4.30E-05 | 0.0050782 | -0.084895 |
| 5mo_SIGAD9 | 0.01168755 | 0.06391843 | 3.74E-05 | 0.0065941 | 0.263     |
| 5mo_SIGAD9 | 0.01892775 | 0.10859776 | 4.11E-05 | 0.0055212 | 0.0010121 |
| 5mo_SIGAD9 | 0.03072545 | 0.18140137 | 4.57E-05 | 0.0046464 | -0.12245  |
| 5mo_SIGAD9 | 0.01827482 | 0.10456852 | 4.09E-05 | 0.0055879 | 0.030658  |
| 5mo_SIGAD9 | 0.0059346  | 0.028417   | 3.41E-05 | 0.0078664 | 0.50694   |
| 5mo_SIGAD9 | 0.01768105 | 0.10090434 | 4.06E-05 | 0.0056572 | 0.046584  |
| 5mo_SIGAD9 | 0.01538967 | 0.08676424 | 3.95E-05 | 0.0059603 | 0.11709   |
| 5mo_SIGAD9 | 0.03180274 | 0.18804929 | 4.60E-05 | 0.0046154 | -0.12002  |
| 5mo_SIGAD9 | 0.01225084 | 0.06739453 | 3.77E-05 | 0.0064954 | 0.24064   |
| 5mo_SIGAD9 | 0.01513031 | 0.08516373 | 3.92E-05 | 0.0060428 | 0.11709   |
| 5mo_SIGAD9 | 0.02941934 | 0.17334133 | 4.53E-05 | 0.0046846 | -0.1231   |
| 5mo_SIGAD9 | 0.01482131 | 0.08325691 | 3.92E-05 | 0.0060428 | 0.1363    |
| 5mo_SIGAD9 | 0.03479819 | 0.20653422 | 4.72E-05 | 0.0045646 | -0.10426  |
| 5mo_SIGAD9 | 0.02415694 | 0.14086705 | 4.34E-05 | 0.0049916 | -0.091842 |
| 5mo_SIGAD9 | 0.00590649 | 0.02824353 | 3.41E-05 | 0.0078664 | 0.53284   |
| 5mo_SIGAD9 | 0.0111593  | 0.0606586  | 3.71E-05 | 0.0066957 | 0.2858    |
| 5mo_SIGAD9 | 0.01357225 | 0.07554895 | 3.86E-05 | 0.0062156 | 0.17645   |
| 5mo_SIGAD9 | 0.01253614 | 0.06915508 | 3.80E-05 | 0.0063994 | 0.21875   |
| 5mo_SIGAD9 | 0.03005658 | 0.17727377 | 4.55E-05 | 0.0046645 | -0.12301  |
| 5mo_SIGAD9 | 0.02281005 | 0.13255543 | 4.30E-05 | 0.0050782 | -0.077142 |
| 5mo_SIGAD9 | 0.01128068 | 0.06140766 | 3.71E-05 | 0.0066957 | 0.2858    |
| 5mo_SIGAD9 | 0.003201   | 0.01154793 | 3.26E-05 | 0.0085576 | 0.66457   |
| 5mo_SIGAD9 | 0.02290741 | 0.13315625 | 4.30E-05 | 0.0050782 | -0.077142 |
| 5mo_SIGAD9 | 0.01440218 | 0.08067045 | 3.89E-05 | 0.0061278 | 0.1561    |
| 5mo_SIGAD9 | 0.0091193  | 0.04806981 | 3.59E-05 | 0.00713   | 0.38094   |
| 5mo_SIGAD9 | 0.08764572 | 0.5326563  | 4.79E-05 | 0.010571  | -0.29935  |
| 5mo_SIGAD9 | 0.01239749 | 0.06829947 | 3.77E-05 | 0.0064954 | 0.24064   |
| 5mo_SIGAD9 | 0.00614468 | 0.02971341 | 3.44E-05 | 0.0077366 | 0.50694   |
| 5mo_SIGAD9 | 0.02133727 | 0.12346692 | 4.24E-05 | 0.0052258 | -0.04878  |
| 5mo_SIGAD9 | 0.00314342 | 0.01119265 | 3.26E-05 | 0.0085576 | 0.66457   |
| 5mo_SIGAD9 | 0.00483587 | 0.02163672 | 3.35E-05 | 0.0081345 | 0.58516   |
| 5mo_SIGAD9 | 0.08263346 | 0.5017257  | 4.79E-05 | 0.013563  | 0.02505   |
| 5mo_SIGAD9 | 0.09131952 | 0.55532736 | 4.93E-05 | 0.0079874 | -0.60562  |
| 5mo_SIGAD9 | 0.00952826 | 0.05059347 | 3.62E-05 | 0.0070172 | 0.35661   |
| 5mo_SIGAD9 | 0.08816305 | 0.53584874 | 4.80E-05 | 0.010188  | -0.3415   |
| 5mo_SIGAD9 | 0.01814735 | 0.10378187 | 4.09E-05 | 0.0055879 | 0.030658  |
| 5mo_SIGAD9 | 0.07121983 | 0.4312922  | 5.65E-05 | 0.011849  | 0.23476   |
| 5mo_SIGAD9 | 0.03587779 | 0.21319644 | 4.77E-05 | 0.0045615 | -0.096915 |
| 5mo_SIGAD9 | 0.02216376 | 0.12856716 | 4.26E-05 | 0.0051742 | -0.068556 |
| 5mo_SIGAD9 | 0.01658628 | 0.09414852 | 4.00E-05 | 0.0058035 | 0.080526  |
| 5mo_SIGAD9 | 0.02778652 | 0.16326524 | 4.48E-05 | 0.0047558 | -0.12024  |

|            |            |            |          |           |           |
|------------|------------|------------|----------|-----------|-----------|
| 5mo_SIGAD9 | 0.00738024 | 0.03733804 | 3.50E-05 | 0.0074854 | 0.45576   |
| 5mo_SIGAD9 | 0.03457008 | 0.20512658 | 4.70E-05 | 0.0045688 | -0.10426  |
| 5mo_SIGAD9 | 0.01226979 | 0.06751145 | 3.77E-05 | 0.0064954 | 0.24064   |
| 5mo_SIGAD9 | 0.02843544 | 0.1672697  | 4.49E-05 | 0.0047302 | -0.12174  |
| 5mo_SIGAD9 | 0.0866181  | 0.5263149  | 4.77E-05 | 0.01133   | -0.21781  |
| 5mo_SIGAD9 | 0.02398839 | 0.13982697 | 4.34E-05 | 0.0049916 | -0.091842 |
| 5mo_SIGAD9 | 0.08014453 | 0.48636648 | 4.90E-05 | 0.014278  | 0.14202   |
| 5mo_SIGAD9 | 0.03207473 | 0.18972777 | 4.62E-05 | 0.0046026 | -0.11821  |
| 5mo_SIGAD9 | 0.02085891 | 0.12051491 | 4.21E-05 | 0.0052798 | -0.037579 |
| 5mo_SIGAD9 | 0.01062699 | 0.05737373 | 3.68E-05 | 0.0068    | 0.30902   |
| 5mo_SIGAD9 | 0.02009852 | 0.11582258 | 4.19E-05 | 0.0053364 | -0.025531 |
| 5mo_SIGAD9 | 0.09221871 | 0.56087625 | 4.99E-05 | 0.0073308 | -0.6503   |
| 5mo_SIGAD9 | 0.01419068 | 0.07936526 | 3.89E-05 | 0.0061278 | 0.1561    |
| 5mo_SIGAD9 | 0.03472766 | 0.206099   | 4.72E-05 | 0.0045646 | -0.10426  |
| 5mo_SIGAD9 | 0.02359268 | 0.13738506 | 4.32E-05 | 0.0050338 | -0.084895 |
| 5mo_SIGAD9 | 0.0951449  | 0.5789338  | 5.16E-05 | 0.0059226 | -0.91061  |
| 5mo_SIGAD9 | 0.05137269 | 0.30881548 | 5.87E-05 | 0.0053288 | 0.011221  |
| 5mo_SIGAD9 | 0.02891933 | 0.1702558  | 4.51E-05 | 0.0047064 | -0.12268  |
| 5mo_SIGAD9 | 0.01195461 | 0.06556646 | 3.77E-05 | 0.0064954 | 0.24064   |
| 5mo_SIGAD9 | 0.01522985 | 0.08577801 | 3.95E-05 | 0.0059603 | 0.11709   |
| 5mo_SIGAD9 | 0.0216834  | 0.12560284 | 4.26E-05 | 0.0051742 | -0.059109 |
| 5mo_SIGAD9 | 0.01194422 | 0.0655024  | 3.77E-05 | 0.0064954 | 0.24064   |
| 5mo_SIGAD9 | 0.02148471 | 0.12437674 | 4.24E-05 | 0.0052258 | -0.04878  |
| 5mo_SIGAD9 | 0.02946636 | 0.17363152 | 4.53E-05 | 0.0046846 | -0.1231   |
| 5mo_SIGAD9 | 0.00763966 | 0.03893895 | 3.53E-05 | 0.0073641 | 0.43054   |
| 5mo_SIGAD9 | 0.00444119 | 0.01920117 | 3.35E-05 | 0.0081345 | 0.58516   |
| 5mo_SIGAD9 | 0.09358621 | 0.5693151  | 5.06E-05 | 0.0067258 | -0.7829   |
| 5mo_SIGAD9 | 0.01975388 | 0.11369576 | 4.16E-05 | 0.0053955 | -0.012659 |
| 5mo_SIGAD9 | 0.01696409 | 0.09647999 | 4.03E-05 | 0.005729  | 0.063215  |
| 5mo_SIGAD9 | 0.02031896 | 0.1171829  | 4.19E-05 | 0.0053364 | -0.025531 |
| 5mo_SIGAD9 | 0.06406942 | 0.387167   | 6.27E-05 | 0.0084357 | 0.14015   |
| 5mo_SIGAD9 | 0.0224325  | 0.13022557 | 4.28E-05 | 0.005125  | -0.068556 |
| 5mo_SIGAD9 | 0.01346869 | 0.07490984 | 3.83E-05 | 0.0063061 | 0.19734   |
| 5mo_SIGAD9 | 0.0280464  | 0.16486894 | 4.48E-05 | 0.0047558 | -0.12024  |
| 5mo_SIGAD9 | 0.01604692 | 0.09082013 | 3.98E-05 | 0.0058806 | 0.098494  |
| 5mo_SIGAD9 | 0.0921033  | 0.56016403 | 4.96E-05 | 0.0076529 | -0.6503   |
| 5mo_SIGAD9 | 0.01954273 | 0.11239278 | 4.16E-05 | 0.0053955 | -0.012659 |
| 5mo_SIGAD9 | 0.01383966 | 0.0771991  | 3.86E-05 | 0.0062156 | 0.17645   |
| 5mo_SIGAD9 | 0.01224946 | 0.06738598 | 3.77E-05 | 0.0064954 | 0.24064   |
| 5mo_SIGAD9 | 0.07524998 | 0.4561622  | 5.28E-05 | 0.013537  | 0.23858   |
| 5mo_SIGAD9 | 0.01875398 | 0.10752542 | 4.11E-05 | 0.0055212 | 0.015459  |
| 5mo_SIGAD9 | 0.03882484 | 0.2313827  | 4.89E-05 | 0.0045836 | -0.076088 |
| 5mo_SIGAD9 | 0.09099052 | 0.5532971  | 4.91E-05 | 0.0083333 | -0.56091  |

|            |            |            |          |           |           |
|------------|------------|------------|----------|-----------|-----------|
| 5mo_SIGAD9 | 0.02053364 | 0.11850769 | 4.19E-05 | 0.0053364 | -0.037579 |
| 5mo_SIGAD9 | 0.01832318 | 0.10486696 | 4.09E-05 | 0.0055879 | 0.030658  |
| 5mo_SIGAD9 | 0.01129598 | 0.06150206 | 3.71E-05 | 0.0066957 | 0.2858    |
| 5mo_SIGAD9 | 0.03559016 | 0.21142147 | 4.74E-05 | 0.0045622 | -0.10068  |
| 5mo_SIGAD9 | 0.00953695 | 0.05064712 | 3.62E-05 | 0.0070172 | 0.35661   |
| 5mo_SIGAD9 | 0.08661138 | 0.52627337 | 4.77E-05 | 0.01133   | -0.21781  |
| 5mo_SIGAD9 | 0.02950215 | 0.17385238 | 4.53E-05 | 0.0046846 | -0.1231   |
| 5mo_SIGAD9 | 0.01435041 | 0.08035097 | 3.89E-05 | 0.0061278 | 0.1561    |
| 5mo_SIGAD9 | 0.02357201 | 0.13725749 | 4.32E-05 | 0.0050338 | -0.084895 |
| 5mo_SIGAD9 | 0.00796491 | 0.04094606 | 3.53E-05 | 0.0073641 | 0.43054   |
| 5mo_SIGAD9 | 0.0114151  | 0.06223714 | 3.74E-05 | 0.0065941 | 0.263     |
| 5mo_SIGAD9 | 0.03518684 | 0.20893255 | 4.72E-05 | 0.0045646 | -0.10068  |
| 5mo_SIGAD9 | 0.07707238 | 0.4674083  | 5.09E-05 | 0.014141  | 0.22047   |
| 5mo_SIGAD9 | 0.02000628 | 0.11525334 | 4.16E-05 | 0.0053955 | -0.025531 |
| 5mo_SIGAD9 | 0.02220326 | 0.12881093 | 4.28E-05 | 0.005125  | -0.068556 |
| 5mo_SIGAD9 | 0.028432   | 0.16724846 | 4.49E-05 | 0.0047302 | -0.12174  |
| 5mo_SIGAD9 | 0.01958163 | 0.11263285 | 4.16E-05 | 0.0053955 | -0.012659 |
| 5mo_SIGAD9 | 0.09077835 | 0.5519878  | 4.91E-05 | 0.0083333 | -0.56091  |
| 5mo_SIGAD9 | 0.02333774 | 0.13581179 | 4.32E-05 | 0.0050338 | -0.084895 |
| 5mo_SIGAD9 | 0.08843024 | 0.5374976  | 4.82E-05 | 0.0098057 | -0.3415   |
| 5mo_SIGAD9 | 0.01618462 | 0.09166986 | 3.98E-05 | 0.0058806 | 0.098494  |
| 5mo_SIGAD9 | 0.01559117 | 0.08800771 | 3.95E-05 | 0.0059603 | 0.11709   |
| 5mo_SIGAD9 | 0.09350127 | 0.5687909  | 5.06E-05 | 0.0067258 | -0.7829   |
| 5mo_SIGAD9 | 0.01268281 | 0.07006019 | 3.80E-05 | 0.0063994 | 0.21875   |
| 5mo_SIGAD9 | 0.06103591 | 0.3684472  | 6.38E-05 | 0.0072613 | 0.10072   |
| 5mo_SIGAD9 | 0.02716404 | 0.15942392 | 4.46E-05 | 0.0047834 | -0.11816  |
| 5mo_SIGAD9 | 0.05557829 | 0.33476824 | 6.21E-05 | 0.005966  | 0.038579  |
| 5mo_SIGAD9 | 0.01637068 | 0.09281807 | 4.00E-05 | 0.0058035 | 0.080526  |
| 5mo_SIGAD9 | 0.08879228 | 0.53973174 | 4.82E-05 | 0.0098057 | -0.3844   |
| 5mo_SIGAD9 | 0.03046656 | 0.17980374 | 4.57E-05 | 0.0046464 | -0.12245  |
| 5mo_SIGAD9 | 0.06028117 | 0.36378968 | 6.38E-05 | 0.0070986 | 0.087064  |
| 5mo_SIGAD9 | 0.0203241  | 0.11721461 | 4.19E-05 | 0.0053364 | -0.025531 |
| 5mo_SIGAD9 | 0.03749182 | 0.22315665 | 4.84E-05 | 0.0045696 | -0.084703 |
| 5mo_SIGAD9 | 0.02550674 | 0.14919667 | 4.40E-05 | 0.0048781 | -0.10813  |
| 5mo_SIGAD9 | 0.0171949  | 0.09790432 | 4.03E-05 | 0.005729  | 0.063215  |
| 5mo_SIGAD9 | 0.03232354 | 0.19126314 | 4.62E-05 | 0.0046026 | -0.11821  |
| 5mo_SIGAD9 | 0.01249998 | 0.06893193 | 3.80E-05 | 0.0063994 | 0.21875   |
| 5mo_SIGAD9 | 0.00320965 | 0.01160135 | 3.26E-05 | 0.0085576 | 0.66457   |
| 5mo_SIGAD9 | 0.01677665 | 0.09532332 | 4.03E-05 | 0.005729  | 0.063215  |
| 5mo_SIGAD9 | 0.00818893 | 0.04232847 | 3.56E-05 | 0.0072456 | 0.40559   |
| 5mo_SIGAD9 | 0.02358866 | 0.13736022 | 4.32E-05 | 0.0050338 | -0.084895 |
| 5mo_SIGAD9 | 0.02008262 | 0.11572446 | 4.19E-05 | 0.0053364 | -0.025531 |
| 5mo_SIGAD9 | 0.01521591 | 0.08569197 | 3.95E-05 | 0.0059603 | 0.11709   |

|            |            |            |          |           |           |
|------------|------------|------------|----------|-----------|-----------|
| 5mo_SIGAD9 | 0.03263488 | 0.19318444 | 4.64E-05 | 0.0045915 | -0.11603  |
| 5mo_SIGAD9 | 0.01428125 | 0.07992418 | 3.89E-05 | 0.0061278 | 0.1561    |
| 5mo_SIGAD9 | 0.0160547  | 0.09086814 | 3.98E-05 | 0.0058806 | 0.098494  |
| 5mo_SIGAD9 | 0.0962102  | 0.58550775 | 5.24E-05 | 0.0054581 | -0.99133  |
| 5mo_SIGAD9 | 0.03321991 | 0.19679467 | 4.66E-05 | 0.0045822 | -0.11352  |
| 5mo_SIGAD9 | 0.02566723 | 0.15018708 | 4.40E-05 | 0.0048781 | -0.10813  |
| 5mo_SIGAD9 | 0.01815278 | 0.10381541 | 4.09E-05 | 0.0055879 | 0.030658  |
| 5mo_SIGAD9 | 0.02785845 | 0.16370909 | 4.48E-05 | 0.0047558 | -0.12024  |
| 5mo_SIGAD9 | 0.09163117 | 0.55725056 | 4.96E-05 | 0.0076529 | -0.60562  |
| 5mo_SIGAD9 | 0.013805   | 0.07698526 | 3.86E-05 | 0.0062156 | 0.17645   |
| 5mo_SIGAD9 | 0.02140188 | 0.1238656  | 4.24E-05 | 0.0052258 | -0.04878  |
| 5mo_SIGAD9 | 0.01034284 | 0.05562023 | 3.68E-05 | 0.0068    | 0.30902   |
| 5mo_SIGAD9 | 0.02023567 | 0.11666894 | 4.19E-05 | 0.0053364 | -0.025531 |
| 5mo_SIGAD9 | 0.01693633 | 0.09630866 | 4.03E-05 | 0.005729  | 0.063215  |
| 5mo_SIGAD9 | 0.01185158 | 0.06493071 | 3.74E-05 | 0.0065941 | 0.263     |
| 5mo_SIGAD9 | 0.05847044 | 0.35261565 | 6.34E-05 | 0.0065282 | 0.068735  |
| 5mo_SIGAD9 | 0.05329049 | 0.32065025 | 6.05E-05 | 0.0056127 | 0.022172  |
| 5mo_SIGAD9 | 0.01506966 | 0.08478946 | 3.92E-05 | 0.0060428 | 0.1363    |
| 5mo_SIGAD9 | 0.01773938 | 0.10126433 | 4.06E-05 | 0.0056572 | 0.046584  |
| 5mo_SIGAD9 | 0.01550351 | 0.08746673 | 3.95E-05 | 0.0059603 | 0.11709   |
| 5mo_SIGAD9 | 0.03119941 | 0.18432616 | 4.58E-05 | 0.00463   | -0.12145  |
| 5mo_SIGAD9 | 0.02302785 | 0.13389945 | 4.30E-05 | 0.0050782 | -0.077142 |
| 5mo_SIGAD9 | 0.0098907  | 0.05283012 | 3.65E-05 | 0.0069072 | 0.33263   |
| 5mo_SIGAD9 | 0.09754003 | 0.5937141  | 5.36E-05 | 0.0048658 | -1.0673   |
| 5mo_SIGAD9 | 0.03118042 | 0.18420896 | 4.58E-05 | 0.00463   | -0.12145  |
| 5mo_SIGAD9 | 0.01936874 | 0.11131911 | 4.14E-05 | 0.0054571 | 0.0010121 |
| 5mo_SIGAD9 | 0.00663654 | 0.0327487  | 3.47E-05 | 0.0076096 | 0.48124   |
| 5mo_SIGAD9 | 0.01015117 | 0.05443748 | 3.65E-05 | 0.0069072 | 0.33263   |
| 5mo_SIGAD9 | 0.09638741 | 0.5866013  | 5.24E-05 | 0.0054581 | -0.99133  |
| 5mo_SIGAD9 | 0.030234   | 0.17836861 | 4.55E-05 | 0.0046645 | -0.12245  |
| 5mo_SIGAD9 | 0.01157488 | 0.06322318 | 3.74E-05 | 0.0065941 | 0.263     |
| 5mo_SIGAD9 | 0.02742146 | 0.16101241 | 4.46E-05 | 0.0047834 | -0.11816  |
| 5mo_SIGAD9 | 0.03877317 | 0.23106384 | 4.89E-05 | 0.0045836 | -0.076088 |
| 5mo_SIGAD9 | 0.03222847 | 0.1906765  | 4.62E-05 | 0.0046026 | -0.11821  |
| 5mo_SIGAD9 | 0.03641062 | 0.2164845  | 4.79E-05 | 0.0045625 | -0.092976 |
| 5mo_SIGAD9 | 0.03722401 | 0.22150396 | 4.81E-05 | 0.0045652 | -0.088896 |
| 5mo_SIGAD9 | 0.01022916 | 0.05491871 | 3.65E-05 | 0.0069072 | 0.33263   |
| 5mo_SIGAD9 | 0.09327427 | 0.56739014 | 5.06E-05 | 0.0067258 | -0.73907  |
| 5mo_SIGAD9 | 0.08850569 | 0.5379632  | 4.82E-05 | 0.0098057 | -0.3415   |
| 5mo_SIGAD9 | 0.02172547 | 0.12586243 | 4.26E-05 | 0.0051742 | -0.059109 |
| 5mo_SIGAD9 | 0.01997204 | 0.11504205 | 4.16E-05 | 0.0053955 | -0.025531 |
| 5mo_SIGAD9 | 0.01153369 | 0.06296898 | 3.74E-05 | 0.0065941 | 0.263     |
| 5mo_SIGAD9 | 0.02523224 | 0.14750277 | 4.38E-05 | 0.0049138 | -0.10343  |

|            |            |            |          |           |            |
|------------|------------|------------|----------|-----------|------------|
| 5mo_SIGAD9 | 0.02787947 | 0.16383883 | 4.48E-05 | 0.0047558 | -0.12024   |
| 5mo_SIGAD9 | 0.020539   | 0.11854078 | 4.19E-05 | 0.0053364 | -0.037579  |
| 5mo_SIGAD9 | 0.01886394 | 0.10820399 | 4.11E-05 | 0.0055212 | 0.015459   |
| 5mo_SIGAD9 | 0.09654515 | 0.58757466 | 5.28E-05 | 0.0052469 | -0.99133   |
| 5mo_SIGAD9 | 0.03145646 | 0.18591242 | 4.60E-05 | 0.0046154 | -0.12002   |
| 5mo_SIGAD9 | 0.01689228 | 0.09603681 | 4.03E-05 | 0.005729  | 0.063215   |
| 5mo_SIGAD9 | 0.03039819 | 0.17938183 | 4.57E-05 | 0.0046464 | -0.12245   |
| 5mo_SIGAD9 | 0.00386695 | 0.01565754 | 3.32E-05 | 0.0082728 | 0.61153    |
| 5mo_SIGAD9 | 0.01419387 | 0.07938492 | 3.89E-05 | 0.0061278 | 0.1561     |
| 5mo_SIGAD9 | 0.02991626 | 0.17640781 | 4.55E-05 | 0.0046645 | -0.12301   |
| 5mo_SIGAD9 | 0.02653035 | 0.15551338 | 4.42E-05 | 0.0048445 | -0.11546   |
| 5mo_SIGAD9 | 0.02262415 | 0.13140821 | 4.28E-05 | 0.005125  | -0.068556  |
| 5mo_SIGAD9 | 0.04091479 | 0.24427974 | 5.02E-05 | 0.0046325 | -0.058715  |
| 5mo_SIGAD9 | 0.01586704 | 0.08971011 | 3.98E-05 | 0.0058806 | 0.098494   |
| 5mo_SIGAD9 | 0.0968686  | 0.5895707  | 5.28E-05 | 0.0052469 | -1.03      |
| 5mo_SIGAD9 | 0.03883113 | 0.2314215  | 4.89E-05 | 0.0045836 | -0.076088  |
| 5mo_SIGAD9 | 0.05021996 | 0.301702   | 5.78E-05 | 0.0052091 | 0.0043724  |
| 5mo_SIGAD9 | 0.06591424 | 0.3985514  | 6.16E-05 | 0.0091463 | 0.17407    |
| 5mo_SIGAD9 | 0.01661592 | 0.09433144 | 4.00E-05 | 0.0058035 | 0.080526   |
| 5mo_SIGAD9 | 0.01577783 | 0.08915958 | 3.98E-05 | 0.0058806 | 0.098494   |
| 5mo_SIGAD9 | 0.02581481 | 0.15109777 | 4.40E-05 | 0.0048781 | -0.10813   |
| 5mo_SIGAD9 | 0.08325496 | 0.50556093 | 4.78E-05 | 0.013315  | -0.0045591 |
| 5mo_SIGAD9 | 0.02245135 | 0.13034186 | 4.28E-05 | 0.005125  | -0.068556  |
| 5mo_SIGAD9 | 0.07330691 | 0.44417155 | 5.43E-05 | 0.012883  | 0.24489    |
| 5mo_SIGAD9 | 0.04007334 | 0.23908718 | 4.95E-05 | 0.0046046 | -0.063007  |
| 5mo_SIGAD9 | 0.0242024  | 0.14114761 | 4.34E-05 | 0.0049916 | -0.091842  |
| 5mo_SIGAD9 | 0.03447698 | 0.20455204 | 4.70E-05 | 0.0045688 | -0.10761   |
| 5mo_SIGAD9 | 0.02609625 | 0.15283455 | 4.42E-05 | 0.0048445 | -0.11213   |
| 5mo_SIGAD9 | 0.00807729 | 0.04163952 | 3.53E-05 | 0.0073641 | 0.43054    |
| 5mo_SIGAD9 | 0.020306   | 0.11710294 | 4.19E-05 | 0.0053364 | -0.025531  |
| 5mo_SIGAD9 | 0.00650979 | 0.03196647 | 3.47E-05 | 0.0076096 | 0.48124    |
| 5mo_SIGAD9 | 0.02516665 | 0.147098   | 4.38E-05 | 0.0049138 | -0.10343   |
| 5mo_SIGAD9 | 0.03221737 | 0.19060796 | 4.62E-05 | 0.0046026 | -0.11821   |
| 5mo_SIGAD9 | 0.0216405  | 0.1253381  | 4.24E-05 | 0.0052258 | -0.059109  |
| 5mo_SIGAD9 | 0.02576242 | 0.15077448 | 4.40E-05 | 0.0048781 | -0.10813   |
| 5mo_SIGAD9 | 0.02623552 | 0.15369397 | 4.42E-05 | 0.0048445 | -0.11213   |
| 5mo_SIGAD9 | 0.08261032 | 0.50158286 | 4.79E-05 | 0.013563  | 0.05262    |
| 5mo_SIGAD9 | 0.01751635 | 0.099888   | 4.06E-05 | 0.0056572 | 0.046584   |
| 5mo_SIGAD9 | 0.02025572 | 0.11679262 | 4.19E-05 | 0.0053364 | -0.025531  |
| 5mo_SIGAD9 | 0.02656375 | 0.15571947 | 4.44E-05 | 0.004813  | -0.11546   |
| 5mo_SIGAD9 | 0.01474531 | 0.08278791 | 3.92E-05 | 0.0060428 | 0.1363     |
| 5mo_SIGAD9 | 0.00815914 | 0.04214461 | 3.56E-05 | 0.0072456 | 0.40559    |
| 5mo_SIGAD9 | 0.02700718 | 0.1584559  | 4.44E-05 | 0.004813  | -0.11816   |

|              |            |            |          |           |           |
|--------------|------------|------------|----------|-----------|-----------|
| 5mo_SIGAD9   | 0.02158886 | 0.12501945 | 4.24E-05 | 0.0052258 | -0.059109 |
| 5mo_SIGAD9   | 0.03592153 | 0.21346633 | 4.77E-05 | 0.0045615 | -0.096915 |
| 5mo_SIGAD9   | 0.01093578 | 0.05927931 | 3.71E-05 | 0.0066957 | 0.2858    |
| 5mo_SIGAD9   | 0.00859842 | 0.04485543 | 3.56E-05 | 0.0072456 | 0.40559   |
| 5mo_SIGAD9   | 0.07511827 | 0.45534948 | 5.28E-05 | 0.013537  | 0.23858   |
| 5mo_SIGAD9   | 0.03000709 | 0.17696832 | 4.55E-05 | 0.0046645 | -0.12301  |
| 5mo_SIGAD9   | 0.01600471 | 0.09055967 | 3.98E-05 | 0.0058806 | 0.098494  |
| 5mo_SIGAD9   | 0.03697536 | 0.21996953 | 4.81E-05 | 0.0045652 | -0.088896 |
| 5mo_SIGAD9   | 0.07581807 | 0.45966792 | 5.23E-05 | 0.013721  | 0.23393   |
| 5mo_SIGAD9   | 0.02498101 | 0.14595245 | 4.38E-05 | 0.0049138 | -0.10343  |
| 5mo_SIGAD9   | 0.03005583 | 0.17726916 | 4.55E-05 | 0.0046645 | -0.12301  |
| 5mo_SIGAD9   | 0.02231247 | 0.12948488 | 4.28E-05 | 0.005125  | -0.068556 |
| 5mo_SIGAD9   | 0.02250746 | 0.13068812 | 4.28E-05 | 0.005125  | -0.068556 |
| 5mo_SIGAD9   | 0.0205822  | 0.11880736 | 4.21E-05 | 0.0052798 | -0.037579 |
| 5mo_SIGAD9   | 0.0283887  | 0.16698126 | 4.49E-05 | 0.0047302 | -0.12174  |
| 5mo_SIGAD9   | 0.02512328 | 0.14683038 | 4.38E-05 | 0.0049138 | -0.10343  |
| 5mo_SIGAD9   | 0.01358736 | 0.07564218 | 3.86E-05 | 0.0062156 | 0.17645   |
| 5mo_SIGAD9   | 0.03872963 | 0.23079517 | 4.89E-05 | 0.0045836 | -0.076088 |
| 5mo_SIGAD9   | 0.05301608 | 0.31895682 | 6.01E-05 | 0.0055357 | 0.022172  |
| 5mo_SIGAD9   | 0.03282007 | 0.19432722 | 4.64E-05 | 0.0045915 | -0.11603  |
| 5mo_SIGAD9   | 0.02785244 | 0.16367204 | 4.48E-05 | 0.0047558 | -0.12024  |
| 5mo_SIGAD9   | 0.01786943 | 0.10206685 | 4.09E-05 | 0.0055879 | 0.030658  |
| 5mo_SIGAD9   | 0.09196187 | 0.5592913  | 4.96E-05 | 0.0076529 | -0.6503   |
| 5mo_SIGAD9   | 0.08485935 | 0.5154616  | 4.76E-05 | 0.012404  | -0.10433  |
| 5mo_SIGAD9   | 0.0161972  | 0.09174752 | 3.98E-05 | 0.0058806 | 0.080526  |
| 5mo_SIGAD9   | 0.02141111 | 0.12392258 | 4.24E-05 | 0.0052258 | -0.04878  |
| 5mo_SIGAD9   | 0.05466005 | 0.3291018  | 6.14E-05 | 0.0057798 | 0.034245  |
| 5mo_SIGAD9   | 0.02399232 | 0.1398512  | 4.34E-05 | 0.0049916 | -0.091842 |
| 5mo_SIGAD9   | 0.00936897 | 0.0496105  | 3.62E-05 | 0.0070172 | 0.35661   |
| 5mo_SIGAD9   | 0.0294536  | 0.17355277 | 4.53E-05 | 0.0046846 | -0.1231   |
| 5mo_SIGAD9   | 0.01773103 | 0.10121276 | 4.06E-05 | 0.0056572 | 0.046584  |
| 5mo_SIGAD9   | 0.01256773 | 0.06935004 | 3.80E-05 | 0.0063994 | 0.21875   |
| 5mo_SIGAD9   | 0.00832756 | 0.04318394 | 3.56E-05 | 0.0072456 | 0.40559   |
| 5mo_SIGAD9   | 0.02001613 | 0.11531416 | 4.16E-05 | 0.0053955 | -0.025531 |
| 5mo_SIGAD9   | 0.06628135 | 0.40081683 | 6.12E-05 | 0.0093985 | 0.17407   |
| 5mo_SIGAD9   | 0.04381271 | 0.26216283 | 5.21E-05 | 0.0047343 | -0.035266 |
| 5mo_SIGAD9   | 0.01057627 | 0.05706075 | 3.68E-05 | 0.0068    | 0.30902   |
| 5mo_SIGAD9   | 0.02852801 | 0.16784093 | 4.49E-05 | 0.0047302 | -0.12174  |
| 7dr2_7dold_9 | 0.00800021 | 0.04116386 | 3.53E-05 | 0.0073641 | 0.43054   |
| 7dr2_7dold_9 | 0.03005401 | 0.17725788 | 4.55E-05 | 0.0046645 | -0.12301  |
| 7dr2_7dold_9 | 0.01825905 | 0.10447121 | 4.09E-05 | 0.0055879 | 0.030658  |
| 7dr2_7dold_9 | 0.01097777 | 0.05953837 | 3.71E-05 | 0.0066957 | 0.2858    |
| 7dr2_7dold_9 | 0.01262396 | 0.06969702 | 3.80E-05 | 0.0063994 | 0.21875   |

|              |            |            |          |           |            |
|--------------|------------|------------|----------|-----------|------------|
| 7dr2_7dold_§ | 0.01562611 | 0.08822332 | 3.95E-05 | 0.0059603 | 0.11709    |
| 7dr2_7dold_§ | 0.0297562  | 0.17542014 | 4.53E-05 | 0.0046846 | -0.12301   |
| 7dr2_7dold_§ | 0.02521245 | 0.14738065 | 4.38E-05 | 0.0049138 | -0.10343   |
| 7dr2_7dold_§ | 0.01890384 | 0.10845016 | 4.11E-05 | 0.0055212 | 0.0010121  |
| 7dr2_7dold_§ | 0.02773055 | 0.1629198  | 4.48E-05 | 0.0047558 | -0.12024   |
| 7dr2_7dold_§ | 0.0213957  | 0.12382748 | 4.24E-05 | 0.0052258 | -0.04878   |
| 7dr2_7dold_§ | 0.00998462 | 0.05340967 | 3.65E-05 | 0.0069072 | 0.33263    |
| 7dr2_7dold_§ | 0.0200148  | 0.11530592 | 4.16E-05 | 0.0053955 | -0.025531  |
| 7dr2_7dold_§ | 0.07436722 | 0.4507147  | 5.33E-05 | 0.013335  | 0.24406    |
| 7dr2_7dold_§ | 0.01020011 | 0.05473945 | 3.65E-05 | 0.0069072 | 0.33263    |
| 7dr2_7dold_§ | 0.02889398 | 0.17009938 | 4.51E-05 | 0.0047064 | -0.12268   |
| 7dr2_7dold_§ | 0.02621676 | 0.15357825 | 4.42E-05 | 0.0048445 | -0.11213   |
| 7dr2_7dold_§ | 0.01824688 | 0.10439608 | 4.09E-05 | 0.0055879 | 0.030658   |
| 7dr2_7dold_§ | 0.01636798 | 0.09280139 | 4.00E-05 | 0.0058035 | 0.080526   |
| 7dr2_7dold_§ | 0.01334409 | 0.07414094 | 3.83E-05 | 0.0063061 | 0.19734    |
| 7dr2_7dold_§ | 0.01895862 | 0.10878827 | 4.14E-05 | 0.0054571 | 0.0010121  |
| 7dr2_7dold_§ | 0.08335562 | 0.50618213 | 4.78E-05 | 0.013315  | -0.0045591 |
| 7dr2_7dold_§ | 0.03096971 | 0.1829087  | 4.58E-05 | 0.00463   | -0.12145   |
| 7dr2_7dold_§ | 0.01407001 | 0.07862062 | 3.89E-05 | 0.0061278 | 0.1561     |
| 7dr2_7dold_§ | 0.02672925 | 0.15674081 | 4.44E-05 | 0.004813  | -0.11546   |
| 7dr2_7dold_§ | 0.01957406 | 0.11258613 | 4.16E-05 | 0.0053955 | -0.012659  |
| 7dr2_7dold_§ | 0.01673476 | 0.0950648  | 4.00E-05 | 0.0058035 | 0.063215   |
| 7dr2_7dold_§ | 0.02672052 | 0.15668696 | 4.44E-05 | 0.004813  | -0.11546   |
| 7dr2_7dold_§ | 0.02599525 | 0.1522113  | 4.42E-05 | 0.0048445 | -0.11213   |
| 7dr2_7dold_§ | 0.01856935 | 0.10638603 | 4.11E-05 | 0.0055212 | 0.015459   |
| 7dr2_7dold_§ | 0.01388473 | 0.07747728 | 3.86E-05 | 0.0062156 | 0.17645    |
| 7dr2_7dold_§ | 0.01058645 | 0.05712358 | 3.68E-05 | 0.0068    | 0.30902    |
| 7dr2_7dold_§ | 0.02706663 | 0.15882275 | 4.44E-05 | 0.004813  | -0.11816   |
| 7dr2_7dold_§ | 0.02959036 | 0.17439674 | 4.53E-05 | 0.0046846 | -0.1231    |
| 7dr2_7dold_§ | 0.00632026 | 0.03079692 | 3.44E-05 | 0.0077366 | 0.50694    |
| 7dr2_7dold_§ | 0.02297808 | 0.13359232 | 4.30E-05 | 0.0050782 | -0.077142  |
| 7dr2_7dold_§ | 0.01020074 | 0.05474332 | 3.65E-05 | 0.0069072 | 0.33263    |
| 7dr2_7dold_§ | 0.02925113 | 0.17230335 | 4.53E-05 | 0.0046846 | -0.1231    |
| 7dr2_7dold_§ | 0.02234967 | 0.12971441 | 4.28E-05 | 0.005125  | -0.068556  |
| 7dr2_7dold_§ | 0.07014573 | 0.42466393 | 5.76E-05 | 0.011297  | 0.22487    |
| 7dr2_7dold_§ | 0.01696857 | 0.09650762 | 4.03E-05 | 0.005729  | 0.063215   |
| 7dr2_7dold_§ | 0.00645525 | 0.03162992 | 3.44E-05 | 0.0077366 | 0.50694    |
| 7dr2_7dold_§ | 0.01882784 | 0.10798118 | 4.11E-05 | 0.0055212 | 0.015459   |
| 7dr2_7dold_§ | 0.02419369 | 0.14109387 | 4.34E-05 | 0.0049916 | -0.091842  |
| 7dr2_7dold_§ | 0.02308531 | 0.13425407 | 4.30E-05 | 0.0050782 | -0.077142  |
| 7dr2_7dold_§ | 0.02951072 | 0.17390525 | 4.53E-05 | 0.0046846 | -0.1231    |
| 7dr2_7dold_§ | 0.0161364  | 0.0913723  | 3.98E-05 | 0.0058806 | 0.098494   |
| 7dr2_7dold_§ | 0.03340203 | 0.19791855 | 4.66E-05 | 0.0045822 | -0.11352   |

|              |            |            |          |           |           |
|--------------|------------|------------|----------|-----------|-----------|
| 7dr2_7dold_9 | 0.04069225 | 0.24290647 | 5.02E-05 | 0.0046325 | -0.058715 |
| 7dr2_7dold_9 | 0.02504582 | 0.14635235 | 4.38E-05 | 0.0049138 | -0.10343  |
| 7dr2_7dold_9 | 0.02149423 | 0.12443547 | 4.24E-05 | 0.0052258 | -0.04878  |
| 7dr2_7dold_9 | 0.01489436 | 0.08370768 | 3.92E-05 | 0.0060428 | 0.1363    |
| 7dr2_7dold_9 | 0.05287037 | 0.3180577  | 6.01E-05 | 0.0055357 | 0.018414  |
| 7dr2_7dold_9 | 0.01623141 | 0.09195862 | 3.98E-05 | 0.0058806 | 0.080526  |
| 7dr2_7dold_9 | 0.00637564 | 0.03113865 | 3.44E-05 | 0.0077366 | 0.50694   |
| 7dr2_7dold_9 | 0.0334147  | 0.19799674 | 4.66E-05 | 0.0045822 | -0.11352  |
| 7dr2_7dold_9 | 0.01495319 | 0.08407071 | 3.92E-05 | 0.0060428 | 0.1363    |
| 7dr2_7dold_9 | 0.01789652 | 0.10223402 | 4.09E-05 | 0.0055879 | 0.030658  |
| 7dr2_7dold_9 | 0.03634279 | 0.21606594 | 4.79E-05 | 0.0045625 | -0.092976 |
| 7dr2_7dold_9 | 0.01282439 | 0.07093387 | 3.80E-05 | 0.0063994 | 0.21875   |
| 7dr2_7dold_9 | 0.02832577 | 0.16659293 | 4.49E-05 | 0.0047302 | -0.12174  |
| 7dr2_7dold_9 | 0.0371783  | 0.22122191 | 4.81E-05 | 0.0045652 | -0.088896 |
| 7dr2_7dold_9 | 0.03188784 | 0.18857445 | 4.60E-05 | 0.0046154 | -0.11821  |
| 7dr2_7dold_9 | 0.01955326 | 0.11245777 | 4.16E-05 | 0.0053955 | -0.012659 |
| 7dr2_7dold_9 | 0.03118547 | 0.18424012 | 4.58E-05 | 0.00463   | -0.12145  |
| 7dr2_7dold_9 | 0.02292253 | 0.13324954 | 4.30E-05 | 0.0050782 | -0.077142 |
| 7dr2_7dold_9 | 0.02074303 | 0.11979985 | 4.21E-05 | 0.0052798 | -0.037579 |
| 7dr2_7dold_9 | 0.0156175  | 0.08817016 | 3.95E-05 | 0.0059603 | 0.11709   |
| 7dr2_7dold_9 | 0.00497952 | 0.02252321 | 3.38E-05 | 0.0079991 | 0.55892   |
| 7dr2_7dold_9 | 0.02620397 | 0.15349928 | 4.42E-05 | 0.0048445 | -0.11213  |
| 7dr2_7dold_9 | 0.01790142 | 0.10226423 | 4.09E-05 | 0.0055879 | 0.030658  |
| 7dr2_7dold_9 | 0.024598   | 0.14358883 | 4.36E-05 | 0.0049516 | -0.098011 |
| 7dr2_7dold_9 | 0.00757419 | 0.03853489 | 3.53E-05 | 0.0073641 | 0.43054   |
| 7dr2_7dold_9 | 0.01979018 | 0.11391979 | 4.16E-05 | 0.0053955 | -0.012659 |
| 7dr2_7dold_9 | 0.01872717 | 0.10735998 | 4.11E-05 | 0.0055212 | 0.015459  |
| 7dr2_7dold_9 | 0.01532078 | 0.08633909 | 3.95E-05 | 0.0059603 | 0.11709   |
| 7dr2_7dold_9 | 0.01290207 | 0.07141326 | 3.80E-05 | 0.0063994 | 0.21875   |
| 7dr2_7dold_9 | 0.01748751 | 0.09971003 | 4.06E-05 | 0.0056572 | 0.046584  |
| 7dr2_7dold_9 | 0.02699521 | 0.15838203 | 4.44E-05 | 0.004813  | -0.11816  |
| 7dr2_7dold_9 | 0.0217882  | 0.12624955 | 4.26E-05 | 0.0051742 | -0.059109 |
| 7dr2_7dold_9 | 0.0159338  | 0.09012206 | 3.98E-05 | 0.0058806 | 0.098494  |
| 7dr2_7dold_9 | 0.0162419  | 0.09202338 | 4.00E-05 | 0.0058035 | 0.080526  |
| 7dr2_7dold_9 | 0.06242887 | 0.37704313 | 6.35E-05 | 0.0078047 | 0.11565   |
| 7dr2_7dold_9 | 0.00599878 | 0.02881302 | 3.44E-05 | 0.0077366 | 0.50694   |
| 7dr2_7dold_9 | 0.02190177 | 0.12695041 | 4.26E-05 | 0.0051742 | -0.059109 |
| 7dr2_7dold_9 | 0.01953151 | 0.11232356 | 4.16E-05 | 0.0053955 | -0.012659 |
| 7dr2_7dold_9 | 0.02255864 | 0.13100396 | 4.28E-05 | 0.005125  | -0.068556 |
| 7dr2_7dold_9 | 0.04437427 | 0.2656282  | 5.25E-05 | 0.0047605 | -0.031751 |
| 7dr2_7dold_9 | 0.01988121 | 0.11448152 | 4.16E-05 | 0.0053955 | -0.012659 |
| 7dr2_7dold_9 | 0.02106598 | 0.12179273 | 4.21E-05 | 0.0052798 | -0.04878  |
| 7dr2_7dold_9 | 0.02011236 | 0.11590796 | 4.19E-05 | 0.0053364 | -0.025531 |



|              |            |            |          |           |           |
|--------------|------------|------------|----------|-----------|-----------|
| 7dr2_7dold_9 | 0.02854444 | 0.16794235 | 4.49E-05 | 0.0047302 | -0.12174  |
| 7dr2_7dold_9 | 0.01616379 | 0.09154131 | 3.98E-05 | 0.0058806 | 0.098494  |
| 7dr2_7dold_9 | 0.01317657 | 0.07310718 | 3.83E-05 | 0.0063061 | 0.19734   |
| 7dr2_7dold_9 | 0.061078   | 0.36870694 | 6.38E-05 | 0.0072613 | 0.10072   |
| 7dr2_7dold_9 | 0.02465791 | 0.14395855 | 4.36E-05 | 0.0049516 | -0.098011 |
| 7dr2_7dold_9 | 0.01256886 | 0.06935701 | 3.80E-05 | 0.0063994 | 0.21875   |
| 7dr2_7dold_9 | 0.01665782 | 0.09458999 | 4.00E-05 | 0.0058035 | 0.080526  |
| 7dr2_7dold_9 | 0.02309807 | 0.1343328  | 4.30E-05 | 0.0050782 | -0.077142 |
| 7dr2_7dold_9 | 0.03137098 | 0.18538494 | 4.58E-05 | 0.00463   | -0.12002  |
| 7dr2_7dold_9 | 0.02500259 | 0.1460856  | 4.38E-05 | 0.0049138 | -0.10343  |
| 7dr2_7dold_9 | 0.02142542 | 0.12401088 | 4.24E-05 | 0.0052258 | -0.04878  |
| 7dr2_7dold_9 | 0.02249294 | 0.13059852 | 4.28E-05 | 0.005125  | -0.068556 |
| 7dr2_7dold_9 | 0.01607475 | 0.09099186 | 3.98E-05 | 0.0058806 | 0.098494  |
| 7dr2_7dold_9 | 0.01774041 | 0.10127065 | 4.06E-05 | 0.0056572 | 0.046584  |
| 7dr2_7dold_9 | 0.02164282 | 0.12535246 | 4.24E-05 | 0.0052258 | -0.059109 |
| 7dr2_7dold_9 | 0.01952189 | 0.1122642  | 4.16E-05 | 0.0053955 | -0.012659 |
| 7dr2_7dold_9 | 0.00556657 | 0.02614588 | 3.41E-05 | 0.0078664 | 0.53284   |
| 7dr2_7dold_9 | 0.0158997  | 0.08991162 | 3.98E-05 | 0.0058806 | 0.098494  |
| 7dr2_7dold_9 | 0.03494418 | 0.20743513 | 4.72E-05 | 0.0045646 | -0.10426  |
| 7dr2_7dold_9 | 0.01958265 | 0.11263911 | 4.16E-05 | 0.0053955 | -0.012659 |
| 7dr2_7dold_9 | 0.02172524 | 0.12586105 | 4.26E-05 | 0.0051742 | -0.059109 |
| 7dr2_7dold_9 | 0.01253608 | 0.06915475 | 3.80E-05 | 0.0063994 | 0.21875   |
| 7dr2_7dold_9 | 0.02766873 | 0.16253832 | 4.48E-05 | 0.0047558 | -0.12024  |
| 7dr2_7dold_9 | 0.03695601 | 0.21985012 | 4.81E-05 | 0.0045652 | -0.088896 |
| 7dr2_7dold_9 | 0.01672725 | 0.09501847 | 4.00E-05 | 0.0058035 | 0.063215  |
| 7dr2_7dold_9 | 0.00739231 | 0.03741254 | 3.50E-05 | 0.0074854 | 0.45576   |
| 7dr2_7dold_9 | 0.01082764 | 0.05861193 | 3.71E-05 | 0.0066957 | 0.2858    |
| 7dr2_7dold_9 | 0.01514289 | 0.08524136 | 3.92E-05 | 0.0060428 | 0.11709   |
| 7dr2_7dold_9 | 0.02317176 | 0.13478753 | 4.30E-05 | 0.0050782 | -0.077142 |
| 7dr2_7dold_9 | 0.00582871 | 0.02776353 | 3.41E-05 | 0.0078664 | 0.53284   |
| 7dr2_7dold_9 | 0.01804024 | 0.10312089 | 4.09E-05 | 0.0055879 | 0.030658  |
| 7dr2_7dold_9 | 0.02095857 | 0.12112995 | 4.21E-05 | 0.0052798 | -0.037579 |
| 7dr2_7dold_9 | 0.0395615  | 0.23592861 | 4.95E-05 | 0.0046046 | -0.067351 |
| 7dr2_7dold_9 | 0.0262459  | 0.15375805 | 4.42E-05 | 0.0048445 | -0.11213  |
| 7dr2_7dold_9 | 0.01599741 | 0.0905146  | 3.98E-05 | 0.0058806 | 0.098494  |
| 7dr2_7dold_9 | 0.02990356 | 0.17632945 | 4.55E-05 | 0.0046645 | -0.12301  |
| 7dr2_7dold_9 | 0.02731908 | 0.16038065 | 4.46E-05 | 0.0047834 | -0.11816  |
| 7dr2_7dold_9 | 0.03006305 | 0.1773137  | 4.55E-05 | 0.0046645 | -0.12301  |
| 7dr2_7dold_9 | 0.03446455 | 0.20447536 | 4.70E-05 | 0.0045688 | -0.10761  |
| 7dr2_7dold_9 | 0.03348049 | 0.19840269 | 4.66E-05 | 0.0045822 | -0.11071  |
| 7dr2_7dold_9 | 0.02687664 | 0.15765032 | 4.44E-05 | 0.004813  | -0.11546  |
| 7dr2_7dold_9 | 0.02751546 | 0.16159248 | 4.46E-05 | 0.0047834 | -0.11816  |
| 7dr2_7dold_9 | 0.09901528 | 0.6028179  | 5.45E-05 | 0.0045382 | -1.1701   |

|              |            |            |          |           |           |
|--------------|------------|------------|----------|-----------|-----------|
| 7dr2_7dold_9 | 0.08229341 | 0.49962726 | 4.81E-05 | 0.013778  | 0.05262   |
| 7dr2_7dold_9 | 0.02318829 | 0.13488951 | 4.30E-05 | 0.0050782 | -0.077142 |
| 7dr2_7dold_9 | 0.0030858  | 0.01083706 | 3.26E-05 | 0.0085576 | 0.66457   |
| 7dr2_7dold_9 | 0.0199138  | 0.11468263 | 4.16E-05 | 0.0053955 | -0.012659 |
| 7dr2_7dold_9 | 0.01643438 | 0.09321116 | 4.00E-05 | 0.0058035 | 0.080526  |
| 7dr2_7dold_9 | 0.019049   | 0.10934597 | 4.14E-05 | 0.0054571 | 0.0010121 |
| 7dr2_7dold_9 | 0.02693144 | 0.15798855 | 4.44E-05 | 0.004813  | -0.11546  |
| 7dr2_7dold_9 | 0.07308889 | 0.44282618 | 5.49E-05 | 0.012637  | 0.24489   |
| 7dr2_7dold_9 | 0.01629402 | 0.09234498 | 4.00E-05 | 0.0058035 | 0.080526  |
| 7dr2_7dold_9 | 0.03760942 | 0.22388233 | 4.84E-05 | 0.0045696 | -0.084703 |
| 7dr2_7dold_9 | 0.01857014 | 0.10639093 | 4.11E-05 | 0.0055212 | 0.015459  |
| 7dr2_7dold_9 | 0.022676   | 0.13172817 | 4.28E-05 | 0.005125  | -0.077142 |
| 7dr2_7dold_9 | 0.02627117 | 0.15391399 | 4.42E-05 | 0.0048445 | -0.11213  |
| 7dr2_7dold_9 | 0.05604897 | 0.33767283 | 6.24E-05 | 0.0060668 | 0.043089  |
| 7dr2_7dold_9 | 0.00653557 | 0.03212556 | 3.47E-05 | 0.0076096 | 0.48124   |
| 7dr2_7dold_9 | 0.02760408 | 0.16213942 | 4.46E-05 | 0.0047834 | -0.12024  |
| 7dr2_7dold_9 | 0.01188056 | 0.06510953 | 3.74E-05 | 0.0065941 | 0.24064   |
| 7dr2_7dold_9 | 0.01275957 | 0.0705339  | 3.80E-05 | 0.0063994 | 0.21875   |
| 7dr2_7dold_9 | 0.01078672 | 0.05835946 | 3.68E-05 | 0.0068    | 0.2858    |
| 7dr2_7dold_9 | 0.01552687 | 0.0876109  | 3.95E-05 | 0.0059603 | 0.11709   |
| 7dr2_7dold_9 | 0.0078157  | 0.04002524 | 3.53E-05 | 0.0073641 | 0.43054   |
| 7dr2_7dold_9 | 0.01993051 | 0.11478575 | 4.16E-05 | 0.0053955 | -0.012659 |
| 7dr2_7dold_9 | 0.01627362 | 0.09221909 | 4.00E-05 | 0.0058035 | 0.080526  |
| 7dr2_7dold_9 | 0.01946611 | 0.11191995 | 4.14E-05 | 0.0054571 | -0.012659 |
| 7dr2_7dold_9 | 0.01058621 | 0.05712206 | 3.68E-05 | 0.0068    | 0.30902   |
| 7dr2_7dold_9 | 0.0309464  | 0.18276486 | 4.58E-05 | 0.00463   | -0.12145  |
| 7dr2_7dold_9 | 0.01520974 | 0.0856539  | 3.95E-05 | 0.0059603 | 0.11709   |
| 7dr2_7dold_9 | 0.0133819  | 0.07437427 | 3.83E-05 | 0.0063061 | 0.19734   |
| 7dr2_7dold_9 | 0.02014229 | 0.11609265 | 4.19E-05 | 0.0053364 | -0.025531 |
| 7dr2_7dold_9 | 0.01306259 | 0.07240382 | 3.83E-05 | 0.0063061 | 0.19734   |
| 7dr2_7dold_9 | 0.00907123 | 0.04777312 | 3.59E-05 | 0.00713   | 0.38094   |
| 7dr2_7dold_9 | 0.01499211 | 0.08431089 | 3.92E-05 | 0.0060428 | 0.1363    |
| 7dr2_7dold_9 | 0.02187264 | 0.12677063 | 4.26E-05 | 0.0051742 | -0.059109 |
| 7dr2_7dold_9 | 0.0248431  | 0.14510135 | 4.36E-05 | 0.0049516 | -0.10343  |
| 7dr2_7dold_9 | 0.01742296 | 0.09931166 | 4.06E-05 | 0.0056572 | 0.046584  |
| 7dr2_7dold_9 | 0.00365391 | 0.01434284 | 3.29E-05 | 0.0084138 | 0.63801   |
| 7dr2_7dold_9 | 0.01310693 | 0.07267743 | 3.83E-05 | 0.0063061 | 0.19734   |
| 7dr2_7dold_9 | 0.02922795 | 0.1721603  | 4.51E-05 | 0.0047064 | -0.1231   |
| 7dr2_7dold_9 | 0.01860712 | 0.10661915 | 4.11E-05 | 0.0055212 | 0.015459  |
| 7dr2_7dold_9 | 0.01555758 | 0.08780044 | 3.95E-05 | 0.0059603 | 0.11709   |
| 7dr2_7dold_9 | 0.01580875 | 0.0893504  | 3.98E-05 | 0.0058806 | 0.098494  |
| 7dr2_7dold_9 | 0.00887531 | 0.04656411 | 3.59E-05 | 0.00713   | 0.38094   |
| 7dr2_7dold_9 | 0.01573644 | 0.08890418 | 3.98E-05 | 0.0058806 | 0.098494  |

|              |            |            |          |           |           |
|--------------|------------|------------|----------|-----------|-----------|
| 7dr2_7dold_§ | 0.01364772 | 0.07601468 | 3.86E-05 | 0.0062156 | 0.17645   |
| 7dr2_7dold_§ | 0.02978877 | 0.17562112 | 4.55E-05 | 0.0046645 | -0.12301  |
| 7dr2_7dold_§ | 0.02235638 | 0.12975582 | 4.28E-05 | 0.005125  | -0.068556 |
| 7dr2_7dold_§ | 0.03627764 | 0.2156639  | 4.77E-05 | 0.0045615 | -0.092976 |
| 7dr2_7dold_§ | 0.00422038 | 0.01783856 | 3.32E-05 | 0.0082728 | 0.61153   |
| 7dr2_7dold_§ | 0.01263846 | 0.06978654 | 3.80E-05 | 0.0063994 | 0.21875   |
| 7dr2_7dold_§ | 0.02304651 | 0.13401459 | 4.30E-05 | 0.0050782 | -0.077142 |
| 7dr2_7dold_§ | 0.00763469 | 0.03890827 | 3.53E-05 | 0.0073641 | 0.43054   |
| 7dr2_7dold_§ | 0.0219026  | 0.12695552 | 4.26E-05 | 0.0051742 | -0.059109 |
| 7dr2_7dold_§ | 0.01680103 | 0.09547375 | 4.03E-05 | 0.005729  | 0.063215  |
| 7dr2_7dold_§ | 0.00910559 | 0.04798517 | 3.59E-05 | 0.00713   | 0.38094   |
| 7dr2_7dold_§ | 0.00786302 | 0.04031728 | 3.53E-05 | 0.0073641 | 0.43054   |
| 7dr2_7dold_§ | 0.02139893 | 0.1238474  | 4.24E-05 | 0.0052258 | -0.04878  |
| 7dr2_7dold_§ | 0.03157841 | 0.18666495 | 4.60E-05 | 0.0046154 | -0.12002  |
| 7dr2_7dold_§ | 0.01103832 | 0.05991205 | 3.71E-05 | 0.0066957 | 0.2858    |
| 7dr2_7dold_§ | 0.02110247 | 0.12201792 | 4.21E-05 | 0.0052798 | -0.04878  |
| 7dr2_7dold_§ | 0.01261717 | 0.06965513 | 3.80E-05 | 0.0063994 | 0.21875   |
| 7dr2_7dold_§ | 0.01223873 | 0.06731977 | 3.77E-05 | 0.0064954 | 0.24064   |
| 7dr2_7dold_§ | 0.01499059 | 0.08430152 | 3.92E-05 | 0.0060428 | 0.1363    |
| 7dr2_7dold_§ | 0.00956538 | 0.05082253 | 3.62E-05 | 0.0070172 | 0.35661   |
| 7dr2_7dold_§ | 0.01843535 | 0.10555914 | 4.11E-05 | 0.0055212 | 0.015459  |
| 7dr2_7dold_§ | 0.01413664 | 0.07903182 | 3.89E-05 | 0.0061278 | 0.1561    |
| 7dr2_7dold_§ | 0.01486424 | 0.08352182 | 3.92E-05 | 0.0060428 | 0.1363    |
| 7dr2_7dold_§ | 0.02452536 | 0.1431406  | 4.36E-05 | 0.0049516 | -0.098011 |
| 7dr2_7dold_§ | 0.01449836 | 0.08126395 | 3.89E-05 | 0.0061278 | 0.1561    |
| 7dr2_7dold_§ | 0.03422238 | 0.2029809  | 4.70E-05 | 0.0045688 | -0.10761  |
| 7dr2_7dold_§ | 0.02619956 | 0.1534721  | 4.42E-05 | 0.0048445 | -0.11213  |
| 7dr2_7dold_§ | 0.01204085 | 0.0660987  | 3.77E-05 | 0.0064954 | 0.24064   |
| 7dr2_7dold_§ | 0.01503167 | 0.08455504 | 3.92E-05 | 0.0060428 | 0.1363    |
| 7dr2_7dold_§ | 0.01004662 | 0.05379229 | 3.65E-05 | 0.0069072 | 0.33263   |
| 7dr2_7dold_§ | 0.01514116 | 0.08523069 | 3.92E-05 | 0.0060428 | 0.11709   |
| 7dr2_7dold_§ | 0.01630366 | 0.0924045  | 4.00E-05 | 0.0058035 | 0.080526  |
| 7dr2_7dold_§ | 0.01806445 | 0.10327031 | 4.09E-05 | 0.0055879 | 0.030658  |
| 7dr2_7dold_§ | 0.02185834 | 0.1266824  | 4.26E-05 | 0.0051742 | -0.059109 |
| 7dr2_7dold_§ | 0.01641814 | 0.09311094 | 4.00E-05 | 0.0058035 | 0.080526  |
| 7dr2_7dold_§ | 0.01423322 | 0.07962778 | 3.89E-05 | 0.0061278 | 0.1561    |
| 7dr2_7dold_§ | 0.0142345  | 0.07963568 | 3.89E-05 | 0.0061278 | 0.1561    |
| 7dr2_7dold_§ | 0.02650179 | 0.15533713 | 4.42E-05 | 0.0048445 | -0.11546  |
| 7dr2_7dold_§ | 0.02355391 | 0.13714576 | 4.32E-05 | 0.0050338 | -0.084895 |
| 7dr2_7dold_§ | 0.01247981 | 0.06880749 | 3.80E-05 | 0.0063994 | 0.21875   |
| 7dr2_7dold_§ | 0.01376581 | 0.07674342 | 3.86E-05 | 0.0062156 | 0.17645   |
| 7dr2_7dold_§ | 0.0206273  | 0.11908564 | 4.21E-05 | 0.0052798 | -0.037579 |
| 7dr2_7dold_§ | 0.02029316 | 0.11702366 | 4.19E-05 | 0.0053364 | -0.025531 |

|              |            |            |          |           |           |
|--------------|------------|------------|----------|-----------|-----------|
| 7dr2_7dold_§ | 0.01520095 | 0.08559963 | 3.95E-05 | 0.0059603 | 0.11709   |
| 7dr2_7dold_§ | 0.02119888 | 0.12261291 | 4.24E-05 | 0.0052258 | -0.04878  |
| 7dr2_7dold_§ | 0.00508041 | 0.02314578 | 3.38E-05 | 0.0079991 | 0.55892   |
| 7dr2_7dold_§ | 0.01961321 | 0.11282774 | 4.16E-05 | 0.0053955 | -0.012659 |
| 7dr2_7dold_§ | 0.01924907 | 0.11058059 | 4.14E-05 | 0.0054571 | 0.0010121 |
| 7dr2_7dold_§ | 0.01380212 | 0.07696746 | 3.86E-05 | 0.0062156 | 0.17645   |
| 7dr2_7dold_§ | 0.01974145 | 0.11361907 | 4.16E-05 | 0.0053955 | -0.012659 |
| 7dr2_7dold_§ | 0.01900876 | 0.10909765 | 4.14E-05 | 0.0054571 | 0.0010121 |
| 7dr2_7dold_§ | 0.0171018  | 0.09732982 | 4.03E-05 | 0.005729  | 0.063215  |
| 7dr2_7dold_§ | 0.03758483 | 0.22373061 | 4.84E-05 | 0.0045696 | -0.084703 |
| 7dr2_7dold_§ | 0.013881   | 0.07745422 | 3.86E-05 | 0.0062156 | 0.17645   |
| 7dr2_7dold_§ | 0.01543746 | 0.08705913 | 3.95E-05 | 0.0059603 | 0.11709   |
| 7dr2_7dold_§ | 0.01436567 | 0.08044514 | 3.89E-05 | 0.0061278 | 0.1561    |
| 7dr2_7dold_§ | 0.0225487  | 0.13094266 | 4.28E-05 | 0.005125  | -0.068556 |
| 7dr2_7dold_§ | 0.01353064 | 0.07529218 | 3.86E-05 | 0.0062156 | 0.17645   |
| 7dr2_7dold_§ | 0.01852313 | 0.10610082 | 4.11E-05 | 0.0055212 | 0.015459  |
| 7dr2_7dold_§ | 0.02600213 | 0.15225373 | 4.42E-05 | 0.0048445 | -0.11213  |
| 7dr2_7dold_§ | 0.01686452 | 0.09586556 | 4.03E-05 | 0.005729  | 0.063215  |
| 7dr2_7dold_§ | 0.01089155 | 0.05900632 | 3.71E-05 | 0.0066957 | 0.2858    |
| 7dr2_7dold_§ | 0.01233129 | 0.06789096 | 3.77E-05 | 0.0064954 | 0.24064   |
| 7dr2_7dold_§ | 0.01779709 | 0.10162043 | 4.06E-05 | 0.0056572 | 0.046584  |
| 7dr2_7dold_§ | 0.01329183 | 0.07381844 | 3.83E-05 | 0.0063061 | 0.19734   |
| 7dr2_7dold_§ | 0.02555963 | 0.14952305 | 4.40E-05 | 0.0048781 | -0.10813  |
| 7dr2_7dold_§ | 0.02623239 | 0.15367469 | 4.42E-05 | 0.0048445 | -0.11213  |
| 7dr2_7dold_§ | 0.01980498 | 0.11401113 | 4.16E-05 | 0.0053955 | -0.012659 |
| 7dr2_7dold_§ | 0.01758282 | 0.10029818 | 4.06E-05 | 0.0056572 | 0.046584  |
| 7dr2_7dold_§ | 0.0216814  | 0.12559052 | 4.26E-05 | 0.0051742 | -0.059109 |
| 7dr2_7dold_§ | 0.01846153 | 0.10572069 | 4.11E-05 | 0.0055212 | 0.015459  |
| 7dr2_7dold_§ | 0.01093962 | 0.05930299 | 3.71E-05 | 0.0066957 | 0.2858    |
| 7dr2_7dold_§ | 0.0247241  | 0.14436705 | 4.36E-05 | 0.0049516 | -0.098011 |
| 7dr2_7dold_§ | 0.02543056 | 0.14872661 | 4.38E-05 | 0.0049138 | -0.10813  |
| 7dr2_7dold_§ | 0.01080106 | 0.05844791 | 3.68E-05 | 0.0068    | 0.2858    |
| 7dr2_7dold_§ | 0.01004936 | 0.05380917 | 3.65E-05 | 0.0069072 | 0.33263   |
| 7dr2_7dold_§ | 0.01952543 | 0.11228602 | 4.16E-05 | 0.0053955 | -0.012659 |
| 7dr2_7dold_§ | 0.00967764 | 0.05151532 | 3.62E-05 | 0.0070172 | 0.35661   |
| 7dr2_7dold_§ | 0.01790267 | 0.10227194 | 4.09E-05 | 0.0055879 | 0.030658  |
| 7dr2_7dold_§ | 0.01196815 | 0.06565007 | 3.77E-05 | 0.0064954 | 0.24064   |
| 7dr2_7dold_§ | 0.0208582  | 0.12051051 | 4.21E-05 | 0.0052798 | -0.037579 |
| 7dr2_7dold_§ | 0.0121376  | 0.06669574 | 3.77E-05 | 0.0064954 | 0.24064   |
| 7dr2_7dold_§ | 0.00869926 | 0.04547771 | 3.59E-05 | 0.00713   | 0.38094   |
| 7dr2_7dold_§ | 0.01678512 | 0.09537555 | 4.03E-05 | 0.005729  | 0.063215  |
| 7dr2_7dold_§ | 0.00924563 | 0.04884939 | 3.62E-05 | 0.0070172 | 0.35661   |
| 7dr2_7dold_§ | 0.01133597 | 0.06174883 | 3.71E-05 | 0.0066957 | 0.263     |

|              |            |            |          |           |           |
|--------------|------------|------------|----------|-----------|-----------|
| 7dr2_7dold_9 | 0.0132247  | 0.07340419 | 3.83E-05 | 0.0063061 | 0.19734   |
| 7dr2_7dold_9 | 0.01270668 | 0.07020749 | 3.80E-05 | 0.0063994 | 0.21875   |
| 7dr2_7dold_9 | 0.01252582 | 0.06909142 | 3.80E-05 | 0.0063994 | 0.21875   |
| 7dr2_7dold_9 | 0.02383418 | 0.13887534 | 4.34E-05 | 0.0049916 | -0.091842 |
| 7dr2_7dold_9 | 0.02427284 | 0.14158231 | 4.34E-05 | 0.0049916 | -0.091842 |
| 7dr2_7dold_9 | 0.02018073 | 0.11632987 | 4.19E-05 | 0.0053364 | -0.025531 |
| 7dr2_7dold_9 | 0.00983218 | 0.05246897 | 3.65E-05 | 0.0069072 | 0.33263   |
| 7dr2_7dold_9 | 0.0079045  | 0.04057322 | 3.53E-05 | 0.0073641 | 0.43054   |
| 7dr2_7dold_9 | 0.01224306 | 0.06734652 | 3.77E-05 | 0.0064954 | 0.24064   |
| 7dr2_7dold_9 | 0.0156475  | 0.08835529 | 3.95E-05 | 0.0059603 | 0.098494  |
| 7dr2_7dold_9 | 0.00654905 | 0.03220878 | 3.47E-05 | 0.0076096 | 0.48124   |
| 7dr2_7dold_9 | 0.01814337 | 0.10375734 | 4.09E-05 | 0.0055879 | 0.030658  |
| 7dr2_7dold_9 | 0.02656554 | 0.15573058 | 4.44E-05 | 0.004813  | -0.11546  |
| 7dr2_7dold_9 | 0.019604   | 0.11277086 | 4.16E-05 | 0.0053955 | -0.012659 |
| 7dr2_7dold_9 | 0.02578828 | 0.15093407 | 4.40E-05 | 0.0048781 | -0.10813  |
| 7dr2_7dold_9 | 0.01477106 | 0.08294678 | 3.92E-05 | 0.0060428 | 0.1363    |
| 7dr2_7dold_9 | 0.02078828 | 0.12007909 | 4.21E-05 | 0.0052798 | -0.037579 |
| 7dr2_7dold_9 | 0.01574468 | 0.08895501 | 3.98E-05 | 0.0058806 | 0.098494  |
| 7dr2_7dold_9 | 0.01746103 | 0.0995466  | 4.06E-05 | 0.0056572 | 0.046584  |
| 7dr2_7dold_9 | 0.0083407  | 0.04326502 | 3.56E-05 | 0.0072456 | 0.40559   |
| 7dr2_7dold_9 | 0.01931743 | 0.11100243 | 4.14E-05 | 0.0054571 | 0.0010121 |
| 7dr2_7dold_9 | 0.02455077 | 0.14329742 | 4.36E-05 | 0.0049516 | -0.098011 |
| 7dr2_7dold_9 | 0.01149926 | 0.06275652 | 3.74E-05 | 0.0065941 | 0.263     |
| 7dr2_7dold_9 | 0.01629878 | 0.09237436 | 4.00E-05 | 0.0058035 | 0.080526  |
| 7dr2_7dold_9 | 0.01885418 | 0.10814374 | 4.11E-05 | 0.0055212 | 0.015459  |
| 7dr2_7dold_9 | 0.01998479 | 0.11512073 | 4.16E-05 | 0.0053955 | -0.025531 |
| 7dr2_7dold_9 | 0.01307087 | 0.07245491 | 3.83E-05 | 0.0063061 | 0.19734   |
| 7dr2_7dold_9 | 0.00415524 | 0.01743656 | 3.32E-05 | 0.0082728 | 0.61153   |
| 7dr2_7dold_9 | 0.01281686 | 0.07088742 | 3.80E-05 | 0.0063994 | 0.21875   |
| 7dr2_7dold_9 | 0.01628315 | 0.09227788 | 4.00E-05 | 0.0058035 | 0.080526  |
| 7dr2_7dold_9 | 0.01334603 | 0.07415292 | 3.83E-05 | 0.0063061 | 0.19734   |
| 7dr2_7dold_9 | 0.02724767 | 0.15993999 | 4.46E-05 | 0.0047834 | -0.11816  |
| 7dr2_7dold_9 | 0.01308457 | 0.07253948 | 3.83E-05 | 0.0063061 | 0.19734   |
| 7dr2_7dold_9 | 0.01236398 | 0.06809273 | 3.77E-05 | 0.0064954 | 0.24064   |
| 7dr2_7dold_9 | 0.02090784 | 0.12081689 | 4.21E-05 | 0.0052798 | -0.037579 |
| 7dr2_7dold_9 | 0.01465251 | 0.08221522 | 3.92E-05 | 0.0060428 | 0.1363    |
| 7dr2_7dold_9 | 0.02041695 | 0.11778761 | 4.19E-05 | 0.0053364 | -0.025531 |
| 7dr2_7dold_9 | 0.01929919 | 0.11088992 | 4.14E-05 | 0.0054571 | 0.0010121 |
| 7dr2_7dold_9 | 0.0198613  | 0.11435867 | 4.16E-05 | 0.0053955 | -0.012659 |
| 7dr2_7dold_9 | 0.0290447  | 0.17102943 | 4.51E-05 | 0.0047064 | -0.12268  |
| 7dr2_7dold_9 | 0.02640618 | 0.15474711 | 4.42E-05 | 0.0048445 | -0.11213  |
| 7dr2_7dold_9 | 0.01106423 | 0.06007195 | 3.71E-05 | 0.0066957 | 0.2858    |
| 7dr2_7dold_9 | 0.01725198 | 0.09825657 | 4.03E-05 | 0.005729  | 0.063215  |

|              |            |            |          |           |           |
|--------------|------------|------------|----------|-----------|-----------|
| 7dr2_7dold_§ | 0.00550398 | 0.02575961 | 3.41E-05 | 0.0078664 | 0.53284   |
| 7dr2_7dold_§ | 0.02633934 | 0.1543347  | 4.42E-05 | 0.0048445 | -0.11213  |
| 7dr2_7dold_§ | 0.02857159 | 0.16810988 | 4.49E-05 | 0.0047302 | -0.12174  |
| 7dr2_7dold_§ | 0.02651041 | 0.15539035 | 4.42E-05 | 0.0048445 | -0.11546  |
| 7dr2_7dold_§ | 0.02254905 | 0.13094477 | 4.28E-05 | 0.005125  | -0.068556 |
| 7dr2_7dold_§ | 0.01727107 | 0.09837437 | 4.03E-05 | 0.005729  | 0.046584  |
| 7dr2_7dold_§ | 0.01386839 | 0.07737641 | 3.86E-05 | 0.0062156 | 0.17645   |
| 7dr2_7dold_§ | 0.01023183 | 0.05493522 | 3.65E-05 | 0.0069072 | 0.33263   |
| 7dr2_7dold_§ | 0.01164524 | 0.06365734 | 3.74E-05 | 0.0065941 | 0.263     |
| 7dr2_7dold_§ | 0.01440704 | 0.08070041 | 3.89E-05 | 0.0061278 | 0.1561    |
| 7dr2_7dold_§ | 0.01511052 | 0.08504163 | 3.92E-05 | 0.0060428 | 0.11709   |
| 7dr2_7dold_§ | 0.00235014 | 0.0062973  | 3.23E-05 | 0.0087041 | 0.69119   |
| 7dr2_7dold_§ | 0.0137788  | 0.07682359 | 3.86E-05 | 0.0062156 | 0.17645   |
| 7dr2_7dold_§ | 0.01957742 | 0.11260685 | 4.16E-05 | 0.0053955 | -0.012659 |
| 7dr2_7dold_§ | 0.00760949 | 0.03875276 | 3.53E-05 | 0.0073641 | 0.43054   |
| 7dr2_7dold_§ | 0.01166126 | 0.06375621 | 3.74E-05 | 0.0065941 | 0.263     |
| 7dr2_7dold_§ | 0.0218501  | 0.12663157 | 4.26E-05 | 0.0051742 | -0.059109 |
| 7dr2_7dold_§ | 0.02503498 | 0.14628543 | 4.38E-05 | 0.0049138 | -0.10343  |
| 7dr2_7dold_§ | 0.02426071 | 0.14150746 | 4.34E-05 | 0.0049916 | -0.091842 |
| 7dr2_7dold_§ | 0.01818106 | 0.1039899  | 4.09E-05 | 0.0055879 | 0.030658  |
| 7dr2_7dold_§ | 0.01825381 | 0.10443885 | 4.09E-05 | 0.0055879 | 0.030658  |
| 7dr2_7dold_§ | 0.0292346  | 0.17220132 | 4.51E-05 | 0.0047064 | -0.1231   |
| 7dr2_7dold_§ | 0.01079606 | 0.05841706 | 3.68E-05 | 0.0068    | 0.2858    |
| 7dr2_7dold_§ | 0.01925336 | 0.11060707 | 4.14E-05 | 0.0054571 | 0.0010121 |
| 7dr2_7dold_§ | 0.02107463 | 0.12184615 | 4.21E-05 | 0.0052798 | -0.04878  |
| 7dr2_7dold_§ | 0.0168537  | 0.09579877 | 4.03E-05 | 0.005729  | 0.063215  |
| 7dr2_7dold_§ | 0.05580497 | 0.33616707 | 6.24E-05 | 0.0060668 | 0.043089  |
| 7dr2_7dold_§ | 0.02309269 | 0.13429956 | 4.30E-05 | 0.0050782 | -0.077142 |
| 7dr2_7dold_§ | 0.02065849 | 0.11927814 | 4.21E-05 | 0.0052798 | -0.037579 |
| 7dr2_7dold_§ | 0.03119996 | 0.18432954 | 4.58E-05 | 0.00463   | -0.12145  |
| 7dr2_7dold_§ | 0.05847681 | 0.35265496 | 6.34E-05 | 0.0065282 | 0.068735  |
| 7dr2_7dold_§ | 0.03964808 | 0.23646289 | 4.95E-05 | 0.0046046 | -0.067351 |
| 7dr2_7dold_§ | 0.00637045 | 0.03110665 | 3.44E-05 | 0.0077366 | 0.50694   |
| 7dr2_7dold_§ | 0.02641844 | 0.15482281 | 4.42E-05 | 0.0048445 | -0.11213  |
| 7dr2_7dold_§ | 0.00340604 | 0.01281327 | 3.29E-05 | 0.0084138 | 0.63801   |
| 7dr2_7dold_§ | 0.02186588 | 0.12672892 | 4.26E-05 | 0.0051742 | -0.059109 |
| 7dr2_7dold_§ | 0.00630947 | 0.0307303  | 3.44E-05 | 0.0077366 | 0.50694   |
| 7dr2_7dold_§ | 0.02549969 | 0.14915317 | 4.40E-05 | 0.0048781 | -0.10813  |
| 7dr2_7dold_§ | 0.02545159 | 0.14885639 | 4.40E-05 | 0.0048781 | -0.10813  |
| 7dr2_7dold_§ | 0.02135218 | 0.12355889 | 4.24E-05 | 0.0052258 | -0.04878  |
| 7dr2_7dold_§ | 0.02349856 | 0.13680421 | 4.32E-05 | 0.0050338 | -0.084895 |
| 7dr2_7dold_§ | 0.01860427 | 0.10660155 | 4.11E-05 | 0.0055212 | 0.015459  |
| 7dr2_7dold_§ | 0.02199322 | 0.12751475 | 4.26E-05 | 0.0051742 | -0.059109 |

|              |            |            |          |           |           |
|--------------|------------|------------|----------|-----------|-----------|
| 7dr2_7dold_9 | 0.01546806 | 0.08724801 | 3.95E-05 | 0.0059603 | 0.11709   |
| 7dr2_7dold_9 | 0.01889329 | 0.10838509 | 4.11E-05 | 0.0055212 | 0.0010121 |
| 7dr2_7dold_9 | 0.02060132 | 0.11892531 | 4.21E-05 | 0.0052798 | -0.037579 |
| 7dr2_7dold_9 | 0.0309292  | 0.18265869 | 4.58E-05 | 0.00463   | -0.12145  |
| 7dr2_7dold_9 | 0.02621804 | 0.15358613 | 4.42E-05 | 0.0048445 | -0.11213  |
| 7dr2_7dold_9 | 0.02379401 | 0.13862742 | 4.32E-05 | 0.0050338 | -0.091842 |
| 7dr2_7dold_9 | 0.01996785 | 0.11501616 | 4.16E-05 | 0.0053955 | -0.025531 |
| 7dr2_7dold_9 | 0.01980976 | 0.1140406  | 4.16E-05 | 0.0053955 | -0.012659 |
| 7dr2_7dold_9 | 0.01380562 | 0.07698904 | 3.86E-05 | 0.0062156 | 0.17645   |
| 7dr2_7dold_9 | 0.01766482 | 0.10080417 | 4.06E-05 | 0.0056572 | 0.046584  |
| 7dr2_7dold_9 | 0.02815507 | 0.16553953 | 4.48E-05 | 0.0047558 | -0.12174  |
| 7dr2_7dold_9 | 0.02500554 | 0.1461038  | 4.38E-05 | 0.0049138 | -0.10343  |
| 7dr2_7dold_9 | 0.02275784 | 0.13223323 | 4.30E-05 | 0.0050782 | -0.077142 |
| 7dr2_7dold_9 | 0.01436212 | 0.0804232  | 3.89E-05 | 0.0061278 | 0.1561    |
| 7dr2_7dold_9 | 0.02042687 | 0.11784883 | 4.19E-05 | 0.0053364 | -0.025531 |
| 7dr2_7dold_9 | 0.01598658 | 0.0904478  | 3.98E-05 | 0.0058806 | 0.098494  |
| 7dr2_7dold_9 | 0.02159624 | 0.12506498 | 4.24E-05 | 0.0052258 | -0.059109 |
| 7dr2_7dold_9 | 0.02806874 | 0.1650068  | 4.48E-05 | 0.0047558 | -0.12024  |
| 7dr2_7dold_9 | 0.01553171 | 0.08764074 | 3.95E-05 | 0.0059603 | 0.11709   |
| 7dr2_7dold_9 | 0.01772983 | 0.10120537 | 4.06E-05 | 0.0056572 | 0.046584  |
| 7dr2_7dold_9 | 0.01792581 | 0.10241478 | 4.09E-05 | 0.0055879 | 0.030658  |
| 7dr2_7dold_9 | 0.01942724 | 0.11168007 | 4.14E-05 | 0.0054571 | -0.012659 |
| 7dr2_7dold_9 | 0.02700417 | 0.15843736 | 4.44E-05 | 0.004813  | -0.11816  |
| 7dr2_7dold_9 | 0.00666967 | 0.03295311 | 3.47E-05 | 0.0076096 | 0.48124   |
| 7dr2_7dold_9 | 0.02547036 | 0.1489722  | 4.40E-05 | 0.0048781 | -0.10813  |
| 7dr2_7dold_9 | 0.01992906 | 0.11477681 | 4.16E-05 | 0.0053955 | -0.012659 |
| 7dr2_7dold_9 | 0.01523349 | 0.08580045 | 3.95E-05 | 0.0059603 | 0.11709   |
| 7dr2_7dold_9 | 0.00827249 | 0.04284412 | 3.56E-05 | 0.0072456 | 0.40559   |
| 7dr2_7dold_9 | 0.00827007 | 0.04282918 | 3.56E-05 | 0.0072456 | 0.40559   |
| 7dr2_7dold_9 | 0.01947125 | 0.11195165 | 4.14E-05 | 0.0054571 | -0.012659 |
| 7dr2_7dold_9 | 0.02552253 | 0.14929415 | 4.40E-05 | 0.0048781 | -0.10813  |
| 7dr2_7dold_9 | 0.01889046 | 0.10836764 | 4.11E-05 | 0.0055212 | 0.0010121 |
| 7dr2_7dold_9 | 0.01962819 | 0.11292013 | 4.16E-05 | 0.0053955 | -0.012659 |
| 7dr2_7dold_9 | 0.02321127 | 0.13503137 | 4.30E-05 | 0.0050782 | -0.084895 |
| 7dr2_7dold_9 | 0.02344943 | 0.13650101 | 4.32E-05 | 0.0050338 | -0.084895 |
| 7dr2_7dold_9 | 0.00351963 | 0.01351423 | 3.29E-05 | 0.0084138 | 0.63801   |
| 7dr2_7dold_9 | 0.00686558 | 0.03416211 | 3.47E-05 | 0.0076096 | 0.48124   |
| 7dr2_7dold_9 | 0.02354012 | 0.13706069 | 4.32E-05 | 0.0050338 | -0.084895 |
| 7dr2_7dold_9 | 0.02017561 | 0.11629828 | 4.19E-05 | 0.0053364 | -0.025531 |
| 7dr2_7dold_9 | 0.07537846 | 0.4569551  | 5.23E-05 | 0.013721  | 0.23858   |
| 7dr2_7dold_9 | 0.00919362 | 0.04852842 | 3.62E-05 | 0.0070172 | 0.35661   |
| 7dr2_7dold_9 | 0.01244848 | 0.06861413 | 3.80E-05 | 0.0063994 | 0.21875   |
| 7dr2_7dold_9 | 0.02358069 | 0.13731106 | 4.32E-05 | 0.0050338 | -0.084895 |

|              |            |            |          |           |           |
|--------------|------------|------------|----------|-----------|-----------|
| 7dr2_7dold_§ | 0.00836421 | 0.0434101  | 3.56E-05 | 0.0072456 | 0.40559   |
| 7dr2_7dold_§ | 0.01469532 | 0.08247941 | 3.92E-05 | 0.0060428 | 0.1363    |
| 7dr2_7dold_§ | 0.02860886 | 0.16833988 | 4.49E-05 | 0.0047302 | -0.12174  |
| 7dr2_7dold_§ | 0.02915141 | 0.17168798 | 4.51E-05 | 0.0047064 | -0.1231   |
| 7dr2_7dold_§ | 0.02170985 | 0.12576608 | 4.26E-05 | 0.0051742 | -0.059109 |
| 7dr2_7dold_§ | 0.02419472 | 0.1411002  | 4.34E-05 | 0.0049916 | -0.091842 |
| 7dr2_7dold_§ | 0.00615353 | 0.029768   | 3.44E-05 | 0.0077366 | 0.50694   |
| 7dr2_7dold_§ | 0.01570265 | 0.08869563 | 3.98E-05 | 0.0058806 | 0.098494  |
| 7dr2_7dold_§ | 0.0150153  | 0.08445401 | 3.92E-05 | 0.0060428 | 0.1363    |
| 7dr2_7dold_§ | 0.00814304 | 0.04204529 | 3.56E-05 | 0.0072456 | 0.40559   |
| 7dr2_7dold_§ | 0.00999697 | 0.05348591 | 3.65E-05 | 0.0069072 | 0.33263   |
| 7dr2_7dold_§ | 0.01541356 | 0.08691163 | 3.95E-05 | 0.0059603 | 0.11709   |
| 7dr2_7dold_§ | 0.01377006 | 0.0767696  | 3.86E-05 | 0.0062156 | 0.17645   |
| 7dr2_7dold_§ | 0.02292721 | 0.13327843 | 4.30E-05 | 0.0050782 | -0.077142 |
| 7dr2_7dold_§ | 0.01830568 | 0.10475894 | 4.09E-05 | 0.0055879 | 0.030658  |
| 7dr2_7dold_§ | 0.02260491 | 0.1312895  | 4.28E-05 | 0.005125  | -0.068556 |
| 7dr2_7dold_§ | 0.01467349 | 0.08234472 | 3.92E-05 | 0.0060428 | 0.1363    |
| 7dr2_7dold_§ | 0.01459427 | 0.0818558  | 3.89E-05 | 0.0061278 | 0.1363    |
| 7dr2_7dold_§ | 0.0221491  | 0.12847666 | 4.26E-05 | 0.0051742 | -0.068556 |
| 7dr2_7dold_§ | 0.02855814 | 0.16802686 | 4.49E-05 | 0.0047302 | -0.12174  |
| 7dr2_7dold_§ | 0.01764401 | 0.10067576 | 4.06E-05 | 0.0056572 | 0.046584  |
| 7dr2_7dold_§ | 0.01451677 | 0.08137758 | 3.89E-05 | 0.0061278 | 0.1561    |
| 7dr2_7dold_§ | 0.0323579  | 0.1914752  | 4.62E-05 | 0.0046026 | -0.11821  |
| 7dr2_7dold_§ | 0.00639294 | 0.03124539 | 3.44E-05 | 0.0077366 | 0.50694   |
| 7dr2_7dold_§ | 0.00746079 | 0.03783511 | 3.50E-05 | 0.0074854 | 0.45576   |
| 7dr2_7dold_§ | 0.02266206 | 0.13164221 | 4.28E-05 | 0.005125  | -0.068556 |
| 7dr2_7dold_§ | 0.02716549 | 0.15943284 | 4.46E-05 | 0.0047834 | -0.11816  |
| 7dr2_7dold_§ | 0.01428646 | 0.07995632 | 3.89E-05 | 0.0061278 | 0.1561    |
| 7dr2_7dold_§ | 0.02135578 | 0.1235811  | 4.24E-05 | 0.0052258 | -0.04878  |
| 7dr2_7dold_§ | 0.01131878 | 0.06164278 | 3.71E-05 | 0.0066957 | 0.2858    |
| 7dr2_7dold_§ | 0.01435286 | 0.08036609 | 3.89E-05 | 0.0061278 | 0.1561    |
| 7dr2_7dold_§ | 0.01912105 | 0.10979059 | 4.14E-05 | 0.0054571 | 0.0010121 |
| 7dr2_7dold_§ | 0.02403113 | 0.14009072 | 4.34E-05 | 0.0049916 | -0.091842 |
| 7dr2_7dold_§ | 0.02727763 | 0.16012485 | 4.46E-05 | 0.0047834 | -0.11816  |
| 7dr2_7dold_§ | 0.03293864 | 0.19505894 | 4.64E-05 | 0.0045915 | -0.11352  |
| 7dr2_7dold_§ | 0.02229994 | 0.12940751 | 4.28E-05 | 0.005125  | -0.068556 |
| 7dr2_7dold_§ | 0.01799107 | 0.10281746 | 4.09E-05 | 0.0055879 | 0.030658  |
| 7dr2_7dold_§ | 0.02998753 | 0.17684765 | 4.55E-05 | 0.0046645 | -0.12301  |
| 7dr2_7dold_§ | 0.02085907 | 0.12051593 | 4.21E-05 | 0.0052798 | -0.037579 |
| 7dr2_7dold_§ | 0.01286101 | 0.07115987 | 3.80E-05 | 0.0063994 | 0.21875   |
| 7dr2_7dold_§ | 0.0143655  | 0.08044408 | 3.89E-05 | 0.0061278 | 0.1561    |
| 7dr2_7dold_§ | 0.036193   | 0.2151416  | 4.77E-05 | 0.0045615 | -0.092976 |
| 7dr2_7dold_§ | 0.01423602 | 0.07964505 | 3.89E-05 | 0.0061278 | 0.1561    |



|              |            |            |          |           |           |
|--------------|------------|------------|----------|-----------|-----------|
| 7dr2_7dold_§ | 0.01500901 | 0.08441521 | 3.92E-05 | 0.0060428 | 0.1363    |
| 7dr2_7dold_§ | 0.01005153 | 0.05382257 | 3.65E-05 | 0.0069072 | 0.33263   |
| 7dr2_7dold_§ | 0.02804293 | 0.16484752 | 4.48E-05 | 0.0047558 | -0.12024  |
| 7dr2_7dold_§ | 0.01007557 | 0.05397093 | 3.65E-05 | 0.0069072 | 0.33263   |
| 7dr2_7dold_§ | 0.02687877 | 0.15766352 | 4.44E-05 | 0.004813  | -0.11546  |
| 7dr2_7dold_§ | 0.01722009 | 0.09805974 | 4.03E-05 | 0.005729  | 0.063215  |
| 7dr2_7dold_§ | 0.02124027 | 0.12286832 | 4.24E-05 | 0.0052258 | -0.04878  |
| 7dr2_7dold_§ | 0.02561234 | 0.14984834 | 4.40E-05 | 0.0048781 | -0.10813  |
| 7dr2_7dold_§ | 0.02085166 | 0.12047018 | 4.21E-05 | 0.0052798 | -0.037579 |
| 7dr2_7dold_§ | 0.00378383 | 0.0151446  | 3.32E-05 | 0.0082728 | 0.61153   |
| 7dr2_7dold_§ | 0.01883736 | 0.10803995 | 4.11E-05 | 0.0055212 | 0.015459  |
| 7dr2_7dold_§ | 0.01235666 | 0.06804752 | 3.77E-05 | 0.0064954 | 0.24064   |
| 7dr2_7dold_§ | 0.00586852 | 0.02800922 | 3.41E-05 | 0.0078664 | 0.53284   |
| 7dr2_7dold_§ | 0.00571365 | 0.02705354 | 3.41E-05 | 0.0078664 | 0.53284   |
| 7dr2_7dold_§ | 0.014755   | 0.08284769 | 3.92E-05 | 0.0060428 | 0.1363    |
| 7dr2_7dold_§ | 0.02673918 | 0.15680206 | 4.44E-05 | 0.004813  | -0.11546  |
| 7dr2_7dold_§ | 0.01834134 | 0.104979   | 4.09E-05 | 0.0055879 | 0.030658  |
| 7dr2_7dold_§ | 0.01264496 | 0.06982663 | 3.80E-05 | 0.0063994 | 0.21875   |
| 7dr2_7dold_§ | 0.03808655 | 0.22682668 | 4.87E-05 | 0.0045758 | -0.080425 |
| 7dr2_7dold_§ | 0.01193471 | 0.06544367 | 3.77E-05 | 0.0064954 | 0.24064   |
| 7dr2_7dold_§ | 0.00640439 | 0.0313161  | 3.44E-05 | 0.0077366 | 0.50694   |
| 7dr2_7dold_§ | 0.02060399 | 0.11894178 | 4.21E-05 | 0.0052798 | -0.037579 |
| 7dr2_7dold_§ | 0.01166757 | 0.06379514 | 3.74E-05 | 0.0065941 | 0.263     |
| 7dr2_7dold_§ | 0.00785932 | 0.04029442 | 3.53E-05 | 0.0073641 | 0.43054   |
| 7dr2_7dold_§ | 0.02618219 | 0.15336487 | 4.42E-05 | 0.0048445 | -0.11213  |
| 7dr2_7dold_§ | 0.02143262 | 0.12405531 | 4.24E-05 | 0.0052258 | -0.04878  |
| 7dr2_7dold_§ | 0.01419944 | 0.0794193  | 3.89E-05 | 0.0061278 | 0.1561    |
| 7dr2_7dold_§ | 0.01970331 | 0.11338372 | 4.16E-05 | 0.0053955 | -0.012659 |
| 7dr2_7dold_§ | 0.01963996 | 0.11299277 | 4.16E-05 | 0.0053955 | -0.012659 |
| 7dr2_7dold_§ | 0.02833797 | 0.16666825 | 4.49E-05 | 0.0047302 | -0.12174  |
| 7dr2_7dold_§ | 0.09438349 | 0.5742351  | 5.13E-05 | 0.0061762 | -0.82618  |
| 7dr2_7dold_§ | 0.01484875 | 0.08342624 | 3.92E-05 | 0.0060428 | 0.1363    |
| 7dr2_7dold_§ | 0.01741858 | 0.09928467 | 4.06E-05 | 0.0056572 | 0.046584  |
| 7dr2_7dold_§ | 0.01612875 | 0.09132507 | 3.98E-05 | 0.0058806 | 0.098494  |
| 7dr2_7dold_§ | 0.01526163 | 0.08597414 | 3.95E-05 | 0.0059603 | 0.11709   |
| 7dr2_7dold_§ | 0.01370774 | 0.07638504 | 3.86E-05 | 0.0062156 | 0.17645   |
| 7dr2_7dold_§ | 0.01520543 | 0.0856273  | 3.95E-05 | 0.0059603 | 0.11709   |
| 7dr2_7dold_§ | 0.01689647 | 0.0960627  | 4.03E-05 | 0.005729  | 0.063215  |
| 7dr2_7dold_§ | 0.01107868 | 0.06016112 | 3.71E-05 | 0.0066957 | 0.2858    |
| 7dr2_7dold_§ | 0.01742934 | 0.09935103 | 4.06E-05 | 0.0056572 | 0.046584  |
| 7dr2_7dold_§ | 0.0071769  | 0.03608322 | 3.50E-05 | 0.0074854 | 0.45576   |
| 7dr2_7dold_§ | 0.02216914 | 0.12860034 | 4.26E-05 | 0.0051742 | -0.068556 |
| 7dr2_7dold_§ | 0.01091497 | 0.05915087 | 3.71E-05 | 0.0066957 | 0.2858    |

|              |            |            |          |           |           |
|--------------|------------|------------|----------|-----------|-----------|
| 7dr2_7dold_§ | 0.01464312 | 0.08215728 | 3.92E-05 | 0.0060428 | 0.1363    |
| 7dr2_7dold_§ | 0.02047438 | 0.11814202 | 4.19E-05 | 0.0053364 | -0.025531 |
| 7dr2_7dold_§ | 0.02124367 | 0.12288929 | 4.24E-05 | 0.0052258 | -0.04878  |
| 7dr2_7dold_§ | 0.02750792 | 0.16154596 | 4.46E-05 | 0.0047834 | -0.11816  |
| 7dr2_7dold_§ | 0.01698864 | 0.09663148 | 4.03E-05 | 0.005729  | 0.063215  |
| 7dr2_7dold_§ | 0.0232862  | 0.13549373 | 4.32E-05 | 0.0050338 | -0.084895 |
| 7dr2_7dold_§ | 0.02154849 | 0.12477031 | 4.24E-05 | 0.0052258 | -0.04878  |
| 7dr2_7dold_§ | 0.01943903 | 0.11175284 | 4.14E-05 | 0.0054571 | -0.012659 |
| 7dr2_7dold_§ | 0.0323525  | 0.19144188 | 4.62E-05 | 0.0046026 | -0.11821  |
| 7dr2_7dold_§ | 0.01291034 | 0.07146426 | 3.80E-05 | 0.0063994 | 0.21875   |
| 7dr2_7dold_§ | 0.00724768 | 0.03652003 | 3.50E-05 | 0.0074854 | 0.45576   |
| 7dr2_7dold_§ | 0.01073887 | 0.05806414 | 3.68E-05 | 0.0068    | 0.30902   |
| 7dr2_7dold_§ | 0.03112052 | 0.18383932 | 4.58E-05 | 0.00463   | -0.12145  |
| 7dr2_7dold_§ | 0.00566786 | 0.02677097 | 3.41E-05 | 0.0078664 | 0.53284   |
| 7dr2_7dold_§ | 0.01873481 | 0.10740709 | 4.11E-05 | 0.0055212 | 0.015459  |
| 7dr2_7dold_§ | 0.01688269 | 0.09597764 | 4.03E-05 | 0.005729  | 0.063215  |
| 7dr2_7dold_§ | 0.02258457 | 0.13116398 | 4.28E-05 | 0.005125  | -0.068556 |
| 7dr2_7dold_§ | 0.01181361 | 0.0646964  | 3.74E-05 | 0.0065941 | 0.263     |
| 7dr2_7dold_§ | 0.00577263 | 0.02741745 | 3.41E-05 | 0.0078664 | 0.53284   |
| 7dr2_7dold_§ | 0.01371104 | 0.07640541 | 3.86E-05 | 0.0062156 | 0.17645   |
| 7dr2_7dold_§ | 0.01842792 | 0.10551328 | 4.11E-05 | 0.0055212 | 0.015459  |
| 7dr2_7dold_§ | 0.01660225 | 0.09424706 | 4.00E-05 | 0.0058035 | 0.080526  |
| 7dr2_7dold_§ | 0.0223775  | 0.12988614 | 4.28E-05 | 0.005125  | -0.068556 |
| 7dr2_7dold_§ | 0.01755855 | 0.10014842 | 4.06E-05 | 0.0056572 | 0.046584  |
| 7dr2_7dold_§ | 0.03537021 | 0.21006417 | 4.74E-05 | 0.0045622 | -0.10068  |
| 7dr2_7dold_§ | 0.01555487 | 0.0877837  | 3.95E-05 | 0.0059603 | 0.11709   |
| 7dr2_7dold_§ | 0.01714374 | 0.09758861 | 4.03E-05 | 0.005729  | 0.063215  |
| 7dr2_7dold_§ | 0.00928572 | 0.04909677 | 3.62E-05 | 0.0070172 | 0.35661   |
| 7dr2_7dold_§ | 0.01771976 | 0.10114325 | 4.06E-05 | 0.0056572 | 0.046584  |
| 7dr2_7dold_§ | 0.01470217 | 0.08252167 | 3.92E-05 | 0.0060428 | 0.1363    |
| 7dr2_7dold_§ | 0.02952714 | 0.17400655 | 4.53E-05 | 0.0046846 | -0.1231   |
| 7dr2_7dold_§ | 0.02847283 | 0.16750042 | 4.49E-05 | 0.0047302 | -0.12174  |
| 7dr2_7dold_§ | 0.02086534 | 0.12055462 | 4.21E-05 | 0.0052798 | -0.037579 |
| 7dr2_7dold_§ | 0.01571779 | 0.08878905 | 3.98E-05 | 0.0058806 | 0.098494  |
| 7dr2_7dold_§ | 0.01635355 | 0.09271235 | 4.00E-05 | 0.0058035 | 0.080526  |
| 7dr2_7dold_§ | 0.00635994 | 0.0310418  | 3.44E-05 | 0.0077366 | 0.50694   |
| 7dr2_7dold_§ | 0.01778158 | 0.10152473 | 4.06E-05 | 0.0056572 | 0.046584  |
| 7dr2_7dold_§ | 0.01877856 | 0.10767706 | 4.11E-05 | 0.0055212 | 0.015459  |
| 7dr2_7dold_§ | 0.01106448 | 0.06007351 | 3.71E-05 | 0.0066957 | 0.2858    |
| 7dr2_7dold_§ | 0.01793435 | 0.10246745 | 4.09E-05 | 0.0055879 | 0.030658  |
| 7dr2_7dold_§ | 0.02833635 | 0.16665824 | 4.49E-05 | 0.0047302 | -0.12174  |
| 7dr2_7dold_§ | 0.01853511 | 0.10617475 | 4.11E-05 | 0.0055212 | 0.015459  |
| 7dr2_7dold_§ | 0.02763241 | 0.16231422 | 4.48E-05 | 0.0047558 | -0.12024  |

|              |            |            |          |           |           |
|--------------|------------|------------|----------|-----------|-----------|
| 7dr2_7dold_§ | 0.00231081 | 0.00605459 | 3.23E-05 | 0.0087041 | 0.69119   |
| 7dr2_7dold_§ | 0.01540495 | 0.08685853 | 3.95E-05 | 0.0059603 | 0.11709   |
| 7dr2_7dold_§ | 0.01345562 | 0.07482922 | 3.83E-05 | 0.0063061 | 0.19734   |
| 7dr2_7dold_§ | 0.01828142 | 0.10460924 | 4.09E-05 | 0.0055879 | 0.030658  |
| 7dr2_7dold_§ | 0.02263125 | 0.13145204 | 4.28E-05 | 0.005125  | -0.068556 |
| 7dr2_7dold_§ | 0.02518746 | 0.14722645 | 4.38E-05 | 0.0049138 | -0.10343  |
| 7dr2_7dold_§ | 0.01397581 | 0.07803932 | 3.86E-05 | 0.0062156 | 0.17645   |
| 7dr2_7dold_§ | 0.00950632 | 0.05045807 | 3.62E-05 | 0.0070172 | 0.35661   |
| 7dr2_7dold_§ | 0.02106298 | 0.12177423 | 4.21E-05 | 0.0052798 | -0.04878  |
| 7dr2_7dold_§ | 0.01120504 | 0.06094088 | 3.71E-05 | 0.0066957 | 0.2858    |
| 7dr2_7dold_§ | 0.00925195 | 0.04888836 | 3.62E-05 | 0.0070172 | 0.35661   |
| 7dr2_7dold_§ | 0.02276828 | 0.13229768 | 4.30E-05 | 0.0050782 | -0.077142 |
| 7dr2_7dold_§ | 0.02253002 | 0.13082734 | 4.28E-05 | 0.005125  | -0.068556 |
| 7dr2_7dold_§ | 0.01501609 | 0.08445886 | 3.92E-05 | 0.0060428 | 0.1363    |
| 7dr2_7dold_§ | 0.01134554 | 0.06180788 | 3.71E-05 | 0.0066957 | 0.263     |
| 7dr2_7dold_§ | 0.0117452  | 0.06427421 | 3.74E-05 | 0.0065941 | 0.263     |
| 7dr2_7dold_§ | 0.00728058 | 0.03672302 | 3.50E-05 | 0.0074854 | 0.45576   |
| 7dr2_7dold_§ | 0.01874596 | 0.10747594 | 4.11E-05 | 0.0055212 | 0.015459  |
| 7dr2_7dold_§ | 0.01264433 | 0.06982275 | 3.80E-05 | 0.0063994 | 0.21875   |
| 7dr2_7dold_§ | 0.01580064 | 0.08930031 | 3.98E-05 | 0.0058806 | 0.098494  |
| 7dr2_7dold_§ | 0.08618767 | 0.5236587  | 4.77E-05 | 0.01133   | -0.17867  |
| 7dr2_7dold_§ | 0.01957284 | 0.11257857 | 4.16E-05 | 0.0053955 | -0.012659 |
| 7dr2_7dold_§ | 0.09833421 | 0.598615   | 5.40E-05 | 0.0046955 | -1.1375   |
| 7dr2_7dold_§ | 0.03801714 | 0.22639833 | 4.87E-05 | 0.0045758 | -0.080425 |
| 7dr2_7dold_§ | 0.01538999 | 0.0867662  | 3.95E-05 | 0.0059603 | 0.11709   |
| 7dr2_7dold_§ | 0.01732434 | 0.0987031  | 4.06E-05 | 0.0056572 | 0.046584  |
| 7dr2_7dold_§ | 0.0095599  | 0.05078873 | 3.62E-05 | 0.0070172 | 0.35661   |
| 7dr2_7dold_§ | 0.02728987 | 0.1602004  | 4.46E-05 | 0.0047834 | -0.11816  |
| 7dr2_7dold_§ | 0.0295113  | 0.17390881 | 4.53E-05 | 0.0046846 | -0.1231   |
| 7dr2_7dold_§ | 0.01809556 | 0.10346232 | 4.09E-05 | 0.0055879 | 0.030658  |
| 7dr2_7dold_§ | 0.01802997 | 0.10305752 | 4.09E-05 | 0.0055879 | 0.030658  |
| 7dr2_7dold_§ | 0.02338067 | 0.13607672 | 4.32E-05 | 0.0050338 | -0.084895 |
| 7dr2_7dold_§ | 0.00872336 | 0.04562644 | 3.59E-05 | 0.00713   | 0.38094   |
| 7dr2_7dold_§ | 0.01001805 | 0.05361599 | 3.65E-05 | 0.0069072 | 0.33263   |
| 7dr2_7dold_§ | 0.02718359 | 0.15954453 | 4.46E-05 | 0.0047834 | -0.11816  |
| 7dr2_7dold_§ | 0.02432827 | 0.14192437 | 4.34E-05 | 0.0049916 | -0.098011 |
| 7dr2_7dold_§ | 0.01672915 | 0.09503017 | 4.00E-05 | 0.0058035 | 0.063215  |
| 7dr2_7dold_§ | 0.02357888 | 0.13729987 | 4.32E-05 | 0.0050338 | -0.084895 |
| 7dr2_7dold_§ | 0.01802909 | 0.10305209 | 4.09E-05 | 0.0055879 | 0.030658  |
| 7dr2_7dold_§ | 0.02189431 | 0.12690438 | 4.26E-05 | 0.0051742 | -0.059109 |
| 7dr2_7dold_§ | 0.02570149 | 0.15039848 | 4.40E-05 | 0.0048781 | -0.10813  |
| 7dr2_7dold_§ | 0.01347591 | 0.07495443 | 3.83E-05 | 0.0063061 | 0.19734   |
| 7dr2_7dold_§ | 0.02576293 | 0.15077761 | 4.40E-05 | 0.0048781 | -0.10813  |

|              |            |            |          |           |           |
|--------------|------------|------------|----------|-----------|-----------|
| 7dr2_7dold_9 | 0.01449105 | 0.08121888 | 3.89E-05 | 0.0061278 | 0.1561    |
| 7dr2_7dold_9 | 0.02514426 | 0.14695986 | 4.38E-05 | 0.0049138 | -0.10343  |
| 7dr2_7dold_9 | 0.02734763 | 0.16055682 | 4.46E-05 | 0.0047834 | -0.11816  |
| 7dr2_7dold_9 | 0.08858824 | 0.5384726  | 4.82E-05 | 0.0098057 | -0.3844   |
| 7dr2_7dold_9 | 0.01164089 | 0.06363051 | 3.74E-05 | 0.0065941 | 0.263     |
| 7dr2_7dold_9 | 0.01176355 | 0.06438745 | 3.74E-05 | 0.0065941 | 0.263     |
| 7dr2_7dold_9 | 0.0143368  | 0.08026699 | 3.89E-05 | 0.0061278 | 0.1561    |
| 7dr2_7dold_9 | 0.022719   | 0.13199355 | 4.28E-05 | 0.005125  | -0.077142 |
| 7dr2_7dold_9 | 0.02190791 | 0.12698829 | 4.26E-05 | 0.0051742 | -0.059109 |
| 7dr2_7dold_9 | 0.04178948 | 0.24967748 | 5.09E-05 | 0.0046676 | -0.0504   |
| 7dr2_7dold_9 | 0.01641263 | 0.0930769  | 4.00E-05 | 0.0058035 | 0.080526  |
| 7dr2_7dold_9 | 0.02289464 | 0.13307744 | 4.30E-05 | 0.0050782 | -0.077142 |
| 7dr2_7dold_9 | 0.02019235 | 0.11640157 | 4.19E-05 | 0.0053364 | -0.025531 |
| 7dr2_7dold_9 | 0.02592239 | 0.15176167 | 4.40E-05 | 0.0048781 | -0.11213  |
| 7dr2_7dold_9 | 0.0107794  | 0.05831427 | 3.68E-05 | 0.0068    | 0.30902   |
| 7dr2_7dold_9 | 0.00993263 | 0.05308885 | 3.65E-05 | 0.0069072 | 0.33263   |
| 7dr2_7dold_9 | 0.01290594 | 0.07143716 | 3.80E-05 | 0.0063994 | 0.21875   |
| 7dr2_7dold_9 | 0.01101469 | 0.05976626 | 3.71E-05 | 0.0066957 | 0.2858    |
| 7dr2_7dold_9 | 0.02337235 | 0.13602538 | 4.32E-05 | 0.0050338 | -0.084895 |
| 7dr2_7dold_9 | 0.02127066 | 0.12305585 | 4.24E-05 | 0.0052258 | -0.04878  |
| 7dr2_7dold_9 | 0.02146852 | 0.12427683 | 4.24E-05 | 0.0052258 | -0.04878  |
| 7dr2_7dold_9 | 0.02029111 | 0.11701105 | 4.19E-05 | 0.0053364 | -0.025531 |
| 7dr2_7dold_9 | 0.01263902 | 0.06978999 | 3.80E-05 | 0.0063994 | 0.21875   |
| 7dr2_7dold_9 | 0.01909753 | 0.10964543 | 4.14E-05 | 0.0054571 | 0.0010121 |
| 7dr2_7dold_9 | 0.01618044 | 0.09164406 | 3.98E-05 | 0.0058806 | 0.098494  |
| 7dr2_7dold_9 | 0.02158595 | 0.12500148 | 4.24E-05 | 0.0052258 | -0.04878  |
| 7dr2_7dold_9 | 0.01070187 | 0.05783582 | 3.68E-05 | 0.0068    | 0.30902   |
| 7dr2_7dold_9 | 0.01788054 | 0.10213538 | 4.09E-05 | 0.0055879 | 0.030658  |
| 7dr2_7dold_9 | 0.02006015 | 0.11558576 | 4.19E-05 | 0.0053364 | -0.025531 |
| 7dr2_7dold_9 | 0.0120978  | 0.06645007 | 3.77E-05 | 0.0064954 | 0.24064   |
| 7dr2_7dold_9 | 0.0204748  | 0.11814459 | 4.19E-05 | 0.0053364 | -0.025531 |
| 7dr2_7dold_9 | 0.00949982 | 0.05041798 | 3.62E-05 | 0.0070172 | 0.35661   |
| 7dr2_7dold_9 | 0.02007641 | 0.1156861  | 4.19E-05 | 0.0053364 | -0.025531 |
| 7dr2_7dold_9 | 0.01015027 | 0.05443193 | 3.65E-05 | 0.0069072 | 0.33263   |
| 7dr2_7dold_9 | 0.03063855 | 0.18086508 | 4.57E-05 | 0.0046464 | -0.12245  |
| 7dr2_7dold_9 | 0.02999133 | 0.17687109 | 4.55E-05 | 0.0046645 | -0.12301  |
| 7dr2_7dold_9 | 0.02052826 | 0.11847451 | 4.19E-05 | 0.0053364 | -0.037579 |
| 7dr2_7dold_9 | 0.01481734 | 0.08323237 | 3.92E-05 | 0.0060428 | 0.1363    |
| 7dr2_7dold_9 | 0.01077417 | 0.05828197 | 3.68E-05 | 0.0068    | 0.30902   |
| 7dr2_7dold_9 | 0.01245525 | 0.0686559  | 3.80E-05 | 0.0063994 | 0.21875   |
| 7dr2_7dold_9 | 0.01154444 | 0.06303529 | 3.74E-05 | 0.0065941 | 0.263     |
| 7dr2_7dold_9 | 0.01629765 | 0.0923674  | 4.00E-05 | 0.0058035 | 0.080526  |
| 7dr2_7dold_9 | 0.01887298 | 0.10825975 | 4.11E-05 | 0.0055212 | 0.015459  |

|              |            |            |          |           |           |
|--------------|------------|------------|----------|-----------|-----------|
| 7dr2_7dold_9 | 0.01354391 | 0.07537403 | 3.86E-05 | 0.0062156 | 0.17645   |
| 7dr2_7dold_9 | 0.0073947  | 0.03742726 | 3.50E-05 | 0.0074854 | 0.45576   |
| 7dr2_7dold_9 | 0.0149827  | 0.08425284 | 3.92E-05 | 0.0060428 | 0.1363    |
| 7dr2_7dold_9 | 0.02825717 | 0.16616961 | 4.49E-05 | 0.0047302 | -0.12174  |
| 7dr2_7dold_9 | 0.01317707 | 0.07311028 | 3.83E-05 | 0.0063061 | 0.19734   |
| 7dr2_7dold_9 | 0.03136214 | 0.18533036 | 4.58E-05 | 0.00463   | -0.12002  |
| 7dr2_7dold_9 | 0.01196089 | 0.06560524 | 3.77E-05 | 0.0064954 | 0.24064   |
| 7dr2_7dold_9 | 0.02030071 | 0.11707026 | 4.19E-05 | 0.0053364 | -0.025531 |
| 7dr2_7dold_9 | 0.01568686 | 0.08859819 | 3.95E-05 | 0.0059603 | 0.098494  |
| 7dr2_7dold_9 | 0.02007426 | 0.11567283 | 4.19E-05 | 0.0053364 | -0.025531 |
| 7dr2_7dold_9 | 0.03355024 | 0.19883315 | 4.66E-05 | 0.0045822 | -0.11071  |
| 7dr2_7dold_9 | 0.02560012 | 0.14977297 | 4.40E-05 | 0.0048781 | -0.10813  |
| 7dr2_7dold_9 | 0.01646442 | 0.09339651 | 4.00E-05 | 0.0058035 | 0.080526  |
| 7dr2_7dold_9 | 0.03211527 | 0.18997796 | 4.62E-05 | 0.0046026 | -0.11821  |
| 7dr2_7dold_9 | 0.00382201 | 0.01538019 | 3.32E-05 | 0.0082728 | 0.61153   |
| 7dr2_7dold_9 | 0.03046507 | 0.17979454 | 4.57E-05 | 0.0046464 | -0.12245  |
| 7dr2_7dold_9 | 0.00485599 | 0.02176091 | 3.38E-05 | 0.0079991 | 0.55892   |
| 7dr2_7dold_9 | 0.00470516 | 0.02083009 | 3.35E-05 | 0.0081345 | 0.58516   |
| 7dr2_7dold_9 | 0.02473569 | 0.14443856 | 4.36E-05 | 0.0049516 | -0.098011 |
| 7dr2_7dold_9 | 0.01219507 | 0.06705038 | 3.77E-05 | 0.0064954 | 0.24064   |
| 7dr2_7dold_9 | 0.02346139 | 0.13657485 | 4.32E-05 | 0.0050338 | -0.084895 |
| 7dr2_7dold_9 | 0.01457492 | 0.08173642 | 3.89E-05 | 0.0061278 | 0.1363    |
| 7dr2_7dold_9 | 0.01549634 | 0.08742251 | 3.95E-05 | 0.0059603 | 0.11709   |
| 7dr2_7dold_9 | 0.02097531 | 0.12123321 | 4.21E-05 | 0.0052798 | -0.037579 |
| 7dr2_7dold_9 | 0.0293414  | 0.17286037 | 4.53E-05 | 0.0046846 | -0.1231   |
| 7dr2_7dold_9 | 0.01235981 | 0.06806695 | 3.77E-05 | 0.0064954 | 0.24064   |
| 7dr2_7dold_9 | 0.03053308 | 0.18021423 | 4.57E-05 | 0.0046464 | -0.12245  |
| 7dr2_7dold_9 | 0.01939505 | 0.11148144 | 4.14E-05 | 0.0054571 | 0.0010121 |
| 7dr2_7dold_9 | 0.02135697 | 0.12358844 | 4.24E-05 | 0.0052258 | -0.04878  |
| 7dr2_7dold_9 | 0.01558826 | 0.08798975 | 3.95E-05 | 0.0059603 | 0.11709   |
| 7dr2_7dold_9 | 0.01271358 | 0.07025006 | 3.80E-05 | 0.0063994 | 0.21875   |
| 7dr2_7dold_9 | 0.01623787 | 0.09199847 | 4.00E-05 | 0.0058035 | 0.080526  |
| 7dr2_7dold_9 | 0.01748767 | 0.09971101 | 4.06E-05 | 0.0056572 | 0.046584  |
| 7dr2_7dold_9 | 0.02475119 | 0.14453417 | 4.36E-05 | 0.0049516 | -0.098011 |
| 7dr2_7dold_9 | 0.00459988 | 0.02018045 | 3.35E-05 | 0.0081345 | 0.58516   |
| 7dr2_7dold_9 | 0.02311215 | 0.13441971 | 4.30E-05 | 0.0050782 | -0.077142 |
| 7dr2_7dold_9 | 0.018655   | 0.10691459 | 4.11E-05 | 0.0055212 | 0.015459  |
| 7dr2_7dold_9 | 0.02282542 | 0.13265024 | 4.30E-05 | 0.0050782 | -0.077142 |
| 7dr2_7dold_9 | 0.02104983 | 0.12169309 | 4.21E-05 | 0.0052798 | -0.04878  |
| 7dr2_7dold_9 | 0.01709144 | 0.09726585 | 4.03E-05 | 0.005729  | 0.063215  |
| 7dr2_7dold_9 | 0.0174263  | 0.09933228 | 4.06E-05 | 0.0056572 | 0.046584  |
| 7dr2_7dold_9 | 0.01629415 | 0.0923458  | 4.00E-05 | 0.0058035 | 0.080526  |
| 7dr2_7dold_9 | 0.01287878 | 0.07126951 | 3.80E-05 | 0.0063994 | 0.21875   |

|              |            |            |          |           |           |
|--------------|------------|------------|----------|-----------|-----------|
| 7dr2_7dold_9 | 0.02267683 | 0.1317333  | 4.28E-05 | 0.005125  | -0.077142 |
| 7dr2_7dold_9 | 0.01783561 | 0.10185814 | 4.06E-05 | 0.0056572 | 0.030658  |
| 7dr2_7dold_9 | 0.01532251 | 0.08634981 | 3.95E-05 | 0.0059603 | 0.11709   |
| 7dr2_7dold_9 | 0.02413119 | 0.14070821 | 4.34E-05 | 0.0049916 | -0.091842 |
| 7dr2_7dold_9 | 0.01580119 | 0.08930372 | 3.98E-05 | 0.0058806 | 0.098494  |
| 7dr2_7dold_9 | 0.02864005 | 0.16853233 | 4.49E-05 | 0.0047302 | -0.12268  |
| 7dr2_7dold_9 | 0.01739813 | 0.09915845 | 4.06E-05 | 0.0056572 | 0.046584  |
| 7dr2_7dold_9 | 0.020054   | 0.11554781 | 4.19E-05 | 0.0053364 | -0.025531 |
| 7dr2_7dold_9 | 0.01923573 | 0.11049829 | 4.14E-05 | 0.0054571 | 0.0010121 |
| 7dr2_7dold_9 | 0.01898009 | 0.1089207  | 4.14E-05 | 0.0054571 | 0.0010121 |
| 7dr2_7dold_9 | 0.03818796 | 0.22745252 | 4.87E-05 | 0.0045758 | -0.080425 |
| 7dr2_7dold_9 | 0.02650339 | 0.15534705 | 4.42E-05 | 0.0048445 | -0.11546  |
| 7dr2_7dold_9 | 0.01250671 | 0.0689735  | 3.80E-05 | 0.0063994 | 0.21875   |
| 7dr2_7dold_9 | 0.01350445 | 0.07513055 | 3.83E-05 | 0.0063061 | 0.17645   |
| 7dr2_7dold_9 | 0.01533882 | 0.08645044 | 3.95E-05 | 0.0059603 | 0.11709   |
| 7dr2_7dold_9 | 0.01319774 | 0.07323785 | 3.83E-05 | 0.0063061 | 0.19734   |
| 7dr2_7dold_9 | 0.01069356 | 0.05778452 | 3.68E-05 | 0.0068    | 0.30902   |
| 7dr2_7dold_9 | 0.01803712 | 0.10310166 | 4.09E-05 | 0.0055879 | 0.030658  |
| 7dr2_7dold_9 | 0.02044603 | 0.11796702 | 4.19E-05 | 0.0053364 | -0.025531 |
| 7dr2_7dold_9 | 0.03078793 | 0.18178692 | 4.57E-05 | 0.0046464 | -0.12145  |
| 7dr2_7dold_9 | 0.01339502 | 0.07445524 | 3.83E-05 | 0.0063061 | 0.19734   |
| 7dr2_7dold_9 | 0.0118979  | 0.06521655 | 3.74E-05 | 0.0065941 | 0.24064   |
| 7dr2_7dold_9 | 0.02399452 | 0.13986479 | 4.34E-05 | 0.0049916 | -0.091842 |
| 7dr2_7dold_9 | 0.0181149  | 0.10358163 | 4.09E-05 | 0.0055879 | 0.030658  |
| 7dr2_7dold_9 | 0.01609677 | 0.09112772 | 3.98E-05 | 0.0058806 | 0.098494  |
| 7dr2_7dold_9 | 0.02277018 | 0.13230936 | 4.30E-05 | 0.0050782 | -0.077142 |
| 7dr2_7dold_9 | 0.02143371 | 0.124062   | 4.24E-05 | 0.0052258 | -0.04878  |
| 7dr2_7dold_9 | 0.02254356 | 0.13091093 | 4.28E-05 | 0.005125  | -0.068556 |
| 7dr2_7dold_9 | 0.02265053 | 0.13157102 | 4.28E-05 | 0.005125  | -0.068556 |
| 7dr2_7dold_9 | 0.01153552 | 0.06298029 | 3.74E-05 | 0.0065941 | 0.263     |
| 7dr2_7dold_9 | 0.02231374 | 0.12949269 | 4.28E-05 | 0.005125  | -0.068556 |
| 7dr2_7dold_9 | 0.02401242 | 0.13997525 | 4.34E-05 | 0.0049916 | -0.091842 |
| 7dr2_7dold_9 | 0.01767997 | 0.10089767 | 4.06E-05 | 0.0056572 | 0.046584  |
| 7dr2_7dold_9 | 0.01832245 | 0.10486241 | 4.09E-05 | 0.0055879 | 0.030658  |
| 7dr2_7dold_9 | 0.0072091  | 0.03628191 | 3.50E-05 | 0.0074854 | 0.45576   |
| 7dr2_7dold_9 | 0.0175866  | 0.10032148 | 4.06E-05 | 0.0056572 | 0.046584  |
| 7dr2_7dold_9 | 0.02647041 | 0.15514348 | 4.42E-05 | 0.0048445 | -0.11546  |
| 7dr2_7dold_9 | 0.02545257 | 0.14886244 | 4.40E-05 | 0.0048781 | -0.10813  |
| 7dr2_7dold_9 | 0.02034641 | 0.11735229 | 4.19E-05 | 0.0053364 | -0.025531 |
| 7dr2_7dold_9 | 0.00724472 | 0.03650175 | 3.50E-05 | 0.0074854 | 0.45576   |
| 7dr2_7dold_9 | 0.02275455 | 0.13221292 | 4.30E-05 | 0.0050782 | -0.077142 |
| 7dr2_7dold_9 | 0.00932344 | 0.04932952 | 3.62E-05 | 0.0070172 | 0.35661   |
| 7dr2_7dold_9 | 0.02214254 | 0.12843622 | 4.26E-05 | 0.0051742 | -0.068556 |

|              |            |            |          |           |           |
|--------------|------------|------------|----------|-----------|-----------|
| 7dr2_7dold_§ | 0.01346774 | 0.07490399 | 3.83E-05 | 0.0063061 | 0.19734   |
| 7dr2_7dold_§ | 0.01836958 | 0.10515325 | 4.09E-05 | 0.0055879 | 0.015459  |
| 7dr2_7dold_§ | 0.02299097 | 0.1336719  | 4.30E-05 | 0.0050782 | -0.077142 |
| 7dr2_7dold_§ | 0.0133154  | 0.07396394 | 3.83E-05 | 0.0063061 | 0.19734   |
| 7dr2_7dold_§ | 0.00621081 | 0.03012146 | 3.44E-05 | 0.0077366 | 0.50694   |
| 7dr2_7dold_§ | 0.01148975 | 0.06269785 | 3.74E-05 | 0.0065941 | 0.263     |
| 7dr2_7dold_§ | 0.01431514 | 0.0801333  | 3.89E-05 | 0.0061278 | 0.1561    |
| 7dr2_7dold_§ | 0.02271438 | 0.13196507 | 4.28E-05 | 0.005125  | -0.077142 |
| 7dr2_7dold_§ | 0.01895818 | 0.10878551 | 4.14E-05 | 0.0054571 | 0.0010121 |
| 7dr2_7dold_§ | 0.01425966 | 0.07979095 | 3.89E-05 | 0.0061278 | 0.1561    |
| 7dr2_7dold_§ | 0.01595065 | 0.09022606 | 3.98E-05 | 0.0058806 | 0.098494  |
| 7dr2_7dold_§ | 0.01728103 | 0.09843583 | 4.03E-05 | 0.005729  | 0.046584  |
| 7dr2_7dold_§ | 0.01853491 | 0.10617355 | 4.11E-05 | 0.0055212 | 0.015459  |
| 7dr2_7dold_§ | 0.02159008 | 0.12502697 | 4.24E-05 | 0.0052258 | -0.059109 |
| 7dr2_7dold_§ | 0.02489307 | 0.14540973 | 4.36E-05 | 0.0049516 | -0.10343  |
| 7dr2_7dold_§ | 0.09249112 | 0.5625573  | 4.99E-05 | 0.0073308 | -0.69483  |
| 7dr2_7dold_§ | 0.01690112 | 0.09609139 | 4.03E-05 | 0.005729  | 0.063215  |
| 7dr2_7dold_§ | 0.00773725 | 0.03954114 | 3.53E-05 | 0.0073641 | 0.43054   |
| 7dr2_7dold_§ | 0.02075078 | 0.11984767 | 4.21E-05 | 0.0052798 | -0.037579 |
| 7dr2_7dold_§ | 0.01316009 | 0.07300549 | 3.83E-05 | 0.0063061 | 0.19734   |
| 7dr2_7dold_§ | 0.01776098 | 0.10139758 | 4.06E-05 | 0.0056572 | 0.046584  |
| 7dr2_7dold_§ | 0.01234991 | 0.0680059  | 3.77E-05 | 0.0064954 | 0.24064   |
| 7dr2_7dold_§ | 0.02231263 | 0.12948585 | 4.28E-05 | 0.005125  | -0.068556 |
| 7dr2_7dold_§ | 0.05236111 | 0.31491497 | 5.97E-05 | 0.0054628 | 0.014768  |
| 7dr2_7dold_§ | 0.09208303 | 0.560039   | 4.96E-05 | 0.0076529 | -0.6503   |
| 7dr2_7dold_§ | 0.02604424 | 0.15251362 | 4.42E-05 | 0.0048445 | -0.11213  |
| 7dr2_7dold_§ | 0.01300793 | 0.0720665  | 3.83E-05 | 0.0063061 | 0.19734   |
| 7dr2_7dold_§ | 0.01508475 | 0.08488257 | 3.92E-05 | 0.0060428 | 0.1363    |
| 7dr2_7dold_§ | 0.01123471 | 0.06112399 | 3.71E-05 | 0.0066957 | 0.2858    |
| 7dr2_7dold_§ | 0.02008642 | 0.11574786 | 4.19E-05 | 0.0053364 | -0.025531 |
| 7dr2_7dold_§ | 0.0221705  | 0.12860875 | 4.26E-05 | 0.0051742 | -0.068556 |
| 7dr2_7dold_§ | 0.01838456 | 0.10524572 | 4.09E-05 | 0.0055879 | 0.015459  |
| 7dr2_7dold_§ | 0.01956323 | 0.11251927 | 4.16E-05 | 0.0053955 | -0.012659 |
| 7dr2_7dold_§ | 0.01567891 | 0.08854915 | 3.95E-05 | 0.0059603 | 0.098494  |
| 7dr2_7dold_§ | 0.01228109 | 0.0675812  | 3.77E-05 | 0.0064954 | 0.24064   |
| 7dr2_7dold_§ | 0.01370042 | 0.07633986 | 3.86E-05 | 0.0062156 | 0.17645   |
| 7dr2_7dold_§ | 0.0155025  | 0.08746051 | 3.95E-05 | 0.0059603 | 0.11709   |
| 7dr2_7dold_§ | 0.02344402 | 0.13646765 | 4.32E-05 | 0.0050338 | -0.084895 |
| 7dr2_7dold_§ | 0.01733336 | 0.09876022 | 4.06E-05 | 0.0056572 | 0.046584  |
| 7dr2_7dold_§ | 0.01218495 | 0.06698791 | 3.77E-05 | 0.0064954 | 0.24064   |
| 7dr2_7dold_§ | 0.00390406 | 0.01588651 | 3.32E-05 | 0.0082728 | 0.61153   |
| 7dr2_7dold_§ | 0.01431121 | 0.08010905 | 3.89E-05 | 0.0061278 | 0.1561    |
| 7dr2_7dold_§ | 0.0280449  | 0.16485967 | 4.48E-05 | 0.0047558 | -0.12024  |

|              |            |            |          |           |           |
|--------------|------------|------------|----------|-----------|-----------|
| 7dr2_7dold_§ | 0.01991122 | 0.11466675 | 4.16E-05 | 0.0053955 | -0.012659 |
| 7dr2_7dold_§ | 0.01583864 | 0.08953482 | 3.98E-05 | 0.0058806 | 0.098494  |
| 7dr2_7dold_§ | 0.02082301 | 0.12029336 | 4.21E-05 | 0.0052798 | -0.037579 |
| 7dr2_7dold_§ | 0.03682061 | 0.21901459 | 4.79E-05 | 0.0045625 | -0.088896 |
| 7dr2_7dold_§ | 0.01250793 | 0.068981   | 3.80E-05 | 0.0063994 | 0.21875   |
| 7dr2_7dold_§ | 0.01598224 | 0.09042101 | 3.98E-05 | 0.0058806 | 0.098494  |
| 7dr2_7dold_§ | 0.01641332 | 0.09308118 | 4.00E-05 | 0.0058035 | 0.080526  |
| 7dr2_7dold_§ | 0.01443643 | 0.0808818  | 3.89E-05 | 0.0061278 | 0.1561    |
| 7dr2_7dold_§ | 0.06182128 | 0.37329373 | 6.36E-05 | 0.0076138 | 0.10802   |
| 7dr2_7dold_§ | 0.0221538  | 0.12850572 | 4.26E-05 | 0.0051742 | -0.068556 |
| 7dr2_7dold_§ | 0.00573661 | 0.0271952  | 3.41E-05 | 0.0078664 | 0.53284   |
| 7dr2_7dold_§ | 0.01559988 | 0.08806143 | 3.95E-05 | 0.0059603 | 0.11709   |
| 7dr2_7dold_§ | 0.01914522 | 0.10993975 | 4.14E-05 | 0.0054571 | 0.0010121 |
| 7dr2_7dold_§ | 0.00860415 | 0.04489076 | 3.56E-05 | 0.0072456 | 0.40559   |
| 7dr2_7dold_§ | 0.01361151 | 0.07579123 | 3.86E-05 | 0.0062156 | 0.17645   |
| 7dr2_7dold_§ | 0.01343203 | 0.07468367 | 3.83E-05 | 0.0063061 | 0.19734   |
| 7dr2_7dold_§ | 0.00430794 | 0.01837889 | 3.32E-05 | 0.0082728 | 0.58516   |
| 7dr2_7dold_§ | 0.01766546 | 0.10080817 | 4.06E-05 | 0.0056572 | 0.046584  |
| 7dr2_7dold_§ | 0.0270048  | 0.15844123 | 4.44E-05 | 0.004813  | -0.11816  |
| 7dr2_7dold_§ | 0.00564514 | 0.02663075 | 3.41E-05 | 0.0078664 | 0.53284   |
| 7dr2_7dold_§ | 0.00492748 | 0.02220208 | 3.38E-05 | 0.0079991 | 0.55892   |
| 7dr2_7dold_§ | 0.00646115 | 0.03166635 | 3.44E-05 | 0.0077366 | 0.50694   |
| 7dr2_7dold_§ | 0.00912731 | 0.0481192  | 3.59E-05 | 0.00713   | 0.38094   |
| 7dr2_7dold_§ | 0.01616235 | 0.09153247 | 3.98E-05 | 0.0058806 | 0.098494  |
| 7dr2_7dold_§ | 0.01183875 | 0.06485152 | 3.74E-05 | 0.0065941 | 0.263     |
| 7dr2_7dold_§ | 0.01839797 | 0.10532845 | 4.09E-05 | 0.0055879 | 0.015459  |
| 7dr2_7dold_§ | 0.02963625 | 0.1746799  | 4.53E-05 | 0.0046846 | -0.1231   |
| 7dr2_7dold_§ | 0.0166786  | 0.0947182  | 4.00E-05 | 0.0058035 | 0.080526  |
| 7dr2_7dold_§ | 0.00878306 | 0.04599487 | 3.59E-05 | 0.00713   | 0.38094   |
| 7dr2_7dold_§ | 0.00764216 | 0.03895433 | 3.53E-05 | 0.0073641 | 0.43054   |
| 7dr2_7dold_§ | 0.02345162 | 0.13651453 | 4.32E-05 | 0.0050338 | -0.084895 |
| 7dr2_7dold_§ | 0.01400095 | 0.07819443 | 3.86E-05 | 0.0062156 | 0.17645   |
| 7dr2_7dold_§ | 0.02670047 | 0.15656318 | 4.44E-05 | 0.004813  | -0.11546  |
| 7dr2_7dold_§ | 0.01451765 | 0.08138301 | 3.89E-05 | 0.0061278 | 0.1561    |
| 7dr2_7dold_§ | 0.02540966 | 0.1485976  | 4.38E-05 | 0.0049138 | -0.10813  |
| 7dr2_7dold_§ | 0.01921287 | 0.11035724 | 4.14E-05 | 0.0054571 | 0.0010121 |
| 7dr2_7dold_§ | 0.01012475 | 0.05427443 | 3.65E-05 | 0.0069072 | 0.33263   |
| 7dr2_7dold_§ | 0.01945356 | 0.11184252 | 4.14E-05 | 0.0054571 | -0.012659 |
| 7dr2_7dold_§ | 0.01991085 | 0.11466443 | 4.16E-05 | 0.0053955 | -0.012659 |
| 7dr2_7dold_§ | 0.02112562 | 0.12216079 | 4.24E-05 | 0.0052258 | -0.04878  |
| 7dr2_7dold_§ | 0.03001667 | 0.1770275  | 4.55E-05 | 0.0046645 | -0.12301  |
| 7dr2_7dold_§ | 0.02997029 | 0.17674129 | 4.55E-05 | 0.0046645 | -0.12301  |
| 7dr2_7dold_§ | 0.01459611 | 0.08186718 | 3.89E-05 | 0.0061278 | 0.1363    |



|              |            |            |          |           |           |
|--------------|------------|------------|----------|-----------|-----------|
| 7dr2_7dold_§ | 0.02395569 | 0.13962515 | 4.34E-05 | 0.0049916 | -0.091842 |
| 7dr2_7dold_§ | 0.01635218 | 0.0927039  | 4.00E-05 | 0.0058035 | 0.080526  |
| 7dr2_7dold_§ | 0.01794143 | 0.10251115 | 4.09E-05 | 0.0055879 | 0.030658  |
| 7dr2_7dold_§ | 0.02655016 | 0.15563564 | 4.44E-05 | 0.004813  | -0.11546  |
| 7dr2_7dold_§ | 0.02290442 | 0.13313776 | 4.30E-05 | 0.0050782 | -0.077142 |
| 7dr2_7dold_§ | 0.01665182 | 0.09455299 | 4.00E-05 | 0.0058035 | 0.080526  |
| 7dr2_7dold_§ | 0.05303322 | 0.3190626  | 6.01E-05 | 0.0055357 | 0.022172  |
| 7dr2_7dold_§ | 0.02687671 | 0.1576508  | 4.44E-05 | 0.004813  | -0.11546  |
| 7dr2_7dold_§ | 0.01354194 | 0.0753619  | 3.86E-05 | 0.0062156 | 0.17645   |
| 7dr2_7dold_§ | 0.02198983 | 0.12749386 | 4.26E-05 | 0.0051742 | -0.059109 |
| 7dr2_7dold_§ | 0.02440145 | 0.14237598 | 4.36E-05 | 0.0049516 | -0.098011 |
| 7dr2_7dold_§ | 0.02469696 | 0.14419954 | 4.36E-05 | 0.0049516 | -0.098011 |
| 7dr2_7dold_§ | 0.02755754 | 0.16185217 | 4.46E-05 | 0.0047834 | -0.12024  |
| 7dr2_7dold_§ | 0.02555653 | 0.14950392 | 4.40E-05 | 0.0048781 | -0.10813  |
| 7dr2_7dold_§ | 0.00594538 | 0.02848354 | 3.44E-05 | 0.0077366 | 0.50694   |
| 7dr2_7dold_§ | 0.02312064 | 0.13447207 | 4.30E-05 | 0.0050782 | -0.077142 |
| 7dr2_7dold_§ | 0.01772171 | 0.10115526 | 4.06E-05 | 0.0056572 | 0.046584  |
| 7dr2_7dold_§ | 0.03920044 | 0.23370054 | 4.92E-05 | 0.0045932 | -0.071721 |
| 7dr2_7dold_§ | 0.00623805 | 0.03028958 | 3.44E-05 | 0.0077366 | 0.50694   |
| 7dr2_7dold_§ | 0.01782473 | 0.10179099 | 4.06E-05 | 0.0056572 | 0.030658  |
| 7dr2_7dold_§ | 0.01491387 | 0.08382805 | 3.92E-05 | 0.0060428 | 0.1363    |
| 7dr2_7dold_§ | 0.0257716  | 0.15083112 | 4.40E-05 | 0.0048781 | -0.10813  |
| 7dr2_7dold_§ | 0.01331259 | 0.07394655 | 3.83E-05 | 0.0063061 | 0.19734   |
| 7dr2_7dold_§ | 0.01536732 | 0.08662634 | 3.95E-05 | 0.0059603 | 0.11709   |
| 7dr2_7dold_§ | 0.01787201 | 0.10208277 | 4.09E-05 | 0.0055879 | 0.030658  |
| 7dr2_7dold_§ | 0.01344813 | 0.07478302 | 3.83E-05 | 0.0063061 | 0.19734   |
| 7dr2_7dold_§ | 0.03405057 | 0.20192063 | 4.68E-05 | 0.0045746 | -0.10761  |
| 7dr2_7dold_§ | 0.0075441  | 0.03834924 | 3.50E-05 | 0.0074854 | 0.43054   |
| 7dr2_7dold_§ | 0.01556619 | 0.08785357 | 3.95E-05 | 0.0059603 | 0.11709   |
| 7dr2_7dold_§ | 0.00304256 | 0.01057024 | 3.26E-05 | 0.0085576 | 0.66457   |
| 7dr2_7dold_§ | 0.01146794 | 0.06256322 | 3.74E-05 | 0.0065941 | 0.263     |
| 7dr2_7dold_§ | 0.01188734 | 0.06515139 | 3.74E-05 | 0.0065941 | 0.24064   |
| 7dr2_7dold_§ | 0.01905912 | 0.1094084  | 4.14E-05 | 0.0054571 | 0.0010121 |
| 7dr2_7dold_§ | 0.01954675 | 0.11241757 | 4.16E-05 | 0.0053955 | -0.012659 |
| 7dr2_7dold_§ | 0.00877563 | 0.04594897 | 3.59E-05 | 0.00713   | 0.38094   |
| 7dr2_7dold_§ | 0.0191278  | 0.10983226 | 4.14E-05 | 0.0054571 | 0.0010121 |
| 7dr2_7dold_§ | 0.0230597  | 0.13409601 | 4.30E-05 | 0.0050782 | -0.077142 |
| 7dr2_7dold_§ | 0.00643993 | 0.03153538 | 3.44E-05 | 0.0077366 | 0.50694   |
| 7dr2_7dold_§ | 0.01145968 | 0.06251226 | 3.74E-05 | 0.0065941 | 0.263     |
| 7dr2_7dold_§ | 0.01269252 | 0.07012014 | 3.80E-05 | 0.0063994 | 0.21875   |
| 7dr2_7dold_§ | 0.01558406 | 0.08796381 | 3.95E-05 | 0.0059603 | 0.11709   |
| 7dr2_7dold_§ | 0.02023724 | 0.11667862 | 4.19E-05 | 0.0053364 | -0.025531 |
| 7dr2_7dold_§ | 0.02532733 | 0.14808953 | 4.38E-05 | 0.0049138 | -0.10343  |

|              |            |            |          |           |           |
|--------------|------------|------------|----------|-----------|-----------|
| 7dr2_7dold_9 | 0.02292298 | 0.13325234 | 4.30E-05 | 0.0050782 | -0.077142 |
| 7dr2_7dold_9 | 0.0116036  | 0.06340042 | 3.74E-05 | 0.0065941 | 0.263     |
| 7dr2_7dold_9 | 0.01339608 | 0.07446177 | 3.83E-05 | 0.0063061 | 0.19734   |
| 7dr2_7dold_9 | 0.01459364 | 0.08185195 | 3.89E-05 | 0.0061278 | 0.1363    |
| 7dr2_7dold_9 | 0.01859008 | 0.10651396 | 4.11E-05 | 0.0055212 | 0.015459  |
| 7dr2_7dold_9 | 0.01467397 | 0.08234765 | 3.92E-05 | 0.0060428 | 0.1363    |
| 7dr2_7dold_9 | 0.01418284 | 0.07931688 | 3.89E-05 | 0.0061278 | 0.1561    |
| 7dr2_7dold_9 | 0.0116228  | 0.06351887 | 3.74E-05 | 0.0065941 | 0.263     |
| 7dr2_7dold_9 | 0.01711457 | 0.09740862 | 4.03E-05 | 0.005729  | 0.063215  |
| 7dr2_7dold_9 | 0.02537059 | 0.14835648 | 4.38E-05 | 0.0049138 | -0.10813  |
| 7dr2_7dold_9 | 0.01342204 | 0.07462201 | 3.83E-05 | 0.0063061 | 0.19734   |
| 7dr2_7dold_9 | 0.01475296 | 0.08283512 | 3.92E-05 | 0.0060428 | 0.1363    |
| 7dr2_7dold_9 | 0.02289213 | 0.13306193 | 4.30E-05 | 0.0050782 | -0.077142 |
| 7dr2_7dold_9 | 0.01820615 | 0.10414472 | 4.09E-05 | 0.0055879 | 0.030658  |
| 7dr2_7dold_9 | 0.01750423 | 0.09981319 | 4.06E-05 | 0.0056572 | 0.046584  |
| 7dr2_7dold_9 | 0.01698746 | 0.09662421 | 4.03E-05 | 0.005729  | 0.063215  |
| 7dr2_7dold_9 | 0.01566885 | 0.08848704 | 3.95E-05 | 0.0059603 | 0.098494  |
| 7dr2_7dold_9 | 0.02636297 | 0.1544805  | 4.42E-05 | 0.0048445 | -0.11213  |
| 7dr2_7dold_9 | 0.00606387 | 0.0292147  | 3.44E-05 | 0.0077366 | 0.50694   |
| 7dr2_7dold_9 | 0.01677355 | 0.09530414 | 4.00E-05 | 0.0058035 | 0.063215  |
| 7dr2_7dold_9 | 0.01953241 | 0.11232907 | 4.16E-05 | 0.0053955 | -0.012659 |
| 7dr2_7dold_9 | 0.01255108 | 0.0692473  | 3.80E-05 | 0.0063994 | 0.21875   |
| 7dr2_7dold_9 | 0.021526   | 0.12463152 | 4.24E-05 | 0.0052258 | -0.04878  |
| 7dr2_7dold_9 | 0.02816239 | 0.16558474 | 4.49E-05 | 0.0047302 | -0.12174  |
| 7dr2_7dold_9 | 0.00280166 | 0.00908363 | 3.26E-05 | 0.0085576 | 0.66457   |
| 7dr2_7dold_9 | 0.01417859 | 0.07929064 | 3.89E-05 | 0.0061278 | 0.1561    |
| 7dr2_7dold_9 | 0.01999462 | 0.11518141 | 4.16E-05 | 0.0053955 | -0.025531 |
| 7dr2_7dold_9 | 0.01740482 | 0.09919971 | 4.06E-05 | 0.0056572 | 0.046584  |
| 7dr2_7dold_9 | 0.02004646 | 0.11550127 | 4.19E-05 | 0.0053364 | -0.025531 |
| 7dr2_7dold_9 | 0.02423355 | 0.14133985 | 4.34E-05 | 0.0049916 | -0.091842 |
| 7dr2_7dold_9 | 0.04648084 | 0.27862787 | 5.44E-05 | 0.0048874 | -0.018376 |
| 7dr2_7dold_9 | 0.01997891 | 0.11508443 | 4.16E-05 | 0.0053955 | -0.025531 |
| 7dr2_7dold_9 | 0.01594167 | 0.09017064 | 3.98E-05 | 0.0058806 | 0.098494  |
| 7dr2_7dold_9 | 0.00916566 | 0.04835589 | 3.59E-05 | 0.00713   | 0.35661   |
| 7dr2_7dold_9 | 0.01291059 | 0.07146586 | 3.80E-05 | 0.0063994 | 0.21875   |
| 7dr2_7dold_9 | 0.04744002 | 0.28454697 | 5.53E-05 | 0.0049654 | -0.01514  |
| 7dr2_7dold_9 | 0.02611842 | 0.15297139 | 4.42E-05 | 0.0048445 | -0.11213  |
| 7dr2_7dold_9 | 0.01521554 | 0.08568969 | 3.95E-05 | 0.0059603 | 0.11709   |
| 7dr2_7dold_9 | 0.02869153 | 0.16885003 | 4.49E-05 | 0.0047302 | -0.12268  |
| 7dr2_7dold_9 | 0.01727715 | 0.0984119  | 4.03E-05 | 0.005729  | 0.046584  |
| 7dr2_7dold_9 | 0.02072508 | 0.11968905 | 4.21E-05 | 0.0052798 | -0.037579 |
| 7dr2_7dold_9 | 0.00963747 | 0.05126743 | 3.62E-05 | 0.0070172 | 0.35661   |
| 7dr2_7dold_9 | 0.02186311 | 0.12671186 | 4.26E-05 | 0.0051742 | -0.059109 |

|              |            |            |          |           |           |
|--------------|------------|------------|----------|-----------|-----------|
| 7dr2_7dold_§ | 0.06798509 | 0.41133058 | 5.98E-05 | 0.010192  | 0.19812   |
| 7dr2_7dold_§ | 0.09335025 | 0.567859   | 5.06E-05 | 0.0067258 | -0.73907  |
| 7dr2_7dold_§ | 0.00550084 | 0.02574029 | 3.41E-05 | 0.0078664 | 0.53284   |
| 7dr2_7dold_§ | 0.02366132 | 0.1378086  | 4.32E-05 | 0.0050338 | -0.084895 |
| 7dr2_7dold_§ | 0.00243942 | 0.00684826 | 3.23E-05 | 0.0087041 | 0.69119   |
| 7dr2_7dold_§ | 0.01671399 | 0.09493664 | 4.00E-05 | 0.0058035 | 0.080526  |
| 7dr2_7dold_§ | 0.02743254 | 0.16108082 | 4.46E-05 | 0.0047834 | -0.11816  |
| 7dr2_7dold_§ | 0.02935655 | 0.17295389 | 4.53E-05 | 0.0046846 | -0.1231   |
| 7dr2_7dold_§ | 0.01537979 | 0.08670325 | 3.95E-05 | 0.0059603 | 0.11709   |
| 7dr2_7dold_§ | 0.01416294 | 0.0791941  | 3.89E-05 | 0.0061278 | 0.1561    |
| 7dr2_7dold_§ | 0.01823184 | 0.10430327 | 4.09E-05 | 0.0055879 | 0.030658  |
| 7dr2_7dold_§ | 0.03884908 | 0.23153226 | 4.89E-05 | 0.0045836 | -0.076088 |
| 7dr2_7dold_§ | 0.02340354 | 0.13621785 | 4.32E-05 | 0.0050338 | -0.084895 |
| 7dr2_7dold_§ | 0.02797733 | 0.16444267 | 4.48E-05 | 0.0047558 | -0.12024  |
| 7dr2_7dold_§ | 0.06182014 | 0.3732867  | 6.36E-05 | 0.0076138 | 0.10802   |
| 7dr2_7dold_§ | 0.03774592 | 0.22472464 | 4.84E-05 | 0.0045696 | -0.084703 |
| 7dr2_7dold_§ | 0.02518656 | 0.14722088 | 4.38E-05 | 0.0049138 | -0.10343  |
| 7dr2_7dold_§ | 0.02756113 | 0.16187434 | 4.46E-05 | 0.0047834 | -0.12024  |
| 7dr2_7dold_§ | 0.00831039 | 0.043078   | 3.56E-05 | 0.0072456 | 0.40559   |
| 7dr2_7dold_§ | 0.00515335 | 0.02359592 | 3.38E-05 | 0.0079991 | 0.55892   |
| 7dr2_7dold_§ | 0.04348576 | 0.26014522 | 5.21E-05 | 0.0047343 | -0.038876 |
| 7dr2_7dold_§ | 0.01140471 | 0.06217305 | 3.74E-05 | 0.0065941 | 0.263     |
| 7dr2_7dold_§ | 0.00359732 | 0.01399363 | 3.29E-05 | 0.0084138 | 0.63801   |
| 7dr2_7dold_§ | 0.01023007 | 0.05492434 | 3.65E-05 | 0.0069072 | 0.33263   |
| 7dr2_7dold_§ | 0.00929507 | 0.04915444 | 3.62E-05 | 0.0070172 | 0.35661   |
| 7dr2_7dold_§ | 0.02726142 | 0.1600248  | 4.46E-05 | 0.0047834 | -0.11816  |
| 7dr2_7dold_§ | 0.09940013 | 0.6051928  | 5.49E-05 | 0.0043938 | -1.2008   |
| 7dr2_7dold_§ | 0.01194845 | 0.06552846 | 3.77E-05 | 0.0064954 | 0.24064   |
| 7dr2_7dold_§ | 0.02061334 | 0.11899951 | 4.21E-05 | 0.0052798 | -0.037579 |
| 7dr2_7dold_§ | 0.02060745 | 0.11896319 | 4.21E-05 | 0.0052798 | -0.037579 |
| 7dr2_7dold_§ | 0.01733183 | 0.09874928 | 4.06E-05 | 0.0056572 | 0.046584  |
| 7dr2_7dold_§ | 0.09635717 | 0.5864147  | 5.24E-05 | 0.0054581 | -0.99133  |
| 7dr2_7dold_§ | 0.02905825 | 0.17111304 | 4.51E-05 | 0.0047064 | -0.12268  |
| 7dr2_7dold_§ | 0.01181404 | 0.06469905 | 3.74E-05 | 0.0065941 | 0.263     |
| 7dr2_7dold_§ | 0.02058009 | 0.1187943  | 4.21E-05 | 0.0052798 | -0.037579 |
| 7dr2_7dold_§ | 0.01461683 | 0.08199502 | 3.92E-05 | 0.0060428 | 0.1363    |
| 7dr2_7dold_§ | 0.0148273  | 0.08329385 | 3.92E-05 | 0.0060428 | 0.1363    |
| 7dr2_7dold_§ | 0.03987712 | 0.23787628 | 4.95E-05 | 0.0046046 | -0.067351 |
| 7dr2_7dold_§ | 0.0260062  | 0.15227884 | 4.42E-05 | 0.0048445 | -0.11213  |
| 7dr2_7dold_§ | 0.01544574 | 0.08711023 | 3.95E-05 | 0.0059603 | 0.11709   |
| 7dr2_7dold_§ | 0.02097757 | 0.1212472  | 4.21E-05 | 0.0052798 | -0.037579 |
| 7dr2_7dold_§ | 0.00579664 | 0.02756563 | 3.41E-05 | 0.0078664 | 0.53284   |
| 7dr2_7dold_§ | 0.00959029 | 0.05097625 | 3.62E-05 | 0.0070172 | 0.35661   |

|              |            |            |          |           |           |
|--------------|------------|------------|----------|-----------|-----------|
| 7dr2_7dold_§ | 0.01036318 | 0.05574578 | 3.68E-05 | 0.0068    | 0.30902   |
| 7dr2_7dold_§ | 0.03052839 | 0.18018527 | 4.57E-05 | 0.0046464 | -0.12245  |
| 7dr2_7dold_§ | 0.01560338 | 0.08808303 | 3.95E-05 | 0.0059603 | 0.11709   |
| 7dr2_7dold_§ | 0.01869597 | 0.10716742 | 4.11E-05 | 0.0055212 | 0.015459  |
| 7dr2_7dold_§ | 0.02603877 | 0.15247984 | 4.42E-05 | 0.0048445 | -0.11213  |
| 7dr2_7dold_§ | 0.01764595 | 0.10068775 | 4.06E-05 | 0.0056572 | 0.046584  |
| 7dr2_7dold_§ | 0.01914974 | 0.10996763 | 4.14E-05 | 0.0054571 | 0.0010121 |
| 7dr2_7dold_§ | 0.01652403 | 0.09376437 | 4.00E-05 | 0.0058035 | 0.080526  |
| 7dr2_7dold_§ | 0.00538151 | 0.02500387 | 3.38E-05 | 0.0079991 | 0.55892   |
| 7dr2_7dold_§ | 0.00992787 | 0.05305947 | 3.65E-05 | 0.0069072 | 0.33263   |
| 7dr2_7dold_§ | 0.00984194 | 0.05252919 | 3.65E-05 | 0.0069072 | 0.33263   |
| 7dr2_7dold_§ | 0.02478505 | 0.14474314 | 4.36E-05 | 0.0049516 | -0.098011 |
| 7dr2_7dold_§ | 0.01705189 | 0.09702178 | 4.03E-05 | 0.005729  | 0.063215  |
| 7dr2_7dold_§ | 0.02322929 | 0.13514253 | 4.30E-05 | 0.0050782 | -0.084895 |
| 7dr2_7dold_§ | 0.01495302 | 0.08406969 | 3.92E-05 | 0.0060428 | 0.1363    |
| 7dr2_7dold_§ | 0.01348398 | 0.07500424 | 3.83E-05 | 0.0063061 | 0.19734   |
| 7dr2_7dold_§ | 0.03898558 | 0.23237461 | 4.89E-05 | 0.0045836 | -0.071721 |
| 7dr2_7dold_§ | 0.01299096 | 0.07196178 | 3.83E-05 | 0.0063061 | 0.19734   |
| 7dr2_7dold_§ | 0.01800483 | 0.10290237 | 4.09E-05 | 0.0055879 | 0.030658  |
| 7dr2_7dold_§ | 0.00917364 | 0.0484051  | 3.59E-05 | 0.00713   | 0.35661   |
| 7dr2_7dold_§ | 0.00901329 | 0.04741557 | 3.59E-05 | 0.00713   | 0.38094   |
| 7dr2_7dold_§ | 0.03104681 | 0.18338445 | 4.58E-05 | 0.00463   | -0.12145  |
| 7dr2_7dold_§ | 0.02967088 | 0.17489357 | 4.53E-05 | 0.0046846 | -0.1231   |
| 7dr2_7dold_§ | 0.01228026 | 0.06757606 | 3.77E-05 | 0.0064954 | 0.24064   |
| 7dr2_7dold_§ | 0.02147788 | 0.1243346  | 4.24E-05 | 0.0052258 | -0.04878  |
| 7dr2_7dold_§ | 0.01521093 | 0.08566125 | 3.95E-05 | 0.0059603 | 0.11709   |
| 7dr2_7dold_§ | 0.02135581 | 0.12358128 | 4.24E-05 | 0.0052258 | -0.04878  |
| 7dr2_7dold_§ | 0.01558638 | 0.08797815 | 3.95E-05 | 0.0059603 | 0.11709   |
| 7dr2_7dold_§ | 0.0088141  | 0.04618636 | 3.59E-05 | 0.00713   | 0.38094   |
| 7dr2_7dold_§ | 0.01835623 | 0.10507085 | 4.09E-05 | 0.0055879 | 0.015459  |
| 7dr2_7dold_§ | 0.09142361 | 0.55596966 | 4.93E-05 | 0.0079874 | -0.60562  |
| 7dr2_7dold_§ | 0.0157184  | 0.08879282 | 3.98E-05 | 0.0058806 | 0.098494  |
| 7dr2_7dold_§ | 0.01557599 | 0.087914   | 3.95E-05 | 0.0059603 | 0.11709   |
| 7dr2_7dold_§ | 0.03283491 | 0.19441883 | 4.64E-05 | 0.0045915 | -0.11603  |
| 7dr2_7dold_§ | 0.0133941  | 0.07444955 | 3.83E-05 | 0.0063061 | 0.19734   |
| 7dr2_7dold_§ | 0.03167276 | 0.18724719 | 4.60E-05 | 0.0046154 | -0.12002  |
| 7dr2_7dold_§ | 0.0193464  | 0.11118122 | 4.14E-05 | 0.0054571 | 0.0010121 |
| 7dr2_7dold_§ | 0.02020989 | 0.1165098  | 4.19E-05 | 0.0053364 | -0.025531 |
| 7dr2_7dold_§ | 0.00732743 | 0.03701213 | 3.50E-05 | 0.0074854 | 0.45576   |
| 7dr2_7dold_§ | 0.02880402 | 0.1695442  | 4.51E-05 | 0.0047064 | -0.12268  |
| 7dr2_7dold_§ | 0.01510969 | 0.08503649 | 3.92E-05 | 0.0060428 | 0.11709   |
| 7dr2_7dold_§ | 0.02768436 | 0.16263479 | 4.48E-05 | 0.0047558 | -0.12024  |
| 7dr2_7dold_§ | 0.01861888 | 0.1066917  | 4.11E-05 | 0.0055212 | 0.015459  |

|              |            |            |          |           |           |
|--------------|------------|------------|----------|-----------|-----------|
| 7dr2_7dold_§ | 0.01825987 | 0.10447624 | 4.09E-05 | 0.0055879 | 0.030658  |
| 7dr2_7dold_§ | 0.0217572  | 0.12605827 | 4.26E-05 | 0.0051742 | -0.059109 |
| 7dr2_7dold_§ | 0.01574996 | 0.0889876  | 3.98E-05 | 0.0058806 | 0.098494  |
| 7dr2_7dold_§ | 0.01950597 | 0.11216594 | 4.16E-05 | 0.0053955 | -0.012659 |
| 7dr2_7dold_§ | 0.01820304 | 0.10412556 | 4.09E-05 | 0.0055879 | 0.030658  |
| 7dr2_7dold_§ | 0.0127557  | 0.07051    | 3.80E-05 | 0.0063994 | 0.21875   |
| 7dr2_7dold_§ | 0.01800584 | 0.10290863 | 4.09E-05 | 0.0055879 | 0.030658  |
| 7dr2_7dold_§ | 0.0066413  | 0.03277805 | 3.47E-05 | 0.0076096 | 0.48124   |
| 7dr2_7dold_§ | 0.01300373 | 0.07204058 | 3.83E-05 | 0.0063061 | 0.19734   |
| 7dr2_7dold_§ | 0.01036657 | 0.05576669 | 3.68E-05 | 0.0068    | 0.30902   |
| 7dr2_7dold_§ | 0.01189127 | 0.06517563 | 3.74E-05 | 0.0065941 | 0.24064   |
| 7dr2_7dold_§ | 0.01623291 | 0.09196786 | 3.98E-05 | 0.0058806 | 0.080526  |
| 7dr2_7dold_§ | 0.03428227 | 0.20335048 | 4.70E-05 | 0.0045688 | -0.10761  |
| 7dr2_7dold_§ | 0.01757021 | 0.10022034 | 4.06E-05 | 0.0056572 | 0.046584  |
| 7dr2_7dold_§ | 0.01268904 | 0.07009866 | 3.80E-05 | 0.0063994 | 0.21875   |
| 7dr2_7dold_§ | 0.01789186 | 0.10220526 | 4.09E-05 | 0.0055879 | 0.030658  |
| 7dr2_7dold_§ | 0.01859793 | 0.1065624  | 4.11E-05 | 0.0055212 | 0.015459  |
| 7dr2_7dold_§ | 0.01163891 | 0.06361827 | 3.74E-05 | 0.0065941 | 0.263     |
| 7dr2_7dold_§ | 0.01389673 | 0.07755129 | 3.86E-05 | 0.0062156 | 0.17645   |
| 7dr2_7dold_§ | 0.02055952 | 0.11866738 | 4.19E-05 | 0.0053364 | -0.037579 |
| 7dr2_7dold_§ | 0.01801294 | 0.10295242 | 4.09E-05 | 0.0055879 | 0.030658  |
| 7dr2_7dold_§ | 0.02810522 | 0.16523193 | 4.48E-05 | 0.0047558 | -0.12174  |
| 7dr2_7dold_§ | 0.02385061 | 0.13897671 | 4.34E-05 | 0.0049916 | -0.091842 |
| 7dr2_7dold_§ | 0.02476711 | 0.14463241 | 4.36E-05 | 0.0049516 | -0.098011 |
| 7dr2_7dold_§ | 0.00429239 | 0.01828289 | 3.32E-05 | 0.0082728 | 0.61153   |
| 7dr2_7dold_§ | 0.01012266 | 0.05426155 | 3.65E-05 | 0.0069072 | 0.33263   |
| 7dr2_7dold_§ | 0.01349479 | 0.07507093 | 3.83E-05 | 0.0063061 | 0.17645   |
| 7dr2_7dold_§ | 0.01755773 | 0.10014333 | 4.06E-05 | 0.0056572 | 0.046584  |
| 7dr2_7dold_§ | 0.02426717 | 0.1415473  | 4.34E-05 | 0.0049916 | -0.091842 |
| 7dr2_7dold_§ | 0.0136119  | 0.07579364 | 3.86E-05 | 0.0062156 | 0.17645   |
| 7dr2_7dold_§ | 0.01258139 | 0.06943432 | 3.80E-05 | 0.0063994 | 0.21875   |
| 7dr2_7dold_§ | 0.02327464 | 0.13542242 | 4.30E-05 | 0.0050782 | -0.084895 |
| 7dr2_7dold_§ | 0.01898671 | 0.10896157 | 4.14E-05 | 0.0054571 | 0.0010121 |
| 7dr2_7dold_§ | 0.00771504 | 0.03940412 | 3.53E-05 | 0.0073641 | 0.43054   |
| 7dr2_7dold_§ | 0.02573896 | 0.15062971 | 4.40E-05 | 0.0048781 | -0.10813  |
| 7dr2_7dold_§ | 0.02766537 | 0.16251759 | 4.48E-05 | 0.0047558 | -0.12024  |
| 7dr2_7dold_§ | 0.01630725 | 0.09242661 | 4.00E-05 | 0.0058035 | 0.080526  |
| 7dr2_7dold_§ | 0.02116817 | 0.12242335 | 4.24E-05 | 0.0052258 | -0.04878  |
| 7dr2_7dold_§ | 0.01795162 | 0.10257404 | 4.09E-05 | 0.0055879 | 0.030658  |
| 7dr2_7dold_§ | 0.01644853 | 0.09329844 | 4.00E-05 | 0.0058035 | 0.080526  |
| 7dr2_7dold_§ | 0.00933744 | 0.04941593 | 3.62E-05 | 0.0070172 | 0.35661   |
| 7dr2_7dold_§ | 0.02494684 | 0.14574158 | 4.38E-05 | 0.0049138 | -0.10343  |
| 7dr2_7dold_§ | 0.02375077 | 0.1383606  | 4.32E-05 | 0.0050338 | -0.091842 |

|              |            |            |          |           |           |
|--------------|------------|------------|----------|-----------|-----------|
| 7dr2_7dold_9 | 0.00991882 | 0.05300365 | 3.65E-05 | 0.0069072 | 0.33263   |
| 7dr2_7dold_9 | 0.01060925 | 0.05726424 | 3.68E-05 | 0.0068    | 0.30902   |
| 7dr2_7dold_9 | 0.01463236 | 0.0820909  | 3.92E-05 | 0.0060428 | 0.1363    |
| 7dr2_7dold_9 | 0.01286729 | 0.07119865 | 3.80E-05 | 0.0063994 | 0.21875   |
| 7dr2_7dold_9 | 0.0242577  | 0.14148888 | 4.34E-05 | 0.0049916 | -0.091842 |
| 7dr2_7dold_9 | 0.01155505 | 0.06310079 | 3.74E-05 | 0.0065941 | 0.263     |
| 7dr2_7dold_9 | 0.02344627 | 0.13648152 | 4.32E-05 | 0.0050338 | -0.084895 |
| 7dr2_7dold_9 | 0.01223648 | 0.0673059  | 3.77E-05 | 0.0064954 | 0.24064   |
| 7dr2_7dold_9 | 0.02057122 | 0.11873961 | 4.21E-05 | 0.0052798 | -0.037579 |
| 7dr2_7dold_9 | 0.00590928 | 0.02826073 | 3.41E-05 | 0.0078664 | 0.53284   |
| 7dr2_7dold_9 | 0.01734913 | 0.09885605 | 4.06E-05 | 0.0056572 | 0.046584  |
| 7dr2_7dold_9 | 0.01227897 | 0.06756812 | 3.77E-05 | 0.0064954 | 0.24064   |
| 7dr2_7dold_9 | 0.01520058 | 0.08559737 | 3.95E-05 | 0.0059603 | 0.11709   |
| 7dr2_7dold_9 | 0.01061942 | 0.057327   | 3.68E-05 | 0.0068    | 0.30902   |
| 7dr2_7dold_9 | 0.00812282 | 0.04192049 | 3.56E-05 | 0.0072456 | 0.40559   |
| 7dr2_7dold_9 | 0.02841553 | 0.16714683 | 4.49E-05 | 0.0047302 | -0.12174  |
| 7dr2_7dold_9 | 0.01428798 | 0.07996568 | 3.89E-05 | 0.0061278 | 0.1561    |
| 7dr2_7dold_9 | 0.0143163  | 0.08014049 | 3.89E-05 | 0.0061278 | 0.1561    |
| 7dr2_7dold_9 | 0.01408721 | 0.07872675 | 3.89E-05 | 0.0061278 | 0.1561    |
| 7dr2_7dold_9 | 0.02233296 | 0.12961131 | 4.28E-05 | 0.005125  | -0.068556 |
| 7dr2_7dold_9 | 0.01787659 | 0.102111   | 4.09E-05 | 0.0055879 | 0.030658  |
| 7dr2_7dold_9 | 0.00632814 | 0.03084554 | 3.44E-05 | 0.0077366 | 0.50694   |
| 7dr2_7dold_9 | 0.02283459 | 0.13270688 | 4.30E-05 | 0.0050782 | -0.077142 |
| 7dr2_7dold_9 | 0.01112258 | 0.06043204 | 3.71E-05 | 0.0066957 | 0.2858    |
| 7dr2_7dold_9 | 0.01380396 | 0.07697885 | 3.86E-05 | 0.0062156 | 0.17645   |
| 7dr2_7dold_9 | 0.02319884 | 0.13495462 | 4.30E-05 | 0.0050782 | -0.077142 |
| 7dr2_7dold_9 | 0.01288147 | 0.07128612 | 3.80E-05 | 0.0063994 | 0.21875   |
| 7dr2_7dold_9 | 0.02324224 | 0.1352225  | 4.30E-05 | 0.0050782 | -0.084895 |
| 7dr2_7dold_9 | 0.00548745 | 0.02565763 | 3.41E-05 | 0.0078664 | 0.53284   |
| 7dr2_7dold_9 | 0.01805495 | 0.10321171 | 4.09E-05 | 0.0055879 | 0.030658  |
| 7dr2_7dold_9 | 0.02968768 | 0.1749973  | 4.53E-05 | 0.0046846 | -0.1231   |
| 7dr2_7dold_9 | 0.01707149 | 0.09714276 | 4.03E-05 | 0.005729  | 0.063215  |
| 7dr2_7dold_9 | 0.00978525 | 0.05217933 | 3.65E-05 | 0.0069072 | 0.33263   |
| 7dr2_7dold_9 | 0.01603124 | 0.09072337 | 3.98E-05 | 0.0058806 | 0.098494  |
| 7dr2_7dold_9 | 0.00779776 | 0.03991457 | 3.53E-05 | 0.0073641 | 0.43054   |
| 7dr2_7dold_9 | 0.01701961 | 0.0968226  | 4.03E-05 | 0.005729  | 0.063215  |
| 7dr2_7dold_9 | 0.01794684 | 0.10254454 | 4.09E-05 | 0.0055879 | 0.030658  |
| 7dr2_7dold_9 | 0.02855716 | 0.16802081 | 4.49E-05 | 0.0047302 | -0.12174  |
| 7dr2_7dold_9 | 0.02848621 | 0.167583   | 4.49E-05 | 0.0047302 | -0.12174  |
| 7dr2_7dold_9 | 0.00925115 | 0.04888346 | 3.62E-05 | 0.0070172 | 0.35661   |
| 7dr2_7dold_9 | 0.0174735  | 0.09962352 | 4.06E-05 | 0.0056572 | 0.046584  |
| 7dr2_7dold_9 | 0.01220545 | 0.06711441 | 3.77E-05 | 0.0064954 | 0.24064   |
| 7dr2_7dold_9 | 0.02119902 | 0.12261374 | 4.24E-05 | 0.0052258 | -0.04878  |

|              |            |            |          |           |           |
|--------------|------------|------------|----------|-----------|-----------|
| 7dr2_7dold_9 | 0.0200921  | 0.11578295 | 4.19E-05 | 0.0053364 | -0.025531 |
| 7dr2_7dold_9 | 0.02274495 | 0.13215366 | 4.30E-05 | 0.0050782 | -0.077142 |
| 7dr2_7dold_9 | 0.0191863  | 0.11019325 | 4.14E-05 | 0.0054571 | 0.0010121 |
| 7dr2_7dold_9 | 0.08850224 | 0.5379419  | 4.82E-05 | 0.0098057 | -0.3415   |
| 7dr2_7dold_9 | 0.01676688 | 0.09526303 | 4.00E-05 | 0.0058035 | 0.063215  |
| 7dr2_7dold_9 | 0.01376334 | 0.07672814 | 3.86E-05 | 0.0062156 | 0.17645   |
| 7dr2_7dold_9 | 0.01780756 | 0.10168506 | 4.06E-05 | 0.0056572 | 0.030658  |
| 7dr2_7dold_9 | 0.01589556 | 0.08988609 | 3.98E-05 | 0.0058806 | 0.098494  |
| 7dr2_7dold_9 | 0.0257412  | 0.15064354 | 4.40E-05 | 0.0048781 | -0.10813  |
| 7dr2_7dold_9 | 0.01515742 | 0.08533105 | 3.95E-05 | 0.0059603 | 0.11709   |
| 7dr2_7dold_9 | 0.01187992 | 0.06510554 | 3.74E-05 | 0.0065941 | 0.24064   |
| 7dr2_7dold_9 | 0.02152104 | 0.12460092 | 4.24E-05 | 0.0052258 | -0.04878  |
| 7dr2_7dold_9 | 0.01140661 | 0.06218477 | 3.74E-05 | 0.0065941 | 0.263     |
| 7dr2_7dold_9 | 0.00870715 | 0.04552643 | 3.59E-05 | 0.00713   | 0.38094   |
| 7dr2_7dold_9 | 0.01887254 | 0.10825702 | 4.11E-05 | 0.0055212 | 0.015459  |
| 7dr2_7dold_9 | 0.0115666  | 0.06317207 | 3.74E-05 | 0.0065941 | 0.263     |
| 7dr2_7dold_9 | 0.02128826 | 0.12316442 | 4.24E-05 | 0.0052258 | -0.04878  |
| 7dr2_7dold_9 | 0.02021309 | 0.11652956 | 4.19E-05 | 0.0053364 | -0.025531 |
| 7dr2_7dold_9 | 0.01006663 | 0.05391575 | 3.65E-05 | 0.0069072 | 0.33263   |
| 7dr2_7dold_9 | 0.02197539 | 0.12740472 | 4.26E-05 | 0.0051742 | -0.059109 |
| 7dr2_7dold_9 | 0.00541949 | 0.02523824 | 3.41E-05 | 0.0078664 | 0.53284   |
| 7dr2_7dold_9 | 0.0122456  | 0.0673622  | 3.77E-05 | 0.0064954 | 0.24064   |
| 7dr2_7dold_9 | 0.01391504 | 0.07766432 | 3.86E-05 | 0.0062156 | 0.17645   |
| 7dr2_7dold_9 | 0.01170395 | 0.06401964 | 3.74E-05 | 0.0065941 | 0.263     |
| 7dr2_7dold_9 | 0.01507404 | 0.08481649 | 3.92E-05 | 0.0060428 | 0.1363    |
| 7dr2_7dold_9 | 0.00703451 | 0.03520453 | 3.50E-05 | 0.0074854 | 0.45576   |
| 7dr2_7dold_9 | 0.0193609  | 0.11127069 | 4.14E-05 | 0.0054571 | 0.0010121 |
| 7dr2_7dold_9 | 0.01912235 | 0.10979861 | 4.14E-05 | 0.0054571 | 0.0010121 |
| 7dr2_7dold_9 | 0.01821096 | 0.10417444 | 4.09E-05 | 0.0055879 | 0.030658  |
| 7dr2_7dold_9 | 0.01953019 | 0.11231541 | 4.16E-05 | 0.0053955 | -0.012659 |
| 7dr2_7dold_9 | 0.03090989 | 0.18253955 | 4.58E-05 | 0.00463   | -0.12145  |
| 7dr2_7dold_9 | 0.0155344  | 0.08765739 | 3.95E-05 | 0.0059603 | 0.11709   |
| 7dr2_7dold_9 | 0.03185048 | 0.18834391 | 4.60E-05 | 0.0046154 | -0.11821  |
| 7dr2_7dold_9 | 0.01722743 | 0.09810507 | 4.03E-05 | 0.005729  | 0.063215  |
| 7dr2_7dold_9 | 0.0243717  | 0.14219238 | 4.36E-05 | 0.0049516 | -0.098011 |
| 7dr2_7dold_9 | 0.00487153 | 0.02185679 | 3.38E-05 | 0.0079991 | 0.55892   |
| 7dr2_7dold_9 | 0.01945515 | 0.11185231 | 4.14E-05 | 0.0054571 | -0.012659 |
| 7dr2_7dold_9 | 0.01760648 | 0.10044419 | 4.06E-05 | 0.0056572 | 0.046584  |
| 7dr2_7dold_9 | 0.01324699 | 0.07354177 | 3.83E-05 | 0.0063061 | 0.19734   |
| 7dr2_7dold_9 | 0.02768614 | 0.1626458  | 4.48E-05 | 0.0047558 | -0.12024  |
| 7dr2_7dold_9 | 0.01390672 | 0.07761297 | 3.86E-05 | 0.0062156 | 0.17645   |
| 7dr2_7dold_9 | 0.02561769 | 0.14988136 | 4.40E-05 | 0.0048781 | -0.10813  |
| 7dr2_7dold_9 | 0.00320779 | 0.01158985 | 3.26E-05 | 0.0085576 | 0.66457   |

|              |            |            |          |           |           |
|--------------|------------|------------|----------|-----------|-----------|
| 7dr2_7dold_§ | 0.01276285 | 0.07055413 | 3.80E-05 | 0.0063994 | 0.21875   |
| 7dr2_7dold_§ | 0.02437363 | 0.14220427 | 4.36E-05 | 0.0049516 | -0.098011 |
| 7dr2_7dold_§ | 0.01358061 | 0.07560051 | 3.86E-05 | 0.0062156 | 0.17645   |
| 7dr2_7dold_§ | 0.00651041 | 0.03197035 | 3.47E-05 | 0.0076096 | 0.48124   |
| 7dr2_7dold_§ | 0.01195637 | 0.06557737 | 3.77E-05 | 0.0064954 | 0.24064   |
| 7dr2_7dold_§ | 0.03454086 | 0.20494625 | 4.70E-05 | 0.0045688 | -0.10761  |
| 7dr2_7dold_§ | 0.01009235 | 0.0540745  | 3.65E-05 | 0.0069072 | 0.33263   |
| 7dr2_7dold_§ | 0.01703893 | 0.09694181 | 4.03E-05 | 0.005729  | 0.063215  |
| 7dr2_7dold_§ | 0.0220959  | 0.12814839 | 4.26E-05 | 0.0051742 | -0.059109 |
| 7dr2_7dold_§ | 0.02414722 | 0.1408071  | 4.34E-05 | 0.0049916 | -0.091842 |
| 7dr2_7dold_§ | 0.02764105 | 0.16236752 | 4.48E-05 | 0.0047558 | -0.12024  |
| 7dr2_7dold_§ | 0.02087162 | 0.12059335 | 4.21E-05 | 0.0052798 | -0.037579 |
| 7dr2_7dold_§ | 0.01409435 | 0.07877082 | 3.89E-05 | 0.0061278 | 0.1561    |
| 7dr2_7dold_§ | 0.01740975 | 0.09923015 | 4.06E-05 | 0.0056572 | 0.046584  |
| 7dr2_7dold_§ | 0.02417768 | 0.14099507 | 4.34E-05 | 0.0049916 | -0.091842 |
| 7dr2_7dold_§ | 0.00873326 | 0.04568756 | 3.59E-05 | 0.00713   | 0.38094   |
| 7dr2_7dold_§ | 0.00544294 | 0.02538295 | 3.41E-05 | 0.0078664 | 0.53284   |
| 7dr2_7dold_§ | 0.01801399 | 0.10295895 | 4.09E-05 | 0.0055879 | 0.030658  |
| 7dr2_7dold_§ | 0.01835498 | 0.1050632  | 4.09E-05 | 0.0055879 | 0.015459  |
| 7dr2_7dold_§ | 0.02758871 | 0.16204454 | 4.46E-05 | 0.0047834 | -0.12024  |
| 7dr2_7dold_§ | 0.01431846 | 0.08015379 | 3.89E-05 | 0.0061278 | 0.1561    |
| 7dr2_7dold_§ | 0.01850469 | 0.10598704 | 4.11E-05 | 0.0055212 | 0.015459  |
| 7dr2_7dold_§ | 0.01820267 | 0.10412328 | 4.09E-05 | 0.0055879 | 0.030658  |
| 7dr2_7dold_§ | 0.02257676 | 0.13111581 | 4.28E-05 | 0.005125  | -0.068556 |
| 7dr2_7dold_§ | 0.01457564 | 0.08174086 | 3.89E-05 | 0.0061278 | 0.1363    |
| 7dr2_7dold_§ | 0.00912736 | 0.04811952 | 3.59E-05 | 0.00713   | 0.38094   |
| 7dr2_7dold_§ | 0.01627027 | 0.09219845 | 4.00E-05 | 0.0058035 | 0.080526  |
| 7dr2_7dold_§ | 0.0190628  | 0.10943113 | 4.14E-05 | 0.0054571 | 0.0010121 |
| 7dr2_7dold_§ | 0.02648579 | 0.15523839 | 4.42E-05 | 0.0048445 | -0.11546  |
| 7dr2_7dold_§ | 0.02933816 | 0.17284036 | 4.53E-05 | 0.0046846 | -0.1231   |
| 7dr2_7dold_§ | 0.01282381 | 0.0709303  | 3.80E-05 | 0.0063994 | 0.21875   |
| 7dr2_7dold_§ | 0.01643859 | 0.09323714 | 4.00E-05 | 0.0058035 | 0.080526  |
| 7dr2_7dold_§ | 0.0311756  | 0.18417926 | 4.58E-05 | 0.00463   | -0.12145  |
| 7dr2_7dold_§ | 0.02452083 | 0.14311266 | 4.36E-05 | 0.0049516 | -0.098011 |
| 7dr2_7dold_§ | 0.01457497 | 0.08173674 | 3.89E-05 | 0.0061278 | 0.1363    |
| 7dr2_7dold_§ | 0.01403741 | 0.07841943 | 3.86E-05 | 0.0062156 | 0.1561    |
| 7dr2_7dold_§ | 0.02533659 | 0.14814672 | 4.38E-05 | 0.0049138 | -0.10343  |
| 7dr2_7dold_§ | 0.01491499 | 0.08383499 | 3.92E-05 | 0.0060428 | 0.1363    |
| 7dr2_7dold_§ | 0.01967646 | 0.11321801 | 4.16E-05 | 0.0053955 | -0.012659 |
| 7dr2_7dold_§ | 0.01688251 | 0.09597655 | 4.03E-05 | 0.005729  | 0.063215  |
| 7dr2_7dold_§ | 0.0094684  | 0.05022408 | 3.62E-05 | 0.0070172 | 0.35661   |
| 7dr2_7dold_§ | 0.01970256 | 0.1133791  | 4.16E-05 | 0.0053955 | -0.012659 |
| 7dr2_7dold_§ | 0.01296759 | 0.0718176  | 3.80E-05 | 0.0063994 | 0.19734   |



|              |            |            |          |           |           |
|--------------|------------|------------|----------|-----------|-----------|
| 7dr2_7dold_§ | 0.01015715 | 0.05447434 | 3.65E-05 | 0.0069072 | 0.33263   |
| 7dr2_7dold_§ | 0.02059566 | 0.11889043 | 4.21E-05 | 0.0052798 | -0.037579 |
| 7dr2_7dold_§ | 0.02512344 | 0.14683138 | 4.38E-05 | 0.0049138 | -0.10343  |
| 7dr2_7dold_§ | 0.00738616 | 0.03737456 | 3.50E-05 | 0.0074854 | 0.45576   |
| 7dr2_7dold_§ | 0.02310207 | 0.13435747 | 4.30E-05 | 0.0050782 | -0.077142 |
| 7dr2_7dold_§ | 0.02385237 | 0.1389876  | 4.34E-05 | 0.0049916 | -0.091842 |
| 7dr2_7dold_§ | 0.01702385 | 0.09684878 | 4.03E-05 | 0.005729  | 0.063215  |
| 7dr2_7dold_§ | 0.02873457 | 0.16911565 | 4.51E-05 | 0.0047064 | -0.12268  |
| 7dr2_7dold_§ | 0.01790262 | 0.10227165 | 4.09E-05 | 0.0055879 | 0.030658  |
| 7dr2_7dold_§ | 0.02575789 | 0.15074657 | 4.40E-05 | 0.0048781 | -0.10813  |
| 7dr2_7dold_§ | 0.01436886 | 0.0804648  | 3.89E-05 | 0.0061278 | 0.1561    |
| 7dr2_7dold_§ | 0.05191002 | 0.31213138 | 5.92E-05 | 0.0053939 | 0.014768  |
| 7dr2_7dold_§ | 0.00776816 | 0.03973192 | 3.53E-05 | 0.0073641 | 0.43054   |
| 7dr2_7dold_§ | 0.00975508 | 0.05199318 | 3.65E-05 | 0.0069072 | 0.33263   |
| 7dr2_7dold_§ | 0.00638028 | 0.03116731 | 3.44E-05 | 0.0077366 | 0.50694   |
| 7dr2_7dold_§ | 0.02861632 | 0.16838588 | 4.49E-05 | 0.0047302 | -0.12268  |
| 7dr2_7dold_§ | 0.0200165  | 0.11531641 | 4.16E-05 | 0.0053955 | -0.025531 |
| 7dr2_7dold_§ | 0.03078028 | 0.1817397  | 4.57E-05 | 0.0046464 | -0.12145  |
| 7dr2_7dold_§ | 0.00554559 | 0.0260164  | 3.41E-05 | 0.0078664 | 0.53284   |
| 7dr2_7dold_§ | 0.02060922 | 0.11897411 | 4.21E-05 | 0.0052798 | -0.037579 |
| 7dr2_7dold_§ | 0.0299498  | 0.17661484 | 4.55E-05 | 0.0046645 | -0.12301  |
| 7dr2_7dold_§ | 0.00697211 | 0.03481949 | 3.47E-05 | 0.0076096 | 0.48124   |
| 7dr2_7dold_§ | 0.0165551  | 0.09395611 | 4.00E-05 | 0.0058035 | 0.080526  |
| 7dr2_7dold_§ | 0.01551529 | 0.08753942 | 3.95E-05 | 0.0059603 | 0.11709   |
| 7dr2_7dold_§ | 0.02150741 | 0.12451682 | 4.24E-05 | 0.0052258 | -0.04878  |
| 7dr2_7dold_§ | 0.01545001 | 0.0871366  | 3.95E-05 | 0.0059603 | 0.11709   |
| 7dr2_7dold_§ | 0.00893385 | 0.04692538 | 3.59E-05 | 0.00713   | 0.38094   |
| 7dr2_7dold_§ | 0.02136725 | 0.12365189 | 4.24E-05 | 0.0052258 | -0.04878  |
| 7dr2_7dold_§ | 0.01962347 | 0.11289101 | 4.16E-05 | 0.0053955 | -0.012659 |
| 7dr2_7dold_§ | 0.0153329  | 0.08641393 | 3.95E-05 | 0.0059603 | 0.11709   |
| 7dr2_7dold_§ | 0.02467849 | 0.14408557 | 4.36E-05 | 0.0049516 | -0.098011 |
| 7dr2_7dold_§ | 0.0169444  | 0.0963585  | 4.03E-05 | 0.005729  | 0.063215  |
| 7dr2_7dold_§ | 0.02559525 | 0.14974292 | 4.40E-05 | 0.0048781 | -0.10813  |
| 7dr2_7dold_§ | 0.01500858 | 0.08441251 | 3.92E-05 | 0.0060428 | 0.1363    |
| 7dr2_7dold_§ | 0.02644034 | 0.15495792 | 4.42E-05 | 0.0048445 | -0.11213  |
| 7dr2_7dold_§ | 0.01461057 | 0.08195642 | 3.92E-05 | 0.0060428 | 0.1363    |
| 7dr2_7dold_§ | 0.00566035 | 0.02672463 | 3.41E-05 | 0.0078664 | 0.53284   |
| 7dr2_7dold_§ | 0.01417758 | 0.07928443 | 3.89E-05 | 0.0061278 | 0.1561    |
| 7dr2_7dold_§ | 0.01670484 | 0.09488013 | 4.00E-05 | 0.0058035 | 0.080526  |
| 7dr2_7dold_§ | 0.00911893 | 0.04806749 | 3.59E-05 | 0.00713   | 0.38094   |
| 7dr2_7dold_§ | 0.0166567  | 0.09458309 | 4.00E-05 | 0.0058035 | 0.080526  |
| 7dr2_7dold_§ | 0.01920251 | 0.11029328 | 4.14E-05 | 0.0054571 | 0.0010121 |
| 7dr2_7dold_§ | 0.01292515 | 0.07155569 | 3.80E-05 | 0.0063994 | 0.21875   |

|              |            |            |          |           |           |
|--------------|------------|------------|----------|-----------|-----------|
| 7dr2_7dold_§ | 0.01778897 | 0.10157031 | 4.06E-05 | 0.0056572 | 0.046584  |
| 7dr2_7dold_§ | 0.01570436 | 0.08870618 | 3.98E-05 | 0.0058806 | 0.098494  |
| 7dr2_7dold_§ | 0.01880702 | 0.10785273 | 4.11E-05 | 0.0055212 | 0.015459  |
| 7dr2_7dold_§ | 0.02567036 | 0.15020637 | 4.40E-05 | 0.0048781 | -0.10813  |
| 7dr2_7dold_§ | 0.02601274 | 0.15231922 | 4.42E-05 | 0.0048445 | -0.11213  |
| 7dr2_7dold_§ | 0.02101983 | 0.12150799 | 4.21E-05 | 0.0052798 | -0.037579 |
| 7dr2_7dold_§ | 0.02322716 | 0.13512942 | 4.30E-05 | 0.0050782 | -0.084895 |
| 7dr2_7dold_§ | 0.0107991  | 0.05843585 | 3.68E-05 | 0.0068    | 0.2858    |
| 7dr2_7dold_§ | 0.01746826 | 0.09959121 | 4.06E-05 | 0.0056572 | 0.046584  |
| 7dr2_7dold_§ | 0.01651005 | 0.09367811 | 4.00E-05 | 0.0058035 | 0.080526  |
| 7dr2_7dold_§ | 0.01321072 | 0.07331796 | 3.83E-05 | 0.0063061 | 0.19734   |
| 7dr2_7dold_§ | 0.01255164 | 0.06925074 | 3.80E-05 | 0.0063994 | 0.21875   |
| 7dr2_7dold_§ | 0.01922167 | 0.11041153 | 4.14E-05 | 0.0054571 | 0.0010121 |
| 7dr2_7dold_§ | 0.01968119 | 0.11324722 | 4.16E-05 | 0.0053955 | -0.012659 |
| 7dr2_7dold_§ | 0.01005726 | 0.05385795 | 3.65E-05 | 0.0069072 | 0.33263   |
| 7dr2_7dold_§ | 0.02049207 | 0.11825115 | 4.19E-05 | 0.0053364 | -0.025531 |
| 7dr2_7dold_§ | 0.02578477 | 0.1509124  | 4.40E-05 | 0.0048781 | -0.10813  |
| 7dr2_7dold_§ | 0.03184225 | 0.18829311 | 4.60E-05 | 0.0046154 | -0.12002  |
| 7dr2_7dold_§ | 0.0235345  | 0.13702598 | 4.32E-05 | 0.0050338 | -0.084895 |
| 7dr2_7dold_§ | 0.01883573 | 0.10802988 | 4.11E-05 | 0.0055212 | 0.015459  |
| 7dr2_7dold_§ | 0.01513942 | 0.08521995 | 3.92E-05 | 0.0060428 | 0.11709   |
| 7dr2_7dold_§ | 0.01309022 | 0.07257433 | 3.83E-05 | 0.0063061 | 0.19734   |
| 7dr2_7dold_§ | 0.01312011 | 0.07275876 | 3.83E-05 | 0.0063061 | 0.19734   |
| 7dr2_7dold_§ | 0.01957062 | 0.11256486 | 4.16E-05 | 0.0053955 | -0.012659 |
| 7dr2_7dold_§ | 0.014679   | 0.08237872 | 3.92E-05 | 0.0060428 | 0.1363    |
| 7dr2_7dold_§ | 0.0197844  | 0.11388411 | 4.16E-05 | 0.0053955 | -0.012659 |
| 7dr2_7dold_§ | 0.02063617 | 0.11914039 | 4.21E-05 | 0.0052798 | -0.037579 |
| 7dr2_7dold_§ | 0.02590557 | 0.15165786 | 4.40E-05 | 0.0048781 | -0.10813  |
| 7dr2_7dold_§ | 0.0186559  | 0.10692014 | 4.11E-05 | 0.0055212 | 0.015459  |
| 7dr2_7dold_§ | 0.01724054 | 0.09818594 | 4.03E-05 | 0.005729  | 0.063215  |
| 7dr2_7dold_§ | 0.01238508 | 0.06822288 | 3.77E-05 | 0.0064954 | 0.24064   |
| 7dr2_7dold_§ | 0.01781321 | 0.10171991 | 4.06E-05 | 0.0056572 | 0.030658  |
| 7dr2_7dold_§ | 0.0094515  | 0.05011976 | 3.62E-05 | 0.0070172 | 0.35661   |
| 7dr2_7dold_§ | 0.00619389 | 0.03001708 | 3.44E-05 | 0.0077366 | 0.50694   |
| 7dr2_7dold_§ | 0.01828606 | 0.10463785 | 4.09E-05 | 0.0055879 | 0.030658  |
| 7dr2_7dold_§ | 0.02129933 | 0.12323277 | 4.24E-05 | 0.0052258 | -0.04878  |
| 7dr2_7dold_§ | 0.01957888 | 0.11261586 | 4.16E-05 | 0.0053955 | -0.012659 |
| 7dr2_7dold_§ | 0.01009058 | 0.05406354 | 3.65E-05 | 0.0069072 | 0.33263   |
| 7dr2_7dold_§ | 0.02799214 | 0.16453409 | 4.48E-05 | 0.0047558 | -0.12024  |
| 7dr2_7dold_§ | 0.01994097 | 0.11485029 | 4.16E-05 | 0.0053955 | -0.012659 |
| 7dr2_7dold_§ | 0.02083845 | 0.12038866 | 4.21E-05 | 0.0052798 | -0.037579 |
| 7dr2_7dold_§ | 0.02931977 | 0.17272693 | 4.53E-05 | 0.0046846 | -0.1231   |
| 7dr2_7dold_§ | 0.00597997 | 0.02869695 | 3.44E-05 | 0.0077366 | 0.50694   |

|              |            |            |          |           |           |
|--------------|------------|------------|----------|-----------|-----------|
| 7dr2_7dold_9 | 0.01893138 | 0.10862014 | 4.11E-05 | 0.0055212 | 0.0010121 |
| 7dr2_7dold_9 | 0.02977528 | 0.17553788 | 4.53E-05 | 0.0046846 | -0.12301  |
| 7dr2_7dold_9 | 0.00818273 | 0.0422902  | 3.56E-05 | 0.0072456 | 0.40559   |
| 7dr2_7dold_9 | 0.01979764 | 0.11396583 | 4.16E-05 | 0.0053955 | -0.012659 |
| 7dr2_7dold_9 | 0.0166832  | 0.09474661 | 4.00E-05 | 0.0058035 | 0.080526  |
| 7dr2_7dold_9 | 0.01864963 | 0.10688146 | 4.11E-05 | 0.0055212 | 0.015459  |
| 7dr2_7dold_9 | 0.01320338 | 0.07327265 | 3.83E-05 | 0.0063061 | 0.19734   |
| 7dr2_7dold_9 | 0.02221014 | 0.12885338 | 4.28E-05 | 0.005125  | -0.068556 |
| 7dr2_7dold_9 | 0.02142884 | 0.12403197 | 4.24E-05 | 0.0052258 | -0.04878  |
| 7dr2_7dold_9 | 0.00907638 | 0.04780491 | 3.59E-05 | 0.00713   | 0.38094   |
| 7dr2_7dold_9 | 0.02294819 | 0.13340788 | 4.30E-05 | 0.0050782 | -0.077142 |
| 7dr2_7dold_9 | 0.01556031 | 0.08781724 | 3.95E-05 | 0.0059603 | 0.11709   |
| 7dr2_7dold_9 | 0.01679863 | 0.09545895 | 4.03E-05 | 0.005729  | 0.063215  |
| 7dr2_7dold_9 | 0.02451086 | 0.1430511  | 4.36E-05 | 0.0049516 | -0.098011 |
| 7dr2_7dold_9 | 0.01288732 | 0.07132226 | 3.80E-05 | 0.0063994 | 0.21875   |
| 7dr2_7dold_9 | 0.00843752 | 0.04386249 | 3.56E-05 | 0.0072456 | 0.40559   |
| 7dr2_7dold_9 | 0.00345019 | 0.01308569 | 3.29E-05 | 0.0084138 | 0.63801   |
| 7dr2_7dold_9 | 0.01914603 | 0.10994472 | 4.14E-05 | 0.0054571 | 0.0010121 |
| 7dr2_7dold_9 | 0.0258601  | 0.15137726 | 4.40E-05 | 0.0048781 | -0.10813  |
| 7dr2_7dold_9 | 0.02721255 | 0.15972322 | 4.46E-05 | 0.0047834 | -0.11816  |
| 7dr2_7dold_9 | 0.01868245 | 0.10708398 | 4.11E-05 | 0.0055212 | 0.015459  |
| 7dr2_7dold_9 | 0.00671116 | 0.03320916 | 3.47E-05 | 0.0076096 | 0.48124   |
| 7dr2_7dold_9 | 0.02146956 | 0.12428326 | 4.24E-05 | 0.0052258 | -0.04878  |
| 7dr2_7dold_9 | 0.01313031 | 0.07282171 | 3.83E-05 | 0.0063061 | 0.19734   |
| 7dr2_7dold_9 | 0.02007607 | 0.11568403 | 4.19E-05 | 0.0053364 | -0.025531 |
| 7dr2_7dold_9 | 0.02249953 | 0.13063923 | 4.28E-05 | 0.005125  | -0.068556 |
| 7dr2_7dold_9 | 0.01222953 | 0.06726302 | 3.77E-05 | 0.0064954 | 0.24064   |
| 7dr2_7dold_9 | 0.01398544 | 0.07809874 | 3.86E-05 | 0.0062156 | 0.17645   |
| 7dr2_7dold_9 | 0.00764936 | 0.03899877 | 3.53E-05 | 0.0073641 | 0.43054   |
| 7dr2_7dold_9 | 0.02699015 | 0.15835081 | 4.44E-05 | 0.004813  | -0.11816  |
| 7dr2_7dold_9 | 0.0102721  | 0.05518371 | 3.65E-05 | 0.0069072 | 0.30902   |
| 7dr2_7dold_9 | 0.02490001 | 0.14545256 | 4.36E-05 | 0.0049516 | -0.10343  |
| 7dr2_7dold_9 | 0.01472449 | 0.08265941 | 3.92E-05 | 0.0060428 | 0.1363    |
| 7dr2_7dold_9 | 0.01783424 | 0.10184971 | 4.06E-05 | 0.0056572 | 0.030658  |
| 7dr2_7dold_9 | 0.02269736 | 0.13186003 | 4.28E-05 | 0.005125  | -0.077142 |
| 7dr2_7dold_9 | 0.02148452 | 0.1243756  | 4.24E-05 | 0.0052258 | -0.04878  |
| 7dr2_7dold_9 | 0.0033751  | 0.01262234 | 3.29E-05 | 0.0084138 | 0.63801   |
| 7dr2_7dold_9 | 0.01378369 | 0.07685373 | 3.86E-05 | 0.0062156 | 0.17645   |
| 7dr2_7dold_9 | 0.00835739 | 0.04336804 | 3.56E-05 | 0.0072456 | 0.40559   |
| 7dr2_7dold_9 | 0.02393046 | 0.13946947 | 4.34E-05 | 0.0049916 | -0.091842 |
| 7dr2_7dold_9 | 0.01557354 | 0.08789893 | 3.95E-05 | 0.0059603 | 0.11709   |
| 7dr2_7dold_9 | 0.0211207  | 0.12213044 | 4.24E-05 | 0.0052258 | -0.04878  |
| 3d7d_SITTB7  | 0.02672671 | 0.15672511 | 4.44E-05 | 0.004813  | -0.11546  |

|             |            |            |          |           |           |
|-------------|------------|------------|----------|-----------|-----------|
| 3d7d_SITTB7 | 0.0235135  | 0.13689642 | 4.32E-05 | 0.0050338 | -0.084895 |
| 3d7d_SITTB7 | 0.01418432 | 0.07932604 | 3.89E-05 | 0.0061278 | 0.1561    |
| 3d7d_SITTB7 | 0.0200368  | 0.11544167 | 4.19E-05 | 0.0053364 | -0.025531 |
| 3d7d_SITTB7 | 0.00670465 | 0.03316897 | 3.47E-05 | 0.0076096 | 0.48124   |
| 3d7d_SITTB7 | 0.01139747 | 0.06212838 | 3.74E-05 | 0.0065941 | 0.263     |
| 3d7d_SITTB7 | 0.01881146 | 0.10788013 | 4.11E-05 | 0.0055212 | 0.015459  |
| 3d7d_SITTB7 | 0.00404156 | 0.01673506 | 3.32E-05 | 0.0082728 | 0.61153   |
| 3d7d_SITTB7 | 0.02039084 | 0.11762648 | 4.19E-05 | 0.0053364 | -0.025531 |
| 3d7d_SITTB7 | 0.01205904 | 0.06621093 | 3.77E-05 | 0.0064954 | 0.24064   |
| 3d7d_SITTB7 | 0.02804721 | 0.16487391 | 4.48E-05 | 0.0047558 | -0.12024  |
| 3d7d_SITTB7 | 0.00951109 | 0.0504875  | 3.62E-05 | 0.0070172 | 0.35661   |
| 3d7d_SITTB7 | 0.00455572 | 0.01990796 | 3.35E-05 | 0.0081345 | 0.58516   |
| 3d7d_SITTB7 | 0.01763472 | 0.10061847 | 4.06E-05 | 0.0056572 | 0.046584  |
| 3d7d_SITTB7 | 0.01939902 | 0.11150596 | 4.14E-05 | 0.0054571 | 0.0010121 |
| 3d7d_SITTB7 | 0.02591616 | 0.1517232  | 4.40E-05 | 0.0048781 | -0.11213  |
| 3d7d_SITTB7 | 0.08765281 | 0.53270006 | 4.79E-05 | 0.010571  | -0.29935  |
| 3d7d_SITTB7 | 0.01585789 | 0.0896536  | 3.98E-05 | 0.0058806 | 0.098494  |
| 3d7d_SITTB7 | 0.01833691 | 0.10495166 | 4.09E-05 | 0.0055879 | 0.030658  |
| 3d7d_SITTB7 | 0.01225783 | 0.06743762 | 3.77E-05 | 0.0064954 | 0.24064   |
| 3d7d_SITTB7 | 0.00908645 | 0.04786705 | 3.59E-05 | 0.00713   | 0.38094   |
| 3d7d_SITTB7 | 0.00584211 | 0.02784623 | 3.41E-05 | 0.0078664 | 0.53284   |
| 3d7d_SITTB7 | 0.00406948 | 0.01690732 | 3.32E-05 | 0.0082728 | 0.61153   |
| 3d7d_SITTB7 | 0.03646762 | 0.2168363  | 4.79E-05 | 0.0045625 | -0.092976 |
| 3d7d_SITTB7 | 0.03784086 | 0.22531056 | 4.84E-05 | 0.0045696 | -0.080425 |
| 3d7d_SITTB7 | 0.09934825 | 0.60487264 | 5.49E-05 | 0.0043938 | -1.1701   |
| 3d7d_SITTB7 | 0.02919599 | 0.17196308 | 4.51E-05 | 0.0047064 | -0.1231   |
| 3d7d_SITTB7 | 0.03189002 | 0.18858792 | 4.60E-05 | 0.0046154 | -0.11821  |
| 3d7d_SITTB7 | 0.08417871 | 0.5112614  | 4.76E-05 | 0.012731  | -0.036078 |
| 3d7d_SITTB7 | 0.01491975 | 0.08386433 | 3.92E-05 | 0.0060428 | 0.1363    |
| 3d7d_SITTB7 | 0.02719696 | 0.15962707 | 4.46E-05 | 0.0047834 | -0.11816  |
| 3d7d_SITTB7 | 0.01241087 | 0.06838207 | 3.77E-05 | 0.0064954 | 0.21875   |
| 3d7d_SITTB7 | 0.01567188 | 0.08850577 | 3.95E-05 | 0.0059603 | 0.098494  |
| 3d7d_SITTB7 | 0.02306608 | 0.13413535 | 4.30E-05 | 0.0050782 | -0.077142 |
| 3d7d_SITTB7 | 0.0199059  | 0.11463388 | 4.16E-05 | 0.0053955 | -0.012659 |
| 3d7d_SITTB7 | 0.01366606 | 0.07612781 | 3.86E-05 | 0.0062156 | 0.17645   |
| 3d7d_SITTB7 | 0.01992663 | 0.11476184 | 4.16E-05 | 0.0053955 | -0.012659 |
| 3d7d_SITTB7 | 0.01985556 | 0.11432328 | 4.16E-05 | 0.0053955 | -0.012659 |
| 3d7d_SITTB7 | 0.02092706 | 0.12093546 | 4.21E-05 | 0.0052798 | -0.037579 |
| 3d7d_SITTB7 | 0.04698155 | 0.28171778 | 5.49E-05 | 0.0049251 | -0.01514  |
| 3d7d_SITTB7 | 0.00474589 | 0.0210815  | 3.35E-05 | 0.0081345 | 0.58516   |
| 3d7d_SITTB7 | 0.01646274 | 0.09338617 | 4.00E-05 | 0.0058035 | 0.080526  |
| 3d7d_SITTB7 | 0.01994594 | 0.11488099 | 4.16E-05 | 0.0053955 | -0.012659 |
| 3d7d_SITTB7 | 0.00821105 | 0.04246497 | 3.56E-05 | 0.0072456 | 0.40559   |

|             |            |            |          |           |           |
|-------------|------------|------------|----------|-----------|-----------|
| 3d7d_SITTB7 | 0.00872998 | 0.0456673  | 3.59E-05 | 0.00713   | 0.38094   |
| 3d7d_SITTB7 | 0.03121039 | 0.18439393 | 4.58E-05 | 0.00463   | -0.12145  |
| 3d7d_SITTB7 | 0.02112014 | 0.12212694 | 4.24E-05 | 0.0052258 | -0.04878  |
| 3d7d_SITTB7 | 0.01107983 | 0.06016823 | 3.71E-05 | 0.0066957 | 0.2858    |
| 3d7d_SITTB7 | 0.01671747 | 0.09495807 | 4.00E-05 | 0.0058035 | 0.080526  |
| 3d7d_SITTB7 | 0.00889211 | 0.04666777 | 3.59E-05 | 0.00713   | 0.38094   |
| 3d7d_SITTB7 | 0.01211957 | 0.06658445 | 3.77E-05 | 0.0064954 | 0.24064   |
| 3d7d_SITTB7 | 0.02040172 | 0.1176936  | 4.19E-05 | 0.0053364 | -0.025531 |
| 3d7d_SITTB7 | 0.00963332 | 0.05124181 | 3.62E-05 | 0.0070172 | 0.35661   |
| 3d7d_SITTB7 | 0.01767434 | 0.10086294 | 4.06E-05 | 0.0056572 | 0.046584  |
| 3d7d_SITTB7 | 0.02624322 | 0.15374152 | 4.42E-05 | 0.0048445 | -0.11213  |
| 3d7d_SITTB7 | 0.0135906  | 0.07566216 | 3.86E-05 | 0.0062156 | 0.17645   |
| 3d7d_SITTB7 | 0.0593013  | 0.3577429  | 6.37E-05 | 0.0067983 | 0.074574  |
| 3d7d_SITTB7 | 0.01938541 | 0.11142193 | 4.14E-05 | 0.0054571 | 0.0010121 |
| 2w4w_SITTC4 | 0.06747358 | 0.40817404 | 6.03E-05 | 0.009922  | 0.19037   |
| 2w4w_SITTC4 | 0.01763498 | 0.10062006 | 4.06E-05 | 0.0056572 | 0.046584  |
| 2w4w_SITTC4 | 0.01760042 | 0.10040677 | 4.06E-05 | 0.0056572 | 0.046584  |
| 2w4w_SITTC4 | 0.09277327 | 0.56429845 | 5.02E-05 | 0.0070215 | -0.69483  |
| 2w4w_SITTC4 | 0.04093628 | 0.2444124  | 5.02E-05 | 0.0046325 | -0.058715 |
| 2w4w_SITTC4 | 0.01490285 | 0.08376005 | 3.92E-05 | 0.0060428 | 0.1363    |
| 2w4w_SITTC4 | 0.01812474 | 0.10364238 | 4.09E-05 | 0.0055879 | 0.030658  |
| 2w4w_SITTC4 | 0.00790632 | 0.04058447 | 3.53E-05 | 0.0073641 | 0.43054   |
| 2w4w_SITTC4 | 0.01691846 | 0.09619842 | 4.03E-05 | 0.005729  | 0.063215  |
| 2w4w_SITTC4 | 0.06892872 | 0.41715375 | 5.87E-05 | 0.010741  | 0.21248   |
| 2w4w_SITTC4 | 0.0154656  | 0.0872328  | 3.95E-05 | 0.0059603 | 0.11709   |
| 2w4w_SITTC4 | 0.02128444 | 0.12314084 | 4.24E-05 | 0.0052258 | -0.04878  |
| 2w4w_SITTC4 | 0.03478771 | 0.20646954 | 4.72E-05 | 0.0045646 | -0.10426  |
| 2w4w_SITTC4 | 0.08503123 | 0.51652235 | 4.76E-05 | 0.012404  | -0.10433  |
| 2w4w_SITTC4 | 0.0320006  | 0.1892703  | 4.62E-05 | 0.0046026 | -0.11821  |
| 2w4w_SITTC4 | 0.02504201 | 0.14632884 | 4.38E-05 | 0.0049138 | -0.10343  |
| 2w4w_SITTC4 | 0.08614036 | 0.52336675 | 4.76E-05 | 0.0117    | -0.17867  |
| 2w4w_SITTC4 | 0.02365439 | 0.13776582 | 4.32E-05 | 0.0050338 | -0.084895 |
| 2w4w_SITTC4 | 0.08087906 | 0.49089932 | 4.85E-05 | 0.0141    | 0.12269   |
| 2w4w_SITTC4 | 0.02352229 | 0.13695063 | 4.32E-05 | 0.0050338 | -0.084895 |
| 2w4w_SITTC4 | 0.01299794 | 0.07200488 | 3.83E-05 | 0.0063061 | 0.19734   |
| 2w4w_SITTC4 | 0.03007705 | 0.17740007 | 4.55E-05 | 0.0046645 | -0.12301  |
| 2w4w_SITTC4 | 0.05351163 | 0.32201487 | 6.05E-05 | 0.0056127 | 0.026054  |
| 2w4w_SITTC4 | 0.01330114 | 0.07387591 | 3.83E-05 | 0.0063061 | 0.19734   |
| 2w4w_SITTC4 | 0.01578396 | 0.08919738 | 3.98E-05 | 0.0058806 | 0.098494  |
| 2w4w_SITTC4 | 0.03098118 | 0.18297945 | 4.58E-05 | 0.00463   | -0.12145  |
| 2w4w_SITTC4 | 0.0129542  | 0.07173497 | 3.80E-05 | 0.0063994 | 0.19734   |
| 2w4w_SITTC4 | 0.01628853 | 0.09231113 | 4.00E-05 | 0.0058035 | 0.080526  |
| 2w4w_SITTC4 | 0.02055948 | 0.11866715 | 4.19E-05 | 0.0053364 | -0.037579 |

|                    |            |            |          |           |           |
|--------------------|------------|------------|----------|-----------|-----------|
| 2w4w_SITTC $\zeta$ | 0.01646441 | 0.09339643 | 4.00E-05 | 0.0058035 | 0.080526  |
| 2w4w_SITTC $\zeta$ | 0.02294415 | 0.13338293 | 4.30E-05 | 0.0050782 | -0.077142 |
| 2w4w_SITTC $\zeta$ | 0.09763839 | 0.59432113 | 5.36E-05 | 0.0048658 | -1.0673   |
| 2w4w_SITTC $\zeta$ | 0.01679036 | 0.09540787 | 4.03E-05 | 0.005729  | 0.063215  |
| 2w4w_SITTC $\zeta$ | 0.02392385 | 0.1394287  | 4.34E-05 | 0.0049916 | -0.091842 |
| 2w4w_SITTC $\zeta$ | 0.02293184 | 0.13330701 | 4.30E-05 | 0.0050782 | -0.077142 |
| 2w4w_SITTC $\zeta$ | 0.0899563  | 0.54691494 | 4.88E-05 | 0.0086895 | -0.47194  |
| 2w4w_SITTC $\zeta$ | 0.00716357 | 0.03600095 | 3.50E-05 | 0.0074854 | 0.45576   |
| 2w4w_SITTC $\zeta$ | 0.02724643 | 0.15993232 | 4.46E-05 | 0.0047834 | -0.11816  |
| 2w4w_SITTC $\zeta$ | 0.017022   | 0.09683736 | 4.03E-05 | 0.005729  | 0.063215  |
| 2w4w_SITTC $\zeta$ | 0.09357696 | 0.56925803 | 5.06E-05 | 0.0067258 | -0.7829   |
| 2w4w_SITTC $\zeta$ | 0.02448506 | 0.14289191 | 4.36E-05 | 0.0049516 | -0.098011 |
| 2w4w_SITTC $\zeta$ | 0.09114946 | 0.55427796 | 4.93E-05 | 0.0079874 | -0.56091  |
| 2w4w_SITTC $\zeta$ | 0.02675025 | 0.1568704  | 4.44E-05 | 0.004813  | -0.11546  |
| 2w4w_SITTC $\zeta$ | 0.01053596 | 0.05681202 | 3.68E-05 | 0.0068    | 0.30902   |
| 2w4w_SITTC $\zeta$ | 0.0195712  | 0.11256845 | 4.16E-05 | 0.0053955 | -0.012659 |
| 2w4w_SITTC $\zeta$ | 0.09215509 | 0.5604837  | 4.99E-05 | 0.0073308 | -0.6503   |
| 2w4w_SITTC $\zeta$ | 0.02756234 | 0.1618818  | 4.46E-05 | 0.0047834 | -0.12024  |
| 2w4w_SITTC $\zeta$ | 0.01968497 | 0.11327057 | 4.16E-05 | 0.0053955 | -0.012659 |
| 2w4w_SITTC $\zeta$ | 0.08632196 | 0.5244874  | 4.77E-05 | 0.01133   | -0.17867  |
| 2w4w_SITTC $\zeta$ | 0.08590327 | 0.52190363 | 4.76E-05 | 0.0117    | -0.17867  |
| 2w4w_SITTC $\zeta$ | 0.08507481 | 0.5167912  | 4.76E-05 | 0.012059  | -0.10433  |
| 2w4w_SITTC $\zeta$ | 0.02980152 | 0.17569976 | 4.55E-05 | 0.0046645 | -0.12301  |
| 2w4w_SITTC $\zeta$ | 0.09942965 | 0.605375   | 5.49E-05 | 0.0043938 | -1.2008   |
| 2w4w_SITTC $\zeta$ | 0.08914677 | 0.5419193  | 4.84E-05 | 0.0094274 | -0.42792  |
| 2w4w_SITTC $\zeta$ | 0.09829024 | 0.5983437  | 5.40E-05 | 0.0046955 | -1.1375   |
| 2w4w_SITTC $\zeta$ | 0.09325804 | 0.56728995 | 5.06E-05 | 0.0067258 | -0.73907  |
| 2w4w_SITTC $\zeta$ | 0.04036755 | 0.24090275 | 4.99E-05 | 0.0046177 | -0.063007 |
| 2w4w_SITTC $\zeta$ | 0.07614452 | 0.46168247 | 5.18E-05 | 0.013885  | 0.22792   |
| 2w4w_SITTC $\zeta$ | 0.02138406 | 0.12375566 | 4.24E-05 | 0.0052258 | -0.04878  |
| 2w4w_SITTC $\zeta$ | 0.09344337 | 0.56843364 | 5.06E-05 | 0.0067258 | -0.7829   |
| 2w4w_SITTC $\zeta$ | 0.02954018 | 0.17408705 | 4.53E-05 | 0.0046846 | -0.1231   |
| 2w4w_SITTC $\zeta$ | 0.02114237 | 0.12226418 | 4.24E-05 | 0.0052258 | -0.04878  |
| 2w4w_SITTC $\zeta$ | 0.04096301 | 0.24457735 | 5.02E-05 | 0.0046325 | -0.058715 |
| 2w4w_SITTC $\zeta$ | 0.04406271 | 0.26370558 | 5.25E-05 | 0.0047605 | -0.035266 |
| 2w4w_SITTC $\zeta$ | 0.09049681 | 0.5502504  | 4.91E-05 | 0.0083333 | -0.51631  |
| 2w4w_SITTC $\zeta$ | 0.01898782 | 0.10896841 | 4.14E-05 | 0.0054571 | 0.0010121 |
| 2w4w_SITTC $\zeta$ | 0.03066932 | 0.18105496 | 4.57E-05 | 0.0046464 | -0.12245  |
| 2w4w_SITTC $\zeta$ | 0.01613046 | 0.09133566 | 3.98E-05 | 0.0058806 | 0.098494  |
| 2w4w_SITTC $\zeta$ | 0.0387599  | 0.23098196 | 4.89E-05 | 0.0045836 | -0.076088 |
| 2w4w_SITTC $\zeta$ | 0.03110337 | 0.18373348 | 4.58E-05 | 0.00463   | -0.12145  |
| 2w4w_SITTC $\zeta$ | 0.01577136 | 0.08911967 | 3.98E-05 | 0.0058806 | 0.098494  |
| 2w4w_SITTC $\zeta$ | 0.02852081 | 0.16779654 | 4.49E-05 | 0.0047302 | -0.12174  |

|                    |            |            |          |           |            |
|--------------------|------------|------------|----------|-----------|------------|
| 2w4w_SITTC $\zeta$ | 0.08475807 | 0.51483667 | 4.76E-05 | 0.012404  | -0.069378  |
| 2w4w_SITTC $\zeta$ | 0.03409469 | 0.20219292 | 4.68E-05 | 0.0045746 | -0.10761   |
| 2w4w_SITTC $\zeta$ | 0.01506997 | 0.08479136 | 3.92E-05 | 0.0060428 | 0.1363     |
| 2w4w_SITTC $\zeta$ | 0.02029982 | 0.11706481 | 4.19E-05 | 0.0053364 | -0.025531  |
| 2w4w_SITTC $\zeta$ | 0.01972842 | 0.11353865 | 4.16E-05 | 0.0053955 | -0.012659  |
| 2w4w_SITTC $\zeta$ | 0.03374054 | 0.20000748 | 4.68E-05 | 0.0045746 | -0.11071   |
| 2w4w_SITTC $\zeta$ | 0.09936486 | 0.60497516 | 5.49E-05 | 0.0043938 | -1.1701    |
| 2w4w_SITTC $\zeta$ | 0.03871589 | 0.23071037 | 4.89E-05 | 0.0045836 | -0.076088  |
| 2w4w_SITTC $\zeta$ | 0.07978783 | 0.4841653  | 4.90E-05 | 0.014278  | 0.15946    |
| 2w4w_SITTC $\zeta$ | 0.02463905 | 0.14384218 | 4.36E-05 | 0.0049516 | -0.098011  |
| 2w4w_SITTC $\zeta$ | 0.06954126 | 0.42093372 | 5.82E-05 | 0.011019  | 0.21895    |
| 2w4w_SITTC $\zeta$ | 0.02378795 | 0.13859002 | 4.32E-05 | 0.0050338 | -0.091842  |
| 2w4w_SITTC $\zeta$ | 0.02193562 | 0.12715933 | 4.26E-05 | 0.0051742 | -0.059109  |
| 2w4w_SITTC $\zeta$ | 0.04949434 | 0.2972242  | 5.73E-05 | 0.0051543 | -0.0022352 |
| 2w4w_SITTC $\zeta$ | 0.03932349 | 0.23445983 | 4.92E-05 | 0.0045932 | -0.071721  |
| 2w4w_SITTC $\zeta$ | 0.0138902  | 0.07751098 | 3.86E-05 | 0.0062156 | 0.17645    |
| 2w4w_SITTC $\zeta$ | 0.01859295 | 0.10653171 | 4.11E-05 | 0.0055212 | 0.015459   |
| 2w4w_SITTC $\zeta$ | 0.08997381 | 0.54702294 | 4.88E-05 | 0.0086895 | -0.47194   |
| 2w4w_SITTC $\zeta$ | 0.01266502 | 0.06995039 | 3.80E-05 | 0.0063994 | 0.21875    |
| 2w4w_SITTC $\zeta$ | 0.04696434 | 0.28161153 | 5.49E-05 | 0.0049251 | -0.018376  |
| 2w4w_SITTC $\zeta$ | 0.0239347  | 0.13949564 | 4.34E-05 | 0.0049916 | -0.091842  |
| 2w4w_SITTC $\zeta$ | 0.08520906 | 0.51761967 | 4.76E-05 | 0.012059  | -0.10433   |
| 2w4w_SITTC $\zeta$ | 0.0839977  | 0.51014435 | 4.76E-05 | 0.012731  | -0.036078  |
| 2w4w_SITTC $\zeta$ | 0.01699873 | 0.09669374 | 4.03E-05 | 0.005729  | 0.063215   |
| 2w4w_SITTC $\zeta$ | 0.1013239  | 0.61706436 | 5.66E-05 | 0.0039398 | -1.2808    |
| 2w4w_SITTC $\zeta$ | 0.0210946  | 0.12196939 | 4.21E-05 | 0.0052798 | -0.04878   |
| 2w4w_SITTC $\zeta$ | 0.01826281 | 0.10449439 | 4.09E-05 | 0.0055879 | 0.030658   |
| 2w4w_SITTC $\zeta$ | 0.02832034 | 0.1665594  | 4.49E-05 | 0.0047302 | -0.12174   |
| 2w4w_SITTC $\zeta$ | 0.0132419  | 0.07351036 | 3.83E-05 | 0.0063061 | 0.19734    |
| 2w4w_SITTC $\zeta$ | 0.01439782 | 0.08064356 | 3.89E-05 | 0.0061278 | 0.1561     |
| 2w4w_SITTC $\zeta$ | 0.01473812 | 0.08274355 | 3.92E-05 | 0.0060428 | 0.1363     |
| 2w4w_SITTC $\zeta$ | 0.06973833 | 0.42214984 | 5.82E-05 | 0.011019  | 0.22487    |
| 2w4w_SITTC $\zeta$ | 0.01261973 | 0.06967093 | 3.80E-05 | 0.0063994 | 0.21875    |
| 2w4w_SITTC $\zeta$ | 0.03859462 | 0.22996199 | 4.89E-05 | 0.0045836 | -0.076088  |
| 2w4w_SITTC $\zeta$ | 0.11125077 | 0.67832315 | 6.31E-05 | 0.0037825 | -1.342     |
| 2w4w_SITTC $\zeta$ | 0.01395103 | 0.07788637 | 3.86E-05 | 0.0062156 | 0.17645    |
| 2w4w_SITTC $\zeta$ | 0.02994748 | 0.17660052 | 4.55E-05 | 0.0046645 | -0.12301   |
| 2w4w_SITTC $\zeta$ | 0.07231411 | 0.438045   | 5.54E-05 | 0.012382  | 0.24161    |
| 2w4w_SITTC $\zeta$ | 0.0044525  | 0.01927098 | 3.35E-05 | 0.0081345 | 0.58516    |
| 2w4w_SITTC $\zeta$ | 0.01986585 | 0.11438678 | 4.16E-05 | 0.0053955 | -0.012659  |
| 2w4w_SITTC $\zeta$ | 0.02726243 | 0.16003104 | 4.46E-05 | 0.0047834 | -0.11816   |
| 2w4w_SITTC $\zeta$ | 0.0308948  | 0.1824464  | 4.58E-05 | 0.00463   | -0.12145   |
| 2w4w_SITTC $\zeta$ | 0.07662614 | 0.46465456 | 5.13E-05 | 0.014025  | 0.22792    |

|                         |            |            |          |           |            |
|-------------------------|------------|------------|----------|-----------|------------|
| 2w4w_SITTC <sup>Δ</sup> | 0.01157498 | 0.06322376 | 3.74E-05 | 0.0065941 | 0.263      |
| 2w4w_SITTC <sup>Δ</sup> | 0.06967824 | 0.42177904 | 5.82E-05 | 0.011019  | 0.22487    |
| 2w4w_SITTC <sup>Δ</sup> | 0.02979784 | 0.17567705 | 4.55E-05 | 0.0046645 | -0.12301   |
| 2w4w_SITTC <sup>Δ</sup> | 0.00706561 | 0.03539648 | 3.50E-05 | 0.0074854 | 0.45576    |
| 2w4w_SITTC <sup>Δ</sup> | 0.01866112 | 0.10695236 | 4.11E-05 | 0.0055212 | 0.015459   |
| 2w4w_SITTC <sup>Δ</sup> | 0.01445717 | 0.08100977 | 3.89E-05 | 0.0061278 | 0.1561     |
| 2w4w_SITTC <sup>Δ</sup> | 0.0216764  | 0.12555963 | 4.26E-05 | 0.0051742 | -0.059109  |
| 2w4w_SITTC <sup>Δ</sup> | 0.01840769 | 0.10538847 | 4.11E-05 | 0.0055212 | 0.015459   |
| 2w4w_SITTC <sup>Δ</sup> | 0.01430075 | 0.08004449 | 3.89E-05 | 0.0061278 | 0.1561     |
| 2w4w_SITTC <sup>Δ</sup> | 0.05101159 | 0.30658713 | 5.87E-05 | 0.0053288 | 0.0077602  |
| 2w4w_SITTC <sup>Δ</sup> | 0.08311994 | 0.5047278  | 4.78E-05 | 0.013315  | 0.02505    |
| 2w4w_SITTC <sup>Δ</sup> | 0.07333282 | 0.44433147 | 5.43E-05 | 0.012883  | 0.24489    |
| 2w4w_SITTC <sup>Δ</sup> | 0.00852368 | 0.04439421 | 3.56E-05 | 0.0072456 | 0.40559    |
| 2w4w_SITTC <sup>Δ</sup> | 0.01791288 | 0.10233496 | 4.09E-05 | 0.0055879 | 0.030658   |
| 2w4w_SITTC <sup>Δ</sup> | 0.03836121 | 0.22852163 | 4.87E-05 | 0.0045758 | -0.076088  |
| 2w4w_SITTC <sup>Δ</sup> | 0.02340857 | 0.1362489  | 4.32E-05 | 0.0050338 | -0.084895  |
| 2w4w_SITTC <sup>Δ</sup> | 0.02282243 | 0.13263182 | 4.30E-05 | 0.0050782 | -0.077142  |
| 2w4w_SITTC <sup>Δ</sup> | 0.07430291 | 0.4503179  | 5.33E-05 | 0.013335  | 0.24406    |
| 2w4w_SITTC <sup>Δ</sup> | 0.02200413 | 0.1275821  | 4.26E-05 | 0.0051742 | -0.059109  |
| 2w4w_SITTC <sup>Δ</sup> | 0.01093308 | 0.0592626  | 3.71E-05 | 0.0066957 | 0.2858     |
| 2w4w_SITTC <sup>Δ</sup> | 0.03632569 | 0.21596046 | 4.79E-05 | 0.0045625 | -0.092976  |
| 2w4w_SITTC <sup>Δ</sup> | 0.00422048 | 0.01783917 | 3.32E-05 | 0.0082728 | 0.61153    |
| 2w4w_SITTC <sup>Δ</sup> | 0.02644216 | 0.15496919 | 4.42E-05 | 0.0048445 | -0.11213   |
| 2w4w_SITTC <sup>Δ</sup> | 0.03120012 | 0.18433051 | 4.58E-05 | 0.00463   | -0.12145   |
| 2w4w_SITTC <sup>Δ</sup> | 0.01532967 | 0.08639399 | 3.95E-05 | 0.0059603 | 0.11709    |
| 2w4w_SITTC <sup>Δ</sup> | 0.08472721 | 0.51464623 | 4.76E-05 | 0.012404  | -0.069378  |
| 2w4w_SITTC <sup>Δ</sup> | 0.09363537 | 0.56961846 | 5.06E-05 | 0.0067258 | -0.7829    |
| 2w4w_SITTC <sup>Δ</sup> | 0.03704824 | 0.22041926 | 4.81E-05 | 0.0045652 | -0.088896  |
| 2w4w_SITTC <sup>Δ</sup> | 0.014954   | 0.08407571 | 3.92E-05 | 0.0060428 | 0.1363     |
| 2w4w_SITTC <sup>Δ</sup> | 0.02471987 | 0.1443409  | 4.36E-05 | 0.0049516 | -0.098011  |
| 2w4w_SITTC <sup>Δ</sup> | 0.02385739 | 0.13901855 | 4.34E-05 | 0.0049916 | -0.091842  |
| 2w4w_SITTC <sup>Δ</sup> | 0.02556195 | 0.14953738 | 4.40E-05 | 0.0048781 | -0.10813   |
| 2w4w_SITTC <sup>Δ</sup> | 0.02442855 | 0.1425432  | 4.36E-05 | 0.0049516 | -0.098011  |
| 2w4w_SITTC <sup>Δ</sup> | 0.02751906 | 0.16161473 | 4.46E-05 | 0.0047834 | -0.11816   |
| 2w4w_SITTC <sup>Δ</sup> | 0.01347175 | 0.07492874 | 3.83E-05 | 0.0063061 | 0.19734    |
| 2w4w_SITTC <sup>Δ</sup> | 0.02005894 | 0.11557832 | 4.19E-05 | 0.0053364 | -0.025531  |
| 2w4w_SITTC <sup>Δ</sup> | 0.03000483 | 0.17695439 | 4.55E-05 | 0.0046645 | -0.12301   |
| 2w4w_SITTC <sup>Δ</sup> | 0.08898185 | 0.5409016  | 4.84E-05 | 0.0094274 | -0.3844    |
| 2w4w_SITTC <sup>Δ</sup> | 0.08645987 | 0.5253384  | 4.77E-05 | 0.01133   | -0.21781   |
| 2w4w_SITTC <sup>Δ</sup> | 0.0286816  | 0.16878879 | 4.49E-05 | 0.0047302 | -0.12268   |
| 2w4w_SITTC <sup>Δ</sup> | 0.02128522 | 0.12314569 | 4.24E-05 | 0.0052258 | -0.04878   |
| 2w4w_SITTC <sup>Δ</sup> | 0.01888111 | 0.10830995 | 4.11E-05 | 0.0055212 | 0.015459   |
| 2w4w_SITTC <sup>Δ</sup> | 0.08366576 | 0.508096   | 4.77E-05 | 0.013036  | -0.0045591 |



|                    |            |            |          |           |           |
|--------------------|------------|------------|----------|-----------|-----------|
| 2w4w_SITTC $\zeta$ | 0.02241079 | 0.13009161 | 4.28E-05 | 0.005125  | -0.068556 |
| 2w4w_SITTC $\zeta$ | 0.00894098 | 0.04696935 | 3.59E-05 | 0.00713   | 0.38094   |
| 2w4w_SITTC $\zeta$ | 0.07733189 | 0.46900973 | 5.09E-05 | 0.014141  | 0.21153   |
| 2w4w_SITTC $\zeta$ | 0.02795978 | 0.16433437 | 4.48E-05 | 0.0047558 | -0.12024  |
| 2w4w_SITTC $\zeta$ | 0.02241361 | 0.13010898 | 4.28E-05 | 0.005125  | -0.068556 |
| 2w4w_SITTC $\zeta$ | 0.03978498 | 0.23730771 | 4.95E-05 | 0.0046046 | -0.067351 |
| 2w4w_SITTC $\zeta$ | 0.08863919 | 0.53878707 | 4.82E-05 | 0.0098057 | -0.3844   |
| 2w4w_SITTC $\zeta$ | 0.02952236 | 0.17397708 | 4.53E-05 | 0.0046846 | -0.1231   |
| 2w4w_SITTC $\zeta$ | 0.0140644  | 0.07858602 | 3.86E-05 | 0.0062156 | 0.1561    |
| 2w4w_SITTC $\zeta$ | 0.0231229  | 0.13448602 | 4.30E-05 | 0.0050782 | -0.077142 |
| 2w4w_SITTC $\zeta$ | 0.01066858 | 0.05763039 | 3.68E-05 | 0.0068    | 0.30902   |
| 2w4w_SITTC $\zeta$ | 0.07751026 | 0.47011045 | 5.05E-05 | 0.014229  | 0.21153   |
| 2w4w_SITTC $\zeta$ | 0.0294218  | 0.17335655 | 4.53E-05 | 0.0046846 | -0.1231   |
| 2w4w_SITTC $\zeta$ | 0.0086005  | 0.04486829 | 3.56E-05 | 0.0072456 | 0.40559   |
| 2w4w_SITTC $\zeta$ | 0.01992773 | 0.11476862 | 4.16E-05 | 0.0053955 | -0.012659 |
| 2w4w_SITTC $\zeta$ | 0.00485603 | 0.02176113 | 3.38E-05 | 0.0079991 | 0.55892   |
| 2w4w_SITTC $\zeta$ | 0.09710364 | 0.5910212  | 5.32E-05 | 0.0050496 | -1.03     |
| 2w4w_SITTC $\zeta$ | 0.06479096 | 0.39161965 | 6.24E-05 | 0.0086643 | 0.14863   |
| 2w4w_SITTC $\zeta$ | 0.00992316 | 0.05303043 | 3.65E-05 | 0.0069072 | 0.33263   |
| 2w4w_SITTC $\zeta$ | 0.01421772 | 0.07953212 | 3.89E-05 | 0.0061278 | 0.1561    |
| 2w4w_SITTC $\zeta$ | 0.10106318 | 0.61545545 | 5.62E-05 | 0.0040352 | -1.2808   |
| 2w4w_SITTC $\zeta$ | 0.02625903 | 0.15383905 | 4.42E-05 | 0.0048445 | -0.11213  |
| 2w4w_SITTC $\zeta$ | 0.01402106 | 0.07831851 | 3.86E-05 | 0.0062156 | 0.17645   |
| 2w4w_SITTC $\zeta$ | 0.01642511 | 0.09315391 | 4.00E-05 | 0.0058035 | 0.080526  |
| 2w4w_SITTC $\zeta$ | 0.02028417 | 0.11696818 | 4.19E-05 | 0.0053364 | -0.025531 |
| 2w4w_SITTC $\zeta$ | 0.02173833 | 0.12594183 | 4.26E-05 | 0.0051742 | -0.059109 |
| 2w4w_SITTC $\zeta$ | 0.02240739 | 0.13007061 | 4.28E-05 | 0.005125  | -0.068556 |
| 2w4w_SITTC $\zeta$ | 0.07939598 | 0.4817472  | 4.93E-05 | 0.014315  | 0.15946   |
| 2w4w_SITTC $\zeta$ | 0.01332262 | 0.0740085  | 3.83E-05 | 0.0063061 | 0.19734   |
| 2w4w_SITTC $\zeta$ | 0.02155294 | 0.12479778 | 4.24E-05 | 0.0052258 | -0.04878  |
| 2w4w_SITTC $\zeta$ | 0.03168292 | 0.18730994 | 4.60E-05 | 0.0046154 | -0.12002  |
| 2w4w_SITTC $\zeta$ | 0.02147288 | 0.12430375 | 4.24E-05 | 0.0052258 | -0.04878  |
| 2w4w_SITTC $\zeta$ | 0.02893637 | 0.17036092 | 4.51E-05 | 0.0047064 | -0.12268  |
| 2w4w_SITTC $\zeta$ | 0.02981985 | 0.17581289 | 4.55E-05 | 0.0046645 | -0.12301  |
| 2w4w_SITTC $\zeta$ | 0.02654926 | 0.15563011 | 4.44E-05 | 0.004813  | -0.11546  |
| 2w4w_SITTC $\zeta$ | 0.02102381 | 0.1215325  | 4.21E-05 | 0.0052798 | -0.037579 |
| 2w4w_SITTC $\zeta$ | 0.09216844 | 0.56056607 | 4.99E-05 | 0.0073308 | -0.6503   |
| 2w4w_SITTC $\zeta$ | 0.08775881 | 0.5333542  | 4.79E-05 | 0.010571  | -0.29935  |
| 2w4w_SITTC $\zeta$ | 0.02497607 | 0.1459219  | 4.38E-05 | 0.0049138 | -0.10343  |
| 2w4w_SITTC $\zeta$ | 0.02723096 | 0.15983684 | 4.46E-05 | 0.0047834 | -0.11816  |
| 2w4w_SITTC $\zeta$ | 0.01294633 | 0.07168638 | 3.80E-05 | 0.0063994 | 0.19734   |
| 2w4w_SITTC $\zeta$ | 0.12767959 | 0.77970535 | 7.03E-05 | 0.0055431 | -0.96275  |
| 2w4w_SITTC $\zeta$ | 0.02300685 | 0.13376988 | 4.30E-05 | 0.0050782 | -0.077142 |

|                    |            |            |          |           |            |
|--------------------|------------|------------|----------|-----------|------------|
| 2w4w_SITTC $\zeta$ | 0.04783069 | 0.28695777 | 5.58E-05 | 0.0050083 | -0.01192   |
| 2w4w_SITTC $\zeta$ | 0.00519307 | 0.02384103 | 3.38E-05 | 0.0079991 | 0.55892    |
| 2w4w_SITTC $\zeta$ | 0.02273654 | 0.13210179 | 4.28E-05 | 0.005125  | -0.077142  |
| 2w4w_SITTC $\zeta$ | 0.02624185 | 0.15373307 | 4.42E-05 | 0.0048445 | -0.11213   |
| 2w4w_SITTC $\zeta$ | 0.01604565 | 0.09081226 | 3.98E-05 | 0.0058806 | 0.098494   |
| 2w4w_SITTC $\zeta$ | 0.0152549  | 0.08593261 | 3.95E-05 | 0.0059603 | 0.11709    |
| 2w4w_SITTC $\zeta$ | 0.01255876 | 0.06929469 | 3.80E-05 | 0.0063994 | 0.21875    |
| 2w4w_SITTC $\zeta$ | 0.04152873 | 0.2480684  | 5.05E-05 | 0.0046492 | -0.054504  |
| 2w4w_SITTC $\zeta$ | 0.02182069 | 0.12645009 | 4.26E-05 | 0.0051742 | -0.059109  |
| 2w4w_SITTC $\zeta$ | 0.04809194 | 0.28856996 | 5.58E-05 | 0.0050083 | -0.0087048 |
| 2w4w_SITTC $\zeta$ | 0.02728482 | 0.16016921 | 4.46E-05 | 0.0047834 | -0.11816   |
| 2w4w_SITTC $\zeta$ | 0.00909671 | 0.04793037 | 3.59E-05 | 0.00713   | 0.38094    |
| 2w4w_SITTC $\zeta$ | 0.00575492 | 0.02730818 | 3.41E-05 | 0.0078664 | 0.53284    |
| 2w4w_SITTC $\zeta$ | 0.00437638 | 0.01880124 | 3.35E-05 | 0.0081345 | 0.58516    |
| 2w4w_SITTC $\zeta$ | 0.08695971 | 0.52842295 | 4.78E-05 | 0.010952  | -0.25808   |
| 2w4w_SITTC $\zeta$ | 0.0168416  | 0.09572409 | 4.03E-05 | 0.005729  | 0.063215   |
| 2w4w_SITTC $\zeta$ | 0.01668828 | 0.09477796 | 4.00E-05 | 0.0058035 | 0.080526   |
| 2w4w_SITTC $\zeta$ | 0.02786884 | 0.16377322 | 4.48E-05 | 0.0047558 | -0.12024   |
| 2w4w_SITTC $\zeta$ | 0.03429222 | 0.20341189 | 4.70E-05 | 0.0045688 | -0.10761   |
| 2w4w_SITTC $\zeta$ | 0.01043104 | 0.05616453 | 3.68E-05 | 0.0068    | 0.30902    |
| 2w4w_SITTC $\zeta$ | 0.01591981 | 0.0900357  | 3.98E-05 | 0.0058806 | 0.098494   |
| 2w4w_SITTC $\zeta$ | 0.01605545 | 0.09087279 | 3.98E-05 | 0.0058806 | 0.098494   |
| 2w4w_SITTC $\zeta$ | 0.02149065 | 0.12441339 | 4.24E-05 | 0.0052258 | -0.04878   |
| 2w4w_SITTC $\zeta$ | 0.04427689 | 0.2650273  | 5.25E-05 | 0.0047605 | -0.031751  |
| 2w4w_SITTC $\zeta$ | 0.01645892 | 0.09336258 | 4.00E-05 | 0.0058035 | 0.080526   |
| 2w4w_SITTC $\zeta$ | 0.0136333  | 0.07592569 | 3.86E-05 | 0.0062156 | 0.17645    |
| 2w4w_SITTC $\zeta$ | 0.02254487 | 0.13091898 | 4.28E-05 | 0.005125  | -0.068556  |
| 2w4w_SITTC $\zeta$ | 0.01912324 | 0.1098041  | 4.14E-05 | 0.0054571 | 0.0010121  |
| 2w4w_SITTC $\zeta$ | 0.02005615 | 0.11556111 | 4.19E-05 | 0.0053364 | -0.025531  |
| 2w4w_SITTC $\zeta$ | 0.02794112 | 0.16421925 | 4.48E-05 | 0.0047558 | -0.12024   |
| 2w4w_SITTC $\zeta$ | 0.03185175 | 0.18835174 | 4.60E-05 | 0.0046154 | -0.11821   |
| 2w4w_SITTC $\zeta$ | 0.06852995 | 0.41469294 | 5.93E-05 | 0.010465  | 0.20551    |
| 2w4w_SITTC $\zeta$ | 0.03487331 | 0.20699777 | 4.72E-05 | 0.0045646 | -0.10426   |
| 2w4w_SITTC $\zeta$ | 0.08384933 | 0.5092288  | 4.77E-05 | 0.013036  | -0.036078  |
| 2w4w_SITTC $\zeta$ | 0.01997234 | 0.11504391 | 4.16E-05 | 0.0053955 | -0.025531  |
| 2w4w_SITTC $\zeta$ | 0.02649844 | 0.15531649 | 4.42E-05 | 0.0048445 | -0.11546   |
| 2w4w_SITTC $\zeta$ | 0.09598382 | 0.58411074 | 5.24E-05 | 0.0054581 | -0.9515    |
| 2w4w_SITTC $\zeta$ | 0.0261678  | 0.15327612 | 4.42E-05 | 0.0048445 | -0.11213   |
| 2w4w_SITTC $\zeta$ | 0.03041655 | 0.17949511 | 4.57E-05 | 0.0046464 | -0.12245   |
| 2w4w_SITTC $\zeta$ | 0.05342301 | 0.321468   | 6.05E-05 | 0.0056127 | 0.022172   |
| 2w4w_SITTC $\zeta$ | 0.00547569 | 0.02558504 | 3.41E-05 | 0.0078664 | 0.53284    |
| 2w4w_SITTC $\zeta$ | 0.01124485 | 0.06118658 | 3.71E-05 | 0.0066957 | 0.2858     |
| 2w4w_SITTC $\zeta$ | 0.01276056 | 0.07054    | 3.80E-05 | 0.0063994 | 0.21875    |

|                    |            |            |          |           |           |
|--------------------|------------|------------|----------|-----------|-----------|
| 2w4w_SITTC $\zeta$ | 0.09321499 | 0.5670243  | 5.06E-05 | 0.0067258 | -0.73907  |
| 2w4w_SITTC $\zeta$ | 0.02698556 | 0.15832247 | 4.44E-05 | 0.004813  | -0.11546  |
| 2w4w_SITTC $\zeta$ | 0.08041257 | 0.48802063 | 4.87E-05 | 0.014207  | 0.14202   |
| 2w4w_SITTC $\zeta$ | 0.09530437 | 0.57991785 | 5.16E-05 | 0.0059226 | -0.91061  |
| 2w4w_SITTC $\zeta$ | 0.05611161 | 0.33805934 | 6.24E-05 | 0.0060668 | 0.043089  |
| 2w4w_SITTC $\zeta$ | 0.07879695 | 0.47805056 | 4.97E-05 | 0.014318  | 0.18889   |
| 2w4w_SITTC $\zeta$ | 0.02357972 | 0.13730504 | 4.32E-05 | 0.0050338 | -0.084895 |
| 2w4w_SITTC $\zeta$ | 0.01930592 | 0.1109314  | 4.14E-05 | 0.0054571 | 0.0010121 |
| 2w4w_SITTC $\zeta$ | 0.01498065 | 0.08424018 | 3.92E-05 | 0.0060428 | 0.1363    |
| 2w4w_SITTC $\zeta$ | 0.02085564 | 0.12049473 | 4.21E-05 | 0.0052798 | -0.037579 |
| 2w4w_SITTC $\zeta$ | 0.05782161 | 0.34861177 | 6.32E-05 | 0.0064035 | 0.06315   |
| 2w4w_SITTC $\zeta$ | 0.032382   | 0.19162393 | 4.62E-05 | 0.0046026 | -0.11821  |
| 2w4w_SITTC $\zeta$ | 0.02328762 | 0.1355025  | 4.32E-05 | 0.0050338 | -0.084895 |
| 2w4w_SITTC $\zeta$ | 0.01892749 | 0.10859612 | 4.11E-05 | 0.0055212 | 0.0010121 |
| 2w4w_SITTC $\zeta$ | 0.01769154 | 0.1009691  | 4.06E-05 | 0.0056572 | 0.046584  |
| 2w4w_SITTC $\zeta$ | 0.0209269  | 0.12093451 | 4.21E-05 | 0.0052798 | -0.037579 |
| 2w4w_SITTC $\zeta$ | 0.02974283 | 0.17533758 | 4.53E-05 | 0.0046846 | -0.12301  |
| 2w4w_SITTC $\zeta$ | 0.00564775 | 0.02664685 | 3.41E-05 | 0.0078664 | 0.53284   |
| 2w4w_SITTC $\zeta$ | 0.01555362 | 0.087776   | 3.95E-05 | 0.0059603 | 0.11709   |
| 2w4w_SITTC $\zeta$ | 0.03065901 | 0.18099137 | 4.57E-05 | 0.0046464 | -0.12245  |
| 2w4w_SITTC $\zeta$ | 0.01176442 | 0.06439282 | 3.74E-05 | 0.0065941 | 0.263     |
| 2w4w_SITTC $\zeta$ | 0.01576989 | 0.0891106  | 3.98E-05 | 0.0058806 | 0.098494  |
| 2w4w_SITTC $\zeta$ | 0.02177724 | 0.12618198 | 4.26E-05 | 0.0051742 | -0.059109 |
| 2w4w_SITTC $\zeta$ | 0.01173202 | 0.06419291 | 3.74E-05 | 0.0065941 | 0.263     |
| 2w4w_SITTC $\zeta$ | 0.0276745  | 0.16257396 | 4.48E-05 | 0.0047558 | -0.12024  |
| 2w4w_SITTC $\zeta$ | 0.01663434 | 0.09444509 | 4.00E-05 | 0.0058035 | 0.080526  |
| 2w4w_SITTC $\zeta$ | 0.01699699 | 0.09668298 | 4.03E-05 | 0.005729  | 0.063215  |
| 2w4w_SITTC $\zeta$ | 0.02240558 | 0.1300594  | 4.28E-05 | 0.005125  | -0.068556 |
| 2w4w_SITTC $\zeta$ | 0.02229767 | 0.12939355 | 4.28E-05 | 0.005125  | -0.068556 |
| 2w4w_SITTC $\zeta$ | 0.07122188 | 0.43130484 | 5.65E-05 | 0.011849  | 0.23476   |
| 2w4w_SITTC $\zeta$ | 0.02136673 | 0.12364867 | 4.24E-05 | 0.0052258 | -0.04878  |
| 2w4w_SITTC $\zeta$ | 0.03099252 | 0.18304946 | 4.58E-05 | 0.00463   | -0.12145  |
| 2w4w_SITTC $\zeta$ | 0.08109776 | 0.4922489  | 4.85E-05 | 0.0141    | 0.10139   |
| 2w4w_SITTC $\zeta$ | 0.04313535 | 0.25798285 | 5.17E-05 | 0.0047101 | -0.042593 |
| 2w4w_SITTC $\zeta$ | 0.01753504 | 0.1000033  | 4.06E-05 | 0.0056572 | 0.046584  |
| 2w4w_SITTC $\zeta$ | 0.01600299 | 0.09054902 | 3.98E-05 | 0.0058806 | 0.098494  |
| 2w4w_SITTC $\zeta$ | 0.01720736 | 0.09798119 | 4.03E-05 | 0.005729  | 0.063215  |
| 2w4w_SITTC $\zeta$ | 0.0185418  | 0.10621607 | 4.11E-05 | 0.0055212 | 0.015459  |
| 2w4w_SITTC $\zeta$ | 0.00879565 | 0.04607255 | 3.59E-05 | 0.00713   | 0.38094   |
| 2w4w_SITTC $\zeta$ | 0.03125405 | 0.18466334 | 4.58E-05 | 0.00463   | -0.12145  |
| 2w4w_SITTC $\zeta$ | 0.01856207 | 0.10634111 | 4.11E-05 | 0.0055212 | 0.015459  |
| 2w4w_SITTC $\zeta$ | 0.02104129 | 0.1216404  | 4.21E-05 | 0.0052798 | -0.037579 |
| 2w4w_SITTC $\zeta$ | 0.01712773 | 0.0974898  | 4.03E-05 | 0.005729  | 0.063215  |

|                         |            |            |          |           |            |
|-------------------------|------------|------------|----------|-----------|------------|
| 2w4w_SITTC <sup>z</sup> | 0.01951078 | 0.11219562 | 4.16E-05 | 0.0053955 | -0.012659  |
| 2w4w_SITTC <sup>z</sup> | 0.02281499 | 0.13258593 | 4.30E-05 | 0.0050782 | -0.077142  |
| 2w4w_SITTC <sup>z</sup> | 0.08369601 | 0.50828266 | 4.77E-05 | 0.013036  | -0.0045591 |
| 2w4w_SITTC <sup>z</sup> | 0.01504621 | 0.08464474 | 3.92E-05 | 0.0060428 | 0.1363     |
| 2w4w_SITTC <sup>z</sup> | 0.02385897 | 0.13902831 | 4.34E-05 | 0.0049916 | -0.091842  |
| 2w4w_SITTC <sup>z</sup> | 0.02155213 | 0.12479281 | 4.24E-05 | 0.0052258 | -0.04878   |
| 2w4w_SITTC <sup>z</sup> | 0.05074848 | 0.30496347 | 5.83E-05 | 0.0052672 | 0.0043724  |
| 2w4w_SITTC <sup>z</sup> | 0.03805359 | 0.22662328 | 4.87E-05 | 0.0045758 | -0.080425  |
| 2w4w_SITTC <sup>z</sup> | 0.00709344 | 0.0355682  | 3.50E-05 | 0.0074854 | 0.45576    |
| 2w4w_SITTC <sup>z</sup> | 0.00709839 | 0.03559872 | 3.50E-05 | 0.0074854 | 0.45576    |
| 2w4w_SITTC <sup>z</sup> | 0.07084037 | 0.42895055 | 5.71E-05 | 0.011574  | 0.23476    |
| 2w4w_SITTC <sup>z</sup> | 0.07650735 | 0.46392146 | 5.13E-05 | 0.014025  | 0.22792    |
| 2w4w_SITTC <sup>z</sup> | 0.05014427 | 0.30123493 | 5.78E-05 | 0.0052091 | 0.0010449  |
| 2w4w_SITTC <sup>z</sup> | 0.01513062 | 0.08516562 | 3.92E-05 | 0.0060428 | 0.11709    |
| 2w4w_SITTC <sup>z</sup> | 0.01096632 | 0.05946771 | 3.71E-05 | 0.0066957 | 0.2858     |
| 2w4w_SITTC <sup>z</sup> | 0.02566909 | 0.15019858 | 4.40E-05 | 0.0048781 | -0.10813   |
| 2w4w_SITTC <sup>z</sup> | 0.0247826  | 0.144728   | 4.36E-05 | 0.0049516 | -0.098011  |
| 2w4w_SITTC <sup>z</sup> | 0.08991842 | 0.54668117 | 4.86E-05 | 0.0090548 | -0.47194   |
| 2w4w_SITTC <sup>z</sup> | 0.02991996 | 0.1764307  | 4.55E-05 | 0.0046645 | -0.12301   |
| 2w4w_SITTC <sup>z</sup> | 0.01207143 | 0.06628741 | 3.77E-05 | 0.0064954 | 0.24064    |
| 2w4w_SITTC <sup>z</sup> | 0.09738232 | 0.59274083 | 5.32E-05 | 0.0050496 | -1.0673    |
| 2w4w_SITTC <sup>z</sup> | 0.00755219 | 0.03839917 | 3.50E-05 | 0.0074854 | 0.43054    |
| 2w4w_SITTC <sup>z</sup> | 0.01628048 | 0.09226144 | 4.00E-05 | 0.0058035 | 0.080526   |
| 2w4w_SITTC <sup>z</sup> | 0.0063139  | 0.03075765 | 3.44E-05 | 0.0077366 | 0.50694    |
| 2w4w_SITTC <sup>z</sup> | 0.01528669 | 0.08612878 | 3.95E-05 | 0.0059603 | 0.11709    |
| 2w4w_SITTC <sup>z</sup> | 0.07907086 | 0.4797409  | 4.97E-05 | 0.014318  | 0.17506    |
| 2w4w_SITTC <sup>z</sup> | 0.01283418 | 0.07099428 | 3.80E-05 | 0.0063994 | 0.21875    |
| 2w4w_SITTC <sup>z</sup> | 0.01334673 | 0.07415725 | 3.83E-05 | 0.0063061 | 0.19734    |
| 2w4w_SITTC <sup>z</sup> | 0.0422154  | 0.2523058  | 5.09E-05 | 0.0046676 | -0.04643   |
| 2w4w_SITTC <sup>z</sup> | 0.04154538 | 0.24817112 | 5.05E-05 | 0.0046492 | -0.054504  |
| 2w4w_SITTC <sup>z</sup> | 0.01770698 | 0.10106438 | 4.06E-05 | 0.0056572 | 0.046584   |
| 2w4w_SITTC <sup>z</sup> | 0.01798649 | 0.10278921 | 4.09E-05 | 0.0055879 | 0.030658   |
| 2w4w_SITTC <sup>z</sup> | 0.02003366 | 0.11542229 | 4.19E-05 | 0.0053364 | -0.025531  |
| 2w4w_SITTC <sup>z</sup> | 0.02407478 | 0.14036009 | 4.34E-05 | 0.0049916 | -0.091842  |
| 2w4w_SITTC <sup>z</sup> | 0.02071301 | 0.11961459 | 4.21E-05 | 0.0052798 | -0.037579  |
| 2w4w_SITTC <sup>z</sup> | 0.09387646 | 0.5711062  | 5.09E-05 | 0.0064439 | -0.7829    |
| 2w4w_SITTC <sup>z</sup> | 0.02572778 | 0.15056074 | 4.40E-05 | 0.0048781 | -0.10813   |
| 2w4w_SITTC <sup>z</sup> | 0.00957753 | 0.05089751 | 3.62E-05 | 0.0070172 | 0.35661    |
| 2w4w_SITTC <sup>z</sup> | 0.01882837 | 0.10798445 | 4.11E-05 | 0.0055212 | 0.015459   |
| 2w4w_SITTC <sup>z</sup> | 0.0972762  | 0.592086   | 5.32E-05 | 0.0050496 | -1.0673    |
| 2w4w_SITTC <sup>z</sup> | 0.09417163 | 0.5729277  | 5.09E-05 | 0.0064439 | -0.82618   |
| 2w4w_SITTC <sup>z</sup> | 0.03329261 | 0.19724329 | 4.66E-05 | 0.0045822 | -0.11352   |
| 2w4w_SITTC <sup>z</sup> | 0.04834467 | 0.29012954 | 5.63E-05 | 0.005054  | -0.0087048 |

|                    |            |            |          |           |           |
|--------------------|------------|------------|----------|-----------|-----------|
| 2w4w_SITTC $\zeta$ | 0.04540949 | 0.27201658 | 5.34E-05 | 0.0048194 | -0.024952 |
| 2w4w_SITTC $\zeta$ | 0.08222159 | 0.49918404 | 4.81E-05 | 0.013778  | 0.05262   |
| 2w4w_SITTC $\zeta$ | 0.02314018 | 0.13459262 | 4.30E-05 | 0.0050782 | -0.077142 |
| 2w4w_SITTC $\zeta$ | 0.01052051 | 0.05671663 | 3.68E-05 | 0.0068    | 0.30902   |
| 2w4w_SITTC $\zeta$ | 0.0271435  | 0.15929715 | 4.46E-05 | 0.0047834 | -0.11816  |
| 2w4w_SITTC $\zeta$ | 0.1014737  | 0.61798877 | 5.66E-05 | 0.0039398 | -1.2808   |
| 2w4w_SITTC $\zeta$ | 0.02209914 | 0.12816839 | 4.26E-05 | 0.0051742 | -0.059109 |
| 2w4w_SITTC $\zeta$ | 0.06551722 | 0.39610142 | 6.20E-05 | 0.0089013 | 0.16566   |
| 2w4w_SITTC $\zeta$ | 0.04373284 | 0.26166996 | 5.21E-05 | 0.0047343 | -0.038876 |
| 2w4w_SITTC $\zeta$ | 0.07314356 | 0.4431635  | 5.43E-05 | 0.012883  | 0.24489   |
| 2w4w_SITTC $\zeta$ | 0.01950866 | 0.11218251 | 4.16E-05 | 0.0053955 | -0.012659 |
| 2w4w_SITTC $\zeta$ | 0.01064338 | 0.05747486 | 3.68E-05 | 0.0068    | 0.30902   |
| 2w4w_SITTC $\zeta$ | 0.09708478 | 0.5909048  | 5.32E-05 | 0.0050496 | -1.03     |
| 2w4w_SITTC $\zeta$ | 0.02088917 | 0.12070166 | 4.21E-05 | 0.0052798 | -0.037579 |
| 2w4w_SITTC $\zeta$ | 0.02220654 | 0.12883115 | 4.28E-05 | 0.005125  | -0.068556 |
| 2w4w_SITTC $\zeta$ | 0.0182212  | 0.10423759 | 4.09E-05 | 0.0055879 | 0.030658  |
| 2w4w_SITTC $\zeta$ | 0.02815577 | 0.16554387 | 4.48E-05 | 0.0047558 | -0.12174  |
| 2w4w_SITTC $\zeta$ | 0.0215615  | 0.1248506  | 4.24E-05 | 0.0052258 | -0.04878  |
| 2w4w_SITTC $\zeta$ | 0.06699759 | 0.40523672 | 6.07E-05 | 0.0096573 | 0.19037   |
| 2w4w_SITTC $\zeta$ | 0.03057171 | 0.18045262 | 4.57E-05 | 0.0046464 | -0.12245  |
| 2w4w_SITTC $\zeta$ | 0.05909901 | 0.3564946  | 6.37E-05 | 0.0067983 | 0.074574  |
| 2w4w_SITTC $\zeta$ | 0.0846589  | 0.51422465 | 4.76E-05 | 0.012404  | -0.069378 |
| 2w4w_SITTC $\zeta$ | 0.01579555 | 0.08926895 | 3.98E-05 | 0.0058806 | 0.098494  |
| 2w4w_SITTC $\zeta$ | 0.02124413 | 0.12289214 | 4.24E-05 | 0.0052258 | -0.04878  |
| 2w4w_SITTC $\zeta$ | 0.02614155 | 0.15311413 | 4.42E-05 | 0.0048445 | -0.11213  |
| 2w4w_SITTC $\zeta$ | 0.02748892 | 0.16142873 | 4.46E-05 | 0.0047834 | -0.11816  |
| 2w4w_SITTC $\zeta$ | 0.04111179 | 0.24549548 | 5.02E-05 | 0.0046325 | -0.054504 |
| 2w4w_SITTC $\zeta$ | 0.03152741 | 0.18635024 | 4.60E-05 | 0.0046154 | -0.12002  |
| 2w4w_SITTC $\zeta$ | 0.03140599 | 0.185601   | 4.58E-05 | 0.00463   | -0.12002  |
| 2w4w_SITTC $\zeta$ | 0.00742236 | 0.03759794 | 3.50E-05 | 0.0074854 | 0.45576   |
| 2w4w_SITTC $\zeta$ | 0.01307514 | 0.07248125 | 3.83E-05 | 0.0063061 | 0.19734   |
| 2w4w_SITTC $\zeta$ | 0.01566157 | 0.08844215 | 3.95E-05 | 0.0059603 | 0.098494  |
| 2w4w_SITTC $\zeta$ | 0.03467401 | 0.20576791 | 4.72E-05 | 0.0045646 | -0.10426  |
| 2w4w_SITTC $\zeta$ | 0.02249578 | 0.13061605 | 4.28E-05 | 0.005125  | -0.068556 |
| 2w4w_SITTC $\zeta$ | 0.01873882 | 0.10743184 | 4.11E-05 | 0.0055212 | 0.015459  |
| 2w4w_SITTC $\zeta$ | 0.0503341  | 0.3024063  | 5.78E-05 | 0.0052091 | 0.0043724 |
| 2w4w_SITTC $\zeta$ | 0.05800891 | 0.3497676  | 6.34E-05 | 0.0065282 | 0.06315   |
| 2w4w_SITTC $\zeta$ | 0.0242122  | 0.14120811 | 4.34E-05 | 0.0049916 | -0.091842 |
| 2w4w_SITTC $\zeta$ | 0.01684471 | 0.0957433  | 4.03E-05 | 0.005729  | 0.063215  |
| 2w4w_SITTC $\zeta$ | 0.01747544 | 0.09963555 | 4.06E-05 | 0.0056572 | 0.046584  |
| 2w4w_SITTC $\zeta$ | 0.03110071 | 0.18371709 | 4.58E-05 | 0.00463   | -0.12145  |
| 2w4w_SITTC $\zeta$ | 0.01618101 | 0.09164757 | 3.98E-05 | 0.0058806 | 0.098494  |
| 2w4w_SITTC $\zeta$ | 0.01947963 | 0.11200342 | 4.14E-05 | 0.0054571 | -0.012659 |

|                         |            |            |          |           |           |
|-------------------------|------------|------------|----------|-----------|-----------|
| 2w4w_SITTC <sup>Δ</sup> | 0.0170788  | 0.09718783 | 4.03E-05 | 0.005729  | 0.063215  |
| 2w4w_SITTC <sup>Δ</sup> | 0.01498395 | 0.08426056 | 3.92E-05 | 0.0060428 | 0.1363    |
| 2w4w_SITTC <sup>Δ</sup> | 0.08584253 | 0.52152884 | 4.76E-05 | 0.0117    | -0.14081  |
| 2w4w_SITTC <sup>Δ</sup> | 0.03402736 | 0.20177746 | 4.68E-05 | 0.0045746 | -0.10761  |
| 2w4w_SITTC <sup>Δ</sup> | 0.08813842 | 0.53569674 | 4.80E-05 | 0.010188  | -0.3415   |
| 2w4w_SITTC <sup>Δ</sup> | 0.08502759 | 0.5164999  | 4.76E-05 | 0.012404  | -0.10433  |
| 2w4w_SITTC <sup>Δ</sup> | 0.02844771 | 0.16734542 | 4.49E-05 | 0.0047302 | -0.12174  |
| 2w4w_SITTC <sup>Δ</sup> | 0.0213567  | 0.12358681 | 4.24E-05 | 0.0052258 | -0.04878  |
| 2w4w_SITTC <sup>Δ</sup> | 0.09262554 | 0.5633868  | 4.99E-05 | 0.0073308 | -0.69483  |
| 2w4w_SITTC <sup>Δ</sup> | 0.01323343 | 0.07345808 | 3.83E-05 | 0.0063061 | 0.19734   |
| 2w4w_SITTC <sup>Δ</sup> | 0.04232028 | 0.25295305 | 5.13E-05 | 0.0046879 | -0.04643  |
| 2w4w_SITTC <sup>Δ</sup> | 0.01797227 | 0.10270149 | 4.09E-05 | 0.0055879 | 0.030658  |
| 2w4w_SITTC <sup>Δ</sup> | 0.01068871 | 0.05775459 | 3.68E-05 | 0.0068    | 0.30902   |
| 2w4w_SITTC <sup>Δ</sup> | 0.01873057 | 0.10738095 | 4.11E-05 | 0.0055212 | 0.015459  |
| 2w4w_SITTC <sup>Δ</sup> | 0.01802359 | 0.10301816 | 4.09E-05 | 0.0055879 | 0.030658  |
| 2w4w_SITTC <sup>Δ</sup> | 0.01936688 | 0.11130758 | 4.14E-05 | 0.0054571 | 0.0010121 |
| 2w4w_SITTC <sup>Δ</sup> | 0.00769024 | 0.03925102 | 3.53E-05 | 0.0073641 | 0.43054   |
| 2w4w_SITTC <sup>Δ</sup> | 0.01192088 | 0.06535835 | 3.77E-05 | 0.0064954 | 0.24064   |
| 2w4w_SITTC <sup>Δ</sup> | 0.01204029 | 0.06609522 | 3.77E-05 | 0.0064954 | 0.24064   |
| 2w4w_SITTC <sup>Δ</sup> | 0.07714062 | 0.4678294  | 5.09E-05 | 0.014141  | 0.22047   |
| 2w4w_SITTC <sup>Δ</sup> | 0.00366494 | 0.01441095 | 3.29E-05 | 0.0084138 | 0.63801   |
| 2w4w_SITTC <sup>Δ</sup> | 0.02006989 | 0.11564587 | 4.19E-05 | 0.0053364 | -0.025531 |
| 2w4w_SITTC <sup>Δ</sup> | 0.01177807 | 0.06447709 | 3.74E-05 | 0.0065941 | 0.263     |
| 2w4w_SITTC <sup>Δ</sup> | 0.02309136 | 0.13429138 | 4.30E-05 | 0.0050782 | -0.077142 |
| 2w4w_SITTC <sup>Δ</sup> | 0.02268909 | 0.13180897 | 4.28E-05 | 0.005125  | -0.077142 |
| 2w4w_SITTC <sup>Δ</sup> | 0.0163587  | 0.09274412 | 4.00E-05 | 0.0058035 | 0.080526  |
| 2w4w_SITTC <sup>Δ</sup> | 0.01542187 | 0.08696297 | 3.95E-05 | 0.0059603 | 0.11709   |
| 2w4w_SITTC <sup>Δ</sup> | 0.01219433 | 0.06704581 | 3.77E-05 | 0.0064954 | 0.24064   |
| 2w4w_SITTC <sup>Δ</sup> | 0.08463047 | 0.51404923 | 4.76E-05 | 0.012404  | -0.069378 |
| 2w4w_SITTC <sup>Δ</sup> | 0.05815857 | 0.3506911  | 6.34E-05 | 0.0065282 | 0.06315   |
| 2w4w_SITTC <sup>Δ</sup> | 0.0163316  | 0.09257688 | 4.00E-05 | 0.0058035 | 0.080526  |
| 2w4w_SITTC <sup>Δ</sup> | 0.01199093 | 0.06579059 | 3.77E-05 | 0.0064954 | 0.24064   |
| 2w4w_SITTC <sup>Δ</sup> | 0.01492311 | 0.08388507 | 3.92E-05 | 0.0060428 | 0.1363    |
| 2w4w_SITTC <sup>Δ</sup> | 0.02043827 | 0.11791918 | 4.19E-05 | 0.0053364 | -0.025531 |
| 2w4w_SITTC <sup>Δ</sup> | 0.02705164 | 0.15873025 | 4.44E-05 | 0.004813  | -0.11816  |
| 2w4w_SITTC <sup>Δ</sup> | 0.0174291  | 0.09934953 | 4.06E-05 | 0.0056572 | 0.046584  |
| 2w4w_SITTC <sup>Δ</sup> | 0.03534264 | 0.20989402 | 4.74E-05 | 0.0045622 | -0.10068  |
| 2w4w_SITTC <sup>Δ</sup> | 0.04472442 | 0.26778898 | 5.30E-05 | 0.0047888 | -0.031751 |
| 2w4w_SITTC <sup>Δ</sup> | 0.0114505  | 0.06245563 | 3.74E-05 | 0.0065941 | 0.263     |
| 2w4w_SITTC <sup>Δ</sup> | 0.00937551 | 0.04965083 | 3.62E-05 | 0.0070172 | 0.35661   |
| 2w4w_SITTC <sup>Δ</sup> | 0.00635995 | 0.03104184 | 3.44E-05 | 0.0077366 | 0.50694   |
| 2w4w_SITTC <sup>Δ</sup> | 0.01554179 | 0.08770298 | 3.95E-05 | 0.0059603 | 0.11709   |
| 2w4w_SITTC <sup>Δ</sup> | 0.02316544 | 0.13474852 | 4.30E-05 | 0.0050782 | -0.077142 |

|            |            |            |          |           |           |
|------------|------------|------------|----------|-----------|-----------|
| 2w4w_SITTC | 0.06793539 | 0.41102389 | 5.98E-05 | 0.010192  | 0.19812   |
| 2w4w_SITTC | 0.03471966 | 0.20604962 | 4.72E-05 | 0.0045646 | -0.10426  |
| 2w4w_SITTC | 0.01223672 | 0.0673074  | 3.77E-05 | 0.0064954 | 0.24064   |
| 2w4w_SITTC | 0.02064555 | 0.11919828 | 4.21E-05 | 0.0052798 | -0.037579 |
| 2w4w_SITTC | 0.01891502 | 0.10851916 | 4.11E-05 | 0.0055212 | 0.0010121 |
| 2w4w_SITTC | 0.05096687 | 0.3063112  | 5.87E-05 | 0.0053288 | 0.0077602 |
| 2w4w_SITTC | 0.02198429 | 0.12745966 | 4.26E-05 | 0.0051742 | -0.059109 |
| 2w4w_SITTC | 0.01256561 | 0.06933697 | 3.80E-05 | 0.0063994 | 0.21875   |
| 2w4w_SITTC | 0.03685425 | 0.21922219 | 4.81E-05 | 0.0045652 | -0.088896 |
| 2w4w_SITTC | 0.01070757 | 0.05787097 | 3.68E-05 | 0.0068    | 0.30902   |
| 2w4w_SITTC | 0.02375218 | 0.13836928 | 4.32E-05 | 0.0050338 | -0.091842 |
| 2w4w_SITTC | 0.02601263 | 0.15231855 | 4.42E-05 | 0.0048445 | -0.11213  |
| 2w4w_SITTC | 0.02673703 | 0.15678878 | 4.44E-05 | 0.004813  | -0.11546  |
| 2w4w_SITTC | 0.01912591 | 0.10982061 | 4.14E-05 | 0.0054571 | 0.0010121 |
| 2w4w_SITTC | 0.02200763 | 0.12760365 | 4.26E-05 | 0.0051742 | -0.059109 |
| 2w4w_SITTC | 0.01720355 | 0.09795768 | 4.03E-05 | 0.005729  | 0.063215  |
| 2w4w_SITTD | 0.01300432 | 0.07204427 | 3.83E-05 | 0.0063061 | 0.19734   |
| 2w4w_SITTD | 0.01139329 | 0.06210256 | 3.74E-05 | 0.0065941 | 0.263     |
| 2w4w_SITTD | 0.04381082 | 0.26215115 | 5.21E-05 | 0.0047343 | -0.035266 |
| 2w4w_SITTD | 0.01076321 | 0.05821437 | 3.68E-05 | 0.0068    | 0.30902   |
| 2w4w_SITTD | 0.01823827 | 0.10434294 | 4.09E-05 | 0.0055879 | 0.030658  |
| 2w4w_SITTD | 0.01320603 | 0.07328899 | 3.83E-05 | 0.0063061 | 0.19734   |
| 2w4w_SITTD | 0.02723926 | 0.15988809 | 4.46E-05 | 0.0047834 | -0.11816  |
| 2w4w_SITTD | 0.01795959 | 0.10262319 | 4.09E-05 | 0.0055879 | 0.030658  |
| 2w4w_SITTD | 0.06835128 | 0.41359037 | 5.93E-05 | 0.010465  | 0.20551   |
| 2w4w_SITTD | 0.08838707 | 0.5372312  | 4.82E-05 | 0.0098057 | -0.3415   |
| 2w4w_SITTD | 0.0097988  | 0.052263   | 3.65E-05 | 0.0069072 | 0.33263   |
| 2w4w_SITTD | 0.01783239 | 0.10183825 | 4.06E-05 | 0.0056572 | 0.030658  |
| 2w4w_SITTD | 0.01813128 | 0.10368275 | 4.09E-05 | 0.0055879 | 0.030658  |
| 2w4w_SITTD | 0.02288009 | 0.13298762 | 4.30E-05 | 0.0050782 | -0.077142 |
| 2w4w_SITTD | 0.01441824 | 0.08076954 | 3.89E-05 | 0.0061278 | 0.1561    |
| 2w4w_SITTD | 0.01204336 | 0.06611416 | 3.77E-05 | 0.0064954 | 0.24064   |
| 2w4w_SITTD | 0.10127536 | 0.61676484 | 5.62E-05 | 0.0040352 | -1.2808   |
| 2w4w_SITTD | 0.02619045 | 0.15341584 | 4.42E-05 | 0.0048445 | -0.11213  |
| 2w4w_SITTD | 0.01790384 | 0.10227919 | 4.09E-05 | 0.0055879 | 0.030658  |
| 2w4w_SITTD | 0.0131559  | 0.07297961 | 3.83E-05 | 0.0063061 | 0.19734   |
| 2w4w_SITTD | 0.01201746 | 0.06595436 | 3.77E-05 | 0.0064954 | 0.24064   |
| 2w4w_SITTD | 0.08969539 | 0.54530483 | 4.86E-05 | 0.0090548 | -0.47194  |
| 2w4w_SITTD | 0.08977459 | 0.5457936  | 4.86E-05 | 0.0090548 | -0.47194  |
| 2w4w_SITTD | 0.02747915 | 0.16136844 | 4.46E-05 | 0.0047834 | -0.11816  |
| 2w4w_SITTD | 0.01424164 | 0.07967976 | 3.89E-05 | 0.0061278 | 0.1561    |
| 2w4w_SITTD | 0.02121303 | 0.12270023 | 4.24E-05 | 0.0052258 | -0.04878  |
| 2w4w_SITTD | 0.03774492 | 0.22471851 | 4.84E-05 | 0.0045696 | -0.084703 |

|            |            |            |          |           |           |
|------------|------------|------------|----------|-----------|-----------|
| 2w4w_SITTD | 0.04152771 | 0.24806209 | 5.05E-05 | 0.0046492 | -0.054504 |
| 2w4w_SITTD | 0.01353259 | 0.0753042  | 3.86E-05 | 0.0062156 | 0.17645   |
| 2w4w_SITTD | 0.02103411 | 0.12159608 | 4.21E-05 | 0.0052798 | -0.037579 |
| 2w4w_SITTD | 0.01569958 | 0.08867668 | 3.98E-05 | 0.0058806 | 0.098494  |
| 2w4w_SITTD | 0.02473592 | 0.14443997 | 4.36E-05 | 0.0049516 | -0.098011 |
| 2w4w_SITTD | 0.02991574 | 0.17640463 | 4.55E-05 | 0.0046645 | -0.12301  |
| 2w4w_SITTD | 0.05103259 | 0.3067167  | 5.87E-05 | 0.0053288 | 0.0077602 |
| 2w4w_SITTD | 0.01416907 | 0.07923191 | 3.89E-05 | 0.0061278 | 0.1561    |
| 2w4w_SITTD | 0.00624154 | 0.03031114 | 3.44E-05 | 0.0077366 | 0.50694   |
| 2w4w_SITTD | 0.02033749 | 0.11729725 | 4.19E-05 | 0.0053364 | -0.025531 |
| 2w4w_SITTD | 0.00747079 | 0.03789682 | 3.50E-05 | 0.0074854 | 0.45576   |
| 2w4w_SITTD | 0.02591009 | 0.15168579 | 4.40E-05 | 0.0048781 | -0.11213  |
| 2w4w_SITTD | 0.01142978 | 0.06232778 | 3.74E-05 | 0.0065941 | 0.263     |
| 2w4w_SITTD | 0.03669303 | 0.2182273  | 4.79E-05 | 0.0045625 | -0.092976 |
| 2w4w_SITTD | 0.04077265 | 0.24340263 | 5.02E-05 | 0.0046325 | -0.058715 |
| 2w4w_SITTD | 0.01680156 | 0.09547699 | 4.03E-05 | 0.005729  | 0.063215  |
| 2w4w_SITTD | 0.09245788 | 0.5623522  | 4.99E-05 | 0.0073308 | -0.69483  |
| 2w4w_SITTD | 0.01550712 | 0.08748905 | 3.95E-05 | 0.0059603 | 0.11709   |
| 2w4w_SITTD | 0.09445951 | 0.57470423 | 5.13E-05 | 0.0061762 | -0.82618  |
| 2w4w_SITTD | 0.07868326 | 0.477349   | 4.97E-05 | 0.014318  | 0.18889   |
| 2w4w_SITTD | 0.03106757 | 0.18351261 | 4.58E-05 | 0.00463   | -0.12145  |
| 2w4w_SITTD | 0.01429676 | 0.08001986 | 3.89E-05 | 0.0061278 | 0.1561    |
| 2w4w_SITTD | 0.02991086 | 0.1763745  | 4.55E-05 | 0.0046645 | -0.12301  |
| 2w4w_SITTD | 0.09193555 | 0.5591288  | 4.96E-05 | 0.0076529 | -0.6503   |
| 2w4w_SITTD | 0.01280818 | 0.07083389 | 3.80E-05 | 0.0063994 | 0.21875   |
| 2w4w_SITTD | 0.01930548 | 0.11092873 | 4.14E-05 | 0.0054571 | 0.0010121 |
| 2w4w_SITTD | 0.02050143 | 0.11830889 | 4.19E-05 | 0.0053364 | -0.025531 |
| 2w4w_SITTD | 0.013129   | 0.07281363 | 3.83E-05 | 0.0063061 | 0.19734   |
| 2w4w_SITTD | 0.00876099 | 0.04585865 | 3.59E-05 | 0.00713   | 0.38094   |
| 2w4w_SITTD | 0.0170438  | 0.09697187 | 4.03E-05 | 0.005729  | 0.063215  |
| 2w4w_SITTD | 0.01370403 | 0.07636213 | 3.86E-05 | 0.0062156 | 0.17645   |
| 2w4w_SITTD | 0.03383573 | 0.20059487 | 4.68E-05 | 0.0045746 | -0.11071  |
| 2w4w_SITTD | 0.00972411 | 0.05180208 | 3.62E-05 | 0.0070172 | 0.33263   |
| 2w4w_SITTD | 0.00922266 | 0.0487076  | 3.62E-05 | 0.0070172 | 0.35661   |
| 2w4w_SITTD | 0.03053261 | 0.18021132 | 4.57E-05 | 0.0046464 | -0.12245  |
| 2w4w_SITTD | 0.01191239 | 0.06530596 | 3.77E-05 | 0.0064954 | 0.24064   |
| 2w4w_SITTD | 0.02213598 | 0.12839572 | 4.26E-05 | 0.0051742 | -0.068556 |
| 2w4w_SITTD | 0.08190149 | 0.4972087  | 4.81E-05 | 0.013778  | 0.078055  |
| 2w4w_SITTD | 0.01417362 | 0.07925999 | 3.89E-05 | 0.0061278 | 0.1561    |
| 2w4w_SITTD | 0.062769   | 0.37914208 | 6.35E-05 | 0.0078047 | 0.12359   |
| 2w4w_SITTD | 0.02306804 | 0.13414751 | 4.30E-05 | 0.0050782 | -0.077142 |
| 2w4w_SITTD | 0.02407478 | 0.14036006 | 4.34E-05 | 0.0049916 | -0.091842 |
| 2w4w_SITTD | 0.09376962 | 0.5704469  | 5.09E-05 | 0.0064439 | -0.7829   |



|            |            |            |          |           |            |
|------------|------------|------------|----------|-----------|------------|
| 2w4w_SITTD | 0.02590028 | 0.15162522 | 4.40E-05 | 0.0048781 | -0.10813   |
| 2w4w_SITTD | 0.08525806 | 0.5179221  | 4.76E-05 | 0.012059  | -0.10433   |
| 2w4w_SITTD | 0.02259059 | 0.13120113 | 4.28E-05 | 0.005125  | -0.068556  |
| 2w4w_SITTD | 0.0101036  | 0.05414392 | 3.65E-05 | 0.0069072 | 0.33263    |
| 2w4w_SITTD | 0.01214332 | 0.06673104 | 3.77E-05 | 0.0064954 | 0.24064    |
| 2w4w_SITTD | 0.02179731 | 0.12630577 | 4.26E-05 | 0.0051742 | -0.059109  |
| 2w4w_SITTD | 0.02157055 | 0.12490649 | 4.24E-05 | 0.0052258 | -0.04878   |
| 2w4w_SITTD | 0.07132538 | 0.43194357 | 5.65E-05 | 0.011849  | 0.2386     |
| 2w4w_SITTD | 0.03221043 | 0.19056518 | 4.62E-05 | 0.0046026 | -0.11821   |
| 2w4w_SITTD | 0.0224605  | 0.13039835 | 4.28E-05 | 0.005125  | -0.068556  |
| 2w4w_SITTD | 0.01677019 | 0.09528343 | 4.00E-05 | 0.0058035 | 0.063215   |
| 2w4w_SITTD | 0.01425582 | 0.07976724 | 3.89E-05 | 0.0061278 | 0.1561     |
| 2w4w_SITTD | 0.03017527 | 0.17800619 | 4.55E-05 | 0.0046645 | -0.12301   |
| 2w4w_SITTD | 0.09534932 | 0.58019525 | 5.16E-05 | 0.0059226 | -0.91061   |
| 2w4w_SITTD | 0.01159738 | 0.06336201 | 3.74E-05 | 0.0065941 | 0.263      |
| 2w4w_SITTD | 0.08364163 | 0.5079471  | 4.77E-05 | 0.013036  | -0.0045591 |
| 2w4w_SITTD | 0.08289769 | 0.5033563  | 4.78E-05 | 0.013315  | 0.02505    |
| 2w4w_SITTD | 0.01533795 | 0.08644509 | 3.95E-05 | 0.0059603 | 0.11709    |
| 2w4w_SITTD | 0.00895403 | 0.04704993 | 3.59E-05 | 0.00713   | 0.38094    |
| 2w4w_SITTD | 0.03011291 | 0.17762138 | 4.55E-05 | 0.0046645 | -0.12301   |
| 2w4w_SITTD | 0.02655271 | 0.15565139 | 4.44E-05 | 0.004813  | -0.11546   |
| 2w4w_SITTD | 0.09683713 | 0.5893765  | 5.28E-05 | 0.0052469 | -1.03      |
| 2w4w_SITTD | 0.0171391  | 0.09756    | 4.03E-05 | 0.005729  | 0.063215   |
| 2w4w_SITTD | 0.00740977 | 0.03752026 | 3.50E-05 | 0.0074854 | 0.45576    |
| 2w4w_SITTD | 0.07066682 | 0.42787957 | 5.71E-05 | 0.011574  | 0.23016    |
| 2w4w_SITTD | 0.02437555 | 0.14221609 | 4.36E-05 | 0.0049516 | -0.098011  |
| 2w4w_SITTD | 0.02722517 | 0.15980113 | 4.46E-05 | 0.0047834 | -0.11816   |
| 2w4w_SITTD | 0.06353889 | 0.38389313 | 6.30E-05 | 0.008216  | 0.13178    |
| 2w4w_SITTD | 0.03065807 | 0.18098554 | 4.57E-05 | 0.0046464 | -0.12245   |
| 2w4w_SITTD | 0.0906603  | 0.55125934 | 4.91E-05 | 0.0083333 | -0.51631   |
| 2w4w_SITTD | 0.0180931  | 0.1034471  | 4.09E-05 | 0.0055879 | 0.030658   |
| 2w4w_SITTD | 0.00918942 | 0.04850248 | 3.62E-05 | 0.0070172 | 0.35661    |
| 2w4w_SITTD | 0.10031139 | 0.6108162  | 5.58E-05 | 0.0041426 | -1.2296    |
| 2w4w_SITTD | 0.02726774 | 0.16006382 | 4.46E-05 | 0.0047834 | -0.11816   |
| 2w4w_SITTD | 0.02889239 | 0.17008956 | 4.51E-05 | 0.0047064 | -0.12268   |
| 2w4w_SITTD | 0.01211754 | 0.06657194 | 3.77E-05 | 0.0064954 | 0.24064    |
| 2w4w_SITTD | 0.07688754 | 0.46626765 | 5.13E-05 | 0.014025  | 0.22047    |
| 2w4w_SITTD | 0.07735807 | 0.4691713  | 5.09E-05 | 0.014141  | 0.21153    |
| 2w4w_SITTD | 0.08576208 | 0.5210324  | 4.76E-05 | 0.0117    | -0.14081   |
| 2w4w_SITTD | 0.00893719 | 0.04694596 | 3.59E-05 | 0.00713   | 0.38094    |
| 2w4w_SITTD | 0.01652958 | 0.09379865 | 4.00E-05 | 0.0058035 | 0.080526   |
| 2w4w_SITTD | 0.02128857 | 0.12316635 | 4.24E-05 | 0.0052258 | -0.04878   |
| 2w4w_SITTD | 0.01483012 | 0.08331124 | 3.92E-05 | 0.0060428 | 0.1363     |

|            |            |            |          |           |           |
|------------|------------|------------|----------|-----------|-----------|
| 2w4w_SITTD | 0.03443133 | 0.20427032 | 4.70E-05 | 0.0045688 | -0.10761  |
| 2w4w_SITTD | 0.09466833 | 0.5759929  | 5.13E-05 | 0.0061762 | -0.8688   |
| 2w4w_SITTD | 0.01251081 | 0.06899879 | 3.80E-05 | 0.0063994 | 0.21875   |
| 2w4w_SITTD | 0.02569292 | 0.1503456  | 4.40E-05 | 0.0048781 | -0.10813  |
| 2w4w_SITTD | 0.00956583 | 0.05082531 | 3.62E-05 | 0.0070172 | 0.35661   |
| 2w4w_SITTD | 0.07889088 | 0.47863021 | 4.97E-05 | 0.014318  | 0.17506   |
| 2w4w_SITTD | 0.02408881 | 0.14044663 | 4.34E-05 | 0.0049916 | -0.091842 |
| 2w4w_SITTD | 0.05242269 | 0.31529504 | 5.97E-05 | 0.0054628 | 0.018414  |
| 2w4w_SITTD | 0.02814072 | 0.16545099 | 4.48E-05 | 0.0047558 | -0.12174  |
| 2w4w_SITTD | 0.03199851 | 0.1892574  | 4.62E-05 | 0.0046026 | -0.11821  |
| 2w4w_SITTD | 0.00826345 | 0.0427883  | 3.56E-05 | 0.0072456 | 0.40559   |
| 2w4w_SITTD | 0.00661757 | 0.03263161 | 3.47E-05 | 0.0076096 | 0.48124   |
| 2w4w_SITTD | 0.01509362 | 0.08493732 | 3.92E-05 | 0.0060428 | 0.1363    |
| 2w4w_SITTD | 0.0974086  | 0.5929031  | 5.32E-05 | 0.0050496 | -1.0673   |
| 2w4w_SITTD | 0.04492341 | 0.26901695 | 5.30E-05 | 0.0047888 | -0.028317 |
| 2w4w_SITTD | 0.08734828 | 0.5308208  | 4.79E-05 | 0.010571  | -0.25808  |
| 2w4w_SITTD | 0.01923236 | 0.11047749 | 4.14E-05 | 0.0054571 | 0.0010121 |
| 2w4w_SITTD | 0.07326756 | 0.44392875 | 5.43E-05 | 0.012883  | 0.24489   |
| 2w4w_SITTD | 0.06351473 | 0.38374403 | 6.30E-05 | 0.008216  | 0.13178   |
| 2w4w_SITTD | 0.0164714  | 0.09343958 | 4.00E-05 | 0.0058035 | 0.080526  |
| 2w4w_SITTD | 0.00740893 | 0.03751512 | 3.50E-05 | 0.0074854 | 0.45576   |
| 2w4w_SITTD | 0.01167178 | 0.06382114 | 3.74E-05 | 0.0065941 | 0.263     |
| 2w4w_SITTD | 0.02689308 | 0.15775178 | 4.44E-05 | 0.004813  | -0.11546  |
| 2w4w_SITTD | 0.01328413 | 0.07377094 | 3.83E-05 | 0.0063061 | 0.19734   |
| 2w4w_SITTD | 0.04705741 | 0.28218588 | 5.49E-05 | 0.0049251 | -0.01514  |
| 2w4w_SITTD | 0.10156637 | 0.6185607  | 5.66E-05 | 0.0039398 | -1.303    |
| 2w4w_SITTD | 0.02587375 | 0.15146148 | 4.40E-05 | 0.0048781 | -0.10813  |
| 2w4w_SITTD | 0.02151309 | 0.12455186 | 4.24E-05 | 0.0052258 | -0.04878  |
| 2w4w_SITTD | 0.02239343 | 0.12998445 | 4.28E-05 | 0.005125  | -0.068556 |
| 2w4w_SITTD | 0.01436376 | 0.08043335 | 3.89E-05 | 0.0061278 | 0.1561    |
| 2w4w_SITTD | 0.02464285 | 0.1438656  | 4.36E-05 | 0.0049516 | -0.098011 |
| 2w4w_SITTD | 0.01598058 | 0.09041073 | 3.98E-05 | 0.0058806 | 0.098494  |
| 2w4w_SITTD | 0.01409328 | 0.07876421 | 3.89E-05 | 0.0061278 | 0.1561    |
| 2w4w_SITTD | 0.10050835 | 0.61203164 | 5.58E-05 | 0.0041426 | -1.2563   |
| 2w4w_SITTD | 0.0198349  | 0.11419578 | 4.16E-05 | 0.0053955 | -0.012659 |
| 2w4w_SITTD | 0.05867534 | 0.35388014 | 6.35E-05 | 0.0066597 | 0.068735  |
| 2w4w_SITTD | 0.02255825 | 0.13100153 | 4.28E-05 | 0.005125  | -0.068556 |
| 2w4w_SITTD | 0.01028988 | 0.05529343 | 3.68E-05 | 0.0068    | 0.30902   |
| 2w4w_SITTD | 0.02564241 | 0.15003392 | 4.40E-05 | 0.0048781 | -0.10813  |
| 2w4w_SITTD | 0.01671757 | 0.09495869 | 4.00E-05 | 0.0058035 | 0.080526  |
| 2w4w_SITTD | 0.07954438 | 0.48266298 | 4.93E-05 | 0.014315  | 0.15946   |
| 2w4w_SITTD | 0.0948501  | 0.5771146  | 5.16E-05 | 0.0059226 | -0.8688   |
| 2w4w_SITTD | 0.01502631 | 0.08452195 | 3.92E-05 | 0.0060428 | 0.1363    |

|            |            |            |          |           |           |
|------------|------------|------------|----------|-----------|-----------|
| 2w4w_SITTD | 0.01928291 | 0.11078944 | 4.14E-05 | 0.0054571 | 0.0010121 |
| 2w4w_SITTD | 0.02270873 | 0.1319302  | 4.28E-05 | 0.005125  | -0.077142 |
| 2w4w_SITTD | 0.02505039 | 0.14638053 | 4.38E-05 | 0.0049138 | -0.10343  |
| 2w4w_SITTD | 0.01185912 | 0.06497721 | 3.74E-05 | 0.0065941 | 0.263     |
| 2w4w_SITTD | 0.02245911 | 0.13038978 | 4.28E-05 | 0.005125  | -0.068556 |
| 2w4w_SITTD | 0.01222273 | 0.06722103 | 3.77E-05 | 0.0064954 | 0.24064   |
| 2w4w_SITTD | 0.02985949 | 0.17605755 | 4.55E-05 | 0.0046645 | -0.12301  |
| 2w4w_SITTD | 0.01509744 | 0.0849609  | 3.92E-05 | 0.0060428 | 0.1363    |
| 2w4w_SITTD | 0.03242899 | 0.19191392 | 4.62E-05 | 0.0046026 | -0.11603  |
| 2w4w_SITTD | 0.01895918 | 0.1087917  | 4.14E-05 | 0.0054571 | 0.0010121 |
| 2w4w_SITTD | 0.0245192  | 0.1431026  | 4.36E-05 | 0.0049516 | -0.098011 |
| 2w4w_SITTD | 0.00866799 | 0.04528474 | 3.59E-05 | 0.00713   | 0.38094   |
| 2w4w_SITTD | 0.08740045 | 0.5311428  | 4.79E-05 | 0.010571  | -0.25808  |
| 2w4w_SITTD | 0.02754234 | 0.16175838 | 4.46E-05 | 0.0047834 | -0.12024  |
| 2w4w_SITTD | 0.02557088 | 0.14959252 | 4.40E-05 | 0.0048781 | -0.10813  |
| 2w4w_SITTD | 0.02167047 | 0.12552306 | 4.26E-05 | 0.0051742 | -0.059109 |
| 2w4w_SITTD | 0.03243865 | 0.19197349 | 4.62E-05 | 0.0046026 | -0.11603  |
| 2w4w_SITTD | 0.02211035 | 0.12823758 | 4.26E-05 | 0.0051742 | -0.059109 |
| 2w4w_SITTD | 0.01316345 | 0.0730262  | 3.83E-05 | 0.0063061 | 0.19734   |
| 2w4w_SITTD | 0.03859786 | 0.22998199 | 4.89E-05 | 0.0045836 | -0.076088 |
| 2w4w_SITTD | 0.02672967 | 0.15674338 | 4.44E-05 | 0.004813  | -0.11546  |
| 2w4w_SITTD | 0.01345235 | 0.07480901 | 3.83E-05 | 0.0063061 | 0.19734   |
| 2w4w_SITTD | 0.02680969 | 0.15723722 | 4.44E-05 | 0.004813  | -0.11546  |
| 2w4w_SITTD | 0.02107362 | 0.12183987 | 4.21E-05 | 0.0052798 | -0.04878  |
| 2w4w_SITTD | 0.01286973 | 0.07121369 | 3.80E-05 | 0.0063994 | 0.21875   |
| 2w4w_SITTD | 0.01497722 | 0.08421899 | 3.92E-05 | 0.0060428 | 0.1363    |
| 2w4w_SITTD | 0.00974138 | 0.05190866 | 3.65E-05 | 0.0069072 | 0.33263   |
| 2w4w_SITTD | 0.0207542  | 0.11986876 | 4.21E-05 | 0.0052798 | -0.037579 |
| 2w4w_SITTD | 0.01508093 | 0.08485902 | 3.92E-05 | 0.0060428 | 0.1363    |
| 2w4w_SITTD | 0.01942108 | 0.11164209 | 4.14E-05 | 0.0054571 | 0.0010121 |
| 2w4w_SITTD | 0.05091504 | 0.30599135 | 5.83E-05 | 0.0052672 | 0.0077602 |
| 2w4w_SITTD | 0.02002361 | 0.11536028 | 4.16E-05 | 0.0053955 | -0.025531 |
| 2w4w_SITTD | 0.09992806 | 0.60845065 | 5.53E-05 | 0.004262  | -1.2296   |
| 2w4w_SITTD | 0.00908248 | 0.04784258 | 3.59E-05 | 0.00713   | 0.38094   |
| 2w4w_SITTD | 0.02673793 | 0.15679435 | 4.44E-05 | 0.004813  | -0.11546  |
| 2w4w_SITTD | 0.00750254 | 0.03809277 | 3.50E-05 | 0.0074854 | 0.45576   |
| 2w4w_SITTD | 0.02365753 | 0.13778524 | 4.32E-05 | 0.0050338 | -0.084895 |
| 2w4w_SITTD | 0.01504347 | 0.08462784 | 3.92E-05 | 0.0060428 | 0.1363    |
| 2w4w_SITTD | 0.01040477 | 0.05600245 | 3.68E-05 | 0.0068    | 0.30902   |
| 2w4w_SITTD | 0.0169541  | 0.09641836 | 4.03E-05 | 0.005729  | 0.063215  |
| 2w4w_SITTD | 0.02143946 | 0.12409751 | 4.24E-05 | 0.0052258 | -0.04878  |
| 2w4w_SITTD | 0.02032942 | 0.11724742 | 4.19E-05 | 0.0053364 | -0.025531 |
| 2w4w_SITTD | 0.01651243 | 0.09369281 | 4.00E-05 | 0.0058035 | 0.080526  |

|            |            |            |          |           |            |
|------------|------------|------------|----------|-----------|------------|
| 2w4w_SITTD | 0.02442804 | 0.14254001 | 4.36E-05 | 0.0049516 | -0.098011  |
| 2w4w_SITTD | 0.01614395 | 0.09141889 | 3.98E-05 | 0.0058806 | 0.098494   |
| 2w4w_SITTD | 0.01332624 | 0.0740308  | 3.83E-05 | 0.0063061 | 0.19734    |
| 2w4w_SITTD | 0.02755147 | 0.16181473 | 4.46E-05 | 0.0047834 | -0.12024   |
| 2w4w_SITTD | 0.02447248 | 0.14281425 | 4.36E-05 | 0.0049516 | -0.098011  |
| 2w4w_SITTD | 0.00687948 | 0.03424786 | 3.47E-05 | 0.0076096 | 0.48124    |
| 2w4w_SITTD | 0.0207879  | 0.12007675 | 4.21E-05 | 0.0052798 | -0.037579  |
| 2w4w_SITTD | 0.01592212 | 0.09004999 | 3.98E-05 | 0.0058806 | 0.098494   |
| 2w4w_SITTD | 0.01296653 | 0.07181105 | 3.80E-05 | 0.0063994 | 0.19734    |
| 2w4w_SITTD | 0.01984716 | 0.11427142 | 4.16E-05 | 0.0053955 | -0.012659  |
| 2w4w_SITTD | 0.08823908 | 0.53631794 | 4.80E-05 | 0.010188  | -0.3415    |
| 2w4w_SITTD | 0.01827278 | 0.10455591 | 4.09E-05 | 0.0055879 | 0.030658   |
| 2w4w_SITTD | 0.02230007 | 0.12940833 | 4.28E-05 | 0.005125  | -0.068556  |
| 2w4w_SITTD | 0.07253233 | 0.4393916  | 5.54E-05 | 0.012382  | 0.24373    |
| 2w4w_SITTD | 0.02047447 | 0.11814257 | 4.19E-05 | 0.0053364 | -0.025531  |
| 2w4w_SITTD | 0.01457343 | 0.0817272  | 3.89E-05 | 0.0061278 | 0.1363     |
| 2w4w_SITTD | 0.03317383 | 0.1965103  | 4.66E-05 | 0.0045822 | -0.11352   |
| 2w4w_SITTD | 0.04837936 | 0.2903436  | 5.63E-05 | 0.005054  | -0.0087048 |
| 2w4w_SITTD | 0.02399317 | 0.13985646 | 4.34E-05 | 0.0049916 | -0.091842  |
| 2w4w_SITTD | 0.01095492 | 0.05939739 | 3.71E-05 | 0.0066957 | 0.2858     |
| 2w4w_SITTD | 0.01605213 | 0.09085228 | 3.98E-05 | 0.0058806 | 0.098494   |
| 2w4w_SITTD | 0.06691835 | 0.40474775 | 6.07E-05 | 0.0096573 | 0.18233    |
| 2w4w_SITTD | 0.08533546 | 0.5183997  | 4.76E-05 | 0.012059  | -0.14081   |
| 2w4w_SITTD | 0.00980403 | 0.05229526 | 3.65E-05 | 0.0069072 | 0.33263    |
| 2w4w_SITTD | 0.01748535 | 0.09969669 | 4.06E-05 | 0.0056572 | 0.046584   |
| 2w4w_SITTD | 0.0257241  | 0.15053804 | 4.40E-05 | 0.0048781 | -0.10813   |
| 2w4w_SITTD | 0.02916812 | 0.17179109 | 4.51E-05 | 0.0047064 | -0.1231    |
| 2w4w_SITTD | 0.01870191 | 0.10720407 | 4.11E-05 | 0.0055212 | 0.015459   |
| 2w4w_SITTD | 0.06428029 | 0.3884683  | 6.27E-05 | 0.0084357 | 0.14863    |
| 2w4w_SITTD | 0.00313906 | 0.0111657  | 3.26E-05 | 0.0085576 | 0.66457    |
| 2w4w_SITTD | 0.06913589 | 0.41843218 | 5.87E-05 | 0.010741  | 0.21895    |
| 2w4w_SITTD | 0.01320344 | 0.073273   | 3.83E-05 | 0.0063061 | 0.19734    |
| 2w4w_SITTD | 0.01311476 | 0.07272575 | 3.83E-05 | 0.0063061 | 0.19734    |
| 2w4w_SITTD | 0.0805487  | 0.48886064 | 4.87E-05 | 0.014207  | 0.12269    |
| 2w4w_SITTD | 0.05747121 | 0.3464494  | 6.32E-05 | 0.0064035 | 0.057806   |
| 2w4w_SITTD | 0.06980139 | 0.422539   | 5.82E-05 | 0.011019  | 0.22487    |
| 2w4w_SITTD | 0.03122038 | 0.18445557 | 4.58E-05 | 0.00463   | -0.12145   |
| 2w4w_SITTD | 0.01958933 | 0.11268037 | 4.16E-05 | 0.0053955 | -0.012659  |
| 2w4w_SITTD | 0.01675419 | 0.09518467 | 4.00E-05 | 0.0058035 | 0.063215   |
| 2w4w_SITTD | 0.06003992 | 0.36230093 | 6.37E-05 | 0.0069445 | 0.087064   |
| 2w4w_SITTD | 0.08727851 | 0.53039026 | 4.79E-05 | 0.010571  | -0.25808   |
| 2w4w_SITTD | 0.01325764 | 0.07360745 | 3.83E-05 | 0.0063061 | 0.19734    |
| 2w4w_SITTD | 0.08446673 | 0.5130388  | 4.76E-05 | 0.012731  | -0.069378  |

|            |            |            |          |           |           |
|------------|------------|------------|----------|-----------|-----------|
| 2w4w_SITTD | 0.09412313 | 0.57262844 | 5.09E-05 | 0.0064439 | -0.82618  |
| 2w4w_SITTD | 0.02081648 | 0.1202531  | 4.21E-05 | 0.0052798 | -0.037579 |
| 2w4w_SITTD | 0.02584078 | 0.15125808 | 4.40E-05 | 0.0048781 | -0.10813  |
| 2w4w_SITTD | 0.0117052  | 0.06402734 | 3.74E-05 | 0.0065941 | 0.263     |
| 2w4w_SITTD | 0.02854768 | 0.16796233 | 4.49E-05 | 0.0047302 | -0.12174  |
| 2w4w_SITTD | 0.02498238 | 0.14596087 | 4.38E-05 | 0.0049138 | -0.10343  |
| 2w4w_SITTD | 0.0143024  | 0.08005469 | 3.89E-05 | 0.0061278 | 0.1561    |
| 2w4w_SITTD | 0.02838134 | 0.16693585 | 4.49E-05 | 0.0047302 | -0.12174  |
| 2w4w_SITTD | 0.02851482 | 0.16775957 | 4.49E-05 | 0.0047302 | -0.12174  |
| 2w4w_SITTD | 0.06823158 | 0.41285172 | 5.98E-05 | 0.010192  | 0.20551   |
| 2w4w_SITTD | 0.06486874 | 0.39209962 | 6.24E-05 | 0.0086643 | 0.15715   |
| 2w4w_SITTD | 0.02033879 | 0.11730526 | 4.19E-05 | 0.0053364 | -0.025531 |
| 2w4w_SITTD | 0.0837891  | 0.5088571  | 4.77E-05 | 0.013036  | -0.036078 |
| 2w4w_SITTD | 0.03309136 | 0.19600137 | 4.66E-05 | 0.0045822 | -0.11352  |
| 2w4w_SITTD | 0.01529238 | 0.08616388 | 3.95E-05 | 0.0059603 | 0.11709   |
| 2w4w_SITTD | 0.01392443 | 0.07772221 | 3.86E-05 | 0.0062156 | 0.17645   |
| 2w4w_SITTD | 0.0105385  | 0.05682769 | 3.68E-05 | 0.0068    | 0.30902   |
| 2w4w_SITTD | 0.02285026 | 0.13280357 | 4.30E-05 | 0.0050782 | -0.077142 |
| 2w4w_SITTD | 0.01076913 | 0.05825086 | 3.68E-05 | 0.0068    | 0.30902   |
| 2w4w_SITTD | 0.02789224 | 0.1639176  | 4.48E-05 | 0.0047558 | -0.12024  |
| 2w4w_SITTD | 0.08688785 | 0.52797955 | 4.78E-05 | 0.010952  | -0.21781  |
| 2w4w_SITTD | 0.02010339 | 0.11585263 | 4.19E-05 | 0.0053364 | -0.025531 |
| 2w4w_SITTD | 0.05071749 | 0.30477226 | 5.83E-05 | 0.0052672 | 0.0043724 |
| 2w4w_SITTD | 0.01902309 | 0.10918611 | 4.14E-05 | 0.0054571 | 0.0010121 |
| 2w4w_SITTD | 0.02231293 | 0.12948768 | 4.28E-05 | 0.005125  | -0.068556 |
| 2w4w_SITTD | 0.02083083 | 0.12034166 | 4.21E-05 | 0.0052798 | -0.037579 |
| 2w4w_SITTD | 0.01650509 | 0.09364749 | 4.00E-05 | 0.0058035 | 0.080526  |
| 2w4w_SITTD | 0.01389715 | 0.07755389 | 3.86E-05 | 0.0062156 | 0.17645   |
| 2w4w_SITTD | 0.06943572 | 0.42028245 | 5.82E-05 | 0.011019  | 0.21895   |
| 2w4w_SITTD | 0.03478263 | 0.2064382  | 4.72E-05 | 0.0045646 | -0.10426  |
| 2w4w_SITTD | 0.02423311 | 0.14133711 | 4.34E-05 | 0.0049916 | -0.091842 |
| 2w4w_SITTD | 0.08838958 | 0.5372467  | 4.82E-05 | 0.0098057 | -0.3415   |
| 2w4w_SITTD | 0.01524664 | 0.08588158 | 3.95E-05 | 0.0059603 | 0.11709   |
| 2w4w_SITTD | 0.06811649 | 0.4121415  | 5.98E-05 | 0.010192  | 0.20551   |
| 2w4w_SITTD | 0.01308438 | 0.07253826 | 3.83E-05 | 0.0063061 | 0.19734   |
| 2w4w_SITTD | 0.00641825 | 0.0314016  | 3.44E-05 | 0.0077366 | 0.50694   |
| 2w4w_SITTD | 0.00513003 | 0.02345202 | 3.38E-05 | 0.0079991 | 0.55892   |
| 2w4w_SITTD | 0.02359256 | 0.1373843  | 4.32E-05 | 0.0050338 | -0.084895 |
| 2w4w_SITTD | 0.02048492 | 0.11820702 | 4.19E-05 | 0.0053364 | -0.025531 |
| 2w4w_SITTD | 0.01332195 | 0.07400435 | 3.83E-05 | 0.0063061 | 0.19734   |
| 2w4w_SITTD | 0.0172445  | 0.0982104  | 4.03E-05 | 0.005729  | 0.063215  |
| 2w4w_SITTD | 0.00988822 | 0.0528148  | 3.65E-05 | 0.0069072 | 0.33263   |
| 2w4w_SITTD | 0.05499792 | 0.33118677 | 6.17E-05 | 0.0058704 | 0.034245  |

|            |            |            |          |           |            |
|------------|------------|------------|----------|-----------|------------|
| 2w4w_SITTD | 0.02723303 | 0.15984964 | 4.46E-05 | 0.0047834 | -0.11816   |
| 2w4w_SITTD | 0.03073758 | 0.18147624 | 4.57E-05 | 0.0046464 | -0.12245   |
| 2w4w_SITTD | 0.09155816 | 0.5568     | 4.93E-05 | 0.0079874 | -0.60562   |
| 2w4w_SITTD | 0.0867921  | 0.52738863 | 4.78E-05 | 0.010952  | -0.21781   |
| 2w4w_SITTD | 0.01241922 | 0.06843358 | 3.77E-05 | 0.0064954 | 0.21875    |
| 2w4w_SITTD | 0.01636306 | 0.09277101 | 4.00E-05 | 0.0058035 | 0.080526   |
| 2w4w_SITTD | 0.05729058 | 0.34533477 | 6.30E-05 | 0.0062853 | 0.057806   |
| 2w4w_SITTD | 0.07051104 | 0.4269182  | 5.71E-05 | 0.011574  | 0.23016    |
| 2w4w_SITTD | 0.02349217 | 0.13676481 | 4.32E-05 | 0.0050338 | -0.084895  |
| 2w4w_SITTD | 0.03509368 | 0.20835769 | 4.72E-05 | 0.0045646 | -0.10068   |
| 2w4w_SITTD | 0.02180577 | 0.12635802 | 4.26E-05 | 0.0051742 | -0.059109  |
| 2w4w_SITTD | 0.01899902 | 0.10903757 | 4.14E-05 | 0.0054571 | 0.0010121  |
| 2w4w_SITTD | 0.11333306 | 0.6911729  | 6.42E-05 | 0.0040096 | -1.2882    |
| 2w4w_SITTD | 0.01218643 | 0.06699705 | 3.77E-05 | 0.0064954 | 0.24064    |
| 2w4w_SITTD | 0.01289874 | 0.07139269 | 3.80E-05 | 0.0063994 | 0.21875    |
| 2w4w_SITTD | 0.02624668 | 0.15376286 | 4.42E-05 | 0.0048445 | -0.11213   |
| 2w4w_SITTD | 0.0879632  | 0.5346155  | 4.80E-05 | 0.010188  | -0.29935   |
| 2w4w_SITTD | 0.01691163 | 0.09615626 | 4.03E-05 | 0.005729  | 0.063215   |
| 2w4w_SITTD | 0.0215964  | 0.12506598 | 4.24E-05 | 0.0052258 | -0.059109  |
| 2w4w_SITTD | 0.00790888 | 0.04060025 | 3.53E-05 | 0.0073641 | 0.43054    |
| 2w4w_SITTD | 0.0793606  | 0.4815289  | 4.93E-05 | 0.014315  | 0.17506    |
| 2w4w_SITTD | 0.04129164 | 0.2466053  | 5.05E-05 | 0.0046492 | -0.054504  |
| 2w4w_SITTD | 0.00810507 | 0.041811   | 3.56E-05 | 0.0072456 | 0.40559    |
| 2w4w_SITTD | 0.02245005 | 0.13033387 | 4.28E-05 | 0.005125  | -0.068556  |
| 2w4w_SITTD | 0.01174515 | 0.06427389 | 3.74E-05 | 0.0065941 | 0.263      |
| 2w4w_SITTD | 0.02309308 | 0.13430199 | 4.30E-05 | 0.0050782 | -0.077142  |
| 2w4w_SITTD | 0.01611433 | 0.09123611 | 3.98E-05 | 0.0058806 | 0.098494   |
| 2w4w_SITTD | 0.01713747 | 0.09754992 | 4.03E-05 | 0.005729  | 0.063215   |
| 2w4w_SITTD | 0.02264815 | 0.13155633 | 4.28E-05 | 0.005125  | -0.068556  |
| 2w4w_SITTD | 0.01370156 | 0.0763469  | 3.86E-05 | 0.0062156 | 0.17645    |
| 2w4w_SITTD | 0.0393557  | 0.2346586  | 4.92E-05 | 0.0045932 | -0.071721  |
| 2w4w_SITTD | 0.02702394 | 0.15855932 | 4.44E-05 | 0.004813  | -0.11816   |
| 2w4w_SITTD | 0.02458209 | 0.1434907  | 4.36E-05 | 0.0049516 | -0.098011  |
| 2w4w_SITTD | 0.01345012 | 0.07479529 | 3.83E-05 | 0.0063061 | 0.19734    |
| 2w4w_SITTD | 0.01703314 | 0.0969061  | 4.03E-05 | 0.005729  | 0.063215   |
| 2w4w_SITTD | 0.0887842  | 0.53968185 | 4.82E-05 | 0.0098057 | -0.3844    |
| 2w4w_SITTD | 0.01321875 | 0.07336748 | 3.83E-05 | 0.0063061 | 0.19734    |
| 2w4w_SITTD | 0.03901993 | 0.23258659 | 4.92E-05 | 0.0045932 | -0.071721  |
| 2w4w_SITTD | 0.02931678 | 0.17270845 | 4.53E-05 | 0.0046846 | -0.1231    |
| 2w4w_SITTD | 0.02162811 | 0.12526165 | 4.24E-05 | 0.0052258 | -0.059109  |
| 2w4w_SITTD | 0.0279623  | 0.16434996 | 4.48E-05 | 0.0047558 | -0.12024   |
| 2w4w_SITTD | 0.01565598 | 0.08840764 | 3.95E-05 | 0.0059603 | 0.098494   |
| 2w4w_SITTD | 0.08355855 | 0.5074344  | 4.77E-05 | 0.013036  | -0.0045591 |

|            |            |            |          |           |            |
|------------|------------|------------|----------|-----------|------------|
| 2w4w_SITTD | 0.01454911 | 0.08157712 | 3.89E-05 | 0.0061278 | 0.1561     |
| 2w4w_SITTD | 0.02622647 | 0.15363812 | 4.42E-05 | 0.0048445 | -0.11213   |
| 2w4w_SITTD | 0.01974194 | 0.1136221  | 4.16E-05 | 0.0053955 | -0.012659  |
| 2w4w_SITTD | 0.0690429  | 0.41785833 | 5.87E-05 | 0.010741  | 0.21248    |
| 2w4w_SITTD | 0.02119568 | 0.12259314 | 4.24E-05 | 0.0052258 | -0.04878   |
| 2w4w_SITTD | 0.01705978 | 0.09707046 | 4.03E-05 | 0.005729  | 0.063215   |
| 2w4w_SITTD | 0.0162721  | 0.09220973 | 4.00E-05 | 0.0058035 | 0.080526   |
| 2w4w_SITTD | 0.02034059 | 0.11731637 | 4.19E-05 | 0.0053364 | -0.025531  |
| 2w4w_SITTD | 0.01623861 | 0.09200303 | 4.00E-05 | 0.0058035 | 0.080526   |
| 2w4w_SITTD | 0.04851748 | 0.29119596 | 5.63E-05 | 0.005054  | -0.0087048 |
| 2w4w_SITTD | 0.01708679 | 0.09723715 | 4.03E-05 | 0.005729  | 0.063215   |
| 2w4w_SITTD | 0.09549421 | 0.5810894  | 5.20E-05 | 0.0056833 | -0.91061   |
| 2w4w_SITTD | 0.02956553 | 0.17424351 | 4.53E-05 | 0.0046846 | -0.1231    |
| 2w4w_SITTD | 0.04593577 | 0.27526423 | 5.39E-05 | 0.0048522 | -0.021643  |
| 2w4w_SITTD | 0.01238812 | 0.06824169 | 3.77E-05 | 0.0064954 | 0.24064    |
| 2w4w_SITTD | 0.01918014 | 0.11015521 | 4.14E-05 | 0.0054571 | 0.0010121  |
| 2w4w_SITTD | 0.01226575 | 0.06748653 | 3.77E-05 | 0.0064954 | 0.24064    |
| 2w4w_SITTD | 0.02966932 | 0.17488398 | 4.53E-05 | 0.0046846 | -0.1231    |
| 2w4w_SITTD | 0.03532531 | 0.20978707 | 4.74E-05 | 0.0045622 | -0.10068   |
| 2w4w_SITTD | 0.01494335 | 0.08400997 | 3.92E-05 | 0.0060428 | 0.1363     |
| 2w4w_SITTD | 0.01563004 | 0.08824753 | 3.95E-05 | 0.0059603 | 0.11709    |
| 2w4w_SITTD | 0.01615434 | 0.091483   | 3.98E-05 | 0.0058806 | 0.098494   |
| 2w4w_SITTD | 0.02600262 | 0.15225676 | 4.42E-05 | 0.0048445 | -0.11213   |
| 2w4w_SITTD | 0.02543968 | 0.14878285 | 4.38E-05 | 0.0049138 | -0.10813   |
| 2w4w_SITTD | 0.03911649 | 0.23318246 | 4.92E-05 | 0.0045932 | -0.071721  |
| 2w4w_SITTD | 0.08355892 | 0.5074367  | 4.77E-05 | 0.013036  | -0.0045591 |
| 2w4w_SITTD | 0.01539279 | 0.08678347 | 3.95E-05 | 0.0059603 | 0.11709    |
| 2w4w_SITTD | 0.03799506 | 0.22626214 | 4.87E-05 | 0.0045758 | -0.080425  |
| 2w4w_SITTD | 0.02466626 | 0.14401008 | 4.36E-05 | 0.0049516 | -0.098011  |
| 2w4w_SITTD | 0.03023445 | 0.17837143 | 4.55E-05 | 0.0046645 | -0.12245   |
| 2w4w_SITTD | 0.00559003 | 0.02629064 | 3.41E-05 | 0.0078664 | 0.53284    |
| 2w4w_SITTD | 0.09333863 | 0.5677873  | 5.06E-05 | 0.0067258 | -0.73907   |
| 2w4w_SITTD | 0.01121076 | 0.06097618 | 3.71E-05 | 0.0066957 | 0.2858     |
| 2w4w_SITTD | 0.0204706  | 0.11811867 | 4.19E-05 | 0.0053364 | -0.025531  |
| 2w4w_SITTD | 0.02128978 | 0.12317382 | 4.24E-05 | 0.0052258 | -0.04878   |
| 2w4w_SITTD | 0.02774593 | 0.16301475 | 4.48E-05 | 0.0047558 | -0.12024   |
| 2w4w_SITTD | 0.01791062 | 0.10232103 | 4.09E-05 | 0.0055879 | 0.030658   |
| 2w4w_SITTD | 0.02326891 | 0.13538706 | 4.30E-05 | 0.0050782 | -0.084895  |
| 2w4w_SITTD | 0.02935397 | 0.17293794 | 4.53E-05 | 0.0046846 | -0.1231    |
| 2w4w_SITTD | 0.0248557  | 0.14517911 | 4.36E-05 | 0.0049516 | -0.10343   |
| 2w4w_SITTD | 0.01706061 | 0.09707563 | 4.03E-05 | 0.005729  | 0.063215   |
| 2w4w_SITTD | 0.02052211 | 0.11843655 | 4.19E-05 | 0.0053364 | -0.037579  |
| 2w4w_SITTD | 0.09603309 | 0.5844148  | 5.24E-05 | 0.0054581 | -0.9515    |

|            |            |            |          |           |           |
|------------|------------|------------|----------|-----------|-----------|
| 2w4w_SITTD | 0.02821461 | 0.16590697 | 4.49E-05 | 0.0047302 | -0.12174  |
| 2w4w_SITTD | 0.03653473 | 0.21725044 | 4.79E-05 | 0.0045625 | -0.092976 |
| 2w4w_SITTD | 0.00731987 | 0.03696553 | 3.50E-05 | 0.0074854 | 0.45576   |
| 2w4w_SITTD | 0.0231102  | 0.13440764 | 4.30E-05 | 0.0050782 | -0.077142 |
| 2w4w_SITTD | 0.01857966 | 0.10644968 | 4.11E-05 | 0.0055212 | 0.015459  |
| 2w4w_SITTD | 0.01347151 | 0.07492728 | 3.83E-05 | 0.0063061 | 0.19734   |
| 2w4w_SITTD | 0.03735742 | 0.22232723 | 4.81E-05 | 0.0045652 | -0.084703 |
| 2w4w_SITTD | 0.01743883 | 0.09940961 | 4.06E-05 | 0.0056572 | 0.046584  |
| 2w4w_SITTD | 0.02772436 | 0.1628816  | 4.48E-05 | 0.0047558 | -0.12024  |
| 2w4w_SITTD | 0.03537348 | 0.21008432 | 4.74E-05 | 0.0045622 | -0.10068  |
| 2w4w_SITTD | 0.02740981 | 0.16094053 | 4.46E-05 | 0.0047834 | -0.11816  |
| 2w4w_SITTD | 0.01645735 | 0.09335286 | 4.00E-05 | 0.0058035 | 0.080526  |
| 2w4w_SITTD | 0.07946798 | 0.4821915  | 4.93E-05 | 0.014315  | 0.15946   |
| 2w4w_SITTD | 0.03231011 | 0.19118029 | 4.62E-05 | 0.0046026 | -0.11821  |
| 2w4w_SITTD | 0.02775377 | 0.1630631  | 4.48E-05 | 0.0047558 | -0.12024  |
| 2w4w_SITTD | 0.02836926 | 0.1668613  | 4.49E-05 | 0.0047302 | -0.12174  |
| 2w4w_SITTD | 0.010379   | 0.05584338 | 3.68E-05 | 0.0068    | 0.30902   |
| 2w4w_SITTD | 0.0505796  | 0.3039213  | 5.83E-05 | 0.0052672 | 0.0043724 |
| 2w4w_SITTD | 0.01417208 | 0.07925049 | 3.89E-05 | 0.0061278 | 0.1561    |
| 2w4w_SITTD | 0.04390815 | 0.26275176 | 5.25E-05 | 0.0047605 | -0.035266 |
| 2w4w_SITTD | 0.02544478 | 0.14881432 | 4.38E-05 | 0.0049138 | -0.10813  |
| 2w4w_SITTD | 0.02626427 | 0.15387143 | 4.42E-05 | 0.0048445 | -0.11213  |
| 2w4w_SITTD | 0.04777044 | 0.28658596 | 5.58E-05 | 0.0050083 | -0.01192  |
| 2w4w_SITTD | 0.02596402 | 0.15201855 | 4.40E-05 | 0.0048781 | -0.11213  |
| 2w4w_SITTD | 0.01581493 | 0.08938849 | 3.98E-05 | 0.0058806 | 0.098494  |
| 2w4w_SITTD | 0.0219122  | 0.12701477 | 4.26E-05 | 0.0051742 | -0.059109 |
| 2w4w_SITTD | 0.02189767 | 0.12692511 | 4.26E-05 | 0.0051742 | -0.059109 |
| 2w4w_SITTD | 0.01171261 | 0.06407312 | 3.74E-05 | 0.0065941 | 0.263     |
| 2w4w_SITTD | 0.06519936 | 0.39413986 | 6.20E-05 | 0.0089013 | 0.15715   |
| 2w4w_SITTD | 0.01048973 | 0.05652668 | 3.68E-05 | 0.0068    | 0.30902   |
| 2w4w_SITTD | 0.0306069  | 0.18066977 | 4.57E-05 | 0.0046464 | -0.12245  |
| 2w4w_SITTD | 0.02445344 | 0.14269677 | 4.36E-05 | 0.0049516 | -0.098011 |
| 2w4w_SITTD | 0.01780423 | 0.10166451 | 4.06E-05 | 0.0056572 | 0.046584  |
| 2w4w_SITTD | 0.01556073 | 0.08781987 | 3.95E-05 | 0.0059603 | 0.11709   |
| 2w4w_SITTD | 0.02815412 | 0.1655337  | 4.48E-05 | 0.0047558 | -0.12174  |
| 2w4w_SITTD | 0.09661246 | 0.5879901  | 5.28E-05 | 0.0052469 | -0.99133  |
| 2w4w_SITTD | 0.02518924 | 0.14723739 | 4.38E-05 | 0.0049138 | -0.10343  |
| 2w4w_SITTD | 0.0222464  | 0.12907717 | 4.28E-05 | 0.005125  | -0.068556 |
| 2w4w_SITTD | 0.02988023 | 0.17618552 | 4.55E-05 | 0.0046645 | -0.12301  |
| 2w4w_SITTD | 0.09159355 | 0.5570184  | 4.96E-05 | 0.0076529 | -0.60562  |
| 2w4w_SITTD | 0.08835086 | 0.5370077  | 4.82E-05 | 0.0098057 | -0.3415   |
| 2w4w_SITTD | 0.02288544 | 0.13302064 | 4.30E-05 | 0.0050782 | -0.077142 |
| 2w4w_SITTD | 0.03459387 | 0.20527336 | 4.70E-05 | 0.0045688 | -0.10426  |



|            |            |            |          |           |           |
|------------|------------|------------|----------|-----------|-----------|
| 2w4w_SITTD | 0.01484529 | 0.08340485 | 3.92E-05 | 0.0060428 | 0.1363    |
| 2w4w_SITTD | 0.01464988 | 0.08219899 | 3.92E-05 | 0.0060428 | 0.1363    |
| 2w4w_SITTD | 0.0108207  | 0.05856911 | 3.71E-05 | 0.0066957 | 0.2858    |
| 2w4w_SITTD | 0.09243137 | 0.56218857 | 4.99E-05 | 0.0073308 | -0.69483  |
| 2w4w_SITTD | 0.01639109 | 0.09294401 | 4.00E-05 | 0.0058035 | 0.080526  |
| 2w4w_SITTD | 0.02899844 | 0.17074397 | 4.51E-05 | 0.0047064 | -0.12268  |
| 2w4w_SITTD | 0.00470637 | 0.02083759 | 3.35E-05 | 0.0081345 | 0.58516   |
| 2w4w_SITTD | 0.02497572 | 0.14591977 | 4.38E-05 | 0.0049138 | -0.10343  |
| 2w4w_SITTD | 0.01442893 | 0.08083551 | 3.89E-05 | 0.0061278 | 0.1561    |
| 2w4w_SITTD | 0.02669451 | 0.15652642 | 4.44E-05 | 0.004813  | -0.11546  |
| 2w4w_SITTD | 0.02849653 | 0.16764668 | 4.49E-05 | 0.0047302 | -0.12174  |
| 2w4w_SITTD | 0.05403302 | 0.32523236 | 6.10E-05 | 0.005694  | 0.030074  |
| 2w4w_SITTD | 0.02494527 | 0.14573187 | 4.38E-05 | 0.0049138 | -0.10343  |
| 2w4w_SITTD | 0.08506881 | 0.5167542  | 4.76E-05 | 0.012059  | -0.10433  |
| 2w4w_SITTD | 0.01169777 | 0.06398154 | 3.74E-05 | 0.0065941 | 0.263     |
| 2w4w_SITTD | 0.01778862 | 0.10156819 | 4.06E-05 | 0.0056572 | 0.046584  |
| 2w4w_SITTD | 0.05214868 | 0.3136041  | 5.97E-05 | 0.0054628 | 0.014768  |
| 2w4w_SITTD | 0.02841721 | 0.16715723 | 4.49E-05 | 0.0047302 | -0.12174  |
| 2w4w_SITTD | 0.08051087 | 0.4886272  | 4.87E-05 | 0.014207  | 0.12269   |
| 2w4w_SITTD | 0.00519177 | 0.02383298 | 3.38E-05 | 0.0079991 | 0.55892   |
| 2w4w_SITTD | 0.01186726 | 0.06502746 | 3.74E-05 | 0.0065941 | 0.24064   |
| 2w4w_SITTD | 0.06095916 | 0.3679736  | 6.38E-05 | 0.0072613 | 0.09374   |
| 2w4w_SITTD | 0.07381591 | 0.44731262 | 5.38E-05 | 0.013116  | 0.24502   |
| 2w4w_SITTD | 0.02509154 | 0.14663449 | 4.38E-05 | 0.0049138 | -0.10343  |
| 2w4w_SITTD | 0.02179071 | 0.12626508 | 4.26E-05 | 0.0051742 | -0.059109 |
| 2w4w_SITTD | 0.0761058  | 0.46144354 | 5.18E-05 | 0.013885  | 0.23393   |
| 2w4w_SITTD | 0.02644393 | 0.15498006 | 4.42E-05 | 0.0048445 | -0.11213  |
| 2w4w_SITTD | 0.03265419 | 0.19330359 | 4.64E-05 | 0.0045915 | -0.11603  |
| 2w4w_SITTD | 0.01313625 | 0.07285836 | 3.83E-05 | 0.0063061 | 0.19734   |
| 2w4w_SITTD | 0.02018658 | 0.11636596 | 4.19E-05 | 0.0053364 | -0.025531 |
| 2w4w_SITTD | 0.01446224 | 0.08104109 | 3.89E-05 | 0.0061278 | 0.1561    |
| 2w4w_SITTD | 0.01786516 | 0.10204048 | 4.09E-05 | 0.0055879 | 0.030658  |
| 2w4w_SITTD | 0.02984616 | 0.17597528 | 4.55E-05 | 0.0046645 | -0.12301  |
| 2w4w_SITTD | 0.09173657 | 0.55790097 | 4.96E-05 | 0.0076529 | -0.60562  |
| 2w4w_SITTD | 0.03368277 | 0.19965096 | 4.68E-05 | 0.0045746 | -0.11071  |
| 2w4w_SITTD | 0.01746397 | 0.09956474 | 4.06E-05 | 0.0056572 | 0.046584  |
| 2w4w_SITTD | 0.03236528 | 0.19152077 | 4.62E-05 | 0.0046026 | -0.11821  |
| 2w4w_SITTD | 0.00463584 | 0.02040234 | 3.35E-05 | 0.0081345 | 0.58516   |
| 2w4w_SITTD | 0.00945726 | 0.05015534 | 3.62E-05 | 0.0070172 | 0.35661   |
| 2w4w_SITTD | 0.03084218 | 0.18212171 | 4.57E-05 | 0.0046464 | -0.12145  |
| 2w4w_SITTD | 0.0206834  | 0.11943188 | 4.21E-05 | 0.0052798 | -0.037579 |
| 2w4w_SITTD | 0.02849548 | 0.1676402  | 4.49E-05 | 0.0047302 | -0.12174  |
| 2w4w_SITTD | 0.05981133 | 0.3608903  | 6.37E-05 | 0.0069445 | 0.080679  |

|            |            |            |          |           |           |
|------------|------------|------------|----------|-----------|-----------|
| 2w4w_SITTD | 0.04729227 | 0.28363523 | 5.53E-05 | 0.0049654 | -0.01514  |
| 2w4w_SITTD | 0.00784807 | 0.04022501 | 3.53E-05 | 0.0073641 | 0.43054   |
| 2w4w_SITTD | 0.01141158 | 0.06221545 | 3.74E-05 | 0.0065941 | 0.263     |
| 2w4w_SITTD | 0.02782853 | 0.16352446 | 4.48E-05 | 0.0047558 | -0.12024  |
| 2w4w_SITTD | 0.00828082 | 0.04289553 | 3.56E-05 | 0.0072456 | 0.40559   |
| 2w4w_SITTD | 0.09153898 | 0.55668163 | 4.93E-05 | 0.0079874 | -0.60562  |
| 2w4w_SITTD | 0.01351643 | 0.07520445 | 3.83E-05 | 0.0063061 | 0.17645   |
| 2w4w_SITTD | 0.09055958 | 0.5506378  | 4.91E-05 | 0.0083333 | -0.51631  |
| 2w4w_SITTD | 0.02906948 | 0.1711824  | 4.51E-05 | 0.0047064 | -0.12268  |
| 2w4w_SITTD | 0.03777963 | 0.22493272 | 4.84E-05 | 0.0045696 | -0.084703 |
| 2w4w_SITTD | 0.08199453 | 0.4977829  | 4.81E-05 | 0.013778  | 0.078055  |
| 2w4w_SITTD | 0.03740581 | 0.22262584 | 4.84E-05 | 0.0045696 | -0.084703 |
| 2w4w_SITTD | 0.01500745 | 0.08440554 | 3.92E-05 | 0.0060428 | 0.1363    |
| 2w4w_SITTD | 0.04741348 | 0.28438318 | 5.53E-05 | 0.0049654 | -0.01514  |
| 2w4w_SITTD | 0.08305466 | 0.5043249  | 4.78E-05 | 0.013315  | 0.02505   |
| 2w4w_SITTD | 0.00897988 | 0.04720945 | 3.59E-05 | 0.00713   | 0.38094   |
| 2w4w_SITTD | 0.02538407 | 0.1484397  | 4.38E-05 | 0.0049138 | -0.10813  |
| 2w4w_SITTD | 0.00639752 | 0.03127365 | 3.44E-05 | 0.0077366 | 0.50694   |
| 2w4w_SITTD | 0.03002115 | 0.17705512 | 4.55E-05 | 0.0046645 | -0.12301  |
| 2w4w_SITTD | 0.04804794 | 0.28829846 | 5.58E-05 | 0.0050083 | -0.01192  |
| 2w4w_SITTD | 0.02265511 | 0.13159926 | 4.28E-05 | 0.005125  | -0.068556 |
| 2w4w_SITTD | 0.09076494 | 0.55190504 | 4.91E-05 | 0.0083333 | -0.56091  |
| 2w4w_SITTD | 0.01986234 | 0.1143651  | 4.16E-05 | 0.0053955 | -0.012659 |
| 2w4w_SITTD | 0.01855615 | 0.10630461 | 4.11E-05 | 0.0055212 | 0.015459  |
| 2w4w_SITTD | 0.01116332 | 0.06068344 | 3.71E-05 | 0.0066957 | 0.2858    |
| 2w4w_SITTD | 0.0216986  | 0.12569664 | 4.26E-05 | 0.0051742 | -0.059109 |
| 2w4w_SITTD | 0.01667469 | 0.09469409 | 4.00E-05 | 0.0058035 | 0.080526  |
| 2w4w_SITTD | 0.09691633 | 0.58986527 | 5.28E-05 | 0.0052469 | -1.03     |
| 2w4w_SITTD | 0.05364647 | 0.32284698 | 6.10E-05 | 0.005694  | 0.026054  |
| 2w4w_SITTD | 0.0828391  | 0.5029947  | 4.79E-05 | 0.013563  | 0.02505   |
| 2w4w_SITTD | 0.02714174 | 0.1592863  | 4.46E-05 | 0.0047834 | -0.11816  |
| 2w4w_SITTD | 0.01496001 | 0.08411279 | 3.92E-05 | 0.0060428 | 0.1363    |
| 2w4w_SITTD | 0.0148548  | 0.08346356 | 3.92E-05 | 0.0060428 | 0.1363    |
| 2w4w_SITTD | 0.02000191 | 0.1152264  | 4.16E-05 | 0.0053955 | -0.025531 |
| 2w4w_SITTD | 0.08831831 | 0.5368069  | 4.82E-05 | 0.0098057 | -0.3415   |
| 2w4w_SITTD | 0.01037809 | 0.05583775 | 3.68E-05 | 0.0068    | 0.30902   |
| 2w4w_SITTD | 0.08207775 | 0.4982964  | 4.81E-05 | 0.013778  | 0.078055  |
| 2w4w_SITTD | 0.09429455 | 0.57368624 | 5.13E-05 | 0.0061762 | -0.82618  |
| 2w4w_SITTD | 0.00555892 | 0.02609868 | 3.41E-05 | 0.0078664 | 0.53284   |
| 2w4w_SITTD | 0.00778886 | 0.03985962 | 3.53E-05 | 0.0073641 | 0.43054   |
| 2w4w_SITTD | 0.0903903  | 0.54959315 | 4.88E-05 | 0.0086895 | -0.51631  |
| 2w4w_SITTD | 0.03084089 | 0.18211374 | 4.57E-05 | 0.0046464 | -0.12145  |
| 2w4w_SITTD | 0.02785692 | 0.16369964 | 4.48E-05 | 0.0047558 | -0.12024  |

|            |            |            |          |           |            |
|------------|------------|------------|----------|-----------|------------|
| 2w4w_SITTD | 0.01153716 | 0.06299042 | 3.74E-05 | 0.0065941 | 0.263      |
| 2w4w_SITTD | 0.0151759  | 0.08544504 | 3.95E-05 | 0.0059603 | 0.11709    |
| 2w4w_SITTD | 0.02500135 | 0.1460779  | 4.38E-05 | 0.0049138 | -0.10343   |
| 2w4w_SITTD | 0.08608928 | 0.52305156 | 4.76E-05 | 0.0117    | -0.17867   |
| 2w4w_SITTD | 0.01003472 | 0.05371882 | 3.65E-05 | 0.0069072 | 0.33263    |
| 2w4w_SITTD | 0.09824688 | 0.5980761  | 5.40E-05 | 0.0046955 | -1.1032    |
| 2w4w_SITTD | 0.00367125 | 0.01444987 | 3.29E-05 | 0.0084138 | 0.63801    |
| 2w4w_SITTD | 0.05221849 | 0.31403494 | 5.97E-05 | 0.0054628 | 0.014768   |
| 2w4w_SITTD | 0.01278552 | 0.070694   | 3.80E-05 | 0.0063994 | 0.21875    |
| 2w4w_SITTD | 0.01131606 | 0.06162598 | 3.71E-05 | 0.0066957 | 0.2858     |
| 2w4w_SITTD | 0.08503717 | 0.516559   | 4.76E-05 | 0.012404  | -0.10433   |
| 2w4w_SITTD | 0.00493835 | 0.02226914 | 3.38E-05 | 0.0079991 | 0.55892    |
| 2w4w_SITTD | 0.08850131 | 0.5379362  | 4.82E-05 | 0.0098057 | -0.3415    |
| 2w4w_SITTD | 0.01821698 | 0.10421161 | 4.09E-05 | 0.0055879 | 0.030658   |
| 2w4w_SITTD | 0.02725744 | 0.16000025 | 4.46E-05 | 0.0047834 | -0.11816   |
| 2w4w_SITTD | 0.0512311  | 0.3079417  | 5.87E-05 | 0.0053288 | 0.0077602  |
| 2w4w_SITTD | 0.02212771 | 0.12834471 | 4.26E-05 | 0.0051742 | -0.068556  |
| 2w4w_SITTD | 0.04898218 | 0.29406363 | 5.68E-05 | 0.0051026 | -0.0054808 |
| 2w4w_SITTD | 0.03420851 | 0.20289534 | 4.70E-05 | 0.0045688 | -0.10761   |
| 2w4w_SITTD | 0.0873972  | 0.53112274 | 4.79E-05 | 0.010571  | -0.25808   |
| 2w4w_SITTD | 0.01859986 | 0.10657436 | 4.11E-05 | 0.0055212 | 0.015459   |
| 2w4w_SITTD | 0.04033341 | 0.24069206 | 4.99E-05 | 0.0046177 | -0.063007  |
| 2w4w_SITTD | 0.00764242 | 0.03895598 | 3.53E-05 | 0.0073641 | 0.43054    |
| 2w4w_SITTD | 0.01552623 | 0.08760695 | 3.95E-05 | 0.0059603 | 0.11709    |
| 2w4w_SITTD | 0.01958785 | 0.11267123 | 4.16E-05 | 0.0053955 | -0.012659  |
| 2w4w_SITTD | 0.02349639 | 0.13679081 | 4.32E-05 | 0.0050338 | -0.084895  |
| 2w4w_SITTD | 0.01368957 | 0.07627293 | 3.86E-05 | 0.0062156 | 0.17645    |
| 2w4w_SITTD | 0.02040698 | 0.11772608 | 4.19E-05 | 0.0053364 | -0.025531  |
| 2w4w_SITTD | 0.0204841  | 0.11820196 | 4.19E-05 | 0.0053364 | -0.025531  |
| 2w4w_SITTD | 0.02689007 | 0.15773322 | 4.44E-05 | 0.004813  | -0.11546   |
| 2w4w_SITTD | 0.0153011  | 0.08621765 | 3.95E-05 | 0.0059603 | 0.11709    |
| 2w4w_SITTD | 0.00474011 | 0.02104583 | 3.35E-05 | 0.0081345 | 0.58516    |
| 2w4w_SITTD | 0.01507182 | 0.08480277 | 3.92E-05 | 0.0060428 | 0.1363     |
| 2w4w_SITTD | 0.01724253 | 0.09819822 | 4.03E-05 | 0.005729  | 0.063215   |
| 2w4w_SITTD | 0.01104139 | 0.05993098 | 3.71E-05 | 0.0066957 | 0.2858     |
| 2w4w_SITTD | 0.07679163 | 0.46567577 | 5.13E-05 | 0.014025  | 0.22047    |
| 2w4w_SITTD | 0.07239905 | 0.43856916 | 5.54E-05 | 0.012382  | 0.24373    |
| 2w4w_SITTD | 0.02473008 | 0.14440393 | 4.36E-05 | 0.0049516 | -0.098011  |
| 2w4w_SITTD | 0.01485136 | 0.08344235 | 3.92E-05 | 0.0060428 | 0.1363     |
| 2w4w_SITTD | 0.01993816 | 0.11483295 | 4.16E-05 | 0.0053955 | -0.012659  |
| 2w4w_SITTD | 0.01483847 | 0.08336281 | 3.92E-05 | 0.0060428 | 0.1363     |
| 2w4w_SITTD | 0.03725552 | 0.2216984  | 4.81E-05 | 0.0045652 | -0.084703  |
| 2w4w_SITTD | 0.01364389 | 0.07599101 | 3.86E-05 | 0.0062156 | 0.17645    |

|            |            |            |          |           |            |
|------------|------------|------------|----------|-----------|------------|
| 2w4w_SITTD | 0.11199218 | 0.68289834 | 6.34E-05 | 0.0038331 | -1.3168    |
| 2w4w_SITTD | 0.08428665 | 0.51192755 | 4.76E-05 | 0.012731  | -0.069378  |
| 2w4w_SITTD | 0.03089861 | 0.1824699  | 4.58E-05 | 0.00463   | -0.12145   |
| 2w4w_SITTD | 0.01375065 | 0.07664982 | 3.86E-05 | 0.0062156 | 0.17645    |
| 2w4w_SITTD | 0.07363286 | 0.446183   | 5.43E-05 | 0.012883  | 0.24502    |
| 2w4w_SITTD | 0.03318993 | 0.19660963 | 4.66E-05 | 0.0045822 | -0.11352   |
| 2w4w_SITTD | 0.02951763 | 0.1739479  | 4.53E-05 | 0.0046846 | -0.1231    |
| 2w4w_SITTD | 0.01382728 | 0.07712272 | 3.86E-05 | 0.0062156 | 0.17645    |
| 2w4w_SITTD | 0.01720494 | 0.09796628 | 4.03E-05 | 0.005729  | 0.063215   |
| 2w4w_SITTD | 0.0278927  | 0.16392045 | 4.48E-05 | 0.0047558 | -0.12024   |
| 2w4w_SITTD | 0.02442083 | 0.14249557 | 4.36E-05 | 0.0049516 | -0.098011  |
| 2w4w_SITTD | 0.02060621 | 0.11895549 | 4.21E-05 | 0.0052798 | -0.037579  |
| 2w4w_SITTD | 0.07687943 | 0.4662176  | 5.13E-05 | 0.014025  | 0.22047    |
| 2w4w_SITTD | 0.03748165 | 0.22309384 | 4.84E-05 | 0.0045696 | -0.084703  |
| 2w4w_SITTD | 0.03252987 | 0.19253643 | 4.64E-05 | 0.0045915 | -0.11603   |
| 2w4w_SITTD | 0.08329968 | 0.5058369  | 4.78E-05 | 0.013315  | -0.0045591 |
| 2w4w_SITTD | 0.03471384 | 0.20601366 | 4.72E-05 | 0.0045646 | -0.10426   |
| 2w4w_SITTD | 0.02544993 | 0.14884612 | 4.40E-05 | 0.0048781 | -0.10813   |
| 2w4w_SITTD | 0.00452036 | 0.01968972 | 3.35E-05 | 0.0081345 | 0.58516    |
| 2w4w_SITTD | 0.07875714 | 0.4778049  | 4.97E-05 | 0.014318  | 0.18889    |
| 2w4w_SITTD | 0.09742162 | 0.59298337 | 5.32E-05 | 0.0050496 | -1.0673    |
| 2w4w_SITTD | 0.01073802 | 0.05805891 | 3.68E-05 | 0.0068    | 0.30902    |
| 2w4w_SITTD | 0.08728254 | 0.5304151  | 4.79E-05 | 0.010571  | -0.25808   |
| 2w4w_SITTD | 0.03871024 | 0.23067547 | 4.89E-05 | 0.0045836 | -0.076088  |
| 2w4w_SITTD | 0.01289136 | 0.07134719 | 3.80E-05 | 0.0063994 | 0.21875    |
| 2w4w_SITTD | 0.00735191 | 0.03716319 | 3.50E-05 | 0.0074854 | 0.45576    |
| 2w4w_SITTD | 0.09065083 | 0.55120087 | 4.91E-05 | 0.0083333 | -0.51631   |
| 2w4w_SITTD | 0.01235327 | 0.06802662 | 3.77E-05 | 0.0064954 | 0.24064    |
| 2w4w_SITTD | 0.02608211 | 0.1527473  | 4.42E-05 | 0.0048445 | -0.11213   |
| 2w4w_SITTD | 0.02487084 | 0.14527254 | 4.36E-05 | 0.0049516 | -0.10343   |
| 2w4w_SITTD | 0.04089274 | 0.24414371 | 5.02E-05 | 0.0046325 | -0.058715  |
| 2w4w_SITTD | 0.01124255 | 0.06117237 | 3.71E-05 | 0.0066957 | 0.2858     |
| 2w4w_SITTD | 0.01214859 | 0.06676357 | 3.77E-05 | 0.0064954 | 0.24064    |
| 2w4w_SITTD | 0.01912114 | 0.10979112 | 4.14E-05 | 0.0054571 | 0.0010121  |
| 2w4w_SITTD | 0.01792997 | 0.10244042 | 4.09E-05 | 0.0055879 | 0.030658   |
| 2w4w_SITTD | 0.08623331 | 0.5239403  | 4.77E-05 | 0.01133   | -0.17867   |
| 2w4w_SITTD | 0.00677198 | 0.03358445 | 3.47E-05 | 0.0076096 | 0.48124    |
| 2w4w_SITTD | 0.02641053 | 0.15477401 | 4.42E-05 | 0.0048445 | -0.11213   |
| 2w4w_SITTD | 0.01869886 | 0.10718527 | 4.11E-05 | 0.0055212 | 0.015459   |
| 2w4w_SITTD | 0.01058423 | 0.05710985 | 3.68E-05 | 0.0068    | 0.30902    |
| 2w4w_SITTD | 0.02949557 | 0.17381176 | 4.53E-05 | 0.0046846 | -0.1231    |
| 2w4w_SITTD | 0.02766355 | 0.16250639 | 4.48E-05 | 0.0047558 | -0.12024   |
| 2w4w_SITTD | 0.01824657 | 0.10439418 | 4.09E-05 | 0.0055879 | 0.030658   |

|            |            |            |          |           |            |
|------------|------------|------------|----------|-----------|------------|
| 2w4w_SITTD | 0.01890267 | 0.10844299 | 4.11E-05 | 0.0055212 | 0.0010121  |
| 2w4w_SITTD | 0.02375929 | 0.13841318 | 4.32E-05 | 0.0050338 | -0.091842  |
| 2w4w_SITTD | 0.02410007 | 0.14051615 | 4.34E-05 | 0.0049916 | -0.091842  |
| 2w4w_SITTD | 0.02187861 | 0.12680748 | 4.26E-05 | 0.0051742 | -0.059109  |
| 2w4w_SITTD | 0.02217291 | 0.1286236  | 4.26E-05 | 0.0051742 | -0.068556  |
| 2w4w_SITTD | 0.03298725 | 0.19535892 | 4.64E-05 | 0.0045915 | -0.11352   |
| 2w4w_SITTD | 0.0678499  | 0.41049638 | 5.98E-05 | 0.010192  | 0.19812    |
| 2w4w_SITTD | 0.07482022 | 0.4535102  | 5.28E-05 | 0.013537  | 0.24193    |
| 2w4w_SITTD | 0.01243886 | 0.0685548  | 3.77E-05 | 0.0064954 | 0.21875    |
| 2w4w_SITTD | 0.02426712 | 0.14154696 | 4.34E-05 | 0.0049916 | -0.091842  |
| 2w4w_SITTD | 0.01590856 | 0.08996629 | 3.98E-05 | 0.0058806 | 0.098494   |
| 2w4w_SITTD | 0.01836002 | 0.10509428 | 4.09E-05 | 0.0055879 | 0.015459   |
| 2w4w_SITTD | 0.03829802 | 0.22813165 | 4.87E-05 | 0.0045758 | -0.080425  |
| 2w4w_SITTD | 0.0822054  | 0.49908414 | 4.81E-05 | 0.013778  | 0.05262    |
| 2w4w_SITTD | 0.01833664 | 0.10494998 | 4.09E-05 | 0.0055879 | 0.030658   |
| 2w4w_SITTD | 0.0135103  | 0.07516664 | 3.83E-05 | 0.0063061 | 0.17645    |
| 2w4w_SITTD | 0.01916957 | 0.11009    | 4.14E-05 | 0.0054571 | 0.0010121  |
| 2w4w_SITTD | 0.07762655 | 0.47082806 | 5.05E-05 | 0.014229  | 0.21153    |
| 2w4w_SITTD | 0.02365042 | 0.13774136 | 4.32E-05 | 0.0050338 | -0.084895  |
| 2w4w_SITTD | 0.02404381 | 0.14016898 | 4.34E-05 | 0.0049916 | -0.091842  |
| 2w4w_SITTD | 0.08553162 | 0.5196102  | 4.76E-05 | 0.012059  | -0.14081   |
| 2w4w_SITTD | 0.0453416  | 0.27159762 | 5.34E-05 | 0.0048194 | -0.028317  |
| 2w4w_SITTD | 0.02584585 | 0.15128936 | 4.40E-05 | 0.0048781 | -0.10813   |
| 2w4w_SITTD | 0.02936616 | 0.1730132  | 4.53E-05 | 0.0046846 | -0.1231    |
| 2w4w_SITTD | 0.0883731  | 0.53714496 | 4.82E-05 | 0.0098057 | -0.3415    |
| 2w4w_SITTD | 0.08763811 | 0.53260934 | 4.79E-05 | 0.010571  | -0.29935   |
| 2w4w_SITTD | 0.02471083 | 0.14428514 | 4.36E-05 | 0.0049516 | -0.098011  |
| 2w4w_SITTD | 0.05583697 | 0.33636454 | 6.24E-05 | 0.0060668 | 0.043089   |
| 2w4w_SITTD | 0.01907235 | 0.10949007 | 4.14E-05 | 0.0054571 | 0.0010121  |
| 2w4w_SITTE | 0.03496033 | 0.20753482 | 4.72E-05 | 0.0045646 | -0.10426   |
| 2w4w_SITTE | 0.08608833 | 0.52304566 | 4.76E-05 | 0.0117    | -0.17867   |
| 2w4w_SITTE | 0.08926656 | 0.54265857 | 4.84E-05 | 0.0094274 | -0.42792   |
| 2w4w_SITTE | 0.01711494 | 0.09741086 | 4.03E-05 | 0.005729  | 0.063215   |
| 2w4w_SITTE | 0.01997961 | 0.11508875 | 4.16E-05 | 0.0053955 | -0.025531  |
| 2w4w_SITTE | 0.02497632 | 0.1459235  | 4.38E-05 | 0.0049138 | -0.10343   |
| 2w4w_SITTE | 0.00625938 | 0.03042122 | 3.44E-05 | 0.0077366 | 0.50694    |
| 2w4w_SITTE | 0.02708813 | 0.15895543 | 4.46E-05 | 0.0047834 | -0.11816   |
| 2w4w_SITTE | 0.0151999  | 0.08559319 | 3.95E-05 | 0.0059603 | 0.11709    |
| 2w4w_SITTE | 0.09579238 | 0.5829294  | 5.20E-05 | 0.0056833 | -0.9515    |
| 2w4w_SITTE | 0.03230088 | 0.19112332 | 4.62E-05 | 0.0046026 | -0.11821   |
| 2w4w_SITTE | 0.09077987 | 0.5519972  | 4.91E-05 | 0.0083333 | -0.56091   |
| 2w4w_SITTE | 0.08358668 | 0.507608   | 4.77E-05 | 0.013036  | -0.0045591 |
| 2w4w_SITTE | 0.00771098 | 0.03937906 | 3.53E-05 | 0.0073641 | 0.43054    |

|                         |            |            |          |           |           |
|-------------------------|------------|------------|----------|-----------|-----------|
| 2w4w_SITTE <sup>z</sup> | 0.06022188 | 0.36342385 | 6.38E-05 | 0.0070986 | 0.087064  |
| 2w4w_SITTE <sup>z</sup> | 0.03222454 | 0.19065222 | 4.62E-05 | 0.0046026 | -0.11821  |
| 2w4w_SITTE <sup>z</sup> | 0.04264439 | 0.25495312 | 5.13E-05 | 0.0046879 | -0.04643  |
| 2w4w_SITTE <sup>z</sup> | 0.02645214 | 0.15503077 | 4.42E-05 | 0.0048445 | -0.11546  |
| 2w4w_SITTE <sup>z</sup> | 0.02327492 | 0.13542415 | 4.30E-05 | 0.0050782 | -0.084895 |
| 2w4w_SITTE <sup>z</sup> | 0.09935407 | 0.6049085  | 5.49E-05 | 0.0043938 | -1.1701   |
| 2w4w_SITTE <sup>z</sup> | 0.00853769 | 0.04448066 | 3.56E-05 | 0.0072456 | 0.40559   |
| 2w4w_SITTE <sup>z</sup> | 0.03554104 | 0.21111833 | 4.74E-05 | 0.0045622 | -0.10068  |
| 2w4w_SITTE <sup>z</sup> | 0.04585277 | 0.27475202 | 5.39E-05 | 0.0048522 | -0.024952 |
| 2w4w_SITTE <sup>z</sup> | 0.02317956 | 0.13483569 | 4.30E-05 | 0.0050782 | -0.077142 |
| 2w4w_SITTE <sup>z</sup> | 0.01634394 | 0.09265305 | 4.00E-05 | 0.0058035 | 0.080526  |
| 2w4w_SITTE <sup>z</sup> | 0.0113931  | 0.06210142 | 3.74E-05 | 0.0065941 | 0.263     |
| 2w4w_SITTE <sup>z</sup> | 0.03758452 | 0.22372867 | 4.84E-05 | 0.0045696 | -0.084703 |
| 2w4w_SITTE <sup>z</sup> | 0.02505842 | 0.14643013 | 4.38E-05 | 0.0049138 | -0.10343  |
| 2w4w_SITTE <sup>z</sup> | 0.03530183 | 0.20964222 | 4.74E-05 | 0.0045622 | -0.10068  |
| 2w4w_SITTE <sup>z</sup> | 0.02028815 | 0.11699279 | 4.19E-05 | 0.0053364 | -0.025531 |
| 2w4w_SITTE <sup>z</sup> | 0.02248224 | 0.1305325  | 4.28E-05 | 0.005125  | -0.068556 |
| 2w4w_SITTE <sup>z</sup> | 0.01409881 | 0.07879836 | 3.89E-05 | 0.0061278 | 0.1561    |
| 2w4w_SITTE <sup>z</sup> | 0.09303729 | 0.5659277  | 5.02E-05 | 0.0070215 | -0.73907  |
| 2w4w_SITTE <sup>z</sup> | 0.03531683 | 0.20973477 | 4.74E-05 | 0.0045622 | -0.10068  |
| 2w4w_SITTE <sup>z</sup> | 0.08080384 | 0.49043512 | 4.85E-05 | 0.0141    | 0.12269   |
| 2w4w_SITTE <sup>z</sup> | 0.03372633 | 0.19991976 | 4.68E-05 | 0.0045746 | -0.11071  |
| 2w4w_SITTE <sup>z</sup> | 0.02022734 | 0.11661748 | 4.19E-05 | 0.0053364 | -0.025531 |
| 2w4w_SITTE <sup>z</sup> | 0.01965693 | 0.1130975  | 4.16E-05 | 0.0053955 | -0.012659 |
| 2w4w_SITTE <sup>z</sup> | 0.01151248 | 0.06283808 | 3.74E-05 | 0.0065941 | 0.263     |
| 2w4w_SITTE <sup>z</sup> | 0.02444594 | 0.1426505  | 4.36E-05 | 0.0049516 | -0.098011 |
| 2w4w_SITTE <sup>z</sup> | 0.07674655 | 0.46539754 | 5.13E-05 | 0.014025  | 0.22047   |
| 2w4w_SITTE <sup>z</sup> | 0.02648447 | 0.15523024 | 4.42E-05 | 0.0048445 | -0.11546  |
| 2w4w_SITTE <sup>z</sup> | 0.01204419 | 0.06611926 | 3.77E-05 | 0.0064954 | 0.24064   |
| 2w4w_SITTE <sup>z</sup> | 0.06552584 | 0.39615455 | 6.20E-05 | 0.0089013 | 0.16566   |
| 2w4w_SITTE <sup>z</sup> | 0.03304624 | 0.19572297 | 4.66E-05 | 0.0045822 | -0.11352  |
| 2w4w_SITTE <sup>z</sup> | 0.05367923 | 0.32304916 | 6.10E-05 | 0.005694  | 0.026054  |
| 2w4w_SITTE <sup>z</sup> | 0.1013862  | 0.61744887 | 5.66E-05 | 0.0039398 | -1.2808   |
| 2w4w_SITTE <sup>z</sup> | 0.0222093  | 0.12884821 | 4.28E-05 | 0.005125  | -0.068556 |
| 2w4w_SITTE <sup>z</sup> | 0.06790023 | 0.4108069  | 5.98E-05 | 0.010192  | 0.19812   |
| 2w4w_SITTE <sup>z</sup> | 0.01482345 | 0.08327008 | 3.92E-05 | 0.0060428 | 0.1363    |
| 2w4w_SITTE <sup>z</sup> | 0.02774642 | 0.16301776 | 4.48E-05 | 0.0047558 | -0.12024  |
| 2w4w_SITTE <sup>z</sup> | 0.0911522  | 0.5542948  | 4.93E-05 | 0.0079874 | -0.56091  |
| 2w4w_SITTE <sup>z</sup> | 0.0735082  | 0.44541368 | 5.43E-05 | 0.012883  | 0.24502   |
| 2w4w_SITTE <sup>z</sup> | 0.08239906 | 0.50027925 | 4.79E-05 | 0.013563  | 0.05262   |
| 2w4w_SITTE <sup>z</sup> | 0.00878297 | 0.0459943  | 3.59E-05 | 0.00713   | 0.38094   |
| 2w4w_SITTE <sup>z</sup> | 0.05445249 | 0.32782093 | 6.14E-05 | 0.0057798 | 0.030074  |
| 2w4w_SITTE <sup>z</sup> | 0.03998294 | 0.23852932 | 4.95E-05 | 0.0046046 | -0.063007 |

|                         |            |            |          |           |           |
|-------------------------|------------|------------|----------|-----------|-----------|
| 2w4w_SITTE <sup>Δ</sup> | 0.03011766 | 0.17765066 | 4.55E-05 | 0.0046645 | -0.12301  |
| 2w4w_SITTE <sup>Δ</sup> | 0.02339659 | 0.13617498 | 4.32E-05 | 0.0050338 | -0.084895 |
| 2w4w_SITTE <sup>Δ</sup> | 0.0936289  | 0.5695785  | 5.06E-05 | 0.0067258 | -0.7829   |
| 2w4w_SITTE <sup>Δ</sup> | 0.01215084 | 0.06677739 | 3.77E-05 | 0.0064954 | 0.24064   |
| 2w4w_SITTE <sup>Δ</sup> | 0.02204293 | 0.1278215  | 4.26E-05 | 0.0051742 | -0.059109 |
| 2w4w_SITTE <sup>Δ</sup> | 0.02213386 | 0.12838267 | 4.26E-05 | 0.0051742 | -0.068556 |
| 2w4w_SITTE <sup>Δ</sup> | 0.09413058 | 0.57267445 | 5.09E-05 | 0.0064439 | -0.82618  |
| 2w4w_SITTE <sup>Δ</sup> | 0.02966322 | 0.17484637 | 4.53E-05 | 0.0046846 | -0.1231   |
| 2w4w_SITTE <sup>Δ</sup> | 0.09652409 | 0.5874448  | 5.28E-05 | 0.0052469 | -0.99133  |
| 2w4w_SITTE <sup>Δ</sup> | 0.01894133 | 0.10868157 | 4.11E-05 | 0.0055212 | 0.0010121 |
| 2w4w_SITTE <sup>Δ</sup> | 0.03360212 | 0.19915324 | 4.68E-05 | 0.0045746 | -0.11071  |
| 2w4w_SITTE <sup>Δ</sup> | 0.05177397 | 0.31129178 | 5.92E-05 | 0.0053939 | 0.011221  |
| 2w4w_SITTE <sup>Δ</sup> | 0.01537279 | 0.08666004 | 3.95E-05 | 0.0059603 | 0.11709   |
| 2w4w_SITTE <sup>Δ</sup> | 0.03287499 | 0.19466619 | 4.64E-05 | 0.0045915 | -0.11603  |
| 2w4w_SITTE <sup>Δ</sup> | 0.03348534 | 0.19843262 | 4.66E-05 | 0.0045822 | -0.11071  |
| 2w4w_SITTE <sup>Δ</sup> | 0.00917655 | 0.04842308 | 3.59E-05 | 0.00713   | 0.35661   |
| 2w4w_SITTE <sup>Δ</sup> | 0.06737725 | 0.4075796  | 6.03E-05 | 0.009922  | 0.19037   |
| 2w4w_SITTE <sup>Δ</sup> | 0.01661595 | 0.0943316  | 4.00E-05 | 0.0058035 | 0.080526  |
| 2w4w_SITTE <sup>Δ</sup> | 0.02877697 | 0.16937728 | 4.51E-05 | 0.0047064 | -0.12268  |
| 2w4w_SITTE <sup>Δ</sup> | 0.02953669 | 0.17406555 | 4.53E-05 | 0.0046846 | -0.1231   |
| 2w4w_SITTE <sup>Δ</sup> | 0.08289088 | 0.5033142  | 4.79E-05 | 0.013563  | 0.02505   |
| 2w4w_SITTE <sup>Δ</sup> | 0.0330482  | 0.19573504 | 4.66E-05 | 0.0045822 | -0.11352  |
| 2w4w_SITTE <sup>Δ</sup> | 0.0800471  | 0.48576528 | 4.90E-05 | 0.014278  | 0.14202   |
| 2w4w_SITTE <sup>Δ</sup> | 0.02677604 | 0.15702955 | 4.44E-05 | 0.004813  | -0.11546  |
| 2w4w_SITTE <sup>Δ</sup> | 0.01861307 | 0.10665586 | 4.11E-05 | 0.0055212 | 0.015459  |
| 2w4w_SITTE <sup>Δ</sup> | 0.01853047 | 0.10614614 | 4.11E-05 | 0.0055212 | 0.015459  |
| 2w4w_SITTE <sup>Δ</sup> | 0.012521   | 0.06906165 | 3.80E-05 | 0.0063994 | 0.21875   |
| 2w4w_SITTE <sup>Δ</sup> | 0.01171513 | 0.06408864 | 3.74E-05 | 0.0065941 | 0.263     |
| 2w4w_SITTE <sup>Δ</sup> | 0.01860152 | 0.10658457 | 4.11E-05 | 0.0055212 | 0.015459  |
| 2w4w_SITTE <sup>Δ</sup> | 0.01093809 | 0.05929354 | 3.71E-05 | 0.0066957 | 0.2858    |
| 2w4w_SITTE <sup>Δ</sup> | 0.01888911 | 0.10835927 | 4.11E-05 | 0.0055212 | 0.0010121 |
| 2w4w_SITTE <sup>Δ</sup> | 0.00461707 | 0.02028651 | 3.35E-05 | 0.0081345 | 0.58516   |
| 2w4w_SITTE <sup>Δ</sup> | 0.02350895 | 0.13686831 | 4.32E-05 | 0.0050338 | -0.084895 |
| 2w4w_SITTE <sup>Δ</sup> | 0.01913853 | 0.10989845 | 4.14E-05 | 0.0054571 | 0.0010121 |
| 2w4w_SITTE <sup>Δ</sup> | 0.02080307 | 0.12017035 | 4.21E-05 | 0.0052798 | -0.037579 |
| 2w4w_SITTE <sup>Δ</sup> | 0.00985135 | 0.05258724 | 3.65E-05 | 0.0069072 | 0.33263   |
| 2w4w_SITTE <sup>Δ</sup> | 0.03340331 | 0.19792643 | 4.66E-05 | 0.0045822 | -0.11352  |
| 2w4w_SITTE <sup>Δ</sup> | 0.01066376 | 0.05760064 | 3.68E-05 | 0.0068    | 0.30902   |
| 2w4w_SITTE <sup>Δ</sup> | 0.01776867 | 0.10144504 | 4.06E-05 | 0.0056572 | 0.046584  |
| 2w4w_SITTE <sup>Δ</sup> | 0.02271145 | 0.13194695 | 4.28E-05 | 0.005125  | -0.077142 |
| 2w4w_SITTE <sup>Δ</sup> | 0.01363334 | 0.07592595 | 3.86E-05 | 0.0062156 | 0.17645   |
| 2w4w_SITTE <sup>Δ</sup> | 0.02973705 | 0.17530197 | 4.53E-05 | 0.0046846 | -0.12301  |
| 2w4w_SITTE <sup>Δ</sup> | 0.01632055 | 0.0925087  | 4.00E-05 | 0.0058035 | 0.080526  |

|             |            |            |          |           |            |
|-------------|------------|------------|----------|-----------|------------|
| 2w4w_SITTE  | 0.02496832 | 0.14587413 | 4.38E-05 | 0.0049138 | -0.10343   |
| 2w4w_SITTE  | 0.07730854 | 0.46886563 | 5.09E-05 | 0.014141  | 0.21153    |
| 2w4w_SITTE  | 0.0310928  | 0.18366826 | 4.58E-05 | 0.00463   | -0.12145   |
| 2w4w_SITTE  | 0.09130424 | 0.55523306 | 4.93E-05 | 0.0079874 | -0.60562   |
| 2w4w_SITTE  | 0.01798865 | 0.10280252 | 4.09E-05 | 0.0055879 | 0.030658   |
| 2w4w_SITTE  | 0.03455381 | 0.20502616 | 4.70E-05 | 0.0045688 | -0.10426   |
| 2w4w_SITTE  | 0.00821593 | 0.04249509 | 3.56E-05 | 0.0072456 | 0.40559    |
| 2w4w_SITTE  | 0.02462114 | 0.14373164 | 4.36E-05 | 0.0049516 | -0.098011  |
| 2w4w_SITTE  | 0.02096862 | 0.12119197 | 4.21E-05 | 0.0052798 | -0.037579  |
| 2w4w_SITTE  | 0.02535737 | 0.14827491 | 4.38E-05 | 0.0049138 | -0.10343   |
| 2w4w_SITTE  | 0.04862674 | 0.29187024 | 5.63E-05 | 0.005054  | -0.0054808 |
| 2w4w_SITTE  | 0.00922009 | 0.04869174 | 3.62E-05 | 0.0070172 | 0.35661    |
| 2w4w_SITTE  | 0.01472669 | 0.08267301 | 3.92E-05 | 0.0060428 | 0.1363     |
| 2w4w_SITTE  | 0.07844012 | 0.47584856 | 5.01E-05 | 0.014289  | 0.18889    |
| 2w4w_SITTE  | 0.01402661 | 0.07835276 | 3.86E-05 | 0.0062156 | 0.1561     |
| 2w4w_SITTE  | 0.01418687 | 0.07934175 | 3.89E-05 | 0.0061278 | 0.1561     |
| 2w4w_SITTE  | 0.03246217 | 0.19211864 | 4.62E-05 | 0.0046026 | -0.11603   |
| 2w4w_SITTE  | 0.04898085 | 0.29405546 | 5.68E-05 | 0.0051026 | -0.0054808 |
| 2w4w_SITTE  | 0.00933459 | 0.04939831 | 3.62E-05 | 0.0070172 | 0.35661    |
| 2w4w_SITTE  | 0.01308549 | 0.07254512 | 3.83E-05 | 0.0063061 | 0.19734    |
| 7w11w_SITTE | 0.01203591 | 0.06606821 | 3.77E-05 | 0.0064954 | 0.24064    |
| 7w11w_SITTE | 0.03168427 | 0.18731822 | 4.60E-05 | 0.0046154 | -0.12002   |
| 7w11w_SITTE | 0.03130173 | 0.18495758 | 4.58E-05 | 0.00463   | -0.12145   |
| 7w11w_SITTE | 0.01360372 | 0.07574314 | 3.86E-05 | 0.0062156 | 0.17645    |
| 7w11w_SITTE | 0.01564638 | 0.0883484  | 3.95E-05 | 0.0059603 | 0.098494   |
| 7w11w_SITTE | 0.025451   | 0.14885272 | 4.40E-05 | 0.0048781 | -0.10813   |
| 7w11w_SITTE | 0.02215753 | 0.12852873 | 4.26E-05 | 0.0051742 | -0.068556  |
| 7w11w_SITTE | 0.02029678 | 0.11704601 | 4.19E-05 | 0.0053364 | -0.025531  |
| 7w11w_SITTE | 0.01142789 | 0.06231611 | 3.74E-05 | 0.0065941 | 0.263      |
| 7w11w_SITTE | 0.01209309 | 0.06642101 | 3.77E-05 | 0.0064954 | 0.24064    |
| 7w11w_SITTE | 0.09657314 | 0.5877474  | 5.28E-05 | 0.0052469 | -0.99133   |
| 7w11w_SITTE | 0.05887221 | 0.35509503 | 6.35E-05 | 0.0066597 | 0.074574   |
| 7w11w_SITTE | 0.0159912  | 0.0904763  | 3.98E-05 | 0.0058806 | 0.098494   |
| 7w11w_SITTE | 0.03357556 | 0.19898936 | 4.66E-05 | 0.0045822 | -0.11071   |
| 7w11w_SITTE | 0.05526759 | 0.3328509  | 6.21E-05 | 0.005966  | 0.038579   |
| 7w11w_SITTE | 0.02696963 | 0.15822418 | 4.44E-05 | 0.004813  | -0.11546   |
| 7w11w_SITTE | 0.01876106 | 0.10756911 | 4.11E-05 | 0.0055212 | 0.015459   |
| 7w11w_SITTE | 0.06017589 | 0.36314002 | 6.38E-05 | 0.0070986 | 0.087064   |
| 7w11w_SITTE | 0.00708635 | 0.03552447 | 3.50E-05 | 0.0074854 | 0.45576    |
| 7w11w_SITTE | 0.02232523 | 0.12956357 | 4.28E-05 | 0.005125  | -0.068556  |
| 7w11w_SITTE | 0.01564921 | 0.08836589 | 3.95E-05 | 0.0059603 | 0.098494   |
| 7w11w_SITTE | 0.06824808 | 0.4129535  | 5.98E-05 | 0.010192  | 0.20551    |
| 7w11w_SITTE | 0.03101822 | 0.18320803 | 4.58E-05 | 0.00463   | -0.12145   |



|             |            |            |          |           |           |
|-------------|------------|------------|----------|-----------|-----------|
| 7w11w_SITTC | 0.02088684 | 0.12068726 | 4.21E-05 | 0.0052798 | -0.037579 |
| 7w11w_SITTC | 0.04028542 | 0.24039592 | 4.99E-05 | 0.0046177 | -0.063007 |
| 7w11w_SITTC | 0.01248717 | 0.06885292 | 3.80E-05 | 0.0063994 | 0.21875   |
| 7w11w_SITTC | 0.02336224 | 0.13596301 | 4.32E-05 | 0.0050338 | -0.084895 |
| 7w11w_SITTC | 0.07224683 | 0.4376298  | 5.54E-05 | 0.012382  | 0.24161   |
| 7w11w_SITTC | 0.02353512 | 0.13702984 | 4.32E-05 | 0.0050338 | -0.084895 |
| 7w11w_SITTC | 0.02182392 | 0.12647003 | 4.26E-05 | 0.0051742 | -0.059109 |
| 7w11w_SITTC | 0.01375344 | 0.07666706 | 3.86E-05 | 0.0062156 | 0.17645   |
| 7w11w_SITTC | 0.09008181 | 0.54768944 | 4.88E-05 | 0.0086895 | -0.47194  |
| 7w11w_SITTC | 0.01882987 | 0.10799373 | 4.11E-05 | 0.0055212 | 0.015459  |
| 7w11w_SITTC | 0.02934362 | 0.17287406 | 4.53E-05 | 0.0046846 | -0.1231   |
| 7w11w_SITTC | 0.01337826 | 0.07435182 | 3.83E-05 | 0.0063061 | 0.19734   |
| 7w11w_SITTC | 0.01951001 | 0.11219088 | 4.16E-05 | 0.0053955 | -0.012659 |
| 7w11w_SITTC | 0.01295602 | 0.07174621 | 3.80E-05 | 0.0063994 | 0.19734   |
| 7w11w_SITTC | 0.03815412 | 0.22724368 | 4.87E-05 | 0.0045758 | -0.080425 |
| 7w11w_SITTC | 0.09067104 | 0.55132556 | 4.91E-05 | 0.0083333 | -0.51631  |
| 7w11w_SITTC | 0.06598711 | 0.39900106 | 6.16E-05 | 0.0091463 | 0.17407   |
| 7w11w_SITTC | 0.03242319 | 0.1918781  | 4.62E-05 | 0.0046026 | -0.11603  |
| 7w11w_SITTC | 0.05936058 | 0.35810873 | 6.37E-05 | 0.0067983 | 0.074574  |
| 7w11w_SITTC | 0.03093339 | 0.18268457 | 4.58E-05 | 0.00463   | -0.12145  |
| 7w11w_SITTC | 0.02360693 | 0.13747294 | 4.32E-05 | 0.0050338 | -0.084895 |
| 7w11w_SITTC | 0.02239735 | 0.13000862 | 4.28E-05 | 0.005125  | -0.068556 |
| 7w11w_SITTC | 0.02589964 | 0.1516213  | 4.40E-05 | 0.0048781 | -0.10813  |
| 7w11w_SITTC | 0.0242978  | 0.14173631 | 4.34E-05 | 0.0049916 | -0.098011 |
| 7w11w_SITTC | 0.08122635 | 0.4930424  | 4.85E-05 | 0.0141    | 0.10139   |
| 7w11w_SITTC | 0.0141382  | 0.07904143 | 3.89E-05 | 0.0061278 | 0.1561    |
| 7w11w_SITTC | 0.09866876 | 0.6006795  | 5.45E-05 | 0.0045382 | -1.1375   |
| 7w11w_SITTC | 0.00657078 | 0.03234289 | 3.47E-05 | 0.0076096 | 0.48124   |
| 7w11w_SITTC | 0.02144035 | 0.124103   | 4.24E-05 | 0.0052258 | -0.04878  |
| 7w11w_SITTC | 0.02192477 | 0.12709236 | 4.26E-05 | 0.0051742 | -0.059109 |
| 7w11w_SITTC | 0.03164924 | 0.1871021  | 4.60E-05 | 0.0046154 | -0.12002  |
| 7w11w_SITTC | 0.01512265 | 0.08511642 | 3.92E-05 | 0.0060428 | 0.11709   |
| 7w11w_SITTC | 0.01794827 | 0.10255335 | 4.09E-05 | 0.0055879 | 0.030658  |
| 7w11w_SITTC | 0.01622095 | 0.09189409 | 3.98E-05 | 0.0058806 | 0.080526  |
| 7w11w_SITTC | 0.03410402 | 0.2022505  | 4.68E-05 | 0.0045746 | -0.10761  |
| 7w11w_SITTC | 0.01555525 | 0.08778601 | 3.95E-05 | 0.0059603 | 0.11709   |
| 7w11w_SITTC | 0.01586287 | 0.08968433 | 3.98E-05 | 0.0058806 | 0.098494  |
| 7w11w_SITTC | 0.02945424 | 0.17355673 | 4.53E-05 | 0.0046846 | -0.1231   |
| 7w11w_SITTC | 0.03649677 | 0.21701616 | 4.79E-05 | 0.0045625 | -0.092976 |
| 7w11w_SITTC | 0.03095502 | 0.18281801 | 4.58E-05 | 0.00463   | -0.12145  |
| 7w11w_SITTC | 0.03268648 | 0.1935029  | 4.64E-05 | 0.0045915 | -0.11603  |
| 7w11w_SITTC | 0.01806015 | 0.10324379 | 4.09E-05 | 0.0055879 | 0.030658  |
| 7w11w_SITTC | 0.01638126 | 0.09288336 | 4.00E-05 | 0.0058035 | 0.080526  |

|             |            |            |          |           |           |
|-------------|------------|------------|----------|-----------|-----------|
| 7w11w_SITTC | 0.08517169 | 0.5173891  | 4.76E-05 | 0.012059  | -0.10433  |
| 7w11w_SITTC | 0.07779352 | 0.47185844 | 5.05E-05 | 0.014229  | 0.20103   |
| 7w11w_SITTC | 0.03081605 | 0.18196048 | 4.57E-05 | 0.0046464 | -0.12145  |
| 7w11w_SITTC | 0.02902496 | 0.1709076  | 4.51E-05 | 0.0047064 | -0.12268  |
| 7w11w_SITTC | 0.02468879 | 0.14414911 | 4.36E-05 | 0.0049516 | -0.098011 |
| 7w11w_SITTC | 0.0286398  | 0.16853082 | 4.49E-05 | 0.0047302 | -0.12268  |
| 7w11w_SITTC | 0.07090598 | 0.42935544 | 5.71E-05 | 0.011574  | 0.23476   |
| 7w11w_SITTC | 0.03216407 | 0.19027908 | 4.62E-05 | 0.0046026 | -0.11821  |
| 7w11w_SITTC | 0.02581934 | 0.15112577 | 4.40E-05 | 0.0048781 | -0.10813  |
| 7w11w_SITTC | 0.02363721 | 0.13765985 | 4.32E-05 | 0.0050338 | -0.084895 |
| 7w11w_SITTC | 0.01978185 | 0.11386839 | 4.16E-05 | 0.0053955 | -0.012659 |
| 7w11w_SITTC | 0.0376127  | 0.22390254 | 4.84E-05 | 0.0045696 | -0.084703 |
| 7w11w_SITTC | 0.02200518 | 0.12758854 | 4.26E-05 | 0.0051742 | -0.059109 |
| 7w11w_SITTC | 0.03311055 | 0.1961198  | 4.66E-05 | 0.0045822 | -0.11352  |
| 7w11w_SITTC | 0.03821948 | 0.22764699 | 4.87E-05 | 0.0045758 | -0.080425 |
| 7w11w_SITTC | 0.03687019 | 0.21932057 | 4.81E-05 | 0.0045652 | -0.088896 |
| 7w11w_SITTC | 0.09179553 | 0.5582648  | 4.96E-05 | 0.0076529 | -0.60562  |
| 7w11w_SITTC | 0.06637744 | 0.40140978 | 6.12E-05 | 0.0093985 | 0.17407   |
| 7w11w_SITTC | 0.01338013 | 0.07436336 | 3.83E-05 | 0.0063061 | 0.19734   |
| 7w11w_SITTC | 0.02582697 | 0.1511728  | 4.40E-05 | 0.0048781 | -0.10813  |
| 7w11w_SITTC | 0.02610622 | 0.15289609 | 4.42E-05 | 0.0048445 | -0.11213  |
| 7w11w_SITTC | 0.08775824 | 0.5333507  | 4.79E-05 | 0.010571  | -0.29935  |
| 7w11w_SITTC | 0.01446537 | 0.08106037 | 3.89E-05 | 0.0061278 | 0.1561    |
| 7w11w_SITTC | 0.02004261 | 0.11547756 | 4.19E-05 | 0.0053364 | -0.025531 |
| 7w11w_SITTC | 0.02173439 | 0.12591752 | 4.26E-05 | 0.0051742 | -0.059109 |
| 7w11w_SITTC | 0.01881724 | 0.1079158  | 4.11E-05 | 0.0055212 | 0.015459  |
| 7w11w_SITTC | 0.09149443 | 0.55640674 | 4.93E-05 | 0.0079874 | -0.60562  |
| 7w11w_SITTC | 0.02230865 | 0.12946127 | 4.28E-05 | 0.005125  | -0.068556 |
| 7w11w_SITTC | 0.01780892 | 0.10169345 | 4.06E-05 | 0.0056572 | 0.030658  |
| 7w11w_SITTC | 0.01953369 | 0.11233699 | 4.16E-05 | 0.0053955 | -0.012659 |
| 7w11w_SITTC | 0.02157434 | 0.12492985 | 4.24E-05 | 0.0052258 | -0.04878  |
| 7w11w_SITTC | 0.02124939 | 0.12292457 | 4.24E-05 | 0.0052258 | -0.04878  |
| 7w11w_SITTC | 0.01297329 | 0.07185274 | 3.80E-05 | 0.0063994 | 0.19734   |
| 7w11w_SITTC | 0.09002146 | 0.547317   | 4.88E-05 | 0.0086895 | -0.47194  |
| 7w11w_SITTC | 0.02525409 | 0.14763762 | 4.38E-05 | 0.0049138 | -0.10343  |
| 7w11w_SITTC | 0.09236772 | 0.56179583 | 4.99E-05 | 0.0073308 | -0.69483  |
| 7w11w_SITTC | 0.05447572 | 0.32796428 | 6.14E-05 | 0.0057798 | 0.030074  |
| 7w11w_SITTC | 0.02947391 | 0.17367813 | 4.53E-05 | 0.0046846 | -0.1231   |
| 7w11w_SITTC | 0.09354458 | 0.5690582  | 5.06E-05 | 0.0067258 | -0.7829   |
| 7w11w_SITTC | 0.01780648 | 0.10167838 | 4.06E-05 | 0.0056572 | 0.030658  |
| 7w11w_SITTC | 0.02735412 | 0.16059685 | 4.46E-05 | 0.0047834 | -0.11816  |
| 7w11w_SITTC | 0.03180551 | 0.18806642 | 4.60E-05 | 0.0046154 | -0.12002  |
| 7w11w_SITTC | 0.0725917  | 0.439758   | 5.54E-05 | 0.012382  | 0.24373   |

|             |            |            |          |           |            |
|-------------|------------|------------|----------|-----------|------------|
| 7w11w_SITTC | 0.01856893 | 0.10638344 | 4.11E-05 | 0.0055212 | 0.015459   |
| 7w11w_SITTC | 0.01471664 | 0.08261097 | 3.92E-05 | 0.0060428 | 0.1363     |
| 7w11w_SITTC | 0.00688692 | 0.03429378 | 3.47E-05 | 0.0076096 | 0.48124    |
| 7w11w_SITTC | 0.0161481  | 0.09144452 | 3.98E-05 | 0.0058806 | 0.098494   |
| 7w11w_SITTC | 0.0259692  | 0.15205054 | 4.40E-05 | 0.0048781 | -0.11213   |
| 7w11w_SITTC | 0.01863678 | 0.10680214 | 4.11E-05 | 0.0055212 | 0.015459   |
| 7w11w_SITTC | 0.02095439 | 0.12110414 | 4.21E-05 | 0.0052798 | -0.037579  |
| 7w11w_SITTC | 0.09968799 | 0.6069692  | 5.49E-05 | 0.0043938 | -1.2008    |
| 7w11w_SITTC | 0.07201772 | 0.43621597 | 5.60E-05 | 0.012118  | 0.24161    |
| 7w11w_SITTC | 0.02698941 | 0.15834624 | 4.44E-05 | 0.004813  | -0.11816   |
| 7w11w_SITTC | 0.03225665 | 0.1908504  | 4.62E-05 | 0.0046026 | -0.11821   |
| 7w11w_SITTC | 0.03503791 | 0.2080135  | 4.72E-05 | 0.0045646 | -0.10426   |
| 7w11w_SITTC | 0.01255318 | 0.06926028 | 3.80E-05 | 0.0063994 | 0.21875    |
| 7w11w_SITTC | 0.01637743 | 0.09285973 | 4.00E-05 | 0.0058035 | 0.080526   |
| 7w11w_SITTC | 0.01283441 | 0.07099573 | 3.80E-05 | 0.0063994 | 0.21875    |
| 7w11w_SITTC | 0.01476571 | 0.08291379 | 3.92E-05 | 0.0060428 | 0.1363     |
| 7w11w_SITTC | 0.08698626 | 0.5285868  | 4.78E-05 | 0.010952  | -0.25808   |
| 7w11w_SITTC | 0.01936899 | 0.11132062 | 4.14E-05 | 0.0054571 | 0.0010121  |
| 7w11w_SITTC | 0.02667097 | 0.15638117 | 4.44E-05 | 0.004813  | -0.11546   |
| 7w11w_SITTC | 0.02603192 | 0.15243757 | 4.42E-05 | 0.0048445 | -0.11213   |
| 7w11w_SITTC | 0.03411706 | 0.20233096 | 4.68E-05 | 0.0045746 | -0.10761   |
| 7w11w_SITTC | 0.02173231 | 0.12590466 | 4.26E-05 | 0.0051742 | -0.059109  |
| 7w11w_SITTC | 0.09366173 | 0.5697811  | 5.06E-05 | 0.0067258 | -0.7829    |
| 7w11w_SITTC | 0.01581578 | 0.08939375 | 3.98E-05 | 0.0058806 | 0.098494   |
| 7w11w_SITTC | 0.02728649 | 0.16017956 | 4.46E-05 | 0.0047834 | -0.11816   |
| 7w11w_SITTC | 0.01365982 | 0.07608934 | 3.86E-05 | 0.0062156 | 0.17645    |
| 7w11w_SITTC | 0.01370447 | 0.07636488 | 3.86E-05 | 0.0062156 | 0.17645    |
| 7w11w_SITTC | 0.07843877 | 0.4758403  | 5.01E-05 | 0.014289  | 0.18889    |
| 7w11w_SITTC | 0.00958929 | 0.05097009 | 3.62E-05 | 0.0070172 | 0.35661    |
| 7w11w_SITTC | 0.10048486 | 0.6118866  | 5.58E-05 | 0.0041426 | -1.2563    |
| 7w11w_SITTC | 0.01001491 | 0.05359661 | 3.65E-05 | 0.0069072 | 0.33263    |
| 7w11w_SITTC | 0.02572878 | 0.1505669  | 4.40E-05 | 0.0048781 | -0.10813   |
| 7w11w_SITTC | 0.00657555 | 0.03237231 | 3.47E-05 | 0.0076096 | 0.48124    |
| 7w11w_SITTC | 0.06744264 | 0.40798315 | 6.03E-05 | 0.009922  | 0.19037    |
| 7w11w_SITTC | 0.04957272 | 0.29770786 | 5.73E-05 | 0.0051543 | -0.0022352 |
| 7w11w_SITTC | 0.10006856 | 0.6093177  | 5.53E-05 | 0.004262  | -1.2296    |
| 7w11w_SITTC | 0.02480107 | 0.14484201 | 4.36E-05 | 0.0049516 | -0.098011  |
| 7w11w_SITTC | 0.01819197 | 0.10405722 | 4.09E-05 | 0.0055879 | 0.030658   |
| 7w11w_SITTC | 0.00497534 | 0.02249741 | 3.38E-05 | 0.0079991 | 0.55892    |
| 7w11w_SITTC | 0.01917009 | 0.11009321 | 4.14E-05 | 0.0054571 | 0.0010121  |
| 7w11w_SITTC | 0.02779215 | 0.16329996 | 4.48E-05 | 0.0047558 | -0.12024   |
| 7w11w_SITTC | 0.0892155  | 0.54234344 | 4.84E-05 | 0.0094274 | -0.42792   |
| 7w11w_SITTC | 0.0367619  | 0.2186523  | 4.79E-05 | 0.0045625 | -0.088896  |

|             |            |            |          |           |           |
|-------------|------------|------------|----------|-----------|-----------|
| 7w11w_SITTC | 0.02311224 | 0.13442022 | 4.30E-05 | 0.0050782 | -0.077142 |
| 7w11w_SITTC | 0.01258274 | 0.06944265 | 3.80E-05 | 0.0063994 | 0.21875   |
| 7w11w_SITTC | 0.08007374 | 0.48592964 | 4.90E-05 | 0.014278  | 0.14202   |
| 7w11w_SITTC | 0.01532204 | 0.08634691 | 3.95E-05 | 0.0059603 | 0.11709   |
| 7w11w_SITTC | 0.03044547 | 0.17967358 | 4.57E-05 | 0.0046464 | -0.12245  |
| 7w11w_SITTC | 0.01506682 | 0.08477195 | 3.92E-05 | 0.0060428 | 0.1363    |
| 7w11w_SITTC | 0.03142491 | 0.18571773 | 4.60E-05 | 0.0046154 | -0.12002  |
| 7w11w_SITTC | 0.0153191  | 0.08632878 | 3.95E-05 | 0.0059603 | 0.11709   |
| 7w11w_SITTC | 0.04167794 | 0.24898915 | 5.05E-05 | 0.0046492 | -0.0504   |
| 7w11w_SITTC | 0.08963914 | 0.54495776 | 4.86E-05 | 0.0090548 | -0.42792  |
| 7w11w_SITTC | 0.02223352 | 0.12899768 | 4.28E-05 | 0.005125  | -0.068556 |
| 7w11w_SITTC | 0.01815978 | 0.10385862 | 4.09E-05 | 0.0055879 | 0.030658  |
| 7w11w_SITTC | 0.03735926 | 0.22233859 | 4.81E-05 | 0.0045652 | -0.084703 |
| 7w11w_SITTC | 0.03517635 | 0.20886785 | 4.72E-05 | 0.0045646 | -0.10068  |
| 7w11w_SITTC | 0.08077693 | 0.49026906 | 4.85E-05 | 0.0141    | 0.12269   |
| 7w11w_SITTC | 0.10139548 | 0.6175061  | 5.66E-05 | 0.0039398 | -1.2808   |
| 7w11w_SITTC | 0.01294331 | 0.07166778 | 3.80E-05 | 0.0063994 | 0.21875   |
| 7w11w_SITTC | 0.02645733 | 0.15506276 | 4.42E-05 | 0.0048445 | -0.11546  |
| 7w11w_SITTC | 0.02023591 | 0.11667037 | 4.19E-05 | 0.0053364 | -0.025531 |
| 7w11w_SITTC | 0.09213649 | 0.56036884 | 4.99E-05 | 0.0073308 | -0.6503   |
| 7w11w_SITTC | 0.03320402 | 0.19669662 | 4.66E-05 | 0.0045822 | -0.11352  |
| 7w11w_SITTC | 0.02067208 | 0.11936197 | 4.21E-05 | 0.0052798 | -0.037579 |
| 7w11w_SITTC | 0.03096268 | 0.1828653  | 4.58E-05 | 0.00463   | -0.12145  |
| 7w11w_SITTC | 0.02094631 | 0.12105427 | 4.21E-05 | 0.0052798 | -0.037579 |
| 7w11w_SITTC | 0.02693127 | 0.15798746 | 4.44E-05 | 0.004813  | -0.11546  |
| 7w11w_SITTC | 0.02342294 | 0.13633755 | 4.32E-05 | 0.0050338 | -0.084895 |
| 7w11w_SITTC | 0.03131573 | 0.18504398 | 4.58E-05 | 0.00463   | -0.12002  |
| 7w11w_SITTC | 0.02781822 | 0.16346085 | 4.48E-05 | 0.0047558 | -0.12024  |
| 7w11w_SITTC | 0.01838717 | 0.10526183 | 4.09E-05 | 0.0055879 | 0.015459  |
| 7w11w_SITTC | 0.02341153 | 0.13626717 | 4.32E-05 | 0.0050338 | -0.084895 |
| 7w11w_SITTC | 0.00679668 | 0.0337369  | 3.47E-05 | 0.0076096 | 0.48124   |
| 7w11w_SITTC | 0.02143781 | 0.12408735 | 4.24E-05 | 0.0052258 | -0.04878  |
| 7w11w_SITTC | 0.02458635 | 0.14351697 | 4.36E-05 | 0.0049516 | -0.098011 |
| 7w11w_SITTC | 0.01838914 | 0.10527395 | 4.09E-05 | 0.0055879 | 0.015459  |
| 7w11w_SITTC | 0.02534917 | 0.14822435 | 4.38E-05 | 0.0049138 | -0.10343  |
| 7w11w_SITTC | 0.01978212 | 0.11387008 | 4.16E-05 | 0.0053955 | -0.012659 |
| 7w11w_SITTC | 0.02911778 | 0.1714804  | 4.51E-05 | 0.0047064 | -0.12268  |
| 7w11w_SITTC | 0.03444037 | 0.20432611 | 4.70E-05 | 0.0045688 | -0.10761  |
| 7w11w_SITTC | 0.07621784 | 0.4621349  | 5.18E-05 | 0.013885  | 0.22792   |
| 7w11w_SITTC | 0.0203321  | 0.11726397 | 4.19E-05 | 0.0053364 | -0.025531 |
| 7w11w_SITTC | 0.00877048 | 0.04591722 | 3.59E-05 | 0.00713   | 0.38094   |
| 7w11w_SITTC | 0.04601154 | 0.27573183 | 5.39E-05 | 0.0048522 | -0.021643 |
| 7w11w_SITTC | 0.02247575 | 0.13049243 | 4.28E-05 | 0.005125  | -0.068556 |

|             |            |            |          |           |           |
|-------------|------------|------------|----------|-----------|-----------|
| 7w11w_SITTC | 0.05725263 | 0.34510058 | 6.30E-05 | 0.0062853 | 0.057806  |
| 7w11w_SITTC | 0.06465295 | 0.39076796 | 6.24E-05 | 0.0086643 | 0.14863   |
| 7w11w_SITTC | 0.02166689 | 0.12550099 | 4.26E-05 | 0.0051742 | -0.059109 |
| 7w11w_SITTC | 0.01656407 | 0.09401146 | 4.00E-05 | 0.0058035 | 0.080526  |
| 7w11w_SITTC | 0.02749601 | 0.16147247 | 4.46E-05 | 0.0047834 | -0.11816  |
| 7w11w_SITTC | 0.01782899 | 0.10181728 | 4.06E-05 | 0.0056572 | 0.030658  |
| 7w11w_SITTC | 0.03081462 | 0.1819516  | 4.57E-05 | 0.0046464 | -0.12145  |
| 7w11w_SITTC | 0.0165243  | 0.09376602 | 4.00E-05 | 0.0058035 | 0.080526  |
| 7w11w_SITTC | 0.01630605 | 0.09241922 | 4.00E-05 | 0.0058035 | 0.080526  |
| 7w11w_SITTC | 0.02097918 | 0.12125713 | 4.21E-05 | 0.0052798 | -0.037579 |
| 7w11w_SITTC | 0.04629302 | 0.27746883 | 5.44E-05 | 0.0048874 | -0.021643 |
| 7w11w_SITTC | 0.00878225 | 0.04598984 | 3.59E-05 | 0.00713   | 0.38094   |
| 7w11w_SITTC | 0.0290661  | 0.17116153 | 4.51E-05 | 0.0047064 | -0.12268  |
| 7w11w_SITTC | 0.01293241 | 0.07160051 | 3.80E-05 | 0.0063994 | 0.21875   |
| 7w11w_SITTC | 0.01882722 | 0.10797734 | 4.11E-05 | 0.0055212 | 0.015459  |
| 7w11w_SITTC | 0.01304168 | 0.07227477 | 3.83E-05 | 0.0063061 | 0.19734   |
| 7w11w_SITTC | 0.00940548 | 0.04983582 | 3.62E-05 | 0.0070172 | 0.35661   |
| 7w11w_SITTC | 0.03222251 | 0.19063972 | 4.62E-05 | 0.0046026 | -0.11821  |
| 7w11w_SITTC | 0.01854114 | 0.10621195 | 4.11E-05 | 0.0055212 | 0.015459  |
| 7w11w_SITTC | 0.01320091 | 0.07325739 | 3.83E-05 | 0.0063061 | 0.19734   |
| 7w11w_SITTC | 0.03675496 | 0.21860942 | 4.79E-05 | 0.0045625 | -0.088896 |
| 7w11w_SITTC | 0.08120258 | 0.49289575 | 4.85E-05 | 0.0141    | 0.10139   |
| 7w11w_SITTC | 0.02898539 | 0.17066345 | 4.51E-05 | 0.0047064 | -0.12268  |
| 7w11w_SITTC | 0.07600787 | 0.46083915 | 5.18E-05 | 0.013885  | 0.23393   |
| 7w11w_SITTC | 0.01637856 | 0.09286667 | 4.00E-05 | 0.0058035 | 0.080526  |
| 7w11w_SITTC | 0.02606878 | 0.15266505 | 4.42E-05 | 0.0048445 | -0.11213  |
| 7w11w_SITTC | 0.09094105 | 0.5529918  | 4.91E-05 | 0.0083333 | -0.56091  |
| 7w11w_SITTC | 0.00615902 | 0.02980187 | 3.44E-05 | 0.0077366 | 0.50694   |
| 7w11w_SITTC | 0.02435111 | 0.14206533 | 4.34E-05 | 0.0049916 | -0.098011 |
| 7w11w_SITTC | 0.03287374 | 0.19465843 | 4.64E-05 | 0.0045915 | -0.11603  |
| 7w11w_SITTC | 0.0196231  | 0.11288872 | 4.16E-05 | 0.0053955 | -0.012659 |
| 7w11w_SITTC | 0.01334414 | 0.07414129 | 3.83E-05 | 0.0063061 | 0.19734   |
| 7w11w_SITTC | 0.07809266 | 0.47370446 | 5.01E-05 | 0.014289  | 0.20103   |
| 7w11w_SITTC | 0.02415763 | 0.14087136 | 4.34E-05 | 0.0049916 | -0.091842 |
| 7w11w_SITTC | 0.01022578 | 0.05489788 | 3.65E-05 | 0.0069072 | 0.33263   |
| 7w11w_SITTC | 0.02005656 | 0.11556363 | 4.19E-05 | 0.0053364 | -0.025531 |
| 7w11w_SITTC | 0.01342921 | 0.07466622 | 3.83E-05 | 0.0063061 | 0.19734   |
| 7w11w_SITTC | 0.02689829 | 0.15778394 | 4.44E-05 | 0.004813  | -0.11546  |
| 7w11w_SITTC | 0.0320685  | 0.1896893  | 4.62E-05 | 0.0046026 | -0.11821  |
| 7w11w_SITTC | 0.02898112 | 0.1706371  | 4.51E-05 | 0.0047064 | -0.12268  |
| 7w11w_SITTC | 0.02958807 | 0.1743826  | 4.53E-05 | 0.0046846 | -0.1231   |
| 7w11w_SITTC | 0.02191169 | 0.12701161 | 4.26E-05 | 0.0051742 | -0.059109 |
| 7w11w_SITTC | 0.02263479 | 0.13147391 | 4.28E-05 | 0.005125  | -0.068556 |

|             |            |            |          |           |            |
|-------------|------------|------------|----------|-----------|------------|
| 7w11w_SITTC | 0.07055453 | 0.42718658 | 5.71E-05 | 0.011574  | 0.23016    |
| 7w11w_SITTC | 0.01684285 | 0.09573183 | 4.03E-05 | 0.005729  | 0.063215   |
| 7w11w_SITTC | 0.01548489 | 0.08735185 | 3.95E-05 | 0.0059603 | 0.11709    |
| 7w11w_SITTC | 0.01649562 | 0.09358904 | 4.00E-05 | 0.0058035 | 0.080526   |
| 7w11w_SITTC | 0.04948557 | 0.29717007 | 5.73E-05 | 0.0051543 | -0.0022352 |
| 7w11w_SITTC | 0.01636145 | 0.09276111 | 4.00E-05 | 0.0058035 | 0.080526   |
| 7w11w_SITTC | 0.09665835 | 0.5882733  | 5.28E-05 | 0.0052469 | -0.99133   |
| 7w11w_SITTC | 0.02503613 | 0.14629255 | 4.38E-05 | 0.0049138 | -0.10343   |
| 7w11w_SITTC | 0.08436441 | 0.51240736 | 4.76E-05 | 0.012731  | -0.069378  |
| 7w11w_SITTC | 0.02091431 | 0.12085678 | 4.21E-05 | 0.0052798 | -0.037579  |
| 7w11w_SITTC | 0.0845698  | 0.5136748  | 4.76E-05 | 0.012404  | -0.069378  |
| 7w11w_SITTC | 0.08880702 | 0.5398227  | 4.82E-05 | 0.0098057 | -0.3844    |
| 7w11w_SITTC | 0.01175089 | 0.06430934 | 3.74E-05 | 0.0065941 | 0.263      |
| 7w11w_SITTC | 0.01032069 | 0.05548359 | 3.68E-05 | 0.0068    | 0.30902    |
| 7w11w_SITTC | 0.01213217 | 0.06666221 | 3.77E-05 | 0.0064954 | 0.24064    |
| 7w11w_SITTC | 0.0318221  | 0.18816881 | 4.60E-05 | 0.0046154 | -0.12002   |
| 7w11w_SITTC | 0.06912427 | 0.41836047 | 5.87E-05 | 0.010741  | 0.21895    |
| 7w11w_SITTC | 0.01528105 | 0.08609394 | 3.95E-05 | 0.0059603 | 0.11709    |
| 7w11w_SITTC | 0.01575697 | 0.08903088 | 3.98E-05 | 0.0058806 | 0.098494   |
| 7w11w_SITTC | 0.03271436 | 0.19367489 | 4.64E-05 | 0.0045915 | -0.11603   |
| 7w11w_SITTC | 0.08494646 | 0.5159992  | 4.76E-05 | 0.012404  | -0.10433   |
| 7w11w_SITTC | 0.02025715 | 0.11680146 | 4.19E-05 | 0.0053364 | -0.025531  |
| 7w11w_SITTC | 0.08064299 | 0.48944253 | 4.87E-05 | 0.014207  | 0.12269    |
| 7w11w_SITTC | 0.01439669 | 0.08063653 | 3.89E-05 | 0.0061278 | 0.1561     |
| 7w11w_SITTC | 0.01932201 | 0.11103073 | 4.14E-05 | 0.0054571 | 0.0010121  |
| 7w11w_SITTC | 0.01371456 | 0.07642712 | 3.86E-05 | 0.0062156 | 0.17645    |
| 7w11w_SITTC | 0.01697746 | 0.0965625  | 4.03E-05 | 0.005729  | 0.063215   |
| 7w11w_SITTC | 0.01201812 | 0.06595839 | 3.77E-05 | 0.0064954 | 0.24064    |
| 7w11w_SITTC | 0.01398447 | 0.07809275 | 3.86E-05 | 0.0062156 | 0.17645    |
| 7w11w_SITTC | 0.08416567 | 0.51118094 | 4.76E-05 | 0.012731  | -0.036078  |
| 7w11w_SITTC | 0.01143843 | 0.06238115 | 3.74E-05 | 0.0065941 | 0.263      |
| 7w11w_SITTC | 0.01886789 | 0.10822836 | 4.11E-05 | 0.0055212 | 0.015459   |
| 7w11w_SITTC | 0.02103148 | 0.12157989 | 4.21E-05 | 0.0052798 | -0.037579  |
| 7w11w_SITTC | 0.0143803  | 0.08053541 | 3.89E-05 | 0.0061278 | 0.1561     |
| 7w11w_SITTC | 0.01665574 | 0.09457713 | 4.00E-05 | 0.0058035 | 0.080526   |
| 7w11w_SITTC | 0.08375046 | 0.5086187  | 4.77E-05 | 0.013036  | -0.036078  |
| 7w11w_SITTC | 0.01634773 | 0.09267641 | 4.00E-05 | 0.0058035 | 0.080526   |
| 7w11w_SITTC | 0.01942848 | 0.11168777 | 4.14E-05 | 0.0054571 | -0.012659  |
| 7w11w_SITTC | 0.01152669 | 0.06292577 | 3.74E-05 | 0.0065941 | 0.263      |
| 7w11w_SITTC | 0.01902635 | 0.10920619 | 4.14E-05 | 0.0054571 | 0.0010121  |
| 7w11w_SITTC | 0.02083514 | 0.12036821 | 4.21E-05 | 0.0052798 | -0.037579  |
| 7w11w_SITTC | 0.07800655 | 0.47317305 | 5.05E-05 | 0.014229  | 0.20103    |
| 7w11w_SITTC | 0.01716278 | 0.09770611 | 4.03E-05 | 0.005729  | 0.063215   |

|             |            |            |          |           |           |
|-------------|------------|------------|----------|-----------|-----------|
| 7w11w_SITTC | 0.01692998 | 0.09626946 | 4.03E-05 | 0.005729  | 0.063215  |
| 7w11w_SITTC | 0.02464796 | 0.14389713 | 4.36E-05 | 0.0049516 | -0.098011 |
| 7w11w_SITTC | 0.03195649 | 0.1889981  | 4.62E-05 | 0.0046026 | -0.11821  |
| 7w11w_SITTC | 0.01796082 | 0.10263084 | 4.09E-05 | 0.0055879 | 0.030658  |
| 7w11w_SITTC | 0.00853638 | 0.04447256 | 3.56E-05 | 0.0072456 | 0.40559   |
| 7w11w_SITTC | 0.02636185 | 0.15447356 | 4.42E-05 | 0.0048445 | -0.11213  |
| 7w11w_SITTC | 0.01986787 | 0.1143992  | 4.16E-05 | 0.0053955 | -0.012659 |
| 7w11w_SITTC | 0.0161666  | 0.09155865 | 3.98E-05 | 0.0058806 | 0.098494  |
| 7w11w_SITTC | 0.02714117 | 0.15928274 | 4.46E-05 | 0.0047834 | -0.11816  |
| 7w11w_SITTC | 0.0871949  | 0.5298743  | 4.78E-05 | 0.010952  | -0.25808  |
| 7w11w_SITTC | 0.07932601 | 0.48131543 | 4.93E-05 | 0.014315  | 0.17506   |
| 7w11w_SITTC | 0.06307946 | 0.38105798 | 6.33E-05 | 0.0080056 | 0.12359   |
| 7w11w_SITTC | 0.01436077 | 0.08041489 | 3.89E-05 | 0.0061278 | 0.1561    |
| 7w11w_SITTC | 0.04646692 | 0.27854198 | 5.44E-05 | 0.0048874 | -0.018376 |
| 7w11w_SITTC | 0.02637655 | 0.1545643  | 4.42E-05 | 0.0048445 | -0.11213  |
| 7w11w_SITTC | 0.01402434 | 0.07833882 | 3.86E-05 | 0.0062156 | 0.17645   |
| 7w11w_SITTC | 0.00832868 | 0.04319085 | 3.56E-05 | 0.0072456 | 0.40559   |
| 7w11w_SITTC | 0.02193312 | 0.12714386 | 4.26E-05 | 0.0051742 | -0.059109 |
| 7w11w_SITTC | 0.07758857 | 0.47059366 | 5.05E-05 | 0.014229  | 0.21153   |
| 7w11w_SITTC | 0.02829749 | 0.16641839 | 4.49E-05 | 0.0047302 | -0.12174  |
| 7w11w_SITTC | 0.07167585 | 0.4341063  | 5.60E-05 | 0.012118  | 0.2386    |
| 7w11w_SITTC | 0.03086274 | 0.18224858 | 4.57E-05 | 0.0046464 | -0.12145  |
| 7w11w_SITTC | 0.01356221 | 0.075487   | 3.86E-05 | 0.0062156 | 0.17645   |
| 7w11w_SITTC | 0.02022899 | 0.11662769 | 4.19E-05 | 0.0053364 | -0.025531 |
| 7w11w_SITTC | 0.07809562 | 0.4737227  | 5.01E-05 | 0.014289  | 0.20103   |
| 7w11w_SITTC | 0.03727935 | 0.22184548 | 4.81E-05 | 0.0045652 | -0.084703 |
| 7w11w_SITTC | 0.02226751 | 0.12920737 | 4.28E-05 | 0.005125  | -0.068556 |
| 7w11w_SITTC | 0.02800005 | 0.16458292 | 4.48E-05 | 0.0047558 | -0.12024  |
| 7w11w_SITTC | 0.03941532 | 0.23502651 | 4.92E-05 | 0.0045932 | -0.067351 |
| 7w11w_SITTC | 0.02612993 | 0.1530424  | 4.42E-05 | 0.0048445 | -0.11213  |
| 7w11w_SITTC | 0.07672966 | 0.46529338 | 5.13E-05 | 0.014025  | 0.22047   |
| 7w11w_SITTC | 0.06556773 | 0.3964131  | 6.16E-05 | 0.0091463 | 0.16566   |
| 7w11w_SITTC | 0.01852614 | 0.10611939 | 4.11E-05 | 0.0055212 | 0.015459  |
| 7w11w_SITTC | 0.01917713 | 0.11013666 | 4.14E-05 | 0.0054571 | 0.0010121 |
| 7w11w_SITTC | 0.03077678 | 0.18171811 | 4.57E-05 | 0.0046464 | -0.12145  |
| 7w11w_SITTC | 0.0217759  | 0.12617369 | 4.26E-05 | 0.0051742 | -0.059109 |
| 7w11w_SITTC | 0.0122179  | 0.06719124 | 3.77E-05 | 0.0064954 | 0.24064   |
| 7w11w_SITTC | 0.01641803 | 0.09311024 | 4.00E-05 | 0.0058035 | 0.080526  |
| 7w11w_SITTC | 0.01990327 | 0.11461769 | 4.16E-05 | 0.0053955 | -0.012659 |
| 7w11w_SITTC | 0.02002117 | 0.11534522 | 4.16E-05 | 0.0053955 | -0.025531 |
| 7w11w_SITTC | 0.01346491 | 0.07488655 | 3.83E-05 | 0.0063061 | 0.19734   |
| 7w11w_SITTC | 0.03982676 | 0.23756555 | 4.95E-05 | 0.0046046 | -0.067351 |
| 7w11w_SITTC | 0.01230543 | 0.06773142 | 3.77E-05 | 0.0064954 | 0.24064   |

|             |            |            |          |           |           |
|-------------|------------|------------|----------|-----------|-----------|
| 7w11w_SITTC | 0.02203758 | 0.12778853 | 4.26E-05 | 0.0051742 | -0.059109 |
| 7w11w_SITTC | 0.02283184 | 0.13268991 | 4.30E-05 | 0.0050782 | -0.077142 |
| 7w11w_SITTC | 0.01407539 | 0.07865383 | 3.89E-05 | 0.0061278 | 0.1561    |
| 7w11w_SITTC | 0.03605026 | 0.21426077 | 4.77E-05 | 0.0045615 | -0.096915 |
| 7w11w_SITTC | 0.00873925 | 0.04572451 | 3.59E-05 | 0.00713   | 0.38094   |
| 7w11w_SITTC | 0.03842901 | 0.22894002 | 4.87E-05 | 0.0045758 | -0.076088 |
| 7w11w_SITTC | 0.03163572 | 0.18701862 | 4.60E-05 | 0.0046154 | -0.12002  |
| 7w11w_SITTC | 0.02160976 | 0.1251484  | 4.24E-05 | 0.0052258 | -0.059109 |
| 7w11w_SITTC | 0.01519342 | 0.0855532  | 3.95E-05 | 0.0059603 | 0.11709   |
| 7w11w_SITTC | 0.01684122 | 0.09572177 | 4.03E-05 | 0.005729  | 0.063215  |
| 7w11w_SITTC | 0.01697099 | 0.09652256 | 4.03E-05 | 0.005729  | 0.063215  |
| 7w11w_SITTC | 0.02151136 | 0.12454118 | 4.24E-05 | 0.0052258 | -0.04878  |
| 7w11w_SITTC | 0.06020818 | 0.36333928 | 6.38E-05 | 0.0070986 | 0.087064  |
| 7w11w_SITTC | 0.06458547 | 0.39035153 | 6.24E-05 | 0.0086643 | 0.14863   |
| 7w11w_SITTC | 0.01713389 | 0.09752783 | 4.03E-05 | 0.005729  | 0.063215  |
| 7w11w_SITTC | 0.01889641 | 0.10840431 | 4.11E-05 | 0.0055212 | 0.0010121 |
| 7w11w_SITTC | 0.08998203 | 0.5470737  | 4.88E-05 | 0.0086895 | -0.47194  |
| 7w11w_SITTC | 0.02182002 | 0.12644593 | 4.26E-05 | 0.0051742 | -0.059109 |
| 7w11w_SITTC | 0.06596361 | 0.39885604 | 6.16E-05 | 0.0091463 | 0.17407   |
| 7w11w_SITTC | 0.02890021 | 0.1701378  | 4.51E-05 | 0.0047064 | -0.12268  |
| 7w11w_SITTC | 0.01265245 | 0.06987282 | 3.80E-05 | 0.0063994 | 0.21875   |
| 7w11w_SITTC | 0.01483718 | 0.08335485 | 3.92E-05 | 0.0060428 | 0.1363    |
| 7w11w_SITTC | 0.02279956 | 0.13249066 | 4.30E-05 | 0.0050782 | -0.077142 |
| 7w11w_SITTC | 0.00543942 | 0.02536121 | 3.41E-05 | 0.0078664 | 0.53284   |
| 7w11w_SITTC | 0.0883261  | 0.536855   | 4.82E-05 | 0.0098057 | -0.3415   |
| 7w11w_SITTC | 0.0409191  | 0.24430634 | 5.02E-05 | 0.0046325 | -0.058715 |
| 7w11w_SITTC | 0.09293527 | 0.56529814 | 5.02E-05 | 0.0070215 | -0.73907  |
| 7w11w_SITTC | 0.02344565 | 0.13647768 | 4.32E-05 | 0.0050338 | -0.084895 |
| 7w11w_SITTC | 0.02845488 | 0.16738966 | 4.49E-05 | 0.0047302 | -0.12174  |
| 7w11w_SITTC | 0.02305173 | 0.13404684 | 4.30E-05 | 0.0050782 | -0.077142 |
| 7w11w_SITTC | 0.01992983 | 0.11478155 | 4.16E-05 | 0.0053955 | -0.012659 |
| 7w11w_SITTC | 0.02320193 | 0.1349737  | 4.30E-05 | 0.0050782 | -0.077142 |
| 7w11w_SITTC | 0.03750362 | 0.22322945 | 4.84E-05 | 0.0045696 | -0.084703 |
| 7w11w_SITTC | 0.02181673 | 0.12642564 | 4.26E-05 | 0.0051742 | -0.059109 |
| 7w11w_SITTC | 0.02175198 | 0.1260261  | 4.26E-05 | 0.0051742 | -0.059109 |
| 7w11w_SITTC | 0.07454808 | 0.45183083 | 5.33E-05 | 0.013335  | 0.24193   |
| 7w11w_SITTC | 0.02229032 | 0.12934816 | 4.28E-05 | 0.005125  | -0.068556 |
| 7w11w_SITTC | 0.0840776  | 0.51063746 | 4.76E-05 | 0.012731  | -0.036078 |
| 7w11w_SITTC | 0.01630824 | 0.09243272 | 4.00E-05 | 0.0058035 | 0.080526  |
| 7w11w_SITTC | 0.02945768 | 0.17357795 | 4.53E-05 | 0.0046846 | -0.1231   |
| 7w11w_SITTC | 0.03460688 | 0.20535366 | 4.70E-05 | 0.0045688 | -0.10426  |
| 7w11w_SITTC | 0.02253603 | 0.13086446 | 4.28E-05 | 0.005125  | -0.068556 |
| 7w11w_SITTC | 0.09429929 | 0.57371557 | 5.13E-05 | 0.0061762 | -0.82618  |



|             |            |            |          |           |            |
|-------------|------------|------------|----------|-----------|------------|
| 7w11w_SITTC | 0.04484381 | 0.26852575 | 5.30E-05 | 0.0047888 | -0.028317  |
| 7w11w_SITTC | 0.0203856  | 0.11759414 | 4.19E-05 | 0.0053364 | -0.025531  |
| 7w11w_SITTC | 0.0244871  | 0.1429045  | 4.36E-05 | 0.0049516 | -0.098011  |
| 7w11w_SITTC | 0.02111532 | 0.12209722 | 4.24E-05 | 0.0052258 | -0.04878   |
| 7w11w_SITTC | 0.09795845 | 0.5962962  | 5.36E-05 | 0.0048658 | -1.1032    |
| 7w11w_SITTC | 0.02614126 | 0.1531123  | 4.42E-05 | 0.0048445 | -0.11213   |
| 7w11w_SITTC | 0.00792551 | 0.04070289 | 3.53E-05 | 0.0073641 | 0.43054    |
| 7w11w_SITTC | 0.03075399 | 0.18157749 | 4.57E-05 | 0.0046464 | -0.12245   |
| 7w11w_SITTC | 0.00829709 | 0.04299594 | 3.56E-05 | 0.0072456 | 0.40559    |
| 7w11w_SITTC | 0.02591371 | 0.15170813 | 4.40E-05 | 0.0048781 | -0.11213   |
| 7w11w_SITTC | 0.01832076 | 0.10485203 | 4.09E-05 | 0.0055879 | 0.030658   |
| 7w11w_SITTC | 0.02349029 | 0.13675319 | 4.32E-05 | 0.0050338 | -0.084895  |
| 7w11w_SITTC | 0.09458803 | 0.5754973  | 5.13E-05 | 0.0061762 | -0.8688    |
| 7w11w_SITTC | 0.02803562 | 0.16480242 | 4.48E-05 | 0.0047558 | -0.12024   |
| 7w11w_SITTC | 0.09290002 | 0.56508064 | 5.02E-05 | 0.0070215 | -0.73907   |
| 7w11w_SITTC | 0.02776675 | 0.16314323 | 4.48E-05 | 0.0047558 | -0.12024   |
| 7w11w_SITTC | 0.0183633  | 0.10511454 | 4.09E-05 | 0.0055879 | 0.015459   |
| 7w11w_SITTC | 0.02366096 | 0.13780637 | 4.32E-05 | 0.0050338 | -0.084895  |
| 7w11w_SITTC | 0.07241014 | 0.4386376  | 5.54E-05 | 0.012382  | 0.24373    |
| 7w11w_SITTC | 0.0492673  | 0.2958231  | 5.68E-05 | 0.0051026 | -0.0022352 |
| 7w11w_SITTC | 0.04154933 | 0.24819553 | 5.05E-05 | 0.0046492 | -0.054504  |
| 7w11w_SITTC | 0.03746048 | 0.22296321 | 4.84E-05 | 0.0045696 | -0.084703  |
| 7w11w_SITTC | 0.02431893 | 0.14186671 | 4.34E-05 | 0.0049916 | -0.098011  |
| 7w11w_SITTC | 0.01792987 | 0.10243981 | 4.09E-05 | 0.0055879 | 0.030658   |
| 7w11w_SITTC | 0.02810453 | 0.16522767 | 4.48E-05 | 0.0047558 | -0.12174   |
| 7w11w_SITTC | 0.01989896 | 0.11459109 | 4.16E-05 | 0.0053955 | -0.012659  |
| 7w11w_SITTC | 0.03252156 | 0.19248515 | 4.64E-05 | 0.0045915 | -0.11603   |
| 7w11w_SITTC | 0.01512264 | 0.08511639 | 3.92E-05 | 0.0060428 | 0.11709    |
| 7w11w_SITTC | 0.08886839 | 0.5402014  | 4.84E-05 | 0.0094274 | -0.3844    |
| 7w11w_SITTC | 0.0710597  | 0.430304   | 5.65E-05 | 0.011849  | 0.23476    |
| 7w11w_SITTC | 0.02479599 | 0.14481063 | 4.36E-05 | 0.0049516 | -0.098011  |
| 7w11w_SITTC | 0.02289619 | 0.13308698 | 4.30E-05 | 0.0050782 | -0.077142  |
| 7w11w_SITTC | 0.0429752  | 0.25699452 | 5.17E-05 | 0.0047101 | -0.042593  |
| 7w11w_SITTC | 0.09744792 | 0.59314567 | 5.32E-05 | 0.0050496 | -1.0673    |
| 7w11w_SITTC | 0.01733889 | 0.09879284 | 4.06E-05 | 0.0056572 | 0.046584   |
| 7w11w_SITTC | 0.02376529 | 0.13845018 | 4.32E-05 | 0.0050338 | -0.091842  |
| 7w11w_SITTC | 0.02576042 | 0.15076213 | 4.40E-05 | 0.0048781 | -0.10813   |
| 7w11w_SITTC | 0.02917285 | 0.1718203  | 4.51E-05 | 0.0047064 | -0.1231    |
| 7w11w_SITTC | 0.06341621 | 0.383136   | 6.30E-05 | 0.008216  | 0.13178    |
| 7w11w_SITTC | 0.00758816 | 0.03862111 | 3.53E-05 | 0.0073641 | 0.43054    |
| 7w11w_SITTC | 0.08729833 | 0.5305126  | 4.79E-05 | 0.010571  | -0.25808   |
| 7w11w_SITTC | 0.02118205 | 0.12250902 | 4.24E-05 | 0.0052258 | -0.04878   |
| 7w11w_SITTC | 0.00943132 | 0.04999527 | 3.62E-05 | 0.0070172 | 0.35661    |

|             |            |            |          |           |           |
|-------------|------------|------------|----------|-----------|-----------|
| 7w11w_SITTC | 0.08399986 | 0.5101577  | 4.76E-05 | 0.012731  | -0.036078 |
| 7w11w_SITTC | 0.03103036 | 0.18328297 | 4.58E-05 | 0.00463   | -0.12145  |
| 7w11w_SITTC | 0.05348717 | 0.32186392 | 6.05E-05 | 0.0056127 | 0.026054  |
| 7w11w_SITTC | 0.019612   | 0.11282022 | 4.16E-05 | 0.0053955 | -0.012659 |
| 7w11w_SITTC | 0.02131195 | 0.12331063 | 4.24E-05 | 0.0052258 | -0.04878  |
| 7w11w_SITTC | 0.01454237 | 0.08153558 | 3.89E-05 | 0.0061278 | 0.1561    |
| 7w11w_SITTC | 0.01175218 | 0.06431732 | 3.74E-05 | 0.0065941 | 0.263     |
| 7w11w_SITTC | 0.06965751 | 0.42165107 | 5.82E-05 | 0.011019  | 0.21895   |
| 7w11w_SITTC | 0.01653302 | 0.09381987 | 4.00E-05 | 0.0058035 | 0.080526  |
| 7w11w_SITTC | 0.02838468 | 0.16695647 | 4.49E-05 | 0.0047302 | -0.12174  |
| 7w11w_SITTC | 0.0159859  | 0.09044356 | 3.98E-05 | 0.0058806 | 0.098494  |
| 7w11w_SITTC | 0.01344379 | 0.07475619 | 3.83E-05 | 0.0063061 | 0.19734   |
| 7w11w_SITTC | 0.01956251 | 0.11251482 | 4.16E-05 | 0.0053955 | -0.012659 |
| 7w11w_SITTC | 0.02318602 | 0.13487555 | 4.30E-05 | 0.0050782 | -0.077142 |
| 7w11w_SITTC | 0.09584539 | 0.5832565  | 5.20E-05 | 0.0056833 | -0.9515   |
| 7w11w_SITTC | 0.01752204 | 0.09992312 | 4.06E-05 | 0.0056572 | 0.046584  |
| 7w11w_SITTC | 0.05244229 | 0.31541595 | 5.97E-05 | 0.0054628 | 0.018414  |
| 7w11w_SITTC | 0.09391037 | 0.5713155  | 5.09E-05 | 0.0064439 | -0.7829   |
| 7w11w_SITTC | 0.01284171 | 0.07104078 | 3.80E-05 | 0.0063994 | 0.21875   |
| 7w11w_SITTC | 0.09354498 | 0.5690606  | 5.06E-05 | 0.0067258 | -0.7829   |
| 7w11w_SITTC | 0.0952946  | 0.5798575  | 5.16E-05 | 0.0059226 | -0.91061  |
| 7w11w_SITTC | 0.0425206  | 0.25418922 | 5.13E-05 | 0.0046879 | -0.04643  |
| 7w11w_SITTC | 0.09476318 | 0.5765782  | 5.13E-05 | 0.0061762 | -0.8688   |
| 7w11w_SITTC | 0.02840077 | 0.16705577 | 4.49E-05 | 0.0047302 | -0.12174  |
| 7w11w_SITTC | 0.03238533 | 0.1916445  | 4.62E-05 | 0.0046026 | -0.11821  |
| 7w11w_SITTC | 0.06775868 | 0.40993342 | 5.98E-05 | 0.010192  | 0.19812   |
| 7w11w_SITTC | 0.02607328 | 0.15269281 | 4.42E-05 | 0.0048445 | -0.11213  |
| 7w11w_SITTC | 0.00846209 | 0.04401415 | 3.56E-05 | 0.0072456 | 0.40559   |
| 7w11w_SITTC | 0.01537254 | 0.0866585  | 3.95E-05 | 0.0059603 | 0.11709   |
| 7w11w_SITTC | 0.0461865  | 0.27681148 | 5.44E-05 | 0.0048874 | -0.021643 |
| 7w11w_SITTC | 0.07833904 | 0.47522482 | 5.01E-05 | 0.014289  | 0.18889   |
| 7w11w_SITTC | 0.0164738  | 0.09345443 | 4.00E-05 | 0.0058035 | 0.080526  |
| 7w11w_SITTC | 0.01861614 | 0.10667481 | 4.11E-05 | 0.0055212 | 0.015459  |
| 7w11w_SITTC | 0.01235008 | 0.06800695 | 3.77E-05 | 0.0064954 | 0.24064   |
| 7w11w_SITTC | 0.01577466 | 0.08914003 | 3.98E-05 | 0.0058806 | 0.098494  |
| 7w11w_SITTC | 0.02435317 | 0.14207798 | 4.34E-05 | 0.0049916 | -0.098011 |
| 7w11w_SITTC | 0.02649285 | 0.15528195 | 4.42E-05 | 0.0048445 | -0.11546  |
| 7w11w_SITTC | 0.04583793 | 0.27466047 | 5.39E-05 | 0.0048522 | -0.024952 |
| 7w11w_SITTC | 0.0154455  | 0.08710878 | 3.95E-05 | 0.0059603 | 0.11709   |
| 7w11w_SITTC | 0.01883004 | 0.10799479 | 4.11E-05 | 0.0055212 | 0.015459  |
| 7w11w_SITTC | 0.01386864 | 0.07737797 | 3.86E-05 | 0.0062156 | 0.17645   |
| 7w11w_SITTC | 0.01475341 | 0.08283785 | 3.92E-05 | 0.0060428 | 0.1363    |
| 7w11w_SITTC | 0.00831679 | 0.04311747 | 3.56E-05 | 0.0072456 | 0.40559   |

|             |            |            |          |           |           |
|-------------|------------|------------|----------|-----------|-----------|
| 7w11w_SITTC | 0.02619189 | 0.15342474 | 4.42E-05 | 0.0048445 | -0.11213  |
| 7w11w_SITTC | 0.01473791 | 0.08274222 | 3.92E-05 | 0.0060428 | 0.1363    |
| 7w11w_SITTC | 0.02969376 | 0.1750348  | 4.53E-05 | 0.0046846 | -0.12301  |
| 7w11w_SITTC | 0.0069058  | 0.03441028 | 3.47E-05 | 0.0076096 | 0.48124   |
| 7w11w_SITTC | 0.02004775 | 0.11550929 | 4.19E-05 | 0.0053364 | -0.025531 |
| 7w11w_SITTC | 0.08560427 | 0.5200586  | 4.76E-05 | 0.012059  | -0.14081  |
| 7w11w_SITTC | 0.01362274 | 0.07586048 | 3.86E-05 | 0.0062156 | 0.17645   |
| 7w11w_SITTC | 0.02176643 | 0.12611523 | 4.26E-05 | 0.0051742 | -0.059109 |
| 7w11w_SITTC | 0.06342588 | 0.38319573 | 6.30E-05 | 0.008216  | 0.13178   |
| 7w11w_SITTC | 0.01234729 | 0.06798971 | 3.77E-05 | 0.0064954 | 0.24064   |
| 7w11w_SITTC | 0.01254289 | 0.06919676 | 3.80E-05 | 0.0063994 | 0.21875   |
| 7w11w_SITTC | 0.03483329 | 0.20675081 | 4.72E-05 | 0.0045646 | -0.10426  |
| 7w11w_SITTC | 0.01856661 | 0.10636914 | 4.11E-05 | 0.0055212 | 0.015459  |
| 7w11w_SITTC | 0.04398752 | 0.26324156 | 5.25E-05 | 0.0047605 | -0.035266 |
| 7w11w_SITTC | 0.01230819 | 0.06774843 | 3.77E-05 | 0.0064954 | 0.24064   |
| 7w11w_SITTC | 0.03257809 | 0.19283397 | 4.64E-05 | 0.0045915 | -0.11603  |
| 7w11w_SITTC | 0.02211417 | 0.12826115 | 4.26E-05 | 0.0051742 | -0.059109 |
| 7w11w_SITTC | 0.06667341 | 0.40323624 | 6.07E-05 | 0.0096573 | 0.18233   |
| 7w11w_SITTC | 0.00796425 | 0.04094197 | 3.53E-05 | 0.0073641 | 0.43054   |
| 7w11w_SITTC | 0.01839001 | 0.10527936 | 4.09E-05 | 0.0055879 | 0.015459  |
| 7w11w_SITTC | 0.01298351 | 0.07191581 | 3.83E-05 | 0.0063061 | 0.19734   |
| 7w11w_SITTC | 0.01888846 | 0.10835528 | 4.11E-05 | 0.0055212 | 0.0010121 |
| 7w11w_SITTC | 0.00933492 | 0.04940037 | 3.62E-05 | 0.0070172 | 0.35661   |
| 7w11w_SITTC | 0.05443462 | 0.32771063 | 6.14E-05 | 0.0057798 | 0.030074  |
| 7w11w_SITTC | 0.01318198 | 0.07314061 | 3.83E-05 | 0.0063061 | 0.19734   |
| 7w11w_SITTC | 0.08447454 | 0.513087   | 4.76E-05 | 0.012731  | -0.069378 |
| 7w11w_SITTC | 0.01487326 | 0.08357745 | 3.92E-05 | 0.0060428 | 0.1363    |
| 7w11w_SITTC | 0.01336662 | 0.07427999 | 3.83E-05 | 0.0063061 | 0.19734   |
| 7w11w_SITTC | 0.01242917 | 0.06849502 | 3.77E-05 | 0.0064954 | 0.21875   |
| 7w11w_SITTC | 0.02998117 | 0.17680842 | 4.55E-05 | 0.0046645 | -0.12301  |
| 7w11w_SITTC | 0.01357387 | 0.07555895 | 3.86E-05 | 0.0062156 | 0.17645   |
| 7w11w_SITTC | 0.02319256 | 0.13491589 | 4.30E-05 | 0.0050782 | -0.077142 |
| 7w11w_SITTC | 0.00828037 | 0.04289277 | 3.56E-05 | 0.0072456 | 0.40559   |
| 7w11w_SITTC | 0.02828909 | 0.16636659 | 4.49E-05 | 0.0047302 | -0.12174  |
| 7w11w_SITTC | 0.00654743 | 0.03219874 | 3.47E-05 | 0.0076096 | 0.48124   |
| 7w11w_SITTC | 0.01548497 | 0.08735236 | 3.95E-05 | 0.0059603 | 0.11709   |
| 7w11w_SITTC | 0.01178076 | 0.06449366 | 3.74E-05 | 0.0065941 | 0.263     |
| 7w11w_SITTC | 0.04093585 | 0.24440974 | 5.02E-05 | 0.0046325 | -0.058715 |
| 7w11w_SITTC | 0.01632089 | 0.09251079 | 4.00E-05 | 0.0058035 | 0.080526  |
| 7w11w_SITTC | 0.02137732 | 0.12371404 | 4.24E-05 | 0.0052258 | -0.04878  |
| 7w11w_SITTC | 0.03369907 | 0.19975156 | 4.68E-05 | 0.0045746 | -0.11071  |
| 7w11w_SITTC | 0.03153079 | 0.18637112 | 4.60E-05 | 0.0046154 | -0.12002  |
| 7w11w_SITTC | 0.01004896 | 0.05380671 | 3.65E-05 | 0.0069072 | 0.33263   |

|             |            |            |          |           |           |
|-------------|------------|------------|----------|-----------|-----------|
| 7w11w_SITTC | 0.04190482 | 0.25038925 | 5.09E-05 | 0.0046676 | -0.0504   |
| 7w11w_SITTC | 0.08399811 | 0.5101469  | 4.76E-05 | 0.012731  | -0.036078 |
| 7w11w_SITTC | 0.01505466 | 0.08469691 | 3.92E-05 | 0.0060428 | 0.1363    |
| 7w11w_SITTC | 0.01610759 | 0.09119454 | 3.98E-05 | 0.0058806 | 0.098494  |
| 7w11w_SITTC | 0.03170634 | 0.18745446 | 4.60E-05 | 0.0046154 | -0.12002  |
| 7w11w_SITTC | 0.01834361 | 0.10499304 | 4.09E-05 | 0.0055879 | 0.030658  |
| 7w11w_SITTC | 0.08051416 | 0.48864746 | 4.87E-05 | 0.014207  | 0.12269   |
| 7w11w_SITTC | 0.00764933 | 0.03899857 | 3.53E-05 | 0.0073641 | 0.43054   |
| 7w11w_SITTC | 0.01726082 | 0.09831113 | 4.03E-05 | 0.005729  | 0.063215  |
| 7w11w_SITTC | 0.00884427 | 0.04637258 | 3.59E-05 | 0.00713   | 0.38094   |
| 7w11w_SITTC | 0.036357   | 0.21615367 | 4.79E-05 | 0.0045625 | -0.092976 |
| 7w11w_SITTC | 0.03563244 | 0.21168241 | 4.74E-05 | 0.0045622 | -0.096915 |
| 7w11w_SITTC | 0.01445815 | 0.08101583 | 3.89E-05 | 0.0061278 | 0.1561    |
| 7w11w_SITTC | 0.02597663 | 0.15209638 | 4.40E-05 | 0.0048781 | -0.11213  |
| 7w11w_SITTC | 0.07484995 | 0.45369366 | 5.28E-05 | 0.013537  | 0.24193   |
| 7w11w_SITTC | 0.03026682 | 0.17857118 | 4.55E-05 | 0.0046645 | -0.12245  |
| 7w11w_SITTC | 0.02950995 | 0.17390053 | 4.53E-05 | 0.0046846 | -0.1231   |
| 7w11w_SITTC | 0.01666641 | 0.094643   | 4.00E-05 | 0.0058035 | 0.080526  |
| 7w11w_SITTC | 0.02118683 | 0.12253849 | 4.24E-05 | 0.0052258 | -0.04878  |
| 7w11w_SITTC | 0.04622508 | 0.27704954 | 5.44E-05 | 0.0048874 | -0.021643 |
| 7w11w_SITTC | 0.03826875 | 0.22795106 | 4.87E-05 | 0.0045758 | -0.080425 |
| 7w11w_SITTC | 0.02198643 | 0.12747283 | 4.26E-05 | 0.0051742 | -0.059109 |
| 7w11w_SITTC | 0.02184802 | 0.12661873 | 4.26E-05 | 0.0051742 | -0.059109 |
| 7w11w_SITTC | 0.09560742 | 0.58178794 | 5.20E-05 | 0.0056833 | -0.9515   |
| 7w11w_SITTC | 0.01607937 | 0.09102039 | 3.98E-05 | 0.0058806 | 0.098494  |
| 7w11w_SITTC | 0.02371539 | 0.1381423  | 4.32E-05 | 0.0050338 | -0.084895 |
| 7w11w_SITTC | 0.01321084 | 0.07331869 | 3.83E-05 | 0.0063061 | 0.19734   |
| 7w11w_SITTC | 0.02043738 | 0.11791366 | 4.19E-05 | 0.0053364 | -0.025531 |
| 7w11w_SITTC | 0.04021888 | 0.23998532 | 4.99E-05 | 0.0046177 | -0.063007 |
| 7w11w_SITTC | 0.01893656 | 0.10865208 | 4.11E-05 | 0.0055212 | 0.0010121 |
| 7w11w_SITTC | 0.01843511 | 0.10555768 | 4.11E-05 | 0.0055212 | 0.015459  |
| 7w11w_SITTC | 0.02465123 | 0.14391732 | 4.36E-05 | 0.0049516 | -0.098011 |
| 7w11w_SITTC | 0.01408355 | 0.07870418 | 3.89E-05 | 0.0061278 | 0.1561    |
| 7w11w_SITTC | 0.0151401  | 0.08522412 | 3.92E-05 | 0.0060428 | 0.11709   |
| 7w11w_SITTC | 0.02075347 | 0.11986426 | 4.21E-05 | 0.0052798 | -0.037579 |
| 7w11w_SITTC | 0.00976622 | 0.05206192 | 3.65E-05 | 0.0069072 | 0.33263   |
| 7w11w_SITTC | 0.02649489 | 0.15529457 | 4.42E-05 | 0.0048445 | -0.11546  |
| 7w11w_SITTC | 0.08779295 | 0.53356487 | 4.80E-05 | 0.010188  | -0.29935  |
| 7w11w_SITTC | 0.01514114 | 0.08523055 | 3.92E-05 | 0.0060428 | 0.11709   |
| 7w11w_SITTC | 0.09561389 | 0.5818279  | 5.20E-05 | 0.0056833 | -0.9515   |
| 7w11w_SITTC | 0.01595594 | 0.09025867 | 3.98E-05 | 0.0058806 | 0.098494  |
| 7w11w_SITTC | 0.02791035 | 0.1640294  | 4.48E-05 | 0.0047558 | -0.12024  |
| 7w11w_SITTC | 0.03379569 | 0.2003478  | 4.68E-05 | 0.0045746 | -0.11071  |

|             |            |            |          |           |            |
|-------------|------------|------------|----------|-----------|------------|
| 7w11w_SITTC | 0.02903608 | 0.17097627 | 4.51E-05 | 0.0047064 | -0.12268   |
| 7w11w_SITTC | 0.0452429  | 0.27098852 | 5.34E-05 | 0.0048194 | -0.028317  |
| 7w11w_SITTC | 0.02339621 | 0.13617264 | 4.32E-05 | 0.0050338 | -0.084895  |
| 7w11w_SITTC | 0.01217235 | 0.06691014 | 3.77E-05 | 0.0064954 | 0.24064    |
| 7w11w_SITTC | 0.09914386 | 0.60361135 | 5.45E-05 | 0.0045382 | -1.1701    |
| 7w11w_SITTC | 0.01973063 | 0.11355232 | 4.16E-05 | 0.0053955 | -0.012659  |
| 7w11w_SITTC | 0.02471862 | 0.1443332  | 4.36E-05 | 0.0049516 | -0.098011  |
| 7w11w_SITTC | 0.02044543 | 0.11796334 | 4.19E-05 | 0.0053364 | -0.025531  |
| 7w11w_SITTC | 0.02963322 | 0.17466122 | 4.53E-05 | 0.0046846 | -0.1231    |
| 7w11w_SITTC | 0.02680052 | 0.15718062 | 4.44E-05 | 0.004813  | -0.11546   |
| 7w11w_SITTC | 0.02343708 | 0.13642481 | 4.32E-05 | 0.0050338 | -0.084895  |
| 7w11w_SITTC | 0.03081606 | 0.18196052 | 4.57E-05 | 0.0046464 | -0.12145   |
| 7w11w_SITTC | 0.01705412 | 0.09703556 | 4.03E-05 | 0.005729  | 0.063215   |
| 7w11w_SITTC | 0.03083416 | 0.1820722  | 4.57E-05 | 0.0046464 | -0.12145   |
| 7w11w_SITTC | 0.0226136  | 0.13134311 | 4.28E-05 | 0.005125  | -0.068556  |
| 7w11w_SITTC | 0.01135714 | 0.06187949 | 3.74E-05 | 0.0065941 | 0.263      |
| 7w11w_SITTC | 0.01680415 | 0.095493   | 4.03E-05 | 0.005729  | 0.063215   |
| 7w11w_SITTC | 0.01144065 | 0.06239481 | 3.74E-05 | 0.0065941 | 0.263      |
| 7w11w_SITTC | 0.01163495 | 0.06359386 | 3.74E-05 | 0.0065941 | 0.263      |
| 7w11w_SITTC | 0.00890309 | 0.04673556 | 3.59E-05 | 0.00713   | 0.38094    |
| 7w11w_SITTC | 0.01464728 | 0.08218296 | 3.92E-05 | 0.0060428 | 0.1363     |
| 7w11w_SITTC | 0.01341522 | 0.07457989 | 3.83E-05 | 0.0063061 | 0.19734    |
| 7w11w_SITTC | 0.01500929 | 0.08441694 | 3.92E-05 | 0.0060428 | 0.1363     |
| 7w11w_SITTC | 0.04520481 | 0.2707535  | 5.34E-05 | 0.0048194 | -0.028317  |
| 7w11w_SITTC | 0.00968385 | 0.05155359 | 3.62E-05 | 0.0070172 | 0.35661    |
| 7w11w_SITTC | 0.00966312 | 0.05142571 | 3.62E-05 | 0.0070172 | 0.35661    |
| 7w11w_SITTC | 0.03319976 | 0.1966703  | 4.66E-05 | 0.0045822 | -0.11352   |
| 7w11w_SITTC | 0.0755506  | 0.45801738 | 5.23E-05 | 0.013721  | 0.23858    |
| 7w11w_SITTC | 0.01406773 | 0.07860657 | 3.89E-05 | 0.0061278 | 0.1561     |
| 7w11w_SITTC | 0.04429188 | 0.2651198  | 5.25E-05 | 0.0047605 | -0.031751  |
| 7w11w_SITTC | 0.0864104  | 0.5250332  | 4.77E-05 | 0.01133   | -0.21781   |
| 7w11w_SITTC | 0.03501518 | 0.20787328 | 4.72E-05 | 0.0045646 | -0.10426   |
| 7w11w_SITTC | 0.02006692 | 0.11562753 | 4.19E-05 | 0.0053364 | -0.025531  |
| 7w11w_SITTC | 0.01438994 | 0.08059494 | 3.89E-05 | 0.0061278 | 0.1561     |
| 7w11w_SITTC | 0.02757422 | 0.16195513 | 4.46E-05 | 0.0047834 | -0.12024   |
| 7w11w_SITTC | 0.01764845 | 0.10070315 | 4.06E-05 | 0.0056572 | 0.046584   |
| 7w11w_SITTC | 0.08848605 | 0.537842   | 4.82E-05 | 0.0098057 | -0.3415    |
| 7w11w_SITTC | 0.01271017 | 0.07022902 | 3.80E-05 | 0.0063994 | 0.21875    |
| 7w11w_SITTC | 0.08903803 | 0.54124826 | 4.84E-05 | 0.0094274 | -0.3844    |
| 7w11w_SITTC | 0.04922793 | 0.29558015 | 5.68E-05 | 0.0051026 | -0.0022352 |
| 7w11w_SITTC | 0.02719671 | 0.15962552 | 4.46E-05 | 0.0047834 | -0.11816   |
| 7w11w_SITTC | 0.02486854 | 0.1452584  | 4.36E-05 | 0.0049516 | -0.10343   |
| 7w11w_SITTC | 0.01387396 | 0.07741077 | 3.86E-05 | 0.0062156 | 0.17645    |

|             |            |            |          |           |           |
|-------------|------------|------------|----------|-----------|-----------|
| 7w11w_SITTC | 0.09133643 | 0.5554317  | 4.93E-05 | 0.0079874 | -0.60562  |
| 7w11w_SITTC | 0.01771673 | 0.10112456 | 4.06E-05 | 0.0056572 | 0.046584  |
| 7w11w_SITTC | 0.09518812 | 0.57920045 | 5.16E-05 | 0.0059226 | -0.91061  |
| 7w11w_SITTC | 0.03010294 | 0.17755987 | 4.55E-05 | 0.0046645 | -0.12301  |
| 7w11w_SITTC | 0.01221075 | 0.0671471  | 3.77E-05 | 0.0064954 | 0.24064   |
| 7w11w_SITTC | 0.04045038 | 0.24141392 | 4.99E-05 | 0.0046177 | -0.063007 |
| 7w11w_SITTC | 0.0126248  | 0.0697022  | 3.80E-05 | 0.0063994 | 0.21875   |
| 7w11w_SITTC | 0.08415191 | 0.511096   | 4.76E-05 | 0.012731  | -0.036078 |
| 7w11w_SITTC | 0.06349481 | 0.38362107 | 6.30E-05 | 0.008216  | 0.13178   |
| 7w11w_SITTC | 0.03308811 | 0.19598135 | 4.66E-05 | 0.0045822 | -0.11352  |
| 7w11w_SITTC | 0.03139099 | 0.18550842 | 4.58E-05 | 0.00463   | -0.12002  |
| 7w11w_SITTC | 0.03339692 | 0.19788696 | 4.66E-05 | 0.0045822 | -0.11352  |
| 7w11w_SITTC | 0.02570354 | 0.15041116 | 4.40E-05 | 0.0048781 | -0.10813  |
| 7w11w_SITTC | 0.03036131 | 0.17915423 | 4.57E-05 | 0.0046464 | -0.12245  |
| 7w11w_SITTC | 0.09641163 | 0.58675075 | 5.24E-05 | 0.0054581 | -0.99133  |
| 7w11w_SITTC | 0.04736439 | 0.28408024 | 5.53E-05 | 0.0049654 | -0.01514  |
| 7w11w_SITTC | 0.01996622 | 0.11500616 | 4.16E-05 | 0.0053955 | -0.012659 |
| 7w11w_SITTC | 0.01678461 | 0.09537243 | 4.03E-05 | 0.005729  | 0.063215  |
| 7w11w_SITTC | 0.00687894 | 0.0342445  | 3.47E-05 | 0.0076096 | 0.48124   |
| 7w11w_SITTC | 0.01640233 | 0.09301333 | 4.00E-05 | 0.0058035 | 0.080526  |
| 7w11w_SITTC | 0.0180445  | 0.10314719 | 4.09E-05 | 0.0055879 | 0.030658  |
| 7w11w_SITTC | 0.01560623 | 0.08810061 | 3.95E-05 | 0.0059603 | 0.11709   |
| 7w11w_SITTC | 0.09379882 | 0.57062715 | 5.09E-05 | 0.0064439 | -0.7829   |
| 7w11w_SITTC | 0.0132804  | 0.07374793 | 3.83E-05 | 0.0063061 | 0.19734   |
| 7w11w_SITTC | 0.08759706 | 0.532356   | 4.79E-05 | 0.010571  | -0.29935  |
| 7w11w_SITTC | 0.02082006 | 0.12027516 | 4.21E-05 | 0.0052798 | -0.037579 |
| 7w11w_SITTC | 0.0251374  | 0.14691749 | 4.38E-05 | 0.0049138 | -0.10343  |
| 7w11w_SITTC | 0.01583168 | 0.08949187 | 3.98E-05 | 0.0058806 | 0.098494  |
| 7w11w_SITTC | 0.02444166 | 0.14262407 | 4.36E-05 | 0.0049516 | -0.098011 |
| 7w11w_SITTC | 0.03401981 | 0.20173086 | 4.68E-05 | 0.0045746 | -0.10761  |
| 7w11w_SITTC | 0.06361752 | 0.3843783  | 6.30E-05 | 0.008216  | 0.13178   |
| 7w11w_SITTC | 0.10058454 | 0.6125018  | 5.58E-05 | 0.0041426 | -1.2563   |
| 7w11w_SITTC | 0.01604179 | 0.09078848 | 3.98E-05 | 0.0058806 | 0.098494  |
| 7w11w_SITTC | 0.02272662 | 0.13204058 | 4.28E-05 | 0.005125  | -0.077142 |
| 7w11w_SITTC | 0.09820488 | 0.59781694 | 5.40E-05 | 0.0046955 | -1.1032   |
| 7w11w_SITTC | 0.01214467 | 0.06673933 | 3.77E-05 | 0.0064954 | 0.24064   |
| 7w11w_SITTC | 0.08617306 | 0.5235685  | 4.77E-05 | 0.01133   | -0.17867  |
| 7w11w_SITTC | 0.01920766 | 0.11032509 | 4.14E-05 | 0.0054571 | 0.0010121 |
| 7w11w_SITTC | 0.01311471 | 0.07272545 | 3.83E-05 | 0.0063061 | 0.19734   |
| 7w11w_SITTC | 0.03934353 | 0.23458351 | 4.92E-05 | 0.0045932 | -0.071721 |
| 7w11w_SITTC | 0.02570164 | 0.15039945 | 4.40E-05 | 0.0048781 | -0.10813  |
| 7w11w_SITTC | 0.02279774 | 0.13247944 | 4.30E-05 | 0.0050782 | -0.077142 |
| 7w11w_SITTC | 0.02016047 | 0.11620484 | 4.19E-05 | 0.0053364 | -0.025531 |

|             |            |            |          |           |           |
|-------------|------------|------------|----------|-----------|-----------|
| 7w11w_SITTC | 0.01030173 | 0.05536655 | 3.68E-05 | 0.0068    | 0.30902   |
| 7w11w_SITTC | 0.02709368 | 0.15898971 | 4.46E-05 | 0.0047834 | -0.11816  |
| 7w11w_SITTC | 0.0225108  | 0.13070877 | 4.28E-05 | 0.005125  | -0.068556 |
| 7w11w_SITTC | 0.05937487 | 0.3581969  | 6.37E-05 | 0.0067983 | 0.074574  |
| 7w11w_SITTC | 0.02720003 | 0.15964596 | 4.46E-05 | 0.0047834 | -0.11816  |
| 7w11w_SITTC | 0.03717152 | 0.22118007 | 4.81E-05 | 0.0045652 | -0.088896 |
| 7w11w_SITTC | 0.01022699 | 0.05490536 | 3.65E-05 | 0.0069072 | 0.33263   |
| 7w11w_SITTC | 0.0174313  | 0.09936316 | 4.06E-05 | 0.0056572 | 0.046584  |
| 7w11w_SITTC | 0.08551259 | 0.51949275 | 4.76E-05 | 0.012059  | -0.14081  |
| 7w11w_SITTC | 0.00764307 | 0.03895997 | 3.53E-05 | 0.0073641 | 0.43054   |
| 7w11w_SITTC | 0.03039958 | 0.17939042 | 4.57E-05 | 0.0046464 | -0.12245  |
| 7w11w_SITTC | 0.01811907 | 0.1036074  | 4.09E-05 | 0.0055879 | 0.030658  |
| 7w11w_SITTC | 0.03022599 | 0.17831922 | 4.55E-05 | 0.0046645 | -0.12301  |
| 7w11w_SITTC | 0.0946952  | 0.57615864 | 5.13E-05 | 0.0061762 | -0.8688   |
| 7w11w_SITTC | 0.02206394 | 0.12795116 | 4.26E-05 | 0.0051742 | -0.059109 |
| 7w11w_SITTC | 0.01477666 | 0.08298138 | 3.92E-05 | 0.0060428 | 0.1363    |
| 7w11w_SITTC | 0.03291603 | 0.19491942 | 4.64E-05 | 0.0045915 | -0.11603  |
| 7w11w_SITTC | 0.02073247 | 0.11973465 | 4.21E-05 | 0.0052798 | -0.037579 |
| 7w11w_SITTC | 0.01479998 | 0.08312526 | 3.92E-05 | 0.0060428 | 0.1363    |
| 7w11w_SITTC | 0.01521414 | 0.08568105 | 3.95E-05 | 0.0059603 | 0.11709   |
| 7w11w_SITTC | 0.00682956 | 0.03393981 | 3.47E-05 | 0.0076096 | 0.48124   |
| 7w11w_SITTC | 0.09120631 | 0.55462873 | 4.93E-05 | 0.0079874 | -0.56091  |
| 7w11w_SITTC | 0.02030806 | 0.11711562 | 4.19E-05 | 0.0053364 | -0.025531 |
| 7w11w_SITTC | 0.01786109 | 0.10201535 | 4.09E-05 | 0.0055879 | 0.030658  |
| 7w11w_SITTC | 0.00893724 | 0.04694628 | 3.59E-05 | 0.00713   | 0.38094   |
| 7w11w_SITTC | 0.01108888 | 0.06022407 | 3.71E-05 | 0.0066957 | 0.2858    |
| 7w11w_SITTC | 0.01080036 | 0.05844358 | 3.68E-05 | 0.0068    | 0.2858    |
| 7w11w_SITTC | 0.01465031 | 0.08220166 | 3.92E-05 | 0.0060428 | 0.1363    |
| 7w11w_SITTC | 0.01632322 | 0.0925252  | 4.00E-05 | 0.0058035 | 0.080526  |
| 7w11w_SITTC | 0.02126422 | 0.12301607 | 4.24E-05 | 0.0052258 | -0.04878  |
| 7w11w_SITTC | 0.01735019 | 0.09886262 | 4.06E-05 | 0.0056572 | 0.046584  |
| 7w11w_SITTC | 0.00887355 | 0.04655327 | 3.59E-05 | 0.00713   | 0.38094   |
| 7w11w_SITTC | 0.02332775 | 0.13575013 | 4.32E-05 | 0.0050338 | -0.084895 |
| 7w11w_SITTC | 0.09141273 | 0.55590254 | 4.93E-05 | 0.0079874 | -0.60562  |
| 7w11w_SITTC | 0.02529293 | 0.14787729 | 4.38E-05 | 0.0049138 | -0.10343  |
| 7w11w_SITTC | 0.02238397 | 0.12992607 | 4.28E-05 | 0.005125  | -0.068556 |
| 7w11w_SITTC | 0.03494087 | 0.20741472 | 4.72E-05 | 0.0045646 | -0.10426  |
| 7w11w_SITTC | 0.09055477 | 0.55060804 | 4.91E-05 | 0.0083333 | -0.51631  |
| 7w11w_SITTC | 0.02793366 | 0.16417322 | 4.48E-05 | 0.0047558 | -0.12024  |
| 7w11w_SITTC | 0.01863774 | 0.10680807 | 4.11E-05 | 0.0055212 | 0.015459  |
| 7w11w_SITTC | 0.02527816 | 0.14778614 | 4.38E-05 | 0.0049138 | -0.10343  |
| 7w11w_SITTC | 0.02859705 | 0.16826701 | 4.49E-05 | 0.0047302 | -0.12174  |
| 7w11w_SITTC | 0.07976311 | 0.48401275 | 4.90E-05 | 0.014278  | 0.15946   |

|             |            |            |          |           |           |
|-------------|------------|------------|----------|-----------|-----------|
| 7w11w_SITTC | 0.00907701 | 0.04780879 | 3.59E-05 | 0.00713   | 0.38094   |
| 7w11w_SITTC | 0.07868313 | 0.4773482  | 4.97E-05 | 0.014318  | 0.18889   |
| 7w11w_SITTC | 0.01179177 | 0.0645616  | 3.74E-05 | 0.0065941 | 0.263     |
| 7w11w_SITTC | 0.01742276 | 0.09931047 | 4.06E-05 | 0.0056572 | 0.046584  |
| 7w11w_SITTC | 0.01282961 | 0.07096613 | 3.80E-05 | 0.0063994 | 0.21875   |
| 7w11w_SITTC | 0.02773928 | 0.1629737  | 4.48E-05 | 0.0047558 | -0.12024  |
| 7w11w_SITTC | 0.03502847 | 0.2079553  | 4.72E-05 | 0.0045646 | -0.10426  |
| 7w11w_SITTC | 0.00673226 | 0.03333934 | 3.47E-05 | 0.0076096 | 0.48124   |
| 7w11w_SITTC | 0.01190694 | 0.0652723  | 3.77E-05 | 0.0064954 | 0.24064   |
| 7w11w_SITTC | 0.02212409 | 0.12832233 | 4.26E-05 | 0.0051742 | -0.059109 |
| 7w11w_SITTC | 0.0168293  | 0.0956482  | 4.03E-05 | 0.005729  | 0.063215  |
| 7w11w_SITTC | 0.01803914 | 0.10311414 | 4.09E-05 | 0.0055879 | 0.030658  |
| 7w11w_SITTC | 0.09379747 | 0.57061875 | 5.09E-05 | 0.0064439 | -0.7829   |
| 7w11w_SITTC | 0.01952542 | 0.11228599 | 4.16E-05 | 0.0053955 | -0.012659 |
| 7w11w_SITTC | 0.03008012 | 0.17741904 | 4.55E-05 | 0.0046645 | -0.12301  |
| 7w11w_SITTC | 0.02076035 | 0.11990674 | 4.21E-05 | 0.0052798 | -0.037579 |
| 7w11w_SITTC | 0.05839049 | 0.3521223  | 6.34E-05 | 0.0065282 | 0.068735  |
| 7w11w_SITTC | 0.05131623 | 0.30846706 | 5.87E-05 | 0.0053288 | 0.011221  |
| 7w11w_SITTC | 0.03003703 | 0.17715313 | 4.55E-05 | 0.0046645 | -0.12301  |
| 7w11w_SITTC | 0.00607267 | 0.02926901 | 3.44E-05 | 0.0077366 | 0.50694   |
| 7w11w_SITTC | 0.02356842 | 0.13723533 | 4.32E-05 | 0.0050338 | -0.084895 |
| 7w11w_SITTC | 0.02085689 | 0.12050246 | 4.21E-05 | 0.0052798 | -0.037579 |
| 7w11w_SITTC | 0.02153341 | 0.12467726 | 4.24E-05 | 0.0052258 | -0.04878  |
| 7w11w_SITTC | 0.0287951  | 0.16948919 | 4.51E-05 | 0.0047064 | -0.12268  |
| 7w11w_SITTC | 0.02261534 | 0.13135386 | 4.28E-05 | 0.005125  | -0.068556 |
| 7w11w_SITTC | 0.08917721 | 0.54210716 | 4.84E-05 | 0.0094274 | -0.42792  |
| 7w11w_SITTC | 0.08576129 | 0.5210275  | 4.76E-05 | 0.0117    | -0.14081  |
| 7w11w_SITTC | 0.04173231 | 0.24932466 | 5.09E-05 | 0.0046676 | -0.0504   |
| 7w11w_SITTC | 0.01508638 | 0.08489265 | 3.92E-05 | 0.0060428 | 0.1363    |
| 7w11w_SITTC | 0.01681362 | 0.09555142 | 4.03E-05 | 0.005729  | 0.063215  |
| 7w11w_SITTC | 0.02946704 | 0.17363572 | 4.53E-05 | 0.0046846 | -0.1231   |
| 7w11w_SITTC | 0.0099071  | 0.0529313  | 3.65E-05 | 0.0069072 | 0.33263   |
| 7w11w_SITTC | 0.09089606 | 0.55271417 | 4.91E-05 | 0.0083333 | -0.56091  |
| 7w11w_SITTC | 0.01511245 | 0.08505353 | 3.92E-05 | 0.0060428 | 0.11709   |
| 7w11w_SITTC | 0.02259148 | 0.1312066  | 4.28E-05 | 0.005125  | -0.068556 |
| 7w11w_SITTC | 0.01114849 | 0.06059193 | 3.71E-05 | 0.0066957 | 0.2858    |
| 7w11w_SITTC | 0.01989281 | 0.11455314 | 4.16E-05 | 0.0053955 | -0.012659 |
| 7w11w_SITTC | 0.01371177 | 0.07640992 | 3.86E-05 | 0.0062156 | 0.17645   |
| 7w11w_SITTC | 0.02205505 | 0.12789628 | 4.26E-05 | 0.0051742 | -0.059109 |
| 7w11w_SITTC | 0.07241839 | 0.43868852 | 5.54E-05 | 0.012382  | 0.24373   |
| 7w11w_SITTC | 0.01893209 | 0.10862452 | 4.11E-05 | 0.0055212 | 0.0010121 |
| 7w11w_SITTC | 0.02277605 | 0.1323456  | 4.30E-05 | 0.0050782 | -0.077142 |
| 7w11w_SITTC | 0.0087803  | 0.04597781 | 3.59E-05 | 0.00713   | 0.38094   |



|             |            |            |          |           |           |
|-------------|------------|------------|----------|-----------|-----------|
| 7w11w_SITTC | 0.01583266 | 0.08949792 | 3.98E-05 | 0.0058806 | 0.098494  |
| 7w11w_SITTC | 0.0158047  | 0.08932541 | 3.98E-05 | 0.0058806 | 0.098494  |
| 7w11w_SITTC | 0.01850979 | 0.10601851 | 4.11E-05 | 0.0055212 | 0.015459  |
| 7w11w_SITTC | 0.02008865 | 0.11576168 | 4.19E-05 | 0.0053364 | -0.025531 |
| 7w11w_SITTC | 0.01319979 | 0.07325047 | 3.83E-05 | 0.0063061 | 0.19734   |
| 7w11w_SITTC | 0.01623127 | 0.09195773 | 3.98E-05 | 0.0058806 | 0.080526  |
| 7w11w_SITTC | 0.02852045 | 0.16779429 | 4.49E-05 | 0.0047302 | -0.12174  |
| 7w11w_SITTC | 0.09967672 | 0.6068996  | 5.49E-05 | 0.0043938 | -1.2008   |
| 7w11w_SITTC | 0.00767018 | 0.03912726 | 3.53E-05 | 0.0073641 | 0.43054   |
| 7w11w_SITTC | 0.01550659 | 0.08748576 | 3.95E-05 | 0.0059603 | 0.11709   |
| 7w11w_SITTC | 0.01433104 | 0.08023144 | 3.89E-05 | 0.0061278 | 0.1561    |
| 7w11w_SITTC | 0.01912299 | 0.10980257 | 4.14E-05 | 0.0054571 | 0.0010121 |
| 7w11w_SITTC | 0.03293794 | 0.19505464 | 4.64E-05 | 0.0045915 | -0.11352  |
| 7w11w_SITTC | 0.02446499 | 0.14276804 | 4.36E-05 | 0.0049516 | -0.098011 |
| 7w11w_SITTC | 0.01219695 | 0.06706195 | 3.77E-05 | 0.0064954 | 0.24064   |
| 7w11w_SITTC | 0.00917042 | 0.04838525 | 3.59E-05 | 0.00713   | 0.35661   |
| 7w11w_SITTC | 0.06757703 | 0.4088125  | 6.03E-05 | 0.009922  | 0.19812   |
| 7w11w_SITTC | 0.01643398 | 0.09320867 | 4.00E-05 | 0.0058035 | 0.080526  |
| 7w11w_SITTC | 0.02275551 | 0.13221882 | 4.30E-05 | 0.0050782 | -0.077142 |
| 7w11w_SITTC | 0.02616876 | 0.15328202 | 4.42E-05 | 0.0048445 | -0.11213  |
| 7w11w_SITTC | 0.02593782 | 0.15185688 | 4.40E-05 | 0.0048781 | -0.11213  |
| 7w11w_SITTC | 0.09024403 | 0.5486905  | 4.88E-05 | 0.0086895 | -0.51631  |
| 7w11w_SITTC | 0.02617814 | 0.15333992 | 4.42E-05 | 0.0048445 | -0.11213  |
| 7w11w_SITTC | 0.07856005 | 0.47658873 | 5.01E-05 | 0.014289  | 0.18889   |
| 7w11w_SITTC | 0.01648647 | 0.09353261 | 4.00E-05 | 0.0058035 | 0.080526  |
| 7w11w_SITTC | 0.01948734 | 0.11205096 | 4.16E-05 | 0.0053955 | -0.012659 |
| 7w11w_SITTC | 0.0173313  | 0.09874604 | 4.06E-05 | 0.0056572 | 0.046584  |
| 7w11w_SITTC | 0.09129979 | 0.5552056  | 4.93E-05 | 0.0079874 | -0.60562  |
| 7w11w_SITTC | 0.02716953 | 0.15945774 | 4.46E-05 | 0.0047834 | -0.11816  |
| 7w11w_SITTC | 0.0371683  | 0.22116016 | 4.81E-05 | 0.0045652 | -0.088896 |
| 7w11w_SITTC | 0.09287202 | 0.5649078  | 5.02E-05 | 0.0070215 | -0.69483  |
| 7w11w_SITTC | 0.03626644 | 0.21559481 | 4.77E-05 | 0.0045615 | -0.092976 |
| 7w11w_SITTC | 0.01754119 | 0.10004125 | 4.06E-05 | 0.0056572 | 0.046584  |
| 7w11w_SITTC | 0.01461892 | 0.08200791 | 3.92E-05 | 0.0060428 | 0.1363    |
| 7w11w_SITTC | 0.01379909 | 0.07694875 | 3.86E-05 | 0.0062156 | 0.17645   |
| 7w11w_SITTC | 0.02853439 | 0.16788036 | 4.49E-05 | 0.0047302 | -0.12174  |
| 7w11w_SITTC | 0.02071985 | 0.11965682 | 4.21E-05 | 0.0052798 | -0.037579 |
| 7w11w_SITTC | 0.06689126 | 0.4045806  | 6.07E-05 | 0.0096573 | 0.18233   |
| 7w11w_SITTC | 0.08061811 | 0.48928896 | 4.87E-05 | 0.014207  | 0.12269   |
| 7w11w_SITTC | 0.08561833 | 0.5201453  | 4.76E-05 | 0.0117    | -0.14081  |
| 7w11w_SITTC | 0.02062194 | 0.11905255 | 4.21E-05 | 0.0052798 | -0.037579 |
| 7w11w_SITTC | 0.01973916 | 0.11360492 | 4.16E-05 | 0.0053955 | -0.012659 |
| 7w11w_SITTC | 0.0277182  | 0.16284364 | 4.48E-05 | 0.0047558 | -0.12024  |

|             |            |            |          |           |           |
|-------------|------------|------------|----------|-----------|-----------|
| 7w11w_SITTC | 0.01073937 | 0.05806726 | 3.68E-05 | 0.0068    | 0.30902   |
| 7w11w_SITTC | 0.02935906 | 0.17296936 | 4.53E-05 | 0.0046846 | -0.1231   |
| 7w11w_SITTC | 0.01499734 | 0.0843432  | 3.92E-05 | 0.0060428 | 0.1363    |
| 7w11w_SITTC | 0.02118138 | 0.12250487 | 4.24E-05 | 0.0052258 | -0.04878  |
| 7w11w_SITTC | 0.04058433 | 0.24224052 | 4.99E-05 | 0.0046177 | -0.058715 |
| 7w11w_SITTC | 0.0795442  | 0.48266187 | 4.93E-05 | 0.014315  | 0.15946   |
| 7w11w_SITTC | 0.02925883 | 0.17235084 | 4.53E-05 | 0.0046846 | -0.1231   |
| 7w11w_SITTC | 0.02002639 | 0.11537743 | 4.16E-05 | 0.0053955 | -0.025531 |
| 7w11w_SITTC | 0.02645596 | 0.15505435 | 4.42E-05 | 0.0048445 | -0.11546  |
| 7w11w_SITTC | 0.01037652 | 0.05582812 | 3.68E-05 | 0.0068    | 0.30902   |
| 7w11w_SITTC | 0.03371518 | 0.19985098 | 4.68E-05 | 0.0045746 | -0.11071  |
| 7w11w_SITTC | 0.01127368 | 0.06136446 | 3.71E-05 | 0.0066957 | 0.2858    |
| 7w11w_SITTC | 0.05992551 | 0.36159492 | 6.37E-05 | 0.0069445 | 0.080679  |
| 7w11w_SITTC | 0.03656229 | 0.21742049 | 4.79E-05 | 0.0045625 | -0.092976 |
| 7w11w_SITTC | 0.08387223 | 0.5093701  | 4.77E-05 | 0.013036  | -0.036078 |
| 7w11w_SITTC | 0.01296956 | 0.07182974 | 3.80E-05 | 0.0063994 | 0.19734   |
| 7w11w_SITTC | 0.02836717 | 0.16684839 | 4.49E-05 | 0.0047302 | -0.12174  |
| 7w11w_SITTC | 0.03235741 | 0.1914722  | 4.62E-05 | 0.0046026 | -0.11821  |
| 7w11w_SITTC | 0.04556936 | 0.27300316 | 5.39E-05 | 0.0048522 | -0.024952 |
| 7w11w_SITTC | 0.09235054 | 0.56168973 | 4.99E-05 | 0.0073308 | -0.69483  |
| 7w11w_SITTC | 0.03464156 | 0.20556764 | 4.70E-05 | 0.0045688 | -0.10426  |
| 7w11w_SITTC | 0.03223021 | 0.19068725 | 4.62E-05 | 0.0046026 | -0.11821  |
| 7w11w_SITTC | 0.02940608 | 0.1732595  | 4.53E-05 | 0.0046846 | -0.1231   |
| 7w11w_SITTC | 0.04044979 | 0.24141024 | 4.99E-05 | 0.0046177 | -0.063007 |
| 7w11w_SITTC | 0.03144114 | 0.18581787 | 4.60E-05 | 0.0046154 | -0.12002  |
| 7w11w_SITTC | 0.01935042 | 0.111206   | 4.14E-05 | 0.0054571 | 0.0010121 |
| 7w11w_SITTC | 0.0935538  | 0.5691151  | 5.06E-05 | 0.0067258 | -0.7829   |
| 7w11w_SITTC | 0.01144673 | 0.06243235 | 3.74E-05 | 0.0065941 | 0.263     |
| 7w11w_SITTC | 0.02202088 | 0.12768546 | 4.26E-05 | 0.0051742 | -0.059109 |
| 7w11w_SITTC | 0.0412469  | 0.24632923 | 5.05E-05 | 0.0046492 | -0.054504 |
| 7w11w_SITTC | 0.015099   | 0.08497054 | 3.92E-05 | 0.0060428 | 0.1363    |
| 7w11w_SITTC | 0.0950084  | 0.57809144 | 5.16E-05 | 0.0059226 | -0.8688   |
| 7w11w_SITTC | 0.02368897 | 0.13797921 | 4.32E-05 | 0.0050338 | -0.084895 |
| 7w11w_SITTC | 0.01884837 | 0.10810791 | 4.11E-05 | 0.0055212 | 0.015459  |
| 7w11w_SITTC | 0.04763316 | 0.28573883 | 5.53E-05 | 0.0049654 | -0.01192  |
| 7w11w_SITTC | 0.00921466 | 0.04865826 | 3.62E-05 | 0.0070172 | 0.35661   |
| 7w11w_SITTC | 0.03086506 | 0.18226285 | 4.57E-05 | 0.0046464 | -0.12145  |
| 7w11w_SITTC | 0.0224949  | 0.13061062 | 4.28E-05 | 0.005125  | -0.068556 |
| 7w11w_SITTC | 0.03563097 | 0.21167332 | 4.74E-05 | 0.0045622 | -0.096915 |
| 7w11w_SITTC | 0.01669267 | 0.09480505 | 4.00E-05 | 0.0058035 | 0.080526  |
| 7w11w_SITTC | 0.01387794 | 0.07743535 | 3.86E-05 | 0.0062156 | 0.17645   |
| 7w11w_SITTC | 0.05376792 | 0.32359642 | 6.10E-05 | 0.005694  | 0.026054  |
| 7w11w_SITTC | 0.02061599 | 0.11901584 | 4.21E-05 | 0.0052798 | -0.037579 |

|             |            |            |          |           |           |
|-------------|------------|------------|----------|-----------|-----------|
| 7w11w_SITTC | 0.01324868 | 0.07355218 | 3.83E-05 | 0.0063061 | 0.19734   |
| 7w11w_SITTC | 0.00370939 | 0.01468521 | 3.29E-05 | 0.0084138 | 0.63801   |
| 7w11w_SITTC | 0.03290613 | 0.19485836 | 4.64E-05 | 0.0045915 | -0.11603  |
| 7w11w_SITTC | 0.04417896 | 0.26442292 | 5.25E-05 | 0.0047605 | -0.035266 |
| 7w11w_SITTC | 0.02350977 | 0.13687336 | 4.32E-05 | 0.0050338 | -0.084895 |
| 7w11w_SITTC | 0.06573315 | 0.39743388 | 6.16E-05 | 0.0091463 | 0.16566   |
| 7w11w_SITTC | 0.00638867 | 0.03121905 | 3.44E-05 | 0.0077366 | 0.50694   |
| 7w11w_SITTC | 0.00868393 | 0.04538313 | 3.59E-05 | 0.00713   | 0.38094   |
| 7w11w_SITTC | 0.0087644  | 0.04587967 | 3.59E-05 | 0.00713   | 0.38094   |
| 7w11w_SITTC | 0.0882156  | 0.53617305 | 4.80E-05 | 0.010188  | -0.3415   |
| 7w11w_SITTC | 0.01379947 | 0.07695112 | 3.86E-05 | 0.0062156 | 0.17645   |
| 7w11w_SITTC | 0.07164045 | 0.43388787 | 5.60E-05 | 0.012118  | 0.2386    |
| 7w11w_SITTC | 0.02161975 | 0.1252101  | 4.24E-05 | 0.0052258 | -0.059109 |
| 7w11w_SITTC | 0.01682176 | 0.09560166 | 4.03E-05 | 0.005729  | 0.063215  |
| 7w11w_SITTC | 0.01877198 | 0.1076365  | 4.11E-05 | 0.0055212 | 0.015459  |
| 7w11w_SITTC | 0.02138729 | 0.12377556 | 4.24E-05 | 0.0052258 | -0.04878  |
| 7w11w_SITTC | 0.09349271 | 0.5687381  | 5.06E-05 | 0.0067258 | -0.7829   |
| 7w11w_SITTC | 0.02721864 | 0.15976083 | 4.46E-05 | 0.0047834 | -0.11816  |
| 7w11w_SITTC | 0.020026   | 0.11537502 | 4.16E-05 | 0.0053955 | -0.025531 |
| 7w11w_SITTC | 0.02500637 | 0.14610888 | 4.38E-05 | 0.0049138 | -0.10343  |
| 7w11w_SITTC | 0.01325861 | 0.07361347 | 3.83E-05 | 0.0063061 | 0.19734   |
| 7w11w_SITTC | 0.02783115 | 0.16354063 | 4.48E-05 | 0.0047558 | -0.12024  |
| 7w11w_SITTC | 0.00693055 | 0.034563   | 3.47E-05 | 0.0076096 | 0.48124   |
| 7w11w_SITTC | 0.08735848 | 0.5308837  | 4.79E-05 | 0.010571  | -0.25808  |
| 7w11w_SITTC | 0.01291678 | 0.07150405 | 3.80E-05 | 0.0063994 | 0.21875   |
| 7w11w_SITTC | 0.012476   | 0.06878395 | 3.80E-05 | 0.0063994 | 0.21875   |
| 7w11w_SITTC | 0.0270472  | 0.15870288 | 4.44E-05 | 0.004813  | -0.11816  |
| 7w11w_SITTC | 0.08448997 | 0.5131822  | 4.76E-05 | 0.012731  | -0.069378 |
| 7w11w_SITTC | 0.04134831 | 0.24695499 | 5.05E-05 | 0.0046492 | -0.054504 |
| 7w11w_SITTC | 0.0209945  | 0.12135163 | 4.21E-05 | 0.0052798 | -0.037579 |
| 7w11w_SITTC | 0.0249299  | 0.14563702 | 4.38E-05 | 0.0049138 | -0.10343  |
| 7w11w_SITTC | 0.06852922 | 0.4146884  | 5.93E-05 | 0.010465  | 0.20551   |
| 7w11w_SITTC | 0.02223508 | 0.12900725 | 4.28E-05 | 0.005125  | -0.068556 |
| 7w11w_SITTC | 0.01451835 | 0.08138729 | 3.89E-05 | 0.0061278 | 0.1561    |
| 7w11w_SITTC | 0.02883426 | 0.1697308  | 4.51E-05 | 0.0047064 | -0.12268  |
| 7w11w_SITTC | 0.01322004 | 0.07337542 | 3.83E-05 | 0.0063061 | 0.19734   |
| 7w11w_SITTC | 0.02442177 | 0.14250131 | 4.36E-05 | 0.0049516 | -0.098011 |
| 7w11w_SITTC | 0.02203351 | 0.12776338 | 4.26E-05 | 0.0051742 | -0.059109 |
| 7w11w_SITTC | 0.05421688 | 0.326367   | 6.14E-05 | 0.0057798 | 0.030074  |
| 7w11w_SITTC | 0.01717337 | 0.09777144 | 4.03E-05 | 0.005729  | 0.063215  |
| 7w11w_SITTC | 0.02049658 | 0.11827897 | 4.19E-05 | 0.0053364 | -0.025531 |
| 7w11w_SITTC | 0.02639502 | 0.15467824 | 4.42E-05 | 0.0048445 | -0.11213  |
| 7w11w_SITTC | 0.00825754 | 0.04275185 | 3.56E-05 | 0.0072456 | 0.40559   |

|             |            |            |          |           |           |
|-------------|------------|------------|----------|-----------|-----------|
| 7w11w_SITTC | 0.02161129 | 0.12515785 | 4.24E-05 | 0.0052258 | -0.059109 |
| 7w11w_SITTC | 0.01602837 | 0.09070569 | 3.98E-05 | 0.0058806 | 0.098494  |
| 7w11w_SITTC | 0.00685817 | 0.03411636 | 3.47E-05 | 0.0076096 | 0.48124   |
| 7w11w_SITTC | 0.09105611 | 0.5537018  | 4.93E-05 | 0.0079874 | -0.56091  |
| 7w11w_SITTC | 0.07467723 | 0.4526278  | 5.33E-05 | 0.013335  | 0.24193   |
| 7w11w_SITTC | 0.029522   | 0.17397486 | 4.53E-05 | 0.0046846 | -0.1231   |
| 7w11w_SITTC | 0.06873948 | 0.41598594 | 5.93E-05 | 0.010465  | 0.21248   |
| 7w11w_SITTC | 0.02083851 | 0.12038903 | 4.21E-05 | 0.0052798 | -0.037579 |
| 7w11w_SITTC | 0.00913272 | 0.0481526  | 3.59E-05 | 0.00713   | 0.38094   |
| 7w11w_SITTC | 0.00715406 | 0.03594231 | 3.50E-05 | 0.0074854 | 0.45576   |
| 7w11w_SITTC | 0.03410985 | 0.20228645 | 4.68E-05 | 0.0045746 | -0.10761  |
| 7w11w_SITTC | 0.08828066 | 0.53657454 | 4.80E-05 | 0.010188  | -0.3415   |
| 7w11w_SITTC | 0.02043832 | 0.11791948 | 4.19E-05 | 0.0053364 | -0.025531 |
| 7w11w_SITTC | 0.02191142 | 0.12700996 | 4.26E-05 | 0.0051742 | -0.059109 |
| 7w11w_SITTC | 0.03787821 | 0.22554104 | 4.84E-05 | 0.0045696 | -0.080425 |
| 7w11w_SITTC | 0.01498593 | 0.08427274 | 3.92E-05 | 0.0060428 | 0.1363    |
| 7w11w_SITTC | 0.03054171 | 0.18026748 | 4.57E-05 | 0.0046464 | -0.12245  |
| 7w11w_SITTC | 0.08745323 | 0.5314685  | 4.79E-05 | 0.010571  | -0.25808  |
| 7w11w_SITTC | 0.02762395 | 0.16226201 | 4.48E-05 | 0.0047558 | -0.12024  |
| 7w11w_SITTC | 0.02077973 | 0.12002633 | 4.21E-05 | 0.0052798 | -0.037579 |
| 7w11w_SITTC | 0.01870575 | 0.10722777 | 4.11E-05 | 0.0055212 | 0.015459  |
| 7w11w_SITTC | 0.0126678  | 0.06996755 | 3.80E-05 | 0.0063994 | 0.21875   |
| 7w11w_SITTC | 0.01742425 | 0.09931964 | 4.06E-05 | 0.0056572 | 0.046584  |
| 7w11w_SITTC | 0.02175583 | 0.1260498  | 4.26E-05 | 0.0051742 | -0.059109 |
| 7w11w_SITTC | 0.03618634 | 0.21510051 | 4.77E-05 | 0.0045615 | -0.092976 |
| 7w11w_SITTC | 0.03391271 | 0.20106994 | 4.68E-05 | 0.0045746 | -0.11071  |
| 7w11w_SITTC | 0.08160057 | 0.49535173 | 4.83E-05 | 0.013957  | 0.078055  |
| 7w11w_SITTC | 0.0210804  | 0.12188172 | 4.21E-05 | 0.0052798 | -0.04878  |
| 7w11w_SITTC | 0.03177192 | 0.18785915 | 4.60E-05 | 0.0046154 | -0.12002  |
| 7w11w_SITTC | 0.00878748 | 0.04602211 | 3.59E-05 | 0.00713   | 0.38094   |
| 7w11w_SITTC | 0.01477017 | 0.08294133 | 3.92E-05 | 0.0060428 | 0.1363    |
| 7w11w_SITTC | 0.01399671 | 0.07816827 | 3.86E-05 | 0.0062156 | 0.17645   |
| 7w11w_SITTC | 0.09870749 | 0.60091853 | 5.45E-05 | 0.0045382 | -1.1375   |
| 7w11w_SITTC | 0.01424236 | 0.07968416 | 3.89E-05 | 0.0061278 | 0.1561    |
| 7w11w_SITTC | 0.02866749 | 0.16870166 | 4.49E-05 | 0.0047302 | -0.12268  |
| 7w11w_SITTC | 0.09940891 | 0.60524696 | 5.49E-05 | 0.0043938 | -1.2008   |
| 7w11w_SITTC | 0.03287954 | 0.19469422 | 4.64E-05 | 0.0045915 | -0.11603  |
| 7w11w_SITTC | 0.02208232 | 0.12806459 | 4.26E-05 | 0.0051742 | -0.059109 |
| 7w11w_SITTC | 0.02299435 | 0.13369273 | 4.30E-05 | 0.0050782 | -0.077142 |
| 7w11w_SITTC | 0.09176115 | 0.55805266 | 4.96E-05 | 0.0076529 | -0.60562  |
| 7w11w_SITTC | 0.02742703 | 0.1610468  | 4.46E-05 | 0.0047834 | -0.11816  |
| 7w11w_SITTC | 0.04157507 | 0.24835439 | 5.05E-05 | 0.0046492 | -0.0504   |
| 7w11w_SITTC | 0.03870064 | 0.23061623 | 4.89E-05 | 0.0045836 | -0.076088 |

|             |            |            |          |           |           |
|-------------|------------|------------|----------|-----------|-----------|
| 7w11w_SITTC | 0.07562645 | 0.45848542 | 5.23E-05 | 0.013721  | 0.23393   |
| 7w11w_SITTC | 0.02361606 | 0.13752933 | 4.32E-05 | 0.0050338 | -0.084895 |
| 7w11w_SITTC | 0.03734646 | 0.22225958 | 4.81E-05 | 0.0045652 | -0.084703 |
| 7w11w_SITTC | 0.0924668  | 0.56240726 | 4.99E-05 | 0.0073308 | -0.69483  |
| 7w11w_SITTC | 0.0770499  | 0.46726954 | 5.09E-05 | 0.014141  | 0.22047   |
| 7w11w_SITTC | 0.09696502 | 0.59016573 | 5.28E-05 | 0.0052469 | -1.03     |
| 7w11w_SITTC | 0.014062   | 0.07857117 | 3.86E-05 | 0.0062156 | 0.1561    |
| 7w11w_SITTC | 0.00550359 | 0.02575723 | 3.41E-05 | 0.0078664 | 0.53284   |
| 7w11w_SITTC | 0.0689739  | 0.41743255 | 5.87E-05 | 0.010741  | 0.21248   |
| 7w11w_SITTC | 0.02918509 | 0.17189582 | 4.51E-05 | 0.0047064 | -0.1231   |
| 7w11w_SITTC | 0.08433986 | 0.51225585 | 4.76E-05 | 0.012731  | -0.069378 |
| 7w11w_SITTC | 0.02511517 | 0.14678031 | 4.38E-05 | 0.0049138 | -0.10343  |
| 7w11w_SITTC | 0.01974594 | 0.11364681 | 4.16E-05 | 0.0053955 | -0.012659 |
| 7w11w_SITTC | 0.06563693 | 0.39684007 | 6.16E-05 | 0.0091463 | 0.16566   |
| 7w11w_SITTC | 0.01845017 | 0.10565061 | 4.11E-05 | 0.0055212 | 0.015459  |
| 7w11w_SITTC | 0.0102781  | 0.05522071 | 3.68E-05 | 0.0068    | 0.30902   |
| 7w11w_SITTC | 0.02276912 | 0.13230287 | 4.30E-05 | 0.0050782 | -0.077142 |
| 7w11w_SITTC | 0.02028398 | 0.11696702 | 4.19E-05 | 0.0053364 | -0.025531 |
| 7w11w_SITTC | 0.02884363 | 0.16978866 | 4.51E-05 | 0.0047064 | -0.12268  |
| 7w11w_SITTC | 0.02247518 | 0.13048896 | 4.28E-05 | 0.005125  | -0.068556 |
| 7w11w_SITTC | 0.02281143 | 0.13256396 | 4.30E-05 | 0.0050782 | -0.077142 |
| 7w11w_SITTC | 0.02736815 | 0.16068347 | 4.46E-05 | 0.0047834 | -0.11816  |
| 7w11w_SITTC | 0.01501171 | 0.08443184 | 3.92E-05 | 0.0060428 | 0.1363    |
| 7w11w_SITTC | 0.01623728 | 0.09199483 | 4.00E-05 | 0.0058035 | 0.080526  |
| 7w11w_SITTC | 0.02082696 | 0.12031776 | 4.21E-05 | 0.0052798 | -0.037579 |
| 7w11w_SITTC | 0.02711231 | 0.15910466 | 4.46E-05 | 0.0047834 | -0.11816  |
| 7w11w_SITTC | 0.01039199 | 0.05592357 | 3.68E-05 | 0.0068    | 0.30902   |
| 7w11w_SITTC | 0.03841326 | 0.22884285 | 4.87E-05 | 0.0045758 | -0.076088 |
| 7w11w_SITTC | 0.03508817 | 0.2083237  | 4.72E-05 | 0.0045646 | -0.10426  |
| 7w11w_SITTC | 0.01709668 | 0.09729818 | 4.03E-05 | 0.005729  | 0.063215  |
| 7w11w_SITTC | 0.01255873 | 0.06929451 | 3.80E-05 | 0.0063994 | 0.21875   |
| 7w11w_SITTC | 0.00936248 | 0.04957046 | 3.62E-05 | 0.0070172 | 0.35661   |
| 7w11w_SITTC | 0.03017141 | 0.17798239 | 4.55E-05 | 0.0046645 | -0.12301  |
| 7w11w_SITTC | 0.02327764 | 0.13544092 | 4.30E-05 | 0.0050782 | -0.084895 |
| 7w11w_SITTC | 0.02588385 | 0.15152381 | 4.40E-05 | 0.0048781 | -0.10813  |
| 7w11w_SITTC | 0.04411971 | 0.2640573  | 5.25E-05 | 0.0047605 | -0.035266 |
| 7w11w_SITTC | 0.00537126 | 0.02494062 | 3.38E-05 | 0.0079991 | 0.55892   |
| 7w11w_SITTC | 0.00974532 | 0.05193293 | 3.65E-05 | 0.0069072 | 0.33263   |
| 7w11w_SITTC | 0.01564629 | 0.08834783 | 3.95E-05 | 0.0059603 | 0.098494  |
| 7w11w_SITTC | 0.02258705 | 0.13117929 | 4.28E-05 | 0.005125  | -0.068556 |
| 7w11w_SITTC | 0.03727722 | 0.2218323  | 4.81E-05 | 0.0045652 | -0.084703 |
| 7w11w_SITTC | 0.09544655 | 0.5807952  | 5.20E-05 | 0.0056833 | -0.91061  |
| 7w11w_SITTC | 0.02404162 | 0.14015542 | 4.34E-05 | 0.0049916 | -0.091842 |

|             |            |            |          |           |            |
|-------------|------------|------------|----------|-----------|------------|
| 7w11w_SITTC | 0.09908073 | 0.60322183 | 5.45E-05 | 0.0045382 | -1.1701    |
| 7w11w_SITTC | 0.06997815 | 0.42362976 | 5.76E-05 | 0.011297  | 0.22487    |
| 7w11w_SITTC | 0.04779035 | 0.28670883 | 5.58E-05 | 0.0050083 | -0.01192   |
| 7w11w_SITTC | 0.01788102 | 0.10213835 | 4.09E-05 | 0.0055879 | 0.030658   |
| 7w11w_SITTC | 0.00860329 | 0.04488549 | 3.56E-05 | 0.0072456 | 0.40559    |
| 7w11w_SITTC | 0.01009423 | 0.05408607 | 3.65E-05 | 0.0069072 | 0.33263    |
| 7w11w_SITTC | 0.0030122  | 0.01038286 | 3.26E-05 | 0.0085576 | 0.66457    |
| 7w11w_SITTC | 0.03188781 | 0.18857431 | 4.60E-05 | 0.0046154 | -0.11821   |
| 7w11w_SITTC | 0.04229032 | 0.25276816 | 5.13E-05 | 0.0046879 | -0.04643   |
| 7w11w_SITTC | 0.03209573 | 0.18985733 | 4.62E-05 | 0.0046026 | -0.11821   |
| 7w11w_SITTC | 0.0226821  | 0.13176584 | 4.28E-05 | 0.005125  | -0.077142  |
| 7w11w_SITTC | 0.02712252 | 0.15916768 | 4.46E-05 | 0.0047834 | -0.11816   |
| 7w11w_SITTC | 0.0331166  | 0.19615713 | 4.66E-05 | 0.0045822 | -0.11352   |
| 7w11w_SITTC | 0.0482469  | 0.28952622 | 5.63E-05 | 0.005054  | -0.0087048 |
| 7w11w_SITTC | 0.00642442 | 0.03143965 | 3.44E-05 | 0.0077366 | 0.50694    |
| 7w11w_SITTC | 0.08804249 | 0.5351048  | 4.80E-05 | 0.010188  | -0.3415    |
| 7w11w_SITTC | 0.01424804 | 0.07971921 | 3.89E-05 | 0.0061278 | 0.1561     |
| 7w11w_SITTC | 0.02455509 | 0.14332406 | 4.36E-05 | 0.0049516 | -0.098011  |
| 7w11w_SITTC | 0.0626501  | 0.37840837 | 6.35E-05 | 0.0078047 | 0.12359    |
| 7w11w_SITTC | 0.01591994 | 0.09003652 | 3.98E-05 | 0.0058806 | 0.098494   |
| 7w11w_SITTC | 0.00959038 | 0.05097679 | 3.62E-05 | 0.0070172 | 0.35661    |
| 7w11w_SITTC | 0.0242797  | 0.14162463 | 4.34E-05 | 0.0049916 | -0.091842  |
| 7w11w_SITTC | 0.02436085 | 0.14212538 | 4.34E-05 | 0.0049916 | -0.098011  |
| 7w11w_SITTC | 0.08622313 | 0.5238775  | 4.77E-05 | 0.01133   | -0.17867   |
| 7w11w_SITTC | 0.02021667 | 0.11655167 | 4.19E-05 | 0.0053364 | -0.025531  |
| 7w11w_SITTC | 0.01907777 | 0.10952351 | 4.14E-05 | 0.0054571 | 0.0010121  |
| 7w11w_SITTC | 0.05462847 | 0.32890692 | 6.14E-05 | 0.0057798 | 0.034245   |
| 7w11w_SITTC | 0.08110105 | 0.49226916 | 4.85E-05 | 0.0141    | 0.10139    |
| 7w11w_SITTC | 0.02178869 | 0.12625259 | 4.26E-05 | 0.0051742 | -0.059109  |
| 7w11w_SITTC | 0.08640458 | 0.52499723 | 4.77E-05 | 0.01133   | -0.17867   |
| 7w11w_SITTC | 0.02406622 | 0.14030722 | 4.34E-05 | 0.0049916 | -0.091842  |
| 7w11w_SITTC | 0.01711847 | 0.09743264 | 4.03E-05 | 0.005729  | 0.063215   |
| 7w11w_SITTC | 0.02520969 | 0.14736357 | 4.38E-05 | 0.0049138 | -0.10343   |
| 7w11w_SITTC | 0.02315668 | 0.13469447 | 4.30E-05 | 0.0050782 | -0.077142  |
| 7w11w_SITTC | 0.02282078 | 0.13262166 | 4.30E-05 | 0.0050782 | -0.077142  |
| 7w11w_SITTC | 0.03786352 | 0.22545038 | 4.84E-05 | 0.0045696 | -0.080425  |
| 7w11w_SITTC | 0.01621386 | 0.09185034 | 3.98E-05 | 0.0058806 | 0.080526   |
| 7w11w_SITTC | 0.0351028  | 0.20841394 | 4.72E-05 | 0.0045646 | -0.10068   |
| 7w11w_SITTC | 0.01834524 | 0.1050031  | 4.09E-05 | 0.0055879 | 0.030658   |
| 7w11w_SITTC | 0.02602488 | 0.15239416 | 4.42E-05 | 0.0048445 | -0.11213   |
| 7w11w_SITTC | 0.03345507 | 0.19824585 | 4.66E-05 | 0.0045822 | -0.11352   |
| 7w11w_SITTC | 0.01399696 | 0.07816984 | 3.86E-05 | 0.0062156 | 0.17645    |
| 7w11w_SITTC | 0.03475576 | 0.20627236 | 4.72E-05 | 0.0045646 | -0.10426   |

|             |            |            |          |           |           |
|-------------|------------|------------|----------|-----------|-----------|
| 7w11w_SITTC | 0.09477455 | 0.57664835 | 5.13E-05 | 0.0061762 | -0.8688   |
| 7w11w_SITTC | 0.00984538 | 0.05255041 | 3.65E-05 | 0.0069072 | 0.33263   |
| 7w11w_SITTC | 0.07189883 | 0.43548226 | 5.60E-05 | 0.012118  | 0.24161   |
| 7w11w_SITTC | 0.02819345 | 0.1657764  | 4.49E-05 | 0.0047302 | -0.12174  |
| 7w11w_SITTC | 0.02520783 | 0.14735214 | 4.38E-05 | 0.0049138 | -0.10343  |
| 7w11w_SITTC | 0.02174985 | 0.12601295 | 4.26E-05 | 0.0051742 | -0.059109 |
| 7w11w_SITTC | 0.04386658 | 0.26249528 | 5.21E-05 | 0.0047343 | -0.035266 |
| 7w11w_SITTC | 0.017558   | 0.10014498 | 4.06E-05 | 0.0056572 | 0.046584  |
| 7w11w_SITTC | 0.02334692 | 0.13586842 | 4.32E-05 | 0.0050338 | -0.084895 |
| 7w11w_SITTC | 0.05020836 | 0.3016304  | 5.78E-05 | 0.0052091 | 0.0010449 |
| 7w11w_SITTC | 0.08575912 | 0.5210141  | 4.76E-05 | 0.0117    | -0.14081  |
| 7w11w_SITTC | 0.08853115 | 0.5381203  | 4.82E-05 | 0.0098057 | -0.3415   |
| 7w11w_SITTC | 0.01819403 | 0.10406993 | 4.09E-05 | 0.0055879 | 0.030658  |
| 7w11w_SITTC | 0.04148936 | 0.24782541 | 5.05E-05 | 0.0046492 | -0.054504 |
| 7w11w_SITTC | 0.07776498 | 0.4716823  | 5.05E-05 | 0.014229  | 0.20103   |
| 7w11w_SITTC | 0.01894962 | 0.10873272 | 4.14E-05 | 0.0054571 | 0.0010121 |
| 7w11w_SITTC | 0.06800706 | 0.41146618 | 5.98E-05 | 0.010192  | 0.19812   |
| 7w11w_SITTC | 0.02318903 | 0.13489412 | 4.30E-05 | 0.0050782 | -0.077142 |
| 7w11w_SITTC | 0.02146299 | 0.12424273 | 4.24E-05 | 0.0052258 | -0.04878  |
| 7w11w_SITTC | 0.01390117 | 0.07757871 | 3.86E-05 | 0.0062156 | 0.17645   |
| 7w11w_SITTC | 0.01714568 | 0.09760058 | 4.03E-05 | 0.005729  | 0.063215  |
| 7w11w_SITTC | 0.01604846 | 0.09082963 | 3.98E-05 | 0.0058806 | 0.098494  |
| 7w11w_SITTC | 0.00828053 | 0.04289372 | 3.56E-05 | 0.0072456 | 0.40559   |
| 7w11w_SITTC | 0.02170645 | 0.12574513 | 4.26E-05 | 0.0051742 | -0.059109 |
| 7w11w_SITTC | 0.03784641 | 0.22534476 | 4.84E-05 | 0.0045696 | -0.080425 |
| 7w11w_SITTC | 0.0199429  | 0.11486222 | 4.16E-05 | 0.0053955 | -0.012659 |
| 7w11w_SITTC | 0.02603307 | 0.1524447  | 4.42E-05 | 0.0048445 | -0.11213  |
| 7w11w_SITTC | 0.07937143 | 0.48159572 | 4.93E-05 | 0.014315  | 0.17506   |
| 7w11w_SITTC | 0.02328543 | 0.13548899 | 4.32E-05 | 0.0050338 | -0.084895 |
| 7w11w_SITTC | 0.05340529 | 0.32135862 | 6.05E-05 | 0.0056127 | 0.022172  |
| 7w11w_SITTC | 0.0626177  | 0.37820846 | 6.35E-05 | 0.0078047 | 0.11565   |
| 7w11w_SITTC | 0.08214355 | 0.4987025  | 4.81E-05 | 0.013778  | 0.05262   |
| 7w11w_SITTC | 0.01915863 | 0.1100225  | 4.14E-05 | 0.0054571 | 0.0010121 |
| 7w11w_SITTC | 0.03166108 | 0.1871751  | 4.60E-05 | 0.0046154 | -0.12002  |
| 7w11w_SITTC | 0.04643852 | 0.2783667  | 5.44E-05 | 0.0048874 | -0.018376 |
| 7w11w_SITTC | 0.09660626 | 0.58795184 | 5.28E-05 | 0.0052469 | -0.99133  |
| 7w11w_SITTC | 0.01751622 | 0.09988719 | 4.06E-05 | 0.0056572 | 0.046584  |
| 7w11w_SITTC | 0.01213011 | 0.06664947 | 3.77E-05 | 0.0064954 | 0.24064   |
| 7w11w_SITTC | 0.07132897 | 0.43196568 | 5.65E-05 | 0.011849  | 0.2386    |
| 7w11w_SITTC | 0.02342025 | 0.136321   | 4.32E-05 | 0.0050338 | -0.084895 |
| 7w11w_SITTC | 0.07333087 | 0.44431943 | 5.43E-05 | 0.012883  | 0.24489   |
| 7w11w_SITTC | 0.02824013 | 0.16606444 | 4.49E-05 | 0.0047302 | -0.12174  |
| 7w11w_SITTC | 0.01049261 | 0.05654448 | 3.68E-05 | 0.0068    | 0.30902   |

|             |            |            |          |           |           |
|-------------|------------|------------|----------|-----------|-----------|
| 7w11w_SITTC | 0.02841559 | 0.16714723 | 4.49E-05 | 0.0047302 | -0.12174  |
| 7w11w_SITTC | 0.02150343 | 0.12449229 | 4.24E-05 | 0.0052258 | -0.04878  |
| 7w11w_SITTC | 0.03337085 | 0.1977261  | 4.66E-05 | 0.0045822 | -0.11352  |
| 7w11w_SITTC | 0.0225046  | 0.13067052 | 4.28E-05 | 0.005125  | -0.068556 |
| 7w11w_SITTC | 0.09464388 | 0.57584196 | 5.13E-05 | 0.0061762 | -0.8688   |
| 7w11w_SITTC | 0.02417612 | 0.14098543 | 4.34E-05 | 0.0049916 | -0.091842 |
| 7w11w_SITTC | 0.03667146 | 0.2180942  | 4.79E-05 | 0.0045625 | -0.092976 |
| 7w11w_SITTC | 0.01013523 | 0.05433911 | 3.65E-05 | 0.0069072 | 0.33263   |
| 7w11w_SITTC | 0.01043079 | 0.05616297 | 3.68E-05 | 0.0068    | 0.30902   |
| 7w11w_SITTC | 0.02807192 | 0.16502641 | 4.48E-05 | 0.0047558 | -0.12174  |
| 7w11w_SITTC | 0.02759462 | 0.162081   | 4.46E-05 | 0.0047834 | -0.12024  |
| 7w11w_SITTC | 0.09081101 | 0.55218935 | 4.91E-05 | 0.0083333 | -0.56091  |
| 7w11w_SITTC | 0.01842123 | 0.10547198 | 4.11E-05 | 0.0055212 | 0.015459  |
| 7w11w_SITTC | 0.01897169 | 0.10886888 | 4.14E-05 | 0.0054571 | 0.0010121 |
| 7w11w_SITTC | 0.01721269 | 0.09801409 | 4.03E-05 | 0.005729  | 0.063215  |
| 7w11w_SITTC | 0.02269777 | 0.13186255 | 4.28E-05 | 0.005125  | -0.077142 |
| 7w11w_SITTC | 0.02495918 | 0.14581771 | 4.38E-05 | 0.0049138 | -0.10343  |
| 7w11w_SITTC | 0.03396101 | 0.201368   | 4.68E-05 | 0.0045746 | -0.11071  |
| 7w11w_SITTC | 0.0090098  | 0.04739404 | 3.59E-05 | 0.00713   | 0.38094   |
| 7w11w_SITTC | 0.09519655 | 0.5792525  | 5.16E-05 | 0.0059226 | -0.91061  |
| 7w11w_SITTC | 0.0291668  | 0.17178293 | 4.51E-05 | 0.0047064 | -0.1231   |
| 7w11w_SITTC | 0.07107166 | 0.43037778 | 5.65E-05 | 0.011849  | 0.23476   |
| 7w11w_SITTC | 0.02061888 | 0.11903368 | 4.21E-05 | 0.0052798 | -0.037579 |
| 7w11w_SITTC | 0.03188898 | 0.18858151 | 4.60E-05 | 0.0046154 | -0.11821  |
| 7w11w_SITTC | 0.00787042 | 0.04036293 | 3.53E-05 | 0.0073641 | 0.43054   |
| 7w11w_SITTC | 0.06729575 | 0.40707666 | 6.03E-05 | 0.009922  | 0.19037   |
| 7w11w_SITTC | 0.02668205 | 0.15644951 | 4.44E-05 | 0.004813  | -0.11546  |
| 7w11w_SITTC | 0.02438738 | 0.1422891  | 4.36E-05 | 0.0049516 | -0.098011 |
| 7w11w_SITTC | 0.01439927 | 0.08065246 | 3.89E-05 | 0.0061278 | 0.1561    |
| 7w11w_SITTC | 0.07860375 | 0.47685838 | 4.97E-05 | 0.014318  | 0.18889   |
| 7w11w_SITTC | 0.01874221 | 0.10745279 | 4.11E-05 | 0.0055212 | 0.015459  |
| 7w11w_SITTC | 0.09322535 | 0.5670882  | 5.06E-05 | 0.0067258 | -0.73907  |
| 7w11w_SITTC | 0.03253328 | 0.19255745 | 4.64E-05 | 0.0045915 | -0.11603  |
| 7w11w_SITTC | 0.01648148 | 0.0935018  | 4.00E-05 | 0.0058035 | 0.080526  |
| 7w11w_SITTC | 0.01543573 | 0.08704849 | 3.95E-05 | 0.0059603 | 0.11709   |
| 7w11w_SITTC | 0.01947484 | 0.11197383 | 4.14E-05 | 0.0054571 | -0.012659 |
| 7w11w_SITTC | 0.02504058 | 0.14632002 | 4.38E-05 | 0.0049138 | -0.10343  |
| 7w11w_SITTC | 0.00556605 | 0.02614267 | 3.41E-05 | 0.0078664 | 0.53284   |
| 7w11w_SITTC | 0.03558247 | 0.21137401 | 4.74E-05 | 0.0045622 | -0.10068  |
| 7w11w_SITTC | 0.02234675 | 0.12969638 | 4.28E-05 | 0.005125  | -0.068556 |
| 7w11w_SITTC | 0.02778425 | 0.1632512  | 4.48E-05 | 0.0047558 | -0.12024  |
| 7w11w_SITTC | 0.01670289 | 0.09486812 | 4.00E-05 | 0.0058035 | 0.080526  |
| 7w11w_SITTC | 0.09348989 | 0.5687207  | 5.06E-05 | 0.0067258 | -0.7829   |



|             |            |            |          |           |           |
|-------------|------------|------------|----------|-----------|-----------|
| 7w11w_SITTC | 0.02545755 | 0.14889316 | 4.40E-05 | 0.0048781 | -0.10813  |
| 7w11w_SITTC | 0.01808504 | 0.10339736 | 4.09E-05 | 0.0055879 | 0.030658  |
| 7w11w_SITTC | 0.01379864 | 0.07694598 | 3.86E-05 | 0.0062156 | 0.17645   |
| 7w11w_SITTC | 0.09213522 | 0.560361   | 4.99E-05 | 0.0073308 | -0.6503   |
| 7w11w_SITTC | 0.01035791 | 0.05571325 | 3.68E-05 | 0.0068    | 0.30902   |
| 7w11w_SITTC | 0.03909269 | 0.2330356  | 4.92E-05 | 0.0045932 | -0.071721 |
| 7w11w_SITTC | 0.01788708 | 0.10217574 | 4.09E-05 | 0.0055879 | 0.030658  |
| 7w11w_SITTC | 0.00860754 | 0.0449117  | 3.56E-05 | 0.0072456 | 0.40559   |
| 7w11w_SITTC | 0.09362257 | 0.5695394  | 5.06E-05 | 0.0067258 | -0.7829   |
| 7w11w_SITTC | 0.01004601 | 0.05378849 | 3.65E-05 | 0.0069072 | 0.33263   |
| 7w11w_SITTC | 0.01786094 | 0.10201445 | 4.09E-05 | 0.0055879 | 0.030658  |
| 7w11w_SITTC | 0.01605179 | 0.09085018 | 3.98E-05 | 0.0058806 | 0.098494  |
| 7w11w_SITTC | 0.05572199 | 0.335655   | 6.21E-05 | 0.005966  | 0.043089  |
| 7w11w_SITTC | 0.02044228 | 0.1179439  | 4.19E-05 | 0.0053364 | -0.025531 |
| 7w11w_SITTC | 0.02544225 | 0.14879872 | 4.38E-05 | 0.0049138 | -0.10813  |
| 7w11w_SITTC | 0.02208326 | 0.1280704  | 4.26E-05 | 0.0051742 | -0.059109 |
| 7w11w_SITTC | 0.01595814 | 0.09027226 | 3.98E-05 | 0.0058806 | 0.098494  |
| 7w11w_SITTC | 0.02516109 | 0.14706367 | 4.38E-05 | 0.0049138 | -0.10343  |
| 7w11w_SITTC | 0.01658586 | 0.09414593 | 4.00E-05 | 0.0058035 | 0.080526  |
| 7w11w_SITTC | 0.01796626 | 0.10266437 | 4.09E-05 | 0.0055879 | 0.030658  |
| 7w11w_SITTC | 0.00464173 | 0.02043871 | 3.35E-05 | 0.0081345 | 0.58516   |
| 7w11w_SITTC | 0.01449712 | 0.08125629 | 3.89E-05 | 0.0061278 | 0.1561    |
| 7w11w_SITTC | 0.09188423 | 0.55881214 | 4.96E-05 | 0.0076529 | -0.6503   |
| 7w11w_SITTC | 0.02420218 | 0.14114627 | 4.34E-05 | 0.0049916 | -0.091842 |
| 7w11w_SITTC | 0.01833882 | 0.10496345 | 4.09E-05 | 0.0055879 | 0.030658  |
| 7w11w_SITTC | 0.01077146 | 0.05826528 | 3.68E-05 | 0.0068    | 0.30902   |
| 7w11w_SITTC | 0.02335864 | 0.13594075 | 4.32E-05 | 0.0050338 | -0.084895 |
| 7w11w_SITTC | 0.02091395 | 0.1208546  | 4.21E-05 | 0.0052798 | -0.037579 |
| 7w11w_SITTC | 0.02674632 | 0.15684615 | 4.44E-05 | 0.004813  | -0.11546  |
| 7w11w_SITTC | 0.01936548 | 0.11129897 | 4.14E-05 | 0.0054571 | 0.0010121 |
| 7w11w_SITTC | 0.02123987 | 0.12286584 | 4.24E-05 | 0.0052258 | -0.04878  |
| 7w11w_SITTC | 0.01932272 | 0.11103512 | 4.14E-05 | 0.0054571 | 0.0010121 |
| 7w11w_SITTC | 0.00896177 | 0.04709768 | 3.59E-05 | 0.00713   | 0.38094   |
| 7w11w_SITTC | 0.01183684 | 0.06483971 | 3.74E-05 | 0.0065941 | 0.263     |
| 7w11w_SITTC | 0.01698578 | 0.09661385 | 4.03E-05 | 0.005729  | 0.063215  |
| 7w11w_SITTC | 0.02652073 | 0.15545401 | 4.42E-05 | 0.0048445 | -0.11546  |
| 7w11w_SITTC | 0.02195096 | 0.12725395 | 4.26E-05 | 0.0051742 | -0.059109 |
| 7w11w_SITTC | 0.01506133 | 0.08473802 | 3.92E-05 | 0.0060428 | 0.1363    |
| 7w11w_SITTC | 0.0375562  | 0.22355391 | 4.84E-05 | 0.0045696 | -0.084703 |
| 7w11w_SITTC | 0.05042716 | 0.30298063 | 5.83E-05 | 0.0052672 | 0.0043724 |
| 7w11w_SITTC | 0.012921   | 0.0715301  | 3.80E-05 | 0.0063994 | 0.21875   |
| 7w11w_SITTC | 0.01929924 | 0.1108902  | 4.14E-05 | 0.0054571 | 0.0010121 |
| 7w11w_SITTC | 0.0641457  | 0.38763773 | 6.27E-05 | 0.0084357 | 0.14015   |

|             |            |            |          |           |            |
|-------------|------------|------------|----------|-----------|------------|
| 7w11w_SITTC | 0.0245437  | 0.1432538  | 4.36E-05 | 0.0049516 | -0.098011  |
| 7w11w_SITTC | 0.01782196 | 0.10177391 | 4.06E-05 | 0.0056572 | 0.030658   |
| 7w11w_SITTC | 0.06815217 | 0.41236162 | 5.98E-05 | 0.010192  | 0.20551    |
| 7w11w_SITTC | 0.0173669  | 0.0989657  | 4.06E-05 | 0.0056572 | 0.046584   |
| 7w11w_SITTC | 0.0214279  | 0.12402617 | 4.24E-05 | 0.0052258 | -0.04878   |
| 7w11w_SITTC | 0.08975225 | 0.5456557  | 4.86E-05 | 0.0090548 | -0.47194   |
| 7w11w_SITTC | 0.02321793 | 0.13507245 | 4.30E-05 | 0.0050782 | -0.084895  |
| 7w11w_SITTC | 0.09256564 | 0.5630172  | 4.99E-05 | 0.0073308 | -0.69483   |
| 7w11w_SITTC | 0.09131429 | 0.55529505 | 4.93E-05 | 0.0079874 | -0.60562   |
| 7w11w_SITTC | 0.01699561 | 0.09667449 | 4.03E-05 | 0.005729  | 0.063215   |
| 7w11w_SITTC | 0.02751279 | 0.16157605 | 4.46E-05 | 0.0047834 | -0.11816   |
| 7w11w_SITTC | 0.01601904 | 0.09064806 | 3.98E-05 | 0.0058806 | 0.098494   |
| 7w11w_SITTC | 0.03953952 | 0.23579298 | 4.95E-05 | 0.0046046 | -0.067351  |
| 7w11w_SITTC | 0.01557865 | 0.0879304  | 3.95E-05 | 0.0059603 | 0.11709    |
| 7w11w_SITTC | 0.00558593 | 0.02626535 | 3.41E-05 | 0.0078664 | 0.53284    |
| 7w11w_SITTC | 0.01051365 | 0.05667429 | 3.68E-05 | 0.0068    | 0.30902    |
| 7w11w_SITTC | 0.01488277 | 0.08363615 | 3.92E-05 | 0.0060428 | 0.1363     |
| 7w11w_SITTC | 0.02324497 | 0.13523932 | 4.30E-05 | 0.0050782 | -0.084895  |
| 7w11w_SITTC | 0.06258858 | 0.37802875 | 6.35E-05 | 0.0078047 | 0.11565    |
| 7w11w_SITTC | 0.04163231 | 0.24870758 | 5.05E-05 | 0.0046492 | -0.0504    |
| 7w11w_SITTC | 0.0206444  | 0.1191912  | 4.21E-05 | 0.0052798 | -0.037579  |
| 7w11w_SITTC | 0.02952879 | 0.17401677 | 4.53E-05 | 0.0046846 | -0.1231    |
| 7w11w_SITTC | 0.03725266 | 0.22168078 | 4.81E-05 | 0.0045652 | -0.084703  |
| 7w11w_SITTC | 0.01263958 | 0.06979343 | 3.80E-05 | 0.0063994 | 0.21875    |
| 7w11w_SITTC | 0.01864823 | 0.1068728  | 4.11E-05 | 0.0055212 | 0.015459   |
| 7w11w_SITTC | 0.02853371 | 0.1678761  | 4.49E-05 | 0.0047302 | -0.12174   |
| 7w11w_SITTC | 0.01913236 | 0.10986041 | 4.14E-05 | 0.0054571 | 0.0010121  |
| 7w11w_SITTC | 0.08897817 | 0.5408789  | 4.84E-05 | 0.0094274 | -0.3844    |
| 7w11w_SITTC | 0.0263366  | 0.15431774 | 4.42E-05 | 0.0048445 | -0.11213   |
| 7w11w_SITTC | 0.02855615 | 0.16801463 | 4.49E-05 | 0.0047302 | -0.12174   |
| 7w11w_SITTC | 0.027105   | 0.15905957 | 4.46E-05 | 0.0047834 | -0.11816   |
| 7w11w_SITTC | 0.02054742 | 0.1185927  | 4.19E-05 | 0.0053364 | -0.037579  |
| 7w11w_SITTC | 0.02148113 | 0.12435465 | 4.24E-05 | 0.0052258 | -0.04878   |
| 7w11w_SITTC | 0.06338562 | 0.38294727 | 6.30E-05 | 0.008216  | 0.13178    |
| 7w11w_SITTC | 0.02307455 | 0.13418764 | 4.30E-05 | 0.0050782 | -0.077142  |
| 7w11w_SITTC | 0.04904813 | 0.29447064 | 5.68E-05 | 0.0051026 | -0.0054808 |
| 7w11w_SITTC | 0.08244082 | 0.50053686 | 4.79E-05 | 0.013563  | 0.05262    |
| 7w11w_SITTC | 0.01927486 | 0.11073974 | 4.14E-05 | 0.0054571 | 0.0010121  |
| 7w11w_SITTC | 0.01909478 | 0.10962846 | 4.14E-05 | 0.0054571 | 0.0010121  |
| 7w11w_SITTC | 0.03104672 | 0.18338391 | 4.58E-05 | 0.00463   | -0.12145   |
| 7w11w_SITTC | 0.05283337 | 0.3178293  | 6.01E-05 | 0.0055357 | 0.018414   |
| 7w11w_SITTC | 0.02651181 | 0.15539896 | 4.42E-05 | 0.0048445 | -0.11546   |
| 7w11w_SITTC | 0.01698377 | 0.09660146 | 4.03E-05 | 0.005729  | 0.063215   |

|             |            |            |          |           |           |
|-------------|------------|------------|----------|-----------|-----------|
| 7w11w_SITTC | 0.02702995 | 0.15859641 | 4.44E-05 | 0.004813  | -0.11816  |
| 7w11w_SITTC | 0.09049069 | 0.5502126  | 4.91E-05 | 0.0083333 | -0.51631  |
| 7w11w_SITTC | 0.02067901 | 0.11940479 | 4.21E-05 | 0.0052798 | -0.037579 |
| 7w11w_SITTC | 0.01596313 | 0.09030306 | 3.98E-05 | 0.0058806 | 0.098494  |
| 7w11w_SITTC | 0.05412521 | 0.32580128 | 6.10E-05 | 0.005694  | 0.030074  |
| 7w11w_SITTC | 0.01440118 | 0.08066426 | 3.89E-05 | 0.0061278 | 0.1561    |
| 7w11w_SITTC | 0.09149469 | 0.5564083  | 4.93E-05 | 0.0079874 | -0.60562  |
| 7w11w_SITTC | 0.04042058 | 0.24122998 | 4.99E-05 | 0.0046177 | -0.063007 |
| 7w11w_SITTC | 0.02798161 | 0.16446912 | 4.48E-05 | 0.0047558 | -0.12024  |
| 7w11w_SITTC | 0.01017601 | 0.05459076 | 3.65E-05 | 0.0069072 | 0.33263   |
| 7w11w_SITTC | 0.01058122 | 0.05709127 | 3.68E-05 | 0.0068    | 0.30902   |
| 7w11w_SITTC | 0.01583835 | 0.08953305 | 3.98E-05 | 0.0058806 | 0.098494  |
| 7w11w_SITTC | 0.03100374 | 0.18311867 | 4.58E-05 | 0.00463   | -0.12145  |
| 7w11w_SITTC | 0.06769298 | 0.409528   | 6.03E-05 | 0.009922  | 0.19812   |
| 7w11w_SITTC | 0.01019999 | 0.05473869 | 3.65E-05 | 0.0069072 | 0.33263   |
| 7w11w_SITTC | 0.02081895 | 0.12026833 | 4.21E-05 | 0.0052798 | -0.037579 |
| 7w11w_SITTC | 0.02025732 | 0.11680253 | 4.19E-05 | 0.0053364 | -0.025531 |
| 7w11w_SITTC | 0.02569654 | 0.15036798 | 4.40E-05 | 0.0048781 | -0.10813  |
| 7w11w_SITTC | 0.03075063 | 0.18155678 | 4.57E-05 | 0.0046464 | -0.12245  |
| 7w11w_SITTC | 0.01625346 | 0.09209467 | 4.00E-05 | 0.0058035 | 0.080526  |
| 7w11w_SITTC | 0.01421627 | 0.07952317 | 3.89E-05 | 0.0061278 | 0.1561    |
| 7w11w_SITTC | 0.0628304  | 0.37952104 | 6.35E-05 | 0.0078047 | 0.12359   |
| 7w11w_SITTC | 0.09444001 | 0.57458395 | 5.13E-05 | 0.0061762 | -0.82618  |
| 7w11w_SITTC | 0.00940153 | 0.04981143 | 3.62E-05 | 0.0070172 | 0.35661   |
| 7w11w_SITTC | 0.03327042 | 0.19710638 | 4.66E-05 | 0.0045822 | -0.11352  |
| 7w11w_SITTC | 0.01925338 | 0.11060721 | 4.14E-05 | 0.0054571 | 0.0010121 |
| 7w11w_SITTC | 0.0174635  | 0.09956187 | 4.06E-05 | 0.0056572 | 0.046584  |
| 7w11w_SITTC | 0.00831165 | 0.04308575 | 3.56E-05 | 0.0072456 | 0.40559   |
| 7w11w_SITTC | 0.02216946 | 0.12860233 | 4.26E-05 | 0.0051742 | -0.068556 |
| 7w11w_SITTC | 0.01646097 | 0.09337524 | 4.00E-05 | 0.0058035 | 0.080526  |
| 7w11w_SITTC | 0.01284944 | 0.07108847 | 3.80E-05 | 0.0063994 | 0.21875   |
| 7w11w_SITTC | 0.00935465 | 0.04952212 | 3.62E-05 | 0.0070172 | 0.35661   |
| 7w11w_SITTC | 0.01742955 | 0.09935232 | 4.06E-05 | 0.0056572 | 0.046584  |
| 7w11w_SITTC | 0.02134459 | 0.12351207 | 4.24E-05 | 0.0052258 | -0.04878  |
| 7w11w_SITTC | 0.0096678  | 0.05145455 | 3.62E-05 | 0.0070172 | 0.35661   |
| 7w11w_SITTC | 0.0215256  | 0.12462904 | 4.24E-05 | 0.0052258 | -0.04878  |
| 7w11w_SITTC | 0.01827966 | 0.1045984  | 4.09E-05 | 0.0055879 | 0.030658  |
| 7w11w_SITTC | 0.0161012  | 0.09115507 | 3.98E-05 | 0.0058806 | 0.098494  |
| 7w11w_SITTC | 0.09523382 | 0.5794825  | 5.16E-05 | 0.0059226 | -0.91061  |
| 7w11w_SITTC | 0.01574647 | 0.08896603 | 3.98E-05 | 0.0058806 | 0.098494  |
| 7w11w_SITTC | 0.01070835 | 0.05787579 | 3.68E-05 | 0.0068    | 0.30902   |
| 7w11w_SITTC | 0.01850043 | 0.10596074 | 4.11E-05 | 0.0055212 | 0.015459  |
| 7w11w_SITTC | 0.0307815  | 0.18174723 | 4.57E-05 | 0.0046464 | -0.12145  |

|             |            |            |          |           |           |
|-------------|------------|------------|----------|-----------|-----------|
| 7w11w_SITTC | 0.01502998 | 0.08454462 | 3.92E-05 | 0.0060428 | 0.1363    |
| 7w11w_SITTC | 0.00644658 | 0.03157641 | 3.44E-05 | 0.0077366 | 0.50694   |
| 7w11w_SITTC | 0.08095139 | 0.49134567 | 4.85E-05 | 0.0141    | 0.12269   |
| 7w11w_SITTC | 0.01289687 | 0.07138116 | 3.80E-05 | 0.0063994 | 0.21875   |
| 7w11w_SITTC | 0.01905781 | 0.10940031 | 4.14E-05 | 0.0054571 | 0.0010121 |
| 7w11w_SITTC | 0.01615769 | 0.09150371 | 3.98E-05 | 0.0058806 | 0.098494  |
| 7w11w_SITTC | 0.02452725 | 0.14315227 | 4.36E-05 | 0.0049516 | -0.098011 |
| 7w11w_SITTC | 0.0124519  | 0.06863523 | 3.80E-05 | 0.0063994 | 0.21875   |
| 7w11w_SITTC | 0.08198884 | 0.49774775 | 4.81E-05 | 0.013778  | 0.078055  |
| 7w11w_SITTC | 0.01397574 | 0.0780389  | 3.86E-05 | 0.0062156 | 0.17645   |
| 7w11w_SITTC | 0.0252622  | 0.14768766 | 4.38E-05 | 0.0049138 | -0.10343  |
| 7w11w_SITTC | 0.01866777 | 0.10699339 | 4.11E-05 | 0.0055212 | 0.015459  |
| 7w11w_SITTC | 0.01488368 | 0.08364179 | 3.92E-05 | 0.0060428 | 0.1363    |
| 7w11w_SITTC | 0.09996172 | 0.6086584  | 5.53E-05 | 0.004262  | -1.2296   |
| 7w11w_SITTC | 0.02183189 | 0.12651917 | 4.26E-05 | 0.0051742 | -0.059109 |
| 7w11w_SITTC | 0.03089667 | 0.18245794 | 4.58E-05 | 0.00463   | -0.12145  |
| 7w11w_SITTC | 0.01106631 | 0.06008476 | 3.71E-05 | 0.0066957 | 0.2858    |
| 7w11w_SITTC | 0.02600894 | 0.15229577 | 4.42E-05 | 0.0048445 | -0.11213  |
| 7w11w_SITTC | 0.02839833 | 0.1670407  | 4.49E-05 | 0.0047302 | -0.12174  |
| 7w11w_SITTC | 0.02616451 | 0.15325579 | 4.42E-05 | 0.0048445 | -0.11213  |
| 7w11w_SITTC | 0.01077763 | 0.05830333 | 3.68E-05 | 0.0068    | 0.30902   |
| 7w11w_SITTC | 0.01623915 | 0.09200638 | 4.00E-05 | 0.0058035 | 0.080526  |
| 7w11w_SITTC | 0.03540349 | 0.21026956 | 4.74E-05 | 0.0045622 | -0.10068  |
| 7w11w_SITTC | 0.08540374 | 0.51882106 | 4.76E-05 | 0.012059  | -0.14081  |
| 7w11w_SITTC | 0.08231988 | 0.49979058 | 4.81E-05 | 0.013778  | 0.05262   |
| 7w11w_SITTC | 0.02073839 | 0.11977122 | 4.21E-05 | 0.0052798 | -0.037579 |
| 7w11w_SITTC | 0.01025571 | 0.05508257 | 3.65E-05 | 0.0069072 | 0.30902   |
| 7w11w_SITTC | 0.07170112 | 0.43426225 | 5.60E-05 | 0.012118  | 0.2386    |
| 7w11w_SITTC | 0.01737225 | 0.09899873 | 4.06E-05 | 0.0056572 | 0.046584  |
| 7w11w_SITTC | 0.03438241 | 0.20396845 | 4.70E-05 | 0.0045688 | -0.10761  |
| 7w11w_SITTC | 0.02798783 | 0.1645075  | 4.48E-05 | 0.0047558 | -0.12024  |
| 7w11w_SITTC | 0.09126446 | 0.5549876  | 4.93E-05 | 0.0079874 | -0.56091  |
| 7w11w_SITTC | 0.01284393 | 0.07105447 | 3.80E-05 | 0.0063994 | 0.21875   |
| 7w11w_SITTC | 0.01239532 | 0.0682861  | 3.77E-05 | 0.0064954 | 0.24064   |
| 7w11w_SITTC | 0.01698881 | 0.09663251 | 4.03E-05 | 0.005729  | 0.063215  |
| 7w11w_SITTC | 0.02728127 | 0.16014731 | 4.46E-05 | 0.0047834 | -0.11816  |
| 7w11w_SITTC | 0.02434372 | 0.1420197  | 4.34E-05 | 0.0049916 | -0.098011 |
| 7w11w_SITTC | 0.09192116 | 0.55904007 | 4.96E-05 | 0.0076529 | -0.6503   |
| 7w11w_SITTC | 0.01851089 | 0.10602527 | 4.11E-05 | 0.0055212 | 0.015459  |
| 7w11w_SITTC | 0.01685214 | 0.09578912 | 4.03E-05 | 0.005729  | 0.063215  |
| 7w11w_SITTC | 0.08848879 | 0.5378589  | 4.82E-05 | 0.0098057 | -0.3415   |
| 7w11w_SITTC | 0.03020137 | 0.17816725 | 4.55E-05 | 0.0046645 | -0.12301  |
| 7w11w_SITTC | 0.00528056 | 0.02438094 | 3.38E-05 | 0.0079991 | 0.55892   |

|             |            |            |          |           |           |
|-------------|------------|------------|----------|-----------|-----------|
| 7w11w_SITTC | 0.02393611 | 0.13950434 | 4.34E-05 | 0.0049916 | -0.091842 |
| 7w11w_SITTC | 0.00809635 | 0.04175713 | 3.53E-05 | 0.0073641 | 0.40559   |
| 7w11w_SITTC | 0.0242625  | 0.1415185  | 4.34E-05 | 0.0049916 | -0.091842 |
| 7w11w_SITTC | 0.01827107 | 0.10454537 | 4.09E-05 | 0.0055879 | 0.030658  |
| 7w11w_SITTC | 0.0193219  | 0.11103005 | 4.14E-05 | 0.0054571 | 0.0010121 |
| 7w11w_SITTC | 0.01015641 | 0.05446976 | 3.65E-05 | 0.0069072 | 0.33263   |
| 7w11w_SITTC | 0.00881785 | 0.04620952 | 3.59E-05 | 0.00713   | 0.38094   |
| 7w11w_SITTC | 0.04106366 | 0.24519846 | 5.02E-05 | 0.0046325 | -0.054504 |
| 7w11w_SITTC | 0.01105336 | 0.06000488 | 3.71E-05 | 0.0066957 | 0.2858    |
| 7w11w_SITTC | 0.06559592 | 0.396587   | 6.16E-05 | 0.0091463 | 0.16566   |
| 7w11w_SITTC | 0.0214208  | 0.12398233 | 4.24E-05 | 0.0052258 | -0.04878  |
| 7w11w_SITTC | 0.01888675 | 0.10834472 | 4.11E-05 | 0.0055212 | 0.0010121 |
| 7w11w_SITTC | 0.02357723 | 0.13728967 | 4.32E-05 | 0.0050338 | -0.084895 |
| 7w11w_SITTC | 0.07331675 | 0.44423226 | 5.43E-05 | 0.012883  | 0.24489   |
| 7w11w_SITTC | 0.09098454 | 0.5532602  | 4.91E-05 | 0.0083333 | -0.56091  |
| 7w11w_SITTC | 0.02113623 | 0.12222625 | 4.24E-05 | 0.0052258 | -0.04878  |
| 7w11w_SITTC | 0.01083777 | 0.05867447 | 3.71E-05 | 0.0066957 | 0.2858    |
| 7w11w_SITTC | 0.02393467 | 0.13949548 | 4.34E-05 | 0.0049916 | -0.091842 |
| 7w11w_SITTC | 0.0154597  | 0.08719638 | 3.95E-05 | 0.0059603 | 0.11709   |
| 7w11w_SITTC | 0.03079507 | 0.18183097 | 4.57E-05 | 0.0046464 | -0.12145  |
| 7w11w_SITTC | 0.01361639 | 0.07582132 | 3.86E-05 | 0.0062156 | 0.17645   |
| 7w11w_SITTC | 0.01443849 | 0.08089449 | 3.89E-05 | 0.0061278 | 0.1561    |
| 7w11w_SITTC | 0.09737123 | 0.59267247 | 5.32E-05 | 0.0050496 | -1.0673   |
| 7w11w_SITTC | 0.02725382 | 0.15997794 | 4.46E-05 | 0.0047834 | -0.11816  |
| 7w11w_SITTC | 0.01637541 | 0.09284727 | 4.00E-05 | 0.0058035 | 0.080526  |
| 7w11w_SITTC | 0.02094667 | 0.12105652 | 4.21E-05 | 0.0052798 | -0.037579 |
| 7w11w_SITTC | 0.01623531 | 0.09198266 | 4.00E-05 | 0.0058035 | 0.080526  |
| 7w11w_SITTC | 0.02729344 | 0.16022241 | 4.46E-05 | 0.0047834 | -0.11816  |
| 7w11w_SITTC | 0.00741369 | 0.03754444 | 3.50E-05 | 0.0074854 | 0.45576   |
| 7w11w_SITTC | 0.02110359 | 0.12202483 | 4.21E-05 | 0.0052798 | -0.04878  |
| 7w11w_SITTC | 0.08945278 | 0.5438077  | 4.86E-05 | 0.0090548 | -0.42792  |
| 7w11w_SITTC | 0.03509004 | 0.20833527 | 4.72E-05 | 0.0045646 | -0.10426  |
| 7w11w_SITTC | 0.01093338 | 0.05926448 | 3.71E-05 | 0.0066957 | 0.2858    |
| 7w11w_SITTC | 0.00796426 | 0.04094201 | 3.53E-05 | 0.0073641 | 0.43054   |
| 7w11w_SITTC | 0.09024677 | 0.5487074  | 4.88E-05 | 0.0086895 | -0.51631  |
| 7w11w_SITTC | 0.03241003 | 0.19179687 | 4.62E-05 | 0.0046026 | -0.11603  |
| 7w11w_SITTC | 0.05454474 | 0.32839018 | 6.14E-05 | 0.0057798 | 0.034245  |
| 7w11w_SITTC | 0.06622455 | 0.4004663  | 6.12E-05 | 0.0093985 | 0.17407   |
| 7w11w_SITTC | 0.01261749 | 0.06965708 | 3.80E-05 | 0.0063994 | 0.21875   |
| 7w11w_SITTC | 0.01863685 | 0.10680258 | 4.11E-05 | 0.0055212 | 0.015459  |
| 7w11w_SITTC | 0.04508015 | 0.2699842  | 5.34E-05 | 0.0048194 | -0.028317 |
| 7w11w_SITTC | 0.00897599 | 0.04718543 | 3.59E-05 | 0.00713   | 0.38094   |
| 7w11w_SITTC | 0.01830642 | 0.10476349 | 4.09E-05 | 0.0055879 | 0.030658  |

|             |            |            |          |           |           |
|-------------|------------|------------|----------|-----------|-----------|
| 7w11w_SITTC | 0.00898155 | 0.04721972 | 3.59E-05 | 0.00713   | 0.38094   |
| 7w11w_SITTC | 0.02485956 | 0.14520293 | 4.36E-05 | 0.0049516 | -0.10343  |
| 7w11w_SITTC | 0.01242106 | 0.06844493 | 3.77E-05 | 0.0064954 | 0.21875   |
| 7w11w_SITTC | 0.02292484 | 0.1332638  | 4.30E-05 | 0.0050782 | -0.077142 |
| 7w11w_SITTC | 0.02879022 | 0.16945903 | 4.51E-05 | 0.0047064 | -0.12268  |
| 7w11w_SITTC | 0.02433696 | 0.14197795 | 4.34E-05 | 0.0049916 | -0.098011 |
| 7w11w_SITTC | 0.01612566 | 0.09130604 | 3.98E-05 | 0.0058806 | 0.098494  |
| 7w11w_SITTC | 0.09401707 | 0.5719739  | 5.09E-05 | 0.0064439 | -0.82618  |
| 7w11w_SITTC | 0.04364726 | 0.26114187 | 5.21E-05 | 0.0047343 | -0.038876 |
| 7w11w_SITTC | 0.01254057 | 0.06918244 | 3.80E-05 | 0.0063994 | 0.21875   |
| 7w11w_SITTC | 0.07528842 | 0.45639944 | 5.28E-05 | 0.013537  | 0.23858   |
| 7w11w_SITTC | 0.09985204 | 0.60798156 | 5.53E-05 | 0.004262  | -1.2008   |
| 7w11w_SITTC | 0.02307927 | 0.13421677 | 4.30E-05 | 0.0050782 | -0.077142 |
| 7w11w_SITTC | 0.01237617 | 0.06816793 | 3.77E-05 | 0.0064954 | 0.24064   |
| 7w11w_SITTC | 0.02525748 | 0.1476585  | 4.38E-05 | 0.0049138 | -0.10343  |
| 7w11w_SITTC | 0.01032101 | 0.05548552 | 3.68E-05 | 0.0068    | 0.30902   |
| 7w11w_SITTC | 0.09308609 | 0.5662288  | 5.02E-05 | 0.0070215 | -0.73907  |
| 7w11w_SITTC | 0.01316317 | 0.07302453 | 3.83E-05 | 0.0063061 | 0.19734   |
| 7w11w_SITTC | 0.01771254 | 0.10109865 | 4.06E-05 | 0.0056572 | 0.046584  |
| 7w11w_SITTC | 0.0310545  | 0.18343192 | 4.58E-05 | 0.00463   | -0.12145  |
| 7w11w_SITTC | 0.09764072 | 0.5943355  | 5.36E-05 | 0.0048658 | -1.0673   |
| 7w11w_SITTC | 0.02867411 | 0.16874254 | 4.49E-05 | 0.0047302 | -0.12268  |
| 7w11w_SITTC | 0.01292433 | 0.07155062 | 3.80E-05 | 0.0063994 | 0.21875   |
| 7w11w_SITTC | 0.04338515 | 0.25952435 | 5.21E-05 | 0.0047343 | -0.038876 |
| 7w11w_SITTC | 0.01913991 | 0.10990697 | 4.14E-05 | 0.0054571 | 0.0010121 |
| 7w11w_SITTC | 0.0346299  | 0.20549573 | 4.70E-05 | 0.0045688 | -0.10426  |
| 7w11w_SITTC | 0.02744573 | 0.16116221 | 4.46E-05 | 0.0047834 | -0.11816  |
| 7w11w_SITTC | 0.08795923 | 0.534591   | 4.80E-05 | 0.010188  | -0.29935  |
| 7w11w_SITTC | 0.0072528  | 0.03655163 | 3.50E-05 | 0.0074854 | 0.45576   |
| 7w11w_SITTC | 0.02709034 | 0.15896907 | 4.46E-05 | 0.0047834 | -0.11816  |
| 7w11w_SITTC | 0.08947849 | 0.54396635 | 4.86E-05 | 0.0090548 | -0.42792  |
| 7w11w_SITTC | 0.00731135 | 0.03691293 | 3.50E-05 | 0.0074854 | 0.45576   |
| 7w11w_SITTC | 0.02223921 | 0.12903279 | 4.28E-05 | 0.005125  | -0.068556 |
| 7w11w_SITTC | 0.02493275 | 0.14565462 | 4.38E-05 | 0.0049138 | -0.10343  |
| 7w11w_SITTC | 0.03631513 | 0.21589525 | 4.79E-05 | 0.0045625 | -0.092976 |
| 7w11w_SITTC | 0.03034559 | 0.17905724 | 4.57E-05 | 0.0046464 | -0.12245  |
| 7w11w_SITTC | 0.01223989 | 0.06732692 | 3.77E-05 | 0.0064954 | 0.24064   |
| 7w11w_SITTC | 0.01105201 | 0.05999652 | 3.71E-05 | 0.0066957 | 0.2858    |
| 7w11w_SITTC | 0.02032964 | 0.11724883 | 4.19E-05 | 0.0053364 | -0.025531 |
| 7w11w_SITTC | 0.05776926 | 0.3482887  | 6.32E-05 | 0.0064035 | 0.057806  |
| 7w11w_SITTC | 0.01855242 | 0.10628159 | 4.11E-05 | 0.0055212 | 0.015459  |
| 7w11w_SITTC | 0.01852044 | 0.10608421 | 4.11E-05 | 0.0055212 | 0.015459  |
| 7w11w_SITTC | 0.01034391 | 0.05562688 | 3.68E-05 | 0.0068    | 0.30902   |

|             |            |            |          |           |            |
|-------------|------------|------------|----------|-----------|------------|
| 7w11w_SITTC | 0.01744825 | 0.09946772 | 4.06E-05 | 0.0056572 | 0.046584   |
| 7w11w_SITTC | 0.0481522  | 0.2889418  | 5.58E-05 | 0.0050083 | -0.0087048 |
| 7w11w_SITTC | 0.02205715 | 0.12790929 | 4.26E-05 | 0.0051742 | -0.059109  |
| 7w11w_SITTC | 0.02262805 | 0.13143232 | 4.28E-05 | 0.005125  | -0.068556  |
| 7w11w_SITTC | 0.02126787 | 0.1230386  | 4.24E-05 | 0.0052258 | -0.04878   |
| 7w11w_SITTC | 0.00819611 | 0.0423728  | 3.56E-05 | 0.0072456 | 0.40559    |
| 7w11w_SITTC | 0.02587944 | 0.15149665 | 4.40E-05 | 0.0048781 | -0.10813   |
| 7w11w_SITTC | 0.09626971 | 0.585875   | 5.24E-05 | 0.0054581 | -0.99133   |
| 7w11w_SITTC | 0.08525144 | 0.5178813  | 4.76E-05 | 0.012059  | -0.10433   |
| 7w11w_SITTC | 0.01114237 | 0.06055416 | 3.71E-05 | 0.0066957 | 0.2858     |
| 7w11w_SITTC | 0.03521868 | 0.20912907 | 4.74E-05 | 0.0045622 | -0.10068   |
| 7w11w_SITTC | 0.09136955 | 0.5556361  | 4.93E-05 | 0.0079874 | -0.60562   |
| 7w11w_SITTC | 0.01360328 | 0.0757404  | 3.86E-05 | 0.0062156 | 0.17645    |
| 7w11w_SITTC | 0.08636633 | 0.52476126 | 4.77E-05 | 0.01133   | -0.17867   |
| 7w11w_SITTC | 0.01404063 | 0.07843933 | 3.86E-05 | 0.0062156 | 0.1561     |
| 7w11w_SITTC | 0.02512327 | 0.1468303  | 4.38E-05 | 0.0049138 | -0.10343   |
| 7w11w_SITTC | 0.0192279  | 0.11044996 | 4.14E-05 | 0.0054571 | 0.0010121  |
| 7w11w_SITTC | 0.06855399 | 0.4148413  | 5.93E-05 | 0.010465  | 0.20551    |
| 7w11w_SITTC | 0.06787195 | 0.41063243 | 5.98E-05 | 0.010192  | 0.19812    |
| 7w11w_SITTC | 0.01516428 | 0.08537336 | 3.95E-05 | 0.0059603 | 0.11709    |
| 7w11w_SITTC | 0.01637636 | 0.09285308 | 4.00E-05 | 0.0058035 | 0.080526   |
| 7w11w_SITTC | 0.01064334 | 0.05747465 | 3.68E-05 | 0.0068    | 0.30902    |
| 7w11w_SITTC | 0.01537454 | 0.08667086 | 3.95E-05 | 0.0059603 | 0.11709    |
| 7w11w_SITTC | 0.07904507 | 0.4795817  | 4.97E-05 | 0.014318  | 0.17506    |
| 7w11w_SITTC | 0.04505267 | 0.2698146  | 5.34E-05 | 0.0048194 | -0.028317  |
| 7w11w_SITTC | 0.03957422 | 0.2360071  | 4.95E-05 | 0.0046046 | -0.067351  |
| 7w11w_SITTC | 0.02874258 | 0.16916505 | 4.51E-05 | 0.0047064 | -0.12268   |
| 7w11w_SITTC | 0.01975815 | 0.11372212 | 4.16E-05 | 0.0053955 | -0.012659  |
| 7w11w_SITTC | 0.01176516 | 0.06439739 | 3.74E-05 | 0.0065941 | 0.263      |
| 7w11w_SITTC | 0.01597689 | 0.09038795 | 3.98E-05 | 0.0058806 | 0.098494   |
| 7w11w_SITTC | 0.02678707 | 0.15709762 | 4.44E-05 | 0.004813  | -0.11546   |
| 7w11w_SITTC | 0.0072986  | 0.03683426 | 3.50E-05 | 0.0074854 | 0.45576    |
| 7w11w_SITTC | 0.02200265 | 0.12757294 | 4.26E-05 | 0.0051742 | -0.059109  |
| 7w11w_SITTC | 0.04369789 | 0.26145428 | 5.21E-05 | 0.0047343 | -0.038876  |
| 7w11w_SITTC | 0.00828884 | 0.04294501 | 3.56E-05 | 0.0072456 | 0.40559    |
| 7w11w_SITTC | 0.01400378 | 0.0782119  | 3.86E-05 | 0.0062156 | 0.17645    |
| 7w11w_SITTC | 0.01518097 | 0.08547636 | 3.95E-05 | 0.0059603 | 0.11709    |
| 7w11w_SITTC | 0.06736826 | 0.40752417 | 6.03E-05 | 0.009922  | 0.19037    |
| 7w11w_SITTC | 0.02854035 | 0.16791709 | 4.49E-05 | 0.0047302 | -0.12174   |
| 7w11w_SITTC | 0.00698961 | 0.03492747 | 3.47E-05 | 0.0076096 | 0.48124    |
| 7w11w_SITTC | 0.022657   | 0.13161096 | 4.28E-05 | 0.005125  | -0.068556  |
| 7w11w_SITTC | 0.02146441 | 0.12425146 | 4.24E-05 | 0.0052258 | -0.04878   |
| 7w11w_SITTC | 0.07011025 | 0.42444494 | 5.76E-05 | 0.011297  | 0.22487    |

|             |            |            |          |           |           |
|-------------|------------|------------|----------|-----------|-----------|
| 7w11w_SITTC | 0.0182065  | 0.10414688 | 4.09E-05 | 0.0055879 | 0.030658  |
| 7w11w_SITTC | 0.01436791 | 0.08045894 | 3.89E-05 | 0.0061278 | 0.1561    |
| 7w11w_SITTC | 0.06281278 | 0.37941223 | 6.35E-05 | 0.0078047 | 0.12359   |
| 7w11w_SITTC | 0.02646878 | 0.15513343 | 4.42E-05 | 0.0048445 | -0.11546  |
| 7w11w_SITTC | 0.0225046  | 0.13067049 | 4.28E-05 | 0.005125  | -0.068556 |
| 7w11w_SITTC | 0.01727842 | 0.0984197  | 4.03E-05 | 0.005729  | 0.046584  |
| 7w11w_SITTC | 0.01848402 | 0.10585951 | 4.11E-05 | 0.0055212 | 0.015459  |
| 7w11w_SITTC | 0.02131853 | 0.12335127 | 4.24E-05 | 0.0052258 | -0.04878  |
| 7w11w_SITTC | 0.0196148  | 0.11283753 | 4.16E-05 | 0.0053955 | -0.012659 |
| 7w11w_SITTC | 0.0983723  | 0.59885    | 5.40E-05 | 0.0046955 | -1.1375   |
| 7w11w_SITTC | 0.01731079 | 0.09861945 | 4.03E-05 | 0.005729  | 0.046584  |
| 7w11w_SITTC | 0.08726022 | 0.53027743 | 4.79E-05 | 0.010571  | -0.25808  |
| 7w11w_SITTC | 0.08269131 | 0.5020827  | 4.79E-05 | 0.013563  | 0.02505   |
| 7w11w_SITTC | 0.03025671 | 0.17850873 | 4.55E-05 | 0.0046645 | -0.12245  |
| 7w11w_SITTC | 0.02672342 | 0.1567048  | 4.44E-05 | 0.004813  | -0.11546  |
| 7w11w_SITTC | 0.01630976 | 0.09244209 | 4.00E-05 | 0.0058035 | 0.080526  |
| 7w11w_SITTC | 0.00281977 | 0.00919539 | 3.26E-05 | 0.0085576 | 0.66457   |
| 7w11w_SITTC | 0.04528642 | 0.27125713 | 5.34E-05 | 0.0048194 | -0.028317 |
| 7w11w_SITTC | 0.02029817 | 0.1170546  | 4.19E-05 | 0.0053364 | -0.025531 |
| 7w11w_SITTC | 0.02453675 | 0.1432109  | 4.36E-05 | 0.0049516 | -0.098011 |
| 7w11w_SITTC | 0.01644656 | 0.0932863  | 4.00E-05 | 0.0058035 | 0.080526  |
| 7w11w_SITTC | 0.0115652  | 0.06316342 | 3.74E-05 | 0.0065941 | 0.263     |
| 7w11w_SITTC | 0.03328383 | 0.19718911 | 4.66E-05 | 0.0045822 | -0.11352  |
| 7w11w_SITTC | 0.0178345  | 0.10185127 | 4.06E-05 | 0.0056572 | 0.030658  |
| 7w11w_SITTC | 0.01757689 | 0.10026161 | 4.06E-05 | 0.0056572 | 0.046584  |
| 7w11w_SITTC | 0.03215296 | 0.1902105  | 4.62E-05 | 0.0046026 | -0.11821  |
| 7w11w_SITTC | 0.03621486 | 0.2152765  | 4.77E-05 | 0.0045615 | -0.092976 |
| 7w11w_SITTC | 0.09391487 | 0.5713433  | 5.09E-05 | 0.0064439 | -0.7829   |
| 7w11w_SITTC | 0.04556473 | 0.27297455 | 5.39E-05 | 0.0048522 | -0.024952 |
| 7w11w_SITTC | 0.01563723 | 0.08829194 | 3.95E-05 | 0.0059603 | 0.11709   |
| 7w11w_SITTC | 0.02808976 | 0.16513649 | 4.48E-05 | 0.0047558 | -0.12174  |
| 7w11w_SITTC | 0.00934883 | 0.04948618 | 3.62E-05 | 0.0070172 | 0.35661   |
| 7w11w_SITTC | 0.02733634 | 0.16048716 | 4.46E-05 | 0.0047834 | -0.11816  |
| 7w11w_SITTC | 0.0220931  | 0.1281311  | 4.26E-05 | 0.0051742 | -0.059109 |
| 7w11w_SITTC | 0.02531118 | 0.14798991 | 4.38E-05 | 0.0049138 | -0.10343  |
| 7w11w_SITTC | 0.08488223 | 0.5156028  | 4.76E-05 | 0.012404  | -0.10433  |
| 7w11w_SITTC | 0.04676091 | 0.28035617 | 5.49E-05 | 0.0049251 | -0.018376 |
| 7w11w_SITTC | 0.03359945 | 0.19913681 | 4.68E-05 | 0.0045746 | -0.11071  |
| 7w11w_SITTC | 0.02027214 | 0.11689397 | 4.19E-05 | 0.0053364 | -0.025531 |
| 7w11w_SITTC | 0.02743615 | 0.1611031  | 4.46E-05 | 0.0047834 | -0.11816  |
| 7w11w_SITTC | 0.00978441 | 0.05217416 | 3.65E-05 | 0.0069072 | 0.33263   |
| 7w11w_SITTC | 0.09730413 | 0.5922584  | 5.32E-05 | 0.0050496 | -1.0673   |
| 7w11w_SITTC | 0.02485331 | 0.14516437 | 4.36E-05 | 0.0049516 | -0.10343  |



|             |            |            |          |           |           |
|-------------|------------|------------|----------|-----------|-----------|
| 7w11w_SITTC | 0.02380812 | 0.1387145  | 4.32E-05 | 0.0050338 | -0.091842 |
| 7w11w_SITTC | 0.05446096 | 0.32787317 | 6.14E-05 | 0.0057798 | 0.030074  |
| 7w11w_SITTC | 0.01529166 | 0.0861594  | 3.95E-05 | 0.0059603 | 0.11709   |
| 7w11w_SITTC | 0.02098211 | 0.12127518 | 4.21E-05 | 0.0052798 | -0.037579 |
| 7w11w_SITTC | 0.01812273 | 0.10362998 | 4.09E-05 | 0.0055879 | 0.030658  |
| 7w11w_SITTC | 0.02176475 | 0.12610485 | 4.26E-05 | 0.0051742 | -0.059109 |
| 7w11w_SITTC | 0.02476755 | 0.14463514 | 4.36E-05 | 0.0049516 | -0.098011 |
| 7w11w_SITTC | 0.01278748 | 0.07070614 | 3.80E-05 | 0.0063994 | 0.21875   |
| 7w11w_SITTC | 0.07934339 | 0.4814227  | 4.93E-05 | 0.014315  | 0.17506   |
| 7w11w_SITTC | 0.03931516 | 0.23440845 | 4.92E-05 | 0.0045932 | -0.071721 |
| 7w11w_SITTC | 0.03458116 | 0.2051949  | 4.70E-05 | 0.0045688 | -0.10426  |
| 7w11w_SITTC | 0.01843197 | 0.10553829 | 4.11E-05 | 0.0055212 | 0.015459  |
| 7w11w_SITTC | 0.02996619 | 0.17671597 | 4.55E-05 | 0.0046645 | -0.12301  |
| 7w11w_SITTC | 0.02688931 | 0.15772852 | 4.44E-05 | 0.004813  | -0.11546  |
| 7w11w_SITTC | 0.08474276 | 0.5147422  | 4.76E-05 | 0.012404  | -0.069378 |
| 7w11w_SITTC | 0.07139178 | 0.43235326 | 5.65E-05 | 0.011849  | 0.2386    |
| 7w11w_SITTC | 0.02548337 | 0.14905246 | 4.40E-05 | 0.0048781 | -0.10813  |
| 7w11w_SITTC | 0.01867721 | 0.10705163 | 4.11E-05 | 0.0055212 | 0.015459  |
| 7w11w_SITTC | 0.03443151 | 0.20427147 | 4.70E-05 | 0.0045688 | -0.10761  |
| 7w11w_SITTC | 0.01401368 | 0.07827302 | 3.86E-05 | 0.0062156 | 0.17645   |
| 7w11w_SITTC | 0.02263754 | 0.13149086 | 4.28E-05 | 0.005125  | -0.068556 |
| 7w11w_SITTC | 0.09123269 | 0.5547915  | 4.93E-05 | 0.0079874 | -0.56091  |
| 7w11w_SITTC | 0.0122169  | 0.06718504 | 3.77E-05 | 0.0064954 | 0.24064   |
| 7w11w_SITTC | 0.09242728 | 0.56216335 | 4.99E-05 | 0.0073308 | -0.69483  |
| 7w11w_SITTC | 0.02263083 | 0.13144948 | 4.28E-05 | 0.005125  | -0.068556 |
| 7w11w_SITTC | 0.01989555 | 0.11457004 | 4.16E-05 | 0.0053955 | -0.012659 |
| 7w11w_SITTC | 0.02087355 | 0.12060528 | 4.21E-05 | 0.0052798 | -0.037579 |
| 7w11w_SITTC | 0.05055812 | 0.30378878 | 5.83E-05 | 0.0052672 | 0.0043724 |
| 7w11w_SITTC | 0.036695   | 0.21823943 | 4.79E-05 | 0.0045625 | -0.092976 |
| 7w11w_SITTC | 0.04519385 | 0.27068585 | 5.34E-05 | 0.0048194 | -0.028317 |
| 7w11w_SITTC | 0.02360569 | 0.13746534 | 4.32E-05 | 0.0050338 | -0.084895 |
| 7w11w_SITTC | 0.0191742  | 0.11011861 | 4.14E-05 | 0.0054571 | 0.0010121 |
| 7w11w_SITTC | 0.00788537 | 0.0404552  | 3.53E-05 | 0.0073641 | 0.43054   |
| 7w11w_SITTC | 0.08056781 | 0.48897856 | 4.87E-05 | 0.014207  | 0.12269   |
| 7w11w_SITTC | 0.05428064 | 0.32676044 | 6.14E-05 | 0.0057798 | 0.030074  |
| 7w11w_SITTC | 0.00917051 | 0.04838578 | 3.59E-05 | 0.00713   | 0.35661   |
| 7w11w_SITTC | 0.01154369 | 0.06303067 | 3.74E-05 | 0.0065941 | 0.263     |
| 7w11w_SITTC | 0.01921799 | 0.11038878 | 4.14E-05 | 0.0054571 | 0.0010121 |
| 7w11w_SITTC | 0.01368651 | 0.07625407 | 3.86E-05 | 0.0062156 | 0.17645   |
| 7w11w_SITTC | 0.02988493 | 0.17621452 | 4.55E-05 | 0.0046645 | -0.12301  |
| 7w11w_SITTC | 0.02484313 | 0.14510153 | 4.36E-05 | 0.0049516 | -0.10343  |
| 7w11w_SITTC | 0.02640083 | 0.15471415 | 4.42E-05 | 0.0048445 | -0.11213  |
| 7w11w_SITTC | 0.02411325 | 0.14059746 | 4.34E-05 | 0.0049916 | -0.091842 |

|             |            |            |          |           |           |
|-------------|------------|------------|----------|-----------|-----------|
| 7w11w_SITTC | 0.01974997 | 0.11367163 | 4.16E-05 | 0.0053955 | -0.012659 |
| 7w11w_SITTC | 0.02470196 | 0.14423041 | 4.36E-05 | 0.0049516 | -0.098011 |
| 7w11w_SITTC | 0.03296443 | 0.19521813 | 4.64E-05 | 0.0045915 | -0.11352  |
| 7w11w_SITTC | 0.01544756 | 0.08712146 | 3.95E-05 | 0.0059603 | 0.11709   |
| 7w11w_SITTC | 0.01190188 | 0.06524109 | 3.77E-05 | 0.0064954 | 0.24064   |
| 7w11w_SITTC | 0.06193878 | 0.37401882 | 6.36E-05 | 0.0076138 | 0.10802   |
| 7w11w_SITTC | 0.01238807 | 0.06824134 | 3.77E-05 | 0.0064954 | 0.24064   |
| 7w11w_SITTC | 0.01535864 | 0.08657275 | 3.95E-05 | 0.0059603 | 0.11709   |
| 7w11w_SITTC | 0.0148121  | 0.08320004 | 3.92E-05 | 0.0060428 | 0.1363    |
| 7w11w_SITTC | 0.01940325 | 0.11153203 | 4.14E-05 | 0.0054571 | 0.0010121 |
| 7w11w_SITTC | 0.01668181 | 0.09473801 | 4.00E-05 | 0.0058035 | 0.080526  |
| 7w11w_SITTC | 0.0310688  | 0.18352015 | 4.58E-05 | 0.00463   | -0.12145  |
| 7w11w_SITTC | 0.02810301 | 0.1652183  | 4.48E-05 | 0.0047558 | -0.12174  |
| 7w11w_SITTC | 0.01702219 | 0.09683853 | 4.03E-05 | 0.005729  | 0.063215  |
| 7w11w_SITTC | 0.03158802 | 0.18672429 | 4.60E-05 | 0.0046154 | -0.12002  |
| 7w11w_SITTC | 0.06896035 | 0.41734895 | 5.87E-05 | 0.010741  | 0.21248   |
| 7w11w_SITTC | 0.01604319 | 0.09079713 | 3.98E-05 | 0.0058806 | 0.098494  |
| 7w11w_SITTC | 0.01181895 | 0.0647293  | 3.74E-05 | 0.0065941 | 0.263     |
| 7w11w_SITTC | 0.07877861 | 0.47793743 | 4.97E-05 | 0.014318  | 0.18889   |
| 7w11w_SITTC | 0.03849863 | 0.22936961 | 4.89E-05 | 0.0045836 | -0.076088 |
| 7w11w_SITTC | 0.09188027 | 0.55878776 | 4.96E-05 | 0.0076529 | -0.6503   |
| 7w11w_SITTC | 0.07159796 | 0.43362564 | 5.60E-05 | 0.012118  | 0.2386    |
| 7w11w_SITTC | 0.02174701 | 0.12599541 | 4.26E-05 | 0.0051742 | -0.059109 |
| 7w11w_SITTC | 0.0200769  | 0.11568914 | 4.19E-05 | 0.0053364 | -0.025531 |
| 7w11w_SITTC | 0.06143498 | 0.37090984 | 6.37E-05 | 0.0074328 | 0.10072   |
| 7w11w_SITTC | 0.11581627 | 0.70649683 | 6.53E-05 | 0.0042916 | -1.2071   |
| 7w11w_SITTC | 0.0325886  | 0.19289884 | 4.64E-05 | 0.0045915 | -0.11603  |
| 7w11w_SITTC | 0.01797066 | 0.10269156 | 4.09E-05 | 0.0055879 | 0.030658  |
| 7w11w_SITTC | 0.0167265  | 0.09501381 | 4.00E-05 | 0.0058035 | 0.063215  |
| 7w11w_SITTC | 0.02396006 | 0.13965215 | 4.34E-05 | 0.0049916 | -0.091842 |
| 7w11w_SITTC | 0.0123795  | 0.06818849 | 3.77E-05 | 0.0064954 | 0.24064   |
| 7w11w_SITTC | 0.00861106 | 0.04493345 | 3.56E-05 | 0.0072456 | 0.40559   |
| 7w11w_SITTC | 0.01979735 | 0.11396405 | 4.16E-05 | 0.0053955 | -0.012659 |
| 7w11w_SITTC | 0.00793054 | 0.04073397 | 3.53E-05 | 0.0073641 | 0.43054   |
| 7w11w_SITTC | 0.0347357  | 0.2061486  | 4.72E-05 | 0.0045646 | -0.10426  |
| 7w11w_SITTC | 0.02416282 | 0.14090334 | 4.34E-05 | 0.0049916 | -0.091842 |
| 7w11w_SITTC | 0.07668236 | 0.46500146 | 5.13E-05 | 0.014025  | 0.22792   |
| 7w11w_SITTC | 0.05798504 | 0.34962028 | 6.34E-05 | 0.0065282 | 0.06315   |
| 7w11w_SITTC | 0.03156203 | 0.1865639  | 4.60E-05 | 0.0046154 | -0.12002  |
| 7w11w_SITTC | 0.00936278 | 0.04957232 | 3.62E-05 | 0.0070172 | 0.35661   |
| 7w11w_SITTC | 0.02945887 | 0.1735853  | 4.53E-05 | 0.0046846 | -0.1231   |
| 7w11w_SITTC | 0.02540386 | 0.14856179 | 4.38E-05 | 0.0049138 | -0.10813  |
| 7w11w_SITTC | 0.02322597 | 0.13512203 | 4.30E-05 | 0.0050782 | -0.084895 |

|             |            |            |          |           |            |
|-------------|------------|------------|----------|-----------|------------|
| 7w11w_SITTC | 0.02714863 | 0.15932879 | 4.46E-05 | 0.0047834 | -0.11816   |
| 7w11w_SITTC | 0.09955965 | 0.6061772  | 5.49E-05 | 0.0043938 | -1.2008    |
| 7w11w_SITTC | 0.02905086 | 0.17106749 | 4.51E-05 | 0.0047064 | -0.12268   |
| 7w11w_SITTC | 0.02647194 | 0.15515296 | 4.42E-05 | 0.0048445 | -0.11546   |
| 7w11w_SITTC | 0.05622431 | 0.3387548  | 6.24E-05 | 0.0060668 | 0.047788   |
| 7w11w_SITTC | 0.04819589 | 0.28921145 | 5.58E-05 | 0.0050083 | -0.0087048 |
| 7w11w_SITTC | 0.01798855 | 0.10280191 | 4.09E-05 | 0.0055879 | 0.030658   |
| 7w11w_SITTC | 0.01002692 | 0.05367073 | 3.65E-05 | 0.0069072 | 0.33263    |
| 7w11w_SITTC | 0.03302813 | 0.19561118 | 4.64E-05 | 0.0045915 | -0.11352   |
| 7w11w_SITTC | 0.01514882 | 0.08527796 | 3.92E-05 | 0.0060428 | 0.11709    |
| 7w11w_SITTC | 0.02644287 | 0.15497357 | 4.42E-05 | 0.0048445 | -0.11213   |
| 7w11w_SITTC | 0.01540755 | 0.0868746  | 3.95E-05 | 0.0059603 | 0.11709    |
| 7w11w_SITTC | 0.06376544 | 0.38529113 | 6.30E-05 | 0.008216  | 0.14015    |
| 7w11w_SITTC | 0.01985964 | 0.11434846 | 4.16E-05 | 0.0053955 | -0.012659  |
| 7w11w_SITTC | 0.02963039 | 0.17464373 | 4.53E-05 | 0.0046846 | -0.1231    |
| 7w11w_SITTC | 0.01171418 | 0.06408276 | 3.74E-05 | 0.0065941 | 0.263      |
| 7w11w_SITTC | 0.01138893 | 0.06207568 | 3.74E-05 | 0.0065941 | 0.263      |
| 7w11w_SITTC | 0.04989966 | 0.29972544 | 5.78E-05 | 0.0052091 | 0.0010449  |
| 7w11w_SITTC | 0.08793394 | 0.5344349  | 4.80E-05 | 0.010188  | -0.29935   |
| 7w11w_SITTC | 0.02496461 | 0.14585118 | 4.38E-05 | 0.0049138 | -0.10343   |
| 7w11w_SITTC | 0.01506138 | 0.08473834 | 3.92E-05 | 0.0060428 | 0.1363     |
| 7w11w_SITTC | 0.08831135 | 0.53676397 | 4.80E-05 | 0.010188  | -0.3415    |
| 7w11w_SITTC | 0.0114207  | 0.06227173 | 3.74E-05 | 0.0065941 | 0.263      |
| 7w11w_SITTC | 0.02814397 | 0.16547106 | 4.48E-05 | 0.0047558 | -0.12174   |
| 7w11w_SITTC | 0.00841072 | 0.04369715 | 3.56E-05 | 0.0072456 | 0.40559    |
| 7w11w_SITTC | 0.07817995 | 0.47424307 | 5.01E-05 | 0.014289  | 0.20103    |
| 7w11w_SITTC | 0.01949855 | 0.11212015 | 4.16E-05 | 0.0053955 | -0.012659  |
| 7w11w_SITTC | 0.02383016 | 0.1388505  | 4.34E-05 | 0.0049916 | -0.091842  |
| 7w11w_SITTC | 0.08622494 | 0.52388865 | 4.77E-05 | 0.01133   | -0.17867   |
| 7w11w_SITTC | 0.00950883 | 0.0504736  | 3.62E-05 | 0.0070172 | 0.35661    |
| 7w11w_SITTC | 0.02242665 | 0.13018946 | 4.28E-05 | 0.005125  | -0.068556  |
| 7w11w_SITTC | 0.03132544 | 0.18510388 | 4.58E-05 | 0.00463   | -0.12002   |
| 7w11w_SITTC | 0.00874627 | 0.04576783 | 3.59E-05 | 0.00713   | 0.38094    |
| 7w11w_SITTC | 0.02680686 | 0.15721974 | 4.44E-05 | 0.004813  | -0.11546   |
| 7w11w_SITTC | 0.02103551 | 0.12160473 | 4.21E-05 | 0.0052798 | -0.037579  |
| 7w11w_SITTC | 0.02005073 | 0.11552765 | 4.19E-05 | 0.0053364 | -0.025531  |
| 7w11w_SITTC | 0.06673963 | 0.40364486 | 6.07E-05 | 0.0096573 | 0.18233    |
| 7w11w_SITTC | 0.02736747 | 0.16067928 | 4.46E-05 | 0.0047834 | -0.11816   |
| 7w11w_SITTC | 0.02177056 | 0.12614074 | 4.26E-05 | 0.0051742 | -0.059109  |
| 7w11w_SITTC | 0.01949711 | 0.11211128 | 4.16E-05 | 0.0053955 | -0.012659  |
| 7w11w_SITTC | 0.01730012 | 0.09855365 | 4.03E-05 | 0.005729  | 0.046584   |
| 7w11w_SITTC | 0.08839092 | 0.5372549  | 4.82E-05 | 0.0098057 | -0.3415    |
| 7w11w_SITTC | 0.01532317 | 0.08635388 | 3.95E-05 | 0.0059603 | 0.11709    |

|             |            |            |          |           |           |
|-------------|------------|------------|----------|-----------|-----------|
| 7w11w_SITTC | 0.00248331 | 0.00711908 | 3.23E-05 | 0.0087041 | 0.69119   |
| 7w11w_SITTC | 0.02169761 | 0.12569052 | 4.26E-05 | 0.0051742 | -0.059109 |
| 7w11w_SITTC | 0.01111501 | 0.06038529 | 3.71E-05 | 0.0066957 | 0.2858    |
| 7w11w_SITTC | 0.0245158  | 0.14308158 | 4.36E-05 | 0.0049516 | -0.098011 |
| 7w11w_SITTC | 0.02141196 | 0.12392777 | 4.24E-05 | 0.0052258 | -0.04878  |
| 7w11w_SITTC | 0.00755805 | 0.03843532 | 3.50E-05 | 0.0074854 | 0.43054   |
| 7w11w_SITTC | 0.02231487 | 0.12949963 | 4.28E-05 | 0.005125  | -0.068556 |
| 7w11w_SITTC | 0.04481885 | 0.2683717  | 5.30E-05 | 0.0047888 | -0.028317 |
| 7w11w_SITTC | 0.01216847 | 0.06688622 | 3.77E-05 | 0.0064954 | 0.24064   |
| 7w11w_SITTC | 0.01933847 | 0.11113228 | 4.14E-05 | 0.0054571 | 0.0010121 |
| 7w11w_SITTC | 0.08067866 | 0.48966262 | 4.87E-05 | 0.014207  | 0.12269   |
| 7w11w_SITTC | 0.02309667 | 0.13432415 | 4.30E-05 | 0.0050782 | -0.077142 |
| 7w11w_SITTC | 0.04617327 | 0.27672985 | 5.44E-05 | 0.0048874 | -0.021643 |
| 7w11w_SITTC | 0.02916616 | 0.17177898 | 4.51E-05 | 0.0047064 | -0.1231   |
| 7w11w_SITTC | 0.02562009 | 0.1498962  | 4.40E-05 | 0.0048781 | -0.10813  |
| 7w11w_SITTC | 0.02509114 | 0.146632   | 4.38E-05 | 0.0049138 | -0.10343  |
| 7w11w_SITTC | 0.02701602 | 0.15851045 | 4.44E-05 | 0.004813  | -0.11816  |
| 7w11w_SITTC | 0.05721219 | 0.34485102 | 6.30E-05 | 0.0062853 | 0.05269   |
| 7w11w_SITTC | 0.03841826 | 0.2288737  | 4.87E-05 | 0.0045758 | -0.076088 |
| 7w11w_SITTC | 0.03094747 | 0.18277141 | 4.58E-05 | 0.00463   | -0.12145  |
| 7w11w_SITTC | 0.02442115 | 0.14249751 | 4.36E-05 | 0.0049516 | -0.098011 |
| 7w11w_SITTC | 0.02466827 | 0.14402251 | 4.36E-05 | 0.0049516 | -0.098011 |
| 7w11w_SITTC | 0.06076841 | 0.3667965  | 6.38E-05 | 0.0072613 | 0.09374   |
| 7w11w_SITTC | 0.01804873 | 0.10317332 | 4.09E-05 | 0.0055879 | 0.030658  |
| 7w11w_SITTC | 0.013888   | 0.07749744 | 3.86E-05 | 0.0062156 | 0.17645   |
| 7w11w_SITTC | 0.01995932 | 0.11496357 | 4.16E-05 | 0.0053955 | -0.012659 |
| 7w11w_SITTC | 0.01350488 | 0.07513319 | 3.83E-05 | 0.0063061 | 0.17645   |
| 7w11w_SITTC | 0.0218845  | 0.12684387 | 4.26E-05 | 0.0051742 | -0.059109 |
| 7w11w_SITTC | 0.00990512 | 0.05291909 | 3.65E-05 | 0.0069072 | 0.33263   |
| 7w11w_SITTC | 0.02045775 | 0.11803935 | 4.19E-05 | 0.0053364 | -0.025531 |
| 7w11w_SITTC | 0.01790131 | 0.10226356 | 4.09E-05 | 0.0055879 | 0.030658  |
| 7w11w_SITTC | 0.0212037  | 0.12264261 | 4.24E-05 | 0.0052258 | -0.04878  |
| 7w11w_SITTC | 0.0207209  | 0.11966326 | 4.21E-05 | 0.0052798 | -0.037579 |
| 7w11w_SITTC | 0.03312144 | 0.19618699 | 4.66E-05 | 0.0045822 | -0.11352  |
| 7w11w_SITTC | 0.00948543 | 0.05032916 | 3.62E-05 | 0.0070172 | 0.35661   |
| 7w11w_SITTC | 0.03334548 | 0.19756958 | 4.66E-05 | 0.0045822 | -0.11352  |
| 7w11w_SITTC | 0.02902455 | 0.17090511 | 4.51E-05 | 0.0047064 | -0.12268  |
| 7w11w_SITTC | 0.05456996 | 0.3285458  | 6.14E-05 | 0.0057798 | 0.034245  |
| 7w11w_SITTC | 0.01627335 | 0.09221743 | 4.00E-05 | 0.0058035 | 0.080526  |
| 7w11w_SITTC | 0.0442734  | 0.26500577 | 5.25E-05 | 0.0047605 | -0.035266 |
| 7w11w_SITTC | 0.09246198 | 0.56237745 | 4.99E-05 | 0.0073308 | -0.69483  |
| 7w11w_SITTC | 0.02032402 | 0.1172141  | 4.19E-05 | 0.0053364 | -0.025531 |
| 7w11w_SITTC | 0.01436194 | 0.08042213 | 3.89E-05 | 0.0061278 | 0.1561    |

|             |            |            |          |           |           |
|-------------|------------|------------|----------|-----------|-----------|
| 7w11w_SITTC | 0.01192254 | 0.06536858 | 3.77E-05 | 0.0064954 | 0.24064   |
| 7w11w_SITTC | 0.01958774 | 0.11267052 | 4.16E-05 | 0.0053955 | -0.012659 |
| 7w11w_SITTC | 0.01676525 | 0.09525297 | 4.00E-05 | 0.0058035 | 0.063215  |
| 7w11w_SITTC | 0.00782364 | 0.04007429 | 3.53E-05 | 0.0073641 | 0.43054   |
| 7w11w_SITTC | 0.08284979 | 0.5030607  | 4.79E-05 | 0.013563  | 0.02505   |
| 7w11w_SITTC | 0.02545021 | 0.14884785 | 4.40E-05 | 0.0048781 | -0.10813  |
| 7w11w_SITTC | 0.02109743 | 0.12198685 | 4.21E-05 | 0.0052798 | -0.04878  |
| 7w11w_SITTC | 0.02388338 | 0.13917893 | 4.34E-05 | 0.0049916 | -0.091842 |
| 7w11w_SITTC | 0.04470274 | 0.26765522 | 5.30E-05 | 0.0047888 | -0.031751 |
| 7w11w_SITTC | 0.05161633 | 0.31031898 | 5.92E-05 | 0.0053939 | 0.011221  |
| 7w11w_SITTC | 0.01013487 | 0.05433687 | 3.65E-05 | 0.0069072 | 0.33263   |
| 7w11w_SITTC | 0.08625959 | 0.5241025  | 4.77E-05 | 0.01133   | -0.17867  |
| 7w11w_SITTC | 0.02472526 | 0.14437419 | 4.36E-05 | 0.0049516 | -0.098011 |
| 7w11w_SITTC | 0.02723089 | 0.15983641 | 4.46E-05 | 0.0047834 | -0.11816  |
| 7w11w_SITTC | 0.01031977 | 0.05547788 | 3.68E-05 | 0.0068    | 0.30902   |
| 7w11w_SITTC | 0.01269191 | 0.07011635 | 3.80E-05 | 0.0063994 | 0.21875   |
| 7w11w_SITTC | 0.01347815 | 0.07496828 | 3.83E-05 | 0.0063061 | 0.19734   |
| 7w11w_SITTC | 0.08989942 | 0.5465639  | 4.86E-05 | 0.0090548 | -0.47194  |
| 7w11w_SITTC | 0.07020927 | 0.42505598 | 5.76E-05 | 0.011297  | 0.23016   |
| 7w11w_SITTC | 0.02209949 | 0.12817055 | 4.26E-05 | 0.0051742 | -0.059109 |
| 7w11w_SITTC | 0.02406748 | 0.14031503 | 4.34E-05 | 0.0049916 | -0.091842 |
| 7w11w_SITTC | 0.09328588 | 0.5674618  | 5.06E-05 | 0.0067258 | -0.73907  |
| 7w11w_SITTC | 0.09600188 | 0.5842222  | 5.24E-05 | 0.0054581 | -0.9515   |
| 7w11w_SITTC | 0.0093386  | 0.04942311 | 3.62E-05 | 0.0070172 | 0.35661   |
| 7w11w_SITTC | 0.02763917 | 0.16235591 | 4.48E-05 | 0.0047558 | -0.12024  |
| 7w11w_SITTC | 0.01625682 | 0.09211544 | 4.00E-05 | 0.0058035 | 0.080526  |
| 7w11w_SITTC | 0.03078615 | 0.18177594 | 4.57E-05 | 0.0046464 | -0.12145  |
| 7w11w_SITTC | 0.01952565 | 0.11228739 | 4.16E-05 | 0.0053955 | -0.012659 |
| 7w11w_SITTC | 0.07495382 | 0.45433468 | 5.28E-05 | 0.013537  | 0.24193   |
| 7w11w_SITTC | 0.0868543  | 0.5277725  | 4.78E-05 | 0.010952  | -0.21781  |
| 7w11w_SITTC | 0.00969705 | 0.05163508 | 3.62E-05 | 0.0070172 | 0.35661   |
| 7w11w_SITTC | 0.01660518 | 0.09426515 | 4.00E-05 | 0.0058035 | 0.080526  |
| 7w11w_SITTC | 0.08783322 | 0.53381336 | 4.80E-05 | 0.010188  | -0.29935  |
| 7w11w_SITTC | 0.01606613 | 0.0909387  | 3.98E-05 | 0.0058806 | 0.098494  |
| 7w11w_SITTC | 0.02533994 | 0.14816737 | 4.38E-05 | 0.0049138 | -0.10343  |
| 7w11w_SITTC | 0.08668423 | 0.52672297 | 4.77E-05 | 0.01133   | -0.21781  |
| 7w11w_SITTC | 0.02732875 | 0.16044028 | 4.46E-05 | 0.0047834 | -0.11816  |
| 7w11w_SITTC | 0.04035397 | 0.24081895 | 4.99E-05 | 0.0046177 | -0.063007 |
| 7w11w_SITTC | 0.07170504 | 0.43428645 | 5.60E-05 | 0.012118  | 0.2386    |
| 7w11w_SITTC | 0.01227449 | 0.06754045 | 3.77E-05 | 0.0064954 | 0.24064   |
| 7w11w_SITTC | 0.02656791 | 0.15574516 | 4.44E-05 | 0.004813  | -0.11546  |
| 7w11w_SITTC | 0.07939951 | 0.481769   | 4.93E-05 | 0.014315  | 0.15946   |
| 7w11w_SITTC | 0.02824955 | 0.1661226  | 4.49E-05 | 0.0047302 | -0.12174  |

|             |            |            |          |           |           |
|-------------|------------|------------|----------|-----------|-----------|
| 7w11w_SITTC | 0.0352766  | 0.20948651 | 4.74E-05 | 0.0045622 | -0.10068  |
| 7w11w_SITTC | 0.03834642 | 0.22843036 | 4.87E-05 | 0.0045758 | -0.076088 |
| 7w11w_SITTC | 0.09869882 | 0.600865   | 5.45E-05 | 0.0045382 | -1.1375   |
| 7w11w_SITTC | 0.02011182 | 0.11590461 | 4.19E-05 | 0.0053364 | -0.025531 |
| 7w11w_SITTC | 0.0131506  | 0.07294697 | 3.83E-05 | 0.0063061 | 0.19734   |
| 7w11w_SITTC | 0.0236159  | 0.13752832 | 4.32E-05 | 0.0050338 | -0.084895 |
| 7w11w_SITTC | 0.08667704 | 0.52667856 | 4.77E-05 | 0.01133   | -0.21781  |
| 7w11w_SITTC | 0.09027606 | 0.54888815 | 4.88E-05 | 0.0086895 | -0.51631  |
| 7w11w_SITTC | 0.08727983 | 0.5303984  | 4.79E-05 | 0.010571  | -0.25808  |
| 7w11w_SITTC | 0.02461657 | 0.14370345 | 4.36E-05 | 0.0049516 | -0.098011 |
| 7w11w_SITTC | 0.0140979  | 0.07879274 | 3.89E-05 | 0.0061278 | 0.1561    |
| 7w11w_SITTC | 0.01684    | 0.0957142  | 4.03E-05 | 0.005729  | 0.063215  |
| 7w11w_SITTC | 0.0072228  | 0.0363665  | 3.50E-05 | 0.0074854 | 0.45576   |
| 7w11w_SITTC | 0.02306766 | 0.13414516 | 4.30E-05 | 0.0050782 | -0.077142 |
| 7w11w_SITTC | 0.05339062 | 0.3212681  | 6.05E-05 | 0.0056127 | 0.022172  |
| 7w11w_SITTC | 0.09554968 | 0.5814317  | 5.20E-05 | 0.0056833 | -0.91061  |
| 7w11w_SITTC | 0.03175129 | 0.18773182 | 4.60E-05 | 0.0046154 | -0.12002  |
| 7w11w_SITTC | 0.02801707 | 0.16468792 | 4.48E-05 | 0.0047558 | -0.12024  |
| 7w11w_SITTC | 0.02841632 | 0.16715175 | 4.49E-05 | 0.0047302 | -0.12174  |
| 7w11w_SITTC | 0.07973674 | 0.48385003 | 4.90E-05 | 0.014278  | 0.15946   |
| 7w11w_SITTC | 0.06657397 | 0.40262258 | 6.12E-05 | 0.0093985 | 0.18233   |
| 7w11w_SITTC | 0.02928886 | 0.17253615 | 4.53E-05 | 0.0046846 | -0.1231   |
| 7w11w_SITTC | 0.02302351 | 0.13387267 | 4.30E-05 | 0.0050782 | -0.077142 |
| 7w11w_SITTC | 0.02545662 | 0.1488874  | 4.40E-05 | 0.0048781 | -0.10813  |
| 7w11w_SITTC | 0.03355734 | 0.19887692 | 4.66E-05 | 0.0045822 | -0.11071  |
| 7w11w_SITTC | 0.02380495 | 0.13869494 | 4.32E-05 | 0.0050338 | -0.091842 |
| 7w11w_SITTC | 0.00509784 | 0.02325335 | 3.38E-05 | 0.0079991 | 0.55892   |
| 7w11w_SITTC | 0.02483531 | 0.14505328 | 4.36E-05 | 0.0049516 | -0.10343  |
| 7w11w_SITTC | 0.01538928 | 0.08676185 | 3.95E-05 | 0.0059603 | 0.11709   |
| 7w11w_SITTC | 0.01924216 | 0.11053796 | 4.14E-05 | 0.0054571 | 0.0010121 |
| 7w11w_SITTC | 0.02394593 | 0.13956492 | 4.34E-05 | 0.0049916 | -0.091842 |
| 7w11w_SITTC | 0.08115937 | 0.49262908 | 4.85E-05 | 0.0141    | 0.10139   |
| 7w11w_SITTC | 0.01617498 | 0.09161039 | 3.98E-05 | 0.0058806 | 0.098494  |
| 7w11w_SITTC | 0.01251833 | 0.06904517 | 3.80E-05 | 0.0063994 | 0.21875   |
| 7w11w_SITTC | 0.02146242 | 0.12423917 | 4.24E-05 | 0.0052258 | -0.04878  |
| 7w11w_SITTC | 0.04669639 | 0.27995804 | 5.49E-05 | 0.0049251 | -0.018376 |
| 7w11w_SITTC | 0.09241551 | 0.5620907  | 4.99E-05 | 0.0073308 | -0.69483  |
| 7w11w_SITTC | 0.07994372 | 0.4851273  | 4.90E-05 | 0.014278  | 0.14202   |
| 7w11w_SITTI | 0.02775265 | 0.16305621 | 4.48E-05 | 0.0047558 | -0.12024  |
| 7w11w_SITTI | 0.09402088 | 0.57199746 | 5.09E-05 | 0.0064439 | -0.82618  |
| 7w11w_SITTI | 0.09151401 | 0.55652755 | 4.93E-05 | 0.0079874 | -0.60562  |
| 7w11w_SITTI | 0.07782672 | 0.47206327 | 5.05E-05 | 0.014229  | 0.20103   |
| 7w11w_SITTI | 0.02502385 | 0.14621681 | 4.38E-05 | 0.0049138 | -0.10343  |

|             |            |            |          |           |            |
|-------------|------------|------------|----------|-----------|------------|
| 7w11w_SITTI | 0.03409165 | 0.20217417 | 4.68E-05 | 0.0045746 | -0.10761   |
| 7w11w_SITTI | 0.02835519 | 0.16677448 | 4.49E-05 | 0.0047302 | -0.12174   |
| 7w11w_SITTI | 0.02939019 | 0.17316145 | 4.53E-05 | 0.0046846 | -0.1231    |
| 7w11w_SITTI | 0.02699312 | 0.15836914 | 4.44E-05 | 0.004813  | -0.11816   |
| 7w11w_SITTI | 0.01846423 | 0.10573737 | 4.11E-05 | 0.0055212 | 0.015459   |
| 7w11w_SITTI | 0.09172225 | 0.5578126  | 4.96E-05 | 0.0076529 | -0.60562   |
| 7w11w_SITTI | 0.01987667 | 0.11445352 | 4.16E-05 | 0.0053955 | -0.012659  |
| 7w11w_SITTI | 0.01391328 | 0.07765345 | 3.86E-05 | 0.0062156 | 0.17645    |
| 7w11w_SITTI | 0.08874372 | 0.53943205 | 4.82E-05 | 0.0098057 | -0.3844    |
| 7w11w_SITTI | 0.06944405 | 0.42033386 | 5.82E-05 | 0.011019  | 0.21895    |
| 7w11w_SITTI | 0.08800583 | 0.5348786  | 4.80E-05 | 0.010188  | -0.29935   |
| 7w11w_SITTI | 0.02964368 | 0.17472573 | 4.53E-05 | 0.0046846 | -0.1231    |
| 7w11w_SITTI | 0.02818329 | 0.16571365 | 4.49E-05 | 0.0047302 | -0.12174   |
| 7w11w_SITTI | 0.01784656 | 0.10192574 | 4.06E-05 | 0.0056572 | 0.030658   |
| 7w11w_SITTI | 0.08348607 | 0.5069871  | 4.77E-05 | 0.013036  | -0.0045591 |
| 7w11w_SITTI | 0.03907359 | 0.23291773 | 4.92E-05 | 0.0045932 | -0.071721  |
| 7w11w_SITTI | 0.02546511 | 0.14893982 | 4.40E-05 | 0.0048781 | -0.10813   |
| 7w11w_SITTI | 0.08116742 | 0.49267873 | 4.85E-05 | 0.0141    | 0.10139    |
| 7w11w_SITTI | 0.04349123 | 0.260179   | 5.21E-05 | 0.0047343 | -0.038876  |
| 7w11w_SITTI | 0.08767673 | 0.53284764 | 4.79E-05 | 0.010571  | -0.29935   |
| 7w11w_SITTI | 0.01953225 | 0.11232812 | 4.16E-05 | 0.0053955 | -0.012659  |
| 7w11w_SITTI | 0.04110829 | 0.24547385 | 5.02E-05 | 0.0046325 | -0.054504  |
| 7w11w_SITTI | 0.08954579 | 0.5443817  | 4.86E-05 | 0.0090548 | -0.42792   |
| 7w11w_SITTI | 0.04044193 | 0.24136172 | 4.99E-05 | 0.0046177 | -0.063007  |
| 7w11w_SITTI | 0.05876325 | 0.35442263 | 6.35E-05 | 0.0066597 | 0.068735   |
| 7w11w_SITTI | 0.08373641 | 0.5085319  | 4.77E-05 | 0.013036  | -0.036078  |
| 7w11w_SITTI | 0.06208204 | 0.37490287 | 6.36E-05 | 0.0076138 | 0.10802    |
| 7w11w_SITTI | 0.03432179 | 0.20359436 | 4.70E-05 | 0.0045688 | -0.10761   |
| 7w11w_SITTI | 0.02267082 | 0.1316962  | 4.28E-05 | 0.005125  | -0.077142  |
| 7w11w_SITTI | 0.09840062 | 0.5990248  | 5.40E-05 | 0.0046955 | -1.1375    |
| 7w11w_SITTI | 0.03080414 | 0.18188697 | 4.57E-05 | 0.0046464 | -0.12145   |
| 7w11w_SITTI | 0.08491334 | 0.5157948  | 4.76E-05 | 0.012404  | -0.10433   |
| 7w11w_SITTI | 0.09477663 | 0.57666117 | 5.13E-05 | 0.0061762 | -0.8688    |
| 7w11w_SITTI | 0.02754335 | 0.1617646  | 4.46E-05 | 0.0047834 | -0.12024   |
| 7w11w_SITTI | 0.02093885 | 0.12100825 | 4.21E-05 | 0.0052798 | -0.037579  |
| 7w11w_SITTI | 0.09248389 | 0.5625127  | 4.99E-05 | 0.0073308 | -0.69483   |
| 7w11w_SITTI | 0.0131724  | 0.07308146 | 3.83E-05 | 0.0063061 | 0.19734    |
| 7w11w_SITTI | 0.02158525 | 0.1249972  | 4.24E-05 | 0.0052258 | -0.04878   |
| 7w11w_SITTI | 0.01265643 | 0.06989744 | 3.80E-05 | 0.0063994 | 0.21875    |
| 7w11w_SITTI | 0.01046159 | 0.05635304 | 3.68E-05 | 0.0068    | 0.30902    |
| 7w11w_SITTI | 0.00862495 | 0.04501918 | 3.56E-05 | 0.0072456 | 0.38094    |
| 7w11w_SITTI | 0.07956708 | 0.48280308 | 4.93E-05 | 0.014315  | 0.15946    |
| 7w11w_SITTI | 0.01688868 | 0.09601462 | 4.03E-05 | 0.005729  | 0.063215   |

|             |            |            |          |           |            |
|-------------|------------|------------|----------|-----------|------------|
| 7w11w_SITTI | 0.01765943 | 0.10077091 | 4.06E-05 | 0.0056572 | 0.046584   |
| 7w11w_SITTI | 0.02213767 | 0.12840617 | 4.26E-05 | 0.0051742 | -0.068556  |
| 7w11w_SITTI | 0.03676948 | 0.21869905 | 4.79E-05 | 0.0045625 | -0.088896  |
| 7w11w_SITTI | 0.01860608 | 0.10661269 | 4.11E-05 | 0.0055212 | 0.015459   |
| 7w11w_SITTI | 0.01913986 | 0.10990666 | 4.14E-05 | 0.0054571 | 0.0010121  |
| 7w11w_SITTI | 0.01418062 | 0.07930321 | 3.89E-05 | 0.0061278 | 0.1561     |
| 7w11w_SITTI | 0.02879665 | 0.16949871 | 4.51E-05 | 0.0047064 | -0.12268   |
| 7w11w_SITTI | 0.0195754  | 0.1125944  | 4.16E-05 | 0.0053955 | -0.012659  |
| 7w11w_SITTI | 0.09366782 | 0.56981874 | 5.06E-05 | 0.0067258 | -0.7829    |
| 7w11w_SITTI | 0.03999511 | 0.23860441 | 4.95E-05 | 0.0046046 | -0.063007  |
| 7w11w_SITTI | 0.06665275 | 0.40310872 | 6.07E-05 | 0.0096573 | 0.18233    |
| 7w11w_SITTI | 0.08292822 | 0.5035446  | 4.78E-05 | 0.013315  | 0.02505    |
| 7w11w_SITTI | 0.08813808 | 0.5356947  | 4.80E-05 | 0.010188  | -0.3415    |
| 7w11w_SITTI | 0.01040087 | 0.05597835 | 3.68E-05 | 0.0068    | 0.30902    |
| 7w11w_SITTI | 0.02271632 | 0.13197704 | 4.28E-05 | 0.005125  | -0.077142  |
| 7w11w_SITTI | 0.08977241 | 0.5457801  | 4.86E-05 | 0.0090548 | -0.47194   |
| 7w11w_SITTI | 0.02619175 | 0.15342389 | 4.42E-05 | 0.0048445 | -0.11213   |
| 7w11w_SITTI | 0.014947   | 0.08403252 | 3.92E-05 | 0.0060428 | 0.1363     |
| 7w11w_SITTI | 0.03202418 | 0.18941584 | 4.62E-05 | 0.0046026 | -0.11821   |
| 7w11w_SITTI | 0.03550358 | 0.21088718 | 4.74E-05 | 0.0045622 | -0.10068   |
| 7w11w_SITTI | 0.00400335 | 0.01649928 | 3.32E-05 | 0.0082728 | 0.61153    |
| 7w11w_SITTI | 0.06741569 | 0.40781686 | 6.03E-05 | 0.009922  | 0.19037    |
| 7w11w_SITTI | 0.08347663 | 0.50692886 | 4.77E-05 | 0.013036  | -0.0045591 |
| 7w11w_SITTI | 0.0251375  | 0.1469181  | 4.38E-05 | 0.0049138 | -0.10343   |
| 7w11w_SITTI | 0.08703335 | 0.52887744 | 4.78E-05 | 0.010952  | -0.25808   |
| 7w11w_SITTI | 0.02631124 | 0.15416127 | 4.42E-05 | 0.0048445 | -0.11213   |
| 7w11w_SITTI | 0.01493595 | 0.0839643  | 3.92E-05 | 0.0060428 | 0.1363     |
| 7w11w_SITTI | 0.02243047 | 0.13021304 | 4.28E-05 | 0.005125  | -0.068556  |
| 7w11w_SITTI | 0.0097209  | 0.05178223 | 3.62E-05 | 0.0070172 | 0.33263    |
| 7w11w_SITTI | 0.05025497 | 0.30191803 | 5.78E-05 | 0.0052091 | 0.0043724  |
| 7w11w_SITTI | 0.00932225 | 0.04932217 | 3.62E-05 | 0.0070172 | 0.35661    |
| 7w11w_SITTI | 0.02587277 | 0.15145543 | 4.40E-05 | 0.0048781 | -0.10813   |
| 7w11w_SITTI | 0.06643704 | 0.4017776  | 6.12E-05 | 0.0093985 | 0.18233    |
| 7w11w_SITTI | 0.07904811 | 0.47960046 | 4.97E-05 | 0.014318  | 0.17506    |
| 7w11w_SITTI | 0.06295109 | 0.38026577 | 6.33E-05 | 0.0080056 | 0.12359    |
| 7w11w_SITTI | 0.08763772 | 0.53260696 | 4.79E-05 | 0.010571  | -0.29935   |
| 7w11w_SITTI | 0.02340813 | 0.13624616 | 4.32E-05 | 0.0050338 | -0.084895  |
| 7w11w_SITTI | 0.01625362 | 0.09209568 | 4.00E-05 | 0.0058035 | 0.080526   |
| 7w11w_SITTI | 0.09232524 | 0.56153363 | 4.99E-05 | 0.0073308 | -0.6503    |
| 7w11w_SITTI | 0.02923759 | 0.17221974 | 4.51E-05 | 0.0047064 | -0.1231    |
| 7w11w_SITTI | 0.01345284 | 0.07481206 | 3.83E-05 | 0.0063061 | 0.19734    |
| 7w11w_SITTI | 0.03850614 | 0.22941598 | 4.89E-05 | 0.0045836 | -0.076088  |
| 7w11w_SITTI | 0.03290991 | 0.19488166 | 4.64E-05 | 0.0045915 | -0.11603   |



|             |            |            |          |           |           |
|-------------|------------|------------|----------|-----------|-----------|
| 7w11w_SITTI | 0.06884106 | 0.4166128  | 5.87E-05 | 0.010741  | 0.21248   |
| 7w11w_SITTI | 0.0243132  | 0.14183137 | 4.34E-05 | 0.0049916 | -0.098011 |
| 7w11w_SITTI | 0.01192634 | 0.06539205 | 3.77E-05 | 0.0064954 | 0.24064   |
| 7w11w_SITTI | 0.01106997 | 0.0601074  | 3.71E-05 | 0.0066957 | 0.2858    |
| 7w11w_SITTI | 0.03937429 | 0.23477334 | 4.92E-05 | 0.0045932 | -0.071721 |
| 7w11w_SITTI | 0.07904963 | 0.4796099  | 4.97E-05 | 0.014318  | 0.17506   |
| 7w11w_SITTI | 0.08082641 | 0.4905744  | 4.85E-05 | 0.0141    | 0.12269   |
| 7w11w_SITTI | 0.02398306 | 0.13979408 | 4.34E-05 | 0.0049916 | -0.091842 |
| 7w11w_SITTI | 0.02182086 | 0.1264511  | 4.26E-05 | 0.0051742 | -0.059109 |
| 7w11w_SITTI | 0.02502118 | 0.14620027 | 4.38E-05 | 0.0049138 | -0.10343  |
| 7w11w_SITTI | 0.02761561 | 0.16221055 | 4.48E-05 | 0.0047558 | -0.12024  |
| 7w11w_SITTI | 0.01668988 | 0.09478784 | 4.00E-05 | 0.0058035 | 0.080526  |
| 7w11w_SITTI | 0.01524887 | 0.08589535 | 3.95E-05 | 0.0059603 | 0.11709   |
| 7w11w_SITTI | 0.0252818  | 0.1478086  | 4.38E-05 | 0.0049138 | -0.10343  |
| 7w11w_SITTI | 0.03502541 | 0.20793642 | 4.72E-05 | 0.0045646 | -0.10426  |
| 7w11w_SITTI | 0.01360342 | 0.07574131 | 3.86E-05 | 0.0062156 | 0.17645   |
| 7w11w_SITTI | 0.08563189 | 0.520229   | 4.76E-05 | 0.0117    | -0.14081  |
| 7w11w_SITTI | 0.03962884 | 0.23634417 | 4.95E-05 | 0.0046046 | -0.067351 |
| 7w11w_SITTI | 0.00714572 | 0.03589081 | 3.50E-05 | 0.0074854 | 0.45576   |
| 7w11w_SITTI | 0.05744691 | 0.3462995  | 6.32E-05 | 0.0064035 | 0.057806  |
| 7w11w_SITTI | 0.02297776 | 0.13359036 | 4.30E-05 | 0.0050782 | -0.077142 |
| 7w11w_SITTI | 0.07422024 | 0.44980773 | 5.38E-05 | 0.013116  | 0.24406   |
| 7w11w_SITTI | 0.08720166 | 0.529916   | 4.78E-05 | 0.010952  | -0.25808  |
| 7w11w_SITTI | 0.01281894 | 0.07090024 | 3.80E-05 | 0.0063994 | 0.21875   |
| 7w11w_SITTI | 0.09198736 | 0.5594486  | 4.96E-05 | 0.0076529 | -0.6503   |
| 7w11w_SITTI | 0.04672324 | 0.2801237  | 5.49E-05 | 0.0049251 | -0.018376 |
| 7w11w_SITTI | 0.02877341 | 0.16935532 | 4.51E-05 | 0.0047064 | -0.12268  |
| 7w11w_SITTI | 0.01998249 | 0.11510655 | 4.16E-05 | 0.0053955 | -0.025531 |
| 7w11w_SITTI | 0.07525407 | 0.45618746 | 5.28E-05 | 0.013537  | 0.23858   |
| 7w11w_SITTI | 0.0329539  | 0.19515315 | 4.64E-05 | 0.0045915 | -0.11352  |
| 7w11w_SITTI | 0.01231343 | 0.06778075 | 3.77E-05 | 0.0064954 | 0.24064   |
| 7w11w_SITTI | 0.05108906 | 0.30706516 | 5.87E-05 | 0.0053288 | 0.0077602 |
| 7w11w_SITTI | 0.02275115 | 0.13219194 | 4.30E-05 | 0.0050782 | -0.077142 |
| 7w11w_SITTI | 0.03106027 | 0.18346752 | 4.58E-05 | 0.00463   | -0.12145  |
| 7w11w_SITTI | 0.07629872 | 0.46263403 | 5.18E-05 | 0.013885  | 0.22792   |
| 7w11w_SITTI | 0.01230349 | 0.06771945 | 3.77E-05 | 0.0064954 | 0.24064   |
| 7w11w_SITTI | 0.01233574 | 0.06791844 | 3.77E-05 | 0.0064954 | 0.24064   |
| 7w11w_SITTI | 0.06224302 | 0.37589625 | 6.36E-05 | 0.0076138 | 0.11565   |
| 7w11w_SITTI | 0.01560623 | 0.08810064 | 3.95E-05 | 0.0059603 | 0.11709   |
| 7w11w_SITTI | 0.07007653 | 0.42423686 | 5.76E-05 | 0.011297  | 0.22487   |
| 7w11w_SITTI | 0.08651969 | 0.5257076  | 4.77E-05 | 0.01133   | -0.21781  |
| 7w11w_SITTI | 0.02878984 | 0.16945668 | 4.51E-05 | 0.0047064 | -0.12268  |
| 7w11w_SITTI | 0.05377608 | 0.3236468  | 6.10E-05 | 0.005694  | 0.026054  |

|             |            |            |          |           |            |
|-------------|------------|------------|----------|-----------|------------|
| 7w11w_SITTI | 0.01208514 | 0.06637197 | 3.77E-05 | 0.0064954 | 0.24064    |
| 7w11w_SITTI | 0.02506878 | 0.14649402 | 4.38E-05 | 0.0049138 | -0.10343   |
| 7w11w_SITTI | 0.05783537 | 0.34869668 | 6.32E-05 | 0.0064035 | 0.06315    |
| 7w11w_SITTI | 0.08499793 | 0.51631683 | 4.76E-05 | 0.012404  | -0.10433   |
| 7w11w_SITTI | 0.062199   | 0.37562463 | 6.36E-05 | 0.0076138 | 0.11565    |
| 7w11w_SITTI | 0.07990629 | 0.48489636 | 4.90E-05 | 0.014278  | 0.15946    |
| 7w11w_SITTI | 0.05770455 | 0.3478894  | 6.32E-05 | 0.0064035 | 0.057806   |
| 7w11w_SITTI | 0.08596078 | 0.5222585  | 4.76E-05 | 0.0117    | -0.17867   |
| 7w11w_SITTI | 0.07466918 | 0.45257813 | 5.33E-05 | 0.013335  | 0.24193    |
| 7w11w_SITTI | 0.02216193 | 0.12855585 | 4.26E-05 | 0.0051742 | -0.068556  |
| 7w11w_SITTI | 0.01428713 | 0.07996048 | 3.89E-05 | 0.0061278 | 0.1561     |
| 7w11w_SITTI | 0.01551621 | 0.08754514 | 3.95E-05 | 0.0059603 | 0.11709    |
| 7w11w_SITTI | 0.01648794 | 0.09354166 | 4.00E-05 | 0.0058035 | 0.080526   |
| 7w11w_SITTI | 0.02011561 | 0.11592802 | 4.19E-05 | 0.0053364 | -0.025531  |
| 7w11w_SITTI | 0.01231739 | 0.06780517 | 3.77E-05 | 0.0064954 | 0.24064    |
| 7w11w_SITTI | 0.02386006 | 0.13903505 | 4.34E-05 | 0.0049916 | -0.091842  |
| 7w11w_SITTI | 0.03836536 | 0.22854722 | 4.87E-05 | 0.0045758 | -0.076088  |
| 7w11w_SITTI | 0.08207737 | 0.49829406 | 4.81E-05 | 0.013778  | 0.078055   |
| 7w11w_SITTI | 0.01387893 | 0.07744145 | 3.86E-05 | 0.0062156 | 0.17645    |
| 7w11w_SITTI | 0.00689764 | 0.03435989 | 3.47E-05 | 0.0076096 | 0.48124    |
| 7w11w_SITTI | 0.06604471 | 0.3993565  | 6.16E-05 | 0.0091463 | 0.17407    |
| 7w11w_SITTI | 0.01018204 | 0.05462796 | 3.65E-05 | 0.0069072 | 0.33263    |
| 7w11w_SITTI | 0.07981574 | 0.48433754 | 4.90E-05 | 0.014278  | 0.15946    |
| 7w11w_SITTI | 0.03854826 | 0.22967589 | 4.89E-05 | 0.0045836 | -0.076088  |
| 7w11w_SITTI | 0.08332954 | 0.5060212  | 4.78E-05 | 0.013315  | -0.0045591 |
| 7w11w_SITTI | 0.01922028 | 0.11040294 | 4.14E-05 | 0.0054571 | 0.0010121  |
| 7w11w_SITTI | 0.07513461 | 0.45545033 | 5.28E-05 | 0.013537  | 0.23858    |
| 7w11w_SITTI | 0.07633133 | 0.46283528 | 5.18E-05 | 0.013885  | 0.22792    |
| 7w11w_SITTI | 0.01532336 | 0.08635502 | 3.95E-05 | 0.0059603 | 0.11709    |
| 7w11w_SITTI | 0.00935441 | 0.04952062 | 3.62E-05 | 0.0070172 | 0.35661    |
| 7w11w_SITTI | 0.09266235 | 0.56361395 | 5.02E-05 | 0.0070215 | -0.69483   |
| 7w11w_SITTI | 0.0413497  | 0.2469636  | 5.05E-05 | 0.0046492 | -0.054504  |
| 7w11w_SITTI | 0.02438377 | 0.14226687 | 4.36E-05 | 0.0049516 | -0.098011  |
| 7w11w_SITTI | 0.05556462 | 0.3346839  | 6.21E-05 | 0.005966  | 0.038579   |
| 7w11w_SITTI | 0.00831048 | 0.04307856 | 3.56E-05 | 0.0072456 | 0.40559    |
| 7w11w_SITTI | 0.06382258 | 0.38564372 | 6.30E-05 | 0.008216  | 0.14015    |
| 7w11w_SITTI | 0.0167638  | 0.09524401 | 4.00E-05 | 0.0058035 | 0.063215   |
| 7w11w_SITTI | 0.01805711 | 0.10322501 | 4.09E-05 | 0.0055879 | 0.030658   |
| 7w11w_SITTI | 0.0990087  | 0.6027773  | 5.45E-05 | 0.0045382 | -1.1701    |
| 7w11w_SITTI | 0.07998521 | 0.48538333 | 4.90E-05 | 0.014278  | 0.14202    |
| 7w11w_SITTI | 0.04388012 | 0.26257882 | 5.25E-05 | 0.0047605 | -0.035266  |
| 7w11w_SITTI | 0.02696705 | 0.15820828 | 4.44E-05 | 0.004813  | -0.11546   |
| 7w11w_SITTI | 0.01655225 | 0.09393852 | 4.00E-05 | 0.0058035 | 0.080526   |

|             |            |            |          |           |           |
|-------------|------------|------------|----------|-----------|-----------|
| 7w11w_SITTI | 0.07172994 | 0.4344401  | 5.60E-05 | 0.012118  | 0.2386    |
| 7w11w_SITTI | 0.03438575 | 0.20398907 | 4.70E-05 | 0.0045688 | -0.10761  |
| 7w11w_SITTI | 0.10416051 | 0.6345691  | 5.86E-05 | 0.0036344 | -1.3662   |
| 7w11w_SITTI | 0.02295678 | 0.13346091 | 4.30E-05 | 0.0050782 | -0.077142 |
| 7w11w_SITTI | 0.04234138 | 0.25308323 | 5.13E-05 | 0.0046879 | -0.04643  |
| 7w11w_SITTI | 0.08528689 | 0.5181     | 4.76E-05 | 0.012059  | -0.10433  |
| 7w11w_SITTI | 0.03179704 | 0.18801416 | 4.60E-05 | 0.0046154 | -0.12002  |
| 7w11w_SITTI | 0.01692875 | 0.09626191 | 4.03E-05 | 0.005729  | 0.063215  |
| 7w11w_SITTI | 0.01193048 | 0.0654176  | 3.77E-05 | 0.0064954 | 0.24064   |
| 7w11w_SITTI | 0.07195912 | 0.43585438 | 5.60E-05 | 0.012118  | 0.24161   |
| 7w11w_SITTI | 0.02143763 | 0.1240862  | 4.24E-05 | 0.0052258 | -0.04878  |
| 7w11w_SITTI | 0.0114756  | 0.06261052 | 3.74E-05 | 0.0065941 | 0.263     |
| 7w11w_SITTI | 0.03075028 | 0.18155456 | 4.57E-05 | 0.0046464 | -0.12245  |
| 7w11w_SITTI | 0.07279644 | 0.44102144 | 5.49E-05 | 0.012637  | 0.24373   |
| 7w11w_SITTI | 0.0733325  | 0.4443295  | 5.43E-05 | 0.012883  | 0.24489   |
| 7w11w_SITTI | 0.05628493 | 0.33912894 | 6.24E-05 | 0.0060668 | 0.047788  |
| 7w11w_SITTI | 0.02551401 | 0.14924155 | 4.40E-05 | 0.0048781 | -0.10813  |
| 7w11w_SITTI | 0.01721767 | 0.09804484 | 4.03E-05 | 0.005729  | 0.063215  |
| 7w11w_SITTI | 0.07762658 | 0.47082824 | 5.05E-05 | 0.014229  | 0.21153   |
| 7w11w_SITTI | 0.01537297 | 0.08666119 | 3.95E-05 | 0.0059603 | 0.11709   |
| 7w11w_SITTI | 0.01130225 | 0.06154079 | 3.71E-05 | 0.0066957 | 0.2858    |
| 7w11w_SITTI | 0.08996439 | 0.5469648  | 4.88E-05 | 0.0086895 | -0.47194  |
| 7w11w_SITTI | 0.01569135 | 0.0886259  | 3.95E-05 | 0.0059603 | 0.098494  |
| 7w11w_SITTI | 0.02272613 | 0.13203758 | 4.28E-05 | 0.005125  | -0.077142 |
| 7w11w_SITTI | 0.08136454 | 0.4938952  | 4.83E-05 | 0.013957  | 0.10139   |
| 7w11w_SITTI | 0.08181052 | 0.49664733 | 4.83E-05 | 0.013957  | 0.078055  |
| 7w11w_SITTI | 0.09719715 | 0.59159815 | 5.32E-05 | 0.0050496 | -1.03     |
| 7w11w_SITTI | 0.02434983 | 0.1420574  | 4.34E-05 | 0.0049916 | -0.098011 |
| 7w11w_SITTI | 0.1026014  | 0.62494785 | 5.74E-05 | 0.0037844 | -1.3227   |
| 7w11w_SITTI | 0.02669363 | 0.156521   | 4.44E-05 | 0.004813  | -0.11546  |
| 7w11w_SITTI | 0.01549543 | 0.0874169  | 3.95E-05 | 0.0059603 | 0.11709   |
| 7w11w_SITTI | 0.05577497 | 0.33598194 | 6.21E-05 | 0.005966  | 0.043089  |
| 7w11w_SITTI | 0.01348438 | 0.07500666 | 3.83E-05 | 0.0063061 | 0.19734   |
| 7w11w_SITTI | 0.02522758 | 0.14747396 | 4.38E-05 | 0.0049138 | -0.10343  |
| 7w11w_SITTI | 0.01430624 | 0.08007836 | 3.89E-05 | 0.0061278 | 0.1561    |
| 7w11w_SITTI | 0.02501888 | 0.14618614 | 4.38E-05 | 0.0049138 | -0.10343  |
| 7w11w_SITTI | 0.02011263 | 0.11590964 | 4.19E-05 | 0.0053364 | -0.025531 |
| 7w11w_SITTI | 0.02435829 | 0.1421096  | 4.34E-05 | 0.0049916 | -0.098011 |
| 7w11w_SITTI | 0.03474917 | 0.2062317  | 4.72E-05 | 0.0045646 | -0.10426  |
| 7w11w_SITTI | 0.0175704  | 0.1002215  | 4.06E-05 | 0.0056572 | 0.046584  |
| 7w11w_SITTI | 0.02483912 | 0.14507681 | 4.36E-05 | 0.0049516 | -0.10343  |
| 7w11w_SITTI | 0.02305768 | 0.13408357 | 4.30E-05 | 0.0050782 | -0.077142 |
| 7w11w_SITTI | 0.08019636 | 0.48668635 | 4.87E-05 | 0.014207  | 0.14202   |

|             |            |            |          |           |           |
|-------------|------------|------------|----------|-----------|-----------|
| 7w11w_SITTI | 0.07685593 | 0.46607256 | 5.13E-05 | 0.014025  | 0.22047   |
| 7w11w_SITTI | 0.02354358 | 0.13708204 | 4.32E-05 | 0.0050338 | -0.084895 |
| 7w11w_SITTI | 0.03532755 | 0.20980088 | 4.74E-05 | 0.0045622 | -0.10068  |
| 7w11w_SITTI | 0.01600184 | 0.09054195 | 3.98E-05 | 0.0058806 | 0.098494  |
| 7w11w_SITTI | 0.0703678  | 0.4260343  | 5.76E-05 | 0.011297  | 0.23016   |
| 7w11w_SITTI | 0.03520867 | 0.20906731 | 4.74E-05 | 0.0045622 | -0.10068  |
| 7w11w_SITTI | 0.01338325 | 0.07438265 | 3.83E-05 | 0.0063061 | 0.19734   |
| 7w11w_SITTI | 0.05824327 | 0.3512138  | 6.34E-05 | 0.0065282 | 0.06315   |
| 7w11w_SITTI | 0.0691682  | 0.41863155 | 5.87E-05 | 0.010741  | 0.21895   |
| 7w11w_SITTI | 0.00968208 | 0.05154269 | 3.62E-05 | 0.0070172 | 0.35661   |
| 7w11w_SITTI | 0.02325522 | 0.13530254 | 4.30E-05 | 0.0050782 | -0.084895 |
| 7w11w_SITTI | 0.09299146 | 0.5656449  | 5.02E-05 | 0.0070215 | -0.73907  |
| 7w11w_SITTI | 0.01838423 | 0.10524368 | 4.09E-05 | 0.0055879 | 0.015459  |
| 7w11w_SITTI | 0.02198801 | 0.1274826  | 4.26E-05 | 0.0051742 | -0.059109 |
| 7w11w_SITTI | 0.03905748 | 0.2328183  | 4.92E-05 | 0.0045932 | -0.071721 |
| 7w11w_SITTI | 0.09364412 | 0.56967247 | 5.06E-05 | 0.0067258 | -0.7829   |
| 7w11w_SITTI | 0.0169233  | 0.09622829 | 4.03E-05 | 0.005729  | 0.063215  |
| 7w11w_SITTI | 0.02143233 | 0.12405351 | 4.24E-05 | 0.0052258 | -0.04878  |
| 7w11w_SITTI | 0.00797398 | 0.04100199 | 3.53E-05 | 0.0073641 | 0.43054   |
| 7w11w_SITTI | 0.08752378 | 0.53190386 | 4.79E-05 | 0.010571  | -0.29935  |
| 7w11w_SITTI | 0.06691877 | 0.40475032 | 6.07E-05 | 0.0096573 | 0.18233   |
| 7w11w_SITTI | 0.04270982 | 0.2553569  | 5.13E-05 | 0.0046879 | -0.042593 |
| 7w11w_SITTI | 0.02144594 | 0.12413748 | 4.24E-05 | 0.0052258 | -0.04878  |
| 7w11w_SITTI | 0.08894896 | 0.5406986  | 4.84E-05 | 0.0094274 | -0.3844   |
| 7w11w_SITTI | 0.01665427 | 0.09456807 | 4.00E-05 | 0.0058035 | 0.080526  |
| 7w11w_SITTI | 0.01471401 | 0.08259472 | 3.92E-05 | 0.0060428 | 0.1363    |
| 7w11w_SITTI | 0.02334556 | 0.13586003 | 4.32E-05 | 0.0050338 | -0.084895 |
| 7w11w_SITTI | 0.07608265 | 0.46130067 | 5.18E-05 | 0.013885  | 0.23393   |
| 7w11w_SITTI | 0.03622837 | 0.2153599  | 4.77E-05 | 0.0045615 | -0.092976 |
| 7w11w_SITTI | 0.09131526 | 0.5553011  | 4.93E-05 | 0.0079874 | -0.60562  |
| 7w11w_SITTI | 0.05048093 | 0.3033124  | 5.83E-05 | 0.0052672 | 0.0043724 |
| 7w11w_SITTI | 0.015245   | 0.08587145 | 3.95E-05 | 0.0059603 | 0.11709   |
| 7w11w_SITTI | 0.017178   | 0.09779999 | 4.03E-05 | 0.005729  | 0.063215  |
| 7w11w_SITTI | 0.03060237 | 0.18064183 | 4.57E-05 | 0.0046464 | -0.12245  |
| 7w11w_SITTI | 0.06691143 | 0.40470505 | 6.07E-05 | 0.0096573 | 0.18233   |
| 7w11w_SITTI | 0.03301017 | 0.19550039 | 4.64E-05 | 0.0045915 | -0.11352  |
| 7w11w_SITTI | 0.01172823 | 0.0641695  | 3.74E-05 | 0.0065941 | 0.263     |
| 7w11w_SITTI | 0.06188588 | 0.3736924  | 6.36E-05 | 0.0076138 | 0.10802   |
| 7w11w_SITTI | 0.08241055 | 0.5003501  | 4.79E-05 | 0.013563  | 0.05262   |
| 7w11w_SITTI | 0.01919559 | 0.11025056 | 4.14E-05 | 0.0054571 | 0.0010121 |
| 7w11w_SITTI | 0.02411475 | 0.14060672 | 4.34E-05 | 0.0049916 | -0.091842 |
| 7w11w_SITTI | 0.0519134  | 0.31215218 | 5.92E-05 | 0.0053939 | 0.014768  |
| 7w11w_SITTI | 0.01783305 | 0.10184234 | 4.06E-05 | 0.0056572 | 0.030658  |

|             |            |            |          |           |           |
|-------------|------------|------------|----------|-----------|-----------|
| 7w11w_SITTI | 0.01698396 | 0.0966026  | 4.03E-05 | 0.005729  | 0.063215  |
| 7w11w_SITTI | 0.0221702  | 0.12860689 | 4.26E-05 | 0.0051742 | -0.068556 |
| 7w11w_SITTI | 0.03918653 | 0.23361465 | 4.92E-05 | 0.0045932 | -0.071721 |
| 7w11w_SITTI | 0.04581929 | 0.27454543 | 5.39E-05 | 0.0048522 | -0.024952 |
| 7w11w_SITTI | 0.07334863 | 0.44442898 | 5.43E-05 | 0.012883  | 0.24489   |
| 7w11w_SITTI | 0.02446549 | 0.14277115 | 4.36E-05 | 0.0049516 | -0.098011 |
| 7w11w_SITTI | 0.01162578 | 0.06353728 | 3.74E-05 | 0.0065941 | 0.263     |
| 7w11w_SITTI | 0.01496247 | 0.08412802 | 3.92E-05 | 0.0060428 | 0.1363    |
| 7w11w_SITTI | 0.08971085 | 0.5454002  | 4.86E-05 | 0.0090548 | -0.47194  |
| 7w11w_SITTI | 0.00994056 | 0.05313779 | 3.65E-05 | 0.0069072 | 0.33263   |
| 7w11w_SITTI | 0.01151138 | 0.06283131 | 3.74E-05 | 0.0065941 | 0.263     |
| 7w11w_SITTI | 0.01143893 | 0.0623842  | 3.74E-05 | 0.0065941 | 0.263     |
| 7w11w_SITTI | 0.01326345 | 0.07364333 | 3.83E-05 | 0.0063061 | 0.19734   |
| 7w11w_SITTI | 0.0936572  | 0.56975317 | 5.06E-05 | 0.0067258 | -0.7829   |
| 7w11w_SITTI | 0.01494317 | 0.08400887 | 3.92E-05 | 0.0060428 | 0.1363    |
| 7w11w_SITTI | 0.03497358 | 0.20761654 | 4.72E-05 | 0.0045646 | -0.10426  |
| 7w11w_SITTI | 0.02702505 | 0.15856618 | 4.44E-05 | 0.004813  | -0.11816  |
| 7w11w_SITTI | 0.03417358 | 0.20267977 | 4.70E-05 | 0.0045688 | -0.10761  |
| 7w11w_SITTI | 0.05866174 | 0.35379624 | 6.35E-05 | 0.0066597 | 0.068735  |
| 7w11w_SITTI | 0.04109321 | 0.24538079 | 5.02E-05 | 0.0046325 | -0.054504 |
| 7w11w_SITTI | 0.09613226 | 0.58502674 | 5.24E-05 | 0.0054581 | -0.99133  |
| 7w11w_SITTI | 0.04696499 | 0.28161556 | 5.49E-05 | 0.0049251 | -0.018376 |
| 7w11w_SITTI | 0.01191274 | 0.06530812 | 3.77E-05 | 0.0064954 | 0.24064   |
| 7w11w_SITTI | 0.0962145  | 0.5855343  | 5.24E-05 | 0.0054581 | -0.99133  |
| 7w11w_SITTI | 0.07387855 | 0.44769913 | 5.38E-05 | 0.013116  | 0.24502   |
| 7w11w_SITTI | 0.02610195 | 0.15286975 | 4.42E-05 | 0.0048445 | -0.11213  |
| 7w11w_SITTI | 0.03008515 | 0.17745009 | 4.55E-05 | 0.0046645 | -0.12301  |
| 7w11w_SITTI | 0.02884596 | 0.16980302 | 4.51E-05 | 0.0047064 | -0.12268  |
| 7w11w_SITTI | 0.02351735 | 0.13692018 | 4.32E-05 | 0.0050338 | -0.084895 |
| 7w11w_SITTI | 0.08968003 | 0.54521006 | 4.86E-05 | 0.0090548 | -0.47194  |
| 7w11w_SITTI | 0.02800982 | 0.1646432  | 4.48E-05 | 0.0047558 | -0.12024  |
| 7w11w_SITTI | 0.02497759 | 0.14593133 | 4.38E-05 | 0.0049138 | -0.10343  |
| 7w11w_SITTI | 0.02957184 | 0.17428245 | 4.53E-05 | 0.0046846 | -0.1231   |
| 7w11w_SITTI | 0.08002603 | 0.48563525 | 4.90E-05 | 0.014278  | 0.14202   |
| 7w11w_SITTI | 0.02886551 | 0.16992366 | 4.51E-05 | 0.0047064 | -0.12268  |
| 7w11w_SITTI | 0.04759365 | 0.285495   | 5.53E-05 | 0.0049654 | -0.01192  |
| 7w11w_SITTI | 0.079941   | 0.48511052 | 4.90E-05 | 0.014278  | 0.14202   |
| 7w11w_SITTI | 0.08005668 | 0.4858244  | 4.90E-05 | 0.014278  | 0.14202   |
| 7w11w_SITTI | 0.01908349 | 0.10955878 | 4.14E-05 | 0.0054571 | 0.0010121 |
| 7w11w_SITTI | 0.01833917 | 0.10496564 | 4.09E-05 | 0.0055879 | 0.030658  |
| 7w11w_SITTI | 0.08684325 | 0.52770424 | 4.78E-05 | 0.010952  | -0.21781  |
| 7w11w_SITTI | 0.08812466 | 0.53561187 | 4.80E-05 | 0.010188  | -0.3415   |
| 7w11w_SITTI | 0.08772284 | 0.53313226 | 4.79E-05 | 0.010571  | -0.29935  |

|             |            |            |          |           |            |
|-------------|------------|------------|----------|-----------|------------|
| 7w11w_SITTI | 0.01256949 | 0.06936093 | 3.80E-05 | 0.0063994 | 0.21875    |
| 7w11w_SITTI | 0.09887421 | 0.60194737 | 5.45E-05 | 0.0045382 | -1.1701    |
| 7w11w_SITTI | 0.0098588  | 0.05263324 | 3.65E-05 | 0.0069072 | 0.33263    |
| 7w11w_SITTI | 0.00895142 | 0.04703377 | 3.59E-05 | 0.00713   | 0.38094    |
| 7w11w_SITTI | 0.0149452  | 0.08402143 | 3.92E-05 | 0.0060428 | 0.1363     |
| 7w11w_SITTI | 0.08209267 | 0.49838847 | 4.81E-05 | 0.013778  | 0.05262    |
| 7w11w_SITTI | 0.0528205  | 0.31774992 | 6.01E-05 | 0.0055357 | 0.018414   |
| 7w11w_SITTI | 0.01664156 | 0.09448963 | 4.00E-05 | 0.0058035 | 0.080526   |
| 7w11w_SITTI | 0.02598535 | 0.1521502  | 4.40E-05 | 0.0048781 | -0.11213   |
| 7w11w_SITTI | 0.01912878 | 0.1098383  | 4.14E-05 | 0.0054571 | 0.0010121  |
| 7w11w_SITTI | 0.0201537  | 0.11616308 | 4.19E-05 | 0.0053364 | -0.025531  |
| 7w11w_SITTI | 0.01557327 | 0.08789725 | 3.95E-05 | 0.0059603 | 0.11709    |
| 7w11w_SITTI | 0.01681748 | 0.09557526 | 4.03E-05 | 0.005729  | 0.063215   |
| 7w11w_SITTI | 0.01425928 | 0.07978859 | 3.89E-05 | 0.0061278 | 0.1561     |
| 7w11w_SITTI | 0.10237711 | 0.62356377 | 5.70E-05 | 0.0038563 | -1.3227    |
| 7w11w_SITTI | 0.08107874 | 0.4921315  | 4.85E-05 | 0.0141    | 0.10139    |
| 7w11w_SITTI | 0.09693147 | 0.5899587  | 5.28E-05 | 0.0052469 | -1.03      |
| 7w11w_SITTI | 0.01888988 | 0.10836407 | 4.11E-05 | 0.0055212 | 0.0010121  |
| 7w11w_SITTI | 0.02974261 | 0.17533626 | 4.53E-05 | 0.0046846 | -0.12301   |
| 7w11w_SITTI | 0.03211618 | 0.18998355 | 4.62E-05 | 0.0046026 | -0.11821   |
| 7w11w_SITTI | 0.0780749  | 0.47359478 | 5.01E-05 | 0.014289  | 0.20103    |
| 7w11w_SITTI | 0.07943434 | 0.48198396 | 4.93E-05 | 0.014315  | 0.15946    |
| 7w11w_SITTI | 0.02757604 | 0.16196634 | 4.46E-05 | 0.0047834 | -0.12024   |
| 7w11w_SITTI | 0.03264684 | 0.19325827 | 4.64E-05 | 0.0045915 | -0.11603   |
| 7w11w_SITTI | 0.08538971 | 0.5187345  | 4.76E-05 | 0.012059  | -0.14081   |
| 7w11w_SITTI | 0.01711667 | 0.09742158 | 4.03E-05 | 0.005729  | 0.063215   |
| 7w11w_SITTI | 0.0338365  | 0.20059961 | 4.68E-05 | 0.0045746 | -0.11071   |
| 7w11w_SITTI | 0.0245584  | 0.14334446 | 4.36E-05 | 0.0049516 | -0.098011  |
| 7w11w_SITTI | 0.01318928 | 0.07318562 | 3.83E-05 | 0.0063061 | 0.19734    |
| 7w11w_SITTI | 0.08871163 | 0.53923404 | 4.82E-05 | 0.0098057 | -0.3844    |
| 7w11w_SITTI | 0.0464758  | 0.27859676 | 5.44E-05 | 0.0048874 | -0.018376  |
| 7w11w_SITTI | 0.0181456  | 0.10377107 | 4.09E-05 | 0.0055879 | 0.030658   |
| 7w11w_SITTI | 0.00907018 | 0.04776667 | 3.59E-05 | 0.00713   | 0.38094    |
| 7w11w_SITTI | 0.02399442 | 0.13986416 | 4.34E-05 | 0.0049916 | -0.091842  |
| 7w11w_SITTI | 0.02330115 | 0.13558596 | 4.32E-05 | 0.0050338 | -0.084895  |
| 7w11w_SITTI | 0.04944794 | 0.29693782 | 5.73E-05 | 0.0051543 | -0.0022352 |
| 7w11w_SITTI | 0.02192769 | 0.12711038 | 4.26E-05 | 0.0051742 | -0.059109  |
| 7w11w_SITTI | 0.08098942 | 0.49158034 | 4.85E-05 | 0.0141    | 0.12269    |
| 7w11w_SITTI | 0.09072731 | 0.5516728  | 4.91E-05 | 0.0083333 | -0.56091   |
| 7w11w_SITTI | 0.08669166 | 0.52676886 | 4.78E-05 | 0.010952  | -0.21781   |
| 7w11w_SITTI | 0.05322962 | 0.32027456 | 6.05E-05 | 0.0056127 | 0.022172   |
| 7w11w_SITTI | 0.06688532 | 0.40454388 | 6.07E-05 | 0.0096573 | 0.18233    |
| 7w11w_SITTI | 0.08394512 | 0.5098199  | 4.77E-05 | 0.013036  | -0.036078  |

|             |            |            |          |           |            |
|-------------|------------|------------|----------|-----------|------------|
| 7w11w_SITTI | 0.02373645 | 0.13827223 | 4.32E-05 | 0.0050338 | -0.084895  |
| 7w11w_SITTI | 0.084061   | 0.510535   | 4.76E-05 | 0.012731  | -0.036078  |
| 7w11w_SITTI | 0.03058798 | 0.18055306 | 4.57E-05 | 0.0046464 | -0.12245   |
| 7w11w_SITTI | 0.01788479 | 0.1021616  | 4.09E-05 | 0.0055879 | 0.030658   |
| 7w11w_SITTI | 0.06173415 | 0.37275603 | 6.37E-05 | 0.0074328 | 0.10802    |
| 7w11w_SITTI | 0.02273237 | 0.13207605 | 4.28E-05 | 0.005125  | -0.077142  |
| 7w11w_SITTI | 0.01621767 | 0.0918738  | 3.98E-05 | 0.0058806 | 0.080526   |
| 7w11w_SITTI | 0.02981619 | 0.17579031 | 4.55E-05 | 0.0046645 | -0.12301   |
| 7w11w_SITTI | 0.09162182 | 0.55719286 | 4.96E-05 | 0.0076529 | -0.60562   |
| 7w11w_SITTI | 0.08003843 | 0.48571175 | 4.90E-05 | 0.014278  | 0.14202    |
| 7w11w_SITTI | 0.08168016 | 0.4958429  | 4.83E-05 | 0.013957  | 0.078055   |
| 7w11w_SITTI | 0.0182701  | 0.10453938 | 4.09E-05 | 0.0055879 | 0.030658   |
| 7w11w_SITTI | 0.07023519 | 0.42521593 | 5.76E-05 | 0.011297  | 0.23016    |
| 7w11w_SITTI | 0.09800691 | 0.5965952  | 5.36E-05 | 0.0048658 | -1.1032    |
| 7w11w_SITTI | 0.03287143 | 0.19464421 | 4.64E-05 | 0.0045915 | -0.11603   |
| 7w11w_SITTI | 0.07714613 | 0.46786338 | 5.09E-05 | 0.014141  | 0.22047    |
| 7w11w_SITTI | 0.08348577 | 0.50698525 | 4.77E-05 | 0.013036  | -0.0045591 |
| 7w11w_SITTI | 0.01064545 | 0.05748763 | 3.68E-05 | 0.0068    | 0.30902    |
| 7w11w_SITTI | 0.02033314 | 0.11727042 | 4.19E-05 | 0.0053364 | -0.025531  |
| 7w11w_SITTI | 0.0272281  | 0.15981923 | 4.46E-05 | 0.0047834 | -0.11816   |
| 7w11w_SITTI | 0.0191797  | 0.11015254 | 4.14E-05 | 0.0054571 | 0.0010121  |
| 7w11w_SITTI | 0.02137528 | 0.12370147 | 4.24E-05 | 0.0052258 | -0.04878   |
| 7w11w_SITTI | 0.02973096 | 0.17526433 | 4.53E-05 | 0.0046846 | -0.12301   |
| 7w11w_SITTI | 0.02688698 | 0.15771417 | 4.44E-05 | 0.004813  | -0.11546   |
| 7w11w_SITTI | 0.0220073  | 0.12760162 | 4.26E-05 | 0.0051742 | -0.059109  |
| 7w11w_SITTI | 0.01509753 | 0.08496147 | 3.92E-05 | 0.0060428 | 0.1363     |
| 7w11w_SITTI | 0.01877771 | 0.10767183 | 4.11E-05 | 0.0055212 | 0.015459   |
| 7w11w_SITTI | 0.04105188 | 0.24512577 | 5.02E-05 | 0.0046325 | -0.054504  |
| 7w11w_SITTI | 0.03540454 | 0.21027602 | 4.74E-05 | 0.0045622 | -0.10068   |
| 7w11w_SITTI | 0.02212098 | 0.1283032  | 4.26E-05 | 0.0051742 | -0.059109  |
| 7w11w_SITTI | 0.01689668 | 0.09606399 | 4.03E-05 | 0.005729  | 0.063215   |
| 7w11w_SITTI | 0.09478498 | 0.5767127  | 5.13E-05 | 0.0061762 | -0.8688    |
| 7w11w_SITTI | 0.01147914 | 0.06263238 | 3.74E-05 | 0.0065941 | 0.263      |
| 7w11w_SITTI | 0.01159787 | 0.06336506 | 3.74E-05 | 0.0065941 | 0.263      |
| 7w11w_SITTI | 0.02278792 | 0.13241883 | 4.30E-05 | 0.0050782 | -0.077142  |
| 7w11w_SITTI | 0.08702943 | 0.5288532  | 4.78E-05 | 0.010952  | -0.25808   |
| 7w11w_SITTI | 0.02588142 | 0.15150884 | 4.40E-05 | 0.0048781 | -0.10813   |
| 7w11w_SITTI | 0.01638153 | 0.09288501 | 4.00E-05 | 0.0058035 | 0.080526   |
| 7w11w_SITTI | 0.02633062 | 0.15428084 | 4.42E-05 | 0.0048445 | -0.11213   |
| 7w11w_SITTI | 0.03137008 | 0.18537936 | 4.58E-05 | 0.00463   | -0.12002   |
| 7w11w_SITTI | 0.06985422 | 0.42286497 | 5.82E-05 | 0.011019  | 0.22487    |
| 7w11w_SITTI | 0.00793203 | 0.04074311 | 3.53E-05 | 0.0073641 | 0.43054    |
| 7w11w_SITTI | 0.01511502 | 0.08506938 | 3.92E-05 | 0.0060428 | 0.11709    |

|             |            |            |          |           |           |
|-------------|------------|------------|----------|-----------|-----------|
| 7w11w_SITTI | 0.02067348 | 0.11937062 | 4.21E-05 | 0.0052798 | -0.037579 |
| 7w11w_SITTI | 0.07650898 | 0.46393156 | 5.13E-05 | 0.014025  | 0.22792   |
| 7w11w_SITTI | 0.02058382 | 0.11881734 | 4.21E-05 | 0.0052798 | -0.037579 |
| 7w11w_SITTI | 0.02374232 | 0.13830844 | 4.32E-05 | 0.0050338 | -0.084895 |
| 7w11w_SITTI | 0.01099827 | 0.05966489 | 3.71E-05 | 0.0066957 | 0.2858    |
| 7w11w_SITTI | 0.08950447 | 0.54412663 | 4.86E-05 | 0.0090548 | -0.42792  |
| 7w11w_SITTI | 0.08680557 | 0.5274717  | 4.78E-05 | 0.010952  | -0.21781  |
| 7w11w_SITTI | 0.0829094  | 0.50342846 | 4.78E-05 | 0.013315  | 0.02505   |
| 7w11w_SITTI | 0.01141328 | 0.06222591 | 3.74E-05 | 0.0065941 | 0.263     |
| 7w11w_SITTI | 0.02657565 | 0.15579292 | 4.44E-05 | 0.004813  | -0.11546  |
| 7w11w_SITTI | 0.09925825 | 0.60431725 | 5.49E-05 | 0.0043938 | -1.1701   |
| 7w11w_SITTI | 0.02880377 | 0.16954269 | 4.51E-05 | 0.0047064 | -0.12268  |
| 7w11w_SITTI | 0.02426624 | 0.14154159 | 4.34E-05 | 0.0049916 | -0.091842 |
| 7w11w_SITTI | 0.00918588 | 0.04848064 | 3.59E-05 | 0.00713   | 0.35661   |
| 7w11w_SITTI | 0.05536947 | 0.33347958 | 6.21E-05 | 0.005966  | 0.038579  |
| 7w11w_SITTI | 0.01267526 | 0.07001361 | 3.80E-05 | 0.0063994 | 0.21875   |
| 7w11w_SITTI | 0.0167888  | 0.09539826 | 4.03E-05 | 0.005729  | 0.063215  |
| 7w11w_SITTI | 0.01608887 | 0.091079   | 3.98E-05 | 0.0058806 | 0.098494  |
| 7w11w_SITTI | 0.02245477 | 0.13036302 | 4.28E-05 | 0.005125  | -0.068556 |
| 7w11w_SITTI | 0.09352022 | 0.5689079  | 5.06E-05 | 0.0067258 | -0.7829   |
| 7w11w_SITTI | 0.02667135 | 0.1563835  | 4.44E-05 | 0.004813  | -0.11546  |
| 7w11w_SITTI | 0.05781061 | 0.34854388 | 6.32E-05 | 0.0064035 | 0.06315   |
| 7w11w_SITTI | 0.01417487 | 0.0792677  | 3.89E-05 | 0.0061278 | 0.1561    |
| 7w11w_SITTI | 0.04192326 | 0.250503   | 5.09E-05 | 0.0046676 | -0.0504   |
| 7w11w_SITTI | 0.01525005 | 0.08590262 | 3.95E-05 | 0.0059603 | 0.11709   |
| 7w11w_SITTI | 0.06850533 | 0.414541   | 5.93E-05 | 0.010465  | 0.20551   |
| 7w11w_SITTI | 0.08375727 | 0.50866073 | 4.77E-05 | 0.013036  | -0.036078 |
| 7w11w_SITTI | 0.06675167 | 0.4037192  | 6.07E-05 | 0.0096573 | 0.18233   |
| 7w11w_SITTI | 0.02092915 | 0.12094836 | 4.21E-05 | 0.0052798 | -0.037579 |
| 7w11w_SITTI | 0.02728344 | 0.1601607  | 4.46E-05 | 0.0047834 | -0.11816  |
| 7w11w_SITTI | 0.08177578 | 0.496433   | 4.83E-05 | 0.013957  | 0.078055  |
| 7w11w_SITTI | 0.07317004 | 0.44332695 | 5.43E-05 | 0.012883  | 0.24489   |
| 7w11w_SITTI | 0.01913188 | 0.10985742 | 4.14E-05 | 0.0054571 | 0.0010121 |
| 7w11w_SITTI | 0.01568013 | 0.08855669 | 3.95E-05 | 0.0059603 | 0.098494  |
| 7w11w_SITTI | 0.08887481 | 0.54024106 | 4.84E-05 | 0.0094274 | -0.3844   |
| 7w11w_SITTI | 0.07502607 | 0.45478052 | 5.28E-05 | 0.013537  | 0.24193   |
| 7w11w_SITTI | 0.01575832 | 0.08903918 | 3.98E-05 | 0.0058806 | 0.098494  |
| 7w11w_SITTI | 0.02726532 | 0.16004889 | 4.46E-05 | 0.0047834 | -0.11816  |
| 7w11w_SITTI | 0.01615259 | 0.09147222 | 3.98E-05 | 0.0058806 | 0.098494  |
| 7w11w_SITTI | 0.0301023  | 0.17755592 | 4.55E-05 | 0.0046645 | -0.12301  |
| 7w11w_SITTI | 0.00511293 | 0.02334648 | 3.38E-05 | 0.0079991 | 0.55892   |
| 7w11w_SITTI | 0.00783532 | 0.04014635 | 3.53E-05 | 0.0073641 | 0.43054   |
| 7w11w_SITTI | 0.0707875  | 0.42862427 | 5.71E-05 | 0.011574  | 0.23476   |



|             |            |            |          |           |            |
|-------------|------------|------------|----------|-----------|------------|
| 7w11w_SITTI | 0.07854959 | 0.47652417 | 5.01E-05 | 0.014289  | 0.18889    |
| 7w11w_SITTI | 0.08382242 | 0.50906277 | 4.77E-05 | 0.013036  | -0.036078  |
| 7w11w_SITTI | 0.10531102 | 0.6416689  | 5.94E-05 | 0.0035815 | -1.3882    |
| 7w11w_SITTI | 0.03507407 | 0.20823666 | 4.72E-05 | 0.0045646 | -0.10426   |
| 7w11w_SITTI | 0.05546491 | 0.33406854 | 6.21E-05 | 0.005966  | 0.038579   |
| 7w11w_SITTI | 0.10151059 | 0.61821645 | 5.66E-05 | 0.0039398 | -1.2808    |
| 7w11w_SITTI | 0.0612793  | 0.3699492  | 6.37E-05 | 0.0074328 | 0.10072    |
| 7w11w_SITTI | 0.08326984 | 0.5056528  | 4.78E-05 | 0.013315  | -0.0045591 |
| 7w11w_SITTI | 0.09760553 | 0.5941183  | 5.36E-05 | 0.0048658 | -1.0673    |
| 7w11w_SITTI | 0.01488682 | 0.08366112 | 3.92E-05 | 0.0060428 | 0.1363     |
| 7w11w_SITTI | 0.01024803 | 0.05503515 | 3.65E-05 | 0.0069072 | 0.30902    |
| 7w11w_SITTI | 0.07350257 | 0.445379   | 5.43E-05 | 0.012883  | 0.24502    |
| 7w11w_SITTI | 0.02368243 | 0.1379389  | 4.32E-05 | 0.0050338 | -0.084895  |
| 7w11w_SITTI | 0.09234742 | 0.56167054 | 4.99E-05 | 0.0073308 | -0.69483   |
| 7w11w_SITTI | 0.06671776 | 0.4035099  | 6.07E-05 | 0.0096573 | 0.18233    |
| 7w11w_SITTI | 0.0208609  | 0.12052721 | 4.21E-05 | 0.0052798 | -0.037579  |
| 7w11w_SITTI | 0.03272057 | 0.19371322 | 4.64E-05 | 0.0045915 | -0.11603   |
| 7w11w_SITTI | 0.05818357 | 0.35084543 | 6.34E-05 | 0.0065282 | 0.06315    |
| 7w11w_SITTI | 0.08456781 | 0.5136625  | 4.76E-05 | 0.012404  | -0.069378  |
| 7w11w_SITTI | 0.08503111 | 0.5165216  | 4.76E-05 | 0.012404  | -0.10433   |
| 7w11w_SITTI | 0.08599321 | 0.5224587  | 4.76E-05 | 0.0117    | -0.17867   |
| 7w11w_SITTI | 0.03220544 | 0.1905344  | 4.62E-05 | 0.0046026 | -0.11821   |
| 7w11w_SITTI | 0.02525117 | 0.14761956 | 4.38E-05 | 0.0049138 | -0.10343   |
| 7w11w_SITTI | 0.01088422 | 0.05896112 | 3.71E-05 | 0.0066957 | 0.2858     |
| 7w11w_SITTI | 0.09254789 | 0.5629076  | 4.99E-05 | 0.0073308 | -0.69483   |
| 7w11w_SITTI | 0.0563344  | 0.3394342  | 6.24E-05 | 0.0060668 | 0.047788   |
| 7w11w_SITTI | 0.02805888 | 0.16494595 | 4.48E-05 | 0.0047558 | -0.12024   |
| 7w11w_SITTI | 0.08503842 | 0.51656663 | 4.76E-05 | 0.012404  | -0.10433   |
| 7w11w_SITTI | 0.0862447  | 0.52401066 | 4.77E-05 | 0.01133   | -0.17867   |
| 7w11w_SITTI | 0.01783451 | 0.10185132 | 4.06E-05 | 0.0056572 | 0.030658   |
| 7w11w_SITTI | 0.08726966 | 0.53033566 | 4.79E-05 | 0.010571  | -0.25808   |
| 7w11w_SITTI | 0.02401115 | 0.1399674  | 4.34E-05 | 0.0049916 | -0.091842  |
| 7w11w_SITTI | 0.01895382 | 0.1087586  | 4.14E-05 | 0.0054571 | 0.0010121  |
| 7w11w_SITTI | 0.00750375 | 0.03810025 | 3.50E-05 | 0.0074854 | 0.45576    |
| 7w11w_SITTI | 0.08445354 | 0.5129574  | 4.76E-05 | 0.012731  | -0.069378  |
| 7w11w_SITTI | 0.01698409 | 0.09660339 | 4.03E-05 | 0.005729  | 0.063215   |
| 7w11w_SITTI | 0.06328872 | 0.38234928 | 6.33E-05 | 0.0080056 | 0.13178    |
| 7w11w_SITTI | 0.02184211 | 0.12658228 | 4.26E-05 | 0.0051742 | -0.059109  |
| 7w11w_SITTI | 0.03460384 | 0.2053349  | 4.70E-05 | 0.0045688 | -0.10426   |
| 7w11w_SITTI | 0.02394417 | 0.13955405 | 4.34E-05 | 0.0049916 | -0.091842  |
| 7w11w_SITTI | 0.02980981 | 0.17575096 | 4.55E-05 | 0.0046645 | -0.12301   |
| 7w11w_SITTI | 0.02690825 | 0.15784544 | 4.44E-05 | 0.004813  | -0.11546   |
| 7w11w_SITTI | 0.07759935 | 0.47066024 | 5.05E-05 | 0.014229  | 0.21153    |

|             |            |            |          |           |            |
|-------------|------------|------------|----------|-----------|------------|
| 7w11w_SITTI | 0.026928   | 0.15796731 | 4.44E-05 | 0.004813  | -0.11546   |
| 7w11w_SITTI | 0.0278837  | 0.16386494 | 4.48E-05 | 0.0047558 | -0.12024   |
| 7w11w_SITTI | 0.06423257 | 0.38817382 | 6.27E-05 | 0.0084357 | 0.14015    |
| 7w11w_SITTI | 0.02003847 | 0.11545202 | 4.19E-05 | 0.0053364 | -0.025531  |
| 7w11w_SITTI | 0.0249366  | 0.14567836 | 4.38E-05 | 0.0049138 | -0.10343   |
| 7w11w_SITTI | 0.07235889 | 0.43832132 | 5.54E-05 | 0.012382  | 0.24161    |
| 7w11w_SITTI | 0.0796534  | 0.48333573 | 4.90E-05 | 0.014278  | 0.15946    |
| 7w11w_SITTI | 0.09808727 | 0.59709114 | 5.40E-05 | 0.0046955 | -1.1032    |
| 7w11w_SITTI | 0.02415115 | 0.14083132 | 4.34E-05 | 0.0049916 | -0.091842  |
| 7w11w_SITTI | 0.01732213 | 0.09868948 | 4.06E-05 | 0.0056572 | 0.046584   |
| 7w11w_SITTI | 0.02426324 | 0.14152308 | 4.34E-05 | 0.0049916 | -0.091842  |
| 7w11w_SITTI | 0.02029299 | 0.11702265 | 4.19E-05 | 0.0053364 | -0.025531  |
| 7w11w_SITTI | 0.01333534 | 0.07408694 | 3.83E-05 | 0.0063061 | 0.19734    |
| 7w11w_SITTI | 0.08165584 | 0.4956928  | 4.83E-05 | 0.013957  | 0.078055   |
| 7w11w_SITTI | 0.03184161 | 0.18828915 | 4.60E-05 | 0.0046154 | -0.12002   |
| 7w11w_SITTI | 0.02307476 | 0.13418895 | 4.30E-05 | 0.0050782 | -0.077142  |
| 7w11w_SITTI | 0.02574945 | 0.15069446 | 4.40E-05 | 0.0048781 | -0.10813   |
| 7w11w_SITTI | 0.01674868 | 0.09515068 | 4.00E-05 | 0.0058035 | 0.063215   |
| 7w11w_SITTI | 0.07761707 | 0.47076955 | 5.05E-05 | 0.014229  | 0.21153    |
| 7w11w_SITTI | 0.09470027 | 0.57618994 | 5.13E-05 | 0.0061762 | -0.8688    |
| 7w11w_SITTI | 0.0188191  | 0.10792726 | 4.11E-05 | 0.0055212 | 0.015459   |
| 7w11w_SITTI | 0.01922407 | 0.11042633 | 4.14E-05 | 0.0054571 | 0.0010121  |
| 7w11w_SITTI | 0.01685309 | 0.09579498 | 4.03E-05 | 0.005729  | 0.063215   |
| 7w11w_SITTI | 0.08338044 | 0.50633526 | 4.78E-05 | 0.013315  | -0.0045591 |
| 7w11w_SITTI | 0.03311781 | 0.19616462 | 4.66E-05 | 0.0045822 | -0.11352   |
| 7w11w_SITTI | 0.09234025 | 0.5616263  | 4.99E-05 | 0.0073308 | -0.6503    |
| 7w11w_SITTI | 0.01581683 | 0.08940025 | 3.98E-05 | 0.0058806 | 0.098494   |
| 7w11w_SITTI | 0.01826676 | 0.10451875 | 4.09E-05 | 0.0055879 | 0.030658   |
| 7w11w_SITTI | 0.03902124 | 0.23259464 | 4.92E-05 | 0.0045932 | -0.071721  |
| 7w11w_SITTI | 0.02352898 | 0.13699193 | 4.32E-05 | 0.0050338 | -0.084895  |
| 7w11w_SITTI | 0.07965705 | 0.48335826 | 4.90E-05 | 0.014278  | 0.15946    |
| 7w11w_SITTI | 0.03225495 | 0.19083987 | 4.62E-05 | 0.0046026 | -0.11821   |
| 7w11w_SITTI | 0.02853915 | 0.16790971 | 4.49E-05 | 0.0047302 | -0.12174   |
| 7w11w_SITTI | 0.086041   | 0.5227536  | 4.76E-05 | 0.0117    | -0.17867   |
| 7w11w_SITTI | 0.09072556 | 0.551662   | 4.91E-05 | 0.0083333 | -0.51631   |
| 7w11w_SITTI | 0.02335715 | 0.13593158 | 4.32E-05 | 0.0050338 | -0.084895  |
| 7w11w_SITTI | 0.02542473 | 0.14869063 | 4.38E-05 | 0.0049138 | -0.10813   |
| 7w11w_SITTI | 0.02754156 | 0.16175355 | 4.46E-05 | 0.0047834 | -0.12024   |
| 7w11w_SITTI | 0.0921118  | 0.5602165  | 4.99E-05 | 0.0073308 | -0.6503    |
| 7w11w_SITTI | 0.01399833 | 0.07817829 | 3.86E-05 | 0.0062156 | 0.17645    |
| 7w11w_SITTI | 0.04636178 | 0.27789316 | 5.44E-05 | 0.0048874 | -0.021643  |
| 7w11w_SITTI | 0.0946521  | 0.5758927  | 5.13E-05 | 0.0061762 | -0.8688    |
| 7w11w_SITTI | 0.03327246 | 0.19711895 | 4.66E-05 | 0.0045822 | -0.11352   |

|             |            |            |          |           |           |
|-------------|------------|------------|----------|-----------|-----------|
| 7w11w_SITTI | 0.02192983 | 0.1271236  | 4.26E-05 | 0.0051742 | -0.059109 |
| 7w11w_SITTI | 0.0234853  | 0.1367224  | 4.32E-05 | 0.0050338 | -0.084895 |
| 7w11w_SITTI | 0.02775198 | 0.16305208 | 4.48E-05 | 0.0047558 | -0.12024  |
| 7w11w_SITTI | 0.08984043 | 0.54619986 | 4.86E-05 | 0.0090548 | -0.47194  |
| 7w11w_SITTI | 0.1223904  | 0.7470657  | 6.82E-05 | 0.005205  | -1.0229   |
| 7w11w_SITTI | 0.11023566 | 0.6720589  | 6.25E-05 | 0.003695  | -1.3531   |
| 7w11w_SITTI | 0.08768272 | 0.53288466 | 4.79E-05 | 0.010571  | -0.29935  |
| 7w11w_SITTI | 0.01503645 | 0.08458454 | 3.92E-05 | 0.0060428 | 0.1363    |
| 7w11w_SITTI | 0.01978379 | 0.11388037 | 4.16E-05 | 0.0053955 | -0.012659 |
| 7w11w_SITTI | 0.09660368 | 0.58793586 | 5.28E-05 | 0.0052469 | -0.99133  |
| 7w11w_SITTI | 0.03617942 | 0.21505778 | 4.77E-05 | 0.0045615 | -0.092976 |
| 7w11w_SITTI | 0.08374628 | 0.50859284 | 4.77E-05 | 0.013036  | -0.036078 |
| 7w11w_SITTI | 0.019174   | 0.11011732 | 4.14E-05 | 0.0054571 | 0.0010121 |
| 7w11w_SITTI | 0.0726592  | 0.44017455 | 5.49E-05 | 0.012637  | 0.24373   |
| 7w11w_SITTI | 0.01951372 | 0.11221378 | 4.16E-05 | 0.0053955 | -0.012659 |
| 7w11w_SITTI | 0.01463589 | 0.08211269 | 3.92E-05 | 0.0060428 | 0.1363    |
| 7w11w_SITTI | 0.09055615 | 0.5506166  | 4.91E-05 | 0.0083333 | -0.51631  |
| 7w11w_SITTI | 0.01574881 | 0.08898052 | 3.98E-05 | 0.0058806 | 0.098494  |
| 7w11w_SITTI | 0.02114737 | 0.12229503 | 4.24E-05 | 0.0052258 | -0.04878  |
| 7w11w_SITTI | 0.08632608 | 0.5245128  | 4.77E-05 | 0.01133   | -0.17867  |
| 7w11w_SITTI | 0.00671929 | 0.03325931 | 3.47E-05 | 0.0076096 | 0.48124   |
| 7w11w_SITTI | 0.02000133 | 0.11522282 | 4.16E-05 | 0.0053955 | -0.025531 |
| 7w11w_SITTI | 0.00812524 | 0.04193541 | 3.56E-05 | 0.0072456 | 0.40559   |
| 7w11w_SITTI | 0.02635184 | 0.15441182 | 4.42E-05 | 0.0048445 | -0.11213  |
| 7w11w_SITTI | 0.01301895 | 0.07213452 | 3.83E-05 | 0.0063061 | 0.19734   |
| 7w11w_SITTI | 0.0208077  | 0.12019889 | 4.21E-05 | 0.0052798 | -0.037579 |
| 7w11w_SITTI | 0.01802997 | 0.10305755 | 4.09E-05 | 0.0055879 | 0.030658  |
| 7w11w_SITTI | 0.03083876 | 0.1821006  | 4.57E-05 | 0.0046464 | -0.12145  |
| 7w11w_SITTI | 0.05543331 | 0.3338736  | 6.21E-05 | 0.005966  | 0.038579  |
| 7w11w_SITTI | 0.08837547 | 0.5371596  | 4.82E-05 | 0.0098057 | -0.3415   |
| 7w11w_SITTI | 0.07160279 | 0.43365544 | 5.60E-05 | 0.012118  | 0.2386    |
| 7w11w_SITTI | 0.08861975 | 0.5386671  | 4.82E-05 | 0.0098057 | -0.3844   |
| 7w11w_SITTI | 0.06485568 | 0.392019   | 6.24E-05 | 0.0086643 | 0.15715   |
| 7w11w_SITTI | 0.08154329 | 0.49499825 | 4.83E-05 | 0.013957  | 0.10139   |
| 7w11w_SITTI | 0.02135563 | 0.1235802  | 4.24E-05 | 0.0052258 | -0.04878  |
| 7w11w_SITTI | 0.08699279 | 0.5286271  | 4.78E-05 | 0.010952  | -0.25808  |
| 7w11w_SITTI | 0.03010248 | 0.17755698 | 4.55E-05 | 0.0046645 | -0.12301  |
| 7w11w_SITTI | 0.01101019 | 0.05973848 | 3.71E-05 | 0.0066957 | 0.2858    |
| 7w11w_SITTI | 0.10272073 | 0.6256842  | 5.74E-05 | 0.0037844 | -1.3397   |
| 7w11w_SITTI | 0.01386556 | 0.07735894 | 3.86E-05 | 0.0062156 | 0.17645   |
| 7w11w_SITTI | 0.02095219 | 0.12109055 | 4.21E-05 | 0.0052798 | -0.037579 |
| 7w11w_SITTI | 0.08153554 | 0.49495044 | 4.83E-05 | 0.013957  | 0.10139   |
| 7w11w_SITTI | 0.07112829 | 0.4307273  | 5.65E-05 | 0.011849  | 0.23476   |

|             |            |            |          |           |           |
|-------------|------------|------------|----------|-----------|-----------|
| 7w11w_SITTI | 0.02487101 | 0.14527358 | 4.36E-05 | 0.0049516 | -0.10343  |
| 7w11w_SITTI | 0.017925   | 0.10240978 | 4.09E-05 | 0.0055879 | 0.030658  |
| 7w11w_SITTI | 0.03849042 | 0.22931899 | 4.89E-05 | 0.0045836 | -0.076088 |
| 7w11w_SITTI | 0.05461198 | 0.32880515 | 6.14E-05 | 0.0057798 | 0.034245  |
| 7w11w_SITTI | 0.01286595 | 0.07119038 | 3.80E-05 | 0.0063994 | 0.21875   |
| 7w11w_SITTI | 0.03586597 | 0.21312352 | 4.77E-05 | 0.0045615 | -0.096915 |
| 7w11w_SITTI | 0.06736292 | 0.40749118 | 6.03E-05 | 0.009922  | 0.19037   |
| 7w11w_SITTI | 0.02730282 | 0.16028032 | 4.46E-05 | 0.0047834 | -0.11816  |
| 7w11w_SITTI | 0.07946841 | 0.48219416 | 4.93E-05 | 0.014315  | 0.15946   |
| 7w11w_SITTI | 0.02736353 | 0.16065496 | 4.46E-05 | 0.0047834 | -0.11816  |
| 7w11w_SITTI | 0.07544961 | 0.45739415 | 5.23E-05 | 0.013721  | 0.23858   |
| 7w11w_SITTI | 0.02637418 | 0.15454967 | 4.42E-05 | 0.0048445 | -0.11213  |
| 7w11w_SITTI | 0.02465483 | 0.14393954 | 4.36E-05 | 0.0049516 | -0.098011 |
| 7w11w_SITTI | 0.03031518 | 0.17886959 | 4.55E-05 | 0.0046645 | -0.12245  |
| 7w11w_SITTI | 0.08373612 | 0.5085302  | 4.77E-05 | 0.013036  | -0.036078 |
| 7w11w_SITTI | 0.09513826 | 0.57889277 | 5.16E-05 | 0.0059226 | -0.91061  |
| 7w11w_SITTI | 0.00764781 | 0.03898921 | 3.53E-05 | 0.0073641 | 0.43054   |
| 7w11w_SITTI | 0.07689402 | 0.46630758 | 5.13E-05 | 0.014025  | 0.22047   |
| 7w11w_SITTI | 0.01566327 | 0.0884526  | 3.95E-05 | 0.0059603 | 0.098494  |
| 7w11w_SITTI | 0.0147183  | 0.08262119 | 3.92E-05 | 0.0060428 | 0.1363    |
| 7w11w_SITTI | 0.09129203 | 0.5551577  | 4.93E-05 | 0.0079874 | -0.60562  |
| 7w11w_SITTI | 0.01365304 | 0.07604748 | 3.86E-05 | 0.0062156 | 0.17645   |
| 7w11w_SITTI | 0.08976616 | 0.54574156 | 4.86E-05 | 0.0090548 | -0.47194  |
| 7w11w_SITTI | 0.01277717 | 0.0706425  | 3.80E-05 | 0.0063994 | 0.21875   |
| 7w11w_SITTI | 0.01859476 | 0.10654286 | 4.11E-05 | 0.0055212 | 0.015459  |
| 7w11w_SITTI | 0.08676779 | 0.52723867 | 4.78E-05 | 0.010952  | -0.21781  |
| 7w11w_SITTI | 0.01772566 | 0.10117964 | 4.06E-05 | 0.0056572 | 0.046584  |
| 7w11w_SITTI | 0.01770904 | 0.10107709 | 4.06E-05 | 0.0056572 | 0.046584  |
| 7w11w_SITTI | 0.08861095 | 0.5386127  | 4.82E-05 | 0.0098057 | -0.3844   |
| 7w11w_SITTI | 0.01871762 | 0.10730104 | 4.11E-05 | 0.0055212 | 0.015459  |
| 7w11w_SITTI | 0.09800465 | 0.59658134 | 5.36E-05 | 0.0048658 | -1.1032   |
| 7w11w_SITTI | 0.02013009 | 0.11601736 | 4.19E-05 | 0.0053364 | -0.025531 |
| 7w11w_SITTI | 0.0214001  | 0.12385461 | 4.24E-05 | 0.0052258 | -0.04878  |
| 7w11w_SITTI | 0.02261203 | 0.13133343 | 4.28E-05 | 0.005125  | -0.068556 |
| 7w11w_SITTI | 0.07696274 | 0.46673167 | 5.09E-05 | 0.014141  | 0.22047   |
| 7w11w_SITTI | 0.02181788 | 0.12643272 | 4.26E-05 | 0.0051742 | -0.059109 |
| 7w11w_SITTI | 0.07713269 | 0.46778044 | 5.09E-05 | 0.014141  | 0.22047   |
| 7w11w_SITTI | 0.08861396 | 0.5386313  | 4.82E-05 | 0.0098057 | -0.3844   |
| 7w11w_SITTI | 0.01783327 | 0.10184372 | 4.06E-05 | 0.0056572 | 0.030658  |
| 7w11w_SITTI | 0.07296784 | 0.44207916 | 5.49E-05 | 0.012637  | 0.24489   |
| 7w11w_SITTI | 0.01223224 | 0.06727976 | 3.77E-05 | 0.0064954 | 0.24064   |
| 7w11w_SITTI | 0.07327166 | 0.443954   | 5.43E-05 | 0.012883  | 0.24489   |
| 7w11w_SITTI | 0.02037104 | 0.11750431 | 4.19E-05 | 0.0053364 | -0.025531 |

|             |            |            |          |           |            |
|-------------|------------|------------|----------|-----------|------------|
| 7w11w_SITTI | 0.02012654 | 0.11599545 | 4.19E-05 | 0.0053364 | -0.025531  |
| 7w11w_SITTI | 0.02708165 | 0.15891546 | 4.46E-05 | 0.0047834 | -0.11816   |
| 7w11w_SITTI | 0.08160443 | 0.49537554 | 4.83E-05 | 0.013957  | 0.078055   |
| 7w11w_SITTI | 0.04358316 | 0.26074624 | 5.21E-05 | 0.0047343 | -0.038876  |
| 7w11w_SITTI | 0.02078136 | 0.12003637 | 4.21E-05 | 0.0052798 | -0.037579  |
| 7w11w_SITTI | 0.02106917 | 0.12181244 | 4.21E-05 | 0.0052798 | -0.04878   |
| 7w11w_SITTI | 0.02920038 | 0.17199013 | 4.51E-05 | 0.0047064 | -0.1231    |
| 7w11w_SITTI | 0.01600899 | 0.09058607 | 3.98E-05 | 0.0058806 | 0.098494   |
| 7w11w_SITTI | 0.06441973 | 0.38932878 | 6.27E-05 | 0.0084357 | 0.14863    |
| 7w11w_SITTI | 0.05238662 | 0.31507242 | 5.97E-05 | 0.0054628 | 0.018414   |
| 7w11w_SITTI | 0.03044904 | 0.1796956  | 4.57E-05 | 0.0046464 | -0.12245   |
| 7w11w_SITTI | 0.09030492 | 0.54906625 | 4.88E-05 | 0.0086895 | -0.51631   |
| 7w11w_SITTI | 0.03768577 | 0.22435349 | 4.84E-05 | 0.0045696 | -0.084703  |
| 7w11w_SITTI | 0.08824295 | 0.53634185 | 4.80E-05 | 0.010188  | -0.3415    |
| 7w11w_SITTI | 0.09378479 | 0.57054055 | 5.09E-05 | 0.0064439 | -0.7829    |
| 7w11w_SITTI | 0.02597088 | 0.15206091 | 4.40E-05 | 0.0048781 | -0.11213   |
| 7w11w_SITTI | 0.01141449 | 0.06223339 | 3.74E-05 | 0.0065941 | 0.263      |
| 7w11w_SITTI | 0.07809103 | 0.47369432 | 5.01E-05 | 0.014289  | 0.20103    |
| 7w11w_SITTI | 0.09373233 | 0.5702168  | 5.06E-05 | 0.0067258 | -0.7829    |
| 7w11w_SITTI | 0.01930592 | 0.11093145 | 4.14E-05 | 0.0054571 | 0.0010121  |
| 7w11w_SITTI | 0.03161792 | 0.1869088  | 4.60E-05 | 0.0046154 | -0.12002   |
| 7w11w_SITTI | 0.01147282 | 0.06259336 | 3.74E-05 | 0.0065941 | 0.263      |
| 7w11w_SITTI | 0.04289216 | 0.2564821  | 5.17E-05 | 0.0047101 | -0.042593  |
| 7w11w_SITTI | 0.03072396 | 0.18139215 | 4.57E-05 | 0.0046464 | -0.12245   |
| 7w11w_SITTI | 0.08346207 | 0.50683904 | 4.77E-05 | 0.013036  | -0.0045591 |
| 7w11w_SITTI | 0.03950058 | 0.23555267 | 4.92E-05 | 0.0045932 | -0.067351  |
| 7w11w_SITTI | 0.09650295 | 0.5873143  | 5.28E-05 | 0.0052469 | -0.99133   |
| 7w11w_SITTI | 0.03619604 | 0.21516037 | 4.77E-05 | 0.0045615 | -0.092976  |
| 7w11w_SITTI | 0.02222259 | 0.12893021 | 4.28E-05 | 0.005125  | -0.068556  |
| 7w11w_SITTI | 0.01991804 | 0.1147088  | 4.16E-05 | 0.0053955 | -0.012659  |
| 7w11w_SITTI | 0.03104681 | 0.18338445 | 4.58E-05 | 0.00463   | -0.12145   |
| 7w11w_SITTI | 0.08020875 | 0.48676282 | 4.87E-05 | 0.014207  | 0.14202    |
| 7w11w_SITTI | 0.04044858 | 0.24140276 | 4.99E-05 | 0.0046177 | -0.063007  |
| 7w11w_SITTI | 0.04876411 | 0.29271793 | 5.68E-05 | 0.0051026 | -0.0054808 |
| 7w11w_SITTI | 0.08759669 | 0.53235376 | 4.79E-05 | 0.010571  | -0.29935   |
| 7w11w_SITTI | 0.07400773 | 0.4484963  | 5.38E-05 | 0.013116  | 0.24406    |
| 7w11w_SITTI | 0.01084421 | 0.05871421 | 3.71E-05 | 0.0066957 | 0.2858     |
| 7w11w_SITTI | 0.02575876 | 0.15075193 | 4.40E-05 | 0.0048781 | -0.10813   |
| 7w11w_SITTI | 0.03044571 | 0.17967507 | 4.57E-05 | 0.0046464 | -0.12245   |
| 7w11w_SITTI | 0.03800683 | 0.22633475 | 4.87E-05 | 0.0045758 | -0.080425  |
| 7w11w_SITTI | 0.01083393 | 0.05865077 | 3.71E-05 | 0.0066957 | 0.2858     |
| 7w11w_SITTI | 0.02059128 | 0.11886337 | 4.21E-05 | 0.0052798 | -0.037579  |
| 7w11w_SITTI | 0.09980334 | 0.60768104 | 5.53E-05 | 0.004262  | -1.2008    |

|             |            |            |          |           |            |
|-------------|------------|------------|----------|-----------|------------|
| 7w11w_SITTI | 0.08249503 | 0.5008715  | 4.79E-05 | 0.013563  | 0.05262    |
| 7w11w_SITTI | 0.07190805 | 0.4355392  | 5.60E-05 | 0.012118  | 0.24161    |
| 7w11w_SITTI | 0.08308955 | 0.5045402  | 4.78E-05 | 0.013315  | 0.02505    |
| 7w11w_SITTI | 0.0157537  | 0.08901066 | 3.98E-05 | 0.0058806 | 0.098494   |
| 7w11w_SITTI | 0.06861118 | 0.41519418 | 5.93E-05 | 0.010465  | 0.21248    |
| 7w11w_SITTI | 0.08198367 | 0.49771586 | 4.81E-05 | 0.013778  | 0.078055   |
| 7w11w_SITTI | 0.01256753 | 0.06934882 | 3.80E-05 | 0.0063994 | 0.21875    |
| 7w11w_SITTI | 0.01680887 | 0.0955221  | 4.03E-05 | 0.005729  | 0.063215   |
| 7w11w_SITTI | 0.09281157 | 0.5645348  | 5.02E-05 | 0.0070215 | -0.69483   |
| 7w11w_SITTI | 0.00791233 | 0.04062155 | 3.53E-05 | 0.0073641 | 0.43054    |
| 7w11w_SITTI | 0.04864046 | 0.29195487 | 5.63E-05 | 0.005054  | -0.0054808 |
| 7w11w_SITTI | 0.01304772 | 0.07231207 | 3.83E-05 | 0.0063061 | 0.19734    |
| 7w11w_SITTI | 0.02703367 | 0.15861939 | 4.44E-05 | 0.004813  | -0.11816   |
| 7w11w_SITTI | 0.09337445 | 0.56800836 | 5.06E-05 | 0.0067258 | -0.73907   |
| 7w11w_SITTI | 0.08936045 | 0.5432379  | 4.84E-05 | 0.0094274 | -0.42792   |
| 7w11w_SITTI | 0.02312462 | 0.13449666 | 4.30E-05 | 0.0050782 | -0.077142  |
| 7w11w_SITTI | 0.08740065 | 0.53114396 | 4.79E-05 | 0.010571  | -0.25808   |
| 7w11w_SITTI | 0.09192681 | 0.55907494 | 4.96E-05 | 0.0076529 | -0.6503    |
| 7w11w_SITTI | 0.02313829 | 0.134581   | 4.30E-05 | 0.0050782 | -0.077142  |
| 7w11w_SITTI | 0.0088837  | 0.0466159  | 3.59E-05 | 0.00713   | 0.38094    |
| 7w11w_SITTI | 0.0162122  | 0.09184007 | 3.98E-05 | 0.0058806 | 0.080526   |
| 7w11w_SITTI | 0.02805644 | 0.1649309  | 4.48E-05 | 0.0047558 | -0.12024   |
| 7w11w_SITTI | 0.04483227 | 0.26845458 | 5.30E-05 | 0.0047888 | -0.028317  |
| 7w11w_SITTI | 0.07734845 | 0.4691119  | 5.09E-05 | 0.014141  | 0.21153    |
| 7w11w_SITTI | 0.08845595 | 0.5376563  | 4.82E-05 | 0.0098057 | -0.3415    |
| 7w11w_SITTI | 0.07912907 | 0.48010013 | 4.93E-05 | 0.014315  | 0.17506    |
| 7w11w_SITTI | 0.01818644 | 0.10402311 | 4.09E-05 | 0.0055879 | 0.030658   |
| 7w11w_SITTI | 0.06598114 | 0.3989642  | 6.16E-05 | 0.0091463 | 0.17407    |
| 7w11w_SITTI | 0.02135614 | 0.12358334 | 4.24E-05 | 0.0052258 | -0.04878   |
| 7w11w_SITTI | 0.03124861 | 0.18462978 | 4.58E-05 | 0.00463   | -0.12145   |
| 7w11w_SITTI | 0.09421442 | 0.5731918  | 5.09E-05 | 0.0064439 | -0.82618   |
| 7w11w_SITTI | 0.08503903 | 0.51657045 | 4.76E-05 | 0.012404  | -0.10433   |
| 7w11w_SITTI | 0.08549573 | 0.51938874 | 4.76E-05 | 0.012059  | -0.14081   |
| 7w11w_SITTI | 0.07440068 | 0.4509212  | 5.33E-05 | 0.013335  | 0.24406    |
| 7w11w_SITTI | 0.06783405 | 0.41039854 | 5.98E-05 | 0.010192  | 0.19812    |
| 7w11w_SITTI | 0.0213554  | 0.12357876 | 4.24E-05 | 0.0052258 | -0.04878   |
| 7w11w_SITTI | 0.09618626 | 0.58536    | 5.24E-05 | 0.0054581 | -0.99133   |
| 7w11w_SITTI | 0.02063624 | 0.11914082 | 4.21E-05 | 0.0052798 | -0.037579  |
| 7w11w_SITTI | 0.01809272 | 0.10344479 | 4.09E-05 | 0.0055879 | 0.030658   |
| 7w11w_SITTI | 0.01352872 | 0.07528032 | 3.86E-05 | 0.0062156 | 0.17645    |
| 7w11w_SITTI | 0.01141792 | 0.06225456 | 3.74E-05 | 0.0065941 | 0.263      |
| 7w11w_SITTI | 0.06561294 | 0.39669204 | 6.16E-05 | 0.0091463 | 0.16566    |
| 7w11w_SITTI | 0.02780935 | 0.1634061  | 4.48E-05 | 0.0047558 | -0.12024   |

|             |            |            |          |           |           |
|-------------|------------|------------|----------|-----------|-----------|
| 7w11w_SITTI | 0.01083376 | 0.0586497  | 3.71E-05 | 0.0066957 | 0.2858    |
| 7w11w_SITTI | 0.02023128 | 0.11664184 | 4.19E-05 | 0.0053364 | -0.025531 |
| 7w11w_SITTI | 0.01788833 | 0.10218347 | 4.09E-05 | 0.0055879 | 0.030658  |
| 7w11w_SITTI | 0.00970708 | 0.05169695 | 3.62E-05 | 0.0070172 | 0.33263   |
| 7w11w_SITTI | 0.00353314 | 0.01359757 | 3.29E-05 | 0.0084138 | 0.63801   |
| 7w11w_SITTI | 0.01636817 | 0.09280254 | 4.00E-05 | 0.0058035 | 0.080526  |
| 7w11w_SITTI | 0.08185109 | 0.49689767 | 4.81E-05 | 0.013778  | 0.078055  |
| 7w11w_SITTI | 0.01881206 | 0.10788383 | 4.11E-05 | 0.0055212 | 0.015459  |
| 7w11w_SITTI | 0.07495821 | 0.45436174 | 5.28E-05 | 0.013537  | 0.24193   |
| 7w11w_SITTI | 0.01020286 | 0.05475641 | 3.65E-05 | 0.0069072 | 0.33263   |
| 7w11w_SITTI | 0.07892992 | 0.47887117 | 4.97E-05 | 0.014318  | 0.17506   |
| 7w11w_SITTI | 0.01362001 | 0.07584366 | 3.86E-05 | 0.0062156 | 0.17645   |
| 7w11w_SITTI | 0.05859093 | 0.35335922 | 6.35E-05 | 0.0066597 | 0.068735  |
| 7w11w_SITTI | 0.01370814 | 0.07638749 | 3.86E-05 | 0.0062156 | 0.17645   |
| 7w11w_SITTI | 0.04331271 | 0.2590773  | 5.17E-05 | 0.0047101 | -0.038876 |
| 7w11w_SITTI | 0.04736535 | 0.28408614 | 5.53E-05 | 0.0049654 | -0.01514  |
| 7w11w_SITTI | 0.07145775 | 0.4327604  | 5.65E-05 | 0.011849  | 0.2386    |
| 7w11w_SITTI | 0.09012257 | 0.54794097 | 4.88E-05 | 0.0086895 | -0.47194  |
| 7w11w_SITTI | 0.02383989 | 0.13891058 | 4.34E-05 | 0.0049916 | -0.091842 |
| 7w11w_SITTI | 0.08613602 | 0.52334    | 4.76E-05 | 0.0117    | -0.17867  |
| 7w11w_SITTI | 0.02282291 | 0.13263477 | 4.30E-05 | 0.0050782 | -0.077142 |
| 7w11w_SITTI | 0.01674064 | 0.09510106 | 4.00E-05 | 0.0058035 | 0.063215  |
| 7w11w_SITTI | 0.024654   | 0.14393446 | 4.36E-05 | 0.0049516 | -0.098011 |
| 7w11w_SITTI | 0.09130649 | 0.5552469  | 4.93E-05 | 0.0079874 | -0.60562  |
| 7w11w_SITTI | 0.03189994 | 0.18864912 | 4.60E-05 | 0.0046154 | -0.11821  |
| 7w11w_SITTI | 0.02883988 | 0.16976553 | 4.51E-05 | 0.0047064 | -0.12268  |
| 7w11w_SITTI | 0.00526771 | 0.02430162 | 3.38E-05 | 0.0079991 | 0.55892   |
| 7w11w_SITTI | 0.08464473 | 0.5141372  | 4.76E-05 | 0.012404  | -0.069378 |
| 7w11w_SITTI | 0.02939025 | 0.17316186 | 4.53E-05 | 0.0046846 | -0.1231   |
| 7w11w_SITTI | 0.0169318  | 0.09628075 | 4.03E-05 | 0.005729  | 0.063215  |
| 7w11w_SITTI | 0.15731746 | 0.96260065 | 7.83E-05 | 0.0047478 | -1.0869   |
| 7w11w_SITTI | 0.06394929 | 0.3864257  | 6.27E-05 | 0.0084357 | 0.14015   |
| 7w11w_SITTI | 0.10608981 | 0.6464748  | 5.98E-05 | 0.0035674 | -1.3913   |
| 7w11w_SITTI | 0.09964864 | 0.60672635 | 5.49E-05 | 0.0043938 | -1.2008   |
| 7w11w_SITTI | 0.01653894 | 0.09385641 | 4.00E-05 | 0.0058035 | 0.080526  |
| 7w11w_SITTI | 0.01928254 | 0.11078715 | 4.14E-05 | 0.0054571 | 0.0010121 |
| 7w11w_SITTI | 0.10328479 | 0.62916505 | 5.78E-05 | 0.003724  | -1.3542   |
| 7w11w_SITTI | 0.02679721 | 0.15716021 | 4.44E-05 | 0.004813  | -0.11546  |
| 7w11w_SITTI | 0.10147619 | 0.6180042  | 5.66E-05 | 0.0039398 | -1.2808   |
| 7w11w_SITTI | 0.1040627  | 0.6339655  | 5.86E-05 | 0.0036344 | -1.3662   |
| 7w11w_SITTI | 0.10316221 | 0.62840855 | 5.78E-05 | 0.003724  | -1.3542   |
| 7w11w_SITTI | 0.08514743 | 0.5172394  | 4.76E-05 | 0.012059  | -0.10433  |
| 7w11w_SITTI | 0.03075417 | 0.1815786  | 4.57E-05 | 0.0046464 | -0.12245  |

|             |            |            |          |           |           |
|-------------|------------|------------|----------|-----------|-----------|
| 7w11w_SITTI | 0.03233014 | 0.19130392 | 4.62E-05 | 0.0046026 | -0.11821  |
| 7w11w_SITTI | 0.09257988 | 0.56310505 | 4.99E-05 | 0.0073308 | -0.69483  |
| 7w11w_SITTI | 0.08511811 | 0.51705843 | 4.76E-05 | 0.012059  | -0.10433  |
| 7w11w_SITTI | 0.03536776 | 0.21004905 | 4.74E-05 | 0.0045622 | -0.10068  |
| 7w11w_SITTI | 0.07429016 | 0.45023918 | 5.33E-05 | 0.013335  | 0.24406   |
| 7w11w_SITTI | 0.03760095 | 0.22383007 | 4.84E-05 | 0.0045696 | -0.084703 |
| 7w11w_SITTI | 0.0228246  | 0.13264522 | 4.30E-05 | 0.0050782 | -0.077142 |
| 7w11w_SITTI | 0.01069686 | 0.05780492 | 3.68E-05 | 0.0068    | 0.30902   |
| 7w11w_SITTI | 0.04280622 | 0.2559518  | 5.17E-05 | 0.0047101 | -0.042593 |
| 7w11w_SITTI | 0.0645464  | 0.39011043 | 6.24E-05 | 0.0086643 | 0.14863   |
| 7w11w_SITTI | 0.09562256 | 0.5818814  | 5.20E-05 | 0.0056833 | -0.9515   |
| 7w11w_SITTI | 0.08556184 | 0.5197967  | 4.76E-05 | 0.012059  | -0.14081  |
| 7w11w_SITTI | 0.01369576 | 0.0763111  | 3.86E-05 | 0.0062156 | 0.17645   |
| 7w11w_SITTI | 0.08278631 | 0.5026689  | 4.79E-05 | 0.013563  | 0.02505   |
| 7w11w_SITTI | 0.08481039 | 0.5151595  | 4.76E-05 | 0.012404  | -0.10433  |
| 7w11w_SITTI | 0.08848931 | 0.5378621  | 4.82E-05 | 0.0098057 | -0.3415   |
| 7w11w_SITTI | 0.08876175 | 0.53954333 | 4.82E-05 | 0.0098057 | -0.3844   |
| 7w11w_SITTI | 0.01566571 | 0.08846771 | 3.95E-05 | 0.0059603 | 0.098494  |
| 7w11w_SITTI | 0.00673866 | 0.03337887 | 3.47E-05 | 0.0076096 | 0.48124   |
| 7w11w_SITTI | 0.01136025 | 0.06189867 | 3.74E-05 | 0.0065941 | 0.263     |
| 7w11w_SITTI | 0.01531059 | 0.08627622 | 3.95E-05 | 0.0059603 | 0.11709   |
| 7w11w_SITTI | 0.01953692 | 0.11235692 | 4.16E-05 | 0.0053955 | -0.012659 |
| 7w11w_SITTI | 0.09081221 | 0.55219674 | 4.91E-05 | 0.0083333 | -0.56091  |
| 7w11w_SITTI | 0.02888253 | 0.17002869 | 4.51E-05 | 0.0047064 | -0.12268  |
| 7w11w_SITTI | 0.10208194 | 0.62174225 | 5.70E-05 | 0.0038563 | -1.3227   |
| 7w11w_SITTI | 0.01975138 | 0.11368033 | 4.16E-05 | 0.0053955 | -0.012659 |
| 7w11w_SITTI | 0.06967433 | 0.4217549  | 5.82E-05 | 0.011019  | 0.22487   |
| 7w11w_SITTI | 0.0931562  | 0.56666154 | 5.02E-05 | 0.0070215 | -0.73907  |
| 7w11w_SITTI | 0.04799179 | 0.28795195 | 5.58E-05 | 0.0050083 | -0.01192  |
| 7w11w_SITTI | 0.02157136 | 0.12491143 | 4.24E-05 | 0.0052258 | -0.04878  |
| 7w11w_SITTI | 0.08042357 | 0.4880885  | 4.87E-05 | 0.014207  | 0.14202   |
| 7w11w_SITTI | 0.09504205 | 0.5782991  | 5.16E-05 | 0.0059226 | -0.8688   |
| 7w11w_SITTI | 0.01680017 | 0.09546846 | 4.03E-05 | 0.005729  | 0.063215  |
| 7w11w_SITTI | 0.00978487 | 0.05217702 | 3.65E-05 | 0.0069072 | 0.33263   |
| 7w11w_SITTI | 0.0989275  | 0.6022762  | 5.45E-05 | 0.0045382 | -1.1701   |
| 7w11w_SITTI | 0.01061245 | 0.05728402 | 3.68E-05 | 0.0068    | 0.30902   |
| 7w11w_SITTI | 0.01321787 | 0.07336203 | 3.83E-05 | 0.0063061 | 0.19734   |
| 7w11w_SITTI | 0.01055117 | 0.05690585 | 3.68E-05 | 0.0068    | 0.30902   |
| 7w11w_SITTI | 0.01928855 | 0.11082424 | 4.14E-05 | 0.0054571 | 0.0010121 |
| 7w11w_SITTI | 0.00931091 | 0.04925218 | 3.62E-05 | 0.0070172 | 0.35661   |
| 7w11w_SITTI | 0.06387225 | 0.38595027 | 6.30E-05 | 0.008216  | 0.14015   |
| 7w11w_SITTI | 0.01435283 | 0.08036589 | 3.89E-05 | 0.0061278 | 0.1561    |
| 7w11w_SITTI | 0.10160296 | 0.6187865  | 5.66E-05 | 0.0039398 | -1.303    |



|             |            |            |          |           |           |
|-------------|------------|------------|----------|-----------|-----------|
| 7w11w_SITTI | 0.02461358 | 0.14368501 | 4.36E-05 | 0.0049516 | -0.098011 |
| 7w11w_SITTI | 0.03134773 | 0.18524145 | 4.58E-05 | 0.00463   | -0.12002  |
| 7w11w_SITTI | 0.00517992 | 0.02375987 | 3.38E-05 | 0.0079991 | 0.55892   |
| 7w11w_SITTI | 0.016404   | 0.09302367 | 4.00E-05 | 0.0058035 | 0.080526  |
| 7w11w_SITTI | 0.06304946 | 0.38087282 | 6.33E-05 | 0.0080056 | 0.12359   |
| 7w11w_SITTI | 0.0928081  | 0.5645134  | 5.02E-05 | 0.0070215 | -0.69483  |
| 7w11w_SITTI | 0.02469705 | 0.14420007 | 4.36E-05 | 0.0049516 | -0.098011 |
| 7w11w_SITTI | 0.01811091 | 0.10355704 | 4.09E-05 | 0.0055879 | 0.030658  |
| 7w11w_SITTI | 0.02925317 | 0.17231594 | 4.53E-05 | 0.0046846 | -0.1231   |
| 7w11w_SITTI | 0.04016304 | 0.2396407  | 4.99E-05 | 0.0046177 | -0.063007 |
| 7w11w_SITTI | 0.09053091 | 0.5504608  | 4.91E-05 | 0.0083333 | -0.51631  |
| 7w11w_SITTI | 0.09018495 | 0.5483259  | 4.88E-05 | 0.0086895 | -0.47194  |
| 7w11w_SITTI | 0.07787432 | 0.47235703 | 5.05E-05 | 0.014229  | 0.20103   |
| 7w11w_SITTI | 0.02222249 | 0.1289296  | 4.28E-05 | 0.005125  | -0.068556 |
| 7w11w_SITTI | 0.00988661 | 0.05280482 | 3.65E-05 | 0.0069072 | 0.33263   |
| 7w11w_SITTI | 0.08617678 | 0.52359146 | 4.77E-05 | 0.01133   | -0.17867  |
| 7w11w_SITTI | 0.03684787 | 0.21918279 | 4.81E-05 | 0.0045652 | -0.088896 |
| 7w11w_SITTI | 0.03078971 | 0.18179788 | 4.57E-05 | 0.0046464 | -0.12145  |
| 7w11w_SITTI | 0.09608086 | 0.5847095  | 5.24E-05 | 0.0054581 | -0.9515   |
| 7w11w_SITTI | 0.04427394 | 0.26500908 | 5.25E-05 | 0.0047605 | -0.031751 |
| 7w11w_SITTI | 0.05343151 | 0.32152045 | 6.05E-05 | 0.0056127 | 0.022172  |
| 7w11w_SITTI | 0.01347879 | 0.07497221 | 3.83E-05 | 0.0063061 | 0.19734   |
| 7w11w_SITTI | 0.02621556 | 0.15357085 | 4.42E-05 | 0.0048445 | -0.11213  |
| 7w11w_SITTI | 0.08716101 | 0.5296652  | 4.78E-05 | 0.010952  | -0.25808  |
| 7w11w_SITTI | 0.08956591 | 0.54450583 | 4.86E-05 | 0.0090548 | -0.42792  |
| 7w11w_SITTI | 0.03337003 | 0.19772105 | 4.66E-05 | 0.0045822 | -0.11352  |
| 7w11w_SITTI | 0.01266597 | 0.0699563  | 3.80E-05 | 0.0063994 | 0.21875   |
| 7w11w_SITTI | 0.01575255 | 0.08900356 | 3.98E-05 | 0.0058806 | 0.098494  |
| 7w11w_SITTI | 0.01528535 | 0.08612051 | 3.95E-05 | 0.0059603 | 0.11709   |
| 7w11w_SITTI | 0.08247953 | 0.50077575 | 4.79E-05 | 0.013563  | 0.05262   |
| 7w11w_SITTI | 0.02026443 | 0.11684641 | 4.19E-05 | 0.0053364 | -0.025531 |
| 7w11w_SITTI | 0.08863048 | 0.5387333  | 4.82E-05 | 0.0098057 | -0.3844   |
| 7w11w_SITTI | 0.00899836 | 0.04732349 | 3.59E-05 | 0.00713   | 0.38094   |
| 7w11w_SITTI | 0.01597101 | 0.09035166 | 3.98E-05 | 0.0058806 | 0.098494  |
| 7w11w_SITTI | 0.0274967  | 0.16147676 | 4.46E-05 | 0.0047834 | -0.11816  |
| 7w11w_SITTI | 0.08174606 | 0.4962496  | 4.83E-05 | 0.013957  | 0.078055  |
| 7w11w_SITTI | 0.07233434 | 0.43816984 | 5.54E-05 | 0.012382  | 0.24161   |
| 7w11w_SITTI | 0.03635753 | 0.21615689 | 4.79E-05 | 0.0045625 | -0.092976 |
| 7w11w_SITTI | 0.01923752 | 0.11050934 | 4.14E-05 | 0.0054571 | 0.0010121 |
| 7w11w_SITTI | 0.02202795 | 0.12772906 | 4.26E-05 | 0.0051742 | -0.059109 |
| 7w11w_SITTI | 0.01991264 | 0.11467549 | 4.16E-05 | 0.0053955 | -0.012659 |
| 7w11w_SITTI | 0.01567531 | 0.08852691 | 3.95E-05 | 0.0059603 | 0.098494  |
| 7w11w_SITTI | 0.01261189 | 0.06962257 | 3.80E-05 | 0.0063994 | 0.21875   |

|             |            |            |          |           |           |
|-------------|------------|------------|----------|-----------|-----------|
| 7w11w_SITTF | 0.10124093 | 0.61655235 | 5.62E-05 | 0.0040352 | -1.2808   |
| 7w11w_SITTF | 0.04754561 | 0.28519854 | 5.53E-05 | 0.0049654 | -0.01192  |
| 7w11w_SITTF | 0.01666793 | 0.0946524  | 4.00E-05 | 0.0058035 | 0.080526  |
| 7w11w_SITTF | 0.02873622 | 0.1691258  | 4.51E-05 | 0.0047064 | -0.12268  |
| 7w11w_SITTF | 0.01402922 | 0.07836893 | 3.86E-05 | 0.0062156 | 0.1561    |
| 7w11w_SITTF | 0.0985476  | 0.59993184 | 5.40E-05 | 0.0046955 | -1.1375   |
| 7w11w_SITTF | 0.01699724 | 0.09668457 | 4.03E-05 | 0.005729  | 0.063215  |
| 7w11w_SITTF | 0.11561386 | 0.7052477  | 6.53E-05 | 0.0042916 | -1.2071   |
| 7w11w_SITTF | 0.02332945 | 0.13576062 | 4.32E-05 | 0.0050338 | -0.084895 |
| 7w11w_SITTF | 0.06604045 | 0.39933023 | 6.16E-05 | 0.0091463 | 0.17407   |
| 7w11w_SITTF | 0.00632418 | 0.03082111 | 3.44E-05 | 0.0077366 | 0.50694   |
| 7w11w_SITTF | 0.07129321 | 0.43174502 | 5.65E-05 | 0.011849  | 0.2386    |
| 7w11w_SITTF | 0.03353618 | 0.19874637 | 4.66E-05 | 0.0045822 | -0.11071  |
| 7w11w_SITTF | 0.08430107 | 0.5120165  | 4.76E-05 | 0.012731  | -0.069378 |
| 7w11w_SITTF | 0.08374035 | 0.50855625 | 4.77E-05 | 0.013036  | -0.036078 |
| 7w11w_SITTF | 0.00774975 | 0.03961829 | 3.53E-05 | 0.0073641 | 0.43054   |
| 7w11w_SITTF | 0.08846156 | 0.5376909  | 4.82E-05 | 0.0098057 | -0.3415   |
| 7w11w_SITTF | 0.05282397 | 0.31777135 | 6.01E-05 | 0.0055357 | 0.018414  |
| 7w11w_SITTF | 0.08666703 | 0.5266168  | 4.77E-05 | 0.01133   | -0.21781  |
| 7w11w_SITTF | 0.09546727 | 0.58092314 | 5.20E-05 | 0.0056833 | -0.91061  |
| 7w11w_SITTF | 0.01143669 | 0.0623704  | 3.74E-05 | 0.0065941 | 0.263     |
| 7w11w_SITTF | 0.03185398 | 0.1883655  | 4.60E-05 | 0.0046154 | -0.11821  |
| 7w11w_SITTF | 0.03681497 | 0.21897978 | 4.79E-05 | 0.0045625 | -0.088896 |
| 7w11w_SITTF | 0.05524181 | 0.33269182 | 6.17E-05 | 0.0058704 | 0.038579  |
| 7w11w_SITTF | 0.04781839 | 0.2868819  | 5.58E-05 | 0.0050083 | -0.01192  |
| 7w11w_SITTF | 0.02104574 | 0.12166783 | 4.21E-05 | 0.0052798 | -0.037579 |
| 7w11w_SITTF | 0.01277897 | 0.07065359 | 3.80E-05 | 0.0063994 | 0.21875   |
| 7w11w_SITTF | 0.08796056 | 0.53459924 | 4.80E-05 | 0.010188  | -0.29935  |
| 7w11w_SITTF | 0.00946817 | 0.05022268 | 3.62E-05 | 0.0070172 | 0.35661   |
| 7w11w_SITTF | 0.01775416 | 0.10135549 | 4.06E-05 | 0.0056572 | 0.046584  |
| 7w11w_SITTF | 0.0544906  | 0.3280561  | 6.14E-05 | 0.0057798 | 0.030074  |
| 7w11w_SITTF | 0.01514931 | 0.08528099 | 3.92E-05 | 0.0060428 | 0.11709   |
| 7w11w_SITTF | 0.07273569 | 0.44064656 | 5.49E-05 | 0.012637  | 0.24373   |
| 7w11w_SITTF | 0.08174689 | 0.49625468 | 4.83E-05 | 0.013957  | 0.078055  |
| 7w11w_SITTF | 0.03047576 | 0.1798605  | 4.57E-05 | 0.0046464 | -0.12245  |
| 7w11w_SITTF | 0.09284287 | 0.56472796 | 5.02E-05 | 0.0070215 | -0.69483  |
| 7w11w_SITTF | 0.03934167 | 0.23457202 | 4.92E-05 | 0.0045932 | -0.071721 |
| 7w11w_SITTF | 0.03304833 | 0.19573584 | 4.66E-05 | 0.0045822 | -0.11352  |
| 7w11w_SITTF | 0.06574674 | 0.39751774 | 6.16E-05 | 0.0091463 | 0.16566   |
| 7w11w_SITTF | 0.01881049 | 0.10787413 | 4.11E-05 | 0.0055212 | 0.015459  |
| 7w11w_SITTF | 0.01625178 | 0.09208429 | 4.00E-05 | 0.0058035 | 0.080526  |
| 7w11w_SITTF | 0.01928414 | 0.11079705 | 4.14E-05 | 0.0054571 | 0.0010121 |
| 7w11w_SITTF | 0.02448305 | 0.14287952 | 4.36E-05 | 0.0049516 | -0.098011 |

|             |            |            |          |           |            |
|-------------|------------|------------|----------|-----------|------------|
| 7w11w_SITTF | 0.10252712 | 0.6244894  | 5.74E-05 | 0.0037844 | -1.3227    |
| 7w11w_SITTF | 0.03973345 | 0.2369897  | 4.95E-05 | 0.0046046 | -0.067351  |
| 7w11w_SITTF | 0.02026328 | 0.11683932 | 4.19E-05 | 0.0053364 | -0.025531  |
| 7w11w_SITTF | 0.01700362 | 0.09672393 | 4.03E-05 | 0.005729  | 0.063215   |
| 7w11w_SITTF | 0.08005389 | 0.48580715 | 4.90E-05 | 0.014278  | 0.14202    |
| 7w11w_SITTF | 0.05863229 | 0.35361445 | 6.35E-05 | 0.0066597 | 0.068735   |
| 7w11w_SITTF | 0.09381943 | 0.5707543  | 5.09E-05 | 0.0064439 | -0.7829    |
| 7w11w_SITTF | 0.13088171 | 0.79946566 | 7.15E-05 | 0.0055086 | -0.96693   |
| 7w11w_SITTF | 0.055581   | 0.33478495 | 6.21E-05 | 0.005966  | 0.038579   |
| 7w11w_SITTF | 0.01812839 | 0.10366486 | 4.09E-05 | 0.0055879 | 0.030658   |
| 7w11w_SITTF | 0.02955457 | 0.17417587 | 4.53E-05 | 0.0046846 | -0.1231    |
| 7w11w_SITTF | 0.07969365 | 0.48358414 | 4.90E-05 | 0.014278  | 0.15946    |
| 7w11w_SITTF | 0.07514623 | 0.455522   | 5.28E-05 | 0.013537  | 0.23858    |
| 7w11w_SITTF | 0.0198404  | 0.11422973 | 4.16E-05 | 0.0053955 | -0.012659  |
| 7w11w_SITTF | 0.09598816 | 0.58413756 | 5.24E-05 | 0.0054581 | -0.9515    |
| 7w11w_SITTF | 0.01911787 | 0.10977095 | 4.14E-05 | 0.0054571 | 0.0010121  |
| 7w11w_SITTF | 0.02174011 | 0.12595278 | 4.26E-05 | 0.0051742 | -0.059109  |
| 7w11w_SITTF | 0.0208846  | 0.12067343 | 4.21E-05 | 0.0052798 | -0.037579  |
| 7w11w_SITTF | 0.00479287 | 0.02137135 | 3.35E-05 | 0.0081345 | 0.58516    |
| 7w11w_SITTF | 0.086029   | 0.52267957 | 4.76E-05 | 0.0117    | -0.17867   |
| 7w11w_SITTF | 0.09372795 | 0.5701898  | 5.06E-05 | 0.0067258 | -0.7829    |
| 7w11w_SITTF | 0.01186497 | 0.06501333 | 3.74E-05 | 0.0065941 | 0.24064    |
| 7w11w_SITTF | 0.02007384 | 0.11567023 | 4.19E-05 | 0.0053364 | -0.025531  |
| 7w11w_SITTF | 0.01457389 | 0.08173008 | 3.89E-05 | 0.0061278 | 0.1363     |
| 7w11w_SITTF | 0.08350422 | 0.50709915 | 4.77E-05 | 0.013036  | -0.0045591 |
| 7w11w_SITTF | 0.02605641 | 0.15258871 | 4.42E-05 | 0.0048445 | -0.11213   |
| 7w11w_SITTF | 0.00981134 | 0.05234034 | 3.65E-05 | 0.0069072 | 0.33263    |
| 7w11w_SITTF | 0.08987949 | 0.54644096 | 4.86E-05 | 0.0090548 | -0.47194   |
| 7w11w_SITTF | 0.01214691 | 0.06675316 | 3.77E-05 | 0.0064954 | 0.24064    |
| 7w11w_SITTF | 0.09121369 | 0.55467427 | 4.93E-05 | 0.0079874 | -0.56091   |
| 7w11w_SITTF | 0.06884537 | 0.4166394  | 5.87E-05 | 0.010741  | 0.21248    |
| 7w11w_SITTF | 0.01272636 | 0.07032894 | 3.80E-05 | 0.0063994 | 0.21875    |
| 7w11w_SITTF | 0.02378592 | 0.1385775  | 4.32E-05 | 0.0050338 | -0.091842  |
| 7w11w_SITTF | 0.02606927 | 0.15266804 | 4.42E-05 | 0.0048445 | -0.11213   |
| 7w11w_SITTF | 0.06305148 | 0.38088527 | 6.33E-05 | 0.0080056 | 0.12359    |
| 7w11w_SITTF | 0.0915665  | 0.5568515  | 4.93E-05 | 0.0079874 | -0.60562   |
| 7w11w_SITTF | 0.02960261 | 0.17447232 | 4.53E-05 | 0.0046846 | -0.1231    |
| 7w11w_SITTF | 0.02654596 | 0.15560974 | 4.44E-05 | 0.004813  | -0.11546   |
| 7w11w_SITTF | 0.03296433 | 0.19521752 | 4.64E-05 | 0.0045915 | -0.11352   |
| 7w11w_SITTF | 0.1043571  | 0.6357823  | 5.86E-05 | 0.0036344 | -1.3758    |
| 7w11w_SITTF | 0.02850795 | 0.16771716 | 4.49E-05 | 0.0047302 | -0.12174   |
| 7w11w_SITTF | 0.01370191 | 0.07634904 | 3.86E-05 | 0.0062156 | 0.17645    |
| 7w11w_SITTF | 0.02704679 | 0.15870035 | 4.44E-05 | 0.004813  | -0.11816   |

|             |            |            |          |           |           |
|-------------|------------|------------|----------|-----------|-----------|
| 7w11w_SITTF | 0.02415268 | 0.14084081 | 4.34E-05 | 0.0049916 | -0.091842 |
| 7w11w_SITTF | 0.01289281 | 0.07135612 | 3.80E-05 | 0.0063994 | 0.21875   |
| 7w11w_SITTF | 0.01874623 | 0.10747758 | 4.11E-05 | 0.0055212 | 0.015459  |
| 7w11w_SITTF | 0.07868052 | 0.4773321  | 4.97E-05 | 0.014318  | 0.18889   |
| 7w11w_SITTF | 0.02467855 | 0.14408593 | 4.36E-05 | 0.0049516 | -0.098011 |
| 7w11w_SITTF | 0.09989431 | 0.6082424  | 5.53E-05 | 0.004262  | -1.2008   |
| 7w11w_SITTF | 0.09543862 | 0.58074635 | 5.20E-05 | 0.0056833 | -0.91061  |
| 7w11w_SITTF | 0.02272857 | 0.1320526  | 4.28E-05 | 0.005125  | -0.077142 |
| 7w11w_SITTF | 0.02642866 | 0.15488587 | 4.42E-05 | 0.0048445 | -0.11213  |
| 7w11w_SITTF | 0.01942317 | 0.11165495 | 4.14E-05 | 0.0054571 | 0.0010121 |
| 7w11w_SITTF | 0.10591548 | 0.64539903 | 5.98E-05 | 0.0035674 | -1.3913   |
| 7w11w_SITTF | 0.05975282 | 0.36052924 | 6.37E-05 | 0.0069445 | 0.080679  |
| 7w11w_SITTF | 0.03227221 | 0.19094643 | 4.62E-05 | 0.0046026 | -0.11821  |
| 7w11w_SITTF | 0.01392968 | 0.07775464 | 3.86E-05 | 0.0062156 | 0.17645   |
| 7w11w_SITTF | 0.09626176 | 0.58582586 | 5.24E-05 | 0.0054581 | -0.99133  |
| 7w11w_SITTF | 0.02512628 | 0.14684886 | 4.38E-05 | 0.0049138 | -0.10343  |
| 7w11w_SITTF | 0.0741085  | 0.44911814 | 5.38E-05 | 0.013116  | 0.24406   |
| 7w11w_SITTF | 0.05772808 | 0.3480346  | 6.32E-05 | 0.0064035 | 0.057806  |
| 7w11w_SITTF | 0.00890153 | 0.04672594 | 3.59E-05 | 0.00713   | 0.38094   |
| 7w11w_SITTF | 0.01817657 | 0.1039622  | 4.09E-05 | 0.0055879 | 0.030658  |
| 7w11w_SITTF | 0.10348772 | 0.6304173  | 5.78E-05 | 0.003724  | -1.3542   |
| 7w11w_SITTF | 0.01306601 | 0.07242494 | 3.83E-05 | 0.0063061 | 0.19734   |
| 7w11w_SITTF | 0.02386487 | 0.13906468 | 4.34E-05 | 0.0049916 | -0.091842 |
| 7w11w_SITTF | 0.03331344 | 0.19737183 | 4.66E-05 | 0.0045822 | -0.11352  |
| 7w11w_SITTF | 0.03807961 | 0.22678389 | 4.87E-05 | 0.0045758 | -0.080425 |
| 7w11w_SITTF | 0.0142369  | 0.07965048 | 3.89E-05 | 0.0061278 | 0.1561    |
| 7w11w_SITTF | 0.01492805 | 0.08391558 | 3.92E-05 | 0.0060428 | 0.1363    |
| 7w11w_SITTF | 0.08559147 | 0.51997954 | 4.76E-05 | 0.012059  | -0.14081  |
| 7w11w_SITTF | 0.14520332 | 0.8878443  | 7.59E-05 | 0.0047531 | -1.0927   |
| 7w11w_SITTF | 0.05570418 | 0.33554512 | 6.21E-05 | 0.005966  | 0.043089  |
| 7w11w_SITTF | 0.0383445  | 0.2284185  | 4.87E-05 | 0.0045758 | -0.076088 |
| 7w11w_SITTF | 0.09494094 | 0.5776751  | 5.16E-05 | 0.0059226 | -0.8688   |
| 7w11w_SITTF | 0.02823984 | 0.16606265 | 4.49E-05 | 0.0047302 | -0.12174  |
| 7w11w_SITTF | 0.01884328 | 0.10807649 | 4.11E-05 | 0.0055212 | 0.015459  |
| 7w11w_SITTF | 0.08695151 | 0.52837235 | 4.78E-05 | 0.010952  | -0.25808  |
| 7w11w_SITTF | 0.1154845  | 0.7044495  | 6.53E-05 | 0.0042916 | -1.224    |
| 7w11w_SITTF | 0.08158585 | 0.49526092 | 4.83E-05 | 0.013957  | 0.078055  |
| 7w11w_SITTF | 0.00709941 | 0.03560503 | 3.50E-05 | 0.0074854 | 0.45576   |
| 7w11w_SITTF | 0.03346185 | 0.1982877  | 4.66E-05 | 0.0045822 | -0.11352  |
| 7w11w_SITTF | 0.00888466 | 0.0466218  | 3.59E-05 | 0.00713   | 0.38094   |
| 7w11w_SITTF | 0.02005251 | 0.11553861 | 4.19E-05 | 0.0053364 | -0.025531 |
| 7w11w_SITTF | 0.01854144 | 0.10621381 | 4.11E-05 | 0.0055212 | 0.015459  |
| 7w11w_SITTF | 0.07049301 | 0.42680696 | 5.71E-05 | 0.011574  | 0.23016   |

|             |            |            |          |           |           |
|-------------|------------|------------|----------|-----------|-----------|
| 7w11w_SITTF | 0.02895924 | 0.17050211 | 4.51E-05 | 0.0047064 | -0.12268  |
| 7w11w_SITTF | 0.01341742 | 0.07459347 | 3.83E-05 | 0.0063061 | 0.19734   |
| 7w11w_SITTF | 0.02217909 | 0.12866175 | 4.26E-05 | 0.0051742 | -0.068556 |
| 7w11w_SITTF | 0.09910968 | 0.6034004  | 5.45E-05 | 0.0045382 | -1.1701   |
| 7w11w_SITTF | 0.08629026 | 0.5242918  | 4.77E-05 | 0.01133   | -0.17867  |
| 7w11w_SITTF | 0.02012274 | 0.11597201 | 4.19E-05 | 0.0053364 | -0.025531 |
| 7w11w_SITTF | 0.09346049 | 0.56853926 | 5.06E-05 | 0.0067258 | -0.7829   |
| 7w11w_SITTF | 0.08831031 | 0.5367575  | 4.80E-05 | 0.010188  | -0.3415   |
| 7w11w_SITTF | 0.07445091 | 0.45123118 | 5.33E-05 | 0.013335  | 0.24406   |
| 7w11w_SITTF | 0.01953498 | 0.11234494 | 4.16E-05 | 0.0053955 | -0.012659 |
| 7w11w_SITTF | 0.06587925 | 0.39833546 | 6.16E-05 | 0.0091463 | 0.16566   |
| 7w11w_SITTF | 0.09969769 | 0.6070291  | 5.53E-05 | 0.004262  | -1.2008   |
| 7w11w_SITTF | 0.02173179 | 0.12590146 | 4.26E-05 | 0.0051742 | -0.059109 |
| 7w11w_SITTF | 0.08573411 | 0.5208598  | 4.76E-05 | 0.0117    | -0.14081  |
| 7w11w_SITTF | 0.02843719 | 0.16728052 | 4.49E-05 | 0.0047302 | -0.12174  |
| 7w11w_SITTF | 0.01578057 | 0.08917648 | 3.98E-05 | 0.0058806 | 0.098494  |
| 7w11w_SITTF | 0.04055348 | 0.24205013 | 4.99E-05 | 0.0046177 | -0.058715 |
| 7w11w_SITTF | 0.08017219 | 0.4865372  | 4.90E-05 | 0.014278  | 0.14202   |
| 7w11w_SITTF | 0.07435596 | 0.45064524 | 5.33E-05 | 0.013335  | 0.24406   |
| 7w11w_SITTF | 0.02072947 | 0.11971618 | 4.21E-05 | 0.0052798 | -0.037579 |
| 7w11w_SITTF | 0.1007994  | 0.6138277  | 5.62E-05 | 0.0040352 | -1.2563   |
| 7w11w_SITTF | 0.016697   | 0.09483177 | 4.00E-05 | 0.0058035 | 0.080526  |
| 7w11w_SITTF | 0.01804235 | 0.1031339  | 4.09E-05 | 0.0055879 | 0.030658  |
| 7w11w_SITTF | 0.00922193 | 0.0487031  | 3.62E-05 | 0.0070172 | 0.35661   |
| 7w11w_SITTF | 0.06210516 | 0.37504557 | 6.36E-05 | 0.0076138 | 0.11565   |
| 7w11w_SITTF | 0.00882776 | 0.04627067 | 3.59E-05 | 0.00713   | 0.38094   |
| 7w11w_SITTF | 0.01707421 | 0.09715953 | 4.03E-05 | 0.005729  | 0.063215  |
| 7w11w_SITTF | 0.02066682 | 0.11932951 | 4.21E-05 | 0.0052798 | -0.037579 |
| 7w11w_SITTF | 0.091546   | 0.55672497 | 4.93E-05 | 0.0079874 | -0.60562  |
| 7w11w_SITTF | 0.10174079 | 0.619637   | 5.66E-05 | 0.0039398 | -1.303    |
| 7w11w_SITTF | 0.00755571 | 0.03842086 | 3.50E-05 | 0.0074854 | 0.43054   |
| 7w11w_SITTF | 0.09211317 | 0.56022495 | 4.99E-05 | 0.0073308 | -0.6503   |
| 7w11w_SITTF | 0.03370741 | 0.19980302 | 4.68E-05 | 0.0045746 | -0.11071  |
| 7w11w_SITTF | 0.0132037  | 0.07327461 | 3.83E-05 | 0.0063061 | 0.19734   |
| 7w11w_SITTF | 0.00997759 | 0.05336631 | 3.65E-05 | 0.0069072 | 0.33263   |
| 7w11w_SITTF | 0.00900364 | 0.04735605 | 3.59E-05 | 0.00713   | 0.38094   |
| 7w11w_SITTF | 0.08482321 | 0.51523864 | 4.76E-05 | 0.012404  | -0.10433  |
| 7w11w_SITTF | 0.01539414 | 0.08679185 | 3.95E-05 | 0.0059603 | 0.11709   |
| 7w11w_SITTF | 0.01359932 | 0.075716   | 3.86E-05 | 0.0062156 | 0.17645   |
| 7w11w_SITTF | 0.06463034 | 0.39062843 | 6.24E-05 | 0.0086643 | 0.14863   |
| 7w11w_SITTF | 0.02851775 | 0.16777764 | 4.49E-05 | 0.0047302 | -0.12174  |
| 7w11w_SITTF | 0.03172447 | 0.18756633 | 4.60E-05 | 0.0046154 | -0.12002  |
| 7w11w_SITTF | 0.00254557 | 0.00750327 | 3.23E-05 | 0.0087041 | 0.69119   |

|             |            |            |          |           |           |
|-------------|------------|------------|----------|-----------|-----------|
| 7w11w_SITTF | 0.08256196 | 0.5012844  | 4.79E-05 | 0.013563  | 0.05262   |
| 7w11w_SITTF | 0.01748172 | 0.09967429 | 4.06E-05 | 0.0056572 | 0.046584  |
| 7w11w_SITTF | 0.09291178 | 0.5651532  | 5.02E-05 | 0.0070215 | -0.73907  |
| 7w11w_SITTF | 0.03398217 | 0.20149857 | 4.68E-05 | 0.0045746 | -0.11071  |
| 7w11w_SITTF | 0.06761357 | 0.40903798 | 6.03E-05 | 0.009922  | 0.19812   |
| 7w11w_SITTF | 0.00865159 | 0.04518352 | 3.59E-05 | 0.00713   | 0.38094   |
| 7w11w_SITTF | 0.02026665 | 0.11686007 | 4.19E-05 | 0.0053364 | -0.025531 |
| 7w11w_SITTF | 0.07631773 | 0.46275133 | 5.18E-05 | 0.013885  | 0.22792   |
| 7w11w_SITTF | 0.09387142 | 0.57107514 | 5.09E-05 | 0.0064439 | -0.7829   |
| 7w11w_SITTF | 0.00358233 | 0.01390115 | 3.29E-05 | 0.0084138 | 0.63801   |
| 7w11w_SITTF | 0.09459141 | 0.5755182  | 5.13E-05 | 0.0061762 | -0.8688   |
| 7w11w_SITTF | 0.09402411 | 0.5720174  | 5.09E-05 | 0.0064439 | -0.82618  |
| 7w11w_SITTF | 0.09087731 | 0.5525985  | 4.91E-05 | 0.0083333 | -0.56091  |
| 7w11w_SITTF | 0.0823012  | 0.49967533 | 4.81E-05 | 0.013778  | 0.05262   |
| 7w11w_SITTF | 0.06099893 | 0.368219   | 6.38E-05 | 0.0072613 | 0.09374   |
| 7w11w_SITTF | 0.01946094 | 0.11188806 | 4.14E-05 | 0.0054571 | -0.012659 |
| 7w11w_SITTF | 0.09654331 | 0.58756334 | 5.28E-05 | 0.0052469 | -0.99133  |
| 7w11w_SITTF | 0.09670591 | 0.5885667  | 5.28E-05 | 0.0052469 | -1.03     |
| 7w11w_SITTF | 0.08274823 | 0.50243396 | 4.79E-05 | 0.013563  | 0.02505   |
| 7w11w_SITTF | 0.09075509 | 0.55184424 | 4.91E-05 | 0.0083333 | -0.56091  |
| 7w11w_SITTF | 0.02705578 | 0.15875582 | 4.44E-05 | 0.004813  | -0.11816  |
| 7w11w_SITTF | 0.05083919 | 0.30552322 | 5.83E-05 | 0.0052672 | 0.0077602 |
| 7w11w_SITTF | 0.02776648 | 0.16314153 | 4.48E-05 | 0.0047558 | -0.12024  |
| 7w11w_SITTF | 0.01678987 | 0.09540489 | 4.03E-05 | 0.005729  | 0.063215  |
| 7w11w_SITTF | 0.01822968 | 0.10428995 | 4.09E-05 | 0.0055879 | 0.030658  |
| 7w11w_SITTF | 0.02893398 | 0.17034619 | 4.51E-05 | 0.0047064 | -0.12268  |
| 7w11w_SITTF | 0.08742326 | 0.5312835  | 4.79E-05 | 0.010571  | -0.25808  |
| 7w11w_SITTF | 0.02937967 | 0.17309654 | 4.53E-05 | 0.0046846 | -0.1231   |
| 7w11w_SITTF | 0.04124354 | 0.24630845 | 5.05E-05 | 0.0046492 | -0.054504 |
| 7w11w_SITTF | 0.01518747 | 0.08551647 | 3.95E-05 | 0.0059603 | 0.11709   |
| 7w11w_SITTF | 0.03244637 | 0.19202118 | 4.62E-05 | 0.0046026 | -0.11603  |
| 7w11w_SITTF | 0.07154256 | 0.43328375 | 5.60E-05 | 0.012118  | 0.2386    |
| 7w11w_SITTF | 0.00919428 | 0.04853251 | 3.62E-05 | 0.0070172 | 0.35661   |
| 7w11w_SITTF | 0.06304471 | 0.38084352 | 6.33E-05 | 0.0080056 | 0.12359   |
| 7w11w_SITTF | 0.09013823 | 0.5480376  | 4.88E-05 | 0.0086895 | -0.47194  |
| 7w11w_SITTF | 0.01771596 | 0.10111976 | 4.06E-05 | 0.0056572 | 0.046584  |
| 7w11w_SITTF | 0.05941401 | 0.35843846 | 6.37E-05 | 0.0067983 | 0.080679  |
| 7w11w_SITTF | 0.07672527 | 0.4652663  | 5.13E-05 | 0.014025  | 0.22047   |
| 7w11w_SITTF | 0.08389693 | 0.50952256 | 4.77E-05 | 0.013036  | -0.036078 |
| 7w11w_SITTF | 0.07971077 | 0.4836898  | 4.90E-05 | 0.014278  | 0.15946   |
| 7w11w_SITTF | 0.07892822 | 0.47886065 | 4.97E-05 | 0.014318  | 0.17506   |
| 7w11w_SITTF | 0.03078031 | 0.18173988 | 4.57E-05 | 0.0046464 | -0.12145  |
| 7w11w_SITTF | 0.02061392 | 0.11900307 | 4.21E-05 | 0.0052798 | -0.037579 |

|             |            |            |          |           |           |
|-------------|------------|------------|----------|-----------|-----------|
| 7w11w_SITTF | 0.03400459 | 0.20163691 | 4.68E-05 | 0.0045746 | -0.11071  |
| 7w11w_SITTF | 0.01346262 | 0.07487241 | 3.83E-05 | 0.0063061 | 0.19734   |
| 7w11w_SITTF | 0.00840819 | 0.0436815  | 3.56E-05 | 0.0072456 | 0.40559   |
| 7w11w_SITTF | 0.07600949 | 0.46084917 | 5.18E-05 | 0.013885  | 0.23393   |
| 7w11w_SITTF | 0.02117782 | 0.12248294 | 4.24E-05 | 0.0052258 | -0.04878  |
| 7w11w_SITTF | 0.0159656  | 0.0903183  | 3.98E-05 | 0.0058806 | 0.098494  |
| 7w11w_SITTF | 0.09117208 | 0.5544175  | 4.93E-05 | 0.0079874 | -0.56091  |
| 7w11w_SITTF | 0.05373139 | 0.32337102 | 6.10E-05 | 0.005694  | 0.026054  |
| 7w11w_SITTF | 0.06460101 | 0.39044747 | 6.24E-05 | 0.0086643 | 0.14863   |
| 7w11w_SITTF | 0.03117875 | 0.18419866 | 4.58E-05 | 0.00463   | -0.12145  |
| 7w11w_SITTF | 0.00853676 | 0.04447495 | 3.56E-05 | 0.0072456 | 0.40559   |
| 7w11w_SITTF | 0.11687684 | 0.7130416  | 6.58E-05 | 0.0044464 | -1.173    |
| 7w11w_SITTF | 0.00373043 | 0.01481506 | 3.29E-05 | 0.0084138 | 0.63801   |
| 7w11w_SITTF | 0.04348103 | 0.26011604 | 5.21E-05 | 0.0047343 | -0.038876 |
| 7w11w_SITTF | 0.03965088 | 0.23648018 | 4.95E-05 | 0.0046046 | -0.067351 |
| 7w11w_SITTF | 0.02182337 | 0.12646663 | 4.26E-05 | 0.0051742 | -0.059109 |
| 7w11w_SITTF | 0.01075929 | 0.05819017 | 3.68E-05 | 0.0068    | 0.30902   |
| 7w11w_SITTF | 0.1046303  | 0.63746816 | 5.90E-05 | 0.0036036 | -1.3758   |
| 7w11w_SITTF | 0.01650992 | 0.09367733 | 4.00E-05 | 0.0058035 | 0.080526  |
| 7w11w_SITTF | 0.08973163 | 0.54552853 | 4.86E-05 | 0.0090548 | -0.47194  |
| 7w11w_SITTF | 0.03379863 | 0.20036595 | 4.68E-05 | 0.0045746 | -0.11071  |
| 7w11w_SITTF | 0.0704327  | 0.42643481 | 5.71E-05 | 0.011574  | 0.23016   |
| 7w11w_SITTF | 0.02371769 | 0.13815647 | 4.32E-05 | 0.0050338 | -0.084895 |
| 7w11w_SITTF | 0.02561894 | 0.14988908 | 4.40E-05 | 0.0048781 | -0.10813  |
| 7w11w_SITTF | 0.09413351 | 0.5726925  | 5.09E-05 | 0.0064439 | -0.82618  |
| 7w11w_SITTF | 0.01221428 | 0.06716891 | 3.77E-05 | 0.0064954 | 0.24064   |
| 7w11w_SITTF | 0.02030988 | 0.11712689 | 4.19E-05 | 0.0053364 | -0.025531 |
| 7w11w_SITTF | 0.08434467 | 0.51228553 | 4.76E-05 | 0.012731  | -0.069378 |
| 7w11w_SITTF | 0.05237221 | 0.3149835  | 5.97E-05 | 0.0054628 | 0.014768  |
| 7w11w_SITTF | 0.05197279 | 0.3125187  | 5.92E-05 | 0.0053939 | 0.014768  |
| 7w11w_SITTF | 0.01250956 | 0.06899107 | 3.80E-05 | 0.0063994 | 0.21875   |
| 7w11w_SITTF | 0.01284817 | 0.07108064 | 3.80E-05 | 0.0063994 | 0.21875   |
| 7w11w_SITTF | 0.02715853 | 0.15938987 | 4.46E-05 | 0.0047834 | -0.11816  |
| 7w11w_SITTF | 0.10128865 | 0.61684686 | 5.62E-05 | 0.0040352 | -1.2808   |
| 7w11w_SITTF | 0.07416185 | 0.4494474  | 5.38E-05 | 0.013116  | 0.24406   |
| 7w11w_SITTF | 0.08514789 | 0.5172422  | 4.76E-05 | 0.012059  | -0.10433  |
| 7w11w_SITTF | 0.01587464 | 0.08975699 | 3.98E-05 | 0.0058806 | 0.098494  |
| 7w11w_SITTF | 0.08213847 | 0.4986711  | 4.81E-05 | 0.013778  | 0.05262   |
| 7w11w_SITTF | 0.02651727 | 0.15543267 | 4.42E-05 | 0.0048445 | -0.11546  |
| 7w11w_SITTF | 0.02099743 | 0.12136971 | 4.21E-05 | 0.0052798 | -0.037579 |
| 7w11w_SITTF | 0.09310065 | 0.5663187  | 5.02E-05 | 0.0070215 | -0.73907  |
| 7w11w_SITTF | 0.01694841 | 0.09638321 | 4.03E-05 | 0.005729  | 0.063215  |
| 7w11w_SITTF | 0.1064008  | 0.6483939  | 6.01E-05 | 0.0035608 | -1.3924   |

|             |            |            |          |           |            |
|-------------|------------|------------|----------|-----------|------------|
| 7w11w_SITTF | 0.02499754 | 0.14605443 | 4.38E-05 | 0.0049138 | -0.10343   |
| 7w11w_SITTF | 0.07465343 | 0.45248094 | 5.33E-05 | 0.013335  | 0.24193    |
| 7w11w_SITTF | 0.06925764 | 0.4191835  | 5.87E-05 | 0.010741  | 0.21895    |
| 7w11w_SITTF | 0.10259187 | 0.624889   | 5.74E-05 | 0.0037844 | -1.3227    |
| 7w11w_SITTF | 0.03623505 | 0.21540107 | 4.77E-05 | 0.0045615 | -0.092976  |
| 7w11w_SITTF | 0.01970717 | 0.11340754 | 4.16E-05 | 0.0053955 | -0.012659  |
| 7w11w_SITTF | 0.07235035 | 0.43826863 | 5.54E-05 | 0.012382  | 0.24161    |
| 7w11w_SITTF | 0.02696271 | 0.15818146 | 4.44E-05 | 0.004813  | -0.11546   |
| 7w11w_SITTF | 0.10246424 | 0.62410146 | 5.74E-05 | 0.0037844 | -1.3227    |
| 7w11w_SITTF | 0.09904955 | 0.6030294  | 5.45E-05 | 0.0045382 | -1.1701    |
| 7w11w_SITTF | 0.01424372 | 0.07969256 | 3.89E-05 | 0.0061278 | 0.1561     |
| 7w11w_SITTF | 0.03290542 | 0.19485395 | 4.64E-05 | 0.0045915 | -0.11603   |
| 7w11w_SITTF | 0.04900178 | 0.2941846  | 5.68E-05 | 0.0051026 | -0.0054808 |
| 7w11w_SITTF | 0.02246185 | 0.13040665 | 4.28E-05 | 0.005125  | -0.068556  |
| 7w11w_SITTF | 0.08454819 | 0.51354146 | 4.76E-05 | 0.012404  | -0.069378  |
| 7w11w_SITTF | 0.08151781 | 0.494841   | 4.83E-05 | 0.013957  | 0.10139    |
| 7w11w_SITTF | 0.02390021 | 0.13928282 | 4.34E-05 | 0.0049916 | -0.091842  |
| 7w11w_SITTF | 0.04113042 | 0.24561045 | 5.02E-05 | 0.0046325 | -0.054504  |
| 7w11w_SITTF | 0.01547442 | 0.08728723 | 3.95E-05 | 0.0059603 | 0.11709    |
| 7w11w_SITTF | 0.03258641 | 0.19288537 | 4.64E-05 | 0.0045915 | -0.11603   |
| 7w11w_SITTF | 0.03209075 | 0.18982662 | 4.62E-05 | 0.0046026 | -0.11821   |
| 7w11w_SITTF | 0.07660823 | 0.46454397 | 5.13E-05 | 0.014025  | 0.22792    |
| 7w11w_SITTF | 0.0259338  | 0.15183206 | 4.40E-05 | 0.0048781 | -0.11213   |
| 7w11w_SITTF | 0.02076754 | 0.11995108 | 4.21E-05 | 0.0052798 | -0.037579  |
| 7w11w_SITTF | 0.02342514 | 0.13635112 | 4.32E-05 | 0.0050338 | -0.084895  |
| 7w11w_SITTF | 0.06362576 | 0.3844292  | 6.30E-05 | 0.008216  | 0.13178    |
| 7w11w_SITTF | 0.09424814 | 0.57339984 | 5.09E-05 | 0.0064439 | -0.82618   |
| 7w11w_SITTF | 0.01886018 | 0.10818075 | 4.11E-05 | 0.0055212 | 0.015459   |
| 7w11w_SITTF | 0.08686005 | 0.52780795 | 4.78E-05 | 0.010952  | -0.21781   |
| 7w11w_SITTF | 0.03115174 | 0.18403198 | 4.58E-05 | 0.00463   | -0.12145   |
| 7w11w_SITTF | 0.02188619 | 0.12685429 | 4.26E-05 | 0.0051742 | -0.059109  |
| 7w11w_SITTF | 0.0820578  | 0.49817333 | 4.81E-05 | 0.013778  | 0.078055   |
| 7w11w_SITTF | 0.03785023 | 0.22536838 | 4.84E-05 | 0.0045696 | -0.080425  |
| 7w11w_SITTF | 0.09610497 | 0.58485836 | 5.24E-05 | 0.0054581 | -0.9515    |
| 7w11w_SITTF | 0.02276269 | 0.13226317 | 4.30E-05 | 0.0050782 | -0.077142  |
| 7w11w_SITTF | 0.07612413 | 0.46155664 | 5.18E-05 | 0.013885  | 0.23393    |
| 7w11w_SITTF | 0.01666815 | 0.09465371 | 4.00E-05 | 0.0058035 | 0.080526   |
| 7w11w_SITTF | 0.08168408 | 0.4958671  | 4.83E-05 | 0.013957  | 0.078055   |
| 7w11w_SITTF | 0.03360527 | 0.19917274 | 4.68E-05 | 0.0045746 | -0.11071   |
| 7w11w_SITTF | 0.04008402 | 0.23915306 | 4.99E-05 | 0.0046177 | -0.063007  |
| 7w11w_SITTF | 0.0187622  | 0.10757612 | 4.11E-05 | 0.0055212 | 0.015459   |
| 7w11w_SITTF | 0.0301137  | 0.17762625 | 4.55E-05 | 0.0046645 | -0.12301   |
| 7w11w_SITTF | 0.09642632 | 0.5868414  | 5.24E-05 | 0.0054581 | -0.99133   |



|             |            |            |          |           |            |
|-------------|------------|------------|----------|-----------|------------|
| 7w11w_SITTF | 0.02414044 | 0.14076525 | 4.34E-05 | 0.0049916 | -0.091842  |
| 7w11w_SITTF | 0.07545944 | 0.4574548  | 5.23E-05 | 0.013721  | 0.23858    |
| 7w11w_SITTF | 0.01053424 | 0.05680138 | 3.68E-05 | 0.0068    | 0.30902    |
| 7w11w_SITTF | 0.03217637 | 0.190355   | 4.62E-05 | 0.0046026 | -0.11821   |
| 7w11w_SITTF | 0.0063372  | 0.03090143 | 3.44E-05 | 0.0077366 | 0.50694    |
| 7w11w_SITTF | 0.10621128 | 0.64722437 | 6.01E-05 | 0.0035608 | -1.3913    |
| 7w11w_SITTF | 0.0903528  | 0.5493617  | 4.88E-05 | 0.0086895 | -0.51631   |
| 7w11w_SITTF | 0.09620678 | 0.58548665 | 5.24E-05 | 0.0054581 | -0.99133   |
| 7w11w_SITTF | 0.05571754 | 0.33562756 | 6.21E-05 | 0.005966  | 0.043089   |
| 7w11w_SITTF | 0.01724423 | 0.09820875 | 4.03E-05 | 0.005729  | 0.063215   |
| 7w11w_SITTF | 0.1094283  | 0.66707665 | 6.18E-05 | 0.0036276 | -1.3717    |
| 7w11w_SITTF | 0.01980547 | 0.11401416 | 4.16E-05 | 0.0053955 | -0.012659  |
| 7w11w_SITTF | 0.01193374 | 0.06543767 | 3.77E-05 | 0.0064954 | 0.24064    |
| 7w11w_SITTF | 0.08483589 | 0.51531684 | 4.76E-05 | 0.012404  | -0.10433   |
| 7w11w_SITTF | 0.08915683 | 0.5419814  | 4.84E-05 | 0.0094274 | -0.42792   |
| 7w11w_SITTF | 0.00889237 | 0.04666941 | 3.59E-05 | 0.00713   | 0.38094    |
| 7w11w_SITTF | 0.01807082 | 0.10330959 | 4.09E-05 | 0.0055879 | 0.030658   |
| 7w11w_SITTF | 0.08791719 | 0.5343316  | 4.80E-05 | 0.010188  | -0.29935   |
| 7w11w_SITTF | 0.097049   | 0.59068394 | 5.32E-05 | 0.0050496 | -1.03      |
| 7w11w_SITTF | 0.08668847 | 0.52674913 | 4.77E-05 | 0.01133   | -0.21781   |
| 7w11w_SITTF | 0.07540856 | 0.4571408  | 5.23E-05 | 0.013721  | 0.23858    |
| 7w11w_SITTF | 0.03246294 | 0.19212343 | 4.62E-05 | 0.0046026 | -0.11603   |
| 7w11w_SITTF | 0.01915191 | 0.10998102 | 4.14E-05 | 0.0054571 | 0.0010121  |
| 7w11w_SITTF | 0.02935954 | 0.17297235 | 4.53E-05 | 0.0046846 | -0.1231    |
| 7w11w_SITTF | 0.13768733 | 0.8414631  | 7.39E-05 | 0.0051198 | -1.024     |
| 7w11w_SITTF | 0.01191307 | 0.06531016 | 3.77E-05 | 0.0064954 | 0.24064    |
| 7w11w_SITTF | 0.02709002 | 0.1589671  | 4.46E-05 | 0.0047834 | -0.11816   |
| 7w11w_SITTF | 0.01640415 | 0.0930246  | 4.00E-05 | 0.0058035 | 0.080526   |
| 7w11w_SITTF | 0.08695916 | 0.52841955 | 4.78E-05 | 0.010952  | -0.25808   |
| 7w11w_SITTF | 0.08299623 | 0.5039643  | 4.78E-05 | 0.013315  | 0.02505    |
| 7w11w_SITTF | 0.05332321 | 0.32085213 | 6.05E-05 | 0.0056127 | 0.022172   |
| 7w11w_SITTF | 0.01464177 | 0.08214898 | 3.92E-05 | 0.0060428 | 0.1363     |
| 7w11w_SITTF | 0.00513962 | 0.02351115 | 3.38E-05 | 0.0079991 | 0.55892    |
| 7w11w_SITTF | 0.03066434 | 0.18102425 | 4.57E-05 | 0.0046464 | -0.12245   |
| 7w11w_SITTF | 0.09553915 | 0.58136666 | 5.20E-05 | 0.0056833 | -0.91061   |
| 7w11w_SITTF | 0.01593677 | 0.09014037 | 3.98E-05 | 0.0058806 | 0.098494   |
| 7w11w_SITTF | 0.02338656 | 0.13611308 | 4.32E-05 | 0.0050338 | -0.084895  |
| 7w11w_SITTF | 0.0919626  | 0.5592958  | 4.96E-05 | 0.0076529 | -0.6503    |
| 7w11w_SITTF | 0.03308305 | 0.19595012 | 4.66E-05 | 0.0045822 | -0.11352   |
| 7w11w_SITTF | 0.07034419 | 0.4258886  | 5.76E-05 | 0.011297  | 0.23016    |
| 7w11w_SITTF | 0.02191088 | 0.12700662 | 4.26E-05 | 0.0051742 | -0.059109  |
| 7w11w_SITTF | 0.01251219 | 0.06900729 | 3.80E-05 | 0.0063994 | 0.21875    |
| 7w11w_SITTF | 0.0833077  | 0.5058864  | 4.78E-05 | 0.013315  | -0.0045591 |

|             |            |            |          |           |           |
|-------------|------------|------------|----------|-----------|-----------|
| 7w11w_SITTF | 0.09524456 | 0.5795488  | 5.16E-05 | 0.0059226 | -0.91061  |
| 7w11w_SITTF | 0.10015607 | 0.6098577  | 5.53E-05 | 0.004262  | -1.2296   |
| 7w11w_SITTF | 0.0330232  | 0.19558077 | 4.64E-05 | 0.0045915 | -0.11352  |
| 7w11w_SITTF | 0.08296128 | 0.50374866 | 4.78E-05 | 0.013315  | 0.02505   |
| 7w11w_SITTF | 0.09415745 | 0.5728402  | 5.09E-05 | 0.0064439 | -0.82618  |
| 7w11w_SITTF | 0.0306271  | 0.18079442 | 4.57E-05 | 0.0046464 | -0.12245  |
| 7w11w_SITTF | 0.07564578 | 0.4586047  | 5.23E-05 | 0.013721  | 0.23393   |
| 7w11w_SITTF | 0.0665658  | 0.40257215 | 6.12E-05 | 0.0093985 | 0.18233   |
| 7w11w_SITTF | 0.09631774 | 0.5861714  | 5.24E-05 | 0.0054581 | -0.99133  |
| 7w11w_SITTF | 0.06039875 | 0.3645153  | 6.38E-05 | 0.0070986 | 0.087064  |
| 7w11w_SITTF | 0.08163164 | 0.49554345 | 4.83E-05 | 0.013957  | 0.078055  |
| 7w11w_SITTF | 0.08931994 | 0.54298794 | 4.84E-05 | 0.0094274 | -0.42792  |
| 7w11w_SITTF | 0.08551523 | 0.5195091  | 4.76E-05 | 0.012059  | -0.14081  |
| 7w11w_SITTF | 0.09873211 | 0.6010704  | 5.45E-05 | 0.0045382 | -1.1375   |
| 7w11w_SITTF | 0.01404494 | 0.07846591 | 3.86E-05 | 0.0062156 | 0.1561    |
| 7w11w_SITTF | 0.00859038 | 0.04480579 | 3.56E-05 | 0.0072456 | 0.40559   |
| 7w11w_SITTF | 0.08698839 | 0.5285999  | 4.78E-05 | 0.010952  | -0.25808  |
| 7w11w_SITTF | 0.09480065 | 0.5768094  | 5.13E-05 | 0.0061762 | -0.8688   |
| 7w11w_SITTF | 0.09473512 | 0.576405   | 5.13E-05 | 0.0061762 | -0.8688   |
| 7w11w_SITTF | 0.08155146 | 0.49504864 | 4.83E-05 | 0.013957  | 0.078055  |
| 7w11w_SITTF | 0.02561269 | 0.14985049 | 4.40E-05 | 0.0048781 | -0.10813  |
| 7w11w_SITTF | 0.06980576 | 0.42256594 | 5.82E-05 | 0.011019  | 0.22487   |
| 7w11w_SITTF | 0.09296312 | 0.56547004 | 5.02E-05 | 0.0070215 | -0.73907  |
| 7w11w_SITTF | 0.00982351 | 0.05241548 | 3.65E-05 | 0.0069072 | 0.33263   |
| 7w11w_SITTF | 0.08821356 | 0.53616047 | 4.80E-05 | 0.010188  | -0.3415   |
| 7w11w_SITTF | 0.07411463 | 0.449156   | 5.38E-05 | 0.013116  | 0.24406   |
| 7w11w_SITTF | 0.08809853 | 0.5354506  | 4.80E-05 | 0.010188  | -0.3415   |
| 7w11w_SITTF | 0.02325083 | 0.13527548 | 4.30E-05 | 0.0050782 | -0.084895 |
| 7w11w_SITTF | 0.09309875 | 0.56630695 | 5.02E-05 | 0.0070215 | -0.73907  |
| 7w11w_SITTF | 0.07808294 | 0.47364447 | 5.01E-05 | 0.014289  | 0.20103   |
| 7w11w_SITTF | 0.01276099 | 0.07054262 | 3.80E-05 | 0.0063994 | 0.21875   |
| 7w11w_SITTF | 0.08573257 | 0.5208503  | 4.76E-05 | 0.0117    | -0.14081  |
| 7w11w_SITTF | 0.09756173 | 0.59384805 | 5.36E-05 | 0.0048658 | -1.0673   |
| 7w11w_SITTF | 0.006598   | 0.03251087 | 3.47E-05 | 0.0076096 | 0.48124   |
| 7w11w_SITTF | 0.09624589 | 0.58572793 | 5.24E-05 | 0.0054581 | -0.99133  |
| 7w11w_SITTF | 0.02092432 | 0.12091859 | 4.21E-05 | 0.0052798 | -0.037579 |
| 7w11w_SITTF | 0.10163189 | 0.61896497 | 5.66E-05 | 0.0039398 | -1.303    |
| 7w11w_SITTF | 0.07686286 | 0.46611536 | 5.13E-05 | 0.014025  | 0.22047   |
| 7w11w_SITTF | 0.02346626 | 0.13660488 | 4.32E-05 | 0.0050338 | -0.084895 |
| 7w11w_SITTF | 0.09351581 | 0.5688807  | 5.06E-05 | 0.0067258 | -0.7829   |
| 7w11w_SITTF | 0.0141048  | 0.07883529 | 3.89E-05 | 0.0061278 | 0.1561    |
| 7w11w_SITTF | 0.01930584 | 0.11093096 | 4.14E-05 | 0.0054571 | 0.0010121 |
| 7w11w_SITTF | 0.07264173 | 0.44006673 | 5.49E-05 | 0.012637  | 0.24373   |

|             |            |            |          |           |            |
|-------------|------------|------------|----------|-----------|------------|
| 7w11w_SITTF | 0.10228867 | 0.62301797 | 5.70E-05 | 0.0038563 | -1.3227    |
| 7w11w_SITTF | 0.06431925 | 0.38870868 | 6.27E-05 | 0.0084357 | 0.14863    |
| 7w11w_SITTF | 0.09618688 | 0.58536386 | 5.24E-05 | 0.0054581 | -0.99133   |
| 7w11w_SITTF | 0.03218901 | 0.19043298 | 4.62E-05 | 0.0046026 | -0.11821   |
| 7w11w_SITTF | 0.03212351 | 0.19002882 | 4.62E-05 | 0.0046026 | -0.11821   |
| 7w11w_SITTF | 0.08333518 | 0.50605595 | 4.78E-05 | 0.013315  | -0.0045591 |
| 7w11w_SITTF | 0.0693006  | 0.4194486  | 5.87E-05 | 0.010741  | 0.21895    |
| 7w11w_SITTF | 0.00950829 | 0.05047025 | 3.62E-05 | 0.0070172 | 0.35661    |
| 7w11w_SITTF | 0.09277569 | 0.56431335 | 5.02E-05 | 0.0070215 | -0.69483   |
| 7w11w_SITTF | 0.03885487 | 0.23156801 | 4.89E-05 | 0.0045836 | -0.076088  |
| 7w11w_SITTF | 0.01287072 | 0.07121977 | 3.80E-05 | 0.0063994 | 0.21875    |
| 7w11w_SITTF | 0.07275221 | 0.44074848 | 5.49E-05 | 0.012637  | 0.24373    |
| 7w11w_SITTF | 0.08684667 | 0.52772534 | 4.78E-05 | 0.010952  | -0.21781   |
| 7w11w_SITTF | 0.02060604 | 0.11895445 | 4.21E-05 | 0.0052798 | -0.037579  |
| 7w11w_SITTF | 0.00511448 | 0.02335604 | 3.38E-05 | 0.0079991 | 0.55892    |
| 7w11w_SITTF | 0.02184144 | 0.12657812 | 4.26E-05 | 0.0051742 | -0.059109  |
| 7w11w_SITTF | 0.01320475 | 0.07328109 | 3.83E-05 | 0.0063061 | 0.19734    |
| 7w11w_SITTF | 0.03833793 | 0.22837795 | 4.87E-05 | 0.0045758 | -0.076088  |
| 7w11w_SITTF | 0.09401835 | 0.57198185 | 5.09E-05 | 0.0064439 | -0.82618   |
| 7w11w_SITTF | 0.02421046 | 0.14119738 | 4.34E-05 | 0.0049916 | -0.091842  |
| 7w11w_SITTF | 0.08425346 | 0.5117227  | 4.76E-05 | 0.012731  | -0.069378  |
| 7w11w_SITTF | 0.09542304 | 0.58065015 | 5.20E-05 | 0.0056833 | -0.91061   |
| 7w11w_SITTF | 0.02993261 | 0.17650874 | 4.55E-05 | 0.0046645 | -0.12301   |
| 7w11w_SITTF | 0.10112613 | 0.61584395 | 5.62E-05 | 0.0040352 | -1.2808    |
| 7w11w_SITTF | 0.08130545 | 0.49353057 | 4.83E-05 | 0.013957  | 0.10139    |
| 7w11w_SITTF | 0.07421298 | 0.44976294 | 5.38E-05 | 0.013116  | 0.24406    |
| 7w11w_SITTF | 0.08577483 | 0.5211111  | 4.76E-05 | 0.0117    | -0.14081   |
| 7w11w_SITTF | 0.01284192 | 0.07104207 | 3.80E-05 | 0.0063994 | 0.21875    |
| 7w11w_SITTF | 0.02952848 | 0.17401487 | 4.53E-05 | 0.0046846 | -0.1231    |
| 7w11w_SITTF | 0.01260077 | 0.06955393 | 3.80E-05 | 0.0063994 | 0.21875    |
| 7w11w_SITTF | 0.09163977 | 0.5573036  | 4.96E-05 | 0.0076529 | -0.60562   |
| 7w11w_SITTF | 0.08919687 | 0.54222846 | 4.84E-05 | 0.0094274 | -0.42792   |
| 7w11w_SITTF | 0.01933396 | 0.11110447 | 4.14E-05 | 0.0054571 | 0.0010121  |
| 7w11w_SITTF | 0.0217364  | 0.1259299  | 4.26E-05 | 0.0051742 | -0.059109  |
| 7w11w_SITTF | 0.01744506 | 0.09944805 | 4.06E-05 | 0.0056572 | 0.046584   |
| 7w11w_SITTF | 0.01817056 | 0.10392509 | 4.09E-05 | 0.0055879 | 0.030658   |
| 7w11w_SITTF | 0.01428716 | 0.07996065 | 3.89E-05 | 0.0061278 | 0.1561     |
| 7w11w_SITTF | 0.07760708 | 0.47070792 | 5.05E-05 | 0.014229  | 0.21153    |
| 7w11w_SITTF | 0.00625919 | 0.03042004 | 3.44E-05 | 0.0077366 | 0.50694    |
| 7w11w_SITTF | 0.06819428 | 0.4126215  | 5.98E-05 | 0.010192  | 0.20551    |
| 7w11w_SITTF | 0.00907154 | 0.04777504 | 3.59E-05 | 0.00713   | 0.38094    |
| 7w11w_SITTF | 0.01751781 | 0.09989701 | 4.06E-05 | 0.0056572 | 0.046584   |
| 7w11w_SITTF | 0.02569728 | 0.15037253 | 4.40E-05 | 0.0048781 | -0.10813   |

|             |            |            |          |           |           |
|-------------|------------|------------|----------|-----------|-----------|
| 7w11w_SITTF | 0.01546498 | 0.08722896 | 3.95E-05 | 0.0059603 | 0.11709   |
| 7w11w_SITTF | 0.0848892  | 0.5156458  | 4.76E-05 | 0.012404  | -0.10433  |
| 7w11w_SITTF | 0.0155098  | 0.08750554 | 3.95E-05 | 0.0059603 | 0.11709   |
| 7w11w_SITTF | 0.01449352 | 0.08123412 | 3.89E-05 | 0.0061278 | 0.1561    |
| 7w11w_SITTF | 0.01127627 | 0.06138046 | 3.71E-05 | 0.0066957 | 0.2858    |
| 7w11w_SITTF | 0.0360405  | 0.21420054 | 4.77E-05 | 0.0045615 | -0.096915 |
| 7w11w_SITTF | 0.0133501  | 0.07417806 | 3.83E-05 | 0.0063061 | 0.19734   |
| 7w11w_SITTF | 0.01382214 | 0.07709099 | 3.86E-05 | 0.0062156 | 0.17645   |
| 7w11w_SITTF | 0.01862514 | 0.1067303  | 4.11E-05 | 0.0055212 | 0.015459  |
| 7w11w_SITTF | 0.10533667 | 0.6418272  | 5.94E-05 | 0.0035815 | -1.3882   |
| 7w11w_SITTF | 0.00791755 | 0.04065376 | 3.53E-05 | 0.0073641 | 0.43054   |
| 7w11w_SITTF | 0.06557159 | 0.3964369  | 6.16E-05 | 0.0091463 | 0.16566   |
| 7w11w_SITTF | 0.01635329 | 0.09271074 | 4.00E-05 | 0.0058035 | 0.080526  |
| 7w11w_SITTF | 0.03027492 | 0.17862116 | 4.55E-05 | 0.0046645 | -0.12245  |
| 7w11w_SITTF | 0.09761012 | 0.5941466  | 5.36E-05 | 0.0048658 | -1.0673   |
| 7w11w_SITTF | 0.02647675 | 0.15518264 | 4.42E-05 | 0.0048445 | -0.11546  |
| 7w11w_SITTF | 0.06612287 | 0.39983884 | 6.12E-05 | 0.0093985 | 0.17407   |
| 7w11w_SITTF | 0.00913742 | 0.0481816  | 3.59E-05 | 0.00713   | 0.38094   |
| 7w11w_SITTF | 0.09734841 | 0.5925316  | 5.32E-05 | 0.0050496 | -1.0673   |
| 7w11w_SITTF | 0.03594919 | 0.21363707 | 4.77E-05 | 0.0045615 | -0.096915 |
| 7w11w_SITTF | 0.01894072 | 0.1086778  | 4.11E-05 | 0.0055212 | 0.0010121 |
| 7w11w_SITTF | 0.03333791 | 0.19752283 | 4.66E-05 | 0.0045822 | -0.11352  |
| 7w11w_SITTF | 0.07648847 | 0.46380493 | 5.13E-05 | 0.014025  | 0.22792   |
| 7w11w_SITTF | 0.01138922 | 0.06207747 | 3.74E-05 | 0.0065941 | 0.263     |
| 7w11w_SITTF | 0.07223593 | 0.43756253 | 5.54E-05 | 0.012382  | 0.24161   |
| 7w11w_SITTF | 0.02078225 | 0.12004186 | 4.21E-05 | 0.0052798 | -0.037579 |
| 7w11w_SITTF | 0.10040471 | 0.6113921  | 5.58E-05 | 0.0041426 | -1.2296   |
| 7w11w_SITTF | 0.01522513 | 0.08574883 | 3.95E-05 | 0.0059603 | 0.11709   |
| 7w11w_SITTF | 0.09044442 | 0.54992706 | 4.88E-05 | 0.0086895 | -0.51631  |
| 7w11w_SITTF | 0.01695241 | 0.09640792 | 4.03E-05 | 0.005729  | 0.063215  |
| 7w11w_SITTF | 0.00834865 | 0.04331407 | 3.56E-05 | 0.0072456 | 0.40559   |
| 7w11w_SITTF | 0.09423726 | 0.5733327  | 5.09E-05 | 0.0064439 | -0.82618  |
| 7w11w_SITTF | 0.08133143 | 0.49369088 | 4.83E-05 | 0.013957  | 0.10139   |
| 7w11w_SITTF | 0.08647035 | 0.52540314 | 4.77E-05 | 0.01133   | -0.21781  |
| 7w11w_SITTF | 0.00572245 | 0.02710784 | 3.41E-05 | 0.0078664 | 0.53284   |
| 7w11w_SITTF | 0.09739348 | 0.59280974 | 5.32E-05 | 0.0050496 | -1.0673   |
| 7w11w_SITTF | 0.09014728 | 0.54809344 | 4.88E-05 | 0.0086895 | -0.47194  |
| 7w11w_SITTF | 0.09847169 | 0.5994634  | 5.40E-05 | 0.0046955 | -1.1375   |
| 7w11w_SITTF | 0.0794914  | 0.48233604 | 4.93E-05 | 0.014315  | 0.15946   |
| 7w11w_SITTF | 0.02753362 | 0.16170457 | 4.46E-05 | 0.0047834 | -0.12024  |
| 7w11w_SITTF | 0.01272013 | 0.07029054 | 3.80E-05 | 0.0063994 | 0.21875   |
| 7w11w_SITTF | 0.0071308  | 0.03579872 | 3.50E-05 | 0.0074854 | 0.45576   |
| 7w11w_SITTF | 0.08947456 | 0.5439421  | 4.86E-05 | 0.0090548 | -0.42792  |

|             |            |            |          |           |            |
|-------------|------------|------------|----------|-----------|------------|
| 7w11w_SITTF | 0.08302978 | 0.5041714  | 4.78E-05 | 0.013315  | 0.02505    |
| 7w11w_SITTF | 0.07765538 | 0.47100595 | 5.05E-05 | 0.014229  | 0.21153    |
| 7w11w_SITTF | 0.03480375 | 0.20656855 | 4.72E-05 | 0.0045646 | -0.10426   |
| 7w11w_SITTF | 0.02538189 | 0.14842626 | 4.38E-05 | 0.0049138 | -0.10813   |
| 7w11w_SITTF | 0.02063431 | 0.1191289  | 4.21E-05 | 0.0052798 | -0.037579  |
| 7w11w_SITTF | 0.05078666 | 0.3051991  | 5.83E-05 | 0.0052672 | 0.0077602  |
| 7w11w_SITTF | 0.03838531 | 0.22867031 | 4.87E-05 | 0.0045758 | -0.076088  |
| 7w11w_SITTF | 0.00903731 | 0.04756383 | 3.59E-05 | 0.00713   | 0.38094    |
| 7w11w_SITTF | 0.02406207 | 0.14028165 | 4.34E-05 | 0.0049916 | -0.091842  |
| 7w11w_SITTF | 0.14300287 | 0.8742653  | 7.53E-05 | 0.0048359 | -1.0786    |
| 7w11w_SITTF | 0.09217076 | 0.5605804  | 4.99E-05 | 0.0073308 | -0.6503    |
| 7w11w_SITTF | 0.00743879 | 0.03769933 | 3.50E-05 | 0.0074854 | 0.45576    |
| 7w11w_SITTF | 0.10314631 | 0.62831044 | 5.78E-05 | 0.003724  | -1.3397    |
| 7w11w_SITTF | 0.01516384 | 0.08537065 | 3.95E-05 | 0.0059603 | 0.11709    |
| 7w11w_SITTF | 0.08256529 | 0.50130504 | 4.79E-05 | 0.013563  | 0.05262    |
| 7w11w_SITTF | 0.04808608 | 0.28853384 | 5.58E-05 | 0.0050083 | -0.0087048 |
| 7w11w_SITTF | 0.02593098 | 0.15181468 | 4.40E-05 | 0.0048781 | -0.11213   |
| 7w11w_SITTF | 0.03950446 | 0.2355766  | 4.92E-05 | 0.0045932 | -0.067351  |
| 7w11w_SITTF | 0.08122452 | 0.4930311  | 4.85E-05 | 0.0141    | 0.10139    |
| 7w11w_SITTF | 0.06902767 | 0.41776437 | 5.87E-05 | 0.010741  | 0.21248    |
| 7w11w_SITTF | 0.00785131 | 0.04024503 | 3.53E-05 | 0.0073641 | 0.43054    |
| 7w11w_SITTF | 0.0875151  | 0.5318503  | 4.79E-05 | 0.010571  | -0.29935   |
| 7w11w_SITTF | 0.02315898 | 0.13470867 | 4.30E-05 | 0.0050782 | -0.077142  |
| 7w11w_SITTF | 0.10291875 | 0.6269062  | 5.74E-05 | 0.0037844 | -1.3397    |
| 7w11w_SITTF | 0.01233368 | 0.06790572 | 3.77E-05 | 0.0064954 | 0.24064    |
| 7w11w_SITTF | 0.01355073 | 0.07541616 | 3.86E-05 | 0.0062156 | 0.17645    |
| 7w11w_SITTF | 0.02625124 | 0.15379103 | 4.42E-05 | 0.0048445 | -0.11213   |
| 7w11w_SITTF | 0.01347684 | 0.07496015 | 3.83E-05 | 0.0063061 | 0.19734    |
| 7w11w_SITTF | 0.05386863 | 0.32421795 | 6.10E-05 | 0.005694  | 0.026054   |
| 7w11w_SITTF | 0.0238904  | 0.1392223  | 4.34E-05 | 0.0049916 | -0.091842  |
| 7w11w_SITTF | 0.04021339 | 0.23995143 | 4.99E-05 | 0.0046177 | -0.063007  |
| 7w11w_SITTF | 0.07765324 | 0.47099274 | 5.05E-05 | 0.014229  | 0.21153    |
| 7w11w_SITTF | 0.01793022 | 0.10244197 | 4.09E-05 | 0.0055879 | 0.030658   |
| 7w11w_SITTF | 0.02363907 | 0.13767132 | 4.32E-05 | 0.0050338 | -0.084895  |
| 7w11w_SITTF | 0.02666502 | 0.15634446 | 4.44E-05 | 0.004813  | -0.11546   |
| 7w11w_SITTF | 0.03471449 | 0.20601772 | 4.72E-05 | 0.0045646 | -0.10426   |
| 7w11w_SITTF | 0.01615879 | 0.09151047 | 3.98E-05 | 0.0058806 | 0.098494   |
| 7w11w_SITTF | 0.09045047 | 0.5499644  | 4.88E-05 | 0.0086895 | -0.51631   |
| 7w11w_SITTF | 0.02139745 | 0.12383827 | 4.24E-05 | 0.0052258 | -0.04878   |
| 7w11w_SITTF | 0.01886236 | 0.10819424 | 4.11E-05 | 0.0055212 | 0.015459   |
| 7w11w_SITTF | 0.0120974  | 0.06644763 | 3.77E-05 | 0.0064954 | 0.24064    |
| 7w11w_SITTF | 0.0213878  | 0.12377872 | 4.24E-05 | 0.0052258 | -0.04878   |
| 7w11w_SITTF | 0.02464007 | 0.14384846 | 4.36E-05 | 0.0049516 | -0.098011  |

|             |            |            |          |           |           |
|-------------|------------|------------|----------|-----------|-----------|
| 7w11w_SITTF | 0.02511463 | 0.14677697 | 4.38E-05 | 0.0049138 | -0.10343  |
| 7w11w_SITTF | 0.0188447  | 0.10808526 | 4.11E-05 | 0.0055212 | 0.015459  |
| 7w11w_SITTF | 0.02129462 | 0.12320368 | 4.24E-05 | 0.0052258 | -0.04878  |
| 7w11w_SITTF | 0.07809208 | 0.47370085 | 5.01E-05 | 0.014289  | 0.20103   |
| 7w11w_SITTF | 0.01063941 | 0.05745038 | 3.68E-05 | 0.0068    | 0.30902   |
| 7w11w_SITTF | 0.00880462 | 0.0461279  | 3.59E-05 | 0.00713   | 0.38094   |
| 7w11w_SITTF | 0.03452773 | 0.20486525 | 4.70E-05 | 0.0045688 | -0.10761  |
| 7w11w_SITTF | 0.05732499 | 0.34554714 | 6.30E-05 | 0.0062853 | 0.057806  |
| 7w11w_SITTF | 0.04283853 | 0.25615114 | 5.17E-05 | 0.0047101 | -0.042593 |
| 7w11w_SITTF | 0.0156061  | 0.08809985 | 3.95E-05 | 0.0059603 | 0.11709   |
| 7w11w_SITTF | 0.03150248 | 0.18619642 | 4.60E-05 | 0.0046154 | -0.12002  |
| 7w11w_SITTF | 0.02829478 | 0.16640167 | 4.49E-05 | 0.0047302 | -0.12174  |
| 7w11w_SITTF | 0.08026586 | 0.48711523 | 4.87E-05 | 0.014207  | 0.14202   |
| 7w11w_SITTF | 0.0314269  | 0.18573003 | 4.60E-05 | 0.0046154 | -0.12002  |
| 7w11w_SITTF | 0.03035258 | 0.17910038 | 4.57E-05 | 0.0046464 | -0.12245  |
| 7w11w_SITTF | 0.02852631 | 0.16783048 | 4.49E-05 | 0.0047302 | -0.12174  |
| 7w11w_SITTF | 0.0237211  | 0.13817754 | 4.32E-05 | 0.0050338 | -0.084895 |
| 7w11w_SITTF | 0.03051939 | 0.18012977 | 4.57E-05 | 0.0046464 | -0.12245  |
| 7w11w_SITTF | 0.02892273 | 0.17027676 | 4.51E-05 | 0.0047064 | -0.12268  |
| 7w11w_SITTF | 0.01887716 | 0.10828552 | 4.11E-05 | 0.0055212 | 0.015459  |
| 7w11w_SITTF | 0.01908559 | 0.10957176 | 4.14E-05 | 0.0054571 | 0.0010121 |
| 7w11w_SITTF | 0.03330301 | 0.19730745 | 4.66E-05 | 0.0045822 | -0.11352  |
| 7w11w_SITTF | 0.03386433 | 0.2007714  | 4.68E-05 | 0.0045746 | -0.11071  |
| 7w11w_SITTF | 0.07526228 | 0.45623815 | 5.28E-05 | 0.013537  | 0.23858   |
| 7w11w_SITTF | 0.01259784 | 0.06953588 | 3.80E-05 | 0.0063994 | 0.21875   |
| 7w11w_SITTF | 0.07048489 | 0.4267569  | 5.71E-05 | 0.011574  | 0.23016   |
| 7w11w_SITTF | 0.06962066 | 0.4214237  | 5.82E-05 | 0.011019  | 0.21895   |
| 7w11w_SITTF | 0.07928818 | 0.48108196 | 4.93E-05 | 0.014315  | 0.17506   |
| 7w11w_SITTF | 0.03082548 | 0.18201861 | 4.57E-05 | 0.0046464 | -0.12145  |
| 7w11w_SITTF | 0.00809462 | 0.04174649 | 3.53E-05 | 0.0073641 | 0.40559   |
| 7w11w_SITTF | 0.01782798 | 0.10181102 | 4.06E-05 | 0.0056572 | 0.030658  |
| 7w11w_SITTF | 0.00937761 | 0.0496638  | 3.62E-05 | 0.0070172 | 0.35661   |
| 7w11w_SITTF | 0.02508768 | 0.1466107  | 4.38E-05 | 0.0049138 | -0.10343  |
| 7w11w_SITTF | 0.06549399 | 0.39595804 | 6.20E-05 | 0.0089013 | 0.16566   |
| 7w11w_SITTF | 0.01577512 | 0.08914283 | 3.98E-05 | 0.0058806 | 0.098494  |
| 7w11w_SITTF | 0.01990148 | 0.11460666 | 4.16E-05 | 0.0053955 | -0.012659 |
| 7w11w_SITTF | 0.02449779 | 0.14297049 | 4.36E-05 | 0.0049516 | -0.098011 |
| 7w11w_SITTF | 0.03007592 | 0.17739311 | 4.55E-05 | 0.0046645 | -0.12301  |
| 7w11w_SITTF | 0.01776713 | 0.10143555 | 4.06E-05 | 0.0056572 | 0.046584  |
| 7w11w_SITTF | 0.03446797 | 0.20449646 | 4.70E-05 | 0.0045688 | -0.10761  |
| 7w11w_SITTF | 0.06765824 | 0.4093136  | 6.03E-05 | 0.009922  | 0.19812   |
| 7w11w_SITTF | 0.02419412 | 0.14109653 | 4.34E-05 | 0.0049916 | -0.091842 |
| 7w11w_SITTF | 0.02414526 | 0.14079499 | 4.34E-05 | 0.0049916 | -0.091842 |

|             |            |            |          |           |           |
|-------------|------------|------------|----------|-----------|-----------|
| 7w11w_SITTF | 0.02213052 | 0.12836203 | 4.26E-05 | 0.0051742 | -0.068556 |
| 7w11w_SITTF | 0.03063834 | 0.18086377 | 4.57E-05 | 0.0046464 | -0.12245  |
| 7w11w_SITTF | 0.0129311  | 0.07159241 | 3.80E-05 | 0.0063994 | 0.21875   |
| 7w11w_SITTF | 0.03906852 | 0.23288643 | 4.92E-05 | 0.0045932 | -0.071721 |
| 7w11w_SITTF | 0.0321365  | 0.19010897 | 4.62E-05 | 0.0046026 | -0.11821  |
| 7w11w_SITTF | 0.02761003 | 0.1621761  | 4.46E-05 | 0.0047834 | -0.12024  |
| 7w11w_SITTF | 0.04166768 | 0.24892586 | 5.05E-05 | 0.0046492 | -0.0504   |
| 7w11w_SITTF | 0.02303931 | 0.13397019 | 4.30E-05 | 0.0050782 | -0.077142 |
| 7w11w_SITTF | 0.04218769 | 0.25213486 | 5.09E-05 | 0.0046676 | -0.04643  |
| 7w11w_SITTF | 0.02409921 | 0.14051081 | 4.34E-05 | 0.0049916 | -0.091842 |
| 7w11w_SITTF | 0.02022203 | 0.11657406 | 4.19E-05 | 0.0053364 | -0.025531 |
| 7w11w_SITTF | 0.02073055 | 0.11972279 | 4.21E-05 | 0.0052798 | -0.037579 |
| 7w11w_SITTF | 0.07422721 | 0.44985077 | 5.33E-05 | 0.013335  | 0.24406   |
| 7w11w_SITTF | 0.0092924  | 0.04913795 | 3.62E-05 | 0.0070172 | 0.35661   |
| 7w11w_SITTF | 0.01519854 | 0.0855848  | 3.95E-05 | 0.0059603 | 0.11709   |
| 7w11w_SITTF | 0.03348883 | 0.19845414 | 4.66E-05 | 0.0045822 | -0.11071  |
| 7w11w_SITTF | 0.0884673  | 0.5377263  | 4.82E-05 | 0.0098057 | -0.3415   |
| 7w11w_SITTF | 0.09498734 | 0.57796144 | 5.16E-05 | 0.0059226 | -0.8688   |
| 7w11w_SITTF | 0.0753362  | 0.45669433 | 5.23E-05 | 0.013721  | 0.23858   |
| 7w11w_SITTF | 0.02716904 | 0.15945478 | 4.46E-05 | 0.0047834 | -0.11816  |
| 7w11w_SITTF | 0.05301797 | 0.3189685  | 6.01E-05 | 0.0055357 | 0.022172  |
| 7w11w_SITTF | 0.02488125 | 0.14533682 | 4.36E-05 | 0.0049516 | -0.10343  |
| 7w11w_SITTF | 0.03583268 | 0.21291807 | 4.77E-05 | 0.0045615 | -0.096915 |
| 7w11w_SITTF | 0.08154009 | 0.49497855 | 4.83E-05 | 0.013957  | 0.10139   |
| 7w11w_SITTF | 0.05686916 | 0.34273422 | 6.27E-05 | 0.0061731 | 0.05269   |
| 7w11w_SITTF | 0.01952091 | 0.11225816 | 4.16E-05 | 0.0053955 | -0.012659 |
| 7w11w_SITTF | 0.0741301  | 0.44925147 | 5.38E-05 | 0.013116  | 0.24406   |
| 7w11w_SITTF | 0.02623258 | 0.15367584 | 4.42E-05 | 0.0048445 | -0.11213  |
| 7w11w_SITTF | 0.03397029 | 0.20142527 | 4.68E-05 | 0.0045746 | -0.11071  |
| 7w11w_SITTF | 0.07525183 | 0.45617363 | 5.28E-05 | 0.013537  | 0.23858   |
| 7w11w_SITTF | 0.01684398 | 0.09573877 | 4.03E-05 | 0.005729  | 0.063215  |
| 7w11w_SITTF | 0.03684251 | 0.21914971 | 4.81E-05 | 0.0045652 | -0.088896 |
| 7w11w_SITTF | 0.03603131 | 0.21414378 | 4.77E-05 | 0.0045615 | -0.096915 |
| 7w11w_SITTF | 0.01575287 | 0.08900558 | 3.98E-05 | 0.0058806 | 0.098494  |
| 7w11w_SITTF | 0.02541675 | 0.14864133 | 4.38E-05 | 0.0049138 | -0.10813  |
| 7w11w_SITTF | 0.05129391 | 0.30832934 | 5.87E-05 | 0.0053288 | 0.0077602 |
| 7w11w_SITTF | 0.01917582 | 0.11012857 | 4.14E-05 | 0.0054571 | 0.0010121 |
| 7w11w_SITTF | 0.06537255 | 0.39520863 | 6.20E-05 | 0.0089013 | 0.16566   |
| 7w11w_SITTF | 0.02205465 | 0.12789387 | 4.26E-05 | 0.0051742 | -0.059109 |
| 7w11w_SITTF | 0.07430968 | 0.45035967 | 5.33E-05 | 0.013335  | 0.24406   |
| 7w11w_SITTF | 0.01215256 | 0.06678806 | 3.77E-05 | 0.0064954 | 0.24064   |
| 7w11w_SITTF | 0.02310811 | 0.13439478 | 4.30E-05 | 0.0050782 | -0.077142 |
| 7w11w_SITTF | 0.07519717 | 0.45583633 | 5.28E-05 | 0.013537  | 0.23858   |

|             |            |            |          |           |            |
|-------------|------------|------------|----------|-----------|------------|
| 7w11w_SITTF | 0.02237015 | 0.1298408  | 4.28E-05 | 0.005125  | -0.068556  |
| 7w11w_SITTF | 0.01018135 | 0.05462368 | 3.65E-05 | 0.0069072 | 0.33263    |
| 7w11w_SITTF | 0.02956761 | 0.17425635 | 4.53E-05 | 0.0046846 | -0.1231    |
| 7w11w_SITTF | 0.00490136 | 0.02204088 | 3.38E-05 | 0.0079991 | 0.55892    |
| 7w11w_SITTF | 0.04062142 | 0.24246936 | 4.99E-05 | 0.0046177 | -0.058715  |
| 7w11w_SITTF | 0.01231233 | 0.06777399 | 3.77E-05 | 0.0064954 | 0.24064    |
| 7w11w_SITTF | 0.03143887 | 0.18580389 | 4.60E-05 | 0.0046154 | -0.12002   |
| 7w11w_SITTF | 0.02676215 | 0.15694386 | 4.44E-05 | 0.004813  | -0.11546   |
| 7w11w_SITTF | 0.02261003 | 0.13132109 | 4.28E-05 | 0.005125  | -0.068556  |
| 7w11w_SITTF | 0.01669647 | 0.09482852 | 4.00E-05 | 0.0058035 | 0.080526   |
| 7w11w_SITTF | 0.01662024 | 0.09435806 | 4.00E-05 | 0.0058035 | 0.080526   |
| 7w11w_SITTF | 0.02556806 | 0.1495751  | 4.40E-05 | 0.0048781 | -0.10813   |
| 7w11w_SITTF | 0.04961766 | 0.29798517 | 5.73E-05 | 0.0051543 | -0.0022352 |
| 7w11w_SITTF | 0.01117223 | 0.06073842 | 3.71E-05 | 0.0066957 | 0.2858     |
| 7w11w_SITTF | 0.01855072 | 0.10627111 | 4.11E-05 | 0.0055212 | 0.015459   |
| 7w11w_SITTF | 0.01103348 | 0.05988216 | 3.71E-05 | 0.0066957 | 0.2858     |
| 7w11w_SITTF | 0.03208538 | 0.1897935  | 4.62E-05 | 0.0046026 | -0.11821   |
| 7w11w_SITTF | 0.02508573 | 0.14659864 | 4.38E-05 | 0.0049138 | -0.10343   |
| 7w11w_SITTF | 0.01105752 | 0.06003053 | 3.71E-05 | 0.0066957 | 0.2858     |
| 7w11w_SITTF | 0.0149939  | 0.08432191 | 3.92E-05 | 0.0060428 | 0.1363     |
| 7w11w_SITTF | 0.02312168 | 0.13447851 | 4.30E-05 | 0.0050782 | -0.077142  |
| 7w11w_SITTF | 0.08031335 | 0.48740828 | 4.87E-05 | 0.014207  | 0.14202    |
| 7w11w_SITTF | 0.01366589 | 0.07612681 | 3.86E-05 | 0.0062156 | 0.17645    |
| 7w11w_SITTF | 0.01567359 | 0.08851632 | 3.95E-05 | 0.0059603 | 0.098494   |
| 7w11w_SITTF | 0.02964827 | 0.17475405 | 4.53E-05 | 0.0046846 | -0.1231    |
| 7w11w_SITTF | 0.0733957  | 0.44471946 | 5.43E-05 | 0.012883  | 0.24489    |
| 7w11w_SITTF | 0.07611804 | 0.46151903 | 5.18E-05 | 0.013885  | 0.23393    |
| 7w11w_SITTF | 0.00515423 | 0.02360134 | 3.38E-05 | 0.0079991 | 0.55892    |
| 7w11w_SITTF | 0.08569324 | 0.5206076  | 4.76E-05 | 0.0117    | -0.14081   |
| 7w11w_SITTF | 0.09135594 | 0.5555521  | 4.93E-05 | 0.0079874 | -0.60562   |
| 7w11w_SITTF | 0.0133242  | 0.07401821 | 3.83E-05 | 0.0063061 | 0.19734    |
| 7w11w_SITTF | 0.02133203 | 0.12343454 | 4.24E-05 | 0.0052258 | -0.04878   |
| 7w11w_SITTF | 0.06131217 | 0.370152   | 6.37E-05 | 0.0074328 | 0.10072    |
| 7w11w_SITTF | 0.01606016 | 0.09090181 | 3.98E-05 | 0.0058806 | 0.098494   |
| 7w11w_SITTF | 0.01904425 | 0.10931664 | 4.14E-05 | 0.0054571 | 0.0010121  |
| 7w11w_SITTF | 0.02975668 | 0.17542304 | 4.53E-05 | 0.0046846 | -0.12301   |
| 7w11w_SITTF | 0.02506597 | 0.14647672 | 4.38E-05 | 0.0049138 | -0.10343   |
| 7w11w_SITTF | 0.03292458 | 0.19497217 | 4.64E-05 | 0.0045915 | -0.11603   |
| 7w11w_SITTF | 0.01869807 | 0.10718035 | 4.11E-05 | 0.0055212 | 0.015459   |
| 7w11w_SITTF | 0.01970989 | 0.11342429 | 4.16E-05 | 0.0053955 | -0.012659  |
| 7w11w_SITTF | 0.01950272 | 0.11214588 | 4.16E-05 | 0.0053955 | -0.012659  |
| 7w11w_SITTF | 0.02199811 | 0.12754495 | 4.26E-05 | 0.0051742 | -0.059109  |
| 7w11w_SITTF | 0.01007367 | 0.05395921 | 3.65E-05 | 0.0069072 | 0.33263    |



|             |            |            |          |           |            |
|-------------|------------|------------|----------|-----------|------------|
| 7w11w_SITTF | 0.03842456 | 0.22891258 | 4.87E-05 | 0.0045758 | -0.076088  |
| 7w11w_SITTF | 0.03278376 | 0.1941032  | 4.64E-05 | 0.0045915 | -0.11603   |
| 7w11w_SITTF | 0.03250613 | 0.19238994 | 4.64E-05 | 0.0045915 | -0.11603   |
| 7w11w_SITTF | 0.02784325 | 0.16361532 | 4.48E-05 | 0.0047558 | -0.12024   |
| 7w11w_SITTF | 0.00973662 | 0.05187928 | 3.65E-05 | 0.0069072 | 0.33263    |
| 7w11w_SITTF | 0.01293687 | 0.07162803 | 3.80E-05 | 0.0063994 | 0.21875    |
| 7w11w_SITTF | 0.02084019 | 0.12039943 | 4.21E-05 | 0.0052798 | -0.037579  |
| 7w11w_SITTF | 0.04493681 | 0.26909962 | 5.30E-05 | 0.0047888 | -0.028317  |
| 7w11w_SITTF | 0.022217   | 0.12889569 | 4.28E-05 | 0.005125  | -0.068556  |
| 7w11w_SITTF | 0.01712432 | 0.09746876 | 4.03E-05 | 0.005729  | 0.063215   |
| 7w11w_SITTF | 0.07906914 | 0.47973028 | 4.97E-05 | 0.014318  | 0.17506    |
| 7w11w_SITTF | 0.02738297 | 0.16077492 | 4.46E-05 | 0.0047834 | -0.11816   |
| 7w11w_SITTF | 0.01911873 | 0.10977625 | 4.14E-05 | 0.0054571 | 0.0010121  |
| 7w11w_SITTF | 0.03346568 | 0.19831128 | 4.66E-05 | 0.0045822 | -0.11352   |
| 7w11w_SITTF | 0.01324877 | 0.07355273 | 3.83E-05 | 0.0063061 | 0.19734    |
| 7w11w_SITTF | 0.01898649 | 0.10896024 | 4.14E-05 | 0.0054571 | 0.0010121  |
| 7w11w_SITTF | 0.01816758 | 0.10390675 | 4.09E-05 | 0.0055879 | 0.030658   |
| 7w11w_SITTF | 0.01344506 | 0.07476406 | 3.83E-05 | 0.0063061 | 0.19734    |
| 7w11w_SITTF | 0.02467543 | 0.14406668 | 4.36E-05 | 0.0049516 | -0.098011  |
| 7w11w_SITTF | 0.02861569 | 0.16838203 | 4.49E-05 | 0.0047302 | -0.12268   |
| 7w11w_SITTF | 0.0532136  | 0.3201757  | 6.05E-05 | 0.0056127 | 0.022172   |
| 7w11w_SITTF | 0.01734394 | 0.09882403 | 4.06E-05 | 0.0056572 | 0.046584   |
| 7w11w_SITTF | 0.07933774 | 0.4813878  | 4.93E-05 | 0.014315  | 0.17506    |
| 7w11w_SITTF | 0.07226201 | 0.4377235  | 5.54E-05 | 0.012382  | 0.24161    |
| 7w11w_SITTF | 0.01498753 | 0.08428262 | 3.92E-05 | 0.0060428 | 0.1363     |
| 7w11w_SITTF | 0.00713245 | 0.0358089  | 3.50E-05 | 0.0074854 | 0.45576    |
| 7w11w_SITTF | 0.0468474  | 0.28088993 | 5.49E-05 | 0.0049251 | -0.018376  |
| 7w11w_SITTF | 0.01969804 | 0.11335121 | 4.16E-05 | 0.0053955 | -0.012659  |
| 7w11w_SITTF | 0.02829416 | 0.16639785 | 4.49E-05 | 0.0047302 | -0.12174   |
| 7w11w_SITTF | 0.03319358 | 0.19663219 | 4.66E-05 | 0.0045822 | -0.11352   |
| 7w11w_SITTF | 0.03851483 | 0.2294696  | 4.89E-05 | 0.0045836 | -0.076088  |
| 7w11w_SITTF | 0.07760484 | 0.47069407 | 5.05E-05 | 0.014229  | 0.21153    |
| 7w11w_SITTF | 0.01815879 | 0.10385247 | 4.09E-05 | 0.0055879 | 0.030658   |
| 7w11w_SITTF | 0.08544845 | 0.519097   | 4.76E-05 | 0.012059  | -0.14081   |
| 7w11w_SITTF | 0.08116821 | 0.49268365 | 4.85E-05 | 0.0141    | 0.10139    |
| 7w11w_SITTF | 0.01897566 | 0.10889339 | 4.14E-05 | 0.0054571 | 0.0010121  |
| 7w11w_SITTF | 0.04927131 | 0.29584783 | 5.68E-05 | 0.0051026 | -0.0022352 |
| 7w11w_SITTF | 0.04522413 | 0.27087274 | 5.34E-05 | 0.0048194 | -0.028317  |
| 7w11w_SITTF | 0.03031979 | 0.17889802 | 4.55E-05 | 0.0046645 | -0.12245   |
| 7w11w_SITTF | 0.03367872 | 0.19962598 | 4.68E-05 | 0.0045746 | -0.11071   |
| 7w11w_SITTF | 0.07701464 | 0.46705195 | 5.09E-05 | 0.014141  | 0.22047    |
| 7w11w_SITTF | 0.02358909 | 0.1373629  | 4.32E-05 | 0.0050338 | -0.084895  |
| 7w11w_SITTF | 0.01734204 | 0.09881234 | 4.06E-05 | 0.0056572 | 0.046584   |

|             |            |            |          |           |           |
|-------------|------------|------------|----------|-----------|-----------|
| 7w11w_SITTF | 0.0153304  | 0.08639848 | 3.95E-05 | 0.0059603 | 0.11709   |
| 7w11w_SITTF | 0.00248252 | 0.0071142  | 3.23E-05 | 0.0087041 | 0.69119   |
| 7w11w_SITTF | 0.01123351 | 0.06111658 | 3.71E-05 | 0.0066957 | 0.2858    |
| 7w11w_SITTF | 0.03306782 | 0.19585614 | 4.66E-05 | 0.0045822 | -0.11352  |
| 7w11w_SITTF | 0.06883081 | 0.41654953 | 5.87E-05 | 0.010741  | 0.21248   |
| 7w11w_SITTF | 0.02014446 | 0.11610609 | 4.19E-05 | 0.0053364 | -0.025531 |
| 7w11w_SITTF | 0.03148418 | 0.1860835  | 4.60E-05 | 0.0046154 | -0.12002  |
| 7w11w_SITTF | 0.0334707  | 0.19834228 | 4.66E-05 | 0.0045822 | -0.11071  |
| 7w11w_SITTF | 0.06420034 | 0.38797492 | 6.27E-05 | 0.0084357 | 0.14015   |
| 7w11w_SITTF | 0.02925137 | 0.17230482 | 4.53E-05 | 0.0046846 | -0.1231   |
| 7w11w_SITTF | 0.0111217  | 0.06042659 | 3.71E-05 | 0.0066957 | 0.2858    |
| 7w11w_SITTF | 0.09175505 | 0.558015   | 4.96E-05 | 0.0076529 | -0.60562  |
| 16w_SITTD12 | 0.09145048 | 0.55613554 | 4.93E-05 | 0.0079874 | -0.60562  |
| 16w_SITTD12 | 0.0257922  | 0.15095828 | 4.40E-05 | 0.0048781 | -0.10813  |
| 16w_SITTD12 | 0.03126905 | 0.18475592 | 4.58E-05 | 0.00463   | -0.12145  |
| 16w_SITTD12 | 0.01818199 | 0.10399565 | 4.09E-05 | 0.0055879 | 0.030658  |
| 16w_SITTD12 | 0.09721802 | 0.591727   | 5.32E-05 | 0.0050496 | -1.0673   |
| 16w_SITTD12 | 0.09207283 | 0.55997604 | 4.96E-05 | 0.0076529 | -0.6503   |
| 16w_SITTD12 | 0.02025085 | 0.11676258 | 4.19E-05 | 0.0053364 | -0.025531 |
| 16w_SITTD12 | 0.09221467 | 0.56085134 | 4.99E-05 | 0.0073308 | -0.6503   |
| 16w_SITTD12 | 0.08487421 | 0.5155533  | 4.76E-05 | 0.012404  | -0.10433  |
| 16w_SITTD12 | 0.02268737 | 0.13179834 | 4.28E-05 | 0.005125  | -0.077142 |
| 16w_SITTD12 | 0.08993237 | 0.54676723 | 4.86E-05 | 0.0090548 | -0.47194  |
| 16w_SITTD12 | 0.02134748 | 0.12352988 | 4.24E-05 | 0.0052258 | -0.04878  |
| 16w_SITTD12 | 0.07821983 | 0.47448918 | 5.01E-05 | 0.014289  | 0.20103   |
| 16w_SITTD12 | 0.02274901 | 0.13217874 | 4.30E-05 | 0.0050782 | -0.077142 |
| 16w_SITTD12 | 0.07632811 | 0.46281537 | 5.18E-05 | 0.013885  | 0.22792   |
| 16w_SITTD12 | 0.01569888 | 0.08867239 | 3.98E-05 | 0.0058806 | 0.098494  |
| 16w_SITTD12 | 0.03196834 | 0.18907121 | 4.62E-05 | 0.0046026 | -0.11821  |
| 16w_SITTD12 | 0.06766091 | 0.4093301  | 6.03E-05 | 0.009922  | 0.19812   |
| 16w_SITTD12 | 0.00830291 | 0.04303184 | 3.56E-05 | 0.0072456 | 0.40559   |
| 16w_SITTD12 | 0.02128136 | 0.12312188 | 4.24E-05 | 0.0052258 | -0.04878  |
| 16w_SITTD12 | 0.03523381 | 0.20922242 | 4.74E-05 | 0.0045622 | -0.10068  |
| 16w_SITTD12 | 0.02230688 | 0.12945038 | 4.28E-05 | 0.005125  | -0.068556 |
| 16w_SITTD12 | 0.02717242 | 0.1594756  | 4.46E-05 | 0.0047834 | -0.11816  |
| 16w_SITTD12 | 0.02852844 | 0.16784362 | 4.49E-05 | 0.0047302 | -0.12174  |
| 16w_SITTD12 | 0.08167423 | 0.49580628 | 4.83E-05 | 0.013957  | 0.078055  |
| 16w_SITTD12 | 0.05151992 | 0.309724   | 5.92E-05 | 0.0053939 | 0.011221  |
| 16w_SITTD12 | 0.04403801 | 0.26355314 | 5.25E-05 | 0.0047605 | -0.035266 |
| 16w_SITTD12 | 0.01903876 | 0.1092828  | 4.14E-05 | 0.0054571 | 0.0010121 |
| 16w_SITTD12 | 0.03165866 | 0.18716018 | 4.60E-05 | 0.0046154 | -0.12002  |
| 16w_SITTD12 | 0.034779   | 0.20641579 | 4.72E-05 | 0.0045646 | -0.10426  |
| 16w_SITTD12 | 0.00619147 | 0.03000214 | 3.44E-05 | 0.0077366 | 0.50694   |

|             |            |            |          |           |            |
|-------------|------------|------------|----------|-----------|------------|
| 16w_SITTD12 | 0.01707798 | 0.0971828  | 4.03E-05 | 0.005729  | 0.063215   |
| 16w_SITTD12 | 0.08889356 | 0.54035676 | 4.84E-05 | 0.0094274 | -0.3844    |
| 16w_SITTD12 | 0.05337826 | 0.32119185 | 6.05E-05 | 0.0056127 | 0.022172   |
| 16w_SITTD12 | 0.0937941  | 0.570598   | 5.09E-05 | 0.0064439 | -0.7829    |
| 16w_SITTD12 | 0.03761741 | 0.22393164 | 4.84E-05 | 0.0045696 | -0.084703  |
| 16w_SITTD12 | 0.02618613 | 0.15338919 | 4.42E-05 | 0.0048445 | -0.11213   |
| 16w_SITTD12 | 0.05121438 | 0.30783853 | 5.87E-05 | 0.0053288 | 0.0077602  |
| 16w_SITTD12 | 0.02142691 | 0.12402009 | 4.24E-05 | 0.0052258 | -0.04878   |
| 16w_SITTD12 | 0.04657584 | 0.27921408 | 5.44E-05 | 0.0048874 | -0.018376  |
| 16w_SITTD12 | 0.01907187 | 0.10948712 | 4.14E-05 | 0.0054571 | 0.0010121  |
| 16w_SITTD12 | 0.00551891 | 0.02585175 | 3.41E-05 | 0.0078664 | 0.53284    |
| 16w_SITTD12 | 0.08068968 | 0.48973066 | 4.87E-05 | 0.014207  | 0.12269    |
| 16w_SITTD12 | 0.02315027 | 0.1346549  | 4.30E-05 | 0.0050782 | -0.077142  |
| 16w_SITTD12 | 0.02624063 | 0.1537255  | 4.42E-05 | 0.0048445 | -0.11213   |
| 16w_SITTD12 | 0.01528624 | 0.08612599 | 3.95E-05 | 0.0059603 | 0.11709    |
| 16w_SITTD12 | 0.0926026  | 0.56324524 | 4.99E-05 | 0.0073308 | -0.69483   |
| 16w_SITTD12 | 0.01938021 | 0.11138988 | 4.14E-05 | 0.0054571 | 0.0010121  |
| 16w_SITTD12 | 0.02490899 | 0.14550798 | 4.38E-05 | 0.0049138 | -0.10343   |
| 16w_SITTD12 | 0.02134314 | 0.12350311 | 4.24E-05 | 0.0052258 | -0.04878   |
| 16w_SITTD12 | 0.01590571 | 0.08994871 | 3.98E-05 | 0.0058806 | 0.098494   |
| 16w_SITTD12 | 0.04481215 | 0.2683304  | 5.30E-05 | 0.0047888 | -0.031751  |
| 16w_SITTD12 | 0.0194549  | 0.11185081 | 4.14E-05 | 0.0054571 | -0.012659  |
| 16w_SITTD12 | 0.01552332 | 0.08758897 | 3.95E-05 | 0.0059603 | 0.11709    |
| 16w_SITTD12 | 0.08017236 | 0.48653826 | 4.90E-05 | 0.014278  | 0.14202    |
| 16w_SITTD12 | 0.06669016 | 0.4033396  | 6.07E-05 | 0.0096573 | 0.18233    |
| 16w_SITTD12 | 0.03525429 | 0.20934884 | 4.74E-05 | 0.0045622 | -0.10068   |
| 16w_SITTD12 | 0.01716562 | 0.09772362 | 4.03E-05 | 0.005729  | 0.063215   |
| 16w_SITTD12 | 0.0153064  | 0.0862504  | 3.95E-05 | 0.0059603 | 0.11709    |
| 16w_SITTD12 | 0.01277649 | 0.07063831 | 3.80E-05 | 0.0063994 | 0.21875    |
| 16w_SITTD12 | 0.08665952 | 0.5265705  | 4.77E-05 | 0.01133   | -0.21781   |
| 16w_SITTD12 | 0.02745357 | 0.16121057 | 4.46E-05 | 0.0047834 | -0.11816   |
| 16w_SITTD12 | 0.02218476 | 0.12869677 | 4.26E-05 | 0.0051742 | -0.068556  |
| 16w_SITTD12 | 0.03449803 | 0.20468195 | 4.70E-05 | 0.0045688 | -0.10761   |
| 16w_SITTD12 | 0.08452493 | 0.51339793 | 4.76E-05 | 0.012404  | -0.069378  |
| 16w_SITTD12 | 0.06536557 | 0.39516553 | 6.20E-05 | 0.0089013 | 0.16566    |
| 16w_SITTD12 | 0.01825319 | 0.104435   | 4.09E-05 | 0.0055879 | 0.030658   |
| 16w_SITTD12 | 0.09741562 | 0.5929464  | 5.32E-05 | 0.0050496 | -1.0673    |
| 16w_SITTD12 | 0.06901763 | 0.41770238 | 5.87E-05 | 0.010741  | 0.21248    |
| 16w_SITTD12 | 0.07874365 | 0.4777217  | 4.97E-05 | 0.014318  | 0.18889    |
| 16w_SITTD12 | 0.08340894 | 0.50651115 | 4.78E-05 | 0.013315  | -0.0045591 |
| 16w_SITTD12 | 0.0807171  | 0.48989984 | 4.87E-05 | 0.014207  | 0.12269    |
| 16w_SITTD12 | 0.03273305 | 0.19379023 | 4.64E-05 | 0.0045915 | -0.11603   |
| 16w_SITTD12 | 0.01478666 | 0.08304308 | 3.92E-05 | 0.0060428 | 0.1363     |

|             |            |            |          |           |            |
|-------------|------------|------------|----------|-----------|------------|
| 16w_SITTD12 | 0.05688968 | 0.3428608  | 6.30E-05 | 0.0062853 | 0.05269    |
| 16w_SITTD12 | 0.01337145 | 0.07430983 | 3.83E-05 | 0.0063061 | 0.19734    |
| 16w_SITTD12 | 0.02919476 | 0.17195547 | 4.51E-05 | 0.0047064 | -0.1231    |
| 16w_SITTD12 | 0.08724667 | 0.5301938  | 4.79E-05 | 0.010571  | -0.25808   |
| 16w_SITTD12 | 0.00895418 | 0.04705081 | 3.59E-05 | 0.00713   | 0.38094    |
| 16w_SITTD12 | 0.07495093 | 0.4543168  | 5.28E-05 | 0.013537  | 0.24193    |
| 16w_SITTD12 | 0.02309658 | 0.13432361 | 4.30E-05 | 0.0050782 | -0.077142  |
| 16w_SITTD12 | 0.01048411 | 0.05649204 | 3.68E-05 | 0.0068    | 0.30902    |
| 16w_SITTD12 | 0.03319708 | 0.19665377 | 4.66E-05 | 0.0045822 | -0.11352   |
| 16w_SITTD12 | 0.01902035 | 0.10916919 | 4.14E-05 | 0.0054571 | 0.0010121  |
| 16w_SITTD12 | 0.00967328 | 0.0514884  | 3.62E-05 | 0.0070172 | 0.35661    |
| 16w_SITTD12 | 0.00771578 | 0.03940869 | 3.53E-05 | 0.0073641 | 0.43054    |
| 16w_SITTD12 | 0.02717234 | 0.1594751  | 4.46E-05 | 0.0047834 | -0.11816   |
| 16w_SITTD12 | 0.04820478 | 0.2892663  | 5.58E-05 | 0.0050083 | -0.0087048 |
| 16w_SITTD12 | 0.08916645 | 0.54204077 | 4.84E-05 | 0.0094274 | -0.42792   |
| 16w_SITTD12 | 0.02118096 | 0.12250228 | 4.24E-05 | 0.0052258 | -0.04878   |
| 16w_SITTD12 | 0.02122529 | 0.12277588 | 4.24E-05 | 0.0052258 | -0.04878   |
| 16w_SITTD12 | 0.01911864 | 0.10977575 | 4.14E-05 | 0.0054571 | 0.0010121  |
| 16w_SITTD12 | 0.04316412 | 0.25816035 | 5.17E-05 | 0.0047101 | -0.042593  |
| 16w_SITTD12 | 0.03128474 | 0.18485275 | 4.58E-05 | 0.00463   | -0.12145   |
| 16w_SITTD12 | 0.07200196 | 0.43611872 | 5.60E-05 | 0.012118  | 0.24161    |
| 16w_SITTD12 | 0.0324594  | 0.1921016  | 4.62E-05 | 0.0046026 | -0.11603   |
| 16w_SITTD12 | 0.0982608  | 0.598162   | 5.40E-05 | 0.0046955 | -1.1032    |
| 16w_SITTD12 | 0.02341967 | 0.13631739 | 4.32E-05 | 0.0050338 | -0.084895  |
| 16w_SITTD12 | 0.01247851 | 0.06879944 | 3.80E-05 | 0.0063994 | 0.21875    |
| 16w_SITTD12 | 0.03229164 | 0.19106631 | 4.62E-05 | 0.0046026 | -0.11821   |
| 16w_SITTD12 | 0.03219391 | 0.19046323 | 4.62E-05 | 0.0046026 | -0.11821   |
| 16w_SITTD12 | 0.09431384 | 0.5738053  | 5.13E-05 | 0.0061762 | -0.82618   |
| 16w_SITTD12 | 0.09724296 | 0.5918809  | 5.32E-05 | 0.0050496 | -1.0673    |
| 16w_SITTD12 | 0.02072245 | 0.11967281 | 4.21E-05 | 0.0052798 | -0.037579  |
| 16w_SITTD12 | 0.00760848 | 0.03874648 | 3.53E-05 | 0.0073641 | 0.43054    |
| 16w_SITTD12 | 0.02644351 | 0.15497752 | 4.42E-05 | 0.0048445 | -0.11213   |
| 16w_SITTD12 | 0.01961691 | 0.11285052 | 4.16E-05 | 0.0053955 | -0.012659  |
| 16w_SITTD12 | 0.0821249  | 0.49858737 | 4.81E-05 | 0.013778  | 0.05262    |
| 16w_SITTD12 | 0.01656346 | 0.09400772 | 4.00E-05 | 0.0058035 | 0.080526   |
| 16w_SITTD12 | 0.08643757 | 0.52520084 | 4.77E-05 | 0.01133   | -0.21781   |
| 16w_SITTD12 | 0.01456904 | 0.08170013 | 3.89E-05 | 0.0061278 | 0.1363     |
| 16w_SITTD12 | 0.01873907 | 0.10743341 | 4.11E-05 | 0.0055212 | 0.015459   |
| 16w_SITTD12 | 0.08859445 | 0.538511   | 4.82E-05 | 0.0098057 | -0.3844    |
| 16w_SITTD12 | 0.08416387 | 0.5111698  | 4.76E-05 | 0.012731  | -0.036078  |
| 16w_SITTD12 | 0.01741151 | 0.09924103 | 4.06E-05 | 0.0056572 | 0.046584   |
| 16w_SITTD12 | 0.09289593 | 0.5650554  | 5.02E-05 | 0.0070215 | -0.73907   |
| 16w_SITTD12 | 0.02079811 | 0.1201397  | 4.21E-05 | 0.0052798 | -0.037579  |

|             |            |            |          |           |           |
|-------------|------------|------------|----------|-----------|-----------|
| 16w_SITTD12 | 0.02069289 | 0.11949045 | 4.21E-05 | 0.0052798 | -0.037579 |
| 16w_SITTD12 | 0.08745657 | 0.5314891  | 4.79E-05 | 0.010571  | -0.25808  |
| 16w_SITTD12 | 0.05426762 | 0.3266801  | 6.14E-05 | 0.0057798 | 0.030074  |
| 16w_SITTD12 | 0.08629129 | 0.52429813 | 4.77E-05 | 0.01133   | -0.17867  |
| 16w_SITTD12 | 0.02365124 | 0.13774641 | 4.32E-05 | 0.0050338 | -0.084895 |
| 16w_SITTD12 | 0.05858235 | 0.3533063  | 6.35E-05 | 0.0066597 | 0.068735  |
| 16w_SITTD12 | 0.01125528 | 0.0612509  | 3.71E-05 | 0.0066957 | 0.2858    |
| 16w_SITTD12 | 0.01698141 | 0.09658687 | 4.03E-05 | 0.005729  | 0.063215  |
| 16w_SITTD12 | 0.01587236 | 0.08974294 | 3.98E-05 | 0.0058806 | 0.098494  |
| 16w_SITTD12 | 0.09333368 | 0.5677567  | 5.06E-05 | 0.0067258 | -0.73907  |
| 16w_SITTD12 | 0.03423254 | 0.20304361 | 4.70E-05 | 0.0045688 | -0.10761  |
| 16w_SITTD12 | 0.02291559 | 0.13320673 | 4.30E-05 | 0.0050782 | -0.077142 |
| 16w_SITTD12 | 0.08729213 | 0.5304743  | 4.79E-05 | 0.010571  | -0.25808  |
| 16w_SITTD12 | 0.05685177 | 0.34262687 | 6.27E-05 | 0.0061731 | 0.05269   |
| 16w_SITTD12 | 0.02361146 | 0.13750094 | 4.32E-05 | 0.0050338 | -0.084895 |
| 16w_SITTD12 | 0.03302605 | 0.19559836 | 4.64E-05 | 0.0045915 | -0.11352  |
| 16w_SITTD12 | 0.08943862 | 0.5437203  | 4.86E-05 | 0.0090548 | -0.42792  |
| 16w_SITTD12 | 0.01498992 | 0.0842974  | 3.92E-05 | 0.0060428 | 0.1363    |
| 16w_SITTD12 | 0.04258774 | 0.25460356 | 5.13E-05 | 0.0046879 | -0.04643  |
| 16w_SITTD12 | 0.08460663 | 0.51390207 | 4.76E-05 | 0.012404  | -0.069378 |
| 16w_SITTD12 | 0.02137091 | 0.12367448 | 4.24E-05 | 0.0052258 | -0.04878  |
| 16w_SITTD12 | 0.01137209 | 0.06197174 | 3.74E-05 | 0.0065941 | 0.263     |
| 16w_SITTD12 | 0.09533335 | 0.58009666 | 5.16E-05 | 0.0059226 | -0.91061  |
| 16w_SITTD12 | 0.02285055 | 0.13280532 | 4.30E-05 | 0.0050782 | -0.077142 |
| 16w_SITTD12 | 0.02373114 | 0.13823949 | 4.32E-05 | 0.0050338 | -0.084895 |
| 16w_SITTD12 | 0.07727871 | 0.46868154 | 5.09E-05 | 0.014141  | 0.21153   |
| 16w_SITTD12 | 0.01527565 | 0.08606061 | 3.95E-05 | 0.0059603 | 0.11709   |
| 16w_SITTD12 | 0.01385536 | 0.07729599 | 3.86E-05 | 0.0062156 | 0.17645   |
| 16w_SITTD12 | 0.09009519 | 0.547772   | 4.88E-05 | 0.0086895 | -0.47194  |
| 16w_SITTD12 | 0.05680242 | 0.34232232 | 6.27E-05 | 0.0061731 | 0.05269   |
| 16w_SITTD12 | 0.09635015 | 0.58637136 | 5.24E-05 | 0.0054581 | -0.99133  |
| 16w_SITTD12 | 0.02667208 | 0.15638798 | 4.44E-05 | 0.004813  | -0.11546  |
| 16w_SITTD12 | 0.02407564 | 0.14036535 | 4.34E-05 | 0.0049916 | -0.091842 |
| 16w_SITTD12 | 0.08315272 | 0.50493    | 4.78E-05 | 0.013315  | 0.02505   |
| 16w_SITTD12 | 0.0769484  | 0.46664318 | 5.09E-05 | 0.014141  | 0.22047   |
| 16w_SITTD12 | 0.04167022 | 0.24894151 | 5.05E-05 | 0.0046492 | -0.0504   |
| 16w_SITTD12 | 0.02215435 | 0.12850912 | 4.26E-05 | 0.0051742 | -0.068556 |
| 16w_SITTD12 | 0.01201234 | 0.06592276 | 3.77E-05 | 0.0064954 | 0.24064   |
| 16w_SITTD12 | 0.07050394 | 0.42687446 | 5.71E-05 | 0.011574  | 0.23016   |
| 16w_SITTD12 | 0.03633365 | 0.21600953 | 4.79E-05 | 0.0045625 | -0.092976 |
| 16w_SITTD12 | 0.01274203 | 0.07042567 | 3.80E-05 | 0.0063994 | 0.21875   |
| 16w_SITTD12 | 0.01389761 | 0.07755672 | 3.86E-05 | 0.0062156 | 0.17645   |
| 16w_SITTD12 | 0.08018628 | 0.48662415 | 4.87E-05 | 0.014207  | 0.14202   |

|             |            |            |          |           |            |
|-------------|------------|------------|----------|-----------|------------|
| 16w_SITTD12 | 0.07658609 | 0.46440738 | 5.13E-05 | 0.014025  | 0.22792    |
| 16w_SITTD12 | 0.03270774 | 0.1936341  | 4.64E-05 | 0.0045915 | -0.11603   |
| 16w_SITTD12 | 0.16283672 | 0.99666    | 7.92E-05 | 0.0048848 | -1.0593    |
| 16w_SITTD12 | 0.01390674 | 0.07761305 | 3.86E-05 | 0.0062156 | 0.17645    |
| 16w_SITTD12 | 0.02880134 | 0.16952765 | 4.51E-05 | 0.0047064 | -0.12268   |
| 16w_SITTD12 | 0.01597874 | 0.09039936 | 3.98E-05 | 0.0058806 | 0.098494   |
| 16w_SITTD12 | 0.02341639 | 0.13629715 | 4.32E-05 | 0.0050338 | -0.084895  |
| 16w_SITTD12 | 0.02600587 | 0.15227684 | 4.42E-05 | 0.0048445 | -0.11213   |
| 16w_SITTD12 | 0.02495142 | 0.14576985 | 4.38E-05 | 0.0049138 | -0.10343   |
| 16w_SITTD12 | 0.03942454 | 0.2350834  | 4.92E-05 | 0.0045932 | -0.067351  |
| 16w_SITTD12 | 0.03606524 | 0.21435319 | 4.77E-05 | 0.0045615 | -0.096915  |
| 16w_SITTD12 | 0.01599105 | 0.09047537 | 3.98E-05 | 0.0058806 | 0.098494   |
| 16w_SITTD12 | 0.01198682 | 0.06576526 | 3.77E-05 | 0.0064954 | 0.24064    |
| 16w_SITTD12 | 0.05775162 | 0.34817982 | 6.32E-05 | 0.0064035 | 0.057806   |
| 16w_SITTD12 | 0.02161436 | 0.1251768  | 4.24E-05 | 0.0052258 | -0.059109  |
| 16w_SITTD12 | 0.02667444 | 0.15640259 | 4.44E-05 | 0.004813  | -0.11546   |
| 16w_SITTD12 | 0.0831025  | 0.50462013 | 4.78E-05 | 0.013315  | 0.02505    |
| 16w_SITTD12 | 0.01415629 | 0.07915308 | 3.89E-05 | 0.0061278 | 0.1561     |
| 16w_SITTD12 | 0.01681015 | 0.09553003 | 4.03E-05 | 0.005729  | 0.063215   |
| 16w_SITTD12 | 0.07312529 | 0.44305077 | 5.49E-05 | 0.012637  | 0.24489    |
| 16w_SITTD12 | 0.10094978 | 0.6147557  | 5.62E-05 | 0.0040352 | -1.2563    |
| 16w_SITTD12 | 0.01305752 | 0.07237253 | 3.83E-05 | 0.0063061 | 0.19734    |
| 16w_SITTD12 | 0.01887656 | 0.10828184 | 4.11E-05 | 0.0055212 | 0.015459   |
| 16w_SITTD12 | 0.10286167 | 0.626554   | 5.74E-05 | 0.0037844 | -1.3397    |
| 16w_SITTD12 | 0.01817915 | 0.10397813 | 4.09E-05 | 0.0055879 | 0.030658   |
| 16w_SITTD12 | 0.01475834 | 0.08286829 | 3.92E-05 | 0.0060428 | 0.1363     |
| 16w_SITTD12 | 0.09248348 | 0.5625102  | 4.99E-05 | 0.0073308 | -0.69483   |
| 16w_SITTD12 | 0.04909439 | 0.2947561  | 5.68E-05 | 0.0051026 | -0.0054808 |
| 16w_SITTD12 | 0.07887591 | 0.47853783 | 4.97E-05 | 0.014318  | 0.17506    |
| 16w_SITTD12 | 0.00986144 | 0.05264952 | 3.65E-05 | 0.0069072 | 0.33263    |
| 16w_SITTD12 | 0.02484579 | 0.14511795 | 4.36E-05 | 0.0049516 | -0.10343   |
| 16w_SITTD12 | 0.07255914 | 0.43955708 | 5.54E-05 | 0.012382  | 0.24373    |
| 16w_SITTD12 | 0.01877438 | 0.10765129 | 4.11E-05 | 0.0055212 | 0.015459   |
| 16w_SITTD12 | 0.05714671 | 0.344447   | 6.30E-05 | 0.0062853 | 0.05269    |
| 16w_SITTD12 | 0.02440514 | 0.14239869 | 4.36E-05 | 0.0049516 | -0.098011  |
| 16w_SITTD12 | 0.00598427 | 0.0287235  | 3.44E-05 | 0.0077366 | 0.50694    |
| 16w_SITTD12 | 0.08540178 | 0.51880896 | 4.76E-05 | 0.012059  | -0.14081   |
| 16w_SITTD12 | 0.0296152  | 0.17455001 | 4.53E-05 | 0.0046846 | -0.1231    |
| 16w_SITTD12 | 0.0562941  | 0.33918548 | 6.24E-05 | 0.0060668 | 0.047788   |
| 16w_SITTD12 | 0.01088703 | 0.05897846 | 3.71E-05 | 0.0066957 | 0.2858     |
| 16w_SITTD12 | 0.02235959 | 0.12977564 | 4.28E-05 | 0.005125  | -0.068556  |
| 16w_SITTD12 | 0.09213604 | 0.5603661  | 4.99E-05 | 0.0073308 | -0.6503    |
| 16w_SITTD12 | 0.09626485 | 0.585845   | 5.24E-05 | 0.0054581 | -0.99133   |

|             |            |            |          |           |           |
|-------------|------------|------------|----------|-----------|-----------|
| 16w_SITTD12 | 0.02671815 | 0.1566723  | 4.44E-05 | 0.004813  | -0.11546  |
| 16w_SITTD12 | 0.01076495 | 0.0582251  | 3.68E-05 | 0.0068    | 0.30902   |
| 16w_SITTD12 | 0.05763009 | 0.3474299  | 6.32E-05 | 0.0064035 | 0.057806  |
| 16w_SITTD12 | 0.01255846 | 0.06929283 | 3.80E-05 | 0.0063994 | 0.21875   |
| 16w_SITTD12 | 0.02408361 | 0.14041454 | 4.34E-05 | 0.0049916 | -0.091842 |
| 16w_SITTD12 | 0.09033442 | 0.54924834 | 4.88E-05 | 0.0086895 | -0.51631  |
| 16w_SITTD12 | 0.09096477 | 0.5531382  | 4.91E-05 | 0.0083333 | -0.56091  |
| 16w_SITTD12 | 0.02754623 | 0.16178241 | 4.46E-05 | 0.0047834 | -0.12024  |
| 16w_SITTD12 | 0.01568976 | 0.08861611 | 3.95E-05 | 0.0059603 | 0.098494  |
| 16w_SITTD12 | 0.06982128 | 0.42266172 | 5.82E-05 | 0.011019  | 0.22487   |
| 16w_SITTD12 | 0.02703274 | 0.15861364 | 4.44E-05 | 0.004813  | -0.11816  |
| 16w_SITTD12 | 0.05368421 | 0.32307982 | 6.10E-05 | 0.005694  | 0.026054  |
| 16w_SITTD12 | 0.02529931 | 0.14791662 | 4.38E-05 | 0.0049138 | -0.10343  |
| 16w_SITTD12 | 0.01388958 | 0.07750718 | 3.86E-05 | 0.0062156 | 0.17645   |
| 16w_SITTD12 | 0.08959691 | 0.54469717 | 4.86E-05 | 0.0090548 | -0.42792  |
| 16w_SITTD12 | 0.07883324 | 0.47827452 | 4.97E-05 | 0.014318  | 0.18889   |
| 16w_SITTD12 | 0.08953209 | 0.5442971  | 4.86E-05 | 0.0090548 | -0.42792  |
| 16w_SITTD12 | 0.08053874 | 0.48879915 | 4.87E-05 | 0.014207  | 0.12269   |
| 16w_SITTD12 | 0.02656795 | 0.1557454  | 4.44E-05 | 0.004813  | -0.11546  |
| 16w_SITTD12 | 0.02587042 | 0.151441   | 4.40E-05 | 0.0048781 | -0.10813  |
| 16w_SITTD12 | 0.08965311 | 0.5450439  | 4.86E-05 | 0.0090548 | -0.47194  |
| 16w_SITTD12 | 0.02769779 | 0.16271764 | 4.48E-05 | 0.0047558 | -0.12024  |
| 16w_SITTD12 | 0.0262652  | 0.15387718 | 4.42E-05 | 0.0048445 | -0.11213  |
| 16w_SITTD12 | 0.03404927 | 0.20191266 | 4.68E-05 | 0.0045746 | -0.10761  |
| 16w_SITTD12 | 0.089111   | 0.5416986  | 4.84E-05 | 0.0094274 | -0.42792  |
| 16w_SITTD12 | 0.08944951 | 0.54378754 | 4.86E-05 | 0.0090548 | -0.42792  |
| 16w_SITTD12 | 0.02650028 | 0.15532784 | 4.42E-05 | 0.0048445 | -0.11546  |
| 16w_SITTD12 | 0.07811412 | 0.4738368  | 5.01E-05 | 0.014289  | 0.20103   |
| 16w_SITTD12 | 0.03114717 | 0.18400379 | 4.58E-05 | 0.00463   | -0.12145  |
| 16w_SITTD12 | 0.02916738 | 0.1717865  | 4.51E-05 | 0.0047064 | -0.1231   |
| 16w_SITTD12 | 0.01667965 | 0.0947247  | 4.00E-05 | 0.0058035 | 0.080526  |
| 16w_SITTD12 | 0.03888757 | 0.2317698  | 4.89E-05 | 0.0045836 | -0.071721 |
| 16w_SITTD12 | 0.03640771 | 0.21646659 | 4.79E-05 | 0.0045625 | -0.092976 |
| 16w_SITTD12 | 0.03023921 | 0.17840075 | 4.55E-05 | 0.0046645 | -0.12245  |
| 16w_SITTD12 | 0.07415041 | 0.44937682 | 5.38E-05 | 0.013116  | 0.24406   |
| 16w_SITTD12 | 0.02917789 | 0.17185137 | 4.51E-05 | 0.0047064 | -0.1231   |
| 16w_SITTD12 | 0.08986746 | 0.5463667  | 4.86E-05 | 0.0090548 | -0.47194  |
| 16w_SITTD12 | 0.00640021 | 0.03129029 | 3.44E-05 | 0.0077366 | 0.50694   |
| 16w_SITTD12 | 0.02031158 | 0.11713735 | 4.19E-05 | 0.0053364 | -0.025531 |
| 16w_SITTD12 | 0.08390979 | 0.5096019  | 4.77E-05 | 0.013036  | -0.036078 |
| 16w_SITTD12 | 0.06820114 | 0.41266385 | 5.98E-05 | 0.010192  | 0.20551   |
| 16w_SITTD12 | 0.02705167 | 0.15873045 | 4.44E-05 | 0.004813  | -0.11816  |
| 16w_SITTD12 | 0.01083772 | 0.05867413 | 3.71E-05 | 0.0066957 | 0.2858    |

|             |            |            |          |           |           |
|-------------|------------|------------|----------|-----------|-----------|
| 16w_SITTD12 | 0.02154639 | 0.12475734 | 4.24E-05 | 0.0052258 | -0.04878  |
| 16w_SITTD12 | 0.07921794 | 0.48064852 | 4.93E-05 | 0.014315  | 0.17506   |
| 16w_SITTD12 | 0.05328314 | 0.3206049  | 6.05E-05 | 0.0056127 | 0.022172  |
| 16w_SITTD12 | 0.09977321 | 0.60749507 | 5.53E-05 | 0.004262  | -1.2008   |
| 16w_SITTD12 | 0.02331465 | 0.13566928 | 4.32E-05 | 0.0050338 | -0.084895 |
| 16w_SITTD12 | 0.03186529 | 0.18843532 | 4.60E-05 | 0.0046154 | -0.11821  |
| 16w_SITTD12 | 0.09228146 | 0.5612635  | 4.99E-05 | 0.0073308 | -0.6503   |
| 16w_SITTD12 | 0.04011732 | 0.23935857 | 4.99E-05 | 0.0046177 | -0.063007 |
| 16w_SITTD12 | 0.02107929 | 0.12187492 | 4.21E-05 | 0.0052798 | -0.04878  |
| 16w_SITTD12 | 0.02413602 | 0.140738   | 4.34E-05 | 0.0049916 | -0.091842 |
| 16w_SITTD12 | 0.01250381 | 0.06895559 | 3.80E-05 | 0.0063994 | 0.21875   |
| 16w_SITTD12 | 0.00749558 | 0.03804978 | 3.50E-05 | 0.0074854 | 0.45576   |
| 16w_SITTD12 | 0.03149303 | 0.18613808 | 4.60E-05 | 0.0046154 | -0.12002  |
| 16w_SITTD12 | 0.03742525 | 0.22274584 | 4.84E-05 | 0.0045696 | -0.084703 |
| 16w_SITTD12 | 0.08224858 | 0.49935058 | 4.81E-05 | 0.013778  | 0.05262   |
| 16w_SITTD12 | 0.09106993 | 0.5537871  | 4.93E-05 | 0.0079874 | -0.56091  |
| 16w_SITTD12 | 0.08277646 | 0.5026081  | 4.79E-05 | 0.013563  | 0.02505   |
| 16w_SITTD12 | 0.02812417 | 0.16534889 | 4.48E-05 | 0.0047558 | -0.12174  |
| 16w_SITTD12 | 0.02185359 | 0.12665308 | 4.26E-05 | 0.0051742 | -0.059109 |
| 16w_SITTD12 | 0.04688472 | 0.28112024 | 5.49E-05 | 0.0049251 | -0.018376 |
| 16w_SITTD12 | 0.02655657 | 0.15567517 | 4.44E-05 | 0.004813  | -0.11546  |
| 16w_SITTD12 | 0.01852215 | 0.10609476 | 4.11E-05 | 0.0055212 | 0.015459  |
| 16w_SITTD12 | 0.03688408 | 0.21940623 | 4.81E-05 | 0.0045652 | -0.088896 |
| 16w_SITTD12 | 0.02523374 | 0.14751202 | 4.38E-05 | 0.0049138 | -0.10343  |
| 16w_SITTD12 | 0.02215288 | 0.12850004 | 4.26E-05 | 0.0051742 | -0.068556 |
| 16w_SITTD12 | 0.07810676 | 0.47379145 | 5.01E-05 | 0.014289  | 0.20103   |
| 16w_SITTD12 | 0.00688208 | 0.03426388 | 3.47E-05 | 0.0076096 | 0.48124   |
| 16w_SITTD12 | 0.06074436 | 0.36664805 | 6.38E-05 | 0.0072613 | 0.09374   |
| 16w_SITTD12 | 0.0213839  | 0.12375466 | 4.24E-05 | 0.0052258 | -0.04878  |
| 16w_SITTD12 | 0.03259746 | 0.19295353 | 4.64E-05 | 0.0045915 | -0.11603  |
| 16w_SITTD12 | 0.0242924  | 0.14170301 | 4.34E-05 | 0.0049916 | -0.098011 |
| 16w_SITTD12 | 0.08518611 | 0.51747805 | 4.76E-05 | 0.012059  | -0.10433  |
| 16w_SITTD12 | 0.02439478 | 0.14233482 | 4.36E-05 | 0.0049516 | -0.098011 |
| 16w_SITTD12 | 0.03453624 | 0.20491773 | 4.70E-05 | 0.0045688 | -0.10761  |
| 16w_SITTD12 | 0.0186026  | 0.10659123 | 4.11E-05 | 0.0055212 | 0.015459  |
| 16w_SITTD12 | 0.01822814 | 0.10428044 | 4.09E-05 | 0.0055879 | 0.030658  |
| 16w_SITTD12 | 0.07170773 | 0.43430305 | 5.60E-05 | 0.012118  | 0.2386    |
| 16w_SITTD12 | 0.04279153 | 0.2558611  | 5.17E-05 | 0.0047101 | -0.042593 |
| 16w_SITTD12 | 0.03007203 | 0.1773691  | 4.55E-05 | 0.0046645 | -0.12301  |
| 16w_SITTD12 | 0.09331045 | 0.56761336 | 5.06E-05 | 0.0067258 | -0.73907  |
| 16w_SITTD12 | 0.02240101 | 0.13003121 | 4.28E-05 | 0.005125  | -0.068556 |
| 16w_SITTD12 | 0.01063312 | 0.05741158 | 3.68E-05 | 0.0068    | 0.30902   |
| 16w_SITTD12 | 0.01887816 | 0.1082917  | 4.11E-05 | 0.0055212 | 0.015459  |



|             |            |            |          |           |           |
|-------------|------------|------------|----------|-----------|-----------|
| 16w_SITTD12 | 0.01588199 | 0.08980232 | 3.98E-05 | 0.0058806 | 0.098494  |
| 16w_SITTD12 | 0.03551693 | 0.21096957 | 4.74E-05 | 0.0045622 | -0.10068  |
| 16w_SITTD12 | 0.08428709 | 0.5119302  | 4.76E-05 | 0.012731  | -0.069378 |
| 16w_SITTD12 | 0.02403438 | 0.14011073 | 4.34E-05 | 0.0049916 | -0.091842 |
| 16w_SITTD12 | 0.0214892  | 0.12440447 | 4.24E-05 | 0.0052258 | -0.04878  |
| 16w_SITTD12 | 0.01655344 | 0.09394588 | 4.00E-05 | 0.0058035 | 0.080526  |
| 16w_SITTD12 | 0.0843874  | 0.5125492  | 4.76E-05 | 0.012731  | -0.069378 |
| 16w_SITTD12 | 0.026951   | 0.15810919 | 4.44E-05 | 0.004813  | -0.11546  |
| 16w_SITTD12 | 0.00962009 | 0.05116015 | 3.62E-05 | 0.0070172 | 0.35661   |
| 16w_SITTD12 | 0.0172271  | 0.098103   | 4.03E-05 | 0.005729  | 0.063215  |
| 16w_SITTD12 | 0.01445979 | 0.08102595 | 3.89E-05 | 0.0061278 | 0.1561    |
| 16w_SITTD12 | 0.07289988 | 0.44165975 | 5.49E-05 | 0.012637  | 0.24373   |
| 16w_SITTD12 | 0.09088117 | 0.55262226 | 4.91E-05 | 0.0083333 | -0.56091  |
| 16w_SITTD12 | 0.01840736 | 0.10538644 | 4.11E-05 | 0.0055212 | 0.015459  |
| 16w_SITTD12 | 0.01268306 | 0.07006173 | 3.80E-05 | 0.0063994 | 0.21875   |
| 16w_SITTD12 | 0.01227453 | 0.06754071 | 3.77E-05 | 0.0064954 | 0.24064   |
| 16w_SITTD12 | 0.02665317 | 0.15627131 | 4.44E-05 | 0.004813  | -0.11546  |
| 16w_SITTD12 | 0.10197071 | 0.62105584 | 5.70E-05 | 0.0038563 | -1.303    |
| 16w_SITTD12 | 0.02391494 | 0.13937369 | 4.34E-05 | 0.0049916 | -0.091842 |
| 16w_SITTD12 | 0.01439331 | 0.08061573 | 3.89E-05 | 0.0061278 | 0.1561    |
| 16w_SITTD12 | 0.04665761 | 0.27971873 | 5.49E-05 | 0.0049251 | -0.018376 |
| 16w_SITTD12 | 0.07786889 | 0.4723235  | 5.05E-05 | 0.014229  | 0.20103   |
| 16w_SITTD12 | 0.02219499 | 0.12875988 | 4.26E-05 | 0.0051742 | -0.068556 |
| 16w_SITTD12 | 0.04679102 | 0.280542   | 5.49E-05 | 0.0049251 | -0.018376 |
| 16w_SITTD12 | 0.05906148 | 0.356263   | 6.37E-05 | 0.0067983 | 0.074574  |
| 16w_SITTD12 | 0.07057623 | 0.4273205  | 5.71E-05 | 0.011574  | 0.23016   |
| 16w_SITTD12 | 0.01973752 | 0.11359484 | 4.16E-05 | 0.0053955 | -0.012659 |
| 16w_SITTD12 | 0.08590154 | 0.52189296 | 4.76E-05 | 0.0117    | -0.17867  |
| 16w_SITTD12 | 0.08183513 | 0.4967992  | 4.81E-05 | 0.013778  | 0.078055  |
| 16w_SITTD12 | 0.01478137 | 0.08301044 | 3.92E-05 | 0.0060428 | 0.1363    |
| 16w_SITTD12 | 0.03248352 | 0.19225042 | 4.62E-05 | 0.0046026 | -0.11603  |
| 16w_SITTD12 | 0.0137651  | 0.07673904 | 3.86E-05 | 0.0062156 | 0.17645   |
| 16w_SITTD12 | 0.04754969 | 0.28522375 | 5.53E-05 | 0.0049654 | -0.01192  |
| 16w_SITTD12 | 0.02134067 | 0.12348787 | 4.24E-05 | 0.0052258 | -0.04878  |
| 16w_SITTD12 | 0.00745112 | 0.03777542 | 3.50E-05 | 0.0074854 | 0.45576   |
| 16w_SITTD12 | 0.02382532 | 0.13882066 | 4.34E-05 | 0.0049916 | -0.091842 |
| 16w_SITTD12 | 0.03696096 | 0.21988066 | 4.81E-05 | 0.0045652 | -0.088896 |
| 16w_SITTD12 | 0.01125387 | 0.06124221 | 3.71E-05 | 0.0066957 | 0.2858    |
| 16w_SITTD12 | 0.08764344 | 0.53264225 | 4.79E-05 | 0.010571  | -0.29935  |
| 16w_SITTD12 | 0.00856246 | 0.04463351 | 3.56E-05 | 0.0072456 | 0.40559   |
| 16w_SITTD12 | 0.01375661 | 0.07668664 | 3.86E-05 | 0.0062156 | 0.17645   |
| 16w_SITTD12 | 0.01094765 | 0.05935256 | 3.71E-05 | 0.0066957 | 0.2858    |
| 16w_SITTD12 | 0.00315208 | 0.01124608 | 3.26E-05 | 0.0085576 | 0.66457   |

|             |            |            |          |           |           |
|-------------|------------|------------|----------|-----------|-----------|
| 16w_SITTD12 | 0.0908237  | 0.5522677  | 4.91E-05 | 0.0083333 | -0.56091  |
| 16w_SITTD12 | 0.0148585  | 0.08348639 | 3.92E-05 | 0.0060428 | 0.1363    |
| 16w_SITTD12 | 0.02058967 | 0.11885343 | 4.21E-05 | 0.0052798 | -0.037579 |
| 16w_SITTD12 | 0.04170005 | 0.24912563 | 5.05E-05 | 0.0046492 | -0.0504   |
| 16w_SITTD12 | 0.08461201 | 0.5139353  | 4.76E-05 | 0.012404  | -0.069378 |
| 16w_SITTD12 | 0.01830578 | 0.10475957 | 4.09E-05 | 0.0055879 | 0.030658  |
| 16w_SITTD12 | 0.07222647 | 0.43750417 | 5.54E-05 | 0.012382  | 0.24161   |
| 16w_SITTD12 | 0.02943717 | 0.1734514  | 4.53E-05 | 0.0046846 | -0.1231   |
| 16w_SITTD12 | 0.01315045 | 0.07294603 | 3.83E-05 | 0.0063061 | 0.19734   |
| 16w_SITTD12 | 0.08631266 | 0.52443004 | 4.77E-05 | 0.01133   | -0.17867  |
| 16w_SITTD12 | 0.08476337 | 0.51486933 | 4.76E-05 | 0.012404  | -0.069378 |
| 16w_SITTD12 | 0.09567317 | 0.58219373 | 5.20E-05 | 0.0056833 | -0.9515   |
| 16w_SITTD12 | 0.01060863 | 0.05726047 | 3.68E-05 | 0.0068    | 0.30902   |
| 16w_SITTD12 | 0.07419847 | 0.44967338 | 5.38E-05 | 0.013116  | 0.24406   |
| 16w_SITTD12 | 0.03865771 | 0.23035134 | 4.89E-05 | 0.0045836 | -0.076088 |
| 16w_SITTD12 | 0.01456868 | 0.08169789 | 3.89E-05 | 0.0061278 | 0.1363    |
| 16w_SITTD12 | 0.09518348 | 0.57917184 | 5.16E-05 | 0.0059226 | -0.91061  |
| 16w_SITTD12 | 0.01571389 | 0.08876499 | 3.98E-05 | 0.0058806 | 0.098494  |
| 16w_SITTD12 | 0.02931024 | 0.1726681  | 4.53E-05 | 0.0046846 | -0.1231   |
| 16w_SITTD12 | 0.05450006 | 0.32811448 | 6.14E-05 | 0.0057798 | 0.030074  |
| 16w_SITTD12 | 0.01602833 | 0.0907054  | 3.98E-05 | 0.0058806 | 0.098494  |
| 16w_SITTD12 | 0.0231063  | 0.1343836  | 4.30E-05 | 0.0050782 | -0.077142 |
| 16w_SITTD12 | 0.0947694  | 0.5766165  | 5.13E-05 | 0.0061762 | -0.8688   |
| 16w_SITTD12 | 0.05297567 | 0.31870747 | 6.01E-05 | 0.0055357 | 0.022172  |
| 16w_SITTD12 | 0.01660166 | 0.09424343 | 4.00E-05 | 0.0058035 | 0.080526  |
| 16w_SITTD12 | 0.0178871  | 0.10217588 | 4.09E-05 | 0.0055879 | 0.030658  |
| 16w_SITTD12 | 0.02442518 | 0.14252238 | 4.36E-05 | 0.0049516 | -0.098011 |
| 16w_SITTD12 | 0.02507216 | 0.14651492 | 4.38E-05 | 0.0049138 | -0.10343  |
| 16w_SITTD12 | 0.01799281 | 0.10282822 | 4.09E-05 | 0.0055879 | 0.030658  |
| 16w_SITTD12 | 0.01943752 | 0.11174353 | 4.14E-05 | 0.0054571 | -0.012659 |
| 16w_SITTD12 | 0.04412851 | 0.26411164 | 5.25E-05 | 0.0047605 | -0.035266 |
| 16w_SITTD12 | 0.01993634 | 0.11482174 | 4.16E-05 | 0.0053955 | -0.012659 |
| 16w_SITTD12 | 0.02146143 | 0.12423306 | 4.24E-05 | 0.0052258 | -0.04878  |
| 16w_SITTD12 | 0.02880667 | 0.16956058 | 4.51E-05 | 0.0047064 | -0.12268  |
| 16w_SITTD12 | 0.01280106 | 0.07078995 | 3.80E-05 | 0.0063994 | 0.21875   |
| 16w_SITTD12 | 0.06027916 | 0.36377728 | 6.38E-05 | 0.0070986 | 0.087064  |
| 16w_SITTD12 | 0.04766809 | 0.2859544  | 5.53E-05 | 0.0049654 | -0.01192  |
| 16w_SITTD12 | 0.09782031 | 0.5954437  | 5.36E-05 | 0.0048658 | -1.1032   |
| 16w_SITTD12 | 0.00878235 | 0.04599049 | 3.59E-05 | 0.00713   | 0.38094   |
| 16w_SITTD12 | 0.03578617 | 0.21263108 | 4.77E-05 | 0.0045615 | -0.096915 |
| 16w_SITTD12 | 0.01486514 | 0.08352734 | 3.92E-05 | 0.0060428 | 0.1363    |
| 16w_SITTD12 | 0.07887217 | 0.47851476 | 4.97E-05 | 0.014318  | 0.17506   |
| 16w_SITTD12 | 0.01126563 | 0.06131481 | 3.71E-05 | 0.0066957 | 0.2858    |

|             |            |            |          |           |            |
|-------------|------------|------------|----------|-----------|------------|
| 16w_SITTD12 | 0.01344241 | 0.0747477  | 3.83E-05 | 0.0063061 | 0.19734    |
| 16w_SITTD12 | 0.01406432 | 0.07858549 | 3.86E-05 | 0.0062156 | 0.1561     |
| 16w_SITTD12 | 0.03649775 | 0.21702224 | 4.79E-05 | 0.0045625 | -0.092976  |
| 16w_SITTD12 | 0.08091726 | 0.49113503 | 4.85E-05 | 0.0141    | 0.12269    |
| 16w_SITTD12 | 0.00874834 | 0.04578056 | 3.59E-05 | 0.00713   | 0.38094    |
| 16w_SITTD12 | 0.06628862 | 0.40086168 | 6.12E-05 | 0.0093985 | 0.17407    |
| 16w_SITTD12 | 0.01689856 | 0.09607559 | 4.03E-05 | 0.005729  | 0.063215   |
| 16w_SITTD12 | 0.09674238 | 0.58879185 | 5.28E-05 | 0.0052469 | -1.03      |
| 16w_SITTD12 | 0.04121015 | 0.24610241 | 5.05E-05 | 0.0046492 | -0.054504  |
| 16w_SITTD12 | 0.02346383 | 0.13658988 | 4.32E-05 | 0.0050338 | -0.084895  |
| 16w_SITTD12 | 0.08042687 | 0.48810884 | 4.87E-05 | 0.014207  | 0.14202    |
| 16w_SITTD12 | 0.03476458 | 0.2063268  | 4.72E-05 | 0.0045646 | -0.10426   |
| 16w_SITTD12 | 0.0161422  | 0.09140808 | 3.98E-05 | 0.0058806 | 0.098494   |
| 16w_SITTD12 | 0.02456382 | 0.14337792 | 4.36E-05 | 0.0049516 | -0.098011  |
| 16w_SITTD12 | 0.01494379 | 0.08401274 | 3.92E-05 | 0.0060428 | 0.1363     |
| 16w_SITTD12 | 0.09168208 | 0.5575647  | 4.96E-05 | 0.0076529 | -0.60562   |
| 16w_SITTD12 | 0.08725817 | 0.53026474 | 4.79E-05 | 0.010571  | -0.25808   |
| 16w_SITTD12 | 0.04954927 | 0.29756317 | 5.73E-05 | 0.0051543 | -0.0022352 |
| 16w_SITTD12 | 0.09882622 | 0.6016512  | 5.45E-05 | 0.0045382 | -1.1375    |
| 16w_SITTD12 | 0.10373583 | 0.6319484  | 5.82E-05 | 0.0036742 | -1.3662    |
| 16w_SITTD12 | 0.03432543 | 0.20361681 | 4.70E-05 | 0.0045688 | -0.10761   |
| 16w_SITTD12 | 0.02670493 | 0.15659074 | 4.44E-05 | 0.004813  | -0.11546   |
| 16w_SITTD12 | 0.0098931  | 0.05284491 | 3.65E-05 | 0.0069072 | 0.33263    |
| 16w_SITTD12 | 0.03378498 | 0.2002817  | 4.68E-05 | 0.0045746 | -0.11071   |
| 16w_SITTD12 | 0.09412969 | 0.5726689  | 5.09E-05 | 0.0064439 | -0.82618   |
| 16w_SITTD12 | 0.02075208 | 0.11985569 | 4.21E-05 | 0.0052798 | -0.037579  |
| 16w_SITTD12 | 0.02761041 | 0.16217847 | 4.46E-05 | 0.0047834 | -0.12024   |
| 16w_SITTD12 | 0.08197315 | 0.49765092 | 4.81E-05 | 0.013778  | 0.078055   |
| 16w_SITTD12 | 0.0545409  | 0.32836652 | 6.14E-05 | 0.0057798 | 0.034245   |
| 16w_SITTD12 | 0.08225777 | 0.49940732 | 4.81E-05 | 0.013778  | 0.05262    |
| 16w_SITTD12 | 0.04071762 | 0.24306306 | 5.02E-05 | 0.0046325 | -0.058715  |
| 16w_SITTD12 | 0.0609964  | 0.36820337 | 6.38E-05 | 0.0072613 | 0.09374    |
| 16w_SITTD12 | 0.03899369 | 0.23242469 | 4.89E-05 | 0.0045836 | -0.071721  |
| 16w_SITTD12 | 0.01521136 | 0.08566386 | 3.95E-05 | 0.0059603 | 0.11709    |
| 16w_SITTD12 | 0.02771906 | 0.16284892 | 4.48E-05 | 0.0047558 | -0.12024   |
| 16w_SITTD12 | 0.09572178 | 0.5824937  | 5.20E-05 | 0.0056833 | -0.9515    |
| 16w_SITTD12 | 0.01199592 | 0.06582142 | 3.77E-05 | 0.0064954 | 0.24064    |
| 16w_SITTD12 | 0.01351454 | 0.07519282 | 3.83E-05 | 0.0063061 | 0.17645    |
| 16w_SITTD12 | 0.08946306 | 0.54387116 | 4.86E-05 | 0.0090548 | -0.42792   |
| 16w_SITTD12 | 0.02255213 | 0.13096382 | 4.28E-05 | 0.005125  | -0.068556  |
| 16w_SITTD12 | 0.02023013 | 0.11663475 | 4.19E-05 | 0.0053364 | -0.025531  |
| 16w_SITTD12 | 0.02231776 | 0.12951748 | 4.28E-05 | 0.005125  | -0.068556  |
| 16w_SITTD12 | 0.02974602 | 0.17535731 | 4.53E-05 | 0.0046846 | -0.12301   |

|             |            |            |          |           |           |
|-------------|------------|------------|----------|-----------|-----------|
| 16w_SITTD12 | 0.08649784 | 0.5255728  | 4.77E-05 | 0.01133   | -0.21781  |
| 16w_SITTD12 | 0.0337179  | 0.19986774 | 4.68E-05 | 0.0045746 | -0.11071  |
| 16w_SITTD12 | 0.07593983 | 0.46041933 | 5.18E-05 | 0.013885  | 0.23393   |
| 16w_SITTD12 | 0.02576533 | 0.15079248 | 4.40E-05 | 0.0048781 | -0.10813  |
| 16w_SITTD12 | 0.09723504 | 0.59183204 | 5.32E-05 | 0.0050496 | -1.0673   |
| 16w_SITTD12 | 0.022982   | 0.13361655 | 4.30E-05 | 0.0050782 | -0.077142 |
| 16w_SITTD12 | 0.06637847 | 0.40141618 | 6.12E-05 | 0.0093985 | 0.17407   |
| 16w_SITTD12 | 0.02516393 | 0.1470812  | 4.38E-05 | 0.0049138 | -0.10343  |
| 16w_SITTD12 | 0.07964101 | 0.48325932 | 4.93E-05 | 0.014315  | 0.15946   |
| 16w_SITTD12 | 0.06204256 | 0.37465924 | 6.36E-05 | 0.0076138 | 0.10802   |
| 16w_SITTD12 | 0.07621851 | 0.46213904 | 5.18E-05 | 0.013885  | 0.22792   |
| 16w_SITTD12 | 0.09162247 | 0.55719686 | 4.96E-05 | 0.0076529 | -0.60562  |
| 16w_SITTD12 | 0.04657091 | 0.27918372 | 5.44E-05 | 0.0048874 | -0.018376 |
| 16w_SITTD12 | 0.04159972 | 0.24850646 | 5.05E-05 | 0.0046492 | -0.0504   |
| 16w_SITTD12 | 0.0232946  | 0.1355456  | 4.32E-05 | 0.0050338 | -0.084895 |
| 16w_SITTD12 | 0.02710949 | 0.15908729 | 4.46E-05 | 0.0047834 | -0.11816  |
| 16w_SITTD12 | 0.02344811 | 0.13649288 | 4.32E-05 | 0.0050338 | -0.084895 |
| 16w_SITTD12 | 0.00763555 | 0.03891353 | 3.53E-05 | 0.0073641 | 0.43054   |
| 16w_SITTD12 | 0.04471261 | 0.2677161  | 5.30E-05 | 0.0047888 | -0.031751 |
| 16w_SITTD12 | 0.02118755 | 0.12254299 | 4.24E-05 | 0.0052258 | -0.04878  |
| 16w_SITTD12 | 0.01196699 | 0.06564289 | 3.77E-05 | 0.0064954 | 0.24064   |
| 16w_SITTD12 | 0.01406189 | 0.07857052 | 3.86E-05 | 0.0062156 | 0.1561    |
| 16w_SITTD12 | 0.02683282 | 0.15737993 | 4.44E-05 | 0.004813  | -0.11546  |
| 16w_SITTD12 | 0.06629252 | 0.40088573 | 6.12E-05 | 0.0093985 | 0.17407   |
| 16w_SITTD12 | 0.03102427 | 0.18324536 | 4.58E-05 | 0.00463   | -0.12145  |
| 16w_SITTD12 | 0.02418531 | 0.14104214 | 4.34E-05 | 0.0049916 | -0.091842 |
| 16w_SITTD12 | 0.01931392 | 0.11098081 | 4.14E-05 | 0.0054571 | 0.0010121 |
| 16w_SITTD12 | 0.01910583 | 0.10969669 | 4.14E-05 | 0.0054571 | 0.0010121 |
| 16w_SITTD12 | 0.01802133 | 0.10300423 | 4.09E-05 | 0.0055879 | 0.030658  |
| 16w_SITTD12 | 0.085223   | 0.51770574 | 4.76E-05 | 0.012059  | -0.10433  |
| 16w_SITTD12 | 0.01800265 | 0.10288893 | 4.09E-05 | 0.0055879 | 0.030658  |
| 16w_SITTD12 | 0.10132799 | 0.61708957 | 5.66E-05 | 0.0039398 | -1.2808   |
| 16w_SITTD12 | 0.07409212 | 0.44901708 | 5.38E-05 | 0.013116  | 0.24406   |
| 16w_SITTD12 | 0.08696523 | 0.528457   | 4.78E-05 | 0.010952  | -0.25808  |
| 16w_SITTD12 | 0.00355308 | 0.01372064 | 3.29E-05 | 0.0084138 | 0.63801   |
| 16w_SITTD12 | 0.026439   | 0.1549497  | 4.42E-05 | 0.0048445 | -0.11213  |
| 16w_SITTD12 | 0.01623298 | 0.09196831 | 3.98E-05 | 0.0058806 | 0.080526  |
| 16w_SITTD12 | 0.12680747 | 0.77432346 | 7.01E-05 | 0.0055336 | -0.96718  |
| 16w_SITTD12 | 0.03116639 | 0.18412237 | 4.58E-05 | 0.00463   | -0.12145  |
| 16w_SITTD12 | 0.03040964 | 0.17945251 | 4.57E-05 | 0.0046464 | -0.12245  |
| 16w_SITTD12 | 0.10565463 | 0.6437893  | 5.94E-05 | 0.0035815 | -1.3882   |
| 16w_SITTD12 | 0.0172902  | 0.09849242 | 4.03E-05 | 0.005729  | 0.046584  |
| 16w_SITTD12 | 0.0699433  | 0.42341474 | 5.76E-05 | 0.011297  | 0.22487   |

|             |            |            |          |           |           |
|-------------|------------|------------|----------|-----------|-----------|
| 16w_SITTD12 | 0.01535182 | 0.08653066 | 3.95E-05 | 0.0059603 | 0.11709   |
| 16w_SITTD12 | 0.10018707 | 0.610049   | 5.53E-05 | 0.004262  | -1.2296   |
| 16w_SITTD12 | 0.02098877 | 0.12131627 | 4.21E-05 | 0.0052798 | -0.037579 |
| 16w_SITTD12 | 0.03298005 | 0.1953145  | 4.64E-05 | 0.0045915 | -0.11352  |
| 16w_SITTD12 | 0.01351944 | 0.07522308 | 3.83E-05 | 0.0063061 | 0.17645   |
| 16w_SITTD12 | 0.01964634 | 0.11303213 | 4.16E-05 | 0.0053955 | -0.012659 |
| 16w_SITTD12 | 0.09099726 | 0.5533387  | 4.91E-05 | 0.0083333 | -0.56091  |
| 16w_SITTD12 | 0.03142108 | 0.1856941  | 4.60E-05 | 0.0046154 | -0.12002  |
| 16w_SITTD12 | 0.02047139 | 0.11812355 | 4.19E-05 | 0.0053364 | -0.025531 |
| 16w_SITTD12 | 0.02426778 | 0.14155105 | 4.34E-05 | 0.0049916 | -0.091842 |
| 16w_SITTD12 | 0.10034652 | 0.61103296 | 5.58E-05 | 0.0041426 | -1.2296   |
| 16w_SITTD12 | 0.02442016 | 0.14249139 | 4.36E-05 | 0.0049516 | -0.098011 |
| 16w_SITTD12 | 0.03441877 | 0.2041928  | 4.70E-05 | 0.0045688 | -0.10761  |
| 16w_SITTD12 | 0.04216771 | 0.2520115  | 5.09E-05 | 0.0046676 | -0.04643  |
| 16w_SITTD12 | 0.04245259 | 0.25376952 | 5.13E-05 | 0.0046879 | -0.04643  |
| 16w_SITTD12 | 0.03070787 | 0.18129289 | 4.57E-05 | 0.0046464 | -0.12245  |
| 16w_SITTD12 | 0.08380291 | 0.50894237 | 4.77E-05 | 0.013036  | -0.036078 |
| 16w_SITTD12 | 0.03076913 | 0.18167092 | 4.57E-05 | 0.0046464 | -0.12245  |
| 16w_SITTD12 | 0.02575988 | 0.15075885 | 4.40E-05 | 0.0048781 | -0.10813  |
| 16w_SITTD12 | 0.03451859 | 0.20480879 | 4.70E-05 | 0.0045688 | -0.10761  |
| 16w_SITTD12 | 0.01447122 | 0.08109652 | 3.89E-05 | 0.0061278 | 0.1561    |
| 16w_SITTD12 | 0.01371182 | 0.07641023 | 3.86E-05 | 0.0062156 | 0.17645   |
| 16w_SITTD12 | 0.0168918  | 0.09603386 | 4.03E-05 | 0.005729  | 0.063215  |
| 16w_SITTD12 | 0.0134729  | 0.07493588 | 3.83E-05 | 0.0063061 | 0.19734   |
| 16w_SITTD12 | 0.08415834 | 0.5111357  | 4.76E-05 | 0.012731  | -0.036078 |
| 16w_SITTD12 | 0.02800275 | 0.1645996  | 4.48E-05 | 0.0047558 | -0.12024  |
| 16w_SITTD12 | 0.02210821 | 0.12822434 | 4.26E-05 | 0.0051742 | -0.059109 |
| 16w_SITTD12 | 0.08837535 | 0.53715885 | 4.82E-05 | 0.0098057 | -0.3415   |
| 16w_SITTD12 | 0.02076053 | 0.1199078  | 4.21E-05 | 0.0052798 | -0.037579 |
| 16w_SITTD12 | 0.08782222 | 0.5337455  | 4.80E-05 | 0.010188  | -0.29935  |
| 16w_SITTD12 | 0.08987577 | 0.54641795 | 4.86E-05 | 0.0090548 | -0.47194  |
| 16w_SITTD12 | 0.03048532 | 0.17991953 | 4.57E-05 | 0.0046464 | -0.12245  |
| 16w_SITTD12 | 0.02150323 | 0.124491   | 4.24E-05 | 0.0052258 | -0.04878  |
| 16w_SITTD12 | 0.02169882 | 0.125698   | 4.26E-05 | 0.0051742 | -0.059109 |
| 16w_SITTD12 | 0.00694327 | 0.03464148 | 3.47E-05 | 0.0076096 | 0.48124   |
| 16w_SITTD12 | 0.09490902 | 0.5774782  | 5.16E-05 | 0.0059226 | -0.8688   |
| 16w_SITTD12 | 0.06484201 | 0.39193463 | 6.24E-05 | 0.0086643 | 0.15715   |
| 16w_SITTD12 | 0.09040066 | 0.54965705 | 4.88E-05 | 0.0086895 | -0.51631  |
| 16w_SITTD12 | 0.08974728 | 0.54562503 | 4.86E-05 | 0.0090548 | -0.47194  |
| 16w_SITTD12 | 0.022798   | 0.13248104 | 4.30E-05 | 0.0050782 | -0.077142 |
| 16w_SITTD12 | 0.01339364 | 0.07444672 | 3.83E-05 | 0.0063061 | 0.19734   |
| 16w_SITTD12 | 0.01557482 | 0.08790679 | 3.95E-05 | 0.0059603 | 0.11709   |
| 16w_SITTD12 | 0.02064442 | 0.11919134 | 4.21E-05 | 0.0052798 | -0.037579 |

|             |            |            |          |           |           |
|-------------|------------|------------|----------|-----------|-----------|
| 16w_SITTD12 | 0.01536362 | 0.08660346 | 3.95E-05 | 0.0059603 | 0.11709   |
| 16w_SITTD12 | 0.01365918 | 0.07608537 | 3.86E-05 | 0.0062156 | 0.17645   |
| 16w_SITTD12 | 0.0239306  | 0.13947035 | 4.34E-05 | 0.0049916 | -0.091842 |
| 16w_SITTD12 | 0.08997132 | 0.5470076  | 4.88E-05 | 0.0086895 | -0.47194  |
| 16w_SITTD12 | 0.08889817 | 0.54038525 | 4.84E-05 | 0.0094274 | -0.3844   |
| 16w_SITTD12 | 0.01960189 | 0.11275783 | 4.16E-05 | 0.0053955 | -0.012659 |
| 16w_SITTD12 | 0.08614267 | 0.52338105 | 4.76E-05 | 0.0117    | -0.17867  |
| 16w_SITTD12 | 0.09061673 | 0.5509904  | 4.91E-05 | 0.0083333 | -0.51631  |
| 16w_SITTD12 | 0.0288641  | 0.16991498 | 4.51E-05 | 0.0047064 | -0.12268  |
| 16w_SITTD12 | 0.02972762 | 0.17524375 | 4.53E-05 | 0.0046846 | -0.12301  |
| 16w_SITTD12 | 0.08826961 | 0.53650635 | 4.80E-05 | 0.010188  | -0.3415   |
| 16w_SITTD12 | 0.02020809 | 0.11649875 | 4.19E-05 | 0.0053364 | -0.025531 |
| 16w_SITTD12 | 0.02052696 | 0.11846648 | 4.19E-05 | 0.0053364 | -0.037579 |
| 16w_SITTD12 | 0.01567811 | 0.08854423 | 3.95E-05 | 0.0059603 | 0.098494  |
| 16w_SITTD12 | 0.0413667  | 0.24706848 | 5.05E-05 | 0.0046492 | -0.054504 |
| 16w_SITTD12 | 0.02456373 | 0.14337738 | 4.36E-05 | 0.0049516 | -0.098011 |
| 16w_SITTD12 | 0.02247856 | 0.13050978 | 4.28E-05 | 0.005125  | -0.068556 |
| 16w_SITTD12 | 0.08943421 | 0.54369307 | 4.86E-05 | 0.0090548 | -0.42792  |
| 16w_SITTD12 | 0.01111475 | 0.06038372 | 3.71E-05 | 0.0066957 | 0.2858    |
| 16w_SITTD12 | 0.09345441 | 0.5685018  | 5.06E-05 | 0.0067258 | -0.7829   |
| 16w_SITTD12 | 0.08072151 | 0.48992702 | 4.87E-05 | 0.014207  | 0.12269   |
| 16w_SITTD12 | 0.00999422 | 0.05346891 | 3.65E-05 | 0.0069072 | 0.33263   |
| 16w_SITTD12 | 0.0290316  | 0.17094861 | 4.51E-05 | 0.0047064 | -0.12268  |
| 16w_SITTD12 | 0.08305436 | 0.50432307 | 4.78E-05 | 0.013315  | 0.02505   |
| 16w_SITTD12 | 0.07695304 | 0.46667182 | 5.09E-05 | 0.014141  | 0.22047   |
| 16w_SITTD12 | 0.04679129 | 0.28054368 | 5.49E-05 | 0.0049251 | -0.018376 |
| 16w_SITTD12 | 0.00846872 | 0.04405507 | 3.56E-05 | 0.0072456 | 0.40559   |
| 16w_SITTD12 | 0.08124499 | 0.49315745 | 4.85E-05 | 0.0141    | 0.10139   |
| 16w_SITTD12 | 0.08447665 | 0.51309997 | 4.76E-05 | 0.012731  | -0.069378 |
| 16w_SITTD12 | 0.08436485 | 0.51241004 | 4.76E-05 | 0.012731  | -0.069378 |
| 16w_SITTD12 | 0.0913435  | 0.55547535 | 4.93E-05 | 0.0079874 | -0.60562  |
| 16w_SITTD12 | 0.0549806  | 0.33107987 | 6.17E-05 | 0.0058704 | 0.034245  |
| 16w_SITTD12 | 0.01811652 | 0.10359166 | 4.09E-05 | 0.0055879 | 0.030658  |
| 16w_SITTD12 | 0.01664914 | 0.09453643 | 4.00E-05 | 0.0058035 | 0.080526  |
| 16w_SITTD12 | 0.08590577 | 0.5219191  | 4.76E-05 | 0.0117    | -0.17867  |
| 16w_SITTD12 | 0.02204832 | 0.12785478 | 4.26E-05 | 0.0051742 | -0.059109 |
| 16w_SITTD12 | 0.03196188 | 0.18903135 | 4.62E-05 | 0.0046026 | -0.11821  |
| 16w_SITTD12 | 0.04683821 | 0.28083318 | 5.49E-05 | 0.0049251 | -0.018376 |
| 16w_SITTD12 | 0.05132742 | 0.30853614 | 5.87E-05 | 0.0053288 | 0.011221  |
| 16w_SITTD12 | 0.02795741 | 0.16431977 | 4.48E-05 | 0.0047558 | -0.12024  |
| 16w_SITTD12 | 0.01595449 | 0.09024972 | 3.98E-05 | 0.0058806 | 0.098494  |
| 16w_SITTD12 | 0.07434738 | 0.45059234 | 5.33E-05 | 0.013335  | 0.24406   |
| 16w_SITTD12 | 0.08964374 | 0.5449861  | 4.86E-05 | 0.0090548 | -0.42792  |

|             |            |            |          |           |           |
|-------------|------------|------------|----------|-----------|-----------|
| 16w_SITTD12 | 0.00764017 | 0.03894205 | 3.53E-05 | 0.0073641 | 0.43054   |
| 16w_SITTD12 | 0.09644227 | 0.5869398  | 5.24E-05 | 0.0054581 | -0.99133  |
| 16w_SITTD12 | 0.01390818 | 0.07762196 | 3.86E-05 | 0.0062156 | 0.17645   |
| 16w_SITTD12 | 0.0106232  | 0.05735033 | 3.68E-05 | 0.0068    | 0.30902   |
| 16w_SITTD12 | 0.04120909 | 0.24609588 | 5.05E-05 | 0.0046492 | -0.054504 |
| 16w_SITTD12 | 0.02824424 | 0.16608982 | 4.49E-05 | 0.0047302 | -0.12174  |
| 16w_SITTD12 | 0.01483653 | 0.08335083 | 3.92E-05 | 0.0060428 | 0.1363    |
| 16w_SITTD12 | 0.0356634  | 0.21187341 | 4.74E-05 | 0.0045622 | -0.096915 |
| 16w_SITTD12 | 0.09716883 | 0.59142345 | 5.32E-05 | 0.0050496 | -1.03     |
| 16w_SITTD12 | 0.07342204 | 0.444882   | 5.43E-05 | 0.012883  | 0.24489   |
| 16w_SITTD12 | 0.01533691 | 0.08643864 | 3.95E-05 | 0.0059603 | 0.11709   |
| 16w_SITTD12 | 0.01834726 | 0.10501552 | 4.09E-05 | 0.0055879 | 0.015459  |
| 16w_SITTD12 | 0.08436615 | 0.5124181  | 4.76E-05 | 0.012731  | -0.069378 |
| 16w_SITTD12 | 0.07683945 | 0.46597084 | 5.13E-05 | 0.014025  | 0.22047   |
| 16w_SITTD12 | 0.03407152 | 0.20204994 | 4.68E-05 | 0.0045746 | -0.10761  |
| 16w_SITTD12 | 0.09355911 | 0.5691479  | 5.06E-05 | 0.0067258 | -0.7829   |
| 16w_SITTD12 | 0.02255257 | 0.13096651 | 4.28E-05 | 0.005125  | -0.068556 |
| 16w_SITTD12 | 0.0470877  | 0.28237283 | 5.49E-05 | 0.0049251 | -0.01514  |
| 16w_SITTD12 | 0.02563612 | 0.14999512 | 4.40E-05 | 0.0048781 | -0.10813  |
| 16w_SITTD12 | 0.01297225 | 0.07184637 | 3.80E-05 | 0.0063994 | 0.19734   |
| 16w_SITTD12 | 0.09529554 | 0.57986337 | 5.16E-05 | 0.0059226 | -0.91061  |
| 16w_SITTD12 | 0.0211492  | 0.12230633 | 4.24E-05 | 0.0052258 | -0.04878  |
| 16w_SITTD12 | 0.07860169 | 0.47684562 | 4.97E-05 | 0.014318  | 0.18889   |
| 16w_SITTD12 | 0.06749778 | 0.40832344 | 6.03E-05 | 0.009922  | 0.19037   |
| 16w_SITTD12 | 0.0283559  | 0.16677885 | 4.49E-05 | 0.0047302 | -0.12174  |
| 16w_SITTD12 | 0.00411033 | 0.01715942 | 3.32E-05 | 0.0082728 | 0.61153   |
| 16w_SITTD12 | 0.01376448 | 0.0767352  | 3.86E-05 | 0.0062156 | 0.17645   |
| 16w_SITTD12 | 0.00839886 | 0.04362395 | 3.56E-05 | 0.0072456 | 0.40559   |
| 16w_SITTD12 | 0.02797189 | 0.16440912 | 4.48E-05 | 0.0047558 | -0.12024  |
| 16w_SITTD12 | 0.06157655 | 0.37178347 | 6.37E-05 | 0.0074328 | 0.10802   |
| 16w_SITTD12 | 0.03514234 | 0.208658   | 4.72E-05 | 0.0045646 | -0.10068  |
| 16w_SITTD12 | 0.01086394 | 0.05883594 | 3.71E-05 | 0.0066957 | 0.2858    |
| 16w_SITTD12 | 0.02306387 | 0.13412172 | 4.30E-05 | 0.0050782 | -0.077142 |
| 16w_SITTD12 | 0.01071816 | 0.05793633 | 3.68E-05 | 0.0068    | 0.30902   |
| 16w_SITTD12 | 0.0091578  | 0.04830734 | 3.59E-05 | 0.00713   | 0.38094   |
| 16w_SITTD12 | 0.01513236 | 0.08517636 | 3.92E-05 | 0.0060428 | 0.11709   |
| 16w_SITTD12 | 0.04382588 | 0.2622441  | 5.21E-05 | 0.0047343 | -0.035266 |
| 16w_SITTD12 | 0.0923159  | 0.561476   | 4.99E-05 | 0.0073308 | -0.6503   |
| 16w_SITTD12 | 0.03120519 | 0.18436185 | 4.58E-05 | 0.00463   | -0.12145  |
| 16w_SITTD12 | 0.07852273 | 0.4763584  | 5.01E-05 | 0.014289  | 0.18889   |
| 16w_SITTD12 | 0.03472829 | 0.20610285 | 4.72E-05 | 0.0045646 | -0.10426  |
| 16w_SITTD12 | 0.02367477 | 0.1378916  | 4.32E-05 | 0.0050338 | -0.084895 |
| 16w_SITTD12 | 0.013489   | 0.07503521 | 3.83E-05 | 0.0063061 | 0.17645   |

|             |            |            |          |           |            |
|-------------|------------|------------|----------|-----------|------------|
| 16w_SITTD12 | 0.01613274 | 0.09134969 | 3.98E-05 | 0.0058806 | 0.098494   |
| 16w_SITTD12 | 0.10779718 | 0.657011   | 6.08E-05 | 0.0035686 | -1.389     |
| 16w_SITTD12 | 0.02246684 | 0.13043746 | 4.28E-05 | 0.005125  | -0.068556  |
| 16w_SITTD12 | 0.0203788  | 0.11755214 | 4.19E-05 | 0.0053364 | -0.025531  |
| 16w_SITTD12 | 0.08973245 | 0.54553354 | 4.86E-05 | 0.0090548 | -0.47194   |
| 16w_SITTD12 | 0.02074216 | 0.11979444 | 4.21E-05 | 0.0052798 | -0.037579  |
| 16w_SITTD12 | 0.01370691 | 0.07637992 | 3.86E-05 | 0.0062156 | 0.17645    |
| 16w_SITTD12 | 0.09093304 | 0.5529424  | 4.91E-05 | 0.0083333 | -0.56091   |
| 16w_SITTD12 | 0.03135561 | 0.18529007 | 4.58E-05 | 0.00463   | -0.12002   |
| 16w_SITTD12 | 0.00849491 | 0.04421665 | 3.56E-05 | 0.0072456 | 0.40559    |
| 16w_SITTD12 | 0.00814043 | 0.04202917 | 3.56E-05 | 0.0072456 | 0.40559    |
| 16w_SITTD12 | 0.01838926 | 0.10527472 | 4.09E-05 | 0.0055879 | 0.015459   |
| 16w_SITTD12 | 0.02255254 | 0.1309663  | 4.28E-05 | 0.005125  | -0.068556  |
| 16w_SITTD12 | 0.06625889 | 0.4006782  | 6.12E-05 | 0.0093985 | 0.17407    |
| 16w_SITTD12 | 0.02017871 | 0.11631738 | 4.19E-05 | 0.0053364 | -0.025531  |
| 16w_SITTD12 | 0.00726668 | 0.03663727 | 3.50E-05 | 0.0074854 | 0.45576    |
| 16w_SITTD12 | 0.0138365  | 0.07717964 | 3.86E-05 | 0.0062156 | 0.17645    |
| 16w_SITTD12 | 0.08122914 | 0.4930596  | 4.85E-05 | 0.0141    | 0.10139    |
| 16w_SITTD12 | 0.05450989 | 0.3281751  | 6.14E-05 | 0.0057798 | 0.030074   |
| 16w_SITTD12 | 0.02125012 | 0.12292908 | 4.24E-05 | 0.0052258 | -0.04878   |
| 16w_SITTD12 | 0.08369052 | 0.5082488  | 4.77E-05 | 0.013036  | -0.0045591 |
| 16w_SITTD12 | 0.02386487 | 0.13906468 | 4.34E-05 | 0.0049916 | -0.091842  |
| 16w_SITTD12 | 0.01092624 | 0.05922041 | 3.71E-05 | 0.0066957 | 0.2858     |
| 16w_SITTD12 | 0.01494902 | 0.08404499 | 3.92E-05 | 0.0060428 | 0.1363     |
| 16w_SITTD12 | 0.08878557 | 0.5396904  | 4.82E-05 | 0.0098057 | -0.3844    |
| 16w_SITTD12 | 0.02868375 | 0.16880205 | 4.49E-05 | 0.0047302 | -0.12268   |
| 16w_SITTD12 | 0.0895922  | 0.544668   | 4.86E-05 | 0.0090548 | -0.42792   |
| 16w_SITTD12 | 0.0725498  | 0.4394994  | 5.54E-05 | 0.012382  | 0.24373    |
| 16w_SITTD12 | 0.01629347 | 0.09234159 | 4.00E-05 | 0.0058035 | 0.080526   |
| 16w_SITTD12 | 0.00927792 | 0.0490486  | 3.62E-05 | 0.0070172 | 0.35661    |
| 16w_SITTD12 | 0.0158114  | 0.0893667  | 3.98E-05 | 0.0058806 | 0.098494   |
| 16w_SITTD12 | 0.02359865 | 0.13742189 | 4.32E-05 | 0.0050338 | -0.084895  |
| 16w_SITTD12 | 0.079985   | 0.48538205 | 4.90E-05 | 0.014278  | 0.14202    |
| 16w_SITTD12 | 0.08852007 | 0.5380519  | 4.82E-05 | 0.0098057 | -0.3415    |
| 16w_SITTD12 | 0.04764719 | 0.28582537 | 5.53E-05 | 0.0049654 | -0.01192   |
| 16w_SITTD12 | 0.01227462 | 0.06754129 | 3.77E-05 | 0.0064954 | 0.24064    |
| 16w_SITTD12 | 0.08428386 | 0.51191026 | 4.76E-05 | 0.012731  | -0.069378  |
| 16w_SITTD12 | 0.08138655 | 0.49403104 | 4.83E-05 | 0.013957  | 0.10139    |
| 16w_SITTD12 | 0.03161443 | 0.18688728 | 4.60E-05 | 0.0046154 | -0.12002   |
| 16w_SITTD12 | 0.02961589 | 0.17455424 | 4.53E-05 | 0.0046846 | -0.1231    |
| 16w_SITTD12 | 0.02363087 | 0.13762069 | 4.32E-05 | 0.0050338 | -0.084895  |
| 16w_SITTD12 | 0.03472456 | 0.20607989 | 4.72E-05 | 0.0045646 | -0.10426   |
| 16w_SITTD12 | 0.0284074  | 0.1670967  | 4.49E-05 | 0.0047302 | -0.12174   |



|             |            |            |          |           |           |
|-------------|------------|------------|----------|-----------|-----------|
| 16w_SITTD12 | 0.0283442  | 0.16670665 | 4.49E-05 | 0.0047302 | -0.12174  |
| 16w_SITTD12 | 0.0222194  | 0.12891051 | 4.28E-05 | 0.005125  | -0.068556 |
| 16w_SITTD12 | 0.01148353 | 0.06265948 | 3.74E-05 | 0.0065941 | 0.263     |
| 16w_SITTD12 | 0.06653153 | 0.4023607  | 6.12E-05 | 0.0093985 | 0.18233   |
| 16w_SITTD12 | 0.01707904 | 0.09718932 | 4.03E-05 | 0.005729  | 0.063215  |
| 16w_SITTD12 | 0.07626253 | 0.46241072 | 5.18E-05 | 0.013885  | 0.22792   |
| 16w_SITTD12 | 0.07297063 | 0.44209635 | 5.49E-05 | 0.012637  | 0.24489   |
| 16w_SITTD12 | 0.0129687  | 0.07182442 | 3.80E-05 | 0.0063994 | 0.19734   |
| 16w_SITTD12 | 0.07911119 | 0.47998977 | 4.93E-05 | 0.014315  | 0.17506   |
| 16w_SITTD12 | 0.03208159 | 0.18977007 | 4.62E-05 | 0.0046026 | -0.11821  |
| 16w_SITTD12 | 0.08244348 | 0.5005533  | 4.79E-05 | 0.013563  | 0.05262   |
| 16w_SITTD12 | 0.03723772 | 0.22158858 | 4.81E-05 | 0.0045652 | -0.088896 |
| 16w_SITTD12 | 0.0254787  | 0.14902368 | 4.40E-05 | 0.0048781 | -0.10813  |
| 16w_SITTD12 | 0.01951662 | 0.11223163 | 4.16E-05 | 0.0053955 | -0.012659 |
| 16w_SITTD12 | 0.02461704 | 0.14370634 | 4.36E-05 | 0.0049516 | -0.098011 |
| 16w_SITTD12 | 0.07961485 | 0.48309785 | 4.93E-05 | 0.014315  | 0.15946   |
| 16w_SITTD12 | 0.06640282 | 0.4015664  | 6.12E-05 | 0.0093985 | 0.17407   |
| 16w_SITTD12 | 0.06622582 | 0.40047413 | 6.12E-05 | 0.0093985 | 0.17407   |
| 16w_SITTD12 | 0.03107988 | 0.18358853 | 4.58E-05 | 0.00463   | -0.12145  |
| 16w_SITTD12 | 0.09540163 | 0.58051807 | 5.20E-05 | 0.0056833 | -0.91061  |
| 16w_SITTD12 | 0.04496059 | 0.26924643 | 5.34E-05 | 0.0048194 | -0.028317 |
| 16w_SITTD12 | 0.04374854 | 0.26176682 | 5.21E-05 | 0.0047343 | -0.035266 |
| 16w_SITTD12 | 0.03081928 | 0.1819804  | 4.57E-05 | 0.0046464 | -0.12145  |
| 16w_SITTD12 | 0.07391512 | 0.4479248  | 5.38E-05 | 0.013116  | 0.24502   |
| 16w_SITTD12 | 0.03001476 | 0.17701568 | 4.55E-05 | 0.0046645 | -0.12301  |
| 16w_SITTD12 | 0.02332398 | 0.13572688 | 4.32E-05 | 0.0050338 | -0.084895 |
| 16w_SITTD12 | 0.03294919 | 0.19512409 | 4.64E-05 | 0.0045915 | -0.11352  |
| 16w_SITTD12 | 0.02024588 | 0.11673193 | 4.19E-05 | 0.0053364 | -0.025531 |
| 16w_SITTD12 | 0.01238642 | 0.0682312  | 3.77E-05 | 0.0064954 | 0.24064   |
| 16w_SITTD12 | 0.05512213 | 0.3319533  | 6.17E-05 | 0.0058704 | 0.038579  |
| 16w_SITTD12 | 0.02094513 | 0.12104698 | 4.21E-05 | 0.0052798 | -0.037579 |
| 16w_SITTD12 | 0.0196331  | 0.11295047 | 4.16E-05 | 0.0053955 | -0.012659 |
| 16w_SITTD12 | 0.0245302  | 0.14317049 | 4.36E-05 | 0.0049516 | -0.098011 |
| 16w_SITTD12 | 0.01765775 | 0.10076054 | 4.06E-05 | 0.0056572 | 0.046584  |
| 16w_SITTD12 | 0.01751341 | 0.09986984 | 4.06E-05 | 0.0056572 | 0.046584  |
| 16w_SITTD12 | 0.0108882  | 0.05898566 | 3.71E-05 | 0.0066957 | 0.2858    |
| 16w_SITTD12 | 0.00890603 | 0.04675372 | 3.59E-05 | 0.00713   | 0.38094   |
| 16w_SITTD12 | 0.06458355 | 0.39033967 | 6.24E-05 | 0.0086643 | 0.14863   |
| 16w_SITTD12 | 0.01930728 | 0.11093979 | 4.14E-05 | 0.0054571 | 0.0010121 |
| 16w_SITTD12 | 0.03273736 | 0.19381683 | 4.64E-05 | 0.0045915 | -0.11603  |
| 16w_SITTD12 | 0.05367906 | 0.32304808 | 6.10E-05 | 0.005694  | 0.026054  |
| 16w_SITTD12 | 0.01114146 | 0.06054854 | 3.71E-05 | 0.0066957 | 0.2858    |
| 16w_SITTD12 | 0.09534152 | 0.5801471  | 5.16E-05 | 0.0059226 | -0.91061  |

|             |            |            |          |           |           |
|-------------|------------|------------|----------|-----------|-----------|
| 16w_SITTD12 | 0.07623956 | 0.46226898 | 5.18E-05 | 0.013885  | 0.22792   |
| 16w_SITTD12 | 0.03047552 | 0.17985904 | 4.57E-05 | 0.0046464 | -0.12245  |
| 16w_SITTD12 | 0.09402799 | 0.57204133 | 5.09E-05 | 0.0064439 | -0.82618  |
| 16w_SITTD12 | 0.01949494 | 0.11209787 | 4.16E-05 | 0.0053955 | -0.012659 |
| 16w_SITTD12 | 0.01157302 | 0.06321168 | 3.74E-05 | 0.0065941 | 0.263     |
| 16w_SITTD12 | 0.03231778 | 0.1912276  | 4.62E-05 | 0.0046026 | -0.11821  |
| 16w_SITTD12 | 0.09010943 | 0.5478599  | 4.88E-05 | 0.0086895 | -0.47194  |
| 16w_SITTD12 | 0.01823094 | 0.10429771 | 4.09E-05 | 0.0055879 | 0.030658  |
| 16w_SITTD12 | 0.01908314 | 0.10955665 | 4.14E-05 | 0.0054571 | 0.0010121 |
| 16w_SITTD12 | 0.0128014  | 0.07079199 | 3.80E-05 | 0.0063994 | 0.21875   |
| 16w_SITTD12 | 0.09257283 | 0.56306154 | 4.99E-05 | 0.0073308 | -0.69483  |
| 16w_SITTD12 | 0.00710783 | 0.03565699 | 3.50E-05 | 0.0074854 | 0.45576   |
| 16w_SITTD12 | 0.02180616 | 0.12636043 | 4.26E-05 | 0.0051742 | -0.059109 |
| 16w_SITTD12 | 0.02144762 | 0.12414783 | 4.24E-05 | 0.0052258 | -0.04878  |
| 16w_SITTD12 | 0.02400839 | 0.13995038 | 4.34E-05 | 0.0049916 | -0.091842 |
| 16w_SITTD12 | 0.03242626 | 0.19189708 | 4.62E-05 | 0.0046026 | -0.11603  |
| 16w_SITTD12 | 0.08524425 | 0.51783687 | 4.76E-05 | 0.012059  | -0.10433  |
| 16w_SITTD12 | 0.02587188 | 0.15144998 | 4.40E-05 | 0.0048781 | -0.10813  |
| 16w_SITTD12 | 0.0783904  | 0.47554177 | 5.01E-05 | 0.014289  | 0.18889   |
| 16w_SITTD12 | 0.01496303 | 0.08413143 | 3.92E-05 | 0.0060428 | 0.1363    |
| 16w_SITTD12 | 0.01601545 | 0.09062593 | 3.98E-05 | 0.0058806 | 0.098494  |
| 16w_SITTD12 | 0.0469645  | 0.28161255 | 5.49E-05 | 0.0049251 | -0.018376 |
| 16w_SITTD12 | 0.00694292 | 0.03463936 | 3.47E-05 | 0.0076096 | 0.48124   |
| 16w_SITTD12 | 0.01651908 | 0.09373383 | 4.00E-05 | 0.0058035 | 0.080526  |
| 16w_SITTD12 | 0.02100566 | 0.12142049 | 4.21E-05 | 0.0052798 | -0.037579 |
| 16w_SITTD12 | 0.01924935 | 0.11058231 | 4.14E-05 | 0.0054571 | 0.0010121 |
| 16w_SITTD12 | 0.01866603 | 0.10698265 | 4.11E-05 | 0.0055212 | 0.015459  |
| 16w_SITTD12 | 0.0097951  | 0.05224013 | 3.65E-05 | 0.0069072 | 0.33263   |
| 16w_SITTD12 | 0.02113739 | 0.12223342 | 4.24E-05 | 0.0052258 | -0.04878  |
| 16w_SITTD12 | 0.08544083 | 0.51904994 | 4.76E-05 | 0.012059  | -0.14081  |
| 16w_SITTD12 | 0.01379792 | 0.07694152 | 3.86E-05 | 0.0062156 | 0.17645   |
| 16w_SITTD12 | 0.02731108 | 0.1603313  | 4.46E-05 | 0.0047834 | -0.11816  |
| 16w_SITTD12 | 0.08889838 | 0.5403865  | 4.84E-05 | 0.0094274 | -0.3844   |
| 16w_SITTD12 | 0.02442974 | 0.14255053 | 4.36E-05 | 0.0049516 | -0.098011 |
| 16w_SITTD12 | 0.03664231 | 0.21791431 | 4.79E-05 | 0.0045625 | -0.092976 |
| 16w_SITTD12 | 0.05293971 | 0.31848556 | 6.01E-05 | 0.0055357 | 0.022172  |
| 16w_SITTD12 | 0.05760946 | 0.3473026  | 6.32E-05 | 0.0064035 | 0.057806  |
| 16w_SITTD12 | 0.03397498 | 0.20145419 | 4.68E-05 | 0.0045746 | -0.11071  |
| 16w_SITTD12 | 0.01288491 | 0.07130739 | 3.80E-05 | 0.0063994 | 0.21875   |
| 16w_SITTD12 | 0.02111587 | 0.12210064 | 4.24E-05 | 0.0052258 | -0.04878  |
| 16w_SITTD12 | 0.01649024 | 0.09355585 | 4.00E-05 | 0.0058035 | 0.080526  |
| 16w_SITTD12 | 0.03521313 | 0.20909484 | 4.74E-05 | 0.0045622 | -0.10068  |
| 16w_SITTD12 | 0.01986644 | 0.11439037 | 4.16E-05 | 0.0053955 | -0.012659 |

|             |            |            |          |           |           |
|-------------|------------|------------|----------|-----------|-----------|
| 16w_SITTD12 | 0.0228668  | 0.13290562 | 4.30E-05 | 0.0050782 | -0.077142 |
| 16w_SITTD12 | 0.01576261 | 0.08906566 | 3.98E-05 | 0.0058806 | 0.098494  |
| 16w_SITTD12 | 0.01719154 | 0.0978836  | 4.03E-05 | 0.005729  | 0.063215  |
| 16w_SITTD12 | 0.0211653  | 0.12240564 | 4.24E-05 | 0.0052258 | -0.04878  |
| 16w_SITTD12 | 0.09081577 | 0.5522187  | 4.91E-05 | 0.0083333 | -0.56091  |
| 16w_SITTD12 | 0.08174966 | 0.4962718  | 4.83E-05 | 0.013957  | 0.078055  |
| 16w_SITTD12 | 0.02747311 | 0.16133113 | 4.46E-05 | 0.0047834 | -0.11816  |
| 16w_SITTD12 | 0.02123041 | 0.12280743 | 4.24E-05 | 0.0052258 | -0.04878  |
| 16w_SITTD12 | 0.09319774 | 0.56691784 | 5.06E-05 | 0.0067258 | -0.73907  |
| 16w_SITTD12 | 0.07646333 | 0.46364984 | 5.13E-05 | 0.014025  | 0.22792   |
| 16w_SITTD12 | 0.09437475 | 0.57418114 | 5.13E-05 | 0.0061762 | -0.82618  |
| 16w_SITTD12 | 0.03105144 | 0.18341304 | 4.58E-05 | 0.00463   | -0.12145  |
| 16w_SITTD12 | 0.09319309 | 0.56688917 | 5.02E-05 | 0.0070215 | -0.73907  |
| 16w_SITTD12 | 0.0524086  | 0.31520805 | 5.97E-05 | 0.0054628 | 0.018414  |
| 16w_SITTD12 | 0.00448745 | 0.01948664 | 3.35E-05 | 0.0081345 | 0.58516   |
| 16w_SITTD12 | 0.01917601 | 0.11012977 | 4.14E-05 | 0.0054571 | 0.0010121 |
| 16w_SITTD12 | 0.07061449 | 0.42755666 | 5.71E-05 | 0.011574  | 0.23016   |
| 16w_SITTD12 | 0.08220262 | 0.49906698 | 4.81E-05 | 0.013778  | 0.05262   |
| 16w_SITTD12 | 0.01409279 | 0.07876119 | 3.89E-05 | 0.0061278 | 0.1561    |
| 16w_SITTD12 | 0.02910679 | 0.17141263 | 4.51E-05 | 0.0047064 | -0.12268  |
| 16w_SITTD12 | 0.01379475 | 0.07692199 | 3.86E-05 | 0.0062156 | 0.17645   |
| 16w_SITTD12 | 0.02038096 | 0.11756548 | 4.19E-05 | 0.0053364 | -0.025531 |
| 16w_SITTD12 | 0.08879257 | 0.5397335  | 4.82E-05 | 0.0098057 | -0.3844   |
| 16w_SITTD12 | 0.01827777 | 0.10458674 | 4.09E-05 | 0.0055879 | 0.030658  |
| 16w_SITTD12 | 0.02300593 | 0.13376416 | 4.30E-05 | 0.0050782 | -0.077142 |
| 16w_SITTD12 | 0.01622589 | 0.09192453 | 3.98E-05 | 0.0058806 | 0.080526  |
| 16w_SITTD12 | 0.02635831 | 0.15445176 | 4.42E-05 | 0.0048445 | -0.11213  |
| 16w_SITTD12 | 0.06892531 | 0.41713274 | 5.87E-05 | 0.010741  | 0.21248   |
| 16w_SITTD12 | 0.08209414 | 0.49839756 | 4.81E-05 | 0.013778  | 0.05262   |
| 16w_SITTD12 | 0.08423263 | 0.5115941  | 4.76E-05 | 0.012731  | -0.036078 |
| 16w_SITTD12 | 0.01376469 | 0.07673648 | 3.86E-05 | 0.0062156 | 0.17645   |
| 16w_SITTD12 | 0.08916168 | 0.5420113  | 4.84E-05 | 0.0094274 | -0.42792  |
| 16w_SITTD12 | 0.01241782 | 0.06842492 | 3.77E-05 | 0.0064954 | 0.21875   |
| 16w_SITTD12 | 0.03271382 | 0.19367158 | 4.64E-05 | 0.0045915 | -0.11603  |
| 16w_SITTD12 | 0.0240372  | 0.14012817 | 4.34E-05 | 0.0049916 | -0.091842 |
| 16w_SITTD12 | 0.02143342 | 0.12406026 | 4.24E-05 | 0.0052258 | -0.04878  |
| 16w_SITTD12 | 0.09162161 | 0.55719155 | 4.96E-05 | 0.0076529 | -0.60562  |
| 16w_SITTD12 | 0.01754799 | 0.10008322 | 4.06E-05 | 0.0056572 | 0.046584  |
| 16w_SITTD12 | 0.02048636 | 0.11821593 | 4.19E-05 | 0.0053364 | -0.025531 |
| 16w_SITTD12 | 0.05424331 | 0.32653007 | 6.14E-05 | 0.0057798 | 0.030074  |
| 16w_SITTD12 | 0.01018783 | 0.0546637  | 3.65E-05 | 0.0069072 | 0.33263   |
| 16w_SITTD12 | 0.01943231 | 0.11171139 | 4.14E-05 | 0.0054571 | -0.012659 |
| 16w_SITTD12 | 0.02512214 | 0.14682335 | 4.38E-05 | 0.0049138 | -0.10343  |

|             |            |            |          |           |            |
|-------------|------------|------------|----------|-----------|------------|
| 16w_SITTD12 | 0.02155543 | 0.12481315 | 4.24E-05 | 0.0052258 | -0.04878   |
| 16w_SITTD12 | 0.0128363  | 0.07100739 | 3.80E-05 | 0.0063994 | 0.21875    |
| 16w_SITTD12 | 0.01713379 | 0.09752718 | 4.03E-05 | 0.005729  | 0.063215   |
| 16w_SITTD12 | 0.02584792 | 0.1513021  | 4.40E-05 | 0.0048781 | -0.10813   |
| 16w_SITTD12 | 0.01220522 | 0.06711302 | 3.77E-05 | 0.0064954 | 0.24064    |
| 16w_SITTD12 | 0.07599104 | 0.46073535 | 5.18E-05 | 0.013885  | 0.23393    |
| 16w_SITTD12 | 0.02277944 | 0.13236655 | 4.30E-05 | 0.0050782 | -0.077142  |
| 16w_SITTD12 | 0.01881253 | 0.10788672 | 4.11E-05 | 0.0055212 | 0.015459   |
| 16w_SITTD12 | 0.08536901 | 0.5186067  | 4.76E-05 | 0.012059  | -0.14081   |
| 16w_SITTD12 | 0.07484613 | 0.45367005 | 5.28E-05 | 0.013537  | 0.24193    |
| 16w_SITTD12 | 0.02096431 | 0.12116533 | 4.21E-05 | 0.0052798 | -0.037579  |
| 16w_SITTD12 | 0.08813686 | 0.53568715 | 4.80E-05 | 0.010188  | -0.3415    |
| 16w_SITTD12 | 0.03544788 | 0.2105435  | 4.74E-05 | 0.0045622 | -0.10068   |
| 16w_SITTD12 | 0.00796033 | 0.04091775 | 3.53E-05 | 0.0073641 | 0.43054    |
| 16w_SITTD12 | 0.09638684 | 0.5865978  | 5.24E-05 | 0.0054581 | -0.99133   |
| 16w_SITTD12 | 0.02270455 | 0.13190436 | 4.28E-05 | 0.005125  | -0.077142  |
| 16w_SITTD12 | 0.02567623 | 0.15024263 | 4.40E-05 | 0.0048781 | -0.10813   |
| 16w_SITTD12 | 0.01693277 | 0.09628669 | 4.03E-05 | 0.005729  | 0.063215   |
| 16w_SITTD12 | 0.02144045 | 0.12410361 | 4.24E-05 | 0.0052258 | -0.04878   |
| 16w_SITTD12 | 0.08324746 | 0.5055147  | 4.78E-05 | 0.013315  | -0.0045591 |
| 16w_SITTD12 | 0.04173564 | 0.24934523 | 5.09E-05 | 0.0046676 | -0.0504    |
| 16w_SITTD12 | 0.02201165 | 0.12762852 | 4.26E-05 | 0.0051742 | -0.059109  |
| 16w_SITTD12 | 0.00920859 | 0.04862079 | 3.62E-05 | 0.0070172 | 0.35661    |
| 16w_SITTD12 | 0.02578929 | 0.15094033 | 4.40E-05 | 0.0048781 | -0.10813   |
| 16w_SITTD12 | 0.01871917 | 0.10731057 | 4.11E-05 | 0.0055212 | 0.015459   |
| 16w_SITTD12 | 0.02773195 | 0.16292845 | 4.48E-05 | 0.0047558 | -0.12024   |
| 16w_SITTD12 | 0.02627972 | 0.15396672 | 4.42E-05 | 0.0048445 | -0.11213   |
| 16w_SITTD12 | 0.03624153 | 0.2154411  | 4.77E-05 | 0.0045615 | -0.092976  |
| 16w_SITTD12 | 0.03359114 | 0.19908555 | 4.68E-05 | 0.0045746 | -0.11071   |
| 16w_SITTD12 | 0.01554706 | 0.08773549 | 3.95E-05 | 0.0059603 | 0.11709    |
| 16w_SITTD12 | 0.01130414 | 0.06155243 | 3.71E-05 | 0.0066957 | 0.2858     |
| 16w_SITTD12 | 0.02238314 | 0.12992097 | 4.28E-05 | 0.005125  | -0.068556  |
| 16w_SITTD12 | 0.03091737 | 0.18258567 | 4.58E-05 | 0.00463   | -0.12145   |
| 16w_SITTD12 | 0.09115677 | 0.554323   | 4.93E-05 | 0.0079874 | -0.56091   |
| 16w_SITTD12 | 0.01776712 | 0.10143548 | 4.06E-05 | 0.0056572 | 0.046584   |
| 16w_SITTD12 | 0.02523312 | 0.14750819 | 4.38E-05 | 0.0049138 | -0.10343   |
| 16w_SITTD12 | 0.0955554  | 0.581467   | 5.20E-05 | 0.0056833 | -0.91061   |
| 16w_SITTD12 | 0.07741256 | 0.46950752 | 5.09E-05 | 0.014141  | 0.21153    |
| 16w_SITTD12 | 0.0115827  | 0.06327144 | 3.74E-05 | 0.0065941 | 0.263      |
| 16w_SITTD12 | 0.01684319 | 0.09573392 | 4.03E-05 | 0.005729  | 0.063215   |
| 16w_SITTD12 | 0.0200588  | 0.11557744 | 4.19E-05 | 0.0053364 | -0.025531  |
| 16w_SITTD12 | 0.04840752 | 0.29051742 | 5.63E-05 | 0.005054  | -0.0087048 |
| 16w_SITTD12 | 0.00483888 | 0.0216553  | 3.35E-05 | 0.0081345 | 0.58516    |

|             |            |            |          |           |           |
|-------------|------------|------------|----------|-----------|-----------|
| 16w_SITTD12 | 0.01451131 | 0.0813439  | 3.89E-05 | 0.0061278 | 0.1561    |
| 16w_SITTD12 | 0.09632949 | 0.58624387 | 5.24E-05 | 0.0054581 | -0.99133  |
| 16w_SITTD12 | 0.06758986 | 0.40889162 | 6.03E-05 | 0.009922  | 0.19812   |
| 16w_SITTD12 | 0.06031793 | 0.36401656 | 6.38E-05 | 0.0070986 | 0.087064  |
| 16w_SITTD12 | 0.087368   | 0.53094256 | 4.79E-05 | 0.010571  | -0.25808  |
| 16w_SITTD12 | 0.08128641 | 0.49341303 | 4.83E-05 | 0.013957  | 0.10139   |
| 16w_SITTD12 | 0.01296393 | 0.07179499 | 3.80E-05 | 0.0063994 | 0.19734   |
| 16w_SITTD12 | 0.02623676 | 0.15370168 | 4.42E-05 | 0.0048445 | -0.11213  |
| 16w_SITTD12 | 0.05393503 | 0.32462764 | 6.10E-05 | 0.005694  | 0.026054  |
| 16w_SITTD12 | 0.01566587 | 0.08846869 | 3.95E-05 | 0.0059603 | 0.098494  |
| 16w_SITTD12 | 0.02386932 | 0.13909215 | 4.34E-05 | 0.0049916 | -0.091842 |
| 16w_SITTD12 | 0.03803821 | 0.22652839 | 4.87E-05 | 0.0045758 | -0.080425 |
| 16w_SITTD12 | 0.09540778 | 0.580556   | 5.20E-05 | 0.0056833 | -0.91061  |
| 16w_SITTD12 | 0.06234243 | 0.37650976 | 6.35E-05 | 0.0078047 | 0.11565   |
| 16w_SITTD12 | 0.02745795 | 0.16123764 | 4.46E-05 | 0.0047834 | -0.11816  |
| 16w_SITTD12 | 0.08533271 | 0.5183827  | 4.76E-05 | 0.012059  | -0.14081  |
| 16w_SITTD12 | 0.01868922 | 0.10712577 | 4.11E-05 | 0.0055212 | 0.015459  |
| 16w_SITTD12 | 0.07812087 | 0.47387847 | 5.01E-05 | 0.014289  | 0.20103   |
| 16w_SITTD12 | 0.01232079 | 0.0678262  | 3.77E-05 | 0.0064954 | 0.24064   |
| 16w_SITTD12 | 0.02341342 | 0.13627884 | 4.32E-05 | 0.0050338 | -0.084895 |
| 16w_SITTD12 | 0.02845439 | 0.16738664 | 4.49E-05 | 0.0047302 | -0.12174  |
| 16w_SITTD12 | 0.06127242 | 0.36990672 | 6.37E-05 | 0.0074328 | 0.10072   |
| 16w_SITTD12 | 0.03200536 | 0.18929967 | 4.62E-05 | 0.0046026 | -0.11821  |
| 16w_SITTD12 | 0.03682669 | 0.21905208 | 4.79E-05 | 0.0045625 | -0.088896 |
| 16w_SITTD12 | 0.01606157 | 0.09091052 | 3.98E-05 | 0.0058806 | 0.098494  |
| 16w_SITTD12 | 0.08436973 | 0.5124402  | 4.76E-05 | 0.012731  | -0.069378 |
| 16w_SITTD12 | 0.01654862 | 0.09391609 | 4.00E-05 | 0.0058035 | 0.080526  |
| 16w_SITTD12 | 0.00878732 | 0.04602111 | 3.59E-05 | 0.00713   | 0.38094   |
| 16w_SITTD12 | 0.01174558 | 0.06427653 | 3.74E-05 | 0.0065941 | 0.263     |
| 16w_SITTD12 | 0.00909436 | 0.04791588 | 3.59E-05 | 0.00713   | 0.38094   |
| 16w_SITTD12 | 0.06459713 | 0.3904235  | 6.24E-05 | 0.0086643 | 0.14863   |
| 16w_SITTD12 | 0.03056555 | 0.1804146  | 4.57E-05 | 0.0046464 | -0.12245  |
| 16w_SITTD12 | 0.01526042 | 0.08596665 | 3.95E-05 | 0.0059603 | 0.11709   |
| 16w_SITTD12 | 0.02626886 | 0.15389976 | 4.42E-05 | 0.0048445 | -0.11213  |
| 16w_SITTD12 | 0.01554329 | 0.08771221 | 3.95E-05 | 0.0059603 | 0.11709   |
| 16w_SITTD12 | 0.06043734 | 0.36475343 | 6.38E-05 | 0.0070986 | 0.087064  |
| 16w_SITTD12 | 0.02150893 | 0.12452618 | 4.24E-05 | 0.0052258 | -0.04878  |
| 16w_SITTD12 | 0.08898847 | 0.54094243 | 4.84E-05 | 0.0094274 | -0.3844   |
| 16w_SITTD12 | 0.07142114 | 0.43253446 | 5.65E-05 | 0.011849  | 0.2386    |
| 16w_SITTD12 | 0.08589523 | 0.52185404 | 4.76E-05 | 0.0117    | -0.17867  |
| 16w_SITTD12 | 0.08496931 | 0.51614016 | 4.76E-05 | 0.012404  | -0.10433  |
| 16w_SITTD12 | 0.06540299 | 0.39539644 | 6.20E-05 | 0.0089013 | 0.16566   |
| 16w_SITTD12 | 0.01960249 | 0.11276155 | 4.16E-05 | 0.0053955 | -0.012659 |

|             |            |            |          |           |            |
|-------------|------------|------------|----------|-----------|------------|
| 16w_SITTD12 | 0.00888802 | 0.04664257 | 3.59E-05 | 0.00713   | 0.38094    |
| 16w_SITTD12 | 0.06152332 | 0.37145498 | 6.37E-05 | 0.0074328 | 0.10072    |
| 16w_SITTD12 | 0.01019227 | 0.05469105 | 3.65E-05 | 0.0069072 | 0.33263    |
| 16w_SITTD12 | 0.01825781 | 0.10446353 | 4.09E-05 | 0.0055879 | 0.030658   |
| 16w_SITTD12 | 0.01570523 | 0.08871154 | 3.98E-05 | 0.0058806 | 0.098494   |
| 16w_SITTD12 | 0.01617295 | 0.09159787 | 3.98E-05 | 0.0058806 | 0.098494   |
| 16w_SITTD12 | 0.01256996 | 0.0693638  | 3.80E-05 | 0.0063994 | 0.21875    |
| 16w_SITTD12 | 0.0832607  | 0.5055964  | 4.78E-05 | 0.013315  | -0.0045591 |
| 16w_SITTD12 | 0.02083756 | 0.12038317 | 4.21E-05 | 0.0052798 | -0.037579  |
| 16w_SITTD12 | 0.02179907 | 0.12631664 | 4.26E-05 | 0.0051742 | -0.059109  |
| 16w_SITTD12 | 0.01450948 | 0.08133262 | 3.89E-05 | 0.0061278 | 0.1561     |
| 16w_SITTD12 | 0.00736079 | 0.03721802 | 3.50E-05 | 0.0074854 | 0.45576    |
| 16w_SITTD12 | 0.03201001 | 0.18932837 | 4.62E-05 | 0.0046026 | -0.11821   |
| 16w_SITTD12 | 0.0221457  | 0.12845574 | 4.26E-05 | 0.0051742 | -0.068556  |
| 16w_SITTD12 | 0.02458536 | 0.1435109  | 4.36E-05 | 0.0049516 | -0.098011  |
| 16w_SITTD12 | 0.01828726 | 0.10464527 | 4.09E-05 | 0.0055879 | 0.030658   |
| 16w_SITTD12 | 0.05738621 | 0.3459249  | 6.30E-05 | 0.0062853 | 0.057806   |
| 16w_SITTD12 | 0.04372665 | 0.2616318  | 5.21E-05 | 0.0047343 | -0.038876  |
| 16w_SITTD12 | 0.08531214 | 0.51825583 | 4.76E-05 | 0.012059  | -0.10433   |
| 16w_SITTD12 | 0.02607693 | 0.15271534 | 4.42E-05 | 0.0048445 | -0.11213   |
| 16w_SITTD12 | 0.01544312 | 0.08709406 | 3.95E-05 | 0.0059603 | 0.11709    |
| 16w_SITTD12 | 0.01495012 | 0.08405177 | 3.92E-05 | 0.0060428 | 0.1363     |
| 16w_SITTD12 | 0.00890475 | 0.04674577 | 3.59E-05 | 0.00713   | 0.38094    |
| 16w_SITTD12 | 0.02840257 | 0.16706684 | 4.49E-05 | 0.0047302 | -0.12174   |
| 16w_SITTD12 | 0.0289064  | 0.17017601 | 4.51E-05 | 0.0047064 | -0.12268   |
| 16w_SITTD12 | 0.01674188 | 0.09510873 | 4.00E-05 | 0.0058035 | 0.063215   |
| 16w_SITTD12 | 0.02376058 | 0.13842113 | 4.32E-05 | 0.0050338 | -0.091842  |
| 16w_SITTD12 | 0.07590719 | 0.4602179  | 5.18E-05 | 0.013885  | 0.23393    |
| 16w_SITTD12 | 0.03677525 | 0.21873467 | 4.79E-05 | 0.0045625 | -0.088896  |
| 16w_SITTD12 | 0.0323074  | 0.19116358 | 4.62E-05 | 0.0046026 | -0.11821   |
| 16w_SITTD12 | 0.01381252 | 0.07703162 | 3.86E-05 | 0.0062156 | 0.17645    |
| 16w_SITTD12 | 0.01473058 | 0.08269701 | 3.92E-05 | 0.0060428 | 0.1363     |
| 16w_SITTD12 | 0.02771367 | 0.16281563 | 4.48E-05 | 0.0047558 | -0.12024   |
| 16w_SITTD12 | 0.09461024 | 0.57563436 | 5.13E-05 | 0.0061762 | -0.8688    |
| 16w_SITTD12 | 0.01847463 | 0.10580155 | 4.11E-05 | 0.0055212 | 0.015459   |
| 16w_SITTD12 | 0.04649797 | 0.27873358 | 5.44E-05 | 0.0048874 | -0.018376  |
| 16w_SITTD12 | 0.02157147 | 0.12491214 | 4.24E-05 | 0.0052258 | -0.04878   |
| 16w_SITTD12 | 0.01349387 | 0.07506526 | 3.83E-05 | 0.0063061 | 0.17645    |
| 16w_SITTD12 | 0.03388084 | 0.20087327 | 4.68E-05 | 0.0045746 | -0.11071   |
| 16w_SITTD12 | 0.01406074 | 0.07856339 | 3.86E-05 | 0.0062156 | 0.1561     |
| 16w_SITTD12 | 0.02496981 | 0.14588328 | 4.38E-05 | 0.0049138 | -0.10343   |
| 16w_SITTD12 | 0.0180102  | 0.10293555 | 4.09E-05 | 0.0055879 | 0.030658   |
| 16w_SITTD12 | 0.03018439 | 0.1780625  | 4.55E-05 | 0.0046645 | -0.12301   |

|             |            |            |          |           |           |
|-------------|------------|------------|----------|-----------|-----------|
| 16w_SITTD12 | 0.01956879 | 0.11255362 | 4.16E-05 | 0.0053955 | -0.012659 |
| 16w_SITTD12 | 0.01810791 | 0.10353848 | 4.09E-05 | 0.0055879 | 0.030658  |
| 16w_SITTD12 | 0.09342235 | 0.5683039  | 5.06E-05 | 0.0067258 | -0.73907  |
| 16w_SITTD12 | 0.08952744 | 0.5442684  | 4.86E-05 | 0.0090548 | -0.42792  |
| 16w_SITTD12 | 0.01807754 | 0.10335108 | 4.09E-05 | 0.0055879 | 0.030658  |
| 16w_SITTD12 | 0.0783051  | 0.47501537 | 5.01E-05 | 0.014289  | 0.18889   |
| 16w_SITTD12 | 0.02464163 | 0.14385808 | 4.36E-05 | 0.0049516 | -0.098011 |
| 16w_SITTD12 | 0.01674606 | 0.09513453 | 4.00E-05 | 0.0058035 | 0.063215  |
| 16w_SITTD12 | 0.02722772 | 0.15981686 | 4.46E-05 | 0.0047834 | -0.11816  |
| 16w_SITTD12 | 0.03974921 | 0.237087   | 4.95E-05 | 0.0046046 | -0.067351 |
| 16w_SITTD12 | 0.0154991  | 0.08743952 | 3.95E-05 | 0.0059603 | 0.11709   |
| 16w_SITTD12 | 0.01411906 | 0.0789233  | 3.89E-05 | 0.0061278 | 0.1561    |
| 16w_SITTD12 | 0.07698837 | 0.46688986 | 5.09E-05 | 0.014141  | 0.22047   |
| 16w_SITTD12 | 0.0451569  | 0.27045786 | 5.34E-05 | 0.0048194 | -0.028317 |
| 16w_SITTD12 | 0.01325712 | 0.07360429 | 3.83E-05 | 0.0063061 | 0.19734   |
| 16w_SITTD12 | 0.09464216 | 0.57583135 | 5.13E-05 | 0.0061762 | -0.8688   |
| 16w_SITTD12 | 0.09303821 | 0.5659334  | 5.02E-05 | 0.0070215 | -0.73907  |
| 16w_SITTD12 | 0.01845021 | 0.10565085 | 4.11E-05 | 0.0055212 | 0.015459  |
| 16w_SITTD12 | 0.0123565  | 0.06804655 | 3.77E-05 | 0.0064954 | 0.24064   |
| 16w_SITTD12 | 0.06302873 | 0.3807449  | 6.33E-05 | 0.0080056 | 0.12359   |
| 16w_SITTD12 | 0.03139776 | 0.18555018 | 4.58E-05 | 0.00463   | -0.12002  |
| 16w_SITTD12 | 0.04737717 | 0.2841591  | 5.53E-05 | 0.0049654 | -0.01514  |
| 16w_SITTD12 | 0.01695525 | 0.09642541 | 4.03E-05 | 0.005729  | 0.063215  |
| 16w_SITTD12 | 0.03340836 | 0.19795758 | 4.66E-05 | 0.0045822 | -0.11352  |
| 16w_SITTD12 | 0.0090935  | 0.0479106  | 3.59E-05 | 0.00713   | 0.38094   |
| 16w_SITTD12 | 0.01309738 | 0.0726185  | 3.83E-05 | 0.0063061 | 0.19734   |
| 16w_SITTD12 | 0.01135435 | 0.06186225 | 3.71E-05 | 0.0066957 | 0.263     |
| 16w_SITTD12 | 0.01852137 | 0.10608994 | 4.11E-05 | 0.0055212 | 0.015459  |
| 16w_SITTD12 | 0.02343395 | 0.13640551 | 4.32E-05 | 0.0050338 | -0.084895 |
| 16w_SITTD12 | 0.03091263 | 0.18255644 | 4.58E-05 | 0.00463   | -0.12145  |
| 16w_SITTD12 | 0.02240444 | 0.13005242 | 4.28E-05 | 0.005125  | -0.068556 |
| 16w_SITTD12 | 0.02566598 | 0.15017939 | 4.40E-05 | 0.0048781 | -0.10813  |
| 16w_SITTD12 | 0.025269   | 0.1477296  | 4.38E-05 | 0.0049138 | -0.10343  |
| 16w_SITTD12 | 0.08556749 | 0.5198316  | 4.76E-05 | 0.012059  | -0.14081  |
| 16w_SITTD12 | 0.01946787 | 0.11193081 | 4.14E-05 | 0.0054571 | -0.012659 |
| 16w_SITTD12 | 0.01888056 | 0.10830655 | 4.11E-05 | 0.0055212 | 0.015459  |
| 16w_SITTD12 | 0.03517653 | 0.20886895 | 4.72E-05 | 0.0045646 | -0.10068  |
| 16w_SITTD12 | 0.00948408 | 0.05032085 | 3.62E-05 | 0.0070172 | 0.35661   |
| 16w_SITTD12 | 0.08636258 | 0.5247381  | 4.77E-05 | 0.01133   | -0.17867  |
| 16w_SITTD12 | 0.0161623  | 0.09153216 | 3.98E-05 | 0.0058806 | 0.098494  |
| 16w_SITTD12 | 0.06114877 | 0.36914364 | 6.38E-05 | 0.0072613 | 0.10072   |
| 16w_SITTD12 | 0.02041541 | 0.11777811 | 4.19E-05 | 0.0053364 | -0.025531 |
| 16w_SITTD12 | 0.01300094 | 0.07202338 | 3.83E-05 | 0.0063061 | 0.19734   |

|             |            |            |          |           |           |
|-------------|------------|------------|----------|-----------|-----------|
| 16w_SITTD12 | 0.08189923 | 0.49719474 | 4.81E-05 | 0.013778  | 0.078055  |
| 16w_SITTD12 | 0.03356215 | 0.19890663 | 4.66E-05 | 0.0045822 | -0.11071  |
| 16w_SITTD12 | 0.0386858  | 0.23052469 | 4.89E-05 | 0.0045836 | -0.076088 |
| 16w_SITTD12 | 0.02292739 | 0.13327952 | 4.30E-05 | 0.0050782 | -0.077142 |
| 16w_SITTD12 | 0.01769537 | 0.10099273 | 4.06E-05 | 0.0056572 | 0.046584  |
| 16w_SITTD12 | 0.03831561 | 0.2282402  | 4.87E-05 | 0.0045758 | -0.080425 |
| 16w_SITTD12 | 0.0249596  | 0.1458203  | 4.38E-05 | 0.0049138 | -0.10343  |
| 16w_SITTD12 | 0.01347931 | 0.07497539 | 3.83E-05 | 0.0063061 | 0.19734   |
| 16w_SITTD12 | 0.09094091 | 0.5529909  | 4.91E-05 | 0.0083333 | -0.56091  |
| 16w_SITTD12 | 0.00821066 | 0.04246254 | 3.56E-05 | 0.0072456 | 0.40559   |
| 16w_SITTD12 | 0.01438397 | 0.08055804 | 3.89E-05 | 0.0061278 | 0.1561    |
| 16w_SITTD12 | 0.05891947 | 0.35538664 | 6.35E-05 | 0.0066597 | 0.074574  |
| 16w_SITTD12 | 0.0794898  | 0.48232615 | 4.93E-05 | 0.014315  | 0.15946   |
| 16w_SITTD12 | 0.01838208 | 0.10523038 | 4.09E-05 | 0.0055879 | 0.015459  |
| 16w_SITTD12 | 0.0275911  | 0.16205926 | 4.46E-05 | 0.0047834 | -0.12024  |
| 16w_SITTD12 | 0.005781   | 0.02746914 | 3.41E-05 | 0.0078664 | 0.53284   |
| 16w_SITTD12 | 0.0251148  | 0.14677802 | 4.38E-05 | 0.0049138 | -0.10343  |
| 16w_SITTD12 | 0.03340634 | 0.1979451  | 4.66E-05 | 0.0045822 | -0.11352  |
| 16w_SITTD12 | 0.07811719 | 0.47385582 | 5.01E-05 | 0.014289  | 0.20103   |
| 16w_SITTD12 | 0.00673683 | 0.03336757 | 3.47E-05 | 0.0076096 | 0.48124   |
| 16w_SITTD12 | 0.01266644 | 0.06995916 | 3.80E-05 | 0.0063994 | 0.21875   |
| 16w_SITTD12 | 0.07667839 | 0.46497694 | 5.13E-05 | 0.014025  | 0.22792   |
| 16w_SITTD12 | 0.02493771 | 0.1456852  | 4.38E-05 | 0.0049138 | -0.10343  |
| 16w_SITTD12 | 0.02136288 | 0.12362495 | 4.24E-05 | 0.0052258 | -0.04878  |
| 16w_SITTD12 | 0.03955743 | 0.2359035  | 4.95E-05 | 0.0046046 | -0.067351 |
| 16w_SITTD12 | 0.0775111  | 0.47011563 | 5.05E-05 | 0.014229  | 0.21153   |
| 16w_SITTD12 | 0.09482665 | 0.57696986 | 5.16E-05 | 0.0059226 | -0.8688   |
| 16w_SITTD12 | 0.05714476 | 0.34443492 | 6.30E-05 | 0.0062853 | 0.05269   |
| 16w_SITTD12 | 0.03519305 | 0.20897092 | 4.72E-05 | 0.0045646 | -0.10068  |
| 16w_SITTD12 | 0.09480523 | 0.57683766 | 5.13E-05 | 0.0061762 | -0.8688   |
| 16w_SITTD12 | 0.00792552 | 0.04070296 | 3.53E-05 | 0.0073641 | 0.43054   |
| 16w_SITTD12 | 0.02014511 | 0.11611007 | 4.19E-05 | 0.0053364 | -0.025531 |
| 16w_SITTD12 | 0.07520993 | 0.4559151  | 5.28E-05 | 0.013537  | 0.23858   |
| 16w_SITTD12 | 0.01735934 | 0.09891906 | 4.06E-05 | 0.0056572 | 0.046584  |
| 16w_SITTD12 | 0.0594225  | 0.35849085 | 6.37E-05 | 0.0067983 | 0.080679  |
| 16w_SITTD12 | 0.02282029 | 0.1326186  | 4.30E-05 | 0.0050782 | -0.077142 |
| 16w_SITTD12 | 0.02007036 | 0.11564877 | 4.19E-05 | 0.0053364 | -0.025531 |
| 16w_SITTD12 | 0.02835887 | 0.1667972  | 4.49E-05 | 0.0047302 | -0.12174  |
| 16w_SITTD12 | 0.03680381 | 0.2189109  | 4.79E-05 | 0.0045625 | -0.088896 |
| 16w_SITTD12 | 0.07469907 | 0.45276254 | 5.33E-05 | 0.013335  | 0.24193   |
| 16w_SITTD12 | 0.02599545 | 0.15221249 | 4.42E-05 | 0.0048445 | -0.11213  |
| 16w_SITTD12 | 0.01752772 | 0.09995813 | 4.06E-05 | 0.0056572 | 0.046584  |
| 16w_SITTD12 | 0.02457698 | 0.14345914 | 4.36E-05 | 0.0049516 | -0.098011 |



|             |            |            |          |           |           |
|-------------|------------|------------|----------|-----------|-----------|
| 16w_SITTD12 | 0.02965147 | 0.17477381 | 4.53E-05 | 0.0046846 | -0.1231   |
| 16w_SITTD12 | 0.01776114 | 0.1013986  | 4.06E-05 | 0.0056572 | 0.046584  |
| 16w_SITTD12 | 0.03133998 | 0.18519363 | 4.58E-05 | 0.00463   | -0.12002  |
| 16w_SITTD12 | 0.01248386 | 0.06883249 | 3.80E-05 | 0.0063994 | 0.21875   |
| 16w_SITTD12 | 0.06924233 | 0.41908902 | 5.87E-05 | 0.010741  | 0.21895   |
| 16w_SITTD12 | 0.03730493 | 0.22200334 | 4.81E-05 | 0.0045652 | -0.084703 |
| 16w_SITTD12 | 0.06011724 | 0.3627781  | 6.37E-05 | 0.0069445 | 0.087064  |
| 16w_SITTD12 | 0.03383444 | 0.20058694 | 4.68E-05 | 0.0045746 | -0.11071  |
| 16w_SITTD12 | 0.03190109 | 0.18865624 | 4.60E-05 | 0.0046154 | -0.11821  |
| 16w_SITTD12 | 0.01346477 | 0.07488567 | 3.83E-05 | 0.0063061 | 0.19734   |
| 16w_SITTD12 | 0.08838671 | 0.537229   | 4.82E-05 | 0.0098057 | -0.3415   |
| 16w_SITTD12 | 0.02741933 | 0.16099931 | 4.46E-05 | 0.0047834 | -0.11816  |
| 16w_SITTD12 | 0.0440004  | 0.26332107 | 5.25E-05 | 0.0047605 | -0.035266 |
| 16w_SITTD12 | 0.02964945 | 0.17476137 | 4.53E-05 | 0.0046846 | -0.1231   |
| 16w_SITTD12 | 0.0086113  | 0.04493493 | 3.56E-05 | 0.0072456 | 0.40559   |
| 16w_SITTD12 | 0.07677726 | 0.46558708 | 5.13E-05 | 0.014025  | 0.22047   |
| 16w_SITTD12 | 0.09368373 | 0.5699169  | 5.06E-05 | 0.0067258 | -0.7829   |
| 16w_SITTD12 | 0.09033401 | 0.5492458  | 4.88E-05 | 0.0086895 | -0.51631  |
| 16w_SITTD12 | 0.04267449 | 0.25513884 | 5.13E-05 | 0.0046879 | -0.042593 |
| 16w_SITTD12 | 0.08182803 | 0.4967554  | 4.81E-05 | 0.013778  | 0.078055  |
| 16w_SITTD12 | 0.08120704 | 0.4929233  | 4.85E-05 | 0.0141    | 0.10139   |
| 16w_SITTD12 | 0.01893471 | 0.10864069 | 4.11E-05 | 0.0055212 | 0.0010121 |
| 16w_SITTD12 | 0.00946887 | 0.05022696 | 3.62E-05 | 0.0070172 | 0.35661   |
| 16w_SITTD12 | 0.01396533 | 0.07797465 | 3.86E-05 | 0.0062156 | 0.17645   |
| 16w_SITTD12 | 0.01194329 | 0.06549661 | 3.77E-05 | 0.0064954 | 0.24064   |
| 16w_SITTD12 | 0.06655166 | 0.40248492 | 6.12E-05 | 0.0093985 | 0.18233   |
| 16w_SITTD12 | 0.0372111  | 0.22142428 | 4.81E-05 | 0.0045652 | -0.088896 |
| 16w_SITTD12 | 0.01960667 | 0.11278734 | 4.16E-05 | 0.0053955 | -0.012659 |
| 16w_SITTD12 | 0.02821701 | 0.16592179 | 4.49E-05 | 0.0047302 | -0.12174  |
| 16w_SITTD12 | 0.01923019 | 0.11046411 | 4.14E-05 | 0.0054571 | 0.0010121 |
| 16w_SITTD12 | 0.02539387 | 0.14850017 | 4.38E-05 | 0.0049138 | -0.10813  |
| 16w_SITTD12 | 0.07200622 | 0.43614498 | 5.60E-05 | 0.012118  | 0.24161   |
| 16w_SITTD12 | 0.05074841 | 0.30496305 | 5.83E-05 | 0.0052672 | 0.0043724 |
| 16w_SITTD12 | 0.04218931 | 0.25214484 | 5.09E-05 | 0.0046676 | -0.04643  |
| 16w_SITTD12 | 0.01867842 | 0.10705913 | 4.11E-05 | 0.0055212 | 0.015459  |
| 16w_SITTD12 | 0.07846178 | 0.47598228 | 5.01E-05 | 0.014289  | 0.18889   |
| 16w_SITTD12 | 0.01915624 | 0.11000774 | 4.14E-05 | 0.0054571 | 0.0010121 |
| 16w_SITTD12 | 0.03433782 | 0.2036933  | 4.70E-05 | 0.0045688 | -0.10761  |
| 16w_SITTD12 | 0.0226088  | 0.13131353 | 4.28E-05 | 0.005125  | -0.068556 |
| 16w_SITTD12 | 0.04468609 | 0.26755247 | 5.30E-05 | 0.0047888 | -0.031751 |
| 16w_SITTD12 | 0.08693953 | 0.52829844 | 4.78E-05 | 0.010952  | -0.21781  |
| 16w_SITTD12 | 0.02660053 | 0.15594651 | 4.44E-05 | 0.004813  | -0.11546  |
| 16w_SITTD12 | 0.03079183 | 0.18181099 | 4.57E-05 | 0.0046464 | -0.12145  |

|             |            |            |          |           |            |
|-------------|------------|------------|----------|-----------|------------|
| 16w_SITTD12 | 0.04947697 | 0.297117   | 5.73E-05 | 0.0051543 | -0.0022352 |
| 16w_SITTD12 | 0.08612884 | 0.52329564 | 4.76E-05 | 0.0117    | -0.17867   |
| 16w_SITTD12 | 0.06948531 | 0.4205885  | 5.82E-05 | 0.011019  | 0.21895    |
| 16w_SITTD12 | 0.02633286 | 0.15429467 | 4.42E-05 | 0.0048445 | -0.11213   |
| 16w_SITTD12 | 0.02077077 | 0.11997099 | 4.21E-05 | 0.0052798 | -0.037579  |
| 16w_SITTD12 | 0.06458071 | 0.39032218 | 6.24E-05 | 0.0086643 | 0.14863    |
| 16w_SITTD12 | 0.02813815 | 0.16543514 | 4.48E-05 | 0.0047558 | -0.12174   |
| 16w_SITTD12 | 0.01237928 | 0.0681871  | 3.77E-05 | 0.0064954 | 0.24064    |
| 16w_SITTD12 | 0.08150259 | 0.49474713 | 4.83E-05 | 0.013957  | 0.10139    |
| 16w_SITTD12 | 0.03848372 | 0.22927764 | 4.89E-05 | 0.0045836 | -0.076088  |
| 16w_SITTD12 | 0.02407512 | 0.14036219 | 4.34E-05 | 0.0049916 | -0.091842  |
| 16w_SITTD12 | 0.08241575 | 0.5003822  | 4.79E-05 | 0.013563  | 0.05262    |
| 16w_SITTD12 | 0.01575701 | 0.0890311  | 3.98E-05 | 0.0058806 | 0.098494   |
| 16w_SITTD12 | 0.01874976 | 0.10749937 | 4.11E-05 | 0.0055212 | 0.015459   |
| 16w_SITTD12 | 0.08883373 | 0.5399875  | 4.82E-05 | 0.0098057 | -0.3844    |
| 16w_SITTD12 | 0.03125197 | 0.1846505  | 4.58E-05 | 0.00463   | -0.12145   |
| 16w_SITTD12 | 0.07834469 | 0.4752597  | 5.01E-05 | 0.014289  | 0.18889    |
| 16w_SITTD12 | 0.02932977 | 0.17278859 | 4.53E-05 | 0.0046846 | -0.1231    |
| 16w_SITTD12 | 0.01219654 | 0.06705943 | 3.77E-05 | 0.0064954 | 0.24064    |
| 16w_SITTD12 | 0.0910114  | 0.5534259  | 4.91E-05 | 0.0083333 | -0.56091   |
| 16w_SITTD12 | 0.02808539 | 0.16510952 | 4.48E-05 | 0.0047558 | -0.12174   |
| 16w_SITTD12 | 0.01355512 | 0.07544324 | 3.86E-05 | 0.0062156 | 0.17645    |
| 16w_SITTD12 | 0.07289811 | 0.4416488  | 5.49E-05 | 0.012637  | 0.24373    |
| 16w_SITTD12 | 0.02466704 | 0.14401491 | 4.36E-05 | 0.0049516 | -0.098011  |
| 16w_SITTD12 | 0.01836131 | 0.10510226 | 4.09E-05 | 0.0055879 | 0.015459   |
| 16w_SITTD12 | 0.02551269 | 0.14923342 | 4.40E-05 | 0.0048781 | -0.10813   |
| 16w_SITTD12 | 0.06830059 | 0.41327757 | 5.93E-05 | 0.010465  | 0.20551    |
| 16w_SITTD12 | 0.0161698  | 0.09157839 | 3.98E-05 | 0.0058806 | 0.098494   |
| 16w_SITTD12 | 0.06539584 | 0.39535233 | 6.20E-05 | 0.0089013 | 0.16566    |
| 16w_SITTD12 | 0.09988801 | 0.60820353 | 5.53E-05 | 0.004262  | -1.2008    |
| 16w_SITTD12 | 0.05780716 | 0.34852257 | 6.32E-05 | 0.0064035 | 0.06315    |
| 16w_SITTD12 | 0.01902727 | 0.10921187 | 4.14E-05 | 0.0054571 | 0.0010121  |
| 16w_SITTD12 | 0.01550341 | 0.08746612 | 3.95E-05 | 0.0059603 | 0.11709    |
| 16w_SITTD12 | 0.0898888  | 0.54649836 | 4.86E-05 | 0.0090548 | -0.47194   |
| 16w_SITTD12 | 0.098991   | 0.60266805 | 5.45E-05 | 0.0045382 | -1.1701    |
| 16w_SITTD12 | 0.02024663 | 0.11673653 | 4.19E-05 | 0.0053364 | -0.025531  |
| 16w_SITTD12 | 0.03829488 | 0.22811231 | 4.87E-05 | 0.0045758 | -0.080425  |
| 16w_SITTD12 | 0.01696806 | 0.09650448 | 4.03E-05 | 0.005729  | 0.063215   |
| 16w_SITTD12 | 0.08856162 | 0.5383083  | 4.82E-05 | 0.0098057 | -0.3415    |
| 16w_SITTD12 | 0.08975644 | 0.54568154 | 4.86E-05 | 0.0090548 | -0.47194   |
| 16w_SITTD12 | 0.02427274 | 0.1415817  | 4.34E-05 | 0.0049916 | -0.091842  |
| 16w_SITTD12 | 0.09524993 | 0.5795819  | 5.16E-05 | 0.0059226 | -0.91061   |
| 16w_SITTD12 | 0.04474775 | 0.26793298 | 5.30E-05 | 0.0047888 | -0.031751  |

|             |            |            |          |           |           |
|-------------|------------|------------|----------|-----------|-----------|
| 16w_SITTD12 | 0.07939432 | 0.48173696 | 4.93E-05 | 0.014315  | 0.15946   |
| 16w_SITTD12 | 0.01571713 | 0.08878501 | 3.98E-05 | 0.0058806 | 0.098494  |
| 16w_SITTD12 | 0.02339023 | 0.13613573 | 4.32E-05 | 0.0050338 | -0.084895 |
| 16w_SITTD12 | 0.01932637 | 0.11105759 | 4.14E-05 | 0.0054571 | 0.0010121 |
| 16w_SITTD12 | 0.02632318 | 0.15423493 | 4.42E-05 | 0.0048445 | -0.11213  |
| 16w_SITTD12 | 0.02874932 | 0.16920668 | 4.51E-05 | 0.0047064 | -0.12268  |
| 16w_SITTD12 | 0.0980057  | 0.5965878  | 5.36E-05 | 0.0048658 | -1.1032   |
| 16w_SITTD12 | 0.02398378 | 0.13979852 | 4.34E-05 | 0.0049916 | -0.091842 |
| 16w_SITTD12 | 0.02129866 | 0.12322865 | 4.24E-05 | 0.0052258 | -0.04878  |
| 16w_SITTD12 | 0.02461341 | 0.14368393 | 4.36E-05 | 0.0049516 | -0.098011 |
| 16w_SITTD12 | 0.07630177 | 0.46265283 | 5.18E-05 | 0.013885  | 0.22792   |
| 16w_SITTD12 | 0.00573809 | 0.02720433 | 3.41E-05 | 0.0078664 | 0.53284   |
| 16w_SITTD12 | 0.01133038 | 0.06171436 | 3.71E-05 | 0.0066957 | 0.263     |
| 16w_SITTD12 | 0.0822686  | 0.49947417 | 4.81E-05 | 0.013778  | 0.05262   |
| 16w_SITTD12 | 0.02078244 | 0.12004302 | 4.21E-05 | 0.0052798 | -0.037579 |
| 16w_SITTD12 | 0.06213833 | 0.37525025 | 6.36E-05 | 0.0076138 | 0.11565   |
| 16w_SITTD12 | 0.07369129 | 0.4465436  | 5.38E-05 | 0.013116  | 0.24502   |
| 16w_SITTD12 | 0.02554075 | 0.14940655 | 4.40E-05 | 0.0048781 | -0.10813  |
| 16w_SITTD12 | 0.01802952 | 0.10305475 | 4.09E-05 | 0.0055879 | 0.030658  |
| 16w_SITTD12 | 0.04131889 | 0.24677347 | 5.05E-05 | 0.0046492 | -0.054504 |
| 16w_SITTD12 | 0.05323787 | 0.3203255  | 6.05E-05 | 0.0056127 | 0.022172  |
| 16w_SITTD12 | 0.10228085 | 0.6229697  | 5.70E-05 | 0.0038563 | -1.3227   |
| 16w_SITTD12 | 0.09983566 | 0.6078805  | 5.53E-05 | 0.004262  | -1.2008   |
| 16w_SITTD12 | 0.02556475 | 0.14955464 | 4.40E-05 | 0.0048781 | -0.10813  |
| 16w_SITTD12 | 0.06184176 | 0.37342012 | 6.36E-05 | 0.0076138 | 0.10802   |
| 16w_SITTD12 | 0.01471854 | 0.08262269 | 3.92E-05 | 0.0060428 | 0.1363    |
| 16w_SITTD12 | 0.07958026 | 0.48288438 | 4.93E-05 | 0.014315  | 0.15946   |
| 16w_SITTD12 | 0.07880876 | 0.47812346 | 4.97E-05 | 0.014318  | 0.18889   |
| 16w_SITTD12 | 0.02184664 | 0.1266102  | 4.26E-05 | 0.0051742 | -0.059109 |
| 16w_SITTD12 | 0.0380453  | 0.22657214 | 4.87E-05 | 0.0045758 | -0.080425 |
| 16w_SITTD12 | 0.00908755 | 0.04787387 | 3.59E-05 | 0.00713   | 0.38094   |
| 16w_SITTD12 | 0.02136651 | 0.12364731 | 4.24E-05 | 0.0052258 | -0.04878  |
| 16w_SITTD12 | 0.03103503 | 0.18331178 | 4.58E-05 | 0.00463   | -0.12145  |
| 16w_SITTD12 | 0.02240314 | 0.13004437 | 4.28E-05 | 0.005125  | -0.068556 |
| 16w_SITTD12 | 0.02317339 | 0.13479762 | 4.30E-05 | 0.0050782 | -0.077142 |
| 16w_SITTD12 | 0.08990783 | 0.5466158  | 4.86E-05 | 0.0090548 | -0.47194  |
| 16w_SITTD12 | 0.08430231 | 0.51202416 | 4.76E-05 | 0.012731  | -0.069378 |
| 16w_SITTD12 | 0.02195201 | 0.12726046 | 4.26E-05 | 0.0051742 | -0.059109 |
| 16w_SITTD12 | 0.08899473 | 0.5409811  | 4.84E-05 | 0.0094274 | -0.3844   |
| 16w_SITTD12 | 0.0250985  | 0.14667743 | 4.38E-05 | 0.0049138 | -0.10343  |
| 16w_SITTD12 | 0.04410244 | 0.26395077 | 5.25E-05 | 0.0047605 | -0.035266 |
| 16w_SITTD12 | 0.06277852 | 0.37920085 | 6.35E-05 | 0.0078047 | 0.12359   |
| 16w_SITTD12 | 0.0951969  | 0.5792546  | 5.16E-05 | 0.0059226 | -0.91061  |

|             |            |            |          |           |           |
|-------------|------------|------------|----------|-----------|-----------|
| 16w_SITTD12 | 0.02278377 | 0.13239323 | 4.30E-05 | 0.0050782 | -0.077142 |
| 16w_SITTD12 | 0.09121689 | 0.554694   | 4.93E-05 | 0.0079874 | -0.56091  |
| 16w_SITTD12 | 0.02028843 | 0.11699452 | 4.19E-05 | 0.0053364 | -0.025531 |
| 16w_SITTD12 | 0.02076533 | 0.11993741 | 4.21E-05 | 0.0052798 | -0.037579 |
| 16w_SITTD12 | 0.09613109 | 0.5850196  | 5.24E-05 | 0.0054581 | -0.99133  |
| 16w_SITTD12 | 0.01565004 | 0.088371   | 3.95E-05 | 0.0059603 | 0.098494  |
| 16w_SITTD12 | 0.01221152 | 0.0671519  | 3.77E-05 | 0.0064954 | 0.24064   |
| 16w_SITTD12 | 0.01612868 | 0.09132467 | 3.98E-05 | 0.0058806 | 0.098494  |
| 16w_SITTD12 | 0.03316534 | 0.19645788 | 4.66E-05 | 0.0045822 | -0.11352  |
| 16w_SITTD12 | 0.03273775 | 0.19381927 | 4.64E-05 | 0.0045915 | -0.11603  |
| 16w_SITTD12 | 0.0911042  | 0.5539986  | 4.93E-05 | 0.0079874 | -0.56091  |
| 16w_SITTD12 | 0.07666254 | 0.46487916 | 5.13E-05 | 0.014025  | 0.22792   |
| 16w_SITTD12 | 0.01773072 | 0.10121085 | 4.06E-05 | 0.0056572 | 0.046584  |
| 16w_SITTD12 | 0.0294548  | 0.17356016 | 4.53E-05 | 0.0046846 | -0.1231   |
| 16w_SITTD12 | 0.0205087  | 0.11835379 | 4.19E-05 | 0.0053364 | -0.037579 |
| 16w_SITTD12 | 0.0215723  | 0.12491728 | 4.24E-05 | 0.0052258 | -0.04878  |
| 16w_SITTD12 | 0.02036949 | 0.11749469 | 4.19E-05 | 0.0053364 | -0.025531 |
| 16w_SITTD12 | 0.07563968 | 0.45856708 | 5.23E-05 | 0.013721  | 0.23393   |
| 16w_SITTD12 | 0.05834932 | 0.35186827 | 6.34E-05 | 0.0065282 | 0.068735  |
| 16w_SITTD12 | 0.0554298  | 0.3338519  | 6.21E-05 | 0.005966  | 0.038579  |
| 16w_SITTD12 | 0.08542074 | 0.51892596 | 4.76E-05 | 0.012059  | -0.14081  |
| 16w_SITTD12 | 0.08770302 | 0.53300995 | 4.79E-05 | 0.010571  | -0.29935  |
| 16w_SITTD12 | 0.00949087 | 0.05036273 | 3.62E-05 | 0.0070172 | 0.35661   |
| 16w_SITTD12 | 0.09050489 | 0.5503003  | 4.91E-05 | 0.0083333 | -0.51631  |
| 16w_SITTD12 | 0.01661696 | 0.09433785 | 4.00E-05 | 0.0058035 | 0.080526  |
| 16w_SITTD12 | 0.02659245 | 0.15589662 | 4.44E-05 | 0.004813  | -0.11546  |
| 16w_SITTD12 | 0.04051685 | 0.24182406 | 4.99E-05 | 0.0046177 | -0.058715 |
| 16w_SITTD12 | 0.07930177 | 0.48116583 | 4.93E-05 | 0.014315  | 0.17506   |
| 16w_SITTD12 | 0.02829095 | 0.16637804 | 4.49E-05 | 0.0047302 | -0.12174  |
| 16w_SITTD12 | 0.05344484 | 0.32160273 | 6.05E-05 | 0.0056127 | 0.022172  |
| 16w_SITTD12 | 0.05681424 | 0.34239528 | 6.27E-05 | 0.0061731 | 0.05269   |
| 16w_SITTD12 | 0.01412194 | 0.07894108 | 3.89E-05 | 0.0061278 | 0.1561    |
| 16w_SITTD12 | 0.05177268 | 0.31128383 | 5.92E-05 | 0.0053939 | 0.011221  |
| 16w_SITTD12 | 0.00590489 | 0.02823366 | 3.41E-05 | 0.0078664 | 0.53284   |
| 16w_SITTD12 | 0.0548386  | 0.3302036  | 6.17E-05 | 0.0058704 | 0.034245  |
| 16w_SITTD12 | 0.02785391 | 0.16368106 | 4.48E-05 | 0.0047558 | -0.12024  |
| 16w_SITTD12 | 0.06781113 | 0.4102571  | 5.98E-05 | 0.010192  | 0.19812   |
| 16w_SITTD12 | 0.09331247 | 0.5676258  | 5.06E-05 | 0.0067258 | -0.73907  |
| 16w_SITTD12 | 0.03887464 | 0.23168999 | 4.89E-05 | 0.0045836 | -0.071721 |
| 16w_SITTD12 | 0.02302858 | 0.13390398 | 4.30E-05 | 0.0050782 | -0.077142 |
| 16w_SITTD12 | 0.08542251 | 0.5189369  | 4.76E-05 | 0.012059  | -0.14081  |
| 16w_SITTD12 | 0.0224238  | 0.13017185 | 4.28E-05 | 0.005125  | -0.068556 |
| 16w_SITTD12 | 0.0129605  | 0.07177384 | 3.80E-05 | 0.0063994 | 0.19734   |

|             |            |            |          |           |           |
|-------------|------------|------------|----------|-----------|-----------|
| 16w_SITTD12 | 0.0094638  | 0.05019569 | 3.62E-05 | 0.0070172 | 0.35661   |
| 16w_SITTD12 | 0.03720364 | 0.22137828 | 4.81E-05 | 0.0045652 | -0.088896 |
| 16w_SITTD12 | 0.01812305 | 0.10363192 | 4.09E-05 | 0.0055879 | 0.030658  |
| 16w_SITTD12 | 0.01871824 | 0.10730485 | 4.11E-05 | 0.0055212 | 0.015459  |
| 16w_SITTD12 | 0.07109403 | 0.43051586 | 5.65E-05 | 0.011849  | 0.23476   |
| 16w_SITTD12 | 0.03944732 | 0.23522398 | 4.92E-05 | 0.0045932 | -0.067351 |
| 16w_SITTD12 | 0.08513717 | 0.5171761  | 4.76E-05 | 0.012059  | -0.10433  |
| 16w_SITTD12 | 0.03229125 | 0.1910639  | 4.62E-05 | 0.0046026 | -0.11821  |
| 16w_SITTD12 | 0.01888277 | 0.10832018 | 4.11E-05 | 0.0055212 | 0.015459  |
| 16w_SITTD12 | 0.08996547 | 0.5469715  | 4.88E-05 | 0.0086895 | -0.47194  |
| 16w_SITTD12 | 0.02671878 | 0.15667619 | 4.44E-05 | 0.004813  | -0.11546  |
| 16w_SITTD12 | 0.03278939 | 0.19413796 | 4.64E-05 | 0.0045915 | -0.11603  |
| 16w_SITTD12 | 0.01923801 | 0.11051235 | 4.14E-05 | 0.0054571 | 0.0010121 |
| 16w_SITTD12 | 0.01484762 | 0.08341925 | 3.92E-05 | 0.0060428 | 0.1363    |
| 16w_SITTD12 | 0.01659414 | 0.09419703 | 4.00E-05 | 0.0058035 | 0.080526  |
| 16w_SITTD12 | 0.05931566 | 0.3578315  | 6.37E-05 | 0.0067983 | 0.074574  |
| 16w_SITTD12 | 0.07473718 | 0.45299777 | 5.33E-05 | 0.013335  | 0.24193   |
| 16w_SITTD12 | 0.09952643 | 0.6059722  | 5.49E-05 | 0.0043938 | -1.2008   |
| 16w_SITTD12 | 0.02315784 | 0.13470165 | 4.30E-05 | 0.0050782 | -0.077142 |
| 16w_SITTD12 | 0.07002612 | 0.42392576 | 5.76E-05 | 0.011297  | 0.22487   |
| 16w_SITTD12 | 0.02348883 | 0.13674416 | 4.32E-05 | 0.0050338 | -0.084895 |
| 16w_SITTD12 | 0.02639135 | 0.1546556  | 4.42E-05 | 0.0048445 | -0.11213  |
| 16w_SITTD12 | 0.01227416 | 0.06753842 | 3.77E-05 | 0.0064954 | 0.24064   |
| 16w_SITTD12 | 0.0320653  | 0.1896696  | 4.62E-05 | 0.0046026 | -0.11821  |
| 16w_SITTD12 | 0.04434291 | 0.26543468 | 5.25E-05 | 0.0047605 | -0.031751 |
| 16w_SITTD12 | 0.08829851 | 0.53668475 | 4.80E-05 | 0.010188  | -0.3415   |
| 16w_SITTD12 | 0.03680733 | 0.21893264 | 4.79E-05 | 0.0045625 | -0.088896 |
| 16w_SITTD12 | 0.05843711 | 0.35241002 | 6.34E-05 | 0.0065282 | 0.068735  |
| 16w_SITTD12 | 0.1010538  | 0.61539763 | 5.62E-05 | 0.0040352 | -1.2808   |
| 16w_SITTD12 | 0.02282942 | 0.13267495 | 4.30E-05 | 0.0050782 | -0.077142 |
| 16w_SITTD12 | 0.03563761 | 0.21171431 | 4.74E-05 | 0.0045622 | -0.096915 |
| 16w_SITTD12 | 0.07070337 | 0.4281051  | 5.71E-05 | 0.011574  | 0.23016   |
| 16w_SITTD12 | 0.02333746 | 0.13581009 | 4.32E-05 | 0.0050338 | -0.084895 |
| 16w_SITTD12 | 0.02240479 | 0.13005456 | 4.28E-05 | 0.005125  | -0.068556 |
| 16w_SITTD12 | 0.02355992 | 0.13718286 | 4.32E-05 | 0.0050338 | -0.084895 |
| 16w_SITTD12 | 0.02482438 | 0.14498585 | 4.36E-05 | 0.0049516 | -0.098011 |
| 16w_SITTD12 | 0.02930936 | 0.17266269 | 4.53E-05 | 0.0046846 | -0.1231   |
| 16w_SITTD12 | 0.01755626 | 0.10013425 | 4.06E-05 | 0.0056572 | 0.046584  |
| 16w_SITTD12 | 0.02473844 | 0.14445554 | 4.36E-05 | 0.0049516 | -0.098011 |
| 16w_SITTD12 | 0.07196461 | 0.43588826 | 5.60E-05 | 0.012118  | 0.24161   |
| 16w_SITTD12 | 0.0937623  | 0.5704017  | 5.09E-05 | 0.0064439 | -0.7829   |
| 16w_SITTD12 | 0.08451842 | 0.51335776 | 4.76E-05 | 0.012731  | -0.069378 |
| 16w_SITTD12 | 0.03452067 | 0.20482168 | 4.70E-05 | 0.0045688 | -0.10761  |

|             |            |            |          |           |            |
|-------------|------------|------------|----------|-----------|------------|
| 16w_SITTD12 | 0.02083484 | 0.12036637 | 4.21E-05 | 0.0052798 | -0.037579  |
| 16w_SITTD12 | 0.08356053 | 0.5074466  | 4.77E-05 | 0.013036  | -0.0045591 |
| 16w_SITTD12 | 0.03871004 | 0.23067422 | 4.89E-05 | 0.0045836 | -0.076088  |
| 16w_SITTD12 | 0.0067357  | 0.0333606  | 3.47E-05 | 0.0076096 | 0.48124    |
| 16w_SITTD12 | 0.08772041 | 0.53311723 | 4.79E-05 | 0.010571  | -0.29935   |
| 16w_SITTD12 | 0.05158744 | 0.31014073 | 5.92E-05 | 0.0053939 | 0.011221   |
| 16w_SITTD12 | 0.02393655 | 0.13950706 | 4.34E-05 | 0.0049916 | -0.091842  |
| 16w_SITTD12 | 0.02600179 | 0.15225163 | 4.42E-05 | 0.0048445 | -0.11213   |
| 16w_SITTD12 | 0.10095294 | 0.6147752  | 5.62E-05 | 0.0040352 | -1.2563    |
| 16w_SITTD12 | 0.00907284 | 0.04778306 | 3.59E-05 | 0.00713   | 0.38094    |
| 16w_SITTD12 | 0.08569975 | 0.52064776 | 4.76E-05 | 0.0117    | -0.14081   |
| 16w_SITTD12 | 0.0204404  | 0.11793231 | 4.19E-05 | 0.0053364 | -0.025531  |
| 16w_SITTD12 | 0.02492675 | 0.14561757 | 4.38E-05 | 0.0049138 | -0.10343   |
| 16w_SITTD12 | 0.05489859 | 0.33057383 | 6.17E-05 | 0.0058704 | 0.034245   |
| 16w_SITTD12 | 0.03914574 | 0.23336294 | 4.92E-05 | 0.0045932 | -0.071721  |
| 16w_SITTD12 | 0.0546704  | 0.32916564 | 6.14E-05 | 0.0057798 | 0.034245   |
| 16w_SITTD12 | 0.03120078 | 0.18433459 | 4.58E-05 | 0.00463   | -0.12145   |
| 16w_SITTD12 | 0.0418511  | 0.2500577  | 5.09E-05 | 0.0046676 | -0.0504    |
| 16w_SITTD12 | 0.09363191 | 0.5695971  | 5.06E-05 | 0.0067258 | -0.7829    |
| 16w_SITTD12 | 0.01517112 | 0.08541556 | 3.95E-05 | 0.0059603 | 0.11709    |
| 16w_SITTD12 | 0.0762448  | 0.46230128 | 5.18E-05 | 0.013885  | 0.22792    |
| 16w_SITTD12 | 0.07622007 | 0.46214864 | 5.18E-05 | 0.013885  | 0.22792    |
| 16w_SITTD12 | 0.01394209 | 0.07783119 | 3.86E-05 | 0.0062156 | 0.17645    |
| 16w_SITTD12 | 0.04081601 | 0.24367021 | 5.02E-05 | 0.0046325 | -0.058715  |
| 16w_SITTD12 | 0.02625817 | 0.15383376 | 4.42E-05 | 0.0048445 | -0.11213   |
| 16w_SITTD12 | 0.02130383 | 0.12326056 | 4.24E-05 | 0.0052258 | -0.04878   |
| 16w_SITTD12 | 0.01724254 | 0.0981983  | 4.03E-05 | 0.005729  | 0.063215   |
| 16w_SITTD12 | 0.03355341 | 0.19885269 | 4.66E-05 | 0.0045822 | -0.11071   |
| 16w_SITTD12 | 0.01130755 | 0.06157346 | 3.71E-05 | 0.0066957 | 0.2858     |
| 16w_SITTD12 | 0.00679442 | 0.03372296 | 3.47E-05 | 0.0076096 | 0.48124    |
| 16w_SITTD12 | 0.03790027 | 0.22567718 | 4.84E-05 | 0.0045696 | -0.080425  |
| 16w_SITTD12 | 0.08761789 | 0.5324846  | 4.79E-05 | 0.010571  | -0.29935   |
| 16w_SITTD12 | 0.01923012 | 0.11046369 | 4.14E-05 | 0.0054571 | 0.0010121  |
| 16w_SITTD12 | 0.01099413 | 0.05963934 | 3.71E-05 | 0.0066957 | 0.2858     |
| 16w_SITTD12 | 0.0265126  | 0.15540388 | 4.42E-05 | 0.0048445 | -0.11546   |
| 16w_SITTD12 | 0.01920022 | 0.11027914 | 4.14E-05 | 0.0054571 | 0.0010121  |
| 16w_SITTD12 | 0.05137067 | 0.308803   | 5.87E-05 | 0.0053288 | 0.011221   |
| 16w_SITTD12 | 0.08351556 | 0.5071691  | 4.77E-05 | 0.013036  | -0.0045591 |
| 16w_SITTD12 | 0.01345147 | 0.07480358 | 3.83E-05 | 0.0063061 | 0.19734    |
| 16w_SITTD12 | 0.02738546 | 0.16079026 | 4.46E-05 | 0.0047834 | -0.11816   |
| 16w_SITTD12 | 0.01730757 | 0.09859957 | 4.03E-05 | 0.005729  | 0.046584   |
| 16w_SITTD12 | 0.03696488 | 0.21990484 | 4.81E-05 | 0.0045652 | -0.088896  |
| 16w_SITTD12 | 0.01033511 | 0.05557253 | 3.68E-05 | 0.0068    | 0.30902    |

|             |            |            |          |           |            |
|-------------|------------|------------|----------|-----------|------------|
| 16w_SITTD12 | 0.02422703 | 0.14129958 | 4.34E-05 | 0.0049916 | -0.091842  |
| 16w_SITTD12 | 0.08814059 | 0.5357102  | 4.80E-05 | 0.010188  | -0.3415    |
| 16w_SITTD12 | 0.01539478 | 0.08679577 | 3.95E-05 | 0.0059603 | 0.11709    |
| 16w_SITTD12 | 0.02475585 | 0.14456296 | 4.36E-05 | 0.0049516 | -0.098011  |
| 16w_SITTD12 | 0.02137566 | 0.1237038  | 4.24E-05 | 0.0052258 | -0.04878   |
| 16w_SITTD12 | 0.02743974 | 0.16112521 | 4.46E-05 | 0.0047834 | -0.11816   |
| 16w_SITTD12 | 0.08906348 | 0.5414053  | 4.84E-05 | 0.0094274 | -0.3844    |
| 16w_SITTD12 | 0.04835676 | 0.29020414 | 5.63E-05 | 0.005054  | -0.0087048 |
| 16w_SITTD12 | 0.06495034 | 0.39260316 | 6.24E-05 | 0.0086643 | 0.15715    |
| 16w_SITTD12 | 0.08933453 | 0.54307795 | 4.84E-05 | 0.0094274 | -0.42792   |
| 16w_SITTD12 | 0.03611734 | 0.21467471 | 4.77E-05 | 0.0045615 | -0.096915  |
| 16w_SITTD12 | 0.092693   | 0.5638031  | 5.02E-05 | 0.0070215 | -0.69483   |
| 16w_SITTD12 | 0.02270931 | 0.13193378 | 4.28E-05 | 0.005125  | -0.077142  |
| 16w_SITTD12 | 0.08555872 | 0.5197775  | 4.76E-05 | 0.012059  | -0.14081   |
| 16w_SITTD12 | 0.01539298 | 0.08678466 | 3.95E-05 | 0.0059603 | 0.11709    |
| 16w_SITTD12 | 0.01691625 | 0.09618476 | 4.03E-05 | 0.005729  | 0.063215   |
| 16w_SITTD12 | 0.02822474 | 0.16596946 | 4.49E-05 | 0.0047302 | -0.12174   |
| 16w_SITTD12 | 0.01741599 | 0.09926866 | 4.06E-05 | 0.0056572 | 0.046584   |
| 16w_SITTD12 | 0.02231158 | 0.12947936 | 4.28E-05 | 0.005125  | -0.068556  |
| 16w_SITTD12 | 0.01227477 | 0.06754217 | 3.77E-05 | 0.0064954 | 0.24064    |
| 16w_SITTD12 | 0.08827253 | 0.53652436 | 4.80E-05 | 0.010188  | -0.3415    |
| 16w_SITTD12 | 0.02115728 | 0.12235617 | 4.24E-05 | 0.0052258 | -0.04878   |
| 16w_SITTD12 | 0.07095099 | 0.4296332  | 5.71E-05 | 0.011574  | 0.23476    |
| 16w_SITTD12 | 0.01985897 | 0.11434429 | 4.16E-05 | 0.0053955 | -0.012659  |
| 16w_SITTD12 | 0.02508074 | 0.14656782 | 4.38E-05 | 0.0049138 | -0.10343   |
| 16w_SITTD12 | 0.02408765 | 0.14043948 | 4.34E-05 | 0.0049916 | -0.091842  |
| 16w_SITTD12 | 0.09204741 | 0.55981916 | 4.96E-05 | 0.0076529 | -0.6503    |
| 16w_SITTD12 | 0.02428571 | 0.14166173 | 4.34E-05 | 0.0049916 | -0.091842  |
| 16w_SITTD12 | 0.02449474 | 0.14295167 | 4.36E-05 | 0.0049516 | -0.098011  |
| 16w_SITTD12 | 0.01802108 | 0.10300266 | 4.09E-05 | 0.0055879 | 0.030658   |
| 16w_SITTD12 | 0.02235306 | 0.12973534 | 4.28E-05 | 0.005125  | -0.068556  |
| 16w_SITTD12 | 0.02642724 | 0.15487708 | 4.42E-05 | 0.0048445 | -0.11213   |
| 16w_SITTD12 | 0.08323286 | 0.50542456 | 4.78E-05 | 0.013315  | -0.0045591 |
| 16w_SITTD12 | 0.02309886 | 0.13433766 | 4.30E-05 | 0.0050782 | -0.077142  |
| 16w_SITTD12 | 0.03602811 | 0.21412407 | 4.77E-05 | 0.0045615 | -0.096915  |
| 16w_SITTD12 | 0.09059811 | 0.55087554 | 4.91E-05 | 0.0083333 | -0.51631   |
| 16w_SITTD12 | 0.02740756 | 0.16092665 | 4.46E-05 | 0.0047834 | -0.11816   |
| 16w_SITTD12 | 0.08641261 | 0.5250468  | 4.77E-05 | 0.011133  | -0.21781   |
| 16w_SITTD12 | 0.08267382 | 0.50197476 | 4.79E-05 | 0.013563  | 0.02505    |
| 16w_SITTD12 | 0.09534261 | 0.5801539  | 5.16E-05 | 0.0059226 | -0.91061   |
| 16w_SITTD12 | 0.03168722 | 0.18733643 | 4.60E-05 | 0.0046154 | -0.12002   |
| 16w_SITTD12 | 0.06483999 | 0.39192218 | 6.24E-05 | 0.0086643 | 0.15715    |
| 16w_SITTD12 | 0.07933393 | 0.4813643  | 4.93E-05 | 0.014315  | 0.17506    |

|             |            |            |          |           |           |
|-------------|------------|------------|----------|-----------|-----------|
| 16w_SITTD12 | 0.02095215 | 0.12109034 | 4.21E-05 | 0.0052798 | -0.037579 |
| 16w_SITTD12 | 0.00962124 | 0.05116724 | 3.62E-05 | 0.0070172 | 0.35661   |
| 16w_SITTD12 | 0.02612826 | 0.15303212 | 4.42E-05 | 0.0048445 | -0.11213  |
| 16w_SITTD12 | 0.00953845 | 0.05065633 | 3.62E-05 | 0.0070172 | 0.35661   |
| 16w_SITTD12 | 0.00925404 | 0.04890127 | 3.62E-05 | 0.0070172 | 0.35661   |
| 16w_SITTD12 | 0.03081113 | 0.18193011 | 4.57E-05 | 0.0046464 | -0.12145  |
| 16w_SITTD12 | 0.08386684 | 0.5093368  | 4.77E-05 | 0.013036  | -0.036078 |
| 16w_SITTD12 | 0.02190144 | 0.12694839 | 4.26E-05 | 0.0051742 | -0.059109 |
| 16w_SITTD12 | 0.03728958 | 0.22190857 | 4.81E-05 | 0.0045652 | -0.084703 |
| 16w_SITTD12 | 0.03801408 | 0.22637947 | 4.87E-05 | 0.0045758 | -0.080425 |
| 16w_SITTD12 | 0.02382489 | 0.138818   | 4.34E-05 | 0.0049916 | -0.091842 |
| 16w_SITTD12 | 0.04123202 | 0.2462374  | 5.05E-05 | 0.0046492 | -0.054504 |
| 16w_SITTD12 | 0.05387245 | 0.3242415  | 6.10E-05 | 0.005694  | 0.026054  |
| 16w_SITTD12 | 0.02640637 | 0.15474834 | 4.42E-05 | 0.0048445 | -0.11213  |
| 16w_SITTD12 | 0.0107481  | 0.05812109 | 3.68E-05 | 0.0068    | 0.30902   |
| 16w_SITTD12 | 0.0842479  | 0.5116884  | 4.76E-05 | 0.012731  | -0.069378 |
| 16w_SITTD12 | 0.07327934 | 0.44400144 | 5.43E-05 | 0.012883  | 0.24489   |
| 16w_SITTD12 | 0.08456314 | 0.5136337  | 4.76E-05 | 0.012404  | -0.069378 |
| 16w_SITTD12 | 0.00566213 | 0.02673561 | 3.41E-05 | 0.0078664 | 0.53284   |
| 16w_SITTD12 | 0.07858604 | 0.4767491  | 4.97E-05 | 0.014318  | 0.18889   |
| 16w_SITTD12 | 0.02829943 | 0.16643035 | 4.49E-05 | 0.0047302 | -0.12174  |
| 16w_SITTD12 | 0.0306189  | 0.18074381 | 4.57E-05 | 0.0046464 | -0.12245  |
| 16w_SITTD12 | 0.01299953 | 0.07201468 | 3.83E-05 | 0.0063061 | 0.19734   |
| 16w_SITTD12 | 0.06570535 | 0.39726233 | 6.16E-05 | 0.0091463 | 0.16566   |
| 16w_SITTD12 | 0.0145816  | 0.08177764 | 3.89E-05 | 0.0061278 | 0.1363    |
| 16w_SITTD12 | 0.02358218 | 0.13732025 | 4.32E-05 | 0.0050338 | -0.084895 |
| 16w_SITTD12 | 0.01377041 | 0.07677181 | 3.86E-05 | 0.0062156 | 0.17645   |
| 16w_SITTD12 | 0.01932278 | 0.11103547 | 4.14E-05 | 0.0054571 | 0.0010121 |
| 16w_SITTD12 | 0.05387317 | 0.32424596 | 6.10E-05 | 0.005694  | 0.026054  |
| 16w_SITTD12 | 0.03601791 | 0.21406113 | 4.77E-05 | 0.0045615 | -0.096915 |
| 16w_SITTD12 | 0.08272362 | 0.502282   | 4.79E-05 | 0.013563  | 0.02505   |
| 16w_SITTD12 | 0.03120471 | 0.18435887 | 4.58E-05 | 0.00463   | -0.12145  |
| 16w_SITTD12 | 0.01975493 | 0.11370225 | 4.16E-05 | 0.0053955 | -0.012659 |
| 16w_SITTD12 | 0.03875471 | 0.23094994 | 4.89E-05 | 0.0045836 | -0.076088 |
| 16w_SITTD12 | 0.04260796 | 0.25472832 | 5.13E-05 | 0.0046879 | -0.04643  |
| 16w_SITTD12 | 0.0747757  | 0.45323545 | 5.28E-05 | 0.013537  | 0.24193   |
| 16w_SITTD12 | 0.01546008 | 0.08719873 | 3.95E-05 | 0.0059603 | 0.11709   |
| 16w_SITTD12 | 0.03816276 | 0.227297   | 4.87E-05 | 0.0045758 | -0.080425 |
| 16w_SITTD12 | 0.08986325 | 0.5463407  | 4.86E-05 | 0.0090548 | -0.47194  |
| 16w_SITTD12 | 0.0875839  | 0.53227484 | 4.79E-05 | 0.010571  | -0.29935  |
| 16w_SITTD12 | 0.08256206 | 0.5012851  | 4.79E-05 | 0.013563  | 0.05262   |
| 16w_SITTD12 | 0.09101085 | 0.5534226  | 4.91E-05 | 0.0083333 | -0.56091  |
| 16w_SITTD12 | 0.0559861  | 0.33728483 | 6.24E-05 | 0.0060668 | 0.043089  |



|             |            |            |          |           |            |
|-------------|------------|------------|----------|-----------|------------|
| 16w_SITTD12 | 0.02607084 | 0.15267774 | 4.42E-05 | 0.0048445 | -0.11213   |
| 16w_SITTD12 | 0.07905828 | 0.47966328 | 4.97E-05 | 0.014318  | 0.17506    |
| 16w_SITTD12 | 0.08524988 | 0.5178716  | 4.76E-05 | 0.012059  | -0.10433   |
| 16w_SITTD12 | 0.06167861 | 0.3724133  | 6.37E-05 | 0.0074328 | 0.10802    |
| 16w_SITTD12 | 0.02504426 | 0.14634272 | 4.38E-05 | 0.0049138 | -0.10343   |
| 16w_SITTD12 | 0.02193593 | 0.12716122 | 4.26E-05 | 0.0051742 | -0.059109  |
| 16w_SITTD12 | 0.03010846 | 0.17759389 | 4.55E-05 | 0.0046645 | -0.12301   |
| 16w_SITTD12 | 0.03682422 | 0.21903685 | 4.79E-05 | 0.0045625 | -0.088896  |
| 16w_SITTD12 | 0.02815574 | 0.16554366 | 4.48E-05 | 0.0047558 | -0.12174   |
| 16w_SITTD12 | 0.07759201 | 0.4706149  | 5.05E-05 | 0.014229  | 0.21153    |
| 16w_SITTD12 | 0.05701517 | 0.34363523 | 6.30E-05 | 0.0062853 | 0.05269    |
| 16w_SITTD12 | 0.01071061 | 0.05788975 | 3.68E-05 | 0.0068    | 0.30902    |
| 16w_SITTD12 | 0.02806125 | 0.16496056 | 4.48E-05 | 0.0047558 | -0.12024   |
| 16w_SITTD12 | 0.09917989 | 0.60383373 | 5.49E-05 | 0.0043938 | -1.1701    |
| 16w_SITTD12 | 0.04044627 | 0.24138856 | 4.99E-05 | 0.0046177 | -0.063007  |
| 16w_SITTD12 | 0.01851295 | 0.10603803 | 4.11E-05 | 0.0055212 | 0.015459   |
| 16w_SITTD12 | 0.02830544 | 0.16646749 | 4.49E-05 | 0.0047302 | -0.12174   |
| 16w_SITTD12 | 0.02840588 | 0.16708732 | 4.49E-05 | 0.0047302 | -0.12174   |
| 16w_SITTD12 | 0.01472432 | 0.08265834 | 3.92E-05 | 0.0060428 | 0.1363     |
| 16w_SITTD12 | 0.08452351 | 0.51338917 | 4.76E-05 | 0.012404  | -0.069378  |
| 16w_SITTD12 | 0.02376417 | 0.13844326 | 4.32E-05 | 0.0050338 | -0.091842  |
| 16w_SITTD12 | 0.03660513 | 0.21768486 | 4.79E-05 | 0.0045625 | -0.092976  |
| 16w_SITTD12 | 0.01597756 | 0.09039212 | 3.98E-05 | 0.0058806 | 0.098494   |
| 16w_SITTD12 | 0.00535747 | 0.02485552 | 3.38E-05 | 0.0079991 | 0.55892    |
| 16w_SITTD12 | 0.02845215 | 0.16737285 | 4.49E-05 | 0.0047302 | -0.12174   |
| 16w_SITTD12 | 0.01443149 | 0.08085129 | 3.89E-05 | 0.0061278 | 0.1561     |
| 16w_SITTD12 | 0.02655528 | 0.15566725 | 4.44E-05 | 0.004813  | -0.11546   |
| 16w_SITTD12 | 0.06983864 | 0.4227689  | 5.82E-05 | 0.011019  | 0.22487    |
| 16w_SITTD12 | 0.08316758 | 0.5050217  | 4.78E-05 | 0.013315  | -0.0045591 |
| 16w_SITTD12 | 0.08076286 | 0.49018225 | 4.85E-05 | 0.0141    | 0.12269    |
| 16w_SITTD12 | 0.01409476 | 0.07877333 | 3.89E-05 | 0.0061278 | 0.1561     |
| 16w_SITTD12 | 0.01235737 | 0.06805193 | 3.77E-05 | 0.0064954 | 0.24064    |
| 16w_SITTD12 | 0.04745761 | 0.28465554 | 5.53E-05 | 0.0049654 | -0.01514   |
| 16w_SITTD12 | 0.09105976 | 0.55372435 | 4.93E-05 | 0.0079874 | -0.56091   |
| 16w_SITTD12 | 0.09366516 | 0.5698023  | 5.06E-05 | 0.0067258 | -0.7829    |
| 16w_SITTD12 | 0.01887182 | 0.10825261 | 4.11E-05 | 0.0055212 | 0.015459   |
| 16w_SITTD12 | 0.04039775 | 0.24108914 | 4.99E-05 | 0.0046177 | -0.063007  |
| 16w_SITTD12 | 0.00784283 | 0.04019269 | 3.53E-05 | 0.0073641 | 0.43054    |
| 16w_SITTD12 | 0.05341439 | 0.32141477 | 6.05E-05 | 0.0056127 | 0.022172   |
| 16w_SITTD12 | 0.0575149  | 0.34671906 | 6.32E-05 | 0.0064035 | 0.057806   |
| 16w_SITTD12 | 0.01896812 | 0.10884684 | 4.14E-05 | 0.0054571 | 0.0010121  |
| 16w_SITTD12 | 0.03056186 | 0.18039185 | 4.57E-05 | 0.0046464 | -0.12245   |
| 16w_SITTD12 | 0.02388273 | 0.13917491 | 4.34E-05 | 0.0049916 | -0.091842  |

|             |            |            |          |           |           |
|-------------|------------|------------|----------|-----------|-----------|
| 16w_SITTD12 | 0.00964204 | 0.0512956  | 3.62E-05 | 0.0070172 | 0.35661   |
| 16w_SITTD12 | 0.03756463 | 0.22360592 | 4.84E-05 | 0.0045696 | -0.084703 |
| 16w_SITTD12 | 0.07217321 | 0.43717548 | 5.54E-05 | 0.012382  | 0.24161   |
| 16w_SITTD12 | 0.02054167 | 0.11855723 | 4.19E-05 | 0.0053364 | -0.037579 |
| 16w_SITTD12 | 0.03590808 | 0.21338336 | 4.77E-05 | 0.0045615 | -0.096915 |
| 16w_SITTD12 | 0.00648111 | 0.0317895  | 3.47E-05 | 0.0076096 | 0.48124   |
| 16w_SITTD12 | 0.03380325 | 0.20039448 | 4.68E-05 | 0.0045746 | -0.11071  |
| 16w_SITTD12 | 0.02533328 | 0.14812629 | 4.38E-05 | 0.0049138 | -0.10343  |
| 16w_SITTD12 | 0.01500303 | 0.08437829 | 3.92E-05 | 0.0060428 | 0.1363    |
| 16w_SITTD12 | 0.02616018 | 0.1532291  | 4.42E-05 | 0.0048445 | -0.11213  |
| 16w_SITTD12 | 0.03090045 | 0.18248129 | 4.58E-05 | 0.00463   | -0.12145  |
| 16w_SITTD12 | 0.01658999 | 0.09417139 | 4.00E-05 | 0.0058035 | 0.080526  |
| 16w_SITTD12 | 0.01187426 | 0.06507065 | 3.74E-05 | 0.0065941 | 0.24064   |
| 16w_SITTD12 | 0.02403273 | 0.14010058 | 4.34E-05 | 0.0049916 | -0.091842 |
| 16w_SITTD12 | 0.03679828 | 0.21887676 | 4.79E-05 | 0.0045625 | -0.088896 |
| 16w_SITTD12 | 0.05773891 | 0.34810144 | 6.32E-05 | 0.0064035 | 0.057806  |
| 16w_SITTD12 | 0.02568914 | 0.15032229 | 4.40E-05 | 0.0048781 | -0.10813  |
| 16w_SITTD12 | 0.015397   | 0.08680947 | 3.95E-05 | 0.0059603 | 0.11709   |
| 16w_SITTD12 | 0.08606987 | 0.5229318  | 4.76E-05 | 0.0117    | -0.17867  |
| 16w_SITTD12 | 0.01526858 | 0.08601698 | 3.95E-05 | 0.0059603 | 0.11709   |
| 16w_SITTD12 | 0.04209039 | 0.2515344  | 5.09E-05 | 0.0046676 | -0.0504   |
| 16w_SITTD12 | 0.03451886 | 0.20481049 | 4.70E-05 | 0.0045688 | -0.10761  |
| 16w_SITTD12 | 0.01305649 | 0.0723662  | 3.83E-05 | 0.0063061 | 0.19734   |
| 16w_SITTD12 | 0.01560945 | 0.08812049 | 3.95E-05 | 0.0059603 | 0.11709   |
| 16w_SITTD12 | 0.07469045 | 0.4527094  | 5.33E-05 | 0.013335  | 0.24193   |
| 16w_SITTD12 | 0.07986836 | 0.48466226 | 4.90E-05 | 0.014278  | 0.15946   |
| 16w_SITTD12 | 0.01684269 | 0.09573083 | 4.03E-05 | 0.005729  | 0.063215  |
| 16w_SITTD12 | 0.01645935 | 0.09336525 | 4.00E-05 | 0.0058035 | 0.080526  |
| 16w_SITTD12 | 0.09159444 | 0.5570239  | 4.96E-05 | 0.0076529 | -0.60562  |
| 16w_SITTD12 | 0.02438401 | 0.14226833 | 4.36E-05 | 0.0049516 | -0.098011 |
| 16w_SITTD12 | 0.07181183 | 0.43494537 | 5.60E-05 | 0.012118  | 0.2386    |
| 16w_SITTD12 | 0.06381775 | 0.38561398 | 6.30E-05 | 0.008216  | 0.14015   |
| 16w_SITTD12 | 0.01356567 | 0.07550835 | 3.86E-05 | 0.0062156 | 0.17645   |
| 16w_SITTD12 | 0.09040649 | 0.549693   | 4.88E-05 | 0.0086895 | -0.51631  |
| 16w_SITTD12 | 0.08541656 | 0.51890016 | 4.76E-05 | 0.012059  | -0.14081  |
| 16w_SITTD12 | 0.02486995 | 0.14526704 | 4.36E-05 | 0.0049516 | -0.10343  |
| 16w_SITTD12 | 0.05788481 | 0.3490018  | 6.32E-05 | 0.0064035 | 0.06315   |
| 16w_SITTD12 | 0.03329449 | 0.19725491 | 4.66E-05 | 0.0045822 | -0.11352  |
| 16w_SITTD12 | 0.07276859 | 0.4408496  | 5.49E-05 | 0.012637  | 0.24373   |
| 16w_SITTD12 | 0.08772065 | 0.5331187  | 4.79E-05 | 0.010571  | -0.29935  |
| 16w_SITTD12 | 0.03888157 | 0.23173279 | 4.89E-05 | 0.0045836 | -0.071721 |
| 16w_SITTD12 | 0.07870911 | 0.47750854 | 4.97E-05 | 0.014318  | 0.18889   |
| 16w_SITTD12 | 0.01731373 | 0.09863763 | 4.03E-05 | 0.005729  | 0.046584  |

|             |            |            |          |           |           |
|-------------|------------|------------|----------|-----------|-----------|
| 16w_SITTD12 | 0.02411939 | 0.14063533 | 4.34E-05 | 0.0049916 | -0.091842 |
| 16w_SITTD12 | 0.01480537 | 0.08315854 | 3.92E-05 | 0.0060428 | 0.1363    |
| 16w_SITTD12 | 0.01840846 | 0.10539322 | 4.11E-05 | 0.0055212 | 0.015459  |
| 16w_SITTD12 | 0.0160923  | 0.09110015 | 3.98E-05 | 0.0058806 | 0.098494  |
| 16w_SITTD12 | 0.01185021 | 0.06492226 | 3.74E-05 | 0.0065941 | 0.263     |
| 16w_SITTD12 | 0.02106512 | 0.12178744 | 4.21E-05 | 0.0052798 | -0.04878  |
| 16w_SITTD12 | 0.02349074 | 0.13675594 | 4.32E-05 | 0.0050338 | -0.084895 |
| 16w_SITTD12 | 0.02420151 | 0.14114214 | 4.34E-05 | 0.0049916 | -0.091842 |
| 16w_SITTD12 | 0.02189356 | 0.12689973 | 4.26E-05 | 0.0051742 | -0.059109 |
| 16w_SITTD12 | 0.00633316 | 0.03087653 | 3.44E-05 | 0.0077366 | 0.50694   |
| 16w_SITTD12 | 0.02205261 | 0.12788123 | 4.26E-05 | 0.0051742 | -0.059109 |
| 16w_SITTD12 | 0.02797366 | 0.16442008 | 4.48E-05 | 0.0047558 | -0.12024  |
| 16w_SITTD12 | 0.02987749 | 0.17616858 | 4.55E-05 | 0.0046645 | -0.12301  |
| 16w_SITTD12 | 0.08491585 | 0.5158103  | 4.76E-05 | 0.012404  | -0.10433  |
| 16w_SITTD12 | 0.03097251 | 0.18292594 | 4.58E-05 | 0.00463   | -0.12145  |
| 16w_SITTD12 | 0.05755393 | 0.3469599  | 6.32E-05 | 0.0064035 | 0.057806  |
| 16w_SITTD12 | 0.02556427 | 0.14955167 | 4.40E-05 | 0.0048781 | -0.10813  |
| 16w_SITTD12 | 0.01832262 | 0.10486349 | 4.09E-05 | 0.0055879 | 0.030658  |
| 16w_SITTD12 | 0.09574693 | 0.58264893 | 5.20E-05 | 0.0056833 | -0.9515   |
| 16w_SITTD12 | 0.03173688 | 0.18764292 | 4.60E-05 | 0.0046154 | -0.12002  |
| 16w_SITTD12 | 0.02041527 | 0.11777723 | 4.19E-05 | 0.0053364 | -0.025531 |
| 16w_SITTD12 | 0.02737856 | 0.16074769 | 4.46E-05 | 0.0047834 | -0.11816  |
| 16w_SITTD12 | 0.07985286 | 0.4845666  | 4.90E-05 | 0.014278  | 0.15946   |
| 16w_SITTD12 | 0.09060062 | 0.550891   | 4.91E-05 | 0.0083333 | -0.51631  |
| 16w_SITTD12 | 0.01832755 | 0.1048939  | 4.09E-05 | 0.0055879 | 0.030658  |
| 16w_SITTD12 | 0.02217691 | 0.12864831 | 4.26E-05 | 0.0051742 | -0.068556 |
| 16w_SITTD12 | 0.01927766 | 0.11075705 | 4.14E-05 | 0.0054571 | 0.0010121 |
| 16w_SITTD12 | 0.01958097 | 0.11262876 | 4.16E-05 | 0.0053955 | -0.012659 |
| 16w_SITTD12 | 0.01617699 | 0.09162279 | 3.98E-05 | 0.0058806 | 0.098494  |
| 16w_SITTD12 | 0.08256391 | 0.50129646 | 4.79E-05 | 0.013563  | 0.05262   |
| 16w_SITTD12 | 0.08807124 | 0.53528225 | 4.80E-05 | 0.010188  | -0.3415   |
| 16w_SITTD12 | 0.09550124 | 0.5811327  | 5.20E-05 | 0.0056833 | -0.91061  |
| 16w_SITTD12 | 0.01955745 | 0.1124836  | 4.16E-05 | 0.0053955 | -0.012659 |
| 16w_SITTD12 | 0.02539126 | 0.1484841  | 4.38E-05 | 0.0049138 | -0.10813  |
| 16w_SITTD12 | 0.09970843 | 0.6070953  | 5.53E-05 | 0.004262  | -1.2008   |
| 16w_SITTD12 | 0.02700112 | 0.15841852 | 4.44E-05 | 0.004813  | -0.11816  |
| 16w_SITTD12 | 0.03200848 | 0.18931894 | 4.62E-05 | 0.0046026 | -0.11821  |
| 16w_SITTD12 | 0.09115908 | 0.5543373  | 4.93E-05 | 0.0079874 | -0.56091  |
| 16w_SITTD12 | 0.08761369 | 0.53245866 | 4.79E-05 | 0.010571  | -0.29935  |
| 16w_SITTD12 | 0.00662711 | 0.03269048 | 3.47E-05 | 0.0076096 | 0.48124   |
| 16w_SITTD12 | 0.0156579  | 0.08841948 | 3.95E-05 | 0.0059603 | 0.098494  |
| 16w_SITTD12 | 0.00338856 | 0.01270537 | 3.29E-05 | 0.0084138 | 0.63801   |
| 16w_SITTD12 | 0.00834063 | 0.04326461 | 3.56E-05 | 0.0072456 | 0.40559   |

|             |            |            |          |           |           |
|-------------|------------|------------|----------|-----------|-----------|
| 16w_SITTD12 | 0.02650742 | 0.1553719  | 4.42E-05 | 0.0048445 | -0.11546  |
| 16w_SITTD12 | 0.03186628 | 0.18844144 | 4.60E-05 | 0.0046154 | -0.11821  |
| 16w_SITTD12 | 0.03106745 | 0.18351184 | 4.58E-05 | 0.00463   | -0.12145  |
| 16w_SITTD12 | 0.02273348 | 0.1320829  | 4.28E-05 | 0.005125  | -0.077142 |
| 16w_SITTD12 | 0.01832694 | 0.10489016 | 4.09E-05 | 0.0055879 | 0.030658  |
| 16w_SITTD12 | 0.01690332 | 0.09610496 | 4.03E-05 | 0.005729  | 0.063215  |
| 16w_SITTD12 | 0.08087143 | 0.49085224 | 4.85E-05 | 0.0141    | 0.12269   |
| 16w_SITTD12 | 0.01625305 | 0.09209213 | 4.00E-05 | 0.0058035 | 0.080526  |
| 16w_SITTD12 | 0.07717919 | 0.4680674  | 5.09E-05 | 0.014141  | 0.22047   |
| 16w_SITTD12 | 0.01752093 | 0.09991628 | 4.06E-05 | 0.0056572 | 0.046584  |
| 16w_SITTD12 | 0.035019   | 0.20789681 | 4.72E-05 | 0.0045646 | -0.10426  |
| 16w_SITTD12 | 0.02499779 | 0.14605594 | 4.38E-05 | 0.0049138 | -0.10343  |
| 16w_SITTD12 | 0.02693145 | 0.15798856 | 4.44E-05 | 0.004813  | -0.11546  |
| 16w_SITTD12 | 0.01521505 | 0.08568667 | 3.95E-05 | 0.0059603 | 0.11709   |
| 16w_SITTD12 | 0.02151739 | 0.12457839 | 4.24E-05 | 0.0052258 | -0.04878  |
| 16w_SITTD12 | 0.01501537 | 0.08445446 | 3.92E-05 | 0.0060428 | 0.1363    |
| 16w_SITTD12 | 0.0148462  | 0.08341046 | 3.92E-05 | 0.0060428 | 0.1363    |
| 16w_SITTD12 | 0.05780114 | 0.3484854  | 6.32E-05 | 0.0064035 | 0.06315   |
| 16w_SITTD12 | 0.07345679 | 0.4450965  | 5.43E-05 | 0.012883  | 0.24502   |
| 16w_SITTD12 | 0.01358437 | 0.07562372 | 3.86E-05 | 0.0062156 | 0.17645   |
| 16w_SITTD12 | 0.08743968 | 0.5313848  | 4.79E-05 | 0.010571  | -0.25808  |
| 16w_SITTD12 | 0.01878894 | 0.10774112 | 4.11E-05 | 0.0055212 | 0.015459  |
| 16w_SITTD12 | 0.01886268 | 0.1081962  | 4.11E-05 | 0.0055212 | 0.015459  |
| 16w_SITTD12 | 0.01376392 | 0.07673176 | 3.86E-05 | 0.0062156 | 0.17645   |
| 16w_SITTD12 | 0.09434445 | 0.5739942  | 5.13E-05 | 0.0061762 | -0.82618  |
| 16w_SITTD12 | 0.00724264 | 0.03648889 | 3.50E-05 | 0.0074854 | 0.45576   |
| 16w_SITTD12 | 0.02738337 | 0.16077738 | 4.46E-05 | 0.0047834 | -0.11816  |
| 16w_SITTD12 | 0.02216886 | 0.12859866 | 4.26E-05 | 0.0051742 | -0.068556 |
| 16w_SITTD12 | 0.02219073 | 0.12873358 | 4.26E-05 | 0.0051742 | -0.068556 |
| 16w_SITTD12 | 0.09298855 | 0.5656269  | 5.02E-05 | 0.0070215 | -0.73907  |
| 16w_SITTD12 | 0.02951318 | 0.17392044 | 4.53E-05 | 0.0046846 | -0.1231   |
| 16w_SITTD12 | 0.0406697  | 0.2427673  | 5.02E-05 | 0.0046325 | -0.058715 |
| 16w_SITTD12 | 0.01463949 | 0.08213484 | 3.92E-05 | 0.0060428 | 0.1363    |
| 16w_SITTD12 | 0.02636163 | 0.15447222 | 4.42E-05 | 0.0048445 | -0.11213  |
| 16w_SITTD12 | 0.031944   | 0.18892103 | 4.60E-05 | 0.0046154 | -0.11821  |
| 16w_SITTD12 | 0.02305281 | 0.13405347 | 4.30E-05 | 0.0050782 | -0.077142 |
| 16w_SITTD12 | 0.03306268 | 0.19582441 | 4.66E-05 | 0.0045822 | -0.11352  |
| 16w_SITTD12 | 0.09764104 | 0.59433746 | 5.36E-05 | 0.0048658 | -1.0673   |
| 16w_SITTD12 | 0.02103923 | 0.12162767 | 4.21E-05 | 0.0052798 | -0.037579 |
| 16w_SITTD12 | 0.05250635 | 0.3158113  | 5.97E-05 | 0.0054628 | 0.018414  |
| 16w_SITTD12 | 0.08628951 | 0.52428716 | 4.77E-05 | 0.01133   | -0.17867  |
| 16w_SITTD12 | 0.03136618 | 0.18535534 | 4.58E-05 | 0.00463   | -0.12002  |
| 16w_SITTD12 | 0.07884676 | 0.47835797 | 4.97E-05 | 0.014318  | 0.17506   |

|             |            |            |          |           |            |
|-------------|------------|------------|----------|-----------|------------|
| 16w_SITTD12 | 0.08346958 | 0.50688535 | 4.77E-05 | 0.013036  | -0.0045591 |
| 16w_SITTD12 | 0.01229879 | 0.06769039 | 3.77E-05 | 0.0064954 | 0.24064    |
| 16w_SITTD12 | 0.07371485 | 0.44668898 | 5.38E-05 | 0.013116  | 0.24502    |
| 16w_SITTD12 | 0.0413898  | 0.24721105 | 5.05E-05 | 0.0046492 | -0.054504  |
| 16w_SITTD12 | 0.02482855 | 0.14501156 | 4.36E-05 | 0.0049516 | -0.10343   |
| 16w_SITTD12 | 0.039145   | 0.2333584  | 4.92E-05 | 0.0045932 | -0.071721  |
| 16w_SITTD12 | 0.03582437 | 0.21286675 | 4.77E-05 | 0.0045615 | -0.096915  |
| 16w_SITTD12 | 0.07827795 | 0.47484782 | 5.01E-05 | 0.014289  | 0.20103    |
| 16w_SITTD12 | 0.01195313 | 0.06555737 | 3.77E-05 | 0.0064954 | 0.24064    |
| 16w_SITTD12 | 0.08265092 | 0.5018334  | 4.79E-05 | 0.013563  | 0.02505    |
| 16w_SITTD12 | 0.07897811 | 0.47916856 | 4.97E-05 | 0.014318  | 0.17506    |
| 16w_SITTD12 | 0.00658689 | 0.03244225 | 3.47E-05 | 0.0076096 | 0.48124    |
| 16w_SITTD12 | 0.02245111 | 0.1303404  | 4.28E-05 | 0.005125  | -0.068556  |
| 16w_SITTD12 | 0.04383253 | 0.26228517 | 5.21E-05 | 0.0047343 | -0.035266  |
| 16w_SITTD12 | 0.02284449 | 0.13276793 | 4.30E-05 | 0.0050782 | -0.077142  |
| 16w_SITTD12 | 0.02253119 | 0.13083456 | 4.28E-05 | 0.005125  | -0.068556  |
| 16w_SITTD12 | 0.09262179 | 0.5633637  | 4.99E-05 | 0.0073308 | -0.69483   |
| 16w_SITTD12 | 0.09040038 | 0.5496553  | 4.88E-05 | 0.0086895 | -0.51631   |
| 16w_SITTD12 | 0.06960008 | 0.4212967  | 5.82E-05 | 0.011019  | 0.21895    |
| 16w_SITTD12 | 0.0152465  | 0.08588072 | 3.95E-05 | 0.0059603 | 0.11709    |
| 16w_SITTD12 | 0.01494954 | 0.08404819 | 3.92E-05 | 0.0060428 | 0.1363     |
| 16w_SITTD12 | 0.00834771 | 0.04330827 | 3.56E-05 | 0.0072456 | 0.40559    |
| 16w_SITTD12 | 0.04173429 | 0.24933693 | 5.09E-05 | 0.0046676 | -0.0504    |
| 16w_SITTD12 | 0.02643241 | 0.15490898 | 4.42E-05 | 0.0048445 | -0.11213   |
| 16w_SITTD12 | 0.00619684 | 0.03003526 | 3.44E-05 | 0.0077366 | 0.50694    |
| 16w_SITTD12 | 0.04156969 | 0.24832115 | 5.05E-05 | 0.0046492 | -0.054504  |
| 16w_SITTD12 | 0.03492887 | 0.20734063 | 4.72E-05 | 0.0045646 | -0.10426   |
| 16w_SITTD12 | 0.02761338 | 0.16219676 | 4.46E-05 | 0.0047834 | -0.12024   |
| 16w_SITTD12 | 0.01801091 | 0.10293991 | 4.09E-05 | 0.0055879 | 0.030658   |
| 16w_SITTD12 | 0.0308233  | 0.18200518 | 4.57E-05 | 0.0046464 | -0.12145   |
| 16w_SITTD12 | 0.01516091 | 0.08535254 | 3.95E-05 | 0.0059603 | 0.11709    |
| 16w_SITTD12 | 0.01682086 | 0.0955961  | 4.03E-05 | 0.005729  | 0.063215   |
| 16w_SITTD12 | 0.07658586 | 0.46440595 | 5.13E-05 | 0.014025  | 0.22792    |
| 16w_SITTD12 | 0.08419438 | 0.5113581  | 4.76E-05 | 0.012731  | -0.036078  |
| 16w_SITTD12 | 0.02234837 | 0.12970638 | 4.28E-05 | 0.005125  | -0.068556  |
| 16w_SITTD12 | 0.07211052 | 0.43678862 | 5.54E-05 | 0.012382  | 0.24161    |
| 16w_SITTD12 | 0.06329349 | 0.38237873 | 6.33E-05 | 0.0080056 | 0.13178    |
| 16w_SITTD12 | 0.08185199 | 0.49690324 | 4.81E-05 | 0.013778  | 0.078055   |
| 16w_SITTD12 | 0.01379002 | 0.07689277 | 3.86E-05 | 0.0062156 | 0.17645    |
| 16w_SITTD12 | 0.04912086 | 0.2949194  | 5.68E-05 | 0.0051026 | -0.0054808 |
| 16w_SITTD12 | 0.02215801 | 0.1285317  | 4.26E-05 | 0.0051742 | -0.068556  |
| 16w_SITTD12 | 0.01315549 | 0.07297711 | 3.83E-05 | 0.0063061 | 0.19734    |
| 16w_SITTD12 | 0.0131299  | 0.07281917 | 3.83E-05 | 0.0063061 | 0.19734    |

|             |            |            |          |           |            |
|-------------|------------|------------|----------|-----------|------------|
| 16w_SITTD12 | 0.00993403 | 0.05309748 | 3.65E-05 | 0.0069072 | 0.33263    |
| 16w_SITTD12 | 0.02454846 | 0.14328316 | 4.36E-05 | 0.0049516 | -0.098011  |
| 16w_SITTD12 | 0.0285523  | 0.16799086 | 4.49E-05 | 0.0047302 | -0.12174   |
| 16w_SITTD12 | 0.01350886 | 0.07515776 | 3.83E-05 | 0.0063061 | 0.17645    |
| 16w_SITTD12 | 0.02552014 | 0.14927939 | 4.40E-05 | 0.0048781 | -0.10813   |
| 16w_SITTD12 | 0.01349299 | 0.07505985 | 3.83E-05 | 0.0063061 | 0.17645    |
| 16w_SITTD12 | 0.08602544 | 0.5226576  | 4.76E-05 | 0.0117    | -0.17867   |
| 16w_SITTD12 | 0.02316556 | 0.13474926 | 4.30E-05 | 0.0050782 | -0.077142  |
| 16w_SITTD12 | 0.04703845 | 0.28206885 | 5.49E-05 | 0.0049251 | -0.01514   |
| 16w_SITTD12 | 0.08929776 | 0.5428511  | 4.84E-05 | 0.0094274 | -0.42792   |
| 16w_SITTD12 | 0.0371174  | 0.22084609 | 4.81E-05 | 0.0045652 | -0.088896  |
| 16w_SITTD12 | 0.01154245 | 0.06302307 | 3.74E-05 | 0.0065941 | 0.263      |
| 16w_SITTD12 | 0.05906583 | 0.35628986 | 6.37E-05 | 0.0067983 | 0.074574   |
| 16w_SITTD12 | 0.02273457 | 0.13208966 | 4.28E-05 | 0.005125  | -0.077142  |
| 16w_SITTD12 | 0.01016569 | 0.05452704 | 3.65E-05 | 0.0069072 | 0.33263    |
| 16w_SITTD12 | 0.07800733 | 0.47317788 | 5.05E-05 | 0.014229  | 0.20103    |
| 16w_SITTD12 | 0.00361496 | 0.01410248 | 3.29E-05 | 0.0084138 | 0.63801    |
| 16w_SITTD12 | 0.05630779 | 0.33926994 | 6.24E-05 | 0.0060668 | 0.047788   |
| 16w_SITTD12 | 0.02668283 | 0.15645435 | 4.44E-05 | 0.004813  | -0.11546   |
| 16w_SITTD12 | 0.08826616 | 0.5364851  | 4.80E-05 | 0.010188  | -0.3415    |
| 16w_SITTD12 | 0.02336325 | 0.1359692  | 4.32E-05 | 0.0050338 | -0.084895  |
| 16w_SITTD12 | 0.03301759 | 0.19554614 | 4.64E-05 | 0.0045915 | -0.11352   |
| 16w_SITTD12 | 0.02366265 | 0.13781682 | 4.32E-05 | 0.0050338 | -0.084895  |
| 16w_SITTD12 | 0.07738239 | 0.46932137 | 5.09E-05 | 0.014141  | 0.21153    |
| 16w_SITTD12 | 0.01805616 | 0.10321918 | 4.09E-05 | 0.0055879 | 0.030658   |
| 16w_SITTD12 | 0.01887568 | 0.10827643 | 4.11E-05 | 0.0055212 | 0.015459   |
| 16w_SITTD12 | 0.07868722 | 0.47737345 | 4.97E-05 | 0.014318  | 0.18889    |
| 16w_SITTD12 | 0.01283975 | 0.07102869 | 3.80E-05 | 0.0063994 | 0.21875    |
| 16w_SITTD12 | 0.01976729 | 0.11377856 | 4.16E-05 | 0.0053955 | -0.012659  |
| 16w_SITTD12 | 0.01418139 | 0.07930792 | 3.89E-05 | 0.0061278 | 0.1561     |
| 16w_SITTD12 | 0.01553466 | 0.087659   | 3.95E-05 | 0.0059603 | 0.11709    |
| 16w_SITTD12 | 0.04917587 | 0.2952589  | 5.68E-05 | 0.0051026 | -0.0022352 |
| 16w_SITTD12 | 0.0467385  | 0.2802179  | 5.49E-05 | 0.0049251 | -0.018376  |
| 16w_SITTD12 | 0.02892603 | 0.17029713 | 4.51E-05 | 0.0047064 | -0.12268   |
| 16w_SITTD12 | 0.03033152 | 0.17897043 | 4.57E-05 | 0.0046464 | -0.12245   |
| 16w_SITTD12 | 0.04542595 | 0.27211812 | 5.34E-05 | 0.0048194 | -0.024952  |
| 16w_SITTD12 | 0.03676378 | 0.21866386 | 4.79E-05 | 0.0045625 | -0.088896  |
| 16w_SITTD12 | 0.09007727 | 0.5476614  | 4.88E-05 | 0.0086895 | -0.47194   |
| 16w_SITTD12 | 0.02288277 | 0.13300417 | 4.30E-05 | 0.0050782 | -0.077142  |
| 16w_SITTD12 | 0.08767021 | 0.53280747 | 4.79E-05 | 0.010571  | -0.29935   |
| 16w_SITTD12 | 0.01395834 | 0.07793147 | 3.86E-05 | 0.0062156 | 0.17645    |
| 16w_SITTD12 | 0.01788826 | 0.10218303 | 4.09E-05 | 0.0055879 | 0.030658   |
| 16w_SITTD12 | 0.06980034 | 0.4225325  | 5.82E-05 | 0.011019  | 0.22487    |

|             |            |            |          |           |           |
|-------------|------------|------------|----------|-----------|-----------|
| 16w_SITTD12 | 0.01096366 | 0.05945133 | 3.71E-05 | 0.0066957 | 0.2858    |
| 16w_SITTD12 | 0.03041892 | 0.17950974 | 4.57E-05 | 0.0046464 | -0.12245  |
| 16w_SITTD12 | 0.06444834 | 0.38950533 | 6.27E-05 | 0.0084357 | 0.14863   |
| 16w_SITTD12 | 0.03010418 | 0.17756751 | 4.55E-05 | 0.0046645 | -0.12301  |
| 16w_SITTD12 | 0.01182915 | 0.06479227 | 3.74E-05 | 0.0065941 | 0.263     |
| 16w_SITTD12 | 0.02122977 | 0.12280351 | 4.24E-05 | 0.0052258 | -0.04878  |
| 16w_SITTD12 | 0.01311826 | 0.07274736 | 3.83E-05 | 0.0063061 | 0.19734   |
| 16w_SITTD12 | 0.01560519 | 0.08809423 | 3.95E-05 | 0.0059603 | 0.11709   |
| 16w_SITTD12 | 0.0139256  | 0.07772944 | 3.86E-05 | 0.0062156 | 0.17645   |
| 16w_SITTD12 | 0.01463708 | 0.08211999 | 3.92E-05 | 0.0060428 | 0.1363    |
| 16w_SITTD12 | 0.01190926 | 0.06528664 | 3.77E-05 | 0.0064954 | 0.24064   |
| 16w_SITTD12 | 0.02360316 | 0.13744968 | 4.32E-05 | 0.0050338 | -0.084895 |
| 16w_SITTD12 | 0.02153562 | 0.12469088 | 4.24E-05 | 0.0052258 | -0.04878  |
| 16w_SITTD12 | 0.08236643 | 0.50007784 | 4.79E-05 | 0.013563  | 0.05262   |
| 16w_SITTD12 | 0.09806104 | 0.59692925 | 5.36E-05 | 0.0048658 | -1.1032   |
| 16w_SITTD12 | 0.01668081 | 0.09473186 | 4.00E-05 | 0.0058035 | 0.080526  |
| 16w_SITTD12 | 0.08805844 | 0.5352032  | 4.80E-05 | 0.010188  | -0.3415   |
| 16w_SITTD12 | 0.08629426 | 0.52431643 | 4.77E-05 | 0.01133   | -0.17867  |
| 16w_SITTD12 | 0.0282996  | 0.16643141 | 4.49E-05 | 0.0047302 | -0.12174  |
| 16w_SITTD12 | 0.03979603 | 0.23737587 | 4.95E-05 | 0.0046046 | -0.067351 |
| 16w_SITTD12 | 0.02917338 | 0.17182356 | 4.51E-05 | 0.0047064 | -0.1231   |
| 16w_SITTD12 | 0.08648922 | 0.5255196  | 4.77E-05 | 0.01133   | -0.21781  |
| 16w_SITTD12 | 0.07346778 | 0.44516426 | 5.43E-05 | 0.012883  | 0.24502   |
| 16w_SITTD12 | 0.02588236 | 0.15151466 | 4.40E-05 | 0.0048781 | -0.10813  |
| 16w_SITTD12 | 0.02259786 | 0.131246   | 4.28E-05 | 0.005125  | -0.068556 |
| 16w_SITTD12 | 0.03483376 | 0.20675375 | 4.72E-05 | 0.0045646 | -0.10426  |
| 16w_SITTD12 | 0.03106983 | 0.1835265  | 4.58E-05 | 0.00463   | -0.12145  |
| 16w_SITTD12 | 0.07551406 | 0.45779186 | 5.23E-05 | 0.013721  | 0.23858   |
| 16w_SITTD12 | 0.01837595 | 0.10519258 | 4.09E-05 | 0.0055879 | 0.015459  |
| 16w_SITTD12 | 0.02405183 | 0.14021844 | 4.34E-05 | 0.0049916 | -0.091842 |
| 16w_SITTD12 | 0.03928562 | 0.23422614 | 4.92E-05 | 0.0045932 | -0.071721 |
| 16w_SITTD12 | 0.02560286 | 0.14978988 | 4.40E-05 | 0.0048781 | -0.10813  |
| 16w_SITTD12 | 0.01201524 | 0.06594064 | 3.77E-05 | 0.0064954 | 0.24064   |
| 16w_SITTD12 | 0.03246182 | 0.19211648 | 4.62E-05 | 0.0046026 | -0.11603  |
| 16w_SITTD12 | 0.01759041 | 0.10034503 | 4.06E-05 | 0.0056572 | 0.046584  |
| 16w_SITTD12 | 0.01904242 | 0.10930537 | 4.14E-05 | 0.0054571 | 0.0010121 |
| 16w_SITTD12 | 0.04191444 | 0.25044864 | 5.09E-05 | 0.0046676 | -0.0504   |
| 16w_SITTD12 | 0.03119684 | 0.18431027 | 4.58E-05 | 0.00463   | -0.12145  |
| 16w_SITTD12 | 0.08028226 | 0.48721647 | 4.87E-05 | 0.014207  | 0.14202   |
| 16w_SITTD12 | 0.08998464 | 0.5470898  | 4.88E-05 | 0.0086895 | -0.47194  |
| 16w_SITTD12 | 0.02173787 | 0.125939   | 4.26E-05 | 0.0051742 | -0.059109 |
| 16w_SITTD12 | 0.01337411 | 0.07432625 | 3.83E-05 | 0.0063061 | 0.19734   |
| 16w_SITTD12 | 0.02344086 | 0.13644812 | 4.32E-05 | 0.0050338 | -0.084895 |

|             |            |            |          |           |            |
|-------------|------------|------------|----------|-----------|------------|
| 16w_SITTD12 | 0.03206816 | 0.18968724 | 4.62E-05 | 0.0046026 | -0.11821   |
| 16w_SITTD12 | 0.02605638 | 0.1525885  | 4.42E-05 | 0.0048445 | -0.11213   |
| 16w_SITTD12 | 0.01747857 | 0.09965483 | 4.06E-05 | 0.0056572 | 0.046584   |
| 16w_SITTD12 | 0.03695593 | 0.21984965 | 4.81E-05 | 0.0045652 | -0.088896  |
| 16w_SITTD12 | 0.08251973 | 0.5010238  | 4.79E-05 | 0.013563  | 0.05262    |
| 16w_SITTD12 | 0.02740466 | 0.16090877 | 4.46E-05 | 0.0047834 | -0.11816   |
| 16w_SITTD12 | 0.06627064 | 0.4007507  | 6.12E-05 | 0.0093985 | 0.17407    |
| 16w_SITTD12 | 0.02263743 | 0.13149019 | 4.28E-05 | 0.005125  | -0.068556  |
| 16w_SITTD12 | 0.08532088 | 0.5183098  | 4.76E-05 | 0.012059  | -0.10433   |
| 16w_SITTD12 | 0.01516763 | 0.085394   | 3.95E-05 | 0.0059603 | 0.11709    |
| 16w_SITTD12 | 0.02606557 | 0.15264522 | 4.42E-05 | 0.0048445 | -0.11213   |
| 16w_SITTD12 | 0.02425928 | 0.1414986  | 4.34E-05 | 0.0049916 | -0.091842  |
| 16w_SITTD12 | 0.08524388 | 0.5178346  | 4.76E-05 | 0.012059  | -0.10433   |
| 16w_SITTD12 | 0.01362442 | 0.07587087 | 3.86E-05 | 0.0062156 | 0.17645    |
| 16w_SITTD12 | 0.01863932 | 0.1068178  | 4.11E-05 | 0.0055212 | 0.015459   |
| 16w_SITTD12 | 0.08767083 | 0.5328113  | 4.79E-05 | 0.010571  | -0.29935   |
| 16w_SITTD12 | 0.00289963 | 0.00968819 | 3.26E-05 | 0.0085576 | 0.66457    |
| 16w_SITTD12 | 0.08791005 | 0.5342875  | 4.80E-05 | 0.010188  | -0.29935   |
| 16w_SITTD12 | 0.03023031 | 0.17834586 | 4.55E-05 | 0.0046645 | -0.12245   |
| 16w_SITTD12 | 0.02953638 | 0.17406362 | 4.53E-05 | 0.0046846 | -0.1231    |
| 16w_SITTD12 | 0.05300802 | 0.3189071  | 6.01E-05 | 0.0055357 | 0.022172   |
| 16w_SITTD12 | 0.0241065  | 0.14055583 | 4.34E-05 | 0.0049916 | -0.091842  |
| 16w_SITTD12 | 0.02437489 | 0.14221203 | 4.36E-05 | 0.0049516 | -0.098011  |
| 16w_SITTD12 | 0.02351606 | 0.1369122  | 4.32E-05 | 0.0050338 | -0.084895  |
| 16w_SITTD12 | 0.05201369 | 0.31277108 | 5.97E-05 | 0.0054628 | 0.014768   |
| 16w_SITTD12 | 0.04068706 | 0.24287446 | 5.02E-05 | 0.0046325 | -0.058715  |
| 16w_SITTD12 | 0.01761842 | 0.10051787 | 4.06E-05 | 0.0056572 | 0.046584   |
| 16w_SITTD12 | 0.02683677 | 0.1574043  | 4.44E-05 | 0.004813  | -0.11546   |
| 16w_SITTD12 | 0.05509397 | 0.3317795  | 6.17E-05 | 0.0058704 | 0.038579   |
| 16w_SITTD12 | 0.01601036 | 0.09059452 | 3.98E-05 | 0.0058806 | 0.098494   |
| 16w_SITTD12 | 0.01915369 | 0.10999201 | 4.14E-05 | 0.0054571 | 0.0010121  |
| 16w_SITTD12 | 0.08363789 | 0.50792396 | 4.77E-05 | 0.013036  | -0.0045591 |
| 16w_SITTD12 | 0.07780466 | 0.4719272  | 5.05E-05 | 0.014229  | 0.20103    |
| 16w_SITTD12 | 0.09729935 | 0.5922289  | 5.32E-05 | 0.0050496 | -1.0673    |
| 16w_SITTD12 | 0.02193721 | 0.12716912 | 4.26E-05 | 0.0051742 | -0.059109  |
| 16w_SITTD12 | 0.00644621 | 0.03157412 | 3.44E-05 | 0.0077366 | 0.50694    |
| 16w_SITTD12 | 0.01737291 | 0.09900279 | 4.06E-05 | 0.0056572 | 0.046584   |
| 16w_SITTD12 | 0.0516288  | 0.31039593 | 5.92E-05 | 0.0053939 | 0.011221   |
| 16w_SITTD12 | 0.01435738 | 0.08039395 | 3.89E-05 | 0.0061278 | 0.1561     |
| 16w_SITTD12 | 0.09581998 | 0.5830997  | 5.20E-05 | 0.0056833 | -0.9515    |
| 16w_SITTD12 | 0.09146566 | 0.5562292  | 4.93E-05 | 0.0079874 | -0.60562   |
| 16w_SITTD12 | 0.02063721 | 0.11914685 | 4.21E-05 | 0.0052798 | -0.037579  |
| 16w_SITTD12 | 0.08758613 | 0.5322886  | 4.79E-05 | 0.010571  | -0.29935   |



|             |            |            |          |           |           |
|-------------|------------|------------|----------|-----------|-----------|
| 16w_SITTD12 | 0.07504805 | 0.45491615 | 5.28E-05 | 0.013537  | 0.24193   |
| 16w_SITTD12 | 0.01953046 | 0.11231708 | 4.16E-05 | 0.0053955 | -0.012659 |
| 16w_SITTD12 | 0.03304696 | 0.19572738 | 4.66E-05 | 0.0045822 | -0.11352  |
| 16w_SITTD12 | 0.02913253 | 0.17157143 | 4.51E-05 | 0.0047064 | -0.12268  |
| 16w_SITTD12 | 0.02614352 | 0.15312628 | 4.42E-05 | 0.0048445 | -0.11213  |
| 16w_SITTD12 | 0.0229917  | 0.13367638 | 4.30E-05 | 0.0050782 | -0.077142 |
| 16w_SITTD12 | 0.02075482 | 0.1198726  | 4.21E-05 | 0.0052798 | -0.037579 |
| 16w_SITTD12 | 0.01818816 | 0.10403375 | 4.09E-05 | 0.0055879 | 0.030658  |
| 16w_SITTD12 | 0.01829551 | 0.1046962  | 4.09E-05 | 0.0055879 | 0.030658  |
| 16w_SITTD12 | 0.08258966 | 0.50145537 | 4.79E-05 | 0.013563  | 0.05262   |
| 16w_SITTD12 | 0.08823948 | 0.53632045 | 4.80E-05 | 0.010188  | -0.3415   |
| 16w_SITTD12 | 0.01343138 | 0.07467963 | 3.83E-05 | 0.0063061 | 0.19734   |
| 16w_SITTD12 | 0.06758561 | 0.40886542 | 6.03E-05 | 0.009922  | 0.19812   |
| 16w_SITTD12 | 0.01200756 | 0.06589326 | 3.77E-05 | 0.0064954 | 0.24064   |
| 16w_SITTD12 | 0.02941994 | 0.17334507 | 4.53E-05 | 0.0046846 | -0.1231   |
| 16w_SITTD12 | 0.0984847  | 0.5995437  | 5.40E-05 | 0.0046955 | -1.1375   |
| 16w_SITTD12 | 0.02229086 | 0.1293515  | 4.28E-05 | 0.005125  | -0.068556 |
| 16w_SITTD12 | 0.00817321 | 0.04223148 | 3.56E-05 | 0.0072456 | 0.40559   |
| 16w_SITTD12 | 0.02002622 | 0.1153764  | 4.16E-05 | 0.0053955 | -0.025531 |
| 16w_SITTD12 | 0.01520377 | 0.08561707 | 3.95E-05 | 0.0059603 | 0.11709   |
| 16w_SITTD12 | 0.01371314 | 0.07641835 | 3.86E-05 | 0.0062156 | 0.17645   |
| 16w_SITTD12 | 0.01956621 | 0.11253767 | 4.16E-05 | 0.0053955 | -0.012659 |
| 16w_SITTD12 | 0.0410926  | 0.24537703 | 5.02E-05 | 0.0046325 | -0.054504 |
| 16w_SITTD12 | 0.03378174 | 0.20026173 | 4.68E-05 | 0.0045746 | -0.11071  |
| 16w_SITTD12 | 0.02067216 | 0.11936251 | 4.21E-05 | 0.0052798 | -0.037579 |
| 16w_SITTD12 | 0.09025725 | 0.5487721  | 4.88E-05 | 0.0086895 | -0.51631  |
| 16w_SITTD12 | 0.02930925 | 0.17266196 | 4.53E-05 | 0.0046846 | -0.1231   |
| 16w_SITTD12 | 0.08795943 | 0.5345923  | 4.80E-05 | 0.010188  | -0.29935  |
| 16w_SITTD12 | 0.02748628 | 0.16141245 | 4.46E-05 | 0.0047834 | -0.11816  |
| 16w_SITTD12 | 0.02553319 | 0.14935991 | 4.40E-05 | 0.0048781 | -0.10813  |
| 16w_SITTD12 | 0.00902836 | 0.04750858 | 3.59E-05 | 0.00713   | 0.38094   |
| 16w_SITTD12 | 0.07391433 | 0.44791996 | 5.38E-05 | 0.013116  | 0.24502   |
| 16w_SITTD12 | 0.03151566 | 0.18627776 | 4.60E-05 | 0.0046154 | -0.12002  |
| 16w_SITTD12 | 0.02856395 | 0.16806276 | 4.49E-05 | 0.0047302 | -0.12174  |
| 16w_SITTD12 | 0.0166074  | 0.09427887 | 4.00E-05 | 0.0058035 | 0.080526  |
| 16w_SITTD12 | 0.01875979 | 0.10756125 | 4.11E-05 | 0.0055212 | 0.015459  |
| 16w_SITTD12 | 0.01660525 | 0.0942656  | 4.00E-05 | 0.0058035 | 0.080526  |
| 16w_SITTD12 | 0.01066984 | 0.05763816 | 3.68E-05 | 0.0068    | 0.30902   |
| 16w_SITTD12 | 0.09117459 | 0.554433   | 4.93E-05 | 0.0079874 | -0.56091  |
| 16w_SITTD12 | 0.08834767 | 0.536988   | 4.82E-05 | 0.0098057 | -0.3415   |
| 16w_SITTE12 | 0.02152364 | 0.12461697 | 4.24E-05 | 0.0052258 | -0.04878  |
| 16w_SITTE12 | 0.07232017 | 0.4380824  | 5.54E-05 | 0.012382  | 0.24161   |
| 16w_SITTE12 | 0.01225484 | 0.06741922 | 3.77E-05 | 0.0064954 | 0.24064   |

|             |            |            |          |           |            |
|-------------|------------|------------|----------|-----------|------------|
| 16w_SITTE12 | 0.06776051 | 0.40994474 | 5.98E-05 | 0.010192  | 0.19812    |
| 16w_SITTE12 | 0.01780622 | 0.10167675 | 4.06E-05 | 0.0056572 | 0.046584   |
| 16w_SITTE12 | 0.04717227 | 0.2828947  | 5.53E-05 | 0.0049654 | -0.01514   |
| 16w_SITTE12 | 0.01942711 | 0.11167931 | 4.14E-05 | 0.0054571 | -0.012659  |
| 16w_SITTE12 | 0.01760976 | 0.10046443 | 4.06E-05 | 0.0056572 | 0.046584   |
| 16w_SITTE12 | 0.08293586 | 0.5035918  | 4.78E-05 | 0.013315  | 0.02505    |
| 16w_SITTE12 | 0.08881988 | 0.53990203 | 4.82E-05 | 0.0098057 | -0.3844    |
| 16w_SITTE12 | 0.01876596 | 0.10759934 | 4.11E-05 | 0.0055212 | 0.015459   |
| 16w_SITTE12 | 0.04045087 | 0.2414169  | 4.99E-05 | 0.0046177 | -0.063007  |
| 16w_SITTE12 | 0.01730835 | 0.09860443 | 4.03E-05 | 0.005729  | 0.046584   |
| 16w_SITTE12 | 0.08442242 | 0.51276535 | 4.76E-05 | 0.012731  | -0.069378  |
| 16w_SITTE12 | 0.02154356 | 0.12473992 | 4.24E-05 | 0.0052258 | -0.04878   |
| 16w_SITTE12 | 0.02445718 | 0.14271988 | 4.36E-05 | 0.0049516 | -0.098011  |
| 16w_SITTE12 | 0.00894095 | 0.04696921 | 3.59E-05 | 0.00713   | 0.38094    |
| 16w_SITTE12 | 0.0190435  | 0.10931201 | 4.14E-05 | 0.0054571 | 0.0010121  |
| 16w_SITTE12 | 0.0259979  | 0.15222766 | 4.42E-05 | 0.0048445 | -0.11213   |
| 16w_SITTE12 | 0.02194973 | 0.1272464  | 4.26E-05 | 0.0051742 | -0.059109  |
| 16w_SITTE12 | 0.09167193 | 0.5575021  | 4.96E-05 | 0.0076529 | -0.60562   |
| 16w_SITTE12 | 0.01749885 | 0.09978    | 4.06E-05 | 0.0056572 | 0.046584   |
| 16w_SITTE12 | 0.02809485 | 0.16516796 | 4.48E-05 | 0.0047558 | -0.12174   |
| 16w_SITTE12 | 0.04471528 | 0.2677326  | 5.30E-05 | 0.0047888 | -0.031751  |
| 16w_SITTE12 | 0.00796709 | 0.04095947 | 3.53E-05 | 0.0073641 | 0.43054    |
| 16w_SITTE12 | 0.01469    | 0.08244658 | 3.92E-05 | 0.0060428 | 0.1363     |
| 16w_SITTE12 | 0.01274735 | 0.07045849 | 3.80E-05 | 0.0063994 | 0.21875    |
| 16w_SITTE12 | 0.01890356 | 0.10844845 | 4.11E-05 | 0.0055212 | 0.0010121  |
| 16w_SITTE12 | 0.03634848 | 0.2161011  | 4.79E-05 | 0.0045625 | -0.092976  |
| 16w_SITTE12 | 0.03564303 | 0.2117477  | 4.74E-05 | 0.0045622 | -0.096915  |
| 16w_SITTE12 | 0.01739286 | 0.09912593 | 4.06E-05 | 0.0056572 | 0.046584   |
| 16w_SITTE12 | 0.05960045 | 0.35958898 | 6.37E-05 | 0.0069445 | 0.080679   |
| 16w_SITTE12 | 0.04301446 | 0.25723684 | 5.17E-05 | 0.0047101 | -0.042593  |
| 16w_SITTE12 | 0.02294512 | 0.13338892 | 4.30E-05 | 0.0050782 | -0.077142  |
| 16w_SITTE12 | 0.0225916  | 0.13120739 | 4.28E-05 | 0.005125  | -0.068556  |
| 16w_SITTE12 | 0.01541875 | 0.08694369 | 3.95E-05 | 0.0059603 | 0.11709    |
| 16w_SITTE12 | 0.08779544 | 0.53358024 | 4.80E-05 | 0.010188  | -0.29935   |
| 16w_SITTE12 | 0.04912208 | 0.29492694 | 5.68E-05 | 0.0051026 | -0.0054808 |
| 16w_SITTE12 | 0.03582268 | 0.21285637 | 4.77E-05 | 0.0045615 | -0.096915  |
| 16w_SITTE12 | 0.02752281 | 0.16163784 | 4.46E-05 | 0.0047834 | -0.11816   |
| 16w_SITTE12 | 0.10146623 | 0.6179427  | 5.66E-05 | 0.0039398 | -1.2808    |
| 16w_SITTE12 | 0.0871691  | 0.5297151  | 4.78E-05 | 0.010952  | -0.25808   |
| 16w_SITTE12 | 0.04798855 | 0.28793195 | 5.58E-05 | 0.0050083 | -0.01192   |
| 16w_SITTE12 | 0.04042054 | 0.24122977 | 4.99E-05 | 0.0046177 | -0.063007  |
| 16w_SITTE12 | 0.09958024 | 0.6063043  | 5.49E-05 | 0.0043938 | -1.2008    |
| 16w_SITTE12 | 0.01546748 | 0.08724438 | 3.95E-05 | 0.0059603 | 0.11709    |

|             |            |            |          |           |           |
|-------------|------------|------------|----------|-----------|-----------|
| 16w_SITTE12 | 0.01609669 | 0.09112725 | 3.98E-05 | 0.0058806 | 0.098494  |
| 16w_SITTE12 | 0.02462342 | 0.14374574 | 4.36E-05 | 0.0049516 | -0.098011 |
| 16w_SITTE12 | 0.06279157 | 0.3792814  | 6.35E-05 | 0.0078047 | 0.12359   |
| 16w_SITTE12 | 0.02421438 | 0.14122152 | 4.34E-05 | 0.0049916 | -0.091842 |
| 16w_SITTE12 | 0.03214004 | 0.19013077 | 4.62E-05 | 0.0046026 | -0.11821  |
| 16w_SITTE12 | 0.01970237 | 0.11337789 | 4.16E-05 | 0.0053955 | -0.012659 |
| 16w_SITTE12 | 0.03719942 | 0.22135222 | 4.81E-05 | 0.0045652 | -0.088896 |
| 16w_SITTE12 | 0.07373035 | 0.44678462 | 5.38E-05 | 0.013116  | 0.24502   |
| 16w_SITTE12 | 0.09205361 | 0.5598574  | 4.96E-05 | 0.0076529 | -0.6503   |
| 16w_SITTE12 | 0.01495177 | 0.08406196 | 3.92E-05 | 0.0060428 | 0.1363    |
| 16w_SITTE12 | 0.01264015 | 0.06979697 | 3.80E-05 | 0.0063994 | 0.21875   |
| 16w_SITTE12 | 0.01102505 | 0.05983019 | 3.71E-05 | 0.0066957 | 0.2858    |
| 16w_SITTE12 | 0.09387066 | 0.57107043 | 5.09E-05 | 0.0064439 | -0.7829   |
| 16w_SITTE12 | 0.0190633  | 0.10943422 | 4.14E-05 | 0.0054571 | 0.0010121 |
| 16w_SITTE12 | 0.01966898 | 0.11317185 | 4.16E-05 | 0.0053955 | -0.012659 |
| 16w_SITTE12 | 0.04079718 | 0.24355398 | 5.02E-05 | 0.0046325 | -0.058715 |
| 16w_SITTE12 | 0.01506353 | 0.08475163 | 3.92E-05 | 0.0060428 | 0.1363    |
| 16w_SITTE12 | 0.06524267 | 0.39440712 | 6.20E-05 | 0.0089013 | 0.15715   |
| 16w_SITTE12 | 0.08035468 | 0.48766336 | 4.87E-05 | 0.014207  | 0.14202   |
| 16w_SITTE12 | 0.09270456 | 0.5638744  | 5.02E-05 | 0.0070215 | -0.69483  |
| 16w_SITTE12 | 0.02399501 | 0.13986781 | 4.34E-05 | 0.0049916 | -0.091842 |
| 16w_SITTE12 | 0.03331035 | 0.19735274 | 4.66E-05 | 0.0045822 | -0.11352  |
| 16w_SITTE12 | 0.02452829 | 0.14315869 | 4.36E-05 | 0.0049516 | -0.098011 |
| 16w_SITTE12 | 0.02700077 | 0.15841633 | 4.44E-05 | 0.004813  | -0.11816  |
| 16w_SITTE12 | 0.0845621  | 0.5136273  | 4.76E-05 | 0.012404  | -0.069378 |
| 16w_SITTE12 | 0.08014523 | 0.4863708  | 4.90E-05 | 0.014278  | 0.14202   |
| 16w_SITTE12 | 0.03336771 | 0.19770674 | 4.66E-05 | 0.0045822 | -0.11352  |
| 16w_SITTE12 | 0.02878845 | 0.16944812 | 4.51E-05 | 0.0047064 | -0.12268  |
| 16w_SITTE12 | 0.06772868 | 0.4097483  | 5.98E-05 | 0.010192  | 0.19812   |
| 16w_SITTE12 | 0.04433604 | 0.26539227 | 5.25E-05 | 0.0047605 | -0.031751 |
| 16w_SITTE12 | 0.01388333 | 0.07746862 | 3.86E-05 | 0.0062156 | 0.17645   |
| 16w_SITTE12 | 0.01358058 | 0.07560036 | 3.86E-05 | 0.0062156 | 0.17645   |
| 16w_SITTE12 | 0.09919597 | 0.6039329  | 5.49E-05 | 0.0043938 | -1.1701   |
| 16w_SITTE12 | 0.01003364 | 0.05371215 | 3.65E-05 | 0.0069072 | 0.33263   |
| 16w_SITTE12 | 0.01206106 | 0.06622338 | 3.77E-05 | 0.0064954 | 0.24064   |
| 16w_SITTE12 | 0.02013893 | 0.11607191 | 4.19E-05 | 0.0053364 | -0.025531 |
| 16w_SITTE12 | 0.04216365 | 0.25198647 | 5.09E-05 | 0.0046676 | -0.04643  |
| 16w_SITTE12 | 0.01974987 | 0.11367104 | 4.16E-05 | 0.0053955 | -0.012659 |
| 16w_SITTE12 | 0.03387187 | 0.20081791 | 4.68E-05 | 0.0045746 | -0.11071  |
| 16w_SITTE12 | 0.02081766 | 0.12026037 | 4.21E-05 | 0.0052798 | -0.037579 |
| 16w_SITTE12 | 0.00651987 | 0.03202872 | 3.47E-05 | 0.0076096 | 0.48124   |
| 16w_SITTE12 | 0.01958004 | 0.11262302 | 4.16E-05 | 0.0053955 | -0.012659 |
| 16w_SITTE12 | 0.02041899 | 0.1178002  | 4.19E-05 | 0.0053364 | -0.025531 |

|             |            |            |          |           |            |
|-------------|------------|------------|----------|-----------|------------|
| 16w_SITTE12 | 0.01488419 | 0.08364494 | 3.92E-05 | 0.0060428 | 0.1363     |
| 16w_SITTE12 | 0.02886331 | 0.16991009 | 4.51E-05 | 0.0047064 | -0.12268   |
| 16w_SITTE12 | 0.01163852 | 0.06361587 | 3.74E-05 | 0.0065941 | 0.263      |
| 16w_SITTE12 | 0.01497213 | 0.0841876  | 3.92E-05 | 0.0060428 | 0.1363     |
| 16w_SITTE12 | 0.12906675 | 0.7882655  | 7.09E-05 | 0.0055438 | -0.96145   |
| 16w_SITTE12 | 0.01976354 | 0.11375539 | 4.16E-05 | 0.0053955 | -0.012659  |
| 16w_SITTE12 | 0.00956566 | 0.05082428 | 3.62E-05 | 0.0070172 | 0.35661    |
| 16w_SITTE12 | 0.01290984 | 0.07146122 | 3.80E-05 | 0.0063994 | 0.21875    |
| 16w_SITTE12 | 0.02158586 | 0.12500091 | 4.24E-05 | 0.0052258 | -0.04878   |
| 16w_SITTE12 | 0.08994339 | 0.54683524 | 4.88E-05 | 0.0086895 | -0.47194   |
| 16w_SITTE12 | 0.07640288 | 0.4632768  | 5.13E-05 | 0.014025  | 0.22792    |
| 16w_SITTE12 | 0.08328995 | 0.5057769  | 4.78E-05 | 0.013315  | -0.0045591 |
| 16w_SITTE12 | 0.02655608 | 0.15567215 | 4.44E-05 | 0.004813  | -0.11546   |
| 16w_SITTE12 | 0.01951685 | 0.11223307 | 4.16E-05 | 0.0053955 | -0.012659  |
| 16w_SITTE12 | 0.0211451  | 0.12228099 | 4.24E-05 | 0.0052258 | -0.04878   |
| 16w_SITTE12 | 0.01899131 | 0.10898997 | 4.14E-05 | 0.0054571 | 0.0010121  |
| 16w_SITTE12 | 0.0575278  | 0.34679866 | 6.32E-05 | 0.0064035 | 0.057806   |
| 16w_SITTE12 | 0.1154729  | 0.70437783 | 6.53E-05 | 0.0042916 | -1.224     |
| 16w_SITTE12 | 0.08258249 | 0.50141114 | 4.79E-05 | 0.013563  | 0.05262    |
| 16w_SITTE12 | 0.02315562 | 0.1346879  | 4.30E-05 | 0.0050782 | -0.077142  |
| 16w_SITTE12 | 0.07930193 | 0.48116684 | 4.93E-05 | 0.014315  | 0.17506    |
| 16w_SITTE12 | 0.02874114 | 0.16915618 | 4.51E-05 | 0.0047064 | -0.12268   |
| 16w_SITTE12 | 0.04938688 | 0.29656103 | 5.73E-05 | 0.0051543 | -0.0022352 |
| 16w_SITTE12 | 0.01475596 | 0.08285362 | 3.92E-05 | 0.0060428 | 0.1363     |
| 16w_SITTE12 | 0.1060491  | 0.6462236  | 5.98E-05 | 0.0035674 | -1.3913    |
| 16w_SITTE12 | 0.00434094 | 0.01858255 | 3.35E-05 | 0.0081345 | 0.58516    |
| 16w_SITTE12 | 0.02756379 | 0.16189076 | 4.46E-05 | 0.0047834 | -0.12024   |
| 16w_SITTE12 | 0.01955136 | 0.11244603 | 4.16E-05 | 0.0053955 | -0.012659  |
| 16w_SITTE12 | 0.08386148 | 0.50930375 | 4.77E-05 | 0.013036  | -0.036078  |
| 16w_SITTE12 | 0.02096375 | 0.12116189 | 4.21E-05 | 0.0052798 | -0.037579  |
| 16w_SITTE12 | 0.03664808 | 0.21794993 | 4.79E-05 | 0.0045625 | -0.092976  |
| 16w_SITTE12 | 0.03363861 | 0.19937848 | 4.68E-05 | 0.0045746 | -0.11071   |
| 16w_SITTE12 | 0.02189733 | 0.12692301 | 4.26E-05 | 0.0051742 | -0.059109  |
| 16w_SITTE12 | 0.02610188 | 0.15286928 | 4.42E-05 | 0.0048445 | -0.11213   |
| 16w_SITTE12 | 0.0156301  | 0.08824795 | 3.95E-05 | 0.0059603 | 0.11709    |
| 16w_SITTE12 | 0.01992216 | 0.11473423 | 4.16E-05 | 0.0053955 | -0.012659  |
| 16w_SITTE12 | 0.05023079 | 0.3017688  | 5.78E-05 | 0.0052091 | 0.0043724  |
| 16w_SITTE12 | 0.08681578 | 0.5275348  | 4.78E-05 | 0.010952  | -0.21781   |
| 16w_SITTE12 | 0.01640626 | 0.09303764 | 4.00E-05 | 0.0058035 | 0.080526   |
| 16w_SITTE12 | 0.05635629 | 0.3395693  | 6.27E-05 | 0.0061731 | 0.047788   |
| 16w_SITTE12 | 0.08521329 | 0.5176458  | 4.76E-05 | 0.012059  | -0.10433   |
| 16w_SITTE12 | 0.01951168 | 0.11220119 | 4.16E-05 | 0.0053955 | -0.012659  |
| 16w_SITTE12 | 0.01138448 | 0.06204822 | 3.74E-05 | 0.0065941 | 0.263      |

|             |            |            |          |           |           |
|-------------|------------|------------|----------|-----------|-----------|
| 16w_SITTE12 | 0.03851171 | 0.22945035 | 4.89E-05 | 0.0045836 | -0.076088 |
| 16w_SITTE12 | 0.01402487 | 0.07834204 | 3.86E-05 | 0.0062156 | 0.17645   |
| 16w_SITTE12 | 0.03819757 | 0.22751182 | 4.87E-05 | 0.0045758 | -0.080425 |
| 16w_SITTE12 | 0.02034785 | 0.11736116 | 4.19E-05 | 0.0053364 | -0.025531 |
| 16w_SITTE12 | 0.06935229 | 0.41976762 | 5.82E-05 | 0.011019  | 0.21895   |
| 16w_SITTE12 | 0.02369143 | 0.1379944  | 4.32E-05 | 0.0050338 | -0.084895 |
| 16w_SITTE12 | 0.09233116 | 0.5615702  | 4.99E-05 | 0.0073308 | -0.6503   |
| 16w_SITTE12 | 0.02465243 | 0.14392476 | 4.36E-05 | 0.0049516 | -0.098011 |
| 16w_SITTE12 | 0.0235442  | 0.13708588 | 4.32E-05 | 0.0050338 | -0.084895 |
| 16w_SITTE12 | 0.01350867 | 0.0751566  | 3.83E-05 | 0.0063061 | 0.17645   |
| 16w_SITTE12 | 0.01534511 | 0.08648924 | 3.95E-05 | 0.0059603 | 0.11709   |
| 16w_SITTE12 | 0.02881462 | 0.16960964 | 4.51E-05 | 0.0047064 | -0.12268  |
| 16w_SITTE12 | 0.0339056  | 0.20102602 | 4.68E-05 | 0.0045746 | -0.11071  |
| 16w_SITTE12 | 0.08516374 | 0.51734    | 4.76E-05 | 0.012059  | -0.10433  |
| 16w_SITTE12 | 0.02037167 | 0.11750816 | 4.19E-05 | 0.0053364 | -0.025531 |
| 16w_SITTE12 | 0.03162258 | 0.18693756 | 4.60E-05 | 0.0046154 | -0.12002  |
| 16w_SITTE12 | 0.01812981 | 0.10367363 | 4.09E-05 | 0.0055879 | 0.030658  |
| 16w_SITTE12 | 0.0165477  | 0.09391047 | 4.00E-05 | 0.0058035 | 0.080526  |
| 16w_SITTE12 | 0.0324792  | 0.19222376 | 4.62E-05 | 0.0046026 | -0.11603  |
| 16w_SITTE12 | 0.0244903  | 0.14292422 | 4.36E-05 | 0.0049516 | -0.098011 |
| 16w_SITTE12 | 0.0558303  | 0.3363234  | 6.24E-05 | 0.0060668 | 0.043089  |
| 16w_SITTE12 | 0.04200558 | 0.251011   | 5.09E-05 | 0.0046676 | -0.0504   |
| 16w_SITTE12 | 0.02716318 | 0.15941857 | 4.46E-05 | 0.0047834 | -0.11816  |
| 16w_SITTE12 | 0.01268383 | 0.07006647 | 3.80E-05 | 0.0063994 | 0.21875   |
| 16w_SITTE12 | 0.02714429 | 0.15930204 | 4.46E-05 | 0.0047834 | -0.11816  |
| 16w_SITTE12 | 0.0577445  | 0.3481359  | 6.32E-05 | 0.0064035 | 0.057806  |
| 16w_SITTE12 | 0.01742408 | 0.0993186  | 4.06E-05 | 0.0056572 | 0.046584  |
| 16w_SITTE12 | 0.08604915 | 0.5228039  | 4.76E-05 | 0.0117    | -0.17867  |
| 16w_SITTE12 | 0.0173993  | 0.09916566 | 4.06E-05 | 0.0056572 | 0.046584  |
| 16w_SITTE12 | 0.02259888 | 0.1312523  | 4.28E-05 | 0.005125  | -0.068556 |
| 16w_SITTE12 | 0.06140025 | 0.37069553 | 6.37E-05 | 0.0074328 | 0.10072   |
| 16w_SITTE12 | 0.01512334 | 0.0851207  | 3.92E-05 | 0.0060428 | 0.11709   |
| 16w_SITTE12 | 0.02554107 | 0.14940853 | 4.40E-05 | 0.0048781 | -0.10813  |
| 16w_SITTE12 | 0.01936303 | 0.11128385 | 4.14E-05 | 0.0054571 | 0.0010121 |
| 16w_SITTE12 | 0.09601717 | 0.58431655 | 5.24E-05 | 0.0054581 | -0.9515   |
| 16w_SITTE12 | 0.01313486 | 0.07284982 | 3.83E-05 | 0.0063061 | 0.19734   |
| 16w_SITTE12 | 0.02962377 | 0.17460288 | 4.53E-05 | 0.0046846 | -0.1231   |
| 16w_SITTE12 | 0.01428179 | 0.07992753 | 3.89E-05 | 0.0061278 | 0.1561    |
| 16w_SITTE12 | 0.01440498 | 0.0806877  | 3.89E-05 | 0.0061278 | 0.1561    |
| 16w_SITTE12 | 0.01511902 | 0.08509404 | 3.92E-05 | 0.0060428 | 0.11709   |
| 16w_SITTE12 | 0.05471049 | 0.32941303 | 6.14E-05 | 0.0057798 | 0.034245  |
| 16w_SITTE12 | 0.08234752 | 0.49996117 | 4.81E-05 | 0.013778  | 0.05262   |
| 16w_SITTE12 | 0.03835176 | 0.22846328 | 4.87E-05 | 0.0045758 | -0.076088 |

|             |            |            |          |           |            |
|-------------|------------|------------|----------|-----------|------------|
| 16w_SITTE12 | 0.01309042 | 0.07257559 | 3.83E-05 | 0.0063061 | 0.19734    |
| 16w_SITTE12 | 0.0772211  | 0.46832603 | 5.09E-05 | 0.014141  | 0.22047    |
| 16w_SITTE12 | 0.03862296 | 0.23013689 | 4.89E-05 | 0.0045836 | -0.076088  |
| 16w_SITTE12 | 0.03736212 | 0.22235624 | 4.81E-05 | 0.0045652 | -0.084703  |
| 16w_SITTE12 | 0.08077032 | 0.49022827 | 4.85E-05 | 0.0141    | 0.12269    |
| 16w_SITTE12 | 0.01873753 | 0.10742391 | 4.11E-05 | 0.0055212 | 0.015459   |
| 16w_SITTE12 | 0.08362116 | 0.5078208  | 4.77E-05 | 0.013036  | -0.0045591 |
| 16w_SITTE12 | 0.02239602 | 0.13000041 | 4.28E-05 | 0.005125  | -0.068556  |
| 16w_SITTE12 | 0.01560949 | 0.08812074 | 3.95E-05 | 0.0059603 | 0.11709    |
| 16w_SITTE12 | 0.01586096 | 0.08967257 | 3.98E-05 | 0.0058806 | 0.098494   |
| 16w_SITTE12 | 0.01453978 | 0.08151957 | 3.89E-05 | 0.0061278 | 0.1561     |
| 16w_SITTE12 | 0.01095877 | 0.05942117 | 3.71E-05 | 0.0066957 | 0.2858     |
| 16w_SITTE12 | 0.02357453 | 0.137273   | 4.32E-05 | 0.0050338 | -0.084895  |
| 16w_SITTE12 | 0.03258157 | 0.19285549 | 4.64E-05 | 0.0045915 | -0.11603   |
| 16w_SITTE12 | 0.05588713 | 0.3366741  | 6.24E-05 | 0.0060668 | 0.043089   |
| 16w_SITTE12 | 0.06158716 | 0.37184897 | 6.37E-05 | 0.0074328 | 0.10802    |
| 16w_SITTE12 | 0.06099451 | 0.36819175 | 6.38E-05 | 0.0072613 | 0.09374    |
| 16w_SITTE12 | 0.02360473 | 0.1374594  | 4.32E-05 | 0.0050338 | -0.084895  |
| 16w_SITTE12 | 0.06741762 | 0.40782875 | 6.03E-05 | 0.009922  | 0.19037    |
| 16w_SITTE12 | 0.01112358 | 0.06043819 | 3.71E-05 | 0.0066957 | 0.2858     |
| 16w_SITTE12 | 0.04401263 | 0.26339656 | 5.25E-05 | 0.0047605 | -0.035266  |
| 16w_SITTE12 | 0.03584744 | 0.21300913 | 4.77E-05 | 0.0045615 | -0.096915  |
| 16w_SITTE12 | 0.08989606 | 0.5465432  | 4.86E-05 | 0.0090548 | -0.47194   |
| 16w_SITTE12 | 0.01561823 | 0.08817467 | 3.95E-05 | 0.0059603 | 0.11709    |
| 16w_SITTE12 | 0.02685963 | 0.15754537 | 4.44E-05 | 0.004813  | -0.11546   |
| 16w_SITTE12 | 0.02418677 | 0.14105113 | 4.34E-05 | 0.0049916 | -0.091842  |
| 16w_SITTE12 | 0.0301457  | 0.17782372 | 4.55E-05 | 0.0046645 | -0.12301   |
| 16w_SITTE12 | 0.01538751 | 0.08675093 | 3.95E-05 | 0.0059603 | 0.11709    |
| 16w_SITTE12 | 0.07180343 | 0.43489358 | 5.60E-05 | 0.012118  | 0.2386     |
| 16w_SITTE12 | 0.06547967 | 0.39586964 | 6.20E-05 | 0.0089013 | 0.16566    |
| 16w_SITTE12 | 0.10305318 | 0.62773573 | 5.78E-05 | 0.003724  | -1.3397    |
| 16w_SITTE12 | 0.01407354 | 0.07864239 | 3.89E-05 | 0.0061278 | 0.1561     |
| 16w_SITTE12 | 0.02311121 | 0.13441388 | 4.30E-05 | 0.0050782 | -0.077142  |
| 16w_SITTE12 | 0.01868447 | 0.10709646 | 4.11E-05 | 0.0055212 | 0.015459   |
| 16w_SITTE12 | 0.05519189 | 0.33238378 | 6.17E-05 | 0.0058704 | 0.038579   |
| 16w_SITTE12 | 0.01659404 | 0.0941964  | 4.00E-05 | 0.0058035 | 0.080526   |
| 16w_SITTE12 | 0.02284178 | 0.13275123 | 4.30E-05 | 0.0050782 | -0.077142  |
| 16w_SITTE12 | 0.014898   | 0.08373016 | 3.92E-05 | 0.0060428 | 0.1363     |
| 16w_SITTE12 | 0.0920314  | 0.55972034 | 4.96E-05 | 0.0076529 | -0.6503    |
| 16w_SITTE12 | 0.00934834 | 0.04948316 | 3.62E-05 | 0.0070172 | 0.35661    |
| 16w_SITTE12 | 0.05402853 | 0.32520464 | 6.10E-05 | 0.005694  | 0.030074   |
| 16w_SITTE12 | 0.0216745  | 0.12554792 | 4.26E-05 | 0.0051742 | -0.059109  |
| 16w_SITTE12 | 0.08738142 | 0.5310253  | 4.79E-05 | 0.010571  | -0.25808   |

|             |            |            |          |           |           |
|-------------|------------|------------|----------|-----------|-----------|
| 16w_SITTE12 | 0.01127051 | 0.06134487 | 3.71E-05 | 0.0066957 | 0.2858    |
| 16w_SITTE12 | 0.03492714 | 0.20732996 | 4.72E-05 | 0.0045646 | -0.10426  |
| 16w_SITTE12 | 0.09332828 | 0.56772345 | 5.06E-05 | 0.0067258 | -0.73907  |
| 16w_SITTE12 | 0.02547417 | 0.14899571 | 4.40E-05 | 0.0048781 | -0.10813  |
| 16w_SITTE12 | 0.08439305 | 0.5125841  | 4.76E-05 | 0.012731  | -0.069378 |
| 16w_SITTE12 | 0.05359321 | 0.3225183  | 6.05E-05 | 0.0056127 | 0.026054  |
| 16w_SITTE12 | 0.07807854 | 0.4736173  | 5.01E-05 | 0.014289  | 0.20103   |
| 16w_SITTE12 | 0.02327669 | 0.13543509 | 4.30E-05 | 0.0050782 | -0.084895 |
| 16w_SITTE12 | 0.02489753 | 0.14543726 | 4.36E-05 | 0.0049516 | -0.10343  |
| 16w_SITTE12 | 0.04507113 | 0.26992851 | 5.34E-05 | 0.0048194 | -0.028317 |
| 16w_SITTE12 | 0.0799207  | 0.48498526 | 4.90E-05 | 0.014278  | 0.15946   |
| 16w_SITTE12 | 0.02022873 | 0.11662607 | 4.19E-05 | 0.0053364 | -0.025531 |
| 16w_SITTE12 | 0.08030298 | 0.4873443  | 4.87E-05 | 0.014207  | 0.14202   |
| 16w_SITTE12 | 0.08449154 | 0.5131919  | 4.76E-05 | 0.012731  | -0.069378 |
| 16w_SITTE12 | 0.09737459 | 0.5926932  | 5.32E-05 | 0.0050496 | -1.0673   |
| 16w_SITTE12 | 0.0410623  | 0.24519007 | 5.02E-05 | 0.0046325 | -0.054504 |
| 16w_SITTE12 | 0.00722322 | 0.0363691  | 3.50E-05 | 0.0074854 | 0.45576   |
| 16w_SITTE12 | 0.02455394 | 0.14331698 | 4.36E-05 | 0.0049516 | -0.098011 |
| 16w_SITTE12 | 0.03068363 | 0.1811433  | 4.57E-05 | 0.0046464 | -0.12245  |
| 16w_SITTE12 | 0.01532415 | 0.0863599  | 3.95E-05 | 0.0059603 | 0.11709   |
| 16w_SITTE12 | 0.09669177 | 0.58847946 | 5.28E-05 | 0.0052469 | -1.03     |
| 16w_SITTE12 | 0.07353082 | 0.44555333 | 5.43E-05 | 0.012883  | 0.24502   |
| 16w_SITTE12 | 0.09314823 | 0.5666123  | 5.02E-05 | 0.0070215 | -0.73907  |
| 16w_SITTE12 | 0.02092353 | 0.12091367 | 4.21E-05 | 0.0052798 | -0.037579 |
| 16w_SITTE12 | 0.07660865 | 0.4645466  | 5.13E-05 | 0.014025  | 0.22792   |
| 16w_SITTE12 | 0.02473711 | 0.1444473  | 4.36E-05 | 0.0049516 | -0.098011 |
| 16w_SITTE12 | 0.08995765 | 0.5469232  | 4.88E-05 | 0.0086895 | -0.47194  |
| 16w_SITTE12 | 0.03001906 | 0.17704223 | 4.55E-05 | 0.0046645 | -0.12301  |
| 16w_SITTE12 | 0.09297669 | 0.5655537  | 5.02E-05 | 0.0070215 | -0.73907  |
| 16w_SITTE12 | 0.09077907 | 0.55199224 | 4.91E-05 | 0.0083333 | -0.56091  |
| 16w_SITTE12 | 0.02289583 | 0.13308474 | 4.30E-05 | 0.0050782 | -0.077142 |
| 16w_SITTE12 | 0.02578485 | 0.15091288 | 4.40E-05 | 0.0048781 | -0.10813  |
| 16w_SITTE12 | 0.02505839 | 0.14642994 | 4.38E-05 | 0.0049138 | -0.10343  |
| 16w_SITTE12 | 0.02128043 | 0.12311612 | 4.24E-05 | 0.0052258 | -0.04878  |
| 16w_SITTE12 | 0.09480301 | 0.576824   | 5.13E-05 | 0.0061762 | -0.8688   |
| 16w_SITTE12 | 0.04683578 | 0.28081822 | 5.49E-05 | 0.0049251 | -0.018376 |
| 16w_SITTE12 | 0.08397197 | 0.5099856  | 4.77E-05 | 0.013036  | -0.036078 |
| 16w_SITTE12 | 0.05769478 | 0.34782907 | 6.32E-05 | 0.0064035 | 0.057806  |
| 16w_SITTE12 | 0.02668924 | 0.15649392 | 4.44E-05 | 0.004813  | -0.11546  |
| 16w_SITTE12 | 0.08731091 | 0.53059024 | 4.79E-05 | 0.010571  | -0.25808  |
| 16w_SITTE12 | 0.02185932 | 0.12668844 | 4.26E-05 | 0.0051742 | -0.059109 |
| 16w_SITTE12 | 0.0243355  | 0.14196898 | 4.34E-05 | 0.0049916 | -0.098011 |
| 16w_SITTE12 | 0.0113056  | 0.06156146 | 3.71E-05 | 0.0066957 | 0.2858    |

|             |            |            |          |           |           |
|-------------|------------|------------|----------|-----------|-----------|
| 16w_SITTE12 | 0.08871999 | 0.53928566 | 4.82E-05 | 0.0098057 | -0.3844   |
| 16w_SITTE12 | 0.06554833 | 0.39629337 | 6.20E-05 | 0.0089013 | 0.16566   |
| 16w_SITTE12 | 0.03942225 | 0.23506932 | 4.92E-05 | 0.0045932 | -0.067351 |
| 16w_SITTE12 | 0.055313   | 0.33313113 | 6.21E-05 | 0.005966  | 0.038579  |
| 16w_SITTE12 | 0.02024599 | 0.11673258 | 4.19E-05 | 0.0053364 | -0.025531 |
| 16w_SITTE12 | 0.02503021 | 0.14625604 | 4.38E-05 | 0.0049138 | -0.10343  |
| 16w_SITTE12 | 0.0653339  | 0.39497012 | 6.20E-05 | 0.0089013 | 0.15715   |
| 16w_SITTE12 | 0.07809082 | 0.4736931  | 5.01E-05 | 0.014289  | 0.20103   |
| 16w_SITTE12 | 0.09337368 | 0.5680036  | 5.06E-05 | 0.0067258 | -0.73907  |
| 16w_SITTE12 | 0.03156204 | 0.18656394 | 4.60E-05 | 0.0046154 | -0.12002  |
| 16w_SITTE12 | 0.01640661 | 0.09303976 | 4.00E-05 | 0.0058035 | 0.080526  |
| 16w_SITTE12 | 0.02291867 | 0.13322571 | 4.30E-05 | 0.0050782 | -0.077142 |
| 16w_SITTE12 | 0.0163378  | 0.09261514 | 4.00E-05 | 0.0058035 | 0.080526  |
| 16w_SITTE12 | 0.08496216 | 0.51609606 | 4.76E-05 | 0.012404  | -0.10433  |
| 16w_SITTE12 | 0.0182532  | 0.10443509 | 4.09E-05 | 0.0055879 | 0.030658  |
| 16w_SITTE12 | 0.06282648 | 0.3794968  | 6.35E-05 | 0.0078047 | 0.12359   |
| 16w_SITTE12 | 0.02403362 | 0.14010608 | 4.34E-05 | 0.0049916 | -0.091842 |
| 16w_SITTE12 | 0.01206049 | 0.06621985 | 3.77E-05 | 0.0064954 | 0.24064   |
| 16w_SITTE12 | 0.01646782 | 0.09341751 | 4.00E-05 | 0.0058035 | 0.080526  |
| 16w_SITTE12 | 0.0096813  | 0.0515379  | 3.62E-05 | 0.0070172 | 0.35661   |
| 16w_SITTE12 | 0.09320562 | 0.5669665  | 5.06E-05 | 0.0067258 | -0.73907  |
| 16w_SITTE12 | 0.02946759 | 0.17363912 | 4.53E-05 | 0.0046846 | -0.1231   |
| 16w_SITTE12 | 0.01311294 | 0.07271453 | 3.83E-05 | 0.0063061 | 0.19734   |
| 16w_SITTE12 | 0.01757066 | 0.10022315 | 4.06E-05 | 0.0056572 | 0.046584  |
| 16w_SITTE12 | 0.02104007 | 0.12163285 | 4.21E-05 | 0.0052798 | -0.037579 |
| 16w_SITTE12 | 0.08108947 | 0.49219772 | 4.85E-05 | 0.0141    | 0.10139   |
| 16w_SITTE12 | 0.02776353 | 0.16312332 | 4.48E-05 | 0.0047558 | -0.12024  |
| 16w_SITTE12 | 0.01871866 | 0.10730744 | 4.11E-05 | 0.0055212 | 0.015459  |
| 16w_SITTE12 | 0.09692525 | 0.58992034 | 5.28E-05 | 0.0052469 | -1.03     |
| 16w_SITTE12 | 0.02648723 | 0.15524727 | 4.42E-05 | 0.0048445 | -0.11546  |
| 16w_SITTE12 | 0.01498653 | 0.08427645 | 3.92E-05 | 0.0060428 | 0.1363    |
| 16w_SITTE12 | 0.04041599 | 0.24120168 | 4.99E-05 | 0.0046177 | -0.063007 |
| 16w_SITTE12 | 0.01612246 | 0.09128626 | 3.98E-05 | 0.0058806 | 0.098494  |
| 16w_SITTE12 | 0.09695382 | 0.59009665 | 5.28E-05 | 0.0052469 | -1.03     |
| 16w_SITTE12 | 0.07446504 | 0.4513184  | 5.33E-05 | 0.013335  | 0.24406   |
| 16w_SITTE12 | 0.02489284 | 0.1454083  | 4.36E-05 | 0.0049516 | -0.10343  |
| 16w_SITTE12 | 0.02809924 | 0.16519499 | 4.48E-05 | 0.0047558 | -0.12174  |
| 16w_SITTE12 | 0.03902107 | 0.23259363 | 4.92E-05 | 0.0045932 | -0.071721 |
| 16w_SITTE12 | 0.02533344 | 0.14812726 | 4.38E-05 | 0.0049138 | -0.10343  |
| 16w_SITTE12 | 0.06806231 | 0.4118071  | 5.98E-05 | 0.010192  | 0.20551   |
| 16w_SITTE12 | 0.06307359 | 0.38102174 | 6.33E-05 | 0.0080056 | 0.12359   |
| 16w_SITTE12 | 0.07924942 | 0.4808428  | 4.93E-05 | 0.014315  | 0.17506   |
| 16w_SITTE12 | 0.02406124 | 0.14027648 | 4.34E-05 | 0.0049916 | -0.091842 |



|             |            |            |          |           |           |
|-------------|------------|------------|----------|-----------|-----------|
| 16w_SITTE12 | 0.02575024 | 0.15069933 | 4.40E-05 | 0.0048781 | -0.10813  |
| 16w_SITTE12 | 0.03718193 | 0.22124428 | 4.81E-05 | 0.0045652 | -0.088896 |
| 16w_SITTE12 | 0.01888986 | 0.10836392 | 4.11E-05 | 0.0055212 | 0.0010121 |
| 16w_SITTE12 | 0.01784496 | 0.10191583 | 4.06E-05 | 0.0056572 | 0.030658  |
| 16w_SITTE12 | 0.09153535 | 0.5566593  | 4.93E-05 | 0.0079874 | -0.60562  |
| 16w_SITTE12 | 0.07806513 | 0.47353452 | 5.01E-05 | 0.014289  | 0.20103   |
| 16w_SITTE12 | 0.01959494 | 0.11271499 | 4.16E-05 | 0.0053955 | -0.012659 |
| 16w_SITTE12 | 0.03635378 | 0.21613376 | 4.79E-05 | 0.0045625 | -0.092976 |
| 16w_SITTE12 | 0.03449194 | 0.20464437 | 4.70E-05 | 0.0045688 | -0.10761  |
| 16w_SITTE12 | 0.01402877 | 0.07836612 | 3.86E-05 | 0.0062156 | 0.1561    |
| 16w_SITTE12 | 0.01856215 | 0.10634162 | 4.11E-05 | 0.0055212 | 0.015459  |
| 16w_SITTE12 | 0.02948301 | 0.17373426 | 4.53E-05 | 0.0046846 | -0.1231   |
| 16w_SITTE12 | 0.00993578 | 0.05310827 | 3.65E-05 | 0.0069072 | 0.33263   |
| 16w_SITTE12 | 0.03097929 | 0.18296778 | 4.58E-05 | 0.00463   | -0.12145  |
| 16w_SITTE12 | 0.00513083 | 0.02345696 | 3.38E-05 | 0.0079991 | 0.55892   |
| 16w_SITTE12 | 0.0947597  | 0.57655674 | 5.13E-05 | 0.0061762 | -0.8688   |
| 16w_SITTE12 | 0.06905884 | 0.41795668 | 5.87E-05 | 0.010741  | 0.21248   |
| 16w_SITTE12 | 0.02779881 | 0.16334105 | 4.48E-05 | 0.0047558 | -0.12024  |
| 16w_SITTE12 | 0.09708236 | 0.5908899  | 5.32E-05 | 0.0050496 | -1.03     |
| 16w_SITTE12 | 0.03164224 | 0.18705887 | 4.60E-05 | 0.0046154 | -0.12002  |
| 16w_SITTE12 | 0.02255143 | 0.13095947 | 4.28E-05 | 0.005125  | -0.068556 |
| 16w_SITTE12 | 0.02656908 | 0.1557524  | 4.44E-05 | 0.004813  | -0.11546  |
| 16w_SITTE12 | 0.02105296 | 0.12171244 | 4.21E-05 | 0.0052798 | -0.04878  |
| 16w_SITTE12 | 0.03020714 | 0.17820288 | 4.55E-05 | 0.0046645 | -0.12301  |
| 16w_SITTE12 | 0.01380679 | 0.07699626 | 3.86E-05 | 0.0062156 | 0.17645   |
| 16w_SITTE12 | 0.02083893 | 0.12039162 | 4.21E-05 | 0.0052798 | -0.037579 |
| 16w_SITTE12 | 0.09530377 | 0.5799142  | 5.16E-05 | 0.0059226 | -0.91061  |
| 16w_SITTE12 | 0.02068949 | 0.11946943 | 4.21E-05 | 0.0052798 | -0.037579 |
| 16w_SITTE12 | 0.01048658 | 0.05650724 | 3.68E-05 | 0.0068    | 0.30902   |
| 16w_SITTE12 | 0.01729573 | 0.09852653 | 4.03E-05 | 0.005729  | 0.046584  |
| 16w_SITTE12 | 0.01965282 | 0.11307213 | 4.16E-05 | 0.0053955 | -0.012659 |
| 16w_SITTE12 | 0.08768757 | 0.5329146  | 4.79E-05 | 0.010571  | -0.29935  |
| 16w_SITTE12 | 0.02129708 | 0.12321886 | 4.24E-05 | 0.0052258 | -0.04878  |
| 16w_SITTE12 | 0.02436565 | 0.14215505 | 4.36E-05 | 0.0049516 | -0.098011 |
| 16w_SITTE12 | 0.04493258 | 0.26907355 | 5.30E-05 | 0.0047888 | -0.028317 |
| 16w_SITTE12 | 0.02742491 | 0.16103375 | 4.46E-05 | 0.0047834 | -0.11816  |
| 16w_SITTE12 | 0.08793398 | 0.5344352  | 4.80E-05 | 0.010188  | -0.29935  |
| 16w_SITTE12 | 0.01998834 | 0.11514264 | 4.16E-05 | 0.0053955 | -0.025531 |
| 16w_SITTE12 | 0.08021165 | 0.48678073 | 4.87E-05 | 0.014207  | 0.14202   |
| 16w_SITTE12 | 0.05021834 | 0.30169195 | 5.78E-05 | 0.0052091 | 0.0043724 |
| 16w_SITTE12 | 0.00432689 | 0.0184958  | 3.35E-05 | 0.0081345 | 0.58516   |
| 16w_SITTE12 | 0.07795063 | 0.47282794 | 5.05E-05 | 0.014229  | 0.20103   |
| 16w_SITTE12 | 0.08258709 | 0.5014396  | 4.79E-05 | 0.013563  | 0.05262   |

|             |            |            |          |           |           |
|-------------|------------|------------|----------|-----------|-----------|
| 16w_SITTE12 | 0.02008864 | 0.11576161 | 4.19E-05 | 0.0053364 | -0.025531 |
| 16w_SITTE12 | 0.07754265 | 0.4703103  | 5.05E-05 | 0.014229  | 0.21153   |
| 16w_SITTE12 | 0.02184677 | 0.12661102 | 4.26E-05 | 0.0051742 | -0.059109 |
| 16w_SITTE12 | 0.02378493 | 0.1385714  | 4.32E-05 | 0.0050338 | -0.091842 |
| 16w_SITTE12 | 0.0787356  | 0.47767198 | 4.97E-05 | 0.014318  | 0.18889   |
| 16w_SITTE12 | 0.01772078 | 0.10114954 | 4.06E-05 | 0.0056572 | 0.046584  |
| 16w_SITTE12 | 0.02290379 | 0.13313386 | 4.30E-05 | 0.0050782 | -0.077142 |
| 16w_SITTE12 | 0.0649877  | 0.39283368 | 6.24E-05 | 0.0086643 | 0.15715   |
| 16w_SITTE12 | 0.01405253 | 0.07851275 | 3.86E-05 | 0.0062156 | 0.1561    |
| 16w_SITTE12 | 0.01893014 | 0.10861249 | 4.11E-05 | 0.0055212 | 0.0010121 |
| 16w_SITTE12 | 0.07466918 | 0.45257813 | 5.33E-05 | 0.013335  | 0.24193   |
| 16w_SITTE12 | 0.0243326  | 0.14195108 | 4.34E-05 | 0.0049916 | -0.098011 |
| 16w_SITTE12 | 0.07844469 | 0.4758768  | 5.01E-05 | 0.014289  | 0.18889   |
| 16w_SITTE12 | 0.03785271 | 0.22538364 | 4.84E-05 | 0.0045696 | -0.080425 |
| 16w_SITTE12 | 0.03121378 | 0.18441482 | 4.58E-05 | 0.00463   | -0.12145  |
| 16w_SITTE12 | 0.03434852 | 0.20375933 | 4.70E-05 | 0.0045688 | -0.10761  |
| 16w_SITTE12 | 0.01382905 | 0.07713363 | 3.86E-05 | 0.0062156 | 0.17645   |
| 16w_SITTE12 | 0.09786271 | 0.5957054  | 5.36E-05 | 0.0048658 | -1.1032   |
| 16w_SITTE12 | 0.01697888 | 0.09657124 | 4.03E-05 | 0.005729  | 0.063215  |
| 16w_SITTE12 | 0.04692285 | 0.2813555  | 5.49E-05 | 0.0049251 | -0.018376 |
| 16w_SITTE12 | 0.02278711 | 0.13241383 | 4.30E-05 | 0.0050782 | -0.077142 |
| 16w_SITTE12 | 0.08951142 | 0.54416955 | 4.86E-05 | 0.0090548 | -0.42792  |
| 16w_SITTE12 | 0.02464433 | 0.14387478 | 4.36E-05 | 0.0049516 | -0.098011 |
| 16w_SITTE12 | 0.02242379 | 0.13017182 | 4.28E-05 | 0.005125  | -0.068556 |
| 16w_SITTE12 | 0.01915029 | 0.10997104 | 4.14E-05 | 0.0054571 | 0.0010121 |
| 16w_SITTE12 | 0.00488926 | 0.02196619 | 3.38E-05 | 0.0079991 | 0.55892   |
| 16w_SITTE12 | 0.08237081 | 0.5001049  | 4.79E-05 | 0.013563  | 0.05262   |
| 16w_SITTE12 | 0.02035916 | 0.11743097 | 4.19E-05 | 0.0053364 | -0.025531 |
| 16w_SITTE12 | 0.04480896 | 0.2683107  | 5.30E-05 | 0.0047888 | -0.031751 |
| 16w_SITTE12 | 0.08403189 | 0.51035535 | 4.76E-05 | 0.012731  | -0.036078 |
| 16w_SITTE12 | 0.02455246 | 0.14330783 | 4.36E-05 | 0.0049516 | -0.098011 |
| 16w_SITTE12 | 0.01636485 | 0.09278204 | 4.00E-05 | 0.0058035 | 0.080526  |
| 16w_SITTE12 | 0.06277629 | 0.3791871  | 6.35E-05 | 0.0078047 | 0.12359   |
| 16w_SITTE12 | 0.01447109 | 0.08109569 | 3.89E-05 | 0.0061278 | 0.1561    |
| 16w_SITTE12 | 0.00952584 | 0.05057854 | 3.62E-05 | 0.0070172 | 0.35661   |
| 16w_SITTE12 | 0.02812465 | 0.16535181 | 4.48E-05 | 0.0047558 | -0.12174  |
| 16w_SITTE12 | 0.08946896 | 0.5439075  | 4.86E-05 | 0.0090548 | -0.42792  |
| 16w_SITTE12 | 0.01297164 | 0.07184259 | 3.80E-05 | 0.0063994 | 0.19734   |
| 16w_SITTE12 | 0.01055114 | 0.05690566 | 3.68E-05 | 0.0068    | 0.30902   |
| 16w_SITTE12 | 0.0273064  | 0.16030242 | 4.46E-05 | 0.0047834 | -0.11816  |
| 16w_SITTE12 | 0.01075869 | 0.05818645 | 3.68E-05 | 0.0068    | 0.30902   |
| 16w_SITTE12 | 0.01427207 | 0.07986754 | 3.89E-05 | 0.0061278 | 0.1561    |
| 16w_SITTE12 | 0.01464705 | 0.08218152 | 3.92E-05 | 0.0060428 | 0.1363    |

|             |            |            |          |           |           |
|-------------|------------|------------|----------|-----------|-----------|
| 16w_SITTE12 | 0.01366642 | 0.07613004 | 3.86E-05 | 0.0062156 | 0.17645   |
| 16w_SITTE12 | 0.0388056  | 0.23126398 | 4.89E-05 | 0.0045836 | -0.076088 |
| 16w_SITTE12 | 0.00754154 | 0.03833342 | 3.50E-05 | 0.0074854 | 0.45576   |
| 16w_SITTE12 | 0.01039862 | 0.05596447 | 3.68E-05 | 0.0068    | 0.30902   |
| 16w_SITTE12 | 0.10441427 | 0.63613504 | 5.86E-05 | 0.0036344 | -1.3758   |
| 16w_SITTE12 | 0.05617134 | 0.33842796 | 6.24E-05 | 0.0060668 | 0.047788  |
| 16w_SITTE12 | 0.09108433 | 0.553876   | 4.93E-05 | 0.0079874 | -0.56091  |
| 16w_SITTE12 | 0.07542029 | 0.45721322 | 5.23E-05 | 0.013721  | 0.23858   |
| 16w_SITTE12 | 0.01738108 | 0.09905324 | 4.06E-05 | 0.0056572 | 0.046584  |
| 16w_SITTE12 | 0.02462749 | 0.14377087 | 4.36E-05 | 0.0049516 | -0.098011 |
| 16w_SITTE12 | 0.01021678 | 0.05484233 | 3.65E-05 | 0.0069072 | 0.33263   |
| 16w_SITTE12 | 0.03339519 | 0.19787633 | 4.66E-05 | 0.0045822 | -0.11352  |
| 16w_SITTE12 | 0.0169782  | 0.09656705 | 4.03E-05 | 0.005729  | 0.063215  |
| 16w_SITTE12 | 0.02103598 | 0.12160763 | 4.21E-05 | 0.0052798 | -0.037579 |
| 16w_SITTE12 | 0.09545542 | 0.58084995 | 5.20E-05 | 0.0056833 | -0.91061  |
| 16w_SITTE12 | 0.02480356 | 0.14485736 | 4.36E-05 | 0.0049516 | -0.098011 |
| 16w_SITTE12 | 0.09697949 | 0.590255   | 5.28E-05 | 0.0052469 | -1.03     |
| 16w_SITTE12 | 0.07330152 | 0.44413832 | 5.43E-05 | 0.012883  | 0.24489   |
| 16w_SITTE12 | 0.05436235 | 0.32726464 | 6.14E-05 | 0.0057798 | 0.030074  |
| 16w_SITTE12 | 0.02227718 | 0.12926705 | 4.28E-05 | 0.005125  | -0.068556 |
| 16w_SITTE12 | 0.09689172 | 0.5897134  | 5.28E-05 | 0.0052469 | -1.03     |
| 16w_SITTE12 | 0.01984087 | 0.11423263 | 4.16E-05 | 0.0053955 | -0.012659 |
| 16w_SITTE12 | 0.01938009 | 0.11138916 | 4.14E-05 | 0.0054571 | 0.0010121 |
| 16w_SITTE12 | 0.06495474 | 0.39263028 | 6.24E-05 | 0.0086643 | 0.15715   |
| 16w_SITTE12 | 0.09502186 | 0.5781745  | 5.16E-05 | 0.0059226 | -0.8688   |
| 16w_SITTE12 | 0.01586148 | 0.08967578 | 3.98E-05 | 0.0058806 | 0.098494  |
| 16w_SITTE12 | 0.01967143 | 0.11318696 | 4.16E-05 | 0.0053955 | -0.012659 |
| 16w_SITTE12 | 0.07940911 | 0.4818282  | 4.93E-05 | 0.014315  | 0.15946   |
| 16w_SITTE12 | 0.03508769 | 0.20832075 | 4.72E-05 | 0.0045646 | -0.10426  |
| 16w_SITTE12 | 0.10040004 | 0.61136323 | 5.58E-05 | 0.0041426 | -1.2296   |
| 16w_SITTE12 | 0.014502   | 0.08128641 | 3.89E-05 | 0.0061278 | 0.1561    |
| 16w_SITTE12 | 0.07918988 | 0.48047537 | 4.93E-05 | 0.014315  | 0.17506   |
| 16w_SITTE12 | 0.0459427  | 0.275307   | 5.39E-05 | 0.0048522 | -0.021643 |
| 16w_SITTE12 | 0.0805748  | 0.4890217  | 4.87E-05 | 0.014207  | 0.12269   |
| 16w_SITTE12 | 0.02873889 | 0.16914229 | 4.51E-05 | 0.0047064 | -0.12268  |
| 16w_SITTE12 | 0.02248664 | 0.13055968 | 4.28E-05 | 0.005125  | -0.068556 |
| 16w_SITTE12 | 0.05192581 | 0.3122288  | 5.92E-05 | 0.0053939 | 0.014768  |
| 16w_SITTE12 | 0.02455701 | 0.14333594 | 4.36E-05 | 0.0049516 | -0.098011 |
| 16w_SITTE12 | 0.01520395 | 0.08561814 | 3.95E-05 | 0.0059603 | 0.11709   |
| 16w_SITTE12 | 0.01451969 | 0.08139556 | 3.89E-05 | 0.0061278 | 0.1561    |
| 16w_SITTE12 | 0.08267957 | 0.5020102  | 4.79E-05 | 0.013563  | 0.02505   |
| 16w_SITTE12 | 0.08312005 | 0.50472844 | 4.78E-05 | 0.013315  | 0.02505   |
| 16w_SITTE12 | 0.09122472 | 0.55474234 | 4.93E-05 | 0.0079874 | -0.56091  |

|             |            |            |          |           |            |
|-------------|------------|------------|----------|-----------|------------|
| 16w_SITTE12 | 0.02146359 | 0.12424638 | 4.24E-05 | 0.0052258 | -0.04878   |
| 16w_SITTE12 | 0.01826566 | 0.104512   | 4.09E-05 | 0.0055879 | 0.030658   |
| 16w_SITTE12 | 0.06867559 | 0.4155917  | 5.93E-05 | 0.010465  | 0.21248    |
| 16w_SITTE12 | 0.1078625  | 0.6574141  | 6.12E-05 | 0.0035823 | -1.389     |
| 16w_SITTE12 | 0.08384715 | 0.50921535 | 4.77E-05 | 0.013036  | -0.036078  |
| 16w_SITTE12 | 0.01256152 | 0.06931174 | 3.80E-05 | 0.0063994 | 0.21875    |
| 16w_SITTE12 | 0.01484982 | 0.08343285 | 3.92E-05 | 0.0060428 | 0.1363     |
| 16w_SITTE12 | 0.01585438 | 0.08963195 | 3.98E-05 | 0.0058806 | 0.098494   |
| 16w_SITTE12 | 0.01509134 | 0.08492326 | 3.92E-05 | 0.0060428 | 0.1363     |
| 16w_SITTE12 | 0.01212454 | 0.0666151  | 3.77E-05 | 0.0064954 | 0.24064    |
| 16w_SITTE12 | 0.02099571 | 0.12135915 | 4.21E-05 | 0.0052798 | -0.037579  |
| 16w_SITTE12 | 0.08778968 | 0.5335447  | 4.80E-05 | 0.010188  | -0.29935   |
| 16w_SITTE12 | 0.02378763 | 0.13858806 | 4.32E-05 | 0.0050338 | -0.091842  |
| 16w_SITTE12 | 0.02727432 | 0.16010444 | 4.46E-05 | 0.0047834 | -0.11816   |
| 16w_SITTE12 | 0.02483041 | 0.14502305 | 4.36E-05 | 0.0049516 | -0.10343   |
| 16w_SITTE12 | 0.02497435 | 0.14591134 | 4.38E-05 | 0.0049138 | -0.10343   |
| 16w_SITTE12 | 0.00681514 | 0.03385079 | 3.47E-05 | 0.0076096 | 0.48124    |
| 16w_SITTE12 | 0.03349835 | 0.1985129  | 4.66E-05 | 0.0045822 | -0.11071   |
| 16w_SITTE12 | 0.02298545 | 0.13363779 | 4.30E-05 | 0.0050782 | -0.077142  |
| 16w_SITTE12 | 0.02025029 | 0.11675913 | 4.19E-05 | 0.0053364 | -0.025531  |
| 16w_SITTE12 | 0.05430017 | 0.32688096 | 6.14E-05 | 0.0057798 | 0.030074   |
| 16w_SITTE12 | 0.0187237  | 0.10733853 | 4.11E-05 | 0.0055212 | 0.015459   |
| 16w_SITTE12 | 0.08483518 | 0.5153125  | 4.76E-05 | 0.012404  | -0.10433   |
| 16w_SITTE12 | 0.01834546 | 0.10500441 | 4.09E-05 | 0.0055879 | 0.030658   |
| 16w_SITTE12 | 0.02359075 | 0.13737312 | 4.32E-05 | 0.0050338 | -0.084895  |
| 16w_SITTE12 | 0.01594684 | 0.09020251 | 3.98E-05 | 0.0058806 | 0.098494   |
| 16w_SITTE12 | 0.02505603 | 0.14641535 | 4.38E-05 | 0.0049138 | -0.10343   |
| 16w_SITTE12 | 0.07588689 | 0.4600926  | 5.18E-05 | 0.013885  | 0.23393    |
| 16w_SITTE12 | 0.01993832 | 0.11483398 | 4.16E-05 | 0.0053955 | -0.012659  |
| 16w_SITTE12 | 0.03448669 | 0.20461193 | 4.70E-05 | 0.0045688 | -0.10761   |
| 16w_SITTE12 | 0.02879571 | 0.16949292 | 4.51E-05 | 0.0047064 | -0.12268   |
| 16w_SITTE12 | 0.01309525 | 0.07260536 | 3.83E-05 | 0.0063061 | 0.19734    |
| 16w_SITTE12 | 0.07342393 | 0.4448937  | 5.43E-05 | 0.012883  | 0.24489    |
| 16w_SITTE12 | 0.08425251 | 0.51171684 | 4.76E-05 | 0.012731  | -0.069378  |
| 16w_SITTE12 | 0.0605865  | 0.36567387 | 6.38E-05 | 0.0070986 | 0.09374    |
| 16w_SITTE12 | 0.02876479 | 0.16930212 | 4.51E-05 | 0.0047064 | -0.12268   |
| 16w_SITTE12 | 0.05278589 | 0.3175363  | 6.01E-05 | 0.0055357 | 0.018414   |
| 16w_SITTE12 | 0.08342638 | 0.5066188  | 4.78E-05 | 0.013315  | -0.0045591 |
| 16w_SITTE12 | 0.07604171 | 0.46104798 | 5.18E-05 | 0.013885  | 0.23393    |
| 16w_SITTE12 | 0.00982956 | 0.05245283 | 3.65E-05 | 0.0069072 | 0.33263    |
| 16w_SITTE12 | 0.04865662 | 0.2920546  | 5.63E-05 | 0.005054  | -0.0054808 |
| 16w_SITTE12 | 0.01298005 | 0.07189447 | 3.80E-05 | 0.0063994 | 0.19734    |
| 16w_SITTE12 | 0.01506521 | 0.08476201 | 3.92E-05 | 0.0060428 | 0.1363     |

|             |            |            |          |           |           |
|-------------|------------|------------|----------|-----------|-----------|
| 16w_SITTE12 | 0.00998228 | 0.05339523 | 3.65E-05 | 0.0069072 | 0.33263   |
| 16w_SITTE12 | 0.02419941 | 0.14112917 | 4.34E-05 | 0.0049916 | -0.091842 |
| 16w_SITTE12 | 0.08874264 | 0.5394254  | 4.82E-05 | 0.0098057 | -0.3844   |
| 16w_SITTE12 | 0.08574887 | 0.52095085 | 4.76E-05 | 0.0117    | -0.14081  |
| 16w_SITTE12 | 0.03527098 | 0.2094518  | 4.74E-05 | 0.0045622 | -0.10068  |
| 16w_SITTE12 | 0.10463046 | 0.6374692  | 5.90E-05 | 0.0036036 | -1.3758   |
| 16w_SITTE12 | 0.0142117  | 0.07949499 | 3.89E-05 | 0.0061278 | 0.1561    |
| 16w_SITTE12 | 0.02582464 | 0.15115845 | 4.40E-05 | 0.0048781 | -0.10813  |
| 16w_SITTE12 | 0.03748857 | 0.22313657 | 4.84E-05 | 0.0045696 | -0.084703 |
| 16w_SITTE12 | 0.01142762 | 0.06231443 | 3.74E-05 | 0.0065941 | 0.263     |
| 16w_SITTE12 | 0.02578697 | 0.15092601 | 4.40E-05 | 0.0048781 | -0.10813  |
| 16w_SITTE12 | 0.02432801 | 0.14192277 | 4.34E-05 | 0.0049916 | -0.098011 |
| 16w_SITTE12 | 0.06501624 | 0.39300984 | 6.20E-05 | 0.0089013 | 0.15715   |
| 16w_SITTE12 | 0.02596245 | 0.15200888 | 4.40E-05 | 0.0048781 | -0.11213  |
| 16w_SITTE12 | 0.09170385 | 0.557699   | 4.96E-05 | 0.0076529 | -0.60562  |
| 16w_SITTE12 | 0.02488932 | 0.14538658 | 4.36E-05 | 0.0049516 | -0.10343  |
| 16w_SITTE12 | 0.02178731 | 0.12624408 | 4.26E-05 | 0.0051742 | -0.059109 |
| 16w_SITTE12 | 0.03052765 | 0.18018074 | 4.57E-05 | 0.0046464 | -0.12245  |
| 16w_SITTE12 | 0.06325641 | 0.38214988 | 6.33E-05 | 0.0080056 | 0.13178   |
| 16w_SITTE12 | 0.02665406 | 0.15627679 | 4.44E-05 | 0.004813  | -0.11546  |
| 16w_SITTE12 | 0.02693992 | 0.15804085 | 4.44E-05 | 0.004813  | -0.11546  |
| 16w_SITTE12 | 0.08488921 | 0.5156459  | 4.76E-05 | 0.012404  | -0.10433  |
| 16w_SITTE12 | 0.01852692 | 0.1061242  | 4.11E-05 | 0.0055212 | 0.015459  |
| 16w_SITTE12 | 0.01721853 | 0.09805012 | 4.03E-05 | 0.005729  | 0.063215  |
| 16w_SITTE12 | 0.01585198 | 0.08961716 | 3.98E-05 | 0.0058806 | 0.098494  |
| 16w_SITTE12 | 0.03074529 | 0.18152376 | 4.57E-05 | 0.0046464 | -0.12245  |
| 16w_SITTE12 | 0.01850874 | 0.106012   | 4.11E-05 | 0.0055212 | 0.015459  |
| 16w_SITTE12 | 0.06032001 | 0.36402938 | 6.38E-05 | 0.0070986 | 0.087064  |
| 16w_SITTE12 | 0.03120259 | 0.1843458  | 4.58E-05 | 0.00463   | -0.12145  |
| 16w_SITTE12 | 0.0209334  | 0.1209746  | 4.21E-05 | 0.0052798 | -0.037579 |
| 16w_SITTE12 | 0.0503406  | 0.30244642 | 5.78E-05 | 0.0052091 | 0.0043724 |
| 16w_SITTE12 | 0.01200997 | 0.06590813 | 3.77E-05 | 0.0064954 | 0.24064   |
| 16w_SITTE12 | 0.05829646 | 0.3515421  | 6.34E-05 | 0.0065282 | 0.06315   |
| 16w_SITTE12 | 0.01039353 | 0.05593303 | 3.68E-05 | 0.0068    | 0.30902   |
| 16w_SITTE12 | 0.01798496 | 0.10277981 | 4.09E-05 | 0.0055879 | 0.030658  |
| 16w_SITTE12 | 0.02660529 | 0.15597586 | 4.44E-05 | 0.004813  | -0.11546  |
| 16w_SITTE12 | 0.01870823 | 0.10724308 | 4.11E-05 | 0.0055212 | 0.015459  |
| 16w_SITTE12 | 0.09423545 | 0.5733216  | 5.09E-05 | 0.0064439 | -0.82618  |
| 16w_SITTE12 | 0.04010283 | 0.23926918 | 4.99E-05 | 0.0046177 | -0.063007 |
| 16w_SITTE12 | 0.02323419 | 0.13517275 | 4.30E-05 | 0.0050782 | -0.084895 |
| 16w_SITTE12 | 0.09192302 | 0.5590516  | 4.96E-05 | 0.0076529 | -0.6503   |
| 16w_SITTE12 | 0.03946425 | 0.23532847 | 4.92E-05 | 0.0045932 | -0.067351 |
| 16w_SITTE12 | 0.02188628 | 0.12685485 | 4.26E-05 | 0.0051742 | -0.059109 |

|             |            |            |          |           |            |
|-------------|------------|------------|----------|-----------|------------|
| 16w_SITTE12 | 0.0455729  | 0.27302495 | 5.39E-05 | 0.0048522 | -0.024952  |
| 16w_SITTE12 | 0.01793337 | 0.10246145 | 4.09E-05 | 0.0055879 | 0.030658   |
| 16w_SITTE12 | 0.02111127 | 0.12207221 | 4.21E-05 | 0.0052798 | -0.04878   |
| 16w_SITTE12 | 0.02315469 | 0.13468216 | 4.30E-05 | 0.0050782 | -0.077142  |
| 16w_SITTE12 | 0.00860234 | 0.04487963 | 3.56E-05 | 0.0072456 | 0.40559    |
| 16w_SITTE12 | 0.02860708 | 0.1683289  | 4.49E-05 | 0.0047302 | -0.12174   |
| 16w_SITTE12 | 0.03443281 | 0.2042795  | 4.70E-05 | 0.0045688 | -0.10761   |
| 16w_SITTE12 | 0.0624755  | 0.3773309  | 6.35E-05 | 0.0078047 | 0.11565    |
| 16w_SITTE12 | 0.01233491 | 0.06791332 | 3.77E-05 | 0.0064954 | 0.24064    |
| 16w_SITTE12 | 0.06998995 | 0.4237026  | 5.76E-05 | 0.011297  | 0.22487    |
| 16w_SITTE12 | 0.06884239 | 0.416621   | 5.87E-05 | 0.010741  | 0.21248    |
| 16w_SITTE12 | 0.09640074 | 0.5866836  | 5.24E-05 | 0.0054581 | -0.99133   |
| 16w_SITTE12 | 0.04845154 | 0.29078904 | 5.63E-05 | 0.005054  | -0.0087048 |
| 16w_SITTE12 | 0.07262467 | 0.43996143 | 5.49E-05 | 0.012637  | 0.24373    |
| 16w_SITTE12 | 0.08051056 | 0.48862532 | 4.87E-05 | 0.014207  | 0.12269    |
| 16w_SITTE12 | 0.06871546 | 0.41583773 | 5.93E-05 | 0.010465  | 0.21248    |
| 16w_SITTE12 | 0.01279564 | 0.07075646 | 3.80E-05 | 0.0063994 | 0.21875    |
| 16w_SITTE12 | 0.07012288 | 0.42452294 | 5.76E-05 | 0.011297  | 0.22487    |
| 16w_SITTE12 | 0.029632   | 0.17465366 | 4.53E-05 | 0.0046846 | -0.1231    |
| 16w_SITTE12 | 0.014433   | 0.08086064 | 3.89E-05 | 0.0061278 | 0.1561     |
| 16w_SITTE12 | 0.01547297 | 0.08727828 | 3.95E-05 | 0.0059603 | 0.11709    |
| 16w_SITTE12 | 0.02211455 | 0.12826346 | 4.26E-05 | 0.0051742 | -0.059109  |
| 16w_SITTE12 | 0.08888662 | 0.5403139  | 4.84E-05 | 0.0094274 | -0.3844    |
| 16w_SITTE12 | 0.01763273 | 0.10060614 | 4.06E-05 | 0.0056572 | 0.046584   |
| 16w_SITTE12 | 0.01618742 | 0.09168712 | 3.98E-05 | 0.0058806 | 0.080526   |
| 16w_SITTE12 | 0.0395692  | 0.23597613 | 4.95E-05 | 0.0046046 | -0.067351  |
| 16w_SITTE12 | 0.01784597 | 0.10192209 | 4.06E-05 | 0.0056572 | 0.030658   |
| 16w_SITTE12 | 0.03241268 | 0.19181326 | 4.62E-05 | 0.0046026 | -0.11603   |
| 16w_SITTE12 | 0.01423366 | 0.07963048 | 3.89E-05 | 0.0061278 | 0.1561     |
| 16w_SITTE12 | 0.0739549  | 0.44817033 | 5.38E-05 | 0.013116  | 0.24502    |
| 16w_SITTE12 | 0.01543483 | 0.08704291 | 3.95E-05 | 0.0059603 | 0.11709    |
| 16w_SITTE12 | 0.01784605 | 0.10192259 | 4.06E-05 | 0.0056572 | 0.030658   |
| 16w_SITTE12 | 0.02734663 | 0.16055064 | 4.46E-05 | 0.0047834 | -0.11816   |
| 16w_SITTE12 | 0.01833024 | 0.1049105  | 4.09E-05 | 0.0055879 | 0.030658   |
| 16w_SITTE12 | 0.02711694 | 0.15913326 | 4.46E-05 | 0.0047834 | -0.11816   |
| 16w_SITTE12 | 0.01311486 | 0.07272639 | 3.83E-05 | 0.0063061 | 0.19734    |
| 16w_SITTE12 | 0.0858333  | 0.5214719  | 4.76E-05 | 0.0117    | -0.14081   |
| 16w_SITTE12 | 0.02139847 | 0.12384458 | 4.24E-05 | 0.0052258 | -0.04878   |
| 16w_SITTE12 | 0.00484374 | 0.0216853  | 3.35E-05 | 0.0081345 | 0.55892    |
| 16w_SITTE12 | 0.02245131 | 0.13034165 | 4.28E-05 | 0.005125  | -0.068556  |
| 16w_SITTE12 | 0.0226873  | 0.13179791 | 4.28E-05 | 0.005125  | -0.077142  |
| 16w_SITTE12 | 0.09033907 | 0.549277   | 4.88E-05 | 0.0086895 | -0.51631   |
| 16w_SITTE12 | 0.02345894 | 0.13655971 | 4.32E-05 | 0.0050338 | -0.084895  |

|             |            |            |          |           |           |
|-------------|------------|------------|----------|-----------|-----------|
| 16w_SITTE12 | 0.02257421 | 0.13110003 | 4.28E-05 | 0.005125  | -0.068556 |
| 16w_SITTE12 | 0.03870221 | 0.23062593 | 4.89E-05 | 0.0045836 | -0.076088 |
| 16w_SITTE12 | 0.05545486 | 0.33400655 | 6.21E-05 | 0.005966  | 0.038579  |
| 16w_SITTE12 | 0.02263917 | 0.1315009  | 4.28E-05 | 0.005125  | -0.068556 |
| 16w_SITTE12 | 0.01450752 | 0.08132049 | 3.89E-05 | 0.0061278 | 0.1561    |
| 16w_SITTE12 | 0.02463485 | 0.14381628 | 4.36E-05 | 0.0049516 | -0.098011 |
| 16w_SITTE12 | 0.02482519 | 0.14499083 | 4.36E-05 | 0.0049516 | -0.098011 |
| 16w_SITTE12 | 0.01774776 | 0.101316   | 4.06E-05 | 0.0056572 | 0.046584  |
| 16w_SITTE12 | 0.03125083 | 0.1846435  | 4.58E-05 | 0.00463   | -0.12145  |
| 16w_SITTE12 | 0.03770592 | 0.22447781 | 4.84E-05 | 0.0045696 | -0.084703 |
| 16w_SITTE12 | 0.09429719 | 0.5737025  | 5.13E-05 | 0.0061762 | -0.82618  |
| 16w_SITTE12 | 0.08693503 | 0.52827066 | 4.78E-05 | 0.010952  | -0.21781  |
| 16w_SITTE12 | 0.00469113 | 0.02074354 | 3.35E-05 | 0.0081345 | 0.58516   |
| 16w_SITTE12 | 0.01334154 | 0.07412521 | 3.83E-05 | 0.0063061 | 0.19734   |
| 16w_SITTE12 | 0.07532921 | 0.45665115 | 5.23E-05 | 0.013721  | 0.23858   |
| 16w_SITTE12 | 0.03293827 | 0.19505666 | 4.64E-05 | 0.0045915 | -0.11352  |
| 16w_SITTE12 | 0.03354927 | 0.19882715 | 4.66E-05 | 0.0045822 | -0.11071  |
| 16w_SITTE12 | 0.01763666 | 0.10063045 | 4.06E-05 | 0.0056572 | 0.046584  |
| 16w_SITTE12 | 0.01720594 | 0.09797246 | 4.03E-05 | 0.005729  | 0.063215  |
| 16w_SITTE12 | 0.01686929 | 0.09589499 | 4.03E-05 | 0.005729  | 0.063215  |
| 16w_SITTE12 | 0.08740798 | 0.5311892  | 4.79E-05 | 0.010571  | -0.25808  |
| 16w_SITTE12 | 0.05947778 | 0.358832   | 6.37E-05 | 0.0067983 | 0.080679  |
| 16w_SITTE12 | 0.01413651 | 0.07903101 | 3.89E-05 | 0.0061278 | 0.1561    |
| 16w_SITTE12 | 0.02529707 | 0.14790282 | 4.38E-05 | 0.0049138 | -0.10343  |
| 16w_SITTE12 | 0.02833925 | 0.16667613 | 4.49E-05 | 0.0047302 | -0.12174  |
| 16w_SITTE12 | 0.03098345 | 0.18299349 | 4.58E-05 | 0.00463   | -0.12145  |
| 16w_SITTE12 | 0.05100513 | 0.30654725 | 5.87E-05 | 0.0053288 | 0.0077602 |
| 16w_SITTE12 | 0.02781637 | 0.1634494  | 4.48E-05 | 0.0047558 | -0.12024  |
| 16w_SITTE12 | 0.02749782 | 0.16148363 | 4.46E-05 | 0.0047834 | -0.11816  |
| 16w_SITTE12 | 0.0233512  | 0.13589483 | 4.32E-05 | 0.0050338 | -0.084895 |
| 16w_SITTE12 | 0.02059344 | 0.11887668 | 4.21E-05 | 0.0052798 | -0.037579 |
| 16w_SITTE12 | 0.02085417 | 0.12048568 | 4.21E-05 | 0.0052798 | -0.037579 |
| 16w_SITTE12 | 0.02229748 | 0.12939234 | 4.28E-05 | 0.005125  | -0.068556 |
| 16w_SITTE12 | 0.07672872 | 0.46528757 | 5.13E-05 | 0.014025  | 0.22047   |
| 16w_SITTE12 | 0.01977926 | 0.11385242 | 4.16E-05 | 0.0053955 | -0.012659 |
| 16w_SITTE12 | 0.01590131 | 0.08992155 | 3.98E-05 | 0.0058806 | 0.098494  |
| 16w_SITTE12 | 0.09416495 | 0.5728865  | 5.09E-05 | 0.0064439 | -0.82618  |
| 16w_SITTE12 | 0.02344239 | 0.13645759 | 4.32E-05 | 0.0050338 | -0.084895 |
| 16w_SITTE12 | 0.08640743 | 0.5250148  | 4.77E-05 | 0.01133   | -0.21781  |
| 16w_SITTE12 | 0.04295591 | 0.25687551 | 5.17E-05 | 0.0047101 | -0.042593 |
| 16w_SITTE12 | 0.02386035 | 0.13903679 | 4.34E-05 | 0.0049916 | -0.091842 |
| 16w_SITTE12 | 0.07914259 | 0.48018357 | 4.93E-05 | 0.014315  | 0.17506   |
| 16w_SITTE12 | 0.02206586 | 0.12796304 | 4.26E-05 | 0.0051742 | -0.059109 |

|             |            |            |          |           |           |
|-------------|------------|------------|----------|-----------|-----------|
| 16w_SITTE12 | 0.02023743 | 0.11667976 | 4.19E-05 | 0.0053364 | -0.025531 |
| 16w_SITTE12 | 0.03148808 | 0.18610755 | 4.60E-05 | 0.0046154 | -0.12002  |
| 16w_SITTE12 | 0.02108387 | 0.12190314 | 4.21E-05 | 0.0052798 | -0.04878  |
| 16w_SITTE12 | 0.01261751 | 0.06965723 | 3.80E-05 | 0.0063994 | 0.21875   |
| 16w_SITTE12 | 0.01604048 | 0.09078039 | 3.98E-05 | 0.0058806 | 0.098494  |
| 16w_SITTE12 | 0.01359856 | 0.07571127 | 3.86E-05 | 0.0062156 | 0.17645   |
| 16w_SITTE12 | 0.09102362 | 0.5535013  | 4.91E-05 | 0.0083333 | -0.56091  |
| 16w_SITTE12 | 0.01272926 | 0.07034685 | 3.80E-05 | 0.0063994 | 0.21875   |
| 16w_SITTE12 | 0.03685271 | 0.21921267 | 4.81E-05 | 0.0045652 | -0.088896 |
| 16w_SITTE12 | 0.03196058 | 0.18902333 | 4.62E-05 | 0.0046026 | -0.11821  |
| 16w_SITTE12 | 0.04768939 | 0.2860858  | 5.58E-05 | 0.0050083 | -0.01192  |
| 16w_SITTE12 | 0.08463845 | 0.51409847 | 4.76E-05 | 0.012404  | -0.069378 |
| 16w_SITTE12 | 0.07531419 | 0.4565585  | 5.23E-05 | 0.013721  | 0.23858   |
| 16w_SITTE12 | 0.01866854 | 0.10699817 | 4.11E-05 | 0.0055212 | 0.015459  |
| 16w_SITTE12 | 0.08541112 | 0.51886666 | 4.76E-05 | 0.012059  | -0.14081  |
| 16w_SITTE12 | 0.02399835 | 0.1398884  | 4.34E-05 | 0.0049916 | -0.091842 |
| 16w_SITTE12 | 0.02023932 | 0.11669141 | 4.19E-05 | 0.0053364 | -0.025531 |
| 16w_SITTE12 | 0.09614391 | 0.5850987  | 5.24E-05 | 0.0054581 | -0.99133  |
| 16w_SITTE12 | 0.02654215 | 0.15558621 | 4.44E-05 | 0.004813  | -0.11546  |
| 16w_SITTE12 | 0.02060857 | 0.1189701  | 4.21E-05 | 0.0052798 | -0.037579 |
| 16w_SITTE12 | 0.021734   | 0.12591513 | 4.26E-05 | 0.0051742 | -0.059109 |
| 16w_SITTE12 | 0.02138179 | 0.12374163 | 4.24E-05 | 0.0052258 | -0.04878  |
| 16w_SITTE12 | 0.03422978 | 0.20302656 | 4.70E-05 | 0.0045688 | -0.10761  |
| 16w_SITTE12 | 0.02350975 | 0.13687328 | 4.32E-05 | 0.0050338 | -0.084895 |
| 16w_SITTE12 | 0.0323217  | 0.19125181 | 4.62E-05 | 0.0046026 | -0.11821  |
| 16w_SITTE12 | 0.01424232 | 0.07968395 | 3.89E-05 | 0.0061278 | 0.1561    |
| 16w_SITTE12 | 0.01626132 | 0.09214319 | 4.00E-05 | 0.0058035 | 0.080526  |
| 16w_SITTE12 | 0.02211503 | 0.12826644 | 4.26E-05 | 0.0051742 | -0.059109 |
| 16w_SITTE12 | 0.02835037 | 0.16674472 | 4.49E-05 | 0.0047302 | -0.12174  |
| 16w_SITTE12 | 0.01178087 | 0.06449436 | 3.74E-05 | 0.0065941 | 0.263     |
| 16w_SITTE12 | 0.09141646 | 0.55592555 | 4.93E-05 | 0.0079874 | -0.60562  |
| 16w_SITTE12 | 0.03146335 | 0.18595493 | 4.60E-05 | 0.0046154 | -0.12002  |
| 16w_SITTE12 | 0.01150015 | 0.06276199 | 3.74E-05 | 0.0065941 | 0.263     |
| 16w_SITTE12 | 0.07764483 | 0.47094083 | 5.05E-05 | 0.014229  | 0.21153   |
| 16w_SITTE12 | 0.0081328  | 0.04198211 | 3.56E-05 | 0.0072456 | 0.40559   |
| 16w_SITTE12 | 0.03559965 | 0.21148004 | 4.74E-05 | 0.0045622 | -0.10068  |
| 16w_SITTE12 | 0.07890718 | 0.4787308  | 4.97E-05 | 0.014318  | 0.17506   |
| 16w_SITTE12 | 0.02934391 | 0.17287585 | 4.53E-05 | 0.0046846 | -0.1231   |
| 16w_SITTE12 | 0.07538577 | 0.45700023 | 5.23E-05 | 0.013721  | 0.23858   |
| 16w_SITTE12 | 0.02192811 | 0.12711297 | 4.26E-05 | 0.0051742 | -0.059109 |
| 16w_SITTE12 | 0.01389393 | 0.077534   | 3.86E-05 | 0.0062156 | 0.17645   |
| 16w_SITTE12 | 0.0194876  | 0.11205258 | 4.16E-05 | 0.0053955 | -0.012659 |
| 16w_SITTE12 | 0.02371859 | 0.13816202 | 4.32E-05 | 0.0050338 | -0.084895 |



|             |            |            |          |           |            |
|-------------|------------|------------|----------|-----------|------------|
| 16w_SITTE12 | 0.04901279 | 0.2942525  | 5.68E-05 | 0.0051026 | -0.0054808 |
| 16w_SITTE12 | 0.04702146 | 0.281964   | 5.49E-05 | 0.0049251 | -0.01514   |
| 16w_SITTE12 | 0.01667923 | 0.0947221  | 4.00E-05 | 0.0058035 | 0.080526   |
| 16w_SITTE12 | 0.05155622 | 0.309948   | 5.92E-05 | 0.0053939 | 0.011221   |
| 16w_SITTE12 | 0.02053579 | 0.11852096 | 4.19E-05 | 0.0053364 | -0.037579  |
| 16w_SITTE12 | 0.0844749  | 0.5130892  | 4.76E-05 | 0.012731  | -0.069378  |
| 16w_SITTE12 | 0.02086611 | 0.12055937 | 4.21E-05 | 0.0052798 | -0.037579  |
| 16w_SITTE12 | 0.01737632 | 0.09902389 | 4.06E-05 | 0.0056572 | 0.046584   |
| 16w_SITTE12 | 0.07906979 | 0.47973427 | 4.97E-05 | 0.014318  | 0.17506    |
| 16w_SITTE12 | 0.04425468 | 0.26489022 | 5.25E-05 | 0.0047605 | -0.035266  |
| 16w_SITTE12 | 0.02866309 | 0.16867451 | 4.49E-05 | 0.0047302 | -0.12268   |
| 16w_SITTE12 | 0.01108067 | 0.06017339 | 3.71E-05 | 0.0066957 | 0.2858     |
| 16w_SITTE12 | 0.03525891 | 0.20937735 | 4.74E-05 | 0.0045622 | -0.10068   |
| 16w_SITTE12 | 0.02412389 | 0.14066315 | 4.34E-05 | 0.0049916 | -0.091842  |
| 16w_SITTE12 | 0.0459819  | 0.27554888 | 5.39E-05 | 0.0048522 | -0.021643  |
| 16w_SITTE12 | 0.0119175  | 0.06533749 | 3.77E-05 | 0.0064954 | 0.24064    |
| 16w_SITTE12 | 0.0285895  | 0.16822037 | 4.49E-05 | 0.0047302 | -0.12174   |
| 16w_SITTE12 | 0.01433725 | 0.08026973 | 3.89E-05 | 0.0061278 | 0.1561     |
| 16w_SITTE12 | 0.08854232 | 0.53818923 | 4.82E-05 | 0.0098057 | -0.3415    |
| 16w_SITTE12 | 0.03681361 | 0.2189714  | 4.79E-05 | 0.0045625 | -0.088896  |
| 16w_SITTE12 | 0.01598332 | 0.09042764 | 3.98E-05 | 0.0058806 | 0.098494   |
| 16w_SITTE12 | 0.02964655 | 0.17474349 | 4.53E-05 | 0.0046846 | -0.1231    |
| 16w_SITTE12 | 0.08067348 | 0.48963067 | 4.87E-05 | 0.014207  | 0.12269    |
| 16w_SITTE12 | 0.03187607 | 0.1885018  | 4.60E-05 | 0.0046154 | -0.11821   |
| 16w_SITTE12 | 0.10237057 | 0.62352335 | 5.70E-05 | 0.0038563 | -1.3227    |
| 16w_SITTE12 | 0.01613829 | 0.09138397 | 3.98E-05 | 0.0058806 | 0.098494   |
| 16w_SITTE12 | 0.06196455 | 0.37417784 | 6.36E-05 | 0.0076138 | 0.10802    |
| 16w_SITTE12 | 0.03000395 | 0.17694901 | 4.55E-05 | 0.0046645 | -0.12301   |
| 16w_SITTE12 | 0.04539632 | 0.27193528 | 5.34E-05 | 0.0048194 | -0.024952  |
| 16w_SITTE12 | 0.0375114  | 0.22327743 | 4.84E-05 | 0.0045696 | -0.084703  |
| 16w_SITTE12 | 0.08858231 | 0.538436   | 4.82E-05 | 0.0098057 | -0.3844    |
| 16w_SITTE12 | 0.11865394 | 0.7240081  | 6.66E-05 | 0.0046865 | -1.1226    |
| 16w_SITTE12 | 0.01715687 | 0.09766964 | 4.03E-05 | 0.005729  | 0.063215   |
| 16w_SITTE12 | 0.04682358 | 0.28074294 | 5.49E-05 | 0.0049251 | -0.018376  |
| 16w_SITTE12 | 0.03835711 | 0.22849631 | 4.87E-05 | 0.0045758 | -0.076088  |
| 16w_SITTE12 | 0.07628173 | 0.46252915 | 5.18E-05 | 0.013885  | 0.22792    |
| 16w_SITTE12 | 0.01362341 | 0.07586462 | 3.86E-05 | 0.0062156 | 0.17645    |
| 16w_SITTE12 | 0.00402047 | 0.01660489 | 3.32E-05 | 0.0082728 | 0.61153    |
| 16w_SITTE12 | 0.08885843 | 0.54014    | 4.84E-05 | 0.0094274 | -0.3844    |
| 16w_SITTE12 | 0.01464798 | 0.08218729 | 3.92E-05 | 0.0060428 | 0.1363     |
| 16w_SITTE12 | 0.03067642 | 0.18109879 | 4.57E-05 | 0.0046464 | -0.12245   |
| 16w_SITTE12 | 0.01957072 | 0.11256553 | 4.16E-05 | 0.0053955 | -0.012659  |
| 16w_SITTE12 | 0.03429834 | 0.20344964 | 4.70E-05 | 0.0045688 | -0.10761   |

|             |            |            |          |           |            |
|-------------|------------|------------|----------|-----------|------------|
| 16w_SITTE12 | 0.09183972 | 0.55853754 | 4.96E-05 | 0.0076529 | -0.6503    |
| 16w_SITTE12 | 0.01498741 | 0.08428189 | 3.92E-05 | 0.0060428 | 0.1363     |
| 16w_SITTE12 | 0.01748944 | 0.09972189 | 4.06E-05 | 0.0056572 | 0.046584   |
| 16w_SITTE12 | 0.07569066 | 0.4588817  | 5.23E-05 | 0.013721  | 0.23393    |
| 16w_SITTE12 | 0.04529821 | 0.27132985 | 5.34E-05 | 0.0048194 | -0.028317  |
| 16w_SITTE12 | 0.00551833 | 0.02584822 | 3.41E-05 | 0.0078664 | 0.53284    |
| 16w_SITTE12 | 0.01204163 | 0.06610346 | 3.77E-05 | 0.0064954 | 0.24064    |
| 16w_SITTE12 | 0.0113359  | 0.06174843 | 3.71E-05 | 0.0066957 | 0.263      |
| 16w_SITTE12 | 0.00585462 | 0.02792345 | 3.41E-05 | 0.0078664 | 0.53284    |
| 16w_SITTE12 | 0.02066905 | 0.1193433  | 4.21E-05 | 0.0052798 | -0.037579  |
| 16w_SITTE12 | 0.04878875 | 0.29287    | 5.68E-05 | 0.0051026 | -0.0054808 |
| 16w_SITTE12 | 0.02000725 | 0.11525931 | 4.16E-05 | 0.0053955 | -0.025531  |
| 16w_SITTE12 | 0.08493553 | 0.5159317  | 4.76E-05 | 0.012404  | -0.10433   |
| 16w_SITTE12 | 0.08166817 | 0.49576887 | 4.83E-05 | 0.013957  | 0.078055   |
| 16w_SITTE12 | 0.02618813 | 0.15340152 | 4.42E-05 | 0.0048445 | -0.11213   |
| 16w_SITTE12 | 0.02151177 | 0.12454371 | 4.24E-05 | 0.0052258 | -0.04878   |
| 16w_SITTE12 | 0.01843291 | 0.10554411 | 4.11E-05 | 0.0055212 | 0.015459   |
| 16w_SITTE12 | 0.01856896 | 0.10638363 | 4.11E-05 | 0.0055212 | 0.015459   |
| 16w_SITTE12 | 0.03117751 | 0.18419105 | 4.58E-05 | 0.00463   | -0.12145   |
| 16w_SITTE12 | 0.05062908 | 0.30422667 | 5.83E-05 | 0.0052672 | 0.0043724  |
| 16w_SITTE12 | 0.0284181  | 0.16716267 | 4.49E-05 | 0.0047302 | -0.12174   |
| 16w_SITTE12 | 0.01604942 | 0.09083556 | 3.98E-05 | 0.0058806 | 0.098494   |
| 16w_SITTE12 | 0.08241082 | 0.5003518  | 4.79E-05 | 0.013563  | 0.05262    |
| 16w_SITTE12 | 0.08788782 | 0.53415036 | 4.80E-05 | 0.010188  | -0.29935   |
| 16w_SITTE12 | 0.03028276 | 0.1786695  | 4.55E-05 | 0.0046645 | -0.12245   |
| 16w_SITTE12 | 0.02206245 | 0.12794197 | 4.26E-05 | 0.0051742 | -0.059109  |
| 16w_SITTE12 | 0.01590998 | 0.08997506 | 3.98E-05 | 0.0058806 | 0.098494   |
| 16w_SITTE12 | 0.08538616 | 0.5187126  | 4.76E-05 | 0.012059  | -0.14081   |
| 16w_SITTE12 | 0.0480433  | 0.2882698  | 5.58E-05 | 0.0050083 | -0.01192   |
| 16w_SITTE12 | 0.08425263 | 0.5117176  | 4.76E-05 | 0.012731  | -0.069378  |
| 16w_SITTE12 | 0.02589415 | 0.15158741 | 4.40E-05 | 0.0048781 | -0.10813   |
| 16w_SITTE12 | 0.08027732 | 0.48718598 | 4.87E-05 | 0.014207  | 0.14202    |
| 16w_SITTE12 | 0.01968001 | 0.11323994 | 4.16E-05 | 0.0053955 | -0.012659  |
| 16w_SITTE12 | 0.02379246 | 0.1386179  | 4.32E-05 | 0.0050338 | -0.091842  |
| 16w_SITTE12 | 0.0226206  | 0.13138632 | 4.28E-05 | 0.005125  | -0.068556  |
| 16w_SITTE12 | 0.08788866 | 0.5341555  | 4.80E-05 | 0.010188  | -0.29935   |
| 16w_SITTE12 | 0.0335235  | 0.19866812 | 4.66E-05 | 0.0045822 | -0.11071   |
| 16w_SITTE12 | 0.0910209  | 0.55348456 | 4.91E-05 | 0.0083333 | -0.56091   |
| 16w_SITTE12 | 0.01879432 | 0.10777431 | 4.11E-05 | 0.0055212 | 0.015459   |
| 16w_SITTE12 | 0.03607258 | 0.21439846 | 4.77E-05 | 0.0045615 | -0.096915  |
| 16w_SITTE12 | 0.08451559 | 0.5133403  | 4.76E-05 | 0.012731  | -0.069378  |
| 16w_SITTE12 | 0.03251708 | 0.19245753 | 4.64E-05 | 0.0045915 | -0.11603   |
| 16w_SITTE12 | 0.02134633 | 0.12352281 | 4.24E-05 | 0.0052258 | -0.04878   |

|             |            |            |          |           |            |
|-------------|------------|------------|----------|-----------|------------|
| 16w_SITTE12 | 0.01810294 | 0.10350785 | 4.09E-05 | 0.0055879 | 0.030658   |
| 16w_SITTE12 | 0.01248186 | 0.06882016 | 3.80E-05 | 0.0063994 | 0.21875    |
| 16w_SITTE12 | 0.06573815 | 0.39746472 | 6.16E-05 | 0.0091463 | 0.16566    |
| 16w_SITTE12 | 0.01646617 | 0.09340734 | 4.00E-05 | 0.0058035 | 0.080526   |
| 16w_SITTE12 | 0.01553763 | 0.08767733 | 3.95E-05 | 0.0059603 | 0.11709    |
| 16w_SITTE12 | 0.05091659 | 0.30600092 | 5.83E-05 | 0.0052672 | 0.0077602  |
| 16w_SITTE12 | 0.01849993 | 0.10595764 | 4.11E-05 | 0.0055212 | 0.015459   |
| 16w_SITTE12 | 0.02956537 | 0.17424248 | 4.53E-05 | 0.0046846 | -0.1231    |
| 16w_SITTE12 | 0.03086765 | 0.18227887 | 4.58E-05 | 0.00463   | -0.12145   |
| 16w_SITTE12 | 0.01762564 | 0.1005624  | 4.06E-05 | 0.0056572 | 0.046584   |
| 16w_SITTE12 | 0.0333312  | 0.19748141 | 4.66E-05 | 0.0045822 | -0.11352   |
| 16w_SITTE12 | 0.02180287 | 0.12634009 | 4.26E-05 | 0.0051742 | -0.059109  |
| 16w_SITTE12 | 0.02346128 | 0.13657415 | 4.32E-05 | 0.0050338 | -0.084895  |
| 16w_SITTE12 | 0.0154608  | 0.08720317 | 3.95E-05 | 0.0059603 | 0.11709    |
| 16w_SITTE12 | 0.08513474 | 0.5171611  | 4.76E-05 | 0.012059  | -0.10433   |
| 16w_SITTE12 | 0.01804276 | 0.10313646 | 4.09E-05 | 0.0055879 | 0.030658   |
| 16w_SITTE12 | 0.07857738 | 0.4766956  | 4.97E-05 | 0.014318  | 0.18889    |
| 16w_SITTE12 | 0.08488281 | 0.5156064  | 4.76E-05 | 0.012404  | -0.10433   |
| 16w_SITTE12 | 0.03839999 | 0.22876094 | 4.87E-05 | 0.0045758 | -0.076088  |
| 16w_SITTE12 | 0.00956648 | 0.05082933 | 3.62E-05 | 0.0070172 | 0.35661    |
| 16w_SITTE12 | 0.00921641 | 0.04866907 | 3.62E-05 | 0.0070172 | 0.35661    |
| 16w_SITTE12 | 0.07830135 | 0.47499225 | 5.01E-05 | 0.014289  | 0.20103    |
| 16w_SITTE12 | 0.01273105 | 0.07035791 | 3.80E-05 | 0.0063994 | 0.21875    |
| 16w_SITTE12 | 0.01660195 | 0.09424521 | 4.00E-05 | 0.0058035 | 0.080526   |
| 16w_SITTE12 | 0.08340132 | 0.5064641  | 4.78E-05 | 0.013315  | -0.0045591 |
| 16w_SITTE12 | 0.02781569 | 0.16344519 | 4.48E-05 | 0.0047558 | -0.12024   |
| 16w_SITTE12 | 0.01483107 | 0.08331709 | 3.92E-05 | 0.0060428 | 0.1363     |
| 16w_SITTE12 | 0.01857313 | 0.10640938 | 4.11E-05 | 0.0055212 | 0.015459   |
| 16w_SITTE12 | 0.02504225 | 0.14633031 | 4.38E-05 | 0.0049138 | -0.10343   |
| 16w_SITTE12 | 0.03172436 | 0.18756561 | 4.60E-05 | 0.0046154 | -0.12002   |
| 16w_SITTE12 | 0.01627671 | 0.09223817 | 4.00E-05 | 0.0058035 | 0.080526   |
| 16w_SITTE12 | 0.0222568  | 0.1291413  | 4.28E-05 | 0.005125  | -0.068556  |
| 16w_SITTE12 | 0.03144956 | 0.18586984 | 4.60E-05 | 0.0046154 | -0.12002   |
| 16w_SITTE12 | 0.10164071 | 0.6190194  | 5.66E-05 | 0.0039398 | -1.303     |
| 16w_SITTE12 | 0.09493749 | 0.5776538  | 5.16E-05 | 0.0059226 | -0.8688    |
| 16w_SITTE12 | 0.03478104 | 0.2064284  | 4.72E-05 | 0.0045646 | -0.10426   |
| 16w_SITTE12 | 0.07316583 | 0.443301   | 5.43E-05 | 0.012883  | 0.24489    |
| 16w_SITTE12 | 0.03753874 | 0.22344615 | 4.84E-05 | 0.0045696 | -0.084703  |
| 16w_SITTE12 | 0.01554961 | 0.08775124 | 3.95E-05 | 0.0059603 | 0.11709    |
| 16w_SITTE12 | 0.01473266 | 0.08270986 | 3.92E-05 | 0.0060428 | 0.1363     |
| 16w_SITTE12 | 0.0469707  | 0.28165075 | 5.49E-05 | 0.0049251 | -0.018376  |
| 16w_SITTE12 | 0.02999354 | 0.17688476 | 4.55E-05 | 0.0046645 | -0.12301   |
| 16w_SITTE12 | 0.0227723  | 0.13232249 | 4.30E-05 | 0.0050782 | -0.077142  |

|             |            |            |          |           |           |
|-------------|------------|------------|----------|-----------|-----------|
| 16w_SITTE12 | 0.08807381 | 0.53529805 | 4.80E-05 | 0.010188  | -0.3415   |
| 16w_SITTE12 | 0.04415847 | 0.26429653 | 5.25E-05 | 0.0047605 | -0.035266 |
| 16w_SITTE12 | 0.09163477 | 0.5572728  | 4.96E-05 | 0.0076529 | -0.60562  |
| 16w_SITTE12 | 0.05636786 | 0.33964068 | 6.27E-05 | 0.0061731 | 0.047788  |
| 16w_SITTE12 | 0.02435219 | 0.14207198 | 4.34E-05 | 0.0049916 | -0.098011 |
| 16w_SITTE12 | 0.02009007 | 0.1157704  | 4.19E-05 | 0.0053364 | -0.025531 |
| 16w_SITTE12 | 0.02728622 | 0.16017786 | 4.46E-05 | 0.0047834 | -0.11816  |
| 16w_SITTE12 | 0.06115102 | 0.36915758 | 6.38E-05 | 0.0072613 | 0.10072   |
| 16w_SITTE12 | 0.0179153  | 0.10234993 | 4.09E-05 | 0.0055879 | 0.030658  |
| 16w_SITTE12 | 0.01027958 | 0.05522989 | 3.68E-05 | 0.0068    | 0.30902   |
| 16w_SITTE12 | 0.01044486 | 0.05624982 | 3.68E-05 | 0.0068    | 0.30902   |
| 16w_SITTE12 | 0.07281416 | 0.4411308  | 5.49E-05 | 0.012637  | 0.24373   |
| 16w_SITTE12 | 0.03319564 | 0.1966449  | 4.66E-05 | 0.0045822 | -0.11352  |
| 16w_SITTE12 | 0.00869475 | 0.04544991 | 3.59E-05 | 0.00713   | 0.38094   |
| 16w_SITTE12 | 0.05720921 | 0.34483263 | 6.30E-05 | 0.0062853 | 0.05269   |
| 16w_SITTE12 | 0.01111991 | 0.06041553 | 3.71E-05 | 0.0066957 | 0.2858    |
| 16w_SITTE12 | 0.02314265 | 0.1346079  | 4.30E-05 | 0.0050782 | -0.077142 |
| 16w_SITTE12 | 0.02477547 | 0.14468405 | 4.36E-05 | 0.0049516 | -0.098011 |
| 16w_SITTE12 | 0.09267559 | 0.56369567 | 5.02E-05 | 0.0070215 | -0.69483  |
| 16w_SITTE12 | 0.0118237  | 0.06475866 | 3.74E-05 | 0.0065941 | 0.263     |
| 16w_SITTE12 | 0.09420942 | 0.5731609  | 5.09E-05 | 0.0064439 | -0.82618  |
| 16w_SITTE12 | 0.07118831 | 0.43109766 | 5.65E-05 | 0.011849  | 0.23476   |
| 16w_SITTE12 | 0.01108322 | 0.06018914 | 3.71E-05 | 0.0066957 | 0.2858    |
| 16w_SITTE12 | 0.05645048 | 0.3401505  | 6.27E-05 | 0.0061731 | 0.047788  |
| 16w_SITTE12 | 0.01364519 | 0.07599902 | 3.86E-05 | 0.0062156 | 0.17645   |
| 16w_SITTE12 | 0.03318315 | 0.19656783 | 4.66E-05 | 0.0045822 | -0.11352  |
| 16w_SITTE12 | 0.01901702 | 0.10914861 | 4.14E-05 | 0.0054571 | 0.0010121 |
| 16w_SITTE12 | 0.01449375 | 0.08123549 | 3.89E-05 | 0.0061278 | 0.1561    |
| 16w_SITTE12 | 0.02013788 | 0.11606547 | 4.19E-05 | 0.0053364 | -0.025531 |
| 16w_SITTE12 | 0.06578517 | 0.3977549  | 6.16E-05 | 0.0091463 | 0.16566   |
| 16w_SITTE12 | 0.02166415 | 0.12548406 | 4.26E-05 | 0.0051742 | -0.059109 |
| 16w_SITTE12 | 0.01847986 | 0.10583382 | 4.11E-05 | 0.0055212 | 0.015459  |
| 16w_SITTE12 | 0.03281285 | 0.19428268 | 4.64E-05 | 0.0045915 | -0.11603  |
| 16w_SITTE12 | 0.07591652 | 0.46027547 | 5.18E-05 | 0.013885  | 0.23393   |
| 16w_SITTE12 | 0.0358689  | 0.21314158 | 4.77E-05 | 0.0045615 | -0.096915 |
| 16w_SITTE12 | 0.02441754 | 0.14247525 | 4.36E-05 | 0.0049516 | -0.098011 |
| 16w_SITTE12 | 0.02729646 | 0.16024104 | 4.46E-05 | 0.0047834 | -0.11816  |
| 16w_SITTE12 | 0.0465469  | 0.2790355  | 5.44E-05 | 0.0048874 | -0.018376 |
| 16w_SITTE12 | 0.00958615 | 0.05095069 | 3.62E-05 | 0.0070172 | 0.35661   |
| 16w_SITTE12 | 0.07893738 | 0.4789172  | 4.97E-05 | 0.014318  | 0.17506   |
| 16w_SITTE12 | 0.02453466 | 0.14319797 | 4.36E-05 | 0.0049516 | -0.098011 |
| 16w_SITTE12 | 0.03871776 | 0.2307219  | 4.89E-05 | 0.0045836 | -0.076088 |
| 16w_SITTE12 | 0.09362146 | 0.5695326  | 5.06E-05 | 0.0067258 | -0.7829   |

|             |            |            |          |           |           |
|-------------|------------|------------|----------|-----------|-----------|
| 16w_SITTE12 | 0.01018143 | 0.05462418 | 3.65E-05 | 0.0069072 | 0.33263   |
| 16w_SITTE12 | 0.02880317 | 0.16953896 | 4.51E-05 | 0.0047064 | -0.12268  |
| 16w_SITTE12 | 0.03842463 | 0.228913   | 4.87E-05 | 0.0045758 | -0.076088 |
| 16w_SITTE12 | 0.00808168 | 0.04166662 | 3.53E-05 | 0.0073641 | 0.43054   |
| 16w_SITTE12 | 0.01635785 | 0.09273889 | 4.00E-05 | 0.0058035 | 0.080526  |
| 16w_SITTE12 | 0.07416691 | 0.4494786  | 5.38E-05 | 0.013116  | 0.24406   |
| 16w_SITTE12 | 0.01220432 | 0.06710747 | 3.77E-05 | 0.0064954 | 0.24064   |
| 16w_SITTE12 | 0.02715181 | 0.1593484  | 4.46E-05 | 0.0047834 | -0.11816  |
| 16w_SITTE12 | 0.14340186 | 0.8767275  | 7.55E-05 | 0.0048121 | -1.0827   |
| 16w_SITTE12 | 0.02114522 | 0.12228175 | 4.24E-05 | 0.0052258 | -0.04878  |
| 16w_SITTE12 | 0.01517136 | 0.08541703 | 3.95E-05 | 0.0059603 | 0.11709   |
| 16w_SITTE12 | 0.01579092 | 0.08924035 | 3.98E-05 | 0.0058806 | 0.098494  |
| 16w_SITTE12 | 0.08107156 | 0.49208724 | 4.85E-05 | 0.0141    | 0.10139   |
| 16w_SITTE12 | 0.02088891 | 0.12070008 | 4.21E-05 | 0.0052798 | -0.037579 |
| 16w_SITTE12 | 0.09144315 | 0.5560903  | 4.93E-05 | 0.0079874 | -0.60562  |
| 16w_SITTE12 | 0.02290088 | 0.13311595 | 4.30E-05 | 0.0050782 | -0.077142 |
| 16w_SITTE12 | 0.03483542 | 0.20676398 | 4.72E-05 | 0.0045646 | -0.10426  |
| 16w_SITTE12 | 0.09215155 | 0.56046176 | 4.99E-05 | 0.0073308 | -0.6503   |
| 16w_SITTE12 | 0.02087414 | 0.12060888 | 4.21E-05 | 0.0052798 | -0.037579 |
| 16w_SITTE12 | 0.06238608 | 0.37677914 | 6.35E-05 | 0.0078047 | 0.11565   |
| 16w_SITTE12 | 0.01814648 | 0.10377654 | 4.09E-05 | 0.0055879 | 0.030658  |
| 16w_SITTE12 | 0.01683739 | 0.0956981  | 4.03E-05 | 0.005729  | 0.063215  |
| 16w_SITTE12 | 0.09192424 | 0.559059   | 4.96E-05 | 0.0076529 | -0.6503   |
| 16w_SITTE12 | 0.06972862 | 0.42208993 | 5.82E-05 | 0.011019  | 0.22487   |
| 16w_SITTE12 | 0.01492877 | 0.08392    | 3.92E-05 | 0.0060428 | 0.1363    |
| 16w_SITTE12 | 0.03387452 | 0.20083426 | 4.68E-05 | 0.0045746 | -0.11071  |
| 16w_SITTE12 | 0.01832066 | 0.1048514  | 4.09E-05 | 0.0055879 | 0.030658  |
| 16w_SITTE12 | 0.00941826 | 0.04991464 | 3.62E-05 | 0.0070172 | 0.35661   |
| 16w_SITTE12 | 0.02709703 | 0.15901038 | 4.46E-05 | 0.0047834 | -0.11816  |
| 16w_SITTE12 | 0.00712393 | 0.03575638 | 3.50E-05 | 0.0074854 | 0.45576   |
| 16w_SITTE12 | 0.0850811  | 0.5168301  | 4.76E-05 | 0.012059  | -0.10433  |
| 16w_SITTE12 | 0.020615   | 0.11900974 | 4.21E-05 | 0.0052798 | -0.037579 |
| 16w_SITTE12 | 0.03592779 | 0.213505   | 4.77E-05 | 0.0045615 | -0.096915 |
| 16w_SITTE12 | 0.02173447 | 0.125918   | 4.26E-05 | 0.0051742 | -0.059109 |
| 16w_SITTE12 | 0.02024264 | 0.11671194 | 4.19E-05 | 0.0053364 | -0.025531 |
| 16w_SITTE12 | 0.01922141 | 0.11040992 | 4.14E-05 | 0.0054571 | 0.0010121 |
| 16w_SITTE12 | 0.08784366 | 0.53387785 | 4.80E-05 | 0.010188  | -0.29935  |
| 16w_SITTE12 | 0.00965763 | 0.0513918  | 3.62E-05 | 0.0070172 | 0.35661   |
| 16w_SITTE12 | 0.00362728 | 0.01417852 | 3.29E-05 | 0.0084138 | 0.63801   |
| 16w_SITTE12 | 0.03610618 | 0.21460584 | 4.77E-05 | 0.0045615 | -0.096915 |
| 16w_SITTE12 | 0.00822398 | 0.04254479 | 3.56E-05 | 0.0072456 | 0.40559   |
| 16w_SITTE12 | 0.0211985  | 0.12261055 | 4.24E-05 | 0.0052258 | -0.04878  |
| 16w_SITTE12 | 0.08518267 | 0.5174568  | 4.76E-05 | 0.012059  | -0.10433  |

|             |            |            |          |           |            |
|-------------|------------|------------|----------|-----------|------------|
| 16w_SITTE12 | 0.02346383 | 0.1365899  | 4.32E-05 | 0.0050338 | -0.084895  |
| 16w_SITTE12 | 0.01365705 | 0.07607222 | 3.86E-05 | 0.0062156 | 0.17645    |
| 16w_SITTE12 | 0.0180077  | 0.10292012 | 4.09E-05 | 0.0055879 | 0.030658   |
| 16w_SITTE12 | 0.02121863 | 0.12273473 | 4.24E-05 | 0.0052258 | -0.04878   |
| 16w_SITTE12 | 0.02986343 | 0.17608182 | 4.55E-05 | 0.0046645 | -0.12301   |
| 16w_SITTE12 | 0.02217845 | 0.12865783 | 4.26E-05 | 0.0051742 | -0.068556  |
| 16w_SITTE12 | 0.05930213 | 0.35774806 | 6.37E-05 | 0.0067983 | 0.074574   |
| 16w_SITTE12 | 0.08041064 | 0.48800865 | 4.87E-05 | 0.014207  | 0.14202    |
| 16w_SITTE12 | 0.02372971 | 0.13823064 | 4.32E-05 | 0.0050338 | -0.084895  |
| 16w_SITTE12 | 0.0499992  | 0.3003397  | 5.78E-05 | 0.0052091 | 0.0010449  |
| 16w_SITTE12 | 0.026997   | 0.15839311 | 4.44E-05 | 0.004813  | -0.11816   |
| 16w_SITTE12 | 0.01908339 | 0.10955818 | 4.14E-05 | 0.0054571 | 0.0010121  |
| 16w_SITTE12 | 0.03683744 | 0.21911845 | 4.81E-05 | 0.0045652 | -0.088896  |
| 16w_SITTE12 | 0.04727561 | 0.2835324  | 5.53E-05 | 0.0049654 | -0.01514   |
| 16w_SITTE12 | 0.0879264  | 0.5343884  | 4.80E-05 | 0.010188  | -0.29935   |
| 16w_SITTE12 | 0.03150513 | 0.18621276 | 4.60E-05 | 0.0046154 | -0.12002   |
| 16w_SITTE12 | 0.05185243 | 0.31177592 | 5.92E-05 | 0.0053939 | 0.014768   |
| 16w_SITTE12 | 0.01033121 | 0.05554847 | 3.68E-05 | 0.0068    | 0.30902    |
| 16w_SITTE12 | 0.02152336 | 0.12461526 | 4.24E-05 | 0.0052258 | -0.04878   |
| 16w_SITTE12 | 0.08839506 | 0.5372805  | 4.82E-05 | 0.0098057 | -0.3415    |
| 16w_SITTE12 | 0.01502431 | 0.08450962 | 3.92E-05 | 0.0060428 | 0.1363     |
| 16w_SITTE12 | 0.01503647 | 0.08458465 | 3.92E-05 | 0.0060428 | 0.1363     |
| 16w_SITTE12 | 0.0219404  | 0.12718883 | 4.26E-05 | 0.0051742 | -0.059109  |
| 16w_SITTE12 | 0.02660309 | 0.15596224 | 4.44E-05 | 0.004813  | -0.11546   |
| 16w_SITTE12 | 0.09784379 | 0.5955886  | 5.36E-05 | 0.0048658 | -1.1032    |
| 16w_SITTE12 | 0.00564981 | 0.02665954 | 3.41E-05 | 0.0078664 | 0.53284    |
| 16w_SITTE12 | 0.02492311 | 0.14559512 | 4.38E-05 | 0.0049138 | -0.10343   |
| 16w_SITTE12 | 0.0886598  | 0.5389142  | 4.82E-05 | 0.0098057 | -0.3844    |
| 16w_SITTE12 | 0.0315485  | 0.18648037 | 4.60E-05 | 0.0046154 | -0.12002   |
| 16w_SITTE12 | 0.0957814  | 0.5828616  | 5.20E-05 | 0.0056833 | -0.9515    |
| 16w_SITTE12 | 0.02384601 | 0.13894835 | 4.34E-05 | 0.0049916 | -0.091842  |
| 16w_SITTE12 | 0.09157453 | 0.556901   | 4.96E-05 | 0.0076529 | -0.60562   |
| 16w_SITTE12 | 0.08560228 | 0.5200463  | 4.76E-05 | 0.012059  | -0.14081   |
| 16w_SITTE12 | 0.01439715 | 0.0806394  | 3.89E-05 | 0.0061278 | 0.1561     |
| 16w_SITTE12 | 0.08249735 | 0.5008858  | 4.79E-05 | 0.013563  | 0.05262    |
| 16w_SITTE12 | 0.03632512 | 0.21595693 | 4.79E-05 | 0.0045625 | -0.092976  |
| 16w_SITTE12 | 0.01934956 | 0.11120073 | 4.14E-05 | 0.0054571 | 0.0010121  |
| 16w_SITTE12 | 0.02404082 | 0.14015049 | 4.34E-05 | 0.0049916 | -0.091842  |
| 16w_SITTE12 | 0.08585858 | 0.5216279  | 4.76E-05 | 0.0117    | -0.14081   |
| 16w_SITTE12 | 0.04913346 | 0.2949972  | 5.68E-05 | 0.0051026 | -0.0054808 |
| 16w_SITTE12 | 0.08143853 | 0.49435177 | 4.83E-05 | 0.013957  | 0.10139    |
| 16w_SITTE12 | 0.01718931 | 0.09786979 | 4.03E-05 | 0.005729  | 0.063215   |
| 16w_SITTE12 | 0.08184785 | 0.49687767 | 4.81E-05 | 0.013778  | 0.078055   |

|             |            |            |          |           |           |
|-------------|------------|------------|----------|-----------|-----------|
| 16w_SITTE12 | 0.01742549 | 0.09932726 | 4.06E-05 | 0.0056572 | 0.046584  |
| 16w_SITTE12 | 0.03170925 | 0.18747239 | 4.60E-05 | 0.0046154 | -0.12002  |
| 16w_SITTE12 | 0.01577332 | 0.08913171 | 3.98E-05 | 0.0058806 | 0.098494  |
| 16w_SITTE12 | 0.01326715 | 0.07366613 | 3.83E-05 | 0.0063061 | 0.19734   |
| 16w_SITTE12 | 0.01018755 | 0.05466195 | 3.65E-05 | 0.0069072 | 0.33263   |
| 16w_SITTE12 | 0.01161131 | 0.06344801 | 3.74E-05 | 0.0065941 | 0.263     |
| 16w_SITTE12 | 0.02774064 | 0.16298206 | 4.48E-05 | 0.0047558 | -0.12024  |
| 16w_SITTE12 | 0.02179524 | 0.12629303 | 4.26E-05 | 0.0051742 | -0.059109 |
| 16w_SITTE12 | 0.03188497 | 0.18855673 | 4.60E-05 | 0.0046154 | -0.11821  |
| 16w_SITTE12 | 0.03090118 | 0.18248582 | 4.58E-05 | 0.00463   | -0.12145  |
| 16w_SITTE12 | 0.01684686 | 0.09575655 | 4.03E-05 | 0.005729  | 0.063215  |
| 16w_SITTE12 | 0.02282781 | 0.13266501 | 4.30E-05 | 0.0050782 | -0.077142 |
| 16w_SITTE12 | 0.09727895 | 0.592103   | 5.32E-05 | 0.0050496 | -1.0673   |
| 16w_SITTE12 | 0.07097013 | 0.4297513  | 5.71E-05 | 0.011574  | 0.23476   |
| 16w_SITTE12 | 0.08872585 | 0.53932184 | 4.82E-05 | 0.0098057 | -0.3844   |
| 16w_SITTE12 | 0.0306201  | 0.18075126 | 4.57E-05 | 0.0046464 | -0.12245  |
| 16w_SITTE12 | 0.03433864 | 0.20369835 | 4.70E-05 | 0.0045688 | -0.10761  |
| 16w_SITTE12 | 0.01844091 | 0.10559346 | 4.11E-05 | 0.0055212 | 0.015459  |
| 16w_SITTE12 | 0.09598086 | 0.5840925  | 5.24E-05 | 0.0054581 | -0.9515   |
| 16w_SITTE12 | 0.01592914 | 0.09009328 | 3.98E-05 | 0.0058806 | 0.098494  |
| 16w_SITTE12 | 0.0360473  | 0.2142425  | 4.77E-05 | 0.0045615 | -0.096915 |
| 16w_SITTE12 | 0.02254834 | 0.13094044 | 4.28E-05 | 0.005125  | -0.068556 |
| 16w_SITTE12 | 0.01415695 | 0.07915713 | 3.89E-05 | 0.0061278 | 0.1561    |
| 16w_SITTE12 | 0.05004244 | 0.3006065  | 5.78E-05 | 0.0052091 | 0.0010449 |
| 16w_SITTE12 | 0.07831896 | 0.47510093 | 5.01E-05 | 0.014289  | 0.18889   |
| 16w_SITTE12 | 0.04258174 | 0.2545665  | 5.13E-05 | 0.0046879 | -0.04643  |
| 16w_SITTE12 | 0.08671578 | 0.5269177  | 4.78E-05 | 0.010952  | -0.21781  |
| 16w_SITTE12 | 0.02428558 | 0.14166091 | 4.34E-05 | 0.0049916 | -0.091842 |
| 16w_SITTE12 | 0.01136356 | 0.06191913 | 3.74E-05 | 0.0065941 | 0.263     |
| 16w_SITTE12 | 0.01384025 | 0.07720278 | 3.86E-05 | 0.0062156 | 0.17645   |
| 16w_SITTE12 | 0.07650355 | 0.463898   | 5.13E-05 | 0.014025  | 0.22792   |
| 16w_SITTE12 | 0.02223028 | 0.12897764 | 4.28E-05 | 0.005125  | -0.068556 |
| 16w_SITTE12 | 0.01939875 | 0.11150425 | 4.14E-05 | 0.0054571 | 0.0010121 |
| 16w_SITTE12 | 0.0825818  | 0.5014069  | 4.79E-05 | 0.013563  | 0.05262   |
| 16w_SITTE12 | 0.01793604 | 0.10247789 | 4.09E-05 | 0.0055879 | 0.030658  |
| 16w_SITTE12 | 0.09442215 | 0.57447374 | 5.13E-05 | 0.0061762 | -0.82618  |
| 16w_SITTE12 | 0.03045274 | 0.17971845 | 4.57E-05 | 0.0046464 | -0.12245  |
| 16w_SITTE12 | 0.00901029 | 0.04739706 | 3.59E-05 | 0.00713   | 0.38094   |
| 16w_SITTE12 | 0.02323461 | 0.13517536 | 4.30E-05 | 0.0050782 | -0.084895 |
| 16w_SITTE12 | 0.01128331 | 0.06142388 | 3.71E-05 | 0.0066957 | 0.2858    |
| 16w_SITTE12 | 0.01797294 | 0.10270564 | 4.09E-05 | 0.0055879 | 0.030658  |
| 16w_SITTE12 | 0.02124565 | 0.12290152 | 4.24E-05 | 0.0052258 | -0.04878  |
| 16w_SITTE12 | 0.02304469 | 0.13400339 | 4.30E-05 | 0.0050782 | -0.077142 |

|             |            |            |          |           |           |
|-------------|------------|------------|----------|-----------|-----------|
| 16w_SITTE12 | 0.01813151 | 0.10368414 | 4.09E-05 | 0.0055879 | 0.030658  |
| 16w_SITTE12 | 0.0352985  | 0.20962164 | 4.74E-05 | 0.0045622 | -0.10068  |
| 16w_SITTE12 | 0.03526213 | 0.2093972  | 4.74E-05 | 0.0045622 | -0.10068  |
| 16w_SITTE12 | 0.02760857 | 0.1621671  | 4.46E-05 | 0.0047834 | -0.12024  |
| 16w_SITTE12 | 0.02321598 | 0.13506038 | 4.30E-05 | 0.0050782 | -0.084895 |
| 16w_SITTE12 | 0.01306152 | 0.07239723 | 3.83E-05 | 0.0063061 | 0.19734   |
| 16w_SITTE12 | 0.09371713 | 0.570123   | 5.06E-05 | 0.0067258 | -0.7829   |
| 16w_SITTE12 | 0.07825893 | 0.4747305  | 5.01E-05 | 0.014289  | 0.20103   |
| 16w_SITTE12 | 0.02852641 | 0.1678311  | 4.49E-05 | 0.0047302 | -0.12174  |
| 16w_SITTE12 | 0.01859045 | 0.10651625 | 4.11E-05 | 0.0055212 | 0.015459  |
| 16w_SITTE12 | 0.02337306 | 0.13602977 | 4.32E-05 | 0.0050338 | -0.084895 |
| 16w_SITTE12 | 0.01395121 | 0.07788751 | 3.86E-05 | 0.0062156 | 0.17645   |
| 16w_SITTE12 | 0.053923   | 0.32455346 | 6.10E-05 | 0.005694  | 0.026054  |
| 16w_SITTE12 | 0.03044369 | 0.17966263 | 4.57E-05 | 0.0046464 | -0.12245  |
| 16w_SITTE12 | 0.08078108 | 0.49029467 | 4.85E-05 | 0.0141    | 0.12269   |
| 16w_SITTE12 | 0.03704713 | 0.2204124  | 4.81E-05 | 0.0045652 | -0.088896 |
| 16w_SITTE12 | 0.08305009 | 0.50429666 | 4.78E-05 | 0.013315  | 0.02505   |
| 16w_SITTE12 | 0.02170101 | 0.12571156 | 4.26E-05 | 0.0051742 | -0.059109 |
| 16w_SITTE12 | 0.01453961 | 0.08151854 | 3.89E-05 | 0.0061278 | 0.1561    |
| 16w_SITTE12 | 0.08634023 | 0.52460015 | 4.77E-05 | 0.01133   | -0.17867  |
| 16w_SITTE12 | 0.02738939 | 0.16081454 | 4.46E-05 | 0.0047834 | -0.11816  |
| 16w_SITTE12 | 0.01702295 | 0.09684321 | 4.03E-05 | 0.005729  | 0.063215  |
| 16w_SITTE12 | 0.02391986 | 0.13940409 | 4.34E-05 | 0.0049916 | -0.091842 |
| 16w_SITTE12 | 0.09194454 | 0.5591843  | 4.96E-05 | 0.0076529 | -0.6503   |
| 16w_SITTE12 | 0.01003826 | 0.05374069 | 3.65E-05 | 0.0069072 | 0.33263   |
| 16w_SITTE12 | 0.02890187 | 0.17014806 | 4.51E-05 | 0.0047064 | -0.12268  |
| 16w_SITTE12 | 0.03891051 | 0.23191136 | 4.89E-05 | 0.0045836 | -0.071721 |
| 16w_SITTE12 | 0.01070186 | 0.05783573 | 3.68E-05 | 0.0068    | 0.30902   |
| 16w_SITTE12 | 0.08255428 | 0.5012371  | 4.79E-05 | 0.013563  | 0.05262   |
| 16w_SITTE12 | 0.08283293 | 0.50295657 | 4.79E-05 | 0.013563  | 0.02505   |
| 16w_SITTE12 | 0.09508353 | 0.57855505 | 5.16E-05 | 0.0059226 | -0.91061  |
| 16w_SITTE12 | 0.03183102 | 0.18822382 | 4.60E-05 | 0.0046154 | -0.12002  |
| 16w_SITTE12 | 0.02881437 | 0.1696081  | 4.51E-05 | 0.0047064 | -0.12268  |
| 16w_SITTE12 | 0.04325263 | 0.25870654 | 5.17E-05 | 0.0047101 | -0.038876 |
| 16w_SITTE12 | 0.02820375 | 0.16583994 | 4.49E-05 | 0.0047302 | -0.12174  |
| 16w_SITTE12 | 0.00916955 | 0.04837985 | 3.59E-05 | 0.00713   | 0.35661   |
| 16w_SITTE12 | 0.03899701 | 0.23244515 | 4.92E-05 | 0.0045932 | -0.071721 |
| 16w_SITTE12 | 0.00495119 | 0.0223484  | 3.38E-05 | 0.0079991 | 0.55892   |
| 16w_SITTE12 | 0.03575206 | 0.21242057 | 4.77E-05 | 0.0045615 | -0.096915 |
| 16w_SITTE12 | 0.02916618 | 0.17177913 | 4.51E-05 | 0.0047064 | -0.1231   |
| 16w_SITTE12 | 0.01977093 | 0.11380101 | 4.16E-05 | 0.0053955 | -0.012659 |
| 16w_SITTE12 | 0.06346325 | 0.3834263  | 6.30E-05 | 0.008216  | 0.13178   |
| 16w_SITTE12 | 0.08910312 | 0.54164994 | 4.84E-05 | 0.0094274 | -0.3844   |



|             |            |            |          |           |           |
|-------------|------------|------------|----------|-----------|-----------|
| 16w_SITTE12 | 0.01956338 | 0.11252018 | 4.16E-05 | 0.0053955 | -0.012659 |
| 16w_SITTE12 | 0.07609832 | 0.46139732 | 5.18E-05 | 0.013885  | 0.23393   |
| 16w_SITTE12 | 0.03729728 | 0.22195609 | 4.81E-05 | 0.0045652 | -0.084703 |
| 16w_SITTE12 | 0.03244871 | 0.19203562 | 4.62E-05 | 0.0046026 | -0.11603  |
| 16w_SITTE12 | 0.01737523 | 0.09901714 | 4.06E-05 | 0.0056572 | 0.046584  |
| 16w_SITTE12 | 0.0075144  | 0.03816596 | 3.50E-05 | 0.0074854 | 0.45576   |
| 16w_SITTE12 | 0.02129357 | 0.1231972  | 4.24E-05 | 0.0052258 | -0.04878  |
| 16w_SITTE12 | 0.01201329 | 0.06592858 | 3.77E-05 | 0.0064954 | 0.24064   |
| 16w_SITTE12 | 0.09270876 | 0.56390035 | 5.02E-05 | 0.0070215 | -0.69483  |
| 16w_SITTE12 | 0.01951203 | 0.11220334 | 4.16E-05 | 0.0053955 | -0.012659 |
| 16w_SITTE12 | 0.08851198 | 0.538002   | 4.82E-05 | 0.0098057 | -0.3415   |
| 16w_SITTE12 | 0.06294386 | 0.3802212  | 6.33E-05 | 0.0080056 | 0.12359   |
| 16w_SITTE12 | 0.03921993 | 0.23382081 | 4.92E-05 | 0.0045932 | -0.071721 |
| 16w_SITTE12 | 0.09510963 | 0.5787161  | 5.16E-05 | 0.0059226 | -0.91061  |
| 16w_SITTE12 | 0.00726958 | 0.03665514 | 3.50E-05 | 0.0074854 | 0.45576   |
| 16w_SITTE12 | 0.05570655 | 0.33555976 | 6.21E-05 | 0.005966  | 0.043089  |
| 16w_SITTE12 | 0.01486373 | 0.08351867 | 3.92E-05 | 0.0060428 | 0.1363    |
| 16w_SITTE12 | 0.02761312 | 0.16219515 | 4.46E-05 | 0.0047834 | -0.12024  |
| 16w_SITTE12 | 0.08274784 | 0.5024315  | 4.79E-05 | 0.013563  | 0.02505   |
| 16w_SITTE12 | 0.09450923 | 0.5750111  | 5.13E-05 | 0.0061762 | -0.8688   |
| 16w_SITTE12 | 0.0228776  | 0.13297227 | 4.30E-05 | 0.0050782 | -0.077142 |
| 16w_SITTE12 | 0.03442628 | 0.20423919 | 4.70E-05 | 0.0045688 | -0.10761  |
| 16w_SITTE12 | 0.01333714 | 0.07409809 | 3.83E-05 | 0.0063061 | 0.19734   |
| 16w_SITTE12 | 0.0279143  | 0.16405377 | 4.48E-05 | 0.0047558 | -0.12024  |
| 16w_SITTE12 | 0.0121027  | 0.06648032 | 3.77E-05 | 0.0064954 | 0.24064   |
| 16w_SITTE12 | 0.02112377 | 0.12214939 | 4.24E-05 | 0.0052258 | -0.04878  |
| 16w_SITTE12 | 0.03598931 | 0.21388465 | 4.77E-05 | 0.0045615 | -0.096915 |
| 16w_SITTE12 | 0.00891066 | 0.04678225 | 3.59E-05 | 0.00713   | 0.38094   |
| 16w_SITTE12 | 0.01559143 | 0.08800929 | 3.95E-05 | 0.0059603 | 0.11709   |
| 16w_SITTE12 | 0.03253876 | 0.1925913  | 4.64E-05 | 0.0045915 | -0.11603  |
| 16w_SITTE12 | 0.02637423 | 0.15455    | 4.42E-05 | 0.0048445 | -0.11213  |
| 16w_SITTE12 | 0.0136115  | 0.07579113 | 3.86E-05 | 0.0062156 | 0.17645   |
| 16w_SITTE12 | 0.02820506 | 0.16584803 | 4.49E-05 | 0.0047302 | -0.12174  |
| 16w_SITTE12 | 0.08087535 | 0.4908764  | 4.85E-05 | 0.0141    | 0.12269   |
| 16w_SITTE12 | 0.03193587 | 0.18887089 | 4.60E-05 | 0.0046154 | -0.11821  |
| 16w_SITTE12 | 0.03547311 | 0.21069917 | 4.74E-05 | 0.0045622 | -0.10068  |
| 16w_SITTE12 | 0.07713466 | 0.4677926  | 5.09E-05 | 0.014141  | 0.22047   |
| 16w_SITTE12 | 0.09128775 | 0.55513126 | 4.93E-05 | 0.0079874 | -0.60562  |
| 16w_SITTE12 | 0.07414156 | 0.44932216 | 5.38E-05 | 0.013116  | 0.24406   |
| 16w_SITTE12 | 0.04438863 | 0.26571682 | 5.25E-05 | 0.0047605 | -0.031751 |
| 16w_SITTE12 | 0.03064388 | 0.18089797 | 4.57E-05 | 0.0046464 | -0.12245  |
| 16w_SITTE12 | 0.02922718 | 0.17215553 | 4.51E-05 | 0.0047064 | -0.1231   |
| 16w_SITTE12 | 0.0755681  | 0.45812532 | 5.23E-05 | 0.013721  | 0.23858   |

|             |            |            |          |           |            |
|-------------|------------|------------|----------|-----------|------------|
| 16w_SITTE12 | 0.01370303 | 0.07635598 | 3.86E-05 | 0.0062156 | 0.17645    |
| 16w_SITTE12 | 0.01888622 | 0.10834146 | 4.11E-05 | 0.0055212 | 0.015459   |
| 16w_SITTE12 | 0.041379   | 0.24714439 | 5.05E-05 | 0.0046492 | -0.054504  |
| 16w_SITTE12 | 0.03088709 | 0.18239881 | 4.58E-05 | 0.00463   | -0.12145   |
| 16w_SITTE12 | 0.08890519 | 0.5404285  | 4.84E-05 | 0.0094274 | -0.3844    |
| 16w_SITTE12 | 0.04244778 | 0.25373986 | 5.13E-05 | 0.0046879 | -0.04643   |
| 16w_SITTE12 | 0.02075447 | 0.11987042 | 4.21E-05 | 0.0052798 | -0.037579  |
| 16w_SITTE12 | 0.0278012  | 0.16335578 | 4.48E-05 | 0.0047558 | -0.12024   |
| 16w_SITTE12 | 0.02253312 | 0.13084652 | 4.28E-05 | 0.005125  | -0.068556  |
| 16w_SITTE12 | 0.05829045 | 0.35150498 | 6.34E-05 | 0.0065282 | 0.06315    |
| 16w_SITTE12 | 0.01124324 | 0.06117661 | 3.71E-05 | 0.0066957 | 0.2858     |
| 16w_SITTE12 | 0.01700412 | 0.09672698 | 4.03E-05 | 0.005729  | 0.063215   |
| 16w_SITTE12 | 0.05001737 | 0.3004518  | 5.78E-05 | 0.0052091 | 0.0010449  |
| 16w_SITTE12 | 0.02387453 | 0.1391243  | 4.34E-05 | 0.0049916 | -0.091842  |
| 16w_SITTE12 | 0.01139728 | 0.06212721 | 3.74E-05 | 0.0065941 | 0.263      |
| 16w_SITTE12 | 0.06591494 | 0.3985557  | 6.16E-05 | 0.0091463 | 0.17407    |
| 16w_SITTE12 | 0.08193671 | 0.49742606 | 4.81E-05 | 0.013778  | 0.078055   |
| 16w_SITTE12 | 0.09128168 | 0.5550938  | 4.93E-05 | 0.0079874 | -0.60562   |
| 16w_SITTE12 | 0.04563089 | 0.27338284 | 5.39E-05 | 0.0048522 | -0.024952  |
| 16w_SITTE12 | 0.07149021 | 0.4329607  | 5.65E-05 | 0.011849  | 0.2386     |
| 16w_SITTE12 | 0.02697601 | 0.15826355 | 4.44E-05 | 0.004813  | -0.11546   |
| 16w_SITTE12 | 0.02653922 | 0.15556815 | 4.44E-05 | 0.004813  | -0.11546   |
| 16w_SITTE12 | 0.02295346 | 0.13344043 | 4.30E-05 | 0.0050782 | -0.077142  |
| 16w_SITTE12 | 0.03449377 | 0.20465566 | 4.70E-05 | 0.0045688 | -0.10761   |
| 16w_SITTE12 | 0.01611554 | 0.09124359 | 3.98E-05 | 0.0058806 | 0.098494   |
| 16w_SITTE12 | 0.00691806 | 0.03448593 | 3.47E-05 | 0.0076096 | 0.48124    |
| 16w_SITTE12 | 0.08349524 | 0.5070437  | 4.77E-05 | 0.013036  | -0.0045591 |
| 16w_SITTE12 | 0.09207711 | 0.56000245 | 4.96E-05 | 0.0076529 | -0.6503    |
| 16w_SITTE12 | 0.02599886 | 0.15223356 | 4.42E-05 | 0.0048445 | -0.11213   |
| 16w_SITTE12 | 0.01441248 | 0.08073399 | 3.89E-05 | 0.0061278 | 0.1561     |
| 16w_SITTE12 | 0.09009846 | 0.54779214 | 4.88E-05 | 0.0086895 | -0.47194   |
| 16w_SITTE12 | 0.01994669 | 0.11488564 | 4.16E-05 | 0.0053955 | -0.012659  |
| 16w_SITTE12 | 0.01365973 | 0.0760888  | 3.86E-05 | 0.0062156 | 0.17645    |
| 16w_SITTE12 | 0.02386218 | 0.1390481  | 4.34E-05 | 0.0049916 | -0.091842  |
| 16w_SITTE12 | 0.02067616 | 0.11938714 | 4.21E-05 | 0.0052798 | -0.037579  |
| 16w_SITTE12 | 0.08129178 | 0.4934462  | 4.83E-05 | 0.013957  | 0.10139    |
| 16w_SITTE12 | 0.01743004 | 0.09935535 | 4.06E-05 | 0.0056572 | 0.046584   |
| 16w_SITTE12 | 0.02689879 | 0.15778701 | 4.44E-05 | 0.004813  | -0.11546   |
| 16w_SITTE12 | 0.03788531 | 0.22558486 | 4.84E-05 | 0.0045696 | -0.080425  |
| 16w_SITTE12 | 0.02568925 | 0.15032297 | 4.40E-05 | 0.0048781 | -0.10813   |
| 16w_SITTE12 | 0.0139994  | 0.07818487 | 3.86E-05 | 0.0062156 | 0.17645    |
| 16w_SITTE12 | 0.06847494 | 0.41435346 | 5.93E-05 | 0.010465  | 0.20551    |
| 16w_SITTE12 | 0.06806748 | 0.41183907 | 5.98E-05 | 0.010192  | 0.20551    |

|             |            |            |          |           |            |
|-------------|------------|------------|----------|-----------|------------|
| 16w_SITTE12 | 0.07991353 | 0.48494104 | 4.90E-05 | 0.014278  | 0.15946    |
| 16w_SITTE12 | 0.07996657 | 0.4852683  | 4.90E-05 | 0.014278  | 0.14202    |
| 16w_SITTE12 | 0.04129701 | 0.24663843 | 5.05E-05 | 0.0046492 | -0.054504  |
| 16w_SITTE12 | 0.01320513 | 0.07328347 | 3.83E-05 | 0.0063061 | 0.19734    |
| 16w_SITTE12 | 0.04479385 | 0.26821744 | 5.30E-05 | 0.0047888 | -0.031751  |
| 16w_SITTE12 | 0.08321972 | 0.5053435  | 4.78E-05 | 0.013315  | -0.0045591 |
| 16w_SITTE12 | 0.07092756 | 0.4294886  | 5.71E-05 | 0.011574  | 0.23476    |
| 16w_SITTE12 | 0.00932542 | 0.04934176 | 3.62E-05 | 0.0070172 | 0.35661    |
| 16w_SITTE12 | 0.06501866 | 0.39302477 | 6.20E-05 | 0.0089013 | 0.15715    |
| 16w_SITTE12 | 0.02389979 | 0.13928021 | 4.34E-05 | 0.0049916 | -0.091842  |
| 16w_SITTE12 | 0.03062511 | 0.18078215 | 4.57E-05 | 0.0046464 | -0.12245   |
| 16w_SITTE12 | 0.01218168 | 0.06696773 | 3.77E-05 | 0.0064954 | 0.24064    |
| 16w_SITTE12 | 0.01392395 | 0.07771929 | 3.86E-05 | 0.0062156 | 0.17645    |
| 16w_SITTE12 | 0.04061419 | 0.24242477 | 4.99E-05 | 0.0046177 | -0.058715  |
| 16w_SITTE12 | 0.07027473 | 0.42545995 | 5.76E-05 | 0.011297  | 0.23016    |
| 16w_SITTE12 | 0.01230686 | 0.06774022 | 3.77E-05 | 0.0064954 | 0.24064    |
| 16w_SITTE12 | 0.07264816 | 0.44010642 | 5.49E-05 | 0.012637  | 0.24373    |
| 16w_SITTE12 | 0.10178622 | 0.61991733 | 5.66E-05 | 0.0039398 | -1.303     |
| 16w_SITTE12 | 0.10112257 | 0.615822   | 5.62E-05 | 0.0040352 | -1.2808    |
| 16w_SITTE12 | 0.06657819 | 0.40264866 | 6.12E-05 | 0.0093985 | 0.18233    |
| 16w_SITTE12 | 0.06041758 | 0.3646315  | 6.38E-05 | 0.0070986 | 0.087064   |
| 16w_SITTE12 | 0.01659421 | 0.09419748 | 4.00E-05 | 0.0058035 | 0.080526   |
| 16w_SITTE12 | 0.01515989 | 0.08534626 | 3.95E-05 | 0.0059603 | 0.11709    |
| 16w_SITTE12 | 0.02546838 | 0.14895996 | 4.40E-05 | 0.0048781 | -0.10813   |
| 16w_SITTE12 | 0.01289602 | 0.07137595 | 3.80E-05 | 0.0063994 | 0.21875    |
| 16w_SITTE12 | 0.01181307 | 0.06469306 | 3.74E-05 | 0.0065941 | 0.263      |
| 16w_SITTE12 | 0.01040037 | 0.05597524 | 3.68E-05 | 0.0068    | 0.30902    |
| 16w_SITTE12 | 0.09708966 | 0.5909349  | 5.32E-05 | 0.0050496 | -1.03      |
| 16w_SITTE12 | 0.02085705 | 0.12050347 | 4.21E-05 | 0.0052798 | -0.037579  |
| 16w_SITTE12 | 0.07453059 | 0.45172292 | 5.33E-05 | 0.013335  | 0.24193    |
| 16w_SITTE12 | 0.09154607 | 0.5567254  | 4.93E-05 | 0.0079874 | -0.60562   |
| 16w_SITTE12 | 0.10113324 | 0.6158878  | 5.62E-05 | 0.0040352 | -1.2808    |
| 16w_SITTE12 | 0.03827958 | 0.22801788 | 4.87E-05 | 0.0045758 | -0.080425  |
| 16w_SITTE12 | 0.01134441 | 0.06180091 | 3.71E-05 | 0.0066957 | 0.263      |
| 16w_SITTE12 | 0.01466981 | 0.08232197 | 3.92E-05 | 0.0060428 | 0.1363     |
| 16w_SITTE12 | 0.09738897 | 0.5927819  | 5.32E-05 | 0.0050496 | -1.0673    |
| 16w_SITTE12 | 0.06468868 | 0.39098847 | 6.24E-05 | 0.0086643 | 0.14863    |
| 16w_SITTE12 | 0.08179627 | 0.49655938 | 4.83E-05 | 0.013957  | 0.078055   |
| 16w_SITTE12 | 0.01931472 | 0.11098573 | 4.14E-05 | 0.0054571 | 0.0010121  |
| 16w_SITTE12 | 0.08150993 | 0.49479237 | 4.83E-05 | 0.013957  | 0.10139    |
| 16w_SITTE12 | 0.01368214 | 0.07622707 | 3.86E-05 | 0.0062156 | 0.17645    |
| 16w_SITTE12 | 0.00801336 | 0.04124504 | 3.53E-05 | 0.0073641 | 0.43054    |
| 16w_SITTE12 | 0.0118582  | 0.06497151 | 3.74E-05 | 0.0065941 | 0.263      |

|             |            |            |          |           |           |
|-------------|------------|------------|----------|-----------|-----------|
| 16w_SITTE12 | 0.07636605 | 0.46304953 | 5.18E-05 | 0.013885  | 0.22792   |
| 16w_SITTE12 | 0.02226871 | 0.12921481 | 4.28E-05 | 0.005125  | -0.068556 |
| 16w_SITTE12 | 0.09949524 | 0.6057797  | 5.49E-05 | 0.0043938 | -1.2008   |
| 16w_SITTE12 | 0.06176559 | 0.37295005 | 6.36E-05 | 0.0076138 | 0.10802   |
| 16w_SITTE12 | 0.08183239 | 0.49678233 | 4.81E-05 | 0.013778  | 0.078055  |
| 16w_SITTE12 | 0.01703661 | 0.0969275  | 4.03E-05 | 0.005729  | 0.063215  |
| 16w_SITTE12 | 0.01579541 | 0.08926807 | 3.98E-05 | 0.0058806 | 0.098494  |
| 16w_SITTE12 | 0.03614398 | 0.2148391  | 4.77E-05 | 0.0045615 | -0.096915 |
| 16w_SITTE12 | 0.01053044 | 0.05677789 | 3.68E-05 | 0.0068    | 0.30902   |
| 16w_SITTE12 | 0.0331455  | 0.19633546 | 4.66E-05 | 0.0045822 | -0.11352  |
| 16w_SITTE12 | 0.02370531 | 0.13808009 | 4.32E-05 | 0.0050338 | -0.084895 |
| 16w_SITTE12 | 0.06509237 | 0.39347962 | 6.20E-05 | 0.0089013 | 0.15715   |
| 16w_SITTE12 | 0.02982618 | 0.17585197 | 4.55E-05 | 0.0046645 | -0.12301  |
| 16w_SITTE12 | 0.03055771 | 0.18036623 | 4.57E-05 | 0.0046464 | -0.12245  |
| 16w_SITTE12 | 0.08469652 | 0.5144568  | 4.76E-05 | 0.012404  | -0.069378 |
| 16w_SITTE12 | 0.08710104 | 0.5292951  | 4.78E-05 | 0.010952  | -0.25808  |
| 16w_SITTE12 | 0.01735455 | 0.0988895  | 4.06E-05 | 0.0056572 | 0.046584  |
| 16w_SITTE12 | 0.0331567  | 0.19640462 | 4.66E-05 | 0.0045822 | -0.11352  |
| 16w_SITTE12 | 0.07022571 | 0.42515746 | 5.76E-05 | 0.011297  | 0.23016   |
| 16w_SITTE12 | 0.02855613 | 0.16801447 | 4.49E-05 | 0.0047302 | -0.12174  |
| 16w_SITTE12 | 0.03157979 | 0.1866735  | 4.60E-05 | 0.0046154 | -0.12002  |
| 16w_SITTE12 | 0.01823388 | 0.10431586 | 4.09E-05 | 0.0055879 | 0.030658  |
| 16w_SITTE12 | 0.01448867 | 0.08120414 | 3.89E-05 | 0.0061278 | 0.1561    |
| 16w_SITTE12 | 0.02699287 | 0.15836763 | 4.44E-05 | 0.004813  | -0.11816  |
| 16w_SITTE12 | 0.01150694 | 0.06280393 | 3.74E-05 | 0.0065941 | 0.263     |
| 16w_SITTE12 | 0.07051915 | 0.42696828 | 5.71E-05 | 0.011574  | 0.23016   |
| 16w_SITTE12 | 0.08042705 | 0.48810995 | 4.87E-05 | 0.014207  | 0.14202   |
| 16w_SITTE12 | 0.01440442 | 0.08068427 | 3.89E-05 | 0.0061278 | 0.1561    |
| 16w_SITTE12 | 0.07808002 | 0.47362643 | 5.01E-05 | 0.014289  | 0.20103   |
| 16w_SITTE12 | 0.08431971 | 0.5121315  | 4.76E-05 | 0.012731  | -0.069378 |
| 16w_SITTE12 | 0.0331249  | 0.19620834 | 4.66E-05 | 0.0045822 | -0.11352  |
| 16w_SITTE12 | 0.0169347  | 0.09629864 | 4.03E-05 | 0.005729  | 0.063215  |
| 16w_SITTE12 | 0.08234644 | 0.4999545  | 4.81E-05 | 0.013778  | 0.05262   |
| 16w_SITTE12 | 0.0291754  | 0.17183597 | 4.51E-05 | 0.0047064 | -0.1231   |
| 16w_SITTE12 | 0.01171423 | 0.06408307 | 3.74E-05 | 0.0065941 | 0.263     |
| 16w_SITTE12 | 0.05012797 | 0.3011343  | 5.78E-05 | 0.0052091 | 0.0010449 |
| 16w_SITTE12 | 0.07193124 | 0.43568233 | 5.60E-05 | 0.012118  | 0.24161   |
| 16w_SITTE12 | 0.01798086 | 0.1027545  | 4.09E-05 | 0.0055879 | 0.030658  |
| 16w_SITTE12 | 0.00983712 | 0.05249947 | 3.65E-05 | 0.0069072 | 0.33263   |
| 16w_SITTE12 | 0.01221753 | 0.06718895 | 3.77E-05 | 0.0064954 | 0.24064   |
| 16w_SITTE12 | 0.01188942 | 0.06516422 | 3.74E-05 | 0.0065941 | 0.24064   |
| 16w_SITTE12 | 0.06566373 | 0.3970055  | 6.16E-05 | 0.0091463 | 0.16566   |
| 16w_SITTE12 | 0.02857808 | 0.16814993 | 4.49E-05 | 0.0047302 | -0.12174  |

|             |            |            |          |           |            |
|-------------|------------|------------|----------|-----------|------------|
| 16w_SITTE12 | 0.03420411 | 0.20286813 | 4.70E-05 | 0.0045688 | -0.10761   |
| 16w_SITTE12 | 0.02717107 | 0.1594673  | 4.46E-05 | 0.0047834 | -0.11816   |
| 16w_SITTE12 | 0.09241661 | 0.56209755 | 4.99E-05 | 0.0073308 | -0.69483   |
| 16w_SITTE12 | 0.02682798 | 0.1573501  | 4.44E-05 | 0.004813  | -0.11546   |
| 16w_SITTE12 | 0.0230894  | 0.13427931 | 4.30E-05 | 0.0050782 | -0.077142  |
| 16w_SITTE12 | 0.01779717 | 0.10162092 | 4.06E-05 | 0.0056572 | 0.046584   |
| 16w_SITTE12 | 0.01942563 | 0.11167013 | 4.14E-05 | 0.0054571 | 0.0010121  |
| 16w_SITTE12 | 0.02854572 | 0.16795024 | 4.49E-05 | 0.0047302 | -0.12174   |
| 16w_SITTE12 | 0.01421893 | 0.07953963 | 3.89E-05 | 0.0061278 | 0.1561     |
| 16w_SITTE12 | 0.07347843 | 0.44523    | 5.43E-05 | 0.012883  | 0.24502    |
| 16w_SITTE12 | 0.07831172 | 0.47505623 | 5.01E-05 | 0.014289  | 0.18889    |
| 16w_SITTE12 | 0.08233716 | 0.4998972  | 4.81E-05 | 0.013778  | 0.05262    |
| 16w_SITTE12 | 0.06593812 | 0.39869878 | 6.16E-05 | 0.0091463 | 0.17407    |
| 16w_SITTE12 | 0.02960676 | 0.1744979  | 4.53E-05 | 0.0046846 | -0.1231    |
| 16w_SITTE12 | 0.07397993 | 0.44832477 | 5.38E-05 | 0.013116  | 0.24502    |
| 16w_SITTE12 | 0.02328001 | 0.13545556 | 4.32E-05 | 0.0050338 | -0.084895  |
| 16w_SITTE12 | 0.09105248 | 0.55367947 | 4.93E-05 | 0.0079874 | -0.56091   |
| 16w_SITTE12 | 0.01907074 | 0.10948015 | 4.14E-05 | 0.0054571 | 0.0010121  |
| 16w_SITTE12 | 0.02315992 | 0.13471445 | 4.30E-05 | 0.0050782 | -0.077142  |
| 16w_SITTE12 | 0.08344404 | 0.5067278  | 4.77E-05 | 0.013036  | -0.0045591 |
| 16w_SITTE12 | 0.01688736 | 0.09600648 | 4.03E-05 | 0.005729  | 0.063215   |
| 16w_SITTE12 | 0.02264006 | 0.13150643 | 4.28E-05 | 0.005125  | -0.068556  |
| 16w_SITTE12 | 0.09458274 | 0.5754647  | 5.13E-05 | 0.0061762 | -0.8688    |
| 16w_SITTE12 | 0.00675106 | 0.0334554  | 3.47E-05 | 0.0076096 | 0.48124    |
| 16w_SITTE12 | 0.01443226 | 0.08085606 | 3.89E-05 | 0.0061278 | 0.1561     |
| 16w_SITTE12 | 0.03112355 | 0.18385807 | 4.58E-05 | 0.00463   | -0.12145   |
| 16w_SITTE12 | 0.02687986 | 0.15767024 | 4.44E-05 | 0.004813  | -0.11546   |
| 16w_SITTE12 | 0.01668963 | 0.09478626 | 4.00E-05 | 0.0058035 | 0.080526   |
| 16w_SITTE12 | 0.09012765 | 0.5479723  | 4.88E-05 | 0.0086895 | -0.47194   |
| 16w_SITTE12 | 0.08036123 | 0.48770377 | 4.87E-05 | 0.014207  | 0.14202    |
| 16w_SITTE12 | 0.00458863 | 0.02011104 | 3.35E-05 | 0.0081345 | 0.58516    |
| 16w_SITTE12 | 0.07560187 | 0.45833376 | 5.23E-05 | 0.013721  | 0.23858    |
| 16w_SITTE12 | 0.01108002 | 0.0601694  | 3.71E-05 | 0.0066957 | 0.2858     |
| 16w_SITTE12 | 0.02456817 | 0.14340477 | 4.36E-05 | 0.0049516 | -0.098011  |
| 16w_SITTE12 | 0.01718782 | 0.09786061 | 4.03E-05 | 0.005729  | 0.063215   |
| 16w_SITTE12 | 0.03206343 | 0.18965805 | 4.62E-05 | 0.0046026 | -0.11821   |
| 16w_SITTE12 | 0.03802291 | 0.22643395 | 4.87E-05 | 0.0045758 | -0.080425  |
| 16w_SITTE12 | 0.02264316 | 0.13152556 | 4.28E-05 | 0.005125  | -0.068556  |
| 16w_SITTE12 | 0.00687843 | 0.03424136 | 3.47E-05 | 0.0076096 | 0.48124    |
| 16w_SITTE12 | 0.01936326 | 0.11128525 | 4.14E-05 | 0.0054571 | 0.0010121  |
| 16w_SITTE12 | 0.02516807 | 0.14710675 | 4.38E-05 | 0.0049138 | -0.10343   |
| 16w_SITTE12 | 0.06000663 | 0.36209553 | 6.37E-05 | 0.0069445 | 0.087064   |
| 16w_SITTE12 | 0.03204245 | 0.18952857 | 4.62E-05 | 0.0046026 | -0.11821   |

|             |            |            |          |           |           |
|-------------|------------|------------|----------|-----------|-----------|
| 16w_SITTE12 | 0.03423571 | 0.20306318 | 4.70E-05 | 0.0045688 | -0.10761  |
| 16w_SITTE12 | 0.09287935 | 0.564953   | 5.02E-05 | 0.0070215 | -0.69483  |
| 16w_SITTE12 | 0.02104442 | 0.1216597  | 4.21E-05 | 0.0052798 | -0.037579 |
| 16w_SITTE12 | 0.01852593 | 0.10611812 | 4.11E-05 | 0.0055212 | 0.015459  |
| 16w_SITTE12 | 0.01519587 | 0.08556833 | 3.95E-05 | 0.0059603 | 0.11709   |
| 16w_SITTE12 | 0.0897193  | 0.5454524  | 4.86E-05 | 0.0090548 | -0.47194  |
| 16w_SITTE12 | 0.08683378 | 0.5276458  | 4.78E-05 | 0.010952  | -0.21781  |
| 16w_SITTE12 | 0.00976681 | 0.05206555 | 3.65E-05 | 0.0069072 | 0.33263   |
| 16w_SITTE12 | 0.02719795 | 0.15963316 | 4.46E-05 | 0.0047834 | -0.11816  |
| 16w_SITTE12 | 0.02212331 | 0.12831755 | 4.26E-05 | 0.0051742 | -0.059109 |
| 16w_SITTE12 | 0.0455742  | 0.27303302 | 5.39E-05 | 0.0048522 | -0.024952 |
| 16w_SITTE12 | 0.01430627 | 0.08007859 | 3.89E-05 | 0.0061278 | 0.1561    |
| 16w_SITTE12 | 0.02894208 | 0.17039618 | 4.51E-05 | 0.0047064 | -0.12268  |
| 16w_SITTE12 | 0.01878401 | 0.10771073 | 4.11E-05 | 0.0055212 | 0.015459  |
| 16w_SITTE12 | 0.02148593 | 0.12438426 | 4.24E-05 | 0.0052258 | -0.04878  |
| 16w_SITTE12 | 0.01594195 | 0.09017234 | 3.98E-05 | 0.0058806 | 0.098494  |
| 16w_SITTE12 | 0.01463183 | 0.08208763 | 3.92E-05 | 0.0060428 | 0.1363    |
| 16w_SITTE12 | 0.08088667 | 0.49094626 | 4.85E-05 | 0.0141    | 0.12269   |
| 16w_SITTE12 | 0.02652319 | 0.15546918 | 4.42E-05 | 0.0048445 | -0.11546  |
| 16w_SITTE12 | 0.08373797 | 0.5085416  | 4.77E-05 | 0.013036  | -0.036078 |
| 16w_SITTE12 | 0.04102406 | 0.2449541  | 5.02E-05 | 0.0046325 | -0.058715 |
| 16w_SITTE12 | 0.02092228 | 0.12090596 | 4.21E-05 | 0.0052798 | -0.037579 |
| 16w_SITTE12 | 0.01012687 | 0.05428748 | 3.65E-05 | 0.0069072 | 0.33263   |
| 16w_SITTE12 | 0.02320454 | 0.13498984 | 4.30E-05 | 0.0050782 | -0.077142 |
| 16w_SITTE12 | 0.05017693 | 0.30143642 | 5.78E-05 | 0.0052091 | 0.0010449 |
| 16w_SITTE12 | 0.03425063 | 0.20315525 | 4.70E-05 | 0.0045688 | -0.10761  |
| 16w_SITTE12 | 0.02859284 | 0.16824102 | 4.49E-05 | 0.0047302 | -0.12174  |
| 16w_SITTE12 | 0.01240378 | 0.06833831 | 3.77E-05 | 0.0064954 | 0.24064   |
| 16w_SITTE12 | 0.05816929 | 0.3507573  | 6.34E-05 | 0.0065282 | 0.06315   |
| 16w_SITTE12 | 0.05917291 | 0.35695067 | 6.37E-05 | 0.0067983 | 0.074574  |
| 16w_SITTE12 | 0.09019601 | 0.5483942  | 4.88E-05 | 0.0086895 | -0.51631  |
| 16w_SITTE12 | 0.01761416 | 0.10049155 | 4.06E-05 | 0.0056572 | 0.046584  |
| 16w_SITTE12 | 0.01527572 | 0.08606102 | 3.95E-05 | 0.0059603 | 0.11709   |
| 16w_SITTE12 | 0.01727689 | 0.0984103  | 4.03E-05 | 0.005729  | 0.046584  |
| 16w_SITTE12 | 0.0123984  | 0.06830514 | 3.77E-05 | 0.0064954 | 0.24064   |
| 16w_SITTE12 | 0.01524167 | 0.0858509  | 3.95E-05 | 0.0059603 | 0.11709   |
| 16w_SITTE12 | 0.01560321 | 0.08808199 | 3.95E-05 | 0.0059603 | 0.11709   |
| 16w_SITTE12 | 0.02008548 | 0.11574212 | 4.19E-05 | 0.0053364 | -0.025531 |
| 16w_SITTE12 | 0.03437267 | 0.20390835 | 4.70E-05 | 0.0045688 | -0.10761  |
| 16w_SITTE12 | 0.00783121 | 0.040121   | 3.53E-05 | 0.0073641 | 0.43054   |
| 16w_SITTE12 | 0.03637634 | 0.21627297 | 4.79E-05 | 0.0045625 | -0.092976 |
| 16w_SITTE12 | 0.08777597 | 0.5334601  | 4.80E-05 | 0.010188  | -0.29935  |
| 16w_SITTE12 | 0.02805385 | 0.16491494 | 4.48E-05 | 0.0047558 | -0.12024  |

|             |            |            |          |           |           |
|-------------|------------|------------|----------|-----------|-----------|
| 16w_SITTE12 | 0.01143486 | 0.06235913 | 3.74E-05 | 0.0065941 | 0.263     |
| 16w_SITTE12 | 0.05303829 | 0.31909388 | 6.01E-05 | 0.0055357 | 0.022172  |
| 16w_SITTE12 | 0.05102427 | 0.3066654  | 5.87E-05 | 0.0053288 | 0.0077602 |
| 16w_SITTE12 | 0.01150545 | 0.06279471 | 3.74E-05 | 0.0065941 | 0.263     |
| 16w_SITTE12 | 0.0883618  | 0.5370753  | 4.82E-05 | 0.0098057 | -0.3415   |
| 16w_SITTE12 | 0.02294845 | 0.13340952 | 4.30E-05 | 0.0050782 | -0.077142 |
| 16w_SITTE12 | 0.06688453 | 0.40453908 | 6.07E-05 | 0.0096573 | 0.18233   |
| 16w_SITTE12 | 0.02146404 | 0.1242492  | 4.24E-05 | 0.0052258 | -0.04878  |
| 16w_SITTE12 | 0.01227648 | 0.06755274 | 3.77E-05 | 0.0064954 | 0.24064   |
| 16w_SITTE12 | 0.08829865 | 0.5366855  | 4.80E-05 | 0.010188  | -0.3415   |
| 16w_SITTE12 | 0.01552628 | 0.08760724 | 3.95E-05 | 0.0059603 | 0.11709   |
| 16w_SITTE12 | 0.0101784  | 0.05460551 | 3.65E-05 | 0.0069072 | 0.33263   |
| 16w_SITTE12 | 0.00883146 | 0.04629352 | 3.59E-05 | 0.00713   | 0.38094   |
| 16w_SITTE12 | 0.02029743 | 0.11705003 | 4.19E-05 | 0.0053364 | -0.025531 |
| 16w_SITTE12 | 0.04209009 | 0.25153255 | 5.09E-05 | 0.0046676 | -0.0504   |
| 16w_SITTE12 | 0.02267689 | 0.1317337  | 4.28E-05 | 0.005125  | -0.077142 |
| 16w_SITTE12 | 0.08606105 | 0.52287734 | 4.76E-05 | 0.0117    | -0.17867  |
| 16w_SITTE12 | 0.01771919 | 0.10113971 | 4.06E-05 | 0.0056572 | 0.046584  |
| 16w_SITTE12 | 0.03488012 | 0.20703982 | 4.72E-05 | 0.0045646 | -0.10426  |
| 16w_SITTE12 | 0.08977999 | 0.5458269  | 4.86E-05 | 0.0090548 | -0.47194  |
| 16w_SITTE12 | 0.03180127 | 0.18804021 | 4.60E-05 | 0.0046154 | -0.12002  |
| 16w_SITTE12 | 0.01439983 | 0.08065596 | 3.89E-05 | 0.0061278 | 0.1561    |
| 16w_SITTE12 | 0.01297733 | 0.07187769 | 3.80E-05 | 0.0063994 | 0.19734   |
| 16w_SITTE12 | 0.05993679 | 0.36166456 | 6.37E-05 | 0.0069445 | 0.080679  |
| 16w_SITTE12 | 0.01707251 | 0.09714902 | 4.03E-05 | 0.005729  | 0.063215  |
| 16w_SITTE12 | 0.06875296 | 0.41606912 | 5.93E-05 | 0.010465  | 0.21248   |
| 16w_SITTE12 | 0.02459963 | 0.14359893 | 4.36E-05 | 0.0049516 | -0.098011 |
| 16w_SITTE12 | 0.02559595 | 0.1497472  | 4.40E-05 | 0.0048781 | -0.10813  |
| 16w_SITTE12 | 0.02840862 | 0.1671042  | 4.49E-05 | 0.0047302 | -0.12174  |
| 16w_SITTE12 | 0.09225118 | 0.56107664 | 4.99E-05 | 0.0073308 | -0.6503   |
| 16w_SITTE12 | 0.01794935 | 0.10256004 | 4.09E-05 | 0.0055879 | 0.030658  |
| 16w_SITTE12 | 0.01903022 | 0.10923006 | 4.14E-05 | 0.0054571 | 0.0010121 |
| 16w_SITTE12 | 0.0102699  | 0.05517015 | 3.65E-05 | 0.0069072 | 0.30902   |
| 16w_SITTE12 | 0.08972886 | 0.54551136 | 4.86E-05 | 0.0090548 | -0.47194  |
| 16w_SITTE12 | 0.01378156 | 0.07684062 | 3.86E-05 | 0.0062156 | 0.17645   |
| 16w_SITTE12 | 0.03237606 | 0.19158724 | 4.62E-05 | 0.0046026 | -0.11821  |
| 16w_SITTE12 | 0.02250513 | 0.13067377 | 4.28E-05 | 0.005125  | -0.068556 |
| 16w_SITTE12 | 0.093351   | 0.5678636  | 5.06E-05 | 0.0067258 | -0.73907  |
| 16w_SITTE12 | 0.02448642 | 0.14290033 | 4.36E-05 | 0.0049516 | -0.098011 |
| 16w_SITTE12 | 0.08176906 | 0.49639148 | 4.83E-05 | 0.013957  | 0.078055  |
| 16w_SITTE12 | 0.02736297 | 0.16065146 | 4.46E-05 | 0.0047834 | -0.11816  |
| 16w_SITTE12 | 0.01821281 | 0.10418584 | 4.09E-05 | 0.0055879 | 0.030658  |
| 16w_SITTE12 | 0.02203772 | 0.12778936 | 4.26E-05 | 0.0051742 | -0.059109 |

|             |            |            |          |           |            |
|-------------|------------|------------|----------|-----------|------------|
| 16w_SITTE12 | 0.04965003 | 0.29818496 | 5.73E-05 | 0.0051543 | -0.0022352 |
| 16w_SITTE12 | 0.0230601  | 0.13409849 | 4.30E-05 | 0.0050782 | -0.077142  |
| 16w_SITTE12 | 0.01019325 | 0.05469715 | 3.65E-05 | 0.0069072 | 0.33263    |
| 16w_SITTE12 | 0.01435489 | 0.08037859 | 3.89E-05 | 0.0061278 | 0.1561     |
| 16w_SITTE12 | 0.02706336 | 0.15880257 | 4.44E-05 | 0.004813  | -0.11816   |
| 16w_SITTE12 | 0.00731531 | 0.03693734 | 3.50E-05 | 0.0074854 | 0.45576    |
| 16w_SITTE12 | 0.08758023 | 0.5322522  | 4.79E-05 | 0.010571  | -0.29935   |
| 16w_SITTE12 | 0.03881969 | 0.23135088 | 4.89E-05 | 0.0045836 | -0.076088  |
| 16w_SITTE12 | 0.02843621 | 0.16727445 | 4.49E-05 | 0.0047302 | -0.12174   |
| 16w_SITTE12 | 0.09998283 | 0.6087886  | 5.53E-05 | 0.004262  | -1.2296    |
| 16w_SITTE12 | 0.04781403 | 0.28685498 | 5.58E-05 | 0.0050083 | -0.01192   |
| 16w_SITTE12 | 0.01488351 | 0.08364075 | 3.92E-05 | 0.0060428 | 0.1363     |
| 16w_SITTE12 | 0.07654971 | 0.46418288 | 5.13E-05 | 0.014025  | 0.22792    |
| 16w_SITTE12 | 0.02900543 | 0.17078713 | 4.51E-05 | 0.0047064 | -0.12268   |
| 16w_SITTE12 | 0.08857676 | 0.5384018  | 4.82E-05 | 0.0098057 | -0.3844    |
| 16w_SITTE12 | 0.06601702 | 0.39918566 | 6.16E-05 | 0.0091463 | 0.17407    |
| 16w_SITTE12 | 0.02192812 | 0.12711301 | 4.26E-05 | 0.0051742 | -0.059109  |
| 16w_SITTE12 | 0.01240259 | 0.06833094 | 3.77E-05 | 0.0064954 | 0.24064    |
| 16w_SITTE12 | 0.01221274 | 0.06715938 | 3.77E-05 | 0.0064954 | 0.24064    |
| 16w_SITTE12 | 0.06613649 | 0.39992288 | 6.12E-05 | 0.0093985 | 0.17407    |
| 16w_SITTE12 | 0.01879951 | 0.10780636 | 4.11E-05 | 0.0055212 | 0.015459   |
| 16w_SITTE12 | 0.08945604 | 0.54382783 | 4.86E-05 | 0.0090548 | -0.42792   |
| 16w_SITTE12 | 0.08626372 | 0.524128   | 4.77E-05 | 0.01133   | -0.17867   |
| 16w_SITTE12 | 0.03529953 | 0.20962799 | 4.74E-05 | 0.0045622 | -0.10068   |
| 16w_SITTE12 | 0.08024271 | 0.48697236 | 4.87E-05 | 0.014207  | 0.14202    |
| 16w_SITTE12 | 0.01104438 | 0.05994943 | 3.71E-05 | 0.0066957 | 0.2858     |
| 16w_SITTE12 | 0.02514023 | 0.14693496 | 4.38E-05 | 0.0049138 | -0.10343   |
| 16w_SITTE12 | 0.00885019 | 0.0464091  | 3.59E-05 | 0.00713   | 0.38094    |
| 16w_SITTE12 | 0.01526742 | 0.08600981 | 3.95E-05 | 0.0059603 | 0.11709    |
| 16w_SITTE12 | 0.02108767 | 0.12192659 | 4.21E-05 | 0.0052798 | -0.04878   |
| 16w_SITTE12 | 0.01500548 | 0.0843934  | 3.92E-05 | 0.0060428 | 0.1363     |
| 16w_SITTE12 | 0.03840689 | 0.22880352 | 4.87E-05 | 0.0045758 | -0.076088  |
| 16w_SITTE12 | 0.02268342 | 0.13177396 | 4.28E-05 | 0.005125  | -0.077142  |
| 16w_SITTE12 | 0.01585804 | 0.08965455 | 3.98E-05 | 0.0058806 | 0.098494   |
| 16w_SITTE12 | 0.01687899 | 0.09595485 | 4.03E-05 | 0.005729  | 0.063215   |
| 16w_SITTE12 | 0.0154779  | 0.08730868 | 3.95E-05 | 0.0059603 | 0.11709    |
| 16w_SITTE12 | 0.03098327 | 0.18299235 | 4.58E-05 | 0.00463   | -0.12145   |
| 16w_SITTE12 | 0.0152165  | 0.0856956  | 3.95E-05 | 0.0059603 | 0.11709    |
| 16w_SITTE12 | 0.01141002 | 0.06220581 | 3.74E-05 | 0.0065941 | 0.263      |
| 16w_SITTE12 | 0.01680708 | 0.09551109 | 4.03E-05 | 0.005729  | 0.063215   |
| 16w_SITTE12 | 0.08678607 | 0.52735144 | 4.78E-05 | 0.010952  | -0.21781   |
| 16w_SITTE12 | 0.08522864 | 0.51774055 | 4.76E-05 | 0.012059  | -0.10433   |
| 16w_SITTE12 | 0.08762825 | 0.53254855 | 4.79E-05 | 0.010571  | -0.29935   |



|             |            |            |          |           |           |
|-------------|------------|------------|----------|-----------|-----------|
| 16w_SITTE12 | 0.00838696 | 0.0435505  | 3.56E-05 | 0.0072456 | 0.40559   |
| 16w_SITTE12 | 0.02069154 | 0.11948212 | 4.21E-05 | 0.0052798 | -0.037579 |
| 16w_SITTE12 | 0.08975406 | 0.5456669  | 4.86E-05 | 0.0090548 | -0.47194  |
| 16w_SITTE12 | 0.07884398 | 0.47834083 | 4.97E-05 | 0.014318  | 0.17506   |
| 16w_SITTE12 | 0.05263826 | 0.3166253  | 6.01E-05 | 0.0055357 | 0.018414  |
| 16w_SITTE12 | 0.04158054 | 0.24838813 | 5.05E-05 | 0.0046492 | -0.0504   |
| 16w_SITTE12 | 0.07544315 | 0.45735428 | 5.23E-05 | 0.013721  | 0.23858   |
| 16w_SITTE12 | 0.10276474 | 0.6259558  | 5.74E-05 | 0.0037844 | -1.3397   |
| 16w_SITTE12 | 0.03092183 | 0.1826132  | 4.58E-05 | 0.00463   | -0.12145  |
| 16w_SITTE12 | 0.02685616 | 0.15752399 | 4.44E-05 | 0.004813  | -0.11546  |
| 16w_SITTE12 | 0.03243412 | 0.19194554 | 4.62E-05 | 0.0046026 | -0.11603  |
| 16w_SITTE12 | 0.02285355 | 0.13282387 | 4.30E-05 | 0.0050782 | -0.077142 |
| 16w_SITTE12 | 0.06750037 | 0.40833938 | 6.03E-05 | 0.009922  | 0.19812   |
| 16w_SITTE12 | 0.01920275 | 0.11029477 | 4.14E-05 | 0.0054571 | 0.0010121 |
| 16w_SITTE12 | 0.01316437 | 0.07303192 | 3.83E-05 | 0.0063061 | 0.19734   |
| 16w_SITTE12 | 0.09061567 | 0.5509839  | 4.91E-05 | 0.0083333 | -0.51631  |
| 16w_SITTE12 | 0.00761372 | 0.03877888 | 3.53E-05 | 0.0073641 | 0.43054   |
| 16w_SITTE12 | 0.03023973 | 0.17840396 | 4.55E-05 | 0.0046645 | -0.12245  |
| 16w_SITTE12 | 0.02116117 | 0.12238015 | 4.24E-05 | 0.0052258 | -0.04878  |
| 16w_SITTE12 | 0.01762939 | 0.10058554 | 4.06E-05 | 0.0056572 | 0.046584  |
| 16w_SITTE12 | 0.00958973 | 0.0509728  | 3.62E-05 | 0.0070172 | 0.35661   |
| 16w_SITTE12 | 0.01217997 | 0.06695718 | 3.77E-05 | 0.0064954 | 0.24064   |
| 16w_SITTE12 | 0.0190919  | 0.1096107  | 4.14E-05 | 0.0054571 | 0.0010121 |
| 16w_SITTE12 | 0.02255253 | 0.13096629 | 4.28E-05 | 0.005125  | -0.068556 |
| 16w_SITTE12 | 0.03413565 | 0.2024457  | 4.70E-05 | 0.0045688 | -0.10761  |
| 16w_SITTE12 | 0.02033997 | 0.11731257 | 4.19E-05 | 0.0053364 | -0.025531 |
| 16w_SITTE12 | 0.03535158 | 0.20994921 | 4.74E-05 | 0.0045622 | -0.10068  |
| 16w_SITTE12 | 0.09024149 | 0.5486748  | 4.88E-05 | 0.0086895 | -0.51631  |
| 16w_SITTE12 | 0.07672215 | 0.46524698 | 5.13E-05 | 0.014025  | 0.22047   |
| 16w_SITTE12 | 0.08895416 | 0.5407307  | 4.84E-05 | 0.0094274 | -0.3844   |
| 16w_SITTE12 | 0.09217746 | 0.5606217  | 4.99E-05 | 0.0073308 | -0.6503   |
| 16w_SITTE12 | 0.02544623 | 0.14882328 | 4.38E-05 | 0.0049138 | -0.10813  |
| 16w_SITTE12 | 0.00954052 | 0.0506691  | 3.62E-05 | 0.0070172 | 0.35661   |
| 16w_SITTE12 | 0.05570494 | 0.3355498  | 6.21E-05 | 0.005966  | 0.043089  |
| 16w_SITTE12 | 0.02624825 | 0.15377256 | 4.42E-05 | 0.0048445 | -0.11213  |
| 16w_SITTE12 | 0.02802275 | 0.16472301 | 4.48E-05 | 0.0047558 | -0.12024  |
| 16w_SITTE12 | 0.01693121 | 0.09627706 | 4.03E-05 | 0.005729  | 0.063215  |
| 16w_SITTE12 | 0.0145292  | 0.08145429 | 3.89E-05 | 0.0061278 | 0.1561    |
| 16w_SITTE12 | 0.03640013 | 0.21641979 | 4.79E-05 | 0.0045625 | -0.092976 |
| 16w_SITTE12 | 0.00552838 | 0.02591022 | 3.41E-05 | 0.0078664 | 0.53284   |
| 16w_SITTE12 | 0.04007127 | 0.23907441 | 4.95E-05 | 0.0046046 | -0.063007 |
| 16w_SITTE12 | 0.03551126 | 0.21093458 | 4.74E-05 | 0.0045622 | -0.10068  |
| 16w_SITTE12 | 0.01984061 | 0.11423097 | 4.16E-05 | 0.0053955 | -0.012659 |

|             |            |            |          |           |           |
|-------------|------------|------------|----------|-----------|-----------|
| 16w_SITTE12 | 0.07164186 | 0.43389654 | 5.60E-05 | 0.012118  | 0.2386    |
| 16w_SITTE12 | 0.02481512 | 0.1449287  | 4.36E-05 | 0.0049516 | -0.098011 |
| 16w_SITTE12 | 0.02033985 | 0.1173118  | 4.19E-05 | 0.0053364 | -0.025531 |
| 16w_SITTE12 | 0.08785996 | 0.5339784  | 4.80E-05 | 0.010188  | -0.29935  |
| 16w_SITTE12 | 0.07993867 | 0.48509613 | 4.90E-05 | 0.014278  | 0.14202   |
| 16w_SITTE12 | 0.0903098  | 0.54909635 | 4.88E-05 | 0.0086895 | -0.51631  |
| 16w_SITTE12 | 0.00833618 | 0.04323717 | 3.56E-05 | 0.0072456 | 0.40559   |
| 16w_SITTE12 | 0.00913919 | 0.04819254 | 3.59E-05 | 0.00713   | 0.38094   |
| 16w_SITTE12 | 0.01684673 | 0.09575578 | 4.03E-05 | 0.005729  | 0.063215  |
| 16w_SITTE12 | 0.03085109 | 0.18217668 | 4.57E-05 | 0.0046464 | -0.12145  |
| 16w_SITTE12 | 0.05313306 | 0.31967872 | 6.05E-05 | 0.0056127 | 0.022172  |
| 16w_SITTE12 | 0.01058581 | 0.05711961 | 3.68E-05 | 0.0068    | 0.30902   |
| 16w_SITTE12 | 0.01560782 | 0.08811043 | 3.95E-05 | 0.0059603 | 0.11709   |
| 16w_SITTE12 | 0.0193909  | 0.11145585 | 4.14E-05 | 0.0054571 | 0.0010121 |
| 16w_SITTE12 | 0.03050761 | 0.18005703 | 4.57E-05 | 0.0046464 | -0.12245  |
| 16w_SITTE12 | 0.02501487 | 0.14616135 | 4.38E-05 | 0.0049138 | -0.10343  |
| 16w_SITTE12 | 0.01304418 | 0.07229022 | 3.83E-05 | 0.0063061 | 0.19734   |
| 16w_SITTE12 | 0.07582001 | 0.45967993 | 5.23E-05 | 0.013721  | 0.23393   |
| 16w_SITTE12 | 0.07882836 | 0.47824442 | 4.97E-05 | 0.014318  | 0.18889   |
| 16w_SITTE12 | 0.01493177 | 0.08393853 | 3.92E-05 | 0.0060428 | 0.1363    |
| 16w_SITTE12 | 0.07650418 | 0.4639019  | 5.13E-05 | 0.014025  | 0.22792   |
| 16w_SITTE12 | 0.01909489 | 0.10962914 | 4.14E-05 | 0.0054571 | 0.0010121 |
| 16w_SITTE12 | 0.02324163 | 0.13521871 | 4.30E-05 | 0.0050782 | -0.084895 |
| 16w_SITTE12 | 0.03785515 | 0.22539875 | 4.84E-05 | 0.0045696 | -0.080425 |
| 16w_SITTE12 | 0.07462959 | 0.4523338  | 5.33E-05 | 0.013335  | 0.24193   |
| 16w_SITTE12 | 0.01523016 | 0.08577989 | 3.95E-05 | 0.0059603 | 0.11709   |
| 16w_SITTE12 | 0.08286496 | 0.5031542  | 4.79E-05 | 0.013563  | 0.02505   |
| 16w_SITTE12 | 0.01482279 | 0.08326602 | 3.92E-05 | 0.0060428 | 0.1363    |
| 16w_SITTE12 | 0.06679468 | 0.40398458 | 6.07E-05 | 0.0096573 | 0.18233   |
| 16w_SITTE12 | 0.04336076 | 0.25937387 | 5.21E-05 | 0.0047343 | -0.038876 |
| 16w_SITTE12 | 0.02087564 | 0.12061819 | 4.21E-05 | 0.0052798 | -0.037579 |
| 16w_SITTE12 | 0.02967021 | 0.17488948 | 4.53E-05 | 0.0046846 | -0.1231   |
| 16w_SITTE12 | 0.02953214 | 0.17403743 | 4.53E-05 | 0.0046846 | -0.1231   |
| 16w_SITTE12 | 0.01861694 | 0.10667975 | 4.11E-05 | 0.0055212 | 0.015459  |
| 16w_SITTE12 | 0.02359085 | 0.13737375 | 4.32E-05 | 0.0050338 | -0.084895 |
| 16w_SITTE12 | 0.04145076 | 0.24758725 | 5.05E-05 | 0.0046492 | -0.054504 |
| 16w_SITTE12 | 0.0232318  | 0.13515806 | 4.30E-05 | 0.0050782 | -0.084895 |
| 16w_SITTE12 | 0.02482783 | 0.14500713 | 4.36E-05 | 0.0049516 | -0.10343  |
| 16w_SITTE12 | 0.03254965 | 0.1926585  | 4.64E-05 | 0.0045915 | -0.11603  |
| 16w_SITTE12 | 0.09145196 | 0.55614465 | 4.93E-05 | 0.0079874 | -0.60562  |
| 16w_SITTE12 | 0.00956273 | 0.05080618 | 3.62E-05 | 0.0070172 | 0.35661   |
| 16w_SITTE12 | 0.02636676 | 0.15450388 | 4.42E-05 | 0.0048445 | -0.11213  |
| 16w_SITTE12 | 0.04076221 | 0.24333818 | 5.02E-05 | 0.0046325 | -0.058715 |

|             |            |            |          |           |           |
|-------------|------------|------------|----------|-----------|-----------|
| 16w_SITTE12 | 0.08221563 | 0.49914727 | 4.81E-05 | 0.013778  | 0.05262   |
| 16w_SITTE12 | 0.09553868 | 0.5813638  | 5.20E-05 | 0.0056833 | -0.91061  |
| 16w_SITTE12 | 0.02090276 | 0.12078555 | 4.21E-05 | 0.0052798 | -0.037579 |
| 16w_SITTE12 | 0.01130747 | 0.06157299 | 3.71E-05 | 0.0066957 | 0.2858    |
| 16w_SITTE12 | 0.01130187 | 0.06153841 | 3.71E-05 | 0.0066957 | 0.2858    |
| 16w_SITTE12 | 0.016663   | 0.09462193 | 4.00E-05 | 0.0058035 | 0.080526  |
| 16w_SITTE12 | 0.02349754 | 0.13679792 | 4.32E-05 | 0.0050338 | -0.084895 |
| 16w_SITTE12 | 0.01074526 | 0.05810358 | 3.68E-05 | 0.0068    | 0.30902   |
| 16w_SITTE12 | 0.02510449 | 0.1467144  | 4.38E-05 | 0.0049138 | -0.10343  |
| 16w_SITTE12 | 0.02252246 | 0.13078067 | 4.28E-05 | 0.005125  | -0.068556 |
| 16w_SITTE12 | 0.02357577 | 0.1372807  | 4.32E-05 | 0.0050338 | -0.084895 |
| 16w_SITTE12 | 0.0748955  | 0.45397475 | 5.28E-05 | 0.013537  | 0.24193   |
| 16w_SITTE12 | 0.08678834 | 0.52736545 | 4.78E-05 | 0.010952  | -0.21781  |
| 16w_SITTE12 | 0.04646178 | 0.27851027 | 5.44E-05 | 0.0048874 | -0.018376 |
| 16w_SITTE12 | 0.02137265 | 0.1236852  | 4.24E-05 | 0.0052258 | -0.04878  |
| 16w_SITTE12 | 0.02486772 | 0.14525327 | 4.36E-05 | 0.0049516 | -0.10343  |
| 16w_SITTE12 | 0.0091802  | 0.0484456  | 3.59E-05 | 0.00713   | 0.35661   |
| 16w_SITTE12 | 0.01219967 | 0.06707873 | 3.77E-05 | 0.0064954 | 0.24064   |
| 16w_SITTE12 | 0.08658917 | 0.5261364  | 4.77E-05 | 0.01133   | -0.21781  |
| 16w_SITTE12 | 0.07551091 | 0.45777246 | 5.23E-05 | 0.013721  | 0.23858   |
| 16w_SITTE12 | 0.03715451 | 0.2210751  | 4.81E-05 | 0.0045652 | -0.088896 |
| 16w_SITTE12 | 0.01503643 | 0.0845844  | 3.92E-05 | 0.0060428 | 0.1363    |
| 16w_SITTE12 | 0.01067231 | 0.05765344 | 3.68E-05 | 0.0068    | 0.30902   |
| 16w_SITTE12 | 0.01805677 | 0.10322289 | 4.09E-05 | 0.0055879 | 0.030658  |
| 16w_SITTE12 | 0.01544926 | 0.08713199 | 3.95E-05 | 0.0059603 | 0.11709   |
| 16w_SITTE12 | 0.07743982 | 0.46967575 | 5.09E-05 | 0.014141  | 0.21153   |
| 16w_SITTE12 | 0.02265209 | 0.13158067 | 4.28E-05 | 0.005125  | -0.068556 |
| 16w_SITTE12 | 0.01615345 | 0.0914775  | 3.98E-05 | 0.0058806 | 0.098494  |
| 16w_SITTE12 | 0.01043795 | 0.0562072  | 3.68E-05 | 0.0068    | 0.30902   |
| 16w_SITTE12 | 0.03773644 | 0.22466616 | 4.84E-05 | 0.0045696 | -0.084703 |
| 16w_SITTE12 | 0.01144654 | 0.06243116 | 3.74E-05 | 0.0065941 | 0.263     |
| 16w_SITTE12 | 0.01955782 | 0.11248587 | 4.16E-05 | 0.0053955 | -0.012659 |
| 16w_SITTE12 | 0.01872859 | 0.10736875 | 4.11E-05 | 0.0055212 | 0.015459  |
| 16w_SITTE12 | 0.08689858 | 0.5280457  | 4.78E-05 | 0.010952  | -0.21781  |
| 16w_SITTE12 | 0.07155787 | 0.43337825 | 5.60E-05 | 0.012118  | 0.2386    |
| 16w_SITTE12 | 0.06539086 | 0.39532158 | 6.20E-05 | 0.0089013 | 0.16566   |
| 16w_SITTE12 | 0.07799246 | 0.4730861  | 5.05E-05 | 0.014229  | 0.20103   |
| 16w_SITTE12 | 0.01443673 | 0.08088362 | 3.89E-05 | 0.0061278 | 0.1561    |
| 16w_SITTE12 | 0.09652222 | 0.5874332  | 5.28E-05 | 0.0052469 | -0.99133  |
| 16w_SITTE12 | 0.04351312 | 0.26031405 | 5.21E-05 | 0.0047343 | -0.038876 |
| 16w_SITTE12 | 0.09425478 | 0.57344085 | 5.09E-05 | 0.0064439 | -0.82618  |
| 16w_SITTE12 | 0.09292337 | 0.5652247  | 5.02E-05 | 0.0070215 | -0.73907  |
| 16w_SITTE12 | 0.08786985 | 0.53403944 | 4.80E-05 | 0.010188  | -0.29935  |

|             |            |            |          |           |           |
|-------------|------------|------------|----------|-----------|-----------|
| 16w_SITTE12 | 0.08196976 | 0.49763    | 4.81E-05 | 0.013778  | 0.078055  |
| 16w_SITTE12 | 0.09227947 | 0.5612512  | 4.99E-05 | 0.0073308 | -0.6503   |
| 16w_SITTE12 | 0.02780071 | 0.16335279 | 4.48E-05 | 0.0047558 | -0.12024  |
| 16w_SITTE12 | 0.00612362 | 0.02958342 | 3.44E-05 | 0.0077366 | 0.50694   |
| 16w_SITTE12 | 0.07387123 | 0.44765398 | 5.38E-05 | 0.013116  | 0.24502   |
| 16w_SITTE12 | 0.08155163 | 0.49504974 | 4.83E-05 | 0.013957  | 0.078055  |
| 16w_SITTE12 | 0.03231695 | 0.1912225  | 4.62E-05 | 0.0046026 | -0.11821  |
| 16w_SITTE12 | 0.02766222 | 0.16249815 | 4.48E-05 | 0.0047558 | -0.12024  |
| 16w_SITTE12 | 0.01579732 | 0.08927988 | 3.98E-05 | 0.0058806 | 0.098494  |
| 16w_SITTE12 | 0.01958037 | 0.11262508 | 4.16E-05 | 0.0053955 | -0.012659 |
| 16w_SITTE12 | 0.07685711 | 0.46607986 | 5.13E-05 | 0.014025  | 0.22047   |
| 16w_SITTE12 | 0.08558692 | 0.51995146 | 4.76E-05 | 0.012059  | -0.14081  |
| 16w_SITTE12 | 0.01976025 | 0.11373512 | 4.16E-05 | 0.0053955 | -0.012659 |
| 16w_SITTE12 | 0.01274681 | 0.07045515 | 3.80E-05 | 0.0063994 | 0.21875   |
| 16w_SITTE12 | 0.03023359 | 0.17836608 | 4.55E-05 | 0.0046645 | -0.12245  |
| 16w_SITTE12 | 0.0237279  | 0.13821949 | 4.32E-05 | 0.0050338 | -0.084895 |
| 16w_SITTE12 | 0.02081513 | 0.12024476 | 4.21E-05 | 0.0052798 | -0.037579 |
| 16w_SITTE12 | 0.02366816 | 0.13785085 | 4.32E-05 | 0.0050338 | -0.084895 |
| 16w_SITTE12 | 0.08922549 | 0.54240507 | 4.84E-05 | 0.0094274 | -0.42792  |
| 16w_SITTE12 | 0.0374258  | 0.22274922 | 4.84E-05 | 0.0045696 | -0.084703 |
| 16w_SITTE12 | 0.06793077 | 0.41099542 | 5.98E-05 | 0.010192  | 0.19812   |
| 16w_SITTE12 | 0.08927532 | 0.5427126  | 4.84E-05 | 0.0094274 | -0.42792  |
| 16w_SITTE12 | 0.02151327 | 0.12455297 | 4.24E-05 | 0.0052258 | -0.04878  |
| 16w_SITTE12 | 0.08790799 | 0.53427476 | 4.80E-05 | 0.010188  | -0.29935  |
| 16w_SITTE12 | 0.00564334 | 0.02661966 | 3.41E-05 | 0.0078664 | 0.53284   |
| 16w_SITTE12 | 0.03120859 | 0.18438284 | 4.58E-05 | 0.00463   | -0.12145  |
| 16w_SITTE12 | 0.00514058 | 0.02351709 | 3.38E-05 | 0.0079991 | 0.55892   |
| 16w_SITTE12 | 0.01947549 | 0.11197785 | 4.14E-05 | 0.0054571 | -0.012659 |
| 16w_SITTE12 | 0.04802017 | 0.2881271  | 5.58E-05 | 0.0050083 | -0.01192  |
| 16w_SITTE12 | 0.02981838 | 0.17580381 | 4.55E-05 | 0.0046645 | -0.12301  |
| 16w_SITTE12 | 0.02357075 | 0.13724971 | 4.32E-05 | 0.0050338 | -0.084895 |
| 16w_SITTE12 | 0.01043214 | 0.05617132 | 3.68E-05 | 0.0068    | 0.30902   |
| 16w_SITTE12 | 0.01191336 | 0.06531194 | 3.77E-05 | 0.0064954 | 0.24064   |
| 16w_SITTE12 | 0.02331052 | 0.13564384 | 4.32E-05 | 0.0050338 | -0.084895 |
| 16w_SITTE12 | 0.0740137  | 0.44853318 | 5.38E-05 | 0.013116  | 0.24406   |
| 16w_SITTE12 | 0.01334592 | 0.07415228 | 3.83E-05 | 0.0063061 | 0.19734   |
| 16w_SITTE12 | 0.01601479 | 0.09062188 | 3.98E-05 | 0.0058806 | 0.098494  |
| 16w_SITTE12 | 0.0363855  | 0.21632953 | 4.79E-05 | 0.0045625 | -0.092976 |
| 16w_SITTE12 | 0.01752688 | 0.099953   | 4.06E-05 | 0.0056572 | 0.046584  |
| 16w_SITTE12 | 0.07177696 | 0.4347302  | 5.60E-05 | 0.012118  | 0.2386    |
| 16w_SITTE12 | 0.01597963 | 0.09040485 | 3.98E-05 | 0.0058806 | 0.098494  |
| 16w_SITTE12 | 0.01830436 | 0.10475082 | 4.09E-05 | 0.0055879 | 0.030658  |
| 16w_SITTE12 | 0.09232348 | 0.5615228  | 4.99E-05 | 0.0073308 | -0.6503   |

|             |            |            |          |           |            |
|-------------|------------|------------|----------|-----------|------------|
| 16w_SITTE12 | 0.02654858 | 0.15562586 | 4.44E-05 | 0.004813  | -0.11546   |
| 16w_SITTE12 | 0.08297468 | 0.5038313  | 4.78E-05 | 0.013315  | 0.02505    |
| 16w_SITTE12 | 0.0300267  | 0.1770894  | 4.55E-05 | 0.0046645 | -0.12301   |
| 16w_SITTE12 | 0.01945338 | 0.1118414  | 4.14E-05 | 0.0054571 | -0.012659  |
| 16w_SITTE12 | 0.02725508 | 0.15998569 | 4.46E-05 | 0.0047834 | -0.11816   |
| 16w_SITTE12 | 0.0622824  | 0.37613925 | 6.36E-05 | 0.0076138 | 0.11565    |
| 16w_SITTE12 | 0.02167572 | 0.12555544 | 4.26E-05 | 0.0051742 | -0.059109  |
| 16w_SITTE12 | 0.02993637 | 0.17653193 | 4.55E-05 | 0.0046645 | -0.12301   |
| 16w_SITTE12 | 0.08616743 | 0.5235338  | 4.77E-05 | 0.01133   | -0.17867   |
| 16w_SITTE12 | 0.03166789 | 0.18721718 | 4.60E-05 | 0.0046154 | -0.12002   |
| 16w_SITTE12 | 0.09644602 | 0.586963   | 5.28E-05 | 0.0052469 | -0.99133   |
| 16w_SITTE12 | 0.02073284 | 0.11973692 | 4.21E-05 | 0.0052798 | -0.037579  |
| 16w_SITTE12 | 0.02111255 | 0.12208013 | 4.24E-05 | 0.0052258 | -0.04878   |
| 16w_SITTE12 | 0.04921117 | 0.2954767  | 5.68E-05 | 0.0051026 | -0.0022352 |
| 16w_SITTE12 | 0.01968381 | 0.11326338 | 4.16E-05 | 0.0053955 | -0.012659  |
| 16w_SITTE12 | 0.096731   | 0.5887216  | 5.28E-05 | 0.0052469 | -1.03      |
| 16w_SITTE12 | 0.0713982  | 0.4323929  | 5.65E-05 | 0.011849  | 0.2386     |
| 16w_SITTE12 | 0.08516989 | 0.517378   | 4.76E-05 | 0.012059  | -0.10433   |
| 16w_SITTE12 | 0.01605221 | 0.09085277 | 3.98E-05 | 0.0058806 | 0.098494   |
| 16w_SITTE12 | 0.01315201 | 0.07295562 | 3.83E-05 | 0.0063061 | 0.19734    |
| 16w_SITTE12 | 0.02848736 | 0.16759007 | 4.49E-05 | 0.0047302 | -0.12174   |
| 16w_SITTE12 | 0.01462513 | 0.08204623 | 3.92E-05 | 0.0060428 | 0.1363     |
| 16w_SITTE12 | 0.00904229 | 0.04759453 | 3.59E-05 | 0.00713   | 0.38094    |
| 16w_SITTE12 | 0.08757558 | 0.53222346 | 4.79E-05 | 0.010571  | -0.29935   |
| 16w_SITTE12 | 0.02385174 | 0.13898368 | 4.34E-05 | 0.0049916 | -0.091842  |
| 16w_SITTE12 | 0.10393065 | 0.63315064 | 5.82E-05 | 0.0036742 | -1.3662    |
| 16w_SITTE12 | 0.01003846 | 0.0537419  | 3.65E-05 | 0.0069072 | 0.33263    |
| 16w_SITTE12 | 0.01857123 | 0.10639767 | 4.11E-05 | 0.0055212 | 0.015459   |
| 16w_SITTE12 | 0.01559481 | 0.08803016 | 3.95E-05 | 0.0059603 | 0.11709    |
| 16w_SITTE12 | 0.08184625 | 0.49686784 | 4.81E-05 | 0.013778  | 0.078055   |
| 16w_SITTE12 | 0.0285136  | 0.16775204 | 4.49E-05 | 0.0047302 | -0.12174   |
| 16w_SITTE12 | 0.07370172 | 0.44660792 | 5.38E-05 | 0.013116  | 0.24502    |
| 16w_SITTE12 | 0.02175214 | 0.12602705 | 4.26E-05 | 0.0051742 | -0.059109  |
| 16w_SITTE12 | 0.01922176 | 0.11041209 | 4.14E-05 | 0.0054571 | 0.0010121  |
| 16w_SITTE12 | 0.0971769  | 0.5914732  | 5.32E-05 | 0.0050496 | -1.03      |
| 16w_SITTE12 | 0.0306409  | 0.18087958 | 4.57E-05 | 0.0046464 | -0.12245   |
| 16w_SITTE12 | 0.0366688  | 0.21807773 | 4.79E-05 | 0.0045625 | -0.092976  |
| 16w_SITTE12 | 0.01835473 | 0.10506164 | 4.09E-05 | 0.0055879 | 0.015459   |
| 16w_SITTE12 | 0.01456031 | 0.08164625 | 3.89E-05 | 0.0061278 | 0.1561     |
| 16w_SITTE12 | 0.01766166 | 0.10078467 | 4.06E-05 | 0.0056572 | 0.046584   |
| 16w_SITTE12 | 0.01213033 | 0.06665083 | 3.77E-05 | 0.0064954 | 0.24064    |
| 16w_SITTE12 | 0.02216205 | 0.12855661 | 4.26E-05 | 0.0051742 | -0.068556  |
| 16w_SITTE12 | 0.01662597 | 0.09439342 | 4.00E-05 | 0.0058035 | 0.080526   |

|             |            |            |          |           |            |
|-------------|------------|------------|----------|-----------|------------|
| 16w_SITTE12 | 0.0611645  | 0.36924076 | 6.38E-05 | 0.0072613 | 0.10072    |
| 16w_SITTE12 | 0.02210697 | 0.12821668 | 4.26E-05 | 0.0051742 | -0.059109  |
| 16w_SITTE12 | 0.01873205 | 0.10739005 | 4.11E-05 | 0.0055212 | 0.015459   |
| 16w_SITTE12 | 0.01428123 | 0.07992403 | 3.89E-05 | 0.0061278 | 0.1561     |
| 16w_SITTE12 | 0.01811579 | 0.10358711 | 4.09E-05 | 0.0055879 | 0.030658   |
| 16w_SITTE12 | 0.01697696 | 0.09655938 | 4.03E-05 | 0.005729  | 0.063215   |
| 16w_SITTE12 | 0.02328127 | 0.1354633  | 4.32E-05 | 0.0050338 | -0.084895  |
| 16w_SITTE12 | 0.01764756 | 0.10069768 | 4.06E-05 | 0.0056572 | 0.046584   |
| 16w_SITTE12 | 0.01981575 | 0.11407758 | 4.16E-05 | 0.0053955 | -0.012659  |
| 16w_SITTE12 | 0.03466231 | 0.20569573 | 4.72E-05 | 0.0045646 | -0.10426   |
| 16w_SITTE12 | 0.01814212 | 0.1037496  | 4.09E-05 | 0.0055879 | 0.030658   |
| 16w_SITTE12 | 0.00971377 | 0.05173824 | 3.62E-05 | 0.0070172 | 0.33263    |
| 16w_SITTE12 | 0.02374861 | 0.1383473  | 4.32E-05 | 0.0050338 | -0.091842  |
| 16w_SITTE12 | 0.03024242 | 0.17842059 | 4.55E-05 | 0.0046645 | -0.12245   |
| 16w_SITTE12 | 0.08210538 | 0.49846694 | 4.81E-05 | 0.013778  | 0.05262    |
| 16w_SITTE12 | 0.03259346 | 0.19292887 | 4.64E-05 | 0.0045915 | -0.11603   |
| 16w_SITTE12 | 0.01625426 | 0.09209962 | 4.00E-05 | 0.0058035 | 0.080526   |
| 16w_SITTE12 | 0.01773919 | 0.10126316 | 4.06E-05 | 0.0056572 | 0.046584   |
| 16w_SITTE12 | 0.09584845 | 0.5832754  | 5.20E-05 | 0.0056833 | -0.9515    |
| 16w_SITTE12 | 0.04100797 | 0.24485478 | 5.02E-05 | 0.0046325 | -0.058715  |
| 16w_SITTE12 | 0.02441569 | 0.14246385 | 4.36E-05 | 0.0049516 | -0.098011  |
| 16w_SITTE12 | 0.02344843 | 0.13649485 | 4.32E-05 | 0.0050338 | -0.084895  |
| 16w_SITTE12 | 0.02918867 | 0.17191786 | 4.51E-05 | 0.0047064 | -0.1231    |
| 16w_SITTE12 | 0.08758675 | 0.5322924  | 4.79E-05 | 0.010571  | -0.29935   |
| 16w_SITTE12 | 0.03838898 | 0.22869296 | 4.87E-05 | 0.0045758 | -0.076088  |
| 16w_SITTE12 | 0.0227987  | 0.13248539 | 4.30E-05 | 0.0050782 | -0.077142  |
| 16w_SITTE12 | 0.01865061 | 0.10688748 | 4.11E-05 | 0.0055212 | 0.015459   |
| 16w_SITTE12 | 0.04088914 | 0.2441215  | 5.02E-05 | 0.0046325 | -0.058715  |
| 16w_SITTE12 | 0.03630912 | 0.21585818 | 4.79E-05 | 0.0045625 | -0.092976  |
| 16w_SITTE12 | 0.0227409  | 0.13212869 | 4.30E-05 | 0.0050782 | -0.077142  |
| 16w_SITTE12 | 0.04889336 | 0.2935155  | 5.68E-05 | 0.0051026 | -0.0054808 |
| 16w_SITTE12 | 0.02972585 | 0.17523283 | 4.53E-05 | 0.0046846 | -0.12301   |
| 16w_SITTE12 | 0.00626231 | 0.03043932 | 3.44E-05 | 0.0077366 | 0.50694    |
| 16w_SITTE12 | 0.08958971 | 0.5446527  | 4.86E-05 | 0.0090548 | -0.42792   |
| 16w_SITTE12 | 0.00929144 | 0.04913206 | 3.62E-05 | 0.0070172 | 0.35661    |
| 16w_SITTE12 | 0.01051413 | 0.05667727 | 3.68E-05 | 0.0068    | 0.30902    |
| 16w_SITTE12 | 0.01141815 | 0.06225602 | 3.74E-05 | 0.0065941 | 0.263      |
| 16w_SITTE12 | 0.06590048 | 0.3984665  | 6.16E-05 | 0.0091463 | 0.17407    |
| 16w_SITTE12 | 0.093876   | 0.5711034  | 5.09E-05 | 0.0064439 | -0.7829    |
| 16w_SITTE12 | 0.02022943 | 0.1166304  | 4.19E-05 | 0.0053364 | -0.025531  |
| 16w_SITTE12 | 0.03145614 | 0.18591046 | 4.60E-05 | 0.0046154 | -0.12002   |
| 16w_SITTE12 | 0.01141454 | 0.06223374 | 3.74E-05 | 0.0065941 | 0.263      |
| 16w_SITTE12 | 0.03391346 | 0.20107454 | 4.68E-05 | 0.0045746 | -0.11071   |

|             |            |            |          |           |           |
|-------------|------------|------------|----------|-----------|-----------|
| 16w_SITTE12 | 0.02308405 | 0.13424626 | 4.30E-05 | 0.0050782 | -0.077142 |
| 16w_SITTE12 | 0.05187053 | 0.31188765 | 5.92E-05 | 0.0053939 | 0.014768  |
| 16w_SITTE12 | 0.05743515 | 0.34622693 | 6.32E-05 | 0.0064035 | 0.057806  |
| 16w_SITTE12 | 0.09814379 | 0.5974399  | 5.40E-05 | 0.0046955 | -1.1032   |
| 16w_SITTE12 | 0.0955311  | 0.581317   | 5.20E-05 | 0.0056833 | -0.91061  |
| 16w_SITTE12 | 0.01133429 | 0.06173848 | 3.71E-05 | 0.0066957 | 0.263     |
| 16w_SITTE12 | 0.01920695 | 0.1103207  | 4.14E-05 | 0.0054571 | 0.0010121 |
| 16w_SITTE12 | 0.01830147 | 0.10473295 | 4.09E-05 | 0.0055879 | 0.030658  |
| 16w_SITTE12 | 0.0222265  | 0.12895434 | 4.28E-05 | 0.005125  | -0.068556 |
| 16w_SITTE12 | 0.07439437 | 0.45088226 | 5.33E-05 | 0.013335  | 0.24406   |
| 16w_SITTE12 | 0.07032984 | 0.42580006 | 5.76E-05 | 0.011297  | 0.23016   |
| 16w_SITTE12 | 0.06945665 | 0.42041162 | 5.82E-05 | 0.011019  | 0.21895   |
| 16w_SITTE12 | 0.00876182 | 0.04586377 | 3.59E-05 | 0.00713   | 0.38094   |
| 16w_SITTE12 | 0.03345784 | 0.19826292 | 4.66E-05 | 0.0045822 | -0.11352  |
| 16w_SITTE12 | 0.03342437 | 0.19805638 | 4.66E-05 | 0.0045822 | -0.11352  |
| 16w_SITTE12 | 0.01631232 | 0.09245793 | 4.00E-05 | 0.0058035 | 0.080526  |
| 16w_SITTE12 | 0.02946284 | 0.17360978 | 4.53E-05 | 0.0046846 | -0.1231   |
| 16w_SITTE12 | 0.09477511 | 0.5766518  | 5.13E-05 | 0.0061762 | -0.8688   |
| 16w_SITTE12 | 0.0238451  | 0.13894269 | 4.34E-05 | 0.0049916 | -0.091842 |
| 16w_SITTE12 | 0.02029424 | 0.11703034 | 4.19E-05 | 0.0053364 | -0.025531 |
| 16w_SITTE12 | 0.05339146 | 0.3212733  | 6.05E-05 | 0.0056127 | 0.022172  |
| 16w_SITTE12 | 0.01122284 | 0.06105071 | 3.71E-05 | 0.0066957 | 0.2858    |
| 16w_SITTE12 | 0.0174682  | 0.09959083 | 4.06E-05 | 0.0056572 | 0.046584  |
| 16w_SITTE12 | 0.02331347 | 0.13566203 | 4.32E-05 | 0.0050338 | -0.084895 |
| 16w_SITTE12 | 0.08114939 | 0.4925675  | 4.85E-05 | 0.0141    | 0.10139   |
| 16w_SITTE12 | 0.02485132 | 0.14515209 | 4.36E-05 | 0.0049516 | -0.10343  |
| 16w_SITTE12 | 0.01761455 | 0.100494   | 4.06E-05 | 0.0056572 | 0.046584  |
| 16w_SITTE12 | 0.02271165 | 0.13194819 | 4.28E-05 | 0.005125  | -0.077142 |
| 16w_SITTE12 | 0.02808027 | 0.16507795 | 4.48E-05 | 0.0047558 | -0.12174  |
| 16w_SITTE12 | 0.01726755 | 0.09835266 | 4.03E-05 | 0.005729  | 0.046584  |
| 16w_SITTE12 | 0.07994469 | 0.48513326 | 4.90E-05 | 0.014278  | 0.14202   |
| 16w_SITTE12 | 0.01668651 | 0.09476703 | 4.00E-05 | 0.0058035 | 0.080526  |
| 16w_SITTE12 | 0.01510674 | 0.08501829 | 3.92E-05 | 0.0060428 | 0.11709   |
| 16w_SITTE12 | 0.05458004 | 0.32860807 | 6.14E-05 | 0.0057798 | 0.034245  |
| 16w_SITTE12 | 0.09462459 | 0.575723   | 5.13E-05 | 0.0061762 | -0.8688   |
| 16w_SITTE12 | 0.02597821 | 0.15210615 | 4.40E-05 | 0.0048781 | -0.11213  |
| 16w_SITTE12 | 0.08393619 | 0.5097648  | 4.77E-05 | 0.013036  | -0.036078 |
| 16w_SITTE12 | 0.0899158  | 0.54666495 | 4.86E-05 | 0.0090548 | -0.47194  |
| 16w_SITTE12 | 0.02523432 | 0.1475156  | 4.38E-05 | 0.0049138 | -0.10343  |
| 16w_SITTE12 | 0.00882706 | 0.04626637 | 3.59E-05 | 0.00713   | 0.38094   |
| 16w_SITTE12 | 0.0253409  | 0.14817332 | 4.38E-05 | 0.0049138 | -0.10343  |
| 16w_SITTE12 | 0.01445433 | 0.08099224 | 3.89E-05 | 0.0061278 | 0.1561    |
| 16w_SITTE12 | 0.07619327 | 0.46198326 | 5.18E-05 | 0.013885  | 0.22792   |

|             |            |            |          |           |            |
|-------------|------------|------------|----------|-----------|------------|
| 16w_SITTE12 | 0.08859415 | 0.5385091  | 4.82E-05 | 0.0098057 | -0.3844    |
| 16w_SITTE12 | 0.09950566 | 0.605844   | 5.49E-05 | 0.0043938 | -1.2008    |
| 16w_SITTE12 | 0.01155811 | 0.06311969 | 3.74E-05 | 0.0065941 | 0.263      |
| 16w_SITTE12 | 0.01617967 | 0.09163933 | 3.98E-05 | 0.0058806 | 0.098494   |
| 16w_SITTE12 | 0.041642   | 0.24876738 | 5.05E-05 | 0.0046492 | -0.0504    |
| 16w_SITTE12 | 0.03433055 | 0.20364845 | 4.70E-05 | 0.0045688 | -0.10761   |
| 16w_SITTE12 | 0.08332957 | 0.5060214  | 4.78E-05 | 0.013315  | -0.0045591 |
| 16w_SITTE12 | 0.01177881 | 0.06448163 | 3.74E-05 | 0.0065941 | 0.263      |
| 16w_SITTE12 | 0.01111709 | 0.06039815 | 3.71E-05 | 0.0066957 | 0.2858     |
| 16w_SITTE12 | 0.07308377 | 0.44279453 | 5.49E-05 | 0.012637  | 0.24489    |
| 16w_SITTE12 | 0.09711285 | 0.591078   | 5.32E-05 | 0.0050496 | -1.03      |
| 16w_SITTE12 | 0.01288023 | 0.07127851 | 3.80E-05 | 0.0063994 | 0.21875    |
| 16w_SITTE12 | 0.03384478 | 0.20065075 | 4.68E-05 | 0.0045746 | -0.11071   |
| 16w_SITTE12 | 0.02120773 | 0.12266749 | 4.24E-05 | 0.0052258 | -0.04878   |
| 16w_SITTE12 | 0.02703748 | 0.15864287 | 4.44E-05 | 0.004813  | -0.11816   |
| 16w_SITTE12 | 0.01207335 | 0.06629925 | 3.77E-05 | 0.0064954 | 0.24064    |
| 16w_SITTE12 | 0.08832063 | 0.5368212  | 4.82E-05 | 0.0098057 | -0.3415    |
| 16w_SITTE12 | 0.01074703 | 0.05811451 | 3.68E-05 | 0.0068    | 0.30902    |
| 16w_SITTE12 | 0.03684579 | 0.21916993 | 4.81E-05 | 0.0045652 | -0.088896  |
| 16w_SITTE12 | 0.02307892 | 0.13421461 | 4.30E-05 | 0.0050782 | -0.077142  |
| 16w_SITTE12 | 0.08596517 | 0.52228564 | 4.76E-05 | 0.0117    | -0.17867   |
| 16w_SITTE12 | 0.01717711 | 0.09779455 | 4.03E-05 | 0.005729  | 0.063215   |
| 16w_SITTE12 | 0.01486581 | 0.08353149 | 3.92E-05 | 0.0060428 | 0.1363     |
| 16w_SITTE12 | 0.03239557 | 0.19170766 | 4.62E-05 | 0.0046026 | -0.11603   |
| 16w_SITTE12 | 0.03062672 | 0.18079211 | 4.57E-05 | 0.0046464 | -0.12245   |
| 16w_SITTE12 | 0.0230758  | 0.13419536 | 4.30E-05 | 0.0050782 | -0.077142  |
| 16w_SITTE12 | 0.09458023 | 0.57544917 | 5.13E-05 | 0.0061762 | -0.8688    |
| 16w_SITTE12 | 0.03767055 | 0.22425959 | 4.84E-05 | 0.0045696 | -0.084703  |
| 16w_SITTE12 | 0.01194947 | 0.06553477 | 3.77E-05 | 0.0064954 | 0.24064    |
| 16w_SITTE12 | 0.01764033 | 0.10065308 | 4.06E-05 | 0.0056572 | 0.046584   |
| 16w_SITTE12 | 0.0289139  | 0.1702223  | 4.51E-05 | 0.0047064 | -0.12268   |
| 16w_SITTE12 | 0.01503659 | 0.08458538 | 3.92E-05 | 0.0060428 | 0.1363     |
| 16w_SITTE12 | 0.08866256 | 0.53893125 | 4.82E-05 | 0.0098057 | -0.3844    |
| 16w_SITTE12 | 0.09387818 | 0.57111686 | 5.09E-05 | 0.0064439 | -0.7829    |
| 16w_SITTE12 | 0.02819462 | 0.16578358 | 4.49E-05 | 0.0047302 | -0.12174   |
| 16w_SITTE12 | 0.01627316 | 0.09221628 | 4.00E-05 | 0.0058035 | 0.080526   |
| 16w_SITTE12 | 0.01649943 | 0.09361259 | 4.00E-05 | 0.0058035 | 0.080526   |
| 16w_SITTE12 | 0.01433771 | 0.08027259 | 3.89E-05 | 0.0061278 | 0.1561     |
| 16w_SITTE12 | 0.08102088 | 0.49177444 | 4.85E-05 | 0.0141    | 0.10139    |
| 16w_SITTE12 | 0.07367119 | 0.44641954 | 5.43E-05 | 0.012883  | 0.24502    |
| 16w_SITTE12 | 0.02244036 | 0.13027404 | 4.28E-05 | 0.005125  | -0.068556  |
| 16w_SITTE12 | 0.02385938 | 0.13903083 | 4.34E-05 | 0.0049916 | -0.091842  |
| 16w_SITTE12 | 0.02427126 | 0.14157255 | 4.34E-05 | 0.0049916 | -0.091842  |



|             |            |            |          |           |            |
|-------------|------------|------------|----------|-----------|------------|
| 16w_SITTE12 | 0.08352903 | 0.5072522  | 4.77E-05 | 0.013036  | -0.0045591 |
| 16w_SITTE12 | 0.02427582 | 0.14160067 | 4.34E-05 | 0.0049916 | -0.091842  |
| 16w_SITTE12 | 0.06368911 | 0.38482007 | 6.30E-05 | 0.008216  | 0.13178    |
| 16w_SITTE12 | 0.02944622 | 0.17350726 | 4.53E-05 | 0.0046846 | -0.1231    |
| 16w_SITTE12 | 0.02122911 | 0.1227994  | 4.24E-05 | 0.0052258 | -0.04878   |
| 16w_SITTE12 | 0.02536392 | 0.14831536 | 4.38E-05 | 0.0049138 | -0.10343   |
| 16w_SITTE12 | 0.02777943 | 0.16322146 | 4.48E-05 | 0.0047558 | -0.12024   |
| 16w_SITTE12 | 0.01482394 | 0.08327311 | 3.92E-05 | 0.0060428 | 0.1363     |
| 16w_SITTE12 | 0.02548321 | 0.14905149 | 4.40E-05 | 0.0048781 | -0.10813   |
| 16w_SITTE12 | 0.02318785 | 0.1348868  | 4.30E-05 | 0.0050782 | -0.077142  |
| 16w_SITTE12 | 0.01607486 | 0.09099252 | 3.98E-05 | 0.0058806 | 0.098494   |
| 16w_SITTE12 | 0.09434934 | 0.5740244  | 5.13E-05 | 0.0061762 | -0.82618   |
| 16w_SITTE12 | 0.01504968 | 0.08466617 | 3.92E-05 | 0.0060428 | 0.1363     |
| 16w_SITTE12 | 0.02362909 | 0.13760972 | 4.32E-05 | 0.0050338 | -0.084895  |
| 16w_SITTE12 | 0.02839537 | 0.16702245 | 4.49E-05 | 0.0047302 | -0.12174   |
| 16w_SITTE12 | 0.05580865 | 0.33618975 | 6.24E-05 | 0.0060668 | 0.043089   |
| 16w_SITTE12 | 0.03185021 | 0.18834224 | 4.60E-05 | 0.0046154 | -0.11821   |
| 16w_SITTE12 | 0.02843335 | 0.16725679 | 4.49E-05 | 0.0047302 | -0.12174   |
| 16w_SITTE12 | 0.03022897 | 0.17833754 | 4.55E-05 | 0.0046645 | -0.12301   |
| 16w_SITTE12 | 0.04346091 | 0.25999188 | 5.21E-05 | 0.0047343 | -0.038876  |
| 16w_SITTE12 | 0.07829464 | 0.47495082 | 5.01E-05 | 0.014289  | 0.20103    |
| 16w_SITTE12 | 0.03550874 | 0.21091901 | 4.74E-05 | 0.0045622 | -0.10068   |
| 16w_SITTE12 | 0.04002665 | 0.23879908 | 4.95E-05 | 0.0046046 | -0.063007  |
| 16w_SITTE12 | 0.03206034 | 0.18963899 | 4.62E-05 | 0.0046026 | -0.11821   |
| 16w_SITTE12 | 0.02149282 | 0.12442681 | 4.24E-05 | 0.0052258 | -0.04878   |
| 16w_SITTE12 | 0.0172546  | 0.09827271 | 4.03E-05 | 0.005729  | 0.063215   |
| 16w_SITTE12 | 0.03739834 | 0.22257975 | 4.84E-05 | 0.0045696 | -0.084703  |
| 16w_SITTE12 | 0.01548729 | 0.08736664 | 3.95E-05 | 0.0059603 | 0.11709    |
| 16w_SITTE12 | 0.00739818 | 0.03744873 | 3.50E-05 | 0.0074854 | 0.45576    |
| 16w_SITTE12 | 0.01881785 | 0.10791954 | 4.11E-05 | 0.0055212 | 0.015459   |
| 16w_SITTE12 | 0.03539389 | 0.2102103  | 4.74E-05 | 0.0045622 | -0.10068   |
| 16w_SITTE12 | 0.02822571 | 0.16597544 | 4.49E-05 | 0.0047302 | -0.12174   |
| 16w_SITTE12 | 0.06412349 | 0.38750067 | 6.27E-05 | 0.0084357 | 0.14015    |
| 16w_SITTE12 | 0.04177378 | 0.2495806  | 5.09E-05 | 0.0046676 | -0.0504    |
| 16w_SITTE12 | 0.03860601 | 0.2300323  | 4.89E-05 | 0.0045836 | -0.076088  |
| 16w_SITTE12 | 0.04562051 | 0.27331874 | 5.39E-05 | 0.0048522 | -0.024952  |
| 16w_SITTE12 | 0.02177313 | 0.12615655 | 4.26E-05 | 0.0051742 | -0.059109  |
| 16w_SITTE12 | 0.01773248 | 0.10122171 | 4.06E-05 | 0.0056572 | 0.046584   |
| 16w_SITTE12 | 0.01590101 | 0.08991971 | 3.98E-05 | 0.0058806 | 0.098494   |
| 16w_SITTE12 | 0.01975425 | 0.1136981  | 4.16E-05 | 0.0053955 | -0.012659  |
| 16w_SITTE12 | 0.02818084 | 0.16569857 | 4.49E-05 | 0.0047302 | -0.12174   |
| 16w_SITTE12 | 0.02572688 | 0.1505552  | 4.40E-05 | 0.0048781 | -0.10813   |
| 0-SS2       | 0.02386477 | 0.13906412 | 4.34E-05 | 0.0049916 | -0.091842  |

|         |            |            |          |           |            |
|---------|------------|------------|----------|-----------|------------|
| 1-SS2   | 0.0139309  | 0.07776216 | 3.86E-05 | 0.0062156 | 0.17645    |
| 6-SS2   | 0.08421591 | 0.51149094 | 4.76E-05 | 0.012731  | -0.036078  |
| 7-SS2   | 0.01816943 | 0.10391812 | 4.09E-05 | 0.0055879 | 0.030658   |
| 9-SS2   | 0.02068541 | 0.11944423 | 4.21E-05 | 0.0052798 | -0.037579  |
| 11-SS2  | 0.01870273 | 0.10720915 | 4.11E-05 | 0.0055212 | 0.015459   |
| 19-SS2  | 0.01701349 | 0.09678482 | 4.03E-05 | 0.005729  | 0.063215   |
| 21-SS2  | 0.01939058 | 0.11145385 | 4.14E-05 | 0.0054571 | 0.0010121  |
| 29-SS2  | 0.01756097 | 0.10016336 | 4.06E-05 | 0.0056572 | 0.046584   |
| 34-SS2  | 0.09274449 | 0.5641208  | 5.02E-05 | 0.0070215 | -0.69483   |
| 42-SS2  | 0.02332793 | 0.13575123 | 4.32E-05 | 0.0050338 | -0.084895  |
| 46-SS2  | 0.01988101 | 0.11448031 | 4.16E-05 | 0.0053955 | -0.012659  |
| 49-SS2  | 0.02003816 | 0.11545007 | 4.19E-05 | 0.0053364 | -0.025531  |
| 51-SS2  | 0.01775506 | 0.10136109 | 4.06E-05 | 0.0056572 | 0.046584   |
| 58-SS2  | 0.02936392 | 0.17299937 | 4.53E-05 | 0.0046846 | -0.1231    |
| 62-SS2  | 0.01647784 | 0.09347935 | 4.00E-05 | 0.0058035 | 0.080526   |
| 64-SS2  | 0.02034257 | 0.11732857 | 4.19E-05 | 0.0053364 | -0.025531  |
| 66-SS2  | 0.0286902  | 0.1688418  | 4.49E-05 | 0.0047302 | -0.12268   |
| 76-SS2  | 0.0055546  | 0.02607204 | 3.41E-05 | 0.0078664 | 0.53284    |
| 77-SS2  | 0.02361429 | 0.13751838 | 4.32E-05 | 0.0050338 | -0.084895  |
| 78-SS2  | 0.01959389 | 0.11270852 | 4.16E-05 | 0.0053955 | -0.012659  |
| 85-SS2  | 0.01184    | 0.0648592  | 3.74E-05 | 0.0065941 | 0.263      |
| 88-SS2  | 0.01606688 | 0.0909433  | 3.98E-05 | 0.0058806 | 0.098494   |
| 95-SS2  | 0.07279198 | 0.4409939  | 5.49E-05 | 0.012637  | 0.24373    |
| 101-SS2 | 0.01701441 | 0.09679049 | 4.03E-05 | 0.005729  | 0.063215   |
| 103-SS2 | 0.0158162  | 0.08939638 | 3.98E-05 | 0.0058806 | 0.098494   |
| 120-SS2 | 0.01478514 | 0.08303369 | 3.92E-05 | 0.0060428 | 0.1363     |
| 128-SS2 | 0.02052846 | 0.11847574 | 4.19E-05 | 0.0053364 | -0.037579  |
| 136-SS2 | 0.04962424 | 0.2980258  | 5.73E-05 | 0.0051543 | -0.0022352 |
| 137-SS2 | 0.06205418 | 0.37473094 | 6.36E-05 | 0.0076138 | 0.10802    |
| 142-SS2 | 0.02155881 | 0.12483401 | 4.24E-05 | 0.0052258 | -0.04878   |
| 143-SS2 | 0.0087399  | 0.04572849 | 3.59E-05 | 0.00713   | 0.38094    |
| 144-SS2 | 0.00515381 | 0.02359872 | 3.38E-05 | 0.0079991 | 0.55892    |
| 146-SS2 | 0.01632365 | 0.09252786 | 4.00E-05 | 0.0058035 | 0.080526   |
| 148-SS2 | 0.02078119 | 0.12003531 | 4.21E-05 | 0.0052798 | -0.037579  |
| 149-SS2 | 0.01762697 | 0.10057061 | 4.06E-05 | 0.0056572 | 0.046584   |
| 150-SS2 | 0.01970341 | 0.11338435 | 4.16E-05 | 0.0053955 | -0.012659  |
| 151-SS2 | 0.01003004 | 0.05368995 | 3.65E-05 | 0.0069072 | 0.33263    |
| 155-SS2 | 0.01049548 | 0.0565622  | 3.68E-05 | 0.0068    | 0.30902    |
| 161-SS2 | 0.07961122 | 0.48307544 | 4.93E-05 | 0.014315  | 0.15946    |
| 162-SS2 | 0.0201112  | 0.11590081 | 4.19E-05 | 0.0053364 | -0.025531  |
| 166-SS2 | 0.02921523 | 0.1720818  | 4.51E-05 | 0.0047064 | -0.1231    |
| 169-SS2 | 0.01570059 | 0.08868291 | 3.98E-05 | 0.0058806 | 0.098494   |
| 173-SS2 | 0.01252696 | 0.06909844 | 3.80E-05 | 0.0063994 | 0.21875    |

|         |            |            |          |           |           |
|---------|------------|------------|----------|-----------|-----------|
| 174-SS2 | 0.01034722 | 0.05564728 | 3.68E-05 | 0.0068    | 0.30902   |
| 177-SS2 | 0.01603573 | 0.09075105 | 3.98E-05 | 0.0058806 | 0.098494  |
| 181-SS2 | 0.01096167 | 0.05943906 | 3.71E-05 | 0.0066957 | 0.2858    |
| 188-SS2 | 0.00563077 | 0.02654205 | 3.41E-05 | 0.0078664 | 0.53284   |
| 195-SS2 | 0.01436998 | 0.08047172 | 3.89E-05 | 0.0061278 | 0.1561    |
| 196-SS2 | 0.02835845 | 0.16679457 | 4.49E-05 | 0.0047302 | -0.12174  |
| 197-SS2 | 0.0057032  | 0.02698902 | 3.41E-05 | 0.0078664 | 0.53284   |
| 198-SS2 | 0.01645354 | 0.09332939 | 4.00E-05 | 0.0058035 | 0.080526  |
| 199-SS2 | 0.00483764 | 0.02164766 | 3.35E-05 | 0.0081345 | 0.58516   |
| 202-SS2 | 0.0238829  | 0.13917595 | 4.34E-05 | 0.0049916 | -0.091842 |
| 205-SS2 | 0.03295721 | 0.19517353 | 4.64E-05 | 0.0045915 | -0.11352  |
| 209-SS2 | 0.02556982 | 0.14958598 | 4.40E-05 | 0.0048781 | -0.10813  |
| 214-SS2 | 0.02425414 | 0.14146692 | 4.34E-05 | 0.0049916 | -0.091842 |
| 221-SS2 | 0.02194062 | 0.12719019 | 4.26E-05 | 0.0051742 | -0.059109 |
| 222-SS2 | 0.01748574 | 0.09969907 | 4.06E-05 | 0.0056572 | 0.046584  |
| 223-SS2 | 0.03220295 | 0.190519   | 4.62E-05 | 0.0046026 | -0.11821  |
| 224-SS2 | 0.03088523 | 0.18238734 | 4.58E-05 | 0.00463   | -0.12145  |
| 226-SS2 | 0.01272904 | 0.07034546 | 3.80E-05 | 0.0063994 | 0.21875   |
| 233-SS2 | 0.00686597 | 0.03416446 | 3.47E-05 | 0.0076096 | 0.48124   |
| 238-SS2 | 0.02013415 | 0.11604245 | 4.19E-05 | 0.0053364 | -0.025531 |
| 254-SS2 | 0.01545075 | 0.08714113 | 3.95E-05 | 0.0059603 | 0.11709   |
| 258-SS2 | 0.01403787 | 0.07842226 | 3.86E-05 | 0.0062156 | 0.1561    |
| 259-SS2 | 0.01742842 | 0.09934538 | 4.06E-05 | 0.0056572 | 0.046584  |
| 262-SS2 | 0.02113257 | 0.12220367 | 4.24E-05 | 0.0052258 | -0.04878  |
| 263-SS2 | 0.0741616  | 0.44944587 | 5.38E-05 | 0.013116  | 0.24406   |
| 285-SS2 | 0.02794714 | 0.1642564  | 4.48E-05 | 0.0047558 | -0.12024  |
| 286-SS2 | 0.00814935 | 0.04208424 | 3.56E-05 | 0.0072456 | 0.40559   |
| 304-SS2 | 0.01352188 | 0.07523812 | 3.83E-05 | 0.0063061 | 0.17645   |
| 306-SS2 | 0.01494119 | 0.08399668 | 3.92E-05 | 0.0060428 | 0.1363    |
| 321-SS2 | 0.02383592 | 0.13888608 | 4.34E-05 | 0.0049916 | -0.091842 |
| 330-SS2 | 0.03221623 | 0.19060096 | 4.62E-05 | 0.0046026 | -0.11821  |
| 331-SS2 | 0.01823373 | 0.10431495 | 4.09E-05 | 0.0055879 | 0.030658  |
| 332-SS2 | 0.02285574 | 0.13283736 | 4.30E-05 | 0.0050782 | -0.077142 |
| 336-SS2 | 0.0259544  | 0.15195921 | 4.40E-05 | 0.0048781 | -0.11213  |
| 351-SS2 | 0.02701281 | 0.15849063 | 4.44E-05 | 0.004813  | -0.11816  |
| 357-SS2 | 0.01888211 | 0.10831612 | 4.11E-05 | 0.0055212 | 0.015459  |
| 360-SS2 | 0.03140697 | 0.18560702 | 4.58E-05 | 0.00463   | -0.12002  |
| 361-SS2 | 0.0047327  | 0.02100007 | 3.35E-05 | 0.0081345 | 0.58516   |
| 363-SS2 | 0.0154711  | 0.08726677 | 3.95E-05 | 0.0059603 | 0.11709   |
| 367-SS2 | 0.0223015  | 0.12941718 | 4.28E-05 | 0.005125  | -0.068556 |
| 368-SS2 | 0.01838997 | 0.1052791  | 4.09E-05 | 0.0055879 | 0.015459  |
| 370-SS2 | 0.02400479 | 0.13992813 | 4.34E-05 | 0.0049916 | -0.091842 |
| 375-SS2 | 0.02144632 | 0.12413985 | 4.24E-05 | 0.0052258 | -0.04878  |

|         |            |            |          |           |           |
|---------|------------|------------|----------|-----------|-----------|
| 377-SS2 | 0.03054963 | 0.18031636 | 4.57E-05 | 0.0046464 | -0.12245  |
| 378-SS2 | 0.02390948 | 0.13934003 | 4.34E-05 | 0.0049916 | -0.091842 |
| 382-SS2 | 0.01438775 | 0.08058137 | 3.89E-05 | 0.0061278 | 0.1561    |
| 384-SS2 | 0.01623643 | 0.09198962 | 4.00E-05 | 0.0058035 | 0.080526  |
| 387-SS2 | 0.01190296 | 0.06524777 | 3.77E-05 | 0.0064954 | 0.24064   |
| 393-SS2 | 0.02680712 | 0.15722135 | 4.44E-05 | 0.004813  | -0.11546  |
| 398-SS2 | 0.02216447 | 0.12857157 | 4.26E-05 | 0.0051742 | -0.068556 |
| 400-SS2 | 0.02737977 | 0.16075517 | 4.46E-05 | 0.0047834 | -0.11816  |
| 404-SS2 | 0.00659094 | 0.03246727 | 3.47E-05 | 0.0076096 | 0.48124   |
| 410-SS2 | 0.01568962 | 0.0886152  | 3.95E-05 | 0.0059603 | 0.098494  |
| 415-SS2 | 0.00867257 | 0.04531301 | 3.59E-05 | 0.00713   | 0.38094   |
| 416-SS2 | 0.01871006 | 0.10725437 | 4.11E-05 | 0.0055212 | 0.015459  |
| 417-SS2 | 0.02988324 | 0.1762041  | 4.55E-05 | 0.0046645 | -0.12301  |
| 418-SS2 | 0.00849847 | 0.04423866 | 3.56E-05 | 0.0072456 | 0.40559   |
| 419-SS2 | 0.00967217 | 0.05148153 | 3.62E-05 | 0.0070172 | 0.35661   |
| 424-SS2 | 0.03405298 | 0.20193556 | 4.68E-05 | 0.0045746 | -0.10761  |
| 425-SS2 | 0.02569513 | 0.15035927 | 4.40E-05 | 0.0048781 | -0.10813  |
| 430-SS2 | 0.0276633  | 0.1625048  | 4.48E-05 | 0.0047558 | -0.12024  |
| 431-SS2 | 0.01528435 | 0.0861143  | 3.95E-05 | 0.0059603 | 0.11709   |
| 433-SS2 | 0.08380634 | 0.5089635  | 4.77E-05 | 0.013036  | -0.036078 |
| 436-SS2 | 0.03324988 | 0.1969796  | 4.66E-05 | 0.0045822 | -0.11352  |
| 437-SS2 | 0.00858049 | 0.04474476 | 3.56E-05 | 0.0072456 | 0.40559   |
| 442-SS2 | 0.01578745 | 0.08921892 | 3.98E-05 | 0.0058806 | 0.098494  |
| 444-SS2 | 0.00841366 | 0.04371525 | 3.56E-05 | 0.0072456 | 0.40559   |
| 447-SS2 | 0.03176015 | 0.1877865  | 4.60E-05 | 0.0046154 | -0.12002  |
| 448-SS2 | 0.02209013 | 0.1281128  | 4.26E-05 | 0.0051742 | -0.059109 |
| 450-SS2 | 0.01861717 | 0.10668112 | 4.11E-05 | 0.0055212 | 0.015459  |
| 455-SS2 | 0.01443655 | 0.08088253 | 3.89E-05 | 0.0061278 | 0.1561    |
| 456-SS2 | 0.01439446 | 0.08062279 | 3.89E-05 | 0.0061278 | 0.1561    |
| 458-SS2 | 0.01050955 | 0.056649   | 3.68E-05 | 0.0068    | 0.30902   |
| 466-SS2 | 0.02927106 | 0.17242631 | 4.53E-05 | 0.0046846 | -0.1231   |
| 472-SS2 | 0.01138828 | 0.06207166 | 3.74E-05 | 0.0065941 | 0.263     |
| 473-SS2 | 0.02367298 | 0.13788056 | 4.32E-05 | 0.0050338 | -0.084895 |
| 476-SS2 | 0.01415237 | 0.07912883 | 3.89E-05 | 0.0061278 | 0.1561    |
| 481-SS2 | 0.01005616 | 0.05385116 | 3.65E-05 | 0.0069072 | 0.33263   |
| 482-SS2 | 0.02759378 | 0.16207582 | 4.46E-05 | 0.0047834 | -0.12024  |
| 488-SS2 | 0.01562448 | 0.08821326 | 3.95E-05 | 0.0059603 | 0.11709   |
| 490-SS2 | 0.03769959 | 0.22443876 | 4.84E-05 | 0.0045696 | -0.084703 |
| 492-SS2 | 0.02898246 | 0.17064534 | 4.51E-05 | 0.0047064 | -0.12268  |
| 493-SS2 | 0.0301537  | 0.17787306 | 4.55E-05 | 0.0046645 | -0.12301  |
| 495-SS2 | 0.01877186 | 0.10763572 | 4.11E-05 | 0.0055212 | 0.015459  |
| 499-SS2 | 0.03134477 | 0.18522316 | 4.58E-05 | 0.00463   | -0.12002  |
| 500-SS2 | 0.0506064  | 0.30408671 | 5.83E-05 | 0.0052672 | 0.0043724 |

|         |            |            |          |           |            |
|---------|------------|------------|----------|-----------|------------|
| 501-SS2 | 0.07894473 | 0.47896254 | 4.97E-05 | 0.014318  | 0.17506    |
| 504-SS2 | 0.02438356 | 0.14226556 | 4.36E-05 | 0.0049516 | -0.098011  |
| 505-SS2 | 0.01096243 | 0.05944371 | 3.71E-05 | 0.0066957 | 0.2858     |
| 509-SS2 | 0.04062734 | 0.24250592 | 5.02E-05 | 0.0046325 | -0.058715  |
| 510-SS2 | 0.01808699 | 0.10340941 | 4.09E-05 | 0.0055879 | 0.030658   |
| 511-SS2 | 0.02915403 | 0.17170413 | 4.51E-05 | 0.0047064 | -0.1231    |
| 512-SS2 | 0.06438183 | 0.3890949  | 6.27E-05 | 0.0084357 | 0.14863    |
| 513-SS2 | 0.03335489 | 0.19762765 | 4.66E-05 | 0.0045822 | -0.11352   |
| 515-SS2 | 0.03113863 | 0.18395106 | 4.58E-05 | 0.00463   | -0.12145   |
| 516-SS2 | 0.0491595  | 0.29515785 | 5.68E-05 | 0.0051026 | -0.0022352 |
| 517-SS2 | 0.0927264  | 0.56400925 | 5.02E-05 | 0.0070215 | -0.69483   |
| 522-SS2 | 0.02172475 | 0.12585801 | 4.26E-05 | 0.0051742 | -0.059109  |
| 524-SS2 | 0.02173914 | 0.12594683 | 4.26E-05 | 0.0051742 | -0.059109  |
| 529-SS2 | 0.07068075 | 0.4279655  | 5.71E-05 | 0.011574  | 0.23016    |
| 531-SS2 | 0.03798072 | 0.22617365 | 4.87E-05 | 0.0045758 | -0.080425  |
| 532-SS2 | 0.0222661  | 0.1291987  | 4.28E-05 | 0.005125  | -0.068556  |
| 533-SS2 | 0.02737534 | 0.16072781 | 4.46E-05 | 0.0047834 | -0.11816   |
| 534-SS2 | 0.0262704  | 0.15390922 | 4.42E-05 | 0.0048445 | -0.11213   |
| 535-SS2 | 0.01427393 | 0.07987898 | 3.89E-05 | 0.0061278 | 0.1561     |
| 537-SS2 | 0.01638301 | 0.09289412 | 4.00E-05 | 0.0058035 | 0.080526   |
| 538-SS2 | 0.02365508 | 0.13777012 | 4.32E-05 | 0.0050338 | -0.084895  |
| 540-SS2 | 0.01038047 | 0.05585244 | 3.68E-05 | 0.0068    | 0.30902    |
| 541-SS2 | 0.03042658 | 0.179557   | 4.57E-05 | 0.0046464 | -0.12245   |
| 543-SS2 | 0.01178082 | 0.06449404 | 3.74E-05 | 0.0065941 | 0.263      |
| 545-SS2 | 0.02588661 | 0.1515409  | 4.40E-05 | 0.0048781 | -0.10813   |
| 546-SS2 | 0.02400068 | 0.13990282 | 4.34E-05 | 0.0049916 | -0.091842  |
| 549-SS2 | 0.01158413 | 0.06328028 | 3.74E-05 | 0.0065941 | 0.263      |
| 553-SS2 | 0.01666613 | 0.09464127 | 4.00E-05 | 0.0058035 | 0.080526   |
| 557-SS2 | 0.01741061 | 0.09923548 | 4.06E-05 | 0.0056572 | 0.046584   |
| 558-SS2 | 0.01363927 | 0.07596251 | 3.86E-05 | 0.0062156 | 0.17645    |
| 559-SS2 | 0.01818525 | 0.1040158  | 4.09E-05 | 0.0055879 | 0.030658   |
| 567-SS2 | 0.01737948 | 0.09904337 | 4.06E-05 | 0.0056572 | 0.046584   |
| 569-SS2 | 0.00673126 | 0.03333319 | 3.47E-05 | 0.0076096 | 0.48124    |
| 571-SS2 | 0.02150504 | 0.1245022  | 4.24E-05 | 0.0052258 | -0.04878   |
| 572-SS2 | 0.02095358 | 0.12109912 | 4.21E-05 | 0.0052798 | -0.037579  |
| 575-SS2 | 0.0071481  | 0.0359055  | 3.50E-05 | 0.0074854 | 0.45576    |
| 576-SS2 | 0.01847566 | 0.10580788 | 4.11E-05 | 0.0055212 | 0.015459   |
| 577-SS2 | 0.01970636 | 0.11340252 | 4.16E-05 | 0.0053955 | -0.012659  |
| 578-SS2 | 0.01981371 | 0.11406499 | 4.16E-05 | 0.0053955 | -0.012659  |
| 579-SS2 | 0.03044053 | 0.1796431  | 4.57E-05 | 0.0046464 | -0.12245   |
| 580-SS2 | 0.0208838  | 0.12066854 | 4.21E-05 | 0.0052798 | -0.037579  |
| 581-SS2 | 0.01834697 | 0.10501375 | 4.09E-05 | 0.0055879 | 0.015459   |
| 583-SS2 | 0.00770006 | 0.03931163 | 3.53E-05 | 0.0073641 | 0.43054    |

|         |            |            |          |           |           |
|---------|------------|------------|----------|-----------|-----------|
| 585-SS2 | 0.02447869 | 0.14285263 | 4.36E-05 | 0.0049516 | -0.098011 |
| 587-SS2 | 0.01308405 | 0.07253627 | 3.83E-05 | 0.0063061 | 0.19734   |
| 588-SS2 | 0.01012874 | 0.05429904 | 3.65E-05 | 0.0069072 | 0.33263   |
| 589-SS2 | 0.02544001 | 0.14878489 | 4.38E-05 | 0.0049138 | -0.10813  |
| 595-SS2 | 0.00874958 | 0.04578826 | 3.59E-05 | 0.00713   | 0.38094   |
| 598-SS2 | 0.01641755 | 0.09310728 | 4.00E-05 | 0.0058035 | 0.080526  |
| 599-SS2 | 0.02293831 | 0.13334692 | 4.30E-05 | 0.0050782 | -0.077142 |
| 600-SS2 | 0.07931364 | 0.4812391  | 4.93E-05 | 0.014315  | 0.17506   |
| 601-SS2 | 0.01481971 | 0.08324704 | 3.92E-05 | 0.0060428 | 0.1363    |
| 604-SS2 | 0.03017593 | 0.17801026 | 4.55E-05 | 0.0046645 | -0.12301  |
| 605-SS2 | 0.02044151 | 0.11793914 | 4.19E-05 | 0.0053364 | -0.025531 |
| 609-SS2 | 0.04056002 | 0.24209048 | 4.99E-05 | 0.0046177 | -0.058715 |
| 612-SS2 | 0.02295502 | 0.13345005 | 4.30E-05 | 0.0050782 | -0.077142 |
| 613-SS2 | 0.02281835 | 0.13260666 | 4.30E-05 | 0.0050782 | -0.077142 |
| 615-SS2 | 0.02201735 | 0.12766369 | 4.26E-05 | 0.0051742 | -0.059109 |
| 616-SS2 | 0.01453735 | 0.08150455 | 3.89E-05 | 0.0061278 | 0.1561    |
| 617-SS2 | 0.02251183 | 0.13071507 | 4.28E-05 | 0.005125  | -0.068556 |
| 619-SS2 | 0.06870464 | 0.41577095 | 5.93E-05 | 0.010465  | 0.21248   |
| 622-SS2 | 0.09275577 | 0.56419045 | 5.02E-05 | 0.0070215 | -0.69483  |
| 623-SS2 | 0.0132979  | 0.07385594 | 3.83E-05 | 0.0063061 | 0.19734   |
| 624-SS2 | 0.02345213 | 0.13651767 | 4.32E-05 | 0.0050338 | -0.084895 |
| 643-SS2 | 0.04313673 | 0.25799137 | 5.17E-05 | 0.0047101 | -0.042593 |
| 644-SS2 | 0.02023729 | 0.11667892 | 4.19E-05 | 0.0053364 | -0.025531 |
| 645-SS2 | 0.0618281  | 0.37333578 | 6.36E-05 | 0.0076138 | 0.10802   |
| 646-SS2 | 0.09949978 | 0.6058078  | 5.49E-05 | 0.0043938 | -1.2008   |
| 647-SS2 | 0.01161033 | 0.0634419  | 3.74E-05 | 0.0065941 | 0.263     |
| 648-SS2 | 0.03098132 | 0.18298033 | 4.58E-05 | 0.00463   | -0.12145  |
| 653-SS2 | 0.00962782 | 0.05120784 | 3.62E-05 | 0.0070172 | 0.35661   |
| 656-SS2 | 0.01113264 | 0.06049408 | 3.71E-05 | 0.0066957 | 0.2858    |
| 661-SS2 | 0.01959944 | 0.11274272 | 4.16E-05 | 0.0053955 | -0.012659 |
| 663-SS2 | 0.020199   | 0.11644261 | 4.19E-05 | 0.0053364 | -0.025531 |
| 664-SS2 | 0.03369076 | 0.19970027 | 4.68E-05 | 0.0045746 | -0.11071  |
| 669-SS2 | 0.09021216 | 0.5484938  | 4.88E-05 | 0.0086895 | -0.51631  |
| 671-SS2 | 0.02151123 | 0.12454037 | 4.24E-05 | 0.0052258 | -0.04878  |
| 672-SS2 | 0.05044719 | 0.30310422 | 5.83E-05 | 0.0052672 | 0.0043724 |
| 674-SS2 | 0.01554512 | 0.08772354 | 3.95E-05 | 0.0059603 | 0.11709   |
| 676-SS2 | 0.01901913 | 0.10916162 | 4.14E-05 | 0.0054571 | 0.0010121 |
| 677-SS2 | 0.02691432 | 0.15788285 | 4.44E-05 | 0.004813  | -0.11546  |
| 680-SS2 | 0.01593112 | 0.09010553 | 3.98E-05 | 0.0058806 | 0.098494  |
| 681-SS2 | 0.0109569  | 0.0594096  | 3.71E-05 | 0.0066957 | 0.2858    |
| 684-SS2 | 0.02042174 | 0.11781717 | 4.19E-05 | 0.0053364 | -0.025531 |
| 685-SS2 | 0.0070271  | 0.03515884 | 3.50E-05 | 0.0074854 | 0.45576   |
| 686-SS2 | 0.00879539 | 0.04607094 | 3.59E-05 | 0.00713   | 0.38094   |

|         |            |            |          |           |            |
|---------|------------|------------|----------|-----------|------------|
| 690-SS2 | 0.02096696 | 0.12118173 | 4.21E-05 | 0.0052798 | -0.037579  |
| 692-SS2 | 0.01733382 | 0.09876157 | 4.06E-05 | 0.0056572 | 0.046584   |
| 693-SS2 | 0.0198741  | 0.11443766 | 4.16E-05 | 0.0053955 | -0.012659  |
| 694-SS2 | 0.0251525  | 0.14701071 | 4.38E-05 | 0.0049138 | -0.10343   |
| 695-SS2 | 0.02101916 | 0.12150386 | 4.21E-05 | 0.0052798 | -0.037579  |
| 697-SS2 | 0.01795394 | 0.10258837 | 4.09E-05 | 0.0055879 | 0.030658   |
| 698-SS2 | 0.03062422 | 0.18077669 | 4.57E-05 | 0.0046464 | -0.12245   |
| 699-SS2 | 0.01965181 | 0.11306592 | 4.16E-05 | 0.0053955 | -0.012659  |
| 703-SS2 | 0.02109666 | 0.12198207 | 4.21E-05 | 0.0052798 | -0.04878   |
| 705-SS2 | 0.02018386 | 0.11634917 | 4.19E-05 | 0.0053364 | -0.025531  |
| 706-SS2 | 0.01130714 | 0.06157097 | 3.71E-05 | 0.0066957 | 0.2858     |
| 707-SS2 | 0.01846974 | 0.10577133 | 4.11E-05 | 0.0055212 | 0.015459   |
| 708-SS2 | 0.02975306 | 0.17540072 | 4.53E-05 | 0.0046846 | -0.12301   |
| 710-SS2 | 0.02416414 | 0.14091147 | 4.34E-05 | 0.0049916 | -0.091842  |
| 711-SS2 | 0.02074324 | 0.11980114 | 4.21E-05 | 0.0052798 | -0.037579  |
| 712-SS2 | 0.01597508 | 0.09037677 | 3.98E-05 | 0.0058806 | 0.098494   |
| 713-SS2 | 0.01858394 | 0.10647611 | 4.11E-05 | 0.0055212 | 0.015459   |
| 714-SS2 | 0.01146928 | 0.06257152 | 3.74E-05 | 0.0065941 | 0.263      |
| 715-SS2 | 0.02116028 | 0.1223747  | 4.24E-05 | 0.0052258 | -0.04878   |
| 716-SS2 | 0.01181415 | 0.06469972 | 3.74E-05 | 0.0065941 | 0.263      |
| 723-SS2 | 0.00644872 | 0.03158963 | 3.44E-05 | 0.0077366 | 0.50694    |
| 724-SS2 | 0.02507835 | 0.14655308 | 4.38E-05 | 0.0049138 | -0.10343   |
| 728-SS2 | 0.08504874 | 0.51663035 | 4.76E-05 | 0.012404  | -0.10433   |
| 730-SS2 | 0.02455679 | 0.14333455 | 4.36E-05 | 0.0049516 | -0.098011  |
| 731-SS2 | 0.02694692 | 0.15808403 | 4.44E-05 | 0.004813  | -0.11546   |
| 738-SS2 | 0.0113757  | 0.06199405 | 3.74E-05 | 0.0065941 | 0.263      |
| 740-SS2 | 0.01126001 | 0.06128012 | 3.71E-05 | 0.0066957 | 0.2858     |
| 745-SS2 | 0.08611582 | 0.52321535 | 4.76E-05 | 0.0117    | -0.17867   |
| 746-SS2 | 0.01967087 | 0.11318354 | 4.16E-05 | 0.0053955 | -0.012659  |
| 747-SS2 | 0.01309768 | 0.07262038 | 3.83E-05 | 0.0063061 | 0.19734    |
| 748-SS2 | 0.03427221 | 0.20328839 | 4.70E-05 | 0.0045688 | -0.10761   |
| 751-SS2 | 0.01411809 | 0.07891735 | 3.89E-05 | 0.0061278 | 0.1561     |
| 752-SS2 | 0.01217157 | 0.06690535 | 3.77E-05 | 0.0064954 | 0.24064    |
| 753-SS2 | 0.00539424 | 0.02508241 | 3.38E-05 | 0.0079991 | 0.53284    |
| 754-SS2 | 0.02062788 | 0.11908922 | 4.21E-05 | 0.0052798 | -0.037579  |
| 758-SS2 | 0.02624233 | 0.15373603 | 4.42E-05 | 0.0048445 | -0.11213   |
| 759-SS2 | 0.04793039 | 0.28757307 | 5.58E-05 | 0.0050083 | -0.01192   |
| 765-SS2 | 0.0272911  | 0.16020799 | 4.46E-05 | 0.0047834 | -0.11816   |
| 766-SS2 | 0.03098444 | 0.18299957 | 4.58E-05 | 0.00463   | -0.12145   |
| 767-SS2 | 0.08327624 | 0.5056923  | 4.78E-05 | 0.013315  | -0.0045591 |
| 768-SS2 | 0.02758931 | 0.16204825 | 4.46E-05 | 0.0047834 | -0.12024   |
| 769-SS2 | 0.02229348 | 0.12936763 | 4.28E-05 | 0.005125  | -0.068556  |
| 770-SS2 | 0.02695668 | 0.15814427 | 4.44E-05 | 0.004813  | -0.11546   |

|         |            |            |          |           |            |
|---------|------------|------------|----------|-----------|------------|
| 772-SS2 | 0.01533202 | 0.08640845 | 3.95E-05 | 0.0059603 | 0.11709    |
| 775-SS2 | 0.03067801 | 0.18110862 | 4.57E-05 | 0.0046464 | -0.12245   |
| 780-SS2 | 0.01406289 | 0.07857668 | 3.86E-05 | 0.0062156 | 0.1561     |
| 781-SS2 | 0.01114384 | 0.06056324 | 3.71E-05 | 0.0066957 | 0.2858     |
| 785-SS2 | 0.03927595 | 0.2341665  | 4.92E-05 | 0.0045932 | -0.071721  |
| 786-SS2 | 0.03373341 | 0.19996347 | 4.68E-05 | 0.0045746 | -0.11071   |
| 793-SS2 | 0.03582992 | 0.21290101 | 4.77E-05 | 0.0045615 | -0.096915  |
| 795-SS2 | 0.09287634 | 0.5649345  | 5.02E-05 | 0.0070215 | -0.69483   |
| 797-SS2 | 0.03196036 | 0.18902197 | 4.62E-05 | 0.0046026 | -0.11821   |
| 800-SS2 | 0.0445972  | 0.26700392 | 5.30E-05 | 0.0047888 | -0.031751  |
| 801-SS2 | 0.01664038 | 0.09448236 | 4.00E-05 | 0.0058035 | 0.080526   |
| 806-SS2 | 0.08781276 | 0.5336871  | 4.80E-05 | 0.010188  | -0.29935   |
| 808-SS2 | 0.00364721 | 0.01430149 | 3.29E-05 | 0.0084138 | 0.63801    |
| 812-SS2 | 0.01943947 | 0.11175555 | 4.14E-05 | 0.0054571 | -0.012659  |
| 815-SS2 | 0.02002032 | 0.11533999 | 4.16E-05 | 0.0053955 | -0.025531  |
| 818-SS2 | 0.00895187 | 0.0470366  | 3.59E-05 | 0.00713   | 0.38094    |
| 821-SS2 | 0.09694301 | 0.59002995 | 5.28E-05 | 0.0052469 | -1.03      |
| 824-SS2 | 0.04543568 | 0.27217817 | 5.34E-05 | 0.0048194 | -0.024952  |
| 825-SS2 | 0.02919164 | 0.17193623 | 4.51E-05 | 0.0047064 | -0.1231    |
| 827-SS2 | 0.01548454 | 0.08734967 | 3.95E-05 | 0.0059603 | 0.11709    |
| 828-SS2 | 0.0255847  | 0.14967777 | 4.40E-05 | 0.0048781 | -0.10813   |
| 829-SS2 | 0.01326362 | 0.07364439 | 3.83E-05 | 0.0063061 | 0.19734    |
| 832-SS2 | 0.0835388  | 0.50731254 | 4.77E-05 | 0.013036  | -0.0045591 |
| 840-SS2 | 0.02938388 | 0.17312253 | 4.53E-05 | 0.0046846 | -0.1231    |
| 841-SS2 | 0.01822349 | 0.10425177 | 4.09E-05 | 0.0055879 | 0.030658   |
| 843-SS2 | 0.02691889 | 0.15791106 | 4.44E-05 | 0.004813  | -0.11546   |
| 846-SS2 | 0.03795635 | 0.22602323 | 4.87E-05 | 0.0045758 | -0.080425  |
| 858-SS2 | 0.09708373 | 0.5908983  | 5.32E-05 | 0.0050496 | -1.03      |
| 862-SS2 | 0.02429225 | 0.1417021  | 4.34E-05 | 0.0049916 | -0.098011  |
| 870-SS2 | 0.02151024 | 0.12453427 | 4.24E-05 | 0.0052258 | -0.04878   |
| 871-SS2 | 0.07881614 | 0.478169   | 4.97E-05 | 0.014318  | 0.18889    |
| 872-SS2 | 0.00406652 | 0.01688907 | 3.32E-05 | 0.0082728 | 0.61153    |
| 874-SS2 | 0.0121778  | 0.06694378 | 3.77E-05 | 0.0064954 | 0.24064    |
| 880-SS2 | 0.09831533 | 0.59849846 | 5.40E-05 | 0.0046955 | -1.1375    |
| 881-SS2 | 0.02110491 | 0.12203297 | 4.21E-05 | 0.0052798 | -0.04878   |
| 882-SS2 | 0.02376887 | 0.13847232 | 4.32E-05 | 0.0050338 | -0.091842  |
| 884-SS2 | 0.02257684 | 0.13111632 | 4.28E-05 | 0.005125  | -0.068556  |
| 888-SS2 | 0.06945796 | 0.42041966 | 5.82E-05 | 0.011019  | 0.21895    |
| 889-SS2 | 0.01477568 | 0.08297531 | 3.92E-05 | 0.0060428 | 0.1363     |
| 898-SS2 | 0.01190568 | 0.06526453 | 3.77E-05 | 0.0064954 | 0.24064    |
| 900-SS2 | 0.02260704 | 0.13130264 | 4.28E-05 | 0.005125  | -0.068556  |
| 901-SS2 | 0.03148735 | 0.18610305 | 4.60E-05 | 0.0046154 | -0.12002   |
| 902-SS2 | 0.06361468 | 0.38436082 | 6.30E-05 | 0.008216  | 0.13178    |



|          |            |            |          |           |            |
|----------|------------|------------|----------|-----------|------------|
| 904-SS2  | 0.02292062 | 0.13323775 | 4.30E-05 | 0.0050782 | -0.077142  |
| 906-SS2  | 0.09125887 | 0.5549531  | 4.93E-05 | 0.0079874 | -0.56091   |
| 907-SS2  | 0.01855496 | 0.10629726 | 4.11E-05 | 0.0055212 | 0.015459   |
| 911-SS2  | 0.02020385 | 0.11647257 | 4.19E-05 | 0.0053364 | -0.025531  |
| 914-SS2  | 0.02231743 | 0.12951548 | 4.28E-05 | 0.005125  | -0.068556  |
| 915-SS2  | 0.06703815 | 0.40548703 | 6.07E-05 | 0.0096573 | 0.19037    |
| 918-SS2  | 0.01736108 | 0.09892982 | 4.06E-05 | 0.0056572 | 0.046584   |
| 927-SS2  | 0.02477219 | 0.1446638  | 4.36E-05 | 0.0049516 | -0.098011  |
| 931-SS2  | 0.03251264 | 0.19243008 | 4.64E-05 | 0.0045915 | -0.11603   |
| 937-SS2  | 0.03560482 | 0.21151194 | 4.74E-05 | 0.0045622 | -0.10068   |
| 941-SS2  | 0.01566989 | 0.0884935  | 3.95E-05 | 0.0059603 | 0.098494   |
| 945-SS2  | 0.0304451  | 0.17967132 | 4.57E-05 | 0.0046464 | -0.12245   |
| 946-SS2  | 0.01474377 | 0.08277842 | 3.92E-05 | 0.0060428 | 0.1363     |
| 947-SS2  | 0.02346095 | 0.13657214 | 4.32E-05 | 0.0050338 | -0.084895  |
| 949-SS2  | 0.01624761 | 0.09205856 | 4.00E-05 | 0.0058035 | 0.080526   |
| 950-SS2  | 0.03203497 | 0.1894824  | 4.62E-05 | 0.0046026 | -0.11821   |
| 963-SS2  | 0.01996085 | 0.114973   | 4.16E-05 | 0.0053955 | -0.012659  |
| 964-SS2  | 0.015462   | 0.08721057 | 3.95E-05 | 0.0059603 | 0.11709    |
| 965-SS2  | 0.01940085 | 0.11151721 | 4.14E-05 | 0.0054571 | 0.0010121  |
| 971-SS2  | 0.01540804 | 0.08687762 | 3.95E-05 | 0.0059603 | 0.11709    |
| 978-SS2  | 0.08334854 | 0.50613844 | 4.78E-05 | 0.013315  | -0.0045591 |
| 979-SS2  | 0.02380192 | 0.13867623 | 4.32E-05 | 0.0050338 | -0.091842  |
| 980-SS2  | 0.02865171 | 0.16860431 | 4.49E-05 | 0.0047302 | -0.12268   |
| 981-SS2  | 0.00847807 | 0.04411273 | 3.56E-05 | 0.0072456 | 0.40559    |
| 986-SS2  | 0.02146705 | 0.12426773 | 4.24E-05 | 0.0052258 | -0.04878   |
| 987-SS2  | 0.09312771 | 0.5664857  | 5.02E-05 | 0.0070215 | -0.73907   |
| 991-SS2  | 0.00678695 | 0.03367686 | 3.47E-05 | 0.0076096 | 0.48124    |
| 992-SS2  | 0.03461959 | 0.20543207 | 4.70E-05 | 0.0045688 | -0.10426   |
| 993-SS2  | 0.02100821 | 0.12143628 | 4.21E-05 | 0.0052798 | -0.037579  |
| 995-SS2  | 0.07984908 | 0.4845433  | 4.90E-05 | 0.014278  | 0.15946    |
| 997-SS2  | 0.02174427 | 0.12597847 | 4.26E-05 | 0.0051742 | -0.059109  |
| 1001-SS2 | 0.02026787 | 0.11686765 | 4.19E-05 | 0.0053364 | -0.025531  |
| 1004-SS2 | 0.0200805  | 0.11571135 | 4.19E-05 | 0.0053364 | -0.025531  |
| 1006-SS2 | 0.00273962 | 0.00870076 | 3.26E-05 | 0.0085576 | 0.66457    |
| 1008-SS2 | 0.03273962 | 0.19383079 | 4.64E-05 | 0.0045915 | -0.11603   |
| 1014-SS2 | 0.0115058  | 0.06279688 | 3.74E-05 | 0.0065941 | 0.263      |
| 1015-SS2 | 0.02244257 | 0.1302877  | 4.28E-05 | 0.005125  | -0.068556  |
| 1019-SS2 | 0.02969026 | 0.17501318 | 4.53E-05 | 0.0046846 | -0.12301   |
| 1025-SS2 | 0.02159876 | 0.12508053 | 4.24E-05 | 0.0052258 | -0.059109  |
| 1027-SS2 | 0.0160732  | 0.09098231 | 3.98E-05 | 0.0058806 | 0.098494   |
| 1029-SS2 | 0.02476054 | 0.14459193 | 4.36E-05 | 0.0049516 | -0.098011  |
| 1030-SS2 | 0.03387123 | 0.20081398 | 4.68E-05 | 0.0045746 | -0.11071   |
| 1034-SS2 | 0.08472844 | 0.51465374 | 4.76E-05 | 0.012404  | -0.069378  |

|          |            |            |          |           |           |
|----------|------------|------------|----------|-----------|-----------|
| 1037-SS2 | 0.05708905 | 0.34409112 | 6.30E-05 | 0.0062853 | 0.05269   |
| 1038-SS2 | 0.08202768 | 0.49798745 | 4.81E-05 | 0.013778  | 0.078055  |
| 1039-SS2 | 0.01675567 | 0.0951938  | 4.00E-05 | 0.0058035 | 0.063215  |
| 1045-SS2 | 0.01160536 | 0.06341124 | 3.74E-05 | 0.0065941 | 0.263     |
| 1047-SS2 | 0.03139139 | 0.18551084 | 4.58E-05 | 0.00463   | -0.12002  |
| 1050-SS2 | 0.02230311 | 0.12942708 | 4.28E-05 | 0.005125  | -0.068556 |
| 1058-SS2 | 0.02325193 | 0.13528226 | 4.30E-05 | 0.0050782 | -0.084895 |
| 1062-SS2 | 0.00793969 | 0.04079039 | 3.53E-05 | 0.0073641 | 0.43054   |
| 1067-SS2 | 0.02603454 | 0.15245375 | 4.42E-05 | 0.0048445 | -0.11213  |
| 1068-SS2 | 0.01095843 | 0.05941908 | 3.71E-05 | 0.0066957 | 0.2858    |
| 1075-SS2 | 0.06673975 | 0.40364558 | 6.07E-05 | 0.0096573 | 0.18233   |
| 1077-SS2 | 0.03380437 | 0.20040135 | 4.68E-05 | 0.0045746 | -0.11071  |
| 1080-SS2 | 0.01609856 | 0.09113877 | 3.98E-05 | 0.0058806 | 0.098494  |
| 1081-SS2 | 0.0081634  | 0.0421709  | 3.56E-05 | 0.0072456 | 0.40559   |
| 1082-SS2 | 0.02218554 | 0.12870157 | 4.26E-05 | 0.0051742 | -0.068556 |
| 1084-SS2 | 0.00772751 | 0.03948106 | 3.53E-05 | 0.0073641 | 0.43054   |
| 1085-SS2 | 0.01577611 | 0.08914895 | 3.98E-05 | 0.0058806 | 0.098494  |
| 1086-SS2 | 0.02008937 | 0.11576608 | 4.19E-05 | 0.0053364 | -0.025531 |
| 1089-SS2 | 0.02687021 | 0.15761064 | 4.44E-05 | 0.004813  | -0.11546  |
| 1091-SS2 | 0.01926765 | 0.11069529 | 4.14E-05 | 0.0054571 | 0.0010121 |
| 1092-SS2 | 0.02587156 | 0.151448   | 4.40E-05 | 0.0048781 | -0.10813  |
| 1093-SS2 | 0.00947833 | 0.05028533 | 3.62E-05 | 0.0070172 | 0.35661   |
| 1097-SS2 | 0.02494488 | 0.14572945 | 4.38E-05 | 0.0049138 | -0.10343  |
| 1099-SS2 | 0.00982803 | 0.05244338 | 3.65E-05 | 0.0069072 | 0.33263   |
| 1101-SS2 | 0.01946567 | 0.11191722 | 4.14E-05 | 0.0054571 | -0.012659 |
| 1102-SS2 | 0.01858303 | 0.10647048 | 4.11E-05 | 0.0055212 | 0.015459  |
| 1105-SS2 | 0.02437693 | 0.14222462 | 4.36E-05 | 0.0049516 | -0.098011 |
| 1111-SS2 | 0.02798622 | 0.16449755 | 4.48E-05 | 0.0047558 | -0.12024  |
| 1115-SS2 | 0.01768362 | 0.10092023 | 4.06E-05 | 0.0056572 | 0.046584  |
| 1119-SS2 | 0.00717523 | 0.03607294 | 3.50E-05 | 0.0074854 | 0.45576   |
| 1125-SS2 | 0.03433032 | 0.203647   | 4.70E-05 | 0.0045688 | -0.10761  |
| 1127-SS2 | 0.00992869 | 0.05306453 | 3.65E-05 | 0.0069072 | 0.33263   |
| 1128-SS2 | 0.01021165 | 0.0548107  | 3.65E-05 | 0.0069072 | 0.33263   |
| 1130-SS2 | 0.01816153 | 0.10386939 | 4.09E-05 | 0.0055879 | 0.030658  |
| 1131-SS2 | 0.00722286 | 0.03636688 | 3.50E-05 | 0.0074854 | 0.45576   |
| 1133-SS2 | 0.01432949 | 0.08022184 | 3.89E-05 | 0.0061278 | 0.1561    |
| 1134-SS2 | 0.00187164 | 0.0033445  | 3.20E-05 | 0.0088533 | 0.71784   |
| 1137-SS2 | 0.0110084  | 0.05972742 | 3.71E-05 | 0.0066957 | 0.2858    |
| 1138-SS2 | 0.01553059 | 0.08763388 | 3.95E-05 | 0.0059603 | 0.11709   |
| 1139-SS2 | 0.01877485 | 0.10765421 | 4.11E-05 | 0.0055212 | 0.015459  |
| 1144-SS2 | 0.00737191 | 0.03728661 | 3.50E-05 | 0.0074854 | 0.45576   |
| 1150-SS2 | 0.01753974 | 0.10003233 | 4.06E-05 | 0.0056572 | 0.046584  |
| 1152-SS2 | 0.02108413 | 0.12190474 | 4.21E-05 | 0.0052798 | -0.04878  |

|          |            |            |          |           |           |
|----------|------------|------------|----------|-----------|-----------|
| 1158-SS2 | 0.00868146 | 0.0453679  | 3.59E-05 | 0.00713   | 0.38094   |
| 1160-SS2 | 0.02005891 | 0.11557815 | 4.19E-05 | 0.0053364 | -0.025531 |
| 1161-SS2 | 0.01912125 | 0.10979181 | 4.14E-05 | 0.0054571 | 0.0010121 |
| 1162-SS2 | 0.01030212 | 0.05536895 | 3.68E-05 | 0.0068    | 0.30902   |
| 1163-SS2 | 0.02093995 | 0.12101505 | 4.21E-05 | 0.0052798 | -0.037579 |
| 1164-SS2 | 0.00768753 | 0.03923436 | 3.53E-05 | 0.0073641 | 0.43054   |
| 1165-SS2 | 0.01282559 | 0.07094128 | 3.80E-05 | 0.0063994 | 0.21875   |
| 1166-SS2 | 0.01692041 | 0.09621041 | 4.03E-05 | 0.005729  | 0.063215  |
| 1169-SS2 | 0.02163786 | 0.12532182 | 4.24E-05 | 0.0052258 | -0.059109 |
| 1173-SS2 | 0.00648472 | 0.03181182 | 3.47E-05 | 0.0076096 | 0.48124   |
| 1176-SS2 | 0.00521959 | 0.02400467 | 3.38E-05 | 0.0079991 | 0.55892   |
| 1180-SS2 | 0.01275753 | 0.07052131 | 3.80E-05 | 0.0063994 | 0.21875   |
| 1182-SS2 | 0.01835825 | 0.10508336 | 4.09E-05 | 0.0055879 | 0.015459  |
| 1184-SS2 | 0.01608416 | 0.09104994 | 3.98E-05 | 0.0058806 | 0.098494  |
| 1186-SS2 | 0.02081405 | 0.12023812 | 4.21E-05 | 0.0052798 | -0.037579 |
| 1187-SS2 | 0.01576745 | 0.0890955  | 3.98E-05 | 0.0058806 | 0.098494  |
| 1190-SS2 | 0.01188578 | 0.06514171 | 3.74E-05 | 0.0065941 | 0.24064   |
| 1192-SS2 | 0.02088506 | 0.12067631 | 4.21E-05 | 0.0052798 | -0.037579 |
| 1194-SS2 | 0.00559428 | 0.0263169  | 3.41E-05 | 0.0078664 | 0.53284   |
| 1196-SS2 | 0.02737902 | 0.16075055 | 4.46E-05 | 0.0047834 | -0.11816  |
| 1199-SS2 | 0.00819444 | 0.04236249 | 3.56E-05 | 0.0072456 | 0.40559   |
| 1202-SS2 | 0.02144897 | 0.12415618 | 4.24E-05 | 0.0052258 | -0.04878  |
| 1203-SS2 | 0.01692436 | 0.09623478 | 4.03E-05 | 0.005729  | 0.063215  |
| 1205-SS2 | 0.0191373  | 0.10989089 | 4.14E-05 | 0.0054571 | 0.0010121 |
| 1208-SS2 | 0.03245067 | 0.19204766 | 4.62E-05 | 0.0046026 | -0.11603  |
| 1209-SS2 | 0.01624978 | 0.092072   | 4.00E-05 | 0.0058035 | 0.080526  |
| 1211-SS2 | 0.01342964 | 0.07466891 | 3.83E-05 | 0.0063061 | 0.19734   |
| 1213-SS2 | 0.03502098 | 0.20790908 | 4.72E-05 | 0.0045646 | -0.10426  |
| 1216-SS2 | 0.0117408  | 0.06424707 | 3.74E-05 | 0.0065941 | 0.263     |
| 1222-SS2 | 0.00773799 | 0.03954569 | 3.53E-05 | 0.0073641 | 0.43054   |
| 1223-SS2 | 0.01667172 | 0.09467579 | 4.00E-05 | 0.0058035 | 0.080526  |
| 1224-SS2 | 0.00782863 | 0.04010508 | 3.53E-05 | 0.0073641 | 0.43054   |
| 1229-SS2 | 0.01366621 | 0.07612878 | 3.86E-05 | 0.0062156 | 0.17645   |
| 1230-SS2 | 0.01530891 | 0.08626588 | 3.95E-05 | 0.0059603 | 0.11709   |
| 1232-SS2 | 0.03953541 | 0.23576765 | 4.92E-05 | 0.0045932 | -0.067351 |
| 1239-SS2 | 0.03178092 | 0.18791467 | 4.60E-05 | 0.0046154 | -0.12002  |
| 1242-SS2 | 0.02608626 | 0.15277292 | 4.42E-05 | 0.0048445 | -0.11213  |
| 1243-SS2 | 0.02560086 | 0.14977752 | 4.40E-05 | 0.0048781 | -0.10813  |
| 1248-SS2 | 0.01733418 | 0.09876379 | 4.06E-05 | 0.0056572 | 0.046584  |
| 1253-SS2 | 0.02098388 | 0.12128609 | 4.21E-05 | 0.0052798 | -0.037579 |
| 1258-SS2 | 0.00327814 | 0.01202397 | 3.29E-05 | 0.0084138 | 0.63801   |
| 1259-SS2 | 0.02024341 | 0.11671665 | 4.19E-05 | 0.0053364 | -0.025531 |
| 1260-SS2 | 0.01507317 | 0.08481112 | 3.92E-05 | 0.0060428 | 0.1363    |

|          |            |            |          |           |           |
|----------|------------|------------|----------|-----------|-----------|
| 1262-SS2 | 0.02165085 | 0.12540199 | 4.24E-05 | 0.0052258 | -0.059109 |
| 1263-SS2 | 0.01933843 | 0.11113205 | 4.14E-05 | 0.0054571 | 0.0010121 |
| 1265-SS2 | 0.02343099 | 0.13638721 | 4.32E-05 | 0.0050338 | -0.084895 |
| 1268-SS2 | 0.00374465 | 0.0149028  | 3.29E-05 | 0.0084138 | 0.63801   |
| 1270-SS2 | 0.01253821 | 0.06916786 | 3.80E-05 | 0.0063994 | 0.21875   |
| 1271-SS2 | 0.00495626 | 0.02237966 | 3.38E-05 | 0.0079991 | 0.55892   |
| 1272-SS2 | 0.0232462  | 0.13524692 | 4.30E-05 | 0.0050782 | -0.084895 |
| 1273-SS2 | 0.02600796 | 0.15228973 | 4.42E-05 | 0.0048445 | -0.11213  |
| 1274-SS2 | 0.01198327 | 0.06574334 | 3.77E-05 | 0.0064954 | 0.24064   |
| 1275-SS2 | 0.02820666 | 0.16585788 | 4.49E-05 | 0.0047302 | -0.12174  |
| 1277-SS2 | 0.0144627  | 0.08104388 | 3.89E-05 | 0.0061278 | 0.1561    |
| 1279-SS2 | 0.02302526 | 0.13388349 | 4.30E-05 | 0.0050782 | -0.077142 |
| 1283-SS2 | 0.01605177 | 0.09085004 | 3.98E-05 | 0.0058806 | 0.098494  |
| 1286-SS2 | 0.00829298 | 0.04297058 | 3.56E-05 | 0.0072456 | 0.40559   |

| cellid      | dpt_pseudoti | dpt_pseudoti | diffusion  | diff_rate | net_proliferation |
|-------------|--------------|--------------|------------|-----------|-------------------|
| 9mo_SIGAE3_ | 0.05901195   | 0.578092     | 0.00011368 | 0.097776  | -0.29758          |
| 9mo_SIGAE3_ | 0.05772057   | 0.56551456   | 0.00011241 | 0.096416  | -0.25188          |
| 9mo_SIGAE3_ | 0.0114573    | 0.11493298   | 6.11E-05   | 0.016373  | 0.1115            |
| 9mo_SIGAE3_ | 0.06880561   | 0.6734774    | 0.00012161 | 0.084113  | -0.77743          |
| 9mo_SIGAE3_ | 0.07658382   | 0.74923337   | 0.0001268  | 0.060479  | -1.1061           |
| 9mo_SIGAE3_ | 0.06362609   | 0.62303144   | 0.00011758 | 0.097678  | -0.5246           |
| 9mo_SIGAE3_ | 0.00985488   | 0.09932621   | 5.98E-05   | 0.014626  | 0.1081            |
| 9mo_SIGAE3_ | 0.05111093   | 0.5011399    | 0.00010597 | 0.092472  | 0.010852          |
| 9mo_SIGAE3_ | 0.06331454   | 0.619997     | 0.0001173  | 0.098072  | -0.50782          |
| 9mo_SIGAE3_ | 0.04881964   | 0.47882393   | 0.00010344 | 0.095375  | 0.072211          |
| 9mo_SIGAE3_ | 0.01241126   | 0.12422413   | 6.21E-05   | 0.017782  | 0.12723           |
| 9mo_SIGAE3_ | 0.04374395   | 0.42938915   | 9.78E-05   | 0.10633   | 0.21046           |
| 9mo_SIGAE3_ | 0.05101728   | 0.5002278    | 0.00010597 | 0.092472  | 0.010852          |
| 9mo_SIGAE3_ | 0.01062923   | 0.10686804   | 6.05E-05   | 0.01548   | 0.10741           |
| 9mo_SIGAE3_ | 0.0509772    | 0.4998375    | 0.00010561 | 0.092703  | 0.010852          |
| 9mo_SIGAE3_ | 0.06199275   | 0.60712355   | 0.00011642 | 0.098794  | -0.44141          |
| 9mo_SIGAE3_ | 0.0477895    | 0.46879086   | 0.00010234 | 0.09734   | 0.10061           |
| 9mo_SIGAE3_ | 0.06265257   | 0.6135499    | 0.00011672 | 0.098627  | -0.47447          |
| 9mo_SIGAE3_ | 0.06731724   | 0.65898144   | 0.00012058 | 0.088682  | -0.71078          |
| 9mo_SIGAE3_ | 0.06830129   | 0.66856563   | 0.00012136 | 0.085284  | -0.7609           |
| 9mo_SIGAE3_ | 0.07282122   | 0.7125875    | 0.00012446 | 0.070202  | -0.96444          |
| 9mo_SIGAE3_ | 0.07068953   | 0.69182587   | 0.00012308 | 0.076976  | -0.87403          |
| 9mo_SIGAE3_ | 0.07858699   | 0.7687433    | 0.00012797 | 0.057152  | -1.1666           |
| 9mo_SIGAE3_ | 0.07120067   | 0.69680417   | 0.00012331 | 0.075804  | -0.88959          |
| 9mo_SIGAE3_ | 0.07183585   | 0.70299053   | 0.00012378 | 0.073503  | -0.92016          |
| 9mo_SIGAE3_ | 0.05836359   | 0.5717772    | 0.00011305 | 0.097132  | -0.2822           |
| 9mo_SIGAE3_ | 0.06303957   | 0.61731905   | 0.0001173  | 0.098072  | -0.49111          |
| 9mo_SIGAE3_ | 0.06051238   | 0.5927055    | 0.00011492 | 0.0987    | -0.37638          |
| 9mo_SIGAE3_ | 0.07509396   | 0.73472285   | 0.00012598 | 0.063504  | -1.0462           |
| 9mo_SIGAE3_ | 0.03914208   | 0.38456917   | 9.26E-05   | 0.10901   | 0.36311           |
| 9mo_SIGAE3_ | 0.07464867   | 0.730386     | 0.00012556 | 0.06525   | -1.0333           |
| 9mo_SIGAE3_ | 0.07183759   | 0.70300746   | 0.00012378 | 0.073503  | -0.92016          |
| 9mo_SIGAE3_ | 0.06457794   | 0.632302     | 0.00011843 | 0.096001  | -0.57526          |
| 9mo_SIGAE3_ | 0.04462289   | 0.4379496    | 9.89E-05   | 0.10421   | 0.19178           |
| 9mo_SIGAE3_ | 0.0485575    | 0.4762708    | 0.00010308 | 0.095994  | 0.081803          |
| 9mo_SIGAE3_ | 0.07264625   | 0.7108833    | 0.00012446 | 0.070202  | -0.9499           |
| 9mo_SIGAE3_ | 0.06196546   | 0.6068577    | 0.00011613 | 0.098894  | -0.44141          |
| 9mo_SIGAE3_ | 0.07298002   | 0.7141342    | 0.00012469 | 0.069151  | -0.96444          |
| 9mo_SIGAE3_ | 0.07153215   | 0.70003265   | 0.00012355 | 0.074645  | -0.90497          |
| 9mo_SIGAE3_ | 0.02007977   | 0.19891165   | 6.99E-05   | 0.031319  | 0.52662           |
| 9mo_SIGAE3_ | 0.04919103   | 0.48244104   | 0.00010381 | 0.094798  | 0.062467          |
| 9mo_SIGAE3_ | 0.04637336   | 0.45499837   | 0.00010084 | 0.10033   | 0.14626           |
| 9mo_SIGAE3_ | 0.03974009   | 0.39039353   | 9.34E-05   | 0.10962   | 0.33794           |
| 9mo_SIGAE3_ | 0.02939004   | 0.2895891    | 8.11E-05   | 0.066108  | 0.7438            |
| 9mo_SIGAE3_ | 0.04754494   | 0.46640894   | 0.00010197 | 0.098057  | 0.10986           |

|             |            |            |            |          |           |
|-------------|------------|------------|------------|----------|-----------|
| 9mo_SIGAE3_ | 0.06147667 | 0.6020972  | 0.00011583 | 0.09893  | -0.42501  |
| 9mo_SIGAE3_ | 0.05568112 | 0.5456513  | 0.00011045 | 0.094186 | -0.16472  |
| 9mo_SIGAE3_ | 0.0318445  | 0.31349438 | 8.40E-05   | 0.07911  | 0.67094   |
| 9mo_SIGAE3_ | 0.03360614 | 0.33065185 | 8.61E-05   | 0.088522 | 0.60151   |
| 9mo_SIGAE3_ | 0.06696089 | 0.6555107  | 0.00012032 | 0.089759 | -0.69393  |
| 9mo_SIGAE3_ | 0.07589875 | 0.74256116 | 0.0001264  | 0.06191  | -1.0832   |
| 9mo_SIGAE3_ | 0.0610519  | 0.59796005 | 0.00011553 | 0.098907 | -0.39249  |
| 9mo_SIGAE3_ | 0.06013367 | 0.589017   | 0.00011462 | 0.098526 | -0.36038  |
| 9mo_SIGAE3_ | 0.05419308 | 0.53115857 | 0.0001091  | 0.092966 | -0.097097 |
| 9mo_SIGAE3_ | 0.06297906 | 0.6167297  | 0.00011701 | 0.098387 | -0.49111  |
| 9mo_SIGAE3_ | 0.06895145 | 0.67489785 | 0.00012186 | 0.08293  | -0.77743  |
| 9mo_SIGAE3_ | 0.05797505 | 0.5679931  | 0.00011273 | 0.096781 | -0.25188  |
| 9mo_SIGAE3_ | 0.02846934 | 0.28062195 | 7.99E-05   | 0.060913 | 0.76245   |
| 9mo_SIGAE3_ | 0.02965669 | 0.29218614 | 8.11E-05   | 0.066108 | 0.7357    |
| 9mo_SIGAE3_ | 0.0360809  | 0.3547548  | 8.90E-05   | 0.10026  | 0.49376   |
| 9mo_SIGAE3_ | 0.04791271 | 0.46999088 | 0.00010271 | 0.09665  | 0.10061   |
| 9mo_SIGAE3_ | 0.06595311 | 0.6456955  | 0.00011953 | 0.092756 | -0.64315  |
| 9mo_SIGAE3_ | 0.05071135 | 0.49724817 | 0.00010561 | 0.092703 | 0.021622  |
| 9mo_SIGAE3_ | 0.07521328 | 0.73588496 | 0.00012598 | 0.063504 | -1.0589   |
| 9mo_SIGAE3_ | 0.06397613 | 0.6264407  | 0.00011787 | 0.097201 | -0.54144  |
| 9mo_SIGAE3_ | 0.05772344 | 0.5655425  | 0.00011241 | 0.096416 | -0.25188  |
| 9mo_SIGAE3_ | 0.03259799 | 0.32083297 | 8.48E-05   | 0.082909 | 0.64444   |
| 9mo_SIGAE3_ | 0.02971187 | 0.2927236  | 8.15E-05   | 0.067903 | 0.7357    |
| 9mo_SIGAE3_ | 0.04805759 | 0.47140187 | 0.00010271 | 0.09665  | 0.10061   |
| 9mo_SIGAE3_ | 0.06064225 | 0.59397036 | 0.00011523 | 0.098828 | -0.37638  |
| 9mo_SIGAE3_ | 0.00630584 | 0.06476028 | 5.66E-05   | 0.010584 | 0.18365   |
| 9mo_SIGAE3_ | 0.05622368 | 0.55093557 | 0.00011111 | 0.094909 | -0.17881  |
| 9mo_SIGAE3_ | 0.06488843 | 0.635326   | 0.00011871 | 0.095287 | -0.59222  |
| 9mo_SIGAE3_ | 0.0189582  | 0.18798812 | 6.87E-05   | 0.029043 | 0.44251   |
| 9mo_SIGAE3_ | 0.04915997 | 0.4821385  | 0.00010381 | 0.094798 | 0.062467  |
| 9mo_SIGAE3_ | 0.07382648 | 0.72237825 | 0.00012513 | 0.067136 | -1.0066   |
| 9mo_SIGAE3_ | 0.05673678 | 0.5559329  | 0.00011144 | 0.095284 | -0.20754  |
| 9mo_SIGAE3_ | 0.07616836 | 0.745187   | 0.0001266  | 0.061174 | -1.0948   |
| 9mo_SIGAE3_ | 0.07474426 | 0.731317   | 0.00012577 | 0.064358 | -1.0333   |
| 9mo_SIGAE3_ | 0.07079785 | 0.69288087 | 0.00012308 | 0.076976 | -0.87403  |
| 9mo_SIGAE3_ | 0.04061551 | 0.39891967 | 9.42E-05   | 0.10978  | 0.3027    |
| 9mo_SIGAE3_ | 0.05521017 | 0.54106456 | 0.00011011 | 0.093847 | -0.13708  |
| 9mo_SIGAE3_ | 0.07595502 | 0.74310917 | 0.0001264  | 0.06191  | -1.0832   |
| 9mo_SIGAE3_ | 0.06928068 | 0.67810434 | 0.00012211 | 0.081739 | -0.79386  |
| 9mo_SIGAE3_ | 0.05315696 | 0.5210672  | 0.00010807 | 0.092373 | -0.059017 |
| 9mo_SIGAE3_ | 0.05052109 | 0.49539515 | 0.00010525 | 0.093003 | 0.021622  |
| 9mo_SIGAE3_ | 0.08718435 | 0.8524774  | 0.00013207 | 0.052686 | -1.3094   |
| 9mo_SIGAE3_ | 0.07301875 | 0.71451133 | 0.00012469 | 0.069151 | -0.96444  |
| 9mo_SIGAE3_ | 0.06128665 | 0.6002464  | 0.00011553 | 0.098907 | -0.4087   |
| 9mo_SIGAE3_ | 0.06070963 | 0.5946266  | 0.00011523 | 0.098828 | -0.37638  |
| 9mo_SIGAE3_ | 0.0394779  | 0.38783988 | 9.30E-05   | 0.10937  | 0.35035   |

|             |            |            |            |          |           |
|-------------|------------|------------|------------|----------|-----------|
| 9mo_SIGAE3_ | 0.05587378 | 0.54752773 | 0.00011078 | 0.094541 | -0.16472  |
| 9mo_SIGAE3_ | 0.0484746  | 0.47546336 | 0.00010308 | 0.095994 | 0.081803  |
| 9mo_SIGAE3_ | 0.04724655 | 0.46350273 | 0.00010197 | 0.098057 | 0.11903   |
| 9mo_SIGAE3_ | 0.04010642 | 0.3939614  | 9.38E-05   | 0.10975  | 0.32588   |
| 9mo_SIGAE3_ | 0.07239391 | 0.7084257  | 0.00012424 | 0.071279 | -0.9499   |
| 9mo_SIGAE3_ | 0.01437421 | 0.1433423  | 6.41E-05   | 0.020862 | 0.19442   |
| 9mo_SIGAE3_ | 0.02305111 | 0.22785099 | 7.34E-05   | 0.039406 | 0.67444   |
| 9mo_SIGAE3_ | 0.05863002 | 0.57437223 | 0.00011337 | 0.097465 | -0.2822   |
| 9mo_SIGAE3_ | 0.05332625 | 0.522716   | 0.00010807 | 0.092373 | -0.07149  |
| 9mo_SIGAE3_ | 0.07070967 | 0.692022   | 0.00012308 | 0.076976 | -0.87403  |
| 9mo_SIGAE3_ | 0.0457272  | 0.44870502 | 0.00010009 | 0.1019   | 0.1553    |
| 9mo_SIGAE3_ | 0.06874707 | 0.67290723 | 0.00012161 | 0.084113 | -0.77743  |
| 9mo_SIGAE3_ | 0.06571627 | 0.64338875 | 0.00011925 | 0.093659 | -0.62617  |
| 9mo_SIGAE3_ | 0.00713828 | 0.07286786 | 5.75E-05   | 0.011579 | 0.15252   |
| 9mo_SIGAE3_ | 0.05991853 | 0.5869217  | 0.00011431 | 0.098311 | -0.3445   |
| 9mo_SIGAE3_ | 0.03438849 | 0.33827156 | 8.69E-05   | 0.09213  | 0.57137   |
| 9mo_SIGAE3_ | 0.01128896 | 0.11329339 | 6.11E-05   | 0.016373 | 0.1115    |
| 9mo_SIGAE3_ | 0.06342396 | 0.6210628  | 0.00011758 | 0.097678 | -0.50782  |
| 9mo_SIGAE3_ | 0.04826113 | 0.47338423 | 0.00010308 | 0.095994 | 0.091263  |
| 9mo_SIGAE3_ | 0.07092898 | 0.6941581  | 0.00012331 | 0.075804 | -0.87403  |
| 9mo_SIGAE3_ | 0.04404073 | 0.43227962 | 9.82E-05   | 0.10565  | 0.20107   |
| 9mo_SIGAE3_ | 0.07350104 | 0.71920866 | 0.00012491 | 0.068128 | -0.99278  |
| 9mo_SIGAE3_ | 0.05518416 | 0.5408112  | 0.00011011 | 0.093847 | -0.13708  |
| 9mo_SIGAE3_ | 0.05958653 | 0.5836881  | 0.00011431 | 0.098311 | -0.32873  |
| 9mo_SIGAE3_ | 0.05051274 | 0.49531385 | 0.00010525 | 0.093003 | 0.021622  |
| 9mo_SIGAE3_ | 0.07472342 | 0.731114   | 0.00012577 | 0.064358 | -1.0333   |
| 9mo_SIGAE3_ | 0.0566823  | 0.5554023  | 0.00011144 | 0.095284 | -0.20754  |
| 9mo_SIGAE3_ | 0.06043424 | 0.5919444  | 0.00011492 | 0.0987   | -0.37638  |
| 9mo_SIGAE3_ | 0.02992667 | 0.29481566 | 8.15E-05   | 0.067903 | 0.7357    |
| 9mo_SIGAE3_ | 0.0498456  | 0.48881626 | 0.00010453 | 0.09379  | 0.042456  |
| 9mo_SIGAE3_ | 0.08064728 | 0.7888095  | 0.00012907 | 0.054994 | -1.2155   |
| 9mo_SIGAE3_ | 0.06262936 | 0.61332375 | 0.00011672 | 0.098627 | -0.47447  |
| 9mo_SIGAE3_ | 0.0080709  | 0.08195114 | 5.84E-05   | 0.012653 | 0.12871   |
| 9mo_SIGAE3_ | 0.04574366 | 0.44886538 | 0.00010009 | 0.1019   | 0.1553    |
| 9mo_SIGAE3_ | 0.04973056 | 0.4876958  | 0.00010453 | 0.09379  | 0.052555  |
| 9mo_SIGAE3_ | 0.06730508 | 0.658863   | 0.00012058 | 0.088682 | -0.71078  |
| 9mo_SIGAE3_ | 0.03016095 | 0.2970974  | 8.19E-05   | 0.069725 | 0.72675   |
| 9mo_SIGAE3_ | 0.05880562 | 0.57608247 | 0.00011337 | 0.097465 | -0.29758  |
| 9mo_SIGAE3_ | 0.05396045 | 0.5288929  | 0.00010876 | 0.092731 | -0.097097 |
| 9mo_SIGAE3_ | 0.07443323 | 0.7282877  | 0.00012556 | 0.06525  | -1.0201   |
| 9mo_SIGAE3_ | 0.04876984 | 0.47833887 | 0.00010344 | 0.095375 | 0.072211  |
| 9mo_SIGAE3_ | 0.019536   | 0.19361559 | 6.95E-05   | 0.030541 | 0.48489   |
| 9mo_SIGAE3_ | 0.05293767 | 0.51893145 | 0.00010773 | 0.092257 | -0.059017 |
| 9mo_SIGAE3_ | 0.03173032 | 0.31238225 | 8.36E-05   | 0.07721  | 0.67094   |
| 9mo_SIGAE3_ | 0.05991213 | 0.5868593  | 0.00011431 | 0.098311 | -0.3445   |
| 9mo_SIGAE3_ | 0.06111286 | 0.59855384 | 0.00011553 | 0.098907 | -0.4087   |

|             |            |            |            |           |            |
|-------------|------------|------------|------------|-----------|------------|
| 9mo_SIGAE3_ | 0.0512359  | 0.5023571  | 0.00010597 | 0.092472  | -0.0001745 |
| 9mo_SIGAE3_ | 0.06400923 | 0.626763   | 0.00011787 | 0.097201  | -0.54144   |
| 9mo_SIGAE3_ | 0.03447537 | 0.33911774 | 8.69E-05   | 0.09213   | 0.55601    |
| 9mo_SIGAE3_ | 0.02012545 | 0.19935659 | 7.02E-05   | 0.032119  | 0.52662    |
| 9mo_SIGAE3_ | 0.05761655 | 0.5645015  | 0.00011241 | 0.096416  | -0.23694   |
| 9mo_SIGAE3_ | 0.04742571 | 0.46524775 | 0.00010197 | 0.098057  | 0.10986    |
| 9mo_SIGAE3_ | 0.0578123  | 0.56640804 | 0.00011241 | 0.096416  | -0.25188   |
| 9mo_SIGAE3_ | 0.04004071 | 0.39332142 | 9.38E-05   | 0.10975   | 0.32588    |
| 9mo_SIGAE3_ | 0.0732328  | 0.7165961  | 0.00012469 | 0.069151  | -0.97873   |
| 9mo_SIGAE3_ | 0.01865081 | 0.18499428 | 6.84E-05   | 0.028322  | 0.42127    |
| 9mo_SIGAE3_ | 0.08155434 | 0.79764384 | 0.00012942 | 0.054478  | -1.2295    |
| 9mo_SIGAE3_ | 0.02396066 | 0.23670956 | 7.46E-05   | 0.042633  | 0.71639    |
| 9mo_SIGAE3_ | 0.04854152 | 0.47611514 | 0.00010308 | 0.095994  | 0.081803   |
| 9mo_SIGAE3_ | 0.04387829 | 0.43069753 | 9.82E-05   | 0.10565   | 0.21046    |
| 9mo_SIGAE3_ | 0.04762071 | 0.46714687 | 0.00010234 | 0.09734   | 0.10986    |
| 9mo_SIGAE3_ | 0.04457025 | 0.4374369  | 9.89E-05   | 0.10421   | 0.19178    |
| 9mo_SIGAE3_ | 0.07078794 | 0.6927843  | 0.00012308 | 0.076976  | -0.87403   |
| 9mo_SIGAE3_ | 0.01330007 | 0.13288063 | 6.30E-05   | 0.019276  | 0.15521    |
| 9mo_SIGAE3_ | 0.07842136 | 0.76713014 | 0.00012778 | 0.057615  | -1.1573    |
| 9mo_SIGAE3_ | 0.05386238 | 0.52793765 | 0.00010876 | 0.092731  | -0.084185  |
| 9mo_SIGAE3_ | 0.02118095 | 0.20963657 | 7.14E-05   | 0.034655  | 0.58661    |
| 9mo_SIGAE3_ | 0.00359758 | 0.03838316 | 5.44E-05   | 0.0082917 | 0.27903    |
| 9mo_SIGAE3_ | 0.05002564 | 0.49056974 | 0.0001049  | 0.093366  | 0.042456   |
| 9mo_SIGAE3_ | 0.04156643 | 0.4081812  | 9.54E-05   | 0.10929   | 0.28067    |
| 9mo_SIGAE3_ | 0.07300394 | 0.71436715 | 0.00012469 | 0.069151  | -0.96444   |
| 9mo_SIGAE3_ | 0.03101939 | 0.30545816 | 8.28E-05   | 0.073435  | 0.69526    |
| 9mo_SIGAE3_ | 0.05357562 | 0.5251448  | 0.00010842 | 0.092532  | -0.084185  |
| 9mo_SIGAE3_ | 0.01131645 | 0.11356121 | 6.11E-05   | 0.016373  | 0.1115     |
| 9mo_SIGAE3_ | 0.05700113 | 0.55850756 | 0.00011177 | 0.095663  | -0.22216   |
| 9mo_SIGAE3_ | 0.02068299 | 0.20478673 | 7.06E-05   | 0.032941  | 0.54704    |
| 9mo_SIGAE3_ | 0.05288078 | 0.51837736 | 0.00010773 | 0.092257  | -0.059017  |
| 9mo_SIGAE3_ | 0.04372731 | 0.42922705 | 9.78E-05   | 0.10633   | 0.21046    |
| 9mo_SIGAE3_ | 0.04461154 | 0.43783906 | 9.89E-05   | 0.10421   | 0.19178    |
| 9mo_SIGAE3_ | 0.03102606 | 0.3055231  | 8.28E-05   | 0.073435  | 0.69526    |
| 9mo_SIGAE3_ | 0.06415308 | 0.62816405 | 0.00011815 | 0.096641  | -0.54144   |
| 9mo_SIGAE3_ | 0.07024574 | 0.6875036  | 0.00012284 | 0.078159  | -0.8424    |
| 9mo_SIGAE3_ | 0.02501523 | 0.24698061 | 7.58E-05   | 0.046199  | 0.74769    |
| 9mo_SIGAE3_ | 0.0357381  | 0.35141605 | 8.86E-05   | 0.098764  | 0.50933    |
| 9mo_SIGAE3_ | 0.05841139 | 0.57224286 | 0.00011305 | 0.097132  | -0.2822    |
| 9mo_SIGAE3_ | 0.06598041 | 0.6459614  | 0.00011953 | 0.092756  | -0.64315   |
| 9mo_SIGAE3_ | 0.0553662  | 0.5425842  | 0.00011011 | 0.093847  | -0.1508    |
| 9mo_SIGAE3_ | 0.06961777 | 0.6813875  | 0.00012235 | 0.080544  | -0.81017   |
| 9mo_SIGAE3_ | 0.08697885 | 0.85047585 | 0.00013193 | 0.052709  | -1.3063    |
| 9mo_SIGAE3_ | 0.02989667 | 0.29452342 | 8.15E-05   | 0.067903  | 0.7357     |
| 9mo_SIGAE3_ | 0.06713426 | 0.6571993  | 0.00012058 | 0.088682  | -0.69393   |
| 9mo_SIGAE3_ | 0.07740632 | 0.7572441  | 0.0001272  | 0.059217  | -1.1276    |



|             |            |            |            |          |           |
|-------------|------------|------------|------------|----------|-----------|
| 9mo_SIGAE3_ | 0.04343729 | 0.42640245 | 9.74E-05   | 0.10696  | 0.21998   |
| 9mo_SIGAE3_ | 0.06447338 | 0.63128364 | 0.00011843 | 0.096001 | -0.55833  |
| 9mo_SIGAE3_ | 0.04610314 | 0.45236647 | 0.00010046 | 0.10111  | 0.14626   |
| 9mo_SIGAE3_ | 0.03991871 | 0.3921332  | 9.34E-05   | 0.10962  | 0.32588   |
| 9mo_SIGAE3_ | 0.06306384 | 0.6175554  | 0.0001173  | 0.098072 | -0.49111  |
| 9mo_SIGAE3_ | 0.05431091 | 0.53230613 | 0.0001091  | 0.092966 | -0.11022  |
| 9mo_SIGAE3_ | 0.04200952 | 0.4124967  | 9.58E-05   | 0.10896  | 0.25963   |
| 9mo_SIGAE3_ | 0.08281306 | 0.80990314 | 0.00013009 | 0.053693 | -1.2543   |
| 9mo_SIGAE3_ | 0.07246801 | 0.7091474  | 0.00012424 | 0.071279 | -0.9499   |
| 9mo_SIGAE3_ | 0.04346758 | 0.42669746 | 9.78E-05   | 0.10633  | 0.21998   |
| 9mo_SIGAE3_ | 0.01557062 | 0.15499476 | 6.51E-05   | 0.022546 | 0.24275   |
| 9mo_SIGAE3_ | 0.06173251 | 0.6045889  | 0.00011613 | 0.098894 | -0.42501  |
| 9mo_SIGAE3_ | 0.07018686 | 0.6869301  | 0.0001226  | 0.07935  | -0.8424   |
| 9mo_SIGAE3_ | 0.06202405 | 0.6074283  | 0.00011642 | 0.098794 | -0.44141  |
| 9mo_SIGAE3_ | 0.04328958 | 0.42496383 | 9.74E-05   | 0.10696  | 0.22964   |
| 9mo_SIGAE3_ | 0.03086315 | 0.30393648 | 8.28E-05   | 0.073435 | 0.70647   |
| 9mo_SIGAE3_ | 0.04455124 | 0.4372518  | 9.89E-05   | 0.10421  | 0.19178   |
| 9mo_SIGAE3_ | 0.05709483 | 0.55942017 | 0.00011177 | 0.095663 | -0.22216  |
| 9mo_SIGAE3_ | 0.0564016  | 0.5526685  | 0.00011111 | 0.094909 | -0.19309  |
| 9mo_SIGAE3_ | 0.03972398 | 0.39023665 | 9.34E-05   | 0.10962  | 0.33794   |
| 9mo_SIGAE3_ | 0.06714959 | 0.65734863 | 0.00012058 | 0.088682 | -0.69393  |
| 9mo_SIGAE3_ | 0.04910767 | 0.48162913 | 0.00010381 | 0.094798 | 0.072211  |
| 9mo_SIGAE3_ | 0.01333191 | 0.13319083 | 6.30E-05   | 0.019276 | 0.15521   |
| 9mo_SIGAE3_ | 0.06060261 | 0.5935842  | 0.00011492 | 0.0987   | -0.37638  |
| 9mo_SIGAE3_ | 0.0509248  | 0.49932718 | 0.00010561 | 0.092703 | 0.010852  |
| 9mo_SIGAE3_ | 0.04946596 | 0.48511878 | 0.00010417 | 0.094268 | 0.052555  |
| 9mo_SIGAE3_ | 0.06981102 | 0.6832696  | 0.00012235 | 0.080544 | -0.82636  |
| 9mo_SIGAE3_ | 0.04620688 | 0.45337686 | 0.00010084 | 0.10033  | 0.14626   |
| 9mo_SIGAE3_ | 0.0539436  | 0.5287287  | 0.00010876 | 0.092731 | -0.097097 |
| 9mo_SIGAE3_ | 0.07352474 | 0.7194394  | 0.00012491 | 0.068128 | -0.99278  |
| 9mo_SIGAE3_ | 0.06470271 | 0.6335172  | 0.00011843 | 0.096001 | -0.57526  |
| 9mo_SIGAE3_ | 0.01967413 | 0.1949609  | 6.95E-05   | 0.030541 | 0.48489   |
| 9mo_SIGAE3_ | 0.05184986 | 0.5083367  | 0.00010668 | 0.092211 | -0.022986 |
| 9mo_SIGAE3_ | 0.06190002 | 0.60622036 | 0.00011613 | 0.098894 | -0.44141  |
| 9mo_SIGAE3_ | 0.05751882 | 0.5635496  | 0.00011241 | 0.096416 | -0.23694  |
| 9mo_SIGAE3_ | 0.05681094 | 0.5566552  | 0.00011144 | 0.095284 | -0.20754  |
| 9mo_SIGAE3_ | 0.08030745 | 0.7854997  | 0.00012889 | 0.055287 | -1.2081   |
| 9mo_SIGAE3_ | 0.07434665 | 0.72744447 | 0.00012556 | 0.06525  | -1.0201   |
| 9mo_SIGAE3_ | 0.03724472 | 0.36608988 | 9.02E-05   | 0.1042   | 0.43275   |
| 9mo_SIGAE3_ | 0.03594392 | 0.3534207  | 8.90E-05   | 0.10026  | 0.49376   |
| 9mo_SIGAE3_ | 0.05116252 | 0.5016424  | 0.00010597 | 0.092472 | 0.010852  |
| 9mo_SIGAE3_ | 0.07680413 | 0.75137913 | 0.000127   | 0.059827 | -1.1061   |
| 9mo_SIGAE3_ | 0.04940792 | 0.4845535  | 0.00010417 | 0.094268 | 0.062467  |
| 9mo_SIGAE3_ | 0.05065971 | 0.49674532 | 0.00010561 | 0.092703 | 0.021622  |
| 9mo_SIGAE3_ | 0.0381495  | 0.37490195 | 9.14E-05   | 0.10717  | 0.40374   |
| 9mo_SIGAE3_ | 0.04413193 | 0.43316787 | 9.86E-05   | 0.10494  | 0.20107   |

|             |            |            |            |           |            |
|-------------|------------|------------|------------|-----------|------------|
| 9mo_SIGAE3_ | 0.03687238 | 0.36246344 | 8.98E-05   | 0.10298   | 0.4477     |
| 9mo_SIGAE3_ | 0.06487367 | 0.6351823  | 0.00011871 | 0.095287  | -0.59222   |
| 9mo_SIGAE3_ | 0.04504992 | 0.44210866 | 9.93E-05   | 0.10345   | 0.17344    |
| 9mo_SIGAE3_ | 0.04616376 | 0.45295694 | 0.00010046 | 0.10111   | 0.14626    |
| 9mo_SIGAE3_ | 0.04697024 | 0.46081167 | 0.00010159 | 0.098799  | 0.12814    |
| 9mo_SIGAE3_ | 0.05934582 | 0.58134377 | 0.000114   | 0.098059  | -0.31309   |
| 9mo_SIGAE3_ | 0.05685078 | 0.5570432  | 0.00011177 | 0.095663  | -0.20754   |
| 9mo_SIGAE3_ | 0.06181609 | 0.60540295 | 0.00011613 | 0.098894  | -0.44141   |
| 9mo_SIGAE3_ | 0.06076585 | 0.59517413 | 0.00011523 | 0.098828  | -0.39249   |
| 9mo_SIGAE3_ | 0.05857603 | 0.57384634 | 0.00011337 | 0.097465  | -0.2822    |
| 9mo_SIGAE3_ | 0.06346335 | 0.6214464  | 0.00011758 | 0.097678  | -0.50782   |
| 9mo_SIGAE3_ | 0.05590803 | 0.5478613  | 0.00011078 | 0.094541  | -0.16472   |
| 9mo_SIGAE3_ | 0.06630713 | 0.64914346 | 0.00011979 | 0.091802  | -0.66011   |
| 9mo_SIGAE3_ | 0.00488081 | 0.05088116 | 5.55E-05   | 0.0093744 | 0.23478    |
| 9mo_SIGAE3_ | 0.04426643 | 0.43447787 | 9.86E-05   | 0.10494   | 0.20107    |
| 9mo_SIGAE3_ | 0.06790648 | 0.6647203  | 0.0001211  | 0.086439  | -0.72756   |
| 9mo_SIGAE3_ | 0.04496273 | 0.44125944 | 9.93E-05   | 0.10345   | 0.18258    |
| 9mo_SIGAE3_ | 0.08021272 | 0.78457713 | 0.00012889 | 0.055287  | -1.2004    |
| 9mo_SIGAE3_ | 0.05070591 | 0.49719524 | 0.00010561 | 0.092703  | 0.021622   |
| 9mo_SIGAE3_ | 0.05130855 | 0.50306463 | 0.00010597 | 0.092472  | -0.0001745 |
| 9mo_SIGAE3_ | 0.05540589 | 0.5429707  | 0.00011011 | 0.093847  | -0.1508    |
| 9mo_SIGAE3_ | 0.0484838  | 0.47555295 | 0.00010308 | 0.095994  | 0.081803   |
| 9mo_SIGAE3_ | 0.04795814 | 0.4704333  | 0.00010271 | 0.09665   | 0.10061    |
| 9mo_SIGAE3_ | 0.07002991 | 0.6854015  | 0.0001226  | 0.07935   | -0.8424    |
| 9mo_SIGAE3_ | 0.07341622 | 0.7183825  | 0.00012491 | 0.068128  | -0.99278   |
| 9mo_SIGAE3_ | 0.04009453 | 0.39384556 | 9.38E-05   | 0.10975   | 0.32588    |
| 9mo_SIGAE3_ | 0.04927972 | 0.4833049  | 0.00010417 | 0.094268  | 0.062467   |
| 9mo_SIGAE3_ | 0.05467151 | 0.5358182  | 0.00010944 | 0.093233  | -0.12355   |
| 9mo_SIGAE3_ | 0.03457308 | 0.3400694  | 8.73E-05   | 0.093873  | 0.55601    |
| 9mo_SIGAE3_ | 0.02880859 | 0.28392604 | 8.03E-05   | 0.062611  | 0.75723    |
| 9mo_SIGAE3_ | 0.06040876 | 0.5916962  | 0.00011492 | 0.0987    | -0.37638   |
| 9mo_SIGAE3_ | 0.01291592 | 0.12913923 | 6.27E-05   | 0.018769  | 0.14454    |
| 9mo_SIGAE3_ | 0.03274559 | 0.3222705  | 8.48E-05   | 0.082909  | 0.6305     |
| 9mo_SIGAE3_ | 0.05173009 | 0.50717026 | 0.00010668 | 0.092211  | -0.011455  |
| 9mo_SIGAE3_ | 0.05345542 | 0.5239741  | 0.00010842 | 0.092532  | -0.07149   |
| 9mo_SIGAE3_ | 0.07959309 | 0.7785422  | 0.00012853 | 0.055948  | -1.1924    |
| 9mo_SIGAE3_ | 0.05192591 | 0.50907737 | 0.00010668 | 0.092211  | -0.022986  |
| 9mo_SIGAE3_ | 0.04676286 | 0.45879188 | 0.00010122 | 0.099559  | 0.12814    |
| 9mo_SIGAE3_ | 0.06165939 | 0.6038767  | 0.00011613 | 0.098894  | -0.42501   |
| 9mo_SIGAE3_ | 0.06302537 | 0.6171807  | 0.0001173  | 0.098072  | -0.49111   |
| 9mo_SIGAE3_ | 0.03901074 | 0.38329    | 9.26E-05   | 0.10901   | 0.36311    |
| 9mo_SIGAE3_ | 0.01883316 | 0.18677028 | 6.87E-05   | 0.029043  | 0.44251    |
| 9mo_SIGAE3_ | 0.06481656 | 0.6346261  | 0.00011871 | 0.095287  | -0.57526   |
| 9mo_SIGAE3_ | 0.01907358 | 0.18911187 | 6.91E-05   | 0.029782  | 0.46374    |
| 9mo_SIGAE3_ | 0.04977085 | 0.48808822 | 0.00010453 | 0.09379   | 0.052555   |
| 9mo_SIGAE3_ | 0.07734105 | 0.7566084  | 0.0001272  | 0.059217  | -1.1276    |

|             |            |            |            |          |           |
|-------------|------------|------------|------------|----------|-----------|
| 9mo_SIGAE3_ | 0.0437495  | 0.4294432  | 9.78E-05   | 0.10633  | 0.21046   |
| 9mo_SIGAE3_ | 0.01576141 | 0.15685293 | 6.54E-05   | 0.023132 | 0.26052   |
| 9mo_SIGAE3_ | 0.07082281 | 0.693124   | 0.00012308 | 0.076976 | -0.87403  |
| 9mo_SIGAE3_ | 0.0599577  | 0.58730316 | 0.00011462 | 0.098526 | -0.3445   |
| 9mo_SIGAE3_ | 0.04712642 | 0.46233273 | 0.00010159 | 0.098799 | 0.11903   |
| 9mo_SIGAE3_ | 0.0433214  | 0.42527372 | 9.74E-05   | 0.10696  | 0.21998   |
| 9mo_SIGAE3_ | 0.03865808 | 0.37985525 | 9.22E-05   | 0.10852  | 0.37625   |
| 9mo_SIGAE3_ | 0.0164648  | 0.16370364 | 6.62E-05   | 0.024342 | 0.29808   |
| 9mo_SIGAE3_ | 0.05774317 | 0.56573474 | 0.00011241 | 0.096416 | -0.25188  |
| 9mo_SIGAE3_ | 0.06812396 | 0.66683847 | 0.0001211  | 0.086439 | -0.74427  |
| 9mo_SIGAE3_ | 0.06035469 | 0.5911696  | 0.00011492 | 0.0987   | -0.36038  |
| 9mo_SIGAE3_ | 0.08376008 | 0.81912667 | 0.00013058 | 0.053285 | -1.2702   |
| 9mo_SIGAE3_ | 0.06792931 | 0.66494274 | 0.0001211  | 0.086439 | -0.72756  |
| 9mo_SIGAE3_ | 0.04764273 | 0.46736142 | 0.00010234 | 0.09734  | 0.10986   |
| 9mo_SIGAE3_ | 0.01667506 | 0.1657514  | 6.65E-05   | 0.024968 | 0.31771   |
| 9mo_SIGAE3_ | 0.03065717 | 0.30193028 | 8.23E-05   | 0.07157  | 0.70647   |
| 9mo_SIGAE3_ | 0.06681689 | 0.6541083  | 0.00012032 | 0.089759 | -0.67704  |
| 9mo_SIGAE3_ | 0.0387657  | 0.38090348 | 9.22E-05   | 0.10852  | 0.37625   |
| 9mo_SIGAE3_ | 0.07255496 | 0.70999426 | 0.00012424 | 0.071279 | -0.9499   |
| 9mo_SIGAE3_ | 0.04084407 | 0.40114573 | 9.46E-05   | 0.10971  | 0.3027    |
| 9mo_SIGAE3_ | 0.0590818  | 0.5787723  | 0.00011368 | 0.097776 | -0.31309  |
| 9mo_SIGAE3_ | 0.04164013 | 0.40889898 | 9.54E-05   | 0.10929  | 0.27003   |
| 9mo_SIGAE3_ | 0.04018313 | 0.39470857 | 9.38E-05   | 0.10975  | 0.32588   |
| 9mo_SIGAE3_ | 0.0578388  | 0.56666607 | 0.00011241 | 0.096416 | -0.25188  |
| 9mo_SIGAE3_ | 0.06939869 | 0.67925376 | 0.00012211 | 0.081739 | -0.81017  |
| 9mo_SIGAE3_ | 0.00675653 | 0.06914977 | 5.72E-05   | 0.011238 | 0.16213   |
| 9mo_SIGAE3_ | 0.06433988 | 0.62998337 | 0.00011815 | 0.096641 | -0.55833  |
| 9mo_SIGAE3_ | 0.0666049  | 0.6520436  | 0.00012006 | 0.090801 | -0.67704  |
| 9mo_SIGAE3_ | 0.04865816 | 0.4772511  | 0.00010344 | 0.095375 | 0.081803  |
| 9mo_SIGAE3_ | 0.04972424 | 0.48763424 | 0.00010453 | 0.09379  | 0.052555  |
| 9mo_SIGAE3_ | 0.05262391 | 0.51587564 | 0.00010738 | 0.092189 | -0.046772 |
| 9mo_SIGAE3_ | 0.03991497 | 0.39209676 | 9.34E-05   | 0.10962  | 0.32588   |
| 9mo_SIGAE3_ | 0.03527628 | 0.3469182  | 8.81E-05   | 0.097198 | 0.52494   |
| 9mo_SIGAE3_ | 0.04948761 | 0.48532963 | 0.00010417 | 0.094268 | 0.052555  |
| 9mo_SIGAE3_ | 0.0699242  | 0.68437195 | 0.0001226  | 0.07935  | -0.82636  |
| 9mo_SIGAE3_ | 0.07395262 | 0.72360677 | 0.00012513 | 0.067136 | -1.0066   |
| 9mo_SIGAE3_ | 0.03753606 | 0.36892733 | 9.06E-05   | 0.10531  | 0.41807   |
| 9mo_SIGAE3_ | 0.07509787 | 0.73476094 | 0.00012598 | 0.063504 | -1.0462   |
| 9mo_SIGAE3_ | 0.070586   | 0.69081753 | 0.00012308 | 0.076976 | -0.8583   |
| 9mo_SIGAE3_ | 0.05908669 | 0.5788199  | 0.00011368 | 0.097776 | -0.31309  |
| 9mo_SIGAE3_ | 0.05410982 | 0.53034765 | 0.0001091  | 0.092966 | -0.097097 |
| 9mo_SIGAE3_ | 0.0367413  | 0.3611868  | 8.98E-05   | 0.10298  | 0.46289   |
| 9mo_SIGAE3_ | 0.05700566 | 0.55855167 | 0.00011177 | 0.095663 | -0.22216  |
| 9mo_SIGAE3_ | 0.01099702 | 0.11045013 | 6.08E-05   | 0.015922 | 0.10884   |
| 9mo_SIGAE3_ | 0.04213064 | 0.41367632 | 9.62E-05   | 0.10856  | 0.25963   |
| 9mo_SIGAE3_ | 0.06237557 | 0.610852   | 0.00011672 | 0.098627 | -0.4579   |

|             |            |            |            |          |           |
|-------------|------------|------------|------------|----------|-----------|
| 9mo_SIGAE3_ | 0.0695148  | 0.6803846  | 0.00012211 | 0.081739 | -0.81017  |
| 9mo_SIGAE3_ | 0.05751271 | 0.56349015 | 0.00011209 | 0.096042 | -0.23694  |
| 9mo_SIGAE3_ | 0.02605757 | 0.2571325  | 7.70E-05   | 0.050154 | 0.76634   |
| 9mo_SIGAE3_ | 0.05235996 | 0.5133048  | 0.00010703 | 0.092172 | -0.03476  |
| 9mo_SIGAE3_ | 0.02624652 | 0.25897276 | 7.70E-05   | 0.050154 | 0.76965   |
| 9mo_SIGAE3_ | 0.04633989 | 0.45467234 | 0.00010084 | 0.10033  | 0.14626   |
| 9mo_SIGAE3_ | 0.06292446 | 0.6161979  | 0.00011701 | 0.098387 | -0.49111  |
| 9mo_SIGAE3_ | 0.03269078 | 0.3217367  | 8.48E-05   | 0.082909 | 0.6305    |
| 9mo_SIGAE3_ | 0.05090859 | 0.49916923 | 0.00010561 | 0.092703 | 0.010852  |
| 9mo_SIGAE3_ | 0.05052374 | 0.49542102 | 0.00010525 | 0.093003 | 0.021622  |
| 9mo_SIGAE3_ | 0.06190819 | 0.6063     | 0.00011613 | 0.098894 | -0.44141  |
| 9mo_SIGAE3_ | 0.05431324 | 0.5323288  | 0.0001091  | 0.092966 | -0.11022  |
| 9mo_SIGAE3_ | 0.05949912 | 0.58283675 | 0.000114   | 0.098059 | -0.32873  |
| 9mo_SIGAE3_ | 0.06828389 | 0.6683961  | 0.00012136 | 0.085284 | -0.7609   |
| 9mo_SIGAE3_ | 0.06442832 | 0.6308447  | 0.00011843 | 0.096001 | -0.55833  |
| 9mo_SIGAE3_ | 0.04579155 | 0.4493318  | 0.00010009 | 0.1019   | 0.1553    |
| 9mo_SIGAE3_ | 0.03203335 | 0.31533366 | 8.40E-05   | 0.07911  | 0.65793   |
| 9mo_SIGAE3_ | 0.05272186 | 0.51682955 | 0.00010773 | 0.092257 | -0.046772 |
| 9mo_SIGAE3_ | 0.064207   | 0.62868917 | 0.00011815 | 0.096641 | -0.55833  |
| 9mo_SIGAE3_ | 0.02566256 | 0.25328532 | 7.66E-05   | 0.04879  | 0.7616    |
| 9mo_SIGAE3_ | 0.04648035 | 0.45604032 | 0.00010084 | 0.10033  | 0.13721   |
| 9mo_SIGAE3_ | 0.04599973 | 0.4513594  | 0.00010046 | 0.10111  | 0.1553    |
| 9mo_SIGAE3_ | 0.04199662 | 0.41237107 | 9.58E-05   | 0.10896  | 0.25963   |
| 9mo_SIGAE3_ | 0.05388869 | 0.52819395 | 0.00010876 | 0.092731 | -0.084185 |
| 9mo_SIGAE3_ | 0.06369869 | 0.6237385  | 0.00011758 | 0.097678 | -0.5246   |
| 9mo_SIGAE3_ | 0.06066817 | 0.5942228  | 0.00011523 | 0.098828 | -0.37638  |
| 9mo_SIGAE3_ | 0.05386128 | 0.527927   | 0.00010876 | 0.092731 | -0.084185 |
| 9mo_SIGAE3_ | 0.04790206 | 0.4698871  | 0.00010234 | 0.09734  | 0.10061   |
| 9mo_SIGAE3_ | 0.0681784  | 0.6673687  | 0.00012136 | 0.085284 | -0.74427  |
| 9mo_SIGAE3_ | 0.05398297 | 0.52911216 | 0.00010876 | 0.092731 | -0.097097 |
| 9mo_SIGAE3_ | 0.06089266 | 0.59640914 | 0.00011523 | 0.098828 | -0.39249  |
| 9mo_SIGAE3_ | 0.06347696 | 0.621579   | 0.00011758 | 0.097678 | -0.50782  |
| 9mo_SIGAE3_ | 0.08406805 | 0.82212615 | 0.00013074 | 0.053178 | -1.2751   |
| 9mo_SIGAE3_ | 0.0569812  | 0.5583135  | 0.00011177 | 0.095663 | -0.20754  |
| 9mo_SIGAE3_ | 0.04359946 | 0.42798188 | 9.78E-05   | 0.10633  | 0.21998   |
| 9mo_SIGAE3_ | 0.03544527 | 0.34856403 | 8.81E-05   | 0.097198 | 0.50933   |
| 9mo_SIGAE3_ | 0.01597002 | 0.15888467 | 6.58E-05   | 0.023731 | 0.27899   |
| 9mo_SIGAE3_ | 0.05836025 | 0.57174474 | 0.00011305 | 0.097132 | -0.2822   |
| 9mo_SIGAE3_ | 0.05183902 | 0.50823116 | 0.00010668 | 0.092211 | -0.011455 |
| 9mo_SIGAE3_ | 0.05920366 | 0.5799591  | 0.00011368 | 0.097776 | -0.31309  |
| 9mo_SIGAE3_ | 0.06975937 | 0.68276656 | 0.00012235 | 0.080544 | -0.82636  |
| 9mo_SIGAE3_ | 0.05637376 | 0.5523974  | 0.00011111 | 0.094909 | -0.19309  |
| 9mo_SIGAE3_ | 0.05288799 | 0.51844764 | 0.00010773 | 0.092257 | -0.059017 |
| 9mo_SIGAE3_ | 0.06383723 | 0.62508786 | 0.00011787 | 0.097201 | -0.54144  |
| 9mo_SIGAE3_ | 0.06341992 | 0.6210235  | 0.00011758 | 0.097678 | -0.50782  |
| 9mo_SIGAE3_ | 0.03471213 | 0.34142366 | 8.73E-05   | 0.093873 | 0.55601   |

|             |            |            |            |           |           |
|-------------|------------|------------|------------|-----------|-----------|
| 9mo_SIGAE3_ | 0.04710695 | 0.46214312 | 0.00010159 | 0.098799  | 0.11903   |
| 9mo_SIGAE3_ | 0.01219402 | 0.12210828 | 6.21E-05   | 0.017782  | 0.12723   |
| 9mo_SIGAE3_ | 0.0145284  | 0.14484401 | 6.41E-05   | 0.020862  | 0.19442   |
| 9mo_SIGAE3_ | 0.0045199  | 0.04736614 | 5.52E-05   | 0.0090922 | 0.24903   |
| 9mo_SIGAE3_ | 0.05497409 | 0.5387652  | 0.00010978 | 0.093528  | -0.13708  |
| 9mo_SIGAE3_ | 0.0190943  | 0.18931362 | 6.91E-05   | 0.029782  | 0.46374   |
| 9mo_SIGAE3_ | 0.03759366 | 0.36948836 | 9.06E-05   | 0.10531   | 0.41807   |
| 9mo_SIGAE3_ | 0.05537802 | 0.5426993  | 0.00011011 | 0.093847  | -0.1508   |
| 9mo_SIGAE3_ | 0.05610434 | 0.54977334 | 0.00011078 | 0.094541  | -0.17881  |
| 9mo_SIGAE3_ | 0.0701785  | 0.6868487  | 0.0001226  | 0.07935   | -0.8424   |
| 9mo_SIGAE3_ | 0.01580905 | 0.15731688 | 6.54E-05   | 0.023132  | 0.26052   |
| 9mo_SIGAE3_ | 0.05097936 | 0.49985853 | 0.00010561 | 0.092703  | 0.010852  |
| 9mo_SIGAE3_ | 0.04839155 | 0.47465453 | 0.00010308 | 0.095994  | 0.091263  |
| 9mo_SIGAE3_ | 0.06631208 | 0.6491916  | 0.00011979 | 0.091802  | -0.66011  |
| 9mo_SIGAE3_ | 0.05176104 | 0.5074717  | 0.00010668 | 0.092211  | -0.011455 |
| 9mo_SIGAE3_ | 0.05945379 | 0.5823953  | 0.000114   | 0.098059  | -0.32873  |
| 9mo_SIGAE3_ | 0.07458302 | 0.7297465  | 0.00012556 | 0.06525   | -1.0333   |
| 9mo_SIGAE3_ | 0.01431804 | 0.14279519 | 6.41E-05   | 0.020862  | 0.19442   |
| 9mo_SIGAE3_ | 0.05836266 | 0.5717682  | 0.00011305 | 0.097132  | -0.2822   |
| 9mo_SIGAE3_ | 0.06356437 | 0.6224303  | 0.00011758 | 0.097678  | -0.5246   |
| 9mo_SIGAE3_ | 0.06927323 | 0.6780318  | 0.00012211 | 0.081739  | -0.79386  |
| 9mo_SIGAE3_ | 0.03163563 | 0.31146002 | 8.36E-05   | 0.07721   | 0.6834    |
| 9mo_SIGAE3_ | 0.07800568 | 0.7630816  | 0.00012759 | 0.058113  | -1.1478   |
| 9mo_SIGAE3_ | 0.06823849 | 0.66795397 | 0.00012136 | 0.085284  | -0.74427  |
| 9mo_SIGAE3_ | 0.03599985 | 0.35396543 | 8.90E-05   | 0.10026   | 0.49376   |
| 9mo_SIGAE3_ | 0.04822267 | 0.47300965 | 0.00010271 | 0.09665   | 0.091263  |
| 9mo_SIGAE3_ | 0.07035547 | 0.6885723  | 0.00012284 | 0.078159  | -0.8583   |
| 9mo_SIGAE3_ | 0.06755433 | 0.6612906  | 0.00012084 | 0.087573  | -0.71078  |
| 9mo_SIGAE3_ | 0.03486213 | 0.34288457 | 8.77E-05   | 0.095565  | 0.54051   |
| 9mo_SIGAE3_ | 0.07780477 | 0.7611249  | 0.00012759 | 0.058113  | -1.1379   |
| 9mo_SIGAE3_ | 0.04581279 | 0.44953868 | 0.00010009 | 0.1019    | 0.1553    |
| 9mo_SIGAE3_ | 0.06183448 | 0.60558206 | 0.00011613 | 0.098894  | -0.44141  |
| 9mo_SIGAE3_ | 0.06805266 | 0.6661441  | 0.0001211  | 0.086439  | -0.74427  |
| 9mo_SIGAE3_ | 0.011901   | 0.1192544  | 6.17E-05   | 0.017303  | 0.12065   |
| 9mo_SIGAE3_ | 0.05851019 | 0.5732051  | 0.00011305 | 0.097132  | -0.2822   |
| 9mo_SIGAE3_ | 0.07574581 | 0.74107164 | 0.0001264  | 0.06191   | -1.0712   |
| 9mo_SIGAE3_ | 0.0546256  | 0.5353711  | 0.00010944 | 0.093233  | -0.12355  |
| 9mo_SIGAE3_ | 0.07024051 | 0.6874526  | 0.00012284 | 0.078159  | -0.8424   |
| 9mo_SIGAE3_ | 0.08119629 | 0.7941566  | 0.00012924 | 0.054725  | -1.2227   |
| 9mo_SIGAE3_ | 0.07128766 | 0.6976514  | 0.00012355 | 0.074645  | -0.88959  |
| 9mo_SIGAE3_ | 0.03103439 | 0.30560428 | 8.28E-05   | 0.073435  | 0.69526   |
| 9mo_SIGAE3_ | 0.07662429 | 0.74962753 | 0.0001268  | 0.060479  | -1.1061   |
| 9mo_SIGAE3_ | 0.06774731 | 0.6631701  | 0.00012084 | 0.087573  | -0.72756  |
| 9mo_SIGAE3_ | 0.07198519 | 0.704445   | 0.00012401 | 0.07238   | -0.92016  |
| 9mo_SIGAE3_ | 0.00952007 | 0.09606533 | 5.95E-05   | 0.014213  | 0.11014   |
| 9mo_SIGAE3_ | 0.03303768 | 0.32511532 | 8.52E-05   | 0.084798  | 0.61617   |

|             |            |            |            |           |            |
|-------------|------------|------------|------------|-----------|------------|
| 9mo_SIGAE3_ | 0.06759777 | 0.66171366 | 0.00012084 | 0.087573  | -0.72756   |
| 9mo_SIGAE3_ | 0.05534492 | 0.5423769  | 0.00011011 | 0.093847  | -0.1508    |
| 9mo_SIGAE3_ | 0.04462561 | 0.43797606 | 9.89E-05   | 0.10421   | 0.19178    |
| 9mo_SIGAE3_ | 0.05183366 | 0.5081789  | 0.00010668 | 0.092211  | -0.011455  |
| 9mo_SIGAE3_ | 0.05961763 | 0.58399105 | 0.00011431 | 0.098311  | -0.32873   |
| 9mo_SIGAE3_ | 0.04577687 | 0.44918883 | 0.00010009 | 0.1019    | 0.1553     |
| 9mo_SIGAE3_ | 0.05189666 | 0.5087925  | 0.00010668 | 0.092211  | -0.022986  |
| 9mo_SIGAE3_ | 0.06132291 | 0.6005996  | 0.00011583 | 0.09893   | -0.4087    |
| 9mo_SIGAE3_ | 0.0469601  | 0.46071294 | 0.00010159 | 0.098799  | 0.12814    |
| 9mo_SIGAE3_ | 0.03382457 | 0.3327793  | 8.65E-05   | 0.090344  | 0.58656    |
| 9mo_SIGAE3_ | 0.07071925 | 0.69211537 | 0.00012308 | 0.076976  | -0.87403   |
| 9mo_SIGAE3_ | 0.04651757 | 0.45640284 | 0.00010084 | 0.10033   | 0.13721    |
| 9mo_SIGAE3_ | 0.06685039 | 0.6544346  | 0.00012032 | 0.089759  | -0.67704   |
| 9mo_SIGAE3_ | 0.04145972 | 0.40714192 | 9.54E-05   | 0.10929   | 0.28067    |
| 9mo_SIGAE3_ | 0.07183506 | 0.70298284 | 0.00012378 | 0.073503  | -0.92016   |
| 9mo_SIGAE3_ | 0.01050505 | 0.10565858 | 6.05E-05   | 0.01548   | 0.10741    |
| 9mo_SIGAE3_ | 0.06409095 | 0.627559   | 0.00011815 | 0.096641  | -0.54144   |
| 9mo_SIGAE3_ | 0.00066886 | 0.0098589  | 5.23E-05   | 0.0064696 | 0.43121    |
| 9mo_SIGAE3_ | 0.07010958 | 0.68617743 | 0.0001226  | 0.07935   | -0.8424    |
| 9mo_SIGAE3_ | 0.01488027 | 0.1482711  | 6.44E-05   | 0.021412  | 0.20962    |
| 9mo_SIGAE3_ | 0.06437709 | 0.6303458  | 0.00011815 | 0.096641  | -0.55833   |
| 9mo_SIGAE3_ | 0.05598519 | 0.54861283 | 0.00011078 | 0.094541  | -0.17881   |
| 9mo_SIGAE3_ | 0.07852493 | 0.7681388  | 0.00012797 | 0.057152  | -1.1573    |
| 9mo_SIGAE3_ | 0.03982993 | 0.39126855 | 9.34E-05   | 0.10962   | 0.33794    |
| 9mo_SIGAE3_ | 0.04824044 | 0.47318277 | 0.00010271 | 0.09665   | 0.091263   |
| 9mo_SIGAE3_ | 0.06068754 | 0.59441143 | 0.00011523 | 0.098828  | -0.37638   |
| 9mo_SIGAE3_ | 0.07521212 | 0.7358737  | 0.00012598 | 0.063504  | -1.0589    |
| 9mo_SIGAE3_ | 0.08126848 | 0.7948597  | 0.00012942 | 0.054478  | -1.2227    |
| 9mo_SIGAE3_ | 0.05119521 | 0.50196075 | 0.00010597 | 0.092472  | -0.0001745 |
| 9mo_SIGAE3_ | 0.05853625 | 0.5734589  | 0.00011305 | 0.097132  | -0.2822    |
| 9mo_SIGAE3_ | 0.0512199  | 0.50220126 | 0.00010597 | 0.092472  | -0.0001745 |
| 9mo_SIGAE3_ | 0.04858242 | 0.47651345 | 0.00010308 | 0.095994  | 0.081803   |
| 9mo_SIGAE3_ | 0.0277149  | 0.27327406 | 7.90E-05   | 0.057632  | 0.76966    |
| 9mo_SIGAE3_ | 0.05111048 | 0.5011356  | 0.00010597 | 0.092472  | 0.010852   |
| 9mo_SIGAE3_ | 0.08280919 | 0.8098654  | 0.00013009 | 0.053693  | -1.2543    |
| 9mo_SIGAE3_ | 0.05040842 | 0.49429786 | 0.00010525 | 0.093003  | 0.032151   |
| 9mo_SIGAE3_ | 0.00638318 | 0.06551351 | 5.69E-05   | 0.010907  | 0.17252    |
| 9mo_SIGAE3_ | 0.06740388 | 0.6598252  | 0.00012058 | 0.088682  | -0.71078   |
| 9mo_SIGAE3_ | 0.03547473 | 0.348851   | 8.81E-05   | 0.097198  | 0.50933    |
| 9mo_SIGAE3_ | 0.06165885 | 0.6038715  | 0.00011613 | 0.098894  | -0.42501   |
| 9mo_SIGAE3_ | 0.05267553 | 0.5163784  | 0.00010738 | 0.092189  | -0.046772  |
| 9mo_SIGAE3_ | 0.02377519 | 0.23490326 | 7.42E-05   | 0.041523  | 0.70349    |
| 9mo_SIGAE3_ | 0.06119406 | 0.5993447  | 0.00011553 | 0.098907  | -0.4087    |
| 9mo_SIGAE3_ | 0.07142093 | 0.6989494  | 0.00012355 | 0.074645  | -0.90497   |
| 9mo_SIGAE3_ | 0.06460124 | 0.63252896 | 0.00011843 | 0.096001  | -0.57526   |
| 9mo_SIGAE3_ | 0.06050964 | 0.5926788  | 0.00011492 | 0.0987    | -0.37638   |

|             |            |            |            |           |          |
|-------------|------------|------------|------------|-----------|----------|
| 9mo_SIGAE3_ | 0.03840314 | 0.37737224 | 9.18E-05   | 0.10791   | 0.38979  |
| 9mo_SIGAE3_ | 0.06777512 | 0.663441   | 0.00012084 | 0.087573  | -0.72756 |
| 9mo_SIGAE3_ | 0.07596819 | 0.7432375  | 0.0001264  | 0.06191   | -1.0832  |
| 9mo_SIGAE3_ | 0.04499921 | 0.44161475 | 9.93E-05   | 0.10345   | 0.18258  |
| 9mo_SIGAE3_ | 0.04364256 | 0.42840165 | 9.78E-05   | 0.10633   | 0.21046  |
| 9mo_SIGAE3_ | 0.04577127 | 0.4491343  | 0.00010009 | 0.1019    | 0.1553   |
| 9mo_SIGAE3_ | 0.07530633 | 0.7367913  | 0.00012598 | 0.063504  | -1.0589  |
| 9mo_SIGAE3_ | 0.03209035 | 0.3158888  | 8.40E-05   | 0.07911   | 0.65793  |
| 9mo_SIGAE3_ | 0.08082727 | 0.79056257 | 0.00012907 | 0.054994  | -1.2155  |
| 9mo_SIGAE3_ | 0.0309269  | 0.30455738 | 8.28E-05   | 0.073435  | 0.70647  |
| 9mo_SIGAE3_ | 0.0313417  | 0.30859733 | 8.32E-05   | 0.075317  | 0.6834   |
| 9mo_SIGAE3_ | 0.06891421 | 0.67453516 | 0.00012186 | 0.08293   | -0.77743 |
| 9mo_SIGAE3_ | 0.06856674 | 0.671151   | 0.00012161 | 0.084113  | -0.7609  |
| 9mo_SIGAE3_ | 0.06085502 | 0.5960426  | 0.00011523 | 0.098828  | -0.39249 |
| 9mo_SIGAE3_ | 0.04658649 | 0.4570741  | 0.00010122 | 0.099559  | 0.13721  |
| 9mo_SIGAE3_ | 0.05023946 | 0.49265227 | 0.0001049  | 0.093366  | 0.032151 |
| 9mo_SIGAE3_ | 0.06499451 | 0.6363592  | 0.00011871 | 0.095287  | -0.59222 |
| 9mo_SIGAE3_ | 0.02604423 | 0.25700256 | 7.70E-05   | 0.050154  | 0.76634  |
| 9mo_SIGAE3_ | 0.04844712 | 0.47519577 | 0.00010308 | 0.095994  | 0.081803 |
| 9mo_SIGAE3_ | 0.02693132 | 0.2656424  | 7.78E-05   | 0.053015  | 0.77219  |
| 9mo_SIGAE3_ | 0.06178614 | 0.60511124 | 0.00011613 | 0.098894  | -0.44141 |
| 9mo_SIGAE3_ | 0.01064973 | 0.10706766 | 6.05E-05   | 0.01548   | 0.10741  |
| 9mo_SIGAE3_ | 0.06683104 | 0.6542461  | 0.00012032 | 0.089759  | -0.67704 |
| 9mo_SIGAE3_ | 0.00121493 | 0.01517731 | 5.29E-05   | 0.0068852 | 0.39576  |
| 9mo_SIGAE3_ | 0.0542953  | 0.53215414 | 0.0001091  | 0.092966  | -0.11022 |
| 9mo_SIGAE3_ | 0.07476594 | 0.73152816 | 0.00012577 | 0.064358  | -1.0333  |
| 9mo_SIGAE3_ | 0.04181273 | 0.41057998 | 9.58E-05   | 0.10896   | 0.27003  |
| 9mo_SIGAE3_ | 0.03899759 | 0.383162   | 9.26E-05   | 0.10901   | 0.36311  |
| 9mo_SIGAE3_ | 0.05222079 | 0.51194936 | 0.00010703 | 0.092172  | -0.03476 |
| 9mo_SIGAE3_ | 0.02395182 | 0.23662354 | 7.46E-05   | 0.042633  | 0.71639  |
| 9mo_SIGAE3_ | 0.07863975 | 0.7692572  | 0.00012797 | 0.057152  | -1.1666  |
| 9mo_SIGAE3_ | 0.04931983 | 0.4836955  | 0.00010417 | 0.094268  | 0.062467 |
| 9mo_SIGAE3_ | 0.03495298 | 0.34376937 | 8.77E-05   | 0.095565  | 0.54051  |
| 9mo_SIGAE3_ | 0.0608168  | 0.5956703  | 0.00011523 | 0.098828  | -0.39249 |
| 9mo_SIGAE3_ | 0.06064143 | 0.5939623  | 0.00011523 | 0.098828  | -0.37638 |
| 9mo_SIGAE3_ | 0.06195699 | 0.6067753  | 0.00011613 | 0.098894  | -0.44141 |
| 9mo_SIGAE3_ | 0.06253792 | 0.61243325 | 0.00011672 | 0.098627  | -0.47447 |
| 9mo_SIGAE3_ | 0.03741779 | 0.36777547 | 9.06E-05   | 0.10531   | 0.43275  |
| 9mo_SIGAE3_ | 0.06626064 | 0.64869064 | 0.00011979 | 0.091802  | -0.66011 |
| 9mo_SIGAE3_ | 0.01701569 | 0.16906902 | 6.69E-05   | 0.025607  | 0.33781  |
| 9mo_SIGAE3_ | 0.03434742 | 0.33787155 | 8.69E-05   | 0.09213   | 0.57137  |
| 9mo_SIGAE3_ | 0.04806868 | 0.47150993 | 0.00010271 | 0.09665   | 0.10061  |
| 9mo_SIGAE3_ | 0.0764024  | 0.7474665  | 0.0001266  | 0.061174  | -1.0948  |
| 9mo_SIGAE3_ | 0.0818776  | 0.8007923  | 0.00012959 | 0.054253  | -1.2361  |
| 9mo_SIGAE3_ | 0.0713662  | 0.6984163  | 0.00012355 | 0.074645  | -0.90497 |
| 9mo_SIGAE3_ | 0.04743274 | 0.4653162  | 0.00010197 | 0.098057  | 0.10986  |

|             |            |            |            |          |           |
|-------------|------------|------------|------------|----------|-----------|
| 9mo_SIGAE3_ | 0.00940665 | 0.09496065 | 5.92E-05   | 0.013809 | 0.11326   |
| 9mo_SIGAE3_ | 0.04689092 | 0.46003914 | 0.00010159 | 0.098799 | 0.12814   |
| 9mo_SIGAE3_ | 0.04838752 | 0.47461528 | 0.00010308 | 0.095994 | 0.091263  |
| 9mo_SIGAE3_ | 0.05204172 | 0.5102054  | 0.00010703 | 0.092172 | -0.022986 |
| 9mo_SIGAE3_ | 0.03016587 | 0.29714534 | 8.19E-05   | 0.069725 | 0.72675   |
| 9mo_SIGAE3_ | 0.01176299 | 0.11791027 | 6.14E-05   | 0.016833 | 0.11542   |
| 9mo_SIGAE3_ | 0.05926163 | 0.5805237  | 0.000114   | 0.098059 | -0.31309  |
| 9mo_SIGAE3_ | 0.0297829  | 0.29341534 | 8.15E-05   | 0.067903 | 0.7357    |
| 9mo_SIGAE3_ | 0.05093663 | 0.49944237 | 0.00010561 | 0.092703 | 0.010852  |
| 9mo_SIGAE3_ | 0.02647645 | 0.2612122  | 7.74E-05   | 0.051562 | 0.76965   |
| 9mo_SIGAE3_ | 0.05467232 | 0.53582615 | 0.00010944 | 0.093233 | -0.12355  |
| 9mo_SIGAE3_ | 0.01315493 | 0.1314671  | 6.27E-05   | 0.018769 | 0.14454   |
| 9mo_SIGAE3_ | 0.05727259 | 0.5611515  | 0.00011209 | 0.096042 | -0.22216  |
| 9mo_SIGAE3_ | 0.04274929 | 0.41970164 | 9.66E-05   | 0.10808  | 0.23945   |
| 9mo_SIGAE3_ | 0.05899994 | 0.57797503 | 0.00011368 | 0.097776 | -0.29758  |
| 9mo_SIGAE3_ | 0.04926471 | 0.48315865 | 0.00010381 | 0.094798 | 0.062467  |
| 9mo_SIGAE3_ | 0.06742994 | 0.66007906 | 0.00012058 | 0.088682 | -0.71078  |
| 9mo_SIGAE3_ | 0.06122291 | 0.59962565 | 0.00011553 | 0.098907 | -0.4087   |
| 9mo_SIGAE3_ | 0.04642991 | 0.45554915 | 0.00010084 | 0.10033  | 0.13721   |
| 9mo_SIGAE3_ | 0.06758993 | 0.6616373  | 0.00012084 | 0.087573 | -0.71078  |
| 9mo_SIGAE3_ | 0.01683514 | 0.16731055 | 6.65E-05   | 0.024968 | 0.31771   |
| 9mo_SIGAE3_ | 0.08302907 | 0.81200695 | 0.00013026 | 0.053541 | -1.2598   |
| 9mo_SIGAE3_ | 0.04636837 | 0.4549497  | 0.00010084 | 0.10033  | 0.14626   |
| 9mo_SIGAE3_ | 0.01118251 | 0.11225668 | 6.11E-05   | 0.016373 | 0.1115    |
| 9mo_SIGAE3_ | 0.06296933 | 0.61663496 | 0.00011701 | 0.098387 | -0.49111  |
| 9mo_SIGAE3_ | 0.07308507 | 0.7151573  | 0.00012469 | 0.069151 | -0.97873  |
| 9mo_SIGAE3_ | 0.04552894 | 0.44677407 | 0.00010009 | 0.1019   | 0.16436   |
| 9mo_SIGAE3_ | 0.07735898 | 0.7567831  | 0.0001272  | 0.059217 | -1.1276   |
| 9mo_SIGAE3_ | 0.0540625  | 0.5298868  | 0.00010876 | 0.092731 | -0.097097 |
| 9mo_SIGAE3_ | 0.04909068 | 0.48146367 | 0.00010381 | 0.094798 | 0.072211  |
| 9mo_SIGAE3_ | 0.07109523 | 0.6957772  | 0.00012331 | 0.075804 | -0.88959  |
| 9mo_SIGAE3_ | 0.03516854 | 0.34586892 | 8.77E-05   | 0.095565 | 0.52494   |
| 9mo_SIGAE3_ | 0.04655463 | 0.45676377 | 0.00010122 | 0.099559 | 0.13721   |
| 9mo_SIGAE3_ | 0.04906436 | 0.48120737 | 0.00010381 | 0.094798 | 0.072211  |
| 9mo_SIGAE3_ | 0.07311441 | 0.715443   | 0.00012469 | 0.069151 | -0.97873  |
| 9mo_SIGAE3_ | 0.07952375 | 0.7778669  | 0.00012853 | 0.055948 | -1.1841   |
| 9mo_SIGAE3_ | 0.02619246 | 0.25844628 | 7.70E-05   | 0.050154 | 0.76965   |
| 9mo_SIGAE3_ | 0.05740158 | 0.56240773 | 0.00011209 | 0.096042 | -0.23694  |
| 9mo_SIGAE3_ | 0.05465023 | 0.535611   | 0.00010944 | 0.093233 | -0.12355  |
| 9mo_SIGAE3_ | 0.0670313  | 0.65619653 | 0.00012032 | 0.089759 | -0.69393  |
| 9mo_SIGAE3_ | 0.05523831 | 0.5413386  | 0.00011011 | 0.093847 | -0.13708  |
| 9mo_SIGAE3_ | 0.04857533 | 0.47644445 | 0.00010308 | 0.095994 | 0.081803  |
| 9mo_SIGAE3_ | 0.06000804 | 0.5877934  | 0.00011462 | 0.098526 | -0.3445   |
| 9mo_SIGAE3_ | 0.04167937 | 0.40928113 | 9.54E-05   | 0.10929  | 0.27003   |
| 9mo_SIGAE3_ | 0.01707238 | 0.16962114 | 6.69E-05   | 0.025607 | 0.33781   |
| 9mo_SIGAE3_ | 0.0595869  | 0.5836917  | 0.00011431 | 0.098311 | -0.32873  |



|             |            |            |            |          |            |
|-------------|------------|------------|------------|----------|------------|
| 9mo_SIGAE3_ | 0.05123129 | 0.5023122  | 0.00010597 | 0.092472 | -0.0001745 |
| 9mo_SIGAE3_ | 0.01125832 | 0.11299504 | 6.11E-05   | 0.016373 | 0.1115     |
| 9mo_SIGAE3_ | 0.04825924 | 0.47336587 | 0.00010308 | 0.095994 | 0.091263   |
| 9mo_SIGAE3_ | 0.04949627 | 0.4854139  | 0.00010417 | 0.094268 | 0.052555   |
| 9mo_SIGAE3_ | 0.01892425 | 0.18765748 | 6.87E-05   | 0.029043 | 0.44251    |
| 9mo_SIGAE3_ | 0.07879157 | 0.77073574 | 0.00012797 | 0.057152 | -1.1666    |
| 9mo_SIGAE3_ | 0.05827992 | 0.57096237 | 0.00011305 | 0.097132 | -0.26697   |
| 9mo_SIGAE3_ | 0.08449344 | 0.8262692  | 0.00013089 | 0.053084 | -1.2797    |
| 9mo_SIGAE3_ | 0.02696146 | 0.265936   | 7.82E-05   | 0.054511 | 0.77219    |
| 9mo_SIGAE3_ | 0.0745783  | 0.7297006  | 0.00012556 | 0.06525  | -1.0333    |
| 9mo_SIGAE3_ | 0.0265807  | 0.26222748 | 7.74E-05   | 0.051562 | 0.77158    |
| 9mo_SIGAE3_ | 0.08953614 | 0.87538266 | 0.000133   | 0.052606 | -1.3264    |
| 9mo_SIGAE3_ | 0.06119483 | 0.5993522  | 0.00011553 | 0.098907 | -0.4087    |
| 9mo_SIGAE3_ | 0.03486842 | 0.34294587 | 8.77E-05   | 0.095565 | 0.54051    |
| 9mo_SIGAE3_ | 0.05918019 | 0.5797305  | 0.00011368 | 0.097776 | -0.31309   |
| 9mo_SIGAE3_ | 0.06019044 | 0.58956987 | 0.00011462 | 0.098526 | -0.36038   |
| 9mo_SIGAE3_ | 0.02631309 | 0.25962108 | 7.74E-05   | 0.051562 | 0.76965    |
| 9mo_SIGAE3_ | 0.03027888 | 0.29824594 | 8.19E-05   | 0.069725 | 0.72675    |
| 9mo_SIGAE3_ | 0.05431546 | 0.5323505  | 0.0001091  | 0.092966 | -0.11022   |
| 9mo_SIGAE3_ | 0.05957586 | 0.58358413 | 0.000114   | 0.098059 | -0.32873   |
| 9mo_SIGAE3_ | 0.04815007 | 0.4723026  | 0.00010271 | 0.09665  | 0.091263   |
| 9mo_SIGAE3_ | 0.07843977 | 0.7673095  | 0.00012778 | 0.057615 | -1.1573    |
| 9mo_SIGAE3_ | 0.0738076  | 0.7221944  | 0.00012513 | 0.067136 | -1.0066    |
| 9mo_SIGAE3_ | 0.05071653 | 0.4972987  | 0.00010561 | 0.092703 | 0.021622   |
| 9mo_SIGAE3_ | 0.05576448 | 0.5464632  | 0.00011045 | 0.094186 | -0.16472   |
| 9mo_SIGAE3_ | 0.05038594 | 0.4940789  | 0.00010525 | 0.093003 | 0.032151   |
| 9mo_SIGAE3_ | 0.04870011 | 0.47765973 | 0.00010344 | 0.095375 | 0.081803   |
| 9mo_SIGAE3_ | 0.04566152 | 0.4480654  | 0.00010009 | 0.1019   | 0.16436    |
| 9mo_SIGAE3_ | 0.05250747 | 0.5147415  | 0.00010738 | 0.092189 | -0.03476   |
| 9mo_SIGAE3_ | 0.01534331 | 0.15278085 | 6.51E-05   | 0.022546 | 0.24275    |
| 9mo_SIGAE3_ | 0.03284058 | 0.32319564 | 8.52E-05   | 0.084798 | 0.6305     |
| 9mo_SIGAE3_ | 0.05854348 | 0.5735293  | 0.00011305 | 0.097132 | -0.2822    |
| 9mo_SIGAE3_ | 0.05389235 | 0.5282296  | 0.00010876 | 0.092731 | -0.084185  |
| 9mo_SIGAE3_ | 0.07709445 | 0.7542067  | 0.0001272  | 0.059217 | -1.117     |
| 9mo_SIGAE3_ | 0.04306195 | 0.42274684 | 9.70E-05   | 0.10755  | 0.22964    |
| 9mo_SIGAE3_ | 0.0672165  | 0.6580003  | 0.00012058 | 0.088682 | -0.69393   |
| 9mo_SIGAE3_ | 0.03905908 | 0.38376084 | 9.26E-05   | 0.10901  | 0.36311    |
| 9mo_SIGAE3_ | 0.06527279 | 0.63906956 | 0.00011898 | 0.094504 | -0.60919   |
| 9mo_SIGAE3_ | 0.05792485 | 0.56750417 | 0.00011273 | 0.096781 | -0.25188   |
| 9mo_SIGAE3_ | 0.03073829 | 0.30272046 | 8.28E-05   | 0.073435 | 0.70647    |
| 9mo_SIGAE3_ | 0.02707261 | 0.26701847 | 7.82E-05   | 0.054511 | 0.77219    |
| 9mo_SIGAE3_ | 0.05811083 | 0.5693155  | 0.00011273 | 0.096781 | -0.26697   |
| 9mo_SIGAE3_ | 0.01670017 | 0.165996   | 6.65E-05   | 0.024968 | 0.31771    |
| 9mo_SIGAE3_ | 0.08448849 | 0.826221   | 0.00013089 | 0.053084 | -1.2797    |
| 9mo_SIGAE3_ | 0.05250425 | 0.5147102  | 0.00010738 | 0.092189 | -0.03476   |
| 9mo_SIGAE3_ | 0.05470821 | 0.53617567 | 0.00010944 | 0.093233 | -0.12355   |

|             |            |            |            |           |           |
|-------------|------------|------------|------------|-----------|-----------|
| 9mo_SIGAE3_ | 0.05985951 | 0.5863468  | 0.00011431 | 0.098311  | -0.3445   |
| 9mo_SIGAE3_ | 0.06816094 | 0.66719866 | 0.0001211  | 0.086439  | -0.74427  |
| 9mo_SIGAE3_ | 0.08088251 | 0.79110056 | 0.00012924 | 0.054725  | -1.2155   |
| 9mo_SIGAE3_ | 0.04697522 | 0.46086016 | 0.00010159 | 0.098799  | 0.12814   |
| 9mo_SIGAE3_ | 0.06306537 | 0.61757034 | 0.0001173  | 0.098072  | -0.49111  |
| 9mo_SIGAE3_ | 0.04424608 | 0.43427965 | 9.86E-05   | 0.10494   | 0.20107   |
| 9mo_SIGAE3_ | 0.04642402 | 0.4554917  | 0.00010084 | 0.10033   | 0.13721   |
| 9mo_SIGAE3_ | 0.02250904 | 0.22257157 | 7.30E-05   | 0.038397  | 0.65846   |
| 9mo_SIGAE3_ | 0.03600929 | 0.3540574  | 8.90E-05   | 0.10026   | 0.49376   |
| 9mo_SIGAE3_ | 0.00567114 | 0.05857859 | 5.63E-05   | 0.010269  | 0.19547   |
| 9mo_SIGAE3_ | 0.05605091 | 0.5492529  | 0.00011078 | 0.094541  | -0.17881  |
| 9mo_SIGAE3_ | 0.0100156  | 0.10089155 | 5.98E-05   | 0.014626  | 0.1081    |
| 9mo_SIGAE3_ | 0.01530345 | 0.15239264 | 6.51E-05   | 0.022546  | 0.24275   |
| 9mo_SIGAE3_ | 0.04566546 | 0.44810373 | 0.00010009 | 0.1019    | 0.16436   |
| 9mo_SIGAE3_ | 0.05828189 | 0.57098156 | 0.00011305 | 0.097132  | -0.26697  |
| 9mo_SIGAE3_ | 0.00354332 | 0.03785466 | 5.44E-05   | 0.0082917 | 0.2947    |
| 9mo_SIGAE3_ | 0.05220575 | 0.5118029  | 0.00010703 | 0.092172  | -0.03476  |
| 9mo_SIGAE3_ | 0.06116415 | 0.5990533  | 0.00011553 | 0.098907  | -0.4087   |
| 9mo_SIGAE3_ | 0.0548458  | 0.5375157  | 0.00010978 | 0.093528  | -0.12355  |
| 9mo_SIGAE3_ | 0.06661545 | 0.65214634 | 0.00012006 | 0.090801  | -0.67704  |
| 9mo_SIGAE3_ | 0.01012108 | 0.10191886 | 5.98E-05   | 0.014626  | 0.10718   |
| 9mo_SIGAE3_ | 0.04956624 | 0.48609537 | 0.00010417 | 0.094268  | 0.052555  |
| 9mo_SIGAE3_ | 0.06313977 | 0.61829495 | 0.0001173  | 0.098072  | -0.49111  |
| 9mo_SIGAE3_ | 0.06010975 | 0.588784   | 0.00011462 | 0.098526  | -0.36038  |
| 9mo_SIGAE3_ | 0.06507235 | 0.6371173  | 0.00011871 | 0.095287  | -0.59222  |
| 9mo_SIGAE3_ | 0.05029561 | 0.49319917 | 0.0001049  | 0.093366  | 0.032151  |
| 9mo_SIGAE3_ | 0.02918151 | 0.28755814 | 8.07E-05   | 0.064343  | 0.751     |
| 9mo_SIGAE3_ | 0.05701972 | 0.55868864 | 0.00011177 | 0.095663  | -0.22216  |
| 9mo_SIGAE3_ | 0.02767947 | 0.272929   | 7.90E-05   | 0.057632  | 0.76966   |
| 9mo_SIGAE3_ | 0.06196591 | 0.60686207 | 0.00011613 | 0.098894  | -0.44141  |
| 9mo_SIGAE3_ | 0.00325974 | 0.03509276 | 5.42E-05   | 0.0080398 | 0.2947    |
| 9mo_SIGAE3_ | 0.07398122 | 0.72388536 | 0.00012513 | 0.067136  | -1.0066   |
| 9mo_SIGAE3_ | 0.05604692 | 0.54921407 | 0.00011078 | 0.094541  | -0.17881  |
| 9mo_SIGAE3_ | 0.05345307 | 0.5239512  | 0.00010842 | 0.092532  | -0.07149  |
| 9mo_SIGAE3_ | 0.07083608 | 0.6932532  | 0.00012308 | 0.076976  | -0.87403  |
| 9mo_SIGAE3_ | 0.07529667 | 0.7366972  | 0.00012598 | 0.063504  | -1.0589   |
| 9mo_SIGAE3_ | 0.05151528 | 0.5050781  | 0.00010632 | 0.092309  | -0.011455 |
| 9mo_SIGAE3_ | 0.07345417 | 0.71875215 | 0.00012491 | 0.068128  | -0.99278  |
| 9mo_SIGAE3_ | 0.06900262 | 0.6753962  | 0.00012186 | 0.08293   | -0.79386  |
| 9mo_SIGAE3_ | 0.04533763 | 0.4449108  | 9.97E-05   | 0.10268   | 0.17344   |
| 9mo_SIGAE3_ | 0.06967319 | 0.6819272  | 0.00012235 | 0.080544  | -0.82636  |
| 9mo_SIGAE3_ | 0.07042841 | 0.6892827  | 0.00012284 | 0.078159  | -0.8583   |
| 9mo_SIGAE3_ | 0.04975391 | 0.48792326 | 0.00010453 | 0.09379   | 0.052555  |
| 9mo_SIGAE3_ | 0.04669469 | 0.45812795 | 0.00010122 | 0.099559  | 0.13721   |
| 9mo_SIGAE3_ | 0.06449263 | 0.6314711  | 0.00011843 | 0.096001  | -0.55833  |
| 9mo_SIGAE3_ | 0.06663626 | 0.65234905 | 0.00012006 | 0.090801  | -0.67704  |

|             |            |            |            |          |           |
|-------------|------------|------------|------------|----------|-----------|
| 9mo_SIGAE3_ | 0.04542065 | 0.44571945 | 9.97E-05   | 0.10268  | 0.16436   |
| 9mo_SIGAE3_ | 0.03438762 | 0.33826312 | 8.69E-05   | 0.09213  | 0.57137   |
| 9mo_SIGAE3_ | 0.0815745  | 0.7978402  | 0.00012959 | 0.054253 | -1.2295   |
| 9mo_SIGAE3_ | 0.03281924 | 0.32298785 | 8.52E-05   | 0.084798 | 0.6305    |
| 9mo_SIGAE3_ | 0.08421116 | 0.8235199  | 0.00013074 | 0.053178 | -1.2751   |
| 9mo_SIGAE3_ | 0.08350305 | 0.8166233  | 0.00013042 | 0.053406 | -1.2651   |
| 9mo_SIGAE3_ | 0.05247644 | 0.5144393  | 0.00010738 | 0.092189 | -0.03476  |
| 9mo_SIGAE3_ | 0.06218338 | 0.6089802  | 0.00011642 | 0.098794 | -0.4579   |
| 9mo_SIGAE3_ | 0.05890289 | 0.57702976 | 0.00011368 | 0.097776 | -0.29758  |
| 9mo_SIGAE3_ | 0.05973678 | 0.58515143 | 0.00011431 | 0.098311 | -0.3445   |
| 9mo_SIGAE3_ | 0.07054413 | 0.6904098  | 0.00012284 | 0.078159 | -0.8583   |
| 9mo_SIGAE3_ | 0.06006864 | 0.5883836  | 0.00011462 | 0.098526 | -0.36038  |
| 9mo_SIGAE3_ | 0.00960226 | 0.09686583 | 5.95E-05   | 0.014213 | 0.11014   |
| 9mo_SIGAE3_ | 0.0141896  | 0.14154428 | 6.37E-05   | 0.020323 | 0.18023   |
| 9mo_SIGAE3_ | 0.05661171 | 0.5547148  | 0.00011144 | 0.095284 | -0.19309  |
| 9mo_SIGAE3_ | 0.05159582 | 0.50586253 | 0.00010632 | 0.092309 | -0.011455 |
| 9mo_SIGAE3_ | 0.03040663 | 0.2994902  | 8.23E-05   | 0.07157  | 0.71698   |
| 9mo_SIGAE3_ | 0.07713812 | 0.754632   | 0.0001272  | 0.059217 | -1.117    |
| 9mo_SIGAE3_ | 0.06243383 | 0.61141944 | 0.00011672 | 0.098627 | -0.4579   |
| 9mo_SIGAE3_ | 0.04021942 | 0.395062   | 9.38E-05   | 0.10975  | 0.31414   |
| 9mo_SIGAE3_ | 0.05443239 | 0.5334893  | 0.00010944 | 0.093233 | -0.11022  |
| 9mo_SIGAE3_ | 0.05178264 | 0.5076821  | 0.00010668 | 0.092211 | -0.011455 |
| 9mo_SIGAE3_ | 0.04928168 | 0.48332396 | 0.00010417 | 0.094268 | 0.062467  |
| 9mo_SIGAE3_ | 0.00577201 | 0.05956104 | 5.63E-05   | 0.010269 | 0.19547   |
| 9mo_SIGAE3_ | 0.07290815 | 0.71343416 | 0.00012446 | 0.070202 | -0.96444  |
| 9mo_SIGAE3_ | 0.046928   | 0.46040028 | 0.00010159 | 0.098799 | 0.12814   |
| 9mo_SIGAE3_ | 0.0477729  | 0.46862912 | 0.00010234 | 0.09734  | 0.10061   |
| 9mo_SIGAE3_ | 0.01177519 | 0.11802906 | 6.14E-05   | 0.016833 | 0.11542   |
| 9mo_SIGAE3_ | 0.02889975 | 0.2848139  | 8.03E-05   | 0.062611 | 0.75723   |
| 9mo_SIGAE3_ | 0.06258396 | 0.6128816  | 0.00011672 | 0.098627 | -0.47447  |
| 9mo_SIGAE3_ | 0.03009384 | 0.29644382 | 8.19E-05   | 0.069725 | 0.72675   |
| 9mo_SIGAE3_ | 0.07887614 | 0.7715595  | 0.00012816 | 0.056721 | -1.1666   |
| 9mo_SIGAE3_ | 0.05471627 | 0.5362541  | 0.00010944 | 0.093233 | -0.12355  |
| 9mo_SIGAE3_ | 0.04533303 | 0.44486603 | 9.97E-05   | 0.10268  | 0.17344   |
| 9mo_SIGAE3_ | 0.02193665 | 0.21699677 | 7.22E-05   | 0.03647  | 0.62396   |
| 9mo_SIGAE3_ | 0.07059479 | 0.6909031  | 0.00012308 | 0.076976 | -0.8583   |
| 9mo_SIGAE3_ | 0.01414431 | 0.14110315 | 6.37E-05   | 0.020323 | 0.18023   |
| 9mo_SIGAE3_ | 0.0483364  | 0.47411737 | 0.00010308 | 0.095994 | 0.091263  |
| 9mo_SIGAE3_ | 0.01775798 | 0.17629857 | 6.76E-05   | 0.026932 | 0.37908   |
| 9mo_SIGAE3_ | 0.06694689 | 0.65537447 | 0.00012032 | 0.089759 | -0.69393  |
| 9mo_SIGAE3_ | 0.05595387 | 0.5483078  | 0.00011078 | 0.094541 | -0.16472  |
| 9mo_SIGAE3_ | 0.05938667 | 0.58174163 | 0.000114   | 0.098059 | -0.32873  |
| 9mo_SIGAE3_ | 0.0483476  | 0.47422647 | 0.00010308 | 0.095994 | 0.091263  |
| 9mo_SIGAE3_ | 0.07037146 | 0.6887281  | 0.00012284 | 0.078159 | -0.8583   |
| 9mo_SIGAE3_ | 0.0737845  | 0.72196937 | 0.00012513 | 0.067136 | -1.0066   |
| 9mo_SIGAE3_ | 0.04309213 | 0.42304078 | 9.70E-05   | 0.10755  | 0.22964   |

|             |            |            |            |          |            |
|-------------|------------|------------|------------|----------|------------|
| 9mo_SIGAE3_ | 0.07075914 | 0.69250387 | 0.00012308 | 0.076976 | -0.87403   |
| 9mo_SIGAE3_ | 0.07455581 | 0.7294815  | 0.00012556 | 0.06525  | -1.0333    |
| 9mo_SIGAE3_ | 0.051113   | 0.50116    | 0.00010597 | 0.092472 | 0.010852   |
| 9mo_SIGAE3_ | 0.03075573 | 0.3028903  | 8.28E-05   | 0.073435 | 0.70647    |
| 9mo_SIGAE3_ | 0.00758629 | 0.07723122 | 5.78E-05   | 0.011928 | 0.14372    |
| 9mo_SIGAE3_ | 0.07659046 | 0.74929804 | 0.0001268  | 0.060479 | -1.1061    |
| 9mo_SIGAE3_ | 0.03940712 | 0.38715053 | 9.30E-05   | 0.10937  | 0.35035    |
| 9mo_SIGAE3_ | 0.04599679 | 0.45133072 | 0.00010046 | 0.10111  | 0.1553     |
| 9mo_SIGAE3_ | 0.07155786 | 0.700283   | 0.00012355 | 0.074645 | -0.90497   |
| 9mo_SIGAE3_ | 0.05547031 | 0.5435982  | 0.00011045 | 0.094186 | -0.1508    |
| 9mo_SIGAE3_ | 0.07750519 | 0.75820714 | 0.0001274  | 0.058646 | -1.1276    |
| 9mo_SIGAE3_ | 0.01874521 | 0.18591368 | 6.87E-05   | 0.029043 | 0.44251    |
| 9mo_SIGAE3_ | 0.0646372  | 0.63287914 | 0.00011843 | 0.096001 | -0.57526   |
| 9mo_SIGAE3_ | 0.05702641 | 0.55875385 | 0.00011177 | 0.095663 | -0.22216   |
| 9mo_SIGAE3_ | 0.07672092 | 0.7505687  | 0.0001268  | 0.060479 | -1.1061    |
| 9mo_SIGAE3_ | 0.07832094 | 0.766152   | 0.00012778 | 0.057615 | -1.1573    |
| 9mo_SIGAE3_ | 0.06230047 | 0.61012053 | 0.00011642 | 0.098794 | -0.4579    |
| 9mo_SIGAE3_ | 0.02923792 | 0.28810748 | 8.07E-05   | 0.064343 | 0.751      |
| 9mo_SIGAE3_ | 0.06965021 | 0.68170345 | 0.00012235 | 0.080544 | -0.82636   |
| 9mo_SIGAE3_ | 0.0413627  | 0.40619692 | 9.50E-05   | 0.10955  | 0.28067    |
| 9mo_SIGAE3_ | 0.07266212 | 0.711038   | 0.00012446 | 0.070202 | -0.9499    |
| 9mo_SIGAE3_ | 0.06769639 | 0.6626742  | 0.00012084 | 0.087573 | -0.72756   |
| 9mo_SIGAE3_ | 0.00924163 | 0.09335344 | 5.92E-05   | 0.013809 | 0.11326    |
| 9mo_SIGAE3_ | 0.05888534 | 0.5768588  | 0.00011337 | 0.097465 | -0.29758   |
| 9mo_SIGAE3_ | 0.0623253  | 0.6103624  | 0.00011642 | 0.098794 | -0.4579    |
| 9mo_SIGAE3_ | 0.0799544  | 0.7820612  | 0.00012871 | 0.055605 | -1.2004    |
| 9mo_SIGAE3_ | 0.07210578 | 0.70561945 | 0.00012401 | 0.07238  | -0.93514   |
| 9mo_SIGAE3_ | 0.03836478 | 0.37699866 | 9.18E-05   | 0.10791  | 0.38979    |
| 9mo_SIGAE3_ | 0.08361239 | 0.8176882  | 0.00013042 | 0.053406 | -1.2651    |
| 9mo_SIGAE3_ | 0.05353823 | 0.52478063 | 0.00010842 | 0.092532 | -0.07149   |
| 9mo_SIGAE3_ | 0.05051797 | 0.4953648  | 0.00010525 | 0.093003 | 0.021622   |
| 9mo_SIGAE3_ | 0.07376814 | 0.72181004 | 0.00012513 | 0.067136 | -1.0066    |
| 9mo_SIGAE3_ | 0.04243543 | 0.41664478 | 9.66E-05   | 0.10808  | 0.24945    |
| 9mo_SIGAE3_ | 0.0667932  | 0.65387756 | 0.00012032 | 0.089759 | -0.67704   |
| 9mo_SIGAE3_ | 0.04574534 | 0.4488817  | 0.00010009 | 0.1019   | 0.1553     |
| 9mo_SIGAE3_ | 0.04617878 | 0.4531032  | 0.00010046 | 0.10111  | 0.14626    |
| 9mo_SIGAE3_ | 0.05755311 | 0.56388354 | 0.00011241 | 0.096416 | -0.23694   |
| 9mo_SIGAE3_ | 0.01169467 | 0.1172449  | 6.14E-05   | 0.016833 | 0.11542    |
| 9mo_SIGAE3_ | 0.05118908 | 0.50190103 | 0.00010597 | 0.092472 | -0.0001745 |
| 9mo_SIGAE3_ | 0.02139958 | 0.21176592 | 7.14E-05   | 0.034655 | 0.6056     |
| 9mo_SIGAE3_ | 0.06547306 | 0.64102    | 0.00011925 | 0.093659 | -0.60919   |
| 9mo_SIGAE3_ | 0.07719061 | 0.7551432  | 0.0001272  | 0.059217 | -1.1276    |
| 9mo_SIGAE3_ | 0.05001819 | 0.4904972  | 0.0001049  | 0.093366 | 0.042456   |
| 9mo_SIGAE3_ | 0.05834093 | 0.5715565  | 0.00011305 | 0.097132 | -0.26697   |
| 9mo_SIGAE3_ | 0.06728906 | 0.658707   | 0.00012058 | 0.088682 | -0.71078   |
| 9mo_SIGAE3_ | 0.07935959 | 0.77626806 | 0.00012835 | 0.05632  | -1.1841    |

|             |            |            |            |          |            |
|-------------|------------|------------|------------|----------|------------|
| 9mo_SIGAE3_ | 0.06044272 | 0.592027   | 0.00011492 | 0.0987   | -0.37638   |
| 9mo_SIGAE3_ | 0.0538582  | 0.52789694 | 0.00010876 | 0.092731 | -0.084185  |
| 9mo_SIGAE3_ | 0.07368876 | 0.7210369  | 0.00012513 | 0.067136 | -0.99278   |
| 9mo_SIGAE3_ | 0.07416897 | 0.72571397 | 0.00012534 | 0.066176 | -1.0201    |
| 9mo_SIGAE3_ | 0.05246659 | 0.5143434  | 0.00010738 | 0.092189 | -0.03476   |
| 9mo_SIGAE3_ | 0.03797956 | 0.37324682 | 9.14E-05   | 0.10717  | 0.40374    |
| 9mo_SIGAE3_ | 0.0510392  | 0.5004413  | 0.00010597 | 0.092472 | 0.010852   |
| 9mo_SIGAE3_ | 0.06972323 | 0.68241465 | 0.00012235 | 0.080544 | -0.82636   |
| 9mo_SIGAE3_ | 0.0548087  | 0.53715444 | 0.00010978 | 0.093528 | -0.12355   |
| 9mo_SIGAE3_ | 0.02391367 | 0.23625195 | 7.46E-05   | 0.042633 | 0.71639    |
| 9mo_SIGAE3_ | 0.02952794 | 0.2909322  | 8.11E-05   | 0.066108 | 0.7438     |
| 9mo_SIGAE3_ | 0.0693645  | 0.6789208  | 0.00012211 | 0.081739 | -0.81017   |
| 9mo_SIGAE3_ | 0.03872408 | 0.38049808 | 9.22E-05   | 0.10852  | 0.37625    |
| 9mo_SIGAE3_ | 0.05967354 | 0.58453554 | 0.00011431 | 0.098311 | -0.32873   |
| 9mo_SIGAE3_ | 0.01070787 | 0.1076339  | 6.05E-05   | 0.01548  | 0.10741    |
| 9mo_SIGAE3_ | 0.05934497 | 0.5813354  | 0.000114   | 0.098059 | -0.31309   |
| 9mo_SIGAE3_ | 0.04653129 | 0.4565365  | 0.00010122 | 0.099559 | 0.13721    |
| 9mo_SIGAE3_ | 0.01436202 | 0.14322352 | 6.41E-05   | 0.020862 | 0.19442    |
| 9mo_SIGAE3_ | 0.0827011  | 0.80881274 | 0.00013009 | 0.053693 | -1.2543    |
| 9mo_SIGAE3_ | 0.0509443  | 0.499517   | 0.00010561 | 0.092703 | 0.010852   |
| 9mo_SIGAE3_ | 0.07111367 | 0.6959568  | 0.00012331 | 0.075804 | -0.88959   |
| 9mo_SIGAE3_ | 0.04600382 | 0.45139915 | 0.00010046 | 0.10111  | 0.1553     |
| 9mo_SIGAE3_ | 0.05243342 | 0.5140204  | 0.00010738 | 0.092189 | -0.03476   |
| 9mo_SIGAE3_ | 0.08479369 | 0.8291935  | 0.00013105 | 0.053002 | -1.2841    |
| 9mo_SIGAE3_ | 0.06156174 | 0.6029257  | 0.00011583 | 0.09893  | -0.42501   |
| 9mo_SIGAE3_ | 0.0060222  | 0.06199777 | 5.66E-05   | 0.010584 | 0.18365    |
| 9mo_SIGAE3_ | 0.05321232 | 0.52160645 | 0.00010807 | 0.092373 | -0.059017  |
| 9mo_SIGAE3_ | 0.06535646 | 0.63988435 | 0.00011898 | 0.094504 | -0.60919   |
| 9mo_SIGAE3_ | 0.07262134 | 0.7106408  | 0.00012424 | 0.071279 | -0.9499    |
| 9mo_SIGAE3_ | 0.08519522 | 0.83310425 | 0.0001312  | 0.05293  | -1.2883    |
| 9mo_SIGAE3_ | 0.05314755 | 0.52097565 | 0.00010807 | 0.092373 | -0.059017  |
| 9mo_SIGAE3_ | 0.06354386 | 0.6222305  | 0.00011758 | 0.097678 | -0.5246    |
| 9mo_SIGAE3_ | 0.05416924 | 0.53092635 | 0.0001091  | 0.092966 | -0.097097  |
| 9mo_SIGAE3_ | 0.01043392 | 0.10496579 | 6.02E-05   | 0.015048 | 0.10718    |
| 9mo_SIGAE3_ | 0.0673872  | 0.65966284 | 0.00012058 | 0.088682 | -0.71078   |
| 9mo_SIGAE3_ | 0.04078632 | 0.40058324 | 9.46E-05   | 0.10971  | 0.3027     |
| 9mo_SIGAE3_ | 0.04819175 | 0.47270858 | 0.00010271 | 0.09665  | 0.091263   |
| 9mo_SIGAE3_ | 0.04872323 | 0.4778849  | 0.00010344 | 0.095375 | 0.081803   |
| 9mo_SIGAE3_ | 0.06457323 | 0.6322561  | 0.00011843 | 0.096001 | -0.57526   |
| 9mo_SIGAE3_ | 0.07230785 | 0.70758754 | 0.00012424 | 0.071279 | -0.93514   |
| 9mo_SIGAE3_ | 0.06440876 | 0.63065434 | 0.00011843 | 0.096001 | -0.55833   |
| 9mo_SIGAE3_ | 0.05395569 | 0.5288465  | 0.00010876 | 0.092731 | -0.097097  |
| 9mo_SIGAE3_ | 0.05121176 | 0.502122   | 0.00010597 | 0.092472 | -0.0001745 |
| 9mo_SIGAE3_ | 0.00684005 | 0.0699632  | 5.72E-05   | 0.011238 | 0.16213    |
| 9mo_SIGAE3_ | 0.05453602 | 0.53449863 | 0.00010944 | 0.093233 | -0.11022   |
| 9mo_SIGAE3_ | 0.01041243 | 0.10475649 | 6.02E-05   | 0.015048 | 0.10718    |

|             |            |            |            |          |           |
|-------------|------------|------------|------------|----------|-----------|
| 9mo_SIGAE3_ | 0.04662778 | 0.4574762  | 0.00010122 | 0.099559 | 0.13721   |
| 9mo_SIGAE3_ | 0.02828742 | 0.2788501  | 7.94E-05   | 0.059253 | 0.76245   |
| 9mo_SIGAE3_ | 0.04876506 | 0.47829235 | 0.00010344 | 0.095375 | 0.081803  |
| 9mo_SIGAE3_ | 0.05847642 | 0.57287616 | 0.00011305 | 0.097132 | -0.2822   |
| 9mo_SIGAE3_ | 0.05452583 | 0.5343994  | 0.00010944 | 0.093233 | -0.11022  |
| 9mo_SIGAE3_ | 0.03757587 | 0.36931512 | 9.06E-05   | 0.10531  | 0.41807   |
| 9mo_SIGAE3_ | 0.0173626  | 0.17244771 | 6.72E-05   | 0.026262 | 0.35829   |
| 9mo_SIGAE3_ | 0.05450714 | 0.53421736 | 0.00010944 | 0.093233 | -0.11022  |
| 9mo_SIGAE3_ | 0.04370251 | 0.42898557 | 9.78E-05   | 0.10633  | 0.21046   |
| 9mo_SIGAE3_ | 0.03589769 | 0.35297042 | 8.90E-05   | 0.10026  | 0.49376   |
| 9mo_SIGAE3_ | 0.07499155 | 0.7337255  | 0.00012577 | 0.064358 | -1.0462   |
| 9mo_SIGAE3_ | 0.07349432 | 0.7191432  | 0.00012491 | 0.068128 | -0.99278  |
| 9mo_SIGAE3_ | 0.05078399 | 0.49795568 | 0.00010561 | 0.092703 | 0.021622  |
| 9mo_SIGAE3_ | 0.07610074 | 0.7445285  | 0.0001266  | 0.061174 | -1.0832   |
| 9mo_SIGAE3_ | 0.01492448 | 0.14870162 | 6.44E-05   | 0.021412 | 0.22576   |
| 9mo_SIGAE3_ | 0.04110445 | 0.4036817  | 9.50E-05   | 0.10955  | 0.29155   |
| 9mo_SIGAE3_ | 0.0770458  | 0.75373286 | 0.000127   | 0.059827 | -1.117    |
| 9mo_SIGAE3_ | 0.08852425 | 0.8655273  | 0.00013261 | 0.052631 | -1.32     |
| 9mo_SIGAE3_ | 0.07317848 | 0.716067   | 0.00012469 | 0.069151 | -0.97873  |
| 9mo_SIGAE3_ | 0.04423547 | 0.43417633 | 9.86E-05   | 0.10494  | 0.20107   |
| 9mo_SIGAE3_ | 0.08080839 | 0.7903787  | 0.00012907 | 0.054994 | -1.2155   |
| 9mo_SIGAE3_ | 0.03510856 | 0.34528464 | 8.77E-05   | 0.095565 | 0.52494   |
| 9mo_SIGAE3_ | 0.07790402 | 0.7620915  | 0.00012759 | 0.058113 | -1.1478   |
| 9mo_SIGAE3_ | 0.04521704 | 0.4437363  | 9.97E-05   | 0.10268  | 0.17344   |
| 9mo_SIGAE3_ | 0.03630507 | 0.35693812 | 8.94E-05   | 0.10166  | 0.47826   |
| 9mo_SIGAE3_ | 0.06993657 | 0.68449247 | 0.0001226  | 0.07935  | -0.82636  |
| 9mo_SIGAE3_ | 0.0761485  | 0.74499357 | 0.0001266  | 0.061174 | -1.0832   |
| 9mo_SIGAE3_ | 0.08440302 | 0.8253886  | 0.00013089 | 0.053084 | -1.2797   |
| 9mo_SIGAE3_ | 0.01824551 | 0.18104684 | 6.80E-05   | 0.027619 | 0.4001    |
| 9mo_SIGAE3_ | 0.07900765 | 0.7728403  | 0.00012816 | 0.056721 | -1.1755   |
| 9mo_SIGAE3_ | 0.0126839  | 0.12687948 | 6.24E-05   | 0.018271 | 0.13519   |
| 9mo_SIGAE3_ | 0.01339639 | 0.13381878 | 6.30E-05   | 0.019276 | 0.15521   |
| 9mo_SIGAE3_ | 0.06913678 | 0.6767029  | 0.00012186 | 0.08293  | -0.79386  |
| 9mo_SIGAE3_ | 0.06285556 | 0.61552685 | 0.00011701 | 0.098387 | -0.49111  |
| 9mo_SIGAE3_ | 0.00941888 | 0.09507976 | 5.92E-05   | 0.013809 | 0.11014   |
| 9mo_SIGAE3_ | 0.04787121 | 0.46958667 | 0.00010234 | 0.09734  | 0.10061   |
| 9mo_SIGAE3_ | 0.02386632 | 0.23579077 | 7.46E-05   | 0.042633 | 0.71639   |
| 9mo_SIGAE3_ | 0.02911532 | 0.2869135  | 8.07E-05   | 0.064343 | 0.751     |
| 9mo_SIGAE3_ | 0.07873083 | 0.7701442  | 0.00012797 | 0.057152 | -1.1666   |
| 9mo_SIGAE3_ | 0.08457038 | 0.82701856 | 0.00013089 | 0.053084 | -1.2797   |
| 9mo_SIGAE3_ | 0.06933288 | 0.67861277 | 0.00012211 | 0.081739 | -0.81017  |
| 9mo_SIGAE3_ | 0.06125266 | 0.5999154  | 0.00011553 | 0.098907 | -0.4087   |
| 9mo_SIGAE3_ | 0.02268411 | 0.22427662 | 7.30E-05   | 0.038397 | 0.65846   |
| 9mo_SIGAE3_ | 0.04691493 | 0.46027294 | 0.00010159 | 0.098799 | 0.12814   |
| 9mo_SIGAE3_ | 0.07092619 | 0.69413084 | 0.00012331 | 0.075804 | -0.87403  |
| 9mo_SIGAE3_ | 0.05258204 | 0.51546776 | 0.00010738 | 0.092189 | -0.046772 |

|             |            |            |            |          |           |
|-------------|------------|------------|------------|----------|-----------|
| 9mo_SIGAE3_ | 0.04436167 | 0.4354055  | 9.86E-05   | 0.10494  | 0.19178   |
| 9mo_SIGAE3_ | 0.04527007 | 0.44425288 | 9.97E-05   | 0.10268  | 0.17344   |
| 9mo_SIGAE3_ | 0.05232038 | 0.5129193  | 0.00010703 | 0.092172 | -0.03476  |
| 9mo_SIGAE3_ | 0.07064808 | 0.6914222  | 0.00012308 | 0.076976 | -0.8583   |
| 9mo_SIGAE3_ | 0.01857639 | 0.18426946 | 6.84E-05   | 0.028322 | 0.42127   |
| 9mo_SIGAE3_ | 0.06772013 | 0.6629054  | 0.00012084 | 0.087573 | -0.72756  |
| 9mo_SIGAE3_ | 0.0566576  | 0.5551618  | 0.00011144 | 0.095284 | -0.20754  |
| 9mo_SIGAE3_ | 0.02028102 | 0.20087175 | 7.02E-05   | 0.032119 | 0.52662   |
| 9mo_SIGAE3_ | 0.0492079  | 0.48260537 | 0.00010381 | 0.094798 | 0.062467  |
| 9mo_SIGAE3_ | 0.04834626 | 0.47421336 | 0.00010308 | 0.095994 | 0.091263  |
| 9mo_SIGAE3_ | 0.05214434 | 0.51120484 | 0.00010703 | 0.092172 | -0.022986 |
| 9mo_SIGAE3_ | 0.04668962 | 0.4580785  | 0.00010122 | 0.099559 | 0.13721   |
| 9mo_SIGAE3_ | 0.07048462 | 0.6898301  | 0.00012284 | 0.078159 | -0.8583   |
| 9mo_SIGAE3_ | 0.03126136 | 0.30781484 | 8.32E-05   | 0.075317 | 0.69526   |
| 9mo_SIGAE3_ | 0.01126697 | 0.1130793  | 6.11E-05   | 0.016373 | 0.1115    |
| 9mo_SIGAE3_ | 0.0673908  | 0.6596979  | 0.00012058 | 0.088682 | -0.71078  |
| 9mo_SIGAE3_ | 0.04125657 | 0.4051633  | 9.50E-05   | 0.10955  | 0.28067   |
| 9mo_SIGAE3_ | 0.05425429 | 0.53175473 | 0.0001091  | 0.092966 | -0.11022  |
| 9mo_SIGAE3_ | 0.04250692 | 0.4173411  | 9.66E-05   | 0.10808  | 0.24945   |
| 9mo_SIGAE3_ | 0.06730299 | 0.6588427  | 0.00012058 | 0.088682 | -0.71078  |
| 9mo_SIGAE3_ | 0.01647147 | 0.16376859 | 6.62E-05   | 0.024342 | 0.29808   |
| 9mo_SIGAE3_ | 0.01198292 | 0.12005227 | 6.17E-05   | 0.017303 | 0.12065   |
| 9mo_SIGAE3_ | 0.04903646 | 0.4809356  | 0.00010381 | 0.094798 | 0.072211  |
| 9mo_SIGAE3_ | 0.08186249 | 0.80064505 | 0.00012959 | 0.054253 | -1.2361   |
| 9mo_SIGAE3_ | 0.04595536 | 0.45092723 | 0.00010046 | 0.10111  | 0.1553    |
| 9mo_SIGAE3_ | 0.05111434 | 0.50117314 | 0.00010597 | 0.092472 | 0.010852  |
| 9mo_SIGAE3_ | 0.03802644 | 0.37370342 | 9.14E-05   | 0.10717  | 0.40374   |
| 9mo_SIGAE3_ | 0.012046   | 0.12066661 | 6.17E-05   | 0.017303 | 0.12065   |
| 9mo_SIGAE3_ | 0.02315471 | 0.22886    | 7.34E-05   | 0.039406 | 0.68948   |
| 9mo_SIGAE3_ | 0.07978654 | 0.7804263  | 0.00012853 | 0.055948 | -1.1924   |
| 9mo_SIGAE3_ | 0.02374799 | 0.23463829 | 7.42E-05   | 0.041523 | 0.70349   |
| 9mo_SIGAE3_ | 0.0600792  | 0.58848643 | 0.00011462 | 0.098526 | -0.36038  |
| 9mo_SIGAE3_ | 0.02038391 | 0.20187382 | 7.02E-05   | 0.032119 | 0.54704   |
| 9mo_SIGAE3_ | 0.07520191 | 0.7357743  | 0.00012598 | 0.063504 | -1.0589   |
| 9mo_SIGAE3_ | 0.04815765 | 0.4723764  | 0.00010271 | 0.09665  | 0.091263  |
| 9mo_SIGAE3_ | 0.01168947 | 0.11719424 | 6.14E-05   | 0.016833 | 0.11542   |
| 9mo_SIGAE3_ | 0.07325591 | 0.7168212  | 0.00012469 | 0.069151 | -0.97873  |
| 9mo_SIGAE3_ | 0.07895275 | 0.77230555 | 0.00012816 | 0.056721 | -1.1755   |
| 9mo_SIGAE3_ | 0.04391345 | 0.43104005 | 9.82E-05   | 0.10565  | 0.21046   |
| 9mo_SIGAE3_ | 0.05379926 | 0.52732295 | 0.00010876 | 0.092731 | -0.084185 |
| 9mo_SIGAE3_ | 0.07969102 | 0.779496   | 0.00012853 | 0.055948 | -1.1924   |
| 9mo_SIGAE3_ | 0.02667165 | 0.26311332 | 7.78E-05   | 0.053015 | 0.77158   |
| 9mo_SIGAE3_ | 0.06371881 | 0.6239345  | 0.00011787 | 0.097201 | -0.5246   |
| 9mo_SIGAE3_ | 0.01499765 | 0.14941432 | 6.47E-05   | 0.021973 | 0.22576   |
| 9mo_SIGAE3_ | 0.05678538 | 0.55640626 | 0.00011144 | 0.095284 | -0.20754  |
| 9mo_SIGAE3_ | 0.05714287 | 0.55988806 | 0.00011177 | 0.095663 | -0.22216  |

|             |            |            |            |          |           |
|-------------|------------|------------|------------|----------|-----------|
| 9mo_SIGAE3_ | 0.0387937  | 0.38117614 | 9.22E-05   | 0.10852  | 0.37625   |
| 9mo_SIGAE3_ | 0.06571427 | 0.6433693  | 0.00011925 | 0.093659 | -0.62617  |
| 9mo_SIGAE3_ | 0.01727532 | 0.1715977  | 6.69E-05   | 0.025607 | 0.33781   |
| 9mo_SIGAE3_ | 0.01332763 | 0.13314909 | 6.30E-05   | 0.019276 | 0.15521   |
| 9mo_SIGAE3_ | 0.0201212  | 0.19931513 | 7.02E-05   | 0.032119 | 0.52662   |
| 9mo_SIGAE3_ | 0.0239215  | 0.2363282  | 7.46E-05   | 0.042633 | 0.71639   |
| 9mo_SIGAE3_ | 0.04363338 | 0.42831227 | 9.78E-05   | 0.10633  | 0.21998   |
| 9mo_SIGAE3_ | 0.05588337 | 0.54762113 | 0.00011078 | 0.094541 | -0.16472  |
| 9mo_SIGAE3_ | 0.04899178 | 0.48050052 | 0.00010381 | 0.094798 | 0.072211  |
| 9mo_SIGAE3_ | 0.00605694 | 0.06233611 | 5.66E-05   | 0.010584 | 0.18365   |
| 9mo_SIGAE3_ | 0.05018583 | 0.49212992 | 0.0001049  | 0.093366 | 0.032151  |
| 9mo_SIGAE3_ | 0.0063605  | 0.06529268 | 5.69E-05   | 0.010907 | 0.17252   |
| 9mo_SIGAE3_ | 0.08991965 | 0.87911785 | 0.00013313 | 0.052597 | -1.3283   |
| 9mo_SIGAE3_ | 0.07597984 | 0.743351   | 0.0001264  | 0.06191  | -1.0832   |
| 9mo_SIGAE3_ | 0.05665587 | 0.5551449  | 0.00011144 | 0.095284 | -0.20754  |
| 9mo_SIGAE3_ | 0.06860226 | 0.6714969  | 0.00012161 | 0.084113 | -0.7609   |
| 9mo_SIGAE3_ | 0.00994697 | 0.10022315 | 5.98E-05   | 0.014626 | 0.1081    |
| 9mo_SIGAE3_ | 0.05300346 | 0.5195722  | 0.00010773 | 0.092257 | -0.059017 |
| 9mo_SIGAE3_ | 0.04607767 | 0.4521185  | 0.00010046 | 0.10111  | 0.14626   |
| 9mo_SIGAE3_ | 0.01146976 | 0.11505431 | 6.11E-05   | 0.016373 | 0.11542   |
| 9mo_SIGAE3_ | 0.05680231 | 0.5565712  | 0.00011144 | 0.095284 | -0.20754  |
| 9mo_SIGAE3_ | 0.01517592 | 0.15111505 | 6.47E-05   | 0.021973 | 0.22576   |
| 9mo_SIGAE3_ | 0.01709466 | 0.16983807 | 6.69E-05   | 0.025607 | 0.33781   |
| 9mo_SIGAE3_ | 0.05579533 | 0.54676366 | 0.00011045 | 0.094186 | -0.16472  |
| 9mo_SIGAE3_ | 0.05194003 | 0.50921494 | 0.00010668 | 0.092211 | -0.022986 |
| 9mo_SIGAE3_ | 0.07274346 | 0.7118302  | 0.00012446 | 0.070202 | -0.96444  |
| 9mo_SIGAE3_ | 0.05999889 | 0.58770424 | 0.00011462 | 0.098526 | -0.3445   |
| 9mo_SIGAE3_ | 0.05833314 | 0.5714807  | 0.00011305 | 0.097132 | -0.26697  |
| 9mo_SIGAE3_ | 0.06613933 | 0.6475092  | 0.00011979 | 0.091802 | -0.64315  |
| 9mo_SIGAE3_ | 0.0585796  | 0.5738811  | 0.00011337 | 0.097465 | -0.2822   |
| 9mo_SIGAE3_ | 0.08630632 | 0.8439258  | 0.00013164 | 0.052775 | -1.2997   |
| 9mo_SIGAE3_ | 0.02495929 | 0.24643579 | 7.58E-05   | 0.046199 | 0.74769   |
| 9mo_SIGAE3_ | 0.06499663 | 0.63637984 | 0.00011871 | 0.095287 | -0.59222  |
| 9mo_SIGAE3_ | 0.03323804 | 0.3270667  | 8.57E-05   | 0.086671 | 0.61617   |
| 9mo_SIGAE3_ | 0.06104667 | 0.59790915 | 0.00011553 | 0.098907 | -0.39249  |
| 9mo_SIGAE3_ | 0.04582807 | 0.44968745 | 0.00010009 | 0.1019   | 0.1553    |
| 9mo_SIGAE3_ | 0.04780982 | 0.46898875 | 0.00010234 | 0.09734  | 0.10061   |
| 9mo_SIGAE3_ | 0.02825034 | 0.27848902 | 7.94E-05   | 0.059253 | 0.76245   |
| 9mo_SIGAE3_ | 0.0419613  | 0.41202703 | 9.58E-05   | 0.10896  | 0.25963   |
| 9mo_SIGAE3_ | 0.06446136 | 0.6311666  | 0.00011843 | 0.096001 | -0.55833  |
| 9mo_SIGAE3_ | 0.04805016 | 0.4713295  | 0.00010271 | 0.09665  | 0.10061   |
| 9mo_SIGAE3_ | 0.00743779 | 0.07578496 | 5.78E-05   | 0.011928 | 0.14372   |
| 9mo_SIGAE3_ | 0.02664885 | 0.26289126 | 7.78E-05   | 0.053015 | 0.77158   |
| 9mo_SIGAE3_ | 0.07241307 | 0.70861226 | 0.00012424 | 0.071279 | -0.9499   |
| 9mo_SIGAE3_ | 0.07495615 | 0.7333807  | 0.00012577 | 0.064358 | -1.0462   |
| 9mo_SIGAE3_ | 0.07881075 | 0.7709226  | 0.00012816 | 0.056721 | -1.1666   |



|             |            |            |            |          |           |
|-------------|------------|------------|------------|----------|-----------|
| 9mo_SIGAE3_ | 0.07637929 | 0.7472414  | 0.0001266  | 0.061174 | -1.0948   |
| 9mo_SIGAE3_ | 0.06000811 | 0.5877941  | 0.00011462 | 0.098526 | -0.3445   |
| 9mo_SIGAE3_ | 0.03274069 | 0.32222283 | 8.48E-05   | 0.082909 | 0.6305    |
| 9mo_SIGAE3_ | 0.06837526 | 0.669286   | 0.00012136 | 0.085284 | -0.7609   |
| 9mo_SIGAE3_ | 0.06522592 | 0.63861305 | 0.00011898 | 0.094504 | -0.60919  |
| 9mo_SIGAE3_ | 0.05025224 | 0.49277675 | 0.0001049  | 0.093366 | 0.032151  |
| 9mo_SIGAE3_ | 0.00831198 | 0.08429913 | 5.84E-05   | 0.012653 | 0.12871   |
| 9mo_SIGAE3_ | 0.046491   | 0.45614406 | 0.00010084 | 0.10033  | 0.13721   |
| 9mo_SIGAE3_ | 0.02514737 | 0.24826756 | 7.58E-05   | 0.046199 | 0.74769   |
| 9mo_SIGAE3_ | 0.0793131  | 0.77581525 | 0.00012835 | 0.05632  | -1.1841   |
| 9mo_SIGAE3_ | 0.06429582 | 0.6295543  | 0.00011815 | 0.096641 | -0.55833  |
| 9mo_SIGAE3_ | 0.00720623 | 0.07352964 | 5.75E-05   | 0.011579 | 0.15252   |
| 9mo_SIGAE3_ | 0.07016343 | 0.68670195 | 0.0001226  | 0.07935  | -0.8424   |
| 9mo_SIGAE3_ | 0.07173194 | 0.70197845 | 0.00012378 | 0.073503 | -0.92016  |
| 9mo_SIGAE3_ | 0.06208761 | 0.6080474  | 0.00011642 | 0.098794 | -0.44141  |
| 9mo_SIGAE3_ | 0.05666433 | 0.5552273  | 0.00011144 | 0.095284 | -0.20754  |
| 9mo_SIGAE3_ | 0.07097804 | 0.6946358  | 0.00012331 | 0.075804 | -0.87403  |
| 9mo_SIGAE3_ | 0.03164676 | 0.31156847 | 8.36E-05   | 0.07721  | 0.6834    |
| 9mo_SIGAE3_ | 0.01617792 | 0.16090956 | 6.58E-05   | 0.023731 | 0.27899   |
| 9mo_SIGAE3_ | 0.07106867 | 0.6955185  | 0.00012331 | 0.075804 | -0.88959  |
| 9mo_SIGAE3_ | 0.07882973 | 0.77110744 | 0.00012816 | 0.056721 | -1.1666   |
| 9mo_SIGAE3_ | 0.06127426 | 0.6001258  | 0.00011553 | 0.098907 | -0.4087   |
| 9mo_SIGAE3_ | 0.05204014 | 0.51018995 | 0.00010703 | 0.092172 | -0.022986 |
| 9mo_SIGAE3_ | 0.01862821 | 0.18477415 | 6.84E-05   | 0.028322 | 0.42127   |
| 9mo_SIGAE3_ | 0.06842681 | 0.6697881  | 0.00012136 | 0.085284 | -0.7609   |
| 9mo_SIGAE3_ | 0.05185299 | 0.50836724 | 0.00010668 | 0.092211 | -0.022986 |
| 9mo_SIGAE3_ | 0.05428362 | 0.53204036 | 0.0001091  | 0.092966 | -0.11022  |
| 9mo_SIGAE3_ | 0.04365851 | 0.42855698 | 9.78E-05   | 0.10633  | 0.21046   |
| 9mo_SIGAE3_ | 0.05541392 | 0.543049   | 0.00011011 | 0.093847 | -0.1508   |
| 9mo_SIGAE3_ | 0.0143917  | 0.14351259 | 6.41E-05   | 0.020862 | 0.19442   |
| 9mo_SIGAE3_ | 0.06310795 | 0.61798507 | 0.0001173  | 0.098072 | -0.49111  |
| 9mo_SIGAE3_ | 0.0574806  | 0.5631774  | 0.00011209 | 0.096042 | -0.23694  |
| 9mo_SIGAE3_ | 0.05162402 | 0.5061372  | 0.00010632 | 0.092309 | -0.011455 |
| 9mo_SIGAE3_ | 0.05154805 | 0.5053972  | 0.00010632 | 0.092309 | -0.011455 |
| 9mo_SIGAE3_ | 0.04389904 | 0.4308997  | 9.82E-05   | 0.10565  | 0.21046   |
| 9mo_SIGAE3_ | 0.06471825 | 0.63366854 | 0.00011843 | 0.096001 | -0.57526  |
| 9mo_SIGAE3_ | 0.06033256 | 0.590954   | 0.00011492 | 0.0987   | -0.36038  |
| 9mo_SIGAE3_ | 0.05911339 | 0.5790799  | 0.00011368 | 0.097776 | -0.31309  |
| 9mo_SIGAE3_ | 0.07495466 | 0.7333662  | 0.00012577 | 0.064358 | -1.0462   |
| 9mo_SIGAE3_ | 0.02432153 | 0.24022429 | 7.50E-05   | 0.043782 | 0.72811   |
| 9mo_SIGAE3_ | 0.07423762 | 0.7263825  | 0.00012534 | 0.066176 | -1.0201   |
| 9mo_SIGAE3_ | 0.08226106 | 0.804527   | 0.00012993 | 0.053861 | -1.2424   |
| 9mo_SIGAE3_ | 0.03352043 | 0.32981706 | 8.61E-05   | 0.088522 | 0.60151   |
| 9mo_SIGAE3_ | 0.07281099 | 0.7124878  | 0.00012446 | 0.070202 | -0.96444  |
| 9mo_SIGAE3_ | 0.04990996 | 0.48944312 | 0.00010453 | 0.09379  | 0.042456  |
| 9mo_SIGAE3_ | 0.01551799 | 0.15448213 | 6.51E-05   | 0.022546 | 0.24275   |

|             |            |            |            |          |           |
|-------------|------------|------------|------------|----------|-----------|
| 9mo_SIGAE3_ | 0.05382881 | 0.5276108  | 0.00010876 | 0.092731 | -0.084185 |
| 9mo_SIGAE3_ | 0.07207688 | 0.705338   | 0.00012401 | 0.07238  | -0.93514  |
| 9mo_SIGAE3_ | 0.06995482 | 0.6846702  | 0.0001226  | 0.07935  | -0.82636  |
| 9mo_SIGAE3_ | 0.03621892 | 0.356099   | 8.90E-05   | 0.10026  | 0.47826   |
| 9mo_SIGAE3_ | 0.06873525 | 0.67279214 | 0.00012161 | 0.084113 | -0.77743  |
| 9mo_SIGAE3_ | 0.03744154 | 0.36800683 | 9.06E-05   | 0.10531  | 0.43275   |
| 9mo_SIGAE3_ | 0.05099628 | 0.5000233  | 0.00010597 | 0.092472 | 0.010852  |
| 9mo_SIGAE3_ | 0.07735833 | 0.75677675 | 0.0001272  | 0.059217 | -1.1276   |
| 9mo_SIGAE3_ | 0.0608545  | 0.59603757 | 0.00011523 | 0.098828 | -0.39249  |
| 9mo_SIGAE3_ | 0.04522579 | 0.44382155 | 9.97E-05   | 0.10268  | 0.17344   |
| 9mo_SIGAE3_ | 0.0482679  | 0.47345024 | 0.00010308 | 0.095994 | 0.091263  |
| 9mo_SIGAE3_ | 0.05384158 | 0.52773505 | 0.00010876 | 0.092731 | -0.084185 |
| 9mo_SIGAE3_ | 0.05064898 | 0.49664074 | 0.00010525 | 0.093003 | 0.021622  |
| 9mo_SIGAE3_ | 0.06653145 | 0.6513282  | 0.00012006 | 0.090801 | -0.66011  |
| 9mo_SIGAE3_ | 0.07222953 | 0.7068247  | 0.00012401 | 0.07238  | -0.93514  |
| 9mo_SIGAE3_ | 0.0107791  | 0.10832761 | 6.05E-05   | 0.01548  | 0.10741   |
| 9mo_SIGAE3_ | 0.06404809 | 0.62714154 | 0.00011815 | 0.096641 | -0.54144  |
| 9mo_SIGAE3_ | 0.04313526 | 0.4234608  | 9.74E-05   | 0.10696  | 0.22964   |
| 9mo_SIGAE3_ | 0.06798261 | 0.6654618  | 0.0001211  | 0.086439 | -0.74427  |
| 9mo_SIGAE3_ | 0.06613541 | 0.64747095 | 0.00011979 | 0.091802 | -0.64315  |
| 9mo_SIGAE3_ | 0.03941947 | 0.38727084 | 9.30E-05   | 0.10937  | 0.35035   |
| 9mo_SIGAE3_ | 0.04770415 | 0.46795958 | 0.00010234 | 0.09734  | 0.10986   |
| 9mo_SIGAE3_ | 0.06486447 | 0.6350927  | 0.00011871 | 0.095287 | -0.59222  |
| 9mo_SIGAE3_ | 0.03982778 | 0.39124754 | 9.34E-05   | 0.10962  | 0.33794   |
| 9mo_SIGAE3_ | 0.04024804 | 0.3953407  | 9.38E-05   | 0.10975  | 0.31414   |
| 9mo_SIGAE3_ | 0.09285995 | 0.90775496 | 0.00013408 | 0.052495 | -1.3392   |
| 9mo_SIGAE3_ | 0.0678544  | 0.66421306 | 0.0001211  | 0.086439 | -0.72756  |
| 9mo_SIGAE3_ | 0.041448   | 0.40702772 | 9.54E-05   | 0.10929  | 0.28067   |
| 9mo_SIGAE3_ | 0.03026286 | 0.29808992 | 8.19E-05   | 0.069725 | 0.72675   |
| 9mo_SIGAE3_ | 0.03832898 | 0.37665    | 9.18E-05   | 0.10791  | 0.38979   |
| 9mo_SIGAE3_ | 0.07784285 | 0.7614957  | 0.00012759 | 0.058113 | -1.1379   |
| 9mo_SIGAE3_ | 0.09381344 | 0.9170415  | 0.00013442 | 0.052444 | -1.3416   |
| 9mo_SIGAE3_ | 0.05424155 | 0.5316306  | 0.0001091  | 0.092966 | -0.097097 |
| 9mo_SIGAE3_ | 0.08403959 | 0.821849   | 0.00013074 | 0.053178 | -1.2751   |
| 9mo_SIGAE3_ | 0.07296041 | 0.7139432  | 0.00012446 | 0.070202 | -0.96444  |
| 9mo_SIGAE3_ | 0.01145905 | 0.11495002 | 6.11E-05   | 0.016373 | 0.1115    |
| 9mo_SIGAE3_ | 0.01012175 | 0.10192534 | 5.98E-05   | 0.014626 | 0.10718   |
| 9mo_SIGAE3_ | 0.04833539 | 0.47410756 | 0.00010308 | 0.095994 | 0.091263  |
| 9mo_SIGAE3_ | 0.07181022 | 0.7027409  | 0.00012378 | 0.073503 | -0.92016  |
| 9mo_SIGAE3_ | 0.04167086 | 0.40919828 | 9.54E-05   | 0.10929  | 0.27003   |
| 9mo_SIGAE3_ | 0.03349747 | 0.32959348 | 8.61E-05   | 0.088522 | 0.60151   |
| 9mo_SIGAE3_ | 0.01132601 | 0.11365428 | 6.11E-05   | 0.016373 | 0.1115    |
| 9mo_SIGAE3_ | 0.05718717 | 0.5603195  | 0.00011209 | 0.096042 | -0.22216  |
| 9mo_SIGAE3_ | 0.07754404 | 0.75858545 | 0.0001274  | 0.058646 | -1.1379   |
| 9mo_SIGAE3_ | 0.07209573 | 0.7055216  | 0.00012401 | 0.07238  | -0.93514  |
| 9mo_SIGAE3_ | 0.07570379 | 0.7406623  | 0.00012619 | 0.062687 | -1.0712   |

|             |            |            |            |          |           |
|-------------|------------|------------|------------|----------|-----------|
| 9mo_SIGAE3_ | 0.04668028 | 0.4579876  | 0.00010122 | 0.099559 | 0.13721   |
| 9mo_SIGAE3_ | 0.01182732 | 0.11853682 | 6.14E-05   | 0.016833 | 0.12065   |
| 9mo_SIGAE3_ | 0.05688521 | 0.55737853 | 0.00011177 | 0.095663 | -0.20754  |
| 9mo_SIGAE3_ | 0.01803984 | 0.17904373 | 6.80E-05   | 0.027619 | 0.4001    |
| 9mo_SIGAE3_ | 0.04824898 | 0.47326595 | 0.00010308 | 0.095994 | 0.091263  |
| 9mo_SIGAE3_ | 0.06309864 | 0.61789435 | 0.0001173  | 0.098072 | -0.49111  |
| 9mo_SIGAE3_ | 0.04557082 | 0.44718203 | 0.00010009 | 0.1019   | 0.16436   |
| 9mo_SIGAE3_ | 0.02537042 | 0.25044    | 7.62E-05   | 0.047472 | 0.75539   |
| 9mo_SIGAE3_ | 0.05312328 | 0.52073926 | 0.00010807 | 0.092373 | -0.059017 |
| 9mo_SIGAE3_ | 0.03487936 | 0.34305245 | 8.77E-05   | 0.095565 | 0.54051   |
| 9mo_SIGAE3_ | 0.09163004 | 0.8957762  | 0.00013374 | 0.052539 | -1.336    |
| 9mo_SIGAE3_ | 0.04149911 | 0.40752554 | 9.54E-05   | 0.10929  | 0.28067   |
| 9mo_SIGAE3_ | 0.02626568 | 0.25915936 | 7.70E-05   | 0.050154 | 0.76965   |
| 9mo_SIGAE3_ | 0.05329511 | 0.5224128  | 0.00010807 | 0.092373 | -0.07149  |
| 9mo_SIGAE3_ | 0.07073017 | 0.69222164 | 0.00012308 | 0.076976 | -0.87403  |
| 9mo_SIGAE3_ | 0.06799684 | 0.66560036 | 0.0001211  | 0.086439 | -0.74427  |
| 9mo_SIGAE3_ | 0.05056679 | 0.49584028 | 0.00010525 | 0.093003 | 0.021622  |
| 9mo_SIGAE3_ | 0.04271376 | 0.4193556  | 9.66E-05   | 0.10808  | 0.23945   |
| 9mo_SIGAE3_ | 0.06909038 | 0.676251   | 0.00012186 | 0.08293  | -0.79386  |
| 9mo_SIGAE3_ | 0.0367215  | 0.36099395 | 8.98E-05   | 0.10298  | 0.46289   |
| 9mo_SIGAE3_ | 0.04142404 | 0.40679434 | 9.54E-05   | 0.10929  | 0.28067   |
| 9mo_SIGAE3_ | 0.0112993  | 0.11339418 | 6.11E-05   | 0.016373 | 0.1115    |
| 9mo_SIGAE3_ | 0.02235635 | 0.2210844  | 7.26E-05   | 0.037419 | 0.64161   |
| 9mo_SIGAE3_ | 0.06688895 | 0.65481013 | 0.00012032 | 0.089759 | -0.67704  |
| 9mo_SIGAE3_ | 0.05832145 | 0.5713669  | 0.00011305 | 0.097132 | -0.26697  |
| 9mo_SIGAE3_ | 0.04830257 | 0.47378787 | 0.00010308 | 0.095994 | 0.091263  |
| 9mo_SIGAE3_ | 0.03738491 | 0.36745524 | 9.06E-05   | 0.10531  | 0.43275   |
| 9mo_SIGAE3_ | 0.08156321 | 0.79773015 | 0.00012959 | 0.054253 | -1.2295   |
| 9mo_SIGAE3_ | 0.05744442 | 0.56282496 | 0.00011209 | 0.096042 | -0.23694  |
| 9mo_SIGAE3_ | 0.06692985 | 0.6552084  | 0.00012032 | 0.089759 | -0.69393  |
| 9mo_SIGAE3_ | 0.04669542 | 0.45813504 | 0.00010122 | 0.099559 | 0.13721   |
| 9mo_SIGAE3_ | 0.02199937 | 0.21760765 | 7.22E-05   | 0.03647  | 0.62396   |
| 9mo_SIGAE3_ | 0.07271762 | 0.71157855 | 0.00012446 | 0.070202 | -0.9499   |
| 9mo_SIGAE3_ | 0.04949401 | 0.48539197 | 0.00010417 | 0.094268 | 0.052555  |
| 9mo_SIGAE3_ | 0.08393321 | 0.8208129  | 0.00013058 | 0.053285 | -1.2702   |
| 9mo_SIGAE3_ | 0.0108749  | 0.10926069 | 6.08E-05   | 0.015922 | 0.10884   |
| 9mo_SIGAE3_ | 0.01301241 | 0.13007905 | 6.27E-05   | 0.018769 | 0.14454   |
| 9mo_SIGAE3_ | 0.02091209 | 0.20701805 | 7.10E-05   | 0.033786 | 0.56707   |
| 9mo_SIGAE3_ | 0.02320472 | 0.22934712 | 7.38E-05   | 0.040447 | 0.68948   |
| 9mo_SIGAE3_ | 0.01673738 | 0.16635838 | 6.65E-05   | 0.024968 | 0.31771   |
| 9mo_SIGAE3_ | 0.04500133 | 0.44163546 | 9.93E-05   | 0.10345  | 0.18258   |
| 9mo_SIGAE3_ | 0.06577398 | 0.6439508  | 0.00011953 | 0.092756 | -0.62617  |
| 9mo_SIGAE3_ | 0.00823401 | 0.08353968 | 5.84E-05   | 0.012653 | 0.12871   |
| 9mo_SIGAE3_ | 0.04058426 | 0.39861536 | 9.42E-05   | 0.10978  | 0.3027    |
| 9mo_SIGAE3_ | 0.04455534 | 0.43729168 | 9.89E-05   | 0.10421  | 0.19178   |
| 9mo_SIGAE3_ | 0.04278609 | 0.42006007 | 9.70E-05   | 0.10755  | 0.23945   |

|             |            |            |            |           |           |
|-------------|------------|------------|------------|-----------|-----------|
| 9mo_SIGAE3_ | 0.07604168 | 0.7439532  | 0.0001264  | 0.06191   | -1.0832   |
| 9mo_SIGAE3_ | 0.0575367  | 0.5637238  | 0.00011241 | 0.096416  | -0.23694  |
| 9mo_SIGAE3_ | 0.08417386 | 0.82315665 | 0.00013074 | 0.053178  | -1.2751   |
| 9mo_SIGAE3_ | 0.0584384  | 0.5725059  | 0.00011305 | 0.097132  | -0.2822   |
| 9mo_SIGAE3_ | 0.06600379 | 0.6461891  | 0.00011953 | 0.092756  | -0.64315  |
| 9mo_SIGAE3_ | 0.05934534 | 0.581339   | 0.000114   | 0.098059  | -0.31309  |
| 9mo_SIGAE3_ | 0.02904281 | 0.28620726 | 8.07E-05   | 0.064343  | 0.751     |
| 9mo_SIGAE3_ | 0.05378092 | 0.5271443  | 0.00010876 | 0.092731  | -0.084185 |
| 9mo_SIGAE3_ | 0.0092246  | 0.09318756 | 5.92E-05   | 0.013809  | 0.11326   |
| 9mo_SIGAE3_ | 0.04698779 | 0.46098256 | 0.00010159 | 0.098799  | 0.12814   |
| 9mo_SIGAE3_ | 0.02853387 | 0.2812504  | 7.99E-05   | 0.060913  | 0.76245   |
| 9mo_SIGAE3_ | 0.05754415 | 0.56379634 | 0.00011241 | 0.096416  | -0.23694  |
| 9mo_SIGAE3_ | 0.02781293 | 0.27422887 | 7.90E-05   | 0.057632  | 0.76966   |
| 9mo_SIGAE3_ | 0.06719005 | 0.6577427  | 0.00012058 | 0.088682  | -0.69393  |
| 9mo_SIGAE3_ | 0.04108104 | 0.40345374 | 9.50E-05   | 0.10955   | 0.29155   |
| 9mo_SIGAE3_ | 0.06721628 | 0.65799814 | 0.00012058 | 0.088682  | -0.69393  |
| 9mo_SIGAE3_ | 0.05186484 | 0.50848264 | 0.00010668 | 0.092211  | -0.022986 |
| 9mo_SIGAE3_ | 0.06497954 | 0.63621336 | 0.00011871 | 0.095287  | -0.59222  |
| 9mo_SIGAE3_ | 0.07616602 | 0.7451642  | 0.0001266  | 0.061174  | -1.0948   |
| 9mo_SIGAE3_ | 0.07203244 | 0.7049052  | 0.00012401 | 0.07238   | -0.92016  |
| 9mo_SIGAE3_ | 0.03610478 | 0.35498738 | 8.90E-05   | 0.10026   | 0.49376   |
| 9mo_SIGAE3_ | 0.06561902 | 0.64244163 | 0.00011925 | 0.093659  | -0.62617  |
| 9mo_SIGAE3_ | 0.04693864 | 0.46050388 | 0.00010159 | 0.098799  | 0.12814   |
| 9mo_SIGAE3_ | 0.07887946 | 0.77159184 | 0.00012816 | 0.056721  | -1.1666   |
| 9mo_SIGAE3_ | 0.01903693 | 0.18875489 | 6.87E-05   | 0.029043  | 0.46374   |
| 9mo_SIGAE3_ | 0.06167372 | 0.6040163  | 0.00011613 | 0.098894  | -0.42501  |
| 9mo_SIGAE3_ | 0.06644739 | 0.65050954 | 0.00012006 | 0.090801  | -0.66011  |
| 9mo_SIGAE3_ | 0.06254976 | 0.61254853 | 0.00011672 | 0.098627  | -0.47447  |
| 9mo_SIGAE3_ | 0.0712759  | 0.6975368  | 0.00012355 | 0.074645  | -0.88959  |
| 9mo_SIGAE3_ | 0.05887349 | 0.5767435  | 0.00011337 | 0.097465  | -0.29758  |
| 9mo_SIGAE3_ | 0.05039038 | 0.49412212 | 0.00010525 | 0.093003  | 0.032151  |
| 9mo_SIGAE3_ | 0.07713569 | 0.75460833 | 0.0001272  | 0.059217  | -1.117    |
| 9mo_SIGAE3_ | 0.07414465 | 0.7254771  | 0.00012534 | 0.066176  | -1.0201   |
| 9mo_SIGAE3_ | 0.07370824 | 0.7212267  | 0.00012513 | 0.067136  | -0.99278  |
| 9mo_SIGAE3_ | 0.06292775 | 0.6162299  | 0.00011701 | 0.098387  | -0.49111  |
| 9mo_SIGAE3_ | 0.05068605 | 0.49700183 | 0.00010561 | 0.092703  | 0.021622  |
| 9mo_SIGAE3_ | 0.07903183 | 0.77307576 | 0.00012816 | 0.056721  | -1.1755   |
| 9mo_SIGAE3_ | 0.03848839 | 0.37820256 | 9.18E-05   | 0.10791   | 0.38979   |
| 9mo_SIGAE3_ | 0.0608672  | 0.5961612  | 0.00011523 | 0.098828  | -0.39249  |
| 9mo_SIGAE3_ | 0.00337343 | 0.03620004 | 5.44E-05   | 0.0082917 | 0.2947    |
| 9mo_SIGAE3_ | 0.03110619 | 0.3063036  | 8.32E-05   | 0.075317  | 0.69526   |
| 9mo_SIGAE3_ | 0.09322839 | 0.9113434  | 0.00013419 | 0.052478  | -1.3401   |
| 9mo_SIGAE3_ | 0.06339397 | 0.62077075 | 0.00011758 | 0.097678  | -0.50782  |
| 9mo_SIGAE3_ | 0.00911322 | 0.09210283 | 5.92E-05   | 0.013809  | 0.11326   |
| 9mo_SIGAE3_ | 0.04985486 | 0.48890647 | 0.00010453 | 0.09379   | 0.042456  |
| 9mo_SIGAE3_ | 0.05156065 | 0.5055199  | 0.00010632 | 0.092309  | -0.011455 |

|             |            |            |            |          |           |
|-------------|------------|------------|------------|----------|-----------|
| 9mo_SIGAE3_ | 0.08411164 | 0.82255065 | 0.00013074 | 0.053178 | -1.2751   |
| 9mo_SIGAE3_ | 0.06491963 | 0.6356299  | 0.00011871 | 0.095287 | -0.59222  |
| 9mo_SIGAE3_ | 0.03261684 | 0.32101658 | 8.48E-05   | 0.082909 | 0.64444   |
| 9mo_SIGAE3_ | 0.04151756 | 0.40770522 | 9.54E-05   | 0.10929  | 0.28067   |
| 9mo_SIGAE3_ | 0.09256484 | 0.9048807  | 0.00013408 | 0.052495 | -1.3382   |
| 9mo_SIGAE3_ | 0.01239052 | 0.12402211 | 6.21E-05   | 0.017782 | 0.12723   |
| 9mo_SIGAE3_ | 0.02530832 | 0.24983516 | 7.62E-05   | 0.047472 | 0.75539   |
| 9mo_SIGAE3_ | 0.08335137 | 0.81514597 | 0.00013042 | 0.053406 | -1.2651   |
| 9mo_SIGAE3_ | 0.05063698 | 0.4965239  | 0.00010525 | 0.093003 | 0.021622  |
| 9mo_SIGAE3_ | 0.04137331 | 0.40630025 | 9.50E-05   | 0.10955  | 0.28067   |
| 9mo_SIGAE3_ | 0.04382169 | 0.4301463  | 9.82E-05   | 0.10565  | 0.21046   |
| 9mo_SIGAE3_ | 0.05806818 | 0.56890017 | 0.00011273 | 0.096781 | -0.26697  |
| 9mo_SIGAE3_ | 0.0449581  | 0.44121438 | 9.93E-05   | 0.10345  | 0.18258   |
| 9mo_SIGAE3_ | 0.02283125 | 0.22570972 | 7.30E-05   | 0.038397 | 0.67444   |
| 9mo_SIGAE3_ | 0.01003552 | 0.10108554 | 5.98E-05   | 0.014626 | 0.1081    |
| 9mo_SIGAE3_ | 0.06853528 | 0.6708446  | 0.00012161 | 0.084113 | -0.7609   |
| 9mo_SIGAE3_ | 0.07136723 | 0.6984264  | 0.00012355 | 0.074645 | -0.90497  |
| 9mo_SIGAE3_ | 0.08062717 | 0.7886136  | 0.00012907 | 0.054994 | -1.2155   |
| 9mo_SIGAE3_ | 0.031249   | 0.3076945  | 8.32E-05   | 0.075317 | 0.69526   |
| 9mo_SIGAE3_ | 0.07148998 | 0.69962186 | 0.00012355 | 0.074645 | -0.90497  |
| 9mo_SIGAE3_ | 0.06450246 | 0.6315668  | 0.00011843 | 0.096001 | -0.55833  |
| 9mo_SIGAE3_ | 0.04862857 | 0.47696295 | 0.00010344 | 0.095375 | 0.081803  |
| 9mo_SIGAE3_ | 0.07475789 | 0.7314497  | 0.00012577 | 0.064358 | -1.0333   |
| 9mo_SIGAE3_ | 0.07098325 | 0.6946866  | 0.00012331 | 0.075804 | -0.87403  |
| 9mo_SIGAE3_ | 0.05327879 | 0.52225375 | 0.00010807 | 0.092373 | -0.07149  |
| 9mo_SIGAE3_ | 0.0699601  | 0.6847215  | 0.0001226  | 0.07935  | -0.82636  |
| 9mo_SIGAE3_ | 0.058421   | 0.57233644 | 0.00011305 | 0.097132 | -0.2822   |
| 9mo_SIGAE3_ | 0.09369703 | 0.91590774 | 0.00013442 | 0.052444 | -1.3416   |
| 9mo_SIGAE3_ | 0.0185269  | 0.18378744 | 6.84E-05   | 0.028322 | 0.42127   |
| 9mo_SIGAE3_ | 0.02609766 | 0.25752294 | 7.70E-05   | 0.050154 | 0.76634   |
| 9mo_SIGAE3_ | 0.03615322 | 0.35545918 | 8.90E-05   | 0.10026  | 0.47826   |
| 9mo_SIGAE3_ | 0.01187947 | 0.11904468 | 6.17E-05   | 0.017303 | 0.12065   |
| 9mo_SIGAE3_ | 0.07727648 | 0.75597954 | 0.0001272  | 0.059217 | -1.1276   |
| 9mo_SIGAE3_ | 0.0582834  | 0.5709963  | 0.00011305 | 0.097132 | -0.26697  |
| 9mo_SIGAE3_ | 0.08399733 | 0.82143736 | 0.00013074 | 0.053178 | -1.2702   |
| 9mo_SIGAE3_ | 0.05284314 | 0.5180108  | 0.00010773 | 0.092257 | -0.046772 |
| 9mo_SIGAE3_ | 0.06559098 | 0.6421685  | 0.00011925 | 0.093659 | -0.62617  |
| 9mo_SIGAE3_ | 0.05590888 | 0.54786956 | 0.00011078 | 0.094541 | -0.16472  |
| 9mo_SIGAE3_ | 0.03563738 | 0.35043517 | 8.86E-05   | 0.098764 | 0.50933   |
| 9mo_SIGAE3_ | 0.051734   | 0.5072083  | 0.00010668 | 0.092211 | -0.011455 |
| 9mo_SIGAE3_ | 0.07058954 | 0.69085205 | 0.00012308 | 0.076976 | -0.8583   |
| 9mo_SIGAE3_ | 0.07704405 | 0.7537158  | 0.000127   | 0.059827 | -1.117    |
| 9mo_SIGAE3_ | 0.03508684 | 0.34507313 | 8.77E-05   | 0.095565 | 0.52494   |
| 9mo_SIGAE3_ | 0.0568896  | 0.5574213  | 0.00011177 | 0.095663 | -0.20754  |
| 9mo_SIGAE3_ | 0.0668266  | 0.6542029  | 0.00012032 | 0.089759 | -0.67704  |
| 9mo_SIGAE3_ | 0.06144912 | 0.6018289  | 0.00011583 | 0.09893  | -0.42501  |

|             |            |            |            |           |            |
|-------------|------------|------------|------------|-----------|------------|
| 9mo_SIGAE3_ | 0.0343381  | 0.33778077 | 8.69E-05   | 0.09213   | 0.57137    |
| 9mo_SIGAE3_ | 0.0099145  | 0.0999069  | 5.98E-05   | 0.014626  | 0.1081     |
| 9mo_SIGAE3_ | 0.05199225 | 0.50972354 | 0.00010668 | 0.092211  | -0.022986  |
| 9mo_SIGAE3_ | 0.05943174 | 0.58218056 | 0.000114   | 0.098059  | -0.32873   |
| 9mo_SIGAE3_ | 0.01106019 | 0.11106529 | 6.08E-05   | 0.015922  | 0.10884    |
| 9mo_SIGAE3_ | 0.06971385 | 0.6823232  | 0.00012235 | 0.080544  | -0.82636   |
| 9mo_SIGAE3_ | 0.05762633 | 0.56459665 | 0.00011241 | 0.096416  | -0.23694   |
| 9mo_SIGAE3_ | 0.06320659 | 0.6189457  | 0.0001173  | 0.098072  | -0.50782   |
| 9mo_SIGAE3_ | 0.09496156 | 0.9282236  | 0.00013484 | 0.052368  | -1.3433    |
| 9mo_SIGAE3_ | 0.07663757 | 0.7497569  | 0.0001268  | 0.060479  | -1.1061    |
| 9mo_SIGAE3_ | 0.03434625 | 0.33786017 | 8.69E-05   | 0.09213   | 0.57137    |
| 9mo_SIGAE3_ | 0.0266105  | 0.26251772 | 7.74E-05   | 0.051562  | 0.77158    |
| 9mo_SIGAE3_ | 0.0211708  | 0.20953774 | 7.14E-05   | 0.034655  | 0.58661    |
| 9mo_SIGAE3_ | 0.05611867 | 0.5499128  | 0.00011078 | 0.094541  | -0.17881   |
| 9mo_SIGAE3_ | 0.05992264 | 0.5869617  | 0.00011462 | 0.098526  | -0.3445    |
| 9mo_SIGAE3_ | 0.04779215 | 0.46881664 | 0.00010234 | 0.09734   | 0.10061    |
| 9mo_SIGAE3_ | 0.07604271 | 0.74396324 | 0.0001264  | 0.06191   | -1.0832    |
| 9mo_SIGAE3_ | 0.08129738 | 0.7951411  | 0.00012942 | 0.054478  | -1.2295    |
| 9mo_SIGAE3_ | 0.06186951 | 0.60592324 | 0.00011613 | 0.098894  | -0.44141   |
| 9mo_SIGAE3_ | 0.02927552 | 0.28847378 | 8.07E-05   | 0.064343  | 0.7438     |
| 9mo_SIGAE3_ | 0.07878406 | 0.7706626  | 0.00012797 | 0.057152  | -1.1666    |
| 9mo_SIGAE3_ | 0.08662491 | 0.8470287  | 0.00013179 | 0.052739  | -1.3031    |
| 9mo_SIGAE3_ | 0.0736732  | 0.72088534 | 0.00012513 | 0.067136  | -0.99278   |
| 9mo_SIGAE3_ | 0.04709937 | 0.46206933 | 0.00010159 | 0.098799  | 0.11903    |
| 9mo_SIGAE3_ | 0.0932562  | 0.9116142  | 0.00013431 | 0.052462  | -1.3401    |
| 9mo_SIGAE3_ | 0.0068876  | 0.07042631 | 5.72E-05   | 0.011238  | 0.16213    |
| 9mo_SIGAE3_ | 0.02986379 | 0.2942032  | 8.15E-05   | 0.067903  | 0.7357     |
| 9mo_SIGAE3_ | 0.06385936 | 0.6253034  | 0.00011787 | 0.097201  | -0.54144   |
| 9mo_SIGAE3_ | 0.03182738 | 0.31332755 | 8.40E-05   | 0.07911   | 0.67094    |
| 9mo_SIGAE3_ | 0.0680367  | 0.6659886  | 0.0001211  | 0.086439  | -0.74427   |
| 9mo_SIGAE3_ | 0.04323918 | 0.42447296 | 9.74E-05   | 0.10696   | 0.22964    |
| 9mo_SIGAE3_ | 0.07956137 | 0.77823323 | 0.00012853 | 0.055948  | -1.1841    |
| 9mo_SIGAE3_ | 0.05138156 | 0.5037757  | 0.00010632 | 0.092309  | -0.0001745 |
| 9mo_SIGAE3_ | 0.00461338 | 0.04827653 | 5.52E-05   | 0.0090922 | 0.24903    |
| 9mo_SIGAE3_ | 0.07579971 | 0.7415966  | 0.0001264  | 0.06191   | -1.0712    |
| 9mo_SIGAE3_ | 0.0078024  | 0.07933608 | 5.81E-05   | 0.012286  | 0.13577    |
| 9mo_SIGAE3_ | 0.03303521 | 0.32509127 | 8.52E-05   | 0.084798  | 0.61617    |
| 9mo_SIGAE3_ | 0.07160833 | 0.70077455 | 0.00012378 | 0.073503  | -0.90497   |
| 9mo_SIGAE3_ | 0.08420021 | 0.8234133  | 0.00013074 | 0.053178  | -1.2751    |
| 9mo_SIGAE3_ | 0.05386193 | 0.5279333  | 0.00010876 | 0.092731  | -0.084185  |
| 9mo_SIGAE3_ | 0.06812494 | 0.666848   | 0.0001211  | 0.086439  | -0.74427   |
| 9mo_SIGAE3_ | 0.013932   | 0.1390354  | 6.37E-05   | 0.020323  | 0.18023    |
| 9mo_SIGAE3_ | 0.06365334 | 0.6232968  | 0.00011758 | 0.097678  | -0.5246    |
| 9mo_SIGAE3_ | 0.04495925 | 0.44122562 | 9.93E-05   | 0.10345   | 0.18258    |
| 9mo_SIGAE3_ | 0.00773382 | 0.07866811 | 5.81E-05   | 0.012286  | 0.13577    |
| 9mo_SIGAE3_ | 0.04612909 | 0.45261928 | 0.00010046 | 0.10111   | 0.14626    |

|             |            |            |            |          |            |
|-------------|------------|------------|------------|----------|------------|
| 9mo_SIGAE3_ | 0.08265454 | 0.80835927 | 0.00013009 | 0.053693 | -1.2543    |
| 9mo_SIGAE3_ | 0.06014653 | 0.5891422  | 0.00011462 | 0.098526 | -0.36038   |
| 9mo_SIGAE3_ | 0.04151434 | 0.40767384 | 9.54E-05   | 0.10929  | 0.28067    |
| 9mo_SIGAE3_ | 0.07911011 | 0.7738382  | 0.00012816 | 0.056721 | -1.1755    |
| 9mo_SIGAE3_ | 0.04755596 | 0.4665163  | 0.00010197 | 0.098057 | 0.10986    |
| 9mo_SIGAE3_ | 0.05038049 | 0.49402583 | 0.00010525 | 0.093003 | 0.032151   |
| 9mo_SIGAE3_ | 0.08335961 | 0.8152263  | 0.00013042 | 0.053406 | -1.2651    |
| 9mo_SIGAE3_ | 0.05819451 | 0.5701305  | 0.00011273 | 0.096781 | -0.26697   |
| 9mo_SIGAE3_ | 0.0833715  | 0.81534207 | 0.00013042 | 0.053406 | -1.2651    |
| 9mo_SIGAE3_ | 0.07658885 | 0.74928236 | 0.0001268  | 0.060479 | -1.1061    |
| 9mo_SIGAE3_ | 0.04747959 | 0.46577245 | 0.00010197 | 0.098057 | 0.10986    |
| 9mo_SIGAE3_ | 0.06709385 | 0.65680575 | 0.00012032 | 0.089759 | -0.69393   |
| 9mo_SIGAE3_ | 0.01484596 | 0.14793691 | 6.44E-05   | 0.021412 | 0.20962    |
| 9mo_SIGAE3_ | 0.07831927 | 0.7661358  | 0.00012778 | 0.057615 | -1.1573    |
| 9mo_SIGAE3_ | 0.05970466 | 0.5848386  | 0.00011431 | 0.098311 | -0.32873   |
| 9mo_SIGAE3_ | 0.05768734 | 0.56519085 | 0.00011241 | 0.096416 | -0.25188   |
| 9mo_SIGAE3_ | 0.08052863 | 0.7876539  | 0.00012907 | 0.054994 | -1.2081    |
| 9mo_SIGAE3_ | 0.05053989 | 0.49557832 | 0.00010525 | 0.093003 | 0.021622   |
| 9mo_SIGAE3_ | 0.06263442 | 0.61337304 | 0.00011672 | 0.098627 | -0.47447   |
| 9mo_SIGAE3_ | 0.07587255 | 0.74230593 | 0.0001264  | 0.06191  | -1.0832    |
| 9mo_SIGAE3_ | 0.02613313 | 0.25786835 | 7.70E-05   | 0.050154 | 0.76634    |
| 9mo_SIGAE3_ | 0.06321564 | 0.6190339  | 0.0001173  | 0.098072 | -0.50782   |
| 9mo_SIGAE3_ | 0.01153475 | 0.1156873  | 6.14E-05   | 0.016833 | 0.11542    |
| 9mo_SIGAE3_ | 0.064271   | 0.6293126  | 0.00011815 | 0.096641 | -0.55833   |
| 9mo_SIGAE3_ | 0.073078   | 0.7150884  | 0.00012469 | 0.069151 | -0.97873   |
| 9mo_SIGAE3_ | 0.07475557 | 0.73142713 | 0.00012577 | 0.064358 | -1.0333    |
| 9mo_SIGAE3_ | 0.05546759 | 0.54357165 | 0.00011045 | 0.094186 | -0.1508    |
| 9mo_SIGAE3_ | 0.07740987 | 0.75727874 | 0.0001272  | 0.059217 | -1.1276    |
| 9mo_SIGAE3_ | 0.066392   | 0.64997005 | 0.00011979 | 0.091802 | -0.66011   |
| 9mo_SIGAE3_ | 0.00911827 | 0.09215201 | 5.92E-05   | 0.013809 | 0.11326    |
| 9mo_SIGAE3_ | 0.05008591 | 0.49115676 | 0.0001049  | 0.093366 | 0.042456   |
| 9mo_SIGAE3_ | 0.07546122 | 0.7382998  | 0.00012619 | 0.062687 | -1.0589    |
| 9mo_SIGAE3_ | 0.07524712 | 0.7362146  | 0.00012598 | 0.063504 | -1.0589    |
| 9mo_SIGAE3_ | 0.01770458 | 0.17577842 | 6.76E-05   | 0.026932 | 0.37908    |
| 9mo_SIGAE3_ | 0.04411825 | 0.4330347  | 9.82E-05   | 0.10565  | 0.20107    |
| 9mo_SIGAE3_ | 0.03955567 | 0.38859737 | 9.30E-05   | 0.10937  | 0.33794    |
| 9mo_SIGAE3_ | 0.0634291  | 0.6211128  | 0.00011758 | 0.097678 | -0.50782   |
| 9mo_SIGAE3_ | 0.03230128 | 0.31794316 | 8.44E-05   | 0.081011 | 0.65793    |
| 9mo_SIGAE3_ | 0.01071908 | 0.1077431  | 6.05E-05   | 0.01548  | 0.10741    |
| 9mo_SIGAE3_ | 0.01194087 | 0.11964268 | 6.17E-05   | 0.017303 | 0.12065    |
| 9mo_SIGAE3_ | 0.07253148 | 0.70976555 | 0.00012424 | 0.071279 | -0.9499    |
| 9mo_SIGAE3_ | 0.03262858 | 0.32113087 | 8.48E-05   | 0.082909 | 0.64444    |
| 9mo_SIGAE3_ | 0.04975592 | 0.48794284 | 0.00010453 | 0.09379  | 0.052555   |
| 9mo_SIGAE3_ | 0.05129097 | 0.5028934  | 0.00010597 | 0.092472 | -0.0001745 |
| 9mo_SIGAE3_ | 0.06573169 | 0.64353895 | 0.00011925 | 0.093659 | -0.62617   |
| 9mo_SIGAE3_ | 0.01061487 | 0.10672813 | 6.05E-05   | 0.01548  | 0.10741    |

|             |            |            |            |           |            |
|-------------|------------|------------|------------|-----------|------------|
| 9mo_SIGAE3_ | 0.04786335 | 0.46951014 | 0.00010234 | 0.09734   | 0.10061    |
| 9mo_SIGAE3_ | 0.0413345  | 0.40592226 | 9.50E-05   | 0.10955   | 0.28067    |
| 9mo_SIGAE3_ | 0.02711295 | 0.26741135 | 7.82E-05   | 0.054511  | 0.77219    |
| 9mo_SIGAE3_ | 0.04731296 | 0.46414953 | 0.00010197 | 0.098057  | 0.11903    |
| 9mo_SIGAE3_ | 0.05146261 | 0.5045651  | 0.00010632 | 0.092309  | -0.0001745 |
| 9mo_SIGAE3_ | 0.0220073  | 0.21768484 | 7.22E-05   | 0.03647   | 0.62396    |
| 9mo_SIGAE3_ | 0.0706253  | 0.6912003  | 0.00012308 | 0.076976  | -0.8583    |
| 9mo_SIGAE3_ | 0.0348815  | 0.34307322 | 8.77E-05   | 0.095565  | 0.54051    |
| 9mo_SIGAE3_ | 0.01395751 | 0.13928382 | 6.37E-05   | 0.020323  | 0.18023    |
| 9mo_SIGAE3_ | 0.03528043 | 0.34695864 | 8.81E-05   | 0.097198  | 0.52494    |
| 9mo_SIGAE3_ | 0.03944543 | 0.38752368 | 9.30E-05   | 0.10937   | 0.35035    |
| 9mo_SIGAE3_ | 0.08570532 | 0.8380723  | 0.0001315  | 0.052818  | -1.2923    |
| 9mo_SIGAE3_ | 0.03407478 | 0.3352162  | 8.65E-05   | 0.090344  | 0.57137    |
| 9mo_SIGAE3_ | 0.06502902 | 0.63669527 | 0.00011871 | 0.095287  | -0.59222   |
| 9mo_SIGAE3_ | 0.00581039 | 0.05993481 | 5.63E-05   | 0.010269  | 0.19547    |
| 9mo_SIGAE3_ | 0.04548043 | 0.44630164 | 9.97E-05   | 0.10268   | 0.16436    |
| 9mo_SIGAE3_ | 0.04207439 | 0.41312847 | 9.62E-05   | 0.10856   | 0.25963    |
| 9mo_SIGAE3_ | 0.00827881 | 0.08397605 | 5.84E-05   | 0.012653  | 0.12871    |
| 9mo_SIGAE3_ | 0.0541825  | 0.53105545 | 0.0001091  | 0.092966  | -0.097097  |
| 9mo_SIGAE3_ | 0.05606497 | 0.54938984 | 0.00011078 | 0.094541  | -0.17881   |
| 9mo_SIGAE3_ | 0.05040913 | 0.49430478 | 0.00010525 | 0.093003  | 0.032151   |
| 9mo_SIGAE3_ | 0.03563578 | 0.3504196  | 8.86E-05   | 0.098764  | 0.50933    |
| 9mo_SIGAE3_ | 0.0498957  | 0.4893042  | 0.00010453 | 0.09379   | 0.042456   |
| 9mo_SIGAE3_ | 0.05354607 | 0.524857   | 0.00010842 | 0.092532  | -0.07149   |
| 9mo_SIGAE3_ | 0.03341053 | 0.32874677 | 8.57E-05   | 0.086671  | 0.60151    |
| 9mo_SIGAE3_ | 0.03997764 | 0.3927072  | 9.34E-05   | 0.10962   | 0.32588    |
| 9mo_SIGAE3_ | 0.01501742 | 0.1496068  | 6.47E-05   | 0.021973  | 0.22576    |
| 9mo_SIGAE3_ | 0.09003974 | 0.88028747 | 0.00013313 | 0.052597  | -1.3283    |
| 9mo_SIGAE3_ | 0.0890292  | 0.8704453  | 0.00013275 | 0.052622  | -1.3223    |
| 9mo_SIGAE3_ | 0.04172372 | 0.4097131  | 9.58E-05   | 0.10896   | 0.27003    |
| 9mo_SIGAE3_ | 0.07259566 | 0.7103907  | 0.00012424 | 0.071279  | -0.9499    |
| 9mo_SIGAE3_ | 0.04948314 | 0.4852861  | 0.00010417 | 0.094268  | 0.052555   |
| 9mo_SIGAE3_ | 0.06117712 | 0.5991797  | 0.00011553 | 0.098907  | -0.4087    |
| 9mo_SIGAE3_ | 0.02694789 | 0.26580375 | 7.78E-05   | 0.053015  | 0.77219    |
| 9mo_SIGAE3_ | 0.00223495 | 0.02511182 | 5.36E-05   | 0.0075574 | 0.34395    |
| 9mo_SIGAE3_ | 0.02517266 | 0.24851389 | 7.58E-05   | 0.046199  | 0.75539    |
| 9mo_SIGAE3_ | 0.05527688 | 0.5417142  | 0.00011011 | 0.093847  | -0.1508    |
| 9mo_SIGAE3_ | 0.0048929  | 0.05099893 | 5.55E-05   | 0.0093744 | 0.23478    |
| 9mo_SIGAE3_ | 0.05153063 | 0.50522757 | 0.00010632 | 0.092309  | -0.011455  |
| 9mo_SIGAE3_ | 0.03729709 | 0.36659986 | 9.06E-05   | 0.10531   | 0.43275    |
| 9mo_SIGAE3_ | 0.05139421 | 0.5038989  | 0.00010632 | 0.092309  | -0.0001745 |
| 9mo_SIGAE3_ | 0.06973776 | 0.6825561  | 0.00012235 | 0.080544  | -0.82636   |
| 9mo_SIGAE3_ | 0.0177596  | 0.17631435 | 6.76E-05   | 0.026932  | 0.37908    |
| 9mo_SIGAE3_ | 0.08952174 | 0.87524235 | 0.000133   | 0.052606  | -1.3264    |
| 9mo_SIGAE3_ | 0.00403198 | 0.04261397 | 5.50E-05   | 0.0088178 | 0.2638     |
| 9mo_SIGAE3_ | 0.06509372 | 0.6373254  | 0.00011898 | 0.094504  | -0.59222   |



|             |            |            |            |          |           |
|-------------|------------|------------|------------|----------|-----------|
| 9mo_SIGAE3_ | 0.06954348 | 0.68066394 | 0.00012235 | 0.080544 | -0.81017  |
| 9mo_SIGAE3_ | 0.06280495 | 0.615034   | 0.00011701 | 0.098387 | -0.49111  |
| 9mo_SIGAE3_ | 0.04648193 | 0.45605576 | 0.00010084 | 0.10033  | 0.13721   |
| 9mo_SIGAE3_ | 0.08702911 | 0.8509654  | 0.00013193 | 0.052709 | -1.3063   |
| 9mo_SIGAE3_ | 0.04280468 | 0.42024112 | 9.70E-05   | 0.10755  | 0.23945   |
| 9mo_SIGAE3_ | 0.0728786  | 0.7131464  | 0.00012446 | 0.070202 | -0.96444  |
| 9mo_SIGAE3_ | 0.05884028 | 0.57642    | 0.00011337 | 0.097465 | -0.29758  |
| 9mo_SIGAE3_ | 0.04420863 | 0.43391493 | 9.86E-05   | 0.10494  | 0.20107   |
| 9mo_SIGAE3_ | 0.05470513 | 0.5361456  | 0.00010944 | 0.093233 | -0.12355  |
| 9mo_SIGAE3_ | 0.06846514 | 0.67016137 | 0.00012136 | 0.085284 | -0.7609   |
| 9mo_SIGAE3_ | 0.09597677 | 0.93811125 | 0.00013505 | 0.052327 | -1.3442   |
| 9mo_SIGAE3_ | 0.02108057 | 0.20865895 | 7.10E-05   | 0.033786 | 0.58661   |
| 9mo_SIGAE3_ | 0.04604507 | 0.45180094 | 0.00010046 | 0.10111  | 0.14626   |
| 9mo_SIGAE3_ | 0.05762561 | 0.5645897  | 0.00011241 | 0.096416 | -0.23694  |
| 9mo_SIGAE3_ | 0.04461642 | 0.4378866  | 9.89E-05   | 0.10421  | 0.19178   |
| 9mo_SIGAE3_ | 0.04542577 | 0.4457693  | 9.97E-05   | 0.10268  | 0.16436   |
| 9mo_SIGAE3_ | 0.08678012 | 0.8485404  | 0.00013193 | 0.052709 | -1.3063   |
| 9mo_SIGAE3_ | 0.0898525  | 0.87846386 | 0.00013313 | 0.052597 | -1.3283   |
| 9mo_SIGAE3_ | 0.0126431  | 0.12648208 | 6.24E-05   | 0.018271 | 0.13519   |
| 9mo_SIGAE3_ | 0.07566321 | 0.7402671  | 0.00012619 | 0.062687 | -1.0712   |
| 9mo_SIGAE3_ | 0.05542135 | 0.54312134 | 0.00011011 | 0.093847 | -0.1508   |
| 9mo_SIGAE3_ | 0.01367329 | 0.13651566 | 6.34E-05   | 0.019794 | 0.16714   |
| 9mo_SIGAE3_ | 0.06229541 | 0.6100713  | 0.00011642 | 0.098794 | -0.4579   |
| 9mo_SIGAE3_ | 0.05459968 | 0.5351187  | 0.00010944 | 0.093233 | -0.12355  |
| 9mo_SIGAE3_ | 0.04072976 | 0.4000324  | 9.46E-05   | 0.10971  | 0.3027    |
| 9mo_SIGAE3_ | 0.06678437 | 0.65379155 | 0.00012006 | 0.090801 | -0.67704  |
| 9mo_SIGAE3_ | 0.0694602  | 0.6798528  | 0.00012211 | 0.081739 | -0.81017  |
| 9mo_SIGAE3_ | 0.04978016 | 0.48817888 | 0.00010453 | 0.09379  | 0.052555  |
| 9mo_SIGAE3_ | 0.02790543 | 0.27512977 | 7.90E-05   | 0.057632 | 0.76661   |
| 9mo_SIGAE3_ | 0.07605597 | 0.7440924  | 0.0001264  | 0.06191  | -1.0832   |
| 9mo_SIGAE3_ | 0.08527367 | 0.83386827 | 0.0001312  | 0.05293  | -1.2883   |
| 9mo_SIGAE3_ | 0.03190144 | 0.31404895 | 8.40E-05   | 0.07911  | 0.67094   |
| 9mo_SIGAE3_ | 0.05733258 | 0.56173575 | 0.00011209 | 0.096042 | -0.23694  |
| 9mo_SIGAE3_ | 0.06736986 | 0.6594939  | 0.00012058 | 0.088682 | -0.71078  |
| 9mo_SIGAE3_ | 0.04375617 | 0.42950818 | 9.78E-05   | 0.10633  | 0.21046   |
| 9mo_SIGAE3_ | 0.08233928 | 0.80528873 | 0.00012993 | 0.053861 | -1.2485   |
| 9mo_SIGAE3_ | 0.05406717 | 0.5299322  | 0.00010876 | 0.092731 | -0.097097 |
| 9mo_SIGAE3_ | 0.06215245 | 0.60867894 | 0.00011642 | 0.098794 | -0.4579   |
| 9mo_SIGAE3_ | 0.02888848 | 0.28470418 | 8.03E-05   | 0.062611 | 0.75723   |
| 9mo_SIGAE3_ | 0.08014325 | 0.7839005  | 0.00012871 | 0.055605 | -1.2004   |
| 9mo_SIGAE3_ | 0.05208628 | 0.5106393  | 0.00010703 | 0.092172 | -0.022986 |
| 9mo_SIGAE3_ | 0.06214253 | 0.6085823  | 0.00011642 | 0.098794 | -0.4579   |
| 9mo_SIGAE3_ | 0.03174161 | 0.31249222 | 8.36E-05   | 0.07721  | 0.67094   |
| 9mo_SIGAE3_ | 0.03723902 | 0.36603433 | 9.02E-05   | 0.1042   | 0.43275   |
| 9mo_SIGAE3_ | 0.01449242 | 0.14449356 | 6.41E-05   | 0.020862 | 0.19442   |
| 9mo_SIGAE3_ | 0.01263417 | 0.1263951  | 6.24E-05   | 0.018271 | 0.13519   |

|             |            |            |            |          |            |
|-------------|------------|------------|------------|----------|------------|
| 9mo_SIGAE3_ | 0.06356385 | 0.6224253  | 0.00011758 | 0.097678 | -0.5246    |
| 9mo_SIGAE3_ | 0.07082309 | 0.6931267  | 0.00012308 | 0.076976 | -0.87403   |
| 9mo_SIGAE3_ | 0.07264596 | 0.7108805  | 0.00012446 | 0.070202 | -0.9499    |
| 9mo_SIGAE3_ | 0.01637576 | 0.16283639 | 6.62E-05   | 0.024342 | 0.29808    |
| 9mo_SIGAE3_ | 0.05078938 | 0.49800822 | 0.00010561 | 0.092703 | 0.021622   |
| 9mo_SIGAE3_ | 0.00819756 | 0.08318471 | 5.84E-05   | 0.012653 | 0.12871    |
| 9mo_SIGAE3_ | 0.08989641 | 0.8788915  | 0.00013313 | 0.052597 | -1.3283    |
| 9mo_SIGAE3_ | 0.01428782 | 0.14250088 | 6.41E-05   | 0.020862 | 0.19442    |
| 9mo_SIGAE3_ | 0.04967541 | 0.48715863 | 0.00010453 | 0.09379  | 0.052555   |
| 9mo_SIGAE3_ | 0.05119238 | 0.5019332  | 0.00010597 | 0.092472 | -0.0001745 |
| 9mo_SIGAE3_ | 0.0672634  | 0.6584571  | 0.00012058 | 0.088682 | -0.71078   |
| 9mo_SIGAE3_ | 0.09114498 | 0.89105195 | 0.0001335  | 0.052565 | -1.3333    |
| 9mo_SIGAE3_ | 0.04523795 | 0.44394    | 9.97E-05   | 0.10268  | 0.17344    |
| 9mo_SIGAE3_ | 0.01485734 | 0.1480477  | 6.44E-05   | 0.021412 | 0.20962    |
| 9mo_SIGAE3_ | 0.07016066 | 0.68667495 | 0.0001226  | 0.07935  | -0.8424    |
| 9mo_SIGAE3_ | 0.06216859 | 0.6088362  | 0.00011642 | 0.098794 | -0.4579    |
| 9mo_SIGAE3_ | 0.04377649 | 0.42970613 | 9.78E-05   | 0.10633  | 0.21046    |
| 9mo_SIGAE3_ | 0.03030086 | 0.29846    | 8.19E-05   | 0.069725 | 0.71698    |
| 9mo_SIGAE3_ | 0.03620482 | 0.35596174 | 8.90E-05   | 0.10026  | 0.47826    |
| 9mo_SIGAE3_ | 0.0505424  | 0.49560273 | 0.00010525 | 0.093003 | 0.021622   |
| 9mo_SIGAE3_ | 0.04534108 | 0.4449444  | 9.97E-05   | 0.10268  | 0.17344    |
| 9mo_SIGAE3_ | 0.01661058 | 0.16512342 | 6.62E-05   | 0.024342 | 0.31771    |
| 9mo_SIGAE3_ | 0.03530172 | 0.347166   | 8.81E-05   | 0.097198 | 0.52494    |
| 9mo_SIGAE3_ | 0.02951903 | 0.29084542 | 8.11E-05   | 0.066108 | 0.7438     |
| 9mo_SIGAE3_ | 0.04489653 | 0.44061476 | 9.93E-05   | 0.10345  | 0.18258    |
| 9mo_SIGAE3_ | 0.0714839  | 0.6995626  | 0.00012355 | 0.074645 | -0.90497   |
| 9mo_SIGAE3_ | 0.09103406 | 0.8899717  | 0.0001335  | 0.052565 | -1.3333    |
| 9mo_SIGAE3_ | 0.06790493 | 0.6647053  | 0.0001211  | 0.086439 | -0.72756   |
| 9mo_SIGAE3_ | 0.05679701 | 0.55651957 | 0.00011144 | 0.095284 | -0.20754   |
| 9mo_SIGAE3_ | 0.05106781 | 0.50071996 | 0.00010597 | 0.092472 | 0.010852   |
| 9mo_SIGAE3_ | 0.01152044 | 0.11554794 | 6.14E-05   | 0.016833 | 0.11542    |
| 9mo_SIGAE3_ | 0.07130166 | 0.69778776 | 0.00012355 | 0.074645 | -0.88959   |
| 9mo_SIGAE3_ | 0.01106163 | 0.11107937 | 6.08E-05   | 0.015922 | 0.10884    |
| 9mo_SIGAE3_ | 0.04659632 | 0.45716983 | 0.00010122 | 0.099559 | 0.13721    |
| 9mo_SIGAE3_ | 0.06340478 | 0.620876   | 0.00011758 | 0.097678 | -0.50782   |
| 9mo_SIGAE3_ | 0.02457453 | 0.24268837 | 7.54E-05   | 0.044969 | 0.73857    |
| 9mo_SIGAE3_ | 0.05536639 | 0.54258597 | 0.00011011 | 0.093847 | -0.1508    |
| 9mo_SIGAE3_ | 0.01790739 | 0.17775376 | 6.76E-05   | 0.026932 | 0.37908    |
| 9mo_SIGAE3_ | 0.00865549 | 0.0876447  | 5.86E-05   | 0.013029 | 0.12259    |
| 9mo_SIGAE3_ | 0.06638082 | 0.64986116 | 0.00011979 | 0.091802 | -0.66011   |
| 9mo_SIGAE3_ | 0.05442582 | 0.53342533 | 0.0001091  | 0.092966 | -0.11022   |
| 9mo_SIGAE3_ | 0.06003766 | 0.5880819  | 0.00011462 | 0.098526 | -0.3445    |
| 9mo_SIGAE3_ | 0.07227365 | 0.70725447 | 0.00012401 | 0.07238  | -0.93514   |
| 9mo_SIGAE3_ | 0.07605173 | 0.7440511  | 0.0001264  | 0.06191  | -1.0832    |
| 9mo_SIGAE3_ | 0.08702833 | 0.8509578  | 0.00013193 | 0.052709 | -1.3063    |
| 9mo_SIGAE3_ | 0.07112352 | 0.69605273 | 0.00012331 | 0.075804 | -0.88959   |

|             |            |            |            |           |           |
|-------------|------------|------------|------------|-----------|-----------|
| 9mo_SIGAE3_ | 0.00827178 | 0.08390755 | 5.84E-05   | 0.012653  | 0.12871   |
| 9mo_SIGAE3_ | 0.06426855 | 0.62928873 | 0.00011815 | 0.096641  | -0.55833  |
| 9mo_SIGAE3_ | 0.03952371 | 0.38828605 | 9.30E-05   | 0.10937   | 0.35035   |
| 9mo_SIGAE3_ | 0.04981031 | 0.48847258 | 0.00010453 | 0.09379   | 0.042456  |
| 9mo_SIGAE3_ | 0.01295886 | 0.12955745 | 6.27E-05   | 0.018769  | 0.14454   |
| 9mo_SIGAE3_ | 0.04030011 | 0.3958479  | 9.38E-05   | 0.10975   | 0.31414   |
| 9mo_SIGAE3_ | 0.0394728  | 0.3877903  | 9.30E-05   | 0.10937   | 0.35035   |
| 9mo_SIGAE3_ | 0.06400254 | 0.6266979  | 0.00011787 | 0.097201  | -0.54144  |
| 9mo_SIGAE3_ | 0.04209064 | 0.4132867  | 9.62E-05   | 0.10856   | 0.25963   |
| 9mo_SIGAE3_ | 0.04086834 | 0.40138215 | 9.46E-05   | 0.10971   | 0.3027    |
| 9mo_SIGAE3_ | 0.05809068 | 0.5691192  | 0.00011273 | 0.096781  | -0.26697  |
| 9mo_SIGAE3_ | 0.08385314 | 0.820033   | 0.00013058 | 0.053285  | -1.2702   |
| 9mo_SIGAE3_ | 0.01091827 | 0.10968308 | 6.08E-05   | 0.015922  | 0.10884   |
| 9mo_SIGAE3_ | 0.05386312 | 0.5279449  | 0.00010876 | 0.092731  | -0.084185 |
| 9mo_SIGAE3_ | 0.07042813 | 0.68928    | 0.00012284 | 0.078159  | -0.8583   |
| 9mo_SIGAE3_ | 0.05597139 | 0.5484784  | 0.00011078 | 0.094541  | -0.17881  |
| 9mo_SIGAE3_ | 0.04832432 | 0.47399977 | 0.00010308 | 0.095994  | 0.091263  |
| 9mo_SIGAE3_ | 0.06791782 | 0.66483086 | 0.0001211  | 0.086439  | -0.72756  |
| 9mo_SIGAE3_ | 0.03934386 | 0.38653442 | 9.30E-05   | 0.10937   | 0.35035   |
| 9mo_SIGAE3_ | 0.079055   | 0.77330154 | 0.00012816 | 0.056721  | -1.1755   |
| 9mo_SIGAE3_ | 0.05033679 | 0.4936002  | 0.00010525 | 0.093003  | 0.032151  |
| 9mo_SIGAE3_ | 0.0687367  | 0.6728063  | 0.00012161 | 0.084113  | -0.77743  |
| 9mo_SIGAE3_ | 0.08289986 | 0.8107485  | 0.00013009 | 0.053693  | -1.2543   |
| 9mo_SIGAE3_ | 0.06423997 | 0.6290104  | 0.00011815 | 0.096641  | -0.55833  |
| 9mo_SIGAE3_ | 0.05397434 | 0.5290281  | 0.00010876 | 0.092731  | -0.097097 |
| 9mo_SIGAE3_ | 0.08353061 | 0.81689173 | 0.00013042 | 0.053406  | -1.2651   |
| 9mo_SIGAE3_ | 0.07924394 | 0.7751417  | 0.00012835 | 0.05632   | -1.1841   |
| 9mo_SIGAE3_ | 0.05322421 | 0.5217222  | 0.00010807 | 0.092373  | -0.07149  |
| 9mo_SIGAE3_ | 0.05234803 | 0.5131887  | 0.00010703 | 0.092172  | -0.03476  |
| 9mo_SIGAE3_ | 0.05043304 | 0.49453762 | 0.00010525 | 0.093003  | 0.032151  |
| 9mo_SIGAE3_ | 0.01235018 | 0.12362918 | 6.21E-05   | 0.017782  | 0.12723   |
| 9mo_SIGAE3_ | 0.02760669 | 0.27222016 | 7.86E-05   | 0.05605   | 0.76966   |
| 9mo_SIGAE3_ | 0.06865407 | 0.6720015  | 0.00012161 | 0.084113  | -0.77743  |
| 9mo_SIGAE3_ | 0.03077644 | 0.30309197 | 8.28E-05   | 0.073435  | 0.70647   |
| 9mo_SIGAE3_ | 0.06638753 | 0.64992654 | 0.00011979 | 0.091802  | -0.66011  |
| 9mo_SIGAE3_ | 0.07125341 | 0.69731784 | 0.00012331 | 0.075804  | -0.88959  |
| 9mo_SIGAE3_ | 0.0411197  | 0.40383023 | 9.50E-05   | 0.10955   | 0.29155   |
| 9mo_SIGAE3_ | 0.05359809 | 0.5253636  | 0.00010842 | 0.092532  | -0.084185 |
| 9mo_SIGAE3_ | 0.05818608 | 0.5700484  | 0.00011273 | 0.096781  | -0.26697  |
| 9mo_SIGAE3_ | 0.04998832 | 0.4902062  | 0.0001049  | 0.093366  | 0.042456  |
| 9mo_SIGAF3_ | 0.04467187 | 0.4384267  | 9.89E-05   | 0.10421   | 0.18258   |
| 9mo_SIGAF3_ | 0.0034629  | 0.03707143 | 5.44E-05   | 0.0082917 | 0.2947    |
| 9mo_SIGAF3_ | 0.04983782 | 0.48874044 | 0.00010453 | 0.09379   | 0.042456  |
| 9mo_SIGAF3_ | 0.05650183 | 0.55364466 | 0.00011144 | 0.095284  | -0.19309  |
| 9mo_SIGAF3_ | 0.03325894 | 0.32727027 | 8.57E-05   | 0.086671  | 0.61617   |
| 9mo_SIGAF3_ | 0.04149469 | 0.40748248 | 9.54E-05   | 0.10929   | 0.28067   |

|             |            |            |            |          |           |
|-------------|------------|------------|------------|----------|-----------|
| 9mo_SIGAF3_ | 0.01085309 | 0.10904831 | 6.08E-05   | 0.015922 | 0.10884   |
| 9mo_SIGAF3_ | 0.06121526 | 0.5995511  | 0.00011553 | 0.098907 | -0.4087   |
| 9mo_SIGAF3_ | 0.07676358 | 0.75098413 | 0.000127   | 0.059827 | -1.1061   |
| 9mo_SIGAF3_ | 0.0406944  | 0.39968804 | 9.46E-05   | 0.10971  | 0.3027    |
| 9mo_SIGAF3_ | 0.04040608 | 0.39687994 | 9.42E-05   | 0.10978  | 0.31414   |
| 9mo_SIGAF3_ | 0.07720401 | 0.75527376 | 0.0001272  | 0.059217 | -1.1276   |
| 9mo_SIGAF3_ | 0.01909682 | 0.18933818 | 6.91E-05   | 0.029782 | 0.46374   |
| 9mo_SIGAF3_ | 0.05649681 | 0.5535957  | 0.00011144 | 0.095284 | -0.19309  |
| 9mo_SIGAF3_ | 0.06567707 | 0.643007   | 0.00011925 | 0.093659 | -0.62617  |
| 9mo_SIGAF3_ | 0.05305941 | 0.5201171  | 0.00010807 | 0.092373 | -0.059017 |
| 9mo_SIGAF3_ | 0.04357147 | 0.4277093  | 9.78E-05   | 0.10633  | 0.21998   |
| 9mo_SIGAF3_ | 0.06754518 | 0.6612014  | 0.00012084 | 0.087573 | -0.71078  |
| 9mo_SIGAF3_ | 0.06010061 | 0.588695   | 0.00011462 | 0.098526 | -0.36038  |
| 9mo_SIGAF3_ | 0.0738183  | 0.7222986  | 0.00012513 | 0.067136 | -1.0066   |
| 9mo_SIGAF3_ | 0.04930821 | 0.48358235 | 0.00010417 | 0.094268 | 0.062467  |
| 9mo_SIGAF3_ | 0.01185031 | 0.11876074 | 6.17E-05   | 0.017303 | 0.12065   |
| 9mo_SIGAF3_ | 0.04849832 | 0.47569442 | 0.00010308 | 0.095994 | 0.081803  |
| 9mo_SIGAF3_ | 0.07655406 | 0.74894357 | 0.0001268  | 0.060479 | -1.1061   |
| 9mo_SIGAF3_ | 0.00725739 | 0.07402793 | 5.75E-05   | 0.011579 | 0.15252   |
| 9mo_SIGAF3_ | 0.05917731 | 0.57970256 | 0.00011368 | 0.097776 | -0.31309  |
| 9mo_SIGAF3_ | 0.08304678 | 0.81217945 | 0.00013026 | 0.053541 | -1.2598   |
| 9mo_SIGAF3_ | 0.03913139 | 0.3844651  | 9.26E-05   | 0.10901  | 0.36311   |
| 9mo_SIGAF3_ | 0.02974867 | 0.29308197 | 8.15E-05   | 0.067903 | 0.7357    |
| 9mo_SIGAF3_ | 0.06816851 | 0.66727245 | 0.00012136 | 0.085284 | -0.74427  |
| 9mo_SIGAF3_ | 0.04266302 | 0.4188614  | 9.66E-05   | 0.10808  | 0.23945   |
| 9mo_SIGAF3_ | 0.03832964 | 0.3766564  | 9.18E-05   | 0.10791  | 0.38979   |
| 9mo_SIGAF3_ | 0.04494214 | 0.44105893 | 9.93E-05   | 0.10345  | 0.18258   |
| 9mo_SIGAF3_ | 0.06792776 | 0.66492754 | 0.0001211  | 0.086439 | -0.72756  |
| 9mo_SIGAF3_ | 0.05297046 | 0.51925087 | 0.00010773 | 0.092257 | -0.059017 |
| 9mo_SIGAF3_ | 0.05404694 | 0.5297352  | 0.00010876 | 0.092731 | -0.097097 |
| 9mo_SIGAF3_ | 0.05307138 | 0.52023375 | 0.00010807 | 0.092373 | -0.059017 |
| 9mo_SIGAF3_ | 0.0613846  | 0.6012004  | 0.00011583 | 0.09893  | -0.4087   |
| 9mo_SIGAF3_ | 0.04054968 | 0.3982786  | 9.42E-05   | 0.10978  | 0.31414   |
| 9mo_SIGAF3_ | 0.0270848  | 0.26713717 | 7.82E-05   | 0.054511 | 0.77219   |
| 9mo_SIGAF3_ | 0.05810486 | 0.5692574  | 0.00011273 | 0.096781 | -0.26697  |
| 9mo_SIGAF3_ | 0.06055897 | 0.5931592  | 0.00011492 | 0.0987   | -0.37638  |
| 9mo_SIGAF3_ | 0.03663335 | 0.36013538 | 8.98E-05   | 0.10298  | 0.46289   |
| 9mo_SIGAF3_ | 0.0626021  | 0.6130583  | 0.00011672 | 0.098627 | -0.47447  |
| 9mo_SIGAF3_ | 0.04338953 | 0.4259373  | 9.74E-05   | 0.10696  | 0.21998   |
| 9mo_SIGAF3_ | 0.06334537 | 0.6202974  | 0.0001173  | 0.098072 | -0.50782  |
| 9mo_SIGAF3_ | 0.02161689 | 0.21388239 | 7.18E-05   | 0.035549 | 0.6056    |
| 9mo_SIGAF3_ | 0.06468221 | 0.63331753 | 0.00011843 | 0.096001 | -0.57526  |
| 9mo_SIGAF3_ | 0.00655569 | 0.06719369 | 5.69E-05   | 0.010907 | 0.17252   |
| 9mo_SIGAF3_ | 0.04571996 | 0.44863456 | 0.00010009 | 0.1019   | 0.1553    |
| 9mo_SIGAF3_ | 0.04489905 | 0.44063923 | 9.93E-05   | 0.10345  | 0.18258   |
| 9mo_SIGAF3_ | 0.03171113 | 0.31219536 | 8.36E-05   | 0.07721  | 0.67094   |

|             |            |            |            |          |            |
|-------------|------------|------------|------------|----------|------------|
| 9mo_SIGAF3_ | 0.07525208 | 0.73626286 | 0.00012598 | 0.063504 | -1.0589    |
| 9mo_SIGAF3_ | 0.03236458 | 0.31855965 | 8.44E-05   | 0.081011 | 0.64444    |
| 9mo_SIGAF3_ | 0.06427246 | 0.62932676 | 0.00011815 | 0.096641 | -0.55833   |
| 9mo_SIGAF3_ | 0.06651539 | 0.65117186 | 0.00012006 | 0.090801 | -0.66011   |
| 9mo_SIGAF3_ | 0.04686717 | 0.45980775 | 0.00010122 | 0.099559 | 0.12814    |
| 9mo_SIGAF3_ | 0.053081   | 0.5203274  | 0.00010807 | 0.092373 | -0.059017  |
| 9mo_SIGAF3_ | 0.05615708 | 0.55028695 | 0.00011111 | 0.094909 | -0.17881   |
| 9mo_SIGAF3_ | 0.05070405 | 0.49717715 | 0.00010561 | 0.092703 | 0.021622   |
| 9mo_SIGAF3_ | 0.0116218  | 0.11653516 | 6.14E-05   | 0.016833 | 0.11542    |
| 9mo_SIGAF3_ | 0.04653473 | 0.45656994 | 0.00010122 | 0.099559 | 0.13721    |
| 9mo_SIGAF3_ | 0.07790091 | 0.7620612  | 0.00012759 | 0.058113 | -1.1478    |
| 9mo_SIGAF3_ | 0.06490218 | 0.63545996 | 0.00011871 | 0.095287 | -0.59222   |
| 9mo_SIGAF3_ | 0.07602292 | 0.74377054 | 0.0001264  | 0.06191  | -1.0832    |
| 9mo_SIGAF3_ | 0.05877161 | 0.57575125 | 0.00011337 | 0.097465 | -0.29758   |
| 9mo_SIGAF3_ | 0.03677477 | 0.3615128  | 8.98E-05   | 0.10298  | 0.46289    |
| 9mo_SIGAF3_ | 0.01020009 | 0.10268837 | 6.02E-05   | 0.015048 | 0.10718    |
| 9mo_SIGAF3_ | 0.07344633 | 0.7186758  | 0.00012491 | 0.068128 | -0.99278   |
| 9mo_SIGAF3_ | 0.04689216 | 0.46005115 | 0.00010159 | 0.098799 | 0.12814    |
| 9mo_SIGAF3_ | 0.03133444 | 0.30852658 | 8.32E-05   | 0.075317 | 0.6834     |
| 9mo_SIGAF3_ | 0.05275073 | 0.51711076 | 0.00010773 | 0.092257 | -0.046772  |
| 9mo_SIGAF3_ | 0.08899764 | 0.87013793 | 0.00013275 | 0.052622 | -1.3223    |
| 9mo_SIGAF3_ | 0.03408278 | 0.33529407 | 8.65E-05   | 0.090344 | 0.57137    |
| 9mo_SIGAF3_ | 0.06824204 | 0.6679886  | 0.00012136 | 0.085284 | -0.74427   |
| 9mo_SIGAF3_ | 0.0513333  | 0.50330573 | 0.00010597 | 0.092472 | -0.0001745 |
| 9mo_SIGAF3_ | 0.02814847 | 0.27749678 | 7.94E-05   | 0.059253 | 0.76661    |
| 9mo_SIGAF3_ | 0.02507008 | 0.24751477 | 7.58E-05   | 0.046199 | 0.74769    |
| 9mo_SIGAF3_ | 0.05530059 | 0.5419451  | 0.00011011 | 0.093847 | -0.1508    |
| 9mo_SIGAF3_ | 0.07721718 | 0.75540197 | 0.0001272  | 0.059217 | -1.1276    |
| 9mo_SIGAF3_ | 0.04482586 | 0.43992648 | 9.93E-05   | 0.10345  | 0.18258    |
| 9mo_SIGAF3_ | 0.06831339 | 0.66868347 | 0.00012136 | 0.085284 | -0.7609    |
| 9mo_SIGAF3_ | 0.08097138 | 0.791966   | 0.00012924 | 0.054725 | -1.2227    |
| 9mo_SIGAF3_ | 0.04626546 | 0.45394748 | 0.00010084 | 0.10033  | 0.14626    |
| 9mo_SIGAF3_ | 0.08873485 | 0.8675785  | 0.00013261 | 0.052631 | -1.32      |
| 9mo_SIGAF3_ | 0.0559982  | 0.54873955 | 0.00011078 | 0.094541 | -0.17881   |
| 9mo_SIGAF3_ | 0.05716375 | 0.5600914  | 0.00011177 | 0.095663 | -0.22216   |
| 9mo_SIGAF3_ | 0.07388047 | 0.7229041  | 0.00012513 | 0.067136 | -1.0066    |
| 9mo_SIGAF3_ | 0.04838907 | 0.47463033 | 0.00010308 | 0.095994 | 0.091263   |
| 9mo_SIGAF3_ | 0.03849661 | 0.3782826  | 9.18E-05   | 0.10791  | 0.38979    |
| 9mo_SIGAF3_ | 0.048867   | 0.47928518 | 0.00010344 | 0.095375 | 0.072211   |
| 9mo_SIGAF3_ | 0.00710372 | 0.07253125 | 5.75E-05   | 0.011579 | 0.15252    |
| 9mo_SIGAF3_ | 0.01545892 | 0.15390684 | 6.51E-05   | 0.022546 | 0.24275    |
| 9mo_SIGAF3_ | 0.0624431  | 0.6115097  | 0.00011672 | 0.098627 | -0.4579    |
| 9mo_SIGAF3_ | 0.04352344 | 0.42724144 | 9.78E-05   | 0.10633  | 0.21998    |
| 9mo_SIGAF3_ | 0.0304584  | 0.2999944  | 8.23E-05   | 0.07157  | 0.71698    |
| 9mo_SIGAF3_ | 0.07721706 | 0.75540084 | 0.0001272  | 0.059217 | -1.1276    |
| 9mo_SIGAF3_ | 0.06858714 | 0.67134964 | 0.00012161 | 0.084113 | -0.7609    |

|             |            |            |            |           |            |
|-------------|------------|------------|------------|-----------|------------|
| 9mo_SIGAF3_ | 0.04928323 | 0.48333904 | 0.00010417 | 0.094268  | 0.062467   |
| 9mo_SIGAF3_ | 0.00709062 | 0.07240365 | 5.75E-05   | 0.011579  | 0.15252    |
| 9mo_SIGAF3_ | 0.04363324 | 0.42831093 | 9.78E-05   | 0.10633   | 0.21998    |
| 9mo_SIGAF3_ | 0.08530646 | 0.8341876  | 0.0001312  | 0.05293   | -1.2883    |
| 9mo_SIGAF3_ | 0.06959117 | 0.6811284  | 0.00012235 | 0.080544  | -0.81017   |
| 9mo_SIGAF3_ | 0.0425286  | 0.41755226 | 9.66E-05   | 0.10808   | 0.24945    |
| 9mo_SIGAF3_ | 0.07897667 | 0.77253854 | 0.00012816 | 0.056721  | -1.1755    |
| 9mo_SIGAF3_ | 0.0133322  | 0.1331936  | 6.30E-05   | 0.019276  | 0.15521    |
| 9mo_SIGAF3_ | 0.05454243 | 0.5345611  | 0.00010944 | 0.093233  | -0.11022   |
| 9mo_SIGAF3_ | 0.06147438 | 0.60207486 | 0.00011583 | 0.09893   | -0.42501   |
| 9mo_SIGAF3_ | 0.0512084  | 0.50208926 | 0.00010597 | 0.092472  | -0.0001745 |
| 9mo_SIGAF3_ | 0.06360128 | 0.6227898  | 0.00011758 | 0.097678  | -0.5246    |
| 9mo_SIGAF3_ | 0.09222211 | 0.90154266 | 0.00013397 | 0.05251   | -1.3372    |
| 9mo_SIGAF3_ | 0.06316046 | 0.6184964  | 0.0001173  | 0.098072  | -0.50782   |
| 9mo_SIGAF3_ | 0.07819185 | 0.76489484 | 0.00012778 | 0.057615  | -1.1478    |
| 9mo_SIGAF3_ | 0.0430935  | 0.4230541  | 9.70E-05   | 0.10755   | 0.22964    |
| 9mo_SIGAF3_ | 0.03079388 | 0.30326185 | 8.28E-05   | 0.073435  | 0.70647    |
| 9mo_SIGAF3_ | 0.02592522 | 0.2558435  | 7.66E-05   | 0.04879   | 0.76634    |
| 9mo_SIGAF3_ | 0.03697701 | 0.3634825  | 9.02E-05   | 0.1042    | 0.4477     |
| 9mo_SIGAF3_ | 0.02506115 | 0.24742785 | 7.58E-05   | 0.046199  | 0.74769    |
| 9mo_SIGAF3_ | 0.05176491 | 0.5075093  | 0.00010668 | 0.092211  | -0.011455  |
| 9mo_SIGAF3_ | 0.01218728 | 0.12204264 | 6.17E-05   | 0.017303  | 0.12723    |
| 9mo_SIGAF3_ | 0.07765184 | 0.7596353  | 0.0001274  | 0.058646  | -1.1379    |
| 9mo_SIGAF3_ | 0.03129476 | 0.30814016 | 8.32E-05   | 0.075317  | 0.69526    |
| 9mo_SIGAF3_ | 0.04165497 | 0.40904352 | 9.54E-05   | 0.10929   | 0.27003    |
| 9mo_SIGAF3_ | 0.00990523 | 0.09981658 | 5.98E-05   | 0.014626  | 0.1081     |
| 9mo_SIGAF3_ | 0.05597836 | 0.5485463  | 0.00011078 | 0.094541  | -0.17881   |
| 9mo_SIGAF3_ | 0.06192616 | 0.60647494 | 0.00011613 | 0.098894  | -0.44141   |
| 9mo_SIGAF3_ | 0.01095848 | 0.1100747  | 6.08E-05   | 0.015922  | 0.10884    |
| 9mo_SIGAF3_ | 0.02082147 | 0.20613545 | 7.10E-05   | 0.033786  | 0.56707    |
| 9mo_SIGAF3_ | 0.01922305 | 0.19056761 | 6.91E-05   | 0.029782  | 0.46374    |
| 9mo_SIGAF3_ | 0.05407127 | 0.52997214 | 0.00010876 | 0.092731  | -0.097097  |
| 9mo_SIGAF3_ | 0.02429758 | 0.23999104 | 7.50E-05   | 0.043782  | 0.72811    |
| 9mo_SIGAF3_ | 0.06091571 | 0.5966336  | 0.00011523 | 0.098828  | -0.39249   |
| 9mo_SIGAF3_ | 0.0671171  | 0.65703213 | 0.00012032 | 0.089759  | -0.69393   |
| 9mo_SIGAF3_ | 0.06161139 | 0.6034093  | 0.00011583 | 0.09893   | -0.42501   |
| 9mo_SIGAF3_ | 0.06343652 | 0.6211852  | 0.00011758 | 0.097678  | -0.50782   |
| 9mo_SIGAF3_ | 0.02993251 | 0.2948725  | 8.15E-05   | 0.067903  | 0.7357     |
| 9mo_SIGAF3_ | 0.08032688 | 0.78568894 | 0.00012889 | 0.055287  | -1.2081    |
| 9mo_SIGAF3_ | 0.07045163 | 0.6895089  | 0.00012284 | 0.078159  | -0.8583    |
| 9mo_SIGAF3_ | 0.07258369 | 0.7102741  | 0.00012424 | 0.071279  | -0.9499    |
| 9mo_SIGAF3_ | 0.00051434 | 0.00835395 | 5.21E-05   | 0.0062712 | 0.43121    |
| 9mo_SIGAF3_ | 0.05020415 | 0.4923084  | 0.0001049  | 0.093366  | 0.032151   |
| 9mo_SIGAF3_ | 0.05748675 | 0.5632373  | 0.00011209 | 0.096042  | -0.23694   |
| 9mo_SIGAF3_ | 0.01555817 | 0.15487342 | 6.51E-05   | 0.022546  | 0.24275    |
| 9mo_SIGAF3_ | 0.01601651 | 0.15933745 | 6.58E-05   | 0.023731  | 0.27899    |

|             |            |            |            |           |           |
|-------------|------------|------------|------------|-----------|-----------|
| 9mo_SIGAF3_ | 0.07647792 | 0.7482019  | 0.0001268  | 0.060479  | -1.0948   |
| 9mo_SIGAF3_ | 0.05432334 | 0.53242725 | 0.0001091  | 0.092966  | -0.11022  |
| 9mo_SIGAF3_ | 0.03978698 | 0.39085022 | 9.34E-05   | 0.10962   | 0.33794   |
| 9mo_SIGAF3_ | 0.08297009 | 0.81143254 | 0.00013026 | 0.053541  | -1.2543   |
| 9mo_SIGAF3_ | 0.04193169 | 0.41173863 | 9.58E-05   | 0.10896   | 0.25963   |
| 9mo_SIGAF3_ | 0.07091783 | 0.6940494  | 0.00012331 | 0.075804  | -0.87403  |
| 9mo_SIGAF3_ | 0.04814903 | 0.47229245 | 0.00010271 | 0.09665   | 0.091263  |
| 9mo_SIGAF3_ | 0.02678709 | 0.2642376  | 7.78E-05   | 0.053015  | 0.77158   |
| 9mo_SIGAF3_ | 0.03896253 | 0.38282046 | 9.22E-05   | 0.10852   | 0.36311   |
| 9mo_SIGAF3_ | 0.06050387 | 0.5926226  | 0.00011492 | 0.0987    | -0.37638  |
| 9mo_SIGAF3_ | 0.04794587 | 0.4703138  | 0.00010271 | 0.09665   | 0.10061   |
| 9mo_SIGAF3_ | 0.05266777 | 0.51630276 | 0.00010738 | 0.092189  | -0.046772 |
| 9mo_SIGAF3_ | 0.07399489 | 0.7240185  | 0.00012513 | 0.067136  | -1.0066   |
| 9mo_SIGAF3_ | 0.04925648 | 0.48307848 | 0.00010381 | 0.094798  | 0.062467  |
| 9mo_SIGAF3_ | 0.01067762 | 0.10733929 | 6.05E-05   | 0.01548   | 0.10741   |
| 9mo_SIGAF3_ | 0.05574685 | 0.54629153 | 0.00011045 | 0.094186  | -0.16472  |
| 9mo_SIGAF3_ | 0.05971576 | 0.58494675 | 0.00011431 | 0.098311  | -0.32873  |
| 9mo_SIGAF3_ | 0.0768204  | 0.7515375  | 0.000127   | 0.059827  | -1.1061   |
| 9mo_SIGAF3_ | 0.07609643 | 0.74448645 | 0.0001266  | 0.061174  | -1.0832   |
| 9mo_SIGAF3_ | 0.02112092 | 0.20905188 | 7.14E-05   | 0.034655  | 0.58661   |
| 9mo_SIGAF3_ | 0.01397662 | 0.13946989 | 6.37E-05   | 0.020323  | 0.18023   |
| 9mo_SIGAF3_ | 0.04778459 | 0.46874303 | 0.00010234 | 0.09734   | 0.10061   |
| 9mo_SIGAF3_ | 0.05283912 | 0.51797163 | 0.00010773 | 0.092257  | -0.046772 |
| 9mo_SIGAF3_ | 0.02889702 | 0.2847873  | 8.03E-05   | 0.062611  | 0.75723   |
| 9mo_SIGAF3_ | 0.06424025 | 0.62901306 | 0.00011815 | 0.096641  | -0.55833  |
| 9mo_SIGAF3_ | 0.03675096 | 0.36128083 | 8.98E-05   | 0.10298   | 0.46289   |
| 9mo_SIGAF3_ | 0.0595648  | 0.5834765  | 0.000114   | 0.098059  | -0.32873  |
| 9mo_SIGAF3_ | 0.06742256 | 0.66000724 | 0.00012058 | 0.088682  | -0.71078  |
| 9mo_SIGAF3_ | 0.01134797 | 0.11386813 | 6.11E-05   | 0.016373  | 0.1115    |
| 9mo_SIGAF3_ | 0.05734103 | 0.561818   | 0.00011209 | 0.096042  | -0.23694  |
| 9mo_SIGAF3_ | 0.06607188 | 0.6468522  | 0.00011953 | 0.092756  | -0.64315  |
| 9mo_SIGAF3_ | 0.07704039 | 0.75368017 | 0.000127   | 0.059827  | -1.117    |
| 9mo_SIGAF3_ | 0.09332809 | 0.91231436 | 0.00013431 | 0.052462  | -1.3409   |
| 9mo_SIGAF3_ | 0.05321243 | 0.5216075  | 0.00010807 | 0.092373  | -0.059017 |
| 9mo_SIGAF3_ | 0.07859337 | 0.7688054  | 0.00012797 | 0.057152  | -1.1666   |
| 9mo_SIGAF3_ | 0.0597119  | 0.5849092  | 0.00011431 | 0.098311  | -0.32873  |
| 9mo_SIGAF3_ | 0.05345547 | 0.5239746  | 0.00010842 | 0.092532  | -0.07149  |
| 9mo_SIGAF3_ | 0.04906862 | 0.4812488  | 0.00010381 | 0.094798  | 0.072211  |
| 9mo_SIGAF3_ | 0.05092872 | 0.49936527 | 0.00010561 | 0.092703  | 0.010852  |
| 9mo_SIGAF3_ | 0.00864769 | 0.08756878 | 5.86E-05   | 0.013029  | 0.12259   |
| 9mo_SIGAF3_ | 0.05470527 | 0.536147   | 0.00010944 | 0.093233  | -0.12355  |
| 9mo_SIGAF3_ | 0.07072881 | 0.69220847 | 0.00012308 | 0.076976  | -0.87403  |
| 9mo_SIGAF3_ | 0.05179955 | 0.5078467  | 0.00010668 | 0.092211  | -0.011455 |
| 9mo_SIGAF3_ | 0.00218011 | 0.02457771 | 5.34E-05   | 0.0073266 | 0.36099   |
| 9mo_SIGAF3_ | 0.03592804 | 0.353266   | 8.90E-05   | 0.10026   | 0.49376   |
| 9mo_SIGAF3_ | 0.08781321 | 0.8586021  | 0.00013235 | 0.052652  | -1.315    |

|             |            |            |            |           |           |
|-------------|------------|------------|------------|-----------|-----------|
| 9mo_SIGAF3_ | 0.08262022 | 0.80802494 | 0.00013009 | 0.053693  | -1.2485   |
| 9mo_SIGAF3_ | 0.06791573 | 0.6648104  | 0.0001211  | 0.086439  | -0.72756  |
| 9mo_SIGAF3_ | 0.07421193 | 0.72613233 | 0.00012534 | 0.066176  | -1.0201   |
| 9mo_SIGAF3_ | 0.03294    | 0.32416403 | 8.52E-05   | 0.084798  | 0.6305    |
| 9mo_SIGAF3_ | 0.05805136 | 0.5687363  | 0.00011273 | 0.096781  | -0.26697  |
| 9mo_SIGAF3_ | 0.06123904 | 0.59978276 | 0.00011553 | 0.098907  | -0.4087   |
| 9mo_SIGAF3_ | 0.04666606 | 0.4578491  | 0.00010122 | 0.099559  | 0.13721   |
| 9mo_SIGAF3_ | 0.03731198 | 0.36674497 | 9.06E-05   | 0.10531   | 0.43275   |
| 9mo_SIGAF3_ | 0.08821168 | 0.862483   | 0.00013248 | 0.05264   | -1.3176   |
| 9mo_SIGAF3_ | 0.08346631 | 0.81626546 | 0.00013042 | 0.053406  | -1.2651   |
| 9mo_SIGAF3_ | 0.0526517  | 0.5161463  | 0.00010738 | 0.092189  | -0.046772 |
| 9mo_SIGAF3_ | 0.03712563 | 0.36492994 | 9.02E-05   | 0.1042    | 0.4477    |
| 9mo_SIGAF3_ | 0.04770462 | 0.46796414 | 0.00010234 | 0.09734   | 0.10986   |
| 9mo_SIGAF3_ | 0.00723537 | 0.07381345 | 5.75E-05   | 0.011579  | 0.15252   |
| 9mo_SIGAF3_ | 0.07228646 | 0.7073793  | 0.00012424 | 0.071279  | -0.93514  |
| 9mo_SIGAF3_ | 0.05310156 | 0.5205277  | 0.00010807 | 0.092373  | -0.059017 |
| 9mo_SIGAF3_ | 0.0456929  | 0.44837096 | 0.00010009 | 0.1019    | 0.1553    |
| 9mo_SIGAF3_ | 0.03492254 | 0.34347296 | 8.77E-05   | 0.095565  | 0.54051   |
| 9mo_SIGAF3_ | 0.05004473 | 0.49075565 | 0.0001049  | 0.093366  | 0.042456  |
| 9mo_SIGAF3_ | 0.03144566 | 0.3096099  | 8.36E-05   | 0.07721   | 0.6834    |
| 9mo_SIGAF3_ | 0.06473151 | 0.6337977  | 0.00011871 | 0.095287  | -0.57526  |
| 9mo_SIGAF3_ | 0.04608107 | 0.45215157 | 0.00010046 | 0.10111   | 0.14626   |
| 9mo_SIGAF3_ | 0.04669895 | 0.4581694  | 0.00010122 | 0.099559  | 0.13721   |
| 9mo_SIGAF3_ | 0.05797939 | 0.56803536 | 0.00011273 | 0.096781  | -0.25188  |
| 9mo_SIGAF3_ | 0.04370054 | 0.4289664  | 9.78E-05   | 0.10633   | 0.21046   |
| 9mo_SIGAF3_ | 0.05033465 | 0.49357936 | 0.00010525 | 0.093003  | 0.032151  |
| 9mo_SIGAF3_ | 0.02383084 | 0.23544526 | 7.42E-05   | 0.041523  | 0.71639   |
| 9mo_SIGAF3_ | 0.06393252 | 0.62601596 | 0.00011787 | 0.097201  | -0.54144  |
| 9mo_SIGAF3_ | 0.0215831  | 0.21355332 | 7.18E-05   | 0.035549  | 0.6056    |
| 9mo_SIGAF3_ | 0.03385709 | 0.33309594 | 8.65E-05   | 0.090344  | 0.58656   |
| 9mo_SIGAF3_ | 0.00201354 | 0.02295543 | 5.34E-05   | 0.0073266 | 0.36099   |
| 9mo_SIGAF3_ | 0.02569802 | 0.25363067 | 7.66E-05   | 0.04879   | 0.7616    |
| 9mo_SIGAF3_ | 0.06658358 | 0.651836   | 0.00012006 | 0.090801  | -0.67704  |
| 9mo_SIGAF3_ | 0.0809628  | 0.7918825  | 0.00012924 | 0.054725  | -1.2227   |
| 9mo_SIGAF3_ | 0.03708234 | 0.36450836 | 9.02E-05   | 0.1042    | 0.4477    |
| 9mo_SIGAF3_ | 0.0339226  | 0.333734   | 8.65E-05   | 0.090344  | 0.58656   |
| 9mo_SIGAF3_ | 0.09002265 | 0.88012105 | 0.00013313 | 0.052597  | -1.3283   |
| 9mo_SIGAF3_ | 0.04910824 | 0.48163477 | 0.00010381 | 0.094798  | 0.072211  |
| 9mo_SIGAF3_ | 0.04273239 | 0.41953704 | 9.66E-05   | 0.10808   | 0.23945   |
| 9mo_SIGAF3_ | 0.02116158 | 0.20944797 | 7.14E-05   | 0.034655  | 0.58661   |
| 9mo_SIGAF3_ | 0.05760408 | 0.56438005 | 0.00011241 | 0.096416  | -0.23694  |
| 9mo_SIGAF3_ | 0.06873078 | 0.6727486  | 0.00012161 | 0.084113  | -0.77743  |
| 9mo_SIGAF3_ | 0.0841931  | 0.8233441  | 0.00013074 | 0.053178  | -1.2751   |
| 9mo_SIGAF3_ | 0.04277005 | 0.4199039  | 9.70E-05   | 0.10755   | 0.23945   |
| 9mo_SIGAF3_ | 0.03228673 | 0.31780142 | 8.44E-05   | 0.081011  | 0.65793   |
| 9mo_SIGAF3_ | 0.03893317 | 0.38253456 | 9.22E-05   | 0.10852   | 0.36311   |



|             |            |            |            |          |           |
|-------------|------------|------------|------------|----------|-----------|
| 9mo_SIGAF3_ | 0.05859556 | 0.57403654 | 0.00011337 | 0.097465 | -0.2822   |
| 9mo_SIGAF3_ | 0.08531383 | 0.8342594  | 0.0001312  | 0.05293  | -1.2883   |
| 9mo_SIGAF3_ | 0.04844246 | 0.47515035 | 0.00010308 | 0.095994 | 0.081803  |
| 9mo_SIGAF3_ | 0.09552006 | 0.93366313 | 0.00013495 | 0.052348 | -1.344    |
| 9mo_SIGAF3_ | 0.04559092 | 0.4473777  | 0.00010009 | 0.1019   | 0.16436   |
| 9mo_SIGAF3_ | 0.03642926 | 0.35814762 | 8.94E-05   | 0.10166  | 0.47826   |
| 9mo_SIGAF3_ | 0.07785828 | 0.76164603 | 0.00012759 | 0.058113 | -1.1379   |
| 9mo_SIGAF3_ | 0.05656394 | 0.5542496  | 0.00011144 | 0.095284 | -0.19309  |
| 9mo_SIGAF3_ | 0.06880821 | 0.6735028  | 0.00012161 | 0.084113 | -0.77743  |
| 9mo_SIGAF3_ | 0.07193924 | 0.70399743 | 0.00012378 | 0.073503 | -0.92016  |
| 9mo_SIGAF3_ | 0.06334788 | 0.62032187 | 0.0001173  | 0.098072 | -0.50782  |
| 9mo_SIGAF3_ | 0.0190819  | 0.18919289 | 6.91E-05   | 0.029782 | 0.46374   |
| 9mo_SIGAF3_ | 0.05289311 | 0.51849747 | 0.00010773 | 0.092257 | -0.059017 |
| 9mo_SIGAF3_ | 0.04407391 | 0.43260282 | 9.82E-05   | 0.10565  | 0.20107   |
| 9mo_SIGAF3_ | 0.06009958 | 0.588685   | 0.00011462 | 0.098526 | -0.36038  |
| 9mo_SIGAF3_ | 0.02638072 | 0.26027977 | 7.74E-05   | 0.051562 | 0.76965   |
| 9mo_SIGAF3_ | 0.05539237 | 0.54283905 | 0.00011011 | 0.093847 | -0.1508   |
| 9mo_SIGAF3_ | 0.03045109 | 0.29992324 | 8.23E-05   | 0.07157  | 0.71698   |
| 9mo_SIGAF3_ | 0.0117493  | 0.11777692 | 6.14E-05   | 0.016833 | 0.11542   |
| 9mo_SIGAF3_ | 0.06665283 | 0.65251046 | 0.00012006 | 0.090801 | -0.67704  |
| 9mo_SIGAF3_ | 0.04783795 | 0.46926275 | 0.00010234 | 0.09734  | 0.10061   |
| 9mo_SIGAF3_ | 0.03678431 | 0.36160564 | 8.98E-05   | 0.10298  | 0.46289   |
| 9mo_SIGAF3_ | 0.02272386 | 0.22466373 | 7.30E-05   | 0.038397 | 0.65846   |
| 9mo_SIGAF3_ | 0.05408521 | 0.5301079  | 0.0001091  | 0.092966 | -0.097097 |
| 9mo_SIGAF3_ | 0.03553781 | 0.34946537 | 8.81E-05   | 0.097198 | 0.50933   |
| 9mo_SIGAF3_ | 0.02998501 | 0.2953838  | 8.15E-05   | 0.067903 | 0.72675   |
| 9mo_SIGAF3_ | 0.07383035 | 0.722416   | 0.00012513 | 0.067136 | -1.0066   |
| 9mo_SIGAF3_ | 0.06084081 | 0.59590423 | 0.00011523 | 0.098828 | -0.39249  |
| 9mo_SIGAF3_ | 0.0274327  | 0.27052552 | 7.86E-05   | 0.05605  | 0.77153   |
| 9mo_SIGAF3_ | 0.05266485 | 0.5162744  | 0.00010738 | 0.092189 | -0.046772 |
| 9mo_SIGAF3_ | 0.04154591 | 0.40798134 | 9.54E-05   | 0.10929  | 0.28067   |
| 9mo_SIGAF3_ | 0.06931896 | 0.67847717 | 0.00012211 | 0.081739 | -0.81017  |
| 9mo_SIGAF3_ | 0.0594677  | 0.58253074 | 0.000114   | 0.098059 | -0.32873  |
| 9mo_SIGAF3_ | 0.00750125 | 0.07640301 | 5.78E-05   | 0.011928 | 0.14372   |
| 9mo_SIGAF3_ | 0.05932543 | 0.5811451  | 0.000114   | 0.098059 | -0.31309  |
| 9mo_SIGAF3_ | 0.01049322 | 0.10554335 | 6.05E-05   | 0.01548  | 0.10741   |
| 9mo_SIGAF3_ | 0.01584072 | 0.15762539 | 6.54E-05   | 0.023132 | 0.26052   |
| 9mo_SIGAF3_ | 0.05684525 | 0.55698943 | 0.00011177 | 0.095663 | -0.20754  |
| 9mo_SIGAF3_ | 0.07447798 | 0.7287235  | 0.00012556 | 0.06525  | -1.0333   |
| 9mo_SIGAF3_ | 0.03893816 | 0.3825831  | 9.22E-05   | 0.10852  | 0.36311   |
| 9mo_SIGAF3_ | 0.01926436 | 0.19096996 | 6.91E-05   | 0.029782 | 0.46374   |
| 9mo_SIGAF3_ | 0.06543419 | 0.64064145 | 0.00011925 | 0.093659 | -0.60919  |
| 9mo_SIGAF3_ | 0.08256519 | 0.807489   | 0.00012993 | 0.053861 | -1.2485   |
| 9mo_SIGAF3_ | 0.00890519 | 0.09007669 | 5.89E-05   | 0.013414 | 0.11742   |
| 9mo_SIGAF3_ | 0.04296741 | 0.421826   | 9.70E-05   | 0.10755  | 0.22964   |
| 9mo_SIGAF3_ | 0.0556596  | 0.5454417  | 0.00011045 | 0.094186 | -0.16472  |

|             |            |            |            |           |           |
|-------------|------------|------------|------------|-----------|-----------|
| 9mo_SIGAF3_ | 0.0378341  | 0.37183017 | 9.10E-05   | 0.1063    | 0.40374   |
| 9mo_SIGAF3_ | 0.04741542 | 0.46514753 | 0.00010197 | 0.098057  | 0.10986   |
| 9mo_SIGAF3_ | 0.06686869 | 0.65461284 | 0.00012032 | 0.089759  | -0.67704  |
| 9mo_SIGAF3_ | 0.08117563 | 0.7939554  | 0.00012924 | 0.054725  | -1.2227   |
| 9mo_SIGAF3_ | 0.04765185 | 0.4674502  | 0.00010234 | 0.09734   | 0.10986   |
| 9mo_SIGAF3_ | 0.03644645 | 0.35831508 | 8.94E-05   | 0.10166   | 0.47826   |
| 9mo_SIGAF3_ | 0.05332059 | 0.522661   | 0.00010807 | 0.092373  | -0.07149  |
| 9mo_SIGAF3_ | 0.06378887 | 0.62461686 | 0.00011787 | 0.097201  | -0.5246   |
| 9mo_SIGAF3_ | 0.07121247 | 0.6969191  | 0.00012331 | 0.075804  | -0.88959  |
| 9mo_SIGAF3_ | 0.07693598 | 0.75266325 | 0.000127   | 0.059827  | -1.117    |
| 9mo_SIGAF3_ | 0.07909541 | 0.77369505 | 0.00012816 | 0.056721  | -1.1755   |
| 9mo_SIGAF3_ | 0.0406119  | 0.39888456 | 9.42E-05   | 0.10978   | 0.3027    |
| 9mo_SIGAF3_ | 0.00352523 | 0.03767849 | 5.44E-05   | 0.0082917 | 0.2947    |
| 9mo_SIGAF3_ | 0.08769842 | 0.8574841  | 0.00013221 | 0.052667  | -1.3123   |
| 9mo_SIGAF3_ | 0.05161499 | 0.50604916 | 0.00010632 | 0.092309  | -0.011455 |
| 9mo_SIGAF3_ | 0.04429564 | 0.4347623  | 9.86E-05   | 0.10494   | 0.20107   |
| 9mo_SIGAF3_ | 0.05525121 | 0.5414642  | 0.00011011 | 0.093847  | -0.13708  |
| 9mo_SIGAF3_ | 0.02659692 | 0.26238552 | 7.74E-05   | 0.051562  | 0.77158   |
| 9mo_SIGAF3_ | 0.01724162 | 0.1712694  | 6.69E-05   | 0.025607  | 0.33781   |
| 9mo_SIGAF3_ | 0.07906923 | 0.77344006 | 0.00012816 | 0.056721  | -1.1755   |
| 9mo_SIGAF3_ | 0.08622006 | 0.8430857  | 0.00013164 | 0.052775  | -1.2997   |
| 9mo_SIGAF3_ | 0.00288267 | 0.03142031 | 5.39E-05   | 0.007795  | 0.3272    |
| 9mo_SIGAF3_ | 0.02524823 | 0.24924989 | 7.62E-05   | 0.047472  | 0.75539   |
| 9mo_SIGAF3_ | 0.06699834 | 0.6558755  | 0.00012032 | 0.089759  | -0.69393  |
| 9mo_SIGAF3_ | 0.06191383 | 0.6063549  | 0.00011613 | 0.098894  | -0.44141  |
| 9mo_SIGAF3_ | 0.04956275 | 0.48606142 | 0.00010417 | 0.094268  | 0.052555  |
| 9mo_SIGAF3_ | 0.0357579  | 0.35160893 | 8.86E-05   | 0.098764  | 0.50933   |
| 9mo_SIGAF3_ | 0.04224885 | 0.4148276  | 9.62E-05   | 0.10856   | 0.25963   |
| 9mo_SIGAF3_ | 0.06118108 | 0.59921825 | 0.00011553 | 0.098907  | -0.4087   |
| 9mo_SIGAF3_ | 0.03362717 | 0.33085668 | 8.61E-05   | 0.088522  | 0.60151   |
| 9mo_SIGAF3_ | 0.05023426 | 0.4926016  | 0.0001049  | 0.093366  | 0.032151  |
| 9mo_SIGAF3_ | 0.04517989 | 0.44337454 | 9.97E-05   | 0.10268   | 0.17344   |
| 9mo_SIGAF3_ | 0.0720964  | 0.70552814 | 0.00012401 | 0.07238   | -0.93514  |
| 9mo_SIGAF3_ | 0.03831342 | 0.3764984  | 9.18E-05   | 0.10791   | 0.38979   |
| 9mo_SIGAF3_ | 0.01961567 | 0.19439152 | 6.95E-05   | 0.030541  | 0.48489   |
| 9mo_SIGAF3_ | 0.07579177 | 0.7415192  | 0.0001264  | 0.06191   | -1.0712   |
| 9mo_SIGAF3_ | 0.05497387 | 0.53876305 | 0.00010978 | 0.093528  | -0.13708  |
| 9mo_SIGAF3_ | 0.07347837 | 0.7189878  | 0.00012491 | 0.068128  | -0.99278  |
| 9mo_SIGAF3_ | 0.03324214 | 0.32710665 | 8.57E-05   | 0.086671  | 0.61617   |
| 9mo_SIGAF3_ | 0.05430198 | 0.5322192  | 0.0001091  | 0.092966  | -0.11022  |
| 9mo_SIGAF3_ | 0.07129714 | 0.6977437  | 0.00012355 | 0.074645  | -0.88959  |
| 9mo_SIGAF3_ | 0.06702703 | 0.656155   | 0.00012032 | 0.089759  | -0.69393  |
| 9mo_SIGAF3_ | 0.02999997 | 0.29552948 | 8.15E-05   | 0.067903  | 0.72675   |
| 9mo_SIGAF3_ | 0.08017629 | 0.78422236 | 0.00012871 | 0.055605  | -1.2004   |
| 9mo_SIGAF3_ | 0.04221323 | 0.41448072 | 9.62E-05   | 0.10856   | 0.25963   |
| 9mo_SIGAF3_ | 0.00775506 | 0.07887495 | 5.81E-05   | 0.012286  | 0.13577   |

|             |            |            |            |           |            |
|-------------|------------|------------|------------|-----------|------------|
| 9mo_SIGAF3_ | 0.06213921 | 0.60855    | 0.00011642 | 0.098794  | -0.4579    |
| 9mo_SIGAF3_ | 0.02374489 | 0.2346081  | 7.42E-05   | 0.041523  | 0.70349    |
| 9mo_SIGAF3_ | 0.01156767 | 0.11600798 | 6.14E-05   | 0.016833  | 0.11542    |
| 9mo_SIGAF3_ | 0.0514387  | 0.50433224 | 0.00010632 | 0.092309  | -0.0001745 |
| 9mo_SIGAF3_ | 0.05056817 | 0.4958537  | 0.00010525 | 0.093003  | 0.021622   |
| 9mo_SIGAF3_ | 0.05161814 | 0.5060799  | 0.00010632 | 0.092309  | -0.011455  |
| 9mo_SIGAF3_ | 0.06915347 | 0.6768654  | 0.00012186 | 0.08293   | -0.79386   |
| 9mo_SIGAF3_ | 0.03064342 | 0.30179647 | 8.23E-05   | 0.07157   | 0.70647    |
| 9mo_SIGAF3_ | 0.06913814 | 0.6767161  | 0.00012186 | 0.08293   | -0.79386   |
| 9mo_SIGAF3_ | 0.01976479 | 0.1958439  | 6.99E-05   | 0.031319  | 0.50588    |
| 9mo_SIGAF3_ | 0.04677015 | 0.4588629  | 0.00010122 | 0.099559  | 0.12814    |
| 9mo_SIGAF3_ | 0.08260907 | 0.80791634 | 0.00013009 | 0.053693  | -1.2485    |
| 9mo_SIGAF3_ | 0.03911664 | 0.38432142 | 9.26E-05   | 0.10901   | 0.36311    |
| 9mo_SIGAF3_ | 0.04576363 | 0.44905987 | 0.00010009 | 0.1019    | 0.1553     |
| 9mo_SIGAF3_ | 0.07537326 | 0.73744315 | 0.00012598 | 0.063504  | -1.0589    |
| 9mo_SIGAF3_ | 0.00493844 | 0.05144245 | 5.55E-05   | 0.0093744 | 0.23478    |
| 9mo_SIGAF3_ | 0.00853166 | 0.08643869 | 5.86E-05   | 0.013029  | 0.12259    |
| 9mo_SIGAF3_ | 0.08771597 | 0.85765505 | 0.00013221 | 0.052667  | -1.3123    |
| 9mo_SIGAF3_ | 0.08602527 | 0.8411885  | 0.00013164 | 0.052775  | -1.2961    |
| 9mo_SIGAF3_ | 0.03288629 | 0.3236409  | 8.52E-05   | 0.084798  | 0.6305     |
| 9mo_SIGAF3_ | 0.03018773 | 0.29735819 | 8.19E-05   | 0.069725  | 0.72675    |
| 9mo_SIGAF3_ | 0.06279016 | 0.61488986 | 0.00011701 | 0.098387  | -0.47447   |
| 9mo_SIGAF3_ | 0.07247666 | 0.7092316  | 0.00012424 | 0.071279  | -0.9499    |
| 9mo_SIGAF3_ | 0.06243405 | 0.6114216  | 0.00011672 | 0.098627  | -0.4579    |
| 9mo_SIGAF3_ | 0.00451467 | 0.04731513 | 5.52E-05   | 0.0090922 | 0.24903    |
| 9mo_SIGAF3_ | 0.05409168 | 0.530171   | 0.0001091  | 0.092966  | -0.097097  |
| 9mo_SIGAF3_ | 0.04943575 | 0.48482454 | 0.00010417 | 0.094268  | 0.062467   |
| 9mo_SIGAF3_ | 0.06942166 | 0.67947745 | 0.00012211 | 0.081739  | -0.81017   |
| 9mo_SIGAF3_ | 0.0648094  | 0.6345563  | 0.00011871 | 0.095287  | -0.57526   |
| 9mo_SIGAF3_ | 0.04948312 | 0.4852859  | 0.00010417 | 0.094268  | 0.052555   |
| 9mo_SIGAF3_ | 0.00443654 | 0.04655419 | 5.52E-05   | 0.0090922 | 0.24903    |
| 9mo_SIGAF3_ | 0.04911133 | 0.48166484 | 0.00010381 | 0.094798  | 0.072211   |
| 9mo_SIGAF3_ | 0.05161454 | 0.5060448  | 0.00010632 | 0.092309  | -0.011455  |
| 9mo_SIGAF3_ | 0.0495467  | 0.4859051  | 0.00010417 | 0.094268  | 0.052555   |
| 9mo_SIGAF3_ | 0.01073354 | 0.10788395 | 6.05E-05   | 0.01548   | 0.10741    |
| 9mo_SIGAF3_ | 0.0708534  | 0.6934219  | 0.00012308 | 0.076976  | -0.87403   |
| 9mo_SIGAF3_ | 0.05270305 | 0.5166464  | 0.00010738 | 0.092189  | -0.046772  |
| 9mo_SIGAF3_ | 0.02250912 | 0.22257233 | 7.30E-05   | 0.038397  | 0.65846    |
| 9mo_SIGAF3_ | 0.01412492 | 0.14091428 | 6.37E-05   | 0.020323  | 0.18023    |
| 9mo_SIGAF3_ | 0.09460502 | 0.9247511  | 0.00013474 | 0.052388  | -1.3428    |
| 9mo_SIGAF3_ | 0.01385567 | 0.1382919  | 6.34E-05   | 0.019794  | 0.16714    |
| 9mo_SIGAF3_ | 0.03510064 | 0.34520757 | 8.77E-05   | 0.095565  | 0.52494    |
| 9mo_SIGAF3_ | 0.01652179 | 0.16425863 | 6.62E-05   | 0.024342  | 0.29808    |
| 9mo_SIGAF3_ | 0.06700237 | 0.6559148  | 0.00012032 | 0.089759  | -0.69393   |
| 9mo_SIGAF3_ | 0.02059938 | 0.20397243 | 7.06E-05   | 0.032941  | 0.54704    |
| 9mo_SIGAF3_ | 0.07965374 | 0.7791329  | 0.00012853 | 0.055948  | -1.1924    |

|             |            |            |            |           |           |
|-------------|------------|------------|------------|-----------|-----------|
| 9mo_SIGAF3_ | 0.00421865 | 0.04443207 | 5.50E-05   | 0.0088178 | 0.2638    |
| 9mo_SIGAF3_ | 0.02620058 | 0.25852528 | 7.70E-05   | 0.050154  | 0.76965   |
| 9mo_SIGAF3_ | 0.03179585 | 0.31302053 | 8.40E-05   | 0.07911   | 0.67094   |
| 9mo_SIGAF3_ | 0.03482576 | 0.34253034 | 8.73E-05   | 0.093873  | 0.54051   |
| 9mo_SIGAF3_ | 0.0473012  | 0.46403506 | 0.00010197 | 0.098057  | 0.11903   |
| 9mo_SIGAF3_ | 0.0565718  | 0.55432606 | 0.00011144 | 0.095284  | -0.19309  |
| 9mo_SIGAF3_ | 0.09052321 | 0.8849962  | 0.00013338 | 0.052577  | -1.3317   |
| 9mo_SIGAF3_ | 0.03830875 | 0.37645295 | 9.18E-05   | 0.10791   | 0.38979   |
| 9mo_SIGAF3_ | 0.04554888 | 0.4469683  | 0.00010009 | 0.1019    | 0.16436   |
| 9mo_SIGAF3_ | 0.07159312 | 0.70062643 | 0.00012355 | 0.074645  | -0.90497  |
| 9mo_SIGAF3_ | 0.03604289 | 0.35438463 | 8.90E-05   | 0.10026   | 0.49376   |
| 9mo_SIGAF3_ | 0.05839667 | 0.57209945 | 0.00011305 | 0.097132  | -0.2822   |
| 9mo_SIGAF3_ | 0.03203018 | 0.31530276 | 8.40E-05   | 0.07911   | 0.65793   |
| 9mo_SIGAF3_ | 0.05518241 | 0.54079413 | 0.00011011 | 0.093847  | -0.13708  |
| 9mo_SIGAF3_ | 0.03816303 | 0.37503368 | 9.14E-05   | 0.10717   | 0.38979   |
| 9mo_SIGAF3_ | 0.01954181 | 0.1936722  | 6.95E-05   | 0.030541  | 0.48489   |
| 9mo_SIGAF3_ | 0.00949238 | 0.09579561 | 5.95E-05   | 0.014213  | 0.11014   |
| 9mo_SIGAF3_ | 0.0451721  | 0.44329867 | 9.97E-05   | 0.10268   | 0.17344   |
| 9mo_SIGAF3_ | 0.05250272 | 0.5146953  | 0.00010738 | 0.092189  | -0.03476  |
| 9mo_SIGAF3_ | 0.05214151 | 0.5111773  | 0.00010703 | 0.092172  | -0.022986 |
| 9mo_SIGAF3_ | 0.03073838 | 0.30272132 | 8.28E-05   | 0.073435  | 0.70647   |
| 9mo_SIGAF3_ | 0.07769311 | 0.7600373  | 0.0001274  | 0.058646  | -1.1379   |
| 9mo_SIGAF3_ | 0.05242521 | 0.51394033 | 0.00010738 | 0.092189  | -0.03476  |
| 9mo_SIGAF3_ | 0.02294707 | 0.2268377  | 7.34E-05   | 0.039406  | 0.67444   |
| 9mo_SIGAF3_ | 0.06936657 | 0.67894095 | 0.00012211 | 0.081739  | -0.81017  |
| 9mo_SIGAF3_ | 0.08176683 | 0.7997134  | 0.00012959 | 0.054253  | -1.2361   |
| 9mo_SIGAF3_ | 0.03582701 | 0.35228205 | 8.86E-05   | 0.098764  | 0.49376   |
| 9mo_SIGAF3_ | 0.06958924 | 0.68110955 | 0.00012235 | 0.080544  | -0.81017  |
| 9mo_SIGAF3_ | 0.07094768 | 0.6943401  | 0.00012331 | 0.075804  | -0.87403  |
| 9mo_SIGAF3_ | 0.07163595 | 0.70104355 | 0.00012378 | 0.073503  | -0.90497  |
| 9mo_SIGAF3_ | 0.07681102 | 0.7514462  | 0.000127   | 0.059827  | -1.1061   |
| 9mo_SIGAF3_ | 0.07521084 | 0.73586124 | 0.00012598 | 0.063504  | -1.0589   |
| 9mo_SIGAF3_ | 0.04727926 | 0.46382138 | 0.00010197 | 0.098057  | 0.11903   |
| 9mo_SIGAF3_ | 0.06273389 | 0.61434186 | 0.00011701 | 0.098387  | -0.47447  |
| 9mo_SIGAF3_ | 0.02841452 | 0.28008807 | 7.99E-05   | 0.060913  | 0.76245   |
| 9mo_SIGAF3_ | 0.0414421  | 0.40697026 | 9.54E-05   | 0.10929   | 0.28067   |
| 9mo_SIGAF3_ | 0.0193356  | 0.19166374 | 6.91E-05   | 0.029782  | 0.46374   |
| 9mo_SIGAF3_ | 0.02686621 | 0.2650082  | 7.78E-05   | 0.053015  | 0.77219   |
| 9mo_SIGAF3_ | 0.06528808 | 0.63921845 | 0.00011898 | 0.094504  | -0.60919  |
| 9mo_SIGAF3_ | 0.07446344 | 0.72858196 | 0.00012556 | 0.06525   | -1.0333   |
| 9mo_SIGAF3_ | 0.04515534 | 0.4431354  | 9.93E-05   | 0.10345   | 0.17344   |
| 9mo_SIGAF3_ | 0.03104186 | 0.30567706 | 8.28E-05   | 0.073435  | 0.69526   |
| 9mo_SIGAF3_ | 0.05389693 | 0.52827424 | 0.00010876 | 0.092731  | -0.084185 |
| 9mo_SIGAF3_ | 0.06205029 | 0.6076839  | 0.00011642 | 0.098794  | -0.44141  |
| 9mo_SIGAF3_ | 0.06730527 | 0.6588649  | 0.00012058 | 0.088682  | -0.71078  |
| 9mo_SIGAF3_ | 0.04841575 | 0.47489026 | 0.00010308 | 0.095994  | 0.091263  |

|             |            |            |            |          |           |
|-------------|------------|------------|------------|----------|-----------|
| 9mo_SIGAF3_ | 0.05178309 | 0.5076864  | 0.00010668 | 0.092211 | -0.011455 |
| 9mo_SIGAF3_ | 0.0808857  | 0.7911316  | 0.00012924 | 0.054725 | -1.2155   |
| 9mo_SIGAF3_ | 0.03513381 | 0.3455306  | 8.77E-05   | 0.095565 | 0.52494   |
| 9mo_SIGAF3_ | 0.06984403 | 0.6835911  | 0.00012235 | 0.080544 | -0.82636  |
| 9mo_SIGAF3_ | 0.00781721 | 0.0794803  | 5.81E-05   | 0.012286 | 0.13577   |
| 9mo_SIGAF3_ | 0.06574547 | 0.6436731  | 0.00011925 | 0.093659 | -0.62617  |
| 9mo_SIGAF3_ | 0.06478363 | 0.63430536 | 0.00011871 | 0.095287 | -0.57526  |
| 9mo_SIGAF3_ | 0.04815633 | 0.47236353 | 0.00010271 | 0.09665  | 0.091263  |
| 9mo_SIGAF3_ | 0.03947791 | 0.38784003 | 9.30E-05   | 0.10937  | 0.35035   |
| 9mo_SIGAF3_ | 0.04019383 | 0.3948127  | 9.38E-05   | 0.10975  | 0.32588   |
| 9mo_SIGAF3_ | 0.03487621 | 0.34302166 | 8.77E-05   | 0.095565 | 0.54051   |
| 9mo_SIGAF3_ | 0.04374237 | 0.42937374 | 9.78E-05   | 0.10633  | 0.21046   |
| 9mo_SIGAF3_ | 0.05351964 | 0.52459955 | 0.00010842 | 0.092532 | -0.07149  |
| 9mo_SIGAF3_ | 0.05787083 | 0.56697804 | 0.00011273 | 0.096781 | -0.25188  |
| 9mo_SIGAF3_ | 0.04457205 | 0.43745446 | 9.89E-05   | 0.10421  | 0.19178   |
| 9mo_SIGAF3_ | 0.04673863 | 0.45855582 | 0.00010122 | 0.099559 | 0.12814   |
| 9mo_SIGAF3_ | 0.05751003 | 0.563464   | 0.00011209 | 0.096042 | -0.23694  |
| 9mo_SIGAF3_ | 0.05714091 | 0.559869   | 0.00011177 | 0.095663 | -0.22216  |
| 9mo_SIGAF3_ | 0.06497799 | 0.6361983  | 0.00011871 | 0.095287 | -0.59222  |
| 9mo_SIGAF3_ | 0.0598538  | 0.5862912  | 0.00011431 | 0.098311 | -0.3445   |
| 9mo_SIGAF3_ | 0.04349583 | 0.42697263 | 9.78E-05   | 0.10633  | 0.21998   |
| 9mo_SIGAF3_ | 0.01463134 | 0.14584659 | 6.44E-05   | 0.021412 | 0.20962   |
| 9mo_SIGAF3_ | 0.0448418  | 0.44008166 | 9.93E-05   | 0.10345  | 0.18258   |
| 9mo_SIGAF3_ | 0.04586014 | 0.44999984 | 0.00010046 | 0.10111  | 0.1553    |
| 9mo_SIGAF3_ | 0.05223033 | 0.5120423  | 0.00010703 | 0.092172 | -0.03476  |
| 9mo_SIGAF3_ | 0.05020892 | 0.4923548  | 0.0001049  | 0.093366 | 0.032151  |
| 9mo_SIGAF3_ | 0.05655502 | 0.5541627  | 0.00011144 | 0.095284 | -0.19309  |
| 9mo_SIGAF3_ | 0.05748799 | 0.56324935 | 0.00011209 | 0.096042 | -0.23694  |
| 9mo_SIGAF3_ | 0.07644867 | 0.7479171  | 0.0001268  | 0.060479 | -1.0948   |
| 9mo_SIGAF3_ | 0.05932765 | 0.58116674 | 0.000114   | 0.098059 | -0.31309  |
| 9mo_SIGAF3_ | 0.0505489  | 0.4956661  | 0.00010525 | 0.093003 | 0.021622  |
| 9mo_SIGAF3_ | 0.04702403 | 0.46133557 | 0.00010159 | 0.098799 | 0.12814   |
| 9mo_SIGAF3_ | 0.02189484 | 0.21658948 | 7.22E-05   | 0.03647  | 0.62396   |
| 9mo_SIGAF3_ | 0.06279428 | 0.61493003 | 0.00011701 | 0.098387 | -0.47447  |
| 9mo_SIGAF3_ | 0.06124692 | 0.5998595  | 0.00011553 | 0.098907 | -0.4087   |
| 9mo_SIGAF3_ | 0.07574675 | 0.74108076 | 0.0001264  | 0.06191  | -1.0712   |
| 9mo_SIGAF3_ | 0.01342474 | 0.13409494 | 6.30E-05   | 0.019276 | 0.15521   |
| 9mo_SIGAF3_ | 0.05890955 | 0.5770946  | 0.00011368 | 0.097776 | -0.29758  |
| 9mo_SIGAF3_ | 0.07314504 | 0.71574134 | 0.00012469 | 0.069151 | -0.97873  |
| 9mo_SIGAF3_ | 0.04624121 | 0.45371124 | 0.00010084 | 0.10033  | 0.14626   |
| 9mo_SIGAF3_ | 0.05083788 | 0.4984806  | 0.00010561 | 0.092703 | 0.010852  |
| 9mo_SIGAF3_ | 0.03522742 | 0.3464423  | 8.81E-05   | 0.097198 | 0.52494   |
| 9mo_SIGAF3_ | 0.01969296 | 0.19514433 | 6.95E-05   | 0.030541 | 0.50588   |
| 9mo_SIGAF3_ | 0.0491511  | 0.48205218 | 0.00010381 | 0.094798 | 0.062467  |
| 9mo_SIGAF3_ | 0.07743084 | 0.75748295 | 0.0001272  | 0.059217 | -1.1276   |
| 9mo_SIGAF3_ | 0.0826486  | 0.8083014  | 0.00013009 | 0.053693 | -1.2485   |

|             |            |            |            |           |            |
|-------------|------------|------------|------------|-----------|------------|
| 9mo_SIGAF3_ | 0.0362686  | 0.3565829  | 8.94E-05   | 0.10166   | 0.47826    |
| 9mo_SIGAF3_ | 0.00541987 | 0.05613142 | 5.61E-05   | 0.0099627 | 0.20797    |
| 9mo_SIGAF3_ | 0.03741217 | 0.36772078 | 9.06E-05   | 0.10531   | 0.43275    |
| 9mo_SIGAF3_ | 0.04916126 | 0.48215106 | 0.00010381 | 0.094798  | 0.062467   |
| 9mo_SIGAF3_ | 0.02373516 | 0.23451333 | 7.42E-05   | 0.041523  | 0.70349    |
| 9mo_SIGAF3_ | 0.04791411 | 0.4700045  | 0.00010271 | 0.09665   | 0.10061    |
| 9mo_SIGAF3_ | 0.0630985  | 0.617893   | 0.0001173  | 0.098072  | -0.49111   |
| 9mo_SIGAF3_ | 0.00815903 | 0.0828094  | 5.84E-05   | 0.012653  | 0.12871    |
| 9mo_SIGAF3_ | 0.07586636 | 0.7422457  | 0.0001264  | 0.06191   | -1.0832    |
| 9mo_SIGAF3_ | 0.03856129 | 0.37891254 | 9.18E-05   | 0.10791   | 0.37625    |
| 9mo_SIGAF3_ | 0.01393575 | 0.13907193 | 6.37E-05   | 0.020323  | 0.18023    |
| 9mo_SIGAF3_ | 0.07269308 | 0.7113395  | 0.00012446 | 0.070202  | -0.9499    |
| 9mo_SIGAF3_ | 0.0600744  | 0.58843976 | 0.00011462 | 0.098526  | -0.36038   |
| 9mo_SIGAF3_ | 0.04358366 | 0.42782798 | 9.78E-05   | 0.10633   | 0.21998    |
| 9mo_SIGAF3_ | 0.0513625  | 0.5035901  | 0.00010632 | 0.092309  | -0.0001745 |
| 9mo_SIGAF3_ | 0.00725553 | 0.07400982 | 5.75E-05   | 0.011579  | 0.15252    |
| 9mo_SIGAF3_ | 0.05148974 | 0.50482935 | 0.00010632 | 0.092309  | -0.0001745 |
| 9mo_SIGAF3_ | 0.03130623 | 0.3082519  | 8.32E-05   | 0.075317  | 0.69526    |
| 9mo_SIGAF3_ | 0.06860828 | 0.6715555  | 0.00012161 | 0.084113  | -0.7609    |
| 9mo_SIGAF3_ | 0.07052397 | 0.69021344 | 0.00012284 | 0.078159  | -0.8583    |
| 9mo_SIGAF3_ | 0.06043993 | 0.5919998  | 0.00011492 | 0.0987    | -0.37638   |
| 9mo_SIGAF3_ | 0.06054767 | 0.59304917 | 0.00011492 | 0.0987    | -0.37638   |
| 9mo_SIGAF3_ | 0.04829514 | 0.47371548 | 0.00010308 | 0.095994  | 0.091263   |
| 9mo_SIGAF3_ | 0.05768756 | 0.565193   | 0.00011241 | 0.096416  | -0.25188   |
| 9mo_SIGAF3_ | 0.07093223 | 0.69418967 | 0.00012331 | 0.075804  | -0.87403   |
| 9mo_SIGAF3_ | 0.06286918 | 0.61565953 | 0.00011701 | 0.098387  | -0.49111   |
| 9mo_SIGAF3_ | 0.07923396 | 0.77504444 | 0.00012835 | 0.05632   | -1.1841    |
| 9mo_SIGAF3_ | 0.04040895 | 0.3969079  | 9.42E-05   | 0.10978   | 0.31414    |
| 9mo_SIGAF3_ | 0.08655767 | 0.84637386 | 0.00013179 | 0.052739  | -1.3031    |
| 9mo_SIGAF3_ | 0.04504627 | 0.44207308 | 9.93E-05   | 0.10345   | 0.17344    |
| 9mo_SIGAF3_ | 0.04898461 | 0.4804306  | 0.00010381 | 0.094798  | 0.072211   |
| 9mo_SIGAF3_ | 0.03171914 | 0.31227338 | 8.36E-05   | 0.07721   | 0.67094    |
| 9mo_SIGAF3_ | 0.03731268 | 0.36675176 | 9.06E-05   | 0.10531   | 0.43275    |
| 9mo_SIGAF3_ | 0.08883368 | 0.86854106 | 0.00013275 | 0.052622  | -1.3223    |
| 9mo_SIGAF3_ | 0.06320438 | 0.6189242  | 0.0001173  | 0.098072  | -0.50782   |
| 9mo_SIGAF3_ | 0.05356745 | 0.5250652  | 0.00010842 | 0.092532  | -0.084185  |
| 9mo_SIGAF3_ | 0.06163687 | 0.6036574  | 0.00011583 | 0.09893   | -0.42501   |
| 9mo_SIGAF3_ | 0.07836615 | 0.7665924  | 0.00012778 | 0.057615  | -1.1573    |
| 9mo_SIGAF3_ | 0.05209669 | 0.51074076 | 0.00010703 | 0.092172  | -0.022986  |
| 9mo_SIGAF3_ | 0.02360074 | 0.23320414 | 7.42E-05   | 0.041523  | 0.70349    |
| 9mo_SIGAF3_ | 0.06493998 | 0.6358281  | 0.00011871 | 0.095287  | -0.59222   |
| 9mo_SIGAF3_ | 0.05001597 | 0.49047554 | 0.0001049  | 0.093366  | 0.042456   |
| 9mo_SIGAF3_ | 0.04479008 | 0.43957794 | 9.89E-05   | 0.10421   | 0.18258    |
| 9mo_SIGAF3_ | 0.06394897 | 0.6261762  | 0.00011787 | 0.097201  | -0.54144   |
| 9mo_SIGAF3_ | 0.06023672 | 0.5900206  | 0.00011462 | 0.098526  | -0.36038   |
| 9mo_SIGAF3_ | 0.0595336  | 0.58317256 | 0.000114   | 0.098059  | -0.32873   |

|             |            |            |            |          |          |
|-------------|------------|------------|------------|----------|----------|
| 9mo_SIGAF3_ | 0.05104505 | 0.50049824 | 0.00010597 | 0.092472 | 0.010852 |
| 9mo_SIGAF3_ | 0.0059403  | 0.06120015 | 5.63E-05   | 0.010269 | 0.19547  |
| 9mo_SIGAF3_ | 0.07851955 | 0.76808643 | 0.00012797 | 0.057152 | -1.1573  |
| 9mo_SIGAF3_ | 0.03252085 | 0.3200817  | 8.48E-05   | 0.082909 | 0.64444  |
| 9mo_SIGAF3_ | 0.03546518 | 0.34875798 | 8.81E-05   | 0.097198 | 0.50933  |
| 9mo_SIGAF3_ | 0.03621595 | 0.3560701  | 8.90E-05   | 0.10026  | 0.47826  |
| 9mo_SIGAF3_ | 0.0826779  | 0.8085868  | 0.00013009 | 0.053693 | -1.2543  |
| 9mo_SIGAF3_ | 0.04478971 | 0.4395744  | 9.89E-05   | 0.10421  | 0.18258  |
| 9mo_SIGAF3_ | 0.06916353 | 0.6769634  | 0.00012186 | 0.08293  | -0.79386 |
| 9mo_SIGAF3_ | 0.02745482 | 0.270741   | 7.86E-05   | 0.05605  | 0.77153  |
| 9mo_SIGAF3_ | 0.04527808 | 0.4443308  | 9.97E-05   | 0.10268  | 0.17344  |
| 9mo_SIGAF3_ | 0.05324848 | 0.52195865 | 0.00010807 | 0.092373 | -0.07149 |
| 9mo_SIGAF3_ | 0.07835276 | 0.766462   | 0.00012778 | 0.057615 | -1.1573  |
| 9mo_SIGAF3_ | 0.07395765 | 0.7236558  | 0.00012513 | 0.067136 | -1.0066  |
| 9mo_SIGAF3_ | 0.05844867 | 0.57260585 | 0.00011305 | 0.097132 | -0.2822  |
| 9mo_SIGAF3_ | 0.04954409 | 0.4858797  | 0.00010417 | 0.094268 | 0.052555 |
| 9mo_SIGAF3_ | 0.06546992 | 0.6409895  | 0.00011925 | 0.093659 | -0.60919 |
| 9mo_SIGAF3_ | 0.0534616  | 0.5240343  | 0.00010842 | 0.092532 | -0.07149 |
| 9mo_SIGAF3_ | 0.08358016 | 0.8173743  | 0.00013042 | 0.053406 | -1.2651  |
| 9mo_SIGAF3_ | 0.07319402 | 0.7162184  | 0.00012469 | 0.069151 | -0.97873 |
| 9mo_SIGAF3_ | 0.05027992 | 0.49304634 | 0.0001049  | 0.093366 | 0.032151 |
| 9mo_SIGAF3_ | 0.01651219 | 0.16416518 | 6.62E-05   | 0.024342 | 0.29808  |
| 9mo_SIGAF3_ | 0.0380538  | 0.3739699  | 9.14E-05   | 0.10717  | 0.40374  |
| 9mo_SIGAF3_ | 0.0608367  | 0.5958641  | 0.00011523 | 0.098828 | -0.39249 |
| 9mo_SIGAF3_ | 0.04256834 | 0.4179393  | 9.66E-05   | 0.10808  | 0.24945  |
| 9mo_SIGAF3_ | 0.03499938 | 0.34422132 | 8.77E-05   | 0.095565 | 0.54051  |
| 9mo_SIGAF3_ | 0.01114175 | 0.11185972 | 6.08E-05   | 0.015922 | 0.1115   |
| 9mo_SIGAF3_ | 0.04136987 | 0.40626675 | 9.50E-05   | 0.10955  | 0.28067  |
| 9mo_SIGAF3_ | 0.05774462 | 0.5657488  | 0.00011241 | 0.096416 | -0.25188 |
| 9mo_SIGAF3_ | 0.04776161 | 0.46851924 | 0.00010234 | 0.09734  | 0.10061  |
| 9mo_SIGAF3_ | 0.07778554 | 0.76093763 | 0.00012759 | 0.058113 | -1.1379  |
| 9mo_SIGAF3_ | 0.04331022 | 0.42516485 | 9.74E-05   | 0.10696  | 0.21998  |
| 9mo_SIGAF3_ | 0.03688006 | 0.36253825 | 8.98E-05   | 0.10298  | 0.4477   |
| 9mo_SIGAF3_ | 0.02140789 | 0.21184683 | 7.14E-05   | 0.034655 | 0.6056   |
| 9mo_SIGAF3_ | 0.04653993 | 0.45662063 | 0.00010122 | 0.099559 | 0.13721  |
| 9mo_SIGAF3_ | 0.04058009 | 0.39857468 | 9.42E-05   | 0.10978  | 0.3027   |
| 9mo_SIGAF3_ | 0.07324476 | 0.7167126  | 0.00012469 | 0.069151 | -0.97873 |
| 9mo_SIGAF3_ | 0.08574887 | 0.83849645 | 0.0001315  | 0.052818 | -1.2961  |
| 9mo_SIGAF3_ | 0.03414557 | 0.33590567 | 8.65E-05   | 0.090344 | 0.57137  |
| 9mo_SIGAF3_ | 0.06315449 | 0.6184383  | 0.0001173  | 0.098072 | -0.50782 |
| 9mo_SIGAF3_ | 0.02716334 | 0.26790214 | 7.82E-05   | 0.054511 | 0.77219  |
| 9mo_SIGAF3_ | 0.04225401 | 0.4148779  | 9.62E-05   | 0.10856  | 0.25963  |
| 9mo_SIGAF3_ | 0.06482587 | 0.63471675 | 0.00011871 | 0.095287 | -0.57526 |
| 9mo_SIGAF3_ | 0.05072279 | 0.4973597  | 0.00010561 | 0.092703 | 0.021622 |
| 9mo_SIGAF3_ | 0.05095302 | 0.499602   | 0.00010561 | 0.092703 | 0.010852 |
| 9mo_SIGAF3_ | 0.05927215 | 0.5806262  | 0.000114   | 0.098059 | -0.31309 |

|             |            |            |            |          |           |
|-------------|------------|------------|------------|----------|-----------|
| 9mo_SIGAF3_ | 0.0212578  | 0.21038508 | 7.14E-05   | 0.034655 | 0.58661   |
| 9mo_SIGAF3_ | 0.0672561  | 0.658386   | 0.00012058 | 0.088682 | -0.71078  |
| 9mo_SIGAF3_ | 0.00744744 | 0.07587891 | 5.78E-05   | 0.011928 | 0.14372   |
| 9mo_SIGAF3_ | 0.05653128 | 0.5539315  | 0.00011144 | 0.095284 | -0.19309  |
| 9mo_SIGAF3_ | 0.04566601 | 0.44810912 | 0.00010009 | 0.1019   | 0.16436   |
| 9mo_SIGAF3_ | 0.04829754 | 0.47373885 | 0.00010308 | 0.095994 | 0.091263  |
| 9mo_SIGAF3_ | 0.07405179 | 0.72457266 | 0.00012534 | 0.066176 | -1.0066   |
| 9mo_SIGAF3_ | 0.0567942  | 0.5564922  | 0.00011144 | 0.095284 | -0.20754  |
| 9mo_SIGAF3_ | 0.05228004 | 0.51252645 | 0.00010703 | 0.092172 | -0.03476  |
| 9mo_SIGAF3_ | 0.05914808 | 0.57941777 | 0.00011368 | 0.097776 | -0.31309  |
| 9mo_SIGAF3_ | 0.05207341 | 0.510514   | 0.00010703 | 0.092172 | -0.022986 |
| 9mo_SIGAF3_ | 0.03317048 | 0.32640877 | 8.57E-05   | 0.086671 | 0.61617   |
| 9mo_SIGAF3_ | 0.04876196 | 0.4782621  | 0.00010344 | 0.095375 | 0.081803  |
| 9mo_SIGAF3_ | 0.06152064 | 0.6025254  | 0.00011583 | 0.09893  | -0.42501  |
| 9mo_SIGAF3_ | 0.04506747 | 0.44227958 | 9.93E-05   | 0.10345  | 0.17344   |
| 9mo_SIGAF3_ | 0.04738521 | 0.46485323 | 0.00010197 | 0.098057 | 0.11903   |
| 9mo_SIGAF3_ | 0.02327736 | 0.23005457 | 7.38E-05   | 0.040447 | 0.68948   |
| 9mo_SIGAF3_ | 0.0483322  | 0.4740765  | 0.00010308 | 0.095994 | 0.091263  |
| 9mo_SIGAF3_ | 0.06676046 | 0.6535587  | 0.00012006 | 0.090801 | -0.67704  |
| 9mo_SIGAF3_ | 0.06783483 | 0.6640225  | 0.0001211  | 0.086439 | -0.72756  |
| 9mo_SIGAF3_ | 0.06203507 | 0.60753566 | 0.00011642 | 0.098794 | -0.44141  |
| 9mo_SIGAF3_ | 0.01675118 | 0.16649279 | 6.65E-05   | 0.024968 | 0.31771   |
| 9mo_SIGAF3_ | 0.06003919 | 0.5880968  | 0.00011462 | 0.098526 | -0.3445   |
| 9mo_SIGAF3_ | 0.06425235 | 0.6291309  | 0.00011815 | 0.096641 | -0.55833  |
| 9mo_SIGAF3_ | 0.07014203 | 0.6864935  | 0.0001226  | 0.07935  | -0.8424   |
| 9mo_SIGAF3_ | 0.04732839 | 0.4642999  | 0.00010197 | 0.098057 | 0.11903   |
| 9mo_SIGAF3_ | 0.08875755 | 0.8677996  | 0.00013261 | 0.052631 | -1.32     |
| 9mo_SIGAF3_ | 0.05261634 | 0.51580185 | 0.00010738 | 0.092189 | -0.046772 |
| 9mo_SIGAF3_ | 0.06055965 | 0.59316576 | 0.00011492 | 0.0987   | -0.37638  |
| 9mo_SIGAF3_ | 0.05219063 | 0.5116556  | 0.00010703 | 0.092172 | -0.022986 |
| 9mo_SIGAF3_ | 0.00272787 | 0.0299126  | 5.39E-05   | 0.007795 | 0.3272    |
| 9mo_SIGAF3_ | 0.06382481 | 0.62496686 | 0.00011787 | 0.097201 | -0.5246   |
| 9mo_SIGAF3_ | 0.05216253 | 0.511382   | 0.00010703 | 0.092172 | -0.022986 |
| 9mo_SIGAF3_ | 0.04160224 | 0.40852994 | 9.54E-05   | 0.10929  | 0.27003   |
| 9mo_SIGAF3_ | 0.02127238 | 0.21052703 | 7.14E-05   | 0.034655 | 0.58661   |
| 9mo_SIGAF3_ | 0.05289279 | 0.51849437 | 0.00010773 | 0.092257 | -0.059017 |
| 9mo_SIGAF3_ | 0.04524231 | 0.44398248 | 9.97E-05   | 0.10268  | 0.17344   |
| 9mo_SIGAF3_ | 0.04688179 | 0.45995018 | 0.00010159 | 0.098799 | 0.12814   |
| 9mo_SIGAF3_ | 0.0899148  | 0.8790706  | 0.00013313 | 0.052597 | -1.3283   |
| 9mo_SIGAF3_ | 0.06241265 | 0.61121315 | 0.00011672 | 0.098627 | -0.4579   |
| 9mo_SIGAF3_ | 0.07755363 | 0.75867885 | 0.0001274  | 0.058646 | -1.1379   |
| 9mo_SIGAF3_ | 0.0584381  | 0.5725029  | 0.00011305 | 0.097132 | -0.2822   |
| 9mo_SIGAF3_ | 0.04503155 | 0.44192973 | 9.93E-05   | 0.10345  | 0.17344   |
| 9mo_SIGAF3_ | 0.06064773 | 0.5940237  | 0.00011523 | 0.098828 | -0.37638  |
| 9mo_SIGAF3_ | 0.08390702 | 0.82055783 | 0.00013058 | 0.053285 | -1.2702   |
| 9mo_SIGAF3_ | 0.04668719 | 0.45805493 | 0.00010122 | 0.099559 | 0.13721   |



|             |            |            |            |           |           |
|-------------|------------|------------|------------|-----------|-----------|
| 9mo_SIGAF3_ | 0.07881025 | 0.7709178  | 0.00012816 | 0.056721  | -1.1666   |
| 9mo_SIGAF3_ | 0.05644736 | 0.5531142  | 0.00011111 | 0.094909  | -0.19309  |
| 9mo_SIGAF3_ | 0.05733664 | 0.5617753  | 0.00011209 | 0.096042  | -0.23694  |
| 9mo_SIGAF3_ | 0.05094245 | 0.49949905 | 0.00010561 | 0.092703  | 0.010852  |
| 9mo_SIGAF3_ | 0.04733543 | 0.4643684  | 0.00010197 | 0.098057  | 0.11903   |
| 9mo_SIGAF3_ | 0.00690154 | 0.07056212 | 5.72E-05   | 0.011238  | 0.16213   |
| 9mo_SIGAF3_ | 0.06395745 | 0.6262587  | 0.00011787 | 0.097201  | -0.54144  |
| 9mo_SIGAF3_ | 0.05603293 | 0.5490778  | 0.00011078 | 0.094541  | -0.17881  |
| 9mo_SIGAF3_ | 0.06621308 | 0.64822745 | 0.00011979 | 0.091802  | -0.64315  |
| 9mo_SIGAF3_ | 0.04983896 | 0.48875162 | 0.00010453 | 0.09379   | 0.042456  |
| 9mo_SIGAF3_ | 0.0367115  | 0.3608966  | 8.98E-05   | 0.10298   | 0.46289   |
| 9mo_SIGAF3_ | 0.0606209  | 0.5937624  | 0.00011523 | 0.098828  | -0.37638  |
| 9mo_SIGAF3_ | 0.05021248 | 0.49238953 | 0.0001049  | 0.093366  | 0.032151  |
| 9mo_SIGAF3_ | 0.04382713 | 0.43019927 | 9.82E-05   | 0.10565   | 0.21046   |
| 9mo_SIGAF3_ | 0.03514212 | 0.3456115  | 8.77E-05   | 0.095565  | 0.52494   |
| 9mo_SIGAF3_ | 0.07802926 | 0.76331127 | 0.00012759 | 0.058113  | -1.1478   |
| 9mo_SIGAF3_ | 0.07316667 | 0.71595204 | 0.00012469 | 0.069151  | -0.97873  |
| 9mo_SIGAF3_ | 0.05314421 | 0.52094305 | 0.00010807 | 0.092373  | -0.059017 |
| 9mo_SIGAF3_ | 0.06919483 | 0.67726827 | 0.00012211 | 0.081739  | -0.79386  |
| 9mo_SIGAF3_ | 0.03896681 | 0.38286212 | 9.22E-05   | 0.10852   | 0.36311   |
| 9mo_SIGAF3_ | 0.04354028 | 0.42740557 | 9.78E-05   | 0.10633   | 0.21998   |
| 9mo_SIGAF3_ | 0.01061473 | 0.10672678 | 6.05E-05   | 0.01548   | 0.10741   |
| 9mo_SIGAF3_ | 0.06706064 | 0.6564823  | 0.00012032 | 0.089759  | -0.69393  |
| 9mo_SIGAF3_ | 0.07136423 | 0.69839716 | 0.00012355 | 0.074645  | -0.90497  |
| 9mo_SIGAF3_ | 0.00042916 | 0.0075243  | 5.21E-05   | 0.0062712 | 0.4491    |
| 9mo_SIGAF3_ | 0.06883992 | 0.6738116  | 0.00012161 | 0.084113  | -0.77743  |
| 9mo_SIGAF3_ | 0.01143952 | 0.11475979 | 6.11E-05   | 0.016373  | 0.1115    |
| 9mo_SIGAF3_ | 0.00820083 | 0.08321658 | 5.84E-05   | 0.012653  | 0.12871   |
| 9mo_SIGAF3_ | 0.0313619  | 0.30879405 | 8.32E-05   | 0.075317  | 0.6834    |
| 9mo_SIGAF3_ | 0.04509651 | 0.44256246 | 9.93E-05   | 0.10345   | 0.17344   |
| 9mo_SIGAF3_ | 0.01174952 | 0.11777905 | 6.14E-05   | 0.016833  | 0.11542   |
| 9mo_SIGAF3_ | 0.04167601 | 0.40924844 | 9.54E-05   | 0.10929   | 0.27003   |
| 9mo_SIGAF3_ | 0.04459529 | 0.43768084 | 9.89E-05   | 0.10421   | 0.19178   |
| 9mo_SIGAF3_ | 0.05627891 | 0.5514735  | 0.00011111 | 0.094909  | -0.17881  |
| 9mo_SIGAF3_ | 0.06851264 | 0.6706241  | 0.00012161 | 0.084113  | -0.7609   |
| 9mo_SIGAF3_ | 0.09862879 | 0.9639406  | 0.00013585 | 0.052145  | -1.3442   |
| 9mo_SIGAF3_ | 0.00325179 | 0.03501535 | 5.42E-05   | 0.0080398 | 0.2947    |
| 9mo_SIGAF3_ | 0.05829806 | 0.57113904 | 0.00011305 | 0.097132  | -0.26697  |
| 9mo_SIGAF3_ | 0.00671867 | 0.0687811  | 5.72E-05   | 0.011238  | 0.16213   |
| 9mo_SIGAF3_ | 0.04282136 | 0.42040354 | 9.70E-05   | 0.10755   | 0.23945   |
| 9mo_SIGAF3_ | 0.06755278 | 0.66127545 | 0.00012084 | 0.087573  | -0.71078  |
| 9mo_SIGAF3_ | 0.02175543 | 0.21523173 | 7.18E-05   | 0.035549  | 0.62396   |
| 9mo_SIGAF3_ | 0.04599308 | 0.4512946  | 0.00010046 | 0.10111   | 0.1553    |
| 9mo_SIGAF3_ | 0.04874123 | 0.4780602  | 0.00010344 | 0.095375  | 0.081803  |
| 9mo_SIGAF3_ | 0.053255   | 0.5220221  | 0.00010807 | 0.092373  | -0.07149  |
| 9mo_SIGAF3_ | 0.06204796 | 0.6076612  | 0.00011642 | 0.098794  | -0.44141  |

|             |            |            |            |          |           |
|-------------|------------|------------|------------|----------|-----------|
| 9mo_SIGAF3_ | 0.04102226 | 0.40288126 | 9.46E-05   | 0.10971  | 0.29155   |
| 9mo_SIGAF3_ | 0.06981786 | 0.6833362  | 0.00012235 | 0.080544 | -0.82636  |
| 9mo_SIGAF3_ | 0.03517705 | 0.34595174 | 8.77E-05   | 0.095565 | 0.52494   |
| 9mo_SIGAF3_ | 0.06192196 | 0.60643405 | 0.00011613 | 0.098894 | -0.44141  |
| 9mo_SIGAF3_ | 0.03057019 | 0.30108318 | 8.23E-05   | 0.07157  | 0.71698   |
| 9mo_SIGAF3_ | 0.0847774  | 0.82903486 | 0.00013105 | 0.053002 | -1.2841   |
| 9mo_SIGAF3_ | 0.01892749 | 0.18768899 | 6.87E-05   | 0.029043 | 0.44251   |
| 9mo_SIGAF3_ | 0.0788139  | 0.77095324 | 0.00012816 | 0.056721 | -1.1666   |
| 9mo_SIGAF3_ | 0.07300475 | 0.714375   | 0.00012469 | 0.069151 | -0.96444  |
| 9mo_SIGAF3_ | 0.07590699 | 0.74264145 | 0.0001264  | 0.06191  | -1.0832   |
| 9mo_SIGAF3_ | 0.07499935 | 0.7338014  | 0.00012577 | 0.064358 | -1.0462   |
| 9mo_SIGAF3_ | 0.07583495 | 0.7419397  | 0.0001264  | 0.06191  | -1.0832   |
| 9mo_SIGAF3_ | 0.04643007 | 0.45555067 | 0.00010084 | 0.10033  | 0.13721   |
| 9mo_SIGAF3_ | 0.04465998 | 0.43831086 | 9.89E-05   | 0.10421  | 0.19178   |
| 9mo_SIGAF3_ | 0.06443457 | 0.6309057  | 0.00011843 | 0.096001 | -0.55833  |
| 9mo_SIGAF3_ | 0.04751913 | 0.46615753 | 0.00010197 | 0.098057 | 0.10986   |
| 9mo_SIGAF3_ | 0.07173709 | 0.70202863 | 0.00012378 | 0.073503 | -0.92016  |
| 9mo_SIGAF3_ | 0.05222332 | 0.51197404 | 0.00010703 | 0.092172 | -0.03476  |
| 9mo_SIGAF3_ | 0.06554719 | 0.64174205 | 0.00011925 | 0.093659 | -0.62617  |
| 9mo_SIGAF3_ | 0.01802069 | 0.17885716 | 6.76E-05   | 0.026932 | 0.4001    |
| 9mo_SIGAF3_ | 0.07368685 | 0.7210183  | 0.00012513 | 0.067136 | -0.99278  |
| 9mo_SIGAF3_ | 0.05592832 | 0.548059   | 0.00011078 | 0.094541 | -0.16472  |
| 9mo_SIGAF3_ | 0.02451133 | 0.24207288 | 7.50E-05   | 0.043782 | 0.73857   |
| 9mo_SIGAF3_ | 0.05065357 | 0.4966855  | 0.00010561 | 0.092703 | 0.021622  |
| 9mo_SIGAF3_ | 0.03561897 | 0.35025585 | 8.86E-05   | 0.098764 | 0.50933   |
| 9mo_SIGAF3_ | 0.05472177 | 0.5363077  | 0.00010944 | 0.093233 | -0.12355  |
| 9mo_SIGAF3_ | 0.05068269 | 0.49696907 | 0.00010561 | 0.092703 | 0.021622  |
| 9mo_SIGAF3_ | 0.00826863 | 0.08387693 | 5.84E-05   | 0.012653 | 0.12871   |
| 9mo_SIGAF3_ | 0.05914616 | 0.57939905 | 0.00011368 | 0.097776 | -0.31309  |
| 9mo_SIGAF3_ | 0.0531183  | 0.52069074 | 0.00010807 | 0.092373 | -0.059017 |
| 9mo_SIGAF3_ | 0.05093494 | 0.49942586 | 0.00010561 | 0.092703 | 0.010852  |
| 9mo_SIGAF3_ | 0.04286783 | 0.4208562  | 9.70E-05   | 0.10755  | 0.23945   |
| 9mo_SIGAF3_ | 0.06851009 | 0.67059916 | 0.00012161 | 0.084113 | -0.7609   |
| 9mo_SIGAF3_ | 0.06731337 | 0.6589437  | 0.00012058 | 0.088682 | -0.71078  |
| 9mo_SIGAF3_ | 0.01524932 | 0.1518654  | 6.47E-05   | 0.021973 | 0.24275   |
| 9mo_SIGAF3_ | 0.06957071 | 0.68092906 | 0.00012235 | 0.080544 | -0.81017  |
| 9mo_SIGAF3_ | 0.04551367 | 0.44662535 | 0.00010009 | 0.1019   | 0.16436   |
| 9mo_SIGAF3_ | 0.04265614 | 0.4187944  | 9.66E-05   | 0.10808  | 0.23945   |
| 9mo_SIGAF3_ | 0.07715294 | 0.7547763  | 0.0001272  | 0.059217 | -1.117    |
| 9mo_SIGAF3_ | 0.05239176 | 0.5136146  | 0.00010738 | 0.092189 | -0.03476  |
| 9mo_SIGAF3_ | 0.07031287 | 0.6881574  | 0.00012284 | 0.078159 | -0.8424   |
| 9mo_SIGAF3_ | 0.05833243 | 0.57147384 | 0.00011305 | 0.097132 | -0.26697  |
| 9mo_SIGAF3_ | 0.06883586 | 0.6737721  | 0.00012161 | 0.084113 | -0.77743  |
| 9mo_SIGAF3_ | 0.01928526 | 0.1911735  | 6.91E-05   | 0.029782 | 0.46374   |
| 9mo_SIGAF3_ | 0.01893114 | 0.18772456 | 6.87E-05   | 0.029043 | 0.44251   |
| 9mo_SIGAF3_ | 0.05286091 | 0.5181838  | 0.00010773 | 0.092257 | -0.046772 |

|             |            |            |            |          |            |
|-------------|------------|------------|------------|----------|------------|
| 9mo_SIGAF3_ | 0.03388805 | 0.3333975  | 8.65E-05   | 0.090344 | 0.58656    |
| 9mo_SIGAF3_ | 0.04774898 | 0.46839616 | 0.00010234 | 0.09734  | 0.10061    |
| 9mo_SIGAF3_ | 0.05768542 | 0.56517226 | 0.00011241 | 0.096416 | -0.25188   |
| 9mo_SIGAF3_ | 0.05142304 | 0.50417966 | 0.00010632 | 0.092309 | -0.0001745 |
| 9mo_SIGAF3_ | 0.08756127 | 0.85614836 | 0.00013221 | 0.052667 | -1.3123    |
| 9mo_SIGAF3_ | 0.07287804 | 0.7131409  | 0.00012446 | 0.070202 | -0.96444   |
| 9mo_SIGAF3_ | 0.04383896 | 0.4303145  | 9.82E-05   | 0.10565  | 0.21046    |
| 9mo_SIGAF3_ | 0.02591175 | 0.2557123  | 7.66E-05   | 0.04879  | 0.76634    |
| 9mo_SIGAF3_ | 0.05768249 | 0.5651437  | 0.00011241 | 0.096416 | -0.25188   |
| 9mo_SIGAF3_ | 0.0412813  | 0.40540415 | 9.50E-05   | 0.10955  | 0.28067    |
| 9mo_SIGAF3_ | 0.01129482 | 0.11335054 | 6.11E-05   | 0.016373 | 0.1115     |
| 9mo_SIGAF3_ | 0.04948974 | 0.4853504  | 0.00010417 | 0.094268 | 0.052555   |
| 9mo_SIGAF3_ | 0.04329749 | 0.42504084 | 9.74E-05   | 0.10696  | 0.21998    |
| 9mo_SIGAF3_ | 0.06171186 | 0.60438776 | 0.00011613 | 0.098894 | -0.42501   |
| 9mo_SIGAF3_ | 0.02575821 | 0.25421685 | 7.66E-05   | 0.04879  | 0.7616     |
| 9mo_SIGAF3_ | 0.00378479 | 0.04020651 | 5.47E-05   | 0.008551 | 0.27903    |
| 9mo_SIGAF3_ | 0.06314899 | 0.6183847  | 0.0001173  | 0.098072 | -0.50782   |
| 9mo_SIGAF3_ | 0.06522162 | 0.63857114 | 0.00011898 | 0.094504 | -0.60919   |
| 9mo_SIGAF3_ | 0.07252213 | 0.7096745  | 0.00012424 | 0.071279 | -0.9499    |
| 9mo_SIGAF3_ | 0.06461124 | 0.63262635 | 0.00011843 | 0.096001 | -0.57526   |
| 9mo_SIGAF3_ | 0.06378772 | 0.62460566 | 0.00011787 | 0.097201 | -0.5246    |
| 9mo_SIGAF3_ | 0.05567094 | 0.5455522  | 0.00011045 | 0.094186 | -0.16472   |
| 9mo_SIGAF3_ | 0.03380244 | 0.33256367 | 8.61E-05   | 0.088522 | 0.58656    |
| 9mo_SIGAF3_ | 0.00583584 | 0.06018276 | 5.63E-05   | 0.010269 | 0.19547    |
| 9mo_SIGAF3_ | 0.05745347 | 0.5629132  | 0.00011209 | 0.096042 | -0.23694   |
| 9mo_SIGAF3_ | 0.0566771  | 0.5553517  | 0.00011144 | 0.095284 | -0.20754   |
| 9mo_SIGAF3_ | 0.0112449  | 0.11286427 | 6.11E-05   | 0.016373 | 0.1115     |
| 9mo_SIGAF3_ | 0.01419787 | 0.14162481 | 6.37E-05   | 0.020323 | 0.18023    |
| 9mo_SIGAF3_ | 0.06347232 | 0.62153375 | 0.00011758 | 0.097678 | -0.50782   |
| 9mo_SIGAF3_ | 0.04931675 | 0.48366553 | 0.00010417 | 0.094268 | 0.062467   |
| 9mo_SIGAF3_ | 0.03417338 | 0.33617648 | 8.69E-05   | 0.09213  | 0.57137    |
| 9mo_SIGAF3_ | 0.06457129 | 0.63223726 | 0.00011843 | 0.096001 | -0.57526   |
| 9mo_SIGAF3_ | 0.04366539 | 0.42862403 | 9.78E-05   | 0.10633  | 0.21046    |
| 9mo_SIGAF3_ | 0.04345773 | 0.4266015  | 9.78E-05   | 0.10633  | 0.21998    |
| 9mo_SIGAF3_ | 0.08246219 | 0.80648583 | 0.00012993 | 0.053861 | -1.2485    |
| 9mo_SIGAF3_ | 0.02405191 | 0.23759836 | 7.46E-05   | 0.042633 | 0.71639    |
| 9mo_SIGAF3_ | 0.06710779 | 0.6569415  | 0.00012032 | 0.089759 | -0.69393   |
| 9mo_SIGAF3_ | 0.03918747 | 0.38501126 | 9.26E-05   | 0.10901  | 0.35035    |
| 9mo_SIGAF3_ | 0.05377137 | 0.52705127 | 0.00010876 | 0.092731 | -0.084185  |
| 9mo_SIGAF3_ | 0.04473301 | 0.4390221  | 9.89E-05   | 0.10421  | 0.18258    |
| 9mo_SIGAF3_ | 0.06823813 | 0.66795045 | 0.00012136 | 0.085284 | -0.74427   |
| 9mo_SIGAF3_ | 0.04267073 | 0.41893658 | 9.66E-05   | 0.10808  | 0.23945    |
| 9mo_SIGAF3_ | 0.03438089 | 0.33819756 | 8.69E-05   | 0.09213  | 0.57137    |
| 9mo_SIGAF3_ | 0.04610213 | 0.45235667 | 0.00010046 | 0.10111  | 0.14626    |
| 9mo_SIGAF3_ | 0.03870236 | 0.38028657 | 9.22E-05   | 0.10852  | 0.37625    |
| 9mo_SIGAF3_ | 0.04955228 | 0.4859595  | 0.00010417 | 0.094268 | 0.052555   |

|             |            |            |            |          |           |
|-------------|------------|------------|------------|----------|-----------|
| 9mo_SIGAF3_ | 0.06266774 | 0.6136975  | 0.00011672 | 0.098627 | -0.47447  |
| 9mo_SIGAF3_ | 0.0827197  | 0.8089939  | 0.00013009 | 0.053693 | -1.2543   |
| 9mo_SIGAF3_ | 0.02356161 | 0.23282306 | 7.42E-05   | 0.041523 | 0.70349   |
| 9mo_SIGAF3_ | 0.01147301 | 0.11508597 | 6.11E-05   | 0.016373 | 0.11542   |
| 9mo_SIGAF3_ | 0.07971523 | 0.7797318  | 0.00012853 | 0.055948 | -1.1924   |
| 9mo_SIGAF3_ | 0.06185485 | 0.6057804  | 0.00011613 | 0.098894 | -0.44141  |
| 9mo_SIGAF3_ | 0.03704375 | 0.36413246 | 9.02E-05   | 0.1042   | 0.4477    |
| 9mo_SIGAF3_ | 0.06039675 | 0.5915792  | 0.00011492 | 0.0987   | -0.36038  |
| 9mo_SIGAF3_ | 0.05312518 | 0.5207578  | 0.00010807 | 0.092373 | -0.059017 |
| 9mo_SIGAF3_ | 0.04817789 | 0.47257358 | 0.00010271 | 0.09665  | 0.091263  |
| 9mo_SIGAF3_ | 0.01273202 | 0.12734815 | 6.24E-05   | 0.018271 | 0.13519   |
| 9mo_SIGAF3_ | 0.01768397 | 0.17557776 | 6.72E-05   | 0.026262 | 0.37908   |
| 9mo_SIGAF3_ | 0.07283837 | 0.7127545  | 0.00012446 | 0.070202 | -0.96444  |
| 9mo_SIGAF3_ | 0.07159095 | 0.7006052  | 0.00012355 | 0.074645 | -0.90497  |
| 9mo_SIGAF3_ | 0.07045206 | 0.689513   | 0.00012284 | 0.078159 | -0.8583   |
| 9mo_SIGAF3_ | 0.07703465 | 0.75362426 | 0.000127   | 0.059827 | -1.117    |
| 9mo_SIGAF3_ | 0.00901555 | 0.09115157 | 5.89E-05   | 0.013414 | 0.11742   |
| 9mo_SIGAF3_ | 0.08155281 | 0.79762894 | 0.00012942 | 0.054478 | -1.2295   |
| 9mo_SIGAF3_ | 0.06844337 | 0.66994935 | 0.00012136 | 0.085284 | -0.7609   |
| 9mo_SIGAF3_ | 0.01802781 | 0.17892659 | 6.76E-05   | 0.026932 | 0.4001    |
| 9mo_SIGAF3_ | 0.05783378 | 0.5666172  | 0.00011241 | 0.096416 | -0.25188  |
| 9mo_SIGAF3_ | 0.04428545 | 0.4346631  | 9.86E-05   | 0.10494  | 0.20107   |
| 9mo_SIGAF3_ | 0.01074948 | 0.10803919 | 6.05E-05   | 0.01548  | 0.10741   |
| 9mo_SIGAF3_ | 0.03322603 | 0.32694975 | 8.57E-05   | 0.086671 | 0.61617   |
| 9mo_SIGAF3_ | 0.07829714 | 0.7659203  | 0.00012778 | 0.057615 | -1.1573   |
| 9mo_SIGAF3_ | 0.03240513 | 0.31895462 | 8.44E-05   | 0.081011 | 0.64444   |
| 9mo_SIGAF3_ | 0.06741876 | 0.6599702  | 0.00012058 | 0.088682 | -0.71078  |
| 9mo_SIGAF3_ | 0.04234077 | 0.41572285 | 9.62E-05   | 0.10856  | 0.24945   |
| 9mo_SIGAF3_ | 0.07895188 | 0.77229714 | 0.00012816 | 0.056721 | -1.1755   |
| 9mo_SIGAF3_ | 0.05828938 | 0.5710545  | 0.00011305 | 0.097132 | -0.26697  |
| 9mo_SIGAF3_ | 0.06309102 | 0.6178201  | 0.0001173  | 0.098072 | -0.49111  |
| 9mo_SIGAF3_ | 0.05334971 | 0.52294457 | 0.00010807 | 0.092373 | -0.07149  |
| 9mo_SIGAF3_ | 0.04674914 | 0.45865822 | 0.00010122 | 0.099559 | 0.12814   |
| 9mo_SIGAF3_ | 0.04723782 | 0.46341774 | 0.00010197 | 0.098057 | 0.11903   |
| 9mo_SIGAF3_ | 0.09000686 | 0.8799672  | 0.00013313 | 0.052597 | -1.3283   |
| 9mo_SIGAF3_ | 0.04805485 | 0.47137523 | 0.00010271 | 0.09665  | 0.10061   |
| 9mo_SIGAF3_ | 0.02624594 | 0.25896707 | 7.70E-05   | 0.050154 | 0.76965   |
| 9mo_SIGAF3_ | 0.01022853 | 0.1029654  | 6.02E-05   | 0.015048 | 0.10718   |
| 9mo_SIGAF3_ | 0.04261145 | 0.41835913 | 9.66E-05   | 0.10808  | 0.23945   |
| 9mo_SIGAF3_ | 0.02711154 | 0.26739764 | 7.82E-05   | 0.054511 | 0.77219   |
| 9mo_SIGAF3_ | 0.01381525 | 0.13789831 | 6.34E-05   | 0.019794 | 0.16714   |
| 9mo_SIGAF3_ | 0.00838454 | 0.08500579 | 5.84E-05   | 0.012653 | 0.12871   |
| 9mo_SIGAF3_ | 0.04456176 | 0.43735418 | 9.89E-05   | 0.10421  | 0.19178   |
| 9mo_SIGAF3_ | 0.07235806 | 0.7080766  | 0.00012424 | 0.071279 | -0.93514  |
| 9mo_SIGAF3_ | 0.03277601 | 0.3225668  | 8.48E-05   | 0.082909 | 0.6305    |
| 9mo_SIGAF3_ | 0.0370941  | 0.36462286 | 9.02E-05   | 0.1042   | 0.4477    |

|             |            |            |            |           |           |
|-------------|------------|------------|------------|-----------|-----------|
| 9mo_SIGAF3_ | 0.08057059 | 0.78806263 | 0.00012907 | 0.054994  | -1.2081   |
| 9mo_SIGAF3_ | 0.07454447 | 0.7293711  | 0.00012556 | 0.06525   | -1.0333   |
| 9mo_SIGAF3_ | 0.01730837 | 0.17191951 | 6.69E-05   | 0.025607  | 0.35829   |
| 9mo_SIGAF3_ | 0.03760567 | 0.36960536 | 9.10E-05   | 0.1063    | 0.41807   |
| 9mo_SIGAF3_ | 0.01866343 | 0.18511717 | 6.84E-05   | 0.028322  | 0.44251   |
| 9mo_SIGAF3_ | 0.01502541 | 0.1496846  | 6.47E-05   | 0.021973  | 0.22576   |
| 9mo_SIGAF3_ | 0.00733947 | 0.07482734 | 5.75E-05   | 0.011579  | 0.15252   |
| 9mo_SIGAF3_ | 0.07027459 | 0.6877846  | 0.00012284 | 0.078159  | -0.8424   |
| 9mo_SIGAF3_ | 0.0739705  | 0.723781   | 0.00012513 | 0.067136  | -1.0066   |
| 9mo_SIGAF3_ | 0.05924741 | 0.58038527 | 0.000114   | 0.098059  | -0.31309  |
| 9mo_SIGAF3_ | 0.08010805 | 0.78355765 | 0.00012871 | 0.055605  | -1.2004   |
| 9mo_SIGAF3_ | 0.0861887  | 0.8427803  | 0.00013164 | 0.052775  | -1.2997   |
| 9mo_SIGAF3_ | 0.05257731 | 0.51542175 | 0.00010738 | 0.092189  | -0.046772 |
| 9mo_SIGAF3_ | 0.04696271 | 0.46073833 | 0.00010159 | 0.098799  | 0.12814   |
| 9mo_SIGAF3_ | 0.08906736 | 0.87081695 | 0.00013275 | 0.052622  | -1.3223   |
| 9mo_SIGAF3_ | 0.01576129 | 0.15685172 | 6.54E-05   | 0.023132  | 0.26052   |
| 9mo_SIGAF3_ | 0.04535389 | 0.44506916 | 9.97E-05   | 0.10268   | 0.16436   |
| 9mo_SIGAF3_ | 0.04945226 | 0.48498532 | 0.00010417 | 0.094268  | 0.062467  |
| 9mo_SIGAF3_ | 0.0689572  | 0.6749539  | 0.00012186 | 0.08293   | -0.77743  |
| 9mo_SIGAF3_ | 0.05975238 | 0.5853034  | 0.00011431 | 0.098311  | -0.3445   |
| 9mo_SIGAF3_ | 0.0281265  | 0.27728283 | 7.94E-05   | 0.059253  | 0.76661   |
| 9mo_SIGAF3_ | 0.05463034 | 0.53541726 | 0.00010944 | 0.093233  | -0.12355  |
| 9mo_SIGAF3_ | 0.07003263 | 0.68542796 | 0.0001226  | 0.07935   | -0.8424   |
| 9mo_SIGAF3_ | 0.04436543 | 0.43544203 | 9.86E-05   | 0.10494   | 0.19178   |
| 9mo_SIGAF3_ | 0.0386903  | 0.3801691  | 9.22E-05   | 0.10852   | 0.37625   |
| 9mo_SIGAF3_ | 0.07311454 | 0.71544427 | 0.00012469 | 0.069151  | -0.97873  |
| 9mo_SIGAF3_ | 0.06654484 | 0.6514586  | 0.00012006 | 0.090801  | -0.66011  |
| 9mo_SIGAF3_ | 0.06236068 | 0.610707   | 0.00011672 | 0.098627  | -0.4579   |
| 9mo_SIGAF3_ | 0.03388631 | 0.3333806  | 8.65E-05   | 0.090344  | 0.58656   |
| 9mo_SIGAF3_ | 0.06091438 | 0.5966207  | 0.00011523 | 0.098828  | -0.39249  |
| 9mo_SIGAF3_ | 0.02285069 | 0.22589909 | 7.34E-05   | 0.039406  | 0.67444   |
| 9mo_SIGAF3_ | 0.07465944 | 0.7304909  | 0.00012556 | 0.06525   | -1.0333   |
| 9mo_SIGAF3_ | 0.0628574  | 0.61554474 | 0.00011701 | 0.098387  | -0.49111  |
| 9mo_SIGAF3_ | 0.06492294 | 0.6356622  | 0.00011871 | 0.095287  | -0.59222  |
| 9mo_SIGAF3_ | 0.04596481 | 0.45101926 | 0.00010046 | 0.10111   | 0.1553    |
| 9mo_SIGAF3_ | 0.04783062 | 0.46919128 | 0.00010234 | 0.09734   | 0.10061   |
| 9mo_SIGAF3_ | 0.04439685 | 0.43574807 | 9.86E-05   | 0.10494   | 0.19178   |
| 9mo_SIGAF3_ | 0.07709607 | 0.75422245 | 0.0001272  | 0.059217  | -1.117    |
| 9mo_SIGAF3_ | 0.01566037 | 0.15586886 | 6.54E-05   | 0.023132  | 0.26052   |
| 9mo_SIGAF3_ | 0.04368451 | 0.42881024 | 9.78E-05   | 0.10633   | 0.21046   |
| 9mo_SIGAF3_ | 0.05762293 | 0.5645636  | 0.00011241 | 0.096416  | -0.23694  |
| 9mo_SIGAF3_ | 0.06213213 | 0.608481   | 0.00011642 | 0.098794  | -0.4579   |
| 9mo_SIGAF3_ | 0.00086668 | 0.01178554 | 5.26E-05   | 0.0066742 | 0.41342   |
| 9mo_SIGAF3_ | 0.07189962 | 0.7036116  | 0.00012378 | 0.073503  | -0.92016  |
| 9mo_SIGAF3_ | 0.00582352 | 0.06006276 | 5.63E-05   | 0.010269  | 0.19547   |
| 9mo_SIGAF3_ | 0.04970911 | 0.4874869  | 0.00010453 | 0.09379   | 0.052555  |

|             |            |            |            |          |           |
|-------------|------------|------------|------------|----------|-----------|
| 9mo_SIGAF3_ | 0.03606197 | 0.35457042 | 8.90E-05   | 0.10026  | 0.49376   |
| 9mo_SIGAF3_ | 0.05459715 | 0.535094   | 0.00010944 | 0.093233 | -0.12355  |
| 9mo_SIGAF3_ | 0.06254092 | 0.6124624  | 0.00011672 | 0.098627 | -0.47447  |
| 9mo_SIGAF3_ | 0.01365409 | 0.13632865 | 6.34E-05   | 0.019794 | 0.16714   |
| 9mo_SIGAF3_ | 0.04793792 | 0.47023636 | 0.00010271 | 0.09665  | 0.10061   |
| 9mo_SIGAF3_ | 0.04961612 | 0.48658127 | 0.00010417 | 0.094268 | 0.052555  |
| 9mo_SIGAF3_ | 0.04746338 | 0.46561456 | 0.00010197 | 0.098057 | 0.10986   |
| 9mo_SIGAF3_ | 0.04273395 | 0.41955224 | 9.66E-05   | 0.10808  | 0.23945   |
| 9mo_SIGAF3_ | 0.0104766  | 0.10538143 | 6.05E-05   | 0.01548  | 0.10741   |
| 9mo_SIGAF3_ | 0.02045067 | 0.202524   | 7.06E-05   | 0.032941 | 0.54704   |
| 9mo_SIGAF3_ | 0.0619145  | 0.6063614  | 0.00011613 | 0.098894 | -0.44141  |
| 9mo_SIGAF3_ | 0.02950118 | 0.29067156 | 8.11E-05   | 0.066108 | 0.7438    |
| 9mo_SIGAF3_ | 0.08153753 | 0.7974801  | 0.00012942 | 0.054478 | -1.2295   |
| 9mo_SIGAF3_ | 0.04653869 | 0.45660856 | 0.00010122 | 0.099559 | 0.13721   |
| 9mo_SIGAF3_ | 0.03998534 | 0.39278212 | 9.34E-05   | 0.10962  | 0.32588   |
| 9mo_SIGAF3_ | 0.04898522 | 0.48043656 | 0.00010381 | 0.094798 | 0.072211  |
| 9mo_SIGAF3_ | 0.05688733 | 0.5573993  | 0.00011177 | 0.095663 | -0.20754  |
| 9mo_SIGAF3_ | 0.05423704 | 0.5315867  | 0.0001091  | 0.092966 | -0.097097 |
| 9mo_SIGAF3_ | 0.03973819 | 0.39037505 | 9.34E-05   | 0.10962  | 0.33794   |
| 9mo_SIGAF3_ | 0.03900075 | 0.38319275 | 9.26E-05   | 0.10901  | 0.36311   |
| 9mo_SIGAF3_ | 0.0779098  | 0.7621478  | 0.00012759 | 0.058113 | -1.1478   |
| 9mo_SIGAF3_ | 0.04120836 | 0.40469375 | 9.50E-05   | 0.10955  | 0.29155   |
| 9mo_SIGAF3_ | 0.06379178 | 0.62464523 | 0.00011787 | 0.097201 | -0.5246   |
| 9mo_SIGAF3_ | 0.03521796 | 0.34635016 | 8.81E-05   | 0.097198 | 0.52494   |
| 9mo_SIGAF3_ | 0.06276815 | 0.6146755  | 0.00011701 | 0.098387 | -0.47447  |
| 9mo_SIGAF3_ | 0.07622108 | 0.7457005  | 0.0001266  | 0.061174 | -1.0948   |
| 9mo_SIGAF3_ | 0.06575248 | 0.6437415  | 0.00011925 | 0.093659 | -0.62617  |
| 9mo_SIGAF3_ | 0.08754934 | 0.85603225 | 0.00013221 | 0.052667 | -1.3123   |
| 9mo_SIGAF3_ | 0.00805377 | 0.08178426 | 5.81E-05   | 0.012286 | 0.12871   |
| 9mo_SIGAF3_ | 0.03135648 | 0.3087413  | 8.32E-05   | 0.075317 | 0.6834    |
| 9mo_SIGAF3_ | 0.02025934 | 0.20066056 | 7.02E-05   | 0.032119 | 0.52662   |
| 9mo_SIGAF3_ | 0.0253375  | 0.25011933 | 7.62E-05   | 0.047472 | 0.75539   |
| 9mo_SIGAF3_ | 0.08247035 | 0.80656534 | 0.00012993 | 0.053861 | -1.2485   |
| 9mo_SIGAF3_ | 0.02617931 | 0.2583182  | 7.70E-05   | 0.050154 | 0.76634   |
| 9mo_SIGAF3_ | 0.0222856  | 0.22039534 | 7.26E-05   | 0.037419 | 0.64161   |
| 9mo_SIGAF3_ | 0.01588474 | 0.15805411 | 6.54E-05   | 0.023132 | 0.26052   |
| 9mo_SIGAF3_ | 0.06465385 | 0.6330413  | 0.00011843 | 0.096001 | -0.57526  |
| 9mo_SIGAF3_ | 0.05473965 | 0.5364819  | 0.00010944 | 0.093233 | -0.12355  |
| 9mo_SIGAF3_ | 0.05984136 | 0.58617    | 0.00011431 | 0.098311 | -0.3445   |
| 9mo_SIGAF3_ | 0.07542016 | 0.73789996 | 0.00012619 | 0.062687 | -1.0589   |
| 9mo_SIGAF3_ | 0.04170669 | 0.40954724 | 9.54E-05   | 0.10929  | 0.27003   |
| 9mo_SIGAF3_ | 0.05272586 | 0.5168685  | 0.00010773 | 0.092257 | -0.046772 |
| 9mo_SIGAF3_ | 0.06412682 | 0.6279083  | 0.00011815 | 0.096641 | -0.54144  |
| 9mo_SIGAF3_ | 0.09151818 | 0.89468676 | 0.00013374 | 0.052539 | -1.3347   |
| 9mo_SIGAF3_ | 0.08342592 | 0.81587213 | 0.00013042 | 0.053406 | -1.2651   |
| 9mo_SIGAF3_ | 0.06340146 | 0.62084365 | 0.00011758 | 0.097678 | -0.50782  |

|             |            |            |            |          |          |
|-------------|------------|------------|------------|----------|----------|
| 9mo_SIGAF3_ | 0.0670564  | 0.65644103 | 0.00012032 | 0.089759 | -0.69393 |
| 9mo_SIGAF3_ | 0.03625037 | 0.35640538 | 8.94E-05   | 0.10166  | 0.47826  |
| 9mo_SIGAF3_ | 0.02894752 | 0.28527918 | 8.03E-05   | 0.062611 | 0.751    |
| 9mo_SIGAF3_ | 0.01040555 | 0.10468949 | 6.02E-05   | 0.015048 | 0.10718  |
| 9mo_SIGAF3_ | 0.05008271 | 0.4911256  | 0.0001049  | 0.093366 | 0.042456 |
| 9mo_SIGAF3_ | 0.04895931 | 0.48018423 | 0.00010381 | 0.094798 | 0.072211 |
| 9mo_SIGAF3_ | 0.07098975 | 0.6947499  | 0.00012331 | 0.075804 | -0.87403 |
| 9mo_SIGAF3_ | 0.08355638 | 0.81714267 | 0.00013042 | 0.053406 | -1.2651  |
| 9mo_SIGAF3_ | 0.06417454 | 0.6283731  | 0.00011815 | 0.096641 | -0.55833 |
| 9mo_SIGAF3_ | 0.07271329 | 0.71153635 | 0.00012446 | 0.070202 | -0.9499  |
| 9mo_SIGAF3_ | 0.04192679 | 0.41169092 | 9.58E-05   | 0.10896  | 0.25963  |
| 9mo_SIGAF3_ | 0.03339559 | 0.32860115 | 8.57E-05   | 0.086671 | 0.60151  |
| 9mo_SIGAF3_ | 0.04372716 | 0.42922562 | 9.78E-05   | 0.10633  | 0.21046  |
| 9mo_SIGAF3_ | 0.04916833 | 0.48222    | 0.00010381 | 0.094798 | 0.062467 |
| 9mo_SIGAF3_ | 0.05727653 | 0.56118983 | 0.00011209 | 0.096042 | -0.22216 |
| 9mo_SIGAF3_ | 0.07011551 | 0.68623525 | 0.0001226  | 0.07935  | -0.8424  |
| 9mo_SIGAF3_ | 0.07859152 | 0.7687874  | 0.00012797 | 0.057152 | -1.1666  |
| 9mo_SIGAF3_ | 0.02991716 | 0.294723   | 8.15E-05   | 0.067903 | 0.7357   |
| 9mo_SIGAF3_ | 0.06180375 | 0.6052828  | 0.00011613 | 0.098894 | -0.44141 |
| 9mo_SIGAF3_ | 0.05500176 | 0.5390347  | 0.00010978 | 0.093528 | -0.13708 |
| 9mo_SIGAF3_ | 0.03110782 | 0.30631942 | 8.32E-05   | 0.075317 | 0.69526  |
| 9mo_SIGAF3_ | 0.04901812 | 0.48075703 | 0.00010381 | 0.094798 | 0.072211 |
| 9mo_SIGAF3_ | 0.05589129 | 0.5476983  | 0.00011078 | 0.094541 | -0.16472 |
| 9mo_SIGAF3_ | 0.07447393 | 0.7286841  | 0.00012556 | 0.06525  | -1.0333  |
| 9mo_SIGAF3_ | 0.08601265 | 0.84106565 | 0.0001315  | 0.052818 | -1.2961  |
| 9mo_SIGAF3_ | 0.0598497  | 0.58625126 | 0.00011431 | 0.098311 | -0.3445  |
| 9mo_SIGAF3_ | 0.04511333 | 0.44272625 | 9.93E-05   | 0.10345  | 0.17344  |
| 9mo_SIGAF3_ | 0.03295995 | 0.3243583  | 8.52E-05   | 0.084798 | 0.6305   |
| 9mo_SIGAF3_ | 0.02601788 | 0.25674587 | 7.70E-05   | 0.050154 | 0.76634  |
| 9mo_SIGAF3_ | 0.04325178 | 0.4245957  | 9.74E-05   | 0.10696  | 0.22964  |
| 9mo_SIGAF3_ | 0.0453344  | 0.44487938 | 9.97E-05   | 0.10268  | 0.17344  |
| 9mo_SIGAF3_ | 0.04716247 | 0.4626839  | 0.00010159 | 0.098799 | 0.11903  |
| 9mo_SIGAF3_ | 0.01023657 | 0.10304372 | 6.02E-05   | 0.015048 | 0.10718  |
| 9mo_SIGAF3_ | 0.03358204 | 0.3304171  | 8.61E-05   | 0.088522 | 0.60151  |
| 9mo_SIGAF3_ | 0.07906942 | 0.7734419  | 0.00012816 | 0.056721 | -1.1755  |
| 9mo_SIGAF3_ | 0.01618244 | 0.16095355 | 6.58E-05   | 0.023731 | 0.27899  |
| 9mo_SIGAF3_ | 0.0691311  | 0.67664754 | 0.00012186 | 0.08293  | -0.79386 |
| 9mo_SIGAF3_ | 0.05039229 | 0.49414077 | 0.00010525 | 0.093003 | 0.032151 |
| 9mo_SIGAF3_ | 0.03891166 | 0.38232502 | 9.22E-05   | 0.10852  | 0.36311  |
| 9mo_SIGAF3_ | 0.06321557 | 0.61903316 | 0.0001173  | 0.098072 | -0.50782 |
| 9mo_SIGAF3_ | 0.0562996  | 0.551675   | 0.00011111 | 0.094909 | -0.19309 |
| 9mo_SIGAF3_ | 0.01220513 | 0.12221652 | 6.21E-05   | 0.017782 | 0.12723  |
| 9mo_SIGAF3_ | 0.07311065 | 0.7154064  | 0.00012469 | 0.069151 | -0.97873 |
| 9mo_SIGAF3_ | 0.06318142 | 0.6187006  | 0.0001173  | 0.098072 | -0.50782 |
| 9mo_SIGAF3_ | 0.07930721 | 0.7757579  | 0.00012835 | 0.05632  | -1.1841  |
| 9mo_SIGAF3_ | 0.01681629 | 0.16712692 | 6.65E-05   | 0.024968 | 0.31771  |

|             |            |            |            |           |          |
|-------------|------------|------------|------------|-----------|----------|
| 9mo_SIGAF3_ | 0.04690852 | 0.4602105  | 0.00010159 | 0.098799  | 0.12814  |
| 9mo_SIGAF3_ | 0.08937253 | 0.8737892  | 0.00013288 | 0.052615  | -1.3244  |
| 9mo_SIGAF3_ | 0.0532906  | 0.5223688  | 0.00010807 | 0.092373  | -0.07149 |
| 9mo_SIGAF3_ | 0.04707537 | 0.46183556 | 0.00010159 | 0.098799  | 0.11903  |
| 9mo_SIGAF3_ | 0.044593   | 0.43765846 | 9.89E-05   | 0.10421   | 0.19178  |
| 9mo_SIGAF3_ | 0.03701665 | 0.3638685  | 9.02E-05   | 0.1042    | 0.4477   |
| 9mo_SIGAF3_ | 0.04795678 | 0.47042003 | 0.00010271 | 0.09665   | 0.10061  |
| 9mo_SIGAF3_ | 0.01166679 | 0.11697332 | 6.14E-05   | 0.016833  | 0.11542  |
| 9mo_SIGAF3_ | 0.05690407 | 0.55756223 | 0.00011177 | 0.095663  | -0.20754 |
| 9mo_SIGAF3_ | 0.0168139  | 0.16710362 | 6.65E-05   | 0.024968  | 0.31771  |
| 9mo_SIGAF3_ | 0.07086631 | 0.69354767 | 0.00012308 | 0.076976  | -0.87403 |
| 9mo_SIGAF3_ | 0.05443232 | 0.53348863 | 0.00010944 | 0.093233  | -0.11022 |
| 9mo_SIGAF3_ | 0.01518818 | 0.15126991 | 6.47E-05   | 0.021973  | 0.22576  |
| 9mo_SIGAF3_ | 0.02480488 | 0.2449319  | 7.54E-05   | 0.044969  | 0.73857  |
| 9mo_SIGAF3_ | 0.01590768 | 0.15827748 | 6.54E-05   | 0.023132  | 0.26052  |
| 9mo_SIGAF3_ | 0.00674735 | 0.06906033 | 5.72E-05   | 0.011238  | 0.16213  |
| 9mo_SIGAF3_ | 0.03702278 | 0.36392832 | 9.02E-05   | 0.1042    | 0.4477   |
| 9mo_SIGAF3_ | 0.0449928  | 0.44155237 | 9.93E-05   | 0.10345   | 0.18258  |
| 9mo_SIGAF3_ | 0.0510494  | 0.5005407  | 0.00010597 | 0.092472  | 0.010852 |
| 9mo_SIGAF3_ | 0.05503214 | 0.53933054 | 0.00010978 | 0.093528  | -0.13708 |
| 9mo_SIGAF3_ | 0.08966249 | 0.87661326 | 0.000133   | 0.052606  | -1.3264  |
| 9mo_SIGAF3_ | 0.0627402  | 0.6144033  | 0.00011701 | 0.098387  | -0.47447 |
| 9mo_SIGAF3_ | 0.04801546 | 0.47099155 | 0.00010271 | 0.09665   | 0.10061  |
| 9mo_SIGAF3_ | 0.04579169 | 0.44933316 | 0.00010009 | 0.1019    | 0.1553   |
| 9mo_SIGAF3_ | 0.07394365 | 0.72351944 | 0.00012513 | 0.067136  | -1.0066  |
| 9mo_SIGAF3_ | 0.04388335 | 0.43074685 | 9.82E-05   | 0.10565   | 0.21046  |
| 9mo_SIGAF3_ | 0.04440018 | 0.4357805  | 9.86E-05   | 0.10494   | 0.19178  |
| 9mo_SIGAF3_ | 0.07002933 | 0.6853959  | 0.0001226  | 0.07935   | -0.8424  |
| 9mo_SIGAF3_ | 0.01337476 | 0.13360816 | 6.30E-05   | 0.019276  | 0.15521  |
| 9mo_SIGAF3_ | 0.02459229 | 0.24286135 | 7.54E-05   | 0.044969  | 0.73857  |
| 9mo_SIGAF3_ | 0.03989868 | 0.39193812 | 9.34E-05   | 0.10962   | 0.32588  |
| 9mo_SIGAF3_ | 0.08308175 | 0.81252    | 0.00013026 | 0.053541  | -1.2598  |
| 9mo_SIGAF3_ | 0.06776631 | 0.6633552  | 0.00012084 | 0.087573  | -0.72756 |
| 9mo_SIGAF3_ | 0.05916372 | 0.5795701  | 0.00011368 | 0.097776  | -0.31309 |
| 9mo_SIGAF3_ | 0.07459226 | 0.7298365  | 0.00012556 | 0.06525   | -1.0333  |
| 9mo_SIGAF3_ | 0.04784112 | 0.46929365 | 0.00010234 | 0.09734   | 0.10061  |
| 9mo_SIGAF3_ | 0.06792624 | 0.6649128  | 0.0001211  | 0.086439  | -0.72756 |
| 9mo_SIGAF3_ | 0.04404621 | 0.43233302 | 9.82E-05   | 0.10565   | 0.20107  |
| 9mo_SIGAF3_ | 0.04780879 | 0.4689787  | 0.00010234 | 0.09734   | 0.10061  |
| 9mo_SIGAF3_ | 0.07927849 | 0.7754782  | 0.00012835 | 0.05632   | -1.1841  |
| 9mo_SIGAF3_ | 0.07522438 | 0.7359931  | 0.00012598 | 0.063504  | -1.0589  |
| 9mo_SIGAF3_ | 0.06165047 | 0.6037899  | 0.00011613 | 0.098894  | -0.42501 |
| 9mo_SIGAF3_ | 0.00213713 | 0.02415907 | 5.34E-05   | 0.0073266 | 0.36099  |
| 9mo_SIGAF3_ | 0.08881041 | 0.86831445 | 0.00013275 | 0.052622  | -1.32    |
| 9mo_SIGAF3_ | 0.07715847 | 0.7548302  | 0.0001272  | 0.059217  | -1.117   |
| 9mo_SIGAF3_ | 0.07821299 | 0.7651007  | 0.00012778 | 0.057615  | -1.1573  |



|             |            |            |            |           |            |
|-------------|------------|------------|------------|-----------|------------|
| 9mo_SIGAF3_ | 0.04010453 | 0.393943   | 9.38E-05   | 0.10975   | 0.32588    |
| 9mo_SIGAF3_ | 0.03768022 | 0.37033138 | 9.10E-05   | 0.1063    | 0.41807    |
| 9mo_SIGAF3_ | 0.02496732 | 0.24651393 | 7.58E-05   | 0.046199  | 0.74769    |
| 9mo_SIGAF3_ | 0.06050041 | 0.59258884 | 0.00011492 | 0.0987    | -0.37638   |
| 9mo_SIGAF3_ | 0.03324671 | 0.3271512  | 8.57E-05   | 0.086671  | 0.61617    |
| 9mo_SIGAF3_ | 0.04304577 | 0.42258924 | 9.70E-05   | 0.10755   | 0.22964    |
| 9mo_SIGAF3_ | 0.07774457 | 0.7605385  | 0.0001274  | 0.058646  | -1.1379    |
| 9mo_SIGAF3_ | 0.03283753 | 0.32316592 | 8.52E-05   | 0.084798  | 0.6305     |
| 9mo_SIGAF3_ | 0.06931753 | 0.6784633  | 0.00012211 | 0.081739  | -0.81017   |
| 9mo_SIGAF3_ | 0.04987838 | 0.4891355  | 0.00010453 | 0.09379   | 0.042456   |
| 9mo_SIGAF3_ | 0.06719144 | 0.6577562  | 0.00012058 | 0.088682  | -0.69393   |
| 9mo_SIGAF3_ | 0.05129219 | 0.5029053  | 0.00010597 | 0.092472  | -0.0001745 |
| 9mo_SIGAF3_ | 0.08144024 | 0.7965326  | 0.00012942 | 0.054478  | -1.2295    |
| 9mo_SIGAF3_ | 0.0508253  | 0.49835807 | 0.00010561 | 0.092703  | 0.010852   |
| 9mo_SIGAF3_ | 0.06339715 | 0.6208016  | 0.00011758 | 0.097678  | -0.50782   |
| 9mo_SIGAF3_ | 0.0573213  | 0.5616259  | 0.00011209 | 0.096042  | -0.22216   |
| 9mo_SIGAF3_ | 0.00720894 | 0.07355608 | 5.75E-05   | 0.011579  | 0.15252    |
| 9mo_SIGAF3_ | 0.01692706 | 0.16820577 | 6.65E-05   | 0.024968  | 0.31771    |
| 9mo_SIGAF3_ | 0.07291024 | 0.71345454 | 0.00012446 | 0.070202  | -0.96444   |
| 9mo_SIGAF3_ | 0.06002767 | 0.5879846  | 0.00011462 | 0.098526  | -0.3445    |
| 9mo_SIGAF3_ | 0.04749531 | 0.46592554 | 0.00010197 | 0.098057  | 0.10986    |
| 9mo_SIGAF3_ | 0.07269062 | 0.7113156  | 0.00012446 | 0.070202  | -0.9499    |
| 9mo_SIGAF3_ | 0.03920712 | 0.38520265 | 9.26E-05   | 0.10901   | 0.35035    |
| 9mo_SIGAF3_ | 0.04110276 | 0.4036652  | 9.50E-05   | 0.10955   | 0.29155    |
| 9mo_SIGAF3_ | 0.03338624 | 0.32851014 | 8.57E-05   | 0.086671  | 0.60151    |
| 9mo_SIGAF3_ | 0.05954803 | 0.58331317 | 0.000114   | 0.098059  | -0.32873   |
| 9mo_SIGAF3_ | 0.01833925 | 0.18195981 | 6.80E-05   | 0.027619  | 0.42127    |
| 9mo_SIGAF3_ | 0.0671705  | 0.6575523  | 0.00012058 | 0.088682  | -0.69393   |
| 9mo_SIGAF3_ | 0.04125507 | 0.4051487  | 9.50E-05   | 0.10955   | 0.28067    |
| 9mo_SIGAF3_ | 0.00166532 | 0.01956387 | 5.31E-05   | 0.0071026 | 0.37827    |
| 9mo_SIGAF3_ | 0.05624639 | 0.55115676 | 0.00011111 | 0.094909  | -0.17881   |
| 9mo_SIGAF3_ | 0.01807705 | 0.1794061  | 6.80E-05   | 0.027619  | 0.4001     |
| 9mo_SIGAF3_ | 0.04694555 | 0.46057117 | 0.00010159 | 0.098799  | 0.12814    |
| 9mo_SIGAF3_ | 0.06067916 | 0.5943298  | 0.00011523 | 0.098828  | -0.37638   |
| 9mo_SIGAF3_ | 0.03524273 | 0.34659144 | 8.81E-05   | 0.097198  | 0.52494    |
| 9mo_SIGAF3_ | 0.03601559 | 0.35411873 | 8.90E-05   | 0.10026   | 0.49376    |
| 9mo_SIGAF3_ | 0.03812415 | 0.37465504 | 9.14E-05   | 0.10717   | 0.40374    |
| 9mo_SIGAF3_ | 0.05445595 | 0.53371876 | 0.00010944 | 0.093233  | -0.11022   |
| 9mo_SIGAF3_ | 0.0784189  | 0.7671061  | 0.00012778 | 0.057615  | -1.1573    |
| 9mo_SIGAF3_ | 0.08146369 | 0.7967609  | 0.00012942 | 0.054478  | -1.2295    |
| 9mo_SIGAF3_ | 0.07577544 | 0.7413601  | 0.0001264  | 0.06191   | -1.0712    |
| 9mo_SIGAF3_ | 0.01504431 | 0.14986876 | 6.47E-05   | 0.021973  | 0.22576    |
| 9mo_SIGAF3_ | 0.007165   | 0.07312813 | 5.75E-05   | 0.011579  | 0.15252    |
| 9mo_SIGAF3_ | 0.05379478 | 0.52727926 | 0.00010876 | 0.092731  | -0.084185  |
| 9mo_SIGAF3_ | 0.01845804 | 0.18311681 | 6.84E-05   | 0.028322  | 0.42127    |
| 9mo_SIGAF3_ | 0.03188481 | 0.31388697 | 8.40E-05   | 0.07911   | 0.67094    |

|             |            |            |            |          |            |
|-------------|------------|------------|------------|----------|------------|
| 9mo_SIGAF3_ | 0.01005129 | 0.10123916 | 5.98E-05   | 0.014626 | 0.1081     |
| 9mo_SIGAF3_ | 0.04731646 | 0.46418366 | 0.00010197 | 0.098057 | 0.11903    |
| 9mo_SIGAF3_ | 0.02076543 | 0.2055896  | 7.06E-05   | 0.032941 | 0.56707    |
| 9mo_SIGAF3_ | 0.00361992 | 0.03860077 | 5.47E-05   | 0.008551 | 0.27903    |
| 9mo_SIGAF3_ | 0.0614324  | 0.60166603 | 0.00011583 | 0.09893  | -0.42501   |
| 9mo_SIGAF3_ | 0.02026462 | 0.20071197 | 7.02E-05   | 0.032119 | 0.52662    |
| 9mo_SIGAF3_ | 0.05225157 | 0.51224923 | 0.00010703 | 0.092172 | -0.03476   |
| 9mo_SIGAF3_ | 0.00978589 | 0.09865429 | 5.95E-05   | 0.014213 | 0.1081     |
| 9mo_SIGAF3_ | 0.05078086 | 0.49792522 | 0.00010561 | 0.092703 | 0.021622   |
| 9mo_SIGAF3_ | 0.0861376  | 0.84228253 | 0.00013164 | 0.052775 | -1.2997    |
| 9mo_SIGAF3_ | 0.07134124 | 0.6981732  | 0.00012355 | 0.074645 | -0.88959   |
| 9mo_SIGAF3_ | 0.04122962 | 0.40490088 | 9.50E-05   | 0.10955  | 0.29155    |
| 9mo_SIGAF3_ | 0.04658662 | 0.45707536 | 0.00010122 | 0.099559 | 0.13721    |
| 9mo_SIGAF3_ | 0.08680904 | 0.848822   | 0.00013193 | 0.052709 | -1.3063    |
| 9mo_SIGAF3_ | 0.04920957 | 0.4826216  | 0.00010381 | 0.094798 | 0.062467   |
| 9mo_SIGAF3_ | 0.03232171 | 0.31814218 | 8.44E-05   | 0.081011 | 0.65793    |
| 9mo_SIGAF3_ | 0.06751784 | 0.66093516 | 0.00012084 | 0.087573 | -0.71078   |
| 9mo_SIGAF3_ | 0.03582588 | 0.35227105 | 8.86E-05   | 0.098764 | 0.49376    |
| 9mo_SIGAF3_ | 0.04698717 | 0.46097654 | 0.00010159 | 0.098799 | 0.12814    |
| 9mo_SIGAF3_ | 0.08360539 | 0.8176201  | 0.00013042 | 0.053406 | -1.2651    |
| 9mo_SIGAF3_ | 0.05266175 | 0.5162441  | 0.00010738 | 0.092189 | -0.046772  |
| 9mo_SIGAF3_ | 0.05565697 | 0.5454162  | 0.00011045 | 0.094186 | -0.16472   |
| 9mo_SIGAF3_ | 0.06398805 | 0.6265567  | 0.00011787 | 0.097201 | -0.54144   |
| 9mo_SIGAF3_ | 0.04898655 | 0.48044953 | 0.00010381 | 0.094798 | 0.072211   |
| 9mo_SIGAF3_ | 0.07426993 | 0.7266972  | 0.00012534 | 0.066176 | -1.0201    |
| 9mo_SIGAF3_ | 0.05128048 | 0.5027912  | 0.00010597 | 0.092472 | -0.0001745 |
| 9mo_SIGAF3_ | 0.04974784 | 0.48786414 | 0.00010453 | 0.09379  | 0.052555   |
| 9mo_SIGAF3_ | 0.05587162 | 0.54750675 | 0.00011078 | 0.094541 | -0.16472   |
| 9mo_SIGAF3_ | 0.0746863  | 0.73075247 | 0.00012556 | 0.06525  | -1.0333    |
| 9mo_SIGAF3_ | 0.05208586 | 0.51063526 | 0.00010703 | 0.092172 | -0.022986  |
| 9mo_SIGAF3_ | 0.04253589 | 0.41762325 | 9.66E-05   | 0.10808  | 0.24945    |
| 9mo_SIGAF3_ | 0.07360685 | 0.72023916 | 0.00012491 | 0.068128 | -0.99278   |
| 9mo_SIGAF3_ | 0.06085907 | 0.59608203 | 0.00011523 | 0.098828 | -0.39249   |
| 9mo_SIGAF3_ | 0.01529566 | 0.15231676 | 6.51E-05   | 0.022546 | 0.24275    |
| 9mo_SIGAF3_ | 0.04992772 | 0.48961604 | 0.00010453 | 0.09379  | 0.042456   |
| 9mo_SIGAF3_ | 0.05459255 | 0.5350492  | 0.00010944 | 0.093233 | -0.12355   |
| 9mo_SIGAF3_ | 0.04953333 | 0.48577493 | 0.00010417 | 0.094268 | 0.052555   |
| 9mo_SIGAF3_ | 0.01360726 | 0.13587251 | 6.34E-05   | 0.019794 | 0.16714    |
| 9mo_SIGAF3_ | 0.07559956 | 0.73964715 | 0.00012619 | 0.062687 | -1.0712    |
| 9mo_SIGAF3_ | 0.05991232 | 0.5868612  | 0.00011431 | 0.098311 | -0.3445    |
| 9mo_SIGAF3_ | 0.03856228 | 0.37892225 | 9.18E-05   | 0.10791  | 0.37625    |
| 9mo_SIGAF3_ | 0.05117431 | 0.5017572  | 0.00010597 | 0.092472 | -0.0001745 |
| 9mo_SIGAF3_ | 0.01531738 | 0.15252827 | 6.51E-05   | 0.022546 | 0.24275    |
| 9mo_SIGAF3_ | 0.0166695  | 0.16569725 | 6.65E-05   | 0.024968 | 0.31771    |
| 9mo_SIGAF3_ | 0.0423133  | 0.41545534 | 9.62E-05   | 0.10856  | 0.24945    |
| 9mo_SIGAF3_ | 0.0842107  | 0.8235155  | 0.00013074 | 0.053178 | -1.2751    |

|             |            |            |            |          |           |
|-------------|------------|------------|------------|----------|-----------|
| 9mo_SIGAF3_ | 0.03479184 | 0.3422     | 8.73E-05   | 0.093873 | 0.54051   |
| 9mo_SIGAF3_ | 0.04272442 | 0.4194594  | 9.66E-05   | 0.10808  | 0.23945   |
| 9mo_SIGAF3_ | 0.0849064  | 0.8302913  | 0.00013105 | 0.053002 | -1.2841   |
| 9mo_SIGAF3_ | 0.05797293 | 0.5679725  | 0.00011273 | 0.096781 | -0.25188  |
| 9mo_SIGAF3_ | 0.03410684 | 0.33552846 | 8.65E-05   | 0.090344 | 0.57137   |
| 9mo_SIGAF3_ | 0.06322264 | 0.61910206 | 0.0001173  | 0.098072 | -0.50782  |
| 9mo_SIGAF3_ | 0.07111314 | 0.69595164 | 0.00012331 | 0.075804 | -0.88959  |
| 9mo_SIGAF3_ | 0.04910496 | 0.48160282 | 0.00010381 | 0.094798 | 0.072211  |
| 9mo_SIGAF3_ | 0.04080643 | 0.4007792  | 9.46E-05   | 0.10971  | 0.3027    |
| 9mo_SIGAF3_ | 0.01013386 | 0.10204329 | 6.02E-05   | 0.015048 | 0.10718   |
| 9mo_SIGAF3_ | 0.07081747 | 0.69307196 | 0.00012308 | 0.076976 | -0.87403  |
| 9mo_SIGAF3_ | 0.07054605 | 0.69042844 | 0.00012284 | 0.078159 | -0.8583   |
| 9mo_SIGAF3_ | 0.06218028 | 0.60895    | 0.00011642 | 0.098794 | -0.4579   |
| 9mo_SIGAF3_ | 0.08352245 | 0.8168123  | 0.00013042 | 0.053406 | -1.2651   |
| 9mo_SIGAF3_ | 0.07024568 | 0.687503   | 0.00012284 | 0.078159 | -0.8424   |
| 9mo_SIGAF3_ | 0.02352595 | 0.23247573 | 7.42E-05   | 0.041523 | 0.70349   |
| 9mo_SIGAF3_ | 0.06364125 | 0.6231791  | 0.00011758 | 0.097678 | -0.5246   |
| 9mo_SIGAF3_ | 0.02421108 | 0.23914862 | 7.50E-05   | 0.043782 | 0.72811   |
| 9mo_SIGAF3_ | 0.07819206 | 0.76489687 | 0.00012778 | 0.057615 | -1.1478   |
| 9mo_SIGAF3_ | 0.04940442 | 0.48451942 | 0.00010417 | 0.094268 | 0.062467  |
| 9mo_SIGAF3_ | 0.01880379 | 0.18648423 | 6.87E-05   | 0.029043 | 0.44251   |
| 9mo_SIGAF3_ | 0.04430027 | 0.43480745 | 9.86E-05   | 0.10494  | 0.20107   |
| 9mo_SIGAF3_ | 0.04648062 | 0.456043   | 0.00010084 | 0.10033  | 0.13721   |
| 9mo_SIGAF3_ | 0.03635132 | 0.35738853 | 8.94E-05   | 0.10166  | 0.47826   |
| 9mo_SIGAF3_ | 0.04985112 | 0.48886997 | 0.00010453 | 0.09379  | 0.042456  |
| 9mo_SIGAF3_ | 0.01206239 | 0.12082627 | 6.17E-05   | 0.017303 | 0.12065   |
| 9mo_SIGAF3_ | 0.03958705 | 0.38890296 | 9.30E-05   | 0.10937  | 0.33794   |
| 9mo_SIGAF3_ | 0.08674096 | 0.84815896 | 0.00013193 | 0.052709 | -1.3031   |
| 9mo_SIGAF3_ | 0.07236721 | 0.7081657  | 0.00012424 | 0.071279 | -0.93514  |
| 9mo_SIGAF3_ | 0.04478359 | 0.4395148  | 9.89E-05   | 0.10421  | 0.18258   |
| 9mo_SIGAF3_ | 0.05398801 | 0.5291613  | 0.00010876 | 0.092731 | -0.097097 |
| 9mo_SIGAF3_ | 0.03322053 | 0.32689625 | 8.57E-05   | 0.086671 | 0.61617   |
| 9mo_SIGAF3_ | 0.08040047 | 0.7864057  | 0.00012889 | 0.055287 | -1.2081   |
| 9mo_SIGAF3_ | 0.01347186 | 0.13455382 | 6.30E-05   | 0.019276 | 0.15521   |
| 5mo_SIGAE9_ | 0.04905926 | 0.48115772 | 0.00010381 | 0.094798 | 0.072211  |
| 5mo_SIGAE9_ | 0.04983322 | 0.48869562 | 0.00010453 | 0.09379  | 0.042456  |
| 5mo_SIGAE9_ | 0.03932184 | 0.38631994 | 9.30E-05   | 0.10937  | 0.35035   |
| 5mo_SIGAE9_ | 0.0554601  | 0.5434987  | 0.00011045 | 0.094186 | -0.1508   |
| 5mo_SIGAE9_ | 0.03667074 | 0.36049953 | 8.98E-05   | 0.10298  | 0.46289   |
| 5mo_SIGAE9_ | 0.0414539  | 0.4070852  | 9.54E-05   | 0.10929  | 0.28067   |
| 5mo_SIGAE9_ | 0.04939567 | 0.48443416 | 0.00010417 | 0.094268 | 0.062467  |
| 5mo_SIGAE9_ | 0.03569527 | 0.35099894 | 8.86E-05   | 0.098764 | 0.50933   |
| 5mo_SIGAE9_ | 0.07020252 | 0.6870827  | 0.0001226  | 0.07935  | -0.8424   |
| 5mo_SIGAE9_ | 0.05030398 | 0.49328062 | 0.0001049  | 0.093366 | 0.032151  |
| 5mo_SIGAE9_ | 0.08973234 | 0.8772936  | 0.000133   | 0.052606 | -1.3264   |
| 5mo_SIGAE9_ | 0.03522228 | 0.34639227 | 8.81E-05   | 0.097198 | 0.52494   |

|             |            |            |            |           |           |
|-------------|------------|------------|------------|-----------|-----------|
| 5mo_SIGAE9_ | 0.00414093 | 0.04367511 | 5.50E-05   | 0.0088178 | 0.2638    |
| 5mo_SIGAE9_ | 0.03357064 | 0.3303061  | 8.61E-05   | 0.088522  | 0.60151   |
| 5mo_SIGAE9_ | 0.05370146 | 0.52637047 | 0.00010842 | 0.092532  | -0.084185 |
| 5mo_SIGAE9_ | 0.06483657 | 0.63482094 | 0.00011871 | 0.095287  | -0.57526  |
| 5mo_SIGAE9_ | 0.00368152 | 0.03920073 | 5.47E-05   | 0.008551  | 0.27903   |
| 5mo_SIGAE9_ | 0.06884729 | 0.6738834  | 0.00012161 | 0.084113  | -0.77743  |
| 5mo_SIGAE9_ | 0.02653616 | 0.26179367 | 7.74E-05   | 0.051562  | 0.77158   |
| 5mo_SIGAE9_ | 0.06475815 | 0.63405716 | 0.00011871 | 0.095287  | -0.57526  |
| 5mo_SIGAE9_ | 0.06654086 | 0.6514199  | 0.00012006 | 0.090801  | -0.66011  |
| 5mo_SIGAE9_ | 0.0417689  | 0.41015312 | 9.58E-05   | 0.10896   | 0.27003   |
| 5mo_SIGAE9_ | 0.06030582 | 0.59069365 | 0.00011492 | 0.0987    | -0.36038  |
| 5mo_SIGAE9_ | 0.07146527 | 0.69938123 | 0.00012355 | 0.074645  | -0.90497  |
| 5mo_SIGAE9_ | 0.03195473 | 0.31456795 | 8.40E-05   | 0.07911   | 0.67094   |
| 5mo_SIGAE9_ | 0.0331952  | 0.32664952 | 8.57E-05   | 0.086671  | 0.61617   |
| 5mo_SIGAE9_ | 0.08543387 | 0.83542854 | 0.00013135 | 0.05287   | -1.2923   |
| 5mo_SIGAE9_ | 0.06377727 | 0.62450385 | 0.00011787 | 0.097201  | -0.5246   |
| 5mo_SIGAE9_ | 0.06001471 | 0.5878584  | 0.00011462 | 0.098526  | -0.3445   |
| 5mo_SIGAE9_ | 0.06170426 | 0.60431373 | 0.00011613 | 0.098894  | -0.42501  |
| 5mo_SIGAE9_ | 0.0549525  | 0.53855497 | 0.00010978 | 0.093528  | -0.13708  |
| 5mo_SIGAE9_ | 0.04298998 | 0.4220459  | 9.70E-05   | 0.10755   | 0.22964   |
| 5mo_SIGAE9_ | 0.06979851 | 0.68314785 | 0.00012235 | 0.080544  | -0.82636  |
| 5mo_SIGAE9_ | 0.07998578 | 0.78236675 | 0.00012871 | 0.055605  | -1.2004   |
| 5mo_SIGAE9_ | 0.05943299 | 0.5821927  | 0.000114   | 0.098059  | -0.32873  |
| 5mo_SIGAE9_ | 0.04494844 | 0.44112036 | 9.93E-05   | 0.10345   | 0.18258   |
| 5mo_SIGAE9_ | 0.03335708 | 0.32822618 | 8.57E-05   | 0.086671  | 0.61617   |
| 5mo_SIGAE9_ | 0.03407532 | 0.33522144 | 8.65E-05   | 0.090344  | 0.57137   |
| 5mo_SIGAE9_ | 0.07911769 | 0.773912   | 0.00012816 | 0.056721  | -1.1755   |
| 5mo_SIGAE9_ | 0.09011708 | 0.88104075 | 0.00013313 | 0.052597  | -1.3283   |
| 5mo_SIGAE9_ | 0.04504215 | 0.44203296 | 9.93E-05   | 0.10345   | 0.17344   |
| 5mo_SIGAE9_ | 0.04708608 | 0.46193984 | 0.00010159 | 0.098799  | 0.11903   |
| 5mo_SIGAE9_ | 0.0798763  | 0.7813006  | 0.00012871 | 0.055605  | -1.1924   |
| 5mo_SIGAE9_ | 0.02932661 | 0.28897136 | 8.07E-05   | 0.064343  | 0.7438    |
| 5mo_SIGAE9_ | 0.04346455 | 0.426668   | 9.78E-05   | 0.10633   | 0.21998   |
| 5mo_SIGAE9_ | 0.04469437 | 0.43864578 | 9.89E-05   | 0.10421   | 0.18258   |
| 5mo_SIGAE9_ | 0.05678871 | 0.55643874 | 0.00011144 | 0.095284  | -0.20754  |
| 5mo_SIGAE9_ | 0.00995041 | 0.10025667 | 5.98E-05   | 0.014626  | 0.1081    |
| 5mo_SIGAE9_ | 0.07447252 | 0.7286704  | 0.00012556 | 0.06525   | -1.0333   |
| 5mo_SIGAE9_ | 0.00917412 | 0.09269589 | 5.92E-05   | 0.013809  | 0.11326   |
| 5mo_SIGAE9_ | 0.05842459 | 0.5723713  | 0.00011305 | 0.097132  | -0.2822   |
| 5mo_SIGAE9_ | 0.04881996 | 0.47882706 | 0.00010344 | 0.095375  | 0.072211  |
| 5mo_SIGAE9_ | 0.07786931 | 0.76175344 | 0.00012759 | 0.058113  | -1.1478   |
| 5mo_SIGAE9_ | 0.04493152 | 0.4409555  | 9.93E-05   | 0.10345   | 0.18258   |
| 5mo_SIGAE9_ | 0.08522917 | 0.8334348  | 0.0001312  | 0.05293   | -1.2883   |
| 5mo_SIGAE9_ | 0.09771788 | 0.9550688  | 0.00013565 | 0.052193  | -1.3445   |
| 5mo_SIGAE9_ | 0.01882565 | 0.18669707 | 6.87E-05   | 0.029043  | 0.44251   |
| 5mo_SIGAE9_ | 0.09221169 | 0.9014412  | 0.00013397 | 0.05251   | -1.3372   |

|             |            |            |            |          |           |
|-------------|------------|------------|------------|----------|-----------|
| 5mo_SIGAE9_ | 0.02401368 | 0.237226   | 7.46E-05   | 0.042633 | 0.71639   |
| 5mo_SIGAE9_ | 0.0263288  | 0.25977415 | 7.74E-05   | 0.051562 | 0.76965   |
| 5mo_SIGAE9_ | 0.06376593 | 0.6243934  | 0.00011787 | 0.097201 | -0.5246   |
| 5mo_SIGAE9_ | 0.05255508 | 0.51520526 | 0.00010738 | 0.092189 | -0.046772 |
| 5mo_SIGAE9_ | 0.05609459 | 0.5496783  | 0.00011078 | 0.094541 | -0.17881  |
| 5mo_SIGAE9_ | 0.00579942 | 0.05982804 | 5.63E-05   | 0.010269 | 0.19547   |
| 5mo_SIGAE9_ | 0.04818649 | 0.47265732 | 0.00010271 | 0.09665  | 0.091263  |
| 5mo_SIGAE9_ | 0.06763431 | 0.6620695  | 0.00012084 | 0.087573 | -0.72756  |
| 5mo_SIGAE9_ | 0.00991333 | 0.09989543 | 5.98E-05   | 0.014626 | 0.1081    |
| 5mo_SIGAE9_ | 0.07328666 | 0.71712065 | 0.00012469 | 0.069151 | -0.97873  |
| 5mo_SIGAE9_ | 0.05718392 | 0.5602879  | 0.00011209 | 0.096042 | -0.22216  |
| 5mo_SIGAE9_ | 0.07528307 | 0.73656476 | 0.00012598 | 0.063504 | -1.0589   |
| 5mo_SIGAE9_ | 0.07270948 | 0.7114992  | 0.00012446 | 0.070202 | -0.9499   |
| 5mo_SIGAE9_ | 0.07454362 | 0.72936285 | 0.00012556 | 0.06525  | -1.0333   |
| 5mo_SIGAE9_ | 0.06963043 | 0.68151075 | 0.00012235 | 0.080544 | -0.81017  |
| 5mo_SIGAE9_ | 0.00873733 | 0.0884418  | 5.86E-05   | 0.013029 | 0.11742   |
| 5mo_SIGAE9_ | 0.05168108 | 0.50669295 | 0.00010668 | 0.092211 | -0.011455 |
| 5mo_SIGAE9_ | 0.05402958 | 0.52956617 | 0.00010876 | 0.092731 | -0.097097 |
| 5mo_SIGAE9_ | 0.0420318  | 0.41271362 | 9.58E-05   | 0.10896  | 0.25963   |
| 5mo_SIGAE9_ | 0.05650313 | 0.5536573  | 0.00011144 | 0.095284 | -0.19309  |
| 5mo_SIGAE9_ | 0.0496606  | 0.48701447 | 0.00010453 | 0.09379  | 0.052555  |
| 5mo_SIGAE9_ | 0.08459014 | 0.8272111  | 0.00013089 | 0.053084 | -1.2797   |
| 5mo_SIGAE9_ | 0.04738391 | 0.46484062 | 0.00010197 | 0.098057 | 0.11903   |
| 5mo_SIGAE9_ | 0.04369073 | 0.4288708  | 9.78E-05   | 0.10633  | 0.21046   |
| 5mo_SIGAE9_ | 0.03830408 | 0.3764075  | 9.18E-05   | 0.10791  | 0.38979   |
| 5mo_SIGAE9_ | 0.07934487 | 0.77612466 | 0.00012835 | 0.05632  | -1.1841   |
| 5mo_SIGAE9_ | 0.04255441 | 0.41780362 | 9.66E-05   | 0.10808  | 0.24945   |
| 5mo_SIGAE9_ | 0.04638298 | 0.455092   | 0.00010084 | 0.10033  | 0.13721   |
| 5mo_SIGAE9_ | 0.06432911 | 0.6298785  | 0.00011815 | 0.096641 | -0.55833  |
| 5mo_SIGAE9_ | 0.05373273 | 0.526675   | 0.00010842 | 0.092532 | -0.084185 |
| 5mo_SIGAE9_ | 0.04530411 | 0.4445843  | 9.97E-05   | 0.10268  | 0.17344   |
| 5mo_SIGAE9_ | 0.05796829 | 0.56792724 | 0.00011273 | 0.096781 | -0.25188  |
| 5mo_SIGAE9_ | 0.01588873 | 0.15809298 | 6.54E-05   | 0.023132 | 0.26052   |
| 5mo_SIGAE9_ | 0.06477533 | 0.6342244  | 0.00011871 | 0.095287 | -0.57526  |
| 5mo_SIGAE9_ | 0.05654814 | 0.5540956  | 0.00011144 | 0.095284 | -0.19309  |
| 5mo_SIGAE9_ | 0.04713276 | 0.46239454 | 0.00010159 | 0.098799 | 0.11903   |
| 5mo_SIGAE9_ | 0.05111922 | 0.50122064 | 0.00010597 | 0.092472 | 0.010852  |
| 5mo_SIGAE9_ | 0.01217988 | 0.12197059 | 6.17E-05   | 0.017303 | 0.12723   |
| 5mo_SIGAE9_ | 0.05347821 | 0.5241961  | 0.00010842 | 0.092532 | -0.07149  |
| 5mo_SIGAE9_ | 0.02249298 | 0.22241515 | 7.30E-05   | 0.038397 | 0.65846   |
| 5mo_SIGAE9_ | 0.04724774 | 0.46351436 | 0.00010197 | 0.098057 | 0.11903   |
| 5mo_SIGAE9_ | 0.02255838 | 0.22305208 | 7.30E-05   | 0.038397 | 0.65846   |
| 5mo_SIGAE9_ | 0.03617571 | 0.35567823 | 8.90E-05   | 0.10026  | 0.47826   |
| 5mo_SIGAE9_ | 0.05848611 | 0.5729705  | 0.00011305 | 0.097132 | -0.2822   |
| 5mo_SIGAE9_ | 0.0640818  | 0.6274698  | 0.00011815 | 0.096641 | -0.54144  |
| 5mo_SIGAE9_ | 0.0613694  | 0.6010524  | 0.00011583 | 0.09893  | -0.4087   |

|             |            |            |            |           |           |
|-------------|------------|------------|------------|-----------|-----------|
| 5mo_SIGAE9_ | 0.06139444 | 0.60129625 | 0.00011583 | 0.09893   | -0.4087   |
| 5mo_SIGAE9_ | 0.0760973  | 0.744495   | 0.0001266  | 0.061174  | -1.0832   |
| 5mo_SIGAE9_ | 0.05102558 | 0.50030863 | 0.00010597 | 0.092472  | 0.010852  |
| 5mo_SIGAE9_ | 0.04484503 | 0.4401131  | 9.93E-05   | 0.10345   | 0.18258   |
| 5mo_SIGAE9_ | 0.05964877 | 0.5842943  | 0.00011431 | 0.098311  | -0.32873  |
| 5mo_SIGAE9_ | 0.04694908 | 0.46060556 | 0.00010159 | 0.098799  | 0.12814   |
| 5mo_SIGAE9_ | 0.05193437 | 0.50915974 | 0.00010668 | 0.092211  | -0.022986 |
| 5mo_SIGAE9_ | 0.06099394 | 0.59739566 | 0.00011553 | 0.098907  | -0.39249  |
| 5mo_SIGAE9_ | 0.04297263 | 0.4218769  | 9.70E-05   | 0.10755   | 0.22964   |
| 5mo_SIGAE9_ | 0.05889609 | 0.57696354 | 0.00011368 | 0.097776  | -0.29758  |
| 5mo_SIGAE9_ | 0.04407982 | 0.43266037 | 9.82E-05   | 0.10565   | 0.20107   |
| 5mo_SIGAE9_ | 0.05106899 | 0.50073147 | 0.00010597 | 0.092472  | 0.010852  |
| 5mo_SIGAE9_ | 0.05101994 | 0.5002538  | 0.00010597 | 0.092472  | 0.010852  |
| 5mo_SIGAE9_ | 0.0657766  | 0.6439764  | 0.00011953 | 0.092756  | -0.62617  |
| 5mo_SIGAE9_ | 0.04579665 | 0.44938144 | 0.00010009 | 0.1019    | 0.1553    |
| 5mo_SIGAE9_ | 0.07209922 | 0.70555556 | 0.00012401 | 0.07238   | -0.93514  |
| 5mo_SIGAE9_ | 0.06192605 | 0.60647386 | 0.00011613 | 0.098894  | -0.44141  |
| 5mo_SIGAE9_ | 0.06808948 | 0.66650265 | 0.0001211  | 0.086439  | -0.74427  |
| 5mo_SIGAE9_ | 0.0778167  | 0.7612411  | 0.00012759 | 0.058113  | -1.1379   |
| 5mo_SIGAE9_ | 0.09935469 | 0.97101057 | 0.00013604 | 0.052097  | -1.3437   |
| 5mo_SIGAE9_ | 0.06630111 | 0.6490848  | 0.00011979 | 0.091802  | -0.66011  |
| 5mo_SIGAE9_ | 0.07824791 | 0.7654408  | 0.00012778 | 0.057615  | -1.1573   |
| 5mo_SIGAE9_ | 0.02653932 | 0.26182452 | 7.74E-05   | 0.051562  | 0.77158   |
| 5mo_SIGAE9_ | 0.00265455 | 0.02919854 | 5.39E-05   | 0.007795  | 0.3272    |
| 5mo_SIGAE9_ | 0.00338563 | 0.03631892 | 5.44E-05   | 0.0082917 | 0.2947    |
| 5mo_SIGAE9_ | 0.05055257 | 0.4957018  | 0.00010525 | 0.093003  | 0.021622  |
| 5mo_SIGAE9_ | 0.04781826 | 0.4690709  | 0.00010234 | 0.09734   | 0.10061   |
| 5mo_SIGAE9_ | 0.05673872 | 0.55595183 | 0.00011144 | 0.095284  | -0.20754  |
| 5mo_SIGAE9_ | 0.0375108  | 0.36868134 | 9.06E-05   | 0.10531   | 0.41807   |
| 5mo_SIGAE9_ | 0.05305341 | 0.5200587  | 0.00010773 | 0.092257  | -0.059017 |
| 5mo_SIGAE9_ | 0.02683082 | 0.2646636  | 7.78E-05   | 0.053015  | 0.77158   |
| 5mo_SIGAE9_ | 0.07566    | 0.7402358  | 0.00012619 | 0.062687  | -1.0712   |
| 5mo_SIGAE9_ | 0.02759822 | 0.2721376  | 7.86E-05   | 0.05605   | 0.76966   |
| 5mo_SIGAE9_ | 0.03701723 | 0.3638742  | 9.02E-05   | 0.1042    | 0.4477    |
| 5mo_SIGAE9_ | 0.06248061 | 0.611875   | 0.00011672 | 0.098627  | -0.47447  |
| 5mo_SIGAE9_ | 0.05325436 | 0.5220158  | 0.00010807 | 0.092373  | -0.07149  |
| 5mo_SIGAE9_ | 0.05150902 | 0.5050171  | 0.00010632 | 0.092309  | -0.011455 |
| 5mo_SIGAE9_ | 0.07168154 | 0.70148766 | 0.00012378 | 0.073503  | -0.90497  |
| 5mo_SIGAE9_ | 0.04852039 | 0.47590938 | 0.00010308 | 0.095994  | 0.081803  |
| 5mo_SIGAE9_ | 0.0637914  | 0.6246415  | 0.00011787 | 0.097201  | -0.5246   |
| 5mo_SIGAE9_ | 0.06398145 | 0.6264925  | 0.00011787 | 0.097201  | -0.54144  |
| 5mo_SIGAE9_ | 0.05681833 | 0.55672723 | 0.00011144 | 0.095284  | -0.20754  |
| 5mo_SIGAE9_ | 0.07259305 | 0.71036524 | 0.00012424 | 0.071279  | -0.9499   |
| 5mo_SIGAE9_ | 0.01284536 | 0.12845205 | 6.24E-05   | 0.018271  | 0.14454   |
| 5mo_SIGAE9_ | 0.042514   | 0.41741005 | 9.66E-05   | 0.10808   | 0.24945   |
| 5mo_SIGAE9_ | 0.06326071 | 0.61947286 | 0.0001173  | 0.098072  | -0.50782  |

|             |            |            |            |           |            |
|-------------|------------|------------|------------|-----------|------------|
| 5mo_SIGAE9_ | 0.07305651 | 0.71487916 | 0.00012469 | 0.069151  | -0.96444   |
| 5mo_SIGAE9_ | 0.05236938 | 0.5133966  | 0.00010738 | 0.092189  | -0.03476   |
| 5mo_SIGAE9_ | 0.0781431  | 0.76442    | 0.00012778 | 0.057615  | -1.1478    |
| 5mo_SIGAE9_ | 0.07005174 | 0.6856141  | 0.0001226  | 0.07935   | -0.8424    |
| 5mo_SIGAE9_ | 0.06208661 | 0.6080377  | 0.00011642 | 0.098794  | -0.44141   |
| 5mo_SIGAE9_ | 0.06407649 | 0.62741816 | 0.00011815 | 0.096641  | -0.54144   |
| 5mo_SIGAE9_ | 0.03839091 | 0.37725317 | 9.18E-05   | 0.10791   | 0.38979    |
| 5mo_SIGAE9_ | 0.04755272 | 0.46648473 | 0.00010197 | 0.098057  | 0.10986    |
| 5mo_SIGAE9_ | 0.06276981 | 0.6146917  | 0.00011701 | 0.098387  | -0.47447   |
| 5mo_SIGAE9_ | 0.0770581  | 0.75385267 | 0.000127   | 0.059827  | -1.117     |
| 5mo_SIGAE9_ | 0.0449211  | 0.44085407 | 9.93E-05   | 0.10345   | 0.18258    |
| 5mo_SIGAE9_ | 0.00524091 | 0.05438836 | 5.58E-05   | 0.0096645 | 0.22108    |
| 5mo_SIGAE9_ | 0.0666016  | 0.65201145 | 0.00012006 | 0.090801  | -0.67704   |
| 5mo_SIGAE9_ | 0.05000254 | 0.4903448  | 0.0001049  | 0.093366  | 0.042456   |
| 5mo_SIGAE9_ | 0.05120584 | 0.5020643  | 0.00010597 | 0.092472  | -0.0001745 |
| 5mo_SIGAE9_ | 0.05443122 | 0.53347784 | 0.00010944 | 0.093233  | -0.11022   |
| 5mo_SIGAE9_ | 0.07462338 | 0.73013973 | 0.00012556 | 0.06525   | -1.0333    |
| 5mo_SIGAE9_ | 0.04550552 | 0.44654596 | 0.00010009 | 0.1019    | 0.16436    |
| 5mo_SIGAE9_ | 0.0910369  | 0.88999933 | 0.0001335  | 0.052565  | -1.3333    |
| 5mo_SIGAE9_ | 0.04338552 | 0.4258982  | 9.74E-05   | 0.10696   | 0.21998    |
| 5mo_SIGAE9_ | 0.02961392 | 0.29176956 | 8.11E-05   | 0.066108  | 0.7357     |
| 5mo_SIGAE9_ | 0.04705972 | 0.46168315 | 0.00010159 | 0.098799  | 0.11903    |
| 5mo_SIGAE9_ | 0.03072139 | 0.3025558  | 8.23E-05   | 0.07157   | 0.70647    |
| 5mo_SIGAE9_ | 0.05966668 | 0.5844687  | 0.00011431 | 0.098311  | -0.32873   |
| 5mo_SIGAE9_ | 0.02203966 | 0.218      | 7.22E-05   | 0.03647   | 0.62396    |
| 5mo_SIGAE9_ | 0.04879353 | 0.47856954 | 0.00010344 | 0.095375  | 0.072211   |
| 5mo_SIGAE9_ | 0.03689869 | 0.36271966 | 8.98E-05   | 0.10298   | 0.4477     |
| 5mo_SIGAE9_ | 0.0583202  | 0.5713547  | 0.00011305 | 0.097132  | -0.26697   |
| 5mo_SIGAE9_ | 0.05385196 | 0.52783614 | 0.00010876 | 0.092731  | -0.084185  |
| 5mo_SIGAE9_ | 0.04386328 | 0.43055135 | 9.82E-05   | 0.10565   | 0.21046    |
| 5mo_SIGAE9_ | 0.04765169 | 0.46744868 | 0.00010234 | 0.09734   | 0.10986    |
| 5mo_SIGAE9_ | 0.05180829 | 0.5079319  | 0.00010668 | 0.092211  | -0.011455  |
| 5mo_SIGAE9_ | 0.00984034 | 0.0991846  | 5.98E-05   | 0.014626  | 0.1081     |
| 5mo_SIGAE9_ | 0.0749223  | 0.733051   | 0.00012577 | 0.064358  | -1.0462    |
| 5mo_SIGAE9_ | 0.01021825 | 0.10286521 | 6.02E-05   | 0.015048  | 0.10718    |
| 5mo_SIGAE9_ | 0.04535231 | 0.44505382 | 9.97E-05   | 0.10268   | 0.16436    |
| 5mo_SIGAE9_ | 0.04960819 | 0.48650396 | 0.00010417 | 0.094268  | 0.052555   |
| 5mo_SIGAE9_ | 0.05471079 | 0.5362008  | 0.00010944 | 0.093233  | -0.12355   |
| 5mo_SIGAE9_ | 0.0553573  | 0.5424975  | 0.00011011 | 0.093847  | -0.1508    |
| 5mo_SIGAE9_ | 0.05630703 | 0.5517474  | 0.00011111 | 0.094909  | -0.19309   |
| 5mo_SIGAE9_ | 0.07734231 | 0.7566207  | 0.0001272  | 0.059217  | -1.1276    |
| 5mo_SIGAE9_ | 0.03273379 | 0.32215565 | 8.48E-05   | 0.082909  | 0.6305     |
| 5mo_SIGAE9_ | 0.07223736 | 0.70690095 | 0.00012401 | 0.07238   | -0.93514   |
| 5mo_SIGAE9_ | 0.0271211  | 0.26749068 | 7.82E-05   | 0.054511  | 0.77219    |
| 5mo_SIGAE9_ | 0.04611154 | 0.45244837 | 0.00010046 | 0.10111   | 0.14626    |
| 5mo_SIGAE9_ | 0.06071528 | 0.5946816  | 0.00011523 | 0.098828  | -0.37638   |

|             |            |            |            |           |           |
|-------------|------------|------------|------------|-----------|-----------|
| 5mo_SIGAE9_ | 0.07929354 | 0.77562475 | 0.00012835 | 0.05632   | -1.1841   |
| 5mo_SIGAE9_ | 0.07805263 | 0.7635389  | 0.00012759 | 0.058113  | -1.1478   |
| 5mo_SIGAE9_ | 0.04494197 | 0.44105732 | 9.93E-05   | 0.10345   | 0.18258   |
| 5mo_SIGAE9_ | 0.08002162 | 0.78271586 | 0.00012871 | 0.055605  | -1.2004   |
| 5mo_SIGAE9_ | 0.00934162 | 0.09432727 | 5.92E-05   | 0.013809  | 0.11326   |
| 5mo_SIGAE9_ | 0.00336732 | 0.03614055 | 5.44E-05   | 0.0082917 | 0.2947    |
| 5mo_SIGAE9_ | 0.06707671 | 0.6566388  | 0.00012032 | 0.089759  | -0.69393  |
| 5mo_SIGAE9_ | 0.06550233 | 0.6413051  | 0.00011925 | 0.093659  | -0.60919  |
| 5mo_SIGAE9_ | 0.00371452 | 0.0395221  | 5.47E-05   | 0.008551  | 0.27903   |
| 5mo_SIGAE9_ | 0.07582529 | 0.74184567 | 0.0001264  | 0.06191   | -1.0832   |
| 5mo_SIGAE9_ | 0.05206269 | 0.51040965 | 0.00010703 | 0.092172  | -0.022986 |
| 5mo_SIGAE9_ | 0.05375066 | 0.5268496  | 0.00010876 | 0.092731  | -0.084185 |
| 5mo_SIGAE9_ | 0.05496102 | 0.5386379  | 0.00010978 | 0.093528  | -0.13708  |
| 5mo_SIGAE9_ | 0.09867422 | 0.96438307 | 0.00013585 | 0.052145  | -1.3442   |
| 5mo_SIGAE9_ | 0.0055859  | 0.05774847 | 5.61E-05   | 0.0099627 | 0.20797   |
| 5mo_SIGAE9_ | 0.04659205 | 0.45712823 | 0.00010122 | 0.099559  | 0.13721   |
| 5mo_SIGAE9_ | 0.06333727 | 0.6202185  | 0.0001173  | 0.098072  | -0.50782  |
| 5mo_SIGAE9_ | 0.06177614 | 0.60501385 | 0.00011613 | 0.098894  | -0.44141  |
| 5mo_SIGAE9_ | 0.06272183 | 0.61422443 | 0.00011701 | 0.098387  | -0.47447  |
| 5mo_SIGAE9_ | 0.04740563 | 0.4650522  | 0.00010197 | 0.098057  | 0.10986   |
| 5mo_SIGAE9_ | 0.05059989 | 0.49616265 | 0.00010525 | 0.093003  | 0.021622  |
| 5mo_SIGAE9_ | 0.01360998 | 0.13589904 | 6.34E-05   | 0.019794  | 0.16714   |
| 5mo_SIGAE9_ | 0.06347045 | 0.6215156  | 0.00011758 | 0.097678  | -0.50782  |
| 5mo_SIGAE9_ | 0.06267529 | 0.61377114 | 0.00011701 | 0.098387  | -0.47447  |
| 5mo_SIGAE9_ | 0.07032377 | 0.6882636  | 0.00012284 | 0.078159  | -0.8424   |
| 5mo_SIGAE9_ | 0.06194823 | 0.60668993 | 0.00011613 | 0.098894  | -0.44141  |
| 5mo_SIGAE9_ | 0.04835862 | 0.47433376 | 0.00010308 | 0.095994  | 0.091263  |
| 5mo_SIGAE9_ | 0.05629972 | 0.5516762  | 0.00011111 | 0.094909  | -0.19309  |
| 5mo_SIGAE9_ | 0.0520882  | 0.510658   | 0.00010703 | 0.092172  | -0.022986 |
| 5mo_SIGAE9_ | 0.05652123 | 0.5538336  | 0.00011144 | 0.095284  | -0.19309  |
| 5mo_SIGAE9_ | 0.04554739 | 0.44695374 | 0.00010009 | 0.1019    | 0.16436   |
| 5mo_SIGAE9_ | 0.01879931 | 0.18644056 | 6.87E-05   | 0.029043  | 0.44251   |
| 5mo_SIGAE9_ | 0.0684358  | 0.6698757  | 0.00012136 | 0.085284  | -0.7609   |
| 5mo_SIGAE9_ | 0.0366558  | 0.36035407 | 8.98E-05   | 0.10298   | 0.46289   |
| 5mo_SIGAE9_ | 0.02889566 | 0.28477404 | 8.03E-05   | 0.062611  | 0.75723   |
| 5mo_SIGAE9_ | 0.07891145 | 0.77190334 | 0.00012816 | 0.056721  | -1.1755   |
| 5mo_SIGAE9_ | 0.05497446 | 0.53876877 | 0.00010978 | 0.093528  | -0.13708  |
| 5mo_SIGAE9_ | 0.07547775 | 0.7384608  | 0.00012619 | 0.062687  | -1.0712   |
| 5mo_SIGAE9_ | 0.0488156  | 0.4787846  | 0.00010344 | 0.095375  | 0.072211  |
| 5mo_SIGAE9_ | 0.06081244 | 0.59562784 | 0.00011523 | 0.098828  | -0.39249  |
| 5mo_SIGAE9_ | 0.03340276 | 0.328671   | 8.57E-05   | 0.086671  | 0.60151   |
| 5mo_SIGAE9_ | 0.03158832 | 0.3109993  | 8.36E-05   | 0.07721   | 0.6834    |
| 5mo_SIGAE9_ | 0.07614571 | 0.7449664  | 0.0001266  | 0.061174  | -1.0832   |
| 5mo_SIGAE9_ | 0.04517748 | 0.44335106 | 9.97E-05   | 0.10268   | 0.17344   |
| 5mo_SIGAE9_ | 0.06515107 | 0.63788396 | 0.00011898 | 0.094504  | -0.59222  |
| 5mo_SIGAE9_ | 0.07794969 | 0.7625363  | 0.00012759 | 0.058113  | -1.1478   |



|             |            |            |            |           |           |
|-------------|------------|------------|------------|-----------|-----------|
| 5mo_SIGAE9_ | 0.05425458 | 0.53175753 | 0.0001091  | 0.092966  | -0.11022  |
| 5mo_SIGAE9_ | 0.06392551 | 0.62594765 | 0.00011787 | 0.097201  | -0.54144  |
| 5mo_SIGAE9_ | 0.06341904 | 0.62101495 | 0.00011758 | 0.097678  | -0.50782  |
| 5mo_SIGAE9_ | 0.02391529 | 0.23626775 | 7.46E-05   | 0.042633  | 0.71639   |
| 5mo_SIGAE9_ | 0.0769864  | 0.75315434 | 0.000127   | 0.059827  | -1.117    |
| 5mo_SIGAE9_ | 0.08578739 | 0.8388716  | 0.0001315  | 0.052818  | -1.2961   |
| 5mo_SIGAE9_ | 0.08696762 | 0.8503665  | 0.00013193 | 0.052709  | -1.3063   |
| 5mo_SIGAE9_ | 0.04776351 | 0.46853772 | 0.00010234 | 0.09734   | 0.10061   |
| 5mo_SIGAE9_ | 0.04697784 | 0.46088567 | 0.00010159 | 0.098799  | 0.12814   |
| 5mo_SIGAE9_ | 0.07312685 | 0.71556413 | 0.00012469 | 0.069151  | -0.97873  |
| 5mo_SIGAE9_ | 0.06115909 | 0.5990041  | 0.00011553 | 0.098907  | -0.4087   |
| 5mo_SIGAE9_ | 0.07143147 | 0.69905204 | 0.00012355 | 0.074645  | -0.90497  |
| 5mo_SIGAE9_ | 0.0434561  | 0.42658567 | 9.78E-05   | 0.10633   | 0.21998   |
| 5mo_SIGAE9_ | 0.0521923  | 0.51167196 | 0.00010703 | 0.092172  | -0.03476  |
| 5mo_SIGAE9_ | 0.03449847 | 0.3393427  | 8.69E-05   | 0.09213   | 0.55601   |
| 5mo_SIGAE9_ | 0.05663478 | 0.55493957 | 0.00011144 | 0.095284  | -0.19309  |
| 5mo_SIGAE9_ | 0.05800488 | 0.5682836  | 0.00011273 | 0.096781  | -0.25188  |
| 5mo_SIGAE9_ | 0.02250961 | 0.22257708 | 7.30E-05   | 0.038397  | 0.65846   |
| 5mo_SIGAE9_ | 0.02239202 | 0.22143179 | 7.26E-05   | 0.037419  | 0.64161   |
| 5mo_SIGAE9_ | 0.05791678 | 0.56742555 | 0.00011273 | 0.096781  | -0.25188  |
| 5mo_SIGAE9_ | 0.06240962 | 0.6111836  | 0.00011672 | 0.098627  | -0.4579   |
| 5mo_SIGAE9_ | 0.06784538 | 0.66412526 | 0.0001211  | 0.086439  | -0.72756  |
| 5mo_SIGAE9_ | 0.02774918 | 0.27360794 | 7.90E-05   | 0.057632  | 0.76966   |
| 5mo_SIGAE9_ | 0.05598295 | 0.548591   | 0.00011078 | 0.094541  | -0.17881  |
| 5mo_SIGAE9_ | 0.05385397 | 0.52785575 | 0.00010876 | 0.092731  | -0.084185 |
| 5mo_SIGAE9_ | 0.01375199 | 0.1372822  | 6.34E-05   | 0.019794  | 0.16714   |
| 5mo_SIGAE9_ | 0.04984499 | 0.48881033 | 0.00010453 | 0.09379   | 0.042456  |
| 5mo_SIGAE9_ | 0.08540689 | 0.83516574 | 0.00013135 | 0.05287   | -1.2923   |
| 5mo_SIGAE9_ | 0.05996247 | 0.5873496  | 0.00011462 | 0.098526  | -0.3445   |
| 5mo_SIGAE9_ | 0.07176584 | 0.70230865 | 0.00012378 | 0.073503  | -0.92016  |
| 5mo_SIGAE9_ | 0.08852178 | 0.86550325 | 0.00013261 | 0.052631  | -1.32     |
| 5mo_SIGAE9_ | 0.07227211 | 0.7072395  | 0.00012401 | 0.07238   | -0.93514  |
| 5mo_SIGAE9_ | 0.05269858 | 0.5166028  | 0.00010738 | 0.092189  | -0.046772 |
| 5mo_SIGAE9_ | 0.07532779 | 0.7370003  | 0.00012598 | 0.063504  | -1.0589   |
| 5mo_SIGAE9_ | 0.00424822 | 0.04472013 | 5.50E-05   | 0.0088178 | 0.2638    |
| 5mo_SIGAE9_ | 0.06106241 | 0.5980625  | 0.00011553 | 0.098907  | -0.39249  |
| 5mo_SIGAE9_ | 0.05076636 | 0.49778405 | 0.00010561 | 0.092703  | 0.021622  |
| 5mo_SIGAE9_ | 0.04912696 | 0.4818171  | 0.00010381 | 0.094798  | 0.062467  |
| 5mo_SIGAE9_ | 0.0414662  | 0.40720496 | 9.54E-05   | 0.10929   | 0.28067   |
| 5mo_SIGAE9_ | 0.0481596  | 0.47239548 | 0.00010271 | 0.09665   | 0.091263  |
| 5mo_SIGAE9_ | 0.05008159 | 0.49111468 | 0.0001049  | 0.093366  | 0.042456  |
| 5mo_SIGAE9_ | 0.07460173 | 0.72992873 | 0.00012556 | 0.06525   | -1.0333   |
| 5mo_SIGAE9_ | 0.06345785 | 0.6213929  | 0.00011758 | 0.097678  | -0.50782  |
| 5mo_SIGAE9_ | 0.03193931 | 0.31441772 | 8.40E-05   | 0.07911   | 0.67094   |
| 5mo_SIGAE9_ | 0.0406264  | 0.39902574 | 9.42E-05   | 0.10978   | 0.3027    |
| 5mo_SIGAE9_ | 0.08020558 | 0.7845076  | 0.00012889 | 0.055287  | -1.2004   |

|             |            |            |            |           |            |
|-------------|------------|------------|------------|-----------|------------|
| 5mo_SIGAE9_ | 0.05143093 | 0.50425655 | 0.00010632 | 0.092309  | -0.0001745 |
| 5mo_SIGAE9_ | 0.05343461 | 0.5237714  | 0.00010842 | 0.092532  | -0.07149   |
| 5mo_SIGAE9_ | 0.05215335 | 0.5112926  | 0.00010703 | 0.092172  | -0.022986  |
| 5mo_SIGAE9_ | 0.02220135 | 0.21957476 | 7.26E-05   | 0.037419  | 0.64161    |
| 5mo_SIGAE9_ | 0.05457451 | 0.5348735  | 0.00010944 | 0.093233  | -0.11022   |
| 5mo_SIGAE9_ | 0.00491331 | 0.05119772 | 5.55E-05   | 0.0093744 | 0.23478    |
| 5mo_SIGAE9_ | 0.07515907 | 0.73535705 | 0.00012598 | 0.063504  | -1.0589    |
| 5mo_SIGAE9_ | 0.03220872 | 0.3170417  | 8.44E-05   | 0.081011  | 0.65793    |
| 5mo_SIGAE9_ | 0.06974188 | 0.6825962  | 0.00012235 | 0.080544  | -0.82636   |
| 5mo_SIGAE9_ | 0.04600668 | 0.45142707 | 0.00010046 | 0.10111   | 0.1553     |
| 5mo_SIGAE9_ | 0.03479183 | 0.34219992 | 8.73E-05   | 0.093873  | 0.54051    |
| 5mo_SIGAE9_ | 0.01202596 | 0.12047146 | 6.17E-05   | 0.017303  | 0.12065    |
| 5mo_SIGAE9_ | 0.05213672 | 0.51113063 | 0.00010703 | 0.092172  | -0.022986  |
| 5mo_SIGAE9_ | 0.05806857 | 0.5689039  | 0.00011273 | 0.096781  | -0.26697   |
| 5mo_SIGAE9_ | 0.07732759 | 0.7564773  | 0.0001272  | 0.059217  | -1.1276    |
| 5mo_SIGAE9_ | 0.04888815 | 0.4794911  | 0.00010344 | 0.095375  | 0.072211   |
| 5mo_SIGAE9_ | 0.04157749 | 0.4082889  | 9.54E-05   | 0.10929   | 0.28067    |
| 5mo_SIGAE9_ | 0.05778925 | 0.56618345 | 0.00011241 | 0.096416  | -0.25188   |
| 5mo_SIGAE9_ | 0.05930847 | 0.5809799  | 0.000114   | 0.098059  | -0.31309   |
| 5mo_SIGAE9_ | 0.0127948  | 0.1279596  | 6.24E-05   | 0.018271  | 0.13519    |
| 5mo_SIGAE9_ | 0.03943516 | 0.3874237  | 9.30E-05   | 0.10937   | 0.35035    |
| 5mo_SIGAE9_ | 0.07774671 | 0.7605594  | 0.0001274  | 0.058646  | -1.1379    |
| 5mo_SIGAE9_ | 0.07172483 | 0.7019092  | 0.00012378 | 0.073503  | -0.92016   |
| 5mo_SIGAE9_ | 0.05926822 | 0.5805879  | 0.000114   | 0.098059  | -0.31309   |
| 5mo_SIGAE9_ | 0.04086176 | 0.40131804 | 9.46E-05   | 0.10971   | 0.3027     |
| 5mo_SIGAE9_ | 0.01813783 | 0.1799981  | 6.80E-05   | 0.027619  | 0.4001     |
| 5mo_SIGAE9_ | 0.07465275 | 0.7304258  | 0.00012556 | 0.06525   | -1.0333    |
| 5mo_SIGAE9_ | 0.05668261 | 0.5554053  | 0.00011144 | 0.095284  | -0.20754   |
| 5mo_SIGAE9_ | 0.06669758 | 0.65294623 | 0.00012006 | 0.090801  | -0.67704   |
| 5mo_SIGAE9_ | 0.04915105 | 0.4820517  | 0.00010381 | 0.094798  | 0.062467   |
| 5mo_SIGAE9_ | 0.06560133 | 0.6422694  | 0.00011925 | 0.093659  | -0.62617   |
| 5mo_SIGAE9_ | 0.06971074 | 0.68229294 | 0.00012235 | 0.080544  | -0.82636   |
| 5mo_SIGAE9_ | 0.059047   | 0.57843333 | 0.00011368 | 0.097776  | -0.31309   |
| 5mo_SIGAE9_ | 0.07476622 | 0.73153085 | 0.00012577 | 0.064358  | -1.0333    |
| 5mo_SIGAE9_ | 0.06721993 | 0.65803367 | 0.00012058 | 0.088682  | -0.69393   |
| 5mo_SIGAE9_ | 0.02251658 | 0.222645   | 7.30E-05   | 0.038397  | 0.65846    |
| 5mo_SIGAE9_ | 0.08254717 | 0.80731356 | 0.00012993 | 0.053861  | -1.2485    |
| 5mo_SIGAE9_ | 0.06291547 | 0.6161104  | 0.00011701 | 0.098387  | -0.49111   |
| 5mo_SIGAE9_ | 0.03036328 | 0.29906797 | 8.19E-05   | 0.069725  | 0.71698    |
| 5mo_SIGAE9_ | 0.01052778 | 0.10587996 | 6.05E-05   | 0.01548   | 0.10741    |
| 5mo_SIGAE9_ | 0.05722696 | 0.56070703 | 0.00011209 | 0.096042  | -0.22216   |
| 5mo_SIGAE9_ | 0.02718637 | 0.2681265  | 7.82E-05   | 0.054511  | 0.77219    |
| 5mo_SIGAE9_ | 0.04871737 | 0.47782782 | 0.00010344 | 0.095375  | 0.081803   |
| 5mo_SIGAE9_ | 0.05004781 | 0.4907857  | 0.0001049  | 0.093366  | 0.042456   |
| 5mo_SIGAE9_ | 0.07826362 | 0.7655938  | 0.00012778 | 0.057615  | -1.1573    |
| 5mo_SIGAE9_ | 0.0583084  | 0.57123977 | 0.00011305 | 0.097132  | -0.26697   |

|             |            |            |            |          |           |
|-------------|------------|------------|------------|----------|-----------|
| 5mo_SIGAE9_ | 0.03728267 | 0.36645946 | 9.06E-05   | 0.10531  | 0.43275   |
| 5mo_SIGAE9_ | 0.0434314  | 0.4263451  | 9.74E-05   | 0.10696  | 0.21998   |
| 5mo_SIGAE9_ | 0.03571051 | 0.35114738 | 8.86E-05   | 0.098764 | 0.50933   |
| 5mo_SIGAE9_ | 0.06510121 | 0.63739836 | 0.00011898 | 0.094504 | -0.59222  |
| 5mo_SIGAE9_ | 0.06045089 | 0.5921065  | 0.00011492 | 0.0987   | -0.37638  |
| 5mo_SIGAE9_ | 0.04317143 | 0.42381307 | 9.74E-05   | 0.10696  | 0.22964   |
| 5mo_SIGAE9_ | 0.03097965 | 0.30507115 | 8.28E-05   | 0.073435 | 0.69526   |
| 5mo_SIGAE9_ | 0.0207646  | 0.20558152 | 7.06E-05   | 0.032941 | 0.56707   |
| 5mo_SIGAE9_ | 0.06779182 | 0.6636036  | 0.00012084 | 0.087573 | -0.72756  |
| 5mo_SIGAE9_ | 0.0775623  | 0.75876325 | 0.0001274  | 0.058646 | -1.1379   |
| 5mo_SIGAE9_ | 0.06215789 | 0.60873187 | 0.00011642 | 0.098794 | -0.4579   |
| 5mo_SIGAE9_ | 0.0381639  | 0.37504226 | 9.14E-05   | 0.10717  | 0.38979   |
| 5mo_SIGAE9_ | 0.06392319 | 0.62592506 | 0.00011787 | 0.097201 | -0.54144  |
| 5mo_SIGAE9_ | 0.03716245 | 0.3652886  | 9.02E-05   | 0.1042   | 0.43275   |
| 5mo_SIGAE9_ | 0.05209668 | 0.5107406  | 0.00010703 | 0.092172 | -0.022986 |
| 5mo_SIGAE9_ | 0.05508698 | 0.53986466 | 0.00010978 | 0.093528 | -0.13708  |
| 5mo_SIGAE9_ | 0.08169703 | 0.7990336  | 0.00012959 | 0.054253 | -1.2361   |
| 5mo_SIGAE9_ | 0.0870882  | 0.85154086 | 0.00013207 | 0.052686 | -1.3063   |
| 5mo_SIGAE9_ | 0.06046985 | 0.5922912  | 0.00011492 | 0.0987   | -0.37638  |
| 5mo_SIGAE9_ | 0.04240562 | 0.41635448 | 9.62E-05   | 0.10856  | 0.24945   |
| 5mo_SIGAE9_ | 0.0799026  | 0.78155667 | 0.00012871 | 0.055605 | -1.1924   |
| 5mo_SIGAE9_ | 0.03258098 | 0.3206673  | 8.48E-05   | 0.082909 | 0.64444   |
| 5mo_SIGAE9_ | 0.03482401 | 0.3425133  | 8.73E-05   | 0.093873 | 0.54051   |
| 5mo_SIGAE9_ | 0.0619789  | 0.6069886  | 0.00011613 | 0.098894 | -0.44141  |
| 5mo_SIGAE9_ | 0.06721164 | 0.6579529  | 0.00012058 | 0.088682 | -0.69393  |
| 5mo_SIGAE9_ | 0.06497996 | 0.6362174  | 0.00011871 | 0.095287 | -0.59222  |
| 5mo_SIGAE9_ | 0.04752702 | 0.46623442 | 0.00010197 | 0.098057 | 0.10986   |
| 5mo_SIGAE9_ | 0.0356187  | 0.35025325 | 8.86E-05   | 0.098764 | 0.50933   |
| 5mo_SIGAE9_ | 0.05104225 | 0.500471   | 0.00010597 | 0.092472 | 0.010852  |
| 5mo_SIGAE9_ | 0.08297596 | 0.8114897  | 0.00013026 | 0.053541 | -1.2543   |
| 5mo_SIGAE9_ | 0.04873471 | 0.47799668 | 0.00010344 | 0.095375 | 0.081803  |
| 5mo_SIGAE9_ | 0.04032783 | 0.39611787 | 9.38E-05   | 0.10975  | 0.31414   |
| 5mo_SIGAE9_ | 0.07763113 | 0.7594337  | 0.0001274  | 0.058646 | -1.1379   |
| 5mo_SIGAE9_ | 0.05089889 | 0.4990748  | 0.00010561 | 0.092703 | 0.010852  |
| 5mo_SIGAE9_ | 0.0775072  | 0.75822663 | 0.0001274  | 0.058646 | -1.1276   |
| 5mo_SIGAE9_ | 0.05446819 | 0.533838   | 0.00010944 | 0.093233 | -0.11022  |
| 5mo_SIGAE9_ | 0.04754695 | 0.46642855 | 0.00010197 | 0.098057 | 0.10986   |
| 5mo_SIGAE9_ | 0.03157739 | 0.31089285 | 8.36E-05   | 0.07721  | 0.6834    |
| 5mo_SIGAE9_ | 0.07101554 | 0.6950011  | 0.00012331 | 0.075804 | -0.88959  |
| 5mo_SIGAE9_ | 0.08121998 | 0.79438734 | 0.00012942 | 0.054478 | -1.2227   |
| 5mo_SIGAE9_ | 0.06678515 | 0.6537991  | 0.00012006 | 0.090801 | -0.67704  |
| 5mo_SIGAE9_ | 0.04113177 | 0.40394783 | 9.50E-05   | 0.10955  | 0.29155   |
| 5mo_SIGAE9_ | 0.05856741 | 0.57376236 | 0.00011337 | 0.097465 | -0.2822   |
| 5mo_SIGAE9_ | 0.06760999 | 0.6618327  | 0.00012084 | 0.087573 | -0.72756  |
| 5mo_SIGAE9_ | 0.05418367 | 0.53106683 | 0.0001091  | 0.092966 | -0.097097 |
| 5mo_SIGAE9_ | 0.01390794 | 0.13880105 | 6.37E-05   | 0.020323 | 0.18023   |

|             |            |            |            |           |           |
|-------------|------------|------------|------------|-----------|-----------|
| 5mo_SIGAE9_ | 0.0104527  | 0.10514867 | 6.02E-05   | 0.015048  | 0.10741   |
| 5mo_SIGAE9_ | 0.05603334 | 0.5490818  | 0.00011078 | 0.094541  | -0.17881  |
| 5mo_SIGAE9_ | 0.01756344 | 0.17440383 | 6.72E-05   | 0.026262  | 0.35829   |
| 5mo_SIGAE9_ | 0.04703618 | 0.46145388 | 0.00010159 | 0.098799  | 0.12814   |
| 5mo_SIGAE9_ | 0.01248891 | 0.12498037 | 6.21E-05   | 0.017782  | 0.12723   |
| 5mo_SIGAE9_ | 0.05377602 | 0.5270965  | 0.00010876 | 0.092731  | -0.084185 |
| 5mo_SIGAE9_ | 0.09686606 | 0.9467725  | 0.00013536 | 0.052262  | -1.3446   |
| 5mo_SIGAE9_ | 0.07121826 | 0.69697547 | 0.00012331 | 0.075804  | -0.88959  |
| 5mo_SIGAE9_ | 0.06293497 | 0.6163003  | 0.00011701 | 0.098387  | -0.49111  |
| 5mo_SIGAE9_ | 0.0880124  | 0.8605421  | 0.00013235 | 0.052652  | -1.315    |
| 5mo_SIGAE9_ | 0.03160689 | 0.31118017 | 8.36E-05   | 0.07721   | 0.6834    |
| 5mo_SIGAE9_ | 0.07138532 | 0.6986025  | 0.00012355 | 0.074645  | -0.90497  |
| 5mo_SIGAE9_ | 0.05770076 | 0.5653216  | 0.00011241 | 0.096416  | -0.25188  |
| 5mo_SIGAE9_ | 0.00168087 | 0.01971537 | 5.31E-05   | 0.0071026 | 0.37827   |
| 5mo_SIGAE9_ | 0.08456811 | 0.8269965  | 0.00013089 | 0.053084  | -1.2797   |
| 5mo_SIGAE9_ | 0.0361695  | 0.3556177  | 8.90E-05   | 0.10026   | 0.47826   |
| 5mo_SIGAE9_ | 0.04040483 | 0.3968678  | 9.42E-05   | 0.10978   | 0.31414   |
| 5mo_SIGAE9_ | 0.02640758 | 0.26054144 | 7.74E-05   | 0.051562  | 0.76965   |
| 5mo_SIGAE9_ | 0.06435786 | 0.63015854 | 0.00011815 | 0.096641  | -0.55833  |
| 5mo_SIGAE9_ | 0.00186455 | 0.0215043  | 5.31E-05   | 0.0071026 | 0.37827   |
| 5mo_SIGAE9_ | 0.03993587 | 0.39230034 | 9.34E-05   | 0.10962   | 0.32588   |
| 5mo_SIGAE9_ | 0.05960675 | 0.5838851  | 0.00011431 | 0.098311  | -0.32873  |
| 5mo_SIGAE9_ | 0.01970348 | 0.19524677 | 6.95E-05   | 0.030541  | 0.50588   |
| 5mo_SIGAE9_ | 0.05818034 | 0.5699925  | 0.00011273 | 0.096781  | -0.26697  |
| 5mo_SIGAE9_ | 0.01034376 | 0.10408762 | 6.02E-05   | 0.015048  | 0.10718   |
| 5mo_SIGAE9_ | 0.02703356 | 0.2666381  | 7.82E-05   | 0.054511  | 0.77219   |
| 5mo_SIGAE9_ | 0.06310661 | 0.61797196 | 0.0001173  | 0.098072  | -0.49111  |
| 5mo_SIGAE9_ | 0.05593317 | 0.5481062  | 0.00011078 | 0.094541  | -0.16472  |
| 5mo_SIGAE9_ | 0.04291746 | 0.4213395  | 9.70E-05   | 0.10755   | 0.23945   |
| 5mo_SIGAE9_ | 0.04724398 | 0.4634777  | 0.00010197 | 0.098057  | 0.11903   |
| 5mo_SIGAE9_ | 0.08690247 | 0.849732   | 0.00013193 | 0.052709  | -1.3063   |
| 5mo_SIGAE9_ | 0.07797357 | 0.7627689  | 0.00012759 | 0.058113  | -1.1478   |
| 5mo_SIGAE9_ | 0.0285308  | 0.2812206  | 7.99E-05   | 0.060913  | 0.76245   |
| 5mo_SIGAE9_ | 0.09628585 | 0.9411215  | 0.00013515 | 0.052305  | -1.3444   |
| 5mo_SIGAE9_ | 0.06457175 | 0.63224167 | 0.00011843 | 0.096001  | -0.57526  |
| 5mo_SIGAE9_ | 0.05184621 | 0.5083012  | 0.00010668 | 0.092211  | -0.011455 |
| 5mo_SIGAE9_ | 0.01291654 | 0.12914525 | 6.27E-05   | 0.018769  | 0.14454   |
| 5mo_SIGAE9_ | 0.07014272 | 0.68650025 | 0.0001226  | 0.07935   | -0.8424   |
| 5mo_SIGAE9_ | 0.09510618 | 0.9296322  | 0.00013484 | 0.052368  | -1.3437   |
| 5mo_SIGAE9_ | 0.05506374 | 0.5396384  | 0.00010978 | 0.093528  | -0.13708  |
| 5mo_SIGAE9_ | 0.04762088 | 0.46714854 | 0.00010234 | 0.09734   | 0.10986   |
| 5mo_SIGAE9_ | 0.07135698 | 0.69832647 | 0.00012355 | 0.074645  | -0.88959  |
| 5mo_SIGAE9_ | 0.02041239 | 0.20215116 | 7.02E-05   | 0.032119  | 0.54704   |
| 5mo_SIGAE9_ | 0.06384238 | 0.625138   | 0.00011787 | 0.097201  | -0.54144  |
| 5mo_SIGAE9_ | 0.00725257 | 0.07398097 | 5.75E-05   | 0.011579  | 0.15252   |
| 5mo_SIGAE9_ | 0.08125129 | 0.7946922  | 0.00012942 | 0.054478  | -1.2227   |

|             |            |            |            |          |            |
|-------------|------------|------------|------------|----------|------------|
| 5mo_SIGAE9_ | 0.05453103 | 0.53445    | 0.00010944 | 0.093233 | -0.11022   |
| 5mo_SIGAE9_ | 0.04178045 | 0.4102656  | 9.58E-05   | 0.10896  | 0.27003    |
| 5mo_SIGAE9_ | 0.06444929 | 0.631049   | 0.00011843 | 0.096001 | -0.55833   |
| 5mo_SIGAE9_ | 0.07051039 | 0.6900811  | 0.00012284 | 0.078159 | -0.8583    |
| 5mo_SIGAE9_ | 0.04484799 | 0.44014198 | 9.93E-05   | 0.10345  | 0.18258    |
| 5mo_SIGAE9_ | 0.02874808 | 0.28333676 | 8.03E-05   | 0.062611 | 0.75723    |
| 5mo_SIGAE9_ | 0.07022902 | 0.68734074 | 0.00012284 | 0.078159 | -0.8424    |
| 5mo_SIGAE9_ | 0.07837576 | 0.76668596 | 0.00012778 | 0.057615 | -1.1573    |
| 5mo_SIGAE9_ | 0.07797472 | 0.76278013 | 0.00012759 | 0.058113 | -1.1478    |
| 5mo_SIGAE9_ | 0.08623792 | 0.84325963 | 0.00013164 | 0.052775 | -1.2997    |
| 5mo_SIGAE9_ | 0.05227066 | 0.5124351  | 0.00010703 | 0.092172 | -0.03476   |
| 5mo_SIGAE9_ | 0.03153931 | 0.31052196 | 8.36E-05   | 0.07721  | 0.6834     |
| 5mo_SIGAE9_ | 0.04501646 | 0.44178283 | 9.93E-05   | 0.10345  | 0.17344    |
| 5mo_SIGAE9_ | 0.04654641 | 0.45668373 | 0.00010122 | 0.099559 | 0.13721    |
| 5mo_SIGAE9_ | 0.05336385 | 0.5230822  | 0.00010807 | 0.092373 | -0.07149   |
| 5mo_SIGAE9_ | 0.05124438 | 0.5024397  | 0.00010597 | 0.092472 | -0.0001745 |
| 5mo_SIGAE9_ | 0.04399149 | 0.4318001  | 9.82E-05   | 0.10565  | 0.20107    |
| 5mo_SIGAE9_ | 0.06037398 | 0.59135747 | 0.00011492 | 0.0987   | -0.36038   |
| 5mo_SIGAE9_ | 0.05937766 | 0.5816538  | 0.000114   | 0.098059 | -0.31309   |
| 5mo_SIGAE9_ | 0.01698238 | 0.1687446  | 6.65E-05   | 0.024968 | 0.33781    |
| 5mo_SIGAE9_ | 0.04314378 | 0.42354384 | 9.74E-05   | 0.10696  | 0.22964    |
| 5mo_SIGAE9_ | 0.04001095 | 0.3930316  | 9.38E-05   | 0.10975  | 0.32588    |
| 5mo_SIGAE9_ | 0.02803717 | 0.2764128  | 7.94E-05   | 0.059253 | 0.76661    |
| 5mo_SIGAE9_ | 0.07588741 | 0.7424507  | 0.0001264  | 0.06191  | -1.0832    |
| 5mo_SIGAE9_ | 0.06156384 | 0.6029461  | 0.00011583 | 0.09893  | -0.42501   |
| 5mo_SIGAE9_ | 0.04998533 | 0.49017718 | 0.0001049  | 0.093366 | 0.042456   |
| 5mo_SIGAE9_ | 0.0500718  | 0.49101934 | 0.0001049  | 0.093366 | 0.042456   |
| 5mo_SIGAE9_ | 0.03410499 | 0.33551043 | 8.65E-05   | 0.090344 | 0.57137    |
| 5mo_SIGAE9_ | 0.06975818 | 0.682755   | 0.00012235 | 0.080544 | -0.82636   |
| 5mo_SIGAE9_ | 0.04433669 | 0.4351622  | 9.86E-05   | 0.10494  | 0.19178    |
| 5mo_SIGAE9_ | 0.04574943 | 0.4489216  | 0.00010009 | 0.1019   | 0.1553     |
| 5mo_SIGAE9_ | 0.05834962 | 0.57164127 | 0.00011305 | 0.097132 | -0.26697   |
| 5mo_SIGAE9_ | 0.05520789 | 0.5410423  | 0.00011011 | 0.093847 | -0.13708   |
| 5mo_SIGAE9_ | 0.0677275  | 0.66297716 | 0.00012084 | 0.087573 | -0.72756   |
| 5mo_SIGAE9_ | 0.05122907 | 0.50229055 | 0.00010597 | 0.092472 | -0.0001745 |
| 5mo_SIGAE9_ | 0.06761555 | 0.6618868  | 0.00012084 | 0.087573 | -0.72756   |
| 5mo_SIGAE9_ | 0.04536712 | 0.44519806 | 9.97E-05   | 0.10268  | 0.16436    |
| 5mo_SIGAE9_ | 0.02634834 | 0.25996447 | 7.74E-05   | 0.051562 | 0.76965    |
| 5mo_SIGAE9_ | 0.03627108 | 0.3566071  | 8.94E-05   | 0.10166  | 0.47826    |
| 5mo_SIGAE9_ | 0.0629148  | 0.6161039  | 0.00011701 | 0.098387 | -0.49111   |
| 5mo_SIGAE9_ | 0.03970714 | 0.39007258 | 9.34E-05   | 0.10962  | 0.33794    |
| 5mo_SIGAE9_ | 0.04917914 | 0.48232523 | 0.00010381 | 0.094798 | 0.062467   |
| 5mo_SIGAE9_ | 0.06200809 | 0.607273   | 0.00011642 | 0.098794 | -0.44141   |
| 5mo_SIGAE9_ | 0.05855746 | 0.57366544 | 0.00011337 | 0.097465 | -0.2822    |
| 5mo_SIGAE9_ | 0.07725588 | 0.7557789  | 0.0001272  | 0.059217 | -1.1276    |
| 5mo_SIGAE9_ | 0.05945113 | 0.5823694  | 0.000114   | 0.098059 | -0.32873   |

|             |            |            |            |           |            |
|-------------|------------|------------|------------|-----------|------------|
| 5mo_SIGAE9_ | 0.03797814 | 0.37323302 | 9.14E-05   | 0.10717   | 0.40374    |
| 5mo_SIGAE9_ | 0.04659914 | 0.45719734 | 0.00010122 | 0.099559  | 0.13721    |
| 5mo_SIGAE9_ | 0.08938369 | 0.8738979  | 0.00013288 | 0.052615  | -1.3244    |
| 5mo_SIGAE9_ | 0.07455082 | 0.729433   | 0.00012556 | 0.06525   | -1.0333    |
| 5mo_SIGAE9_ | 0.04478604 | 0.43953866 | 9.89E-05   | 0.10421   | 0.18258    |
| 5mo_SIGAE9_ | 0.03376561 | 0.33220506 | 8.61E-05   | 0.088522  | 0.58656    |
| 5mo_SIGAE9_ | 0.01357197 | 0.13552888 | 6.34E-05   | 0.019794  | 0.16714    |
| 5mo_SIGAE9_ | 0.05093578 | 0.49943408 | 0.00010561 | 0.092703  | 0.010852   |
| 5mo_SIGAE9_ | 0.04943122 | 0.4847804  | 0.00010417 | 0.094268  | 0.062467   |
| 5mo_SIGAE9_ | 0.07864136 | 0.76927286 | 0.00012797 | 0.057152  | -1.1666    |
| 5mo_SIGAE9_ | 0.05476753 | 0.53675336 | 0.00010944 | 0.093233  | -0.12355   |
| 5mo_SIGAE9_ | 0.01472505 | 0.14675924 | 6.44E-05   | 0.021412  | 0.20962    |
| 5mo_SIGAE9_ | 0.00150665 | 0.01801851 | 5.29E-05   | 0.0068852 | 0.39576    |
| 5mo_SIGAE9_ | 0.03714275 | 0.36509675 | 9.02E-05   | 0.1042    | 0.43275    |
| 5mo_SIGAE9_ | 0.06466474 | 0.63314736 | 0.00011843 | 0.096001  | -0.57526   |
| 5mo_SIGAE9_ | 0.04677718 | 0.45893133 | 0.00010122 | 0.099559  | 0.12814    |
| 5mo_SIGAE9_ | 0.0583816  | 0.57195264 | 0.00011305 | 0.097132  | -0.2822    |
| 5mo_SIGAE9_ | 0.05140256 | 0.5039803  | 0.00010632 | 0.092309  | -0.0001745 |
| 5mo_SIGAE9_ | 0.04558998 | 0.44736862 | 0.00010009 | 0.1019    | 0.16436    |
| 5mo_SIGAE9_ | 0.012132   | 0.12150426 | 6.17E-05   | 0.017303  | 0.12065    |
| 5mo_SIGAE9_ | 0.05086047 | 0.49870053 | 0.00010561 | 0.092703  | 0.010852   |
| 5mo_SIGAE9_ | 0.06844395 | 0.6699551  | 0.00012136 | 0.085284  | -0.7609    |
| 5mo_SIGAE9_ | 0.00805141 | 0.08176129 | 5.81E-05   | 0.012286  | 0.12871    |
| 5mo_SIGAE9_ | 0.05728089 | 0.5612323  | 0.00011209 | 0.096042  | -0.22216   |
| 5mo_SIGAE9_ | 0.04750245 | 0.4659951  | 0.00010197 | 0.098057  | 0.10986    |
| 5mo_SIGAE9_ | 0.03444145 | 0.33878735 | 8.69E-05   | 0.09213   | 0.55601    |
| 5mo_SIGAE9_ | 0.08355414 | 0.8171209  | 0.00013042 | 0.053406  | -1.2651    |
| 5mo_SIGAE9_ | 0.01968938 | 0.19510938 | 6.95E-05   | 0.030541  | 0.50588    |
| 5mo_SIGAE9_ | 0.06526594 | 0.6390028  | 0.00011898 | 0.094504  | -0.60919   |
| 5mo_SIGAE9_ | 0.05055516 | 0.49572697 | 0.00010525 | 0.093003  | 0.021622   |
| 5mo_SIGAE9_ | 0.05781151 | 0.56640035 | 0.00011241 | 0.096416  | -0.25188   |
| 5mo_SIGAE9_ | 0.0143307  | 0.14291848 | 6.41E-05   | 0.020862  | 0.19442    |
| 5mo_SIGAE9_ | 0.09012668 | 0.8811342  | 0.00013313 | 0.052597  | -1.3283    |
| 5mo_SIGAE9_ | 0.0540186  | 0.52945924 | 0.00010876 | 0.092731  | -0.097097  |
| 5mo_SIGAE9_ | 0.02584608 | 0.25507265 | 7.66E-05   | 0.04879   | 0.76634    |
| 5mo_SIGAE9_ | 0.05896878 | 0.5776715  | 0.00011368 | 0.097776  | -0.29758   |
| 5mo_SIGAE9_ | 0.04537069 | 0.44523278 | 9.97E-05   | 0.10268   | 0.16436    |
| 5mo_SIGAE9_ | 0.04563707 | 0.44782725 | 0.00010009 | 0.1019    | 0.16436    |
| 5mo_SIGAE9_ | 0.06733199 | 0.65912515 | 0.00012058 | 0.088682  | -0.71078   |
| 5mo_SIGAE9_ | 0.05076951 | 0.4978147  | 0.00010561 | 0.092703  | 0.021622   |
| 5mo_SIGAE9_ | 0.02048547 | 0.20286298 | 7.06E-05   | 0.032941  | 0.54704    |
| 5mo_SIGAE9_ | 0.04493916 | 0.44102997 | 9.93E-05   | 0.10345   | 0.18258    |
| 5mo_SIGAE9_ | 0.07485396 | 0.7323854  | 0.00012577 | 0.064358  | -1.0462    |
| 5mo_SIGAE9_ | 0.04027661 | 0.39561898 | 9.38E-05   | 0.10975   | 0.31414    |
| 5mo_SIGAE9_ | 0.06822962 | 0.6678676  | 0.00012136 | 0.085284  | -0.74427   |
| 5mo_SIGAE9_ | 0.01636103 | 0.16269289 | 6.62E-05   | 0.024342  | 0.29808    |

|             |            |            |            |           |           |
|-------------|------------|------------|------------|-----------|-----------|
| 5mo_SIGAE9_ | 0.04004837 | 0.39339605 | 9.38E-05   | 0.10975   | 0.32588   |
| 5mo_SIGAE9_ | 0.05184555 | 0.50829476 | 0.00010668 | 0.092211  | -0.011455 |
| 5mo_SIGAE9_ | 0.03919308 | 0.38506588 | 9.26E-05   | 0.10901   | 0.35035   |
| 5mo_SIGAE9_ | 0.08457306 | 0.82704467 | 0.00013089 | 0.053084  | -1.2797   |
| 5mo_SIGAE9_ | 0.05152183 | 0.5051419  | 0.00010632 | 0.092309  | -0.011455 |
| 5mo_SIGAE9_ | 0.06843246 | 0.66984314 | 0.00012136 | 0.085284  | -0.7609   |
| 5mo_SIGAE9_ | 0.07394705 | 0.7235525  | 0.00012513 | 0.067136  | -1.0066   |
| 5mo_SIGAE9_ | 0.04937629 | 0.48424542 | 0.00010417 | 0.094268  | 0.062467  |
| 5mo_SIGAE9_ | 0.04484176 | 0.44008133 | 9.93E-05   | 0.10345   | 0.18258   |
| 5mo_SIGAE9_ | 0.05428729 | 0.5320761  | 0.0001091  | 0.092966  | -0.11022  |
| 5mo_SIGAE9_ | 0.04580921 | 0.44950375 | 0.00010009 | 0.1019    | 0.1553    |
| 5mo_SIGAE9_ | 0.06499548 | 0.6363686  | 0.00011871 | 0.095287  | -0.59222  |
| 5mo_SIGAE9_ | 0.043721   | 0.42916563 | 9.78E-05   | 0.10633   | 0.21046   |
| 5mo_SIGAE9_ | 0.08453023 | 0.8266275  | 0.00013089 | 0.053084  | -1.2797   |
| 5mo_SIGAE9_ | 0.0169846  | 0.1687662  | 6.65E-05   | 0.024968  | 0.33781   |
| 5mo_SIGAE9_ | 0.03737022 | 0.36731213 | 9.06E-05   | 0.10531   | 0.43275   |
| 5mo_SIGAE9_ | 0.04442499 | 0.4360221  | 9.86E-05   | 0.10494   | 0.19178   |
| 5mo_SIGAE9_ | 0.08097964 | 0.7920465  | 0.00012924 | 0.054725  | -1.2227   |
| 5mo_SIGAE9_ | 0.02863482 | 0.2822336  | 7.99E-05   | 0.060913  | 0.75723   |
| 5mo_SIGAE9_ | 0.0642608  | 0.6292133  | 0.00011815 | 0.096641  | -0.55833  |
| 5mo_SIGAE9_ | 0.0584416  | 0.57253706 | 0.00011305 | 0.097132  | -0.2822   |
| 5mo_SIGAE9_ | 0.02116813 | 0.20951171 | 7.14E-05   | 0.034655  | 0.58661   |
| 5mo_SIGAE9_ | 0.07557867 | 0.7394437  | 0.00012619 | 0.062687  | -1.0712   |
| 5mo_SIGAE9_ | 0.08838823 | 0.86420256 | 0.00013248 | 0.05264   | -1.3176   |
| 5mo_SIGAE9_ | 0.04470018 | 0.43870237 | 9.89E-05   | 0.10421   | 0.18258   |
| 5mo_SIGAE9_ | 0.05502656 | 0.53927624 | 0.00010978 | 0.093528  | -0.13708  |
| 5mo_SIGAE9_ | 0.07331639 | 0.7174102  | 0.00012491 | 0.068128  | -0.97873  |
| 5mo_SIGAE9_ | 0.06887781 | 0.6741806  | 0.00012186 | 0.08293   | -0.77743  |
| 5mo_SIGAE9_ | 0.06981082 | 0.68326765 | 0.00012235 | 0.080544  | -0.82636  |
| 5mo_SIGAE9_ | 0.04880982 | 0.4787282  | 0.00010344 | 0.095375  | 0.072211  |
| 5mo_SIGAE9_ | 0.09106714 | 0.8902939  | 0.0001335  | 0.052565  | -1.3333   |
| 5mo_SIGAE9_ | 0.02506382 | 0.24745382 | 7.58E-05   | 0.046199  | 0.74769   |
| 5mo_SIGAE9_ | 0.04844829 | 0.47520715 | 0.00010308 | 0.095994  | 0.081803  |
| 5mo_SIGAE9_ | 0.0725063  | 0.70952034 | 0.00012424 | 0.071279  | -0.9499   |
| 5mo_SIGAE9_ | 0.0269178  | 0.26551074 | 7.78E-05   | 0.053015  | 0.77219   |
| 5mo_SIGAE9_ | 0.07422902 | 0.72629887 | 0.00012534 | 0.066176  | -1.0201   |
| 5mo_SIGAE9_ | 0.05791103 | 0.5673695  | 0.00011273 | 0.096781  | -0.25188  |
| 5mo_SIGAE9_ | 0.04620529 | 0.45336136 | 0.00010084 | 0.10033   | 0.14626   |
| 5mo_SIGAE9_ | 0.07924049 | 0.77510804 | 0.00012835 | 0.05632   | -1.1841   |
| 5mo_SIGAE9_ | 0.06267753 | 0.61379296 | 0.00011701 | 0.098387  | -0.47447  |
| 5mo_SIGAE9_ | 0.05356922 | 0.52508247 | 0.00010842 | 0.092532  | -0.084185 |
| 5mo_SIGAE9_ | 0.04605625 | 0.4519098  | 0.00010046 | 0.10111   | 0.14626   |
| 5mo_SIGAE9_ | 0.05785537 | 0.5668275  | 0.00011241 | 0.096416  | -0.25188  |
| 5mo_SIGAE9_ | 0.06039568 | 0.5915688  | 0.00011492 | 0.0987    | -0.36038  |
| 5mo_SIGAE9_ | 0.01897613 | 0.18816274 | 6.87E-05   | 0.029043  | 0.44251   |
| 5mo_SIGAE9_ | 0.00471909 | 0.04930613 | 5.55E-05   | 0.0093744 | 0.23478   |

|             |            |            |            |           |            |
|-------------|------------|------------|------------|-----------|------------|
| 5mo_SIGAE9_ | 0.0527413  | 0.5170189  | 0.00010773 | 0.092257  | -0.046772  |
| 5mo_SIGAE9_ | 0.05719313 | 0.5603776  | 0.00011209 | 0.096042  | -0.22216   |
| 5mo_SIGAE9_ | 0.08317855 | 0.81346285 | 0.00013026 | 0.053541  | -1.2598    |
| 5mo_SIGAE9_ | 0.07997385 | 0.7822506  | 0.00012871 | 0.055605  | -1.2004    |
| 5mo_SIGAE9_ | 0.0576477  | 0.56480485 | 0.00011241 | 0.096416  | -0.23694   |
| 5mo_SIGAE9_ | 0.02655929 | 0.262019   | 7.74E-05   | 0.051562  | 0.77158    |
| 5mo_SIGAE9_ | 0.02358052 | 0.23300724 | 7.42E-05   | 0.041523  | 0.70349    |
| 5mo_SIGAE9_ | 0.04954922 | 0.4859296  | 0.00010417 | 0.094268  | 0.052555   |
| 5mo_SIGAE9_ | 0.06927259 | 0.67802554 | 0.00012211 | 0.081739  | -0.79386   |
| 5mo_SIGAE9_ | 0.04685885 | 0.45972675 | 0.00010122 | 0.099559  | 0.12814    |
| 5mo_SIGAE9_ | 0.06641657 | 0.65020937 | 0.00011979 | 0.091802  | -0.66011   |
| 5mo_SIGAE9_ | 0.03494604 | 0.34370187 | 8.77E-05   | 0.095565  | 0.54051    |
| 5mo_SIGAE9_ | 0.07707825 | 0.75404894 | 0.000127   | 0.059827  | -1.117     |
| 5mo_SIGAE9_ | 0.05078584 | 0.49797374 | 0.00010561 | 0.092703  | 0.021622   |
| 5mo_SIGAE9_ | 0.07701809 | 0.753463   | 0.000127   | 0.059827  | -1.117     |
| 5mo_SIGAE9_ | 0.08483066 | 0.82955354 | 0.00013105 | 0.053002  | -1.2841    |
| 5mo_SIGAE9_ | 0.07132206 | 0.6979864  | 0.00012355 | 0.074645  | -0.88959   |
| 5mo_SIGAE9_ | 0.00433148 | 0.04553104 | 5.52E-05   | 0.0090922 | 0.24903    |
| 5mo_SIGAE9_ | 0.04459561 | 0.4376839  | 9.89E-05   | 0.10421   | 0.19178    |
| 5mo_SIGAE9_ | 0.01112245 | 0.1116717  | 6.08E-05   | 0.015922  | 0.10884    |
| 5mo_SIGAE9_ | 0.04760701 | 0.4670135  | 0.00010234 | 0.09734   | 0.10986    |
| 5mo_SIGAE9_ | 0.04881474 | 0.4787762  | 0.00010344 | 0.095375  | 0.072211   |
| 5mo_SIGAE9_ | 0.08127465 | 0.7949198  | 0.00012942 | 0.054478  | -1.2227    |
| 5mo_SIGAE9_ | 0.08000373 | 0.78254163 | 0.00012871 | 0.055605  | -1.2004    |
| 5mo_SIGAE9_ | 0.03853298 | 0.3786369  | 9.18E-05   | 0.10791   | 0.37625    |
| 5mo_SIGAE9_ | 0.04786646 | 0.4695404  | 0.00010234 | 0.09734   | 0.10061    |
| 5mo_SIGAE9_ | 0.01366324 | 0.13641782 | 6.34E-05   | 0.019794  | 0.16714    |
| 5mo_SIGAE9_ | 0.0524968  | 0.5146376  | 0.00010738 | 0.092189  | -0.03476   |
| 5mo_SIGAE9_ | 0.07202303 | 0.7048135  | 0.00012401 | 0.07238   | -0.92016   |
| 5mo_SIGAE9_ | 0.06316691 | 0.61855924 | 0.0001173  | 0.098072  | -0.50782   |
| 5mo_SIGAE9_ | 0.05040451 | 0.49425977 | 0.00010525 | 0.093003  | 0.032151   |
| 5mo_SIGAE9_ | 0.05965285 | 0.5843341  | 0.00011431 | 0.098311  | -0.32873   |
| 5mo_SIGAE9_ | 0.08410726 | 0.822508   | 0.00013074 | 0.053178  | -1.2751    |
| 5mo_SIGAE9_ | 0.06244733 | 0.6115509  | 0.00011672 | 0.098627  | -0.4579    |
| 5mo_SIGAE9_ | 0.08331964 | 0.814837   | 0.00013042 | 0.053406  | -1.2598    |
| 5mo_SIGAE9_ | 0.04515018 | 0.4430851  | 9.93E-05   | 0.10345   | 0.17344    |
| 5mo_SIGAE9_ | 0.0736376  | 0.7205386  | 0.00012491 | 0.068128  | -0.99278   |
| 5mo_SIGAE9_ | 0.06350429 | 0.6218451  | 0.00011758 | 0.097678  | -0.5246    |
| 5mo_SIGAE9_ | 0.02227876 | 0.22032872 | 7.26E-05   | 0.037419  | 0.64161    |
| 5mo_SIGAE9_ | 0.03439283 | 0.33831388 | 8.69E-05   | 0.09213   | 0.57137    |
| 5mo_SIGAE9_ | 0.0512203  | 0.50220513 | 0.00010597 | 0.092472  | -0.0001745 |
| 5mo_SIGAE9_ | 0.07283864 | 0.7127572  | 0.00012446 | 0.070202  | -0.96444   |
| 5mo_SIGAE9_ | 0.05623235 | 0.5510201  | 0.00011111 | 0.094909  | -0.17881   |
| 5mo_SIGAE9_ | 0.03245745 | 0.31946412 | 8.48E-05   | 0.082909  | 0.64444    |
| 5mo_SIGAE9_ | 0.05026873 | 0.49293733 | 0.0001049  | 0.093366  | 0.032151   |
| 5mo_SIGAE9_ | 0.04519905 | 0.4435611  | 9.97E-05   | 0.10268   | 0.17344    |



|             |            |            |            |          |            |
|-------------|------------|------------|------------|----------|------------|
| 5mo_SIGAE9_ | 0.06431514 | 0.62974244 | 0.00011815 | 0.096641 | -0.55833   |
| 5mo_SIGAE9_ | 0.0536965  | 0.5263221  | 0.00010842 | 0.092532 | -0.084185  |
| 5mo_SIGAE9_ | 0.03089385 | 0.3042355  | 8.28E-05   | 0.073435 | 0.70647    |
| 5mo_SIGAE9_ | 0.07620885 | 0.7455813  | 0.0001266  | 0.061174 | -1.0948    |
| 5mo_SIGAE9_ | 0.03438461 | 0.3382338  | 8.69E-05   | 0.09213  | 0.57137    |
| 5mo_SIGAE9_ | 0.00697807 | 0.07130747 | 5.72E-05   | 0.011238 | 0.16213    |
| 5mo_SIGAE9_ | 0.05542233 | 0.5431308  | 0.00011011 | 0.093847 | -0.1508    |
| 5mo_SIGAE9_ | 0.0458808  | 0.45020097 | 0.00010046 | 0.10111  | 0.1553     |
| 5mo_SIGAE9_ | 0.06189073 | 0.6061299  | 0.00011613 | 0.098894 | -0.44141   |
| 5mo_SIGAE9_ | 0.09022479 | 0.88208973 | 0.00013325 | 0.052587 | -1.3301    |
| 5mo_SIGAE9_ | 0.06585167 | 0.6447075  | 0.00011953 | 0.092756 | -0.62617   |
| 5mo_SIGAE9_ | 0.06697083 | 0.6556075  | 0.00012032 | 0.089759 | -0.69393   |
| 5mo_SIGAE9_ | 0.05379183 | 0.5272505  | 0.00010876 | 0.092731 | -0.084185  |
| 5mo_SIGAE9_ | 0.05557497 | 0.5446175  | 0.00011045 | 0.094186 | -0.1508    |
| 5mo_SIGAE9_ | 0.0694868  | 0.68011194 | 0.00012211 | 0.081739 | -0.81017   |
| 5mo_SIGAE9_ | 0.04465113 | 0.4382246  | 9.89E-05   | 0.10421  | 0.19178    |
| 5mo_SIGAE9_ | 0.08727304 | 0.85334116 | 0.00013207 | 0.052686 | -1.3094    |
| 5mo_SIGAE9_ | 0.06047732 | 0.592364   | 0.00011492 | 0.0987   | -0.37638   |
| 5mo_SIGAE9_ | 0.06821236 | 0.66769946 | 0.00012136 | 0.085284 | -0.74427   |
| 5mo_SIGAE9_ | 0.05148242 | 0.50475806 | 0.00010632 | 0.092309 | -0.0001745 |
| 5mo_SIGAE9_ | 0.03495675 | 0.34380615 | 8.77E-05   | 0.095565 | 0.54051    |
| 5mo_SIGAE9_ | 0.06011093 | 0.58879554 | 0.00011462 | 0.098526 | -0.36038   |
| 5mo_SIGAE9_ | 0.07943043 | 0.776958   | 0.00012835 | 0.05632  | -1.1841    |
| 5mo_SIGAE9_ | 0.01612185 | 0.1603634  | 6.58E-05   | 0.023731 | 0.27899    |
| 5mo_SIGAE9_ | 0.05102114 | 0.5002655  | 0.00010597 | 0.092472 | 0.010852   |
| 5mo_SIGAE9_ | 0.06685872 | 0.65451574 | 0.00012032 | 0.089759 | -0.67704   |
| 5mo_SIGAE9_ | 0.04571169 | 0.448554   | 0.00010009 | 0.1019   | 0.1553     |
| 5mo_SIGAE9_ | 0.04164564 | 0.40895268 | 9.54E-05   | 0.10929  | 0.27003    |
| 5mo_SIGAE9_ | 0.05255443 | 0.5151989  | 0.00010738 | 0.092189 | -0.046772  |
| 5mo_SIGAE9_ | 0.05705104 | 0.5589937  | 0.00011177 | 0.095663 | -0.22216   |
| 5mo_SIGAE9_ | 0.0405229  | 0.3980177  | 9.42E-05   | 0.10978  | 0.31414    |
| 5mo_SIGAE9_ | 0.0393142  | 0.38624552 | 9.26E-05   | 0.10901  | 0.35035    |
| 5mo_SIGAE9_ | 0.05728672 | 0.5612891  | 0.00011209 | 0.096042 | -0.22216   |
| 5mo_SIGAE9_ | 0.05485501 | 0.5376054  | 0.00010978 | 0.093528 | -0.12355   |
| 5mo_SIGAE9_ | 0.04152102 | 0.4077389  | 9.54E-05   | 0.10929  | 0.28067    |
| 5mo_SIGAE9_ | 0.00572703 | 0.05912298 | 5.63E-05   | 0.010269 | 0.19547    |
| 5mo_SIGAE9_ | 0.0130405  | 0.13035257 | 6.27E-05   | 0.018769 | 0.14454    |
| 5mo_SIGAE9_ | 0.00579341 | 0.05976946 | 5.63E-05   | 0.010269 | 0.19547    |
| 5mo_SIGAE9_ | 0.07238002 | 0.70829046 | 0.00012424 | 0.071279 | -0.93514   |
| 5mo_SIGAE9_ | 0.01202928 | 0.12050381 | 6.17E-05   | 0.017303 | 0.12065    |
| 5mo_SIGAE9_ | 0.04827143 | 0.47348464 | 0.00010308 | 0.095994 | 0.091263   |
| 5mo_SIGAE9_ | 0.06839091 | 0.6694384  | 0.00012136 | 0.085284 | -0.7609    |
| 5mo_SIGAE9_ | 0.03251367 | 0.3200117  | 8.48E-05   | 0.082909 | 0.64444    |
| 5mo_SIGAE9_ | 0.05458785 | 0.5350034  | 0.00010944 | 0.093233 | -0.12355   |
| 5mo_SIGAE9_ | 0.01188856 | 0.11913324 | 6.17E-05   | 0.017303 | 0.12065    |
| 5mo_SIGAE9_ | 0.08228395 | 0.8047499  | 0.00012993 | 0.053861 | -1.2424    |

|            |            |            |            |           |           |
|------------|------------|------------|------------|-----------|-----------|
| 5mo_SIGAE9 | 0.02953612 | 0.2910119  | 8.11E-05   | 0.066108  | 0.7438    |
| 5mo_SIGAE9 | 0.07107649 | 0.6955947  | 0.00012331 | 0.075804  | -0.88959  |
| 5mo_SIGAE9 | 0.01254169 | 0.12549444 | 6.24E-05   | 0.018271  | 0.13519   |
| 5mo_SIGAE9 | 0.07273402 | 0.7117382  | 0.00012446 | 0.070202  | -0.96444  |
| 5mo_SIGAE9 | 0.04330452 | 0.42510933 | 9.74E-05   | 0.10696   | 0.21998   |
| 5mo_SIGAE9 | 0.07076646 | 0.6925752  | 0.00012308 | 0.076976  | -0.87403  |
| 5mo_SIGAE9 | 0.03392495 | 0.3337569  | 8.65E-05   | 0.090344  | 0.58656   |
| 5mo_SIGAE9 | 0.06441858 | 0.6307499  | 0.00011843 | 0.096001  | -0.55833  |
| 5mo_SIGAE9 | 0.00142893 | 0.01726155 | 5.29E-05   | 0.0068852 | 0.39576   |
| 5mo_SIGAE9 | 0.07655425 | 0.74894536 | 0.0001268  | 0.060479  | -1.1061   |
| 5mo_SIGAE9 | 0.08868232 | 0.8670669  | 0.00013261 | 0.052631  | -1.32     |
| 5mo_SIGAE9 | 0.01471569 | 0.14666812 | 6.44E-05   | 0.021412  | 0.20962   |
| 5mo_SIGAD9 | 0.06862385 | 0.67170715 | 0.00012161 | 0.084113  | -0.77743  |
| 5mo_SIGAD9 | 0.06659434 | 0.65194076 | 0.00012006 | 0.090801  | -0.67704  |
| 5mo_SIGAD9 | 0.07899903 | 0.77275634 | 0.00012816 | 0.056721  | -1.1755   |
| 5mo_SIGAD9 | 0.06471819 | 0.633668   | 0.00011843 | 0.096001  | -0.57526  |
| 5mo_SIGAD9 | 0.04530487 | 0.4445918  | 9.97E-05   | 0.10268   | 0.17344   |
| 5mo_SIGAD9 | 0.07802793 | 0.7632983  | 0.00012759 | 0.058113  | -1.1478   |
| 5mo_SIGAD9 | 0.02611673 | 0.25770867 | 7.70E-05   | 0.050154  | 0.76634   |
| 5mo_SIGAD9 | 0.03071491 | 0.3024927  | 8.23E-05   | 0.07157   | 0.70647   |
| 5mo_SIGAD9 | 0.0603029  | 0.59066516 | 0.00011492 | 0.0987    | -0.36038  |
| 5mo_SIGAD9 | 0.05887697 | 0.5767773  | 0.00011337 | 0.097465  | -0.29758  |
| 5mo_SIGAD9 | 0.0787718  | 0.7705433  | 0.00012797 | 0.057152  | -1.1666   |
| 5mo_SIGAD9 | 0.04671374 | 0.45831344 | 0.00010122 | 0.099559  | 0.13721   |
| 5mo_SIGAD9 | 0.03159708 | 0.31108457 | 8.36E-05   | 0.07721   | 0.6834    |
| 5mo_SIGAD9 | 0.05011804 | 0.49146968 | 0.0001049  | 0.093366  | 0.042456  |
| 5mo_SIGAD9 | 0.08159706 | 0.7980599  | 0.00012959 | 0.054253  | -1.2295   |
| 5mo_SIGAD9 | 0.05788554 | 0.5671213  | 0.00011273 | 0.096781  | -0.25188  |
| 5mo_SIGAD9 | 0.07840288 | 0.76695013 | 0.00012778 | 0.057615  | -1.1573   |
| 5mo_SIGAD9 | 0.03916546 | 0.38479695 | 9.26E-05   | 0.10901   | 0.36311   |
| 5mo_SIGAD9 | 0.05832415 | 0.5713932  | 0.00011305 | 0.097132  | -0.26697  |
| 5mo_SIGAD9 | 0.0711289  | 0.6961051  | 0.00012331 | 0.075804  | -0.88959  |
| 5mo_SIGAD9 | 0.06709167 | 0.6567845  | 0.00012032 | 0.089759  | -0.69393  |
| 5mo_SIGAD9 | 0.06374443 | 0.6241841  | 0.00011787 | 0.097201  | -0.5246   |
| 5mo_SIGAD9 | 0.06899878 | 0.6753588  | 0.00012186 | 0.08293   | -0.79386  |
| 5mo_SIGAD9 | 0.06065365 | 0.59408134 | 0.00011523 | 0.098828  | -0.37638  |
| 5mo_SIGAD9 | 0.03412314 | 0.33568716 | 8.65E-05   | 0.090344  | 0.57137   |
| 5mo_SIGAD9 | 0.05171704 | 0.5070431  | 0.00010668 | 0.092211  | -0.011455 |
| 5mo_SIGAD9 | 0.0782816  | 0.7657689  | 0.00012778 | 0.057615  | -1.1573   |
| 5mo_SIGAD9 | 0.07276617 | 0.71205133 | 0.00012446 | 0.070202  | -0.96444  |
| 5mo_SIGAD9 | 0.0493817  | 0.48429808 | 0.00010417 | 0.094268  | 0.062467  |
| 5mo_SIGAD9 | 0.06955966 | 0.68082154 | 0.00012235 | 0.080544  | -0.81017  |
| 5mo_SIGAD9 | 0.05067345 | 0.49687907 | 0.00010561 | 0.092703  | 0.021622  |
| 5mo_SIGAD9 | 0.0542462  | 0.53167593 | 0.0001091  | 0.092966  | -0.11022  |
| 5mo_SIGAD9 | 0.03429338 | 0.33734524 | 8.69E-05   | 0.09213   | 0.57137   |
| 5mo_SIGAD9 | 0.06631403 | 0.64921063 | 0.00011979 | 0.091802  | -0.66011  |

|            |            |            |            |          |           |
|------------|------------|------------|------------|----------|-----------|
| 5mo_SIGAD9 | 0.05159277 | 0.5058328  | 0.00010632 | 0.092309 | -0.011455 |
| 5mo_SIGAD9 | 0.06431026 | 0.62969494 | 0.00011815 | 0.096641 | -0.55833  |
| 5mo_SIGAD9 | 0.05407984 | 0.53005564 | 0.00010876 | 0.092731 | -0.097097 |
| 5mo_SIGAD9 | 0.07193738 | 0.7039793  | 0.00012378 | 0.073503 | -0.92016  |
| 5mo_SIGAD9 | 0.03899879 | 0.38317367 | 9.26E-05   | 0.10901  | 0.36311   |
| 5mo_SIGAD9 | 0.07307579 | 0.71506685 | 0.00012469 | 0.069151 | -0.97873  |
| 5mo_SIGAD9 | 0.09369358 | 0.9158741  | 0.00013442 | 0.052444 | -1.3416   |
| 5mo_SIGAD9 | 0.07270048 | 0.71141154 | 0.00012446 | 0.070202 | -0.9499   |
| 5mo_SIGAD9 | 0.07472273 | 0.73111073 | 0.00012577 | 0.064358 | -1.0333   |
| 5mo_SIGAD9 | 0.05105742 | 0.50061876 | 0.00010597 | 0.092472 | 0.010852  |
| 5mo_SIGAD9 | 0.02248872 | 0.22237363 | 7.26E-05   | 0.037419 | 0.65846   |
| 5mo_SIGAD9 | 0.08187505 | 0.80076736 | 0.00012959 | 0.054253 | -1.2361   |
| 5mo_SIGAD9 | 0.05697676 | 0.5582702  | 0.00011177 | 0.095663 | -0.20754  |
| 5mo_SIGAD9 | 0.02810741 | 0.27709696 | 7.94E-05   | 0.059253 | 0.76661   |
| 5mo_SIGAD9 | 0.06662029 | 0.6521935  | 0.00012006 | 0.090801 | -0.67704  |
| 5mo_SIGAD9 | 0.09018504 | 0.8817026  | 0.00013325 | 0.052587 | -1.3301   |
| 5mo_SIGAD9 | 0.05619175 | 0.5506246  | 0.00011111 | 0.094909 | -0.17881  |
| 5mo_SIGAD9 | 0.05323423 | 0.5218198  | 0.00010807 | 0.092373 | -0.07149  |
| 5mo_SIGAD9 | 0.07334506 | 0.71768945 | 0.00012491 | 0.068128 | -0.97873  |
| 5mo_SIGAD9 | 0.06247577 | 0.61182785 | 0.00011672 | 0.098627 | -0.47447  |
| 5mo_SIGAD9 | 0.05880345 | 0.57606125 | 0.00011337 | 0.097465 | -0.29758  |
| 5mo_SIGAD9 | 0.02450201 | 0.24198212 | 7.50E-05   | 0.043782 | 0.73857   |
| 5mo_SIGAD9 | 0.06806866 | 0.66629994 | 0.0001211  | 0.086439 | -0.74427  |
| 5mo_SIGAD9 | 0.04605668 | 0.45191404 | 0.00010046 | 0.10111  | 0.14626   |
| 5mo_SIGAD9 | 0.05029767 | 0.4932192  | 0.0001049  | 0.093366 | 0.032151  |
| 5mo_SIGAD9 | 0.04919593 | 0.48248878 | 0.00010381 | 0.094798 | 0.062467  |
| 5mo_SIGAD9 | 0.04090989 | 0.4017868  | 9.46E-05   | 0.10971  | 0.29155   |
| 5mo_SIGAD9 | 0.06227038 | 0.60982746 | 0.00011642 | 0.098794 | -0.4579   |
| 5mo_SIGAD9 | 0.04064403 | 0.3991975  | 9.42E-05   | 0.10978  | 0.3027    |
| 5mo_SIGAD9 | 0.04368589 | 0.4288237  | 9.78E-05   | 0.10633  | 0.21046   |
| 5mo_SIGAD9 | 0.04306445 | 0.42277116 | 9.70E-05   | 0.10755  | 0.22964   |
| 5mo_SIGAD9 | 0.03974522 | 0.39044344 | 9.34E-05   | 0.10962  | 0.33794   |
| 5mo_SIGAD9 | 0.06477976 | 0.6342676  | 0.00011871 | 0.095287 | -0.57526  |
| 5mo_SIGAD9 | 0.05554409 | 0.54431677 | 0.00011045 | 0.094186 | -0.1508   |
| 5mo_SIGAD9 | 0.07121252 | 0.6969196  | 0.00012331 | 0.075804 | -0.88959  |
| 5mo_SIGAD9 | 0.04847067 | 0.47542506 | 0.00010308 | 0.095994 | 0.081803  |
| 5mo_SIGAD9 | 0.06273444 | 0.6143472  | 0.00011701 | 0.098387 | -0.47447  |
| 5mo_SIGAD9 | 0.05657425 | 0.55434996 | 0.00011144 | 0.095284 | -0.19309  |
| 5mo_SIGAD9 | 0.08170733 | 0.79913384 | 0.00012959 | 0.054253 | -1.2361   |
| 5mo_SIGAD9 | 0.07961731 | 0.77877814 | 0.00012853 | 0.055948 | -1.1924   |
| 5mo_SIGAD9 | 0.06571001 | 0.6433278  | 0.00011925 | 0.093659 | -0.62617  |
| 5mo_SIGAD9 | 0.05595005 | 0.5482705  | 0.00011078 | 0.094541 | -0.16472  |
| 5mo_SIGAD9 | 0.04520843 | 0.44365248 | 9.97E-05   | 0.10268  | 0.17344   |
| 5mo_SIGAD9 | 0.05153518 | 0.5052719  | 0.00010632 | 0.092309 | -0.011455 |
| 5mo_SIGAD9 | 0.04288553 | 0.42102855 | 9.70E-05   | 0.10755  | 0.23945   |
| 5mo_SIGAD9 | 0.04426503 | 0.43446425 | 9.86E-05   | 0.10494  | 0.20107   |

|            |            |            |            |          |            |
|------------|------------|------------|------------|----------|------------|
| 5mo_SIGAD9 | 0.01837211 | 0.1822799  | 6.84E-05   | 0.028322 | 0.42127    |
| 5mo_SIGAD9 | 0.04983575 | 0.48872036 | 0.00010453 | 0.09379  | 0.042456   |
| 5mo_SIGAD9 | 0.00978414 | 0.09863723 | 5.95E-05   | 0.014213 | 0.1081     |
| 5mo_SIGAD9 | 0.05460829 | 0.5352025  | 0.00010944 | 0.093233 | -0.12355   |
| 5mo_SIGAD9 | 0.03148286 | 0.3099721  | 8.36E-05   | 0.07721  | 0.6834     |
| 5mo_SIGAD9 | 0.03630689 | 0.35695586 | 8.94E-05   | 0.10166  | 0.47826    |
| 5mo_SIGAD9 | 0.05381951 | 0.5275201  | 0.00010876 | 0.092731 | -0.084185  |
| 5mo_SIGAD9 | 0.0464544  | 0.45578766 | 0.00010084 | 0.10033  | 0.13721    |
| 5mo_SIGAD9 | 0.05801728 | 0.5684044  | 0.00011273 | 0.096781 | -0.26697   |
| 5mo_SIGAD9 | 0.03603266 | 0.35428497 | 8.90E-05   | 0.10026  | 0.49376    |
| 5mo_SIGAD9 | 0.04820258 | 0.47281405 | 0.00010271 | 0.09665  | 0.091263   |
| 5mo_SIGAD9 | 0.04347508 | 0.42677048 | 9.78E-05   | 0.10633  | 0.21998    |
| 5mo_SIGAD9 | 0.0394947  | 0.38800356 | 9.30E-05   | 0.10937  | 0.35035    |
| 5mo_SIGAD9 | 0.07482192 | 0.73207337 | 0.00012577 | 0.064358 | -1.0462    |
| 5mo_SIGAD9 | 0.06016909 | 0.5893619  | 0.00011462 | 0.098526 | -0.36038   |
| 5mo_SIGAD9 | 0.03143564 | 0.3095123  | 8.36E-05   | 0.07721  | 0.6834     |
| 5mo_SIGAD9 | 0.05727584 | 0.5611831  | 0.00011209 | 0.096042 | -0.22216   |
| 5mo_SIGAD9 | 0.02621951 | 0.25870967 | 7.70E-05   | 0.050154 | 0.76965    |
| 5mo_SIGAD9 | 0.01796684 | 0.17833273 | 6.76E-05   | 0.026932 | 0.37908    |
| 5mo_SIGAD9 | 0.04942056 | 0.48467654 | 0.00010417 | 0.094268 | 0.062467   |
| 5mo_SIGAD9 | 0.08723988 | 0.8530182  | 0.00013207 | 0.052686 | -1.3094    |
| 5mo_SIGAD9 | 0.05132159 | 0.50319165 | 0.00010597 | 0.092472 | -0.0001745 |
| 5mo_SIGAD9 | 0.08635176 | 0.84436834 | 0.00013164 | 0.052775 | -1.2997    |
| 5mo_SIGAD9 | 0.02049228 | 0.20292932 | 7.06E-05   | 0.032941 | 0.54704    |
| 5mo_SIGAD9 | 0.04756465 | 0.46660092 | 0.00010234 | 0.09734  | 0.10986    |
| 5mo_SIGAD9 | 0.06753583 | 0.6611104  | 0.00012084 | 0.087573 | -0.71078   |
| 5mo_SIGAD9 | 0.06235027 | 0.61060554 | 0.00011672 | 0.098627 | -0.4579    |
| 5mo_SIGAD9 | 0.01115074 | 0.11194723 | 6.08E-05   | 0.015922 | 0.1115     |
| 5mo_SIGAD9 | 0.05848753 | 0.5729844  | 0.00011305 | 0.097132 | -0.2822    |
| 5mo_SIGAD9 | 0.04680604 | 0.45921242 | 0.00010122 | 0.099559 | 0.12814    |
| 5mo_SIGAD9 | 0.03146669 | 0.30981463 | 8.36E-05   | 0.07721  | 0.6834     |
| 5mo_SIGAD9 | 0.06850454 | 0.67054516 | 0.00012136 | 0.085284 | -0.7609    |
| 5mo_SIGAD9 | 0.05633435 | 0.55201346 | 0.00011111 | 0.094909 | -0.19309   |
| 5mo_SIGAD9 | 0.05115351 | 0.50155467 | 0.00010597 | 0.092472 | 0.010852   |
| 5mo_SIGAD9 | 0.0567743  | 0.5562984  | 0.00011144 | 0.095284 | -0.20754   |
| 5mo_SIGAD9 | 0.01771532 | 0.17588308 | 6.76E-05   | 0.026932 | 0.37908    |
| 5mo_SIGAD9 | 0.05861656 | 0.5742411  | 0.00011337 | 0.097465 | -0.2822    |
| 5mo_SIGAD9 | 0.08654372 | 0.846238   | 0.00013179 | 0.052739 | -1.3031    |
| 5mo_SIGAD9 | 0.04000426 | 0.39296642 | 9.34E-05   | 0.10962  | 0.32588    |
| 5mo_SIGAD9 | 0.07258615 | 0.71029806 | 0.00012424 | 0.071279 | -0.9499    |
| 5mo_SIGAD9 | 0.04757179 | 0.46667045 | 0.00010234 | 0.09734  | 0.10986    |
| 5mo_SIGAD9 | 0.08474083 | 0.8286787  | 0.00013105 | 0.053002 | -1.2841    |
| 5mo_SIGAD9 | 0.09546206 | 0.93309826 | 0.00013495 | 0.052348 | -1.344     |
| 5mo_SIGAD9 | 0.0076591  | 0.07794037 | 5.78E-05   | 0.011928 | 0.14372    |
| 5mo_SIGAD9 | 0.05827509 | 0.57091534 | 0.00011305 | 0.097132 | -0.26697   |
| 5mo_SIGAD9 | 0.0663366  | 0.64943045 | 0.00011979 | 0.091802 | -0.66011   |

|            |            |            |            |          |          |
|------------|------------|------------|------------|----------|----------|
| 5mo_SIGAD9 | 0.0500735  | 0.4910359  | 0.0001049  | 0.093366 | 0.042456 |
| 5mo_SIGAD9 | 0.06009454 | 0.58863586 | 0.00011462 | 0.098526 | -0.36038 |
| 5mo_SIGAD9 | 0.06993668 | 0.6844935  | 0.0001226  | 0.07935  | -0.82636 |
| 5mo_SIGAD9 | 0.06896316 | 0.67501193 | 0.00012186 | 0.08293  | -0.79386 |
| 5mo_SIGAD9 | 0.04355888 | 0.42758667 | 9.78E-05   | 0.10633  | 0.21998  |
| 5mo_SIGAD9 | 0.05648029 | 0.55343485 | 0.00011111 | 0.094909 | -0.19309 |
| 5mo_SIGAD9 | 0.03402685 | 0.33474934 | 8.65E-05   | 0.090344 | 0.58656  |
| 5mo_SIGAD9 | 0.06517288 | 0.63809645 | 0.00011898 | 0.094504 | -0.59222 |
| 5mo_SIGAD9 | 0.05047882 | 0.49498355 | 0.00010525 | 0.093003 | 0.032151 |
| 5mo_SIGAD9 | 0.03737439 | 0.36735275 | 9.06E-05   | 0.10531  | 0.43275  |
| 5mo_SIGAD9 | 0.03428061 | 0.3372209  | 8.69E-05   | 0.09213  | 0.57137  |
| 5mo_SIGAD9 | 0.0656074  | 0.64232844 | 0.00011925 | 0.093659 | -0.62617 |
| 5mo_SIGAD9 | 0.06877995 | 0.67322755 | 0.00012161 | 0.084113 | -0.77743 |
| 5mo_SIGAD9 | 0.02492232 | 0.24607567 | 7.58E-05   | 0.046199 | 0.74769  |
| 5mo_SIGAD9 | 0.04654927 | 0.4567116  | 0.00010122 | 0.099559 | 0.13721  |
| 5mo_SIGAD9 | 0.06869344 | 0.672385   | 0.00012161 | 0.084113 | -0.77743 |
| 5mo_SIGAD9 | 0.05934028 | 0.58128977 | 0.000114   | 0.098059 | -0.31309 |
| 5mo_SIGAD9 | 0.05012513 | 0.49153876 | 0.0001049  | 0.093366 | 0.042456 |
| 5mo_SIGAD9 | 0.03723661 | 0.36601084 | 9.02E-05   | 0.1042   | 0.43275  |
| 5mo_SIGAD9 | 0.0216185  | 0.21389814 | 7.18E-05   | 0.035549 | 0.6056   |
| 5mo_SIGAD9 | 0.0735305  | 0.7194956  | 0.00012491 | 0.068128 | -0.99278 |
| 5mo_SIGAD9 | 0.04420462 | 0.4338759  | 9.86E-05   | 0.10494  | 0.20107  |
| 5mo_SIGAD9 | 0.00992576 | 0.10001655 | 5.98E-05   | 0.014626 | 0.1081   |
| 5mo_SIGAD9 | 0.00749755 | 0.07636698 | 5.78E-05   | 0.011928 | 0.14372  |
| 5mo_SIGAD9 | 0.07753346 | 0.75848246 | 0.0001274  | 0.058646 | -1.1379  |
| 5mo_SIGAD9 | 0.01409903 | 0.14066221 | 6.37E-05   | 0.020323 | 0.18023  |
| 5mo_SIGAD9 | 0.06151582 | 0.6024784  | 0.00011583 | 0.09893  | -0.42501 |
| 5mo_SIGAD9 | 0.03361687 | 0.3307564  | 8.61E-05   | 0.088522 | 0.60151  |
| 5mo_SIGAD9 | 0.07109202 | 0.69574594 | 0.00012331 | 0.075804 | -0.88959 |
| 5mo_SIGAD9 | 0.05221371 | 0.5118804  | 0.00010703 | 0.092172 | -0.03476 |
| 5mo_SIGAD9 | 0.0559793  | 0.54855543 | 0.00011078 | 0.094541 | -0.17881 |
| 5mo_SIGAD9 | 0.04803201 | 0.47115278 | 0.00010271 | 0.09665  | 0.10061  |
| 5mo_SIGAD9 | 0.03201289 | 0.31513435 | 8.40E-05   | 0.07911  | 0.65793  |
| 5mo_SIGAD9 | 0.02439626 | 0.24095213 | 7.50E-05   | 0.043782 | 0.72811  |
| 5mo_SIGAD9 | 0.04248045 | 0.41708326 | 9.66E-05   | 0.10808  | 0.24945  |
| 5mo_SIGAD9 | 0.0679208  | 0.6648599  | 0.0001211  | 0.086439 | -0.72756 |
| 5mo_SIGAD9 | 0.02148209 | 0.21256958 | 7.18E-05   | 0.035549 | 0.6056   |
| 5mo_SIGAD9 | 0.06680407 | 0.65398335 | 0.00012032 | 0.089759 | -0.67704 |
| 5mo_SIGAD9 | 0.05900407 | 0.5780152  | 0.00011368 | 0.097776 | -0.29758 |
| 5mo_SIGAD9 | 0.01684365 | 0.16739343 | 6.65E-05   | 0.024968 | 0.31771  |
| 5mo_SIGAD9 | 0.04612007 | 0.45253143 | 0.00010046 | 0.10111  | 0.14626  |
| 5mo_SIGAD9 | 0.0474679  | 0.46565858 | 0.00010197 | 0.098057 | 0.10986  |
| 5mo_SIGAD9 | 0.07495343 | 0.7333542  | 0.00012577 | 0.064358 | -1.0462  |
| 5mo_SIGAD9 | 0.05759867 | 0.56432736 | 0.00011241 | 0.096416 | -0.23694 |
| 5mo_SIGAD9 | 0.04444784 | 0.4362447  | 9.86E-05   | 0.10494  | 0.19178  |
| 5mo_SIGAD9 | 0.0535559  | 0.52495265 | 0.00010842 | 0.092532 | -0.07149 |

|            |            |            |            |          |           |
|------------|------------|------------|------------|----------|-----------|
| 5mo_SIGAD9 | 0.08457591 | 0.8270724  | 0.00013089 | 0.053084 | -1.2797   |
| 5mo_SIGAD9 | 0.0658302  | 0.6444984  | 0.00011953 | 0.092756 | -0.62617  |
| 5mo_SIGAD9 | 0.06487732 | 0.63521785 | 0.00011871 | 0.095287 | -0.59222  |
| 5mo_SIGAD9 | 0.06201078 | 0.60729915 | 0.00011642 | 0.098794 | -0.44141  |
| 5mo_SIGAD9 | 0.05840508 | 0.57218134 | 0.00011305 | 0.097132 | -0.2822   |
| 5mo_SIGAD9 | 0.05339513 | 0.5233869  | 0.00010807 | 0.092373 | -0.07149  |
| 5mo_SIGAD9 | 0.0098085  | 0.09887447 | 5.98E-05   | 0.014626 | 0.1081    |
| 5mo_SIGAD9 | 0.05390197 | 0.5283233  | 0.00010876 | 0.092731 | -0.084185 |
| 5mo_SIGAD9 | 0.08254981 | 0.80733925 | 0.00012993 | 0.053861 | -1.2485   |
| 5mo_SIGAD9 | 0.05554346 | 0.54431057 | 0.00011045 | 0.094186 | -0.1508   |
| 5mo_SIGAD9 | 0.02209783 | 0.21856654 | 7.22E-05   | 0.03647  | 0.64161   |
| 5mo_SIGAD9 | 0.04367158 | 0.4286843  | 9.78E-05   | 0.10633  | 0.21046   |
| 5mo_SIGAD9 | 0.02943221 | 0.2899998  | 8.11E-05   | 0.066108 | 0.7438    |
| 5mo_SIGAD9 | 0.03363098 | 0.3308938  | 8.61E-05   | 0.088522 | 0.60151   |
| 5mo_SIGAD9 | 0.03319057 | 0.3266044  | 8.57E-05   | 0.086671 | 0.61617   |
| 5mo_SIGAD9 | 0.02584221 | 0.255035   | 7.66E-05   | 0.04879  | 0.76634   |
| 5mo_SIGAD9 | 0.06653395 | 0.6513526  | 0.00012006 | 0.090801 | -0.66011  |
| 5mo_SIGAD9 | 0.0429151  | 0.42131656 | 9.70E-05   | 0.10755  | 0.23945   |
| 5mo_SIGAD9 | 0.01823034 | 0.18089905 | 6.80E-05   | 0.027619 | 0.4001    |
| 5mo_SIGAD9 | 0.04336634 | 0.42571142 | 9.74E-05   | 0.10696  | 0.21998   |
| 5mo_SIGAD9 | 0.05989077 | 0.58665127 | 0.00011431 | 0.098311 | -0.3445   |
| 5mo_SIGAD9 | 0.06157139 | 0.6030197  | 0.00011583 | 0.09893  | -0.42501  |
| 5mo_SIGAD9 | 0.06341279 | 0.620954   | 0.00011758 | 0.097678 | -0.50782  |
| 5mo_SIGAD9 | 0.0791489  | 0.774216   | 0.00012816 | 0.056721 | -1.1755   |
| 5mo_SIGAD9 | 0.10046676 | 0.9818415  | 0.00013643 | 0.051998 | -1.3425   |
| 5mo_SIGAD9 | 0.05605421 | 0.549285   | 0.00011078 | 0.094541 | -0.17881  |
| 5mo_SIGAD9 | 0.07385445 | 0.72265065 | 0.00012513 | 0.067136 | -1.0066   |
| 5mo_SIGAD9 | 0.04204147 | 0.41280785 | 9.58E-05   | 0.10896  | 0.25963   |
| 5mo_SIGAD9 | 0.03010634 | 0.29656556 | 8.19E-05   | 0.069725 | 0.72675   |
| 5mo_SIGAD9 | 0.06743446 | 0.6601231  | 0.00012058 | 0.088682 | -0.71078  |
| 5mo_SIGAD9 | 0.04960277 | 0.4864512  | 0.00010417 | 0.094268 | 0.052555  |
| 5mo_SIGAD9 | 0.08602414 | 0.84117746 | 0.00013164 | 0.052775 | -1.2961   |
| 5mo_SIGAD9 | 0.06019561 | 0.58962023 | 0.00011462 | 0.098526 | -0.36038  |
| 5mo_SIGAD9 | 0.04451909 | 0.43693864 | 9.89E-05   | 0.10421  | 0.19178   |
| 5mo_SIGAD9 | 0.02350769 | 0.23229794 | 7.38E-05   | 0.040447 | 0.70349   |
| 5mo_SIGAD9 | 0.02033008 | 0.20134954 | 7.02E-05   | 0.032119 | 0.52662   |
| 5mo_SIGAD9 | 0.04085171 | 0.4012201  | 9.46E-05   | 0.10971  | 0.3027    |
| 5mo_SIGAD9 | 0.01770403 | 0.1757731  | 6.76E-05   | 0.026932 | 0.37908   |
| 5mo_SIGAD9 | 0.01249554 | 0.12504494 | 6.21E-05   | 0.017782 | 0.13519   |
| 5mo_SIGAD9 | 0.05379315 | 0.5272634  | 0.00010876 | 0.092731 | -0.084185 |
| 5mo_SIGAD9 | 0.02118977 | 0.20972247 | 7.14E-05   | 0.034655 | 0.58661   |
| 5mo_SIGAD9 | 0.07712302 | 0.7544849  | 0.0001272  | 0.059217 | -1.117    |
| 5mo_SIGAD9 | 0.08363598 | 0.81791794 | 0.00013058 | 0.053285 | -1.2651   |
| 5mo_SIGAD9 | 0.01673226 | 0.16630854 | 6.65E-05   | 0.024968 | 0.31771   |
| 5mo_SIGAD9 | 0.07187209 | 0.7033434  | 0.00012378 | 0.073503 | -0.92016  |
| 5mo_SIGAD9 | 0.013716   | 0.13693166 | 6.34E-05   | 0.019794 | 0.16714   |

|            |            |            |            |           |           |
|------------|------------|------------|------------|-----------|-----------|
| 5mo_SIGAD9 | 0.09046785 | 0.88445705 | 0.00013325 | 0.052587  | -1.3301   |
| 5mo_SIGAD9 | 0.05768711 | 0.5651887  | 0.00011241 | 0.096416  | -0.25188  |
| 5mo_SIGAD9 | 0.0379196  | 0.3726628  | 9.10E-05   | 0.1063    | 0.40374   |
| 5mo_SIGAD9 | 0.00461244 | 0.04826739 | 5.52E-05   | 0.0090922 | 0.24903   |
| 5mo_SIGAD9 | 0.06026105 | 0.5902576  | 0.00011462 | 0.098526  | -0.36038  |
| 5mo_SIGAD9 | 0.06568604 | 0.64309436 | 0.00011925 | 0.093659  | -0.62617  |
| 5mo_SIGAD9 | 0.01538269 | 0.15316437 | 6.51E-05   | 0.022546  | 0.24275   |
| 5mo_SIGAD9 | 0.06472255 | 0.63371044 | 0.00011843 | 0.096001  | -0.57526  |
| 5mo_SIGAD9 | 0.07112367 | 0.69605416 | 0.00012331 | 0.075804  | -0.88959  |
| 5mo_SIGAD9 | 0.04465465 | 0.43825898 | 9.89E-05   | 0.10421   | 0.19178   |
| 5mo_SIGAD9 | 0.0417272  | 0.409747   | 9.58E-05   | 0.10896   | 0.27003   |
| 5mo_SIGAD9 | 0.00968182 | 0.09764065 | 5.95E-05   | 0.014213  | 0.11014   |
| 5mo_SIGAD9 | 0.05833357 | 0.5714849  | 0.00011305 | 0.097132  | -0.26697  |
| 5mo_SIGAD9 | 0.04950005 | 0.48545077 | 0.00010417 | 0.094268  | 0.052555  |
| 5mo_SIGAD9 | 0.0847704  | 0.82896674 | 0.00013105 | 0.053002  | -1.2841   |
| 5mo_SIGAD9 | 0.04593506 | 0.45072952 | 0.00010046 | 0.10111   | 0.1553    |
| 5mo_SIGAD9 | 0.06761123 | 0.66184473 | 0.00012084 | 0.087573  | -0.72756  |
| 5mo_SIGAD9 | 0.06407268 | 0.62738097 | 0.00011815 | 0.096641  | -0.54144  |
| 5mo_SIGAD9 | 0.06080626 | 0.5955677  | 0.00011523 | 0.098828  | -0.39249  |
| 5mo_SIGAD9 | 0.05644541 | 0.5530951  | 0.00011111 | 0.094909  | -0.19309  |
| 5mo_SIGAD9 | 0.06292023 | 0.6161567  | 0.00011701 | 0.098387  | -0.49111  |
| 5mo_SIGAD9 | 0.02203805 | 0.2179843  | 7.22E-05   | 0.03647   | 0.62396   |
| 5mo_SIGAD9 | 0.05291964 | 0.51875585 | 0.00010773 | 0.092257  | -0.059017 |
| 5mo_SIGAD9 | 0.04053362 | 0.3981221  | 9.42E-05   | 0.10978   | 0.31414   |
| 5mo_SIGAD9 | 0.05671276 | 0.555699   | 0.00011144 | 0.095284  | -0.20754  |
| 5mo_SIGAD9 | 0.03373199 | 0.33187762 | 8.61E-05   | 0.088522  | 0.58656   |
| 5mo_SIGAD9 | 0.06310041 | 0.6179115  | 0.0001173  | 0.098072  | -0.49111  |
| 5mo_SIGAD9 | 0.01169897 | 0.1172867  | 6.14E-05   | 0.016833  | 0.11542   |
| 5mo_SIGAD9 | 0.01513359 | 0.15073824 | 6.47E-05   | 0.021973  | 0.22576   |
| 5mo_SIGAD9 | 0.04878156 | 0.47845298 | 0.00010344 | 0.095375  | 0.072211  |
| 5mo_SIGAD9 | 0.04291676 | 0.42133272 | 9.70E-05   | 0.10755   | 0.23945   |
| 5mo_SIGAD9 | 0.05021022 | 0.4923675  | 0.0001049  | 0.093366  | 0.032151  |
| 5mo_SIGAD9 | 0.08960319 | 0.87603563 | 0.000133   | 0.052606  | -1.3264   |
| 5mo_SIGAD9 | 0.05980955 | 0.58586025 | 0.00011431 | 0.098311  | -0.3445   |
| 5mo_SIGAD9 | 0.0637844  | 0.6245733  | 0.00011787 | 0.097201  | -0.5246   |
| 5mo_SIGAD9 | 0.03049379 | 0.3003391  | 8.23E-05   | 0.07157   | 0.71698   |
| 5mo_SIGAD9 | 0.02861809 | 0.2820707  | 7.99E-05   | 0.060913  | 0.75723   |
| 5mo_SIGAD9 | 0.07437024 | 0.7276742  | 0.00012556 | 0.06525   | -1.0201   |
| 5mo_SIGAD9 | 0.0639308  | 0.62599915 | 0.00011787 | 0.097201  | -0.54144  |
| 5mo_SIGAD9 | 0.07342306 | 0.7184491  | 0.00012491 | 0.068128  | -0.99278  |
| 5mo_SIGAD9 | 0.06943227 | 0.67958075 | 0.00012211 | 0.081739  | -0.81017  |
| 5mo_SIGAD9 | 0.05090876 | 0.49917087 | 0.00010561 | 0.092703  | 0.010852  |
| 5mo_SIGAD9 | 0.06415246 | 0.62815803 | 0.00011815 | 0.096641  | -0.54144  |
| 5mo_SIGAD9 | 0.07194648 | 0.70406795 | 0.00012401 | 0.07238   | -0.92016  |
| 5mo_SIGAD9 | 0.07392873 | 0.7233741  | 0.00012513 | 0.067136  | -1.0066   |
| 5mo_SIGAD9 | 0.03675918 | 0.36136097 | 8.98E-05   | 0.10298   | 0.46289   |

|            |            |            |            |           |           |
|------------|------------|------------|------------|-----------|-----------|
| 5mo_SIGAD9 | 0.07594296 | 0.74299175 | 0.0001264  | 0.06191   | -1.0832   |
| 5mo_SIGAD9 | 0.06671986 | 0.65316325 | 0.00012006 | 0.090801  | -0.67704  |
| 5mo_SIGAD9 | 0.06687266 | 0.6546514  | 0.00012032 | 0.089759  | -0.67704  |
| 5mo_SIGAD9 | 0.0649347  | 0.6357767  | 0.00011871 | 0.095287  | -0.59222  |
| 5mo_SIGAD9 | 0.05977335 | 0.5855076  | 0.00011431 | 0.098311  | -0.3445   |
| 5mo_SIGAD9 | 0.06825984 | 0.6681619  | 0.00012136 | 0.085284  | -0.74427  |
| 5mo_SIGAD9 | 0.06620889 | 0.6481867  | 0.00011979 | 0.091802  | -0.64315  |
| 5mo_SIGAD9 | 0.00934059 | 0.09431727 | 5.92E-05   | 0.013809  | 0.11326   |
| 5mo_SIGAD9 | 0.00784772 | 0.07977743 | 5.81E-05   | 0.012286  | 0.13577   |
| 5mo_SIGAD9 | 0.03061064 | 0.30147713 | 8.23E-05   | 0.07157   | 0.71698   |
| 5mo_SIGAD9 | 0.06294196 | 0.61636835 | 0.00011701 | 0.098387  | -0.49111  |
| 5mo_SIGAD9 | 0.06924159 | 0.6777237  | 0.00012211 | 0.081739  | -0.79386  |
| 5mo_SIGAD9 | 0.0615367  | 0.60268176 | 0.00011583 | 0.09893   | -0.42501  |
| 5mo_SIGAD9 | 0.07303248 | 0.71464515 | 0.00012469 | 0.069151  | -0.96444  |
| 5mo_SIGAD9 | 0.07834112 | 0.7663486  | 0.00012778 | 0.057615  | -1.1573   |
| 5mo_SIGAD9 | 0.07375037 | 0.72163695 | 0.00012513 | 0.067136  | -0.99278  |
| 5mo_SIGAD9 | 0.07406712 | 0.7247219  | 0.00012534 | 0.066176  | -1.0066   |
| 5mo_SIGAD9 | 0.08827153 | 0.86306596 | 0.00013248 | 0.05264   | -1.3176   |
| 5mo_SIGAD9 | 0.05472246 | 0.5363145  | 0.00010944 | 0.093233  | -0.12355  |
| 5mo_SIGAD9 | 0.03006561 | 0.29616886 | 8.19E-05   | 0.069725  | 0.72675   |
| 5mo_SIGAD9 | 0.03101118 | 0.30537826 | 8.28E-05   | 0.073435  | 0.69526   |
| 5mo_SIGAD9 | 0.06626653 | 0.64874804 | 0.00011979 | 0.091802  | -0.66011  |
| 5mo_SIGAD9 | 0.06082041 | 0.5957055  | 0.00011523 | 0.098828  | -0.39249  |
| 5mo_SIGAD9 | 0.07366911 | 0.7208455  | 0.00012513 | 0.067136  | -0.99278  |
| 5mo_SIGAD9 | 0.03679584 | 0.36171794 | 8.98E-05   | 0.10298   | 0.4477    |
| 5mo_SIGAD9 | 0.00209279 | 0.02372723 | 5.34E-05   | 0.0073266 | 0.36099   |
| 5mo_SIGAD9 | 0.06065938 | 0.5941372  | 0.00011523 | 0.098828  | -0.37638  |
| 5mo_SIGAD9 | 0.00979843 | 0.09877645 | 5.98E-05   | 0.014626  | 0.1081    |
| 5mo_SIGAD9 | 0.04745536 | 0.46553648 | 0.00010197 | 0.098057  | 0.10986   |
| 5mo_SIGAD9 | 0.06939427 | 0.67921066 | 0.00012211 | 0.081739  | -0.81017  |
| 5mo_SIGAD9 | 0.00761107 | 0.07747261 | 5.78E-05   | 0.011928  | 0.14372   |
| 5mo_SIGAD9 | 0.02351691 | 0.23238772 | 7.38E-05   | 0.040447  | 0.70349   |
| 5mo_SIGAD9 | 0.06030542 | 0.5906897  | 0.00011492 | 0.0987    | -0.36038  |
| 5mo_SIGAD9 | 0.0688991  | 0.674388   | 0.00012186 | 0.08293   | -0.77743  |
| 5mo_SIGAD9 | 0.07707579 | 0.754025   | 0.000127   | 0.059827  | -1.117    |
| 5mo_SIGAD9 | 0.05285756 | 0.5181513  | 0.00010773 | 0.092257  | -0.046772 |
| 5mo_SIGAD9 | 0.06919079 | 0.6772289  | 0.00012186 | 0.08293   | -0.79386  |
| 5mo_SIGAD9 | 0.06572894 | 0.6435122  | 0.00011925 | 0.093659  | -0.62617  |
| 5mo_SIGAD9 | 0.05108871 | 0.5009235  | 0.00010597 | 0.092472  | 0.010852  |
| 5mo_SIGAD9 | 0.06166872 | 0.6039676  | 0.00011613 | 0.098894  | -0.42501  |
| 5mo_SIGAD9 | 0.04517641 | 0.44334066 | 9.97E-05   | 0.10268   | 0.17344   |
| 5mo_SIGAD9 | 0.02624426 | 0.2589508  | 7.70E-05   | 0.050154  | 0.76965   |
| 5mo_SIGAD9 | 0.03427893 | 0.33720446 | 8.69E-05   | 0.09213   | 0.57137   |
| 5mo_SIGAD9 | 0.04351394 | 0.42714897 | 9.78E-05   | 0.10633   | 0.21998   |
| 5mo_SIGAD9 | 0.07543995 | 0.7380926  | 0.00012619 | 0.062687  | -1.0589   |
| 5mo_SIGAD9 | 0.06581689 | 0.6443687  | 0.00011953 | 0.092756  | -0.62617  |



|            |            |            |            |          |           |
|------------|------------|------------|------------|----------|-----------|
| 5mo_SIGAD9 | 0.02963881 | 0.29201198 | 8.11E-05   | 0.066108 | 0.7357    |
| 5mo_SIGAD9 | 0.06664661 | 0.65244985 | 0.00012006 | 0.090801 | -0.67704  |
| 5mo_SIGAD9 | 0.07869013 | 0.7697478  | 0.00012797 | 0.057152 | -1.1666   |
| 5mo_SIGAD9 | 0.04282834 | 0.42047158 | 9.70E-05   | 0.10755  | 0.23945   |
| 5mo_SIGAD9 | 0.06587789 | 0.6449629  | 0.00011953 | 0.092756 | -0.62617  |
| 5mo_SIGAD9 | 0.05990777 | 0.58681685 | 0.00011431 | 0.098311 | -0.3445   |
| 5mo_SIGAD9 | 0.07523238 | 0.73607105 | 0.00012598 | 0.063504 | -1.0589   |
| 5mo_SIGAD9 | 0.05017648 | 0.49203888 | 0.0001049  | 0.093366 | 0.032151  |
| 5mo_SIGAD9 | 0.05897021 | 0.5776854  | 0.00011368 | 0.097776 | -0.29758  |
| 5mo_SIGAD9 | 0.01202283 | 0.12044098 | 6.17E-05   | 0.017303 | 0.12065   |
| 5mo_SIGAD9 | 0.02407805 | 0.23785293 | 7.46E-05   | 0.042633 | 0.71639   |
| 5mo_SIGAD9 | 0.04862883 | 0.47696546 | 0.00010344 | 0.095375 | 0.081803  |
| 5mo_SIGAD9 | 0.05180382 | 0.5078883  | 0.00010668 | 0.092211 | -0.011455 |
| 5mo_SIGAD9 | 0.04636557 | 0.4549225  | 0.00010084 | 0.10033  | 0.14626   |
| 5mo_SIGAD9 | 0.0519518  | 0.50932956 | 0.00010668 | 0.092211 | -0.022986 |
| 5mo_SIGAD9 | 0.064587   | 0.6323902  | 0.00011843 | 0.096001 | -0.57526  |
| 5mo_SIGAD9 | 0.09033883 | 0.8832005  | 0.00013325 | 0.052587 | -1.3301   |
| 5mo_SIGAD9 | 0.05969608 | 0.58475506 | 0.00011431 | 0.098311 | -0.32873  |
| 5mo_SIGAD9 | 0.07577126 | 0.7413194  | 0.0001264  | 0.06191  | -1.0712   |
| 5mo_SIGAD9 | 0.02899115 | 0.28570414 | 8.03E-05   | 0.062611 | 0.751     |
| 5mo_SIGAD9 | 0.08084372 | 0.7907228  | 0.00012907 | 0.054994 | -1.2155   |
| 5mo_SIGAD9 | 0.0469364  | 0.46048203 | 0.00010159 | 0.098799 | 0.12814   |
| 5mo_SIGAD9 | 0.05233494 | 0.51306117 | 0.00010703 | 0.092172 | -0.03476  |
| 5mo_SIGAD9 | 0.06602757 | 0.64642066 | 0.00011953 | 0.092756 | -0.64315  |
| 5mo_SIGAD9 | 0.06167711 | 0.6040493  | 0.00011613 | 0.098894 | -0.42501  |
| 5mo_SIGAD9 | 0.09212201 | 0.90056777 | 0.00013385 | 0.052525 | -1.3372   |
| 5mo_SIGAD9 | 0.00944665 | 0.09535021 | 5.95E-05   | 0.014213 | 0.11014   |
| 5mo_SIGAD9 | 0.026468   | 0.26112986 | 7.74E-05   | 0.051562 | 0.76965   |
| 5mo_SIGAD9 | 0.07430825 | 0.72707045 | 0.00012534 | 0.066176 | -1.0201   |
| 5mo_SIGAD9 | 0.08131343 | 0.7952975  | 0.00012942 | 0.054478 | -1.2295   |
| 5mo_SIGAD9 | 0.07665421 | 0.749919   | 0.0001268  | 0.060479 | -1.1061   |
| 5mo_SIGAD9 | 0.05746147 | 0.562991   | 0.00011209 | 0.096042 | -0.23694  |
| 5mo_SIGAD9 | 0.01721582 | 0.17101817 | 6.69E-05   | 0.025607 | 0.33781   |
| 5mo_SIGAD9 | 0.0115392  | 0.11573064 | 6.14E-05   | 0.016833 | 0.11542   |
| 5mo_SIGAD9 | 0.04091393 | 0.4018261  | 9.46E-05   | 0.10971  | 0.29155   |
| 5mo_SIGAD9 | 0.08119576 | 0.7941515  | 0.00012924 | 0.054725 | -1.2227   |
| 5mo_SIGAD9 | 0.01396344 | 0.13934155 | 6.37E-05   | 0.020323 | 0.18023   |
| 5mo_SIGAD9 | 0.0607101  | 0.59463114 | 0.00011523 | 0.098828 | -0.37638  |
| 5mo_SIGAD9 | 0.07389787 | 0.72307354 | 0.00012513 | 0.067136 | -1.0066   |
| 5mo_SIGAD9 | 0.03285314 | 0.32331797 | 8.52E-05   | 0.084798 | 0.6305    |
| 5mo_SIGAD9 | 0.02399863 | 0.23707944 | 7.46E-05   | 0.042633 | 0.71639   |
| 5mo_SIGAD9 | 0.02982084 | 0.29378486 | 8.15E-05   | 0.067903 | 0.7357    |
| 5mo_SIGAD9 | 0.06776587 | 0.6633509  | 0.00012084 | 0.087573 | -0.72756  |
| 5mo_SIGAD9 | 0.05979983 | 0.58576554 | 0.00011431 | 0.098311 | -0.3445   |
| 5mo_SIGAD9 | 0.05503651 | 0.5393731  | 0.00010978 | 0.093528 | -0.13708  |
| 5mo_SIGAD9 | 0.0810414  | 0.7926481  | 0.00012924 | 0.054725 | -1.2227   |

|            |            |            |            |          |           |
|------------|------------|------------|------------|----------|-----------|
| 5mo_SIGAD9 | 0.06242556 | 0.6113389  | 0.00011672 | 0.098627 | -0.4579   |
| 5mo_SIGAD9 | 0.0433499  | 0.42555135 | 9.74E-05   | 0.10696  | 0.21998   |
| 5mo_SIGAD9 | 0.10198823 | 0.99665993 | 0.00013681 | 0.051897 | -1.341    |
| 5mo_SIGAD9 | 0.04321311 | 0.42421907 | 9.74E-05   | 0.10696  | 0.22964   |
| 5mo_SIGAD9 | 0.01560194 | 0.15529981 | 6.51E-05   | 0.022546 | 0.26052   |
| 5mo_SIGAD9 | 0.05454022 | 0.5345395  | 0.00010944 | 0.093233 | -0.11022  |
| 5mo_SIGAD9 | 0.04780431 | 0.4689351  | 0.00010234 | 0.09734  | 0.10061   |
| 5mo_SIGAD9 | 0.05729481 | 0.56136787 | 0.00011209 | 0.096042 | -0.22216  |
| 5mo_SIGAD9 | 0.07439745 | 0.72793925 | 0.00012556 | 0.06525  | -1.0201   |
| 5mo_SIGAD9 | 0.04005057 | 0.39341745 | 9.38E-05   | 0.10975  | 0.32588   |
| 5mo_SIGAD9 | 0.05373008 | 0.5266491  | 0.00010842 | 0.092532 | -0.084185 |
| 5mo_SIGAD9 | 0.03125415 | 0.30774462 | 8.32E-05   | 0.075317 | 0.69526   |
| 5mo_SIGAD9 | 0.0202087  | 0.20016739 | 7.02E-05   | 0.032119 | 0.52662   |
| 5mo_SIGAD9 | 0.06677962 | 0.6537453  | 0.00012006 | 0.090801 | -0.67704  |
| 5mo_SIGAD9 | 0.06784799 | 0.66415066 | 0.0001211  | 0.086439 | -0.72756  |
| 5mo_SIGAD9 | 0.06061901 | 0.5937439  | 0.00011523 | 0.098828 | -0.37638  |
| 5mo_SIGAD9 | 0.08539575 | 0.83505726 | 0.00013135 | 0.05287  | -1.2923   |
| 5mo_SIGAD9 | 0.03277128 | 0.3225207  | 8.48E-05   | 0.082909 | 0.6305    |
| 5mo_SIGAD9 | 0.06711764 | 0.65703744 | 0.00012032 | 0.089759 | -0.69393  |
| 5mo_SIGAD9 | 0.0478006  | 0.46889892 | 0.00010234 | 0.09734  | 0.10061   |
| 5mo_SIGAD9 | 0.02763841 | 0.2725291  | 7.86E-05   | 0.05605  | 0.76966   |
| 5mo_SIGAD9 | 0.05229982 | 0.51271915 | 0.00010703 | 0.092172 | -0.03476  |
| 5mo_SIGAD9 | 0.05576746 | 0.5464923  | 0.00011045 | 0.094186 | -0.16472  |
| 5mo_SIGAD9 | 0.03429688 | 0.33737934 | 8.69E-05   | 0.09213  | 0.57137   |
| 5mo_SIGAD9 | 0.06043556 | 0.5919573  | 0.00011492 | 0.0987   | -0.37638  |
| 5mo_SIGAD9 | 0.02143181 | 0.21207987 | 7.14E-05   | 0.034655 | 0.6056    |
| 5mo_SIGAD9 | 0.05380322 | 0.52736145 | 0.00010876 | 0.092731 | -0.084185 |
| 5mo_SIGAD9 | 0.02483691 | 0.24524383 | 7.54E-05   | 0.044969 | 0.74769   |
| 5mo_SIGAD9 | 0.07491088 | 0.7329398  | 0.00012577 | 0.064358 | -1.0462   |
| 5mo_SIGAD9 | 0.0444428  | 0.43619558 | 9.86E-05   | 0.10494  | 0.19178   |
| 5mo_SIGAD9 | 0.02650342 | 0.26147485 | 7.74E-05   | 0.051562 | 0.76965   |
| 5mo_SIGAD9 | 0.06356767 | 0.62246245 | 0.00011758 | 0.097678 | -0.5246   |
| 5mo_SIGAD9 | 0.03153682 | 0.3104977  | 8.36E-05   | 0.07721  | 0.6834    |
| 5mo_SIGAD9 | 0.0091688  | 0.09264414 | 5.92E-05   | 0.013809 | 0.11326   |
| 5mo_SIGAD9 | 0.08920077 | 0.87211627 | 0.00013288 | 0.052615 | -1.3244   |
| 5mo_SIGAD9 | 0.08227521 | 0.8046648  | 0.00012993 | 0.053861 | -1.2424   |
| 5mo_SIGAD9 | 0.05450615 | 0.5342077  | 0.00010944 | 0.093233 | -0.11022  |
| 5mo_SIGAD9 | 0.06675004 | 0.65345716 | 0.00012006 | 0.090801 | -0.67704  |
| 5mo_SIGAD9 | 0.05454724 | 0.5346078  | 0.00010944 | 0.093233 | -0.11022  |
| 5mo_SIGAD9 | 0.06208795 | 0.60805076 | 0.00011642 | 0.098794 | -0.44141  |
| 5mo_SIGAD9 | 0.06376395 | 0.62437415 | 0.00011787 | 0.097201 | -0.5246   |
| 5mo_SIGAD9 | 0.06330642 | 0.61991805 | 0.0001173  | 0.098072 | -0.50782  |
| 5mo_SIGAD9 | 0.07198928 | 0.7044849  | 0.00012401 | 0.07238  | -0.92016  |
| 5mo_SIGAD9 | 0.02426548 | 0.23967837 | 7.50E-05   | 0.043782 | 0.72811   |
| 5mo_SIGAD9 | 0.00844111 | 0.08555675 | 5.86E-05   | 0.013029 | 0.12259   |
| 5mo_SIGAD9 | 0.04116579 | 0.40427914 | 9.50E-05   | 0.10955  | 0.29155   |

|            |            |            |            |           |           |
|------------|------------|------------|------------|-----------|-----------|
| 5mo_SIGAD9 | 0.01891975 | 0.18761364 | 6.87E-05   | 0.029043  | 0.44251   |
| 5mo_SIGAD9 | 0.04780068 | 0.46889973 | 0.00010234 | 0.09734   | 0.10061   |
| 5mo_SIGAD9 | 0.03119218 | 0.30714107 | 8.32E-05   | 0.075317  | 0.69526   |
| 5mo_SIGAD9 | 0.05377559 | 0.5270924  | 0.00010876 | 0.092731  | -0.084185 |
| 5mo_SIGAD9 | 0.05830544 | 0.5712109  | 0.00011305 | 0.097132  | -0.26697  |
| 5mo_SIGAD9 | 0.0078474  | 0.07977437 | 5.81E-05   | 0.012286  | 0.13577   |
| 5mo_SIGAD9 | 0.0642894  | 0.62949175 | 0.00011815 | 0.096641  | -0.55833  |
| 5mo_SIGAD9 | 0.04505564 | 0.44216442 | 9.93E-05   | 0.10345   | 0.17344   |
| 5mo_SIGAD9 | 0.05344873 | 0.5239089  | 0.00010842 | 0.092532  | -0.07149  |
| 5mo_SIGAD9 | 0.0216343  | 0.21405199 | 7.18E-05   | 0.035549  | 0.6056    |
| 5mo_SIGAD9 | 0.05596269 | 0.54839367 | 0.00011078 | 0.094541  | -0.17881  |
| 5mo_SIGAD9 | 0.05883819 | 0.5763996  | 0.00011337 | 0.097465  | -0.29758  |
| 5mo_SIGAD9 | 0.06585991 | 0.6447877  | 0.00011953 | 0.092756  | -0.62617  |
| 5mo_SIGAD9 | 0.01507629 | 0.15018022 | 6.47E-05   | 0.021973  | 0.22576   |
| 5mo_SIGAD9 | 0.06366853 | 0.62344474 | 0.00011758 | 0.097678  | -0.5246   |
| 5mo_SIGAD9 | 0.02887314 | 0.28455478 | 8.03E-05   | 0.062611  | 0.75723   |
| 5mo_SIGAD9 | 0.06261456 | 0.6131796  | 0.00011672 | 0.098627  | -0.47447  |
| 5mo_SIGAD9 | 0.05577171 | 0.54653364 | 0.00011045 | 0.094186  | -0.16472  |
| 5mo_SIGAD9 | 0.04959027 | 0.48632947 | 0.00010417 | 0.094268  | 0.052555  |
| 5mo_SIGAD9 | 0.00610076 | 0.0627629  | 5.66E-05   | 0.010584  | 0.18365   |
| 5mo_SIGAD9 | 0.08586746 | 0.83965147 | 0.0001315  | 0.052818  | -1.2961   |
| 5mo_SIGAD9 | 0.04156999 | 0.40821582 | 9.54E-05   | 0.10929   | 0.28067   |
| 5mo_SIGAD9 | 0.00112202 | 0.01427245 | 5.26E-05   | 0.0066742 | 0.41342   |
| 5mo_SIGAD9 | 0.05784293 | 0.56670624 | 0.00011241 | 0.096416  | -0.25188  |
| 5mo_SIGAD9 | 0.0707421  | 0.69233793 | 0.00012308 | 0.076976  | -0.87403  |
| 5mo_SIGAD9 | 0.06258643 | 0.6129056  | 0.00011672 | 0.098627  | -0.47447  |
| 5mo_SIGAD9 | 0.06867515 | 0.6722069  | 0.00012161 | 0.084113  | -0.77743  |
| 5mo_SIGAD9 | 0.05203737 | 0.510163   | 0.00010703 | 0.092172  | -0.022986 |
| 5mo_SIGAD9 | 0.06321447 | 0.6190225  | 0.0001173  | 0.098072  | -0.50782  |
| 5mo_SIGAD9 | 0.04468824 | 0.43858606 | 9.89E-05   | 0.10421   | 0.18258   |
| 5mo_SIGAD9 | 0.03894386 | 0.3826387  | 9.22E-05   | 0.10852   | 0.36311   |
| 5mo_SIGAD9 | 0.06006335 | 0.58833206 | 0.00011462 | 0.098526  | -0.3445   |
| 5mo_SIGAD9 | 0.08590214 | 0.83998924 | 0.0001315  | 0.052818  | -1.2961   |
| 5mo_SIGAD9 | 0.07444426 | 0.72839516 | 0.00012556 | 0.06525   | -1.0333   |
| 5mo_SIGAD9 | 0.02934653 | 0.28916535 | 8.07E-05   | 0.064343  | 0.7438    |
| 5mo_SIGAD9 | 0.06736623 | 0.6594586  | 0.00012058 | 0.088682  | -0.71078  |
| 5mo_SIGAD9 | 0.04650535 | 0.4562838  | 0.00010084 | 0.10033   | 0.13721   |
| 5mo_SIGAD9 | 0.00480159 | 0.05010967 | 5.55E-05   | 0.0093744 | 0.23478   |
| 5mo_SIGAD9 | 0.00926161 | 0.09354805 | 5.92E-05   | 0.013809  | 0.11326   |
| 5mo_SIGAD9 | 0.068205   | 0.6676278  | 0.00012136 | 0.085284  | -0.74427  |
| 5mo_SIGAD9 | 0.00990447 | 0.09980914 | 5.98E-05   | 0.014626  | 0.1081    |
| 5mo_SIGAD9 | 0.04435259 | 0.435317   | 9.86E-05   | 0.10494   | 0.19178   |
| 5mo_SIGAD9 | 0.04530698 | 0.44461235 | 9.97E-05   | 0.10268   | 0.17344   |
| 5mo_SIGAD9 | 0.05683204 | 0.5568607  | 0.00011177 | 0.095663  | -0.20754  |
| 5mo_SIGAD9 | 0.01329656 | 0.13284652 | 6.30E-05   | 0.019276  | 0.15521   |
| 5mo_SIGAD9 | 0.08414013 | 0.8228282  | 0.00013074 | 0.053178  | -1.2751   |

|            |            |            |            |          |           |
|------------|------------|------------|------------|----------|-----------|
| 5mo_SIGAD9 | 0.0373629  | 0.36724085 | 9.06E-05   | 0.10531  | 0.43275   |
| 5mo_SIGAD9 | 0.06417332 | 0.62836117 | 0.00011815 | 0.096641 | -0.55833  |
| 5mo_SIGAD9 | 0.07261125 | 0.7105425  | 0.00012424 | 0.071279 | -0.9499   |
| 5mo_SIGAD9 | 0.04935148 | 0.48400372 | 0.00010417 | 0.094268 | 0.062467  |
| 5mo_SIGAD9 | 0.05408729 | 0.53012824 | 0.0001091  | 0.092966 | -0.097097 |
| 5mo_SIGAD9 | 0.01386598 | 0.13839239 | 6.34E-05   | 0.019794 | 0.18023   |
| 5mo_SIGAD9 | 0.04926451 | 0.48315674 | 0.00010381 | 0.094798 | 0.062467  |
| 5mo_SIGAD9 | 0.01579009 | 0.15713225 | 6.54E-05   | 0.023132 | 0.26052   |
| 5mo_SIGAD9 | 0.01420169 | 0.141662   | 6.37E-05   | 0.020323 | 0.18023   |
| 5mo_SIGAD9 | 0.06304511 | 0.61737293 | 0.0001173  | 0.098072 | -0.49111  |
| 5mo_SIGAD9 | 0.0428294  | 0.42048192 | 9.70E-05   | 0.10755  | 0.23945   |
| 5mo_SIGAD9 | 0.07213556 | 0.70590955 | 0.00012401 | 0.07238  | -0.93514  |
| 5mo_SIGAD9 | 0.02082598 | 0.2061794  | 7.10E-05   | 0.033786 | 0.56707   |
| 5mo_SIGAD9 | 0.04501934 | 0.44181085 | 9.93E-05   | 0.10345  | 0.17344   |
| 5mo_SIGAD9 | 0.08397476 | 0.8212175  | 0.00013074 | 0.053178 | -1.2702   |
| 5mo_SIGAD9 | 0.05673421 | 0.5559079  | 0.00011144 | 0.095284 | -0.20754  |
| 5mo_SIGAD9 | 0.05255751 | 0.51522887 | 0.00010738 | 0.092189 | -0.046772 |
| 5mo_SIGAD9 | 0.03375681 | 0.3321193  | 8.61E-05   | 0.088522 | 0.58656   |
| 5mo_SIGAD9 | 0.03929844 | 0.38609207 | 9.26E-05   | 0.10901  | 0.35035   |
| 5mo_SIGAD9 | 0.05239052 | 0.51360244 | 0.00010738 | 0.092189 | -0.03476  |
| 5mo_SIGAD9 | 0.04340939 | 0.4261307  | 9.74E-05   | 0.10696  | 0.21998   |
| 5mo_SIGAD9 | 0.05160379 | 0.5059402  | 0.00010632 | 0.092309 | -0.011455 |
| 5mo_SIGAD9 | 0.05990723 | 0.58681154 | 0.00011431 | 0.098311 | -0.3445   |
| 5mo_SIGAD9 | 0.07196319 | 0.7042307  | 0.00012401 | 0.07238  | -0.92016  |
| 5mo_SIGAD9 | 0.05246508 | 0.51432866 | 0.00010738 | 0.092189 | -0.03476  |
| 5mo_SIGAD9 | 0.07440744 | 0.72803646 | 0.00012556 | 0.06525  | -1.0201   |
| 5mo_SIGAD9 | 0.07285321 | 0.7128991  | 0.00012446 | 0.070202 | -0.96444  |
| 5mo_SIGAD9 | 0.03699019 | 0.36361083 | 9.02E-05   | 0.1042   | 0.4477    |
| 5mo_SIGAD9 | 0.06877814 | 0.67320985 | 0.00012161 | 0.084113 | -0.77743  |
| 5mo_SIGAD9 | 0.05075949 | 0.49771714 | 0.00010561 | 0.092703 | 0.021622  |
| 5mo_SIGAD9 | 0.06013002 | 0.58898145 | 0.00011462 | 0.098526 | -0.36038  |
| 5mo_SIGAD9 | 0.01504819 | 0.14990649 | 6.47E-05   | 0.021973 | 0.22576   |
| 5mo_SIGAD9 | 0.03287543 | 0.32353505 | 8.52E-05   | 0.084798 | 0.6305    |
| 5mo_SIGAD9 | 0.0349409  | 0.34365174 | 8.77E-05   | 0.095565 | 0.54051   |
| 5mo_SIGAD9 | 0.04734653 | 0.4644765  | 0.00010197 | 0.098057 | 0.11903   |
| 5mo_SIGAD9 | 0.00709968 | 0.07249189 | 5.75E-05   | 0.011579 | 0.15252   |
| 5mo_SIGAD9 | 0.08101134 | 0.7923553  | 0.00012924 | 0.054725 | -1.2227   |
| 5mo_SIGAD9 | 0.07223089 | 0.706838   | 0.00012401 | 0.07238  | -0.93514  |
| 5mo_SIGAD9 | 0.03264957 | 0.32133538 | 8.48E-05   | 0.082909 | 0.64444   |
| 5mo_SIGAD9 | 0.03688901 | 0.3626254  | 8.98E-05   | 0.10298  | 0.4477    |
| 5mo_SIGAD9 | 0.02331673 | 0.23043801 | 7.38E-05   | 0.040447 | 0.68948   |
| 5mo_SIGAD9 | 0.08755564 | 0.8560935  | 0.00013221 | 0.052667 | -1.3123   |
| 5mo_SIGAD9 | 0.03892883 | 0.38249227 | 9.22E-05   | 0.10852  | 0.36311   |
| 5mo_SIGAD9 | 0.00940871 | 0.09498068 | 5.92E-05   | 0.013809 | 0.11326   |
| 5mo_SIGAD9 | 0.05204346 | 0.5102223  | 0.00010703 | 0.092172 | -0.022986 |
| 5mo_SIGAD9 | 0.04735467 | 0.46455583 | 0.00010197 | 0.098057 | 0.11903   |

|            |            |            |            |          |           |
|------------|------------|------------|------------|----------|-----------|
| 5mo_SIGAD9 | 0.04616658 | 0.45298442 | 0.00010046 | 0.10111  | 0.14626   |
| 5mo_SIGAD9 | 0.05631062 | 0.5517823  | 0.00011111 | 0.094909 | -0.19309  |
| 5mo_SIGAD9 | 0.03842773 | 0.37761182 | 9.18E-05   | 0.10791  | 0.38979   |
| 5mo_SIGAD9 | 0.06473347 | 0.6338168  | 0.00011871 | 0.095287 | -0.57526  |
| 5mo_SIGAD9 | 0.04129445 | 0.4055322  | 9.50E-05   | 0.10955  | 0.28067   |
| 5mo_SIGAD9 | 0.07736232 | 0.7568156  | 0.0001272  | 0.059217 | -1.1276   |
| 5mo_SIGAD9 | 0.01231721 | 0.12330807 | 6.21E-05   | 0.017782 | 0.12723   |
| 5mo_SIGAD9 | 0.02971607 | 0.2927645  | 8.15E-05   | 0.067903 | 0.7357    |
| 5mo_SIGAD9 | 0.03195394 | 0.31456023 | 8.40E-05   | 0.07911  | 0.67094   |
| 5mo_SIGAD9 | 0.07039665 | 0.68897337 | 0.00012284 | 0.078159 | -0.8583   |
| 5mo_SIGAD9 | 0.05167217 | 0.50660616 | 0.00010632 | 0.092309 | -0.011455 |
| 5mo_SIGAD9 | 0.03294289 | 0.3241921  | 8.52E-05   | 0.084798 | 0.6305    |
| 5mo_SIGAD9 | 0.07200404 | 0.7046286  | 0.00012401 | 0.07238  | -0.92016  |
| 5mo_SIGAD9 | 0.07056407 | 0.690604   | 0.00012284 | 0.078159 | -0.8583   |
| 5mo_SIGAD9 | 0.03071121 | 0.30245662 | 8.23E-05   | 0.07157  | 0.70647   |
| 5mo_SIGAD9 | 0.04597772 | 0.45114502 | 0.00010046 | 0.10111  | 0.1553    |
| 5mo_SIGAD9 | 0.08526656 | 0.83379906 | 0.0001312  | 0.05293  | -1.2883   |
| 5mo_SIGAD9 | 0.0637372  | 0.6241136  | 0.00011787 | 0.097201 | -0.5246   |
| 5mo_SIGAD9 | 0.06761984 | 0.6619286  | 0.00012084 | 0.087573 | -0.72756  |
| 5mo_SIGAD9 | 0.04244163 | 0.41670516 | 9.66E-05   | 0.10808  | 0.24945   |
| 5mo_SIGAD9 | 0.0733131  | 0.7173782  | 0.00012469 | 0.069151 | -0.97873  |
| 5mo_SIGAD9 | 0.02566158 | 0.25327575 | 7.66E-05   | 0.04879  | 0.7616    |
| 5mo_SIGAD9 | 0.05737752 | 0.5621734  | 0.00011209 | 0.096042 | -0.23694  |
| 5mo_SIGAD9 | 0.05993343 | 0.5870667  | 0.00011462 | 0.098526 | -0.3445   |
| 5mo_SIGAD9 | 0.04447291 | 0.43648884 | 9.89E-05   | 0.10421  | 0.19178   |
| 5mo_SIGAD9 | 0.0582201  | 0.57037973 | 0.00011305 | 0.097132 | -0.26697  |
| 5mo_SIGAD9 | 0.0178238  | 0.17693959 | 6.76E-05   | 0.026932 | 0.37908   |
| 5mo_SIGAD9 | 0.00907671 | 0.0917472  | 5.89E-05   | 0.013414 | 0.11326   |
| 5mo_SIGAD9 | 0.06356259 | 0.622413   | 0.00011758 | 0.097678 | -0.5246   |
| 5mo_SIGAD9 | 0.06809221 | 0.66652924 | 0.0001211  | 0.086439 | -0.74427  |
| 5mo_SIGAD9 | 0.05394232 | 0.5287162  | 0.00010876 | 0.092731 | -0.097097 |
| 5mo_SIGAD9 | 0.00772279 | 0.07856067 | 5.78E-05   | 0.011928 | 0.13577   |
| 5mo_SIGAD9 | 0.01144864 | 0.11484861 | 6.11E-05   | 0.016373 | 0.1115    |
| 5mo_SIGAD9 | 0.0884746  | 0.8650438  | 0.00013261 | 0.052631 | -1.32     |
| 5mo_SIGAD9 | 0.03948437 | 0.38790298 | 9.30E-05   | 0.10937  | 0.35035   |
| 5mo_SIGAD9 | 0.06370112 | 0.6237622  | 0.00011787 | 0.097201 | -0.5246   |
| 5mo_SIGAD9 | 0.05765811 | 0.56490624 | 0.00011241 | 0.096416 | -0.23694  |
| 5mo_SIGAD9 | 0.0787748  | 0.7705724  | 0.00012797 | 0.057152 | -1.1666   |
| 5mo_SIGAD9 | 0.07260032 | 0.71043605 | 0.00012424 | 0.071279 | -0.9499   |
| 5mo_SIGAD9 | 0.06908032 | 0.676153   | 0.00012186 | 0.08293  | -0.79386  |
| 5mo_SIGAD9 | 0.01259529 | 0.12601647 | 6.24E-05   | 0.018271 | 0.13519   |
| 5mo_SIGAD9 | 0.03343776 | 0.32901192 | 8.57E-05   | 0.086671 | 0.60151   |
| 5mo_SIGAD9 | 0.06803393 | 0.6659616  | 0.0001211  | 0.086439 | -0.74427  |
| 5mo_SIGAD9 | 0.01150625 | 0.11540974 | 6.14E-05   | 0.016833 | 0.11542   |
| 5mo_SIGAD9 | 0.07619501 | 0.74544656 | 0.0001266  | 0.061174 | -1.0948   |
| 5mo_SIGAD9 | 0.0423377  | 0.41569296 | 9.62E-05   | 0.10856  | 0.24945   |

|            |            |            |            |           |           |
|------------|------------|------------|------------|-----------|-----------|
| 5mo_SIGAD9 | 0.03847099 | 0.37803313 | 9.18E-05   | 0.10791   | 0.38979   |
| 5mo_SIGAD9 | 0.04706391 | 0.46172395 | 0.00010159 | 0.098799  | 0.11903   |
| 5mo_SIGAD9 | 0.02254163 | 0.22288892 | 7.30E-05   | 0.038397  | 0.65846   |
| 5mo_SIGAD9 | 0.07037164 | 0.6887298  | 0.00012284 | 0.078159  | -0.8583   |
| 5mo_SIGAD9 | 0.02061688 | 0.2041428  | 7.06E-05   | 0.032941  | 0.54704   |
| 5mo_SIGAD9 | 0.00797223 | 0.0809901  | 5.81E-05   | 0.012286  | 0.13577   |
| 5mo_SIGAD9 | 0.08545619 | 0.8356459  | 0.00013135 | 0.05287   | -1.2923   |
| 5mo_SIGAD9 | 0.04054339 | 0.39821726 | 9.42E-05   | 0.10978   | 0.31414   |
| 5mo_SIGAD9 | 0.02247829 | 0.22227208 | 7.26E-05   | 0.037419  | 0.65846   |
| 5mo_SIGAD9 | 0.05833794 | 0.5715274  | 0.00011305 | 0.097132  | -0.26697  |
| 5mo_SIGAD9 | 0.04399927 | 0.43187588 | 9.82E-05   | 0.10565   | 0.20107   |
| 5mo_SIGAD9 | 0.02319028 | 0.22920647 | 7.38E-05   | 0.040447  | 0.68948   |
| 5mo_SIGAD9 | 0.02137093 | 0.21148695 | 7.14E-05   | 0.034655  | 0.58661   |
| 5mo_SIGAD9 | 0.07838167 | 0.76674354 | 0.00012778 | 0.057615  | -1.1573   |
| 5mo_SIGAD9 | 0.08011157 | 0.783592   | 0.00012871 | 0.055605  | -1.2004   |
| 5mo_SIGAD9 | 0.06097353 | 0.5971968  | 0.00011553 | 0.098907  | -0.39249  |
| 5mo_SIGAD9 | 0.02105429 | 0.20840298 | 7.10E-05   | 0.033786  | 0.58661   |
| 5mo_SIGAD9 | 0.06709784 | 0.65684456 | 0.00012032 | 0.089759  | -0.69393  |
| 5mo_SIGAD9 | 0.00866989 | 0.08778495 | 5.86E-05   | 0.013029  | 0.12259   |
| 5mo_SIGAD9 | 0.00228246 | 0.0255745  | 5.36E-05   | 0.0075574 | 0.34395   |
| 5mo_SIGAD9 | 0.03339584 | 0.32860366 | 8.57E-05   | 0.086671  | 0.60151   |
| 5mo_SIGAD9 | 0.05299577 | 0.51949733 | 0.00010773 | 0.092257  | -0.059017 |
| 5mo_SIGAD9 | 0.04758356 | 0.4667851  | 0.00010234 | 0.09734   | 0.10986   |
| 5mo_SIGAD9 | 0.06526075 | 0.6389522  | 0.00011898 | 0.094504  | -0.60919  |
| 5mo_SIGAD9 | 0.0831319  | 0.8130085  | 0.00013026 | 0.053541  | -1.2598   |
| 5mo_SIGAD9 | 0.07533213 | 0.73704255 | 0.00012598 | 0.063504  | -1.0589   |
| 5mo_SIGAD9 | 0.01773963 | 0.17611979 | 6.76E-05   | 0.026932  | 0.37908   |
| 5mo_SIGAD9 | 0.01492455 | 0.14870232 | 6.44E-05   | 0.021412  | 0.22576   |
| 5mo_SIGAD9 | 0.00741671 | 0.07557963 | 5.78E-05   | 0.011928  | 0.14372   |
| 5mo_SIGAD9 | 0.044501   | 0.43676245 | 9.89E-05   | 0.10421   | 0.19178   |
| 5mo_SIGAD9 | 0.05423775 | 0.5315936  | 0.0001091  | 0.092966  | -0.097097 |
| 5mo_SIGAD9 | 0.04054892 | 0.3982711  | 9.42E-05   | 0.10978   | 0.31414   |
| 5mo_SIGAD9 | 0.00931706 | 0.09408809 | 5.92E-05   | 0.013809  | 0.11326   |
| 5mo_SIGAD9 | 0.06617035 | 0.6478113  | 0.00011979 | 0.091802  | -0.64315  |
| 5mo_SIGAD9 | 0.06845258 | 0.6700391  | 0.00012136 | 0.085284  | -0.7609   |
| 5mo_SIGAD9 | 0.01450337 | 0.14460023 | 6.41E-05   | 0.020862  | 0.19442   |
| 5mo_SIGAD9 | 0.05854769 | 0.5735703  | 0.00011305 | 0.097132  | -0.2822   |
| 5mo_SIGAD9 | 0.05641952 | 0.552843   | 0.00011111 | 0.094909  | -0.19309  |
| 5mo_SIGAD9 | 0.07442122 | 0.72817075 | 0.00012556 | 0.06525   | -1.0201   |
| 5mo_SIGAD9 | 0.07844848 | 0.7673943  | 0.00012778 | 0.057615  | -1.1573   |
| 5mo_SIGAD9 | 0.04908552 | 0.48141345 | 0.00010381 | 0.094798  | 0.072211  |
| 5mo_SIGAD9 | 0.07328161 | 0.7170715  | 0.00012469 | 0.069151  | -0.97873  |
| 5mo_SIGAD9 | 0.0432103  | 0.42419168 | 9.74E-05   | 0.10696   | 0.22964   |
| 5mo_SIGAD9 | 0.01376128 | 0.13737267 | 6.34E-05   | 0.019794  | 0.16714   |
| 5mo_SIGAD9 | 0.0551573  | 0.54054964 | 0.00011011 | 0.093847  | -0.13708  |
| 5mo_SIGAD9 | 0.02150266 | 0.21276991 | 7.18E-05   | 0.035549  | 0.6056    |

|            |            |            |            |           |          |
|------------|------------|------------|------------|-----------|----------|
| 5mo_SIGAD9 | 0.07804957 | 0.7635091  | 0.00012759 | 0.058113  | -1.1478  |
| 5mo_SIGAD9 | 0.05543465 | 0.54325086 | 0.00011011 | 0.093847  | -0.1508  |
| 5mo_SIGAD9 | 0.06096273 | 0.5970916  | 0.00011553 | 0.098907  | -0.39249 |
| 5mo_SIGAD9 | 0.01219057 | 0.12207466 | 6.17E-05   | 0.017303  | 0.12723  |
| 5mo_SIGAD9 | 0.03532382 | 0.3473812  | 8.81E-05   | 0.097198  | 0.52494  |
| 5mo_SIGAD9 | 0.06509747 | 0.63736194 | 0.00011898 | 0.094504  | -0.59222 |
| 5mo_SIGAD9 | 0.01642218 | 0.16328844 | 6.62E-05   | 0.024342  | 0.29808  |
| 5mo_SIGAD9 | 0.04093365 | 0.40201825 | 9.46E-05   | 0.10971   | 0.29155  |
| 5mo_SIGAD9 | 0.01314404 | 0.13136098 | 6.27E-05   | 0.018769  | 0.14454  |
| 5mo_SIGAD9 | 0.02735576 | 0.26977625 | 7.86E-05   | 0.05605   | 0.77153  |
| 5mo_SIGAD9 | 0.02135934 | 0.21137401 | 7.14E-05   | 0.034655  | 0.58661  |
| 5mo_SIGAD9 | 0.06247005 | 0.61177224 | 0.00011672 | 0.098627  | -0.47447 |
| 5mo_SIGAD9 | 0.02906615 | 0.2864346  | 8.07E-05   | 0.064343  | 0.751    |
| 5mo_SIGAD9 | 0.03269015 | 0.32173055 | 8.48E-05   | 0.082909  | 0.6305   |
| 5mo_SIGAD9 | 0.04718667 | 0.46291953 | 0.00010159 | 0.098799  | 0.11903  |
| 5mo_SIGAD9 | 0.06416653 | 0.62829506 | 0.00011815 | 0.096641  | -0.54144 |
| 5mo_SIGAD9 | 0.09325422 | 0.91159487 | 0.00013431 | 0.052462  | -1.3401  |
| 5mo_SIGAD9 | 0.06794461 | 0.6650917  | 0.0001211  | 0.086439  | -0.74427 |
| 5mo_SIGAD9 | 0.04318722 | 0.42396685 | 9.74E-05   | 0.10696   | 0.22964  |
| 5mo_SIGAD9 | 0.05578365 | 0.54664993 | 0.00011045 | 0.094186  | -0.16472 |
| 5mo_SIGAD9 | 0.07150886 | 0.69980574 | 0.00012355 | 0.074645  | -0.90497 |
| 5mo_SIGAD9 | 0.06431691 | 0.62975967 | 0.00011815 | 0.096641  | -0.55833 |
| 5mo_SIGAD9 | 0.03420925 | 0.33652583 | 8.69E-05   | 0.09213   | 0.57137  |
| 5mo_SIGAD9 | 0.04253172 | 0.41758266 | 9.66E-05   | 0.10808   | 0.24945  |
| 5mo_SIGAD9 | 0.06083324 | 0.59583044 | 0.00011523 | 0.098828  | -0.39249 |
| 5mo_SIGAD9 | 0.00074865 | 0.01063597 | 5.23E-05   | 0.0064696 | 0.43121  |
| 5mo_SIGAD9 | 0.0428838  | 0.42101172 | 9.70E-05   | 0.10755   | 0.23945  |
| 5mo_SIGAD9 | 0.06226803 | 0.6098046  | 0.00011642 | 0.098794  | -0.4579  |
| 5mo_SIGAD9 | 0.019477   | 0.1930409  | 6.95E-05   | 0.030541  | 0.48489  |
| 5mo_SIGAD9 | 0.07351413 | 0.71933615 | 0.00012491 | 0.068128  | -0.99278 |
| 5mo_SIGAD9 | 0.02532312 | 0.24997929 | 7.62E-05   | 0.047472  | 0.75539  |
| 5mo_SIGAD9 | 0.04106141 | 0.40326253 | 9.50E-05   | 0.10955   | 0.29155  |
| 5mo_SIGAD9 | 0.03727494 | 0.36638415 | 9.06E-05   | 0.10531   | 0.43275  |
| 5mo_SIGAD9 | 0.06608065 | 0.64693767 | 0.00011953 | 0.092756  | -0.64315 |
| 5mo_SIGAD9 | 0.0302271  | 0.2977417  | 8.19E-05   | 0.069725  | 0.72675  |
| 5mo_SIGAD9 | 0.05716286 | 0.5600828  | 0.00011177 | 0.095663  | -0.22216 |
| 5mo_SIGAD9 | 0.05826271 | 0.57079476 | 0.00011305 | 0.097132  | -0.26697 |
| 5mo_SIGAD9 | 0.06667785 | 0.65275407 | 0.00012006 | 0.090801  | -0.67704 |
| 5mo_SIGAD9 | 0.06548775 | 0.6411631  | 0.00011925 | 0.093659  | -0.60919 |
| 5mo_SIGAD9 | 0.06181937 | 0.6054349  | 0.00011613 | 0.098894  | -0.44141 |
| 5mo_SIGAD9 | 0.05930423 | 0.58093864 | 0.000114   | 0.098059  | -0.31309 |
| 5mo_SIGAD9 | 0.0122282  | 0.12244115 | 6.21E-05   | 0.017782  | 0.12723  |
| 5mo_SIGAD9 | 0.04571834 | 0.44861877 | 0.00010009 | 0.1019    | 0.1553   |
| 5mo_SIGAD9 | 0.06416576 | 0.62828755 | 0.00011815 | 0.096641  | -0.54144 |
| 5mo_SIGAD9 | 0.03263294 | 0.32117334 | 8.48E-05   | 0.082909  | 0.64444  |
| 5mo_SIGAD9 | 0.04302185 | 0.4223563  | 9.70E-05   | 0.10755   | 0.22964  |

|              |            |            |            |          |          |
|--------------|------------|------------|------------|----------|----------|
| 5mo_SIGAD9   | 0.00613426 | 0.06308916 | 5.66E-05   | 0.010584 | 0.18365  |
| 5mo_SIGAD9   | 0.0470359  | 0.46145117 | 0.00010159 | 0.098799 | 0.12814  |
| 5mo_SIGAD9   | 0.06009954 | 0.58868456 | 0.00011462 | 0.098526 | -0.36038 |
| 5mo_SIGAD9   | 0.01765991 | 0.17534341 | 6.72E-05   | 0.026262 | 0.37908  |
| 5mo_SIGAD9   | 0.02774484 | 0.27356565 | 7.90E-05   | 0.057632 | 0.76966  |
| 5mo_SIGAD9   | 0.0428659  | 0.42083734 | 9.70E-05   | 0.10755  | 0.23945  |
| 5mo_SIGAD9   | 0.06041265 | 0.5917341  | 0.00011492 | 0.0987   | -0.37638 |
| 5mo_SIGAD9   | 0.09303515 | 0.9094613  | 0.00013419 | 0.052478 | -1.3401  |
| 5mo_SIGAD9   | 0.03814437 | 0.37485197 | 9.14E-05   | 0.10717  | 0.40374  |
| 5mo_SIGAD9   | 0.06525932 | 0.63893825 | 0.00011898 | 0.094504 | -0.60919 |
| 5mo_SIGAD9   | 0.04504144 | 0.4420261  | 9.93E-05   | 0.10345  | 0.17344  |
| 5mo_SIGAD9   | 0.05649163 | 0.55354524 | 0.00011144 | 0.095284 | -0.19309 |
| 5mo_SIGAD9   | 0.02591706 | 0.25576404 | 7.66E-05   | 0.04879  | 0.76634  |
| 5mo_SIGAD9   | 0.08453232 | 0.8266479  | 0.00013089 | 0.053084 | -1.2797  |
| 5mo_SIGAD9   | 0.05935491 | 0.5814322  | 0.000114   | 0.098059 | -0.31309 |
| 7dr2_7dold_9 | 0.07935795 | 0.7762521  | 0.00012835 | 0.05632  | -1.1841  |
| 7dr2_7dold_9 | 0.07155961 | 0.70030004 | 0.00012355 | 0.074645 | -0.90497 |
| 7dr2_7dold_9 | 0.0752123  | 0.7358755  | 0.00012598 | 0.063504 | -1.0589  |
| 7dr2_7dold_9 | 0.07108866 | 0.6957133  | 0.00012331 | 0.075804 | -0.88959 |
| 7dr2_7dold_9 | 0.04340462 | 0.4260843  | 9.74E-05   | 0.10696  | 0.21998  |
| 7dr2_7dold_9 | 0.04308007 | 0.4229233  | 9.70E-05   | 0.10755  | 0.22964  |
| 7dr2_7dold_9 | 0.04993946 | 0.48973042 | 0.00010453 | 0.09379  | 0.042456 |
| 7dr2_7dold_9 | 0.05546152 | 0.54351246 | 0.00011045 | 0.094186 | -0.1508  |
| 7dr2_7dold_9 | 0.06530123 | 0.63934654 | 0.00011898 | 0.094504 | -0.60919 |
| 7dr2_7dold_9 | 0.07436191 | 0.72759306 | 0.00012556 | 0.06525  | -1.0201  |
| 7dr2_7dold_9 | 0.07136782 | 0.69843215 | 0.00012355 | 0.074645 | -0.90497 |
| 7dr2_7dold_9 | 0.00382577 | 0.04060566 | 5.47E-05   | 0.008551 | 0.27903  |
| 7dr2_7dold_9 | 0.06351046 | 0.62190527 | 0.00011758 | 0.097678 | -0.5246  |
| 7dr2_7dold_9 | 0.04989353 | 0.48928308 | 0.00010453 | 0.09379  | 0.042456 |
| 7dr2_7dold_9 | 0.07934641 | 0.7761397  | 0.00012835 | 0.05632  | -1.1841  |
| 7dr2_7dold_9 | 0.08216317 | 0.80357355 | 0.00012976 | 0.054048 | -1.2424  |
| 7dr2_7dold_9 | 0.09292937 | 0.90843105 | 0.00013419 | 0.052478 | -1.3401  |
| 7dr2_7dold_9 | 0.07008839 | 0.6859711  | 0.0001226  | 0.07935  | -0.8424  |
| 7dr2_7dold_9 | 0.07127652 | 0.6975429  | 0.00012355 | 0.074645 | -0.88959 |
| 7dr2_7dold_9 | 0.03236422 | 0.3185562  | 8.44E-05   | 0.081011 | 0.64444  |
| 7dr2_7dold_9 | 0.08325676 | 0.81422454 | 0.00013026 | 0.053541 | -1.2598  |
| 7dr2_7dold_9 | 0.08124067 | 0.7945888  | 0.00012942 | 0.054478 | -1.2227  |
| 7dr2_7dold_9 | 0.07353091 | 0.7194996  | 0.00012491 | 0.068128 | -0.99278 |
| 3d7d_SITTB7  | 0.07328096 | 0.71706516 | 0.00012469 | 0.069151 | -0.97873 |
| 3d7d_SITTB7  | 0.01965796 | 0.1948034  | 6.95E-05   | 0.030541 | 0.48489  |
| 3d7d_SITTB7  | 0.01941629 | 0.19244966 | 6.95E-05   | 0.030541 | 0.48489  |
| 3d7d_SITTB7  | 0.0255105  | 0.2518043  | 7.62E-05   | 0.047472 | 0.7616   |
| 3d7d_SITTB7  | 0.08280818 | 0.80985564 | 0.00013009 | 0.053693 | -1.2543  |
| 3d7d_SITTB7  | 0.06953117 | 0.680544   | 0.00012211 | 0.081739 | -0.81017 |
| 3d7d_SITTB7  | 0.00627816 | 0.06449068 | 5.66E-05   | 0.010584 | 0.18365  |
| 3d7d_SITTB7  | 0.00391931 | 0.04151668 | 5.47E-05   | 0.008551 | 0.27903  |



|              |            |            |            |           |           |
|--------------|------------|------------|------------|-----------|-----------|
| 3d7d_SITTB7_ | 0.02237859 | 0.22130103 | 7.26E-05   | 0.037419  | 0.64161   |
| 3d7d_SITTB7_ | 0.07287867 | 0.713147   | 0.00012446 | 0.070202  | -0.96444  |
| 3d7d_SITTB7_ | 0.02749915 | 0.27117273 | 7.86E-05   | 0.05605   | 0.77153   |
| 3d7d_SITTB7_ | 0.02172548 | 0.21494003 | 7.18E-05   | 0.035549  | 0.6056    |
| 3d7d_SITTB7_ | 0.02418705 | 0.23891449 | 7.46E-05   | 0.042633  | 0.72811   |
| 3d7d_SITTB7_ | 0.06477753 | 0.63424593 | 0.00011871 | 0.095287  | -0.57526  |
| 3d7d_SITTB7_ | 0.02034347 | 0.20147993 | 7.02E-05   | 0.032119  | 0.52662   |
| 3d7d_SITTB7_ | 0.01356658 | 0.13547634 | 6.34E-05   | 0.019794  | 0.16714   |
| 3d7d_SITTB7_ | 0.00556249 | 0.05752045 | 5.61E-05   | 0.0099627 | 0.20797   |
| 3d7d_SITTB7_ | 0.06439125 | 0.6304837  | 0.00011843 | 0.096001  | -0.55833  |
| 3d7d_SITTB7_ | 0.04376155 | 0.42956057 | 9.78E-05   | 0.10633   | 0.21046   |
| 3d7d_SITTB7_ | 0.07284418 | 0.7128111  | 0.00012446 | 0.070202  | -0.96444  |
| 3d7d_SITTB7_ | 0.06366745 | 0.62343425 | 0.00011758 | 0.097678  | -0.5246   |
| 3d7d_SITTB7_ | 0.07648732 | 0.7482935  | 0.0001268  | 0.060479  | -1.0948   |
| 3d7d_SITTB7_ | 0.05182054 | 0.5080512  | 0.00010668 | 0.092211  | -0.011455 |
| 3d7d_SITTB7_ | 0.07135133 | 0.69827145 | 0.00012355 | 0.074645  | -0.88959  |
| 3d7d_SITTB7_ | 0.02057575 | 0.20374219 | 7.06E-05   | 0.032941  | 0.54704   |
| 3d7d_SITTB7_ | 0.0127768  | 0.12778428 | 6.24E-05   | 0.018271  | 0.13519   |
| 3d7d_SITTB7_ | 0.06191402 | 0.60635674 | 0.00011613 | 0.098894  | -0.44141  |
| 3d7d_SITTB7_ | 0.04505262 | 0.44213495 | 9.93E-05   | 0.10345   | 0.17344   |
| 3d7d_SITTB7_ | 0.00278836 | 0.03050179 | 5.39E-05   | 0.007795  | 0.3272    |
| 3d7d_SITTB7_ | 0.03320723 | 0.32676664 | 8.57E-05   | 0.086671  | 0.61617   |
| 3d7d_SITTB7_ | 0.02593487 | 0.25593743 | 7.70E-05   | 0.050154  | 0.76634   |
| 2w4w_SITTC^  | 0.06245865 | 0.6116612  | 0.00011672 | 0.098627  | -0.4579   |
| 2w4w_SITTC^  | 0.06272385 | 0.6142441  | 0.00011701 | 0.098387  | -0.47447  |
| 2w4w_SITTC^  | 0.02536443 | 0.2503816  | 7.62E-05   | 0.047472  | 0.75539   |
| 2w4w_SITTC^  | 0.04604926 | 0.45184174 | 0.00010046 | 0.10111   | 0.14626   |
| 2w4w_SITTC^  | 0.05445472 | 0.5337068  | 0.00010944 | 0.093233  | -0.11022  |
| 2w4w_SITTC^  | 0.0739823  | 0.72389585 | 0.00012513 | 0.067136  | -1.0066   |
| 2w4w_SITTC^  | 0.08852261 | 0.8655114  | 0.00013261 | 0.052631  | -1.32     |
| 2w4w_SITTC^  | 0.05008085 | 0.49110743 | 0.0001049  | 0.093366  | 0.042456  |
| 2w4w_SITTC^  | 0.03992602 | 0.39220443 | 9.34E-05   | 0.10962   | 0.32588   |
| 2w4w_SITTC^  | 0.03327389 | 0.32741588 | 8.57E-05   | 0.086671  | 0.61617   |
| 2w4w_SITTC^  | 0.05380908 | 0.5274186  | 0.00010876 | 0.092731  | -0.084185 |
| 2w4w_SITTC^  | 0.02317821 | 0.22908892 | 7.34E-05   | 0.039406  | 0.68948   |
| 2w4w_SITTC^  | 0.06008406 | 0.5885338  | 0.00011462 | 0.098526  | -0.36038  |
| 2w4w_SITTC^  | 0.02570136 | 0.25366318 | 7.66E-05   | 0.04879   | 0.7616    |
| 2w4w_SITTC^  | 0.04426771 | 0.4344903  | 9.86E-05   | 0.10494   | 0.20107   |
| 2w4w_SITTC^  | 0.06803168 | 0.66593975 | 0.0001211  | 0.086439  | -0.74427  |
| 2w4w_SITTC^  | 0.04403888 | 0.43226165 | 9.82E-05   | 0.10565   | 0.20107   |
| 2w4w_SITTC^  | 0.03513629 | 0.34555477 | 8.77E-05   | 0.095565  | 0.52494   |
| 2w4w_SITTC^  | 0.04455539 | 0.4372922  | 9.89E-05   | 0.10421   | 0.19178   |
| 2w4w_SITTC^  | 0.03538193 | 0.3479472  | 8.81E-05   | 0.097198  | 0.52494   |
| 2w4w_SITTC^  | 0.07898487 | 0.7726185  | 0.00012816 | 0.056721  | -1.1755   |
| 2w4w_SITTC^  | 0.06925488 | 0.6778531  | 0.00012211 | 0.081739  | -0.79386  |
| 2w4w_SITTC^  | 0.05833808 | 0.5715288  | 0.00011305 | 0.097132  | -0.26697  |

|            |            |            |            |          |           |
|------------|------------|------------|------------|----------|-----------|
| 2w4w_SITTC | 0.0615522  | 0.60283273 | 0.00011583 | 0.09893  | -0.42501  |
| 2w4w_SITTC | 0.04479298 | 0.43960622 | 9.89E-05   | 0.10421  | 0.18258   |
| 2w4w_SITTC | 0.01407035 | 0.14038284 | 6.37E-05   | 0.020323 | 0.18023   |
| 2w4w_SITTC | 0.04824803 | 0.47325674 | 0.00010308 | 0.095994 | 0.091263  |
| 2w4w_SITTC | 0.05683707 | 0.55690974 | 0.00011177 | 0.095663 | -0.20754  |
| 2w4w_SITTC | 0.0788864  | 0.7716594  | 0.00012816 | 0.056721 | -1.1666   |
| 2w4w_SITTC | 0.04597902 | 0.4511577  | 0.00010046 | 0.10111  | 0.1553    |
| 2w4w_SITTC | 0.06231656 | 0.6102773  | 0.00011642 | 0.098794 | -0.4579   |
| 2w4w_SITTC | 0.05090325 | 0.4991172  | 0.00010561 | 0.092703 | 0.010852  |
| 2w4w_SITTC | 0.05208424 | 0.51061946 | 0.00010703 | 0.092172 | -0.022986 |
| 2w4w_SITTC | 0.07324882 | 0.7167521  | 0.00012469 | 0.069151 | -0.97873  |
| 2w4w_SITTC | 0.08731522 | 0.85375196 | 0.00013207 | 0.052686 | -1.3094   |
| 2w4w_SITTC | 0.01314624 | 0.13138245 | 6.27E-05   | 0.018769 | 0.14454   |
| 2w4w_SITTC | 0.05696403 | 0.55814624 | 0.00011177 | 0.095663 | -0.20754  |
| 2w4w_SITTC | 0.05308071 | 0.5203246  | 0.00010807 | 0.092373 | -0.059017 |
| 2w4w_SITTC | 0.04635992 | 0.4548674  | 0.00010084 | 0.10033  | 0.14626   |
| 2w4w_SITTC | 0.04935979 | 0.48408467 | 0.00010417 | 0.094268 | 0.062467  |
| 2w4w_SITTC | 0.02875072 | 0.28336245 | 8.03E-05   | 0.062611 | 0.75723   |
| 2w4w_SITTC | 0.06177557 | 0.6050083  | 0.00011613 | 0.098894 | -0.44141  |
| 2w4w_SITTC | 0.00919022 | 0.09285275 | 5.92E-05   | 0.013809 | 0.11326   |
| 2w4w_SITTC | 0.04445685 | 0.43633243 | 9.86E-05   | 0.10494  | 0.19178   |
| 2w4w_SITTC | 0.0724471  | 0.7089438  | 0.00012424 | 0.071279 | -0.9499   |
| 2w4w_SITTC | 0.05359524 | 0.52533585 | 0.00010842 | 0.092532 | -0.084185 |
| 2w4w_SITTC | 0.04669146 | 0.4580964  | 0.00010122 | 0.099559 | 0.13721   |
| 2w4w_SITTC | 0.04296647 | 0.42181695 | 9.70E-05   | 0.10755  | 0.22964   |
| 2w4w_SITTC | 0.0599949  | 0.5876654  | 0.00011462 | 0.098526 | -0.3445   |
| 2w4w_SITTC | 0.05926326 | 0.5805396  | 0.000114   | 0.098059 | -0.31309  |
| 2w4w_SITTC | 0.04357303 | 0.42772448 | 9.78E-05   | 0.10633  | 0.21998   |
| 2w4w_SITTC | 0.05220339 | 0.51177996 | 0.00010703 | 0.092172 | -0.03476  |
| 2w4w_SITTC | 0.04564218 | 0.44787702 | 0.00010009 | 0.1019   | 0.16436   |
| 2w4w_SITTC | 0.09335415 | 0.9125682  | 0.00013431 | 0.052462 | -1.3409   |
| 2w4w_SITTC | 0.04679317 | 0.45908704 | 0.00010122 | 0.099559 | 0.12814   |
| 2w4w_SITTC | 0.04258417 | 0.41809347 | 9.66E-05   | 0.10808  | 0.24945   |
| 2w4w_SITTC | 0.02702578 | 0.26656237 | 7.82E-05   | 0.054511 | 0.77219   |
| 2w4w_SITTC | 0.02252993 | 0.22277503 | 7.30E-05   | 0.038397 | 0.65846   |
| 2w4w_SITTC | 0.04789767 | 0.46984437 | 0.00010234 | 0.09734  | 0.10061   |
| 2w4w_SITTC | 0.04533862 | 0.44492048 | 9.97E-05   | 0.10268  | 0.17344   |
| 2w4w_SITTC | 0.05477948 | 0.5368698  | 0.00010978 | 0.093528 | -0.12355  |
| 2w4w_SITTC | 0.05347973 | 0.5242109  | 0.00010842 | 0.092532 | -0.07149  |
| 2w4w_SITTC | 0.00949901 | 0.09586016 | 5.95E-05   | 0.014213 | 0.11014   |
| 2w4w_SITTC | 0.06359657 | 0.6227439  | 0.00011758 | 0.097678 | -0.5246   |
| 2w4w_SITTC | 0.01964226 | 0.1946505  | 6.95E-05   | 0.030541 | 0.48489   |
| 2w4w_SITTC | 0.04079234 | 0.40064195 | 9.46E-05   | 0.10971  | 0.3027    |
| 2w4w_SITTC | 0.05756394 | 0.56398904 | 0.00011241 | 0.096416 | -0.23694  |
| 2w4w_SITTC | 0.05949608 | 0.5828072  | 0.000114   | 0.098059 | -0.32873  |
| 2w4w_SITTC | 0.02645461 | 0.26099944 | 7.74E-05   | 0.051562 | 0.76965   |

|            |            |            |            |           |           |
|------------|------------|------------|------------|-----------|-----------|
| 2w4w_SITTC | 0.07209306 | 0.7054956  | 0.00012401 | 0.07238   | -0.93514  |
| 2w4w_SITTC | 0.06850407 | 0.67054063 | 0.00012136 | 0.085284  | -0.7609   |
| 2w4w_SITTC | 0.08440498 | 0.8254077  | 0.00013089 | 0.053084  | -1.2797   |
| 2w4w_SITTC | 0.04789072 | 0.46977666 | 0.00010234 | 0.09734   | 0.10061   |
| 2w4w_SITTC | 0.04309532 | 0.42307186 | 9.70E-05   | 0.10755   | 0.22964   |
| 2w4w_SITTC | 0.00495965 | 0.05164909 | 5.55E-05   | 0.0093744 | 0.23478   |
| 2w4w_SITTC | 0.05710835 | 0.55955184 | 0.00011177 | 0.095663  | -0.22216  |
| 2w4w_SITTC | 0.04083847 | 0.40109116 | 9.46E-05   | 0.10971   | 0.3027    |
| 2w4w_SITTC | 0.04826718 | 0.4734432  | 0.00010308 | 0.095994  | 0.091263  |
| 2w4w_SITTC | 0.03165175 | 0.31161705 | 8.36E-05   | 0.07721   | 0.6834    |
| 2w4w_SITTC | 0.06354766 | 0.6222676  | 0.00011758 | 0.097678  | -0.5246   |
| 2w4w_SITTC | 0.04166573 | 0.40914828 | 9.54E-05   | 0.10929   | 0.27003   |
| 2w4w_SITTC | 0.04508325 | 0.44243327 | 9.93E-05   | 0.10345   | 0.17344   |
| 2w4w_SITTC | 0.08308853 | 0.812586   | 0.00013026 | 0.053541  | -1.2598   |
| 2w4w_SITTC | 0.01960852 | 0.19432189 | 6.95E-05   | 0.030541  | 0.48489   |
| 2w4w_SITTC | 0.06689561 | 0.654875   | 0.00012032 | 0.089759  | -0.67704  |
| 2w4w_SITTC | 0.05671143 | 0.555686   | 0.00011144 | 0.095284  | -0.20754  |
| 2w4w_SITTC | 0.02100188 | 0.20789252 | 7.10E-05   | 0.033786  | 0.56707   |
| 2w4w_SITTC | 0.06533359 | 0.63966167 | 0.00011898 | 0.094504  | -0.60919  |
| 2w4w_SITTC | 0.00331034 | 0.03558556 | 5.44E-05   | 0.0082917 | 0.2947    |
| 2w4w_SITTC | 0.09118918 | 0.8914825  | 0.00013362 | 0.052552  | -1.3333   |
| 2w4w_SITTC | 0.03163884 | 0.31149134 | 8.36E-05   | 0.07721   | 0.6834    |
| 2w4w_SITTC | 0.07348768 | 0.7190785  | 0.00012491 | 0.068128  | -0.99278  |
| 2w4w_SITTC | 0.04504159 | 0.4420275  | 9.93E-05   | 0.10345   | 0.17344   |
| 2w4w_SITTC | 0.0652948  | 0.63928384 | 0.00011898 | 0.094504  | -0.60919  |
| 2w4w_SITTC | 0.04165237 | 0.40901825 | 9.54E-05   | 0.10929   | 0.27003   |
| 2w4w_SITTC | 0.03709802 | 0.3646611  | 9.02E-05   | 0.1042    | 0.4477    |
| 2w4w_SITTC | 0.05165894 | 0.5064773  | 0.00010632 | 0.092309  | -0.011455 |
| 2w4w_SITTC | 0.04518899 | 0.44346318 | 9.97E-05   | 0.10268   | 0.17344   |
| 2w4w_SITTC | 0.01244962 | 0.12459768 | 6.21E-05   | 0.017782  | 0.12723   |
| 2w4w_SITTC | 0.06845024 | 0.6700163  | 0.00012136 | 0.085284  | -0.7609   |
| 2w4w_SITTC | 0.02185808 | 0.2162315  | 7.22E-05   | 0.03647   | 0.62396   |
| 2w4w_SITTC | 0.07765866 | 0.75970185 | 0.0001274  | 0.058646  | -1.1379   |
| 2w4w_SITTC | 0.04487463 | 0.44040143 | 9.93E-05   | 0.10345   | 0.18258   |
| 2w4w_SITTC | 0.07897408 | 0.7725134  | 0.00012816 | 0.056721  | -1.1755   |
| 2w4w_SITTC | 0.00408116 | 0.04309299 | 5.50E-05   | 0.0088178 | 0.2638    |
| 2w4w_SITTC | 0.04434068 | 0.435201   | 9.86E-05   | 0.10494   | 0.19178   |
| 2w4w_SITTC | 0.02695113 | 0.26583537 | 7.78E-05   | 0.053015  | 0.77219   |
| 2w4w_SITTC | 0.01287041 | 0.12869598 | 6.24E-05   | 0.018271  | 0.14454   |
| 2w4w_SITTC | 0.06159762 | 0.6032752  | 0.00011583 | 0.09893   | -0.42501  |
| 2w4w_SITTC | 0.02314742 | 0.22878903 | 7.34E-05   | 0.039406  | 0.68948   |
| 2w4w_SITTC | 0.0528691  | 0.51826364 | 0.00010773 | 0.092257  | -0.046772 |
| 2w4w_SITTC | 0.06797978 | 0.6654343  | 0.0001211  | 0.086439  | -0.74427  |
| 2w4w_SITTC | 0.0345787  | 0.3401241  | 8.73E-05   | 0.093873  | 0.55601   |
| 2w4w_SITTC | 0.0353369  | 0.34750867 | 8.81E-05   | 0.097198  | 0.52494   |
| 2w4w_SITTC | 0.06234032 | 0.6105087  | 0.00011672 | 0.098627  | -0.4579   |

|            |            |            |            |          |           |
|------------|------------|------------|------------|----------|-----------|
| 2w4w_SITTC | 0.07960787 | 0.7786862  | 0.00012853 | 0.055948 | -1.1924   |
| 2w4w_SITTC | 0.08626461 | 0.84351957 | 0.00013164 | 0.052775 | -1.2997   |
| 2w4w_SITTC | 0.06595369 | 0.6457011  | 0.00011953 | 0.092756 | -0.64315  |
| 2w4w_SITTC | 0.04311355 | 0.42324936 | 9.74E-05   | 0.10696  | 0.22964   |
| 2w4w_SITTC | 0.01468685 | 0.14638722 | 6.44E-05   | 0.021412 | 0.20962   |
| 2w4w_SITTC | 0.0446652  | 0.43836164 | 9.89E-05   | 0.10421  | 0.18258   |
| 2w4w_SITTC | 0.0234416  | 0.23165421 | 7.38E-05   | 0.040447 | 0.68948   |
| 2w4w_SITTC | 0.06070947 | 0.594625   | 0.00011523 | 0.098828 | -0.37638  |
| 2w4w_SITTC | 0.07427317 | 0.7267288  | 0.00012534 | 0.066176 | -1.0201   |
| 2w4w_SITTC | 0.05967751 | 0.58457416 | 0.00011431 | 0.098311 | -0.32873  |
| 2w4w_SITTC | 0.03846034 | 0.3779294  | 9.18E-05   | 0.10791  | 0.38979   |
| 2w4w_SITTC | 0.0812836  | 0.79500693 | 0.00012942 | 0.054478 | -1.2295   |
| 2w4w_SITTC | 0.04802326 | 0.47106752 | 0.00010271 | 0.09665  | 0.10061   |
| 2w4w_SITTC | 0.01527021 | 0.15206884 | 6.47E-05   | 0.021973 | 0.24275   |
| 2w4w_SITTC | 0.06651638 | 0.6511815  | 0.00012006 | 0.090801 | -0.66011  |
| 2w4w_SITTC | 0.06087101 | 0.59619826 | 0.00011523 | 0.098828 | -0.39249  |
| 2w4w_SITTC | 0.04946793 | 0.4851379  | 0.00010417 | 0.094268 | 0.052555  |
| 2w4w_SITTC | 0.07551184 | 0.73879284 | 0.00012619 | 0.062687 | -1.0712   |
| 2w4w_SITTC | 0.07947838 | 0.77742505 | 0.00012835 | 0.05632  | -1.1841   |
| 2w4w_SITTC | 0.00640438 | 0.06572004 | 5.69E-05   | 0.010907 | 0.17252   |
| 2w4w_SITTC | 0.04538589 | 0.4453809  | 9.97E-05   | 0.10268  | 0.16436   |
| 2w4w_SITTC | 0.03669119 | 0.3606987  | 8.98E-05   | 0.10298  | 0.46289   |
| 2w4w_SITTC | 0.06852683 | 0.67076224 | 0.00012161 | 0.084113 | -0.7609   |
| 2w4w_SITTC | 0.07348084 | 0.71901196 | 0.00012491 | 0.068128 | -0.99278  |
| 2w4w_SITTC | 0.01470963 | 0.14660908 | 6.44E-05   | 0.021412 | 0.20962   |
| 2w4w_SITTC | 0.07169417 | 0.7016106  | 0.00012378 | 0.073503 | -0.90497  |
| 2w4w_SITTC | 0.02702429 | 0.2665479  | 7.82E-05   | 0.054511 | 0.77219   |
| 2w4w_SITTC | 0.04900801 | 0.48065853 | 0.00010381 | 0.094798 | 0.072211  |
| 2w4w_SITTC | 0.05278201 | 0.51741546 | 0.00010773 | 0.092257 | -0.046772 |
| 2w4w_SITTC | 0.06769761 | 0.6626861  | 0.00012084 | 0.087573 | -0.72756  |
| 2w4w_SITTC | 0.07464883 | 0.7303875  | 0.00012556 | 0.06525  | -1.0333   |
| 2w4w_SITTC | 0.06645554 | 0.6505889  | 0.00012006 | 0.090801 | -0.66011  |
| 2w4w_SITTC | 0.06549755 | 0.64125854 | 0.00011925 | 0.093659 | -0.60919  |
| 2w4w_SITTC | 0.068245   | 0.6680174  | 0.00012136 | 0.085284 | -0.74427  |
| 2w4w_SITTC | 0.06928537 | 0.67815006 | 0.00012211 | 0.081739 | -0.79386  |
| 2w4w_SITTC | 0.06995785 | 0.68469965 | 0.0001226  | 0.07935  | -0.82636  |
| 2w4w_SITTC | 0.01440859 | 0.1436771  | 6.41E-05   | 0.020862 | 0.19442   |
| 2w4w_SITTC | 0.06995842 | 0.68470526 | 0.0001226  | 0.07935  | -0.82636  |
| 2w4w_SITTC | 0.07473236 | 0.7312011  | 0.00012577 | 0.064358 | -1.0333   |
| 2w4w_SITTC | 0.0272381  | 0.26863027 | 7.82E-05   | 0.054511 | 0.77153   |
| 2w4w_SITTC | 0.01255096 | 0.12558474 | 6.24E-05   | 0.018271 | 0.13519   |
| 2w4w_SITTC | 0.06915779 | 0.6769075  | 0.00012186 | 0.08293  | -0.79386  |
| 2w4w_SITTC | 0.0333088  | 0.32775587 | 8.57E-05   | 0.086671 | 0.61617   |
| 2w4w_SITTC | 0.0108162  | 0.10868895 | 6.05E-05   | 0.01548  | 0.10884   |
| 2w4w_SITTC | 0.04412933 | 0.43314257 | 9.86E-05   | 0.10494  | 0.20107   |
| 2w4w_SITTC | 0.05555926 | 0.54446447 | 0.00011045 | 0.094186 | -0.1508   |

|            |            |            |            |          |           |
|------------|------------|------------|------------|----------|-----------|
| 2w4w_SITTC | 0.08280432 | 0.80981797 | 0.00013009 | 0.053693 | -1.2543   |
| 2w4w_SITTC | 0.06899782 | 0.6753494  | 0.00012186 | 0.08293  | -0.79386  |
| 2w4w_SITTC | 0.04664043 | 0.4575995  | 0.00010122 | 0.099559 | 0.13721   |
| 2w4w_SITTC | 0.00921334 | 0.09307791 | 5.92E-05   | 0.013809 | 0.11326   |
| 2w4w_SITTC | 0.05286662 | 0.5182395  | 0.00010773 | 0.092257 | -0.046772 |
| 2w4w_SITTC | 0.08744697 | 0.8550351  | 0.00013221 | 0.052667 | -1.3123   |
| 2w4w_SITTC | 0.03369457 | 0.33151317 | 8.61E-05   | 0.088522 | 0.60151   |
| 2w4w_SITTC | 0.05337465 | 0.5231874  | 0.00010807 | 0.092373 | -0.07149  |
| 2w4w_SITTC | 0.07360175 | 0.7201895  | 0.00012491 | 0.068128 | -0.99278  |
| 2w4w_SITTC | 0.049836   | 0.4887227  | 0.00010453 | 0.09379  | 0.042456  |
| 2w4w_SITTC | 0.0110311  | 0.11078204 | 6.08E-05   | 0.015922 | 0.10884   |
| 2w4w_SITTC | 0.06094052 | 0.59687525 | 0.00011523 | 0.098828 | -0.39249  |
| 2w4w_SITTC | 0.04566118 | 0.44806203 | 0.00010009 | 0.1019   | 0.16436   |
| 2w4w_SITTC | 0.08609115 | 0.8418301  | 0.00013164 | 0.052775 | -1.2997   |
| 2w4w_SITTC | 0.05578413 | 0.5466546  | 0.00011045 | 0.094186 | -0.16472  |
| 2w4w_SITTC | 0.07561406 | 0.7397884  | 0.00012619 | 0.062687 | -1.0712   |
| 2w4w_SITTC | 0.06695699 | 0.65547276 | 0.00012032 | 0.089759 | -0.69393  |
| 2w4w_SITTC | 0.03162273 | 0.31133443 | 8.36E-05   | 0.07721  | 0.6834    |
| 2w4w_SITTC | 0.03551297 | 0.3492234  | 8.81E-05   | 0.097198 | 0.50933   |
| 2w4w_SITTC | 0.02646372 | 0.26108813 | 7.74E-05   | 0.051562 | 0.76965   |
| 2w4w_SITTC | 0.07092233 | 0.6940932  | 0.00012331 | 0.075804 | -0.87403  |
| 2w4w_SITTC | 0.04913851 | 0.48192948 | 0.00010381 | 0.094798 | 0.062467  |
| 2w4w_SITTC | 0.06940822 | 0.6793465  | 0.00012211 | 0.081739 | -0.81017  |
| 2w4w_SITTC | 0.07822187 | 0.7651872  | 0.00012778 | 0.057615 | -1.1573   |
| 2w4w_SITTC | 0.06104359 | 0.59787923 | 0.00011553 | 0.098907 | -0.39249  |
| 2w4w_SITTC | 0.0436621  | 0.428592   | 9.78E-05   | 0.10633  | 0.21046   |
| 2w4w_SITTC | 0.02162989 | 0.21400908 | 7.18E-05   | 0.035549 | 0.6056    |
| 2w4w_SITTC | 0.08744202 | 0.8549869  | 0.00013221 | 0.052667 | -1.3094   |
| 2w4w_SITTC | 0.06817962 | 0.66738063 | 0.00012136 | 0.085284 | -0.74427  |
| 2w4w_SITTC | 0.05176058 | 0.5074672  | 0.00010668 | 0.092211 | -0.011455 |
| 2w4w_SITTC | 0.03635186 | 0.3573938  | 8.94E-05   | 0.10166  | 0.47826   |
| 2w4w_SITTC | 0.06519511 | 0.638313   | 0.00011898 | 0.094504 | -0.59222  |
| 2w4w_SITTC | 0.05022493 | 0.49251077 | 0.0001049  | 0.093366 | 0.032151  |
| 2w4w_SITTC | 0.04970759 | 0.4874721  | 0.00010453 | 0.09379  | 0.052555  |
| 2w4w_SITTC | 0.05415123 | 0.53075093 | 0.0001091  | 0.092966 | -0.097097 |
| 2w4w_SITTC | 0.0679373  | 0.6650205  | 0.0001211  | 0.086439 | -0.74427  |
| 2w4w_SITTC | 0.02419631 | 0.23900469 | 7.46E-05   | 0.042633 | 0.72811   |
| 2w4w_SITTC | 0.06755449 | 0.66129214 | 0.00012084 | 0.087573 | -0.71078  |
| 2w4w_SITTC | 0.05522488 | 0.5412078  | 0.00011011 | 0.093847 | -0.13708  |
| 2w4w_SITTC | 0.03280703 | 0.32286888 | 8.52E-05   | 0.084798 | 0.6305    |
| 2w4w_SITTC | 0.04247575 | 0.4170375  | 9.66E-05   | 0.10808  | 0.24945   |
| 2w4w_SITTC | 0.02937719 | 0.28946394 | 8.11E-05   | 0.066108 | 0.7438    |
| 2w4w_SITTC | 0.04310065 | 0.42312372 | 9.74E-05   | 0.10696  | 0.22964   |
| 2w4w_SITTC | 0.03852047 | 0.37851506 | 9.18E-05   | 0.10791  | 0.37625   |
| 2w4w_SITTC | 0.06217058 | 0.6088555  | 0.00011642 | 0.098794 | -0.4579   |
| 2w4w_SITTC | 0.05842438 | 0.57236934 | 0.00011305 | 0.097132 | -0.2822   |

|            |            |            |            |           |          |
|------------|------------|------------|------------|-----------|----------|
| 2w4w_SITTC | 0.00315173 | 0.03404076 | 5.42E-05   | 0.0080398 | 0.31077  |
| 2w4w_SITTC | 0.07345308 | 0.71874154 | 0.00012491 | 0.068128  | -0.99278 |
| 2w4w_SITTC | 0.05060437 | 0.49620625 | 0.00010525 | 0.093003  | 0.021622 |
| 2w4w_SITTC | 0.08125054 | 0.79468495 | 0.00012942 | 0.054478  | -1.2227  |
| 2w4w_SITTC | 0.04625936 | 0.45388803 | 0.00010084 | 0.10033   | 0.14626  |
| 2w4w_SITTC | 0.0600491  | 0.5881933  | 0.00011462 | 0.098526  | -0.3445  |
| 2w4w_SITTC | 0.07964519 | 0.7790497  | 0.00012853 | 0.055948  | -1.1924  |
| 2w4w_SITTC | 0.08424725 | 0.8238715  | 0.00013074 | 0.053178  | -1.2751  |
| 2w4w_SITTC | 0.02889332 | 0.28475127 | 8.03E-05   | 0.062611  | 0.75723  |
| 2w4w_SITTC | 0.00557295 | 0.05762228 | 5.61E-05   | 0.0099627 | 0.20797  |
| 2w4w_SITTC | 0.05877185 | 0.57575345 | 0.00011337 | 0.097465  | -0.29758 |
| 2w4w_SITTC | 0.07240267 | 0.70851105 | 0.00012424 | 0.071279  | -0.9499  |
| 2w4w_SITTC | 0.0043562  | 0.04577171 | 5.52E-05   | 0.0090922 | 0.24903  |
| 2w4w_SITTC | 0.03789716 | 0.37244424 | 9.10E-05   | 0.1063    | 0.40374  |
| 2w4w_SITTC | 0.03916173 | 0.38476056 | 9.26E-05   | 0.10901   | 0.36311  |
| 2w4w_SITTC | 0.03161129 | 0.31122303 | 8.36E-05   | 0.07721   | 0.6834   |
| 2w4w_SITTC | 0.03063987 | 0.30176178 | 8.23E-05   | 0.07157   | 0.70647  |
| 2w4w_SITTC | 0.06769954 | 0.6627048  | 0.00012084 | 0.087573  | -0.72756 |
| 2w4w_SITTC | 0.05072648 | 0.49739558 | 0.00010561 | 0.092703  | 0.021622 |
| 2w4w_SITTC | 0.03289044 | 0.32368124 | 8.52E-05   | 0.084798  | 0.6305   |
| 2w4w_SITTC | 0.03324196 | 0.3271049  | 8.57E-05   | 0.086671  | 0.61617  |
| 2w4w_SITTC | 0.07664146 | 0.7497947  | 0.0001268  | 0.060479  | -1.1061  |
| 2w4w_SITTC | 0.06624101 | 0.6484995  | 0.00011979 | 0.091802  | -0.66011 |
| 2w4w_SITTC | 0.0291024  | 0.28678763 | 8.07E-05   | 0.064343  | 0.751    |
| 2w4w_SITTC | 0.09633042 | 0.9415556  | 0.00013526 | 0.052284  | -1.3444  |
| 2w4w_SITTC | 0.03898694 | 0.3830582  | 9.26E-05   | 0.10901   | 0.36311  |
| 2w4w_SITTC | 0.0248901  | 0.24576189 | 7.54E-05   | 0.044969  | 0.74769  |
| 2w4w_SITTC | 0.04883432 | 0.47896692 | 0.00010344 | 0.095375  | 0.072211 |
| 2w4w_SITTC | 0.00259546 | 0.02862302 | 5.39E-05   | 0.007795  | 0.3272   |
| 2w4w_SITTC | 0.06350847 | 0.62188584 | 0.00011758 | 0.097678  | -0.5246  |
| 2w4w_SITTC | 0.0473384  | 0.46439734 | 0.00010197 | 0.098057  | 0.11903  |
| 2w4w_SITTC | 0.01321569 | 0.13205887 | 6.27E-05   | 0.018769  | 0.15521  |
| 2w4w_SITTC | 0.0699099  | 0.6842327  | 0.0001226  | 0.07935   | -0.82636 |
| 2w4w_SITTC | 0.05082928 | 0.49839684 | 0.00010561 | 0.092703  | 0.010852 |
| 2w4w_SITTC | 0.06100846 | 0.597537   | 0.00011553 | 0.098907  | -0.39249 |
| 2w4w_SITTC | 0.01825976 | 0.18118563 | 6.80E-05   | 0.027619  | 0.4001   |
| 2w4w_SITTC | 0.06694662 | 0.6553718  | 0.00012032 | 0.089759  | -0.69393 |
| 2w4w_SITTC | 0.06337458 | 0.62058187 | 0.00011758 | 0.097678  | -0.50782 |
| 2w4w_SITTC | 0.06424414 | 0.6290509  | 0.00011815 | 0.096641  | -0.55833 |
| 2w4w_SITTC | 0.05848271 | 0.5729374  | 0.00011305 | 0.097132  | -0.2822  |
| 2w4w_SITTC | 0.08120319 | 0.79422385 | 0.00012924 | 0.054725  | -1.2227  |
| 2w4w_SITTC | 0.05919191 | 0.5798447  | 0.00011368 | 0.097776  | -0.31309 |
| 2w4w_SITTC | 0.07027815 | 0.6878193  | 0.00012284 | 0.078159  | -0.8424  |
| 2w4w_SITTC | 0.08025242 | 0.7849638  | 0.00012889 | 0.055287  | -1.2004  |
| 2w4w_SITTC | 0.05806724 | 0.568891   | 0.00011273 | 0.096781  | -0.26697 |
| 2w4w_SITTC | 0.05761148 | 0.56445205 | 0.00011241 | 0.096416  | -0.23694 |

|            |            |            |            |           |           |
|------------|------------|------------|------------|-----------|-----------|
| 2w4w_SITTC | 0.04084692 | 0.40117353 | 9.46E-05   | 0.10971   | 0.3027    |
| 2w4w_SITTC | 0.06283362 | 0.6153131  | 0.00011701 | 0.098387  | -0.49111  |
| 2w4w_SITTC | 0.03495665 | 0.34380516 | 8.77E-05   | 0.095565  | 0.54051   |
| 2w4w_SITTC | 0.01531028 | 0.15245911 | 6.51E-05   | 0.022546  | 0.24275   |
| 2w4w_SITTC | 0.02837469 | 0.27970007 | 7.99E-05   | 0.060913  | 0.76245   |
| 2w4w_SITTC | 0.06404449 | 0.6271065  | 0.00011815 | 0.096641  | -0.54144  |
| 2w4w_SITTC | 0.07070109 | 0.6919385  | 0.00012308 | 0.076976  | -0.87403  |
| 2w4w_SITTC | 0.00772864 | 0.07861771 | 5.81E-05   | 0.012286  | 0.13577   |
| 2w4w_SITTC | 0.05436349 | 0.53281826 | 0.0001091  | 0.092966  | -0.11022  |
| 2w4w_SITTC | 0.08269218 | 0.8087258  | 0.00013009 | 0.053693  | -1.2543   |
| 2w4w_SITTC | 0.04694706 | 0.46058586 | 0.00010159 | 0.098799  | 0.12814   |
| 2w4w_SITTC | 0.03492429 | 0.34348997 | 8.77E-05   | 0.095565  | 0.54051   |
| 2w4w_SITTC | 0.05635176 | 0.552183   | 0.00011111 | 0.094909  | -0.19309  |
| 2w4w_SITTC | 0.06744668 | 0.66024214 | 0.00012058 | 0.088682  | -0.71078  |
| 2w4w_SITTC | 0.04870045 | 0.47766304 | 0.00010344 | 0.095375  | 0.081803  |
| 2w4w_SITTC | 0.05442264 | 0.5333944  | 0.0001091  | 0.092966  | -0.11022  |
| 2w4w_SITTC | 0.02295855 | 0.2269495  | 7.34E-05   | 0.039406  | 0.67444   |
| 2w4w_SITTC | 0.0165842  | 0.16486646 | 6.62E-05   | 0.024342  | 0.29808   |
| 2w4w_SITTC | 0.01345442 | 0.13438395 | 6.30E-05   | 0.019276  | 0.15521   |
| 2w4w_SITTC | 0.07438969 | 0.7278636  | 0.00012556 | 0.06525   | -1.0201   |
| 2w4w_SITTC | 0.06096281 | 0.5970924  | 0.00011553 | 0.098907  | -0.39249  |
| 2w4w_SITTC | 0.06191875 | 0.60640275 | 0.00011613 | 0.098894  | -0.44141  |
| 2w4w_SITTC | 0.06583787 | 0.6445731  | 0.00011953 | 0.092756  | -0.62617  |
| 2w4w_SITTC | 0.05764617 | 0.56478995 | 0.00011241 | 0.096416  | -0.23694  |
| 2w4w_SITTC | 0.00389795 | 0.04130861 | 5.47E-05   | 0.008551  | 0.27903   |
| 2w4w_SITTC | 0.02995446 | 0.29508623 | 8.15E-05   | 0.067903  | 0.72675   |
| 2w4w_SITTC | 0.04555025 | 0.4469816  | 0.00010009 | 0.1019    | 0.16436   |
| 2w4w_SITTC | 0.04445689 | 0.43633282 | 9.86E-05   | 0.10494   | 0.19178   |
| 2w4w_SITTC | 0.0039739  | 0.04204838 | 5.50E-05   | 0.0088178 | 0.2638    |
| 2w4w_SITTC | 0.06303477 | 0.6172723  | 0.0001173  | 0.098072  | -0.49111  |
| 2w4w_SITTC | 0.0432316  | 0.4243991  | 9.74E-05   | 0.10696   | 0.22964   |
| 2w4w_SITTC | 0.06133497 | 0.60071707 | 0.00011583 | 0.09893   | -0.4087   |
| 2w4w_SITTC | 0.05165092 | 0.5063991  | 0.00010632 | 0.092309  | -0.011455 |
| 2w4w_SITTC | 0.04120992 | 0.40470898 | 9.50E-05   | 0.10955   | 0.29155   |
| 2w4w_SITTC | 0.07321395 | 0.7164125  | 0.00012469 | 0.069151  | -0.97873  |
| 2w4w_SITTC | 0.01707882 | 0.16968384 | 6.69E-05   | 0.025607  | 0.33781   |
| 2w4w_SITTC | 0.05420888 | 0.5313124  | 0.0001091  | 0.092966  | -0.097097 |
| 2w4w_SITTC | 0.02880811 | 0.28392142 | 8.03E-05   | 0.062611  | 0.75723   |
| 2w4w_SITTC | 0.06570613 | 0.64329    | 0.00011925 | 0.093659  | -0.62617  |
| 2w4w_SITTC | 0.08622868 | 0.84316957 | 0.00013164 | 0.052775  | -1.2997   |
| 2w4w_SITTC | 0.04752306 | 0.46619588 | 0.00010197 | 0.098057  | 0.10986   |
| 2w4w_SITTC | 0.06541376 | 0.6404425  | 0.00011898 | 0.094504  | -0.60919  |
| 2w4w_SITTC | 0.05684821 | 0.5570182  | 0.00011177 | 0.095663  | -0.20754  |
| 2w4w_SITTC | 0.02476407 | 0.24453442 | 7.54E-05   | 0.044969  | 0.73857   |
| 2w4w_SITTC | 0.05985997 | 0.58635134 | 0.00011431 | 0.098311  | -0.3445   |
| 2w4w_SITTC | 0.05456888 | 0.5348187  | 0.00010944 | 0.093233  | -0.11022  |

|            |            |            |            |           |           |
|------------|------------|------------|------------|-----------|-----------|
| 2w4w_SITTC | 0.02942949 | 0.28997332 | 8.11E-05   | 0.066108  | 0.7438    |
| 2w4w_SITTC | 0.02618347 | 0.2583587  | 7.70E-05   | 0.050154  | 0.76965   |
| 2w4w_SITTC | 0.03693882 | 0.36311048 | 9.02E-05   | 0.1042    | 0.4477    |
| 2w4w_SITTC | 0.02884153 | 0.28424683 | 8.03E-05   | 0.062611  | 0.75723   |
| 2w4w_SITTC | 0.02035521 | 0.20159425 | 7.02E-05   | 0.032119  | 0.52662   |
| 2w4w_SITTC | 0.07604569 | 0.7439922  | 0.0001264  | 0.06191   | -1.0832   |
| 2w4w_SITTC | 0.02172816 | 0.21496618 | 7.18E-05   | 0.035549  | 0.6056    |
| 2w4w_SITTC | 0.02681877 | 0.26454616 | 7.78E-05   | 0.053015  | 0.77158   |
| 2w4w_SITTC | 0.04233966 | 0.41571206 | 9.62E-05   | 0.10856   | 0.24945   |
| 2w4w_SITTC | 0.02402956 | 0.23738064 | 7.46E-05   | 0.042633  | 0.71639   |
| 2w4w_SITTC | 0.00189394 | 0.0217905  | 5.34E-05   | 0.0073266 | 0.36099   |
| 2w4w_SITTC | 0.01127296 | 0.11313764 | 6.11E-05   | 0.016373  | 0.1115    |
| 2w4w_SITTC | 0.01529704 | 0.15233022 | 6.51E-05   | 0.022546  | 0.24275   |
| 2w4w_SITTC | 0.01621438 | 0.16126461 | 6.58E-05   | 0.023731  | 0.27899   |
| 2w4w_SITTC | 0.05435596 | 0.53274494 | 0.0001091  | 0.092966  | -0.11022  |
| 2w4w_SITTC | 0.05470775 | 0.53617114 | 0.00010944 | 0.093233  | -0.12355  |
| 2w4w_SITTC | 0.04538786 | 0.4454001  | 9.97E-05   | 0.10268   | 0.16436   |
| 2w4w_SITTC | 0.05883351 | 0.5763541  | 0.00011337 | 0.097465  | -0.29758  |
| 2w4w_SITTC | 0.03701979 | 0.36389917 | 9.02E-05   | 0.1042    | 0.4477    |
| 2w4w_SITTC | 0.05904347 | 0.578399   | 0.00011368 | 0.097776  | -0.31309  |
| 2w4w_SITTC | 0.07961419 | 0.77874774 | 0.00012853 | 0.055948  | -1.1924   |
| 2w4w_SITTC | 0.07783923 | 0.7614604  | 0.00012759 | 0.058113  | -1.1379   |
| 2w4w_SITTC | 0.0459503  | 0.45087793 | 0.00010046 | 0.10111   | 0.1553    |
| 2w4w_SITTC | 0.0532154  | 0.52163637 | 0.00010807 | 0.092373  | -0.059017 |
| 2w4w_SITTC | 0.076184   | 0.74533933 | 0.0001266  | 0.061174  | -1.0948   |
| 2w4w_SITTC | 0.03155014 | 0.31062743 | 8.36E-05   | 0.07721   | 0.6834    |
| 2w4w_SITTC | 0.0375559  | 0.36912054 | 9.06E-05   | 0.10531   | 0.41807   |
| 2w4w_SITTC | 0.01739463 | 0.17275964 | 6.72E-05   | 0.026262  | 0.35829   |
| 2w4w_SITTD | 0.07116735 | 0.6964796  | 0.00012331 | 0.075804  | -0.88959  |
| 2w4w_SITTD | 0.04891414 | 0.47974423 | 0.00010344 | 0.095375  | 0.072211  |
| 2w4w_SITTD | 0.05100358 | 0.50009435 | 0.00010597 | 0.092472  | 0.010852  |
| 2w4w_SITTD | 0.04478665 | 0.4395446  | 9.89E-05   | 0.10421   | 0.18258   |
| 2w4w_SITTD | 0.01337443 | 0.13360494 | 6.30E-05   | 0.019276  | 0.15521   |
| 2w4w_SITTD | 0.02682835 | 0.2646395  | 7.78E-05   | 0.053015  | 0.77158   |
| 2w4w_SITTD | 0.06882808 | 0.6736962  | 0.00012161 | 0.084113  | -0.77743  |
| 2w4w_SITTD | 0.05218249 | 0.5115764  | 0.00010703 | 0.092172  | -0.022986 |
| 2w4w_SITTD | 0.03912113 | 0.38436514 | 9.26E-05   | 0.10901   | 0.36311   |
| 2w4w_SITTD | 0.06100568 | 0.59751    | 0.00011553 | 0.098907  | -0.39249  |
| 2w4w_SITTD | 0.02909448 | 0.28671053 | 8.07E-05   | 0.064343  | 0.751     |
| 2w4w_SITTD | 0.04808341 | 0.47165343 | 0.00010271 | 0.09665   | 0.10061   |
| 2w4w_SITTD | 0.04237195 | 0.41602653 | 9.62E-05   | 0.10856   | 0.24945   |
| 2w4w_SITTD | 0.05545646 | 0.54346323 | 0.00011011 | 0.093847  | -0.1508   |
| 2w4w_SITTD | 0.06564    | 0.6426459  | 0.00011925 | 0.093659  | -0.62617  |
| 2w4w_SITTD | 0.03968762 | 0.38988253 | 9.34E-05   | 0.10962   | 0.33794   |
| 2w4w_SITTD | 0.06260272 | 0.61306435 | 0.00011672 | 0.098627  | -0.47447  |
| 2w4w_SITTD | 0.00886161 | 0.0896522  | 5.89E-05   | 0.013414  | 0.11742   |



|            |            |            |            |           |            |
|------------|------------|------------|------------|-----------|------------|
| 2w4w_SITTD | 0.00702469 | 0.07176155 | 5.72E-05   | 0.011238  | 0.15252    |
| 2w4w_SITTD | 0.01224837 | 0.12263766 | 6.21E-05   | 0.017782  | 0.12723    |
| 2w4w_SITTD | 0.03865958 | 0.37986994 | 9.22E-05   | 0.10852   | 0.37625    |
| 2w4w_SITTD | 0.05663011 | 0.55489403 | 0.00011144 | 0.095284  | -0.19309   |
| 2w4w_SITTD | 0.03784565 | 0.37194264 | 9.10E-05   | 0.1063    | 0.40374    |
| 2w4w_SITTD | 0.03923132 | 0.38543838 | 9.26E-05   | 0.10901   | 0.35035    |
| 2w4w_SITTD | 0.05272948 | 0.51690376 | 0.00010773 | 0.092257  | -0.046772  |
| 2w4w_SITTD | 0.05682093 | 0.55675256 | 0.00011144 | 0.095284  | -0.20754   |
| 2w4w_SITTD | 0.04871835 | 0.4778374  | 0.00010344 | 0.095375  | 0.081803   |
| 2w4w_SITTD | 0.08349804 | 0.8165745  | 0.00013042 | 0.053406  | -1.2651    |
| 2w4w_SITTD | 0.06050723 | 0.5926553  | 0.00011492 | 0.0987    | -0.37638   |
| 2w4w_SITTD | 0.0714928  | 0.69964933 | 0.00012355 | 0.074645  | -0.90497   |
| 2w4w_SITTD | 0.04986584 | 0.48901337 | 0.00010453 | 0.09379   | 0.042456   |
| 2w4w_SITTD | 0.05201474 | 0.5099426  | 0.00010668 | 0.092211  | -0.022986  |
| 2w4w_SITTD | 0.07484409 | 0.7322893  | 0.00012577 | 0.064358  | -1.0462    |
| 2w4w_SITTD | 0.00371276 | 0.03950498 | 5.47E-05   | 0.008551  | 0.27903    |
| 2w4w_SITTD | 0.03019019 | 0.29738212 | 8.19E-05   | 0.069725  | 0.72675    |
| 2w4w_SITTD | 0.05331368 | 0.5225937  | 0.00010807 | 0.092373  | -0.07149   |
| 2w4w_SITTD | 0.00402549 | 0.04255076 | 5.50E-05   | 0.0088178 | 0.2638     |
| 2w4w_SITTD | 0.04762019 | 0.46714187 | 0.00010234 | 0.09734   | 0.10986    |
| 2w4w_SITTD | 0.02226932 | 0.22023678 | 7.26E-05   | 0.037419  | 0.64161    |
| 2w4w_SITTD | 0.03879724 | 0.38121068 | 9.22E-05   | 0.10852   | 0.37625    |
| 2w4w_SITTD | 0.0584738  | 0.57285064 | 0.00011305 | 0.097132  | -0.2822    |
| 2w4w_SITTD | 0.00836804 | 0.08484511 | 5.84E-05   | 0.012653  | 0.12871    |
| 2w4w_SITTD | 0.04574595 | 0.44888765 | 0.00010009 | 0.1019    | 0.1553     |
| 2w4w_SITTD | 0.03569787 | 0.35102433 | 8.86E-05   | 0.098764  | 0.50933    |
| 2w4w_SITTD | 0.06257732 | 0.6128169  | 0.00011672 | 0.098627  | -0.47447   |
| 2w4w_SITTD | 0.06088597 | 0.596344   | 0.00011523 | 0.098828  | -0.39249   |
| 2w4w_SITTD | 0.03656976 | 0.35951608 | 8.94E-05   | 0.10166   | 0.46289    |
| 2w4w_SITTD | 0.03872104 | 0.3804685  | 9.22E-05   | 0.10852   | 0.37625    |
| 2w4w_SITTD | 0.04626187 | 0.45391244 | 0.00010084 | 0.10033   | 0.14626    |
| 2w4w_SITTD | 0.07822339 | 0.76520205 | 0.00012778 | 0.057615  | -1.1573    |
| 2w4w_SITTD | 0.08050628 | 0.78743625 | 0.00012889 | 0.055287  | -1.2081    |
| 2w4w_SITTD | 0.04235419 | 0.41585362 | 9.62E-05   | 0.10856   | 0.24945    |
| 2w4w_SITTD | 0.05342319 | 0.5236602  | 0.00010842 | 0.092532  | -0.07149   |
| 2w4w_SITTD | 0.07626956 | 0.74617267 | 0.0001266  | 0.061174  | -1.0948    |
| 2w4w_SITTD | 0.08608939 | 0.84181297 | 0.00013164 | 0.052775  | -1.2997    |
| 2w4w_SITTD | 0.03707321 | 0.3644194  | 9.02E-05   | 0.1042    | 0.4477     |
| 2w4w_SITTD | 0.03091873 | 0.30447778 | 8.28E-05   | 0.073435  | 0.70647    |
| 2w4w_SITTD | 0.08117534 | 0.7939525  | 0.00012924 | 0.054725  | -1.2227    |
| 2w4w_SITTD | 0.00870245 | 0.08810206 | 5.86E-05   | 0.013029  | 0.12259    |
| 2w4w_SITTD | 0.01607663 | 0.159923   | 6.58E-05   | 0.023731  | 0.27899    |
| 2w4w_SITTD | 0.05750313 | 0.5633968  | 0.00011209 | 0.096042  | -0.23694   |
| 2w4w_SITTD | 0.02947546 | 0.29042107 | 8.11E-05   | 0.066108  | 0.7438     |
| 2w4w_SITTD | 0.05140042 | 0.50395936 | 0.00010632 | 0.092309  | -0.0001745 |
| 2w4w_SITTD | 0.07522199 | 0.73596984 | 0.00012598 | 0.063504  | -1.0589    |

|            |            |            |            |           |          |
|------------|------------|------------|------------|-----------|----------|
| 2w4w_SITTD | 0.0057566  | 0.05941098 | 5.63E-05   | 0.010269  | 0.19547  |
| 2w4w_SITTD | 0.00173349 | 0.02022786 | 5.31E-05   | 0.0071026 | 0.37827  |
| 2w4w_SITTD | 0.03557022 | 0.34978107 | 8.86E-05   | 0.098764  | 0.50933  |
| 2w4w_SITTD | 0.0675727  | 0.66146946 | 0.00012084 | 0.087573  | -0.71078 |
| 2w4w_SITTD | 0.05328729 | 0.52233666 | 0.00010807 | 0.092373  | -0.07149 |
| 2w4w_SITTD | 0.00184052 | 0.02127023 | 5.31E-05   | 0.0071026 | 0.37827  |
| 2w4w_SITTD | 0.0614753  | 0.60208386 | 0.00011583 | 0.09893   | -0.42501 |
| 2w4w_SITTD | 0.00770424 | 0.07837999 | 5.78E-05   | 0.011928  | 0.13577  |
| 2w4w_SITTD | 0.0484525  | 0.4752482  | 0.00010308 | 0.095994  | 0.081803 |
| 2w4w_SITTD | 0.05810092 | 0.569219   | 0.00011273 | 0.096781  | -0.26697 |
| 2w4w_SITTD | 0.00917043 | 0.09266    | 5.92E-05   | 0.013809  | 0.11326  |
| 2w4w_SITTD | 0.01434821 | 0.143089   | 6.41E-05   | 0.020862  | 0.19442  |
| 2w4w_SITTD | 0.07540182 | 0.7377213  | 0.00012619 | 0.062687  | -1.0589  |
| 2w4w_SITTD | 0.04917764 | 0.48231068 | 0.00010381 | 0.094798  | 0.062467 |
| 2w4w_SITTD | 0.0028349  | 0.03095508 | 5.39E-05   | 0.007795  | 0.3272   |
| 2w4w_SITTD | 0.04404265 | 0.43229836 | 9.82E-05   | 0.10565   | 0.20107  |
| 2w4w_SITTD | 0.00470529 | 0.04917173 | 5.55E-05   | 0.0093744 | 0.23478  |
| 2w4w_SITTD | 0.06317534 | 0.6186413  | 0.0001173  | 0.098072  | -0.50782 |
| 2w4w_SITTD | 0.07356445 | 0.71982616 | 0.00012491 | 0.068128  | -0.99278 |
| 2w4w_SITTD | 0.04874222 | 0.47806987 | 0.00010344 | 0.095375  | 0.081803 |
| 2w4w_SITTD | 0.07590915 | 0.7426624  | 0.0001264  | 0.06191   | -1.0832  |
| 2w4w_SITTD | 0.06614152 | 0.6475305  | 0.00011979 | 0.091802  | -0.64315 |
| 2w4w_SITTD | 0.05112353 | 0.5012626  | 0.00010597 | 0.092472  | 0.010852 |
| 2w4w_SITTD | 0.07809532 | 0.76395464 | 0.00012759 | 0.058113  | -1.1478  |
| 2w4w_SITTD | 0.01776192 | 0.17633694 | 6.76E-05   | 0.026932  | 0.37908  |
| 2w4w_SITTD | 0.02056138 | 0.20360225 | 7.06E-05   | 0.032941  | 0.54704  |
| 2w4w_SITTD | 0.03969782 | 0.38998187 | 9.34E-05   | 0.10962   | 0.33794  |
| 2w4w_SITTD | 0.00872833 | 0.0883542  | 5.86E-05   | 0.013029  | 0.11742  |
| 2w4w_SITTD | 0.01237009 | 0.12382308 | 6.21E-05   | 0.017782  | 0.12723  |
| 2w4w_SITTD | 0.07252201 | 0.7096734  | 0.00012424 | 0.071279  | -0.9499  |
| 2w4w_SITTD | 0.09713236 | 0.9493661  | 0.00013546 | 0.052239  | -1.3446  |
| 2w4w_SITTD | 0.05845901 | 0.5727066  | 0.00011305 | 0.097132  | -0.2822  |
| 2w4w_SITTD | 0.04212985 | 0.41366863 | 9.62E-05   | 0.10856   | 0.25963  |
| 2w4w_SITTD | 0.02517638 | 0.24855016 | 7.58E-05   | 0.046199  | 0.75539  |
| 2w4w_SITTD | 0.04474339 | 0.43912318 | 9.89E-05   | 0.10421   | 0.18258  |
| 2w4w_SITTD | 0.08177252 | 0.7997688  | 0.00012959 | 0.054253  | -1.2361  |
| 2w4w_SITTD | 0.02763807 | 0.2725258  | 7.86E-05   | 0.05605   | 0.76966  |
| 2w4w_SITTD | 0.0704863  | 0.6898465  | 0.00012284 | 0.078159  | -0.8583  |
| 2w4w_SITTD | 0.00197008 | 0.0225321  | 5.34E-05   | 0.0073266 | 0.36099  |
| 2w4w_SITTD | 0.02967892 | 0.29240265 | 8.11E-05   | 0.066108  | 0.7357   |
| 2w4w_SITTD | 0.04382813 | 0.43020907 | 9.82E-05   | 0.10565   | 0.21046  |
| 2w4w_SITTD | 0.04835775 | 0.4743253  | 0.00010308 | 0.095994  | 0.091263 |
| 2w4w_SITTD | 0.09082085 | 0.8878951  | 0.00013338 | 0.052577  | -1.3317  |
| 2w4w_SITTD | 0.0460916  | 0.45225412 | 0.00010046 | 0.10111   | 0.14626  |
| 2w4w_SITTD | 0.03044581 | 0.29987174 | 8.23E-05   | 0.07157   | 0.71698  |
| 2w4w_SITTD | 0.06998203 | 0.6849352  | 0.0001226  | 0.07935   | -0.82636 |

|            |            |            |            |          |           |
|------------|------------|------------|------------|----------|-----------|
| 2w4w_SITTD | 0.04777414 | 0.46864125 | 0.00010234 | 0.09734  | 0.10061   |
| 2w4w_SITTD | 0.01526308 | 0.1519994  | 6.47E-05   | 0.021973 | 0.24275   |
| 2w4w_SITTD | 0.02670182 | 0.2634072  | 7.78E-05   | 0.053015 | 0.77158   |
| 2w4w_SITTD | 0.06624255 | 0.64851445 | 0.00011979 | 0.091802 | -0.66011  |
| 2w4w_SITTD | 0.04286145 | 0.420794   | 9.70E-05   | 0.10755  | 0.23945   |
| 2w4w_SITTD | 0.06530184 | 0.63935244 | 0.00011898 | 0.094504 | -0.60919  |
| 2w4w_SITTD | 0.06750184 | 0.6607794  | 0.00012084 | 0.087573 | -0.71078  |
| 2w4w_SITTD | 0.06062122 | 0.59376544 | 0.00011523 | 0.098828 | -0.37638  |
| 2w4w_SITTD | 0.06816439 | 0.6672322  | 0.00012136 | 0.085284 | -0.74427  |
| 2w4w_SITTD | 0.04844084 | 0.47513455 | 0.00010308 | 0.095994 | 0.081803  |
| 2w4w_SITTD | 0.04863648 | 0.47704    | 0.00010344 | 0.095375 | 0.081803  |
| 2w4w_SITTD | 0.0475044  | 0.46601415 | 0.00010197 | 0.098057 | 0.10986   |
| 2w4w_SITTD | 0.02918314 | 0.28757405 | 8.07E-05   | 0.064343 | 0.751     |
| 2w4w_SITTD | 0.0711594  | 0.6964022  | 0.00012331 | 0.075804 | -0.88959  |
| 2w4w_SITTD | 0.05687156 | 0.5572456  | 0.00011177 | 0.095663 | -0.20754  |
| 2w4w_SITTD | 0.02126938 | 0.21049789 | 7.14E-05   | 0.034655 | 0.58661   |
| 2w4w_SITTD | 0.00817242 | 0.08293989 | 5.84E-05   | 0.012653 | 0.12871   |
| 2w4w_SITTD | 0.04515053 | 0.44308856 | 9.93E-05   | 0.10345  | 0.17344   |
| 2w4w_SITTD | 0.03238274 | 0.31873652 | 8.44E-05   | 0.081011 | 0.64444   |
| 2w4w_SITTD | 0.06759711 | 0.6617072  | 0.00012084 | 0.087573 | -0.72756  |
| 2w4w_SITTD | 0.05198373 | 0.5096406  | 0.00010668 | 0.092211 | -0.022986 |
| 2w4w_SITTD | 0.04330299 | 0.4250944  | 9.74E-05   | 0.10696  | 0.21998   |
| 2w4w_SITTD | 0.02275464 | 0.22496352 | 7.30E-05   | 0.038397 | 0.65846   |
| 2w4w_SITTD | 0.05204365 | 0.51022416 | 0.00010703 | 0.092172 | -0.022986 |
| 2w4w_SITTD | 0.05715753 | 0.5600308  | 0.00011177 | 0.095663 | -0.22216  |
| 2w4w_SITTD | 0.03693702 | 0.36309302 | 9.02E-05   | 0.1042   | 0.4477    |
| 2w4w_SITTD | 0.0247994  | 0.24487852 | 7.54E-05   | 0.044969 | 0.73857   |
| 2w4w_SITTD | 0.0068129  | 0.06969883 | 5.72E-05   | 0.011238 | 0.16213   |
| 2w4w_SITTD | 0.06844568 | 0.66997194 | 0.00012136 | 0.085284 | -0.7609   |
| 2w4w_SITTD | 0.05187472 | 0.50857884 | 0.00010668 | 0.092211 | -0.022986 |
| 2w4w_SITTD | 0.07848068 | 0.76770794 | 0.00012797 | 0.057152 | -1.1573   |
| 2w4w_SITTD | 0.04193069 | 0.41172895 | 9.58E-05   | 0.10896  | 0.25963   |
| 2w4w_SITTD | 0.03370075 | 0.33157328 | 8.61E-05   | 0.088522 | 0.60151   |
| 2w4w_SITTD | 0.03115237 | 0.30675337 | 8.32E-05   | 0.075317 | 0.69526   |
| 2w4w_SITTD | 0.0320441  | 0.31543836 | 8.40E-05   | 0.07911  | 0.65793   |
| 2w4w_SITTD | 0.07062278 | 0.69117576 | 0.00012308 | 0.076976 | -0.8583   |
| 2w4w_SITTD | 0.03493955 | 0.34363857 | 8.77E-05   | 0.095565 | 0.54051   |
| 2w4w_SITTD | 0.05787606 | 0.567029   | 0.00011273 | 0.096781 | -0.25188  |
| 2w4w_SITTD | 0.02227821 | 0.22032331 | 7.26E-05   | 0.037419 | 0.64161   |
| 2w4w_SITTD | 0.06129658 | 0.6003431  | 0.00011583 | 0.09893  | -0.4087   |
| 2w4w_SITTD | 0.04967699 | 0.4871741  | 0.00010453 | 0.09379  | 0.052555  |
| 2w4w_SITTD | 0.07944606 | 0.77711016 | 0.00012835 | 0.05632  | -1.1841   |
| 2w4w_SITTD | 0.03093852 | 0.30467054 | 8.28E-05   | 0.073435 | 0.70647   |
| 2w4w_SITTD | 0.01940133 | 0.19230397 | 6.91E-05   | 0.029782 | 0.48489   |
| 2w4w_SITTD | 0.08493095 | 0.83053035 | 0.00013105 | 0.053002 | -1.2841   |
| 2w4w_SITTD | 0.05498204 | 0.5388426  | 0.00010978 | 0.093528 | -0.13708  |

|            |            |            |            |           |           |
|------------|------------|------------|------------|-----------|-----------|
| 2w4w_SITTD | 0.02934596 | 0.2891598  | 8.07E-05   | 0.064343  | 0.7438    |
| 2w4w_SITTD | 0.02833158 | 0.27928028 | 7.99E-05   | 0.060913  | 0.76245   |
| 2w4w_SITTD | 0.04564057 | 0.4478613  | 0.00010009 | 0.1019    | 0.16436   |
| 2w4w_SITTD | 0.04641448 | 0.45539886 | 0.00010084 | 0.10033   | 0.13721   |
| 2w4w_SITTD | 0.05469086 | 0.5360067  | 0.00010944 | 0.093233  | -0.12355  |
| 2w4w_SITTD | 0.01654281 | 0.16446336 | 6.62E-05   | 0.024342  | 0.29808   |
| 2w4w_SITTD | 0.07674542 | 0.7508073  | 0.0001268  | 0.060479  | -1.1061   |
| 2w4w_SITTD | 0.05402124 | 0.52948487 | 0.00010876 | 0.092731  | -0.097097 |
| 2w4w_SITTD | 0.07165898 | 0.70126784 | 0.00012378 | 0.073503  | -0.90497  |
| 2w4w_SITTD | 0.07796163 | 0.7626526  | 0.00012759 | 0.058113  | -1.1478   |
| 2w4w_SITTD | 0.05319751 | 0.52146214 | 0.00010807 | 0.092373  | -0.059017 |
| 2w4w_SITTD | 0.06860178 | 0.6714922  | 0.00012161 | 0.084113  | -0.7609   |
| 2w4w_SITTD | 0.01579121 | 0.15714318 | 6.54E-05   | 0.023132  | 0.26052   |
| 2w4w_SITTD | 0.02999296 | 0.29546127 | 8.15E-05   | 0.067903  | 0.72675   |
| 2w4w_SITTD | 0.06529441 | 0.63928    | 0.00011898 | 0.094504  | -0.60919  |
| 2w4w_SITTD | 0.08553561 | 0.83641946 | 0.00013135 | 0.05287   | -1.2923   |
| 2w4w_SITTD | 0.00488087 | 0.05088179 | 5.55E-05   | 0.0093744 | 0.23478   |
| 2w4w_SITTD | 0.00402867 | 0.04258172 | 5.50E-05   | 0.0088178 | 0.2638    |
| 2w4w_SITTD | 0.03315468 | 0.32625487 | 8.57E-05   | 0.086671  | 0.61617   |
| 2w4w_SITTD | 0.05265031 | 0.5161328  | 0.00010738 | 0.092189  | -0.046772 |
| 2w4w_SITTD | 0.00541226 | 0.05605722 | 5.61E-05   | 0.0099627 | 0.20797   |
| 2w4w_SITTD | 0.08204221 | 0.80239546 | 0.00012976 | 0.054048  | -1.2424   |
| 2w4w_SITTD | 0.05657996 | 0.5544056  | 0.00011144 | 0.095284  | -0.19309  |
| 2w4w_SITTD | 0.04969328 | 0.48733267 | 0.00010453 | 0.09379   | 0.052555  |
| 2w4w_SITTD | 0.08278741 | 0.80965334 | 0.00013009 | 0.053693  | -1.2543   |
| 2w4w_SITTD | 0.01136882 | 0.11407124 | 6.11E-05   | 0.016373  | 0.1115    |
| 2w4w_SITTD | 0.08774683 | 0.85795563 | 0.00013235 | 0.052652  | -1.3123   |
| 2w4w_SITTD | 0.04735992 | 0.46460697 | 0.00010197 | 0.098057  | 0.11903   |
| 2w4w_SITTD | 0.01568562 | 0.15611479 | 6.54E-05   | 0.023132  | 0.26052   |
| 2w4w_SITTD | 0.04245209 | 0.4168071  | 9.66E-05   | 0.10808   | 0.24945   |
| 2w4w_SITTD | 0.04761213 | 0.46706337 | 0.00010234 | 0.09734   | 0.10986   |
| 2w4w_SITTD | 0.02301624 | 0.22751144 | 7.34E-05   | 0.039406  | 0.67444   |
| 2w4w_SITTD | 0.08042627 | 0.786657   | 0.00012889 | 0.055287  | -1.2081   |
| 2w4w_SITTD | 0.02032074 | 0.20125853 | 7.02E-05   | 0.032119  | 0.52662   |
| 2w4w_SITTD | 0.02863996 | 0.28228372 | 7.99E-05   | 0.060913  | 0.75723   |
| 2w4w_SITTD | 0.06631494 | 0.6492196  | 0.00011979 | 0.091802  | -0.66011  |
| 2w4w_SITTD | 0.00515182 | 0.05352069 | 5.58E-05   | 0.0096645 | 0.22108   |
| 2w4w_SITTD | 0.04866344 | 0.47730258 | 0.00010344 | 0.095375  | 0.081803  |
| 2w4w_SITTD | 0.04712826 | 0.46235067 | 0.00010159 | 0.098799  | 0.11903   |
| 2w4w_SITTD | 0.08032138 | 0.7856354  | 0.00012889 | 0.055287  | -1.2081   |
| 2w4w_SITTD | 0.06450419 | 0.63158375 | 0.00011843 | 0.096001  | -0.55833  |
| 2w4w_SITTD | 0.05803996 | 0.5686253  | 0.00011273 | 0.096781  | -0.26697  |
| 2w4w_SITTD | 0.07322559 | 0.71652585 | 0.00012469 | 0.069151  | -0.97873  |
| 2w4w_SITTD | 0.04497258 | 0.44135538 | 9.93E-05   | 0.10345   | 0.18258   |
| 2w4w_SITTD | 0.05839727 | 0.57210535 | 0.00011305 | 0.097132  | -0.2822   |
| 2w4w_SITTD | 0.07960244 | 0.7786333  | 0.00012853 | 0.055948  | -1.1924   |

|            |            |            |            |           |          |
|------------|------------|------------|------------|-----------|----------|
| 2w4w_SITTD | 0.05601167 | 0.5488707  | 0.00011078 | 0.094541  | -0.17881 |
| 2w4w_SITTD | 0.06522145 | 0.6385695  | 0.00011898 | 0.094504  | -0.60919 |
| 2w4w_SITTD | 0.00354516 | 0.03787266 | 5.44E-05   | 0.0082917 | 0.2947   |
| 2w4w_SITTD | 0.06326208 | 0.61948615 | 0.0001173  | 0.098072  | -0.50782 |
| 2w4w_SITTD | 0.05572791 | 0.54610705 | 0.00011045 | 0.094186  | -0.16472 |
| 2w4w_SITTD | 0.04400273 | 0.43190953 | 9.82E-05   | 0.10565   | 0.20107  |
| 2w4w_SITTD | 0.03384555 | 0.3329836  | 8.65E-05   | 0.090344  | 0.58656  |
| 2w4w_SITTD | 0.07939053 | 0.77656937 | 0.00012835 | 0.05632   | -1.1841  |
| 2w4w_SITTD | 0.04711549 | 0.4622263  | 0.00010159 | 0.098799  | 0.11903  |
| 2w4w_SITTD | 0.04502092 | 0.44182622 | 9.93E-05   | 0.10345   | 0.17344  |
| 2w4w_SITTD | 0.04178077 | 0.41026878 | 9.58E-05   | 0.10896   | 0.27003  |
| 2w4w_SITTD | 0.0827575  | 0.809362   | 0.00013009 | 0.053693  | -1.2543  |
| 2w4w_SITTD | 0.06327336 | 0.619596   | 0.0001173  | 0.098072  | -0.50782 |
| 2w4w_SITTD | 0.02243954 | 0.22189465 | 7.26E-05   | 0.037419  | 0.65846  |
| 2w4w_SITTD | 0.05234299 | 0.51313955 | 0.00010703 | 0.092172  | -0.03476 |
| 2w4w_SITTD | 0.05749653 | 0.56333256 | 0.00011209 | 0.096042  | -0.23694 |
| 2w4w_SITTD | 0.0697297  | 0.68247765 | 0.00012235 | 0.080544  | -0.82636 |
| 2w4w_SITTD | 0.04327446 | 0.42481655 | 9.74E-05   | 0.10696   | 0.22964  |
| 2w4w_SITTD | 0.07364566 | 0.7206172  | 0.00012491 | 0.068128  | -0.99278 |
| 2w4w_SITTD | 0.06255688 | 0.61261785 | 0.00011672 | 0.098627  | -0.47447 |
| 2w4w_SITTD | 0.06607261 | 0.6468593  | 0.00011953 | 0.092756  | -0.64315 |
| 2w4w_SITTD | 0.07559765 | 0.7396286  | 0.00012619 | 0.062687  | -1.0712  |
| 2w4w_SITTD | 0.04461795 | 0.43790147 | 9.89E-05   | 0.10421   | 0.19178  |
| 2w4w_SITTD | 0.03622999 | 0.35620683 | 8.94E-05   | 0.10166   | 0.47826  |
| 2w4w_SITTD | 0.02703969 | 0.26669782 | 7.82E-05   | 0.054511  | 0.77219  |
| 2w4w_SITTD | 0.07207822 | 0.70535105 | 0.00012401 | 0.07238   | -0.93514 |
| 2w4w_SITTD | 0.02734356 | 0.26965737 | 7.86E-05   | 0.05605   | 0.77153  |
| 2w4w_SITTD | 0.04359293 | 0.42791826 | 9.78E-05   | 0.10633   | 0.21998  |
| 2w4w_SITTD | 0.04800671 | 0.47090635 | 0.00010271 | 0.09665   | 0.10061  |
| 2w4w_SITTD | 0.0689403  | 0.6747893  | 0.00012186 | 0.08293   | -0.77743 |
| 2w4w_SITTD | 0.01102974 | 0.11076875 | 6.08E-05   | 0.015922  | 0.10884  |
| 2w4w_SITTD | 0.07273499 | 0.71174765 | 0.00012446 | 0.070202  | -0.96444 |
| 2w4w_SITTD | 0.0261938  | 0.2584593  | 7.70E-05   | 0.050154  | 0.76965  |
| 2w4w_SITTD | 0.04505231 | 0.44213194 | 9.93E-05   | 0.10345   | 0.17344  |
| 2w4w_SITTD | 0.06313582 | 0.61825645 | 0.0001173  | 0.098072  | -0.49111 |
| 2w4w_SITTD | 0.03304227 | 0.32516003 | 8.52E-05   | 0.084798  | 0.61617  |
| 2w4w_SITTD | 0.03596139 | 0.35359082 | 8.90E-05   | 0.10026   | 0.49376  |
| 2w4w_SITTD | 0.06458293 | 0.6323506  | 0.00011843 | 0.096001  | -0.57526 |
| 2w4w_SITTD | 0.04688314 | 0.4599633  | 0.00010159 | 0.098799  | 0.12814  |
| 2w4w_SITTD | 0.00229873 | 0.02573302 | 5.36E-05   | 0.0075574 | 0.34395  |
| 2w4w_SITTD | 0.02773718 | 0.27349105 | 7.90E-05   | 0.057632  | 0.76966  |
| 2w4w_SITTD | 0.0554144  | 0.54305357 | 0.00011011 | 0.093847  | -0.1508  |
| 2w4w_SITTD | 0.07566889 | 0.7403224  | 0.00012619 | 0.062687  | -1.0712  |
| 2w4w_SITTD | 0.03617644 | 0.35568532 | 8.90E-05   | 0.10026   | 0.47826  |
| 2w4w_SITTD | 0.02302643 | 0.22761062 | 7.34E-05   | 0.039406  | 0.67444  |
| 2w4w_SITTD | 0.03990638 | 0.3920131  | 9.34E-05   | 0.10962   | 0.32588  |

|            |            |            |            |           |           |
|------------|------------|------------|------------|-----------|-----------|
| 2w4w_SITTD | 0.07880635 | 0.77087975 | 0.00012797 | 0.057152  | -1.1666   |
| 2w4w_SITTD | 0.03765966 | 0.3701312  | 9.10E-05   | 0.1063    | 0.41807   |
| 2w4w_SITTD | 0.07362469 | 0.72041285 | 0.00012491 | 0.068128  | -0.99278  |
| 2w4w_SITTD | 0.03420416 | 0.33647627 | 8.69E-05   | 0.09213   | 0.57137   |
| 2w4w_SITTD | 0.083527   | 0.81685656 | 0.00013042 | 0.053406  | -1.2651   |
| 2w4w_SITTD | 0.02261336 | 0.22358756 | 7.30E-05   | 0.038397  | 0.65846   |
| 2w4w_SITTD | 0.02096905 | 0.20757279 | 7.10E-05   | 0.033786  | 0.56707   |
| 2w4w_SITTD | 0.07530408 | 0.7367694  | 0.00012598 | 0.063504  | -1.0589   |
| 2w4w_SITTD | 0.05652789 | 0.5538984  | 0.00011144 | 0.095284  | -0.19309  |
| 2w4w_SITTD | 0.04932087 | 0.48370564 | 0.00010417 | 0.094268  | 0.062467  |
| 2w4w_SITTD | 0.02498822 | 0.24671751 | 7.58E-05   | 0.046199  | 0.74769   |
| 2w4w_SITTD | 0.03860384 | 0.37932697 | 9.18E-05   | 0.10791   | 0.37625   |
| 2w4w_SITTD | 0.04165684 | 0.4090617  | 9.54E-05   | 0.10929   | 0.27003   |
| 2w4w_SITTD | 0.00416002 | 0.04386107 | 5.50E-05   | 0.0088178 | 0.2638    |
| 2w4w_SITTD | 0.05905481 | 0.57850945 | 0.00011368 | 0.097776  | -0.31309  |
| 2w4w_SITTD | 0.02096134 | 0.20749772 | 7.10E-05   | 0.033786  | 0.56707   |
| 2w4w_SITTD | 0.05292618 | 0.5188196  | 0.00010773 | 0.092257  | -0.059017 |
| 2w4w_SITTD | 0.04948053 | 0.48526067 | 0.00010417 | 0.094268  | 0.052555  |
| 2w4w_SITTD | 0.08022505 | 0.7846972  | 0.00012889 | 0.055287  | -1.2004   |
| 2w4w_SITTD | 0.05067437 | 0.49688804 | 0.00010561 | 0.092703  | 0.021622  |
| 2w4w_SITTD | 0.065897   | 0.64514905 | 0.00011953 | 0.092756  | -0.64315  |
| 2w4w_SITTD | 0.06860799 | 0.6715528  | 0.00012161 | 0.084113  | -0.7609   |
| 2w4w_SITTD | 0.06796703 | 0.6653101  | 0.0001211  | 0.086439  | -0.74427  |
| 2w4w_SITTD | 0.07302009 | 0.71452445 | 0.00012469 | 0.069151  | -0.96444  |
| 2w4w_SITTD | 0.07894532 | 0.7722333  | 0.00012816 | 0.056721  | -1.1755   |
| 2w4w_SITTD | 0.02365646 | 0.23374684 | 7.42E-05   | 0.041523  | 0.70349   |
| 2w4w_SITTD | 0.05702933 | 0.5587823  | 0.00011177 | 0.095663  | -0.22216  |
| 2w4w_SITTD | 0.0770533  | 0.75380594 | 0.000127   | 0.059827  | -1.117    |
| 2w4w_SITTD | 0.05719699 | 0.5604152  | 0.00011209 | 0.096042  | -0.22216  |
| 2w4w_SITTD | 0.0534051  | 0.52348405 | 0.00010842 | 0.092532  | -0.07149  |
| 2w4w_SITTD | 0.02179839 | 0.21565019 | 7.18E-05   | 0.035549  | 0.62396   |
| 2w4w_SITTD | 0.08710356 | 0.85169053 | 0.00013207 | 0.052686  | -1.3094   |
| 2w4w_SITTD | 0.01649779 | 0.16402493 | 6.62E-05   | 0.024342  | 0.29808   |
| 2w4w_SITTD | 0.06086454 | 0.5961353  | 0.00011523 | 0.098828  | -0.39249  |
| 2w4w_SITTD | 0.05269237 | 0.5165423  | 0.00010738 | 0.092189  | -0.046772 |
| 2w4w_SITTD | 0.05968887 | 0.58468485 | 0.00011431 | 0.098311  | -0.32873  |
| 2w4w_SITTD | 0.06454642 | 0.631995   | 0.00011843 | 0.096001  | -0.57526  |
| 2w4w_SITTD | 0.07968092 | 0.7793976  | 0.00012853 | 0.055948  | -1.1924   |
| 2w4w_SITTD | 0.0827397  | 0.80918866 | 0.00013009 | 0.053693  | -1.2543   |
| 2w4w_SITTD | 0.07016567 | 0.68672377 | 0.0001226  | 0.07935   | -0.8424   |
| 2w4w_SITTD | 0.03470389 | 0.34134343 | 8.73E-05   | 0.093873  | 0.55601   |
| 2w4w_SITTD | 0.04942133 | 0.4846841  | 0.00010417 | 0.094268  | 0.062467  |
| 2w4w_SITTD | 0.03139663 | 0.30913234 | 8.32E-05   | 0.075317  | 0.6834    |
| 2w4w_SITTD | 0.0267291  | 0.2636729  | 7.78E-05   | 0.053015  | 0.77158   |
| 2w4w_SITTD | 0.02339218 | 0.2311729  | 7.38E-05   | 0.040447  | 0.68948   |
| 2w4w_SITTD | 0.0664869  | 0.65089434 | 0.00012006 | 0.090801  | -0.66011  |

|            |            |            |            |           |           |
|------------|------------|------------|------------|-----------|-----------|
| 2w4w_SITTD | 0.0437175  | 0.4291315  | 9.78E-05   | 0.10633   | 0.21046   |
| 2w4w_SITTD | 0.04299594 | 0.42210388 | 9.70E-05   | 0.10755   | 0.22964   |
| 2w4w_SITTD | 0.06686052 | 0.6545332  | 0.00012032 | 0.089759  | -0.67704  |
| 2w4w_SITTD | 0.05210282 | 0.5108004  | 0.00010703 | 0.092172  | -0.022986 |
| 2w4w_SITTD | 0.04868428 | 0.4775056  | 0.00010344 | 0.095375  | 0.081803  |
| 2w4w_SITTD | 0.06981304 | 0.6832893  | 0.00012235 | 0.080544  | -0.82636  |
| 2w4w_SITTD | 0.00615615 | 0.06330238 | 5.66E-05   | 0.010584  | 0.18365   |
| 2w4w_SITTD | 0.0285071  | 0.28098974 | 7.99E-05   | 0.060913  | 0.76245   |
| 2w4w_SITTD | 0.0408234  | 0.40094444 | 9.46E-05   | 0.10971   | 0.3027    |
| 2w4w_SITTD | 0.05868436 | 0.5749014  | 0.00011337 | 0.097465  | -0.2822   |
| 2w4w_SITTD | 0.05836809 | 0.5718211  | 0.00011305 | 0.097132  | -0.2822   |
| 2w4w_SITTD | 0.0430596  | 0.42272392 | 9.70E-05   | 0.10755   | 0.22964   |
| 2w4w_SITTD | 0.04905634 | 0.48112926 | 0.00010381 | 0.094798  | 0.072211  |
| 2w4w_SITTD | 0.04508033 | 0.44240487 | 9.93E-05   | 0.10345   | 0.17344   |
| 2w4w_SITTD | 0.06082799 | 0.5957793  | 0.00011523 | 0.098828  | -0.39249  |
| 2w4w_SITTD | 0.04874227 | 0.47807032 | 0.00010344 | 0.095375  | 0.081803  |
| 2w4w_SITTD | 0.03068656 | 0.3022166  | 8.23E-05   | 0.07157   | 0.70647   |
| 2w4w_SITTD | 0.03476307 | 0.34191978 | 8.73E-05   | 0.093873  | 0.54051   |
| 2w4w_SITTD | 0.05233494 | 0.51306117 | 0.00010703 | 0.092172  | -0.03476  |
| 2w4w_SITTD | 0.00743233 | 0.07573175 | 5.78E-05   | 0.011928  | 0.14372   |
| 2w4w_SITTD | 0.07030037 | 0.68803567 | 0.00012284 | 0.078159  | -0.8424   |
| 2w4w_SITTD | 0.01959634 | 0.19420321 | 6.95E-05   | 0.030541  | 0.48489   |
| 2w4w_SITTD | 0.06234353 | 0.61054    | 0.00011672 | 0.098627  | -0.4579   |
| 2w4w_SITTD | 0.02601238 | 0.25669232 | 7.70E-05   | 0.050154  | 0.76634   |
| 2w4w_SITTD | 0.02570991 | 0.25374645 | 7.66E-05   | 0.04879   | 0.7616    |
| 2w4w_SITTD | 0.01001099 | 0.10084664 | 5.98E-05   | 0.014626  | 0.1081    |
| 2w4w_SITTD | 0.0624621  | 0.6116947  | 0.00011672 | 0.098627  | -0.47447  |
| 2w4w_SITTD | 0.05389844 | 0.5282889  | 0.00010876 | 0.092731  | -0.084185 |
| 2w4w_SITTD | 0.0730035  | 0.71436286 | 0.00012469 | 0.069151  | -0.96444  |
| 2w4w_SITTD | 0.02752024 | 0.27137816 | 7.86E-05   | 0.05605   | 0.77153   |
| 2w4w_SITTD | 0.05409676 | 0.53022045 | 0.0001091  | 0.092966  | -0.097097 |
| 2w4w_SITTD | 0.07310611 | 0.7153622  | 0.00012469 | 0.069151  | -0.97873  |
| 2w4w_SITTD | 0.00880653 | 0.08911578 | 5.89E-05   | 0.013414  | 0.11742   |
| 2w4w_SITTD | 0.05461753 | 0.53529245 | 0.00010944 | 0.093233  | -0.12355  |
| 2w4w_SITTD | 0.07382707 | 0.722384   | 0.00012513 | 0.067136  | -1.0066   |
| 2w4w_SITTD | 0.02567811 | 0.25343677 | 7.66E-05   | 0.04879   | 0.7616    |
| 2w4w_SITTD | 0.06594814 | 0.6456471  | 0.00011953 | 0.092756  | -0.64315  |
| 2w4w_SITTD | 0.05855674 | 0.5736584  | 0.00011337 | 0.097465  | -0.2822   |
| 2w4w_SITTD | 0.02350414 | 0.23226333 | 7.38E-05   | 0.040447  | 0.70349   |
| 2w4w_SITTD | 0.01379254 | 0.13767706 | 6.34E-05   | 0.019794  | 0.16714   |
| 2w4w_SITTD | 0.01432509 | 0.14286387 | 6.41E-05   | 0.020862  | 0.19442   |
| 2w4w_SITTD | 0.02985131 | 0.29408163 | 8.15E-05   | 0.067903  | 0.7357    |
| 2w4w_SITTD | 0.04592375 | 0.4506193  | 0.00010046 | 0.10111   | 0.1553    |
| 2w4w_SITTD | 0.00323096 | 0.03481248 | 5.42E-05   | 0.0080398 | 0.31077   |
| 2w4w_SITTD | 0.07462712 | 0.7301761  | 0.00012556 | 0.06525   | -1.0333   |
| 2w4w_SITTD | 0.04254899 | 0.41775087 | 9.66E-05   | 0.10808   | 0.24945   |

|            |            |            |            |           |           |
|------------|------------|------------|------------|-----------|-----------|
| 2w4w_SITTD | 0.02314233 | 0.22873951 | 7.34E-05   | 0.039406  | 0.68948   |
| 2w4w_SITTD | 0.05236433 | 0.51334745 | 0.00010703 | 0.092172  | -0.03476  |
| 2w4w_SITTD | 0.02697118 | 0.26603058 | 7.82E-05   | 0.054511  | 0.77219   |
| 2w4w_SITTD | 0.07523016 | 0.7360494  | 0.00012598 | 0.063504  | -1.0589   |
| 2w4w_SITTD | 0.06014011 | 0.58907974 | 0.00011462 | 0.098526  | -0.36038  |
| 2w4w_SITTD | 0.06107836 | 0.59821784 | 0.00011553 | 0.098907  | -0.39249  |
| 2w4w_SITTD | 0.05582985 | 0.5470999  | 0.00011078 | 0.094541  | -0.16472  |
| 2w4w_SITTD | 0.07304291 | 0.7147467  | 0.00012469 | 0.069151  | -0.96444  |
| 2w4w_SITTD | 0.00653138 | 0.06695692 | 5.69E-05   | 0.010907  | 0.17252   |
| 2w4w_SITTD | 0.01640333 | 0.16310488 | 6.62E-05   | 0.024342  | 0.29808   |
| 2w4w_SITTD | 0.06878441 | 0.67327094 | 0.00012161 | 0.084113  | -0.77743  |
| 2w4w_SITTD | 0.08068929 | 0.78921866 | 0.00012907 | 0.054994  | -1.2155   |
| 2w4w_SITTD | 0.07774667 | 0.760559   | 0.0001274  | 0.058646  | -1.1379   |
| 2w4w_SITTD | 0.00648076 | 0.06646395 | 5.69E-05   | 0.010907  | 0.17252   |
| 2w4w_SITTD | 0.03196058 | 0.31462488 | 8.40E-05   | 0.07911   | 0.67094   |
| 2w4w_SITTD | 0.03105403 | 0.30579552 | 8.28E-05   | 0.073435  | 0.69526   |
| 2w4w_SITTD | 0.04766499 | 0.4675782  | 0.00010234 | 0.09734   | 0.10986   |
| 2w4w_SITTD | 0.06449901 | 0.63153327 | 0.00011843 | 0.096001  | -0.55833  |
| 2w4w_SITTD | 0.01466239 | 0.14614901 | 6.44E-05   | 0.021412  | 0.20962   |
| 2w4w_SITTD | 0.02727233 | 0.26896363 | 7.82E-05   | 0.054511  | 0.77153   |
| 2w4w_SITTD | 0.05776861 | 0.5659824  | 0.00011241 | 0.096416  | -0.25188  |
| 2w4w_SITTD | 0.06877651 | 0.67319405 | 0.00012161 | 0.084113  | -0.77743  |
| 2w4w_SITTD | 0.02697726 | 0.26608986 | 7.82E-05   | 0.054511  | 0.77219   |
| 2w4w_SITTD | 0.06679887 | 0.6539328  | 0.00012032 | 0.089759  | -0.67704  |
| 2w4w_SITTD | 0.01120467 | 0.11247248 | 6.11E-05   | 0.016373  | 0.1115    |
| 2w4w_SITTD | 0.01450943 | 0.14465922 | 6.41E-05   | 0.020862  | 0.19442   |
| 2w4w_SITTD | 0.0652063  | 0.6384219  | 0.00011898 | 0.094504  | -0.60919  |
| 2w4w_SITTD | 0.0671196  | 0.6570565  | 0.00012032 | 0.089759  | -0.69393  |
| 2w4w_SITTD | 0.03278638 | 0.3226678  | 8.48E-05   | 0.082909  | 0.6305    |
| 2w4w_SITTD | 0.01483607 | 0.14784057 | 6.44E-05   | 0.021412  | 0.20962   |
| 2w4w_SITTD | 0.06351692 | 0.62196815 | 0.00011758 | 0.097678  | -0.5246   |
| 2w4w_SITTD | 0.08290412 | 0.81079    | 0.00013009 | 0.053693  | -1.2543   |
| 2w4w_SITTD | 0.03506196 | 0.34483078 | 8.77E-05   | 0.095565  | 0.54051   |
| 2w4w_SITTD | 0.03822871 | 0.37567338 | 9.14E-05   | 0.10717   | 0.38979   |
| 2w4w_SITTD | 0.0741838  | 0.7258584  | 0.00012534 | 0.066176  | -1.0201   |
| 2w4w_SITTD | 0.00560649 | 0.05794899 | 5.61E-05   | 0.0099627 | 0.20797   |
| 2w4w_SITTD | 0.0640242  | 0.6269089  | 0.00011787 | 0.097201  | -0.54144  |
| 2w4w_SITTD | 0.02441199 | 0.2411053  | 7.50E-05   | 0.043782  | 0.72811   |
| 2w4w_SITTD | 0.07086256 | 0.6935111  | 0.00012308 | 0.076976  | -0.87403  |
| 2w4w_SITTD | 0.04830859 | 0.47384655 | 0.00010308 | 0.095994  | 0.091263  |
| 2w4w_SITTD | 0.04183409 | 0.41078803 | 9.58E-05   | 0.10896   | 0.27003   |
| 2w4w_SITTD | 0.0558346  | 0.5471462  | 0.00011078 | 0.094541  | -0.16472  |
| 2w4w_SITTD | 0.06945139 | 0.679767   | 0.00012211 | 0.081739  | -0.81017  |
| 2w4w_SITTD | 0.05295607 | 0.5191106  | 0.00010773 | 0.092257  | -0.059017 |
| 2w4w_SITTD | 0.04763141 | 0.46725115 | 0.00010234 | 0.09734   | 0.10986   |
| 2w4w_SITTD | 0.07122097 | 0.6970019  | 0.00012331 | 0.075804  | -0.88959  |



|            |            |            |            |          |            |
|------------|------------|------------|------------|----------|------------|
| 2w4w_SITTD | 0.07829348 | 0.76588464 | 0.00012778 | 0.057615 | -1.1573    |
| 2w4w_SITTD | 0.05644918 | 0.5531318  | 0.00011111 | 0.094909 | -0.19309   |
| 2w4w_SITTD | 0.03806479 | 0.37407687 | 9.14E-05   | 0.10717  | 0.40374    |
| 2w4w_SITTD | 0.06718361 | 0.6576799  | 0.00012058 | 0.088682 | -0.69393   |
| 2w4w_SITTD | 0.05737979 | 0.56219554 | 0.00011209 | 0.096042 | -0.23694   |
| 2w4w_SITTD | 0.04558464 | 0.4473166  | 0.00010009 | 0.1019   | 0.16436    |
| 2w4w_SITTD | 0.02781814 | 0.27427953 | 7.90E-05   | 0.057632 | 0.76966    |
| 2w4w_SITTD | 0.07888731 | 0.77166826 | 0.00012816 | 0.056721 | -1.1755    |
| 2w4w_SITTD | 0.05676873 | 0.55624413 | 0.00011144 | 0.095284 | -0.20754   |
| 2w4w_SITTD | 0.04661906 | 0.45739135 | 0.00010122 | 0.099559 | 0.13721    |
| 2w4w_SITTD | 0.05991097 | 0.586848   | 0.00011431 | 0.098311 | -0.3445    |
| 2w4w_SITTD | 0.0635917  | 0.6226965  | 0.00011758 | 0.097678 | -0.5246    |
| 2w4w_SITTD | 0.09696878 | 0.9477729  | 0.00013536 | 0.052262 | -1.3446    |
| 2w4w_SITTD | 0.06460719 | 0.63258684 | 0.00011843 | 0.096001 | -0.57526   |
| 2w4w_SITTD | 0.04663158 | 0.45751324 | 0.00010122 | 0.099559 | 0.13721    |
| 2w4w_SITTD | 0.02782903 | 0.27438563 | 7.90E-05   | 0.057632 | 0.76966    |
| 2w4w_SITTD | 0.02382368 | 0.23537552 | 7.42E-05   | 0.041523 | 0.71639    |
| 2w4w_SITTD | 0.08662768 | 0.8470557  | 0.00013179 | 0.052739 | -1.3031    |
| 2w4w_SITTD | 0.05537058 | 0.54262686 | 0.00011011 | 0.093847 | -0.1508    |
| 2w4w_SITTD | 0.07706899 | 0.75395876 | 0.000127   | 0.059827 | -1.117     |
| 2w4w_SITTD | 0.02931731 | 0.28888074 | 8.07E-05   | 0.064343 | 0.7438     |
| 2w4w_SITTD | 0.05819447 | 0.5701301  | 0.00011273 | 0.096781 | -0.26697   |
| 2w4w_SITTD | 0.07574308 | 0.741045   | 0.0001264  | 0.06191  | -1.0712    |
| 2w4w_SITTD | 0.02170538 | 0.2147443  | 7.18E-05   | 0.035549 | 0.6056     |
| 2w4w_SITTD | 0.07366406 | 0.7207964  | 0.00012513 | 0.067136 | -0.99278   |
| 2w4w_SITTD | 0.04738819 | 0.4648823  | 0.00010197 | 0.098057 | 0.11903    |
| 2w4w_SITTD | 0.06820404 | 0.6676184  | 0.00012136 | 0.085284 | -0.74427   |
| 2w4w_SITTD | 0.06981261 | 0.6832851  | 0.00012235 | 0.080544 | -0.82636   |
| 2w4w_SITTD | 0.06363068 | 0.62307614 | 0.00011758 | 0.097678 | -0.5246    |
| 2w4w_SITTD | 0.01866213 | 0.18510449 | 6.84E-05   | 0.028322 | 0.44251    |
| 2w4w_SITTD | 0.05885274 | 0.57654136 | 0.00011337 | 0.097465 | -0.29758   |
| 2w4w_SITTD | 0.06988907 | 0.6840298  | 0.0001226  | 0.07935  | -0.82636   |
| 2w4w_SITTD | 0.05143921 | 0.5043372  | 0.00010632 | 0.092309 | -0.0001745 |
| 2w4w_SITTD | 0.04681338 | 0.4592839  | 0.00010122 | 0.099559 | 0.12814    |
| 2w4w_SITTD | 0.04080569 | 0.40077192 | 9.46E-05   | 0.10971  | 0.3027     |
| 2w4w_SITTD | 0.00743692 | 0.07577648 | 5.78E-05   | 0.011928 | 0.14372    |
| 2w4w_SITTD | 0.04241832 | 0.41647813 | 9.66E-05   | 0.10808  | 0.24945    |
| 2w4w_SITTD | 0.07722513 | 0.7554794  | 0.0001272  | 0.059217 | -1.1276    |
| 2w4w_SITTD | 0.05269526 | 0.51657057 | 0.00010738 | 0.092189 | -0.046772  |
| 2w4w_SITTD | 0.0344184  | 0.33856285 | 8.69E-05   | 0.09213  | 0.55601    |
| 2w4w_SITTD | 0.0631489  | 0.6183839  | 0.0001173  | 0.098072 | -0.50782   |
| 2w4w_SITTD | 0.03999922 | 0.39291734 | 9.34E-05   | 0.10962  | 0.32588    |
| 2w4w_SITTD | 0.0218431  | 0.21608564 | 7.22E-05   | 0.03647  | 0.62396    |
| 2w4w_SITTD | 0.03521615 | 0.3463326  | 8.81E-05   | 0.097198 | 0.52494    |
| 2w4w_SITTD | 0.02182875 | 0.21594588 | 7.22E-05   | 0.03647  | 0.62396    |
| 2w4w_SITTD | 0.07164507 | 0.7011324  | 0.00012378 | 0.073503 | -0.90497   |

|            |            |            |            |          |           |
|------------|------------|------------|------------|----------|-----------|
| 2w4w_SITTD | 0.04148061 | 0.40734532 | 9.54E-05   | 0.10929  | 0.28067   |
| 2w4w_SITTD | 0.08753602 | 0.85590243 | 0.00013221 | 0.052667 | -1.3123   |
| 2w4w_SITTD | 0.07624693 | 0.74595225 | 0.0001266  | 0.061174 | -1.0948   |
| 2w4w_SITTD | 0.06008767 | 0.588569   | 0.00011462 | 0.098526 | -0.36038  |
| 2w4w_SITTD | 0.06010686 | 0.58875585 | 0.00011462 | 0.098526 | -0.36038  |
| 2w4w_SITTD | 0.06647463 | 0.65077484 | 0.00012006 | 0.090801 | -0.66011  |
| 2w4w_SITTD | 0.06280987 | 0.61508185 | 0.00011701 | 0.098387 | -0.49111  |
| 2w4w_SITTD | 0.04200951 | 0.4124966  | 9.58E-05   | 0.10896  | 0.25963   |
| 2w4w_SITTD | 0.07136789 | 0.6984328  | 0.00012355 | 0.074645 | -0.90497  |
| 2w4w_SITTD | 0.02656395 | 0.2620644  | 7.74E-05   | 0.051562 | 0.77158   |
| 2w4w_SITTD | 0.0060071  | 0.0618507  | 5.63E-05   | 0.010269 | 0.18365   |
| 2w4w_SITTD | 0.0799567  | 0.78208363 | 0.00012871 | 0.055605 | -1.2004   |
| 2w4w_SITTD | 0.0545223  | 0.534365   | 0.00010944 | 0.093233 | -0.11022  |
| 2w4w_SITTD | 0.08549213 | 0.83599603 | 0.00013135 | 0.05287  | -1.2923   |
| 2w4w_SITTD | 0.0565653  | 0.5542628  | 0.00011144 | 0.095284 | -0.19309  |
| 2w4w_SITTD | 0.04995838 | 0.48991466 | 0.00010453 | 0.09379  | 0.042456  |
| 2w4w_SITTD | 0.07250641 | 0.7095215  | 0.00012424 | 0.071279 | -0.9499   |
| 2w4w_SITTD | 0.05881459 | 0.5761697  | 0.00011337 | 0.097465 | -0.29758  |
| 2w4w_SITTD | 0.0475554  | 0.4665108  | 0.00010197 | 0.098057 | 0.10986   |
| 2w4w_SITTD | 0.07480026 | 0.7318624  | 0.00012577 | 0.064358 | -1.0462   |
| 2w4w_SITTD | 0.06248556 | 0.6119232  | 0.00011672 | 0.098627 | -0.47447  |
| 2w4w_SITTD | 0.065507   | 0.6413506  | 0.00011925 | 0.093659 | -0.60919  |
| 2w4w_SITTD | 0.06475029 | 0.63398063 | 0.00011871 | 0.095287 | -0.57526  |
| 2w4w_SITTD | 0.0533734  | 0.52317524 | 0.00010807 | 0.092373 | -0.07149  |
| 2w4w_SITTD | 0.04536568 | 0.44518405 | 9.97E-05   | 0.10268  | 0.16436   |
| 2w4w_SITTD | 0.01392533 | 0.13897036 | 6.37E-05   | 0.020323 | 0.18023   |
| 2w4w_SITTD | 0.06056652 | 0.5932327  | 0.00011492 | 0.0987   | -0.37638  |
| 2w4w_SITTD | 0.03769547 | 0.37047994 | 9.10E-05   | 0.1063   | 0.41807   |
| 2w4w_SITTD | 0.08696161 | 0.850308   | 0.00013193 | 0.052709 | -1.3063   |
| 2w4w_SITTD | 0.05397411 | 0.52902585 | 0.00010876 | 0.092731 | -0.097097 |
| 2w4w_SITTD | 0.05247086 | 0.514385   | 0.00010738 | 0.092189 | -0.03476  |
| 2w4w_SITTD | 0.02950706 | 0.29072887 | 8.11E-05   | 0.066108 | 0.7438    |
| 2w4w_SITTD | 0.06289769 | 0.6159372  | 0.00011701 | 0.098387 | -0.49111  |
| 2w4w_SITTD | 0.04257513 | 0.41800538 | 9.66E-05   | 0.10808  | 0.24945   |
| 2w4w_SITTD | 0.0488345  | 0.4789686  | 0.00010344 | 0.095375 | 0.072211  |
| 2w4w_SITTD | 0.0462915  | 0.4542011  | 0.00010084 | 0.10033  | 0.14626   |
| 2w4w_SITTE | 0.0313735  | 0.308907   | 8.32E-05   | 0.075317 | 0.6834    |
| 2w4w_SITTE | 0.03038392 | 0.29926905 | 8.19E-05   | 0.069725 | 0.71698   |
| 2w4w_SITTE | 0.06291396 | 0.61609566 | 0.00011701 | 0.098387 | -0.49111  |
| 2w4w_SITTE | 0.03594213 | 0.3534032  | 8.90E-05   | 0.10026  | 0.49376   |
| 2w4w_SITTE | 0.06306296 | 0.6175468  | 0.0001173  | 0.098072 | -0.49111  |
| 2w4w_SITTE | 0.02226101 | 0.2201559  | 7.26E-05   | 0.037419 | 0.64161   |
| 2w4w_SITTE | 0.06370538 | 0.6238037  | 0.00011787 | 0.097201 | -0.5246   |
| 2w4w_SITTE | 0.03420302 | 0.3364652  | 8.69E-05   | 0.09213  | 0.57137   |
| 2w4w_SITTE | 0.04386265 | 0.43054524 | 9.82E-05   | 0.10565  | 0.21046   |
| 2w4w_SITTE | 0.08646258 | 0.84544766 | 0.00013179 | 0.052739 | -1.3031   |

|             |            |            |            |          |           |
|-------------|------------|------------|------------|----------|-----------|
| 2w4w_SITTE4 | 0.06357992 | 0.6225817  | 0.00011758 | 0.097678 | -0.5246   |
| 2w4w_SITTE4 | 0.0649707  | 0.6361273  | 0.00011871 | 0.095287 | -0.59222  |
| 2w4w_SITTE4 | 0.05249641 | 0.51463383 | 0.00010738 | 0.092189 | -0.03476  |
| 2w4w_SITTE4 | 0.06314798 | 0.6183749  | 0.0001173  | 0.098072 | -0.50782  |
| 2w4w_SITTE4 | 0.01501344 | 0.14956807 | 6.47E-05   | 0.021973 | 0.22576   |
| 2w4w_SITTE4 | 0.05601301 | 0.54888374 | 0.00011078 | 0.094541 | -0.17881  |
| 2w4w_SITTE4 | 0.05087501 | 0.4988422  | 0.00010561 | 0.092703 | 0.010852  |
| 2w4w_SITTE4 | 0.06835844 | 0.66912216 | 0.00012136 | 0.085284 | -0.7609   |
| 2w4w_SITTE4 | 0.06942181 | 0.67947894 | 0.00012211 | 0.081739 | -0.81017  |
| 2w4w_SITTE4 | 0.02667696 | 0.263165   | 7.78E-05   | 0.053015 | 0.77158   |
| 2w4w_SITTE4 | 0.04488684 | 0.44052035 | 9.93E-05   | 0.10345  | 0.18258   |
| 2w4w_SITTE4 | 0.05433266 | 0.53251797 | 0.0001091  | 0.092966 | -0.11022  |
| 2w4w_SITTE4 | 0.08617184 | 0.84261596 | 0.00013164 | 0.052775 | -1.2997   |
| 2w4w_SITTE4 | 0.08417314 | 0.8231497  | 0.00013074 | 0.053178 | -1.2751   |
| 2w4w_SITTE4 | 0.05246621 | 0.5143396  | 0.00010738 | 0.092189 | -0.03476  |
| 2w4w_SITTE4 | 0.07342541 | 0.718472   | 0.00012491 | 0.068128 | -0.99278  |
| 2w4w_SITTE4 | 0.07360393 | 0.72021073 | 0.00012491 | 0.068128 | -0.99278  |
| 2w4w_SITTE4 | 0.07592114 | 0.74277925 | 0.0001264  | 0.06191  | -1.0832   |
| 2w4w_SITTE4 | 0.06892593 | 0.67464924 | 0.00012186 | 0.08293  | -0.77743  |
| 2w4w_SITTE4 | 0.04892524 | 0.47985244 | 0.00010344 | 0.095375 | 0.072211  |
| 2w4w_SITTE4 | 0.07151111 | 0.69982773 | 0.00012355 | 0.074645 | -0.90497  |
| 2w4w_SITTE4 | 0.04829057 | 0.47367102 | 0.00010308 | 0.095994 | 0.091263  |
| 2w4w_SITTE4 | 0.05541747 | 0.5430835  | 0.00011011 | 0.093847 | -0.1508   |
| 2w4w_SITTE4 | 0.04757366 | 0.4666887  | 0.00010234 | 0.09734  | 0.10986   |
| 2w4w_SITTE4 | 0.06293769 | 0.6163268  | 0.00011701 | 0.098387 | -0.49111  |
| 2w4w_SITTE4 | 0.07227773 | 0.70729417 | 0.00012401 | 0.07238  | -0.93514  |
| 2w4w_SITTE4 | 0.07915108 | 0.7742372  | 0.00012816 | 0.056721 | -1.1755   |
| 2w4w_SITTE4 | 0.0486018  | 0.47670224 | 0.00010344 | 0.095375 | 0.081803  |
| 2w4w_SITTE4 | 0.04982382 | 0.48860416 | 0.00010453 | 0.09379  | 0.042456  |
| 2w4w_SITTE4 | 0.04859026 | 0.47658986 | 0.00010308 | 0.095994 | 0.081803  |
| 2w4w_SITTE4 | 0.06512366 | 0.63761705 | 0.00011898 | 0.094504 | -0.59222  |
| 2w4w_SITTE4 | 0.05361943 | 0.52557147 | 0.00010842 | 0.092532 | -0.084185 |
| 2w4w_SITTE4 | 0.06372869 | 0.6240307  | 0.00011787 | 0.097201 | -0.5246   |
| 2w4w_SITTE4 | 0.0168098  | 0.1670637  | 6.65E-05   | 0.024968 | 0.31771   |
| 2w4w_SITTE4 | 0.03861019 | 0.3793889  | 9.18E-05   | 0.10791  | 0.37625   |
| 2w4w_SITTE4 | 0.04056137 | 0.3983924  | 9.42E-05   | 0.10978  | 0.3027    |
| 2w4w_SITTE4 | 0.06393751 | 0.6260645  | 0.00011787 | 0.097201 | -0.54144  |
| 2w4w_SITTE4 | 0.06325325 | 0.61940014 | 0.0001173  | 0.098072 | -0.50782  |
| 2w4w_SITTE4 | 0.05696085 | 0.55811524 | 0.00011177 | 0.095663 | -0.20754  |
| 2w4w_SITTE4 | 0.03639383 | 0.35780254 | 8.94E-05   | 0.10166  | 0.47826   |
| 2w4w_SITTE4 | 0.0751684  | 0.7354479  | 0.00012598 | 0.063504 | -1.0589   |
| 2w4w_SITTE4 | 0.01762796 | 0.17503223 | 6.72E-05   | 0.026262 | 0.37908   |
| 2w4w_SITTE4 | 0.05624094 | 0.5511037  | 0.00011111 | 0.094909 | -0.17881  |
| 2w4w_SITTE4 | 0.01956672 | 0.19391476 | 6.95E-05   | 0.030541 | 0.48489   |
| 2w4w_SITTE4 | 0.05394764 | 0.5287681  | 0.00010876 | 0.092731 | -0.097097 |
| 2w4w_SITTE4 | 0.05216078 | 0.51136494 | 0.00010703 | 0.092172 | -0.022986 |

|             |            |            |            |          |           |
|-------------|------------|------------|------------|----------|-----------|
| 2w4w_SITTE4 | 0.01935719 | 0.19187407 | 6.91E-05   | 0.029782 | 0.48489   |
| 2w4w_SITTE4 | 0.05242373 | 0.5139259  | 0.00010738 | 0.092189 | -0.03476  |
| 2w4w_SITTE4 | 0.01654069 | 0.16444272 | 6.62E-05   | 0.024342 | 0.29808   |
| 2w4w_SITTE4 | 0.04637267 | 0.45499158 | 0.00010084 | 0.10033  | 0.14626   |
| 2w4w_SITTE4 | 0.05622381 | 0.5509369  | 0.00011111 | 0.094909 | -0.17881  |
| 2w4w_SITTE4 | 0.02552286 | 0.25192463 | 7.62E-05   | 0.047472 | 0.7616    |
| 2w4w_SITTE4 | 0.03806942 | 0.37412205 | 9.14E-05   | 0.10717  | 0.40374   |
| 2w4w_SITTE4 | 0.00567272 | 0.05859397 | 5.63E-05   | 0.010269 | 0.19547   |
| 2w4w_SITTE4 | 0.04850492 | 0.47575864 | 0.00010308 | 0.095994 | 0.081803  |
| 2w4w_SITTE4 | 0.05449487 | 0.53409785 | 0.00010944 | 0.093233 | -0.11022  |
| 2w4w_SITTE4 | 0.08467604 | 0.8280477  | 0.00013105 | 0.053002 | -1.2797   |
| 2w4w_SITTE4 | 0.06199721 | 0.6071669  | 0.00011642 | 0.098794 | -0.44141  |
| 2w4w_SITTE4 | 0.05623145 | 0.55101126 | 0.00011111 | 0.094909 | -0.17881  |
| 2w4w_SITTE4 | 0.0682677  | 0.6682384  | 0.00012136 | 0.085284 | -0.74427  |
| 2w4w_SITTE4 | 0.08097826 | 0.7920331  | 0.00012924 | 0.054725 | -1.2227   |
| 2w4w_SITTE4 | 0.08603381 | 0.84127164 | 0.00013164 | 0.052775 | -1.2961   |
| 2w4w_SITTE4 | 0.03177014 | 0.31277016 | 8.40E-05   | 0.07911  | 0.67094   |
| 2w4w_SITTE4 | 0.0780787  | 0.7637928  | 0.00012759 | 0.058113 | -1.1478   |
| 2w4w_SITTE4 | 0.07696553 | 0.752951   | 0.000127   | 0.059827 | -1.117    |
| 2w4w_SITTE4 | 0.05325209 | 0.52199376 | 0.00010807 | 0.092373 | -0.07149  |
| 2w4w_SITTE4 | 0.04079169 | 0.40063557 | 9.46E-05   | 0.10971  | 0.3027    |
| 2w4w_SITTE4 | 0.05317507 | 0.52124363 | 0.00010807 | 0.092373 | -0.059017 |
| 2w4w_SITTE4 | 0.03554051 | 0.34949172 | 8.81E-05   | 0.097198 | 0.50933   |
| 2w4w_SITTE4 | 0.06714185 | 0.6572732  | 0.00012058 | 0.088682 | -0.69393  |
| 2w4w_SITTE4 | 0.03050391 | 0.3004377  | 8.23E-05   | 0.07157  | 0.71698   |
| 2w4w_SITTE4 | 0.04734584 | 0.46446985 | 0.00010197 | 0.098057 | 0.11903   |
| 2w4w_SITTE4 | 0.05066637 | 0.49681014 | 0.00010561 | 0.092703 | 0.021622  |
| 2w4w_SITTE4 | 0.05932536 | 0.58114445 | 0.000114   | 0.098059 | -0.31309  |
| 2w4w_SITTE4 | 0.07018653 | 0.6869269  | 0.0001226  | 0.07935  | -0.8424   |
| 2w4w_SITTE4 | 0.06959309 | 0.68114716 | 0.00012235 | 0.080544 | -0.81017  |
| 2w4w_SITTE4 | 0.03809045 | 0.37432688 | 9.14E-05   | 0.10717  | 0.40374   |
| 2w4w_SITTE4 | 0.08781183 | 0.8585887  | 0.00013235 | 0.052652 | -1.315    |
| 2w4w_SITTE4 | 0.06484554 | 0.6349083  | 0.00011871 | 0.095287 | -0.57526  |
| 2w4w_SITTE4 | 0.04006931 | 0.3936     | 9.38E-05   | 0.10975  | 0.32588   |
| 2w4w_SITTE4 | 0.05568177 | 0.5456577  | 0.00011045 | 0.094186 | -0.16472  |
| 2w4w_SITTE4 | 0.01647118 | 0.1637657  | 6.62E-05   | 0.024342 | 0.29808   |
| 2w4w_SITTE4 | 0.01579752 | 0.1572046  | 6.54E-05   | 0.023132 | 0.26052   |
| 2w4w_SITTE4 | 0.01828442 | 0.18142582 | 6.80E-05   | 0.027619 | 0.4001    |
| 2w4w_SITTE4 | 0.035061   | 0.34482145 | 8.77E-05   | 0.095565 | 0.54051   |
| 2w4w_SITTE4 | 0.01394364 | 0.13914877 | 6.37E-05   | 0.020323 | 0.18023   |
| 2w4w_SITTE4 | 0.06737731 | 0.65956646 | 0.00012058 | 0.088682 | -0.71078  |
| 2w4w_SITTE4 | 0.05843825 | 0.5725044  | 0.00011305 | 0.097132 | -0.2822   |
| 2w4w_SITTE4 | 0.08232077 | 0.8051085  | 0.00012993 | 0.053861 | -1.2485   |
| 2w4w_SITTE4 | 0.02664157 | 0.2628204  | 7.78E-05   | 0.053015 | 0.77158   |
| 2w4w_SITTE4 | 0.04047994 | 0.3975993  | 9.42E-05   | 0.10978  | 0.31414   |
| 2w4w_SITTE4 | 0.03320209 | 0.32671663 | 8.57E-05   | 0.086671 | 0.61617   |

|             |            |            |            |           |            |
|-------------|------------|------------|------------|-----------|------------|
| 2w4w_SITTE4 | 0.04776983 | 0.46859926 | 0.00010234 | 0.09734   | 0.10061    |
| 2w4w_SITTE4 | 0.01822212 | 0.18081905 | 6.80E-05   | 0.027619  | 0.4001     |
| 2w4w_SITTE4 | 0.02085711 | 0.20648253 | 7.10E-05   | 0.033786  | 0.56707    |
| 2w4w_SITTE4 | 0.01918443 | 0.19019146 | 6.91E-05   | 0.029782  | 0.46374    |
| 2w4w_SITTE4 | 0.05825071 | 0.5706779  | 0.00011305 | 0.097132  | -0.26697   |
| 2w4w_SITTE4 | 0.0670732  | 0.6566046  | 0.00012032 | 0.089759  | -0.69393   |
| 2w4w_SITTE4 | 0.0746549  | 0.73044664 | 0.00012556 | 0.06525   | -1.0333    |
| 2w4w_SITTE4 | 0.04465875 | 0.43829885 | 9.89E-05   | 0.10421   | 0.19178    |
| 2w4w_SITTE4 | 0.08386181 | 0.8201174  | 0.00013058 | 0.053285  | -1.2702    |
| 2w4w_SITTE4 | 0.01841512 | 0.18269879 | 6.84E-05   | 0.028322  | 0.42127    |
| 2w4w_SITTE4 | 0.05127478 | 0.50273573 | 0.00010597 | 0.092472  | -0.0001745 |
| 2w4w_SITTE4 | 0.0829222  | 0.8109661  | 0.00013009 | 0.053693  | -1.2543    |
| 2w4w_SITTE4 | 0.01715552 | 0.17043091 | 6.69E-05   | 0.025607  | 0.33781    |
| 2w4w_SITTE4 | 0.08688312 | 0.8495435  | 0.00013193 | 0.052709  | -1.3063    |
| 2w4w_SITTE4 | 0.0511875  | 0.50188565 | 0.00010597 | 0.092472  | -0.0001745 |
| 2w4w_SITTE4 | 0.06988126 | 0.68395376 | 0.0001226  | 0.07935   | -0.82636   |
| 2w4w_SITTE4 | 0.00079789 | 0.01111555 | 5.23E-05   | 0.0064696 | 0.43121    |
| 2w4w_SITTE4 | 0.04048021 | 0.3976019  | 9.42E-05   | 0.10978   | 0.31414    |
| 2w4w_SITTE4 | 0.01278501 | 0.12786427 | 6.24E-05   | 0.018271  | 0.13519    |
| 2w4w_SITTE4 | 0.02712151 | 0.26749474 | 7.82E-05   | 0.054511  | 0.77219    |
| 2w4w_SITTE4 | 0.03166653 | 0.31176096 | 8.36E-05   | 0.07721   | 0.67094    |
| 2w4w_SITTE4 | 0.05307293 | 0.5202488  | 0.00010807 | 0.092373  | -0.059017  |
| 2w4w_SITTE4 | 0.08558757 | 0.8369255  | 0.00013135 | 0.05287   | -1.2923    |
| 2w4w_SITTE4 | 0.06882093 | 0.67362666 | 0.00012161 | 0.084113  | -0.77743   |
| 2w4w_SITTE4 | 0.00411826 | 0.0434543  | 5.50E-05   | 0.0088178 | 0.2638     |
| 2w4w_SITTE4 | 0.05915729 | 0.5795075  | 0.00011368 | 0.097776  | -0.31309   |
| 2w4w_SITTE4 | 0.07522778 | 0.73602617 | 0.00012598 | 0.063504  | -1.0589    |
| 2w4w_SITTE4 | 0.04421714 | 0.43399784 | 9.86E-05   | 0.10494   | 0.20107    |
| 2w4w_SITTE4 | 0.04702223 | 0.46131802 | 0.00010159 | 0.098799  | 0.12814    |
| 2w4w_SITTE4 | 0.05954373 | 0.5832712  | 0.000114   | 0.098059  | -0.32873   |
| 2w4w_SITTE4 | 0.05448    | 0.533953   | 0.00010944 | 0.093233  | -0.11022   |
| 2w4w_SITTE4 | 0.03987807 | 0.3917374  | 9.34E-05   | 0.10962   | 0.32588    |
| 2w4w_SITTE4 | 0.04691529 | 0.46027645 | 0.00010159 | 0.098799  | 0.12814    |
| 2w4w_SITTE4 | 0.065374   | 0.64005524 | 0.00011898 | 0.094504  | -0.60919   |
| 2w4w_SITTE4 | 0.00632362 | 0.06493348 | 5.66E-05   | 0.010584  | 0.18365    |
| 2w4w_SITTE4 | 0.07200648 | 0.7046523  | 0.00012401 | 0.07238   | -0.92016   |
| 7w11w_SITTC | 0.04886674 | 0.47928265 | 0.00010344 | 0.095375  | 0.072211   |
| 7w11w_SITTC | 0.05787853 | 0.567053   | 0.00011273 | 0.096781  | -0.25188   |
| 7w11w_SITTC | 0.04671577 | 0.45833328 | 0.00010122 | 0.099559  | 0.13721    |
| 7w11w_SITTC | 0.06994077 | 0.6845333  | 0.0001226  | 0.07935   | -0.82636   |
| 7w11w_SITTC | 0.07270043 | 0.71141106 | 0.00012446 | 0.070202  | -0.9499    |
| 7w11w_SITTC | 0.02893003 | 0.28510883 | 8.03E-05   | 0.062611  | 0.751      |
| 7w11w_SITTC | 0.06645689 | 0.65060204 | 0.00012006 | 0.090801  | -0.66011   |
| 7w11w_SITTC | 0.05690971 | 0.55761725 | 0.00011177 | 0.095663  | -0.20754   |
| 7w11w_SITTC | 0.07616996 | 0.7452026  | 0.0001266  | 0.061174  | -1.0948    |
| 7w11w_SITTC | 0.06684259 | 0.65435857 | 0.00012032 | 0.089759  | -0.67704   |

|             |            |            |            |           |           |
|-------------|------------|------------|------------|-----------|-----------|
| 7w11w_SITTC | 0.05854804 | 0.57357377 | 0.00011305 | 0.097132  | -0.2822   |
| 7w11w_SITTC | 0.077348   | 0.75667614 | 0.0001272  | 0.059217  | -1.1276   |
| 7w11w_SITTC | 0.04593889 | 0.45076686 | 0.00010046 | 0.10111   | 0.1553    |
| 7w11w_SITTC | 0.04495609 | 0.44119483 | 9.93E-05   | 0.10345   | 0.18258   |
| 7w11w_SITTC | 0.07024813 | 0.68752694 | 0.00012284 | 0.078159  | -0.8424   |
| 7w11w_SITTC | 0.06744717 | 0.6602469  | 0.00012058 | 0.088682  | -0.71078  |
| 7w11w_SITTC | 0.06024095 | 0.5900619  | 0.00011462 | 0.098526  | -0.36038  |
| 7w11w_SITTC | 0.06216951 | 0.60884506 | 0.00011642 | 0.098794  | -0.4579   |
| 7w11w_SITTC | 0.05422478 | 0.53146726 | 0.0001091  | 0.092966  | -0.097097 |
| 7w11w_SITTC | 0.02050935 | 0.20309554 | 7.06E-05   | 0.032941  | 0.54704   |
| 7w11w_SITTC | 0.05597365 | 0.5485004  | 0.00011078 | 0.094541  | -0.17881  |
| 7w11w_SITTC | 0.059013   | 0.57810223 | 0.00011368 | 0.097776  | -0.29758  |
| 7w11w_SITTC | 0.01195076 | 0.11973903 | 6.17E-05   | 0.017303  | 0.12065   |
| 7w11w_SITTC | 0.02717898 | 0.26805452 | 7.82E-05   | 0.054511  | 0.77219   |
| 7w11w_SITTC | 0.08238301 | 0.80571467 | 0.00012993 | 0.053861  | -1.2485   |
| 7w11w_SITTC | 0.0720968  | 0.70553195 | 0.00012401 | 0.07238   | -0.93514  |
| 7w11w_SITTC | 0.04541476 | 0.44566205 | 9.97E-05   | 0.10268   | 0.16436   |
| 7w11w_SITTC | 0.06703045 | 0.6561882  | 0.00012032 | 0.089759  | -0.69393  |
| 7w11w_SITTC | 0.03456966 | 0.34003606 | 8.73E-05   | 0.093873  | 0.55601   |
| 7w11w_SITTC | 0.05309546 | 0.5204683  | 0.00010807 | 0.092373  | -0.059017 |
| 7w11w_SITTC | 0.04855804 | 0.47627604 | 0.00010308 | 0.095994  | 0.081803  |
| 7w11w_SITTC | 0.00159883 | 0.01891628 | 5.31E-05   | 0.0071026 | 0.37827   |
| 7w11w_SITTC | 0.08499696 | 0.8311733  | 0.0001312  | 0.05293   | -1.2841   |
| 7w11w_SITTC | 0.04130428 | 0.40562797 | 9.50E-05   | 0.10955   | 0.28067   |
| 7w11w_SITTC | 0.01478388 | 0.14733227 | 6.44E-05   | 0.021412  | 0.20962   |
| 7w11w_SITTC | 0.05196235 | 0.5094324  | 0.00010668 | 0.092211  | -0.022986 |
| 7w11w_SITTC | 0.05230188 | 0.5127391  | 0.00010703 | 0.092172  | -0.03476  |
| 7w11w_SITTC | 0.03060694 | 0.30144113 | 8.23E-05   | 0.07157   | 0.71698   |
| 7w11w_SITTC | 0.0427403  | 0.4196141  | 9.66E-05   | 0.10808   | 0.23945   |
| 7w11w_SITTC | 0.08725856 | 0.8532001  | 0.00013207 | 0.052686  | -1.3094   |
| 7w11w_SITTC | 0.07312653 | 0.7155611  | 0.00012469 | 0.069151  | -0.97873  |
| 7w11w_SITTC | 0.06706464 | 0.6565212  | 0.00012032 | 0.089759  | -0.69393  |
| 7w11w_SITTC | 0.04784368 | 0.46931848 | 0.00010234 | 0.09734   | 0.10061   |
| 7w11w_SITTC | 0.0987176  | 0.9648056  | 0.00013585 | 0.052145  | -1.3442   |
| 7w11w_SITTC | 0.05628972 | 0.5515788  | 0.00011111 | 0.094909  | -0.17881  |
| 7w11w_SITTC | 0.05553624 | 0.54424024 | 0.00011045 | 0.094186  | -0.1508   |
| 7w11w_SITTC | 0.03744753 | 0.3680651  | 9.06E-05   | 0.10531   | 0.43275   |
| 7w11w_SITTC | 0.0481025  | 0.47183928 | 0.00010271 | 0.09665   | 0.091263  |
| 7w11w_SITTC | 0.05224753 | 0.51220983 | 0.00010703 | 0.092172  | -0.03476  |
| 7w11w_SITTC | 0.06322341 | 0.6191096  | 0.0001173  | 0.098072  | -0.50782  |
| 7w11w_SITTC | 0.07031541 | 0.6881822  | 0.00012284 | 0.078159  | -0.8424   |
| 7w11w_SITTC | 0.03486136 | 0.34287706 | 8.77E-05   | 0.095565  | 0.54051   |
| 7w11w_SITTC | 0.09142969 | 0.8938249  | 0.00013362 | 0.052552  | -1.3347   |
| 7w11w_SITTC | 0.0401158  | 0.3940528  | 9.38E-05   | 0.10975   | 0.32588   |
| 7w11w_SITTC | 0.04950886 | 0.48553655 | 0.00010417 | 0.094268  | 0.052555  |
| 7w11w_SITTC | 0.03761722 | 0.3697178  | 9.10E-05   | 0.1063    | 0.41807   |

|             |            |            |            |          |           |
|-------------|------------|------------|------------|----------|-----------|
| 7w11w_SITTC | 0.0414218  | 0.40677252 | 9.54E-05   | 0.10929  | 0.28067   |
| 7w11w_SITTC | 0.05017754 | 0.49204916 | 0.0001049  | 0.093366 | 0.032151  |
| 7w11w_SITTC | 0.03743367 | 0.36793008 | 9.06E-05   | 0.10531  | 0.43275   |
| 7w11w_SITTC | 0.0569934  | 0.5584323  | 0.00011177 | 0.095663 | -0.22216  |
| 7w11w_SITTC | 0.06315468 | 0.6184401  | 0.0001173  | 0.098072 | -0.50782  |
| 7w11w_SITTC | 0.07644948 | 0.74792504 | 0.0001268  | 0.060479 | -1.0948   |
| 7w11w_SITTC | 0.05346586 | 0.5240758  | 0.00010842 | 0.092532 | -0.07149  |
| 7w11w_SITTC | 0.01013749 | 0.1020787  | 6.02E-05   | 0.015048 | 0.10718   |
| 7w11w_SITTC | 0.08496074 | 0.83082056 | 0.00013105 | 0.053002 | -1.2841   |
| 7w11w_SITTC | 0.01434017 | 0.14301074 | 6.41E-05   | 0.020862 | 0.19442   |
| 7w11w_SITTC | 0.04178338 | 0.41029415 | 9.58E-05   | 0.10896  | 0.27003   |
| 7w11w_SITTC | 0.04300171 | 0.42216012 | 9.70E-05   | 0.10755  | 0.22964   |
| 7w11w_SITTC | 0.02041349 | 0.20216191 | 7.02E-05   | 0.032119 | 0.54704   |
| 7w11w_SITTC | 0.07381334 | 0.7222503  | 0.00012513 | 0.067136 | -1.0066   |
| 7w11w_SITTC | 0.04835879 | 0.4743355  | 0.00010308 | 0.095994 | 0.091263  |
| 7w11w_SITTC | 0.0769209  | 0.7525164  | 0.000127   | 0.059827 | -1.117    |
| 7w11w_SITTC | 0.07778174 | 0.7609005  | 0.00012759 | 0.058113 | -1.1379   |
| 7w11w_SITTC | 0.0383915  | 0.37725893 | 9.18E-05   | 0.10791  | 0.38979   |
| 7w11w_SITTC | 0.05749613 | 0.5633286  | 0.00011209 | 0.096042 | -0.23694  |
| 7w11w_SITTC | 0.04981667 | 0.48853448 | 0.00010453 | 0.09379  | 0.042456  |
| 7w11w_SITTC | 0.01754213 | 0.17419627 | 6.72E-05   | 0.026262 | 0.35829   |
| 7w11w_SITTC | 0.03760217 | 0.3695712  | 9.10E-05   | 0.1063   | 0.41807   |
| 7w11w_SITTC | 0.07301383 | 0.7144634  | 0.00012469 | 0.069151 | -0.96444  |
| 7w11w_SITTC | 0.07383688 | 0.7224795  | 0.00012513 | 0.067136 | -1.0066   |
| 7w11w_SITTC | 0.03412754 | 0.33573005 | 8.65E-05   | 0.090344 | 0.57137   |
| 7w11w_SITTC | 0.0789957  | 0.7727239  | 0.00012816 | 0.056721 | -1.1755   |
| 7w11w_SITTC | 0.01177226 | 0.11800056 | 6.14E-05   | 0.016833 | 0.11542   |
| 7w11w_SITTC | 0.03531503 | 0.3472956  | 8.81E-05   | 0.097198 | 0.52494   |
| 7w11w_SITTC | 0.0676861  | 0.662574   | 0.00012084 | 0.087573 | -0.72756  |
| 7w11w_SITTC | 0.07543073 | 0.73800284 | 0.00012619 | 0.062687 | -1.0589   |
| 7w11w_SITTC | 0.05304749 | 0.5200011  | 0.00010773 | 0.092257 | -0.059017 |
| 7w11w_SITTC | 0.05681312 | 0.55667645 | 0.00011144 | 0.095284 | -0.20754  |
| 7w11w_SITTC | 0.07865609 | 0.7694163  | 0.00012797 | 0.057152 | -1.1666   |
| 7w11w_SITTC | 0.04308262 | 0.42294815 | 9.70E-05   | 0.10755  | 0.22964   |
| 7w11w_SITTC | 0.06307237 | 0.61763847 | 0.0001173  | 0.098072 | -0.49111  |
| 7w11w_SITTC | 0.03214494 | 0.31642047 | 8.44E-05   | 0.081011 | 0.65793   |
| 7w11w_SITTC | 0.06857444 | 0.6712259  | 0.00012161 | 0.084113 | -0.7609   |
| 7w11w_SITTC | 0.03255257 | 0.3203906  | 8.48E-05   | 0.082909 | 0.64444   |
| 7w11w_SITTC | 0.0531819  | 0.52131015 | 0.00010807 | 0.092373 | -0.059017 |
| 7w11w_SITTC | 0.07129951 | 0.6977668  | 0.00012355 | 0.074645 | -0.88959  |
| 7w11w_SITTC | 0.01202566 | 0.12046854 | 6.17E-05   | 0.017303 | 0.12065   |
| 7w11w_SITTC | 0.06190698 | 0.60628814 | 0.00011613 | 0.098894 | -0.44141  |
| 7w11w_SITTC | 0.07732902 | 0.75649124 | 0.0001272  | 0.059217 | -1.1276   |
| 7w11w_SITTC | 0.04769305 | 0.46785146 | 0.00010234 | 0.09734  | 0.10986   |
| 7w11w_SITTC | 0.05189194 | 0.50874656 | 0.00010668 | 0.092211 | -0.022986 |
| 7w11w_SITTC | 0.02543424 | 0.2510615  | 7.62E-05   | 0.047472 | 0.75539   |

|             |            |            |            |           |           |
|-------------|------------|------------|------------|-----------|-----------|
| 7w11w_SITTC | 0.07929722 | 0.7756605  | 0.00012835 | 0.05632   | -1.1841   |
| 7w11w_SITTC | 0.06475556 | 0.63403195 | 0.00011871 | 0.095287  | -0.57526  |
| 7w11w_SITTC | 0.00234837 | 0.0262165  | 5.36E-05   | 0.0075574 | 0.34395   |
| 7w11w_SITTC | 0.03793042 | 0.37276822 | 9.10E-05   | 0.1063    | 0.40374   |
| 7w11w_SITTC | 0.0664466  | 0.6505018  | 0.00012006 | 0.090801  | -0.66011  |
| 7w11w_SITTC | 0.0586996  | 0.5750499  | 0.00011337 | 0.097465  | -0.29758  |
| 7w11w_SITTC | 0.05468992 | 0.53599757 | 0.00010944 | 0.093233  | -0.12355  |
| 7w11w_SITTC | 0.05254799 | 0.5151362  | 0.00010738 | 0.092189  | -0.046772 |
| 7w11w_SITTC | 0.07393025 | 0.7233889  | 0.00012513 | 0.067136  | -1.0066   |
| 7w11w_SITTC | 0.07057255 | 0.6906865  | 0.00012308 | 0.076976  | -0.8583   |
| 7w11w_SITTC | 0.04924721 | 0.48298824 | 0.00010381 | 0.094798  | 0.062467  |
| 7w11w_SITTC | 0.01367278 | 0.13651067 | 6.34E-05   | 0.019794  | 0.16714   |
| 7w11w_SITTC | 0.04881554 | 0.47878394 | 0.00010344 | 0.095375  | 0.072211  |
| 7w11w_SITTC | 0.02911433 | 0.28690383 | 8.07E-05   | 0.064343  | 0.751     |
| 7w11w_SITTC | 0.01887072 | 0.18713611 | 6.87E-05   | 0.029043  | 0.44251   |
| 7w11w_SITTC | 0.0299316  | 0.29486367 | 8.15E-05   | 0.067903  | 0.7357    |
| 7w11w_SITTC | 0.00641565 | 0.06582975 | 5.69E-05   | 0.010907  | 0.17252   |
| 7w11w_SITTC | 0.05050784 | 0.4952661  | 0.00010525 | 0.093003  | 0.021622  |
| 7w11w_SITTC | 0.05308693 | 0.5203852  | 0.00010807 | 0.092373  | -0.059017 |
| 7w11w_SITTC | 0.06468179 | 0.6333135  | 0.00011843 | 0.096001  | -0.57526  |
| 7w11w_SITTC | 0.00564931 | 0.05836605 | 5.61E-05   | 0.0099627 | 0.19547   |
| 7w11w_SITTC | 0.04994565 | 0.48979068 | 0.00010453 | 0.09379   | 0.042456  |
| 7w11w_SITTC | 0.06891805 | 0.6745725  | 0.00012186 | 0.08293   | -0.77743  |
| 7w11w_SITTC | 0.04230107 | 0.41533622 | 9.62E-05   | 0.10856   | 0.24945   |
| 7w11w_SITTC | 0.05753714 | 0.56372803 | 0.00011241 | 0.096416  | -0.23694  |
| 7w11w_SITTC | 0.05421623 | 0.53138405 | 0.0001091  | 0.092966  | -0.097097 |
| 7w11w_SITTC | 0.01329566 | 0.13283768 | 6.30E-05   | 0.019276  | 0.15521   |
| 7w11w_SITTC | 0.04645261 | 0.45577016 | 0.00010084 | 0.10033   | 0.13721   |
| 7w11w_SITTC | 0.07710089 | 0.75426936 | 0.0001272  | 0.059217  | -1.117    |
| 7w11w_SITTC | 0.07188078 | 0.7034281  | 0.00012378 | 0.073503  | -0.92016  |
| 7w11w_SITTC | 0.03172508 | 0.3123313  | 8.36E-05   | 0.07721   | 0.67094   |
| 7w11w_SITTC | 0.03179828 | 0.31304416 | 8.40E-05   | 0.07911   | 0.67094   |
| 7w11w_SITTC | 0.04001806 | 0.39310077 | 9.38E-05   | 0.10975   | 0.32588   |
| 7w11w_SITTC | 0.04449197 | 0.43667454 | 9.89E-05   | 0.10421   | 0.19178   |
| 7w11w_SITTC | 0.05229484 | 0.5126706  | 0.00010703 | 0.092172  | -0.03476  |
| 7w11w_SITTC | 0.04540321 | 0.44554958 | 9.97E-05   | 0.10268   | 0.16436   |
| 7w11w_SITTC | 0.07213144 | 0.7058694  | 0.00012401 | 0.07238   | -0.93514  |
| 7w11w_SITTC | 0.04739289 | 0.46492803 | 0.00010197 | 0.098057  | 0.11903   |
| 7w11w_SITTC | 0.04496572 | 0.4412886  | 9.93E-05   | 0.10345   | 0.18258   |
| 7w11w_SITTC | 0.02825217 | 0.2785068  | 7.94E-05   | 0.059253  | 0.76245   |
| 7w11w_SITTC | 0.06093198 | 0.59679216 | 0.00011523 | 0.098828  | -0.39249  |
| 7w11w_SITTC | 0.06293038 | 0.6162556  | 0.00011701 | 0.098387  | -0.49111  |
| 7w11w_SITTC | 0.04289293 | 0.42110068 | 9.70E-05   | 0.10755   | 0.23945   |
| 7w11w_SITTC | 0.05102965 | 0.50034827 | 0.00010597 | 0.092472  | 0.010852  |
| 7w11w_SITTC | 0.07278399 | 0.7122249  | 0.00012446 | 0.070202  | -0.96444  |
| 7w11w_SITTC | 0.02813717 | 0.27738672 | 7.94E-05   | 0.059253  | 0.76661   |



|             |            |            |            |           |           |
|-------------|------------|------------|------------|-----------|-----------|
| 7w11w_SITTC | 0.05544192 | 0.5433216  | 0.00011011 | 0.093847  | -0.1508   |
| 7w11w_SITTC | 0.07245576 | 0.7090281  | 0.00012424 | 0.071279  | -0.9499   |
| 7w11w_SITTC | 0.00585186 | 0.06033876 | 5.63E-05   | 0.010269  | 0.19547   |
| 7w11w_SITTC | 0.03372693 | 0.33182827 | 8.61E-05   | 0.088522  | 0.58656   |
| 7w11w_SITTC | 0.06488895 | 0.63533103 | 0.00011871 | 0.095287  | -0.59222  |
| 7w11w_SITTC | 0.06290676 | 0.61602557 | 0.00011701 | 0.098387  | -0.49111  |
| 7w11w_SITTC | 0.02752922 | 0.2714656  | 7.86E-05   | 0.05605   | 0.77153   |
| 7w11w_SITTC | 0.00612012 | 0.06295146 | 5.66E-05   | 0.010584  | 0.18365   |
| 7w11w_SITTC | 0.06059989 | 0.5935577  | 0.00011492 | 0.0987    | -0.37638  |
| 7w11w_SITTC | 0.05295087 | 0.51906    | 0.00010773 | 0.092257  | -0.059017 |
| 7w11w_SITTC | 0.04655505 | 0.45676792 | 0.00010122 | 0.099559  | 0.13721   |
| 7w11w_SITTC | 0.06207397 | 0.60791457 | 0.00011642 | 0.098794  | -0.44141  |
| 7w11w_SITTC | 0.01905436 | 0.18892467 | 6.87E-05   | 0.029043  | 0.46374   |
| 7w11w_SITTC | 0.08530141 | 0.8341385  | 0.0001312  | 0.05293   | -1.2883   |
| 7w11w_SITTC | 0.08924213 | 0.87251914 | 0.00013288 | 0.052615  | -1.3244   |
| 7w11w_SITTC | 0.06978097 | 0.68297696 | 0.00012235 | 0.080544  | -0.82636  |
| 7w11w_SITTC | 0.02630438 | 0.25953624 | 7.74E-05   | 0.051562  | 0.76965   |
| 7w11w_SITTC | 0.05445483 | 0.5337078  | 0.00010944 | 0.093233  | -0.11022  |
| 7w11w_SITTC | 0.05403854 | 0.52965343 | 0.00010876 | 0.092731  | -0.097097 |
| 7w11w_SITTC | 0.09056458 | 0.88539916 | 0.00013338 | 0.052577  | -1.3317   |
| 7w11w_SITTC | 0.05038205 | 0.49404103 | 0.00010525 | 0.093003  | 0.032151  |
| 7w11w_SITTC | 0.04835869 | 0.4743345  | 0.00010308 | 0.095994  | 0.091263  |
| 7w11w_SITTC | 0.06106019 | 0.5980409  | 0.00011553 | 0.098907  | -0.39249  |
| 7w11w_SITTC | 0.07449026 | 0.7288432  | 0.00012556 | 0.06525   | -1.0333   |
| 7w11w_SITTC | 0.04834184 | 0.47417042 | 0.00010308 | 0.095994  | 0.091263  |
| 7w11w_SITTC | 0.05670865 | 0.55565894 | 0.00011144 | 0.095284  | -0.20754  |
| 7w11w_SITTC | 0.07046554 | 0.6896443  | 0.00012284 | 0.078159  | -0.8583   |
| 7w11w_SITTC | 0.0197647  | 0.195843   | 6.99E-05   | 0.031319  | 0.50588   |
| 7w11w_SITTC | 0.01564254 | 0.1556952  | 6.54E-05   | 0.023132  | 0.26052   |
| 7w11w_SITTC | 0.09688686 | 0.94697505 | 0.00013536 | 0.052262  | -1.3446   |
| 7w11w_SITTC | 0.03836963 | 0.37704596 | 9.18E-05   | 0.10791   | 0.38979   |
| 7w11w_SITTC | 0.08352029 | 0.81679124 | 0.00013042 | 0.053406  | -1.2651   |
| 7w11w_SITTC | 0.0447039  | 0.43873858 | 9.89E-05   | 0.10421   | 0.18258   |
| 7w11w_SITTC | 0.06872284 | 0.6726713  | 0.00012161 | 0.084113  | -0.77743  |
| 7w11w_SITTC | 0.0431185  | 0.42329755 | 9.74E-05   | 0.10696   | 0.22964   |
| 7w11w_SITTC | 0.05997171 | 0.5874396  | 0.00011462 | 0.098526  | -0.3445   |
| 7w11w_SITTC | 0.06168562 | 0.60413224 | 0.00011613 | 0.098894  | -0.42501  |
| 7w11w_SITTC | 0.0624942  | 0.6120074  | 0.00011672 | 0.098627  | -0.47447  |
| 7w11w_SITTC | 0.00506051 | 0.05263136 | 5.58E-05   | 0.0096645 | 0.22108   |
| 7w11w_SITTC | 0.01311384 | 0.13106687 | 6.27E-05   | 0.018769  | 0.14454   |
| 7w11w_SITTC | 0.04629728 | 0.45425737 | 0.00010084 | 0.10033   | 0.14626   |
| 7w11w_SITTC | 0.06048078 | 0.5923977  | 0.00011492 | 0.0987    | -0.37638  |
| 7w11w_SITTC | 0.01753234 | 0.17410089 | 6.72E-05   | 0.026262  | 0.35829   |
| 7w11w_SITTC | 0.07891121 | 0.771901   | 0.00012816 | 0.056721  | -1.1755   |
| 7w11w_SITTC | 0.01990952 | 0.19725345 | 6.99E-05   | 0.031319  | 0.50588   |
| 7w11w_SITTC | 0.04800434 | 0.4708833  | 0.00010271 | 0.09665   | 0.10061   |

|             |            |            |            |           |          |
|-------------|------------|------------|------------|-----------|----------|
| 7w11w_SITTC | 0.05680712 | 0.55661803 | 0.00011144 | 0.095284  | -0.20754 |
| 7w11w_SITTC | 0.00547322 | 0.05665095 | 5.61E-05   | 0.0099627 | 0.20797  |
| 7w11w_SITTC | 0.0083287  | 0.084462   | 5.84E-05   | 0.012653  | 0.12871  |
| 7w11w_SITTC | 0.05932625 | 0.5811531  | 0.000114   | 0.098059  | -0.31309 |
| 7w11w_SITTC | 0.05438486 | 0.5330264  | 0.0001091  | 0.092966  | -0.11022 |
| 7w11w_SITTC | 0.02802521 | 0.27629632 | 7.94E-05   | 0.059253  | 0.76661  |
| 7w11w_SITTC | 0.0547456  | 0.53653985 | 0.00010944 | 0.093233  | -0.12355 |
| 7w11w_SITTC | 0.00550447 | 0.05695538 | 5.61E-05   | 0.0099627 | 0.20797  |
| 7w11w_SITTC | 0.04875961 | 0.4782392  | 0.00010344 | 0.095375  | 0.081803 |
| 7w11w_SITTC | 0.00780526 | 0.07936394 | 5.81E-05   | 0.012286  | 0.13577  |
| 7w11w_SITTC | 0.03001986 | 0.29572323 | 8.15E-05   | 0.067903  | 0.72675  |
| 7w11w_SITTC | 0.0728019  | 0.71239936 | 0.00012446 | 0.070202  | -0.96444 |
| 7w11w_SITTC | 0.03838063 | 0.37715307 | 9.18E-05   | 0.10791   | 0.38979  |
| 7w11w_SITTC | 0.04433753 | 0.43517035 | 9.86E-05   | 0.10494   | 0.19178  |
| 7w11w_SITTC | 0.04795663 | 0.47041857 | 0.00010271 | 0.09665   | 0.10061  |
| 7w11w_SITTC | 0.07576002 | 0.74121    | 0.0001264  | 0.06191   | -1.0712  |
| 7w11w_SITTC | 0.0303195  | 0.2986416  | 8.19E-05   | 0.069725  | 0.71698  |
| 7w11w_SITTC | 0.01218269 | 0.12199794 | 6.17E-05   | 0.017303  | 0.12723  |
| 7w11w_SITTC | 0.0674147  | 0.65993065 | 0.00012058 | 0.088682  | -0.71078 |
| 7w11w_SITTC | 0.00852606 | 0.08638416 | 5.86E-05   | 0.013029  | 0.12259  |
| 7w11w_SITTC | 0.07664842 | 0.7498626  | 0.0001268  | 0.060479  | -1.1061  |
| 7w11w_SITTC | 0.04677089 | 0.4588701  | 0.00010122 | 0.099559  | 0.12814  |
| 7w11w_SITTC | 0.02616546 | 0.2581833  | 7.70E-05   | 0.050154  | 0.76634  |
| 7w11w_SITTC | 0.04179788 | 0.41043544 | 9.58E-05   | 0.10896   | 0.27003  |
| 7w11w_SITTC | 0.07158384 | 0.700536   | 0.00012355 | 0.074645  | -0.90497 |
| 7w11w_SITTC | 0.03713914 | 0.36506155 | 9.02E-05   | 0.1042    | 0.43275  |
| 7w11w_SITTC | 0.06691647 | 0.6550782  | 0.00012032 | 0.089759  | -0.69393 |
| 7w11w_SITTC | 0.0854623  | 0.8357054  | 0.00013135 | 0.05287   | -1.2923  |
| 7w11w_SITTC | 0.07210351 | 0.70559734 | 0.00012401 | 0.07238   | -0.93514 |
| 7w11w_SITTC | 0.06018598 | 0.5895265  | 0.00011462 | 0.098526  | -0.36038 |
| 7w11w_SITTC | 0.03831381 | 0.37650222 | 9.18E-05   | 0.10791   | 0.38979  |
| 7w11w_SITTC | 0.03803821 | 0.373818   | 9.14E-05   | 0.10717   | 0.40374  |
| 7w11w_SITTC | 0.05483967 | 0.53745604 | 0.00010978 | 0.093528  | -0.12355 |
| 7w11w_SITTC | 0.02657784 | 0.26219967 | 7.74E-05   | 0.051562  | 0.77158  |
| 7w11w_SITTC | 0.05454231 | 0.53455985 | 0.00010944 | 0.093233  | -0.11022 |
| 7w11w_SITTC | 0.04818988 | 0.47269034 | 0.00010271 | 0.09665   | 0.091263 |
| 7w11w_SITTC | 0.06576374 | 0.64385116 | 0.00011953 | 0.092756  | -0.62617 |
| 7w11w_SITTC | 0.0708226  | 0.6931219  | 0.00012308 | 0.076976  | -0.87403 |
| 7w11w_SITTC | 0.0346472  | 0.34079129 | 8.73E-05   | 0.093873  | 0.55601  |
| 7w11w_SITTC | 0.07625228 | 0.7460044  | 0.0001266  | 0.061174  | -1.0948  |
| 7w11w_SITTC | 0.07330197 | 0.7172698  | 0.00012469 | 0.069151  | -0.97873 |
| 7w11w_SITTC | 0.04654739 | 0.45669326 | 0.00010122 | 0.099559  | 0.13721  |
| 7w11w_SITTC | 0.03715658 | 0.36523142 | 9.02E-05   | 0.1042    | 0.43275  |
| 7w11w_SITTC | 0.02597016 | 0.25628114 | 7.70E-05   | 0.050154  | 0.76634  |
| 7w11w_SITTC | 0.05680433 | 0.5565908  | 0.00011144 | 0.095284  | -0.20754 |
| 7w11w_SITTC | 0.03337315 | 0.3283826  | 8.57E-05   | 0.086671  | 0.60151  |

|             |            |            |            |          |           |
|-------------|------------|------------|------------|----------|-----------|
| 7w11w_SITTC | 0.08468378 | 0.8281231  | 0.00013105 | 0.053002 | -1.2797   |
| 7w11w_SITTC | 0.04110221 | 0.4036599  | 9.50E-05   | 0.10955  | 0.29155   |
| 7w11w_SITTC | 0.02438705 | 0.24086247 | 7.50E-05   | 0.043782 | 0.72811   |
| 7w11w_SITTC | 0.06072046 | 0.59473205 | 0.00011523 | 0.098828 | -0.37638  |
| 7w11w_SITTC | 0.01220789 | 0.1222434  | 6.21E-05   | 0.017782 | 0.12723   |
| 7w11w_SITTC | 0.04266843 | 0.41891408 | 9.66E-05   | 0.10808  | 0.23945   |
| 7w11w_SITTC | 0.08640829 | 0.8449189  | 0.00013179 | 0.052739 | -1.2997   |
| 7w11w_SITTC | 0.02879841 | 0.28382692 | 8.03E-05   | 0.062611 | 0.75723   |
| 7w11w_SITTC | 0.0440272  | 0.4321479  | 9.82E-05   | 0.10565  | 0.20107   |
| 7w11w_SITTC | 0.01709979 | 0.16988806 | 6.69E-05   | 0.025607 | 0.33781   |
| 7w11w_SITTC | 0.05947537 | 0.5826055  | 0.000114   | 0.098059 | -0.32873  |
| 7w11w_SITTC | 0.04584444 | 0.4498469  | 0.00010046 | 0.10111  | 0.1553    |
| 7w11w_SITTC | 0.05616396 | 0.55035394 | 0.00011111 | 0.094909 | -0.17881  |
| 7w11w_SITTC | 0.044594   | 0.43766823 | 9.89E-05   | 0.10421  | 0.19178   |
| 7w11w_SITTC | 0.08390383 | 0.8205268  | 0.00013058 | 0.053285 | -1.2702   |
| 7w11w_SITTC | 0.07823528 | 0.7653178  | 0.00012778 | 0.057615 | -1.1573   |
| 7w11w_SITTC | 0.07631888 | 0.74665296 | 0.0001266  | 0.061174 | -1.0948   |
| 7w11w_SITTC | 0.01228075 | 0.12295301 | 6.21E-05   | 0.017782 | 0.12723   |
| 7w11w_SITTC | 0.06419235 | 0.62854654 | 0.00011815 | 0.096641 | -0.55833  |
| 7w11w_SITTC | 0.07283838 | 0.71275467 | 0.00012446 | 0.070202 | -0.96444  |
| 7w11w_SITTC | 0.07794767 | 0.7625166  | 0.00012759 | 0.058113 | -1.1478   |
| 7w11w_SITTC | 0.04606338 | 0.4519793  | 0.00010046 | 0.10111  | 0.14626   |
| 7w11w_SITTC | 0.04091388 | 0.4018257  | 9.46E-05   | 0.10971  | 0.29155   |
| 7w11w_SITTC | 0.05271108 | 0.5167246  | 0.00010773 | 0.092257 | -0.046772 |
| 7w11w_SITTC | 0.04765282 | 0.4674596  | 0.00010234 | 0.09734  | 0.10986   |
| 7w11w_SITTC | 0.03649557 | 0.3587935  | 8.94E-05   | 0.10166  | 0.46289   |
| 7w11w_SITTC | 0.04647955 | 0.4560325  | 0.00010084 | 0.10033  | 0.13721   |
| 7w11w_SITTC | 0.07125786 | 0.6973612  | 0.00012355 | 0.074645 | -0.88959  |
| 7w11w_SITTC | 0.05582484 | 0.54705113 | 0.00011078 | 0.094541 | -0.16472  |
| 7w11w_SITTC | 0.01133782 | 0.11376928 | 6.11E-05   | 0.016373 | 0.1115    |
| 7w11w_SITTC | 0.05777274 | 0.5660227  | 0.00011241 | 0.096416 | -0.25188  |
| 7w11w_SITTC | 0.01127242 | 0.11313237 | 6.11E-05   | 0.016373 | 0.1115    |
| 7w11w_SITTC | 0.03698045 | 0.36351603 | 9.02E-05   | 0.1042   | 0.4477    |
| 7w11w_SITTC | 0.04956183 | 0.48605248 | 0.00010417 | 0.094268 | 0.052555  |
| 7w11w_SITTC | 0.03730923 | 0.3667181  | 9.06E-05   | 0.10531  | 0.43275   |
| 7w11w_SITTC | 0.01342483 | 0.1340958  | 6.30E-05   | 0.019276 | 0.15521   |
| 7w11w_SITTC | 0.04506605 | 0.44226578 | 9.93E-05   | 0.10345  | 0.17344   |
| 7w11w_SITTC | 0.04903219 | 0.480894   | 0.00010381 | 0.094798 | 0.072211  |
| 7w11w_SITTC | 0.06164618 | 0.603748   | 0.00011613 | 0.098894 | -0.42501  |
| 7w11w_SITTC | 0.05408844 | 0.53013945 | 0.0001091  | 0.092966 | -0.097097 |
| 7w11w_SITTC | 0.07056721 | 0.6906345  | 0.00012284 | 0.078159 | -0.8583   |
| 7w11w_SITTC | 0.03136475 | 0.30882186 | 8.32E-05   | 0.075317 | 0.6834    |
| 7w11w_SITTC | 0.01284095 | 0.12840909 | 6.24E-05   | 0.018271 | 0.14454   |
| 7w11w_SITTC | 0.0719871  | 0.7044636  | 0.00012401 | 0.07238  | -0.92016  |
| 7w11w_SITTC | 0.07030351 | 0.68806624 | 0.00012284 | 0.078159 | -0.8424   |
| 7w11w_SITTC | 0.0280321  | 0.2763634  | 7.94E-05   | 0.059253 | 0.76661   |

|             |            |            |            |          |           |
|-------------|------------|------------|------------|----------|-----------|
| 7w11w_SITTC | 0.07462093 | 0.73011583 | 0.00012556 | 0.06525  | -1.0333   |
| 7w11w_SITTC | 0.0802556  | 0.7849947  | 0.00012889 | 0.055287 | -1.2004   |
| 7w11w_SITTC | 0.03351136 | 0.3297287  | 8.61E-05   | 0.088522 | 0.60151   |
| 7w11w_SITTC | 0.07402471 | 0.7243089  | 0.00012534 | 0.066176 | -1.0066   |
| 7w11w_SITTC | 0.04274615 | 0.41967112 | 9.66E-05   | 0.10808  | 0.23945   |
| 7w11w_SITTC | 0.03264231 | 0.32126456 | 8.48E-05   | 0.082909 | 0.64444   |
| 7w11w_SITTC | 0.08115125 | 0.793718   | 0.00012924 | 0.054725 | -1.2227   |
| 7w11w_SITTC | 0.07847818 | 0.76768357 | 0.00012797 | 0.057152 | -1.1573   |
| 7w11w_SITTC | 0.0719555  | 0.7041558  | 0.00012401 | 0.07238  | -0.92016  |
| 7w11w_SITTC | 0.07577298 | 0.7413362  | 0.0001264  | 0.06191  | -1.0712   |
| 7w11w_SITTC | 0.05212591 | 0.5110253  | 0.00010703 | 0.092172 | -0.022986 |
| 7w11w_SITTC | 0.02095324 | 0.20741883 | 7.10E-05   | 0.033786 | 0.56707   |
| 7w11w_SITTC | 0.04426312 | 0.43444565 | 9.86E-05   | 0.10494  | 0.20107   |
| 7w11w_SITTC | 0.05325565 | 0.5220284  | 0.00010807 | 0.092373 | -0.07149  |
| 7w11w_SITTC | 0.09814165 | 0.9591961  | 0.00013575 | 0.052169 | -1.3443   |
| 7w11w_SITTC | 0.04462498 | 0.43796992 | 9.89E-05   | 0.10421  | 0.19178   |
| 7w11w_SITTC | 0.03923716 | 0.38549525 | 9.26E-05   | 0.10901  | 0.35035   |
| 7w11w_SITTC | 0.0533957  | 0.52339244 | 0.00010807 | 0.092373 | -0.07149  |
| 7w11w_SITTC | 0.04212602 | 0.41363126 | 9.62E-05   | 0.10856  | 0.25963   |
| 7w11w_SITTC | 0.04451437 | 0.4368927  | 9.89E-05   | 0.10421  | 0.19178   |
| 7w11w_SITTC | 0.07485992 | 0.73244345 | 0.00012577 | 0.064358 | -1.0462   |
| 7w11w_SITTC | 0.01331326 | 0.13300912 | 6.30E-05   | 0.019276 | 0.15521   |
| 7w11w_SITTC | 0.06189396 | 0.6061613  | 0.00011613 | 0.098894 | -0.44141  |
| 7w11w_SITTC | 0.02242872 | 0.22178927 | 7.26E-05   | 0.037419 | 0.65846   |
| 7w11w_SITTC | 0.03021364 | 0.29761052 | 8.19E-05   | 0.069725 | 0.72675   |
| 7w11w_SITTC | 0.06947086 | 0.6799567  | 0.00012211 | 0.081739 | -0.81017  |
| 7w11w_SITTC | 0.04642446 | 0.455496   | 0.00010084 | 0.10033  | 0.13721   |
| 7w11w_SITTC | 0.02725541 | 0.2687989  | 7.82E-05   | 0.054511 | 0.77153   |
| 7w11w_SITTC | 0.04378488 | 0.42978784 | 9.82E-05   | 0.10565  | 0.21046   |
| 7w11w_SITTC | 0.0354627  | 0.34873387 | 8.81E-05   | 0.097198 | 0.50933   |
| 7w11w_SITTC | 0.04091091 | 0.40179673 | 9.46E-05   | 0.10971  | 0.29155   |
| 7w11w_SITTC | 0.07866504 | 0.7695035  | 0.00012797 | 0.057152 | -1.1666   |
| 7w11w_SITTC | 0.07186435 | 0.7032681  | 0.00012378 | 0.073503 | -0.92016  |
| 7w11w_SITTC | 0.06765558 | 0.6622767  | 0.00012084 | 0.087573 | -0.72756  |
| 7w11w_SITTC | 0.00654798 | 0.06711861 | 5.69E-05   | 0.010907 | 0.17252   |
| 7w11w_SITTC | 0.03880592 | 0.3812952  | 9.22E-05   | 0.10852  | 0.37625   |
| 7w11w_SITTC | 0.04230902 | 0.41541368 | 9.62E-05   | 0.10856  | 0.24945   |
| 7w11w_SITTC | 0.07351186 | 0.71931404 | 0.00012491 | 0.068128 | -0.99278  |
| 7w11w_SITTC | 0.07714344 | 0.7546838  | 0.0001272  | 0.059217 | -1.117    |
| 7w11w_SITTC | 0.05943644 | 0.58222634 | 0.000114   | 0.098059 | -0.32873  |
| 7w11w_SITTC | 0.03384621 | 0.33299    | 8.65E-05   | 0.090344 | 0.58656   |
| 7w11w_SITTC | 0.03467184 | 0.34103125 | 8.73E-05   | 0.093873 | 0.55601   |
| 7w11w_SITTC | 0.07723687 | 0.7555938  | 0.0001272  | 0.059217 | -1.1276   |
| 7w11w_SITTC | 0.03485531 | 0.34281814 | 8.77E-05   | 0.095565 | 0.54051   |
| 7w11w_SITTC | 0.06496983 | 0.6361188  | 0.00011871 | 0.095287 | -0.59222  |
| 7w11w_SITTC | 0.02991226 | 0.29467526 | 8.15E-05   | 0.067903 | 0.7357    |

|             |            |            |            |           |            |
|-------------|------------|------------|------------|-----------|------------|
| 7w11w_SITTC | 0.07417085 | 0.72573227 | 0.00012534 | 0.066176  | -1.0201    |
| 7w11w_SITTC | 0.06279299 | 0.6149175  | 0.00011701 | 0.098387  | -0.47447   |
| 7w11w_SITTC | 0.0126419  | 0.12647042 | 6.24E-05   | 0.018271  | 0.13519    |
| 7w11w_SITTC | 0.02250503 | 0.22253245 | 7.30E-05   | 0.038397  | 0.65846    |
| 7w11w_SITTC | 0.0802346  | 0.7847902  | 0.00012889 | 0.055287  | -1.2004    |
| 7w11w_SITTC | 0.05594542 | 0.5482255  | 0.00011078 | 0.094541  | -0.16472   |
| 7w11w_SITTC | 0.01203271 | 0.12053722 | 6.17E-05   | 0.017303  | 0.12065    |
| 7w11w_SITTC | 0.03925099 | 0.3856299  | 9.26E-05   | 0.10901   | 0.35035    |
| 7w11w_SITTC | 0.05497951 | 0.538818   | 0.00010978 | 0.093528  | -0.13708   |
| 7w11w_SITTC | 0.01641823 | 0.16325006 | 6.62E-05   | 0.024342  | 0.29808    |
| 7w11w_SITTC | 0.04834043 | 0.4741566  | 0.00010308 | 0.095994  | 0.091263   |
| 7w11w_SITTC | 0.05129018 | 0.50288576 | 0.00010597 | 0.092472  | -0.0001745 |
| 7w11w_SITTC | 0.0254785  | 0.25149262 | 7.62E-05   | 0.047472  | 0.75539    |
| 7w11w_SITTC | 0.02035143 | 0.2015575  | 7.02E-05   | 0.032119  | 0.52662    |
| 7w11w_SITTC | 0.06542502 | 0.6405521  | 0.00011925 | 0.093659  | -0.60919   |
| 7w11w_SITTC | 0.04978962 | 0.488271   | 0.00010453 | 0.09379   | 0.052555   |
| 7w11w_SITTC | 0.06190855 | 0.6063035  | 0.00011613 | 0.098894  | -0.44141   |
| 7w11w_SITTC | 0.06528115 | 0.639151   | 0.00011898 | 0.094504  | -0.60919   |
| 7w11w_SITTC | 0.07959504 | 0.7785612  | 0.00012853 | 0.055948  | -1.1924    |
| 7w11w_SITTC | 0.01083204 | 0.1088433  | 6.08E-05   | 0.015922  | 0.10884    |
| 7w11w_SITTC | 0.05599222 | 0.5486813  | 0.00011078 | 0.094541  | -0.17881   |
| 7w11w_SITTC | 0.06985354 | 0.68368375 | 0.00012235 | 0.080544  | -0.82636   |
| 7w11w_SITTC | 0.06223963 | 0.609528   | 0.00011642 | 0.098794  | -0.4579    |
| 7w11w_SITTC | 0.06736414 | 0.65943825 | 0.00012058 | 0.088682  | -0.71078   |
| 7w11w_SITTC | 0.05026868 | 0.49293682 | 0.0001049  | 0.093366  | 0.032151   |
| 7w11w_SITTC | 0.06153355 | 0.6026511  | 0.00011583 | 0.09893   | -0.42501   |
| 7w11w_SITTC | 0.0031537  | 0.03405995 | 5.42E-05   | 0.0080398 | 0.31077    |
| 7w11w_SITTC | 0.02776338 | 0.27374628 | 7.90E-05   | 0.057632  | 0.76966    |
| 7w11w_SITTC | 0.05643479 | 0.55299175 | 0.00011111 | 0.094909  | -0.19309   |
| 7w11w_SITTC | 0.06186212 | 0.6058512  | 0.00011613 | 0.098894  | -0.44141   |
| 7w11w_SITTC | 0.04769518 | 0.46787223 | 0.00010234 | 0.09734   | 0.10986    |
| 7w11w_SITTC | 0.04124983 | 0.40509766 | 9.50E-05   | 0.10955   | 0.28067    |
| 7w11w_SITTC | 0.05389297 | 0.5282356  | 0.00010876 | 0.092731  | -0.084185  |
| 7w11w_SITTC | 0.06047152 | 0.5923075  | 0.00011492 | 0.0987    | -0.37638   |
| 7w11w_SITTC | 0.06540529 | 0.64036006 | 0.00011898 | 0.094504  | -0.60919   |
| 7w11w_SITTC | 0.05457677 | 0.53489554 | 0.00010944 | 0.093233  | -0.11022   |
| 7w11w_SITTC | 0.01307759 | 0.13071385 | 6.27E-05   | 0.018769  | 0.14454    |
| 7w11w_SITTC | 0.04334159 | 0.42547035 | 9.74E-05   | 0.10696   | 0.21998    |
| 7w11w_SITTC | 0.02456292 | 0.24257536 | 7.54E-05   | 0.044969  | 0.73857    |
| 7w11w_SITTC | 0.06348104 | 0.62161875 | 0.00011758 | 0.097678  | -0.50782   |
| 7w11w_SITTC | 0.03756246 | 0.36918446 | 9.06E-05   | 0.10531   | 0.41807    |
| 7w11w_SITTC | 0.05427613 | 0.5319674  | 0.0001091  | 0.092966  | -0.11022   |
| 7w11w_SITTC | 0.05086993 | 0.4987927  | 0.00010561 | 0.092703  | 0.010852   |
| 7w11w_SITTC | 0.06891681 | 0.6745604  | 0.00012186 | 0.08293   | -0.77743   |
| 7w11w_SITTC | 0.02973601 | 0.2929587  | 8.15E-05   | 0.067903  | 0.7357     |
| 7w11w_SITTC | 0.08896881 | 0.8698572  | 0.00013275 | 0.052622  | -1.3223    |

|             |            |            |            |           |            |
|-------------|------------|------------|------------|-----------|------------|
| 7w11w_SITTC | 0.04253605 | 0.41762477 | 9.66E-05   | 0.10808   | 0.24945    |
| 7w11w_SITTC | 0.00982348 | 0.09902039 | 5.98E-05   | 0.014626  | 0.1081     |
| 7w11w_SITTC | 0.05234493 | 0.51315844 | 0.00010703 | 0.092172  | -0.03476   |
| 7w11w_SITTC | 0.03549156 | 0.34901494 | 8.81E-05   | 0.097198  | 0.50933    |
| 7w11w_SITTC | 0.04001455 | 0.39306667 | 9.38E-05   | 0.10975   | 0.32588    |
| 7w11w_SITTC | 0.04396354 | 0.43152788 | 9.82E-05   | 0.10565   | 0.21046    |
| 7w11w_SITTC | 0.00259585 | 0.02862677 | 5.39E-05   | 0.007795  | 0.3272     |
| 7w11w_SITTC | 0.07456829 | 0.7296031  | 0.00012556 | 0.06525   | -1.0333    |
| 7w11w_SITTC | 0.00924277 | 0.09336454 | 5.92E-05   | 0.013809  | 0.11326    |
| 7w11w_SITTC | 0.08485506 | 0.8297912  | 0.00013105 | 0.053002  | -1.2841    |
| 7w11w_SITTC | 0.08228377 | 0.80474806 | 0.00012993 | 0.053861  | -1.2424    |
| 7w11w_SITTC | 0.03107246 | 0.3059751  | 8.28E-05   | 0.073435  | 0.69526    |
| 7w11w_SITTC | 0.07824051 | 0.7653687  | 0.00012778 | 0.057615  | -1.1573    |
| 7w11w_SITTC | 0.06112231 | 0.5986458  | 0.00011553 | 0.098907  | -0.4087    |
| 7w11w_SITTC | 0.01400773 | 0.13977297 | 6.37E-05   | 0.020323  | 0.18023    |
| 7w11w_SITTC | 0.024146   | 0.2385147  | 7.46E-05   | 0.042633  | 0.72811    |
| 7w11w_SITTC | 0.02494409 | 0.24628776 | 7.58E-05   | 0.046199  | 0.74769    |
| 7w11w_SITTC | 0.01805285 | 0.17917043 | 6.80E-05   | 0.027619  | 0.4001     |
| 7w11w_SITTC | 0.02046594 | 0.20267276 | 7.06E-05   | 0.032941  | 0.54704    |
| 7w11w_SITTC | 0.08667242 | 0.8474914  | 0.00013179 | 0.052739  | -1.3031    |
| 7w11w_SITTC | 0.04889984 | 0.47960502 | 0.00010344 | 0.095375  | 0.072211   |
| 7w11w_SITTC | 0.06376041 | 0.62433964 | 0.00011787 | 0.097201  | -0.5246    |
| 7w11w_SITTC | 0.04178395 | 0.4102997  | 9.58E-05   | 0.10896   | 0.27003    |
| 7w11w_SITTC | 0.00608143 | 0.06257466 | 5.66E-05   | 0.010584  | 0.18365    |
| 7w11w_SITTC | 0.06624009 | 0.6484905  | 0.00011979 | 0.091802  | -0.66011   |
| 7w11w_SITTC | 0.02129165 | 0.21071476 | 7.14E-05   | 0.034655  | 0.58661    |
| 7w11w_SITTC | 0.02028155 | 0.20087685 | 7.02E-05   | 0.032119  | 0.52662    |
| 7w11w_SITTC | 0.05210647 | 0.510836   | 0.00010703 | 0.092172  | -0.022986  |
| 7w11w_SITTC | 0.07004667 | 0.68556476 | 0.0001226  | 0.07935   | -0.8424    |
| 7w11w_SITTC | 0.05137953 | 0.5037559  | 0.00010632 | 0.092309  | -0.0001745 |
| 7w11w_SITTC | 0.02914732 | 0.28722513 | 8.07E-05   | 0.064343  | 0.751      |
| 7w11w_SITTC | 0.02846436 | 0.28057343 | 7.99E-05   | 0.060913  | 0.76245    |
| 7w11w_SITTC | 0.04361238 | 0.42810774 | 9.78E-05   | 0.10633   | 0.21998    |
| 7w11w_SITTC | 0.06168337 | 0.6041103  | 0.00011613 | 0.098894  | -0.42501   |
| 7w11w_SITTC | 0.05126502 | 0.5026407  | 0.00010597 | 0.092472  | -0.0001745 |
| 7w11w_SITTC | 0.05733357 | 0.5617454  | 0.00011209 | 0.096042  | -0.23694   |
| 7w11w_SITTC | 0.00523063 | 0.05428831 | 5.58E-05   | 0.0096645 | 0.22108    |
| 7w11w_SITTC | 0.01058743 | 0.10646089 | 6.05E-05   | 0.01548   | 0.10741    |
| 7w11w_SITTC | 0.07245488 | 0.70901954 | 0.00012424 | 0.071279  | -0.9499    |
| 7w11w_SITTC | 0.03424903 | 0.3369133  | 8.69E-05   | 0.09213   | 0.57137    |
| 7w11w_SITTC | 0.04872253 | 0.4778781  | 0.00010344 | 0.095375  | 0.081803   |
| 7w11w_SITTC | 0.05385701 | 0.5278854  | 0.00010876 | 0.092731  | -0.084185  |
| 7w11w_SITTC | 0.05051727 | 0.49535796 | 0.00010525 | 0.093003  | 0.021622   |
| 7w11w_SITTC | 0.04884004 | 0.47902256 | 0.00010344 | 0.095375  | 0.072211   |
| 7w11w_SITTC | 0.05680098 | 0.5565582  | 0.00011144 | 0.095284  | -0.20754   |
| 7w11w_SITTC | 0.01270456 | 0.1270807  | 6.24E-05   | 0.018271  | 0.13519    |

|             |            |            |            |           |          |
|-------------|------------|------------|------------|-----------|----------|
| 7w11w_SITTC | 0.04198809 | 0.41228798 | 9.58E-05   | 0.10896   | 0.25963  |
| 7w11w_SITTC | 0.0760437  | 0.7439729  | 0.0001264  | 0.06191   | -1.0832  |
| 7w11w_SITTC | 0.01605615 | 0.15972352 | 6.58E-05   | 0.023731  | 0.27899  |
| 7w11w_SITTC | 0.00249863 | 0.0276799  | 5.36E-05   | 0.0075574 | 0.34395  |
| 7w11w_SITTC | 0.01771611 | 0.17589076 | 6.76E-05   | 0.026932  | 0.37908  |
| 7w11w_SITTC | 0.03158207 | 0.31093836 | 8.36E-05   | 0.07721   | 0.6834   |
| 7w11w_SITTC | 0.06583124 | 0.6445085  | 0.00011953 | 0.092756  | -0.62617 |
| 7w11w_SITTC | 0.02370236 | 0.23419385 | 7.42E-05   | 0.041523  | 0.70349  |
| 7w11w_SITTC | 0.06835808 | 0.6691187  | 0.00012136 | 0.085284  | -0.7609  |
| 7w11w_SITTC | 0.071465   | 0.6993786  | 0.00012355 | 0.074645  | -0.90497 |
| 7w11w_SITTC | 0.06241304 | 0.61121696 | 0.00011672 | 0.098627  | -0.4579  |
| 7w11w_SITTC | 0.06038402 | 0.59145534 | 0.00011492 | 0.0987    | -0.36038 |
| 7w11w_SITTC | 0.06237225 | 0.61081964 | 0.00011672 | 0.098627  | -0.4579  |
| 7w11w_SITTC | 0.08603302 | 0.84126395 | 0.00013164 | 0.052775  | -1.2961  |
| 7w11w_SITTC | 0.06321929 | 0.6190694  | 0.0001173  | 0.098072  | -0.50782 |
| 7w11w_SITTC | 0.05040546 | 0.494269   | 0.00010525 | 0.093003  | 0.032151 |
| 7w11w_SITTC | 0.04878188 | 0.47845617 | 0.00010344 | 0.095375  | 0.072211 |
| 7w11w_SITTC | 0.03425086 | 0.33693114 | 8.69E-05   | 0.09213   | 0.57137  |
| 7w11w_SITTC | 0.06431658 | 0.62975645 | 0.00011815 | 0.096641  | -0.55833 |
| 7w11w_SITTC | 0.01034104 | 0.10406117 | 6.02E-05   | 0.015048  | 0.10718  |
| 7w11w_SITTC | 0.07845614 | 0.76746887 | 0.00012778 | 0.057615  | -1.1573  |
| 7w11w_SITTC | 0.01294276 | 0.12940064 | 6.27E-05   | 0.018769  | 0.14454  |
| 7w11w_SITTC | 0.03951565 | 0.3882076  | 9.30E-05   | 0.10937   | 0.35035  |
| 7w11w_SITTC | 0.07828828 | 0.765834   | 0.00012778 | 0.057615  | -1.1573  |
| 7w11w_SITTC | 0.01482241 | 0.14770752 | 6.44E-05   | 0.021412  | 0.20962  |
| 7w11w_SITTC | 0.03048755 | 0.30027834 | 8.23E-05   | 0.07157   | 0.71698  |
| 7w11w_SITTC | 0.05708047 | 0.5592803  | 0.00011177 | 0.095663  | -0.22216 |
| 7w11w_SITTC | 0.04856074 | 0.47630236 | 0.00010308 | 0.095994  | 0.081803 |
| 7w11w_SITTC | 0.04641364 | 0.45539063 | 0.00010084 | 0.10033   | 0.13721  |
| 7w11w_SITTC | 0.05747035 | 0.5630775  | 0.00011209 | 0.096042  | -0.23694 |
| 7w11w_SITTC | 0.02944422 | 0.29011682 | 8.11E-05   | 0.066108  | 0.7438   |
| 7w11w_SITTC | 0.02433077 | 0.24031425 | 7.50E-05   | 0.043782  | 0.72811  |
| 7w11w_SITTC | 0.08239931 | 0.8058734  | 0.00012993 | 0.053861  | -1.2485  |
| 7w11w_SITTC | 0.03619004 | 0.3558178  | 8.90E-05   | 0.10026   | 0.47826  |
| 7w11w_SITTC | 0.05017607 | 0.49203482 | 0.0001049  | 0.093366  | 0.032151 |
| 7w11w_SITTC | 0.07646661 | 0.74809176 | 0.0001268  | 0.060479  | -1.0948  |
| 7w11w_SITTC | 0.01889769 | 0.18739876 | 6.87E-05   | 0.029043  | 0.44251  |
| 7w11w_SITTC | 0.06161555 | 0.6034498  | 0.00011583 | 0.09893   | -0.42501 |
| 7w11w_SITTC | 0.03667863 | 0.36057642 | 8.98E-05   | 0.10298   | 0.46289  |
| 7w11w_SITTC | 0.05012678 | 0.49155486 | 0.0001049  | 0.093366  | 0.042456 |
| 7w11w_SITTC | 0.01552638 | 0.15456389 | 6.51E-05   | 0.022546  | 0.24275  |
| 7w11w_SITTC | 0.01248262 | 0.12491912 | 6.21E-05   | 0.017782  | 0.12723  |
| 7w11w_SITTC | 0.05104223 | 0.50047076 | 0.00010597 | 0.092472  | 0.010852 |
| 7w11w_SITTC | 0.04001139 | 0.39303583 | 9.38E-05   | 0.10975   | 0.32588  |
| 7w11w_SITTC | 0.04805279 | 0.47135517 | 0.00010271 | 0.09665   | 0.10061  |
| 7w11w_SITTC | 0.04274288 | 0.41963926 | 9.66E-05   | 0.10808   | 0.23945  |

|             |            |            |            |           |           |
|-------------|------------|------------|------------|-----------|-----------|
| 7w11w_SITTC | 0.05578259 | 0.5466396  | 0.00011045 | 0.094186  | -0.16472  |
| 7w11w_SITTC | 0.043784   | 0.4297792  | 9.82E-05   | 0.10565   | 0.21046   |
| 7w11w_SITTC | 0.01087323 | 0.10924438 | 6.08E-05   | 0.015922  | 0.10884   |
| 7w11w_SITTC | 0.03596609 | 0.35363662 | 8.90E-05   | 0.10026   | 0.49376   |
| 7w11w_SITTC | 0.0454823  | 0.44631982 | 9.97E-05   | 0.10268   | 0.16436   |
| 7w11w_SITTC | 0.04680875 | 0.45923877 | 0.00010122 | 0.099559  | 0.12814   |
| 7w11w_SITTC | 0.05710433 | 0.5595127  | 0.00011177 | 0.095663  | -0.22216  |
| 7w11w_SITTC | 0.08672594 | 0.8480126  | 0.00013193 | 0.052709  | -1.3031   |
| 7w11w_SITTC | 0.03951985 | 0.38824847 | 9.30E-05   | 0.10937   | 0.35035   |
| 7w11w_SITTC | 0.05963243 | 0.5841351  | 0.00011431 | 0.098311  | -0.32873  |
| 7w11w_SITTC | 0.05547057 | 0.5436007  | 0.00011045 | 0.094186  | -0.1508   |
| 7w11w_SITTC | 0.03983121 | 0.39128104 | 9.34E-05   | 0.10962   | 0.33794   |
| 7w11w_SITTC | 0.0557945  | 0.5467556  | 0.00011045 | 0.094186  | -0.16472  |
| 7w11w_SITTC | 0.04424174 | 0.43423736 | 9.86E-05   | 0.10494   | 0.20107   |
| 7w11w_SITTC | 0.07843076 | 0.7672217  | 0.00012778 | 0.057615  | -1.1573   |
| 7w11w_SITTC | 0.02422594 | 0.23929334 | 7.50E-05   | 0.043782  | 0.72811   |
| 7w11w_SITTC | 0.06767969 | 0.6625115  | 0.00012084 | 0.087573  | -0.72756  |
| 7w11w_SITTC | 0.04556153 | 0.44709155 | 0.00010009 | 0.1019    | 0.16436   |
| 7w11w_SITTC | 0.07783812 | 0.76144964 | 0.00012759 | 0.058113  | -1.1379   |
| 7w11w_SITTC | 0.05029294 | 0.49317312 | 0.0001049  | 0.093366  | 0.032151  |
| 7w11w_SITTC | 0.03053206 | 0.30071187 | 8.23E-05   | 0.07157   | 0.71698   |
| 7w11w_SITTC | 0.05905872 | 0.57854754 | 0.00011368 | 0.097776  | -0.31309  |
| 7w11w_SITTC | 0.00764065 | 0.07776067 | 5.78E-05   | 0.011928  | 0.14372   |
| 7w11w_SITTC | 0.05562951 | 0.5451487  | 0.00011045 | 0.094186  | -0.16472  |
| 7w11w_SITTC | 0.03355398 | 0.33014384 | 8.61E-05   | 0.088522  | 0.60151   |
| 7w11w_SITTC | 0.03386752 | 0.33319756 | 8.65E-05   | 0.090344  | 0.58656   |
| 7w11w_SITTC | 0.05179722 | 0.507824   | 0.00010668 | 0.092211  | -0.011455 |
| 7w11w_SITTC | 0.07307918 | 0.7150999  | 0.00012469 | 0.069151  | -0.97873  |
| 7w11w_SITTC | 0.06500469 | 0.63645834 | 0.00011871 | 0.095287  | -0.59222  |
| 7w11w_SITTC | 0.015628   | 0.15555355 | 6.54E-05   | 0.023132  | 0.26052   |
| 7w11w_SITTC | 0.05770211 | 0.5653348  | 0.00011241 | 0.096416  | -0.25188  |
| 7w11w_SITTC | 0.0815217  | 0.7973259  | 0.00012942 | 0.054478  | -1.2295   |
| 7w11w_SITTC | 0.07997245 | 0.78223693 | 0.00012871 | 0.055605  | -1.2004   |
| 7w11w_SITTC | 0.06320758 | 0.6189554  | 0.0001173  | 0.098072  | -0.50782  |
| 7w11w_SITTC | 0.05940412 | 0.5819115  | 0.000114   | 0.098059  | -0.32873  |
| 7w11w_SITTC | 0.02836207 | 0.27957723 | 7.99E-05   | 0.060913  | 0.76245   |
| 7w11w_SITTC | 0.04164942 | 0.40898943 | 9.54E-05   | 0.10929   | 0.27003   |
| 7w11w_SITTC | 0.07822411 | 0.765209   | 0.00012778 | 0.057615  | -1.1573   |
| 7w11w_SITTC | 0.08409643 | 0.82240254 | 0.00013074 | 0.053178  | -1.2751   |
| 7w11w_SITTC | 0.08150028 | 0.7971173  | 0.00012942 | 0.054478  | -1.2295   |
| 7w11w_SITTC | 0.07015733 | 0.6866425  | 0.0001226  | 0.07935   | -0.8424   |
| 7w11w_SITTC | 0.06096469 | 0.5971107  | 0.00011553 | 0.098907  | -0.39249  |
| 7w11w_SITTC | 0.00185158 | 0.02137795 | 5.31E-05   | 0.0071026 | 0.37827   |
| 7w11w_SITTC | 0.01589892 | 0.15819219 | 6.54E-05   | 0.023132  | 0.26052   |
| 7w11w_SITTC | 0.02236465 | 0.22116522 | 7.26E-05   | 0.037419  | 0.64161   |
| 7w11w_SITTC | 0.06543361 | 0.64063585 | 0.00011925 | 0.093659  | -0.60919  |



|             |            |            |            |          |           |
|-------------|------------|------------|------------|----------|-----------|
| 7w11w_SITTC | 0.06119931 | 0.5993958  | 0.00011553 | 0.098907 | -0.4087   |
| 7w11w_SITTC | 0.04623942 | 0.45369387 | 0.00010084 | 0.10033  | 0.14626   |
| 7w11w_SITTC | 0.06967289 | 0.68192434 | 0.00012235 | 0.080544 | -0.82636  |
| 7w11w_SITTC | 0.05256217 | 0.5152742  | 0.00010738 | 0.092189 | -0.046772 |
| 7w11w_SITTC | 0.04794402 | 0.47029585 | 0.00010271 | 0.09665  | 0.10061   |
| 7w11w_SITTC | 0.04687737 | 0.45990714 | 0.00010159 | 0.098799 | 0.12814   |
| 7w11w_SITTC | 0.04269737 | 0.41919595 | 9.66E-05   | 0.10808  | 0.23945   |
| 7w11w_SITTC | 0.05374157 | 0.52676105 | 0.00010876 | 0.092731 | -0.084185 |
| 7w11w_SITTC | 0.06477918 | 0.63426197 | 0.00011871 | 0.095287 | -0.57526  |
| 7w11w_SITTC | 0.04166696 | 0.40916026 | 9.54E-05   | 0.10929  | 0.27003   |
| 7w11w_SITTC | 0.06509212 | 0.6373099  | 0.00011898 | 0.094504 | -0.59222  |
| 7w11w_SITTC | 0.04325125 | 0.42459056 | 9.74E-05   | 0.10696  | 0.22964   |
| 7w11w_SITTC | 0.01113191 | 0.11176388 | 6.08E-05   | 0.015922 | 0.1115    |
| 7w11w_SITTC | 0.04207749 | 0.41315863 | 9.62E-05   | 0.10856  | 0.25963   |
| 7w11w_SITTC | 0.0679079  | 0.6647342  | 0.0001211  | 0.086439 | -0.72756  |
| 7w11w_SITTC | 0.04059934 | 0.3987622  | 9.42E-05   | 0.10978  | 0.3027    |
| 7w11w_SITTC | 0.08500236 | 0.8312259  | 0.0001312  | 0.05293  | -1.2841   |
| 7w11w_SITTC | 0.05833991 | 0.5715467  | 0.00011305 | 0.097132 | -0.26697  |
| 7w11w_SITTC | 0.04180971 | 0.4105506  | 9.58E-05   | 0.10896  | 0.27003   |
| 7w11w_SITTC | 0.0777147  | 0.7602476  | 0.0001274  | 0.058646 | -1.1379   |
| 7w11w_SITTC | 0.03657134 | 0.3595314  | 8.98E-05   | 0.10298  | 0.46289   |
| 7w11w_SITTC | 0.05390243 | 0.52832776 | 0.00010876 | 0.092731 | -0.084185 |
| 7w11w_SITTC | 0.06770493 | 0.66275734 | 0.00012084 | 0.087573 | -0.72756  |
| 7w11w_SITTC | 0.05924514 | 0.58036315 | 0.000114   | 0.098059 | -0.31309  |
| 7w11w_SITTC | 0.03778013 | 0.37130442 | 9.10E-05   | 0.1063   | 0.41807   |
| 7w11w_SITTC | 0.01178538 | 0.11812835 | 6.14E-05   | 0.016833 | 0.11542   |
| 7w11w_SITTC | 0.04400558 | 0.43193737 | 9.82E-05   | 0.10565  | 0.20107   |
| 7w11w_SITTC | 0.00918506 | 0.09280246 | 5.92E-05   | 0.013809 | 0.11326   |
| 7w11w_SITTC | 0.06808925 | 0.6665005  | 0.0001211  | 0.086439 | -0.74427  |
| 7w11w_SITTC | 0.04648851 | 0.45611978 | 0.00010084 | 0.10033  | 0.13721   |
| 7w11w_SITTC | 0.05626218 | 0.55131054 | 0.00011111 | 0.094909 | -0.17881  |
| 7w11w_SITTC | 0.02007318 | 0.19884743 | 6.99E-05   | 0.031319 | 0.52662   |
| 7w11w_SITTC | 0.04929979 | 0.4835003  | 0.00010417 | 0.094268 | 0.062467  |
| 7w11w_SITTC | 0.06207281 | 0.6079033  | 0.00011642 | 0.098794 | -0.44141  |
| 7w11w_SITTC | 0.03185551 | 0.31360152 | 8.40E-05   | 0.07911  | 0.67094   |
| 7w11w_SITTC | 0.03716127 | 0.36527708 | 9.02E-05   | 0.1042   | 0.43275   |
| 7w11w_SITTC | 0.03645536 | 0.3584019  | 8.94E-05   | 0.10166  | 0.46289   |
| 7w11w_SITTC | 0.05186522 | 0.5084864  | 0.00010668 | 0.092211 | -0.022986 |
| 7w11w_SITTC | 0.07237848 | 0.70827544 | 0.00012424 | 0.071279 | -0.93514  |
| 7w11w_SITTC | 0.06302651 | 0.61719185 | 0.0001173  | 0.098072 | -0.49111  |
| 7w11w_SITTC | 0.05354556 | 0.52485204 | 0.00010842 | 0.092532 | -0.07149  |
| 7w11w_SITTC | 0.07417756 | 0.72579753 | 0.00012534 | 0.066176 | -1.0201   |
| 7w11w_SITTC | 0.05644162 | 0.5530582  | 0.00011111 | 0.094909 | -0.19309  |
| 7w11w_SITTC | 0.03865923 | 0.3798665  | 9.22E-05   | 0.10852  | 0.37625   |
| 7w11w_SITTC | 0.06028029 | 0.59044504 | 0.00011492 | 0.0987   | -0.36038  |
| 7w11w_SITTC | 0.06578963 | 0.6441032  | 0.00011953 | 0.092756 | -0.62617  |

|             |            |            |            |           |          |
|-------------|------------|------------|------------|-----------|----------|
| 7w11w_SITTC | 0.01481464 | 0.14763184 | 6.44E-05   | 0.021412  | 0.20962  |
| 7w11w_SITTC | 0.07241057 | 0.70858794 | 0.00012424 | 0.071279  | -0.9499  |
| 7w11w_SITTC | 0.07446209 | 0.7285688  | 0.00012556 | 0.06525   | -1.0333  |
| 7w11w_SITTC | 0.09267518 | 0.9059554  | 0.00013408 | 0.052495  | -1.3392  |
| 7w11w_SITTC | 0.04308021 | 0.4229247  | 9.70E-05   | 0.10755   | 0.22964  |
| 7w11w_SITTC | 0.06478126 | 0.6342823  | 0.00011871 | 0.095287  | -0.57526 |
| 7w11w_SITTC | 0.03465958 | 0.3409118  | 8.73E-05   | 0.093873  | 0.55601  |
| 7w11w_SITTC | 0.05501641 | 0.5391774  | 0.00010978 | 0.093528  | -0.13708 |
| 7w11w_SITTC | 0.06851515 | 0.6706485  | 0.00012161 | 0.084113  | -0.7609  |
| 7w11w_SITTC | 0.04272733 | 0.41948777 | 9.66E-05   | 0.10808   | 0.23945  |
| 7w11w_SITTC | 0.02117252 | 0.20955448 | 7.14E-05   | 0.034655  | 0.58661  |
| 7w11w_SITTC | 0.02012323 | 0.19933495 | 7.02E-05   | 0.032119  | 0.52662  |
| 7w11w_SITTC | 0.05540206 | 0.54293346 | 0.00011011 | 0.093847  | -0.1508  |
| 7w11w_SITTC | 0.03426736 | 0.33709177 | 8.69E-05   | 0.09213   | 0.57137  |
| 7w11w_SITTC | 0.06112554 | 0.59867734 | 0.00011553 | 0.098907  | -0.4087  |
| 7w11w_SITTC | 0.05640427 | 0.55269444 | 0.00011111 | 0.094909  | -0.19309 |
| 7w11w_SITTC | 0.08714141 | 0.8520591  | 0.00013207 | 0.052686  | -1.3094  |
| 7w11w_SITTC | 0.05443394 | 0.5335044  | 0.00010944 | 0.093233  | -0.11022 |
| 7w11w_SITTC | 0.07107831 | 0.69561243 | 0.00012331 | 0.075804  | -0.88959 |
| 7w11w_SITTC | 0.0707808  | 0.6927148  | 0.00012308 | 0.076976  | -0.87403 |
| 7w11w_SITTC | 0.05831844 | 0.5713375  | 0.00011305 | 0.097132  | -0.26697 |
| 7w11w_SITTC | 0.01115382 | 0.11197726 | 6.08E-05   | 0.015922  | 0.1115   |
| 7w11w_SITTC | 0.01526051 | 0.15197441 | 6.47E-05   | 0.021973  | 0.24275  |
| 7w11w_SITTC | 0.04011234 | 0.394019   | 9.38E-05   | 0.10975   | 0.32588  |
| 7w11w_SITTC | 0.05703483 | 0.5588358  | 0.00011177 | 0.095663  | -0.22216 |
| 7w11w_SITTC | 0.0174948  | 0.17373526 | 6.72E-05   | 0.026262  | 0.35829  |
| 7w11w_SITTC | 0.01437197 | 0.14332044 | 6.41E-05   | 0.020862  | 0.19442  |
| 7w11w_SITTC | 0.04802743 | 0.4711082  | 0.00010271 | 0.09665   | 0.10061  |
| 7w11w_SITTC | 0.00461283 | 0.04827119 | 5.52E-05   | 0.0090922 | 0.24903  |
| 7w11w_SITTC | 0.04973552 | 0.48774415 | 0.00010453 | 0.09379   | 0.052555 |
| 7w11w_SITTC | 0.04373523 | 0.42930418 | 9.78E-05   | 0.10633   | 0.21046  |
| 7w11w_SITTC | 0.05804681 | 0.568692   | 0.00011273 | 0.096781  | -0.26697 |
| 7w11w_SITTC | 0.02643861 | 0.26084366 | 7.74E-05   | 0.051562  | 0.76965  |
| 7w11w_SITTC | 0.05480368 | 0.53710544 | 0.00010978 | 0.093528  | -0.12355 |
| 7w11w_SITTC | 0.05600994 | 0.5488539  | 0.00011078 | 0.094541  | -0.17881 |
| 7w11w_SITTC | 0.04565064 | 0.44795933 | 0.00010009 | 0.1019    | 0.16436  |
| 7w11w_SITTC | 0.07211414 | 0.7057009  | 0.00012401 | 0.07238   | -0.93514 |
| 7w11w_SITTC | 0.03898694 | 0.3830582  | 9.26E-05   | 0.10901   | 0.36311  |
| 7w11w_SITTC | 0.02253615 | 0.22283553 | 7.30E-05   | 0.038397  | 0.65846  |
| 7w11w_SITTC | 0.06670529 | 0.6530214  | 0.00012006 | 0.090801  | -0.67704 |
| 7w11w_SITTC | 0.0491028  | 0.48158172 | 0.00010381 | 0.094798  | 0.072211 |
| 7w11w_SITTC | 0.09390865 | 0.9179687  | 0.00013442 | 0.052444  | -1.3416  |
| 7w11w_SITTC | 0.06483408 | 0.6347967  | 0.00011871 | 0.095287  | -0.57526 |
| 7w11w_SITTC | 0.05025229 | 0.49277723 | 0.0001049  | 0.093366  | 0.032151 |
| 7w11w_SITTC | 0.02045433 | 0.20255971 | 7.06E-05   | 0.032941  | 0.54704  |
| 7w11w_SITTC | 0.0249379  | 0.24622741 | 7.58E-05   | 0.046199  | 0.74769  |

|             |            |            |            |           |           |
|-------------|------------|------------|------------|-----------|-----------|
| 7w11w_SITTC | 0.04202246 | 0.41262272 | 9.58E-05   | 0.10896   | 0.25963   |
| 7w11w_SITTC | 0.0820517  | 0.8024879  | 0.00012976 | 0.054048  | -1.2424   |
| 7w11w_SITTC | 0.01319049 | 0.1318134  | 6.27E-05   | 0.018769  | 0.15521   |
| 7w11w_SITTC | 0.04398638 | 0.43175036 | 9.82E-05   | 0.10565   | 0.20107   |
| 7w11w_SITTC | 0.0652854  | 0.63919234 | 0.00011898 | 0.094504  | -0.60919  |
| 7w11w_SITTC | 0.07771253 | 0.7602265  | 0.0001274  | 0.058646  | -1.1379   |
| 7w11w_SITTC | 0.06132128 | 0.6005837  | 0.00011583 | 0.09893   | -0.4087   |
| 7w11w_SITTC | 0.02985675 | 0.29413462 | 8.15E-05   | 0.067903  | 0.7357    |
| 7w11w_SITTC | 0.05286087 | 0.51818347 | 0.00010773 | 0.092257  | -0.046772 |
| 7w11w_SITTC | 0.04610783 | 0.45241222 | 0.00010046 | 0.10111   | 0.14626   |
| 7w11w_SITTC | 0.08950103 | 0.8750407  | 0.000133   | 0.052606  | -1.3264   |
| 7w11w_SITTC | 0.04584971 | 0.44989827 | 0.00010046 | 0.10111   | 0.1553    |
| 7w11w_SITTC | 0.07121491 | 0.6969428  | 0.00012331 | 0.075804  | -0.88959  |
| 7w11w_SITTC | 0.02019263 | 0.20001087 | 7.02E-05   | 0.032119  | 0.52662   |
| 7w11w_SITTC | 0.05888327 | 0.5768387  | 0.00011337 | 0.097465  | -0.29758  |
| 7w11w_SITTC | 0.06600674 | 0.6462178  | 0.00011953 | 0.092756  | -0.64315  |
| 7w11w_SITTC | 0.06660836 | 0.6520773  | 0.00012006 | 0.090801  | -0.67704  |
| 7w11w_SITTC | 0.06584457 | 0.6446383  | 0.00011953 | 0.092756  | -0.62617  |
| 7w11w_SITTC | 0.06746851 | 0.66045475 | 0.00012058 | 0.088682  | -0.71078  |
| 7w11w_SITTC | 0.02037375 | 0.20177482 | 7.02E-05   | 0.032119  | 0.54704   |
| 7w11w_SITTC | 0.04935034 | 0.48399267 | 0.00010417 | 0.094268  | 0.062467  |
| 7w11w_SITTC | 0.05508111 | 0.53980756 | 0.00010978 | 0.093528  | -0.13708  |
| 7w11w_SITTC | 0.04411062 | 0.4329604  | 9.82E-05   | 0.10565   | 0.20107   |
| 7w11w_SITTC | 0.08132728 | 0.7954324  | 0.00012942 | 0.054478  | -1.2295   |
| 7w11w_SITTC | 0.02970171 | 0.29262465 | 8.11E-05   | 0.066108  | 0.7357    |
| 7w11w_SITTC | 0.0290017  | 0.2858069  | 8.03E-05   | 0.062611  | 0.751     |
| 7w11w_SITTC | 0.02489957 | 0.24585411 | 7.58E-05   | 0.046199  | 0.74769   |
| 7w11w_SITTC | 0.04200743 | 0.41247633 | 9.58E-05   | 0.10896   | 0.25963   |
| 7w11w_SITTC | 0.03192182 | 0.3142474  | 8.40E-05   | 0.07911   | 0.67094   |
| 7w11w_SITTC | 0.02695404 | 0.26586366 | 7.78E-05   | 0.053015  | 0.77219   |
| 7w11w_SITTC | 0.05355336 | 0.52492803 | 0.00010842 | 0.092532  | -0.07149  |
| 7w11w_SITTC | 0.05951212 | 0.58296335 | 0.000114   | 0.098059  | -0.32873  |
| 7w11w_SITTC | 0.06462891 | 0.6327985  | 0.00011843 | 0.096001  | -0.57526  |
| 7w11w_SITTC | 0.01842155 | 0.18276136 | 6.84E-05   | 0.028322  | 0.42127   |
| 7w11w_SITTC | 0.05288041 | 0.5183738  | 0.00010773 | 0.092257  | -0.059017 |
| 7w11w_SITTC | 0.00775836 | 0.07890716 | 5.81E-05   | 0.012286  | 0.13577   |
| 7w11w_SITTC | 0.02946918 | 0.2903599  | 8.11E-05   | 0.066108  | 0.7438    |
| 7w11w_SITTC | 0.05429736 | 0.5321742  | 0.0001091  | 0.092966  | -0.11022  |
| 7w11w_SITTC | 0.07579703 | 0.7415704  | 0.0001264  | 0.06191   | -1.0712   |
| 7w11w_SITTC | 0.02343795 | 0.23161869 | 7.38E-05   | 0.040447  | 0.68948   |
| 7w11w_SITTC | 0          | 0.0033445  | 5.18E-05   | 0.0060787 | 0.46704   |
| 7w11w_SITTC | 0.09133803 | 0.8929322  | 0.00013362 | 0.052552  | -1.3347   |
| 7w11w_SITTC | 0.07634658 | 0.74692285 | 0.0001266  | 0.061174  | -1.0948   |
| 7w11w_SITTC | 0.04931326 | 0.48363155 | 0.00010417 | 0.094268  | 0.062467  |
| 7w11w_SITTC | 0.07579615 | 0.7415619  | 0.0001264  | 0.06191   | -1.0712   |
| 7w11w_SITTC | 0.0522604  | 0.5123352  | 0.00010703 | 0.092172  | -0.03476  |

|             |            |            |            |           |           |
|-------------|------------|------------|------------|-----------|-----------|
| 7w11w_SITTC | 0.07664098 | 0.7497901  | 0.0001268  | 0.060479  | -1.1061   |
| 7w11w_SITTC | 0.03189571 | 0.3139931  | 8.40E-05   | 0.07911   | 0.67094   |
| 7w11w_SITTC | 0.04002456 | 0.39316416 | 9.38E-05   | 0.10975   | 0.32588   |
| 7w11w_SITTC | 0.04000794 | 0.39300224 | 9.38E-05   | 0.10975   | 0.32588   |
| 7w11w_SITTC | 0.07045512 | 0.68954283 | 0.00012284 | 0.078159  | -0.8583   |
| 7w11w_SITTC | 0.06043563 | 0.5919579  | 0.00011492 | 0.0987    | -0.37638  |
| 7w11w_SITTC | 0.05516496 | 0.54062414 | 0.00011011 | 0.093847  | -0.13708  |
| 7w11w_SITTC | 0.0494998  | 0.48544836 | 0.00010417 | 0.094268  | 0.052555  |
| 7w11w_SITTC | 0.04992608 | 0.48960012 | 0.00010453 | 0.09379   | 0.042456  |
| 7w11w_SITTC | 0.05533801 | 0.5423096  | 0.00011011 | 0.093847  | -0.1508   |
| 7w11w_SITTC | 0.00398267 | 0.04213372 | 5.50E-05   | 0.0088178 | 0.2638    |
| 7w11w_SITTC | 0.08260878 | 0.8079136  | 0.00013009 | 0.053693  | -1.2485   |
| 7w11w_SITTC | 0.07118051 | 0.69660777 | 0.00012331 | 0.075804  | -0.88959  |
| 7w11w_SITTC | 0.06441575 | 0.6307223  | 0.00011843 | 0.096001  | -0.55833  |
| 7w11w_SITTC | 0.06939137 | 0.67918247 | 0.00012211 | 0.081739  | -0.81017  |
| 7w11w_SITTC | 0.06110347 | 0.59846234 | 0.00011553 | 0.098907  | -0.4087   |
| 7w11w_SITTC | 0.06173339 | 0.60459745 | 0.00011613 | 0.098894  | -0.42501  |
| 7w11w_SITTC | 0.04715015 | 0.4625639  | 0.00010159 | 0.098799  | 0.11903   |
| 7w11w_SITTC | 0.01862674 | 0.18475978 | 6.84E-05   | 0.028322  | 0.42127   |
| 7w11w_SITTC | 0.05791396 | 0.5673981  | 0.00011273 | 0.096781  | -0.25188  |
| 7w11w_SITTC | 0.01415248 | 0.1411827  | 6.37E-05   | 0.020323  | 0.18023   |
| 7w11w_SITTC | 0.04037662 | 0.396593   | 9.42E-05   | 0.10978   | 0.31414   |
| 7w11w_SITTC | 0.05322306 | 0.52171105 | 0.00010807 | 0.092373  | -0.07149  |
| 7w11w_SITTC | 0.05245083 | 0.5141899  | 0.00010738 | 0.092189  | -0.03476  |
| 7w11w_SITTC | 0.06662254 | 0.6522154  | 0.00012006 | 0.090801  | -0.67704  |
| 7w11w_SITTC | 0.07065737 | 0.6915127  | 0.00012308 | 0.076976  | -0.8583   |
| 7w11w_SITTC | 0.04676436 | 0.4588065  | 0.00010122 | 0.099559  | 0.12814   |
| 7w11w_SITTC | 0.03966209 | 0.38963383 | 9.34E-05   | 0.10962   | 0.33794   |
| 7w11w_SITTC | 0.03629023 | 0.35679352 | 8.94E-05   | 0.10166   | 0.47826   |
| 7w11w_SITTC | 0.06317591 | 0.6186469  | 0.0001173  | 0.098072  | -0.50782  |
| 7w11w_SITTC | 0.03084271 | 0.30373743 | 8.28E-05   | 0.073435  | 0.70647   |
| 7w11w_SITTC | 0.03939966 | 0.3870779  | 9.30E-05   | 0.10937   | 0.35035   |
| 7w11w_SITTC | 0.06105017 | 0.5979432  | 0.00011553 | 0.098907  | -0.39249  |
| 7w11w_SITTC | 0.02765918 | 0.27273133 | 7.90E-05   | 0.057632  | 0.76966   |
| 7w11w_SITTC | 0.06423914 | 0.6290022  | 0.00011815 | 0.096641  | -0.55833  |
| 7w11w_SITTC | 0.03181076 | 0.31316578 | 8.40E-05   | 0.07911   | 0.67094   |
| 7w11w_SITTC | 0.07134859 | 0.69824487 | 0.00012355 | 0.074645  | -0.88959  |
| 7w11w_SITTC | 0.02223061 | 0.21985976 | 7.26E-05   | 0.037419  | 0.64161   |
| 7w11w_SITTC | 0.01496055 | 0.1490529  | 6.47E-05   | 0.021973  | 0.22576   |
| 7w11w_SITTC | 0.06875018 | 0.6729376  | 0.00012161 | 0.084113  | -0.77743  |
| 7w11w_SITTC | 0.03021525 | 0.29762623 | 8.19E-05   | 0.069725  | 0.72675   |
| 7w11w_SITTC | 0.04495978 | 0.4412307  | 9.93E-05   | 0.10345   | 0.18258   |
| 7w11w_SITTC | 0.05997763 | 0.58749723 | 0.00011462 | 0.098526  | -0.3445   |
| 7w11w_SITTC | 0.05318891 | 0.5213784  | 0.00010807 | 0.092373  | -0.059017 |
| 7w11w_SITTC | 0.04816096 | 0.47240868 | 0.00010271 | 0.09665   | 0.091263  |
| 7w11w_SITTC | 0.08155002 | 0.7976018  | 0.00012942 | 0.054478  | -1.2295   |

|             |            |            |            |          |           |
|-------------|------------|------------|------------|----------|-----------|
| 7w11w_SITTC | 0.04770787 | 0.4679958  | 0.00010234 | 0.09734  | 0.10986   |
| 7w11w_SITTC | 0.03809021 | 0.3743245  | 9.14E-05   | 0.10717  | 0.40374   |
| 7w11w_SITTC | 0.06638793 | 0.6499304  | 0.00011979 | 0.091802 | -0.66011  |
| 7w11w_SITTC | 0.06539477 | 0.6402575  | 0.00011898 | 0.094504 | -0.60919  |
| 7w11w_SITTC | 0.02897135 | 0.28551129 | 8.03E-05   | 0.062611 | 0.751     |
| 7w11w_SITTC | 0.01313112 | 0.13123521 | 6.27E-05   | 0.018769 | 0.14454   |
| 7w11w_SITTC | 0.05413256 | 0.5305691  | 0.0001091  | 0.092966 | -0.097097 |
| 7w11w_SITTC | 0.01385341 | 0.13826995 | 6.34E-05   | 0.019794 | 0.16714   |
| 7w11w_SITTC | 0.07080167 | 0.69291806 | 0.00012308 | 0.076976 | -0.87403  |
| 7w11w_SITTC | 0.04983825 | 0.48874462 | 0.00010453 | 0.09379  | 0.042456  |
| 7w11w_SITTC | 0.04888823 | 0.4794919  | 0.00010344 | 0.095375 | 0.072211  |
| 7w11w_SITTC | 0.0501236  | 0.49152383 | 0.0001049  | 0.093366 | 0.042456  |
| 7w11w_SITTC | 0.06473842 | 0.633865   | 0.00011871 | 0.095287 | -0.57526  |
| 7w11w_SITTC | 0.05333602 | 0.52281123 | 0.00010807 | 0.092373 | -0.07149  |
| 7w11w_SITTC | 0.06330032 | 0.6198586  | 0.0001173  | 0.098072 | -0.50782  |
| 7w11w_SITTC | 0.02101217 | 0.20799275 | 7.10E-05   | 0.033786 | 0.56707   |
| 7w11w_SITTC | 0.09113806 | 0.89098454 | 0.0001335  | 0.052565 | -1.3333   |
| 7w11w_SITTC | 0.00884688 | 0.08950879 | 5.89E-05   | 0.013414 | 0.11742   |
| 7w11w_SITTC | 0.03639238 | 0.3577885  | 8.94E-05   | 0.10166  | 0.47826   |
| 7w11w_SITTC | 0.06137889 | 0.6011448  | 0.00011583 | 0.09893  | -0.4087   |
| 7w11w_SITTC | 0.02266369 | 0.22407773 | 7.30E-05   | 0.038397 | 0.65846   |
| 7w11w_SITTC | 0.05774046 | 0.5657083  | 0.00011241 | 0.096416 | -0.25188  |
| 7w11w_SITTC | 0.04756461 | 0.46660054 | 0.00010234 | 0.09734  | 0.10986   |
| 7w11w_SITTC | 0.05821282 | 0.57030886 | 0.00011305 | 0.097132 | -0.26697  |
| 7w11w_SITTC | 0.09106157 | 0.8902396  | 0.0001335  | 0.052565 | -1.3333   |
| 7w11w_SITTC | 0.05275284 | 0.5171313  | 0.00010773 | 0.092257 | -0.046772 |
| 7w11w_SITTC | 0.06881651 | 0.6735836  | 0.00012161 | 0.084113 | -0.77743  |
| 7w11w_SITTC | 0.06814944 | 0.66708666 | 0.0001211  | 0.086439 | -0.74427  |
| 7w11w_SITTC | 0.07780024 | 0.7610808  | 0.00012759 | 0.058113 | -1.1379   |
| 7w11w_SITTC | 0.02867478 | 0.28262278 | 8.03E-05   | 0.062611 | 0.75723   |
| 7w11w_SITTC | 0.04135465 | 0.4061185  | 9.50E-05   | 0.10955  | 0.28067   |
| 7w11w_SITTC | 0.05266028 | 0.51622987 | 0.00010738 | 0.092189 | -0.046772 |
| 7w11w_SITTC | 0.04827917 | 0.47356004 | 0.00010308 | 0.095994 | 0.091263  |
| 7w11w_SITTC | 0.00667227 | 0.06832913 | 5.69E-05   | 0.010907 | 0.17252   |
| 7w11w_SITTC | 0.06162559 | 0.6035475  | 0.00011583 | 0.09893  | -0.42501  |
| 7w11w_SITTC | 0.03015178 | 0.2970081  | 8.19E-05   | 0.069725 | 0.72675   |
| 7w11w_SITTC | 0.06006478 | 0.58834606 | 0.00011462 | 0.098526 | -0.36038  |
| 7w11w_SITTC | 0.05645851 | 0.5532227  | 0.00011111 | 0.094909 | -0.19309  |
| 7w11w_SITTC | 0.04635721 | 0.45484105 | 0.00010084 | 0.10033  | 0.14626   |
| 7w11w_SITTC | 0.05390877 | 0.5283895  | 0.00010876 | 0.092731 | -0.097097 |
| 7w11w_SITTC | 0.05648222 | 0.5534536  | 0.00011111 | 0.094909 | -0.19309  |
| 7w11w_SITTC | 0.04756124 | 0.46656772 | 0.00010234 | 0.09734  | 0.10986   |
| 7w11w_SITTC | 0.012539   | 0.12546818 | 6.24E-05   | 0.018271 | 0.13519   |
| 7w11w_SITTC | 0.05453854 | 0.5345231  | 0.00010944 | 0.093233 | -0.11022  |
| 7w11w_SITTC | 0.07101074 | 0.69495434 | 0.00012331 | 0.075804 | -0.87403  |
| 7w11w_SITTC | 0.0759207  | 0.74277496 | 0.0001264  | 0.06191  | -1.0832   |

|             |            |            |            |          |           |
|-------------|------------|------------|------------|----------|-----------|
| 7w11w_SITTC | 0.04166896 | 0.40917978 | 9.54E-05   | 0.10929  | 0.27003   |
| 7w11w_SITTC | 0.06841105 | 0.6696346  | 0.00012136 | 0.085284 | -0.7609   |
| 7w11w_SITTC | 0.07800701 | 0.7630946  | 0.00012759 | 0.058113 | -1.1478   |
| 7w11w_SITTC | 0.04996707 | 0.48999935 | 0.0001049  | 0.093366 | 0.042456  |
| 7w11w_SITTC | 0.04915542 | 0.48209426 | 0.00010381 | 0.094798 | 0.062467  |
| 7w11w_SITTC | 0.04859835 | 0.4766686  | 0.00010344 | 0.095375 | 0.081803  |
| 7w11w_SITTC | 0.02026183 | 0.20068479 | 7.02E-05   | 0.032119 | 0.52662   |
| 7w11w_SITTC | 0.06513437 | 0.63772136 | 0.00011898 | 0.094504 | -0.59222  |
| 7w11w_SITTC | 0.05602999 | 0.54904914 | 0.00011078 | 0.094541 | -0.17881  |
| 7w11w_SITTC | 0.02579484 | 0.25457358 | 7.66E-05   | 0.04879  | 0.7616    |
| 7w11w_SITTC | 0.08028947 | 0.7853246  | 0.00012889 | 0.055287 | -1.2081   |
| 7w11w_SITTC | 0.06436931 | 0.63027    | 0.00011815 | 0.096641 | -0.55833  |
| 7w11w_SITTC | 0.05669267 | 0.5555033  | 0.00011144 | 0.095284 | -0.20754  |
| 7w11w_SITTC | 0.08124203 | 0.79460204 | 0.00012942 | 0.054478 | -1.2227   |
| 7w11w_SITTC | 0.03266016 | 0.32143852 | 8.48E-05   | 0.082909 | 0.64444   |
| 7w11w_SITTC | 0.05442433 | 0.5334108  | 0.0001091  | 0.092966 | -0.11022  |
| 7w11w_SITTC | 0.07088471 | 0.6937268  | 0.00012308 | 0.076976 | -0.87403  |
| 7w11w_SITTC | 0.06631831 | 0.64925236 | 0.00011979 | 0.091802 | -0.66011  |
| 7w11w_SITTC | 0.06141175 | 0.60146487 | 0.00011583 | 0.09893  | -0.4087   |
| 7w11w_SITTC | 0.05710596 | 0.5595286  | 0.00011177 | 0.095663 | -0.22216  |
| 7w11w_SITTC | 0.04489017 | 0.44055274 | 9.93E-05   | 0.10345  | 0.18258   |
| 7w11w_SITTC | 0.07010941 | 0.6861758  | 0.0001226  | 0.07935  | -0.8424   |
| 7w11w_SITTC | 0.04993837 | 0.48971975 | 0.00010453 | 0.09379  | 0.042456  |
| 7w11w_SITTC | 0.05472505 | 0.53633964 | 0.00010944 | 0.093233 | -0.12355  |
| 7w11w_SITTC | 0.05224386 | 0.5121741  | 0.00010703 | 0.092172 | -0.03476  |
| 7w11w_SITTC | 0.06437831 | 0.6303577  | 0.00011815 | 0.096641 | -0.55833  |
| 7w11w_SITTC | 0.02866142 | 0.28249273 | 7.99E-05   | 0.060913 | 0.75723   |
| 7w11w_SITTC | 0.06560563 | 0.6423112  | 0.00011925 | 0.093659 | -0.62617  |
| 7w11w_SITTC | 0.07195118 | 0.7041138  | 0.00012401 | 0.07238  | -0.92016  |
| 7w11w_SITTC | 0.05427002 | 0.5319079  | 0.0001091  | 0.092966 | -0.11022  |
| 7w11w_SITTC | 0.03959854 | 0.3890149  | 9.30E-05   | 0.10937  | 0.33794   |
| 7w11w_SITTC | 0.05301667 | 0.5197009  | 0.00010773 | 0.092257 | -0.059017 |
| 7w11w_SITTC | 0.07027029 | 0.6877427  | 0.00012284 | 0.078159 | -0.8424   |
| 7w11w_SITTC | 0.01822493 | 0.18084644 | 6.80E-05   | 0.027619 | 0.4001    |
| 7w11w_SITTC | 0.07402607 | 0.7243222  | 0.00012534 | 0.066176 | -1.0066   |
| 7w11w_SITTC | 0.04831341 | 0.47389346 | 0.00010308 | 0.095994 | 0.091263  |
| 7w11w_SITTC | 0.04166301 | 0.40912184 | 9.54E-05   | 0.10929  | 0.27003   |
| 7w11w_SITTC | 0.0556151  | 0.54500836 | 0.00011045 | 0.094186 | -0.16472  |
| 7w11w_SITTC | 0.08159931 | 0.7980818  | 0.00012959 | 0.054253 | -1.2295   |
| 7w11w_SITTC | 0.05232637 | 0.51297766 | 0.00010703 | 0.092172 | -0.03476  |
| 7w11w_SITTC | 0.04896436 | 0.48023337 | 0.00010381 | 0.094798 | 0.072211  |
| 7w11w_SITTC | 0.0478766  | 0.46963912 | 0.00010234 | 0.09734  | 0.10061   |
| 7w11w_SITTC | 0.05373706 | 0.52671707 | 0.00010842 | 0.092532 | -0.084185 |
| 7w11w_SITTC | 0.08065896 | 0.78892326 | 0.00012907 | 0.054994 | -1.2155   |
| 7w11w_SITTC | 0.07035709 | 0.6885881  | 0.00012284 | 0.078159 | -0.8583   |
| 7w11w_SITTC | 0.06333219 | 0.62016904 | 0.0001173  | 0.098072 | -0.50782  |

|             |            |            |            |          |            |
|-------------|------------|------------|------------|----------|------------|
| 7w11w_SITTC | 0.01493423 | 0.1487966  | 6.44E-05   | 0.021412 | 0.22576    |
| 7w11w_SITTC | 0.04882449 | 0.47887114 | 0.00010344 | 0.095375 | 0.072211   |
| 7w11w_SITTC | 0.07443681 | 0.7283226  | 0.00012556 | 0.06525  | -1.0201    |
| 7w11w_SITTC | 0.09035286 | 0.8833371  | 0.00013325 | 0.052587 | -1.3301    |
| 7w11w_SITTC | 0.08328561 | 0.8145055  | 0.00013042 | 0.053406 | -1.2598    |
| 7w11w_SITTC | 0.07777941 | 0.7608778  | 0.00012759 | 0.058113 | -1.1379    |
| 7w11w_SITTC | 0.0487154  | 0.47780862 | 0.00010344 | 0.095375 | 0.081803   |
| 7w11w_SITTC | 0.03617292 | 0.35565102 | 8.90E-05   | 0.10026  | 0.47826    |
| 7w11w_SITTC | 0.04304002 | 0.4225332  | 9.70E-05   | 0.10755  | 0.22964    |
| 7w11w_SITTC | 0.023006   | 0.2274117  | 7.34E-05   | 0.039406 | 0.67444    |
| 7w11w_SITTC | 0.0742316  | 0.72632396 | 0.00012534 | 0.066176 | -1.0201    |
| 7w11w_SITTC | 0.05090337 | 0.49911845 | 0.00010561 | 0.092703 | 0.010852   |
| 7w11w_SITTC | 0.0637525  | 0.6242626  | 0.00011787 | 0.097201 | -0.5246    |
| 7w11w_SITTC | 0.01347157 | 0.13455105 | 6.30E-05   | 0.019276 | 0.15521    |
| 7w11w_SITTC | 0.04534313 | 0.4449644  | 9.97E-05   | 0.10268  | 0.17344    |
| 7w11w_SITTC | 0.06633755 | 0.64943975 | 0.00011979 | 0.091802 | -0.66011   |
| 7w11w_SITTC | 0.04834401 | 0.4741915  | 0.00010308 | 0.095994 | 0.091263   |
| 7w11w_SITTC | 0.06261352 | 0.6131695  | 0.00011672 | 0.098627 | -0.47447   |
| 7w11w_SITTC | 0.03680762 | 0.36183265 | 8.98E-05   | 0.10298  | 0.4477     |
| 7w11w_SITTC | 0.05147477 | 0.50468355 | 0.00010632 | 0.092309 | -0.0001745 |
| 7w11w_SITTC | 0.07457347 | 0.7296536  | 0.00012556 | 0.06525  | -1.0333    |
| 7w11w_SITTC | 0.07602353 | 0.7437765  | 0.0001264  | 0.06191  | -1.0832    |
| 7w11w_SITTC | 0.04905449 | 0.48111126 | 0.00010381 | 0.094798 | 0.072211   |
| 7w11w_SITTC | 0.00615392 | 0.06328069 | 5.66E-05   | 0.010584 | 0.18365    |
| 7w11w_SITTC | 0.05491569 | 0.5381964  | 0.00010978 | 0.093528 | -0.12355   |
| 7w11w_SITTC | 0.04498455 | 0.441472   | 9.93E-05   | 0.10345  | 0.18258    |
| 7w11w_SITTC | 0.05265474 | 0.51617587 | 0.00010738 | 0.092189 | -0.046772  |
| 7w11w_SITTC | 0.03456884 | 0.34002808 | 8.73E-05   | 0.093873 | 0.55601    |
| 7w11w_SITTC | 0.05126094 | 0.502601   | 0.00010597 | 0.092472 | -0.0001745 |
| 7w11w_SITTC | 0.05562492 | 0.54510397 | 0.00011045 | 0.094186 | -0.16472   |
| 7w11w_SITTC | 0.05149946 | 0.50492406 | 0.00010632 | 0.092309 | -0.0001745 |
| 7w11w_SITTC | 0.05303804 | 0.519909   | 0.00010773 | 0.092257 | -0.059017  |
| 7w11w_SITTC | 0.07189269 | 0.7035441  | 0.00012378 | 0.073503 | -0.92016   |
| 7w11w_SITTC | 0.03318698 | 0.32656944 | 8.57E-05   | 0.086671 | 0.61617    |
| 7w11w_SITTC | 0.06273387 | 0.6143417  | 0.00011701 | 0.098387 | -0.47447   |
| 7w11w_SITTC | 0.05554497 | 0.5443253  | 0.00011045 | 0.094186 | -0.1508    |
| 7w11w_SITTC | 0.03563767 | 0.35043794 | 8.86E-05   | 0.098764 | 0.50933    |
| 7w11w_SITTC | 0.06003364 | 0.58804274 | 0.00011462 | 0.098526 | -0.3445    |
| 7w11w_SITTC | 0.02148961 | 0.2126428  | 7.18E-05   | 0.035549 | 0.6056     |
| 7w11w_SITTC | 0.05842526 | 0.57237786 | 0.00011305 | 0.097132 | -0.2822    |
| 7w11w_SITTC | 0.02802942 | 0.27633736 | 7.94E-05   | 0.059253 | 0.76661    |
| 7w11w_SITTC | 0.07279883 | 0.7123694  | 0.00012446 | 0.070202 | -0.96444   |
| 7w11w_SITTC | 0.07606745 | 0.74420416 | 0.0001266  | 0.061174 | -1.0832    |
| 7w11w_SITTC | 0.04969116 | 0.48731205 | 0.00010453 | 0.09379  | 0.052555   |
| 7w11w_SITTC | 0.05438653 | 0.53304267 | 0.0001091  | 0.092966 | -0.11022   |
| 7w11w_SITTC | 0.01620917 | 0.1612139  | 6.58E-05   | 0.023731 | 0.27899    |

|             |            |            |            |           |            |
|-------------|------------|------------|------------|-----------|------------|
| 7w11w_SITTC | 0.06865245 | 0.67198575 | 0.00012161 | 0.084113  | -0.77743   |
| 7w11w_SITTC | 0.06777299 | 0.66342026 | 0.00012084 | 0.087573  | -0.72756   |
| 7w11w_SITTC | 0.02160783 | 0.21379422 | 7.18E-05   | 0.035549  | 0.6056     |
| 7w11w_SITTC | 0.01976189 | 0.19581562 | 6.99E-05   | 0.031319  | 0.50588    |
| 7w11w_SITTC | 0.03432611 | 0.33766404 | 8.69E-05   | 0.09213   | 0.57137    |
| 7w11w_SITTC | 0.04350254 | 0.42703792 | 9.78E-05   | 0.10633   | 0.21998    |
| 7w11w_SITTC | 0.07578858 | 0.74148816 | 0.0001264  | 0.06191   | -1.0712    |
| 7w11w_SITTC | 0.01332198 | 0.13309404 | 6.30E-05   | 0.019276  | 0.15521    |
| 7w11w_SITTC | 0.05318816 | 0.5213711  | 0.00010807 | 0.092373  | -0.059017  |
| 7w11w_SITTC | 0.06252907 | 0.61234695 | 0.00011672 | 0.098627  | -0.47447   |
| 7w11w_SITTC | 0.08309498 | 0.81264895 | 0.00013026 | 0.053541  | -1.2598    |
| 7w11w_SITTC | 0.03994116 | 0.39235187 | 9.34E-05   | 0.10962   | 0.32588    |
| 7w11w_SITTC | 0.05388578 | 0.5281656  | 0.00010876 | 0.092731  | -0.084185  |
| 7w11w_SITTC | 0.01822844 | 0.1808806  | 6.80E-05   | 0.027619  | 0.4001     |
| 7w11w_SITTC | 0.05700965 | 0.5585906  | 0.00011177 | 0.095663  | -0.22216   |
| 7w11w_SITTC | 0.0395081  | 0.3881341  | 9.30E-05   | 0.10937   | 0.35035    |
| 7w11w_SITTC | 0.0513982  | 0.5039378  | 0.00010632 | 0.092309  | -0.0001745 |
| 7w11w_SITTC | 0.09851752 | 0.9628568  | 0.00013585 | 0.052145  | -1.3442    |
| 7w11w_SITTC | 0.06173213 | 0.6045852  | 0.00011613 | 0.098894  | -0.42501   |
| 7w11w_SITTC | 0.03774078 | 0.37092125 | 9.10E-05   | 0.1063    | 0.41807    |
| 7w11w_SITTC | 0.06881773 | 0.6735954  | 0.00012161 | 0.084113  | -0.77743   |
| 7w11w_SITTC | 0.06051599 | 0.59274054 | 0.00011492 | 0.0987    | -0.37638   |
| 7w11w_SITTC | 0.06016556 | 0.5893276  | 0.00011462 | 0.098526  | -0.36038   |
| 7w11w_SITTC | 0.06591275 | 0.64530236 | 0.00011953 | 0.092756  | -0.64315   |
| 7w11w_SITTC | 0.08916552 | 0.871773   | 0.00013288 | 0.052615  | -1.3244    |
| 7w11w_SITTC | 0.06120816 | 0.59948194 | 0.00011553 | 0.098907  | -0.4087    |
| 7w11w_SITTC | 0.06658043 | 0.6518053  | 0.00012006 | 0.090801  | -0.67704   |
| 7w11w_SITTC | 0.06265242 | 0.61354834 | 0.00011672 | 0.098627  | -0.47447   |
| 7w11w_SITTC | 0.06113099 | 0.5987303  | 0.00011553 | 0.098907  | -0.4087    |
| 7w11w_SITTC | 0.01514216 | 0.1508217  | 6.47E-05   | 0.021973  | 0.22576    |
| 7w11w_SITTC | 0.03393712 | 0.33387545 | 8.65E-05   | 0.090344  | 0.58656    |
| 7w11w_SITTC | 0.00359385 | 0.03834683 | 5.44E-05   | 0.0082917 | 0.27903    |
| 7w11w_SITTC | 0.07294162 | 0.71376014 | 0.00012446 | 0.070202  | -0.96444   |
| 7w11w_SITTC | 0.01015419 | 0.10224138 | 6.02E-05   | 0.015048  | 0.10718    |
| 7w11w_SITTC | 0.00950508 | 0.09591934 | 5.95E-05   | 0.014213  | 0.11014    |
| 7w11w_SITTC | 0.04892185 | 0.47981933 | 0.00010344 | 0.095375  | 0.072211   |
| 7w11w_SITTC | 0.06728637 | 0.6586808  | 0.00012058 | 0.088682  | -0.71078   |
| 7w11w_SITTC | 0.04961154 | 0.48653662 | 0.00010417 | 0.094268  | 0.052555   |
| 7w11w_SITTC | 0.02249837 | 0.22246763 | 7.30E-05   | 0.038397  | 0.65846    |
| 7w11w_SITTC | 0.07171934 | 0.7018558  | 0.00012378 | 0.073503  | -0.92016   |
| 7w11w_SITTC | 0.04475442 | 0.43923062 | 9.89E-05   | 0.10421   | 0.18258    |
| 7w11w_SITTC | 0.05162689 | 0.5061651  | 0.00010632 | 0.092309  | -0.011455  |
| 7w11w_SITTC | 0.04928085 | 0.48331583 | 0.00010417 | 0.094268  | 0.062467   |
| 7w11w_SITTC | 0.05579028 | 0.5467145  | 0.00011045 | 0.094186  | -0.16472   |
| 7w11w_SITTC | 0.08924016 | 0.87249994 | 0.00013288 | 0.052615  | -1.3244    |
| 7w11w_SITTC | 0.06601266 | 0.64627546 | 0.00011953 | 0.092756  | -0.64315   |



|             |            |            |            |           |           |
|-------------|------------|------------|------------|-----------|-----------|
| 7w11w_SITTC | 0.03270132 | 0.32183933 | 8.48E-05   | 0.082909  | 0.6305    |
| 7w11w_SITTC | 0.05668634 | 0.5554417  | 0.00011144 | 0.095284  | -0.20754  |
| 7w11w_SITTC | 0.04828649 | 0.4736313  | 0.00010308 | 0.095994  | 0.091263  |
| 7w11w_SITTC | 0.02027123 | 0.20077634 | 7.02E-05   | 0.032119  | 0.52662   |
| 7w11w_SITTC | 0.05287176 | 0.51828957 | 0.00010773 | 0.092257  | -0.046772 |
| 7w11w_SITTC | 0.08100059 | 0.7922506  | 0.00012924 | 0.054725  | -1.2227   |
| 7w11w_SITTC | 0.03822123 | 0.3756006  | 9.14E-05   | 0.10717   | 0.38979   |
| 7w11w_SITTC | 0.03338774 | 0.32852474 | 8.57E-05   | 0.086671  | 0.60151   |
| 7w11w_SITTC | 0.02087935 | 0.20669915 | 7.10E-05   | 0.033786  | 0.56707   |
| 7w11w_SITTC | 0.06155022 | 0.6028134  | 0.00011583 | 0.09893   | -0.42501  |
| 7w11w_SITTC | 0.01972367 | 0.19544342 | 6.95E-05   | 0.030541  | 0.50588   |
| 7w11w_SITTC | 0.0312574  | 0.30777627 | 8.32E-05   | 0.075317  | 0.69526   |
| 7w11w_SITTC | 0.03110591 | 0.30630082 | 8.32E-05   | 0.075317  | 0.69526   |
| 7w11w_SITTC | 0.0169672  | 0.16859668 | 6.65E-05   | 0.024968  | 0.33781   |
| 7w11w_SITTC | 0.07496876 | 0.73350346 | 0.00012577 | 0.064358  | -1.0462   |
| 7w11w_SITTC | 0.07159423 | 0.7006372  | 0.00012355 | 0.074645  | -0.90497  |
| 7w11w_SITTC | 0.05796358 | 0.5678814  | 0.00011273 | 0.096781  | -0.25188  |
| 7w11w_SITTC | 0.04411335 | 0.43298697 | 9.82E-05   | 0.10565   | 0.20107   |
| 7w11w_SITTC | 0.0580299  | 0.5685273  | 0.00011273 | 0.096781  | -0.26697  |
| 7w11w_SITTC | 0.0672961  | 0.6587755  | 0.00012058 | 0.088682  | -0.71078  |
| 7w11w_SITTC | 0.06278174 | 0.61480784 | 0.00011701 | 0.098387  | -0.47447  |
| 7w11w_SITTC | 0.0138216  | 0.13796014 | 6.34E-05   | 0.019794  | 0.16714   |
| 7w11w_SITTC | 0.05690415 | 0.557563   | 0.00011177 | 0.095663  | -0.20754  |
| 7w11w_SITTC | 0.06841325 | 0.66965604 | 0.00012136 | 0.085284  | -0.7609   |
| 7w11w_SITTC | 0.05904724 | 0.57843566 | 0.00011368 | 0.097776  | -0.31309  |
| 7w11w_SITTC | 0.04216325 | 0.41399387 | 9.62E-05   | 0.10856   | 0.25963   |
| 7w11w_SITTC | 0.03667186 | 0.36051047 | 8.98E-05   | 0.10298   | 0.46289   |
| 7w11w_SITTC | 0.05533722 | 0.5423019  | 0.00011011 | 0.093847  | -0.1508   |
| 7w11w_SITTC | 0.07601682 | 0.7437111  | 0.0001264  | 0.06191   | -1.0832   |
| 7w11w_SITTC | 0.03218659 | 0.3168261  | 8.44E-05   | 0.081011  | 0.65793   |
| 7w11w_SITTC | 0.04626025 | 0.4538967  | 0.00010084 | 0.10033   | 0.14626   |
| 7w11w_SITTC | 0.05958604 | 0.5836834  | 0.00011431 | 0.098311  | -0.32873  |
| 7w11w_SITTC | 0.09074725 | 0.8871783  | 0.00013338 | 0.052577  | -1.3317   |
| 7w11w_SITTC | 0.00331442 | 0.03562533 | 5.44E-05   | 0.0082917 | 0.2947    |
| 7w11w_SITTC | 0.02813365 | 0.27735248 | 7.94E-05   | 0.059253  | 0.76661   |
| 7w11w_SITTC | 0.06754935 | 0.66124207 | 0.00012084 | 0.087573  | -0.71078  |
| 7w11w_SITTC | 0.06533893 | 0.6397137  | 0.00011898 | 0.094504  | -0.60919  |
| 7w11w_SITTC | 0.05288899 | 0.51845735 | 0.00010773 | 0.092257  | -0.059017 |
| 7w11w_SITTC | 0.03552637 | 0.34935394 | 8.81E-05   | 0.097198  | 0.50933   |
| 7w11w_SITTC | 0.07179567 | 0.7025991  | 0.00012378 | 0.073503  | -0.92016  |
| 7w11w_SITTC | 0.05260275 | 0.51566947 | 0.00010738 | 0.092189  | -0.046772 |
| 7w11w_SITTC | 0.06320033 | 0.6188848  | 0.0001173  | 0.098072  | -0.50782  |
| 7w11w_SITTC | 0.05048676 | 0.49506083 | 0.00010525 | 0.093003  | 0.021622  |
| 7w11w_SITTC | 0.08395919 | 0.82106584 | 0.00013058 | 0.053285  | -1.2702   |
| 7w11w_SITTC | 0.04305085 | 0.42263874 | 9.70E-05   | 0.10755   | 0.22964   |
| 7w11w_SITTC | 0.05216374 | 0.5113938  | 0.00010703 | 0.092172  | -0.022986 |

|             |            |            |            |          |          |
|-------------|------------|------------|------------|----------|----------|
| 7w11w_SITTC | 0.02413325 | 0.23839054 | 7.46E-05   | 0.042633 | 0.72811  |
| 7w11w_SITTC | 0.0612958  | 0.60033554 | 0.00011583 | 0.09893  | -0.4087  |
| 7w11w_SITTC | 0.08801019 | 0.86052066 | 0.00013235 | 0.052652 | -1.315   |
| 7w11w_SITTC | 0.03906674 | 0.38383546 | 9.26E-05   | 0.10901  | 0.36311  |
| 7w11w_SITTC | 0.07664836 | 0.749862   | 0.0001268  | 0.060479 | -1.1061  |
| 7w11w_SITTC | 0.06519248 | 0.63828737 | 0.00011898 | 0.094504 | -0.59222 |
| 7w11w_SITTC | 0.04771762 | 0.46809077 | 0.00010234 | 0.09734  | 0.10986  |
| 7w11w_SITTC | 0.06000963 | 0.58780885 | 0.00011462 | 0.098526 | -0.3445  |
| 7w11w_SITTC | 0.08287378 | 0.81049454 | 0.00013009 | 0.053693 | -1.2543  |
| 7w11w_SITTC | 0.05695161 | 0.55802524 | 0.00011177 | 0.095663 | -0.20754 |
| 7w11w_SITTC | 0.0564669  | 0.5533045  | 0.00011111 | 0.094909 | -0.19309 |
| 7w11w_SITTC | 0.07053191 | 0.69029075 | 0.00012284 | 0.078159 | -0.8583  |
| 7w11w_SITTC | 0.07739231 | 0.7571077  | 0.0001272  | 0.059217 | -1.1276  |
| 7w11w_SITTC | 0.04866877 | 0.47735453 | 0.00010344 | 0.095375 | 0.081803 |
| 7w11w_SITTC | 0.06474752 | 0.63395363 | 0.00011871 | 0.095287 | -0.57526 |
| 7w11w_SITTC | 0.06241517 | 0.6112377  | 0.00011672 | 0.098627 | -0.4579  |
| 7w11w_SITTC | 0.08063657 | 0.78870517 | 0.00012907 | 0.054994 | -1.2155  |
| 7w11w_SITTC | 0.04518582 | 0.4434323  | 9.97E-05   | 0.10268  | 0.17344  |
| 7w11w_SITTC | 0.0504976  | 0.4951664  | 0.00010525 | 0.093003 | 0.021622 |
| 7w11w_SITTC | 0.06900168 | 0.6753871  | 0.00012186 | 0.08293  | -0.79386 |
| 7w11w_SITTC | 0.05741785 | 0.5625662  | 0.00011209 | 0.096042 | -0.23694 |
| 7w11w_SITTC | 0.04670597 | 0.45823774 | 0.00010122 | 0.099559 | 0.13721  |
| 7w11w_SITTC | 0.06827743 | 0.66833323 | 0.00012136 | 0.085284 | -0.7609  |
| 7w11w_SITTC | 0.0430277  | 0.42241323 | 9.70E-05   | 0.10755  | 0.22964  |
| 7w11w_SITTC | 0.01526107 | 0.15197991 | 6.47E-05   | 0.021973 | 0.24275  |
| 7w11w_SITTC | 0.00822929 | 0.08349378 | 5.84E-05   | 0.012653 | 0.12871  |
| 7w11w_SITTC | 0.03911412 | 0.38429686 | 9.26E-05   | 0.10901  | 0.36311  |
| 7w11w_SITTC | 0.04546291 | 0.44613096 | 9.97E-05   | 0.10268  | 0.16436  |
| 7w11w_SITTC | 0.00680604 | 0.06963196 | 5.72E-05   | 0.011238 | 0.16213  |
| 7w11w_SITTC | 0.07317426 | 0.71602595 | 0.00012469 | 0.069151 | -0.97873 |
| 7w11w_SITTC | 0.08566839 | 0.8377126  | 0.00013135 | 0.05287  | -1.2923  |
| 7w11w_SITTC | 0.04138804 | 0.40644374 | 9.54E-05   | 0.10929  | 0.28067  |
| 7w11w_SITTC | 0.07867096 | 0.7695611  | 0.00012797 | 0.057152 | -1.1666  |
| 7w11w_SITTC | 0.06407145 | 0.6273691  | 0.00011815 | 0.096641 | -0.54144 |
| 7w11w_SITTC | 0.08235367 | 0.8054289  | 0.00012993 | 0.053861 | -1.2485  |
| 7w11w_SITTC | 0.04570821 | 0.4485201  | 0.00010009 | 0.1019   | 0.1553   |
| 7w11w_SITTC | 0.05577936 | 0.54660815 | 0.00011045 | 0.094186 | -0.16472 |
| 7w11w_SITTC | 0.08757707 | 0.85630226 | 0.00013221 | 0.052667 | -1.3123  |
| 7w11w_SITTC | 0.0764697  | 0.7481219  | 0.0001268  | 0.060479 | -1.0948  |
| 7w11w_SITTC | 0.03451137 | 0.3394683  | 8.73E-05   | 0.093873 | 0.55601  |
| 7w11w_SITTC | 0.06781904 | 0.6638688  | 0.00012084 | 0.087573 | -0.72756 |
| 7w11w_SITTC | 0.07967251 | 0.7793157  | 0.00012853 | 0.055948 | -1.1924  |
| 7w11w_SITTC | 0.07141247 | 0.69886696 | 0.00012355 | 0.074645 | -0.90497 |
| 7w11w_SITTC | 0.02903101 | 0.2860923  | 8.07E-05   | 0.064343 | 0.751    |
| 7w11w_SITTC | 0.07175294 | 0.702183   | 0.00012378 | 0.073503 | -0.92016 |
| 7w11w_SITTC | 0.04538894 | 0.44541055 | 9.97E-05   | 0.10268  | 0.16436  |

|             |            |            |            |          |           |
|-------------|------------|------------|------------|----------|-----------|
| 7w11w_SITTC | 0.04948229 | 0.48527774 | 0.00010417 | 0.094268 | 0.052555  |
| 7w11w_SITTC | 0.01498691 | 0.14930964 | 6.47E-05   | 0.021973 | 0.22576   |
| 7w11w_SITTC | 0.06981312 | 0.68329006 | 0.00012235 | 0.080544 | -0.82636  |
| 7w11w_SITTC | 0.03432757 | 0.33767825 | 8.69E-05   | 0.09213  | 0.57137   |
| 7w11w_SITTC | 0.0306232  | 0.30159944 | 8.23E-05   | 0.07157  | 0.71698   |
| 7w11w_SITTC | 0.01676623 | 0.16663934 | 6.65E-05   | 0.024968 | 0.31771   |
| 7w11w_SITTC | 0.09044863 | 0.88426983 | 0.00013325 | 0.052587 | -1.3301   |
| 7w11w_SITTC | 0.02997782 | 0.29531378 | 8.15E-05   | 0.067903 | 0.72675   |
| 7w11w_SITTC | 0.03016646 | 0.29715106 | 8.19E-05   | 0.069725 | 0.72675   |
| 7w11w_SITTC | 0.05252313 | 0.514894   | 0.00010738 | 0.092189 | -0.03476  |
| 7w11w_SITTC | 0.06117296 | 0.59913915 | 0.00011553 | 0.098907 | -0.4087   |
| 7w11w_SITTC | 0.05792448 | 0.56750053 | 0.00011273 | 0.096781 | -0.25188  |
| 7w11w_SITTC | 0.03953192 | 0.38836604 | 9.30E-05   | 0.10937  | 0.33794   |
| 7w11w_SITTC | 0.06580231 | 0.64422673 | 0.00011953 | 0.092756 | -0.62617  |
| 7w11w_SITTC | 0.02384441 | 0.2355774  | 7.42E-05   | 0.041523 | 0.71639   |
| 7w11w_SITTC | 0.06197371 | 0.6069381  | 0.00011613 | 0.098894 | -0.44141  |
| 7w11w_SITTC | 0.06597653 | 0.6459236  | 0.00011953 | 0.092756 | -0.64315  |
| 7w11w_SITTC | 0.06720056 | 0.657845   | 0.00012058 | 0.088682 | -0.69393  |
| 7w11w_SITTC | 0.02002461 | 0.19837444 | 6.99E-05   | 0.031319 | 0.52662   |
| 7w11w_SITTC | 0.03198829 | 0.31489483 | 8.40E-05   | 0.07911  | 0.67094   |
| 7w11w_SITTC | 0.01886247 | 0.18705569 | 6.87E-05   | 0.029043 | 0.44251   |
| 7w11w_SITTC | 0.02038851 | 0.20191863 | 7.02E-05   | 0.032119 | 0.54704   |
| 7w11w_SITTC | 0.02255513 | 0.22302045 | 7.30E-05   | 0.038397 | 0.65846   |
| 7w11w_SITTC | 0.05012233 | 0.49151143 | 0.0001049  | 0.093366 | 0.042456  |
| 7w11w_SITTC | 0.05022644 | 0.49252546 | 0.0001049  | 0.093366 | 0.032151  |
| 7w11w_SITTC | 0.07829163 | 0.76586664 | 0.00012778 | 0.057615 | -1.1573   |
| 7w11w_SITTC | 0.05957188 | 0.5835454  | 0.000114   | 0.098059 | -0.32873  |
| 7w11w_SITTC | 0.01340445 | 0.13389724 | 6.30E-05   | 0.019276 | 0.15521   |
| 7w11w_SITTC | 0.04496294 | 0.4412615  | 9.93E-05   | 0.10345  | 0.18258   |
| 7w11w_SITTC | 0.04223546 | 0.41469726 | 9.62E-05   | 0.10856  | 0.25963   |
| 7w11w_SITTC | 0.07144673 | 0.6992007  | 0.00012355 | 0.074645 | -0.90497  |
| 7w11w_SITTC | 0.01318804 | 0.13178954 | 6.27E-05   | 0.018769 | 0.15521   |
| 7w11w_SITTC | 0.05762454 | 0.5645793  | 0.00011241 | 0.096416 | -0.23694  |
| 7w11w_SITTC | 0.06322107 | 0.61908674 | 0.0001173  | 0.098072 | -0.50782  |
| 7w11w_SITTC | 0.04786696 | 0.46954522 | 0.00010234 | 0.09734  | 0.10061   |
| 7w11w_SITTC | 0.05352284 | 0.5246307  | 0.00010842 | 0.092532 | -0.07149  |
| 7w11w_SITTC | 0.04512826 | 0.4428717  | 9.93E-05   | 0.10345  | 0.17344   |
| 7w11w_SITTC | 0.07690251 | 0.7523373  | 0.000127   | 0.059827 | -1.117    |
| 7w11w_SITTC | 0.06537384 | 0.6400537  | 0.00011898 | 0.094504 | -0.60919  |
| 7w11w_SITTC | 0.01150068 | 0.1153555  | 6.11E-05   | 0.016373 | 0.11542   |
| 7w11w_SITTC | 0.08768228 | 0.857327   | 0.00013221 | 0.052667 | -1.3123   |
| 7w11w_SITTC | 0.05349105 | 0.5243211  | 0.00010842 | 0.092532 | -0.07149  |
| 7w11w_SITTC | 0.07706356 | 0.75390583 | 0.000127   | 0.059827 | -1.117    |
| 7w11w_SITTC | 0.07874637 | 0.77029556 | 0.00012797 | 0.057152 | -1.1666   |
| 7w11w_SITTC | 0.01786556 | 0.17734635 | 6.76E-05   | 0.026932 | 0.37908   |
| 7w11w_SITTC | 0.05362462 | 0.52562207 | 0.00010842 | 0.092532 | -0.084185 |

|             |            |            |            |           |           |
|-------------|------------|------------|------------|-----------|-----------|
| 7w11w_SITTC | 0.03950169 | 0.38807163 | 9.30E-05   | 0.10937   | 0.35035   |
| 7w11w_SITTC | 0.0757051  | 0.74067515 | 0.00012619 | 0.062687  | -1.0712   |
| 7w11w_SITTC | 0.07963166 | 0.77891785 | 0.00012853 | 0.055948  | -1.1924   |
| 7w11w_SITTC | 0.05636741 | 0.5523355  | 0.00011111 | 0.094909  | -0.19309  |
| 7w11w_SITTC | 0.02230961 | 0.2206292  | 7.26E-05   | 0.037419  | 0.64161   |
| 7w11w_SITTC | 0.07476812 | 0.7315494  | 0.00012577 | 0.064358  | -1.0333   |
| 7w11w_SITTC | 0.02231734 | 0.22070442 | 7.26E-05   | 0.037419  | 0.64161   |
| 7w11w_SITTC | 0.07327401 | 0.71699744 | 0.00012469 | 0.069151  | -0.97873  |
| 7w11w_SITTC | 0.03911359 | 0.3842917  | 9.26E-05   | 0.10901   | 0.36311   |
| 7w11w_SITTC | 0.02268026 | 0.22423917 | 7.30E-05   | 0.038397  | 0.65846   |
| 7w11w_SITTC | 0.06293696 | 0.61631966 | 0.00011701 | 0.098387  | -0.49111  |
| 7w11w_SITTC | 0.05462167 | 0.53533286 | 0.00010944 | 0.093233  | -0.12355  |
| 7w11w_SITTC | 0.05729426 | 0.5613625  | 0.00011209 | 0.096042  | -0.22216  |
| 7w11w_SITTC | 0.03838144 | 0.37716094 | 9.18E-05   | 0.10791   | 0.38979   |
| 7w11w_SITTC | 0.03333836 | 0.3280438  | 8.57E-05   | 0.086671  | 0.61617   |
| 7w11w_SITTC | 0.07654851 | 0.7488895  | 0.0001268  | 0.060479  | -1.1061   |
| 7w11w_SITTC | 0.05301828 | 0.5197165  | 0.00010773 | 0.092257  | -0.059017 |
| 7w11w_SITTC | 0.06004405 | 0.5881441  | 0.00011462 | 0.098526  | -0.3445   |
| 7w11w_SITTC | 0.0421416  | 0.41378304 | 9.62E-05   | 0.10856   | 0.25963   |
| 7w11w_SITTC | 0.05392292 | 0.5285273  | 0.00010876 | 0.092731  | -0.097097 |
| 7w11w_SITTC | 0.09523395 | 0.9308765  | 0.00013484 | 0.052368  | -1.3437   |
| 7w11w_SITTC | 0.03015666 | 0.2970556  | 8.19E-05   | 0.069725  | 0.72675   |
| 7w11w_SITTC | 0.0529106  | 0.5186678  | 0.00010773 | 0.092257  | -0.059017 |
| 7w11w_SITTC | 0.08291118 | 0.8108588  | 0.00013009 | 0.053693  | -1.2543   |
| 7w11w_SITTC | 0.05840601 | 0.57219046 | 0.00011305 | 0.097132  | -0.2822   |
| 7w11w_SITTC | 0.03060635 | 0.3014354  | 8.23E-05   | 0.07157   | 0.71698   |
| 7w11w_SITTC | 0.03920424 | 0.38517466 | 9.26E-05   | 0.10901   | 0.35035   |
| 7w11w_SITTC | 0.05952197 | 0.5830594  | 0.000114   | 0.098059  | -0.32873  |
| 7w11w_SITTC | 0.03860908 | 0.37937805 | 9.18E-05   | 0.10791   | 0.37625   |
| 7w11w_SITTC | 0.06291608 | 0.6161163  | 0.00011701 | 0.098387  | -0.49111  |
| 7w11w_SITTC | 0.0233412  | 0.23067634 | 7.38E-05   | 0.040447  | 0.68948   |
| 7w11w_SITTC | 0.02647225 | 0.26117125 | 7.74E-05   | 0.051562  | 0.76965   |
| 7w11w_SITTC | 0.06292128 | 0.61616695 | 0.00011701 | 0.098387  | -0.49111  |
| 7w11w_SITTC | 0.07016519 | 0.68671906 | 0.0001226  | 0.07935   | -0.8424   |
| 7w11w_SITTC | 0.03897948 | 0.38298553 | 9.26E-05   | 0.10901   | 0.36311   |
| 7w11w_SITTC | 0.09056155 | 0.8853696  | 0.00013338 | 0.052577  | -1.3317   |
| 7w11w_SITTC | 0.0733446  | 0.7176849  | 0.00012491 | 0.068128  | -0.97873  |
| 7w11w_SITTC | 0.06660019 | 0.6519977  | 0.00012006 | 0.090801  | -0.67704  |
| 7w11w_SITTC | 0.00330507 | 0.03553428 | 5.44E-05   | 0.0082917 | 0.2947    |
| 7w11w_SITTC | 0.0425708  | 0.41796327 | 9.66E-05   | 0.10808   | 0.24945   |
| 7w11w_SITTC | 0.05741618 | 0.56254995 | 0.00011209 | 0.096042  | -0.23694  |
| 7w11w_SITTC | 0.07256114 | 0.71005446 | 0.00012424 | 0.071279  | -0.9499   |
| 7w11w_SITTC | 0.07279084 | 0.7122916  | 0.00012446 | 0.070202  | -0.96444  |
| 7w11w_SITTC | 0.05355954 | 0.5249882  | 0.00010842 | 0.092532  | -0.07149  |
| 7w11w_SITTC | 0.06706574 | 0.65653193 | 0.00012032 | 0.089759  | -0.69393  |
| 7w11w_SITTC | 0.01875243 | 0.18598399 | 6.87E-05   | 0.029043  | 0.44251   |

|             |            |            |            |           |           |
|-------------|------------|------------|------------|-----------|-----------|
| 7w11w_SITTC | 0.00949013 | 0.09577373 | 5.95E-05   | 0.014213  | 0.11014   |
| 7w11w_SITTC | 0.06270473 | 0.61405784 | 0.00011701 | 0.098387  | -0.47447  |
| 7w11w_SITTC | 0.04931989 | 0.48369604 | 0.00010417 | 0.094268  | 0.062467  |
| 7w11w_SITTC | 0.091699   | 0.8964479  | 0.00013374 | 0.052539  | -1.336    |
| 7w11w_SITTC | 0.003094   | 0.03347854 | 5.42E-05   | 0.0080398 | 0.31077   |
| 7w11w_SITTC | 0.0821864  | 0.8037998  | 0.00012976 | 0.054048  | -1.2424   |
| 7w11w_SITTC | 0.07940721 | 0.7767318  | 0.00012835 | 0.05632   | -1.1841   |
| 7w11w_SITTC | 0.00674439 | 0.06903154 | 5.72E-05   | 0.011238  | 0.16213   |
| 7w11w_SITTC | 0.08254836 | 0.80732507 | 0.00012993 | 0.053861  | -1.2485   |
| 7w11w_SITTC | 0.01591724 | 0.1583706  | 6.54E-05   | 0.023132  | 0.27899   |
| 7w11w_SITTC | 0.06642214 | 0.65026355 | 0.00011979 | 0.091802  | -0.66011  |
| 7w11w_SITTC | 0.07684889 | 0.751815   | 0.000127   | 0.059827  | -1.117    |
| 7w11w_SITTC | 0.06210829 | 0.60824883 | 0.00011642 | 0.098794  | -0.44141  |
| 7w11w_SITTC | 0.05479804 | 0.5370506  | 0.00010978 | 0.093528  | -0.12355  |
| 7w11w_SITTC | 0.02224226 | 0.21997322 | 7.26E-05   | 0.037419  | 0.64161   |
| 7w11w_SITTC | 0.05491663 | 0.53820556 | 0.00010978 | 0.093528  | -0.12355  |
| 7w11w_SITTC | 0.04953796 | 0.48582003 | 0.00010417 | 0.094268  | 0.052555  |
| 7w11w_SITTC | 0.0234216  | 0.23145942 | 7.38E-05   | 0.040447  | 0.68948   |
| 7w11w_SITTC | 0.07968734 | 0.77946013 | 0.00012853 | 0.055948  | -1.1924   |
| 7w11w_SITTC | 0.05510629 | 0.54005283 | 0.00010978 | 0.093528  | -0.13708  |
| 7w11w_SITTC | 0.07001834 | 0.68528885 | 0.0001226  | 0.07935   | -0.8424   |
| 7w11w_SITTC | 0.07597545 | 0.7433081  | 0.0001264  | 0.06191   | -1.0832   |
| 7w11w_SITTC | 0.05939367 | 0.5818098  | 0.000114   | 0.098059  | -0.32873  |
| 7w11w_SITTC | 0.01595443 | 0.15873282 | 6.54E-05   | 0.023132  | 0.27899   |
| 7w11w_SITTC | 0.07436522 | 0.7276253  | 0.00012556 | 0.06525   | -1.0201   |
| 7w11w_SITTC | 0.01131063 | 0.11350452 | 6.11E-05   | 0.016373  | 0.1115    |
| 7w11w_SITTC | 0.02616274 | 0.25815675 | 7.70E-05   | 0.050154  | 0.76634   |
| 7w11w_SITTC | 0.079376   | 0.77642787 | 0.00012835 | 0.05632   | -1.1841   |
| 7w11w_SITTC | 0.02852361 | 0.2811505  | 7.99E-05   | 0.060913  | 0.76245   |
| 7w11w_SITTC | 0.04572735 | 0.44870648 | 0.00010009 | 0.1019    | 0.1553    |
| 7w11w_SITTC | 0.05400089 | 0.5292867  | 0.00010876 | 0.092731  | -0.097097 |
| 7w11w_SITTC | 0.05617334 | 0.55044526 | 0.00011111 | 0.094909  | -0.17881  |
| 7w11w_SITTC | 0.06218917 | 0.60903656 | 0.00011642 | 0.098794  | -0.4579   |
| 7w11w_SITTC | 0.07189988 | 0.70361406 | 0.00012378 | 0.073503  | -0.92016  |
| 7w11w_SITTC | 0.05173874 | 0.5072544  | 0.00010668 | 0.092211  | -0.011455 |
| 7w11w_SITTC | 0.00223506 | 0.02511292 | 5.36E-05   | 0.0075574 | 0.34395   |
| 7w11w_SITTC | 0.06238891 | 0.6109819  | 0.00011672 | 0.098627  | -0.4579   |
| 7w11w_SITTC | 0.08198535 | 0.8018416  | 0.00012976 | 0.054048  | -1.2424   |
| 7w11w_SITTC | 0.07968887 | 0.77947503 | 0.00012853 | 0.055948  | -1.1924   |
| 7w11w_SITTC | 0.01173872 | 0.11767393 | 6.14E-05   | 0.016833  | 0.11542   |
| 7w11w_SITTC | 0.02912391 | 0.28699714 | 8.07E-05   | 0.064343  | 0.751     |
| 7w11w_SITTC | 0.01855082 | 0.1840204  | 6.84E-05   | 0.028322  | 0.42127   |
| 7w11w_SITTC | 0.02644857 | 0.26094058 | 7.74E-05   | 0.051562  | 0.76965   |
| 7w11w_SITTC | 0.07304772 | 0.7147935  | 0.00012469 | 0.069151  | -0.96444  |
| 7w11w_SITTC | 0.04677327 | 0.4588932  | 0.00010122 | 0.099559  | 0.12814   |
| 7w11w_SITTC | 0.02748314 | 0.27101687 | 7.86E-05   | 0.05605   | 0.77153   |

|             |            |            |            |          |           |
|-------------|------------|------------|------------|----------|-----------|
| 7w11w_SITTC | 0.05774511 | 0.5657536  | 0.00011241 | 0.096416 | -0.25188  |
| 7w11w_SITTC | 0.06718521 | 0.65769553 | 0.00012058 | 0.088682 | -0.69393  |
| 7w11w_SITTC | 0.01404238 | 0.14011036 | 6.37E-05   | 0.020323 | 0.18023   |
| 7w11w_SITTC | 0.07515385 | 0.7353062  | 0.00012598 | 0.063504 | -1.0589   |
| 7w11w_SITTC | 0.03720266 | 0.36568025 | 9.02E-05   | 0.1042   | 0.43275   |
| 7w11w_SITTC | 0.07720092 | 0.75524366 | 0.0001272  | 0.059217 | -1.1276   |
| 7w11w_SITTC | 0.06782232 | 0.6639006  | 0.0001211  | 0.086439 | -0.72756  |
| 7w11w_SITTC | 0.03947016 | 0.38776448 | 9.30E-05   | 0.10937  | 0.35035   |
| 7w11w_SITTC | 0.06523531 | 0.6387045  | 0.00011898 | 0.094504 | -0.60919  |
| 7w11w_SITTC | 0.04431872 | 0.43498716 | 9.86E-05   | 0.10494  | 0.20107   |
| 7w11w_SITTC | 0.05459595 | 0.53508234 | 0.00010944 | 0.093233 | -0.12355  |
| 7w11w_SITTC | 0.04913126 | 0.4818589  | 0.00010381 | 0.094798 | 0.062467  |
| 7w11w_SITTC | 0.04338748 | 0.42591733 | 9.74E-05   | 0.10696  | 0.21998   |
| 7w11w_SITTC | 0.01565801 | 0.15584582 | 6.54E-05   | 0.023132 | 0.26052   |
| 7w11w_SITTC | 0.02897731 | 0.28556928 | 8.03E-05   | 0.062611 | 0.751     |
| 7w11w_SITTC | 0.01632362 | 0.16232856 | 6.62E-05   | 0.024342 | 0.29808   |
| 7w11w_SITTC | 0.05202839 | 0.51007557 | 0.00010703 | 0.092172 | -0.022986 |
| 7w11w_SITTC | 0.04557625 | 0.4472349  | 0.00010009 | 0.1019   | 0.16436   |
| 7w11w_SITTC | 0.0132059  | 0.13196348 | 6.27E-05   | 0.018769 | 0.15521   |
| 7w11w_SITTC | 0.0556696  | 0.54553914 | 0.00011045 | 0.094186 | -0.16472  |
| 7w11w_SITTC | 0.06693598 | 0.65526813 | 0.00012032 | 0.089759 | -0.69393  |
| 7w11w_SITTC | 0.04284935 | 0.42067623 | 9.70E-05   | 0.10755  | 0.23945   |
| 7w11w_SITTC | 0.01383074 | 0.1380491  | 6.34E-05   | 0.019794 | 0.16714   |
| 7w11w_SITTC | 0.05539398 | 0.5428547  | 0.00011011 | 0.093847 | -0.1508   |
| 7w11w_SITTC | 0.01322465 | 0.13214608 | 6.30E-05   | 0.019276 | 0.15521   |
| 7w11w_SITTC | 0.02589785 | 0.2555769  | 7.66E-05   | 0.04879  | 0.76634   |
| 7w11w_SITTC | 0.06027773 | 0.5904201  | 0.00011492 | 0.0987   | -0.36038  |
| 7w11w_SITTC | 0.05546358 | 0.5435326  | 0.00011045 | 0.094186 | -0.1508   |
| 7w11w_SITTC | 0.04447321 | 0.4364918  | 9.89E-05   | 0.10421  | 0.19178   |
| 7w11w_SITTC | 0.0365434  | 0.35925934 | 8.94E-05   | 0.10166  | 0.46289   |
| 7w11w_SITTC | 0.0284299  | 0.28023785 | 7.99E-05   | 0.060913 | 0.76245   |
| 7w11w_SITTC | 0.07175436 | 0.70219684 | 0.00012378 | 0.073503 | -0.92016  |
| 7w11w_SITTC | 0.09316509 | 0.91072685 | 0.00013419 | 0.052478 | -1.3401   |
| 7w11w_SITTC | 0.04964148 | 0.48682818 | 0.00010453 | 0.09379  | 0.052555  |
| 7w11w_SITTC | 0.01402725 | 0.13996308 | 6.37E-05   | 0.020323 | 0.18023   |
| 7w11w_SITTC | 0.01079867 | 0.1085183  | 6.05E-05   | 0.01548  | 0.10884   |
| 7w11w_SITTC | 0.05716282 | 0.5600824  | 0.00011177 | 0.095663 | -0.22216  |
| 7w11w_SITTC | 0.05616872 | 0.5504003  | 0.00011111 | 0.094909 | -0.17881  |
| 7w11w_SITTI | 0.03274909 | 0.3223046  | 8.48E-05   | 0.082909 | 0.6305    |
| 7w11w_SITTI | 0.05002815 | 0.49059424 | 0.0001049  | 0.093366 | 0.042456  |
| 7w11w_SITTI | 0.04742838 | 0.46527368 | 0.00010197 | 0.098057 | 0.10986   |
| 7w11w_SITTI | 0.04116279 | 0.40424994 | 9.50E-05   | 0.10955  | 0.29155   |
| 7w11w_SITTI | 0.05448866 | 0.53403735 | 0.00010944 | 0.093233 | -0.11022  |
| 7w11w_SITTI | 0.06804967 | 0.6661149  | 0.0001211  | 0.086439 | -0.74427  |
| 7w11w_SITTI | 0.04904616 | 0.48103008 | 0.00010381 | 0.094798 | 0.072211  |
| 7w11w_SITTI | 0.04449696 | 0.43672308 | 9.89E-05   | 0.10421  | 0.19178   |

|             |            |            |            |          |            |
|-------------|------------|------------|------------|----------|------------|
| 7w11w_SITTI | 0.04532178 | 0.44475645 | 9.97E-05   | 0.10268  | 0.17344    |
| 7w11w_SITTI | 0.0579692  | 0.5679361  | 0.00011273 | 0.096781 | -0.25188   |
| 7w11w_SITTI | 0.07208573 | 0.7054242  | 0.00012401 | 0.07238  | -0.93514   |
| 7w11w_SITTI | 0.04964569 | 0.48686922 | 0.00010453 | 0.09379  | 0.052555   |
| 7w11w_SITTI | 0.01681423 | 0.16710684 | 6.65E-05   | 0.024968 | 0.31771    |
| 7w11w_SITTI | 0.06661741 | 0.6521654  | 0.00012006 | 0.090801 | -0.67704   |
| 7w11w_SITTI | 0.05489    | 0.5379462  | 0.00010978 | 0.093528 | -0.12355   |
| 7w11w_SITTI | 0.06740318 | 0.6598185  | 0.00012058 | 0.088682 | -0.71078   |
| 7w11w_SITTI | 0.01136999 | 0.11408258 | 6.11E-05   | 0.016373 | 0.1115     |
| 7w11w_SITTI | 0.04467867 | 0.43849286 | 9.89E-05   | 0.10421  | 0.18258    |
| 7w11w_SITTI | 0.01556876 | 0.1549766  | 6.51E-05   | 0.022546 | 0.24275    |
| 7w11w_SITTI | 0.0464734  | 0.45597267 | 0.00010084 | 0.10033  | 0.13721    |
| 7w11w_SITTI | 0.04480825 | 0.4397549  | 9.89E-05   | 0.10421  | 0.18258    |
| 7w11w_SITTI | 0.07492962 | 0.7331223  | 0.00012577 | 0.064358 | -1.0462    |
| 7w11w_SITTI | 0.01660018 | 0.16502218 | 6.62E-05   | 0.024342 | 0.31771    |
| 7w11w_SITTI | 0.07008856 | 0.68597275 | 0.0001226  | 0.07935  | -0.8424    |
| 7w11w_SITTI | 0.04158803 | 0.40839154 | 9.54E-05   | 0.10929  | 0.27003    |
| 7w11w_SITTI | 0.03149641 | 0.3101041  | 8.36E-05   | 0.07721  | 0.6834     |
| 7w11w_SITTI | 0.05941244 | 0.58199257 | 0.000114   | 0.098059 | -0.32873   |
| 7w11w_SITTI | 0.05747199 | 0.56309354 | 0.00011209 | 0.096042 | -0.23694   |
| 7w11w_SITTI | 0.04762662 | 0.46720448 | 0.00010234 | 0.09734  | 0.10986    |
| 7w11w_SITTI | 0.0704741  | 0.68972766 | 0.00012284 | 0.078159 | -0.8583    |
| 7w11w_SITTI | 0.05482071 | 0.5372713  | 0.00010978 | 0.093528 | -0.12355   |
| 7w11w_SITTI | 0.03270806 | 0.32190505 | 8.48E-05   | 0.082909 | 0.6305     |
| 7w11w_SITTI | 0.02237586 | 0.2212744  | 7.26E-05   | 0.037419 | 0.64161    |
| 7w11w_SITTI | 0.06152034 | 0.60252243 | 0.00011583 | 0.09893  | -0.42501   |
| 7w11w_SITTI | 0.07700402 | 0.75332594 | 0.000127   | 0.059827 | -1.117     |
| 7w11w_SITTI | 0.06657623 | 0.65176433 | 0.00012006 | 0.090801 | -0.67704   |
| 7w11w_SITTI | 0.05135502 | 0.5035172  | 0.00010632 | 0.092309 | -0.0001745 |
| 7w11w_SITTI | 0.04326724 | 0.42474627 | 9.74E-05   | 0.10696  | 0.22964    |
| 7w11w_SITTI | 0.0796274  | 0.7788763  | 0.00012853 | 0.055948 | -1.1924    |
| 7w11w_SITTI | 0.06878625 | 0.6732889  | 0.00012161 | 0.084113 | -0.77743   |
| 7w11w_SITTI | 0.05281025 | 0.5176904  | 0.00010773 | 0.092257 | -0.046772  |
| 7w11w_SITTI | 0.0403687  | 0.39651588 | 9.42E-05   | 0.10978  | 0.31414    |
| 7w11w_SITTI | 0.06670466 | 0.6530152  | 0.00012006 | 0.090801 | -0.67704   |
| 7w11w_SITTI | 0.01625803 | 0.16168971 | 6.58E-05   | 0.023731 | 0.29808    |
| 7w11w_SITTI | 0.07413678 | 0.7254004  | 0.00012534 | 0.066176 | -1.0201    |
| 7w11w_SITTI | 0.04839875 | 0.47472465 | 0.00010308 | 0.095994 | 0.091263   |
| 7w11w_SITTI | 0.07877156 | 0.77054095 | 0.00012797 | 0.057152 | -1.1666    |
| 7w11w_SITTI | 0.0776264  | 0.7593876  | 0.0001274  | 0.058646 | -1.1379    |
| 7w11w_SITTI | 0.01880951 | 0.18653989 | 6.87E-05   | 0.029043 | 0.44251    |
| 7w11w_SITTI | 0.0734927  | 0.71912736 | 0.00012491 | 0.068128 | -0.99278   |
| 7w11w_SITTI | 0.03678241 | 0.36158723 | 8.98E-05   | 0.10298  | 0.46289    |
| 7w11w_SITTI | 0.0709447  | 0.69431114 | 0.00012331 | 0.075804 | -0.87403   |
| 7w11w_SITTI | 0.0541545  | 0.53078276 | 0.0001091  | 0.092966 | -0.097097  |
| 7w11w_SITTI | 0.03255384 | 0.320403   | 8.48E-05   | 0.082909 | 0.64444    |

|             |            |            |            |           |           |
|-------------|------------|------------|------------|-----------|-----------|
| 7w11w_SITTI | 0.03911197 | 0.38427594 | 9.26E-05   | 0.10901   | 0.36311   |
| 7w11w_SITTI | 0.06186335 | 0.6058632  | 0.00011613 | 0.098894  | -0.44141  |
| 7w11w_SITTI | 0.00468701 | 0.04899373 | 5.55E-05   | 0.0093744 | 0.23478   |
| 7w11w_SITTI | 0.06122956 | 0.5996904  | 0.00011553 | 0.098907  | -0.4087   |
| 7w11w_SITTI | 0.04133998 | 0.4059757  | 9.50E-05   | 0.10955   | 0.28067   |
| 7w11w_SITTI | 0.05619607 | 0.5506667  | 0.00011111 | 0.094909  | -0.17881  |
| 7w11w_SITTI | 0.06734194 | 0.659222   | 0.00012058 | 0.088682  | -0.71078  |
| 7w11w_SITTI | 0.04061607 | 0.3989252  | 9.42E-05   | 0.10978   | 0.3027    |
| 7w11w_SITTI | 0.03711363 | 0.36481312 | 9.02E-05   | 0.1042    | 0.4477    |
| 7w11w_SITTI | 0.05521297 | 0.5410918  | 0.00011011 | 0.093847  | -0.13708  |
| 7w11w_SITTI | 0.03284904 | 0.32327804 | 8.52E-05   | 0.084798  | 0.6305    |
| 7w11w_SITTI | 0.02554322 | 0.25212297 | 7.62E-05   | 0.047472  | 0.7616    |
| 7w11w_SITTI | 0.08253875 | 0.80723155 | 0.00012993 | 0.053861  | -1.2485   |
| 7w11w_SITTI | 0.04221027 | 0.41445187 | 9.62E-05   | 0.10856   | 0.25963   |
| 7w11w_SITTI | 0.05840768 | 0.5722067  | 0.00011305 | 0.097132  | -0.2822   |
| 7w11w_SITTI | 0.07877906 | 0.770614   | 0.00012797 | 0.057152  | -1.1666   |
| 7w11w_SITTI | 0.04146216 | 0.40716565 | 9.54E-05   | 0.10929   | 0.28067   |
| 7w11w_SITTI | 0.06929529 | 0.6782467  | 0.00012211 | 0.081739  | -0.79386  |
| 7w11w_SITTI | 0.02909205 | 0.28668687 | 8.07E-05   | 0.064343  | 0.751     |
| 7w11w_SITTI | 0.06381319 | 0.6248537  | 0.00011787 | 0.097201  | -0.5246   |
| 7w11w_SITTI | 0.01965432 | 0.19476795 | 6.95E-05   | 0.030541  | 0.48489   |
| 7w11w_SITTI | 0.07192584 | 0.70386696 | 0.00012378 | 0.073503  | -0.92016  |
| 7w11w_SITTI | 0.03038652 | 0.29929438 | 8.19E-05   | 0.069725  | 0.71698   |
| 7w11w_SITTI | 0.04344348 | 0.42646268 | 9.78E-05   | 0.10633   | 0.21998   |
| 7w11w_SITTI | 0.06468818 | 0.63337564 | 0.00011843 | 0.096001  | -0.57526  |
| 7w11w_SITTI | 0.04785224 | 0.4694019  | 0.00010234 | 0.09734   | 0.10061   |
| 7w11w_SITTI | 0.0179058  | 0.17773822 | 6.76E-05   | 0.026932  | 0.37908   |
| 7w11w_SITTI | 0.00504455 | 0.05247593 | 5.58E-05   | 0.0096645 | 0.22108   |
| 7w11w_SITTI | 0.08251792 | 0.80702865 | 0.00012993 | 0.053861  | -1.2485   |
| 7w11w_SITTI | 0.03068501 | 0.3022015  | 8.23E-05   | 0.07157   | 0.70647   |
| 7w11w_SITTI | 0.06949554 | 0.68019706 | 0.00012211 | 0.081739  | -0.81017  |
| 7w11w_SITTI | 0.04232389 | 0.41555846 | 9.62E-05   | 0.10856   | 0.24945   |
| 7w11w_SITTI | 0.06256767 | 0.612723   | 0.00011672 | 0.098627  | -0.47447  |
| 7w11w_SITTI | 0.07243935 | 0.70886827 | 0.00012424 | 0.071279  | -0.9499   |
| 7w11w_SITTI | 0.04671646 | 0.45833993 | 0.00010122 | 0.099559  | 0.12814   |
| 7w11w_SITTI | 0.00907745 | 0.09175438 | 5.89E-05   | 0.013414  | 0.11326   |
| 7w11w_SITTI | 0.073045   | 0.71476704 | 0.00012469 | 0.069151  | -0.96444  |
| 7w11w_SITTI | 0.06923328 | 0.6776427  | 0.00012211 | 0.081739  | -0.79386  |
| 7w11w_SITTI | 0.0615372  | 0.60268664 | 0.00011583 | 0.09893   | -0.42501  |
| 7w11w_SITTI | 0.01042659 | 0.10489442 | 6.02E-05   | 0.015048  | 0.10718   |
| 7w11w_SITTI | 0.04734936 | 0.46450406 | 0.00010197 | 0.098057  | 0.11903   |
| 7w11w_SITTI | 0.05369617 | 0.5263189  | 0.00010842 | 0.092532  | -0.084185 |
| 7w11w_SITTI | 0.05888812 | 0.57688594 | 0.00011337 | 0.097465  | -0.29758  |
| 7w11w_SITTI | 0.00637651 | 0.06544863 | 5.69E-05   | 0.010907  | 0.17252   |
| 7w11w_SITTI | 0.05574292 | 0.54625326 | 0.00011045 | 0.094186  | -0.16472  |
| 7w11w_SITTI | 0.05656557 | 0.55426544 | 0.00011144 | 0.095284  | -0.19309  |



|             |            |            |            |           |           |
|-------------|------------|------------|------------|-----------|-----------|
| 7w11w_SITTI | 0.05245091 | 0.5141907  | 0.00010738 | 0.092189  | -0.03476  |
| 7w11w_SITTI | 0.07836275 | 0.7665593  | 0.00012778 | 0.057615  | -1.1573   |
| 7w11w_SITTI | 0.04379499 | 0.42988628 | 9.82E-05   | 0.10565   | 0.21046   |
| 7w11w_SITTI | 0.04488724 | 0.44052422 | 9.93E-05   | 0.10345   | 0.18258   |
| 7w11w_SITTI | 0.05876803 | 0.5757163  | 0.00011337 | 0.097465  | -0.29758  |
| 7w11w_SITTI | 0.0368236  | 0.36198837 | 8.98E-05   | 0.10298   | 0.4477    |
| 7w11w_SITTI | 0.01152069 | 0.11555041 | 6.14E-05   | 0.016833  | 0.11542   |
| 7w11w_SITTI | 0.05933689 | 0.58125675 | 0.000114   | 0.098059  | -0.31309  |
| 7w11w_SITTI | 0.05484225 | 0.53748107 | 0.00010978 | 0.093528  | -0.12355  |
| 7w11w_SITTI | 0.08461723 | 0.82747483 | 0.00013089 | 0.053084  | -1.2797   |
| 7w11w_SITTI | 0.02178338 | 0.21550393 | 7.18E-05   | 0.035549  | 0.62396   |
| 7w11w_SITTI | 0.04819992 | 0.47278816 | 0.00010271 | 0.09665   | 0.091263  |
| 7w11w_SITTI | 0.09220093 | 0.9013364  | 0.00013385 | 0.052525  | -1.3372   |
| 7w11w_SITTI | 0.07270813 | 0.7114861  | 0.00012446 | 0.070202  | -0.9499   |
| 7w11w_SITTI | 0.04707809 | 0.4618621  | 0.00010159 | 0.098799  | 0.11903   |
| 7w11w_SITTI | 0.07691044 | 0.7524145  | 0.000127   | 0.059827  | -1.117    |
| 7w11w_SITTI | 0.06657446 | 0.65174717 | 0.00012006 | 0.090801  | -0.67704  |
| 7w11w_SITTI | 0.05682867 | 0.5568279  | 0.00011144 | 0.095284  | -0.20754  |
| 7w11w_SITTI | 0.04044082 | 0.39721826 | 9.42E-05   | 0.10978   | 0.31414   |
| 7w11w_SITTI | 0.0515771  | 0.5056802  | 0.00010632 | 0.092309  | -0.011455 |
| 7w11w_SITTI | 0.03683851 | 0.36213356 | 8.98E-05   | 0.10298   | 0.4477    |
| 7w11w_SITTI | 0.06532471 | 0.6395752  | 0.00011898 | 0.094504  | -0.60919  |
| 7w11w_SITTI | 0.05545706 | 0.5434691  | 0.00011011 | 0.093847  | -0.1508   |
| 7w11w_SITTI | 0.01486748 | 0.14814651 | 6.44E-05   | 0.021412  | 0.20962   |
| 7w11w_SITTI | 0.02197295 | 0.21735029 | 7.22E-05   | 0.03647   | 0.62396   |
| 7w11w_SITTI | 0.09248025 | 0.90405685 | 0.00013397 | 0.05251   | -1.3382   |
| 7w11w_SITTI | 0.06059852 | 0.5935444  | 0.00011492 | 0.0987    | -0.37638  |
| 7w11w_SITTI | 0.08147995 | 0.79691935 | 0.00012942 | 0.054478  | -1.2295   |
| 7w11w_SITTI | 0.04848348 | 0.47554982 | 0.00010308 | 0.095994  | 0.081803  |
| 7w11w_SITTI | 0.03792043 | 0.37267095 | 9.10E-05   | 0.1063    | 0.40374   |
| 7w11w_SITTI | 0.04479615 | 0.43963704 | 9.89E-05   | 0.10421   | 0.18258   |
| 7w11w_SITTI | 0.06562816 | 0.6425306  | 0.00011925 | 0.093659  | -0.62617  |
| 7w11w_SITTI | 0.06863409 | 0.6718069  | 0.00012161 | 0.084113  | -0.77743  |
| 7w11w_SITTI | 0.02895067 | 0.2853099  | 8.03E-05   | 0.062611  | 0.751     |
| 7w11w_SITTI | 0.01422857 | 0.1419238  | 6.37E-05   | 0.020323  | 0.19442   |
| 7w11w_SITTI | 0.08716717 | 0.85231006 | 0.00013207 | 0.052686  | -1.3094   |
| 7w11w_SITTI | 0.04267431 | 0.41897145 | 9.66E-05   | 0.10808   | 0.23945   |
| 7w11w_SITTI | 0.04819092 | 0.47270045 | 0.00010271 | 0.09665   | 0.091263  |
| 7w11w_SITTI | 0.02805582 | 0.27659446 | 7.94E-05   | 0.059253  | 0.76661   |
| 7w11w_SITTI | 0.06328797 | 0.61973834 | 0.0001173  | 0.098072  | -0.50782  |
| 7w11w_SITTI | 0.00456152 | 0.04777151 | 5.52E-05   | 0.0090922 | 0.24903   |
| 7w11w_SITTI | 0.01122077 | 0.11262934 | 6.11E-05   | 0.016373  | 0.1115    |
| 7w11w_SITTI | 0.06088359 | 0.5963208  | 0.00011523 | 0.098828  | -0.39249  |
| 7w11w_SITTI | 0.0082668  | 0.08385909 | 5.84E-05   | 0.012653  | 0.12871   |
| 7w11w_SITTI | 0.03136835 | 0.30885687 | 8.32E-05   | 0.075317  | 0.6834    |
| 7w11w_SITTI | 0.04927434 | 0.48325244 | 0.00010381 | 0.094798  | 0.062467  |

|             |            |            |            |           |           |
|-------------|------------|------------|------------|-----------|-----------|
| 7w11w_SITTI | 0.04562603 | 0.44771966 | 0.00010009 | 0.1019    | 0.16436   |
| 7w11w_SITTI | 0.03125522 | 0.307755   | 8.32E-05   | 0.075317  | 0.69526   |
| 7w11w_SITTI | 0.04953574 | 0.48579833 | 0.00010417 | 0.094268  | 0.052555  |
| 7w11w_SITTI | 0.05463854 | 0.53549707 | 0.00010944 | 0.093233  | -0.12355  |
| 7w11w_SITTI | 0.0518957  | 0.50878316 | 0.00010668 | 0.092211  | -0.022986 |
| 7w11w_SITTI | 0.05076889 | 0.49780867 | 0.00010561 | 0.092703  | 0.021622  |
| 7w11w_SITTI | 0.07896201 | 0.77239585 | 0.00012816 | 0.056721  | -1.1755   |
| 7w11w_SITTI | 0.05494025 | 0.53843564 | 0.00010978 | 0.093528  | -0.13708  |
| 7w11w_SITTI | 0.0492051  | 0.48257813 | 0.00010381 | 0.094798  | 0.062467  |
| 7w11w_SITTI | 0.06595685 | 0.6457319  | 0.00011953 | 0.092756  | -0.64315  |
| 7w11w_SITTI | 0.02252109 | 0.22268888 | 7.30E-05   | 0.038397  | 0.65846   |
| 7w11w_SITTI | 0.0515205  | 0.5051289  | 0.00010632 | 0.092309  | -0.011455 |
| 7w11w_SITTI | 0.04473919 | 0.43908232 | 9.89E-05   | 0.10421   | 0.18258   |
| 7w11w_SITTI | 0.06767024 | 0.6624195  | 0.00012084 | 0.087573  | -0.72756  |
| 7w11w_SITTI | 0.04517963 | 0.443372   | 9.97E-05   | 0.10268   | 0.17344   |
| 7w11w_SITTI | 0.04466768 | 0.4383858  | 9.89E-05   | 0.10421   | 0.18258   |
| 7w11w_SITTI | 0.04402724 | 0.4321483  | 9.82E-05   | 0.10565   | 0.20107   |
| 7w11w_SITTI | 0.03171964 | 0.3122783  | 8.36E-05   | 0.07721   | 0.67094   |
| 7w11w_SITTI | 0.07758445 | 0.7589791  | 0.0001274  | 0.058646  | -1.1379   |
| 7w11w_SITTI | 0.06277801 | 0.6147716  | 0.00011701 | 0.098387  | -0.47447  |
| 7w11w_SITTI | 0.09125047 | 0.8920794  | 0.00013362 | 0.052552  | -1.3347   |
| 7w11w_SITTI | 0.00313968 | 0.0339234  | 5.42E-05   | 0.0080398 | 0.31077   |
| 7w11w_SITTI | 0.05038327 | 0.4940529  | 0.00010525 | 0.093003  | 0.032151  |
| 7w11w_SITTI | 0.07096728 | 0.694531   | 0.00012331 | 0.075804  | -0.87403  |
| 7w11w_SITTI | 0.07944618 | 0.7771114  | 0.00012835 | 0.05632   | -1.1841   |
| 7w11w_SITTI | 0.05400361 | 0.5293132  | 0.00010876 | 0.092731  | -0.097097 |
| 7w11w_SITTI | 0.06648834 | 0.65090835 | 0.00012006 | 0.090801  | -0.66011  |
| 7w11w_SITTI | 0.01633867 | 0.16247515 | 6.62E-05   | 0.024342  | 0.29808   |
| 7w11w_SITTI | 0.05622495 | 0.55094796 | 0.00011111 | 0.094909  | -0.17881  |
| 7w11w_SITTI | 0.06601682 | 0.646316   | 0.00011953 | 0.092756  | -0.64315  |
| 7w11w_SITTI | 0.04129734 | 0.4055604  | 9.50E-05   | 0.10955   | 0.28067   |
| 7w11w_SITTI | 0.06711785 | 0.65703946 | 0.00012032 | 0.089759  | -0.69393  |
| 7w11w_SITTI | 0.06587149 | 0.6449005  | 0.00011953 | 0.092756  | -0.62617  |
| 7w11w_SITTI | 0.08142573 | 0.79639125 | 0.00012942 | 0.054478  | -1.2295   |
| 7w11w_SITTI | 0.01395572 | 0.13926637 | 6.37E-05   | 0.020323  | 0.18023   |
| 7w11w_SITTI | 0.0323323  | 0.3182453  | 8.44E-05   | 0.081011  | 0.65793   |
| 7w11w_SITTI | 0.04364196 | 0.42839578 | 9.78E-05   | 0.10633   | 0.21046   |
| 7w11w_SITTI | 0.07710085 | 0.754269   | 0.0001272  | 0.059217  | -1.117    |
| 7w11w_SITTI | 0.04688828 | 0.46001345 | 0.00010159 | 0.098799  | 0.12814   |
| 7w11w_SITTI | 0.05609886 | 0.5497199  | 0.00011078 | 0.094541  | -0.17881  |
| 7w11w_SITTI | 0.04576048 | 0.44902915 | 0.00010009 | 0.1019    | 0.1553    |
| 7w11w_SITTI | 0.04623424 | 0.45364335 | 0.00010084 | 0.10033   | 0.14626   |
| 7w11w_SITTI | 0.079583   | 0.77844393 | 0.00012853 | 0.055948  | -1.1924   |
| 7w11w_SITTI | 0.031855   | 0.31359664 | 8.40E-05   | 0.07911   | 0.67094   |
| 7w11w_SITTI | 0.05051019 | 0.4952891  | 0.00010525 | 0.093003  | 0.021622  |
| 7w11w_SITTI | 0.06111801 | 0.598604   | 0.00011553 | 0.098907  | -0.4087   |

|             |            |            |            |          |           |
|-------------|------------|------------|------------|----------|-----------|
| 7w11w_SITTI | 0.05511139 | 0.5401025  | 0.00010978 | 0.093528 | -0.13708  |
| 7w11w_SITTI | 0.01735699 | 0.17239305 | 6.72E-05   | 0.026262 | 0.35829   |
| 7w11w_SITTI | 0.06959389 | 0.6811549  | 0.00012235 | 0.080544 | -0.81017  |
| 7w11w_SITTI | 0.05910469 | 0.5789952  | 0.00011368 | 0.097776 | -0.31309  |
| 7w11w_SITTI | 0.04829089 | 0.47367415 | 0.00010308 | 0.095994 | 0.091263  |
| 7w11w_SITTI | 0.07009103 | 0.68599683 | 0.0001226  | 0.07935  | -0.8424   |
| 7w11w_SITTI | 0.01602126 | 0.15938376 | 6.58E-05   | 0.023731 | 0.27899   |
| 7w11w_SITTI | 0.07220056 | 0.7065426  | 0.00012401 | 0.07238  | -0.93514  |
| 7w11w_SITTI | 0.02575252 | 0.25416142 | 7.66E-05   | 0.04879  | 0.7616    |
| 7w11w_SITTI | 0.07150249 | 0.69974375 | 0.00012355 | 0.074645 | -0.90497  |
| 7w11w_SITTI | 0.01517889 | 0.15117943 | 6.47E-05   | 0.021973 | 0.22576   |
| 7w11w_SITTI | 0.05252221 | 0.5148851  | 0.00010738 | 0.092189 | -0.03476  |
| 7w11w_SITTI | 0.04778968 | 0.4687926  | 0.00010234 | 0.09734  | 0.10061   |
| 7w11w_SITTI | 0.02093813 | 0.20727162 | 7.10E-05   | 0.033786 | 0.56707   |
| 7w11w_SITTI | 0.02961678 | 0.29179743 | 8.11E-05   | 0.066108 | 0.7357    |
| 7w11w_SITTI | 0.07042579 | 0.6892572  | 0.00012284 | 0.078159 | -0.8583   |
| 7w11w_SITTI | 0.0492328  | 0.48284784 | 0.00010381 | 0.094798 | 0.062467  |
| 7w11w_SITTI | 0.04276911 | 0.4198947  | 9.70E-05   | 0.10755  | 0.23945   |
| 7w11w_SITTI | 0.05175779 | 0.50744003 | 0.00010668 | 0.092211 | -0.011455 |
| 7w11w_SITTI | 0.06715336 | 0.6573853  | 0.00012058 | 0.088682 | -0.69393  |
| 7w11w_SITTI | 0.07097825 | 0.69463784 | 0.00012331 | 0.075804 | -0.87403  |
| 7w11w_SITTI | 0.07578205 | 0.74142456 | 0.0001264  | 0.06191  | -1.0712   |
| 7w11w_SITTI | 0.04439065 | 0.4356877  | 9.86E-05   | 0.10494  | 0.19178   |
| 7w11w_SITTI | 0.05427959 | 0.5320011  | 0.0001091  | 0.092966 | -0.11022  |
| 7w11w_SITTI | 0.07803254 | 0.7633432  | 0.00012759 | 0.058113 | -1.1478   |
| 7w11w_SITTI | 0.0649462  | 0.63588864 | 0.00011871 | 0.095287 | -0.59222  |
| 7w11w_SITTI | 0.02409107 | 0.23797971 | 7.46E-05   | 0.042633 | 0.71639   |
| 7w11w_SITTI | 0.03572501 | 0.35128856 | 8.86E-05   | 0.098764 | 0.50933   |
| 7w11w_SITTI | 0.07551879 | 0.73886055 | 0.00012619 | 0.062687 | -1.0712   |
| 7w11w_SITTI | 0.03533732 | 0.3475127  | 8.81E-05   | 0.097198 | 0.52494   |
| 7w11w_SITTI | 0.07057815 | 0.6907411  | 0.00012308 | 0.076976 | -0.8583   |
| 7w11w_SITTI | 0.07184556 | 0.70308506 | 0.00012378 | 0.073503 | -0.92016  |
| 7w11w_SITTI | 0.04624951 | 0.4537921  | 0.00010084 | 0.10033  | 0.14626   |
| 7w11w_SITTI | 0.06541914 | 0.6404949  | 0.00011925 | 0.093659 | -0.60919  |
| 7w11w_SITTI | 0.07922793 | 0.77498573 | 0.00012835 | 0.05632  | -1.1755   |
| 7w11w_SITTI | 0.0293208  | 0.28891477 | 8.07E-05   | 0.064343 | 0.7438    |
| 7w11w_SITTI | 0.04004039 | 0.39331833 | 9.38E-05   | 0.10975  | 0.32588   |
| 7w11w_SITTI | 0.04169672 | 0.40945017 | 9.54E-05   | 0.10929  | 0.27003   |
| 7w11w_SITTI | 0.06199664 | 0.6071614  | 0.00011642 | 0.098794 | -0.44141  |
| 7w11w_SITTI | 0.08220656 | 0.80399615 | 0.00012976 | 0.054048 | -1.2424   |
| 7w11w_SITTI | 0.04106966 | 0.40334293 | 9.50E-05   | 0.10955  | 0.29155   |
| 7w11w_SITTI | 0.04529275 | 0.4444737  | 9.97E-05   | 0.10268  | 0.17344   |
| 7w11w_SITTI | 0.05983633 | 0.5861211  | 0.00011431 | 0.098311 | -0.3445   |
| 7w11w_SITTI | 0.05910811 | 0.5790285  | 0.00011368 | 0.097776 | -0.31309  |
| 7w11w_SITTI | 0.05180778 | 0.5079269  | 0.00010668 | 0.092211 | -0.011455 |
| 7w11w_SITTI | 0.03579643 | 0.35198417 | 8.86E-05   | 0.098764 | 0.49376   |

|             |            |            |            |          |           |
|-------------|------------|------------|------------|----------|-----------|
| 7w11w_SITTI | 0.02093396 | 0.20723099 | 7.10E-05   | 0.033786 | 0.56707   |
| 7w11w_SITTI | 0.06107902 | 0.5982242  | 0.00011553 | 0.098907 | -0.39249  |
| 7w11w_SITTI | 0.07606916 | 0.74422085 | 0.0001266  | 0.061174 | -1.0832   |
| 7w11w_SITTI | 0.04635173 | 0.45478764 | 0.00010084 | 0.10033  | 0.14626   |
| 7w11w_SITTI | 0.03779776 | 0.3714762  | 9.10E-05   | 0.1063   | 0.41807   |
| 7w11w_SITTI | 0.07180987 | 0.7027375  | 0.00012378 | 0.073503 | -0.92016  |
| 7w11w_SITTI | 0.064169   | 0.6283191  | 0.00011815 | 0.096641 | -0.54144  |
| 7w11w_SITTI | 0.05972083 | 0.58499616 | 0.00011431 | 0.098311 | -0.32873  |
| 7w11w_SITTI | 0.07438442 | 0.72781235 | 0.00012556 | 0.06525  | -1.0201   |
| 7w11w_SITTI | 0.06485514 | 0.63500184 | 0.00011871 | 0.095287 | -0.59222  |
| 7w11w_SITTI | 0.01923841 | 0.19071725 | 6.91E-05   | 0.029782 | 0.46374   |
| 7w11w_SITTI | 0.06409218 | 0.6275709  | 0.00011815 | 0.096641 | -0.54144  |
| 7w11w_SITTI | 0.04032546 | 0.39609477 | 9.38E-05   | 0.10975  | 0.31414   |
| 7w11w_SITTI | 0.06122671 | 0.59966266 | 0.00011553 | 0.098907 | -0.4087   |
| 7w11w_SITTI | 0.07119883 | 0.6967862  | 0.00012331 | 0.075804 | -0.88959  |
| 7w11w_SITTI | 0.06599031 | 0.64605784 | 0.00011953 | 0.092756 | -0.64315  |
| 7w11w_SITTI | 0.04915185 | 0.48205942 | 0.00010381 | 0.094798 | 0.062467  |
| 7w11w_SITTI | 0.01055278 | 0.10612345 | 6.05E-05   | 0.01548  | 0.10741   |
| 7w11w_SITTI | 0.06329267 | 0.61978406 | 0.0001173  | 0.098072 | -0.50782  |
| 7w11w_SITTI | 0.07330304 | 0.71728015 | 0.00012469 | 0.069151 | -0.97873  |
| 7w11w_SITTI | 0.01949556 | 0.19322167 | 6.95E-05   | 0.030541 | 0.48489   |
| 7w11w_SITTI | 0.03792007 | 0.37266746 | 9.10E-05   | 0.1063   | 0.40374   |
| 7w11w_SITTI | 0.05519144 | 0.54088205 | 0.00011011 | 0.093847 | -0.13708  |
| 7w11w_SITTI | 0.03817548 | 0.37515494 | 9.14E-05   | 0.10717  | 0.38979   |
| 7w11w_SITTI | 0.04973656 | 0.48775426 | 0.00010453 | 0.09379  | 0.052555  |
| 7w11w_SITTI | 0.04176356 | 0.41010112 | 9.58E-05   | 0.10896  | 0.27003   |
| 7w11w_SITTI | 0.01690422 | 0.16798337 | 6.65E-05   | 0.024968 | 0.31771   |
| 7w11w_SITTI | 0.02442912 | 0.24127221 | 7.50E-05   | 0.043782 | 0.72811   |
| 7w11w_SITTI | 0.00700088 | 0.0715296  | 5.72E-05   | 0.011238 | 0.16213   |
| 7w11w_SITTI | 0.01971919 | 0.19539973 | 6.95E-05   | 0.030541 | 0.50588   |
| 7w11w_SITTI | 0.04010936 | 0.39399007 | 9.38E-05   | 0.10975  | 0.32588   |
| 7w11w_SITTI | 0.05675004 | 0.55606204 | 0.00011144 | 0.095284 | -0.20754  |
| 7w11w_SITTI | 0.05301423 | 0.5196771  | 0.00010773 | 0.092257 | -0.059017 |
| 7w11w_SITTI | 0.02779317 | 0.27403638 | 7.90E-05   | 0.057632 | 0.76966   |
| 7w11w_SITTI | 0.06412061 | 0.6278478  | 0.00011815 | 0.096641 | -0.54144  |
| 7w11w_SITTI | 0.07689176 | 0.75223255 | 0.000127   | 0.059827 | -1.117    |
| 7w11w_SITTI | 0.03286079 | 0.3233925  | 8.52E-05   | 0.084798 | 0.6305    |
| 7w11w_SITTI | 0.07961329 | 0.778739   | 0.00012853 | 0.055948 | -1.1924   |
| 7w11w_SITTI | 0.0502109  | 0.49237406 | 0.0001049  | 0.093366 | 0.032151  |
| 7w11w_SITTI | 0.00770212 | 0.07835936 | 5.78E-05   | 0.011928 | 0.13577   |
| 7w11w_SITTI | 0.07125905 | 0.69737273 | 0.00012355 | 0.074645 | -0.88959  |
| 7w11w_SITTI | 0.05621657 | 0.5508663  | 0.00011111 | 0.094909 | -0.17881  |
| 7w11w_SITTI | 0.07773123 | 0.7604086  | 0.0001274  | 0.058646 | -1.1379   |
| 7w11w_SITTI | 0.06705106 | 0.656389   | 0.00012032 | 0.089759 | -0.69393  |
| 7w11w_SITTI | 0.0473216  | 0.46423373 | 0.00010197 | 0.098057 | 0.11903   |
| 7w11w_SITTI | 0.04897321 | 0.48031965 | 0.00010381 | 0.094798 | 0.072211  |

|             |            |            |            |           |            |
|-------------|------------|------------|------------|-----------|------------|
| 7w11w_SITTI | 0.0431223  | 0.42333463 | 9.74E-05   | 0.10696   | 0.22964    |
| 7w11w_SITTI | 0.07342315 | 0.71845    | 0.00012491 | 0.068128  | -0.99278   |
| 7w11w_SITTI | 0.07523222 | 0.7360695  | 0.00012598 | 0.063504  | -1.0589    |
| 7w11w_SITTI | 0.05141532 | 0.5041045  | 0.00010632 | 0.092309  | -0.0001745 |
| 7w11w_SITTI | 0.04440299 | 0.43580785 | 9.86E-05   | 0.10494   | 0.19178    |
| 7w11w_SITTI | 0.08836133 | 0.8639406  | 0.00013248 | 0.05264   | -1.3176    |
| 7w11w_SITTI | 0.06031663 | 0.590799   | 0.00011492 | 0.0987    | -0.36038   |
| 7w11w_SITTI | 0.05278377 | 0.5174326  | 0.00010773 | 0.092257  | -0.046772  |
| 7w11w_SITTI | 0.07775538 | 0.7606438  | 0.0001274  | 0.058646  | -1.1379    |
| 7w11w_SITTI | 0.0853731  | 0.8348367  | 0.00013135 | 0.05287   | -1.2883    |
| 7w11w_SITTI | 0.03572629 | 0.35130107 | 8.86E-05   | 0.098764  | 0.50933    |
| 7w11w_SITTI | 0.07978471 | 0.78040844 | 0.00012853 | 0.055948  | -1.1924    |
| 7w11w_SITTI | 0.07446594 | 0.7286063  | 0.00012556 | 0.06525   | -1.0333    |
| 7w11w_SITTI | 0.07708298 | 0.75409496 | 0.000127   | 0.059827  | -1.117     |
| 7w11w_SITTI | 0.03368614 | 0.331431   | 8.61E-05   | 0.088522  | 0.60151    |
| 7w11w_SITTI | 0.05145725 | 0.50451285 | 0.00010632 | 0.092309  | -0.0001745 |
| 7w11w_SITTI | 0.02758309 | 0.2719903  | 7.86E-05   | 0.05605   | 0.76966    |
| 7w11w_SITTI | 0.05114082 | 0.501431   | 0.00010597 | 0.092472  | 0.010852   |
| 7w11w_SITTI | 0.02714755 | 0.26774833 | 7.82E-05   | 0.054511  | 0.77219    |
| 7w11w_SITTI | 0.0824137  | 0.8060135  | 0.00012993 | 0.053861  | -1.2485    |
| 7w11w_SITTI | 0.07364208 | 0.72058225 | 0.00012491 | 0.068128  | -0.99278   |
| 7w11w_SITTI | 0.06958342 | 0.68105286 | 0.00012235 | 0.080544  | -0.81017   |
| 7w11w_SITTI | 0.02213917 | 0.21896921 | 7.22E-05   | 0.03647   | 0.64161    |
| 7w11w_SITTI | 0.04061666 | 0.3989309  | 9.42E-05   | 0.10978   | 0.3027     |
| 7w11w_SITTI | 0.08654516 | 0.84625196 | 0.00013179 | 0.052739  | -1.3031    |
| 7w11w_SITTI | 0.08160002 | 0.7980887  | 0.00012959 | 0.054253  | -1.2295    |
| 7w11w_SITTI | 0.05324736 | 0.5219477  | 0.00010807 | 0.092373  | -0.07149   |
| 7w11w_SITTI | 0.04241665 | 0.4164619  | 9.66E-05   | 0.10808   | 0.24945    |
| 7w11w_SITTI | 0.00982861 | 0.09907038 | 5.98E-05   | 0.014626  | 0.1081     |
| 7w11w_SITTI | 0.07160337 | 0.7007262  | 0.00012378 | 0.073503  | -0.90497   |
| 7w11w_SITTI | 0.0569801  | 0.5583027  | 0.00011177 | 0.095663  | -0.20754   |
| 7w11w_SITTI | 0.06823029 | 0.66787416 | 0.00012136 | 0.085284  | -0.74427   |
| 7w11w_SITTI | 0.01766159 | 0.17535971 | 6.72E-05   | 0.026262  | 0.37908    |
| 7w11w_SITTI | 0.07276146 | 0.7120055  | 0.00012446 | 0.070202  | -0.96444   |
| 7w11w_SITTI | 0.04812996 | 0.47210675 | 0.00010271 | 0.09665   | 0.091263   |
| 7w11w_SITTI | 0.05442213 | 0.5333894  | 0.0001091  | 0.092966  | -0.11022   |
| 7w11w_SITTI | 0.0654932  | 0.6412162  | 0.00011925 | 0.093659  | -0.60919   |
| 7w11w_SITTI | 0.08720835 | 0.8527111  | 0.00013207 | 0.052686  | -1.3094    |
| 7w11w_SITTI | 0.05026887 | 0.49293873 | 0.0001049  | 0.093366  | 0.032151   |
| 7w11w_SITTI | 0.01048658 | 0.10547864 | 6.05E-05   | 0.01548   | 0.10741    |
| 7w11w_SITTI | 0.04723672 | 0.46340698 | 0.00010197 | 0.098057  | 0.11903    |
| 7w11w_SITTI | 0.05794932 | 0.56774247 | 0.00011273 | 0.096781  | -0.25188   |
| 7w11w_SITTI | 0.00395271 | 0.04184196 | 5.50E-05   | 0.0088178 | 0.2638     |
| 7w11w_SITTI | 0.07618941 | 0.745392   | 0.0001266  | 0.061174  | -1.0948    |
| 7w11w_SITTI | 0.01294386 | 0.1294114  | 6.27E-05   | 0.018769  | 0.14454    |
| 7w11w_SITTI | 0.07132679 | 0.69803244 | 0.00012355 | 0.074645  | -0.88959   |

|             |            |            |            |          |          |
|-------------|------------|------------|------------|----------|----------|
| 7w11w_SITTI | 0.06455429 | 0.6320717  | 0.00011843 | 0.096001 | -0.57526 |
| 7w11w_SITTI | 0.05860196 | 0.5740989  | 0.00011337 | 0.097465 | -0.2822  |
| 7w11w_SITTI | 0.06911585 | 0.676499   | 0.00012186 | 0.08293  | -0.79386 |
| 7w11w_SITTI | 0.08096565 | 0.79191023 | 0.00012924 | 0.054725 | -1.2227  |
| 7w11w_SITTI | 0.0504059  | 0.4942733  | 0.00010525 | 0.093003 | 0.032151 |
| 7w11w_SITTI | 0.06448802 | 0.6314263  | 0.00011843 | 0.096001 | -0.55833 |
| 7w11w_SITTI | 0.03588321 | 0.35282943 | 8.86E-05   | 0.098764 | 0.49376  |
| 7w11w_SITTI | 0.0810026  | 0.7922702  | 0.00012924 | 0.054725 | -1.2227  |
| 7w11w_SITTI | 0.07845745 | 0.76748157 | 0.00012778 | 0.057615 | -1.1573  |
| 7w11w_SITTI | 0.02777451 | 0.27385464 | 7.90E-05   | 0.057632 | 0.76966  |
| 7w11w_SITTI | 0.08669011 | 0.84766376 | 0.00013179 | 0.052739 | -1.3031  |
| 7w11w_SITTI | 0.03348636 | 0.3294853  | 8.61E-05   | 0.088522 | 0.60151  |
| 7w11w_SITTI | 0.01079949 | 0.10852623 | 6.05E-05   | 0.01548  | 0.10884  |
| 7w11w_SITTI | 0.0160146  | 0.15931888 | 6.58E-05   | 0.023731 | 0.27899  |
| 7w11w_SITTI | 0.07073465 | 0.69226533 | 0.00012308 | 0.076976 | -0.87403 |
| 7w11w_SITTI | 0.04573979 | 0.44882768 | 0.00010009 | 0.1019   | 0.1553   |
| 7w11w_SITTI | 0.04702188 | 0.46131462 | 0.00010159 | 0.098799 | 0.12814  |
| 7w11w_SITTI | 0.02485204 | 0.24539118 | 7.54E-05   | 0.044969 | 0.74769  |
| 7w11w_SITTI | 0.05473433 | 0.5364301  | 0.00010944 | 0.093233 | -0.12355 |
| 7w11w_SITTI | 0.00372836 | 0.03965694 | 5.47E-05   | 0.008551 | 0.27903  |
| 7w11w_SITTI | 0.01609068 | 0.16005985 | 6.58E-05   | 0.023731 | 0.27899  |
| 7w11w_SITTI | 0.04859277 | 0.47661424 | 0.00010344 | 0.095375 | 0.081803 |
| 7w11w_SITTI | 0.05651688 | 0.5537912  | 0.00011144 | 0.095284 | -0.19309 |
| 7w11w_SITTI | 0.04962467 | 0.48666453 | 0.00010453 | 0.09379  | 0.052555 |
| 7w11w_SITTI | 0.04119214 | 0.40453583 | 9.50E-05   | 0.10955  | 0.29155  |
| 7w11w_SITTI | 0.07585186 | 0.7421045  | 0.0001264  | 0.06191  | -1.0832  |
| 7w11w_SITTI | 0.01955273 | 0.19377851 | 6.95E-05   | 0.030541 | 0.48489  |
| 7w11w_SITTF | 0.01508359 | 0.15025128 | 6.47E-05   | 0.021973 | 0.22576  |
| 7w11w_SITTF | 0.04796856 | 0.47053474 | 0.00010271 | 0.09665  | 0.10061  |
| 7w11w_SITTF | 0.06314857 | 0.6183806  | 0.0001173  | 0.098072 | -0.50782 |
| 7w11w_SITTF | 0.01867459 | 0.18522583 | 6.84E-05   | 0.028322 | 0.44251  |
| 7w11w_SITTF | 0.050749   | 0.49761495 | 0.00010561 | 0.092703 | 0.021622 |
| 7w11w_SITTF | 0.04936834 | 0.48416793 | 0.00010417 | 0.094268 | 0.062467 |
| 7w11w_SITTF | 0.0837775  | 0.81929636 | 0.00013058 | 0.053285 | -1.2702  |
| 7w11w_SITTF | 0.06226324 | 0.60975796 | 0.00011642 | 0.098794 | -0.4579  |
| 7w11w_SITTF | 0.08475739 | 0.82883996 | 0.00013105 | 0.053002 | -1.2841  |
| 7w11w_SITTF | 0.02878382 | 0.28368482 | 8.03E-05   | 0.062611 | 0.75723  |
| 7w11w_SITTF | 0.0825809  | 0.80764204 | 0.00012993 | 0.053861 | -1.2485  |
| 7w11w_SITTF | 0.06555276 | 0.64179623 | 0.00011925 | 0.093659 | -0.62617 |
| 7w11w_SITTF | 0.06191881 | 0.6064034  | 0.00011613 | 0.098894 | -0.44141 |
| 7w11w_SITTF | 0.05907987 | 0.5787535  | 0.00011368 | 0.097776 | -0.31309 |
| 7w11w_SITTF | 0.06316266 | 0.6185178  | 0.0001173  | 0.098072 | -0.50782 |
| 7w11w_SITTF | 0.06254232 | 0.61247605 | 0.00011672 | 0.098627 | -0.47447 |
| 7w11w_SITTF | 0.0138317  | 0.13805853 | 6.34E-05   | 0.019794 | 0.16714  |
| 7w11w_SITTF | 0.03872919 | 0.38054782 | 9.22E-05   | 0.10852  | 0.37625  |
| 7w11w_SITTF | 0.0075417  | 0.07679693 | 5.78E-05   | 0.011928 | 0.14372  |

|             |            |            |            |           |          |
|-------------|------------|------------|------------|-----------|----------|
| 7w11w_SITTF | 0.06296758 | 0.61661786 | 0.00011701 | 0.098387  | -0.49111 |
| 7w11w_SITTF | 0.00428213 | 0.04505032 | 5.50E-05   | 0.0088178 | 0.24903  |
| 7w11w_SITTF | 0.01090528 | 0.10955658 | 6.08E-05   | 0.015922  | 0.10884  |
| 7w11w_SITTF | 0.07630081 | 0.746477   | 0.0001266  | 0.061174  | -1.0948  |
| 7w11w_SITTF | 0.01866349 | 0.18511777 | 6.84E-05   | 0.028322  | 0.44251  |
| 7w11w_SITTF | 0.06077894 | 0.59530157 | 0.00011523 | 0.098828  | -0.39249 |
| 7w11w_SITTF | 0.0822183  | 0.80411047 | 0.00012976 | 0.054048  | -1.2424  |
| 7w11w_SITTF | 0.01573115 | 0.15655822 | 6.54E-05   | 0.023132  | 0.26052  |
| 7w11w_SITTF | 0.02322165 | 0.22951204 | 7.38E-05   | 0.040447  | 0.68948  |
| 7w11w_SITTF | 0.05566739 | 0.54551756 | 0.00011045 | 0.094186  | -0.16472 |
| 7w11w_SITTF | 0.07262223 | 0.7106495  | 0.00012424 | 0.071279  | -0.9499  |
| 7w11w_SITTF | 0.05590039 | 0.5477869  | 0.00011078 | 0.094541  | -0.16472 |
| 7w11w_SITTF | 0.05603143 | 0.5490632  | 0.00011078 | 0.094541  | -0.17881 |
| 7w11w_SITTF | 0.04597315 | 0.45110047 | 0.00010046 | 0.10111   | 0.1553   |
| 7w11w_SITTF | 0.06318191 | 0.61870533 | 0.0001173  | 0.098072  | -0.50782 |
| 7w11w_SITTF | 0.04386022 | 0.43052158 | 9.82E-05   | 0.10565   | 0.21046  |
| 7w11w_SITTF | 0.03206996 | 0.31569016 | 8.40E-05   | 0.07911   | 0.65793  |
| 7w11w_SITTF | 0.04745745 | 0.46555683 | 0.00010197 | 0.098057  | 0.10986  |
| 7w11w_SITTF | 0.00484755 | 0.0505573  | 5.55E-05   | 0.0093744 | 0.23478  |
| 7w11w_SITTF | 0.0499298  | 0.4896363  | 0.00010453 | 0.09379   | 0.042456 |
| 7w11w_SITTF | 0.0797426  | 0.7799984  | 0.00012853 | 0.055948  | -1.1924  |
| 7w11w_SITTF | 0.01807536 | 0.1793897  | 6.80E-05   | 0.027619  | 0.4001   |
| 7w11w_SITTF | 0.02305517 | 0.22789055 | 7.34E-05   | 0.039406  | 0.67444  |
| 7w11w_SITTF | 0.06541426 | 0.6404473  | 0.00011898 | 0.094504  | -0.60919 |
| 7w11w_SITTF | 0.02349662 | 0.23219006 | 7.38E-05   | 0.040447  | 0.70349  |
| 7w11w_SITTF | 0.04463063 | 0.43802503 | 9.89E-05   | 0.10421   | 0.19178  |
| 7w11w_SITTF | 0.04658363 | 0.4570463  | 0.00010122 | 0.099559  | 0.13721  |
| 7w11w_SITTF | 0.02456309 | 0.242577   | 7.54E-05   | 0.044969  | 0.73857  |
| 7w11w_SITTF | 0.01688874 | 0.16783258 | 6.65E-05   | 0.024968  | 0.31771  |
| 7w11w_SITTF | 0.08039651 | 0.7863671  | 0.00012889 | 0.055287  | -1.2081  |
| 7w11w_SITTF | 0.0554088  | 0.542999   | 0.00011011 | 0.093847  | -0.1508  |
| 7w11w_SITTF | 0.01225481 | 0.12270034 | 6.21E-05   | 0.017782  | 0.12723  |
| 7w11w_SITTF | 0.05746676 | 0.5630426  | 0.00011209 | 0.096042  | -0.23694 |
| 7w11w_SITTF | 0.05430243 | 0.5322235  | 0.0001091  | 0.092966  | -0.11022 |
| 7w11w_SITTF | 0.03772909 | 0.3708074  | 9.10E-05   | 0.1063    | 0.41807  |
| 7w11w_SITTF | 0.05813587 | 0.5695594  | 0.00011273 | 0.096781  | -0.26697 |
| 7w11w_SITTF | 0.05873627 | 0.57540697 | 0.00011337 | 0.097465  | -0.29758 |
| 7w11w_SITTF | 0.06094635 | 0.5969321  | 0.00011523 | 0.098828  | -0.39249 |
| 7w11w_SITTF | 0.00736051 | 0.07503227 | 5.75E-05   | 0.011579  | 0.14372  |
| 7w11w_SITTF | 0.09332486 | 0.91228294 | 0.00013431 | 0.052462  | -1.3409  |
| 7w11w_SITTF | 0.04851946 | 0.4759003  | 0.00010308 | 0.095994  | 0.081803 |
| 7w11w_SITTF | 0.02575197 | 0.25415614 | 7.66E-05   | 0.04879   | 0.7616   |
| 7w11w_SITTF | 0.05673271 | 0.55589336 | 0.00011144 | 0.095284  | -0.20754 |
| 7w11w_SITTF | 0.06742711 | 0.66005147 | 0.00012058 | 0.088682  | -0.71078 |
| 7w11w_SITTF | 0.0672267  | 0.65809965 | 0.00012058 | 0.088682  | -0.69393 |
| 7w11w_SITTF | 0.02526133 | 0.2493775  | 7.62E-05   | 0.047472  | 0.75539  |

|             |            |            |            |           |          |
|-------------|------------|------------|------------|-----------|----------|
| 7w11w_SITTF | 0.06565651 | 0.64280677 | 0.00011925 | 0.093659  | -0.62617 |
| 7w11w_SITTF | 0.04827203 | 0.47349048 | 0.00010308 | 0.095994  | 0.091263 |
| 7w11w_SITTF | 0.04514681 | 0.44305232 | 9.93E-05   | 0.10345   | 0.17344  |
| 7w11w_SITTF | 0.03781692 | 0.37166283 | 9.10E-05   | 0.1063    | 0.41807  |
| 7w11w_SITTF | 0.0411968  | 0.40458122 | 9.50E-05   | 0.10955   | 0.29155  |
| 7w11w_SITTF | 0.04790034 | 0.4698704  | 0.00010234 | 0.09734   | 0.10061  |
| 7w11w_SITTF | 0.09561433 | 0.9345812  | 0.00013495 | 0.052348  | -1.344   |
| 7w11w_SITTF | 0.00241319 | 0.02684781 | 5.36E-05   | 0.0075574 | 0.34395  |
| 7w11w_SITTF | 0.04119717 | 0.40458477 | 9.50E-05   | 0.10955   | 0.29155  |
| 7w11w_SITTF | 0.06376046 | 0.6243401  | 0.00011787 | 0.097201  | -0.5246  |
| 7w11w_SITTF | 0.01705392 | 0.16944134 | 6.69E-05   | 0.025607  | 0.33781  |
| 7w11w_SITTF | 0.00897551 | 0.0907616  | 5.89E-05   | 0.013414  | 0.11742  |
| 7w11w_SITTF | 0.09144556 | 0.89397943 | 0.00013362 | 0.052552  | -1.3347  |
| 7w11w_SITTF | 0.02741695 | 0.27037218 | 7.86E-05   | 0.05605   | 0.77153  |
| 7w11w_SITTF | 0.03638082 | 0.35767585 | 8.94E-05   | 0.10166   | 0.47826  |
| 7w11w_SITTF | 0.0698122  | 0.6832811  | 0.00012235 | 0.080544  | -0.82636 |
| 7w11w_SITTF | 0.0424499  | 0.41678578 | 9.66E-05   | 0.10808   | 0.24945  |
| 7w11w_SITTF | 0.04095511 | 0.40222722 | 9.46E-05   | 0.10971   | 0.29155  |
| 7w11w_SITTF | 0.05494319 | 0.5384643  | 0.00010978 | 0.093528  | -0.13708 |
| 7w11w_SITTF | 0.07629181 | 0.7463893  | 0.0001266  | 0.061174  | -1.0948  |
| 7w11w_SITTF | 0.08090414 | 0.7913112  | 0.00012924 | 0.054725  | -1.2155  |
| 7w11w_SITTF | 0.02892391 | 0.28504917 | 8.03E-05   | 0.062611  | 0.751    |
| 7w11w_SITTF | 0.07869959 | 0.76983994 | 0.00012797 | 0.057152  | -1.1666  |
| 7w11w_SITTF | 0.06157478 | 0.6030527  | 0.00011583 | 0.09893   | -0.42501 |
| 7w11w_SITTF | 0.05111256 | 0.50115573 | 0.00010597 | 0.092472  | 0.010852 |
| 7w11w_SITTF | 0.05680485 | 0.55659586 | 0.00011144 | 0.095284  | -0.20754 |
| 7w11w_SITTF | 0.0574686  | 0.56306046 | 0.00011209 | 0.096042  | -0.23694 |
| 7w11w_SITTF | 0.09326659 | 0.91171545 | 0.00013431 | 0.052462  | -1.3409  |
| 7w11w_SITTF | 0.04096179 | 0.4022923  | 9.46E-05   | 0.10971   | 0.29155  |
| 7w11w_SITTF | 0.06354612 | 0.6222526  | 0.00011758 | 0.097678  | -0.5246  |
| 7w11w_SITTF | 0.07983413 | 0.7808898  | 0.00012853 | 0.055948  | -1.1924  |
| 7w11w_SITTF | 0.01712601 | 0.17014349 | 6.69E-05   | 0.025607  | 0.33781  |
| 7w11w_SITTF | 0.01177019 | 0.11798038 | 6.14E-05   | 0.016833  | 0.11542  |
| 7w11w_SITTF | 0.07024543 | 0.6875006  | 0.00012284 | 0.078159  | -0.8424  |
| 7w11w_SITTF | 0.0621712  | 0.60886157 | 0.00011642 | 0.098794  | -0.4579  |
| 7w11w_SITTF | 0.05869253 | 0.57498103 | 0.00011337 | 0.097465  | -0.2822  |
| 7w11w_SITTF | 0.02407058 | 0.23778018 | 7.46E-05   | 0.042633  | 0.71639  |
| 7w11w_SITTF | 0.00621816 | 0.06390636 | 5.66E-05   | 0.010584  | 0.18365  |
| 7w11w_SITTF | 0.0505794  | 0.49596313 | 0.00010525 | 0.093003  | 0.021622 |
| 7w11w_SITTF | 0.06438355 | 0.63040876 | 0.00011815 | 0.096641  | -0.55833 |
| 7w11w_SITTF | 0.04662863 | 0.45748454 | 0.00010122 | 0.099559  | 0.13721  |
| 7w11w_SITTF | 0.06692319 | 0.6551436  | 0.00012032 | 0.089759  | -0.69393 |
| 7w11w_SITTF | 0.07886542 | 0.77145505 | 0.00012816 | 0.056721  | -1.1666  |
| 7w11w_SITTF | 0.03628638 | 0.35675606 | 8.94E-05   | 0.10166   | 0.47826  |
| 7w11w_SITTF | 0.00601327 | 0.06191082 | 5.66E-05   | 0.010584  | 0.18365  |
| 7w11w_SITTF | 0.0155289  | 0.15458843 | 6.51E-05   | 0.022546  | 0.24275  |



|             |            |            |            |           |           |
|-------------|------------|------------|------------|-----------|-----------|
| 7w11w_SITTF | 0.06369693 | 0.62372136 | 0.00011758 | 0.097678  | -0.5246   |
| 7w11w_SITTF | 0.05567038 | 0.5455467  | 0.00011045 | 0.094186  | -0.16472  |
| 7w11w_SITTF | 0.01602339 | 0.1594045  | 6.58E-05   | 0.023731  | 0.27899   |
| 7w11w_SITTF | 0.07858866 | 0.76875955 | 0.00012797 | 0.057152  | -1.1666   |
| 7w11w_SITTF | 0.04588283 | 0.4502208  | 0.00010046 | 0.10111   | 0.1553    |
| 7w11w_SITTF | 0.06639389 | 0.6499885  | 0.00011979 | 0.091802  | -0.66011  |
| 7w11w_SITTF | 0.0655354  | 0.64162713 | 0.00011925 | 0.093659  | -0.60919  |
| 7w11w_SITTF | 0.04681172 | 0.45926774 | 0.00010122 | 0.099559  | 0.12814   |
| 7w11w_SITTF | 0.07151736 | 0.6998885  | 0.00012355 | 0.074645  | -0.90497  |
| 7w11w_SITTF | 0.06467196 | 0.63321775 | 0.00011843 | 0.096001  | -0.57526  |
| 7w11w_SITTF | 0.05919533 | 0.57987803 | 0.00011368 | 0.097776  | -0.31309  |
| 7w11w_SITTF | 0.01904479 | 0.18883139 | 6.87E-05   | 0.029043  | 0.46374   |
| 7w11w_SITTF | 0.05811952 | 0.56940013 | 0.00011273 | 0.096781  | -0.26697  |
| 7w11w_SITTF | 0.04783433 | 0.46922743 | 0.00010234 | 0.09734   | 0.10061   |
| 7w11w_SITTF | 0.04107978 | 0.40344143 | 9.50E-05   | 0.10955   | 0.29155   |
| 7w11w_SITTF | 0.04991023 | 0.48944572 | 0.00010453 | 0.09379   | 0.042456  |
| 7w11w_SITTF | 0.05392076 | 0.52850634 | 0.00010876 | 0.092731  | -0.097097 |
| 7w11w_SITTF | 0.05971027 | 0.5848933  | 0.00011431 | 0.098311  | -0.32873  |
| 7w11w_SITTF | 0.09605023 | 0.9388267  | 0.00013515 | 0.052305  | -1.3444   |
| 7w11w_SITTF | 0.03547958 | 0.3488983  | 8.81E-05   | 0.097198  | 0.50933   |
| 7w11w_SITTF | 0.01032728 | 0.10392713 | 6.02E-05   | 0.015048  | 0.10718   |
| 7w11w_SITTF | 0.07287063 | 0.7130688  | 0.00012446 | 0.070202  | -0.96444  |
| 7w11w_SITTF | 0.06463668 | 0.6328741  | 0.00011843 | 0.096001  | -0.57526  |
| 7w11w_SITTF | 0.06075765 | 0.5950942  | 0.00011523 | 0.098828  | -0.39249  |
| 7w11w_SITTF | 0.02515045 | 0.24829754 | 7.58E-05   | 0.046199  | 0.74769   |
| 7w11w_SITTF | 0.05411531 | 0.5304012  | 0.0001091  | 0.092966  | -0.097097 |
| 7w11w_SITTF | 0.04159398 | 0.40844947 | 9.54E-05   | 0.10929   | 0.27003   |
| 7w11w_SITTF | 0.05436838 | 0.5328659  | 0.0001091  | 0.092966  | -0.11022  |
| 7w11w_SITTF | 0.0435187  | 0.42719534 | 9.78E-05   | 0.10633   | 0.21998   |
| 7w11w_SITTF | 0.05382472 | 0.52757084 | 0.00010876 | 0.092731  | -0.084185 |
| 7w11w_SITTF | 0.0588758  | 0.57676595 | 0.00011337 | 0.097465  | -0.29758  |
| 7w11w_SITTF | 0.07023682 | 0.6874168  | 0.00012284 | 0.078159  | -0.8424   |
| 7w11w_SITTF | 0.00180999 | 0.02097291 | 5.31E-05   | 0.0071026 | 0.37827   |
| 7w11w_SITTF | 0.04878421 | 0.47847885 | 0.00010344 | 0.095375  | 0.072211  |
| 7w11w_SITTF | 0.01220564 | 0.12222148 | 6.21E-05   | 0.017782  | 0.12723   |
| 7w11w_SITTF | 0.03875902 | 0.38083842 | 9.22E-05   | 0.10852   | 0.37625   |
| 7w11w_SITTF | 0.07229733 | 0.7074851  | 0.00012424 | 0.071279  | -0.93514  |
| 7w11w_SITTF | 0.04471665 | 0.43886274 | 9.89E-05   | 0.10421   | 0.18258   |
| 7w11w_SITTF | 0.08470912 | 0.8283698  | 0.00013105 | 0.053002  | -1.2841   |
| 7w11w_SITTF | 0.03800948 | 0.3735382  | 9.14E-05   | 0.10717   | 0.40374   |
| 7w11w_SITTF | 0.04959337 | 0.4863597  | 0.00010417 | 0.094268  | 0.052555  |
| 7w11w_SITTF | 0.01850397 | 0.18356414 | 6.84E-05   | 0.028322  | 0.42127   |
| 7w11w_SITTF | 0.07588575 | 0.74243456 | 0.0001264  | 0.06191   | -1.0832   |
| 7w11w_SITTF | 0.05818662 | 0.57005364 | 0.00011273 | 0.096781  | -0.26697  |
| 7w11w_SITTF | 0.07293777 | 0.71372265 | 0.00012446 | 0.070202  | -0.96444  |
| 7w11w_SITTF | 0.0418025  | 0.41048038 | 9.58E-05   | 0.10896   | 0.27003   |

|             |            |            |            |          |            |
|-------------|------------|------------|------------|----------|------------|
| 7w11w_SITTF | 0.02905482 | 0.28632423 | 8.07E-05   | 0.064343 | 0.751      |
| 7w11w_SITTF | 0.00844631 | 0.08560743 | 5.86E-05   | 0.013029 | 0.12259    |
| 7w11w_SITTF | 0.07480135 | 0.731873   | 0.00012577 | 0.064358 | -1.0462    |
| 7w11w_SITTF | 0.01575112 | 0.1567527  | 6.54E-05   | 0.023132 | 0.26052    |
| 7w11w_SITTF | 0.05620489 | 0.55075264 | 0.00011111 | 0.094909 | -0.17881   |
| 7w11w_SITTF | 0.05434351 | 0.53262365 | 0.0001091  | 0.092966 | -0.11022   |
| 7w11w_SITTF | 0.07117332 | 0.69653773 | 0.00012331 | 0.075804 | -0.88959   |
| 7w11w_SITTF | 0.07530621 | 0.73679006 | 0.00012598 | 0.063504 | -1.0589    |
| 7w11w_SITTF | 0.07438299 | 0.7277984  | 0.00012556 | 0.06525  | -1.0201    |
| 7w11w_SITTF | 0.0406505  | 0.3992605  | 9.42E-05   | 0.10978  | 0.3027     |
| 7w11w_SITTF | 0.04736979 | 0.46470302 | 0.00010197 | 0.098057 | 0.11903    |
| 7w11w_SITTF | 0.04631486 | 0.45442858 | 0.00010084 | 0.10033  | 0.14626    |
| 7w11w_SITTF | 0.01542843 | 0.15360984 | 6.51E-05   | 0.022546 | 0.24275    |
| 7w11w_SITTF | 0.05115057 | 0.501526   | 0.00010597 | 0.092472 | 0.010852   |
| 7w11w_SITTF | 0.0447119  | 0.4388165  | 9.89E-05   | 0.10421  | 0.18258    |
| 7w11w_SITTF | 0.01197304 | 0.11995608 | 6.17E-05   | 0.017303 | 0.12065    |
| 7w11w_SITTF | 0.05110472 | 0.5010795  | 0.00010597 | 0.092472 | 0.010852   |
| 7w11w_SITTF | 0.07562969 | 0.73994064 | 0.00012619 | 0.062687 | -1.0712    |
| 7w11w_SITTF | 0.07482374 | 0.73209107 | 0.00012577 | 0.064358 | -1.0462    |
| 7w11w_SITTF | 0.04889861 | 0.479593   | 0.00010344 | 0.095375 | 0.072211   |
| 7w11w_SITTF | 0.04426254 | 0.43443993 | 9.86E-05   | 0.10494  | 0.20107    |
| 7w11w_SITTF | 0.04048768 | 0.39767465 | 9.42E-05   | 0.10978  | 0.31414    |
| 7w11w_SITTF | 0.05121307 | 0.50213474 | 0.00010597 | 0.092472 | -0.0001745 |
| 7w11w_SITTF | 0.00864245 | 0.08751774 | 5.86E-05   | 0.013029 | 0.12259    |
| 7w11w_SITTF | 0.05153773 | 0.5052967  | 0.00010632 | 0.092309 | -0.011455  |
| 7w11w_SITTF | 0.07248625 | 0.7093251  | 0.00012424 | 0.071279 | -0.9499    |
| 7w11w_SITTF | 0.04887424 | 0.4793557  | 0.00010344 | 0.095375 | 0.072211   |
| 7w11w_SITTF | 0.045197   | 0.4435411  | 9.97E-05   | 0.10268  | 0.17344    |
| 7w11w_SITTF | 0.05052324 | 0.49541613 | 0.00010525 | 0.093003 | 0.021622   |
| 7w11w_SITTF | 0.04093279 | 0.40200984 | 9.46E-05   | 0.10971  | 0.29155    |
| 7w11w_SITTF | 0.06862119 | 0.6716813  | 0.00012161 | 0.084113 | -0.77743   |
| 7w11w_SITTF | 0.03359115 | 0.33050585 | 8.61E-05   | 0.088522 | 0.60151    |
| 7w11w_SITTF | 0.04563267 | 0.44778436 | 0.00010009 | 0.1019   | 0.16436    |
| 7w11w_SITTF | 0.04045216 | 0.39732873 | 9.42E-05   | 0.10978  | 0.31414    |
| 7w11w_SITTF | 0.08682431 | 0.8489708  | 0.00013193 | 0.052709 | -1.3063    |
| 7w11w_SITTF | 0.00653276 | 0.06697039 | 5.69E-05   | 0.010907 | 0.17252    |
| 7w11w_SITTF | 0.05793411 | 0.56759435 | 0.00011273 | 0.096781 | -0.25188   |
| 7w11w_SITTF | 0.07630215 | 0.74649006 | 0.0001266  | 0.061174 | -1.0948    |
| 7w11w_SITTF | 0.05223695 | 0.5121068  | 0.00010703 | 0.092172 | -0.03476   |
| 7w11w_SITTF | 0.05931616 | 0.5810548  | 0.000114   | 0.098059 | -0.31309   |
| 7w11w_SITTF | 0.07837057 | 0.7666355  | 0.00012778 | 0.057615 | -1.1573    |
| 7w11w_SITTF | 0.03358177 | 0.3304145  | 8.61E-05   | 0.088522 | 0.60151    |
| 7w11w_SITTF | 0.0478693  | 0.469568   | 0.00010234 | 0.09734  | 0.10061    |
| 7w11w_SITTF | 0.02147898 | 0.21253929 | 7.18E-05   | 0.035549 | 0.6056     |
| 7w11w_SITTF | 0.04632927 | 0.45456892 | 0.00010084 | 0.10033  | 0.14626    |
| 7w11w_SITTF | 0.05910025 | 0.57895195 | 0.00011368 | 0.097776 | -0.31309   |

|             |            |            |            |           |           |
|-------------|------------|------------|------------|-----------|-----------|
| 7w11w_SITTF | 0.02657327 | 0.26215518 | 7.74E-05   | 0.051562  | 0.77158   |
| 7w11w_SITTF | 0.01323085 | 0.13220648 | 6.30E-05   | 0.019276  | 0.15521   |
| 7w11w_SITTF | 0.01306339 | 0.13057557 | 6.27E-05   | 0.018769  | 0.14454   |
| 7w11w_SITTF | 0.08494058 | 0.83062416 | 0.00013105 | 0.053002  | -1.2841   |
| 7w11w_SITTF | 0.06832429 | 0.6687896  | 0.00012136 | 0.085284  | -0.7609   |
| 7w11w_SITTF | 0.08289339 | 0.8106855  | 0.00013009 | 0.053693  | -1.2543   |
| 7w11w_SITTF | 0.06984967 | 0.6836461  | 0.00012235 | 0.080544  | -0.82636  |
| 7w11w_SITTF | 0.05799957 | 0.5682319  | 0.00011273 | 0.096781  | -0.25188  |
| 7w11w_SITTF | 0.03339061 | 0.32855272 | 8.57E-05   | 0.086671  | 0.60151   |
| 7w11w_SITTF | 0.08666092 | 0.84737945 | 0.00013179 | 0.052739  | -1.3031   |
| 7w11w_SITTF | 0.0534464  | 0.5238862  | 0.00010842 | 0.092532  | -0.07149  |
| 7w11w_SITTF | 0.05650989 | 0.55372316 | 0.00011144 | 0.095284  | -0.19309  |
| 7w11w_SITTF | 0.0553888  | 0.5428043  | 0.00011011 | 0.093847  | -0.1508   |
| 7w11w_SITTF | 0.02453263 | 0.24228035 | 7.50E-05   | 0.043782  | 0.73857   |
| 7w11w_SITTF | 0.05513254 | 0.5403084  | 0.00011011 | 0.093847  | -0.13708  |
| 7w11w_SITTF | 0.02368564 | 0.23403102 | 7.42E-05   | 0.041523  | 0.70349   |
| 7w11w_SITTF | 0.04061717 | 0.39893588 | 9.42E-05   | 0.10978   | 0.3027    |
| 7w11w_SITTF | 0.05620825 | 0.5507853  | 0.00011111 | 0.094909  | -0.17881  |
| 7w11w_SITTF | 0.04358826 | 0.42787278 | 9.78E-05   | 0.10633   | 0.21998   |
| 7w11w_SITTF | 0.05748185 | 0.56318957 | 0.00011209 | 0.096042  | -0.23694  |
| 7w11w_SITTF | 0.01530316 | 0.15238976 | 6.51E-05   | 0.022546  | 0.24275   |
| 7w11w_SITTF | 0.05413076 | 0.53055155 | 0.0001091  | 0.092966  | -0.097097 |
| 7w11w_SITTF | 0.08197151 | 0.80170685 | 0.00012976 | 0.054048  | -1.2424   |
| 7w11w_SITTF | 0.03219509 | 0.31690893 | 8.44E-05   | 0.081011  | 0.65793   |
| 7w11w_SITTF | 0.06408481 | 0.62749916 | 0.00011815 | 0.096641  | -0.54144  |
| 7w11w_SITTF | 0.06097199 | 0.5971818  | 0.00011553 | 0.098907  | -0.39249  |
| 7w11w_SITTF | 0.06335842 | 0.62042445 | 0.00011758 | 0.097678  | -0.50782  |
| 7w11w_SITTF | 0.09232237 | 0.90251917 | 0.00013397 | 0.05251   | -1.3382   |
| 7w11w_SITTF | 0.05630843 | 0.551761   | 0.00011111 | 0.094909  | -0.19309  |
| 7w11w_SITTF | 0.05790675 | 0.5673279  | 0.00011273 | 0.096781  | -0.25188  |
| 7w11w_SITTF | 0.05439561 | 0.53313106 | 0.0001091  | 0.092966  | -0.11022  |
| 7w11w_SITTF | 0.07028551 | 0.6878909  | 0.00012284 | 0.078159  | -0.8424   |
| 7w11w_SITTF | 0.07213129 | 0.70586795 | 0.00012401 | 0.07238   | -0.93514  |
| 7w11w_SITTF | 0.04282407 | 0.42043    | 9.70E-05   | 0.10755   | 0.23945   |
| 7w11w_SITTF | 0.00527303 | 0.05470126 | 5.58E-05   | 0.0096645 | 0.22108   |
| 7w11w_SITTF | 0.05958054 | 0.5836298  | 0.00011431 | 0.098311  | -0.32873  |
| 7w11w_SITTF | 0.03334935 | 0.32815084 | 8.57E-05   | 0.086671  | 0.61617   |
| 7w11w_SITTF | 0.04275082 | 0.4197166  | 9.66E-05   | 0.10808   | 0.23945   |
| 7w11w_SITTF | 0.07683497 | 0.7516795  | 0.000127   | 0.059827  | -1.117    |
| 7w11w_SITTF | 0.04755596 | 0.46651632 | 0.00010197 | 0.098057  | 0.10986   |
| 7w11w_SITTF | 0.08831829 | 0.8635214  | 0.00013248 | 0.05264   | -1.3176   |
| 7w11w_SITTF | 0.04986821 | 0.48903644 | 0.00010453 | 0.09379   | 0.042456  |
| 7w11w_SITTF | 0.07207586 | 0.70532805 | 0.00012401 | 0.07238   | -0.93514  |
| 7w11w_SITTF | 0.03912323 | 0.3843856  | 9.26E-05   | 0.10901   | 0.36311   |
| 7w11w_SITTF | 0.07526875 | 0.7364253  | 0.00012598 | 0.063504  | -1.0589   |
| 7w11w_SITTF | 0.06667773 | 0.6527529  | 0.00012006 | 0.090801  | -0.67704  |

|             |            |            |            |          |            |
|-------------|------------|------------|------------|----------|------------|
| 7w11w_SITTF | 0.08562369 | 0.8372773  | 0.00013135 | 0.05287  | -1.2923    |
| 7w11w_SITTF | 0.03723936 | 0.36603764 | 9.02E-05   | 0.1042   | 0.43275    |
| 7w11w_SITTF | 0.04023963 | 0.39525875 | 9.38E-05   | 0.10975  | 0.31414    |
| 7w11w_SITTF | 0.05116662 | 0.50168234 | 0.00010597 | 0.092472 | -0.0001745 |
| 7w11w_SITTF | 0.04716742 | 0.4627321  | 0.00010159 | 0.098799 | 0.11903    |
| 7w11w_SITTF | 0.05129981 | 0.5029796  | 0.00010597 | 0.092472 | -0.0001745 |
| 7w11w_SITTF | 0.04897391 | 0.4803264  | 0.00010381 | 0.094798 | 0.072211   |
| 7w11w_SITTF | 0.06569858 | 0.6432165  | 0.00011925 | 0.093659 | -0.62617   |
| 7w11w_SITTF | 0.0892806  | 0.8728938  | 0.00013288 | 0.052615 | -1.3244    |
| 7w11w_SITTF | 0.0438378  | 0.4303032  | 9.82E-05   | 0.10565  | 0.21046    |
| 7w11w_SITTF | 0.09134802 | 0.89302945 | 0.00013362 | 0.052552 | -1.3347    |
| 7w11w_SITTF | 0.0441348  | 0.43319586 | 9.86E-05   | 0.10494  | 0.20107    |
| 7w11w_SITTF | 0.072874   | 0.7131015  | 0.00012446 | 0.070202 | -0.96444   |
| 7w11w_SITTF | 0.05454835 | 0.53461874 | 0.00010944 | 0.093233 | -0.11022   |
| 7w11w_SITTF | 0.04957235 | 0.48615494 | 0.00010417 | 0.094268 | 0.052555   |
| 7w11w_SITTF | 0.02400469 | 0.23713842 | 7.46E-05   | 0.042633 | 0.71639    |
| 7w11w_SITTF | 0.07419119 | 0.72593033 | 0.00012534 | 0.066176 | -1.0201    |
| 7w11w_SITTF | 0.04241898 | 0.4164846  | 9.66E-05   | 0.10808  | 0.24945    |
| 7w11w_SITTF | 0.04098656 | 0.4025336  | 9.46E-05   | 0.10971  | 0.29155    |
| 7w11w_SITTF | 0.07113809 | 0.69619465 | 0.00012331 | 0.075804 | -0.88959   |
| 7w11w_SITTF | 0.07622462 | 0.74573493 | 0.0001266  | 0.061174 | -1.0948    |
| 7w11w_SITTF | 0.05819153 | 0.5701015  | 0.00011273 | 0.096781 | -0.26697   |
| 7w11w_SITTF | 0.056222   | 0.55091923 | 0.00011111 | 0.094909 | -0.17881   |
| 7w11w_SITTF | 0.04706843 | 0.46176797 | 0.00010159 | 0.098799 | 0.11903    |
| 7w11w_SITTF | 0.04008738 | 0.3937759  | 9.38E-05   | 0.10975  | 0.32588    |
| 7w11w_SITTF | 0.05547206 | 0.54361516 | 0.00011045 | 0.094186 | -0.1508    |
| 7w11w_SITTF | 0.04015238 | 0.39440897 | 9.38E-05   | 0.10975  | 0.32588    |
| 7w11w_SITTF | 0.05004614 | 0.49076945 | 0.0001049  | 0.093366 | 0.042456   |
| 7w11w_SITTF | 0.07979412 | 0.7805001  | 0.00012853 | 0.055948 | -1.1924    |
| 7w11w_SITTF | 0.0695465  | 0.6806933  | 0.00012235 | 0.080544 | -0.81017   |
| 7w11w_SITTF | 0.04001745 | 0.39309484 | 9.38E-05   | 0.10975  | 0.32588    |
| 7w11w_SITTF | 0.0575473  | 0.563827   | 0.00011241 | 0.096416 | -0.23694   |
| 7w11w_SITTF | 0.02781872 | 0.2742852  | 7.90E-05   | 0.057632 | 0.76966    |
| 7w11w_SITTF | 0.01262386 | 0.12629473 | 6.24E-05   | 0.018271 | 0.13519    |
| 7w11w_SITTF | 0.07109904 | 0.6958144  | 0.00012331 | 0.075804 | -0.88959   |
| 7w11w_SITTF | 0.04642848 | 0.45553514 | 0.00010084 | 0.10033  | 0.13721    |
| 7w11w_SITTF | 0.01714094 | 0.17028889 | 6.69E-05   | 0.025607 | 0.33781    |
| 7w11w_SITTF | 0.04683405 | 0.4594852  | 0.00010122 | 0.099559 | 0.12814    |
| 7w11w_SITTF | 0.05675631 | 0.5561232  | 0.00011144 | 0.095284 | -0.20754   |
| 7w11w_SITTF | 0.0689465  | 0.67484957 | 0.00012186 | 0.08293  | -0.77743   |
| 7w11w_SITTF | 0.02248712 | 0.22235802 | 7.26E-05   | 0.037419 | 0.65846    |
| 7w11w_SITTF | 0.02848142 | 0.2807396  | 7.99E-05   | 0.060913 | 0.76245    |
| 7w11w_SITTF | 0.05426141 | 0.53182405 | 0.0001091  | 0.092966 | -0.11022   |
| 7w11w_SITTF | 0.03412776 | 0.3357322  | 8.65E-05   | 0.090344 | 0.57137    |
| 7w11w_SITTF | 0.01742837 | 0.17308825 | 6.72E-05   | 0.026262 | 0.35829    |
| 7w11w_SITTF | 0.04199313 | 0.412337   | 9.58E-05   | 0.10896  | 0.25963    |

|             |            |            |            |          |           |
|-------------|------------|------------|------------|----------|-----------|
| 7w11w_SITTF | 0.0481294  | 0.47210133 | 0.00010271 | 0.09665  | 0.091263  |
| 7w11w_SITTF | 0.07594406 | 0.7430024  | 0.0001264  | 0.06191  | -1.0832   |
| 7w11w_SITTF | 0.07348308 | 0.7190337  | 0.00012491 | 0.068128 | -0.99278  |
| 7w11w_SITTF | 0.02739847 | 0.27019215 | 7.86E-05   | 0.05605  | 0.77153   |
| 7w11w_SITTF | 0.07242753 | 0.7087531  | 0.00012424 | 0.071279 | -0.9499   |
| 7w11w_SITTF | 0.05506093 | 0.53961104 | 0.00010978 | 0.093528 | -0.13708  |
| 7w11w_SITTF | 0.05687424 | 0.5572718  | 0.00011177 | 0.095663 | -0.20754  |
| 7w11w_SITTF | 0.07562629 | 0.73990756 | 0.00012619 | 0.062687 | -1.0712   |
| 7w11w_SITTF | 0.07704224 | 0.75369817 | 0.000127   | 0.059827 | -1.117    |
| 7w11w_SITTF | 0.09179441 | 0.8973771  | 0.00013374 | 0.052539 | -1.336    |
| 7w11w_SITTF | 0.05033131 | 0.49354678 | 0.00010525 | 0.093003 | 0.032151  |
| 7w11w_SITTF | 0.05645531 | 0.55319154 | 0.00011111 | 0.094909 | -0.19309  |
| 7w11w_SITTF | 0.0262068  | 0.25858587 | 7.70E-05   | 0.050154 | 0.76965   |
| 7w11w_SITTF | 0.0206937  | 0.20489098 | 7.06E-05   | 0.032941 | 0.54704   |
| 7w11w_SITTF | 0.04267226 | 0.41895145 | 9.66E-05   | 0.10808  | 0.23945   |
| 16w_SITTD12 | 0.0732902  | 0.71715516 | 0.00012469 | 0.069151 | -0.97873  |
| 16w_SITTD12 | 0.05850751 | 0.573179   | 0.00011305 | 0.097132 | -0.2822   |
| 16w_SITTD12 | 0.02767142 | 0.2728506  | 7.90E-05   | 0.057632 | 0.76966   |
| 16w_SITTD12 | 0.04299429 | 0.42208788 | 9.70E-05   | 0.10755  | 0.22964   |
| 16w_SITTD12 | 0.08202853 | 0.8022622  | 0.00012976 | 0.054048 | -1.2424   |
| 16w_SITTD12 | 0.0109453  | 0.10994634 | 6.08E-05   | 0.015922 | 0.10884   |
| 16w_SITTD12 | 0.04440669 | 0.4358439  | 9.86E-05   | 0.10494  | 0.19178   |
| 16w_SITTD12 | 0.01723379 | 0.17119318 | 6.69E-05   | 0.025607 | 0.33781   |
| 16w_SITTD12 | 0.07030898 | 0.68811953 | 0.00012284 | 0.078159 | -0.8424   |
| 16w_SITTD12 | 0.06463342 | 0.63284236 | 0.00011843 | 0.096001 | -0.57526  |
| 16w_SITTD12 | 0.06255603 | 0.61260957 | 0.00011672 | 0.098627 | -0.47447  |
| 16w_SITTD12 | 0.0745494  | 0.7294191  | 0.00012556 | 0.06525  | -1.0333   |
| 16w_SITTD12 | 0.03526826 | 0.34684008 | 8.81E-05   | 0.097198 | 0.52494   |
| 16w_SITTD12 | 0.05657389 | 0.5543465  | 0.00011144 | 0.095284 | -0.19309  |
| 16w_SITTD12 | 0.01731091 | 0.17194429 | 6.69E-05   | 0.025607 | 0.35829   |
| 16w_SITTD12 | 0.05724404 | 0.56087345 | 0.00011209 | 0.096042 | -0.22216  |
| 16w_SITTD12 | 0.07579856 | 0.7415853  | 0.0001264  | 0.06191  | -1.0712   |
| 16w_SITTD12 | 0.05202463 | 0.5100389  | 0.00010703 | 0.092172 | -0.022986 |
| 16w_SITTD12 | 0.05970141 | 0.58480704 | 0.00011431 | 0.098311 | -0.32873  |
| 16w_SITTD12 | 0.09061061 | 0.88584745 | 0.00013338 | 0.052577 | -1.3317   |
| 16w_SITTD12 | 0.06057617 | 0.5933267  | 0.00011492 | 0.0987   | -0.37638  |
| 16w_SITTD12 | 0.047578   | 0.46673092 | 0.00010234 | 0.09734  | 0.10986   |
| 16w_SITTD12 | 0.03935059 | 0.38660002 | 9.30E-05   | 0.10937  | 0.35035   |
| 16w_SITTD12 | 0.06665835 | 0.65256417 | 0.00012006 | 0.090801 | -0.67704  |
| 16w_SITTD12 | 0.06858812 | 0.67135924 | 0.00012161 | 0.084113 | -0.7609   |
| 16w_SITTD12 | 0.06803461 | 0.6659683  | 0.0001211  | 0.086439 | -0.74427  |
| 16w_SITTD12 | 0.07088453 | 0.69372505 | 0.00012308 | 0.076976 | -0.87403  |
| 16w_SITTD12 | 0.04499646 | 0.441588   | 9.93E-05   | 0.10345  | 0.18258   |
| 16w_SITTD12 | 0.06563637 | 0.6426106  | 0.00011925 | 0.093659 | -0.62617  |
| 16w_SITTD12 | 0.0117846  | 0.11812073 | 6.14E-05   | 0.016833 | 0.11542   |
| 16w_SITTD12 | 0.04251923 | 0.41746095 | 9.66E-05   | 0.10808  | 0.24945   |

|             |            |            |            |           |           |
|-------------|------------|------------|------------|-----------|-----------|
| 16w_SITTD12 | 0.04777642 | 0.46866342 | 0.00010234 | 0.09734   | 0.10061   |
| 16w_SITTD12 | 0.0080337  | 0.08158879 | 5.81E-05   | 0.012286  | 0.13577   |
| 16w_SITTD12 | 0.07459492 | 0.72986245 | 0.00012556 | 0.06525   | -1.0333   |
| 16w_SITTD12 | 0.04720159 | 0.4630649  | 0.00010159 | 0.098799  | 0.11903   |
| 16w_SITTD12 | 0.08160137 | 0.7981019  | 0.00012959 | 0.054253  | -1.2295   |
| 16w_SITTD12 | 0.05800398 | 0.5682749  | 0.00011273 | 0.096781  | -0.25188  |
| 16w_SITTD12 | 0.00998527 | 0.10059611 | 5.98E-05   | 0.014626  | 0.1081    |
| 16w_SITTD12 | 0.00400986 | 0.04239861 | 5.50E-05   | 0.0088178 | 0.2638    |
| 16w_SITTD12 | 0.0338966  | 0.33348083 | 8.65E-05   | 0.090344  | 0.58656   |
| 16w_SITTD12 | 0.05685373 | 0.55707204 | 0.00011177 | 0.095663  | -0.20754  |
| 16w_SITTD12 | 0.04556921 | 0.4471663  | 0.00010009 | 0.1019    | 0.16436   |
| 16w_SITTD12 | 0.06364861 | 0.6232508  | 0.00011758 | 0.097678  | -0.5246   |
| 16w_SITTD12 | 0.01364319 | 0.13622247 | 6.34E-05   | 0.019794  | 0.16714   |
| 16w_SITTD12 | 0.05293574 | 0.5189127  | 0.00010773 | 0.092257  | -0.059017 |
| 16w_SITTD12 | 0.06918539 | 0.6771763  | 0.00012186 | 0.08293   | -0.79386  |
| 16w_SITTD12 | 0.04779303 | 0.46882522 | 0.00010234 | 0.09734   | 0.10061   |
| 16w_SITTD12 | 0.06152954 | 0.6026121  | 0.00011583 | 0.09893   | -0.42501  |
| 16w_SITTD12 | 0.07440306 | 0.7279938  | 0.00012556 | 0.06525   | -1.0201   |
| 16w_SITTD12 | 0.04500627 | 0.44168353 | 9.93E-05   | 0.10345   | 0.17344   |
| 16w_SITTD12 | 0.05987718 | 0.5865189  | 0.00011431 | 0.098311  | -0.3445   |
| 16w_SITTD12 | 0.08746829 | 0.8552428  | 0.00013221 | 0.052667  | -1.3123   |
| 16w_SITTD12 | 0.06813116 | 0.66690856 | 0.0001211  | 0.086439  | -0.74427  |
| 16w_SITTD12 | 0.06575448 | 0.6437609  | 0.00011925 | 0.093659  | -0.62617  |
| 16w_SITTD12 | 0.04702247 | 0.4613203  | 0.00010159 | 0.098799  | 0.12814   |
| 16w_SITTD12 | 0.06009737 | 0.5886634  | 0.00011462 | 0.098526  | -0.36038  |
| 16w_SITTD12 | 0.05693527 | 0.55786616 | 0.00011177 | 0.095663  | -0.20754  |
| 16w_SITTD12 | 0.07794789 | 0.7625188  | 0.00012759 | 0.058113  | -1.1478   |
| 16w_SITTD12 | 0.07168946 | 0.7015648  | 0.00012378 | 0.073503  | -0.90497  |
| 16w_SITTD12 | 0.0736302  | 0.72046655 | 0.00012491 | 0.068128  | -0.99278  |
| 16w_SITTD12 | 0.05230005 | 0.51272136 | 0.00010703 | 0.092172  | -0.03476  |
| 16w_SITTD12 | 0.08705079 | 0.85117656 | 0.00013207 | 0.052686  | -1.3063   |
| 16w_SITTD12 | 0.06168619 | 0.6041378  | 0.00011613 | 0.098894  | -0.42501  |
| 16w_SITTD12 | 0.06018291 | 0.5894966  | 0.00011462 | 0.098526  | -0.36038  |
| 16w_SITTD12 | 0.06890076 | 0.67440414 | 0.00012186 | 0.08293   | -0.77743  |
| 16w_SITTD12 | 0.06368796 | 0.62363404 | 0.00011758 | 0.097678  | -0.5246   |
| 16w_SITTD12 | 0.05015443 | 0.49182412 | 0.0001049  | 0.093366  | 0.032151  |
| 16w_SITTD12 | 0.07354529 | 0.71963954 | 0.00012491 | 0.068128  | -0.99278  |
| 16w_SITTD12 | 0.05726124 | 0.56104094 | 0.00011209 | 0.096042  | -0.22216  |
| 16w_SITTD12 | 0.06551684 | 0.6414465  | 0.00011925 | 0.093659  | -0.60919  |
| 16w_SITTD12 | 0.06053677 | 0.59294295 | 0.00011492 | 0.0987    | -0.37638  |
| 16w_SITTD12 | 0.05365668 | 0.5259342  | 0.00010842 | 0.092532  | -0.084185 |
| 16w_SITTD12 | 0.07683036 | 0.75163454 | 0.000127   | 0.059827  | -1.1061   |
| 16w_SITTD12 | 0.06459495 | 0.6324677  | 0.00011843 | 0.096001  | -0.57526  |
| 16w_SITTD12 | 0.02353474 | 0.23256138 | 7.42E-05   | 0.041523  | 0.70349   |
| 16w_SITTD12 | 0.04994489 | 0.48978323 | 0.00010453 | 0.09379   | 0.042456  |
| 16w_SITTD12 | 0.08478028 | 0.8290629  | 0.00013105 | 0.053002  | -1.2841   |

|             |            |            |            |          |            |
|-------------|------------|------------|------------|----------|------------|
| 16w_SITTD12 | 0.06415544 | 0.62818706 | 0.00011815 | 0.096641 | -0.54144   |
| 16w_SITTD12 | 0.04803772 | 0.47120836 | 0.00010271 | 0.09665  | 0.10061    |
| 16w_SITTD12 | 0.07624082 | 0.7458927  | 0.0001266  | 0.061174 | -1.0948    |
| 16w_SITTD12 | 0.05188671 | 0.5086956  | 0.00010668 | 0.092211 | -0.022986  |
| 16w_SITTD12 | 0.05939106 | 0.58178437 | 0.000114   | 0.098059 | -0.32873   |
| 16w_SITTD12 | 0.05254247 | 0.5150825  | 0.00010738 | 0.092189 | -0.046772  |
| 16w_SITTD12 | 0.05144705 | 0.5044135  | 0.00010632 | 0.092309 | -0.0001745 |
| 16w_SITTD12 | 0.06855799 | 0.67106575 | 0.00012161 | 0.084113 | -0.7609    |
| 16w_SITTD12 | 0.05846379 | 0.5727532  | 0.00011305 | 0.097132 | -0.2822    |
| 16w_SITTD12 | 0.06087548 | 0.5962419  | 0.00011523 | 0.098828 | -0.39249   |
| 16w_SITTD12 | 0.0092714  | 0.09364343 | 5.92E-05   | 0.013809 | 0.11326    |
| 16w_SITTD12 | 0.08557802 | 0.8368325  | 0.00013135 | 0.05287  | -1.2923    |
| 16w_SITTD12 | 0.06581039 | 0.64430547 | 0.00011953 | 0.092756 | -0.62617   |
| 16w_SITTD12 | 0.05382871 | 0.52760977 | 0.00010876 | 0.092731 | -0.084185  |
| 16w_SITTD12 | 0.05767629 | 0.5650833  | 0.00011241 | 0.096416 | -0.25188   |
| 16w_SITTD12 | 0.00958207 | 0.09666917 | 5.95E-05   | 0.014213 | 0.11014    |
| 16w_SITTD12 | 0.05057303 | 0.49590102 | 0.00010525 | 0.093003 | 0.021622   |
| 16w_SITTD12 | 0.09004092 | 0.880299   | 0.00013313 | 0.052597 | -1.3283    |
| 16w_SITTD12 | 0.07559572 | 0.7396098  | 0.00012619 | 0.062687 | -1.0712    |
| 16w_SITTD12 | 0.02984578 | 0.29402778 | 8.15E-05   | 0.067903 | 0.7357     |
| 16w_SITTD12 | 0.0536052  | 0.5254328  | 0.00010842 | 0.092532 | -0.084185  |
| 16w_SITTD12 | 0.05580171 | 0.5468258  | 0.00011078 | 0.094541 | -0.16472   |
| 16w_SITTD12 | 0.04691187 | 0.46024314 | 0.00010159 | 0.098799 | 0.12814    |
| 16w_SITTD12 | 0.05557395 | 0.5446075  | 0.00011045 | 0.094186 | -0.1508    |
| 16w_SITTD12 | 0.06149383 | 0.6022643  | 0.00011583 | 0.09893  | -0.42501   |
| 16w_SITTD12 | 0.03929462 | 0.3860548  | 9.26E-05   | 0.10901  | 0.35035    |
| 16w_SITTD12 | 0.0489389  | 0.47998545 | 0.00010381 | 0.094798 | 0.072211   |
| 16w_SITTD12 | 0.05085881 | 0.49868438 | 0.00010561 | 0.092703 | 0.010852   |
| 16w_SITTD12 | 0.01020959 | 0.10278089 | 6.02E-05   | 0.015048 | 0.10718    |
| 16w_SITTD12 | 0.02210978 | 0.21868289 | 7.22E-05   | 0.03647  | 0.64161    |
| 16w_SITTD12 | 0.00995659 | 0.10031685 | 5.98E-05   | 0.014626 | 0.1081     |
| 16w_SITTD12 | 0.01132097 | 0.11360521 | 6.11E-05   | 0.016373 | 0.1115     |
| 16w_SITTD12 | 0.04848692 | 0.4755834  | 0.00010308 | 0.095994 | 0.081803   |
| 16w_SITTD12 | 0.07070711 | 0.6919972  | 0.00012308 | 0.076976 | -0.87403   |
| 16w_SITTD12 | 0.07448578 | 0.7287995  | 0.00012556 | 0.06525  | -1.0333    |
| 16w_SITTD12 | 0.05567687 | 0.5456099  | 0.00011045 | 0.094186 | -0.16472   |
| 16w_SITTD12 | 0.04054783 | 0.3982605  | 9.42E-05   | 0.10978  | 0.31414    |
| 16w_SITTD12 | 0.04485957 | 0.44025478 | 9.93E-05   | 0.10345  | 0.18258    |
| 16w_SITTD12 | 0.03972168 | 0.39021417 | 9.34E-05   | 0.10962  | 0.33794    |
| 16w_SITTD12 | 0.01448791 | 0.14444967 | 6.41E-05   | 0.020862 | 0.19442    |
| 16w_SITTD12 | 0.04391617 | 0.43106645 | 9.82E-05   | 0.10565  | 0.21046    |
| 16w_SITTD12 | 0.05434578 | 0.53264576 | 0.0001091  | 0.092966 | -0.11022   |
| 16w_SITTD12 | 0.07432801 | 0.72726285 | 0.00012534 | 0.066176 | -1.0201    |
| 16w_SITTD12 | 0.04176124 | 0.41007853 | 9.58E-05   | 0.10896  | 0.27003    |
| 16w_SITTD12 | 0.07258127 | 0.7102505  | 0.00012424 | 0.071279 | -0.9499    |
| 16w_SITTD12 | 0.04867719 | 0.47743648 | 0.00010344 | 0.095375 | 0.081803   |

|             |            |            |            |          |           |
|-------------|------------|------------|------------|----------|-----------|
| 16w_SITTD12 | 0.02866949 | 0.28257132 | 7.99E-05   | 0.060913 | 0.75723   |
| 16w_SITTD12 | 0.03972525 | 0.390249   | 9.34E-05   | 0.10962  | 0.33794   |
| 16w_SITTD12 | 0.05873629 | 0.57540715 | 0.00011337 | 0.097465 | -0.29758  |
| 16w_SITTD12 | 0.04835029 | 0.4742527  | 0.00010308 | 0.095994 | 0.091263  |
| 16w_SITTD12 | 0.06753898 | 0.6611411  | 0.00012084 | 0.087573 | -0.71078  |
| 16w_SITTD12 | 0.06375293 | 0.6242668  | 0.00011787 | 0.097201 | -0.5246   |
| 16w_SITTD12 | 0.06470609 | 0.6335501  | 0.00011843 | 0.096001 | -0.57526  |
| 16w_SITTD12 | 0.08380638 | 0.8195776  | 0.00013058 | 0.053285 | -1.2702   |
| 16w_SITTD12 | 0.01379834 | 0.13773361 | 6.34E-05   | 0.019794 | 0.16714   |
| 16w_SITTD12 | 0.06841799 | 0.6697022  | 0.00012136 | 0.085284 | -0.7609   |
| 16w_SITTD12 | 0.10057903 | 0.982935   | 0.00013643 | 0.051998 | -1.3425   |
| 16w_SITTD12 | 0.06046464 | 0.59224045 | 0.00011492 | 0.0987   | -0.37638  |
| 16w_SITTD12 | 0.01174672 | 0.11775176 | 6.14E-05   | 0.016833 | 0.11542   |
| 16w_SITTD12 | 0.02301889 | 0.22753724 | 7.34E-05   | 0.039406 | 0.67444   |
| 16w_SITTD12 | 0.06413096 | 0.62794864 | 0.00011815 | 0.096641 | -0.54144  |
| 16w_SITTD12 | 0.08667691 | 0.84753513 | 0.00013179 | 0.052739 | -1.3031   |
| 16w_SITTD12 | 0.04425249 | 0.43434212 | 9.86E-05   | 0.10494  | 0.20107   |
| 16w_SITTD12 | 0.06303038 | 0.6172296  | 0.0001173  | 0.098072 | -0.49111  |
| 16w_SITTD12 | 0.01575107 | 0.15675217 | 6.54E-05   | 0.023132 | 0.26052   |
| 16w_SITTD12 | 0.06989521 | 0.6840896  | 0.0001226  | 0.07935  | -0.82636  |
| 16w_SITTD12 | 0.08135422 | 0.79569477 | 0.00012942 | 0.054478 | -1.2295   |
| 16w_SITTD12 | 0.06036997 | 0.5913184  | 0.00011492 | 0.0987   | -0.36038  |
| 16w_SITTD12 | 0.08825754 | 0.86292976 | 0.00013248 | 0.05264  | -1.3176   |
| 16w_SITTD12 | 0.05380718 | 0.5274     | 0.00010876 | 0.092731 | -0.084185 |
| 16w_SITTD12 | 0.02354609 | 0.23267187 | 7.42E-05   | 0.041523 | 0.70349   |
| 16w_SITTD12 | 0.01278801 | 0.1278935  | 6.24E-05   | 0.018271 | 0.13519   |
| 16w_SITTD12 | 0.03570441 | 0.35108796 | 8.86E-05   | 0.098764 | 0.50933   |
| 16w_SITTD12 | 0.04156194 | 0.40813744 | 9.54E-05   | 0.10929  | 0.28067   |
| 16w_SITTD12 | 0.06766632 | 0.66238123 | 0.00012084 | 0.087573 | -0.72756  |
| 16w_SITTD12 | 0.05448298 | 0.53398204 | 0.00010944 | 0.093233 | -0.11022  |
| 16w_SITTD12 | 0.06551583 | 0.6414366  | 0.00011925 | 0.093659 | -0.60919  |
| 16w_SITTD12 | 0.06747996 | 0.6605663  | 0.00012084 | 0.087573 | -0.71078  |
| 16w_SITTD12 | 0.07070741 | 0.69200003 | 0.00012308 | 0.076976 | -0.87403  |
| 16w_SITTD12 | 0.08623304 | 0.8432121  | 0.00013164 | 0.052775 | -1.2997   |
| 16w_SITTD12 | 0.05046928 | 0.49489054 | 0.00010525 | 0.093003 | 0.032151  |
| 16w_SITTD12 | 0.04671144 | 0.45829108 | 0.00010122 | 0.099559 | 0.13721   |
| 16w_SITTD12 | 0.049705   | 0.48744687 | 0.00010453 | 0.09379  | 0.052555  |
| 16w_SITTD12 | 0.05461585 | 0.5352761  | 0.00010944 | 0.093233 | -0.12355  |
| 16w_SITTD12 | 0.06823506 | 0.66792053 | 0.00012136 | 0.085284 | -0.74427  |
| 16w_SITTD12 | 0.03947726 | 0.38783368 | 9.30E-05   | 0.10937  | 0.35035   |
| 16w_SITTD12 | 0.04094472 | 0.402126   | 9.46E-05   | 0.10971  | 0.29155   |
| 16w_SITTD12 | 0.03386244 | 0.3331481  | 8.65E-05   | 0.090344 | 0.58656   |
| 16w_SITTD12 | 0.05729437 | 0.5613636  | 0.00011209 | 0.096042 | -0.22216  |
| 16w_SITTD12 | 0.05718003 | 0.56025    | 0.00011209 | 0.096042 | -0.22216  |
| 16w_SITTD12 | 0.08297415 | 0.8114721  | 0.00013026 | 0.053541 | -1.2543   |
| 16w_SITTD12 | 0.05403724 | 0.5296407  | 0.00010876 | 0.092731 | -0.097097 |



|             |            |            |            |           |           |
|-------------|------------|------------|------------|-----------|-----------|
| 16w_SITTD12 | 0.04794083 | 0.4702647  | 0.00010271 | 0.09665   | 0.10061   |
| 16w_SITTD12 | 0.04188946 | 0.4113273  | 9.58E-05   | 0.10896   | 0.27003   |
| 16w_SITTD12 | 0.06759968 | 0.66173226 | 0.00012084 | 0.087573  | -0.72756  |
| 16w_SITTD12 | 0.03721387 | 0.36578938 | 9.02E-05   | 0.1042    | 0.43275   |
| 16w_SITTD12 | 0.04078738 | 0.40059358 | 9.46E-05   | 0.10971   | 0.3027    |
| 16w_SITTD12 | 0.0523137  | 0.51285434 | 0.00010703 | 0.092172  | -0.03476  |
| 16w_SITTD12 | 0.07161049 | 0.7007956  | 0.00012378 | 0.073503  | -0.90497  |
| 16w_SITTD12 | 0.03494017 | 0.34364468 | 8.77E-05   | 0.095565  | 0.54051   |
| 16w_SITTD12 | 0.02986235 | 0.29418918 | 8.15E-05   | 0.067903  | 0.7357    |
| 16w_SITTD12 | 0.0757263  | 0.74088156 | 0.0001264  | 0.06191   | -1.0712   |
| 16w_SITTD12 | 0.06313788 | 0.61827654 | 0.0001173  | 0.098072  | -0.49111  |
| 16w_SITTD12 | 0.06891446 | 0.67453754 | 0.00012186 | 0.08293   | -0.77743  |
| 16w_SITTD12 | 0.00428071 | 0.0450365  | 5.50E-05   | 0.0088178 | 0.24903   |
| 16w_SITTD12 | 0.04816026 | 0.47240186 | 0.00010271 | 0.09665   | 0.091263  |
| 16w_SITTD12 | 0.04963735 | 0.48678797 | 0.00010453 | 0.09379   | 0.052555  |
| 16w_SITTD12 | 0.07021796 | 0.68723303 | 0.0001226  | 0.07935   | -0.8424   |
| 16w_SITTD12 | 0.07384533 | 0.7225619  | 0.00012513 | 0.067136  | -1.0066   |
| 16w_SITTD12 | 0.05623056 | 0.55100256 | 0.00011111 | 0.094909  | -0.17881  |
| 16w_SITTD12 | 0.06715298 | 0.6573816  | 0.00012058 | 0.088682  | -0.69393  |
| 16w_SITTD12 | 0.05901751 | 0.57814616 | 0.00011368 | 0.097776  | -0.29758  |
| 16w_SITTD12 | 0.04328188 | 0.4248888  | 9.74E-05   | 0.10696   | 0.22964   |
| 16w_SITTD12 | 0.0592766  | 0.5806695  | 0.000114   | 0.098059  | -0.31309  |
| 16w_SITTD12 | 0.04955873 | 0.48602223 | 0.00010417 | 0.094268  | 0.052555  |
| 16w_SITTD12 | 0.03790382 | 0.37250918 | 9.10E-05   | 0.1063    | 0.40374   |
| 16w_SITTD12 | 0.05405251 | 0.5297895  | 0.00010876 | 0.092731  | -0.097097 |
| 16w_SITTD12 | 0.06028251 | 0.59046656 | 0.00011492 | 0.0987    | -0.36038  |
| 16w_SITTD12 | 0.07716782 | 0.7549213  | 0.0001272  | 0.059217  | -1.117    |
| 16w_SITTD12 | 0.01787809 | 0.17746836 | 6.76E-05   | 0.026932  | 0.37908   |
| 16w_SITTD12 | 0.05589257 | 0.5477108  | 0.00011078 | 0.094541  | -0.16472  |
| 16w_SITTD12 | 0.0745096  | 0.7290315  | 0.00012556 | 0.06525   | -1.0333   |
| 16w_SITTD12 | 0.04269797 | 0.41920182 | 9.66E-05   | 0.10808   | 0.23945   |
| 16w_SITTD12 | 0.05230753 | 0.51279426 | 0.00010703 | 0.092172  | -0.03476  |
| 16w_SITTD12 | 0.06568646 | 0.6430985  | 0.00011925 | 0.093659  | -0.62617  |
| 16w_SITTD12 | 0.01325921 | 0.13248268 | 6.30E-05   | 0.019276  | 0.15521   |
| 16w_SITTD12 | 0.01700516 | 0.16896649 | 6.69E-05   | 0.025607  | 0.33781   |
| 16w_SITTD12 | 0.04371477 | 0.42910492 | 9.78E-05   | 0.10633   | 0.21046   |
| 16w_SITTD12 | 0.06406628 | 0.6273186  | 0.00011815 | 0.096641  | -0.54144  |
| 16w_SITTD12 | 0.06286994 | 0.6156669  | 0.00011701 | 0.098387  | -0.49111  |
| 16w_SITTD12 | 0.0306587  | 0.3019452  | 8.23E-05   | 0.07157   | 0.70647   |
| 16w_SITTD12 | 0.07301516 | 0.7144764  | 0.00012469 | 0.069151  | -0.96444  |
| 16w_SITTD12 | 0.08176849 | 0.7997295  | 0.00012959 | 0.054253  | -1.2361   |
| 16w_SITTD12 | 0.01035745 | 0.10422096 | 6.02E-05   | 0.015048  | 0.10718   |
| 16w_SITTD12 | 0.03167956 | 0.31188786 | 8.36E-05   | 0.07721   | 0.67094   |
| 16w_SITTD12 | 0.06787121 | 0.66437685 | 0.0001211  | 0.086439  | -0.72756  |
| 16w_SITTD12 | 0.07046793 | 0.6896676  | 0.00012284 | 0.078159  | -0.8583   |
| 16w_SITTD12 | 0.05870369 | 0.5750897  | 0.00011337 | 0.097465  | -0.29758  |

|             |            |            |            |          |            |
|-------------|------------|------------|------------|----------|------------|
| 16w_SITTD12 | 0.03199431 | 0.3149534  | 8.40E-05   | 0.07911  | 0.67094    |
| 16w_SITTD12 | 0.00702374 | 0.07175227 | 5.72E-05   | 0.011238 | 0.15252    |
| 16w_SITTD12 | 0.06957316 | 0.68095297 | 0.00012235 | 0.080544 | -0.81017   |
| 16w_SITTD12 | 0.01278659 | 0.12787965 | 6.24E-05   | 0.018271 | 0.13519    |
| 16w_SITTD12 | 0.03748942 | 0.36847308 | 9.06E-05   | 0.10531  | 0.41807    |
| 16w_SITTD12 | 0.06519724 | 0.63833374 | 0.00011898 | 0.094504 | -0.60919   |
| 16w_SITTD12 | 0.0470739  | 0.46182126 | 0.00010159 | 0.098799 | 0.11903    |
| 16w_SITTD12 | 0.01084061 | 0.10892677 | 6.08E-05   | 0.015922 | 0.10884    |
| 16w_SITTD12 | 0.07046704 | 0.68965894 | 0.00012284 | 0.078159 | -0.8583    |
| 16w_SITTD12 | 0.05502716 | 0.539282   | 0.00010978 | 0.093528 | -0.13708   |
| 16w_SITTD12 | 0.05507749 | 0.5397722  | 0.00010978 | 0.093528 | -0.13708   |
| 16w_SITTD12 | 0.06940118 | 0.679278   | 0.00012211 | 0.081739 | -0.81017   |
| 16w_SITTD12 | 0.03932145 | 0.38631618 | 9.30E-05   | 0.10937  | 0.35035    |
| 16w_SITTD12 | 0.06574483 | 0.643667   | 0.00011925 | 0.093659 | -0.62617   |
| 16w_SITTD12 | 0.04644243 | 0.45567104 | 0.00010084 | 0.10033  | 0.13721    |
| 16w_SITTD12 | 0.00923496 | 0.09328847 | 5.92E-05   | 0.013809 | 0.11326    |
| 16w_SITTD12 | 0.00658697 | 0.06749839 | 5.69E-05   | 0.010907 | 0.17252    |
| 16w_SITTD12 | 0.04306174 | 0.42274475 | 9.70E-05   | 0.10755  | 0.22964    |
| 16w_SITTD12 | 0.04589915 | 0.45037976 | 0.00010046 | 0.10111  | 0.1553     |
| 16w_SITTD12 | 0.01060787 | 0.10665993 | 6.05E-05   | 0.01548  | 0.10741    |
| 16w_SITTD12 | 0.05050179 | 0.49520722 | 0.00010525 | 0.093003 | 0.021622   |
| 16w_SITTD12 | 0.01752769 | 0.17405565 | 6.72E-05   | 0.026262 | 0.35829    |
| 16w_SITTD12 | 0.02815152 | 0.27752653 | 7.94E-05   | 0.059253 | 0.76661    |
| 16w_SITTD12 | 0.01569532 | 0.15620919 | 6.54E-05   | 0.023132 | 0.26052    |
| 16w_SITTD12 | 0.07607246 | 0.74425304 | 0.0001266  | 0.061174 | -1.0832    |
| 16w_SITTD12 | 0.04963112 | 0.4867273  | 0.00010453 | 0.09379  | 0.052555   |
| 16w_SITTD12 | 0.02628719 | 0.25936884 | 7.74E-05   | 0.051562 | 0.76965    |
| 16w_SITTD12 | 0.07753798 | 0.7585265  | 0.0001274  | 0.058646 | -1.1379    |
| 16w_SITTD12 | 0.04967863 | 0.48719    | 0.00010453 | 0.09379  | 0.052555   |
| 16w_SITTD12 | 0.0878244  | 0.8587111  | 0.00013235 | 0.052652 | -1.315     |
| 16w_SITTD12 | 0.06171802 | 0.6044478  | 0.00011613 | 0.098894 | -0.42501   |
| 16w_SITTD12 | 0.04328928 | 0.42496088 | 9.74E-05   | 0.10696  | 0.22964    |
| 16w_SITTD12 | 0.04765153 | 0.46744704 | 0.00010234 | 0.09734  | 0.10986    |
| 16w_SITTD12 | 0.06396808 | 0.62636226 | 0.00011787 | 0.097201 | -0.54144   |
| 16w_SITTD12 | 0.05648437 | 0.55347455 | 0.00011111 | 0.094909 | -0.19309   |
| 16w_SITTD12 | 0.04676324 | 0.45879558 | 0.00010122 | 0.099559 | 0.12814    |
| 16w_SITTD12 | 0.07544071 | 0.7381     | 0.00012619 | 0.062687 | -1.0589    |
| 16w_SITTD12 | 0.0500956  | 0.49125117 | 0.0001049  | 0.093366 | 0.042456   |
| 16w_SITTD12 | 0.04401901 | 0.4320681  | 9.82E-05   | 0.10565  | 0.20107    |
| 16w_SITTD12 | 0.06696574 | 0.655558   | 0.00012032 | 0.089759 | -0.69393   |
| 16w_SITTD12 | 0.08241638 | 0.80603963 | 0.00012993 | 0.053861 | -1.2485    |
| 16w_SITTD12 | 0.04392406 | 0.43114337 | 9.82E-05   | 0.10565  | 0.21046    |
| 16w_SITTD12 | 0.03878481 | 0.38108954 | 9.22E-05   | 0.10852  | 0.37625    |
| 16w_SITTD12 | 0.06245088 | 0.61158544 | 0.00011672 | 0.098627 | -0.4579    |
| 16w_SITTD12 | 0.04917335 | 0.48226884 | 0.00010381 | 0.094798 | 0.062467   |
| 16w_SITTD12 | 0.05120144 | 0.5020215  | 0.00010597 | 0.092472 | -0.0001745 |

|             |            |            |            |          |            |
|-------------|------------|------------|------------|----------|------------|
| 16w_SITTD12 | 0.04948804 | 0.4853338  | 0.00010417 | 0.094268 | 0.052555   |
| 16w_SITTD12 | 0.03162408 | 0.31134754 | 8.36E-05   | 0.07721  | 0.6834     |
| 16w_SITTD12 | 0.04696751 | 0.46078503 | 0.00010159 | 0.098799 | 0.12814    |
| 16w_SITTD12 | 0.04816767 | 0.472474   | 0.00010271 | 0.09665  | 0.091263   |
| 16w_SITTD12 | 0.09555139 | 0.9339682  | 0.00013495 | 0.052348 | -1.344     |
| 16w_SITTD12 | 0.07467514 | 0.73064375 | 0.00012556 | 0.06525  | -1.0333    |
| 16w_SITTD12 | 0.03665223 | 0.36031926 | 8.98E-05   | 0.10298  | 0.46289    |
| 16w_SITTD12 | 0.02222276 | 0.2197833  | 7.26E-05   | 0.037419 | 0.64161    |
| 16w_SITTD12 | 0.04022768 | 0.39514244 | 9.38E-05   | 0.10975  | 0.31414    |
| 16w_SITTD12 | 0.06875165 | 0.6729519  | 0.00012161 | 0.084113 | -0.77743   |
| 16w_SITTD12 | 0.03932124 | 0.38631418 | 9.30E-05   | 0.10937  | 0.35035    |
| 16w_SITTD12 | 0.06943584 | 0.6796155  | 0.00012211 | 0.081739 | -0.81017   |
| 16w_SITTD12 | 0.06517217 | 0.6380895  | 0.00011898 | 0.094504 | -0.59222   |
| 16w_SITTD12 | 0.08021761 | 0.7846247  | 0.00012889 | 0.055287 | -1.2004    |
| 16w_SITTD12 | 0.0426113  | 0.41835767 | 9.66E-05   | 0.10808  | 0.23945    |
| 16w_SITTD12 | 0.03322638 | 0.32695317 | 8.57E-05   | 0.086671 | 0.61617    |
| 16w_SITTD12 | 0.06589984 | 0.64517665 | 0.00011953 | 0.092756 | -0.64315   |
| 16w_SITTD12 | 0.07533237 | 0.73704493 | 0.00012598 | 0.063504 | -1.0589    |
| 16w_SITTD12 | 0.03387597 | 0.33327985 | 8.65E-05   | 0.090344 | 0.58656    |
| 16w_SITTD12 | 0.01494695 | 0.14892045 | 6.47E-05   | 0.021973 | 0.22576    |
| 16w_SITTD12 | 0.02614221 | 0.25795686 | 7.70E-05   | 0.050154 | 0.76634    |
| 16w_SITTD12 | 0.04413346 | 0.43318278 | 9.86E-05   | 0.10494  | 0.20107    |
| 16w_SITTD12 | 0.04208328 | 0.41321507 | 9.62E-05   | 0.10856  | 0.25963    |
| 16w_SITTD12 | 0.05811619 | 0.5693677  | 0.00011273 | 0.096781 | -0.26697   |
| 16w_SITTD12 | 0.03724592 | 0.36610156 | 9.02E-05   | 0.1042   | 0.43275    |
| 16w_SITTD12 | 0.0475152  | 0.4661193  | 0.00010197 | 0.098057 | 0.10986    |
| 16w_SITTD12 | 0.05550512 | 0.54393715 | 0.00011045 | 0.094186 | -0.1508    |
| 16w_SITTD12 | 0.0513453  | 0.50342256 | 0.00010632 | 0.092309 | -0.0001745 |
| 16w_SITTD12 | 0.03471451 | 0.34144682 | 8.73E-05   | 0.093873 | 0.55601    |
| 16w_SITTD12 | 0.03761828 | 0.36972815 | 9.10E-05   | 0.1063   | 0.41807    |
| 16w_SITTD12 | 0.05126654 | 0.50265545 | 0.00010597 | 0.092472 | -0.0001745 |
| 16w_SITTD12 | 0.05956393 | 0.58346796 | 0.000114   | 0.098059 | -0.32873   |
| 16w_SITTD12 | 0.06281813 | 0.6151623  | 0.00011701 | 0.098387 | -0.49111   |
| 16w_SITTD12 | 0.05939586 | 0.58183104 | 0.000114   | 0.098059 | -0.32873   |
| 16w_SITTD12 | 0.05347461 | 0.524161   | 0.00010842 | 0.092532 | -0.07149   |
| 16w_SITTD12 | 0.04649046 | 0.45613888 | 0.00010084 | 0.10033  | 0.13721    |
| 16w_SITTD12 | 0.04652158 | 0.4564419  | 0.00010084 | 0.10033  | 0.13721    |
| 16w_SITTD12 | 0.05455997 | 0.5347318  | 0.00010944 | 0.093233 | -0.11022   |
| 16w_SITTD12 | 0.01993699 | 0.19752106 | 6.99E-05   | 0.031319 | 0.50588    |
| 16w_SITTD12 | 0.07206237 | 0.7051966  | 0.00012401 | 0.07238  | -0.93514   |
| 16w_SITTD12 | 0.07271963 | 0.7115981  | 0.00012446 | 0.070202 | -0.9499    |
| 16w_SITTD12 | 0.06546736 | 0.6409645  | 0.00011925 | 0.093659 | -0.60919   |
| 16w_SITTD12 | 0.0542974  | 0.5321745  | 0.0001091  | 0.092966 | -0.11022   |
| 16w_SITTD12 | 0.0569457  | 0.5579678  | 0.00011177 | 0.095663 | -0.20754   |
| 16w_SITTD12 | 0.04766008 | 0.46753034 | 0.00010234 | 0.09734  | 0.10986    |
| 16w_SITTD12 | 0.00383942 | 0.04073857 | 5.47E-05   | 0.008551 | 0.27903    |

|             |            |            |            |           |           |
|-------------|------------|------------|------------|-----------|-----------|
| 16w_SITTD12 | 0.0668618  | 0.65454566 | 0.00012032 | 0.089759  | -0.67704  |
| 16w_SITTD12 | 0.02985719 | 0.29413894 | 8.15E-05   | 0.067903  | 0.7357    |
| 16w_SITTD12 | 0.03454216 | 0.33976826 | 8.73E-05   | 0.093873  | 0.55601   |
| 16w_SITTD12 | 0.04704194 | 0.46150994 | 0.00010159 | 0.098799  | 0.12814   |
| 16w_SITTD12 | 0.05955801 | 0.5834103  | 0.000114   | 0.098059  | -0.32873  |
| 16w_SITTD12 | 0.04561093 | 0.44757268 | 0.00010009 | 0.1019    | 0.16436   |
| 16w_SITTD12 | 0.02316146 | 0.2289258  | 7.34E-05   | 0.039406  | 0.68948   |
| 16w_SITTD12 | 0.04027315 | 0.39558524 | 9.38E-05   | 0.10975   | 0.31414   |
| 16w_SITTD12 | 0.00552537 | 0.05715894 | 5.61E-05   | 0.0099627 | 0.20797   |
| 16w_SITTD12 | 0.078068   | 0.7636886  | 0.00012759 | 0.058113  | -1.1478   |
| 16w_SITTD12 | 0.06963949 | 0.681599   | 0.00012235 | 0.080544  | -0.81017  |
| 16w_SITTD12 | 0.08207483 | 0.80271316 | 0.00012976 | 0.054048  | -1.2424   |
| 16w_SITTD12 | 0.04940268 | 0.48450243 | 0.00010417 | 0.094268  | 0.062467  |
| 16w_SITTD12 | 0.04508323 | 0.4424331  | 9.93E-05   | 0.10345   | 0.17344   |
| 16w_SITTD12 | 0.03651637 | 0.35899606 | 8.94E-05   | 0.10166   | 0.46289   |
| 16w_SITTD12 | 0.0686411  | 0.6718752  | 0.00012161 | 0.084113  | -0.77743  |
| 16w_SITTD12 | 0.03769413 | 0.37046692 | 9.10E-05   | 0.1063    | 0.41807   |
| 16w_SITTD12 | 0.03269633 | 0.32179078 | 8.48E-05   | 0.082909  | 0.6305    |
| 16w_SITTD12 | 0.04479468 | 0.43962276 | 9.89E-05   | 0.10421   | 0.18258   |
| 16w_SITTD12 | 0.02518751 | 0.24865855 | 7.58E-05   | 0.046199  | 0.75539   |
| 16w_SITTD12 | 0.02819686 | 0.27796817 | 7.94E-05   | 0.059253  | 0.76661   |
| 16w_SITTD12 | 0.05262947 | 0.5159297  | 0.00010738 | 0.092189  | -0.046772 |
| 16w_SITTD12 | 0.07206    | 0.70517355 | 0.00012401 | 0.07238   | -0.93514  |
| 16w_SITTD12 | 0.08285879 | 0.8103485  | 0.00013009 | 0.053693  | -1.2543   |
| 16w_SITTD12 | 0.04086909 | 0.40138948 | 9.46E-05   | 0.10971   | 0.3027    |
| 16w_SITTD12 | 0.02322198 | 0.22951521 | 7.38E-05   | 0.040447  | 0.68948   |
| 16w_SITTD12 | 0.06730659 | 0.65887773 | 0.00012058 | 0.088682  | -0.71078  |
| 16w_SITTD12 | 0.07613768 | 0.74488825 | 0.0001266  | 0.061174  | -1.0832   |
| 16w_SITTD12 | 0.08024841 | 0.7849247  | 0.00012889 | 0.055287  | -1.2004   |
| 16w_SITTD12 | 0.0520928  | 0.51070285 | 0.00010703 | 0.092172  | -0.022986 |
| 16w_SITTD12 | 0.04487655 | 0.4404201  | 9.93E-05   | 0.10345   | 0.18258   |
| 16w_SITTD12 | 0.05502176 | 0.5392295  | 0.00010978 | 0.093528  | -0.13708  |
| 16w_SITTD12 | 0.07838136 | 0.76674056 | 0.00012778 | 0.057615  | -1.1573   |
| 16w_SITTD12 | 0.00505467 | 0.05257456 | 5.58E-05   | 0.0096645 | 0.22108   |
| 16w_SITTD12 | 0.04442023 | 0.43597582 | 9.86E-05   | 0.10494   | 0.19178   |
| 16w_SITTD12 | 0.07359542 | 0.7201278  | 0.00012491 | 0.068128  | -0.99278  |
| 16w_SITTD12 | 0.02211094 | 0.21869427 | 7.22E-05   | 0.03647   | 0.64161   |
| 16w_SITTD12 | 0.05927241 | 0.5806287  | 0.000114   | 0.098059  | -0.31309  |
| 16w_SITTD12 | 0.05705736 | 0.5590552  | 0.00011177 | 0.095663  | -0.22216  |
| 16w_SITTD12 | 0.00714297 | 0.07291351 | 5.75E-05   | 0.011579  | 0.15252   |
| 16w_SITTD12 | 0.02626792 | 0.25918114 | 7.70E-05   | 0.050154  | 0.76965   |
| 16w_SITTD12 | 0.05154875 | 0.50540406 | 0.00010632 | 0.092309  | -0.011455 |
| 16w_SITTD12 | 0.06552994 | 0.64157397 | 0.00011925 | 0.093659  | -0.60919  |
| 16w_SITTD12 | 0.0719758  | 0.7043535  | 0.00012401 | 0.07238   | -0.92016  |
| 16w_SITTD12 | 0.06858384 | 0.6713175  | 0.00012161 | 0.084113  | -0.7609   |
| 16w_SITTD12 | 0.05500193 | 0.5390364  | 0.00010978 | 0.093528  | -0.13708  |

|             |            |            |            |          |          |
|-------------|------------|------------|------------|----------|----------|
| 16w_SITTD12 | 0.05656331 | 0.55424345 | 0.00011144 | 0.095284 | -0.19309 |
| 16w_SITTD12 | 0.03712954 | 0.3649681  | 9.02E-05   | 0.1042   | 0.4477   |
| 16w_SITTD12 | 0.07146573 | 0.6993857  | 0.00012355 | 0.074645 | -0.90497 |
| 16w_SITTD12 | 0.04967731 | 0.48717716 | 0.00010453 | 0.09379  | 0.052555 |
| 16w_SITTD12 | 0.04800913 | 0.47092995 | 0.00010271 | 0.09665  | 0.10061  |
| 16w_SITTD12 | 0.05528894 | 0.54183173 | 0.00011011 | 0.093847 | -0.1508  |
| 16w_SITTD12 | 0.04584656 | 0.44986752 | 0.00010046 | 0.10111  | 0.1553   |
| 16w_SITTD12 | 0.0296441  | 0.2920635  | 8.11E-05   | 0.066108 | 0.7357   |
| 16w_SITTD12 | 0.07623998 | 0.7458846  | 0.0001266  | 0.061174 | -1.0948  |
| 16w_SITTD12 | 0.08301763 | 0.8118956  | 0.00013026 | 0.053541 | -1.2598  |
| 16w_SITTD12 | 0.06328694 | 0.61972827 | 0.0001173  | 0.098072 | -0.50782 |
| 16w_SITTD12 | 0.07248341 | 0.7092974  | 0.00012424 | 0.071279 | -0.9499  |
| 16w_SITTD12 | 0.09130242 | 0.89258534 | 0.00013362 | 0.052552 | -1.3347  |
| 16w_SITTD12 | 0.03587426 | 0.35274225 | 8.86E-05   | 0.098764 | 0.49376  |
| 16w_SITTD12 | 0.06129848 | 0.60036165 | 0.00011583 | 0.09893  | -0.4087  |
| 16w_SITTD12 | 0.05783716 | 0.56665003 | 0.00011241 | 0.096416 | -0.25188 |
| 16w_SITTD12 | 0.04101201 | 0.40278143 | 9.46E-05   | 0.10971  | 0.29155  |
| 16w_SITTD12 | 0.06304355 | 0.6173578  | 0.0001173  | 0.098072 | -0.49111 |
| 16w_SITTD12 | 0.06605601 | 0.6466977  | 0.00011953 | 0.092756 | -0.64315 |
| 16w_SITTD12 | 0.07566844 | 0.74031806 | 0.00012619 | 0.062687 | -1.0712  |
| 16w_SITTD12 | 0.01026621 | 0.10333234 | 6.02E-05   | 0.015048 | 0.10718  |
| 16w_SITTD12 | 0.03459948 | 0.34032646 | 8.73E-05   | 0.093873 | 0.55601  |
| 16w_SITTD12 | 0.05724495 | 0.5608823  | 0.00011209 | 0.096042 | -0.22216 |
| 16w_SITTD12 | 0.04727389 | 0.46376905 | 0.00010197 | 0.098057 | 0.11903  |
| 16w_SITTD12 | 0.04250506 | 0.41732302 | 9.66E-05   | 0.10808  | 0.24945  |
| 16w_SITTD12 | 0.07619157 | 0.74541306 | 0.0001266  | 0.061174 | -1.0948  |
| 16w_SITTD12 | 0.02596368 | 0.25621808 | 7.70E-05   | 0.050154 | 0.76634  |
| 16w_SITTD12 | 0.05778192 | 0.5661121  | 0.00011241 | 0.096416 | -0.25188 |
| 16w_SITTD12 | 0.08197371 | 0.8017283  | 0.00012976 | 0.054048 | -1.2424  |
| 16w_SITTD12 | 0.03477237 | 0.34201032 | 8.73E-05   | 0.093873 | 0.54051  |
| 16w_SITTD12 | 0.01049993 | 0.10560867 | 6.05E-05   | 0.01548  | 0.10741  |
| 16w_SITTD12 | 0.07323024 | 0.7165712  | 0.00012469 | 0.069151 | -0.97873 |
| 16w_SITTD12 | 0.03813685 | 0.37477878 | 9.14E-05   | 0.10717  | 0.40374  |
| 16w_SITTD12 | 0.03587562 | 0.35275552 | 8.86E-05   | 0.098764 | 0.49376  |
| 16w_SITTD12 | 0.05688788 | 0.55740464 | 0.00011177 | 0.095663 | -0.20754 |
| 16w_SITTD12 | 0.07130392 | 0.69780976 | 0.00012355 | 0.074645 | -0.88959 |
| 16w_SITTD12 | 0.07248448 | 0.7093078  | 0.00012424 | 0.071279 | -0.9499  |
| 16w_SITTD12 | 0.05086521 | 0.49874678 | 0.00010561 | 0.092703 | 0.010852 |
| 16w_SITTD12 | 0.06514908 | 0.6378646  | 0.00011898 | 0.094504 | -0.59222 |
| 16w_SITTD12 | 0.05099219 | 0.49998346 | 0.00010561 | 0.092703 | 0.010852 |
| 16w_SITTD12 | 0.00796743 | 0.08094338 | 5.81E-05   | 0.012286 | 0.13577  |
| 16w_SITTD12 | 0.04091494 | 0.401836   | 9.46E-05   | 0.10971  | 0.29155  |
| 16w_SITTD12 | 0.05862273 | 0.5743011  | 0.00011337 | 0.097465 | -0.2822  |
| 16w_SITTD12 | 0.051      | 0.50005955 | 0.00010597 | 0.092472 | 0.010852 |
| 16w_SITTD12 | 0.04282402 | 0.42042944 | 9.70E-05   | 0.10755  | 0.23945  |
| 16w_SITTD12 | 0.04077514 | 0.40047443 | 9.46E-05   | 0.10971  | 0.3027   |

|             |            |            |            |          |           |
|-------------|------------|------------|------------|----------|-----------|
| 16w_SITTD12 | 0.05768938 | 0.5652108  | 0.00011241 | 0.096416 | -0.25188  |
| 16w_SITTD12 | 0.04567212 | 0.44816855 | 0.00010009 | 0.1019   | 0.16436   |
| 16w_SITTD12 | 0.05920421 | 0.57996446 | 0.00011368 | 0.097776 | -0.31309  |
| 16w_SITTD12 | 0.05564483 | 0.54529786 | 0.00011045 | 0.094186 | -0.16472  |
| 16w_SITTD12 | 0.0524767  | 0.51444185 | 0.00010738 | 0.092189 | -0.03476  |
| 16w_SITTD12 | 0.04928786 | 0.48338416 | 0.00010417 | 0.094268 | 0.062467  |
| 16w_SITTD12 | 0.03704352 | 0.36413026 | 9.02E-05   | 0.1042   | 0.4477    |
| 16w_SITTD12 | 0.07689383 | 0.75225276 | 0.000127   | 0.059827 | -1.117    |
| 16w_SITTD12 | 0.07820091 | 0.7649831  | 0.00012778 | 0.057615 | -1.1478   |
| 16w_SITTD12 | 0.05021684 | 0.49243197 | 0.0001049  | 0.093366 | 0.032151  |
| 16w_SITTD12 | 0.02875185 | 0.2833734  | 8.03E-05   | 0.062611 | 0.75723   |
| 16w_SITTD12 | 0.07075944 | 0.6925068  | 0.00012308 | 0.076976 | -0.87403  |
| 16w_SITTD12 | 0.02258307 | 0.22329256 | 7.30E-05   | 0.038397 | 0.65846   |
| 16w_SITTD12 | 0.08473939 | 0.8286646  | 0.00013105 | 0.053002 | -1.2841   |
| 16w_SITTD12 | 0.04122207 | 0.4048273  | 9.50E-05   | 0.10955  | 0.29155   |
| 16w_SITTD12 | 0.04752775 | 0.46624157 | 0.00010197 | 0.098057 | 0.10986   |
| 16w_SITTD12 | 0.05740651 | 0.5624558  | 0.00011209 | 0.096042 | -0.23694  |
| 16w_SITTD12 | 0.00790135 | 0.08029977 | 5.81E-05   | 0.012286 | 0.13577   |
| 16w_SITTD12 | 0.06562134 | 0.6424642  | 0.00011925 | 0.093659 | -0.62617  |
| 16w_SITTD12 | 0.04811062 | 0.47191837 | 0.00010271 | 0.09665  | 0.091263  |
| 16w_SITTD12 | 0.01852091 | 0.18372907 | 6.84E-05   | 0.028322 | 0.42127   |
| 16w_SITTD12 | 0.04675671 | 0.45873195 | 0.00010122 | 0.099559 | 0.12814   |
| 16w_SITTD12 | 0.02722896 | 0.26854125 | 7.82E-05   | 0.054511 | 0.77153   |
| 16w_SITTD12 | 0.04535481 | 0.4450782  | 9.97E-05   | 0.10268  | 0.16436   |
| 16w_SITTD12 | 0.01067993 | 0.10736182 | 6.05E-05   | 0.01548  | 0.10741   |
| 16w_SITTD12 | 0.08467609 | 0.82804817 | 0.00013105 | 0.053002 | -1.2797   |
| 16w_SITTD12 | 0.06347916 | 0.62160045 | 0.00011758 | 0.097678 | -0.50782  |
| 16w_SITTD12 | 0.06014304 | 0.5891082  | 0.00011462 | 0.098526 | -0.36038  |
| 16w_SITTD12 | 0.0459154  | 0.45053798 | 0.00010046 | 0.10111  | 0.1553    |
| 16w_SITTD12 | 0.0705516  | 0.69048256 | 0.00012284 | 0.078159 | -0.8583   |
| 16w_SITTD12 | 0.04572581 | 0.4486915  | 0.00010009 | 0.1019   | 0.1553    |
| 16w_SITTD12 | 0.0198695  | 0.19686376 | 6.99E-05   | 0.031319 | 0.50588   |
| 16w_SITTD12 | 0.06008286 | 0.58852214 | 0.00011462 | 0.098526 | -0.36038  |
| 16w_SITTD12 | 0.05085756 | 0.49867228 | 0.00010561 | 0.092703 | 0.010852  |
| 16w_SITTD12 | 0.06187638 | 0.6059901  | 0.00011613 | 0.098894 | -0.44141  |
| 16w_SITTD12 | 0.06880942 | 0.67351454 | 0.00012161 | 0.084113 | -0.77743  |
| 16w_SITTD12 | 0.07234238 | 0.7079238  | 0.00012424 | 0.071279 | -0.93514  |
| 16w_SITTD12 | 0.07728126 | 0.7560261  | 0.0001272  | 0.059217 | -1.1276   |
| 16w_SITTD12 | 0.05192743 | 0.5090922  | 0.00010668 | 0.092211 | -0.022986 |
| 16w_SITTD12 | 0.08181055 | 0.8001392  | 0.00012959 | 0.054253 | -1.2361   |
| 16w_SITTD12 | 0.00574641 | 0.0593117  | 5.63E-05   | 0.010269 | 0.19547   |
| 16w_SITTD12 | 0.07485633 | 0.7324085  | 0.00012577 | 0.064358 | -1.0462   |
| 16w_SITTD12 | 0.0619051  | 0.60626984 | 0.00011613 | 0.098894 | -0.44141  |
| 16w_SITTD12 | 0.04892314 | 0.4798319  | 0.00010344 | 0.095375 | 0.072211  |
| 16w_SITTD12 | 0.05416728 | 0.5309073  | 0.0001091  | 0.092966 | -0.097097 |
| 16w_SITTD12 | 0.08517373 | 0.83289486 | 0.0001312  | 0.05293  | -1.2883   |

|             |            |            |            |          |           |
|-------------|------------|------------|------------|----------|-----------|
| 16w_SITTD12 | 0.03315181 | 0.32622695 | 8.57E-05   | 0.086671 | 0.61617   |
| 16w_SITTD12 | 0.05507408 | 0.539739   | 0.00010978 | 0.093528 | -0.13708  |
| 16w_SITTD12 | 0.05396364 | 0.52892387 | 0.00010876 | 0.092731 | -0.097097 |
| 16w_SITTD12 | 0.03799168 | 0.37336484 | 9.14E-05   | 0.10717  | 0.40374   |
| 16w_SITTD12 | 0.05767801 | 0.5651001  | 0.00011241 | 0.096416 | -0.25188  |
| 16w_SITTD12 | 0.02364324 | 0.2336181  | 7.42E-05   | 0.041523 | 0.70349   |
| 16w_SITTD12 | 0.05175787 | 0.5074408  | 0.00010668 | 0.092211 | -0.011455 |
| 16w_SITTD12 | 0.06383439 | 0.6250602  | 0.00011787 | 0.097201 | -0.54144  |
| 16w_SITTD12 | 0.0791215  | 0.77394915 | 0.00012816 | 0.056721 | -1.1755   |
| 16w_SITTD12 | 0.02576151 | 0.25424898 | 7.66E-05   | 0.04879  | 0.7616    |
| 16w_SITTD12 | 0.04101863 | 0.4028459  | 9.46E-05   | 0.10971  | 0.29155   |
| 16w_SITTD12 | 0.03478312 | 0.34211504 | 8.73E-05   | 0.093873 | 0.54051   |
| 16w_SITTD12 | 0.04571422 | 0.44857866 | 0.00010009 | 0.1019   | 0.1553    |
| 16w_SITTD12 | 0.06240383 | 0.61112726 | 0.00011672 | 0.098627 | -0.4579   |
| 16w_SITTD12 | 0.04767383 | 0.46766424 | 0.00010234 | 0.09734  | 0.10986   |
| 16w_SITTD12 | 0.02535621 | 0.25030157 | 7.62E-05   | 0.047472 | 0.75539   |
| 16w_SITTD12 | 0.06109718 | 0.59840107 | 0.00011553 | 0.098907 | -0.4087   |
| 16w_SITTD12 | 0.07446548 | 0.7286018  | 0.00012556 | 0.06525  | -1.0333   |
| 16w_SITTD12 | 0.08171695 | 0.79922754 | 0.00012959 | 0.054253 | -1.2361   |
| 16w_SITTD12 | 0.0194881  | 0.19314907 | 6.95E-05   | 0.030541 | 0.48489   |
| 16w_SITTD12 | 0.04392617 | 0.4311639  | 9.82E-05   | 0.10565  | 0.21046   |
| 16w_SITTD12 | 0.07068166 | 0.6917493  | 0.00012308 | 0.076976 | -0.87403  |
| 16w_SITTD12 | 0.05451413 | 0.53428537 | 0.00010944 | 0.093233 | -0.11022  |
| 16w_SITTD12 | 0.06161048 | 0.60340035 | 0.00011583 | 0.09893  | -0.42501  |
| 16w_SITTD12 | 0.05666535 | 0.55523723 | 0.00011144 | 0.095284 | -0.20754  |
| 16w_SITTD12 | 0.0165613  | 0.16464348 | 6.62E-05   | 0.024342 | 0.29808   |
| 16w_SITTD12 | 0.03228057 | 0.31774148 | 8.44E-05   | 0.081011 | 0.65793   |
| 16w_SITTD12 | 0.03859934 | 0.37928313 | 9.18E-05   | 0.10791  | 0.37625   |
| 16w_SITTD12 | 0.0415803  | 0.40831628 | 9.54E-05   | 0.10929  | 0.28067   |
| 16w_SITTD12 | 0.07685024 | 0.75182813 | 0.000127   | 0.059827 | -1.117    |
| 16w_SITTD12 | 0.03853883 | 0.37869382 | 9.18E-05   | 0.10791  | 0.37625   |
| 16w_SITTD12 | 0.06066537 | 0.5941955  | 0.00011523 | 0.098828 | -0.37638  |
| 16w_SITTD12 | 0.06086928 | 0.5961815  | 0.00011523 | 0.098828 | -0.39249  |
| 16w_SITTD12 | 0.03475697 | 0.34186035 | 8.73E-05   | 0.093873 | 0.54051   |
| 16w_SITTD12 | 0.04291531 | 0.42131862 | 9.70E-05   | 0.10755  | 0.23945   |
| 16w_SITTD12 | 0.06738587 | 0.65964985 | 0.00012058 | 0.088682 | -0.71078  |
| 16w_SITTD12 | 0.03862548 | 0.3795378  | 9.18E-05   | 0.10791  | 0.37625   |
| 16w_SITTD12 | 0.01958392 | 0.19408226 | 6.95E-05   | 0.030541 | 0.48489   |
| 16w_SITTD12 | 0.01421217 | 0.14176413 | 6.37E-05   | 0.020323 | 0.19442   |
| 16w_SITTD12 | 0.03971007 | 0.39010116 | 9.34E-05   | 0.10962  | 0.33794   |
| 16w_SITTD12 | 0.06877092 | 0.67313963 | 0.00012161 | 0.084113 | -0.77743  |
| 16w_SITTD12 | 0.05728173 | 0.5612405  | 0.00011209 | 0.096042 | -0.22216  |
| 16w_SITTD12 | 0.03313227 | 0.32603657 | 8.52E-05   | 0.084798 | 0.61617   |
| 16w_SITTD12 | 0.04282562 | 0.42044505 | 9.70E-05   | 0.10755  | 0.23945   |
| 16w_SITTD12 | 0.05892015 | 0.5771979  | 0.00011368 | 0.097776 | -0.29758  |
| 16w_SITTD12 | 0.04488487 | 0.44050115 | 9.93E-05   | 0.10345  | 0.18258   |

|             |            |            |            |           |            |
|-------------|------------|------------|------------|-----------|------------|
| 16w_SITTD12 | 0.08621445 | 0.84303105 | 0.00013164 | 0.052775  | -1.2997    |
| 16w_SITTD12 | 0.06427106 | 0.6293131  | 0.00011815 | 0.096641  | -0.55833   |
| 16w_SITTD12 | 0.07392579 | 0.7233455  | 0.00012513 | 0.067136  | -1.0066    |
| 16w_SITTD12 | 0.04434324 | 0.43522593 | 9.86E-05   | 0.10494   | 0.19178    |
| 16w_SITTD12 | 0.04670944 | 0.4582716  | 0.00010122 | 0.099559  | 0.13721    |
| 16w_SITTD12 | 0.02506118 | 0.24742813 | 7.58E-05   | 0.046199  | 0.74769    |
| 16w_SITTD12 | 0.01004339 | 0.10116221 | 5.98E-05   | 0.014626  | 0.1081     |
| 16w_SITTD12 | 0.00424844 | 0.04472226 | 5.50E-05   | 0.0088178 | 0.2638     |
| 16w_SITTD12 | 0.05186451 | 0.5084794  | 0.00010668 | 0.092211  | -0.022986  |
| 16w_SITTD12 | 0.03421059 | 0.33653894 | 8.69E-05   | 0.09213   | 0.57137    |
| 16w_SITTD12 | 0.06409507 | 0.62759906 | 0.00011815 | 0.096641  | -0.54144   |
| 16w_SITTD12 | 0.05914864 | 0.5794233  | 0.00011368 | 0.097776  | -0.31309   |
| 16w_SITTD12 | 0.06806337 | 0.6662484  | 0.0001211  | 0.086439  | -0.74427   |
| 16w_SITTD12 | 0.05389708 | 0.5282756  | 0.00010876 | 0.092731  | -0.084185  |
| 16w_SITTD12 | 0.05121678 | 0.50217086 | 0.00010597 | 0.092472  | -0.0001745 |
| 16w_SITTD12 | 0.05296439 | 0.5191917  | 0.00010773 | 0.092257  | -0.059017  |
| 16w_SITTD12 | 0.07267802 | 0.71119285 | 0.00012446 | 0.070202  | -0.9499    |
| 16w_SITTD12 | 0.00803038 | 0.08155643 | 5.81E-05   | 0.012286  | 0.13577    |
| 16w_SITTD12 | 0.03590033 | 0.35299608 | 8.90E-05   | 0.10026   | 0.49376    |
| 16w_SITTD12 | 0.07905067 | 0.7732593  | 0.00012816 | 0.056721  | -1.1755    |
| 16w_SITTD12 | 0.03200993 | 0.31510553 | 8.40E-05   | 0.07911   | 0.65793    |
| 16w_SITTD12 | 0.05556048 | 0.54447633 | 0.00011045 | 0.094186  | -0.1508    |
| 16w_SITTD12 | 0.07541114 | 0.7378121  | 0.00012619 | 0.062687  | -1.0589    |
| 16w_SITTD12 | 0.04685594 | 0.45969844 | 0.00010122 | 0.099559  | 0.12814    |
| 16w_SITTD12 | 0.03877376 | 0.38098192 | 9.22E-05   | 0.10852   | 0.37625    |
| 16w_SITTD12 | 0.07107521 | 0.6955822  | 0.00012331 | 0.075804  | -0.88959   |
| 16w_SITTD12 | 0.06580357 | 0.64423907 | 0.00011953 | 0.092756  | -0.62617   |
| 16w_SITTD12 | 0.06615246 | 0.64763707 | 0.00011979 | 0.091802  | -0.64315   |
| 16w_SITTD12 | 0.08081979 | 0.7904896  | 0.00012907 | 0.054994  | -1.2155    |
| 16w_SITTD12 | 0.04383574 | 0.43028313 | 9.82E-05   | 0.10565   | 0.21046    |
| 16w_SITTD12 | 0.04877848 | 0.47842303 | 0.00010344 | 0.095375  | 0.072211   |
| 16w_SITTD12 | 0.02942558 | 0.28993526 | 8.11E-05   | 0.066108  | 0.7438     |
| 16w_SITTD12 | 0.0756865  | 0.74049395 | 0.00012619 | 0.062687  | -1.0712    |
| 16w_SITTD12 | 0.06119165 | 0.5993212  | 0.00011553 | 0.098907  | -0.4087    |
| 16w_SITTD12 | 0.07840414 | 0.7669624  | 0.00012778 | 0.057615  | -1.1573    |
| 16w_SITTD12 | 0.03604002 | 0.35435662 | 8.90E-05   | 0.10026   | 0.49376    |
| 16w_SITTD12 | 0.01805717 | 0.17921254 | 6.80E-05   | 0.027619  | 0.4001     |
| 16w_SITTD12 | 0.04665978 | 0.45778787 | 0.00010122 | 0.099559  | 0.13721    |
| 16w_SITTD12 | 0.05810095 | 0.5692193  | 0.00011273 | 0.096781  | -0.26697   |
| 16w_SITTD12 | 0.05451661 | 0.53430957 | 0.00010944 | 0.093233  | -0.11022   |
| 16w_SITTD12 | 0.05213308 | 0.51109517 | 0.00010703 | 0.092172  | -0.022986  |
| 16w_SITTD12 | 0.02696237 | 0.26594478 | 7.82E-05   | 0.054511  | 0.77219    |
| 16w_SITTD12 | 0.04837387 | 0.4744823  | 0.00010308 | 0.095994  | 0.091263   |
| 16w_SITTD12 | 0.08117486 | 0.7939479  | 0.00012924 | 0.054725  | -1.2227    |
| 16w_SITTD12 | 0.05439523 | 0.53312737 | 0.0001091  | 0.092966  | -0.11022   |
| 16w_SITTD12 | 0.02359388 | 0.23313731 | 7.42E-05   | 0.041523  | 0.70349    |



|             |            |            |            |          |           |
|-------------|------------|------------|------------|----------|-----------|
| 16w_SITTD12 | 0.07402986 | 0.7243591  | 0.00012534 | 0.066176 | -1.0066   |
| 16w_SITTD12 | 0.07353193 | 0.71950954 | 0.00012491 | 0.068128 | -0.99278  |
| 16w_SITTD12 | 0.07877122 | 0.7705376  | 0.00012797 | 0.057152 | -1.1666   |
| 16w_SITTD12 | 0.04680515 | 0.45920378 | 0.00010122 | 0.099559 | 0.12814   |
| 16w_SITTD12 | 0.04968411 | 0.48724344 | 0.00010453 | 0.09379  | 0.052555  |
| 16w_SITTD12 | 0.07179081 | 0.7025518  | 0.00012378 | 0.073503 | -0.92016  |
| 16w_SITTD12 | 0.09385562 | 0.9174523  | 0.00013442 | 0.052444 | -1.3416   |
| 16w_SITTD12 | 0.05761559 | 0.5644921  | 0.00011241 | 0.096416 | -0.23694  |
| 16w_SITTD12 | 0.05266513 | 0.516277   | 0.00010738 | 0.092189 | -0.046772 |
| 16w_SITTD12 | 0.0496727  | 0.48713225 | 0.00010453 | 0.09379  | 0.052555  |
| 16w_SITTD12 | 0.03652358 | 0.35906628 | 8.94E-05   | 0.10166  | 0.46289   |
| 16w_SITTD12 | 0.03700291 | 0.36373478 | 9.02E-05   | 0.1042   | 0.4477    |
| 16w_SITTD12 | 0.090414   | 0.88393253 | 0.00013325 | 0.052587 | -1.3301   |
| 16w_SITTD12 | 0.06314854 | 0.61838037 | 0.0001173  | 0.098072 | -0.50782  |
| 16w_SITTD12 | 0.02094928 | 0.2073802  | 7.10E-05   | 0.033786 | 0.56707   |
| 16w_SITTD12 | 0.05531983 | 0.5421325  | 0.00011011 | 0.093847 | -0.1508   |
| 16w_SITTD12 | 0.06556949 | 0.6419592  | 0.00011925 | 0.093659 | -0.62617  |
| 16w_SITTD12 | 0.07495798 | 0.73339856 | 0.00012577 | 0.064358 | -1.0462   |
| 16w_SITTD12 | 0.05701734 | 0.55866545 | 0.00011177 | 0.095663 | -0.22216  |
| 16w_SITTD12 | 0.04850074 | 0.47571793 | 0.00010308 | 0.095994 | 0.081803  |
| 16w_SITTD12 | 0.05026892 | 0.49293917 | 0.0001049  | 0.093366 | 0.032151  |
| 16w_SITTD12 | 0.05558125 | 0.5446787  | 0.00011045 | 0.094186 | -0.1508   |
| 16w_SITTD12 | 0.06404909 | 0.62715125 | 0.00011815 | 0.096641 | -0.54144  |
| 16w_SITTD12 | 0.01384863 | 0.13822342 | 6.34E-05   | 0.019794 | 0.16714   |
| 16w_SITTD12 | 0.05192778 | 0.50909567 | 0.00010668 | 0.092211 | -0.022986 |
| 16w_SITTD12 | 0.06491931 | 0.63562673 | 0.00011871 | 0.095287 | -0.59222  |
| 16w_SITTD12 | 0.07230324 | 0.70754266 | 0.00012424 | 0.071279 | -0.93514  |
| 16w_SITTD12 | 0.04269382 | 0.41916144 | 9.66E-05   | 0.10808  | 0.23945   |
| 16w_SITTD12 | 0.02640428 | 0.2605093  | 7.74E-05   | 0.051562 | 0.76965   |
| 16w_SITTD12 | 0.05511035 | 0.54009235 | 0.00010978 | 0.093528 | -0.13708  |
| 16w_SITTD12 | 0.0579825  | 0.5680657  | 0.00011273 | 0.096781 | -0.25188  |
| 16w_SITTD12 | 0.06245177 | 0.6115941  | 0.00011672 | 0.098627 | -0.4579   |
| 16w_SITTD12 | 0.02281121 | 0.2255145  | 7.30E-05   | 0.038397 | 0.67444   |
| 16w_SITTD12 | 0.04648785 | 0.4561134  | 0.00010084 | 0.10033  | 0.13721   |
| 16w_SITTD12 | 0.06721846 | 0.65801936 | 0.00012058 | 0.088682 | -0.69393  |
| 16w_SITTD12 | 0.06683272 | 0.6542625  | 0.00012032 | 0.089759 | -0.67704  |
| 16w_SITTD12 | 0.08208213 | 0.80278426 | 0.00012976 | 0.054048 | -1.2424   |
| 16w_SITTD12 | 0.03568691 | 0.35091758 | 8.86E-05   | 0.098764 | 0.50933   |
| 16w_SITTD12 | 0.0481436  | 0.47223955 | 0.00010271 | 0.09665  | 0.091263  |
| 16w_SITTD12 | 0.0248     | 0.24488439 | 7.54E-05   | 0.044969 | 0.73857   |
| 16w_SITTD12 | 0.00762604 | 0.07761836 | 5.78E-05   | 0.011928 | 0.14372   |
| 16w_SITTD12 | 0.04915327 | 0.48207325 | 0.00010381 | 0.094798 | 0.062467  |
| 16w_SITTD12 | 0.06119195 | 0.5993241  | 0.00011553 | 0.098907 | -0.4087   |
| 16w_SITTD12 | 0.09397791 | 0.91864336 | 0.00013452 | 0.052426 | -1.3423   |
| 16w_SITTD12 | 0.05833888 | 0.57153666 | 0.00011305 | 0.097132 | -0.26697  |
| 16w_SITTD12 | 0.01304898 | 0.13043518 | 6.27E-05   | 0.018769 | 0.14454   |

|             |            |            |            |          |          |
|-------------|------------|------------|------------|----------|----------|
| 16w_SITTD12 | 0.0284388  | 0.2803245  | 7.99E-05   | 0.060913 | 0.76245  |
| 16w_SITTD12 | 0.07082314 | 0.6931272  | 0.00012308 | 0.076976 | -0.87403 |
| 16w_SITTD12 | 0.04814135 | 0.47221768 | 0.00010271 | 0.09665  | 0.091263 |
| 16w_SITTD12 | 0.05557658 | 0.54463315 | 0.00011045 | 0.094186 | -0.1508  |
| 16w_SITTD12 | 0.04304982 | 0.4226287  | 9.70E-05   | 0.10755  | 0.22964  |
| 16w_SITTD12 | 0.06982246 | 0.6833811  | 0.00012235 | 0.080544 | -0.82636 |
| 16w_SITTD12 | 0.04788711 | 0.46974155 | 0.00010234 | 0.09734  | 0.10061  |
| 16w_SITTD12 | 0.06205163 | 0.607697   | 0.00011642 | 0.098794 | -0.44141 |
| 16w_SITTD12 | 0.05974214 | 0.5852037  | 0.00011431 | 0.098311 | -0.3445  |
| 16w_SITTD12 | 0.07656534 | 0.7490534  | 0.0001268  | 0.060479 | -1.1061  |
| 16w_SITTD12 | 0.06869338 | 0.6723843  | 0.00012161 | 0.084113 | -0.77743 |
| 16w_SITTD12 | 0.05889672 | 0.5769697  | 0.00011368 | 0.097776 | -0.29758 |
| 16w_SITTD12 | 0.06034386 | 0.59106416 | 0.00011492 | 0.0987   | -0.36038 |
| 16w_SITTD12 | 0.04042684 | 0.3970821  | 9.42E-05   | 0.10978  | 0.31414  |
| 16w_SITTD12 | 0.02373205 | 0.23448305 | 7.42E-05   | 0.041523 | 0.70349  |
| 16w_SITTD12 | 0.05343448 | 0.52377015 | 0.00010842 | 0.092532 | -0.07149 |
| 16w_SITTD12 | 0.06938196 | 0.6790908  | 0.00012211 | 0.081739 | -0.81017 |
| 16w_SITTD12 | 0.08455426 | 0.8268616  | 0.00013089 | 0.053084 | -1.2797  |
| 16w_SITTD12 | 0.04849273 | 0.4756399  | 0.00010308 | 0.095994 | 0.081803 |
| 16w_SITTD12 | 0.03221989 | 0.31715044 | 8.44E-05   | 0.081011 | 0.65793  |
| 16w_SITTD12 | 0.08649562 | 0.8457694  | 0.00013179 | 0.052739 | -1.3031  |
| 16w_SITTD12 | 0.03842641 | 0.37759897 | 9.18E-05   | 0.10791  | 0.38979  |
| 16w_SITTD12 | 0.04924185 | 0.48293605 | 0.00010381 | 0.094798 | 0.062467 |
| 16w_SITTD12 | 0.06626647 | 0.64874744 | 0.00011979 | 0.091802 | -0.66011 |
| 16w_SITTD12 | 0.01155914 | 0.11592486 | 6.14E-05   | 0.016833 | 0.11542  |
| 16w_SITTD12 | 0.07126722 | 0.6974523  | 0.00012355 | 0.074645 | -0.88959 |
| 16w_SITTD12 | 0.05583306 | 0.5471311  | 0.00011078 | 0.094541 | -0.16472 |
| 16w_SITTD12 | 0.02907495 | 0.2865203  | 8.07E-05   | 0.064343 | 0.751    |
| 16w_SITTD12 | 0.05789528 | 0.5672162  | 0.00011273 | 0.096781 | -0.25188 |
| 16w_SITTD12 | 0.01138427 | 0.11422166 | 6.11E-05   | 0.016373 | 0.1115   |
| 16w_SITTD12 | 0.04541852 | 0.44569862 | 9.97E-05   | 0.10268  | 0.16436  |
| 16w_SITTD12 | 0.05995081 | 0.58723605 | 0.00011462 | 0.098526 | -0.3445  |
| 16w_SITTD12 | 0.04375396 | 0.4294866  | 9.78E-05   | 0.10633  | 0.21046  |
| 16w_SITTD12 | 0.06513996 | 0.63777584 | 0.00011898 | 0.094504 | -0.59222 |
| 16w_SITTD12 | 0.03566081 | 0.3506633  | 8.86E-05   | 0.098764 | 0.50933  |
| 16w_SITTD12 | 0.05930669 | 0.58096254 | 0.000114   | 0.098059 | -0.31309 |
| 16w_SITTD12 | 0.03891063 | 0.38231498 | 9.22E-05   | 0.10852  | 0.36311  |
| 16w_SITTD12 | 0.09430014 | 0.92178166 | 0.00013463 | 0.052407 | -1.3428  |
| 16w_SITTD12 | 0.06391851 | 0.62587947 | 0.00011787 | 0.097201 | -0.54144 |
| 16w_SITTD12 | 0.06963011 | 0.68150765 | 0.00012235 | 0.080544 | -0.81017 |
| 16w_SITTD12 | 0.0587654  | 0.57569075 | 0.00011337 | 0.097465 | -0.29758 |
| 16w_SITTD12 | 0.02405245 | 0.23760355 | 7.46E-05   | 0.042633 | 0.71639  |
| 16w_SITTD12 | 0.07103036 | 0.6951454  | 0.00012331 | 0.075804 | -0.88959 |
| 16w_SITTD12 | 0.07274586 | 0.71185356 | 0.00012446 | 0.070202 | -0.96444 |
| 16w_SITTD12 | 0.03915631 | 0.3847078  | 9.26E-05   | 0.10901  | 0.36311  |
| 16w_SITTD12 | 0.02974136 | 0.29301077 | 8.15E-05   | 0.067903 | 0.7357   |

|             |            |            |            |          |           |
|-------------|------------|------------|------------|----------|-----------|
| 16w_SITTD12 | 0.03790081 | 0.3724798  | 9.10E-05   | 0.1063   | 0.40374   |
| 16w_SITTD12 | 0.05527047 | 0.5416518  | 0.00011011 | 0.093847 | -0.13708  |
| 16w_SITTD12 | 0.0556645  | 0.5454895  | 0.00011045 | 0.094186 | -0.16472  |
| 16w_SITTD12 | 0.06961611 | 0.68137133 | 0.00012235 | 0.080544 | -0.81017  |
| 16w_SITTD12 | 0.06230044 | 0.6101203  | 0.00011642 | 0.098794 | -0.4579   |
| 16w_SITTD12 | 0.06203606 | 0.6075453  | 0.00011642 | 0.098794 | -0.44141  |
| 16w_SITTD12 | 0.05453249 | 0.53446424 | 0.00010944 | 0.093233 | -0.11022  |
| 16w_SITTD12 | 0.06665017 | 0.6524845  | 0.00012006 | 0.090801 | -0.67704  |
| 16w_SITTD12 | 0.01123152 | 0.11273398 | 6.11E-05   | 0.016373 | 0.1115    |
| 16w_SITTD12 | 0.06079147 | 0.5954237  | 0.00011523 | 0.098828 | -0.39249  |
| 16w_SITTD12 | 0.04051343 | 0.39792544 | 9.42E-05   | 0.10978  | 0.31414   |
| 16w_SITTD12 | 0.04625987 | 0.45389304 | 0.00010084 | 0.10033  | 0.14626   |
| 16w_SITTD12 | 0.08641692 | 0.845003   | 0.00013179 | 0.052739 | -1.3031   |
| 16w_SITTD12 | 0.07234167 | 0.707917   | 0.00012424 | 0.071279 | -0.93514  |
| 16w_SITTD12 | 0.04937648 | 0.4842473  | 0.00010417 | 0.094268 | 0.062467  |
| 16w_SITTD12 | 0.07446615 | 0.72860837 | 0.00012556 | 0.06525  | -1.0333   |
| 16w_SITTD12 | 0.04494921 | 0.44112784 | 9.93E-05   | 0.10345  | 0.18258   |
| 16w_SITTD12 | 0.0521197  | 0.5109649  | 0.00010703 | 0.092172 | -0.022986 |
| 16w_SITTD12 | 0.04977111 | 0.48809072 | 0.00010453 | 0.09379  | 0.052555  |
| 16w_SITTD12 | 0.04936976 | 0.48418185 | 0.00010417 | 0.094268 | 0.062467  |
| 16w_SITTD12 | 0.09098244 | 0.8894689  | 0.0001335  | 0.052565 | -1.3333   |
| 16w_SITTD12 | 0.01677628 | 0.16673729 | 6.65E-05   | 0.024968 | 0.31771   |
| 16w_SITTD12 | 0.03763873 | 0.36992732 | 9.10E-05   | 0.1063   | 0.41807   |
| 16w_SITTD12 | 0.04754337 | 0.46639365 | 0.00010197 | 0.098057 | 0.10986   |
| 16w_SITTD12 | 0.02186262 | 0.21627569 | 7.22E-05   | 0.03647  | 0.62396   |
| 16w_SITTD12 | 0.01353485 | 0.1351673  | 6.30E-05   | 0.019276 | 0.16714   |
| 16w_SITTD12 | 0.08158898 | 0.79798114 | 0.00012959 | 0.054253 | -1.2295   |
| 16w_SITTD12 | 0.06448084 | 0.6313563  | 0.00011843 | 0.096001 | -0.55833  |
| 16w_SITTD12 | 0.06142249 | 0.6015695  | 0.00011583 | 0.09893  | -0.4087   |
| 16w_SITTD12 | 0.06553569 | 0.64163    | 0.00011925 | 0.093659 | -0.60919  |
| 16w_SITTD12 | 0.04625243 | 0.45382056 | 0.00010084 | 0.10033  | 0.14626   |
| 16w_SITTD12 | 0.07284866 | 0.71285474 | 0.00012446 | 0.070202 | -0.96444  |
| 16w_SITTD12 | 0.00732382 | 0.07467493 | 5.75E-05   | 0.011579 | 0.15252   |
| 16w_SITTD12 | 0.04716739 | 0.46273184 | 0.00010159 | 0.098799 | 0.11903   |
| 16w_SITTD12 | 0.07000364 | 0.6851456  | 0.0001226  | 0.07935  | -0.8424   |
| 16w_SITTD12 | 0.03385774 | 0.33310238 | 8.65E-05   | 0.090344 | 0.58656   |
| 16w_SITTD12 | 0.07304937 | 0.71480954 | 0.00012469 | 0.069151 | -0.96444  |
| 16w_SITTD12 | 0.07239506 | 0.70843697 | 0.00012424 | 0.071279 | -0.9499   |
| 16w_SITTD12 | 0.02965546 | 0.29217413 | 8.11E-05   | 0.066108 | 0.7357    |
| 16w_SITTD12 | 0.07203542 | 0.70493424 | 0.00012401 | 0.07238  | -0.92016  |
| 16w_SITTD12 | 0.04505798 | 0.44218713 | 9.93E-05   | 0.10345  | 0.17344   |
| 16w_SITTD12 | 0.01483204 | 0.1478013  | 6.44E-05   | 0.021412 | 0.20962   |
| 16w_SITTD12 | 0.0447724  | 0.43940577 | 9.89E-05   | 0.10421  | 0.18258   |
| 16w_SITTD12 | 0.07003144 | 0.68541646 | 0.0001226  | 0.07935  | -0.8424   |
| 16w_SITTD12 | 0.05316747 | 0.5211696  | 0.00010807 | 0.092373 | -0.059017 |
| 16w_SITTD12 | 0.02009058 | 0.19901688 | 7.02E-05   | 0.032119 | 0.52662   |

|             |            |            |            |          |           |
|-------------|------------|------------|------------|----------|-----------|
| 16w_SITTD12 | 0.06386785 | 0.6253861  | 0.00011787 | 0.097201 | -0.54144  |
| 16w_SITTD12 | 0.05821781 | 0.5703574  | 0.00011305 | 0.097132 | -0.26697  |
| 16w_SITTD12 | 0.02558483 | 0.2525282  | 7.66E-05   | 0.04879  | 0.7616    |
| 16w_SITTD12 | 0.06274095 | 0.61441064 | 0.00011701 | 0.098387 | -0.47447  |
| 16w_SITTD12 | 0.06264373 | 0.61346376 | 0.00011672 | 0.098627 | -0.47447  |
| 16w_SITTD12 | 0.04874102 | 0.47805816 | 0.00010344 | 0.095375 | 0.081803  |
| 16w_SITTD12 | 0.03875874 | 0.38083562 | 9.22E-05   | 0.10852  | 0.37625   |
| 16w_SITTD12 | 0.01310511 | 0.13098185 | 6.27E-05   | 0.018769 | 0.14454   |
| 16w_SITTD12 | 0.05685873 | 0.5571207  | 0.00011177 | 0.095663 | -0.20754  |
| 16w_SITTD12 | 0.07435194 | 0.727496   | 0.00012556 | 0.06525  | -1.0201   |
| 16w_SITTD12 | 0.0437581  | 0.42952698 | 9.78E-05   | 0.10633  | 0.21046   |
| 16w_SITTD12 | 0.07686005 | 0.75192374 | 0.000127   | 0.059827 | -1.117    |
| 16w_SITTD12 | 0.04214818 | 0.41384718 | 9.62E-05   | 0.10856  | 0.25963   |
| 16w_SITTD12 | 0.08406779 | 0.82212365 | 0.00013074 | 0.053178 | -1.2751   |
| 16w_SITTD12 | 0.05532653 | 0.5421978  | 0.00011011 | 0.093847 | -0.1508   |
| 16w_SITTD12 | 0.06204684 | 0.6076503  | 0.00011642 | 0.098794 | -0.44141  |
| 16w_SITTD12 | 0.05345968 | 0.52401555 | 0.00010842 | 0.092532 | -0.07149  |
| 16w_SITTD12 | 0.05212554 | 0.5110217  | 0.00010703 | 0.092172 | -0.022986 |
| 16w_SITTD12 | 0.04583041 | 0.44971022 | 0.00010009 | 0.1019   | 0.1553    |
| 16w_SITTD12 | 0.06826568 | 0.66821873 | 0.00012136 | 0.085284 | -0.74427  |
| 16w_SITTD12 | 0.04954923 | 0.4859297  | 0.00010417 | 0.094268 | 0.052555  |
| 16w_SITTD12 | 0.03943782 | 0.38744953 | 9.30E-05   | 0.10937  | 0.35035   |
| 16w_SITTD12 | 0.0281215  | 0.27723417 | 7.94E-05   | 0.059253 | 0.76661   |
| 16w_SITTD12 | 0.04524719 | 0.44402996 | 9.97E-05   | 0.10268  | 0.17344   |
| 16w_SITTD12 | 0.04307557 | 0.42287943 | 9.70E-05   | 0.10755  | 0.22964   |
| 16w_SITTD12 | 0.0565793  | 0.5543992  | 0.00011144 | 0.095284 | -0.19309  |
| 16w_SITTD12 | 0.04901771 | 0.48075297 | 0.00010381 | 0.094798 | 0.072211  |
| 16w_SITTD12 | 0.08321109 | 0.8137797  | 0.00013026 | 0.053541 | -1.2598   |
| 16w_SITTD12 | 0.0392763  | 0.38587645 | 9.26E-05   | 0.10901  | 0.35035   |
| 16w_SITTD12 | 0.03866889 | 0.37996057 | 9.22E-05   | 0.10852  | 0.37625   |
| 16w_SITTD12 | 0.07192578 | 0.70386636 | 0.00012378 | 0.073503 | -0.92016  |
| 16w_SITTD12 | 0.05298584 | 0.5194006  | 0.00010773 | 0.092257 | -0.059017 |
| 16w_SITTD12 | 0.0252036  | 0.24881521 | 7.58E-05   | 0.046199 | 0.75539   |
| 16w_SITTD12 | 0.05678234 | 0.55637664 | 0.00011144 | 0.095284 | -0.20754  |
| 16w_SITTD12 | 0.06343892 | 0.62120855 | 0.00011758 | 0.097678 | -0.50782  |
| 16w_SITTD12 | 0.00629676 | 0.06467186 | 5.66E-05   | 0.010584 | 0.18365   |
| 16w_SITTD12 | 0.07021416 | 0.687196   | 0.0001226  | 0.07935  | -0.8424   |
| 16w_SITTD12 | 0.04752496 | 0.4662143  | 0.00010197 | 0.098057 | 0.10986   |
| 16w_SITTD12 | 0.04491688 | 0.44081298 | 9.93E-05   | 0.10345  | 0.18258   |
| 16w_SITTD12 | 0.0129888  | 0.12984909 | 6.27E-05   | 0.018769 | 0.14454   |
| 16w_SITTD12 | 0.01321057 | 0.13200898 | 6.27E-05   | 0.018769 | 0.15521   |
| 16w_SITTD12 | 0.04660851 | 0.45728856 | 0.00010122 | 0.099559 | 0.13721   |
| 16w_SITTD12 | 0.06346248 | 0.62143797 | 0.00011758 | 0.097678 | -0.50782  |
| 16w_SITTD12 | 0.03270004 | 0.32182688 | 8.48E-05   | 0.082909 | 0.6305    |
| 16w_SITTD12 | 0.06634598 | 0.64952177 | 0.00011979 | 0.091802 | -0.66011  |
| 16w_SITTD12 | 0.07412534 | 0.7252889  | 0.00012534 | 0.066176 | -1.0201   |

|             |            |            |            |           |           |
|-------------|------------|------------|------------|-----------|-----------|
| 16w_SITTD12 | 0.08311052 | 0.8128002  | 0.00013026 | 0.053541  | -1.2598   |
| 16w_SITTD12 | 0.02740812 | 0.2702862  | 7.86E-05   | 0.05605   | 0.77153   |
| 16w_SITTD12 | 0.00171176 | 0.02001622 | 5.31E-05   | 0.0071026 | 0.37827   |
| 16w_SITTD12 | 0.05547899 | 0.5436827  | 0.00011045 | 0.094186  | -0.1508   |
| 16w_SITTD12 | 0.05251497 | 0.51481456 | 0.00010738 | 0.092189  | -0.03476  |
| 16w_SITTD12 | 0.06996687 | 0.6847875  | 0.0001226  | 0.07935   | -0.82636  |
| 16w_SITTD12 | 0.06777822 | 0.66347116 | 0.00012084 | 0.087573  | -0.72756  |
| 16w_SITTD12 | 0.01412858 | 0.14094995 | 6.37E-05   | 0.020323  | 0.18023   |
| 16w_SITTD12 | 0.03830447 | 0.37641135 | 9.18E-05   | 0.10791   | 0.38979   |
| 16w_SITTD12 | 0.07050782 | 0.6900561  | 0.00012284 | 0.078159  | -0.8583   |
| 16w_SITTD12 | 0.08650751 | 0.8458853  | 0.00013179 | 0.052739  | -1.3031   |
| 16w_SITTD12 | 0.0057524  | 0.05937006 | 5.63E-05   | 0.010269  | 0.19547   |
| 16w_SITTD12 | 0.06005342 | 0.58823544 | 0.00011462 | 0.098526  | -0.3445   |
| 16w_SITTD12 | 0.05071043 | 0.49723926 | 0.00010561 | 0.092703  | 0.021622  |
| 16w_SITTD12 | 0.07750422 | 0.7581976  | 0.0001274  | 0.058646  | -1.1276   |
| 16w_SITTD12 | 0.03906331 | 0.38380206 | 9.26E-05   | 0.10901   | 0.36311   |
| 16w_SITTD12 | 0.05353209 | 0.52472085 | 0.00010842 | 0.092532  | -0.07149  |
| 16w_SITTD12 | 0.0380053  | 0.37349758 | 9.14E-05   | 0.10717   | 0.40374   |
| 16w_SITTD12 | 0.08931153 | 0.873195   | 0.00013288 | 0.052615  | -1.3244   |
| 16w_SITTD12 | 0.06542289 | 0.64053136 | 0.00011925 | 0.093659  | -0.60919  |
| 16w_SITTD12 | 0.05641199 | 0.55276966 | 0.00011111 | 0.094909  | -0.19309  |
| 16w_SITTD12 | 0.01204163 | 0.12062404 | 6.17E-05   | 0.017303  | 0.12065   |
| 16w_SITTD12 | 0.07977898 | 0.7803527  | 0.00012853 | 0.055948  | -1.1924   |
| 16w_SITTD12 | 0.03778285 | 0.37133098 | 9.10E-05   | 0.1063    | 0.41807   |
| 16w_SITTD12 | 0.02562499 | 0.25291932 | 7.66E-05   | 0.04879   | 0.7616    |
| 16w_SITTD12 | 0.03522301 | 0.3463994  | 8.81E-05   | 0.097198  | 0.52494   |
| 16w_SITTD12 | 0.04169289 | 0.40941286 | 9.54E-05   | 0.10929   | 0.27003   |
| 16w_SITTD12 | 0.02284751 | 0.22586809 | 7.34E-05   | 0.039406  | 0.67444   |
| 16w_SITTD12 | 0.07694282 | 0.75272983 | 0.000127   | 0.059827  | -1.117    |
| 16w_SITTD12 | 0.05215957 | 0.5113532  | 0.00010703 | 0.092172  | -0.022986 |
| 16w_SITTD12 | 0.04715277 | 0.46258944 | 0.00010159 | 0.098799  | 0.11903   |
| 16w_SITTD12 | 0.01093222 | 0.10981897 | 6.08E-05   | 0.015922  | 0.10884   |
| 16w_SITTD12 | 0.07910552 | 0.7737935  | 0.00012816 | 0.056721  | -1.1755   |
| 16w_SITTD12 | 0.07580265 | 0.74162525 | 0.0001264  | 0.06191   | -1.0712   |
| 16w_SITTD12 | 0.06679724 | 0.6539169  | 0.00012032 | 0.089759  | -0.67704  |
| 16w_SITTD12 | 0.04703639 | 0.46145597 | 0.00010159 | 0.098799  | 0.12814   |
| 16w_SITTD12 | 0.06057476 | 0.5933129  | 0.00011492 | 0.0987    | -0.37638  |
| 16w_SITTD12 | 0.03743155 | 0.36790952 | 9.06E-05   | 0.10531   | 0.43275   |
| 16w_SITTD12 | 0.01512349 | 0.15063989 | 6.47E-05   | 0.021973  | 0.22576   |
| 16w_SITTD12 | 0.04349884 | 0.4270019  | 9.78E-05   | 0.10633   | 0.21998   |
| 16w_SITTD12 | 0.04017064 | 0.39458692 | 9.38E-05   | 0.10975   | 0.32588   |
| 16w_SITTD12 | 0.07672393 | 0.75059795 | 0.0001268  | 0.060479  | -1.1061   |
| 16w_SITTD12 | 0.03118526 | 0.3070737  | 8.32E-05   | 0.075317  | 0.69526   |
| 16w_SITTD12 | 0.0494687  | 0.4851454  | 0.00010417 | 0.094268  | 0.052555  |
| 16w_SITTD12 | 0.05610674 | 0.54979664 | 0.00011078 | 0.094541  | -0.17881  |
| 16w_SITTD12 | 0.08573034 | 0.83831596 | 0.0001315  | 0.052818  | -1.2923   |

|             |            |            |            |          |           |
|-------------|------------|------------|------------|----------|-----------|
| 16w_SITTD12 | 0.06891631 | 0.67455566 | 0.00012186 | 0.08293  | -0.77743  |
| 16w_SITTD12 | 0.06295104 | 0.61645675 | 0.00011701 | 0.098387 | -0.49111  |
| 16w_SITTD12 | 0.0652269  | 0.6386225  | 0.00011898 | 0.094504 | -0.60919  |
| 16w_SITTD12 | 0.04692547 | 0.46037567 | 0.00010159 | 0.098799 | 0.12814   |
| 16w_SITTD12 | 0.0689968  | 0.67533946 | 0.00012186 | 0.08293  | -0.79386  |
| 16w_SITTD12 | 0.07774039 | 0.7604978  | 0.0001274  | 0.058646 | -1.1379   |
| 16w_SITTD12 | 0.02944988 | 0.29017195 | 8.11E-05   | 0.066108 | 0.7438    |
| 16w_SITTD12 | 0.05580788 | 0.5468859  | 0.00011078 | 0.094541 | -0.16472  |
| 16w_SITTD12 | 0.04355878 | 0.42758566 | 9.78E-05   | 0.10633  | 0.21998   |
| 16w_SITTD12 | 0.07467838 | 0.7306754  | 0.00012556 | 0.06525  | -1.0333   |
| 16w_SITTD12 | 0.05602342 | 0.5489852  | 0.00011078 | 0.094541 | -0.17881  |
| 16w_SITTD12 | 0.05855407 | 0.5736324  | 0.00011337 | 0.097465 | -0.2822   |
| 16w_SITTD12 | 0.05606819 | 0.5494212  | 0.00011078 | 0.094541 | -0.17881  |
| 16w_SITTD12 | 0.05841433 | 0.5722714  | 0.00011305 | 0.097132 | -0.2822   |
| 16w_SITTD12 | 0.05518371 | 0.54080683 | 0.00011011 | 0.093847 | -0.13708  |
| 16w_SITTD12 | 0.06456018 | 0.63212895 | 0.00011843 | 0.096001 | -0.57526  |
| 16w_SITTD12 | 0.04932831 | 0.4837781  | 0.00010417 | 0.094268 | 0.062467  |
| 16w_SITTD12 | 0.05855284 | 0.57362044 | 0.00011337 | 0.097465 | -0.2822   |
| 16w_SITTD12 | 0.03229133 | 0.3178463  | 8.44E-05   | 0.081011 | 0.65793   |
| 16w_SITTD12 | 0.06912545 | 0.6765925  | 0.00012186 | 0.08293  | -0.79386  |
| 16w_SITTD12 | 0.06600551 | 0.64620584 | 0.00011953 | 0.092756 | -0.64315  |
| 16w_SITTD12 | 0.01320884 | 0.13199215 | 6.27E-05   | 0.018769 | 0.15521   |
| 16w_SITTD12 | 0.06416503 | 0.6282804  | 0.00011815 | 0.096641 | -0.54144  |
| 16w_SITTD12 | 0.0471668  | 0.46272603 | 0.00010159 | 0.098799 | 0.11903   |
| 16w_SITTD12 | 0.06429201 | 0.6295172  | 0.00011815 | 0.096641 | -0.55833  |
| 16w_SITTD12 | 0.04038319 | 0.39665696 | 9.42E-05   | 0.10978  | 0.31414   |
| 16w_SITTD12 | 0.05541521 | 0.54306144 | 0.00011011 | 0.093847 | -0.1508   |
| 16w_SITTD12 | 0.01260574 | 0.12611826 | 6.24E-05   | 0.018271 | 0.13519   |
| 16w_SITTD12 | 0.02159163 | 0.21363644 | 7.18E-05   | 0.035549 | 0.6056    |
| 16w_SITTD12 | 0.00591876 | 0.06099029 | 5.63E-05   | 0.010269 | 0.19547   |
| 16w_SITTD12 | 0.02960689 | 0.29170114 | 8.11E-05   | 0.066108 | 0.7357    |
| 16w_SITTD12 | 0.05357673 | 0.52515566 | 0.00010842 | 0.092532 | -0.084185 |
| 16w_SITTD12 | 0.0482394  | 0.47317263 | 0.00010271 | 0.09665  | 0.091263  |
| 16w_SITTD12 | 0.03862028 | 0.37948716 | 9.18E-05   | 0.10791  | 0.37625   |
| 16w_SITTD12 | 0.05271131 | 0.5167268  | 0.00010773 | 0.092257 | -0.046772 |
| 16w_SITTD12 | 0.05096723 | 0.4997404  | 0.00010561 | 0.092703 | 0.010852  |
| 16w_SITTD12 | 0.05362832 | 0.5256581  | 0.00010842 | 0.092532 | -0.084185 |
| 16w_SITTD12 | 0.08111627 | 0.7933772  | 0.00012924 | 0.054725 | -1.2227   |
| 16w_SITTD12 | 0.05623081 | 0.551005   | 0.00011111 | 0.094909 | -0.17881  |
| 16w_SITTD12 | 0.06549063 | 0.6411912  | 0.00011925 | 0.093659 | -0.60919  |
| 16w_SITTD12 | 0.07003735 | 0.685474   | 0.0001226  | 0.07935  | -0.8424   |
| 16w_SITTD12 | 0.07984506 | 0.78099626 | 0.00012871 | 0.055605 | -1.1924   |
| 16w_SITTD12 | 0.0450244  | 0.44186008 | 9.93E-05   | 0.10345  | 0.17344   |
| 16w_SITTD12 | 0.05262994 | 0.51593435 | 0.00010738 | 0.092189 | -0.046772 |
| 16w_SITTD12 | 0.07855836 | 0.7684644  | 0.00012797 | 0.057152 | -1.1666   |
| 16w_SITTD12 | 0.04284924 | 0.42067516 | 9.70E-05   | 0.10755  | 0.23945   |

|             |            |            |            |           |            |
|-------------|------------|------------|------------|-----------|------------|
| 16w_SITTD12 | 0.00987332 | 0.09950577 | 5.98E-05   | 0.014626  | 0.1081     |
| 16w_SITTD12 | 0.07263851 | 0.71080804 | 0.00012446 | 0.070202  | -0.9499    |
| 16w_SITTD12 | 0.06383947 | 0.6251096  | 0.00011787 | 0.097201  | -0.54144   |
| 16w_SITTD12 | 0.07377436 | 0.72187066 | 0.00012513 | 0.067136  | -1.0066    |
| 16w_SITTD12 | 0.04105068 | 0.40315807 | 9.50E-05   | 0.10955   | 0.29155    |
| 16w_SITTD12 | 0.07040464 | 0.6890512  | 0.00012284 | 0.078159  | -0.8583    |
| 16w_SITTD12 | 0.02029396 | 0.20099771 | 7.02E-05   | 0.032119  | 0.52662    |
| 16w_SITTD12 | 0.06756099 | 0.66135544 | 0.00012084 | 0.087573  | -0.71078   |
| 16w_SITTD12 | 0.05660677 | 0.5546667  | 0.00011144 | 0.095284  | -0.19309   |
| 16w_SITTD12 | 0.00722564 | 0.07371867 | 5.75E-05   | 0.011579  | 0.15252    |
| 16w_SITTD12 | 0.04383783 | 0.43030348 | 9.82E-05   | 0.10565   | 0.21046    |
| 16w_SITTD12 | 0.04040814 | 0.3969     | 9.42E-05   | 0.10978   | 0.31414    |
| 16w_SITTD12 | 0.05302937 | 0.51982456 | 0.00010773 | 0.092257  | -0.059017  |
| 16w_SITTD12 | 0.05258908 | 0.51553637 | 0.00010738 | 0.092189  | -0.046772  |
| 16w_SITTD12 | 0.06210774 | 0.60824347 | 0.00011642 | 0.098794  | -0.44141   |
| 16w_SITTD12 | 0.05020014 | 0.49226925 | 0.0001049  | 0.093366  | 0.032151   |
| 16w_SITTD12 | 0.03595473 | 0.353526   | 8.90E-05   | 0.10026   | 0.49376    |
| 16w_SITTD12 | 0.08818645 | 0.86223733 | 0.00013248 | 0.05264   | -1.3176    |
| 16w_SITTD12 | 0.08280253 | 0.8098006  | 0.00013009 | 0.053693  | -1.2543    |
| 16w_SITTD12 | 0.06238925 | 0.6109852  | 0.00011672 | 0.098627  | -0.4579    |
| 16w_SITTD12 | 0.02596299 | 0.2562113  | 7.70E-05   | 0.050154  | 0.76634    |
| 16w_SITTD12 | 0.04880851 | 0.4787155  | 0.00010344 | 0.095375  | 0.072211   |
| 16w_SITTD12 | 0.00161037 | 0.01902874 | 5.31E-05   | 0.0071026 | 0.37827    |
| 16w_SITTD12 | 0.0670569  | 0.65644586 | 0.00012032 | 0.089759  | -0.69393   |
| 16w_SITTD12 | 0.03908013 | 0.38396585 | 9.26E-05   | 0.10901   | 0.36311    |
| 16w_SITTD12 | 0.02281361 | 0.22553791 | 7.30E-05   | 0.038397  | 0.67444    |
| 16w_SITTD12 | 0.06559809 | 0.6422378  | 0.00011925 | 0.093659  | -0.62617   |
| 16w_SITTD12 | 0.01803569 | 0.17900331 | 6.80E-05   | 0.027619  | 0.4001     |
| 16w_SITTD12 | 0.02202006 | 0.21780908 | 7.22E-05   | 0.03647   | 0.62396    |
| 16w_SITTD12 | 0.04324269 | 0.42450717 | 9.74E-05   | 0.10696   | 0.22964    |
| 16w_SITTD12 | 0.06895785 | 0.6749602  | 0.00012186 | 0.08293   | -0.77743   |
| 16w_SITTD12 | 0.07567518 | 0.7403836  | 0.00012619 | 0.062687  | -1.0712    |
| 16w_SITTD12 | 0.08667843 | 0.84755    | 0.00013179 | 0.052739  | -1.3031    |
| 16w_SITTD12 | 0.02244137 | 0.22191247 | 7.26E-05   | 0.037419  | 0.65846    |
| 16w_SITTD12 | 0.07357927 | 0.7199706  | 0.00012491 | 0.068128  | -0.99278   |
| 16w_SITTD12 | 0.07809038 | 0.76390654 | 0.00012759 | 0.058113  | -1.1478    |
| 16w_SITTD12 | 0.05864431 | 0.5745113  | 0.00011337 | 0.097465  | -0.2822    |
| 16w_SITTD12 | 0.02499446 | 0.24677834 | 7.58E-05   | 0.046199  | 0.74769    |
| 16w_SITTD12 | 0.03056586 | 0.301041   | 8.23E-05   | 0.07157   | 0.71698    |
| 16w_SITTD12 | 0.05422359 | 0.53145576 | 0.0001091  | 0.092966  | -0.097097  |
| 16w_SITTD12 | 0.03436818 | 0.33807373 | 8.69E-05   | 0.09213   | 0.57137    |
| 16w_SITTD12 | 0.04048543 | 0.39765278 | 9.42E-05   | 0.10978   | 0.31414    |
| 16w_SITTD12 | 0.03352158 | 0.3298283  | 8.61E-05   | 0.088522  | 0.60151    |
| 16w_SITTD12 | 0.05175059 | 0.5073699  | 0.00010668 | 0.092211  | -0.011455  |
| 16w_SITTD12 | 0.09180944 | 0.89752346 | 0.00013374 | 0.052539  | -1.336     |
| 16w_SITTD12 | 0.05121668 | 0.5021699  | 0.00010597 | 0.092472  | -0.0001745 |

|             |            |            |            |          |            |
|-------------|------------|------------|------------|----------|------------|
| 16w_SITTD12 | 0.05126463 | 0.50263685 | 0.00010597 | 0.092472 | -0.0001745 |
| 16w_SITTD12 | 0.05595886 | 0.5483564  | 0.00011078 | 0.094541 | -0.17881   |
| 16w_SITTD12 | 0.04761386 | 0.46708015 | 0.00010234 | 0.09734  | 0.10986    |
| 16w_SITTD12 | 0.0787259  | 0.7700962  | 0.00012797 | 0.057152 | -1.1666    |
| 16w_SITTD12 | 0.08513412 | 0.8325091  | 0.0001312  | 0.05293  | -1.2883    |
| 16w_SITTD12 | 0.09052602 | 0.88502353 | 0.00013338 | 0.052577 | -1.3317    |
| 16w_SITTD12 | 0.05783741 | 0.56665254 | 0.00011241 | 0.096416 | -0.25188   |
| 16w_SITTD12 | 0.06372088 | 0.62395465 | 0.00011787 | 0.097201 | -0.5246    |
| 16w_SITTD12 | 0.03271453 | 0.32196802 | 8.48E-05   | 0.082909 | 0.6305     |
| 16w_SITTD12 | 0.04523069 | 0.4438693  | 9.97E-05   | 0.10268  | 0.17344    |
| 16w_SITTD12 | 0.04820685 | 0.4728556  | 0.00010271 | 0.09665  | 0.091263   |
| 16w_SITTD12 | 0.08146984 | 0.7968209  | 0.00012942 | 0.054478 | -1.2295    |
| 16w_SITTD12 | 0.04700037 | 0.4611051  | 0.00010159 | 0.098799 | 0.12814    |
| 16w_SITTD12 | 0.0620709  | 0.60788465 | 0.00011642 | 0.098794 | -0.44141   |
| 16w_SITTD12 | 0.08593863 | 0.8403446  | 0.0001315  | 0.052818 | -1.2961    |
| 16w_SITTD12 | 0.043326   | 0.42531857 | 9.74E-05   | 0.10696  | 0.21998    |
| 16w_SITTD12 | 0.07110443 | 0.6958668  | 0.00012331 | 0.075804 | -0.88959   |
| 16w_SITTD12 | 0.0610622  | 0.5980604  | 0.00011553 | 0.098907 | -0.39249   |
| 16w_SITTD12 | 0.05915103 | 0.57944655 | 0.00011368 | 0.097776 | -0.31309   |
| 16w_SITTD12 | 0.0680979  | 0.66658473 | 0.0001211  | 0.086439 | -0.74427   |
| 16w_SITTD12 | 0.07835567 | 0.76649034 | 0.00012778 | 0.057615 | -1.1573    |
| 16w_SITTD12 | 0.04510193 | 0.44261527 | 9.93E-05   | 0.10345  | 0.17344    |
| 16w_SITTD12 | 0.01468604 | 0.14637934 | 6.44E-05   | 0.021412 | 0.20962    |
| 16w_SITTD12 | 0.08798654 | 0.86029035 | 0.00013235 | 0.052652 | -1.315     |
| 16w_SITTD12 | 0.07769499 | 0.76005566 | 0.0001274  | 0.058646 | -1.1379    |
| 16w_SITTD12 | 0.06141741 | 0.60152    | 0.00011583 | 0.09893  | -0.4087    |
| 16w_SITTD12 | 0.01715479 | 0.17042373 | 6.69E-05   | 0.025607 | 0.33781    |
| 16w_SITTD12 | 0.0501578  | 0.4918569  | 0.0001049  | 0.093366 | 0.032151   |
| 16w_SITTD12 | 0.07604957 | 0.74403    | 0.0001264  | 0.06191  | -1.0832    |
| 16w_SITTD12 | 0.01919079 | 0.1902534  | 6.91E-05   | 0.029782 | 0.46374    |
| 16w_SITTD12 | 0.05737353 | 0.56213456 | 0.00011209 | 0.096042 | -0.23694   |
| 16w_SITTD12 | 0.08206729 | 0.8026397  | 0.00012976 | 0.054048 | -1.2424    |
| 16w_SITTD12 | 0.04238866 | 0.41618928 | 9.62E-05   | 0.10856  | 0.24945    |
| 16w_SITTD12 | 0.02232045 | 0.22073476 | 7.26E-05   | 0.037419 | 0.64161    |
| 16w_SITTD12 | 0.05865161 | 0.5745824  | 0.00011337 | 0.097465 | -0.2822    |
| 16w_SITTD12 | 0.01985342 | 0.19670705 | 6.99E-05   | 0.031319 | 0.50588    |
| 16w_SITTD12 | 0.07680671 | 0.7514042  | 0.000127   | 0.059827 | -1.1061    |
| 16w_SITTD12 | 0.04733251 | 0.46434003 | 0.00010197 | 0.098057 | 0.11903    |
| 16w_SITTD12 | 0.06449822 | 0.6315256  | 0.00011843 | 0.096001 | -0.55833   |
| 16w_SITTD12 | 0.07480013 | 0.7318611  | 0.00012577 | 0.064358 | -1.0462    |
| 16w_SITTD12 | 0.02915555 | 0.28730533 | 8.07E-05   | 0.064343 | 0.751      |
| 16w_SITTD12 | 0.07195015 | 0.70410377 | 0.00012401 | 0.07238  | -0.92016   |
| 16w_SITTD12 | 0.06470969 | 0.63358516 | 0.00011843 | 0.096001 | -0.57526   |
| 16w_SITTD12 | 0.06152853 | 0.6026022  | 0.00011583 | 0.09893  | -0.42501   |
| 16w_SITTD12 | 0.01278362 | 0.12785074 | 6.24E-05   | 0.018271 | 0.13519    |
| 16w_SITTD12 | 0.07030623 | 0.6880927  | 0.00012284 | 0.078159 | -0.8424    |



|             |            |            |            |           |            |
|-------------|------------|------------|------------|-----------|------------|
| 16w_SITTD12 | 0.04613448 | 0.4526717  | 0.00010046 | 0.10111   | 0.14626    |
| 16w_SITTD12 | 0.06044817 | 0.59208006 | 0.00011492 | 0.0987    | -0.37638   |
| 16w_SITTD12 | 0.01066092 | 0.10717661 | 6.05E-05   | 0.01548   | 0.10741    |
| 16w_SITTD12 | 0.06507874 | 0.6371795  | 0.00011898 | 0.094504  | -0.59222   |
| 16w_SITTD12 | 0.0062205  | 0.0639291  | 5.66E-05   | 0.010584  | 0.18365    |
| 16w_SITTD12 | 0.05311789 | 0.52068675 | 0.00010807 | 0.092373  | -0.059017  |
| 16w_SITTD12 | 0.03190542 | 0.31408772 | 8.40E-05   | 0.07911   | 0.67094    |
| 16w_SITTD12 | 0.0526381  | 0.5160138  | 0.00010738 | 0.092189  | -0.046772  |
| 16w_SITTD12 | 0.05644863 | 0.55312645 | 0.00011111 | 0.094909  | -0.19309   |
| 16w_SITTD12 | 0.01242754 | 0.12438266 | 6.21E-05   | 0.017782  | 0.12723    |
| 16w_SITTD12 | 0.07338714 | 0.7180993  | 0.00012491 | 0.068128  | -0.97873   |
| 16w_SITTD12 | 0.0317882  | 0.31294605 | 8.40E-05   | 0.07911   | 0.67094    |
| 16w_SITTD12 | 0.06588929 | 0.64507395 | 0.00011953 | 0.092756  | -0.64315   |
| 16w_SITTD12 | 0.05707077 | 0.55918586 | 0.00011177 | 0.095663  | -0.22216   |
| 16w_SITTD12 | 0.05144718 | 0.50441486 | 0.00010632 | 0.092309  | -0.0001745 |
| 16w_SITTD12 | 0.060487   | 0.59245825 | 0.00011492 | 0.0987    | -0.37638   |
| 16w_SITTD12 | 0.0397538  | 0.39052704 | 9.34E-05   | 0.10962   | 0.33794    |
| 16w_SITTD12 | 0.05388552 | 0.5281631  | 0.00010876 | 0.092731  | -0.084185  |
| 16w_SITTD12 | 0.05884687 | 0.57648414 | 0.00011337 | 0.097465  | -0.29758   |
| 16w_SITTD12 | 0.0782603  | 0.7655615  | 0.00012778 | 0.057615  | -1.1573    |
| 16w_SITTD12 | 0.02803314 | 0.27637357 | 7.94E-05   | 0.059253  | 0.76661    |
| 16w_SITTD12 | 0.07404712 | 0.7245272  | 0.00012534 | 0.066176  | -1.0066    |
| 16w_SITTD12 | 0.08840994 | 0.864414   | 0.00013248 | 0.05264   | -1.3176    |
| 16w_SITTD12 | 0.04831287 | 0.4738882  | 0.00010308 | 0.095994  | 0.091263   |
| 16w_SITTD12 | 0.05781027 | 0.5663882  | 0.00011241 | 0.096416  | -0.25188   |
| 16w_SITTD12 | 0.06302288 | 0.6171565  | 0.0001173  | 0.098072  | -0.49111   |
| 16w_SITTD12 | 0.07290181 | 0.7133724  | 0.00012446 | 0.070202  | -0.96444   |
| 16w_SITTD12 | 0.05222762 | 0.5120159  | 0.00010703 | 0.092172  | -0.03476   |
| 16w_SITTD12 | 0.05792937 | 0.5675482  | 0.00011273 | 0.096781  | -0.25188   |
| 16w_SITTD12 | 0.08050128 | 0.78738755 | 0.00012889 | 0.055287  | -1.2081    |
| 16w_SITTD12 | 0.00547262 | 0.05664518 | 5.61E-05   | 0.0099627 | 0.20797    |
| 16w_SITTD12 | 0.05864697 | 0.5745373  | 0.00011337 | 0.097465  | -0.2822    |
| 16w_SITTE12 | 0.04157868 | 0.4083005  | 9.54E-05   | 0.10929   | 0.28067    |
| 16w_SITTE12 | 0.03567032 | 0.35075593 | 8.86E-05   | 0.098764  | 0.50933    |
| 16w_SITTE12 | 0.00743721 | 0.0757793  | 5.78E-05   | 0.011928  | 0.14372    |
| 16w_SITTE12 | 0.04494105 | 0.44104832 | 9.93E-05   | 0.10345   | 0.18258    |
| 16w_SITTE12 | 0.04606968 | 0.4520406  | 0.00010046 | 0.10111   | 0.14626    |
| 16w_SITTE12 | 0.05496471 | 0.5386739  | 0.00010978 | 0.093528  | -0.13708   |
| 16w_SITTE12 | 0.06028606 | 0.5905011  | 0.00011492 | 0.0987    | -0.36038   |
| 16w_SITTE12 | 0.04928403 | 0.4833468  | 0.00010417 | 0.094268  | 0.062467   |
| 16w_SITTE12 | 0.08109244 | 0.7931451  | 0.00012924 | 0.054725  | -1.2227    |
| 16w_SITTE12 | 0.07209404 | 0.70550513 | 0.00012401 | 0.07238   | -0.93514   |
| 16w_SITTE12 | 0.05027552 | 0.49300346 | 0.0001049  | 0.093366  | 0.032151   |
| 16w_SITTE12 | 0.00679666 | 0.06954067 | 5.72E-05   | 0.011238  | 0.16213    |
| 16w_SITTE12 | 0.07357559 | 0.71993464 | 0.00012491 | 0.068128  | -0.99278   |
| 16w_SITTE12 | 0.04377734 | 0.42971432 | 9.78E-05   | 0.10633   | 0.21046    |

|             |            |            |            |           |           |
|-------------|------------|------------|------------|-----------|-----------|
| 16w_SITTE12 | 0.01489362 | 0.14840107 | 6.44E-05   | 0.021412  | 0.22576   |
| 16w_SITTE12 | 0.07498617 | 0.73367304 | 0.00012577 | 0.064358  | -1.0462   |
| 16w_SITTE12 | 0.06577121 | 0.6439238  | 0.00011953 | 0.092756  | -0.62617  |
| 16w_SITTE12 | 0.06074988 | 0.59501857 | 0.00011523 | 0.098828  | -0.39249  |
| 16w_SITTE12 | 0.03996229 | 0.39255768 | 9.34E-05   | 0.10962   | 0.32588   |
| 16w_SITTE12 | 0.06894656 | 0.6748502  | 0.00012186 | 0.08293   | -0.77743  |
| 16w_SITTE12 | 0.02701686 | 0.26647547 | 7.82E-05   | 0.054511  | 0.77219   |
| 16w_SITTE12 | 0.01901409 | 0.18853244 | 6.87E-05   | 0.029043  | 0.46374   |
| 16w_SITTE12 | 0.02421276 | 0.23916493 | 7.50E-05   | 0.043782  | 0.72811   |
| 16w_SITTE12 | 0.06918199 | 0.67714316 | 0.00012186 | 0.08293   | -0.79386  |
| 16w_SITTE12 | 0.04362144 | 0.42819598 | 9.78E-05   | 0.10633   | 0.21998   |
| 16w_SITTE12 | 0.06066666 | 0.594208   | 0.00011523 | 0.098828  | -0.37638  |
| 16w_SITTE12 | 0.03203569 | 0.3153565  | 8.40E-05   | 0.07911   | 0.65793   |
| 16w_SITTE12 | 0.06924141 | 0.67772186 | 0.00012211 | 0.081739  | -0.79386  |
| 16w_SITTE12 | 0.05299229 | 0.5194635  | 0.00010773 | 0.092257  | -0.059017 |
| 16w_SITTE12 | 0.05902948 | 0.57826275 | 0.00011368 | 0.097776  | -0.29758  |
| 16w_SITTE12 | 0.00452041 | 0.04737111 | 5.52E-05   | 0.0090922 | 0.24903   |
| 16w_SITTE12 | 0.04473606 | 0.43905184 | 9.89E-05   | 0.10421   | 0.18258   |
| 16w_SITTE12 | 0.04731109 | 0.4641314  | 0.00010197 | 0.098057  | 0.11903   |
| 16w_SITTE12 | 0.00251023 | 0.0277929  | 5.36E-05   | 0.0075574 | 0.34395   |
| 16w_SITTE12 | 0.03711196 | 0.3647968  | 9.02E-05   | 0.1042    | 0.4477    |
| 16w_SITTE12 | 0.08095277 | 0.7917848  | 0.00012924 | 0.054725  | -1.2227   |
| 16w_SITTE12 | 0.07501816 | 0.73398465 | 0.00012577 | 0.064358  | -1.0462   |
| 16w_SITTE12 | 0.0550198  | 0.53921044 | 0.00010978 | 0.093528  | -0.13708  |
| 16w_SITTE12 | 0.07063197 | 0.69126534 | 0.00012308 | 0.076976  | -0.8583   |
| 16w_SITTE12 | 0.05439974 | 0.5331713  | 0.0001091  | 0.092966  | -0.11022  |
| 16w_SITTE12 | 0.04742935 | 0.4652832  | 0.00010197 | 0.098057  | 0.10986   |
| 16w_SITTE12 | 0.04601483 | 0.4515064  | 0.00010046 | 0.10111   | 0.1553    |
| 16w_SITTE12 | 0.04074877 | 0.4002176  | 9.46E-05   | 0.10971   | 0.3027    |
| 16w_SITTE12 | 0.05767136 | 0.5650353  | 0.00011241 | 0.096416  | -0.25188  |
| 16w_SITTE12 | 0.05153206 | 0.50524145 | 0.00010632 | 0.092309  | -0.011455 |
| 16w_SITTE12 | 0.04969638 | 0.48736295 | 0.00010453 | 0.09379   | 0.052555  |
| 16w_SITTE12 | 0.03501033 | 0.34432802 | 8.77E-05   | 0.095565  | 0.54051   |
| 16w_SITTE12 | 0.04426416 | 0.43445572 | 9.86E-05   | 0.10494   | 0.20107   |
| 16w_SITTE12 | 0.05522562 | 0.541215   | 0.00011011 | 0.093847  | -0.13708  |
| 16w_SITTE12 | 0.07073792 | 0.6922972  | 0.00012308 | 0.076976  | -0.87403  |
| 16w_SITTE12 | 0.02424467 | 0.23947568 | 7.50E-05   | 0.043782  | 0.72811   |
| 16w_SITTE12 | 0.04868379 | 0.47750074 | 0.00010344 | 0.095375  | 0.081803  |
| 16w_SITTE12 | 0.05273522 | 0.5169597  | 0.00010773 | 0.092257  | -0.046772 |
| 16w_SITTE12 | 0.07241724 | 0.708653   | 0.00012424 | 0.071279  | -0.9499   |
| 16w_SITTE12 | 0.049785   | 0.48822603 | 0.00010453 | 0.09379   | 0.052555  |
| 16w_SITTE12 | 0.0684948  | 0.6704503  | 0.00012136 | 0.085284  | -0.7609   |
| 16w_SITTE12 | 0.01226916 | 0.12284008 | 6.21E-05   | 0.017782  | 0.12723   |
| 16w_SITTE12 | 0.05698511 | 0.5583516  | 0.00011177 | 0.095663  | -0.22216  |
| 16w_SITTE12 | 0.06513897 | 0.6377661  | 0.00011898 | 0.094504  | -0.59222  |
| 16w_SITTE12 | 0.06448537 | 0.6314004  | 0.00011843 | 0.096001  | -0.55833  |

|             |            |            |            |          |           |
|-------------|------------|------------|------------|----------|-----------|
| 16w_SITTE12 | 0.06970985 | 0.68228424 | 0.00012235 | 0.080544 | -0.82636  |
| 16w_SITTE12 | 0.0637624  | 0.624359   | 0.00011787 | 0.097201 | -0.5246   |
| 16w_SITTE12 | 0.04859775 | 0.47666278 | 0.00010344 | 0.095375 | 0.081803  |
| 16w_SITTE12 | 0.03882461 | 0.38147724 | 9.22E-05   | 0.10852  | 0.37625   |
| 16w_SITTE12 | 0.02329109 | 0.23018834 | 7.38E-05   | 0.040447 | 0.68948   |
| 16w_SITTE12 | 0.08219255 | 0.80385965 | 0.00012976 | 0.054048 | -1.2424   |
| 16w_SITTE12 | 0.03506123 | 0.3448237  | 8.77E-05   | 0.095565 | 0.54051   |
| 16w_SITTE12 | 0.00726726 | 0.07412401 | 5.75E-05   | 0.011579 | 0.15252   |
| 16w_SITTE12 | 0.01273878 | 0.12741402 | 6.24E-05   | 0.018271 | 0.13519   |
| 16w_SITTE12 | 0.05275671 | 0.517169   | 0.00010773 | 0.092257 | -0.046772 |
| 16w_SITTE12 | 0.05185642 | 0.5084006  | 0.00010668 | 0.092211 | -0.022986 |
| 16w_SITTE12 | 0.04739161 | 0.4649156  | 0.00010197 | 0.098057 | 0.11903   |
| 16w_SITTE12 | 0.06658603 | 0.6518598  | 0.00012006 | 0.090801 | -0.67704  |
| 16w_SITTE12 | 0.07272036 | 0.71160525 | 0.00012446 | 0.070202 | -0.9499   |
| 16w_SITTE12 | 0.01580697 | 0.15729669 | 6.54E-05   | 0.023132 | 0.26052   |
| 16w_SITTE12 | 0.04874751 | 0.47812134 | 0.00010344 | 0.095375 | 0.081803  |
| 16w_SITTE12 | 0.0455703  | 0.44717687 | 0.00010009 | 0.1019   | 0.16436   |
| 16w_SITTE12 | 0.03525068 | 0.34666884 | 8.81E-05   | 0.097198 | 0.52494   |
| 16w_SITTE12 | 0.05095498 | 0.4996211  | 0.00010561 | 0.092703 | 0.010852  |
| 16w_SITTE12 | 0.01399431 | 0.13964224 | 6.37E-05   | 0.020323 | 0.18023   |
| 16w_SITTE12 | 0.05895779 | 0.5775644  | 0.00011368 | 0.097776 | -0.29758  |
| 16w_SITTE12 | 0.0246158  | 0.24309039 | 7.54E-05   | 0.044969 | 0.73857   |
| 16w_SITTE12 | 0.07984964 | 0.78104085 | 0.00012871 | 0.055605 | -1.1924   |
| 16w_SITTE12 | 0.04674121 | 0.45858106 | 0.00010122 | 0.099559 | 0.12814   |
| 16w_SITTE12 | 0.02506399 | 0.24745552 | 7.58E-05   | 0.046199 | 0.74769   |
| 16w_SITTE12 | 0.08658835 | 0.84667265 | 0.00013179 | 0.052739 | -1.3031   |
| 16w_SITTE12 | 0.03096221 | 0.30490127 | 8.28E-05   | 0.073435 | 0.70647   |
| 16w_SITTE12 | 0.07715035 | 0.75475115 | 0.0001272  | 0.059217 | -1.117    |
| 16w_SITTE12 | 0.01135986 | 0.11398401 | 6.11E-05   | 0.016373 | 0.1115    |
| 16w_SITTE12 | 0.01344212 | 0.13426416 | 6.30E-05   | 0.019276 | 0.15521   |
| 16w_SITTE12 | 0.01329742 | 0.13285483 | 6.30E-05   | 0.019276 | 0.15521   |
| 16w_SITTE12 | 0.04250081 | 0.41728154 | 9.66E-05   | 0.10808  | 0.24945   |
| 16w_SITTE12 | 0.05189005 | 0.50872815 | 0.00010668 | 0.092211 | -0.022986 |
| 16w_SITTE12 | 0.027336   | 0.26958376 | 7.86E-05   | 0.05605  | 0.77153   |
| 16w_SITTE12 | 0.05093421 | 0.4994188  | 0.00010561 | 0.092703 | 0.010852  |
| 16w_SITTE12 | 0.03576402 | 0.35166857 | 8.86E-05   | 0.098764 | 0.50933   |
| 16w_SITTE12 | 0.0136509  | 0.13629755 | 6.34E-05   | 0.019794 | 0.16714   |
| 16w_SITTE12 | 0.03200634 | 0.31507057 | 8.40E-05   | 0.07911  | 0.65793   |
| 16w_SITTE12 | 0.03051069 | 0.3005037  | 8.23E-05   | 0.07157  | 0.71698   |
| 16w_SITTE12 | 0.05883678 | 0.57638586 | 0.00011337 | 0.097465 | -0.29758  |
| 16w_SITTE12 | 0.01982521 | 0.1964323  | 6.99E-05   | 0.031319 | 0.50588   |
| 16w_SITTE12 | 0.03330094 | 0.3276794  | 8.57E-05   | 0.086671 | 0.61617   |
| 16w_SITTE12 | 0.05087481 | 0.4988402  | 0.00010561 | 0.092703 | 0.010852  |
| 16w_SITTE12 | 0.03872343 | 0.38049173 | 9.22E-05   | 0.10852  | 0.37625   |
| 16w_SITTE12 | 0.0385938  | 0.37922922 | 9.18E-05   | 0.10791  | 0.37625   |
| 16w_SITTE12 | 0.04967801 | 0.487184   | 0.00010453 | 0.09379  | 0.052555  |

|             |            |            |            |          |          |
|-------------|------------|------------|------------|----------|----------|
| 16w_SITTE12 | 0.04548097 | 0.44630694 | 9.97E-05   | 0.10268  | 0.16436  |
| 16w_SITTE12 | 0.0532609  | 0.5220796  | 0.00010807 | 0.092373 | -0.07149 |
| 16w_SITTE12 | 0.06820398 | 0.66761786 | 0.00012136 | 0.085284 | -0.74427 |
| 16w_SITTE12 | 0.04894395 | 0.4800346  | 0.00010381 | 0.094798 | 0.072211 |
| 16w_SITTE12 | 0.06042425 | 0.59184706 | 0.00011492 | 0.0987   | -0.37638 |
| 16w_SITTE12 | 0.06589298 | 0.64510983 | 0.00011953 | 0.092756 | -0.64315 |
| 16w_SITTE12 | 0.0500364  | 0.4906746  | 0.0001049  | 0.093366 | 0.042456 |
| 16w_SITTE12 | 0.05428571 | 0.53206074 | 0.0001091  | 0.092966 | -0.11022 |
| 16w_SITTE12 | 0.03584705 | 0.3524772  | 8.86E-05   | 0.098764 | 0.49376  |
| 16w_SITTE12 | 0.02229059 | 0.22044398 | 7.26E-05   | 0.037419 | 0.64161  |
| 16w_SITTE12 | 0.07802714 | 0.76329064 | 0.00012759 | 0.058113 | -1.1478  |
| 16w_SITTE12 | 0.04787677 | 0.46964082 | 0.00010234 | 0.09734  | 0.10061  |
| 16w_SITTE12 | 0.06170632 | 0.6043338  | 0.00011613 | 0.098894 | -0.42501 |
| 16w_SITTE12 | 0.043434   | 0.42637038 | 9.74E-05   | 0.10696  | 0.21998  |
| 16w_SITTE12 | 0.05246327 | 0.5143111  | 0.00010738 | 0.092189 | -0.03476 |
| 16w_SITTE12 | 0.05781261 | 0.566411   | 0.00011241 | 0.096416 | -0.25188 |
| 16w_SITTE12 | 0.08171739 | 0.7992318  | 0.00012959 | 0.054253 | -1.2361  |
| 16w_SITTE12 | 0.07713408 | 0.75459266 | 0.0001272  | 0.059217 | -1.117   |
| 16w_SITTE12 | 0.07213494 | 0.70590353 | 0.00012401 | 0.07238  | -0.93514 |
| 16w_SITTE12 | 0.03827797 | 0.37615314 | 9.14E-05   | 0.10717  | 0.38979  |
| 16w_SITTE12 | 0.05956124 | 0.5834418  | 0.000114   | 0.098059 | -0.32873 |
| 16w_SITTE12 | 0.07522607 | 0.73600954 | 0.00012598 | 0.063504 | -1.0589  |
| 16w_SITTE12 | 0.06845639 | 0.6700762  | 0.00012136 | 0.085284 | -0.7609  |
| 16w_SITTE12 | 0.05245847 | 0.51426435 | 0.00010738 | 0.092189 | -0.03476 |
| 16w_SITTE12 | 0.04319131 | 0.42400673 | 9.74E-05   | 0.10696  | 0.22964  |
| 16w_SITTE12 | 0.09195998 | 0.8989897  | 0.00013385 | 0.052525 | -1.3372  |
| 16w_SITTE12 | 0.06693382 | 0.6552471  | 0.00012032 | 0.089759 | -0.69393 |
| 16w_SITTE12 | 0.04279725 | 0.42016876 | 9.70E-05   | 0.10755  | 0.23945  |
| 16w_SITTE12 | 0.06049066 | 0.5924939  | 0.00011492 | 0.0987   | -0.37638 |
| 16w_SITTE12 | 0.05677222 | 0.5562781  | 0.00011144 | 0.095284 | -0.20754 |
| 16w_SITTE12 | 0.03110275 | 0.30627006 | 8.32E-05   | 0.075317 | 0.69526  |
| 16w_SITTE12 | 0.02442802 | 0.24126142 | 7.50E-05   | 0.043782 | 0.72811  |
| 16w_SITTE12 | 0.062359   | 0.6106906  | 0.00011672 | 0.098627 | -0.4579  |
| 16w_SITTE12 | 0.06381258 | 0.6248478  | 0.00011787 | 0.097201 | -0.5246  |
| 16w_SITTE12 | 0.08379597 | 0.8194762  | 0.00013058 | 0.053285 | -1.2702  |
| 16w_SITTE12 | 0.05701057 | 0.55859953 | 0.00011177 | 0.095663 | -0.22216 |
| 16w_SITTE12 | 0.07410184 | 0.7250601  | 0.00012534 | 0.066176 | -1.0201  |
| 16w_SITTE12 | 0.06374115 | 0.62415206 | 0.00011787 | 0.097201 | -0.5246  |
| 16w_SITTE12 | 0.04355677 | 0.4275661  | 9.78E-05   | 0.10633  | 0.21998  |
| 16w_SITTE12 | 0.05475555 | 0.53663677 | 0.00010944 | 0.093233 | -0.12355 |
| 16w_SITTE12 | 0.06624682 | 0.6485561  | 0.00011979 | 0.091802 | -0.66011 |
| 16w_SITTE12 | 0.04899419 | 0.4805239  | 0.00010381 | 0.094798 | 0.072211 |
| 16w_SITTE12 | 0.08616159 | 0.8425162  | 0.00013164 | 0.052775 | -1.2997  |
| 16w_SITTE12 | 0.06698985 | 0.6557928  | 0.00012032 | 0.089759 | -0.69393 |
| 16w_SITTE12 | 0.07079492 | 0.6928523  | 0.00012308 | 0.076976 | -0.87403 |
| 16w_SITTE12 | 0.03641019 | 0.3579619  | 8.94E-05   | 0.10166  | 0.47826  |

|             |            |            |            |          |            |
|-------------|------------|------------|------------|----------|------------|
| 16w_SITTE12 | 0.05125592 | 0.50255203 | 0.00010597 | 0.092472 | -0.0001745 |
| 16w_SITTE12 | 0.08112101 | 0.79342335 | 0.00012924 | 0.054725 | -1.2227    |
| 16w_SITTE12 | 0.00945345 | 0.09541649 | 5.95E-05   | 0.014213 | 0.11014    |
| 16w_SITTE12 | 0.03865985 | 0.37987247 | 9.22E-05   | 0.10852  | 0.37625    |
| 16w_SITTE12 | 0.04341444 | 0.42617995 | 9.74E-05   | 0.10696  | 0.21998    |
| 16w_SITTE12 | 0.0787024  | 0.7698673  | 0.00012797 | 0.057152 | -1.1666    |
| 16w_SITTE12 | 0.04138199 | 0.40638483 | 9.54E-05   | 0.10929  | 0.28067    |
| 16w_SITTE12 | 0.04524857 | 0.4440434  | 9.97E-05   | 0.10268  | 0.17344    |
| 16w_SITTE12 | 0.00948406 | 0.09571462 | 5.95E-05   | 0.014213 | 0.11014    |
| 16w_SITTE12 | 0.05515884 | 0.54056454 | 0.00011011 | 0.093847 | -0.13708   |
| 16w_SITTE12 | 0.0495008  | 0.48545805 | 0.00010417 | 0.094268 | 0.052555   |
| 16w_SITTE12 | 0.05348807 | 0.5242921  | 0.00010842 | 0.092532 | -0.07149   |
| 16w_SITTE12 | 0.04369069 | 0.42887044 | 9.78E-05   | 0.10633  | 0.21046    |
| 16w_SITTE12 | 0.07200448 | 0.7046328  | 0.00012401 | 0.07238  | -0.92016   |
| 16w_SITTE12 | 0.06751271 | 0.6608852  | 0.00012084 | 0.087573 | -0.71078   |
| 16w_SITTE12 | 0.05016979 | 0.4919737  | 0.0001049  | 0.093366 | 0.032151   |
| 16w_SITTE12 | 0.04325978 | 0.42467356 | 9.74E-05   | 0.10696  | 0.22964    |
| 16w_SITTE12 | 0.04420452 | 0.43387488 | 9.86E-05   | 0.10494  | 0.20107    |
| 16w_SITTE12 | 0.0665329  | 0.65134233 | 0.00012006 | 0.090801 | -0.66011   |
| 16w_SITTE12 | 0.04762546 | 0.46719313 | 0.00010234 | 0.09734  | 0.10986    |
| 16w_SITTE12 | 0.016223   | 0.1613486  | 6.58E-05   | 0.023731 | 0.27899    |
| 16w_SITTE12 | 0.06413125 | 0.6279515  | 0.00011815 | 0.096641 | -0.54144   |
| 16w_SITTE12 | 0.06717052 | 0.6575525  | 0.00012058 | 0.088682 | -0.69393   |
| 16w_SITTE12 | 0.04822221 | 0.47300524 | 0.00010271 | 0.09665  | 0.091263   |
| 16w_SITTE12 | 0.0262529  | 0.2590349  | 7.70E-05   | 0.050154 | 0.76965    |
| 16w_SITTE12 | 0.07005081 | 0.6856051  | 0.0001226  | 0.07935  | -0.8424    |
| 16w_SITTE12 | 0.05082189 | 0.49832487 | 0.00010561 | 0.092703 | 0.021622   |
| 16w_SITTE12 | 0.02401255 | 0.23721494 | 7.46E-05   | 0.042633 | 0.71639    |
| 16w_SITTE12 | 0.04019437 | 0.39481795 | 9.38E-05   | 0.10975  | 0.32588    |
| 16w_SITTE12 | 0.05480027 | 0.53707224 | 0.00010978 | 0.093528 | -0.12355   |
| 16w_SITTE12 | 0.06124087 | 0.5998006  | 0.00011553 | 0.098907 | -0.4087    |
| 16w_SITTE12 | 0.07104124 | 0.6952514  | 0.00012331 | 0.075804 | -0.88959   |
| 16w_SITTE12 | 0.05122258 | 0.50222737 | 0.00010597 | 0.092472 | -0.0001745 |
| 16w_SITTE12 | 0.06918558 | 0.67717814 | 0.00012186 | 0.08293  | -0.79386   |
| 16w_SITTE12 | 0.06226419 | 0.60976714 | 0.00011642 | 0.098794 | -0.4579    |
| 16w_SITTE12 | 0.0459008  | 0.4503958  | 0.00010046 | 0.10111  | 0.1553     |
| 16w_SITTE12 | 0.07535774 | 0.737292   | 0.00012598 | 0.063504 | -1.0589    |
| 16w_SITTE12 | 0.06809233 | 0.66653043 | 0.0001211  | 0.086439 | -0.74427   |
| 16w_SITTE12 | 0.05246029 | 0.51428205 | 0.00010738 | 0.092189 | -0.03476   |
| 16w_SITTE12 | 0.04977093 | 0.488089   | 0.00010453 | 0.09379  | 0.052555   |
| 16w_SITTE12 | 0.07460476 | 0.7299583  | 0.00012556 | 0.06525  | -1.0333    |
| 16w_SITTE12 | 0.05311946 | 0.52070194 | 0.00010807 | 0.092373 | -0.059017  |
| 16w_SITTE12 | 0.05147208 | 0.5046574  | 0.00010632 | 0.092309 | -0.0001745 |
| 16w_SITTE12 | 0.06156362 | 0.602944   | 0.00011583 | 0.09893  | -0.42501   |
| 16w_SITTE12 | 0.03962263 | 0.38924953 | 9.30E-05   | 0.10937  | 0.33794    |
| 16w_SITTE12 | 0.04997322 | 0.4900592  | 0.0001049  | 0.093366 | 0.042456   |

|             |            |            |            |          |           |
|-------------|------------|------------|------------|----------|-----------|
| 16w_SITTE12 | 0.07996466 | 0.7821611  | 0.00012871 | 0.055605 | -1.2004   |
| 16w_SITTE12 | 0.03158212 | 0.31093886 | 8.36E-05   | 0.07721  | 0.6834    |
| 16w_SITTE12 | 0.04950479 | 0.4854969  | 0.00010417 | 0.094268 | 0.052555  |
| 16w_SITTE12 | 0.06127896 | 0.60017157 | 0.00011553 | 0.098907 | -0.4087   |
| 16w_SITTE12 | 0.02855434 | 0.28144982 | 7.99E-05   | 0.060913 | 0.76245   |
| 16w_SITTE12 | 0.0281641  | 0.2776491  | 7.94E-05   | 0.059253 | 0.76661   |
| 16w_SITTE12 | 0.02488548 | 0.24571685 | 7.54E-05   | 0.044969 | 0.74769   |
| 16w_SITTE12 | 0.02676252 | 0.26399836 | 7.78E-05   | 0.053015 | 0.77158   |
| 16w_SITTE12 | 0.04946934 | 0.4851517  | 0.00010417 | 0.094268 | 0.052555  |
| 16w_SITTE12 | 0.0272988  | 0.26922143 | 7.82E-05   | 0.054511 | 0.77153   |
| 16w_SITTE12 | 0.072527   | 0.7097219  | 0.00012424 | 0.071279 | -0.9499   |
| 16w_SITTE12 | 0.05421901 | 0.5314111  | 0.0001091  | 0.092966 | -0.097097 |
| 16w_SITTE12 | 0.05839614 | 0.5720943  | 0.00011305 | 0.097132 | -0.2822   |
| 16w_SITTE12 | 0.07414515 | 0.725482   | 0.00012534 | 0.066176 | -1.0201   |
| 16w_SITTE12 | 0.04451016 | 0.4368517  | 9.89E-05   | 0.10421  | 0.19178   |
| 16w_SITTE12 | 0.05705702 | 0.55905193 | 0.00011177 | 0.095663 | -0.22216  |
| 16w_SITTE12 | 0.06237907 | 0.6108861  | 0.00011672 | 0.098627 | -0.4579   |
| 16w_SITTE12 | 0.06861275 | 0.67159915 | 0.00012161 | 0.084113 | -0.7609   |
| 16w_SITTE12 | 0.04626267 | 0.4539203  | 0.00010084 | 0.10033  | 0.14626   |
| 16w_SITTE12 | 0.0478632  | 0.46950865 | 0.00010234 | 0.09734  | 0.10061   |
| 16w_SITTE12 | 0.05309652 | 0.5204786  | 0.00010807 | 0.092373 | -0.059017 |
| 16w_SITTE12 | 0.01300723 | 0.13002853 | 6.27E-05   | 0.018769 | 0.14454   |
| 16w_SITTE12 | 0.04891698 | 0.47977194 | 0.00010344 | 0.095375 | 0.072211  |
| 16w_SITTE12 | 0.01217546 | 0.12192748 | 6.17E-05   | 0.017303 | 0.12723   |
| 16w_SITTE12 | 0.04701106 | 0.46120918 | 0.00010159 | 0.098799 | 0.12814   |
| 16w_SITTE12 | 0.02772725 | 0.27339435 | 7.90E-05   | 0.057632 | 0.76966   |
| 16w_SITTE12 | 0.04710968 | 0.4621697  | 0.00010159 | 0.098799 | 0.11903   |
| 16w_SITTE12 | 0.04232072 | 0.41552758 | 9.62E-05   | 0.10856  | 0.24945   |
| 16w_SITTE12 | 0.04044227 | 0.39723238 | 9.42E-05   | 0.10978  | 0.31414   |
| 16w_SITTE12 | 0.01383814 | 0.13812123 | 6.34E-05   | 0.019794 | 0.16714   |
| 16w_SITTE12 | 0.01150591 | 0.11540638 | 6.14E-05   | 0.016833 | 0.11542   |
| 16w_SITTE12 | 0.0555886  | 0.5447502  | 0.00011045 | 0.094186 | -0.1508   |
| 16w_SITTE12 | 0.01807527 | 0.1793888  | 6.80E-05   | 0.027619 | 0.4001    |
| 16w_SITTE12 | 0.0455549  | 0.44702688 | 0.00010009 | 0.1019   | 0.16436   |
| 16w_SITTE12 | 0.01007108 | 0.10143187 | 5.98E-05   | 0.014626 | 0.1081    |
| 16w_SITTE12 | 0.05538944 | 0.5428105  | 0.00011011 | 0.093847 | -0.1508   |
| 16w_SITTE12 | 0.02928744 | 0.28858978 | 8.07E-05   | 0.064343 | 0.7438    |
| 16w_SITTE12 | 0.04602566 | 0.45161188 | 0.00010046 | 0.10111  | 0.1553    |
| 16w_SITTE12 | 0.06748041 | 0.6605706  | 0.00012084 | 0.087573 | -0.71078  |
| 16w_SITTE12 | 0.00269998 | 0.02964098 | 5.39E-05   | 0.007795 | 0.3272    |
| 16w_SITTE12 | 0.05536382 | 0.54256094 | 0.00011011 | 0.093847 | -0.1508   |
| 16w_SITTE12 | 0.0828334  | 0.8101013  | 0.00013009 | 0.053693 | -1.2543   |
| 16w_SITTE12 | 0.09051061 | 0.88487357 | 0.00013338 | 0.052577 | -1.3301   |
| 16w_SITTE12 | 0.06871984 | 0.6726421  | 0.00012161 | 0.084113 | -0.77743  |
| 16w_SITTE12 | 0.03571897 | 0.35122976 | 8.86E-05   | 0.098764 | 0.50933   |
| 16w_SITTE12 | 0.05113921 | 0.5014154  | 0.00010597 | 0.092472 | 0.010852  |

|             |            |            |            |          |           |
|-------------|------------|------------|------------|----------|-----------|
| 16w_SITTE12 | 0.00871704 | 0.08824416 | 5.86E-05   | 0.013029 | 0.12259   |
| 16w_SITTE12 | 0.02188017 | 0.21644662 | 7.22E-05   | 0.03647  | 0.62396   |
| 16w_SITTE12 | 0.07596035 | 0.7431611  | 0.0001264  | 0.06191  | -1.0832   |
| 16w_SITTE12 | 0.05392173 | 0.52851576 | 0.00010876 | 0.092731 | -0.097097 |
| 16w_SITTE12 | 0.0577483  | 0.56578463 | 0.00011241 | 0.096416 | -0.25188  |
| 16w_SITTE12 | 0.03695739 | 0.36329144 | 9.02E-05   | 0.1042   | 0.4477    |
| 16w_SITTE12 | 0.01043394 | 0.10496596 | 6.02E-05   | 0.015048 | 0.10718   |
| 16w_SITTE12 | 0.04956085 | 0.4860429  | 0.00010417 | 0.094268 | 0.052555  |
| 16w_SITTE12 | 0.07205863 | 0.7051603  | 0.00012401 | 0.07238  | -0.93514  |
| 16w_SITTE12 | 0.07159069 | 0.70060277 | 0.00012355 | 0.074645 | -0.90497  |
| 16w_SITTE12 | 0.02253504 | 0.2228248  | 7.30E-05   | 0.038397 | 0.65846   |
| 16w_SITTE12 | 0.03101301 | 0.30539608 | 8.28E-05   | 0.073435 | 0.69526   |
| 16w_SITTE12 | 0.06852689 | 0.67076284 | 0.00012161 | 0.084113 | -0.7609   |
| 16w_SITTE12 | 0.04680616 | 0.45921358 | 0.00010122 | 0.099559 | 0.12814   |
| 16w_SITTE12 | 0.07626733 | 0.746151   | 0.0001266  | 0.061174 | -1.0948   |
| 16w_SITTE12 | 0.03975436 | 0.39053252 | 9.34E-05   | 0.10962  | 0.33794   |
| 16w_SITTE12 | 0.07344713 | 0.7186836  | 0.00012491 | 0.068128 | -0.99278  |
| 16w_SITTE12 | 0.06602146 | 0.6463612  | 0.00011953 | 0.092756 | -0.64315  |
| 16w_SITTE12 | 0.04640173 | 0.45527467 | 0.00010084 | 0.10033  | 0.13721   |
| 16w_SITTE12 | 0.08767439 | 0.85725015 | 0.00013221 | 0.052667 | -1.3123   |
| 16w_SITTE12 | 0.05978174 | 0.58558935 | 0.00011431 | 0.098311 | -0.3445   |
| 16w_SITTE12 | 0.05600125 | 0.5487692  | 0.00011078 | 0.094541 | -0.17881  |
| 16w_SITTE12 | 0.05018923 | 0.49216303 | 0.0001049  | 0.093366 | 0.032151  |
| 16w_SITTE12 | 0.04791832 | 0.47004545 | 0.00010271 | 0.09665  | 0.10061   |
| 16w_SITTE12 | 0.00853427 | 0.08646412 | 5.86E-05   | 0.013029 | 0.12259   |
| 16w_SITTE12 | 0.0459939  | 0.4513026  | 0.00010046 | 0.10111  | 0.1553    |
| 16w_SITTE12 | 0.07361823 | 0.72035    | 0.00012491 | 0.068128 | -0.99278  |
| 16w_SITTE12 | 0.05203947 | 0.5101834  | 0.00010703 | 0.092172 | -0.022986 |
| 16w_SITTE12 | 0.07311556 | 0.7154542  | 0.00012469 | 0.069151 | -0.97873  |
| 16w_SITTE12 | 0.05306033 | 0.52012616 | 0.00010807 | 0.092373 | -0.059017 |
| 16w_SITTE12 | 0.04311333 | 0.42324725 | 9.74E-05   | 0.10696  | 0.22964   |
| 16w_SITTE12 | 0.05895439 | 0.57753134 | 0.00011368 | 0.097776 | -0.29758  |
| 16w_SITTE12 | 0.06356546 | 0.622441   | 0.00011758 | 0.097678 | -0.5246   |
| 16w_SITTE12 | 0.02301622 | 0.22751124 | 7.34E-05   | 0.039406 | 0.67444   |
| 16w_SITTE12 | 0.04672856 | 0.45845783 | 0.00010122 | 0.099559 | 0.12814   |
| 16w_SITTE12 | 0.05312889 | 0.5207939  | 0.00010807 | 0.092373 | -0.059017 |
| 16w_SITTE12 | 0.0568374  | 0.55691296 | 0.00011177 | 0.095663 | -0.20754  |
| 16w_SITTE12 | 0.04998741 | 0.49019736 | 0.0001049  | 0.093366 | 0.042456  |
| 16w_SITTE12 | 0.04204473 | 0.4128396  | 9.58E-05   | 0.10896  | 0.25963   |
| 16w_SITTE12 | 0.01644066 | 0.16346848 | 6.62E-05   | 0.024342 | 0.29808   |
| 16w_SITTE12 | 0.0688122  | 0.6735416  | 0.00012161 | 0.084113 | -0.77743  |
| 16w_SITTE12 | 0.07784724 | 0.7615385  | 0.00012759 | 0.058113 | -1.1379   |
| 16w_SITTE12 | 0.04647709 | 0.45600858 | 0.00010084 | 0.10033  | 0.13721   |
| 16w_SITTE12 | 0.06336201 | 0.62045944 | 0.00011758 | 0.097678 | -0.50782  |
| 16w_SITTE12 | 0.0125181  | 0.12526463 | 6.21E-05   | 0.017782 | 0.13519   |
| 16w_SITTE12 | 0.06872939 | 0.67273504 | 0.00012161 | 0.084113 | -0.77743  |

|             |            |            |            |           |           |
|-------------|------------|------------|------------|-----------|-----------|
| 16w_SITTE12 | 0.06430617 | 0.6296551  | 0.00011815 | 0.096641  | -0.55833  |
| 16w_SITTE12 | 0.04240327 | 0.4163316  | 9.62E-05   | 0.10856   | 0.24945   |
| 16w_SITTE12 | 0.04504276 | 0.44203898 | 9.93E-05   | 0.10345   | 0.17344   |
| 16w_SITTE12 | 0.06296215 | 0.61656505 | 0.00011701 | 0.098387  | -0.49111  |
| 16w_SITTE12 | 0.0689005  | 0.67440164 | 0.00012186 | 0.08293   | -0.77743  |
| 16w_SITTE12 | 0.01824383 | 0.18103053 | 6.80E-05   | 0.027619  | 0.4001    |
| 16w_SITTE12 | 0.04853138 | 0.47601643 | 0.00010308 | 0.095994  | 0.081803  |
| 16w_SITTE12 | 0.06734315 | 0.65923375 | 0.00012058 | 0.088682  | -0.71078  |
| 16w_SITTE12 | 0.07706781 | 0.7539472  | 0.000127   | 0.059827  | -1.117    |
| 16w_SITTE12 | 0.045976   | 0.45112827 | 0.00010046 | 0.10111   | 0.1553    |
| 16w_SITTE12 | 0.02055968 | 0.20358574 | 7.06E-05   | 0.032941  | 0.54704   |
| 16w_SITTE12 | 0.05890018 | 0.57700336 | 0.00011368 | 0.097776  | -0.29758  |
| 16w_SITTE12 | 0.0258181  | 0.25480014 | 7.66E-05   | 0.04879   | 0.7616    |
| 16w_SITTE12 | 0.06055418 | 0.5931125  | 0.00011492 | 0.0987    | -0.37638  |
| 16w_SITTE12 | 0.03597983 | 0.3537704  | 8.90E-05   | 0.10026   | 0.49376   |
| 16w_SITTE12 | 0.08500233 | 0.8312255  | 0.0001312  | 0.05293   | -1.2841   |
| 16w_SITTE12 | 0.02264887 | 0.2239334  | 7.30E-05   | 0.038397  | 0.65846   |
| 16w_SITTE12 | 0.07564121 | 0.7400528  | 0.00012619 | 0.062687  | -1.0712   |
| 16w_SITTE12 | 0.04808945 | 0.47171223 | 0.00010271 | 0.09665   | 0.091263  |
| 16w_SITTE12 | 0.08756372 | 0.85617226 | 0.00013221 | 0.052667  | -1.3123   |
| 16w_SITTE12 | 0.00402725 | 0.04256795 | 5.50E-05   | 0.0088178 | 0.2638    |
| 16w_SITTE12 | 0.03543054 | 0.34842062 | 8.81E-05   | 0.097198  | 0.50933   |
| 16w_SITTE12 | 0.06006289 | 0.58832765 | 0.00011462 | 0.098526  | -0.3445   |
| 16w_SITTE12 | 0.0535455  | 0.52485144 | 0.00010842 | 0.092532  | -0.07149  |
| 16w_SITTE12 | 0.03830244 | 0.37639153 | 9.18E-05   | 0.10791   | 0.38979   |
| 16w_SITTE12 | 0.0157743  | 0.1569785  | 6.54E-05   | 0.023132  | 0.26052   |
| 16w_SITTE12 | 0.01526105 | 0.15197967 | 6.47E-05   | 0.021973  | 0.24275   |
| 16w_SITTE12 | 0.03738437 | 0.36745    | 9.06E-05   | 0.10531   | 0.43275   |
| 16w_SITTE12 | 0.01324207 | 0.13231575 | 6.30E-05   | 0.019276  | 0.15521   |
| 16w_SITTE12 | 0.05913545 | 0.57929486 | 0.00011368 | 0.097776  | -0.31309  |
| 16w_SITTE12 | 0.05634504 | 0.5521176  | 0.00011111 | 0.094909  | -0.19309  |
| 16w_SITTE12 | 0.02775232 | 0.2736385  | 7.90E-05   | 0.057632  | 0.76966   |
| 16w_SITTE12 | 0.02872217 | 0.28308436 | 8.03E-05   | 0.062611  | 0.75723   |
| 16w_SITTE12 | 0.06016007 | 0.58927417 | 0.00011462 | 0.098526  | -0.36038  |
| 16w_SITTE12 | 0.06124223 | 0.5998139  | 0.00011553 | 0.098907  | -0.4087   |
| 16w_SITTE12 | 0.07146735 | 0.69940144 | 0.00012355 | 0.074645  | -0.90497  |
| 16w_SITTE12 | 0.05197432 | 0.50954896 | 0.00010668 | 0.092211  | -0.022986 |
| 16w_SITTE12 | 0.06610348 | 0.64716005 | 0.00011979 | 0.091802  | -0.64315  |
| 16w_SITTE12 | 0.07305782 | 0.71489185 | 0.00012469 | 0.069151  | -0.96444  |
| 16w_SITTE12 | 0.03740899 | 0.3676898  | 9.06E-05   | 0.10531   | 0.43275   |
| 16w_SITTE12 | 0.07826506 | 0.76560783 | 0.00012778 | 0.057615  | -1.1573   |
| 16w_SITTE12 | 0.06357894 | 0.62257224 | 0.00011758 | 0.097678  | -0.5246   |
| 16w_SITTE12 | 0.04462781 | 0.43799755 | 9.89E-05   | 0.10421   | 0.19178   |
| 16w_SITTE12 | 0.05850943 | 0.57319766 | 0.00011305 | 0.097132  | -0.2822   |
| 16w_SITTE12 | 0.08461002 | 0.8274047  | 0.00013089 | 0.053084  | -1.2797   |
| 16w_SITTE12 | 0.08667986 | 0.8475639  | 0.00013179 | 0.052739  | -1.3031   |



|             |            |            |            |           |           |
|-------------|------------|------------|------------|-----------|-----------|
| 16w_SITTE12 | 0.01423623 | 0.14199841 | 6.37E-05   | 0.020323  | 0.19442   |
| 16w_SITTE12 | 0.02441464 | 0.24113119 | 7.50E-05   | 0.043782  | 0.72811   |
| 16w_SITTE12 | 0.0242137  | 0.23917408 | 7.50E-05   | 0.043782  | 0.72811   |
| 16w_SITTE12 | 0.05828479 | 0.5710098  | 0.00011305 | 0.097132  | -0.26697  |
| 16w_SITTE12 | 0.08019286 | 0.78438365 | 0.00012889 | 0.055287  | -1.2004   |
| 16w_SITTE12 | 0.06032351 | 0.5908659  | 0.00011492 | 0.0987    | -0.36038  |
| 16w_SITTE12 | 0.04180132 | 0.41046885 | 9.58E-05   | 0.10896   | 0.27003   |
| 16w_SITTE12 | 0.05086323 | 0.4987275  | 0.00010561 | 0.092703  | 0.010852  |
| 16w_SITTE12 | 0.03117532 | 0.30697682 | 8.32E-05   | 0.075317  | 0.69526   |
| 16w_SITTE12 | 0.01037664 | 0.10440793 | 6.02E-05   | 0.015048  | 0.10718   |
| 16w_SITTE12 | 0.08364875 | 0.81804234 | 0.00013058 | 0.053285  | -1.2651   |
| 16w_SITTE12 | 0.03215746 | 0.3165424  | 8.44E-05   | 0.081011  | 0.65793   |
| 16w_SITTE12 | 0.04972107 | 0.48760334 | 0.00010453 | 0.09379   | 0.052555  |
| 16w_SITTE12 | 0.0562353  | 0.5510488  | 0.00011111 | 0.094909  | -0.17881  |
| 16w_SITTE12 | 0.06519079 | 0.6382708  | 0.00011898 | 0.094504  | -0.59222  |
| 16w_SITTE12 | 0.05715613 | 0.5600172  | 0.00011177 | 0.095663  | -0.22216  |
| 16w_SITTE12 | 0.08016605 | 0.7841226  | 0.00012871 | 0.055605  | -1.2004   |
| 16w_SITTE12 | 0.05660823 | 0.5546809  | 0.00011144 | 0.095284  | -0.19309  |
| 16w_SITTE12 | 0.06924457 | 0.67775273 | 0.00012211 | 0.081739  | -0.79386  |
| 16w_SITTE12 | 0.07394118 | 0.72349536 | 0.00012513 | 0.067136  | -1.0066   |
| 16w_SITTE12 | 0.07849018 | 0.7678004  | 0.00012797 | 0.057152  | -1.1573   |
| 16w_SITTE12 | 0.08633893 | 0.8442434  | 0.00013164 | 0.052775  | -1.2997   |
| 16w_SITTE12 | 0.00283077 | 0.03091481 | 5.39E-05   | 0.007795  | 0.3272    |
| 16w_SITTE12 | 0.07367685 | 0.7209209  | 0.00012513 | 0.067136  | -0.99278  |
| 16w_SITTE12 | 0.05208955 | 0.51067114 | 0.00010703 | 0.092172  | -0.022986 |
| 16w_SITTE12 | 0.0692642  | 0.6779438  | 0.00012211 | 0.081739  | -0.79386  |
| 16w_SITTE12 | 0.02316586 | 0.22896868 | 7.34E-05   | 0.039406  | 0.68948   |
| 16w_SITTE12 | 0.06905556 | 0.6759118  | 0.00012186 | 0.08293   | -0.79386  |
| 16w_SITTE12 | 0.05403172 | 0.5295869  | 0.00010876 | 0.092731  | -0.097097 |
| 16w_SITTE12 | 0.07280696 | 0.71244866 | 0.00012446 | 0.070202  | -0.96444  |
| 16w_SITTE12 | 0.06795734 | 0.66521573 | 0.0001211  | 0.086439  | -0.74427  |
| 16w_SITTE12 | 0.054022   | 0.5294923  | 0.00010876 | 0.092731  | -0.097097 |
| 16w_SITTE12 | 0.05324874 | 0.5219611  | 0.00010807 | 0.092373  | -0.07149  |
| 16w_SITTE12 | 0.04830715 | 0.47383246 | 0.00010308 | 0.095994  | 0.091263  |
| 16w_SITTE12 | 0.05955377 | 0.583369   | 0.000114   | 0.098059  | -0.32873  |
| 16w_SITTE12 | 0.04584081 | 0.44981158 | 0.00010009 | 0.1019    | 0.1553    |
| 16w_SITTE12 | 0.06154769 | 0.60278887 | 0.00011583 | 0.09893   | -0.42501  |
| 16w_SITTE12 | 0.05723699 | 0.5608048  | 0.00011209 | 0.096042  | -0.22216  |
| 16w_SITTE12 | 0.02740275 | 0.2702339  | 7.86E-05   | 0.05605   | 0.77153   |
| 16w_SITTE12 | 0.06285435 | 0.61551505 | 0.00011701 | 0.098387  | -0.49111  |
| 16w_SITTE12 | 0.05486554 | 0.5377079  | 0.00010978 | 0.093528  | -0.12355  |
| 16w_SITTE12 | 0.04222132 | 0.4145595  | 9.62E-05   | 0.10856   | 0.25963   |
| 16w_SITTE12 | 0.00339657 | 0.03642539 | 5.44E-05   | 0.0082917 | 0.2947    |
| 16w_SITTE12 | 0.08533763 | 0.83449125 | 0.00013135 | 0.05287   | -1.2883   |
| 16w_SITTE12 | 0.0468891  | 0.46002144 | 0.00010159 | 0.098799  | 0.12814   |
| 16w_SITTE12 | 0.03748015 | 0.36838284 | 9.06E-05   | 0.10531   | 0.41807   |

|             |            |            |            |          |           |
|-------------|------------|------------|------------|----------|-----------|
| 16w_SITTE12 | 0.04815722 | 0.4723723  | 0.00010271 | 0.09665  | 0.091263  |
| 16w_SITTE12 | 0.05602223 | 0.54897356 | 0.00011078 | 0.094541 | -0.17881  |
| 16w_SITTE12 | 0.06845168 | 0.67003036 | 0.00012136 | 0.085284 | -0.7609   |
| 16w_SITTE12 | 0.06262513 | 0.6132826  | 0.00011672 | 0.098627 | -0.47447  |
| 16w_SITTE12 | 0.08526317 | 0.83376604 | 0.0001312  | 0.05293  | -1.2883   |
| 16w_SITTE12 | 0.07643156 | 0.74775046 | 0.0001268  | 0.060479 | -1.0948   |
| 16w_SITTE12 | 0.05339244 | 0.5233607  | 0.00010807 | 0.092373 | -0.07149  |
| 16w_SITTE12 | 0.08360226 | 0.8175895  | 0.00013042 | 0.053406 | -1.2651   |
| 16w_SITTE12 | 0.05436533 | 0.53283614 | 0.0001091  | 0.092966 | -0.11022  |
| 16w_SITTE12 | 0.01821306 | 0.18073077 | 6.80E-05   | 0.027619 | 0.4001    |
| 16w_SITTE12 | 0.07426637 | 0.72666264 | 0.00012534 | 0.066176 | -1.0201   |
| 16w_SITTE12 | 0.05962056 | 0.58401954 | 0.00011431 | 0.098311 | -0.32873  |
| 16w_SITTE12 | 0.04815909 | 0.4723905  | 0.00010271 | 0.09665  | 0.091263  |
| 16w_SITTE12 | 0.04131766 | 0.40575826 | 9.50E-05   | 0.10955  | 0.28067   |
| 16w_SITTE12 | 0.01739755 | 0.17278811 | 6.72E-05   | 0.026262 | 0.35829   |
| 16w_SITTE12 | 0.05664456 | 0.5550348  | 0.00011144 | 0.095284 | -0.20754  |
| 16w_SITTE12 | 0.06639987 | 0.6500467  | 0.00011979 | 0.091802 | -0.66011  |
| 16w_SITTE12 | 0.05387296 | 0.5280407  | 0.00010876 | 0.092731 | -0.084185 |
| 16w_SITTE12 | 0.04039664 | 0.39678803 | 9.42E-05   | 0.10978  | 0.31414   |
| 16w_SITTE12 | 0.04634347 | 0.4547072  | 0.00010084 | 0.10033  | 0.14626   |
| 16w_SITTE12 | 0.05429766 | 0.5321771  | 0.0001091  | 0.092966 | -0.11022  |
| 16w_SITTE12 | 0.03553784 | 0.3494657  | 8.81E-05   | 0.097198 | 0.50933   |
| 16w_SITTE12 | 0.05049889 | 0.495179   | 0.00010525 | 0.093003 | 0.021622  |
| 16w_SITTE12 | 0.03267978 | 0.32162958 | 8.48E-05   | 0.082909 | 0.64444   |
| 16w_SITTE12 | 0.06012323 | 0.58891535 | 0.00011462 | 0.098526 | -0.36038  |
| 16w_SITTE12 | 0.06034467 | 0.591072   | 0.00011492 | 0.0987   | -0.36038  |
| 16w_SITTE12 | 0.012573   | 0.12579933 | 6.24E-05   | 0.018271 | 0.13519   |
| 16w_SITTE12 | 0.07410903 | 0.7251302  | 0.00012534 | 0.066176 | -1.0201   |
| 16w_SITTE12 | 0.03022567 | 0.29772773 | 8.19E-05   | 0.069725 | 0.72675   |
| 16w_SITTE12 | 0.06651992 | 0.6512159  | 0.00012006 | 0.090801 | -0.66011  |
| 16w_SITTE12 | 0.02259596 | 0.22341809 | 7.30E-05   | 0.038397 | 0.65846   |
| 16w_SITTE12 | 0.04416142 | 0.43345508 | 9.86E-05   | 0.10494  | 0.20107   |
| 16w_SITTE12 | 0.04458209 | 0.43755224 | 9.89E-05   | 0.10421  | 0.19178   |
| 16w_SITTE12 | 0.06191833 | 0.60639864 | 0.00011613 | 0.098894 | -0.44141  |
| 16w_SITTE12 | 0.03321917 | 0.326883   | 8.57E-05   | 0.086671 | 0.61617   |
| 16w_SITTE12 | 0.0480861  | 0.47167957 | 0.00010271 | 0.09665  | 0.091263  |
| 16w_SITTE12 | 0.07633479 | 0.74680793 | 0.0001266  | 0.061174 | -1.0948   |
| 16w_SITTE12 | 0.07519816 | 0.73573774 | 0.00012598 | 0.063504 | -1.0589   |
| 16w_SITTE12 | 0.02670004 | 0.26338977 | 7.78E-05   | 0.053015 | 0.77158   |
| 16w_SITTE12 | 0.08116612 | 0.79386276 | 0.00012924 | 0.054725 | -1.2227   |
| 16w_SITTE12 | 0.05232955 | 0.51300865 | 0.00010703 | 0.092172 | -0.03476  |
| 16w_SITTE12 | 0.05288581 | 0.51842636 | 0.00010773 | 0.092257 | -0.059017 |
| 16w_SITTE12 | 0.02835672 | 0.27952507 | 7.99E-05   | 0.060913 | 0.76245   |
| 16w_SITTE12 | 0.05736017 | 0.5620045  | 0.00011209 | 0.096042 | -0.23694  |
| 16w_SITTE12 | 0.09726778 | 0.950685   | 0.00013546 | 0.052239 | -1.3446   |
| 16w_SITTE12 | 0.05354571 | 0.5248535  | 0.00010842 | 0.092532 | -0.07149  |

|             |            |            |            |           |            |
|-------------|------------|------------|------------|-----------|------------|
| 16w_SITTE12 | 0.07102183 | 0.69506234 | 0.00012331 | 0.075804  | -0.88959   |
| 16w_SITTE12 | 0.06004873 | 0.5881897  | 0.00011462 | 0.098526  | -0.3445    |
| 16w_SITTE12 | 0.0822615  | 0.8045313  | 0.00012993 | 0.053861  | -1.2424    |
| 16w_SITTE12 | 0.04783846 | 0.4692677  | 0.00010234 | 0.09734   | 0.10061    |
| 16w_SITTE12 | 0.04004952 | 0.3934072  | 9.38E-05   | 0.10975   | 0.32588    |
| 16w_SITTE12 | 0.05831232 | 0.5712779  | 0.00011305 | 0.097132  | -0.26697   |
| 16w_SITTE12 | 0.05234908 | 0.51319885 | 0.00010703 | 0.092172  | -0.03476   |
| 16w_SITTE12 | 0.04729655 | 0.4639897  | 0.00010197 | 0.098057  | 0.11903    |
| 16w_SITTE12 | 0.06547216 | 0.64101124 | 0.00011925 | 0.093659  | -0.60919   |
| 16w_SITTE12 | 0.08460575 | 0.8273631  | 0.00013089 | 0.053084  | -1.2797    |
| 16w_SITTE12 | 0.06624503 | 0.6485387  | 0.00011979 | 0.091802  | -0.66011   |
| 16w_SITTE12 | 0.00978611 | 0.09865639 | 5.95E-05   | 0.014213  | 0.1081     |
| 16w_SITTE12 | 0.03128169 | 0.30801287 | 8.32E-05   | 0.075317  | 0.69526    |
| 16w_SITTE12 | 0.0513497  | 0.5034655  | 0.00010632 | 0.092309  | -0.0001745 |
| 16w_SITTE12 | 0.04993274 | 0.4896649  | 0.00010453 | 0.09379   | 0.042456   |
| 16w_SITTE12 | 0.01020671 | 0.10275284 | 6.02E-05   | 0.015048  | 0.10718    |
| 16w_SITTE12 | 0.00362662 | 0.03866597 | 5.47E-05   | 0.008551  | 0.27903    |
| 16w_SITTE12 | 0.06394409 | 0.6261287  | 0.00011787 | 0.097201  | -0.54144   |
| 16w_SITTE12 | 0.00970752 | 0.09789097 | 5.95E-05   | 0.014213  | 0.11014    |
| 16w_SITTE12 | 0.0610224  | 0.5976728  | 0.00011553 | 0.098907  | -0.39249   |
| 16w_SITTE12 | 0.03543195 | 0.34843433 | 8.81E-05   | 0.097198  | 0.50933    |
| 16w_SITTE12 | 0.07536738 | 0.7373859  | 0.00012598 | 0.063504  | -1.0589    |
| 16w_SITTE12 | 0.08439684 | 0.8253284  | 0.00013089 | 0.053084  | -1.2797    |
| 16w_SITTE12 | 0.05138778 | 0.50383633 | 0.00010632 | 0.092309  | -0.0001745 |
| 16w_SITTE12 | 0.0157142  | 0.15639314 | 6.54E-05   | 0.023132  | 0.26052    |
| 16w_SITTE12 | 0.02835152 | 0.2794744  | 7.99E-05   | 0.060913  | 0.76245    |
| 16w_SITTE12 | 0.04838735 | 0.47461355 | 0.00010308 | 0.095994  | 0.091263   |
| 16w_SITTE12 | 0.07213593 | 0.70591307 | 0.00012401 | 0.07238   | -0.93514   |
| 16w_SITTE12 | 0.05117042 | 0.50171936 | 0.00010597 | 0.092472  | -0.0001745 |
| 16w_SITTE12 | 0.06640144 | 0.650062   | 0.00011979 | 0.091802  | -0.66011   |
| 16w_SITTE12 | 0.03832182 | 0.3765803  | 9.18E-05   | 0.10791   | 0.38979    |
| 16w_SITTE12 | 0.0529346  | 0.5189016  | 0.00010773 | 0.092257  | -0.059017  |
| 16w_SITTE12 | 0.01115155 | 0.11195511 | 6.08E-05   | 0.015922  | 0.1115     |
| 16w_SITTE12 | 0.05187856 | 0.5086162  | 0.00010668 | 0.092211  | -0.022986  |
| 16w_SITTE12 | 0.00197175 | 0.0225484  | 5.34E-05   | 0.0073266 | 0.36099    |
| 16w_SITTE12 | 0.00729917 | 0.0744348  | 5.75E-05   | 0.011579  | 0.15252    |
| 16w_SITTE12 | 0.05461279 | 0.5352463  | 0.00010944 | 0.093233  | -0.12355   |
| 16w_SITTE12 | 0.04349027 | 0.42691848 | 9.78E-05   | 0.10633   | 0.21998    |
| 16w_SITTE12 | 0.06622508 | 0.64834434 | 0.00011979 | 0.091802  | -0.66011   |
| 16w_SITTE12 | 0.04379271 | 0.42986402 | 9.82E-05   | 0.10565   | 0.21046    |
| 16w_SITTE12 | 0.03360756 | 0.3306657  | 8.61E-05   | 0.088522  | 0.60151    |
| 16w_SITTE12 | 0.04818931 | 0.47268483 | 0.00010271 | 0.09665   | 0.091263   |
| 16w_SITTE12 | 0.04699971 | 0.46109864 | 0.00010159 | 0.098799  | 0.12814    |
| 16w_SITTE12 | 0.01156648 | 0.11599632 | 6.14E-05   | 0.016833  | 0.11542    |
| 16w_SITTE12 | 0.03039673 | 0.2993938  | 8.23E-05   | 0.07157   | 0.71698    |
| 16w_SITTE12 | 0.06085644 | 0.59605634 | 0.00011523 | 0.098828  | -0.39249   |

|             |            |            |            |          |           |
|-------------|------------|------------|------------|----------|-----------|
| 16w_SITTE12 | 0.01002719 | 0.10100443 | 5.98E-05   | 0.014626 | 0.1081    |
| 16w_SITTE12 | 0.06478861 | 0.6343538  | 0.00011871 | 0.095287 | -0.57526  |
| 16w_SITTE12 | 0.0274631  | 0.27082163 | 7.86E-05   | 0.05605  | 0.77153   |
| 16w_SITTE12 | 0.04638227 | 0.4550851  | 0.00010084 | 0.10033  | 0.13721   |
| 16w_SITTE12 | 0.03792494 | 0.37271488 | 9.10E-05   | 0.1063   | 0.40374   |
| 16w_SITTE12 | 0.07729307 | 0.7561411  | 0.0001272  | 0.059217 | -1.1276   |
| 16w_SITTE12 | 0.05972958 | 0.5850814  | 0.00011431 | 0.098311 | -0.3445   |
| 16w_SITTE12 | 0.07490503 | 0.7328828  | 0.00012577 | 0.064358 | -1.0462   |
| 16w_SITTE12 | 0.07023915 | 0.6874394  | 0.00012284 | 0.078159 | -0.8424   |
| 16w_SITTE12 | 0.06152818 | 0.6025988  | 0.00011583 | 0.09893  | -0.42501  |
| 16w_SITTE12 | 0.05213292 | 0.51109356 | 0.00010703 | 0.092172 | -0.022986 |
| 16w_SITTE12 | 0.06191407 | 0.6063572  | 0.00011613 | 0.098894 | -0.44141  |
| 16w_SITTE12 | 0.03302744 | 0.32501557 | 8.52E-05   | 0.084798 | 0.61617   |
| 16w_SITTE12 | 0.06714188 | 0.6572735  | 0.00012058 | 0.088682 | -0.69393  |
| 16w_SITTE12 | 0.08605373 | 0.84146565 | 0.00013164 | 0.052775 | -1.2961   |
| 16w_SITTE12 | 0.07626942 | 0.7461713  | 0.0001266  | 0.061174 | -1.0948   |
| 16w_SITTE12 | 0.00704543 | 0.07196354 | 5.75E-05   | 0.011579 | 0.15252   |
| 16w_SITTE12 | 0.01188207 | 0.11907004 | 6.17E-05   | 0.017303 | 0.12065   |
| 16w_SITTE12 | 0.05375123 | 0.5268551  | 0.00010876 | 0.092731 | -0.084185 |
| 16w_SITTE12 | 0.05909278 | 0.5788792  | 0.00011368 | 0.097776 | -0.31309  |
| 16w_SITTE12 | 0.06766628 | 0.6623809  | 0.00012084 | 0.087573 | -0.72756  |
| 16w_SITTE12 | 0.07735595 | 0.75675356 | 0.0001272  | 0.059217 | -1.1276   |
| 16w_SITTE12 | 0.07198955 | 0.70448744 | 0.00012401 | 0.07238  | -0.92016  |
| 16w_SITTE12 | 0.02972669 | 0.2928679  | 8.15E-05   | 0.067903 | 0.7357    |
| 16w_SITTE12 | 0.04438961 | 0.43567756 | 9.86E-05   | 0.10494  | 0.19178   |
| 16w_SITTE12 | 0.00868609 | 0.08794274 | 5.86E-05   | 0.013029 | 0.12259   |
| 16w_SITTE12 | 0.0360751  | 0.3546983  | 8.90E-05   | 0.10026  | 0.49376   |
| 16w_SITTE12 | 0.07373051 | 0.72144353 | 0.00012513 | 0.067136 | -0.99278  |
| 16w_SITTE12 | 0.08733577 | 0.8539521  | 0.00013207 | 0.052686 | -1.3094   |
| 16w_SITTE12 | 0.0747198  | 0.73107874 | 0.00012577 | 0.064358 | -1.0333   |
| 16w_SITTE12 | 0.05648345 | 0.55346566 | 0.00011111 | 0.094909 | -0.19309  |
| 16w_SITTE12 | 0.03555297 | 0.34961304 | 8.86E-05   | 0.098764 | 0.50933   |
| 16w_SITTE12 | 0.00866271 | 0.08771509 | 5.86E-05   | 0.013029 | 0.12259   |
| 16w_SITTE12 | 0.07838438 | 0.76676995 | 0.00012778 | 0.057615 | -1.1573   |
| 16w_SITTE12 | 0.03809376 | 0.37435913 | 9.14E-05   | 0.10717  | 0.40374   |
| 16w_SITTE12 | 0.05821149 | 0.57029593 | 0.00011305 | 0.097132 | -0.26697  |
| 16w_SITTE12 | 0.04137301 | 0.40629742 | 9.50E-05   | 0.10955  | 0.28067   |
| 16w_SITTE12 | 0.04802602 | 0.47109446 | 0.00010271 | 0.09665  | 0.10061   |
| 16w_SITTE12 | 0.07849523 | 0.7678496  | 0.00012797 | 0.057152 | -1.1573   |
| 16w_SITTE12 | 0.02549704 | 0.25167322 | 7.62E-05   | 0.047472 | 0.7616    |
| 16w_SITTE12 | 0.07349138 | 0.71911454 | 0.00012491 | 0.068128 | -0.99278  |
| 16w_SITTE12 | 0.05384778 | 0.5277955  | 0.00010876 | 0.092731 | -0.084185 |
| 16w_SITTE12 | 0.0306885  | 0.3022355  | 8.23E-05   | 0.07157  | 0.70647   |
| 16w_SITTE12 | 0.04821859 | 0.47296998 | 0.00010271 | 0.09665  | 0.091263  |
| 16w_SITTE12 | 0.08877106 | 0.8679311  | 0.00013275 | 0.052622 | -1.32     |
| 16w_SITTE12 | 0.04913543 | 0.48189953 | 0.00010381 | 0.094798 | 0.062467  |

|             |            |            |            |           |           |
|-------------|------------|------------|------------|-----------|-----------|
| 16w_SITTE12 | 0.055302   | 0.5419589  | 0.00011011 | 0.093847  | -0.1508   |
| 16w_SITTE12 | 0.06314306 | 0.61832696 | 0.0001173  | 0.098072  | -0.49111  |
| 16w_SITTE12 | 0.03031752 | 0.29862234 | 8.19E-05   | 0.069725  | 0.71698   |
| 16w_SITTE12 | 0.04051872 | 0.397977   | 9.42E-05   | 0.10978   | 0.31414   |
| 16w_SITTE12 | 0.04910953 | 0.4816473  | 0.00010381 | 0.094798  | 0.072211  |
| 16w_SITTE12 | 0.05921516 | 0.58007115 | 0.00011368 | 0.097776  | -0.31309  |
| 16w_SITTE12 | 0.00847637 | 0.08590022 | 5.86E-05   | 0.013029  | 0.12259   |
| 16w_SITTE12 | 0.00537202 | 0.05566534 | 5.61E-05   | 0.0099627 | 0.20797   |
| 16w_SITTE12 | 0.07632591 | 0.74672145 | 0.0001266  | 0.061174  | -1.0948   |
| 16w_SITTE12 | 0.06390347 | 0.625733   | 0.00011787 | 0.097201  | -0.54144  |
| 16w_SITTE12 | 0.06835038 | 0.6690437  | 0.00012136 | 0.085284  | -0.7609   |
| 16w_SITTE12 | 0.02495169 | 0.2463617  | 7.58E-05   | 0.046199  | 0.74769   |
| 16w_SITTE12 | 0.04439375 | 0.4357179  | 9.86E-05   | 0.10494   | 0.19178   |
| 16w_SITTE12 | 0.07194049 | 0.70400965 | 0.00012378 | 0.073503  | -0.92016  |
| 16w_SITTE12 | 0.07901964 | 0.772957   | 0.00012816 | 0.056721  | -1.1755   |
| 16w_SITTE12 | 0.00677352 | 0.06931528 | 5.72E-05   | 0.011238  | 0.16213   |
| 16w_SITTE12 | 0.05487137 | 0.5377647  | 0.00010978 | 0.093528  | -0.12355  |
| 16w_SITTE12 | 0.07463288 | 0.7302322  | 0.00012556 | 0.06525   | -1.0333   |
| 16w_SITTE12 | 0.06299432 | 0.6168783  | 0.00011701 | 0.098387  | -0.49111  |
| 16w_SITTE12 | 0.06145503 | 0.60188633 | 0.00011583 | 0.09893   | -0.42501  |
| 16w_SITTE12 | 0.01214281 | 0.12160952 | 6.17E-05   | 0.017303  | 0.12065   |
| 16w_SITTE12 | 0.05579351 | 0.5467459  | 0.00011045 | 0.094186  | -0.16472  |
| 16w_SITTE12 | 0.0441486  | 0.43333027 | 9.86E-05   | 0.10494   | 0.20107   |
| 16w_SITTE12 | 0.07755107 | 0.75865394 | 0.0001274  | 0.058646  | -1.1379   |
| 16w_SITTE12 | 0.06072948 | 0.5948199  | 0.00011523 | 0.098828  | -0.37638  |
| 16w_SITTE12 | 0.08074257 | 0.7897376  | 0.00012907 | 0.054994  | -1.2155   |
| 16w_SITTE12 | 0.05730544 | 0.56147146 | 0.00011209 | 0.096042  | -0.22216  |
| 16w_SITTE12 | 0.01353875 | 0.13520528 | 6.30E-05   | 0.019276  | 0.16714   |
| 16w_SITTE12 | 0.01542311 | 0.15355806 | 6.51E-05   | 0.022546  | 0.24275   |
| 16w_SITTE12 | 0.0631082  | 0.61798745 | 0.0001173  | 0.098072  | -0.49111  |
| 16w_SITTE12 | 0.07682924 | 0.7516237  | 0.000127   | 0.059827  | -1.1061   |
| 16w_SITTE12 | 0.03821419 | 0.37553203 | 9.14E-05   | 0.10717   | 0.38979   |
| 16w_SITTE12 | 0.03293878 | 0.3241521  | 8.52E-05   | 0.084798  | 0.6305    |
| 16w_SITTE12 | 0.04411114 | 0.4329654  | 9.82E-05   | 0.10565   | 0.20107   |
| 16w_SITTE12 | 0.04496695 | 0.44130057 | 9.93E-05   | 0.10345   | 0.18258   |
| 16w_SITTE12 | 0.08151347 | 0.7972458  | 0.00012942 | 0.054478  | -1.2295   |
| 16w_SITTE12 | 0.01906286 | 0.18900743 | 6.91E-05   | 0.029782  | 0.46374   |
| 16w_SITTE12 | 0.05067575 | 0.4969015  | 0.00010561 | 0.092703  | 0.021622  |
| 16w_SITTE12 | 0.00991131 | 0.09987576 | 5.98E-05   | 0.014626  | 0.1081    |
| 16w_SITTE12 | 0.05378554 | 0.5271894  | 0.00010876 | 0.092731  | -0.084185 |
| 16w_SITTE12 | 0.07788973 | 0.7619523  | 0.00012759 | 0.058113  | -1.1478   |
| 16w_SITTE12 | 0.06818349 | 0.6674183  | 0.00012136 | 0.085284  | -0.74427  |
| 16w_SITTE12 | 0.08142281 | 0.79636276 | 0.00012942 | 0.054478  | -1.2295   |
| 16w_SITTE12 | 0.04322065 | 0.42429253 | 9.74E-05   | 0.10696   | 0.22964   |
| 16w_SITTE12 | 0.07964113 | 0.7790101  | 0.00012853 | 0.055948  | -1.1924   |
| 16w_SITTE12 | 0.06652915 | 0.6513058  | 0.00012006 | 0.090801  | -0.66011  |

|             |            |            |            |           |          |
|-------------|------------|------------|------------|-----------|----------|
| 16w_SITTE12 | 0.03967889 | 0.38979748 | 9.34E-05   | 0.10962   | 0.33794  |
| 16w_SITTE12 | 0.07066561 | 0.6915929  | 0.00012308 | 0.076976  | -0.8583  |
| 16w_SITTE12 | 0.07329122 | 0.7171651  | 0.00012469 | 0.069151  | -0.97873 |
| 16w_SITTE12 | 0.07398807 | 0.723952   | 0.00012513 | 0.067136  | -1.0066  |
| 16w_SITTE12 | 0.00369482 | 0.03933029 | 5.47E-05   | 0.008551  | 0.27903  |
| 16w_SITTE12 | 0.08514235 | 0.8325893  | 0.0001312  | 0.05293   | -1.2883  |
| 16w_SITTE12 | 0.05911866 | 0.57913125 | 0.00011368 | 0.097776  | -0.31309 |
| 16w_SITTE12 | 0.03084539 | 0.30376345 | 8.28E-05   | 0.073435  | 0.70647  |
| 16w_SITTE12 | 0.00541159 | 0.05605076 | 5.61E-05   | 0.0099627 | 0.20797  |
| 16w_SITTE12 | 0.0498222  | 0.4885884  | 0.00010453 | 0.09379   | 0.042456 |
| 16w_SITTE12 | 0.05766843 | 0.56500673 | 0.00011241 | 0.096416  | -0.25188 |
| 16w_SITTE12 | 0.0723972  | 0.70845777 | 0.00012424 | 0.071279  | -0.9499  |
| 16w_SITTE12 | 0.01017182 | 0.10241301 | 6.02E-05   | 0.015048  | 0.10718  |
| 16w_SITTE12 | 0.07386753 | 0.7227781  | 0.00012513 | 0.067136  | -1.0066  |
| 16w_SITTE12 | 0.06468341 | 0.6333292  | 0.00011843 | 0.096001  | -0.57526 |
| 16w_SITTE12 | 0.00947733 | 0.09564909 | 5.95E-05   | 0.014213  | 0.11014  |
| 16w_SITTE12 | 0.06286176 | 0.6155873  | 0.00011701 | 0.098387  | -0.49111 |
| 16w_SITTE12 | 0.01640596 | 0.16313054 | 6.62E-05   | 0.024342  | 0.29808  |
| 16w_SITTE12 | 0.06396998 | 0.62638074 | 0.00011787 | 0.097201  | -0.54144 |
| 16w_SITTE12 | 0.08568344 | 0.8378592  | 0.0001315  | 0.052818  | -1.2923  |
| 16w_SITTE12 | 0.09397838 | 0.91864794 | 0.00013452 | 0.052426  | -1.3423  |
| 16w_SITTE12 | 0.08256182 | 0.8074562  | 0.00012993 | 0.053861  | -1.2485  |
| 16w_SITTE12 | 0.00165785 | 0.01949115 | 5.31E-05   | 0.0071026 | 0.37827  |
| 16w_SITTE12 | 0.05234841 | 0.5131923  | 0.00010703 | 0.092172  | -0.03476 |
| 16w_SITTE12 | 0.03466665 | 0.34098074 | 8.73E-05   | 0.093873  | 0.55601  |
| 16w_SITTE12 | 0.04981602 | 0.48852813 | 0.00010453 | 0.09379   | 0.042456 |
| 16w_SITTE12 | 0.05038288 | 0.49404913 | 0.00010525 | 0.093003  | 0.032151 |
| 16w_SITTE12 | 0.05052416 | 0.49542513 | 0.00010525 | 0.093003  | 0.021622 |
| 16w_SITTE12 | 0.04137196 | 0.40628713 | 9.50E-05   | 0.10955   | 0.28067  |
| 16w_SITTE12 | 0.07473864 | 0.7312622  | 0.00012577 | 0.064358  | -1.0333  |
| 16w_SITTE12 | 0.05465956 | 0.5357018  | 0.00010944 | 0.093233  | -0.12355 |
| 16w_SITTE12 | 0.07481376 | 0.7319939  | 0.00012577 | 0.064358  | -1.0462  |
| 16w_SITTE12 | 0.04134623 | 0.4060366  | 9.50E-05   | 0.10955   | 0.28067  |
| 16w_SITTE12 | 0.04001552 | 0.39307612 | 9.38E-05   | 0.10975   | 0.32588  |
| 16w_SITTE12 | 0.07428954 | 0.72688824 | 0.00012534 | 0.066176  | -1.0201  |
| 16w_SITTE12 | 0.05691043 | 0.5576242  | 0.00011177 | 0.095663  | -0.20754 |
| 16w_SITTE12 | 0.03454993 | 0.33984393 | 8.73E-05   | 0.093873  | 0.55601  |
| 16w_SITTE12 | 0.01066497 | 0.10721609 | 6.05E-05   | 0.01548   | 0.10741  |
| 16w_SITTE12 | 0.07696223 | 0.7529189  | 0.000127   | 0.059827  | -1.117   |
| 16w_SITTE12 | 0.04462528 | 0.43797284 | 9.89E-05   | 0.10421   | 0.19178  |
| 16w_SITTE12 | 0.02944785 | 0.2901521  | 8.11E-05   | 0.066108  | 0.7438   |
| 16w_SITTE12 | 0.00767177 | 0.07806374 | 5.78E-05   | 0.011928  | 0.14372  |
| 16w_SITTE12 | 0.04640105 | 0.45526803 | 0.00010084 | 0.10033   | 0.13721  |
| 16w_SITTE12 | 0.05001067 | 0.49042398 | 0.0001049  | 0.093366  | 0.042456 |
| 16w_SITTE12 | 0.04434021 | 0.43519643 | 9.86E-05   | 0.10494   | 0.19178  |
| 16w_SITTE12 | 0.03520956 | 0.34626842 | 8.81E-05   | 0.097198  | 0.52494  |

|             |            |            |            |          |           |
|-------------|------------|------------|------------|----------|-----------|
| 16w_SITTE12 | 0.06013174 | 0.5889982  | 0.00011462 | 0.098526 | -0.36038  |
| 16w_SITTE12 | 0.06812301 | 0.6668292  | 0.0001211  | 0.086439 | -0.74427  |
| 16w_SITTE12 | 0.0710096  | 0.6949432  | 0.00012331 | 0.075804 | -0.87403  |
| 16w_SITTE12 | 0.01553425 | 0.15464045 | 6.51E-05   | 0.022546 | 0.24275   |
| 16w_SITTE12 | 0.05023538 | 0.49261248 | 0.0001049  | 0.093366 | 0.032151  |
| 16w_SITTE12 | 0.01527585 | 0.1521238  | 6.47E-05   | 0.021973 | 0.24275   |
| 16w_SITTE12 | 0.06205635 | 0.60774297 | 0.00011642 | 0.098794 | -0.44141  |
| 16w_SITTE12 | 0.06996962 | 0.6848143  | 0.0001226  | 0.07935  | -0.82636  |
| 16w_SITTE12 | 0.00679698 | 0.06954373 | 5.72E-05   | 0.011238 | 0.16213   |
| 16w_SITTE12 | 0.04469427 | 0.4386448  | 9.89E-05   | 0.10421  | 0.18258   |
| 16w_SITTE12 | 0.04684673 | 0.45960876 | 0.00010122 | 0.099559 | 0.12814   |
| 16w_SITTE12 | 0.06394424 | 0.62613004 | 0.00011787 | 0.097201 | -0.54144  |
| 16w_SITTE12 | 0.03968627 | 0.3898694  | 9.34E-05   | 0.10962  | 0.33794   |
| 16w_SITTE12 | 0.08217586 | 0.8036971  | 0.00012976 | 0.054048 | -1.2424   |
| 16w_SITTE12 | 0.04234876 | 0.41580066 | 9.62E-05   | 0.10856  | 0.24945   |
| 16w_SITTE12 | 0.06137298 | 0.6010872  | 0.00011583 | 0.09893  | -0.4087   |
| 16w_SITTE12 | 0.07368206 | 0.7209717  | 0.00012513 | 0.067136 | -0.99278  |
| 16w_SITTE12 | 0.04813051 | 0.4721121  | 0.00010271 | 0.09665  | 0.091263  |
| 16w_SITTE12 | 0.04922143 | 0.48273715 | 0.00010381 | 0.094798 | 0.062467  |
| 16w_SITTE12 | 0.08551755 | 0.8362435  | 0.00013135 | 0.05287  | -1.2923   |
| 16w_SITTE12 | 0.037015   | 0.3638525  | 9.02E-05   | 0.1042   | 0.4477    |
| 16w_SITTE12 | 0.04204806 | 0.41287205 | 9.58E-05   | 0.10896  | 0.25963   |
| 16w_SITTE12 | 0.05271764 | 0.5167885  | 0.00010773 | 0.092257 | -0.046772 |
| 16w_SITTE12 | 0.04866776 | 0.4773447  | 0.00010344 | 0.095375 | 0.081803  |
| 16w_SITTE12 | 0.07556146 | 0.7392762  | 0.00012619 | 0.062687 | -1.0712   |
| 16w_SITTE12 | 0.03078365 | 0.3031622  | 8.28E-05   | 0.073435 | 0.70647   |
| 16w_SITTE12 | 0.04743617 | 0.4653496  | 0.00010197 | 0.098057 | 0.10986   |
| 16w_SITTE12 | 0.04818674 | 0.47265974 | 0.00010271 | 0.09665  | 0.091263  |
| 16w_SITTE12 | 0.06193328 | 0.60654426 | 0.00011613 | 0.098894 | -0.44141  |
| 16w_SITTE12 | 0.05313255 | 0.52082944 | 0.00010807 | 0.092373 | -0.059017 |
| 16w_SITTE12 | 0.07306913 | 0.71500206 | 0.00012469 | 0.069151 | -0.97873  |
| 16w_SITTE12 | 0.0105563  | 0.10615766 | 6.05E-05   | 0.01548  | 0.10741   |
| 16w_SITTE12 | 0.047017   | 0.46126708 | 0.00010159 | 0.098799 | 0.12814   |
| 16w_SITTE12 | 0.04749163 | 0.46588975 | 0.00010197 | 0.098057 | 0.10986   |
| 16w_SITTE12 | 0.0651529  | 0.63790184 | 0.00011898 | 0.094504 | -0.59222  |
| 16w_SITTE12 | 0.0657784  | 0.6439939  | 0.00011953 | 0.092756 | -0.62617  |
| 16w_SITTE12 | 0.0676849  | 0.6625623  | 0.00012084 | 0.087573 | -0.72756  |
| 16w_SITTE12 | 0.01308941 | 0.13082893 | 6.27E-05   | 0.018769 | 0.14454   |
| 16w_SITTE12 | 0.04037419 | 0.3965694  | 9.42E-05   | 0.10978  | 0.31414   |
| 16w_SITTE12 | 0.02103431 | 0.20820835 | 7.10E-05   | 0.033786 | 0.56707   |
| 16w_SITTE12 | 0.07026783 | 0.6877187  | 0.00012284 | 0.078159 | -0.8424   |
| 16w_SITTE12 | 0.06806243 | 0.6662392  | 0.0001211  | 0.086439 | -0.74427  |
| 16w_SITTE12 | 0.07007103 | 0.68580204 | 0.0001226  | 0.07935  | -0.8424   |
| 16w_SITTE12 | 0.05038687 | 0.49408796 | 0.00010525 | 0.093003 | 0.032151  |
| 16w_SITTE12 | 0.08511825 | 0.83235455 | 0.0001312  | 0.05293  | -1.2883   |
| 16w_SITTE12 | 0.06275871 | 0.61458355 | 0.00011701 | 0.098387 | -0.47447  |

|             |            |            |            |          |           |
|-------------|------------|------------|------------|----------|-----------|
| 16w_SITTE12 | 0.06476595 | 0.63413316 | 0.00011871 | 0.095287 | -0.57526  |
| 16w_SITTE12 | 0.07581116 | 0.74170804 | 0.0001264  | 0.06191  | -1.0832   |
| 16w_SITTE12 | 0.04883782 | 0.479001   | 0.00010344 | 0.095375 | 0.072211  |
| 16w_SITTE12 | 0.0820013  | 0.801997   | 0.00012976 | 0.054048 | -1.2424   |
| 16w_SITTE12 | 0.08866212 | 0.8668701  | 0.00013261 | 0.052631 | -1.32     |
| 16w_SITTE12 | 0.06510568 | 0.637442   | 0.00011898 | 0.094504 | -0.59222  |
| 16w_SITTE12 | 0.00974151 | 0.09822203 | 5.95E-05   | 0.014213 | 0.11014   |
| 16w_SITTE12 | 0.01411466 | 0.14081433 | 6.37E-05   | 0.020323 | 0.18023   |
| 16w_SITTE12 | 0.01362764 | 0.13607109 | 6.34E-05   | 0.019794 | 0.16714   |
| 16w_SITTE12 | 0.05014747 | 0.49175632 | 0.0001049  | 0.093366 | 0.032151  |
| 16w_SITTE12 | 0.06464288 | 0.63293445 | 0.00011843 | 0.096001 | -0.57526  |
| 16w_SITTE12 | 0.02182951 | 0.21595325 | 7.22E-05   | 0.03647  | 0.62396   |
| 16w_SITTE12 | 0.06305455 | 0.61746496 | 0.0001173  | 0.098072 | -0.49111  |
| 16w_SITTE12 | 0.06682658 | 0.6542027  | 0.00012032 | 0.089759 | -0.67704  |
| 16w_SITTE12 | 0.05649645 | 0.5535922  | 0.00011144 | 0.095284 | -0.19309  |
| 16w_SITTE12 | 0.05348798 | 0.5242912  | 0.00010842 | 0.092532 | -0.07149  |
| 16w_SITTE12 | 0.03733769 | 0.3669953  | 9.06E-05   | 0.10531  | 0.43275   |
| 16w_SITTE12 | 0.03390663 | 0.3335785  | 8.65E-05   | 0.090344 | 0.58656   |
| 16w_SITTE12 | 0.02599533 | 0.2565263  | 7.70E-05   | 0.050154 | 0.76634   |
| 16w_SITTE12 | 0.04894411 | 0.48003617 | 0.00010381 | 0.094798 | 0.072211  |
| 16w_SITTE12 | 0.06812947 | 0.6668921  | 0.0001211  | 0.086439 | -0.74427  |
| 16w_SITTE12 | 0.06108582 | 0.5982905  | 0.00011553 | 0.098907 | -0.39249  |
| 16w_SITTE12 | 0.04516544 | 0.44323376 | 9.97E-05   | 0.10268  | 0.17344   |
| 16w_SITTE12 | 0.08058839 | 0.78823596 | 0.00012907 | 0.054994 | -1.2081   |
| 16w_SITTE12 | 0.01902165 | 0.1886061  | 6.87E-05   | 0.029043 | 0.46374   |
| 16w_SITTE12 | 0.04937344 | 0.48421764 | 0.00010417 | 0.094268 | 0.062467  |
| 16w_SITTE12 | 0.03765216 | 0.37005812 | 9.10E-05   | 0.1063   | 0.41807   |
| 16w_SITTE12 | 0.02836942 | 0.27964878 | 7.99E-05   | 0.060913 | 0.76245   |
| 16w_SITTE12 | 0.02070492 | 0.20500031 | 7.06E-05   | 0.032941 | 0.54704   |
| 16w_SITTE12 | 0.02303758 | 0.22771925 | 7.34E-05   | 0.039406 | 0.67444   |
| 16w_SITTE12 | 0.04823059 | 0.47308683 | 0.00010271 | 0.09665  | 0.091263  |
| 16w_SITTE12 | 0.07198711 | 0.70446366 | 0.00012401 | 0.07238  | -0.92016  |
| 16w_SITTE12 | 0.08516872 | 0.8328461  | 0.0001312  | 0.05293  | -1.2883   |
| 16w_SITTE12 | 0.04543395 | 0.44584897 | 9.97E-05   | 0.10268  | 0.16436   |
| 16w_SITTE12 | 0.04866969 | 0.4773634  | 0.00010344 | 0.095375 | 0.081803  |
| 16w_SITTE12 | 0.04902948 | 0.48086762 | 0.00010381 | 0.094798 | 0.072211  |
| 16w_SITTE12 | 0.07995588 | 0.78207564 | 0.00012871 | 0.055605 | -1.2004   |
| 16w_SITTE12 | 0.03332941 | 0.3279566  | 8.57E-05   | 0.086671 | 0.61617   |
| 16w_SITTE12 | 0.06109744 | 0.59840363 | 0.00011553 | 0.098907 | -0.4087   |
| 16w_SITTE12 | 0.06192443 | 0.6064581  | 0.00011613 | 0.098894 | -0.44141  |
| 16w_SITTE12 | 0.08348787 | 0.81647545 | 0.00013042 | 0.053406 | -1.2651   |
| 16w_SITTE12 | 0.07266749 | 0.7110902  | 0.00012446 | 0.070202 | -0.9499   |
| 16w_SITTE12 | 0.02800855 | 0.276134   | 7.94E-05   | 0.059253 | 0.76661   |
| 16w_SITTE12 | 0.03292869 | 0.3240538  | 8.52E-05   | 0.084798 | 0.6305    |
| 16w_SITTE12 | 0.05405026 | 0.5297676  | 0.00010876 | 0.092731 | -0.097097 |
| 16w_SITTE12 | 0.01276372 | 0.12765688 | 6.24E-05   | 0.018271 | 0.13519   |



|             |            |            |            |          |            |
|-------------|------------|------------|------------|----------|------------|
| 16w_SITTE12 | 0.02085063 | 0.2064194  | 7.10E-05   | 0.033786 | 0.56707    |
| 16w_SITTE12 | 0.07313769 | 0.7156698  | 0.00012469 | 0.069151 | -0.97873   |
| 16w_SITTE12 | 0.04967628 | 0.48716712 | 0.00010453 | 0.09379  | 0.052555   |
| 16w_SITTE12 | 0.07276752 | 0.7120645  | 0.00012446 | 0.070202 | -0.96444   |
| 16w_SITTE12 | 0.04207064 | 0.4130919  | 9.62E-05   | 0.10856  | 0.25963    |
| 16w_SITTE12 | 0.07116093 | 0.6964171  | 0.00012331 | 0.075804 | -0.88959   |
| 16w_SITTE12 | 0.05250161 | 0.5146845  | 0.00010738 | 0.092189 | -0.03476   |
| 16w_SITTE12 | 0.04948219 | 0.48527682 | 0.00010417 | 0.094268 | 0.052555   |
| 16w_SITTE12 | 0.05313112 | 0.52081555 | 0.00010807 | 0.092373 | -0.059017  |
| 16w_SITTE12 | 0.02810755 | 0.27709833 | 7.94E-05   | 0.059253 | 0.76661    |
| 16w_SITTE12 | 0.06433714 | 0.6299567  | 0.00011815 | 0.096641 | -0.55833   |
| 16w_SITTE12 | 0.07582453 | 0.7418383  | 0.0001264  | 0.06191  | -1.0832    |
| 16w_SITTE12 | 0.07359712 | 0.7201444  | 0.00012491 | 0.068128 | -0.99278   |
| 16w_SITTE12 | 0.02378948 | 0.23504244 | 7.42E-05   | 0.041523 | 0.71639    |
| 16w_SITTE12 | 0.08814014 | 0.86178625 | 0.00013248 | 0.05264  | -1.3176    |
| 16w_SITTE12 | 0.06381409 | 0.6248625  | 0.00011787 | 0.097201 | -0.5246    |
| 16w_SITTE12 | 0.00879961 | 0.08904842 | 5.89E-05   | 0.013414 | 0.11742    |
| 16w_SITTE12 | 0.01634251 | 0.16251259 | 6.62E-05   | 0.024342 | 0.29808    |
| 16w_SITTE12 | 0.05859596 | 0.5740404  | 0.00011337 | 0.097465 | -0.2822    |
| 16w_SITTE12 | 0.0586553  | 0.57461834 | 0.00011337 | 0.097465 | -0.2822    |
| 16w_SITTE12 | 0.08179286 | 0.79996693 | 0.00012959 | 0.054253 | -1.2361    |
| 16w_SITTE12 | 0.0339215  | 0.33372328 | 8.65E-05   | 0.090344 | 0.58656    |
| 16w_SITTE12 | 0.02192041 | 0.21683852 | 7.22E-05   | 0.03647  | 0.62396    |
| 16w_SITTE12 | 0.06908682 | 0.6762163  | 0.00012186 | 0.08293  | -0.79386   |
| 16w_SITTE12 | 0.05814161 | 0.5696153  | 0.00011273 | 0.096781 | -0.26697   |
| 16w_SITTE12 | 0.05681912 | 0.55673486 | 0.00011144 | 0.095284 | -0.20754   |
| 16w_SITTE12 | 0.00784448 | 0.07974584 | 5.81E-05   | 0.012286 | 0.13577    |
| 16w_SITTE12 | 0.06255676 | 0.61261666 | 0.00011672 | 0.098627 | -0.47447   |
| 16w_SITTE12 | 0.05375905 | 0.5269313  | 0.00010876 | 0.092731 | -0.084185  |
| 16w_SITTE12 | 0.05328796 | 0.52234316 | 0.00010807 | 0.092373 | -0.07149   |
| 16w_SITTE12 | 0.05580648 | 0.54687226 | 0.00011078 | 0.094541 | -0.16472   |
| 16w_SITTE12 | 0.06921982 | 0.67751163 | 0.00012211 | 0.081739 | -0.79386   |
| 16w_SITTE12 | 0.0495152  | 0.48559827 | 0.00010417 | 0.094268 | 0.052555   |
| 16w_SITTE12 | 0.0372699  | 0.36633506 | 9.06E-05   | 0.10531  | 0.43275    |
| 16w_SITTE12 | 0.08145774 | 0.796703   | 0.00012942 | 0.054478 | -1.2295    |
| 16w_SITTE12 | 0.0469987  | 0.46108878 | 0.00010159 | 0.098799 | 0.12814    |
| 16w_SITTE12 | 0.0387911  | 0.3811508  | 9.22E-05   | 0.10852  | 0.37625    |
| 16w_SITTE12 | 0.0412379  | 0.4049815  | 9.50E-05   | 0.10955  | 0.29155    |
| 16w_SITTE12 | 0.05249204 | 0.5145912  | 0.00010738 | 0.092189 | -0.03476   |
| 16w_SITTE12 | 0.01107386 | 0.11119852 | 6.08E-05   | 0.015922 | 0.10884    |
| 16w_SITTE12 | 0.05588562 | 0.547643   | 0.00011078 | 0.094541 | -0.16472   |
| 16w_SITTE12 | 0.065572   | 0.6419837  | 0.00011925 | 0.093659 | -0.62617   |
| 16w_SITTE12 | 0.03495591 | 0.34379798 | 8.77E-05   | 0.095565 | 0.54051    |
| 16w_SITTE12 | 0.05148668 | 0.5047995  | 0.00010632 | 0.092309 | -0.0001745 |
| 16w_SITTE12 | 0.07689183 | 0.7522332  | 0.000127   | 0.059827 | -1.117     |
| 16w_SITTE12 | 0.04610629 | 0.4523972  | 0.00010046 | 0.10111  | 0.14626    |

|             |            |            |            |          |           |
|-------------|------------|------------|------------|----------|-----------|
| 16w_SITTE12 | 0.06316986 | 0.618588   | 0.0001173  | 0.098072 | -0.50782  |
| 16w_SITTE12 | 0.05045321 | 0.4947341  | 0.00010525 | 0.093003 | 0.032151  |
| 16w_SITTE12 | 0.02880065 | 0.28384876 | 8.03E-05   | 0.062611 | 0.75723   |
| 16w_SITTE12 | 0.06643191 | 0.65035874 | 0.00011979 | 0.091802 | -0.66011  |
| 16w_SITTE12 | 0.04337692 | 0.42581442 | 9.74E-05   | 0.10696  | 0.21998   |
| 16w_SITTE12 | 0.03676574 | 0.3614248  | 8.98E-05   | 0.10298  | 0.46289   |
| 16w_SITTE12 | 0.04346667 | 0.42668858 | 9.78E-05   | 0.10633  | 0.21998   |
| 16w_SITTE12 | 0.06300197 | 0.61695284 | 0.00011701 | 0.098387 | -0.49111  |
| 16w_SITTE12 | 0.04442231 | 0.43599606 | 9.86E-05   | 0.10494  | 0.19178   |
| 16w_SITTE12 | 0.07243118 | 0.70878875 | 0.00012424 | 0.071279 | -0.9499   |
| 16w_SITTE12 | 0.01921633 | 0.19050217 | 6.91E-05   | 0.029782 | 0.46374   |
| 16w_SITTE12 | 0.06388828 | 0.6255851  | 0.00011787 | 0.097201 | -0.54144  |
| 16w_SITTE12 | 0.0530822  | 0.52033913 | 0.00010807 | 0.092373 | -0.059017 |
| 16w_SITTE12 | 0.05493746 | 0.5384084  | 0.00010978 | 0.093528 | -0.13708  |
| 16w_SITTE12 | 0.0355084  | 0.34917897 | 8.81E-05   | 0.097198 | 0.50933   |
| 16w_SITTE12 | 0.04478304 | 0.4395094  | 9.89E-05   | 0.10421  | 0.18258   |
| 16w_SITTE12 | 0.06065787 | 0.59412247 | 0.00011523 | 0.098828 | -0.37638  |
| 16w_SITTE12 | 0.06407    | 0.6273549  | 0.00011815 | 0.096641 | -0.54144  |
| 16w_SITTE12 | 0.06915752 | 0.67690486 | 0.00012186 | 0.08293  | -0.79386  |
| 16w_SITTE12 | 0.05800352 | 0.5682703  | 0.00011273 | 0.096781 | -0.25188  |
| 16w_SITTE12 | 0.01269617 | 0.126999   | 6.24E-05   | 0.018271 | 0.13519   |
| 16w_SITTE12 | 0.05353706 | 0.52476925 | 0.00010842 | 0.092532 | -0.07149  |
| 16w_SITTE12 | 0.09490862 | 0.92770797 | 0.00013474 | 0.052388 | -1.3433   |
| 16w_SITTE12 | 0.00637252 | 0.06540971 | 5.69E-05   | 0.010907 | 0.17252   |
| 16w_SITTE12 | 0.05599934 | 0.5487506  | 0.00011078 | 0.094541 | -0.17881  |
| 16w_SITTE12 | 0.08821511 | 0.8625164  | 0.00013248 | 0.05264  | -1.3176   |
| 16w_SITTE12 | 0.04664941 | 0.45768693 | 0.00010122 | 0.099559 | 0.13721   |
| 16w_SITTE12 | 0.07673995 | 0.75075406 | 0.0001268  | 0.060479 | -1.1061   |
| 16w_SITTE12 | 0.05590861 | 0.54786694 | 0.00011078 | 0.094541 | -0.16472  |
| 16w_SITTE12 | 0.07322704 | 0.71654    | 0.00012469 | 0.069151 | -0.97873  |
| 16w_SITTE12 | 0.07533934 | 0.73711276 | 0.00012598 | 0.063504 | -1.0589   |
| 16w_SITTE12 | 0.04718813 | 0.46293384 | 0.00010159 | 0.098799 | 0.11903   |
| 16w_SITTE12 | 0.03538334 | 0.34796092 | 8.81E-05   | 0.097198 | 0.52494   |
| 16w_SITTE12 | 0.05370288 | 0.5263843  | 0.00010842 | 0.092532 | -0.084185 |
| 16w_SITTE12 | 0.05434392 | 0.53262764 | 0.0001091  | 0.092966 | -0.11022  |
| 16w_SITTE12 | 0.0574787  | 0.56315887 | 0.00011209 | 0.096042 | -0.23694  |
| 16w_SITTE12 | 0.07042738 | 0.6892727  | 0.00012284 | 0.078159 | -0.8583   |
| 16w_SITTE12 | 0.01823537 | 0.18094805 | 6.80E-05   | 0.027619 | 0.4001    |
| 16w_SITTE12 | 0.06578146 | 0.6440237  | 0.00011953 | 0.092756 | -0.62617  |
| 16w_SITTE12 | 0.06468917 | 0.6333853  | 0.00011843 | 0.096001 | -0.57526  |
| 16w_SITTE12 | 0.01044626 | 0.10508599 | 6.02E-05   | 0.015048 | 0.10741   |
| 16w_SITTE12 | 0.03202847 | 0.31528613 | 8.40E-05   | 0.07911  | 0.65793   |
| 16w_SITTE12 | 0.07644793 | 0.74790996 | 0.0001268  | 0.060479 | -1.0948   |
| 16w_SITTE12 | 0.0308598  | 0.30390388 | 8.28E-05   | 0.073435 | 0.70647   |
| 16w_SITTE12 | 0.03938709 | 0.38695544 | 9.30E-05   | 0.10937  | 0.35035   |
| 16w_SITTE12 | 0.01084322 | 0.10895217 | 6.08E-05   | 0.015922 | 0.10884   |

|             |            |            |            |          |           |
|-------------|------------|------------|------------|----------|-----------|
| 16w_SITTE12 | 0.06484333 | 0.63488674 | 0.00011871 | 0.095287 | -0.57526  |
| 16w_SITTE12 | 0.04342752 | 0.42630726 | 9.74E-05   | 0.10696  | 0.21998   |
| 16w_SITTE12 | 0.09761769 | 0.954093   | 0.00013556 | 0.052216 | -1.3446   |
| 16w_SITTE12 | 0.0435728  | 0.42772228 | 9.78E-05   | 0.10633  | 0.21998   |
| 16w_SITTE12 | 0.0110383  | 0.11085215 | 6.08E-05   | 0.015922 | 0.10884   |
| 16w_SITTE12 | 0.01971496 | 0.19535859 | 6.95E-05   | 0.030541 | 0.50588   |
| 16w_SITTE12 | 0.04133824 | 0.40595874 | 9.50E-05   | 0.10955  | 0.28067   |
| 16w_SITTE12 | 0.07106841 | 0.695516   | 0.00012331 | 0.075804 | -0.88959  |
| 16w_SITTE12 | 0.03511571 | 0.34535432 | 8.77E-05   | 0.095565 | 0.52494   |
| 16w_SITTE12 | 0.09096541 | 0.88930297 | 0.0001335  | 0.052565 | -1.3333   |
| 16w_SITTE12 | 0.07616158 | 0.74512094 | 0.0001266  | 0.061174 | -1.0948   |
| 16w_SITTE12 | 0.04799827 | 0.47082415 | 0.00010271 | 0.09665  | 0.10061   |
| 16w_SITTE12 | 0.04278719 | 0.4200708  | 9.70E-05   | 0.10755  | 0.23945   |
| 16w_SITTE12 | 0.07449216 | 0.7288617  | 0.00012556 | 0.06525  | -1.0333   |
| 16w_SITTE12 | 0.04812027 | 0.4720124  | 0.00010271 | 0.09665  | 0.091263  |
| 16w_SITTE12 | 0.05696821 | 0.558187   | 0.00011177 | 0.095663 | -0.20754  |
| 16w_SITTE12 | 0.04257309 | 0.41798553 | 9.66E-05   | 0.10808  | 0.24945   |
| 16w_SITTE12 | 0.07859746 | 0.7688452  | 0.00012797 | 0.057152 | -1.1666   |
| 16w_SITTE12 | 0.05367348 | 0.52609795 | 0.00010842 | 0.092532 | -0.084185 |
| 16w_SITTE12 | 0.06902425 | 0.6756069  | 0.00012186 | 0.08293  | -0.79386  |
| 16w_SITTE12 | 0.0613409  | 0.60077477 | 0.00011583 | 0.09893  | -0.4087   |
| 3-SS2       | 0.00985046 | 0.09928317 | 5.98E-05   | 0.014626 | 0.1081    |
| 4-SS2       | 0.04636494 | 0.45491636 | 0.00010084 | 0.10033  | 0.14626   |
| 15-SS2      | 0.04070639 | 0.3998048  | 9.46E-05   | 0.10971  | 0.3027    |
| 23-SS2      | 0.05440351 | 0.533208   | 0.0001091  | 0.092966 | -0.11022  |
| 24-SS2      | 0.03444473 | 0.33881935 | 8.69E-05   | 0.09213  | 0.55601   |
| 26-SS2      | 0.05334943 | 0.52294177 | 0.00010807 | 0.092373 | -0.07149  |
| 27-SS2      | 0.08359207 | 0.81749034 | 0.00013042 | 0.053406 | -1.2651   |
| 28-SS2      | 0.05013773 | 0.49166143 | 0.0001049  | 0.093366 | 0.042456  |
| 30-SS2      | 0.07774903 | 0.760582   | 0.0001274  | 0.058646 | -1.1379   |
| 35-SS2      | 0.0717793  | 0.7024398  | 0.00012378 | 0.073503 | -0.92016  |
| 38-SS2      | 0.00992442 | 0.10000351 | 5.98E-05   | 0.014626 | 0.1081    |
| 43-SS2      | 0.05225787 | 0.51231056 | 0.00010703 | 0.092172 | -0.03476  |
| 45-SS2      | 0.00884611 | 0.08950131 | 5.89E-05   | 0.013414 | 0.11742   |
| 48-SS2      | 0.04992604 | 0.48959965 | 0.00010453 | 0.09379  | 0.042456  |
| 50-SS2      | 0.01325    | 0.13239299 | 6.30E-05   | 0.019276 | 0.15521   |
| 52-SS2      | 0.00785835 | 0.07988095 | 5.81E-05   | 0.012286 | 0.13577   |
| 53-SS2      | 0.04936914 | 0.48417577 | 0.00010417 | 0.094268 | 0.062467  |
| 55-SS2      | 0.07039147 | 0.68892294 | 0.00012284 | 0.078159 | -0.8583   |
| 60-SS2      | 0.06879038 | 0.6733291  | 0.00012161 | 0.084113 | -0.77743  |
| 61-SS2      | 0.01071317 | 0.10768552 | 6.05E-05   | 0.01548  | 0.10741   |
| 65-SS2      | 0.01868896 | 0.18536587 | 6.84E-05   | 0.028322 | 0.44251   |
| 70-SS2      | 0.07991887 | 0.78171515 | 0.00012871 | 0.055605 | -1.2004   |
| 72-SS2      | 0.0746387  | 0.7302888  | 0.00012556 | 0.06525  | -1.0333   |
| 80-SS2      | 0.02398587 | 0.2369551  | 7.46E-05   | 0.042633 | 0.71639   |
| 81-SS2      | 0.06937528 | 0.6790257  | 0.00012211 | 0.081739 | -0.81017  |

|         |            |            |            |          |            |
|---------|------------|------------|------------|----------|------------|
| 82-SS2  | 0.04791584 | 0.47002137 | 0.00010271 | 0.09665  | 0.10061    |
| 83-SS2  | 0.04007044 | 0.393611   | 9.38E-05   | 0.10975  | 0.32588    |
| 84-SS2  | 0.05283142 | 0.51789665 | 0.00010773 | 0.092257 | -0.046772  |
| 89-SS2  | 0.03985917 | 0.39155325 | 9.34E-05   | 0.10962  | 0.33794    |
| 90-SS2  | 0.0658192  | 0.6443913  | 0.00011953 | 0.092756 | -0.62617   |
| 102-SS2 | 0.05018702 | 0.4921415  | 0.0001049  | 0.093366 | 0.032151   |
| 105-SS2 | 0.03750413 | 0.36861634 | 9.06E-05   | 0.10531  | 0.41807    |
| 111-SS2 | 0.01196422 | 0.11987011 | 6.17E-05   | 0.017303 | 0.12065    |
| 113-SS2 | 0.04374666 | 0.42941555 | 9.78E-05   | 0.10633  | 0.21046    |
| 117-SS2 | 0.05604994 | 0.5492435  | 0.00011078 | 0.094541 | -0.17881   |
| 124-SS2 | 0.04381068 | 0.43003914 | 9.82E-05   | 0.10565  | 0.21046    |
| 134-SS2 | 0.04852686 | 0.47597235 | 0.00010308 | 0.095994 | 0.081803   |
| 138-SS2 | 0.02178037 | 0.21547464 | 7.18E-05   | 0.035549 | 0.62396    |
| 140-SS2 | 0.0639355  | 0.6260449  | 0.00011787 | 0.097201 | -0.54144   |
| 141-SS2 | 0.01515968 | 0.15099241 | 6.47E-05   | 0.021973 | 0.22576    |
| 145-SS2 | 0.06950592 | 0.6802981  | 0.00012211 | 0.081739 | -0.81017   |
| 152-SS2 | 0.04909084 | 0.4814653  | 0.00010381 | 0.094798 | 0.072211   |
| 157-SS2 | 0.00816859 | 0.08290252 | 5.84E-05   | 0.012653 | 0.12871    |
| 160-SS2 | 0.04198012 | 0.41221032 | 9.58E-05   | 0.10896  | 0.25963    |
| 170-SS2 | 0.01158564 | 0.11618292 | 6.14E-05   | 0.016833 | 0.11542    |
| 179-SS2 | 0.06241462 | 0.61123234 | 0.00011672 | 0.098627 | -0.4579    |
| 180-SS2 | 0.07825038 | 0.76546484 | 0.00012778 | 0.057615 | -1.1573    |
| 182-SS2 | 0.048969   | 0.48027864 | 0.00010381 | 0.094798 | 0.072211   |
| 183-SS2 | 0.07418127 | 0.7258337  | 0.00012534 | 0.066176 | -1.0201    |
| 184-SS2 | 0.05903816 | 0.5783472  | 0.00011368 | 0.097776 | -0.31309   |
| 186-SS2 | 0.08228357 | 0.8047462  | 0.00012993 | 0.053861 | -1.2424    |
| 194-SS2 | 0.04049252 | 0.3977218  | 9.42E-05   | 0.10978  | 0.31414    |
| 201-SS2 | 0.06383205 | 0.6250374  | 0.00011787 | 0.097201 | -0.54144   |
| 203-SS2 | 0.09182955 | 0.8977194  | 0.00013374 | 0.052539 | -1.336     |
| 204-SS2 | 0.08339377 | 0.81555897 | 0.00013042 | 0.053406 | -1.2651    |
| 206-SS2 | 0.03798322 | 0.3732825  | 9.14E-05   | 0.10717  | 0.40374    |
| 220-SS2 | 0.04969725 | 0.48737144 | 0.00010453 | 0.09379  | 0.052555   |
| 227-SS2 | 0.08308886 | 0.8125893  | 0.00013026 | 0.053541 | -1.2598    |
| 229-SS2 | 0.0714687  | 0.6994146  | 0.00012355 | 0.074645 | -0.90497   |
| 236-SS2 | 0.04477745 | 0.4394549  | 9.89E-05   | 0.10421  | 0.18258    |
| 239-SS2 | 0.08177518 | 0.79979473 | 0.00012959 | 0.054253 | -1.2361    |
| 240-SS2 | 0.03053126 | 0.300704   | 8.23E-05   | 0.07157  | 0.71698    |
| 255-SS2 | 0.04975374 | 0.4879216  | 0.00010453 | 0.09379  | 0.052555   |
| 257-SS2 | 0.05280055 | 0.517596   | 0.00010773 | 0.092257 | -0.046772  |
| 267-SS2 | 0.07361707 | 0.7203387  | 0.00012491 | 0.068128 | -0.99278   |
| 273-SS2 | 0.07680531 | 0.7513906  | 0.000127   | 0.059827 | -1.1061    |
| 275-SS2 | 0.07789081 | 0.7619628  | 0.00012759 | 0.058113 | -1.1478    |
| 276-SS2 | 0.07644202 | 0.7478523  | 0.0001268  | 0.060479 | -1.0948    |
| 281-SS2 | 0.05119292 | 0.50193846 | 0.00010597 | 0.092472 | -0.0001745 |
| 290-SS2 | 0.00373291 | 0.03970122 | 5.47E-05   | 0.008551 | 0.27903    |
| 292-SS2 | 0.03811378 | 0.37455407 | 9.14E-05   | 0.10717  | 0.40374    |

|         |            |            |            |           |           |
|---------|------------|------------|------------|-----------|-----------|
| 293-SS2 | 0.05902882 | 0.5782563  | 0.00011368 | 0.097776  | -0.29758  |
| 298-SS2 | 0.06818721 | 0.66745454 | 0.00012136 | 0.085284  | -0.74427  |
| 299-SS2 | 0.07530318 | 0.73676056 | 0.00012598 | 0.063504  | -1.0589   |
| 301-SS2 | 0.01301162 | 0.1300713  | 6.27E-05   | 0.018769  | 0.14454   |
| 303-SS2 | 0.08426628 | 0.8240568  | 0.00013074 | 0.053178  | -1.2751   |
| 310-SS2 | 0.07068347 | 0.6917669  | 0.00012308 | 0.076976  | -0.87403  |
| 311-SS2 | 0.03175477 | 0.31262046 | 8.36E-05   | 0.07721   | 0.67094   |
| 314-SS2 | 0.07634257 | 0.7468837  | 0.0001266  | 0.061174  | -1.0948   |
| 316-SS2 | 0.05580881 | 0.54689497 | 0.00011078 | 0.094541  | -0.16472  |
| 317-SS2 | 0.04644751 | 0.4557205  | 0.00010084 | 0.10033   | 0.13721   |
| 318-SS2 | 0.06405336 | 0.6271929  | 0.00011815 | 0.096641  | -0.54144  |
| 319-SS2 | 0.06353923 | 0.62218547 | 0.00011758 | 0.097678  | -0.5246   |
| 324-SS2 | 0.00575519 | 0.05939724 | 5.63E-05   | 0.010269  | 0.19547   |
| 326-SS2 | 0.03716475 | 0.365311   | 9.02E-05   | 0.1042    | 0.43275   |
| 327-SS2 | 0.05278096 | 0.51740515 | 0.00010773 | 0.092257  | -0.046772 |
| 345-SS2 | 0.00292282 | 0.03181132 | 5.42E-05   | 0.0080398 | 0.31077   |
| 346-SS2 | 0.07373844 | 0.7215208  | 0.00012513 | 0.067136  | -0.99278  |
| 349-SS2 | 0.05810279 | 0.56923723 | 0.00011273 | 0.096781  | -0.26697  |
| 356-SS2 | 0.01207088 | 0.12090892 | 6.17E-05   | 0.017303  | 0.12065   |
| 358-SS2 | 0.06553754 | 0.641648   | 0.00011925 | 0.093659  | -0.60919  |
| 365-SS2 | 0.07644759 | 0.7479066  | 0.0001268  | 0.060479  | -1.0948   |
| 371-SS2 | 0.06098948 | 0.59735215 | 0.00011553 | 0.098907  | -0.39249  |
| 372-SS2 | 0.08386681 | 0.8201661  | 0.00013058 | 0.053285  | -1.2702   |
| 374-SS2 | 0.03278487 | 0.32265308 | 8.48E-05   | 0.082909  | 0.6305    |
| 379-SS2 | 0.00767233 | 0.07806925 | 5.78E-05   | 0.011928  | 0.14372   |
| 380-SS2 | 0.06432474 | 0.6298359  | 0.00011815 | 0.096641  | -0.55833  |
| 383-SS2 | 0.06766533 | 0.6623717  | 0.00012084 | 0.087573  | -0.72756  |
| 385-SS2 | 0.07568867 | 0.74051505 | 0.00012619 | 0.062687  | -1.0712   |
| 388-SS2 | 0.01852593 | 0.18377797 | 6.84E-05   | 0.028322  | 0.42127   |
| 390-SS2 | 0.08153731 | 0.797478   | 0.00012942 | 0.054478  | -1.2295   |
| 391-SS2 | 0.06481678 | 0.6346282  | 0.00011871 | 0.095287  | -0.57526  |
| 392-SS2 | 0.06113482 | 0.5987677  | 0.00011553 | 0.098907  | -0.4087   |
| 395-SS2 | 0.03624576 | 0.35636044 | 8.94E-05   | 0.10166   | 0.47826   |
| 396-SS2 | 0.03277665 | 0.32257307 | 8.48E-05   | 0.082909  | 0.6305    |
| 397-SS2 | 0.04152428 | 0.4077707  | 9.54E-05   | 0.10929   | 0.28067   |
| 402-SS2 | 0.06350657 | 0.62186736 | 0.00011758 | 0.097678  | -0.5246   |
| 405-SS2 | 0.077278   | 0.7559943  | 0.0001272  | 0.059217  | -1.1276   |
| 406-SS2 | 0.05790442 | 0.5673052  | 0.00011273 | 0.096781  | -0.25188  |
| 409-SS2 | 0.05574303 | 0.5462543  | 0.00011045 | 0.094186  | -0.16472  |
| 411-SS2 | 0.00640764 | 0.06575181 | 5.69E-05   | 0.010907  | 0.17252   |
| 413-SS2 | 0.06459262 | 0.632445   | 0.00011843 | 0.096001  | -0.57526  |
| 414-SS2 | 0.00610492 | 0.06280341 | 5.66E-05   | 0.010584  | 0.18365   |
| 420-SS2 | 0.06626751 | 0.64875764 | 0.00011979 | 0.091802  | -0.66011  |
| 422-SS2 | 0.04969814 | 0.48738003 | 0.00010453 | 0.09379   | 0.052555  |
| 423-SS2 | 0.05021035 | 0.4923687  | 0.0001049  | 0.093366  | 0.032151  |
| 426-SS2 | 0.00840399 | 0.08519528 | 5.84E-05   | 0.012653  | 0.12259   |

|         |            |            |            |           |          |
|---------|------------|------------|------------|-----------|----------|
| 429-SS2 | 0.04601554 | 0.45151332 | 0.00010046 | 0.10111   | 0.1553   |
| 432-SS2 | 0.02608169 | 0.25736734 | 7.70E-05   | 0.050154  | 0.76634  |
| 434-SS2 | 0.04726366 | 0.46366945 | 0.00010197 | 0.098057  | 0.11903  |
| 441-SS2 | 0.03282804 | 0.3230735  | 8.52E-05   | 0.084798  | 0.6305   |
| 445-SS2 | 0.01491387 | 0.14859825 | 6.44E-05   | 0.021412  | 0.22576  |
| 446-SS2 | 0.00881738 | 0.08922149 | 5.89E-05   | 0.013414  | 0.11742  |
| 449-SS2 | 0.01091187 | 0.10962077 | 6.08E-05   | 0.015922  | 0.10884  |
| 451-SS2 | 0.07103033 | 0.6951451  | 0.00012331 | 0.075804  | -0.88959 |
| 453-SS2 | 0.04184916 | 0.41093484 | 9.58E-05   | 0.10896   | 0.27003  |
| 454-SS2 | 0.07043442 | 0.68934125 | 0.00012284 | 0.078159  | -0.8583  |
| 457-SS2 | 0.03048842 | 0.3002868  | 8.23E-05   | 0.07157   | 0.71698  |
| 462-SS2 | 0.03202691 | 0.31527096 | 8.40E-05   | 0.07911   | 0.65793  |
| 463-SS2 | 0.08416767 | 0.82309633 | 0.00013074 | 0.053178  | -1.2751  |
| 469-SS2 | 0.02569316 | 0.25358334 | 7.66E-05   | 0.04879   | 0.7616   |
| 470-SS2 | 0.03865165 | 0.37979266 | 9.22E-05   | 0.10852   | 0.37625  |
| 471-SS2 | 0.04634927 | 0.45476374 | 0.00010084 | 0.10033   | 0.14626  |
| 474-SS2 | 0.07236923 | 0.7081854  | 0.00012424 | 0.071279  | -0.93514 |
| 479-SS2 | 0.05574938 | 0.5463161  | 0.00011045 | 0.094186  | -0.16472 |
| 483-SS2 | 0.05055796 | 0.49575424 | 0.00010525 | 0.093003  | 0.021622 |
| 489-SS2 | 0.08071118 | 0.78943187 | 0.00012907 | 0.054994  | -1.2155  |
| 528-SS2 | 0.00674527 | 0.06904013 | 5.72E-05   | 0.011238  | 0.16213  |
| 530-SS2 | 0.02074753 | 0.20541531 | 7.06E-05   | 0.032941  | 0.56707  |
| 554-SS2 | 0.04923258 | 0.48284572 | 0.00010381 | 0.094798  | 0.062467 |
| 556-SS2 | 0.04632357 | 0.45451343 | 0.00010084 | 0.10033   | 0.14626  |
| 560-SS2 | 0.04920363 | 0.48256373 | 0.00010381 | 0.094798  | 0.062467 |
| 562-SS2 | 0.04757603 | 0.46671173 | 0.00010234 | 0.09734   | 0.10986  |
| 564-SS2 | 0.01481386 | 0.14762427 | 6.44E-05   | 0.021412  | 0.20962  |
| 566-SS2 | 0.00519112 | 0.05390348 | 5.58E-05   | 0.0096645 | 0.22108  |
| 570-SS2 | 0.01089912 | 0.10949662 | 6.08E-05   | 0.015922  | 0.10884  |
| 582-SS2 | 0.01047217 | 0.10533831 | 6.02E-05   | 0.015048  | 0.10741  |
| 586-SS2 | 0.0147506  | 0.1470081  | 6.44E-05   | 0.021412  | 0.20962  |
| 590-SS2 | 0.02273173 | 0.22474043 | 7.30E-05   | 0.038397  | 0.65846  |
| 593-SS2 | 0.01862374 | 0.18473059 | 6.84E-05   | 0.028322  | 0.42127  |
| 594-SS2 | 0.04325621 | 0.42463884 | 9.74E-05   | 0.10696   | 0.22964  |
| 603-SS2 | 0.01288981 | 0.12888493 | 6.27E-05   | 0.018769  | 0.14454  |
| 606-SS2 | 0.02083774 | 0.20629391 | 7.10E-05   | 0.033786  | 0.56707  |
| 607-SS2 | 0.05801111 | 0.5683443  | 0.00011273 | 0.096781  | -0.26697 |
| 608-SS2 | 0.07188305 | 0.7034502  | 0.00012378 | 0.073503  | -0.92016 |
| 611-SS2 | 0.02033665 | 0.20141356 | 7.02E-05   | 0.032119  | 0.52662  |
| 628-SS2 | 0.02248754 | 0.22236212 | 7.26E-05   | 0.037419  | 0.65846  |
| 631-SS2 | 0.07036638 | 0.6886786  | 0.00012284 | 0.078159  | -0.8583  |
| 634-SS2 | 0.06984334 | 0.6835844  | 0.00012235 | 0.080544  | -0.82636 |
| 635-SS2 | 0.0317923  | 0.31298596 | 8.40E-05   | 0.07911   | 0.67094  |
| 636-SS2 | 0.07501937 | 0.73399645 | 0.00012577 | 0.064358  | -1.0462  |
| 637-SS2 | 0.03555368 | 0.34961998 | 8.86E-05   | 0.098764  | 0.50933  |
| 638-SS2 | 0.00648018 | 0.06645829 | 5.69E-05   | 0.010907  | 0.17252  |

|         |            |            |            |           |          |
|---------|------------|------------|------------|-----------|----------|
| 641-SS2 | 0.04538544 | 0.44537646 | 9.97E-05   | 0.10268   | 0.16436  |
| 650-SS2 | 0.04736093 | 0.46461678 | 0.00010197 | 0.098057  | 0.11903  |
| 651-SS2 | 0.0164805  | 0.16385652 | 6.62E-05   | 0.024342  | 0.29808  |
| 662-SS2 | 0.01072658 | 0.10781612 | 6.05E-05   | 0.01548   | 0.10741  |
| 675-SS2 | 0.00752189 | 0.07660402 | 5.78E-05   | 0.011928  | 0.14372  |
| 679-SS2 | 0.03695643 | 0.363282   | 9.02E-05   | 0.1042    | 0.4477   |
| 688-SS2 | 0.05689304 | 0.5574548  | 0.00011177 | 0.095663  | -0.20754 |
| 689-SS2 | 0.01676072 | 0.1665857  | 6.65E-05   | 0.024968  | 0.31771  |
| 717-SS2 | 0.04322038 | 0.42428988 | 9.74E-05   | 0.10696   | 0.22964  |
| 719-SS2 | 0.01213072 | 0.12149176 | 6.17E-05   | 0.017303  | 0.12065  |
| 720-SS2 | 0.02614618 | 0.2579955  | 7.70E-05   | 0.050154  | 0.76634  |
| 725-SS2 | 0.01605676 | 0.15972945 | 6.58E-05   | 0.023731  | 0.27899  |
| 727-SS2 | 0.0065743  | 0.067375   | 5.69E-05   | 0.010907  | 0.17252  |
| 729-SS2 | 0.04491453 | 0.44079003 | 9.93E-05   | 0.10345   | 0.18258  |
| 732-SS2 | 0.00502888 | 0.05232337 | 5.58E-05   | 0.0096645 | 0.22108  |
| 735-SS2 | 0.07003633 | 0.685464   | 0.0001226  | 0.07935   | -0.8424  |
| 743-SS2 | 0.07833879 | 0.7663259  | 0.00012778 | 0.057615  | -1.1573  |
| 749-SS2 | 0.0643616  | 0.6301949  | 0.00011815 | 0.096641  | -0.55833 |
| 750-SS2 | 0.04832901 | 0.47404543 | 0.00010308 | 0.095994  | 0.091263 |
| 755-SS2 | 0.01256903 | 0.12576067 | 6.24E-05   | 0.018271  | 0.13519  |
| 763-SS2 | 0.00991198 | 0.09988235 | 5.98E-05   | 0.014626  | 0.1081   |
| 764-SS2 | 0.03668342 | 0.3606231  | 8.98E-05   | 0.10298   | 0.46289  |
| 771-SS2 | 0.0740966  | 0.7250091  | 0.00012534 | 0.066176  | -1.0201  |
| 774-SS2 | 0.00067374 | 0.00990636 | 5.23E-05   | 0.0064696 | 0.43121  |
| 783-SS2 | 0.04477721 | 0.43945262 | 9.89E-05   | 0.10421   | 0.18258  |
| 787-SS2 | 0.01695158 | 0.16844459 | 6.65E-05   | 0.024968  | 0.33781  |
| 789-SS2 | 0.03877824 | 0.3810256  | 9.22E-05   | 0.10852   | 0.37625  |
| 790-SS2 | 0.01290184 | 0.12900208 | 6.27E-05   | 0.018769  | 0.14454  |
| 791-SS2 | 0.05676373 | 0.5561954  | 0.00011144 | 0.095284  | -0.20754 |
| 805-SS2 | 0.02875667 | 0.28342038 | 8.03E-05   | 0.062611  | 0.75723  |
| 814-SS2 | 0.00131516 | 0.01615347 | 5.29E-05   | 0.0068852 | 0.39576  |
| 835-SS2 | 0.01120867 | 0.11251145 | 6.11E-05   | 0.016373  | 0.1115   |
| 836-SS2 | 0.00109816 | 0.01404001 | 5.26E-05   | 0.0066742 | 0.41342  |
| 838-SS2 | 0.06868379 | 0.672291   | 0.00012161 | 0.084113  | -0.77743 |
| 844-SS2 | 0.02750131 | 0.27119377 | 7.86E-05   | 0.05605   | 0.77153  |
| 847-SS2 | 0.05989882 | 0.5867297  | 0.00011431 | 0.098311  | -0.3445  |
| 848-SS2 | 0.03549127 | 0.3490121  | 8.81E-05   | 0.097198  | 0.50933  |
| 857-SS2 | 0.07000769 | 0.6851851  | 0.0001226  | 0.07935   | -0.8424  |
| 863-SS2 | 0.06453502 | 0.631884   | 0.00011843 | 0.096001  | -0.57526 |
| 864-SS2 | 0.06823756 | 0.6679449  | 0.00012136 | 0.085284  | -0.74427 |
| 867-SS2 | 0.08915386 | 0.8716594  | 0.00013288 | 0.052615  | -1.3223  |
| 876-SS2 | 0.07219996 | 0.7065367  | 0.00012401 | 0.07238   | -0.93514 |
| 885-SS2 | 0.06742971 | 0.6600768  | 0.00012058 | 0.088682  | -0.71078 |
| 899-SS2 | 0.07432631 | 0.72724634 | 0.00012534 | 0.066176  | -1.0201  |
| 903-SS2 | 0.03783943 | 0.37188205 | 9.10E-05   | 0.1063    | 0.40374  |
| 905-SS2 | 0.04892413 | 0.4798416  | 0.00010344 | 0.095375  | 0.072211 |

|          |            |            |            |           |           |
|----------|------------|------------|------------|-----------|-----------|
| 908-SS2  | 0.05468326 | 0.53593266 | 0.00010944 | 0.093233  | -0.12355  |
| 910-SS2  | 0.01970691 | 0.19528021 | 6.95E-05   | 0.030541  | 0.50588   |
| 912-SS2  | 0.00471478 | 0.04926411 | 5.55E-05   | 0.0093744 | 0.23478   |
| 919-SS2  | 0.06916706 | 0.6769977  | 0.00012186 | 0.08293   | -0.79386  |
| 921-SS2  | 0.08373981 | 0.81892926 | 0.00013058 | 0.053285  | -1.2702   |
| 929-SS2  | 0.00953461 | 0.09620694 | 5.95E-05   | 0.014213  | 0.11014   |
| 932-SS2  | 0.06880243 | 0.6734465  | 0.00012161 | 0.084113  | -0.77743  |
| 938-SS2  | 0.06936396 | 0.6789155  | 0.00012211 | 0.081739  | -0.81017  |
| 943-SS2  | 0.07238589 | 0.7083476  | 0.00012424 | 0.071279  | -0.9499   |
| 948-SS2  | 0.05990653 | 0.58680475 | 0.00011431 | 0.098311  | -0.3445   |
| 953-SS2  | 0.04047484 | 0.39754963 | 9.42E-05   | 0.10978   | 0.31414   |
| 955-SS2  | 0.05965027 | 0.5843089  | 0.00011431 | 0.098311  | -0.32873  |
| 966-SS2  | 0.05822867 | 0.5704632  | 0.00011305 | 0.097132  | -0.26697  |
| 970-SS2  | 0.07743533 | 0.7575267  | 0.0001274  | 0.058646  | -1.1276   |
| 974-SS2  | 0.02686259 | 0.26497295 | 7.78E-05   | 0.053015  | 0.77158   |
| 975-SS2  | 0.06379277 | 0.62465477 | 0.00011787 | 0.097201  | -0.5246   |
| 977-SS2  | 0.0657388  | 0.6436082  | 0.00011925 | 0.093659  | -0.62617  |
| 982-SS2  | 0.054965   | 0.53867674 | 0.00010978 | 0.093528  | -0.13708  |
| 985-SS2  | 0.05375798 | 0.52692086 | 0.00010876 | 0.092731  | -0.084185 |
| 990-SS2  | 0.01442152 | 0.14380307 | 6.41E-05   | 0.020862  | 0.19442   |
| 996-SS2  | 0.07862655 | 0.7691286  | 0.00012797 | 0.057152  | -1.1666   |
| 1002-SS2 | 0.07235536 | 0.70805025 | 0.00012424 | 0.071279  | -0.93514  |
| 1003-SS2 | 0.08126654 | 0.79484075 | 0.00012942 | 0.054478  | -1.2227   |
| 1007-SS2 | 0.03721218 | 0.36577293 | 9.02E-05   | 0.1042    | 0.43275   |
| 1010-SS2 | 0.05684397 | 0.5569769  | 0.00011177 | 0.095663  | -0.20754  |
| 1011-SS2 | 0.04460446 | 0.43777013 | 9.89E-05   | 0.10421   | 0.19178   |
| 1012-SS2 | 0.0275787  | 0.27194756 | 7.86E-05   | 0.05605   | 0.76966   |
| 1013-SS2 | 0.05643208 | 0.5529653  | 0.00011111 | 0.094909  | -0.19309  |
| 1016-SS2 | 0.070964   | 0.69449914 | 0.00012331 | 0.075804  | -0.87403  |
| 1020-SS2 | 0.0537145  | 0.52649736 | 0.00010842 | 0.092532  | -0.084185 |
| 1021-SS2 | 0.0089832  | 0.09083644 | 5.89E-05   | 0.013414  | 0.11742   |
| 1022-SS2 | 0.02055798 | 0.20356917 | 7.06E-05   | 0.032941  | 0.54704   |
| 1023-SS2 | 0.04438414 | 0.43562427 | 9.86E-05   | 0.10494   | 0.19178   |
| 1026-SS2 | 0.05343929 | 0.523817   | 0.00010842 | 0.092532  | -0.07149  |
| 1031-SS2 | 0.04274539 | 0.41966367 | 9.66E-05   | 0.10808   | 0.23945   |
| 1032-SS2 | 0.0738847  | 0.7229453  | 0.00012513 | 0.067136  | -1.0066   |
| 1033-SS2 | 0.05478813 | 0.53695405 | 0.00010978 | 0.093528  | -0.12355  |
| 1035-SS2 | 0.05267258 | 0.5163496  | 0.00010738 | 0.092189  | -0.046772 |
| 1041-SS2 | 0.05535941 | 0.5425181  | 0.00011011 | 0.093847  | -0.1508   |
| 1042-SS2 | 0.06916419 | 0.6769699  | 0.00012186 | 0.08293   | -0.79386  |
| 1043-SS2 | 0.04476008 | 0.43928578 | 9.89E-05   | 0.10421   | 0.18258   |
| 1048-SS2 | 0.01099518 | 0.11043214 | 6.08E-05   | 0.015922  | 0.10884   |
| 1052-SS2 | 0.03953459 | 0.38839203 | 9.30E-05   | 0.10937   | 0.33794   |
| 1055-SS2 | 0.01621787 | 0.16129866 | 6.58E-05   | 0.023731  | 0.27899   |
| 1056-SS2 | 0.0292033  | 0.28777033 | 8.07E-05   | 0.064343  | 0.751     |
| 1060-SS2 | 0.0188514  | 0.18694791 | 6.87E-05   | 0.029043  | 0.44251   |



|          |            |            |            |           |           |
|----------|------------|------------|------------|-----------|-----------|
| 1073-SS2 | 0.06772832 | 0.66298515 | 0.00012084 | 0.087573  | -0.72756  |
| 1078-SS2 | 0.07918061 | 0.77452487 | 0.00012835 | 0.05632   | -1.1755   |
| 1079-SS2 | 0.02424106 | 0.23944055 | 7.50E-05   | 0.043782  | 0.72811   |
| 1083-SS2 | 0.04212715 | 0.41364235 | 9.62E-05   | 0.10856   | 0.25963   |
| 1087-SS2 | 0.0484251  | 0.4749813  | 0.00010308 | 0.095994  | 0.091263  |
| 1096-SS2 | 0.05188302 | 0.5086597  | 0.00010668 | 0.092211  | -0.022986 |
| 1098-SS2 | 0.00908942 | 0.09187103 | 5.89E-05   | 0.013414  | 0.11326   |
| 1103-SS2 | 0.04348169 | 0.42683488 | 9.78E-05   | 0.10633   | 0.21998   |
| 1112-SS2 | 0.01564911 | 0.1557592  | 6.54E-05   | 0.023132  | 0.26052   |
| 1113-SS2 | 0.02114684 | 0.20930433 | 7.14E-05   | 0.034655  | 0.58661   |
| 1114-SS2 | 0.05759544 | 0.5642959  | 0.00011241 | 0.096416  | -0.23694  |
| 1116-SS2 | 0.02199039 | 0.21752013 | 7.22E-05   | 0.03647   | 0.62396   |
| 1122-SS2 | 0.03069465 | 0.30229542 | 8.23E-05   | 0.07157   | 0.70647   |
| 1126-SS2 | 0.05999756 | 0.5876913  | 0.00011462 | 0.098526  | -0.3445   |
| 1132-SS2 | 0.01275803 | 0.12760149 | 6.24E-05   | 0.018271  | 0.13519   |
| 1140-SS2 | 0.02614418 | 0.25797606 | 7.70E-05   | 0.050154  | 0.76634   |
| 1141-SS2 | 0.05520741 | 0.5410376  | 0.00011011 | 0.093847  | -0.13708  |
| 1143-SS2 | 0.04115    | 0.40412536 | 9.50E-05   | 0.10955   | 0.29155   |
| 1145-SS2 | 0.00461979 | 0.04833899 | 5.52E-05   | 0.0090922 | 0.24903   |
| 1146-SS2 | 0.00890437 | 0.09006871 | 5.89E-05   | 0.013414  | 0.11742   |
| 1151-SS2 | 0.03153025 | 0.31043375 | 8.36E-05   | 0.07721   | 0.6834    |
| 1157-SS2 | 0.00917467 | 0.09270129 | 5.92E-05   | 0.013809  | 0.11326   |
| 1168-SS2 | 0.03899385 | 0.38312557 | 9.26E-05   | 0.10901   | 0.36311   |
| 1170-SS2 | 0.06456954 | 0.6322202  | 0.00011843 | 0.096001  | -0.57526  |
| 1172-SS2 | 0.00540477 | 0.05598436 | 5.61E-05   | 0.0099627 | 0.20797   |
| 1174-SS2 | 0.05938959 | 0.58177    | 0.000114   | 0.098059  | -0.32873  |
| 1175-SS2 | 0.04009777 | 0.39387718 | 9.38E-05   | 0.10975   | 0.32588   |
| 1178-SS2 | 0.01294976 | 0.12946884 | 6.27E-05   | 0.018769  | 0.14454   |
| 1183-SS2 | 0.06434057 | 0.6299901  | 0.00011815 | 0.096641  | -0.55833  |
| 1189-SS2 | 0.01095818 | 0.11007183 | 6.08E-05   | 0.015922  | 0.10884   |
| 1195-SS2 | 0.03771412 | 0.3706616  | 9.10E-05   | 0.1063    | 0.41807   |
| 1197-SS2 | 0.06054879 | 0.59306    | 0.00011492 | 0.0987    | -0.37638  |
| 1198-SS2 | 0.01462082 | 0.14574412 | 6.44E-05   | 0.021412  | 0.20962   |
| 1200-SS2 | 0.08823717 | 0.8627313  | 0.00013248 | 0.05264   | -1.3176   |
| 1204-SS2 | 0.04737237 | 0.46472818 | 0.00010197 | 0.098057  | 0.11903   |
| 1207-SS2 | 0.00444762 | 0.04666213 | 5.52E-05   | 0.0090922 | 0.24903   |
| 1210-SS2 | 0.0119578  | 0.11980758 | 6.17E-05   | 0.017303  | 0.12065   |
| 1214-SS2 | 0.07441487 | 0.7281089  | 0.00012556 | 0.06525   | -1.0201   |
| 1218-SS2 | 0.07275299 | 0.711923   | 0.00012446 | 0.070202  | -0.96444  |
| 1226-SS2 | 0.06489842 | 0.63542336 | 0.00011871 | 0.095287  | -0.59222  |
| 1227-SS2 | 0.02344243 | 0.23166227 | 7.38E-05   | 0.040447  | 0.68948   |
| 1228-SS2 | 0.01274265 | 0.12745167 | 6.24E-05   | 0.018271  | 0.13519   |
| 1231-SS2 | 0.07228904 | 0.7074043  | 0.00012424 | 0.071279  | -0.93514  |
| 1233-SS2 | 0.0198754  | 0.19692115 | 6.99E-05   | 0.031319  | 0.50588   |
| 1236-SS2 | 0.08689325 | 0.8496422  | 0.00013193 | 0.052709  | -1.3063   |
| 1237-SS2 | 0.07103766 | 0.6952165  | 0.00012331 | 0.075804  | -0.88959  |

|          |            |            |            |          |           |
|----------|------------|------------|------------|----------|-----------|
| 1238-SS2 | 0.04230021 | 0.41532782 | 9.62E-05   | 0.10856  | 0.24945   |
| 1241-SS2 | 0.03765414 | 0.37007734 | 9.10E-05   | 0.1063   | 0.41807   |
| 1244-SS2 | 0.03485631 | 0.34282786 | 8.77E-05   | 0.095565 | 0.54051   |
| 1250-SS2 | 0.04204536 | 0.41284573 | 9.58E-05   | 0.10896  | 0.25963   |
| 1252-SS2 | 0.05526461 | 0.54159474 | 0.00011011 | 0.093847 | -0.13708  |
| 1254-SS2 | 0.06306428 | 0.6175597  | 0.0001173  | 0.098072 | -0.49111  |
| 1255-SS2 | 0.008282   | 0.08400707 | 5.84E-05   | 0.012653 | 0.12871   |
| 1256-SS2 | 0.04160262 | 0.4085337  | 9.54E-05   | 0.10929  | 0.27003   |
| 1257-SS2 | 0.06068445 | 0.59438133 | 0.00011523 | 0.098828 | -0.37638  |
| 1267-SS2 | 0.06925838 | 0.67788714 | 0.00012211 | 0.081739 | -0.79386  |
| 1282-SS2 | 0.0521158  | 0.5109269  | 0.00010703 | 0.092172 | -0.022986 |

Table S5

| gene_symbol | waldStat   | pvalue   | logFC        | FDR      |
|-------------|------------|----------|--------------|----------|
| Pf4         | 583.355086 |          | 0 2.11460297 | 0        |
| Trem1       | 496.485108 |          | 0 1.11252534 | 0        |
| Ifitm1      | 243.01601  |          | 0 -1.280525  | 0        |
| Nkg7        | 204.059699 |          | 0 1.53786199 | 0        |
| Mfsd2b      | 185.776449 |          | 0 1.86671558 | 0        |
| Tuba8       | 179.464034 |          | 0 1.87574402 | 0        |
| Procr       | 160.787948 |          | 0 -2.5336142 | 0        |
| Gata1       | 151.382798 |          | 0 1.78457648 | 0        |
| Itga2b      | 135.518689 |          | 0 1.24098994 | 0        |
| Hist1h1b    | 129.8899   |          | 0 1.64709966 | 0        |
| Alcam       | 125.426551 |          | 0 -1.4026078 | 0        |
| Rgs10       | 123.841716 |          | 0 1.79861326 | 0        |
| Icam4       | 119.806107 |          | 0 1.51997738 | 0        |
| Hlf         | 115.77437  |          | 0 -1.2067327 | 0        |
| Zfp467      | 104.454131 |          | 0 -1.1779281 | 0        |
| Plek        | 103.712895 |          | 0 1.15739513 | 0        |
| Ly6a        | 99.4921281 |          | 0 -1.6158153 | 0        |
| E2f8        | 97.2846895 |          | 0 1.62554894 | 0        |
| Runx3       | 91.5430557 |          | 0 1.24138372 | 0        |
| Ltb         | 91.4500584 |          | 0 -1.3906372 | 0        |
| Cd180       | 86.5411609 |          | 0 2.22001529 | 0        |
| Gp5         | 85.681222  |          | 0 1.30380001 | 0        |
| Pygm        | 84.7485673 |          | 0 -2.4606769 | 0        |
| Slc22a3     | 81.7801599 |          | 0 1.34382386 | 0        |
| Pde10a      | 79.0637865 |          | 0 2.48903228 | 0        |
| Padi4       | 73.3114275 |          | 0 -1.2297267 | 0        |
| F2rl2       | 73.238019  |          | 0 1.70479975 | 0        |
| St8sia4     | 72.0687712 |          | 0 -1.1653806 | 0        |
| Sult1a1     | 71.6286851 |          | 0 -2.1282261 | 0        |
| Asf1b       | 68.2105889 | 1.11E-16 | 1.44375257   | 3.90E-14 |
| Ltbp1       | 65.3689761 | 6.66E-16 | 1.54931667   | 2.26E-13 |
| Lim2        | 58.6335737 | 1.90E-14 | 3.18133583   | 6.24E-12 |
| Cd48        | 58.531643  | 2.00E-14 | 1.56655395   | 6.37E-12 |
| Hist1h3c    | 58.2997036 | 2.25E-14 | 1.52717377   | 6.98E-12 |
| Spc24       | 57.4788353 | 3.42E-14 | 1.21168236   | 1.03E-11 |
| Olfr417     | 57.0880281 | 4.16E-14 | 1.93993624   | 1.22E-11 |
| Wfdc2       | 55.3917828 | 9.87E-14 | -1.687254    | 2.75E-11 |
| Itsn1       | 55.3817865 | 9.93E-14 | -1.2327762   | 2.75E-11 |
| Mki67       | 53.9049151 | 2.10E-13 | 1.23071717   | 5.68E-11 |
| Cst7        | 52.7021058 | 3.88E-13 | 1.76615714   | 1.02E-10 |
| Top2a       | 51.997254  | 5.56E-13 | 1.17665739   | 1.43E-10 |
| Birc5       | 50.4816689 | 1.20E-12 | 1.26539998   | 3.01E-10 |

|           |            |          |            |          |
|-----------|------------|----------|------------|----------|
| Pbk       | 50.0956087 | 1.46E-12 | 1.32368035 | 3.58E-10 |
| Gp1bb     | 49.8490201 | 1.66E-12 | 2.08542124 | 3.97E-10 |
| Ifitm7    | 48.7918841 | 2.85E-12 | -1.2527764 | 6.66E-10 |
| Hist1h2ap | 48.3462389 | 3.57E-12 | 1.19027582 | 8.17E-10 |
| Hist1h1a  | 47.6737614 | 5.03E-12 | 1.34950816 | 1.13E-09 |
| Hist1h2ae | 47.0713079 | 6.85E-12 | 1.15987369 | 1.50E-09 |
| Myl10     | 46.2893227 | 1.02E-11 | -1.1891095 | 2.19E-09 |
| Hist1h2ab | 46.0083894 | 1.18E-11 | 1.3982354  | 2.48E-09 |
| Cenph     | 45.3613911 | 1.64E-11 | 1.23447036 | 3.33E-09 |
| AI504432  | 45.3520747 | 1.65E-11 | 1.24342892 | 3.33E-09 |
| Hmgb2     | 45.2847366 | 1.70E-11 | 0.99508222 | 3.38E-09 |
| Fbxo5     | 43.8483251 | 3.55E-11 | 1.23160806 | 6.92E-09 |
| Pdcd4     | 43.3922608 | 4.48E-11 | 0.88071034 | 8.57E-09 |
| Prex2     | 42.3428396 | 7.66E-11 | -1.7216959 | 1.42E-08 |
| Ecscr     | 42.3300938 | 7.71E-11 | -1.4725163 | 1.42E-08 |
| Mecom     | 40.8893474 | 1.61E-10 | -1.0657243 | 2.92E-08 |
| Fcgrt     | 40.4391321 | 2.03E-10 | -1.4379288 | 3.62E-08 |
| Fcer1a    | 39.1713588 | 3.88E-10 | 2.54710585 | 6.81E-08 |
| Hist2h2ac | 38.8381375 | 4.60E-10 | 1.22411042 | 7.95E-08 |
| Rad51ap1  | 38.1038461 | 6.71E-10 | 1.25833353 | 1.14E-07 |
| Cks2      | 38.0704035 | 6.82E-10 | 1.01308464 | 1.14E-07 |
| Klhl4     | 38.0416416 | 6.93E-10 | -1.5613015 | 1.14E-07 |
| Nkx2-3    | 37.5898693 | 8.73E-10 | -1.1063957 | 1.41E-07 |
| Spc25     | 36.7561138 | 1.34E-09 | 1.24134519 | 2.14E-07 |
| Cdkn1c    | 36.6983104 | 1.38E-09 | -1.1685634 | 2.17E-07 |
| Proser2   | 36.1490584 | 1.83E-09 | 1.66486389 | 2.83E-07 |
| Tyms      | 35.9219012 | 2.05E-09 | 1.04581199 | 3.13E-07 |
| Mllt3     | 35.6938924 | 2.31E-09 | -1.0013036 | 3.47E-07 |
| Pclaf     | 35.1947043 | 2.98E-09 | 1.1783736  | 4.42E-07 |
| Hist1h2af | 34.383271  | 4.53E-09 | 1.7016412  | 6.62E-07 |
| Phlda1    | 34.0859239 | 5.27E-09 | 1.10936409 | 7.60E-07 |
| Gm16104   | 34.0032478 | 5.50E-09 | -1.7354926 | 7.83E-07 |
| Cdca8     | 33.8097143 | 6.08E-09 | 1.10558439 | 8.53E-07 |
| Rrm2      | 33.6701439 | 6.53E-09 | 1.26516284 | 9.04E-07 |
| Rap1b     | 33.3329155 | 7.77E-09 | 0.86335127 | 1.06E-06 |
| H2afz     | 33.2049551 | 8.29E-09 | 0.8718694  | 1.12E-06 |
| Clec1a    | 33.1676728 | 8.45E-09 | -1.2348856 | 1.13E-06 |
| Myof      | 33.0932823 | 8.78E-09 | -1.7798158 | 1.16E-06 |
| Cdca3     | 32.123953  | 1.45E-08 | 1.16415981 | 1.88E-06 |
| Tk1       | 31.9782887 | 1.56E-08 | 1.13324581 | 2.00E-06 |
| Fen1      | 31.8743232 | 1.64E-08 | 1.07659501 | 2.09E-06 |
| Esco2     | 31.698211  | 1.80E-08 | 1.24371826 | 2.26E-06 |
| Abcg3     | 31.0804022 | 2.48E-08 | -1.3692807 | 3.07E-06 |

|              |            |          |            |            |
|--------------|------------|----------|------------|------------|
| H2afx        | 30.7300744 | 2.97E-08 | 0.99979166 | 3.63E-06   |
| Knl1         | 30.4264887 | 3.47E-08 | 1.14743743 | 4.20E-06   |
| Hist1h2ak    | 30.1746816 | 3.95E-08 | 1.47343135 | 4.69E-06   |
| Hist1h2bm    | 30.1656056 | 3.97E-08 | 1.47427104 | 4.69E-06   |
| Ccl17        | 29.6742413 | 5.11E-08 | 2.37474965 | 5.98E-06   |
| Traf1        | 29.6357394 | 5.21E-08 | -1.6005532 | 6.03E-06   |
| Klf1         | 29.4383416 | 5.77E-08 | 1.41411092 | 6.60E-06   |
| Ska1         | 29.3355501 | 6.09E-08 | 1.34768049 | 6.89E-06   |
| Btnl9        | 29.107551  | 6.85E-08 | 1.86497004 | 7.67E-06   |
| Kif15        | 29.072999  | 6.97E-08 | 1.16266771 | 7.72E-06   |
| Ccl4         | 28.9256386 | 7.52E-08 | -1.0913796 | 8.25E-06   |
| Endod1       | 28.0629816 | 1.17E-07 | 1.23962505 | 1.27E-05   |
| Gimap6       | 27.9327864 | 1.26E-07 | -1.0100148 | 1.35E-05   |
| Ctsf         | 27.844552  | 1.31E-07 | -1.2118832 | 1.40E-05   |
| Ubash3a      | 27.7832385 | 1.36E-07 | 2.20908275 | 1.43E-05   |
| Cpne8        | 27.45997   | 1.60E-07 | -1.3618262 | 1.66E-05   |
| Plac8        | 27.4506853 | 1.61E-07 | 0.99786104 | 1.66E-05   |
| Hist1h2bj    | 27.4149963 | 1.64E-07 | 1.26832273 | 1.68E-05   |
| Cdca5        | 27.319553  | 1.72E-07 | 1.27740078 | 1.75E-05   |
| Hist1h2bb    | 27.1996603 | 1.83E-07 | 1.3246551  | 1.84E-05   |
| Sgo2a        | 27.0983068 | 1.93E-07 | 1.2789867  | 1.92E-05   |
| Ms4a3        | 26.7988663 | 2.26E-07 | 1.18008449 | 2.22E-05   |
| Pglyrp2      | 26.7504735 | 2.31E-07 | -0.8937028 | 2.26E-05   |
| H2-Aa        | 26.6455826 | 2.44E-07 | -1.3479928 | 2.36E-05   |
| Cpa3         | 26.272375  | 2.96E-07 | 1.66123359 | 2.84E-05   |
| Plcl1        | 26.195097  | 3.09E-07 | -1.4522537 | 2.93E-05   |
| I830077J02Ri | 25.7290503 | 3.93E-07 | 1.87372533 | 3.69E-05   |
| Ube2c        | 25.6871875 | 4.01E-07 | 1.21086439 | 3.74E-05   |
| Fgd5         | 25.43023   | 4.59E-07 | -1.3572524 | 4.24E-05   |
| Sifn2        | 25.3957894 | 4.67E-07 | -1.2949574 | 4.27E-05   |
| Tox          | 25.1248544 | 5.37E-07 | -1.2197889 | 4.88E-05   |
| Iigp1        | 24.7019864 | 6.69E-07 | -1.2731171 | 6.02E-05   |
| Mcm10        | 24.6692565 | 6.81E-07 | 1.26540832 | 6.07E-05   |
| Hist1h3i     | 24.5896522 | 7.09E-07 | 1.47551189 | 6.27E-05   |
| Plxna4os1    | 24.3490596 | 8.04E-07 | -1.3187518 | 7.05E-05   |
| Lrr1         | 23.9325759 | 9.98E-07 | 1.55524363 | 8.68E-05   |
| Hist1h3f     | 23.8567466 | 1.04E-06 | 1.25876923 | 8.91E-05   |
| Depdc1a      | 23.8499626 | 1.04E-06 | 1.42296733 | 8.91E-05   |
| Cenpw        | 23.8210241 | 1.06E-06 | 0.99300433 | 8.97E-05   |
| Hist1h3b     | 23.6510194 | 1.15E-06 | 1.56529309 | 9.72E-05   |
| Pde1b        | 23.6071709 | 1.18E-06 | -1.1488674 | 9.87E-05   |
| Runx1t1      | 23.4278273 | 1.30E-06 | -1.3915236 | 0.00010749 |
| Camk2d       | 23.3346688 | 1.36E-06 | -1.1495856 | 0.00011194 |

|             |            |           |            |            |
|-------------|------------|-----------|------------|------------|
| Mybl2       | 23.1506504 | 1.50E-06  | 1.33162232 | 0.00012223 |
| Cnr2        | 22.7871881 | 1.81E-06  | 2.04599235 | 0.00014653 |
| F10         | 22.7260258 | 1.87E-06  | 1.76347405 | 0.00015011 |
| Cd74        | 22.5945076 | 2.00E-06  | -1.5217531 | 0.00015873 |
| Cdk1        | 22.5896006 | 2.01E-06  | 1.01488951 | 0.00015873 |
| Nusap1      | 22.5520641 | 2.05E-06  | 1.12185131 | 0.00016066 |
| Ncapg       | 22.3954555 | 2.22E-06  | 1.14989184 | 0.00017302 |
| Rora        | 22.1015932 | 2.59E-06  | -1.2404939 | 0.00020014 |
| Vdr         | 22.0505919 | 2.66E-06  | -1.0137806 | 0.00020323 |
| Gm15856     | 22.0393564 | 2.67E-06  | 1.60393626 | 0.00020323 |
| Kazald1     | 22.0303272 | 2.68E-06  | -1.3107634 | 0.00020323 |
| D630039A03I | 21.5184766 | 3.50E-06  | -1.4035735 | 0.00026348 |
| Snn         | 21.1260018 | 4.30E-06  | -1.328644  | 0.00032105 |
| Cd82        | 20.9421391 | 4.73E-06  | -1.2822777 | 0.00035089 |
| Ltc4s       | 20.6566657 | 5.49E-06  | 1.30577872 | 0.00040445 |
| Gimap5      | 20.5138018 | 5.92E-06  | -1.0177859 | 0.00043276 |
| Anxa6       | 20.076302  | 7.44E-06  | -1.0349132 | 0.00054019 |
| Gimap8      | 19.6539199 | 9.28E-06  | -1.2770874 | 0.00066914 |
| Ckap2l      | 19.5359407 | 9.87E-06  | 1.02024902 | 0.00070692 |
| Robo4       | 19.4617152 | 1.03E-05  | -1.4046729 | 0.00072997 |
| P2ry1       | 19.2628987 | 1.14E-05  | 1.07660351 | 0.00080463 |
| Gm19590     | 19.1356855 | 1.22E-05  | -1.0113444 | 0.00085434 |
| Hacd4       | 19.1165476 | 1.23E-05  | -0.9181483 | 0.00085723 |
| Mrv1        | 18.9400551 | 1.35E-05  | 2.28506495 | 0.00093412 |
| Shcbp1      | 18.7076755 | 1.52E-05  | 1.15951095 | 0.00104825 |
| Tinagl1     | 18.6591132 | 1.56E-05  | -1.4714393 | 0.00106831 |
| Robo3       | 18.0876268 | 2.11E-05  | 1.21665941 | 0.00143268 |
| Dut         | 17.7237601 | 2.55E-05  | 0.83509014 | 0.00172341 |
| Sptb        | 17.6738458 | 2.62E-05  | 2.60707056 | 0.00175796 |
| B4galt6     | 17.5932498 | 2.74E-05  | -0.9535422 | 0.00182245 |
| Gmnn        | 16.8046551 | 4.14E-05  | 0.91773071 | 0.00274282 |
| Hmgb3       | 16.7471092 | 4.27E-05  | 0.83821027 | 0.00280961 |
| Cracr2b     | 16.5476217 | 4.74E-05  | -1.2627762 | 0.0031018  |
| Diras2      | 16.426174  | 5.06E-05  | 1.8478047  | 0.00328658 |
| Stx11       | 16.3358022 | 5.31E-05  | 1.15455377 | 0.00342593 |
| Cd52        | 16.293939  | 5.42E-05  | 1.16616405 | 0.0034811  |
| Hist1h2bn   | 16.0508188 | 6.17E-05  | 1.35054124 | 0.00393385 |
| Bub1        | 16.0141378 | 6.29E-05  | 1.1440883  | 0.00398664 |
| Lhfpl2      | 15.7179209 | 7.35E-05  | 1.2230256  | 0.00463423 |
| Ptpn14      | 15.4049044 | 8.68E-05  | -1.2888846 | 0.0054361  |
| Plk4        | 15.173309  | 9.81E-05  | 1.01037196 | 0.00610882 |
| Alox5       | 15.1415224 | 9.97E-05  | 1.40841257 | 0.00617599 |
| Dnah12      | 15.0863942 | 0.0001027 | 1.6632089  | 0.00632181 |

|           |            |            |            |            |
|-----------|------------|------------|------------|------------|
| Clspn     | 15.0102352 | 0.00010693 | 0.98435396 | 0.00654385 |
| Socs2     | 14.8882608 | 0.00011407 | -1.074962  | 0.00694051 |
| Il1b      | 14.7614604 | 0.000122   | 3.65539009 | 0.00738052 |
| Prc1      | 14.5919601 | 0.00013348 | 1.02050446 | 0.0080288  |
| Hist2h2bb | 14.5462388 | 0.00013676 | 1.23956396 | 0.00817926 |
| Col4a2    | 14.4852951 | 0.00014126 | -1.1972509 | 0.00840046 |
| Snca      | 14.4365297 | 0.00014496 | 1.3112511  | 0.00857236 |
| Ccna2     | 14.3969827 | 0.00014804 | 1.0212428  | 0.00870537 |
| Uhrf1     | 14.3184828 | 0.00015434 | 0.97179674 | 0.00902558 |
| Cenpm     | 14.2963375 | 0.00015617 | 0.9529275  | 0.00904789 |
| Ndc80     | 14.2930354 | 0.00015644 | 1.08783583 | 0.00904789 |
| Aurkb     | 14.1352375 | 0.00017013 | 1.02143532 | 0.00978555 |
| Espl1     | 14.1189957 | 0.0001716  | 1.21545101 | 0.00981676 |
| Syne2     | 14.0936494 | 0.00017393 | -1.0941873 | 0.00989615 |
| Ifi44     | 13.9832663 | 0.00018444 | -1.1767227 | 0.01043799 |
| Fam46a    | 13.9729606 | 0.00018546 | 1.15956823 | 0.01043924 |
| Cdk6      | 13.9058331 | 0.0001922  | 0.82240477 | 0.01076121 |
| Tpx2      | 13.8788295 | 0.00019498 | 0.9997365  | 0.01085918 |
| Clec4d    | 13.7692545 | 0.00020669 | 1.24274176 | 0.01139687 |
| Emcn      | 13.768245  | 0.0002068  | -0.890174  | 0.01139687 |
| Sh3bp5    | 13.7285033 | 0.00021122 | -1.1852219 | 0.01153208 |
| Mis18bp1  | 13.7265248 | 0.00021145 | 1.02358536 | 0.01153208 |
| Cenpp     | 13.5826174 | 0.00022829 | 1.02490753 | 0.01238648 |
| Cenpk     | 13.496501  | 0.00023901 | 0.96746802 | 0.01290157 |
| Steap3    | 13.4722133 | 0.00024212 | 1.12732135 | 0.01300297 |
| Kcnj5     | 12.8835158 | 0.00033149 | 2.88350804 | 0.01771194 |
| Gins1     | 12.836134  | 0.00033999 | 1.1018556  | 0.01807438 |
| Nasp      | 12.6713727 | 0.0003713  | 0.86603402 | 0.01963955 |
| Evi5      | 12.503701  | 0.00040615 | -1.1834112 | 0.0213755  |
| Hist1h3a  | 12.4708238 | 0.00041336 | 1.14504948 | 0.02164678 |
| Cit       | 12.4501188 | 0.00041797 | 1.01148229 | 0.02171699 |
| Pqlc3     | 12.4462823 | 0.00041882 | -1.1272608 | 0.02171699 |
| Tada2b    | 12.3935761 | 0.00043081 | 1.37172425 | 0.02222913 |
| Tnfaip8l2 | 12.3290828 | 0.00044596 | 1.1801711  | 0.02289818 |
| Aebp1     | 12.2733456 | 0.00045947 | -1.3175229 | 0.02347777 |
| Gm17590   | 12.1703932 | 0.00048554 | 1.4714957  | 0.02468986 |
| Tnks1bp1  | 11.9565895 | 0.00054454 | -1.2083775 | 0.02755709 |
| Fmn12     | 11.9420145 | 0.00054882 | -1.0949495 | 0.02764062 |
| Abi3      | 11.9141372 | 0.0005571  | -0.9124855 | 0.02792374 |
| Atad5     | 11.8129279 | 0.00058821 | 0.96227985 | 0.02934352 |
| Vegfc     | 11.5523049 | 0.00067665 | -1.1745739 | 0.03359647 |
| Dkk1      | 11.5407319 | 0.00068088 | -1.0255795 | 0.03364754 |
| Gsta4     | 11.4324076 | 0.00072174 | -1.2253422 | 0.03550022 |

|           |            |            |            |            |
|-----------|------------|------------|------------|------------|
| Tecpr1    | 11.4180223 | 0.00072735 | -1.172097  | 0.03558342 |
| Kntc1     | 11.4107748 | 0.00073019 | 1.23611252 | 0.03558342 |
| Lhcgr     | 11.3813747 | 0.00074184 | -1.1788639 | 0.03598446 |
| Gm12999   | 11.0106994 | 0.00090587 | 1.84265878 | 0.04373961 |
| Ebi3      | 10.9009814 | 0.00096113 | -1.0270197 | 0.04619584 |
| Lmnb1     | 10.8321866 | 0.00099751 | 0.83524472 | 0.04772621 |
| Kif14     | 10.6717922 | 0.00108782 | 1.1389573  | 0.05181158 |
| Tmem71    | 10.629816  | 0.00111279 | -0.868903  | 0.05276219 |
| Jam3      | 10.5502391 | 0.00116173 | -1.1677766 | 0.05483577 |
| Hist1h4a  | 10.3478403 | 0.00129626 | 1.30158485 | 0.06091277 |
| Map4k2    | 10.2171724 | 0.00139139 | -0.9784296 | 0.06509232 |
| Tbkbp1    | 10.0626098 | 0.00151309 | -1.0355321 | 0.07047238 |
| Rpa3      | 9.99176582 | 0.00157242 | 0.8455855  | 0.07291307 |
| Upp1      | 9.97473508 | 0.00158703 | -1.0693945 | 0.07326781 |
| Notch1    | 9.94517382 | 0.00161272 | -1.1106593 | 0.07412862 |
| Csrp3     | 9.93203226 | 0.00162427 | 1.30319327 | 0.07433512 |
| Aqp1      | 9.7195193  | 0.00182321 | 0.91143225 | 0.08307848 |
| Homer2    | 9.6998681  | 0.00184281 | 1.33652721 | 0.08360967 |
| Parm1     | 9.67547146 | 0.00186744 | 1.43246612 | 0.08436356 |
| Plk1      | 9.64674437 | 0.00189687 | 1.03784446 | 0.08532694 |
| Oip5      | 9.5963158  | 0.00194968 | 1.0791984  | 0.08732914 |
| Ufsp1     | 9.57784436 | 0.0019694  | 0.85990152 | 0.08783836 |
| Sqor      | 9.50303276 | 0.00205133 | -1.0301927 | 0.09110656 |
| Eme1      | 9.48244532 | 0.00207447 | 1.10514674 | 0.09153332 |
| Mgst2     | 9.47331964 | 0.00208482 | -1.1526691 | 0.09153332 |
| Mxd3      | 9.47138071 | 0.00208702 | 1.14088305 | 0.09153332 |
| Hoxb5     | 9.46214163 | 0.00209756 | -1.0630237 | 0.09161378 |
| Cenps     | 9.41987096 | 0.00214647 | 0.92592206 | 0.09314736 |
| Hist1h2bp | 9.41653793 | 0.00215037 | 1.68346511 | 0.09314736 |
| Cnrip1    | 9.32008187 | 0.00226656 | -0.8750085 | 0.09777785 |
| Patj      | 9.28853682 | 0.00230592 | -1.0963596 | 0.09906997 |



| gene_symbol | waldStat   | pvalue   | logFC        | FDR      |
|-------------|------------|----------|--------------|----------|
| Pf4         | 150.466382 |          | 0 1.56209205 | 0        |
| Nkg7        | 137.467569 |          | 0 1.5427413  | 0        |
| Hist1h1b    | 127.71694  |          | 0 1.77342633 | 0        |
| Runx3       | 96.3968214 |          | 0 1.39084196 | 0        |
| E2f8        | 88.3020437 |          | 0 1.82167059 | 0        |
| Gata1       | 84.0984974 |          | 0 1.71001859 | 0        |
| Procr       | 83.2613782 |          | 0 -1.8853297 | 0        |
| Spc24       | 79.661262  |          | 0 1.42489283 | 0        |
| Asf1b       | 75.95798   |          | 0 1.68329795 | 0        |
| Slc22a3     | 66.8298802 | 3.33E-16 | 1.41702215   | 3.51E-13 |
| Top2a       | 64.5350755 | 9.99E-16 | 1.30292657   | 9.56E-13 |
| Trem1       | 62.0803456 | 3.33E-15 | 0.80097316   | 2.92E-12 |
| Mfsd2b      | 60.8708047 | 6.11E-15 | 1.52284505   | 4.94E-12 |
| Tuba8       | 60.6250624 | 6.88E-15 | 1.51668085   | 5.18E-12 |
| Rad51ap1    | 59.9009707 | 9.99E-15 | 1.56911234   | 6.65E-12 |
| Cenph       | 59.880566  | 1.01E-14 | 1.45910078   | 6.65E-12 |
| Pbk         | 59.1462456 | 1.47E-14 | 1.5265512    | 9.02E-12 |
| Rgs10       | 59.0473397 | 1.54E-14 | 1.65253615   | 9.02E-12 |
| Hist1h2ap   | 58.4521771 | 2.09E-14 | 1.30029536   | 1.16E-11 |
| Hist1h1a    | 56.1917229 | 6.57E-14 | 1.54973984   | 3.46E-11 |
| Ifitm1      | 55.2931988 | 1.04E-13 | -0.9777352   | 5.20E-11 |
| Tyms        | 54.0429897 | 1.96E-13 | 1.20682643   | 9.39E-11 |
| Dut         | 52.6082    | 4.07E-13 | 0.97608942   | 1.86E-10 |
| Hist1h3c    | 51.4053445 | 7.51E-13 | 1.62555088   | 3.30E-10 |
| Cd48        | 50.9274249 | 9.58E-13 | 1.7048838    | 4.04E-10 |
| Pclaf       | 50.7476772 | 1.05E-12 | 1.37078073   | 4.25E-10 |
| Hist1h2ae   | 50.5406122 | 1.17E-12 | 1.23027427   | 4.55E-10 |
| Hmgb2       | 49.5755061 | 1.91E-12 | 1.03806396   | 7.18E-10 |
| Tk1         | 49.0973158 | 2.44E-12 | 1.34755419   | 8.84E-10 |
| Uhrf1       | 48.8119146 | 2.82E-12 | 1.31106021   | 9.62E-10 |
| Icam4       | 48.8008595 | 2.83E-12 | 1.33952181   | 9.62E-10 |
| Alcam       | 47.860238  | 4.58E-12 | -1.0097929   | 1.51E-09 |
| Sult1a1     | 47.0942785 | 6.77E-12 | -1.754151    | 2.16E-09 |
| Rrm2        | 45.6437321 | 1.42E-11 | 1.50322947   | 4.39E-09 |
| Cd180       | 45.0631332 | 1.91E-11 | 2.05155252   | 5.74E-09 |
| Nasp        | 44.8897361 | 2.08E-11 | 1.08027701   | 6.09E-09 |
| Atad5       | 44.1451118 | 3.05E-11 | 1.32551707   | 8.67E-09 |
| Gmnn        | 42.8309198 | 5.97E-11 | 1.12001905   | 1.65E-08 |
| Mki67       | 41.7098485 | 1.06E-10 | 1.22806796   | 2.86E-08 |
| Birc5       | 41.3992399 | 1.24E-10 | 1.2924279    | 3.27E-08 |
| Plac8       | 40.3020727 | 2.18E-10 | 1.11003972   | 5.59E-08 |
| Cpa3        | 39.6629079 | 3.02E-10 | 2.1859355    | 7.56E-08 |

|           |            |          |            |            |
|-----------|------------|----------|------------|------------|
| Mcm10     | 38.6846128 | 4.98E-10 | 1.57606855 | 1.22E-07   |
| Olfra417  | 37.184238  | 1.07E-09 | 1.94603661 | 2.57E-07   |
| Clspn     | 36.9804608 | 1.19E-09 | 1.24059045 | 2.79E-07   |
| Hist1h2ab | 36.3726697 | 1.63E-09 | 1.42747836 | 3.69E-07   |
| Hist2h2ac | 36.353058  | 1.65E-09 | 1.30325491 | 3.69E-07   |
| Lig1      | 36.0310353 | 1.94E-09 | 1.0686213  | 4.26E-07   |
| Mybl2     | 34.9681258 | 3.35E-09 | 1.66612319 | 7.20E-07   |
| Cd52      | 34.6936821 | 3.86E-09 | 1.53681093 | 8.12E-07   |
| Spc25     | 33.7798231 | 6.17E-09 | 1.3265769  | 1.27E-06   |
| Pygm      | 33.2065798 | 8.29E-09 | -1.8009704 | 1.65E-06   |
| H2afz     | 33.2055093 | 8.29E-09 | 0.88700525 | 1.65E-06   |
| Itga2b    | 32.478839  | 1.20E-08 | 1.00976762 | 2.35E-06   |
| Esco2     | 31.4908401 | 2.00E-08 | 1.35314727 | 3.83E-06   |
| Mcm5      | 31.2108943 | 2.31E-08 | 1.07498891 | 4.35E-06   |
| Cenps     | 30.029235  | 4.26E-08 | 1.19360195 | 7.86E-06   |
| Ly6a      | 29.6567482 | 5.16E-08 | -1.1676919 | 9.36E-06   |
| Plk4      | 29.4533722 | 5.73E-08 | 1.22771461 | 1.02E-05   |
| Gins1     | 28.7401558 | 8.28E-08 | 1.44206304 | 1.45E-05   |
| Fen1      | 28.5197271 | 9.27E-08 | 1.13035316 | 1.60E-05   |
| Cenpk     | 28.4861399 | 9.44E-08 | 1.17229176 | 1.60E-05   |
| Kif15     | 28.349397  | 1.01E-07 | 1.24538557 | 1.69E-05   |
| Fcer1a    | 27.7722395 | 1.36E-07 | 2.64441151 | 2.24E-05   |
| Hist1h2af | 27.426693  | 1.63E-07 | 1.79347923 | 2.62E-05   |
| Cdca5     | 27.4137117 | 1.64E-07 | 1.40355651 | 2.62E-05   |
| Fbxo5     | 26.9666944 | 2.07E-07 | 1.19449792 | 3.25E-05   |
| Pde10a    | 26.272548  | 2.96E-07 | 1.84838368 | 4.59E-05   |
| Hells     | 25.7778038 | 3.83E-07 | 1.09014415 | 5.84E-05   |
| Lrr1      | 25.3064399 | 4.89E-07 | 1.78024325 | 7.35E-05   |
| Kntc1     | 25.2741649 | 4.97E-07 | 1.69046359 | 7.37E-05   |
| Cdca8     | 24.8825354 | 6.09E-07 | 1.10150569 | 8.91E-05   |
| Ltbp1     | 24.7056316 | 6.68E-07 | 1.11508088 | 9.63E-05   |
| Dhfr      | 24.4202232 | 7.75E-07 | 1.17249211 | 0.00011017 |
| Ltc4s     | 24.0558543 | 9.36E-07 | 1.49817735 | 0.00013134 |
| Shcbp1    | 23.9513518 | 9.88E-07 | 1.330704   | 0.00013684 |
| Lmnb1     | 23.775291  | 1.08E-06 | 0.93919627 | 0.000148   |
| Hist1h2bm | 23.7477092 | 1.10E-06 | 1.53032515 | 0.00014821 |
| Exo1      | 23.1594237 | 1.49E-06 | 1.27761536 | 0.00019868 |
| Rad51     | 23.1281379 | 1.52E-06 | 1.24087853 | 0.00019941 |
| Cdca3     | 23.0570453 | 1.57E-06 | 1.16285725 | 0.00020437 |
| Atad2     | 22.4984533 | 2.10E-06 | 0.98694591 | 0.00026902 |
| Tespa1    | 22.4819347 | 2.12E-06 | 1.77074337 | 0.00026902 |
| Hist1h3b  | 22.3998729 | 2.21E-06 | 1.7282861  | 0.00027593 |
| Cdk1      | 22.3874753 | 2.23E-06 | 1.06722286 | 0.00027593 |

|             |            |            |            |            |
|-------------|------------|------------|------------|------------|
| Cst7        | 22.1510462 | 2.52E-06   | 1.50298566 | 0.00030846 |
| Nusap1      | 21.9099784 | 2.86E-06   | 1.18146851 | 0.00034572 |
| Cks2        | 21.8076211 | 3.01E-06   | 0.96941809 | 0.00036052 |
| Ung         | 21.529302  | 3.48E-06   | 1.16569313 | 0.00041213 |
| Cenpw       | 21.1207453 | 4.31E-06   | 1.02971676 | 0.00050435 |
| Ska1        | 20.9802506 | 4.64E-06   | 1.3561461  | 0.00053129 |
| Gp1bb       | 20.9789396 | 4.64E-06   | 1.642269   | 0.00053129 |
| Fam46a      | 20.7423435 | 5.25E-06   | 1.38133471 | 0.00058887 |
| Gins2       | 20.7406363 | 5.26E-06   | 1.09012223 | 0.00058887 |
| Ltb         | 20.6950946 | 5.39E-06   | -1.0327729 | 0.0005967  |
| Kn1         | 20.505994  | 5.94E-06   | 1.13218142 | 0.00065179 |
| Zfp467      | 20.3242554 | 6.54E-06   | -0.848023  | 0.00070403 |
| F10         | 20.3189858 | 6.55E-06   | 1.97048452 | 0.00070403 |
| AI504432    | 20.0972592 | 7.36E-06   | 1.12564334 | 0.00078256 |
| Cenpm       | 20.0629384 | 7.49E-06   | 1.05913044 | 0.00078876 |
| Hist1h3f    | 19.9652934 | 7.89E-06   | 1.30972784 | 0.00082187 |
| Cd74        | 19.8725269 | 8.28E-06   | -1.4804807 | 0.00085188 |
| Wfdc2       | 19.8592439 | 8.34E-06   | -1.2450448 | 0.00085188 |
| 4930519L02R | 19.3572768 | 1.08E-05   | 1.25193894 | 0.00109719 |
| Chek1       | 19.2145936 | 1.17E-05   | 1.12003826 | 0.00117106 |
| Hist1h2ak   | 18.9161884 | 1.37E-05   | 1.43126971 | 0.00135635 |
| Tipin       | 18.729986  | 1.51E-05   | 0.93009452 | 0.00148147 |
| Depdc1a     | 18.5505928 | 1.65E-05   | 1.46416604 | 0.00161256 |
| Timeless    | 18.5202002 | 1.68E-05   | 1.12255928 | 0.00162345 |
| Padi4       | 18.0839254 | 2.11E-05   | -0.8853838 | 0.0020227  |
| Slbp        | 17.8256334 | 2.42E-05   | 0.91314851 | 0.0022958  |
| Aunip       | 17.6712552 | 2.63E-05   | 1.34433361 | 0.00244308 |
| Ccne2       | 17.6571324 | 2.65E-05   | 1.32500286 | 0.00244308 |
| Itsn1       | 17.6566153 | 2.65E-05   | -1.0041923 | 0.00244308 |
| Hist1h2bj   | 17.3292814 | 3.14E-05   | 1.23482404 | 0.00287686 |
| F2r12       | 16.9982151 | 3.74E-05   | 1.21156997 | 0.00338559 |
| Bub1        | 16.987236  | 3.76E-05   | 1.2464148  | 0.00338559 |
| Ube2c       | 16.7727768 | 4.21E-05   | 1.16294405 | 0.00375845 |
| Rnase6      | 16.085787  | 6.05E-05   | 1.16008024 | 0.0053547  |
| Prim1       | 15.8690205 | 6.79E-05   | 0.96150066 | 0.00595428 |
| Gp5         | 15.4281652 | 8.57E-05   | 0.99992999 | 0.00745531 |
| H2afx       | 15.3441126 | 8.96E-05   | 0.93985937 | 0.00773054 |
| Myof        | 15.0837883 | 0.00010284 | -1.2785299 | 0.008801   |
| Tnfaip8l2   | 14.9471015 | 0.00011057 | 1.35754195 | 0.00938578 |
| Hist1h2bb   | 14.9222181 | 0.00011204 | 1.24513399 | 0.0094343  |
| Ndc80       | 14.8250343 | 0.00011796 | 1.1707884  | 0.00985427 |
| Hist1h3i    | 14.4692167 | 0.00014247 | 1.40364115 | 0.01180809 |
| Lim2        | 14.3046039 | 0.00015548 | 2.15454694 | 0.01278614 |

|              |            |            |            |            |
|--------------|------------|------------|------------|------------|
| Hmgb3        | 14.173473  | 0.0001667  | 0.84713185 | 0.01360255 |
| Sell         | 13.9527502 | 0.00018746 | 1.36839798 | 0.01517875 |
| Hist1h2bn    | 13.6516001 | 0.00022005 | 1.41753544 | 0.01768157 |
| Cycs         | 13.5849537 | 0.00022801 | 0.90818371 | 0.01818173 |
| Ncapg        | 13.2451376 | 0.00027329 | 1.10691003 | 0.02162878 |
| St8sia4      | 13.2090892 | 0.00027859 | -0.8390738 | 0.02188424 |
| Ifitm7       | 13.0792238 | 0.00029859 | -0.9020059 | 0.02328111 |
| Rpa3         | 13.0635379 | 0.0003011  | 0.90041341 | 0.02330427 |
| Plek         | 13.0295703 | 0.00030661 | 0.86793872 | 0.02355756 |
| Prex2        | 12.9970525 | 0.00031198 | -1.2625074 | 0.02379652 |
| Crip1        | 12.9417067 | 0.00032134 | 0.83837049 | 0.02433414 |
| Eme1         | 12.9240393 | 0.00032439 | 1.26735224 | 0.02438943 |
| Hist1h4a     | 12.7795185 | 0.00035044 | 1.49920493 | 0.02616085 |
| Rad54b       | 12.6896234 | 0.00036769 | 1.4074456  | 0.02725569 |
| Prc1         | 12.6406693 | 0.00037744 | 1.0421067  | 0.02778311 |
| Rad54l       | 12.6248324 | 0.00038066 | 1.12888071 | 0.0278249  |
| Neil3        | 12.5911035 | 0.00038759 | 1.09337031 | 0.02813616 |
| Hist2h2bb    | 12.4765577 | 0.00041209 | 1.29117274 | 0.02971006 |
| Ncaph        | 12.3255812 | 0.00044679 | 1.16957279 | 0.0319928  |
| Plcl1        | 12.0851857 | 0.00050824 | -1.2104167 | 0.03614688 |
| Hist1h3a     | 11.9899205 | 0.00053489 | 1.21900356 | 0.03778698 |
| Fcgrt        | 11.9523691 | 0.00054578 | -1.1032952 | 0.03829916 |
| Tcf19        | 11.7349852 | 0.00061336 | 1.30224279 | 0.04275652 |
| Mxd3         | 11.6689755 | 0.00063551 | 1.28186073 | 0.04400907 |
| Proser2      | 11.4016711 | 0.00073378 | 1.21801013 | 0.05048219 |
| Aurkb        | 11.3483456 | 0.00075515 | 1.03609432 | 0.05161514 |
| Btnl9        | 11.1646771 | 0.00083369 | 1.5055003  | 0.05661594 |
| Hlf          | 11.1234547 | 0.00085243 | -0.8513656 | 0.05751708 |
| Ubash3a      | 11.0487825 | 0.00088745 | 1.85357203 | 0.05949902 |
| I830077J02Ri | 10.9588097 | 0.0009316  | 1.53835318 | 0.06206319 |
| Tpx2         | 10.9209836 | 0.00095081 | 1.00652574 | 0.06294489 |
| Ecscr        | 10.8298439 | 0.00099877 | -1.080385  | 0.06570662 |
| Cenpp        | 10.7716532 | 0.00103066 | 1.0434569  | 0.06738367 |
| Trip13       | 10.596467  | 0.00113304 | 1.03823736 | 0.0736196  |
| Mex3b        | 10.5590917 | 0.00115618 | 1.56897723 | 0.07466227 |
| Sgo2a        | 10.4147962 | 0.0012501  | 1.11907158 | 0.08023485 |
| Ccna2        | 10.2136044 | 0.00139408 | 1.01221647 | 0.08893414 |
| Ezh2         | 10.1122801 | 0.00147285 | 0.85081017 | 0.09339265 |
| Lhfpl2       | 10.0964991 | 0.00148551 | 1.18482651 | 0.09363177 |
| Serpinb1a    | 10.0567606 | 0.0015179  | 0.87733497 | 0.09510359 |
| Fam72a       | 9.96910083 | 0.00159189 | 1.72651709 | 0.09914945 |
| Clec1a       | 9.94564536 | 0.0016123  | -0.9943342 | 0.09983003 |

| gene_symbol | waldStat   | pvalue | logFC        | FDR |
|-------------|------------|--------|--------------|-----|
| Ly6c2       | 1255.73357 |        | 0 3.77935894 | 0   |
| Elane       | 1162.14761 |        | 0 2.58677164 | 0   |
| F13a1       | 1069.15657 |        | 0 2.4063     | 0   |
| Ms4a6c      | 998.192873 |        | 0 1.80841214 | 0   |
| Ly86        | 984.091512 |        | 0 2.14942928 | 0   |
| Tifab       | 745.714191 |        | 0 2.31337054 | 0   |
| Ctla2a      | 660.647924 |        | 0 -1.7723341 | 0   |
| Slpi        | 645.917193 |        | 0 1.86800466 | 0   |
| Dntt        | 496.126881 |        | 0 -3.1574029 | 0   |
| Myl10       | 468.897255 |        | 0 -2.1739189 | 0   |
| Tox         | 436.357589 |        | 0 -2.2711979 | 0   |
| Ccr2        | 413.123843 |        | 0 2.0604797  | 0   |
| Hp          | 338.407772 |        | 0 1.82005942 | 0   |
| Ms4a3       | 319.435539 |        | 0 2.04704206 | 0   |
| Prtn3       | 310.229876 |        | 0 1.14224034 | 0   |
| Ifi209      | 283.342587 |        | 0 1.87261028 | 0   |
| Fcer1g      | 275.796965 |        | 0 1.25552727 | 0   |
| Lgals1      | 260.05054  |        | 0 1.28361701 | 0   |
| Trim30b     | 247.703069 |        | 0 -2.005275  | 0   |
| Prkcq       | 234.184846 |        | 0 -1.4334613 | 0   |
| Armc3       | 212.917725 |        | 0 -1.7236853 | 0   |
| Gabbr1      | 211.136021 |        | 0 -1.4528292 | 0   |
| Mefv        | 210.318054 |        | 0 3.82535734 | 0   |
| Slc16a11    | 208.495104 |        | 0 -2.4679426 | 0   |
| Sep-01      | 198.089519 |        | 0 -1.3382871 | 0   |
| Igsf6       | 188.404952 |        | 0 1.53295997 | 0   |
| Gimap1      | 188.368339 |        | 0 -1.7231479 | 0   |
| Ctsh        | 184.563635 |        | 0 1.94591308 | 0   |
| Gem         | 169.738723 |        | 0 -1.717365  | 0   |
| Cadps2      | 167.544891 |        | 0 -1.7462742 | 0   |
| Gcnt2       | 158.44018  |        | 0 -1.3228635 | 0   |
| Gm5111      | 157.118264 |        | 0 -2.4518958 | 0   |
| Robo4       | 155.726521 |        | 0 -1.7472373 | 0   |
| Cybb        | 153.469525 |        | 0 3.0219022  | 0   |
| Nrg1        | 147.55898  |        | 0 2.84828909 | 0   |
| Alas1       | 145.345855 |        | 0 1.27317939 | 0   |
| Aspa        | 144.675408 |        | 0 -1.9330769 | 0   |
| Klhl4       | 142.809966 |        | 0 -1.6901841 | 0   |
| Anxa3       | 136.547594 |        | 0 1.24196513 | 0   |
| Itga1       | 129.218395 |        | 0 2.64157208 | 0   |
| Wfdc17      | 128.109789 |        | 0 -1.7511108 | 0   |
| Cldn15      | 126.522151 |        | 0 2.25504662 | 0   |

|          |            |          |            |          |
|----------|------------|----------|------------|----------|
| Pabpc4l  | 124.384144 | 0        | -2.0260884 | 0        |
| Hlf      | 123.422429 | 0        | -1.4214012 | 0        |
| Fcgr3    | 121.84978  | 0        | 1.8228599  | 0        |
| Ctla2b   | 121.767579 | 0        | -1.5363363 | 0        |
| Scml4    | 115.706182 | 0        | -1.6277134 | 0        |
| Mpo      | 113.658808 | 0        | 1.06825116 | 0        |
| Igf2r    | 106.665238 | 0        | -1.6219367 | 0        |
| Mt1      | 105.80695  | 0        | 1.40927987 | 0        |
| Cx3cr1   | 104.626586 | 0        | 1.73345211 | 0        |
| Mgst1    | 104.249185 | 0        | 1.35368492 | 0        |
| Dkk1     | 103.325272 | 0        | -1.857801  | 0        |
| Csf1r    | 102.269727 | 0        | 1.39286836 | 0        |
| Slc22a3  | 101.419681 | 0        | -1.9471688 | 0        |
| Gucy1a1  | 100.895058 | 0        | -2.1790148 | 0        |
| Ly6c1    | 100.799008 | 0        | 3.87866606 | 0        |
| Trem3    | 100.180599 | 0        | 1.71099591 | 0        |
| Arhgap6  | 99.396169  | 0        | -0.9821066 | 0        |
| Nrgn     | 98.8552464 | 0        | -1.1677046 | 0        |
| Gimap6   | 98.5607991 | 0        | -1.5262164 | 0        |
| Gm16070  | 98.491159  | 0        | -3.0373471 | 0        |
| Al839979 | 91.7080474 | 0        | 2.73658791 | 0        |
| Spns2    | 91.6380374 | 0        | -1.4480758 | 0        |
| Ms4a4c   | 89.8287348 | 0        | 2.03061647 | 0        |
| Xrcc5    | 89.0096264 | 0        | -1.758332  | 0        |
| Tyrobp   | 88.0589213 | 0        | 0.99334061 | 0        |
| P2ry14   | 84.6691109 | 0        | -1.5759435 | 0        |
| Ctnn     | 84.6410475 | 0        | -1.0982782 | 0        |
| Nrp1     | 84.0005501 | 0        | 1.73282218 | 0        |
| Ccdc149  | 78.8569049 | 0        | -1.6399395 | 0        |
| Adgrl4   | 76.1962783 | 0        | -1.0395099 | 0        |
| Il17re   | 73.6931416 | 0        | -2.6744567 | 0        |
| Angpt1   | 73.1182164 | 0        | -1.1300699 | 0        |
| Gpc1     | 71.1411447 | 0        | 1.76361203 | 0        |
| Gm14005  | 70.5855919 | 0        | 1.08022319 | 0        |
| Rgs1     | 70.3285227 | 0        | -1.6344612 | 0        |
| Gfi1b    | 68.8241128 | 1.11E-16 | -1.5085627 | 1.48E-14 |
| Tbxa2r   | 68.1544273 | 1.11E-16 | -1.8317418 | 1.48E-14 |
| Serpib6b | 66.0206117 | 4.44E-16 | -1.0925226 | 5.84E-14 |
| Gm19590  | 64.0021989 | 1.22E-15 | -1.3067721 | 1.59E-13 |
| Cd200    | 63.8276347 | 1.33E-15 | -1.3608719 | 1.71E-13 |
| Oas3     | 62.1476327 | 3.22E-15 | -1.1853271 | 4.08E-13 |
| Rnd2     | 60.374548  | 7.88E-15 | -1.4374954 | 9.88E-13 |
| F11r     | 59.0853397 | 1.51E-14 | -2.2602045 | 1.87E-12 |

|             |            |          |            |          |
|-------------|------------|----------|------------|----------|
| C030037D09I | 56.3550918 | 6.05E-14 | -1.4886066 | 7.41E-12 |
| Zfp831      | 56.2422587 | 6.41E-14 | -2.5256495 | 7.75E-12 |
| Ddx58       | 54.8057641 | 1.33E-13 | -1.6324446 | 1.59E-11 |
| Adora2a     | 54.2300815 | 1.78E-13 | -1.6922876 | 2.11E-11 |
| Lrrn4       | 52.2441154 | 4.90E-13 | -1.4215854 | 5.73E-11 |
| Ctsw        | 51.3976186 | 7.54E-13 | -1.8443393 | 8.73E-11 |
| Gm20467     | 51.2303657 | 8.21E-13 | -1.9747417 | 9.40E-11 |
| Gda         | 51.0913435 | 8.82E-13 | 2.01464028 | 9.98E-11 |
| Nfatc2      | 50.8928438 | 9.75E-13 | -1.4794106 | 1.09E-10 |
| Nkx2-3      | 49.9429138 | 1.58E-12 | -1.9807633 | 1.75E-10 |
| Itih5       | 49.7911835 | 1.71E-12 | -1.068831  | 1.88E-10 |
| Alpk3       | 49.7661228 | 1.73E-12 | -1.4113897 | 1.88E-10 |
| Casp12      | 49.6615951 | 1.83E-12 | -1.1094724 | 1.96E-10 |
| Timp2       | 49.3303714 | 2.16E-12 | -0.9341719 | 2.30E-10 |
| Prkaa2      | 48.6361156 | 3.08E-12 | -1.3626612 | 3.24E-10 |
| Dcaf12l1    | 47.425618  | 5.71E-12 | -1.2634055 | 5.95E-10 |
| Pld4        | 47.1865667 | 6.45E-12 | 1.46611769 | 6.66E-10 |
| Tmem121     | 46.3769267 | 9.76E-12 | -2.4398767 | 9.85E-10 |
| Ccl3        | 46.3662433 | 9.81E-12 | -1.5453812 | 9.85E-10 |
| Ms4a4b      | 46.3629819 | 9.83E-12 | 1.31292125 | 9.85E-10 |
| Rtp4        | 46.0597273 | 1.15E-11 | -1.5790333 | 1.14E-09 |
| Soat1       | 45.9479696 | 1.21E-11 | 1.18986283 | 1.19E-09 |
| Tnfrsf18    | 45.2605346 | 1.72E-11 | -1.5191414 | 1.67E-09 |
| Crispld1    | 45.2498665 | 1.73E-11 | -1.4989303 | 1.67E-09 |
| Dmkn        | 45.2209605 | 1.76E-11 | 1.53309483 | 1.68E-09 |
| Rab37       | 44.8371853 | 2.14E-11 | -1.0686648 | 2.03E-09 |
| Odf3b       | 44.1172958 | 3.09E-11 | -1.7619595 | 2.91E-09 |
| Hoxa10      | 43.7752464 | 3.68E-11 | -1.3893741 | 3.43E-09 |
| Gm43568     | 43.160794  | 5.04E-11 | -1.2868565 | 4.66E-09 |
| Pgr         | 42.8504915 | 5.91E-11 | -2.3749979 | 5.41E-09 |
| Samd9l      | 42.7348064 | 6.27E-11 | -1.8252848 | 5.69E-09 |
| Gnb4        | 41.5463128 | 1.15E-10 | -1.1586314 | 1.03E-08 |
| Sdf2l1      | 41.5404255 | 1.15E-10 | 0.96278103 | 1.03E-08 |
| Stxbp4      | 40.6440446 | 1.83E-10 | -1.2694198 | 1.62E-08 |
| Gulp1       | 40.450169  | 2.02E-10 | -1.5999624 | 1.76E-08 |
| Pglyrp2     | 40.4436593 | 2.02E-10 | -1.7426949 | 1.76E-08 |
| Gimap5      | 39.551927  | 3.19E-10 | -1.7844433 | 2.76E-08 |
| Cldn12      | 39.2332203 | 3.76E-10 | -1.2705598 | 3.22E-08 |
| Nrxn1       | 38.0934002 | 6.74E-10 | -0.8843539 | 5.73E-08 |
| Oas1c       | 37.5734353 | 8.80E-10 | -1.3884667 | 7.41E-08 |
| Map9        | 36.9832301 | 1.19E-09 | -1.0638995 | 9.95E-08 |
| Arl5c       | 36.9036835 | 1.24E-09 | 1.41821503 | 1.03E-07 |
| Met         | 36.635245  | 1.42E-09 | 1.65204051 | 1.17E-07 |

|          |            |          |            |          |
|----------|------------|----------|------------|----------|
| Lck      | 36.4265089 | 1.59E-09 | -1.903465  | 1.29E-07 |
| Tmem156  | 36.251375  | 1.73E-09 | 1.42997314 | 1.40E-07 |
| S1pr1    | 36.2291281 | 1.75E-09 | -2.1690669 | 1.41E-07 |
| Ccl4     | 35.4724138 | 2.59E-09 | -1.341571  | 2.06E-07 |
| Irf8     | 35.3401326 | 2.77E-09 | 0.89540035 | 2.19E-07 |
| Trp53i11 | 35.2656545 | 2.88E-09 | -1.2775955 | 2.26E-07 |
| Hnf4a    | 33.9492672 | 5.66E-09 | -3.1628216 | 4.41E-07 |
| Mtus1    | 33.9033916 | 5.79E-09 | 1.39036469 | 4.48E-07 |
| Cd72     | 33.8250097 | 6.03E-09 | -1.1845651 | 4.63E-07 |
| Tspan6   | 32.2707235 | 1.34E-08 | -1.3582794 | 1.02E-06 |
| Rgcc     | 32.2624531 | 1.35E-08 | 1.11112279 | 1.02E-06 |
| C77080   | 32.1379593 | 1.44E-08 | -2.0191125 | 1.08E-06 |
| Sgce     | 32.0655817 | 1.49E-08 | -1.8693302 | 1.11E-06 |
| Spo11    | 31.6673673 | 1.83E-08 | -1.8620804 | 1.36E-06 |
| Dlg3     | 31.5585775 | 1.94E-08 | -0.9760041 | 1.42E-06 |
| Ltc4s    | 31.2078914 | 2.32E-08 | -1.3227444 | 1.69E-06 |
| Ccser1   | 30.5920768 | 3.18E-08 | -2.0907777 | 2.31E-06 |
| Ptprcap  | 30.5752429 | 3.21E-08 | -0.8491224 | 2.32E-06 |
| Tspan13  | 29.9404646 | 4.46E-08 | -0.8973371 | 3.19E-06 |
| Epb41l3  | 29.7960722 | 4.80E-08 | -1.6360401 | 3.41E-06 |
| Lsp1     | 29.6719114 | 5.12E-08 | -0.9476364 | 3.62E-06 |
| Il2rg    | 29.5803543 | 5.36E-08 | -0.9550239 | 3.76E-06 |
| Sstr2    | 29.3141295 | 6.15E-08 | -1.981084  | 4.29E-06 |
| Nrg2     | 29.1673286 | 6.64E-08 | 1.26165419 | 4.60E-06 |
| Fzd6     | 28.9806059 | 7.31E-08 | -0.9839847 | 5.03E-06 |
| Tnik     | 28.9368238 | 7.48E-08 | -1.4090342 | 5.11E-06 |
| Sall2    | 28.7613145 | 8.19E-08 | -1.2852119 | 5.56E-06 |
| Basp1    | 28.6765025 | 8.55E-08 | -0.9802201 | 5.77E-06 |
| Gimap9   | 28.3736117 | 1.00E-07 | -1.0820791 | 6.71E-06 |
| H2-Aa    | 27.8750786 | 1.29E-07 | -1.4192951 | 8.62E-06 |
| Mcoln2   | 27.6740494 | 1.44E-07 | -1.4018513 | 9.51E-06 |
| Sgsm1    | 27.6152027 | 1.48E-07 | -1.7329718 | 9.74E-06 |
| Rassf4   | 27.5263793 | 1.55E-07 | 1.04332483 | 1.01E-05 |
| Adgrg1   | 27.4341302 | 1.63E-07 | -0.9216456 | 1.06E-05 |
| Gm16141  | 27.1782746 | 1.86E-07 | -1.160922  | 1.20E-05 |
| Bgn      | 26.7446206 | 2.32E-07 | -2.1906817 | 1.49E-05 |
| Tfec     | 26.4872491 | 2.65E-07 | 1.08608029 | 1.69E-05 |
| Carmil2  | 26.2472089 | 3.00E-07 | -1.3126419 | 1.90E-05 |
| Myct1    | 26.0799699 | 3.28E-07 | -1.0870121 | 2.06E-05 |
| Ppfia4   | 25.7041082 | 3.98E-07 | 1.27757084 | 2.49E-05 |
| Gm15987  | 25.6705361 | 4.05E-07 | 1.28526002 | 2.52E-05 |
| Padi4    | 25.6144172 | 4.17E-07 | -1.0053676 | 2.58E-05 |
| Ctsg     | 25.5898897 | 4.22E-07 | 0.89563439 | 2.60E-05 |



|          |            |          |            |            |
|----------|------------|----------|------------|------------|
| Syt11    | 25.4741489 | 4.48E-07 | -0.8887438 | 2.74E-05   |
| Pnck     | 25.1109651 | 5.41E-07 | -1.2485923 | 3.29E-05   |
| Vldlr    | 25.0323495 | 5.64E-07 | -1.4793107 | 3.41E-05   |
| Thbs1    | 24.3272863 | 8.13E-07 | -1.6283069 | 4.89E-05   |
| Calcr1   | 23.9739786 | 9.76E-07 | -1.0516431 | 5.84E-05   |
| Camkk1   | 23.7198759 | 1.11E-06 | -1.0463062 | 6.63E-05   |
| Msi2     | 23.6672196 | 1.15E-06 | -0.8807148 | 6.77E-05   |
| Plscr4   | 23.5124519 | 1.24E-06 | -1.6187048 | 7.30E-05   |
| Shisa8   | 23.477751  | 1.26E-06 | -1.1896052 | 7.39E-05   |
| Prkca    | 23.1918593 | 1.47E-06 | -0.9102879 | 8.53E-05   |
| Ddx4     | 23.1079829 | 1.53E-06 | -1.955883  | 8.86E-05   |
| Hoxb5    | 23.0623637 | 1.57E-06 | -1.9246067 | 8.98E-05   |
| Marveld2 | 23.060359  | 1.57E-06 | -2.1878066 | 8.98E-05   |
| Cep170b  | 22.8935653 | 1.71E-06 | -1.0295237 | 9.74E-05   |
| Pear1    | 22.5518472 | 2.05E-06 | -1.172419  | 0.00011577 |
| Gata3    | 22.365445  | 2.25E-06 | -1.516304  | 0.00012688 |
| Hbb-bt   | 21.6965439 | 3.19E-06 | -1.2039249 | 0.00017883 |
| Cd274    | 21.3853066 | 3.76E-06 | -0.9244089 | 0.00020922 |
| H2-Ob    | 21.0641764 | 4.44E-06 | -1.1755972 | 0.00024608 |
| Mdga1    | 20.9052555 | 4.83E-06 | -1.2393157 | 0.00026597 |
| Aldoc    | 20.7415659 | 5.26E-06 | -1.3286101 | 0.00028819 |
| Nqo1     | 20.5913019 | 5.69E-06 | -1.0732022 | 0.0003101  |
| Ccnjl    | 20.5554999 | 5.79E-06 | -1.5067898 | 0.00031433 |
| Scn1b    | 20.5097328 | 5.93E-06 | -1.7745881 | 0.00032028 |
| Dram1    | 20.4635579 | 6.08E-06 | 1.24496438 | 0.00032643 |
| Lat      | 20.4199346 | 6.22E-06 | -1.3139981 | 0.00033226 |
| Mpeg1    | 19.9158409 | 8.09E-06 | 1.06236831 | 0.00043006 |
| App      | 19.9071126 | 8.13E-06 | 1.08877314 | 0.00043006 |
| Il18rap  | 19.8016598 | 8.59E-06 | -1.1518094 | 0.00045218 |
| Dmwd     | 19.6743201 | 9.18E-06 | -1.3820557 | 0.00048093 |
| Ets1     | 19.5161036 | 9.98E-06 | -1.3508445 | 0.00051986 |
| Hspa12b  | 19.4248242 | 1.05E-05 | -2.51998   | 0.00054262 |
| Tmem37   | 19.3857097 | 1.07E-05 | -1.2120811 | 0.00055114 |
| Tjp1     | 19.0629058 | 1.26E-05 | -1.988108  | 0.00064949 |
| Bend5    | 19.0163699 | 1.30E-05 | -1.3645768 | 0.00066229 |
| Mn1      | 18.9554041 | 1.34E-05 | -1.4625046 | 0.00068049 |
| Cd55     | 18.8696991 | 1.40E-05 | -1.6321684 | 0.00070834 |
| Meis1    | 18.7597161 | 1.48E-05 | -0.9370059 | 0.00074679 |
| Gm26632  | 18.7368389 | 1.50E-05 | -0.9801356 | 0.00075221 |
| Lag3     | 18.5272514 | 1.67E-05 | -1.4862782 | 0.00083564 |
| Hemgn    | 18.4503263 | 1.74E-05 | -1.3908373 | 0.00086595 |
| Zeb2os   | 18.3198523 | 1.87E-05 | 0.98268574 | 0.00092297 |
| Ablim1   | 18.2548012 | 1.93E-05 | -1.1569095 | 0.00095057 |

|           |            |            |            |            |
|-----------|------------|------------|------------|------------|
| Dst       | 18.1952168 | 1.99E-05   | -1.1813161 | 0.00097621 |
| Oasl2     | 18.1280708 | 2.07E-05   | -1.1452973 | 0.00100657 |
| Plxna4os1 | 17.8651868 | 2.37E-05   | -1.2685206 | 0.0011503  |
| Samd12    | 17.7451889 | 2.53E-05   | -1.6218563 | 0.00121956 |
| Il18r1    | 17.6747529 | 2.62E-05   | -1.6232956 | 0.00125979 |
| Clnk      | 17.4308814 | 2.98E-05   | -1.2331639 | 0.00142567 |
| Slc18a2   | 17.3690892 | 3.08E-05   | -1.21966   | 0.00146612 |
| Fgfr1     | 17.319159  | 3.16E-05   | -1.3673518 | 0.00149837 |
| Adcy9     | 17.1656929 | 3.43E-05   | -0.89744   | 0.00161713 |
| Abcd2     | 17.1087553 | 3.53E-05   | 1.06727619 | 0.0016589  |
| Gria3     | 17.0898428 | 3.57E-05   | 0.92205894 | 0.00166806 |
| Zfp532    | 17.0514141 | 3.64E-05   | -1.2593072 | 0.00169463 |
| Tas1r1    | 16.8188056 | 4.11E-05   | -1.00841   | 0.00190709 |
| Rnase6    | 16.7836374 | 4.19E-05   | -1.0684625 | 0.00193424 |
| Naprt     | 16.7282341 | 4.31E-05   | -1.197404  | 0.00198286 |
| Ap3s1     | 16.6353054 | 4.53E-05   | 0.83236227 | 0.00207336 |
| Slc16a12  | 16.1291009 | 5.92E-05   | -2.5778098 | 0.00269636 |
| ldh1      | 15.7580332 | 7.20E-05   | 0.93845186 | 0.00326617 |
| Vipr2     | 15.7129088 | 7.37E-05   | -1.0585994 | 0.00333066 |
| Arhgef40  | 15.3123827 | 9.11E-05   | -1.1215671 | 0.00409911 |
| Adcy6     | 15.3037894 | 9.15E-05   | -0.9261848 | 0.00410028 |
| Rnf180    | 15.2412057 | 9.46E-05   | -1.0894898 | 0.00422045 |
| Fdps      | 15.1094347 | 0.00010145 | 0.87910028 | 0.00450023 |
| Fkbp1b    | 15.1040736 | 0.00010174 | 1.50609693 | 0.00450023 |
| Il6st     | 15.0654403 | 0.00010385 | 0.97679671 | 0.00457406 |
| Ltb       | 15.0453029 | 0.00010496 | -1.08241   | 0.00460386 |
| Phldb2    | 14.9424714 | 0.00011084 | -0.9651456 | 0.00484152 |
| Il1r1     | 14.8704246 | 0.00011515 | -1.0510723 | 0.00500921 |
| Smim6     | 14.8517178 | 0.0001163  | -1.3157723 | 0.00503832 |
| Pde4b     | 14.7831801 | 0.00012061 | -0.9280253 | 0.00520338 |
| Tnfsf10   | 14.6642771 | 0.00012846 | -0.9931343 | 0.0055195  |
| Rbp1      | 14.5102409 | 0.0001394  | -1.0227477 | 0.00596529 |
| Slc16a2   | 14.3272961 | 0.00015362 | -2.6459343 | 0.00654725 |
| Cuedc1    | 14.1873868 | 0.00016548 | -1.2403201 | 0.00702406 |
| Tinagl1   | 13.9047244 | 0.00019231 | -2.219854  | 0.0081305  |
| Mpped2    | 13.875783  | 0.0001953  | -1.2461652 | 0.00822364 |
| Trib3     | 13.7000885 | 0.00021444 | -2.1072906 | 0.00899385 |
| Rsad2     | 13.4855986 | 0.0002404  | -1.2758897 | 0.01004248 |
| Slc30a4   | 13.3634481 | 0.00025658 | -1.1451421 | 0.0106758  |
| Hmga2     | 13.1768613 | 0.00028343 | -1.0037886 | 0.0117466  |
| Chd7      | 13.1037259 | 0.00029471 | 1.34608769 | 0.01216628 |
| Tanc1     | 13.0290203 | 0.0003067  | -1.1580175 | 0.01261188 |
| Cd244     | 12.9332235 | 0.0003228  | -1.0454275 | 0.0132223  |

|             |            |            |            |            |
|-------------|------------|------------|------------|------------|
| Gm1604a     | 12.8624246 | 0.00033525 | 1.00379232 | 0.01367881 |
| Cobll1      | 12.8436518 | 0.00033863 | -1.0527408 | 0.01376339 |
| Unc93b1     | 12.6554982 | 0.00037446 | 0.85232994 | 0.01516142 |
| Socs3       | 12.3891442 | 0.00043184 | -1.2480883 | 0.01741743 |
| Il12rb1     | 12.2303908 | 0.00047017 | -0.9473451 | 0.01889128 |
| Camsap3     | 11.8775928 | 0.00056813 | -1.2802332 | 0.02274045 |
| Prkg1       | 11.6987997 | 0.0006254  | -1.6793307 | 0.024938   |
| Camk2a      | 11.6774248 | 0.00063263 | -0.9873633 | 0.02513094 |
| Aqp9        | 11.5901181 | 0.00066303 | -1.5191991 | 0.02623962 |
| Pim1        | 11.4045993 | 0.00073263 | -0.8180857 | 0.02888518 |
| Ecscr       | 11.3192679 | 0.00076707 | -1.2914714 | 0.03013037 |
| Igfc1       | 11.3059926 | 0.00077257 | -1.1260978 | 0.03023375 |
| 1500009L16R | 11.2520711 | 0.00079534 | -1.0450396 | 0.03100951 |
| Ppp1r9a     | 10.9319459 | 0.0009452  | -0.8956389 | 0.03671638 |
| Nlrc3       | 10.8483731 | 0.00098883 | -1.1534178 | 0.03821783 |
| Gm15261     | 10.8440916 | 0.00099111 | -0.9635737 | 0.03821783 |
| Gsr         | 10.8330004 | 0.00099707 | 0.84347217 | 0.03830711 |
| Klrb1f      | 10.4619884 | 0.00121856 | 0.9844606  | 0.04664649 |
| Cfp         | 10.4544413 | 0.00122355 | 0.92843591 | 0.04666776 |
| Eya2        | 10.1180439 | 0.00146825 | -1.5099057 | 0.0557987  |
| Ptn         | 9.96196077 | 0.00159808 | -2.6325093 | 0.06051426 |
| Paqr5       | 9.87362767 | 0.00167665 | -1.1058278 | 0.06326184 |
| Chdh        | 9.7702894  | 0.00177355 | 0.91570951 | 0.06667897 |
| Cysltr2     | 9.7572918  | 0.00178613 | -1.1900286 | 0.06690858 |
| Palld       | 9.7508847  | 0.00179236 | -1.2715381 | 0.06690858 |
| Sorbs3      | 9.49295569 | 0.00206262 | -0.8922811 | 0.07672519 |
| Rab7b       | 9.47027539 | 0.00208828 | 1.08812744 | 0.07740608 |
| Sox6        | 9.39136134 | 0.0021801  | -1.628902  | 0.08042374 |
| Msrb3       | 9.38727204 | 0.00218497 | -1.3226095 | 0.08042374 |
| Tspoap1     | 9.37272608 | 0.00220238 | 1.05500195 | 0.08078198 |
| Padi1       | 9.33179501 | 0.00225212 | -1.3600765 | 0.08231955 |
| Gm16140     | 9.25728858 | 0.0023456  | -1.5148672 | 0.08543991 |
| Mecom       | 8.97959435 | 0.00273011 | -1.0351024 | 0.09910308 |

| gene_symbol | waldStat   | pvalue | logFC      | FDR |
|-------------|------------|--------|------------|-----|
| Ly6c2       | 1727.71903 | 0      | 2.73101903 | 0   |
| Dstn        | 1392.1769  | 0      | 1.92065986 | 0   |
| Elane       | 1275.91971 | 0      | 1.80474262 | 0   |
| Gstm1       | 888.323537 | 0      | 1.53239425 | 0   |
| Ms4a3       | 759.215426 | 0      | 1.43330428 | 0   |
| Pglyrp1     | 741.546872 | 0      | 1.69006591 | 0   |
| Rgcc        | 709.045026 | 0      | 1.51858978 | 0   |
| S100a8      | 708.425553 | 0      | 3.60969081 | 0   |
| Ifitm1      | 646.534052 | 0      | -1.5584534 | 0   |
| Alas1       | 626.896206 | 0      | 1.44961617 | 0   |
| Wfdc21      | 624.646478 | 0      | 4.83608887 | 0   |
| Ctla2a      | 616.656801 | 0      | -1.6497897 | 0   |
| Clec4a2     | 586.936394 | 0      | 4.37773833 | 0   |
| Ltb4r1      | 539.724314 | 0      | 1.79150959 | 0   |
| Nucb2       | 487.835694 | 0      | 2.36699781 | 0   |
| Trem3       | 423.514434 | 0      | 1.46811019 | 0   |
| B4galt6     | 417.419912 | 0      | 2.06184692 | 0   |
| Hsd11b1     | 406.014738 | 0      | 2.65157662 | 0   |
| Clec12a     | 401.752032 | 0      | 1.34399799 | 0   |
| Cldn15      | 383.480287 | 0      | 1.69677179 | 0   |
| Ikzf2       | 382.142539 | 0      | -1.5375894 | 0   |
| Ifngr1      | 379.824684 | 0      | 1.26404783 | 0   |
| Angpt1      | 378.326888 | 0      | -1.6134114 | 0   |
| Fcgr3       | 364.808859 | 0      | 1.42931831 | 0   |
| Adgrg1      | 354.677902 | 0      | -1.3923075 | 0   |
| Sgms2       | 328.62328  | 0      | 2.85848577 | 0   |
| Nrgn        | 317.064299 | 0      | -1.4709203 | 0   |
| Rflnb       | 290.593748 | 0      | 2.28909335 | 0   |
| Pde4d       | 283.202084 | 0      | 1.41721651 | 0   |
| Casp12      | 272.656904 | 0      | -1.3748588 | 0   |
| Cst7        | 270.945056 | 0      | 1.14239506 | 0   |
| G0s2        | 266.277876 | 0      | 2.80145286 | 0   |
| S100a11     | 262.883044 | 0      | 1.04398762 | 0   |
| Prom1       | 256.454976 | 0      | 3.28804962 | 0   |
| Vcam1       | 256.135966 | 0      | 3.47229157 | 0   |
| Myct1       | 255.683311 | 0      | -1.5845706 | 0   |
| Slpi        | 251.09048  | 0      | 1.29786122 | 0   |
| Emcn        | 249.305571 | 0      | -1.3574197 | 0   |
| S1pr1       | 236.697996 | 0      | -1.9955331 | 0   |
| Prtn3       | 233.276489 | 0      | 0.97932331 | 0   |
| Nkg7        | 223.872978 | 0      | 1.06374942 | 0   |
| Tespa1      | 221.402426 | 0      | -1.3871578 | 0   |

|           |            |   |            |   |
|-----------|------------|---|------------|---|
| Srgn      | 203.666532 | 0 | 0.89178687 | 0 |
| Gsr       | 197.817038 | 0 | 1.06817496 | 0 |
| Chst13    | 195.454368 | 0 | 1.4332531  | 0 |
| Gata2     | 190.418032 | 0 | -1.59151   | 0 |
| Afap1     | 190.400617 | 0 | 1.7833404  | 0 |
| Chd7      | 188.383458 | 0 | 1.94222031 | 0 |
| Prss57    | 187.536293 | 0 | 1.11312379 | 0 |
| Mgl2      | 178.984459 | 0 | 1.89419663 | 0 |
| Gimap1    | 177.161136 | 0 | -1.7612624 | 0 |
| Cd34      | 171.461834 | 0 | -1.0352505 | 0 |
| Mt1       | 164.609984 | 0 | 1.19448449 | 0 |
| Fam181b   | 161.320129 | 0 | -2.2698585 | 0 |
| Serpine2  | 154.100638 | 0 | 1.69647209 | 0 |
| Maml2     | 147.555533 | 0 | -1.3293711 | 0 |
| Mcoln2    | 146.72334  | 0 | -1.4088435 | 0 |
| Gm21188   | 143.601367 | 0 | 1.95374795 | 0 |
| Bach2     | 142.458743 | 0 | -1.4015997 | 0 |
| Gda       | 141.360829 | 0 | 1.4190739  | 0 |
| Selenom   | 139.931532 | 0 | 1.24183154 | 0 |
| Selp      | 139.372545 | 0 | -2.3256871 | 0 |
| Mgst2     | 138.832123 | 0 | 1.44764909 | 0 |
| Slc22a3   | 130.471821 | 0 | -1.6744542 | 0 |
| Mgam      | 130.438186 | 0 | 2.33479659 | 0 |
| Cited4    | 127.837923 | 0 | 1.79628817 | 0 |
| Cpa3      | 123.219183 | 0 | -1.6206802 | 0 |
| Slc40a1   | 123.069068 | 0 | 2.82993394 | 0 |
| Cd63      | 121.792112 | 0 | 0.97936278 | 0 |
| Zfp36l1   | 119.609989 | 0 | -1.0365297 | 0 |
| Apoe      | 118.850358 | 0 | -1.2321618 | 0 |
| Muc13     | 116.454218 | 0 | -1.1425565 | 0 |
| Gm19590   | 115.505133 | 0 | -1.7383747 | 0 |
| Flt3      | 114.809034 | 0 | -1.6978757 | 0 |
| Fyb       | 105.881979 | 0 | -1.2729889 | 0 |
| Il18      | 105.744766 | 0 | -1.4921906 | 0 |
| Cuedc1    | 95.0040848 | 0 | -1.60604   | 0 |
| Smim5     | 93.6055053 | 0 | -1.4669716 | 0 |
| Bend5     | 92.0025203 | 0 | -1.3348769 | 0 |
| Map4k4    | 91.5711925 | 0 | -1.2305941 | 0 |
| Trp53cor1 | 89.1626548 | 0 | -1.3730366 | 0 |
| Ccdc125   | 85.4981775 | 0 | 1.23409803 | 0 |
| Lta4h     | 85.0588577 | 0 | 0.98264535 | 0 |
| Ndrp1     | 82.0476381 | 0 | -1.308135  | 0 |
| Clec5a    | 80.4856041 | 0 | 1.69517591 | 0 |

|             |            |          |            |          |
|-------------|------------|----------|------------|----------|
| Cxcr2       | 80.4624942 | 0        | -1.5111445 | 0        |
| Cebpe       | 78.9074314 | 0        | 1.0301733  | 0        |
| Lair1       | 78.1450166 | 0        | 1.23870552 | 0        |
| Lat2        | 75.9574066 | 0        | -1.3108474 | 0        |
| Hmga2       | 75.8685599 | 0        | -1.7956807 | 0        |
| Sat1        | 73.4796777 | 0        | 1.04508848 | 0        |
| Serpina3g   | 72.8550709 | 0        | -1.2413818 | 0        |
| Klk8        | 70.9583439 | 0        | -1.0667791 | 0        |
| Mfge8       | 68.9226448 | 1.11E-16 | -1.2920882 | 1.22E-14 |
| Ndrp2       | 68.6024894 | 1.11E-16 | 1.64001927 | 1.22E-14 |
| Anxa3       | 67.3230759 | 2.22E-16 | 0.92850722 | 2.42E-14 |
| 1500009L16R | 66.59603   | 3.33E-16 | -1.625396  | 3.55E-14 |
| Cnrip1      | 66.594134  | 3.33E-16 | -2.3522644 | 3.55E-14 |
| Med21       | 65.7086416 | 5.55E-16 | 0.92825791 | 5.80E-14 |
| Ifi203      | 65.6863693 | 5.55E-16 | -1.0507023 | 5.80E-14 |
| Rbp1        | 64.7707145 | 8.88E-16 | -1.3643314 | 9.10E-14 |
| Ddah2       | 64.727865  | 8.88E-16 | -1.4858889 | 9.10E-14 |
| Prdx5       | 64.2137821 | 1.11E-15 | 0.84207821 | 1.13E-13 |
| BC051537    | 63.6499721 | 1.44E-15 | -1.5268867 | 1.45E-13 |
| Wfdc17      | 63.4621037 | 1.67E-15 | -1.9236729 | 1.64E-13 |
| Plek        | 63.4145901 | 1.67E-15 | -1.3115915 | 1.64E-13 |
| Tmem53      | 62.7808872 | 2.33E-15 | 2.0653758  | 2.28E-13 |
| Rnase6      | 61.6856849 | 4.00E-15 | -1.6878591 | 3.87E-13 |
| Pnck        | 61.653073  | 4.11E-15 | -1.1040724 | 3.94E-13 |
| Gnb4        | 61.425551  | 4.55E-15 | -1.30285   | 4.32E-13 |
| Pou2f2      | 59.980479  | 9.55E-15 | -1.0873142 | 8.99E-13 |
| Gpr45       | 59.4661859 | 1.24E-14 | -1.3577086 | 1.16E-12 |
| Milr1       | 57.2349523 | 3.86E-14 | -1.1553066 | 3.57E-12 |
| Basp1       | 55.6627738 | 8.60E-14 | -1.2417924 | 7.88E-12 |
| Naprt       | 55.1120467 | 1.14E-13 | -1.0187495 | 1.03E-11 |
| AI504432    | 54.1963395 | 1.81E-13 | -1.3736218 | 1.63E-11 |
| Ripor1      | 54.0755842 | 1.93E-13 | -1.0497742 | 1.72E-11 |
| Cracr2b     | 53.22587   | 2.97E-13 | 1.84404974 | 2.63E-11 |
| Bcl2        | 52.6086742 | 4.07E-13 | -0.9913421 | 3.57E-11 |
| Spns2       | 52.117708  | 5.23E-13 | -1.1078821 | 4.55E-11 |
| Dlg2        | 51.3114994 | 7.88E-13 | 2.44836196 | 6.80E-11 |
| Rab37       | 51.0366305 | 9.07E-13 | -1.1295686 | 7.76E-11 |
| Hebp1       | 50.1427085 | 1.43E-12 | 1.05939687 | 1.21E-10 |
| Gca         | 50.1408398 | 1.43E-12 | 1.56487276 | 1.21E-10 |
| Ptgr1       | 49.2192573 | 2.29E-12 | 1.07814224 | 1.91E-10 |
| Fyn         | 48.6914043 | 3.00E-12 | -1.2296585 | 2.48E-10 |
| Marveld2    | 47.7963763 | 4.73E-12 | -1.2745281 | 3.89E-10 |
| Slc18a2     | 47.7307446 | 4.89E-12 | -1.3158851 | 3.99E-10 |

|           |            |          |            |          |
|-----------|------------|----------|------------|----------|
| Ncf1      | 47.4741778 | 5.57E-12 | 1.05894193 | 4.51E-10 |
| Slc7a8    | 43.1974501 | 4.95E-11 | -1.278946  | 3.98E-09 |
| Ctxn1     | 41.9398901 | 9.41E-11 | -1.6292152 | 7.51E-09 |
| Meis1     | 41.4201896 | 1.23E-10 | -1.0135777 | 9.72E-09 |
| Rbpms     | 41.4010157 | 1.24E-10 | -0.9529544 | 9.74E-09 |
| Rgs1      | 40.2952227 | 2.18E-10 | -1.3437326 | 1.70E-08 |
| Homer2    | 39.0546298 | 4.12E-10 | -1.5731701 | 3.19E-08 |
| Itga2     | 38.8432807 | 4.59E-10 | -1.1589498 | 3.53E-08 |
| Fam117a   | 38.7885242 | 4.72E-10 | -0.9266955 | 3.60E-08 |
| Lsp1      | 38.6192026 | 5.15E-10 | -1.0539248 | 3.90E-08 |
| C3        | 38.3263497 | 5.98E-10 | 1.1911788  | 4.50E-08 |
| Sox4      | 38.2415663 | 6.25E-10 | -0.8637972 | 4.66E-08 |
| Agps      | 37.7489952 | 8.05E-10 | 1.02413977 | 5.96E-08 |
| Sox6      | 37.4154725 | 9.55E-10 | -1.6217618 | 7.02E-08 |
| Ptms      | 37.229656  | 1.05E-09 | -1.1385287 | 7.67E-08 |
| Gprc5b    | 37.0554828 | 1.15E-09 | -2.3560856 | 8.33E-08 |
| H2-T23    | 36.7669565 | 1.33E-09 | -0.9013999 | 9.59E-08 |
| Coro2a    | 36.4851656 | 1.54E-09 | -1.0008997 | 1.10E-07 |
| Tspan13   | 36.2591131 | 1.73E-09 | -0.958346  | 1.23E-07 |
| Bpifc     | 36.0122397 | 1.96E-09 | -1.276548  | 1.38E-07 |
| Tnfrsf13c | 35.6956974 | 2.31E-09 | -1.7741787 | 1.62E-07 |
| Dmkn      | 35.3454978 | 2.76E-09 | 0.9580088  | 1.92E-07 |
| Dhrs3     | 34.921458  | 3.43E-09 | -1.1314897 | 2.37E-07 |
| Slc35f2   | 34.1756211 | 5.04E-09 | -2.2813399 | 3.46E-07 |
| Tgfb1     | 34.1049836 | 5.22E-09 | -1.4550674 | 3.57E-07 |
| Vegfa     | 33.4387041 | 7.35E-09 | 1.26858871 | 4.99E-07 |
| Slc16a11  | 32.9816581 | 9.30E-09 | -1.7173543 | 6.27E-07 |
| Rgs3      | 32.3064733 | 1.32E-08 | -1.0101232 | 8.82E-07 |
| Ipcef1    | 31.4469164 | 2.05E-08 | -1.8474627 | 1.36E-06 |
| Mdga1     | 30.8963966 | 2.72E-08 | -1.0678592 | 1.80E-06 |
| Hhex      | 29.6775809 | 5.10E-08 | -0.883079  | 3.35E-06 |
| Igfbp7    | 29.4245512 | 5.81E-08 | -1.4443652 | 3.80E-06 |
| Hp        | 28.4948523 | 9.39E-08 | 0.8583406  | 6.10E-06 |
| Abcb1b    | 28.3846155 | 9.95E-08 | -1.2520568 | 6.41E-06 |
| Ctsh      | 28.2265842 | 1.08E-07 | 1.23107171 | 6.92E-06 |
| Rgl1      | 28.1259027 | 1.14E-07 | -1.8761835 | 7.24E-06 |
| Gm17473   | 27.7975812 | 1.35E-07 | -1.6319405 | 8.53E-06 |
| Rcn3      | 27.5549971 | 1.53E-07 | -0.8394027 | 9.61E-06 |
| Neu1      | 27.4185869 | 1.64E-07 | 1.03105913 | 1.02E-05 |
| Prkg1     | 27.3723536 | 1.68E-07 | -1.5290528 | 1.04E-05 |
| Fam241a   | 27.1125434 | 1.92E-07 | 0.95968059 | 1.19E-05 |
| Arhgap6   | 26.8338809 | 2.22E-07 | -1.1282747 | 1.36E-05 |
| Uchl1     | 26.8259829 | 2.23E-07 | -1.729771  | 1.36E-05 |

|             |            |          |            |            |
|-------------|------------|----------|------------|------------|
| Gcnt2       | 26.6976981 | 2.38E-07 | -1.0271866 | 1.44E-05   |
| Irf8        | 26.6217145 | 2.47E-07 | -1.026195  | 1.49E-05   |
| Arsb        | 25.7065114 | 3.97E-07 | 0.9584946  | 2.39E-05   |
| Auts2       | 25.6727267 | 4.05E-07 | -1.2222446 | 2.41E-05   |
| Tpm4        | 25.2359408 | 5.07E-07 | -1.5442873 | 3.01E-05   |
| Sh3glb1     | 24.8743597 | 6.12E-07 | -0.8850456 | 3.61E-05   |
| Siglecg     | 24.8592094 | 6.17E-07 | 1.12134111 | 3.62E-05   |
| Ncam1       | 24.7290809 | 6.60E-07 | 1.01517295 | 3.85E-05   |
| Far2        | 24.6472565 | 6.88E-07 | 1.2157654  | 4.00E-05   |
| Ssbp2       | 24.4148495 | 7.77E-07 | -0.8690149 | 4.48E-05   |
| Bgn         | 24.3466197 | 8.05E-07 | -1.8504669 | 4.62E-05   |
| Gimap6      | 23.4270555 | 1.30E-06 | -1.1708932 | 7.41E-05   |
| Tns1        | 23.2512289 | 1.42E-06 | -1.1689341 | 8.07E-05   |
| Fam160a2    | 22.49317   | 2.11E-06 | 1.32086383 | 0.00011908 |
| Fkbp11      | 22.2990315 | 2.33E-06 | 0.86304048 | 0.00013104 |
| B4galnt4    | 22.27417   | 2.36E-06 | -2.0609405 | 0.00013204 |
| Vldlr       | 22.071386  | 2.63E-06 | -1.4280691 | 0.00014596 |
| Tslp        | 21.9174103 | 2.85E-06 | 1.08541137 | 0.00015732 |
| Dapp1       | 21.699383  | 3.19E-06 | -0.8183764 | 0.00017532 |
| Epb41l3     | 20.9925239 | 4.61E-06 | -2.8774379 | 0.00025217 |
| Ccdc112     | 20.8140496 | 5.06E-06 | -1.3289788 | 0.00027535 |
| Tmem268     | 20.6645405 | 5.47E-06 | -2.177346  | 0.00029617 |
| Fam171a2    | 20.4406943 | 6.15E-06 | -1.5941652 | 0.00033119 |
| Adam17      | 20.3187935 | 6.56E-06 | -0.9401059 | 0.00035117 |
| Padi2       | 20.0315095 | 7.62E-06 | -1.2856805 | 0.00040599 |
| Gimap5      | 19.7672194 | 8.75E-06 | -1.5978373 | 0.00046381 |
| Ppp1r13b    | 19.757076  | 8.79E-06 | -1.0128501 | 0.00046393 |
| Trim45      | 19.6026494 | 9.53E-06 | 1.00048792 | 0.00050045 |
| Fcor        | 19.5287596 | 9.91E-06 | 1.01508678 | 0.00051758 |
| Rgs7bp      | 18.8472009 | 1.42E-05 | -1.5198493 | 0.00073599 |
| Hacd4       | 18.7873214 | 1.46E-05 | -1.2573281 | 0.00075335 |
| Epb41l4b    | 18.7838747 | 1.46E-05 | -1.3942152 | 0.00075335 |
| Ifitm3      | 18.5280711 | 1.67E-05 | -0.8047863 | 0.00085729 |
| Gm20467     | 18.4843617 | 1.71E-05 | -2.5057256 | 0.0008729  |
| Trim47      | 18.4510117 | 1.74E-05 | -1.4200873 | 0.000884   |
| Lag3        | 18.1807454 | 2.01E-05 | -1.5270069 | 0.00101382 |
| Hlf         | 18.0751121 | 2.12E-05 | -0.9485797 | 0.00106649 |
| B430010l23R | 17.8338912 | 2.41E-05 | 1.23552234 | 0.00120479 |
| Pear1       | 17.6591973 | 2.64E-05 | -1.0838927 | 0.00131438 |
| Dach1       | 17.5496988 | 2.80E-05 | -0.9111922 | 0.00138568 |
| Rab27b      | 17.4404199 | 2.96E-05 | -1.7834172 | 0.00146074 |
| Hivep2      | 17.2504008 | 3.28E-05 | -1.2839416 | 0.00160676 |
| Cpxm1       | 17.2057596 | 3.35E-05 | -1.4261219 | 0.00163728 |



|             |            |            |            |            |
|-------------|------------|------------|------------|------------|
| C030037D09I | 17.0776025 | 3.59E-05   | -1.1821448 | 0.00174046 |
| Aldoc       | 17.0720049 | 3.60E-05   | -1.5492714 | 0.00174046 |
| Zfpm1       | 16.956683  | 3.82E-05   | -0.9249895 | 0.00184093 |
| Itgb7       | 16.9471412 | 3.84E-05   | -1.3285099 | 0.00184171 |
| Tmem98      | 16.8645408 | 4.01E-05   | -1.342593  | 0.00191484 |
| Zfp831      | 16.7103979 | 4.35E-05   | -1.4831919 | 0.00206744 |
| Klhl4       | 16.3994333 | 5.13E-05   | -1.6272089 | 0.00242482 |
| Gfi1b       | 16.3512455 | 5.26E-05   | -1.2489851 | 0.00247606 |
| Efna4       | 16.2674269 | 5.50E-05   | -1.5323113 | 0.00257643 |
| Fam129b     | 16.2060392 | 5.68E-05   | -1.5047268 | 0.0026494  |
| Prkcb       | 16.1867815 | 5.74E-05   | 1.25045229 | 0.00266458 |
| Thbs1       | 16.1176597 | 5.95E-05   | 1.56977297 | 0.00275138 |
| Itga2b      | 16.0988596 | 6.01E-05   | -1.0072473 | 0.00276659 |
| Aff3        | 16.0454367 | 6.18E-05   | -0.9187472 | 0.00283327 |
| Gm16104     | 15.8925652 | 6.70E-05   | 1.15798832 | 0.00305815 |
| Csgalnact1  | 15.7378844 | 7.28E-05   | -1.0995094 | 0.00330422 |
| Pdgfrb      | 15.5014459 | 8.24E-05   | -1.0759088 | 0.0037281  |
| Afap111     | 15.3810482 | 8.79E-05   | -0.9689248 | 0.0039425  |
| F10         | 15.3794782 | 8.79E-05   | 1.02772331 | 0.0039425  |
| Cyba        | 15.2479524 | 9.43E-05   | 0.77434446 | 0.00420871 |
| Vamp5       | 15.2307412 | 9.51E-05   | -0.8079282 | 0.00422916 |
| Hnf4a       | 15.1770426 | 9.79E-05   | -1.8846871 | 0.00433271 |
| Egfl7       | 15.0270508 | 0.00010598 | -0.8581593 | 0.00467122 |
| Shank3      | 14.9212521 | 0.00011209 | -1.3463946 | 0.00491985 |
| Plxnb2      | 14.7954318 | 0.00011983 | -1.203662  | 0.00523722 |
| S100a6      | 14.6801885 | 0.00012738 | -1.1784678 | 0.00554413 |
| Msantd3     | 14.4721338 | 0.00014225 | 0.88465389 | 0.00616567 |
| Dpp4        | 14.3520343 | 0.00015162 | -1.0699617 | 0.00654454 |
| Gucy1a1     | 14.3235617 | 0.00015393 | -1.528218  | 0.00661693 |
| Zfp608      | 14.1964159 | 0.00016468 | -0.8648369 | 0.00702352 |
| Gpr171      | 14.1958961 | 0.00016473 | -0.9199107 | 0.00702352 |
| Smim10l2a   | 14.0787961 | 0.00017531 | -1.4959117 | 0.00744422 |
| Nfatc2      | 13.5661572 | 0.0002303  | -1.8509845 | 0.00973975 |
| Elovl6      | 13.4260921 | 0.00024815 | -0.9805301 | 0.01045226 |
| Jsrp1       | 13.2946134 | 0.00026617 | -1.4301691 | 0.0111663  |
| Fam26f      | 13.1608944 | 0.00028585 | -0.9830831 | 0.01194406 |
| Ptgs1       | 12.9967947 | 0.00031202 | 1.00479105 | 0.01298569 |
| Egr1        | 12.9749491 | 0.00031569 | -1.2408678 | 0.01306133 |
| Tifab       | 12.9700123 | 0.00031652 | 0.92304206 | 0.01306133 |
| Rab7b       | 12.9636757 | 0.00031759 | 0.98510896 | 0.01306133 |
| Myof        | 12.9001488 | 0.00032856 | -1.6156269 | 0.0134592  |
| Rhoj        | 12.8709004 | 0.00033373 | 1.37022755 | 0.01361779 |
| Pim1        | 12.6280662 | 0.00038    | -0.8114997 | 0.01544537 |

|             |            |            |            |            |
|-------------|------------|------------|------------|------------|
| Syne1       | 12.6108902 | 0.00038351 | 1.01722497 | 0.01552753 |
| Luzp1       | 12.5904386 | 0.00038773 | -0.9969516 | 0.01563775 |
| Ank         | 12.5700511 | 0.00039198 | -1.0522151 | 0.01574846 |
| Slc25a27    | 12.5063163 | 0.00040558 | -0.9112666 | 0.01623246 |
| Fam129a     | 12.0373914 | 0.00052144 | -1.1213993 | 0.02078989 |
| Zfp532      | 12.0280554 | 0.00052406 | -1.7194744 | 0.02081483 |
| Arl4c       | 11.6924884 | 0.00062753 | -1.0890591 | 0.02483019 |
| Serpini1    | 11.6549837 | 0.00064031 | -1.1394074 | 0.0252402  |
| Rnf150      | 11.5567793 | 0.00067503 | -1.6603196 | 0.02650876 |
| Rab3il1     | 11.3961882 | 0.00073595 | -1.1995665 | 0.02879299 |
| Igfp1       | 11.2487887 | 0.00079675 | -1.8291897 | 0.03105541 |
| 2900026A02F | 11.1515099 | 0.00083963 | -1.0581941 | 0.03260523 |
| Plod2       | 11.0842244 | 0.00087065 | -1.3125295 | 0.03368457 |
| Clec1a      | 11.0039716 | 0.00090917 | -2.1215852 | 0.03504493 |
| Crispld1    | 10.9099051 | 0.00095651 | -1.3291651 | 0.03673437 |
| Insl6       | 10.8976551 | 0.00096286 | -0.8067292 | 0.03684265 |
| Phldb1      | 10.8028895 | 0.00101342 | -0.9018878 | 0.03863563 |
| Gatm        | 10.6057245 | 0.00112738 | 0.80390699 | 0.04282407 |
| Ccl4        | 10.584726  | 0.00114026 | -1.017597  | 0.04315628 |
| Gfi1        | 10.5612389 | 0.00115484 | 0.87165418 | 0.04354322 |
| Tmem71      | 10.5548788 | 0.00115882 | -0.9814662 | 0.04354322 |
| Phf11b      | 10.5327488 | 0.00117278 | -1.327742  | 0.04390976 |
| Grasp       | 10.4001991 | 0.00126002 | -1.0668156 | 0.04700764 |
| Mc5r        | 10.2894746 | 0.00133791 | -1.3518897 | 0.04973604 |
| Bbc3        | 10.2266723 | 0.00138424 | -1.0247337 | 0.05127585 |
| 4930519L02R | 10.165093  | 0.00143125 | -0.8834034 | 0.0528297  |
| Gm26735     | 9.79509601 | 0.00174978 | -0.9269457 | 0.06435982 |
| Mlx         | 9.65592721 | 0.00188742 | 0.84092222 | 0.06917876 |
| Clu         | 9.64087148 | 0.00190295 | 1.02052243 | 0.06950422 |
| Ltc4s       | 9.54288049 | 0.00200726 | -1.0589797 | 0.07305884 |
| Arhgap12    | 9.53223558 | 0.00201894 | -1.5003167 | 0.07322865 |
| Rec8        | 9.48575825 | 0.00207073 | -1.2710886 | 0.07484722 |
| Rara        | 9.38398336 | 0.00218889 | -1.0393602 | 0.07884547 |
| Gstt1       | 9.32828096 | 0.00225644 | -1.582607  | 0.08075164 |
| Igsf6       | 9.32760382 | 0.00225727 | 0.79984319 | 0.08075164 |
| Camk1d      | 9.23276861 | 0.00237722 | -1.557663  | 0.08475233 |
| Atp13a2     | 9.12959592 | 0.00251507 | -0.8692421 | 0.08936207 |
| Ypel5       | 9.09426908 | 0.00256412 | 0.90378094 | 0.0907958  |
| Pbx1        | 9.01711283 | 0.00267464 | -0.8731932 | 0.09438933 |

| gene_symbol | waldStat   | pvalue | logFC      | FDR |
|-------------|------------|--------|------------|-----|
| Mt1         | 3781.4256  | 0      | 2.42479366 | 0   |
| Ctla2a      | 2511.7631  | 0      | -2.8489516 | 0   |
| Car2        | 2396.20008 | 0      | 1.70467532 | 0   |
| Fth1        | 2285.18736 | 0      | 1.27165857 | 0   |
| Mt2         | 2066.80546 | 0      | 3.28832431 | 0   |
| Hspd1       | 2042.25891 | 0      | 1.57237062 | 0   |
| Ermap       | 1962.76986 | 0      | 2.29390762 | 0   |
| Vim         | 1936.75125 | 0      | -2.2543788 | 0   |
| Chchd10     | 1878.80332 | 0      | 2.40608007 | 0   |
| Nme1        | 1736.91009 | 0      | 1.47435914 | 0   |
| C1qbp       | 1725.30602 | 0      | 1.4924164  | 0   |
| Atp5g1      | 1705.51727 | 0      | 1.46276357 | 0   |
| Blvrb       | 1705.26056 | 0      | 1.40655493 | 0   |
| Hspe1       | 1660.52499 | 0      | 1.40344093 | 0   |
| Car1        | 1611.07491 | 0      | 1.76719201 | 0   |
| Ran         | 1488.4142  | 0      | 1.36197073 | 0   |
| Mif         | 1480.53246 | 0      | 1.50921222 | 0   |
| Uqcr11      | 1432.81717 | 0      | 1.44505558 | 0   |
| Uqcrq       | 1401.72143 | 0      | 1.48350306 | 0   |
| Mrpl12      | 1390.91929 | 0      | 1.52758856 | 0   |
| Dut         | 1376.12456 | 0      | 1.54528547 | 0   |
| Glrx5       | 1283.30734 | 0      | 1.44919872 | 0   |
| Asns        | 1270.30897 | 0      | 2.58165034 | 0   |
| Npm1        | 1261.80094 | 0      | 1.15804178 | 0   |
| Ybx1        | 1261.54003 | 0      | 1.23193934 | 0   |
| Lyar        | 1259.68791 | 0      | 1.56494533 | 0   |
| Cox5a       | 1249.49148 | 0      | 1.36910383 | 0   |
| Tomm5       | 1247.45258 | 0      | 1.47424005 | 0   |
| Hsp90aa1    | 1241.36075 | 0      | 1.2798222  | 0   |
| Nhp2        | 1240.39787 | 0      | 1.41418753 | 0   |
| Eif5a       | 1227.20786 | 0      | 1.19676662 | 0   |
| Slc25a21    | 1218.93143 | 0      | 2.85732202 | 0   |
| Atp5g3      | 1210.86336 | 0      | 1.34786749 | 0   |
| Phb2        | 1202.01607 | 0      | 1.36884595 | 0   |
| Nop10       | 1192.85231 | 0      | 1.29847336 | 0   |
| Cox5b       | 1171.46796 | 0      | 1.31243868 | 0   |
| Bola3       | 1155.69259 | 0      | 1.64748173 | 0   |
| Ifitm1      | 1139.3336  | 0      | -2.4974158 | 0   |
| Sox4        | 1134.11179 | 0      | -1.8498296 | 0   |
| Gatm        | 1105.88439 | 0      | 2.03098765 | 0   |
| Minpp1      | 1103.88426 | 0      | 1.84223773 | 0   |
| Snu13       | 1094.8843  | 0      | 1.41182478 | 0   |

|          |            |   |            |   |
|----------|------------|---|------------|---|
| Rexo2    | 1054.61583 | 0 | 1.46760806 | 0 |
| Tmem14c  | 1047.52175 | 0 | 1.36904767 | 0 |
| Nkg7     | 1036.50131 | 0 | -1.9840124 | 0 |
| Pla2g12a | 1035.18099 | 0 | 2.00091798 | 0 |
| Slc25a5  | 1026.72604 | 0 | 1.24482329 | 0 |
| Cyc1     | 1025.19172 | 0 | 1.50076261 | 0 |
| Rps27l   | 992.895766 | 0 | 1.26652638 | 0 |
| Ncl      | 990.375498 | 0 | 1.23461759 | 0 |
| Odc1     | 969.744105 | 0 | 1.65798458 | 0 |
| Cox6a1   | 963.784857 | 0 | 1.30061175 | 0 |
| Sphk1    | 961.621798 | 0 | 3.08683186 | 0 |
| Pa2g4    | 956.826729 | 0 | 1.30289349 | 0 |
| Ndufab1  | 947.417825 | 0 | 1.38232297 | 0 |
| Tmem147  | 941.922575 | 0 | 1.53855682 | 0 |
| Rhd      | 937.677057 | 0 | 3.0497576  | 0 |
| Ybx3     | 919.354587 | 0 | 1.2017617  | 0 |
| Txn1l    | 918.307056 | 0 | 1.30546118 | 0 |
| Snrpd1   | 904.934772 | 0 | 1.26494531 | 0 |
| Uqcr10   | 895.102352 | 0 | 1.32732072 | 0 |
| Tmem238  | 886.141261 | 0 | 1.80126239 | 0 |
| Rgs10    | 883.881453 | 0 | 1.85197026 | 0 |
| Ranbp1   | 868.080968 | 0 | 1.28213301 | 0 |
| Mrto4    | 866.050793 | 0 | 1.5046882  | 0 |
| Prdx6    | 836.034107 | 0 | 1.21554241 | 0 |
| Cox6b1   | 835.854661 | 0 | 1.16970265 | 0 |
| Slc38a5  | 835.754832 | 0 | 2.4637961  | 0 |
| Myct1    | 827.200829 | 0 | -1.972547  | 0 |
| Prelid2  | 822.170873 | 0 | 2.19239319 | 0 |
| Cox7b    | 806.924566 | 0 | 1.24714055 | 0 |
| Cycs     | 806.376951 | 0 | 1.49929726 | 0 |
| Timm8a1  | 798.691671 | 0 | 1.57652725 | 0 |
| Srm      | 789.336187 | 0 | 1.49216295 | 0 |
| Timm13   | 787.469299 | 0 | 1.28222528 | 0 |
| Minos1   | 780.327578 | 0 | 1.22477308 | 0 |
| Cpox     | 778.923459 | 0 | 1.84156192 | 0 |
| Spire1   | 760.067504 | 0 | 2.29754737 | 0 |
| Ppia     | 750.169348 | 0 | 1.14294441 | 0 |
| Prdx2    | 748.834656 | 0 | 1.10937127 | 0 |
| Tomm40   | 743.825484 | 0 | 1.41438484 | 0 |
| Cox6c    | 733.182747 | 0 | 1.15806113 | 0 |
| Atp5k    | 732.901751 | 0 | 1.3698369  | 0 |
| Fam162a  | 723.970668 | 0 | 1.46773767 | 0 |
| Cenpv    | 718.934292 | 0 | 1.58477655 | 0 |

|          |            |   |            |   |
|----------|------------|---|------------|---|
| Mdh2     | 718.286478 | 0 | 1.23310527 | 0 |
| Mospd3   | 712.896832 | 0 | 1.63745513 | 0 |
| Cacybp   | 710.672628 | 0 | 1.29312917 | 0 |
| Cldn13   | 704.623832 | 0 | 3.2994737  | 0 |
| Ndufb9   | 660.753677 | 0 | 1.16007535 | 0 |
| Chchd2   | 657.570656 | 0 | 1.0998321  | 0 |
| Cox7a2   | 657.074275 | 0 | 1.18889052 | 0 |
| Ppp1r14b | 647.884652 | 0 | 1.24447713 | 0 |
| Mrpl20   | 640.136784 | 0 | 1.31895488 | 0 |
| Atp5j2   | 637.122531 | 0 | 1.17218545 | 0 |
| Mrpl42   | 631.243629 | 0 | 1.31522301 | 0 |
| Cox8a    | 629.74149  | 0 | 1.07570768 | 0 |
| Phf5a    | 622.027413 | 0 | 1.29885128 | 0 |
| Mthfd1   | 621.740455 | 0 | 1.69953715 | 0 |
| Atp5o-1  | 617.715833 | 0 | 1.20597297 | 0 |
| Pabpc4   | 615.412368 | 0 | 1.54211822 | 0 |
| Eef1g    | 614.217948 | 0 | 1.07555524 | 0 |
| Nolc1    | 609.664343 | 0 | 1.37686826 | 0 |
| Fkbp4    | 608.773459 | 0 | 1.29269699 | 0 |
| Ndufs6   | 608.581329 | 0 | 1.30785468 | 0 |
| Hint1    | 605.838365 | 0 | 1.10624779 | 0 |
| Plac8    | 604.046007 | 0 | -1.4178613 | 0 |
| Ndufa12  | 599.864373 | 0 | 1.23235319 | 0 |
| Psmb3    | 599.354684 | 0 | 1.21154245 | 0 |
| Ppa1     | 590.676078 | 0 | 1.48709079 | 0 |
| Btg2     | 586.626277 | 0 | -2.8393371 | 0 |
| Ddx39    | 585.179251 | 0 | 1.41608421 | 0 |
| Fam241a  | 577.37455  | 0 | 1.54437704 | 0 |
| Smim1    | 574.965454 | 0 | 1.7766597  | 0 |
| Rpl41    | 571.740394 | 0 | 1.01103917 | 0 |
| Atp5b    | 566.074397 | 0 | 1.08903892 | 0 |
| Pdap1    | 559.642835 | 0 | 1.28111169 | 0 |
| Ndufc2   | 558.742735 | 0 | 1.17608634 | 0 |
| Mrpl36   | 558.359096 | 0 | 1.29814757 | 0 |
| Ldha     | 555.928139 | 0 | 1.1389827  | 0 |
| Aprt     | 554.57014  | 0 | 1.23642757 | 0 |
| Eif4ebp1 | 554.547216 | 0 | 1.26982466 | 0 |
| Cox6b2   | 553.130206 | 0 | 1.27417125 | 0 |
| Polr2f   | 549.997608 | 0 | 1.20997295 | 0 |
| Ifrd2    | 549.112672 | 0 | 1.46728181 | 0 |
| Tmem97   | 544.776852 | 0 | 1.73578604 | 0 |
| Set      | 536.664746 | 0 | 1.10584389 | 0 |
| Tuba1b   | 536.007771 | 0 | 1.35987006 | 0 |

|            |            |   |            |   |
|------------|------------|---|------------|---|
| Jun        | 533.729035 | 0 | -1.6564269 | 0 |
| Atp5d      | 533.6607   | 0 | 1.05540126 | 0 |
| Angpt1     | 529.24699  | 0 | -1.7814705 | 0 |
| Hdgf       | 529.233645 | 0 | 1.06442962 | 0 |
| Mrpl18     | 528.05097  | 0 | 1.21858258 | 0 |
| Mrps24     | 521.073543 | 0 | 1.2153439  | 0 |
| Mcrip2     | 520.363006 | 0 | 1.65072215 | 0 |
| Anp32b     | 518.088152 | 0 | 1.0398664  | 0 |
| Pfdn6      | 517.959878 | 0 | 1.23161617 | 0 |
| Romo1      | 513.32444  | 0 | 1.25570885 | 0 |
| Ndufs7     | 507.75374  | 0 | 1.12532838 | 0 |
| Atp5j      | 504.257151 | 0 | 1.07262939 | 0 |
| Cited4     | 493.792945 | 0 | 2.08842726 | 0 |
| Sdhb       | 493.314211 | 0 | 1.24947319 | 0 |
| Nxpe2      | 492.640096 | 0 | 2.63313902 | 0 |
| Asb17os    | 485.24973  | 0 | 3.33433118 | 0 |
| Snrpd2     | 485.15637  | 0 | 1.10668081 | 0 |
| Casp3      | 484.771879 | 0 | 1.26917486 | 0 |
| Nfia       | 482.909021 | 0 | 1.79667718 | 0 |
| Tmsb4x     | 482.801383 | 0 | -1.1626517 | 0 |
| Morf4l2    | 482.601517 | 0 | 1.24729206 | 0 |
| Cd24a      | 481.276683 | 0 | 1.52216713 | 0 |
| Cox7c      | 480.56044  | 0 | 1.11392183 | 0 |
| Alyref     | 479.24913  | 0 | 1.20148796 | 0 |
| Ube2m      | 478.614556 | 0 | 1.21487635 | 0 |
| Gadd45gip1 | 475.294337 | 0 | 1.24964348 | 0 |
| Fen1       | 473.96039  | 0 | 1.53162631 | 0 |
| Uqcc2      | 473.220857 | 0 | 1.21236415 | 0 |
| Gpx4       | 472.195629 | 0 | 1.07097047 | 0 |
| Lsm2       | 471.003911 | 0 | 1.24499453 | 0 |
| Ndufa5     | 464.939684 | 0 | 1.2578174  | 0 |
| Npm3       | 464.233734 | 0 | 1.20996981 | 0 |
| Ccne1      | 463.93421  | 0 | 2.6150301  | 0 |
| Psmb2      | 463.764661 | 0 | 1.13871228 | 0 |
| H2afj      | 458.311938 | 0 | 1.11154645 | 0 |
| Ndufa4     | 455.52843  | 0 | 1.05974431 | 0 |
| Higd1a     | 454.806137 | 0 | 1.35609342 | 0 |
| Ssca1      | 453.889696 | 0 | 1.36880315 | 0 |
| Gmfg       | 453.630178 | 0 | -1.2348087 | 0 |
| Dnajc19    | 452.823006 | 0 | 1.30213401 | 0 |
| Atpif1     | 452.702499 | 0 | 0.98867666 | 0 |
| Ndufb6     | 452.057394 | 0 | 1.25461359 | 0 |
| Myh10      | 451.551615 | 0 | 2.19148034 | 0 |

|         |            |   |            |   |
|---------|------------|---|------------|---|
| Pnp     | 451.475817 | 0 | 1.23625195 | 0 |
| Mpc1    | 449.393257 | 0 | 1.32745636 | 0 |
| Oat     | 448.708546 | 0 | 1.36286998 | 0 |
| Htra2   | 448.497429 | 0 | 1.41731475 | 0 |
| Comtd1  | 448.018402 | 0 | 1.67021932 | 0 |
| Sf3b5   | 448.005598 | 0 | 1.13373507 | 0 |
| Vdac2   | 447.336339 | 0 | 1.09025893 | 0 |
| Atp5f1  | 443.09948  | 0 | 1.04615604 | 0 |
| Fxyd5   | 439.961206 | 0 | -1.4843776 | 0 |
| Snrpf   | 438.05746  | 0 | 1.11630716 | 0 |
| Psm7    | 436.502806 | 0 | 1.01990492 | 0 |
| Gmnn    | 431.977236 | 0 | 1.40115804 | 0 |
| Eef1d   | 430.795977 | 0 | 1.00574941 | 0 |
| Ndufb8  | 430.667048 | 0 | 1.11717219 | 0 |
| Erh     | 429.879593 | 0 | 1.23900273 | 0 |
| Phb     | 429.747956 | 0 | 1.39408373 | 0 |
| Sdhd    | 429.249701 | 0 | 1.27258851 | 0 |
| Park7   | 429.029334 | 0 | 1.00664085 | 0 |
| Alad    | 428.204195 | 0 | 1.32296981 | 0 |
| Snrpd3  | 425.746196 | 0 | 1.09014033 | 0 |
| Tomm20  | 424.993909 | 0 | 1.08733163 | 0 |
| Bag1    | 424.270684 | 0 | 1.09442447 | 0 |
| Selenoh | 421.784508 | 0 | 1.22431891 | 0 |
| Srsf7   | 420.841114 | 0 | 1.14969237 | 0 |
| Meis1   | 420.684351 | 0 | -2.0605853 | 0 |
| Tomm22  | 420.666169 | 0 | 1.21221183 | 0 |
| Ndufc1  | 419.820187 | 0 | 1.23112059 | 0 |
| Pklr    | 416.935571 | 0 | 2.80057688 | 0 |
| Phf10   | 411.387305 | 0 | 1.42284035 | 0 |
| Usmg5   | 410.22991  | 0 | 1.2230914  | 0 |
| Prss50  | 410.029355 | 0 | 1.88035277 | 0 |
| Bsg     | 406.198046 | 0 | 1.11455969 | 0 |
| Hmgn1   | 406.152681 | 0 | 1.16180476 | 0 |
| Sec61g  | 406.047593 | 0 | 1.13999122 | 0 |
| Wdr18   | 405.215767 | 0 | 1.43560057 | 0 |
| Taf10   | 404.217435 | 0 | 1.08860864 | 0 |
| Fam117a | 404.056313 | 0 | -1.5515416 | 0 |
| Dynll1  | 402.391393 | 0 | 1.09751928 | 0 |
| Tpi1    | 401.360342 | 0 | 1.17235869 | 0 |
| Uqcrb   | 401.245882 | 0 | 1.12331081 | 0 |
| H2afz   | 400.433336 | 0 | 1.11952669 | 0 |
| Cdc34   | 398.850873 | 0 | 1.47853907 | 0 |
| Hspa8   | 397.740285 | 0 | 1.02259244 | 0 |

|          |            |   |            |   |
|----------|------------|---|------------|---|
| Mns1     | 397.230984 | 0 | 1.24421053 | 0 |
| Nasp     | 396.730603 | 0 | 1.29363779 | 0 |
| Phgdh    | 395.455435 | 0 | 1.23551393 | 0 |
| Txn1     | 394.559525 | 0 | 1.03877274 | 0 |
| Polr1d   | 387.712825 | 0 | 1.07204093 | 0 |
| Hmbs     | 386.062309 | 0 | 1.34616446 | 0 |
| Ndufv2   | 385.109503 | 0 | 1.12916775 | 0 |
| Eif2s1   | 385.097418 | 0 | 1.19228155 | 0 |
| Rnaseh2c | 384.601034 | 0 | 1.15276576 | 0 |
| Cox4i1   | 383.731527 | 0 | 0.92508069 | 0 |
| Pdcd5    | 379.21956  | 0 | 1.20242984 | 0 |
| Ndufb7   | 378.366139 | 0 | 1.07909288 | 0 |
| Mrpl21   | 378.251466 | 0 | 1.23510721 | 0 |
| Ppid     | 378.138292 | 0 | 1.21204198 | 0 |
| Tsfm     | 371.695405 | 0 | 1.41171522 | 0 |
| Rplp1    | 367.08301  | 0 | 0.91946437 | 0 |
| Gata2    | 366.378338 | 0 | -1.36106   | 0 |
| Svbp     | 364.895341 | 0 | 1.219602   | 0 |
| Paqr9    | 364.019502 | 0 | 2.37735861 | 0 |
| Stard10  | 362.477564 | 0 | 1.39282995 | 0 |
| Exosc8   | 361.722457 | 0 | 1.23347502 | 0 |
| Rangrf   | 360.152542 | 0 | 1.29913999 | 0 |
| Mrps28   | 356.356452 | 0 | 1.20299906 | 0 |
| St3gal5  | 353.666273 | 0 | 1.82039071 | 0 |
| Ebna1bp2 | 351.885183 | 0 | 1.13685914 | 0 |
| Ptges3   | 348.085476 | 0 | 1.10335744 | 0 |
| Ndufb5   | 345.718941 | 0 | 1.07301342 | 0 |
| Fxn      | 343.526611 | 0 | 1.32630383 | 0 |
| Atp5l    | 342.791869 | 0 | 1.07122403 | 0 |
| Slc18a2  | 338.389237 | 0 | -1.9539295 | 0 |
| Eif3i    | 337.37404  | 0 | 1.01062694 | 0 |
| Eif3g    | 335.906999 | 0 | 1.16722696 | 0 |
| Ssr2     | 334.079971 | 0 | 1.12074383 | 0 |
| Atp5h    | 333.164804 | 0 | 0.99606217 | 0 |
| Ndufb10  | 332.407601 | 0 | 1.06728899 | 0 |
| Psma3    | 331.776804 | 0 | 1.05710547 | 0 |
| U2af1    | 329.415182 | 0 | 1.1040235  | 0 |
| Dpy30    | 327.267155 | 0 | 1.17915778 | 0 |
| Edf1     | 326.766953 | 0 | 1.08059118 | 0 |
| Eif2s2   | 325.165309 | 0 | 1.05964501 | 0 |
| Tubb4b   | 318.91304  | 0 | 1.19272834 | 0 |
| Mrps36   | 318.403948 | 0 | 1.29202813 | 0 |
| Nop56    | 314.305344 | 0 | 1.106234   | 0 |



|             |            |   |            |   |
|-------------|------------|---|------------|---|
| Psmb5       | 311.512891 | 0 | 1.06490364 | 0 |
| Mrpl28      | 310.389219 | 0 | 1.19993082 | 0 |
| Vdac1       | 309.277644 | 0 | 1.08977141 | 0 |
| Canx        | 308.379971 | 0 | 1.13861898 | 0 |
| Psm7        | 307.288538 | 0 | 1.05395415 | 0 |
| Siva1       | 305.808753 | 0 | 1.1502456  | 0 |
| Them6       | 304.820205 | 0 | 1.78366188 | 0 |
| Cct8        | 303.120079 | 0 | 1.08036176 | 0 |
| Tmem176b    | 302.985122 | 0 | -1.5828772 | 0 |
| Mrps18b     | 302.909497 | 0 | 1.30001914 | 0 |
| Cenpx       | 299.949844 | 0 | 1.09063618 | 0 |
| Mrpl15      | 299.900935 | 0 | 1.18077873 | 0 |
| Mydgf       | 297.597227 | 0 | 1.25599412 | 0 |
| Mrpl51      | 297.504654 | 0 | 1.13343134 | 0 |
| Rgs1        | 296.396951 | 0 | -2.4014438 | 0 |
| Gfer        | 294.87362  | 0 | 1.35903967 | 0 |
| Tufm        | 294.204002 | 0 | 1.35109072 | 0 |
| Timm10      | 293.771497 | 0 | 1.23341984 | 0 |
| Mrps15      | 290.080512 | 0 | 1.17109431 | 0 |
| 1110008P14F | 289.15005  | 0 | 1.90767754 | 0 |
| Hras        | 288.46771  | 0 | 1.33166689 | 0 |
| Prmt1       | 286.555849 | 0 | 1.06215759 | 0 |
| Serbp1      | 284.652289 | 0 | 0.914373   | 0 |
| Gstp3       | 283.559119 | 0 | 2.69230091 | 0 |
| Lsm7        | 280.69776  | 0 | 1.12361662 | 0 |
| Mrpl30      | 280.288755 | 0 | 1.05366605 | 0 |
| Atp5c1      | 280.171914 | 0 | 0.97995071 | 0 |
| Gspt1       | 277.81428  | 0 | 1.08008237 | 0 |
| Hspa9       | 275.781931 | 0 | 1.15904654 | 0 |
| Endog       | 275.111599 | 0 | 1.91745019 | 0 |
| Rps2        | 274.824441 | 0 | 0.91204307 | 0 |
| Cct7        | 274.249015 | 0 | 1.06935503 | 0 |
| Snrpa1      | 273.694681 | 0 | 1.12925596 | 0 |
| Sod2        | 271.747166 | 0 | 1.11118525 | 0 |
| Ndr1        | 270.204899 | 0 | -1.8295596 | 0 |
| Mrpl22      | 269.546921 | 0 | 1.2578173  | 0 |
| Dad1        | 267.613043 | 0 | 1.01528638 | 0 |
| Rnase6      | 267.230631 | 0 | -1.9528409 | 0 |
| Add2        | 266.309832 | 0 | 1.7405909  | 0 |
| Rbbp7       | 266.07515  | 0 | 1.15322308 | 0 |
| Slc29a1     | 263.332965 | 0 | 1.60205501 | 0 |
| Magoh       | 262.399519 | 0 | 1.09199788 | 0 |
| Ndufb2      | 259.430651 | 0 | 1.15634414 | 0 |

|             |            |   |            |   |
|-------------|------------|---|------------|---|
| Mrpl41      | 258.417668 | 0 | 1.20282275 | 0 |
| Ndufa1      | 258.289412 | 0 | 1.09871729 | 0 |
| Cisd1       | 258.020296 | 0 | 1.23505311 | 0 |
| Psm5        | 257.332618 | 0 | 1.03573195 | 0 |
| Cinp        | 257.03899  | 0 | 1.42332486 | 0 |
| Ndufs5      | 255.655357 | 0 | 1.10830611 | 0 |
| Lmna        | 254.934699 | 0 | 1.76194921 | 0 |
| Metap2      | 254.484343 | 0 | 0.99434647 | 0 |
| Prdx3       | 254.168237 | 0 | 1.16093372 | 0 |
| Mogs        | 252.086544 | 0 | 1.32596942 | 0 |
| Nap1l1      | 252.080606 | 0 | 0.99222545 | 0 |
| Uqcrfs1     | 251.488272 | 0 | 1.08100575 | 0 |
| Rsl1d1      | 250.79757  | 0 | 1.06063235 | 0 |
| Pgp         | 250.6657   | 0 | 1.17535544 | 0 |
| Pfdn1       | 250.066069 | 0 | 1.17042216 | 0 |
| Tipin       | 249.827494 | 0 | 1.21075059 | 0 |
| Cdv3        | 249.543773 | 0 | 1.09502891 | 0 |
| Naa38       | 248.300014 | 0 | 1.17785479 | 0 |
| Eloc        | 247.820945 | 0 | 1.10076086 | 0 |
| Psm2        | 247.214066 | 0 | 0.99756028 | 0 |
| E2f4        | 245.993662 | 0 | 1.3189293  | 0 |
| Coro1a      | 245.401555 | 0 | -1.3461652 | 0 |
| Rbpms       | 245.104967 | 0 | -2.6217963 | 0 |
| Rpl36al     | 244.368258 | 0 | 1.04361243 | 0 |
| 2010107E04F | 244.295033 | 0 | 1.01550694 | 0 |
| Hist1h2ac   | 244.147439 | 0 | -1.5523852 | 0 |
| Col5a1      | 243.690378 | 0 | 1.58275713 | 0 |
| Rhag        | 242.959449 | 0 | 1.93437539 | 0 |
| Mrps16      | 242.412623 | 0 | 1.0822815  | 0 |
| Nudt19      | 241.267316 | 0 | 1.36787357 | 0 |
| Zyx         | 241.212087 | 0 | -1.5369778 | 0 |
| Snrpg       | 241.187489 | 0 | 1.01177563 | 0 |
| Mrpl50      | 241.098092 | 0 | 1.23865795 | 0 |
| Psm4        | 240.659076 | 0 | 0.9977228  | 0 |
| Rel         | 240.614781 | 0 | -1.7363298 | 0 |
| Hacd1       | 238.958092 | 0 | 1.25618922 | 0 |
| Bex4        | 238.437291 | 0 | 1.7019518  | 0 |
| Mrpl57      | 238.296133 | 0 | 1.04558115 | 0 |
| Cct3        | 237.823972 | 0 | 1.02726278 | 0 |
| Ola1        | 235.742445 | 0 | 1.12536208 | 0 |
| Ndufb4      | 234.798388 | 0 | 1.09261975 | 0 |
| Atox1       | 234.618006 | 0 | 1.04979972 | 0 |
| Cenpw       | 234.492428 | 0 | 1.27720364 | 0 |

|             |            |   |            |   |
|-------------|------------|---|------------|---|
| 1190007I07R | 234.312165 | 0 | 1.17472054 | 0 |
| Polr2j      | 233.736425 | 0 | 1.05400678 | 0 |
| Prdx1       | 233.531846 | 0 | 0.96129088 | 0 |
| Txn2        | 232.593065 | 0 | 1.10279013 | 0 |
| Eef1e1      | 229.598857 | 0 | 1.19417706 | 0 |
| Mef2c       | 229.13901  | 0 | -1.3070385 | 0 |
| Eif4a1      | 228.729706 | 0 | 0.9626215  | 0 |
| Nudt9       | 228.604119 | 0 | 1.38809243 | 0 |
| Mrpl17      | 228.132599 | 0 | 1.12136883 | 0 |
| Sfxn1       | 227.742459 | 0 | 1.07104093 | 0 |
| Guk1        | 226.804906 | 0 | 1.17371403 | 0 |
| Ccdc124     | 226.73055  | 0 | 1.23743691 | 0 |
| Gcsh        | 225.98796  | 0 | 1.24382105 | 0 |
| Chchd1      | 225.724196 | 0 | 1.07003291 | 0 |
| Ndufa11     | 225.500975 | 0 | 1.05417124 | 0 |
| Mrpl35      | 225.180682 | 0 | 1.15781204 | 0 |
| Got2        | 224.378457 | 0 | 1.19010622 | 0 |
| Uqcrc1      | 224.131446 | 0 | 1.13725906 | 0 |
| Txnip       | 223.049984 | 0 | -1.1594626 | 0 |
| Ndufa10     | 222.89278  | 0 | 1.07053677 | 0 |
| Comt        | 221.778499 | 0 | 1.22255679 | 0 |
| Itga2b      | 221.680408 | 0 | -1.9162344 | 0 |
| Ptpn22      | 221.62061  | 0 | -1.3490455 | 0 |
| Slirp       | 221.371576 | 0 | 1.27277534 | 0 |
| Mfge8       | 221.173333 | 0 | -1.4765953 | 0 |
| Nudcd2      | 220.103296 | 0 | 1.14280916 | 0 |
| Epn1        | 219.124535 | 0 | 1.24055899 | 0 |
| Ydjc        | 218.61214  | 0 | 1.41052066 | 0 |
| Serpina3g   | 216.524315 | 0 | -2.6079509 | 0 |
| Gm26735     | 215.857056 | 0 | -2.4167599 | 0 |
| Mrps26      | 215.477225 | 0 | 1.09357991 | 0 |
| Dennd2d     | 215.446772 | 0 | -1.3078761 | 0 |
| 1110004E09F | 214.565933 | 0 | 1.35352788 | 0 |
| Tspan8      | 214.066204 | 0 | 1.96743727 | 0 |
| Ublcp1      | 213.999715 | 0 | 1.69524859 | 0 |
| Fbl         | 212.888251 | 0 | 0.99756922 | 0 |
| Cct5        | 211.996494 | 0 | 0.98578698 | 0 |
| Psmg3       | 211.545975 | 0 | 1.24776882 | 0 |
| Ppih        | 211.352266 | 0 | 1.21264379 | 0 |
| Tes         | 211.299566 | 0 | -1.7511414 | 0 |
| Bax         | 211.145291 | 0 | 1.08905748 | 0 |
| Dhrs4       | 210.92047  | 0 | 1.23011538 | 0 |
| Pik3ip1     | 210.892595 | 0 | -1.6841406 | 0 |

|          |            |   |            |   |
|----------|------------|---|------------|---|
| Ndufaf4  | 210.389215 | 0 | 1.22990746 | 0 |
| Pno1     | 209.266576 | 0 | 1.3784796  | 0 |
| Lman1    | 208.766775 | 0 | 1.15715137 | 0 |
| Ruvbl1   | 208.335437 | 0 | 1.07465732 | 0 |
| Nop58    | 208.294339 | 0 | 1.00460426 | 0 |
| Aurkaip1 | 207.980806 | 0 | 1.02440163 | 0 |
| Rrm2     | 207.017404 | 0 | 1.55766476 | 0 |
| Timm50   | 206.947178 | 0 | 1.20132754 | 0 |
| Gm17590  | 205.985087 | 0 | -2.4615483 | 0 |
| Ammecr1  | 205.584171 | 0 | 1.47653928 | 0 |
| Snrpe    | 204.741528 | 0 | 0.95861073 | 0 |
| Fam136a  | 203.86983  | 0 | 1.34857007 | 0 |
| Stoml2   | 201.917826 | 0 | 1.14506289 | 0 |
| Mrpl52   | 201.625528 | 0 | 0.93883737 | 0 |
| Elob     | 200.783557 | 0 | 0.96831763 | 0 |
| Mrpl54   | 200.716789 | 0 | 1.04567975 | 0 |
| Bag2     | 200.558399 | 0 | 1.49292155 | 0 |
| Vegfb    | 200.477328 | 0 | 1.35547217 | 0 |
| Srsf3    | 199.738129 | 0 | 0.91594072 | 0 |
| Psemb7   | 197.717572 | 0 | 1.07228378 | 0 |
| Snrpb    | 197.611808 | 0 | 0.93851569 | 0 |
| Aplp2    | 197.370895 | 0 | 1.21005229 | 0 |
| Pebp1    | 197.174748 | 0 | 0.91766667 | 0 |
| Crip2    | 197.018096 | 0 | 2.42294464 | 0 |
| Naa50    | 196.376672 | 0 | 1.10166205 | 0 |
| Hebp1    | 195.821668 | 0 | 1.56056203 | 0 |
| Mrps7    | 194.696161 | 0 | 1.16403462 | 0 |
| Mrps21   | 194.520286 | 0 | 1.10705151 | 0 |
| Mrps14   | 194.113114 | 0 | 0.99608849 | 0 |
| Lsm5     | 193.86129  | 0 | 1.12963873 | 0 |
| Ak2      | 192.987446 | 0 | 1.00203025 | 0 |
| Coq7     | 192.961393 | 0 | 1.33712559 | 0 |
| Rp9      | 191.699108 | 0 | 0.97057893 | 0 |
| Bin1     | 191.569878 | 0 | -1.7341284 | 0 |
| Csrp3    | 191.525343 | 0 | -1.6369068 | 0 |
| Tk1      | 191.513753 | 0 | 1.42905591 | 0 |
| Fnbp1l   | 190.449007 | 0 | -1.1715832 | 0 |
| Eif1ax   | 190.43212  | 0 | 1.0296463  | 0 |
| Limd2    | 190.177599 | 0 | -1.7108815 | 0 |
| Rfc4     | 189.908298 | 0 | 1.19422311 | 0 |
| Bzw2     | 189.591443 | 0 | 1.04476146 | 0 |
| Atp7b    | 188.91562  | 0 | 3.41060699 | 0 |
| Ddah2    | 188.167391 | 0 | -1.5706925 | 0 |

|         |            |   |            |   |
|---------|------------|---|------------|---|
| Psmb6   | 187.704989 | 0 | 0.96875127 | 0 |
| Mrpl55  | 187.32465  | 0 | 1.2319841  | 0 |
| Cd93    | 185.783117 | 0 | -2.3169851 | 0 |
| Abcg1   | 185.666777 | 0 | -2.0202378 | 0 |
| Idh3a   | 185.571456 | 0 | 1.17986127 | 0 |
| Pfdn2   | 185.341157 | 0 | 1.05512237 | 0 |
| Timm9   | 185.312802 | 0 | 1.08078799 | 0 |
| Dtymk   | 185.132569 | 0 | 1.01780446 | 0 |
| Larp1b  | 184.757904 | 0 | 1.35675244 | 0 |
| Plcb2   | 184.683708 | 0 | -1.6961321 | 0 |
| Glr3    | 183.712995 | 0 | 1.00657387 | 0 |
| Nedd8   | 183.694345 | 0 | 0.95249741 | 0 |
| Lsm4    | 183.602138 | 0 | 0.95609735 | 0 |
| Gm10076 | 183.574299 | 0 | 0.954102   | 0 |
| Gemin6  | 183.404898 | 0 | 1.45197772 | 0 |
| Mycn    | 181.885177 | 0 | -2.6532815 | 0 |
| Tmem109 | 181.37582  | 0 | 1.89186573 | 0 |
| Psme2   | 180.906412 | 0 | 1.03049947 | 0 |
| Glo1    | 180.571351 | 0 | 1.04314751 | 0 |
| Clpp    | 179.941956 | 0 | 1.14879861 | 0 |
| Timm8b  | 179.449429 | 0 | 1.08362961 | 0 |
| Denr    | 179.029053 | 0 | 1.04556004 | 0 |
| Fcf1    | 178.893417 | 0 | 1.08578632 | 0 |
| Txnl4a  | 178.228207 | 0 | 1.13782091 | 0 |
| Gstp1   | 178.19325  | 0 | 1.26612442 | 0 |
| St8sia6 | 178.043892 | 0 | -1.964549  | 0 |
| Psmc5   | 178.037152 | 0 | 1.09515634 | 0 |
| Rwdd1   | 177.532974 | 0 | 1.08967267 | 0 |
| Psma4   | 177.425416 | 0 | 0.96393947 | 0 |
| Spc24   | 177.213715 | 0 | 1.25652878 | 0 |
| Fh1     | 176.670973 | 0 | 1.13456766 | 0 |
| Gapdh   | 176.603479 | 0 | 0.94312871 | 0 |
| Ssbp1   | 176.115049 | 0 | 1.04254894 | 0 |
| Psm6    | 175.665961 | 0 | 1.0924503  | 0 |
| Dnph1   | 175.633561 | 0 | 1.20533157 | 0 |
| Mrps22  | 174.281679 | 0 | 1.29040125 | 0 |
| Hat1    | 173.854612 | 0 | 1.19343827 | 0 |
| Banf1   | 173.637098 | 0 | 0.95218177 | 0 |
| Eif1ad  | 173.551462 | 0 | 1.15816581 | 0 |
| Lrrc59  | 173.50593  | 0 | 1.23629402 | 0 |
| Tcp1    | 172.87594  | 0 | 0.97540274 | 0 |
| Dnajc2  | 172.304952 | 0 | 1.00956579 | 0 |
| Btf3    | 170.647054 | 0 | 0.88528265 | 0 |

|           |            |   |            |   |
|-----------|------------|---|------------|---|
| Fkbp2     | 170.236544 | 0 | 1.14705453 | 0 |
| Atp5e     | 169.865289 | 0 | 0.91023268 | 0 |
| Tyms      | 169.590856 | 0 | 1.20831195 | 0 |
| Mrps34    | 169.413936 | 0 | 1.14438028 | 0 |
| Tuba8     | 169.257562 | 0 | -2.4170168 | 0 |
| Dap3      | 169.003234 | 0 | 1.07678366 | 0 |
| Nudc      | 168.424861 | 0 | 0.98326765 | 0 |
| Ddx21     | 167.223392 | 0 | 1.05617727 | 0 |
| Ypel3     | 166.675188 | 0 | -1.306023  | 0 |
| Tamm41    | 166.441355 | 0 | 1.34991996 | 0 |
| Fos       | 166.431359 | 0 | -1.6610385 | 0 |
| Ccdc58    | 165.598798 | 0 | 1.24364974 | 0 |
| Dazap1    | 165.398089 | 0 | 1.0363547  | 0 |
| Pvt1      | 165.31297  | 0 | 2.00243188 | 0 |
| Rin3      | 164.769617 | 0 | -1.6766755 | 0 |
| Zfp521    | 164.554791 | 0 | -1.7967254 | 0 |
| Adrm1     | 163.779636 | 0 | 1.17360847 | 0 |
| Tfrc      | 163.76961  | 0 | 1.33586958 | 0 |
| Pbdc1     | 163.745234 | 0 | 1.12153978 | 0 |
| Rpp40     | 163.677292 | 0 | 1.55288694 | 0 |
| Mpv17l2   | 163.463773 | 0 | 1.27911799 | 0 |
| Serpinb1a | 163.3424   | 0 | -1.638015  | 0 |
| Rbmxl1    | 163.280127 | 0 | 1.08126809 | 0 |
| Polr2h    | 163.016531 | 0 | 1.07845962 | 0 |
| Csnk2b    | 162.707853 | 0 | 1.03958185 | 0 |
| Bola1     | 162.703775 | 0 | 1.09233468 | 0 |
| Mrpl2     | 161.81068  | 0 | 1.099739   | 0 |
| Pop5      | 161.523464 | 0 | 1.13906593 | 0 |
| Ftsj3     | 161.405871 | 0 | 1.16293671 | 0 |
| Ndufa8    | 161.330361 | 0 | 0.97865515 | 0 |
| Slc16a1   | 160.876121 | 0 | 1.36755988 | 0 |
| Uchl3     | 160.825974 | 0 | 1.10643681 | 0 |
| mt-Nd1    | 160.758043 | 0 | 0.89734882 | 0 |
| Rpf2      | 160.385851 | 0 | 1.21455432 | 0 |
| Fes       | 160.146103 | 0 | -2.2300792 | 0 |
| Klk8      | 159.893554 | 0 | -2.0240048 | 0 |
| Orc6      | 159.703583 | 0 | 1.15962072 | 0 |
| Pold2     | 159.16613  | 0 | 1.25812632 | 0 |
| Zfhx3     | 158.633469 | 0 | -2.0294485 | 0 |
| Ppm1g     | 158.549992 | 0 | 1.06465729 | 0 |
| Pitrm1    | 158.546835 | 0 | 1.21867644 | 0 |
| Gar1      | 157.670456 | 0 | 1.00146701 | 0 |
| Timm17a   | 157.02297  | 0 | 1.11241842 | 0 |

|         |            |   |            |   |
|---------|------------|---|------------|---|
| Cox17   | 156.632573 | 0 | 1.10683452 | 0 |
| Malat1  | 156.247696 | 0 | -0.9549076 | 0 |
| Mrpl11  | 156.039215 | 0 | 1.07946286 | 0 |
| Memo1   | 155.886349 | 0 | 1.2462449  | 0 |
| Fpgs    | 154.32946  | 0 | 1.33826768 | 0 |
| Mgll    | 153.476333 | 0 | 2.71897534 | 0 |
| Pkig    | 153.263528 | 0 | 1.1911751  | 0 |
| Bccip   | 153.199175 | 0 | 1.13101814 | 0 |
| Tbxas1  | 153.175462 | 0 | -2.9885995 | 0 |
| Rab37   | 152.502631 | 0 | -1.3142613 | 0 |
| Spcs1   | 152.330916 | 0 | 0.98106177 | 0 |
| Mrpl16  | 151.903188 | 0 | 1.15459898 | 0 |
| Mecr    | 151.507878 | 0 | 1.32969514 | 0 |
| Ndufv1  | 150.883537 | 0 | 1.06679475 | 0 |
| Eif4e2  | 150.614306 | 0 | 1.0929162  | 0 |
| Brix1   | 150.539681 | 0 | 1.10130478 | 0 |
| Psmg1   | 150.329956 | 0 | 1.15502559 | 0 |
| Suclg1  | 150.047891 | 0 | 0.99100956 | 0 |
| Egfl7   | 150.007629 | 0 | 1.20137471 | 0 |
| Lap3    | 149.907087 | 0 | 1.15347869 | 0 |
| Nenf    | 149.701152 | 0 | 1.05912183 | 0 |
| Eif6    | 149.193816 | 0 | 1.01681612 | 0 |
| Ndufa2  | 148.959441 | 0 | 0.94024264 | 0 |
| Gml2    | 148.449168 | 0 | 3.09664216 | 0 |
| S1pr1   | 147.826755 | 0 | -2.4217094 | 0 |
| Tspan33 | 146.91837  | 0 | 1.26789431 | 0 |
| Eif3d   | 146.87167  | 0 | 0.98086028 | 0 |
| Mybbp1a | 146.789164 | 0 | 1.06685025 | 0 |
| Hnrnpd  | 146.584085 | 0 | 0.93831886 | 0 |
| Sap18   | 146.003234 | 0 | 1.07825422 | 0 |
| Rnf126  | 145.837964 | 0 | 1.19502846 | 0 |
| Cks1b   | 145.73108  | 0 | 1.0510262  | 0 |
| Birc5   | 145.660536 | 0 | 1.26465165 | 0 |
| Amd1    | 145.278901 | 0 | 1.19505041 | 0 |
| Ndufs3  | 145.227627 | 0 | 1.03218215 | 0 |
| Nup37   | 145.179772 | 0 | 1.25261949 | 0 |
| Rrp9    | 144.386894 | 0 | 1.23031873 | 0 |
| Rrm1    | 143.964853 | 0 | 1.14306402 | 0 |
| Hprt    | 143.683962 | 0 | 1.00902582 | 0 |
| Rrs1    | 143.61856  | 0 | 1.11188349 | 0 |
| Atp5a1  | 143.493817 | 0 | 0.9224025  | 0 |
| Preli3b | 143.375541 | 0 | 1.1525301  | 0 |
| Tomm7   | 143.344456 | 0 | 0.943641   | 0 |

|             |            |   |            |   |
|-------------|------------|---|------------|---|
| Pfdn4       | 143.174977 | 0 | 1.21960613 | 0 |
| Taf12       | 142.926263 | 0 | 1.17585183 | 0 |
| Usp50       | 142.725683 | 0 | 1.33617234 | 0 |
| Btnl9       | 141.943049 | 0 | -2.6340799 | 0 |
| Aldh1a7     | 141.885067 | 0 | 1.83105118 | 0 |
| Samm50      | 141.652803 | 0 | 1.05885611 | 0 |
| Zbtb20      | 141.61699  | 0 | -1.3114102 | 0 |
| Camsap2     | 140.865302 | 0 | 2.61886932 | 0 |
| Nip7        | 140.638093 | 0 | 1.09540684 | 0 |
| Grpel1      | 140.587307 | 0 | 1.04072847 | 0 |
| Sdf2l1      | 140.348917 | 0 | 1.28394981 | 0 |
| Kcnc1       | 139.839081 | 0 | -3.8274262 | 0 |
| Lsm12       | 138.550848 | 0 | 0.99520013 | 0 |
| Rpia        | 138.528258 | 0 | 1.06421442 | 0 |
| Rcc1        | 138.492794 | 0 | 1.31472147 | 0 |
| Atp5g2      | 138.455361 | 0 | 0.91456043 | 0 |
| Klf6        | 137.542543 | 0 | -1.8900579 | 0 |
| Llph        | 137.414824 | 0 | 0.95758384 | 0 |
| Galnt6      | 137.191691 | 0 | -1.3776119 | 0 |
| Jagn1       | 136.922167 | 0 | 1.18928473 | 0 |
| 0610012G03I | 136.811344 | 0 | 1.01587682 | 0 |
| BC003965    | 136.672362 | 0 | 1.11080876 | 0 |
| Aldh1l1     | 136.670904 | 0 | -1.5266379 | 0 |
| Asb17       | 136.221586 | 0 | 2.5233037  | 0 |
| Rapgef3     | 136.200424 | 0 | -1.8624495 | 0 |
| Acp1        | 136.012269 | 0 | 1.04756213 | 0 |
| Eno1        | 135.959179 | 0 | 1.01945193 | 0 |
| Srsf2       | 135.846183 | 0 | 0.91188119 | 0 |
| Cdk4        | 135.773415 | 0 | 0.958644   | 0 |
| Pfn1        | 135.730074 | 0 | 0.84383617 | 0 |
| Mbd2        | 135.720399 | 0 | 1.02114785 | 0 |
| Ndufaf2     | 135.331108 | 0 | 1.15773436 | 0 |
| Ccdc86      | 135.166751 | 0 | 1.18802014 | 0 |
| Rps17       | 135.144266 | 0 | 0.88102164 | 0 |
| Prelid1     | 134.759699 | 0 | 1.00115714 | 0 |
| Cct2        | 134.749658 | 0 | 0.91227277 | 0 |
| Mrfap1      | 134.542802 | 0 | 0.97867883 | 0 |
| Hars        | 133.558901 | 0 | 1.17640095 | 0 |
| Pin1        | 133.535054 | 0 | 1.06257133 | 0 |
| Igfbp4      | 132.677857 | 0 | -1.1814887 | 0 |
| Chchd4      | 132.625392 | 0 | 1.11898582 | 0 |
| Specc1      | 132.424581 | 0 | 1.82458494 | 0 |
| Gtf2a2      | 132.400831 | 0 | 1.00192832 | 0 |



|             |            |   |            |   |
|-------------|------------|---|------------|---|
| Gps1        | 131.759617 | 0 | 1.14329653 | 0 |
| Fam189b     | 131.625958 | 0 | -1.4612583 | 0 |
| Elmo1       | 131.256857 | 0 | -1.6537835 | 0 |
| Orc2        | 131.115835 | 0 | 1.20861103 | 0 |
| Sep-08      | 130.367542 | 0 | 1.21463787 | 0 |
| Dnajc15     | 129.664104 | 0 | 1.10884748 | 0 |
| Rpl14       | 129.485024 | 0 | 0.83930836 | 0 |
| Lat2        | 129.441671 | 0 | -1.7683731 | 0 |
| Nop16       | 129.357429 | 0 | 1.08855595 | 0 |
| H2-Ob       | 129.335022 | 0 | -2.8345219 | 0 |
| Pomp        | 129.331915 | 0 | 0.90117716 | 0 |
| Adgrg3      | 129.325731 | 0 | -1.5772427 | 0 |
| Emg1        | 129.315574 | 0 | 0.94142615 | 0 |
| Psmg2       | 129.116405 | 0 | 1.09544299 | 0 |
| Gins2       | 129.010747 | 0 | 1.25698642 | 0 |
| Ptrh2       | 128.534492 | 0 | 1.13353069 | 0 |
| Pxmp2       | 128.431825 | 0 | 1.54485246 | 0 |
| Mrpl58      | 128.133243 | 0 | 1.12577039 | 0 |
| Mtx1        | 128.102765 | 0 | 1.18026959 | 0 |
| Psma6       | 128.025508 | 0 | 0.95412885 | 0 |
| Tma7        | 127.052805 | 0 | 0.93579632 | 0 |
| Gars        | 126.79823  | 0 | 1.15267685 | 0 |
| Snrpc       | 126.478562 | 0 | 0.99848207 | 0 |
| Il16        | 126.368813 | 0 | -1.7804962 | 0 |
| Slc25a3     | 125.535248 | 0 | 0.87021516 | 0 |
| Poldip2     | 125.511584 | 0 | 1.12928283 | 0 |
| 1110008F13F | 125.102105 | 0 | 0.94140352 | 0 |
| Pbx1        | 124.902615 | 0 | -1.4535936 | 0 |
| Me2         | 124.750435 | 0 | 1.22069971 | 0 |
| Eif2b3      | 124.355721 | 0 | 1.23255626 | 0 |
| Nt5dc2      | 124.301753 | 0 | 1.26220987 | 0 |
| Emc8        | 122.974465 | 0 | 1.13139315 | 0 |
| Nudt5       | 122.023525 | 0 | 1.04395785 | 0 |
| Ccdc167     | 121.79451  | 0 | 1.35868613 | 0 |
| Ptma        | 121.782349 | 0 | 0.86428998 | 0 |
| Gtf2f1      | 121.256296 | 0 | 1.07151301 | 0 |
| Uap1        | 120.942754 | 0 | 1.23839427 | 0 |
| Lcp2        | 120.899843 | 0 | -1.6465015 | 0 |
| Syng2       | 120.817543 | 0 | 1.0972537  | 0 |
| Mrpl38      | 120.536875 | 0 | 1.09918805 | 0 |
| Nsun2       | 120.504963 | 0 | 1.06326646 | 0 |
| Uqcrc2      | 120.304346 | 0 | 0.94515681 | 0 |
| Sdhc        | 119.941562 | 0 | 1.02906138 | 0 |

|             |            |   |            |   |
|-------------|------------|---|------------|---|
| Ccng2       | 119.921532 | 0 | -1.8861857 | 0 |
| Exosc7      | 119.647074 | 0 | 1.02875199 | 0 |
| M1ap        | 119.591703 | 0 | 2.44696652 | 0 |
| Lyz2        | 119.458407 | 0 | -1.5868179 | 0 |
| Trp53inp1   | 119.131404 | 0 | -2.3902157 | 0 |
| C1qtnf12    | 119.042092 | 0 | 1.35778009 | 0 |
| Cdr2        | 118.753565 | 0 | 1.9667633  | 0 |
| Polr2l      | 118.264737 | 0 | 1.26433481 | 0 |
| Psmc2       | 117.676785 | 0 | 1.01887984 | 0 |
| 1810022K09F | 117.339123 | 0 | 1.01666931 | 0 |
| Dkc1        | 117.278193 | 0 | 0.95862993 | 0 |
| Fkbp11      | 116.692013 | 0 | 1.56337686 | 0 |
| Fam171a2    | 116.088304 | 0 | -1.7690057 | 0 |
| Gart        | 115.920441 | 0 | 1.08395769 | 0 |
| Med12l      | 115.793437 | 0 | -2.8004949 | 0 |
| Cenpm       | 115.664821 | 0 | 1.21451589 | 0 |
| Hspa4       | 115.578911 | 0 | 1.00524886 | 0 |
| Sqor        | 115.454905 | 0 | 2.14908615 | 0 |
| Bola2       | 115.162677 | 0 | 0.94087953 | 0 |
| Ruvbl2      | 115.038148 | 0 | 1.05603647 | 0 |
| Nefh        | 114.892024 | 0 | 1.27761609 | 0 |
| Ssb         | 114.680843 | 0 | 0.88107652 | 0 |
| Ier3        | 114.096476 | 0 | -1.4326373 | 0 |
| Gprasp2     | 113.389654 | 0 | -1.9316389 | 0 |
| Tmem176a    | 113.354723 | 0 | -1.4805391 | 0 |
| Smn1        | 113.292223 | 0 | 1.11760485 | 0 |
| F2r         | 113.212297 | 0 | -1.3003152 | 0 |
| Lsm6        | 113.129854 | 0 | 0.96984695 | 0 |
| Dph3        | 112.85913  | 0 | 1.04989069 | 0 |
| Samd1       | 112.764761 | 0 | 1.15596158 | 0 |
| Tceal3      | 112.701196 | 0 | 2.26659359 | 0 |
| Commd1      | 112.570946 | 0 | 1.02983483 | 0 |
| Lsm3        | 112.50862  | 0 | 0.95916892 | 0 |
| Emc6        | 112.302002 | 0 | 0.97415805 | 0 |
| Bud23       | 112.271082 | 0 | 1.13518274 | 0 |
| Rps19bp1    | 112.22818  | 0 | 1.09056308 | 0 |
| Kmt5a       | 112.215015 | 0 | 0.98051773 | 0 |
| Exosc4      | 112.094133 | 0 | 1.10875569 | 0 |
| Mrps25      | 112.043885 | 0 | 1.07200495 | 0 |
| Ryk         | 112.043849 | 0 | 1.86008299 | 0 |
| Mrps5       | 111.495054 | 0 | 1.02982029 | 0 |
| Zfp593      | 111.447797 | 0 | 1.08114206 | 0 |
| Mthfd2      | 111.428476 | 0 | 1.4765411  | 0 |

|             |            |   |            |   |
|-------------|------------|---|------------|---|
| Zmynd19     | 111.408961 | 0 | 1.19864552 | 0 |
| Isyna1      | 111.023482 | 0 | 1.11444271 | 0 |
| D1Ert622e   | 110.852125 | 0 | 1.33494993 | 0 |
| Erg         | 110.338241 | 0 | -1.9937494 | 0 |
| Smco4       | 109.82257  | 0 | 1.18444031 | 0 |
| Mir155hg    | 109.692572 | 0 | -1.8426849 | 0 |
| Rab44       | 109.413587 | 0 | -1.7621061 | 0 |
| Nup85       | 109.046021 | 0 | 1.25216824 | 0 |
| Rpa3        | 108.953211 | 0 | 1.02667872 | 0 |
| Aqp11       | 108.938816 | 0 | 1.32513735 | 0 |
| Tex30       | 108.577195 | 0 | 1.05474923 | 0 |
| Rpl31       | 108.565713 | 0 | 0.86891491 | 0 |
| Epsti1      | 108.55654  | 0 | -1.6860183 | 0 |
| Akr7a5      | 108.271795 | 0 | 1.19851326 | 0 |
| Fam213a     | 108.143221 | 0 | 1.30381726 | 0 |
| Ube2n       | 108.107854 | 0 | 1.00976336 | 0 |
| Snhg12      | 108.027098 | 0 | 1.10015887 | 0 |
| Calm1       | 107.890937 | 0 | 0.87391635 | 0 |
| 2210016F16F | 107.713724 | 0 | 1.13823683 | 0 |
| Ank1        | 107.693146 | 0 | 1.57043119 | 0 |
| Neat1       | 107.585148 | 0 | -1.2681565 | 0 |
| Etf1        | 106.791768 | 0 | 1.06745116 | 0 |
| Fmc1        | 106.535852 | 0 | 0.98730978 | 0 |
| Chchd3      | 106.506218 | 0 | 1.01770567 | 0 |
| Immt        | 106.361038 | 0 | 0.98537976 | 0 |
| Mrpl34      | 106.314384 | 0 | 0.91837964 | 0 |
| Pinx1       | 106.290959 | 0 | 1.25423365 | 0 |
| Sf3b4       | 106.265938 | 0 | 1.10494717 | 0 |
| Hacd4       | 105.86335  | 0 | -2.1368858 | 0 |
| Thop1       | 105.50229  | 0 | 1.25235987 | 0 |
| Plekhj1     | 105.168815 | 0 | 0.9610781  | 0 |
| Mrpl3       | 104.918013 | 0 | 1.11526857 | 0 |
| Gng2        | 104.84243  | 0 | -1.6138819 | 0 |
| 3110082I17R | 104.134882 | 0 | 1.35911342 | 0 |
| Mrpl13      | 103.543537 | 0 | 0.98568813 | 0 |
| Fut7        | 102.926817 | 0 | -2.0340945 | 0 |
| Plec        | 102.880635 | 0 | -1.2284931 | 0 |
| Eny2        | 102.82018  | 0 | 0.94824358 | 0 |
| Gm47754     | 102.621887 | 0 | -2.0106544 | 0 |
| Btg1        | 102.392756 | 0 | -1.1397201 | 0 |
| Zbtb46      | 102.212686 | 0 | 2.26229255 | 0 |
| Noc4l       | 101.950937 | 0 | 1.22613617 | 0 |
| Dkk1        | 101.715443 | 0 | 1.60608581 | 0 |

|            |            |   |            |   |
|------------|------------|---|------------|---|
| Cpa3       | 101.418412 | 0 | -1.7992579 | 0 |
| Prpf19     | 101.219047 | 0 | 1.01475746 | 0 |
| 9130401M01 | 101.156991 | 0 | 1.21938276 | 0 |
| Pmf1       | 101.04131  | 0 | 1.06793095 | 0 |
| Scin       | 101.020944 | 0 | -1.803897  | 0 |
| Psm12      | 100.725686 | 0 | 0.98214498 | 0 |
| Rrp1b      | 100.653739 | 0 | 1.16280346 | 0 |
| Ube2l3     | 100.532686 | 0 | 0.92339409 | 0 |
| Cyba       | 100.464131 | 0 | 0.98552678 | 0 |
| Ffar2      | 100.430638 | 0 | -2.9867866 | 0 |
| Srsf9      | 100.419662 | 0 | 0.96659306 | 0 |
| Dusp1      | 99.8739638 | 0 | -1.5026496 | 0 |
| Mfhas1     | 99.3954445 | 0 | 2.77898091 | 0 |
| Gnl3       | 99.2087086 | 0 | 0.94224626 | 0 |
| Traf3ip3   | 98.9488719 | 0 | -1.5941629 | 0 |
| Ndufa9     | 98.7371669 | 0 | 1.01032205 | 0 |
| Mrps17     | 98.5305467 | 0 | 0.97749861 | 0 |
| Msh5       | 98.3412915 | 0 | -1.7469661 | 0 |
| Accs       | 97.5866289 | 0 | -1.3879791 | 0 |
| Carnmt1    | 97.5113358 | 0 | 1.00273461 | 0 |
| Srp19      | 97.4786262 | 0 | 0.96447329 | 0 |
| Aimp2      | 97.3770091 | 0 | 1.08859994 | 0 |
| Emc9       | 97.2269331 | 0 | 1.22358267 | 0 |
| Rsl24d1    | 97.1689454 | 0 | 0.99670245 | 0 |
| Timm10b    | 96.7848418 | 0 | 1.01820022 | 0 |
| Mrps11     | 96.7013605 | 0 | 1.06524566 | 0 |
| Grk3       | 96.6105999 | 0 | -1.3568285 | 0 |
| Ap1s1      | 96.507365  | 0 | 1.06220166 | 0 |
| Dnah12     | 96.4392356 | 0 | -1.4425845 | 0 |
| Mrpl47     | 96.2770674 | 0 | 1.26576594 | 0 |
| Hnrnpab    | 95.9537956 | 0 | 0.87736214 | 0 |
| Mcm5       | 95.0540336 | 0 | 1.0785453  | 0 |
| Micall1    | 94.9865623 | 0 | -1.5010979 | 0 |
| Ubac1      | 94.9554487 | 0 | 1.13483853 | 0 |
| Rnf187     | 94.2817729 | 0 | 0.96535785 | 0 |
| Dus1l      | 94.1569971 | 0 | 1.1464801  | 0 |
| Lym4       | 94.0980595 | 0 | 1.2593043  | 0 |
| Rpl7a      | 93.8944493 | 0 | 0.83054884 | 0 |
| Gm12999    | 93.7221978 | 0 | 1.6003034  | 0 |
| Net1       | 93.4834466 | 0 | 1.20239951 | 0 |
| Supt16     | 93.4091569 | 0 | 0.9377184  | 0 |
| Klf1       | 93.3322381 | 0 | 0.95217515 | 0 |
| P2ry14     | 92.8017664 | 0 | -2.3495122 | 0 |

|             |            |   |            |   |
|-------------|------------|---|------------|---|
| Nmd3        | 92.6776634 | 0 | 1.17818584 | 0 |
| Mrps18c     | 92.6625552 | 0 | 0.98644906 | 0 |
| Tmem107     | 91.9915337 | 0 | 1.37693539 | 0 |
| Mphosph10   | 91.9757906 | 0 | 0.99940162 | 0 |
| Icam1       | 91.9491714 | 0 | -1.7379306 | 0 |
| Nifk        | 91.8868861 | 0 | 1.00987342 | 0 |
| Atic        | 91.3897108 | 0 | 0.95013787 | 0 |
| Ndufaf8     | 91.0969458 | 0 | 1.01543111 | 0 |
| Pkm         | 90.9138916 | 0 | -1.1733591 | 0 |
| Ak6         | 90.7902876 | 0 | 1.069806   | 0 |
| Fcer1g      | 90.4255518 | 0 | -1.5514984 | 0 |
| Ppan        | 90.4240201 | 0 | 1.00354409 | 0 |
| Cops6       | 90.1760053 | 0 | 0.99515952 | 0 |
| Smad1       | 90.0703343 | 0 | -1.3752013 | 0 |
| Mrpl40      | 89.9641736 | 0 | 1.05483013 | 0 |
| Aldoa       | 89.9431913 | 0 | 0.92741432 | 0 |
| Cnn2        | 89.9421433 | 0 | -1.274812  | 0 |
| Gstm5       | 89.8864982 | 0 | 0.9187169  | 0 |
| Mdga1       | 89.7430515 | 0 | -1.6149719 | 0 |
| Ubl5        | 89.3995718 | 0 | 0.88437597 | 0 |
| Naa20       | 89.3517534 | 0 | 1.04965033 | 0 |
| Eif4e       | 89.0989608 | 0 | 0.95787044 | 0 |
| Gm8186      | 88.574729  | 0 | 1.12209835 | 0 |
| Mpc2        | 88.5187635 | 0 | 0.98488791 | 0 |
| Qdpr        | 88.381348  | 0 | 0.99890281 | 0 |
| Manf        | 88.1857399 | 0 | 0.97895094 | 0 |
| Nrxn1       | 88.0897858 | 0 | -2.1191475 | 0 |
| Psm3        | 87.9194959 | 0 | 1.02425401 | 0 |
| Ndufs8      | 87.7785887 | 0 | 0.93846652 | 0 |
| Mtftp1      | 87.7295024 | 0 | 1.33047052 | 0 |
| Prdx4       | 87.6229349 | 0 | 1.0351904  | 0 |
| Anapc15     | 87.5758855 | 0 | 1.12759345 | 0 |
| Arpp19      | 87.4778735 | 0 | 0.94015468 | 0 |
| Cd3eap      | 87.2894418 | 0 | 1.06185007 | 0 |
| Mak16       | 87.1648332 | 0 | 1.00462848 | 0 |
| Pdzph1      | 87.1547454 | 0 | -2.8264952 | 0 |
| Psm14       | 87.0379247 | 0 | 0.98800339 | 0 |
| Kcng2       | 87.0194789 | 0 | 1.13277829 | 0 |
| Lst1        | 86.9848786 | 0 | -1.9738683 | 0 |
| Hsp90ab1    | 86.5898524 | 0 | 0.80581157 | 0 |
| Vdac3       | 86.5214826 | 0 | 0.92852089 | 0 |
| Sla         | 86.396691  | 0 | -1.8778145 | 0 |
| C030034L19F | 86.3063763 | 0 | -2.5246309 | 0 |

|             |            |   |            |   |
|-------------|------------|---|------------|---|
| 2410015M20  | 86.2166206 | 0 | 0.88049165 | 0 |
| Acsl5       | 85.9498149 | 0 | 1.00956673 | 0 |
| Gm45716     | 85.9406772 | 0 | 1.42287142 | 0 |
| Hpn         | 85.9150949 | 0 | 2.52037906 | 0 |
| Rrp15       | 85.9072257 | 0 | 1.0109425  | 0 |
| Cfdp1       | 85.8076832 | 0 | 0.94484681 | 0 |
| Plekha2     | 85.7818069 | 0 | -1.2567464 | 0 |
| Ccnb1ip1    | 85.3888847 | 0 | 2.35206238 | 0 |
| Gm13012     | 85.234293  | 0 | -1.4153905 | 0 |
| Abcg4       | 85.1881165 | 0 | 3.11660878 | 0 |
| Snrpa       | 85.058798  | 0 | 0.95963237 | 0 |
| G3bp1       | 85.0524701 | 0 | 0.87561115 | 0 |
| Taldo1      | 85.004193  | 0 | 0.85776138 | 0 |
| Gng11       | 84.7795703 | 0 | -1.5243104 | 0 |
| Neurl3      | 84.6558145 | 0 | -2.0733093 | 0 |
| Etfa        | 84.6177421 | 0 | 0.99720454 | 0 |
| Gtf2h5      | 84.2291548 | 0 | 0.94353877 | 0 |
| Pole3       | 83.8392618 | 0 | 1.01899803 | 0 |
| Sesn3       | 83.787595  | 0 | -1.7393234 | 0 |
| Ptges2      | 83.7294199 | 0 | 1.31244036 | 0 |
| Pdgfrb      | 83.6460922 | 0 | -2.0933023 | 0 |
| Clybl       | 83.4834492 | 0 | 1.21857907 | 0 |
| Cdk1        | 83.4537176 | 0 | 1.11192592 | 0 |
| Syce2       | 83.3479163 | 0 | 0.99671307 | 0 |
| 4930519L02R | 82.8964911 | 0 | -1.4192703 | 0 |
| Atad3a      | 82.6516078 | 0 | 1.04020369 | 0 |
| Smim13      | 82.565937  | 0 | 1.11117044 | 0 |
| Ung         | 82.3915116 | 0 | 1.27438003 | 0 |
| Tnfaip8l2   | 82.3554547 | 0 | -1.267963  | 0 |
| Tomm6       | 82.3194363 | 0 | 1.3487431  | 0 |
| Siglecf     | 82.3078154 | 0 | -1.8203717 | 0 |
| Tek         | 82.2367058 | 0 | -2.8093453 | 0 |
| Aifm1       | 82.1858839 | 0 | 1.0947662  | 0 |
| Bysl        | 82.1321137 | 0 | 1.20625739 | 0 |
| Myo1g       | 82.0285328 | 0 | -1.6723109 | 0 |
| Necap2      | 81.9041759 | 0 | 0.95531752 | 0 |
| Arhgap25    | 81.6943482 | 0 | -1.4330101 | 0 |
| Krtcap2     | 81.5866351 | 0 | 0.89245561 | 0 |
| Acaa2       | 81.5653673 | 0 | 0.99498163 | 0 |
| Eif5b       | 81.5132128 | 0 | 0.89407313 | 0 |
| Arhgef28    | 81.3778112 | 0 | -2.7893882 | 0 |
| Mctp1       | 81.3602726 | 0 | -1.5185513 | 0 |
| Rad23a      | 81.0011247 | 0 | 1.00360753 | 0 |

|             |            |   |            |   |
|-------------|------------|---|------------|---|
| Stat4       | 80.8791214 | 0 | -2.0766444 | 0 |
| Galk1       | 80.5263994 | 0 | 1.00218423 | 0 |
| Exosc5      | 80.2966216 | 0 | 0.91574401 | 0 |
| Ndufb3      | 80.0894023 | 0 | 0.90722857 | 0 |
| Ptdss2      | 80.0863111 | 0 | 1.19258923 | 0 |
| Srsf10      | 80.0579847 | 0 | 0.93109582 | 0 |
| Hsph1       | 80.0290744 | 0 | 1.14263556 | 0 |
| Sub1        | 79.9274142 | 0 | 0.84301155 | 0 |
| Gm16141     | 79.9105772 | 0 | -2.3412943 | 0 |
| Uchl5       | 79.1058569 | 0 | 1.01238061 | 0 |
| Urod        | 79.0214821 | 0 | 0.97013734 | 0 |
| Ino80e      | 78.8585425 | 0 | 1.06353316 | 0 |
| Mical1      | 78.7881758 | 0 | -2.8147153 | 0 |
| Ssx2ip      | 78.7864956 | 0 | 1.24688804 | 0 |
| Vma21       | 78.626238  | 0 | 1.06788307 | 0 |
| Eif3m       | 78.6225773 | 0 | 0.85640275 | 0 |
| Tma16       | 78.4848628 | 0 | 1.04535992 | 0 |
| Pnp2        | 78.426964  | 0 | 2.16789667 | 0 |
| Alox5ap     | 78.362892  | 0 | -1.178526  | 0 |
| Rab4a       | 78.354991  | 0 | 1.06862293 | 0 |
| Lim2        | 78.1769993 | 0 | -1.6963725 | 0 |
| Spr         | 77.8329888 | 0 | 1.06339446 | 0 |
| Akap13      | 77.6110857 | 0 | -0.9926236 | 0 |
| Med29       | 77.533564  | 0 | 1.0645893  | 0 |
| Cyth4       | 77.2554039 | 0 | -1.4662935 | 0 |
| Ndufv3      | 77.2144461 | 0 | 0.92012805 | 0 |
| Mrps12      | 76.9998963 | 0 | 0.94459229 | 0 |
| Cst7        | 76.708202  | 0 | -1.2605943 | 0 |
| Gm11837     | 76.5630183 | 0 | 1.7204439  | 0 |
| Psm13       | 76.4813153 | 0 | 0.963271   | 0 |
| Cep164      | 76.457822  | 0 | 1.56376656 | 0 |
| Ddx18       | 76.4271908 | 0 | 0.94770824 | 0 |
| Map2k2      | 76.3947436 | 0 | 0.93520745 | 0 |
| Mtx2        | 76.3177348 | 0 | 1.0406493  | 0 |
| Kti12       | 75.6804643 | 0 | 1.03095051 | 0 |
| Nup43       | 75.5007647 | 0 | 1.15286185 | 0 |
| Iscu        | 75.2960522 | 0 | 1.03334773 | 0 |
| E230001N04I | 75.2357214 | 0 | -1.5875723 | 0 |
| Ccna2       | 75.2302236 | 0 | 1.16770368 | 0 |
| Thyn1       | 75.2160698 | 0 | 1.05117042 | 0 |
| Coa3        | 75.1527051 | 0 | 0.92708371 | 0 |
| Rhob        | 75.0965519 | 0 | -1.5309689 | 0 |
| Aunip       | 75.0723579 | 0 | 1.45673173 | 0 |

|          |            |          |            |          |
|----------|------------|----------|------------|----------|
| Nudt1    | 74.925646  | 0        | 1.0950945  | 0        |
| Spata24  | 74.9136736 | 0        | 1.10413377 | 0        |
| Cdk2ap1  | 74.7863101 | 0        | 1.04653203 | 0        |
| Cdca3    | 74.6552727 | 0        | 1.11146067 | 0        |
| Ahsa1    | 74.25786   | 0        | 0.95265387 | 0        |
| Sf3b6    | 74.2548499 | 0        | 0.85394611 | 0        |
| Hnrnpdl  | 74.072162  | 0        | 0.93087102 | 0        |
| Psme3    | 73.6046044 | 0        | 1.06658529 | 0        |
| Pstpip1  | 73.5704736 | 0        | -1.3609264 | 0        |
| Cops3    | 73.5032794 | 0        | 0.98113333 | 0        |
| Cavin2   | 73.41425   | 0        | -2.4692954 | 0        |
| Clstn1   | 72.7468665 | 0        | 1.37849714 | 0        |
| Rps12    | 72.6350398 | 0        | 0.81608703 | 0        |
| Cpne3    | 72.6346824 | 0        | -1.3632055 | 0        |
| Wdr60    | 72.3871992 | 0        | 1.19531467 | 0        |
| Ska1     | 72.34345   | 0        | 1.3158583  | 0        |
| Nsmce4a  | 72.3187239 | 0        | 0.91950552 | 0        |
| Tfdp1    | 72.3118704 | 0        | 0.97734555 | 0        |
| Med30    | 72.033796  | 0        | 1.00213341 | 0        |
| Chchd6   | 71.8924704 | 0        | 1.09925424 | 0        |
| Myo1d    | 71.1822034 | 0        | 1.4113525  | 0        |
| Polr2i   | 70.9063991 | 0        | 0.98643972 | 0        |
| Pmm1     | 70.4858846 | 0        | 1.08087539 | 0        |
| Naf1     | 70.278857  | 0        | 1.09530696 | 0        |
| Swi5     | 70.2659581 | 0        | 0.83755786 | 0        |
| Slc40a1  | 70.2040244 | 0        | 1.25763327 | 0        |
| Eif4a3   | 70.0762156 | 1.11E-16 | 0.95326494 | 1.17E-15 |
| Mar-02   | 70.0619087 | 1.11E-16 | 0.90514416 | 1.17E-15 |
| Mrpl46   | 70.0177028 | 1.11E-16 | 1.06388482 | 1.17E-15 |
| Hspa14   | 69.9942594 | 1.11E-16 | 1.00995136 | 1.17E-15 |
| Dcun1d5  | 69.901498  | 1.11E-16 | 0.94966433 | 1.17E-15 |
| Mrpl23   | 69.5903377 | 1.11E-16 | 0.8910799  | 1.17E-15 |
| Naa10    | 69.4011398 | 1.11E-16 | 0.90221052 | 1.17E-15 |
| Tcp11l2  | 69.206632  | 1.11E-16 | -1.4200242 | 1.17E-15 |
| Gcnt2    | 69.1729267 | 1.11E-16 | -1.5165536 | 1.17E-15 |
| Snf8     | 69.1558186 | 1.11E-16 | 0.96313434 | 1.17E-15 |
| Psmc4    | 69.0893503 | 1.11E-16 | 0.95775117 | 1.17E-15 |
| Mrpl27   | 69.0350282 | 1.11E-16 | 1.03917138 | 1.17E-15 |
| Eif2s3x  | 68.9478971 | 1.11E-16 | 0.99678604 | 1.17E-15 |
| Oaz1     | 68.73228   | 1.11E-16 | 0.82135996 | 1.17E-15 |
| Erp29    | 68.6605125 | 1.11E-16 | 0.90966544 | 1.17E-15 |
| Slc25a33 | 68.5222344 | 1.11E-16 | 1.47792364 | 1.17E-15 |
| Dhfr     | 68.4525971 | 1.11E-16 | 1.1179679  | 1.17E-15 |



|             |            |          |            |          |
|-------------|------------|----------|------------|----------|
| Itgal       | 68.308991  | 1.11E-16 | -1.7188993 | 1.17E-15 |
| Arhgef25    | 68.1357473 | 1.11E-16 | 1.68748508 | 1.17E-15 |
| Auts2       | 68.1314717 | 1.11E-16 | -1.8719528 | 1.17E-15 |
| Gimap1      | 67.8862406 | 2.22E-16 | -1.2826576 | 2.32E-15 |
| Cd27        | 67.4558435 | 2.22E-16 | -1.2945247 | 2.32E-15 |
| Hspa5       | 67.2460823 | 2.22E-16 | 0.94232313 | 2.32E-15 |
| Rbm8a       | 67.2250733 | 2.22E-16 | 0.88866566 | 2.32E-15 |
| Polr2k      | 67.1763738 | 2.22E-16 | 0.96469497 | 2.32E-15 |
| Umps        | 67.0588149 | 2.22E-16 | 1.04736353 | 2.32E-15 |
| Dapp1       | 66.9703208 | 2.22E-16 | -0.9536694 | 2.32E-15 |
| Slamf1      | 66.9174639 | 3.33E-16 | -1.5932254 | 3.45E-15 |
| Mrpl19      | 66.6720135 | 3.33E-16 | 0.98495074 | 3.45E-15 |
| Sf3a2       | 66.6542012 | 3.33E-16 | 1.02286958 | 3.45E-15 |
| Rex1bd      | 66.5895354 | 3.33E-16 | 0.91143686 | 3.45E-15 |
| Plod2       | 66.4406405 | 3.33E-16 | -1.4272451 | 3.45E-15 |
| Ppil1       | 66.4307899 | 3.33E-16 | 1.02079962 | 3.45E-15 |
| Exosc1      | 66.3173024 | 3.33E-16 | 1.00537791 | 3.45E-15 |
| Uba2        | 66.1487115 | 4.44E-16 | 0.97217725 | 4.57E-15 |
| Atp1b2      | 66.1427595 | 4.44E-16 | 1.0091812  | 4.57E-15 |
| Pcna        | 66.0400702 | 4.44E-16 | 1.01455968 | 4.57E-15 |
| Cd69        | 66.0318214 | 4.44E-16 | -2.1197973 | 4.57E-15 |
| Cib1        | 65.8927999 | 4.44E-16 | 1.06663113 | 4.57E-15 |
| Eif3j1      | 65.8467825 | 4.44E-16 | 0.9374718  | 4.57E-15 |
| Lmcd1       | 65.8093177 | 4.44E-16 | 2.13907    | 4.57E-15 |
| Plscr1      | 65.6737474 | 5.55E-16 | 0.98637655 | 5.70E-15 |
| A430078G23I | 65.5894285 | 5.55E-16 | -1.605095  | 5.70E-15 |
| Znhit3      | 65.4203857 | 5.55E-16 | 1.06583367 | 5.70E-15 |
| Osbpl8      | 65.2054081 | 6.66E-16 | -0.9930305 | 6.81E-15 |
| Mxd4        | 65.2048607 | 6.66E-16 | -1.0732268 | 6.81E-15 |
| Mrps10      | 65.1956708 | 6.66E-16 | 1.00363695 | 6.81E-15 |
| Eif2b1      | 65.080806  | 6.66E-16 | 1.07223616 | 6.81E-15 |
| Ubl4a       | 64.9847914 | 7.77E-16 | 0.99225404 | 7.93E-15 |
| Cfl1        | 64.8653511 | 7.77E-16 | 0.81282309 | 7.93E-15 |
| 1500011K16F | 64.7332042 | 8.88E-16 | 0.97754941 | 9.04E-15 |
| Med9        | 64.576915  | 8.88E-16 | 1.06158168 | 9.04E-15 |
| Tmem258     | 64.5117488 | 9.99E-16 | 0.88537611 | 1.01E-14 |
| Malsu1      | 64.4972522 | 9.99E-16 | 1.02727222 | 1.01E-14 |
| Arpc3       | 64.4724528 | 9.99E-16 | 0.83292886 | 1.01E-14 |
| Ube2v2      | 64.3004359 | 1.11E-15 | 0.99334538 | 1.12E-14 |
| Shmt2       | 64.2517347 | 1.11E-15 | 1.06491433 | 1.12E-14 |
| Cd81        | 64.1175911 | 1.22E-15 | 0.89845816 | 1.24E-14 |
| Nubp2       | 63.9296721 | 1.33E-15 | 1.04265227 | 1.34E-14 |
| Eif3b       | 63.8539057 | 1.33E-15 | 0.93554027 | 1.34E-14 |

|          |            |          |            |          |
|----------|------------|----------|------------|----------|
| Cmc2     | 63.6129447 | 1.55E-15 | 1.02889202 | 1.56E-14 |
| Wdr74    | 63.5998193 | 1.55E-15 | 1.31688024 | 1.56E-14 |
| Pecam1   | 63.5840256 | 1.55E-15 | -1.4631625 | 1.56E-14 |
| Gm32036  | 63.1224957 | 1.89E-15 | -1.5362708 | 1.90E-14 |
| Slc25a39 | 63.080488  | 2.00E-15 | 1.00774642 | 2.01E-14 |
| Acot13   | 62.6203377 | 2.55E-15 | 1.02759664 | 2.56E-14 |
| Mnd1     | 62.5523723 | 2.55E-15 | 1.13472824 | 2.56E-14 |
| Rpa2     | 62.4946689 | 2.66E-15 | 0.99269543 | 2.67E-14 |
| Cuedc1   | 62.2847534 | 3.00E-15 | -2.1777774 | 3.00E-14 |
| Bcl7c    | 62.2369721 | 3.00E-15 | 0.90341146 | 3.00E-14 |
| Psmc3ip  | 62.0994253 | 3.22E-15 | 1.12684194 | 3.21E-14 |
| Runx2    | 61.6589018 | 4.11E-15 | -1.565564  | 4.10E-14 |
| Apoo     | 61.6142468 | 4.22E-15 | 1.22455075 | 4.20E-14 |
| Cd180    | 61.3389389 | 4.77E-15 | -3.2878107 | 4.75E-14 |
| Stip1    | 61.3222912 | 4.88E-15 | 0.94798711 | 4.86E-14 |
| Clec4e   | 61.2346472 | 5.11E-15 | -3.2319373 | 5.07E-14 |
| Dnaja2   | 61.0699615 | 5.55E-15 | 0.90701126 | 5.51E-14 |
| Egr1     | 61.0340846 | 5.66E-15 | -1.3759654 | 5.61E-14 |
| Bop1     | 60.949431  | 5.88E-15 | 1.11955968 | 5.83E-14 |
| Rfc5     | 60.8997052 | 6.00E-15 | 1.00146262 | 5.93E-14 |
| Imp4     | 60.8410307 | 6.22E-15 | 0.98369566 | 6.15E-14 |
| Cenpa    | 60.8013245 | 6.33E-15 | 1.03834314 | 6.25E-14 |
| Tmem86a  | 60.7481054 | 6.44E-15 | -1.4458195 | 6.35E-14 |
| Uhrf1    | 60.673605  | 6.77E-15 | 1.09947084 | 6.67E-14 |
| Nwd1     | 60.6445806 | 6.88E-15 | -1.7271954 | 6.78E-14 |
| Angptl4  | 60.5186658 | 7.33E-15 | 1.26008267 | 7.21E-14 |
| Clspn    | 60.4566644 | 7.55E-15 | 1.09479168 | 7.42E-14 |
| Mtch2    | 60.1770246 | 8.66E-15 | 0.96553465 | 8.50E-14 |
| Trip13   | 60.149724  | 8.77E-15 | 1.22251439 | 8.60E-14 |
| Nt5c     | 60.0630654 | 9.21E-15 | 0.93212601 | 9.03E-14 |
| Dennd1c  | 59.8561031 | 1.02E-14 | -2.0251287 | 9.99E-14 |
| Bbip1    | 59.8551044 | 1.02E-14 | 1.02184342 | 9.99E-14 |
| Adsl     | 59.1228395 | 1.48E-14 | 1.02974776 | 1.44E-13 |
| Yars2    | 59.0499738 | 1.53E-14 | 1.14022557 | 1.50E-13 |
| Rad51ap1 | 59.0202412 | 1.57E-14 | 1.12117198 | 1.53E-13 |
| Tmem126a | 58.9457423 | 1.62E-14 | 1.05142706 | 1.58E-13 |
| Abca3    | 58.8486298 | 1.70E-14 | 1.21589932 | 1.65E-13 |
| Mrpl33   | 58.6879876 | 1.84E-14 | 0.87896616 | 1.79E-13 |
| Igf2r    | 58.400523  | 2.14E-14 | 1.72765849 | 2.08E-13 |
| Ndufa3   | 58.2815161 | 2.28E-14 | 0.89485168 | 2.21E-13 |
| Eprs     | 58.2543442 | 2.30E-14 | 0.89099934 | 2.23E-13 |
| Spred3   | 58.2001543 | 2.36E-14 | -1.5439781 | 2.29E-13 |
| Cachd1   | 58.1467393 | 2.43E-14 | 2.89327463 | 2.35E-13 |

|             |            |          |            |          |
|-------------|------------|----------|------------|----------|
| Abhd11      | 57.8791263 | 2.79E-14 | 1.00288738 | 2.69E-13 |
| Cetn3       | 57.8350245 | 2.85E-14 | 0.88065541 | 2.75E-13 |
| Dlat        | 57.7035442 | 3.04E-14 | 1.04427833 | 2.93E-13 |
| Smyd2       | 57.3871305 | 3.57E-14 | 1.00803748 | 3.45E-13 |
| Plek        | 57.2085304 | 3.92E-14 | -1.6929076 | 3.77E-13 |
| Mrps31      | 57.1953378 | 3.94E-14 | 1.07924854 | 3.79E-13 |
| Pin4        | 57.1068023 | 4.13E-14 | 0.96350763 | 3.97E-13 |
| 1700021F05F | 57.0699352 | 4.21E-14 | 1.11620255 | 4.04E-13 |
| Cenph       | 57.0591964 | 4.23E-14 | 1.07020089 | 4.06E-13 |
| Utp4        | 57.0533973 | 4.24E-14 | 1.12892027 | 4.06E-13 |
| Rars        | 56.8821868 | 4.63E-14 | 0.99968774 | 4.43E-13 |
| Vav3        | 56.7882815 | 4.85E-14 | -1.8285176 | 4.64E-13 |
| Parp8       | 56.7870817 | 4.85E-14 | -1.8130989 | 4.64E-13 |
| Mettl1      | 56.697196  | 5.08E-14 | 0.97913587 | 4.85E-13 |
| Arl6ip4     | 56.6510857 | 5.21E-14 | 0.92730115 | 4.97E-13 |
| Acsl1       | 56.5643474 | 5.44E-14 | 1.02475252 | 5.18E-13 |
| Cbx5        | 56.5235367 | 5.55E-14 | 0.92006127 | 5.28E-13 |
| Ctps        | 56.3528453 | 6.06E-14 | 1.12565045 | 5.76E-13 |
| Bst2        | 56.0660917 | 7.01E-14 | 0.93852117 | 6.65E-13 |
| Peli2       | 55.9619365 | 7.39E-14 | -1.7321285 | 7.02E-13 |
| Cd274       | 55.8859566 | 7.68E-14 | -1.3918244 | 7.28E-13 |
| Ltb         | 55.7939549 | 8.05E-14 | -2.0561252 | 7.62E-13 |
| Cd300a      | 55.5510775 | 9.10E-14 | -1.367526  | 8.61E-13 |
| Pgls        | 55.4383706 | 9.65E-14 | 0.81777783 | 9.12E-13 |
| Slc26a1     | 55.3722563 | 9.97E-14 | 1.69364324 | 9.42E-13 |
| Strap       | 55.2971626 | 1.04E-13 | 0.92315519 | 9.77E-13 |
| Mycbp       | 55.2463382 | 1.06E-13 | 1.10853344 | 1.00E-12 |
| Psm11       | 55.2269949 | 1.07E-13 | 0.89977863 | 1.01E-12 |
| Tnfrsf13b   | 55.1106412 | 1.14E-13 | -1.3585546 | 1.07E-12 |
| Pear1       | 55.0874658 | 1.15E-13 | -1.9062723 | 1.08E-12 |
| Psm1        | 55.0654146 | 1.17E-13 | 0.94695669 | 1.09E-12 |
| Fam49a      | 54.9959857 | 1.21E-13 | -1.7423974 | 1.13E-12 |
| Ttll12      | 54.9195259 | 1.26E-13 | 1.10892458 | 1.18E-12 |
| Hgf         | 54.9126526 | 1.26E-13 | -2.6358375 | 1.18E-12 |
| Zwilch      | 54.8074205 | 1.33E-13 | 1.25064331 | 1.24E-12 |
| Tmem70      | 54.7395128 | 1.38E-13 | 0.98963382 | 1.29E-12 |
| Hypk        | 54.729921  | 1.38E-13 | 0.96999094 | 1.29E-12 |
| Mrpl37      | 54.6672206 | 1.43E-13 | 1.08916317 | 1.33E-12 |
| Glpr1       | 54.567286  | 1.50E-13 | -1.2710855 | 1.40E-12 |
| Slc19a1     | 54.5427877 | 1.52E-13 | 1.11990093 | 1.42E-12 |
| Eya1        | 54.2210664 | 1.79E-13 | -1.6269211 | 1.67E-12 |
| Dctpp1      | 54.1366048 | 1.87E-13 | 0.8672604  | 1.74E-12 |
| Aes         | 53.9780396 | 2.03E-13 | 0.83842752 | 1.88E-12 |

|             |            |          |            |          |
|-------------|------------|----------|------------|----------|
| Gsr         | 53.9460753 | 2.06E-13 | 1.03313125 | 1.91E-12 |
| Mboat2      | 53.7678915 | 2.26E-13 | 2.12939764 | 2.09E-12 |
| Celf2       | 53.7350031 | 2.29E-13 | -0.9416356 | 2.13E-12 |
| Afap111     | 53.6093254 | 2.45E-13 | -1.4412384 | 2.26E-12 |
| Setd6       | 53.5127206 | 2.57E-13 | 1.19057951 | 2.37E-12 |
| Selenow     | 53.3883923 | 2.74E-13 | 0.82720184 | 2.53E-12 |
| Cdc6        | 53.2548413 | 2.93E-13 | 1.11140087 | 2.70E-12 |
| Psd3        | 53.1850376 | 3.04E-13 | -1.594294  | 2.80E-12 |
| Ggt5        | 53.0804651 | 3.20E-13 | -2.3695032 | 2.95E-12 |
| Srgap3      | 52.9666651 | 3.39E-13 | -2.1062221 | 3.12E-12 |
| Eif4g1      | 52.9630853 | 3.40E-13 | 0.91445731 | 3.12E-12 |
| Epor        | 52.8735752 | 3.56E-13 | 1.02470315 | 3.27E-12 |
| Dok2        | 52.8530642 | 3.59E-13 | -1.3246549 | 3.30E-12 |
| Apbb1ip     | 52.8323594 | 3.63E-13 | 0.93738557 | 3.33E-12 |
| Tubg1       | 52.8307178 | 3.64E-13 | 1.17086626 | 3.33E-12 |
| Cenps       | 52.586032  | 4.12E-13 | 1.09902545 | 3.77E-12 |
| Rfesd       | 52.5768826 | 4.14E-13 | 0.99028229 | 3.78E-12 |
| 9930012K11F | 52.576102  | 4.14E-13 | -1.445569  | 3.78E-12 |
| Prkg1       | 52.5392453 | 4.22E-13 | -2.3635998 | 3.85E-12 |
| Rnd2        | 52.4670009 | 4.38E-13 | -2.0476026 | 3.99E-12 |
| Gm2a        | 52.4215533 | 4.48E-13 | -1.0977543 | 4.08E-12 |
| Dnajc25     | 52.3802123 | 4.57E-13 | 1.20055893 | 4.16E-12 |
| Carhsp1     | 52.3648941 | 4.61E-13 | 1.26099893 | 4.19E-12 |
| Ssbp4       | 52.3379248 | 4.67E-13 | 0.95101616 | 4.24E-12 |
| 2310039H08F | 52.2161136 | 4.97E-13 | 0.91640272 | 4.51E-12 |
| Mfsd6       | 52.1814847 | 5.06E-13 | -1.0552101 | 4.59E-12 |
| Aasdhppt    | 52.1514146 | 5.14E-13 | 0.98634858 | 4.65E-12 |
| Psm9        | 52.1296223 | 5.20E-13 | 0.98651359 | 4.70E-12 |
| Trappc2l    | 52.0496033 | 5.41E-13 | 1.00812299 | 4.89E-12 |
| F630028O10F | 51.972443  | 5.63E-13 | -1.5053856 | 5.09E-12 |
| Clns1a      | 51.9339934 | 5.74E-13 | 0.92168693 | 5.18E-12 |
| Polr2c      | 51.9183397 | 5.79E-13 | 0.92973635 | 5.22E-12 |
| 2310061I04R | 51.6468004 | 6.64E-13 | 1.1309594  | 5.99E-12 |
| Aurkb       | 51.5005059 | 7.16E-13 | 1.11373257 | 6.44E-12 |
| Psen2       | 51.3231991 | 7.83E-13 | 1.03450461 | 7.05E-12 |
| Fgl2        | 51.2909377 | 7.96E-13 | -1.5919117 | 7.16E-12 |
| Letm1       | 51.2706097 | 8.05E-13 | 1.07673426 | 7.22E-12 |
| Pdss1       | 51.2363597 | 8.19E-13 | 1.24197785 | 7.35E-12 |
| Gm45620     | 51.0661143 | 8.93E-13 | -2.5575924 | 8.00E-12 |
| Tuba1a      | 50.9881394 | 9.29E-13 | -1.3680474 | 8.32E-12 |
| Ndufa7      | 50.9791728 | 9.33E-13 | 0.83715967 | 8.35E-12 |
| Bloc1s5     | 50.7193331 | 1.07E-12 | 1.14226126 | 9.52E-12 |
| Dnaja3      | 50.6950067 | 1.08E-12 | 1.08131677 | 9.63E-12 |

|             |            |          |            |          |
|-------------|------------|----------|------------|----------|
| Leprot      | 50.6647988 | 1.10E-12 | 0.97386943 | 9.77E-12 |
| Adgrl4      | 50.4978767 | 1.19E-12 | -1.6615947 | 1.06E-11 |
| Sep-04      | 50.448813  | 1.22E-12 | 1.62041652 | 1.09E-11 |
| Cad         | 50.4204997 | 1.24E-12 | 1.07048764 | 1.10E-11 |
| Syng1       | 50.1828732 | 1.40E-12 | 1.43690266 | 1.25E-11 |
| Kars        | 50.1530216 | 1.42E-12 | 0.99852344 | 1.26E-11 |
| Gm16286     | 50.1497445 | 1.42E-12 | 0.87624425 | 1.26E-11 |
| Atp8b2      | 50.0844052 | 1.47E-12 | -2.2231994 | 1.31E-11 |
| Fech        | 50.0306853 | 1.51E-12 | 1.14795012 | 1.34E-11 |
| Eef1akmt1   | 50.022378  | 1.52E-12 | 1.02315755 | 1.35E-11 |
| Sem1        | 50.0041561 | 1.53E-12 | 0.82456628 | 1.36E-11 |
| Myo1f       | 49.9951801 | 1.54E-12 | -2.01032   | 1.36E-11 |
| Lpp         | 49.9938696 | 1.54E-12 | -2.126277  | 1.36E-11 |
| Map4k1      | 49.973482  | 1.56E-12 | 1.03673007 | 1.37E-11 |
| Tmem208     | 49.8817225 | 1.63E-12 | 0.90599731 | 1.44E-11 |
| Plekho1     | 49.845367  | 1.66E-12 | -1.4370032 | 1.46E-11 |
| Fdx1        | 49.7976457 | 1.70E-12 | 0.99731599 | 1.50E-11 |
| Trappc5     | 49.761945  | 1.74E-12 | 0.95614941 | 1.53E-11 |
| Capn2       | 49.7348898 | 1.76E-12 | -1.6846729 | 1.55E-11 |
| Magohb      | 49.6581842 | 1.83E-12 | 0.96044935 | 1.61E-11 |
| Arl2        | 49.5597098 | 1.92E-12 | 0.99079396 | 1.69E-11 |
| Elovl7      | 49.4109559 | 2.08E-12 | -1.2519351 | 1.82E-11 |
| Nop2        | 49.3587086 | 2.13E-12 | 1.04921135 | 1.87E-11 |
| Ptgs1       | 49.3077374 | 2.19E-12 | -2.1726124 | 1.91E-11 |
| Med8        | 49.2643997 | 2.24E-12 | 0.9563339  | 1.95E-11 |
| Ggct        | 49.010662  | 2.55E-12 | 1.15324457 | 2.22E-11 |
| Ppat        | 48.9659924 | 2.60E-12 | 0.94336139 | 2.27E-11 |
| 1700086O06I | 48.8803893 | 2.72E-12 | 1.21622103 | 2.37E-11 |
| Sh2d3c      | 48.7247558 | 2.95E-12 | -2.6564617 | 2.56E-11 |
| Spns2       | 48.6844282 | 3.01E-12 | -1.0866495 | 2.61E-11 |
| Otos        | 48.634475  | 3.08E-12 | -2.1953668 | 2.68E-11 |
| Elk3        | 48.3983215 | 3.48E-12 | -1.1771173 | 3.02E-11 |
| Mrps35      | 48.3946865 | 3.49E-12 | 0.95143026 | 3.02E-11 |
| Agpat3      | 48.101115  | 4.05E-12 | 1.72863746 | 3.51E-11 |
| Pbk         | 47.8578676 | 4.58E-12 | 1.10522104 | 3.97E-11 |
| Ephx2       | 47.5570166 | 5.34E-12 | 1.58896885 | 4.62E-11 |
| Cluh        | 47.4529085 | 5.63E-12 | 1.07748911 | 4.87E-11 |
| Anxa1       | 47.4403786 | 5.67E-12 | -1.2708354 | 4.90E-11 |
| 1110065P20F | 47.4139087 | 5.75E-12 | 1.07478444 | 4.96E-11 |
| Rhof        | 47.2105525 | 6.38E-12 | -2.4919074 | 5.50E-11 |
| Prorsd1     | 47.1993325 | 6.41E-12 | 0.95419436 | 5.52E-11 |
| Aco2        | 47.1791837 | 6.48E-12 | 0.92421233 | 5.58E-11 |
| Rabggtb     | 46.858726  | 7.63E-12 | 0.99550997 | 6.56E-11 |

|             |            |          |            |          |
|-------------|------------|----------|------------|----------|
| Al504432    | 46.8583769 | 7.63E-12 | -1.3584966 | 6.56E-11 |
| Rpl4        | 46.7103371 | 8.23E-12 | 0.78440463 | 7.06E-11 |
| Ube2a       | 46.6837129 | 8.34E-12 | 0.93211922 | 7.15E-11 |
| Utp18       | 46.6119176 | 8.65E-12 | 0.96377969 | 7.41E-11 |
| Lman2       | 46.5569651 | 8.90E-12 | 0.91286651 | 7.62E-11 |
| Reep6       | 46.5155873 | 9.09E-12 | 1.58774131 | 7.78E-11 |
| Psm2        | 46.3843626 | 9.72E-12 | 0.92076329 | 8.31E-11 |
| Rbx1        | 46.1832271 | 1.08E-11 | 0.82272376 | 9.20E-11 |
| Paqr4       | 46.0309002 | 1.16E-11 | 1.56589882 | 9.93E-11 |
| Pik3r2      | 45.9363317 | 1.22E-11 | 1.22823169 | 1.04E-10 |
| Fosb        | 45.891516  | 1.25E-11 | -1.1225055 | 1.06E-10 |
| Lrrc42      | 45.8634418 | 1.27E-11 | 1.22620648 | 1.08E-10 |
| Ciapi1      | 45.7998591 | 1.31E-11 | 1.00741186 | 1.11E-10 |
| Grhpr       | 45.7899554 | 1.32E-11 | 1.04961018 | 1.12E-10 |
| Lrr1        | 45.7773518 | 1.32E-11 | 1.35944869 | 1.12E-10 |
| Asf1b       | 45.7340063 | 1.35E-11 | 1.05476857 | 1.15E-10 |
| Wdr55       | 45.706273  | 1.37E-11 | 1.04896071 | 1.16E-10 |
| Rnps1       | 45.6838431 | 1.39E-11 | 0.86572829 | 1.18E-10 |
| Mcts1       | 45.6147879 | 1.44E-11 | 0.91508623 | 1.22E-10 |
| Pop1        | 45.4402207 | 1.57E-11 | 1.13500598 | 1.33E-10 |
| Farsb       | 45.3993846 | 1.61E-11 | 1.00459776 | 1.36E-10 |
| 1700001L05R | 45.3819523 | 1.62E-11 | 1.78375104 | 1.37E-10 |
| Cdt1        | 45.371512  | 1.63E-11 | 1.05297454 | 1.37E-10 |
| Tsc22d3     | 45.3708071 | 1.63E-11 | -1.09406   | 1.37E-10 |
| Rpp30       | 45.3600803 | 1.64E-11 | 1.00833303 | 1.38E-10 |
| Mrpl32      | 45.1439776 | 1.83E-11 | 0.89745711 | 1.54E-10 |
| Pmvk        | 45.1175423 | 1.86E-11 | 1.04816349 | 1.56E-10 |
| Wdr75       | 45.0741995 | 1.90E-11 | 0.98353802 | 1.59E-10 |
| Klhl6       | 44.9240844 | 2.05E-11 | -1.0310877 | 1.72E-10 |
| Rab31       | 44.9221115 | 2.05E-11 | -1.6481789 | 1.72E-10 |
| Adora2a     | 44.8686425 | 2.11E-11 | -2.394165  | 1.76E-10 |
| Gstm7       | 44.6625363 | 2.34E-11 | -2.0461452 | 1.96E-10 |
| Mybl2       | 44.6511943 | 2.35E-11 | 1.23412504 | 1.97E-10 |
| Hells       | 44.6458316 | 2.36E-11 | 1.0605196  | 1.97E-10 |
| Gins1       | 44.5916164 | 2.43E-11 | 1.18767622 | 2.03E-10 |
| Coq4        | 44.5310726 | 2.50E-11 | 1.16793844 | 2.09E-10 |
| Garem1      | 44.5083875 | 2.53E-11 | 1.72350587 | 2.11E-10 |
| Pglyrp2     | 44.3385251 | 2.76E-11 | -2.1478568 | 2.30E-10 |
| Polr3h      | 44.2273859 | 2.92E-11 | 0.98038247 | 2.43E-10 |
| Get4        | 44.1961175 | 2.97E-11 | 1.01920967 | 2.47E-10 |
| Dgka        | 44.1894319 | 2.98E-11 | -2.4540849 | 2.48E-10 |
| Mrps6       | 44.1436624 | 3.05E-11 | 1.03750307 | 2.53E-10 |
| Thg1l       | 44.1066359 | 3.11E-11 | 1.06576945 | 2.58E-10 |

|         |            |          |            |          |
|---------|------------|----------|------------|----------|
| Cd82    | 44.1008618 | 3.12E-11 | 1.20049523 | 2.58E-10 |
| Zscan2  | 44.0805977 | 3.15E-11 | -1.5421785 | 2.61E-10 |
| Polr1c  | 43.9510308 | 3.37E-11 | 0.96909486 | 2.78E-10 |
| Slc25a4 | 43.8563937 | 3.53E-11 | 0.86575771 | 2.92E-10 |
| Ddx27   | 43.8399179 | 3.56E-11 | 0.89924219 | 2.94E-10 |
| Ecsit   | 43.8062978 | 3.63E-11 | 1.08969494 | 2.99E-10 |
| Sigmar1 | 43.7272121 | 3.77E-11 | 1.07728613 | 3.11E-10 |
| Gm19590 | 43.6491435 | 3.93E-11 | -1.9627669 | 3.24E-10 |
| Rpl22l1 | 43.5824717 | 4.06E-11 | 0.80566448 | 3.34E-10 |
| Hnrnpf  | 43.5806733 | 4.07E-11 | 0.81344497 | 3.35E-10 |
| Pdlim2  | 43.5661059 | 4.10E-11 | -1.4719924 | 3.37E-10 |
| Gm1604a | 43.4899219 | 4.26E-11 | -1.910718  | 3.50E-10 |
| Wdr4    | 43.4039048 | 4.45E-11 | 1.08099703 | 3.65E-10 |
| Smim26  | 43.1419723 | 5.09E-11 | 1.01760497 | 4.17E-10 |
| Stat3   | 43.0022992 | 5.47E-11 | -0.9479382 | 4.48E-10 |
| Eps15   | 42.9549863 | 5.60E-11 | 1.01677495 | 4.58E-10 |
| Sptan1  | 42.8675901 | 5.86E-11 | -1.6925355 | 4.79E-10 |
| Hddc2   | 42.800383  | 6.06E-11 | 0.94478236 | 4.95E-10 |
| Ndufa13 | 42.796472  | 6.07E-11 | 0.83138997 | 4.96E-10 |
| Crebrf  | 42.7228489 | 6.31E-11 | -1.1546122 | 5.14E-10 |
| Tubb5   | 42.6240124 | 6.63E-11 | 0.87063521 | 5.41E-10 |
| Pgk1    | 42.5452773 | 6.91E-11 | 0.87957255 | 5.62E-10 |
| Gm10384 | 42.4904102 | 7.10E-11 | -1.8390167 | 5.78E-10 |
| Gtf3a   | 42.4292963 | 7.33E-11 | 0.87534226 | 5.96E-10 |
| Pdia3   | 42.39631   | 7.45E-11 | 0.86589463 | 6.05E-10 |
| Gpatch4 | 42.1881539 | 8.29E-11 | 0.90245978 | 6.73E-10 |
| Tlcd1   | 42.0866949 | 8.73E-11 | 1.32556944 | 7.08E-10 |
| Acvr1b  | 42.0544207 | 8.88E-11 | -1.6681249 | 7.19E-10 |
| Poc1a   | 41.9268107 | 9.48E-11 | 1.20676651 | 7.67E-10 |
| Zfp637  | 41.9078617 | 9.57E-11 | 0.98751694 | 7.74E-10 |
| Trem12  | 41.5822889 | 1.13E-10 | -0.9898816 | 9.13E-10 |
| Rbm28   | 41.489831  | 1.18E-10 | 0.94313318 | 9.57E-10 |
| Snx3    | 41.4258669 | 1.22E-10 | 0.84001823 | 9.88E-10 |
| Cnih1   | 41.4072067 | 1.24E-10 | 0.9549986  | 9.97E-10 |
| Smc2    | 41.3581    | 1.27E-10 | 0.91521703 | 1.02E-09 |
| Tkt     | 41.346844  | 1.27E-10 | 0.80865772 | 1.03E-09 |
| Dach1   | 41.270605  | 1.33E-10 | -0.9970374 | 1.07E-09 |
| Ssrp1   | 41.1255345 | 1.43E-10 | 0.87014637 | 1.15E-09 |
| Mrps27  | 41.0349029 | 1.50E-10 | 1.11204694 | 1.20E-09 |
| Mrps18a | 40.9819211 | 1.54E-10 | 0.9038819  | 1.23E-09 |
| Atp2a3  | 40.9455529 | 1.57E-10 | -1.3979675 | 1.26E-09 |
| Rcsd1   | 40.9089693 | 1.59E-10 | -1.3990743 | 1.28E-09 |
| Dyrk1b  | 40.6562114 | 1.82E-10 | -1.7472722 | 1.45E-09 |

|             |            |          |            |          |
|-------------|------------|----------|------------|----------|
| Ddx56       | 40.6179104 | 1.85E-10 | 1.01453496 | 1.48E-09 |
| Rnaseh2a    | 40.3941106 | 2.08E-10 | 0.92225566 | 1.66E-09 |
| Slc16a10    | 40.3618837 | 2.11E-10 | 1.16926126 | 1.69E-09 |
| Yrdc        | 40.3212475 | 2.15E-10 | 0.99570704 | 1.72E-09 |
| Klhl24      | 40.094882  | 2.42E-10 | -0.9964561 | 1.93E-09 |
| Wdr83os     | 40.0007565 | 2.54E-10 | 0.84771571 | 2.02E-09 |
| Rad23b      | 39.9244464 | 2.64E-10 | 0.91277848 | 2.10E-09 |
| Fam217b     | 39.8374185 | 2.76E-10 | -1.6056457 | 2.20E-09 |
| Eif1a       | 39.6086166 | 3.10E-10 | 0.92271488 | 2.46E-09 |
| Bud31       | 39.608274  | 3.10E-10 | 0.92675628 | 2.46E-09 |
| Yif1b       | 39.58462   | 3.14E-10 | 0.90193192 | 2.49E-09 |
| Fli1        | 39.5557338 | 3.19E-10 | -1.1129266 | 2.53E-09 |
| Ndufs2      | 39.3810421 | 3.49E-10 | 0.8630515  | 2.76E-09 |
| Ddt         | 39.3799401 | 3.49E-10 | 0.92050419 | 2.76E-09 |
| P2rx1       | 39.3629735 | 3.52E-10 | -2.7143739 | 2.78E-09 |
| Rnaseh2b    | 39.3281301 | 3.58E-10 | 0.93872392 | 2.83E-09 |
| Dohh        | 39.2454217 | 3.74E-10 | 0.93243366 | 2.95E-09 |
| Msh6        | 39.2415241 | 3.74E-10 | 1.04957242 | 2.96E-09 |
| Ssu72       | 39.1855731 | 3.85E-10 | 0.87252427 | 3.04E-09 |
| Ms4a2       | 39.0304265 | 4.17E-10 | -1.9580401 | 3.29E-09 |
| Lpcat2      | 38.992781  | 4.25E-10 | -2.2140714 | 3.35E-09 |
| Arhgap32    | 38.8020536 | 4.69E-10 | -1.8196062 | 3.69E-09 |
| Aven        | 38.6588967 | 5.05E-10 | 0.99322241 | 3.96E-09 |
| Zfp800      | 38.6587087 | 5.05E-10 | 0.91936838 | 3.96E-09 |
| Ormdl2      | 38.6146089 | 5.16E-10 | 0.93209603 | 4.05E-09 |
| Faup24      | 38.4324995 | 5.67E-10 | 1.10019199 | 4.44E-09 |
| St3gal6     | 38.4098484 | 5.73E-10 | 1.97631036 | 4.49E-09 |
| Itga2       | 38.374562  | 5.84E-10 | -4.1658102 | 4.57E-09 |
| Nat10       | 38.3179212 | 6.01E-10 | 1.05105442 | 4.70E-09 |
| 2810004N23I | 38.2634098 | 6.18E-10 | 0.89310037 | 4.83E-09 |
| Dis3        | 38.2524053 | 6.22E-10 | 1.00686824 | 4.86E-09 |
| B9d1        | 38.2231613 | 6.31E-10 | 2.02166946 | 4.92E-09 |
| Rer1        | 38.1675403 | 6.49E-10 | 0.86023624 | 5.06E-09 |
| Mgst3       | 38.1072438 | 6.70E-10 | 1.013848   | 5.22E-09 |
| Cdc14a      | 38.0931393 | 6.74E-10 | -1.0903869 | 5.25E-09 |
| Gm10073     | 37.8956741 | 7.46E-10 | 0.89400337 | 5.81E-09 |
| Gprc5b      | 37.8073006 | 7.81E-10 | -4.0437374 | 6.07E-09 |
| Grwd1       | 37.7319549 | 8.12E-10 | 1.01101961 | 6.30E-09 |
| Exosc3      | 37.6485514 | 8.47E-10 | 0.90062197 | 6.58E-09 |
| Wdr46       | 37.6271045 | 8.56E-10 | 0.96167574 | 6.64E-09 |
| Zfp36       | 37.5953715 | 8.71E-10 | -1.2542596 | 6.75E-09 |
| 1600002K03F | 37.5606399 | 8.86E-10 | 1.00956673 | 6.86E-09 |
| Hist1h1b    | 37.4755124 | 9.26E-10 | 1.01813834 | 7.16E-09 |



|          |            |          |            |          |
|----------|------------|----------|------------|----------|
| Oaf      | 37.4039436 | 9.60E-10 | 1.15635042 | 7.42E-09 |
| Klf3     | 37.3460654 | 9.89E-10 | 0.99400876 | 7.64E-09 |
| Gm10053  | 37.2870202 | 1.02E-09 | 1.40304362 | 7.87E-09 |
| Hmgb2    | 37.2852374 | 1.02E-09 | 0.8651819  | 7.87E-09 |
| Nynrin   | 37.2358745 | 1.05E-09 | -1.5273108 | 8.07E-09 |
| C2       | 37.2274778 | 1.05E-09 | 1.57510543 | 8.10E-09 |
| Abcb6    | 37.2010305 | 1.07E-09 | 1.28861583 | 8.20E-09 |
| Sae1     | 37.1814615 | 1.08E-09 | 0.8878842  | 8.28E-09 |
| BC028528 | 37.1099743 | 1.12E-09 | -1.1381537 | 8.58E-09 |
| Ddx1     | 37.1011415 | 1.12E-09 | 0.92589821 | 8.61E-09 |
| Agpat5   | 37.0181754 | 1.17E-09 | 0.90946993 | 8.98E-09 |
| Cd84     | 36.976655  | 1.20E-09 | -1.0424174 | 9.17E-09 |
| Asna1    | 36.8585415 | 1.27E-09 | 1.02615965 | 9.73E-09 |
| Slc7a6   | 36.827929  | 1.29E-09 | -1.7900676 | 9.88E-09 |
| Rnf180   | 36.7565134 | 1.34E-09 | -1.8644059 | 1.02E-08 |
| Sh2d5    | 36.570523  | 1.47E-09 | -1.5359364 | 1.13E-08 |
| Sap30    | 36.4716166 | 1.55E-09 | 0.94655486 | 1.18E-08 |
| Aen      | 36.4495523 | 1.57E-09 | 0.95613396 | 1.20E-08 |
| Gpsm1    | 36.4286111 | 1.58E-09 | -1.7347267 | 1.21E-08 |
| Top1mt   | 36.3594003 | 1.64E-09 | 1.16254362 | 1.25E-08 |
| Igsf3    | 36.3398121 | 1.66E-09 | 1.32645379 | 1.26E-08 |
| Zfp706   | 36.2624291 | 1.72E-09 | 0.8394668  | 1.31E-08 |
| Armc6    | 36.0716279 | 1.90E-09 | 1.22806942 | 1.45E-08 |
| Cdc37    | 35.7551051 | 2.24E-09 | 0.82201551 | 1.70E-08 |
| Psmc3    | 35.7458063 | 2.25E-09 | 0.85528093 | 1.71E-08 |
| Cd320    | 35.6098606 | 2.41E-09 | 1.0156129  | 1.83E-08 |
| Phlda2   | 35.4454249 | 2.62E-09 | 1.32492781 | 1.99E-08 |
| Ap2s1    | 35.3698934 | 2.73E-09 | 0.84445521 | 2.06E-08 |
| B3gnt5   | 35.288276  | 2.84E-09 | -1.680904  | 2.15E-08 |
| Sumo1    | 35.2803051 | 2.86E-09 | 0.84925703 | 2.16E-08 |
| Abcf2    | 35.1890704 | 2.99E-09 | 0.9751943  | 2.26E-08 |
| Wdr43    | 35.1839823 | 3.00E-09 | 0.87217673 | 2.26E-08 |
| Cnrip1   | 34.8735565 | 3.52E-09 | -2.7827092 | 2.65E-08 |
| Utp14a   | 34.755847  | 3.74E-09 | 0.87591703 | 2.82E-08 |
| Tstd3    | 34.6861213 | 3.87E-09 | 1.4055537  | 2.92E-08 |
| Myg1     | 34.6296042 | 3.99E-09 | 0.93616778 | 3.00E-08 |
| Ifi203   | 34.5913779 | 4.07E-09 | -1.1533783 | 3.06E-08 |
| Nle1     | 34.5549073 | 4.14E-09 | 1.01965877 | 3.11E-08 |
| Mmp14    | 34.4795487 | 4.31E-09 | 1.07760596 | 3.24E-08 |
| Rbm17    | 34.4376133 | 4.40E-09 | 0.87012382 | 3.30E-08 |
| Trmt61a  | 34.3622954 | 4.58E-09 | 1.09383195 | 3.43E-08 |
| Gmps     | 34.3452025 | 4.62E-09 | 0.88432615 | 3.46E-08 |
| Slc43a2  | 34.2612828 | 4.82E-09 | -1.0566584 | 3.61E-08 |

|          |            |          |            |          |
|----------|------------|----------|------------|----------|
| Lrrc20   | 34.2409625 | 4.87E-09 | 1.2675321  | 3.64E-08 |
| Vps29    | 34.2224761 | 4.92E-09 | 0.88807143 | 3.68E-08 |
| Rapsn    | 34.2130741 | 4.94E-09 | -2.3663418 | 3.69E-08 |
| Sav1     | 34.1555728 | 5.09E-09 | 0.99041366 | 3.80E-08 |
| Mrpl49   | 34.0769554 | 5.30E-09 | 0.95351795 | 3.95E-08 |
| Lig1     | 34.0677082 | 5.32E-09 | 0.91194713 | 3.97E-08 |
| Sarnp    | 34.0533994 | 5.36E-09 | 0.87167648 | 3.99E-08 |
| Cdca8    | 34.0319632 | 5.42E-09 | 0.95413742 | 4.04E-08 |
| Ccl17    | 33.9880061 | 5.55E-09 | -1.2980118 | 4.12E-08 |
| Cox11    | 33.9517426 | 5.65E-09 | 1.11626708 | 4.20E-08 |
| Psmc1    | 33.9470317 | 5.66E-09 | 0.91242113 | 4.21E-08 |
| Abhd14a  | 33.8725399 | 5.88E-09 | 0.93083205 | 4.37E-08 |
| Vat1     | 33.8501961 | 5.95E-09 | -1.1304224 | 4.41E-08 |
| B3glct   | 33.7714618 | 6.20E-09 | 1.06535566 | 4.59E-08 |
| Timeless | 33.7310998 | 6.33E-09 | 1.01668041 | 4.69E-08 |
| Mcm7     | 33.7113456 | 6.39E-09 | 0.87467442 | 4.73E-08 |
| Exoc3l2  | 33.7010947 | 6.43E-09 | -2.0379718 | 4.75E-08 |
| Gfi1b    | 33.6820767 | 6.49E-09 | 0.93439555 | 4.79E-08 |
| Ces2g    | 33.6222891 | 6.69E-09 | 0.87623833 | 4.94E-08 |
| Gabbr1   | 33.3748771 | 7.60E-09 | -1.5302012 | 5.61E-08 |
| Hivep3   | 33.1824904 | 8.39E-09 | -2.279665  | 6.19E-08 |
| Ptpcr    | 32.9991484 | 9.22E-09 | -0.9690658 | 6.79E-08 |
| Tmem167  | 32.9053865 | 9.68E-09 | 0.85092863 | 7.12E-08 |
| Pus1     | 32.900857  | 9.70E-09 | 0.93847713 | 7.13E-08 |
| Znhit1   | 32.8953512 | 9.73E-09 | 0.93976351 | 7.15E-08 |
| Hivep2   | 32.8770097 | 9.82E-09 | -2.0291866 | 7.21E-08 |
| Ypel1    | 32.6620644 | 1.10E-08 | -1.6971781 | 8.05E-08 |
| Mdh1     | 32.6224307 | 1.12E-08 | 0.84555204 | 8.21E-08 |
| Emc7     | 32.5847191 | 1.14E-08 | 0.89384957 | 8.36E-08 |
| Rcc1l    | 32.5634809 | 1.15E-08 | 1.07879886 | 8.45E-08 |
| Tmem159  | 32.5130631 | 1.18E-08 | -1.4607499 | 8.66E-08 |
| Mrpl4    | 32.4824041 | 1.20E-08 | 0.91709474 | 8.80E-08 |
| Layn     | 32.4024138 | 1.25E-08 | -2.6926386 | 9.16E-08 |
| Sgce     | 32.3742594 | 1.27E-08 | -1.649025  | 9.28E-08 |
| Chaf1a   | 32.2973044 | 1.32E-08 | 0.98806335 | 9.65E-08 |
| Uck2     | 32.2644869 | 1.35E-08 | 0.93575192 | 9.81E-08 |
| Exo1     | 32.2543344 | 1.35E-08 | 1.1045686  | 9.85E-08 |
| Apopt1   | 32.2068642 | 1.39E-08 | 0.89506547 | 1.01E-07 |
| Rpp21    | 32.1780805 | 1.41E-08 | 0.88728884 | 1.02E-07 |
| Gpr171   | 32.1028702 | 1.46E-08 | -1.5444275 | 1.06E-07 |
| Ntpcr    | 32.0688073 | 1.49E-08 | 0.97807746 | 1.08E-07 |
| Ssna1    | 32.020626  | 1.53E-08 | 0.84152323 | 1.11E-07 |
| Timm44   | 32.0139008 | 1.53E-08 | 0.91673389 | 1.11E-07 |

|         |            |          |            |          |
|---------|------------|----------|------------|----------|
| Ncln    | 31.9517609 | 1.58E-08 | 1.05571657 | 1.15E-07 |
| Cmss1   | 31.8512907 | 1.66E-08 | 0.90184248 | 1.21E-07 |
| Gclm    | 31.8424636 | 1.67E-08 | 0.79629438 | 1.21E-07 |
| Esco2   | 31.8267679 | 1.69E-08 | 1.04195677 | 1.22E-07 |
| Cops9   | 31.667866  | 1.83E-08 | 0.84694079 | 1.32E-07 |
| Rtraf   | 31.6596718 | 1.84E-08 | 0.81285252 | 1.33E-07 |
| Blvra   | 31.6529325 | 1.84E-08 | 0.9578672  | 1.33E-07 |
| Arf5    | 31.6479716 | 1.85E-08 | 0.81542175 | 1.33E-07 |
| Nme6    | 31.4623856 | 2.03E-08 | 1.00743854 | 1.47E-07 |
| Slc2a1  | 31.440553  | 2.06E-08 | -1.4615908 | 1.48E-07 |
| Gm15491 | 31.4331173 | 2.06E-08 | 1.3162741  | 1.49E-07 |
| Mar-08  | 31.3959527 | 2.10E-08 | 1.16078262 | 1.51E-07 |
| Gem     | 31.2849193 | 2.23E-08 | -1.5045068 | 1.60E-07 |
| Emc4    | 31.2787872 | 2.24E-08 | 0.91953462 | 1.60E-07 |
| Txnrd2  | 31.1588512 | 2.38E-08 | 1.01549777 | 1.71E-07 |
| Prim1   | 31.1580874 | 2.38E-08 | 0.9309502  | 1.71E-07 |
| Imp3    | 31.1451233 | 2.39E-08 | 0.81511129 | 1.72E-07 |
| Il21r   | 30.9749628 | 2.61E-08 | -1.7763487 | 1.87E-07 |
| H2-Oa   | 30.9314812 | 2.67E-08 | -1.1011171 | 1.91E-07 |
| Lag3    | 30.9264037 | 2.68E-08 | -2.4937349 | 1.92E-07 |
| Phf21a  | 30.884217  | 2.74E-08 | -0.8810298 | 1.96E-07 |
| Gtf2h4  | 30.8807648 | 2.74E-08 | 0.9845902  | 1.96E-07 |
| Cyth3   | 30.8381922 | 2.80E-08 | 0.97375335 | 2.00E-07 |
| Oasl1   | 30.8303695 | 2.82E-08 | 1.57544591 | 2.01E-07 |
| Nmral1  | 30.8244342 | 2.82E-08 | 0.94645809 | 2.01E-07 |
| Sash1   | 30.8164524 | 2.84E-08 | -1.6644454 | 2.02E-07 |
| Xpo1    | 30.7846859 | 2.88E-08 | 0.93440106 | 2.05E-07 |
| Rpl7l1  | 30.6120366 | 3.15E-08 | 0.86704991 | 2.24E-07 |
| Cct4    | 30.5712586 | 3.22E-08 | 0.80591657 | 2.29E-07 |
| Padi2   | 30.524454  | 3.30E-08 | -1.6399412 | 2.34E-07 |
| Timp3   | 30.446154  | 3.43E-08 | -3.06833   | 2.44E-07 |
| Heatr3  | 30.4395946 | 3.44E-08 | 0.99799902 | 2.44E-07 |
| Mpl     | 30.4167687 | 3.49E-08 | -2.2197329 | 2.47E-07 |
| Gm26532 | 30.4112796 | 3.49E-08 | -1.1089404 | 2.47E-07 |
| Mecom   | 30.3845428 | 3.54E-08 | -1.7724634 | 2.51E-07 |
| Stx3    | 30.3577894 | 3.59E-08 | -1.1171001 | 2.54E-07 |
| Mthfd1l | 30.3337706 | 3.64E-08 | 1.00478055 | 2.57E-07 |
| Bid     | 30.177931  | 3.94E-08 | 1.00741434 | 2.78E-07 |
| Mylpf   | 30.1662865 | 3.97E-08 | 1.12481452 | 2.80E-07 |
| Spp12b  | 30.0410761 | 4.23E-08 | 0.98529044 | 2.98E-07 |
| Ube2s   | 30.0291435 | 4.26E-08 | 0.84389467 | 3.00E-07 |
| Scrn3   | 29.9644902 | 4.40E-08 | 1.1280257  | 3.10E-07 |
| Snrnp40 | 29.9487489 | 4.44E-08 | 0.86157326 | 3.12E-07 |

|             |            |          |            |          |
|-------------|------------|----------|------------|----------|
| Cuta        | 29.8050413 | 4.78E-08 | 0.82531523 | 3.36E-07 |
| Cd34        | 29.7874069 | 4.82E-08 | -1.2478312 | 3.39E-07 |
| Rcl1        | 29.7818769 | 4.83E-08 | 0.90163027 | 3.39E-07 |
| Psmf1       | 29.6754993 | 5.11E-08 | 0.99819686 | 3.58E-07 |
| Cs          | 29.6727206 | 5.11E-08 | 0.92497065 | 3.59E-07 |
| Ncbp2       | 29.6642904 | 5.14E-08 | 0.91837272 | 3.60E-07 |
| Maml2       | 29.6624335 | 5.14E-08 | -2.1429551 | 3.60E-07 |
| Bak1        | 29.6508082 | 5.17E-08 | 0.97035403 | 3.62E-07 |
| Frat2       | 29.5366444 | 5.49E-08 | 0.8620138  | 3.84E-07 |
| Fdps        | 29.5093955 | 5.56E-08 | 0.96890685 | 3.89E-07 |
| Dgkg        | 29.5054889 | 5.58E-08 | -2.5375989 | 3.89E-07 |
| Ddx46       | 29.4670946 | 5.69E-08 | 0.82248298 | 3.97E-07 |
| Amd2        | 29.4018229 | 5.88E-08 | 1.07102463 | 4.10E-07 |
| Rad51       | 29.3288637 | 6.11E-08 | 1.05829186 | 4.25E-07 |
| Arhgap31    | 29.3078943 | 6.17E-08 | -1.5895343 | 4.30E-07 |
| Atp10a      | 29.2857382 | 6.25E-08 | -1.5639969 | 4.34E-07 |
| Asf1a       | 29.2140449 | 6.48E-08 | 0.8627751  | 4.50E-07 |
| Abcg2       | 29.0959963 | 6.89E-08 | 0.96797749 | 4.78E-07 |
| Arl11       | 28.9988311 | 7.24E-08 | -1.2662095 | 5.03E-07 |
| Arhgef5     | 28.9689474 | 7.35E-08 | -1.6717088 | 5.10E-07 |
| Tmem41a     | 28.9680321 | 7.36E-08 | 1.00758046 | 5.10E-07 |
| Ikzf2       | 28.9089479 | 7.59E-08 | -0.9854517 | 5.25E-07 |
| 4930555A03f | 28.9076979 | 7.59E-08 | -1.4762482 | 5.25E-07 |
| Ssr4        | 28.9021413 | 7.61E-08 | 0.78482268 | 5.27E-07 |
| Nfam1       | 28.8034656 | 8.01E-08 | -1.4956347 | 5.54E-07 |
| Nars        | 28.7730617 | 8.14E-08 | 0.87800408 | 5.62E-07 |
| Sec13       | 28.7248435 | 8.34E-08 | 0.93724211 | 5.76E-07 |
| Ifi27l2a    | 28.7181433 | 8.37E-08 | -1.6556419 | 5.77E-07 |
| St6galnac4  | 28.6807122 | 8.53E-08 | 1.01458146 | 5.88E-07 |
| Maged2      | 28.6470754 | 8.68E-08 | -2.1896387 | 5.98E-07 |
| Tomm70a     | 28.6146775 | 8.83E-08 | 0.8784548  | 6.08E-07 |
| Tbca        | 28.6022121 | 8.89E-08 | 0.83189291 | 6.11E-07 |
| Hpf1        | 28.5890362 | 8.95E-08 | 0.84684079 | 6.15E-07 |
| Nedd9       | 28.5504868 | 9.13E-08 | -1.6740193 | 6.27E-07 |
| Adgrg1      | 28.5434999 | 9.16E-08 | -0.9001606 | 6.29E-07 |
| Dscc1       | 28.4093839 | 9.82E-08 | 1.07612302 | 6.74E-07 |
| Pmpcb       | 28.3303898 | 1.02E-07 | 0.89462498 | 7.01E-07 |
| Tie1        | 28.2896803 | 1.04E-07 | -2.1481562 | 7.16E-07 |
| Rpn2        | 28.2487415 | 1.07E-07 | 0.86307864 | 7.30E-07 |
| Ptrhd1      | 28.2407784 | 1.07E-07 | 0.98869109 | 7.33E-07 |
| Wdr61       | 28.1983439 | 1.09E-07 | 0.85688468 | 7.49E-07 |
| Sar1b       | 28.1671548 | 1.11E-07 | 0.90173973 | 7.60E-07 |
| Zbtb16      | 28.1514728 | 1.12E-07 | -1.3923539 | 7.66E-07 |

|             |            |          |            |          |
|-------------|------------|----------|------------|----------|
| Aqp1        | 28.1498464 | 1.12E-07 | 0.85059031 | 7.66E-07 |
| Ppp1cc      | 27.97374   | 1.23E-07 | 0.82886476 | 8.38E-07 |
| Trap1       | 27.9677775 | 1.23E-07 | 0.91553017 | 8.40E-07 |
| Pdcd11      | 27.7697196 | 1.37E-07 | 0.91066806 | 9.30E-07 |
| Coq3        | 27.5732917 | 1.51E-07 | 1.07917617 | 1.03E-06 |
| Jdp2        | 27.5280392 | 1.55E-07 | -1.8340284 | 1.05E-06 |
| Spata13     | 27.4468908 | 1.61E-07 | -1.8410454 | 1.10E-06 |
| Rasgrp2     | 27.4360173 | 1.62E-07 | -0.9802112 | 1.10E-06 |
| Srpk1       | 27.2264099 | 1.81E-07 | 0.83210182 | 1.23E-06 |
| Metrn       | 27.2196461 | 1.82E-07 | 0.94925314 | 1.23E-06 |
| Tmem56      | 27.2075382 | 1.83E-07 | 1.96755904 | 1.24E-06 |
| Mcm10       | 27.1323435 | 1.90E-07 | 1.04562078 | 1.29E-06 |
| Zfp516      | 27.041814  | 1.99E-07 | -1.6645821 | 1.35E-06 |
| Got1        | 27.0311879 | 2.00E-07 | 1.14349298 | 1.35E-06 |
| Haus1       | 27.0259908 | 2.01E-07 | 0.95508015 | 1.36E-06 |
| Ccnb1       | 26.9651757 | 2.07E-07 | 0.98556258 | 1.40E-06 |
| Alg3        | 26.9225192 | 2.12E-07 | 1.09197281 | 1.43E-06 |
| Cope        | 26.8906502 | 2.15E-07 | 0.84761876 | 1.45E-06 |
| Stk10       | 26.8890581 | 2.15E-07 | -1.1799877 | 1.45E-06 |
| Clec2d      | 26.868739  | 2.18E-07 | -0.8990102 | 1.47E-06 |
| BC030867    | 26.7497359 | 2.32E-07 | 1.32758197 | 1.56E-06 |
| Exosc9      | 26.6172518 | 2.48E-07 | 0.97567551 | 1.67E-06 |
| Sec11a      | 26.6156986 | 2.48E-07 | 0.83208743 | 1.67E-06 |
| Traip       | 26.4921181 | 2.65E-07 | 1.10842835 | 1.78E-06 |
| Cebpb       | 26.4751603 | 2.67E-07 | 1.17941183 | 1.79E-06 |
| Slc25a1     | 26.3034909 | 2.92E-07 | 0.91788867 | 1.96E-06 |
| Actl6a      | 26.2913807 | 2.94E-07 | 0.84603425 | 1.97E-06 |
| Rpp25l      | 26.2690752 | 2.97E-07 | 0.88380937 | 1.99E-06 |
| Thoc7       | 26.1852268 | 3.10E-07 | 0.80872109 | 2.08E-06 |
| D8Erttd738e | 26.1728088 | 3.12E-07 | 0.81197812 | 2.09E-06 |
| Cela1       | 26.0792484 | 3.28E-07 | 0.95148868 | 2.19E-06 |
| Eif3a       | 26.0529211 | 3.32E-07 | 0.78846483 | 2.22E-06 |
| Rbks        | 26.0481343 | 3.33E-07 | 1.00944468 | 2.22E-06 |
| Gulp1       | 26.0478264 | 3.33E-07 | -2.4598184 | 2.22E-06 |
| Rap1gap     | 26.0477536 | 3.33E-07 | 1.5417017  | 2.22E-06 |
| Zcrb1       | 26.036664  | 3.35E-07 | 0.8354521  | 2.23E-06 |
| Pdia6       | 26.0084974 | 3.40E-07 | 0.84048743 | 2.26E-06 |
| Crls1       | 25.9640557 | 3.48E-07 | 0.94788426 | 2.31E-06 |
| Apex1       | 25.9068589 | 3.58E-07 | 0.82895015 | 2.38E-06 |
| Spon2       | 25.8173072 | 3.75E-07 | 1.84540434 | 2.49E-06 |
| Ddx58       | 25.7884556 | 3.81E-07 | -1.2258143 | 2.53E-06 |
| Ccdc68      | 25.7002017 | 3.99E-07 | 1.10182741 | 2.65E-06 |
| Dnajb3      | 25.4991464 | 4.43E-07 | 1.31096583 | 2.94E-06 |

|         |            |          |            |          |
|---------|------------|----------|------------|----------|
| Pnrc1   | 25.404486  | 4.65E-07 | -0.8437438 | 3.08E-06 |
| Hmgb1   | 25.3788342 | 4.71E-07 | 0.78292592 | 3.12E-06 |
| Usp10   | 25.3503024 | 4.78E-07 | 0.93084654 | 3.16E-06 |
| Gimap5  | 25.300585  | 4.91E-07 | -1.4531269 | 3.24E-06 |
| Noa1    | 25.2627065 | 5.00E-07 | 0.91613937 | 3.31E-06 |
| Fhit    | 25.1607044 | 5.27E-07 | 1.1470907  | 3.48E-06 |
| Lactb2  | 25.140869  | 5.33E-07 | 1.03898942 | 3.52E-06 |
| Ipo5    | 25.0233794 | 5.66E-07 | 0.89744622 | 3.74E-06 |
| Mdfi    | 25.0060333 | 5.72E-07 | -1.9414045 | 3.77E-06 |
| Med21   | 24.988463  | 5.77E-07 | 0.87881388 | 3.80E-06 |
| Nubp1   | 24.9556531 | 5.87E-07 | 0.89049321 | 3.86E-06 |
| Elovl1  | 24.9458105 | 5.90E-07 | 0.91664335 | 3.88E-06 |
| Bex3    | 24.7299571 | 6.60E-07 | 0.8178992  | 4.34E-06 |
| Gtpbp4  | 24.6884157 | 6.74E-07 | 0.82387136 | 4.43E-06 |
| Bub1    | 24.651836  | 6.87E-07 | 1.05707259 | 4.51E-06 |
| Ddost   | 24.6316961 | 6.94E-07 | 0.83657693 | 4.55E-06 |
| Ube2k   | 24.5398394 | 7.28E-07 | 0.83262946 | 4.77E-06 |
| Rgs2    | 24.3740519 | 7.93E-07 | -1.3012433 | 5.20E-06 |
| Noc2l   | 24.3570761 | 8.00E-07 | 0.85936094 | 5.24E-06 |
| Chn2    | 24.3474806 | 8.04E-07 | -1.9418618 | 5.26E-06 |
| Elavl1  | 24.3031757 | 8.23E-07 | 0.85059178 | 5.38E-06 |
| F2rl2   | 24.2707775 | 8.37E-07 | -2.5373241 | 5.47E-06 |
| Dbi     | 24.2336753 | 8.53E-07 | 0.80626403 | 5.57E-06 |
| Psph    | 24.2283079 | 8.56E-07 | 0.94684118 | 5.59E-06 |
| Heatr1  | 24.1363147 | 8.98E-07 | 0.96694917 | 5.85E-06 |
| Mtfr1   | 24.0419631 | 9.43E-07 | 0.99688479 | 6.14E-06 |
| Sox12   | 24.0345068 | 9.46E-07 | 1.03962288 | 6.16E-06 |
| Sms     | 24.0043095 | 9.61E-07 | 0.84581217 | 6.26E-06 |
| Slc16a6 | 23.8798126 | 1.03E-06 | 0.96881914 | 6.67E-06 |
| Bcat2   | 23.5970818 | 1.19E-06 | 0.91772322 | 7.72E-06 |
| Trps1   | 23.5848982 | 1.20E-06 | -1.7321684 | 7.77E-06 |
| Cd9     | 23.5611341 | 1.21E-06 | -0.9198195 | 7.86E-06 |
| Ctsf    | 23.4721031 | 1.27E-06 | -1.4863633 | 8.22E-06 |
| F11r    | 23.4489866 | 1.28E-06 | -2.7231911 | 8.32E-06 |
| Smpd2   | 23.3923559 | 1.32E-06 | -1.3122528 | 8.56E-06 |
| Vrk1    | 23.3676193 | 1.34E-06 | 0.8671164  | 8.67E-06 |
| Card9   | 23.2932607 | 1.39E-06 | -2.0690376 | 9.00E-06 |
| Ddit4   | 23.2648089 | 1.41E-06 | -1.270901  | 9.13E-06 |
| Nans    | 23.2291149 | 1.44E-06 | 0.8619529  | 9.30E-06 |
| Robo3   | 23.1863696 | 1.47E-06 | -2.3357545 | 9.50E-06 |
| Rsad2   | 23.1547482 | 1.49E-06 | -1.8103846 | 9.65E-06 |
| Ndufaf1 | 23.1161951 | 1.53E-06 | 0.9571846  | 9.84E-06 |
| Chek1   | 23.0166326 | 1.61E-06 | 0.96974982 | 1.04E-05 |

|          |            |          |            |          |
|----------|------------|----------|------------|----------|
| Tspan4   | 22.9741927 | 1.64E-06 | 0.93639354 | 1.06E-05 |
| Fbxo36   | 22.8804157 | 1.72E-06 | 1.27507835 | 1.11E-05 |
| Arid5b   | 22.8546972 | 1.75E-06 | -1.5631984 | 1.12E-05 |
| Nol10    | 22.7768777 | 1.82E-06 | 1.05251206 | 1.17E-05 |
| Lars     | 22.7466324 | 1.85E-06 | 0.86915082 | 1.19E-05 |
| Tmed10   | 22.7012604 | 1.89E-06 | 0.80623714 | 1.22E-05 |
| Kpna2    | 22.6883984 | 1.91E-06 | 1.05600268 | 1.22E-05 |
| Srrm1    | 22.6776191 | 1.92E-06 | 0.79242156 | 1.23E-05 |
| Fkbp3    | 22.6636165 | 1.93E-06 | 0.80263895 | 1.24E-05 |
| Vapa     | 22.6616888 | 1.93E-06 | 0.80232068 | 1.24E-05 |
| Txndc17  | 22.543844  | 2.05E-06 | 0.82601042 | 1.31E-05 |
| Nop14    | 22.5320584 | 2.07E-06 | 0.85603453 | 1.32E-05 |
| Il15     | 22.5250777 | 2.07E-06 | -1.9079252 | 1.33E-05 |
| Fam214a  | 22.4963833 | 2.11E-06 | -0.9204894 | 1.35E-05 |
| Mrpl9    | 22.4369437 | 2.17E-06 | 0.87054827 | 1.39E-05 |
| Znhit2   | 22.3977833 | 2.22E-06 | 0.98446427 | 1.41E-05 |
| Nup93    | 22.3581958 | 2.26E-06 | 0.98069767 | 1.44E-05 |
| Ccdc34   | 22.2858341 | 2.35E-06 | 0.86091379 | 1.50E-05 |
| Slc4a8   | 22.2541466 | 2.39E-06 | -1.4755443 | 1.52E-05 |
| Ppp5c    | 22.246304  | 2.40E-06 | 0.92687688 | 1.53E-05 |
| Mrpl14   | 22.2188875 | 2.43E-06 | 0.824112   | 1.55E-05 |
| Inpp4b   | 22.1397176 | 2.54E-06 | -2.1704821 | 1.61E-05 |
| Ube2i    | 22.0958678 | 2.59E-06 | 0.7866738  | 1.65E-05 |
| Nptn     | 22.0774839 | 2.62E-06 | 0.94137693 | 1.66E-05 |
| Tnik     | 22.0582923 | 2.64E-06 | -0.9364065 | 1.68E-05 |
| Mettl16  | 22.0335801 | 2.68E-06 | 0.89765199 | 1.70E-05 |
| Trmt6    | 21.9672636 | 2.77E-06 | 0.8815729  | 1.76E-05 |
| Mphosph6 | 21.9450923 | 2.81E-06 | 0.92296674 | 1.78E-05 |
| Uxt      | 21.9331679 | 2.82E-06 | 0.90782766 | 1.79E-05 |
| Fgd4     | 21.9228739 | 2.84E-06 | -1.7345587 | 1.80E-05 |
| Psm4     | 21.8957486 | 2.88E-06 | 0.80070917 | 1.82E-05 |
| Dst      | 21.8546194 | 2.94E-06 | -1.2692267 | 1.86E-05 |
| Ufm1     | 21.7670085 | 3.08E-06 | 0.87650173 | 1.94E-05 |
| Alkbh7   | 21.7452509 | 3.11E-06 | 0.92824844 | 1.96E-05 |
| Ube2c    | 21.6659268 | 3.25E-06 | 0.99334487 | 2.05E-05 |
| Suclg2   | 21.5795363 | 3.39E-06 | 0.85071904 | 2.14E-05 |
| Abhd17a  | 21.5219996 | 3.50E-06 | 0.85535577 | 2.20E-05 |
| Plk1     | 21.5023582 | 3.53E-06 | 1.01073308 | 2.22E-05 |
| Cenpk    | 21.494566  | 3.55E-06 | 0.93069788 | 2.23E-05 |
| Nol11    | 21.4944185 | 3.55E-06 | 0.87523576 | 2.23E-05 |
| Sdad1    | 21.3858926 | 3.76E-06 | 0.87862367 | 2.36E-05 |
| Cyb5r3   | 21.1528513 | 4.24E-06 | 0.90263873 | 2.66E-05 |
| Psmc6    | 21.0491819 | 4.48E-06 | 0.82650052 | 2.81E-05 |

|           |            |          |            |          |
|-----------|------------|----------|------------|----------|
| Rps6ka1   | 20.986009  | 4.63E-06 | -1.0471351 | 2.90E-05 |
| Traf4     | 20.9410307 | 4.74E-06 | 1.16522807 | 2.97E-05 |
| Mcm3      | 20.929423  | 4.77E-06 | 0.8457577  | 2.98E-05 |
| Sac3d1    | 20.7623958 | 5.20E-06 | 0.90591114 | 3.25E-05 |
| Gtf2f2    | 20.6463203 | 5.52E-06 | 0.92145839 | 3.45E-05 |
| Irak1bp1  | 20.6064462 | 5.64E-06 | 1.29509414 | 3.53E-05 |
| Serpini1  | 20.5956864 | 5.67E-06 | -1.4812209 | 3.54E-05 |
| Fgfr1     | 20.5918303 | 5.68E-06 | 1.21959882 | 3.55E-05 |
| Nelfe     | 20.5469342 | 5.82E-06 | 0.90740218 | 3.63E-05 |
| Pycr2     | 20.4896123 | 6.00E-06 | 0.87994559 | 3.74E-05 |
| Gdf3      | 20.4698544 | 6.06E-06 | 0.88492209 | 3.77E-05 |
| Zfp608    | 20.4691411 | 6.06E-06 | -1.2743242 | 3.77E-05 |
| Ctxn1     | 20.4433932 | 6.14E-06 | -1.4627423 | 3.82E-05 |
| Zcchc17   | 20.4213747 | 6.21E-06 | 0.85221478 | 3.86E-05 |
| Trnau1ap  | 20.2984118 | 6.63E-06 | 0.88261614 | 4.12E-05 |
| Ckap4     | 20.2330917 | 6.86E-06 | -1.3677312 | 4.26E-05 |
| Ccne2     | 20.1896138 | 7.01E-06 | 1.11830328 | 4.35E-05 |
| Krt18     | 20.1627969 | 7.11E-06 | -1.0019775 | 4.41E-05 |
| Cox20     | 20.1357324 | 7.21E-06 | 0.85600549 | 4.47E-05 |
| Sumf2     | 20.1341697 | 7.22E-06 | 0.98193419 | 4.47E-05 |
| Bend4     | 20.0395816 | 7.59E-06 | -2.0280965 | 4.70E-05 |
| Bdh1      | 19.9369637 | 8.00E-06 | 1.31080077 | 4.95E-05 |
| Gm17586   | 19.8789122 | 8.25E-06 | 1.25971205 | 5.10E-05 |
| Gpc4      | 19.8603745 | 8.33E-06 | 1.21417273 | 5.15E-05 |
| Abce1     | 19.8356552 | 8.44E-06 | 0.85276958 | 5.21E-05 |
| Cdkn2d    | 19.8166278 | 8.52E-06 | -0.9366824 | 5.26E-05 |
| Eme1      | 19.7761017 | 8.71E-06 | 1.08597783 | 5.37E-05 |
| Lipt2     | 19.7702242 | 8.73E-06 | 1.06296564 | 5.38E-05 |
| Lias      | 19.7472305 | 8.84E-06 | 0.90392166 | 5.45E-05 |
| Sec61b    | 19.6198697 | 9.45E-06 | 0.77327745 | 5.81E-05 |
| Eef1akmt4 | 19.6196318 | 9.45E-06 | 0.99450834 | 5.81E-05 |
| Slc35g1   | 19.5935341 | 9.58E-06 | 1.23659919 | 5.89E-05 |
| Btnl10    | 19.5280106 | 9.91E-06 | 2.49134732 | 6.09E-05 |
| Pycard    | 19.515114  | 9.98E-06 | 0.83908434 | 6.13E-05 |
| Eif3c     | 19.4676048 | 1.02E-05 | 0.78087608 | 6.28E-05 |
| Pradc1    | 19.4514193 | 1.03E-05 | 0.94297147 | 6.33E-05 |
| Coa7      | 19.3081532 | 1.11E-05 | 0.99459602 | 6.82E-05 |
| Ncbp1     | 19.200449  | 1.18E-05 | 0.89340959 | 7.21E-05 |
| Arl4c     | 19.1763087 | 1.19E-05 | -1.8723828 | 7.30E-05 |
| Kctd1     | 19.1695469 | 1.20E-05 | -0.9600169 | 7.32E-05 |
| Alg8      | 19.1642947 | 1.20E-05 | 1.03412401 | 7.33E-05 |
| Chaf1b    | 19.0887823 | 1.25E-05 | 0.89543827 | 7.63E-05 |
| Madd      | 19.0373273 | 1.28E-05 | -0.9557205 | 7.83E-05 |



|             |            |          |            |            |
|-------------|------------|----------|------------|------------|
| Rpl27       | 18.9784703 | 1.32E-05 | 0.77898826 | 8.07E-05   |
| Gsto1       | 18.9618552 | 1.33E-05 | 0.81024625 | 8.14E-05   |
| Soat1       | 18.9602267 | 1.33E-05 | -1.6863093 | 8.14E-05   |
| Stradb      | 18.9551006 | 1.34E-05 | 1.02906766 | 8.15E-05   |
| Rangap1     | 18.9512634 | 1.34E-05 | 0.86399931 | 8.17E-05   |
| Crim1       | 18.9360131 | 1.35E-05 | -1.1043819 | 8.23E-05   |
| Sumo2       | 18.9322384 | 1.35E-05 | 0.78017983 | 8.24E-05   |
| Snx33       | 18.9026325 | 1.38E-05 | -0.9917569 | 8.36E-05   |
| Pfas        | 18.8869359 | 1.39E-05 | 0.95130918 | 8.43E-05   |
| Las1l       | 18.8811147 | 1.39E-05 | 0.85410228 | 8.45E-05   |
| Dgcr6       | 18.8391825 | 1.42E-05 | 0.8657608  | 8.63E-05   |
| Calr        | 18.8189251 | 1.44E-05 | 0.78914588 | 8.71E-05   |
| Churc1      | 18.7393888 | 1.50E-05 | 0.83364892 | 9.08E-05   |
| Prpf31      | 18.7046476 | 1.53E-05 | 0.86239447 | 9.24E-05   |
| 3300005D01F | 18.571532  | 1.64E-05 | 1.18109309 | 9.90E-05   |
| Nfkbib      | 18.5595537 | 1.65E-05 | 0.94022523 | 9.96E-05   |
| Zfp467      | 18.529984  | 1.67E-05 | -2.1992701 | 0.0001011  |
| Sephs2      | 18.4276872 | 1.76E-05 | 0.87245864 | 0.00010661 |
| Eif2b5      | 18.3592598 | 1.83E-05 | 0.89291155 | 0.00011039 |
| Nup35       | 18.3589959 | 1.83E-05 | 0.96778646 | 0.00011039 |
| Cers6       | 18.2349689 | 1.95E-05 | -1.3123075 | 0.00011769 |
| Ppib        | 18.2348118 | 1.95E-05 | 0.77468221 | 0.00011769 |
| Vkorc1l1    | 18.2211884 | 1.97E-05 | 0.88779818 | 0.00011846 |
| Mars        | 18.2118676 | 1.98E-05 | 0.92833408 | 0.00011897 |
| Fam96a      | 18.186114  | 2.00E-05 | 0.80739194 | 0.00012051 |
| 2310009B15F | 18.1502756 | 2.04E-05 | 0.89094245 | 0.00012273 |
| Acbd6       | 18.1230466 | 2.07E-05 | 0.81923428 | 0.00012442 |
| Hsp90b1     | 18.0216932 | 2.18E-05 | 0.80311623 | 0.00013115 |
| Fcgr2b      | 18.0105957 | 2.20E-05 | -1.7442412 | 0.00013183 |
| Rbpms2      | 18.0030155 | 2.21E-05 | -2.3202245 | 0.00013228 |
| Mllt3       | 17.981152  | 2.23E-05 | 0.90729863 | 0.00013373 |
| Sptbn1      | 17.9386565 | 2.28E-05 | -1.0214366 | 0.00013666 |
| Slc2a9      | 17.8949149 | 2.33E-05 | -1.3980122 | 0.00013976 |
| Mrpl1       | 17.8711872 | 2.36E-05 | 0.89719228 | 0.0001414  |
| Trmt112     | 17.8703795 | 2.36E-05 | 0.79093791 | 0.0001414  |
| Pclaf       | 17.8411918 | 2.40E-05 | 0.92334086 | 0.0001435  |
| Pcbd2       | 17.7690468 | 2.49E-05 | 0.84754574 | 0.00014896 |
| Marcks      | 17.7222694 | 2.56E-05 | -1.2372997 | 0.00015257 |
| Sdhaf1      | 17.7066652 | 2.58E-05 | 0.88298969 | 0.00015374 |
| Rrp12       | 17.6607921 | 2.64E-05 | 1.02413388 | 0.0001574  |
| Eva1b       | 17.57808   | 2.76E-05 | -1.3709246 | 0.0001643  |
| Gsap        | 17.5733252 | 2.76E-05 | -1.9831653 | 0.00016461 |
| Josd2       | 17.5455548 | 2.81E-05 | 0.86327976 | 0.00016686 |

|          |            |          |            |            |
|----------|------------|----------|------------|------------|
| Smim3    | 17.5452556 | 2.81E-05 | -1.0344189 | 0.00016686 |
| Pcgf6    | 17.4994859 | 2.87E-05 | 0.94032239 | 0.00017082 |
| Utp11    | 17.4781276 | 2.91E-05 | 0.81723697 | 0.00017265 |
| Oxct1    | 17.4493743 | 2.95E-05 | 0.83831815 | 0.00017518 |
| Gbp5     | 17.4360674 | 2.97E-05 | -1.4643473 | 0.0001763  |
| Vsig10l  | 17.4160495 | 3.00E-05 | -1.5506014 | 0.00017806 |
| Isy1     | 17.3611217 | 3.09E-05 | 0.86538736 | 0.00018317 |
| Lsm8     | 17.3164873 | 3.16E-05 | 0.80977197 | 0.00018741 |
| Glrx2    | 17.3034455 | 3.19E-05 | 0.8205341  | 0.00018859 |
| Pde4b    | 17.2892292 | 3.21E-05 | -1.0068717 | 0.0001899  |
| Wdr77    | 17.2798202 | 3.23E-05 | 0.87006418 | 0.00019073 |
| Ell2     | 17.1429283 | 3.47E-05 | 0.9870111  | 0.00020486 |
| Ggact    | 17.1267102 | 3.50E-05 | 1.01407201 | 0.00020649 |
| Sun2     | 17.1103734 | 3.53E-05 | -1.0186144 | 0.00020815 |
| Thumpd3  | 16.9951273 | 3.75E-05 | 0.87954211 | 0.00022104 |
| Ube2j2   | 16.9380579 | 3.86E-05 | 0.85552358 | 0.00022765 |
| Rpusd3   | 16.9020641 | 3.94E-05 | 1.14672001 | 0.00023187 |
| Enkd1    | 16.8944559 | 3.95E-05 | 1.10509842 | 0.00023267 |
| Ndst1    | 16.8861799 | 3.97E-05 | -1.284911  | 0.00023355 |
| Tmed2    | 16.8798646 | 3.98E-05 | 0.80417686 | 0.00023419 |
| Nudt21   | 16.8685738 | 4.01E-05 | 0.80040241 | 0.00023545 |
| Efcc1    | 16.8508086 | 4.04E-05 | -2.4734381 | 0.00023752 |
| Irf2bpl  | 16.7534422 | 4.26E-05 | -1.4266094 | 0.00024988 |
| Ncapg    | 16.733602  | 4.30E-05 | 0.96129799 | 0.00025236 |
| Slc31a1  | 16.7244787 | 4.32E-05 | 1.05490542 | 0.00025342 |
| Cdc123   | 16.7142646 | 4.35E-05 | 0.82901328 | 0.00025457 |
| Tpgs2    | 16.7136804 | 4.35E-05 | 1.02481295 | 0.00025457 |
| Smarca5  | 16.7084555 | 4.36E-05 | 0.78999566 | 0.00025512 |
| Atp8b5   | 16.6941052 | 4.39E-05 | -1.6276256 | 0.00025691 |
| Prmt7    | 16.5642668 | 4.70E-05 | 0.875005   | 0.00027495 |
| Smim4    | 16.5489958 | 4.74E-05 | 0.81580285 | 0.00027701 |
| Hist1h4i | 16.5012466 | 4.86E-05 | 0.88716947 | 0.00028391 |
| Tet1     | 16.493436  | 4.88E-05 | -0.9249679 | 0.00028491 |
| Cdpf1    | 16.4919321 | 4.89E-05 | 0.89952794 | 0.00028497 |
| Ampd3    | 16.4287871 | 5.05E-05 | 1.1510665  | 0.00029445 |
| Donson   | 16.4085903 | 5.11E-05 | 1.12415663 | 0.00029743 |
| Aars     | 16.4059206 | 5.11E-05 | 0.97495785 | 0.00029768 |
| Pthr1    | 16.3932717 | 5.15E-05 | 1.11547048 | 0.0002995  |
| Adh5     | 16.3878666 | 5.16E-05 | 0.80994086 | 0.00030018 |
| Dtd2     | 16.3637783 | 5.23E-05 | 0.89654441 | 0.00030384 |
| Zfp652   | 16.2209179 | 5.64E-05 | 0.90477617 | 0.00032744 |
| Fanca    | 16.2197584 | 5.64E-05 | 1.09506887 | 0.00032745 |
| Cngb1    | 16.2175393 | 5.65E-05 | -1.0511869 | 0.00032764 |

|             |            |            |            |            |
|-------------|------------|------------|------------|------------|
| Map4k4      | 16.1885273 | 5.73E-05   | -0.9504454 | 0.00033251 |
| 2700038G22I | 16.1335825 | 5.90E-05   | 0.97575866 | 0.00034209 |
| Slc44a1     | 15.9924063 | 6.36E-05   | 1.25469421 | 0.00036836 |
| Ift27       | 15.880433  | 6.75E-05   | 0.89752647 | 0.00039058 |
| Mdfic       | 15.8402    | 6.89E-05   | -1.6582552 | 0.00039874 |
| Hmga1       | 15.8380219 | 6.90E-05   | 1.01174442 | 0.00039897 |
| Idi1        | 15.8089051 | 7.01E-05   | 0.92257712 | 0.00040492 |
| Tars        | 15.7598511 | 7.19E-05   | 0.89117458 | 0.00041532 |
| Ndufs1      | 15.7586671 | 7.20E-05   | 0.86635554 | 0.00041534 |
| Plpp1       | 15.6362136 | 7.68E-05   | 1.95173636 | 0.00044286 |
| Ctu2        | 15.5444137 | 8.06E-05   | 0.94790585 | 0.00046462 |
| Abcf1       | 15.5410758 | 8.07E-05   | 0.79597617 | 0.00046518 |
| 2010320M18  | 15.481711  | 8.33E-05   | 0.94866267 | 0.00047974 |
| Bcl2        | 15.4651293 | 8.40E-05   | -0.9429787 | 0.00048345 |
| Acyp2       | 15.4649588 | 8.40E-05   | 1.06698923 | 0.00048345 |
| mt-Cytb     | 15.4407148 | 8.51E-05   | 0.74675906 | 0.00048941 |
| Ctsl        | 15.4272885 | 8.57E-05   | 0.92579314 | 0.00049262 |
| Cars2       | 15.353696  | 8.91E-05   | 0.9071446  | 0.00051172 |
| Gatsl2      | 15.3532199 | 8.92E-05   | -1.0652825 | 0.00051172 |
| Sh2d4a      | 15.2860395 | 9.24E-05   | 1.10332962 | 0.00052994 |
| Nfs1        | 15.261187  | 9.36E-05   | 0.86208249 | 0.00053665 |
| Gsta4       | 15.2554678 | 9.39E-05   | 1.30869217 | 0.00053797 |
| Anapc11     | 15.2390257 | 9.47E-05   | 0.8173511  | 0.00054236 |
| Ubtf        | 15.2298842 | 9.52E-05   | 0.81585162 | 0.00054468 |
| Sco2        | 15.2248324 | 9.54E-05   | 0.89040647 | 0.00054571 |
| Yif1a       | 15.2241416 | 9.55E-05   | 0.87972702 | 0.00054571 |
| Pcbp1       | 15.2007982 | 9.67E-05   | 0.77295249 | 0.00055218 |
| Mrm3        | 15.165736  | 9.85E-05   | 0.93828962 | 0.00056221 |
| Cd2ap       | 15.1540018 | 9.91E-05   | 1.02830975 | 0.00056539 |
| Baz1a       | 15.1088404 | 0.00010149 | 0.81996099 | 0.00057875 |
| Psma1       | 15.0914428 | 0.00010243 | 0.78991634 | 0.00058377 |
| Cops4       | 15.0722499 | 0.00010347 | 0.83814821 | 0.0005894  |
| Pcyt1a      | 15.0623403 | 0.00010402 | 0.92248375 | 0.00059217 |
| Dhx29       | 14.9617016 | 0.00010972 | 0.94319547 | 0.00062425 |
| Gm12454     | 14.9556068 | 0.00011007 | -0.8532146 | 0.00062591 |
| Selenbp1    | 14.9479491 | 0.00011052 | 0.83452469 | 0.0006281  |
| Gm17092     | 14.945929  | 0.00011064 | 1.20470902 | 0.00062841 |
| Frat1       | 14.882782  | 0.0001144  | 0.90944818 | 0.00064943 |
| Dusp6       | 14.8544135 | 0.00011614 | -1.0649567 | 0.0006589  |
| Lamtor2     | 14.8441244 | 0.00011677 | 0.78110954 | 0.00066212 |
| Tespa1      | 14.8247614 | 0.00011798 | -1.3663246 | 0.00066858 |
| Tfg         | 14.7943435 | 0.00011989 | 0.85442648 | 0.00067906 |
| Gbp2        | 14.788859  | 0.00012024 | -1.1517433 | 0.00068065 |

|          |            |            |            |            |
|----------|------------|------------|------------|------------|
| Cyp2j6   | 14.7477273 | 0.0001229  | -2.5105032 | 0.00069527 |
| Mrpl10   | 14.7442292 | 0.00012312 | 0.89545198 | 0.00069617 |
| Phldb1   | 14.6228985 | 0.00013131 | -1.0414728 | 0.00074203 |
| Rpn1     | 14.6117139 | 0.00013209 | 0.82502916 | 0.00074602 |
| Cdca5    | 14.6009601 | 0.00013285 | 0.95806382 | 0.00074987 |
| Dld      | 14.5872645 | 0.00013382 | 0.85180437 | 0.00075491 |
| Mad2l1   | 14.5610279 | 0.00013569 | 0.88775294 | 0.00076506 |
| Dna2     | 14.5387221 | 0.00013731 | 0.96497443 | 0.00077374 |
| Hmgcl    | 14.5016959 | 0.00014003 | 0.86061404 | 0.00078865 |
| Echdc1   | 14.3974088 | 0.00014801 | 0.94992535 | 0.00083308 |
| Slc22a23 | 14.313583  | 0.00015474 | 1.15188107 | 0.00087051 |
| Trim30b  | 14.2941467 | 0.00015635 | -1.8210658 | 0.00087905 |
| Fam96b   | 14.2884192 | 0.00015683 | 0.83472824 | 0.00088123 |
| Gm20186  | 14.2845953 | 0.00015715 | -1.0124226 | 0.00088253 |
| Hnrnp11  | 14.2762626 | 0.00015784 | 0.87975108 | 0.00088595 |
| Vcl      | 14.2732927 | 0.00015809 | 0.96277401 | 0.00088685 |
| Brip1    | 14.2451789 | 0.00016047 | 1.07095699 | 0.00089969 |
| Gm17473  | 14.1994068 | 0.00016442 | -1.2519139 | 0.00092132 |
| Rbfa     | 14.1792633 | 0.00016619 | 0.81938242 | 0.00093071 |
| Pdlim1   | 14.1608679 | 0.00016782 | 0.80838099 | 0.00093933 |
| Stub1    | 14.1370555 | 0.00016996 | 0.8094808  | 0.00095076 |
| Tnip3    | 14.1173111 | 0.00017176 | -2.018603  | 0.00096025 |
| Tbrg4    | 14.1017625 | 0.00017318 | 0.93911864 | 0.00096768 |
| Egln1    | 14.0907119 | 0.0001742  | 0.9508356  | 0.00097284 |
| Trnt1    | 14.0701993 | 0.00017611 | 0.83782928 | 0.00098296 |
| Fastkd2  | 14.0088596 | 0.00018195 | 0.92666683 | 0.00101498 |
| Jund     | 13.962837  | 0.00018646 | -0.8151129 | 0.00103955 |
| Gmppb    | 13.959597  | 0.00018678 | 0.99878306 | 0.00104076 |
| L3mbtl3  | 13.9538488 | 0.00018735 | -0.8433899 | 0.00104336 |
| Cops5    | 13.9429106 | 0.00018845 | 0.81271085 | 0.00104887 |
| Ost4     | 13.9191585 | 0.00019084 | 0.77944154 | 0.00106161 |
| Polr3k   | 13.8703694 | 0.00019586 | 0.81708046 | 0.00108892 |
| Cenpp    | 13.8465649 | 0.00019836 | 0.91433568 | 0.00110219 |
| Mar-05   | 13.8124821 | 0.00020199 | 0.8188249  | 0.00112174 |
| Larp1    | 13.7779348 | 0.00020574 | 0.80928774 | 0.00114192 |
| Fam26f   | 13.7299953 | 0.00021106 | 1.12274087 | 0.00117079 |
| Elp5     | 13.7247868 | 0.00021164 | 0.8680589  | 0.00117339 |
| Bnip1    | 13.7176546 | 0.00021245 | 0.91313348 | 0.0011772  |
| Hacd2    | 13.6922996 | 0.00021534 | 0.92624982 | 0.00119197 |
| Gnl1     | 13.6921494 | 0.00021535 | 0.90805915 | 0.00119197 |
| Pum3     | 13.6852598 | 0.00021614 | 0.82716687 | 0.00119569 |
| Lbh      | 13.6632239 | 0.0002187  | -1.1707838 | 0.00120913 |
| Orc1     | 13.6476041 | 0.00022052 | 1.09447298 | 0.00121855 |

|           |            |            |            |            |
|-----------|------------|------------|------------|------------|
| Dnajc24   | 13.6429029 | 0.00022108 | 0.89795187 | 0.00122093 |
| Armc1     | 13.6404951 | 0.00022136 | 0.84641179 | 0.00122182 |
| Tcea1     | 13.6183959 | 0.00022398 | 0.8118413  | 0.00123561 |
| Sapcd2    | 13.6140849 | 0.00022449 | 1.03467972 | 0.00123776 |
| Dynll2    | 13.5971136 | 0.00022653 | 0.84672716 | 0.00124831 |
| Otud6b    | 13.5283965 | 0.00023498 | 0.91396362 | 0.00129415 |
| Samd12    | 13.4652835 | 0.00024302 | -1.6844632 | 0.00133767 |
| Gm17745   | 13.4117847 | 0.00025005 | -1.1543161 | 0.00137561 |
| Calcoco1  | 13.3672286 | 0.00025606 | -1.1254989 | 0.0014079  |
| Eya2      | 13.3306606 | 0.0002611  | -1.4636657 | 0.00143484 |
| Lpgat1    | 13.2941092 | 0.00026624 | -1.2120229 | 0.00146227 |
| Pim1      | 13.2868603 | 0.00026727 | -0.8785381 | 0.00146713 |
| Cd244     | 13.2653469 | 0.00027036 | -1.6734324 | 0.00148325 |
| St13      | 13.2119676 | 0.00027817 | 0.78079606 | 0.00152526 |
| Exosc2    | 13.1881027 | 0.00028173 | 0.8772745  | 0.00154395 |
| Guca1a    | 13.1536846 | 0.00028695 | -1.3958297 | 0.00157171 |
| Pold3     | 13.1439745 | 0.00028845 | 0.86627638 | 0.00157901 |
| Hspbp1    | 13.1310041 | 0.00029045 | 0.86219398 | 0.00158911 |
| Pus7      | 13.1072415 | 0.00029416 | 0.86963868 | 0.00160851 |
| Rps23     | 13.1061125 | 0.00029433 | 0.74758981 | 0.00160859 |
| Lpar6     | 13.0219751 | 0.00030786 | -1.1295953 | 0.00168158 |
| Camk2a    | 13.01051   | 0.00030975 | -2.3225637 | 0.00169098 |
| Dhrs13    | 12.9763204 | 0.00031546 | 1.04680392 | 0.0017212  |
| Trem1     | 12.9520691 | 0.00031957 | -1.3498197 | 0.00174269 |
| Thap3     | 12.9364258 | 0.00032225 | -0.9363485 | 0.00175635 |
| Mrpl39    | 12.8700316 | 0.00033389 | 0.87136047 | 0.00181878 |
| Suv39h2   | 12.8386415 | 0.00033953 | 0.98568076 | 0.00184853 |
| Igsf8     | 12.7498364 | 0.00035604 | 0.94136719 | 0.00193734 |
| Rufy3     | 12.7400414 | 0.00035791 | -0.8354351 | 0.00194645 |
| Nfatc1    | 12.7234112 | 0.00036111 | -0.841975  | 0.00196277 |
| Cxxc5     | 12.7112827 | 0.00036346 | -0.9162194 | 0.00197446 |
| Dnlz      | 12.64947   | 0.00037567 | 0.8421165  | 0.00203971 |
| Sep-06    | 12.6253459 | 0.00038055 | -0.863554  | 0.00206508 |
| Eif3l     | 12.5937944 | 0.00038703 | 0.79771835 | 0.00209909 |
| Crlf2     | 12.5617751 | 0.00039372 | -0.857955  | 0.00213421 |
| Hoxa7     | 12.5528447 | 0.0003956  | -0.9352095 | 0.00214326 |
| Rida      | 12.5360884 | 0.00039917 | 0.86785703 | 0.00216115 |
| Utrn      | 12.5352873 | 0.00039934 | -0.9125446 | 0.00216115 |
| Rps12-ps3 | 12.5068409 | 0.00040546 | 0.85747811 | 0.00219312 |
| Fbxo32    | 12.2919026 | 0.00045493 | -1.117382  | 0.00245932 |
| Gata3     | 12.2827943 | 0.00045715 | -1.3836242 | 0.00247002 |
| Tmem71    | 12.237389  | 0.00046841 | -1.2584336 | 0.00252948 |
| Dock11    | 12.1675332 | 0.00048629 | -0.9163317 | 0.00262457 |

|             |            |            |            |            |
|-------------|------------|------------|------------|------------|
| Cdc45       | 12.1135183 | 0.00050058 | 0.93681569 | 0.00270024 |
| Coprs       | 12.095065  | 0.00050555 | 1.22800499 | 0.00272562 |
| 1500009L16R | 12.087525  | 0.0005076  | -1.7869516 | 0.00273519 |
| Hirip3      | 12.0770822 | 0.00051045 | 0.84138258 | 0.00274907 |
| Nadk        | 12.0742403 | 0.00051123 | 0.88155717 | 0.00275177 |
| Rbp1        | 12.0719642 | 0.00051186 | -1.1901581 | 0.00275365 |
| Ppa2        | 12.0127442 | 0.00052838 | 0.81837972 | 0.002841   |
| Gm11273     | 12.0112861 | 0.00052879 | 1.09039399 | 0.0028417  |
| Slc7a8      | 11.984385  | 0.00053648 | -1.3964393 | 0.00288146 |
| Wdsub1      | 11.8318087 | 0.00058227 | 0.98290529 | 0.00312573 |
| Calhm2      | 11.8271765 | 0.00058372 | -1.1400722 | 0.00313183 |
| Cks2        | 11.8217323 | 0.00058543 | 0.79365627 | 0.00313931 |
| Mcm4        | 11.8103068 | 0.00058904 | 0.83654905 | 0.00315694 |
| Clta        | 11.7656273 | 0.00060335 | 0.75953296 | 0.00323188 |
| Pdcd2       | 11.7582616 | 0.00060574 | 0.82636535 | 0.00324263 |
| Esd         | 11.757449  | 0.000606   | 0.76517398 | 0.00324263 |
| Coq2        | 11.7502588 | 0.00060835 | 0.84078675 | 0.00325344 |
| Apip        | 11.7443859 | 0.00061027 | 0.82676281 | 0.00326197 |
| Kctd17      | 11.7197474 | 0.0006184  | -1.9979054 | 0.00330367 |
| Smim24      | 11.6943977 | 0.00062689 | -0.9370306 | 0.00334719 |
| Hs6st1      | 11.6847079 | 0.00063016 | 0.94074122 | 0.00336287 |
| Maip1       | 11.6737867 | 0.00063387 | 0.85996911 | 0.00338058 |
| Dnajb11     | 11.672943  | 0.00063416 | 0.8481851  | 0.00338058 |
| Desi1       | 11.6715224 | 0.00063464 | 0.87611063 | 0.00338136 |
| Bad         | 11.663497  | 0.00063738 | 0.85592587 | 0.00339416 |
| Bcap29      | 11.6171829 | 0.00065345 | 0.81407887 | 0.00347788 |
| Selenof     | 11.5631198 | 0.00067273 | 0.76258943 | 0.00357856 |
| Nsfl1c      | 11.4819573 | 0.00070275 | 0.83389882 | 0.00373627 |
| Tnrc18      | 11.4719559 | 0.00070654 | -0.9139007 | 0.00375443 |
| Tmem216     | 11.4703084 | 0.00070717 | 0.92978196 | 0.00375576 |
| 1810055G02I | 11.4481933 | 0.00071564 | 1.15329724 | 0.0037987  |
| Vars        | 11.4298194 | 0.00072275 | 0.81937767 | 0.0038344  |
| Thap7       | 11.4131593 | 0.00072926 | 0.87003145 | 0.00386689 |
| Mettl5      | 11.3947506 | 0.00073652 | 0.84936742 | 0.00390332 |
| Nop9        | 11.3409482 | 0.00075817 | 0.86130049 | 0.0040159  |
| Adat2       | 11.3320399 | 0.00076181 | 0.94920125 | 0.00403307 |
| Yae1d1      | 11.3093107 | 0.00077119 | 0.83693226 | 0.00408058 |
| Cenpn       | 11.2842059 | 0.00078169 | 0.94210246 | 0.00413256 |
| Slc39a8     | 11.28384   | 0.00078185 | 1.0218394  | 0.00413256 |
| U2surp      | 11.2749581 | 0.0007856  | 0.77615368 | 0.00415018 |
| Rps6ka4     | 11.1941979 | 0.00082053 | 1.01446416 | 0.00433246 |
| Recql4      | 11.1750132 | 0.00082906 | 1.1215731  | 0.00437517 |
| Abca1       | 11.1708367 | 0.00083093 | -1.1953598 | 0.00438271 |

|          |            |            |            |            |
|----------|------------|------------|------------|------------|
| Pes1     | 11.1639676 | 0.00083401 | 0.81734428 | 0.00439665 |
| Olfra417 | 11.1187757 | 0.00085458 | -1.0367442 | 0.00450269 |
| Sys1     | 11.1157071 | 0.000856   | 0.80122379 | 0.00450777 |
| Nabp2    | 11.077638  | 0.00087375 | 0.82287402 | 0.00459784 |
| Arhgef18 | 11.0770578 | 0.00087402 | -0.9274427 | 0.00459784 |
| Slc25a10 | 11.0723127 | 0.00087626 | 0.98464059 | 0.00460501 |
| Ggta1    | 11.0722152 | 0.00087631 | -1.0561661 | 0.00460501 |
| Spns3    | 11.0702788 | 0.00087722 | -0.877007  | 0.00460739 |
| Fgd2     | 11.0315503 | 0.00089574 | -1.2830925 | 0.00470217 |
| Zfp30    | 11.0295335 | 0.00089672 | -1.1326738 | 0.00470482 |
| Alg5     | 10.9830901 | 0.00091947 | 0.83936083 | 0.00482166 |
| Gtf2h1   | 10.9807619 | 0.00092063 | 0.86605414 | 0.00482518 |
| Emcn     | 10.9399127 | 0.00094115 | -1.9893924 | 0.00493014 |
| Pusl1    | 10.9218504 | 0.00095037 | 0.98680955 | 0.00497583 |
| Chac2    | 10.9001526 | 0.00096156 | 0.95122751 | 0.00503181 |
| Nol7     | 10.8895048 | 0.00096711 | 0.76480848 | 0.00505817 |
| Acy1     | 10.874755  | 0.00097484 | 1.00938426 | 0.00509594 |
| Mipep    | 10.867988  | 0.00097841 | 0.93114003 | 0.00511191 |
| Nuf2     | 10.8135636 | 0.00100759 | 0.92230614 | 0.00526163 |
| Ltb4r1   | 10.7840699 | 0.00102377 | -1.186969  | 0.00534334 |
| Pgam5    | 10.781053  | 0.00102544 | 0.8930313  | 0.00534925 |
| Coq6     | 10.7788431 | 0.00102667 | 0.9293631  | 0.00535284 |
| Arhgap19 | 10.773046  | 0.00102989 | 0.95322862 | 0.00536683 |
| Epdr1    | 10.7718228 | 0.00103057 | 0.83514733 | 0.00536757 |
| Hdgfl3   | 10.75465   | 0.00104018 | -1.1990166 | 0.00541478 |
| Clec4d   | 10.7406955 | 0.00104805 | -0.8241035 | 0.00545292 |
| Clnk     | 10.7294694 | 0.00105443 | -1.8833106 | 0.00548324 |
| Upp1     | 10.7277994 | 0.00105538 | -1.6208814 | 0.00548533 |
| Rab17    | 10.7250369 | 0.00105696 | -1.3144134 | 0.00549066 |
| Cited2   | 10.7213072 | 0.00105909 | -0.8288896 | 0.00549888 |
| Tysnd1   | 10.7194915 | 0.00106013 | 0.8832682  | 0.00550141 |
| Snrpb2   | 10.718448  | 0.00106073 | 0.8041732  | 0.00550165 |
| Spcs2    | 10.7099424 | 0.00106561 | 0.7668306  | 0.00552413 |
| Ahcy     | 10.7078761 | 0.0010668  | 0.9414586  | 0.00552743 |
| Atpaf2   | 10.6499392 | 0.00110075 | 0.91741349 | 0.00570033 |
| Cacnb2   | 10.6187512 | 0.00111947 | -1.765922  | 0.00579427 |
| Fmo5     | 10.5553032 | 0.00115855 | -0.997334  | 0.00599346 |
| Dnaja4   | 10.5488528 | 0.0011626  | 1.27373266 | 0.0060113  |
| Trim10   | 10.4530947 | 0.00122444 | 1.90758208 | 0.00632776 |
| Trappc1  | 10.4300654 | 0.0012398  | 0.83147148 | 0.00640383 |
| Prkrip1  | 10.4120296 | 0.00125197 | 0.86934624 | 0.00646333 |
| Creld2   | 10.3940409 | 0.00126423 | 0.91190671 | 0.00652323 |
| Cox10    | 10.3929628 | 0.00126496 | 0.90019513 | 0.00652366 |

|          |            |            |            |            |
|----------|------------|------------|------------|------------|
| Cdc20    | 10.3639916 | 0.00128497 | 0.86110218 | 0.00662341 |
| Impdh2   | 10.3403529 | 0.00130153 | 0.75656007 | 0.00670531 |
| Krtcap3  | 10.3316703 | 0.00130767 | 1.16610391 | 0.00673344 |
| Gemin5   | 10.3172118 | 0.00131795 | 0.87127492 | 0.0067829  |
| Bin2     | 10.315638  | 0.00131908 | -0.8587668 | 0.00678518 |
| Nme4     | 10.273173  | 0.00134978 | 0.79669523 | 0.00693956 |
| Syk      | 10.2554954 | 0.00136278 | -0.8842824 | 0.00700277 |
| Hmga2    | 10.2424915 | 0.00137242 | -1.4263381 | 0.00704867 |
| Pop7     | 10.1669678 | 0.00142979 | 0.8143693  | 0.00733851 |
| Psm8     | 10.1662816 | 0.00143032 | 0.76898069 | 0.00733851 |
| Mpp6     | 10.1030707 | 0.00148022 | 0.79607156 | 0.00759062 |
| Gale     | 10.0929966 | 0.00148834 | 1.03038498 | 0.00762831 |
| Mtap     | 10.0904322 | 0.00149041 | 0.83977725 | 0.00763501 |
| Dnajc9   | 10.0594762 | 0.00151566 | 0.78968182 | 0.00776038 |
| Satb1    | 10.0227118 | 0.00154622 | -1.2198201 | 0.00791276 |
| Kif15    | 10.0109251 | 0.00155614 | 0.86636198 | 0.00795947 |
| Spryd4   | 9.95391872 | 0.00160507 | 0.89306876 | 0.00820554 |
| Bcas2    | 9.94273155 | 0.00161486 | 0.76889014 | 0.00825133 |
| Gfm1     | 9.9413644  | 0.00161606 | 0.88906478 | 0.00825323 |
| Morn2    | 9.9244231  | 0.001631   | 0.92025884 | 0.00832528 |
| Rnf122   | 9.91800538 | 0.0016367  | -1.1577597 | 0.00835008 |
| Wls      | 9.90952006 | 0.00164426 | -0.940824  | 0.00838438 |
| Larp4    | 9.88713183 | 0.00166439 | 0.8034811  | 0.00848267 |
| Melk     | 9.83898986 | 0.00170851 | 0.96962745 | 0.00870312 |
| Prpsap1  | 9.82420444 | 0.0017223  | 0.82464757 | 0.00876607 |
| Arhgef6  | 9.82385501 | 0.00172263 | -1.0417151 | 0.00876607 |
| Gm28187  | 9.81945745 | 0.00172675 | -1.2136095 | 0.00878258 |
| Hsbp1    | 9.81798614 | 0.00172813 | 0.77905007 | 0.00878512 |
| Figl1    | 9.81163194 | 0.00173412 | 0.86673458 | 0.00881104 |
| Pelp1    | 9.80637179 | 0.00173908 | 0.8501575  | 0.00882812 |
| Arhgap27 | 9.80619833 | 0.00173925 | -1.2232476 | 0.00882812 |
| Fam72a   | 9.79434512 | 0.00175049 | 1.1374385  | 0.00887856 |
| Eif3k    | 9.79384941 | 0.00175097 | 0.7383809  | 0.00887856 |
| Nr2c2ap  | 9.73003275 | 0.00181281 | 0.82943756 | 0.0091875  |
| Nkrf     | 9.70577708 | 0.0018369  | 0.99180308 | 0.00930483 |
| Hagh     | 9.68332354 | 0.00185948 | 0.85077436 | 0.00941444 |
| Cd79b    | 9.67513168 | 0.00186779 | -1.0504549 | 0.00945171 |
| Mzt2     | 9.64754037 | 0.00189605 | 0.83502906 | 0.00958987 |
| Ptpa     | 9.64583661 | 0.00189781 | 0.80728368 | 0.00959391 |
| Khdrbs3  | 9.64409177 | 0.00189962 | 0.97745005 | 0.00959816 |
| Ywhae    | 9.64176478 | 0.00190202 | 0.75303699 | 0.00960546 |
| Hnrnpa3  | 9.58412461 | 0.00196267 | 0.76302096 | 0.00990672 |
| Psmb10   | 9.57230736 | 0.00197534 | 0.79240158 | 0.00996564 |



|         |            |            |            |            |
|---------|------------|------------|------------|------------|
| Naip5   | 9.56594708 | 0.0019822  | -1.0516127 | 0.00999517 |
| Rrp7a   | 9.55358111 | 0.0019956  | 0.82310319 | 0.01005765 |
| Ptcd2   | 9.4813819  | 0.00207568 | 0.82626813 | 0.01045595 |
| Dnttip2 | 9.3936306  | 0.00217741 | 0.79241929 | 0.01096287 |
| Usp39   | 9.38395659 | 0.00218893 | 0.83588147 | 0.01101531 |
| Noct    | 9.33369153 | 0.00224979 | 0.95727449 | 0.01131587 |
| Emc2    | 9.31588372 | 0.00227176 | 0.81208268 | 0.01141675 |
| Arid3b  | 9.31558154 | 0.00227213 | -1.1012129 | 0.01141675 |
| Gm15417 | 9.30297498 | 0.00228782 | 1.07739997 | 0.01148979 |
| Elof1   | 9.30181527 | 0.00228927 | 0.79187389 | 0.01149128 |
| Gm47283 | 9.29548073 | 0.0022972  | 0.86856018 | 0.01152528 |
| Sox6    | 9.28363187 | 0.00231211 | -1.037173  | 0.01159424 |
| Bsn     | 9.280961   | 0.00231548 | 0.90720496 | 0.01160532 |
| Sgo1    | 9.27290573 | 0.00232568 | 0.87654139 | 0.0116496  |
| Diablo  | 9.27214507 | 0.00232665 | 0.81774645 | 0.0116496  |
| Dcaf13  | 9.25136851 | 0.0023532  | 0.82857081 | 0.0117766  |
| Slco4a1 | 9.24705425 | 0.00235875 | -1.5199504 | 0.01179846 |
| Napa    | 9.15153592 | 0.00248509 | 0.81292377 | 0.01242422 |
| Tmem33  | 9.10431186 | 0.00255008 | 0.8271921  | 0.01274272 |
| Ebi3    | 9.09370478 | 0.00256491 | -1.6316701 | 0.01281041 |
| Pdhx    | 9.05764131 | 0.00261599 | 0.91158505 | 0.01305901 |
| Etfb    | 9.00622145 | 0.00269062 | 0.75609785 | 0.01342484 |
| Htati2  | 8.98726247 | 0.00271868 | 0.86644326 | 0.01355806 |
| Scarf1  | 8.96631563 | 0.00275003 | -1.5744237 | 0.01370753 |
| Dab2ip  | 8.94593215 | 0.00278088 | -0.9310759 | 0.0138544  |
| Lonp1   | 8.90116308 | 0.00284989 | 0.85858694 | 0.01419112 |
| Ppm1l   | 8.81354779 | 0.00299002 | 0.93546112 | 0.01487453 |
| Cc2d2a  | 8.81308675 | 0.00299078 | -1.3324027 | 0.01487453 |
| Eps8l1  | 8.81257849 | 0.00299161 | -1.1424318 | 0.01487453 |
| Gm37233 | 8.78146464 | 0.00304307 | -1.1513729 | 0.01512285 |
| Ltv1    | 8.76110377 | 0.00307723 | 0.82117914 | 0.01528499 |
| Ripor2  | 8.7577619  | 0.00308287 | -0.8397313 | 0.01530541 |
| Cdk2ap2 | 8.74136728 | 0.00311071 | 0.80081876 | 0.01543594 |
| Gpr146  | 8.73517212 | 0.0031213  | -1.0533979 | 0.01548077 |
| Pmpca   | 8.72225242 | 0.00314349 | 0.84700386 | 0.01558311 |
| Erc6l   | 8.68566883 | 0.00320722 | 0.93300922 | 0.01589111 |
| Hira    | 8.6663754  | 0.00324135 | 0.87482232 | 0.01605226 |
| Rbm3    | 8.65713533 | 0.00325783 | 0.74743651 | 0.01612586 |
| Snx2    | 8.62477646 | 0.00331621 | 0.83456722 | 0.01640669 |
| Aaas    | 8.62297586 | 0.00331949 | 0.8867835  | 0.01641478 |
| Gm10093 | 8.60170853 | 0.00335848 | 0.96500396 | 0.01659934 |
| Slc12a4 | 8.59158673 | 0.0033772  | 1.16627813 | 0.01668358 |
| Cd52    | 8.58386962 | 0.00339154 | -1.0640342 | 0.01674614 |

|             |            |            |            |            |
|-------------|------------|------------|------------|------------|
| D030056L22F | 8.55260351 | 0.00345028 | 0.84244842 | 0.01702778 |
| Itpa        | 8.53856718 | 0.00347699 | 0.81652999 | 0.0171511  |
| Spc25       | 8.53383993 | 0.00348603 | 0.8740142  | 0.0171872  |
| Gnaq        | 8.52610636 | 0.00350088 | -0.8709769 | 0.01725186 |
| Wdcp        | 8.52117578 | 0.00351038 | 0.88953051 | 0.01729012 |
| Snrnp25     | 8.51993901 | 0.00351276 | 0.81772782 | 0.01729333 |
| Atg16l2     | 8.48917613 | 0.00357266 | -0.9429388 | 0.01757951 |
| Tspan13     | 8.47628188 | 0.00359807 | 0.78385564 | 0.01769582 |
| Dimt1       | 8.4499168  | 0.0036506  | 0.86010907 | 0.01794534 |
| Wdr12       | 8.4489903  | 0.00365246 | 0.76362065 | 0.01794564 |
| Plxdc2      | 8.43784831 | 0.00367491 | -1.5129982 | 0.01804704 |
| Tbcb        | 8.41554092 | 0.00372027 | 0.80441749 | 0.01826082 |
| Slc25a38    | 8.36485678 | 0.00382547 | 0.80279174 | 0.01876794 |
| Slbp        | 8.35515071 | 0.00384596 | 0.78397413 | 0.01885917 |
| Nufip1      | 8.3324306  | 0.00389435 | 0.84126964 | 0.01908711 |
| Pcp4l1      | 8.27905133 | 0.00401051 | -1.4366702 | 0.01964676 |
| Gm6563      | 8.27495461 | 0.00401957 | 0.89765381 | 0.01968147 |
| Itgb3       | 8.2387144  | 0.00410062 | -1.8346267 | 0.02006847 |
| Ddx49       | 8.20958728 | 0.00416696 | 0.8189486  | 0.02038317 |
| Dnaja1      | 8.19864419 | 0.00419217 | 0.75467054 | 0.02049643 |
| Phlda3      | 8.19222329 | 0.00420703 | 0.96205977 | 0.02055902 |
| Ppp1r18     | 8.18708894 | 0.00421896 | -1.1119425 | 0.02060719 |
| Fads3       | 8.12707115 | 0.00436091 | 1.45035815 | 0.02129014 |
| Dek         | 8.11687612 | 0.00438551 | 0.75906898 | 0.02139973 |
| Gpaa1       | 8.10378801 | 0.00441728 | 0.85976229 | 0.02154027 |
| Casp12      | 8.10323717 | 0.00441863 | -1.7320015 | 0.02154027 |
| L2hgdh      | 8.06908283 | 0.00450269 | 0.8810434  | 0.02193934 |
| Cdkn1b      | 8.0358627  | 0.00458602 | -0.8312999 | 0.02233444 |
| Mex3d       | 7.97163852 | 0.00475159 | 0.94699427 | 0.02312951 |
| H2-T23      | 7.89497734 | 0.00495723 | -0.7728651 | 0.02411872 |
| Map3k14     | 7.88494636 | 0.0049848  | -1.2157926 | 0.02424103 |
| Galnt12     | 7.85839946 | 0.00505852 | -1.6716693 | 0.02458754 |
| Gadd45b     | 7.8534658  | 0.00507234 | -1.1617315 | 0.02464272 |
| Retreg1     | 7.84445311 | 0.00509769 | -0.9181367 | 0.02475382 |
| Nat2        | 7.75147497 | 0.00536687 | 0.86870758 | 0.02604825 |
| Hoxa10      | 7.74249472 | 0.00539362 | -1.0782071 | 0.02616537 |
| Usp46       | 7.72218183 | 0.00545464 | 0.86271363 | 0.02644852 |
| Tmem183a    | 7.71647494 | 0.00547191 | 0.84273489 | 0.02651937 |
| Clpb        | 7.69612505 | 0.00553395 | 0.87427628 | 0.026807   |
| Selp        | 7.68886908 | 0.00555624 | -1.6336316 | 0.02690193 |
| Utp15       | 7.6454289  | 0.00569164 | 0.84231337 | 0.02754409 |
| Gorasp2     | 7.60425117 | 0.00582308 | 0.83196469 | 0.02816656 |
| Xpo4        | 7.58279125 | 0.00589281 | 0.84423015 | 0.02849002 |

|             |            |            |            |            |
|-------------|------------|------------|------------|------------|
| 9930111J21R | 7.57139151 | 0.0059302  | -1.0270535 | 0.02865688 |
| Gm26737     | 7.55742102 | 0.00597635 | 1.16658    | 0.02886589 |
| Haus4       | 7.54564889 | 0.00601552 | 0.80491766 | 0.02904102 |
| Rfc3        | 7.53646196 | 0.00604627 | 0.82322675 | 0.02917535 |
| Spout1      | 7.51784566 | 0.00610907 | 0.83727949 | 0.02946415 |
| Fam98a      | 7.49545832 | 0.00618548 | 0.84688524 | 0.02981825 |
| Tbc1d10c    | 7.44207858 | 0.00637163 | -0.9049813 | 0.03070077 |
| Cdc25a      | 7.38642064 | 0.00657181 | 0.82551301 | 0.03165006 |
| Slc43a1     | 7.33954387 | 0.0067454  | 0.87457165 | 0.03247035 |
| Nae1        | 7.32373139 | 0.006805   | 0.81841366 | 0.03274146 |
| Med7        | 7.31861735 | 0.00682439 | 0.79752339 | 0.03281893 |
| Spdl1       | 7.2896427  | 0.00693533 | 0.89192862 | 0.03333636 |
| Gm43568     | 7.28079082 | 0.00696958 | -0.9795736 | 0.03348489 |
| Ap1s2       | 7.27812169 | 0.00697995 | -0.8328747 | 0.03351854 |
| mt-Nd2      | 7.27667713 | 0.00698556 | 0.74546581 | 0.03352936 |
| Ssbp3       | 7.26754311 | 0.00702118 | 0.78822372 | 0.03368409 |
| Itpkb       | 7.24665866 | 0.00710331 | -0.8108138 | 0.03406172 |
| Magi2       | 7.21072215 | 0.00724693 | -1.0329192 | 0.03473374 |
| Btaf1       | 7.20211646 | 0.00728177 | 0.83157936 | 0.03488392 |
| Gpr65       | 7.19972263 | 0.00729148 | -1.738625  | 0.03491372 |
| Fam216a     | 7.19633513 | 0.00730526 | 0.81819124 | 0.0349629  |
| Tsta3       | 7.19537802 | 0.00730916 | 0.81480653 | 0.03496477 |
| Copz1       | 7.17852172 | 0.00737815 | 0.79982348 | 0.03527787 |
| Cebpzos     | 7.1525357  | 0.00748581 | 0.81295509 | 0.03577549 |
| Hikeshi     | 7.10427961 | 0.00769001 | 0.78916009 | 0.0367338  |
| Iars2       | 7.10026745 | 0.00770725 | 0.82588884 | 0.0367985  |
| Cerk        | 7.07876215 | 0.00780029 | -0.9229667 | 0.03722491 |
| Hmgn5       | 7.07476996 | 0.00781769 | 0.76441738 | 0.0372901  |
| Socs1       | 7.06489217 | 0.0078609  | -1.4756731 | 0.03747288 |
| Kif22       | 7.0642962  | 0.00786352 | 0.8561494  | 0.03747288 |
| Mylip       | 7.01279635 | 0.00809292 | -0.9270601 | 0.03853143 |
| Bard1       | 7.01269493 | 0.00809338 | 0.92382025 | 0.03853143 |
| Mitd1       | 6.97816965 | 0.008251   | 0.83557357 | 0.03926309 |
| Tex264      | 6.9762037  | 0.00826006 | 0.85626152 | 0.0392875  |
| Tex261      | 6.97115551 | 0.0082834  | 0.78413433 | 0.03937971 |
| Tns3        | 6.96455811 | 0.008314   | -0.9228384 | 0.03950634 |
| Mrps30      | 6.96278728 | 0.00832223 | 0.79577726 | 0.03952662 |
| Clca3a1     | 6.93256386 | 0.00846403 | 0.9848832  | 0.04018096 |
| Klhdc4      | 6.85766412 | 0.00882619 | 0.86197442 | 0.04188029 |
| Crispld1    | 6.80936169 | 0.00906812 | -2.1513215 | 0.0430078  |
| Mmrn1       | 6.79665218 | 0.0091329  | -1.6328127 | 0.04329444 |
| Maged1      | 6.79273385 | 0.00915296 | -1.208523  | 0.04336896 |
| Stt3b       | 6.74956961 | 0.00937703 | 0.81047692 | 0.04440954 |

|              |            |            |            |            |
|--------------|------------|------------|------------|------------|
| Rpl27-ps3    | 6.74763622 | 0.0093872  | 0.83230763 | 0.04443659 |
| Zfp945       | 6.72908134 | 0.00948534 | -0.8743331 | 0.0448799  |
| 1300002E11F  | 6.66651381 | 0.00982412 | 0.80979463 | 0.04646076 |
| Hax1         | 6.64196743 | 0.00996039 | 0.8192237  | 0.04708289 |
| Kif17        | 6.6034096  | 0.01017837 | -1.0247757 | 0.0480905  |
| Homer2       | 6.59103873 | 0.01024934 | 1.17593451 | 0.04840287 |
| Ppp4c        | 6.51602889 | 0.01069065 | 0.78505561 | 0.05046308 |
| Cfap126      | 6.50849878 | 0.01073601 | 0.96526562 | 0.05065325 |
| Trmt11       | 6.50625687 | 0.01074956 | 0.8425955  | 0.05069317 |
| Parp3        | 6.4852492  | 0.01087733 | -1.1478221 | 0.05127149 |
| Pdia5        | 6.40840424 | 0.01135814 | 1.01035108 | 0.05350677 |
| Mrpl44       | 6.40775855 | 0.01136228 | 0.8074835  | 0.05350677 |
| Mcat         | 6.36239553 | 0.01165641 | 0.83298839 | 0.05486597 |
| 2300009A05F  | 6.35969393 | 0.01167417 | 0.81446578 | 0.05492366 |
| Esam         | 6.3390523  | 0.0118108  | -1.513943  | 0.05554026 |
| Reep4        | 6.2879476  | 0.01215617 | 0.84479675 | 0.05713745 |
| Aldh7a1      | 6.28050638 | 0.01220732 | 0.89263554 | 0.05735084 |
| Rita1        | 6.27620459 | 0.01223699 | 0.88331819 | 0.05746316 |
| Pnck         | 6.25774162 | 0.01236517 | -1.2598838 | 0.05803776 |
| Kn1          | 6.25297002 | 0.01239852 | 0.80312025 | 0.05816693 |
| Jmjd6        | 6.211944   | 0.01268912 | 0.82751334 | 0.05950225 |
| C1galt1      | 6.21085988 | 0.01269689 | 0.81835408 | 0.05951072 |
| Xrcc5        | 6.19841494 | 0.01278648 | 0.82691768 | 0.05990245 |
| Flvcr1       | 6.19135685 | 0.01283757 | 0.94703508 | 0.06011359 |
| Tmem140      | 6.15734656 | 0.01308674 | -0.9733754 | 0.06125158 |
| Fbxl13       | 6.14991396 | 0.01314185 | -1.0417523 | 0.06148068 |
| Ccnd1        | 6.12407514 | 0.0133353  | 0.98029749 | 0.06235645 |
| I830077J02Ri | 6.09462869 | 0.01355934 | -1.321612  | 0.06337435 |
| Wdr92        | 6.05896108 | 0.01383591 | 0.80984842 | 0.06463669 |
| Tnfsf14      | 6.05367151 | 0.01387741 | -1.7341578 | 0.06480024 |
| Ctsz         | 6.04632434 | 0.01393528 | 0.7877279  | 0.06503998 |
| Tlk1         | 6.04390306 | 0.0139544  | 0.7830046  | 0.06509878 |
| Tusc2        | 6.03903437 | 0.01399294 | 0.83561564 | 0.06524803 |
| Reps2        | 6.03417742 | 0.01403149 | 0.92302391 | 0.06539722 |
| Prps1        | 6.02138342 | 0.01413356 | 0.79824844 | 0.06584221 |
| Ncoa3        | 5.97858175 | 0.01448064 | -0.943788  | 0.0674276  |
| Inpp4a       | 5.97067929 | 0.01454568 | -0.8376665 | 0.06769882 |
| Tcf3         | 5.95957351 | 0.01463758 | 0.77843577 | 0.06809479 |
| Sorbs3       | 5.95673271 | 0.01466119 | -1.3252115 | 0.06817281 |
| Dnajc11      | 5.94906824 | 0.01472507 | 0.81185918 | 0.06843794 |
| Sgsm3        | 5.94199561 | 0.01478427 | 0.98954306 | 0.06868109 |
| Cndp2        | 5.88384182 | 0.01528044 | 0.83440173 | 0.07095305 |
| Ptk2         | 5.87805489 | 0.01533075 | 1.13511098 | 0.07115351 |

|         |            |            |            |            |
|---------|------------|------------|------------|------------|
| App     | 5.86973665 | 0.01540336 | -1.079529  | 0.07145724 |
| Sipa1l1 | 5.86012364 | 0.01548771 | -0.8041853 | 0.07181515 |
| Clptm1l | 5.82418552 | 0.01580729 | 0.8041756  | 0.07326295 |
| Dus2    | 5.82050058 | 0.01584044 | 0.93086366 | 0.07338249 |
| Golt1b  | 5.75946861 | 0.01640003 | 0.83292698 | 0.07593961 |
| Gp9     | 5.75704678 | 0.01642265 | -0.9118346 | 0.07600665 |
| Gpr89   | 5.75628745 | 0.01642975 | 0.84418932 | 0.07600665 |
| Ppil3   | 5.74529615 | 0.01653287 | 0.78490281 | 0.07644823 |
| Mex3b   | 5.73507201 | 0.01662939 | -0.9737592 | 0.0768589  |
| Ispd    | 5.72551585 | 0.01672012 | 1.0693852  | 0.07723583 |
| Gm16140 | 5.72485395 | 0.01672643 | -1.5990174 | 0.07723583 |
| Pla2g15 | 5.72237621 | 0.01675005 | -1.0726075 | 0.0773091  |
| Tacc3   | 5.7013867  | 0.01695151 | 0.82503401 | 0.07820278 |
| Nipa1   | 5.69961835 | 0.0169686  | 0.86553563 | 0.07824542 |
| Daam1   | 5.68985567 | 0.01706326 | 0.81028756 | 0.07864553 |
| Fancd2  | 5.65118544 | 0.01744358 | 0.96653503 | 0.08036131 |
| Txndc16 | 5.6270425  | 0.01768545 | -0.9355659 | 0.08143797 |
| Tcn2    | 5.61712991 | 0.01778575 | -0.975706  | 0.08178779 |
| Hgh1    | 5.61711246 | 0.01778593 | 0.85140567 | 0.08178779 |
| Ndufs4  | 5.61710402 | 0.01778601 | 0.75748641 | 0.08178779 |
| B3gnt8  | 5.60327766 | 0.01792691 | -0.916537  | 0.08239769 |
| Mtss1l  | 5.58131404 | 0.0181531  | -1.7531381 | 0.08339889 |
| Trim14  | 5.57984513 | 0.01816833 | -0.9356064 | 0.08343044 |
| Hmmr    | 5.55817327 | 0.0183946  | 0.83520119 | 0.08443061 |
| Itih5   | 5.54952697 | 0.01848568 | -1.014447  | 0.08480966 |
| Tsen2   | 5.52943914 | 0.0186991  | 0.86021388 | 0.08574934 |
| Lage3   | 5.52848595 | 0.01870929 | 0.76555447 | 0.08575664 |
| Aarsd1  | 5.4672088  | 0.01937655 | 0.92862332 | 0.08877432 |
| Cyb5a   | 5.46436248 | 0.01940813 | 0.75475093 | 0.0888782  |
| Pkmyt1  | 5.45193704 | 0.01954664 | 0.89095644 | 0.08947141 |
| Plp2    | 5.44099578 | 0.01966945 | 0.84892167 | 0.08999226 |
| Serf2   | 5.42145109 | 0.01989082 | 0.73345014 | 0.09096335 |
| Cyp4v3  | 5.3980474  | 0.02015929 | -1.0673194 | 0.09214885 |
| Hnrnpc  | 5.3936764  | 0.02020985 | 0.7383291  | 0.09233762 |
| Hnrnpa1 | 5.38290927 | 0.02033494 | 0.73340193 | 0.09286662 |
| Sars    | 5.37958109 | 0.02037377 | 0.77276566 | 0.09300136 |
| Polr1b  | 5.37395485 | 0.02043958 | 0.85115096 | 0.09325911 |
| Tgfbr2  | 5.35334883 | 0.02068251 | -0.8780821 | 0.09432435 |
| Slco3a1 | 5.35251832 | 0.02069236 | -0.8893964 | 0.09432616 |
| Mrps23  | 5.34181077 | 0.02081984 | 0.78319914 | 0.09486388 |
| Nup54   | 5.33338489 | 0.02092072 | 0.79815885 | 0.09528001 |
| L3mbtl2 | 5.31976702 | 0.02108483 | 0.83798463 | 0.09598361 |
| Ilkap   | 5.31588025 | 0.02113192 | 0.77074025 | 0.09615407 |

|         |            |            |            |            |
|---------|------------|------------|------------|------------|
| Utp20   | 5.31227435 | 0.02117569 | 0.82923013 | 0.09630934 |
| Antxr2  | 5.30189492 | 0.02130224 | -1.0515686 | 0.09684071 |
| Mrm2    | 5.29376913 | 0.02140185 | 0.87606989 | 0.09724923 |
| Leo1    | 5.28265157 | 0.02153892 | 0.80770889 | 0.09782751 |
| Tecr    | 5.26790362 | 0.02172216 | 0.74898978 | 0.09861484 |
| Creg1   | 5.26465639 | 0.02176272 | 0.73363872 | 0.09874958 |
| Tmem158 | 5.26394307 | 0.02177164 | 1.05639443 | 0.09874958 |
| Cryl1   | 5.26307136 | 0.02178255 | 0.853144   | 0.09875414 |
| Maoa    | 5.25130647 | 0.0219303  | 0.95385199 | 0.09937883 |
| Espn    | 5.24389513 | 0.02202391 | 0.99995075 | 0.09975771 |
| Ncf4    | 5.24277332 | 0.02203812 | -1.1005503 | 0.09976271 |
| Tfam    | 5.24222848 | 0.02204502 | 0.77876114 | 0.09976271 |

Table S6

| cluster | day 3 | day 10 | day 17 |
|---------|-------|--------|--------|
| 0       | 154   | 59     | 123    |
| 1       | 0     | 1      | 51     |
| 2       | 0     | 0      | 44     |
| 3       | 0     | 1      | 50     |
| 4       | 14    | 9      | 52     |
| 5       | 2     | 3      | 32     |
| 6       | 0     | 0      | 41     |
| 7       | 3     | 27     | 68     |
| 8       | 15    | 11     | 96     |
| 9       | 0     | 9      | 30     |
| 10      | 0     | 0      | 32     |
| 11      | 0     | 2      | 23     |
| 12      | 0     | 0      | 19     |
| 13      | 0     | 0      | 15     |
| 14      | 0     | 0      | 8      |
| 15      | 0     | 0      | 21     |
| 16      | 0     | 3      | 24     |
| 17      | 0     | 0      | 3      |
| 18      | 0     | 0      | 5      |

Table S7

|               |
|---------------|
| Name          |
| genotyping_F  |
| genotyping_R  |
| genotyping_F' |
| ssDNA         |

|               |
|---------------|
| Name          |
| genotyping_F  |
| genotyping_R  |
| genotyping_F' |



ssDNA

***Hoxb5*** *CreERT2*

CGCATGAAGTGGAAGAAAGACAAC

CAACCACAGACACGAGGACATTC

TGTAGAGGGCATGGTGGAGATC

GGGAGGATGGGAGGGTCCAGCTGGGGTTGGTCCGGGCTCTCGGGCCGCCCCAGGG  
CTCCTCCGGATGGGCTCAAGCTGTGGCAGGGAAACCCTCTGCCTCCCCCGTGATGTA  
ATACTTTTGAAGGAATGCGATGAAGTAGAGCCCGCAGTGGCCAAGTGGCTTTGGTC  
CGTCTCCTCCACGGATGCCCTCCACGGCTAGTGGGCGCATGTAGGCGGTGGGCGT  
CCGCCGCCTCCAGCAGCAGGTCATAGAGGGGGCACCACGTTCTTGCACTTCATGCTGT  
ACAGATGCTCCATGCCTTTGTTACTCATGTGCCTGATGTGGGAGAGGATGAGGAGGA  
GCTGGGCCAGCCGCTGGTGTGCTGCTGCAGGGTCAGGCCTGCCTTGGCCATCAGG  
TGGATCAAAGTGTCTGTGATCTTGTCCAGGACTCGGTGGATATGGTCCTTCTCTTCCA  
GAGACTTCAGGGTGTGGACAGAAATGTGTACACTCCAGAATTAAGCAAATAATAGA  
TTTGAGGCACACAACTCCTCTCCCTGCAGATTCATCATGCGGAACCGAGATGATGTA  
GCCAGCAGCATGTGAAGATCTCCACCATGCCCTCTACACATTTTCCCTGGTTCCTGT  
CCAAGAGCAAGTTAGGAGCAAACAGTAGCTTCACTGGGTGCTCCATGGAGCGCCAGA  
CGAGACCAATCATCAGGATCTTAGCCAGGCACATTCTAGAAGGTGGACCTGATCATG  
GAGGGTCAAATCCACAAAGCCTGGCACCCCTCTTCGCCAGTTGATCATGTGAACCAG  
CTCCCTGTCTGCCAGGTTGGTCAGTAAGCCCATCATCGAAGCTTCACTGAAGGGTCT  
GGTAGGATCATACTCGGAATAGAGTATGGGGGGCTCAGCATCCAACAAGGCACTGAC  
CATCTGGTTCGGCCGTCAGGGACAAGGCCAGGCTGTTCTTCTTAGAGCGTTTGATCAT  
GAGCGGGCTTGGCCAAAGGTTGGCAGCTCTCATGTCTCCAGCAGATGGCTCGAGATC  
GCCATCTTCCAGCAGGCGCACCATTGCCCTGTTTCACTATCCAGGTTACGGATATAG  
TTCATGACAATATTTACATTGGTCCAGCCACCAGCTTGCATGATCTCCGGTATTGAAAC  
TCCAGCGCGGGCCATATCTCGCGCGGCTCCGACACGGGCACTGTGTCCAGACCAGG  
CCAGGTATCTTGACCAGAGTCATCCTTAGCGCCGTAATCAATCGATGAGTTGCTTC  
AAAAATCCCTTCCAGGGCGCGAGTTGATAGCTGGCTGGTGGCAGATGGCGCGGCAA  
CACCATTTTTTCTGACCCGGCAAACAGGTAGTTATTCGGATCATCAGCTACACCAGA  
GACGGAAATCCATCGCTCGACCAGTTTAGTTACCCCCAGGCTAAGTGCCTTCTCTACA  
CCTGCGGTGCTAACCAGCGTTTTCTGTTCTGCCAATATGGATTAACATTCTCCCACCGT  
CAGTACGTGAGATATCTTTAACCCTGATCCTGGCAATTCGGCTATACGTAACAGGGT  
GTTATAAGCAATCCCAGAAATGCCAGATTACGTATATCCTGGCAGCGATCGCTATTTT  
CCATGAGTGAACGAACCTGGTCGAAATCAGTGC GTTTCGAACGCTAGAGCCTGTTTTG  
CACGTTACCGGCATCAACGTTTTCTTTTCGGATCCGCCGCATAACCAGTGAAACAGC

***Hoxb5*** *mKO2*

TCCACTTCAATCGCTACCTGACC

TTCAGAAACACTGGCAACTTGG

TGCATCATCATGTGAGCCCATC

GGGAAGATTGGAAGGGTCGAGCTGGGGTTGGTGCGGGCTCTCGGGCCGCCAGGG  
CTCCTCCGGATGGGCTCACATGATGATGCATGAATGAGCTACTGCATCTTCTACCTGC  
TCAGTAATGTTGCCTTCGGTTTTCTGACGAGGCGATGGCCGATGTAATGGTCTCCTG  
GCATTTCAAGAATCTCTTTTGCCGCCTTGTAAGTAGTCTTCATTTGGCATTGTGATTG  
CCGCCTCCTTCAAGTTTTAGGTACATCGTAACATCACCTTCAGAACTCCGTCGCTGG  
CAGTAATTTTCTCGGTTGATGGCTCCCAATCAACACTTTGGTTTTGCATGATAGGACCA  
TCGGCAGGAAAGTTAACCCAGTAAATTTGGATTTGTGGTAGAAGGTGTTTCCTCTAA  
GGCTTATATGCGCACTGACTGAAGCGGACCCACCATCTTCGAACTCCAACGACCTTTC  
CCATGACAGGCCTTCAGGAAATGCTTGTTTGAATAGTCTGGTATCTCTTCTGGATATT  
TAGTAAATACTCTGTGGCCGTAACAGAACACGTGTGACACTAAGTCAAACGCGAAAGG  
CATTGGCCCGCCCTCGGCCATTGTGACGCGTAGTGTGCATCTCTTGATGTCCCTCGTAA  
GGTCTGCCTGTGCCTTCACCTTCAATTGTGAACTCATGCCATTGACGGAGCCGTCCA  
TG TAGTACCTCATCTTCATCTCTGGTTTAATCACACTCACGGATCCGGGTCCGGGGTT  
CTCCTCCACGTGCGCCGGCCTGCTTCAGCAGGCTGAAGTTGGTGGCGCCGCTGCCGA  
ATTCTGAATGAGCTACTGCATCTTCTACCTGCTCAGTAATGTTGCCTTCGGTTTTCTG  
ACGAGGCGATGGCCGATGTAATGGTCTCCTGGCATTTCAGAAATCTCTTTTGCCGCCT  
TGTAAGTAGTCTTCATTTGGCATTGTGATTGCCGCCTCCTTCAAGTTTTAGGTACATC  
GTAACATCACCTTCAGAACTCCGTCGCTGGCAGTAATTTTCTCGGTTGATGGCTCCC  
AATCAACACTTTGGTTTTGCATGATAGGACCATCGGCAGGAAAGTTAACCCAGTAAA  
TTTGGATTTGTGGTAGAAGGTGTTTCCTCTAAGGCTTATATGCGCACTGACTGAAGCG  
GACCCACCATCTTCGAACTCCAACGACCTTCCCATGACAGGCCTTCAGGAAATGCTT  
GTTTGAATAGTCTGGTATCTCTTCTGGATATTTAGTAAATACTCTGTGGCCGTAACAG  
AACACGTGTGACACTAAGTCAAACGCGAAAGGCATTGGCCCGCCCTCGGCCATTGTG  
ACGCGTAGTGTGCATCTCTTGATGTCCCTCGTAAGGTCTGCCTGTGCCTTCACCTTCAA  
TTGTGAACTCATGCCATTGACGGAGCCGTCATGTAGTACCTCATCTTCATCTCTGG  
TTTAATCACACTACCCATGGGGGTCCGGGGTTCTCCTCCACGTGCGCCGGCCTGCTT  
CAGCAGGCTGAAGTTGGTGGCGCCGCTGCCAGGTTGGAAGGCGCTGCCGGCTGTAG  
CCAGACTCATACTTTTCAGTTTGTGTCTTTCTTCCACTTCATG

### Clusters in the integrated HSPC landscape - manual annotation

| Cluster number | annotation     | passed_filter | Filtered cluster names |
|----------------|----------------|---------------|------------------------|
| 0              | HSC            | YES           | 0                      |
| 1              | Ery prog       | YES           | 1                      |
| 2              | Int prog       | YES           | 2                      |
| 3              | Int prog       | YES           | 3                      |
| 4              | Int prog       | YES           | 4                      |
| 5              | Int prog       | YES           | 5                      |
| 6              | Mono/DC prc    | YES           | 6                      |
| 7              | Meg prog       | YES           | 7                      |
| 8              | Int prog       | YES           | 8                      |
| 9              | Ery prog       | YES           | 9                      |
| 10             | Neu prog       | YES           | 10                     |
| 11             | Ery prog       | YES           | 11                     |
| 12             | Bas/MC prog    | YES           | 12                     |
| 13             | Hi-Mito        | NO            |                        |
| 14             | pDC            | YES           | 13                     |
| 15             | T cell         | NO            |                        |
| 16             | Lymphoid prc   | YES           | 14                     |
| 17             | ILC            | NO            |                        |
| 18             | Hi-Mito        | NO            |                        |
| 19             | B cell         | NO            |                        |
| 20             | Ery progenito  | YES           | 15                     |
| 21             | Unknown/do     | NO            |                        |
| 22             | Myo C1         | NO            |                        |
| 23             | Ifn-act progei | NO            |                        |
| 24             | DCs            | YES           | 16                     |
| 25             | Eos            | YES           | 17                     |
| 26             | Bas            | YES           | 18                     |
| 27             | T cell/ILC     | NO            |                        |
| 28             | B prog         | YES           | 19                     |
| 29             | ILC            | NO            |                        |
| 30             | unknown        | NO            |                        |

## **Marker genes used for manual annotation of clusters in the integrated HSPC I**

### **Cell identity**

HSC

Megakaryocyte (progenitor)

Erythroid (progenitor)

Neutrophil (progenitor)

Basophil (progenitor)

Eosinophil (progenitor)

Mast cell (progenitor)

Monocyte/DC progenitor

Lymphoid progenitor

T cell (progenitor)

B cell (progenitor)

ILC

Monocyte

pDC

Ifn-activated cells

Complement expressing

DCs

## **andscape**

### **marker genes**

Procr; Mecom

Pf4; Vwf; Itga2b; Gp9; Itgb3

Klf1; Gata1; Hba-a1

Elane; Prtn3; Ms4a3

Prss34; Mcrpt8

Pprg2; Prg3; Epx

Kit; Cma1; Gzmb

Csf1r; Mpo

Il7r; Dntt

Cd3e; Cd8a; Bcl11b

Ly6d; Vpreb3; Cd79a

Gata3; Id2; Il7r

Cd14; Ctsg; Ly6c1; Ly6c2

Irf8; Siglech; Ly6d

Ifitm3; Irf7; Isg15

C1qa; C1qb

H2-Aa; Xcr1; Itgax

Table S2

| <b>biosample_ic</b> | <b>0</b> | <b>1</b> | <b>2</b> | <b>3</b> | <b>4</b> | <b>5</b> |
|---------------------|----------|----------|----------|----------|----------|----------|
| 2w4w_SITTC4         | 42       | 16       | 8        | 5        | 15       | 7        |
| 2w4w_SITTC4         | 184      | 122      | 103      | 109      | 118      | 97       |
| 2w4w_SITTD4         | 257      | 122      | 107      | 76       | 116      | 120      |
| 2w4w_SITTD4         | 98       | 61       | 42       | 45       | 42       | 26       |
| 2w4w_SITTE4         | 35       | 10       | 10       | 9        | 6        | 16       |
| 2w4w_SITTE4         | 32       | 46       | 17       | 21       | 17       | 23       |
| 2w4w_SS2_1          | 18       | 6        | 4        | 5        | 22       | 8        |
| 2w4w_SS2_1          | 9        | 4        | 3        | 3        | 9        | 4        |
| 3d7d_SITTB7         | 45       | 4        | 4        | 4        | 15       | 13       |
| 3d7d_SS2_14         | 35       | 0        | 0        | 2        | 15       | 8        |
| 3d7d_SS2_14         | 37       | 1        | 2        | 4        | 14       | 19       |
| 3d7d_SS2_14         | 31       | 0        | 1        | 0        | 18       | 8        |
| 3d7d_SS2_14         | 21       | 5        | 17       | 10       | 22       | 22       |
| 3dr2_SS2_14         | 25       | 2        | 2        | 1        | 14       | 7        |
| 3dr2_SS2_14         | 61       | 1        | 3        | 0        | 20       | 16       |
| 5mo_SIGAD9          | 250      | 122      | 104      | 68       | 119      | 123      |
| 5mo_SIGAD9          | 152      | 181      | 151      | 116      | 176      | 131      |
| 5mo_SIGAE9          | 27       | 23       | 8        | 9        | 20       | 13       |
| 5mo_SIGAE9          | 442      | 379      | 336      | 307      | 361      | 289      |
| 7d_SS2_1468         | 35       | 32       | 11       | 17       | 21       | 15       |
| 7d_SS2_1468         | 25       | 2        | 3        | 2        | 12       | 11       |
| 7dr2_7dold_9        | 42       | 21       | 34       | 9        | 38       | 62       |
| 7w11w_SITTC         | 440      | 377      | 202      | 159      | 306      | 249      |
| 7w11w_SITTC         | 351      | 209      | 177      | 116      | 231      | 175      |
| 7w11w_SITTE         | 49       | 35       | 28       | 55       | 24       | 15       |
| 7w11w_SITTE         | 210      | 154      | 211      | 228      | 159      | 186      |
| 7w11w_SITTF         | 63       | 37       | 65       | 37       | 62       | 67       |
| 7w11w_SITTF         | 169      | 103      | 149      | 200      | 97       | 87       |
| 9mo_SIGAE3          | 481      | 261      | 226      | 190      | 250      | 246      |
| 9mo_SIGAE3          | 401      | 672      | 439      | 434      | 381      | 361      |
| 9mo_SIGAF3          | 425      | 249      | 342      | 320      | 300      | 340      |
| 9mo_SIGAF3          | 636      | 518      | 521      | 503      | 465      | 454      |
| 16w_SITTD12         | 242      | 352      | 242      | 218      | 196      | 216      |
| 16w_SITTD12         | 348      | 359      | 251      | 249      | 248      | 203      |
| 16w_SITTE12         | 87       | 100      | 74       | 81       | 79       | 63       |
| 16w_SITTE12         | 501      | 577      | 429      | 410      | 384      | 369      |

cluster\_number\_filtered

| 6   | 7   | 8   | 9   | 10  | 11  | 12  |
|-----|-----|-----|-----|-----|-----|-----|
| 3   | 19  | 28  | 5   | 0   | 4   | 4   |
| 73  | 149 | 146 | 35  | 56  | 32  | 38  |
| 78  | 175 | 161 | 62  | 36  | 43  | 35  |
| 28  | 52  | 76  | 15  | 24  | 22  | 6   |
| 4   | 19  | 16  | 6   | 2   | 2   | 1   |
| 19  | 56  | 42  | 10  | 6   | 7   | 10  |
| 5   | 26  | 14  | 0   | 0   | 1   | 1   |
| 6   | 10  | 6   | 2   | 4   | 3   | 1   |
| 3   | 13  | 11  | 0   | 2   | 0   | 1   |
| 1   | 19  | 18  | 1   | 0   | 0   | 1   |
| 8   | 7   | 14  | 0   | 2   | 1   | 2   |
| 1   | 2   | 6   | 0   | 0   | 0   | 0   |
| 8   | 4   | 9   | 0   | 4   | 0   | 1   |
| 1   | 5   | 10  | 0   | 1   | 0   | 0   |
| 1   | 18  | 16  | 0   | 0   | 0   | 0   |
| 46  | 239 | 181 | 58  | 38  | 77  | 26  |
| 110 | 118 | 136 | 101 | 61  | 69  | 56  |
| 7   | 20  | 14  | 5   | 3   | 9   | 2   |
| 271 | 345 | 326 | 183 | 166 | 163 | 107 |
| 3   | 38  | 21  | 3   | 8   | 7   | 8   |
| 3   | 12  | 15  | 0   | 1   | 0   | 0   |
| 6   | 18  | 11  | 1   | 4   | 0   | 4   |
| 143 | 300 | 327 | 137 | 69  | 139 | 122 |
| 108 | 293 | 262 | 118 | 60  | 52  | 60  |
| 36  | 38  | 23  | 26  | 38  | 18  | 10  |
| 222 | 147 | 152 | 103 | 140 | 80  | 56  |
| 34  | 55  | 60  | 19  | 11  | 12  | 11  |
| 191 | 107 | 91  | 55  | 114 | 51  | 42  |
| 154 | 375 | 295 | 115 | 79  | 109 | 67  |
| 404 | 425 | 408 | 343 | 235 | 340 | 205 |
| 255 | 168 | 180 | 97  | 105 | 74  | 77  |
| 509 | 380 | 395 | 281 | 307 | 242 | 191 |
| 207 | 238 | 220 | 209 | 110 | 139 | 110 |
| 247 | 286 | 242 | 194 | 103 | 181 | 99  |
| 65  | 71  | 73  | 32  | 31  | 16  | 27  |
| 340 | 349 | 370 | 314 | 194 | 245 | 188 |



| <b>13</b> | <b>14</b> | <b>15</b> | <b>16</b> | <b>17</b> | <b>18</b> | <b>19</b> |
|-----------|-----------|-----------|-----------|-----------|-----------|-----------|
| 0         | 1         | 0         | 0         | 0         | 0         | 0         |
| 1         | 17        | 4         | 11        | 2         | 5         | 2         |
| 5         | 12        | 7         | 4         | 3         | 2         | 1         |
| 2         | 3         | 2         | 2         | 0         | 1         | 0         |
| 0         | 0         | 0         | 0         | 0         | 1         | 0         |
| 0         | 2         | 1         | 0         | 0         | 0         | 0         |
| 0         | 0         | 0         | 0         | 0         | 1         | 0         |
| 0         | 0         | 0         | 0         | 0         | 0         | 0         |
| 0         | 0         | 0         | 0         | 0         | 1         | 0         |
| 0         | 0         | 0         | 0         | 0         | 0         | 0         |
| 0         | 4         | 2         | 0         | 0         | 0         | 0         |
| 0         | 0         | 0         | 0         | 0         | 2         | 1         |
| 0         | 3         | 1         | 1         | 0         | 0         | 1         |
| 1         | 0         | 0         | 0         | 0         | 0         | 0         |
| 0         | 0         | 0         | 0         | 0         | 0         | 0         |
| 14        | 26        | 14        | 2         | 5         | 0         | 8         |
| 23        | 29        | 16        | 4         | 3         | 2         | 0         |
| 2         | 4         | 1         | 0         | 0         | 0         | 0         |
| 258       | 75        | 31        | 30        | 16        | 4         | 6         |
| 2         | 1         | 0         | 1         | 0         | 1         | 0         |
| 0         | 1         | 1         | 0         | 3         | 1         | 0         |
| 0         | 2         | 1         | 0         | 1         | 0         | 0         |
| 32        | 18        | 16        | 5         | 11        | 19        | 3         |
| 14        | 25        | 6         | 3         | 5         | 14        | 3         |
| 1         | 1         | 5         | 1         | 0         | 2         | 0         |
| 9         | 23        | 12        | 8         | 12        | 6         | 0         |
| 1         | 7         | 1         | 2         | 1         | 0         | 0         |
| 6         | 8         | 8         | 9         | 12        | 5         | 0         |
| 26        | 67        | 9         | 9         | 12        | 14        | 9         |
| 78        | 52        | 29        | 37        | 38        | 54        | 7         |
| 47        | 107       | 8         | 15        | 11        | 17        | 28        |
| 88        | 119       | 14        | 39        | 40        | 55        | 24        |
| 43        | 52        | 14        | 7         | 20        | 11        | 26        |
| 79        | 73        | 23        | 16        | 14        | 18        | 35        |
| 8         | 7         | 3         | 2         | 3         | 2         | 1         |
| 160       | 106       | 25        | 24        | 22        | 34        | 7         |

| <b>total_cells_fl</b> | <b>total_cells_sc</b> | <b>total_cells_sc</b> | <b>time_days</b> |
|-----------------------|-----------------------|-----------------------|------------------|
| 634.907992            | 161                   | 157                   | 27               |
| 2320.51911            | 1357                  | 1304                  | 27               |
| 3535.79159            | 1449                  | 1422                  | 27               |
| 895.421264            | 563                   | 547                   | 27               |
| 456.845376            | 143                   | 137                   | 12               |
| 825.926225            | 319                   | 309                   | 12               |
| 540                   | 130                   | 111                   | 12               |
| 484                   | 73                    | 64                    | 12               |
| 709.266598            | 138                   | 116                   | 7                |
| 158                   | 113                   | 100                   | 7                |
| 185                   | 136                   | 117                   | 7                |
| 115                   | 80                    | 70                    | 3                |
| 174                   | 149                   | 129                   | 3                |
| 102                   | 83                    | 69                    | 3                |
| 197                   | 157                   | 136                   | 3                |
| 5252.01591            | 1621                  | 1520                  | 161              |
| 3995.91514            | 1780                  | 1635                  | 161              |
| 675.237113            | 212                   | 167                   | 161              |
| 9844.2343             | 4484                  | 4095                  | 161              |
| 441                   | 262                   | 224                   | 7                |
| 173                   | 105                   | 92                    | 7                |
| 665.607649            | 305                   | 254                   | 7                |
| 7918.13452            | 3325                  | 3074                  | 76               |
| 8549.73075            | 2377                  | 2282                  | 76               |
| 936.85392             | 414                   | 405                   | 49               |
| 5145.48813            | 2219                  | 2118                  | 49               |
| 1709.86946            | 565                   | 545                   | 49               |
| 4700.89931            | 1605                  | 1504                  | 49               |
| 40458.2757            | 3129                  | 2994                  | 269              |
| NA                    | 5800                  | 5343                  | 269              |
| NA                    | 3345                  | 3165                  | 269              |
| 42987.6963            | 6414                  | 5781                  | 269              |
| 12467.3443            | 3014                  | 2872                  | 112              |
| 18572.1872            | 3474                  | 3268                  | 112              |
| 5286.54973            | 852                   | 825                   | 112              |
| 19472.1109            | 5309                  | 5048                  | 112              |

| <b>biosample_ic</b> | <b>0</b> | <b>1</b> | <b>2</b> | <b>3</b> | <b>4</b> | <b>5</b> |
|---------------------|----------|----------|----------|----------|----------|----------|
| 2w4w_SITTA4         | 343      | 268      | 319      | 226      | 286      | 322      |
| 2w4w_SITTA4         | 472      | 479      | 408      | 461      | 321      | 299      |
| 2w4w_SITTB4         | 168      | 284      | 230      | 262      | 152      | 152      |
| 2w4w_SITTB4         | 362      | 390      | 334      | 382      | 279      | 302      |
| 3d7d_SITTC7         | 253      | 166      | 290      | 266      | 217      | 218      |
| 3d7d_SITTC7         | 341      | 310      | 419      | 562      | 277      | 281      |
| 5mo_SIGAF9          | 505      | 324      | 445      | 337      | 429      | 414      |
| 5mo_SIGAF9          | 467      | 276      | 397      | 357      | 407      | 347      |
| 7d_SIGAA5_1         | 220      | 257      | 260      | 295      | 164      | 192      |
| 7d_SIGAA5_1         | 251      | 287      | 323      | 406      | 258      | 257      |
| 7w11w_SITTE         | 387      | 394      | 344      | 238      | 363      | 346      |
| 7w11w_SITTE         | 545      | 600      | 392      | 365      | 378      | 305      |
| 7w11w_SITTE         | 358      | 251      | 273      | 404      | 243      | 234      |
| 7w11w_SITTE         | 544      | 283      | 539      | 517      | 440      | 439      |
| 9mo_SIGAG3          | 537      | 271      | 211      | 176      | 234      | 228      |
| 9mo_SIGAG3          | 401      | 487      | 493      | 510      | 376      | 355      |
| 16w_SITTF12         | 236      | 246      | 237      | 226      | 200      | 168      |
| 16w_SITTF12         | 447      | 358      | 342      | 260      | 355      | 354      |

| cluster_number_filtered |     |     |     |     |     |     |
|-------------------------|-----|-----|-----|-----|-----|-----|
| 6                       | 7   | 8   | 9   | 10  | 11  | 12  |
| 189                     | 185 | 189 | 211 | 64  | 150 | 59  |
| 407                     | 288 | 309 | 181 | 246 | 172 | 133 |
| 208                     | 188 | 142 | 312 | 75  | 237 | 72  |
| 424                     | 266 | 249 | 338 | 216 | 227 | 107 |
| 300                     | 95  | 79  | 165 | 101 | 113 | 48  |
| 548                     | 141 | 164 | 232 | 294 | 186 | 76  |
| 299                     | 314 | 287 | 112 | 178 | 83  | 110 |
| 336                     | 212 | 291 | 111 | 195 | 110 | 97  |
| 244                     | 150 | 145 | 252 | 163 | 195 | 84  |
| 312                     | 150 | 153 | 144 | 211 | 88  | 112 |
| 283                     | 207 | 247 | 250 | 104 | 190 | 116 |
| 334                     | 364 | 366 | 402 | 171 | 384 | 205 |
| 364                     | 217 | 208 | 173 | 211 | 132 | 98  |
| 384                     | 228 | 275 | 215 | 315 | 182 | 127 |
| 171                     | 460 | 336 | 150 | 30  | 119 | 68  |
| 355                     | 343 | 324 | 242 | 348 | 241 | 177 |
| 185                     | 166 | 135 | 136 | 113 | 103 | 81  |
| 290                     | 249 | 246 | 209 | 114 | 185 | 110 |

| <b>13</b> | <b>14</b> | <b>15</b> | <b>16</b> | <b>17</b> | <b>18</b> | <b>19</b> |
|-----------|-----------|-----------|-----------|-----------|-----------|-----------|
| 48        | 48        | 9         | 3         | 5         | 6         | 2         |
| 44        | 50        | 24        | 25        | 13        | 11        | 6         |
| 87        | 26        | 58        | 1         | 7         | 7         | 0         |
| 99        | 63        | 49        | 9         | 10        | 11        | 7         |
| 101       | 55        | 16        | 12        | 3         | 2         | 4         |
| 153       | 50        | 35        | 21        | 13        | 7         | 3         |
| 92        | 99        | 3         | 34        | 18        | 6         | 41        |
| 87        | 69        | 9         | 18        | 15        | 6         | 5         |
| 274       | 85        | 44        | 12        | 21        | 19        | 1         |
| 448       | 81        | 19        | 31        | 21        | 27        | 10        |
| 58        | 99        | 43        | 13        | 13        | 8         | 8         |
| 90        | 50        | 77        | 25        | 35        | 13        | 9         |
| 8         | 29        | 42        | 15        | 11        | 1         | 5         |
| 53        | 80        | 47        | 16        | 19        | 5         | 7         |
| 20        | 64        | 20        | 4         | 15        | 10        | 18        |
| 39        | 60        | 40        | 23        | 35        | 34        | 5         |
| 45        | 56        | 6         | 11        | 13        | 10        | 26        |
| 163       | 102       | 30        | 18        | 12        | 13        | 37        |

| <b>total_cells_fl</b> | <b>total_cells_sc</b> | <b>total_cells_sc</b> | <b>time_days</b> |
|-----------------------|-----------------------|-----------------------|------------------|
| 430125.745            | 3149                  | 2932                  | 27               |
| 177614.97             | 4725                  | 4349                  | 27               |
| 568858.09             | 2820                  | 2668                  | 12               |
| 431659.079            | 4499                  | 4124                  | 12               |
| 367767                | 2844                  | 2504                  | 3                |
| 284883.426            | 4816                  | 4113                  | 3                |
| 1153203.47            | 4761                  | 4130                  | 161              |
| 589288.431            | 4457                  | 3812                  | 161              |
| 659084                | 3598                  | 3077                  | 7                |
| 417946                | 4068                  | 3589                  | 7                |
| 1143088.25            | 3961                  | 3711                  | 76               |
| 666014.383            | 5749                  | 5110                  | 76               |
| 982135.193            | 3542                  | 3277                  | 49               |
| 683243.272            | 5258                  | 4715                  | 49               |
| 791790.941            | 3228                  | 3142                  | 269              |
| NA                    | 5098                  | 4888                  | 269              |
| 653298.651            | 2532                  | 2399                  | 112              |
| 612404.106            | 4213                  | 3894                  | 112              |

## Discrete model parameters

Note: filtered\_names correspond to cluster numbering used in the manuscript figures. Source coc

| parameter_no | parameter_description      | cluster_index | cluster_name |
|--------------|----------------------------|---------------|--------------|
| 1            | cluster size (Tom-)        | 0             | 0c           |
| 2            | cluster size (Tom-)        | 1             | 1            |
| 3            | cluster size (Tom-)        | 2             | 2            |
| 4            | cluster size (Tom-)        | 3             | 3            |
| 5            | cluster size (Tom-)        | 4             | 4            |
| 6            | cluster size (Tom-)        | 5             | 5            |
| 7            | cluster size (Tom-)        | 6             | 6            |
| 8            | cluster size (Tom-)        | 7             | 7            |
| 9            | cluster size (Tom-)        | 8             | 8            |
| 10           | cluster size (Tom-)        | 9             | 9            |
| 11           | cluster size (Tom-)        | 10            | 10           |
| 12           | cluster size (Tom-)        | 11            | 11           |
| 13           | cluster size (Tom-)        | 12            | 12           |
| 14           | cluster size (Tom-)        | 13            | 14           |
| 15           | cluster size (Tom-)        | 14            | 16           |
| 16           | cluster size (Tom-)        | 15            | 20           |
| 17           | cluster size (Tom-)        | 16            | 24           |
| 18           | cluster size (Tom-)        | 17            | 25           |
| 19           | cluster size (Tom-)        | 18            | 26           |
| 20           | cluster size (Tom-)        | 19            | 28           |
| 21           | cluster size (Tom-)        | 20            | 0a           |
| 22           | cluster size (Tom-)        | 21            | 0b           |
| 23           | labelling frequency (Tom+) | 0             | 0c           |
| 24           | labelling frequency (Tom+) | 1             | 1            |
| 25           | labelling frequency (Tom+) | 2             | 2            |
| 26           | labelling frequency (Tom+) | 3             | 3            |
| 27           | labelling frequency (Tom+) | 4             | 4            |
| 28           | labelling frequency (Tom+) | 5             | 5            |
| 29           | labelling frequency (Tom+) | 6             | 6            |
| 30           | labelling frequency (Tom+) | 7             | 7            |
| 31           | labelling frequency (Tom+) | 8             | 8            |
| 32           | labelling frequency (Tom+) | 9             | 9            |
| 33           | labelling frequency (Tom+) | 10            | 10           |
| 34           | labelling frequency (Tom+) | 11            | 11           |
| 35           | labelling frequency (Tom+) | 12            | 12           |
| 36           | labelling frequency (Tom+) | 13            | 14           |
| 37           | labelling frequency (Tom+) | 14            | 16           |
| 38           | labelling frequency (Tom+) | 15            | 20           |
| 39           | labelling frequency (Tom+) | 16            | 24           |
| 40           | labelling frequency (Tom+) | 17            | 25           |

|                               |    |    |
|-------------------------------|----|----|
| 41 labelling frequency (Tom+) | 18 | 26 |
| 42 labelling frequency (Tom+) | 19 | 28 |
| 43 labelling frequency (Tom+) | 20 | 0a |
| 44 labelling frequency (Tom+) | 21 | 0b |
| 45 differentiation rate       | NA | NA |
| 46 differentiation rate       | NA | NA |
| 47 differentiation rate       | NA | NA |
| 48 differentiation rate       | NA | NA |
| 49 differentiation rate       | NA | NA |
| 50 differentiation rate       | NA | NA |
| 51 differentiation rate       | NA | NA |
| 52 differentiation rate       | NA | NA |
| 53 differentiation rate       | NA | NA |
| 54 differentiation rate       | NA | NA |
| 55 differentiation rate       | NA | NA |
| 56 differentiation rate       | NA | NA |
| 57 differentiation rate       | NA | NA |
| 58 differentiation rate       | NA | NA |
| 59 differentiation rate       | NA | NA |
| 60 differentiation rate       | NA | NA |
| 61 differentiation rate       | NA | NA |
| 62 differentiation rate       | NA | NA |
| 63 differentiation rate       | NA | NA |
| 64 differentiation rate       | NA | NA |
| 65 differentiation rate       | NA | NA |
| 66 differentiation rate       | NA | NA |
| 67 differentiation rate       | NA | NA |
| 68 differentiation rate       | NA | NA |
| 69 differentiation rate       | NA | NA |
| 70 differentiation rate       | NA | NA |
| 71 differentiation rate       | NA | NA |
| 72 differentiation rate       | NA | NA |
| 73 differentiation rate       | NA | NA |
| 74 differentiation rate       | NA | NA |
| 75 differentiation rate       | NA | NA |
| 76 differentiation rate       | NA | NA |
| 77 differentiation rate       | NA | NA |
| 78 differentiation rate       | NA | NA |
| 79 differentiation rate       | NA | NA |
| 80 differentiation rate       | NA | NA |
| 81 differentiation rate       | NA | NA |
| 82 net proliferation          | 0  | 0c |
| 83 net proliferation          | 1  | 1  |



|                        |         |          |
|------------------------|---------|----------|
| 84 net proliferation   | 2       | 2        |
| 85 net proliferation   | 3       | 3        |
| 86 net proliferation   | 4       | 4        |
| 87 net proliferation   | 5       | 5        |
| 88 net proliferation   | 6       | 6        |
| 89 net proliferation   | 7       | 7        |
| 90 net proliferation   | 8       | 8        |
| 91 net proliferation   | 9       | 9        |
| 92 net proliferation   | 10      | 10       |
| 93 net proliferation   | 11      | 11       |
| 94 net proliferation   | 12      | 12       |
| 95 net proliferation   | 13      | 14       |
| 96 net proliferation   | 14      | 16       |
| 97 net proliferation   | 15      | 20       |
| 98 net proliferation   | 16      | 24       |
| 99 net proliferation   | 17      | 25       |
| 100 net proliferation  | 18      | 26       |
| 101 net proliferation  | 19      | 28       |
| 102 net proliferation  | 20      | 0a       |
| 103 net proliferation  | 21      | 0b       |
| 104 logistic parameter | 0+21+22 | 0c+0a+0b |

le utilises unfiltered cluster names (as in Figure S2F)

| transition_in | transition_names | cluster_filtered_names | transition_filtered_na | start |
|---------------|------------------|------------------------|------------------------|-------|
| NA            | NA               | 0c                     | NA                     | 0     |
| NA            | NA               | 1                      | NA                     | 0     |
| NA            | NA               | 2                      | NA                     | 0     |
| NA            | NA               | 3                      | NA                     | 0     |
| NA            | NA               | 4                      | NA                     | 0     |
| NA            | NA               | 5                      | NA                     | 0     |
| NA            | NA               | 6                      | NA                     | 0     |
| NA            | NA               | 7                      | NA                     | 0     |
| NA            | NA               | 8                      | NA                     | 0     |
| NA            | NA               | 9                      | NA                     | 0     |
| NA            | NA               | 10                     | NA                     | 0     |
| NA            | NA               | 11                     | NA                     | 0     |
| NA            | NA               | 12                     | NA                     | 0     |
| NA            | NA               | 13                     | NA                     | 0     |
| NA            | NA               | 14                     | NA                     | 0     |
| NA            | NA               | 15                     | NA                     | 0     |
| NA            | NA               | 16                     | NA                     | 0     |
| NA            | NA               | 17                     | NA                     | 0     |
| NA            | NA               | 18                     | NA                     | 0     |
| NA            | NA               | 19                     | NA                     | 0     |
| NA            | NA               | 0a                     | NA                     | 500   |
| NA            | NA               | 0b                     | NA                     | 0     |
| NA            | NA               | 0c                     | NA                     | 0     |
| NA            | NA               | 1                      | NA                     | 0     |
| NA            | NA               | 2                      | NA                     | 0     |
| NA            | NA               | 3                      | NA                     | 0     |
| NA            | NA               | 4                      | NA                     | 0     |
| NA            | NA               | 5                      | NA                     | 0     |
| NA            | NA               | 6                      | NA                     | 0     |
| NA            | NA               | 7                      | NA                     | 0     |
| NA            | NA               | 8                      | NA                     | 0     |
| NA            | NA               | 9                      | NA                     | 0     |
| NA            | NA               | 10                     | NA                     | 0     |
| NA            | NA               | 11                     | NA                     | 0     |
| NA            | NA               | 12                     | NA                     | 0     |
| NA            | NA               | 13                     | NA                     | 0     |
| NA            | NA               | 14                     | NA                     | 0     |
| NA            | NA               | 15                     | NA                     | 0     |
| NA            | NA               | 16                     | NA                     | 0     |
| NA            | NA               | 17                     | NA                     | 0     |

|       |       |    |       |    |
|-------|-------|----|-------|----|
| NA    | NA    | 18 | NA    | 0  |
| NA    | NA    | 19 | NA    | 0  |
| NA    | NA    | 0a | NA    | 0  |
| NA    | NA    | 0b | NA    | 0  |
| 0_4   | 0c_4  | NA | 0c_4  | 0  |
| 0_5   | 0c_5  | NA | 0c_5  | 0  |
| 0_8   | 0c_8  | NA | 0c_8  | 0  |
| 21_8  | 0b_8  | NA | 0b_8  | 0  |
| 0_21  | 0c_0b | NA | 0c_0b | 0  |
| 1_9   | 1_9   | NA | 1_9   | 0  |
| 1_12  | 1_12  | NA | 1_12  | 0  |
| 2_3   | 2_3   | NA | 2_3   | 0  |
| 2_4   | 2_4   | NA | 2_4   | 0  |
| 2_5   | 2_5   | NA | 2_5   | 0  |
| 2_6   | 2_6   | NA | 2_6   | 0  |
| 2_12  | 2_12  | NA | 2_12  | 0  |
| 2_16  | 2_16  | NA | 2_14  | 0  |
| 3_10  | 3_10  | NA | 3_10  | 0  |
| 3_25  | 3_25  | NA | 3_17  | 0  |
| 4_2   | 4_2   | NA | 4_2   | 0  |
| 4_5   | 4_5   | NA | 4_5   | 0  |
| 4_8   | 4_8   | NA | 4_8   | 0  |
| 4_12  | 4_12  | NA | 4_12  | 0  |
| 5_2   | 5_2   | NA | 5_2   | 0  |
| 5_4   | 5_4   | NA | 5_4   | 0  |
| 5_16  | 5_16  | NA | 5_14  | 0  |
| 6_24  | 6_24  | NA | 6_16  | 0  |
| 8_1   | 8_1   | NA | 8_1   | 0  |
| 8_4   | 8_4   | NA | 8_4   | 0  |
| 8_7   | 8_7   | NA | 8_7   | 0  |
| 8_12  | 8_12  | NA | 8_12  | 0  |
| 9_11  | 9_11  | NA | 9_11  | 0  |
| 10_25 | 10_25 | NA | 10_17 | 0  |
| 11_20 | 11_20 | NA | 11_15 | 0  |
| 12_25 | 12_25 | NA | 12_17 | 0  |
| 12_26 | 12_26 | NA | 12_18 | 0  |
| 16_14 | 16_14 | NA | 14_13 | 0  |
| 16_28 | 16_28 | NA | 14_19 | 0  |
| 24_14 | 24_14 | NA | 16_13 | 0  |
| 20_0  | 0a_0c | NA | 0a_0c | 0  |
| 20_21 | 0a_0b | NA | 0a_0b | 0  |
| NA    | NA    | NA | NA    | -4 |
| NA    | NA    | NA | NA    | -4 |



| stop   | best_fit   | upper_bound | lower_bounds |
|--------|------------|-------------|--------------|
| 200000 | 1226.5     | 2139        | 527.54       |
| 200000 | 42900      | 62916       | 27379        |
| 200000 | 53761      | 77960       | 38879        |
| 200000 | 56977      | 88793       | 28767        |
| 200000 | 29367      | 41869       | 19421        |
| 200000 | 33384      | 49368       | 20569        |
| 200000 | 53573      | 77440       | 35208        |
| 200000 | 14833      | 25925       | 5866.1       |
| 200000 | 15209      | 21783       | 8863.4       |
| 200000 | 38589      | 58240       | 23710        |
| 200000 | 23772      | 46335       | 5944.4       |
| 200000 | 18823      | 37650       | 385.32       |
| 200000 | 7819.1     | 14751       | 1096.6       |
| 200000 | 32451      | 46739       | 22685        |
| 200000 | 8068       | 10806       | 4944.5       |
| 200000 | 4789.5     | 9181        | 9.13E-07     |
| 200000 | 2089       | 3765.9      | 310.52       |
| 200000 | 939.17     | 2439.7      | 2.86E-07     |
| 200000 | 534.91     | 1869.4      | 6.19E-07     |
| 200000 | 190.99     | 1072.7      | 2.07E-07     |
| 1500   | 1063.4     | 1500        | 500          |
| 200000 | 35307      | 46706       | 26347        |
| 1      | 0.0032052  | 0.012348    | 1.93E-13     |
| 1      | 0.00077599 | 0.0017114   | 6.08E-07     |
| 1      | 0.00048324 | 0.0012395   | 6.93E-05     |
| 1      | 0.00041038 | 0.0014473   | 2.73E-07     |
| 1      | 0.0026012  | 0.0051834   | 0.0012868    |
| 1      | 0.0027507  | 0.0059597   | 0.0012412    |
| 1      | 0.00027206 | 0.0010644   | 2.72E-07     |
| 1      | 0.0020558  | 0.0082488   | 7.60E-08     |
| 1      | 0.0031318  | 0.0074138   | 0.00071864   |
| 1      | 0.000155   | 0.00059251  | 3.41E-08     |
| 1      | 0.00043628 | 0.0030274   | 2.27E-07     |
| 1      | 4.45E-05   | 0.0042366   | 2.87E-07     |
| 1      | 0.00026208 | 0.0025887   | 5.31E-07     |
| 1      | 1.21E-13   | 0.00035963  | 0            |
| 1      | 0.00048002 | 0.0014469   | 5.88E-07     |
| 1      | 0.00060722 | 0.99998     | 3.60E-07     |
| 1      | 0.00093052 | 0.0086153   | 1.77E-07     |
| 1      | 2.96E-06   | 0.99999     | 2.72E-09     |

|      |            |           |           |
|------|------------|-----------|-----------|
| 1    | 0.0049652  | 0.013529  | 1.14E-07  |
| 1    | 0.0043341  | 0.99999   | 6.30E-08  |
| 1    | 0.022675   | 0.048613  | 1.98E-13  |
| 1    | 0.0038469  | 0.0064758 | 0.0021621 |
| 4    | 0.48487    | 0.94672   | 4.48E-10  |
| 4    | 0.006696   | 0.46217   | 5.27E-11  |
| 4    | 3.0534     | 3.5475    | 2.2073    |
| 4    | 0.19947    | 0.75379   | 4.21E-08  |
| 4    | 0.4653     | 0.89006   | 0.30601   |
| 4    | 0.036843   | 0.1194    | 0.01746   |
| 4    | 3.69E-14   | 0.80746   | 0         |
| 4    | 0.30736    | 1.091     | 0.088923  |
| 4    | 5.35E-07   | 0.099433  | 2.22E-14  |
| 4    | 0.027121   | 0.24799   | 1.15E-08  |
| 4    | 0.22122    | 0.87744   | 0.074914  |
| 4    | 0.47571    | 1.9556    | 0.11896   |
| 4    | 0.01081    | 0.09879   | 6.05E-07  |
| 4    | 0.78135    | 2.5216    | 0.21568   |
| 4    | 0.0069534  | 0.23572   | 2.29E-14  |
| 4    | 0.1004     | 0.2134    | 0.0538    |
| 4    | 0.040892   | 0.21786   | 2.25E-07  |
| 4    | 1.20E-06   | 0.33677   | 2.52E-14  |
| 4    | 2.26E-06   | 0.49857   | 4.04E-12  |
| 4    | 4.15E-14   | 0.043388  | 0         |
| 4    | 3.21E-11   | 0.077429  | 0         |
| 4    | 3.71E-14   | 0.019233  | 0         |
| 4    | 0.11771    | 0.28656   | 0.014886  |
| 4    | 0.074206   | 0.26026   | 0.035957  |
| 4    | 0.012087   | 0.21953   | 2.12E-09  |
| 4    | 3.9959     | 4         | 1.8065    |
| 4    | 3.99E-14   | 0.41116   | 0         |
| 4    | 3.0574     | 3.6457    | 0.85184   |
| 4    | 0.32837    | 0.5249    | 2.25E-14  |
| 4    | 0.019193   | 0.73243   | 0.0034235 |
| 4    | 0.00092591 | 0.74574   | 2.23E-14  |
| 4    | 0.29351    | 0.69152   | 0.039119  |
| 4    | 0.18521    | 0.58811   | 4.86E-07  |
| 4    | 0.023187   | 0.13952   | 5.17E-09  |
| 4    | 0.0066346  | 0.059072  | 0.0025924 |
| 0.02 | 0.02       | 0.02      | 0.006191  |
| 0.02 | 8.99E-13   | 0.02      | 0         |
| 4    | 4          | 4         | 3.0923    |
| 4    | -0.011547  | 0.81021   | -0.17131  |

|        |           |            |           |
|--------|-----------|------------|-----------|
| 4      | 0.94789   | 2.6978     | 0.48236   |
| 4      | 0.48654   | 2.2146     | -0.79321  |
| 4      | 0.12228   | 0.6283     | -0.17069  |
| 4      | -0.066694 | 0.027724   | -0.5133   |
| 4      | -0.12588  | 0.051941   | -1.0409   |
| 4      | -3.7046   | -1.5884    | -4        |
| 4      | 3.671     | 3.9855     | 1.4281    |
| 4      | 3.0002    | 3.5603     | 0.79397   |
| 4      | -1.2153   | -0.17399   | -4        |
| 4      | -3.5822   | -0.86149   | -4        |
| 4      | -1.1043   | 0.83169    | -4        |
| 4      | -0.056239 | -0.0246    | -0.11132  |
| 4      | -0.01513  | 0.1098     | -0.51246  |
| 4      | -0.1218   | -0.013344  | -4        |
| 4      | -2.0404   | -0.11834   | -4        |
| 4      | -3.4938   | -0.92059   | -4        |
| 4      | -2.1874   | -0.27329   | -4        |
| 4      | -0.020912 | -0.0028011 | -0.33676  |
| 4      | 0.1939    | 0.74188    | -0.018695 |
| 4      | 0.012987  | 0.015177   | 0.011427  |
| 500000 | 1.33E+05  | 1.75E+05   | 1.04E+05  |

Note: filtered\_names correspond to cluster numbering used in the manuscript figures. So

## Discrete bi-phasic model parameters

| parameter_n | parameter_description      | phase | cluster_index | cluster_names |
|-------------|----------------------------|-------|---------------|---------------|
| 1           | cluster size (Tom-)        | 1+2   | 0             | 0c            |
| 2           | cluster size (Tom-)        | 1+2   | 1             | 1             |
| 3           | cluster size (Tom-)        | 1+2   | 2             | 2             |
| 4           | cluster size (Tom-)        | 1+2   | 3             | 3             |
| 5           | cluster size (Tom-)        | 1+2   | 4             | 4             |
| 6           | cluster size (Tom-)        | 1+2   | 5             | 5             |
| 7           | cluster size (Tom-)        | 1+2   | 6             | 6             |
| 8           | cluster size (Tom-)        | 1+2   | 7             | 7             |
| 9           | cluster size (Tom-)        | 1+2   | 8             | 8             |
| 10          | cluster size (Tom-)        | 1+2   | 9             | 9             |
| 11          | cluster size (Tom-)        | 1+2   | 10            | 10            |
| 12          | cluster size (Tom-)        | 1+2   | 11            | 11            |
| 13          | cluster size (Tom-)        | 1+2   | 12            | 12            |
| 14          | cluster size (Tom-)        | 1+2   | 13            | 14            |
| 15          | cluster size (Tom-)        | 1+2   | 14            | 16            |
| 16          | cluster size (Tom-)        | 1+2   | 15            | 20            |
| 17          | cluster size (Tom-)        | 1+2   | 16            | 24            |
| 18          | cluster size (Tom-)        | 1+2   | 17            | 25            |
| 19          | cluster size (Tom-)        | 1+2   | 18            | 26            |
| 20          | cluster size (Tom-)        | 1+2   | 19            | 28            |
| 21          | cluster size (Tom-)        | 1+2   | 20            | 0a            |
| 22          | cluster size (Tom-)        | 1+2   | 21            | 0b            |
| 23          | labelling frequency (Tom+) | 1+2   | 0             | 0c            |
| 24          | labelling frequency (Tom+) | 1+2   | 1             | 1             |
| 25          | labelling frequency (Tom+) | 1+2   | 2             | 2             |
| 26          | labelling frequency (Tom+) | 1+2   | 3             | 3             |
| 27          | labelling frequency (Tom+) | 1+2   | 4             | 4             |
| 28          | labelling frequency (Tom+) | 1+2   | 5             | 5             |
| 29          | labelling frequency (Tom+) | 1+2   | 6             | 6             |
| 30          | labelling frequency (Tom+) | 1+2   | 7             | 7             |
| 31          | labelling frequency (Tom+) | 1+2   | 8             | 8             |
| 32          | labelling frequency (Tom+) | 1+2   | 9             | 9             |
| 33          | labelling frequency (Tom+) | 1+2   | 10            | 10            |
| 34          | labelling frequency (Tom+) | 1+2   | 11            | 11            |
| 35          | labelling frequency (Tom+) | 1+2   | 12            | 12            |
| 36          | labelling frequency (Tom+) | 1+2   | 13            | 14            |
| 37          | labelling frequency (Tom+) | 1+2   | 14            | 16            |
| 38          | labelling frequency (Tom+) | 1+2   | 15            | 20            |
| 39          | labelling frequency (Tom+) | 1+2   | 16            | 24            |
| 40          | labelling frequency (Tom+) | 1+2   | 17            | 25            |



|                               |     |    |    |
|-------------------------------|-----|----|----|
| 41 labelling frequency (Tom+) | 1+2 | 18 | 26 |
| 42 labelling frequency (Tom+) | 1+2 | 19 | 28 |
| 43 labelling frequency (Tom+) | 1+2 | 20 | 0a |
| 44 labelling frequency (Tom+) | 1+2 | 21 | 0b |
| 45 differentiation rate       | 1   | NA | NA |
| 46 differentiation rate       | 1   | NA | NA |
| 47 differentiation rate       | 1   | NA | NA |
| 48 differentiation rate       | 1   | NA | NA |
| 49 differentiation rate       | 1   | NA | NA |
| 50 differentiation rate       | 1   | NA | NA |
| 51 differentiation rate       | 1   | NA | NA |
| 52 differentiation rate       | 1   | NA | NA |
| 53 differentiation rate       | 1   | NA | NA |
| 54 differentiation rate       | 1   | NA | NA |
| 55 differentiation rate       | 1   | NA | NA |
| 56 differentiation rate       | 1   | NA | NA |
| 57 differentiation rate       | 1   | NA | NA |
| 58 differentiation rate       | 1   | NA | NA |
| 59 differentiation rate       | 1   | NA | NA |
| 60 differentiation rate       | 1   | NA | NA |
| 61 differentiation rate       | 1   | NA | NA |
| 62 differentiation rate       | 1   | NA | NA |
| 63 differentiation rate       | 1   | NA | NA |
| 64 differentiation rate       | 1   | NA | NA |
| 65 differentiation rate       | 1   | NA | NA |
| 66 differentiation rate       | 1   | NA | NA |
| 67 differentiation rate       | 1   | NA | NA |
| 68 differentiation rate       | 1   | NA | NA |
| 69 differentiation rate       | 1   | NA | NA |
| 70 differentiation rate       | 1   | NA | NA |
| 71 differentiation rate       | 1   | NA | NA |
| 72 differentiation rate       | 1   | NA | NA |
| 73 differentiation rate       | 1   | NA | NA |
| 74 differentiation rate       | 1   | NA | NA |
| 75 differentiation rate       | 1   | NA | NA |
| 76 differentiation rate       | 1   | NA | NA |
| 77 differentiation rate       | 1   | NA | NA |
| 78 differentiation rate       | 1   | NA | NA |
| 79 differentiation rate       | 1   | NA | NA |
| 80 differentiation rate       | 1   | NA | NA |
| 81 differentiation rate       | 1   | NA | NA |
| 82 net proliferation          | 1   | 0  | 0c |
| 83 net proliferation          | 1   | 1  | 1  |

|                          |   |         |          |
|--------------------------|---|---------|----------|
| 84 net proliferation     | 1 | 2       | 2        |
| 85 net proliferation     | 1 | 3       | 3        |
| 86 net proliferation     | 1 | 4       | 4        |
| 87 net proliferation     | 1 | 5       | 5        |
| 88 net proliferation     | 1 | 6       | 6        |
| 89 net proliferation     | 1 | 7       | 7        |
| 90 net proliferation     | 1 | 8       | 8        |
| 91 net proliferation     | 1 | 9       | 9        |
| 92 net proliferation     | 1 | 10      | 10       |
| 93 net proliferation     | 1 | 11      | 11       |
| 94 net proliferation     | 1 | 12      | 12       |
| 95 net proliferation     | 1 | 13      | 14       |
| 96 net proliferation     | 1 | 14      | 16       |
| 97 net proliferation     | 1 | 15      | 20       |
| 98 net proliferation     | 1 | 16      | 24       |
| 99 net proliferation     | 1 | 17      | 25       |
| 100 net proliferation    | 1 | 18      | 26       |
| 101 net proliferation    | 1 | 19      | 28       |
| 102 net proliferation    | 1 | 20      | 0a       |
| 103 net proliferation    | 1 | 21      | 0b       |
| 104 logistic parameter   | 1 | 0+21+22 | 0c+0a+0b |
| 105 differentiation rate | 2 | NA      | NA       |
| 106 differentiation rate | 2 | NA      | NA       |
| 107 differentiation rate | 2 | NA      | NA       |
| 108 differentiation rate | 2 | NA      | NA       |
| 109 differentiation rate | 2 | NA      | NA       |
| 110 differentiation rate | 2 | NA      | NA       |
| 111 differentiation rate | 2 | NA      | NA       |
| 112 differentiation rate | 2 | NA      | NA       |
| 113 differentiation rate | 2 | NA      | NA       |
| 114 differentiation rate | 2 | NA      | NA       |
| 115 differentiation rate | 2 | NA      | NA       |
| 116 differentiation rate | 2 | NA      | NA       |
| 117 differentiation rate | 2 | NA      | NA       |
| 118 differentiation rate | 2 | NA      | NA       |
| 119 differentiation rate | 2 | NA      | NA       |
| 120 differentiation rate | 2 | NA      | NA       |
| 121 differentiation rate | 2 | NA      | NA       |
| 122 differentiation rate | 2 | NA      | NA       |
| 123 differentiation rate | 2 | NA      | NA       |
| 124 differentiation rate | 2 | NA      | NA       |
| 125 differentiation rate | 2 | NA      | NA       |
| 126 differentiation rate | 2 | NA      | NA       |

|     |                      |   |         |          |
|-----|----------------------|---|---------|----------|
| 127 | differentiation rate | 2 | NA      | NA       |
| 128 | differentiation rate | 2 | NA      | NA       |
| 129 | differentiation rate | 2 | NA      | NA       |
| 130 | differentiation rate | 2 | NA      | NA       |
| 131 | differentiation rate | 2 | NA      | NA       |
| 132 | differentiation rate | 2 | NA      | NA       |
| 133 | differentiation rate | 2 | NA      | NA       |
| 134 | differentiation rate | 2 | NA      | NA       |
| 135 | differentiation rate | 2 | NA      | NA       |
| 136 | differentiation rate | 2 | NA      | NA       |
| 137 | differentiation rate | 2 | NA      | NA       |
| 138 | differentiation rate | 2 | NA      | NA       |
| 139 | differentiation rate | 2 | NA      | NA       |
| 140 | differentiation rate | 2 | NA      | NA       |
| 141 | differentiation rate | 2 | NA      | NA       |
| 142 | net proliferation    | 2 | 0       | 0c       |
| 143 | net proliferation    | 2 | 1       | 1        |
| 144 | net proliferation    | 2 | 2       | 2        |
| 145 | net proliferation    | 2 | 3       | 3        |
| 146 | net proliferation    | 2 | 4       | 4        |
| 147 | net proliferation    | 2 | 5       | 5        |
| 148 | net proliferation    | 2 | 6       | 6        |
| 149 | net proliferation    | 2 | 7       | 7        |
| 150 | net proliferation    | 2 | 8       | 8        |
| 151 | net proliferation    | 2 | 9       | 9        |
| 152 | net proliferation    | 2 | 10      | 10       |
| 153 | net proliferation    | 2 | 11      | 11       |
| 154 | net proliferation    | 2 | 12      | 12       |
| 155 | net proliferation    | 2 | 13      | 14       |
| 156 | net proliferation    | 2 | 14      | 16       |
| 157 | net proliferation    | 2 | 15      | 20       |
| 158 | net proliferation    | 2 | 16      | 24       |
| 159 | net proliferation    | 2 | 17      | 25       |
| 160 | net proliferation    | 2 | 18      | 26       |
| 161 | net proliferation    | 2 | 19      | 28       |
| 162 | net proliferation    | 2 | 20      | 0a       |
| 163 | net proliferation    | 2 | 21      | 0b       |
| 164 | logistic parameter   | 2 | 0+21+22 | 0c+0a+0b |

source code utilises unfiltered cluster names (as in Figure S2F)

| transition_indices | transition_names | cluster_filtered_na | transition_filtered_start |     |
|--------------------|------------------|---------------------|---------------------------|-----|
| NA                 | NA               | 0c                  | NA                        | 0   |
| NA                 | NA               | 1                   | NA                        | 0   |
| NA                 | NA               | 2                   | NA                        | 0   |
| NA                 | NA               | 3                   | NA                        | 0   |
| NA                 | NA               | 4                   | NA                        | 0   |
| NA                 | NA               | 5                   | NA                        | 0   |
| NA                 | NA               | 6                   | NA                        | 0   |
| NA                 | NA               | 7                   | NA                        | 0   |
| NA                 | NA               | 8                   | NA                        | 0   |
| NA                 | NA               | 9                   | NA                        | 0   |
| NA                 | NA               | 10                  | NA                        | 0   |
| NA                 | NA               | 11                  | NA                        | 0   |
| NA                 | NA               | 12                  | NA                        | 0   |
| NA                 | NA               | 13                  | NA                        | 0   |
| NA                 | NA               | 14                  | NA                        | 0   |
| NA                 | NA               | 15                  | NA                        | 0   |
| NA                 | NA               | 16                  | NA                        | 0   |
| NA                 | NA               | 17                  | NA                        | 0   |
| NA                 | NA               | 18                  | NA                        | 0   |
| NA                 | NA               | 19                  | NA                        | 0   |
| NA                 | NA               | 0a                  | NA                        | 500 |
| NA                 | NA               | 0b                  | NA                        | 0   |
| NA                 | NA               | 0c                  | NA                        | 0   |
| NA                 | NA               | 1                   | NA                        | 0   |
| NA                 | NA               | 2                   | NA                        | 0   |
| NA                 | NA               | 3                   | NA                        | 0   |
| NA                 | NA               | 4                   | NA                        | 0   |
| NA                 | NA               | 5                   | NA                        | 0   |
| NA                 | NA               | 6                   | NA                        | 0   |
| NA                 | NA               | 7                   | NA                        | 0   |
| NA                 | NA               | 8                   | NA                        | 0   |
| NA                 | NA               | 9                   | NA                        | 0   |
| NA                 | NA               | 10                  | NA                        | 0   |
| NA                 | NA               | 11                  | NA                        | 0   |
| NA                 | NA               | 12                  | NA                        | 0   |
| NA                 | NA               | 13                  | NA                        | 0   |
| NA                 | NA               | 14                  | NA                        | 0   |
| NA                 | NA               | 15                  | NA                        | 0   |
| NA                 | NA               | 16                  | NA                        | 0   |
| NA                 | NA               | 17                  | NA                        | 0   |

|       |       |    |       |    |
|-------|-------|----|-------|----|
| NA    | NA    | 18 | NA    | 0  |
| NA    | NA    | 19 | NA    | 0  |
| NA    | NA    | 0a | NA    | 0  |
| NA    | NA    | 0b | NA    | 0  |
| 0_4   | 0c_4  | NA | 0c_4  | 0  |
| 0_5   | 0c_5  | NA | 0c_5  | 0  |
| 0_8   | 0c_8  | NA | 0c_8  | 0  |
| 21_8  | 0b_8  | NA | 0b_8  | 0  |
| 0_21  | 0c_0b | NA | 0c_0b | 0  |
| 1_9   | 1_9   | NA | 1_9   | 0  |
| 1_12  | 1_12  | NA | 1_12  | 0  |
| 2_3   | 2_3   | NA | 2_3   | 0  |
| 2_4   | 2_4   | NA | 2_4   | 0  |
| 2_5   | 2_5   | NA | 2_5   | 0  |
| 2_6   | 2_6   | NA | 2_6   | 0  |
| 2_12  | 2_12  | NA | 2_12  | 0  |
| 2_16  | 2_16  | NA | 2_14  | 0  |
| 3_10  | 3_10  | NA | 3_10  | 0  |
| 3_25  | 3_25  | NA | 3_17  | 0  |
| 4_2   | 4_2   | NA | 4_2   | 0  |
| 4_5   | 4_5   | NA | 4_5   | 0  |
| 4_8   | 4_8   | NA | 4_8   | 0  |
| 4_12  | 4_12  | NA | 4_12  | 0  |
| 5_2   | 5_2   | NA | 5_2   | 0  |
| 5_4   | 5_4   | NA | 5_4   | 0  |
| 5_16  | 5_16  | NA | 5_14  | 0  |
| 6_24  | 6_24  | NA | 6_16  | 0  |
| 8_1   | 8_1   | NA | 8_1   | 0  |
| 8_4   | 8_4   | NA | 8_4   | 0  |
| 8_7   | 8_7   | NA | 8_7   | 0  |
| 8_12  | 8_12  | NA | 8_12  | 0  |
| 9_11  | 9_11  | NA | 9_11  | 0  |
| 10_25 | 10_25 | NA | 10_17 | 0  |
| 11_20 | 11_20 | NA | 11_15 | 0  |
| 12_25 | 12_25 | NA | 12_17 | 0  |
| 12_26 | 12_26 | NA | 12_18 | 0  |
| 16_14 | 16_14 | NA | 14_13 | 0  |
| 16_28 | 16_28 | NA | 14_19 | 0  |
| 24_14 | 24_14 | NA | 16_13 | 0  |
| 20_0  | 0a_0c | NA | 0a_0c | 0  |
| 20_21 | 0a_0b | NA | 0a_0b | 0  |
| NA    | NA    | 0c | NA    | -4 |
| NA    | NA    | 1  | NA    | -4 |

|      |       |          |       |    |
|------|-------|----------|-------|----|
| NA   | NA    | 2        | NA    | -4 |
| NA   | NA    | 3        | NA    | -4 |
| NA   | NA    | 4        | NA    | -4 |
| NA   | NA    | 5        | NA    | -4 |
| NA   | NA    | 6        | NA    | -4 |
| NA   | NA    | 7        | NA    | -4 |
| NA   | NA    | 8        | NA    | -4 |
| NA   | NA    | 9        | NA    | -4 |
| NA   | NA    | 10       | NA    | -4 |
| NA   | NA    | 11       | NA    | -4 |
| NA   | NA    | 12       | NA    | -4 |
| NA   | NA    | 13       | NA    | -4 |
| NA   | NA    | 14       | NA    | -4 |
| NA   | NA    | 15       | NA    | -4 |
| NA   | NA    | 16       | NA    | -4 |
| NA   | NA    | 17       | NA    | -4 |
| NA   | NA    | 18       | NA    | -4 |
| NA   | NA    | 19       | NA    | -4 |
| NA   | NA    | 0a       | NA    | -4 |
| NA   | NA    | 0b       | NA    | -4 |
| NA   | NA    | 0c+0a+0b | NA    | 0  |
| 0_4  | 0c_4  | NA       | 0c_4  | 0  |
| 0_5  | 0c_5  | NA       | 0c_5  | 0  |
| 0_8  | 0c_8  | NA       | 0c_8  | 0  |
| 21_8 | 0b_8  | NA       | 0b_8  | 0  |
| 0_21 | 0c_0b | NA       | 0c_0b | 0  |
| 1_9  | 1_9   | NA       | 1_9   | 0  |
| 1_12 | 1_12  | NA       | 1_12  | 0  |
| 2_3  | 2_3   | NA       | 2_3   | 0  |
| 2_4  | 2_4   | NA       | 2_4   | 0  |
| 2_5  | 2_5   | NA       | 2_5   | 0  |
| 2_6  | 2_6   | NA       | 2_6   | 0  |
| 2_12 | 2_12  | NA       | 2_12  | 0  |
| 2_16 | 2_16  | NA       | 2_14  | 0  |
| 3_10 | 3_10  | NA       | 3_10  | 0  |
| 3_25 | 3_25  | NA       | 3_17  | 0  |
| 4_2  | 4_2   | NA       | 4_2   | 0  |
| 4_5  | 4_5   | NA       | 4_5   | 0  |
| 4_8  | 4_8   | NA       | 4_8   | 0  |
| 4_12 | 4_12  | NA       | 4_12  | 0  |
| 5_2  | 5_2   | NA       | 5_2   | 0  |
| 5_4  | 5_4   | NA       | 5_4   | 0  |
| 5_16 | 5_16  | NA       | 5_14  | 0  |

|       |       |          |       |    |
|-------|-------|----------|-------|----|
| 6_24  | 6_24  | NA       | 6_16  | 0  |
| 8_1   | 8_1   | NA       | 8_1   | 0  |
| 8_4   | 8_4   | NA       | 8_4   | 0  |
| 8_7   | 8_7   | NA       | 8_7   | 0  |
| 8_12  | 8_12  | NA       | 8_12  | 0  |
| 9_11  | 9_11  | NA       | 9_11  | 0  |
| 10_25 | 10_25 | NA       | 10_17 | 0  |
| 11_20 | 11_20 | NA       | 11_15 | 0  |
| 12_25 | 12_25 | NA       | 12_17 | 0  |
| 12_26 | 12_26 | NA       | 12_18 | 0  |
| 16_14 | 16_14 | NA       | 14_13 | 0  |
| 16_28 | 16_28 | NA       | 14_19 | 0  |
| 24_14 | 24_14 | NA       | 16_13 | 0  |
| 20_0  | 0a_0c | NA       | 0a_0c | 0  |
| 20_21 | 0a_0b | NA       | 0a_0b | 0  |
| NA    | NA    | 0c       | NA    | -4 |
| NA    | NA    | 1        | NA    | -4 |
| NA    | NA    | 2        | NA    | -4 |
| NA    | NA    | 3        | NA    | -4 |
| NA    | NA    | 4        | NA    | -4 |
| NA    | NA    | 5        | NA    | -4 |
| NA    | NA    | 6        | NA    | -4 |
| NA    | NA    | 7        | NA    | -4 |
| NA    | NA    | 8        | NA    | -4 |
| NA    | NA    | 9        | NA    | -4 |
| NA    | NA    | 10       | NA    | -4 |
| NA    | NA    | 11       | NA    | -4 |
| NA    | NA    | 12       | NA    | -4 |
| NA    | NA    | 13       | NA    | -4 |
| NA    | NA    | 14       | NA    | -4 |
| NA    | NA    | 15       | NA    | -4 |
| NA    | NA    | 16       | NA    | -4 |
| NA    | NA    | 17       | NA    | -4 |
| NA    | NA    | 18       | NA    | -4 |
| NA    | NA    | 19       | NA    | -4 |
| NA    | NA    | 0a       | NA    | -4 |
| NA    | NA    | 0b       | NA    | -4 |
| NA    | NA    | 0c+0a+0b | NA    | 0  |

| stop   | best_fit   | upper_bound | lower_bounds |
|--------|------------|-------------|--------------|
| 200000 | 383.38     | 631.74      | 170.72       |
| 200000 | 30242      | 39353       | 15169        |
| 200000 | 41290      | 53636       | 26245        |
| 200000 | 38651      | 56900       | 24557        |
| 200000 | 22270      | 30859       | 13105        |
| 200000 | 25234      | 32817       | 14765        |
| 200000 | 39040      | 57718       | 24780        |
| 200000 | 10995      | 16770       | 5586.4       |
| 200000 | 10815      | 14063       | 5389.3       |
| 200000 | 28028      | 38456       | 15452        |
| 200000 | 17676      | 27622       | 10753        |
| 200000 | 13939      | 22633       | 5881         |
| 200000 | 5796.4     | 9442.9      | 1949         |
| 200000 | 24818      | 32410       | 15769        |
| 200000 | 7285.9     | 10145       | 3955.5       |
| 200000 | 2418.5     | 4681.6      | 249.15       |
| 200000 | 1540.1     | 2515.7      | 487.2        |
| 200000 | 700.25     | 1488.1      | 20.763       |
| 200000 | 398.32     | 838.04      | 5.45E-07     |
| 200000 | 345.33     | 698.52      | 56.362       |
| 1500   | 918.54     | 1487.5      | 543.37       |
| 200000 | 26723      | 34902       | 16670        |
| 1      | 2.70E-14   | 0.0083049   | 2.24E-14     |
| 1      | 0.0011284  | 0.0016332   | 0.00038946   |
| 1      | 0.00055425 | 0.00092869  | 0.00028273   |
| 1      | 0.00032378 | 0.0007112   | 5.74E-07     |
| 1      | 0.0032909  | 0.0054508   | 0.0018269    |
| 1      | 0.0028698  | 0.0041504   | 0.0018293    |
| 1      | 0.000259   | 0.00064975  | 1.14E-07     |
| 1      | 0.0021259  | 0.005102    | 4.15E-07     |
| 1      | 0.0033649  | 0.0059515   | 0.0015059    |
| 1      | 0.00024373 | 0.00045505  | 5.25E-05     |
| 1      | 0.00040658 | 0.0012724   | 1.40E-07     |
| 1      | 2.19E-05   | 0.001128    | 4.97E-07     |
| 1      | 0.00025343 | 0.0020116   | 9.04E-07     |
| 1      | 4.93E-05   | 0.00023434  | 5.81E-07     |
| 1      | 0.0006051  | 0.0011463   | 0.00023344   |
| 1      | 0.00078293 | 0.0032029   | 8.60E-07     |
| 1      | 0.00095987 | 0.0034044   | 6.28E-07     |
| 1      | 9.81E-06   | 0.013889    | 9.15E-10     |



|      |            |            |            |
|------|------------|------------|------------|
| 1    | 0.0050514  | 0.98871    | 6.25E-07   |
| 1    | 0.0072447  | 0.013872   | 5.96E-05   |
| 1    | 0.13582    | 0.23568    | 0.092187   |
| 1    | 4.33E-10   | 0.00082417 | 2.82E-14   |
| 4    | 1.6545     | 1.7331     | 1.0799     |
| 4    | 1.76E-06   | 0.15234    | 1.64E-11   |
| 4    | 1.6497     | 2.0192     | 1.5622     |
| 4    | 5.90E-12   | 0.07262    | 3.73E-14   |
| 4    | 0.69955    | 0.91429    | 0.59587    |
| 4    | 0.021349   | 0.052825   | 0.0020103  |
| 4    | 0.00011376 | 0.13703    | 2.57E-13   |
| 4    | 0.33479    | 0.49584    | 0.14866    |
| 4    | 0.17612    | 0.43069    | 5.56E-05   |
| 4    | 0.027077   | 0.062587   | 2.83E-07   |
| 4    | 0.25265    | 0.42212    | 0.1973     |
| 4    | 0.6398     | 0.8141     | 0.5554     |
| 4    | 0.0037391  | 0.052696   | 2.56E-07   |
| 4    | 0.94679    | 1.3594     | 0.65581    |
| 4    | 2.41E-07   | 0.059374   | 4.97E-12   |
| 4    | 0.0032228  | 0.049046   | 2.88E-13   |
| 4    | 9.10E-06   | 0.070715   | 7.40E-14   |
| 4    | 0.28592    | 0.44879    | 0.20154    |
| 4    | 6.20E-09   | 0.086118   | 1.93E-12   |
| 4    | 0.087171   | 0.18881    | 9.95E-07   |
| 4    | 0.35982    | 0.80437    | 0.17516    |
| 4    | 1.17E-07   | 0.0089475  | 0          |
| 4    | 0.045714   | 0.19882    | 0.017906   |
| 4    | 0.029838   | 0.059143   | 1.33E-07   |
| 4    | 1.12E-05   | 0.31197    | 1.29E-13   |
| 4    | 3.9989     | 4          | 3.7197     |
| 4    | 3.32E-08   | 0.13154    | 3.41E-13   |
| 4    | 2.9743     | 3.6785     | 2.2912     |
| 4    | 8.40E-07   | 0.093054   | 3.92E-12   |
| 4    | 0.064356   | 0.28322    | 0.012668   |
| 4    | 0.38655    | 0.5985     | 8.82E-07   |
| 4    | 0.33476    | 0.63066    | 0.087259   |
| 4    | 9.36E-08   | 0.18524    | 8.21E-14   |
| 4    | 3.33E-14   | 0.092591   | 0          |
| 4    | 0.18915    | 0.62869    | 0.0076415  |
| 0.02 | 0.01999    | 0.02       | 0.012804   |
| 0.02 | 8.14E-08   | 0.02       | 3.12E-11   |
| 4    | 3.9998     | 4          | 3.8193     |
| 4    | 0.028427   | 0.14946    | -0.0010908 |

|        |            |           |           |
|--------|------------|-----------|-----------|
| 4      | 1.3482     | 1.6167    | 1.1645    |
| 4      | 0.68706    | 1.0638    | 0.20378   |
| 4      | -0.27222   | -0.10072  | -0.89139  |
| 4      | 0.43524    | 0.86452   | 0.18133   |
| 4      | -0.18919   | -0.038702 | -0.47011  |
| 4      | -3.5106    | -3.046    | -3.7488   |
| 4      | 3.6626     | 3.8834    | 3.4406    |
| 4      | 2.9561     | 3.6627    | 2.2692    |
| 4      | -1.9985    | -1.2341   | -3.9999   |
| 4      | -3.2189    | -2.4735   | -4        |
| 4      | -1.0942    | -0.71193  | -1.805    |
| 4      | -0.017991  | -9.88E-05 | -0.072314 |
| 4      | 0.16628    | 0.56933   | -0.22209  |
| 4      | -0.30276   | -0.1001   | -2.3529   |
| 4      | -1.0104    | -0.38759  | -3.5281   |
| 4      | -2.5984    | -1.3125   | -4        |
| 4      | -2.057     | -0.71586  | -3.9997   |
| 4      | -2.8513    | -0.52728  | -4        |
| 4      | 0.018411   | 0.095735  | 0.0012354 |
| 4      | 0.028812   | 0.046829  | 0.012807  |
| 500000 | 2.79E+06   | 5.00E+06  | 1.71E+05  |
| 4      | 2.75E-07   | 0.06167   | 2.22E-14  |
| 4      | 0.644      | 0.76393   | 2.22E-14  |
| 4      | 2.4151     | 3.1805    | 1.7581    |
| 4      | 0.086262   | 0.16736   | 0.037499  |
| 4      | 0.94685    | 1.3037    | 0.66618   |
| 4      | 0.034736   | 0.15461   | 0.018988  |
| 4      | 1.0967     | 1.4069    | 0.17007   |
| 4      | 0.29025    | 0.57274   | 0.20338   |
| 4      | 3.00E-08   | 0.078181  | 2.22E-14  |
| 4      | 0.073287   | 0.14343   | 2.22E-14  |
| 4      | 0.23124    | 0.29871   | 0.16791   |
| 4      | 2.88E-05   | 0.27135   | 2.22E-14  |
| 4      | 6.38E-07   | 0.013328  | 6.38E-07  |
| 4      | 0.22948    | 0.59991   | 0.14126   |
| 4      | 0.00036224 | 0.053231  | 2.22E-14  |
| 4      | 0.25085    | 0.31812   | 0.18715   |
| 4      | 0.00021709 | 0.097217  | 2.22E-14  |
| 4      | 8.48E-05   | 0.10906   | 2.22E-14  |
| 4      | 0.0083731  | 0.30175   | 2.22E-14  |
| 4      | 1.53E-12   | 0.055542  | 2.22E-14  |
| 4      | 1.15E-09   | 0.07313   | 2.22E-14  |
| 4      | 0.012297   | 0.024174  | 2.46E-13  |

|        |           |           |            |
|--------|-----------|-----------|------------|
| 4      | 0.0064851 | 0.048619  | 0.0031362  |
| 4      | 2.2242    | 2.9363    | 1.4861     |
| 4      | 0.3706    | 0.49123   | 0.32606    |
| 4      | 1.537     | 2.1331    | 0.39335    |
| 4      | 0.039722  | 0.61815   | 2.22E-14   |
| 4      | 3.0335    | 3.1612    | 2.4884     |
| 4      | 0.25989   | 0.52635   | 0.010246   |
| 4      | 0.054055  | 0.42453   | 0.016572   |
| 4      | 0.17941   | 0.47352   | 7.80E-07   |
| 4      | 0.44455   | 0.58507   | 0.074106   |
| 4      | 7.69E-06  | 0.29942   | 2.22E-14   |
| 4      | 0.11889   | 0.26896   | 0.028969   |
| 4      | 0.01249   | 0.061808  | 0.0051441  |
| 0.02   | 0.0067018 | 0.0083353 | 0.0043649  |
| 0.02   | 3.14E-14  | 0.0059784 | 0          |
| 4      | 4         | 4         | 3.0612     |
| 4      | -0.54366  | 0.14713   | -1.4844    |
| 4      | 0.35517   | 0.75117   | 0.23341    |
| 4      | -0.065483 | 0.33991   | -0.36563   |
| 4      | -0.052228 | 0.2967    | -0.077788  |
| 4      | -0.071746 | -0.029453 | -0.1809    |
| 4      | -0.25583  | -0.1791   | -0.36056   |
| 4      | -1.452    | -0.36961  | -2.1441    |
| 4      | 3.9998    | 4         | 3.5949     |
| 4      | 2.977     | 3.1029    | 2.4308     |
| 4      | -0.17828  | 0.04244   | -0.94253   |
| 4      | -3.61     | -2.8862   | -4         |
| 4      | -3.0533   | -1.2193   | -4         |
| 4      | -0.10238  | -0.047789 | -0.26181   |
| 4      | 0.087601  | 0.2375    | -0.0055168 |
| 4      | -0.37894  | -0.13805  | -3.8982    |
| 4      | -0.10374  | 0.053497  | -1.0909    |
| 4      | -3.6665   | -0.084438 | -4         |
| 4      | -3.6439   | -0.63046  | -4         |
| 4      | -0.047227 | -0.017026 | -0.37232   |
| 4      | 0.079608  | 0.1625    | 0.027251   |
| 4      | 0.012513  | 0.013887  | 0.011284   |
| 500000 | 1.25E+05  | 1.50E+05  | 1.04E+05   |

## Residence time for each cluster

| cluster name | cluster name filtered | inv_self_renewal_k | residence_tir       |
|--------------|-----------------------|--------------------|---------------------|
|              | 0c                    | 0c                 | 0.010266 97.4089227 |
|              | 1                     | 1                  | 0.04839 20.6654267  |
|              | 2                     | 2                  | 0.094332 10.6008565 |
|              | 3                     | 3                  | 0.30176 3.31389183  |
|              | 4                     | 4                  | 0.019015 52.5900605 |
|              | 5                     | 5                  | 0.066694 14.9938525 |
|              | 6                     | 6                  | 0.24359 4.10525884  |
|              | 7                     | 7                  | 3.7046 0.26993468   |
|              | 8                     | 8                  | 0.41119 2.43196576  |
|              | 9                     | 9                  | 0.0572 17.4825175   |
|              | 10                    | 10                 | 1.5437 0.64779426   |
|              | 11                    | 11                 | 3.6014 0.2776698    |
|              | 12                    | 12                 | 1.3987 0.7149496    |
|              | 14                    | 13                 | 0.056239 17.781255  |
|              | 16                    | 15                 | 0.044952 22.2459512 |
|              | 20                    | 16                 | 0.1218 8.21018062   |
|              | 24                    | 17                 | 2.2256 0.44931704   |
|              | 25                    | 18                 | 3.4938 0.28622131   |
|              | 26                    | 19                 | 2.1874 0.45716376   |
|              | 28                    | 20                 | 0.020912 47.8194338 |
|              | 0a                    | 0a                 | 0 Inf               |
|              | 0b                    | 0b                 | 0.00557 179.533214  |

ne\_days

## Time required to accumulate 1 cells (starting from 1 cell in cluster 0)

| cluster name | cluster name | time_days |
|--------------|--------------|-----------|
| 1            | 1            | 33.5      |
| 2            | 2            | 52        |
| 3            | 3            | 54.5      |
| 4            | 4            | 44        |
| 5            | 5            | 60.5      |
| 6            | 6            | 59.5      |
| 7            | 7            | 26.5      |
| 8            | 8            | 31        |
| 9            | 9            | 71.5      |
| 10           | 10           | 87.5      |
| 11           | 11           | 82        |
| 12           | 12           | 111       |
| 14           | 13           | 1.57E+02  |
| 16           | 14           | 154.5     |
| 20           | 15           | 2.29E+02  |
| 24           | 16           | 2.62E+02  |
| 25           | 17           | 2.58E+02  |
| 26           | 18           | 262.5     |
| 28           | 19           | 270       |

## Figure S5

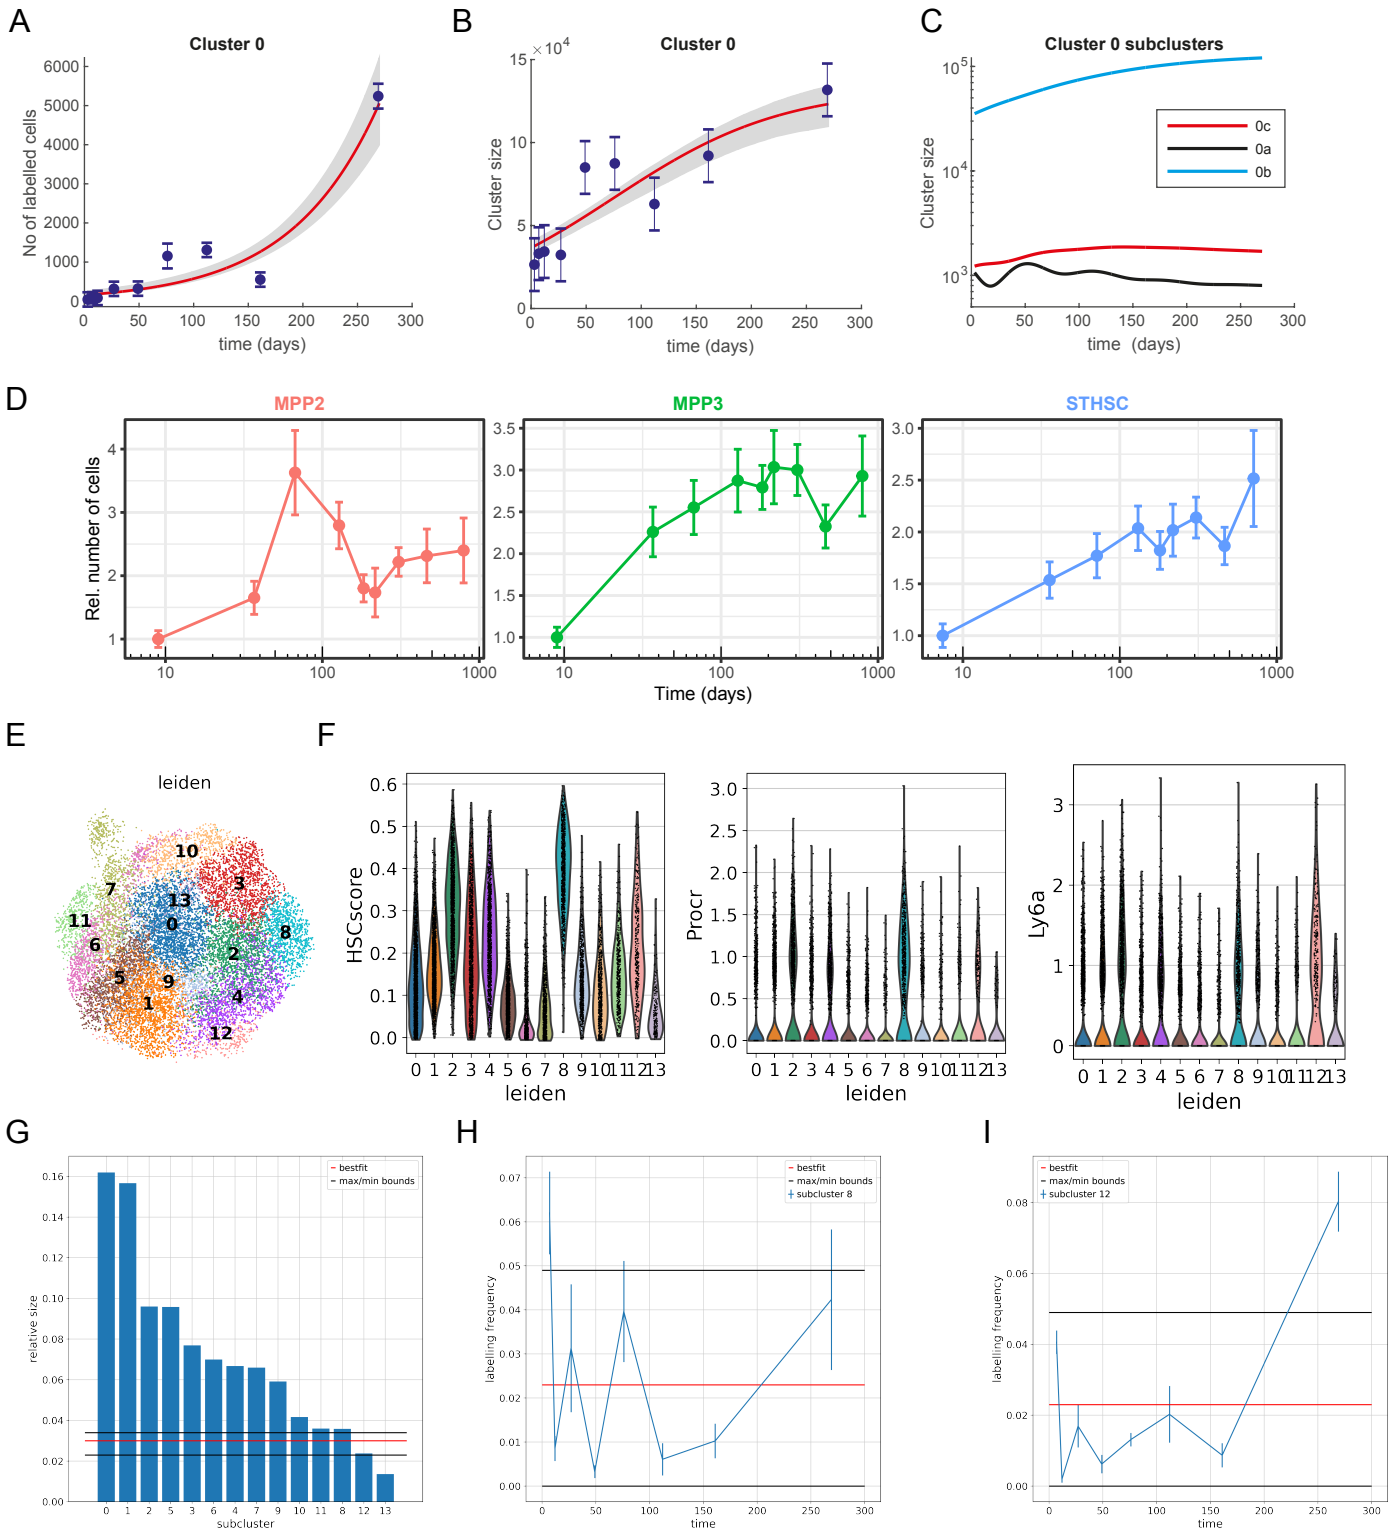

## Figure S6

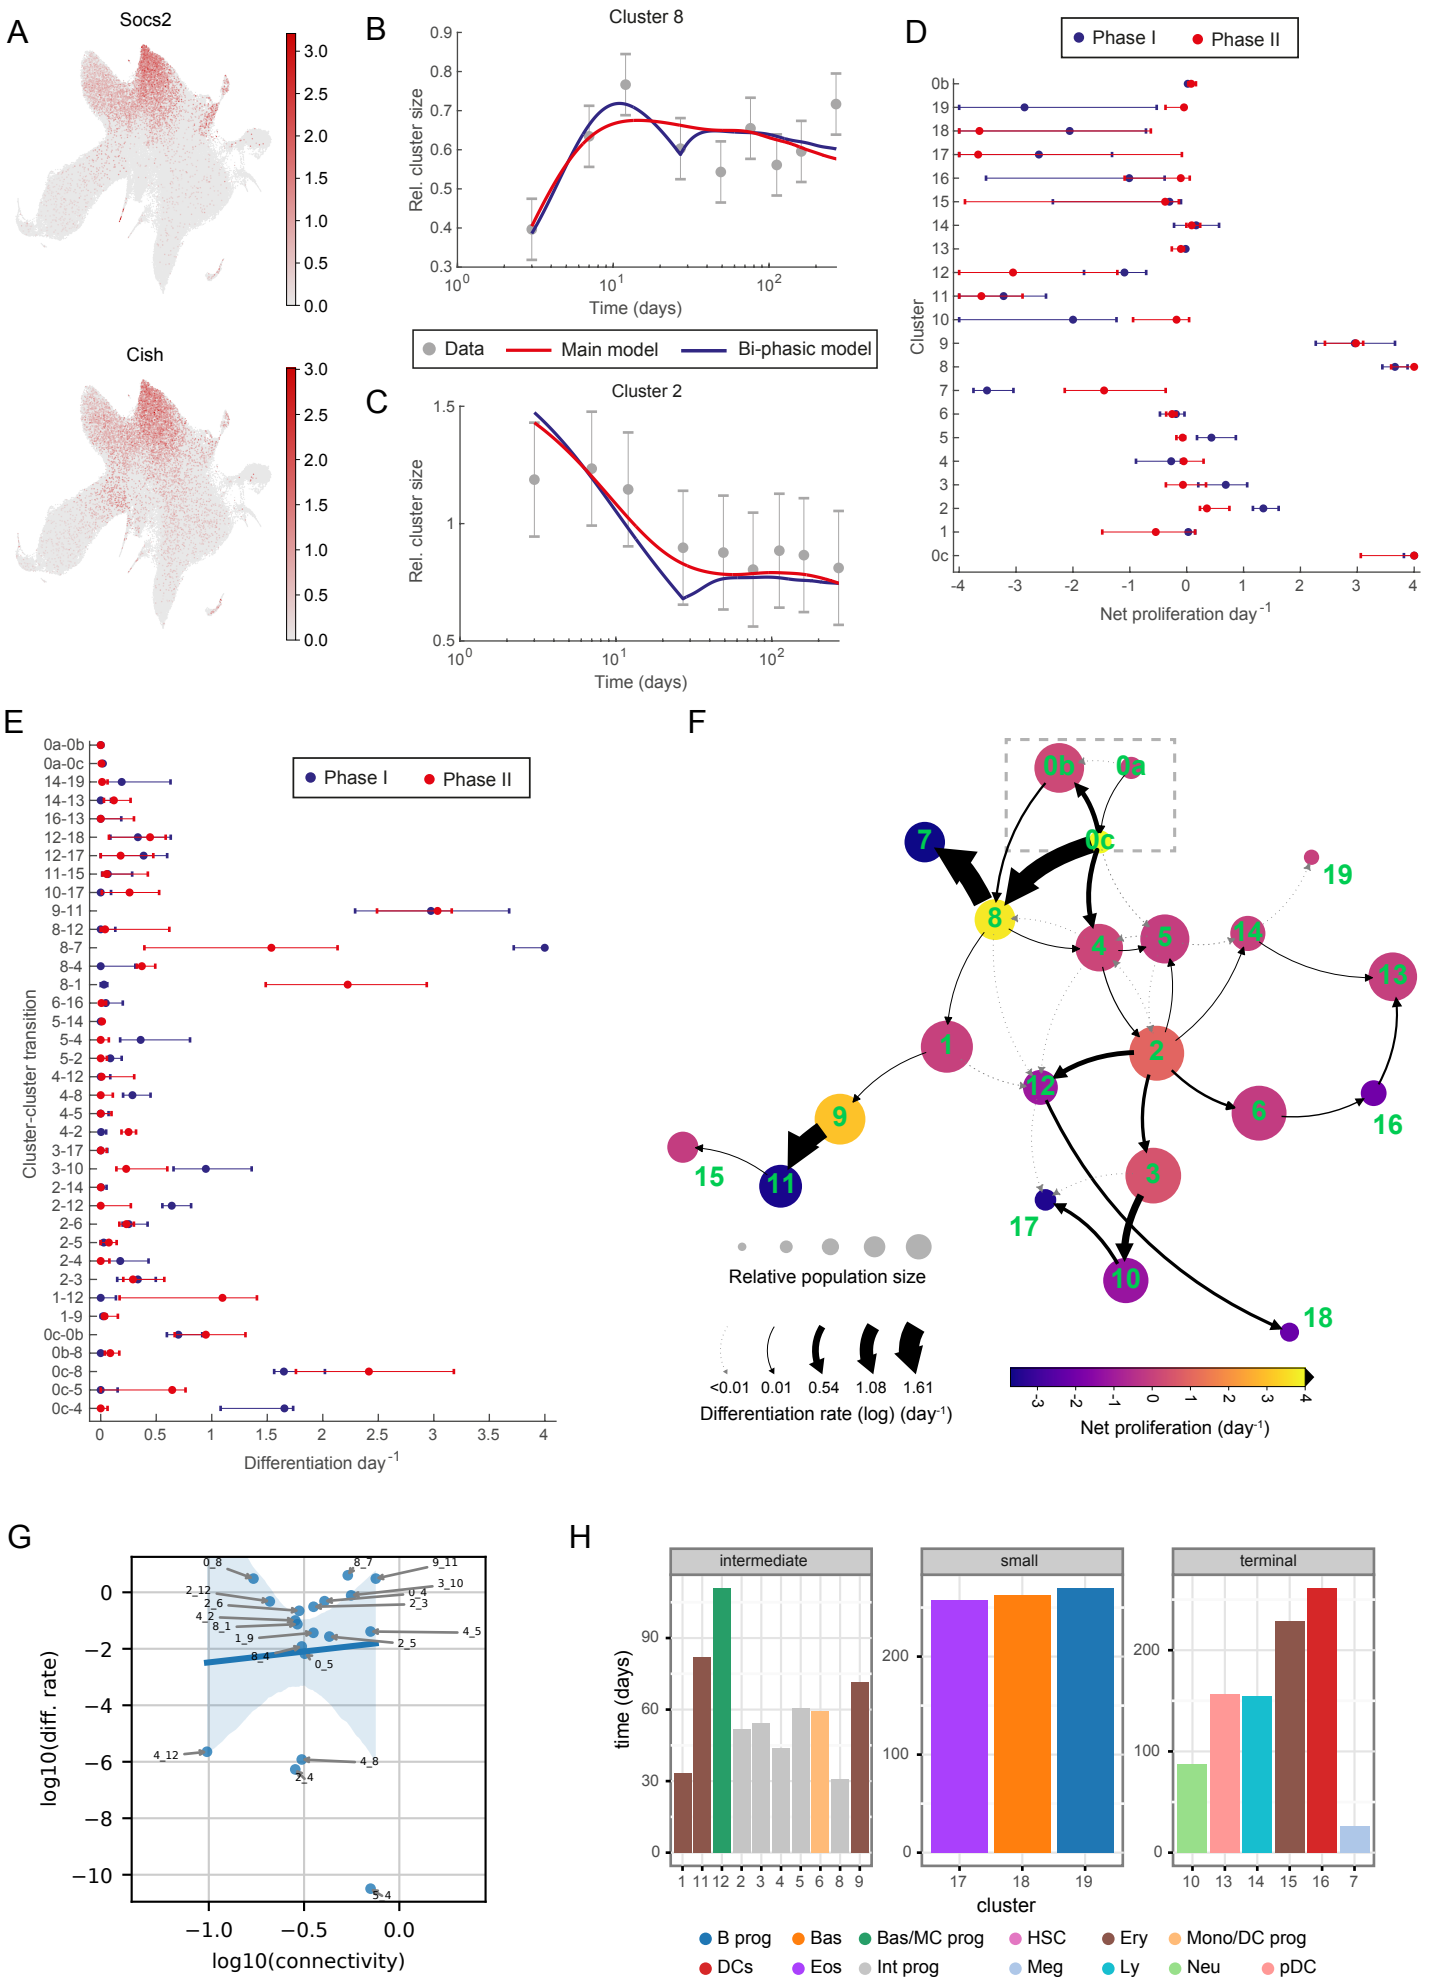



## Figure S7

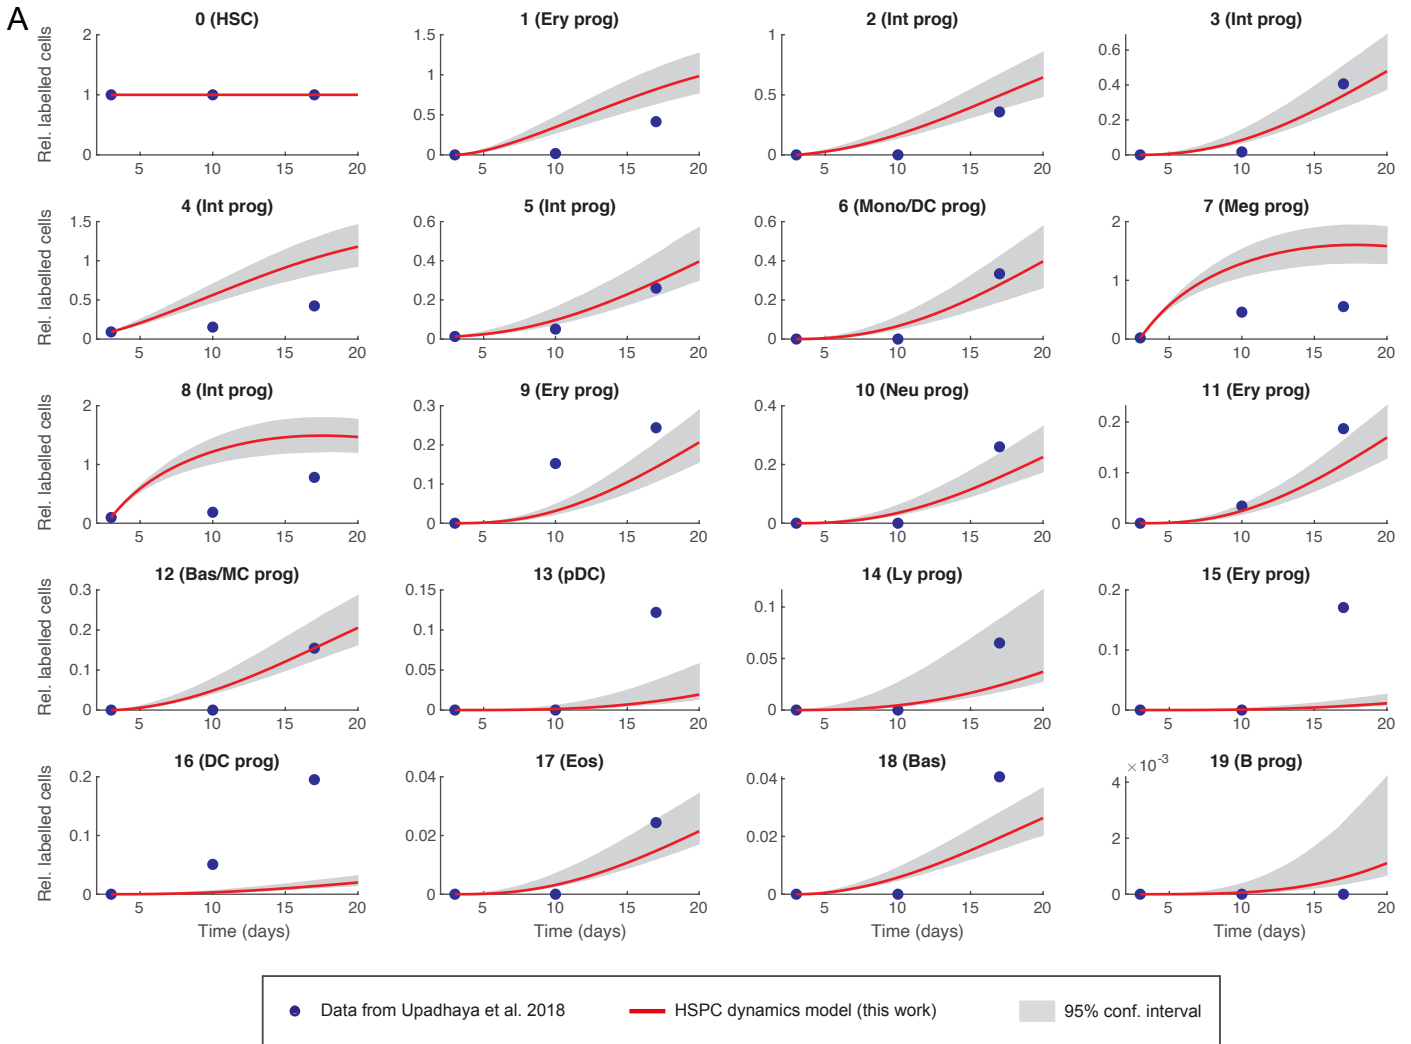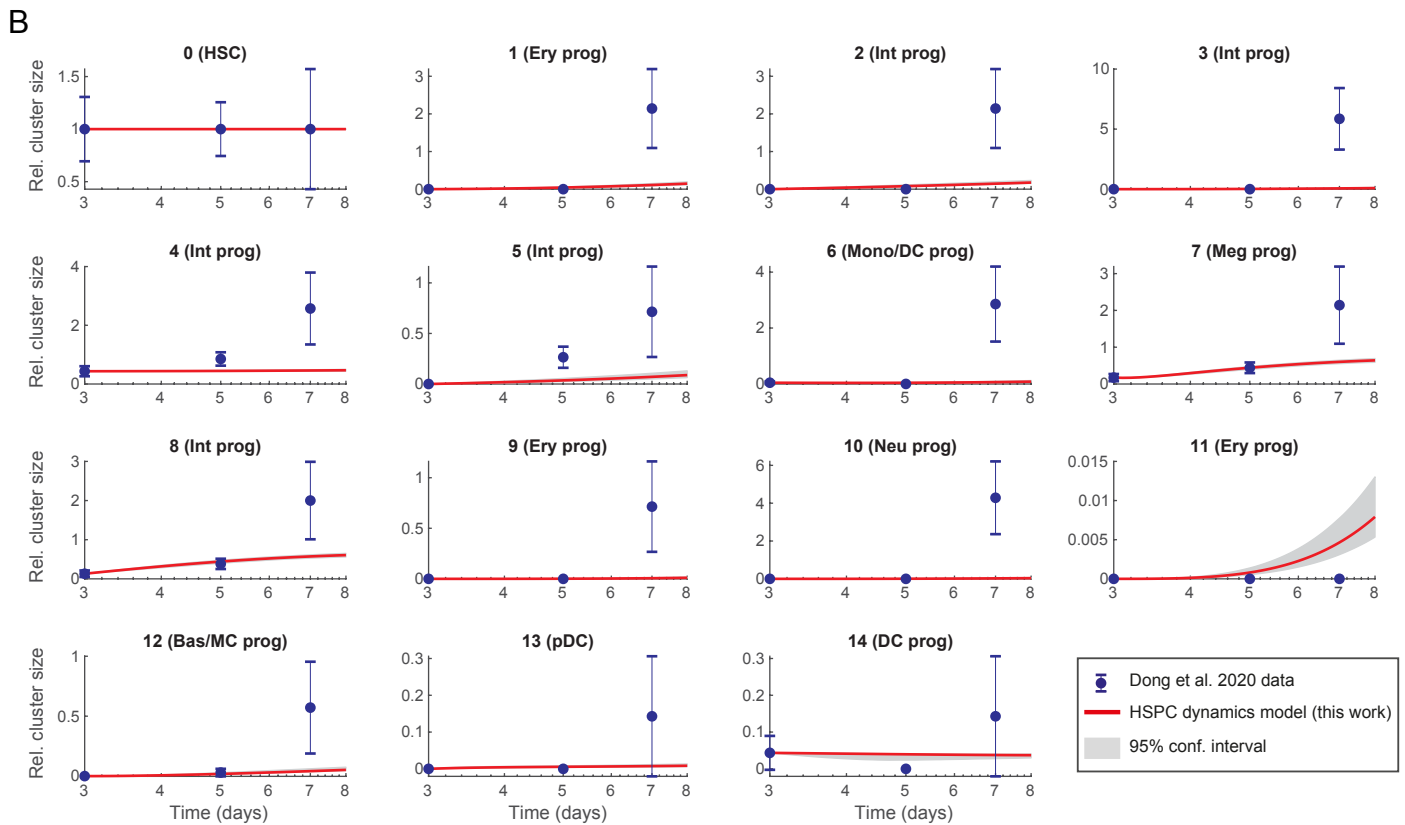

## Figure S1

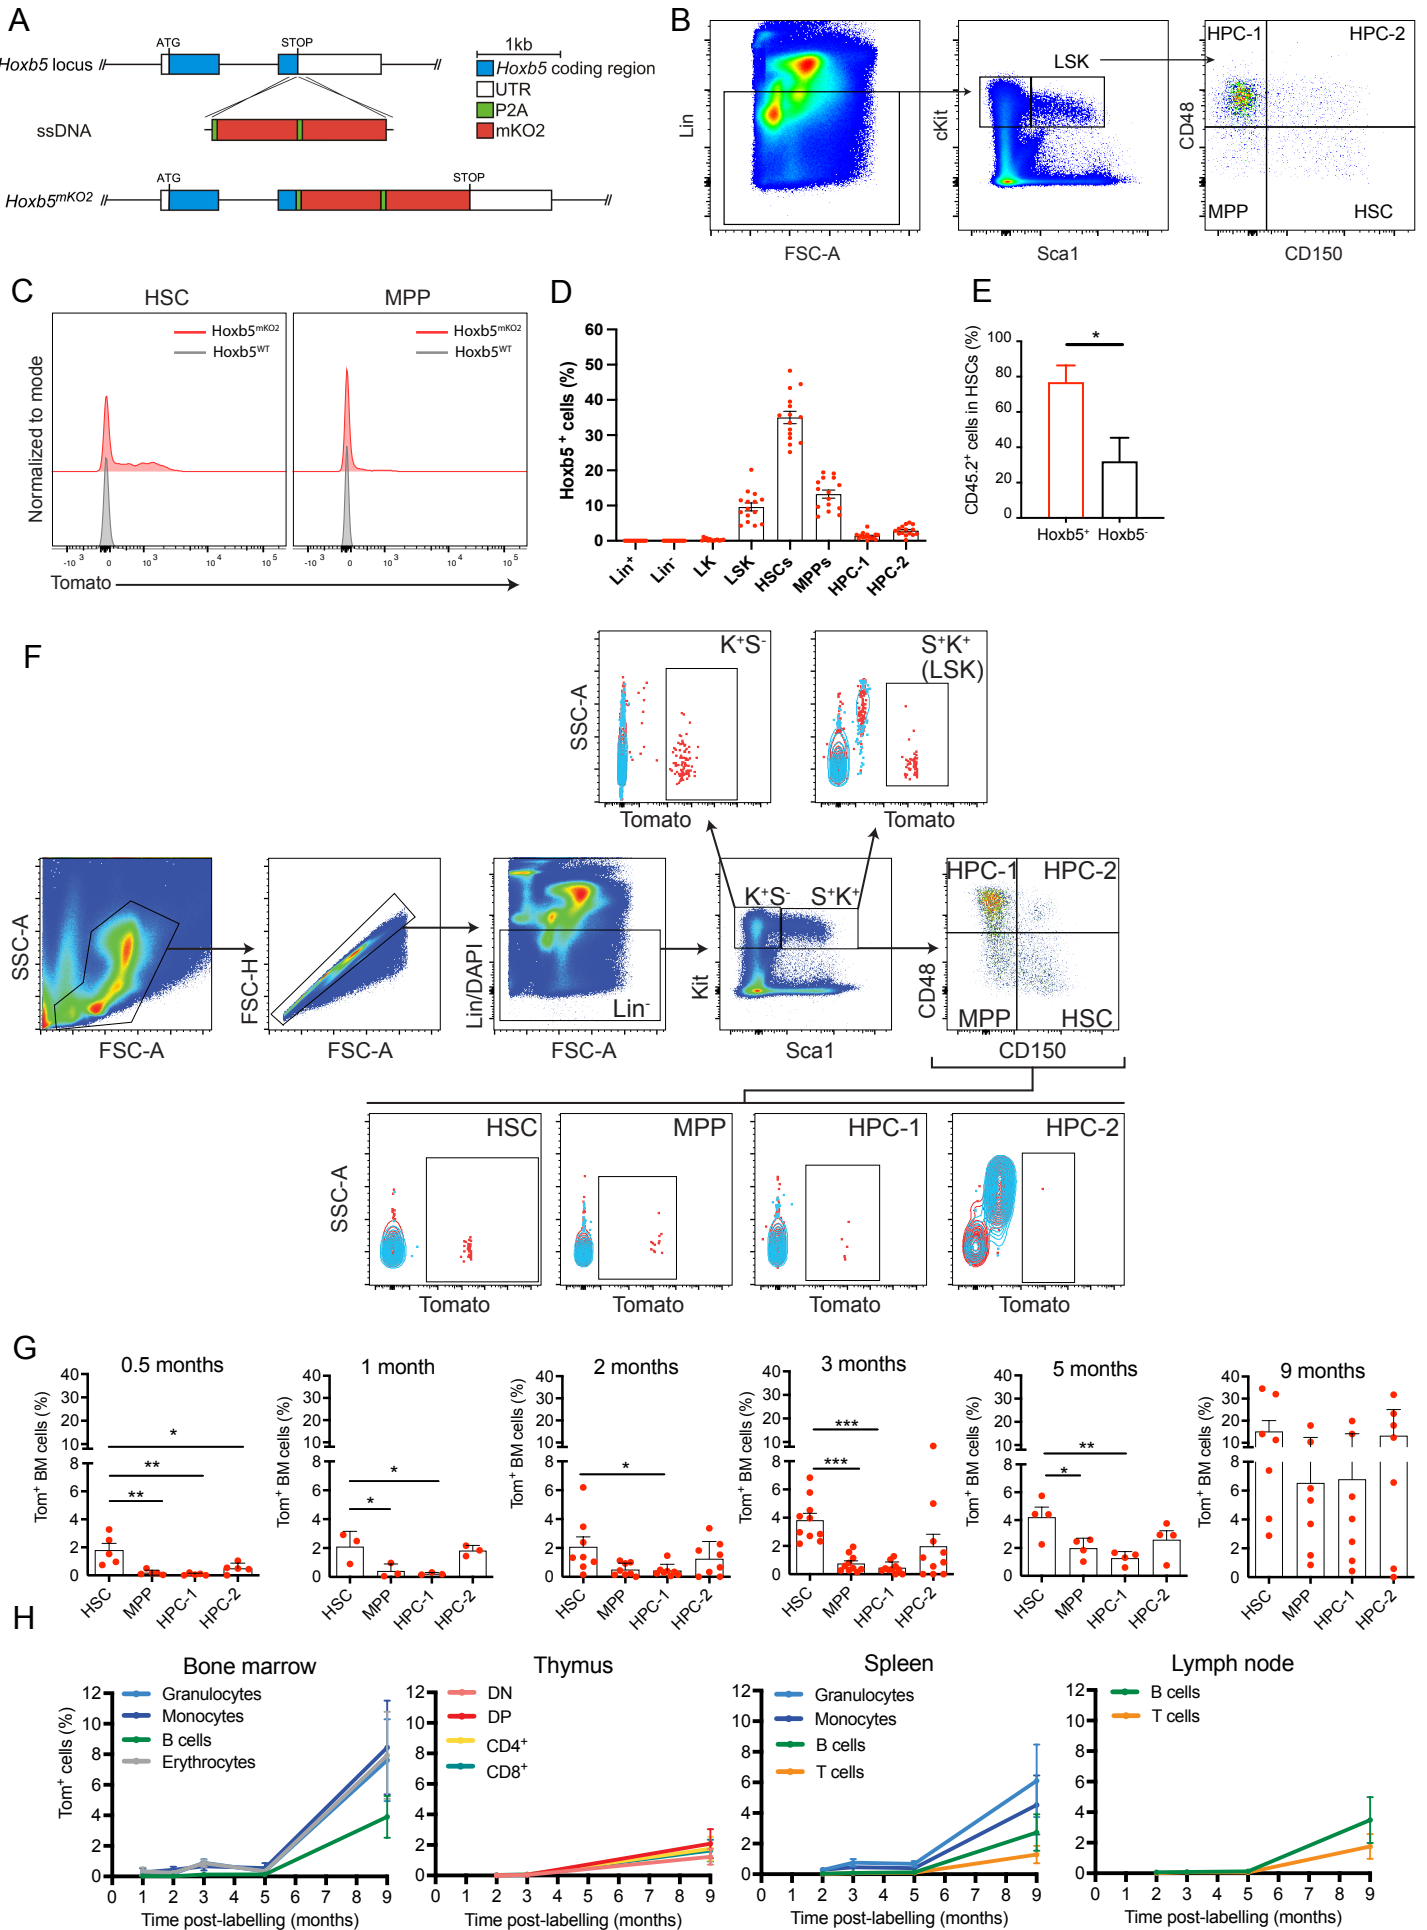

Figure S2

# Figure S2

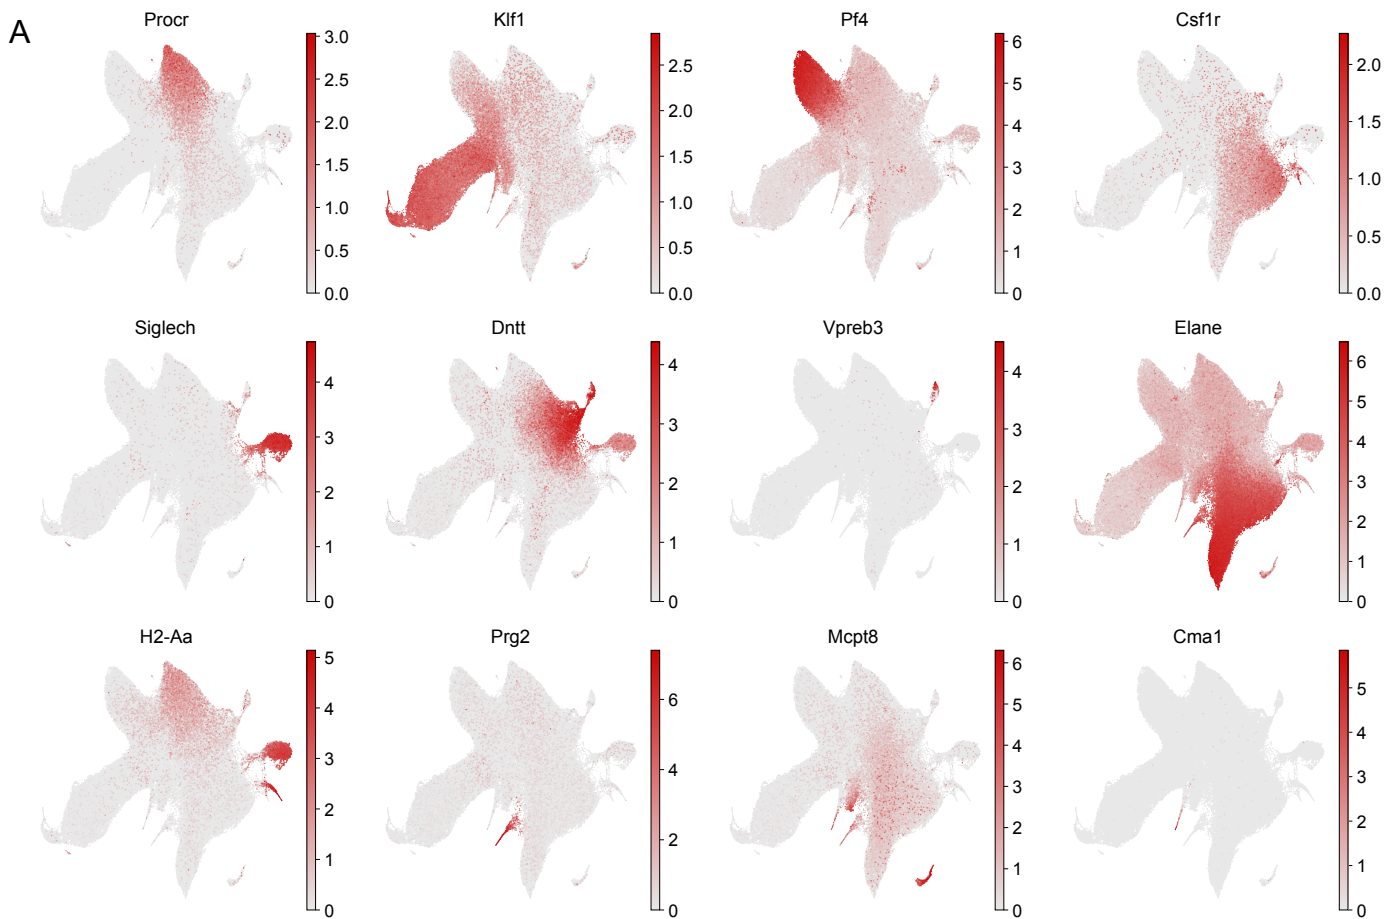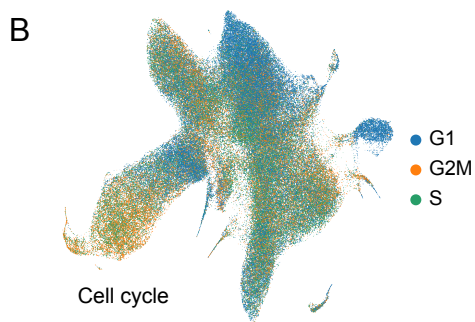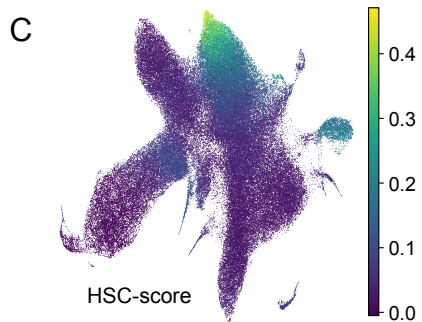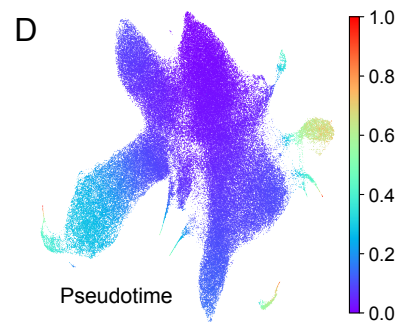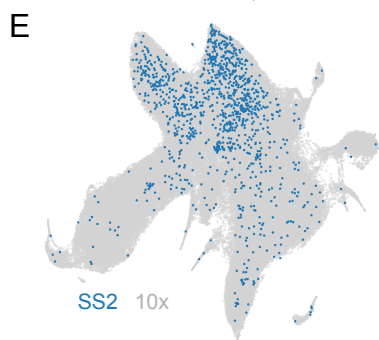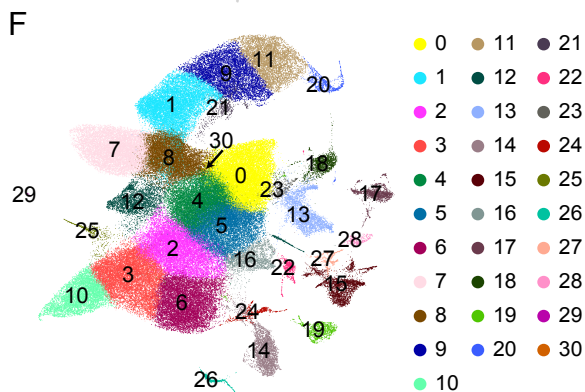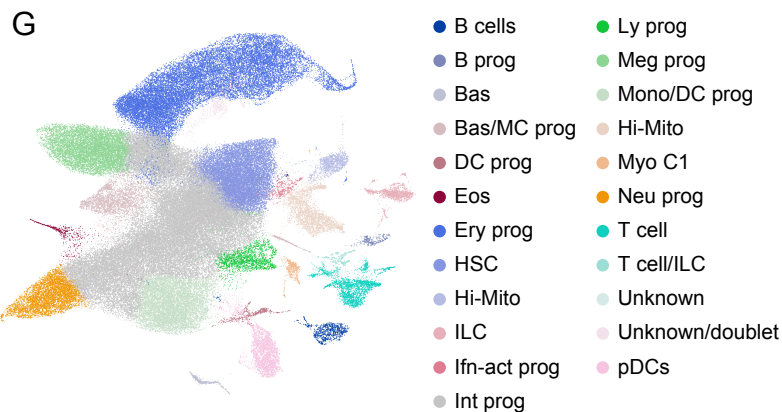

## Figure S3

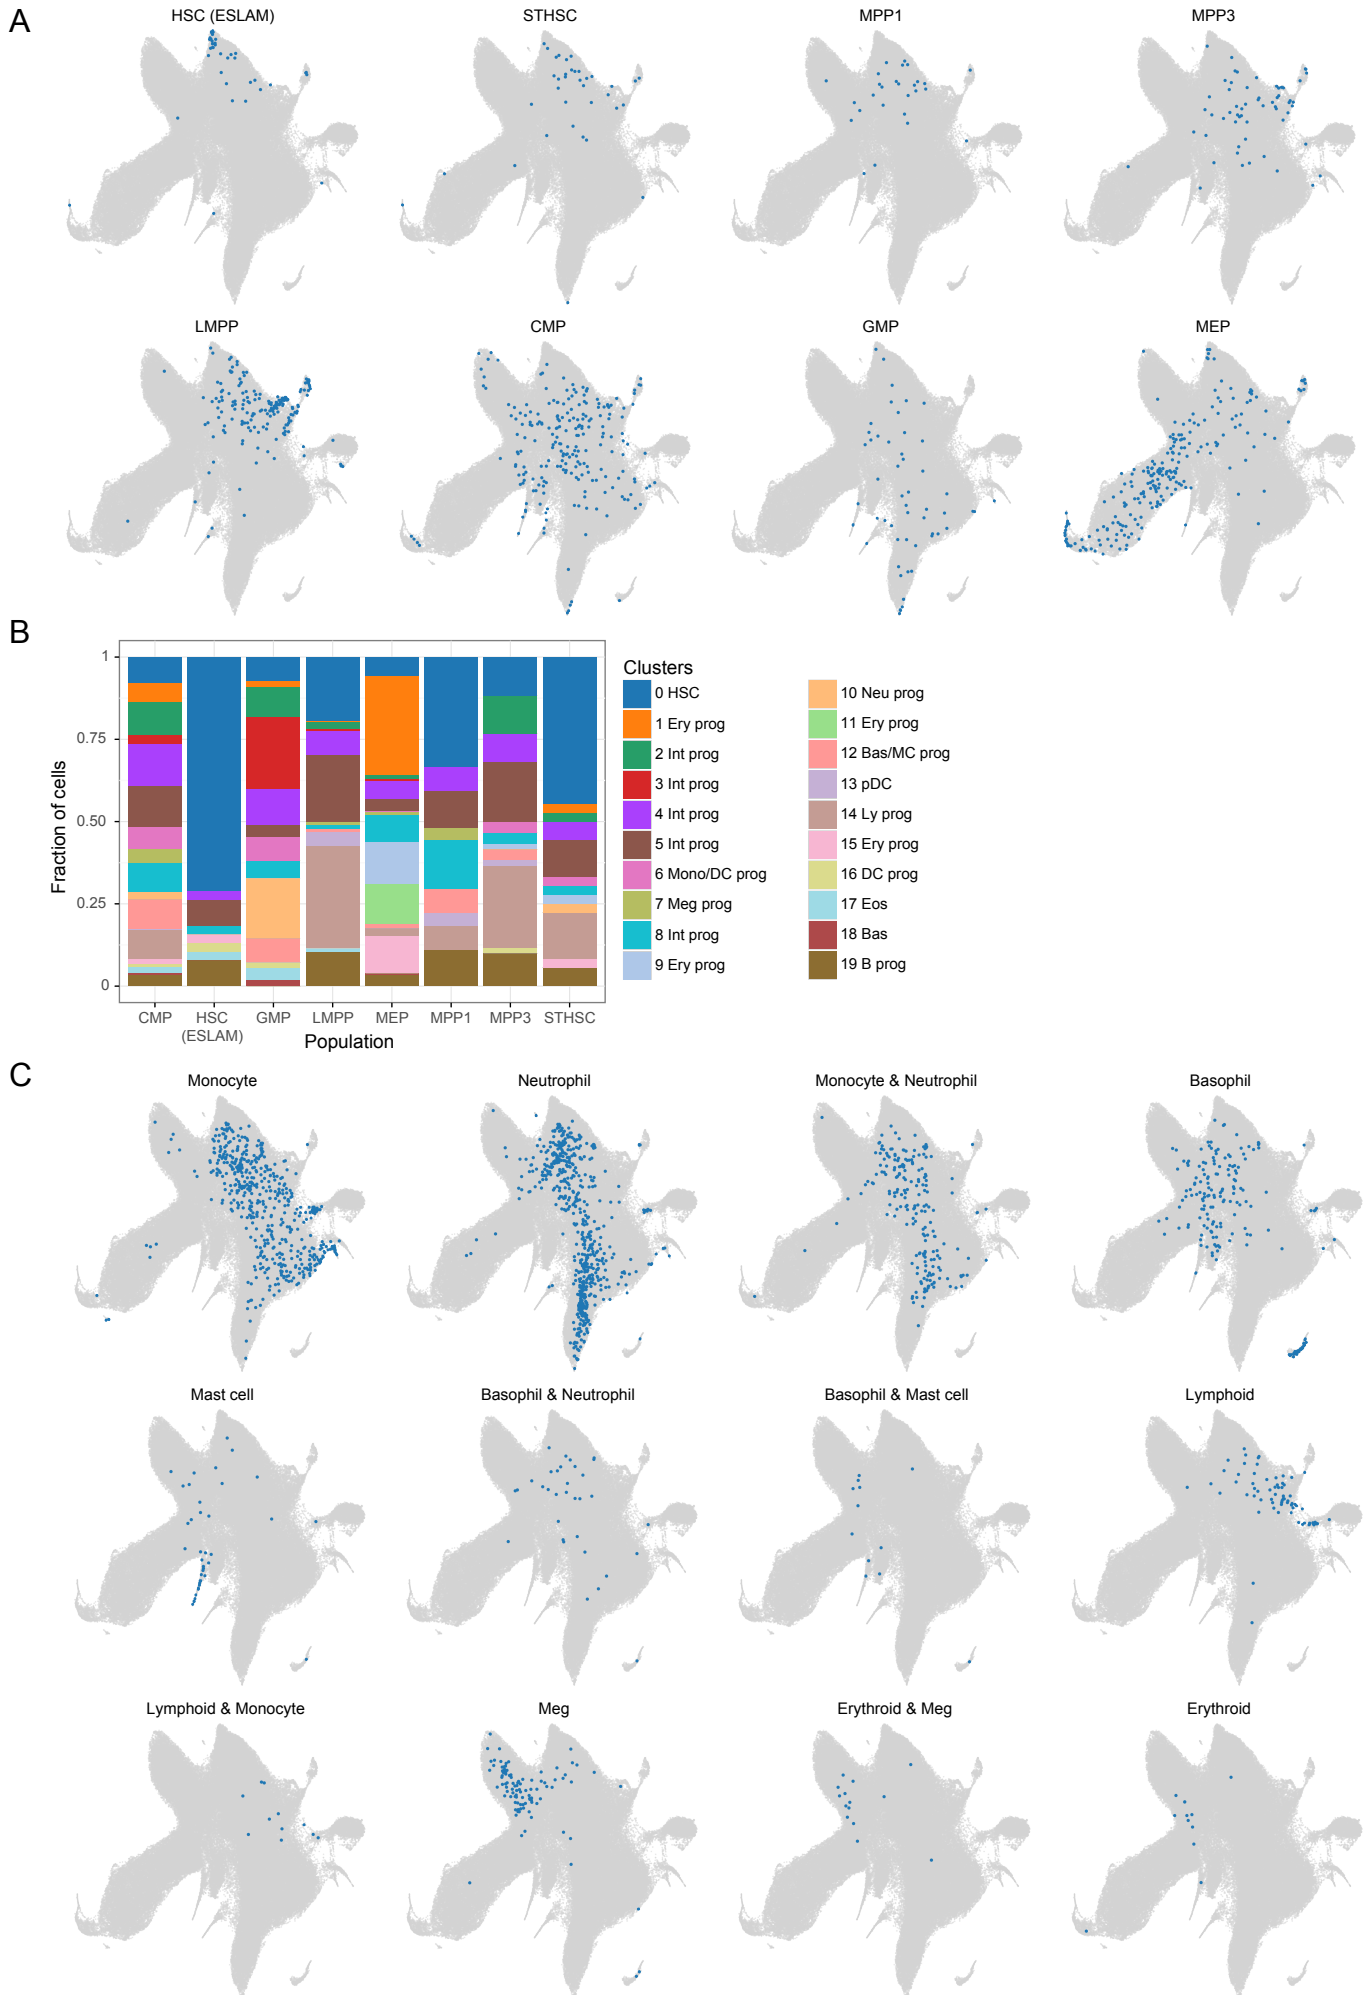

# Figure S4

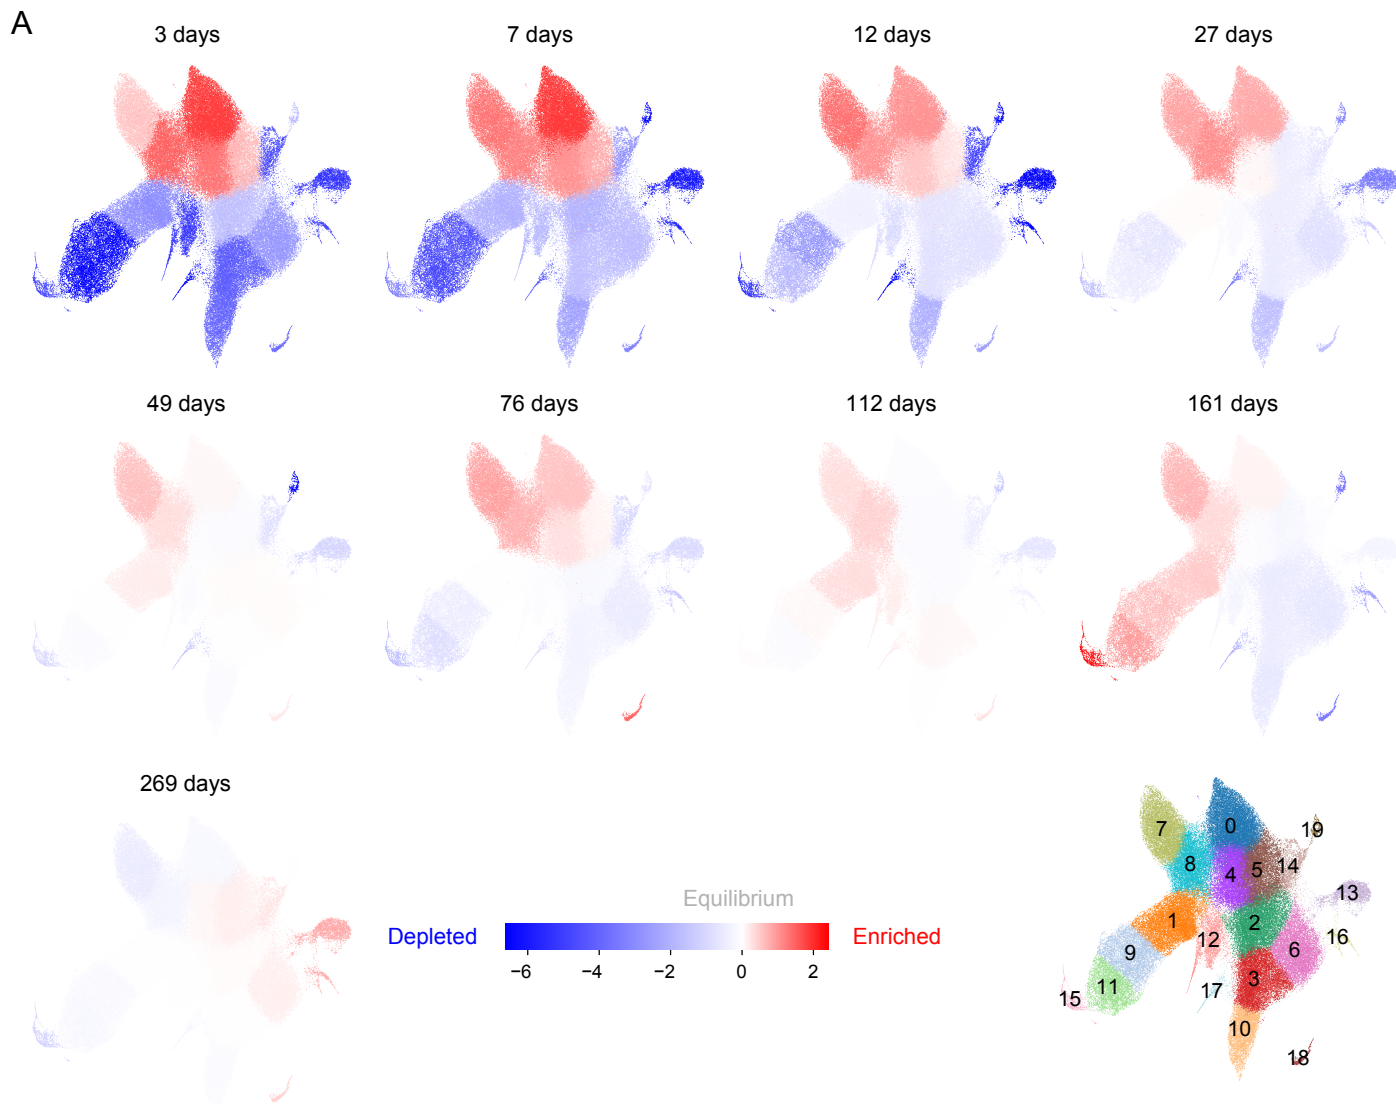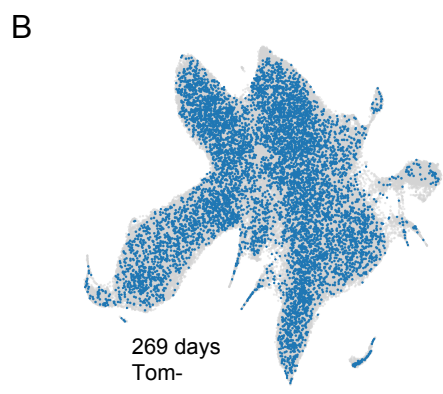
